# Supplementary material for: A rat RNA-Seq transcriptomic BodyMap across 11 organs and 4 developmental stages
Source: PubMed Central journal article supplement — Nat Commun. 2014 Feb 10;5:3230. doi: 10.1038/ncomms4230 (PMC3926002; doi:10.1038/ncomms4230), 2014-02-10
Supplement: ncomms4230-s1.pdf [file ncomms4230-s1.pdf]

**A rat RNA-Seq transcriptomic Bodymap across 11 organs and 4 developmental stages. Yu Y *et al.***

**Supplementary Figures and Tables**

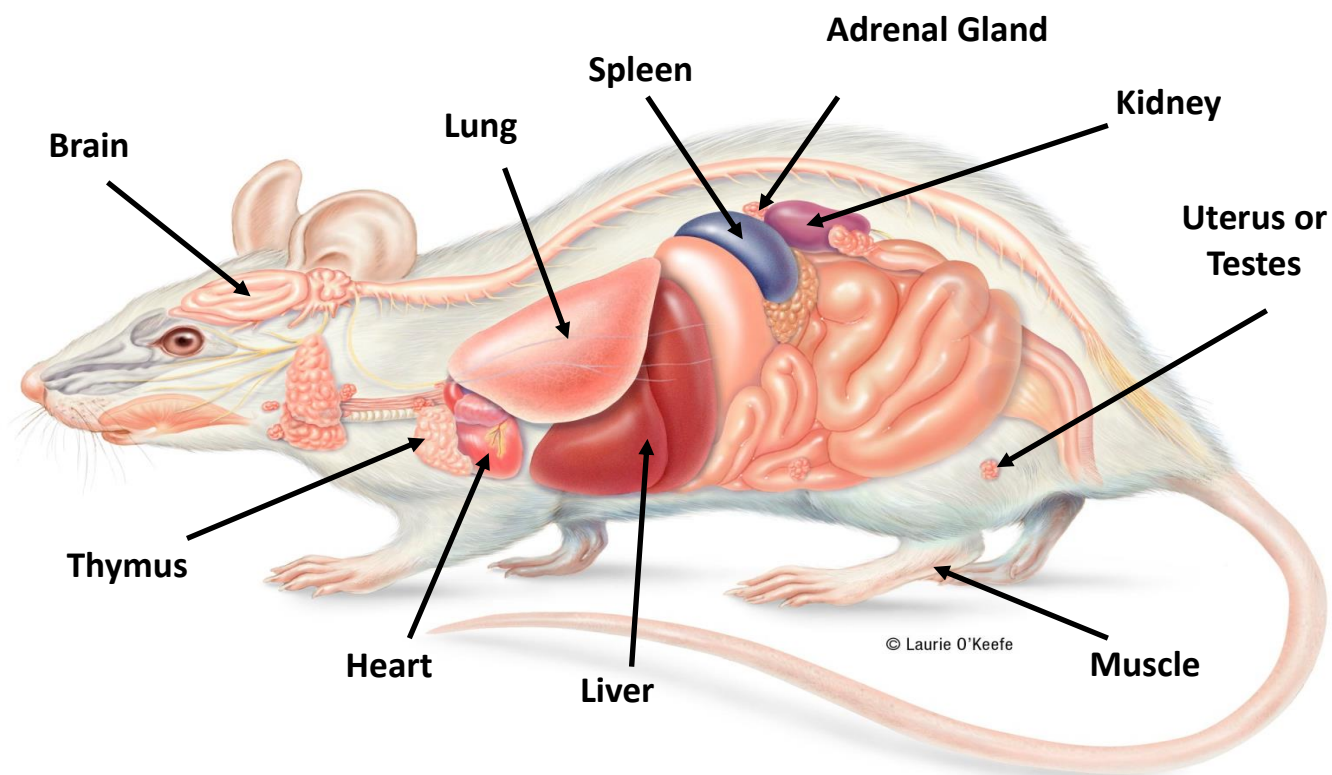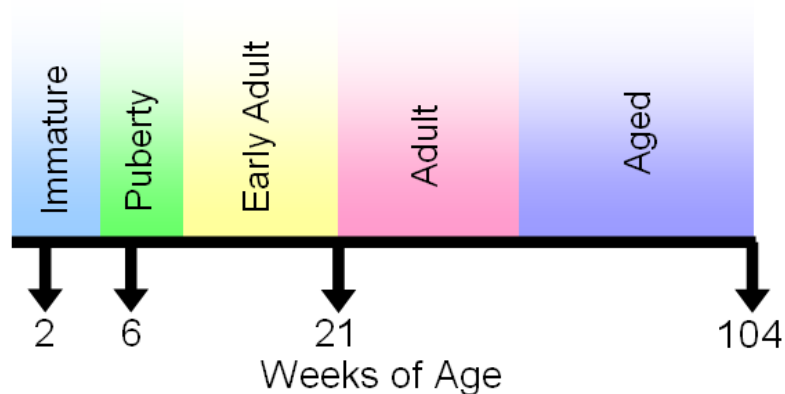

**Supplementary Figure S1. Rat transcriptomic BodyMap study design.** Diagram of organs harvested from Fischer 344 rats and the selected four developmental stages at which organs were harvested. Total number of RNA samples: 10 organs per rat x 32 rats (2 sexes x 4 developmental stages x 4 replicates) = 320 for RNA-Seq.

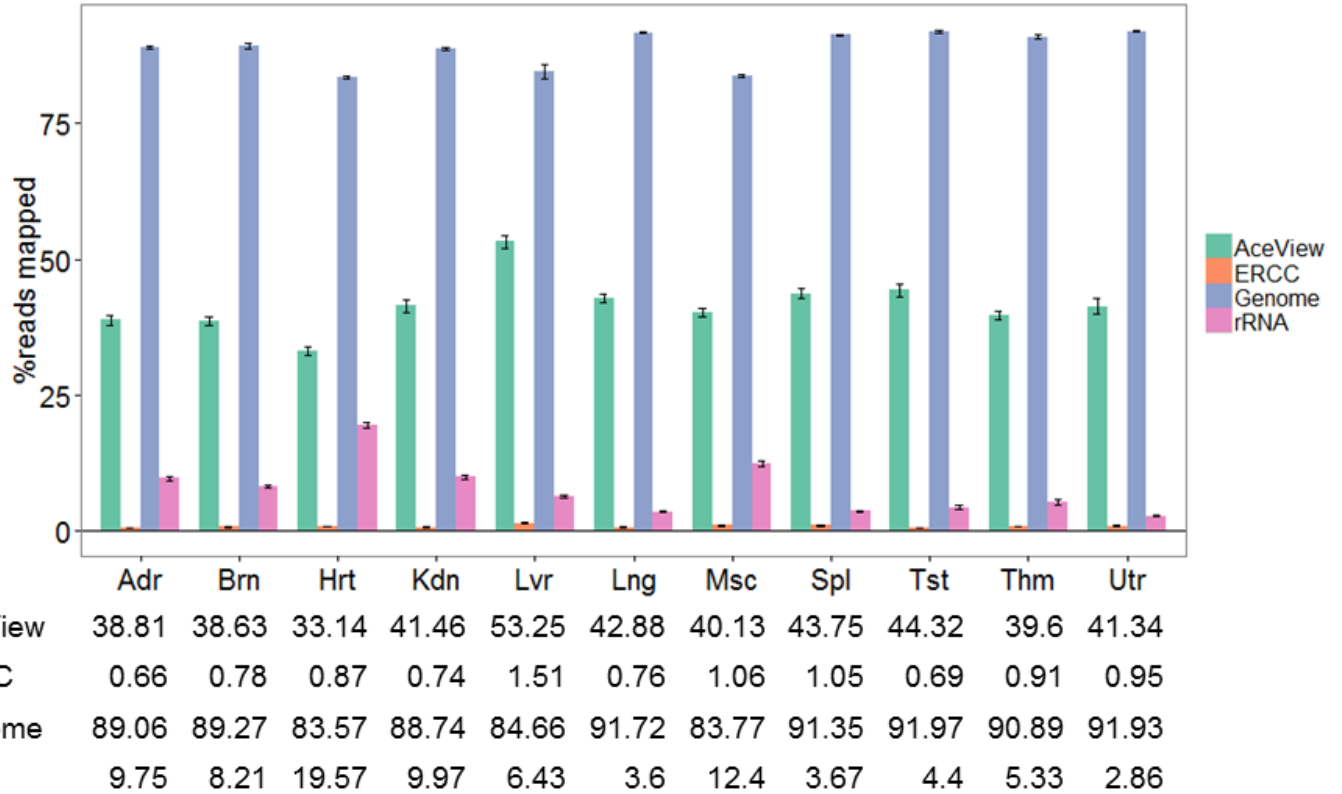

**Supplementary Figure S2. The percentage of reads mapped to ERCC transcripts, rat rRNA, AceView genes, and genomic regions.** The proportions of reads mapped (ratio, Mean  $\pm$  SE; N=16 in uterus and testes, N=32 in the other 9 organs) to AceView exons (green), ERCC transcripts (orange), genomic regions (blue), and rRNA (pink) in each organ. Adr, adrenal; Brn, brain; Hrt, heart; Kdn, kidney; Lng, lung; Lvr, liver; Msc, skeletal muscle; Spl, spleen; Thm, thymus; Tst, testis; and Utr, uterus.

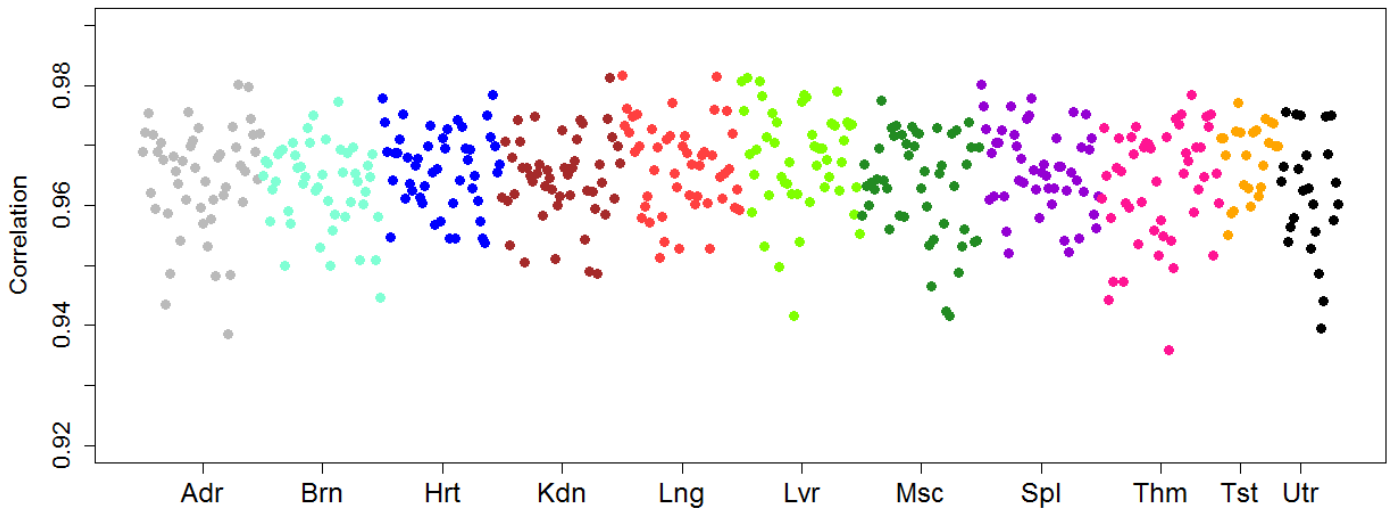

**Supplementary Figure S3. The distribution of the pair-wise correlation (R) between any two biological replicates of the same condition (same organ x age x sex).** Y-axis represents squared Pearson correlation between any two biological replicates ( $\log_2\text{FPKM}$ ). X-axis represents a total of  $6 \times 80 = 480$  values in 11 organ types. There are four biological replicates for each of the 80 sample groups in this study, resulting in six pair-wise comparisons of biological replicates per sample group.

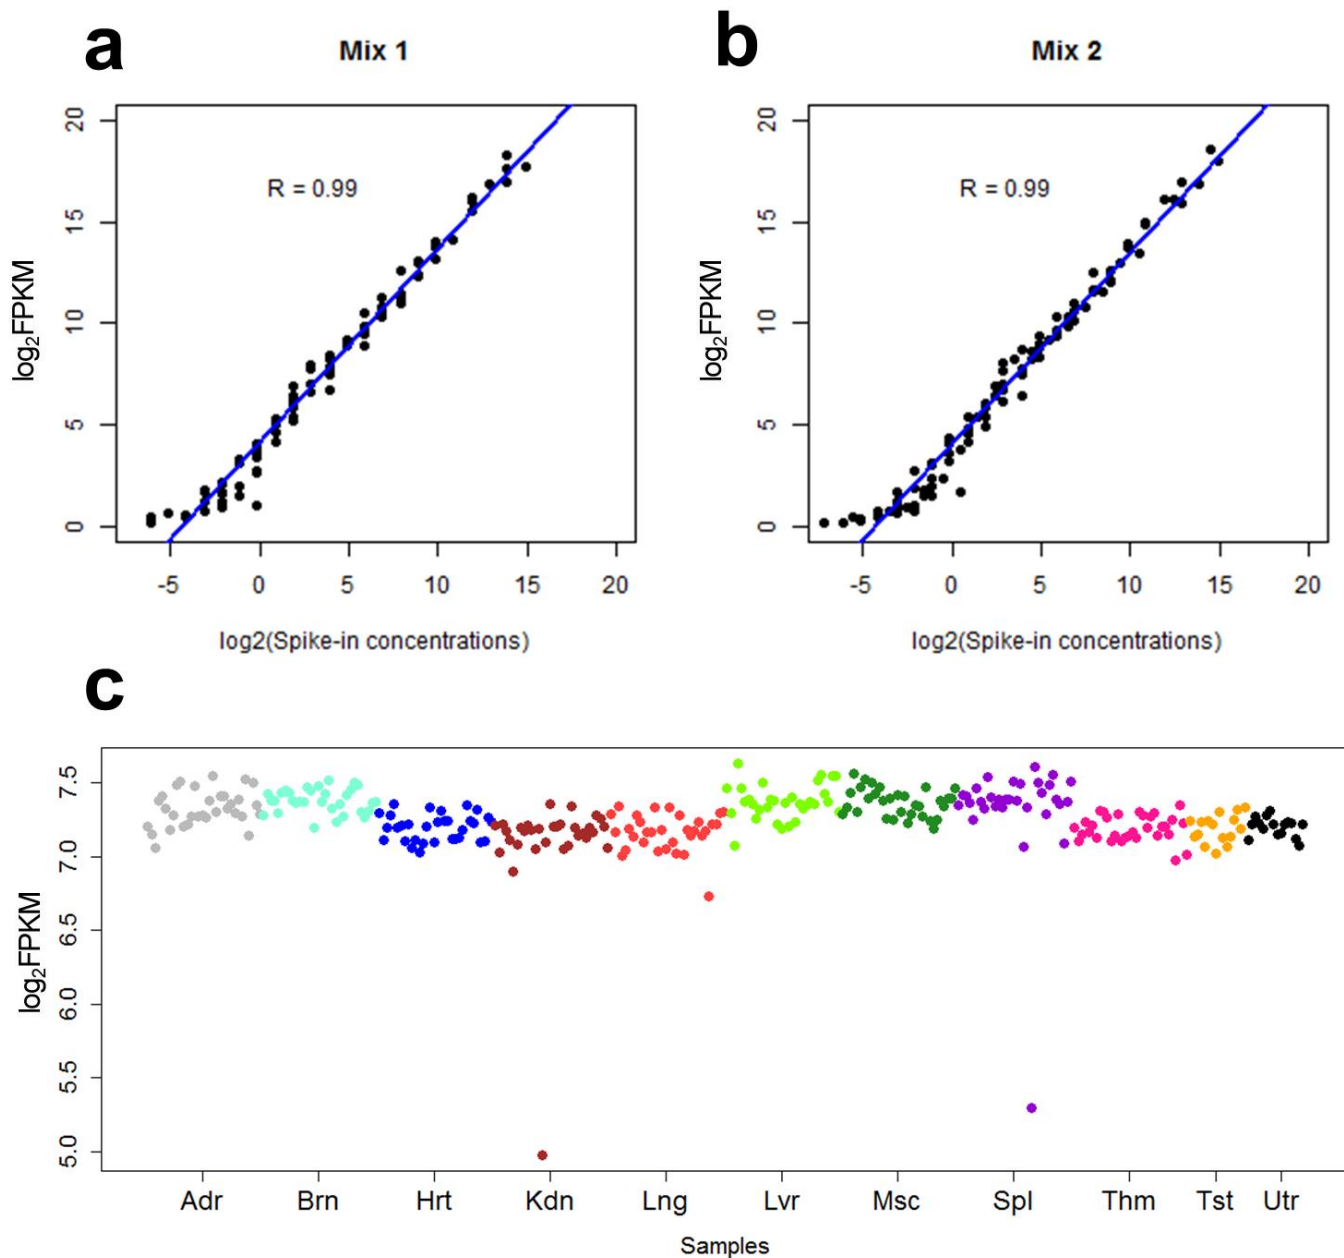

**Supplementary Figure S4. ERCC performance in this study.** (a) Scatterplot of averaged  $\log_2(\text{FPKM})$  across 160 samples spiked with ERCC mixture 1 vs.  $\log_2(\text{spike-in concentrations})$ ; (b) Scatterplot of averaged  $\log_2(\text{FPKM})$  across 160 samples spiked with ERCC mixture 2 vs.  $\log_2(\text{spike-in concentrations})$ ; (c) Averaged expression value of 92 ERCC transcripts for each of the 320 samples. Y-axis represents the averaged  $\log_2(\text{FPKM})$  and X-axis represents 320 samples in this study.

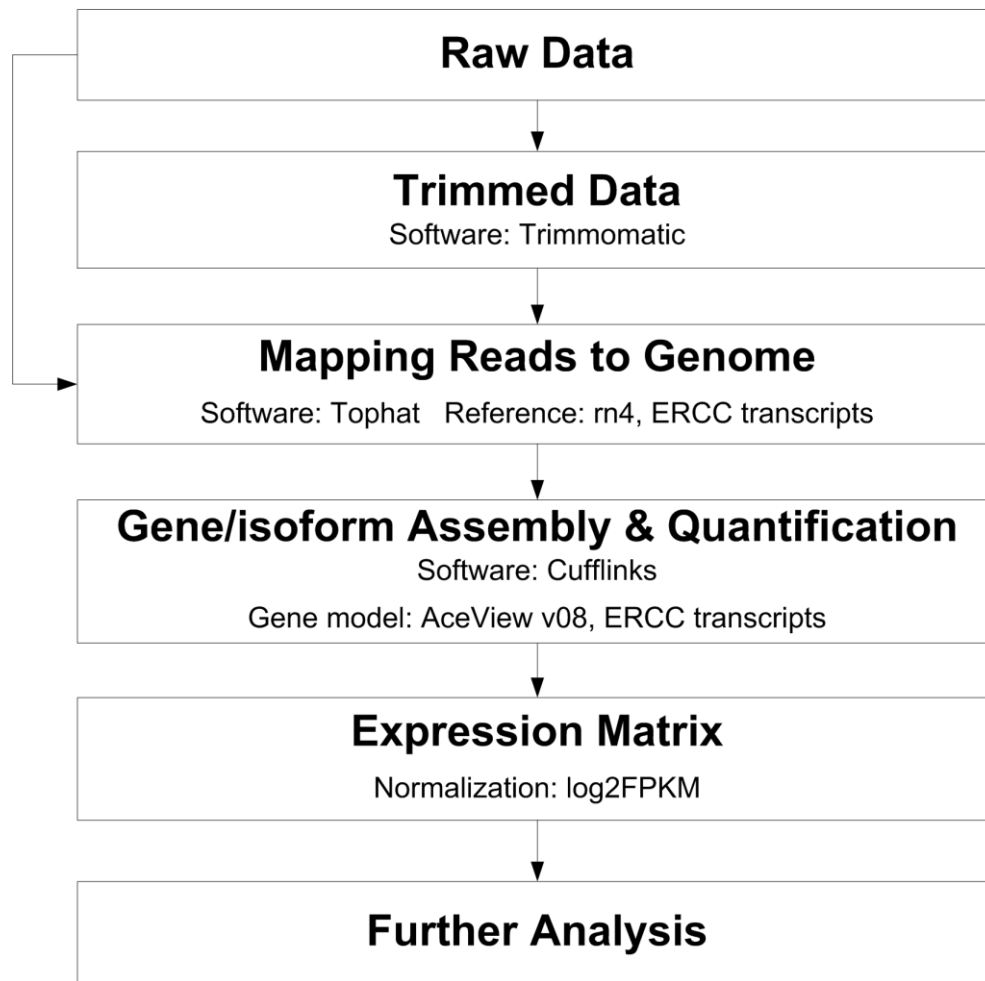

**Supplementary Figure S5. Mapping pipeline.** In total, 320 samples together with technical replicates were used in this study. Data were first trimmed using Trimmomatic. We used the rat transcriptome from AceView v08, which includes 40,064 genes, as a reference. In addition, the UCSC m4 rat genome was used as a reference genome. Reads were aligned to the rat genome and transcriptome using TopHat v2.0.4 allowing a maximum of 2 mismatches in the alignment. The default parameter settings were used. Alignment results were then processed using Cufflinks for gene/transcript assembly and quantification. For samples with 2–3 technical replicates, averaged FPKM (Fragment Per Kilobase per Million mapped reads) values were used. To avoid infinite values, a pseudo-count of one was added to the FPKM value of each gene before  $\log_2$  transformation.

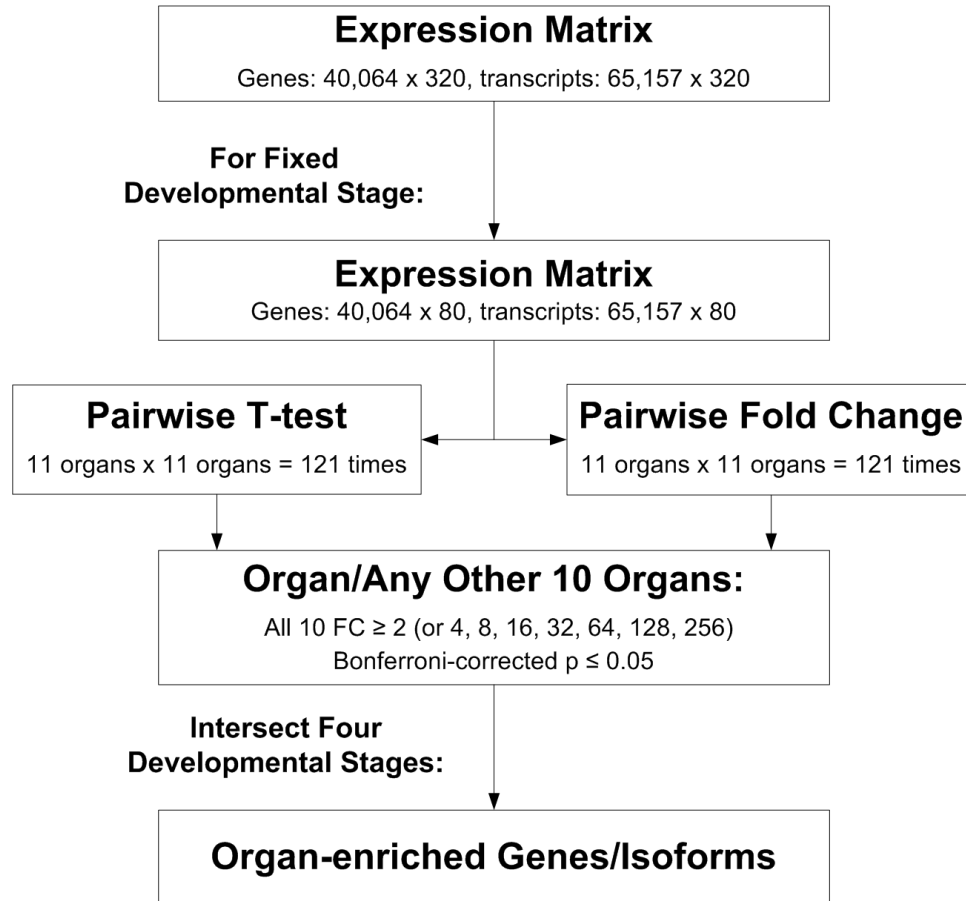

**Supplementary Figure S6. Workflow to identify organ-enriched genes.** A total of 320 samples were separated into 11 groups based on organ. Differentially expressed gene analysis was performed by pair-wise comparison of any 2 of the 11 organs. A gene was defined as organ-enriched if its expression level was at least 2-fold higher than that in any other organ, using a Bonferroni-corrected  $p \leq 0.05$  across the four developmental stages.

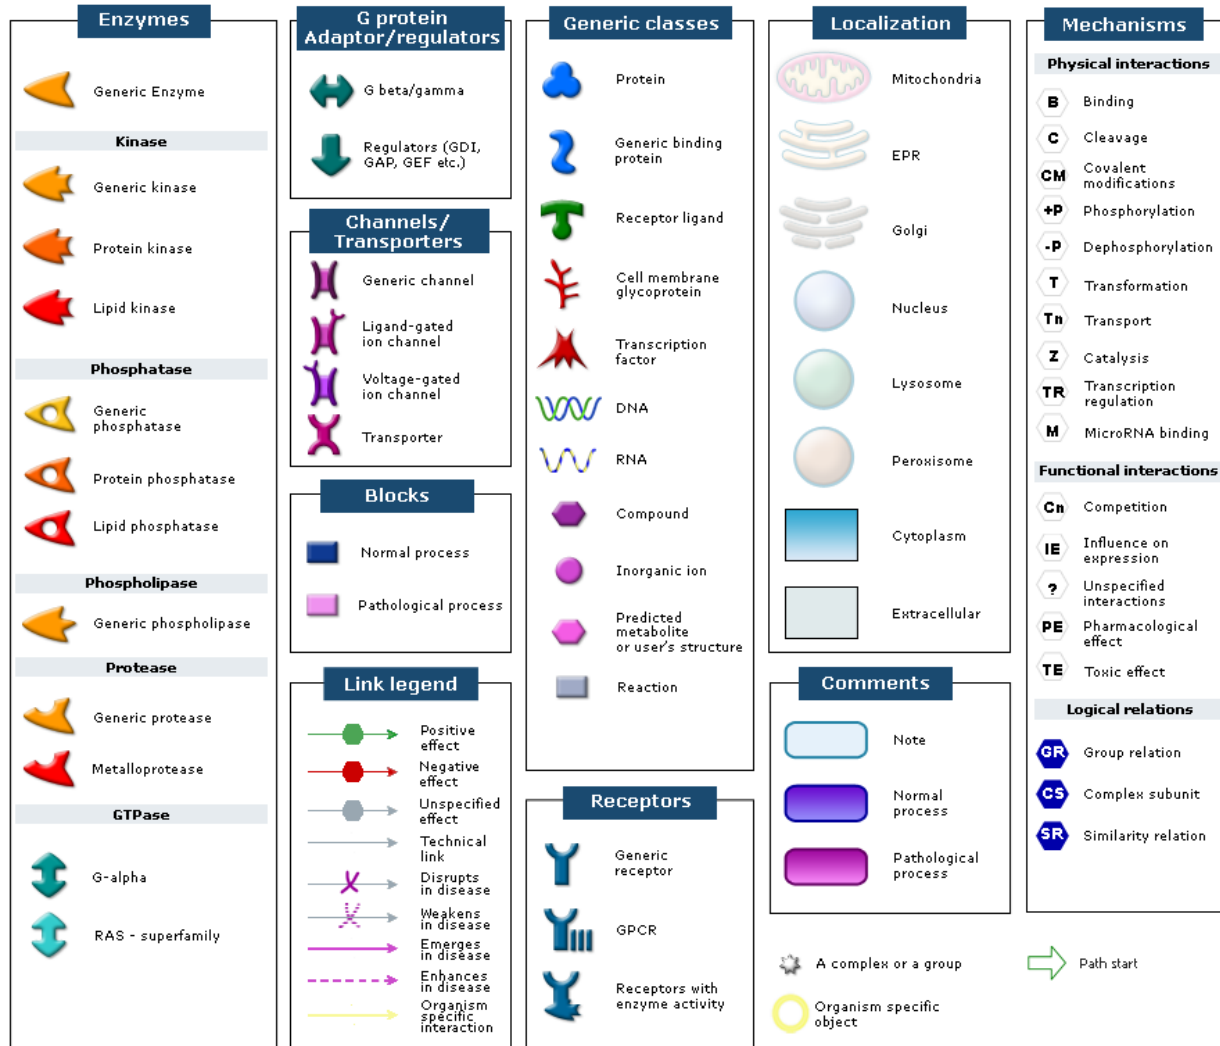

Supplementary Figure. Legends to Thompson Reuters Pathway Maps (for Suppl. Figs. S7, S8, and S9)

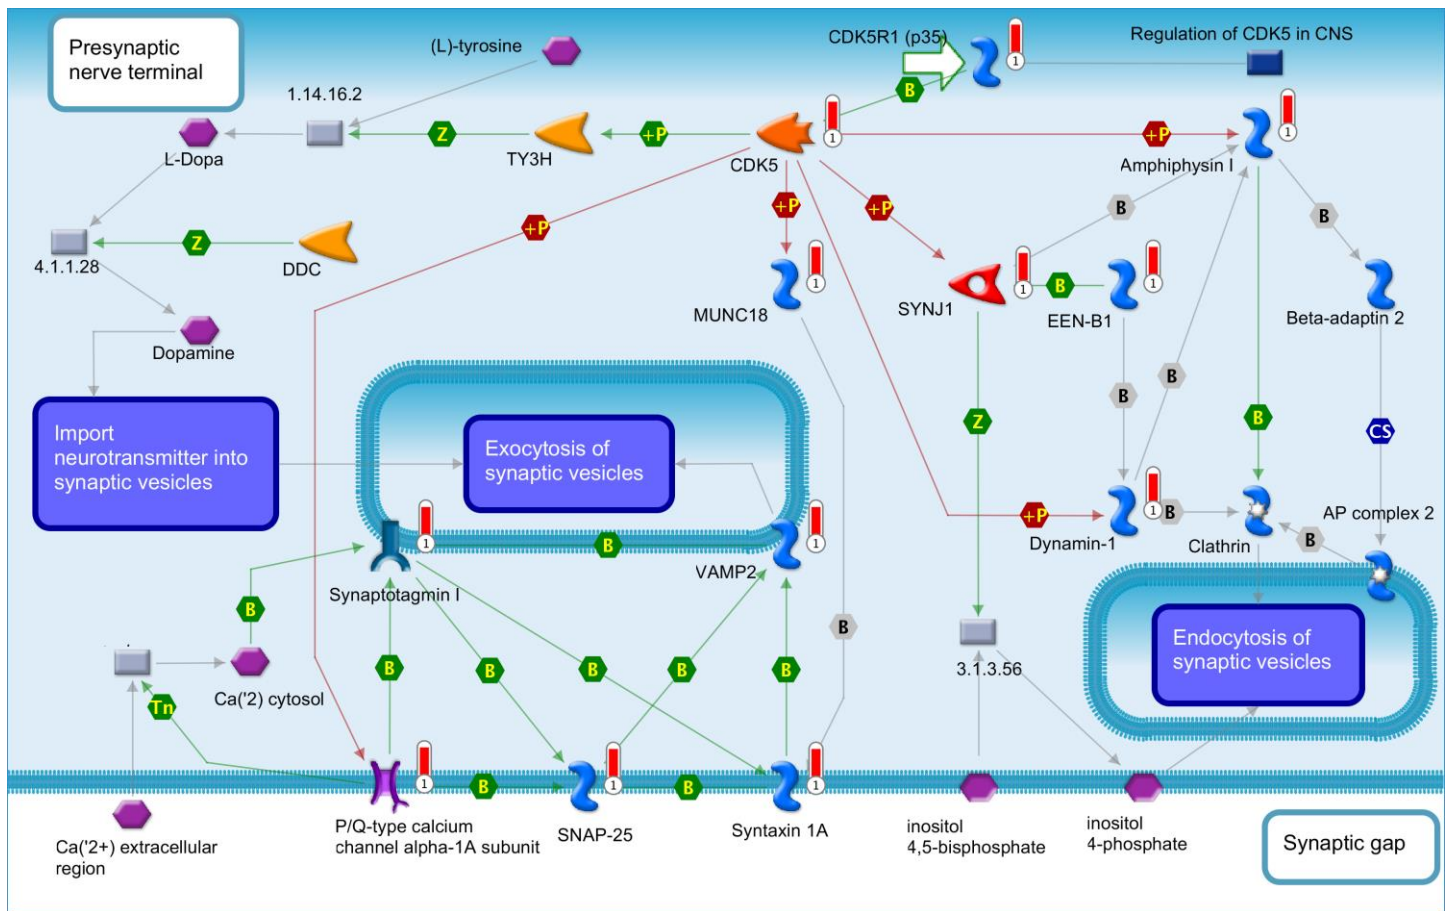

**Supplementary Figure S7. Brain-enriched genes were involved in the role of CDK5 in presynaptic signaling.** Genes identified as specifically enriched in the brain were uniquely overrepresented in the cyclin-dependent kinase 5 (CDK5) presynaptic signaling pathway map from Thompson Reuters Canonical Pathway Maps ontology. Enriched genes were highlighted with red thermometers on the map. CDK5 is a member of the small serine/threonine cyclin-dependent kinase family. CDK5 and its neuronspecific activator, cyclin-dependent kinase 5 regulatory subunit 1 (CDK5R1 (p35)), are all abundantly expressed in the adult brain. Moreover, they are present in subcellular fractions enriched for synaptic membranes, and localize to pre- and post-synaptic compartments, thus they can regulate both pre- and post-synaptic functions.



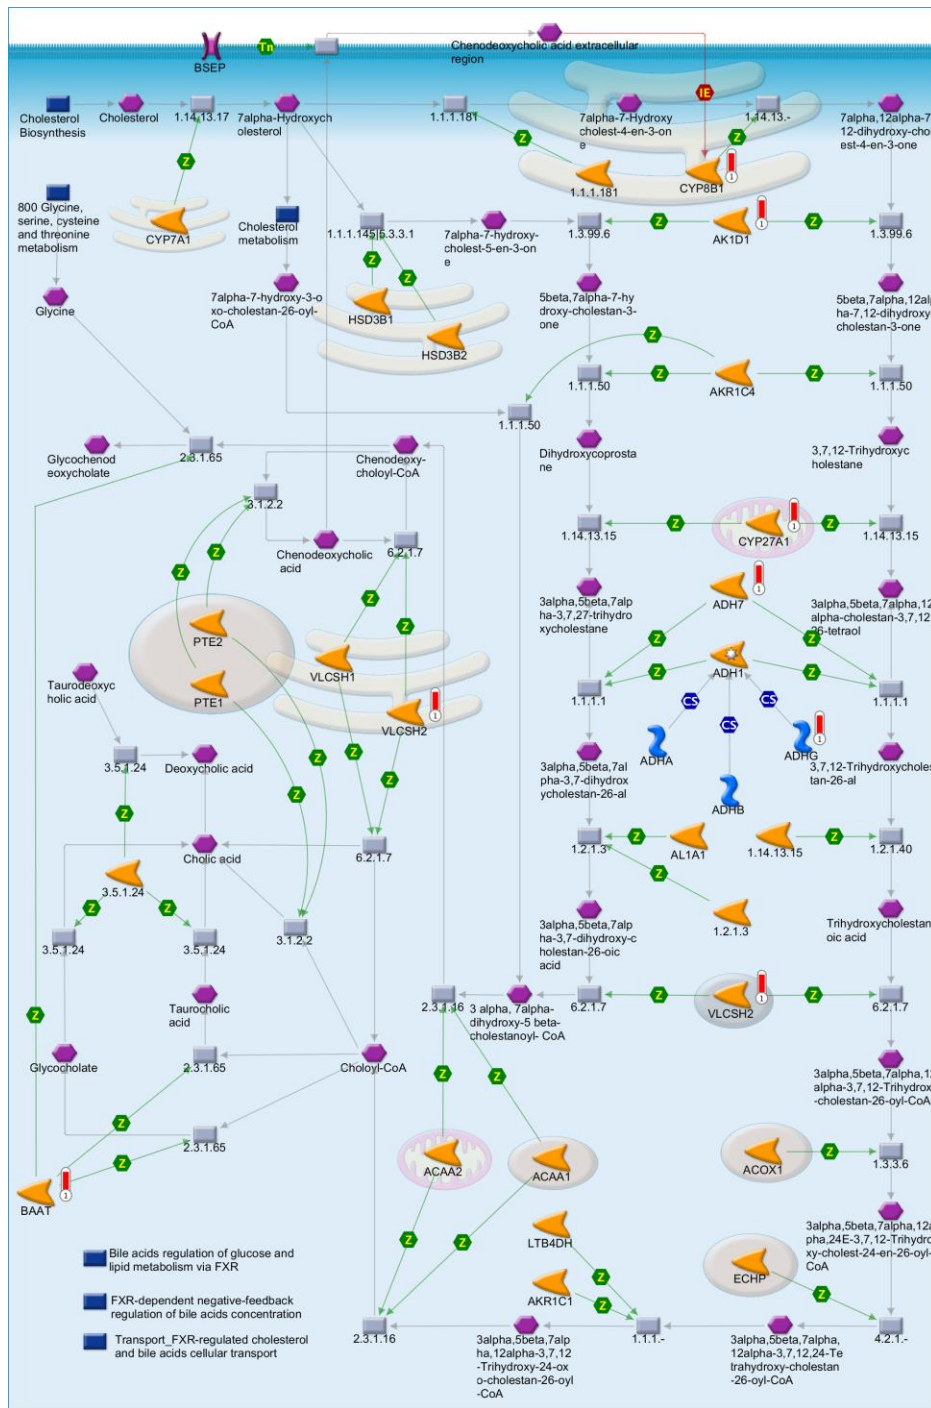

**Supplementary Figure S8. Liver-enriched genes were involved in bile acid biosynthesis pathway.** Genes identified as specifically enriched in the liver were uniquely overrepresented on the bile acid biosynthesis pathway map from Thompson Reuters Canonical Pathway Maps ontology. Enriched genes were highlighted with red thermometers on the map. Bile acids (BAs: cholic acid, deoxycholic acid, chenodeoxycholic acid, etc.) are amphipathic steroidal compounds derived from the enzymatic catabolism of cholesterol in hepatocytes.

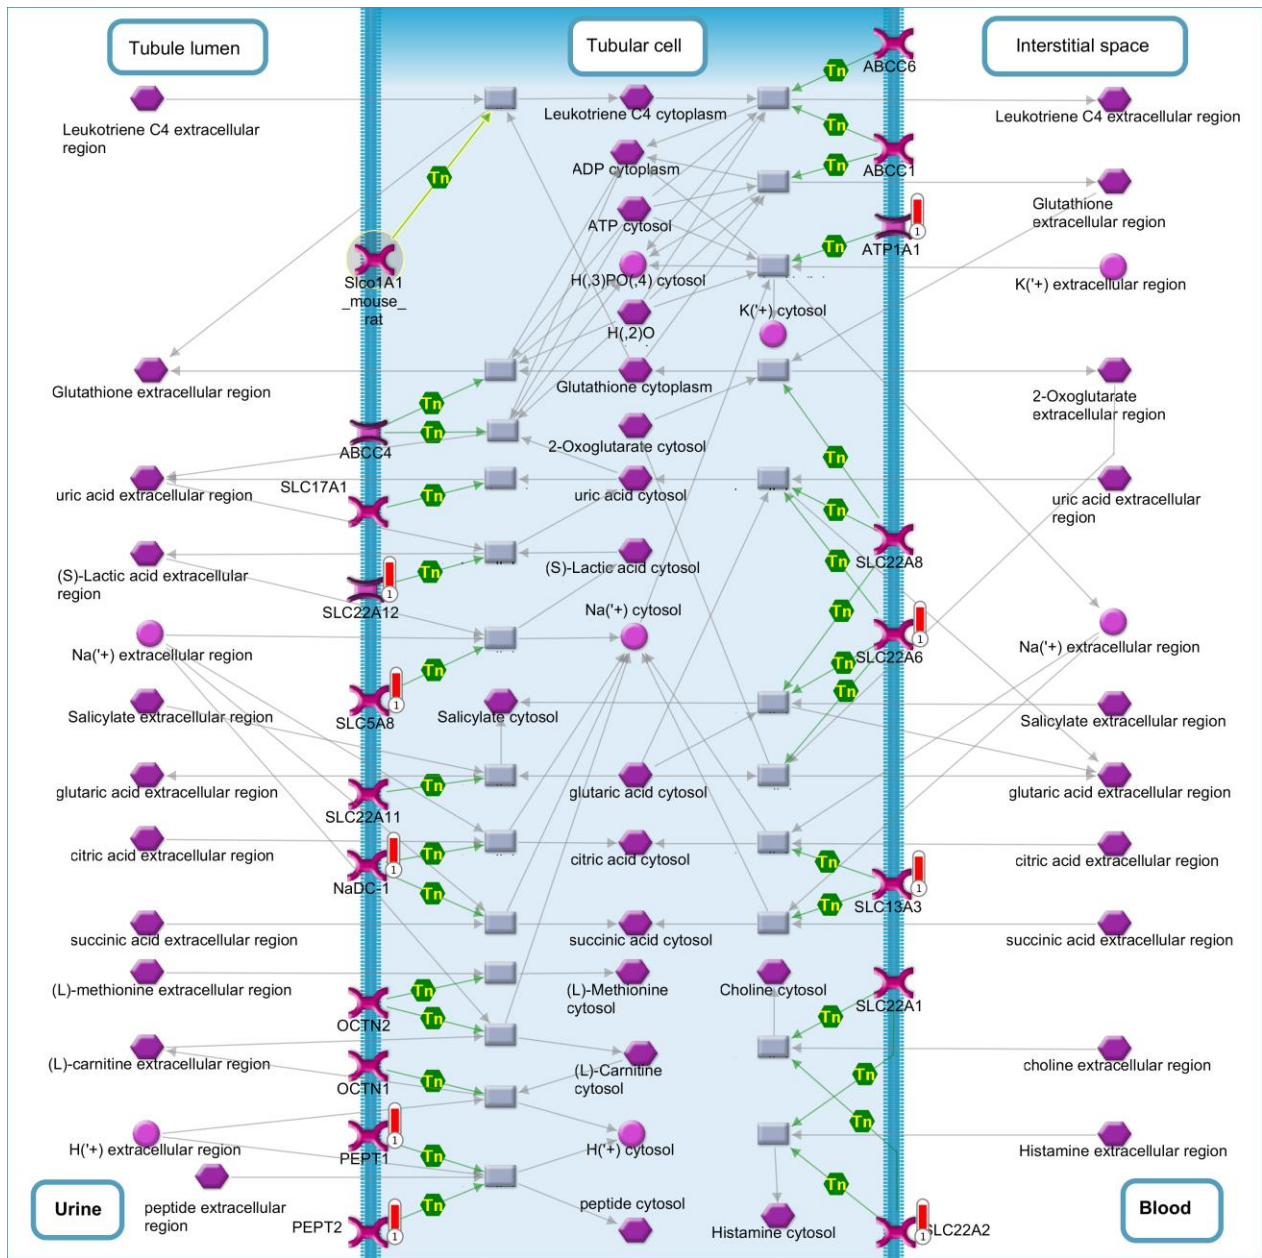

**Supplementary Figure S9. Kidney-enriched genes were involved in renal secretion of organic electrolytes.** Genes identified as specifically and uniquely enriched in the kidney were uniquely overrepresented in the renal secretion of organic electrolytes pathway map from Thompson Reuters Canonical Pathway Maps ontology. Enriched genes were highlighted with red thermometers on the map. Renal secretion of organic cations (including bases) and organic anions (including acids) has physiological, pharmacological, and toxicological importance. The proximal tubule is the primary site of renal electrolyte secretion.

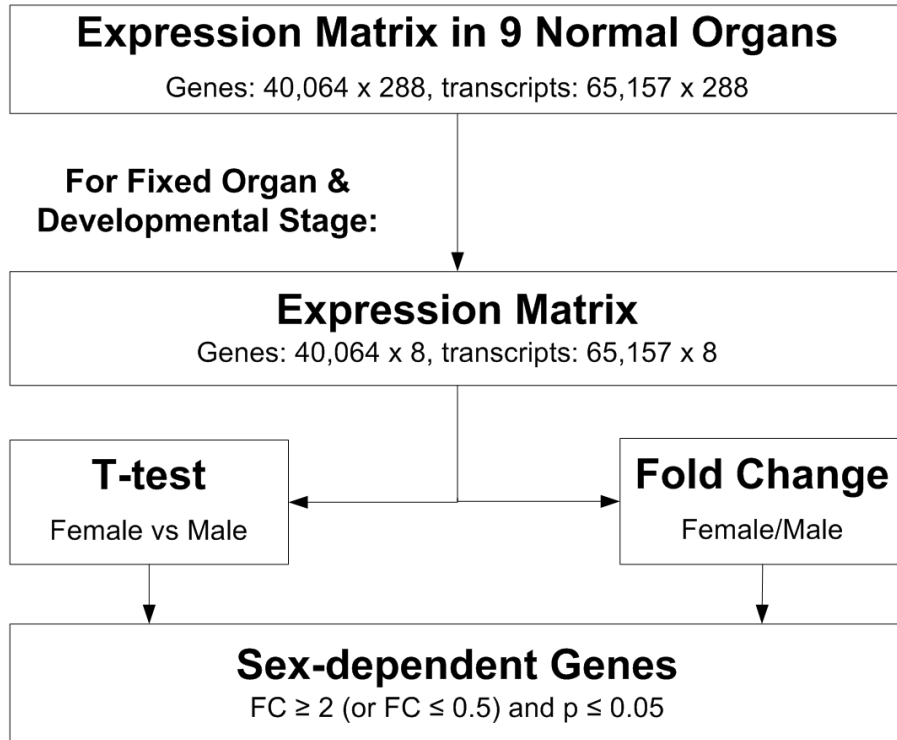

**Supplementary Figure S10. Scheme for identifying sex-specific genes in each organ at each developmental stage.** All 288 samples from 9 organs (except uterus and testis) were used to identify sex-specific genes. For each organ, samples were separated into four groups on the basis of developmental stage. Fold change and t-test *p*-value were calculated between males and females in each organ across the four stages. Sex-specific genes were those that had a fold change  $\geq 2$  (or  $\leq 0.5$ ) and *p*-value  $\leq 0.05$  for any organ at any development stage.

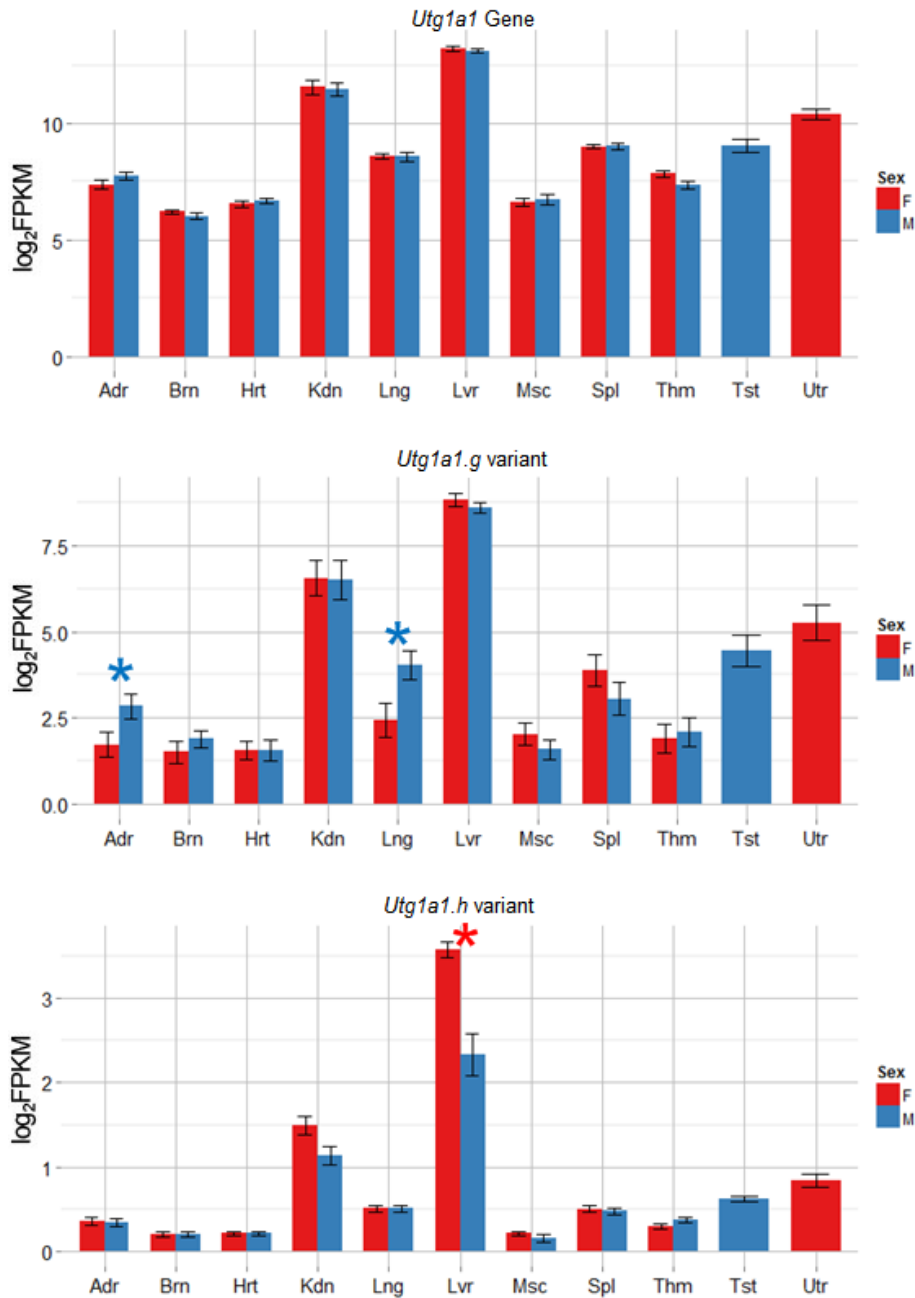

**Supplementary Figure S11. Sex-specific alternatively spliced variant expression of *Ugt1a* in rats.** Bars: expression (log<sub>2</sub>FPKM, Mean ± SE; N=16 in uterus and testes, N=32 in the other 9 organs) of gene *Ugt1a* (upper), its isoform *g* (middle) and isoform *h* (bottom) in each organ in females (red) and males (blue). Stars: sex-specific (female > male, red; female < male, blue) and differently expressed in the organ. For any given organ and transcript variant, a gene/transcript variant with an FC between males and females ≥ 2 (or ≤ 0.5) with a *p*-value ≤ 0.05 (Student's *t*-test) was considered as a sex-specific gene/transcript variant. Adr, adrenal; Brn, brain; Hrt, heart; Kdn, kidney; Lvr, liver; Lng, lung; Msc, skeletal muscle; Spl, spleen; Tst, testis; Thm, thymus; and Utr, uterus.

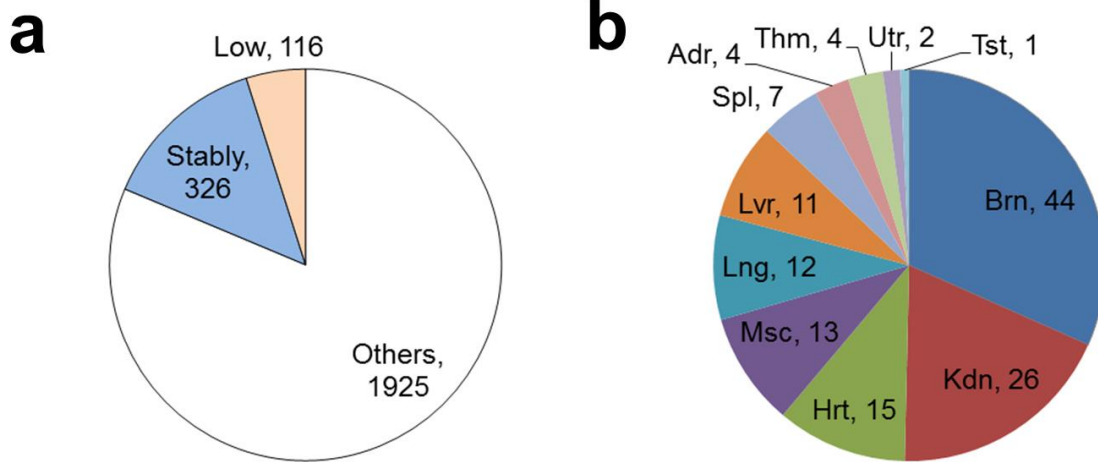

**Supplementary Figure S12. Expression of spliced noncoding genes in AceView. (a)** Distribution of 2,367 spliced noncoding genes based on gene expression level. **(b)** Cross-organ distribution of 139 organ-enriched noncoding genes. A gene that was expressed at  $FPKM \geq 1$  in all eleven organs, across all four developmental stages, in both males and females was defined as a commonly-expressed gene. A gene that was  $FPKM < 1$  in all eleven organs, across all four developmental stages in both males and females, was defined as a “low” expressed gene. Adr, adrenal; Brn, brain; Hrt, heart; Kdn, kidney; Lvr, liver; Lng, lung; Msc, skeletal muscle; Spl, spleen; Tst, testis; Thm, thymus; and Utr, uterus.

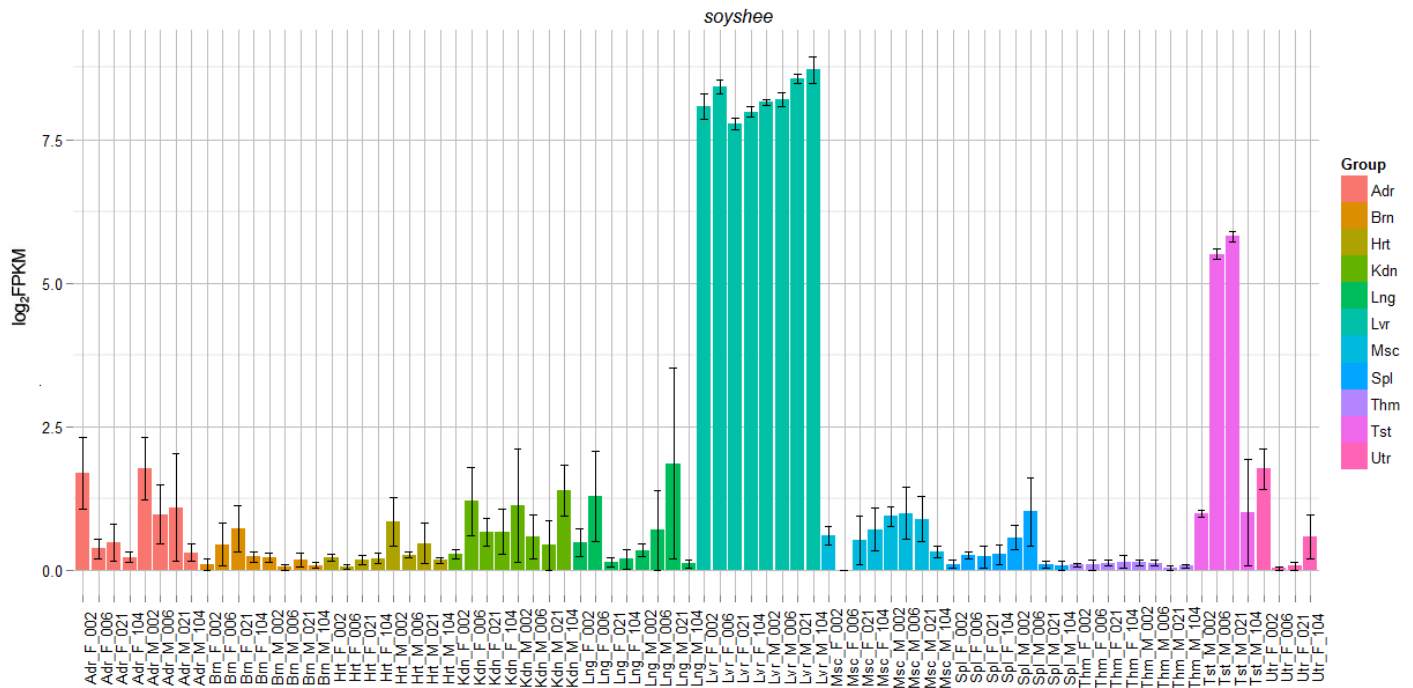

**Supplementary Figure S13. Expression profile of the spliced novel non-coding gene *soyshee*.** Y-axis shows the  $\log_2$ FPKM expression level (Mean  $\pm$  SE; N=4). Adr, adrenal; Brn, brain; Hrt, heart; Kdn, kidney; Lvr, liver; Lng, lung; Msc, skeletal muscle; Spl, spleen; Tst, testis; Thm, thymus; and Utr, uterus.

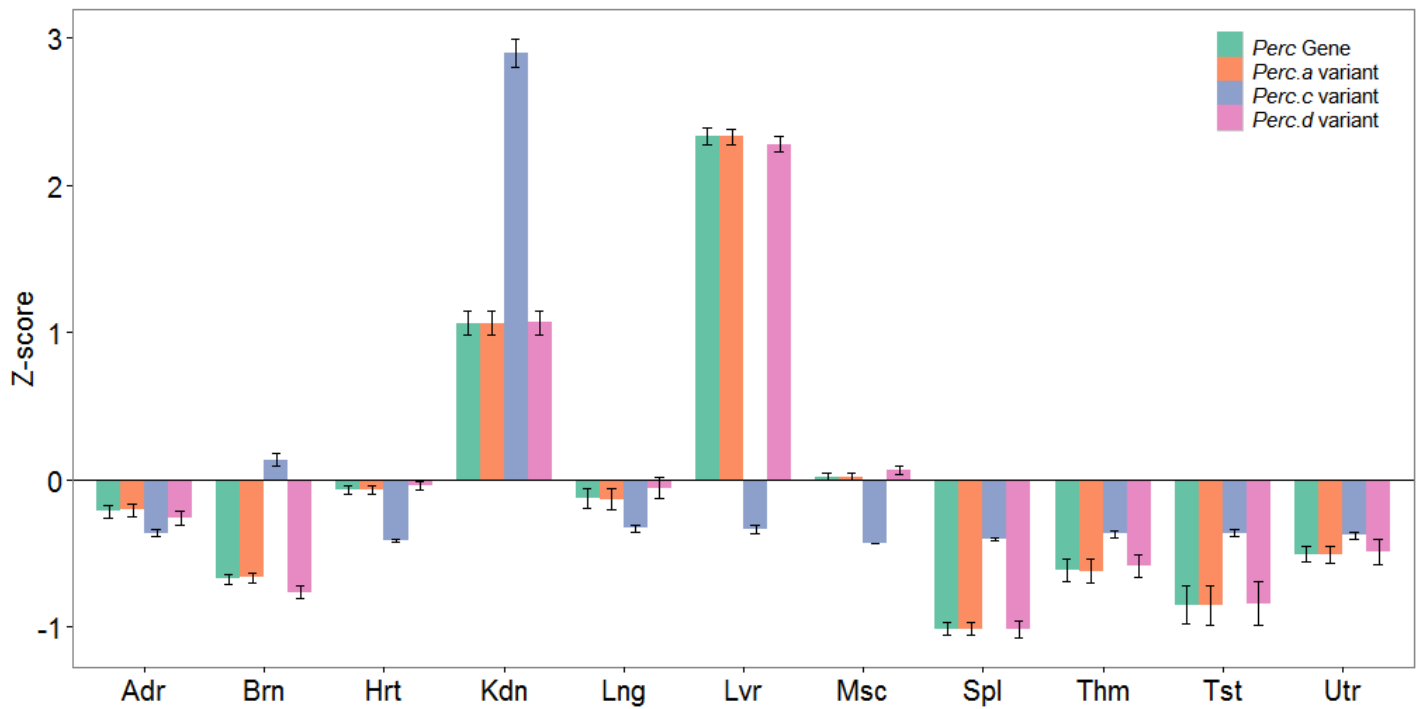

**Supplementary Figure S14. Expression of the *Pocr* gene and its alternatively spliced variants in rats.** The Y-axis represents the Z-score (Mean 0, SD 1) of  $\log_2$ FPKM (Mean  $\pm$  SE; N=16 in uterus and testes, N=32 in the other 9 organs) and the X-axis shows the *Pocr* gene and its transcript variant *Pocr.a*, *Pocr.c*, and *Pocr.d* (*Pocr* gene in green; *Pocr.a* in orange; *Pocr.c* in blue; and *Pocr.d* in pink) in each organ. Adr, adrenal; Brn, brain; Hrt, heart; Kdn, kidney; Lvr, liver; Lng, lung; Msc, skeletal muscle; Spl, spleen; Tst, testis; Thm, thymus; and Utr, uterus.

## Supplementary Tables



**Supplementary Table S1. Significantly enriched GeneGo canonical pathway maps based on the commonly-expressed genes in all organs across the developmental stages.**

| <b>Maps</b>                                                     | <b># Total Genes</b> | <b># On Map</b> | <b>p Value*</b> | <b>Min FDR</b> |
|-----------------------------------------------------------------|----------------------|-----------------|-----------------|----------------|
| Oxidative phosphorylation                                       | 59                   | 58              | 1.39E-07        | 1.06E-04       |
| GTP-XTP metabolism                                              | 44                   | 43              | 1.34E-05        | 3.69E-03       |
| Cytoskeleton remodeling                                         | 65                   | 61              | 1.46E-05        | 3.69E-03       |
| Cell cycle_Influence of Ras and Rho proteins on G1/S Transition | 40                   | 39              | 4.45E-05        | 7.94E-03       |
| Transport_Intracellular cholesterol transport in norm           | 38                   | 37              | 8.07E-05        | 7.94E-03       |
| Ubiquinone metabolism                                           | 38                   | 37              | 8.07E-05        | 7.94E-03       |
| Transport_Clathrin-coated vesicle cycle                         | 52                   | 49              | 8.21E-05        | 7.94E-03       |
| Cytoskeleton remodeling_TGF, WNT and cytoskeletal remodeling    | 76                   | 69              | 8.39E-05        | 7.94E-03       |
| Transcription_Sin3 and NuRD in transcription regulation         | 28                   | 28              | 1.30E-04        | 1.09E-02       |
| NRF2 regulation of oxidative stress response                    | 43                   | 41              | 1.54E-04        | 1.17E-02       |

\*The enrichment analysis was performed using a hypergeometric test to find over-representation of genes. Only statistically significant pathways with p-values < 0.05 were considered. The Benjamini–Hochberg FDR method was used to adjust the p-values for multiple testing.

**Supplementary Table S2. The number of organ-enriched genes\* based on different fold changes.**

| <b>FC</b>  | <b>Adr</b> | <b>Brn</b> | <b>Hrt</b> | <b>Kdn</b> | <b>Lvr</b> | <b>Lng</b> | <b>Msc</b> | <b>Spl</b> | <b>Tst</b> | <b>Thm</b> | <b>Utr</b> | <b>Total</b> |
|------------|------------|------------|------------|------------|------------|------------|------------|------------|------------|------------|------------|--------------|
| <b>2</b>   | 107        | 1,401      | 144        | 386        | 454        | 232        | 306        | 183        | 25         | 62         | 113        | 3,413        |
| <b>4</b>   | 34         | 778        | 67         | 204        | 319        | 87         | 153        | 59         | 18         | 38         | 23         | 1,780        |
| <b>8</b>   | 20         | 392        | 39         | 132        | 235        | 36         | 93         | 23         | 13         | 14         | 3          | 1,000        |
| <b>16</b>  | 12         | 186        | 24         | 82         | 190        | 23         | 72         | 15         | 10         | 7          | 1          | 622          |
| <b>32</b>  | 7          | 81         | 11         | 46         | 144        | 18         | 46         | 9          | 7          | 2          | 0          | 371          |
| <b>64</b>  | 6          | 32         | 4          | 32         | 65         | 13         | 21         | 4          | 6          | 1          | 0          | 184          |
| <b>128</b> | 3          | 11         | 0          | 21         | 6          | 11         | 2          | 0          | 2          | 1          | 0          | 57           |
| <b>256</b> | 1          | 3          | 0          | 10         | 1          | 7          | 2          | 0          | 0          | 0          | 0          | 24           |

\*A gene was considered organ-enriched if its expression level (FPKM) was at least 2-fold higher than that in any other organs with a Bonferroni-corrected  $p$ -value  $\leq 0.05$  across the four developmental stages. FC: fold change.

**Supplementary Table S3. The most characteristic pathways and biological processes identified in organ-enriched genes.**

| <b>Tissue</b> | <b>Characteristic pathways and processes</b>                                                                                                                                       |
|---------------|------------------------------------------------------------------------------------------------------------------------------------------------------------------------------------|
| Brain         | Neurophysiological processes: dopamine signaling, CDK5 signaling, GABA signaling.                                                                                                  |
| Adrenal gland | Pathways dominated by those involving biosynthesis and metabolism, e.g. metabolism of catecholamines.                                                                              |
| Heart         | Significant pathways were associated with muscle contraction, signal transduction and regulation of cardiac hypertrophy.                                                           |
| Kidney        | Top pathways were associated with regulation of renal functions, e.g. secretion of drugs. Other pathways included those associated with metabolism.                                |
| Liver         | Significant pathways were associated with various metabolic processes e.g. fatty acid oxidation, bile acid biosynthesis.                                                           |
| Lung          | Top pathways were directly associated with cell adhesion e.g. endothelial cell contacts. Other developmental pathways were also present, e.g. BMP signaling and NOTCH induced EMT. |
| Muscle        | Significant pathways were mostly enriched for processes involving glycolysis and gluconeogenesis, and also regulation of acetyl CoA carboxylase 2 activity in muscle.              |
| Spleen        | Significant pathways were mostly enriched for those associated with immune response.                                                                                               |
| Testes        | Significant pathways were associated with glutathione metabolism.                                                                                                                  |
| Thymus        | Significant pathways were associated with various immune related processes and signaling pathways.                                                                                 |
| Uterus        | Significant pathways were associated cytoskeletal remodeling and developmental processes.                                                                                          |

In general, selection and ranking of the pathways was highly consistent with the organ function. Conversely, genes defined as commonly-expressed tended to be enriched in non-organ specific pathways.

**Supplementary Table S4. Numbers of development-dependent differentially expressed genes in the various organs.**

| <b>Organ</b> | <b>002_006</b> | <b>002_021</b> | <b>002_104</b> | <b>006_021</b> | <b>006_104</b> | <b>021_104</b> | <b>Unique</b> |
|--------------|----------------|----------------|----------------|----------------|----------------|----------------|---------------|
| Adr          | 1,689          | 2,214          | 2,655          | 630            | 1,399          | 862            | 3,679         |
| Brn          | 749            | 1,189          | 1,252          | 649            | 540            | 728            | 2,211         |
| Hrt          | 1,073          | 1,593          | 1,847          | 652            | 844            | 491            | 2,633         |
| Kdn          | 1,984          | 2,521          | 2,408          | 650            | 959            | 739            | 3,561         |
| Lvr          | 1,980          | 2,669          | 2,601          | 1,169          | 1,502          | 1,283          | 4,220         |
| Lng          | 850            | 1,594          | 2,340          | 594            | 1,253          | 965            | 3,185         |
| Msc          | 1,720          | 3,035          | 3,906          | 1,267          | 2,430          | 1,191          | 5,064         |
| Spl          | 1,623          | 2,245          | 1,900          | 764            | 1,079          | 1,060          | 3,554         |
| Tst          | 11,989         | 12,587         | 6,591          | 1,133          | 12,348         | 12,708         | 16,186        |
| Thm          | 695            | 1,232          | 5,554          | 1,059          | 5,390          | 4,302          | 6,499         |
| Utr          | 2,662          | 3,075          | 3,033          | 1,306          | 1,696          | 1,271          | 4,847         |

To identify development-dependent genes in each organ, we used a fold-change  $\geq 2$  (or  $\leq 0.5$ ) plus Bonferroni-adjusted  $p$ -value  $\leq 0.05$  based on an ANOVA model to select differentially expressed genes among the developmental stages. The first 6 columns show the number of DEGs in comparison between two developmental stages for the organ. The last column shows the total number of DEGs for the organ. Adr, adrenal; Brn, brain; Hrt, heart; Kdn, kidney; Lvr, liver; Lng, lung; Msc, skeletal muscle; Spl, spleen; Tst, testis; Thm, thymus; and Utr, uterus.

**Supplementary Table S5. Number of genes that were female- or male-dominant.**

| Organ | Week 2  |      | Week 6 |      | Week 21 |      | Week 104 |      |
|-------|---------|------|--------|------|---------|------|----------|------|
|       | Female* | Male | Female | Male | Female  | Male | Female   | Male |
| Adr   | 166     | 350  | 317    | 236  | 214     | 469  | 221      | 397  |
| Brn   | 265     | 191  | 189    | 157  | 206     | 448  | 200      | 127  |
| Hrt   | 176     | 462  | 224    | 122  | 199     | 153  | 97       | 505  |
| Kdn   | 194     | 291  | 446    | 219  | 528     | 397  | 199      | 265  |
| Lvr   | 322     | 435  | 328    | 267  | 715     | 495  | 295      | 377  |
| Lng   | 312     | 321  | 182    | 90   | 253     | 131  | 156      | 359  |
| Msc   | 143     | 763  | 233    | 231  | 203     | 412  | 427      | 127  |
| Spl   | 186     | 308  | 161    | 139  | 249     | 200  | 195      | 174  |
| Thm   | 157     | 288  | 150    | 207  | 202     | 240  | 326      | 240  |

\*Female: number of genes that were female-dominant, DEG between female and male:  $FC \geq 2$  (Female/Male) with T-test  $p$ -value  $\leq 0.05$ . Male-dominant genes were calculated in a similar manner;  $FC \leq 0.5$  (Female/Male) with T-test  $p$ -value  $\leq 0.05$ .

All 288 samples (except uterus and testis) were separated on the basis of developmental stages and organ. Fold change and t-test  $p$ -value were calculated between males and females for each organ and developmental stage. For any organ at any development stage, genes with a fold change  $\geq 2$  and  $p$ -value  $\leq 0.05$  were considered sex-specific.

**Supplementary Table S6. The 92 ERCC transcripts and their NCBI accession numbers.**

| <b>ERCC_ID</b> | <b>GenBank</b> | <b>ERCC_ID</b> | <b>GenBank</b> | <b>ERCC_ID</b> | <b>GenBank</b> | <b>ERCC_ID</b> | <b>GenBank</b> |
|----------------|----------------|----------------|----------------|----------------|----------------|----------------|----------------|
| ERCC-00002     | DQ459430       | ERCC-00046     | DQ516748       | ERCC-00085     | DQ883669       | ERCC-00138     | DQ516777       |
| ERCC-00003     | DQ516784       | ERCC-00048     | DQ883671       | ERCC-00086     | DQ516791       | ERCC-00142     | DQ883646       |
| ERCC-00004     | DQ516752       | ERCC-00051     | DQ516740       | ERCC-00092     | DQ459425       | ERCC-00143     | DQ668362       |
| ERCC-00009     | DQ668364       | ERCC-00053     | DQ516785       | ERCC-00095     | DQ516759       | ERCC-00144     | DQ854995       |
| ERCC-00012     | DQ883670       | ERCC-00054     | DQ516731       | ERCC-00096     | DQ459429       | ERCC-00145     | DQ875386       |
| ERCC-00013     | EF011062       | ERCC-00057     | DQ668366       | ERCC-00097     | DQ516758       | ERCC-00147     | DQ516790       |
| ERCC-00014     | DQ875385       | ERCC-00058     | DQ459418       | ERCC-00098     | DQ459415       | ERCC-00148     | DQ883642       |
| ERCC-00016     | DQ883664       | ERCC-00059     | DQ668356       | ERCC-00099     | DQ875387       | ERCC-00150     | DQ883659       |
| ERCC-00017     | DQ459420       | ERCC-00060     | DQ516763       | ERCC-00104     | DQ516815       | ERCC-00154     | DQ854997       |
| ERCC-00019     | DQ883651       | ERCC-00061     | DQ459426       | ERCC-00108     | DQ668365       | ERCC-00156     | DQ883643       |
| ERCC-00022     | DQ855004       | ERCC-00062     | DQ516786       | ERCC-00109     | DQ854998       | ERCC-00157     | DQ839618       |
| ERCC-00024     | DQ854993       | ERCC-00067     | DQ883653       | ERCC-00111     | DQ883685       | ERCC-00158     | DQ516795       |
| ERCC-00025     | DQ883689       | ERCC-00069     | DQ459421       | ERCC-00112     | DQ459422       | ERCC-00160     | DQ883658       |
| ERCC-00028     | DQ459419       | ERCC-00071     | DQ883654       | ERCC-00113     | DQ883663       | ERCC-00162     | DQ516750       |
| ERCC-00031     | DQ459431       | ERCC-00073     | DQ668358       | ERCC-00116     | DQ668367       | ERCC-00163     | DQ668359       |
| ERCC-00033     | DQ516796       | ERCC-00074     | DQ516754       | ERCC-00117     | DQ459412       | ERCC-00164     | DQ516779       |
| ERCC-00034     | DQ855001       | ERCC-00075     | DQ516778       | ERCC-00120     | DQ854992       | ERCC-00165     | DQ668363       |
| ERCC-00035     | DQ459413       | ERCC-00076     | DQ883650       | ERCC-00123     | DQ516782       | ERCC-00168     | DQ516776       |
| ERCC-00039     | DQ883656       | ERCC-00077     | DQ516742       | ERCC-00126     | DQ459427       | ERCC-00170     | DQ516773       |
| ERCC-00040     | DQ883661       | ERCC-00078     | DQ883673       | ERCC-00130     | EF011072       | ERCC-00171     | DQ854994       |
| ERCC-00041     | EF011069       | ERCC-00079     | DQ883652       | ERCC-00131     | DQ855003       |                |                |
| ERCC-00042     | DQ516783       | ERCC-00081     | DQ854991       | ERCC-00134     | DQ516739       |                |                |
| ERCC-00043     | DQ516787       | ERCC-00083     | DQ516780       | ERCC-00136     | EF011063       |                |                |
| ERCC-00044     | DQ459424       | ERCC-00084     | DQ883682       | ERCC-00137     | DQ855000       |                |                |
