# Supplementary material for: A rat RNA-Seq transcriptomic BodyMap across 11 organs and 4 developmental stages
Source: PubMed Central journal article supplement — Nat Commun. 2014 Feb 10;5:3230. doi: 10.1038/ncomms4230 (PMC3926002; doi:10.1038/ncomms4230), 2014-02-10
Supplement: ncomms4230-s7.pdf [file ncomms4230-s7.pdf]

**Supplementary Data 6. Novel alternative spliced transcripts annotated in AceView.**

| <b>Gene</b>                   | <b>mRNA novel (not in RefSeq)</b>    | <b>NCBI gene ID (if any)</b> | <b>Transcript extent on genome (nt)</b> | <b>Transcript length (nt)</b> | <b>Number of exons</b> | <b>CDS length (aa)</b> | <b>Gene descriptor</b>                                                               |
|-------------------------------|--------------------------------------|------------------------------|-----------------------------------------|-------------------------------|------------------------|------------------------|--------------------------------------------------------------------------------------|
| <a href="#">4HBT.0</a>        | <a href="#">4HBT.0.aSep08</a>        |                              | 35437                                   | 721                           | 6                      | 240                    | thioesterase adipose associated BFIT1 (4HBT.0) alternative variant aSep08, mRNA.     |
| <a href="#">4HBT.0</a>        | <a href="#">4HBT.0.bSep08</a>        |                              | 2496                                    | 399                           | 3                      | 132                    | thioesterase adipose associated BFIT1 (4HBT.0) alternative variant bSep08, mRNA.     |
| <a href="#">4HBT.0</a>        | <a href="#">4HBT.0.cSep08</a>        |                              | 28355                                   | 342                           | 3                      | 90                     | thioesterase adipose associated BFIT1 (4HBT.0) alternative variant cSep08, mRNA.     |
| <a href="#">5_nucleotid.0</a> | <a href="#">5_nucleotid.0.aSep08</a> |                              | 83571                                   | 5087                          | 18                     | 593                    | 5'-nucleotidase cytosolic II (5_nucleotid.0) alternative variant aSep08, mRNA.       |
| <a href="#">5_nucleotid.0</a> | <a href="#">5_nucleotid.0.bSep08</a> |                              | 71057                                   | 1793                          | 8                      | 580                    | 5'-nucleotidase cytosolic II (5_nucleotid.0) alternative variant bSep08, mRNA.       |
| <a href="#">5_nucleotid.0</a> | <a href="#">5_nucleotid.0.cSep08</a> |                              | 64390                                   | 740                           | 9                      | 229                    | 5'-nucleotidase cytosolic II (5_nucleotid.0) alternative variant cSep08, mRNA.       |
| <a href="#">5_nucleotid.0</a> | <a href="#">5_nucleotid.0.dSep08</a> |                              | 11283                                   | 927                           | 10                     | 178                    | cytosolic II (5_nucleotid.0) alternative variant dSep08, mRNA.                       |
| <a href="#">5_nucleotid.0</a> | <a href="#">5_nucleotid.0.eSep08</a> |                              | 3405                                    | 416                           | 6                      | 116                    | 5'-Nucleotidase cytosolic II (5_nucleotid.0) alternative variant eSep08, mRNA.       |
| <a href="#">5_nucleotid.0</a> | <a href="#">5_nucleotid.0.fSep08</a> |                              | 90074                                   | 623                           | 3                      | 60                     | putative protein (5_nucleotid.0) alternative variant fSep08, mRNA.                   |
| <a href="#">5_nucleotid.0</a> | <a href="#">5_nucleotid.0.gSep08</a> |                              | 1072                                    | 831                           | 3                      | 54                     | 5'-nucleotidase cytosolic II CRA b (5_nucleotid.0) alternative variant gSep08, mRNA. |
| <a href="#">6PGD.0</a>        | <a href="#">6PGD.0.aSep08</a>        |                              | 16205                                   | 2132                          | 13                     | 514                    | phosphogluconate dehydrogenase (6PGD.0) alternative variant aSep08, mRNA.            |
| <a href="#">6PGD.0</a>        | <a href="#">6PGD.0.bSep08</a>        |                              | 4258                                    | 976                           | 4                      | 158                    | phosphogluconate dehydrogenase (6PGD.0) alternative variant bSep08, mRNA.            |
| <a href="#">6PGD.0</a>        | <a href="#">6PGD.0.cSep08</a>        |                              | 2911                                    | 875                           | 4                      | 144                    | phosphogluconate dehydrogenase (16.2 kD) (6PGD.0) alternative variant cSep08, mRNA.  |
| <a href="#">6PGD.0</a>        | <a href="#">6PGD.0.dSep08</a>        |                              | 1203                                    | 391                           | 2                      | 123                    | phosphogluconate dehydrogenase (6PGD.0) alternative variant dSep08, mRNA.            |
| <a href="#">6PGD.0</a>        | <a href="#">6PGD.0.eSep08</a>        |                              | 842                                     | 350                           | 2                      | 77                     | CRA d like (6PGD.0) alternative variant eSep08, mRNA.                                |
| <a href="#">7a5</a>           | <a href="#">7a5.aSep08</a>           | <a href="#">314539</a>       | 11886                                   | 524                           |                        | 95                     | putative binding protein 7a5 (7a5) mRNA.                                             |
| <a href="#">7tm_2.0</a>       | <a href="#">7tm_2.0.aSep08</a>       |                              | 17118                                   | 742                           |                        | 224                    | brain-specific angiogenesis inhibitor (7tm_2.0) mRNA.                                |
| <a href="#">2331ex4-5</a>     | <a href="#">2331ex4-5.aSep08</a>     | <a href="#">415058</a>       | 2317                                    | 356                           |                        | 61                     | class I gene fragment 2331 (2331ex4-5) mRNA.                                         |
| <a href="#">2747a1a2</a>      | <a href="#">2747a1a2.aSep08</a>      | <a href="#">414861</a>       | 17174                                   | 658                           |                        | 87                     | 2747a1a2 pseudogene (9.2 kD) (2747a1a2) mRNA.                                        |
| <a href="#">A</a>             | <a href="#">A.bSep08</a>             | <a href="#">24152</a>        | 91664                                   | 637                           |                        | 103                    | agouti (11.3 kD) (A) alternative variant bSep08, mRNA.                               |
| <a href="#">A1cf</a>          | <a href="#">A1cf.bSep08</a>          | <a href="#">170912</a>       | 12864                                   | 388                           | 2                      | 82                     | putative protein (A1cf) alternative variant bSep08, mRNA.                            |
| <a href="#">A2bp1</a>         | <a href="#">A2bp1.bSep08</a>         | <a href="#">302920</a>       | 58346                                   | 3167                          | 6                      | 132                    | ataxin 2 binding protein 1 (A2bp1) alternative variant bSep08, mRNA.                 |
| <a href="#">A2bp1</a>         | <a href="#">A2bp1.cSep08</a>         | <a href="#">302920</a>       | 203638                                  | 809                           | 2                      | 113                    | ataxin 2 binding protein 1 (A2bp1) alternative variant cSep08, mRNA.                 |
| <a href="#">A2bp1</a>         | <a href="#">A2bp1.eSep08</a>         | <a href="#">302920</a>       | 37031                                   | 493                           | 2                      | 46                     | ataxin 2 binding protein 1 (A2bp1) alternative variant eSep08, mRNA.                 |

|                             |                                    |                        |       |      |    |     |                                                                                                     |
|-----------------------------|------------------------------------|------------------------|-------|------|----|-----|-----------------------------------------------------------------------------------------------------|
| <a href="#">A2m</a>         | <a href="#">A2m.cSep08</a>         | <a href="#">24153</a>  | 98876 | 1036 | 7  | 345 | murinoglobulin (A2m) alternative variant cSep08, mRNA.                                              |
| <a href="#">A2m</a>         | <a href="#">A2m.cSep08</a>         | <a href="#">297568</a> | 98876 | 1036 | 7  | 345 | murinoglobulin (A2m) alternative variant cSep08, mRNA.                                              |
| <a href="#">A2m</a>         | <a href="#">A2m.dSep08</a>         | <a href="#">24153</a>  | 7540  | 1513 | 8  | 205 | CRA b (22.7 kD) (A2m) alternative variant dSep08, mRNA.                                             |
| <a href="#">A2m</a>         | <a href="#">A2m.dSep08</a>         | <a href="#">297568</a> | 7540  | 1513 | 8  | 205 | CRA b (22.7 kD) (A2m) alternative variant dSep08, mRNA.                                             |
| <a href="#">A2m</a>         | <a href="#">A2m.eSep08</a>         | <a href="#">24153</a>  | 4166  | 494  | 4  | 145 | alpha-2-macroglobulin CRA b (A2m) alternative variant eSep08, mRNA.                                 |
| <a href="#">A2m</a>         | <a href="#">A2m.eSep08</a>         | <a href="#">297568</a> | 4166  | 494  | 4  | 145 | alpha-2-macroglobulin CRA b (A2m) alternative variant eSep08, mRNA.                                 |
| <a href="#">A2m</a>         | <a href="#">A2m.fSep08</a>         | <a href="#">24153</a>  | 2801  | 1336 | 3  | 56  | CRA b (A2m) alternative variant fSep08, mRNA.                                                       |
| <a href="#">A2m</a>         | <a href="#">A2m.fSep08</a>         | <a href="#">297568</a> | 2801  | 1336 | 3  | 56  | CRA b (A2m) alternative variant fSep08, mRNA.                                                       |
| <a href="#">A2M.1</a>       | <a href="#">A2M.1.aSep08</a>       |                        | 2852  | 490  |    | 163 | alpha-2-macroglobulin (A2M.1) mRNA.                                                                 |
| <a href="#">A2M.2</a>       | <a href="#">A2M.2.aSep08</a>       |                        | 10711 | 318  |    | 105 | complement component (A2M.2) mRNA.                                                                  |
| <a href="#">A2M_recep.0</a> | <a href="#">A2M_recep.0.aSep08</a> |                        | 5160  | 513  |    | 127 | murinoglobulin (A2M_recep.0) mRNA.                                                                  |
| <a href="#">A2M_recep.1</a> | <a href="#">A2M_recep.1.aSep08</a> |                        | 4325  | 506  |    | 125 | murinoglobulin (A2M_recep.1) mRNA.                                                                  |
| <a href="#">A3galt2</a>     | <a href="#">A3galt2.bSep08</a>     | <a href="#">171553</a> | 8487  | 613  | 4  | 111 | alpha 1,3-galactosyltransferase 2 (12.9 kD) (A3galt2) alternative variant bSep08, mRNA.             |
| <a href="#">A4galt</a>      | <a href="#">A4galt.bSep08</a>      | <a href="#">63888</a>  | 1889  | 406  | 1  | 135 | alpha 1,4-galactosyltransferase (A4galt) alternative variant bSep08, mRNA.                          |
| <a href="#">A4_EXTRA.0</a>  | <a href="#">A4_EXTRA.0.aSep08</a>  |                        | 33327 | 385  |    | 128 | amyloid -like protein 2 (A4_EXTRA.0) mRNA.                                                          |
| <a href="#">AA926063</a>    | <a href="#">AA926063.aSep08</a>    | <a href="#">294284</a> | 8208  | 815  | 1  | 44  | AA926063gene (AA926063) alternative variant aSep08, mRNA.                                           |
| <a href="#">AA926063</a>    | <a href="#">AA926063.bSep08</a>    | <a href="#">294284</a> | 12519 | 416  | 1  | 97  | AA926063gene (10.3 kD) (AA926063) alternative variant bSep08, mRNA.                                 |
| <a href="#">Aaas</a>        | <a href="#">Aaas.aSep08</a>        | <a href="#">300259</a> | 9396  | 1790 | 10 | 516 | achalasia adrenocortical insufficiency alacrimia (Aaas) alternative variant aSep08, mRNA.           |
| <a href="#">Aaas</a>        | <a href="#">Aaas.cSep08</a>        | <a href="#">300259</a> | 9189  | 1459 | 13 | 275 | achalasia adrenocortical insufficiency alacrimia (Aaas) alternative variant cSep08, mRNA.           |
| <a href="#">Aaas</a>        | <a href="#">Aaas.dSep08</a>        | <a href="#">300259</a> | 1000  | 704  | 3  | 137 | achalasia adrenocortical insufficiency alacrimia (14.7 kD) (Aaas) alternative variant dSep08, mRNA. |
| <a href="#">Aaas</a>        | <a href="#">Aaas.eSep08</a>        | <a href="#">300259</a> | 10864 | 688  | 7  | 115 | achalasia adrenocortical insufficiency alacrimia (Aaas) alternative variant eSep08, mRNA.           |
| <a href="#">AAA_5.0</a>     | <a href="#">AAA_5.0.aSep08</a>     |                        | 6002  | 731  |    | 235 | axonemal dynein heavy Dnahc8 (AAA_5.0) mRNA.                                                        |
| <a href="#">AAA_5.1</a>     | <a href="#">AAA_5.1.aSep08</a>     |                        | 80616 | 1584 |    | 442 | ATPase associated with various cellular activities, AAA-5 (AAA_5.1) mRNA.                           |
| <a href="#">Aadat</a>       | <a href="#">Aadat.bSep08</a>       | <a href="#">29416</a>  | 40594 | 1798 | 7  | 387 | aminoadipate aminotransferase (Aadat) alternative variant bSep08, complete mRNA.                    |
| <a href="#">Aak1</a>        | <a href="#">Aak1.aSep08</a>        | <a href="#">500244</a> | 97336 | 2011 | 2  | 533 | AP2 associated kinase 1 (Aak1) alternative variant aSep08, mRNA.                                    |
| <a href="#">Aak1</a>        | <a href="#">Aak1.bSep08</a>        | <a href="#">500244</a> | 18543 | 1167 | 5  | 388 | AP2 associated kinase 1 (Aak1) alternative variant bSep08, mRNA.                                    |
| <a href="#">Aak1</a>        | <a href="#">Aak1.cSep08</a>        | <a href="#">500244</a> | 96627 | 1442 | 3  | 341 | AP2 associated kinase 1 (38.1 kD) (Aak1) alternative variant cSep08, complete mRNA.                 |
| <a href="#">Aak1</a>        | <a href="#">Aak1.dSep08</a>        | <a href="#">500244</a> | 8426  | 347  | 3  | 115 | AP2 associated kinase 1 (Aak1) alternative variant dSep08, mRNA.                                    |

|                                      |                                             |                        |       |      |    |     |                                                                                                                                |
|--------------------------------------|---------------------------------------------|------------------------|-------|------|----|-----|--------------------------------------------------------------------------------------------------------------------------------|
| <a href="#">Aamp</a>                 | <a href="#">Aamp.bSep08</a>                 | <a href="#">301512</a> | 4108  | 1662 | 7  | 266 | angio-associated, migratory cell protein (28.8 kD) (Aamp) alternative variant bSep08, mRNA.                                    |
| <a href="#">AARP2CN.0</a>            | <a href="#">AARP2CN.0.aSep08</a>            |                        | 4695  | 462  |    | 153 | ribosome assembly protein CRA b (AARP2CN.0) mRNA.                                                                              |
| <a href="#">Aars</a>                 | <a href="#">Aars.aSep08</a>                 | <a href="#">292023</a> | 21985 | 3460 | 22 | 968 | alanyl-tRNA synthetase (106.8 kD) (Aars) alternative variant aSep08, mRNA.                                                     |
| <a href="#">Aars</a>                 | <a href="#">Aars.bSep08</a>                 | <a href="#">292023</a> | 2270  | 598  | 5  | 193 | alanyl-tRNA synthetase (Aars) alternative variant bSep08, mRNA.                                                                |
| <a href="#">Aars</a>                 | <a href="#">Aars.cSep08</a>                 | <a href="#">292023</a> | 3735  | 769  | 4  | 171 | alanyl-tRNA synthetase (Aars) alternative variant cSep08, mRNA.                                                                |
| <a href="#">Aars</a>                 | <a href="#">Aars.dSep08</a>                 | <a href="#">292023</a> | 6390  | 408  | 4  | 135 | alanyl-tRNA synthetase (Aars) alternative variant dSep08, mRNA.                                                                |
| <a href="#">Aars</a>                 | <a href="#">Aars.fSep08</a>                 | <a href="#">292023</a> | 2912  | 433  | 2  | 76  | alanyl-tRNA synthetase (Aars) alternative variant fSep08, mRNA.                                                                |
| <a href="#">Aarsd1</a>               | <a href="#">Aarsd1.bSep08</a>               | <a href="#">619440</a> | 3981  | 716  | 5  | 87  | putative cytoplasmic protein of metazoan origin (9.2 kD) (Aarsd1) alternative variant bSep08, mRNA.                            |
| <a href="#">Aarsd1</a>               | <a href="#">Aarsd1.cSep08</a>               | <a href="#">619440</a> | 614   | 307  | 3  | 65  | threonyl/alanyl tRNA synthetase, SAD (Aarsd1) alternative variant cSep08, mRNA.                                                |
| <a href="#">Aasdh</a>                | <a href="#">Aasdh.aSep08</a>                | <a href="#">364136</a> | 2635  | 707  |    | 205 | aminoadipate-semialdehyde dehydrogenase (Aasdh) mRNA.                                                                          |
| <a href="#">Aasdhppt</a>             | <a href="#">Aasdhppt.bSep08</a>             | <a href="#">300328</a> | 11150 | 1781 | 3  | 252 | aminoadipate-semialdehyde dehydrogenase-phosphopantetheinyl transferase (29.4 kD) (Aasdhppt) alternative variant bSep08, mRNA. |
| <a href="#">Aasdhppt</a>             | <a href="#">Aasdhppt.cSep08</a>             | <a href="#">300328</a> | 10971 | 789  | 2  | 119 | aminoadipate-semialdehyde dehydrogenase-phosphopantetheinyl transferase (14.0 kD) (Aasdhppt) alternative variant cSep08, mRNA. |
| <a href="#">Aass</a>                 | <a href="#">Aass.aSep08</a>                 | <a href="#">296925</a> | 19610 | 1950 |    | 500 | aminoadipate-semialdehyde synthase (Aass) alternative variant aSep08, mRNA.                                                    |
| <a href="#">Aass</a>                 | <a href="#">Aass.cSep08</a>                 | <a href="#">296925</a> | 21082 | 734  |    | 229 | aminoadipate-semialdehyde synthase (Aass) alternative variant cSep08, mRNA.                                                    |
| <a href="#">Aass</a>                 | <a href="#">Aass.dSep08</a>                 | <a href="#">296925</a> | 16921 | 871  |    | 221 | aminoadipate-semialdehyde synthase (Aass) alternative variant dSep08, mRNA.                                                    |
| <a href="#">Aass</a>                 | <a href="#">Aass.eSep08</a>                 | <a href="#">296925</a> | 1479  | 260  |    | 86  | aminoadipate-semialdehyde synthase (Aass) alternative variant eSep08, mRNA.                                                    |
| <a href="#">Abat</a>                 | <a href="#">Abat.bSep08</a>                 | <a href="#">81632</a>  | 36734 | 792  | 1  | 264 | 4-aminobutyrate aminotransferase (Abat) alternative variant bSep08, mRNA.                                                      |
| <a href="#">Abba-1</a>               | <a href="#">Abba-1.aSep08</a>               | <a href="#">307845</a> | 10440 | 598  | 6  | 199 | actin-bundling protein with BAIAP2 homology (Abba-1) alternative variant aSep08, mRNA.                                         |
| <a href="#">Abba-1</a>               | <a href="#">Abba-1.bSep08</a>               | <a href="#">307845</a> | 2985  | 410  | 3  | 136 | actin-bundling protein with BAIAP2 homology (Abba-1) alternative variant bSep08, mRNA.                                         |
| <a href="#">Abba-1</a>               | <a href="#">Abba-1.cSep08</a>               | <a href="#">307845</a> | 754   | 401  | 2  | 133 | actin-bundling protein with BAIAP2 homology (Abba-1) alternative variant cSep08, mRNA.                                         |
| <a href="#">Abba-1</a>               | <a href="#">Abba-1.dSep08</a>               | <a href="#">307845</a> | 10109 | 396  | 4  | 132 | actin-bundling protein with BAIAP2 homology (Abba-1) alternative variant dSep08, mRNA.                                         |
| <a href="#">ABC2_membran<br/>e.0</a> | <a href="#">ABC2_membrane.0.aSe<br/>p08</a> |                        | 10293 | 3151 | 9  | 401 | WHITE (ABC2_membrane.0) alternative variant aSep08, mRNA.                                                                      |
| <a href="#">ABC2_membran<br/>e.0</a> | <a href="#">ABC2_membrane.0.bSe<br/>p08</a> |                        | 3515  | 590  | 3  | 146 | WHITE (ABC2_membrane.0) alternative variant bSep08, mRNA.                                                                      |

|                                      |                                             |                        |       |      |    |     |                                                                                                            |
|--------------------------------------|---------------------------------------------|------------------------|-------|------|----|-----|------------------------------------------------------------------------------------------------------------|
| <a href="#">ABC2_membran<br/>e.0</a> | <a href="#">ABC2_membrane.0.cSe<br/>p08</a> |                        | 9818  | 504  | 3  | 25  | putative protein (ABC2_membrane.0) alternative variant cSep08, mRNA.                                       |
| <a href="#">Abca1</a>                | <a href="#">Abca1.bSep08</a>                | <a href="#">313210</a> | 5724  | 2107 | 6  | 264 | ATP-binding cassette, sub-family A (ABC1), member 1 (Abca1) alternative variant bSep08, mRNA.              |
| <a href="#">Abca2</a>                | <a href="#">Abca2.bSep08</a>                | <a href="#">79248</a>  | 1287  | 856  | 6  | 238 | ATP-binding cassette sub-family A member 2 like (Abca2) alternative variant bSep08, mRNA.                  |
| <a href="#">Abca2</a>                | <a href="#">Abca2.cSep08</a>                | <a href="#">79248</a>  | 649   | 535  | 2  | 117 | ATP-binding cassette sub-family A member 2 like (12.8 kD) (Abca2) alternative variant cSep08, mRNA.        |
| <a href="#">Abca2</a>                | <a href="#">Abca2.dSep08</a>                | <a href="#">79248</a>  | 1293  | 744  | 4  | 100 | ATP-binding cassette sub-family A member 2 like (11.1 kD) (Abca2) alternative variant dSep08, mRNA.        |
| <a href="#">Abca3</a>                | <a href="#">Abca3.aSep08</a>                | <a href="#">302973</a> | 13174 | 3456 | 14 | 815 | ATP-binding cassette, sub-family A (ABC1), member 3 (Abca3) alternative variant aSep08, mRNA.              |
| <a href="#">Abca4</a>                | <a href="#">Abca4.bSep08</a>                | <a href="#">310836</a> | 11110 | 1778 | 7  | 524 | ATP-binding cassette, sub-family A (ABC1), member 4 (Abca4) alternative variant bSep08, mRNA.              |
| <a href="#">Abca4</a>                | <a href="#">Abca4.cSep08</a>                | <a href="#">310836</a> | 6552  | 705  | 4  | 234 | ATP-binding cassette, sub-family A (ABC1), member 4 (Abca4) alternative variant cSep08, mRNA.              |
| <a href="#">Abca4</a>                | <a href="#">Abca4.dSep08</a>                | <a href="#">310836</a> | 11587 | 615  | 5  | 205 | ATP-binding cassette, sub-family A (ABC1), member 4 (Abca4) alternative variant dSep08, mRNA.              |
| <a href="#">Abca4</a>                | <a href="#">Abca4.eSep08</a>                | <a href="#">310836</a> | 2821  | 364  | 3  | 115 | ATP-binding cassette, sub-family A (ABC1), member 4 (Abca4) alternative variant eSep08, mRNA.              |
| <a href="#">Abca4</a>                | <a href="#">Abca4.fSep08</a>                | <a href="#">310836</a> | 1650  | 365  | 2  | 52  | ATP-binding cassette, sub-family A (ABC1), member 4 (Abca4) alternative variant fSep08, mRNA.              |
| <a href="#">Abca5</a>                | <a href="#">Abca5.bSep08</a>                | <a href="#">286970</a> | 738   | 623  | 2  | 32  | ATP-binding cassette, sub-family A (ABC1), member 5 (3.8 kD) (Abca5) alternative variant bSep08, mRNA.     |
| <a href="#">Abca7</a>                | <a href="#">Abca7.aSep08</a>                | <a href="#">299609</a> | 7584  | 2758 | 20 | 891 | ATP-binding cassette, sub-family A (ABC1), member 7 (Abca7) alternative variant aSep08, mRNA.              |
| <a href="#">Abca7</a>                | <a href="#">Abca7.bSep08</a>                | <a href="#">299609</a> | 3261  | 1347 | 7  | 198 | ATP-binding cassette, sub-family A (ABC1), member 7 (Abca7) alternative variant bSep08, mRNA.              |
| <a href="#">Abca7</a>                | <a href="#">Abca7.cSep08</a>                | <a href="#">299609</a> | 677   | 342  | 3  | 113 | ATP-binding cassette, sub-family A (ABC1), member 7 (Abca7) alternative variant cSep08, mRNA.              |
| <a href="#">Abca7</a>                | <a href="#">Abca7.dSep08</a>                | <a href="#">299609</a> | 1023  | 770  | 2  | 98  | ATP-binding cassette, sub-family A (ABC1), member 7 (10.5 kD) (Abca7) alternative variant dSep08, mRNA.    |
| <a href="#">Abca8</a>                | <a href="#">Abca8.aSep08</a>                | <a href="#">303637</a> | 16174 | 2111 |    | 629 | ATP-binding cassette, sub-family A (ABC1), member 8 (Abca8) alternative variant aSep08, mRNA.              |
| <a href="#">Abca8</a>                | <a href="#">Abca8.bSep08</a>                | <a href="#">303637</a> | 7001  | 739  |    | 171 | ATP-binding cassette, sub-family A (ABC1), member 8 (Abca8) alternative variant bSep08, mRNA.              |
| <a href="#">Abca8a</a>               | <a href="#">Abca8a.aSep08</a>               | <a href="#">303638</a> | 34455 | 2819 | 20 | 726 | ATP-binding cassette, sub-family A (ABC1), member 8a (Abca8a) alternative variant aSep08, mRNA.            |
| <a href="#">Abca9</a>                | <a href="#">Abca9.aSep08</a>                | <a href="#">287788</a> | 3696  | 378  |    | 125 | ATP-binding cassette, sub-family A (ABC1), member 9 (Abca9) mRNA.                                          |
| <a href="#">Abca16</a>               | <a href="#">Abca16.aSep08</a>               | <a href="#">293444</a> | 40703 | 408  |    | 125 | ATP-binding cassette, sub-family A (ABC1), member 16 (Abca16) mRNA.                                        |
| <a href="#">Abcb1</a>                | <a href="#">Abcb1.bSep08</a>                | <a href="#">170913</a> | 25433 | 458  | 4  | 97  | ATP-binding cassette, sub-family B (MDR/TAP), member 1 (Abcb1) alternative variant bSep08, mRNA.           |
| <a href="#">Abcb6</a>                | <a href="#">Abcb6.bSep08</a>                | <a href="#">140669</a> | 5010  | 2336 | 2  | 341 | ATP-binding cassette, sub-family B (MDR/TAP), member 6 (38.2 kD) (Abcb6) alternative variant bSep08, mRNA. |

|                        |                               |                        |       |      |    |     |                                                                                                             |
|------------------------|-------------------------------|------------------------|-------|------|----|-----|-------------------------------------------------------------------------------------------------------------|
| <a href="#">Abcb7</a>  | <a href="#">Abcb7.bSep08</a>  | <a href="#">302395</a> | 34626 | 1785 | 7  | 384 | ATP-binding cassette, sub-family B (MDR/TAP), member 7 (Abcb7) alternative variant bSep08, mRNA.            |
| <a href="#">Abcb7</a>  | <a href="#">Abcb7.cSep08</a>  | <a href="#">302395</a> | 7179  | 373  | 2  | 93  | ATP-binding cassette, sub-family B (MDR/TAP), member 7 (Abcb7) alternative variant cSep08, mRNA.            |
| <a href="#">Abcb8</a>  | <a href="#">Abcb8.bSep08</a>  | <a href="#">362302</a> | 6491  | 901  | 6  | 224 | ATP-binding cassette, sub-family B (MDR/TAP), member 8 (24.9 kD) (Abcb8) alternative variant bSep08, mRNA.  |
| <a href="#">Abcb8</a>  | <a href="#">Abcb8.cSep08</a>  | <a href="#">362302</a> | 5620  | 187  | 2  | 40  | ATP-binding cassette, sub-family B (MDR/TAP), member 8 (Abcb8) alternative variant cSep08, mRNA.            |
| <a href="#">Abcb9</a>  | <a href="#">Abcb9.bSep08</a>  | <a href="#">63886</a>  | 2338  | 790  | 2  | 123 | ATP-binding cassette, sub-family B (MDR/TAP), member 9 (Abcb9) alternative variant bSep08, mRNA.            |
| <a href="#">Abcc4</a>  | <a href="#">Abcc4.bSep08</a>  | <a href="#">170924</a> | 43580 | 1787 |    | 568 | ATP-binding cassette, sub-family C (CFTR/MRP), member 4 (Abcc4) alternative variant bSep08, mRNA.           |
| <a href="#">Abcc4</a>  | <a href="#">Abcc4.cSep08</a>  | <a href="#">170924</a> | 56766 | 1197 |    | 399 | ATP-binding cassette, sub-family C (CFTR/MRP), member 4 (Abcc4) alternative variant cSep08, mRNA.           |
| <a href="#">Abcc4</a>  | <a href="#">Abcc4.dSep08</a>  | <a href="#">170924</a> | 9600  | 748  |    | 68  | ATP-binding cassette, sub-family C (CFTR/MRP), member 4 (Abcc4) alternative variant dSep08, mRNA.           |
| <a href="#">Abcc5</a>  | <a href="#">Abcc5.bSep08</a>  | <a href="#">116721</a> | 34336 | 2183 | 6  | 223 | ATP-binding cassette, sub-family C (CFTR/MRP), member 5 (25.7 kD) (Abcc5) alternative variant bSep08, mRNA. |
| <a href="#">Abcc5</a>  | <a href="#">Abcc5.cSep08</a>  | <a href="#">116721</a> | 31246 | 1259 | 5  | 204 | ATP-binding cassette, sub-family C (CFTR/MRP), member 5 (23.4 kD) (Abcc5) alternative variant cSep08, mRNA. |
| <a href="#">Abcc8</a>  | <a href="#">Abcc8.bSep08</a>  | <a href="#">25559</a>  | 926   | 605  | 2  | 190 | atp-binding cassette sub-family c member 8 like (Abcc8) alternative variant bSep08, mRNA.                   |
| <a href="#">Abcc8</a>  | <a href="#">Abcc8.dSep08</a>  | <a href="#">25559</a>  | 1212  | 308  | 3  | 102 | ATP-binding cassette C member 8 like (Abcc8) alternative variant dSep08, mRNA.                              |
| <a href="#">Abcc8</a>  | <a href="#">Abcc8.eSep08</a>  | <a href="#">25559</a>  | 2329  | 480  | 5  | 91  | ATP-binding cassette C member 8 like (Abcc8) alternative variant eSep08, mRNA.                              |
| <a href="#">Abcc10</a> | <a href="#">Abcc10.cSep08</a> | <a href="#">316231</a> | 506   | 287  | 2  | 95  | ATP-binding cassette, sub-family C (CFTR/MRP), member 10 (Abcc10) alternative variant cSep08, mRNA.         |
| <a href="#">Abcd1</a>  | <a href="#">Abcd1.bSep08</a>  | <a href="#">363516</a> | 815   | 733  | 2  | 99  | ATP-binding cassette, sub-family D (ALD), member 1 (Abcd1) alternative variant bSep08, mRNA.                |
| <a href="#">Abcd1</a>  | <a href="#">Abcd1.cSep08</a>  | <a href="#">363516</a> | 7361  | 1508 | 4  | 66  | ATP-binding cassette, sub-family D (ALD), member 1 (Abcd1) alternative variant cSep08, mRNA.                |
| <a href="#">Abcd4</a>  | <a href="#">Abcd4.aSep08</a>  | <a href="#">299196</a> | 15890 | 1194 | 14 | 397 | ATP-binding cassette, sub-family D (ALD), member 4 (Abcd4) alternative variant aSep08, mRNA.                |
| <a href="#">Abcd4</a>  | <a href="#">Abcd4.bSep08</a>  | <a href="#">299196</a> | 11232 | 769  | 5  | 255 | ATP-binding cassette, sub-family D (ALD), member 4 (Abcd4) alternative variant bSep08, mRNA.                |
| <a href="#">Abcd4</a>  | <a href="#">Abcd4.cSep08</a>  | <a href="#">299196</a> | 5368  | 774  | 6  | 209 | ATP-binding cassette, sub-family D (ALD), member 4 (Abcd4) alternative variant cSep08, mRNA.                |
| <a href="#">Abcd4</a>  | <a href="#">Abcd4.dSep08</a>  | <a href="#">299196</a> | 4034  | 581  | 4  | 143 | ATP-binding cassette, sub-family D (ALD), member 4 (Abcd4) alternative variant dSep08, mRNA.                |
| <a href="#">Abcd4</a>  | <a href="#">Abcd4.eSep08</a>  | <a href="#">299196</a> | 2093  | 336  | 3  | 95  | ATP-binding cassette, sub-family D (ALD), member 4 (Abcd4) alternative variant eSep08, mRNA.                |
| <a href="#">Abcd4</a>  | <a href="#">Abcd4.fSep08</a>  | <a href="#">299196</a> | 1420  | 595  | 4  | 67  | ATP-binding cassette, sub-family D (ALD), member 4 (Abcd4) alternative variant fSep08, mRNA.                |
| <a href="#">Abce1</a>  | <a href="#">Abce1.aSep08</a>  | <a href="#">361390</a> | 18206 | 1247 |    | 364 | ATP-binding cassette, sub-family E (OABP), member 1 (Abce1) mRNA.                                           |

|                            |                                   |                        |        |      |    |     |                                                                                                                   |
|----------------------------|-----------------------------------|------------------------|--------|------|----|-----|-------------------------------------------------------------------------------------------------------------------|
| <a href="#">Abcf1</a>      | <a href="#">Abcf1.bSep08</a>      | <a href="#">85493</a>  | 2209   | 1205 | 5  | 113 | ATP-binding cassette, sub-family F (GCN20), member 1 (12.6 kD) (Abcf1) alternative variant bSep08, mRNA.          |
| <a href="#">Abcf1</a>      | <a href="#">Abcf1.dSep08</a>      | <a href="#">85493</a>  | 739    | 414  | 4  | 94  | ATP-binding cassette, sub-family F (GCN20), member 1 (Abcf1) alternative variant dSep08, mRNA.                    |
| <a href="#">Abcf2</a>      | <a href="#">Abcf2.aSep08</a>      | <a href="#">311959</a> | 12670  | 2458 | 15 | 624 | ATP-binding cassette, sub-family F (GCN20), member 2 (71.4 kD) (Abcf2) alternative variant aSep08, complete mRNA. |
| <a href="#">Abcf2</a>      | <a href="#">Abcf2.bSep08</a>      | <a href="#">311959</a> | 4160   | 806  | 5  | 244 | ATP-binding cassette, sub-family F (GCN20), member 2 (Abcf2) alternative variant bSep08, mRNA.                    |
| <a href="#">Abcf2</a>      | <a href="#">Abcf2.cSep08</a>      | <a href="#">311959</a> | 2017   | 722  | 4  | 162 | ATP-binding cassette, sub-family F (GCN20), member 2 (Abcf2) alternative variant cSep08, mRNA.                    |
| <a href="#">Abcf3</a>      | <a href="#">Abcf3.bSep08</a>      | <a href="#">287982</a> | 6774   | 806  | 5  | 198 | ATP-binding cassette sub-family F member 3 like (Abcf3) alternative variant bSep08, mRNA.                         |
| <a href="#">Abcf3</a>      | <a href="#">Abcf3.cSep08</a>      | <a href="#">287982</a> | 7330   | 705  | 6  | 147 | ATP-binding cassette sub-family F member 3 like (Abcf3) alternative variant cSep08, mRNA.                         |
| <a href="#">Abcf3</a>      | <a href="#">Abcf3.dSep08</a>      | <a href="#">287982</a> | 1443   | 668  | 4  | 128 | ATP-binding cassette sub-family F member 3 like (14.1 kD) (Abcf3) alternative variant dSep08, mRNA.               |
| <a href="#">Abcg1</a>      | <a href="#">Abcg1.aSep08</a>      | <a href="#">85264</a>  | 59333  | 914  | 7  | 304 | ATP-binding cassette, sub-family G (WHITE), member 1 (Abcg1) alternative variant aSep08, mRNA.                    |
| <a href="#">Abcg2</a>      | <a href="#">Abcg2.bSep08</a>      | <a href="#">312382</a> | 100846 | 686  | 5  | 165 | ATP-binding cassette, sub-family G (WHITE), member 2 (Abcg2) alternative variant bSep08, mRNA.                    |
| <a href="#">Abcg2</a>      | <a href="#">Abcg2.cSep08</a>      | <a href="#">312382</a> | 24813  | 423  | 4  | 111 | ATP-binding cassette, sub-family G (WHITE), member 2 (Abcg2) alternative variant cSep08, mRNA.                    |
| <a href="#">Abcg3</a>      | <a href="#">Abcg3.bSep08</a>      | <a href="#">498327</a> | 29874  | 765  | 6  | 254 | ATP-binding cassette, sub-family G (WHITE), member 3 (Abcg3) alternative variant bSep08, mRNA.                    |
| <a href="#">Abcg3</a>      | <a href="#">Abcg3.cSep08</a>      | <a href="#">498327</a> | 10876  | 722  | 3  | 88  | ATP-binding cassette, sub-family G (WHITE), member 3 (9.7 kD) (Abcg3) alternative variant cSep08, mRNA.           |
| <a href="#">Abcg3l1</a>    | <a href="#">Abcg3l1.bSep08</a>    | <a href="#">289453</a> | 10183  | 765  | 4  | 141 | ATP-binding cassette, sub-family G (WHITE), member 3-like 1 (15.8 kD) (Abcg3l1) alternative variant bSep08, mRNA. |
| <a href="#">Abcg3l1</a>    | <a href="#">Abcg3l1.cSep08</a>    | <a href="#">289453</a> | 1089   | 390  | 2  | 58  | ATP-binding cassette, sub-family G (WHITE), member 3-like 1 (Abcg3l1) alternative variant cSep08, mRNA.           |
| <a href="#">Abcg3l1</a>    | <a href="#">Abcg3l1.dSep08</a>    | <a href="#">289453</a> | 4702   | 1442 | 3  | 31  | ATP-binding cassette, sub-family G (WHITE), member 3-like 1 (3.6 kD) (Abcg3l1) alternative variant dSep08, mRNA.  |
| <a href="#">Abcg3l2</a>    | <a href="#">Abcg3l2.bSep08</a>    | <a href="#">360910</a> | 5415   | 403  | 1  | 89  | ATP-binding cassette sub-family G member 3 family like (9.6 kD) (Abcg3l2) alternative variant bSep08, mRNA.       |
| <a href="#">Abcg3l2</a>    | <a href="#">Abcg3l2.bSep08</a>    | <a href="#">360997</a> | 5415   | 403  | 1  | 89  | ATP-binding cassette sub-family G member 3 family like (9.6 kD) (Abcg3l2) alternative variant bSep08, mRNA.       |
| <a href="#">Abcg4</a>      | <a href="#">Abcg4.bSep08</a>      | <a href="#">300664</a> | 7807   | 1299 | 4  | 357 | ATP-binding cassette, sub-family G (WHITE), member 4 (Abcg4) alternative variant bSep08, mRNA.                    |
| <a href="#">ABC_tran.0</a> | <a href="#">ABC_tran.0.bSep08</a> |                        | 18903  | 665  | 1  | 133 | ATP-binding cassette member like (ABC_tran.0) alternative variant bSep08, mRNA.                                   |
| <a href="#">ABC_tran.1</a> | <a href="#">ABC_tran.1.aSep08</a> |                        | 2713   | 979  |    | 273 | ATP-binding cassette sub-family A member 7 like (ABC_tran.1) mRNA.                                                |
| <a href="#">Abhd3</a>      | <a href="#">Abhd3.bSep08</a>      | <a href="#">291793</a> | 11070  | 1277 | 5  | 214 | putative protein of ancient origin (Abhd3) alternative variant bSep08, mRNA.                                      |

|                         |                                |                        |       |      |    |     |                                                                                                                              |
|-------------------------|--------------------------------|------------------------|-------|------|----|-----|------------------------------------------------------------------------------------------------------------------------------|
| <a href="#">Abhd4</a>   | <a href="#">Abhd4.bSep08</a>   | <a href="#">364380</a> | 14578 | 980  | 4  | 209 | putative protein of ancient origin (Abhd4) alternative variant bSep08, mRNA.                                                 |
| <a href="#">Abhd4</a>   | <a href="#">Abhd4.cSep08</a>   | <a href="#">364380</a> | 6277  | 693  | 3  | 173 | putative protein of ancient origin (Abhd4) alternative variant cSep08, mRNA.                                                 |
| <a href="#">Abhd4</a>   | <a href="#">Abhd4.dSep08</a>   | <a href="#">364380</a> | 11463 | 696  | 4  | 142 | putative protein of eukaryotic origin (16.6 kD) (Abhd4) alternative variant dSep08, mRNA.                                    |
| <a href="#">Abhd5</a>   | <a href="#">Abhd5.bSep08</a>   | <a href="#">316122</a> | 20074 | 717  | 1  | 207 | putative protein of ancient origin (Abhd5) alternative variant bSep08, mRNA.                                                 |
| <a href="#">Abhd6</a>   | <a href="#">Abhd6.bSep08</a>   | <a href="#">305795</a> | 17835 | 354  | 3  | 63  | putative protein of vertebrate origin (Abhd6) alternative variant bSep08, mRNA.                                              |
| <a href="#">Abhd6</a>   | <a href="#">Abhd6.cSep08</a>   | <a href="#">305795</a> | 4534  | 729  | 2  | 35  | putative protein (Abhd6) alternative variant cSep08, mRNA.                                                                   |
| <a href="#">Abhd7</a>   | <a href="#">Abhd7.bSep08</a>   | <a href="#">289440</a> | 12871 | 725  | 3  | 137 | putative protein of ancient origin (15.7 kD) (Abhd7) alternative variant bSep08, mRNA.                                       |
| <a href="#">Abhd8</a>   | <a href="#">Abhd8.bSep08</a>   | <a href="#">306338</a> | 1056  | 938  | 1  | 114 | putative protein of metazoan origin (Abhd8) alternative variant bSep08, mRNA.                                                |
| <a href="#">Abhd10</a>  | <a href="#">Abhd10.bSep08</a>  | <a href="#">303953</a> | 5563  | 840  | 1  | 60  | putative protein of mammalian origin (Abhd10) alternative variant bSep08, mRNA.                                              |
| <a href="#">Abhd11</a>  | <a href="#">Abhd11.aSep08</a>  | <a href="#">360831</a> | 2729  | 1159 | 6  | 321 | PGAP1-like and alpha/beta hydrolase fold-1 (Abhd11) alternative variant aSep08, mRNA.                                        |
| <a href="#">Abhd11</a>  | <a href="#">Abhd11.bSep08</a>  | <a href="#">360831</a> | 1697  | 663  | 3  | 157 | putative protein of ancient origin (Abhd11) alternative variant bSep08, mRNA.                                                |
| <a href="#">Abhd11</a>  | <a href="#">Abhd11.dSep08</a>  | <a href="#">360831</a> | 2784  | 994  | 5  | 127 | putative protein of ancient origin (13.5 kD) (Abhd11) alternative variant dSep08, mRNA.                                      |
| <a href="#">Abhd11</a>  | <a href="#">Abhd11.eSep08</a>  | <a href="#">360831</a> | 2002  | 1421 | 3  | 39  | putative protein (Abhd11) alternative variant eSep08, mRNA.                                                                  |
| <a href="#">Abhd12</a>  | <a href="#">Abhd12.bSep08</a>  | <a href="#">499913</a> | 55382 | 981  | 8  | 266 | putative protein of ancient origin (29.7 kD) (Abhd12) alternative variant bSep08, mRNA.                                      |
| <a href="#">Abhd12</a>  | <a href="#">Abhd12.cSep08</a>  | <a href="#">499913</a> | 24114 | 1027 | 10 | 237 | putative protein of ancient origin (26.9 kD) (Abhd12) alternative variant cSep08, mRNA.                                      |
| <a href="#">Abhd13</a>  | <a href="#">Abhd13.bSep08</a>  | <a href="#">306630</a> | 9926  | 375  | 1  | 93  | putative protein (Abhd13) alternative variant bSep08, mRNA.                                                                  |
| <a href="#">Abhd14a</a> | <a href="#">Abhd14a.aSep08</a> | <a href="#">300982</a> | 4640  | 1186 | 5  | 303 | putative protein of ancient origin (Abhd14a) alternative variant aSep08, mRNA.                                               |
| <a href="#">Abhd14a</a> | <a href="#">Abhd14a.cSep08</a> | <a href="#">300982</a> | 888   | 705  | 2  | 170 | putative secreted or extracellular protein precursor of ancient origin (18.9 kD) (Abhd14a) alternative variant cSep08, mRNA. |
| <a href="#">Abhd14a</a> | <a href="#">Abhd14a.dSep08</a> | <a href="#">300982</a> | 8261  | 910  | 5  | 166 | putative protein of ancient origin (Abhd14a) alternative variant dSep08, mRNA.                                               |
| <a href="#">Abhd14a</a> | <a href="#">Abhd14a.fSep08</a> | <a href="#">300982</a> | 4032  | 974  | 4  | 111 | putative protein of ancient origin (12.3 kD) (Abhd14a) alternative variant fSep08, mRNA.                                     |
| <a href="#">Abhd14b</a> | <a href="#">Abhd14b.bSep08</a> | <a href="#">300983</a> | 3058  | 639  | 4  | 186 | putative protein of ancient origin (Abhd14b) alternative variant bSep08, mRNA.                                               |
| <a href="#">Abhd14b</a> | <a href="#">Abhd14b.cSep08</a> | <a href="#">300983</a> | 4035  | 1344 | 3  | 158 | putative protein of ancient origin (Abhd14b) alternative variant cSep08, mRNA.                                               |
| <a href="#">Abhd14b</a> | <a href="#">Abhd14b.eSep08</a> | <a href="#">300983</a> | 4391  | 853  | 3  | 96  | putative cytoplasmic protein of ancient origin (10.7 kD) (Abhd14b) alternative variant eSep08, mRNA.                         |
| <a href="#">Abi1</a>    | <a href="#">Abi1.bSep08</a>    | <a href="#">79249</a>  | 32763 | 594  | 5  | 197 | abl-interactor 1 (Abi1) alternative variant bSep08, mRNA.                                                                    |

|                        |                               |                        |        |      |    |     |                                                                                                                             |
|------------------------|-------------------------------|------------------------|--------|------|----|-----|-----------------------------------------------------------------------------------------------------------------------------|
| <a href="#">Abi2</a>   | <a href="#">Abi2.aSep08</a>   | <a href="#">286928</a> | 217692 | 1836 | 10 | 469 | abl-interactor 2 (Abi2) alternative variant aSep08, complete mRNA.                                                          |
| <a href="#">Abi2</a>   | <a href="#">Abi2.bSep08</a>   | <a href="#">286928</a> | 120653 | 1801 | 4  | 436 | abl-interactor 2 (Abi2) alternative variant bSep08, mRNA.                                                                   |
| <a href="#">Abi2</a>   | <a href="#">Abi2.dSep08</a>   | <a href="#">286928</a> | 18292  | 598  | 5  | 199 | abl-interactor 2 (Abi2) alternative variant dSep08, mRNA.                                                                   |
| <a href="#">Abi2</a>   | <a href="#">Abi2.eSep08</a>   | <a href="#">286928</a> | 28101  | 2825 | 3  | 127 | abl-interactor 2 (Abi2) alternative variant eSep08, mRNA.                                                                   |
| <a href="#">Abi2</a>   | <a href="#">Abi2.fSep08</a>   | <a href="#">286928</a> | 4481   | 445  | 2  | 96  | abl-interactor 2 (Abi2) alternative variant fSep08, mRNA.                                                                   |
| <a href="#">Abi3</a>   | <a href="#">Abi3.bSep08</a>   | <a href="#">303476</a> | 1824   | 744  | 4  | 196 | ABI gene family, member 3 (Abi3) alternative variant bSep08, mRNA.                                                          |
| <a href="#">Abi3</a>   | <a href="#">Abi3.cSep08</a>   | <a href="#">303476</a> | 2508   | 783  | 4  | 152 | ABI gene family, member 3 (Abi3) alternative variant cSep08, mRNA.                                                          |
| <a href="#">Abi3</a>   | <a href="#">Abi3.dSep08</a>   | <a href="#">303476</a> | 2155   | 579  | 2  | 144 | ABI gene family, member 3 (Abi3) alternative variant dSep08, mRNA.                                                          |
| <a href="#">Abl1</a>   | <a href="#">Abl1.aSep08</a>   | <a href="#">311860</a> | 8353   | 3502 | 4  | 677 | c-abl oncogene 1, receptor tyrosine kinase (Abl1) alternative variant aSep08, mRNA.                                         |
| <a href="#">Abl1</a>   | <a href="#">Abl1.bSep08</a>   | <a href="#">311860</a> | 24705  | 1310 | 7  | 330 | c-abl oncogene 1, receptor tyrosine kinase (Abl1) alternative variant bSep08, mRNA.                                         |
| <a href="#">Abl2</a>   | <a href="#">Abl2.bSep08</a>   | <a href="#">304883</a> | 1207   | 812  | 1  | 82  | v-abl Abelson murine leukemia viral oncogene homolog 2 (arg, Abelson-related gene) (Abl2) alternative variant bSep08, mRNA. |
| <a href="#">Ablim1</a> | <a href="#">Ablim1.bSep08</a> | <a href="#">307989</a> | 10306  | 1252 |    | 236 | actin-binding LIM protein 1 (Ablim1) alternative variant bSep08, mRNA.                                                      |
| <a href="#">Ablim3</a> | <a href="#">Ablim3.aSep08</a> | <a href="#">307395</a> | 14819  | 2544 |    | 225 | actin binding LIM protein family, member 3 (Ablim3) mRNA.                                                                   |
| <a href="#">Abp1</a>   | <a href="#">Abp1.bSep08</a>   | <a href="#">65029</a>  | 1290   | 758  | 3  | 252 | amiloride binding protein 1 (amine oxidase, copper-containing) (Abp1) alternative variant bSep08, mRNA.                     |
| <a href="#">Abp1</a>   | <a href="#">Abp1.cSep08</a>   | <a href="#">65029</a>  | 13291  | 841  | 3  | 53  | amiloride binding protein 1 (amine oxidase, copper-containing) (6.1 kD) (Abp1) alternative variant cSep08, mRNA.            |
| <a href="#">Abpa</a>   | <a href="#">Abpa.aSep08</a>   | <a href="#">361551</a> | 1266   | 401  | 3  | 92  | androgen binding protein, alpha (Abpa) alternative variant aSep08, mRNA.                                                    |
| <a href="#">Abr</a>    | <a href="#">Abr.aSep08</a>    | <a href="#">287537</a> | 39644  | 3635 | 9  | 429 | active BCR-related gene (Abr) alternative variant aSep08, mRNA.                                                             |
| <a href="#">Abr</a>    | <a href="#">Abr.bSep08</a>    | <a href="#">287537</a> | 14712  | 511  | 4  | 169 | active BCR-related gene (Abr) alternative variant bSep08, mRNA.                                                             |
| <a href="#">Abr</a>    | <a href="#">Abr.cSep08</a>    | <a href="#">287537</a> | 1170   | 382  | 1  | 78  | active BCR-related gene (Abr) alternative variant cSep08, mRNA.                                                             |
| <a href="#">Abt1</a>   | <a href="#">Abt1.bSep08</a>   | <a href="#">306960</a> | 1314   | 311  | 2  | 103 | activator of basal transcription 1 (Abt1) alternative variant bSep08, mRNA.                                                 |
| <a href="#">Abtb1</a>  | <a href="#">Abtb1.bSep08</a>  | <a href="#">297432</a> | 628    | 509  | 2  | 132 | putative protein of eukaryotic origin (Abtb1) alternative variant bSep08, mRNA.                                             |
| <a href="#">Abtb1</a>  | <a href="#">Abtb1.cSep08</a>  | <a href="#">297432</a> | 3739   | 734  | 7  | 95  | putative protein of metazoan origin (Abtb1) alternative variant cSep08, mRNA.                                               |
| <a href="#">Acaa1</a>  | <a href="#">Acaa1.bSep08</a>  | <a href="#">24157</a>  | 5491   | 555  | 6  | 184 | acetyl-Coenzyme A acyltransferase 1 (Acaa1) alternative variant bSep08, mRNA.                                               |
| <a href="#">Acaa1</a>  | <a href="#">Acaa1.cSep08</a>  | <a href="#">24157</a>  | 3680   | 696  | 5  | 163 | acetyl-Coenzyme A acyltransferase 1 (Acaa1) alternative variant cSep08, mRNA.                                               |
| <a href="#">Acaa1</a>  | <a href="#">Acaa1.dSep08</a>  | <a href="#">24157</a>  | 3300   | 605  | 6  | 158 | acetyl-Coenzyme A acyltransferase 1 (Acaa1) alternative variant dSep08, mRNA.                                               |



|                        |                               |                        |       |      |    |      |                                                                                                   |
|------------------------|-------------------------------|------------------------|-------|------|----|------|---------------------------------------------------------------------------------------------------|
| <a href="#">Acaa1</a>  | <a href="#">Acaa1.eSep08</a>  | <a href="#">24157</a>  | 756   | 326  | 3  | 70   | acetyl-Coenzyme A acyltransferase 1 (Acaa1) alternative variant eSep08, mRNA.                     |
| <a href="#">Acaa2</a>  | <a href="#">Acaa2.bSep08</a>  | <a href="#">170465</a> | 45017 | 1281 | 10 | 397  | acetyl-Coenzyme A acyltransferase 2 (41.9 kD) (Acaa2) alternative variant bSep08, mRNA.           |
| <a href="#">Acaa2</a>  | <a href="#">Acaa2.cSep08</a>  | <a href="#">170465</a> | 5105  | 511  | 3  | 114  | acetyl-Coenzyme A acyltransferase 2 (Acaa2) alternative variant cSep08, mRNA.                     |
| <a href="#">Acaa2</a>  | <a href="#">Acaa2.dSep08</a>  | <a href="#">170465</a> | 2486  | 392  | 2  | 22   | acetyl-Coenzyme A acyltransferase 2 (Acaa2) alternative variant dSep08, mRNA.                     |
| <a href="#">Acacb</a>  | <a href="#">Acacb.aSep08</a>  | <a href="#">116719</a> | 4467  | 976  |    | 261  | acetyl-Coenzyme A carboxylase beta (Acacb) mRNA.                                                  |
| <a href="#">Acad9</a>  | <a href="#">Acad9.bSep08</a>  | <a href="#">294973</a> | 1987  | 749  | 4  | 109  | acyl-Coenzyme A dehydrogenase family, member 9 (Acad9) alternative variant bSep08, mRNA.          |
| <a href="#">Acads</a>  | <a href="#">Acads.bSep08</a>  | <a href="#">64304</a>  | 862   | 532  | 3  | 90   | acyl-Coenzyme A dehydrogenase, C-2 to C-3 short chain (Acads) alternative variant bSep08, mRNA.   |
| <a href="#">Acadvl</a> | <a href="#">Acadvl.bSep08</a> | <a href="#">25363</a>  | 1782  | 699  | 6  | 233  | acyl-Coenzyme A dehydrogenase very long chain (Acadvl) alternative variant bSep08, mRNA.          |
| <a href="#">Acadvl</a> | <a href="#">Acadvl.cSep08</a> | <a href="#">25363</a>  | 1326  | 748  | 6  | 169  | acyl-Coenzyme A dehydrogenase very long chain (Acadvl) alternative variant cSep08, mRNA.          |
| <a href="#">Acadvl</a> | <a href="#">Acadvl.dSep08</a> | <a href="#">25363</a>  | 1398  | 1229 | 3  | 105  | acyl-Coenzyme A dehydrogenase very long chain (Acadvl) alternative variant dSep08, mRNA.          |
| <a href="#">Acadvl</a> | <a href="#">Acadvl.eSep08</a> | <a href="#">25363</a>  | 708   | 534  | 3  | 82   | acyl-Coenzyme A dehydrogenase very long chain (Acadvl) alternative variant eSep08, mRNA.          |
| <a href="#">Acadvl</a> | <a href="#">Acadvl.fSep08</a> | <a href="#">25363</a>  | 721   | 625  | 2  | 46   | acyl-Coenzyme A dehydrogenase very long chain (5.2 kD) (Acadvl) alternative variant fSep08, mRNA. |
| <a href="#">Acan</a>   | <a href="#">Acan.bSep08</a>   | <a href="#">58968</a>  | 15963 | 3978 | 6  | 1040 | aggrecan (Acan) alternative variant bSep08, mRNA.                                                 |
| <a href="#">Acan</a>   | <a href="#">Acan.cSep08</a>   | <a href="#">58968</a>  | 17423 | 770  | 3  | 246  | aggrecan (Acan) alternative variant cSep08, mRNA.                                                 |
| <a href="#">Acan</a>   | <a href="#">Acan.dSep08</a>   | <a href="#">58968</a>  | 19999 | 642  | 4  | 150  | aggrecan (Acan) alternative variant dSep08, mRNA.                                                 |
| <a href="#">Acat1</a>  | <a href="#">Acat1.bSep08</a>  | <a href="#">25014</a>  | 12108 | 1457 | 5  | 120  | acetyl-coenzyme A acetyltransferase 1 (Acat1) alternative variant bSep08, mRNA.                   |
| <a href="#">Acat1</a>  | <a href="#">Acat1.cSep08</a>  | <a href="#">25014</a>  | 1576  | 814  | 2  | 79   | mitochondrial acetoacetyl-coa thiolase (8.2 kD) (Acat1) alternative variant cSep08, mRNA.         |
| <a href="#">Acat2</a>  | <a href="#">Acat2.bSep08</a>  | <a href="#">308100</a> | 34558 | 1379 | 8  | 368  | acetyl-Coenzyme A acetyltransferase 2 (Acat2) alternative variant bSep08, mRNA.                   |
| <a href="#">Acat2</a>  | <a href="#">Acat2.cSep08</a>  | <a href="#">308100</a> | 27216 | 1000 | 7  | 326  | acetyl-Coenzyme A acetyltransferase 2 (Acat2) alternative variant cSep08, mRNA.                   |
| <a href="#">Acat2</a>  | <a href="#">Acat2.dSep08</a>  | <a href="#">308100</a> | 13322 | 742  | 6  | 244  | acetyl-Coenzyme A acetyltransferase 2 (Acat2) alternative variant dSep08, mRNA.                   |
| <a href="#">Acat2</a>  | <a href="#">Acat2.eSep08</a>  | <a href="#">308100</a> | 4658  | 510  | 2  | 169  | acetyl-Coenzyme A acetyltransferase 2 (Acat2) alternative variant eSep08, mRNA.                   |
| <a href="#">Acat2</a>  | <a href="#">Acat2.fSep08</a>  | <a href="#">308100</a> | 6654  | 628  | 3  | 122  | acetyl-Coenzyme A acetyltransferase 2 (Acat2) alternative variant fSep08, mRNA.                   |
| <a href="#">Acat2</a>  | <a href="#">Acat2.gSep08</a>  | <a href="#">308100</a> | 6650  | 513  | 2  | 90   | acetyl-Coenzyme A acetyltransferase 2 (Acat2) alternative variant gSep08, mRNA.                   |
| <a href="#">Acbd4</a>  | <a href="#">Acbd4.aSep08</a>  | <a href="#">303577</a> | 10469 | 1874 | 11 | 328  | acyl-coA-binding protein, ACBP (37.5 kD) (Acbd4) alternative variant aSep08, mRNA.                |
| <a href="#">Acbd4</a>  | <a href="#">Acbd4.cSep08</a>  | <a href="#">303577</a> | 7911  | 830  | 8  | 276  | acyl-coA-binding protein, ACBP (Acbd4) alternative variant cSep08, mRNA.                          |

|                       |                              |                        |       |      |    |     |                                                                                                                           |
|-----------------------|------------------------------|------------------------|-------|------|----|-----|---------------------------------------------------------------------------------------------------------------------------|
| <a href="#">Acbd4</a> | <a href="#">Acbd4.eSep08</a> | <a href="#">303577</a> | 2742  | 412  | 3  | 99  | putative protein of mammalian origin (Acbd4) alternative variant eSep08, mRNA.                                            |
| <a href="#">Acbd4</a> | <a href="#">Acbd4.fSep08</a> | <a href="#">303577</a> | 1768  | 545  | 6  | 77  | putative protein (8.1 kD) (Acbd4) alternative variant fSep08, mRNA.                                                       |
| <a href="#">Acbd4</a> | <a href="#">Acbd4.gSep08</a> | <a href="#">303577</a> | 1395  | 517  | 4  | 49  | putative protein (Acbd4) alternative variant gSep08, mRNA.                                                                |
| <a href="#">Acbd4</a> | <a href="#">Acbd4.hSep08</a> | <a href="#">303577</a> | 1230  | 779  | 3  | 50  | putative protein of vertebrate origin (Acbd4) alternative variant hSep08, mRNA.                                           |
| <a href="#">Acbd5</a> | <a href="#">Acbd5.bSep08</a> | <a href="#">307170</a> | 29590 | 3012 | 9  | 352 | putative protein, with a coiled coil domain, of metazoan origin (Acbd5) alternative variant bSep08, mRNA.                 |
| <a href="#">Acbd6</a> | <a href="#">Acbd6.bSep08</a> | <a href="#">289125</a> | 14533 | 268  | 1  | 82  | ankyrin (Acbd6) alternative variant bSep08, mRNA.                                                                         |
| <a href="#">Accn2</a> | <a href="#">Accn2.bSep08</a> | <a href="#">79123</a>  | 2996  | 1137 | 7  | 264 | amiloride-sensitive cation channel 2 neuronal CRA c (Accn2) alternative variant bSep08, mRNA.                             |
| <a href="#">Accn2</a> | <a href="#">Accn2.cSep08</a> | <a href="#">79123</a>  | 23959 | 655  | 6  | 170 | amiloride-sensitive cation channel 2 neuronal CRA b (Accn2) alternative variant cSep08, mRNA.                             |
| <a href="#">Accn2</a> | <a href="#">Accn2.dSep08</a> | <a href="#">79123</a>  | 1407  | 521  | 2  | 99  | putative protein (Accn2) alternative variant dSep08, mRNA.                                                                |
| <a href="#">Accn3</a> | <a href="#">Accn3.bSep08</a> | <a href="#">286920</a> | 915   | 505  | 1  | 138 | amiloride-sensitive cation channel 3 (Accn3) alternative variant bSep08, mRNA.                                            |
| <a href="#">Accn4</a> | <a href="#">Accn4.bSep08</a> | <a href="#">63882</a>  | 741   | 413  | 1  | 93  | amiloride-sensitive cation channel 4, pituitary (10.3 kD) (Accn4) alternative variant bSep08, mRNA.                       |
| <a href="#">Accs</a>  | <a href="#">Accs.aSep08</a>  | <a href="#">311218</a> | 7402  | 1794 | 3  | 543 | 1-aminocyclopropane-1-carboxylate synthase homolog (Arabidopsis)(non-functional) (Accs) alternative variant aSep08, mRNA. |
| <a href="#">Accs</a>  | <a href="#">Accs.bSep08</a>  | <a href="#">311218</a> | 13900 | 1908 | 10 | 523 | 1-aminocyclopropane-1-carboxylate synthase homolog (Arabidopsis)(non-functional) (Accs) alternative variant bSep08, mRNA. |
| <a href="#">Accs</a>  | <a href="#">Accs.cSep08</a>  | <a href="#">311218</a> | 3480  | 403  | 1  | 87  | 1-aminocyclopropane-1-carboxylate synthase homolog (Arabidopsis)(non-functional) (Accs) alternative variant cSep08, mRNA. |
| <a href="#">Acd</a>   | <a href="#">Acd.bSep08</a>   | <a href="#">307798</a> | 2727  | 1378 | 9  | 183 | adrenocortical dysplasia (19.9 kD) (Acd) alternative variant bSep08, mRNA.                                                |
| <a href="#">Acd</a>   | <a href="#">Acd.cSep08</a>   | <a href="#">307798</a> | 1772  | 1465 | 4  | 164 | adrenocortical dysplasia (18.1 kD) (Acd) alternative variant cSep08, mRNA.                                                |
| <a href="#">Acd</a>   | <a href="#">Acd.dSep08</a>   | <a href="#">307798</a> | 1811  | 1493 | 4  | 161 | adrenocortical dysplasia (17.4 kD) (Acd) alternative variant dSep08, mRNA.                                                |
| <a href="#">Acd</a>   | <a href="#">Acd.eSep08</a>   | <a href="#">307798</a> | 2739  | 1173 | 6  | 135 | adrenocortical dysplasia (14.8 kD) (Acd) alternative variant eSep08, mRNA.                                                |
| <a href="#">Ace</a>   | <a href="#">Ace.bSep08</a>   | <a href="#">24310</a>  | 4279  | 816  | 5  | 271 | angiotensin I converting enzyme (peptidyl-dipeptidase A) 1 (Ace) alternative variant bSep08, mRNA.                        |
| <a href="#">Ace2</a>  | <a href="#">Ace2.bSep08</a>  | <a href="#">302668</a> | 2902  | 1053 | 1  | 82  | angiotensin I converting enzyme (peptidyl-dipeptidase A) 2 (Ace2) alternative variant bSep08, mRNA.                       |
| <a href="#">Ace3</a>  | <a href="#">Ace3.aSep08</a>  | <a href="#">498012</a> | 7972  | 1039 |    | 217 | angiotensin I converting enzyme (peptidyl-dipeptidase A) 3 (Ace3) mRNA.                                                   |
| <a href="#">Acin1</a> | <a href="#">Acin1.aSep08</a> | <a href="#">305884</a> | 12088 | 2422 | 12 | 565 | apoptotic chromatin condensation inducer 1 (65.3 kD) (Acin1) alternative variant aSep08, mRNA.                            |
| <a href="#">Acin1</a> | <a href="#">Acin1.bSep08</a> | <a href="#">305884</a> | 7875  | 1540 | 9  | 237 | apoptotic chromatin condensation inducer 1 (Acin1) alternative variant bSep08, mRNA.                                      |

|                        |                               |                        |       |      |    |     |                                                                                           |
|------------------------|-------------------------------|------------------------|-------|------|----|-----|-------------------------------------------------------------------------------------------|
| <a href="#">Acin1</a>  | <a href="#">Acin1.cSep08</a>  | <a href="#">305884</a> | 4016  | 1621 | 4  | 154 | apoptotic chromatin condensation inducer 1 (Acin1) alternative variant cSep08, mRNA.      |
| <a href="#">Acin1</a>  | <a href="#">Acin1.fSep08</a>  | <a href="#">305884</a> | 469   | 370  | 2  | 93  | apoptotic chromatin condensation inducer 1 (Acin1) alternative variant fSep08, mRNA.      |
| <a href="#">Acin1</a>  | <a href="#">Acin1.gSep08</a>  | <a href="#">305884</a> | 1149  | 501  | 2  | 82  | apoptotic chromatin condensation inducer 1 (Acin1) alternative variant gSep08, mRNA.      |
| <a href="#">Acly</a>   | <a href="#">Acly.cSep08</a>   | <a href="#">24159</a>  | 5605  | 607  | 5  | 169 | ATP citrate lyase (Acly) alternative variant cSep08, mRNA.                                |
| <a href="#">Acly</a>   | <a href="#">Acly.dSep08</a>   | <a href="#">24159</a>  | 1342  | 412  | 3  | 117 | ATP citrate lyase (Acly) alternative variant dSep08, mRNA.                                |
| <a href="#">Acn9</a>   | <a href="#">Acn9.aSep08</a>   | <a href="#">362323</a> | 65028 | 695  | 2  | 123 | ACN9 homolog (S. cerevisiae) (Acn9) alternative variant aSep08, mRNA.                     |
| <a href="#">Acn9</a>   | <a href="#">Acn9.cSep08</a>   | <a href="#">362323</a> | 41029 | 441  | 2  | 58  | ACN9 homolog (S. cerevisiae) (6.9 kD) (Acn9) alternative variant cSep08, complete mRNA.   |
| <a href="#">Aco1</a>   | <a href="#">Aco1.bSep08</a>   | <a href="#">50655</a>  | 9447  | 411  | 3  | 67  | aconitase 1 (Aco1) alternative variant bSep08, mRNA.                                      |
| <a href="#">Aco2</a>   | <a href="#">Aco2.bSep08</a>   | <a href="#">79250</a>  | 31752 | 755  | 5  | 251 | aconitase 2, mitochondrial (Aco2) alternative variant bSep08, mRNA.                       |
| <a href="#">Aco2</a>   | <a href="#">Aco2.cSep08</a>   | <a href="#">79250</a>  | 17662 | 948  | 2  | 58  | aconitase 2, mitochondrial (6.8 kD) (Aco2) alternative variant cSep08, mRNA.              |
| <a href="#">Aco2</a>   | <a href="#">Aco2.dSep08</a>   | <a href="#">79250</a>  | 42612 | 417  | 3  | 48  | aconitase 2, mitochondrial (5.5 kD) (Aco2) alternative variant dSep08, mRNA.              |
| <a href="#">Acot3</a>  | <a href="#">Acot3.bSep08</a>  | <a href="#">314304</a> | 4845  | 1031 | 3  | 336 | acyl-CoA thioesterase 3 (Acot3) alternative variant bSep08, mRNA.                         |
| <a href="#">Acot7</a>  | <a href="#">Acot7.bSep08</a>  | <a href="#">26759</a>  | 35070 | 706  | 4  | 182 | acyl-CoA thioesterase 7 (Acot7) alternative variant bSep08, mRNA.                         |
| <a href="#">Acot7</a>  | <a href="#">Acot7.cSep08</a>  | <a href="#">26759</a>  | 30849 | 371  | 1  | 123 | acyl-CoA thioesterase 7 (Acot7) alternative variant cSep08, mRNA.                         |
| <a href="#">Acot8</a>  | <a href="#">Acot8.bSep08</a>  | <a href="#">170588</a> | 11270 | 726  | 4  | 200 | acyl-CoA thioesterase 8 (Acot8) alternative variant bSep08, mRNA.                         |
| <a href="#">Acot8</a>  | <a href="#">Acot8.cSep08</a>  | <a href="#">170588</a> | 4604  | 743  | 4  | 113 | acyl-CoA thioesterase 8 (Acot8) alternative variant cSep08, mRNA.                         |
| <a href="#">Acot8</a>  | <a href="#">Acot8.dSep08</a>  | <a href="#">170588</a> | 8612  | 502  | 3  | 106 | acyl-CoA thioesterase 8 (Acot8) alternative variant dSep08, mRNA.                         |
| <a href="#">Acot8</a>  | <a href="#">Acot8.fSep08</a>  | <a href="#">170588</a> | 3067  | 695  | 3  | 86  | acyl-CoA thioesterase 8 (Acot8) alternative variant fSep08, mRNA.                         |
| <a href="#">Acot12</a> | <a href="#">Acot12.bSep08</a> | <a href="#">170570</a> | 1552  | 336  | 1  | 80  | acyl-CoA thioesterase 12 (Acot12) alternative variant bSep08, mRNA.                       |
| <a href="#">Acox1</a>  | <a href="#">Acox1.aSep08</a>  | <a href="#">50681</a>  | 8246  | 2970 | 9  | 424 | acyl-Coenzyme A oxidase 1, palmitoyl (Acox1) alternative variant aSep08, mRNA.            |
| <a href="#">Acox2</a>  | <a href="#">Acox2.bSep08</a>  | <a href="#">252898</a> | 3353  | 578  | 1  | 132 | acyl-Coenzyme A oxidase 2, branched chain (Acox2) alternative variant bSep08, mRNA.       |
| <a href="#">Acox3</a>  | <a href="#">Acox3.bSep08</a>  | <a href="#">83522</a>  | 45377 | 549  | 4  | 114 | acyl-Coenzyme A oxidase 3, pristanoyl (Acox3) alternative variant bSep08, mRNA.           |
| <a href="#">Acp2</a>   | <a href="#">Acp2.bSep08</a>   | <a href="#">24162</a>  | 9066  | 2669 | 11 | 215 | acid phosphatase 2, lysosomal (24.9 kD) (Acp2) alternative variant bSep08, complete mRNA. |
| <a href="#">Acpp</a>   | <a href="#">Acpp.aSep08</a>   | <a href="#">56780</a>  | 45917 | 1295 | 1  | 430 | acid phosphatase, prostate (Acpp) alternative variant aSep08, mRNA.                       |
| <a href="#">Acpt</a>   | <a href="#">Acpt.bSep08</a>   | <a href="#">308569</a> | 4215  | 686  | 2  | 133 | acid phosphatase, testicular (Acpt) alternative variant bSep08, mRNA.                     |

|                        |                               |                        |       |      |    |     |                                                                                                      |
|------------------------|-------------------------------|------------------------|-------|------|----|-----|------------------------------------------------------------------------------------------------------|
| <a href="#">Acpt</a>   | <a href="#">Acpt.cSep08</a>   | <a href="#">308569</a> | 4859  | 737  | 3  | 114 | acid phosphatase, testicular (Acpt) alternative variant cSep08, mRNA.                                |
| <a href="#">Acpt</a>   | <a href="#">Acpt.dSep08</a>   | <a href="#">308569</a> | 4215  | 761  | 2  | 88  | acid phosphatase, testicular (Acpt) alternative variant dSep08, mRNA.                                |
| <a href="#">Acr</a>    | <a href="#">Acr.bSep08</a>    | <a href="#">24163</a>  | 5908  | 1254 | 1  | 381 | acrosin (42.7 kD) (Acr) alternative variant bSep08, mRNA.                                            |
| <a href="#">Acsbg1</a> | <a href="#">Acsbg1.bSep08</a> | <a href="#">171410</a> | 6947  | 614  | 4  | 204 | acyl-CoA synthetase bubblegum family member 1 (Acsbg1) alternative variant bSep08, mRNA.             |
| <a href="#">Acsbg1</a> | <a href="#">Acsbg1.cSep08</a> | <a href="#">171410</a> | 6747  | 799  | 3  | 86  | acyl-CoA synthetase bubblegum family member 1 (Acsbg1) alternative variant cSep08, mRNA.             |
| <a href="#">Acsf2</a>  | <a href="#">Acsf2.bSep08</a>  | <a href="#">619561</a> | 11147 | 729  | 7  | 243 | acyl-CoA synthetase family member 2 (Acsf2) alternative variant bSep08, mRNA.                        |
| <a href="#">Acsf2</a>  | <a href="#">Acsf2.cSep08</a>  | <a href="#">619561</a> | 5724  | 609  | 3  | 203 | acyl-CoA synthetase family member 2 (Acsf2) alternative variant cSep08, mRNA.                        |
| <a href="#">Acsf3</a>  | <a href="#">Acsf3.aSep08</a>  | <a href="#">498962</a> | 40393 | 2282 | 7  | 629 | acyl-CoA synthetase family member 3 (Acsf3) alternative variant aSep08, mRNA.                        |
| <a href="#">Acsf3</a>  | <a href="#">Acsf3.bSep08</a>  | <a href="#">498962</a> | 8422  | 427  | 3  | 142 | acyl-CoA synthetase family member 3 (Acsf3) alternative variant bSep08, mRNA.                        |
| <a href="#">Acsf3</a>  | <a href="#">Acsf3.cSep08</a>  | <a href="#">498962</a> | 8956  | 344  | 1  | 25  | acyl-CoA synthetase family member 3 (Acsf3) alternative variant cSep08, mRNA.                        |
| <a href="#">Acsl1</a>  | <a href="#">Acsl1.bSep08</a>  | <a href="#">25288</a>  | 41288 | 1500 | 5  | 208 | acyl-CoA synthetase long-chain family member 1 (24.0 kD) (Acsl1) alternative variant bSep08, mRNA.   |
| <a href="#">Acsl3</a>  | <a href="#">Acsl3.bSep08</a>  | <a href="#">114024</a> | 4744  | 495  | 1  | 151 | acyl-CoA synthetase long-chain family member 3 (Acsl3) alternative variant bSep08, mRNA.             |
| <a href="#">Acsl4</a>  | <a href="#">Acsl4.bSep08</a>  | <a href="#">113976</a> | 35957 | 622  | 3  | 162 | acyl-CoA synthetase long-chain family member 4 (Acsl4) alternative variant bSep08, mRNA.             |
| <a href="#">Acsl4</a>  | <a href="#">Acsl4.cSep08</a>  | <a href="#">113976</a> | 33856 | 398  | 1  | 76  | acyl-CoA synthetase long-chain family member 4 (Acsl4) alternative variant cSep08, mRNA.             |
| <a href="#">Acsl5</a>  | <a href="#">Acsl5.aSep08</a>  | <a href="#">94340</a>  | 11065 | 1387 | 10 | 368 | acyl-CoA synthetase long-chain family member 5 (Acsl5) alternative variant aSep08, mRNA.             |
| <a href="#">Acsl5</a>  | <a href="#">Acsl5.bSep08</a>  | <a href="#">94340</a>  | 2085  | 748  | 2  | 78  | acyl-CoA synthetase long-chain family member 5 (8.9 kD) (Acsl5) alternative variant bSep08, mRNA.    |
| <a href="#">Acsl5</a>  | <a href="#">Acsl5.cSep08</a>  | <a href="#">94340</a>  | 1458  | 594  | 1  | 10  | acyl-CoA synthetase long-chain family member 5 (1.1 kD) (Acsl5) alternative variant cSep08, mRNA.    |
| <a href="#">Acsl6</a>  | <a href="#">Acsl6.bSep08</a>  | <a href="#">117243</a> | 30872 | 1350 | 10 | 383 | acyl-CoA synthetase long-chain family member 6 (Acsl6) alternative variant bSep08, mRNA.             |
| <a href="#">Acsl6</a>  | <a href="#">Acsl6.cSep08</a>  | <a href="#">117243</a> | 5323  | 440  | 5  | 146 | acyl-CoA synthetase long-chain family member 6 (Acsl6) alternative variant cSep08, mRNA.             |
| <a href="#">Acsl6</a>  | <a href="#">Acsl6.dSep08</a>  | <a href="#">117243</a> | 5628  | 722  | 2  | 108 | acyl-CoA synthetase long-chain family member 6 (Acsl6) alternative variant dSep08, mRNA.             |
| <a href="#">Acsl6</a>  | <a href="#">Acsl6.eSep08</a>  | <a href="#">117243</a> | 19613 | 480  | 4  | 87  | acyl-CoA synthetase long-chain family member 6 (Acsl6) alternative variant eSep08, mRNA.             |
| <a href="#">Acsl6</a>  | <a href="#">Acsl6.fSep08</a>  | <a href="#">117243</a> | 9562  | 1244 | 2  | 71  | acyl-CoA synthetase long-chain family member 6 (Acsl6) alternative variant fSep08, mRNA.             |
| <a href="#">Acsm2</a>  | <a href="#">Acsm2.bSep08</a>  | <a href="#">246263</a> | 15462 | 801  | 5  | 246 | acyl-CoA synthetase medium-chain family member 2 (Acsm2) alternative variant bSep08, mRNA.           |
| <a href="#">Acsm2</a>  | <a href="#">Acsm2.cSep08</a>  | <a href="#">246263</a> | 5618  | 765  | 4  | 114 | acyl-CoA synthetase medium-chain family member 2 (12.8 kD) (Acsm2) alternative variant cSep08, mRNA. |

|                        |                               |                        |       |      |    |     |                                                                                                     |
|------------------------|-------------------------------|------------------------|-------|------|----|-----|-----------------------------------------------------------------------------------------------------|
| <a href="#">Acsm2</a>  | <a href="#">Acsm2.dSep08</a>  | <a href="#">246263</a> | 1327  | 305  | 3  | 67  | acyl-CoA synthetase medium-chain family member 2 (Acsm2) alternative variant dSep08, mRNA.          |
| <a href="#">Acsm3</a>  | <a href="#">Acsm3.bSep08</a>  | <a href="#">24763</a>  | 994   | 649  |    | 38  | acyl-CoA synthetase medium-chain family member 3 (Acsm3) alternative variant bSep08, mRNA.          |
| <a href="#">Acss1</a>  | <a href="#">Acss1.cSep08</a>  | <a href="#">296259</a> | 8725  | 288  | 2  | 88  | acyl-CoA synthetase short-chain family member 1 (Acss1) alternative variant cSep08, mRNA.           |
| <a href="#">Acss2</a>  | <a href="#">Acss2.bSep08</a>  | <a href="#">311569</a> | 6385  | 1286 | 1  | 239 | acyl-CoA synthetase short-chain family member 2 (Acss2) alternative variant bSep08, mRNA.           |
| <a href="#">Acta1</a>  | <a href="#">Acta1.bSep08</a>  | <a href="#">29437</a>  | 667   | 242  |    | 80  | actin, alpha 1, skeletal muscle (Acta1) alternative variant bSep08, mRNA.                           |
| <a href="#">Actb</a>   | <a href="#">Actb.bSep08</a>   | <a href="#">81822</a>  | 2543  | 1900 | 4  | 336 | beta actin (37.2 kD) (Actb) alternative variant bSep08, mRNA.                                       |
| <a href="#">Actb</a>   | <a href="#">Actb.cSep08</a>   | <a href="#">81822</a>  | 937   | 847  | 2  | 205 | beta-actin (Actb) alternative variant cSep08, mRNA.                                                 |
| <a href="#">Actb</a>   | <a href="#">Actb.eSep08</a>   | <a href="#">81822</a>  | 1239  | 749  | 4  | 125 | actin beta (Actb) alternative variant eSep08, mRNA.                                                 |
| <a href="#">Actc1</a>  | <a href="#">Actc1.bSep08</a>  | <a href="#">29275</a>  | 5829  | 1383 | 6  | 328 | actin, alpha, cardiac muscle 1 (36.5 kD) (Actc1) alternative variant bSep08, complete mRNA.         |
| <a href="#">Actg1</a>  | <a href="#">Actg1.aSep08</a>  | <a href="#">287876</a> | 2866  | 1923 | 6  | 404 | actin, gamma 1 (Actg1) alternative variant aSep08, mRNA.                                            |
| <a href="#">Actg1</a>  | <a href="#">Actg1.bSep08</a>  | <a href="#">287876</a> | 2443  | 1713 | 6  | 375 | actin, gamma 1 (41.8 kD) (Actg1) alternative variant bSep08, mRNA.                                  |
| <a href="#">Actg1</a>  | <a href="#">Actg1.dSep08</a>  | <a href="#">287876</a> | 1729  | 1179 | 4  | 132 | actin, gamma 1 (14.6 kD) (Actg1) alternative variant dSep08, mRNA.                                  |
| <a href="#">Actl6a</a> | <a href="#">Actl6a.bSep08</a> | <a href="#">361925</a> | 5141  | 742  | 7  | 246 | actin-like 6A (Actl6a) alternative variant bSep08, mRNA.                                            |
| <a href="#">Actl6a</a> | <a href="#">Actl6a.cSep08</a> | <a href="#">361925</a> | 8152  | 595  | 6  | 198 | actin-like 6A (Actl6a) alternative variant cSep08, mRNA.                                            |
| <a href="#">Actl6a</a> | <a href="#">Actl6a.dSep08</a> | <a href="#">361925</a> | 8252  | 736  | 7  | 159 | actin-like 6A (Actl6a) alternative variant dSep08, mRNA.                                            |
| <a href="#">Actl6b</a> | <a href="#">Actl6b.cSep08</a> | <a href="#">288563</a> | 1398  | 664  | 2  | 81  | actin-like 6B (Actl6b) alternative variant cSep08, mRNA.                                            |
| <a href="#">Actn1</a>  | <a href="#">Actn1.bSep08</a>  | <a href="#">81634</a>  | 4610  | 841  | 5  | 200 | actinin, alpha 1 (Actn1) alternative variant bSep08, mRNA.                                          |
| <a href="#">Actn1</a>  | <a href="#">Actn1.cSep08</a>  | <a href="#">81634</a>  | 2859  | 1635 | 2  | 82  | actinin, alpha 1 (Actn1) alternative variant cSep08, mRNA.                                          |
| <a href="#">Actn2</a>  | <a href="#">Actn2.aSep08</a>  | <a href="#">291245</a> | 68109 | 2950 | 21 | 959 | actinin alpha 2 (Actn2) alternative variant aSep08, mRNA.                                           |
| <a href="#">Actn2</a>  | <a href="#">Actn2.bSep08</a>  | <a href="#">291245</a> | 5922  | 773  | 6  | 241 | actinin alpha 2 (Actn2) alternative variant bSep08, mRNA.                                           |
| <a href="#">Actn4</a>  | <a href="#">Actn4.bSep08</a>  | <a href="#">63836</a>  | 2579  | 823  | 5  | 243 | actinin alpha 4 (Actn4) alternative variant bSep08, mRNA.                                           |
| <a href="#">Actn4</a>  | <a href="#">Actn4.cSep08</a>  | <a href="#">63836</a>  | 1507  | 917  | 2  | 176 | actinin alpha 4 (18.9 kD) (Actn4) alternative variant cSep08, mRNA.                                 |
| <a href="#">Actn4</a>  | <a href="#">Actn4.dSep08</a>  | <a href="#">63836</a>  | 8164  | 507  | 5  | 169 | actinin alpha 4 (Actn4) alternative variant dSep08, mRNA.                                           |
| <a href="#">Actn4</a>  | <a href="#">Actn4.eSep08</a>  | <a href="#">63836</a>  | 964   | 406  | 2  | 135 | actinin alpha 4 (Actn4) alternative variant eSep08, mRNA.                                           |
| <a href="#">Actr1a</a> | <a href="#">Actr1a.bSep08</a> | <a href="#">294010</a> | 17099 | 1399 | 10 | 365 | ARP1 actin-related protein 1 homolog A (yeast) (Actr1a) alternative variant bSep08, mRNA.           |
| <a href="#">Actr1a</a> | <a href="#">Actr1a.cSep08</a> | <a href="#">294010</a> | 2603  | 600  | 4  | 62  | ARP1 actin-related protein 1 homolog A (yeast) (Actr1a) alternative variant cSep08, mRNA.           |
| <a href="#">Actr1b</a> | <a href="#">Actr1b.bSep08</a> | <a href="#">316333</a> | 11403 | 739  | 6  | 169 | ARP1 actin-related protein 1 homolog B (yeast) (Actr1b) alternative variant bSep08, mRNA.           |
| <a href="#">Actr1b</a> | <a href="#">Actr1b.cSep08</a> | <a href="#">316333</a> | 1104  | 754  | 3  | 167 | ARP1 actin-related protein 1 homolog B (yeast) (18.6 kD) (Actr1b) alternative variant cSep08, mRNA. |
| <a href="#">Actr1b</a> | <a href="#">Actr1b.dSep08</a> | <a href="#">316333</a> | 11875 | 750  | 6  | 142 | ARP1 actin-related protein 1 homolog B (yeast) (Actr1b) alternative variant dSep08, mRNA.           |

|                        |                               |                        |       |      |    |     |                                                                                                                   |
|------------------------|-------------------------------|------------------------|-------|------|----|-----|-------------------------------------------------------------------------------------------------------------------|
| <a href="#">Actr1b</a> | <a href="#">Actr1b.eSep08</a> | <a href="#">316333</a> | 4301  | 580  | 5  | 141 | ARP1 actin-related protein 1 homolog B (yeast) (Actr1b) alternative variant eSep08, mRNA.                         |
| <a href="#">Actr2</a>  | <a href="#">Actr2.bSep08</a>  | <a href="#">289820</a> | 6414  | 1679 | 2  | 86  | ARP2 actin-related protein 2 homolog (yeast) (13.5 kD) (Actr2) alternative variant bSep08, mRNA.                  |
| <a href="#">Actr3</a>  | <a href="#">Actr3.bSep08</a>  | <a href="#">81732</a>  | 18772 | 424  | 4  | 141 | ARP3 actin-related protein 3 homolog (yeast) (Actr3) alternative variant bSep08, mRNA.                            |
| <a href="#">Actr3b</a> | <a href="#">Actr3b.aSep08</a> | <a href="#">362298</a> | 93498 | 1849 | 6  | 356 | ARP3 actin-related protein 3 homolog B (yeast) (Actr3b) alternative variant aSep08, mRNA.                         |
| <a href="#">Actr3b</a> | <a href="#">Actr3b.bSep08</a> | <a href="#">362298</a> | 65189 | 524  | 2  | 174 | ARP3 actin-related protein 3 homolog B (yeast) (Actr3b) alternative variant bSep08, mRNA.                         |
| <a href="#">Actr5</a>  | <a href="#">Actr5.aSep08</a>  | <a href="#">362258</a> | 8076  | 1406 | 5  | 468 | ARP5 actin-related protein 5 homolog (yeast) (Actr5) alternative variant aSep08, mRNA.                            |
| <a href="#">Actr5</a>  | <a href="#">Actr5.cSep08</a>  | <a href="#">362258</a> | 4009  | 1047 | 4  | 166 | ARP5 actin-related protein 5 homolog (yeast) (Actr5) alternative variant cSep08, mRNA.                            |
| <a href="#">Actr8</a>  | <a href="#">Actr8.aSep08</a>  | <a href="#">361107</a> | 15369 | 2876 | 13 | 624 | ARP8 actin-related protein 8 homolog (S. cerevisiae) (70.5 kD) (Actr8) alternative variant aSep08, complete mRNA. |
| <a href="#">Actr8</a>  | <a href="#">Actr8.bSep08</a>  | <a href="#">361107</a> | 2276  | 1006 | 3  | 83  | ARP8 actin-related protein 8 homolog (S. cerevisiae) (Actr8) alternative variant bSep08, mRNA.                    |
| <a href="#">Actr8</a>  | <a href="#">Actr8.cSep08</a>  | <a href="#">361107</a> | 792   | 533  | 2  | 78  | ARP8 actin-related protein 8 homolog (S. cerevisiae) (Actr8) alternative variant cSep08, mRNA.                    |
| <a href="#">Actr8</a>  | <a href="#">Actr8.dSep08</a>  | <a href="#">361107</a> | 2615  | 543  | 3  | 62  | ARP8 actin-related protein 8 homolog (S. cerevisiae) (Actr8) alternative variant dSep08, mRNA.                    |
| <a href="#">Actr10</a> | <a href="#">Actr10.bSep08</a> | <a href="#">299121</a> | 26871 | 2817 | 5  | 290 | actin-related protein 10 homolog (S. cerevisiae) (32.2 kD) (Actr10) alternative variant bSep08, complete mRNA.    |
| <a href="#">Actr10</a> | <a href="#">Actr10.cSep08</a> | <a href="#">299121</a> | 20236 | 715  | 1  | 236 | actin-related protein 10 homolog (S. cerevisiae) (Actr10) alternative variant cSep08, mRNA.                       |
| <a href="#">Acvr1</a>  | <a href="#">Acvr1.bSep08</a>  | <a href="#">79558</a>  | 14806 | 792  | 4  | 232 | activin A receptor, type 1 (Acvr1) alternative variant bSep08, mRNA.                                              |
| <a href="#">Acvr2b</a> | <a href="#">Acvr2b.bSep08</a> | <a href="#">25366</a>  | 2613  | 711  | 1  | 236 | activin receptor IIB (Acvr2b) alternative variant bSep08, mRNA.                                                   |
| <a href="#">Acvr11</a> | <a href="#">Acvr11.bSep08</a> | <a href="#">25237</a>  | 7768  | 826  | 5  | 184 | activin A receptor type II-like 1 (Acvr11) alternative variant bSep08, mRNA.                                      |
| <a href="#">Acvr11</a> | <a href="#">Acvr11.cSep08</a> | <a href="#">25237</a>  | 1440  | 744  | 2  | 128 | activin A receptor type II-like 1 (Acvr11) alternative variant cSep08, mRNA.                                      |
| <a href="#">Acvr11</a> | <a href="#">Acvr11.dSep08</a> | <a href="#">25237</a>  | 7159  | 728  | 3  | 79  | activin A receptor type II-like 1 (Acvr11) alternative variant dSep08, mRNA.                                      |
| <a href="#">Acy1</a>   | <a href="#">Acy1.bSep08</a>   | <a href="#">300981</a> | 4252  | 1644 | 12 | 313 | aminoacylase 1 (35.4 kD) (Acy1) alternative variant bSep08, mRNA.                                                 |
| <a href="#">Acy1</a>   | <a href="#">Acy1.cSep08</a>   | <a href="#">300981</a> | 495   | 409  | 2  | 105 | aminoacylase 1 (Acy1) alternative variant cSep08, mRNA.                                                           |
| <a href="#">Acy1</a>   | <a href="#">Acy1.eSep08</a>   | <a href="#">300981</a> | 1800  | 437  | 4  | 95  | aminoacylase 1 (10.4 kD) (Acy1) alternative variant eSep08, mRNA.                                                 |
| <a href="#">Acy3</a>   | <a href="#">Acy3.bSep08</a>   | <a href="#">293653</a> | 2199  | 784  | 2  | 261 | aspartoacylase (aminoacylase) 3 (Acy3) alternative variant bSep08, mRNA.                                          |
| <a href="#">Acyp1</a>  | <a href="#">Acyp1.aSep08</a>  | <a href="#">299203</a> | 6945  | 587  | 2  | 129 | acylphosphatase 1, erythrocyte (common) type (Acyp1) alternative variant aSep08, mRNA.                            |
| <a href="#">Acyp1</a>  | <a href="#">Acyp1.bSep08</a>  | <a href="#">299203</a> | 6885  | 606  | 2  | 99  | acylphosphatase 1, erythrocyte (common) type (11.3 kD) (Acyp1) alternative variant bSep08, mRNA.                  |

|                        |                               |                        |       |      |   |     |                                                                                                              |
|------------------------|-------------------------------|------------------------|-------|------|---|-----|--------------------------------------------------------------------------------------------------------------|
| <a href="#">Ada</a>    | <a href="#">Ada.bSep08</a>    | <a href="#">24165</a>  | 1002  | 388  | 1 | 64  | adenosine deaminase (Ada) alternative variant bSep08, mRNA.                                                  |
| <a href="#">Adam2</a>  | <a href="#">Adam2.bSep08</a>  | <a href="#">56806</a>  | 6515  | 900  | 3 | 245 | a disintegrin metalloprotease domain 2 (Adam2) alternative variant bSep08, mRNA.                             |
| <a href="#">Adam2</a>  | <a href="#">Adam2.cSep08</a>  | <a href="#">56806</a>  | 16246 | 747  | 9 | 124 | fertilin beta (Adam2) alternative variant cSep08, mRNA.                                                      |
| <a href="#">Adam3</a>  | <a href="#">Adam3.bSep08</a>  | <a href="#">57021</a>  | 7496  | 266  | 4 | 74  | a disintegrin and metalloproteinase domain 3 (cyritestin) (Adam3) alternative variant bSep08, mRNA.          |
| <a href="#">Adam3</a>  | <a href="#">Adam3.cSep08</a>  | <a href="#">57021</a>  | 7086  | 391  | 4 | 64  | a disintegrin and metalloproteinase domain 3 (cyritestin) (7.1 kD) (Adam3) alternative variant cSep08, mRNA. |
| <a href="#">Adam5</a>  | <a href="#">Adam5.bSep08</a>  | <a href="#">498654</a> | 8464  | 751  | 9 | 232 | a disintegrin and metalloproteinase domain 5 (Adam5) alternative variant bSep08, mRNA.                       |
| <a href="#">Adam5</a>  | <a href="#">Adam5.cSep08</a>  | <a href="#">498654</a> | 19089 | 688  | 6 | 229 | a disintegrin and metalloproteinase domain 5 (Adam5) alternative variant cSep08, mRNA.                       |
| <a href="#">Adam5</a>  | <a href="#">Adam5.dSep08</a>  | <a href="#">498654</a> | 12189 | 317  | 3 | 44  | a disintegrin and metalloproteinase domain 5 (Adam5) alternative variant dSep08, mRNA.                       |
| <a href="#">Adam9</a>  | <a href="#">Adam9.bSep08</a>  | <a href="#">290834</a> | 35911 | 481  | 2 | 55  | a disintegrin and metalloproteinase domain 9 (meltrin gamma) (Adam9) alternative variant bSep08, mRNA.       |
| <a href="#">Adam10</a> | <a href="#">Adam10.aSep08</a> | <a href="#">29650</a>  | 34125 | 1374 | 5 | 457 | a disintegrin and metalloproteinase domain 10 (Adam10) alternative variant aSep08, mRNA.                     |
| <a href="#">Adam10</a> | <a href="#">Adam10.bSep08</a> | <a href="#">29650</a>  | 20858 | 591  | 1 | 49  | a disintegrin and metalloproteinase domain 10 (5.8 kD) (Adam10) alternative variant bSep08, mRNA.            |
| <a href="#">Adam11</a> | <a href="#">Adam11.bSep08</a> | <a href="#">360638</a> | 1035  | 347  | 5 | 70  | a disintegrin and metalloproteinase domain 11 (Adam11) alternative variant bSep08, mRNA.                     |
| <a href="#">Adam12</a> | <a href="#">Adam12.aSep08</a> | <a href="#">679837</a> | 91722 | 2928 |   | 699 | a disintegrin and metalloproteinase domain 12 (meltrin alpha) (77.6 kD) (Adam12) mRNA.                       |
| <a href="#">Adam17</a> | <a href="#">Adam17.bSep08</a> | <a href="#">57027</a>  | 4448  | 852  | 4 | 202 | a disintegrin and metalloproteinase domain 17 (Adam17) alternative variant bSep08, mRNA.                     |
| <a href="#">Adam17</a> | <a href="#">Adam17.cSep08</a> | <a href="#">57027</a>  | 1174  | 774  | 1 | 113 | a disintegrin and metalloproteinase domain 17 (3.6 kD) (Adam17) alternative variant cSep08, mRNA.            |
| <a href="#">Adam18</a> | <a href="#">Adam18.aSep08</a> | <a href="#">57029</a>  | 15673 | 279  |   | 42  | a disintegrin and metalloproteinase domain 18 (4.8 kD) (Adam18) mRNA.                                        |
| <a href="#">Adam19</a> | <a href="#">Adam19.aSep08</a> | <a href="#">303068</a> | 68212 | 1776 |   | 561 | a disintegrin and metalloproteinase domain 19 (meltrin beta) (Adam19) alternative variant aSep08, mRNA.      |
| <a href="#">Adam19</a> | <a href="#">Adam19.bSep08</a> | <a href="#">303068</a> | 45740 | 492  |   | 163 | a disintegrin and metalloproteinase domain 19 (meltrin beta) (Adam19) alternative variant bSep08, mRNA.      |
| <a href="#">Adam23</a> | <a href="#">Adam23.bSep08</a> | <a href="#">301460</a> | 3105  | 502  | 2 | 133 | a disintegrin and metalloproteinase domain 23 (Adam23) alternative variant bSep08, mRNA.                     |
| <a href="#">Adam23</a> | <a href="#">Adam23.cSep08</a> | <a href="#">301460</a> | 10852 | 3586 | 2 | 57  | a disintegrin and metalloproteinase domain 23 (Adam23) alternative variant cSep08, mRNA.                     |
| <a href="#">Adam32</a> | <a href="#">Adam32.aSep08</a> | <a href="#">361170</a> | 66006 | 1480 | 9 | 439 | a disintegrin and metalloproteinase domain 32 (Adam32) alternative variant aSep08, mRNA.                     |
| <a href="#">Adam32</a> | <a href="#">Adam32.bSep08</a> | <a href="#">361170</a> | 27139 | 769  | 9 | 256 | a disintegrin and metalloproteinase domain 32 (Adam32) alternative variant bSep08, mRNA.                     |
| <a href="#">Adam32</a> | <a href="#">Adam32.cSep08</a> | <a href="#">361170</a> | 27162 | 727  | 8 | 241 | a disintegrin and metalloproteinase domain 32 (Adam32) alternative variant cSep08, mRNA.                     |
| <a href="#">Adam32</a> | <a href="#">Adam32.dSep08</a> | <a href="#">361170</a> | 32091 | 745  | 1 | 204 | a disintegrin and metalloproteinase domain 32 (Adam32) alternative variant dSep08, mRNA.                     |

|                          |                                 |                        |       |      |   |     |                                                                                                                                             |
|--------------------------|---------------------------------|------------------------|-------|------|---|-----|---------------------------------------------------------------------------------------------------------------------------------------------|
| <a href="#">Adam32</a>   | <a href="#">Adam32.eSep08</a>   | <a href="#">361170</a> | 10204 | 604  | 1 | 132 | a disintegrin and metallopeptidase domain 32 (Adam32) alternative variant eSep08, mRNA.                                                     |
| <a href="#">Adam33</a>   | <a href="#">Adam33.bSep08</a>   | <a href="#">311425</a> | 1810  | 754  | 7 | 171 | a disintegrin and metallopeptidase domain 33 (Adam33) alternative variant bSep08, mRNA.                                                     |
| <a href="#">Adam33</a>   | <a href="#">Adam33.cSep08</a>   | <a href="#">311425</a> | 2057  | 471  | 4 | 79  | a disintegrin and metallopeptidase domain 33 (Adam33) alternative variant cSep08, mRNA.                                                     |
| <a href="#">Adam33</a>   | <a href="#">Adam33.dSep08</a>   | <a href="#">311425</a> | 2027  | 657  | 3 | 69  | a disintegrin and metallopeptidase domain 33 (Adam33) alternative variant dSep08, mRNA.                                                     |
| <a href="#">Adamdec1</a> | <a href="#">Adamdec1.bSep08</a> | <a href="#">290338</a> | 5722  | 432  | 1 | 144 | ADAM-like, decysin 1 (Adamdec1) alternative variant bSep08, mRNA.                                                                           |
| <a href="#">Adamts2</a>  | <a href="#">Adamts2.aSep08</a>  | <a href="#">287899</a> | 11780 | 1278 | 6 | 425 | a disintegrin-like and metallopeptidase (reprolysin type) with thrombospondin type 1 motif, 2 (Adamts2) alternative variant aSep08, mRNA.   |
| <a href="#">Adamts2</a>  | <a href="#">Adamts2.bSep08</a>  | <a href="#">287899</a> | 3252  | 792  |   | 172 | a disintegrin-like and metallopeptidase (reprolysin type) with thrombospondin type 1 motif, 2 (Adamts2) alternative variant bSep08, mRNA.   |
| <a href="#">Adamts2</a>  | <a href="#">Adamts2.cSep08</a>  | <a href="#">287899</a> | 959   | 214  | 2 | 71  | a disintegrin-like and metallopeptidase (reprolysin type) with thrombospondin type 1 motif, 2 (Adamts2) alternative variant cSep08, mRNA.   |
| <a href="#">Adamts4</a>  | <a href="#">Adamts4.aSep08</a>  | <a href="#">66015</a>  | 2922  | 1254 |   | 417 | a disintegrin-like and metallopeptidase (reprolysin type) with thrombospondin type 1 motif, 4 (Adamts4) mRNA.                               |
| <a href="#">Adamts6</a>  | <a href="#">Adamts6.bSep08</a>  | <a href="#">361886</a> | 62411 | 659  | 7 | 202 | a disintegrin-like and metallopeptidase (reprolysin type) with thrombospondin type 1 motif, 6 (Adamts6) alternative variant bSep08, mRNA.   |
| <a href="#">Adamts7</a>  | <a href="#">Adamts7.bSep08</a>  | <a href="#">315879</a> | 7693  | 2431 | 7 | 736 | a disintegrin-like and metallopeptidase (reprolysin type) with thrombospondin type 1 motif, 7 (Adamts7) alternative variant bSep08, mRNA.   |
| <a href="#">Adamts7</a>  | <a href="#">Adamts7.cSep08</a>  | <a href="#">315879</a> | 8808  | 397  | 2 | 33  | a disintegrin-like and metallopeptidase (reprolysin type) with thrombospondin type 1 motif, 7 (Adamts7) alternative variant cSep08, mRNA.   |
| <a href="#">Adamts9</a>  | <a href="#">Adamts9.bSep08</a>  | <a href="#">312566</a> | 12235 | 398  | 4 | 132 | a disintegrin-like and metalloprotease (reprolysin type) with thrombospondin type 1 motif, 9 (Adamts9) alternative variant bSep08, mRNA.    |
| <a href="#">Adamts13</a> | <a href="#">Adamts13.aSep08</a> | <a href="#">362091</a> | 3224  | 752  |   | 250 | a disintegrin-like and metallopeptidase (reprolysin type) with thrombospondin type 1 motif, 13 (Adamts13) mRNA.                             |
| <a href="#">Adamts17</a> | <a href="#">Adamts17.aSep08</a> | <a href="#">293004</a> | 22257 | 373  |   | 123 | ADAM metallopeptidase with thrombospondin type 1 motif, 17 (Adamts17) mRNA.                                                                 |
| <a href="#">Adamts18</a> | <a href="#">Adamts18.aSep08</a> | <a href="#">361412</a> | 71985 | 1704 |   | 498 | a disintegrin-like and metallopeptidase (reprolysin type) with thrombospondin type 1 motif, 18 (Adamts18) alternative variant aSep08, mRNA. |
| <a href="#">Adamts18</a> | <a href="#">Adamts18.bSep08</a> | <a href="#">361412</a> | 6211  | 550  |   | 110 | a disintegrin-like and metallopeptidase (reprolysin type) with thrombospondin type 1 motif, 18 (Adamts18) alternative variant bSep08, mRNA. |
| <a href="#">Adamts19</a> | <a href="#">Adamts19.bSep08</a> | <a href="#">361332</a> | 34964 | 1390 | 2 | 295 | a disintegrin-like and metallopeptidase (reprolysin type) with thrombospondin type 1 motif, 19 (Adamts19) alternative variant bSep08, mRNA. |
| <a href="#">Adamts1</a>  | <a href="#">Adamts1.aSep08</a>  | <a href="#">362539</a> | 99305 | 493  |   | 111 | ADAMTS-like 1 (Adamts1) mRNA.                                                                                                               |



|                             |                                    |                        |        |      |    |     |                                                                                                                  |
|-----------------------------|------------------------------------|------------------------|--------|------|----|-----|------------------------------------------------------------------------------------------------------------------|
| <a href="#">Adamtsl2</a>    | <a href="#">Adamtsl2.aSep08</a>    | <a href="#">311827</a> | 7141   | 1677 |    | 360 | ADAMTS-like 2 (Adamtsl2) mRNA.                                                                                   |
| <a href="#">Adamtsl3</a>    | <a href="#">Adamtsl3.bSep08</a>    | <a href="#">308787</a> | 118115 | 905  | 5  | 125 | ADAMTS-like 3 (Adamtsl3) alternative variant bSep08, mRNA.                                                       |
| <a href="#">Adamtsl4</a>    | <a href="#">Adamtsl4.bSep08</a>    | <a href="#">310670</a> | 4337   | 757  | 5  | 252 | ADAMTS-like 4 (Adamtsl4) alternative variant bSep08, mRNA.                                                       |
| <a href="#">Adamtsl4</a>    | <a href="#">Adamtsl4.cSep08</a>    | <a href="#">310670</a> | 1221   | 728  | 3  | 242 | ADAMTS-like 4 (Adamtsl4) alternative variant cSep08, mRNA.                                                       |
| <a href="#">Adamtsl4</a>    | <a href="#">Adamtsl4.eSep08</a>    | <a href="#">310670</a> | 1329   | 946  | 3  | 140 | ADAMTS-like 4 (Adamtsl4) alternative variant eSep08, mRNA.                                                       |
| <a href="#">Adamtsl4</a>    | <a href="#">Adamtsl4.fSep08</a>    | <a href="#">310670</a> | 2416   | 346  | 4  | 115 | ADAMTS-like 4 (Adamtsl4) alternative variant fSep08, mRNA.                                                       |
| <a href="#">Adamtsl4</a>    | <a href="#">Adamtsl4.gSep08</a>    | <a href="#">310670</a> | 3678   | 514  | 4  | 113 | ADAMTS-like 4 (Adamtsl4) alternative variant gSep08, mRNA.                                                       |
| <a href="#">Adamtsl5</a>    | <a href="#">Adamtsl5.aSep08</a>    | <a href="#">314626</a> | 1640   | 1437 | 3  | 399 | ADAMTS-like 5 (Adamtsl5) alternative variant aSep08, mRNA.                                                       |
| <a href="#">Adamtsl5</a>    | <a href="#">Adamtsl5.bSep08</a>    | <a href="#">314626</a> | 601    | 517  | 1  | 171 | ADAMTS-like 5 (Adamtsl5) alternative variant bSep08, mRNA.                                                       |
| <a href="#">ADAM_CR.1</a>   | <a href="#">ADAM_CR.1.aSep08</a>   |                        | 1692   | 308  |    | 102 | domain 19 (ADAM_CR.1) mRNA.                                                                                      |
| <a href="#">ADAM_CR.2</a>   | <a href="#">ADAM_CR.2.aSep08</a>   |                        | 1121   | 686  |    | 117 | A disintegrin metallopeptidase domain 8 (ADAM_CR.2) mRNA.                                                        |
| <a href="#">Adaptin_N.0</a> | <a href="#">Adaptin_N.0.aSep08</a> |                        | 89654  | 1393 |    | 463 | adaptor-related protein complex 3 beta CRA a (Adaptin_N.0) mRNA.                                                 |
| <a href="#">Adar</a>        | <a href="#">Adar.bSep08</a>        | <a href="#">81635</a>  | 961    | 712  | 2  | 81  | adenosine deaminase, RNA-specific (Adar) alternative variant bSep08, mRNA.                                       |
| <a href="#">Adarb1</a>      | <a href="#">Adarb1.dSep08</a>      | <a href="#">25367</a>  | 89753  | 550  | 4  | 50  | adenosine deaminase, RNA-specific, B1 (5.8 kD) (Adarb1) alternative variant dSep08, complete mRNA.               |
| <a href="#">Adck1</a>       | <a href="#">Adck1.bSep08</a>       | <a href="#">366698</a> | 8332   | 371  | 1  | 109 | putative protein (Adck1) alternative variant bSep08, mRNA.                                                       |
| <a href="#">Adck2</a>       | <a href="#">Adck2.bSep08</a>       | <a href="#">312258</a> | 12821  | 2296 | 6  | 567 | uncharacterized aarF domain-containing protein kinase 2 (62.9 kD) (Adck2) alternative variant bSep08, mRNA.      |
| <a href="#">Adck2</a>       | <a href="#">Adck2.cSep08</a>       | <a href="#">312258</a> | 4176   | 1599 | 2  | 120 | uncharacterized aarF domain-containing protein kinase 2 like (13.3 kD) (Adck2) alternative variant cSep08, mRNA. |
| <a href="#">Adck4</a>       | <a href="#">Adck4.aSep08</a>       | <a href="#">308453</a> | 22872  | 1677 | 15 | 524 | ABC-1 (Adck4) alternative variant aSep08, mRNA.                                                                  |
| <a href="#">Adck4</a>       | <a href="#">Adck4.bSep08</a>       | <a href="#">308453</a> | 10845  | 1403 | 10 | 294 | ABC-1 (32.5 kD) (Adck4) alternative variant bSep08, mRNA.                                                        |
| <a href="#">Adck4</a>       | <a href="#">Adck4.cSep08</a>       | <a href="#">308453</a> | 6117   | 761  | 6  | 183 | uncharacterized aarF domain-containing protein kinase 4 (Adck4) alternative variant cSep08, mRNA.                |
| <a href="#">Adck4</a>       | <a href="#">Adck4.dSep08</a>       | <a href="#">308453</a> | 13617  | 1389 | 8  | 144 | putative protein of ancient origin (Adck4) alternative variant dSep08, mRNA.                                     |
| <a href="#">Adck4</a>       | <a href="#">Adck4.eSep08</a>       | <a href="#">308453</a> | 2340   | 793  | 3  | 72  | putative protein of ancient origin (Adck4) alternative variant eSep08, mRNA.                                     |
| <a href="#">Adck5</a>       | <a href="#">Adck5.aSep08</a>       | <a href="#">362943</a> | 17808  | 1980 | 15 | 602 | ABC-1 (Adck5) alternative variant aSep08, mRNA.                                                                  |
| <a href="#">Adck5</a>       | <a href="#">Adck5.bSep08</a>       | <a href="#">362943</a> | 1248   | 873  | 6  | 243 | putative protein of ancient origin (Adck5) alternative variant bSep08, mRNA.                                     |
| <a href="#">Adck5</a>       | <a href="#">Adck5.cSep08</a>       | <a href="#">362943</a> | 1382   | 698  | 5  | 138 | ABC-1 (Adck5) alternative variant cSep08, mRNA.                                                                  |
| <a href="#">Adck5</a>       | <a href="#">Adck5.dSep08</a>       | <a href="#">362943</a> | 15832  | 734  | 6  | 129 | uncharacterized aarF domain-containing protein kinase 5 like (15.0 kD) (Adck5) alternative variant dSep08, mRNA. |

|                           |                                  |                        |        |      |    |     |                                                                                                     |
|---------------------------|----------------------------------|------------------------|--------|------|----|-----|-----------------------------------------------------------------------------------------------------|
| <a href="#">Adck5</a>     | <a href="#">Adck5.fSep08</a>     | <a href="#">362943</a> | 474    | 388  | 2  | 67  | putative protein of vertebrate origin (Adck5) alternative variant fSep08, mRNA.                     |
| <a href="#">Adcy1</a>     | <a href="#">Adcy1.aSep08</a>     | <a href="#">305509</a> | 10406  | 409  |    | 136 | adenylate cyclase 1 (Adcy1) mRNA.                                                                   |
| <a href="#">Adcy2</a>     | <a href="#">Adcy2.bSep08</a>     | <a href="#">81636</a>  | 161235 | 3238 | 21 | 854 | adenylate cyclase 2 (Adcy2) alternative variant bSep08, mRNA.                                       |
| <a href="#">Adcy2</a>     | <a href="#">Adcy2.cSep08</a>     | <a href="#">81636</a>  | 50556  | 486  | 6  | 161 | adenylate cyclase 2 (Adcy2) alternative variant cSep08, mRNA.                                       |
| <a href="#">Adcy2</a>     | <a href="#">Adcy2.dSep08</a>     | <a href="#">81636</a>  | 2910   | 518  | 2  | 63  | adenylate cyclase 2 (Adcy2) alternative variant dSep08, mRNA.                                       |
| <a href="#">Adcy3</a>     | <a href="#">Adcy3.bSep08</a>     | <a href="#">64508</a>  | 3617   | 748  | 6  | 142 | adenylate cyclase 3 (Adcy3) alternative variant bSep08, mRNA.                                       |
| <a href="#">Adcy3</a>     | <a href="#">Adcy3.dSep08</a>     | <a href="#">64508</a>  | 727    | 389  | 2  | 38  | adenylate cyclase 3 (Adcy3) alternative variant dSep08, mRNA.                                       |
| <a href="#">Adcy4</a>     | <a href="#">Adcy4.bSep08</a>     | <a href="#">54223</a>  | 5971   | 970  | 8  | 303 | adenylate cyclase 4 (34.2 kD) (Adcy4) alternative variant bSep08, mRNA.                             |
| <a href="#">Adcy4</a>     | <a href="#">Adcy4.dSep08</a>     | <a href="#">54223</a>  | 515    | 434  | 2  | 101 | adenylate cyclase 4 CRA c (10.8 kD) (Adcy4) alternative variant dSep08, mRNA.                       |
| <a href="#">Adcy7</a>     | <a href="#">Adcy7.aSep08</a>     | <a href="#">84420</a>  | 5999   | 879  | 8  | 293 | adenylate cyclase 7 (Adcy7) alternative variant aSep08, mRNA.                                       |
| <a href="#">Adcy9</a>     | <a href="#">Adcy9.aSep08</a>     | <a href="#">302950</a> | 12316  | 4390 |    | 461 | adenylate cyclase 9 (Adcy9) mRNA.                                                                   |
| <a href="#">Adcy10</a>    | <a href="#">Adcy10.aSep08</a>    | <a href="#">59320</a>  | 6903   | 758  |    | 252 | adenylate cyclase 10 (Adcy10) mRNA.                                                                 |
| <a href="#">Adcyap1</a>   | <a href="#">Adcyap1.bSep08</a>   | <a href="#">24166</a>  | 2413   | 977  | 3  | 113 | adenylate cyclase activating polypeptide 1 (Adcyap1) alternative variant bSep08, mRNA.              |
| <a href="#">Adcyap1</a>   | <a href="#">Adcyap1.cSep08</a>   | <a href="#">24166</a>  | 1047   | 258  | 3  | 67  | adenylate cyclase activating polypeptide 1 (Adcyap1) alternative variant cSep08, mRNA.              |
| <a href="#">Adcyap1r1</a> | <a href="#">Adcyap1r1.bSep08</a> | <a href="#">24167</a>  | 3466   | 349  | 2  | 115 | adenylate cyclase activating polypeptide 1 receptor 1 (Adcyap1r1) alternative variant bSep08, mRNA. |
| <a href="#">Add1</a>      | <a href="#">Add1.bSep08</a>      | <a href="#">24170</a>  | 14273  | 1034 | 7  | 241 | adducin 1 (alpha) (Add1) alternative variant bSep08, mRNA.                                          |
| <a href="#">Add1</a>      | <a href="#">Add1.cSep08</a>      | <a href="#">24170</a>  | 1544   | 617  | 2  | 97  | adducin 1 (alpha) (Add1) alternative variant cSep08, mRNA.                                          |
| <a href="#">Add1</a>      | <a href="#">Add1.dSep08</a>      | <a href="#">24170</a>  | 1234   | 650  | 2  | 32  | adducin 1 (alpha) (Add1) alternative variant dSep08, mRNA.                                          |
| <a href="#">Add1</a>      | <a href="#">Add1.fSep08</a>      | <a href="#">24170</a>  | 31433  | 410  | 4  | 82  | adducin 1 (alpha) (Add1) alternative variant fSep08, mRNA.                                          |
| <a href="#">Add2</a>      | <a href="#">Add2.cSep08</a>      | <a href="#">24171</a>  | 8744   | 619  | 4  | 206 | adducin 2 (beta) (Add2) alternative variant cSep08, mRNA.                                           |
| <a href="#">Add2</a>      | <a href="#">Add2.dSep08</a>      | <a href="#">24171</a>  | 11554  | 725  | 6  | 162 | adducin 2 (beta) (Add2) alternative variant dSep08, mRNA.                                           |
| <a href="#">Add2</a>      | <a href="#">Add2.eSep08</a>      | <a href="#">24171</a>  | 21312  | 543  | 3  | 91  | adducin 2 (beta) (10.6 kD) (Add2) alternative variant eSep08, mRNA.                                 |
| <a href="#">Add3</a>      | <a href="#">Add3.bSep08</a>      | <a href="#">25230</a>  | 90494  | 1196 | 7  | 273 | adducin 3 (gamma) (Add3) alternative variant bSep08, mRNA.                                          |
| <a href="#">Add3</a>      | <a href="#">Add3.cSep08</a>      | <a href="#">25230</a>  | 9042   | 728  | 6  | 242 | adducin 3 (gamma) (Add3) alternative variant cSep08, mRNA.                                          |
| <a href="#">Add3</a>      | <a href="#">Add3.eSep08</a>      | <a href="#">25230</a>  | 74609  | 437  | 2  | 67  | adducin 3 (gamma) (7.9 kD) (Add3) alternative variant eSep08, mRNA.                                 |

|                             |                                    |                           |        |      |   |     |                                                                                                                |
|-----------------------------|------------------------------------|---------------------------|--------|------|---|-----|----------------------------------------------------------------------------------------------------------------|
| <a href="#">Adfp</a>        | <a href="#">Adfp.bSep08</a>        | <a href="#">298199</a>    | 11200  | 1144 | 2 | 381 | adipose differentiation related protein (Adfp) alternative variant bSep08, mRNA.                               |
| <a href="#">Adfp</a>        | <a href="#">Adfp.cSep08</a>        | <a href="#">298199</a>    | 27494  | 1593 | 5 | 378 | adipose differentiation related protein (Adfp) alternative variant cSep08, mRNA.                               |
| <a href="#">Adh1</a>        | <a href="#">Adh1.bSep08</a>        | <a href="#">24172</a>     | 3679   | 1121 | 3 | 261 | alcohol dehydrogenase 1 (class I) (Adh1) alternative variant bSep08, mRNA.                                     |
| <a href="#">Adh1</a>        | <a href="#">Adh1.dSep08</a>        | <a href="#">24172</a>     | 300    | 208  |   | 69  | alcohol dehydrogenase 1 (class I) (Adh1) alternative variant dSep08, mRNA.                                     |
| <a href="#">Adh1</a>        | <a href="#">Adh1.eSep08</a>        | <a href="#">24172</a>     | 299    | 207  | 2 | 68  | alcohol dehydrogenase 1 (class I) (Adh1) alternative variant eSep08, mRNA.                                     |
| <a href="#">Adh1</a>        | <a href="#">Adh1.fSep08</a>        | <a href="#">24172</a>     | 28416  | 795  | 5 | 11  | alcohol dehydrogenase 1 (class I) (1.1 kD) (Adh1) alternative variant fSep08, mRNA.                            |
| <a href="#">Adh5</a>        | <a href="#">Adh5.bSep08</a>        | <a href="#">100145871</a> | 8196   | 623  | 5 | 194 | alcohol dehydrogenase 5 (Adh5) alternative variant bSep08, mRNA.                                               |
| <a href="#">Adh6</a>        | <a href="#">Adh6.aSep08</a>        | <a href="#">310903</a>    | 30523  | 1680 | 2 | 390 | alcohol dehydrogenase 6 (class V) (Adh6) alternative variant aSep08, mRNA.                                     |
| <a href="#">Adh7</a>        | <a href="#">Adh7.bSep08</a>        | <a href="#">171178</a>    | 7048   | 754  | 1 | 166 | alcohol dehydrogenase 7 (class IV), mu or sigma polypeptide (18.3 kD) (Adh7) alternative variant bSep08, mRNA. |
| <a href="#">Adhfe1</a>      | <a href="#">Adhfe1.bSep08</a>      | <a href="#">362474</a>    | 10688  | 725  | 7 | 241 | alcohol dehydrogenase, iron containing, 1 (Adhfe1) alternative variant bSep08, mRNA.                           |
| <a href="#">Adhfe1</a>      | <a href="#">Adhfe1.cSep08</a>      | <a href="#">362474</a>    | 9863   | 752  | 9 | 178 | alcohol dehydrogenase, iron containing, 1 (Adhfe1) alternative variant cSep08, mRNA.                           |
| <a href="#">Adhfe1</a>      | <a href="#">Adhfe1.dSep08</a>      | <a href="#">362474</a>    | 6066   | 906  | 4 | 68  | alcohol dehydrogenase, iron containing, 1 (Adhfe1) alternative variant dSep08, mRNA.                           |
| <a href="#">Adhfe1</a>      | <a href="#">Adhfe1.eSep08</a>      | <a href="#">362474</a>    | 5427   | 739  | 4 | 36  | alcohol dehydrogenase, iron containing, 1 (4.4 kD) (Adhfe1) alternative variant eSep08, mRNA.                  |
| <a href="#">ADH_N.0</a>     | <a href="#">ADH_N.0.aSep08</a>     |                           | 33226  | 591  |   | 129 | vesicle amine transport protein 1 homolog-like (ADH_N.0) mRNA.                                                 |
| <a href="#">adh_short.0</a> | <a href="#">adh_short.0.aSep08</a> |                           | 2425   | 1037 | 3 | 307 | carbonyl reductase (adh_short.0) alternative variant aSep08, mRNA.                                             |
| <a href="#">adh_short.1</a> | <a href="#">adh_short.1.aSep08</a> |                           | 6167   | 1086 |   | 227 | retinol dehydrogenase (adh_short.1) mRNA.                                                                      |
| <a href="#">Adi1</a>        | <a href="#">Adi1.bSep08</a>        | <a href="#">298934</a>    | 6042   | 621  | 4 | 151 | acireductone dioxygenase 1 (18.0 kD) (Adi1) alternative variant bSep08, mRNA.                                  |
| <a href="#">Adipor1</a>     | <a href="#">Adipor1.bSep08</a>     | <a href="#">289036</a>    | 14959  | 829  | 5 | 199 | adiponectin receptor 1 (Adipor1) alternative variant bSep08, mRNA.                                             |
| <a href="#">Adipor1</a>     | <a href="#">Adipor1.cSep08</a>     | <a href="#">289036</a>    | 16877  | 808  | 5 | 96  | adiponectin receptor 1 (Adipor1) alternative variant cSep08, mRNA.                                             |
| <a href="#">Adipor2</a>     | <a href="#">Adipor2.bSep08</a>     | <a href="#">312670</a>    | 35833  | 454  | 3 | 37  | adiponectin receptor 2 (Adipor2) alternative variant bSep08, mRNA.                                             |
| <a href="#">Adk</a>         | <a href="#">Adk.bSep08</a>         | <a href="#">25368</a>     | 283840 | 836  | 8 | 278 | adenosine kinase (Adk) alternative variant bSep08, mRNA.                                                       |
| <a href="#">Adk</a>         | <a href="#">Adk.cSep08</a>         | <a href="#">25368</a>     | 87096  | 422  | 3 | 69  | adenosine kinase (Adk) alternative variant cSep08, mRNA.                                                       |
| <a href="#">Adk</a>         | <a href="#">Adk.dSep08</a>         | <a href="#">25368</a>     | 1363   | 311  | 2 | 31  | adenosine kinase (3.3 kD) (Adk) alternative variant dSep08, mRNA.                                              |
| <a href="#">Adnp2</a>       | <a href="#">Adnp2.bSep08</a>       | <a href="#">307236</a>    | 20606  | 785  | 4 | 261 | ADNP homeobox 2 (Adnp2) alternative variant bSep08, mRNA.                                                      |

|                                  |                                        |                        |       |      |    |     |                                                                                         |
|----------------------------------|----------------------------------------|------------------------|-------|------|----|-----|-----------------------------------------------------------------------------------------|
| <a href="#">AdoHcyase_NA D.0</a> | <a href="#">AdoHcyase_NAD.0.aSep08</a> |                        | 16318 | 495  |    | 164 | S-adenosylhomocysteine hydrolase-like (AdoHcyase_NAD.0) mRNA.                           |
| <a href="#">Adprh</a>            | <a href="#">Adprh.bSep08</a>           | <a href="#">25371</a>  | 4612  | 780  | 3  | 149 | ADP-ribosylarginine hydrolase (Adprh) alternative variant bSep08, mRNA.                 |
| <a href="#">Adprhl2</a>          | <a href="#">Adprhl2.bSep08</a>         | <a href="#">362600</a> | 2148  | 1315 | 4  | 217 | ADP-ribosylhydrolase like 2 (23.5 kD) (Adprhl2) alternative variant bSep08, mRNA.       |
| <a href="#">Adprhl2</a>          | <a href="#">Adprhl2.cSep08</a>         | <a href="#">362600</a> | 3834  | 1037 | 3  | 211 | ADP-ribosylhydrolase like 2 (21.9 kD) (Adprhl2) alternative variant cSep08, mRNA.       |
| <a href="#">Adrbk1</a>           | <a href="#">Adrbk1.bSep08</a>          | <a href="#">25238</a>  | 2741  | 2089 | 2  | 230 | adrenergic receptor kinase, beta 1 (26.8 kD) (Adrbk1) alternative variant bSep08, mRNA. |
| <a href="#">Adrm1</a>            | <a href="#">Adrm1.bSep08</a>           | <a href="#">65138</a>  | 695   | 590  | 2  | 88  | adhesion regulating molecule 1 (Adrm1) alternative variant bSep08, mRNA.                |
| <a href="#">Adsl</a>             | <a href="#">Adsl.bSep08</a>            | <a href="#">315150</a> | 9136  | 1927 | 6  | 223 | adenylosuccinate lyase (24.9 kD) (Adsl) alternative variant bSep08, mRNA.               |
| <a href="#">Adsl</a>             | <a href="#">Adsl.cSep08</a>            | <a href="#">315150</a> | 19093 | 760  | 7  | 122 | adenylosuccinate lyase (Adsl) alternative variant cSep08, mRNA.                         |
| <a href="#">Adsl</a>             | <a href="#">Adsl.dSep08</a>            | <a href="#">315150</a> | 2690  | 1084 | 1  | 46  | adenylosuccinate lyase (Adsl) alternative variant dSep08, mRNA.                         |
| <a href="#">Aebp1</a>            | <a href="#">Aebp1.bSep08</a>           | <a href="#">305494</a> | 1985  | 578  | 7  | 192 | AE binding protein 1 (Aebp1) alternative variant bSep08, mRNA.                          |
| <a href="#">Aebp2</a>            | <a href="#">Aebp2.bSep08</a>           | <a href="#">297705</a> | 13230 | 5887 | 4  | 106 | AE binding protein 2 (Aebp2) alternative variant bSep08, mRNA.                          |
| <a href="#">Aebp2</a>            | <a href="#">Aebp2.cSep08</a>           | <a href="#">297705</a> | 3663  | 782  | 2  | 33  | AE binding protein 2 (Aebp2) alternative variant cSep08, mRNA.                          |
| <a href="#">Aer61</a>            | <a href="#">Aer61.bSep08</a>           | <a href="#">494219</a> | 33943 | 1792 | 11 | 466 | glycosyltransferase Aer61 (Aer61) alternative variant bSep08, mRNA.                     |
| <a href="#">Aer61</a>            | <a href="#">Aer61.cSep08</a>           | <a href="#">494219</a> | 3060  | 2588 | 2  | 72  | glycosyltransferase Aer61 (7.9 kD) (Aer61) alternative variant cSep08, mRNA.            |
| <a href="#">Aes</a>              | <a href="#">Aes.bSep08</a>             | <a href="#">29466</a>  | 5143  | 1242 | 6  | 187 | amino-terminal enhancer of split (Aes) alternative variant bSep08, mRNA.                |
| <a href="#">Aes</a>              | <a href="#">Aes.cSep08</a>             | <a href="#">29466</a>  | 3425  | 352  | 4  | 61  | amino-terminal enhancer of split (Aes) alternative variant cSep08, mRNA.                |
| <a href="#">Aes</a>              | <a href="#">Aes.dSep08</a>             | <a href="#">29466</a>  | 1273  | 730  | 3  | 42  | amino-terminal enhancer of split (Aes) alternative variant dSep08, mRNA.                |
| <a href="#">Afap1</a>            | <a href="#">Afap1.bSep08</a>           | <a href="#">140935</a> | 1759  | 482  | 1  | 72  | actin filament associated protein 1 (Afap1) alternative variant bSep08, mRNA.           |
| <a href="#">Afap1l1</a>          | <a href="#">Afap1l1.bSep08</a>         | <a href="#">291565</a> | 13236 | 2899 | 5  | 191 | actin filament associated protein 1-like 1 (Afap1l1) alternative variant bSep08, mRNA.  |
| <a href="#">Afap1l2</a>          | <a href="#">Afap1l2.aSep08</a>         | <a href="#">292130</a> | 4888  | 2074 |    | 344 | actin filament associated protein 1-like 2 (Afap1l2) mRNA.                              |
| <a href="#">Aff1</a>             | <a href="#">Aff1.bSep08</a>            | <a href="#">305152</a> | 74363 | 399  | 2  | 100 | AF4/FMR2 family, member 1 (Aff1) alternative variant bSep08, mRNA.                      |
| <a href="#">Aff2</a>             | <a href="#">Aff2.aSep08</a>            | <a href="#">293922</a> | 16588 | 468  |    | 155 | AF4/FMR2 family, member 2 (Aff2) mRNA.                                                  |
| <a href="#">Aff3</a>             | <a href="#">Aff3.aSep08</a>            | <a href="#">363220</a> | 12288 | 828  | 5  | 233 | AF4/FMR2 family, member 3 (Aff3) alternative variant aSep08, mRNA.                      |
| <a href="#">Aff3</a>             | <a href="#">Aff3.bSep08</a>            | <a href="#">363220</a> | 12185 | 677  | 5  | 182 | AF4/FMR2 family, member 3 (Aff3) alternative variant bSep08, mRNA.                      |

|                        |                               |                        |       |      |    |     |                                                                                               |
|------------------------|-------------------------------|------------------------|-------|------|----|-----|-----------------------------------------------------------------------------------------------|
| <a href="#">Aff3</a>   | <a href="#">Aff3.cSep08</a>   | <a href="#">363220</a> | 2286  | 637  | 1  | 150 | AF4/FMR2 family, member 3 (Aff3) alternative variant cSep08, mRNA.                            |
| <a href="#">Aff4</a>   | <a href="#">Aff4.bSep08</a>   | <a href="#">303132</a> | 4107  | 808  | 5  | 246 | AF4/FMR2 family, member 4 (Aff4) alternative variant bSep08, mRNA.                            |
| <a href="#">Aff4</a>   | <a href="#">Aff4.cSep08</a>   | <a href="#">303132</a> | 29551 | 663  | 7  | 221 | AF4/FMR2 family, member 4 (Aff4) alternative variant cSep08, mRNA.                            |
| <a href="#">Aff4</a>   | <a href="#">Aff4.dSep08</a>   | <a href="#">303132</a> | 9205  | 607  | 3  | 201 | AF4/FMR2 family, member 4 (Aff4) alternative variant dSep08, mRNA.                            |
| <a href="#">Aff4</a>   | <a href="#">Aff4.fSep08</a>   | <a href="#">303132</a> | 3653  | 349  | 2  | 41  | AF4/FMR2 family, member 4 (4.8 kD) (Aff4) alternative variant fSep08, mRNA.                   |
| <a href="#">Afg3l1</a> | <a href="#">Afg3l1.bSep08</a> | <a href="#">361436</a> | 12792 | 1675 | 10 | 520 | AFG3(ATPase family gene 3)-like 1 (S. cerevisiae) (Afg3l1) alternative variant bSep08, mRNA.  |
| <a href="#">Afg3l1</a> | <a href="#">Afg3l1.cSep08</a> | <a href="#">361436</a> | 13542 | 500  | 6  | 166 | AFG3(ATPase family gene 3)-like 1 (S. cerevisiae) (Afg3l1) alternative variant cSep08, mRNA.  |
| <a href="#">Afg3l2</a> | <a href="#">Afg3l2.bSep08</a> | <a href="#">307350</a> | 3525  | 795  | 2  | 105 | AFG3(ATPase family gene 3)-like 2 (yeast) (Afg3l2) alternative variant bSep08, mRNA.          |
| <a href="#">Afg3l2</a> | <a href="#">Afg3l2.cSep08</a> | <a href="#">307350</a> | 2593  | 712  | 2  | 101 | AFG3(ATPase family gene 3)-like 2 (yeast) (Afg3l2) alternative variant cSep08, mRNA.          |
| <a href="#">Afp</a>    | <a href="#">Afp.bSep08</a>    | <a href="#">24177</a>  | 7895  | 1235 | 6  | 274 | alpha-fetoprotein (Afp) alternative variant bSep08, mRNA.                                     |
| <a href="#">Afp</a>    | <a href="#">Afp.cSep08</a>    | <a href="#">24177</a>  | 6936  | 764  | 6  | 230 | alpha-fetoprotein (Afp) alternative variant cSep08, mRNA.                                     |
| <a href="#">Afp</a>    | <a href="#">Afp.dSep08</a>    | <a href="#">24177</a>  | 6817  | 651  | 5  | 211 | alpha-fetoprotein precursor (23.5 kD) (Afp) alternative variant dSep08, mRNA.                 |
| <a href="#">Afp</a>    | <a href="#">Afp.eSep08</a>    | <a href="#">24177</a>  | 4175  | 812  | 5  | 183 | alpha-fetoprotein (Afp) alternative variant eSep08, mRNA.                                     |
| <a href="#">Aftph</a>  | <a href="#">Aftph.aSep08</a>  | <a href="#">305544</a> | 53958 | 3745 | 3  | 905 | aftiphilin (98.1 kD) (Aftph) alternative variant aSep08, complete mRNA.                       |
| <a href="#">Aftph</a>  | <a href="#">Aftph.bSep08</a>  | <a href="#">305544</a> | 14353 | 346  | 3  | 115 | aftiphilin (Aftph) alternative variant bSep08, mRNA.                                          |
| <a href="#">Aftph</a>  | <a href="#">Aftph.cSep08</a>  | <a href="#">305544</a> | 6842  | 1708 | 2  | 60  | aftiphilin (6.5 kD) (Aftph) alternative variant cSep08, mRNA.                                 |
| <a href="#">Aftph</a>  | <a href="#">Aftph.eSep08</a>  | <a href="#">305544</a> | 9516  | 404  | 3  | 26  | aftiphilin (Aftph) alternative variant eSep08, mRNA.                                          |
| <a href="#">Aga</a>    | <a href="#">Aga.bSep08</a>    | <a href="#">290923</a> | 11789 | 958  | 8  | 249 | aspartylglucosaminidase (27.1 kD) (Aga) alternative variant bSep08, mRNA.                     |
| <a href="#">Aga</a>    | <a href="#">Aga.cSep08</a>    | <a href="#">290923</a> | 5919  | 712  | 6  | 224 | aspartylglucosaminidase (Aga) alternative variant cSep08, mRNA.                               |
| <a href="#">Aga</a>    | <a href="#">Aga.dSep08</a>    | <a href="#">290923</a> | 6180  | 767  | 5  | 138 | aspartylglucosaminidase (14.7 kD) (Aga) alternative variant dSep08, mRNA.                     |
| <a href="#">Aga</a>    | <a href="#">Aga.eSep08</a>    | <a href="#">290923</a> | 1997  | 419  | 3  | 102 | aspartylglucosaminidase (Aga) alternative variant eSep08, mRNA.                               |
| <a href="#">Aga</a>    | <a href="#">Aga.gSep08</a>    | <a href="#">290923</a> | 2643  | 492  | 2  | 71  | aspartylglucosaminidase (8.0 kD) (Aga) alternative variant gSep08, mRNA.                      |
| <a href="#">Agbl2</a>  | <a href="#">Agbl2.aSep08</a>  | <a href="#">366124</a> | 11086 | 562  |    | 92  | ATP/GTP binding protein-like 2 (Agbl2) mRNA.                                                  |
| <a href="#">Agbl3</a>  | <a href="#">Agbl3.aSep08</a>  | <a href="#">500076</a> | 36603 | 773  | 8  | 257 | ATP/GTP binding protein-like 3 (Agbl3) alternative variant aSep08, mRNA.                      |
| <a href="#">Agbl3</a>  | <a href="#">Agbl3.bSep08</a>  | <a href="#">500076</a> | 8445  | 801  | 1  | 137 | ATP/GTP binding protein-like 3 (16.1 kD) (Agbl3) alternative variant bSep08, mRNA.            |
| <a href="#">Ager</a>   | <a href="#">Ager.bSep08</a>   | <a href="#">81722</a>  | 1501  | 1199 | 4  | 147 | advanced glycosylation end product-specific receptor (Ager) alternative variant bSep08, mRNA. |

|                            |                                   |                        |       |      |    |     |                                                                                                                                                   |
|----------------------------|-----------------------------------|------------------------|-------|------|----|-----|---------------------------------------------------------------------------------------------------------------------------------------------------|
| <a href="#">Ager</a>       | <a href="#">Ager.cSep08</a>       | <a href="#">81722</a>  | 616   | 413  | 3  | 84  | advanced glycosylation end product-specific receptor (Ager) alternative variant cSep08, mRNA.                                                     |
| <a href="#">Ager</a>       | <a href="#">Ager.dSep08</a>       | <a href="#">81722</a>  | 492   | 406  | 2  | 82  | advanced glycosylation end product-specific receptor (Ager) alternative variant dSep08, mRNA.                                                     |
| <a href="#">Ager</a>       | <a href="#">Ager.eSep08</a>       | <a href="#">81722</a>  | 951   | 406  | 3  | 81  | advanced glycosylation end product-specific receptor (Ager) alternative variant eSep08, mRNA.                                                     |
| <a href="#">Aggf1</a>      | <a href="#">Aggf1.aSep08</a>      | <a href="#">310005</a> | 18992 | 1757 | 10 | 585 | angiogenic factor with G patch FHA domains 1 (Aggf1) alternative variant aSep08, mRNA.                                                            |
| <a href="#">Aggf1</a>      | <a href="#">Aggf1.bSep08</a>      | <a href="#">310005</a> | 14943 | 1789 | 9  | 323 | angiogenic factor VG5Q (Aggf1) alternative variant bSep08, mRNA.                                                                                  |
| <a href="#">Aggf1</a>      | <a href="#">Aggf1.cSep08</a>      | <a href="#">310005</a> | 3422  | 399  | 2  | 124 | angiogenic factor VG5Q (Aggf1) alternative variant cSep08, mRNA.                                                                                  |
| <a href="#">Aggf1</a>      | <a href="#">Aggf1.dSep08</a>      | <a href="#">310005</a> | 2158  | 367  | 2  | 81  | angiogenic factor VG5Q (Aggf1) alternative variant dSep08, mRNA.                                                                                  |
| <a href="#">Aggf1</a>      | <a href="#">Aggf1.fSep08</a>      | <a href="#">310005</a> | 1011  | 278  | 2  | 25  | putative protein (2.9 kD) (Aggf1) alternative variant fSep08, mRNA.                                                                               |
| <a href="#">Agk</a>        | <a href="#">Agk.bSep08</a>        | <a href="#">502749</a> | 51247 | 616  |    | 150 | acylglycerol kinase (Agk) alternative variant bSep08, mRNA.                                                                                       |
| <a href="#">Agl</a>        | <a href="#">Agl.bSep08</a>        | <a href="#">362029</a> | 4138  | 509  | 4  | 169 | amylase-1,6-glycosidase, 4-alpha-glucanotransferase (Agl) alternative variant bSep08, mRNA.                                                       |
| <a href="#">Agl</a>        | <a href="#">Agl.cSep08</a>        | <a href="#">362029</a> | 13475 | 349  | 3  | 75  | amylase-1,6-glycosidase, 4-alpha-glucanotransferase (Agl) alternative variant cSep08, mRNA.                                                       |
| <a href="#">Agmat</a>      | <a href="#">Agmat.bSep08</a>      | <a href="#">298607</a> | 3141  | 967  | 3  | 113 | agmatine ureohydrolase (agmatinase) (12.0 kD) (Agmat) alternative variant bSep08, mRNA.                                                           |
| <a href="#">Agmat</a>      | <a href="#">Agmat.cSep08</a>      | <a href="#">298607</a> | 3088  | 681  | 3  | 101 | agmatine ureohydrolase (agmatinase) (10.5 kD) (Agmat) alternative variant cSep08, mRNA.                                                           |
| <a href="#">Ago_hook.0</a> | <a href="#">Ago_hook.0.aSep08</a> |                        | 3845  | 1849 | 3  | 616 | trinucleotide repeat containing 6a (Ago_hook.0) alternative variant aSep08, mRNA.                                                                 |
| <a href="#">Agpat1</a>     | <a href="#">Agpat1.bSep08</a>     | <a href="#">406165</a> | 1030  | 523  | 4  | 173 | 1-acylglycerol-3-phosphate O-acyltransferase 1 (Agpat1) alternative variant bSep08, mRNA.                                                         |
| <a href="#">Agpat1</a>     | <a href="#">Agpat1.cSep08</a>     | <a href="#">406165</a> | 7855  | 805  | 5  | 171 | 1-acylglycerol-3-phosphate O-acyltransferase 1 (18.0 kD) (Agpat1) alternative variant cSep08, mRNA.                                               |
| <a href="#">Agpat1</a>     | <a href="#">Agpat1.dSep08</a>     | <a href="#">406165</a> | 6440  | 474  | 4  | 158 | 1-acylglycerol-3-phosphate O-acyltransferase 1 (Agpat1) alternative variant dSep08, mRNA.                                                         |
| <a href="#">Agpat1</a>     | <a href="#">Agpat1.eSep08</a>     | <a href="#">406165</a> | 969   | 768  | 2  | 255 | 1-acylglycerol-3-phosphate O-acyltransferase 1 (Agpat1) alternative variant eSep08, mRNA.                                                         |
| <a href="#">Agpat1</a>     | <a href="#">Agpat1.fSep08</a>     | <a href="#">406165</a> | 6998  | 828  | 3  | 104 | 1-acylglycerol-3-phosphate O-acyltransferase 1 (Agpat1) alternative variant fSep08, mRNA.                                                         |
| <a href="#">Agpat2</a>     | <a href="#">Agpat2.bSep08</a>     | <a href="#">311821</a> | 10801 | 885  | 1  | 175 | 1-acylglycerol-3-phosphate O-acyltransferase 2 (lysophosphatidic acid acyltransferase, beta) (19.5 kD) (Agpat2) alternative variant bSep08, mRNA. |
| <a href="#">Agpat3</a>     | <a href="#">Agpat3.bSep08</a>     | <a href="#">294324</a> | 1336  | 691  | 2  | 89  | O-acyltransferase 3 (Agpat3) alternative variant bSep08, mRNA.                                                                                    |
| <a href="#">Agpat3</a>     | <a href="#">Agpat3.cSep08</a>     | <a href="#">294324</a> | 65876 | 237  | 3  | 73  | putative protein (Agpat3) alternative variant cSep08, mRNA.                                                                                       |
| <a href="#">Agpat3</a>     | <a href="#">Agpat3.dSep08</a>     | <a href="#">294324</a> | 65867 | 349  | 3  | 69  | putative protein (Agpat3) alternative variant dSep08, mRNA.                                                                                       |

|                         |                                |                        |        |      |    |     |                                                                                                                                                    |
|-------------------------|--------------------------------|------------------------|--------|------|----|-----|----------------------------------------------------------------------------------------------------------------------------------------------------|
| <a href="#">Agpat3</a>  | <a href="#">Agpat3.eSep08</a>  | <a href="#">294324</a> | 19692  | 321  | 2  | 39  | putative protein (Agpat3) alternative variant eSep08, mRNA.                                                                                        |
| <a href="#">Agpat4</a>  | <a href="#">Agpat4.bSep08</a>  | <a href="#">170919</a> | 102988 | 715  | 3  | 118 | 1-acylglycerol-3-phosphate O-acyltransferase 4 (lysophosphatidic acid acyltransferase, delta) (13.0 kD) (Agpat4) alternative variant bSep08, mRNA. |
| <a href="#">Agpat4</a>  | <a href="#">Agpat4.cSep08</a>  | <a href="#">170919</a> | 33521  | 359  | 1  | 60  | 1-acylglycerol-3-phosphate O-acyltransferase 4 (lysophosphatidic acid acyltransferase, delta) (Agpat4) alternative variant cSep08, mRNA.           |
| <a href="#">Agpat5</a>  | <a href="#">Agpat5.bSep08</a>  | <a href="#">306582</a> | 30077  | 488  | 4  | 147 | 1-acylglycerol-3-phosphate O-acyltransferase 5 (lysophosphatidic acid acyltransferase, epsilon) (Agpat5) alternative variant bSep08, mRNA.         |
| <a href="#">Agpat7</a>  | <a href="#">Agpat7.bSep08</a>  | <a href="#">296048</a> | 4249   | 1099 | 2  | 235 | 1-acylglycerol-3-phosphate O-acyltransferase 7 (lysophosphatidic acid acyltransferase, eta) (25.5 kD) (Agpat7) alternative variant bSep08, mRNA.   |
| <a href="#">Agpat9</a>  | <a href="#">Agpat9.bSep08</a>  | <a href="#">305166</a> | 35122  | 705  | 2  | 234 | 1-acylglycerol-3-phosphate O-acyltransferase 9 (Agpat9) alternative variant bSep08, mRNA.                                                          |
| <a href="#">Agps</a>    | <a href="#">Agps.aSep08</a>    | <a href="#">84114</a>  | 19166  | 417  |    | 136 | alkylglycerone phosphate synthase (Agps) mRNA.                                                                                                     |
| <a href="#">Agr2</a>    | <a href="#">Agr2.aSep08</a>    | <a href="#">298961</a> | 10310  | 701  | 1  | 192 | anterior gradient 2 ( <i>Xenopus laevis</i> ) (Agr2) alternative variant aSep08, mRNA.                                                             |
| <a href="#">Agrn</a>    | <a href="#">Agrn.bSep08</a>    | <a href="#">25592</a>  | 4723   | 1429 | 9  | 320 | agrin (Agrn) alternative variant bSep08, mRNA.                                                                                                     |
| <a href="#">Agrn</a>    | <a href="#">Agrn.cSep08</a>    | <a href="#">25592</a>  | 3203   | 797  | 6  | 198 | agrin (Agrn) alternative variant cSep08, mRNA.                                                                                                     |
| <a href="#">Agrn</a>    | <a href="#">Agrn.dSep08</a>    | <a href="#">25592</a>  | 17518  | 414  | 4  | 137 | agrin (Agrn) alternative variant dSep08, mRNA.                                                                                                     |
| <a href="#">Agrn</a>    | <a href="#">Agrn.eSep08</a>    | <a href="#">25592</a>  | 585    | 431  | 2  | 79  | agrin (Agrn) alternative variant eSep08, mRNA.                                                                                                     |
| <a href="#">Agrp</a>    | <a href="#">Agrp.aSep08</a>    | <a href="#">25582</a>  | 759    | 409  |    | 116 | agouti related protein (Agrp) mRNA.                                                                                                                |
| <a href="#">Agt</a>     | <a href="#">Agt.bSep08</a>     | <a href="#">24179</a>  | 2733   | 795  | 3  | 212 | angiotensinogen (serpin peptidase inhibitor, clade A, member 8) (Agt) alternative variant bSep08, mRNA.                                            |
| <a href="#">Agt</a>     | <a href="#">Agt.cSep08</a>     | <a href="#">24179</a>  | 1260   | 636  | 2  | 113 | angiotensinogen (serpin peptidase inhibitor, clade A, member 8) (Agt) alternative variant cSep08, mRNA.                                            |
| <a href="#">Agtbbp1</a> | <a href="#">Agtbbp1.bSep08</a> | <a href="#">290986</a> | 25600  | 1063 | 6  | 220 | ATP/GTP binding protein 1 (Agtbbp1) alternative variant bSep08, mRNA.                                                                              |
| <a href="#">Agtbbp1</a> | <a href="#">Agtbbp1.cSep08</a> | <a href="#">290986</a> | 25380  | 768  | 4  | 152 | ATP/GTP binding protein 1 (Agtbbp1) alternative variant cSep08, mRNA.                                                                              |
| <a href="#">Agtbbp1</a> | <a href="#">Agtbbp1.dSep08</a> | <a href="#">290986</a> | 15900  | 402  | 4  | 130 | ATP/GTP binding protein 1 (Agtbbp1) alternative variant dSep08, mRNA.                                                                              |
| <a href="#">Agr2</a>    | <a href="#">Agr2.bSep08</a>    | <a href="#">24182</a>  | 3839   | 2954 | 2  | 363 | angiotensin II receptor, type 2 (41.3 kD) (Agr2) alternative variant bSep08, mRNA.                                                                 |
| <a href="#">Agxt</a>    | <a href="#">Agxt.bSep08</a>    | <a href="#">24792</a>  | 5502   | 934  | 5  | 228 | alanine-glyoxylate aminotransferase (Agxt) alternative variant bSep08, mRNA.                                                                       |
| <a href="#">Agxt</a>    | <a href="#">Agxt.cSep08</a>    | <a href="#">24792</a>  | 4007   | 417  | 2  | 111 | alanine-glyoxylate aminotransferase (Agxt) alternative variant cSep08, mRNA.                                                                       |
| <a href="#">Ahctf1</a>  | <a href="#">Ahctf1.aSep08</a>  | <a href="#">360886</a> | 9518   | 3180 |    | 578 | AT hook containing transcription factor 1 (Ahctf1) mRNA.                                                                                           |
| <a href="#">Ahcy</a>    | <a href="#">Ahcy.bSep08</a>    | <a href="#">29443</a>  | 2340   | 761  | 1  | 175 | S-adenosylhomocysteine hydrolase (Ahcy) alternative variant bSep08, mRNA.                                                                          |
| <a href="#">Ahcy1</a>   | <a href="#">Ahcy1.aSep08</a>   | <a href="#">362013</a> | 49241  | 2443 | 17 | 524 | S-adenosylhomocysteine hydrolase-like 1 (58.6 kD) (Ahcy1) alternative variant aSep08, mRNA.                                                        |

|                       |                              |                        |        |      |    |     |                                                                                                           |
|-----------------------|------------------------------|------------------------|--------|------|----|-----|-----------------------------------------------------------------------------------------------------------|
| <a href="#">Ahcy1</a> | <a href="#">Ahcy1.cSep08</a> | <a href="#">362013</a> | 25485  | 791  | 8  | 190 | S-adenosylhomocysteine hydrolase-like 1 (Ahcy1) alternative variant cSep08, mRNA.                         |
| <a href="#">Ahcy1</a> | <a href="#">Ahcy1.dSep08</a> | <a href="#">362013</a> | 24915  | 841  | 6  | 173 | S-adenosylhomocysteine hydrolase-like 1 (Ahcy1) alternative variant dSep08, mRNA.                         |
| <a href="#">Ahcy1</a> | <a href="#">Ahcy1.eSep08</a> | <a href="#">362013</a> | 6097   | 2147 | 8  | 158 | S-adenosylhomocysteine hydrolase-like 1 (Ahcy1) alternative variant eSep08, mRNA.                         |
| <a href="#">Ahcy2</a> | <a href="#">Ahcy2.aSep08</a> | <a href="#">312192</a> | 125859 | 1282 | 10 | 423 | S-adenosylhomocysteine hydrolase-like 2 (Ahcy2) alternative variant aSep08, mRNA.                         |
| <a href="#">Ahcy2</a> | <a href="#">Ahcy2.cSep08</a> | <a href="#">312192</a> | 16105  | 536  | 3  | 79  | S-adenosylhomocysteine hydrolase-like 2 (Ahcy2) alternative variant cSep08, mRNA.                         |
| <a href="#">Ahdc1</a> | <a href="#">Ahdc1.aSep08</a> | <a href="#">362617</a> | 12553  | 2503 | 2  | 670 | AT hook, DNA binding motif, containing 1 (Ahdc1) alternative variant aSep08, mRNA.                        |
| <a href="#">Ahi1</a>  | <a href="#">Ahi1.bSep08</a>  | <a href="#">308923</a> | 132267 | 1887 | 3  | 543 | abelson helper integration site 1 (Ahi1) alternative variant bSep08, mRNA.                                |
| <a href="#">Ahi1</a>  | <a href="#">Ahi1.cSep08</a>  | <a href="#">308923</a> | 72156  | 2042 | 7  | 183 | abelson helper integration site 1 (Ahi1) alternative variant cSep08, mRNA.                                |
| <a href="#">Ahi1</a>  | <a href="#">Ahi1.dSep08</a>  | <a href="#">308923</a> | 44327  | 735  | 7  | 150 | abelson helper integration site 1 (17.3 kD) (Ahi1) alternative variant dSep08, mRNA.                      |
| <a href="#">Ahi1</a>  | <a href="#">Ahi1.eSep08</a>  | <a href="#">308923</a> | 12751  | 695  | 3  | 39  | abelson helper integration site 1 (4.4 kD) (Ahi1) alternative variant eSep08, mRNA.                       |
| <a href="#">Ahr</a>   | <a href="#">Ahr.bSep08</a>   | <a href="#">25690</a>  | 35153  | 2590 | 2  | 815 | aryl hydrocarbon receptor (92.3 kD) (Ahr) alternative variant bSep08, mRNA.                               |
| <a href="#">Ahr</a>   | <a href="#">Ahr.cSep08</a>   | <a href="#">25690</a>  | 35153  | 2690 | 2  | 815 | aryl hydrocarbon receptor (92.3 kD) (Ahr) alternative variant cSep08, mRNA.                               |
| <a href="#">Ahr</a>   | <a href="#">Ahr.dSep08</a>   | <a href="#">25690</a>  | 36363  | 3905 | 2  | 815 | aryl hydrocarbon receptor (92.3 kD) (Ahr) alternative variant dSep08, complete mRNA.                      |
| <a href="#">Ahr</a>   | <a href="#">Ahr.eSep08</a>   | <a href="#">25690</a>  | 35153  | 2432 | 2  | 810 | aryl hydrocarbon receptor (Ahr) alternative variant eSep08, mRNA.                                         |
| <a href="#">Ahsa2</a> | <a href="#">Ahsa2.aSep08</a> | <a href="#">305577</a> | 7432   | 702  | 6  | 233 | AHA1, activator of heat shock protein ATPase homolog 2 (yeast) (Ahsa2) alternative variant aSep08, mRNA.  |
| <a href="#">Ahsa2</a> | <a href="#">Ahsa2.bSep08</a> | <a href="#">305577</a> | 5546   | 520  | 4  | 173 | AHA1, activator of heat shock protein ATPase homolog 2 (yeast) (Ahsa2) alternative variant bSep08, mRNA.  |
| <a href="#">Ahsg</a>  | <a href="#">Ahsg.bSep08</a>  | <a href="#">25373</a>  | 1289   | 733  | 2  | 129 | alpha-2-HS-glycoprotein (Ahsg) alternative variant bSep08, mRNA.                                          |
| <a href="#">Ahsg</a>  | <a href="#">Ahsg.cSep08</a>  | <a href="#">25373</a>  | 569    | 260  | 2  | 86  | alpha-2-HS-glycoprotein (Ahsg) alternative variant cSep08, mRNA.                                          |
| <a href="#">Aif1</a>  | <a href="#">Aif1.aSep08</a>  | <a href="#">29427</a>  | 741    | 456  | 1  | 151 | allograft inflammatory factor 1 (Aif1) alternative variant aSep08, mRNA.                                  |
| <a href="#">Aifm1</a> | <a href="#">Aifm1.bSep08</a> | <a href="#">83533</a>  | 6743   | 484  | 4  | 160 | apoptosis-inducing factor, mitochondrion-associated 1 (Aifm1) alternative variant bSep08, mRNA.           |
| <a href="#">Aifm1</a> | <a href="#">Aifm1.cSep08</a> | <a href="#">83533</a>  | 970    | 625  | 2  | 116 | apoptosis-inducing factor, mitochondrion-associated 1 (13.4 kD) (Aifm1) alternative variant cSep08, mRNA. |
| <a href="#">Aifm2</a> | <a href="#">Aifm2.bSep08</a> | <a href="#">361843</a> | 6648   | 898  | 5  | 175 | apoptosis-inducing factor, mitochondrion-associated 2 (Aifm2) alternative variant bSep08, mRNA.           |
| <a href="#">Aifm2</a> | <a href="#">Aifm2.cSep08</a> | <a href="#">361843</a> | 7612   | 715  | 2  | 38  | apoptosis-inducing factor, mitochondrion-associated 2 (4.5 kD) (Aifm2) alternative variant cSep08, mRNA.  |



|                       |                              |                        |       |      |    |     |                                                                                                           |
|-----------------------|------------------------------|------------------------|-------|------|----|-----|-----------------------------------------------------------------------------------------------------------|
| <a href="#">Aifm2</a> | <a href="#">Aifm2.dSep08</a> | <a href="#">361843</a> | 6605  | 638  | 2  | 38  | apoptosis-inducing factor, mitochondrion-associated 2 (4.5 kD) (Aifm2) alternative variant dSep08, mRNA.  |
| <a href="#">Aifm3</a> | <a href="#">Aifm3.aSep08</a> | <a href="#">303786</a> | 6015  | 1541 | 12 | 177 | apoptosis-inducing factor, mitochondrion-associated 3 (19.8 kD) (Aifm3) alternative variant aSep08, mRNA. |
| <a href="#">Aifm3</a> | <a href="#">Aifm3.bSep08</a> | <a href="#">303786</a> | 1258  | 433  | 5  | 144 | apoptosis-inducing factor, mitochondrion-associated 3 (Aifm3) alternative variant bSep08, mRNA.           |
| <a href="#">Aifm3</a> | <a href="#">Aifm3.cSep08</a> | <a href="#">303786</a> | 2510  | 621  | 4  | 97  | apoptosis-inducing factor, mitochondrion-associated 3 (Aifm3) alternative variant cSep08, mRNA.           |
| <a href="#">Aifm3</a> | <a href="#">Aifm3.dSep08</a> | <a href="#">303786</a> | 734   | 384  | 2  | 62  | apoptosis-inducing factor, mitochondrion-associated 3 (Aifm3) alternative variant dSep08, mRNA.           |
| <a href="#">Aim1l</a> | <a href="#">Aim1l.aSep08</a> | <a href="#">298543</a> | 7921  | 840  |    | 280 | absent in melanoma 1-like (Aim1l) mRNA.                                                                   |
| <a href="#">Aim2</a>  | <a href="#">Aim2.aSep08</a>  | <a href="#">304987</a> | 5808  | 832  |    | 148 | absent in melanoma 2 (16.7 kD) (Aim2) mRNA.                                                               |
| <a href="#">Aip</a>   | <a href="#">Aip.bSep08</a>   | <a href="#">282827</a> | 3462  | 487  | 1  | 125 | aryl-hydrocarbon receptor-interacting protein (Aip) alternative variant bSep08, mRNA.                     |
| <a href="#">Ak7</a>   | <a href="#">Ak7.bSep08</a>   | <a href="#">314416</a> | 32246 | 1456 | 8  | 335 | adenylate kinase 7 (Ak7) alternative variant bSep08, mRNA.                                                |
| <a href="#">Ak7</a>   | <a href="#">Ak7.cSep08</a>   | <a href="#">314416</a> | 23532 | 735  | 5  | 203 | adenylate kinase 7 (Ak7) alternative variant cSep08, mRNA.                                                |
| <a href="#">Ak7</a>   | <a href="#">Ak7.dSep08</a>   | <a href="#">314416</a> | 5379  | 415  | 3  | 104 | adenylate kinase 7 (Ak7) alternative variant dSep08, mRNA.                                                |
| <a href="#">Akap1</a> | <a href="#">Akap1.bSep08</a> | <a href="#">114124</a> | 1345  | 799  | 2  | 255 | A kinase anchor protein 1 CRA b (Akap1) alternative variant bSep08, mRNA.                                 |
| <a href="#">Akap1</a> | <a href="#">Akap1.cSep08</a> | <a href="#">114124</a> | 761   | 399  | 2  | 83  | A-kinase anchor protein (Akap1) alternative variant cSep08, mRNA.                                         |
| <a href="#">Akap1</a> | <a href="#">Akap1.dSep08</a> | <a href="#">114124</a> | 18154 | 466  | 2  | 66  | putative protein (Akap1) alternative variant dSep08, mRNA.                                                |
| <a href="#">Akap1</a> | <a href="#">Akap1.eSep08</a> | <a href="#">114124</a> | 11329 | 780  | 2  | 58  | putative protein (Akap1) alternative variant eSep08, mRNA.                                                |
| <a href="#">Akap2</a> | <a href="#">Akap2.bSep08</a> | <a href="#">298024</a> | 29517 | 4463 | 2  | 113 | A kinase (PRKA) anchor protein 2 (Akap2) alternative variant bSep08, mRNA.                                |
| <a href="#">Akap2</a> | <a href="#">Akap2.cSep08</a> | <a href="#">298024</a> | 10173 | 838  | 3  | 60  | A kinase (PRKA) anchor protein 2 (Akap2) alternative variant cSep08, mRNA.                                |
| <a href="#">Akap3</a> | <a href="#">Akap3.bSep08</a> | <a href="#">312720</a> | 11908 | 778  | 1  | 207 | A kinase (PRKA) anchor protein 3 (Akap3) alternative variant bSep08, mRNA.                                |
| <a href="#">Akap4</a> | <a href="#">Akap4.bSep08</a> | <a href="#">79254</a>  | 4896  | 317  | 1  | 63  | A kinase (PRKA) anchor protein 4 (Akap4) alternative variant bSep08, mRNA.                                |
| <a href="#">Akap5</a> | <a href="#">Akap5.aSep08</a> | <a href="#">171026</a> | 7891  | 1277 | 3  | 212 | A kinase (PRKA) anchor protein 5 (23.4 kD) (Akap5) alternative variant aSep08, mRNA.                      |
| <a href="#">Akap6</a> | <a href="#">Akap6.bSep08</a> | <a href="#">64553</a>  | 22161 | 809  | 2  | 77  | A kinase (PRKA) anchor protein 6 (Akap6) alternative variant bSep08, mRNA.                                |
| <a href="#">Akap7</a> | <a href="#">Akap7.bSep08</a> | <a href="#">361458</a> | 51028 | 626  | 4  | 128 | A-kinase anchor protein 7 (Akap7) alternative variant bSep08, mRNA.                                       |
| <a href="#">Akap7</a> | <a href="#">Akap7.cSep08</a> | <a href="#">361458</a> | 28414 | 788  | 2  | 81  | a-kinase anchor protein 7 (9.2 kD) (Akap7) alternative variant cSep08, mRNA.                              |
| <a href="#">Akap8</a> | <a href="#">Akap8.bSep08</a> | <a href="#">116633</a> | 6804  | 1463 | 6  | 310 | A kinase (PRKA) anchor protein 8 (34.6 kD) (Akap8) alternative variant bSep08, mRNA.                      |
| <a href="#">Akap8</a> | <a href="#">Akap8.dSep08</a> | <a href="#">116633</a> | 3438  | 381  | 5  | 127 | A kinase (PRKA) anchor protein 8 (Akap8) alternative variant dSep08, mRNA.                                |

|                         |                                |                        |        |      |    |     |                                                                                                         |
|-------------------------|--------------------------------|------------------------|--------|------|----|-----|---------------------------------------------------------------------------------------------------------|
| <a href="#">Akap8</a>   | <a href="#">Akap8.eSep08</a>   | <a href="#">116633</a> | 1242   | 1070 | 2  | 74  | A kinase (PRKA) anchor protein 8 (14.9 kD) (Akap8) alternative variant eSep08, mRNA.                    |
| <a href="#">Akap8l</a>  | <a href="#">Akap8l.bSep08</a>  | <a href="#">299569</a> | 3426   | 2847 | 4  | 444 | a-kinase anchor protein 8-like precursor (47.7 kD) (Akap8l) alternative variant bSep08, mRNA.           |
| <a href="#">Akap8l</a>  | <a href="#">Akap8l.cSep08</a>  | <a href="#">299569</a> | 15484  | 1149 | 10 | 331 | A kinase anchor protein 8-like (36.6 kD) (Akap8l) alternative variant cSep08, mRNA.                     |
| <a href="#">Akap8l</a>  | <a href="#">Akap8l.dSep08</a>  | <a href="#">299569</a> | 12912  | 898  | 5  | 141 | a-kinase anchor protein 8-like (Akap8l) alternative variant dSep08, mRNA.                               |
| <a href="#">Akap8l</a>  | <a href="#">Akap8l.eSep08</a>  | <a href="#">299569</a> | 16652  | 416  | 2  | 138 | putative protein (Akap8l) alternative variant eSep08, mRNA.                                             |
| <a href="#">Akap8l</a>  | <a href="#">Akap8l.fSep08</a>  | <a href="#">299569</a> | 13052  | 977  | 4  | 134 | A kinase anchor protein 8-like (Akap8l) alternative variant fSep08, mRNA.                               |
| <a href="#">Akap9</a>   | <a href="#">Akap9.bSep08</a>   | <a href="#">246150</a> | 102918 | 730  | 7  | 129 | A kinase (PRKA) anchor protein (yotiao) 9 (14.8 kD) (Akap9) alternative variant bSep08, mRNA.           |
| <a href="#">Akap10</a>  | <a href="#">Akap10.bSep08</a>  | <a href="#">360540</a> | 26457  | 2825 | 1  | 354 | A kinase (PRKA) anchor protein 10 (39.1 kD) (Akap10) alternative variant bSep08, complete mRNA.         |
| <a href="#">Akap11</a>  | <a href="#">Akap11.bSep08</a>  | <a href="#">498549</a> | 11293  | 3917 | 1  | 142 | A kinase (PRKA) anchor protein 11 (Akap11) alternative variant bSep08, mRNA.                            |
| <a href="#">Akap13</a>  | <a href="#">Akap13.bSep08</a>  | <a href="#">293024</a> | 15828  | 2136 | 8  | 515 | A kinase (PRKA) anchor protein 13 (Akap13) alternative variant bSep08, mRNA.                            |
| <a href="#">Akap13</a>  | <a href="#">Akap13.cSep08</a>  | <a href="#">293024</a> | 1706   | 718  | 2  | 239 | A kinase (PRKA) anchor protein 13 (Akap13) alternative variant cSep08, mRNA.                            |
| <a href="#">Akna</a>    | <a href="#">Akna.bSep08</a>    | <a href="#">362530</a> | 5815   | 707  | 5  | 175 | AT-hook transcription factor (Akna) alternative variant bSep08, mRNA.                                   |
| <a href="#">Akr1a1</a>  | <a href="#">Akr1a1.bSep08</a>  | <a href="#">78959</a>  | 3661   | 601  | 5  | 168 | aldo-keto reductase family 1, member A1 (aldehyde reductase) (Akr1a1) alternative variant bSep08, mRNA. |
| <a href="#">Akr1b1</a>  | <a href="#">Akr1b1.bSep08</a>  | <a href="#">24192</a>  | 3121   | 573  | 2  | 73  | aldo-keto reductase family 1, member B1 (aldose reductase) (Akr1b1) alternative variant bSep08, mRNA.   |
| <a href="#">Akr1b7</a>  | <a href="#">Akr1b7.bSep08</a>  | <a href="#">116463</a> | 2005   | 849  | 1  | 125 | aldo-keto reductase family 1, member B7 (Akr1b7) alternative variant bSep08, mRNA.                      |
| <a href="#">Akr1b8</a>  | <a href="#">Akr1b8.bSep08</a>  | <a href="#">286921</a> | 3531   | 508  | 4  | 70  | aldo-keto reductase family 1, member B8 (Akr1b8) alternative variant bSep08, mRNA.                      |
| <a href="#">Akr1b10</a> | <a href="#">Akr1b10.bSep08</a> | <a href="#">296972</a> | 3949   | 372  | 3  | 82  | aldo-keto reductase family 1, member B10 (aldose reductase) (Akr1b10) alternative variant bSep08, mRNA. |
| <a href="#">Akr1b10</a> | <a href="#">Akr1b10.cSep08</a> | <a href="#">296972</a> | 4742   | 599  | 4  | 46  | aldo-keto reductase family 1, member B10 (aldose reductase) (Akr1b10) alternative variant cSep08, mRNA. |
| <a href="#">Akr1c6</a>  | <a href="#">Akr1c6.bSep08</a>  | <a href="#">307092</a> | 7625   | 763  | 1  | 55  | aldo-keto reductase family 1, member C6 (Akr1c6) alternative variant bSep08, mRNA.                      |
| <a href="#">Akr1c12</a> | <a href="#">Akr1c12.aSep08</a> | <a href="#">361266</a> | 33373  | 1329 | 11 | 370 | aldo-keto reductase family 1, member C12 (Akr1c12) alternative variant aSep08, mRNA.                    |
| <a href="#">Akr1c12</a> | <a href="#">Akr1c12.bSep08</a> | <a href="#">361266</a> | 8252   | 869  | 7  | 274 | aldo-keto reductase family 1, member C12 (Akr1c12) alternative variant bSep08, mRNA.                    |
| <a href="#">Akr1c14</a> | <a href="#">Akr1c14.bSep08</a> | <a href="#">191574</a> | 2534   | 392  | 3  | 130 | aldo-keto reductase family 1, member C14 (Akr1c14) alternative variant bSep08, mRNA.                    |
| <a href="#">Akr1c14</a> | <a href="#">Akr1c14.cSep08</a> | <a href="#">191574</a> | 2641   | 1189 | 2  | 34  | aldo-keto reductase family 1, member C14 (3.8 kD) (Akr1c14) alternative variant cSep08, mRNA.           |

|                         |                                |                        |        |      |    |     |                                                                                                                             |
|-------------------------|--------------------------------|------------------------|--------|------|----|-----|-----------------------------------------------------------------------------------------------------------------------------|
| <a href="#">Akr1c18</a> | <a href="#">Akr1c18.bSep08</a> | <a href="#">171516</a> | 13495  | 730  | 3  | 233 | aldo-keto reductase family 1, member C18 (Akr1c18) alternative variant bSep08, mRNA.                                        |
| <a href="#">Akr1c18</a> | <a href="#">Akr1c18.cSep08</a> | <a href="#">171516</a> | 9170   | 627  | 2  | 196 | aldo-keto reductase family 1, member C18 (Akr1c18) alternative variant cSep08, mRNA.                                        |
| <a href="#">Akr1c21</a> | <a href="#">Akr1c21.bSep08</a> | <a href="#">291283</a> | 39491  | 777  |    | 190 | aldo-keto reductase family 1, member C21 (Akr1c21) alternative variant bSep08, mRNA.                                        |
| <a href="#">Akr1cl1</a> | <a href="#">Akr1cl1.bSep08</a> | <a href="#">361267</a> | 16687  | 768  | 6  | 228 | aldo-keto reductase family 1, member C-like 1 (25.9 kD) (Akr1cl1) alternative variant bSep08, complete mRNA.                |
| <a href="#">Akr1cl1</a> | <a href="#">Akr1cl1.cSep08</a> | <a href="#">361267</a> | 14597  | 769  | 6  | 201 | aldo-keto reductase family 1, member C-like 1 (23.1 kD) (Akr1cl1) alternative variant cSep08, mRNA.                         |
| <a href="#">Akr1cl1</a> | <a href="#">Akr1cl1.dSep08</a> | <a href="#">361267</a> | 11826  | 1783 | 3  | 59  | aldo-keto reductase family 1, member C-like 1 (Akr1cl1) alternative variant dSep08, mRNA.                                   |
| <a href="#">Akr1e1</a>  | <a href="#">Akr1e1.bSep08</a>  | <a href="#">307091</a> | 13787  | 651  | 8  | 176 | aldo-keto reductase family 1, member E1 (Akr1e1) alternative variant bSep08, mRNA.                                          |
| <a href="#">Akr1e1</a>  | <a href="#">Akr1e1.cSep08</a>  | <a href="#">307091</a> | 4028   | 360  | 3  | 119 | aldo-keto reductase family 1, member E1 (Akr1e1) alternative variant cSep08, mRNA.                                          |
| <a href="#">Akr1e1</a>  | <a href="#">Akr1e1.dSep08</a>  | <a href="#">307091</a> | 2391   | 660  | 3  | 31  | aldo-keto reductase family 1, member E1 (3.8 kD) (Akr1e1) alternative variant dSep08, mRNA.                                 |
| <a href="#">Akr7a3</a>  | <a href="#">Akr7a3.bSep08</a>  | <a href="#">26760</a>  | 1840   | 927  | 1  | 104 | aldo-keto reductase family 7, member A3 (aflatoxin aldehyde reductase) (11.0 kD) (Akr7a3) alternative variant bSep08, mRNA. |
| <a href="#">Akt1</a>    | <a href="#">Akt1.bSep08</a>    | <a href="#">24185</a>  | 15053  | 762  | 5  | 133 | thymoma viral proto-oncogene 1 (Akt1) alternative variant bSep08, mRNA.                                                     |
| <a href="#">Akt1s1</a>  | <a href="#">Akt1s1.bSep08</a>  | <a href="#">292887</a> | 3857   | 708  | 4  | 221 | AKT1 substrate 1 (proline-rich) (Akt1s1) alternative variant bSep08, mRNA.                                                  |
| <a href="#">Akt1s1</a>  | <a href="#">Akt1s1.cSep08</a>  | <a href="#">292887</a> | 3949   | 507  | 4  | 168 | AKT1 substrate 1 (proline-rich) (Akt1s1) alternative variant cSep08, mRNA.                                                  |
| <a href="#">Akt2</a>    | <a href="#">Akt2.bSep08</a>    | <a href="#">25233</a>  | 42232  | 649  | 6  | 182 | thymoma viral proto-oncogene 2 (Akt2) alternative variant bSep08, mRNA.                                                     |
| <a href="#">Akt2</a>    | <a href="#">Akt2.cSep08</a>    | <a href="#">25233</a>  | 25543  | 594  | 5  | 110 | thymoma viral proto-oncogene 2 (Akt2) alternative variant cSep08, mRNA.                                                     |
| <a href="#">Alad</a>    | <a href="#">Alad.bSep08</a>    | <a href="#">25374</a>  | 5426   | 782  | 8  | 204 | aminolevulinate, delta-, dehydratase (Alad) alternative variant bSep08, mRNA.                                               |
| <a href="#">Alad</a>    | <a href="#">Alad.cSep08</a>    | <a href="#">25374</a>  | 1623   | 420  | 4  | 112 | aminolevulinate, delta-, dehydratase (Alad) alternative variant cSep08, mRNA.                                               |
| <a href="#">Alad</a>    | <a href="#">Alad.dSep08</a>    | <a href="#">25374</a>  | 2112   | 936  | 4  | 81  | aminolevulinate, delta-, dehydratase (9.1 kD) (Alad) alternative variant dSep08, mRNA.                                      |
| <a href="#">Alad</a>    | <a href="#">Alad.eSep08</a>    | <a href="#">25374</a>  | 4911   | 393  | 2  | 27  | aminolevulinate, delta-, dehydratase (Alad) alternative variant eSep08, mRNA.                                               |
| <a href="#">Alcam</a>   | <a href="#">Alcam.bSep08</a>   | <a href="#">79559</a>  | 33689  | 3729 | 10 | 351 | activated leukocyte cell adhesion molecule (Alcam) alternative variant bSep08, mRNA.                                        |
| <a href="#">Alcam</a>   | <a href="#">Alcam.cSep08</a>   | <a href="#">79559</a>  | 14754  | 1068 | 7  | 240 | activated leukocyte cell adhesion molecule (26.6 kD) (Alcam) alternative variant cSep08, mRNA.                              |
| <a href="#">Alcam</a>   | <a href="#">Alcam.dSep08</a>   | <a href="#">79559</a>  | 206151 | 1289 | 4  | 120 | activated leukocyte cell adhesion molecule (Alcam) alternative variant dSep08, mRNA.                                        |
| <a href="#">Aldh1a1</a> | <a href="#">Aldh1a1.bSep08</a> | <a href="#">24188</a>  | 38926  | 1403 | 8  | 304 | aldehyde dehydrogenase family 1, subfamily A1 (32.6 kD) (Aldh1a1) alternative variant bSep08, mRNA.                         |

|                          |                                 |                        |       |      |    |     |                                                                                                                                         |
|--------------------------|---------------------------------|------------------------|-------|------|----|-----|-----------------------------------------------------------------------------------------------------------------------------------------|
| <a href="#">Aldh1a1</a>  | <a href="#">Aldh1a1.cSep08</a>  | <a href="#">24188</a>  | 31859 | 681  | 6  | 81  | aldehyde dehydrogenase family 1, subfamily A1 (8.9 kD) (Aldh1a1) alternative variant cSep08, mRNA.                                      |
| <a href="#">Aldh1a1</a>  | <a href="#">Aldh1a1.dSep08</a>  | <a href="#">24188</a>  | 2160  | 418  | 1  | 43  | aldehyde dehydrogenase family 1, subfamily A1 (Aldh1a1) alternative variant dSep08, mRNA.                                               |
| <a href="#">Aldh1a3</a>  | <a href="#">Aldh1a3.bSep08</a>  | <a href="#">266603</a> | 10085 | 693  | 6  | 158 | aldehyde dehydrogenase family 1, subfamily A3 (Aldh1a3) alternative variant bSep08, mRNA.                                               |
| <a href="#">Aldh1a7</a>  | <a href="#">Aldh1a7.aSep08</a>  | <a href="#">29651</a>  | 28678 | 620  |    | 137 | aldehyde dehydrogenase family 1, subfamily A7 (Aldh1a7) alternative variant aSep08, mRNA.                                               |
| <a href="#">Aldh1l2</a>  | <a href="#">Aldh1l2.aSep08</a>  | <a href="#">299699</a> | 5595  | 399  | 3  | 133 | aldehyde dehydrogenase 1 family, member L2 (Aldh1l2) alternative variant aSep08, mRNA.                                                  |
| <a href="#">Aldh1l2</a>  | <a href="#">Aldh1l2.bSep08</a>  | <a href="#">299699</a> | 3982  | 1234 | 2  | 56  | aldehyde dehydrogenase 1 family, member L2 (6.2 kD) (Aldh1l2) alternative variant bSep08, mRNA.                                         |
| <a href="#">Aldh2</a>    | <a href="#">Aldh2.aSep08</a>    | <a href="#">29539</a>  | 33779 | 2257 | 7  | 552 | aldehyde dehydrogenase 2, mitochondrial (Aldh2) alternative variant aSep08, mRNA.                                                       |
| <a href="#">Aldh2</a>    | <a href="#">Aldh2.cSep08</a>    | <a href="#">29539</a>  | 25872 | 800  | 6  | 253 | aldehyde dehydrogenase 2, mitochondrial (Aldh2) alternative variant cSep08, mRNA.                                                       |
| <a href="#">Aldh2</a>    | <a href="#">Aldh2.dSep08</a>    | <a href="#">29539</a>  | 4526  | 492  | 2  | 108 | aldehyde dehydrogenase 2, mitochondrial (Aldh2) alternative variant dSep08, mRNA.                                                       |
| <a href="#">Aldh3a2</a>  | <a href="#">Aldh3a2.bSep08</a>  | <a href="#">65183</a>  | 2182  | 743  | 1  | 168 | aldehyde dehydrogenase family 3, subfamily A2 (18.3 kD) (Aldh3a2) alternative variant bSep08, mRNA.                                     |
| <a href="#">Aldh3b2</a>  | <a href="#">Aldh3b2.aSep08</a>  | <a href="#">688800</a> | 39907 | 1621 | 7  | 479 | aldehyde dehydrogenase 3 family, member B2 (52.6 kD) (Aldh3b2) alternative variant aSep08, mRNA.                                        |
| <a href="#">Aldh3b2</a>  | <a href="#">Aldh3b2.bSep08</a>  | <a href="#">688800</a> | 916   | 382  | 1  | 73  | aldehyde dehydrogenase 3 family, member B2 (Aldh3b2) alternative variant bSep08, mRNA.                                                  |
| <a href="#">Aldh5a1</a>  | <a href="#">Aldh5a1.aSep08</a>  | <a href="#">291133</a> | 23422 | 2520 | 10 | 614 | aldehyde dehydrogenase 5 family, member A1 (succinate-semialdehyde dehydrogenase) (66.2 kD) (Aldh5a1) alternative variant aSep08, mRNA. |
| <a href="#">Aldh6a1</a>  | <a href="#">Aldh6a1.bSep08</a>  | <a href="#">81708</a>  | 9763  | 415  | 5  | 118 | aldehyde dehydrogenase family 6, subfamily A1 (Aldh6a1) alternative variant bSep08, mRNA.                                               |
| <a href="#">Aldh7a1</a>  | <a href="#">Aldh7a1.aSep08</a>  | <a href="#">291450</a> | 32262 | 1894 | 3  | 539 | aldehyde dehydrogenase family 7, member A1 (58.7 kD) (Aldh7a1) alternative variant aSep08, mRNA.                                        |
| <a href="#">Aldh7a1</a>  | <a href="#">Aldh7a1.bSep08</a>  | <a href="#">291450</a> | 6304  | 537  | 1  | 177 | aldehyde dehydrogenase family 7, member A1 (Aldh7a1) alternative variant bSep08, mRNA.                                                  |
| <a href="#">Aldh8a1</a>  | <a href="#">Aldh8a1.aSep08</a>  | <a href="#">685750</a> | 19384 | 1767 |    | 352 | aldehyde dehydrogenase 8 family, member A1 (Aldh8a1) mRNA.                                                                              |
| <a href="#">Aldh16a1</a> | <a href="#">Aldh16a1.bSep08</a> | <a href="#">361571</a> | 7589  | 528  | 5  | 141 | aldehyde dehydrogenase 16 family, member A1 (Aldh16a1) alternative variant bSep08, mRNA.                                                |
| <a href="#">Aldh16a1</a> | <a href="#">Aldh16a1.cSep08</a> | <a href="#">361571</a> | 6241  | 383  | 3  | 127 | aldehyde dehydrogenase 16 family, member A1 (Aldh16a1) alternative variant cSep08, mRNA.                                                |
| <a href="#">Aldoa</a>    | <a href="#">Aldoa.aSep08</a>    | <a href="#">24189</a>  | 3762  | 1223 | 9  | 391 | aldolase A, fructose-bisphosphate (Aldoa) alternative variant aSep08, mRNA.                                                             |
| <a href="#">Aldoa</a>    | <a href="#">Aldoa.cSep08</a>    | <a href="#">24189</a>  | 4770  | 1077 | 8  | 276 | aldolase A, fructose-bisphosphate (30.0 kD) (Aldoa) alternative variant cSep08, mRNA.                                                   |
| <a href="#">Aldoa</a>    | <a href="#">Aldoa.dSep08</a>    | <a href="#">24189</a>  | 4208  | 941  | 7  | 250 | aldolase A, fructose-bisphosphate (Aldoa) alternative variant dSep08, mRNA.                                                             |
| <a href="#">Aldoa</a>    | <a href="#">Aldoa.eSep08</a>    | <a href="#">24189</a>  | 2884  | 839  | 7  | 246 | aldolase A, fructose-bisphosphate (Aldoa) alternative variant eSep08, mRNA.                                                             |

|                                |                                       |                        |       |      |    |     |                                                                                                                                                   |
|--------------------------------|---------------------------------------|------------------------|-------|------|----|-----|---------------------------------------------------------------------------------------------------------------------------------------------------|
| <a href="#">Aldoa</a>          | <a href="#">Aldoa.fSep08</a>          | <a href="#">24189</a>  | 3872  | 1139 | 6  | 243 | aldolase A, fructose-bisphosphate (26.2 kD) (Aldoa) alternative variant fSep08, mRNA.                                                             |
| <a href="#">Aldoa</a>          | <a href="#">Aldoa.gSep08</a>          | <a href="#">24189</a>  | 2456  | 786  | 7  | 210 | aldolase A, fructose-bisphosphate (Aldoa) alternative variant gSep08, mRNA.                                                                       |
| <a href="#">Aldoa</a>          | <a href="#">Aldoa.hSep08</a>          | <a href="#">24189</a>  | 4247  | 789  | 6  | 208 | aldolase A, fructose-bisphosphate (Aldoa) alternative variant hSep08, mRNA.                                                                       |
| <a href="#">Aldoa</a>          | <a href="#">Aldoa.iSep08</a>          | <a href="#">24189</a>  | 2849  | 742  | 5  | 176 | aldolase A, fructose-bisphosphate (Aldoa) alternative variant iSep08, mRNA.                                                                       |
| <a href="#">Aldoa</a>          | <a href="#">Aldoa.jSep08</a>          | <a href="#">24189</a>  | 2035  | 765  | 2  | 83  | aldolase A, fructose-bisphosphate (9.3 kD) (Aldoa) alternative variant jSep08, mRNA.                                                              |
| <a href="#">Aldob</a>          | <a href="#">Aldob.bSep08</a>          | <a href="#">24190</a>  | 11154 | 903  | 8  | 268 | aldolase B fructose-bisphosphate (29.5 kD) (Aldob) alternative variant bSep08, mRNA.                                                              |
| <a href="#">Aldob</a>          | <a href="#">Aldob.cSep08</a>          | <a href="#">24190</a>  | 9712  | 715  | 6  | 218 | aldolase B fructose-bisphosphate (Aldob) alternative variant cSep08, mRNA.                                                                        |
| <a href="#">Aldob</a>          | <a href="#">Aldob.dSep08</a>          | <a href="#">24190</a>  | 6709  | 686  | 6  | 126 | aldolase B fructose-bisphosphate (Aldob) alternative variant dSep08, mRNA.                                                                        |
| <a href="#">Aldob</a>          | <a href="#">Aldob.eSep08</a>          | <a href="#">24190</a>  | 5742  | 1265 | 2  | 32  | aldolase B fructose-bisphosphate (Aldob) alternative variant eSep08, mRNA.                                                                        |
| <a href="#">Aldoc</a>          | <a href="#">Aldoc.bSep08</a>          | <a href="#">24191</a>  | 2280  | 419  | 3  | 69  | aldolase C, fructose-bisphosphate (Aldoc) alternative variant bSep08, mRNA.                                                                       |
| <a href="#">Aldoc</a>          | <a href="#">Aldoc.dSep08</a>          | <a href="#">24191</a>  | 1502  | 352  | 2  | 39  | aldolase C, fructose-bisphosphate (4.1 kD) (Aldoc) alternative variant dSep08, mRNA.                                                              |
| <a href="#">Aldo_ket_red.0</a> | <a href="#">Aldo_ket_red.0.bSep08</a> |                        | 7104  | 619  | 1  | 205 | potassium channel beta (Aldo_ket_red.0) alternative variant bSep08, mRNA.                                                                         |
| <a href="#">Alg1</a>           | <a href="#">Alg1.aSep08</a>           | <a href="#">360475</a> | 10707 | 1747 | 13 | 462 | asparagine-linked glycosylation 1 homolog (yeast, beta-1,4-mannosyltransferase) (Alg1) alternative variant aSep08, mRNA.                          |
| <a href="#">Alg1</a>           | <a href="#">Alg1.bSep08</a>           | <a href="#">360475</a> | 5928  | 709  | 8  | 180 | asparagine-linked glycosylation 1 homolog (yeast, beta-1,4-mannosyltransferase) (Alg1) alternative variant bSep08, mRNA.                          |
| <a href="#">Alg1</a>           | <a href="#">Alg1.cSep08</a>           | <a href="#">360475</a> | 1043  | 573  | 2  | 100 | asparagine-linked glycosylation 1 homolog (yeast, beta-1,4-mannosyltransferase) (Alg1) alternative variant cSep08, mRNA.                          |
| <a href="#">Alg2</a>           | <a href="#">Alg2.aSep08</a>           | <a href="#">313231</a> | 4567  | 3032 |    | 415 | asparagine-linked glycosylation 2 homolog (yeast, alpha-1,3-mannosyltransferase) (47.3 kD) (Alg2) mRNA.                                           |
| <a href="#">Alg3</a>           | <a href="#">Alg3.bSep08</a>           | <a href="#">287983</a> | 2258  | 574  | 1  | 141 | asparagine-linked glycosylation 3 homolog (yeast, alpha-1,3-mannosyltransferase) (Alg3) alternative variant bSep08, mRNA.                         |
| <a href="#">Alg5</a>           | <a href="#">Alg5.bSep08</a>           | <a href="#">295051</a> | 8101  | 822  | 7  | 240 | asparagine-linked glycosylation 5 homolog (yeast, dolichyl-phosphate beta-glucosyltransferase) (Alg5) alternative variant bSep08, mRNA.           |
| <a href="#">Alg5</a>           | <a href="#">Alg5.cSep08</a>           | <a href="#">295051</a> | 4942  | 692  | 5  | 164 | asparagine-linked glycosylation 5 homolog (yeast, dolichyl-phosphate beta-glucosyltransferase) (19.0 kD) (Alg5) alternative variant cSep08, mRNA. |
| <a href="#">Alg5</a>           | <a href="#">Alg5.dSep08</a>           | <a href="#">295051</a> | 3865  | 497  | 3  | 141 | asparagine-linked glycosylation 5 homolog (yeast, dolichyl-phosphate beta-glucosyltransferase) (Alg5) alternative variant dSep08, mRNA.           |

|                        |                               |                        |       |      |    |     |                                                                                                                                                |
|------------------------|-------------------------------|------------------------|-------|------|----|-----|------------------------------------------------------------------------------------------------------------------------------------------------|
| <a href="#">Alg5</a>   | <a href="#">Alg5.fSep08</a>   | <a href="#">295051</a> | 4162  | 532  | 3  | 81  | asparagine-linked glycosylation 5 homolog (yeast, dolichyl-phosphate beta-glucosyltransferase) (Alg5) alternative variant fSep08, mRNA.        |
| <a href="#">Alg6</a>   | <a href="#">Alg6.aSep08</a>   | <a href="#">362547</a> | 37082 | 2651 | 10 | 227 | asparagine-linked glycosylation 6 (25.9 kD) (Alg6) alternative variant aSep08, mRNA.                                                           |
| <a href="#">Alg6</a>   | <a href="#">Alg6.bSep08</a>   | <a href="#">362547</a> | 21030 | 840  | 7  | 203 | asparagine-linked glycosylation 6 homolog (Alg6) alternative variant bSep08, mRNA.                                                             |
| <a href="#">Alg6</a>   | <a href="#">Alg6.cSep08</a>   | <a href="#">362547</a> | 10700 | 1574 | 2  | 104 | asparagine-linked glycosylation 6 homolog (Alg6) alternative variant cSep08, mRNA.                                                             |
| <a href="#">Alg8</a>   | <a href="#">Alg8.bSep08</a>   | <a href="#">293129</a> | 9239  | 739  | 2  | 119 | asparagine-linked glycosylation 8 homolog (yeast, alpha-1,3-glucosyltransferase) (13.0 kD) (Alg8) alternative variant bSep08, mRNA.            |
| <a href="#">Alg9</a>   | <a href="#">Alg9.bSep08</a>   | <a href="#">367083</a> | 36252 | 756  | 1  | 251 | asparagine-linked glycosylation 9 homolog (yeast, alpha 1,2-mannosyltransferase) (Alg9) alternative variant bSep08, mRNA.                      |
| <a href="#">Alg9</a>   | <a href="#">Alg9.cSep08</a>   | <a href="#">367083</a> | 32159 | 1184 | 1  | 177 | asparagine-linked glycosylation 9 homolog (yeast, alpha 1,2-mannosyltransferase) (Alg9) alternative variant cSep08, mRNA.                      |
| <a href="#">Alg11</a>  | <a href="#">Alg11.bSep08</a>  | <a href="#">361174</a> | 7255  | 1729 | 5  | 401 | asparagine-linked glycosylation 11 homolog (yeast, alpha-1,2-mannosyltransferase) (45.2 kD) (Alg11) alternative variant bSep08, complete mRNA. |
| <a href="#">Alg11</a>  | <a href="#">Alg11.cSep08</a>  | <a href="#">361174</a> | 4382  | 734  | 3  | 148 | asparagine-linked glycosylation 11 homolog (yeast, alpha-1,2-mannosyltransferase) (Alg11) alternative variant cSep08, mRNA.                    |
| <a href="#">Alg11</a>  | <a href="#">Alg11.eSep08</a>  | <a href="#">361174</a> | 990   | 117  | 2  | 22  | asparagine-linked glycosylation 11 homolog (yeast, alpha-1,2-mannosyltransferase) (Alg11) alternative variant eSep08, mRNA.                    |
| <a href="#">Alg12</a>  | <a href="#">Alg12.aSep08</a>  | <a href="#">315212</a> | 14185 | 2038 | 10 | 488 | asparagine-linked glycosylation 12 homolog (yeast, alpha-1,6-mannosyltransferase) (54.7 kD) (Alg12) alternative variant aSep08, mRNA.          |
| <a href="#">Alg14</a>  | <a href="#">Alg14.bSep08</a>  | <a href="#">362031</a> | 89052 | 824  | 2  | 83  | asparagine-linked glycosylation 14 homolog ( <i>S. cerevisiae</i> ) (9.7 kD) (Alg14) alternative variant bSep08, mRNA.                         |
| <a href="#">Alkbh</a>  | <a href="#">Alkbh.bSep08</a>  | <a href="#">362766</a> | 4098  | 458  | 2  | 89  | alkB, alkylation repair homolog ( <i>E. coli</i> ) (Alkbh) alternative variant bSep08, mRNA.                                                   |
| <a href="#">Alkbh2</a> | <a href="#">Alkbh2.aSep08</a> | <a href="#">304578</a> | 4623  | 1796 | 2  | 591 | alkB, alkylation repair homolog 2 ( <i>E. coli</i> ) (Alkbh2) alternative variant aSep08, mRNA.                                                |
| <a href="#">Alkbh3</a> | <a href="#">Alkbh3.bSep08</a> | <a href="#">362169</a> | 14905 | 802  | 8  | 205 | alkB, alkylation repair homolog 3 ( <i>E. coli</i> ) (Alkbh3) alternative variant bSep08, mRNA.                                                |
| <a href="#">Alkbh3</a> | <a href="#">Alkbh3.cSep08</a> | <a href="#">362169</a> | 17775 | 807  | 3  | 187 | alkB, alkylation repair homolog 3 ( <i>E. coli</i> ) (Alkbh3) alternative variant cSep08, mRNA.                                                |
| <a href="#">Alkbh3</a> | <a href="#">Alkbh3.dSep08</a> | <a href="#">362169</a> | 24528 | 766  | 4  | 154 | alkB, alkylation repair homolog 3 ( <i>E. coli</i> ) (17.7 kD) (Alkbh3) alternative variant dSep08, mRNA.                                      |
| <a href="#">Alkbh3</a> | <a href="#">Alkbh3.eSep08</a> | <a href="#">362169</a> | 32192 | 879  | 8  | 143 | alkB, alkylation repair homolog 3 ( <i>E. coli</i> ) (Alkbh3) alternative variant eSep08, mRNA.                                                |
| <a href="#">Alkbh5</a> | <a href="#">Alkbh5.aSep08</a> | <a href="#">303193</a> | 2254  | 1893 |    | 104 | alkB, alkylation repair homolog 5 ( <i>E. coli</i> ) (Alkbh5) mRNA.                                                                            |
| <a href="#">Alkbh6</a> | <a href="#">Alkbh6.bSep08</a> | <a href="#">292780</a> | 5370  | 897  | 7  | 177 | alkB, alkylation repair homolog 6 ( <i>E. coli</i> ) (19.7 kD) (Alkbh6) alternative variant bSep08, complete mRNA.                             |

|                                   |                                          |                        |       |      |    |     |                                                                                                   |
|-----------------------------------|------------------------------------------|------------------------|-------|------|----|-----|---------------------------------------------------------------------------------------------------|
| <a href="#">Alkbh6</a>            | <a href="#">Alkbh6.cSep08</a>            | <a href="#">292780</a> | 4582  | 690  | 5  | 163 | alkB, alkylation repair homolog 6 (E. coli) (17.8 kD) (Alkbh6) alternative variant cSep08, mRNA.  |
| <a href="#">Alkbh6</a>            | <a href="#">Alkbh6.dSep08</a>            | <a href="#">292780</a> | 5334  | 1442 | 5  | 85  | alkB, alkylation repair homolog 6 (E. coli) (Alkbh6) alternative variant dSep08, mRNA.            |
| <a href="#">Alkbh6</a>            | <a href="#">Alkbh6.eSep08</a>            | <a href="#">292780</a> | 1945  | 639  | 4  | 60  | alkB, alkylation repair homolog 6 (E. coli) (Alkbh6) alternative variant eSep08, mRNA.            |
| <a href="#">Alkbh7</a>            | <a href="#">Alkbh7.bSep08</a>            | <a href="#">679944</a> | 954   | 680  | 3  | 79  | alkB, alkylation repair homolog 7 (E. coli) (9.0 kD) (Alkbh7) alternative variant bSep08, mRNA.   |
| <a href="#">Alkbh7</a>            | <a href="#">Alkbh7.cSep08</a>            | <a href="#">679944</a> | 2050  | 609  | 2  | 77  | alkB, alkylation repair homolog 7 (E. coli) (Alkbh7) alternative variant cSep08, mRNA.            |
| <a href="#">Alkbh8</a>            | <a href="#">Alkbh8.aSep08</a>            | <a href="#">366783</a> | 41175 | 730  | 3  | 243 | alkB, alkylation repair homolog 8 (E. coli) (Alkbh8) alternative variant aSep08, mRNA.            |
| <a href="#">Alkbh8</a>            | <a href="#">Alkbh8.bSep08</a>            | <a href="#">366783</a> | 82299 | 740  | 3  | 176 | alkB, alkylation repair homolog 8 (E. coli) (Alkbh8) alternative variant bSep08, mRNA.            |
| <a href="#">Allc</a>              | <a href="#">Allc.bSep08</a>              | <a href="#">246758</a> | 1359  | 400  |    | 104 | allantoicase (Allc) alternative variant bSep08, mRNA.                                             |
| <a href="#">Alms1</a>             | <a href="#">Alms1.bSep08</a>             | <a href="#">297408</a> | 22208 | 1717 | 5  | 529 | alstrom syndrome 1 homolog (human) (Alms1) alternative variant bSep08, mRNA.                      |
| <a href="#">Alms1</a>             | <a href="#">Alms1.cSep08</a>             | <a href="#">297408</a> | 15109 | 636  | 4  | 212 | alstrom syndrome 1 homolog (human) (Alms1) alternative variant cSep08, mRNA.                      |
| <a href="#">Alms1</a>             | <a href="#">Alms1.dSep08</a>             | <a href="#">297408</a> | 5941  | 601  | 5  | 162 | alstrom syndrome 1 homolog (human) (Alms1) alternative variant dSep08, mRNA.                      |
| <a href="#">Alms1</a>             | <a href="#">Alms1.eSep08</a>             | <a href="#">297408</a> | 1690  | 604  | 2  | 124 | alstrom syndrome 1 homolog (human) (Alms1) alternative variant eSep08, mRNA.                      |
| <a href="#">Alox12</a>            | <a href="#">Alox12.bSep08</a>            | <a href="#">287454</a> | 9640  | 1825 | 12 | 514 | arachidonate 12-lipoxygenase (58.4 kD) (Alox12) alternative variant bSep08, complete mRNA.        |
| <a href="#">Alox15</a>            | <a href="#">Alox15.bSep08</a>            | <a href="#">81639</a>  | 1663  | 346  | 4  | 76  | arachidonate 15-lipoxygenase (Alox15) alternative variant bSep08, mRNA.                           |
| <a href="#">Aloxe3</a>            | <a href="#">Aloxe3.bSep08</a>            | <a href="#">287424</a> | 1795  | 585  | 3  | 133 | arachidonate lipoxygenase 3 (Aloxe3) alternative variant bSep08, mRNA.                            |
| <a href="#">Aloxe3</a>            | <a href="#">Aloxe3.cSep08</a>            | <a href="#">287424</a> | 506   | 424  | 2  | 97  | arachidonate lipoxygenase 3 (Aloxe3) alternative variant cSep08, mRNA.                            |
| <a href="#">Aloxe3</a>            | <a href="#">Aloxe3.dSep08</a>            | <a href="#">287424</a> | 1655  | 193  | 2  | 64  | arachidonate lipoxygenase 3 (Aloxe3) alternative variant dSep08, mRNA.                            |
| <a href="#">Alpha-amylase_C.0</a> | <a href="#">Alpha-amylase_C.0.aSep08</a> |                        | 27561 | 1179 |    | 164 | glucan branching enzyme 1 (Alpha-amylase_C.0) mRNA.                                               |
| <a href="#">Alpha-amylase_C.1</a> | <a href="#">Alpha-amylase_C.1.aSep08</a> |                        | 1986  | 348  |    | 104 | alpha-amylase (Alpha-amylase_C.1) mRNA.                                                           |
| <a href="#">Alpha_adaptinC2.0</a> | <a href="#">Alpha_adaptinC2.0.aSep08</a> |                        | 7574  | 2843 | 19 | 329 | CRA b (36.3 kD) (Alpha_adaptinC2.0) alternative variant aSep08, mRNA.                             |
| <a href="#">Alpha_adaptinC2.0</a> | <a href="#">Alpha_adaptinC2.0.bSep08</a> |                        | 995   | 695  | 3  | 156 | adaptor-related protein complex 1 gamma (Alpha_adaptinC2.0) alternative variant bSep08, mRNA.     |
| <a href="#">Alpha_adaptinC2.0</a> | <a href="#">Alpha_adaptinC2.0.cSep08</a> |                        | 1188  | 828  | 3  | 119 | CRA a (13.3 kD) (Alpha_adaptinC2.0) alternative variant cSep08, mRNA.                             |
| <a href="#">Alpha_adaptinC2.0</a> | <a href="#">Alpha_adaptinC2.0.dSep08</a> |                        | 1554  | 775  | 3  | 101 | protein complex 1 gamma precursor (11.1 kD) (Alpha_adaptinC2.0) alternative variant dSep08, mRNA. |
| <a href="#">Alpk1</a>             | <a href="#">Alpk1.aSep08</a>             | <a href="#">310879</a> | 558   | 450  |    | 112 | alpha-kinase 1 (Alpk1) mRNA.                                                                      |
| <a href="#">Alpk2</a>             | <a href="#">Alpk2.aSep08</a>             | <a href="#">498875</a> | 16050 | 785  |    | 261 | alpha-kinase 2 (Alpk2) mRNA.                                                                      |

|                          |                                 |                        |       |      |    |     |                                                                                                                   |
|--------------------------|---------------------------------|------------------------|-------|------|----|-----|-------------------------------------------------------------------------------------------------------------------|
| <a href="#">Alpk3</a>    | <a href="#">Alpk3.aSep08</a>    | <a href="#">365298</a> | 7388  | 1035 |    | 345 | alpha-kinase 3 (Alpk3) mRNA.                                                                                      |
| <a href="#">Alpl</a>     | <a href="#">Alpl.bSep08</a>     | <a href="#">25586</a>  | 11408 | 609  | 3  | 106 | alkaline phosphatase, liver/bone/kidney (Alpl) alternative variant bSep08, mRNA.                                  |
| <a href="#">Alpl</a>     | <a href="#">Alpl.cSep08</a>     | <a href="#">25586</a>  | 3227  | 396  | 3  | 79  | alkaline phosphatase, liver/bone/kidney (Alpl) alternative variant cSep08, mRNA.                                  |
| <a href="#">Alpl</a>     | <a href="#">Alpl.dSep08</a>     | <a href="#">25586</a>  | 13489 | 438  | 4  | 63  | alkaline phosphatase, liver/bone/kidney (Alpl) alternative variant dSep08, mRNA.                                  |
| <a href="#">Alpl</a>     | <a href="#">Alpl.eSep08</a>     | <a href="#">25586</a>  | 15864 | 391  | 3  | 53  | alkaline phosphatase, liver/bone/kidney (Alpl) alternative variant eSep08, mRNA.                                  |
| <a href="#">Als2</a>     | <a href="#">Als2.bSep08</a>     | <a href="#">363235</a> | 14508 | 1783 | 7  | 403 | amyotrophic lateral sclerosis 2 (juvenile) homolog (human) (Als2) alternative variant bSep08, mRNA.               |
| <a href="#">Als2cl</a>   | <a href="#">Als2cl.aSep08</a>   | <a href="#">316017</a> | 5615  | 1196 |    | 375 | ALS2 C-terminal like (Als2cl) mRNA.                                                                               |
| <a href="#">Als2cr2</a>  | <a href="#">Als2cr2.aSep08</a>  | <a href="#">501146</a> | 18911 | 2359 | 11 | 418 | protein kinase and tyrosine protein kinase (46.9 kD) (Als2cr2) mRNA.                                              |
| <a href="#">Als2cr4</a>  | <a href="#">Als2cr4.aSep08</a>  | <a href="#">316412</a> | 17769 | 908  | 4  | 288 | amyotrophic lateral sclerosis 2 region candidate 4 (Als2cr4) alternative variant aSep08, mRNA.                    |
| <a href="#">Als2cr4</a>  | <a href="#">Als2cr4.bSep08</a>  | <a href="#">316412</a> | 13475 | 752  | 1  | 130 | amyotrophic lateral sclerosis 2 region candidate 4 (14.4 kD) (Als2cr4) alternative variant bSep08, complete mRNA. |
| <a href="#">Als2cr12</a> | <a href="#">Als2cr12.bSep08</a> | <a href="#">316413</a> | 6821  | 1776 | 1  | 19  | putative protein (2.0 kD) (Als2cr12) alternative variant bSep08, complete mRNA.                                   |
| <a href="#">Amacr</a>    | <a href="#">Amacr.bSep08</a>    | <a href="#">25284</a>  | 11464 | 741  | 4  | 196 | alpha-methylacyl-CoA racemase (20.9 kD) (Amacr) alternative variant bSep08, mRNA.                                 |
| <a href="#">Amacr</a>    | <a href="#">Amacr.cSep08</a>    | <a href="#">25284</a>  | 5158  | 960  | 2  | 158 | alpha-methylacyl-CoA racemase (Amacr) alternative variant cSep08, mRNA.                                           |
| <a href="#">Ambn</a>     | <a href="#">Ambn.bSep08</a>     | <a href="#">25376</a>  | 6418  | 377  | 1  | 125 | ameloblastin (Ambn) alternative variant bSep08, mRNA.                                                             |
| <a href="#">Ambp</a>     | <a href="#">Ambp.bSep08</a>     | <a href="#">25377</a>  | 8940  | 895  | 8  | 263 | alpha 1 microglobulin/bikunin (29.8 kD) (Ambp) alternative variant bSep08, mRNA.                                  |
| <a href="#">Ambp</a>     | <a href="#">Ambp.cSep08</a>     | <a href="#">25377</a>  | 3489  | 709  | 3  | 100 | alpha 1 microglobulin/bikunin (Ambp) alternative variant cSep08, mRNA.                                            |
| <a href="#">Ambp</a>     | <a href="#">Ambp.dSep08</a>     | <a href="#">25377</a>  | 454   | 276  | 2  | 37  | alpha 1 microglobulin/bikunin (Ambp) alternative variant dSep08, mRNA.                                            |
| <a href="#">Amd1</a>     | <a href="#">Amd1.bSep08</a>     | <a href="#">81640</a>  | 12339 | 701  | 6  | 233 | s-adenosylmethionine decarboxylase (Amd1) alternative variant bSep08, mRNA.                                       |
| <a href="#">Amd1</a>     | <a href="#">Amd1.cSep08</a>     | <a href="#">81640</a>  | 11919 | 697  | 6  | 167 | s-adenosylmethionine decarboxylase (Amd1) alternative variant cSep08, mRNA.                                       |
| <a href="#">Amd1</a>     | <a href="#">Amd1.dSep08</a>     | <a href="#">81640</a>  | 1710  | 1610 | 2  | 110 | S-adenosylmethionine decarboxylase (12.4 kD) (Amd1) alternative variant dSep08, mRNA.                             |
| <a href="#">Amd1</a>     | <a href="#">Amd1.eSep08</a>     | <a href="#">81640</a>  | 1871  | 902  | 2  | 87  | S-adenosylmethionine decarboxylase (10.2 kD) (Amd1) alternative variant eSep08, mRNA.                             |
| <a href="#">Amdhd1</a>   | <a href="#">Amdhd1.aSep08</a>   | <a href="#">299735</a> | 13882 | 1167 | 6  | 388 | amidohydrolase 1 and amidohydrolase 3 (Amdhd1) alternative variant aSep08, mRNA.                                  |
| <a href="#">Amdhd1</a>   | <a href="#">Amdhd1.bSep08</a>   | <a href="#">299735</a> | 3278  | 479  | 1  | 154 | putative protein of ancient origin (Amdhd1) alternative variant bSep08, mRNA.                                     |
| <a href="#">Amdhd2</a>   | <a href="#">Amdhd2.bSep08</a>   | <a href="#">302972</a> | 8496  | 1551 | 10 | 289 | putative protein of ancient origin (31.1 kD) (Amdhd2) alternative variant bSep08, complete mRNA.                  |
| <a href="#">Amdhd2</a>   | <a href="#">Amdhd2.cSep08</a>   | <a href="#">302972</a> | 6125  | 680  | 6  | 226 | putative protein of ancient origin (Amdhd2) alternative variant cSep08, mRNA.                                     |



|                                 |                                        |                        |       |      |   |     |                                                                                            |
|---------------------------------|----------------------------------------|------------------------|-------|------|---|-----|--------------------------------------------------------------------------------------------|
| <a href="#">Amdhd2</a>          | <a href="#">Amdhd2.dSep08</a>          | <a href="#">302972</a> | 6054  | 649  | 5 | 169 | putative protein of ancient origin (Amdhd2) alternative variant dSep08, mRNA.              |
| <a href="#">Amdhd2</a>          | <a href="#">Amdhd2.fSep08</a>          | <a href="#">302972</a> | 1191  | 657  | 2 | 32  | putative protein (3.7 kD) (Amdhd2) alternative variant fSep08, mRNA.                       |
| <a href="#">Amelx</a>           | <a href="#">Amelx.bSep08</a>           | <a href="#">29160</a>  | 5426  | 504  | 1 | 168 | amelogenin (Amelx) alternative variant bSep08, mRNA.                                       |
| <a href="#">Amelx</a>           | <a href="#">Amelx.cSep08</a>           | <a href="#">29160</a>  | 5331  | 481  | 1 | 160 | amelogenin (Amelx) alternative variant cSep08, mRNA.                                       |
| <a href="#">Amfr</a>            | <a href="#">Amfr.aSep08</a>            | <a href="#">361367</a> | 33725 | 2933 | 8 | 763 | autocrine motility factor receptor (Amfr) alternative variant aSep08, mRNA.                |
| <a href="#">Amfr</a>            | <a href="#">Amfr.bSep08</a>            | <a href="#">361367</a> | 15254 | 3204 | 7 | 539 | autocrine motility factor receptor (Amfr) alternative variant bSep08, mRNA.                |
| <a href="#">Amfr</a>            | <a href="#">Amfr.cSep08</a>            | <a href="#">361367</a> | 8918  | 1585 | 5 | 527 | autocrine motility factor receptor (Amfr) alternative variant cSep08, mRNA.                |
| <a href="#">Amfr</a>            | <a href="#">Amfr.dSep08</a>            | <a href="#">361367</a> | 10133 | 1561 | 6 | 520 | autocrine motility factor receptor (Amfr) alternative variant dSep08, mRNA.                |
| <a href="#">Amfr</a>            | <a href="#">Amfr.eSep08</a>            | <a href="#">361367</a> | 1628  | 904  | 2 | 198 | autocrine motility factor receptor (22.6 kD) (Amfr) alternative variant eSep08, mRNA.      |
| <a href="#">Amhr2</a>           | <a href="#">Amhr2.bSep08</a>           | <a href="#">29530</a>  | 403   | 287  | 2 | 95  | anti-Mullerian hormone type 2 receptor (Amhr2) alternative variant bSep08, mRNA.           |
| <a href="#">Amica1</a>          | <a href="#">Amica1.aSep08</a>          | <a href="#">315610</a> | 7064  | 715  |   | 123 | adhesion molecule, interacts with CXADR antigen 1 (Amica1) mRNA.                           |
| <a href="#">Amigo2</a>          | <a href="#">Amigo2.bSep08</a>          | <a href="#">300186</a> | 896   | 514  | 2 | 89  | adhesion molecule with Ig like domain 2 (Amigo2) alternative variant bSep08, mRNA.         |
| <a href="#">Amino_oxidase.0</a> | <a href="#">Amino_oxidase.0.bSep08</a> |                        | 1666  | 739  | 3 | 245 | polyamine oxidase (Amino_oxidase.0) alternative variant bSep08, mRNA.                      |
| <a href="#">Amino_oxidase.0</a> | <a href="#">Amino_oxidase.0.cSep08</a> |                        | 2027  | 543  | 2 | 180 | polyamine oxidase CRA b (Amino_oxidase.0) alternative variant cSep08, mRNA.                |
| <a href="#">Ammecr1l</a>        | <a href="#">Ammecr1l.bSep08</a>        | <a href="#">307526</a> | 13468 | 779  | 4 | 259 | AMME chromosomal region gene 1-like (Ammecr1l) alternative variant bSep08, mRNA.           |
| <a href="#">Ammecr1l</a>        | <a href="#">Ammecr1l.cSep08</a>        | <a href="#">307526</a> | 11833 | 1581 | 3 | 209 | AMME chromosomal region gene 1-like (22.6 kD) (Ammecr1l) alternative variant cSep08, mRNA. |
| <a href="#">Ammecr1l</a>        | <a href="#">Ammecr1l.dSep08</a>        | <a href="#">307526</a> | 11735 | 507  | 3 | 103 | AMME chromosomal region gene 1-like (Ammecr1l) alternative variant dSep08, mRNA.           |
| <a href="#">Ammecr1l</a>        | <a href="#">Ammecr1l.eSep08</a>        | <a href="#">307526</a> | 2071  | 445  | 3 | 34  | AMME chromosomal region gene 1-like (Ammecr1l) alternative variant eSep08, mRNA.           |
| <a href="#">Amn</a>             | <a href="#">Amn.bSep08</a>             | <a href="#">314459</a> | 647   | 476  | 1 | 115 | amnionless (Amn) alternative variant bSep08, mRNA.                                         |
| <a href="#">Amot</a>            | <a href="#">Amot.aSep08</a>            | <a href="#">300289</a> | 24995 | 773  | 1 | 166 | angiominin (Amot) alternative variant aSep08, mRNA.                                        |
| <a href="#">Amot</a>            | <a href="#">Amot.bSep08</a>            | <a href="#">300289</a> | 17191 | 371  | 2 | 72  | angiominin (Amot) alternative variant bSep08, mRNA.                                        |
| <a href="#">Amotl1</a>          | <a href="#">Amotl1.bSep08</a>          | <a href="#">315430</a> | 53283 | 429  | 4 | 142 | angiominin-like 1 (Amotl1) alternative variant bSep08, mRNA.                               |
| <a href="#">Amotl1</a>          | <a href="#">Amotl1.cSep08</a>          | <a href="#">315430</a> | 22849 | 509  | 3 | 97  | angiominin-like 1 (Amotl1) alternative variant cSep08, mRNA.                               |
| <a href="#">Amotl2</a>          | <a href="#">Amotl2.aSep08</a>          | <a href="#">65157</a>  | 9350  | 2998 | 8 | 440 | angiominin like 2 (Amotl2) alternative variant aSep08, mRNA.                               |
| <a href="#">Amotl2</a>          | <a href="#">Amotl2.bSep08</a>          | <a href="#">65157</a>  | 1380  | 748  | 2 | 104 | angiominin like 2 (Amotl2) alternative variant bSep08, mRNA.                               |

|                         |                                |                        |       |      |    |     |                                                                                                     |
|-------------------------|--------------------------------|------------------------|-------|------|----|-----|-----------------------------------------------------------------------------------------------------|
| <a href="#">Ampd1</a>   | <a href="#">Ampd1.bSep08</a>   | <a href="#">25028</a>  | 4862  | 698  | 1  | 98  | adenosine monophosphate deaminase 1 (isoform M) (Ampd1) alternative variant bSep08, mRNA.           |
| <a href="#">Ampd2</a>   | <a href="#">Ampd2.bSep08</a>   | <a href="#">362015</a> | 993   | 634  | 3  | 118 | adenosine monophosphate deaminase 2 (isoform L) (Ampd2) alternative variant bSep08, mRNA.           |
| <a href="#">Ampd2</a>   | <a href="#">Ampd2.cSep08</a>   | <a href="#">362015</a> | 5021  | 775  | 3  | 117 | adenosine monophosphate deaminase 2 (isoform L) (12.9 kD) (Ampd2) alternative variant cSep08, mRNA. |
| <a href="#">Ampd2</a>   | <a href="#">Ampd2.eSep08</a>   | <a href="#">362015</a> | 2351  | 414  | 3  | 60  | adenosine monophosphate deaminase 2 (isoform L) (Ampd2) alternative variant eSep08, mRNA.           |
| <a href="#">Ampd3</a>   | <a href="#">Ampd3.bSep08</a>   | <a href="#">25095</a>  | 6040  | 601  | 5  | 117 | adenosine monophosphate deaminase 3 (Ampd3) alternative variant bSep08, mRNA.                       |
| <a href="#">Ampd3</a>   | <a href="#">Ampd3.dSep08</a>   | <a href="#">25095</a>  | 2100  | 425  | 2  | 45  | adenosine monophosphate deaminase 3 (Ampd3) alternative variant dSep08, mRNA.                       |
| <a href="#">Amt</a>     | <a href="#">Amt.bSep08</a>     | <a href="#">306586</a> | 1510  | 753  | 1  | 126 | aminomethyltransferase (glycine cleavage system protein T) (Amt) alternative variant bSep08, mRNA.  |
| <a href="#">Amy2</a>    | <a href="#">Amy2.aSep08</a>    | <a href="#">497039</a> | 8566  | 974  |    | 324 | amylase 2, pancreatic (Amy2) mRNA.                                                                  |
| <a href="#">Amy2-3</a>  | <a href="#">Amy2-3.aSep08</a>  | <a href="#">365914</a> | 4192  | 571  |    | 190 | amylase 2-3, pancreatic (Amy2-3) mRNA.                                                              |
| <a href="#">Amy2-4</a>  | <a href="#">Amy2-4.aSep08</a>  | <a href="#">499693</a> | 2133  | 519  |    | 94  | amylase 2-4, pancreatic (9.8 kD) (Amy2-4) mRNA.                                                     |
| <a href="#">Amz2</a>    | <a href="#">Amz2.bSep08</a>    | <a href="#">360650</a> | 1516  | 449  | 3  | 135 | archaelysin family metallopeptidase 2 (Amz2) alternative variant bSep08, mRNA.                      |
| <a href="#">Amz2</a>    | <a href="#">Amz2.cSep08</a>    | <a href="#">360650</a> | 2691  | 615  | 6  | 117 | archaelysin family metallopeptidase 2 (Amz2) alternative variant cSep08, mRNA.                      |
| <a href="#">Amz2</a>    | <a href="#">Amz2.dSep08</a>    | <a href="#">360650</a> | 2603  | 615  | 5  | 71  | archaelysin family metallopeptidase 2 (Amz2) alternative variant dSep08, mRNA.                      |
| <a href="#">Anapc1</a>  | <a href="#">Anapc1.bSep08</a>  | <a href="#">311412</a> | 5083  | 580  | 5  | 193 | anaphase promoting complex subunit 1 (Anapc1) alternative variant bSep08, mRNA.                     |
| <a href="#">Anapc2</a>  | <a href="#">Anapc2.bSep08</a>  | <a href="#">296558</a> | 6412  | 979  | 1  | 288 | anaphase promoting complex subunit 2 (Anapc2) alternative variant bSep08, mRNA.                     |
| <a href="#">Anapc4</a>  | <a href="#">Anapc4.bSep08</a>  | <a href="#">305420</a> | 9933  | 890  | 8  | 296 | anaphase promoting complex (Anapc4) alternative variant bSep08, mRNA.                               |
| <a href="#">Anapc4</a>  | <a href="#">Anapc4.cSep08</a>  | <a href="#">305420</a> | 1125  | 726  | 2  | 103 | anaphase promoting complex (11.7 kD) (Anapc4) alternative variant cSep08, mRNA.                     |
| <a href="#">Anapc4</a>  | <a href="#">Anapc4.dSep08</a>  | <a href="#">305420</a> | 1578  | 738  | 2  | 102 | anaphase promoting complex (Anapc4) alternative variant dSep08, mRNA.                               |
| <a href="#">Anapc4</a>  | <a href="#">Anapc4.eSep08</a>  | <a href="#">305420</a> | 8362  | 408  | 6  | 88  | anaphase promoting complex CRA b (Anapc4) alternative variant eSep08, mRNA.                         |
| <a href="#">Anapc4</a>  | <a href="#">Anapc4.fSep08</a>  | <a href="#">305420</a> | 546   | 464  | 2  | 31  | anaphase promoting complex (Anapc4) alternative variant fSep08, mRNA.                               |
| <a href="#">Anapc5</a>  | <a href="#">Anapc5.bSep08</a>  | <a href="#">288671</a> | 27968 | 1522 | 13 | 507 | anaphase-promoting complex subunit 5 (Anapc5) alternative variant bSep08, mRNA.                     |
| <a href="#">Anapc5</a>  | <a href="#">Anapc5.cSep08</a>  | <a href="#">288671</a> | 12538 | 933  | 6  | 196 | anaphase-promoting complex subunit 5 (Anapc5) alternative variant cSep08, mRNA.                     |
| <a href="#">Anapc7</a>  | <a href="#">Anapc7.bSep08</a>  | <a href="#">304490</a> | 13894 | 427  | 5  | 78  | anaphase promoting complex subunit 7 (Anapc7) alternative variant bSep08, mRNA.                     |
| <a href="#">Anapc10</a> | <a href="#">Anapc10.bSep08</a> | <a href="#">361389</a> | 52107 | 976  | 1  | 83  | anaphase promoting complex subunit 10 (9.3 kD) (Anapc10) alternative variant bSep08, mRNA.          |
| <a href="#">Anapc10</a> | <a href="#">Anapc10.cSep08</a> | <a href="#">361389</a> | 51818 | 770  | 2  | 70  | anaphase promoting complex subunit 10 (7.8 kD) (Anapc10) alternative variant cSep08, complete mRNA. |

|                         |                                |                        |       |      |   |     |                                                                                                            |
|-------------------------|--------------------------------|------------------------|-------|------|---|-----|------------------------------------------------------------------------------------------------------------|
| <a href="#">Anapc11</a> | <a href="#">Anapc11.bSep08</a> | <a href="#">498030</a> | 8382  | 978  | 2 | 84  | anaphase promoting complex subunit 11 homolog (yeast) (9.8 kD) (Anapc11) alternative variant bSep08, mRNA. |
| <a href="#">Anapc11</a> | <a href="#">Anapc11.cSep08</a> | <a href="#">498030</a> | 8717  | 852  | 3 | 84  | anaphase promoting complex subunit 11 homolog (yeast) (9.8 kD) (Anapc11) alternative variant cSep08, mRNA. |
| <a href="#">Andpro</a>  | <a href="#">Andpro.bSep08</a>  | <a href="#">25030</a>  | 6346  | 682  | 4 | 168 | androgen regulated 20 kDa protein (Andpro) alternative variant bSep08, mRNA.                               |
| <a href="#">Andpro</a>  | <a href="#">Andpro.cSep08</a>  | <a href="#">25030</a>  | 6346  | 662  | 4 | 106 | androgen regulated 20 kDa protein (12.7 kD) (Andpro) alternative variant cSep08, mRNA.                     |
| <a href="#">Andpro</a>  | <a href="#">Andpro.dSep08</a>  | <a href="#">25030</a>  | 6337  | 530  | 4 | 87  | androgen regulated 20 kDa protein (10.2 kD) (Andpro) alternative variant dSep08, mRNA.                     |
| <a href="#">Andpro</a>  | <a href="#">Andpro.eSep08</a>  | <a href="#">25030</a>  | 2580  | 482  | 2 | 79  | androgen regulated 20 kDa protein (Andpro) alternative variant eSep08, mRNA.                               |
| <a href="#">Angel1</a>  | <a href="#">Angel1.bSep08</a>  | <a href="#">362765</a> | 14705 | 890  | 2 | 135 | angel homolog 1 (Drosophila) (Angel1) alternative variant bSep08, mRNA.                                    |
| <a href="#">Angel2</a>  | <a href="#">Angel2.aSep08</a>  | <a href="#">305035</a> | 7843  | 3108 |   | 195 | angel homolog 2 (Drosophila) (Angel2) mRNA.                                                                |
| <a href="#">Angpt4</a>  | <a href="#">Angpt4.bSep08</a>  | <a href="#">296269</a> | 10046 | 686  | 2 | 116 | angiopoietin 4 (Angpt4) alternative variant bSep08, mRNA.                                                  |
| <a href="#">Angptl1</a> | <a href="#">Angptl1.aSep08</a> | <a href="#">679942</a> | 12913 | 1501 |   | 343 | angiopoietin-like 1 (Angptl1) mRNA.                                                                        |
| <a href="#">Angptl2</a> | <a href="#">Angptl2.bSep08</a> | <a href="#">171100</a> | 5650  | 2325 | 2 | 191 | angiopoietin-like 2 (22.7 kD) (Angptl2) alternative variant bSep08, mRNA.                                  |
| <a href="#">Angptl3</a> | <a href="#">Angptl3.bSep08</a> | <a href="#">502970</a> | 4669  | 904  | 5 | 220 | angiopoietin-like 3 (Angptl3) alternative variant bSep08, mRNA.                                            |
| <a href="#">Angptl3</a> | <a href="#">Angptl3.cSep08</a> | <a href="#">502970</a> | 1266  | 472  | 3 | 89  | angiopoietin-like 3 (Angptl3) alternative variant cSep08, mRNA.                                            |
| <a href="#">Angptl4</a> | <a href="#">Angptl4.bSep08</a> | <a href="#">362850</a> | 2022  | 760  | 4 | 121 | angiopoietin-like 4 (Angptl4) alternative variant bSep08, mRNA.                                            |
| <a href="#">Angptl6</a> | <a href="#">Angptl6.cSep08</a> | <a href="#">298698</a> | 1723  | 712  | 2 |     |                                                                                                            |
| <a href="#">Ank</a>     | <a href="#">Ank.bSep08</a>     | <a href="#">114506</a> | 91349 | 742  | 3 | 219 | progressive ankylosis (Ank) alternative variant bSep08, mRNA.                                              |
| <a href="#">Ank</a>     | <a href="#">Ank.cSep08</a>     | <a href="#">114506</a> | 77291 | 553  | 2 | 171 | progressive ankylosis (Ank) alternative variant cSep08, mRNA.                                              |
| <a href="#">Ank.1</a>   | <a href="#">Ank.1.aSep08</a>   |                        | 2006  | 1499 |   | 313 | ankyrin (34.1 kD) (Ank.1) mRNA.                                                                            |
| <a href="#">Ank.2</a>   | <a href="#">Ank.2.aSep08</a>   |                        | 8081  | 345  |   | 115 | CRA a (Ank.2) mRNA.                                                                                        |
| <a href="#">Ank.3</a>   | <a href="#">Ank.3.aSep08</a>   |                        | 22192 | 1142 | 2 | 380 | CRA a (Ank.3) alternative variant aSep08, mRNA.                                                            |
| <a href="#">Ank.3</a>   | <a href="#">Ank.3.bSep08</a>   |                        | 17065 | 621  | 1 | 207 | CRA a (Ank.3) alternative variant bSep08, mRNA.                                                            |
| <a href="#">Ank.4</a>   | <a href="#">Ank.4.aSep08</a>   |                        | 9906  | 924  |   | 308 | ankyrin (Ank.4) mRNA.                                                                                      |
| <a href="#">Ank.5</a>   | <a href="#">Ank.5.aSep08</a>   | <a href="#">502141</a> | 24570 | 250  |   | 54  | ankyrin (Ank.5) mRNA.                                                                                      |
| <a href="#">Ank.7</a>   | <a href="#">Ank.7.aSep08</a>   |                        | 11547 | 633  |   | 106 | ankyrin (Ank.7) mRNA.                                                                                      |
| <a href="#">Ank.8</a>   | <a href="#">Ank.8.aSep08</a>   |                        | 2884  | 896  |   | 112 | ankyrin (11.8 kD) (Ank.8) mRNA.                                                                            |
| <a href="#">Ank.9</a>   | <a href="#">Ank.9.aSep08</a>   |                        | 30493 | 373  |   | 124 | ankyrin (Ank.9) mRNA.                                                                                      |
| <a href="#">Ank.10</a>  | <a href="#">Ank.10.aSep08</a>  |                        | 25648 | 2181 | 8 | 478 | putative protein of metazoan origin (Ank.10) alternative variant aSep08, mRNA.                             |
| <a href="#">Ank.10</a>  | <a href="#">Ank.10.bSep08</a>  |                        | 3261  | 641  | 3 | 160 | putative protein of vertebrate origin (Ank.10) alternative variant bSep08, mRNA.                           |
| <a href="#">Ank.10</a>  | <a href="#">Ank.10.cSep08</a>  |                        | 27980 | 774  | 4 | 87  | putative protein of vertebrate origin (9.5 kD) (Ank.10) alternative variant cSep08, mRNA.                  |

|                        |                               |                        |       |      |    |     |                                                                        |
|------------------------|-------------------------------|------------------------|-------|------|----|-----|------------------------------------------------------------------------|
| <a href="#">Ank.10</a> | <a href="#">Ank.10.dSep08</a> |                        | 3490  | 2379 | 3  | 84  | ankyrin (Ank.10) alternative variant dSep08, mRNA.                     |
| <a href="#">Ank.11</a> | <a href="#">Ank.11.aSep08</a> |                        | 59815 | 607  |    | 202 | ankyrin (Ank.11) mRNA.                                                 |
| <a href="#">Ank.12</a> | <a href="#">Ank.12.aSep08</a> |                        | 11989 | 809  |    | 144 | CRA b (Ank.12) mRNA.                                                   |
| <a href="#">Ank.13</a> | <a href="#">Ank.13.aSep08</a> |                        | 4581  | 1272 |    | 401 | ankyrin (Ank.13) mRNA.                                                 |
| <a href="#">Ank.14</a> | <a href="#">Ank.14.aSep08</a> |                        | 3873  | 528  |    | 175 | ankyrin (Ank.14) mRNA.                                                 |
| <a href="#">Ank.15</a> | <a href="#">Ank.15.aSep08</a> |                        | 1638  | 750  |    | 245 | ankyrin (Ank.15) mRNA.                                                 |
| <a href="#">Ank.16</a> | <a href="#">Ank.16.aSep08</a> |                        | 10112 | 639  |    | 148 | ankyrin (Ank.16) mRNA.                                                 |
| <a href="#">Ank.17</a> | <a href="#">Ank.17.aSep08</a> |                        | 2297  | 1410 | 1  | 444 | mindbomb homolog 2 CRA a (Ank.17) alternative variant aSep08, mRNA.    |
| <a href="#">Ank.17</a> | <a href="#">Ank.17.bSep08</a> |                        | 1456  | 696  |    | 133 | mindbomb homolog 2 CRA a (Ank.17) alternative variant bSep08, mRNA.    |
| <a href="#">Ank.19</a> | <a href="#">Ank.19.aSep08</a> |                        | 3972  | 449  |    | 113 | ankyrin B (Ank.19) mRNA.                                               |
| <a href="#">Ank.20</a> | <a href="#">Ank.20.aSep08</a> |                        | 21449 | 720  |    | 150 | TNNI3 interacting kinase (16.8 kD) (Ank.20) mRNA.                      |
| <a href="#">Ank1</a>   | <a href="#">Ank1.bSep08</a>   | <a href="#">306570</a> | 8460  | 535  | 2  | 177 | ankyrin (Ank1) alternative variant bSep08, mRNA.                       |
| <a href="#">Ank1</a>   | <a href="#">Ank1.cSep08</a>   | <a href="#">306570</a> | 8638  | 1110 | 5  | 155 | ankyrin 1 precursor (17.5 kD) (Ank1) alternative variant cSep08, mRNA. |
| <a href="#">Ank1</a>   | <a href="#">Ank1.dSep08</a>   | <a href="#">306570</a> | 27661 | 505  | 5  | 137 | ankyrin (Ank1) alternative variant dSep08, mRNA.                       |
| <a href="#">Ank1</a>   | <a href="#">Ank1.fSep08</a>   | <a href="#">306570</a> | 7525  | 567  | 4  | 91  | ankyrin (Ank1) alternative variant fSep08, mRNA.                       |
| <a href="#">Ank1</a>   | <a href="#">Ank1.gSep08</a>   | <a href="#">306570</a> | 1860  | 421  | 3  | 81  | ankyrin (Ank1) alternative variant gSep08, mRNA.                       |
| <a href="#">Ank1</a>   | <a href="#">Ank1.hSep08</a>   | <a href="#">306570</a> | 7182  | 1228 | 3  | 56  | putative protein (6.2 kD) (Ank1) alternative variant hSep08, mRNA.     |
| <a href="#">Ank2</a>   | <a href="#">Ank2.aSep08</a>   | <a href="#">362036</a> | 12001 | 1631 | 6  | 278 | ankyrin 2, neuronal (Ank2) alternative variant aSep08, mRNA.           |
| <a href="#">Ank2</a>   | <a href="#">Ank2.bSep08</a>   | <a href="#">362036</a> | 37120 | 1781 | 6  | 167 | ankyrin 2, neuronal (Ank2) alternative variant bSep08, mRNA.           |
| <a href="#">Ank3</a>   | <a href="#">Ank3.cSep08</a>   | <a href="#">361833</a> | 13214 | 1796 | 6  | 598 | ankyrin 3 epithelial CRA c (Ank3) alternative variant cSep08, mRNA.    |
| <a href="#">Ank3</a>   | <a href="#">Ank3.dSep08</a>   | <a href="#">361833</a> | 54589 | 3041 | 11 | 484 | ankyrin 3 epithelial CRA j (Ank3) alternative variant dSep08, mRNA.    |
| <a href="#">Ank3</a>   | <a href="#">Ank3.eSep08</a>   | <a href="#">361833</a> | 46093 | 1893 | 8  | 453 | ankyrin G (Ank3) alternative variant eSep08, mRNA.                     |
| <a href="#">Ank3</a>   | <a href="#">Ank3.fSep08</a>   | <a href="#">361833</a> | 20408 | 1008 | 9  | 335 | ankyrin 3 (Ank3) alternative variant fSep08, mRNA.                     |
| <a href="#">Ank3</a>   | <a href="#">Ank3.gSep08</a>   | <a href="#">361833</a> | 10380 | 3240 | 5  | 296 | ankyrin G (Ank3) alternative variant gSep08, mRNA.                     |
| <a href="#">Ank3</a>   | <a href="#">Ank3.hSep08</a>   | <a href="#">361833</a> | 32975 | 804  | 6  | 268 | ankyrin G1 (Ank3) alternative variant hSep08, mRNA.                    |
| <a href="#">Ank3</a>   | <a href="#">Ank3.iSep08</a>   | <a href="#">361833</a> | 10310 | 549  | 3  | 183 | ankyrin G (Ank3) alternative variant iSep08, mRNA.                     |
| <a href="#">Ank3</a>   | <a href="#">Ank3.jSep08</a>   | <a href="#">361833</a> | 5457  | 450  | 4  | 149 | ankyrin 3 (Ank3) alternative variant jSep08, mRNA.                     |
| <a href="#">Ank3</a>   | <a href="#">Ank3.kSep08</a>   | <a href="#">361833</a> | 17074 | 391  | 4  | 82  | ankyrin 3 epithelial CRA g (Ank3) alternative variant kSep08, mRNA.    |
| <a href="#">Ank3</a>   | <a href="#">Ank3.lSep08</a>   | <a href="#">361833</a> | 4795  | 395  | 3  | 71  | ankyrin G1 (Ank3) alternative variant lSep08, mRNA.                    |
| <a href="#">Ank3</a>   | <a href="#">Ank3.nSep08</a>   | <a href="#">361833</a> | 1679  | 414  | 3  | 58  | ankyrin 3 (Ank3) alternative variant nSep08, mRNA.                     |
| <a href="#">Ank3</a>   | <a href="#">Ank3.oSep08</a>   | <a href="#">361833</a> | 10205 | 501  | 4  | 54  | ankyrin G1 (Ank3) alternative variant oSep08, mRNA.                    |
| <a href="#">Ank3</a>   | <a href="#">Ank3.pSep08</a>   | <a href="#">361833</a> | 831   | 661  | 2  | 39  | ankyrin 3 epithelial CRA i (Ank3) alternative variant pSep08, mRNA.    |
| <a href="#">Ank3</a>   | <a href="#">Ank3.qSep08</a>   | <a href="#">361833</a> | 64434 | 1111 | 2  | 49  | putative protein (5.3 kD) (Ank3) alternative variant qSep08, mRNA.     |

|                         |                                |                        |        |      |    |     |                                                                                                              |
|-------------------------|--------------------------------|------------------------|--------|------|----|-----|--------------------------------------------------------------------------------------------------------------|
| <a href="#">Ankar</a>   | <a href="#">Ankar.aSep08</a>   | <a href="#">501138</a> | 5571   | 601  |    | 200 | ankyrin and armadillo repeat containing (Ankar) mRNA.                                                        |
| <a href="#">Ankfy1</a>  | <a href="#">Ankfy1.bSep08</a>  | <a href="#">303292</a> | 11475  | 625  | 5  | 208 | ankyrin (Ankfy1) alternative variant bSep08, mRNA.                                                           |
| <a href="#">Ankib1</a>  | <a href="#">Ankib1.bSep08</a>  | <a href="#">368062</a> | 65796  | 1247 | 6  | 276 | ankyrin (31.1 kD) (Ankib1) alternative variant bSep08, complete mRNA.                                        |
| <a href="#">Ankib1</a>  | <a href="#">Ankib1.cSep08</a>  | <a href="#">368062</a> | 11708  | 555  | 6  | 185 | putative protein of eukaryotic origin (Ankib1) alternative variant cSep08, mRNA.                             |
| <a href="#">Ankle2</a>  | <a href="#">Ankle2.bSep08</a>  | <a href="#">360829</a> | 25603  | 1787 | 6  | 528 | putative protein of metazoan origin (Ankle2) alternative variant bSep08, mRNA.                               |
| <a href="#">Ankle2</a>  | <a href="#">Ankle2.cSep08</a>  | <a href="#">360829</a> | 7388   | 1154 | 3  | 384 | lamino-associated polypeptide 2/emerin (Ankle2) alternative variant cSep08, mRNA.                            |
| <a href="#">Ankle2</a>  | <a href="#">Ankle2.dSep08</a>  | <a href="#">360829</a> | 17185  | 954  | 4  | 318 | putative protein of metazoan origin (Ankle2) alternative variant dSep08, mRNA.                               |
| <a href="#">Ankle2</a>  | <a href="#">Ankle2.eSep08</a>  | <a href="#">360829</a> | 2906   | 2004 | 3  | 274 | putative protein of bilateral origin (Ankle2) alternative variant eSep08, mRNA.                              |
| <a href="#">Ankmy2</a>  | <a href="#">Ankmy2.aSep08</a>  | <a href="#">314046</a> | 42803  | 2543 | 11 | 468 | ankyrin and zinc finger, MYND-type (Ankmy2) alternative variant aSep08, mRNA.                                |
| <a href="#">Ankmy2</a>  | <a href="#">Ankmy2.dSep08</a>  | <a href="#">314046</a> | 9238   | 398  | 2  | 132 | putative protein (Ankmy2) alternative variant dSep08, mRNA.                                                  |
| <a href="#">Ankmy2</a>  | <a href="#">Ankmy2.fSep08</a>  | <a href="#">314046</a> | 3125   | 934  | 3  | 65  | zinc finger, MYND-type (Ankmy2) alternative variant fSep08, mRNA.                                            |
| <a href="#">Ankra2</a>  | <a href="#">Ankra2.bSep08</a>  | <a href="#">294679</a> | 8639   | 737  | 5  | 192 | ankyrin (Ankra2) alternative variant bSep08, mRNA.                                                           |
| <a href="#">Ankra2</a>  | <a href="#">Ankra2.cSep08</a>  | <a href="#">294679</a> | 6627   | 1401 | 5  | 165 | ankyrin (Ankra2) alternative variant cSep08, mRNA.                                                           |
| <a href="#">Ankra2</a>  | <a href="#">Ankra2.dSep08</a>  | <a href="#">294679</a> | 1607   | 644  | 3  | 78  | ankyrin (Ankra2) alternative variant dSep08, mRNA.                                                           |
| <a href="#">Ankrd1</a>  | <a href="#">Ankrd1.bSep08</a>  | <a href="#">27064</a>  | 15509  | 931  | 9  | 310 | ankyrin (Ankrd1) alternative variant bSep08, mRNA.                                                           |
| <a href="#">Ankrd1</a>  | <a href="#">Ankrd1.cSep08</a>  | <a href="#">27064</a>  | 4243   | 256  | 3  | 65  | putative protein (Ankrd1) alternative variant cSep08, mRNA.                                                  |
| <a href="#">Ankrd1</a>  | <a href="#">Ankrd1.dSep08</a>  | <a href="#">27064</a>  | 6243   | 567  | 5  | 49  | putative protein (5.4 kD) (Ankrd1) alternative variant dSep08, mRNA.                                         |
| <a href="#">Ankrd2</a>  | <a href="#">Ankrd2.bSep08</a>  | <a href="#">309374</a> | 3239   | 758  | 5  | 166 | ankyrin (18.5 kD) (Ankrd2) alternative variant bSep08, mRNA.                                                 |
| <a href="#">Ankrd5</a>  | <a href="#">Ankrd5.bSep08</a>  | <a href="#">296184</a> | 34561  | 2250 | 12 | 256 | ankyrin (29.1 kD) (Ankrd5) alternative variant bSep08, mRNA.                                                 |
| <a href="#">Ankrd5</a>  | <a href="#">Ankrd5.cSep08</a>  | <a href="#">296184</a> | 2327   | 449  | 3  | 101 | putative protein (Ankrd5) alternative variant cSep08, mRNA.                                                  |
| <a href="#">Ankrd6</a>  | <a href="#">Ankrd6.aSep08</a>  | <a href="#">500430</a> | 139100 | 4586 | 17 | 713 | ankyrin (78.1 kD) (Ankrd6) alternative variant aSep08, mRNA.                                                 |
| <a href="#">Ankrd6</a>  | <a href="#">Ankrd6.bSep08</a>  | <a href="#">500430</a> | 2044   | 775  | 2  | 98  | putative protein, with a coiled coil domain, of vertebrate origin (Ankrd6) alternative variant bSep08, mRNA. |
| <a href="#">Ankrd6</a>  | <a href="#">Ankrd6.cSep08</a>  | <a href="#">500430</a> | 1475   | 245  | 2  | 81  | putative protein of vertebrate origin (Ankrd6) alternative variant cSep08, mRNA.                             |
| <a href="#">Ankrd10</a> | <a href="#">Ankrd10.aSep08</a> | <a href="#">361183</a> | 8189   | 3005 | 3  | 232 | putative nuclear protein of vertebrate origin (24.7 kD) (Ankrd10) alternative variant aSep08, mRNA.          |
| <a href="#">Ankrd10</a> | <a href="#">Ankrd10.bSep08</a> | <a href="#">361183</a> | 16426  | 667  | 4  | 222 | ankyrin (Ankrd10) alternative variant bSep08, mRNA.                                                          |
| <a href="#">Ankrd10</a> | <a href="#">Ankrd10.cSep08</a> | <a href="#">361183</a> | 10328  | 909  | 4  | 219 | putative protein of vertebrate origin (Ankrd10) alternative variant cSep08, mRNA.                            |
| <a href="#">Ankrd10</a> | <a href="#">Ankrd10.dSep08</a> | <a href="#">361183</a> | 22588  | 1781 | 6  | 195 | ankyrin (Ankrd10) alternative variant dSep08, mRNA.                                                          |

|                          |                                 |                        |        |      |    |      |                                                                                                                         |
|--------------------------|---------------------------------|------------------------|--------|------|----|------|-------------------------------------------------------------------------------------------------------------------------|
| <a href="#">Ankrd11</a>  | <a href="#">Ankrd11.bSep08</a>  | <a href="#">365023</a> | 8243   | 3176 | 4  | 626  | putative protein of bilateral origin (Ankrd11) alternative variant bSep08, mRNA.                                        |
| <a href="#">Ankrd11</a>  | <a href="#">Ankrd11.dSep08</a>  | <a href="#">365023</a> | 157390 | 1206 | 7  | 270  | putative protein (Ankrd11) alternative variant dSep08, mRNA.                                                            |
| <a href="#">Ankrd12</a>  | <a href="#">Ankrd12.bSep08</a>  | <a href="#">316775</a> | 25772  | 524  | 4  | 157  | putative protein (Ankrd12) alternative variant bSep08, mRNA.                                                            |
| <a href="#">Ankrd13a</a> | <a href="#">Ankrd13a.bSep08</a> | <a href="#">360823</a> | 8515   | 738  | 8  | 246  | putative protein of eukaryotic origin (Ankrd13a) alternative variant bSep08, mRNA.                                      |
| <a href="#">Ankrd13c</a> | <a href="#">Ankrd13c.aSep08</a> | <a href="#">685374</a> | 8043   | 2383 |    | 124  | putative protein of eukaryotic origin (Ankrd13c) mRNA.                                                                  |
| <a href="#">Ankrd13d</a> | <a href="#">Ankrd13d.dSep08</a> | <a href="#">361699</a> | 479    | 385  | 2  | 83   | putative protein of metazoan origin (Ankrd13d) alternative variant dSep08, mRNA.                                        |
| <a href="#">Ankrd15</a>  | <a href="#">Ankrd15.bSep08</a>  | <a href="#">309429</a> | 25540  | 3431 | 7  | 1000 | putative protein, with 2 coiled coil domains, of bilateral origin (Ankrd15) alternative variant bSep08, mRNA.           |
| <a href="#">Ankrd15</a>  | <a href="#">Ankrd15.cSep08</a>  | <a href="#">309429</a> | 5714   | 360  | 4  | 119  | putative protein of vertebrate origin (Ankrd15) alternative variant cSep08, mRNA.                                       |
| <a href="#">Ankrd15</a>  | <a href="#">Ankrd15.dSep08</a>  | <a href="#">309429</a> | 2950   | 981  | 2  | 105  | ankyrin (11.5 kD) (Ankrd15) alternative variant dSep08, mRNA.                                                           |
| <a href="#">Ankrd15</a>  | <a href="#">Ankrd15.gSep08</a>  | <a href="#">309429</a> | 5134   | 580  | 3  | 72   | putative protein (Ankrd15) alternative variant gSep08, mRNA.                                                            |
| <a href="#">Ankrd15</a>  | <a href="#">Ankrd15.hSep08</a>  | <a href="#">309429</a> | 2320   | 486  | 2  | 99   | putative protein of vertebrate origin (Ankrd15) alternative variant hSep08, mRNA.                                       |
| <a href="#">Ankrd17</a>  | <a href="#">Ankrd17.bSep08</a>  | <a href="#">289521</a> | 53054  | 5239 | 21 | 1680 | ankyrin and KH, type 1 (Ankrd17) alternative variant bSep08, mRNA.                                                      |
| <a href="#">Ankrd17</a>  | <a href="#">Ankrd17.cSep08</a>  | <a href="#">289521</a> | 16763  | 1321 | 5  | 440  | ankyrin (Ankrd17) alternative variant cSep08, mRNA.                                                                     |
| <a href="#">Ankrd17</a>  | <a href="#">Ankrd17.dSep08</a>  | <a href="#">289521</a> | 19222  | 908  | 8  | 302  | ankyrin (Ankrd17) alternative variant dSep08, mRNA.                                                                     |
| <a href="#">Ankrd17</a>  | <a href="#">Ankrd17.eSep08</a>  | <a href="#">289521</a> | 9573   | 359  | 3  | 119  | ankyrin (Ankrd17) alternative variant eSep08, mRNA.                                                                     |
| <a href="#">Ankrd17</a>  | <a href="#">Ankrd17.fSep08</a>  | <a href="#">289521</a> | 1345   | 423  | 3  | 83   | putative protein, with a coiled coil domain (Ankrd17) alternative variant fSep08, mRNA.                                 |
| <a href="#">Ankrd23</a>  | <a href="#">Ankrd23.aSep08</a>  | <a href="#">316330</a> | 5834   | 2765 |    | 309  | ankyrin (Ankrd23) mRNA.                                                                                                 |
| <a href="#">Ankrd24</a>  | <a href="#">Ankrd24.bSep08</a>  | <a href="#">299639</a> | 4412   | 1930 | 5  | 508  | putative protein, with 3 coiled coil domains, of fungal and metazoan origin (Ankrd24) alternative variant bSep08, mRNA. |
| <a href="#">Ankrd24</a>  | <a href="#">Ankrd24.cSep08</a>  | <a href="#">299639</a> | 644    | 532  | 2  |      |                                                                                                                         |
| <a href="#">Ankrd26</a>  | <a href="#">Ankrd26.aSep08</a>  | <a href="#">312667</a> | 7618   | 393  |    | 130  | putative protein, with 2 coiled coil domains, of mammalian origin (Ankrd26) mRNA.                                       |
| <a href="#">Ankrd27</a>  | <a href="#">Ankrd27.aSep08</a>  | <a href="#">361555</a> | 21943  | 1238 |    | 372  | repeat-containing protein (Ankrd27) mRNA.                                                                               |
| <a href="#">Ankrd28</a>  | <a href="#">Ankrd28.aSep08</a>  | <a href="#">306264</a> | 47101  | 1786 |    | 451  | ankyrin (Ankrd28) alternative variant aSep08, mRNA.                                                                     |
| <a href="#">Ankrd28</a>  | <a href="#">Ankrd28.bSep08</a>  | <a href="#">306264</a> | 15773  | 671  |    | 223  | ankyrin (Ankrd28) alternative variant bSep08, mRNA.                                                                     |
| <a href="#">Ankrd28</a>  | <a href="#">Ankrd28.cSep08</a>  | <a href="#">306264</a> | 16062  | 513  |    | 171  | ankyrin (Ankrd28) alternative variant cSep08, mRNA.                                                                     |
| <a href="#">Ankrd28</a>  | <a href="#">Ankrd28.dSep08</a>  | <a href="#">306264</a> | 10758  | 3685 |    | 139  | ankyrin (Ankrd28) alternative variant dSep08, mRNA.                                                                     |
| <a href="#">Ankrd34b</a> | <a href="#">Ankrd34b.bSep08</a> | <a href="#">499506</a> | 1863   | 345  | 1  | 91   | putative protein (Ankrd34b) alternative variant bSep08, mRNA.                                                           |
| <a href="#">Ankrd35</a>  | <a href="#">Ankrd35.aSep08</a>  | <a href="#">365881</a> | 5925   | 463  | 5  | 89   | putative protein, with a coiled coil domain, of vertebrate origin (Ankrd35) alternative variant aSep08, mRNA.           |
| <a href="#">Ankrd36</a>  | <a href="#">Ankrd36.aSep08</a>  | <a href="#">305491</a> | 25707  | 1194 | 9  | 397  | ankyrin (Ankrd36) alternative variant aSep08, mRNA.                                                                     |

|                           |                                  |                        |       |      |   |     |                                                                                                             |
|---------------------------|----------------------------------|------------------------|-------|------|---|-----|-------------------------------------------------------------------------------------------------------------|
| <a href="#">Ankrd36</a>   | <a href="#">Ankrd36.bSep08</a>   | <a href="#">305491</a> | 9711  | 1307 | 4 | 372 | ankyrin (Ankrd36) alternative variant bSep08, mRNA.                                                         |
| <a href="#">Ankrd36</a>   | <a href="#">Ankrd36.cSep08</a>   | <a href="#">305491</a> | 25708 | 1945 | 7 | 227 | putative protein of mammalian origin (25.7 kD) (Ankrd36) alternative variant cSep08, mRNA.                  |
| <a href="#">Ankrd37</a>   | <a href="#">Ankrd37.bSep08</a>   | <a href="#">361149</a> | 1118  | 642  | 1 | 42  | putative protein of mammalian origin (4.9 kD) (Ankrd37) alternative variant bSep08, mRNA.                   |
| <a href="#">Ankrd39</a>   | <a href="#">Ankrd39.aSep08</a>   | <a href="#">367251</a> | 9620  | 1795 |   | 522 | ankyrin (Ankrd39) alternative variant aSep08, mRNA.                                                         |
| <a href="#">Ankrd41</a>   | <a href="#">Ankrd41.aSep08</a>   | <a href="#">361122</a> | 3866  | 2895 |   | 467 | CRA c (51.5 kD) (Ankrd41) mRNA.                                                                             |
| <a href="#">Ankrd42</a>   | <a href="#">Ankrd42.aSep08</a>   | <a href="#">293117</a> | 30455 | 1503 | 8 | 403 | ankyrin (Ankrd42) alternative variant aSep08, mRNA.                                                         |
| <a href="#">Ankrd42</a>   | <a href="#">Ankrd42.bSep08</a>   | <a href="#">293117</a> | 3507  | 786  | 1 | 30  | putative protein (3.5 kD) (Ankrd42) alternative variant bSep08, mRNA.                                       |
| <a href="#">Ankrd44</a>   | <a href="#">Ankrd44.aSep08</a>   | <a href="#">301415</a> | 69738 | 743  |   | 247 | ankyrin (Ankrd44) mRNA.                                                                                     |
| <a href="#">Ankrd45</a>   | <a href="#">Ankrd45.aSep08</a>   | <a href="#">289152</a> | 12677 | 611  |   | 193 | ankyrin (Ankrd45) mRNA.                                                                                     |
| <a href="#">Ankrd46</a>   | <a href="#">Ankrd46.aSep08</a>   | <a href="#">299982</a> | 19492 | 807  | 1 | 250 | ankyrin (Ankrd46) alternative variant aSep08, mRNA.                                                         |
| <a href="#">Ankrd49</a>   | <a href="#">Ankrd49.bSep08</a>   | <a href="#">315434</a> | 1597  | 612  | 2 | 172 | ankyrin (Ankrd49) alternative variant bSep08, mRNA.                                                         |
| <a href="#">Ankrd49</a>   | <a href="#">Ankrd49.cSep08</a>   | <a href="#">315434</a> | 1525  | 400  | 2 | 48  | putative protein of mammalian origin (5.5 kD) (Ankrd49) alternative variant cSep08, mRNA.                   |
| <a href="#">Ankrd54</a>   | <a href="#">Ankrd54.bSep08</a>   | <a href="#">362957</a> | 11933 | 1459 | 6 | 179 | ankyrin (19.8 kD) (Ankrd54) alternative variant bSep08, mRNA.                                               |
| <a href="#">Ankrd54</a>   | <a href="#">Ankrd54.cSep08</a>   | <a href="#">362957</a> | 6495  | 2658 | 2 | 142 | ankyrin (16.0 kD) (Ankrd54) alternative variant cSep08, mRNA.                                               |
| <a href="#">Ankrd55</a>   | <a href="#">Ankrd55.aSep08</a>   | <a href="#">361898</a> | 40608 | 826  | 6 | 249 | ankyrin (Ankrd55) alternative variant aSep08, mRNA.                                                         |
| <a href="#">Ankrd55</a>   | <a href="#">Ankrd55.bSep08</a>   | <a href="#">361898</a> | 20034 | 498  | 4 | 101 | ankyrin (Ankrd55) alternative variant bSep08, mRNA.                                                         |
| <a href="#">Ankrd55</a>   | <a href="#">Ankrd55.cSep08</a>   | <a href="#">361898</a> | 8973  | 889  | 4 | 84  | ankyrin (Ankrd55) alternative variant cSep08, mRNA.                                                         |
| <a href="#">Ankrd60</a>   | <a href="#">Ankrd60.aSep08</a>   | <a href="#">296417</a> | 4181  | 703  |   | 198 | ankyrin (Ankrd60) mRNA.                                                                                     |
| <a href="#">Anks1</a>     | <a href="#">Anks1.bSep08</a>     | <a href="#">309639</a> | 1126  | 387  | 2 | 116 | putative protein of vertebrate origin (Anks1) alternative variant bSep08, mRNA.                             |
| <a href="#">Anks1</a>     | <a href="#">Anks1.dSep08</a>     | <a href="#">309639</a> | 1436  | 442  | 2 | 41  | putative protein (Anks1) alternative variant dSep08, mRNA.                                                  |
| <a href="#">Anks3</a>     | <a href="#">Anks3.bSep08</a>     | <a href="#">302937</a> | 9061  | 751  | 6 | 249 | ankyrin (Anks3) alternative variant bSep08, mRNA.                                                           |
| <a href="#">Anks3</a>     | <a href="#">Anks3.cSep08</a>     | <a href="#">302937</a> | 4266  | 954  | 7 | 153 | putative protein, with 2 coiled coil domains (Anks3) alternative variant cSep08, mRNA.                      |
| <a href="#">Anks3</a>     | <a href="#">Anks3.dSep08</a>     | <a href="#">302937</a> | 1741  | 733  | 5 | 114 | putative protein, with a coiled coil domain, of mammalian origin (Anks3) alternative variant dSep08, mRNA.  |
| <a href="#">Ankzf1</a>    | <a href="#">Ankzf1.bSep08</a>    | <a href="#">363255</a> | 3730  | 1768 | 5 | 241 | putative cytoplasmic protein of eukaryotic origin (26.3 kD) (Ankzf1) alternative variant bSep08, mRNA.      |
| <a href="#">Ankzf1</a>    | <a href="#">Ankzf1.cSep08</a>    | <a href="#">363255</a> | 6690  | 578  | 2 | 141 | putative protein of mammalian origin (Ankzf1) alternative variant cSep08, mRNA.                             |
| <a href="#">Ankzf1</a>    | <a href="#">Ankzf1.dSep08</a>    | <a href="#">363255</a> | 1093  | 753  | 3 | 140 | putative protein of eukaryotic origin (16.1 kD) (Ankzf1) alternative variant dSep08, mRNA.                  |
| <a href="#">Ankzf1</a>    | <a href="#">Ankzf1.eSep08</a>    | <a href="#">363255</a> | 616   | 418  | 2 | 116 | putative protein of eukaryotic origin (Ankzf1) alternative variant eSep08, mRNA.                            |
| <a href="#">Annexin.2</a> | <a href="#">Annexin.2.aSep08</a> |                        | 37970 | 422  |   | 140 | annexin A13 (Annexin.2) mRNA.                                                                               |
| <a href="#">Anp32a</a>    | <a href="#">Anp32a.bSep08</a>    | <a href="#">25379</a>  | 7908  | 766  | 4 | 155 | acidic (leucine-rich) nuclear phosphoprotein 32 family, member A (Anp32a) alternative variant bSep08, mRNA. |
| <a href="#">Anp32a</a>    | <a href="#">Anp32a.cSep08</a>    | <a href="#">25379</a>  | 31101 | 333  | 3 | 110 | acidic (leucine-rich) nuclear phosphoprotein 32 family, member A (Anp32a) alternative variant cSep08, mRNA. |

|                        |                               |                        |       |      |    |     |                                                                                                             |
|------------------------|-------------------------------|------------------------|-------|------|----|-----|-------------------------------------------------------------------------------------------------------------|
| <a href="#">Anp32a</a> | <a href="#">Anp32a.dSep08</a> | <a href="#">25379</a>  | 24717 | 342  | 3  | 25  | acidic (leucine-rich) nuclear phosphoprotein 32 family, member A (Anp32a) alternative variant dSep08, mRNA. |
| <a href="#">Anp32a</a> | <a href="#">Anp32a.eSep08</a> | <a href="#">25379</a>  | 500   | 314  | 2  | 50  | acidic (leucine-rich) nuclear phosphoprotein 32 family, member A (Anp32a) alternative variant eSep08, mRNA. |
| <a href="#">Anp32e</a> | <a href="#">Anp32e.bSep08</a> | <a href="#">361999</a> | 7169  | 858  | 3  | 211 | putative protein (Anp32e) alternative variant bSep08, mRNA.                                                 |
| <a href="#">Anp32e</a> | <a href="#">Anp32e.cSep08</a> | <a href="#">361999</a> | 4372  | 715  | 2  | 90  | acidic nuclear phosphoprotein 32 family member E CRA e (10.5 kD) (Anp32e) alternative variant cSep08, mRNA. |
| <a href="#">Anp32e</a> | <a href="#">Anp32e.dSep08</a> | <a href="#">361999</a> | 3103  | 2298 | 2  | 74  | putative nuclear protein (8.8 kD) (Anp32e) alternative variant dSep08, mRNA.                                |
| <a href="#">Anpep</a>  | <a href="#">Anpep.bSep08</a>  | <a href="#">81641</a>  | 732   | 365  | 2  | 57  | alanyl (membrane) aminopeptidase (Anpep) alternative variant bSep08, mRNA.                                  |
| <a href="#">Antxrl</a> | <a href="#">Antxrl.aSep08</a> | <a href="#">364513</a> | 6552  | 741  |    | 239 | anthrax toxin receptor-like (Antxrl) mRNA.                                                                  |
| <a href="#">Anubl1</a> | <a href="#">Anubl1.bSep08</a> | <a href="#">286998</a> | 51360 | 999  | 6  | 308 | AN1, ubiquitin-like, homolog (Xenopus laevis) (Anubl1) alternative variant bSep08, mRNA.                    |
| <a href="#">Anubl1</a> | <a href="#">Anubl1.dSep08</a> | <a href="#">286998</a> | 27850 | 758  | 4  | 180 | AN1, ubiquitin-like, homolog (Xenopus laevis) (Anubl1) alternative variant dSep08, mRNA.                    |
| <a href="#">Anubl1</a> | <a href="#">Anubl1.eSep08</a> | <a href="#">286998</a> | 27131 | 374  | 4  | 105 | AN1, ubiquitin-like, homolog (Xenopus laevis) (Anubl1) alternative variant eSep08, mRNA.                    |
| <a href="#">Anxa1</a>  | <a href="#">Anxa1.bSep08</a>  | <a href="#">25380</a>  | 12744 | 963  | 11 | 269 | annexin A1 (30.2 kD) (Anxa1) alternative variant bSep08, mRNA.                                              |
| <a href="#">Anxa1</a>  | <a href="#">Anxa1.cSep08</a>  | <a href="#">25380</a>  | 9872  | 661  | 8  | 168 | annexin A1 (Anxa1) alternative variant cSep08, mRNA.                                                        |
| <a href="#">Anxa1</a>  | <a href="#">Anxa1.dSep08</a>  | <a href="#">25380</a>  | 2332  | 1471 | 2  | 78  | putative protein (9.2 kD) (Anxa1) alternative variant dSep08, mRNA.                                         |
| <a href="#">Anxa1</a>  | <a href="#">Anxa1.hSep08</a>  | <a href="#">25380</a>  | 7580  | 508  | 6  | 65  | annexin A1 CRA b (Anxa1) alternative variant hSep08, mRNA.                                                  |
| <a href="#">Anxa2</a>  | <a href="#">Anxa2.bSep08</a>  | <a href="#">56611</a>  | 30556 | 776  | 9  | 258 | annexin A2 (Anxa2) alternative variant bSep08, mRNA.                                                        |
| <a href="#">Anxa2</a>  | <a href="#">Anxa2.cSep08</a>  | <a href="#">56611</a>  | 6021  | 1491 | 6  | 167 | annexin A2 (Anxa2) alternative variant cSep08, mRNA.                                                        |
| <a href="#">Anxa2</a>  | <a href="#">Anxa2.dSep08</a>  | <a href="#">56611</a>  | 879   | 298  | 3  | 27  | annexin A2 (Anxa2) alternative variant dSep08, mRNA.                                                        |
| <a href="#">Anxa3</a>  | <a href="#">Anxa3.aSep08</a>  | <a href="#">25291</a>  | 43383 | 1191 | 13 | 212 | annexin A3 (24.1 kD) (Anxa3) alternative variant aSep08, complete mRNA.                                     |
| <a href="#">Anxa3</a>  | <a href="#">Anxa3.bSep08</a>  | <a href="#">25291</a>  | 52764 | 2281 | 14 | 199 | annexin A3 (22.6 kD) (Anxa3) alternative variant bSep08, complete mRNA.                                     |
| <a href="#">Anxa3</a>  | <a href="#">Anxa3.cSep08</a>  | <a href="#">25291</a>  | 52768 | 418  | 4  | 131 | annexin A3 (Anxa3) alternative variant cSep08, mRNA.                                                        |
| <a href="#">Anxa3</a>  | <a href="#">Anxa3.dSep08</a>  | <a href="#">25291</a>  | 31391 | 698  | 9  | 126 | annexin A3 (13.9 kD) (Anxa3) alternative variant dSep08, mRNA.                                              |
| <a href="#">Anxa3</a>  | <a href="#">Anxa3.eSep08</a>  | <a href="#">25291</a>  | 30542 | 740  | 8  | 126 | annexin A3 (13.9 kD) (Anxa3) alternative variant eSep08, mRNA.                                              |
| <a href="#">Anxa3</a>  | <a href="#">Anxa3.fSep08</a>  | <a href="#">25291</a>  | 18003 | 709  | 7  | 116 | annexin A3 (Anxa3) alternative variant fSep08, mRNA.                                                        |
| <a href="#">Anxa4</a>  | <a href="#">Anxa4.bSep08</a>  | <a href="#">79124</a>  | 25213 | 703  | 8  | 170 | annexin A4 (Anxa4) alternative variant bSep08, mRNA.                                                        |
| <a href="#">Anxa4</a>  | <a href="#">Anxa4.cSep08</a>  | <a href="#">79124</a>  | 27930 | 548  | 7  | 157 | annexin A4 (Anxa4) alternative variant cSep08, mRNA.                                                        |
| <a href="#">Anxa4</a>  | <a href="#">Anxa4.dSep08</a>  | <a href="#">79124</a>  | 4511  | 877  | 2  | 48  | annexin A4 (5.4 kD) (Anxa4) alternative variant dSep08, mRNA.                                               |
| <a href="#">Anxa5</a>  | <a href="#">Anxa5.aSep08</a>  | <a href="#">25673</a>  | 30672 | 1543 | 8  | 377 | annexin A5 (Anxa5) alternative variant aSep08, mRNA.                                                        |
| <a href="#">Anxa5</a>  | <a href="#">Anxa5.bSep08</a>  | <a href="#">25673</a>  | 31292 | 1201 | 8  | 353 | annexin A5 (Anxa5) alternative variant bSep08, mRNA.                                                        |



|                        |                               |                        |       |      |    |     |                                                                                               |
|------------------------|-------------------------------|------------------------|-------|------|----|-----|-----------------------------------------------------------------------------------------------|
| <a href="#">Anxa5</a>  | <a href="#">Anxa5.cSep08</a>  | <a href="#">25673</a>  | 27485 | 765  | 4  | 254 | annexin A5 (Anxa5) alternative variant cSep08, mRNA.                                          |
| <a href="#">Anxa5</a>  | <a href="#">Anxa5.dSep08</a>  | <a href="#">25673</a>  | 28093 | 742  | 4  | 205 | annexin A5 (Anxa5) alternative variant dSep08, mRNA.                                          |
| <a href="#">Anxa5</a>  | <a href="#">Anxa5.eSep08</a>  | <a href="#">25673</a>  | 23026 | 688  | 2  | 137 | annexin A5 (Anxa5) alternative variant eSep08, mRNA.                                          |
| <a href="#">Anxa6</a>  | <a href="#">Anxa6.aSep08</a>  | <a href="#">79125</a>  | 55856 | 2772 | 10 | 714 | annexin A6 (Anxa6) alternative variant aSep08, mRNA.                                          |
| <a href="#">Anxa6</a>  | <a href="#">Anxa6.bSep08</a>  | <a href="#">79125</a>  | 20198 | 1384 | 9  | 330 | annexin A6 (Anxa6) alternative variant bSep08, mRNA.                                          |
| <a href="#">Anxa6</a>  | <a href="#">Anxa6.cSep08</a>  | <a href="#">79125</a>  | 12110 | 749  | 2  | 249 | annexin A6 (Anxa6) alternative variant cSep08, mRNA.                                          |
| <a href="#">Anxa6</a>  | <a href="#">Anxa6.dSep08</a>  | <a href="#">79125</a>  | 8346  | 1010 | 4  | 103 | annexin A6 (Anxa6) alternative variant dSep08, mRNA.                                          |
| <a href="#">Anxa7</a>  | <a href="#">Anxa7.bSep08</a>  | <a href="#">155423</a> | 17016 | 741  | 2  | 230 | annexin A7 (Anxa7) alternative variant bSep08, mRNA.                                          |
| <a href="#">Anxa7</a>  | <a href="#">Anxa7.cSep08</a>  | <a href="#">155423</a> | 20462 | 707  | 2  | 229 | annexin A7 (Anxa7) alternative variant cSep08, mRNA.                                          |
| <a href="#">Anxa7</a>  | <a href="#">Anxa7.dSep08</a>  | <a href="#">155423</a> | 20328 | 715  | 2  | 212 | annexin A7 (Anxa7) alternative variant dSep08, mRNA.                                          |
| <a href="#">Anxa9</a>  | <a href="#">Anxa9.bSep08</a>  | <a href="#">689830</a> | 9087  | 1776 | 7  | 68  | annexin A9 (7.2 kD) (Anxa9) alternative variant bSep08, mRNA.                                 |
| <a href="#">Anxa9</a>  | <a href="#">Anxa9.cSep08</a>  | <a href="#">689830</a> | 938   | 646  | 2  | 55  | annexin A9 (Anxa9) alternative variant cSep08, mRNA.                                          |
| <a href="#">Anxa11</a> | <a href="#">Anxa11.bSep08</a> | <a href="#">290527</a> | 11196 | 1816 | 9  | 236 | annexin A11 (26.8 kD) (Anxa11) alternative variant bSep08, mRNA.                              |
| <a href="#">Anxa11</a> | <a href="#">Anxa11.dSep08</a> | <a href="#">290527</a> | 9004  | 1315 | 8  | 105 | annexin A11 (11.9 kD) (Anxa11) alternative variant dSep08, mRNA.                              |
| <a href="#">Anxa13</a> | <a href="#">Anxa13.aSep08</a> | <a href="#">362915</a> | 7144  | 923  |    | 98  | annexin A13 (Anxa13) mRNA.                                                                    |
| <a href="#">Aoah</a>   | <a href="#">Aoah.aSep08</a>   | <a href="#">498757</a> | 67033 | 414  |    | 137 | acyloxyacyl hydrolase (Aoah) mRNA.                                                            |
| <a href="#">Aof2</a>   | <a href="#">Aof2.aSep08</a>   | <a href="#">500569</a> | 22597 | 1643 | 15 | 547 | amine oxidase (flavin containing) domain 2 (Aof2) alternative variant aSep08, mRNA.           |
| <a href="#">Aof2</a>   | <a href="#">Aof2.cSep08</a>   | <a href="#">500569</a> | 37164 | 799  | 7  | 208 | amine oxidase (flavin containing) domain 2 (Aof2) alternative variant cSep08, mRNA.           |
| <a href="#">Aof2</a>   | <a href="#">Aof2.dSep08</a>   | <a href="#">500569</a> | 3539  | 1778 | 5  | 138 | amine oxidase (flavin containing) domain 2 (14.7 kD) (Aof2) alternative variant dSep08, mRNA. |
| <a href="#">Aox1</a>   | <a href="#">Aox1.bSep08</a>   | <a href="#">54349</a>  | 15635 | 1009 | 6  | 335 | aldehyde oxidase 1 (Aox1) alternative variant bSep08, mRNA.                                   |
| <a href="#">Aox1</a>   | <a href="#">Aox1.cSep08</a>   | <a href="#">54349</a>  | 10675 | 1050 | 8  | 275 | aldehyde oxidase 1 (Aox1) alternative variant cSep08, mRNA.                                   |
| <a href="#">Aox1</a>   | <a href="#">Aox1.dSep08</a>   | <a href="#">54349</a>  | 8586  | 568  | 4  | 188 | aldehyde oxidase 1 (Aox1) alternative variant dSep08, mRNA.                                   |
| <a href="#">Aox1</a>   | <a href="#">Aox1.eSep08</a>   | <a href="#">54349</a>  | 3093  | 520  | 4  | 172 | aldehyde oxidase 1 (Aox1) alternative variant eSep08, mRNA.                                   |
| <a href="#">Aox3</a>   | <a href="#">Aox3.bSep08</a>   | <a href="#">493909</a> | 7343  | 785  | 6  | 261 | aldehyde oxidase (Aox3) alternative variant bSep08, mRNA.                                     |
| <a href="#">Aox3</a>   | <a href="#">Aox3.cSep08</a>   | <a href="#">493909</a> | 1545  | 365  | 2  | 111 | putative protein (Aox3) alternative variant cSep08, mRNA.                                     |
| <a href="#">Aox3</a>   | <a href="#">Aox3.dSep08</a>   | <a href="#">493909</a> | 14406 | 327  | 3  | 80  | aldehyde oxidase (Aox3) alternative variant dSep08, mRNA.                                     |
| <a href="#">Aox3</a>   | <a href="#">Aox3.eSep08</a>   | <a href="#">493909</a> | 9808  | 279  | 4  | 32  | putative protein (3.6 kD) (Aox3) alternative variant eSep08, mRNA.                            |
| <a href="#">Aox4</a>   | <a href="#">Aox4.aSep08</a>   | <a href="#">316424</a> | 3589  | 1051 |    | 96  | aldehyde oxidase 4 (Aox4) mRNA.                                                               |
| <a href="#">Ap1b1</a>  | <a href="#">Ap1b1.bSep08</a>  | <a href="#">29663</a>  | 7935  | 827  | 6  | 275 | adaptor protein complex AP-1, beta 1 subunit (Ap1b1) alternative variant bSep08, mRNA.        |
| <a href="#">Ap1b1</a>  | <a href="#">Ap1b1.cSep08</a>  | <a href="#">29663</a>  | 28260 | 749  | 7  | 194 | adaptor protein complex AP-1, beta 1 subunit (Ap1b1) alternative variant cSep08, mRNA.        |

|                         |                                |                        |       |      |    |     |                                                                                                    |
|-------------------------|--------------------------------|------------------------|-------|------|----|-----|----------------------------------------------------------------------------------------------------|
| <a href="#">Ap1b1</a>   | <a href="#">Ap1b1.dSep08</a>   | <a href="#">29663</a>  | 25544 | 357  | 4  | 71  | adaptor protein complex AP-1, beta 1 subunit (Ap1b1) alternative variant dSep08, mRNA.             |
| <a href="#">Ap1gbp1</a> | <a href="#">Ap1gbp1.aSep08</a> | <a href="#">84479</a>  | 35611 | 2005 | 9  | 600 | AP1 gamma subunit binding protein 1 (Ap1gbp1) alternative variant aSep08, mRNA.                    |
| <a href="#">Ap1gbp1</a> | <a href="#">Ap1gbp1.cSep08</a> | <a href="#">84479</a>  | 25815 | 1915 | 7  | 266 | AP1 gamma subunit binding protein 1 (Ap1gbp1) alternative variant cSep08, mRNA.                    |
| <a href="#">Ap1gbp1</a> | <a href="#">Ap1gbp1.dSep08</a> | <a href="#">84479</a>  | 21779 | 556  | 5  | 69  | AP1 gamma subunit binding protein 1 (Ap1gbp1) alternative variant dSep08, mRNA.                    |
| <a href="#">Ap1s1</a>   | <a href="#">Ap1s1.bSep08</a>   | <a href="#">360785</a> | 10447 | 1302 | 5  | 158 | adaptor protein complex AP-1, sigma 1 (18.7 kD) (Ap1s1) alternative variant bSep08, complete mRNA. |
| <a href="#">Ap1s1</a>   | <a href="#">Ap1s1.dSep08</a>   | <a href="#">360785</a> | 6050  | 711  | 3  | 34  | adaptor protein complex AP-1, sigma 1 (Ap1s1) alternative variant dSep08, mRNA.                    |
| <a href="#">Ap1s2</a>   | <a href="#">Ap1s2.aSep08</a>   | <a href="#">302671</a> | 26182 | 1169 | 2  | 204 | adaptor-related protein complex 1, sigma 2 subunit (Ap1s2) alternative variant aSep08, mRNA.       |
| <a href="#">Ap1s2</a>   | <a href="#">Ap1s2.cSep08</a>   | <a href="#">302671</a> | 22904 | 2025 | 1  | 189 | adaptor-related protein complex 1, sigma 2 subunit (Ap1s2) alternative variant cSep08, mRNA.       |
| <a href="#">Ap1s2</a>   | <a href="#">Ap1s2.dSep08</a>   | <a href="#">302671</a> | 64012 | 751  | 1  | 185 | adaptor-related protein complex 1, sigma 2 subunit (Ap1s2) alternative variant dSep08, mRNA.       |
| <a href="#">Ap2a1</a>   | <a href="#">Ap2a1.aSep08</a>   | <a href="#">308578</a> | 30184 | 2927 | 24 | 972 | adaptor protein complex AP-2, alpha 1 subunit (Ap2a1) alternative variant aSep08, mRNA.            |
| <a href="#">Ap2a1</a>   | <a href="#">Ap2a1.bSep08</a>   | <a href="#">308578</a> | 3404  | 1137 | 9  | 299 | adaptor protein complex AP-2, alpha 1 subunit (Ap2a1) alternative variant bSep08, mRNA.            |
| <a href="#">Ap2a2</a>   | <a href="#">Ap2a2.bSep08</a>   | <a href="#">81637</a>  | 73215 | 2591 | 12 | 631 | adaptor protein complex AP-2, alpha 2 subunit (Ap2a2) alternative variant bSep08, mRNA.            |
| <a href="#">Ap2a2</a>   | <a href="#">Ap2a2.cSep08</a>   | <a href="#">81637</a>  | 14937 | 1663 | 10 | 554 | adaptor protein complex AP-2, alpha 2 subunit (Ap2a2) alternative variant cSep08, mRNA.            |
| <a href="#">Ap2a2</a>   | <a href="#">Ap2a2.dSep08</a>   | <a href="#">81637</a>  | 6496  | 740  | 5  | 246 | adaptor protein complex AP-2, alpha 2 subunit (Ap2a2) alternative variant dSep08, mRNA.            |
| <a href="#">Ap2a2</a>   | <a href="#">Ap2a2.eSep08</a>   | <a href="#">81637</a>  | 2842  | 1238 | 5  | 173 | adaptor protein complex AP-2, alpha 2 subunit (Ap2a2) alternative variant eSep08, mRNA.            |
| <a href="#">Ap2a2</a>   | <a href="#">Ap2a2.fSep08</a>   | <a href="#">81637</a>  | 3024  | 512  | 3  | 155 | adaptor protein complex AP-2, alpha 2 subunit (Ap2a2) alternative variant fSep08, mRNA.            |
| <a href="#">Ap2a2</a>   | <a href="#">Ap2a2.hSep08</a>   | <a href="#">81637</a>  | 41549 | 393  | 3  | 93  | adaptor protein complex AP-2, alpha 2 subunit (Ap2a2) alternative variant hSep08, mRNA.            |
| <a href="#">Ap2b1</a>   | <a href="#">Ap2b1.bSep08</a>   | <a href="#">140670</a> | 44685 | 879  | 6  | 292 | adaptor-related protein complex 2 beta (Ap2b1) alternative variant bSep08, mRNA.                   |
| <a href="#">Ap2b1</a>   | <a href="#">Ap2b1.cSep08</a>   | <a href="#">140670</a> | 28757 | 712  | 7  | 200 | adaptor-related protein complex 2 beta CRA d (Ap2b1) alternative variant cSep08, mRNA.             |
| <a href="#">Ap2b1</a>   | <a href="#">Ap2b1.eSep08</a>   | <a href="#">140670</a> | 16720 | 248  | 4  | 52  | putative protein (Ap2b1) alternative variant eSep08, mRNA.                                         |
| <a href="#">Ap2b1</a>   | <a href="#">Ap2b1.gSep08</a>   | <a href="#">140670</a> | 13295 | 602  | 4  | 65  | putative protein (7.1 kD) (Ap2b1) alternative variant gSep08, mRNA.                                |
| <a href="#">Ap2m1</a>   | <a href="#">Ap2m1.bSep08</a>   | <a href="#">116563</a> | 4573  | 726  | 3  | 132 | adaptor-related protein complex 2 mu (15.2 kD) (Ap2m1) alternative variant bSep08, mRNA.           |
| <a href="#">Ap2m1</a>   | <a href="#">Ap2m1.cSep08</a>   | <a href="#">116563</a> | 1465  | 658  | 5  | 110 | adaptor-related protein complex 2 mu (Ap2m1) alternative variant cSep08, mRNA.                     |

|                       |                              |                        |       |      |    |     |                                                                                                                 |
|-----------------------|------------------------------|------------------------|-------|------|----|-----|-----------------------------------------------------------------------------------------------------------------|
| <a href="#">Ap2m1</a> | <a href="#">Ap2m1.dSep08</a> | <a href="#">116563</a> | 916   | 523  | 2  | 108 | A Mu2 Adaptin Of Ap2 adaptor Complexed With Internalization Peptide (Ap2m1) alternative variant dSep08, mRNA.   |
| <a href="#">Ap2m1</a> | <a href="#">Ap2m1.fSep08</a> | <a href="#">116563</a> | 1363  | 912  | 2  | 78  | adaptor-related protein complex 2 mu (9.1 kD) (Ap2m1) alternative variant fSep08, mRNA.                         |
| <a href="#">Ap2m1</a> | <a href="#">Ap2m1.hSep08</a> | <a href="#">116563</a> | 4152  | 450  | 4  | 42  | adaptor-related protein complex 2 mu (4.5 kD) (Ap2m1) alternative variant hSep08, mRNA.                         |
| <a href="#">Ap2s1</a> | <a href="#">Ap2s1.aSep08</a> | <a href="#">65046</a>  | 11479 | 938  | 5  | 167 | adaptor-related protein complex 2, sigma 1 subunit (20.0 kD) (Ap2s1) alternative variant aSep08, mRNA.          |
| <a href="#">Ap2s1</a> | <a href="#">Ap2s1.cSep08</a> | <a href="#">65046</a>  | 1952  | 918  | 3  | 128 | adaptor-related protein complex 2, sigma 1 subunit (14.9 kD) (Ap2s1) alternative variant cSep08, mRNA.          |
| <a href="#">Ap2s1</a> | <a href="#">Ap2s1.dSep08</a> | <a href="#">65046</a>  | 7055  | 645  | 4  | 121 | adaptor-related protein complex 2, sigma 1 subunit (Ap2s1) alternative variant dSep08, mRNA.                    |
| <a href="#">Ap3b1</a> | <a href="#">Ap3b1.bSep08</a> | <a href="#">309969</a> | 80324 | 1965 | 2  | 338 | adaptor-related protein complex 3, beta 1 subunit (36.4 kD) (Ap3b1) alternative variant bSep08, mRNA.           |
| <a href="#">Ap3b2</a> | <a href="#">Ap3b2.aSep08</a> | <a href="#">308777</a> | 16293 | 2773 | 20 | 845 | adaptor-related protein complex 3 beta (Ap3b2) alternative variant aSep08, mRNA.                                |
| <a href="#">Ap3b2</a> | <a href="#">Ap3b2.cSep08</a> | <a href="#">308777</a> | 3210  | 425  | 4  | 137 | adaptor-related protein complex 3 beta (Ap3b2) alternative variant cSep08, mRNA.                                |
| <a href="#">Ap3b2</a> | <a href="#">Ap3b2.eSep08</a> | <a href="#">308777</a> | 748   | 307  | 2  | 101 | adaptor-related protein complex 3 beta CRA b (Ap3b2) alternative variant eSep08, mRNA.                          |
| <a href="#">Ap3d1</a> | <a href="#">Ap3d1.bSep08</a> | <a href="#">314633</a> | 3265  | 903  | 6  | 300 | adaptor-related protein complex 3, delta 1 subunit (Ap3d1) alternative variant bSep08, mRNA.                    |
| <a href="#">Ap3d1</a> | <a href="#">Ap3d1.cSep08</a> | <a href="#">314633</a> | 2825  | 647  | 4  | 210 | adaptor-related protein complex 3, delta 1 subunit (Ap3d1) alternative variant cSep08, mRNA.                    |
| <a href="#">Ap3d1</a> | <a href="#">Ap3d1.dSep08</a> | <a href="#">314633</a> | 2068  | 829  | 5  | 191 | adaptor-related protein complex 3, delta 1 subunit (Ap3d1) alternative variant dSep08, mRNA.                    |
| <a href="#">Ap3d1</a> | <a href="#">Ap3d1.eSep08</a> | <a href="#">314633</a> | 8755  | 498  | 6  | 73  | adaptor-related protein complex 3, delta 1 subunit (Ap3d1) alternative variant eSep08, mRNA.                    |
| <a href="#">Ap3m1</a> | <a href="#">Ap3m1.bSep08</a> | <a href="#">171126</a> | 11396 | 717  | 4  | 238 | adaptor-related protein complex 3, mu 1 subunit (Ap3m1) alternative variant bSep08, mRNA.                       |
| <a href="#">Ap3m1</a> | <a href="#">Ap3m1.cSep08</a> | <a href="#">171126</a> | 739   | 639  | 2  | 28  | adaptor-related protein complex 3, mu 1 subunit (3.0 kD) (Ap3m1) alternative variant cSep08, mRNA.              |
| <a href="#">Ap3m2</a> | <a href="#">Ap3m2.bSep08</a> | <a href="#">140667</a> | 6560  | 980  | 3  | 296 | adaptor-related protein complex 3 mu (Ap3m2) alternative variant bSep08, mRNA.                                  |
| <a href="#">Ap3m2</a> | <a href="#">Ap3m2.cSep08</a> | <a href="#">140667</a> | 4652  | 597  | 2  | 181 | putative protein of eukaryotic origin (Ap3m2) alternative variant cSep08, mRNA.                                 |
| <a href="#">Ap3m2</a> | <a href="#">Ap3m2.dSep08</a> | <a href="#">140667</a> | 13891 | 775  | 5  | 152 | adaptor-related protein complex 3 mu (17.6 kD) (Ap3m2) alternative variant dSep08, mRNA.                        |
| <a href="#">Ap3m2</a> | <a href="#">Ap3m2.eSep08</a> | <a href="#">140667</a> | 5700  | 663  | 3  | 146 | adaptor-related protein complex 3 mu (Ap3m2) alternative variant eSep08, mRNA.                                  |
| <a href="#">Ap3m2</a> | <a href="#">Ap3m2.fSep08</a> | <a href="#">140667</a> | 1888  | 485  | 2  | 102 | putative protein (Ap3m2) alternative variant fSep08, mRNA.                                                      |
| <a href="#">Ap3s1</a> | <a href="#">Ap3s1.aSep08</a> | <a href="#">302290</a> | 72070 | 1255 | 6  | 225 | adaptor-related protein complex 3, sigma 1 subunit (Ap3s1) alternative variant aSep08, mRNA.                    |
| <a href="#">Ap3s1</a> | <a href="#">Ap3s1.cSep08</a> | <a href="#">302290</a> | 71742 | 968  | 7  | 162 | adaptor-related protein complex 3, sigma 1 subunit (18.8 kD) (Ap3s1) alternative variant cSep08, complete mRNA. |

|                         |                                |                        |       |      |    |     |                                                                                                                     |
|-------------------------|--------------------------------|------------------------|-------|------|----|-----|---------------------------------------------------------------------------------------------------------------------|
| <a href="#">Ap3s1</a>   | <a href="#">Ap3s1.dSep08</a>   | <a href="#">302290</a> | 52775 | 557  | 4  | 134 | adaptor-related protein complex 3, sigma 1 subunit (Ap3s1) alternative variant dSep08, mRNA.                        |
| <a href="#">Ap4b1</a>   | <a href="#">Ap4b1.bSep08</a>   | <a href="#">310746</a> | 11984 | 1782 | 5  | 321 | adaptor-related protein complex AP-4, beta 1 (Ap4b1) alternative variant bSep08, mRNA.                              |
| <a href="#">Ap4b1</a>   | <a href="#">Ap4b1.cSep08</a>   | <a href="#">310746</a> | 3587  | 731  | 5  | 174 | adaptor-related protein complex AP-4, beta 1 (Ap4b1) alternative variant cSep08, mRNA.                              |
| <a href="#">Ap4e1</a>   | <a href="#">Ap4e1.aSep08</a>   | <a href="#">311404</a> | 5025  | 1028 |    | 277 | adaptor-related protein complex AP-4, epsilon 1 (Ap4e1) alternative variant aSep08, mRNA.                           |
| <a href="#">Ap4e1</a>   | <a href="#">Ap4e1.bSep08</a>   | <a href="#">311404</a> | 4732  | 734  |    | 145 | adaptor-related protein complex AP-4, epsilon 1 (Ap4e1) alternative variant bSep08, mRNA.                           |
| <a href="#">Ap4m1</a>   | <a href="#">Ap4m1.bSep08</a>   | <a href="#">304344</a> | 8239  | 3845 | 16 | 325 | adaptor-related protein complex AP-4, mu 1 (35.6 kD) (Ap4m1) alternative variant bSep08, complete mRNA.             |
| <a href="#">Ap4m1</a>   | <a href="#">Ap4m1.cSep08</a>   | <a href="#">304344</a> | 1426  | 380  | 5  | 126 | adaptor-related protein complex AP-4, mu 1 (Ap4m1) alternative variant cSep08, mRNA.                                |
| <a href="#">Ap4m1</a>   | <a href="#">Ap4m1.dSep08</a>   | <a href="#">304344</a> | 1324  | 380  | 3  | 84  | adaptor-related protein complex AP-4, mu 1 (9.5 kD) (Ap4m1) alternative variant dSep08, mRNA.                       |
| <a href="#">Ap4m1</a>   | <a href="#">Ap4m1.eSep08</a>   | <a href="#">304344</a> | 314   | 214  | 2  | 70  | adaptor-related protein complex AP-4, mu 1 (Ap4m1) alternative variant eSep08, mRNA.                                |
| <a href="#">Ap4s1</a>   | <a href="#">Ap4s1.bSep08</a>   | <a href="#">366618</a> | 42170 | 1321 | 3  | 101 | adaptor-related protein complex AP-4, sigma 1 (12.1 kD) (Ap4s1) alternative variant bSep08, complete mRNA.          |
| <a href="#">Ap4s1</a>   | <a href="#">Ap4s1.cSep08</a>   | <a href="#">366618</a> | 41048 | 584  | 2  | 67  | adaptor-related protein complex AP-4, sigma 1 (7.8 kD) (Ap4s1) alternative variant cSep08, complete mRNA.           |
| <a href="#">Apaf1</a>   | <a href="#">Apaf1.bSep08</a>   | <a href="#">78963</a>  | 36162 | 1801 | 1  | 261 | apoptotic peptidase activating factor 1 (Apaf1) alternative variant bSep08, mRNA.                                   |
| <a href="#">Apaf1</a>   | <a href="#">Apaf1.cSep08</a>   | <a href="#">78963</a>  | 5252  | 2026 | 1  | 97  | apoptotic peptidase activating factor 1 (Apaf1) alternative variant cSep08, mRNA.                                   |
| <a href="#">Apba1</a>   | <a href="#">Apba1.bSep08</a>   | <a href="#">83589</a>  | 25066 | 814  | 7  | 271 | amyloid beta (A4) precursor protein-binding, family A, member 1 (Apba1) alternative variant bSep08, mRNA.           |
| <a href="#">Apba1</a>   | <a href="#">Apba1.cSep08</a>   | <a href="#">83589</a>  | 21615 | 398  | 5  | 132 | amyloid beta (A4) precursor protein-binding, family A, member 1 (Apba1) alternative variant cSep08, mRNA.           |
| <a href="#">Apba2</a>   | <a href="#">Apba2.bSep08</a>   | <a href="#">83610</a>  | 13955 | 775  | 6  | 258 | amyloid beta protein-binding family A member 2 CRA b like (Apba2) alternative variant bSep08, mRNA.                 |
| <a href="#">Apba2</a>   | <a href="#">Apba2.cSep08</a>   | <a href="#">83610</a>  | 67388 | 759  | 2  | 125 | putative protein (Apba2) alternative variant cSep08, mRNA.                                                          |
| <a href="#">Apba3</a>   | <a href="#">Apba3.bSep08</a>   | <a href="#">83611</a>  | 2097  | 1289 | 6  | 379 | amyloid beta (A4) precursor protein-binding, family A, member 3 (41.2 kD) (Apba3) alternative variant bSep08, mRNA. |
| <a href="#">Apba3</a>   | <a href="#">Apba3.cSep08</a>   | <a href="#">83611</a>  | 2999  | 878  | 5  | 251 | amyloid beta (A4) precursor protein-binding, family A, member 3 (Apba3) alternative variant cSep08, mRNA.           |
| <a href="#">Apba3</a>   | <a href="#">Apba3.dSep08</a>   | <a href="#">83611</a>  | 1792  | 1087 | 5  | 217 | amyloid beta (A4) precursor protein-binding, family A, member 3 (Apba3) alternative variant dSep08, mRNA.           |
| <a href="#">Apbb1</a>   | <a href="#">Apbb1.bSep08</a>   | <a href="#">29722</a>  | 7779  | 760  | 1  | 252 | amyloid beta (A4) precursor protein-binding, family B, member 1 (Apbb1) alternative variant bSep08, mRNA.           |
| <a href="#">Apbb1</a>   | <a href="#">Apbb1.cSep08</a>   | <a href="#">29722</a>  | 2060  | 311  | 1  | 63  | amyloid beta (A4) precursor protein-binding, family B, member 1 (Apbb1) alternative variant cSep08, mRNA.           |
| <a href="#">Apbb1ip</a> | <a href="#">Apbb1ip.aSep08</a> | <a href="#">307171</a> | 47795 | 2429 |    | 645 | amyloid beta (A4) precursor protein-binding, family B, member 1 interacting protein (Apbb1ip) mRNA.                 |

|                              |                                     |                        |       |      |    |     |                                                                                                                                |
|------------------------------|-------------------------------------|------------------------|-------|------|----|-----|--------------------------------------------------------------------------------------------------------------------------------|
| <a href="#">Apbb2</a>        | <a href="#">Apbb2.aSep08</a>        | <a href="#">305338</a> | 33799 | 4130 | 7  | 265 | amyloid beta (A4) precursor protein-binding, family B, member 2 (Apbb2) alternative variant aSep08, mRNA.                      |
| <a href="#">Apbb2</a>        | <a href="#">Apbb2.bSep08</a>        | <a href="#">305338</a> | 5870  | 439  | 5  | 146 | amyloid beta (A4) precursor protein-binding, family B, member 2 (Apbb2) alternative variant bSep08, mRNA.                      |
| <a href="#">Apbb2</a>        | <a href="#">Apbb2.cSep08</a>        | <a href="#">305338</a> | 10451 | 675  | 2  | 50  | amyloid beta (A4) precursor protein-binding, family B, member 2 (Apbb2) alternative variant cSep08, mRNA.                      |
| <a href="#">Apbb3andSra1</a> | <a href="#">Apbb3andSra1.cSep08</a> | <a href="#">117026</a> | 3253  | 1019 | 2  | 182 | amyloid beta protein-binding family B member 3 CRA b like precursor (19.1 kD) (Apbb3andSra1) alternative variant cSep08, mRNA. |
| <a href="#">Apbb3andSra1</a> | <a href="#">Apbb3andSra1.cSep08</a> | <a href="#">252891</a> | 3253  | 1019 | 2  | 182 | amyloid beta protein-binding family B member 3 CRA b like precursor (19.1 kD) (Apbb3andSra1) alternative variant cSep08, mRNA. |
| <a href="#">Apbb3andSra1</a> | <a href="#">Apbb3andSra1.dSep08</a> | <a href="#">117026</a> | 2319  | 742  | 3  | 147 | steroid receptor RNA activator 1 (15.3 kD) (Apbb3andSra1) alternative variant dSep08, mRNA.                                    |
| <a href="#">Apbb3andSra1</a> | <a href="#">Apbb3andSra1.dSep08</a> | <a href="#">252891</a> | 2319  | 742  | 3  | 147 | steroid receptor RNA activator 1 (15.3 kD) (Apbb3andSra1) alternative variant dSep08, mRNA.                                    |
| <a href="#">Apbb3andSra1</a> | <a href="#">Apbb3andSra1.eSep08</a> | <a href="#">117026</a> | 1445  | 723  | 5  | 94  | amyloid beta protein-binding family B member 3 like (Apbb3andSra1) alternative variant eSep08, mRNA.                           |
| <a href="#">Apbb3andSra1</a> | <a href="#">Apbb3andSra1.eSep08</a> | <a href="#">252891</a> | 1445  | 723  | 5  | 94  | amyloid beta protein-binding family B member 3 like (Apbb3andSra1) alternative variant eSep08, mRNA.                           |
| <a href="#">Apbb3andSra1</a> | <a href="#">Apbb3andSra1.gSep08</a> | <a href="#">117026</a> | 1642  | 1514 | 2  | 74  | steroid receptor RNA activator 1 CRA b (8.4 kD) (Apbb3andSra1) alternative variant gSep08, mRNA.                               |
| <a href="#">Apbb3andSra1</a> | <a href="#">Apbb3andSra1.gSep08</a> | <a href="#">252891</a> | 1642  | 1514 | 2  | 74  | steroid receptor RNA activator 1 CRA b (8.4 kD) (Apbb3andSra1) alternative variant gSep08, mRNA.                               |
| <a href="#">Apbb3andSra1</a> | <a href="#">Apbb3andSra1.hSep08</a> | <a href="#">117026</a> | 1284  | 576  | 3  | 64  | steroid receptor RNA activator 1 (Apbb3andSra1) alternative variant hSep08, mRNA.                                              |
| <a href="#">Apbb3andSra1</a> | <a href="#">Apbb3andSra1.hSep08</a> | <a href="#">252891</a> | 1284  | 576  | 3  | 64  | steroid receptor RNA activator 1 (Apbb3andSra1) alternative variant hSep08, mRNA.                                              |
| <a href="#">Apc</a>          | <a href="#">Apc.bSep08</a>          | <a href="#">24205</a>  | 51250 | 823  | 6  | 235 | adenomatosis polyposis coli (26.6 kD) (Apc) alternative variant bSep08, mRNA.                                                  |
| <a href="#">Apccd1</a>       | <a href="#">Apccd1.aSep08</a>       | <a href="#">689616</a> | 2435  | 873  |    | 215 | adenomatosis polyposis coli down-regulated 1 (Apccd1) mRNA.                                                                    |
| <a href="#">Apeh</a>         | <a href="#">Apeh.bSep08</a>         | <a href="#">24206</a>  | 5138  | 1464 | 10 | 304 | acylpeptide hydrolase (33.9 kD) (Apeh) alternative variant bSep08, mRNA.                                                       |
| <a href="#">Apeh</a>         | <a href="#">Apeh.dSep08</a>         | <a href="#">24206</a>  | 555   | 480  | 2  | 50  | acylpeptide hydrolase (5.4 kD) (Apeh) alternative variant dSep08, mRNA.                                                        |
| <a href="#">Apex1</a>        | <a href="#">Apex1.aSep08</a>        | <a href="#">79116</a>  | 2567  | 1950 | 2  | 347 | apurinic/apurimidinic endonuclease 1 (38.9 kD) (Apex1) alternative variant aSep08, mRNA.                                       |
| <a href="#">Apex1</a>        | <a href="#">Apex1.cSep08</a>        | <a href="#">79116</a>  | 1668  | 785  | 4  | 228 | apurinic/apurimidinic endonuclease 1 (Apex1) alternative variant cSep08, mRNA.                                                 |
| <a href="#">Aph1a</a>        | <a href="#">Aph1a.bSep08</a>        | <a href="#">365872</a> | 435   | 286  | 1  | 95  | anterior pharynx defective 1 homolog a (Aph1a) alternative variant bSep08, mRNA.                                               |
| <a href="#">Aph1b.1</a>      | <a href="#">Aph1b.1.aSep08</a>      | <a href="#">300802</a> | 21014 | 1249 | 6  | 292 | anterior pharynx defective 1b homolog (Aph1b.1) alternative variant aSep08, mRNA.                                              |
| <a href="#">Aph1b.1</a>      | <a href="#">Aph1b.1.bSep08</a>      | <a href="#">300802</a> | 12059 | 628  | 5  | 152 | anterior pharynx defective 1b homolog (Aph1b.1) alternative variant bSep08, mRNA.                                              |

|                         |                                |                        |       |      |    |     |                                                                                                   |
|-------------------------|--------------------------------|------------------------|-------|------|----|-----|---------------------------------------------------------------------------------------------------|
| <a href="#">Aph1b.1</a> | <a href="#">Aph1b.1.cSep08</a> | <a href="#">300802</a> | 7904  | 960  | 2  | 96  | anterior pharynx defective 1b homolog (11.1 kD) (Aph1b.1) alternative variant cSep08, mRNA.       |
| <a href="#">Api5</a>    | <a href="#">Api5.bSep08</a>    | <a href="#">362170</a> | 7601  | 2407 | 5  | 145 | apoptosis inhibitor 5 (Api5) alternative variant bSep08, mRNA.                                    |
| <a href="#">Api5</a>    | <a href="#">Api5.cSep08</a>    | <a href="#">362170</a> | 9882  | 813  | 2  | 80  | apoptosis inhibitor 5 (9.0 kD) (Api5) alternative variant cSep08, mRNA.                           |
| <a href="#">Api5</a>    | <a href="#">Api5.dSep08</a>    | <a href="#">362170</a> | 2423  | 713  | 2  | 64  | apoptosis inhibitor 5 (Api5) alternative variant dSep08, mRNA.                                    |
| <a href="#">Apip</a>    | <a href="#">Apip.bSep08</a>    | <a href="#">295961</a> | 8727  | 1032 | 5  | 165 | APAF1 interacting protein (Apip) alternative variant bSep08, mRNA.                                |
| <a href="#">Aplp1</a>   | <a href="#">Aplp1.aSep08</a>   | <a href="#">502317</a> | 8613  | 1671 | 3  | 556 | amyloid beta (A4) precursor-like protein 1 (Aplp1) alternative variant aSep08, mRNA.              |
| <a href="#">Aplp1</a>   | <a href="#">Aplp1.bSep08</a>   | <a href="#">502317</a> | 6001  | 1268 | 2  | 323 | amyloid beta (A4) precursor-like protein 1 (Aplp1) alternative variant bSep08, mRNA.              |
| <a href="#">Aplp1</a>   | <a href="#">Aplp1.cSep08</a>   | <a href="#">502317</a> | 3324  | 782  | 1  | 260 | amyloid beta (A4) precursor-like protein 1 (Aplp1) alternative variant cSep08, mRNA.              |
| <a href="#">Aplp1</a>   | <a href="#">Aplp1.dSep08</a>   | <a href="#">502317</a> | 1404  | 512  | 1  | 106 | amyloid beta (A4) precursor-like protein 1 (Aplp1) alternative variant dSep08, mRNA.              |
| <a href="#">Aplp2</a>   | <a href="#">Aplp2.aSep08</a>   | <a href="#">64312</a>  | 22454 | 3141 | 11 | 631 | amyloid beta (A4) precursor-like protein 2 (Aplp2) alternative variant aSep08, mRNA.              |
| <a href="#">Aplp2</a>   | <a href="#">Aplp2.bSep08</a>   | <a href="#">64312</a>  | 21424 | 1907 | 9  | 552 | amyloid beta (A4) precursor-like protein 2 (Aplp2) alternative variant bSep08, mRNA.              |
| <a href="#">Aplp2</a>   | <a href="#">Aplp2.cSep08</a>   | <a href="#">64312</a>  | 19361 | 397  | 2  | 132 | amyloid beta (A4) precursor-like protein 2 (Aplp2) alternative variant cSep08, mRNA.              |
| <a href="#">Aplp2</a>   | <a href="#">Aplp2.dSep08</a>   | <a href="#">64312</a>  | 3398  | 858  | 2  | 68  | amyloid beta (A4) precursor-like protein 2 (Aplp2) alternative variant dSep08, mRNA.              |
| <a href="#">Apoa1bp</a> | <a href="#">Apoa1bp.aSep08</a> | <a href="#">295229</a> | 2052  | 921  | 6  | 282 | apolipoprotein A-I binding protein (30.9 kD) (Apoa1bp) alternative variant aSep08, complete mRNA. |
| <a href="#">Apoa1bp</a> | <a href="#">Apoa1bp.cSep08</a> | <a href="#">295229</a> | 1304  | 1030 | 4  | 169 | apolipoprotein A-I binding protein (Apoa1bp) alternative variant cSep08, mRNA.                    |
| <a href="#">Apoa1bp</a> | <a href="#">Apoa1bp.dSep08</a> | <a href="#">295229</a> | 953   | 865  | 2  | 139 | apolipoprotein A-I binding protein (Apoa1bp) alternative variant dSep08, mRNA.                    |
| <a href="#">Apoa2</a>   | <a href="#">Apoa2.aSep08</a>   | <a href="#">25649</a>  | 1723  | 497  | 1  | 129 | apolipoprotein A-II (Apoa2) alternative variant aSep08, mRNA.                                     |
| <a href="#">Apoa2</a>   | <a href="#">Apoa2.bSep08</a>   | <a href="#">25649</a>  | 1844  | 465  | 2  | 117 | apolipoprotein A-II (Apoa2) alternative variant bSep08, mRNA.                                     |
| <a href="#">Apob48r</a> | <a href="#">Apob48r.bSep08</a> | <a href="#">499264</a> | 4178  | 1181 |    | 137 | apolipoprotein B48 receptor (Apob48r) alternative variant bSep08, mRNA.                           |
| <a href="#">Apobec1</a> | <a href="#">Apobec1.aSep08</a> | <a href="#">25383</a>  | 3245  | 1216 | 1  | 89  | apolipoprotein B editing complex 1 (10.6 kD) (Apobec1) alternative variant aSep08, mRNA.          |
| <a href="#">Apobec1</a> | <a href="#">Apobec1.bSep08</a> | <a href="#">25383</a>  | 26648 | 1389 | 2  | 86  | apolipoprotein B editing complex 1 (10.3 kD) (Apobec1) alternative variant bSep08, mRNA.          |
| <a href="#">Apobec3</a> | <a href="#">Apobec3.bSep08</a> | <a href="#">315137</a> | 10233 | 774  | 4  | 172 | apolipoprotein B editing complex 3 (Apobec3) alternative variant bSep08, mRNA.                    |
| <a href="#">Apoe</a>    | <a href="#">Apoe.bSep08</a>    | <a href="#">25728</a>  | 2446  | 820  | 4  | 273 | apolipoprotein E (Apoe) alternative variant bSep08, mRNA.                                         |
| <a href="#">Apoe</a>    | <a href="#">Apoe.cSep08</a>    | <a href="#">25728</a>  | 2104  | 599  | 4  | 173 | apolipoprotein E (Apoe) alternative variant cSep08, mRNA.                                         |
| <a href="#">Apol8</a>   | <a href="#">Apol8.aSep08</a>   | <a href="#">315111</a> | 5695  | 557  |    | 185 | apolipoprotein L 8 (Apol8) mRNA.                                                                  |

|                        |                               |                        |        |      |    |     |                                                                                                                                                      |
|------------------------|-------------------------------|------------------------|--------|------|----|-----|------------------------------------------------------------------------------------------------------------------------------------------------------|
| <a href="#">Apol9a</a> | <a href="#">Apol9a.aSep08</a> | <a href="#">503164</a> | 16599  | 1849 | 5  | 366 | apolipoprotein L 7 (39.9 kD) (Apol9a) alternative variant aSep08, mRNA.                                                                              |
| <a href="#">Apol9a</a> | <a href="#">Apol9a.cSep08</a> | <a href="#">503164</a> | 15382  | 729  | 5  | 191 | apolipoprotein L 7 (Apol9a) alternative variant cSep08, mRNA.                                                                                        |
| <a href="#">Apol9a</a> | <a href="#">Apol9a.dSep08</a> | <a href="#">503164</a> | 17452  | 750  | 6  | 154 | apolipoprotein L 7 (Apol9a) alternative variant dSep08, mRNA.                                                                                        |
| <a href="#">Apol9a</a> | <a href="#">Apol9a.eSep08</a> | <a href="#">503164</a> | 15284  | 756  | 6  | 121 | apolipoprotein L 7 (Apol9a) alternative variant eSep08, mRNA.                                                                                        |
| <a href="#">Apol9a</a> | <a href="#">Apol9a.fSep08</a> | <a href="#">503164</a> | 1198   | 735  | 2  | 66  | apolipoprotein L 9 (Apol9a) alternative variant fSep08, mRNA.                                                                                        |
| <a href="#">Apol9a</a> | <a href="#">Apol9a.gSep08</a> | <a href="#">503164</a> | 12435  | 788  | 3  | 50  | apolipoprotein L 7e like (5.8 kD) (Apol9a) alternative variant gSep08, mRNA.                                                                         |
| <a href="#">Apom</a>   | <a href="#">Apom.bSep08</a>   | <a href="#">55939</a>  | 863    | 597  | 1  | 90  | apolipoprotein M (10.2 kD) (Apom) alternative variant bSep08, mRNA.                                                                                  |
| <a href="#">Apool</a>  | <a href="#">Apool.aSep08</a>  | <a href="#">317191</a> | 68127  | 1965 | 1  | 474 | apolipoprotein O-like (Apool) alternative variant aSep08, mRNA.                                                                                      |
| <a href="#">App</a>    | <a href="#">App.bSep08</a>    | <a href="#">54226</a>  | 136655 | 1868 | 11 | 603 | amyloid beta protein (App) alternative variant bSep08, mRNA.                                                                                         |
| <a href="#">App</a>    | <a href="#">App.cSep08</a>    | <a href="#">54226</a>  | 145602 | 2562 | 12 | 554 | amyloid protein (App) alternative variant cSep08, mRNA.                                                                                              |
| <a href="#">App</a>    | <a href="#">App.dSep08</a>    | <a href="#">54226</a>  | 50952  | 550  | 5  | 178 | amyloid protein (App) alternative variant dSep08, mRNA.                                                                                              |
| <a href="#">App</a>    | <a href="#">App.eSep08</a>    | <a href="#">54226</a>  | 51464  | 404  | 2  | 134 | amyloid protein (App) alternative variant eSep08, mRNA.                                                                                              |
| <a href="#">App</a>    | <a href="#">App.fSep08</a>    | <a href="#">54226</a>  | 6277   | 648  | 2  | 111 | amyloid beta protein (12.4 kD) (App) alternative variant fSep08, mRNA.                                                                               |
| <a href="#">App</a>    | <a href="#">App.gSep08</a>    | <a href="#">54226</a>  | 12107  | 419  | 3  | 86  | amyloid protein (App) alternative variant gSep08, mRNA.                                                                                              |
| <a href="#">Appl2</a>  | <a href="#">Appl2.aSep08</a>  | <a href="#">362860</a> | 49153  | 2962 | 21 | 662 | adaptor protein, phosphotyrosine interaction, PH domain and leucine zipper containing 2 (74.1 kD) (Appl2) alternative variant aSep08, complete mRNA. |
| <a href="#">Appl2</a>  | <a href="#">Appl2.bSep08</a>  | <a href="#">362860</a> | 9555   | 1123 | 9  | 374 | adaptor protein, phosphotyrosine interaction, PH domain and leucine zipper containing 2 (Appl2) alternative variant bSep08, mRNA.                    |
| <a href="#">Appl2</a>  | <a href="#">Appl2.cSep08</a>  | <a href="#">362860</a> | 5165   | 536  | 6  | 178 | adaptor protein, phosphotyrosine interaction, PH domain and leucine zipper containing 2 (Appl2) alternative variant cSep08, mRNA.                    |
| <a href="#">Appl2</a>  | <a href="#">Appl2.dSep08</a>  | <a href="#">362860</a> | 3486   | 1799 | 3  | 55  | adaptor protein, phosphotyrosine interaction, PH domain and leucine zipper containing 2 (6.1 kD) (Appl2) alternative variant dSep08, mRNA.           |
| <a href="#">Appl2</a>  | <a href="#">Appl2.eSep08</a>  | <a href="#">362860</a> | 2462   | 561  | 3  | 48  | adaptor protein, phosphotyrosine interaction, PH domain and leucine zipper containing 2 (Appl2) alternative variant eSep08, mRNA.                    |
| <a href="#">Aprt</a>   | <a href="#">Aprt.bSep08</a>   | <a href="#">292072</a> | 2138   | 843  | 4  | 117 | adenine phosphoribosyl transferase (12.6 kD) (Aprt) alternative variant bSep08, mRNA.                                                                |
| <a href="#">Aqp2</a>   | <a href="#">Aqp2.bSep08</a>   | <a href="#">25386</a>  | 3419   | 487  | 1  | 108 | aquaporin 2 (Aqp2) alternative variant bSep08, mRNA.                                                                                                 |
| <a href="#">Aqp4</a>   | <a href="#">Aqp4.bSep08</a>   | <a href="#">25293</a>  | 4406   | 617  | 3  | 205 | aquaporin 4 (Aqp4) alternative variant bSep08, mRNA.                                                                                                 |
| <a href="#">Aqp5</a>   | <a href="#">Aqp5.bSep08</a>   | <a href="#">25241</a>  | 2071   | 993  | 1  | 134 | aquaporin 5 (14.9 kD) (Aqp5) alternative variant bSep08, mRNA.                                                                                       |
| <a href="#">Aqp7</a>   | <a href="#">Aqp7.bSep08</a>   | <a href="#">29171</a>  | 9160   | 388  | 1  | 129 | aquaporin 7 (Aqp7) alternative variant bSep08, mRNA.                                                                                                 |

|                       |                              |                        |       |      |   |     |                                                                                                              |
|-----------------------|------------------------------|------------------------|-------|------|---|-----|--------------------------------------------------------------------------------------------------------------|
| <a href="#">Aqp8</a>  | <a href="#">Aqp8.bSep08</a>  | <a href="#">29172</a>  | 3059  | 751  | 4 | 202 | aquaporin 8 (21.3 kD) (Aqp8) alternative variant bSep08, mRNA.                                               |
| <a href="#">Aqp9</a>  | <a href="#">Aqp9.bSep08</a>  | <a href="#">65054</a>  | 31519 | 972  | 5 | 237 | aquaporin 9 (Aqp9) alternative variant bSep08, mRNA.                                                         |
| <a href="#">Aqr</a>   | <a href="#">Aqr.bSep08</a>   | <a href="#">366163</a> | 7275  | 558  | 3 | 147 | aquarius (Aqr) alternative variant bSep08, mRNA.                                                             |
| <a href="#">Aqr</a>   | <a href="#">Aqr.cSep08</a>   | <a href="#">366163</a> | 1838  | 810  | 2 | 102 | aquarius (Aqr) alternative variant cSep08, mRNA.                                                             |
| <a href="#">Araf</a>  | <a href="#">Araf.bSep08</a>  | <a href="#">64363</a>  | 4960  | 1091 | 7 | 363 | v-raf murine sarcoma 3611 viral oncogene homolog (Araf) alternative variant bSep08, mRNA.                    |
| <a href="#">Araf</a>  | <a href="#">Araf.cSep08</a>  | <a href="#">64363</a>  | 2395  | 912  | 6 | 295 | v-raf murine sarcoma 3611 viral oncogene homolog (Araf) alternative variant cSep08, mRNA.                    |
| <a href="#">Araf</a>  | <a href="#">Araf.dSep08</a>  | <a href="#">64363</a>  | 4551  | 874  | 5 | 291 | v-raf murine sarcoma 3611 viral oncogene homolog (Araf) alternative variant dSep08, mRNA.                    |
| <a href="#">Araf</a>  | <a href="#">Araf.eSep08</a>  | <a href="#">64363</a>  | 7107  | 1036 | 7 | 219 | v-raf murine sarcoma 3611 viral oncogene homolog (24.7 kD) (Araf) alternative variant eSep08, mRNA.          |
| <a href="#">Araf</a>  | <a href="#">Araf.gSep08</a>  | <a href="#">64363</a>  | 2136  | 929  | 4 | 172 | v-raf murine sarcoma 3611 viral oncogene homolog (Araf) alternative variant gSep08, mRNA.                    |
| <a href="#">Araf</a>  | <a href="#">Araf.hSep08</a>  | <a href="#">64363</a>  | 3742  | 1052 | 6 | 170 | v-raf murine sarcoma 3611 viral oncogene homolog (19.0 kD) (Araf) alternative variant hSep08, complete mRNA. |
| <a href="#">Araf</a>  | <a href="#">Araf.iSep08</a>  | <a href="#">64363</a>  | 3482  | 925  | 5 | 153 | v-raf murine sarcoma 3611 viral oncogene homolog (17.2 kD) (Araf) alternative variant iSep08, complete mRNA. |
| <a href="#">Araf</a>  | <a href="#">Araf.kSep08</a>  | <a href="#">64363</a>  | 1220  | 1056 | 2 | 62  | v-raf murine sarcoma 3611 viral oncogene homolog (Araf) alternative variant kSep08, mRNA.                    |
| <a href="#">Arbp</a>  | <a href="#">Arbp.bSep08</a>  | <a href="#">64205</a>  | 2232  | 861  | 5 | 271 | acidic ribosomal phosphoprotein P0 (Arbp) alternative variant bSep08, mRNA.                                  |
| <a href="#">Arcn1</a> | <a href="#">Arcn1.bSep08</a> | <a href="#">300674</a> | 11372 | 755  | 4 | 204 | archain 1 (Arcn1) alternative variant bSep08, mRNA.                                                          |
| <a href="#">Ard1</a>  | <a href="#">Ard1.aSep08</a>  | <a href="#">363518</a> | 5132  | 873  | 8 | 265 | N-acetyltransferase ARD1 homolog (S. cerevisiae) (Ard1) alternative variant aSep08, mRNA.                    |
| <a href="#">Ard1</a>  | <a href="#">Ard1.bSep08</a>  | <a href="#">363518</a> | 4163  | 758  | 6 | 185 | N-acetyltransferase ARD1 homolog (S. cerevisiae) (Ard1) alternative variant bSep08, mRNA.                    |
| <a href="#">Ard1</a>  | <a href="#">Ard1.cSep08</a>  | <a href="#">363518</a> | 2815  | 543  | 3 | 154 | N-acetyltransferase ARD1 homolog (S. cerevisiae) (Ard1) alternative variant cSep08, mRNA.                    |
| <a href="#">Ard1</a>  | <a href="#">Ard1.dSep08</a>  | <a href="#">363518</a> | 2749  | 568  | 3 | 121 | N-acetyltransferase ARD1 homolog (S. cerevisiae) (Ard1) alternative variant dSep08, mRNA.                    |
| <a href="#">Ard1</a>  | <a href="#">Ard1.fSep08</a>  | <a href="#">363518</a> | 2312  | 759  | 2 | 68  | N-acetyltransferase ARD1 homolog (S. cerevisiae) (Ard1) alternative variant fSep08, mRNA.                    |
| <a href="#">Arf.0</a> | <a href="#">Arf.0.aSep08</a> |                        | 3522  | 2404 |   | 97  | tripartite motif protein 23 CRA a (Arf.0) mRNA.                                                              |
| <a href="#">Arf1</a>  | <a href="#">Arf1.aSep08</a>  | <a href="#">64310</a>  | 16476 | 1774 | 5 | 214 | ADP-ribosylation factor 1 (Arf1) alternative variant aSep08, mRNA.                                           |
| <a href="#">Arf1</a>  | <a href="#">Arf1.bSep08</a>  | <a href="#">64310</a>  | 15425 | 786  | 6 | 195 | ADP-ribosylation factor 1 (22.4 kD) (Arf1) alternative variant bSep08, mRNA.                                 |
| <a href="#">Arf1</a>  | <a href="#">Arf1.dSep08</a>  | <a href="#">64310</a>  | 15827 | 1014 | 4 | 144 | ADP-ribosylation factor 1 (16.2 kD) (Arf1) alternative variant dSep08, mRNA.                                 |
| <a href="#">Arf1</a>  | <a href="#">Arf1.eSep08</a>  | <a href="#">64310</a>  | 14716 | 405  | 2 | 75  | ADP-ribosylation factor 1 (Arf1) alternative variant eSep08, mRNA.                                           |
| <a href="#">Arf2</a>  | <a href="#">Arf2.aSep08</a>  | <a href="#">79119</a>  | 20513 | 1316 | 2 | 189 | ADP-ribosylation factor 2 (21.6 kD) (Arf2) alternative variant aSep08, mRNA.                                 |



|                               |                                      |                        |       |      |    |     |                                                                                                                                 |
|-------------------------------|--------------------------------------|------------------------|-------|------|----|-----|---------------------------------------------------------------------------------------------------------------------------------|
| <a href="#">Arf3andFkbp11</a> | <a href="#">Arf3andFkbp11.aSep08</a> | <a href="#">140940</a> | 3437  | 720  | 6  | 201 | FK506 binding protein 11 like (22.2 kD) (Arf3andFkbp11) alternative variant aSep08, mRNA.                                       |
| <a href="#">Arf3andFkbp11</a> | <a href="#">Arf3andFkbp11.aSep08</a> | <a href="#">300211</a> | 3437  | 720  | 6  | 201 | FK506 binding protein 11 like (22.2 kD) (Arf3andFkbp11) alternative variant aSep08, mRNA.                                       |
| <a href="#">Arf3andFkbp11</a> | <a href="#">Arf3andFkbp11.cSep08</a> | <a href="#">140940</a> | 3404  | 516  | 3  | 144 | FK506 binding protein 11 like (16.0 kD) (Arf3andFkbp11) alternative variant cSep08, mRNA.                                       |
| <a href="#">Arf3andFkbp11</a> | <a href="#">Arf3andFkbp11.cSep08</a> | <a href="#">300211</a> | 3404  | 516  | 3  | 144 | FK506 binding protein 11 like (16.0 kD) (Arf3andFkbp11) alternative variant cSep08, mRNA.                                       |
| <a href="#">Arf3andFkbp11</a> | <a href="#">Arf3andFkbp11.dSep08</a> | <a href="#">140940</a> | 2719  | 450  | 5  | 142 | FK506 binding protein 11 like (Arf3andFkbp11) alternative variant dSep08, mRNA.                                                 |
| <a href="#">Arf3andFkbp11</a> | <a href="#">Arf3andFkbp11.dSep08</a> | <a href="#">300211</a> | 2719  | 450  | 5  | 142 | FK506 binding protein 11 like (Arf3andFkbp11) alternative variant dSep08, mRNA.                                                 |
| <a href="#">Arf3andFkbp11</a> | <a href="#">Arf3andFkbp11.eSep08</a> | <a href="#">140940</a> | 17968 | 588  | 4  | 123 | ADP-ribosylation factor (Arf3andFkbp11) alternative variant eSep08, mRNA.                                                       |
| <a href="#">Arf3andFkbp11</a> | <a href="#">Arf3andFkbp11.eSep08</a> | <a href="#">300211</a> | 17968 | 588  | 4  | 123 | ADP-ribosylation factor (Arf3andFkbp11) alternative variant eSep08, mRNA.                                                       |
| <a href="#">Arf3andFkbp11</a> | <a href="#">Arf3andFkbp11.gSep08</a> | <a href="#">140940</a> | 1275  | 535  | 2  | 88  | putative protein human specific (Arf3andFkbp11) alternative variant gSep08, mRNA.                                               |
| <a href="#">Arf3andFkbp11</a> | <a href="#">Arf3andFkbp11.gSep08</a> | <a href="#">300211</a> | 1275  | 535  | 2  | 88  | putative protein human specific (Arf3andFkbp11) alternative variant gSep08, mRNA.                                               |
| <a href="#">Arf4</a>          | <a href="#">Arf4.aSep08</a>          | <a href="#">79120</a>  | 13682 | 897  | 5  | 186 | ADP-ribosylation factor 4 (20.9 kD) (Arf4) alternative variant aSep08, mRNA.                                                    |
| <a href="#">Arf4l</a>         | <a href="#">Arf4l.bSep08</a>         | <a href="#">303559</a> | 7470  | 500  | 2  | 48  | ADP-ribosylation factor 4-like (Arf4l) alternative variant bSep08, mRNA.                                                        |
| <a href="#">Arf4l</a>         | <a href="#">Arf4l.cSep08</a>         | <a href="#">303559</a> | 13066 | 296  | 2  | 49  | ADP-ribosylation factor 4-like (Arf4l) alternative variant cSep08, mRNA.                                                        |
| <a href="#">Arfgap1</a>       | <a href="#">Arfgap1.bSep08</a>       | <a href="#">246310</a> | 26715 | 2964 | 12 | 330 | ADP-ribosylation factor GTPase activating protein 1 (36.0 kD) (Arfgap1) alternative variant bSep08, complete mRNA.              |
| <a href="#">Arfgap1</a>       | <a href="#">Arfgap1.cSep08</a>       | <a href="#">246310</a> | 5402  | 685  | 6  | 204 | ADP-ribosylation factor GTPase activating protein 1 (Arfgap1) alternative variant cSep08, mRNA.                                 |
| <a href="#">Arfgap1</a>       | <a href="#">Arfgap1.dSep08</a>       | <a href="#">246310</a> | 18660 | 535  | 7  | 178 | ADP-ribosylation factor GTPase activating protein 1 (Arfgap1) alternative variant dSep08, mRNA.                                 |
| <a href="#">Arfgap1</a>       | <a href="#">Arfgap1.eSep08</a>       | <a href="#">246310</a> | 2211  | 1386 | 2  | 103 | ADP-ribosylation factor GTPase activating protein 1 (Arfgap1) alternative variant eSep08, mRNA.                                 |
| <a href="#">Arfgap1</a>       | <a href="#">Arfgap1.fSep08</a>       | <a href="#">246310</a> | 2594  | 1633 | 3  | 59  | ADP-ribosylation factor GTPase activating protein 1 (6.5 kD) (Arfgap1) alternative variant fSep08, mRNA.                        |
| <a href="#">Arfgap1</a>       | <a href="#">Arfgap1.hSep08</a>       | <a href="#">246310</a> | 567   | 358  | 2  | 88  | ADP-ribosylation factor GTPase activating protein 1 (Arfgap1) alternative variant hSep08, mRNA.                                 |
| <a href="#">Arfgap2</a>       | <a href="#">Arfgap2.bSep08</a>       | <a href="#">362162</a> | 2751  | 503  |    | 139 | ADP-ribosylation factor GTPase activating protein 2 (Arfgap2) alternative variant bSep08, mRNA.                                 |
| <a href="#">Arfgef1</a>       | <a href="#">Arfgef1.aSep08</a>       | <a href="#">312915</a> | 43731 | 4131 | 22 | 958 | ADP-ribosylation factor guanine nucleotide-exchange factor 1(brefeldin A-inhibited) (Arfgef1) alternative variant aSep08, mRNA. |
| <a href="#">Arfgef1</a>       | <a href="#">Arfgef1.bSep08</a>       | <a href="#">312915</a> | 4874  | 885  | 4  | 230 | ADP-ribosylation factor guanine nucleotide-exchange factor 1(brefeldin A-inhibited) (Arfgef1) alternative variant bSep08, mRNA. |

|                         |                                |                        |       |      |    |     |                                                                                                           |
|-------------------------|--------------------------------|------------------------|-------|------|----|-----|-----------------------------------------------------------------------------------------------------------|
| <a href="#">Arfp1</a>   | <a href="#">Arfp1.bSep08</a>   | <a href="#">60382</a>  | 53150 | 472  | 5  | 157 | ADP-ribosylation factor interacting protein 1 (Arfp1) alternative variant bSep08, mRNA.                   |
| <a href="#">Arfp1</a>   | <a href="#">Arfp1.cSep08</a>   | <a href="#">60382</a>  | 53120 | 584  | 6  | 119 | ADP-ribosylation factor interacting protein 1 (Arfp1) alternative variant cSep08, mRNA.                   |
| <a href="#">Arfp1</a>   | <a href="#">Arfp1.dSep08</a>   | <a href="#">60382</a>  | 16175 | 1846 | 2  | 62  | ADP-ribosylation factor interacting protein 1 (Arfp1) alternative variant dSep08, mRNA.                   |
| <a href="#">Arfp2</a>   | <a href="#">Arfp2.bSep08</a>   | <a href="#">293344</a> | 3198  | 1008 | 6  | 233 | ADP-ribosylation factor interacting protein 2 (25.0 kD) (Arfp2) alternative variant bSep08, mRNA.         |
| <a href="#">Arfp2</a>   | <a href="#">Arfp2.cSep08</a>   | <a href="#">293344</a> | 3068  | 671  | 6  | 191 | ADP-ribosylation factor interacting protein 2 (Arfp2) alternative variant cSep08, mRNA.                   |
| <a href="#">Arfp2</a>   | <a href="#">Arfp2.dSep08</a>   | <a href="#">293344</a> | 2527  | 663  | 5  | 188 | ADP-ribosylation factor interacting protein 2 (Arfp2) alternative variant dSep08, mRNA.                   |
| <a href="#">Arfp2</a>   | <a href="#">Arfp2.eSep08</a>   | <a href="#">293344</a> | 1847  | 1000 | 3  | 116 | ADP-ribosylation factor interacting protein 2 (Arfp2) alternative variant eSep08, mRNA.                   |
| <a href="#">Arfp2</a>   | <a href="#">Arfp2.hSep08</a>   | <a href="#">293344</a> | 1413  | 396  | 3  | 87  | ADP-ribosylation factor interacting protein 2 (9.0 kD) (Arfp2) alternative variant hSep08, complete mRNA. |
| <a href="#">Arfrp1</a>  | <a href="#">Arfrp1.bSep08</a>  | <a href="#">117051</a> | 5555  | 628  | 6  | 157 | ADP-ribosylation factor related protein 1 (Arfrp1) alternative variant bSep08, mRNA.                      |
| <a href="#">Arfrp1</a>  | <a href="#">Arfrp1.cSep08</a>  | <a href="#">117051</a> | 7534  | 2368 | 5  | 126 | ADP-ribosylation factor related protein 1 (14.5 kD) (Arfrp1) alternative variant cSep08, complete mRNA.   |
| <a href="#">Arfrp1</a>  | <a href="#">Arfrp1.dSep08</a>  | <a href="#">117051</a> | 5895  | 830  | 6  | 121 | ADP-ribosylation factor related protein 1 (13.9 kD) (Arfrp1) alternative variant dSep08, mRNA.            |
| <a href="#">Arfrp1</a>  | <a href="#">Arfrp1.eSep08</a>  | <a href="#">117051</a> | 5816  | 1783 | 4  | 83  | ADP-ribosylation factor related protein 1 (Arfrp1) alternative variant eSep08, mRNA.                      |
| <a href="#">Arfrp1</a>  | <a href="#">Arfrp1.fSep08</a>  | <a href="#">117051</a> | 786   | 713  | 2  | 57  | ADP-ribosylation factor related protein 1 (Arfrp1) alternative variant fSep08, mRNA.                      |
| <a href="#">Argbp2</a>  | <a href="#">Argbp2.aSep08</a>  | <a href="#">114901</a> | 53630 | 3696 | 11 | 514 | arg/Abl-interacting protein ArgBP2 (Argbp2) alternative variant aSep08, mRNA.                             |
| <a href="#">Argbp2</a>  | <a href="#">Argbp2.bSep08</a>  | <a href="#">114901</a> | 33694 | 718  | 7  | 238 | arg/Abl-interacting protein ArgBP2 (Argbp2) alternative variant bSep08, mRNA.                             |
| <a href="#">Argbp2</a>  | <a href="#">Argbp2.cSep08</a>  | <a href="#">114901</a> | 22949 | 917  | 2  | 199 | arg/Abl-interacting protein ArgBP2 (Argbp2) alternative variant cSep08, mRNA.                             |
| <a href="#">Arhgap1</a> | <a href="#">Arhgap1.aSep08</a> | <a href="#">311193</a> | 21934 | 2880 | 13 | 484 | rho GTPase activating protein 1 (Arhgap1) alternative variant aSep08, mRNA.                               |
| <a href="#">Arhgap1</a> | <a href="#">Arhgap1.bSep08</a> | <a href="#">311193</a> | 1976  | 930  | 6  | 253 | rho GTPase activating protein 1 (Arhgap1) alternative variant bSep08, mRNA.                               |
| <a href="#">Arhgap1</a> | <a href="#">Arhgap1.cSep08</a> | <a href="#">311193</a> | 18113 | 751  | 5  | 250 | rho GTPase activating protein 1 (Arhgap1) alternative variant cSep08, mRNA.                               |
| <a href="#">Arhgap1</a> | <a href="#">Arhgap1.dSep08</a> | <a href="#">311193</a> | 18751 | 802  | 9  | 225 | rho GTPase activating protein 1 (Arhgap1) alternative variant dSep08, mRNA.                               |
| <a href="#">Arhgap1</a> | <a href="#">Arhgap1.eSep08</a> | <a href="#">311193</a> | 18673 | 761  | 9  | 215 | rho GTPase activating protein 1 (Arhgap1) alternative variant eSep08, mRNA.                               |
| <a href="#">Arhgap1</a> | <a href="#">Arhgap1.fSep08</a> | <a href="#">311193</a> | 18371 | 759  | 9  | 204 | rho GTPase activating protein 1 (Arhgap1) alternative variant fSep08, mRNA.                               |
| <a href="#">Arhgap1</a> | <a href="#">Arhgap1.gSep08</a> | <a href="#">311193</a> | 18783 | 771  | 8  | 187 | rho GTPase activating protein 1 (21.3 kD) (Arhgap1) alternative variant gSep08, mRNA.                     |

|                           |                                  |                        |        |      |    |      |                                                                                                |
|---------------------------|----------------------------------|------------------------|--------|------|----|------|------------------------------------------------------------------------------------------------|
| <a href="#">Arhgap1</a>   | <a href="#">Arhgap1.hSep08</a>   | <a href="#">311193</a> | 17823  | 460  | 6  | 130  | rho GTPase activating protein 1 (Arhgap1) alternative variant hSep08, mRNA.                    |
| <a href="#">Arhgap1</a>   | <a href="#">Arhgap1.iSep08</a>   | <a href="#">311193</a> | 15575  | 647  | 6  | 115  | rho GTPase activating protein 1 (12.9 kD) (Arhgap1) alternative variant iSep08, complete mRNA. |
| <a href="#">Arhgap1</a>   | <a href="#">Arhgap1.jSep08</a>   | <a href="#">311193</a> | 12081  | 524  | 4  | 106  | rho GTPase activating protein 1 (12.0 kD) (Arhgap1) alternative variant jSep08, mRNA.          |
| <a href="#">Arhgap1</a>   | <a href="#">Arhgap1.kSep08</a>   | <a href="#">311193</a> | 4242   | 293  | 4  | 42   | putative protein (4.5 kD) (Arhgap1) alternative variant kSep08, mRNA.                          |
| <a href="#">Arhgap1</a>   | <a href="#">Arhgap1.lSep08</a>   | <a href="#">311193</a> | 1319   | 982  | 3  | 53   | rho GTPase activating protein 1 (5.8 kD) (Arhgap1) alternative variant lSep08, mRNA.           |
| <a href="#">Arhgap4</a>   | <a href="#">Arhgap4.bSep08</a>   | <a href="#">246249</a> | 2562   | 1096 | 6  | 170  | rho GTPase activating protein 4 (19.3 kD) (Arhgap4) alternative variant bSep08, mRNA.          |
| <a href="#">Arhgap4</a>   | <a href="#">Arhgap4.cSep08</a>   | <a href="#">246249</a> | 1934   | 653  | 3  | 151  | rho GTPase activating protein 4 (Arhgap4) alternative variant cSep08, mRNA.                    |
| <a href="#">Arhgap4</a>   | <a href="#">Arhgap4.dSep08</a>   | <a href="#">246249</a> | 363    | 288  | 2  | 95   | rho GTPase activating protein 4 (Arhgap4) alternative variant dSep08, mRNA.                    |
| <a href="#">Arhgap5</a>   | <a href="#">Arhgap5.aSep08</a>   | <a href="#">299012</a> | 48097  | 5049 | 5  | 1290 | rho GTPase activating protein 5 (Arhgap5) alternative variant aSep08, mRNA.                    |
| <a href="#">Arhgap9</a>   | <a href="#">Arhgap9.cSep08</a>   | <a href="#">362893</a> | 2225   | 729  | 8  | 242  | rho GTPase activating protein 9 (Arhgap9) alternative variant cSep08, mRNA.                    |
| <a href="#">Arhgap9</a>   | <a href="#">Arhgap9.dSep08</a>   | <a href="#">362893</a> | 1574   | 784  | 6  | 182  | rho GTPase activating protein 9 (Arhgap9) alternative variant dSep08, mRNA.                    |
| <a href="#">Arhgap9</a>   | <a href="#">Arhgap9.eSep08</a>   | <a href="#">362893</a> | 2205   | 742  | 5  | 157  | rho GTPase activating protein 9 (Arhgap9) alternative variant eSep08, mRNA.                    |
| <a href="#">Arhgap9</a>   | <a href="#">Arhgap9.fSep08</a>   | <a href="#">362893</a> | 3008   | 785  | 8  | 154  | rho GTPase activating protein 9 (Arhgap9) alternative variant fSep08, mRNA.                    |
| <a href="#">Arhgap9</a>   | <a href="#">Arhgap9.hSep08</a>   | <a href="#">362893</a> | 2559   | 694  | 6  | 90   | rho GTPase activating protein 9 (Arhgap9) alternative variant hSep08, mRNA.                    |
| <a href="#">Arhgap9</a>   | <a href="#">Arhgap9.iSep08</a>   | <a href="#">362893</a> | 2433   | 693  | 5  | 86   | rho GTPase activating protein 9 (9.2 kD) (Arhgap9) alternative variant iSep08, mRNA.           |
| <a href="#">Arhgap9</a>   | <a href="#">Arhgap9.jSep08</a>   | <a href="#">362893</a> | 1220   | 644  | 2  | 104  | rho GTPase activating protein 9 (11.1 kD) (Arhgap9) alternative variant jSep08, mRNA.          |
| <a href="#">Arhgap10</a>  | <a href="#">Arhgap10.bSep08</a>  | <a href="#">688429</a> | 62059  | 707  | 9  | 235  | rho GTPase activating protein 10 (Arhgap10) alternative variant bSep08, mRNA.                  |
| <a href="#">Arhgap10</a>  | <a href="#">Arhgap10.cSep08</a>  | <a href="#">688429</a> | 70037  | 400  | 4  | 86   | rho GTPase activating protein 10 (Arhgap10) alternative variant cSep08, mRNA.                  |
| <a href="#">Arhgap11a</a> | <a href="#">Arhgap11a.aSep08</a> | <a href="#">296060</a> | 8481   | 1019 |    | 325  | rho GTPase activating protein 11A (Arhgap11a) mRNA.                                            |
| <a href="#">Arhgap12</a>  | <a href="#">Arhgap12.bSep08</a>  | <a href="#">307016</a> | 4422   | 729  | 4  | 158  | rho GTPase activating protein 12 (Arhgap12) alternative variant bSep08, mRNA.                  |
| <a href="#">Arhgap17</a>  | <a href="#">Arhgap17.bSep08</a>  | <a href="#">63994</a>  | 21904  | 4305 | 8  | 440  | rho GTPase activating protein 17 (Arhgap17) alternative variant bSep08, mRNA.                  |
| <a href="#">Arhgap18</a>  | <a href="#">Arhgap18.aSep08</a>  | <a href="#">293947</a> | 148407 | 2300 | 14 | 692  | rho GTPase activating protein 18 (Arhgap18) alternative variant aSep08, mRNA.                  |
| <a href="#">Arhgap18</a>  | <a href="#">Arhgap18.bSep08</a>  | <a href="#">293947</a> | 49603  | 788  | 6  | 235  | rho GTPase activating protein 18 (Arhgap18) alternative variant bSep08, mRNA.                  |
| <a href="#">Arhgap21</a>  | <a href="#">Arhgap21.aSep08</a>  | <a href="#">307178</a> | 15054  | 1851 | 11 | 616  | rho GTPase activating protein 21 (Arhgap21) alternative variant aSep08, mRNA.                  |

|                          |                                 |                        |        |      |    |     |                                                                                                  |
|--------------------------|---------------------------------|------------------------|--------|------|----|-----|--------------------------------------------------------------------------------------------------|
| <a href="#">Arhgap21</a> | <a href="#">Arhgap21.bSep08</a> | <a href="#">307178</a> | 12665  | 3040 | 6  | 320 | rho GTPase activating protein 21 (Arhgap21) alternative variant bSep08, mRNA.                    |
| <a href="#">Arhgap21</a> | <a href="#">Arhgap21.cSep08</a> | <a href="#">307178</a> | 4781   | 434  | 1  | 118 | rho GTPase activating protein 21 (Arhgap21) alternative variant cSep08, mRNA.                    |
| <a href="#">Arhgap22</a> | <a href="#">Arhgap22.bSep08</a> | <a href="#">306279</a> | 15506  | 1471 | 3  | 490 | rho GTPase activating protein 22 (Arhgap22) alternative variant bSep08, mRNA.                    |
| <a href="#">Arhgap23</a> | <a href="#">Arhgap23.aSep08</a> | <a href="#">303501</a> | 39983  | 2258 | 10 | 364 | rho GTPase activating protein 23 (Arhgap23) alternative variant aSep08, mRNA.                    |
| <a href="#">Arhgap23</a> | <a href="#">Arhgap23.bSep08</a> | <a href="#">303501</a> | 11282  | 379  |    | 126 | rho GTPase activating protein 23 (Arhgap23) alternative variant bSep08, mRNA.                    |
| <a href="#">Arhgap24</a> | <a href="#">Arhgap24.bSep08</a> | <a href="#">305156</a> | 42079  | 699  | 6  | 214 | rho GTPase activating protein 24 (Arhgap24) alternative variant bSep08, mRNA.                    |
| <a href="#">Arhgap24</a> | <a href="#">Arhgap24.cSep08</a> | <a href="#">305156</a> | 152149 | 801  | 6  | 185 | rho GTPase activating protein 24 (Arhgap24) alternative variant cSep08, mRNA.                    |
| <a href="#">Arhgap24</a> | <a href="#">Arhgap24.dSep08</a> | <a href="#">305156</a> | 355122 | 597  | 5  | 158 | rho GTPase activating protein 24 (Arhgap24) alternative variant dSep08, mRNA.                    |
| <a href="#">Arhgap24</a> | <a href="#">Arhgap24.eSep08</a> | <a href="#">305156</a> | 103165 | 580  | 4  | 115 | rho GTPase activating protein 24 (Arhgap24) alternative variant eSep08, mRNA.                    |
| <a href="#">Arhgap24</a> | <a href="#">Arhgap24.gSep08</a> | <a href="#">305156</a> | 133564 | 389  | 4  | 66  | rho GTPase activating protein 24 (Arhgap24) alternative variant gSep08, mRNA.                    |
| <a href="#">Arhgap27</a> | <a href="#">Arhgap27.bSep08</a> | <a href="#">303583</a> | 4009   | 1361 | 4  | 183 | rho GTPase activating protein 27 (Arhgap27) alternative variant bSep08, mRNA.                    |
| <a href="#">Arhgap27</a> | <a href="#">Arhgap27.cSep08</a> | <a href="#">303583</a> | 2506   | 400  | 3  | 91  | rho GTPase activating protein 27 (Arhgap27) alternative variant cSep08, mRNA.                    |
| <a href="#">Arhgap28</a> | <a href="#">Arhgap28.aSep08</a> | <a href="#">301709</a> | 28869  | 2846 |    | 336 | rho GTPase activating protein 28 (Arhgap28) mRNA.                                                |
| <a href="#">Arhgap29</a> | <a href="#">Arhgap29.bSep08</a> | <a href="#">310833</a> | 36164  | 754  | 6  | 186 | rho GTPase activating protein 29 (Arhgap29) alternative variant bSep08, mRNA.                    |
| <a href="#">Arhgap29</a> | <a href="#">Arhgap29.cSep08</a> | <a href="#">310833</a> | 6758   | 354  | 2  | 68  | rho GTPase activating protein 29 (Arhgap29) alternative variant cSep08, mRNA.                    |
| <a href="#">Arhgdia</a>  | <a href="#">Arhgdia.aSep08</a>  | <a href="#">360678</a> | 1915   | 721  | 6  | 240 | rho GDP dissociation inhibitor (GDI) alpha (Arhgdia) alternative variant aSep08, mRNA.           |
| <a href="#">Arhgdia</a>  | <a href="#">Arhgdia.cSep08</a>  | <a href="#">360678</a> | 1609   | 566  | 5  | 127 | rho GDP dissociation inhibitor (GDI) alpha (Arhgdia) alternative variant cSep08, mRNA.           |
| <a href="#">Arhgdia</a>  | <a href="#">Arhgdia.dSep08</a>  | <a href="#">360678</a> | 514    | 428  | 2  | 92  | rho GDP dissociation inhibitor (GDI) alpha (Arhgdia) alternative variant dSep08, mRNA.           |
| <a href="#">Arhgdib</a>  | <a href="#">Arhgdib.aSep08</a>  | <a href="#">362456</a> | 18019  | 747  | 4  | 200 | rho, GDP dissociation inhibitor (GDI) beta (22.9 kD) (Arhgdib) alternative variant aSep08, mRNA. |
| <a href="#">Arhgdib</a>  | <a href="#">Arhgdib.bSep08</a>  | <a href="#">362456</a> | 18449  | 743  | 4  | 200 | rho, GDP dissociation inhibitor (GDI) beta (22.9 kD) (Arhgdib) alternative variant bSep08, mRNA. |
| <a href="#">Arhgdib</a>  | <a href="#">Arhgdib.cSep08</a>  | <a href="#">362456</a> | 17590  | 753  | 4  | 200 | rho, GDP dissociation inhibitor (GDI) beta (22.9 kD) (Arhgdib) alternative variant cSep08, mRNA. |
| <a href="#">Arhgdib</a>  | <a href="#">Arhgdib.dSep08</a>  | <a href="#">362456</a> | 18092  | 780  | 4  | 200 | rho, GDP dissociation inhibitor (GDI) beta (22.9 kD) (Arhgdib) alternative variant dSep08, mRNA. |
| <a href="#">Arhgdib</a>  | <a href="#">Arhgdib.fSep08</a>  | <a href="#">362456</a> | 12772  | 907  | 2  | 161 | rho, GDP dissociation inhibitor (GDI) beta (18.0 kD) (Arhgdib) alternative variant fSep08, mRNA. |
| <a href="#">Arhgef1</a>  | <a href="#">Arhgef1.aSep08</a>  | <a href="#">60323</a>  | 16341  | 2993 | 26 | 884 | rho guanine nucleotide exchange factor 1 (Arhgef1) alternative variant aSep08, mRNA.             |

|                         |                                |                        |        |      |    |      |                                                                                                  |
|-------------------------|--------------------------------|------------------------|--------|------|----|------|--------------------------------------------------------------------------------------------------|
| <a href="#">Arhgef1</a> | <a href="#">Arhgef1.bSep08</a> | <a href="#">60323</a>  | 9701   | 796  | 9  | 265  | rho guanine nucleotide exchange factor 1 (Arhgef1) alternative variant bSep08, mRNA.             |
| <a href="#">Arhgef1</a> | <a href="#">Arhgef1.cSep08</a> | <a href="#">60323</a>  | 4590   | 744  | 5  | 219  | rho guanine nucleotide exchange factor 1 (Arhgef1) alternative variant cSep08, mRNA.             |
| <a href="#">Arhgef1</a> | <a href="#">Arhgef1.dSep08</a> | <a href="#">60323</a>  | 2368   | 655  | 7  | 218  | rho guanine nucleotide exchange factor 1 (Arhgef1) alternative variant dSep08, mRNA.             |
| <a href="#">Arhgef1</a> | <a href="#">Arhgef1.eSep08</a> | <a href="#">60323</a>  | 987    | 915  | 2  | 155  | rho guanine nucleotide exchange factor 1 (Arhgef1) alternative variant eSep08, mRNA.             |
| <a href="#">Arhgef1</a> | <a href="#">Arhgef1.fSep08</a> | <a href="#">60323</a>  | 3009   | 1664 | 6  | 142  | rho guanine nucleotide exchange factor 1 (Arhgef1) alternative variant fSep08, mRNA.             |
| <a href="#">Arhgef1</a> | <a href="#">Arhgef1.gSep08</a> | <a href="#">60323</a>  | 4412   | 1041 | 3  | 126  | rho guanine nucleotide exchange factor 1 (Arhgef1) alternative variant gSep08, mRNA.             |
| <a href="#">Arhgef1</a> | <a href="#">Arhgef1.hSep08</a> | <a href="#">60323</a>  | 1289   | 898  | 3  | 98   | rho guanine nucleotide exchange factor 1 (10.5 kD) (Arhgef1) alternative variant hSep08, mRNA.   |
| <a href="#">Arhgef1</a> | <a href="#">Arhgef1.iSep08</a> | <a href="#">60323</a>  | 902    | 416  | 4  | 83   | rho guanine nucleotide exchange factor 1 (Arhgef1) alternative variant iSep08, mRNA.             |
| <a href="#">Arhgef2</a> | <a href="#">Arhgef2.aSep08</a> | <a href="#">310635</a> | 27394  | 4238 | 20 | 1026 | rho/rac guanine nucleotide exchange factor (GEF) 2 (Arhgef2) alternative variant aSep08, mRNA.   |
| <a href="#">Arhgef2</a> | <a href="#">Arhgef2.bSep08</a> | <a href="#">310635</a> | 17380  | 775  | 5  | 258  | rho/rac guanine nucleotide exchange factor (GEF) 2 (Arhgef2) alternative variant bSep08, mRNA.   |
| <a href="#">Arhgef2</a> | <a href="#">Arhgef2.cSep08</a> | <a href="#">310635</a> | 17198  | 433  | 3  | 143  | rho/rac guanine nucleotide exchange factor (GEF) 2 (Arhgef2) alternative variant cSep08, mRNA.   |
| <a href="#">Arhgef3</a> | <a href="#">Arhgef3.bSep08</a> | <a href="#">290541</a> | 275996 | 831  | 7  | 168  | rho guanine nucleotide exchange factor (GEF) 3 (Arhgef3) alternative variant bSep08, mRNA.       |
| <a href="#">Arhgef4</a> | <a href="#">Arhgef4.aSep08</a> | <a href="#">301334</a> | 6502   | 2124 | 8  | 406  | rho guanine nucleotide exchange factor (GEF) 4 (Arhgef4) alternative variant aSep08, mRNA.       |
| <a href="#">Arhgef5</a> | <a href="#">Arhgef5.aSep08</a> | <a href="#">140898</a> | 6334   | 867  |    | 288  | rho guanine nucleotide exchange factor (GEF) 5 (Arhgef5) mRNA.                                   |
| <a href="#">Arhgef6</a> | <a href="#">Arhgef6.bSep08</a> | <a href="#">363509</a> | 45161  | 1299 | 13 | 406  | rac/Cdc42 guanine nucleotide exchange factor (GEF) 6 (Arhgef6) alternative variant bSep08, mRNA. |
| <a href="#">Arhgef6</a> | <a href="#">Arhgef6.cSep08</a> | <a href="#">363509</a> | 48893  | 583  | 5  | 194  | rac/Cdc42 guanine nucleotide exchange factor (GEF) 6 (Arhgef6) alternative variant cSep08, mRNA. |
| <a href="#">Arhgef6</a> | <a href="#">Arhgef6.dSep08</a> | <a href="#">363509</a> | 7658   | 386  | 4  | 128  | rac/Cdc42 guanine nucleotide exchange factor (GEF) 6 (Arhgef6) alternative variant dSep08, mRNA. |
| <a href="#">Arhgef6</a> | <a href="#">Arhgef6.eSep08</a> | <a href="#">363509</a> | 27163  | 384  | 4  | 87   | rac/Cdc42 guanine nucleotide exchange factor (GEF) 6 (Arhgef6) alternative variant eSep08, mRNA. |
| <a href="#">Arhgef7</a> | <a href="#">Arhgef7.fSep08</a> | <a href="#">114559</a> | 2637   | 396  | 2  | 39   | rho guanine nucleotide exchange factor (GEF7) (Arhgef7) alternative variant fSep08, mRNA.        |
| <a href="#">Arhgef9</a> | <a href="#">Arhgef9.bSep08</a> | <a href="#">66013</a>  | 13416  | 606  | 4  | 110  | cdc42 guanine nucleotide exchange factor (GEF) 9 (Arhgef9) alternative variant bSep08, mRNA.     |
| <a href="#">Arhgef9</a> | <a href="#">Arhgef9.cSep08</a> | <a href="#">66013</a>  | 3188   | 369  | 2  | 79   | cdc42 guanine nucleotide exchange factor (GEF) 9 (Arhgef9) alternative variant cSep08, mRNA.     |
| <a href="#">Arhgef9</a> | <a href="#">Arhgef9.dSep08</a> | <a href="#">66013</a>  | 33871  | 774  | 2  | 47   | cdc42 guanine nucleotide exchange factor (GEF) 9 (Arhgef9) alternative variant dSep08, mRNA.     |
| <a href="#">Arhgef9</a> | <a href="#">Arhgef9.fSep08</a> | <a href="#">66013</a>  | 33491  | 383  | 2  | 40   | cdc42 guanine nucleotide exchange factor (GEF) 9 (Arhgef9) alternative variant fSep08, mRNA.     |

|                          |                                 |                        |       |      |    |     |                                                                                                           |
|--------------------------|---------------------------------|------------------------|-------|------|----|-----|-----------------------------------------------------------------------------------------------------------|
| <a href="#">Arhgef11</a> | <a href="#">Arhgef11.bSep08</a> | <a href="#">78966</a>  | 6093  | 1213 | 7  | 389 | rho guanine nucleotide exchange factor 11 (Arhgef11) alternative variant bSep08, mRNA.                    |
| <a href="#">Arhgef11</a> | <a href="#">Arhgef11.cSep08</a> | <a href="#">78966</a>  | 2969  | 696  | 4  | 215 | rho guanine nucleotide exchange factor 11 (Arhgef11) alternative variant cSep08, mRNA.                    |
| <a href="#">Arhgef11</a> | <a href="#">Arhgef11.dSep08</a> | <a href="#">78966</a>  | 2876  | 1507 | 3  | 151 | rho guanine nucleotide exchange factor 11 (16.0 kD) (Arhgef11) alternative variant dSep08, mRNA.          |
| <a href="#">Arhgef11</a> | <a href="#">Arhgef11.eSep08</a> | <a href="#">78966</a>  | 8319  | 372  | 4  | 123 | rho guanine nucleotide exchange factor 11 (Arhgef11) alternative variant eSep08, mRNA.                    |
| <a href="#">Arhgef11</a> | <a href="#">Arhgef11.fSep08</a> | <a href="#">78966</a>  | 619   | 369  | 2  | 116 | rho guanine nucleotide exchange factor 11 (Arhgef11) alternative variant fSep08, mRNA.                    |
| <a href="#">Arhgef12</a> | <a href="#">Arhgef12.aSep08</a> | <a href="#">367072</a> | 14694 | 3186 | 11 | 465 | rho guanine nucleotide exchange factor 12 (Arhgef12) alternative variant aSep08, mRNA.                    |
| <a href="#">Arhgef12</a> | <a href="#">Arhgef12.bSep08</a> | <a href="#">367072</a> | 3772  | 1963 | 3  | 129 | putative mitochondrial protein (14.4 kD) (Arhgef12) alternative variant bSep08, mRNA.                     |
| <a href="#">Arhgef12</a> | <a href="#">Arhgef12.cSep08</a> | <a href="#">367072</a> | 1018  | 529  | 2  | 79  | rho guanine nucleotide exchange factor 12 (9.0 kD) (Arhgef12) alternative variant cSep08, mRNA.           |
| <a href="#">Arhgef12</a> | <a href="#">Arhgef12.dSep08</a> | <a href="#">367072</a> | 3067  | 1192 | 2  | 53  | rho guanine nucleotide exchange factor 12 (Arhgef12) alternative variant dSep08, mRNA.                    |
| <a href="#">Arhgef17</a> | <a href="#">Arhgef17.bSep08</a> | <a href="#">308862</a> | 9792  | 1782 | 6  | 387 | rho guanine nucleotide exchange factor (GEF) 17 (Arhgef17) alternative variant bSep08, mRNA.              |
| <a href="#">Arhgef17</a> | <a href="#">Arhgef17.cSep08</a> | <a href="#">308862</a> | 2436  | 774  | 6  | 258 | rho guanine nucleotide exchange factor (GEF) 17 (Arhgef17) alternative variant cSep08, mRNA.              |
| <a href="#">Arhgef18</a> | <a href="#">Arhgef18.bSep08</a> | <a href="#">304193</a> | 22962 | 4344 | 16 | 846 | rho/rac guanine nucleotide exchange factor (GEF) 18 (Arhgef18) alternative variant bSep08, mRNA.          |
| <a href="#">Arhgef18</a> | <a href="#">Arhgef18.dSep08</a> | <a href="#">304193</a> | 2001  | 305  | 3  | 101 | rho/rac guanine nucleotide exchange factor (GEF) 18 (Arhgef18) alternative variant dSep08, mRNA.          |
| <a href="#">Arhgef18</a> | <a href="#">Arhgef18.eSep08</a> | <a href="#">304193</a> | 4413  | 339  | 3  | 16  | rho/rac guanine nucleotide exchange factor (GEF) 18 (1.8 kD) (Arhgef18) alternative variant eSep08, mRNA. |
| <a href="#">Arhgef19</a> | <a href="#">Arhgef19.bSep08</a> | <a href="#">362648</a> | 6739  | 384  | 3  | 103 | putative protein (Arhgef19) alternative variant bSep08, mRNA.                                             |
| <a href="#">Arhgef19</a> | <a href="#">Arhgef19.cSep08</a> | <a href="#">362648</a> | 1455  | 686  | 2  | 96  | putative nuclear protein (11.1 kD) (Arhgef19) alternative variant cSep08, mRNA.                           |
| <a href="#">Arhgef19</a> | <a href="#">Arhgef19.dSep08</a> | <a href="#">362648</a> | 3547  | 421  | 2  | 90  | putative protein (9.7 kD) (Arhgef19) alternative variant dSep08, mRNA.                                    |
| <a href="#">Arhgef19</a> | <a href="#">Arhgef19.eSep08</a> | <a href="#">362648</a> | 468   | 388  | 2  | 36  | putative protein (Arhgef19) alternative variant eSep08, mRNA.                                             |
| <a href="#">Arid1a</a>   | <a href="#">Arid1a.bSep08</a>   | <a href="#">297867</a> | 2035  | 743  | 4  | 226 | AT rich interactive domain 1A (Swi1 like) (Arid1a) alternative variant bSep08, mRNA.                      |
| <a href="#">Arid1a</a>   | <a href="#">Arid1a.cSep08</a>   | <a href="#">297867</a> | 1598  | 627  | 5  | 208 | AT rich interactive domain 1A (Swi1 like) (Arid1a) alternative variant cSep08, mRNA.                      |
| <a href="#">Arid1b</a>   | <a href="#">Arid1b.aSep08</a>   | <a href="#">282546</a> | 91554 | 518  |    | 164 | AT rich interactive domain 1B (Swi1 like) (Arid1b) mRNA.                                                  |
| <a href="#">Arid2</a>    | <a href="#">Arid2.aSep08</a>    | <a href="#">366980</a> | 32105 | 1738 | 7  | 508 | AT rich interactive domain 2 (Arid-rfx like) (Arid2) alternative variant aSep08, mRNA.                    |

|                        |                               |                        |       |      |    |      |                                                                                                                                                                                                                                                                          |
|------------------------|-------------------------------|------------------------|-------|------|----|------|--------------------------------------------------------------------------------------------------------------------------------------------------------------------------------------------------------------------------------------------------------------------------|
| <a href="#">Arid3a</a> | <a href="#">Arid3a.aSep08</a> | <a href="#">314616</a> | 21494 | 2347 | 8  | 655  | AT rich interactive domain 3A (Bright like) and similar to AT-rich interactive domain-containing protein 3A (ARID domain-containing protein 3A) (Dead ringer-like protein 1) (B-cell regulator of IgH transcription) (Bright) (Arid3a) alternative variant aSep08, mRNA. |
| <a href="#">Arid3a</a> | <a href="#">Arid3a.aSep08</a> | <a href="#">690999</a> | 21494 | 2347 | 8  | 655  | AT rich interactive domain 3A (Bright like) and similar to AT-rich interactive domain-containing protein 3A (ARID domain-containing protein 3A) (Dead ringer-like protein 1) (B-cell regulator of IgH transcription) (Bright) (Arid3a) alternative variant aSep08, mRNA. |
| <a href="#">Arid3a</a> | <a href="#">Arid3a.bSep08</a> | <a href="#">314616</a> | 25427 | 1793 | 3  | 346  | AT rich interactive domain 3A (Bright like) and similar to AT-rich interactive domain-containing protein 3A (ARID domain-containing protein 3A) (Dead ringer-like protein 1) (B-cell regulator of IgH transcription) (Bright) (Arid3a) alternative variant bSep08, mRNA. |
| <a href="#">Arid3a</a> | <a href="#">Arid3a.bSep08</a> | <a href="#">690999</a> | 25427 | 1793 | 3  | 346  | AT rich interactive domain 3A (Bright like) and similar to AT-rich interactive domain-containing protein 3A (ARID domain-containing protein 3A) (Dead ringer-like protein 1) (B-cell regulator of IgH transcription) (Bright) (Arid3a) alternative variant bSep08, mRNA. |
| <a href="#">Arid3a</a> | <a href="#">Arid3a.dSep08</a> | <a href="#">314616</a> | 4093  | 353  | 2  | 71   | AT rich interactive domain 3A (Bright like) and similar to AT-rich interactive domain-containing protein 3A (ARID domain-containing protein 3A) (Dead ringer-like protein 1) (B-cell regulator of IgH transcription) (Bright) (Arid3a) alternative variant dSep08, mRNA. |
| <a href="#">Arid3a</a> | <a href="#">Arid3a.dSep08</a> | <a href="#">690999</a> | 4093  | 353  | 2  | 71   | AT rich interactive domain 3A (Bright like) and similar to AT-rich interactive domain-containing protein 3A (ARID domain-containing protein 3A) (Dead ringer-like protein 1) (B-cell regulator of IgH transcription) (Bright) (Arid3a) alternative variant dSep08, mRNA. |
| <a href="#">Arid3a</a> | <a href="#">Arid3a.eSep08</a> | <a href="#">314616</a> | 802   | 176  | 2  | 35   | AT rich interactive domain 3A (Bright like) and similar to AT-rich interactive domain-containing protein 3A (ARID domain-containing protein 3A) (Dead ringer-like protein 1) (B-cell regulator of IgH transcription) (Bright) (Arid3a) alternative variant eSep08, mRNA. |
| <a href="#">Arid3a</a> | <a href="#">Arid3a.eSep08</a> | <a href="#">690999</a> | 802   | 176  | 2  | 35   | AT rich interactive domain 3A (Bright like) and similar to AT-rich interactive domain-containing protein 3A (ARID domain-containing protein 3A) (Dead ringer-like protein 1) (B-cell regulator of IgH transcription) (Bright) (Arid3a) alternative variant eSep08, mRNA. |
| <a href="#">Arid4a</a> | <a href="#">Arid4a.bSep08</a> | <a href="#">314205</a> | 40877 | 4709 | 14 | 1021 | AT rich interactive domain 4A (Rbp1 like) (Arid4a) alternative variant bSep08, mRNA.                                                                                                                                                                                     |
| <a href="#">Arid4a</a> | <a href="#">Arid4a.cSep08</a> | <a href="#">314205</a> | 21823 | 539  | 7  | 179  | AT rich interactive domain 4A (Rbp1 like) (Arid4a) alternative variant cSep08, mRNA.                                                                                                                                                                                     |
| <a href="#">Arid4a</a> | <a href="#">Arid4a.dSep08</a> | <a href="#">314205</a> | 14018 | 545  | 5  | 96   | AT rich interactive domain 4A (Rbp1 like) (Arid4a) alternative variant dSep08, mRNA.                                                                                                                                                                                     |

|                        |                               |                        |        |      |    |     |                                                                                                     |
|------------------------|-------------------------------|------------------------|--------|------|----|-----|-----------------------------------------------------------------------------------------------------|
| <a href="#">Arid4b</a> | <a href="#">Arid4b.bSep08</a> | <a href="#">84481</a>  | 31273  | 1348 | 5  | 449 | AT rich interactive domain 4B (Rbp1 like) (Arid4b) alternative variant bSep08, mRNA.                |
| <a href="#">Arid4b</a> | <a href="#">Arid4b.cSep08</a> | <a href="#">84481</a>  | 2170   | 667  | 2  | 125 | AT rich interactive domain 4B (Rbp1 like) (14.7 kD) (Arid4b) alternative variant cSep08, mRNA.      |
| <a href="#">Arid5a</a> | <a href="#">Arid5a.bSep08</a> | <a href="#">316327</a> | 10458  | 588  | 6  | 196 | AT rich interactive domain 5A (Mrf1 like) (Arid5a) alternative variant bSep08, mRNA.                |
| <a href="#">Arid5a</a> | <a href="#">Arid5a.cSep08</a> | <a href="#">316327</a> | 1234   | 396  | 2  | 121 | AT rich interactive domain 5A (Mrf1 like) (Arid5a) alternative variant cSep08, mRNA.                |
| <a href="#">Arid5b</a> | <a href="#">Arid5b.bSep08</a> | <a href="#">309728</a> | 32172  | 1142 | 5  | 380 | AT rich interactive domain 5B (Mrf1 like) (Arid5b) alternative variant bSep08, mRNA.                |
| <a href="#">Arid5b</a> | <a href="#">Arid5b.cSep08</a> | <a href="#">309728</a> | 1835   | 390  | 2  | 79  | AT rich interactive domain 5B (Mrf1 like) (Arid5b) alternative variant cSep08, mRNA.                |
| <a href="#">Arih2</a>  | <a href="#">Arih2.aSep08</a>  | <a href="#">316005</a> | 58922  | 3754 | 16 | 492 | ariadne homolog 2 (Drosophila) (57.7 kD) (Arih2) alternative variant aSep08, complete mRNA.         |
| <a href="#">Arih2</a>  | <a href="#">Arih2.bSep08</a>  | <a href="#">316005</a> | 7137   | 708  | 7  | 234 | ariadne homolog 2 (Drosophila) (Arih2) alternative variant bSep08, mRNA.                            |
| <a href="#">Arih2</a>  | <a href="#">Arih2.cSep08</a>  | <a href="#">316005</a> | 8784   | 822  | 7  | 228 | ariadne homolog 2 (Drosophila) (Arih2) alternative variant cSep08, mRNA.                            |
| <a href="#">Arih2</a>  | <a href="#">Arih2.dSep08</a>  | <a href="#">316005</a> | 4027   | 729  | 5  | 120 | ariadne homolog 2 (Drosophila) (Arih2) alternative variant dSep08, mRNA.                            |
| <a href="#">Arih2</a>  | <a href="#">Arih2.fSep08</a>  | <a href="#">316005</a> | 7257   | 663  | 3  | 98  | ariadne homolog 2 (Drosophila) (10.8 kD) (Arih2) alternative variant fSep08, complete mRNA.         |
| <a href="#">Arl2</a>   | <a href="#">Arl2.bSep08</a>   | <a href="#">65142</a>  | 3008   | 675  | 3  | 127 | ADP-ribosylation factor-like 2 (Arl2) alternative variant bSep08, mRNA.                             |
| <a href="#">Arl2</a>   | <a href="#">Arl2.cSep08</a>   | <a href="#">65142</a>  | 1051   | 962  | 2  | 125 | ADP-ribosylation factor-like 2 (13.9 kD) (Arl2) alternative variant cSep08, mRNA.                   |
| <a href="#">Arl2</a>   | <a href="#">Arl2.dSep08</a>   | <a href="#">65142</a>  | 1755   | 714  | 2  | 95  | ADP-ribosylation factor-like 2 (10.5 kD) (Arl2) alternative variant dSep08, mRNA.                   |
| <a href="#">Arl2bp</a> | <a href="#">Arl2bp.aSep08</a> | <a href="#">498910</a> | 8619   | 1029 | 6  | 163 | ADP-ribosylation factor-like 2 binding protein (18.7 kD) (Arl2bp) alternative variant aSep08, mRNA. |
| <a href="#">Arl2bp</a> | <a href="#">Arl2bp.bSep08</a> | <a href="#">498910</a> | 7489   | 744  | 5  | 138 | ADP-ribosylation factor-like 2 binding protein (16.0 kD) (Arl2bp) alternative variant bSep08, mRNA. |
| <a href="#">Arl2bp</a> | <a href="#">Arl2bp.dSep08</a> | <a href="#">498910</a> | 8064   | 621  | 7  | 119 | ADP-ribosylation factor-like 2 binding protein (13.8 kD) (Arl2bp) alternative variant dSep08, mRNA. |
| <a href="#">Arl3</a>   | <a href="#">Arl3.aSep08</a>   | <a href="#">64664</a>  | 115072 | 1209 | 2  | 186 | ADP-ribosylation factor-like 3 (20.9 kD) (Arl3) alternative variant aSep08, mRNA.                   |
| <a href="#">Arl4a</a>  | <a href="#">Arl4a.aSep08</a>  | <a href="#">29308</a>  | 1546   | 1117 | 1  | 200 | ADP-ribosylation factor-like 4A (22.6 kD) (Arl4a) alternative variant aSep08, mRNA.                 |
| <a href="#">Arl4c</a>  | <a href="#">Arl4c.aSep08</a>  | <a href="#">367311</a> | 3588   | 770  | 2  | 105 | ADP-ribosylation factor-like 4C (11.6 kD) (Arl4c) alternative variant aSep08, mRNA.                 |
| <a href="#">Arl5b</a>  | <a href="#">Arl5b.aSep08</a>  | <a href="#">364788</a> | 24578  | 3366 | 2  | 245 | ADP-ribosylation factor-like 5B (Arl5b) alternative variant aSep08, mRNA.                           |
| <a href="#">Arl5c</a>  | <a href="#">Arl5c.bSep08</a>  | <a href="#">497990</a> | 10065  | 1674 | 6  | 116 | ADP-ribosylation factor-like 5C (13.0 kD) (Arl5c) alternative variant bSep08, mRNA.                 |
| <a href="#">Arl5c</a>  | <a href="#">Arl5c.cSep08</a>  | <a href="#">497990</a> | 2043   | 670  | 2  | 91  | ADP-ribosylation factor-like 5C (10.2 kD) (Arl5c) alternative variant cSep08, mRNA.                 |



|                         |                                |                        |        |      |    |     |                                                                                                                     |
|-------------------------|--------------------------------|------------------------|--------|------|----|-----|---------------------------------------------------------------------------------------------------------------------|
| <a href="#">Arl6</a>    | <a href="#">Arl6.bSep08</a>    | <a href="#">363760</a> | 26333  | 1856 | 8  | 186 | ADP-ribosylation factor-like 6 (21.0 kD) (Arl6) alternative variant bSep08, mRNA.                                   |
| <a href="#">Arl6</a>    | <a href="#">Arl6.cSep08</a>    | <a href="#">363760</a> | 12314  | 680  | 5  | 155 | ADP-ribosylation factor-like 6 (Arl6) alternative variant cSep08, mRNA.                                             |
| <a href="#">Arl6ip1</a> | <a href="#">Arl6ip1.bSep08</a> | <a href="#">293551</a> | 3438   | 494  | 3  | 97  | ADP-ribosylation factor-like 6 interacting protein 1 (10.9 kD) (Arl6ip1) alternative variant bSep08, mRNA.          |
| <a href="#">Arl6ip2</a> | <a href="#">Arl6ip2.aSep08</a> | <a href="#">298757</a> | 16752  | 2996 | 12 | 461 | ADP-ribosylation factor-like 6 interacting protein 2 (Arl6ip2) alternative variant aSep08, mRNA.                    |
| <a href="#">Arl6ip2</a> | <a href="#">Arl6ip2.bSep08</a> | <a href="#">298757</a> | 5243   | 1216 | 4  | 225 | ADP-ribosylation factor-like 6 interacting protein 2 (Arl6ip2) alternative variant bSep08, mRNA.                    |
| <a href="#">Arl6ip2</a> | <a href="#">Arl6ip2.cSep08</a> | <a href="#">298757</a> | 26089  | 611  | 4  | 203 | ADP-ribosylation factor-like 6 interacting protein 2 (Arl6ip2) alternative variant cSep08, mRNA.                    |
| <a href="#">Arl6ip2</a> | <a href="#">Arl6ip2.dSep08</a> | <a href="#">298757</a> | 1808   | 1711 | 2  | 44  | ADP-ribosylation factor-like 6 interacting protein 2 (4.8 kD) (Arl6ip2) alternative variant dSep08, mRNA.           |
| <a href="#">Arl6ip5</a> | <a href="#">Arl6ip5.bSep08</a> | <a href="#">66028</a>  | 19630  | 846  | 1  | 132 | ADP-ribosylation factor-like 6 interacting protein 5 (Arl6ip5) alternative variant bSep08, mRNA.                    |
| <a href="#">Arl6ip6</a> | <a href="#">Arl6ip6.bSep08</a> | <a href="#">499798</a> | 27508  | 1038 | 4  | 205 | ADP-ribosylation factor-like 6 interacting protein 6 (22.6 kD) (Arl6ip6) alternative variant bSep08, complete mRNA. |
| <a href="#">Arl6ip6</a> | <a href="#">Arl6ip6.cSep08</a> | <a href="#">499798</a> | 25118  | 841  | 4  | 147 | ADP-ribosylation factor-like 6 interacting protein 6 (Arl6ip6) alternative variant cSep08, mRNA.                    |
| <a href="#">Arl8b</a>   | <a href="#">Arl8b.aSep08</a>   | <a href="#">500282</a> | 43065  | 745  | 6  | 200 | ADP-ribosylation factor-like 8B (Arl8b) alternative variant aSep08, mRNA.                                           |
| <a href="#">Arl8b</a>   | <a href="#">Arl8b.cSep08</a>   | <a href="#">500282</a> | 43436  | 189  | 1  | 63  | ADP-ribosylation factor-like 8B (Arl8b) alternative variant cSep08, mRNA.                                           |
| <a href="#">Arl10</a>   | <a href="#">Arl10.aSep08</a>   | <a href="#">306767</a> | 6341   | 595  | 1  | 198 | ADP-ribosylation factor-like 10 (Arl10) alternative variant aSep08, mRNA.                                           |
| <a href="#">Arl13b</a>  | <a href="#">Arl13b.bSep08</a>  | <a href="#">304037</a> | 8661   | 1643 | 3  | 153 | ADP-ribosylation factor-like 1 (Arl13b) alternative variant bSep08, mRNA.                                           |
| <a href="#">Arl13b</a>  | <a href="#">Arl13b.cSep08</a>  | <a href="#">304037</a> | 6719   | 270  | 2  | 54  | ADP-ribosylation factor-like 13 (Arl13b) alternative variant cSep08, mRNA.                                          |
| <a href="#">Arl15</a>   | <a href="#">Arl15.aSep08</a>   | <a href="#">689079</a> | 253623 | 3178 |    | 191 | ADP-ribosylation factor-like 15 (Arl15) mRNA.                                                                       |
| <a href="#">Arm.0</a>   | <a href="#">Arm.0.aSep08</a>   |                        | 32265  | 599  |    | 199 | armadillo repeat containing 3 CRA b (Arm.0) mRNA.                                                                   |
| <a href="#">Arm.1</a>   | <a href="#">Arm.1.aSep08</a>   |                        | 2141   | 1096 |    | 365 | karyopherin alpha 2 (Arm.1) mRNA.                                                                                   |
| <a href="#">Armc2</a>   | <a href="#">Armc2.aSep08</a>   | <a href="#">499470</a> | 73972  | 1705 | 8  | 568 | armadillo repeat containing 2 (Armc2) alternative variant aSep08, mRNA.                                             |
| <a href="#">Armc2</a>   | <a href="#">Armc2.bSep08</a>   | <a href="#">499470</a> | 19150  | 1787 | 3  | 511 | armadillo repeat containing 2 (Armc2) alternative variant bSep08, mRNA.                                             |
| <a href="#">Armc2</a>   | <a href="#">Armc2.cSep08</a>   | <a href="#">499470</a> | 11288  | 767  | 1  | 255 | armadillo repeat containing 2 (Armc2) alternative variant cSep08, mRNA.                                             |
| <a href="#">Armc2</a>   | <a href="#">Armc2.dSep08</a>   | <a href="#">499470</a> | 14072  | 783  | 1  | 191 | armadillo repeat containing 2 (Armc2) alternative variant dSep08, mRNA.                                             |
| <a href="#">Armc4</a>   | <a href="#">Armc4.aSep08</a>   | <a href="#">307036</a> | 42624  | 533  |    | 125 | armadillo repeat containing 4 (Armc4) mRNA.                                                                         |
| <a href="#">Armc5</a>   | <a href="#">Armc5.bSep08</a>   | <a href="#">361653</a> | 1523   | 1431 | 2  | 306 | armadillo repeat containing 5 (32.0 kD) (Armc5) alternative variant bSep08, mRNA.                                   |
| <a href="#">Armc5</a>   | <a href="#">Armc5.cSep08</a>   | <a href="#">361653</a> | 4989   | 2061 | 6  | 160 | armadillo repeat containing 5 CRA c (16.6 kD) (Armc5) alternative variant cSep08, mRNA.                             |

|                        |                               |                        |       |      |    |     |                                                                                                   |
|------------------------|-------------------------------|------------------------|-------|------|----|-----|---------------------------------------------------------------------------------------------------|
| <a href="#">Armc6</a>  | <a href="#">Armc6.aSep08</a>  | <a href="#">306352</a> | 15269 | 1885 | 7  | 468 | armadillo repeat containing 6 (50.6 kD) (Armc6) alternative variant aSep08, complete mRNA.        |
| <a href="#">Armc6</a>  | <a href="#">Armc6.cSep08</a>  | <a href="#">306352</a> | 5462  | 335  | 2  | 111 | armadillo repeat containing 6 (Armc6) alternative variant cSep08, mRNA.                           |
| <a href="#">Armc8</a>  | <a href="#">Armc8.aSep08</a>  | <a href="#">315949</a> | 94311 | 4390 | 22 | 684 | armadillo repeat containing 8 (Armc8) alternative variant aSep08, mRNA.                           |
| <a href="#">Armc8</a>  | <a href="#">Armc8.bSep08</a>  | <a href="#">315949</a> | 44909 | 675  | 7  | 178 | armadillo repeat containing 8 (Armc8) alternative variant bSep08, mRNA.                           |
| <a href="#">Armc8</a>  | <a href="#">Armc8.cSep08</a>  | <a href="#">315949</a> | 3293  | 667  | 2  | 67  | armadillo repeat containing 8 (Armc8) alternative variant cSep08, mRNA.                           |
| <a href="#">Armc9</a>  | <a href="#">Armc9.bSep08</a>  | <a href="#">301579</a> | 70132 | 1594 | 13 | 436 | armadillo repeat containing 9 (Armc9) alternative variant bSep08, mRNA.                           |
| <a href="#">Armc9</a>  | <a href="#">Armc9.cSep08</a>  | <a href="#">301579</a> | 40296 | 407  | 4  | 104 | armadillo repeat containing 9 (Armc9) alternative variant cSep08, mRNA.                           |
| <a href="#">Armc9</a>  | <a href="#">Armc9.dSep08</a>  | <a href="#">301579</a> | 6639  | 310  | 3  | 86  | armadillo repeat containing 9 (Armc9) alternative variant dSep08, mRNA.                           |
| <a href="#">Armc9</a>  | <a href="#">Armc9.fSep08</a>  | <a href="#">301579</a> | 1155  | 600  | 2  | 63  | armadillo repeat containing 9 (Armc9) alternative variant fSep08, mRNA.                           |
| <a href="#">Armcx1</a> | <a href="#">Armcx1.bSep08</a> | <a href="#">501619</a> | 1459  | 405  | 2  | 98  | armadillo repeat containing, X-linked 1 (Armcx1) alternative variant bSep08, mRNA.                |
| <a href="#">Armcx1</a> | <a href="#">Armcx1.cSep08</a> | <a href="#">501619</a> | 2342  | 489  | 1  | 73  | armadillo repeat containing, X-linked 1 (Armcx1) alternative variant cSep08, mRNA.                |
| <a href="#">Armcx3</a> | <a href="#">Armcx3.aSep08</a> | <a href="#">367902</a> | 4915  | 3353 | 2  | 105 | armadillo repeat containing, X-linked 3 (11.9 kD) (Armcx3) alternative variant aSep08, mRNA.      |
| <a href="#">Armcx6</a> | <a href="#">Armcx6.bSep08</a> | <a href="#">363496</a> | 1769  | 800  | 4  | 156 | armadillo repeat containing, X-linked 6 (Armcx6) alternative variant bSep08, mRNA.                |
| <a href="#">Armcx6</a> | <a href="#">Armcx6.cSep08</a> | <a href="#">363496</a> | 1433  | 765  | 3  | 140 | armadillo repeat containing, X-linked 6 (Armcx6) alternative variant cSep08, mRNA.                |
| <a href="#">Armcx6</a> | <a href="#">Armcx6.dSep08</a> | <a href="#">363496</a> | 1668  | 723  | 4  | 116 | armadillo repeat containing, X-linked 6 (Armcx6) alternative variant dSep08, mRNA.                |
| <a href="#">Armet</a>  | <a href="#">Armet.aSep08</a>  | <a href="#">315989</a> | 3235  | 876  | 2  | 200 | arginine-rich, mutated in early stage tumors (Armet) alternative variant aSep08, mRNA.            |
| <a href="#">Arnt</a>   | <a href="#">Arnt.bSep08</a>   | <a href="#">25242</a>  | 5084  | 1386 | 4  | 187 | aryl hydrocarbon receptor nuclear translocator (Arnt) alternative variant bSep08, mRNA.           |
| <a href="#">Arnt</a>   | <a href="#">Arnt.cSep08</a>   | <a href="#">25242</a>  | 33429 | 613  | 7  | 165 | aryl hydrocarbon receptor nuclear translocator (Arnt) alternative variant cSep08, mRNA.           |
| <a href="#">Arnt</a>   | <a href="#">Arnt.dSep08</a>   | <a href="#">25242</a>  | 723   | 289  | 3  | 96  | aryl hydrocarbon receptor nuclear translocator (Arnt) alternative variant dSep08, mRNA.           |
| <a href="#">Arntl</a>  | <a href="#">Arntl.bSep08</a>  | <a href="#">29657</a>  | 11258 | 893  | 7  | 297 | aryl hydrocarbon receptor nuclear translocator-like (Arntl) alternative variant bSep08, mRNA.     |
| <a href="#">Arntl</a>  | <a href="#">Arntl.cSep08</a>  | <a href="#">29657</a>  | 10984 | 738  | 6  | 204 | aryl hydrocarbon receptor nuclear translocator-like (Arntl) alternative variant cSep08, mRNA.     |
| <a href="#">Arntl</a>  | <a href="#">Arntl.dSep08</a>  | <a href="#">29657</a>  | 71941 | 617  | 6  | 122 | aryl hydrocarbon receptor nuclear translocator-like (Arntl) alternative variant dSep08, mRNA.     |
| <a href="#">Arpc1a</a> | <a href="#">Arpc1a.aSep08</a> | <a href="#">81824</a>  | 22483 | 1796 | 5  | 537 | actin related protein 2/3 complex, subunit 1A (Arpc1a) alternative variant aSep08, complete mRNA. |

|                        |                               |                        |       |      |    |     |                                                                                                    |
|------------------------|-------------------------------|------------------------|-------|------|----|-----|----------------------------------------------------------------------------------------------------|
| <a href="#">Arpc1a</a> | <a href="#">Arpc1a.bSep08</a> | <a href="#">81824</a>  | 17696 | 937  | 7  | 257 | actin related protein 2/3 complex, subunit 1A (29.4 kD) (Arpc1a) alternative variant bSep08, mRNA. |
| <a href="#">Arpc1b</a> | <a href="#">Arpc1b.bSep08</a> | <a href="#">54227</a>  | 2180  | 2048 | 2  | 93  | actin related protein 2/3 complex, subunit 1B (9.9 kD) (Arpc1b) alternative variant bSep08, mRNA.  |
| <a href="#">Arpc1b</a> | <a href="#">Arpc1b.dSep08</a> | <a href="#">54227</a>  | 682   | 475  | 3  | 60  | actin related protein 2/3 complex, subunit 1B (Arpc1b) alternative variant dSep08, mRNA.           |
| <a href="#">Arpc2</a>  | <a href="#">Arpc2.bSep08</a>  | <a href="#">301511</a> | 14736 | 524  | 4  | 174 | actin related protein 2/3 complex, subunit 2 (Arpc2) alternative variant bSep08, mRNA.             |
| <a href="#">Arpc2</a>  | <a href="#">Arpc2.cSep08</a>  | <a href="#">301511</a> | 13240 | 463  | 3  | 71  | actin related protein 2/3 complex, subunit 2 (Arpc2) alternative variant cSep08, mRNA.             |
| <a href="#">Arpc2</a>  | <a href="#">Arpc2.dSep08</a>  | <a href="#">301511</a> | 7320  | 784  | 2  | 62  | actin related protein 2/3 complex, subunit 2 (Arpc2) alternative variant dSep08, mRNA.             |
| <a href="#">Arpc2</a>  | <a href="#">Arpc2.fSep08</a>  | <a href="#">301511</a> | 3870  | 771  | 3  | 35  | actin related protein 2/3 complex, subunit 2 (4.0 kD) (Arpc2) alternative variant fSep08, mRNA.    |
| <a href="#">Arpc5</a>  | <a href="#">Arpc5.bSep08</a>  | <a href="#">360854</a> | 6079  | 1045 | 2  | 116 | actin related protein 2/3 complex, subunit 5 (Arpc5) alternative variant bSep08, mRNA.             |
| <a href="#">Arpc5</a>  | <a href="#">Arpc5.cSep08</a>  | <a href="#">360854</a> | 3366  | 689  | 1  | 90  | actin related protein 2/3 complex, subunit 5 (9.9 kD) (Arpc5) alternative variant cSep08, mRNA.    |
| <a href="#">Arpc5l</a> | <a href="#">Arpc5l.aSep08</a> | <a href="#">296710</a> | 8094  | 1740 | 3  | 176 | actin related protein 2/3 complex, subunit 5-like (Arpc5l) alternative variant aSep08, mRNA.       |
| <a href="#">Arpp19</a> | <a href="#">Arpp19.aSep08</a> | <a href="#">60336</a>  | 25779 | 3968 | 4  | 137 | cAMP-regulated phosphoprotein 19 (Arpp19) alternative variant aSep08, mRNA.                        |
| <a href="#">Arpp19</a> | <a href="#">Arpp19.bSep08</a> | <a href="#">60336</a>  | 22601 | 794  | 4  | 112 | cAMP-regulated phosphoprotein 19 (12.3 kD) (Arpp19) alternative variant bSep08, complete mRNA.     |
| <a href="#">Arpp19</a> | <a href="#">Arpp19.dSep08</a> | <a href="#">60336</a>  | 7054  | 462  | 2  | 96  | cAMP-regulated phosphoprotein 19 (10.6 kD) (Arpp19) alternative variant dSep08, mRNA.              |
| <a href="#">Arpp21</a> | <a href="#">Arpp21.aSep08</a> | <a href="#">363153</a> | 60952 | 1551 | 6  | 344 | cyclic AMP-regulated phosphoprotein, 21 (Arpp21) alternative variant aSep08, mRNA.                 |
| <a href="#">Arpp21</a> | <a href="#">Arpp21.bSep08</a> | <a href="#">363153</a> | 1835  | 706  | 3  | 98  | cyclic AMP-regulated phosphoprotein, 21 (Arpp21) alternative variant bSep08, mRNA.                 |
| <a href="#">Arr3</a>   | <a href="#">Arr3.aSep08</a>   | <a href="#">171107</a> | 3881  | 389  | 6  | 95  | arrestin 3, retinal (Arr3) alternative variant aSep08, mRNA.                                       |
| <a href="#">Arrb1</a>  | <a href="#">Arrb1.aSep08</a>  | <a href="#">25387</a>  | 89195 | 1793 | 13 | 553 | arrestin, beta 1 (Arrb1) alternative variant aSep08, mRNA.                                         |
| <a href="#">Arrb1</a>  | <a href="#">Arrb1.cSep08</a>  | <a href="#">25387</a>  | 1899  | 415  | 2  | 50  | arrestin, beta 1 (Arrb1) alternative variant cSep08, mRNA.                                         |
| <a href="#">Arrb2</a>  | <a href="#">Arrb2.bSep08</a>  | <a href="#">25388</a>  | 947   | 761  | 2  | 77  | arrestin, beta 2 (Arrb2) alternative variant bSep08, mRNA.                                         |
| <a href="#">Arrb2</a>  | <a href="#">Arrb2.cSep08</a>  | <a href="#">25388</a>  | 1060  | 697  | 3  | 44  | arrestin, beta 2 (Arrb2) alternative variant cSep08, mRNA.                                         |
| <a href="#">Arrdc1</a> | <a href="#">Arrdc1.aSep08</a> | <a href="#">366001</a> | 7182  | 1702 | 6  | 434 | arrestin, N-terminal and arrestin, C-terminal (46.1 kD) (Arrdc1) alternative variant aSep08, mRNA. |
| <a href="#">Arrdc1</a> | <a href="#">Arrdc1.bSep08</a> | <a href="#">366001</a> | 6989  | 1479 | 4  | 359 | arrestin, N-terminal and arrestin, C-terminal (Arrdc1) alternative variant bSep08, mRNA.           |
| <a href="#">Arrdc1</a> | <a href="#">Arrdc1.cSep08</a> | <a href="#">366001</a> | 1007  | 760  | 1  | 253 | arrestin, C-terminal (Arrdc1) alternative variant cSep08, mRNA.                                    |
| <a href="#">Arrdc2</a> | <a href="#">Arrdc2.aSep08</a> | <a href="#">306344</a> | 1939  | 927  | 4  | 268 | arrestin, N-terminal and arrestin, C-terminal (Arrdc2) alternative variant aSep08, mRNA.           |
| <a href="#">Arrdc2</a> | <a href="#">Arrdc2.bSep08</a> | <a href="#">306344</a> | 1642  | 712  | 3  | 237 | arrestin, N-terminal and arrestin, C-terminal (Arrdc2) alternative variant bSep08, mRNA.           |

|                        |                               |                        |        |      |   |     |                                                                                                        |
|------------------------|-------------------------------|------------------------|--------|------|---|-----|--------------------------------------------------------------------------------------------------------|
| <a href="#">Arrdc3</a> | <a href="#">Arrdc3.bSep08</a> | <a href="#">309945</a> | 4701   | 3026 | 2 | 102 | putative nuclear protein of vertebrate origin (11.5 kD) (Arrdc3) alternative variant bSep08, mRNA.     |
| <a href="#">Arrdc3</a> | <a href="#">Arrdc3.cSep08</a> | <a href="#">309945</a> | 3117   | 887  | 4 | 81  | putative protein of vertebrate origin (Arrdc3) alternative variant cSep08, mRNA.                       |
| <a href="#">Arrdc4</a> | <a href="#">Arrdc4.bSep08</a> | <a href="#">293019</a> | 4587   | 790  | 2 | 214 | arrestin, C-terminal (Arrdc4) alternative variant bSep08, mRNA.                                        |
| <a href="#">Arsa</a>   | <a href="#">Arsa.bSep08</a>   | <a href="#">315222</a> | 3244   | 2168 | 7 | 360 | arylsulfatase A (Arsa) alternative variant bSep08, mRNA.                                               |
| <a href="#">Arsa</a>   | <a href="#">Arsa.cSep08</a>   | <a href="#">315222</a> | 1194   | 696  | 4 | 104 | arylsulfatase A (Arsa) alternative variant cSep08, mRNA.                                               |
| <a href="#">Arzb</a>   | <a href="#">Arzb.bSep08</a>   | <a href="#">25227</a>  | 136335 | 486  |   | 151 | arylsulfatase B (Arzb) alternative variant bSep08, mRNA.                                               |
| <a href="#">Arse</a>   | <a href="#">Arse.bSep08</a>   | <a href="#">310326</a> | 7690   | 3342 | 8 | 287 | arylsulfatase E (chondrodysplasia punctata 1) (30.6 kD) (Arse) alternative variant bSep08, mRNA.       |
| <a href="#">Arse</a>   | <a href="#">Arse.cSep08</a>   | <a href="#">310326</a> | 1296   | 342  | 2 | 47  | arylsulfatase E (chondrodysplasia punctata 1) (4.8 kD) (Arse) alternative variant cSep08, mRNA.        |
| <a href="#">Arsg</a>   | <a href="#">Arsg.bSep08</a>   | <a href="#">303631</a> | 8746   | 385  | 1 | 96  | arylsulfatase G (Arsg) alternative variant bSep08, mRNA.                                               |
| <a href="#">Arsk</a>   | <a href="#">Arsk.bSep08</a>   | <a href="#">365619</a> | 2680   | 410  | 2 | 40  | arylsulfatase K (Arsk) alternative variant bSep08, mRNA.                                               |
| <a href="#">Art2b</a>  | <a href="#">Art2b.bSep08</a>  | <a href="#">293152</a> | 9675   | 1129 | 3 | 266 | ADP-ribosyltransferase 2b (Art2b) alternative variant bSep08, mRNA.                                    |
| <a href="#">Art2b</a>  | <a href="#">Art2b.cSep08</a>  | <a href="#">293152</a> | 10578  | 722  | 5 | 97  | ADP-ribosyltransferase 2b (11.1 kD) (Art2b) alternative variant cSep08, mRNA.                          |
| <a href="#">Art3</a>   | <a href="#">Art3.aSep08</a>   | <a href="#">305235</a> | 28070  | 1466 | 9 | 403 | ADP-ribosyltransferase 3 (Art3) alternative variant aSep08, mRNA.                                      |
| <a href="#">Art3</a>   | <a href="#">Art3.cSep08</a>   | <a href="#">305235</a> | 22666  | 936  | 3 | 259 | ADP-ribosyltransferase 3 (Art3) alternative variant cSep08, mRNA.                                      |
| <a href="#">Art4</a>   | <a href="#">Art4.aSep08</a>   | <a href="#">312806</a> | 9222   | 1323 |   | 311 | ADP-ribosyltransferase 4 (Art4) mRNA.                                                                  |
| <a href="#">Art5</a>   | <a href="#">Art5.bSep08</a>   | <a href="#">259167</a> | 1233   | 440  | 1 | 76  | ADP-ribosyltransferase 5 (Art5) alternative variant bSep08, mRNA.                                      |
| <a href="#">Artn</a>   | <a href="#">Artn.bSep08</a>   | <a href="#">362572</a> | 1249   | 369  | 1 | 91  | artemin (Artn) alternative variant bSep08, mRNA.                                                       |
| <a href="#">Arv1</a>   | <a href="#">Arv1.bSep08</a>   | <a href="#">292097</a> | 11759  | 1059 | 6 | 279 | ARV1 homolog (yeast) (30.9 kD) (Arv1) alternative variant bSep08, complete mRNA.                       |
| <a href="#">Arv1</a>   | <a href="#">Arv1.cSep08</a>   | <a href="#">292097</a> | 11737  | 971  | 6 | 223 | ARV1 homolog (yeast) (Arv1) alternative variant cSep08, mRNA.                                          |
| <a href="#">Arv1</a>   | <a href="#">Arv1.dSep08</a>   | <a href="#">292097</a> | 9033   | 743  | 5 | 175 | ARV1 homolog (yeast) (Arv1) alternative variant dSep08, mRNA.                                          |
| <a href="#">Arvcf</a>  | <a href="#">Arvcf.bSep08</a>  | <a href="#">303798</a> | 5131   | 794  | 3 | 264 | armadillo repeat gene deleted in velo-cardio-facial syndrome (Arvcf) alternative variant bSep08, mRNA. |
| <a href="#">Arvcf</a>  | <a href="#">Arvcf.cSep08</a>  | <a href="#">303798</a> | 2499   | 786  | 8 | 217 | armadillo repeat gene deleted in velo-cardio-facial syndrome (Arvcf) alternative variant cSep08, mRNA. |
| <a href="#">Arvcf</a>  | <a href="#">Arvcf.dSep08</a>  | <a href="#">303798</a> | 1187   | 618  | 4 | 110 | armadillo repeat gene deleted in velo-cardio-facial syndrome (Arvcf) alternative variant dSep08, mRNA. |
| <a href="#">Arx</a>    | <a href="#">Arx.bSep08</a>    | <a href="#">317268</a> | 7055   | 1751 | 3 | 441 | aristaless related homeobox gene (Drosophila) (Arx) alternative variant bSep08, mRNA.                  |
| <a href="#">Arx</a>    | <a href="#">Arx.cSep08</a>    | <a href="#">317268</a> | 6446   | 1558 | 3 | 201 | aristaless related homeobox gene (Drosophila) (Arx) alternative variant cSep08, mRNA.                  |
| <a href="#">Arx</a>    | <a href="#">Arx.dSep08</a>    | <a href="#">317268</a> | 2097   | 522  | 1 | 108 | aristaless related homeobox gene (Drosophila) (Arx) alternative variant dSep08, mRNA.                  |

|                        |                               |                        |       |      |   |     |                                                                                                    |
|------------------------|-------------------------------|------------------------|-------|------|---|-----|----------------------------------------------------------------------------------------------------|
| <a href="#">As3mt</a>  | <a href="#">As3mt.bSep08</a>  | <a href="#">140925</a> | 27141 | 715  | 6 | 231 | methyltransferase (As3mt) alternative variant bSep08, mRNA.                                        |
| <a href="#">As3mt</a>  | <a href="#">As3mt.cSep08</a>  | <a href="#">140925</a> | 7282  | 755  | 7 | 231 | methyltransferase (As3mt) alternative variant cSep08, mRNA.                                        |
| <a href="#">As3mt</a>  | <a href="#">As3mt.dSep08</a>  | <a href="#">140925</a> | 17677 | 733  | 8 | 205 | methyltransferase (23.0 kD) (As3mt) alternative variant dSep08, complete mRNA.                     |
| <a href="#">As3mt</a>  | <a href="#">As3mt.eSep08</a>  | <a href="#">140925</a> | 2019  | 547  | 4 | 117 | methyltransferase (13.1 kD) (As3mt) alternative variant eSep08, mRNA.                              |
| <a href="#">As3mt</a>  | <a href="#">As3mt.hSep08</a>  | <a href="#">140925</a> | 974   | 234  | 2 | 40  | putative protein (As3mt) alternative variant hSep08, mRNA.                                         |
| <a href="#">Asah1</a>  | <a href="#">Asah1.bSep08</a>  | <a href="#">84431</a>  | 25719 | 591  | 8 | 196 | N-acylsphingosine amidohydrolase 1 (Asah1) alternative variant bSep08, mRNA.                       |
| <a href="#">Asah1</a>  | <a href="#">Asah1.cSep08</a>  | <a href="#">84431</a>  | 1733  | 711  | 2 | 43  | N-acylsphingosine amidohydrolase 1 (Asah1) alternative variant cSep08, mRNA.                       |
| <a href="#">Asah2</a>  | <a href="#">Asah2.bSep08</a>  | <a href="#">114104</a> | 37604 | 809  | 4 | 68  | N-acylsphingosine amidohydrolase 2 (6.9 kD) (Asah2) alternative variant bSep08, mRNA.              |
| <a href="#">Asah3</a>  | <a href="#">Asah3.bSep08</a>  | <a href="#">301118</a> | 25496 | 519  | 3 | 115 | N-acylsphingosine amidohydrolase (alkaline ceramidase) 3 (Asah3) alternative variant bSep08, mRNA. |
| <a href="#">Asah3l</a> | <a href="#">Asah3l.bSep08</a> | <a href="#">313339</a> | 22542 | 380  | 3 | 126 | N-acylsphingosine amidohydrolase 3-like (Asah3l) alternative variant bSep08, mRNA.                 |
| <a href="#">Asah3l</a> | <a href="#">Asah3l.cSep08</a> | <a href="#">313339</a> | 2509  | 266  | 2 | 65  | N-acylsphingosine amidohydrolase 3-like (Asah3l) alternative variant cSep08, mRNA.                 |
| <a href="#">Asb1</a>   | <a href="#">Asb1.bSep08</a>   | <a href="#">316628</a> | 15015 | 1473 | 2 | 332 | ankyrin and SOCS protein, C-terminal (37.1 kD) (Asb1) alternative variant bSep08, mRNA.            |
| <a href="#">Asb2</a>   | <a href="#">Asb2.bSep08</a>   | <a href="#">299266</a> | 5185  | 734  | 4 | 244 | ankyrin (Asb2) alternative variant bSep08, mRNA.                                                   |
| <a href="#">Asb2</a>   | <a href="#">Asb2.cSep08</a>   | <a href="#">299266</a> | 10454 | 709  | 2 | 206 | ankyrin (Asb2) alternative variant cSep08, mRNA.                                                   |
| <a href="#">Asb2</a>   | <a href="#">Asb2.fSep08</a>   | <a href="#">299266</a> | 10011 | 486  | 3 | 79  | putative protein of mammalian origin (8.8 kD) (Asb2) alternative variant fSep08, mRNA.             |
| <a href="#">Asb2</a>   | <a href="#">Asb2.gSep08</a>   | <a href="#">299266</a> | 8318  | 549  | 2 | 73  | putative protein of mammalian origin (Asb2) alternative variant gSep08, mRNA.                      |
| <a href="#">Asb3</a>   | <a href="#">Asb3.bSep08</a>   | <a href="#">364227</a> | 74532 | 754  | 6 | 251 | ankyrin (Asb3) alternative variant bSep08, mRNA.                                                   |
| <a href="#">Asb6</a>   | <a href="#">Asb6.bSep08</a>   | <a href="#">296627</a> | 3308  | 919  | 1 | 288 | ankyrin (Asb6) alternative variant bSep08, mRNA.                                                   |
| <a href="#">Asb6</a>   | <a href="#">Asb6.cSep08</a>   | <a href="#">296627</a> | 3079  | 690  | 1 | 197 | ankyrin (Asb6) alternative variant cSep08, mRNA.                                                   |
| <a href="#">Asb8</a>   | <a href="#">Asb8.aSep08</a>   | <a href="#">315287</a> | 10229 | 2111 | 4 | 288 | ankyrin and SOCS protein, C-terminal (31.7 kD) (Asb8) alternative variant aSep08, mRNA.            |
| <a href="#">Asb8</a>   | <a href="#">Asb8.cSep08</a>   | <a href="#">315287</a> | 9268  | 986  | 3 | 262 | ankyrin and SOCS protein, C-terminal (Asb8) alternative variant cSep08, mRNA.                      |
| <a href="#">Asb8</a>   | <a href="#">Asb8.dSep08</a>   | <a href="#">315287</a> | 34357 | 637  | 5 | 88  | putative protein (Asb8) alternative variant dSep08, mRNA.                                          |
| <a href="#">Asb9</a>   | <a href="#">Asb9.aSep08</a>   | <a href="#">367785</a> | 12191 | 696  |   | 201 | ankyrin and SOCS protein, C-terminal (Asb9) mRNA.                                                  |
| <a href="#">Asb11</a>  | <a href="#">Asb11.aSep08</a>  | <a href="#">302666</a> | 23294 | 1667 | 2 | 323 | ankyrin and SOCS protein, C-terminal (35.3 kD) (Asb11) alternative variant aSep08, complete mRNA.  |
| <a href="#">Asb12</a>  | <a href="#">Asb12.aSep08</a>  | <a href="#">503446</a> | 12196 | 1651 | 2 | 443 | ankyrin and SOCS protein, C-terminal (Asb12) alternative variant aSep08, mRNA.                     |
| <a href="#">Asb12</a>  | <a href="#">Asb12.cSep08</a>  | <a href="#">503446</a> | 1472  | 454  | 1 | 106 | CRA b (Asb12) alternative variant cSep08, mRNA.                                                    |
| <a href="#">Asb13</a>  | <a href="#">Asb13.aSep08</a>  | <a href="#">361268</a> | 18923 | 2127 | 6 | 278 | ankyrin and SOCS protein, C-terminal (30.0 kD) (Asb13) alternative variant aSep08, mRNA.           |
| <a href="#">Asb13</a>  | <a href="#">Asb13.bSep08</a>  | <a href="#">361268</a> | 29425 | 723  | 5 | 240 | ankyrin (Asb13) alternative variant bSep08, mRNA.                                                  |

|                        |                               |                        |        |      |    |      |                                                                                                                                |
|------------------------|-------------------------------|------------------------|--------|------|----|------|--------------------------------------------------------------------------------------------------------------------------------|
| <a href="#">Asb13</a>  | <a href="#">Asb13.cSep08</a>  | <a href="#">361268</a> | 8072   | 406  | 2  | 93   | ankyrin (Asb13) alternative variant cSep08, mRNA.                                                                              |
| <a href="#">Asb14</a>  | <a href="#">Asb14.aSep08</a>  | <a href="#">680076</a> | 2983   | 602  | 3  | 186  | SOCS protein, C-terminal (Asb14) alternative variant aSep08, mRNA.                                                             |
| <a href="#">Asb14</a>  | <a href="#">Asb14.cSep08</a>  | <a href="#">680076</a> | 2816   | 468  | 3  | 118  | SOCS protein, C-terminal (Asb14) alternative variant cSep08, mRNA.                                                             |
| <a href="#">Asb15</a>  | <a href="#">Asb15.aSep08</a>  | <a href="#">500050</a> | 35851  | 934  |    | 289  | ankyrin (Asb15) mRNA.                                                                                                          |
| <a href="#">Ascc1</a>  | <a href="#">Ascc1.bSep08</a>  | <a href="#">294512</a> | 45925  | 764  | 7  | 254  | activating signal cointegrator 1 complex subunit 1 (Ascc1) alternative variant bSep08, mRNA.                                   |
| <a href="#">Ascc1</a>  | <a href="#">Ascc1.cSep08</a>  | <a href="#">294512</a> | 36141  | 735  | 6  | 244  | activating signal cointegrator 1 complex subunit 1 (Ascc1) alternative variant cSep08, mRNA.                                   |
| <a href="#">Ascc1</a>  | <a href="#">Ascc1.dSep08</a>  | <a href="#">294512</a> | 45763  | 767  | 7  | 232  | activating signal cointegrator 1 complex subunit 1 (Ascc1) alternative variant dSep08, mRNA.                                   |
| <a href="#">Ascc1</a>  | <a href="#">Ascc1.eSep08</a>  | <a href="#">294512</a> | 9157   | 672  | 5  | 151  | activating signal cointegrator 1 complex subunit 1 (Ascc1) alternative variant eSep08, mRNA.                                   |
| <a href="#">Ascc1</a>  | <a href="#">Ascc1.fSep08</a>  | <a href="#">294512</a> | 31135  | 746  | 4  | 94   | activating signal cointegrator 1 complex subunit 1 (10.9 kD) (Ascc1) alternative variant fSep08, mRNA.                         |
| <a href="#">Ascc2</a>  | <a href="#">Ascc2.bSep08</a>  | <a href="#">498402</a> | 10074  | 645  | 7  | 109  | activating signal cointegrator 1 complex subunit 2 (Ascc2) alternative variant bSep08, mRNA.                                   |
| <a href="#">Ascc3</a>  | <a href="#">Ascc3.bSep08</a>  | <a href="#">309887</a> | 125171 | 2916 | 16 | 769  | activating signal cointegrator 1 complex subunit 3 (Ascc3) alternative variant bSep08, mRNA.                                   |
| <a href="#">Ascc3</a>  | <a href="#">Ascc3.cSep08</a>  | <a href="#">309887</a> | 22387  | 578  | 3  | 92   | activating signal cointegrator 1 complex subunit 3 (10.6 kD) (Ascc3) alternative variant cSep08, mRNA.                         |
| <a href="#">Ascc3</a>  | <a href="#">Ascc3.dSep08</a>  | <a href="#">309887</a> | 11631  | 282  | 3  | 46   | activating signal cointegrator 1 complex subunit 3 (Ascc3) alternative variant dSep08, mRNA.                                   |
| <a href="#">ASD2.0</a> | <a href="#">ASD2.0.aSep08</a> |                        | 4116   | 405  |    | 135  | shroom family member 4 (ASD2.0) mRNA.                                                                                          |
| <a href="#">ASD2.1</a> | <a href="#">ASD2.1.aSep08</a> |                        | 1145   | 1035 |    | 149  | apical protein 2 (ASD2.1) mRNA.                                                                                                |
| <a href="#">Asf1a</a>  | <a href="#">Asf1a.aSep08</a>  | <a href="#">294408</a> | 14847  | 2693 | 2  | 204  | ASF1 anti-silencing function 1 homolog A ( <i>S. cerevisiae</i> ) (22.9 kD) (Asf1a) alternative variant aSep08, complete mRNA. |
| <a href="#">Asf1a</a>  | <a href="#">Asf1a.bSep08</a>  | <a href="#">294408</a> | 12867  | 595  | 2  | 134  | ASF1 anti-silencing function 1 homolog A ( <i>S. cerevisiae</i> ) (15.0 kD) (Asf1a) alternative variant bSep08, mRNA.          |
| <a href="#">Asgr1</a>  | <a href="#">Asgr1.bSep08</a>  | <a href="#">24210</a>  | 3924   | 1185 | 3  | 236  | asialoglycoprotein receptor 1 (27.3 kD) (Asgr1) alternative variant bSep08, complete mRNA.                                     |
| <a href="#">Asgr1</a>  | <a href="#">Asgr1.cSep08</a>  | <a href="#">24210</a>  | 2856   | 678  | 1  | 197  | asialoglycoprotein receptor 1 (Asgr1) alternative variant cSep08, mRNA.                                                        |
| <a href="#">Asgr2</a>  | <a href="#">Asgr2.bSep08</a>  | <a href="#">29403</a>  | 11761  | 728  | 3  | 236  | asialoglycoprotein receptor 2 (Asgr2) alternative variant bSep08, mRNA.                                                        |
| <a href="#">Asgr2</a>  | <a href="#">Asgr2.cSep08</a>  | <a href="#">29403</a>  | 6588   | 835  | 4  | 204  | asialoglycoprotein receptor 2 (Asgr2) alternative variant cSep08, mRNA.                                                        |
| <a href="#">Ash1l</a>  | <a href="#">Ash1l.bSep08</a>  | <a href="#">310638</a> | 32873  | 4614 | 3  | 1537 | ash1 (absent, small, or homeotic)-like ( <i>Drosophila</i> ) (Ash1l) alternative variant bSep08, mRNA.                         |
| <a href="#">Ash1l</a>  | <a href="#">Ash1l.cSep08</a>  | <a href="#">310638</a> | 2236   | 617  | 3  | 152  | ash1 (absent, small, or homeotic)-like ( <i>Drosophila</i> ) (Ash1l) alternative variant cSep08, mRNA.                         |
| <a href="#">Ash1l</a>  | <a href="#">Ash1l.dSep08</a>  | <a href="#">310638</a> | 12900  | 427  | 5  | 141  | ash1 (absent, small, or homeotic)-like ( <i>Drosophila</i> ) (Ash1l) alternative variant dSep08, mRNA.                         |
| <a href="#">Ash1l</a>  | <a href="#">Ash1l.eSep08</a>  | <a href="#">310638</a> | 2708   | 372  | 3  | 124  | ash1 (absent, small, or homeotic)-like ( <i>Drosophila</i> ) (Ash1l) alternative variant eSep08, mRNA.                         |

|                                  |                                         |                        |       |      |    |     |                                                                                                                            |
|----------------------------------|-----------------------------------------|------------------------|-------|------|----|-----|----------------------------------------------------------------------------------------------------------------------------|
| <a href="#">Ash2l</a>            | <a href="#">Ash2l.bSep08</a>            | <a href="#">290829</a> | 15448 | 1351 | 13 | 449 | ash2 (absent, small, or homeotic)-like (Drosophila) (Ash2l) alternative variant bSep08, mRNA.                              |
| <a href="#">Ash2l</a>            | <a href="#">Ash2l.cSep08</a>            | <a href="#">290829</a> | 22976 | 3828 | 15 | 308 | ash2 (absent, small, or homeotic)-like (Drosophila) (33.0 kD) (Ash2l) alternative variant cSep08, complete mRNA.           |
| <a href="#">Ash2l</a>            | <a href="#">Ash2l.dSep08</a>            | <a href="#">290829</a> | 21373 | 814  | 9  | 271 | ash2 (absent, small, or homeotic)-like (Drosophila) (Ash2l) alternative variant dSep08, mRNA.                              |
| <a href="#">Asl</a>              | <a href="#">Asl.bSep08</a>              | <a href="#">59085</a>  | 13101 | 1078 | 9  | 196 | argininosuccinate lyase (Asl) alternative variant bSep08, mRNA.                                                            |
| <a href="#">Asl</a>              | <a href="#">Asl.cSep08</a>              | <a href="#">59085</a>  | 5115  | 415  | 3  | 137 | putative protein (Asl) alternative variant cSep08, mRNA.                                                                   |
| <a href="#">Asl</a>              | <a href="#">Asl.dSep08</a>              | <a href="#">59085</a>  | 5149  | 484  | 3  | 123 | putative protein (Asl) alternative variant dSep08, mRNA.                                                                   |
| <a href="#">Asl</a>              | <a href="#">Asl.eSep08</a>              | <a href="#">59085</a>  | 1043  | 266  | 4  | 88  | argininosuccinate lyase (Asl) alternative variant eSep08, mRNA.                                                            |
| <a href="#">Asl</a>              | <a href="#">Asl.fSep08</a>              | <a href="#">59085</a>  | 5055  | 605  | 3  | 21  | putative protein (Asl) alternative variant fSep08, mRNA.                                                                   |
| <a href="#">Asmtl</a>            | <a href="#">Asmtl.bSep08</a>            | <a href="#">288527</a> | 553   | 439  | 2  | 103 | acetylserotonin O-methyltransferase-like (Asmtl) alternative variant bSep08, mRNA.                                         |
| <a href="#">Asmtl</a>            | <a href="#">Asmtl.cSep08</a>            | <a href="#">288527</a> | 2659  | 1239 | 6  | 98  | acetylserotonin O-methyltransferase-like (10.6 kD) (Asmtl) alternative variant cSep08, mRNA.                               |
| <a href="#">Asmtl</a>            | <a href="#">Asmtl.dSep08</a>            | <a href="#">288527</a> | 822   | 464  | 3  | 23  | acetylserotonin O-methyltransferase-like (Asmtl) alternative variant dSep08, mRNA.                                         |
| <a href="#">Asna1</a>            | <a href="#">Asna1.aSep08</a>            | <a href="#">288919</a> | 8088  | 1351 | 7  | 348 | arsA arsenite transporter, ATP-binding, homolog 1 (bacterial) (38.8 kD) (Asna1) alternative variant aSep08, complete mRNA. |
| <a href="#">Asns</a>             | <a href="#">Asns.bSep08</a>             | <a href="#">25612</a>  | 10606 | 873  | 5  | 245 | asparagine synthetase (Asns) alternative variant bSep08, mRNA.                                                             |
| <a href="#">Asnsd1</a>           | <a href="#">Asnsd1.bSep08</a>           | <a href="#">299507</a> | 16273 | 2094 | 2  | 111 | putative protein, with a coiled coil domain (Asnsd1) alternative variant bSep08, mRNA.                                     |
| <a href="#">Aspa</a>             | <a href="#">Aspa.bSep08</a>             | <a href="#">79251</a>  | 53844 | 1646 | 7  | 262 | aspartoacylase (29.9 kD) (Aspa) alternative variant bSep08, mRNA.                                                          |
| <a href="#">Asph</a>             | <a href="#">Asph.bSep08</a>             | <a href="#">312981</a> | 76386 | 795  | 6  | 202 | aspartate-beta-hydroxylase (Asph) alternative variant bSep08, mRNA.                                                        |
| <a href="#">Asph</a>             | <a href="#">Asph.dSep08</a>             | <a href="#">312981</a> | 43627 | 478  | 3  | 101 | aspartate-beta-hydroxylase (Asph) alternative variant dSep08, mRNA.                                                        |
| <a href="#">Asphd2</a>           | <a href="#">Asphd2.bSep08</a>           | <a href="#">364948</a> | 1787  | 533  | 2  | 32  | putative protein (3.7 kD) (Asphd2) alternative variant bSep08, mRNA.                                                       |
| <a href="#">Aspn</a>             | <a href="#">Aspn.aSep08</a>             | <a href="#">306805</a> | 23988 | 1784 | 1  | 451 | asporin (Aspn) alternative variant aSep08, mRNA.                                                                           |
| <a href="#">Aspscr1</a>          | <a href="#">Aspscr1.aSep08</a>          | <a href="#">691026</a> | 33261 | 1924 |    | 448 | putative protein, with a coiled coil domain, of eukaryotic origin (Aspscr1) mRNA.                                          |
| <a href="#">Asp_Arg_Hydrox.0</a> | <a href="#">Asp_Arg_Hydrox.0.aSep08</a> |                        | 27229 | 2621 |    | 155 | aspartate-beta-hydroxylase CRA a (Asp_Arg_Hydrox.0) mRNA.                                                                  |
| <a href="#">Ass1</a>             | <a href="#">Ass1.bSep08</a>             | <a href="#">25698</a>  | 3340  | 729  | 2  | 59  | argininosuccinate synthetase (Ass1) alternative variant bSep08, mRNA.                                                      |
| <a href="#">Ass1</a>             | <a href="#">Ass1.cSep08</a>             | <a href="#">25698</a>  | 1808  | 515  | 2  | 36  | argininosuccinate synthetase (4.1 kD) (Ass1) alternative variant cSep08, mRNA.                                             |
| <a href="#">Aste1</a>            | <a href="#">Aste1.aSep08</a>            | <a href="#">363130</a> | 2375  | 837  | 2  | 139 | asteroid homolog 1 (15.7 kD) (Aste1) alternative variant aSep08, mRNA.                                                     |
| <a href="#">Astl</a>             | <a href="#">Astl.bSep08</a>             | <a href="#">296129</a> | 2023  | 747  | 2  | 183 | astacin-like metalloendopeptidase (M12 family) (Astl) alternative variant bSep08, mRNA.                                    |

|                        |                               |                        |        |      |    |      |                                                                                                             |
|------------------------|-------------------------------|------------------------|--------|------|----|------|-------------------------------------------------------------------------------------------------------------|
| <a href="#">Astn1</a>  | <a href="#">Astn1.aSep08</a>  | <a href="#">304900</a> | 32001  | 1160 | 6  | 368  | astrotactin 1 (Astn1) alternative variant aSep08, mRNA.                                                     |
| <a href="#">Astn1</a>  | <a href="#">Astn1.bSep08</a>  | <a href="#">304900</a> | 7344   | 471  | 1  | 95   | astrotactin 1 (Astn1) alternative variant bSep08, mRNA.                                                     |
| <a href="#">Asxl2</a>  | <a href="#">Asxl2.dSep08</a>  | <a href="#">313922</a> | 7425   | 1117 | 2  | 64   | additional sex combs like 2 (Drosophila) (7.2 kD) (Asxl2) alternative variant dSep08, mRNA.                 |
| <a href="#">Atad1</a>  | <a href="#">Atad1.bSep08</a>  | <a href="#">309532</a> | 68770  | 3933 | 11 | 361  | neuroprotective protein 6 (40.7 kD) (Atad1) alternative variant bSep08, mRNA.                               |
| <a href="#">Atad2</a>  | <a href="#">Atad2.bSep08</a>  | <a href="#">314993</a> | 15514  | 3395 | 13 | 544  | bromodomain containing protein (62.2 kD) (Atad2) alternative variant bSep08, mRNA.                          |
| <a href="#">Atad3a</a> | <a href="#">Atad3a.bSep08</a> | <a href="#">298682</a> | 12308  | 1307 | 11 | 302  | aaa-atpase tob3 (33.5 kD) (Atad3a) alternative variant bSep08, mRNA.                                        |
| <a href="#">Atad5</a>  | <a href="#">Atad5.aSep08</a>  | <a href="#">303348</a> | 13054  | 716  |    | 238  | putative protein of eukaryotic origin (Atad5) mRNA.                                                         |
| <a href="#">Atcay</a>  | <a href="#">Atcay.bSep08</a>  | <a href="#">362826</a> | 1713   | 436  | 3  | 66   | ataxia, cerebellar, Cayman type (Atcay) alternative variant bSep08, mRNA.                                   |
| <a href="#">Ate1</a>   | <a href="#">Ate1.bSep08</a>   | <a href="#">293526</a> | 122960 | 1276 | 7  | 189  | arginine-tRNA-protein transferase 1 (21.6 kD) (Ate1) alternative variant bSep08, mRNA.                      |
| <a href="#">Ate1</a>   | <a href="#">Ate1.cSep08</a>   | <a href="#">293526</a> | 10818  | 446  | 4  | 87   | arginine-tRNA-protein transferase 1 (Ate1) alternative variant cSep08, mRNA.                                |
| <a href="#">Atf1</a>   | <a href="#">Atf1.aSep08</a>   | <a href="#">315305</a> | 43635  | 2328 | 3  | 359  | activating transcription factor 1 (Atf1) alternative variant aSep08, mRNA.                                  |
| <a href="#">Atf1</a>   | <a href="#">Atf1.bSep08</a>   | <a href="#">315305</a> | 40647  | 1177 | 4  | 224  | activating transcription factor 1 (23.9 kD) (Atf1) alternative variant bSep08, mRNA.                        |
| <a href="#">Atf1</a>   | <a href="#">Atf1.cSep08</a>   | <a href="#">315305</a> | 35808  | 723  | 2  | 211  | activating transcription factor 1 (Atf1) alternative variant cSep08, mRNA.                                  |
| <a href="#">Atf2</a>   | <a href="#">Atf2.bSep08</a>   | <a href="#">81647</a>  | 69111  | 1154 | 11 | 314  | activating transcription factor 2 (Atf2) alternative variant bSep08, mRNA.                                  |
| <a href="#">Atf3</a>   | <a href="#">Atf3.bSep08</a>   | <a href="#">25389</a>  | 87075  | 591  | 3  | 196  | activating transcription factor 3 (Atf3) alternative variant bSep08, mRNA.                                  |
| <a href="#">Atf3</a>   | <a href="#">Atf3.cSep08</a>   | <a href="#">25389</a>  | 29494  | 347  | 2  | 115  | activating transcription factor 3 (Atf3) alternative variant cSep08, mRNA.                                  |
| <a href="#">Atf4</a>   | <a href="#">Atf4.bSep08</a>   | <a href="#">79255</a>  | 1514   | 975  | 2  | 92   | putative mitochondrial protein (9.9 kD) (Atf4) alternative variant bSep08, mRNA.                            |
| <a href="#">Atf5</a>   | <a href="#">Atf5.bSep08</a>   | <a href="#">282840</a> | 3277   | 643  | 3  | 114  | activating transcription factor 5 (Atf5) alternative variant bSep08, mRNA.                                  |
| <a href="#">Atf7</a>   | <a href="#">Atf7.bSep08</a>   | <a href="#">315333</a> | 108569 | 1781 | 12 | 483  | activating transcription factor 7 (51.8 kD) (Atf7) alternative variant bSep08, mRNA.                        |
| <a href="#">Atf7</a>   | <a href="#">Atf7.cSep08</a>   | <a href="#">315333</a> | 74548  | 417  | 5  | 107  | activating transcription factor 7 (Atf7) alternative variant cSep08, mRNA.                                  |
| <a href="#">Atf7ip</a> | <a href="#">Atf7ip.aSep08</a> | <a href="#">312800</a> | 82894  | 4504 | 13 | 1283 | activating transcription factor 7 interacting protein (136.2 kD) (Atf7ip) alternative variant aSep08, mRNA. |
| <a href="#">Atf7ip</a> | <a href="#">Atf7ip.bSep08</a> | <a href="#">312800</a> | 39261  | 1484 | 6  | 436  | activating transcription factor 7 interacting protein (Atf7ip) alternative variant bSep08, mRNA.            |
| <a href="#">Atf7ip</a> | <a href="#">Atf7ip.dSep08</a> | <a href="#">312800</a> | 14647  | 634  | 5  | 211  | activating transcription factor 7 interacting protein (Atf7ip) alternative variant dSep08, mRNA.            |
| <a href="#">Atf7ip</a> | <a href="#">Atf7ip.eSep08</a> | <a href="#">312800</a> | 6408   | 557  | 2  | 156  | activating transcription factor 7 interacting protein (Atf7ip) alternative variant eSep08, mRNA.            |
| <a href="#">Atf7ip</a> | <a href="#">Atf7ip.fSep08</a> | <a href="#">312800</a> | 8099   | 366  | 3  | 121  | activating transcription factor 7 interacting protein (Atf7ip) alternative variant fSep08, mRNA.            |



|                         |                                |                        |        |      |    |     |                                                                                                             |
|-------------------------|--------------------------------|------------------------|--------|------|----|-----|-------------------------------------------------------------------------------------------------------------|
| <a href="#">Atf7ip</a>  | <a href="#">Atf7ip.gSep08</a>  | <a href="#">312800</a> | 6166   | 375  | 3  | 75  | activating transcription factor 7 interacting protein (Atf7ip) alternative variant gSep08, mRNA.            |
| <a href="#">Atf7ip2</a> | <a href="#">Atf7ip2.bSep08</a> | <a href="#">497859</a> | 15398  | 373  | 1  | 124 | activating transcription factor 7 interacting protein 2 (Atf7ip2) alternative variant bSep08, mRNA.         |
| <a href="#">Atg2a</a>   | <a href="#">Atg2a.bSep08</a>   | <a href="#">689688</a> | 1693   | 755  | 1  | 131 | ATG2 autophagy related 2 homolog A ( <i>S. cerevisiae</i> ) (Atg2a) alternative variant bSep08, mRNA.       |
| <a href="#">Atg3</a>    | <a href="#">Atg3.aSep08</a>    | <a href="#">171415</a> | 12663  | 1776 | 6  | 437 | autophagy-related 3 (yeast) (Atg3) alternative variant aSep08, mRNA.                                        |
| <a href="#">Atg3</a>    | <a href="#">Atg3.bSep08</a>    | <a href="#">171415</a> | 28312  | 1374 | 11 | 325 | autophagy-related 3 (yeast) (37.1 kD) (Atg3) alternative variant bSep08, mRNA.                              |
| <a href="#">Atg4b</a>   | <a href="#">Atg4b.aSep08</a>   | <a href="#">316640</a> | 30758  | 1690 | 9  | 360 | autophagy-related 4B (yeast) (Atg4b) alternative variant aSep08, mRNA.                                      |
| <a href="#">Atg4b</a>   | <a href="#">Atg4b.cSep08</a>   | <a href="#">316640</a> | 27433  | 894  | 6  | 143 | autophagy-related 4B (yeast) (16.8 kD) (Atg4b) alternative variant cSep08, mRNA.                            |
| <a href="#">Atg4c</a>   | <a href="#">Atg4c.bSep08</a>   | <a href="#">313391</a> | 7102   | 702  | 4  | 176 | autophagy-related 4C (yeast) (Atg4c) alternative variant bSep08, mRNA.                                      |
| <a href="#">Atg7</a>    | <a href="#">Atg7.bSep08</a>    | <a href="#">312647</a> | 157478 | 1777 | 5  | 510 | ATG7 autophagy related 7 homolog ( <i>S. cerevisiae</i> ) (Atg7) alternative variant bSep08, mRNA.          |
| <a href="#">Atg7</a>    | <a href="#">Atg7.cSep08</a>    | <a href="#">312647</a> | 19208  | 724  | 5  | 171 | ATG7 autophagy related 7 homolog ( <i>S. cerevisiae</i> ) (Atg7) alternative variant cSep08, mRNA.          |
| <a href="#">Atg7</a>    | <a href="#">Atg7.dSep08</a>    | <a href="#">312647</a> | 1097   | 573  | 2  | 68  | ATG7 autophagy related 7 homolog ( <i>S. cerevisiae</i> ) (7.7 kD) (Atg7) alternative variant dSep08, mRNA. |
| <a href="#">Atg9a</a>   | <a href="#">Atg9a.bSep08</a>   | <a href="#">363254</a> | 5533   | 1445 | 8  | 397 | autophagy-related 9A CRA a (Atg9a) alternative variant bSep08, mRNA.                                        |
| <a href="#">Atg9a</a>   | <a href="#">Atg9a.cSep08</a>   | <a href="#">363254</a> | 1903   | 1289 | 3  | 141 | putative protein (15.3 kD) (Atg9a) alternative variant cSep08, mRNA.                                        |
| <a href="#">Atg9a</a>   | <a href="#">Atg9a.dSep08</a>   | <a href="#">363254</a> | 842    | 735  | 2  | 83  | autophagy-related 9A CRA a (Atg9a) alternative variant dSep08, mRNA.                                        |
| <a href="#">Atg9a</a>   | <a href="#">Atg9a.eSep08</a>   | <a href="#">363254</a> | 1600   | 242  | 2  | 80  | autophagy-related 9A CRA a (Atg9a) alternative variant eSep08, mRNA.                                        |
| <a href="#">Atg9a</a>   | <a href="#">Atg9a.gSep08</a>   | <a href="#">363254</a> | 2346   | 405  | 6  | 36  | putative protein (3.9 kD) (Atg9a) alternative variant gSep08, mRNA.                                         |
| <a href="#">Atg10</a>   | <a href="#">Atg10.bSep08</a>   | <a href="#">688555</a> | 68222  | 328  | 3  | 89  | autophagy-related 10 ( <i>S. cerevisiae</i> ) (Atg10) alternative variant bSep08, mRNA.                     |
| <a href="#">Atg10</a>   | <a href="#">Atg10.cSep08</a>   | <a href="#">688555</a> | 42408  | 461  | 2  | 45  | autophagy-related 10 ( <i>S. cerevisiae</i> ) (Atg10) alternative variant cSep08, mRNA.                     |
| <a href="#">Atg16l1</a> | <a href="#">Atg16l1.bSep08</a> | <a href="#">363278</a> | 17369  | 843  | 9  | 280 | 1 16 (Atg16l1) alternative variant bSep08, mRNA.                                                            |
| <a href="#">Atg16l1</a> | <a href="#">Atg16l1.cSep08</a> | <a href="#">363278</a> | 9958   | 522  | 5  | 115 | 1 16 (Atg16l1) alternative variant cSep08, mRNA.                                                            |
| <a href="#">Atg16l1</a> | <a href="#">Atg16l1.dSep08</a> | <a href="#">363278</a> | 1335   | 727  | 2  | 83  | putative protein (9.1 kD) (Atg16l1) alternative variant dSep08, mRNA.                                       |
| <a href="#">Atg16l2</a> | <a href="#">Atg16l2.aSep08</a> | <a href="#">308865</a> | 3991   | 962  | 7  | 231 | ATG16 autophagy related 16-like 2 (Atg16l2) alternative variant aSep08, mRNA.                               |
| <a href="#">Atg16l2</a> | <a href="#">Atg16l2.bSep08</a> | <a href="#">308865</a> | 2535   | 823  | 5  | 151 | ATG16 autophagy related 16-like 2 (16.9 kD) (Atg16l2) alternative variant bSep08, mRNA.                     |
| <a href="#">Atg16l2</a> | <a href="#">Atg16l2.cSep08</a> | <a href="#">308865</a> | 2322   | 582  | 5  | 116 | CRA b (Atg16l2) alternative variant cSep08, mRNA.                                                           |
| <a href="#">Atg16l2</a> | <a href="#">Atg16l2.dSep08</a> | <a href="#">308865</a> | 724    | 491  | 2  | 88  | ATG16 autophagy related 16-like 2 (Atg16l2) alternative variant dSep08, mRNA.                               |

|                                 |                                        |                        |       |      |    |     |                                                                                                                             |
|---------------------------------|----------------------------------------|------------------------|-------|------|----|-----|-----------------------------------------------------------------------------------------------------------------------------|
| <a href="#">Ath1</a>            | <a href="#">Ath1.aSep08</a>            | <a href="#">309103</a> | 2446  | 888  | 7  | 295 | ATH1, acid trehalase-like 1 (yeast) (Ath1) alternative variant aSep08, mRNA.                                                |
| <a href="#">Ath1</a>            | <a href="#">Ath1.bSep08</a>            | <a href="#">309103</a> | 1184  | 771  | 4  | 169 | ATH1, acid trehalase-like 1 (yeast) (Ath1) alternative variant bSep08, mRNA.                                                |
| <a href="#">Ath1</a>            | <a href="#">Ath1.cSep08</a>            | <a href="#">309103</a> | 1893  | 1396 | 3  | 133 | ATH1, acid trehalase-like 1 (yeast) (15.1 kD) (Ath1) alternative variant cSep08, mRNA.                                      |
| <a href="#">Atic</a>            | <a href="#">Atic.bSep08</a>            | <a href="#">81643</a>  | 6014  | 858  | 5  | 216 | 5-aminoimidazole-4-carboxamide ribonucleotide formyltransferase/IMP cyclohydrolase (Atic) alternative variant bSep08, mRNA. |
| <a href="#">Atic</a>            | <a href="#">Atic.cSep08</a>            | <a href="#">81643</a>  | 6984  | 731  | 8  | 153 | 5-aminoimidazole-4-carboxamide ribonucleotide formyltransferase/IMP cyclohydrolase (Atic) alternative variant cSep08, mRNA. |
| <a href="#">Atm</a>             | <a href="#">Atm.bSep08</a>             | <a href="#">300711</a> | 11846 | 921  | 5  | 181 | ataxia telangiectasia mutated homolog (human) (21.2 kD) (Atm) alternative variant bSep08, mRNA.                             |
| <a href="#">Atm</a>             | <a href="#">Atm.cSep08</a>             | <a href="#">300711</a> | 6190  | 480  | 4  | 146 | ataxia telangiectasia mutated homolog (human) (17.4 kD) (Atm) alternative variant cSep08, mRNA.                             |
| <a href="#">Atm</a>             | <a href="#">Atm.dSep08</a>             | <a href="#">300711</a> | 2677  | 527  | 2  | 75  | ataxia telangiectasia mutated homolog (human) (Atm) alternative variant dSep08, mRNA.                                       |
| <a href="#">Atn1</a>            | <a href="#">Atn1.bSep08</a>            | <a href="#">29515</a>  | 3437  | 1729 | 2  | 325 | atrophin 1 (Atn1) alternative variant bSep08, mRNA.                                                                         |
| <a href="#">Atp1a1</a>          | <a href="#">Atp1a1.bSep08</a>          | <a href="#">24211</a>  | 7177  | 1569 | 10 | 208 | na+ K+ -ATPase alpha (24.4 kD) (Atp1a1) alternative variant bSep08, mRNA.                                                   |
| <a href="#">Atp1a1</a>          | <a href="#">Atp1a1.cSep08</a>          | <a href="#">24211</a>  | 1108  | 709  | 2  | 125 | putative mitochondrial protein (13.6 kD) (Atp1a1) alternative variant cSep08, mRNA.                                         |
| <a href="#">Atp1a1</a>          | <a href="#">Atp1a1.dSep08</a>          | <a href="#">24211</a>  | 4167  | 360  | 3  | 119 | na+ K+ -ATPase alpha (Atp1a1) alternative variant dSep08, mRNA.                                                             |
| <a href="#">Atp1a2andAtp1a4</a> | <a href="#">Atp1a2andAtp1a4.cSep08</a> | <a href="#">24212</a>  | 7001  | 767  | 5  | 255 | ATPase Na+ K+ transporting alpha 4 polypeptide (Atp1a2andAtp1a4) alternative variant cSep08, mRNA.                          |
| <a href="#">Atp1a2andAtp1a4</a> | <a href="#">Atp1a2andAtp1a4.cSep08</a> | <a href="#">29132</a>  | 7001  | 767  | 5  | 255 | ATPase Na+ K+ transporting alpha 4 polypeptide (Atp1a2andAtp1a4) alternative variant cSep08, mRNA.                          |
| <a href="#">Atp1a2andAtp1a4</a> | <a href="#">Atp1a2andAtp1a4.dSep08</a> | <a href="#">24212</a>  | 40242 | 712  | 5  | 237 | na+ K+ (Atp1a2andAtp1a4) alternative variant dSep08, mRNA.                                                                  |
| <a href="#">Atp1a2andAtp1a4</a> | <a href="#">Atp1a2andAtp1a4.dSep08</a> | <a href="#">29132</a>  | 40242 | 712  | 5  | 237 | na+ K+ (Atp1a2andAtp1a4) alternative variant dSep08, mRNA.                                                                  |
| <a href="#">Atp1a2andAtp1a4</a> | <a href="#">Atp1a2andAtp1a4.eSep08</a> | <a href="#">24212</a>  | 7845  | 1797 | 5  | 134 | ATPase Na+ K+ alpha (Atp1a2andAtp1a4) alternative variant eSep08, mRNA.                                                     |
| <a href="#">Atp1a2andAtp1a4</a> | <a href="#">Atp1a2andAtp1a4.eSep08</a> | <a href="#">29132</a>  | 7845  | 1797 | 5  | 134 | ATPase Na+ K+ alpha (Atp1a2andAtp1a4) alternative variant eSep08, mRNA.                                                     |
| <a href="#">Atp1a2andAtp1a4</a> | <a href="#">Atp1a2andAtp1a4.fSep08</a> | <a href="#">24212</a>  | 1253  | 519  | 4  | 134 | ATPase Na+ K+ alpha (Atp1a2andAtp1a4) alternative variant fSep08, mRNA.                                                     |
| <a href="#">Atp1a2andAtp1a4</a> | <a href="#">Atp1a2andAtp1a4.fSep08</a> | <a href="#">29132</a>  | 1253  | 519  | 4  | 134 | ATPase Na+ K+ alpha (Atp1a2andAtp1a4) alternative variant fSep08, mRNA.                                                     |
| <a href="#">Atp1a2andAtp1a4</a> | <a href="#">Atp1a2andAtp1a4.gSep08</a> | <a href="#">24212</a>  | 511   | 397  | 2  | 87  | na+ K+ -ATPase (Atp1a2andAtp1a4) alternative variant gSep08, mRNA.                                                          |
| <a href="#">Atp1a2andAtp1a4</a> | <a href="#">Atp1a2andAtp1a4.gSep08</a> | <a href="#">29132</a>  | 511   | 397  | 2  | 87  | na+ K+ -ATPase (Atp1a2andAtp1a4) alternative variant gSep08, mRNA.                                                          |
| <a href="#">Atp1a2andAtp1a4</a> | <a href="#">Atp1a2andAtp1a4.hSep08</a> | <a href="#">24212</a>  | 1090  | 576  | 3  | 60  | ATPase Na+ K+ transporting alpha 2 polypeptide (Atp1a2andAtp1a4) alternative variant hSep08, mRNA.                          |

|                                 |                                        |                       |       |      |    |     |                                                                                                                            |
|---------------------------------|----------------------------------------|-----------------------|-------|------|----|-----|----------------------------------------------------------------------------------------------------------------------------|
| <a href="#">Atp1a2andAtp1a4</a> | <a href="#">Atp1a2andAtp1a4.hSep08</a> | <a href="#">29132</a> | 1090  | 576  | 3  | 60  | ATPase Na <sup>+</sup> K <sup>+</sup> transporting alpha 2 polypeptide (Atp1a2andAtp1a4) alternative variant hSep08, mRNA. |
| <a href="#">Atp1a2andAtp1a4</a> | <a href="#">Atp1a2andAtp1a4.iSep08</a> | <a href="#">24212</a> | 604   | 351  | 2  | 50  | putative protein (Atp1a2andAtp1a4) alternative variant iSep08, mRNA.                                                       |
| <a href="#">Atp1a2andAtp1a4</a> | <a href="#">Atp1a2andAtp1a4.iSep08</a> | <a href="#">29132</a> | 604   | 351  | 2  | 50  | putative protein (Atp1a2andAtp1a4) alternative variant iSep08, mRNA.                                                       |
| <a href="#">Atp1a2andAtp1a4</a> | <a href="#">Atp1a2andAtp1a4.jSep08</a> | <a href="#">24212</a> | 443   | 257  | 2  | 33  | ATPase Na <sup>+</sup> K <sup>+</sup> transporting alpha polypeptide (Atp1a2andAtp1a4) alternative variant jSep08, mRNA.   |
| <a href="#">Atp1a2andAtp1a4</a> | <a href="#">Atp1a2andAtp1a4.jSep08</a> | <a href="#">29132</a> | 443   | 257  | 2  | 33  | ATPase Na <sup>+</sup> K <sup>+</sup> transporting alpha polypeptide (Atp1a2andAtp1a4) alternative variant jSep08, mRNA.   |
| <a href="#">Atp1b1</a>          | <a href="#">Atp1b1.bSep08</a>          | <a href="#">25650</a> | 14381 | 921  | 1  | 143 | ATPase, Na <sup>+</sup> /K <sup>+</sup> transporting, beta 1 polypeptide (Atp1b1) alternative variant bSep08, mRNA.        |
| <a href="#">Atp1b2</a>          | <a href="#">Atp1b2.bSep08</a>          | <a href="#">24214</a> | 3430  | 2166 |    | 210 | ATPase, Na <sup>+</sup> /K <sup>+</sup> transporting, beta 2 polypeptide (Atp1b2) alternative variant bSep08, mRNA.        |
| <a href="#">Atp1b3</a>          | <a href="#">Atp1b3.bSep08</a>          | <a href="#">25390</a> | 11888 | 962  | 4  | 83  | ATPase, Na <sup>+</sup> /K <sup>+</sup> transporting, beta 3 polypeptide (Atp1b3) alternative variant bSep08, mRNA.        |
| <a href="#">Atp1b3</a>          | <a href="#">Atp1b3.dSep08</a>          | <a href="#">25390</a> | 11864 | 293  | 3  | 54  | ATPase, Na <sup>+</sup> /K <sup>+</sup> transporting, beta 3 polypeptide (Atp1b3) alternative variant dSep08, mRNA.        |
| <a href="#">Atp2a2</a>          | <a href="#">Atp2a2.aSep08</a>          | <a href="#">29693</a> | 13152 | 4000 | 12 | 648 | ATPase Ca <sup>++</sup> transporting cardiac muscle slow twitch 2 (Atp2a2) alternative variant aSep08, mRNA.               |
| <a href="#">Atp2a2</a>          | <a href="#">Atp2a2.bSep08</a>          | <a href="#">29693</a> | 30621 | 1767 | 10 | 482 | ATPase Ca <sup>++</sup> transporting cardiac muscle slow twitch 2 (52.7 kD) (Atp2a2) alternative variant bSep08, mRNA.     |
| <a href="#">Atp2a2</a>          | <a href="#">Atp2a2.cSep08</a>          | <a href="#">29693</a> | 10174 | 1947 | 6  | 441 | ATPase Ca <sup>++</sup> transporting cardiac muscle slow twitch 2 (Atp2a2) alternative variant cSep08, mRNA.               |
| <a href="#">Atp2a2</a>          | <a href="#">Atp2a2.dSep08</a>          | <a href="#">29693</a> | 6605  | 1559 | 7  | 295 | ATPase Ca <sup>++</sup> transporting cardiac muscle slow twitch 2 (Atp2a2) alternative variant dSep08, mRNA.               |
| <a href="#">Atp2a2</a>          | <a href="#">Atp2a2.eSep08</a>          | <a href="#">29693</a> | 35306 | 1278 | 8  | 250 | ATPase Ca <sup>++</sup> transporting cardiac muscle slow twitch 2 (Atp2a2) alternative variant eSep08, mRNA.               |
| <a href="#">Atp2a2</a>          | <a href="#">Atp2a2.fSep08</a>          | <a href="#">29693</a> | 5613  | 883  | 6  | 227 | ATPase Ca <sup>++</sup> transporting cardiac muscle slow twitch 2 (Atp2a2) alternative variant fSep08, mRNA.               |
| <a href="#">Atp2a2</a>          | <a href="#">Atp2a2.hSep08</a>          | <a href="#">29693</a> | 707   | 623  | 2  | 130 | ATPase Ca <sup>++</sup> transporting cardiac muscle slow twitch 2 (Atp2a2) alternative variant hSep08, mRNA.               |
| <a href="#">Atp2a2</a>          | <a href="#">Atp2a2.iSep08</a>          | <a href="#">29693</a> | 912   | 297  | 2  | 97  | ATPase Ca <sup>++</sup> transporting cardiac muscle slow twitch 2 (Atp2a2) alternative variant iSep08, mRNA.               |
| <a href="#">Atp2b1</a>          | <a href="#">Atp2b1.bSep08</a>          | <a href="#">29598</a> | 75988 | 1783 | 5  | 479 | ATPase Plasma membrane (Atp2b1) alternative variant bSep08, mRNA.                                                          |
| <a href="#">Atp2b1</a>          | <a href="#">Atp2b1.cSep08</a>          | <a href="#">29598</a> | 23494 | 5325 | 10 | 314 | ATPase plasma membrane 1 (Atp2b1) alternative variant cSep08, mRNA.                                                        |
| <a href="#">Atp2b1</a>          | <a href="#">Atp2b1.dSep08</a>          | <a href="#">29598</a> | 11248 | 688  | 4  | 228 | ATPase Plasma membrane 1 (Atp2b1) alternative variant dSep08, mRNA.                                                        |
| <a href="#">Atp2b1</a>          | <a href="#">Atp2b1.eSep08</a>          | <a href="#">29598</a> | 3676  | 704  | 3  | 184 | membrane calcium-transporting ATPase 1 (Atp2b1) alternative variant eSep08, mRNA.                                          |
| <a href="#">Atp2b1</a>          | <a href="#">Atp2b1.fSep08</a>          | <a href="#">29598</a> | 5497  | 796  | 3  | 172 | plasma membrane ATPase (19.3 kD) (Atp2b1) alternative variant fSep08, mRNA.                                                |
| <a href="#">Atp2b1</a>          | <a href="#">Atp2b1.gSep08</a>          | <a href="#">29598</a> | 1151  | 749  | 2  | 112 | plasma membrane ATPase (Atp2b1) alternative variant gSep08, mRNA.                                                          |

|                        |                               |                        |       |      |    |     |                                                                                                                                                                           |
|------------------------|-------------------------------|------------------------|-------|------|----|-----|---------------------------------------------------------------------------------------------------------------------------------------------------------------------------|
| <a href="#">Atp2b1</a> | <a href="#">Atp2b1.hSep08</a> | <a href="#">29598</a>  | 53375 | 621  | 2  | 103 | putative protein (Atp2b1) alternative variant hSep08, mRNA.                                                                                                               |
| <a href="#">Atp2b1</a> | <a href="#">Atp2b1.jSep08</a> | <a href="#">29598</a>  | 3822  | 763  | 2  | 76  | ATPase plasma membrane (8.2 kD) (Atp2b1) alternative variant jSep08, mRNA.                                                                                                |
| <a href="#">Atp2b1</a> | <a href="#">Atp2b1.nSep08</a> | <a href="#">29598</a>  | 3691  | 478  | 4  | 80  | putative protein (Atp2b1) alternative variant nSep08, mRNA.                                                                                                               |
| <a href="#">Atp2b2</a> | <a href="#">Atp2b2.bSep08</a> | <a href="#">24215</a>  | 15347 | 4395 | 5  | 291 | ATPase, Ca <sup>++</sup> transporting, plasma membrane 2 (Atp2b2) alternative variant bSep08, mRNA.                                                                       |
| <a href="#">Atp2b2</a> | <a href="#">Atp2b2.cSep08</a> | <a href="#">24215</a>  | 44242 | 1652 | 3  | 54  | ATPase, Ca <sup>++</sup> transporting, plasma membrane 2 (5.6 kD) (Atp2b2) alternative variant cSep08, mRNA.                                                              |
| <a href="#">Atp2b3</a> | <a href="#">Atp2b3.bSep08</a> | <a href="#">29599</a>  | 10014 | 1784 | 6  | 554 | ATPase, Ca <sup>++</sup> transporting, plasma membrane 3 (Atp2b3) alternative variant bSep08, mRNA.                                                                       |
| <a href="#">Atp2b3</a> | <a href="#">Atp2b3.cSep08</a> | <a href="#">29599</a>  | 5052  | 386  | 2  | 115 | ATPase, Ca <sup>++</sup> transporting, plasma membrane 3 (Atp2b3) alternative variant cSep08, mRNA.                                                                       |
| <a href="#">Atp2b3</a> | <a href="#">Atp2b3.dSep08</a> | <a href="#">29599</a>  | 1029  | 408  | 2  | 74  | ATPase, Ca <sup>++</sup> transporting, plasma membrane 3 (Atp2b3) alternative variant dSep08, mRNA.                                                                       |
| <a href="#">Atp2b4</a> | <a href="#">Atp2b4.bSep08</a> | <a href="#">29600</a>  | 6121  | 2175 | 2  | 74  | ATPase, Ca <sup>++</sup> transporting, plasma membrane 4 (Atp2b4) alternative variant bSep08, mRNA.                                                                       |
| <a href="#">Atp2c1</a> | <a href="#">Atp2c1.bSep08</a> | <a href="#">170699</a> | 56569 | 4152 | 24 | 820 | ATPase, Ca <sup>++</sup> transporting, type 2C, member 1 (Atp2c1) alternative variant bSep08, mRNA.                                                                       |
| <a href="#">Atp2c1</a> | <a href="#">Atp2c1.cSep08</a> | <a href="#">170699</a> | 4655  | 375  | 3  | 92  | ATPase, Ca <sup>++</sup> transporting, type 2C, member 1 (Atp2c1) alternative variant cSep08, mRNA.                                                                       |
| <a href="#">Atp2c1</a> | <a href="#">Atp2c1.dSep08</a> | <a href="#">170699</a> | 29784 | 566  | 4  | 98  | ATPase, Ca <sup>++</sup> transporting, type 2C, member 1 (Atp2c1) alternative variant dSep08, mRNA.                                                                       |
| <a href="#">Atp4a</a>  | <a href="#">Atp4a.aSep08</a>  | <a href="#">24216</a>  | 1763  | 652  |    | 216 | ATPase, H <sup>+</sup> /K <sup>+</sup> exchanging, alpha polypeptide (Atp4a) mRNA.                                                                                        |
| <a href="#">Atp5a1</a> | <a href="#">Atp5a1.bSep08</a> | <a href="#">65262</a>  | 3522  | 435  | 2  | 137 | ATP synthase, H <sup>+</sup> transporting, mitochondrial F1 complex, alpha subunit 1, cardiac muscle (Atp5a1) alternative variant bSep08, mRNA.                           |
| <a href="#">Atp5b</a>  | <a href="#">Atp5b.bSep08</a>  | <a href="#">171374</a> | 2473  | 1320 | 5  | 283 | ATP synthase, H <sup>+</sup> transporting mitochondrial F1 complex, beta subunit (29.7 kD) (Atp5b) alternative variant bSep08, mRNA.                                      |
| <a href="#">Atp5b</a>  | <a href="#">Atp5b.cSep08</a>  | <a href="#">171374</a> | 2122  | 520  | 3  | 122 | ATP synthase, H <sup>+</sup> transporting mitochondrial F1 complex, beta subunit (Atp5b) alternative variant cSep08, mRNA.                                                |
| <a href="#">Atp5b</a>  | <a href="#">Atp5b.fSep08</a>  | <a href="#">171374</a> | 1158  | 493  | 3  | 81  | ATP synthase, H <sup>+</sup> transporting mitochondrial F1 complex, beta subunit (8.8 kD) (Atp5b) alternative variant fSep08, mRNA.                                       |
| <a href="#">Atp5c1</a> | <a href="#">Atp5c1.bSep08</a> | <a href="#">116550</a> | 21908 | 1436 | 8  | 273 | ATP synthase, H <sup>+</sup> transporting, mitochondrial F1 complex, gamma polypeptide 1 (30.2 kD) (Atp5c1) alternative variant bSep08, mRNA.                             |
| <a href="#">Atp5c1</a> | <a href="#">Atp5c1.cSep08</a> | <a href="#">116550</a> | 3985  | 374  | 2  | 44  | ATP synthase, H <sup>+</sup> transporting, mitochondrial F1 complex, gamma polypeptide 1 (Atp5c1) alternative variant cSep08, mRNA.                                       |
| <a href="#">Atp5d</a>  | <a href="#">Atp5d.bSep08</a>  | <a href="#">245965</a> | 5327  | 2473 | 4  | 184 | ATP synthase, H <sup>+</sup> transporting, mitochondrial F1 complex, delta subunit and hypothetical protein LOC690935 (19.3 kD) (Atp5d) alternative variant bSep08, mRNA. |

|                        |                               |                        |       |      |   |     |                                                                                                                                                               |
|------------------------|-------------------------------|------------------------|-------|------|---|-----|---------------------------------------------------------------------------------------------------------------------------------------------------------------|
| <a href="#">Atp5d</a>  | <a href="#">Atp5d.bSep08</a>  | <a href="#">690935</a> | 5327  | 2473 | 4 | 184 | ATP synthase, H+ transporting, mitochondrial F1 complex, delta subunit and hypothetical protein LOC690935 (19.3 kD) (Atp5d) alternative variant bSep08, mRNA. |
| <a href="#">Atp5f1</a> | <a href="#">Atp5f1.aSep08</a> | <a href="#">171375</a> | 10634 | 1090 | 6 | 314 | ATP synthase, H+ transporting, mitochondrial F0 complex, subunit B1 (35.5 kD) (Atp5f1) alternative variant aSep08, mRNA.                                      |
| <a href="#">Atp5f1</a> | <a href="#">Atp5f1.cSep08</a> | <a href="#">171375</a> | 4270  | 627  | 3 | 119 | ATP synthase, H+ transporting, mitochondrial F0 complex, subunit B1 (13.1 kD) (Atp5f1) alternative variant cSep08, mRNA.                                      |
| <a href="#">Atp5f1</a> | <a href="#">Atp5f1.fSep08</a> | <a href="#">171375</a> | 595   | 345  | 2 | 58  | ATP synthase, H+ transporting, mitochondrial F0 complex, subunit B1 (Atp5f1) alternative variant fSep08, mRNA.                                                |
| <a href="#">Atp5g1</a> | <a href="#">Atp5g1.aSep08</a> | <a href="#">29754</a>  | 2584  | 1103 | 4 | 145 | ATP synthase, H+ transporting, mitochondrial F0 complex, subunit C1 (subunit 9) (15.2 kD) (Atp5g1) alternative variant aSep08, mRNA.                          |
| <a href="#">Atp5g1</a> | <a href="#">Atp5g1.bSep08</a> | <a href="#">29754</a>  | 2648  | 558  | 5 | 136 | ATP synthase, H+ transporting, mitochondrial F0 complex, subunit C1 (subunit 9) (14.2 kD) (Atp5g1) alternative variant bSep08, mRNA.                          |
| <a href="#">Atp5g1</a> | <a href="#">Atp5g1.dSep08</a> | <a href="#">29754</a>  | 2275  | 384  | 5 | 111 | ATP synthase, H+ transporting, mitochondrial F0 complex, subunit C1 (subunit 9) (Atp5g1) alternative variant dSep08, mRNA.                                    |
| <a href="#">Atp5g1</a> | <a href="#">Atp5g1.eSep08</a> | <a href="#">29754</a>  | 1812  | 886  | 2 | 57  | ATP synthase, H+ transporting, mitochondrial F0 complex, subunit C1 (subunit 9) (6.0 kD) (Atp5g1) alternative variant eSep08, mRNA.                           |
| <a href="#">Atp5g2</a> | <a href="#">Atp5g2.aSep08</a> | <a href="#">171082</a> | 7581  | 545  | 5 | 141 | ATP synthase, H+ transporting, mitochondrial F0 complex, subunit C2 (subunit 9) (14.9 kD) (Atp5g2) alternative variant aSep08, mRNA.                          |
| <a href="#">Atp5g3</a> | <a href="#">Atp5g3.aSep08</a> | <a href="#">114630</a> | 2854  | 930  | 4 | 185 | ATP synthase, H+ transporting, mitochondrial F0 complex, subunit C3 (subunit 9) (Atp5g3) alternative variant aSep08, mRNA.                                    |
| <a href="#">Atp5g3</a> | <a href="#">Atp5g3.bSep08</a> | <a href="#">114630</a> | 2625  | 691  | 4 | 179 | ATP synthase, H+ transporting, mitochondrial F0 complex, subunit C3 (subunit 9) (Atp5g3) alternative variant bSep08, mRNA.                                    |
| <a href="#">Atp5g3</a> | <a href="#">Atp5g3.cSep08</a> | <a href="#">114630</a> | 2102  | 603  | 3 | 139 | ATP synthase, H+ transporting, mitochondrial F0 complex, subunit C3 (subunit 9) (Atp5g3) alternative variant cSep08, mRNA.                                    |
| <a href="#">Atp5g3</a> | <a href="#">Atp5g3.dSep08</a> | <a href="#">114630</a> | 2045  | 862  | 2 | 101 | ATP synthase, H+ transporting, mitochondrial F0 complex, subunit C3 (subunit 9) (Atp5g3) alternative variant dSep08, mRNA.                                    |
| <a href="#">Atp5h</a>  | <a href="#">Atp5h.bSep08</a>  | <a href="#">641434</a> | 4395  | 940  | 4 | 108 | ATP synthase, H+ transporting, mitochondrial F0 complex, subunit d (12.0 kD) (Atp5h) alternative variant bSep08, complete mRNA.                               |
| <a href="#">Atp5h</a>  | <a href="#">Atp5h.cSep08</a>  | <a href="#">641434</a> | 4984  | 348  | 5 | 107 | ATP synthase, H+ transporting, mitochondrial F0 complex, subunit d (Atp5h) alternative variant cSep08, mRNA.                                                  |
| <a href="#">Atp5h</a>  | <a href="#">Atp5h.dSep08</a>  | <a href="#">641434</a> | 589   | 459  | 2 | 82  | ATP synthase, H+ transporting, mitochondrial F0 complex, subunit d (8.9 kD) (Atp5h) alternative variant dSep08, mRNA.                                         |

|                          |                                 |                        |       |      |    |     |                                                                                                                                   |
|--------------------------|---------------------------------|------------------------|-------|------|----|-----|-----------------------------------------------------------------------------------------------------------------------------------|
| <a href="#">Atp5i</a>    | <a href="#">Atp5i.bSep08</a>    | <a href="#">140608</a> | 1119  | 524  | 3  | 49  | ATP synthase, H+ transporting, mitochondrial F0 complex, subunit E (5.9 kD) (Atp5i) alternative variant bSep08, complete mRNA.    |
| <a href="#">Atp5j</a>    | <a href="#">Atp5j.aSep08</a>    | <a href="#">94271</a>  | 7099  | 617  | 4  | 108 | ATP synthase, H+ transporting, mitochondrial F0 complex, subunit F6 (12.5 kD) (Atp5j) alternative variant aSep08, mRNA.           |
| <a href="#">Atp5j</a>    | <a href="#">Atp5j.bSep08</a>    | <a href="#">94271</a>  | 7084  | 594  | 4  | 108 | ATP synthase, H+ transporting, mitochondrial F0 complex, subunit F6 (12.5 kD) (Atp5j) alternative variant bSep08, mRNA.           |
| <a href="#">Atp5j2</a>   | <a href="#">Atp5j2.aSep08</a>   | <a href="#">690441</a> | 6373  | 441  | 4  | 88  | ATP synthase, H+ transporting, mitochondrial F0 complex, subunit F2 (10.5 kD) (Atp5j2) alternative variant aSep08, complete mRNA. |
| <a href="#">Atp5l</a>    | <a href="#">Atp5l.bSep08</a>    | <a href="#">300677</a> | 5825  | 732  | 2  | 81  | ATP synthase, H+ transporting, mitochondrial F0 complex, subunit G (9.0 kD) (Atp5l) alternative variant bSep08, mRNA.             |
| <a href="#">Atp5o</a>    | <a href="#">Atp5o.bSep08</a>    | <a href="#">192241</a> | 1963  | 792  | 4  | 177 | synthase mitochondrial (19.5 kD) (Atp5o) alternative variant bSep08, mRNA.                                                        |
| <a href="#">Atp5o</a>    | <a href="#">Atp5o.cSep08</a>    | <a href="#">192241</a> | 2918  | 463  | 3  | 92  | synthase mitochondrial (Atp5o) alternative variant cSep08, complete mRNA.                                                         |
| <a href="#">Atp5sl</a>   | <a href="#">Atp5sl.bSep08</a>   | <a href="#">361520</a> | 4908  | 792  | 2  | 143 | ATP5S-like (Atp5sl) alternative variant bSep08, mRNA.                                                                             |
| <a href="#">Atp6ap1</a>  | <a href="#">Atp6ap1.bSep08</a>  | <a href="#">83615</a>  | 3788  | 1331 | 7  | 300 | ATPase, H+ transporting, lysosomal accessory protein 1 (Atp6ap1) alternative variant bSep08, mRNA.                                |
| <a href="#">Atp6ap1</a>  | <a href="#">Atp6ap1.cSep08</a>  | <a href="#">83615</a>  | 4808  | 1336 | 6  | 190 | ATPase, H+ transporting, lysosomal accessory protein 1 (20.6 kD) (Atp6ap1) alternative variant cSep08, mRNA.                      |
| <a href="#">Atp6ap2</a>  | <a href="#">Atp6ap2.aSep08</a>  | <a href="#">302526</a> | 27917 | 2126 | 1  | 390 | ATPase, H+ transporting, lysosomal accessory protein 2 (Atp6ap2) alternative variant aSep08, mRNA.                                |
| <a href="#">Atp6ap2</a>  | <a href="#">Atp6ap2.bSep08</a>  | <a href="#">302526</a> | 48449 | 669  | 2  | 101 | ATPase, H+ transporting, lysosomal accessory protein 2 (Atp6ap2) alternative variant bSep08, mRNA.                                |
| <a href="#">Atp6v0a1</a> | <a href="#">Atp6v0a1.aSep08</a> | <a href="#">29757</a>  | 27141 | 2771 | 12 | 497 | ATPase, H+ transporting, lysosomal V0 subunit A1 (Atp6v0a1) alternative variant aSep08, mRNA.                                     |
| <a href="#">Atp6v0a1</a> | <a href="#">Atp6v0a1.cSep08</a> | <a href="#">29757</a>  | 20808 | 1855 | 8  | 306 | ATPase, H+ transporting, lysosomal V0 subunit A1 (Atp6v0a1) alternative variant cSep08, mRNA.                                     |
| <a href="#">Atp6v0a1</a> | <a href="#">Atp6v0a1.dSep08</a> | <a href="#">29757</a>  | 4562  | 537  | 3  | 64  | ATPase, H+ transporting, lysosomal V0 subunit A1 (Atp6v0a1) alternative variant dSep08, mRNA.                                     |
| <a href="#">Atp6v0a1</a> | <a href="#">Atp6v0a1.eSep08</a> | <a href="#">29757</a>  | 8651  | 430  | 4  | 37  | ATPase, H+ transporting, lysosomal V0 subunit A1 (Atp6v0a1) alternative variant eSep08, mRNA.                                     |
| <a href="#">Atp6v0a2</a> | <a href="#">Atp6v0a2.aSep08</a> | <a href="#">116455</a> | 31742 | 3502 | 19 | 886 | ATPase, H+ transporting, lysosomal V0 subunit A2 (Atp6v0a2) alternative variant aSep08, mRNA.                                     |
| <a href="#">Atp6v0a2</a> | <a href="#">Atp6v0a2.cSep08</a> | <a href="#">116455</a> | 10184 | 2213 | 10 | 463 | ATPase, H+ transporting, lysosomal V0 subunit A2 (Atp6v0a2) alternative variant cSep08, mRNA.                                     |
| <a href="#">Atp6v0a2</a> | <a href="#">Atp6v0a2.dSep08</a> | <a href="#">116455</a> | 3955  | 748  | 5  | 248 | ATPase, H+ transporting, lysosomal V0 subunit A2 (Atp6v0a2) alternative variant dSep08, mRNA.                                     |
| <a href="#">Atp6v0a4</a> | <a href="#">Atp6v0a4.bSep08</a> | <a href="#">296981</a> | 37951 | 2606 | 16 | 657 | ATPase, H+ transporting, lysosomal V0 subunit A4 (76.0 kD) (Atp6v0a4) alternative variant bSep08, mRNA.                           |
| <a href="#">Atp6v0a4</a> | <a href="#">Atp6v0a4.cSep08</a> | <a href="#">296981</a> | 28397 | 697  | 7  | 213 | ATPase, H+ transporting, lysosomal V0 subunit A4 (Atp6v0a4) alternative variant cSep08, mRNA.                                     |

|                          |                                 |                        |       |      |    |     |                                                                                                                  |
|--------------------------|---------------------------------|------------------------|-------|------|----|-----|------------------------------------------------------------------------------------------------------------------|
| <a href="#">Atp6v0b</a>  | <a href="#">Atp6v0b.aSep08</a>  | <a href="#">298451</a> | 3028  | 1005 | 8  | 239 | ATPase, H+ transporting, lysosomal V0 subunit B (Atp6v0b) alternative variant aSep08, mRNA.                      |
| <a href="#">Atp6v0b</a>  | <a href="#">Atp6v0b.cSep08</a>  | <a href="#">298451</a> | 1615  | 1167 | 4  | 83  | ATPase, H+ transporting, lysosomal V0 subunit B (Atp6v0b) alternative variant cSep08, mRNA.                      |
| <a href="#">Atp6v0b</a>  | <a href="#">Atp6v0b.dSep08</a>  | <a href="#">298451</a> | 1304  | 723  | 2  | 69  | ATPase, H+ transporting, lysosomal V0 subunit B (6.9 kD) (Atp6v0b) alternative variant dSep08, mRNA.             |
| <a href="#">Atp6v0c</a>  | <a href="#">Atp6v0c.aSep08</a>  | <a href="#">170667</a> | 5089  | 878  | 4  | 182 | ATPase, H+ transporting, lysosomal V0 subunit C (Atp6v0c) alternative variant aSep08, mRNA.                      |
| <a href="#">Atp6v0c</a>  | <a href="#">Atp6v0c.bSep08</a>  | <a href="#">170667</a> | 3983  | 620  | 3  | 164 | ATPase, H+ transporting, lysosomal V0 subunit C (Atp6v0c) alternative variant bSep08, mRNA.                      |
| <a href="#">Atp6v0c</a>  | <a href="#">Atp6v0c.dSep08</a>  | <a href="#">170667</a> | 2369  | 2276 | 2  | 128 | ATPase, H+ transporting, lysosomal V0 subunit C (13.0 kD) (Atp6v0c) alternative variant dSep08, mRNA.            |
| <a href="#">Atp6v0d1</a> | <a href="#">Atp6v0d1.bSep08</a> | <a href="#">291969</a> | 43972 | 1488 | 7  | 323 | ATPase, H+ transporting, lysosomal V0 subunit D1 (37.2 kD) (Atp6v0d1) alternative variant bSep08, complete mRNA. |
| <a href="#">Atp6v0d1</a> | <a href="#">Atp6v0d1.cSep08</a> | <a href="#">291969</a> | 9661  | 1537 | 2  | 136 | ATPase, H+ transporting, lysosomal V0 subunit D1 (Atp6v0d1) alternative variant cSep08, mRNA.                    |
| <a href="#">Atp6v0d1</a> | <a href="#">Atp6v0d1.dSep08</a> | <a href="#">291969</a> | 821   | 685  | 2  | 77  | ATPase, H+ transporting, lysosomal V0 subunit D1 (Atp6v0d1) alternative variant dSep08, mRNA.                    |
| <a href="#">Atp6v0d1</a> | <a href="#">Atp6v0d1.fSep08</a> | <a href="#">291969</a> | 42695 | 897  | 5  | 64  | ATPase, H+ transporting, lysosomal V0 subunit D1 (7.3 kD) (Atp6v0d1) alternative variant fSep08, mRNA.           |
| <a href="#">Atp6v0d2</a> | <a href="#">Atp6v0d2.bSep08</a> | <a href="#">297932</a> | 1508  | 265  | 1  | 26  | ATPase, H+ transporting, lysosomal V0 subunit D2 (Atp6v0d2) alternative variant bSep08, mRNA.                    |
| <a href="#">Atp6v0e1</a> | <a href="#">Atp6v0e1.bSep08</a> | <a href="#">94170</a>  | 22693 | 327  | 2  | 57  | ATPase, H+ transporting, lysosomal V0 subunit E1 (6.3 kD) (Atp6v0e1) alternative variant bSep08, mRNA.           |
| <a href="#">Atp6v0e1</a> | <a href="#">Atp6v0e1.cSep08</a> | <a href="#">94170</a>  | 5048  | 835  | 1  | 38  | ATPase, H+ transporting, lysosomal V0 subunit E1 (4.2 kD) (Atp6v0e1) alternative variant cSep08, mRNA.           |
| <a href="#">Atp6v0e2</a> | <a href="#">Atp6v0e2.bSep08</a> | <a href="#">436582</a> | 1147  | 757  | 2  | 42  | ATPase, H+ transporting, lysosomal V0 subunit E2 (4.7 kD) (Atp6v0e2) alternative variant bSep08, mRNA.           |
| <a href="#">Atp6v1b2</a> | <a href="#">Atp6v1b2.aSep08</a> | <a href="#">117596</a> | 24093 | 2767 | 14 | 536 | vacuolar H+ATPase B2 (Atp6v1b2) alternative variant aSep08, mRNA.                                                |
| <a href="#">Atp6v1b2</a> | <a href="#">Atp6v1b2.bSep08</a> | <a href="#">117596</a> | 1566  | 683  | 5  | 165 | vacuolar H+ATPase B2 (Atp6v1b2) alternative variant bSep08, mRNA.                                                |
| <a href="#">Atp6v1b2</a> | <a href="#">Atp6v1b2.cSep08</a> | <a href="#">117596</a> | 2535  | 698  | 2  | 70  | vacuolar H+ATPase B2 (Atp6v1b2) alternative variant cSep08, mRNA.                                                |
| <a href="#">Atp6v1c1</a> | <a href="#">Atp6v1c1.bSep08</a> | <a href="#">299971</a> | 3961  | 1149 | 3  | 64  | ATPase, H+ transporting, lysosomal V1 subunit C1 (7.5 kD) (Atp6v1c1) alternative variant bSep08, mRNA.           |
| <a href="#">Atp6v1c1</a> | <a href="#">Atp6v1c1.cSep08</a> | <a href="#">299971</a> | 1546  | 261  | 2  | 51  | ATPase, H+ transporting, lysosomal V1 subunit C1 (Atp6v1c1) alternative variant cSep08, mRNA.                    |
| <a href="#">Atp6v1c2</a> | <a href="#">Atp6v1c2.bSep08</a> | <a href="#">362802</a> | 14893 | 2818 | 7  | 229 | vacuolar H+ ATPase C2 (25.8 kD) (Atp6v1c2) alternative variant bSep08, mRNA.                                     |
| <a href="#">Atp6v1c2</a> | <a href="#">Atp6v1c2.cSep08</a> | <a href="#">362802</a> | 16548 | 1048 | 9  | 176 | ATPase H+ (20.7 kD) (Atp6v1c2) alternative variant cSep08, mRNA.                                                 |
| <a href="#">Atp6v1c2</a> | <a href="#">Atp6v1c2.dSep08</a> | <a href="#">362802</a> | 3178  | 657  | 3  | 98  | H+ ATPase (11.2 kD) (Atp6v1c2) alternative variant dSep08, mRNA.                                                 |
| <a href="#">Atp6v1d</a>  | <a href="#">Atp6v1d.bSep08</a>  | <a href="#">299159</a> | 1970  | 513  | 2  | 78  | ATPase, H+ transporting, lysosomal V1 subunit D (9.4 kD) (Atp6v1d) alternative variant bSep08, mRNA.             |

|                          |                                 |                        |       |      |    |     |                                                                                                                 |
|--------------------------|---------------------------------|------------------------|-------|------|----|-----|-----------------------------------------------------------------------------------------------------------------|
| <a href="#">Atp6v1d</a>  | <a href="#">Atp6v1d.cSep08</a>  | <a href="#">299159</a> | 11526 | 1494 | 6  | 81  | ATPase, H+ transporting, lysosomal V1 subunit D (Atp6v1d) alternative variant cSep08, mRNA.                     |
| <a href="#">Atp6v1e1</a> | <a href="#">Atp6v1e1.aSep08</a> | <a href="#">297566</a> | 19206 | 725  | 1  | 241 | ATPase, H+ transporting, lysosomal V1 subunit E1 (Atp6v1e1) alternative variant aSep08, mRNA.                   |
| <a href="#">Atp6v1g1</a> | <a href="#">Atp6v1g1.cSep08</a> | <a href="#">298103</a> | 5631  | 505  | 3  | 47  | ATPase, H transporting, lysosomal V1 subunit G1 (Atp6v1g1) alternative variant cSep08, mRNA.                    |
| <a href="#">Atp6v1g2</a> | <a href="#">Atp6v1g2.bSep08</a> | <a href="#">368044</a> | 2229  | 1946 | 2  | 91  | ATPase, H+ transporting, V1 subunit G isoform 2 (10.3 kD) (Atp6v1g2) alternative variant bSep08, complete mRNA. |
| <a href="#">Atp6v1g2</a> | <a href="#">Atp6v1g2.cSep08</a> | <a href="#">368044</a> | 1384  | 722  | 3  | 77  | ATPase, H+ transporting, V1 subunit G isoform 2 (9.0 kD) (Atp6v1g2) alternative variant cSep08, mRNA.           |
| <a href="#">Atp6v1g3</a> | <a href="#">Atp6v1g3.bSep08</a> | <a href="#">289407</a> | 3368  | 342  | 2  | 69  | ATPase, H+ transporting, lysosomal V1 subunit G3 (Atp6v1g3) alternative variant bSep08, mRNA.                   |
| <a href="#">Atp6v1h</a>  | <a href="#">Atp6v1h.aSep08</a>  | <a href="#">297797</a> | 94183 | 1952 | 14 | 483 | ATPase H+ transporting lysosomal V1 (55.9 kD) (Atp6v1h) alternative variant aSep08, mRNA.                       |
| <a href="#">Atp6v1h</a>  | <a href="#">Atp6v1h.aSep08</a>  | <a href="#">681270</a> | 94183 | 1952 | 14 | 483 | ATPase H+ transporting lysosomal V1 (55.9 kD) (Atp6v1h) alternative variant aSep08, mRNA.                       |
| <a href="#">Atp6v1h</a>  | <a href="#">Atp6v1h.cSep08</a>  | <a href="#">297797</a> | 50545 | 984  | 8  | 272 | ATPase H+ transporting lysosomal V1 (Atp6v1h) alternative variant cSep08, mRNA.                                 |
| <a href="#">Atp6v1h</a>  | <a href="#">Atp6v1h.cSep08</a>  | <a href="#">681270</a> | 50545 | 984  | 8  | 272 | ATPase H+ transporting lysosomal V1 (Atp6v1h) alternative variant cSep08, mRNA.                                 |
| <a href="#">Atp6v1h</a>  | <a href="#">Atp6v1h.dSep08</a>  | <a href="#">297797</a> | 32075 | 614  | 6  | 159 | ATPase H+ transporting lysosomal V1 (Atp6v1h) alternative variant dSep08, mRNA.                                 |
| <a href="#">Atp6v1h</a>  | <a href="#">Atp6v1h.dSep08</a>  | <a href="#">681270</a> | 32075 | 614  | 6  | 159 | ATPase H+ transporting lysosomal V1 (Atp6v1h) alternative variant dSep08, mRNA.                                 |
| <a href="#">Atp7b</a>    | <a href="#">Atp7b.bSep08</a>    | <a href="#">24218</a>  | 2727  | 2127 | 2  | 122 | ATPase, Cu++ transporting, beta polypeptide (13.5 kD) (Atp7b) alternative variant bSep08, mRNA.                 |
| <a href="#">Atp8a1</a>   | <a href="#">Atp8a1.aSep08</a>   | <a href="#">289615</a> | 50113 | 5694 |    | 417 | ATPase, aminophospholipid transporter (APLT), class I, type 8A, member 1 (Atp8a1) mRNA.                         |
| <a href="#">Atp8b1</a>   | <a href="#">Atp8b1.bSep08</a>   | <a href="#">291555</a> | 21948 | 3450 | 2  | 400 | ATPase, Class I, type 8B, member 1 (Atp8b1) alternative variant bSep08, mRNA.                                   |
| <a href="#">Atp8b2</a>   | <a href="#">Atp8b2.bSep08</a>   | <a href="#">361984</a> | 34747 | 1552 | 1  | 467 | atpase, class I, type 8B, member 2 (Atp8b2) alternative variant bSep08, mRNA.                                   |
| <a href="#">Atp8b3</a>   | <a href="#">Atp8b3.aSep08</a>   | <a href="#">299616</a> | 12331 | 2342 | 13 | 725 | ATPase, Class I, type 8B, member 3 (Atp8b3) alternative variant aSep08, mRNA.                                   |
| <a href="#">Atp8b3</a>   | <a href="#">Atp8b3.bSep08</a>   | <a href="#">299616</a> | 2472  | 702  | 1  | 233 | ATPase, Class I, type 8B, member 3 (Atp8b3) alternative variant bSep08, mRNA.                                   |
| <a href="#">Atp8b4</a>   | <a href="#">Atp8b4.aSep08</a>   | <a href="#">311396</a> | 21081 | 1606 |    | 258 | ATPase, class I, type 8B, member 4 (29.3 kD) (Atp8b4) complete mRNA.                                            |
| <a href="#">Atp9b</a>    | <a href="#">Atp9b.bSep08</a>    | <a href="#">291411</a> | 11740 | 915  | 4  | 149 | ATPase, class II, type 9B (Atp9b) alternative variant bSep08, mRNA.                                             |
| <a href="#">Atp9b</a>    | <a href="#">Atp9b.cSep08</a>    | <a href="#">291411</a> | 73156 | 403  | 6  | 113 | ATPase, class II, type 9B (Atp9b) alternative variant cSep08, mRNA.                                             |
| <a href="#">Atp9b</a>    | <a href="#">Atp9b.dSep08</a>    | <a href="#">291411</a> | 54096 | 533  | 6  | 84  | ATPase, class II, type 9B (Atp9b) alternative variant dSep08, mRNA.                                             |
| <a href="#">Atp10a</a>   | <a href="#">Atp10a.aSep08</a>   | <a href="#">365266</a> | 19405 | 1033 |    | 344 | ATPase, class V, type 10A (Atp10a) mRNA.                                                                        |
| <a href="#">Atp10d</a>   | <a href="#">Atp10d.aSep08</a>   | <a href="#">360932</a> | 54281 | 1430 |    | 476 | ATPase, class V, type 10D (Atp10d) mRNA.                                                                        |



|                         |                                |                        |       |      |    |     |                                                                                                             |
|-------------------------|--------------------------------|------------------------|-------|------|----|-----|-------------------------------------------------------------------------------------------------------------|
| <a href="#">Atp11a</a>  | <a href="#">Atp11a.bSep08</a>  | <a href="#">306600</a> | 31961 | 1893 | 12 | 564 | ATPase, class VI, type 11A (Atp11a) alternative variant bSep08, mRNA.                                       |
| <a href="#">Atp11a</a>  | <a href="#">Atp11a.cSep08</a>  | <a href="#">306600</a> | 15542 | 1160 | 8  | 235 | ATPase, class VI, type 11A (Atp11a) alternative variant cSep08, mRNA.                                       |
| <a href="#">Atp11a</a>  | <a href="#">Atp11a.dSep08</a>  | <a href="#">306600</a> | 61906 | 795  | 6  | 234 | ATPase, class VI, type 11A (Atp11a) alternative variant dSep08, mRNA.                                       |
| <a href="#">Atp11a</a>  | <a href="#">Atp11a.eSep08</a>  | <a href="#">306600</a> | 61755 | 521  | 5  | 173 | ATPase, class VI, type 11A (Atp11a) alternative variant eSep08, mRNA.                                       |
| <a href="#">Atp11a</a>  | <a href="#">Atp11a.fSep08</a>  | <a href="#">306600</a> | 13057 | 768  | 6  | 149 | ATPase, class VI, type 11A (Atp11a) alternative variant fSep08, mRNA.                                       |
| <a href="#">Atp11a</a>  | <a href="#">Atp11a.gSep08</a>  | <a href="#">306600</a> | 7548  | 476  | 5  | 123 | ATPase, class VI, type 11A (Atp11a) alternative variant gSep08, mRNA.                                       |
| <a href="#">Atp11a</a>  | <a href="#">Atp11a.hSep08</a>  | <a href="#">306600</a> | 3827  | 389  | 3  | 122 | ATPase, class VI, type 11A (Atp11a) alternative variant hSep08, mRNA.                                       |
| <a href="#">Atp11a</a>  | <a href="#">Atp11a.iSep08</a>  | <a href="#">306600</a> | 54355 | 631  | 4  | 117 | ATPase, class VI, type 11A (Atp11a) alternative variant iSep08, mRNA.                                       |
| <a href="#">Atp11a</a>  | <a href="#">Atp11a.jSep08</a>  | <a href="#">306600</a> | 1927  | 336  | 3  | 112 | ATPase, class VI, type 11A (Atp11a) alternative variant jSep08, mRNA.                                       |
| <a href="#">Atp11b</a>  | <a href="#">Atp11b.aSep08</a>  | <a href="#">361929</a> | 25872 | 1764 |    | 587 | ATPase, class VI, type 11B (Atp11b) mRNA.                                                                   |
| <a href="#">Atp11c</a>  | <a href="#">Atp11c.aSep08</a>  | <a href="#">317599</a> | 21705 | 642  | 4  | 191 | atpase, class VI, type 11C (Atp11c) alternative variant aSep08, mRNA.                                       |
| <a href="#">Atp11c</a>  | <a href="#">Atp11c.bSep08</a>  | <a href="#">317599</a> | 14149 | 466  | 1  | 99  | atpase, class VI, type 11C (Atp11c) alternative variant bSep08, mRNA.                                       |
| <a href="#">Atp13a1</a> | <a href="#">Atp13a1.bSep08</a> | <a href="#">290673</a> | 16048 | 3873 | 24 | 507 | ATPase type 13a1 (Atp13a1) alternative variant bSep08, mRNA.                                                |
| <a href="#">Atp13a1</a> | <a href="#">Atp13a1.cSep08</a> | <a href="#">290673</a> | 3583  | 709  | 5  | 134 | ATPase type 13a1 (Atp13a1) alternative variant cSep08, mRNA.                                                |
| <a href="#">Atp13a1</a> | <a href="#">Atp13a1.dSep08</a> | <a href="#">290673</a> | 1376  | 566  | 2  | 86  | ATPase type 13a1 (Atp13a1) alternative variant dSep08, mRNA.                                                |
| <a href="#">Atp13a2</a> | <a href="#">Atp13a2.aSep08</a> | <a href="#">362645</a> | 6636  | 2491 | 15 | 749 | ATPase type 13A2 (Atp13a2) alternative variant aSep08, mRNA.                                                |
| <a href="#">Atp13a2</a> | <a href="#">Atp13a2.bSep08</a> | <a href="#">362645</a> | 3692  | 2076 | 6  | 328 | ATPase type 13A2 (34.8 kD) (Atp13a2) alternative variant bSep08, mRNA.                                      |
| <a href="#">Atp13a2</a> | <a href="#">Atp13a2.cSep08</a> | <a href="#">362645</a> | 2019  | 687  | 4  | 228 | ATPase type 13A2 (Atp13a2) alternative variant cSep08, mRNA.                                                |
| <a href="#">Atp13a2</a> | <a href="#">Atp13a2.dSep08</a> | <a href="#">362645</a> | 1541  | 730  | 5  | 200 | ATPase type 13A2 (Atp13a2) alternative variant dSep08, mRNA.                                                |
| <a href="#">Atp13a2</a> | <a href="#">Atp13a2.eSep08</a> | <a href="#">362645</a> | 1067  | 964  | 1  | 86  | ATPase type 13A2 (Atp13a2) alternative variant eSep08, mRNA.                                                |
| <a href="#">Atp13a4</a> | <a href="#">Atp13a4.aSep08</a> | <a href="#">288026</a> | 11544 | 836  |    | 171 | ATPase type 13A4 (Atp13a4) mRNA.                                                                            |
| <a href="#">Atp13a5</a> | <a href="#">Atp13a5.aSep08</a> | <a href="#">303856</a> | 25564 | 294  |    | 58  | ATPase type 13A5 (Atp13a5) mRNA.                                                                            |
| <a href="#">Atpaf1</a>  | <a href="#">Atpaf1.bSep08</a>  | <a href="#">313510</a> | 5089  | 398  | 3  | 132 | ATP synthase mitochondrial F1 complex assembly factor 1 (Atpaf1) alternative variant bSep08, mRNA.          |
| <a href="#">Atpaf2</a>  | <a href="#">Atpaf2.bSep08</a>  | <a href="#">303190</a> | 781   | 393  | 2  | 86  | ATP synthase mitochondrial F1 complex assembly factor 2 (9.6 kD) (Atpaf2) alternative variant bSep08, mRNA. |
| <a href="#">Atpaf2</a>  | <a href="#">Atpaf2.eSep08</a>  | <a href="#">303190</a> | 4970  | 692  | 6  | 40  | ATP synthase mitochondrial F1 complex assembly factor 2 (4.7 kD) (Atpaf2) alternative variant eSep08, mRNA. |

|                           |                                  |                        |        |      |    |      |                                                                                                              |
|---------------------------|----------------------------------|------------------------|--------|------|----|------|--------------------------------------------------------------------------------------------------------------|
| <a href="#">Atpbd4</a>    | <a href="#">Atpbd4.aSep08</a>    | <a href="#">362191</a> | 131456 | 877  |    | 129  | ATP binding domain 4 (14.6 kD) (Atpbd4) mRNA.                                                                |
| <a href="#">Atrip</a>     | <a href="#">Atrip.bSep08</a>     | <a href="#">301014</a> | 2059   | 1556 | 1  | 98   | ATR interacting protein (11.1 kD) (Atrip) alternative variant bSep08, mRNA.                                  |
| <a href="#">Atrn</a>      | <a href="#">Atrn.bSep08</a>      | <a href="#">83526</a>  | 11203  | 1319 | 5  | 163  | atractin (Atrn) alternative variant bSep08, mRNA.                                                            |
| <a href="#">Atrn</a>      | <a href="#">Atrn.cSep08</a>      | <a href="#">83526</a>  | 65671  | 630  | 3  | 95   | atractin (Atrn) alternative variant cSep08, mRNA.                                                            |
| <a href="#">Atrn</a>      | <a href="#">Atrn.dSep08</a>      | <a href="#">83526</a>  | 4031   | 431  | 2  | 90   | atractin (Atrn) alternative variant dSep08, mRNA.                                                            |
| <a href="#">Atrnl1</a>    | <a href="#">Atrnl1.aSep08</a>    | <a href="#">307992</a> | 413456 | 2785 |    | 206  | atractin like 1 (Atrnl1) mRNA.                                                                               |
| <a href="#">Atrx</a>      | <a href="#">Atrx.aSep08</a>      | <a href="#">246284</a> | 29585  | 4389 |    | 495  | alpha thalassemia/mental retardation syndrome X-linked homolog (human) (Atrx) mRNA.                          |
| <a href="#">Atxn2</a>     | <a href="#">Atxn2.aSep08</a>     | <a href="#">288663</a> | 41579  | 3564 | 18 | 918  | ataxin 2 (Atxn2) alternative variant aSep08, mRNA.                                                           |
| <a href="#">Atxn2</a>     | <a href="#">Atxn2.bSep08</a>     | <a href="#">288663</a> | 27304  | 1901 | 11 | 511  | ataxin 2 (Atxn2) alternative variant bSep08, mRNA.                                                           |
| <a href="#">Atxn2</a>     | <a href="#">Atxn2.cSep08</a>     | <a href="#">288663</a> | 21111  | 1306 | 10 | 434  | ataxin 2 (Atxn2) alternative variant cSep08, mRNA.                                                           |
| <a href="#">Atxn2</a>     | <a href="#">Atxn2.eSep08</a>     | <a href="#">288663</a> | 15801  | 706  | 7  | 235  | ataxin 2 (Atxn2) alternative variant eSep08, mRNA.                                                           |
| <a href="#">Atxn2l</a>    | <a href="#">Atxn2l.aSep08</a>    | <a href="#">361649</a> | 12283  | 5171 | 21 | 1178 | ataxin 2-like CRA f (Atxn2l) alternative variant aSep08, mRNA.                                               |
| <a href="#">Atxn2l</a>    | <a href="#">Atxn2l.cSep08</a>    | <a href="#">361649</a> | 8285   | 1867 | 9  | 455  | ataxin 2-like CRA f (Atxn2l) alternative variant cSep08, mRNA.                                               |
| <a href="#">Atxn2l</a>    | <a href="#">Atxn2l.dSep08</a>    | <a href="#">361649</a> | 2978   | 1974 | 6  | 425  | ataxin 2-like CRA g (Atxn2l) alternative variant dSep08, mRNA.                                               |
| <a href="#">Atxn2l</a>    | <a href="#">Atxn2l.eSep08</a>    | <a href="#">361649</a> | 1464   | 762  | 5  | 253  | ataxin 2-like CRA g (Atxn2l) alternative variant eSep08, mRNA.                                               |
| <a href="#">Atxn2l</a>    | <a href="#">Atxn2l.fSep08</a>    | <a href="#">361649</a> | 1729   | 722  | 5  | 142  | ataxin 2-like CRA e (Atxn2l) alternative variant fSep08, mRNA.                                               |
| <a href="#">Atxn2l</a>    | <a href="#">Atxn2l.gSep08</a>    | <a href="#">361649</a> | 793    | 559  | 2  | 128  | putative protein (14.1 kD) (Atxn2l) alternative variant gSep08, mRNA.                                        |
| <a href="#">Atxn2l</a>    | <a href="#">Atxn2l.hSep08</a>    | <a href="#">361649</a> | 1194   | 597  | 2  | 61   | putative protein (Atxn2l) alternative variant hSep08, mRNA.                                                  |
| <a href="#">Atxn3</a>     | <a href="#">Atxn3.bSep08</a>     | <a href="#">60331</a>  | 22170  | 1038 | 10 | 332  | ataxin 3 (Atxn3) alternative variant bSep08, mRNA.                                                           |
| <a href="#">Atxn7</a>     | <a href="#">Atxn7.aSep08</a>     | <a href="#">361015</a> | 7906   | 1368 |    | 389  | ataxin 7 (Atxn7) mRNA.                                                                                       |
| <a href="#">Atxn7l1</a>   | <a href="#">Atxn7l1.aSep08</a>   | <a href="#">314033</a> | 4433   | 774  | 1  | 257  | ataxin 7-like 1 (Atxn7l1) alternative variant aSep08, mRNA.                                                  |
| <a href="#">Atxn7l1</a>   | <a href="#">Atxn7l1.bSep08</a>   | <a href="#">314033</a> | 4692   | 727  |    | 241  | ataxin 7-like 1 (Atxn7l1) alternative variant bSep08, mRNA.                                                  |
| <a href="#">Atxn7l2</a>   | <a href="#">Atxn7l2.aSep08</a>   | <a href="#">310781</a> | 8258   | 2358 | 11 | 719  | ataxin 7-like 2 (Atxn7l2) alternative variant aSep08, mRNA.                                                  |
| <a href="#">Atxn7l2</a>   | <a href="#">Atxn7l2.cSep08</a>   | <a href="#">310781</a> | 1664   | 424  | 2  | 77   | ataxin 7-like 2 (Atxn7l2) alternative variant cSep08, mRNA.                                                  |
| <a href="#">Atxn10</a>    | <a href="#">Atxn10.bSep08</a>    | <a href="#">170821</a> | 28506  | 877  | 8  | 292  | ataxin 10 (Atxn10) alternative variant bSep08, mRNA.                                                         |
| <a href="#">Atxn10</a>    | <a href="#">Atxn10.cSep08</a>    | <a href="#">170821</a> | 39799  | 866  | 6  | 288  | ataxin 10 (Atxn10) alternative variant cSep08, mRNA.                                                         |
| <a href="#">Atxn10</a>    | <a href="#">Atxn10.dSep08</a>    | <a href="#">170821</a> | 39306  | 861  | 5  | 215  | ataxin 10 (Atxn10) alternative variant dSep08, mRNA.                                                         |
| <a href="#">Atxn10</a>    | <a href="#">Atxn10.eSep08</a>    | <a href="#">170821</a> | 535    | 338  | 2  | 44   | ataxin 10 (Atxn10) alternative variant eSep08, mRNA.                                                         |
| <a href="#">AT_hook.0</a> | <a href="#">AT_hook.0.aSep08</a> |                        | 2094   | 1494 |    | 497  | proline rich 12 (AT_hook.0) mRNA.                                                                            |
| <a href="#">Auh</a>       | <a href="#">Auh.aSep08</a>       | <a href="#">361215</a> | 109838 | 1196 | 9  | 315  | AU RNA binding protein/enoyl-coenzyme A hydratase (33.3 kD) (Auh) alternative variant aSep08, complete mRNA. |
| <a href="#">Auh</a>       | <a href="#">Auh.cSep08</a>       | <a href="#">361215</a> | 97985  | 1259 | 9  | 238  | AU RNA binding protein/enoyl-coenzyme A hydratase (Auh) alternative variant cSep08, mRNA.                    |
| <a href="#">Auh</a>       | <a href="#">Auh.dSep08</a>       | <a href="#">361215</a> | 109594 | 559  | 4  | 181  | AU RNA binding protein/enoyl-coenzyme A hydratase (Auh) alternative variant dSep08, mRNA.                    |

|                          |                                 |                        |        |      |    |     |                                                                                                 |
|--------------------------|---------------------------------|------------------------|--------|------|----|-----|-------------------------------------------------------------------------------------------------|
| <a href="#">Auh</a>      | <a href="#">Auh.eSep08</a>      | <a href="#">361215</a> | 62214  | 457  | 2  | 39  | AU RNA binding protein/enoyl-coenzyme A hydratase (Auh) alternative variant eSep08, mRNA.       |
| <a href="#">Aup1</a>     | <a href="#">Aup1.bSep08</a>     | <a href="#">680423</a> | 1695   | 662  | 7  | 210 | ancient ubiquitous protein 1 (Aup1) alternative variant bSep08, mRNA.                           |
| <a href="#">Aup1</a>     | <a href="#">Aup1.cSep08</a>     | <a href="#">680423</a> | 1257   | 840  | 4  | 127 | ancient ubiquitous protein 1 (Aup1) alternative variant cSep08, mRNA.                           |
| <a href="#">Aup1</a>     | <a href="#">Aup1.dSep08</a>     | <a href="#">680423</a> | 3079   | 2644 | 4  | 114 | ancient ubiquitous protein 1 CRA c (13.0 kD) (Aup1) alternative variant dSep08, mRNA.           |
| <a href="#">Aup1</a>     | <a href="#">Aup1.eSep08</a>     | <a href="#">680423</a> | 1066   | 630  | 5  | 102 | ancient ubiquitous protein 1 CRA c (Aup1) alternative variant eSep08, mRNA.                     |
| <a href="#">Aup1</a>     | <a href="#">Aup1.fSep08</a>     | <a href="#">680423</a> | 682    | 586  | 2  | 92  | ancient ubiquitous protein 1 CRA c precursor (10.2 kD) (Aup1) alternative variant fSep08, mRNA. |
| <a href="#">Aurka</a>    | <a href="#">Aurka.bSep08</a>    | <a href="#">261730</a> | 12510  | 1217 | 7  | 276 | aurora kinase A (Aurka) alternative variant bSep08, mRNA.                                       |
| <a href="#">Aurka</a>    | <a href="#">Aurka.cSep08</a>    | <a href="#">261730</a> | 816    | 728  | 2  | 55  | aurora kinase A (Aurka) alternative variant cSep08, mRNA.                                       |
| <a href="#">Aurkaip1</a> | <a href="#">Aurkaip1.bSep08</a> | <a href="#">298687</a> | 1079   | 496  | 4  | 133 | aurora kinase A interacting protein 1 (Aurkaip1) alternative variant bSep08, mRNA.              |
| <a href="#">Aurkaip1</a> | <a href="#">Aurkaip1.cSep08</a> | <a href="#">298687</a> | 1073   | 806  | 2  | 49  | aurora kinase A interacting protein 1 (Aurkaip1) alternative variant cSep08, mRNA.              |
| <a href="#">Aurkb</a>    | <a href="#">Aurkb.bSep08</a>    | <a href="#">114592</a> | 3742   | 628  | 1  | 209 | aurora kinase B (Aurkb) alternative variant bSep08, mRNA.                                       |
| <a href="#">Auts2l</a>   | <a href="#">Auts2l.aSep08</a>   | <a href="#">304419</a> | 162455 | 856  |    | 86  | autism susceptibility candidate 2-like (Auts2l) mRNA.                                           |
| <a href="#">Aven</a>     | <a href="#">Aven.aSep08</a>     | <a href="#">311299</a> | 134530 | 1185 | 3  | 282 | apoptosis, caspase activation inhibitor (Aven) alternative variant aSep08, mRNA.                |
| <a href="#">Aven</a>     | <a href="#">Aven.cSep08</a>     | <a href="#">311299</a> | 105160 | 463  | 2  | 38  | apoptosis, caspase activation inhibitor (4.5 kD) (Aven) alternative variant cSep08, mRNA.       |
| <a href="#">Avpi1</a>    | <a href="#">Avpi1.cSep08</a>    | <a href="#">171386</a> | 754    | 365  | 2  | 11  | arginine vasopressin-induced 1 (1.2 kD) (Avpi1) alternative variant cSep08, mRNA.               |
| <a href="#">Axin2</a>    | <a href="#">Axin2.bSep08</a>    | <a href="#">29134</a>  | 8353   | 1784 | 1  | 426 | axin2 (Axin2) alternative variant bSep08, mRNA.                                                 |
| <a href="#">Axin2</a>    | <a href="#">Axin2.cSep08</a>    | <a href="#">29134</a>  | 2835   | 403  | 2  | 39  | axin2 (Axin2) alternative variant cSep08, mRNA.                                                 |
| <a href="#">Axl</a>      | <a href="#">Axl.aSep08</a>      | <a href="#">308444</a> | 28350  | 3574 | 17 | 702 | axl receptor tyrosine kinase (Axl) alternative variant aSep08, mRNA.                            |
| <a href="#">Axl</a>      | <a href="#">Axl.bSep08</a>      | <a href="#">308444</a> | 7846   | 712  | 5  | 237 | axl receptor tyrosine kinase (Axl) alternative variant bSep08, mRNA.                            |
| <a href="#">Axl</a>      | <a href="#">Axl.dSep08</a>      | <a href="#">308444</a> | 1139   | 581  | 2  | 70  | axl receptor tyrosine kinase (Axl) alternative variant dSep08, mRNA.                            |
| <a href="#">Azgp1</a>    | <a href="#">Azgp1.bSep08</a>    | <a href="#">25294</a>  | 3529   | 639  | 2  | 210 | alpha-2-glycoprotein 1, zinc (Azgp1) alternative variant bSep08, mRNA.                          |
| <a href="#">Azi1</a>     | <a href="#">Azi1.bSep08</a>     | <a href="#">360672</a> | 954    | 724  | 3  | 127 | 5-azacytidine induced gene 1 (Azi1) alternative variant bSep08, mRNA.                           |
| <a href="#">Azi1</a>     | <a href="#">Azi1.cSep08</a>     | <a href="#">360672</a> | 533    | 461  | 2  | 94  | 5-azacytidine induced gene 1 (9.5 kD) (Azi1) alternative variant cSep08, mRNA.                  |
| <a href="#">Azi2</a>     | <a href="#">Azi2.bSep08</a>     | <a href="#">316051</a> | 15900  | 1379 | 7  | 237 | 5-azacytidine induced gene 2 (27.4 kD) (Azi2) alternative variant bSep08, mRNA.                 |
| <a href="#">Azi2</a>     | <a href="#">Azi2.cSep08</a>     | <a href="#">316051</a> | 1747   | 411  | 3  | 130 | 5-azacytidine induced gene 2 (Azi2) alternative variant cSep08, mRNA.                           |
| <a href="#">Azin1</a>    | <a href="#">Azin1.bSep08</a>    | <a href="#">58961</a>  | 28105  | 1889 | 12 | 437 | antizyme inhibitor 1 (Azin1) alternative variant bSep08, mRNA.                                  |

|                          |                                 |                        |       |      |    |     |                                                                                                                                   |
|--------------------------|---------------------------------|------------------------|-------|------|----|-----|-----------------------------------------------------------------------------------------------------------------------------------|
| <a href="#">Azin1</a>    | <a href="#">Azin1.cSep08</a>    | <a href="#">58961</a>  | 26327 | 1693 | 11 | 324 | antizyme inhibitor 1 (Azin1) alternative variant cSep08, mRNA.                                                                    |
| <a href="#">B3galnt1</a> | <a href="#">B3galnt1.aSep08</a> | <a href="#">310508</a> | 29989 | 832  | 2  | 128 | UDP-GalNAc:betaGlcNAc beta 1,3-galactosaminyltransferase, polypeptide 1 (13.5 kD) (B3galnt1) alternative variant aSep08, mRNA.    |
| <a href="#">B3galnt1</a> | <a href="#">B3galnt1.cSep08</a> | <a href="#">310508</a> | 29446 | 713  | 2  | 94  | UDP-GalNAc:betaGlcNAc beta 1,3-galactosaminyltransferase, polypeptide 1 (B3galnt1) alternative variant cSep08, mRNA.              |
| <a href="#">B3galtl</a>  | <a href="#">B3galtl.aSep08</a>  | <a href="#">689765</a> | 82689 | 2299 |    | 670 | beta 1,3-galactosyltransferase-like (B3galtl) alternative variant aSep08, mRNA.                                                   |
| <a href="#">B3galtl</a>  | <a href="#">B3galtl.bSep08</a>  | <a href="#">689765</a> | 7342  | 1816 |    | 83  | beta 1,3-galactosyltransferase-like (B3galtl) alternative variant bSep08, mRNA.                                                   |
| <a href="#">B3gat1</a>   | <a href="#">B3gat1.cSep08</a>   | <a href="#">117108</a> | 1848  | 406  | 2  | 58  | beta-1,3-glucuronyltransferase 1 (glucuronosyltransferase P) (6.5 kD) (B3gat1) alternative variant cSep08, mRNA.                  |
| <a href="#">B3gnt2</a>   | <a href="#">B3gnt2.bSep08</a>   | <a href="#">305571</a> | 22311 | 393  | 2  | 41  | UDP-GlcNAc:betaGal beta-1,3-N-acetylglucosaminyltransferase 2 (B3gnt2) alternative variant bSep08, mRNA.                          |
| <a href="#">B3gnt1</a>   | <a href="#">B3gnt1.aSep08</a>   | <a href="#">367384</a> | 60232 | 2905 | 2  | 653 | UDP-GlcNAc:betaGal beta-1,3-N-acetylglucosaminyltransferase-like 1 (B3gnt1) alternative variant aSep08, mRNA.                     |
| <a href="#">B4galnt1</a> | <a href="#">B4galnt1.bSep08</a> | <a href="#">64828</a>  | 1448  | 676  | 4  | 207 | beta-1,4-N-acetyl-galactosaminyl transferase 1 (B4galnt1) alternative variant bSep08, mRNA.                                       |
| <a href="#">B4galnt1</a> | <a href="#">B4galnt1.dSep08</a> | <a href="#">64828</a>  | 584   | 397  | 2  | 96  | beta-1,4-N-acetyl-galactosaminyl transferase 1 (B4galnt1) alternative variant dSep08, mRNA.                                       |
| <a href="#">B4galnt4</a> | <a href="#">B4galnt4.bSep08</a> | <a href="#">309105</a> | 3576  | 1715 | 4  | 479 | beta-1 4-N-acetyl-galactosaminyl transferase 4 (B4galnt4) alternative variant bSep08, complete mRNA.                              |
| <a href="#">B4galnt4</a> | <a href="#">B4galnt4.cSep08</a> | <a href="#">309105</a> | 1455  | 943  | 6  | 198 | beta-1 4-N-acetyl-galactosaminyl transferase 4 CRA b (B4galnt4) alternative variant cSep08, mRNA.                                 |
| <a href="#">B4galt1</a>  | <a href="#">B4galt1.bSep08</a>  | <a href="#">24390</a>  | 42841 | 476  | 3  | 98  | UDP-Gal:betaGlcNAc beta 1,4- galactosyltransferase, polypeptide 1 (B4galt1) alternative variant bSep08, mRNA.                     |
| <a href="#">B4galt1</a>  | <a href="#">B4galt1.cSep08</a>  | <a href="#">24390</a>  | 2845  | 829  | 2  | 44  | UDP-Gal:betaGlcNAc beta 1,4- galactosyltransferase, polypeptide 1 (B4galt1) alternative variant cSep08, mRNA.                     |
| <a href="#">B4galt2</a>  | <a href="#">B4galt2.bSep08</a>  | <a href="#">313536</a> | 6060  | 1056 | 6  | 346 | UDP-Gal:betaGlcNAc beta 1,4- galactosyltransferase, polypeptide 2 (B4galt2) alternative variant bSep08, mRNA.                     |
| <a href="#">B4galt3</a>  | <a href="#">B4galt3.bSep08</a>  | <a href="#">494342</a> | 5497  | 1262 | 7  | 198 | beta 1 4- galactosyltransferase 3 (B4galt3) alternative variant bSep08, mRNA.                                                     |
| <a href="#">B4galt3</a>  | <a href="#">B4galt3.cSep08</a>  | <a href="#">494342</a> | 3108  | 2593 | 2  | 70  | putative protein (7.4 kD) (B4galt3) alternative variant cSep08, mRNA.                                                             |
| <a href="#">B4galt5</a>  | <a href="#">B4galt5.bSep08</a>  | <a href="#">362275</a> | 1917  | 361  | 3  | 120 | UDP-Gal:betaGlcNAc beta 1,4-galactosyltransferase, polypeptide 5 (B4galt5) alternative variant bSep08, mRNA.                      |
| <a href="#">B4galt7</a>  | <a href="#">B4galt7.bSep08</a>  | <a href="#">364675</a> | 1060  | 405  | 1  | 123 | xylosylprotein beta1,4-galactosyltransferase, polypeptide 7 (galactosyltransferase I) (B4galt7) alternative variant bSep08, mRNA. |
| <a href="#">B9d1</a>     | <a href="#">B9d1.bSep08</a>     | <a href="#">287383</a> | 7557  | 902  | 7  | 136 | protein-like precursor (15.2 kD) (B9d1) alternative variant bSep08, complete mRNA.                                                |
| <a href="#">B9d1</a>     | <a href="#">B9d1.cSep08</a>     | <a href="#">287383</a> | 3461  | 492  | 3  | 118 | b9 protein domain 1 (B9d1) alternative variant cSep08, mRNA.                                                                      |

|                               |                                      |                        |       |      |   |     |                                                                                     |
|-------------------------------|--------------------------------------|------------------------|-------|------|---|-----|-------------------------------------------------------------------------------------|
| <a href="#">B9d1</a>          | <a href="#">B9d1.dSep08</a>          | <a href="#">287383</a> | 3060  | 412  | 2 | 67  | putative protein (B9d1) alternative variant dSep08, mRNA.                           |
| <a href="#">B9d2andTgfb1</a>  | <a href="#">B9d2andTgfb1.bSep08</a>  | <a href="#">59086</a>  | 5511  | 568  | 4 | 158 | b9 protein domain 2 (B9d2andTgfb1) alternative variant bSep08, mRNA.                |
| <a href="#">B9d2andTgfb1</a>  | <a href="#">B9d2andTgfb1.bSep08</a>  | <a href="#">308443</a> | 5511  | 568  | 4 | 158 | b9 protein domain 2 (B9d2andTgfb1) alternative variant bSep08, mRNA.                |
| <a href="#">B12-binding.0</a> | <a href="#">B12-binding.0.aSep08</a> | <a href="#">301276</a> | 14007 | 2187 |   | 288 | methylmalonyl-CoA mutase (B12-binding.0) mRNA.                                      |
| <a href="#">Baalc</a>         | <a href="#">Baalc.bSep08</a>         | <a href="#">140720</a> | 9142  | 622  | 2 | 56  | brain and acute leukemia, cytoplasmic (Baalc) alternative variant bSep08, mRNA.     |
| <a href="#">baby</a>          | <a href="#">baby.aSep08</a>          |                        | 4325  | 625  |   | 208 | odd Oz ten-m homolog (baby) mRNA.                                                   |
| <a href="#">Bace1</a>         | <a href="#">Bace1.bSep08</a>         | <a href="#">29392</a>  | 2622  | 821  | 3 | 108 | beta-site APP cleaving enzyme 1 (Bace1) alternative variant bSep08, mRNA.           |
| <a href="#">Bace2</a>         | <a href="#">Bace2.bSep08</a>         | <a href="#">288227</a> | 1249  | 742  | 1 | 132 | beta-site APP-cleaving enzyme 2 (Bace2) alternative variant bSep08, mRNA.           |
| <a href="#">Bach1</a>         | <a href="#">Bach1.bSep08</a>         | <a href="#">304127</a> | 17815 | 599  | 1 | 108 | BTB and CNC homology 1 (12.1 kD) (Bach1) alternative variant bSep08, complete mRNA. |
| <a href="#">bachu</a>         | <a href="#">bachu.aSep08</a>         |                        | 1228  | 420  |   | 89  | regulator of telomere elongation helicase 1 (bachu) mRNA.                           |
| <a href="#">bachy</a>         | <a href="#">bachy.aSep08</a>         |                        | 13362 | 442  | 3 | 42  | putative protein (bachy) alternative variant aSep08, mRNA.                          |
| <a href="#">BACK.0</a>        | <a href="#">BACK.0.aSep08</a>        |                        | 34362 | 2612 |   | 509 | kelch-like 13 CRA b (BACK.0) mRNA.                                                  |
| <a href="#">BACK.1</a>        | <a href="#">BACK.1.aSep08</a>        |                        | 22252 | 490  | 3 | 144 | kelch-like 3 (BACK.1) alternative variant aSep08, mRNA.                             |
| <a href="#">BACK.2</a>        | <a href="#">BACK.2.aSep08</a>        |                        | 1778  | 741  |   | 247 | kelch-like 30 (BACK.2) mRNA.                                                        |
| <a href="#">BACK.3</a>        | <a href="#">BACK.3.aSep08</a>        |                        | 17548 | 1800 | 4 | 463 | kelch-like 18 (BACK.3) alternative variant aSep08, mRNA.                            |
| <a href="#">BACK.3</a>        | <a href="#">BACK.3.bSep08</a>        |                        | 1914  | 430  | 1 | 70  | kelch-like 18 CRA c (BACK.3) alternative variant bSep08, mRNA.                      |
| <a href="#">Bad</a>           | <a href="#">Bad.bSep08</a>           | <a href="#">64639</a>  | 2327  | 1891 | 2 | 114 | bcl2-antagonist of cell death (12.0 kD) (Bad) alternative variant bSep08, mRNA.     |
| <a href="#">Bad</a>           | <a href="#">Bad.cSep08</a>           | <a href="#">64639</a>  | 1135  | 359  | 2 | 82  | bcl2-antagonist of cell death (Bad) alternative variant cSep08, mRNA.               |
| <a href="#">Bad</a>           | <a href="#">Bad.dSep08</a>           | <a href="#">64639</a>  | 8634  | 1047 | 5 | 71  | bcl2-antagonist of cell death (Bad) alternative variant dSep08, mRNA.               |
| <a href="#">bafer</a>         | <a href="#">bafer.aSep08</a>         |                        | 498   | 389  | 2 | 116 | putative protein (bafer) alternative variant aSep08, mRNA.                          |
| <a href="#">bafer</a>         | <a href="#">bafer.bSep08</a>         |                        | 12580 | 593  | 3 | 64  | CRA b like (7.5 kD) (bafer) alternative variant bSep08, mRNA.                       |
| <a href="#">bafer</a>         | <a href="#">bafer.cSep08</a>         |                        | 17168 | 781  | 4 | 64  | CRA b like (7.5 kD) (bafer) alternative variant cSep08, mRNA.                       |
| <a href="#">bafer</a>         | <a href="#">bafer.dSep08</a>         |                        | 2160  | 615  | 2 | 39  | putative protein (3.9 kD) (bafer) alternative variant dSep08, mRNA.                 |
| <a href="#">baflo</a>         | <a href="#">baflo.aSep08</a>         |                        | 848   | 409  |   | 80  | putative protein (9.5 kD) (baflo) mRNA.                                             |
| <a href="#">baflu</a>         | <a href="#">baflu.aSep08</a>         |                        | 2551  | 373  |   | 123 | ryanodine receptor (baflu) mRNA.                                                    |
| <a href="#">Bag1</a>          | <a href="#">Bag1.bSep08</a>          | <a href="#">297994</a> | 22335 | 671  | 6 | 159 | bcl2-associated athanogene 1 (Bag1) alternative variant bSep08, mRNA.               |
| <a href="#">Bag1</a>          | <a href="#">Bag1.cSep08</a>          | <a href="#">297994</a> | 6324  | 469  | 4 | 99  | bcl2-associated athanogene 1 (Bag1) alternative variant cSep08, mRNA.               |
| <a href="#">Bag1</a>          | <a href="#">Bag1.dSep08</a>          | <a href="#">297994</a> | 2391  | 356  | 2 | 70  | bcl2-associated athanogene 1 (Bag1) alternative variant dSep08, mRNA.               |

|                          |                                 |                        |       |      |    |     |                                                                                                                   |
|--------------------------|---------------------------------|------------------------|-------|------|----|-----|-------------------------------------------------------------------------------------------------------------------|
| <a href="#">Bag5</a>     | <a href="#">Bag5.bSep08</a>     | <a href="#">366734</a> | 1863  | 679  | 2  | 125 | BCL2-associated athanogene 5 (Bag5) alternative variant bSep08, mRNA.                                             |
| <a href="#">BAH.0</a>    | <a href="#">BAH.0.aSep08</a>    |                        | 3863  | 1818 |    | 152 | bah domain coiled-coil containing 1 (BAH.0) alternative variant aSep08, mRNA.                                     |
| <a href="#">Bahd1</a>    | <a href="#">Bahd1.aSep08</a>    | <a href="#">362194</a> | 7118  | 2872 |    | 308 | bromo adjacent region (Bahd1) mRNA.                                                                               |
| <a href="#">Bai1</a>     | <a href="#">Bai1.aSep08</a>     | <a href="#">362931</a> | 6936  | 2413 | 2  | 381 | brain-specific angiogenesis inhibitor 1 (41.6 kD) (Bai1) alternative variant aSep08, mRNA.                        |
| <a href="#">Bai1</a>     | <a href="#">Bai1.bSep08</a>     | <a href="#">362931</a> | 1495  | 686  | 1  | 228 | brain-specific angiogenesis inhibitor 1 (Bai1) alternative variant bSep08, mRNA.                                  |
| <a href="#">Bai2</a>     | <a href="#">Bai2.bSep08</a>     | <a href="#">313058</a> | 1452  | 607  | 1  | 103 | brain-specific angiogenesis inhibitor 2 (Bai2) alternative variant bSep08, mRNA.                                  |
| <a href="#">Baiap2</a>   | <a href="#">Baiap2.aSep08</a>   | <a href="#">117542</a> | 58907 | 1358 | 8  | 420 | brain-specific angiogenesis inhibitor 1-associated protein 2 (Baiap2) alternative variant aSep08, mRNA.           |
| <a href="#">Baiap2</a>   | <a href="#">Baiap2.bSep08</a>   | <a href="#">117542</a> | 57798 | 771  | 6  | 214 | brain-specific angiogenesis inhibitor 1-associated protein 2 (24.5 kD) (Baiap2) alternative variant bSep08, mRNA. |
| <a href="#">Baiap2</a>   | <a href="#">Baiap2.cSep08</a>   | <a href="#">117542</a> | 18885 | 604  | 1  | 128 | brain-specific angiogenesis inhibitor 1-associated protein 2 (14.5 kD) (Baiap2) alternative variant cSep08, mRNA. |
| <a href="#">Baiap2</a>   | <a href="#">Baiap2.eSep08</a>   | <a href="#">117542</a> | 41373 | 626  | 5  | 81  | brain-specific angiogenesis inhibitor 1-associated protein 2 (9.1 kD) (Baiap2) alternative variant eSep08, mRNA.  |
| <a href="#">Baiap2l1</a> | <a href="#">Baiap2l1.bSep08</a> | <a href="#">304282</a> | 71379 | 1231 | 3  | 409 | BAI1-associated protein 2-like 1 (Baiap2l1) alternative variant bSep08, mRNA.                                     |
| <a href="#">Baiap2l1</a> | <a href="#">Baiap2l1.cSep08</a> | <a href="#">304282</a> | 12905 | 779  | 1  | 199 | BAI1-associated protein 2-like 1 (Baiap2l1) alternative variant cSep08, mRNA.                                     |
| <a href="#">Baiap2l2</a> | <a href="#">Baiap2l2.aSep08</a> | <a href="#">685357</a> | 14569 | 617  |    | 205 | BAI1-associated protein 2-like 2 (Baiap2l2) mRNA.                                                                 |
| <a href="#">Bak1</a>     | <a href="#">Bak1.aSep08</a>     | <a href="#">116502</a> | 8646  | 1941 |    | 209 | BCL2-antagonist/killer 1 (23.2 kD) (Bak1) mRNA.                                                                   |
| <a href="#">baloy</a>    | <a href="#">baloy.aSep08</a>    |                        | 2014  | 345  |    | 28  | putative protein (3.2 kD) (baloy) mRNA.                                                                           |
| <a href="#">Bambi</a>    | <a href="#">Bambi.bSep08</a>    | <a href="#">83837</a>  | 1385  | 953  | 2  | 107 | BMP and activin membrane-bound inhibitor, homolog (Xenopus laevis) (Bambi) alternative variant bSep08, mRNA.      |
| <a href="#">bamer</a>    | <a href="#">bamer.aSep08</a>    |                        | 5401  | 349  |    | 56  | putative protein (bamer) mRNA.                                                                                    |
| <a href="#">Banf2</a>    | <a href="#">Banf2.aSep08</a>    | <a href="#">296198</a> | 13601 | 451  |    | 130 | barrier to autointegration factor 2 (Banf2) mRNA.                                                                 |
| <a href="#">banoy</a>    | <a href="#">banoy.aSep08</a>    |                        | 7881  | 223  |    | 55  | putative protein (banoy) mRNA.                                                                                    |
| <a href="#">Banp</a>     | <a href="#">Banp.aSep08</a>     | <a href="#">292064</a> | 75112 | 2361 | 14 | 548 | btg3 associated nuclear protein (59.7 kD) (Banp) alternative variant aSep08, complete mRNA.                       |
| <a href="#">Banp</a>     | <a href="#">Banp.bSep08</a>     | <a href="#">292064</a> | 26487 | 1138 | 8  | 253 | btg3 associated nuclear protein (27.3 kD) (Banp) alternative variant bSep08, mRNA.                                |
| <a href="#">Banp</a>     | <a href="#">Banp.cSep08</a>     | <a href="#">292064</a> | 43899 | 774  | 6  | 212 | btg3 associated nuclear protein (Banp) alternative variant cSep08, mRNA.                                          |
| <a href="#">Banp</a>     | <a href="#">Banp.dSep08</a>     | <a href="#">292064</a> | 2527  | 988  | 2  | 62  | btg3 associated nuclear protein (7.0 kD) (Banp) alternative variant dSep08, mRNA.                                 |
| <a href="#">Bap1</a>     | <a href="#">Bap1.bSep08</a>     | <a href="#">306257</a> | 1132  | 774  | 3  | 257 | brca1 associated (Bap1) alternative variant bSep08, mRNA.                                                         |
| <a href="#">Bap1</a>     | <a href="#">Bap1.cSep08</a>     | <a href="#">306257</a> | 899   | 785  | 2  | 210 | brca1 associated (Bap1) alternative variant cSep08, mRNA.                                                         |
| <a href="#">Bap1</a>     | <a href="#">Bap1.dSep08</a>     | <a href="#">306257</a> | 3550  | 1299 | 7  | 149 | brca1 associated (Bap1) alternative variant dSep08, mRNA.                                                         |

|                          |                                 |                        |       |      |    |      |                                                                                   |
|--------------------------|---------------------------------|------------------------|-------|------|----|------|-----------------------------------------------------------------------------------|
| <a href="#">Bap1</a>     | <a href="#">Bap1.eSep08</a>     | <a href="#">306257</a> | 1359  | 733  | 3  | 105  | brca1 associated (Bap1) alternative variant eSep08, mRNA.                         |
| <a href="#">Bap1</a>     | <a href="#">Bap1.fSep08</a>     | <a href="#">306257</a> | 593   | 404  | 2  | 67   | putative protein (Bap1) alternative variant fSep08, mRNA.                         |
| <a href="#">bapor</a>    | <a href="#">bapor.aSep08</a>    |                        | 3612  | 306  |    | 13   | putative protein (1.5 kD) (bapor) mRNA.                                           |
| <a href="#">barby</a>    | <a href="#">barby.aSep08</a>    |                        | 10017 | 552  |    | 184  | THO complex 2 (barby) mRNA.                                                       |
| <a href="#">barchy</a>   | <a href="#">barchy.aSep08</a>   |                        | 16332 | 573  | 3  | 91   | putative protein (barchy) mRNA.                                                   |
| <a href="#">Bard1</a>    | <a href="#">Bard1.bSep08</a>    | <a href="#">64557</a>  | 8933  | 416  | 2  | 138  | BRCA1 associated RING domain 1 (Bard1) alternative variant bSep08, mRNA.          |
| <a href="#">barfer</a>   | <a href="#">barfer.aSep08</a>   |                        | 22321 | 407  |    | 51   | putative protein (5.4 kD) (barfer) mRNA.                                          |
| <a href="#">barflo</a>   | <a href="#">barflo.aSep08</a>   |                        | 3749  | 455  |    | 151  | CRA b (barflo) mRNA.                                                              |
| <a href="#">barflu</a>   | <a href="#">barflu.aSep08</a>   |                        | 9069  | 414  |    | 137  | CRA b like (barflu) mRNA.                                                         |
| <a href="#">barloy</a>   | <a href="#">barloy.aSep08</a>   |                        | 24805 | 735  | 2  | 37   | putative protein (4.3 kD) (barloy) alternative variant aSep08, mRNA.              |
| <a href="#">barloy</a>   | <a href="#">barloy.bSep08</a>   |                        | 21054 | 564  | 1  | 76   | putative cytoplasmic protein (8.6 kD) (barloy) alternative variant bSep08, mRNA.  |
| <a href="#">barmer</a>   | <a href="#">barmer.aSep08</a>   |                        | 753   | 506  |    | 35   | putative protein (barmer) mRNA.                                                   |
| <a href="#">barnoy</a>   | <a href="#">barnoy.aSep08</a>   |                        | 1430  | 1337 |    | 91   | putative cytoplasmic protein (10.1 kD) (barnoy) mRNA.                             |
| <a href="#">barpor</a>   | <a href="#">barpor.aSep08</a>   |                        | 2172  | 382  |    | 19   | putative protein (barpor) mRNA.                                                   |
| <a href="#">barsa</a>    | <a href="#">barsa.aSep08</a>    |                        | 1367  | 400  | 2  | 133  | putative protein (barsa) alternative variant aSep08, mRNA.                        |
| <a href="#">barshee</a>  | <a href="#">barshee.aSep08</a>  |                        | 2780  | 646  |    | 86   | putative protein (9.6 kD) (barshee) mRNA.                                         |
| <a href="#">barto</a>    | <a href="#">barto.aSep08</a>    |                        | 5845  | 797  | 4  | 45   | putative protein (5.3 kD) (barto) alternative variant aSep08, mRNA.               |
| <a href="#">barto</a>    | <a href="#">barto.bSep08</a>    |                        | 1203  | 399  | 2  | 43   | putative protein (barto) alternative variant bSep08, mRNA.                        |
| <a href="#">barvar</a>   | <a href="#">barvar.aSep08</a>   |                        | 1499  | 767  |    | 99   | putative protein (11.2 kD) (barvar) mRNA.                                         |
| <a href="#">barwey</a>   | <a href="#">barwey.aSep08</a>   |                        | 4444  | 346  |    | 67   | CRA c like (barwey) mRNA.                                                         |
| <a href="#">basa</a>     | <a href="#">basa.aSep08</a>     |                        | 928   | 653  |    | 82   | putative protein (9.2 kD) (basa) mRNA.                                            |
| <a href="#">bashee</a>   | <a href="#">bashee.aSep08</a>   |                        | 3085  | 453  |    | 150  | putative protein of vertebrate origin (bashee) mRNA.                              |
| <a href="#">Bat1a</a>    | <a href="#">Bat1a.bSep08</a>    | <a href="#">114612</a> | 3702  | 2336 | 4  | 254  | HLA-B associated transcript 1 (28.9 kD) (Bat1a) alternative variant bSep08, mRNA. |
| <a href="#">Bat1a</a>    | <a href="#">Bat1a.cSep08</a>    | <a href="#">114612</a> | 2802  | 613  | 4  | 167  | CRA c like (Bat1a) alternative variant cSep08, mRNA.                              |
| <a href="#">Bat2</a>     | <a href="#">Bat2.aSep08</a>     | <a href="#">294250</a> | 7221  | 3577 | 13 | 1128 | HLA-B associated transcript 2 (Bat2) alternative variant aSep08, mRNA.            |
| <a href="#">Bat2</a>     | <a href="#">Bat2.bSep08</a>     | <a href="#">294250</a> | 4914  | 2233 | 9  | 487  | HLA-B associated transcript 2 (50.6 kD) (Bat2) alternative variant bSep08, mRNA.  |
| <a href="#">Bat2</a>     | <a href="#">Bat2.cSep08</a>     | <a href="#">294250</a> | 1161  | 777  | 2  | 182  | HLA-B associated transcript 2 (Bat2) alternative variant cSep08, mRNA.            |
| <a href="#">Bat2</a>     | <a href="#">Bat2.dSep08</a>     | <a href="#">294250</a> | 1286  | 509  | 2  | 169  | HLA-B associated transcript 2 (Bat2) alternative variant dSep08, mRNA.            |
| <a href="#">Bat2d</a>    | <a href="#">Bat2d.aSep08</a>    | <a href="#">360865</a> | 28701 | 1335 | 9  | 366  | BAT2, N-terminal (Bat2d) alternative variant aSep08, mRNA.                        |
| <a href="#">Bat2d</a>    | <a href="#">Bat2d.bSep08</a>    | <a href="#">360865</a> | 3212  | 395  | 2  | 121  | BAT2, N-terminal (Bat2d) alternative variant bSep08, mRNA.                        |
| <a href="#">Bat2d</a>    | <a href="#">Bat2d.cSep08</a>    | <a href="#">360865</a> | 19951 | 540  | 2  | 83   | putative protein (Bat2d) alternative variant cSep08, mRNA.                        |
| <a href="#">BAT2_N.0</a> | <a href="#">BAT2_N.0.aSep08</a> |                        | 3139  | 593  |    | 143  | hla-b associated transcript 2 (BAT2_N.0) mRNA.                                    |

|                        |                               |                        |       |      |    |     |                                                                                        |
|------------------------|-------------------------------|------------------------|-------|------|----|-----|----------------------------------------------------------------------------------------|
| <a href="#">Bat3</a>   | <a href="#">Bat3.cSep08</a>   | <a href="#">94342</a>  | 8569  | 2087 | 13 | 587 | HLA-B-associated transcript 3 (Bat3) alternative variant cSep08, mRNA.                 |
| <a href="#">Bat3</a>   | <a href="#">Bat3.dSep08</a>   | <a href="#">94342</a>  | 2034  | 915  | 7  | 304 | HLA-B-associated transcript 3 (Bat3) alternative variant dSep08, mRNA.                 |
| <a href="#">Bat3</a>   | <a href="#">Bat3.eSep08</a>   | <a href="#">94342</a>  | 4125  | 697  | 6  | 221 | HLA-B-associated transcript 3 (Bat3) alternative variant eSep08, mRNA.                 |
| <a href="#">Bat3</a>   | <a href="#">Bat3.fSep08</a>   | <a href="#">94342</a>  | 1686  | 698  | 6  | 208 | HLA-B-associated transcript 3 (Bat3) alternative variant fSep08, mRNA.                 |
| <a href="#">Bat3</a>   | <a href="#">Bat3.gSep08</a>   | <a href="#">94342</a>  | 981   | 772  | 3  | 144 | HLA-B-associated transcript 3 (Bat3) alternative variant gSep08, mRNA.                 |
| <a href="#">Bat4</a>   | <a href="#">Bat4.bSep08</a>   | <a href="#">415064</a> | 1879  | 797  | 1  | 202 | bat4 gene (Bat4) alternative variant bSep08, mRNA.                                     |
| <a href="#">Bat5</a>   | <a href="#">Bat5.bSep08</a>   | <a href="#">361796</a> | 4155  | 1192 | 12 | 193 | hla-b associated transcript 5 (22.4 kD) (Bat5) alternative variant bSep08, mRNA.       |
| <a href="#">Bat5</a>   | <a href="#">Bat5.cSep08</a>   | <a href="#">361796</a> | 7242  | 403  | 5  | 133 | hla-b associated transcript 5 CRA d (Bat5) alternative variant cSep08, mRNA.           |
| <a href="#">Bat5</a>   | <a href="#">Bat5.dSep08</a>   | <a href="#">361796</a> | 6184  | 758  | 9  | 129 | hla-b associated transcript 5 CRA c (Bat5) alternative variant dSep08, mRNA.           |
| <a href="#">Bat5</a>   | <a href="#">Bat5.eSep08</a>   | <a href="#">361796</a> | 2439  | 1360 | 9  | 117 | hla-b associated transcript 5 CRA d (13.8 kD) (Bat5) alternative variant eSep08, mRNA. |
| <a href="#">Bat5</a>   | <a href="#">Bat5.fSep08</a>   | <a href="#">361796</a> | 2926  | 771  | 6  | 116 | hla-b associated transcript 5 CRA c (Bat5) alternative variant fSep08, mRNA.           |
| <a href="#">Bat5</a>   | <a href="#">Bat5.gSep08</a>   | <a href="#">361796</a> | 1610  | 738  | 2  | 106 | hla-b associated transcript 5 CRA f (11.9 kD) (Bat5) alternative variant gSep08, mRNA. |
| <a href="#">Bat5</a>   | <a href="#">Bat5.hSep08</a>   | <a href="#">361796</a> | 5435  | 327  | 5  | 99  | hla-b associated transcript 5 CRA a (Bat5) alternative variant hSep08, mRNA.           |
| <a href="#">Bat5</a>   | <a href="#">Bat5.jSep08</a>   | <a href="#">361796</a> | 5612  | 406  | 4  | 65  | hla-b associated transcript 5 CRA f (Bat5) alternative variant jSep08, mRNA.           |
| <a href="#">bato</a>   | <a href="#">bato.aSep08</a>   |                        | 39466 | 1802 |    | 63  | putative protein (bato) mRNA.                                                          |
| <a href="#">bavar</a>  | <a href="#">bavar.aSep08</a>  |                        | 63607 | 790  | 3  | 92  | putative nuclear protein (10.1 kD) (bavar) alternative variant aSep08, mRNA.           |
| <a href="#">bavar</a>  | <a href="#">bavar.bSep08</a>  |                        | 837   | 299  | 1  | 46  | putative protein (5.2 kD) (bavar) alternative variant bSep08, mRNA.                    |
| <a href="#">bawby</a>  | <a href="#">bawby.aSep08</a>  |                        | 16694 | 557  |    | 185 | THO complex 2 (bawby) mRNA.                                                            |
| <a href="#">bawchy</a> | <a href="#">bawchy.aSep08</a> |                        | 2014  | 718  |    | 64  | putative protein (bawchy) mRNA.                                                        |
| <a href="#">bawey</a>  | <a href="#">bawey.aSep08</a>  |                        | 8587  | 643  |    | 86  | putative protein (bawey) mRNA.                                                         |
| <a href="#">bawfer</a> | <a href="#">bawfer.aSep08</a> |                        | 784   | 462  |    | 28  | putative protein (3.0 kD) (bawfer) mRNA.                                               |
| <a href="#">bawflo</a> | <a href="#">bawflo.aSep08</a> |                        | 89552 | 345  |    | 36  | putative protein (bawflo) mRNA.                                                        |
| <a href="#">bawflu</a> | <a href="#">bawflu.aSep08</a> |                        | 837   | 526  | 2  | 125 | HAI-2 related small like (13.0 kD) (bawflu) alternative variant aSep08, mRNA.          |
| <a href="#">bawflu</a> | <a href="#">bawflu.bSep08</a> |                        | 678   | 518  | 1  | 115 | CRA b like (12.2 kD) (bawflu) alternative variant bSep08, mRNA.                        |
| <a href="#">bawflu</a> | <a href="#">bawflu.cSep08</a> |                        | 965   | 535  | 3  | 104 | HAI-2 related small (10.7 kD) (bawflu) alternative variant cSep08, mRNA.               |
| <a href="#">bawkee</a> | <a href="#">bawkee.aSep08</a> |                        | 6457  | 325  |    | 108 | contactin associated protein-like 5A (bawkee) mRNA.                                    |
| <a href="#">bawloy</a> | <a href="#">bawloy.bSep08</a> |                        | 1350  | 646  | 2  | 77  | putative protein (8.8 kD) (bawloy) alternative variant bSep08, mRNA.                   |



|                         |                                |                        |        |      |    |     |                                                                                                   |
|-------------------------|--------------------------------|------------------------|--------|------|----|-----|---------------------------------------------------------------------------------------------------|
| <a href="#">bawmer</a>  | <a href="#">bawmer.aSep08</a>  |                        | 2031   | 657  |    | 218 | CRA b (bawmer) mRNA.                                                                              |
| <a href="#">bawnoy</a>  | <a href="#">bawnoy.aSep08</a>  |                        | 566    | 411  |    | 102 | putative protein (bawnoy) mRNA.                                                                   |
| <a href="#">bawpor</a>  | <a href="#">bawpor.aSep08</a>  |                        | 859    | 683  |    | 47  | putative protein (bawpor) mRNA.                                                                   |
| <a href="#">bawsa</a>   | <a href="#">bawsa.aSep08</a>   |                        | 721    | 510  |    | 169 | methyl-CpG binding domain protein 6 like (bawsa) mRNA.                                            |
| <a href="#">bawshee</a> | <a href="#">bawshee.aSep08</a> |                        | 732    | 463  |    | 13  | putative protein (bawshee) mRNA.                                                                  |
| <a href="#">bawto</a>   | <a href="#">bawto.aSep08</a>   |                        | 1211   | 406  |    | 22  | putative protein (bawto) mRNA.                                                                    |
| <a href="#">bawvar</a>  | <a href="#">bawvar.aSep08</a>  |                        | 15187  | 347  |    | 110 | putative protein (bawvar) mRNA.                                                                   |
| <a href="#">bawwey</a>  | <a href="#">bawwey.aSep08</a>  |                        | 1349   | 570  |    | 36  | putative protein (4.1 kD) (bawwey) mRNA.                                                          |
| <a href="#">Bax</a>     | <a href="#">Bax.aSep08</a>     | <a href="#">24887</a>  | 5407   | 832  | 6  | 192 | bcl2-associated X protein (21.4 kD) (Bax) alternative variant aSep08, mRNA.                       |
| <a href="#">Bax</a>     | <a href="#">Bax.bSep08</a>     | <a href="#">24887</a>  | 4086   | 628  | 5  | 167 | bcl2-associated X protein (18.8 kD) (Bax) alternative variant bSep08, complete mRNA.              |
| <a href="#">Bax</a>     | <a href="#">Bax.cSep08</a>     | <a href="#">24887</a>  | 1636   | 352  | 4  | 117 | bcl2-associated X protein (Bax) alternative variant cSep08, mRNA.                                 |
| <a href="#">Bax</a>     | <a href="#">Bax.dSep08</a>     | <a href="#">24887</a>  | 1705   | 925  | 2  | 70  | bcl2-associated X protein (Bax) alternative variant dSep08, mRNA.                                 |
| <a href="#">Bax</a>     | <a href="#">Bax.eSep08</a>     | <a href="#">24887</a>  | 851    | 758  | 2  | 52  | bcl2-associated X protein (Bax) alternative variant eSep08, mRNA.                                 |
| <a href="#">Baz1a</a>   | <a href="#">Baz1a.aSep08</a>   | <a href="#">314126</a> | 5099   | 1592 | 4  | 284 | bromodomain adjacent to zinc finger domain, 1A (Baz1a) alternative variant aSep08, mRNA.          |
| <a href="#">Baz1a</a>   | <a href="#">Baz1a.bSep08</a>   | <a href="#">314126</a> | 2023   | 741  | 3  | 56  | bromodomain adjacent to zinc finger domain, 1A (6.2 kD) (Baz1a) alternative variant bSep08, mRNA. |
| <a href="#">Baz1b</a>   | <a href="#">Baz1b.aSep08</a>   | <a href="#">368002</a> | 5907   | 2612 | 4  | 229 | bromodomain adjacent to zinc finger domain, 1B (Baz1b) alternative variant aSep08, mRNA.          |
| <a href="#">Baz1b</a>   | <a href="#">Baz1b.bSep08</a>   | <a href="#">368002</a> | 18697  | 801  | 5  | 199 | bromodomain adjacent to zinc finger domain, 1B (Baz1b) alternative variant bSep08, mRNA.          |
| <a href="#">Baz2a</a>   | <a href="#">Baz2a.bSep08</a>   | <a href="#">304601</a> | 7248   | 4823 | 10 | 559 | bromodomain adjacent to zinc finger domain, 2A (Baz2a) alternative variant bSep08, mRNA.          |
| <a href="#">Baz2a</a>   | <a href="#">Baz2a.cSep08</a>   | <a href="#">304601</a> | 875    | 667  | 3  | 177 | bromodomain adjacent to zinc finger domain, 2A (Baz2a) alternative variant cSep08, mRNA.          |
| <a href="#">Baz2b</a>   | <a href="#">Baz2b.bSep08</a>   | <a href="#">317627</a> | 13940  | 2825 | 9  | 522 | bromodomain adjacent to zinc finger domain, 2B (Baz2b) alternative variant bSep08, mRNA.          |
| <a href="#">Baz2b</a>   | <a href="#">Baz2b.cSep08</a>   | <a href="#">317627</a> | 232969 | 1590 | 9  | 372 | bromodomain adjacent to zinc finger domain, 2B (Baz2b) alternative variant cSep08, mRNA.          |
| <a href="#">Baz2b</a>   | <a href="#">Baz2b.dSep08</a>   | <a href="#">317627</a> | 22983  | 697  | 7  | 232 | bromodomain adjacent to zinc finger domain, 2B (Baz2b) alternative variant dSep08, mRNA.          |
| <a href="#">Baz2b</a>   | <a href="#">Baz2b.eSep08</a>   | <a href="#">317627</a> | 5058   | 846  | 3  | 161 | bromodomain adjacent to zinc finger domain, 2B (Baz2b) alternative variant eSep08, mRNA.          |
| <a href="#">Baz2b</a>   | <a href="#">Baz2b.fSep08</a>   | <a href="#">317627</a> | 848    | 752  | 2  | 81  | bromodomain adjacent to zinc finger domain, 2B (Baz2b) alternative variant fSep08, mRNA.          |
| <a href="#">Baz2b</a>   | <a href="#">Baz2b.gSep08</a>   | <a href="#">317627</a> | 1946   | 390  | 2  | 45  | bromodomain adjacent to zinc finger domain, 2B (4.8 kD) (Baz2b) alternative variant gSep08, mRNA. |
| <a href="#">Baz2b</a>   | <a href="#">Baz2b.hSep08</a>   | <a href="#">317627</a> | 134425 | 377  | 4  | 48  | bromodomain adjacent to zinc finger domain, 2B (5.7 kD) (Baz2b) alternative variant hSep08, mRNA. |
| <a href="#">Bbs1</a>    | <a href="#">Bbs1.bSep08</a>    | <a href="#">309156</a> | 4854   | 697  | 4  | 136 | bardet-Biedl syndrome 1 homolog (human) (Bbs1) alternative variant bSep08, mRNA.                  |

|                        |                               |                        |        |      |    |     |                                                                                            |
|------------------------|-------------------------------|------------------------|--------|------|----|-----|--------------------------------------------------------------------------------------------|
| <a href="#">Bbs1</a>   | <a href="#">Bbs1.cSep08</a>   | <a href="#">309156</a> | 3347   | 355  | 5  | 44  | bardet-Biedl syndrome 1 homolog (human) (Bbs1) alternative variant cSep08, mRNA.           |
| <a href="#">Bbs1</a>   | <a href="#">Bbs1.dSep08</a>   | <a href="#">309156</a> | 612    | 369  | 2  | 35  | bardet-Biedl syndrome 1 homolog (human) (Bbs1) alternative variant dSep08, mRNA.           |
| <a href="#">Bbs2</a>   | <a href="#">Bbs2.bSep08</a>   | <a href="#">113948</a> | 6605   | 692  | 6  | 198 | bardet-Biedl syndrome 2 like (Bbs2) alternative variant bSep08, mRNA.                      |
| <a href="#">Bbs2</a>   | <a href="#">Bbs2.cSep08</a>   | <a href="#">113948</a> | 13189  | 746  | 7  | 125 | bardet-Biedl syndrome 2 like (Bbs2) alternative variant cSep08, mRNA.                      |
| <a href="#">Bbs2</a>   | <a href="#">Bbs2.dSep08</a>   | <a href="#">113948</a> | 683    | 514  | 2  | 85  | bardet-Biedl syndrome 2 like (Bbs2) alternative variant dSep08, mRNA.                      |
| <a href="#">Bbs4</a>   | <a href="#">Bbs4.bSep08</a>   | <a href="#">300754</a> | 21345  | 1536 | 10 | 417 | bardet-Biedl syndrome 4 homolog (human) (47.4 kD) (Bbs4) alternative variant bSep08, mRNA. |
| <a href="#">Bbs4</a>   | <a href="#">Bbs4.cSep08</a>   | <a href="#">300754</a> | 5766   | 507  | 1  | 54  | bardet-Biedl syndrome 4 homolog (human) (Bbs4) alternative variant cSep08, mRNA.           |
| <a href="#">Bbs5</a>   | <a href="#">Bbs5.bSep08</a>   | <a href="#">362142</a> | 8450   | 639  | 5  | 148 | bardet-Biedl syndrome 5 (human) (Bbs5) alternative variant bSep08, mRNA.                   |
| <a href="#">Bbs5</a>   | <a href="#">Bbs5.cSep08</a>   | <a href="#">362142</a> | 3179   | 683  | 4  | 121 | bardet-Biedl syndrome 5 (human) (Bbs5) alternative variant cSep08, mRNA.                   |
| <a href="#">Bbs5</a>   | <a href="#">Bbs5.dSep08</a>   | <a href="#">362142</a> | 14864  | 1020 | 4  | 68  | bardet-Biedl syndrome 5 (human) (8.0 kD) (Bbs5) alternative variant dSep08, mRNA.          |
| <a href="#">Bbs7</a>   | <a href="#">Bbs7.bSep08</a>   | <a href="#">361930</a> | 4337   | 595  | 2  | 110 | bardet-Biedl syndrome 7 (12.4 kD) (Bbs7) alternative variant bSep08, mRNA.                 |
| <a href="#">Bbs9</a>   | <a href="#">Bbs9.aSep08</a>   | <a href="#">315484</a> | 241031 | 1914 | 11 | 511 | bardet-Biedl syndrome 9 (Bbs9) alternative variant aSep08, mRNA.                           |
| <a href="#">Bbs9</a>   | <a href="#">Bbs9.bSep08</a>   | <a href="#">315484</a> | 48051  | 378  | 1  | 60  | bardet-Biedl syndrome 9 (Bbs9) alternative variant bSep08, mRNA.                           |
| <a href="#">Bbx</a>    | <a href="#">Bbx.bSep08</a>    | <a href="#">303970</a> | 86029  | 572  | 4  | 60  | bobby sox homolog (Drosophila) (Bbx) alternative variant bSep08, mRNA.                     |
| <a href="#">Bbx</a>    | <a href="#">Bbx.cSep08</a>    | <a href="#">303970</a> | 152454 | 348  | 3  | 34  | bobby sox homolog (Drosophila) (4.0 kD) (Bbx) alternative variant cSep08, mRNA.            |
| <a href="#">Bcam</a>   | <a href="#">Bcam.bSep08</a>   | <a href="#">78958</a>  | 4835   | 792  | 1  | 190 | basal cell adhesion molecule (Bcam) alternative variant bSep08, mRNA.                      |
| <a href="#">Bcan</a>   | <a href="#">Bcan.cSep08</a>   | <a href="#">25393</a>  | 1682   | 418  | 3  | 139 | brevican (Bcan) alternative variant cSep08, mRNA.                                          |
| <a href="#">Bcan</a>   | <a href="#">Bcan.fSep08</a>   | <a href="#">25393</a>  | 1347   | 312  | 3  | 90  | brevican (Bcan) alternative variant fSep08, mRNA.                                          |
| <a href="#">Bcan</a>   | <a href="#">Bcan.hSep08</a>   | <a href="#">25393</a>  | 1445   | 651  | 2  | 25  | brevican (Bcan) alternative variant hSep08, mRNA.                                          |
| <a href="#">Bcap29</a> | <a href="#">Bcap29.bSep08</a> | <a href="#">298943</a> | 34451  | 833  | 1  | 227 | B-cell receptor-associated protein 29 (Bcap29) alternative variant bSep08, mRNA.           |
| <a href="#">Bcap31</a> | <a href="#">Bcap31.bSep08</a> | <a href="#">293852</a> | 28929  | 866  | 7  | 233 | B-cell receptor-associated protein 31 (Bcap31) alternative variant bSep08, mRNA.           |
| <a href="#">Bcap31</a> | <a href="#">Bcap31.cSep08</a> | <a href="#">293852</a> | 28698  | 1548 | 6  | 227 | B-cell receptor-associated protein 31 (25.8 kD) (Bcap31) alternative variant cSep08, mRNA. |
| <a href="#">Bcap31</a> | <a href="#">Bcap31.dSep08</a> | <a href="#">293852</a> | 27741  | 716  | 6  | 178 | B-cell receptor-associated protein 31 (Bcap31) alternative variant dSep08, mRNA.           |
| <a href="#">Bcap31</a> | <a href="#">Bcap31.eSep08</a> | <a href="#">293852</a> | 28457  | 677  | 5  | 159 | B-cell receptor-associated protein 31 (Bcap31) alternative variant eSep08, mRNA.           |
| <a href="#">Bcap31</a> | <a href="#">Bcap31.gSep08</a> | <a href="#">293852</a> | 2035   | 658  | 2  | 35  | B-cell receptor-associated protein 31 (4.1 kD) (Bcap31) alternative variant gSep08, mRNA.  |

|                        |                               |                        |        |      |    |     |                                                                                                        |
|------------------------|-------------------------------|------------------------|--------|------|----|-----|--------------------------------------------------------------------------------------------------------|
| <a href="#">Bcar1</a>  | <a href="#">Bcar1.aSep08</a>  | <a href="#">25414</a>  | 23107  | 3115 | 5  | 874 | breast cancer anti-estrogen resistance 1 (94.5 kD) (Bcar1) alternative variant aSep08, mRNA.           |
| <a href="#">Bcar1</a>  | <a href="#">Bcar1.bSep08</a>  | <a href="#">25414</a>  | 12441  | 472  | 2  | 131 | breast cancer anti-estrogen resistance 1 (Bcar1) alternative variant bSep08, mRNA.                     |
| <a href="#">Bcas1</a>  | <a href="#">Bcas1.bSep08</a>  | <a href="#">246755</a> | 63013  | 2470 | 7  | 470 | breast carcinoma amplified sequence 1 (Bcas1) alternative variant bSep08, mRNA.                        |
| <a href="#">Bcas1</a>  | <a href="#">Bcas1.cSep08</a>  | <a href="#">246755</a> | 62580  | 1803 | 5  | 392 | breast carcinoma amplified sequence 1 (Bcas1) alternative variant cSep08, mRNA.                        |
| <a href="#">Bcas1</a>  | <a href="#">Bcas1.dSep08</a>  | <a href="#">246755</a> | 62580  | 1761 | 4  | 378 | breast carcinoma amplified sequence 1 (Bcas1) alternative variant dSep08, mRNA.                        |
| <a href="#">Bcas1</a>  | <a href="#">Bcas1.eSep08</a>  | <a href="#">246755</a> | 62580  | 1734 | 5  | 369 | breast carcinoma amplified sequence 1 (Bcas1) alternative variant eSep08, mRNA.                        |
| <a href="#">Bcas1</a>  | <a href="#">Bcas1.fSep08</a>  | <a href="#">246755</a> | 22642  | 423  | 1  | 141 | breast carcinoma amplified sequence 1 (Bcas1) alternative variant fSep08, mRNA.                        |
| <a href="#">Bcas3</a>  | <a href="#">Bcas3.aSep08</a>  | <a href="#">363662</a> | 301809 | 1981 | 7  | 543 | breast carcinoma amplified sequence 3 like (Bcas3) alternative variant aSep08, mRNA.                   |
| <a href="#">Bcas3</a>  | <a href="#">Bcas3.bSep08</a>  | <a href="#">363662</a> | 251058 | 920  | 8  | 305 | breast carcinoma amplified sequence 3 like (Bcas3) alternative variant bSep08, mRNA.                   |
| <a href="#">Bcas3</a>  | <a href="#">Bcas3.cSep08</a>  | <a href="#">363662</a> | 4557   | 1532 | 2  | 142 | breast carcinoma amplified sequence 3 like (15.8 kD) (Bcas3) alternative variant cSep08, mRNA.         |
| <a href="#">Bcas3</a>  | <a href="#">Bcas3.dSep08</a>  | <a href="#">363662</a> | 86521  | 1084 | 3  | 130 | breast carcinoma amplified sequence 3 CRA c like (Bcas3) alternative variant dSep08, mRNA.             |
| <a href="#">Bcas3</a>  | <a href="#">Bcas3.eSep08</a>  | <a href="#">363662</a> | 18588  | 417  | 1  | 70  | breast carcinoma amplified sequence 3 like (Bcas3) alternative variant eSep08, mRNA.                   |
| <a href="#">Bcas3</a>  | <a href="#">Bcas3.fSep08</a>  | <a href="#">363662</a> | 87525  | 747  | 4  | 52  | breast carcinoma amplified sequence 3 like (Bcas3) alternative variant fSep08, mRNA.                   |
| <a href="#">Bcat1</a>  | <a href="#">Bcat1.bSep08</a>  | <a href="#">29592</a>  | 84681  | 1551 | 8  | 306 | branched chain aminotransferase 1, cytosolic (34.2 kD) (Bcat1) alternative variant bSep08, mRNA.       |
| <a href="#">Bcat1</a>  | <a href="#">Bcat1.cSep08</a>  | <a href="#">29592</a>  | 28611  | 869  | 6  | 217 | branched chain aminotransferase 1, cytosolic (Bcat1) alternative variant cSep08, mRNA.                 |
| <a href="#">Bcat1</a>  | <a href="#">Bcat1.dSep08</a>  | <a href="#">29592</a>  | 16528  | 390  | 4  | 129 | branched chain aminotransferase 1, cytosolic (Bcat1) alternative variant dSep08, mRNA.                 |
| <a href="#">Bcat1</a>  | <a href="#">Bcat1.eSep08</a>  | <a href="#">29592</a>  | 50104  | 595  | 5  | 122 | branched chain aminotransferase 1, cytosolic (Bcat1) alternative variant eSep08, mRNA.                 |
| <a href="#">Bcat2</a>  | <a href="#">Bcat2.bSep08</a>  | <a href="#">64203</a>  | 13142  | 691  | 6  | 227 | branched chain aminotransferase 2, mitochondrial (Bcat2) alternative variant bSep08, mRNA.             |
| <a href="#">Bccip</a>  | <a href="#">Bccip.aSep08</a>  | <a href="#">361666</a> | 12998  | 1815 | 7  | 370 | BRCA2 and CDKN1A interacting protein (41.7 kD) (Bccip) alternative variant aSep08, mRNA.               |
| <a href="#">Bckdha</a> | <a href="#">Bckdha.bSep08</a> | <a href="#">25244</a>  | 1619   | 1306 | 3  | 310 | branched chain ketoacid dehydrogenase E1, alpha polypeptide (Bckdha) alternative variant bSep08, mRNA. |
| <a href="#">Bckdha</a> | <a href="#">Bckdha.cSep08</a> | <a href="#">25244</a>  | 1589   | 718  | 4  | 233 | branched chain ketoacid dehydrogenase E1, alpha polypeptide (Bckdha) alternative variant cSep08, mRNA. |
| <a href="#">Bckdha</a> | <a href="#">Bckdha.dSep08</a> | <a href="#">25244</a>  | 9893   | 693  | 4  | 167 | branched chain ketoacid dehydrogenase E1, alpha polypeptide (Bckdha) alternative variant dSep08, mRNA. |
| <a href="#">Bckdk</a>  | <a href="#">Bckdk.bSep08</a>  | <a href="#">29603</a>  | 4277   | 1577 | 10 | 365 | branched chain ketoacid dehydrogenase kinase (41.2 kD) (Bckdk) alternative variant bSep08, mRNA.       |

|                         |                                |                        |       |      |   |     |                                                                                                    |
|-------------------------|--------------------------------|------------------------|-------|------|---|-----|----------------------------------------------------------------------------------------------------|
| <a href="#">Bckdk</a>   | <a href="#">Bckdk.cSep08</a>   | <a href="#">29603</a>  | 2911  | 957  | 7 | 248 | branched chain ketoacid dehydrogenase kinase (Bckdk) alternative variant cSep08, mRNA.             |
| <a href="#">Bckdk</a>   | <a href="#">Bckdk.dSep08</a>   | <a href="#">29603</a>  | 892   | 502  | 2 | 98  | branched chain ketoacid dehydrogenase kinase (Bckdk) alternative variant dSep08, mRNA.             |
| <a href="#">Bcl2l1</a>  | <a href="#">Bcl2l1.dSep08</a>  | <a href="#">24888</a>  | 1241  | 976  | 2 | 62  | bcl2-like 1 (7.1 kD) (Bcl2l1) alternative variant dSep08, mRNA.                                    |
| <a href="#">Bcl2l2</a>  | <a href="#">Bcl2l2.cSep08</a>  | <a href="#">60434</a>  | 1066  | 510  | 3 | 64  | bcl2-like 2 (Bcl2l2) alternative variant cSep08, mRNA.                                             |
| <a href="#">Bcl2l2</a>  | <a href="#">Bcl2l2.dSep08</a>  | <a href="#">60434</a>  | 702   | 417  | 2 | 45  | bcl2-like 2 (Bcl2l2) alternative variant dSep08, mRNA.                                             |
| <a href="#">Bcl2l12</a> | <a href="#">Bcl2l12.bSep08</a> | <a href="#">361567</a> | 3286  | 662  | 3 | 173 | BCL2-like 12 (proline rich) (Bcl2l12) alternative variant bSep08, mRNA.                            |
| <a href="#">Bcl2l12</a> | <a href="#">Bcl2l12.cSep08</a> | <a href="#">361567</a> | 3076  | 637  | 3 | 165 | BCL2-like 12 (proline rich) (Bcl2l12) alternative variant cSep08, mRNA.                            |
| <a href="#">Bcl2l12</a> | <a href="#">Bcl2l12.eSep08</a> | <a href="#">361567</a> | 6075  | 449  | 4 | 110 | BCL2-like 12 (proline rich) (Bcl2l12) alternative variant eSep08, mRNA.                            |
| <a href="#">Bcl2l13</a> | <a href="#">Bcl2l13.aSep08</a> | <a href="#">312682</a> | 42812 | 2877 | 2 | 444 | BCL2-like 13 (apoptosis facilitator) (Bcl2l13) alternative variant aSep08, mRNA.                   |
| <a href="#">Bcl2l14</a> | <a href="#">Bcl2l14.bSep08</a> | <a href="#">500348</a> | 3621  | 774  | 3 | 55  | bcl2-like 14 (apoptosis facilitator) (6.1 kD) (Bcl2l14) alternative variant bSep08, mRNA.          |
| <a href="#">Bcl2l14</a> | <a href="#">Bcl2l14.cSep08</a> | <a href="#">500348</a> | 39980 | 558  | 3 | 18  | bcl2-like 14 (apoptosis facilitator) (Bcl2l14) alternative variant cSep08, mRNA.                   |
| <a href="#">Bcl2l14</a> | <a href="#">Bcl2l14.dSep08</a> | <a href="#">500348</a> | 8665  | 394  | 2 | 58  | bcl2-like 14 (apoptosis facilitator) (Bcl2l14) alternative variant dSep08, mRNA.                   |
| <a href="#">Bcl3</a>    | <a href="#">Bcl3.bSep08</a>    | <a href="#">680611</a> | 1991  | 590  | 2 | 96  | B-cell leukemia/lymphoma 3 (Bcl3) alternative variant bSep08, mRNA.                                |
| <a href="#">Bcl3</a>    | <a href="#">Bcl3.cSep08</a>    | <a href="#">680611</a> | 2627  | 617  | 2 | 83  | B-cell leukemia/lymphoma 3 (Bcl3) alternative variant cSep08, mRNA.                                |
| <a href="#">Bcl6b</a>   | <a href="#">Bcl6b.bSep08</a>   | <a href="#">360551</a> | 4487  | 976  | 3 | 209 | B-cell CLL/lymphoma 6, member B (Bcl6b) alternative variant bSep08, mRNA.                          |
| <a href="#">Bcl7b</a>   | <a href="#">Bcl7b.bSep08</a>   | <a href="#">368001</a> | 4768  | 1525 | 1 | 126 | B-cell CLL/lymphoma 7B (Bcl7b) alternative variant bSep08, mRNA.                                   |
| <a href="#">Bcl7c</a>   | <a href="#">Bcl7c.bSep08</a>   | <a href="#">293514</a> | 2560  | 545  | 4 | 157 | B-cell CLL/lymphoma 7C (Bcl7c) alternative variant bSep08, mRNA.                                   |
| <a href="#">Bcl7c</a>   | <a href="#">Bcl7c.cSep08</a>   | <a href="#">293514</a> | 1325  | 372  | 4 | 123 | B-cell CLL/lymphoma 7C (Bcl7c) alternative variant cSep08, mRNA.                                   |
| <a href="#">Bcl9</a>    | <a href="#">Bcl9.bSep08</a>    | <a href="#">310704</a> | 7040  | 4774 | 1 | 628 | B-cell CLL/lymphoma 9 (64.3 kD) (Bcl9) alternative variant bSep08, mRNA.                           |
| <a href="#">Bcl10</a>   | <a href="#">Bcl10.cSep08</a>   | <a href="#">83477</a>  | 8616  | 350  | 2 | 33  | B-cell leukemia/lymphoma 10 (3.7 kD) (Bcl10) alternative variant cSep08, mRNA.                     |
| <a href="#">Bcl11a</a>  | <a href="#">Bcl11a.aSep08</a>  | <a href="#">305589</a> | 93720 | 1486 | 5 | 240 | B-cell CLL/lymphoma 11A (zinc finger protein) (26.4 kD) (Bcl11a) alternative variant aSep08, mRNA. |
| <a href="#">Bcl11a</a>  | <a href="#">Bcl11a.cSep08</a>  | <a href="#">305589</a> | 86203 | 617  | 2 | 64  | B-cell CLL/lymphoma 11A (zinc finger protein) (Bcl11a) alternative variant cSep08, mRNA.           |
| <a href="#">Bcl11a</a>  | <a href="#">Bcl11a.dSep08</a>  | <a href="#">305589</a> | 8486  | 597  | 2 | 60  | B-cell CLL/lymphoma 11A (zinc finger protein) (Bcl11a) alternative variant dSep08, mRNA.           |
| <a href="#">Bcl11b</a>  | <a href="#">Bcl11b.bSep08</a>  | <a href="#">314423</a> | 76178 | 2567 | 3 | 796 | B-cell leukemia/lymphoma 11B (Bcl11b) alternative variant bSep08, mRNA.                            |

|                        |                               |                        |       |      |    |      |                                                                                            |
|------------------------|-------------------------------|------------------------|-------|------|----|------|--------------------------------------------------------------------------------------------|
| <a href="#">Bclaf1</a> | <a href="#">Bclaf1.bSep08</a> | <a href="#">293017</a> | 10884 | 819  | 4  | 216  | transcription factor 1 (Bclaf1) alternative variant bSep08, mRNA.                          |
| <a href="#">Bclaf1</a> | <a href="#">Bclaf1.cSep08</a> | <a href="#">293017</a> | 7584  | 632  | 5  | 210  | transcription factor 1 (Bclaf1) alternative variant cSep08, mRNA.                          |
| <a href="#">Bclaf1</a> | <a href="#">Bclaf1.dSep08</a> | <a href="#">293017</a> | 14418 | 4603 | 7  | 129  | transcription factor 1 (15.4 kD) (Bclaf1) alternative variant dSep08, mRNA.                |
| <a href="#">Bclaf1</a> | <a href="#">Bclaf1.eSep08</a> | <a href="#">293017</a> | 6114  | 742  | 3  | 89   | transcription factor 1 (10.5 kD) (Bclaf1) alternative variant eSep08, mRNA.                |
| <a href="#">Bclaf1</a> | <a href="#">Bclaf1.fSep08</a> | <a href="#">293017</a> | 10655 | 492  | 3  | 83   | aa2-041 like (Bclaf1) alternative variant fSep08, mRNA.                                    |
| <a href="#">Bclaf1</a> | <a href="#">Bclaf1.gSep08</a> | <a href="#">293017</a> | 6497  | 565  | 4  | 54   | putative protein (Bclaf1) alternative variant gSep08, mRNA.                                |
| <a href="#">Bclaf1</a> | <a href="#">Bclaf1.hSep08</a> | <a href="#">293017</a> | 6793  | 543  | 4  | 34   | transcription factor 1 like (Bclaf1) alternative variant hSep08, mRNA.                     |
| <a href="#">Bclaf1</a> | <a href="#">Bclaf1.iSep08</a> | <a href="#">293017</a> | 9825  | 485  | 2  | 46   | putative protein (Bclaf1) alternative variant iSep08, mRNA.                                |
| <a href="#">Bco2</a>   | <a href="#">Bco2.bSep08</a>   | <a href="#">315644</a> | 1644  | 682  | 1  | 87   | beta-carotene oxygenase 2 (Bco2) alternative variant bSep08, mRNA.                         |
| <a href="#">Bcor</a>   | <a href="#">Bcor.aSep08</a>   | <a href="#">317346</a> | 20179 | 4396 | 1  | 1175 | bcl6 interacting corepressor (Bcor) alternative variant aSep08, mRNA.                      |
| <a href="#">Bcor</a>   | <a href="#">Bcor.bSep08</a>   | <a href="#">317346</a> | 1736  | 723  | 1  | 241  | bcl6 interacting corepressor (Bcor) alternative variant bSep08, mRNA.                      |
| <a href="#">Bcorl1</a> | <a href="#">Bcorl1.aSep08</a> | <a href="#">302810</a> | 30093 | 3532 |    | 552  | BCL6 co-repressor-like 1 (Bcorl1) mRNA.                                                    |
| <a href="#">Bcr</a>    | <a href="#">Bcr.aSep08</a>    | <a href="#">309696</a> | 48003 | 1783 |    | 472  | breakpoint cluster region homolog (Bcr) alternative variant aSep08, mRNA.                  |
| <a href="#">Bcr</a>    | <a href="#">Bcr.bSep08</a>    | <a href="#">309696</a> | 25951 | 1177 |    | 389  | breakpoint cluster region homolog (Bcr) alternative variant bSep08, mRNA.                  |
| <a href="#">Bcr</a>    | <a href="#">Bcr.cSep08</a>    | <a href="#">309696</a> | 9314  | 1665 | 1  | 307  | breakpoint cluster region homolog (Bcr) alternative variant cSep08, mRNA.                  |
| <a href="#">Bcr</a>    | <a href="#">Bcr.dSep08</a>    | <a href="#">309696</a> | 8270  | 1077 | 1  | 282  | breakpoint cluster region homolog (Bcr) alternative variant dSep08, mRNA.                  |
| <a href="#">Bcr</a>    | <a href="#">Bcr.eSep08</a>    | <a href="#">309696</a> | 14421 | 405  | 2  | 135  | breakpoint cluster region homolog (Bcr) alternative variant eSep08, mRNA.                  |
| <a href="#">Bdh1</a>   | <a href="#">Bdh1.bSep08</a>   | <a href="#">117099</a> | 41950 | 3061 | 9  | 344  | 3-hydroxybutyrate dehydrogenase, type 1 (38.3 kD) (Bdh1) alternative variant bSep08, mRNA. |
| <a href="#">Bdh1</a>   | <a href="#">Bdh1.cSep08</a>   | <a href="#">117099</a> | 38057 | 769  | 6  | 185  | 3-hydroxybutyrate dehydrogenase, type 1 (Bdh1) alternative variant cSep08, mRNA.           |
| <a href="#">Bdh1</a>   | <a href="#">Bdh1.dSep08</a>   | <a href="#">117099</a> | 2406  | 727  | 2  | 176  | 3-hydroxybutyrate dehydrogenase, type 1 (Bdh1) alternative variant dSep08, mRNA.           |
| <a href="#">Bdh1</a>   | <a href="#">Bdh1.eSep08</a>   | <a href="#">117099</a> | 32581 | 719  | 6  | 152  | 3-hydroxybutyrate dehydrogenase, type 1 (Bdh1) alternative variant eSep08, mRNA.           |
| <a href="#">Bdh2</a>   | <a href="#">Bdh2.bSep08</a>   | <a href="#">295458</a> | 20541 | 1069 | 10 | 228  | 3-hydroxybutyrate dehydrogenase, type 2 (24.8 kD) (Bdh2) alternative variant bSep08, mRNA. |
| <a href="#">Bdh2</a>   | <a href="#">Bdh2.cSep08</a>   | <a href="#">295458</a> | 2392  | 733  | 2  | 71   | 3-hydroxybutyrate dehydrogenase, type 2 (Bdh2) alternative variant cSep08, mRNA.           |
| <a href="#">Bdnf</a>   | <a href="#">Bdnf.aSep08</a>   | <a href="#">24225</a>  | 31261 | 4006 | 2  | 362  | brain derived neurotrophic factor (40.6 kD) (Bdnf) alternative variant aSep08, mRNA.       |
| <a href="#">Bdnf</a>   | <a href="#">Bdnf.dSep08</a>   | <a href="#">24225</a>  | 16132 | 3890 | 2  | 249  | brain derived neurotrophic factor (28.1 kD) (Bdnf) alternative variant dSep08, mRNA.       |

|                         |                                |                        |       |      |   |     |                                                                                                                                         |
|-------------------------|--------------------------------|------------------------|-------|------|---|-----|-----------------------------------------------------------------------------------------------------------------------------------------|
| <a href="#">Bdnf</a>    | <a href="#">Bdnf.eSep08</a>    | <a href="#">24225</a>  | 31723 | 3694 | 2 | 249 | brain derived neurotrophic factor (28.1 kD) (Bdnf) alternative variant eSep08, mRNA.                                                    |
| <a href="#">Bdnf</a>    | <a href="#">Bdnf.fSep08</a>    | <a href="#">24225</a>  | 48197 | 3839 | 2 | 249 | brain derived neurotrophic factor (28.1 kD) (Bdnf) alternative variant fSep08, mRNA.                                                    |
| <a href="#">Bdnf</a>    | <a href="#">Bdnf.gSep08</a>    | <a href="#">24225</a>  | 32310 | 3953 | 2 | 249 | brain derived neurotrophic factor (28.1 kD) (Bdnf) alternative variant gSep08, mRNA.                                                    |
| <a href="#">Bdnf</a>    | <a href="#">Bdnf.hSep08</a>    | <a href="#">24225</a>  | 49333 | 4112 | 2 | 249 | brain derived neurotrophic factor (28.1 kD) (Bdnf) alternative variant hSep08, complete mRNA.                                           |
| <a href="#">Bdnf</a>    | <a href="#">Bdnf.iSep08</a>    | <a href="#">24225</a>  | 49333 | 4029 | 2 | 249 | brain derived neurotrophic factor (28.1 kD) (Bdnf) alternative variant iSep08, complete mRNA.                                           |
| <a href="#">Bdnf</a>    | <a href="#">Bdnf.jSep08</a>    | <a href="#">24225</a>  | 49333 | 3817 | 2 | 249 | brain derived neurotrophic factor (28.1 kD) (Bdnf) alternative variant jSep08, complete mRNA.                                           |
| <a href="#">Bdp1</a>    | <a href="#">Bdp1.bSep08</a>    | <a href="#">294687</a> | 12615 | 1253 | 6 | 310 | B double prime 1, subunit of RNA polymerase III transcription initiation factor IIIB (34.2 kD) (Bdp1) alternative variant bSep08, mRNA. |
| <a href="#">Bdp1</a>    | <a href="#">Bdp1.cSep08</a>    | <a href="#">294687</a> | 20354 | 537  | 6 | 179 | B double prime 1, subunit of RNA polymerase III transcription initiation factor IIIB (Bdp1) alternative variant cSep08, mRNA.           |
| <a href="#">Bdp1</a>    | <a href="#">Bdp1.dSep08</a>    | <a href="#">294687</a> | 6110  | 269  | 3 | 29  | B double prime 1, subunit of RNA polymerase III transcription initiation factor IIIB (Bdp1) alternative variant dSep08, mRNA.           |
| <a href="#">Beach.0</a> | <a href="#">Beach.0.aSep08</a> |                        | 8114  | 893  |   | 259 | beige/BEACH (Beach.0) mRNA.                                                                                                             |
| <a href="#">Beach.1</a> | <a href="#">Beach.1.aSep08</a> |                        | 5094  | 395  |   | 131 | neurobeachin like 1 (Beach.1) mRNA.                                                                                                     |
| <a href="#">Beach.2</a> | <a href="#">Beach.2.aSep08</a> |                        | 958   | 472  | 4 | 156 | CRA a (Beach.2) alternative variant aSep08, mRNA.                                                                                       |
| <a href="#">Beach.3</a> | <a href="#">Beach.3.aSep08</a> |                        | 16416 | 421  |   | 119 | neurobeachin (Beach.3) mRNA.                                                                                                            |
| <a href="#">Beach.4</a> | <a href="#">Beach.4.aSep08</a> |                        | 37279 | 413  |   | 137 | neurobeachin (Beach.4) mRNA.                                                                                                            |
| <a href="#">Bean</a>    | <a href="#">Bean.aSep08</a>    | <a href="#">361358</a> | 35411 | 2617 | 3 | 222 | brain expressed, associated with Nedd4 (24.5 kD) (Bean) alternative variant aSep08, mRNA.                                               |
| <a href="#">Bean</a>    | <a href="#">Bean.bSep08</a>    | <a href="#">361358</a> | 38703 | 395  | 1 | 131 | brain expressed, associated with Nedd4 (Bean) alternative variant bSep08, mRNA.                                                         |
| <a href="#">Becn1</a>   | <a href="#">Becn1.cSep08</a>   | <a href="#">114558</a> | 1649  | 729  | 3 | 156 | beclin 1, autophagy related (Becn1) alternative variant cSep08, mRNA.                                                                   |
| <a href="#">Becn1</a>   | <a href="#">Becn1.dSep08</a>   | <a href="#">114558</a> | 7959  | 695  | 5 | 116 | beclin 1, autophagy related (12.8 kD) (Becn1) alternative variant dSep08, mRNA.                                                         |
| <a href="#">Becn1</a>   | <a href="#">Becn1.eSep08</a>   | <a href="#">114558</a> | 4069  | 821  | 3 | 107 | beclin 1, autophagy related (Becn1) alternative variant eSep08, mRNA.                                                                   |
| <a href="#">Becn1</a>   | <a href="#">Becn1.fSep08</a>   | <a href="#">114558</a> | 7293  | 428  | 4 | 95  | beclin 1, autophagy related (Becn1) alternative variant fSep08, mRNA.                                                                   |
| <a href="#">Becn1</a>   | <a href="#">Becn1.hSep08</a>   | <a href="#">114558</a> | 7304  | 371  | 3 | 46  | beclin 1, autophagy related (5.1 kD) (Becn1) alternative variant hSep08, complete mRNA.                                                 |
| <a href="#">beeby</a>   | <a href="#">beeby.aSep08</a>   |                        | 14331 | 1190 |   | 396 | THO complex 2 (beeby) mRNA.                                                                                                             |
| <a href="#">beechy</a>  | <a href="#">beechy.aSep08</a>  |                        | 5715  | 766  |   | 41  | putative protein (5.0 kD) (beechy) mRNA.                                                                                                |
| <a href="#">beefef</a>  | <a href="#">beefef.aSep08</a>  |                        | 10266 | 268  |   | 52  | putative protein (6.0 kD) (beefef) mRNA.                                                                                                |
| <a href="#">beeflo</a>  | <a href="#">beeflo.aSep08</a>  |                        | 19759 | 369  |   | 63  | putative protein of mammalian origin (7.0 kD) (beeflo) mRNA.                                                                            |
| <a href="#">beeflu</a>  | <a href="#">beeflu.aSep08</a>  |                        | 5125  | 653  |   | 75  | putative protein (beeflu) mRNA.                                                                                                         |

|                         |                                |                       |       |      |    |     |                                                                                                 |
|-------------------------|--------------------------------|-----------------------|-------|------|----|-----|-------------------------------------------------------------------------------------------------|
| <a href="#">beekee</a>  | <a href="#">beekee.aSep08</a>  |                       | 6179  | 758  |    | 63  | putative protein (beekee) mRNA.                                                                 |
| <a href="#">beeloy</a>  | <a href="#">beeloy.aSep08</a>  |                       | 1195  | 418  |    | 64  | putative protein (beeloy) mRNA.                                                                 |
| <a href="#">beemer</a>  | <a href="#">beemer.aSep08</a>  |                       | 5263  | 963  |    | 321 | rho GTPase activating protein 23 (beemer) alternative variant aSep08, mRNA.                     |
| <a href="#">beemer</a>  | <a href="#">beemer.bSep08</a>  |                       | 4735  | 434  |    | 144 | rho GTPase activating protein 23 (beemer) alternative variant bSep08, mRNA.                     |
| <a href="#">beenoy</a>  | <a href="#">beenoy.aSep08</a>  |                       | 435   | 258  |    | 79  | putative protein (beenoy) mRNA.                                                                 |
| <a href="#">beepor</a>  | <a href="#">beepor.aSep08</a>  |                       | 2190  | 536  |    | 91  | putative protein (beepor) mRNA.                                                                 |
| <a href="#">beesa</a>   | <a href="#">beesa.aSep08</a>   |                       | 1794  | 381  |    | 126 | low density lipoprotein-related protein 1B (beesa) mRNA.                                        |
| <a href="#">beeshee</a> | <a href="#">beeshee.aSep08</a> |                       | 14645 | 373  |    | 89  | putative mitochondrial protein (10.0 kD) (beeshee) mRNA.                                        |
| <a href="#">beeto</a>   | <a href="#">beeto.aSep08</a>   |                       | 2441  | 1336 | 2  | 72  | putative protein (8.2 kD) (beeto) alternative variant aSep08, mRNA.                             |
| <a href="#">beeto</a>   | <a href="#">beeto.bSep08</a>   |                       | 2137  | 531  | 3  | 48  | putative protein (beeto) alternative variant bSep08, mRNA.                                      |
| <a href="#">beeto</a>   | <a href="#">beeto.cSep08</a>   |                       | 15844 | 893  | 3  | 39  | putative protein (beeto) alternative variant cSep08, mRNA.                                      |
| <a href="#">beeto</a>   | <a href="#">beeto.dSep08</a>   |                       | 15644 | 3017 | 8  | 91  | putative protein (10.7 kD) (beeto) alternative variant dSep08, mRNA.                            |
| <a href="#">beeto</a>   | <a href="#">beeto.eSep08</a>   |                       | 3230  | 1617 | 3  | 89  | putative cytoplasmic protein (10.5 kD) (beeto) alternative variant eSep08, mRNA.                |
| <a href="#">beeto</a>   | <a href="#">beeto.fSep08</a>   |                       | 42420 | 1522 | 12 |     |                                                                                                 |
| <a href="#">beeto</a>   | <a href="#">beeto.gSep08</a>   |                       | 8862  | 1004 | 5  | 47  | putative protein (beeto) alternative variant gSep08, mRNA.                                      |
| <a href="#">beeto</a>   | <a href="#">beeto.iSep08</a>   |                       | 26150 | 553  | 4  | 38  | putative protein (4.2 kD) (beeto) alternative variant iSep08, mRNA.                             |
| <a href="#">beeto</a>   | <a href="#">beeto.kSep08</a>   |                       | 21841 | 459  | 5  | 34  | putative protein (beeto) alternative variant kSep08, mRNA.                                      |
| <a href="#">beeto</a>   | <a href="#">beeto.lSep08</a>   |                       | 14296 | 239  | 3  | 23  | putative protein (beeto) alternative variant lSep08, mRNA.                                      |
| <a href="#">beeto</a>   | <a href="#">beeto.mSep08</a>   |                       | 914   | 113  | 2  | 37  | putative protein (beeto) alternative variant mSep08, mRNA.                                      |
| <a href="#">beevar</a>  | <a href="#">beevar.aSep08</a>  |                       | 19947 | 432  |    | 107 | putative protein (beevar) mRNA.                                                                 |
| <a href="#">beewey</a>  | <a href="#">beewey.aSep08</a>  |                       | 2021  | 438  |    | 96  | putative protein of metazoan origin (beewey) mRNA.                                              |
| <a href="#">Begain</a>  | <a href="#">Begain.bSep08</a>  | <a href="#">79146</a> | 5064  | 2537 | 3  | 501 | brain-enriched guanylate kinase-associated (53.7 kD) (Begain) alternative variant bSep08, mRNA. |
| <a href="#">Begain</a>  | <a href="#">Begain.eSep08</a>  | <a href="#">79146</a> | 1944  | 402  | 2  | 103 | brain-enriched guanylate kinase-associated (Begain) alternative variant eSep08, mRNA.           |
| <a href="#">berby</a>   | <a href="#">berby.aSep08</a>   |                       | 1169  | 514  |    | 115 | putative protein, with a coiled coil domain, of mammalian origin (berby) mRNA.                  |
| <a href="#">berchy</a>  | <a href="#">berchy.aSep08</a>  |                       | 5535  | 261  |    | 28  | putative protein (berchy) mRNA.                                                                 |
| <a href="#">berfer</a>  | <a href="#">berfer.aSep08</a>  |                       | 11799 | 865  |    | 55  | putative protein (6.5 kD) (berfer) mRNA.                                                        |
| <a href="#">berflo</a>  | <a href="#">berflo.aSep08</a>  |                       | 20285 | 427  | 3  | 82  | putative protein of mammalian origin (berflo) alternative variant aSep08, mRNA.                 |
| <a href="#">berflo</a>  | <a href="#">berflo.bSep08</a>  |                       | 29918 | 279  | 1  | 74  | putative protein (berflo) alternative variant bSep08, mRNA.                                     |
| <a href="#">berflu</a>  | <a href="#">berflu.aSep08</a>  |                       | 8492  | 307  |    | 47  | zinc finger protein 585b (berflu) mRNA.                                                         |
| <a href="#">berkee</a>  | <a href="#">berkee.aSep08</a>  |                       | 2347  | 1100 |    | 42  | putative protein (berkee) mRNA.                                                                 |
| <a href="#">berloy</a>  | <a href="#">berloy.aSep08</a>  |                       | 43372 | 560  |    | 186 | putative protein of mammalian origin (berloy) mRNA.                                             |
| <a href="#">bermer</a>  | <a href="#">bermer.aSep08</a>  |                       | 1392  | 559  |    | 115 | putative protein (bermer) mRNA.                                                                 |
| <a href="#">bernoy</a>  | <a href="#">bernoy.aSep08</a>  |                       | 9002  | 858  |    | 245 | type IX alpha 1 (bernoy) mRNA.                                                                  |

|                         |                                |                        |        |      |   |     |                                                                                                                  |
|-------------------------|--------------------------------|------------------------|--------|------|---|-----|------------------------------------------------------------------------------------------------------------------|
| <a href="#">berpor</a>  | <a href="#">berpor.aSep08</a>  |                        | 484    | 410  |   | 109 | putative protein of metazoan origin (berpor) mRNA.                                                               |
| <a href="#">bersa</a>   | <a href="#">bersa.aSep08</a>   |                        | 2433   | 800  |   | 266 | myosin-ia (bersa) mRNA.                                                                                          |
| <a href="#">bershee</a> | <a href="#">bershee.aSep08</a> |                        | 8059   | 584  |   | 49  | putative protein (bershee) mRNA.                                                                                 |
| <a href="#">berto</a>   | <a href="#">berto.aSep08</a>   |                        | 4030   | 548  |   | 89  | CRA a like (9.9 kD) (berto) mRNA.                                                                                |
| <a href="#">bervar</a>  | <a href="#">bervar.aSep08</a>  |                        | 3839   | 477  |   | 158 | ubiquitin 24 (bervar) mRNA.                                                                                      |
| <a href="#">berwey</a>  | <a href="#">berwey.aSep08</a>  |                        | 68738  | 406  | 2 | 83  | putative protein (9.6 kD) (berwey) alternative variant aSep08, mRNA.                                             |
| <a href="#">berwey</a>  | <a href="#">berwey.bSep08</a>  |                        | 239423 | 1443 | 5 | 65  | putative protein (berwey) alternative variant bSep08, mRNA.                                                      |
| <a href="#">Bet1</a>    | <a href="#">Bet1.bSep08</a>    | <a href="#">29631</a>  | 9368   | 626  | 5 | 96  | blocked early in transport 1 homolog (S. cerevisiae) (10.7 kD) (Bet1) alternative variant bSep08, complete mRNA. |
| <a href="#">Bet1</a>    | <a href="#">Bet1.cSep08</a>    | <a href="#">29631</a>  | 9586   | 787  | 5 | 77  | blocked early in transport 1 homolog (S. cerevisiae) (8.6 kD) (Bet1) alternative variant cSep08, complete mRNA.  |
| <a href="#">Bet1</a>    | <a href="#">Bet1.dSep08</a>    | <a href="#">29631</a>  | 9596   | 689  | 4 | 73  | blocked early in transport 1 homolog (S. cerevisiae) (8.0 kD) (Bet1) alternative variant dSep08, mRNA.           |
| <a href="#">Bet1</a>    | <a href="#">Bet1.eSep08</a>    | <a href="#">29631</a>  | 10351  | 1396 | 4 | 52  | blocked early in transport 1 homolog (S. cerevisiae) (6.1 kD) (Bet1) alternative variant eSep08, complete mRNA.  |
| <a href="#">Bet1l</a>   | <a href="#">Bet1l.aSep08</a>   | <a href="#">54400</a>  | 2172   | 774  | 2 | 125 | blocked early in transport 1 homolog (S. cerevisiae) like (Bet1l) alternative variant aSep08, mRNA.              |
| <a href="#">beyby</a>   | <a href="#">beyby.aSep08</a>   |                        | 1377   | 403  | 3 | 116 | upf3 regulator of nonsense transcripts homolog B (beyby) alternative variant aSep08, mRNA.                       |
| <a href="#">beychy</a>  | <a href="#">beychy.aSep08</a>  |                        | 1049   | 549  |   | 90  | putative protein (beychy) mRNA.                                                                                  |
| <a href="#">beyfer</a>  | <a href="#">beyfer.aSep08</a>  |                        | 33959  | 626  |   | 93  | putative cytoplasmic protein (10.7 kD) (beyfer) mRNA.                                                            |
| <a href="#">beyflo</a>  | <a href="#">beyflo.aSep08</a>  |                        | 1220   | 706  |   | 53  | putative protein (beyflo) mRNA.                                                                                  |
| <a href="#">beyflu</a>  | <a href="#">beyflu.aSep08</a>  |                        | 9733   | 461  | 4 | 33  | putative protein (beyflu) alternative variant aSep08, mRNA.                                                      |
| <a href="#">beyflu</a>  | <a href="#">beyflu.cSep08</a>  |                        | 2463   | 242  | 2 | 29  | putative protein (beyflu) alternative variant cSep08, mRNA.                                                      |
| <a href="#">beykee</a>  | <a href="#">beykee.aSep08</a>  |                        | 2187   | 656  |   | 66  | contactin associated protein-like 5C (7.5 kD) (beykee) mRNA.                                                     |
| <a href="#">beyloy</a>  | <a href="#">beyloy.aSep08</a>  |                        | 4679   | 1349 |   | 61  | putative protein (7.2 kD) (beyloy) mRNA.                                                                         |
| <a href="#">beymer</a>  | <a href="#">beymer.aSep08</a>  |                        | 6819   | 401  |   | 88  | putative protein (beymer) mRNA.                                                                                  |
| <a href="#">beynoy</a>  | <a href="#">beynoy.aSep08</a>  |                        | 555    | 377  |   | 55  | putative protein (6.4 kD) (beynoy) mRNA.                                                                         |
| <a href="#">beypor</a>  | <a href="#">beypor.aSep08</a>  |                        | 1861   | 620  |   | 64  | putative protein (7.2 kD) (beypor) mRNA.                                                                         |
| <a href="#">beysa</a>   | <a href="#">beysa.aSep08</a>   |                        | 2879   | 400  |   | 54  | putative protein (5.8 kD) (beysa) mRNA.                                                                          |
| <a href="#">beyshee</a> | <a href="#">beyshee.aSep08</a> |                        | 1505   | 284  |   | 60  | putative protein (beyshee) mRNA.                                                                                 |
| <a href="#">beyto</a>   | <a href="#">beyto.aSep08</a>   |                        | 1546   | 732  |   | 56  | CRA b like (6.2 kD) (beyto) mRNA.                                                                                |
| <a href="#">beyvar</a>  | <a href="#">beyvar.aSep08</a>  |                        | 7835   | 748  |   | 44  | putative protein (beyvar) mRNA.                                                                                  |
| <a href="#">beywey</a>  | <a href="#">beywey.aSep08</a>  |                        | 10799  | 372  |   | 37  | putative protein (beywey) mRNA.                                                                                  |
| <a href="#">Bfar</a>    | <a href="#">Bfar.bSep08</a>    | <a href="#">304709</a> | 6033   | 942  | 2 | 147 | bifunctional apoptosis regulator (17.8 kD) (Bfar) alternative variant bSep08, mRNA.                              |
| <a href="#">Bgn</a>     | <a href="#">Bgn.bSep08</a>     | <a href="#">25181</a>  | 2836   | 1099 | 5 | 239 | biglycan (Bgn) alternative variant bSep08, mRNA.                                                                 |
| <a href="#">Bgn</a>     | <a href="#">Bgn.cSep08</a>     | <a href="#">25181</a>  | 5529   | 763  | 3 | 141 | biglycan (Bgn) alternative variant cSep08, mRNA.                                                                 |
| <a href="#">Bhlhb2</a>  | <a href="#">Bhlhb2.bSep08</a>  | <a href="#">79431</a>  | 3487   | 1512 |   | 291 | orange (Bhlhb2) alternative variant bSep08, mRNA.                                                                |
| <a href="#">Bhlhb9</a>  | <a href="#">Bhlhb9.bSep08</a>  | <a href="#">317407</a> | 1777   | 614  | 3 | 52  | putative protein (Bhlhb9) alternative variant bSep08, mRNA.                                                      |



|                       |                              |                        |       |      |    |     |                                                                                         |
|-----------------------|------------------------------|------------------------|-------|------|----|-----|-----------------------------------------------------------------------------------------|
| <a href="#">Bhmt2</a> | <a href="#">Bhmt2.bSep08</a> | <a href="#">365972</a> | 6175  | 1615 |    | 245 | betaine-homocysteine methyltransferase 2 (Bhmt2) alternative variant bSep08, mRNA.      |
| <a href="#">Bicd1</a> | <a href="#">Bicd1.bSep08</a> | <a href="#">362466</a> | 2946  | 690  | 2  | 149 | bicaudal D homolog 1 (Drosophila) (Bicd1) alternative variant bSep08, mRNA.             |
| <a href="#">Bicd2</a> | <a href="#">Bicd2.bSep08</a> | <a href="#">306809</a> | 6989  | 710  | 4  | 182 | bicaudal D homolog 2 (Drosophila) (Bicd2) alternative variant bSep08, mRNA.             |
| <a href="#">Bin1</a>  | <a href="#">Bin1.aSep08</a>  | <a href="#">117028</a> | 59536 | 2391 | 18 | 557 | bridging integrator 1 (61.1 kD) (Bin1) alternative variant aSep08, mRNA.                |
| <a href="#">Bin1</a>  | <a href="#">Bin1.bSep08</a>  | <a href="#">117028</a> | 35669 | 1139 | 12 | 340 | bridging integrator 1 (Bin1) alternative variant bSep08, mRNA.                          |
| <a href="#">Bin1</a>  | <a href="#">Bin1.cSep08</a>  | <a href="#">117028</a> | 35885 | 1249 | 13 | 325 | bridging integrator 1 (Bin1) alternative variant cSep08, mRNA.                          |
| <a href="#">Bin1</a>  | <a href="#">Bin1.dSep08</a>  | <a href="#">117028</a> | 24849 | 1164 | 9  | 311 | bridging integrator 1 (Bin1) alternative variant dSep08, mRNA.                          |
| <a href="#">Bin1</a>  | <a href="#">Bin1.eSep08</a>  | <a href="#">117028</a> | 22880 | 852  | 8  | 263 | bridging integrator 1 (Bin1) alternative variant eSep08, mRNA.                          |
| <a href="#">Bin1</a>  | <a href="#">Bin1.fSep08</a>  | <a href="#">117028</a> | 20834 | 986  | 11 | 260 | bridging integrator 1 (Bin1) alternative variant fSep08, mRNA.                          |
| <a href="#">Bin1</a>  | <a href="#">Bin1.gSep08</a>  | <a href="#">117028</a> | 5864  | 413  | 5  | 137 | bridging integrator 1 (Bin1) alternative variant gSep08, mRNA.                          |
| <a href="#">Bin1</a>  | <a href="#">Bin1.iSep08</a>  | <a href="#">117028</a> | 5270  | 2105 | 3  | 72  | bridging integrator 1 (8.4 kD) (Bin1) alternative variant iSep08, mRNA.                 |
| <a href="#">Bin2</a>  | <a href="#">Bin2.bSep08</a>  | <a href="#">366988</a> | 20978 | 737  | 9  | 238 | bridging integrator 2 (Bin2) alternative variant bSep08, mRNA.                          |
| <a href="#">Bin2</a>  | <a href="#">Bin2.dSep08</a>  | <a href="#">366988</a> | 12966 | 465  | 5  | 150 | bridging integrator 2 (Bin2) alternative variant dSep08, mRNA.                          |
| <a href="#">Bin2a</a> | <a href="#">Bin2a.bSep08</a> | <a href="#">494244</a> | 24939 | 657  | 5  | 170 | beta-galactosidase-like protein (Bin2a) alternative variant bSep08, mRNA.               |
| <a href="#">Bin2a</a> | <a href="#">Bin2a.cSep08</a> | <a href="#">494244</a> | 2659  | 402  | 2  | 51  | beta-galactosidase-like protein (Bin2a) alternative variant cSep08, mRNA.               |
| <a href="#">Bin3</a>  | <a href="#">Bin3.bSep08</a>  | <a href="#">361065</a> | 38037 | 747  | 8  | 213 | bridging integrator 3 (Bin3) alternative variant bSep08, mRNA.                          |
| <a href="#">Bin3</a>  | <a href="#">Bin3.cSep08</a>  | <a href="#">361065</a> | 11127 | 832  | 5  | 198 | bridging integrator 3 (Bin3) alternative variant cSep08, mRNA.                          |
| <a href="#">Bin3</a>  | <a href="#">Bin3.dSep08</a>  | <a href="#">361065</a> | 4860  | 345  | 1  | 59  | bridging integrator 3 (Bin3) alternative variant dSep08, mRNA.                          |
| <a href="#">BIR.0</a> | <a href="#">BIR.0.aSep08</a> |                        | 2230  | 364  |    | 121 | neuronal apoptosis inhibitory protein 2 (BIR.0) mRNA.                                   |
| <a href="#">BIR.1</a> | <a href="#">BIR.1.aSep08</a> |                        | 684   | 232  |    | 77  | neuronal apoptosis inhibitory protein 2 (BIR.1) mRNA.                                   |
| <a href="#">Birc2</a> | <a href="#">Birc2.bSep08</a> | <a href="#">60371</a>  | 21010 | 2443 | 7  | 227 | baculoviral IAP repeat-containing 2 (25.6 kD) (Birc2) alternative variant bSep08, mRNA. |
| <a href="#">Birc2</a> | <a href="#">Birc2.cSep08</a> | <a href="#">60371</a>  | 16571 | 386  | 4  | 128 | baculoviral IAP repeat-containing 2 (Birc2) alternative variant cSep08, mRNA.           |
| <a href="#">Birc3</a> | <a href="#">Birc3.bSep08</a> | <a href="#">78971</a>  | 5401  | 1779 | 2  | 498 | baculoviral IAP repeat-containing 3 (Birc3) alternative variant bSep08, mRNA.           |
| <a href="#">Birc6</a> | <a href="#">Birc6.aSep08</a> | <a href="#">313876</a> | 42696 | 3274 |    | 603 | baculoviral IAP repeat-containing 6 (Birc6) mRNA.                                       |
| <a href="#">Birc7</a> | <a href="#">Birc7.aSep08</a> | <a href="#">296468</a> | 2974  | 694  |    | 164 | baculoviral IAP repeat-containing 7 (livin) (Birc7) mRNA.                               |

|                          |                                 |  |       |      |   |     |                                                                                                          |
|--------------------------|---------------------------------|--|-------|------|---|-----|----------------------------------------------------------------------------------------------------------|
| <a href="#">blabor</a>   | <a href="#">blabor.aSep08</a>   |  | 18812 | 865  |   | 65  | putative protein (7.3 kD) (blabor) mRNA.                                                                 |
| <a href="#">blachy</a>   | <a href="#">blachy.aSep08</a>   |  | 14505 | 822  |   | 57  | ac1262 like (6.3 kD) (blachy) mRNA.                                                                      |
| <a href="#">bladoy</a>   | <a href="#">bladoy.aSep08</a>   |  | 757   | 638  |   | 97  | putative protein (bladoy) mRNA.                                                                          |
| <a href="#">blafly</a>   | <a href="#">blafly.aSep08</a>   |  | 444   | 389  |   | 34  | putative protein (3.6 kD) (blafly) mRNA.                                                                 |
| <a href="#">blafly</a>   | <a href="#">blafly.aSep08</a>   |  | 24564 | 438  |   | 56  | putative protein (5.9 kD) (blafly) mRNA.                                                                 |
| <a href="#">blagar</a>   | <a href="#">blagar.aSep08</a>   |  | 8732  | 652  | 3 | 61  | putative protein (blagar) alternative variant aSep08, mRNA.                                              |
| <a href="#">blaja</a>    | <a href="#">blaja.aSep08</a>    |  | 2647  | 229  |   | 43  | putative protein (4.9 kD) (blaja) mRNA.                                                                  |
| <a href="#">blajey</a>   | <a href="#">blajey.aSep08</a>   |  | 1888  | 481  | 2 | 118 | putative protein (blajey) alternative variant aSep08, mRNA.                                              |
| <a href="#">blakee</a>   | <a href="#">blakee.aSep08</a>   |  | 1981  | 358  |   | 38  | mitochondrial -trna synthetase (blakee) mRNA.                                                            |
| <a href="#">blalo</a>    | <a href="#">blalo.aSep08</a>    |  | 39157 | 714  |   | 72  | putative nuclear protein (8.2 kD) (blalo) mRNA.                                                          |
| <a href="#">blamee</a>   | <a href="#">blamee.aSep08</a>   |  | 965   | 692  |   | 52  | putative protein (5.7 kD) (blamee) mRNA.                                                                 |
| <a href="#">blanoy</a>   | <a href="#">blanoy.aSep08</a>   |  | 5972  | 783  |   | 47  | putative protein (blanoy) mRNA.                                                                          |
| <a href="#">blapor</a>   | <a href="#">blapor.aSep08</a>   |  | 5553  | 580  |   | 86  | putative protein of mammalian origin (blapor) mRNA.                                                      |
| <a href="#">blarbor</a>  | <a href="#">blarbor.aSep08</a>  |  | 5397  | 2235 |   | 75  | putative protein (8.3 kD) (blarbor) mRNA.                                                                |
| <a href="#">blarchy</a>  | <a href="#">blarchy.aSep08</a>  |  | 2048  | 757  |   | 44  | putative protein (5.1 kD) (blarchy) mRNA.                                                                |
| <a href="#">blardoy</a>  | <a href="#">blardoy.aSep08</a>  |  | 3170  | 764  |   | 54  | putative protein (5.7 kD) (blardoy) mRNA.                                                                |
| <a href="#">blarflu</a>  | <a href="#">blarflu.aSep08</a>  |  | 754   | 261  |   | 41  | putative protein (blarflu) mRNA.                                                                         |
| <a href="#">blarfly</a>  | <a href="#">blarfly.aSep08</a>  |  | 3428  | 434  |   | 70  | putative protein (7.6 kD) (blarfly) mRNA.                                                                |
| <a href="#">blargar</a>  | <a href="#">blargar.aSep08</a>  |  | 4833  | 672  |   | 125 | polyprotein (13.6 kD) (blargar) mRNA.                                                                    |
| <a href="#">blarja</a>   | <a href="#">blarja.aSep08</a>   |  | 8035  | 715  | 3 | 81  | putative secreted or extracellular protein precursor (9.1 kD) (blarja) alternative variant aSep08, mRNA. |
| <a href="#">blarja</a>   | <a href="#">blarja.bSep08</a>   |  | 14772 | 658  | 1 | 70  | putative protein (7.6 kD) (blarja) alternative variant bSep08, mRNA.                                     |
| <a href="#">blarjey</a>  | <a href="#">blarjey.aSep08</a>  |  | 17701 | 344  |   | 74  | putative mitochondrial protein (8.8 kD) (blarjey) mRNA.                                                  |
| <a href="#">blarkee</a>  | <a href="#">blarkee.aSep08</a>  |  | 3552  | 749  | 3 | 125 | putative protein (13.9 kD) (blarkee) alternative variant aSep08, mRNA.                                   |
| <a href="#">blarlo</a>   | <a href="#">blarlo.aSep08</a>   |  | 1644  | 362  |   | 34  | putative protein (3.8 kD) (blarlo) mRNA.                                                                 |
| <a href="#">blarmee</a>  | <a href="#">blarmee.aSep08</a>  |  | 1383  | 493  | 2 | 108 | putative protein (blarmee) alternative variant aSep08, mRNA.                                             |
| <a href="#">blarmee</a>  | <a href="#">blarmee.bSep08</a>  |  | 1903  | 455  | 3 | 37  | putative protein (blarmee) alternative variant bSep08, mRNA.                                             |
| <a href="#">blarnoy</a>  | <a href="#">blarnoy.aSep08</a>  |  | 1901  | 673  |   | 28  | putative protein (9.4 kD) (blarnoy) mRNA.                                                                |
| <a href="#">blaroy</a>   | <a href="#">blaroy.aSep08</a>   |  | 1373  | 585  | 3 | 60  | putative protein (blaroy) alternative variant aSep08, mRNA.                                              |
| <a href="#">blaroy</a>   | <a href="#">blaroy.bSep08</a>   |  | 1242  | 523  | 1 | 46  | putative protein (5.1 kD) (blaroy) alternative variant bSep08, mRNA.                                     |
| <a href="#">blarpor</a>  | <a href="#">blarpor.aSep08</a>  |  | 882   | 695  |   | 110 | voltage-dependent calcium channel (blarpor) mRNA.                                                        |
| <a href="#">blarroy</a>  | <a href="#">blarroy.aSep08</a>  |  | 2971  | 398  |   | 66  | putative protein (blarroy) mRNA.                                                                         |
| <a href="#">blarsa</a>   | <a href="#">blarsa.aSep08</a>   |  | 913   | 767  |   | 30  | putative protein (blarsa) mRNA.                                                                          |
| <a href="#">blarshee</a> | <a href="#">blarshee.aSep08</a> |  | 1699  | 276  |   | 24  | putative protein (blarshee) mRNA.                                                                        |
| <a href="#">blartu</a>   | <a href="#">blartu.aSep08</a>   |  | 14070 | 573  | 5 | 129 | putative protein (blartu) alternative variant aSep08, mRNA.                                              |
| <a href="#">blartu</a>   | <a href="#">blartu.cSep08</a>   |  | 37290 | 1347 | 5 | 89  | putative protein (9.9 kD) (blartu) alternative variant cSep08, mRNA.                                     |

|                          |                                 |  |        |      |   |     |                                                                                                                                 |
|--------------------------|---------------------------------|--|--------|------|---|-----|---------------------------------------------------------------------------------------------------------------------------------|
| <a href="#">blartu</a>   | <a href="#">blartu.dSep08</a>   |  | 23044  | 994  | 7 | 89  | putative protein (9.9 kD) (blartu) alternative variant dSep08, mRNA.                                                            |
| <a href="#">blarvo</a>   | <a href="#">blarvo.aSep08</a>   |  | 5133   | 841  |   | 46  | putative protein (5.3 kD) (blarvo) mRNA.                                                                                        |
| <a href="#">blarwer</a>  | <a href="#">blarwer.aSep08</a>  |  | 661    | 188  |   |     |                                                                                                                                 |
| <a href="#">blarwey</a>  | <a href="#">blarwey.aSep08</a>  |  | 35655  | 412  |   | 137 | atp-binding cassette sub-family c member 9 like (blarwey) mRNA.                                                                 |
| <a href="#">blasa</a>    | <a href="#">blasa.aSep08</a>    |  | 3810   | 331  |   | 75  | putative nuclear protein (8.7 kD) (blasa) mRNA.                                                                                 |
| <a href="#">blashee</a>  | <a href="#">blashee.aSep08</a>  |  | 20407  | 1036 |   | 202 | homeodomain transcription factor 1 CRA a (blashee) mRNA.                                                                        |
| <a href="#">blatu</a>    | <a href="#">blatu.aSep08</a>    |  | 12500  | 1036 | 5 | 209 | putative cytoplasmic protein, with a coiled coil domain, of metazoan origin (23.8 kD) (blatu) alternative variant aSep08, mRNA. |
| <a href="#">blatu</a>    | <a href="#">blatu.bSep08</a>    |  | 12166  | 537  | 3 | 150 | putative protein, with a coiled coil domain, of vertebrate origin (blatu) alternative variant bSep08, mRNA.                     |
| <a href="#">blavo</a>    | <a href="#">blavo.aSep08</a>    |  | 103671 | 514  |   | 41  | CRA b like (4.9 kD) (blavo) mRNA.                                                                                               |
| <a href="#">blawbor</a>  | <a href="#">blawbor.aSep08</a>  |  | 8584   | 422  |   | 140 | collagen type VI alpha 2 CRA c (blawbor) mRNA.                                                                                  |
| <a href="#">blawchy</a>  | <a href="#">blawchy.aSep08</a>  |  | 22502  | 402  |   | 64  | CRA a like (blawchy) mRNA.                                                                                                      |
| <a href="#">blawdoy</a>  | <a href="#">blawdoy.aSep08</a>  |  | 1577   | 350  |   | 71  | putative protein of vertebrate origin (blawdoy) mRNA.                                                                           |
| <a href="#">blawer</a>   | <a href="#">blawer.aSep08</a>   |  | 8587   | 578  |   | 138 | F-box leucine-rich repeat protein 13 (blawer) mRNA.                                                                             |
| <a href="#">blawey</a>   | <a href="#">blawey.aSep08</a>   |  | 1308   | 621  |   | 159 | putative protein (16.0 kD) (blawey) mRNA.                                                                                       |
| <a href="#">blawflu</a>  | <a href="#">blawflu.aSep08</a>  |  | 5255   | 548  |   | 35  | putative protein (blawflu) mRNA.                                                                                                |
| <a href="#">blawfly</a>  | <a href="#">blawfly.aSep08</a>  |  | 2982   | 590  |   | 71  | putative cytoplasmic protein (8.5 kD) (blawfly) mRNA.                                                                           |
| <a href="#">blawgar</a>  | <a href="#">blawgar.aSep08</a>  |  | 779    | 379  |   | 50  | putative protein (blawgar) mRNA.                                                                                                |
| <a href="#">blawja</a>   | <a href="#">blawja.aSep08</a>   |  | 4717   | 363  |   | 63  | a disintegrin metalloproteinase domain 28 CRA c (blawja) mRNA.                                                                  |
| <a href="#">blawjey</a>  | <a href="#">blawjey.aSep08</a>  |  | 1945   | 734  | 4 | 145 | sfi1 homolog spindle assembly associated (17.4 kD) (blawjey) alternative variant aSep08, mRNA.                                  |
| <a href="#">blawjey</a>  | <a href="#">blawjey.bSep08</a>  |  | 6236   | 352  | 5 | 117 | sfi1 homolog spindle assembly associated (blawjey) alternative variant bSep08, mRNA.                                            |
| <a href="#">blawkee</a>  | <a href="#">blawkee.aSep08</a>  |  | 18375  | 264  |   | 43  | putative protein (blawkee) mRNA.                                                                                                |
| <a href="#">blawlo</a>   | <a href="#">blawlo.aSep08</a>   |  | 1369   | 786  |   | 49  | putative protein (blawlo) mRNA.                                                                                                 |
| <a href="#">blawmee</a>  | <a href="#">blawmee.aSep08</a>  |  | 4493   | 605  |   | 70  | putative protein (7.9 kD) (blawmee) mRNA.                                                                                       |
| <a href="#">blawnoy</a>  | <a href="#">blawnoy.aSep08</a>  |  | 5158   | 616  |   | 92  | putative mitochondrial protein (10.2 kD) (blawnoy) mRNA.                                                                        |
| <a href="#">blawpor</a>  | <a href="#">blawpor.aSep08</a>  |  | 5661   | 885  |   | 41  | putative protein (blawpor) alternative variant aSep08, mRNA.                                                                    |
| <a href="#">blawpor</a>  | <a href="#">blawpor.cSep08</a>  |  | 4995   | 218  |   | 17  | putative protein (2.1 kD) (blawpor) alternative variant cSep08, mRNA.                                                           |
| <a href="#">blawroy</a>  | <a href="#">blawroy.aSep08</a>  |  | 602    | 421  |   | 90  | putative secreted or extracellular protein precursor (9.5 kD) (blawroy) mRNA.                                                   |
| <a href="#">blawsa</a>   | <a href="#">blawsa.aSep08</a>   |  | 2488   | 876  |   | 104 | dip2 disco-interacting protein 2 homolog b (blawsa) mRNA.                                                                       |
| <a href="#">blawshee</a> | <a href="#">blawshee.aSep08</a> |  | 22562  | 409  |   | 117 | putative protein (blawshee) mRNA.                                                                                               |
| <a href="#">blawtu</a>   | <a href="#">blawtu.aSep08</a>   |  | 413    | 313  |   | 98  | putative protein (blawtu) mRNA.                                                                                                 |
| <a href="#">blawvo</a>   | <a href="#">blawvo.aSep08</a>   |  | 989    | 314  |   |     |                                                                                                                                 |
| <a href="#">blawwer</a>  | <a href="#">blawwer.aSep08</a>  |  | 1828   | 388  |   | 32  | putative protein (3.6 kD) (blawwer) mRNA.                                                                                       |

|                         |                                |  |       |      |   |     |                                                                                    |
|-------------------------|--------------------------------|--|-------|------|---|-----|------------------------------------------------------------------------------------|
| <a href="#">blawwey</a> | <a href="#">blawwey.aSep08</a> |  | 3545  | 358  |   | 119 | glycogen synthase (blawwey) mRNA.                                                  |
| <a href="#">bleebor</a> | <a href="#">bleebor.aSep08</a> |  | 6406  | 407  |   | 135 | pericentrin (bleebor) mRNA.                                                        |
| <a href="#">bleechy</a> | <a href="#">bleechy.aSep08</a> |  | 2404  | 738  |   | 57  | putative protein (6.5 kD) (bleechy) mRNA.                                          |
| <a href="#">bleedoy</a> | <a href="#">bleedoy.aSep08</a> |  | 2116  | 652  |   | 82  | putative protein (9.1 kD) (bleedoy) mRNA.                                          |
| <a href="#">bleeflu</a> | <a href="#">bleeflu.aSep08</a> |  | 5932  | 523  |   | 55  | putative protein (5.9 kD) (bleeflu) mRNA.                                          |
| <a href="#">bleefly</a> | <a href="#">bleefly.aSep08</a> |  | 24310 | 859  |   | 160 | putative protein (bleefly) mRNA.                                                   |
| <a href="#">bleegar</a> | <a href="#">bleegar.aSep08</a> |  | 2995  | 763  |   | 127 | CRA a like (bleegar) mRNA.                                                         |
| <a href="#">bleeja</a>  | <a href="#">bleeja.aSep08</a>  |  | 10801 | 367  |   | 44  | putative protein (bleeja) mRNA.                                                    |
| <a href="#">bleejey</a> | <a href="#">bleejey.aSep08</a> |  | 9185  | 706  |   | 80  | sfi1 homolog spindle assembly associated (bleejey) mRNA.                           |
| <a href="#">bleekee</a> | <a href="#">bleekee.aSep08</a> |  | 19262 | 639  |   | 58  | putative protein (bleekee) mRNA.                                                   |
| <a href="#">bleelo</a>  | <a href="#">bleelo.aSep08</a>  |  | 5648  | 789  |   | 92  | putative protein (9.9 kD) (bleelo) mRNA.                                           |
| <a href="#">bleemee</a> | <a href="#">bleemee.aSep08</a> |  | 33798 | 673  |   | 7   | putative protein (0.7 kD) (bleemee) mRNA.                                          |
| <a href="#">bleenoy</a> | <a href="#">bleenoy.bSep08</a> |  | 1564  | 308  | 2 | 37  | putative protein (bleenoy) alternative variant bSep08, mRNA.                       |
| <a href="#">bleepor</a> | <a href="#">bleepor.bSep08</a> |  | 1136  | 501  | 2 | 63  | putative protein of mammalian origin (bleepor) alternative variant bSep08, mRNA.   |
| <a href="#">bleeroy</a> | <a href="#">bleeroy.bSep08</a> |  | 1605  | 446  | 2 | 64  | putative protein (bleeroy) alternative variant bSep08, mRNA.                       |
| <a href="#">bleesa</a>  | <a href="#">bleesa.aSep08</a>  |  | 18806 | 772  |   | 257 | solute carrier family 11 member 2 CRA c (bleesa) alternative variant aSep08, mRNA. |
| <a href="#">bleshee</a> | <a href="#">bleshee.bSep08</a> |  | 1566  | 411  | 2 | 30  | putative protein (3.6 kD) (bleshee) alternative variant bSep08, mRNA.              |
| <a href="#">bleetu</a>  | <a href="#">bleetu.aSep08</a>  |  | 5218  | 613  |   | 75  | putative cytoplasmic protein of ancient origin (8.9 kD) (bleetu) mRNA.             |
| <a href="#">bleevo</a>  | <a href="#">bleevo.aSep08</a>  |  | 4433  | 257  |   | 36  | putative protein (bleevo) mRNA.                                                    |
| <a href="#">bleewer</a> | <a href="#">bleewer.aSep08</a> |  | 28499 | 745  |   | 98  | putative protein (bleewer) mRNA.                                                   |
| <a href="#">blerbor</a> | <a href="#">blerbor.aSep08</a> |  | 2181  | 572  |   | 190 | pericentrin (blerbor) mRNA.                                                        |
| <a href="#">blerchy</a> | <a href="#">blerchy.aSep08</a> |  | 4823  | 973  |   | 100 | csrp2 binding protein like (11.2 kD) (blerchy) mRNA.                               |
| <a href="#">blerdoy</a> | <a href="#">blerdoy.aSep08</a> |  | 1192  | 246  |   | 72  | putative protein (blerdoy) mRNA.                                                   |
| <a href="#">blerflu</a> | <a href="#">blerflu.aSep08</a> |  | 7035  | 678  |   | 50  | putative protein (blerflu) mRNA.                                                   |
| <a href="#">blerfly</a> | <a href="#">blerfly.aSep08</a> |  | 2400  | 424  |   | 74  | putative protein (8.5 kD) (blerfly) mRNA.                                          |
| <a href="#">blergar</a> | <a href="#">blergar.aSep08</a> |  | 5712  | 1173 |   | 235 | putative protein (blergar) alternative variant aSep08, mRNA.                       |
| <a href="#">blerja</a>  | <a href="#">blerja.aSep08</a>  |  | 26572 | 767  | 2 | 67  | putative protein (blerja) alternative variant aSep08, mRNA.                        |
| <a href="#">blerjey</a> | <a href="#">blerjey.aSep08</a> |  | 43627 | 781  |   | 78  | putative protein (blerjey) mRNA.                                                   |
| <a href="#">blerkee</a> | <a href="#">blerkee.aSep08</a> |  | 1111  | 415  |   | 46  | putative protein (4.8 kD) (blerkee) mRNA.                                          |
| <a href="#">blerlo</a>  | <a href="#">blerlo.aSep08</a>  |  | 1005  | 728  | 2 | 90  | dead box polypeptide 55 (blerlo) alternative variant aSep08, mRNA.                 |
| <a href="#">blermee</a> | <a href="#">blermee.aSep08</a> |  | 1813  | 1107 |   | 187 | putative protein (20.3 kD) (blermee) mRNA.                                         |
| <a href="#">blernoy</a> | <a href="#">blernoy.aSep08</a> |  | 56799 | 565  |   | 69  | putative protein of mammalian origin (blernoy) mRNA.                               |
| <a href="#">blerpor</a> | <a href="#">blerpor.aSep08</a> |  | 4121  | 453  |   | 30  | putative protein (blerpor) mRNA.                                                   |
| <a href="#">blerroy</a> | <a href="#">blerroy.aSep08</a> |  | 789   | 684  |   | 56  | putative protein (blerroy) mRNA.                                                   |

|                          |                                 |                        |       |      |    |     |                                                                                                   |
|--------------------------|---------------------------------|------------------------|-------|------|----|-----|---------------------------------------------------------------------------------------------------|
| <a href="#">blersa</a>   | <a href="#">blersa.aSep08</a>   |                        | 12789 | 516  | 4  | 122 | POU domain-containing transcription factor (blersa) alternative variant aSep08, mRNA.             |
| <a href="#">blersa</a>   | <a href="#">blersa.cSep08</a>   |                        | 5826  | 328  | 2  | 67  | CRA a like (blersa) alternative variant cSep08, mRNA.                                             |
| <a href="#">blershee</a> | <a href="#">blershee.aSep08</a> |                        | 8403  | 284  |    | 25  | putative protein (blershee) mRNA.                                                                 |
| <a href="#">blertu</a>   | <a href="#">blertu.aSep08</a>   |                        | 1437  | 698  |    | 53  | putative protein (blertu) mRNA.                                                                   |
| <a href="#">blervo</a>   | <a href="#">blervo.aSep08</a>   |                        | 5888  | 400  |    | 133 | CRA a (blervo) mRNA.                                                                              |
| <a href="#">blerwer</a>  | <a href="#">blerwer.aSep08</a>  |                        | 1289  | 652  |    | 42  | putative protein (5.0 kD) (blerwer) mRNA.                                                         |
| <a href="#">Bles03</a>   | <a href="#">Bles03.aSep08</a>   | <a href="#">266609</a> | 2251  | 1595 | 2  | 292 | basophilic leukemia expressed protein BLES03 (31.4 kD) (Bles03) alternative variant aSep08, mRNA. |
| <a href="#">bleybor</a>  | <a href="#">bleybor.aSep08</a>  |                        | 7242  | 944  |    | 314 | pericentrin (bleybor) mRNA.                                                                       |
| <a href="#">bleychy</a>  | <a href="#">bleychy.aSep08</a>  |                        | 13422 | 421  |    | 140 | csrp2 binding protein CRA b like (bleychy) mRNA.                                                  |
| <a href="#">bleydoy</a>  | <a href="#">bleydoy.aSep08</a>  |                        | 42634 | 736  |    | 45  | putative protein (5.2 kD) (bleydoy) mRNA.                                                         |
| <a href="#">bleyflu</a>  | <a href="#">bleyflu.aSep08</a>  |                        | 4515  | 564  |    | 98  | putative protein (10.9 kD) (bleyflu) mRNA.                                                        |
| <a href="#">bleyfly</a>  | <a href="#">bleyfly.aSep08</a>  |                        | 24741 | 602  |    | 160 | T-cell lymphoma invasion metastasis 2 like (bleyfly) mRNA.                                        |
| <a href="#">bleygar</a>  | <a href="#">bleygar.aSep08</a>  |                        | 314   | 204  |    | 67  | g-protein coupled receptor 124 (bleygar) mRNA.                                                    |
| <a href="#">bleyja</a>   | <a href="#">bleyja.aSep08</a>   |                        | 1083  | 394  |    | 64  | putative protein (bleyja) mRNA.                                                                   |
| <a href="#">bleyjey</a>  | <a href="#">bleyjey.aSep08</a>  |                        | 3685  | 486  |    | 31  | putative protein (3.5 kD) (bleyjey) mRNA.                                                         |
| <a href="#">bleykee</a>  | <a href="#">bleykee.aSep08</a>  |                        | 1199  | 729  |    | 62  | putative protein (bleykee) mRNA.                                                                  |
| <a href="#">bleylo</a>   | <a href="#">bleylo.aSep08</a>   |                        | 4981  | 657  |    | 199 | M-phase phosphoprotein 9 (bleylo) mRNA.                                                           |
| <a href="#">bleymee</a>  | <a href="#">bleymee.aSep08</a>  |                        | 4553  | 1954 |    | 246 | phospholipase D2 (bleymee) mRNA.                                                                  |
| <a href="#">bleynoy</a>  | <a href="#">bleynoy.aSep08</a>  |                        | 44372 | 684  |    | 69  | CRA a (7.8 kD) (bleynoy) mRNA.                                                                    |
| <a href="#">bleypor</a>  | <a href="#">bleypor.aSep08</a>  |                        | 3967  | 370  |    | 55  | putative protein (6.4 kD) (bleypor) mRNA.                                                         |
| <a href="#">bleyroy</a>  | <a href="#">bleyroy.aSep08</a>  |                        | 6041  | 1384 |    | 461 | ATPase class I type 8B member 3 (bleyroy) mRNA.                                                   |
| <a href="#">bleysa</a>   | <a href="#">bleysa.aSep08</a>   |                        | 1533  | 311  |    | 98  | putative protein (bleysa) mRNA.                                                                   |
| <a href="#">bleyshee</a> | <a href="#">bleyshee.aSep08</a> |                        | 1985  | 1010 | 4  | 145 | putative protein of mammalian origin (bleyshee) alternative variant aSep08, mRNA.                 |
| <a href="#">bleyshee</a> | <a href="#">bleyshee.bSep08</a> |                        | 2160  | 384  | 4  | 116 | putative protein of mammalian origin (bleyshee) alternative variant bSep08, mRNA.                 |
| <a href="#">bleyshee</a> | <a href="#">bleyshee.cSep08</a> |                        | 4957  | 640  | 3  | 73  | CRA b like (7.5 kD) (bleyshee) alternative variant cSep08, mRNA.                                  |
| <a href="#">bleytu</a>   | <a href="#">bleytu.aSep08</a>   |                        | 7706  | 317  | 2  | 105 | ctage family member (bleytu) alternative variant aSep08, mRNA.                                    |
| <a href="#">bleytu</a>   | <a href="#">bleytu.bSep08</a>   |                        | 9287  | 293  | 1  | 60  | meningioma expressed antigen 6 CRA b like (bleytu) alternative variant bSep08, mRNA.              |
| <a href="#">bleyvo</a>   | <a href="#">bleyvo.aSep08</a>   |                        | 1836  | 687  |    | 88  | putative protein (9.5 kD) (bleyvo) mRNA.                                                          |
| <a href="#">bleywer</a>  | <a href="#">bleywer.aSep08</a>  |                        | 76713 | 403  |    | 40  | calcium channel voltage-dependent CRA c (bleywer) mRNA.                                           |
| <a href="#">Blk</a>      | <a href="#">Blk.bSep08</a>      | <a href="#">364403</a> | 1829  | 688  | 2  | 65  | B lymphoid kinase (Blk) alternative variant bSep08, mRNA.                                         |
| <a href="#">Blm</a>      | <a href="#">Blm.bSep08</a>      | <a href="#">308755</a> | 29653 | 1844 | 10 | 551 | bloom syndrome homolog (human) (Blm) alternative variant bSep08, mRNA.                            |
| <a href="#">Blmh</a>     | <a href="#">Blmh.bSep08</a>     | <a href="#">287552</a> | 687   | 386  | 2  | 128 | bleomycin hydrolase (Blmh) alternative variant bSep08, mRNA.                                      |
| <a href="#">Blmh</a>     | <a href="#">Blmh.cSep08</a>     | <a href="#">287552</a> | 7013  | 574  | 5  | 93  | bleomycin hydrolase (Blmh) alternative variant cSep08, mRNA.                                      |

|                         |                                |                        |        |      |    |     |                                                                                                                               |
|-------------------------|--------------------------------|------------------------|--------|------|----|-----|-------------------------------------------------------------------------------------------------------------------------------|
| <a href="#">Blnk</a>    | <a href="#">Blnk.aSep08</a>    | <a href="#">499356</a> | 56653  | 1090 | 12 | 362 | B-cell linker (Blnk) alternative variant aSep08, mRNA.                                                                        |
| <a href="#">Blnk</a>    | <a href="#">Blnk.bSep08</a>    | <a href="#">499356</a> | 18879  | 882  | 7  | 135 | putative protein (Blnk) alternative variant bSep08, mRNA.                                                                     |
| <a href="#">Blnk</a>    | <a href="#">Blnk.cSep08</a>    | <a href="#">499356</a> | 6877   | 736  | 2  | 42  | B-cell linker protein like (5.1 kD) (Blnk) alternative variant cSep08, mRNA.                                                  |
| <a href="#">blobor</a>  | <a href="#">blobor.aSep08</a>  |                        | 2432   | 507  |    | 141 | putative nuclear protein (15.6 kD) (blobor) mRNA.                                                                             |
| <a href="#">Bloc1s1</a> | <a href="#">Bloc1s1.bSep08</a> | <a href="#">288785</a> | 1124   | 649  | 1  | 75  | biogenesis of lysosome-related organelles complex-1, subunit 1 (8.6 kD) (Bloc1s1) alternative variant bSep08, mRNA.           |
| <a href="#">Bloc1s2</a> | <a href="#">Bloc1s2.aSep08</a> | <a href="#">293938</a> | 7025   | 929  | 6  | 168 | biogenesis of lysosome-related organelles complex-1, subunit 2 (18.9 kD) (Bloc1s2) alternative variant aSep08, complete mRNA. |
| <a href="#">Bloc1s2</a> | <a href="#">Bloc1s2.bSep08</a> | <a href="#">293938</a> | 3693   | 737  | 3  | 144 | biogenesis of lysosome-related organelles complex-1, subunit 2 (Bloc1s2) alternative variant bSep08, mRNA.                    |
| <a href="#">Bloc1s2</a> | <a href="#">Bloc1s2.dSep08</a> | <a href="#">293938</a> | 7018   | 878  | 5  | 140 | biogenesis of lysosome-related organelles complex-1, subunit 2 (15.7 kD) (Bloc1s2) alternative variant dSep08, mRNA.          |
| <a href="#">Bloc1s2</a> | <a href="#">Bloc1s2.eSep08</a> | <a href="#">293938</a> | 6923   | 633  | 5  | 140 | biogenesis of lysosome-related organelles complex-1, subunit 2 (15.6 kD) (Bloc1s2) alternative variant eSep08, mRNA.          |
| <a href="#">Bloc1s2</a> | <a href="#">Bloc1s2.fSep08</a> | <a href="#">293938</a> | 6750   | 856  | 4  | 99  | biogenesis of lysosome-related organelles complex-1, subunit 2 (11.5 kD) (Bloc1s2) alternative variant fSep08, mRNA.          |
| <a href="#">Bloc1s3</a> | <a href="#">Bloc1s3.aSep08</a> | <a href="#">680476</a> | 1655   | 832  |    | 212 | biogenesis of lysosome-related organelles complex-1, subunit 3 (Bloc1s3) alternative variant aSep08, mRNA.                    |
| <a href="#">blochy</a>  | <a href="#">blochy.aSep08</a>  |                        | 45873  | 279  |    | 92  | putative protein of mammalian origin (blochy) mRNA.                                                                           |
| <a href="#">blodoy</a>  | <a href="#">blodoy.aSep08</a>  |                        | 11786  | 385  | 1  | 84  | putative protein (9.6 kD) (blodoy) alternative variant aSep08, mRNA.                                                          |
| <a href="#">blodoy</a>  | <a href="#">blodoy.bSep08</a>  |                        | 12841  | 353  | 1  | 37  | putative protein (4.3 kD) (blodoy) alternative variant bSep08, mRNA.                                                          |
| <a href="#">bloflu</a>  | <a href="#">bloflu.aSep08</a>  |                        | 16289  | 361  |    | 119 | TEA domain family member 1 (bloflu) mRNA.                                                                                     |
| <a href="#">blofly</a>  | <a href="#">blofly.aSep08</a>  |                        | 1584   | 807  |    | 70  | GTPase activating protein testicular GAP1 like (8.0 kD) (blofly) mRNA.                                                        |
| <a href="#">blogar</a>  | <a href="#">blogar.aSep08</a>  |                        | 1512   | 1007 |    | 46  | putative protein (5.1 kD) (blogar) mRNA.                                                                                      |
| <a href="#">bloja</a>   | <a href="#">bloja.aSep08</a>   |                        | 512860 | 293  |    | 46  | putative protein (5.0 kD) (bloja) mRNA.                                                                                       |
| <a href="#">blojey</a>  | <a href="#">blojey.aSep08</a>  |                        | 3067   | 199  |    | 63  | gag protein like (blojey) mRNA.                                                                                               |
| <a href="#">blokee</a>  | <a href="#">blokee.aSep08</a>  |                        | 10585  | 601  |    | 64  | putative protein (blokee) mRNA.                                                                                               |
| <a href="#">blolo</a>   | <a href="#">blolo.aSep08</a>   |                        | 4056   | 328  | 2  | 109 | putative protein (blolo) alternative variant aSep08, mRNA.                                                                    |
| <a href="#">blolo</a>   | <a href="#">blolo.bSep08</a>   |                        | 4074   | 478  | 3  | 77  | putative protein (8.7 kD) (blolo) alternative variant bSep08, mRNA.                                                           |
| <a href="#">blomee</a>  | <a href="#">blomee.aSep08</a>  |                        | 798    | 697  |    | 77  | putative mitochondrial protein (8.9 kD) (blomee) mRNA.                                                                        |
| <a href="#">blonoy</a>  | <a href="#">blonoy.aSep08</a>  |                        | 13844  | 756  | 5  | 103 | putative protein (11.5 kD) (blonoy) alternative variant aSep08, mRNA.                                                         |
| <a href="#">blonoy</a>  | <a href="#">blonoy.bSep08</a>  |                        | 12189  | 769  | 7  | 55  | putative protein (blonoy) alternative variant bSep08, mRNA.                                                                   |
| <a href="#">blopor</a>  | <a href="#">blopor.aSep08</a>  |                        | 3977   | 402  |    | 134 | vpr binding protein like (blopor) mRNA.                                                                                       |

|                          |                                 |  |       |      |   |     |                                                                                        |
|--------------------------|---------------------------------|--|-------|------|---|-----|----------------------------------------------------------------------------------------|
| <a href="#">blorbor</a>  | <a href="#">blorbor.aSep08</a>  |  | 6392  | 377  |   | 125 | disco-interacting protein 2 homolog a (blorbor) mRNA.                                  |
| <a href="#">blorchy</a>  | <a href="#">blorchy.aSep08</a>  |  | 3663  | 800  | 2 | 123 | putative protein (14.0 kD) (blorchy) alternative variant aSep08, mRNA.                 |
| <a href="#">blordoy</a>  | <a href="#">blordoy.aSep08</a>  |  | 9010  | 346  |   | 114 | putative protein of mammalian origin (blordoy) mRNA.                                   |
| <a href="#">blorflu</a>  | <a href="#">blorflu.aSep08</a>  |  | 3074  | 573  |   | 190 | PI-3-kinase-related kinase smg-1 (blorflu) mRNA.                                       |
| <a href="#">blorfly</a>  | <a href="#">blorfly.aSep08</a>  |  | 5058  | 971  | 6 | 323 | T-cell lymphoma invasion metastasis 2 like (blorfly) alternative variant aSep08, mRNA. |
| <a href="#">blorgar</a>  | <a href="#">blorgar.aSep08</a>  |  | 3308  | 1085 |   | 171 | G-protein coupled receptor 124 (blorgar) mRNA.                                         |
| <a href="#">blorja</a>   | <a href="#">blorja.aSep08</a>   |  | 3779  | 239  |   | 40  | putative protein (blorja) mRNA.                                                        |
| <a href="#">blorjey</a>  | <a href="#">blorjey.aSep08</a>  |  | 472   | 389  |   | 82  | putative protein (blorjey) mRNA.                                                       |
| <a href="#">blorkee</a>  | <a href="#">blorkee.aSep08</a>  |  | 4865  | 551  |   | 77  | putative protein (blorkee) mRNA.                                                       |
| <a href="#">blorlo</a>   | <a href="#">blorlo.aSep08</a>   |  | 1113  | 481  |   | 57  | putative protein (blorlo) mRNA.                                                        |
| <a href="#">blormee</a>  | <a href="#">blormee.aSep08</a>  |  | 5920  | 1212 | 2 | 403 | misshapen-like kinase 1 (blormee) alternative variant aSep08, mRNA.                    |
| <a href="#">blormee</a>  | <a href="#">blormee.bSep08</a>  |  | 1805  | 709  | 1 | 235 | misshapen-like kinase 1 (blormee) alternative variant bSep08, mRNA.                    |
| <a href="#">blornoy</a>  | <a href="#">blornoy.aSep08</a>  |  | 6651  | 575  |   | 44  | putative protein (blornoy) mRNA.                                                       |
| <a href="#">bloroy</a>   | <a href="#">bloroy.aSep08</a>   |  | 995   | 655  |   | 29  | putative protein (3.5 kD) (bloroy) mRNA.                                               |
| <a href="#">blorpor</a>  | <a href="#">blorpor.aSep08</a>  |  | 4312  | 432  |   | 100 | putative protein (blorpor) mRNA.                                                       |
| <a href="#">blorroy</a>  | <a href="#">blorroy.aSep08</a>  |  | 682   | 459  |   | 84  | putative protein (blorroy) mRNA.                                                       |
| <a href="#">blorsa</a>   | <a href="#">blorsa.aSep08</a>   |  | 12129 | 745  |   | 105 | N-acetylgalactosaminyltransferase (blorsa) mRNA.                                       |
| <a href="#">blorshee</a> | <a href="#">blorshee.aSep08</a> |  | 78234 | 1191 | 7 | 232 | adenosine A3 receptor (25.7 kD) (blorshee) alternative variant aSep08, complete mRNA.  |
| <a href="#">blorshee</a> | <a href="#">blorshee.bSep08</a> |  | 8279  | 842  | 4 | 67  | adenosine A3 receptor like (blorshee) alternative variant bSep08, mRNA.                |
| <a href="#">blorshee</a> | <a href="#">blorshee.cSep08</a> |  | 50744 | 751  | 4 | 96  | adenosine A3 receptor (blorshee) alternative variant cSep08, mRNA.                     |
| <a href="#">blorshee</a> | <a href="#">blorshee.dSep08</a> |  | 836   | 244  | 2 | 41  | putative protein (4.8 kD) (blorshee) alternative variant dSep08, mRNA.                 |
| <a href="#">blorvo</a>   | <a href="#">blorvo.aSep08</a>   |  | 1205  | 352  |   | 44  | putative protein (4.8 kD) (blorvo) mRNA.                                               |
| <a href="#">blorwer</a>  | <a href="#">blorwer.aSep08</a>  |  | 1203  | 771  |   | 77  | CRA d like (8.4 kD) (blorwer) mRNA.                                                    |
| <a href="#">blosa</a>    | <a href="#">blosa.aSep08</a>    |  | 26145 | 380  |   | 126 | dip2 disco-interacting protein 2 homolog (blosa) mRNA.                                 |
| <a href="#">bloshee</a>  | <a href="#">bloshee.aSep08</a>  |  | 6142  | 604  |   | 56  | putative protein (6.2 kD) (bloshee) mRNA.                                              |
| <a href="#">blotu</a>    | <a href="#">blotu.aSep08</a>    |  | 810   | 441  |   | 72  | putative protein (blotu) mRNA.                                                         |
| <a href="#">blovo</a>    | <a href="#">blovo.aSep08</a>    |  | 7994  | 869  |   | 46  | putative protein (blovo) mRNA.                                                         |
| <a href="#">blower</a>   | <a href="#">blower.aSep08</a>   |  | 10514 | 260  |   | 62  | putative protein (blower) mRNA.                                                        |
| <a href="#">blowey</a>   | <a href="#">blowey.aSep08</a>   |  | 2285  | 475  | 2 | 111 | putative protein (blowey) alternative variant aSep08, mRNA.                            |
| <a href="#">bloybor</a>  | <a href="#">bloybor.aSep08</a>  |  | 5262  | 2174 |   | 211 | CRA b (bloybor) mRNA.                                                                  |
| <a href="#">bloychy</a>  | <a href="#">bloychy.aSep08</a>  |  | 14541 | 515  | 5 | 171 | putative protein of eukaryotic origin (bloychy) alternative variant aSep08, mRNA.      |
| <a href="#">bloydoy</a>  | <a href="#">bloydoy.aSep08</a>  |  | 38857 | 525  | 1 | 71  | putative protein (bloydoy) alternative variant aSep08, mRNA.                           |

|                          |                                 |  |       |      |   |     |                                                                                                                        |
|--------------------------|---------------------------------|--|-------|------|---|-----|------------------------------------------------------------------------------------------------------------------------|
| <a href="#">bloydoy</a>  | <a href="#">bloydoy.bSep08</a>  |  | 13078 | 249  | 1 | 49  | putative protein (bloydoy) alternative variant bSep08, mRNA.                                                           |
| <a href="#">bloyflu</a>  | <a href="#">bloyflu.aSep08</a>  |  | 2633  | 371  |   | 123 | kinase (bloyflu) mRNA.                                                                                                 |
| <a href="#">bloyfly</a>  | <a href="#">bloyfly.aSep08</a>  |  | 14432 | 403  |   | 81  | putative protein (bloyfly) mRNA.                                                                                       |
| <a href="#">bloygar</a>  | <a href="#">bloygar.aSep08</a>  |  | 18541 | 568  | 3 | 48  | CRA a like (5.3 kD) (bloygar) alternative variant aSep08, mRNA.                                                        |
| <a href="#">bloygar</a>  | <a href="#">bloygar.bSep08</a>  |  | 6894  | 397  | 1 | 71  | CRA b like (bloygar) alternative variant bSep08, mRNA.                                                                 |
| <a href="#">bloyja</a>   | <a href="#">bloyja.aSep08</a>   |  | 3479  | 1755 | 8 | 342 | putative protein, with a coiled coil domain, of bilateral origin (bloyja) alternative variant aSep08, mRNA.            |
| <a href="#">bloyja</a>   | <a href="#">bloyja.bSep08</a>   |  | 2807  | 1609 | 7 | 296 | putative protein, with a coiled coil domain, of bilateral origin (bloyja) alternative variant bSep08, mRNA.            |
| <a href="#">bloyja</a>   | <a href="#">bloyja.cSep08</a>   |  | 1680  | 1272 | 4 | 176 | putative protein, with a coiled coil domain, of vertebrate origin (20.0 kD) (bloyja) alternative variant cSep08, mRNA. |
| <a href="#">bloyjey</a>  | <a href="#">bloyjey.aSep08</a>  |  | 9160  | 425  |   | 59  | putative protein (6.8 kD) (bloyjey) mRNA.                                                                              |
| <a href="#">bloykee</a>  | <a href="#">bloykee.aSep08</a>  |  | 984   | 509  |   | 130 | putative protein of mammalian origin (bloykee) mRNA.                                                                   |
| <a href="#">bloylo</a>   | <a href="#">bloylo.aSep08</a>   |  | 1882  | 451  |   | 149 | DDHD (bloylo) mRNA.                                                                                                    |
| <a href="#">bloymee</a>  | <a href="#">bloymee.aSep08</a>  |  | 961   | 693  | 2 | 221 | CRA c (bloymee) alternative variant aSep08, mRNA.                                                                      |
| <a href="#">bloymee</a>  | <a href="#">bloymee.bSep08</a>  |  | 674   | 388  | 1 | 128 | CRA b (bloymee) alternative variant bSep08, mRNA.                                                                      |
| <a href="#">bloynoy</a>  | <a href="#">bloynoy.aSep08</a>  |  | 828   | 729  |   | 78  | putative protein (bloynoy) mRNA.                                                                                       |
| <a href="#">bloypor</a>  | <a href="#">bloypor.aSep08</a>  |  | 2230  | 618  | 5 | 194 | CRA d (bloypor) alternative variant aSep08, mRNA.                                                                      |
| <a href="#">bloyroy</a>  | <a href="#">bloyroy.aSep08</a>  |  | 2108  | 685  | 4 | 167 | midnolin (bloyroy) alternative variant aSep08, mRNA.                                                                   |
| <a href="#">bloysa</a>   | <a href="#">bloysa.aSep08</a>   |  | 4816  | 340  |   | 28  | putative protein (3.4 kD) (bloysa) mRNA.                                                                               |
| <a href="#">bloyshee</a> | <a href="#">bloyshee.aSep08</a> |  | 27275 | 716  |   | 36  | putative protein (3.8 kD) (bloyshee) mRNA.                                                                             |
| <a href="#">bloytu</a>   | <a href="#">bloytu.aSep08</a>   |  | 14973 | 293  |   | 97  | fam179b (bloytu) mRNA.                                                                                                 |
| <a href="#">bloyvo</a>   | <a href="#">bloyvo.aSep08</a>   |  | 3821  | 313  |   | 33  | putative protein (bloyvo) mRNA.                                                                                        |
| <a href="#">bloywer</a>  | <a href="#">bloywer.aSep08</a>  |  | 2755  | 573  |   | 40  | putative protein (bloywer) mRNA.                                                                                       |
| <a href="#">blubor</a>   | <a href="#">blubor.aSep08</a>   |  | 15166 | 636  |   | 70  | putative protein (blubor) mRNA.                                                                                        |
| <a href="#">bluchy</a>   | <a href="#">bluchy.aSep08</a>   |  | 38524 | 808  | 2 | 127 | CRA a (14.5 kD) (bluchy) alternative variant aSep08, mRNA.                                                             |
| <a href="#">bluchy</a>   | <a href="#">bluchy.bSep08</a>   |  | 70757 | 274  | 2 | 91  | putative protein of vertebrate origin (bluchy) alternative variant bSep08, mRNA.                                       |
| <a href="#">bludoy</a>   | <a href="#">bludoy.bSep08</a>   |  | 1606  | 629  | 2 | 20  | putative protein (2.2 kD) (bludoy) alternative variant bSep08, mRNA.                                                   |
| <a href="#">blufly</a>   | <a href="#">blufly.aSep08</a>   |  | 5487  | 1345 |   | 79  | putative protein (blufly) mRNA.                                                                                        |
| <a href="#">blufly</a>   | <a href="#">blufly.aSep08</a>   |  | 2374  | 523  | 1 | 173 | putative protein of mammalian origin (blufly) alternative variant aSep08, mRNA.                                        |
| <a href="#">blufly</a>   | <a href="#">blufly.bSep08</a>   |  | 32638 | 901  | 6 | 100 | antigen-like 2 (blufly) alternative variant bSep08, mRNA.                                                              |
| <a href="#">blugar</a>   | <a href="#">blugar.aSep08</a>   |  | 16594 | 640  |   | 117 | werner syndrome like (blugar) mRNA.                                                                                    |
| <a href="#">bluja</a>    | <a href="#">bluja.aSep08</a>    |  | 2130  | 526  | 1 | 39  | CRA a like (4.4 kD) (bluja) alternative variant aSep08, mRNA.                                                          |
| <a href="#">bluja</a>    | <a href="#">bluja.bSep08</a>    |  | 2556  | 528  | 1 | 31  | CRA b like (3.3 kD) (bluja) alternative variant bSep08, mRNA.                                                          |
| <a href="#">blujey</a>   | <a href="#">blujey.aSep08</a>   |  | 10992 | 722  |   | 90  | putative protein (10.5 kD) (blujey) mRNA.                                                                              |
| <a href="#">blukee</a>   | <a href="#">blukee.aSep08</a>   |  | 5633  | 615  |   | 41  | putative protein (blukee) mRNA.                                                                                        |



|                         |                                |                        |       |      |   |     |                                                                                                       |
|-------------------------|--------------------------------|------------------------|-------|------|---|-----|-------------------------------------------------------------------------------------------------------|
| <a href="#">blulo</a>   | <a href="#">blulo.aSep08</a>   |                        | 5624  | 313  |   | 40  | putative protein (4.2 kD) (blulo) mRNA.                                                               |
| <a href="#">blumee</a>  | <a href="#">blumee.aSep08</a>  |                        | 1631  | 1454 | 2 | 83  | Y box protein 2 (blumee) alternative variant aSep08, mRNA.                                            |
| <a href="#">blumee</a>  | <a href="#">blumee.bSep08</a>  |                        | 1351  | 774  | 2 | 71  | putative protein of metazoan origin (blumee) alternative variant bSep08, mRNA.                        |
| <a href="#">blunoy</a>  | <a href="#">blunoy.aSep08</a>  |                        | 12989 | 415  |   | 83  | uncharacterized protein like (blunoy) mRNA.                                                           |
| <a href="#">blupor</a>  | <a href="#">blupor.aSep08</a>  |                        | 3450  | 302  |   | 100 | vpr binding protein like (blupor) mRNA.                                                               |
| <a href="#">bluroy</a>  | <a href="#">bluroy.aSep08</a>  |                        | 2043  | 413  | 2 | 66  | putative protein (bluroy) alternative variant aSep08, mRNA.                                           |
| <a href="#">blusa</a>   | <a href="#">blusa.aSep08</a>   |                        | 10476 | 293  | 2 | 62  | uncharacterized protein like (blusa) alternative variant aSep08, mRNA.                                |
| <a href="#">blushee</a> | <a href="#">blushee.aSep08</a> |                        | 11193 | 397  |   | 78  | putative secreted or extracellular protein precursor (8.6 kD) (blushee) mRNA.                         |
| <a href="#">blutu</a>   | <a href="#">blutu.aSep08</a>   |                        | 60238 | 816  |   | 271 | GTPase activating RanGAP domain-like 1 (blutu) mRNA.                                                  |
| <a href="#">bluvo</a>   | <a href="#">bluvo.aSep08</a>   |                        | 1763  | 766  |   | 42  | putative protein (bluvo) mRNA.                                                                        |
| <a href="#">bluwer</a>  | <a href="#">bluwer.aSep08</a>  |                        | 717   | 332  |   | 36  | putative protein (4.3 kD) (bluwer) mRNA.                                                              |
| <a href="#">bluwey</a>  | <a href="#">bluwey.aSep08</a>  |                        | 37962 | 906  |   | 68  | repeat containing 1 like (bluwey) mRNA.                                                               |
| <a href="#">BlvrB</a>   | <a href="#">BlvrB.bSep08</a>   | <a href="#">292737</a> | 17586 | 716  | 3 | 200 | biliverdin reductase B (flavin reductase (NADPH)) (BlvrB) alternative variant bSep08, mRNA.           |
| <a href="#">BlvrB</a>   | <a href="#">BlvrB.cSep08</a>   | <a href="#">292737</a> | 4919  | 553  | 2 | 120 | biliverdin reductase B (flavin reductase (NADPH)) (13.4 kD) (BlvrB) alternative variant cSep08, mRNA. |
| <a href="#">blybor</a>  | <a href="#">blybor.aSep08</a>  |                        | 597   | 416  |   | 45  | putative protein (5.3 kD) (blybor) mRNA.                                                              |
| <a href="#">blychy</a>  | <a href="#">blychy.aSep08</a>  |                        | 11693 | 1204 |   | 43  | putative protein (blychy) mRNA.                                                                       |
| <a href="#">blydoy</a>  | <a href="#">blydoy.aSep08</a>  |                        | 10151 | 746  |   | 180 | putative protein (blydoy) mRNA.                                                                       |
| <a href="#">blyflu</a>  | <a href="#">blyflu.aSep08</a>  |                        | 1785  | 333  |   | 52  | putative protein (6.1 kD) (blyflu) mRNA.                                                              |
| <a href="#">blyfly</a>  | <a href="#">blyfly.aSep08</a>  |                        | 1125  | 201  |   | 35  | putative protein (blyfly) mRNA.                                                                       |
| <a href="#">blygar</a>  | <a href="#">blygar.aSep08</a>  |                        | 4213  | 355  | 4 | 64  | putative protein (blygar) alternative variant aSep08, mRNA.                                           |
| <a href="#">blyja</a>   | <a href="#">blyja.aSep08</a>   |                        | 1041  | 570  |   | 25  | putative protein (blyja) mRNA.                                                                        |
| <a href="#">blyjey</a>  | <a href="#">blyjey.aSep08</a>  |                        | 25792 | 473  |   | 63  | putative protein (7.4 kD) (blyjey) mRNA.                                                              |
| <a href="#">blykee</a>  | <a href="#">blykee.aSep08</a>  |                        | 7899  | 580  |   | 119 | putative protein (13.1 kD) (blykee) mRNA.                                                             |
| <a href="#">blylo</a>   | <a href="#">blylo.aSep08</a>   |                        | 554   | 442  |   | 78  | putative nuclear protein (9.1 kD) (blylo) mRNA.                                                       |
| <a href="#">blymee</a>  | <a href="#">blymee.aSep08</a>  |                        | 833   | 327  |   | 108 | polymerase II (blymee) mRNA.                                                                          |
| <a href="#">blynoy</a>  | <a href="#">blynoy.aSep08</a>  |                        | 6216  | 580  |   | 127 | uncharacterized protein like (blynoy) mRNA.                                                           |
| <a href="#">blypor</a>  | <a href="#">blypor.aSep08</a>  |                        | 778   | 270  |   | 29  | putative protein (3.0 kD) (blypor) mRNA.                                                              |
| <a href="#">blyroy</a>  | <a href="#">blyroy.aSep08</a>  |                        | 1637  | 701  |   | 89  | putative protein (blyroy) mRNA.                                                                       |
| <a href="#">blysa</a>   | <a href="#">blysa.aSep08</a>   |                        | 27388 | 387  |   | 67  | putative protein (blysa) mRNA.                                                                        |
| <a href="#">blyshee</a> | <a href="#">blyshee.aSep08</a> |                        | 28354 | 570  |   | 131 | putative protein (blyshee) mRNA.                                                                      |
| <a href="#">blytu</a>   | <a href="#">blytu.aSep08</a>   |                        | 38604 | 1100 | 7 | 366 | GTPase activating RanGAP domain-like 1 (blytu) alternative variant aSep08, mRNA.                      |
| <a href="#">blyvo</a>   | <a href="#">blyvo.aSep08</a>   |                        | 3347  | 343  |   | 69  | putative protein (blyvo) mRNA.                                                                        |
| <a href="#">blywer</a>  | <a href="#">blywer.aSep08</a>  |                        | 1948  | 1342 |   | 48  | homeodomain transcription factor 2 CRA c (blywer) mRNA.                                               |
| <a href="#">blywey</a>  | <a href="#">blywey.aSep08</a>  |                        | 1216  | 236  |   | 72  | putative protein (blywey) mRNA.                                                                       |
| <a href="#">Bmi1</a>    | <a href="#">Bmi1.bSep08</a>    | <a href="#">307151</a> | 2959  | 2728 | 1 | 66  | bmi1 polycomb ring finger oncogene (Bmi1) alternative variant bSep08, mRNA.                           |

|                        |                               |                        |        |      |    |     |                                                                                                                  |
|------------------------|-------------------------------|------------------------|--------|------|----|-----|------------------------------------------------------------------------------------------------------------------|
| <a href="#">Bmp1</a>   | <a href="#">Bmp1.aSep08</a>   | <a href="#">83470</a>  | 32520  | 3047 | 17 | 829 | bone morphogenetic protein 1 (Bmp1) alternative variant aSep08, mRNA.                                            |
| <a href="#">Bmp1</a>   | <a href="#">Bmp1.bSep08</a>   | <a href="#">83470</a>  | 11490  | 1450 | 6  | 212 | bone morphogenetic protein 1 (Bmp1) alternative variant bSep08, mRNA.                                            |
| <a href="#">Bmp1</a>   | <a href="#">Bmp1.cSep08</a>   | <a href="#">83470</a>  | 11671  | 721  | 5  | 199 | bone morphogenetic protein 1 (Bmp1) alternative variant cSep08, mRNA.                                            |
| <a href="#">Bmp2k</a>  | <a href="#">Bmp2k.aSep08</a>  | <a href="#">498333</a> | 62926  | 2972 | 11 | 322 | BMP-2 inducible kinase (Bmp2k) alternative variant aSep08, mRNA.                                                 |
| <a href="#">Bmp2k</a>  | <a href="#">Bmp2k.bSep08</a>  | <a href="#">498333</a> | 30713  | 2341 | 6  | 183 | BMP-2 inducible kinase (Bmp2k) alternative variant bSep08, mRNA.                                                 |
| <a href="#">Bmp2k</a>  | <a href="#">Bmp2k.cSep08</a>  | <a href="#">498333</a> | 15585  | 708  | 1  | 116 | BMP-2 inducible kinase (Bmp2k) alternative variant cSep08, mRNA.                                                 |
| <a href="#">Bmp4</a>   | <a href="#">Bmp4.bSep08</a>   | <a href="#">25296</a>  | 4650   | 601  | 3  | 69  | bone morphogenetic protein 4 (Bmp4) alternative variant bSep08, mRNA.                                            |
| <a href="#">Bmp6</a>   | <a href="#">Bmp6.bSep08</a>   | <a href="#">25644</a>  | 15872  | 2624 | 2  | 228 | bone morphogenetic protein 6 (Bmp6) alternative variant bSep08, mRNA.                                            |
| <a href="#">Bmp7</a>   | <a href="#">Bmp7.aSep08</a>   | <a href="#">85272</a>  | 10202  | 1274 |    | 180 | bone morphogenetic protein 7 (Bmp7) mRNA.                                                                        |
| <a href="#">Bmper</a>  | <a href="#">Bmper.aSep08</a>  | <a href="#">300455</a> | 70851  | 744  |    | 178 | BMP-binding endothelial regulator (Bmper) mRNA.                                                                  |
| <a href="#">Bmpr1a</a> | <a href="#">Bmpr1a.bSep08</a> | <a href="#">81507</a>  | 483    | 351  | 2  | 77  | bone morphogenetic protein receptor, type 1A (8.7 kD) (Bmpr1a) alternative variant bSep08, mRNA.                 |
| <a href="#">Bmpr2</a>  | <a href="#">Bmpr2.aSep08</a>  | <a href="#">140590</a> | 109512 | 2772 |    | 718 | bone morphogenetic protein receptor, type II (serine/threonine kinase) (Bmpr2) alternative variant aSep08, mRNA. |
| <a href="#">Bms1</a>   | <a href="#">Bms1.aSep08</a>   | <a href="#">362426</a> | 26129  | 2968 |    | 897 | BMS1 homolog, ribosome assembly protein (yeast) (Bms1) alternative variant aSep08, mRNA.                         |
| <a href="#">Bms1</a>   | <a href="#">Bms1.bSep08</a>   | <a href="#">362426</a> | 1109   | 662  |    | 128 | BMS1 homolog, ribosome assembly protein (yeast) (Bms1) alternative variant bSep08, mRNA.                         |
| <a href="#">Bmx</a>    | <a href="#">Bmx.bSep08</a>    | <a href="#">367786</a> | 12696  | 905  |    | 301 | BMX non-receptor tyrosine kinase (Bmx) alternative variant bSep08, mRNA.                                         |
| <a href="#">Bnc2</a>   | <a href="#">Bnc2.bSep08</a>   | <a href="#">298189</a> | 9445   | 610  | 1  | 135 | basonuclin 2 and hypothetical protein LOC678750 (Bnc2) alternative variant bSep08, mRNA.                         |
| <a href="#">Bnc2</a>   | <a href="#">Bnc2.bSep08</a>   | <a href="#">678750</a> | 9445   | 610  | 1  | 135 | basonuclin 2 and hypothetical protein LOC678750 (Bnc2) alternative variant bSep08, mRNA.                         |
| <a href="#">Bnip1</a>  | <a href="#">Bnip1.bSep08</a>  | <a href="#">140932</a> | 11991  | 916  | 4  | 209 | BCL2/adenovirus E1B 19kDa-interacting protein 1 (23.9 kD) (Bnip1) alternative variant bSep08, complete mRNA.     |
| <a href="#">Bnip1</a>  | <a href="#">Bnip1.cSep08</a>  | <a href="#">140932</a> | 10866  | 682  | 3  | 192 | BCL2/adenovirus E1B 19kDa-interacting protein 1 (Bnip1) alternative variant cSep08, mRNA.                        |
| <a href="#">Bnip1</a>  | <a href="#">Bnip1.dSep08</a>  | <a href="#">140932</a> | 6361   | 591  | 1  | 129 | BCL2/adenovirus E1B 19kDa-interacting protein 1 (Bnip1) alternative variant dSep08, mRNA.                        |
| <a href="#">Bnip2</a>  | <a href="#">Bnip2.aSep08</a>  | <a href="#">300811</a> | 10982  | 1779 | 6  | 507 | BCL2/adenovirus E1B interacting protein 2 (Bnip2) alternative variant aSep08, mRNA.                              |
| <a href="#">Bnip2</a>  | <a href="#">Bnip2.cSep08</a>  | <a href="#">300811</a> | 9455   | 1872 | 8  | 242 | BCL2/adenovirus E1B interacting protein 2 (Bnip2) alternative variant cSep08, mRNA.                              |
| <a href="#">Bnip2</a>  | <a href="#">Bnip2.dSep08</a>  | <a href="#">300811</a> | 7827   | 963  | 6  | 215 | BCL2/adenovirus E1B interacting protein 2 (Bnip2) alternative variant dSep08, mRNA.                              |
| <a href="#">Bnip2</a>  | <a href="#">Bnip2.eSep08</a>  | <a href="#">300811</a> | 8465   | 732  | 5  | 183 | BCL2/adenovirus E1B interacting protein 2 (Bnip2) alternative variant eSep08, mRNA.                              |

|                        |                               |                        |       |      |    |     |                                                                                                                                                    |
|------------------------|-------------------------------|------------------------|-------|------|----|-----|----------------------------------------------------------------------------------------------------------------------------------------------------|
| <a href="#">Bnip2</a>  | <a href="#">Bnip2.fSep08</a>  | <a href="#">300811</a> | 3976  | 318  | 3  | 83  | BCL2/adenovirus E1B interacting protein 2 (Bnip2) alternative variant fSep08, mRNA.                                                                |
| <a href="#">Bnip3</a>  | <a href="#">Bnip3.aSep08</a>  | <a href="#">84480</a>  | 17104 | 1619 | 6  | 227 | BCL2/adenovirus E1B 19 kDa-interacting protein 3 (Bnip3) alternative variant aSep08, mRNA.                                                         |
| <a href="#">Bnip3</a>  | <a href="#">Bnip3.bSep08</a>  | <a href="#">84480</a>  | 6855  | 431  | 4  | 129 | BCL2/adenovirus E1B 19 kDa-interacting protein 3 (Bnip3) alternative variant bSep08, mRNA.                                                         |
| <a href="#">Bnip3</a>  | <a href="#">Bnip3.cSep08</a>  | <a href="#">84480</a>  | 9142  | 669  | 2  | 60  | BCL2/adenovirus E1B 19 kDa-interacting protein 3 (6.5 kD) (Bnip3) alternative variant cSep08, mRNA.                                                |
| <a href="#">Bnip3l</a> | <a href="#">Bnip3l.aSep08</a> | <a href="#">140923</a> | 21108 | 1301 | 6  | 271 | BCL2/adenovirus E1B interacting protein 3-like (Bnip3l) alternative variant aSep08, mRNA.                                                          |
| <a href="#">Bnip3l</a> | <a href="#">Bnip3l.cSep08</a> | <a href="#">140923</a> | 13373 | 946  | 6  | 179 | BCL2/adenovirus E1B interacting protein 3-like (19.4 kD) (Bnip3l) alternative variant cSep08, mRNA.                                                |
| <a href="#">Bnip3l</a> | <a href="#">Bnip3l.dSep08</a> | <a href="#">140923</a> | 14774 | 1901 | 4  | 6   | BCL2/adenovirus E1B interacting protein 3-like (Bnip3l) alternative variant dSep08, mRNA.                                                          |
| <a href="#">boby</a>   | <a href="#">boby.aSep08</a>   |                        | 59760 | 726  |    | 110 | putative nuclear protein (12.1 kD) (boby) mRNA.                                                                                                    |
| <a href="#">Boc</a>    | <a href="#">Boc.aSep08</a>    | <a href="#">360715</a> | 75385 | 4491 | 19 | 685 | biregional cell adhesion molecule-related down-regulated by oncogenes binding protein CRA a like (75.1 kD) (Boc) alternative variant aSep08, mRNA. |
| <a href="#">bochy</a>  | <a href="#">bochy.aSep08</a>  |                        | 4385  | 706  |    | 104 | complement component 5 (bochy) mRNA.                                                                                                               |
| <a href="#">bofer</a>  | <a href="#">bofer.aSep08</a>  |                        | 23853 | 373  | 2  | 32  | putative protein (bofer) alternative variant aSep08, mRNA.                                                                                         |
| <a href="#">bofer</a>  | <a href="#">bofer.bSep08</a>  |                        | 10610 | 338  | 1  | 29  | putative protein (bofer) alternative variant bSep08, mRNA.                                                                                         |
| <a href="#">boflo</a>  | <a href="#">boflo.aSep08</a>  |                        | 9913  | 219  |    | 72  | CRA b like (boflo) mRNA.                                                                                                                           |
| <a href="#">boflu</a>  | <a href="#">boflu.aSep08</a>  |                        | 3266  | 1615 | 3  | 181 | putative protein (20.6 kD) (boflu) alternative variant aSep08, mRNA.                                                                               |
| <a href="#">boflu</a>  | <a href="#">boflu.bSep08</a>  |                        | 2430  | 731  | 3  | 83  | uncharacterized Protein homolog like (boflu) alternative variant bSep08, mRNA.                                                                     |
| <a href="#">Bok</a>    | <a href="#">Bok.aSep08</a>    | <a href="#">29884</a>  | 10312 | 1326 | 4  | 213 | ovarian killer (23.5 kD) (Bok) alternative variant aSep08, mRNA.                                                                                   |
| <a href="#">Bok</a>    | <a href="#">Bok.cSep08</a>    | <a href="#">29884</a>  | 9538  | 750  | 5  | 120 | ovarian killer (13.2 kD) (Bok) alternative variant cSep08, mRNA.                                                                                   |
| <a href="#">Bok</a>    | <a href="#">Bok.dSep08</a>    | <a href="#">29884</a>  | 802   | 394  | 2  | 62  | putative protein (6.5 kD) (Bok) alternative variant dSep08, mRNA.                                                                                  |
| <a href="#">BoIA.0</a> | <a href="#">BoIA.0.aSep08</a> |                        | 1415  | 1077 | 3  | 86  | bola-Like Protein 2 (10.2 kD) (BoIA.0) alternative variant aSep08, mRNA.                                                                           |
| <a href="#">BoIA.0</a> | <a href="#">BoIA.0.bSep08</a> |                        | 554   | 299  | 2  | 41  | putative protein (BoIA.0) alternative variant bSep08, mRNA.                                                                                        |
| <a href="#">boloy</a>  | <a href="#">boloy.aSep08</a>  |                        | 1448  | 476  |    | 158 | down syndrome cell adhesion molecule CHD2-42 like (boloy) mRNA.                                                                                    |
| <a href="#">bomer</a>  | <a href="#">bomer.aSep08</a>  |                        | 7493  | 431  | 3  | 61  | putative protein (bomer) alternative variant aSep08, mRNA.                                                                                         |
| <a href="#">bomer</a>  | <a href="#">bomer.bSep08</a>  |                        | 7120  | 1106 | 3  | 45  | putative protein (5.1 kD) (bomer) alternative variant bSep08, mRNA.                                                                                |
| <a href="#">bomer</a>  | <a href="#">bomer.cSep08</a>  |                        | 6073  | 1087 | 3  | 48  | putative protein (5.3 kD) (bomer) alternative variant cSep08, mRNA.                                                                                |
| <a href="#">bomer</a>  | <a href="#">bomer.dSep08</a>  |                        | 19660 | 665  | 3  | 45  | putative protein (5.1 kD) (bomer) alternative variant dSep08, mRNA.                                                                                |

|                         |                                |                        |        |      |    |     |                                                                      |
|-------------------------|--------------------------------|------------------------|--------|------|----|-----|----------------------------------------------------------------------|
| <a href="#">bomer</a>   | <a href="#">bomer.eSep08</a>   |                        | 6500   | 485  | 2  | 45  | putative protein (5.1 kD) (bomer) alternative variant eSep08, mRNA.  |
| <a href="#">bonoy</a>   | <a href="#">bonoy.aSep08</a>   |                        | 3180   | 477  |    | 58  | putative protein (bonoy) mRNA.                                       |
| <a href="#">Bop1</a>    | <a href="#">Bop1.bSep08</a>    | <a href="#">300050</a> | 1338   | 938  | 1  | 312 | block of proliferation 1 (Bop1) alternative variant bSep08, mRNA.    |
| <a href="#">bopor</a>   | <a href="#">bopor.aSep08</a>   |                        | 5552   | 249  |    | 53  | CRA a like (bopor) mRNA.                                             |
| <a href="#">borby</a>   | <a href="#">borby.aSep08</a>   |                        | 1555   | 570  |    | 58  | putative protein (6.8 kD) (borby) mRNA.                              |
| <a href="#">borchy</a>  | <a href="#">borchy.aSep08</a>  |                        | 4014   | 597  |    | 123 | putative protein (13.5 kD) (borchy) mRNA.                            |
| <a href="#">borfer</a>  | <a href="#">borfer.aSep08</a>  |                        | 13423  | 1091 |    | 48  | myosin light kinase (borfer) mRNA.                                   |
| <a href="#">borflo</a>  | <a href="#">borflo.aSep08</a>  |                        | 31766  | 343  |    | 37  | putative protein (borflo) mRNA.                                      |
| <a href="#">borflu</a>  | <a href="#">borflu.aSep08</a>  |                        | 14500  | 726  | 3  | 132 | putative protein (borflu) alternative variant aSep08, mRNA.          |
| <a href="#">borflu</a>  | <a href="#">borflu.bSep08</a>  |                        | 1884   | 345  | 2  | 62  | putative protein (6.8 kD) (borflu) alternative variant bSep08, mRNA. |
| <a href="#">borkee</a>  | <a href="#">borkee.aSep08</a>  |                        | 8196   | 339  | 1  | 88  | putative protein (borkee) alternative variant aSep08, mRNA.          |
| <a href="#">borkee</a>  | <a href="#">borkee.bSep08</a>  |                        | 13316  | 649  | 2  | 46  | putative protein (5.1 kD) (borkee) alternative variant bSep08, mRNA. |
| <a href="#">borloy</a>  | <a href="#">borloy.aSep08</a>  |                        | 4805   | 713  |    | 104 | putative protein (12.0 kD) (borloy) mRNA.                            |
| <a href="#">bormer</a>  | <a href="#">bormer.aSep08</a>  |                        | 2321   | 459  |    | 152 | myeloid lymphoid mixed-lineage leukemia like (bormer) mRNA.          |
| <a href="#">bornoy</a>  | <a href="#">bornoy.aSep08</a>  |                        | 969    | 286  |    | 37  | putative protein (bornoy) mRNA.                                      |
| <a href="#">borpor</a>  | <a href="#">borpor.aSep08</a>  |                        | 422    | 312  |    | 86  | putative protein (borpor) mRNA.                                      |
| <a href="#">borsa</a>   | <a href="#">borsa.bSep08</a>   |                        | 2240   | 822  | 2  | 72  | putative protein (borsa) alternative variant bSep08, mRNA.           |
| <a href="#">borshee</a> | <a href="#">borshee.aSep08</a> |                        | 6501   | 703  |    | 50  | putative protein (5.8 kD) (borshee) mRNA.                            |
| <a href="#">borto</a>   | <a href="#">borto.aSep08</a>   |                        | 3320   | 1350 |    | 44  | putative protein (borto) mRNA.                                       |
| <a href="#">borvar</a>  | <a href="#">borvar.aSep08</a>  |                        | 28493  | 4019 | 17 | 511 | ubiquitin 24 (borvar) alternative variant aSep08, mRNA.              |
| <a href="#">borvar</a>  | <a href="#">borvar.bSep08</a>  |                        | 849    | 715  | 2  | 54  | putative protein (borvar) alternative variant bSep08, mRNA.          |
| <a href="#">borwey</a>  | <a href="#">borwey.aSep08</a>  |                        | 120423 | 1761 |    | 51  | putative protein (borwey) mRNA.                                      |
| <a href="#">bosa</a>    | <a href="#">bosa.aSep08</a>    |                        | 2218   | 644  | 3  | 109 | deltex 3 (bosa) alternative variant aSep08, mRNA.                    |
| <a href="#">bosa</a>    | <a href="#">bosa.bSep08</a>    |                        | 488    | 317  | 1  | 29  | putative protein (bosa) alternative variant bSep08, mRNA.            |
| <a href="#">boshee</a>  | <a href="#">boshee.aSep08</a>  |                        | 3149   | 777  |    | 54  | putative protein (6.2 kD) (boshee) mRNA.                             |
| <a href="#">boto</a>    | <a href="#">boto.aSep08</a>    |                        | 7419   | 261  |    | 27  | putative protein (boto) mRNA.                                        |
| <a href="#">bovar</a>   | <a href="#">bovar.aSep08</a>   |                        | 4281   | 1049 |    | 237 | interacting protein 1 (bovar) mRNA.                                  |
| <a href="#">bowey</a>   | <a href="#">bowey.bSep08</a>   |                        | 16326  | 623  | 2  | 67  | putative protein (bowey) alternative variant bSep08, mRNA.           |
| <a href="#">bowey</a>   | <a href="#">bowey.cSep08</a>   |                        | 1290   | 469  | 1  | 43  | putative protein (4.9 kD) (bowey) alternative variant cSep08, mRNA.  |
| <a href="#">boyby</a>   | <a href="#">boyby.aSep08</a>   |                        | 8719   | 455  |    | 32  | putative protein (3.7 kD) (boyby) mRNA.                              |
| <a href="#">boychy</a>  | <a href="#">boychy.aSep08</a>  |                        | 3677   | 393  |    | 130 | putative protein (boychy) mRNA.                                      |
| <a href="#">boyfer</a>  | <a href="#">boyfer.aSep08</a>  |                        | 1285   | 595  |    | 58  | putative protein (6.5 kD) (boyfer) mRNA.                             |
| <a href="#">boyflo</a>  | <a href="#">boyflo.aSep08</a>  |                        | 6042   | 715  |    | 100 | putative protein (boyflo) mRNA.                                      |
| <a href="#">boyflu</a>  | <a href="#">boyflu.aSep08</a>  |                        | 1820   | 411  |    | 136 | sorting nexin 26 (boyflu) mRNA.                                      |
| <a href="#">boykee</a>  | <a href="#">boykee.aSep08</a>  |                        | 29164  | 355  |    | 50  | putative protein (5.7 kD) (boykee) mRNA.                             |

|                         |                                |                        |       |      |    |     |                                                                                                        |
|-------------------------|--------------------------------|------------------------|-------|------|----|-----|--------------------------------------------------------------------------------------------------------|
| <a href="#">boyloy</a>  | <a href="#">boyloy.aSep08</a>  |                        | 2366  | 555  |    | 98  | putative protein (boyloy) mRNA.                                                                        |
| <a href="#">boymer</a>  | <a href="#">boymer.aSep08</a>  |                        | 551   | 395  |    | 86  | putative protein (boymer) mRNA.                                                                        |
| <a href="#">boynoy</a>  | <a href="#">boynoy.aSep08</a>  |                        | 1942  | 490  |    | 29  | putative protein (3.4 kD) (boynoy) mRNA.                                                               |
| <a href="#">boypor</a>  | <a href="#">boypor.aSep08</a>  |                        | 13491 | 1418 | 11 | 472 | pleckstrin homology-like domain family b member 1 (boypor) alternative variant aSep08, mRNA.           |
| <a href="#">boypor</a>  | <a href="#">boypor.bSep08</a>  |                        | 6660  | 1236 | 5  | 318 | pleckstrin homology-like domain family B member 1 (34.3 kD) (boypor) alternative variant bSep08, mRNA. |
| <a href="#">boypor</a>  | <a href="#">boypor.cSep08</a>  |                        | 1128  | 435  | 3  | 144 | pleckstrin homology-like domain family b member 1 (boypor) alternative variant cSep08, mRNA.           |
| <a href="#">boypor</a>  | <a href="#">boypor.dSep08</a>  |                        | 4020  | 381  | 3  | 126 | pleckstrin homology-like domain family B member 1 CRA a (boypor) alternative variant dSep08, mRNA.     |
| <a href="#">boysa</a>   | <a href="#">boysa.aSep08</a>   |                        | 6928  | 842  | 1  | 166 | putative mitochondrial protein (11.9 kD) (boysa) alternative variant aSep08, mRNA.                     |
| <a href="#">boysa</a>   | <a href="#">boysa.bSep08</a>   |                        | 2657  | 514  | 1  | 113 | regulator of G-protein 22 (boysa) alternative variant bSep08, mRNA.                                    |
| <a href="#">boyshee</a> | <a href="#">boyshee.aSep08</a> |                        | 824   | 278  |    | 30  | putative protein (3.3 kD) (boyshee) mRNA.                                                              |
| <a href="#">boyto</a>   | <a href="#">boyto.aSep08</a>   |                        | 826   | 260  |    | 49  | putative protein (boyto) mRNA.                                                                         |
| <a href="#">boyvar</a>  | <a href="#">boyvar.aSep08</a>  |                        | 8467  | 1239 | 2  | 40  | putative protein (4.2 kD) (boyvar) alternative variant aSep08, mRNA.                                   |
| <a href="#">boyvar</a>  | <a href="#">boyvar.bSep08</a>  |                        | 5100  | 710  | 1  | 81  | putative protein (8.5 kD) (boyvar) alternative variant bSep08, mRNA.                                   |
| <a href="#">boywey</a>  | <a href="#">boywey.aSep08</a>  |                        | 18569 | 509  |    | 44  | putative protein (4.8 kD) (boywey) mRNA.                                                               |
| <a href="#">Bpgm</a>    | <a href="#">Bpgm.bSep08</a>    | <a href="#">296973</a> | 28641 | 848  | 1  | 214 | 2,3-bisphosphoglycerate mutase (Bpgm) alternative variant bSep08, mRNA.                                |
| <a href="#">Bphl</a>    | <a href="#">Bphl.bSep08</a>    | <a href="#">361239</a> | 13789 | 455  | 3  | 151 | biphenyl hydrolase-like CRA a (Bphl) alternative variant bSep08, mRNA.                                 |
| <a href="#">Bphl</a>    | <a href="#">Bphl.cSep08</a>    | <a href="#">361239</a> | 28274 | 813  | 4  | 143 | biphenyl hydrolase-like CRA d (Bphl) alternative variant cSep08, mRNA.                                 |
| <a href="#">Bphl</a>    | <a href="#">Bphl.dSep08</a>    | <a href="#">361239</a> | 9850  | 388  | 4  | 128 | biphenyl hydrolase-like CRA a (Bphl) alternative variant dSep08, mRNA.                                 |
| <a href="#">Bphl</a>    | <a href="#">Bphl.eSep08</a>    | <a href="#">361239</a> | 16025 | 418  | 4  | 89  | biphenyl hydrolase-like CRA a (Bphl) alternative variant eSep08, mRNA.                                 |
| <a href="#">Bphl</a>    | <a href="#">Bphl.fSep08</a>    | <a href="#">361239</a> | 1023  | 934  | 2  | 82  | biphenyl hydrolase-like CRA d (Bphl) alternative variant fSep08, mRNA.                                 |
| <a href="#">Bpnt1</a>   | <a href="#">Bpnt1.bSep08</a>   | <a href="#">64473</a>  | 24708 | 713  | 5  | 237 | bisphosphate 3'-nucleotidase 1 (Bpnt1) alternative variant bSep08, mRNA.                               |
| <a href="#">Bpnt1</a>   | <a href="#">Bpnt1.cSep08</a>   | <a href="#">64473</a>  | 12782 | 639  | 5  | 212 | bisphosphate 3'-nucleotidase 1 (Bpnt1) alternative variant cSep08, mRNA.                               |
| <a href="#">Bpnt1</a>   | <a href="#">Bpnt1.dSep08</a>   | <a href="#">64473</a>  | 8626  | 1090 | 5  | 196 | bisphosphate 3'-nucleotidase 1 (Bpnt1) alternative variant dSep08, mRNA.                               |
| <a href="#">Bpnt1</a>   | <a href="#">Bpnt1.eSep08</a>   | <a href="#">64473</a>  | 9012  | 1431 | 4  | 164 | bisphosphate 3'-nucleotidase 1 (Bpnt1) alternative variant eSep08, mRNA.                               |
| <a href="#">Bpnt1</a>   | <a href="#">Bpnt1.fSep08</a>   | <a href="#">64473</a>  | 1791  | 242  | 2  | 80  | bisphosphate 3'-nucleotidase 1 (Bpnt1) alternative variant fSep08, mRNA.                               |
| <a href="#">Braf</a>    | <a href="#">Braf.aSep08</a>    | <a href="#">114486</a> | 32361 | 2058 |    | 234 | v-raf murine sarcoma viral oncogene homolog B1 (Braf) mRNA.                                            |

|                        |                               |                        |       |      |    |      |                                                                                                                       |
|------------------------|-------------------------------|------------------------|-------|------|----|------|-----------------------------------------------------------------------------------------------------------------------|
| <a href="#">Brca1</a>  | <a href="#">Brca1.cSep08</a>  | <a href="#">497672</a> | 1718  | 457  | 2  | 64   | breast cancer 1 (Brca1) alternative variant cSep08, mRNA.                                                             |
| <a href="#">Brca2</a>  | <a href="#">Brca2.bSep08</a>  | <a href="#">360254</a> | 1904  | 965  | 2  | 238  | breast cancer 2 (25.4 kD) (Brca2) alternative variant bSep08, mRNA.                                                   |
| <a href="#">BRCT.0</a> | <a href="#">BRCT.0.aSep08</a> |                        | 15850 | 613  |    | 204  | ADP-ribosyltransferase -like 1 (BRCT.0) mRNA.                                                                         |
| <a href="#">BRCT.1</a> | <a href="#">BRCT.1.aSep08</a> |                        | 2194  | 401  |    | 132  | topoisomerase II binding protein 1 like (BRCT.1) mRNA.                                                                |
| <a href="#">Brd1</a>   | <a href="#">Brd1.aSep08</a>   | <a href="#">315210</a> | 48051 | 4875 | 2  | 1189 | zinc finger, PHD-type and bromodomain containing protein (133.5 kD) (Brd1) alternative variant aSep08, complete mRNA. |
| <a href="#">Brd1</a>   | <a href="#">Brd1.bSep08</a>   | <a href="#">315210</a> | 16621 | 397  | 2  | 131  | putative protein of metazoan origin (Brd1) alternative variant bSep08, mRNA.                                          |
| <a href="#">Brd1</a>   | <a href="#">Brd1.cSep08</a>   | <a href="#">315210</a> | 852   | 410  | 1  | 62   | putative protein of mammalian origin (Brd1) alternative variant cSep08, mRNA.                                         |
| <a href="#">Brd2</a>   | <a href="#">Brd2.bSep08</a>   | <a href="#">294276</a> | 9158  | 3737 | 13 | 636  | bromodomain containing protein (Brd2) alternative variant bSep08, mRNA.                                               |
| <a href="#">Brd2</a>   | <a href="#">Brd2.cSep08</a>   | <a href="#">294276</a> | 3609  | 1375 | 5  | 286  | bromodomain containing protein (Brd2) alternative variant cSep08, mRNA.                                               |
| <a href="#">Brd2</a>   | <a href="#">Brd2.dSep08</a>   | <a href="#">294276</a> | 2383  | 1958 | 4  | 237  | bromodomain containing protein (25.4 kD) (Brd2) alternative variant dSep08, mRNA.                                     |
| <a href="#">Brd3</a>   | <a href="#">Brd3.bSep08</a>   | <a href="#">362092</a> | 27369 | 2184 | 8  | 497  | bromodomain containing protein (Brd3) alternative variant bSep08, mRNA.                                               |
| <a href="#">Brd3</a>   | <a href="#">Brd3.cSep08</a>   | <a href="#">362092</a> | 6798  | 735  | 5  | 244  | putative protein of eukaryotic origin (Brd3) alternative variant cSep08, mRNA.                                        |
| <a href="#">Brd3</a>   | <a href="#">Brd3.dSep08</a>   | <a href="#">362092</a> | 40838 | 765  | 5  | 206  | bromodomain containing protein (Brd3) alternative variant dSep08, mRNA.                                               |
| <a href="#">Brd3</a>   | <a href="#">Brd3.eSep08</a>   | <a href="#">362092</a> | 7389  | 3459 | 4  | 195  | putative protein, with a coiled coil domain, of eukaryotic origin (Brd3) alternative variant eSep08, mRNA.            |
| <a href="#">Brd3</a>   | <a href="#">Brd3.fSep08</a>   | <a href="#">362092</a> | 4231  | 520  | 2  | 121  | putative protein, with a coiled coil domain, of eukaryotic origin (Brd3) alternative variant fSep08, mRNA.            |
| <a href="#">Brd3</a>   | <a href="#">Brd3.gSep08</a>   | <a href="#">362092</a> | 1819  | 602  | 2  | 16   | putative protein (1.9 kD) (Brd3) alternative variant gSep08, mRNA.                                                    |
| <a href="#">Brd4</a>   | <a href="#">Brd4.aSep08</a>   | <a href="#">362844</a> | 74006 | 3027 | 14 | 978  | bromodomain containing protein (Brd4) alternative variant aSep08, mRNA.                                               |
| <a href="#">Brd4</a>   | <a href="#">Brd4.cSep08</a>   | <a href="#">362844</a> | 54138 | 1235 | 6  | 146  | bromodomain containing protein (16.9 kD) (Brd4) alternative variant cSep08, mRNA.                                     |
| <a href="#">Brd4</a>   | <a href="#">Brd4.dSep08</a>   | <a href="#">362844</a> | 46755 | 373  | 2  | 124  | putative protein of eukaryotic origin (Brd4) alternative variant dSep08, mRNA.                                        |
| <a href="#">Brd7</a>   | <a href="#">Brd7.aSep08</a>   | <a href="#">361374</a> | 27162 | 1967 | 15 | 585  | bromodomain containing protein (Brd7) alternative variant aSep08, mRNA.                                               |
| <a href="#">Brd7</a>   | <a href="#">Brd7.cSep08</a>   | <a href="#">361374</a> | 3768  | 681  | 5  | 168  | putative protein, with a coiled coil domain, of metazoan origin (Brd7) alternative variant cSep08, mRNA.              |
| <a href="#">Brd7</a>   | <a href="#">Brd7.eSep08</a>   | <a href="#">361374</a> | 6167  | 809  | 4  | 121  | putative protein of metazoan origin (Brd7) alternative variant eSep08, mRNA.                                          |
| <a href="#">Brd8</a>   | <a href="#">Brd8.bSep08</a>   | <a href="#">291691</a> | 15363 | 841  | 9  | 280  | putative protein, with 2 coiled coil domains, of metazoan origin (Brd8) alternative variant bSep08, mRNA.             |
| <a href="#">Brd8</a>   | <a href="#">Brd8.cSep08</a>   | <a href="#">291691</a> | 16068 | 762  | 9  | 253  | putative protein, with 2 coiled coil domains, of metazoan origin (Brd8) alternative variant cSep08, mRNA.             |

|                       |                              |                        |        |      |   |     |                                                                                                                                           |
|-----------------------|------------------------------|------------------------|--------|------|---|-----|-------------------------------------------------------------------------------------------------------------------------------------------|
| <a href="#">Brd8</a>  | <a href="#">Brd8.dSep08</a>  | <a href="#">291691</a> | 1957   | 662  | 3 | 182 | putative protein of vertebrate origin (Brd8) alternative variant dSep08, mRNA.                                                            |
| <a href="#">Brd8</a>  | <a href="#">Brd8.eSep08</a>  | <a href="#">291691</a> | 2576   | 621  | 7 | 134 | bromodomain containing protein (Brd8) alternative variant eSep08, mRNA.                                                                   |
| <a href="#">Brd8</a>  | <a href="#">Brd8.gSep08</a>  | <a href="#">291691</a> | 716    | 360  | 2 | 101 | putative protein of vertebrate origin (Brd8) alternative variant gSep08, mRNA.                                                            |
| <a href="#">Brd8</a>  | <a href="#">Brd8.hSep08</a>  | <a href="#">291691</a> | 4077   | 773  | 7 | 127 | putative protein of vertebrate origin (Brd8) alternative variant hSep08, mRNA.                                                            |
| <a href="#">Brd9</a>  | <a href="#">Brd9.bSep08</a>  | <a href="#">308067</a> | 11552  | 737  | 7 | 245 | putative protein of metazoan origin (Brd9) alternative variant bSep08, mRNA.                                                              |
| <a href="#">Brd9</a>  | <a href="#">Brd9.cSep08</a>  | <a href="#">308067</a> | 11381  | 771  | 7 | 233 | putative protein of metazoan origin (Brd9) alternative variant cSep08, mRNA.                                                              |
| <a href="#">Brd9</a>  | <a href="#">Brd9.dSep08</a>  | <a href="#">308067</a> | 2964   | 598  | 5 | 199 | putative protein, with a coiled coil domain, of bilateral origin (Brd9) alternative variant dSep08, mRNA.                                 |
| <a href="#">Brdt</a>  | <a href="#">Brdt.bSep08</a>  | <a href="#">305123</a> | 19745  | 775  | 1 | 146 | bromodomain, testis-specific (Brdt) alternative variant bSep08, mRNA.                                                                     |
| <a href="#">Bre</a>   | <a href="#">Bre.bSep08</a>   | <a href="#">362704</a> | 219385 | 481  | 5 | 130 | brain reproductive organ-expressed (Bre) alternative variant bSep08, mRNA.                                                                |
| <a href="#">Bre</a>   | <a href="#">Bre.cSep08</a>   | <a href="#">362704</a> | 92752  | 464  | 5 | 100 | brain reproductive organ-expressed (Bre) alternative variant cSep08, mRNA.                                                                |
| <a href="#">Bre</a>   | <a href="#">Bre.dSep08</a>   | <a href="#">362704</a> | 8193   | 463  | 4 | 65  | mitochondrial ribosomal protein l33 CRA b (7.5 kD) (Bre) alternative variant dSep08, mRNA.                                                |
| <a href="#">Bre</a>   | <a href="#">Bre.eSep08</a>   | <a href="#">362704</a> | 6029   | 761  | 2 | 50  | putative protein (5.9 kD) (Bre) alternative variant eSep08, mRNA.                                                                         |
| <a href="#">Bre</a>   | <a href="#">Bre.fSep08</a>   | <a href="#">362704</a> | 135436 | 646  | 7 | 72  | brain reproductive organ-expressed (7.8 kD) (Bre) alternative variant fSep08, mRNA.                                                       |
| <a href="#">Brf1</a>  | <a href="#">Brf1.bSep08</a>  | <a href="#">299347</a> | 30615  | 870  | 7 | 289 | BRF1 homolog, subunit of RNA polymerase III transcription initiation factor IIIB (S. cerevisiae) (Brf1) alternative variant bSep08, mRNA. |
| <a href="#">Brf1</a>  | <a href="#">Brf1.cSep08</a>  | <a href="#">299347</a> | 7662   | 779  | 6 | 188 | BRF1 homolog, subunit of RNA polymerase III transcription initiation factor IIIB (S. cerevisiae) (Brf1) alternative variant cSep08, mRNA. |
| <a href="#">Brf1</a>  | <a href="#">Brf1.dSep08</a>  | <a href="#">299347</a> | 18516  | 729  | 5 | 170 | BRF1 homolog, subunit of RNA polymerase III transcription initiation factor IIIB (S. cerevisiae) (Brf1) alternative variant dSep08, mRNA. |
| <a href="#">Brf2</a>  | <a href="#">Brf2.bSep08</a>  | <a href="#">306542</a> | 2103   | 1125 | 1 | 127 | BRF2, subunit of RNA polymerase III transcription initiation factor, BRF1-like (Brf2) alternative variant bSep08, mRNA.                   |
| <a href="#">Bri3</a>  | <a href="#">Bri3.bSep08</a>  | <a href="#">304284</a> | 8221   | 566  | 1 | 98  | brain protein l3 (Bri3) alternative variant bSep08, mRNA.                                                                                 |
| <a href="#">Brip1</a> | <a href="#">Brip1.aSep08</a> | <a href="#">360588</a> | 46245  | 1470 |   | 489 | BRCA1 interacting protein C-terminal helicase 1 (Brip1) mRNA.                                                                             |
| <a href="#">BRK.0</a> | <a href="#">BRK.0.aSep08</a> |                        | 14902  | 647  | 4 | 215 | chromodomain helicase DNA binding protein 9 CRA b like (BRK.0) alternative variant aSep08, mRNA.                                          |
| <a href="#">BRK.0</a> | <a href="#">BRK.0.bSep08</a> |                        | 836    | 356  | 1 | 42  | putative protein (5.1 kD) (BRK.0) alternative variant bSep08, mRNA.                                                                       |
| <a href="#">Brms1</a> | <a href="#">Brms1.bSep08</a> | <a href="#">293668</a> | 1602   | 782  | 6 | 213 | breast cancer metastasis-suppressor 1 (Brms1) alternative variant bSep08, mRNA.                                                           |

|                               |                                      |                        |        |      |    |     |                                                                                                 |
|-------------------------------|--------------------------------------|------------------------|--------|------|----|-----|-------------------------------------------------------------------------------------------------|
| <a href="#">Brms1</a>         | <a href="#">Brms1.cSep08</a>         | <a href="#">293668</a> | 5966   | 769  | 5  | 180 | breast cancer metastasis-suppressor 1 (Brms1) alternative variant cSep08, mRNA.                 |
| <a href="#">Brms1</a>         | <a href="#">Brms1.dSep08</a>         | <a href="#">293668</a> | 1035   | 679  | 4  | 150 | breast cancer metastasis-suppressor 1 (Brms1) alternative variant dSep08, mRNA.                 |
| <a href="#">Brms1</a>         | <a href="#">Brms1.fSep08</a>         | <a href="#">293668</a> | 4325   | 733  | 6  | 91  | breast cancer metastasis-suppressor 1 (Brms1) alternative variant fSep08, mRNA.                 |
| <a href="#">Brms1</a>         | <a href="#">Brms1.gSep08</a>         | <a href="#">293668</a> | 795    | 690  | 2  | 87  | breast cancer metastasis-suppressor 1 (9.9 kD) (Brms1) alternative variant gSep08, mRNA.        |
| <a href="#">Brms1l</a>        | <a href="#">Brms1l.aSep08</a>        | <a href="#">299053</a> | 33957  | 2582 | 10 | 323 | breast cancer metastasis-suppressor 1-like (37.6 kD) (Brms1l) alternative variant aSep08, mRNA. |
| <a href="#">Brms1l</a>        | <a href="#">Brms1l.bSep08</a>        | <a href="#">299053</a> | 29011  | 773  | 9  | 225 | breast cancer metastasis-suppressor 1-like (Brms1l) alternative variant bSep08, mRNA.           |
| <a href="#">Brms1l</a>        | <a href="#">Brms1l.cSep08</a>        | <a href="#">299053</a> | 1720   | 660  | 2  | 37  | breast cancer metastasis-suppressor 1-like (Brms1l) alternative variant cSep08, mRNA.           |
| <a href="#">Bromodomain.0</a> | <a href="#">Bromodomain.0.aSep08</a> |                        | 14802  | 750  | 5  | 249 | polybromo 1 CRA a (Bromodomain.0) alternative variant aSep08, mRNA.                             |
| <a href="#">Bromodomain.0</a> | <a href="#">Bromodomain.0.bSep08</a> |                        | 19713  | 652  | 5  | 217 | polybromo 1 CRA c (Bromodomain.0) alternative variant bSep08, mRNA.                             |
| <a href="#">Bromodomain.1</a> | <a href="#">Bromodomain.1.aSep08</a> |                        | 27808  | 1379 |    | 459 | polybromo 1 CRA c (Bromodomain.1) mRNA.                                                         |
| <a href="#">Bromodomain.3</a> | <a href="#">Bromodomain.3.aSep08</a> |                        | 2335   | 570  |    | 189 | tripartite motif-containing 66 (Bromodomain.3) mRNA.                                            |
| <a href="#">Brp16</a>         | <a href="#">Brp16.bSep08</a>         | <a href="#">315094</a> | 1040   | 832  | 3  | 252 | brain protein 16 (26.2 kD) (Brp16) alternative variant bSep08, mRNA.                            |
| <a href="#">Brpf1</a>         | <a href="#">Brpf1.aSep08</a>         | <a href="#">679713</a> | 3716   | 1567 | 5  | 476 | bromodomain and PHD finger containing, 1 (Brpf1) alternative variant aSep08, mRNA.              |
| <a href="#">Brpf1</a>         | <a href="#">Brpf1.bSep08</a>         | <a href="#">679713</a> | 2131   | 734  | 3  | 244 | bromodomain and PHD finger containing, 1 (Brpf1) alternative variant bSep08, mRNA.              |
| <a href="#">Brs3</a>          | <a href="#">Brs3.bSep08</a>          | <a href="#">260319</a> | 22022  | 760  | 2  | 222 | bombesin-like receptor 3 (Brs3) alternative variant bSep08, mRNA.                               |
| <a href="#">Brsk1</a>         | <a href="#">Brsk1.aSep08</a>         | <a href="#">499073</a> | 25739  | 2798 | 17 | 764 | BR serine/threonine kinase 1 (Brsk1) alternative variant aSep08, mRNA.                          |
| <a href="#">Brsk1</a>         | <a href="#">Brsk1.bSep08</a>         | <a href="#">499073</a> | 2189   | 726  | 4  | 241 | BR serine/threonine kinase 1 (Brsk1) alternative variant bSep08, mRNA.                          |
| <a href="#">Brsk1</a>         | <a href="#">Brsk1.cSep08</a>         | <a href="#">499073</a> | 2101   | 884  | 2  | 239 | BR serine/threonine kinase 1 (27.3 kD) (Brsk1) alternative variant cSep08, mRNA.                |
| <a href="#">Brsk2</a>         | <a href="#">Brsk2.aSep08</a>         | <a href="#">293631</a> | 3954   | 428  |    | 142 | brain serine/threonine kinase 2 (Brsk2) mRNA.                                                   |
| <a href="#">Brunol4</a>       | <a href="#">Brunol4.aSep08</a>       | <a href="#">307540</a> | 28329  | 3134 | 10 | 337 | bruno-like 4, RNA binding protein (Drosophila) (Brunol4) alternative variant aSep08, mRNA.      |
| <a href="#">Brunol4</a>       | <a href="#">Brunol4.bSep08</a>       | <a href="#">307540</a> | 164420 | 597  | 4  | 168 | bruno-like 4, RNA binding protein (Drosophila) (Brunol4) alternative variant bSep08, mRNA.      |
| <a href="#">Brunol4</a>       | <a href="#">Brunol4.cSep08</a>       | <a href="#">307540</a> | 76286  | 774  | 1  | 125 | bruno-like 4, RNA binding protein (Drosophila) (Brunol4) alternative variant cSep08, mRNA.      |
| <a href="#">Brunol5</a>       | <a href="#">Brunol5.aSep08</a>       | <a href="#">314647</a> | 12649  | 457  | 4  | 152 | bruno-like 5, RNA binding protein (Drosophila) (Brunol5) alternative variant aSep08, mRNA.      |
| <a href="#">Brunol5</a>       | <a href="#">Brunol5.bSep08</a>       | <a href="#">314647</a> | 2328   | 418  | 4  | 138 | bruno-like 5, RNA binding protein (Drosophila) (Brunol5) alternative variant bSep08, mRNA.      |



|                         |                                |                        |       |      |    |     |                                                                                                                                           |
|-------------------------|--------------------------------|------------------------|-------|------|----|-----|-------------------------------------------------------------------------------------------------------------------------------------------|
| <a href="#">Brunol5</a> | <a href="#">Brunol5.cSep08</a> | <a href="#">314647</a> | 6231  | 591  | 6  | 108 | bruno-like 5, RNA binding protein (Drosophila) (11.8 kD) (Brunol5) alternative variant cSep08, mRNA.                                      |
| <a href="#">Brunol6</a> | <a href="#">Brunol6.bSep08</a> | <a href="#">300758</a> | 698   | 383  | 4  | 127 | bruno-like 6, RNA binding protein (Drosophila) (Brunol6) alternative variant bSep08, mRNA.                                                |
| <a href="#">Brunol6</a> | <a href="#">Brunol6.cSep08</a> | <a href="#">300758</a> | 16844 | 363  | 4  | 61  | bruno-like 6, RNA binding protein (Drosophila) (Brunol6) alternative variant cSep08, mRNA.                                                |
| <a href="#">Brwd1</a>   | <a href="#">Brwd1.bSep08</a>   | <a href="#">304061</a> | 5905  | 433  | 5  | 144 | putative protein of eukaryotic origin (Brwd1) alternative variant bSep08, mRNA.                                                           |
| <a href="#">Brwd2</a>   | <a href="#">Brwd2.aSep08</a>   | <a href="#">309016</a> | 28262 | 3023 | 20 | 749 | putative protein of ancient origin (Brwd2) alternative variant aSep08, mRNA.                                                              |
| <a href="#">Brwd2</a>   | <a href="#">Brwd2.bSep08</a>   | <a href="#">309016</a> | 5317  | 631  | 5  | 176 | putative protein of metazoan origin (Brwd2) alternative variant bSep08, mRNA.                                                             |
| <a href="#">Brwd2</a>   | <a href="#">Brwd2.cSep08</a>   | <a href="#">309016</a> | 3243  | 684  | 5  | 164 | putative endoplasmic reticulum protein of eukaryotic origin (18.1 kD) (Brwd2) alternative variant cSep08, mRNA.                           |
| <a href="#">Brwd3</a>   | <a href="#">Brwd3.aSep08</a>   | <a href="#">317213</a> | 5624  | 521  |    | 173 | bromodomain containing protein (Brwd3) mRNA.                                                                                              |
| <a href="#">Bsc12</a>   | <a href="#">Bsc12.bSep08</a>   | <a href="#">361722</a> | 10564 | 1699 | 6  | 384 | bernardinelli-Seip congenital lipodystrophy 2 (Bsc12) alternative variant bSep08, mRNA.                                                   |
| <a href="#">Bsc12</a>   | <a href="#">Bsc12.cSep08</a>   | <a href="#">361722</a> | 2724  | 665  | 6  | 186 | seipin (Bsc12) alternative variant cSep08, mRNA.                                                                                          |
| <a href="#">Bsc12</a>   | <a href="#">Bsc12.dSep08</a>   | <a href="#">361722</a> | 2726  | 525  | 5  | 139 | seipin (Bsc12) alternative variant dSep08, mRNA.                                                                                          |
| <a href="#">Bsc12</a>   | <a href="#">Bsc12.eSep08</a>   | <a href="#">361722</a> | 1598  | 1372 | 3  | 121 | congenital lipodystrophy 2 (13.1 kD) (Bsc12) alternative variant eSep08, mRNA.                                                            |
| <a href="#">Bsc12</a>   | <a href="#">Bsc12.fSep08</a>   | <a href="#">361722</a> | 2501  | 610  | 3  | 101 | putative protein (Bsc12) alternative variant fSep08, mRNA.                                                                                |
| <a href="#">Bsc12</a>   | <a href="#">Bsc12.gSep08</a>   | <a href="#">361722</a> | 632   | 398  | 2  | 81  | putative mitochondrial protein (9.3 kD) (Bsc12) alternative variant gSep08, mRNA.                                                         |
| <a href="#">Bsc12</a>   | <a href="#">Bsc12.hSep08</a>   | <a href="#">361722</a> | 895   | 405  | 2  | 61  | putative protein (6.9 kD) (Bsc12) alternative variant hSep08, mRNA.                                                                       |
| <a href="#">Bsd1</a>    | <a href="#">Bsd1.bSep08</a>    | <a href="#">297890</a> | 18085 | 2314 | 6  | 310 | BSD (Bsd1) alternative variant bSep08, mRNA.                                                                                              |
| <a href="#">Bsd1</a>    | <a href="#">Bsd1.cSep08</a>    | <a href="#">297890</a> | 1187  | 366  | 1  | 9   | putative protein (Bsd1) alternative variant cSep08, mRNA.                                                                                 |
| <a href="#">Bsn</a>     | <a href="#">Bsn.bSep08</a>     | <a href="#">29138</a>  | 481   | 365  | 1  | 95  | bassoon (10.8 kD) (Bsn) alternative variant bSep08, mRNA.                                                                                 |
| <a href="#">Bst1</a>    | <a href="#">Bst1.bSep08</a>    | <a href="#">81506</a>  | 8314  | 696  | 2  | 82  | bone marrow stromal cell antigen 1 (Bst1) alternative variant bSep08, mRNA.                                                               |
| <a href="#">Bst2</a>    | <a href="#">Bst2.bSep08</a>    | <a href="#">378947</a> | 562   | 374  |    | 37  | bone marrow stromal cell antigen 2 (Bst2) alternative variant bSep08, mRNA.                                                               |
| <a href="#">Btaf1</a>   | <a href="#">Btaf1.aSep08</a>   | <a href="#">368042</a> | 13488 | 2593 | 7  | 408 | BTAF1 RNA polymerase II, B-TFIID transcription factor-associated, (Mot1 homolog, S. cerevisiae) (Btaf1) alternative variant aSep08, mRNA. |
| <a href="#">Btaf1</a>   | <a href="#">Btaf1.bSep08</a>   | <a href="#">368042</a> | 1094  | 1006 | 1  | 117 | BTAF1 RNA polymerase II, B-TFIID transcription factor-associated, (Mot1 homolog, S. cerevisiae) (Btaf1) alternative variant bSep08, mRNA. |
| <a href="#">BTB.0</a>   | <a href="#">BTB.0.aSep08</a>   |                        | 1102  | 858  |    | 285 | BTB/POZ (BTB.0) mRNA.                                                                                                                     |
| <a href="#">BTB.1</a>   | <a href="#">BTB.1.aSep08</a>   |                        | 44769 | 922  | 1  | 244 | BTB/POZ (BTB.1) alternative variant aSep08, mRNA.                                                                                         |
| <a href="#">BTB.1</a>   | <a href="#">BTB.1.bSep08</a>   |                        | 40407 | 645  | 1  | 182 | BTB/POZ (BTB.1) alternative variant bSep08, mRNA.                                                                                         |
| <a href="#">BTB.2</a>   | <a href="#">BTB.2.aSep08</a>   |                        | 860   | 493  |    | 164 | BTB/POZ (BTB.2) mRNA.                                                                                                                     |
| <a href="#">Btbd1</a>   | <a href="#">Btbd1.bSep08</a>   | <a href="#">293060</a> | 27829 | 1417 | 9  | 206 | putative cytoplasmic protein of eukaryotic origin (23.3 kD) (Btbd1) alternative variant bSep08, mRNA.                                     |

|                         |                                |                        |        |      |   |     |                                                                                                   |
|-------------------------|--------------------------------|------------------------|--------|------|---|-----|---------------------------------------------------------------------------------------------------|
| <a href="#">Btbd1</a>   | <a href="#">Btbd1.cSep08</a>   | <a href="#">293060</a> | 5479   | 2063 | 3 | 73  | putative protein of metazoan origin (8.0 kD) (Btbd1) alternative variant cSep08, mRNA.            |
| <a href="#">Btbd2</a>   | <a href="#">Btbd2.aSep08</a>   | <a href="#">500793</a> | 5667   | 2245 | 2 | 397 | CRA a (Btbd2) alternative variant aSep08, mRNA.                                                   |
| <a href="#">Btbd2</a>   | <a href="#">Btbd2.bSep08</a>   | <a href="#">500793</a> | 2434   | 1360 | 3 | 259 | CRA a (Btbd2) alternative variant bSep08, mRNA.                                                   |
| <a href="#">Btbd2</a>   | <a href="#">Btbd2.cSep08</a>   | <a href="#">500793</a> | 1174   | 473  | 1 | 157 | CRA a (Btbd2) alternative variant cSep08, mRNA.                                                   |
| <a href="#">Btbd4</a>   | <a href="#">Btbd4.bSep08</a>   | <a href="#">311718</a> | 12932  | 1560 | 2 | 462 | BTB/POZ (50.3 kD) (Btbd4) alternative variant bSep08, mRNA.                                       |
| <a href="#">Btbd4</a>   | <a href="#">Btbd4.cSep08</a>   | <a href="#">311718</a> | 6029   | 2159 | 2 | 173 | zinc finger BTB domain-containing protein 46 (19.0 kD) (Btbd4) alternative variant cSep08, mRNA.  |
| <a href="#">Btbd6</a>   | <a href="#">Btbd6.bSep08</a>   | <a href="#">690367</a> | 2031   | 1704 | 4 | 424 | BTB domain protein (Btbd6) alternative variant bSep08, mRNA.                                      |
| <a href="#">Btbd6</a>   | <a href="#">Btbd6.cSep08</a>   | <a href="#">690367</a> | 1260   | 1081 | 3 | 225 | BTB domain 6 (Btbd6) alternative variant cSep08, mRNA.                                            |
| <a href="#">Btbd7</a>   | <a href="#">Btbd7.bSep08</a>   | <a href="#">362772</a> | 11057  | 758  | 5 | 252 | putative protein of metazoan origin (Btbd7) alternative variant bSep08, mRNA.                     |
| <a href="#">Btbd9</a>   | <a href="#">Btbd9.aSep08</a>   | <a href="#">294318</a> | 119195 | 1632 | 4 | 231 | putative protein of ancient origin (Btbd9) alternative variant aSep08, mRNA.                      |
| <a href="#">Btbd9</a>   | <a href="#">Btbd9.bSep08</a>   | <a href="#">294318</a> | 436    | 239  | 1 | 49  | putative protein (Btbd9) alternative variant bSep08, mRNA.                                        |
| <a href="#">Btbd10</a>  | <a href="#">Btbd10.bSep08</a>  | <a href="#">308890</a> | 44101  | 719  | 5 | 217 | putative protein of eukaryotic origin (Btbd10) alternative variant bSep08, mRNA.                  |
| <a href="#">Btbd10</a>  | <a href="#">Btbd10.cSep08</a>  | <a href="#">308890</a> | 6702   | 504  | 2 | 33  | putative protein (3.7 kD) (Btbd10) alternative variant cSep08, mRNA.                              |
| <a href="#">Btbd11</a>  | <a href="#">Btbd11.bSep08</a>  | <a href="#">314675</a> | 26227  | 334  | 1 | 111 | putative protein of metazoan origin (Btbd11) alternative variant bSep08, mRNA.                    |
| <a href="#">Btbd12</a>  | <a href="#">Btbd12.aSep08</a>  | <a href="#">302953</a> | 6679   | 2358 | 4 | 572 | putative protein of metazoan origin (Btbd12) alternative variant aSep08, mRNA.                    |
| <a href="#">Btbd14a</a> | <a href="#">Btbd14a.aSep08</a> | <a href="#">296583</a> | 62944  | 2314 | 4 | 585 | btbde BTB POZ domain-containing protein 14A (63.1 kD) (Btbd14a) alternative variant aSep08, mRNA. |
| <a href="#">Btbd14a</a> | <a href="#">Btbd14a.bSep08</a> | <a href="#">296583</a> | 24696  | 588  | 1 | 180 | btbde BTB POZ domain-containing protein 14A (Btbd14a) alternative variant bSep08, mRNA.           |
| <a href="#">Btbd14b</a> | <a href="#">Btbd14b.bSep08</a> | <a href="#">171454</a> | 5770   | 2054 | 4 | 508 | transcriptional repressor NAC1 (Btbd14b) alternative variant bSep08, mRNA.                        |
| <a href="#">Btbd14b</a> | <a href="#">Btbd14b.cSep08</a> | <a href="#">171454</a> | 1626   | 700  | 1 | 168 | containing BTB domain 14 (Btbd14b) alternative variant cSep08, mRNA.                              |
| <a href="#">Btbd16</a>  | <a href="#">Btbd16.bSep08</a>  | <a href="#">361658</a> | 5047   | 723  | 3 | 130 | putative protein of metazoan origin (Btbd16) alternative variant bSep08, mRNA.                    |
| <a href="#">Btbd16</a>  | <a href="#">Btbd16.cSep08</a>  | <a href="#">361658</a> | 5924   | 991  | 3 | 56  | putative protein of mammalian origin (6.6 kD) (Btbd16) alternative variant cSep08, mRNA.          |
| <a href="#">Btd</a>     | <a href="#">Btd.bSep08</a>     | <a href="#">306262</a> | 31803  | 880  | 4 | 271 | biotinidase (Btd) alternative variant bSep08, mRNA.                                               |
| <a href="#">Btd</a>     | <a href="#">Btd.cSep08</a>     | <a href="#">306262</a> | 31587  | 742  | 5 | 247 | biotinidase (Btd) alternative variant cSep08, mRNA.                                               |
| <a href="#">Btd</a>     | <a href="#">Btd.dSep08</a>     | <a href="#">306262</a> | 31453  | 726  | 7 | 241 | biotinidase (Btd) alternative variant dSep08, mRNA.                                               |
| <a href="#">Btd</a>     | <a href="#">Btd.eSep08</a>     | <a href="#">306262</a> | 31577  | 395  | 3 | 131 | biotinidase (Btd) alternative variant eSep08, mRNA.                                               |
| <a href="#">Btd</a>     | <a href="#">Btd.fSep08</a>     | <a href="#">306262</a> | 30518  | 739  | 4 | 126 | biotinidase (Btd) alternative variant fSep08, mRNA.                                               |
| <a href="#">Btd</a>     | <a href="#">Btd.gSep08</a>     | <a href="#">306262</a> | 30479  | 783  | 4 | 113 | biotinidase (Btd) alternative variant gSep08, mRNA.                                               |
| <a href="#">Btd</a>     | <a href="#">Btd.iSep08</a>     | <a href="#">306262</a> | 26790  | 626  | 4 | 75  | putative protein (Btd) alternative variant iSep08, mRNA.                                          |
| <a href="#">Btd</a>     | <a href="#">Btd.jSep08</a>     | <a href="#">306262</a> | 26654  | 907  | 4 | 69  | putative protein (Btd) alternative variant jSep08, mRNA.                                          |

|                        |                               |                        |        |      |    |     |                                                                                                                             |
|------------------------|-------------------------------|------------------------|--------|------|----|-----|-----------------------------------------------------------------------------------------------------------------------------|
| <a href="#">Btd</a>    | <a href="#">Btd.kSep08</a>    | <a href="#">306262</a> | 26911  | 789  | 5  | 56  | putative protein (Btd) alternative variant kSep08, mRNA.                                                                    |
| <a href="#">Btd</a>    | <a href="#">Btd.mSep08</a>    | <a href="#">306262</a> | 26473  | 546  | 2  | 70  | putative protein (Btd) alternative variant mSep08, mRNA.                                                                    |
| <a href="#">Btf3</a>   | <a href="#">Btf3.aSep08</a>   | <a href="#">294680</a> | 6849   | 841  | 6  | 206 | basic transcription factor 3 (22.1 kD) (Btf3) alternative variant aSep08, mRNA.                                             |
| <a href="#">Btf3</a>   | <a href="#">Btf3.cSep08</a>   | <a href="#">294680</a> | 3982   | 743  | 3  | 99  | basic transcription factor 3 (10.7 kD) (Btf3) alternative variant cSep08, mRNA.                                             |
| <a href="#">Btf3l4</a> | <a href="#">Btf3l4.aSep08</a> | <a href="#">366434</a> | 17831  | 1022 |    | 182 | basic transcription factor 3-like 4 (Btf3l4) mRNA.                                                                          |
| <a href="#">Btg2</a>   | <a href="#">Btg2.bSep08</a>   | <a href="#">29619</a>  | 2014   | 773  |    | 139 | B-cell translocation gene 2, anti-proliferative (Btg2) alternative variant bSep08, mRNA.                                    |
| <a href="#">Btg3</a>   | <a href="#">Btg3.cSep08</a>   | <a href="#">54230</a>  | 12761  | 978  | 4  | 80  | B-cell translocation gene 3 (Btg3) alternative variant cSep08, mRNA.                                                        |
| <a href="#">Btk</a>    | <a href="#">Btk.bSep08</a>    | <a href="#">367901</a> | 4827   | 695  | 1  | 107 | bruton agammaglobulinemia tyrosine kinase (Btk) alternative variant bSep08, mRNA.                                           |
| <a href="#">Btn2a2</a> | <a href="#">Btn2a2.aSep08</a> | <a href="#">306957</a> | 3752   | 743  |    | 160 | butyrophilin, subfamily 2, member A2 (Btn2a2) mRNA.                                                                         |
| <a href="#">Btrc</a>   | <a href="#">Btrc.bSep08</a>   | <a href="#">361765</a> | 138277 | 926  | 6  | 212 | beta-transducin repeat containing (Btrc) alternative variant bSep08, mRNA.                                                  |
| <a href="#">Btrc</a>   | <a href="#">Btrc.cSep08</a>   | <a href="#">361765</a> | 146123 | 790  | 7  | 179 | beta-transducin repeat containing (Btrc) alternative variant cSep08, mRNA.                                                  |
| <a href="#">Btrc</a>   | <a href="#">Btrc.dSep08</a>   | <a href="#">361765</a> | 136649 | 388  | 4  | 128 | beta-transducin repeat containing (Btrc) alternative variant dSep08, mRNA.                                                  |
| <a href="#">Btrc</a>   | <a href="#">Btrc.eSep08</a>   | <a href="#">361765</a> | 12747  | 1353 | 3  | 114 | beta-transducin repeat containing (Btrc) alternative variant eSep08, mRNA.                                                  |
| <a href="#">Bub1</a>   | <a href="#">Bub1.bSep08</a>   | <a href="#">296137</a> | 7096   | 759  | 6  | 252 | budding uninhibited by benzimidazoles 1 homolog (S. cerevisiae) (Bub1) alternative variant bSep08, mRNA.                    |
| <a href="#">Bub1</a>   | <a href="#">Bub1.cSep08</a>   | <a href="#">296137</a> | 5905   | 744  | 5  | 209 | budding uninhibited by benzimidazoles 1 homolog (S. cerevisiae) (Bub1) alternative variant cSep08, mRNA.                    |
| <a href="#">Bub1</a>   | <a href="#">Bub1.dSep08</a>   | <a href="#">296137</a> | 5714   | 658  | 5  | 172 | budding uninhibited by benzimidazoles 1 homolog (S. cerevisiae) (Bub1) alternative variant dSep08, mRNA.                    |
| <a href="#">Bub1b</a>  | <a href="#">Bub1b.aSep08</a>  | <a href="#">171576</a> | 31871  | 2174 | 14 | 645 | budding uninhibited by benzimidazoles 1 homolog, beta (S. cerevisiae) (Bub1b) alternative variant aSep08, mRNA.             |
| <a href="#">Bub1b</a>  | <a href="#">Bub1b.bSep08</a>  | <a href="#">171576</a> | 12952  | 1793 | 3  | 509 | budding uninhibited by benzimidazoles 1 homolog, beta (S. cerevisiae) (Bub1b) alternative variant bSep08, mRNA.             |
| <a href="#">Bub1b</a>  | <a href="#">Bub1b.cSep08</a>  | <a href="#">171576</a> | 7502   | 1835 | 2  | 235 | budding uninhibited by benzimidazoles 1 homolog, beta (S. cerevisiae) (26.9 kD) (Bub1b) alternative variant cSep08, mRNA.   |
| <a href="#">Bub3</a>   | <a href="#">Bub3.bSep08</a>   | <a href="#">361662</a> | 10511  | 1335 | 8  | 254 | budding uninhibited by benzimidazoles 3 homolog (S. cerevisiae) (29.0 kD) (Bub3) alternative variant bSep08, complete mRNA. |
| <a href="#">Bub3</a>   | <a href="#">Bub3.eSep08</a>   | <a href="#">361662</a> | 3518   | 743  | 2  | 78  | budding uninhibited by benzimidazoles 3 homolog (S. cerevisiae) (Bub3) alternative variant eSep08, mRNA.                    |
| <a href="#">buby</a>   | <a href="#">buby.aSep08</a>   |                        | 4096   | 419  |    | 139 | stromal antigen 2 like (buby) mRNA.                                                                                         |
| <a href="#">buchy</a>  | <a href="#">buchy.aSep08</a>  |                        | 4360   | 1785 |    | 489 | complement component (buchy) mRNA.                                                                                          |
| <a href="#">Bud31</a>  | <a href="#">Bud31.aSep08</a>  | <a href="#">89819</a>  | 7427   | 803  | 2  | 144 | BUD31 homolog (yeast) (17.0 kD) (Bud31) alternative variant aSep08, complete mRNA.                                          |
| <a href="#">Bud31</a>  | <a href="#">Bud31.bSep08</a>  | <a href="#">89819</a>  | 8221   | 1756 | 2  | 144 | BUD31 homolog (yeast) (17.0 kD) (Bud31) alternative variant bSep08, complete mRNA.                                          |

|                        |                               |                        |       |      |   |     |                                                                                                             |
|------------------------|-------------------------------|------------------------|-------|------|---|-----|-------------------------------------------------------------------------------------------------------------|
| <a href="#">Bud31</a>  | <a href="#">Bud31.dSep08</a>  | <a href="#">89819</a>  | 5641  | 778  | 2 | 113 | BUD31 homolog (yeast) (Bud31) alternative variant dSep08, mRNA.                                             |
| <a href="#">bufer</a>  | <a href="#">bufer.aSep08</a>  |                        | 7378  | 715  |   | 47  | putative protein (bufer) mRNA.                                                                              |
| <a href="#">buflo</a>  | <a href="#">buflo.aSep08</a>  |                        | 1451  | 608  |   | 202 | putative protein of vertebrate origin (buflo) mRNA.                                                         |
| <a href="#">buflu</a>  | <a href="#">buflu.aSep08</a>  |                        | 4110  | 323  |   | 107 | ryanodine receptor (buflu) mRNA.                                                                            |
| <a href="#">buloy</a>  | <a href="#">buloy.aSep08</a>  |                        | 1264  | 716  |   | 41  | putative protein (buloy) mRNA.                                                                              |
| <a href="#">bumer</a>  | <a href="#">bumer.aSep08</a>  |                        | 2417  | 639  |   | 88  | putative nuclear protein (9.8 kD) (bumer) mRNA.                                                             |
| <a href="#">bunoy</a>  | <a href="#">bunoy.aSep08</a>  |                        | 2072  | 686  | 2 | 80  | putative protein (8.4 kD) (bunoy) alternative variant aSep08, mRNA.                                         |
| <a href="#">bunoy</a>  | <a href="#">bunoy.bSep08</a>  |                        | 2365  | 350  | 2 | 9   | putative protein (bunoy) alternative variant bSep08, mRNA.                                                  |
| <a href="#">bupor</a>  | <a href="#">bupor.aSep08</a>  |                        | 590   | 512  |   | 61  | putative protein (bupor) mRNA.                                                                              |
| <a href="#">busa</a>   | <a href="#">busa.aSep08</a>   |                        | 4916  | 447  | 3 | 54  | centaurin gamma 1 like (busa) alternative variant aSep08, mRNA.                                             |
| <a href="#">bushee</a> | <a href="#">bushee.aSep08</a> |                        | 12948 | 483  |   | 161 | putative protein of eukaryotic origin (bushee) mRNA.                                                        |
| <a href="#">buto</a>   | <a href="#">buto.aSep08</a>   |                        | 1465  | 653  |   | 32  | putative protein (buto) mRNA.                                                                               |
| <a href="#">buvar</a>  | <a href="#">buvar.aSep08</a>  |                        | 22212 | 482  |   | 105 | interacting protein 1 (buvar) mRNA.                                                                         |
| <a href="#">buwey</a>  | <a href="#">buwey.aSep08</a>  |                        | 2571  | 1053 |   | 112 | putative protein of metazoan origin (buwey) mRNA.                                                           |
| <a href="#">Bxdc2</a>  | <a href="#">Bxdc2.bSep08</a>  | <a href="#">294799</a> | 8964  | 734  | 9 | 152 | brix (Bxdc2) alternative variant bSep08, mRNA.                                                              |
| <a href="#">Bxdc5</a>  | <a href="#">Bxdc5.aSep08</a>  | <a href="#">499725</a> | 15050 | 1818 | 9 | 367 | brix (42.2 kD) (Bxdc5) alternative variant aSep08, mRNA.                                                    |
| <a href="#">Bxdc5</a>  | <a href="#">Bxdc5.bSep08</a>  | <a href="#">499725</a> | 2328  | 732  | 2 | 101 | putative protein, with a coiled coil domain, of vertebrate origin (Bxdc5) alternative variant bSep08, mRNA. |
| <a href="#">Bxdc5</a>  | <a href="#">Bxdc5.cSep08</a>  | <a href="#">499725</a> | 1148  | 565  | 3 | 87  | putative protein of eukaryotic origin (Bxdc5) alternative variant cSep08, mRNA.                             |
| <a href="#">Bxdc5</a>  | <a href="#">Bxdc5.dSep08</a>  | <a href="#">499725</a> | 1070  | 928  | 2 | 84  | putative protein of eukaryotic origin (10.1 kD) (Bxdc5) alternative variant dSep08, mRNA.                   |
| <a href="#">byby</a>   | <a href="#">byby.aSep08</a>   |                        | 12287 | 612  |   | 204 | stromal antigen 2 like (byby) mRNA.                                                                         |
| <a href="#">bychu</a>  | <a href="#">bychu.aSep08</a>  |                        | 22136 | 777  | 5 | 118 | epididymal protein 52 like (13.1 kD) (bychu) alternative variant aSep08, mRNA.                              |
| <a href="#">bychu</a>  | <a href="#">bychu.bSep08</a>  |                        | 5586  | 657  | 3 | 76  | putative protein (bychu) alternative variant bSep08, mRNA.                                                  |
| <a href="#">bychy</a>  | <a href="#">bychy.aSep08</a>  |                        | 4249  | 1313 |   | 79  | putative protein (bychy) mRNA.                                                                              |
| <a href="#">byfer</a>  | <a href="#">byfer.aSep08</a>  |                        | 663   | 365  |   | 36  | putative protein (byfer) mRNA.                                                                              |
| <a href="#">byflo</a>  | <a href="#">byflo.aSep08</a>  |                        | 1909  | 536  |   | 178 | putative protein of ancient origin (byflo) mRNA.                                                            |
| <a href="#">byflu</a>  | <a href="#">byflu.aSep08</a>  |                        | 461   | 369  |   | 122 | ryanodine receptor (byflu) mRNA.                                                                            |
| <a href="#">byloy</a>  | <a href="#">byloy.aSep08</a>  |                        | 2981  | 290  |   | 33  | putative protein (byloy) mRNA.                                                                              |
| <a href="#">bymer</a>  | <a href="#">bymer.aSep08</a>  |                        | 534   | 350  |   | 62  | putative protein (7.1 kD) (bymer) mRNA.                                                                     |
| <a href="#">bynoy</a>  | <a href="#">bynoy.aSep08</a>  |                        | 5701  | 674  |   | 224 | putative protein, with a coiled coil domain, of ancient origin (bynoy) mRNA.                                |
| <a href="#">bypor</a>  | <a href="#">bypor.aSep08</a>  |                        | 4122  | 426  |   | 56  | putative protein (6.5 kD) (bypor) mRNA.                                                                     |
| <a href="#">bysa</a>   | <a href="#">bysa.aSep08</a>   |                        | 1212  | 172  |   | 57  | centaurin gamma 1 PIKE-L (bysa) mRNA.                                                                       |
| <a href="#">byshee</a> | <a href="#">byshee.aSep08</a> |                        | 5782  | 501  |   | 166 | putative protein of mammalian origin (byshee) alternative variant aSep08, mRNA.                             |
| <a href="#">byshee</a> | <a href="#">byshee.bSep08</a> |                        | 13768 | 403  |   | 134 | putative protein of mammalian origin (byshee) alternative variant bSep08, mRNA.                             |

|                           |                                  |                        |        |      |   |     |                                                                                                  |
|---------------------------|----------------------------------|------------------------|--------|------|---|-----|--------------------------------------------------------------------------------------------------|
| <a href="#">byto</a>      | <a href="#">byto.bSep08</a>      |                        | 2618   | 770  | 2 | 62  | putative protein of mammalian origin (7.4 kD) (byto) alternative variant bSep08, mRNA.           |
| <a href="#">byvar</a>     | <a href="#">byvar.aSep08</a>     |                        | 6309   | 300  |   | 100 | interacting protein 1 (byvar) mRNA.                                                              |
| <a href="#">bywey</a>     | <a href="#">bywey.aSep08</a>     |                        | 7029   | 418  |   | 116 | putative protein (bywey) mRNA.                                                                   |
| <a href="#">Bzrap1</a>    | <a href="#">Bzrap1.aSep08</a>    | <a href="#">287609</a> | 7789   | 1800 |   | 537 | benzodiazapine receptor associated protein 1 (Bzrap1) alternative variant aSep08, mRNA.          |
| <a href="#">Bzrap1</a>    | <a href="#">Bzrap1.bSep08</a>    | <a href="#">287609</a> | 1728   | 423  |   | 140 | benzodiazapine receptor associated protein 1 (Bzrap1) alternative variant bSep08, mRNA.          |
| <a href="#">Bzw1</a>      | <a href="#">Bzw1.bSep08</a>      | <a href="#">363232</a> | 12716  | 2100 | 7 | 311 | basic leucine zipper and W2 domains 1 (Bzw1) alternative variant bSep08, mRNA.                   |
| <a href="#">Bzw1</a>      | <a href="#">Bzw1.cSep08</a>      | <a href="#">363232</a> | 5601   | 430  | 4 | 143 | basic leucine zipper and W2 domains 1 (Bzw1) alternative variant cSep08, mRNA.                   |
| <a href="#">Bzw1</a>      | <a href="#">Bzw1.eSep08</a>      | <a href="#">363232</a> | 1971   | 680  | 2 | 27  | basic leucine zipper and W2 domains 1 (Bzw1) alternative variant eSep08, mRNA.                   |
| <a href="#">Bzw2</a>      | <a href="#">Bzw2.bSep08</a>      | <a href="#">171439</a> | 2122   | 1486 | 2 | 62  | basic leucine zipper and W2 domains 2 (Bzw2) alternative variant bSep08, mRNA.                   |
| <a href="#">C1-set.0</a>  | <a href="#">C1-set.0.bSep08</a>  |                        | 2721   | 802  | 3 | 128 | T-cell receptor like (C1-set.0) alternative variant bSep08, mRNA.                                |
| <a href="#">C1-set.1</a>  | <a href="#">C1-set.1.aSep08</a>  |                        | 1855   | 492  | 2 | 117 | lambda chain (C1-set.1) alternative variant aSep08, mRNA.                                        |
| <a href="#">C1-set.1</a>  | <a href="#">C1-set.1.bSep08</a>  |                        | 3340   | 531  | 2 | 110 | lambda chain (11.9 kD) (C1-set.1) alternative variant bSep08, mRNA.                              |
| <a href="#">C1-set.3</a>  | <a href="#">C1-set.3.aSep08</a>  |                        | 671    | 587  |   | 195 | ig epsilon (C1-set.3) mRNA.                                                                      |
| <a href="#">C1-set.4</a>  | <a href="#">C1-set.4.aSep08</a>  |                        | 1627   | 1116 |   | 336 | immunoglobulin (C1-set.4) mRNA.                                                                  |
| <a href="#">C1-set.5</a>  | <a href="#">C1-set.5.aSep08</a>  |                        | 1646   | 1078 |   | 322 | immunoglobulin (C1-set.5) mRNA.                                                                  |
| <a href="#">C1-set.6</a>  | <a href="#">C1-set.6.aSep08</a>  |                        | 3922   | 1390 | 3 | 400 | ig region (C1-set.6) alternative variant aSep08, mRNA.                                           |
| <a href="#">C1-set.6</a>  | <a href="#">C1-set.6.bSep08</a>  |                        | 799    | 700  | 1 | 200 | immunoglobulin heavy chain (C1-set.6) alternative variant bSep08, mRNA.                          |
| <a href="#">C1-set.7</a>  | <a href="#">C1-set.7.aSep08</a>  |                        | 7974   | 1481 | 3 | 162 | ig delta region (C1-set.7) alternative variant aSep08, mRNA.                                     |
| <a href="#">C1-set.7</a>  | <a href="#">C1-set.7.bSep08</a>  |                        | 5069   | 386  | 2 | 75  | delta secreted form (C1-set.7) alternative variant bSep08, mRNA.                                 |
| <a href="#">C1-set.8</a>  | <a href="#">C1-set.8.aSep08</a>  |                        | 330240 | 778  | 4 | 259 | T-cell receptor like (C1-set.8) alternative variant aSep08, mRNA.                                |
| <a href="#">C1-set.8</a>  | <a href="#">C1-set.8.bSep08</a>  |                        | 327935 | 727  | 3 | 213 | T-cell receptor like (C1-set.8) alternative variant bSep08, mRNA.                                |
| <a href="#">C1-set.8</a>  | <a href="#">C1-set.8.cSep08</a>  |                        | 4488   | 766  | 5 | 179 | T-cell receptor like (C1-set.8) alternative variant cSep08, mRNA.                                |
| <a href="#">C1galt1c1</a> | <a href="#">C1galt1c1.aSep08</a> | <a href="#">302499</a> | 4928   | 1862 | 2 | 316 | C1GALT1-specific chaperone 1 (36.0 kD) (C1galt1c1) alternative variant aSep08, complete mRNA.    |
| <a href="#">C1galt1c1</a> | <a href="#">C1galt1c1.cSep08</a> | <a href="#">302499</a> | 705    | 401  | 2 | 43  | C1GALT1-specific chaperone 1 (C1galt1c1) alternative variant cSep08, mRNA.                       |
| <a href="#">C1qbp</a>     | <a href="#">C1qbp.bSep08</a>     | <a href="#">29681</a>  | 4251   | 795  | 6 | 233 | complement component 1, q subcomponent binding protein (C1qbp) alternative variant bSep08, mRNA. |
| <a href="#">C1qbp</a>     | <a href="#">C1qbp.cSep08</a>     | <a href="#">29681</a>  | 3941   | 682  | 4 | 145 | complement component 1, q subcomponent binding protein (C1qbp) alternative variant cSep08, mRNA. |

|                                  |                                         |                        |        |      |   |     |                                                                                                       |
|----------------------------------|-----------------------------------------|------------------------|--------|------|---|-----|-------------------------------------------------------------------------------------------------------|
| <a href="#">C1ql3</a>            | <a href="#">C1ql3.aSep08</a>            | <a href="#">680404</a> | 8693   | 2965 | 2 | 98  | complement component 1, q subcomponent-like 3 (C1ql3) alternative variant aSep08, mRNA.               |
| <a href="#">C1qtnf1</a>          | <a href="#">C1qtnf1.aSep08</a>          | <a href="#">303701</a> | 6834   | 2491 | 2 | 315 | c1q and tumor necrosis factor related protein 1 (C1qtnf1) alternative variant aSep08, mRNA.           |
| <a href="#">C1qtnf1</a>          | <a href="#">C1qtnf1.cSep08</a>          | <a href="#">303701</a> | 13856  | 827  | 2 | 259 | c1q and tumor necrosis factor related protein 1 (C1qtnf1) alternative variant cSep08, mRNA.           |
| <a href="#">C1qtnf2</a>          | <a href="#">C1qtnf2.aSep08</a>          | <a href="#">497886</a> | 17664  | 1216 |   | 294 | c1q and tumor necrosis factor related protein 2 (31.0 kD) (C1qtnf2) mRNA.                             |
| <a href="#">C1qtnf3</a>          | <a href="#">C1qtnf3.bSep08</a>          | <a href="#">294806</a> | 13359  | 577  | 1 | 192 | c1q and tumor necrosis factor related protein 3 (C1qtnf3) alternative variant bSep08, mRNA.           |
| <a href="#">C1qtnf4</a>          | <a href="#">C1qtnf4.bSep08</a>          | <a href="#">311184</a> | 2320   | 667  | 1 | 61  | c1q and tumor necrosis factor related protein 4 (C1qtnf4) alternative variant bSep08, mRNA.           |
| <a href="#">C1qtnf5</a>          | <a href="#">C1qtnf5.aSep08</a>          | <a href="#">315598</a> | 1262   | 933  | 1 | 311 | c1q and tumor necrosis factor related protein 5 (C1qtnf5) alternative variant aSep08, mRNA.           |
| <a href="#">C1qtnf7</a>          | <a href="#">C1qtnf7.bSep08</a>          | <a href="#">305423</a> | 112799 | 1785 | 1 | 296 | c1q and tumor necrosis factor related protein 7 (31.4 kD) (C1qtnf7) alternative variant bSep08, mRNA. |
| <a href="#">C1r</a>              | <a href="#">C1r.bSep08</a>              | <a href="#">312705</a> | 1186   | 728  | 2 | 52  | complement component 1, r subcomponent (C1r) alternative variant bSep08, mRNA.                        |
| <a href="#">C1sandRGD1561715</a> | <a href="#">C1sandRGD1561715.bSep08</a> | <a href="#">192262</a> | 2614   | 1012 | 3 | 252 | complement component 1 s subcomponent (C1sandRGD1561715) alternative variant bSep08, mRNA.            |
| <a href="#">C1sandRGD1561715</a> | <a href="#">C1sandRGD1561715.bSep08</a> | <a href="#">500313</a> | 2614   | 1012 | 3 | 252 | complement component 1 s subcomponent (C1sandRGD1561715) alternative variant bSep08, mRNA.            |
| <a href="#">C1sandRGD1561715</a> | <a href="#">C1sandRGD1561715.cSep08</a> | <a href="#">192262</a> | 379569 | 728  | 2 | 209 | complement component C1SA (C1sandRGD1561715) alternative variant cSep08, mRNA.                        |
| <a href="#">C1sandRGD1561715</a> | <a href="#">C1sandRGD1561715.cSep08</a> | <a href="#">500313</a> | 379569 | 728  | 2 | 209 | complement component C1SA (C1sandRGD1561715) alternative variant cSep08, mRNA.                        |
| <a href="#">C1_1.0</a>           | <a href="#">C1_1.0.aSep08</a>           |                        | 82772  | 795  |   | 203 | protein kinase C theta (C1_1.0) mRNA.                                                                 |
| <a href="#">C1_1.1</a>           | <a href="#">C1_1.1.aSep08</a>           |                        | 2798   | 428  |   | 142 | diacylglycerol kinase theta (C1_1.1) mRNA.                                                            |
| <a href="#">C1_1.2</a>           | <a href="#">C1_1.2.aSep08</a>           |                        | 1339   | 292  |   | 97  | diacylglycerol kinase eta (C1_1.2) mRNA.                                                              |
| <a href="#">C1_1.3</a>           | <a href="#">C1_1.3.aSep08</a>           |                        | 6954   | 995  |   | 295 | kinase d1 (C1_1.3) mRNA.                                                                              |
| <a href="#">C2</a>               | <a href="#">C2.aSep08</a>               | <a href="#">24231</a>  | 4893   | 1155 | 9 | 304 | complement component 2 (C2) alternative variant aSep08, mRNA.                                         |
| <a href="#">C2</a>               | <a href="#">C2.bSep08</a>               | <a href="#">24231</a>  | 9862   | 824  | 6 | 274 | complement component 2 (C2) alternative variant bSep08, mRNA.                                         |
| <a href="#">C2</a>               | <a href="#">C2.eSep08</a>               | <a href="#">24231</a>  | 8770   | 691  | 3 |     |                                                                                                       |
| <a href="#">C2.1</a>             | <a href="#">C2.1.aSep08</a>             |                        | 8389   | 337  | 3 | 112 | unc-13 homolog B CRA b (C2.1) alternative variant aSep08, mRNA.                                       |
| <a href="#">C2.2</a>             | <a href="#">C2.2.aSep08</a>             |                        | 16253  | 963  |   | 315 | RAS p21 protein activator 4 (C2.2) mRNA.                                                              |
| <a href="#">C2.3</a>             | <a href="#">C2.3.aSep08</a>             |                        | 2788   | 702  |   | 121 | intersectin 1 (C2.3) mRNA.                                                                            |
| <a href="#">C2.4</a>             | <a href="#">C2.4.aSep08</a>             |                        | 5185   | 3104 |   | 90  | DNA segment Chr 12 ERATO Doi 551 expressed (C2.4) mRNA.                                               |
| <a href="#">C2.5</a>             | <a href="#">C2.5.aSep08</a>             |                        | 12208  | 329  |   | 97  | regulator of G-protein 3 (C2.5) mRNA.                                                                 |
| <a href="#">C2.6</a>             | <a href="#">C2.6.aSep08</a>             |                        | 12761  | 653  |   | 217 | dysferlin (C2.6) mRNA.                                                                                |
| <a href="#">C2.7</a>             | <a href="#">C2.7.aSep08</a>             |                        | 8312   | 738  |   | 245 | synaptotagmin XVII (C2.7) mRNA.                                                                       |
| <a href="#">C2.8</a>             | <a href="#">C2.8.aSep08</a>             |                        | 43202  | 1717 |   | 572 | myoferlin (C2.8) mRNA.                                                                                |

|                             |                                    |                        |       |      |    |     |                                                                                                |
|-----------------------------|------------------------------------|------------------------|-------|------|----|-----|------------------------------------------------------------------------------------------------|
| <a href="#">C2cd3</a>       | <a href="#">C2cd3.aSep08</a>       | <a href="#">293148</a> | 15922 | 1527 |    | 299 | CRA b (C2cd3) mRNA.                                                                            |
| <a href="#">C4.0</a>        | <a href="#">C4.0.aSep08</a>        |                        | 14501 | 3300 |    | 773 | procollagen type IV alpha 2 (C4.0) mRNA.                                                       |
| <a href="#">C4.1</a>        | <a href="#">C4.1.aSep08</a>        |                        | 20795 | 3184 | 6  | 371 | IV alpha (C4.1) alternative variant aSep08, mRNA.                                              |
| <a href="#">C4.1</a>        | <a href="#">C4.1.bSep08</a>        |                        | 5744  | 708  | 1  | 58  | putative protein (C4.1) alternative variant bSep08, mRNA.                                      |
| <a href="#">C4.2</a>        | <a href="#">C4.2.aSep08</a>        |                        | 14018 | 771  |    | 257 | alpha IV (C4.2) mRNA.                                                                          |
| <a href="#">C4aandC4-2</a>  | <a href="#">C4aandC4-2.cSep08</a>  | <a href="#">24233</a>  | 1907  | 898  | 6  | 195 | complement component (C4aandC4-2) alternative variant cSep08, mRNA.                            |
| <a href="#">C4aandC4-2</a>  | <a href="#">C4aandC4-2.cSep08</a>  | <a href="#">406161</a> | 1907  | 898  | 6  | 195 | complement component (C4aandC4-2) alternative variant cSep08, mRNA.                            |
| <a href="#">C4aandC4-2</a>  | <a href="#">C4aandC4-2.dSep08</a>  | <a href="#">24233</a>  | 847   | 512  | 4  | 163 | complement component (C4aandC4-2) alternative variant dSep08, mRNA.                            |
| <a href="#">C4aandC4-2</a>  | <a href="#">C4aandC4-2.dSep08</a>  | <a href="#">406161</a> | 847   | 512  | 4  | 163 | complement component (C4aandC4-2) alternative variant dSep08, mRNA.                            |
| <a href="#">C4aandC4-2</a>  | <a href="#">C4aandC4-2.eSep08</a>  | <a href="#">24233</a>  | 843   | 466  | 4  | 155 | complement component (C4aandC4-2) alternative variant eSep08, mRNA.                            |
| <a href="#">C4aandC4-2</a>  | <a href="#">C4aandC4-2.eSep08</a>  | <a href="#">406161</a> | 843   | 466  | 4  | 155 | complement component (C4aandC4-2) alternative variant eSep08, mRNA.                            |
| <a href="#">C4aandC4-2</a>  | <a href="#">C4aandC4-2.fSep08</a>  | <a href="#">24233</a>  | 1712  | 398  | 6  | 104 | complement component (C4aandC4-2) alternative variant fSep08, mRNA.                            |
| <a href="#">C4aandC4-2</a>  | <a href="#">C4aandC4-2.fSep08</a>  | <a href="#">406161</a> | 1712  | 398  | 6  | 104 | complement component (C4aandC4-2) alternative variant fSep08, mRNA.                            |
| <a href="#">C4aandC4-2</a>  | <a href="#">C4aandC4-2.gSep08</a>  | <a href="#">24233</a>  | 567   | 433  | 2  | 59  | complement component 4a (6.7 kD) (C4aandC4-2) alternative variant gSep08, mRNA.                |
| <a href="#">C4aandC4-2</a>  | <a href="#">C4aandC4-2.gSep08</a>  | <a href="#">406161</a> | 567   | 433  | 2  | 59  | complement component 4a (6.7 kD) (C4aandC4-2) alternative variant gSep08, mRNA.                |
| <a href="#">C4bpb</a>       | <a href="#">C4bpb.bSep08</a>       | <a href="#">24236</a>  | 1629  | 284  | 1  | 81  | complement component 4 binding protein, beta (C4bpb) alternative variant bSep08, mRNA.         |
| <a href="#">C5</a>          | <a href="#">C5.aSep08</a>          | <a href="#">362119</a> | 40720 | 2828 | 20 | 824 | complement component (C5) alternative variant aSep08, mRNA.                                    |
| <a href="#">C5</a>          | <a href="#">C5.bSep08</a>          | <a href="#">362119</a> | 20821 | 1802 | 8  | 435 | complement component (C5) alternative variant bSep08, mRNA.                                    |
| <a href="#">C5</a>          | <a href="#">C5.cSep08</a>          | <a href="#">362119</a> | 8557  | 886  | 3  | 116 | complement component (C5) alternative variant cSep08, mRNA.                                    |
| <a href="#">C5</a>          | <a href="#">C5.dSep08</a>          | <a href="#">362119</a> | 7477  | 928  | 5  | 109 | complement component C5 (C5) alternative variant dSep08, mRNA.                                 |
| <a href="#">C6</a>          | <a href="#">C6.bSep08</a>          | <a href="#">24237</a>  | 10573 | 830  | 2  | 169 | complement component 6 (18.9 kD) (C6) alternative variant bSep08, mRNA.                        |
| <a href="#">C7</a>          | <a href="#">C7.aSep08</a>          | <a href="#">117517</a> | 72587 | 1616 | 8  | 367 | complement component 7 (C7) alternative variant aSep08, mRNA.                                  |
| <a href="#">C8.0</a>        | <a href="#">C8.0.aSep08</a>        |                        | 5118  | 587  |    | 195 | IgG binding protein like (C8.0) mRNA.                                                          |
| <a href="#">C8b</a>         | <a href="#">C8b.aSep08</a>         | <a href="#">313421</a> | 37470 | 2377 |    | 583 | complement component 8, beta polypeptide (C8b) mRNA.                                           |
| <a href="#">C8gandLcn12</a> | <a href="#">C8gandLcn12.aSep08</a> | <a href="#">296545</a> | 10088 | 1300 | 7  | 271 | complement component 8 gamma polypeptide CRA b (C8gandLcn12) alternative variant aSep08, mRNA. |
| <a href="#">C8gandLcn12</a> | <a href="#">C8gandLcn12.aSep08</a> | <a href="#">680602</a> | 10088 | 1300 | 7  | 271 | complement component 8 gamma polypeptide CRA b (C8gandLcn12) alternative variant aSep08, mRNA. |

|                             |                                    |                        |       |      |   |     |                                                                                                |
|-----------------------------|------------------------------------|------------------------|-------|------|---|-----|------------------------------------------------------------------------------------------------|
| <a href="#">C8gandLcn12</a> | <a href="#">C8gandLcn12.bSep08</a> | <a href="#">296545</a> | 2980  | 704  | 6 | 208 | lipocalin 12 (C8gandLcn12) alternative variant bSep08, mRNA.                                   |
| <a href="#">C8gandLcn12</a> | <a href="#">C8gandLcn12.bSep08</a> | <a href="#">680602</a> | 2980  | 704  | 6 | 208 | lipocalin 12 (C8gandLcn12) alternative variant bSep08, mRNA.                                   |
| <a href="#">C8gandLcn12</a> | <a href="#">C8gandLcn12.cSep08</a> | <a href="#">296545</a> | 1545  | 753  | 7 | 199 | complement component 8 gamma polypeptide CRA b (C8gandLcn12) alternative variant cSep08, mRNA. |
| <a href="#">C8gandLcn12</a> | <a href="#">C8gandLcn12.cSep08</a> | <a href="#">680602</a> | 1545  | 753  | 7 | 199 | complement component 8 gamma polypeptide CRA b (C8gandLcn12) alternative variant cSep08, mRNA. |
| <a href="#">C8gandLcn12</a> | <a href="#">C8gandLcn12.eSep08</a> | <a href="#">296545</a> | 1572  | 523  | 5 | 164 | complement component (C8gandLcn12) alternative variant eSep08, mRNA.                           |
| <a href="#">C8gandLcn12</a> | <a href="#">C8gandLcn12.eSep08</a> | <a href="#">680602</a> | 1572  | 523  | 5 | 164 | complement component (C8gandLcn12) alternative variant eSep08, mRNA.                           |
| <a href="#">C8gandLcn12</a> | <a href="#">C8gandLcn12.gSep08</a> | <a href="#">296545</a> | 917   | 576  | 3 | 121 | complement component 8 gamma polypeptide CRA b (C8gandLcn12) alternative variant gSep08, mRNA. |
| <a href="#">C8gandLcn12</a> | <a href="#">C8gandLcn12.gSep08</a> | <a href="#">680602</a> | 917   | 576  | 3 | 121 | complement component 8 gamma polypeptide CRA b (C8gandLcn12) alternative variant gSep08, mRNA. |
| <a href="#">C8gandLcn12</a> | <a href="#">C8gandLcn12.hSep08</a> | <a href="#">296545</a> | 2357  | 370  | 4 | 95  | lipocalin 12 (C8gandLcn12) alternative variant hSep08, mRNA.                                   |
| <a href="#">C8gandLcn12</a> | <a href="#">C8gandLcn12.hSep08</a> | <a href="#">680602</a> | 2357  | 370  | 4 | 95  | lipocalin 12 (C8gandLcn12) alternative variant hSep08, mRNA.                                   |
| <a href="#">C8gandLcn12</a> | <a href="#">C8gandLcn12.iSep08</a> | <a href="#">296545</a> | 1086  | 374  | 2 | 79  | lipocalin 12 (C8gandLcn12) alternative variant iSep08, mRNA.                                   |
| <a href="#">C8gandLcn12</a> | <a href="#">C8gandLcn12.iSep08</a> | <a href="#">680602</a> | 1086  | 374  | 2 | 79  | lipocalin 12 (C8gandLcn12) alternative variant iSep08, mRNA.                                   |
| <a href="#">C9</a>          | <a href="#">C9.bSep08</a>          | <a href="#">117512</a> | 6223  | 1339 | 3 | 446 | complement component 9 (C9) alternative variant bSep08, mRNA.                                  |
| <a href="#">Cab39</a>       | <a href="#">Cab39.aSep08</a>       | <a href="#">301574</a> | 59832 | 1937 | 9 | 341 | calcium binding protein 39 (39.9 kD) (Cab39) alternative variant aSep08, mRNA.                 |
| <a href="#">Cab39</a>       | <a href="#">Cab39.bSep08</a>       | <a href="#">301574</a> | 55861 | 771  | 7 | 230 | calcium binding protein 39 (Cab39) alternative variant bSep08, mRNA.                           |
| <a href="#">Cab39</a>       | <a href="#">Cab39.cSep08</a>       | <a href="#">301574</a> | 53581 | 739  | 6 | 209 | calcium binding protein 39 (Cab39) alternative variant cSep08, mRNA.                           |
| <a href="#">Cab39I</a>      | <a href="#">Cab39I.bSep08</a>      | <a href="#">290291</a> | 89838 | 2739 | 9 | 289 | calcium binding protein 39-like (33.7 kD) (Cab39I) alternative variant bSep08, mRNA.           |
| <a href="#">Cab39I</a>      | <a href="#">Cab39I.cSep08</a>      | <a href="#">290291</a> | 74988 | 931  | 8 | 186 | calcium binding protein 39-like (Cab39I) alternative variant cSep08, mRNA.                     |
| <a href="#">Cab39I</a>      | <a href="#">Cab39I.dSep08</a>      | <a href="#">290291</a> | 64392 | 684  | 6 | 121 | calcium binding protein 39-like (Cab39I) alternative variant dSep08, mRNA.                     |
| <a href="#">Cab39I</a>      | <a href="#">Cab39I.eSep08</a>      | <a href="#">290291</a> | 8833  | 699  | 2 | 93  | calcium binding protein 39-like (11.0 kD) (Cab39I) alternative variant eSep08, mRNA.           |
| <a href="#">Cab39I</a>      | <a href="#">Cab39I.fSep08</a>      | <a href="#">290291</a> | 64361 | 811  | 7 | 116 | calcium binding protein 39-like (Cab39I) alternative variant fSep08, mRNA.                     |
| <a href="#">Cab39I</a>      | <a href="#">Cab39I.gSep08</a>      | <a href="#">290291</a> | 49694 | 618  | 6 | 23  | calcium binding protein 39-like (Cab39I) alternative variant gSep08, mRNA.                     |
| <a href="#">Cab39I</a>      | <a href="#">Cab39I.hSep08</a>      | <a href="#">290291</a> | 15210 | 412  | 2 | 49  | calcium binding protein 39-like (Cab39I) alternative variant hSep08, mRNA.                     |



|                         |                                |                        |        |      |    |      |                                                                                                             |
|-------------------------|--------------------------------|------------------------|--------|------|----|------|-------------------------------------------------------------------------------------------------------------|
| <a href="#">Cabc1</a>   | <a href="#">Cabc1.aSep08</a>   | <a href="#">360887</a> | 29581  | 2676 | 1  | 649  | chaperone, ABC1 activity of bc1 complex like (S. pombe) (72.2 kD) (Cabc1) alternative variant aSep08, mRNA. |
| <a href="#">Cabc1</a>   | <a href="#">Cabc1.bSep08</a>   | <a href="#">360887</a> | 18711  | 766  | 1  | 240  | chaperone, ABC1 activity of bc1 complex like (S. pombe) (Cabc1) alternative variant bSep08, mRNA.           |
| <a href="#">Cabin1</a>  | <a href="#">Cabin1.bSep08</a>  | <a href="#">94165</a>  | 11344  | 1055 | 4  | 258  | calcineurin binding protein 1 like (Cabin1) alternative variant bSep08, mRNA.                               |
| <a href="#">Cabin1</a>  | <a href="#">Cabin1.cSep08</a>  | <a href="#">94165</a>  | 4682   | 596  | 3  | 136  | calcineurin binding protein 1 like (Cabin1) alternative variant cSep08, mRNA.                               |
| <a href="#">Cables2</a> | <a href="#">Cables2.aSep08</a> | <a href="#">311703</a> | 991    | 734  | 2  | 244  | cdk5 and Abl enzyme substrate 2 (Cables2) alternative variant aSep08, mRNA.                                 |
| <a href="#">Cables2</a> | <a href="#">Cables2.bSep08</a> | <a href="#">311703</a> | 928    | 816  | 1  | 123  | cdk5 and Abl enzyme substrate 2 (Cables2) alternative variant bSep08, mRNA.                                 |
| <a href="#">Cabp1</a>   | <a href="#">Cabp1.cSep08</a>   | <a href="#">171051</a> | 3887   | 1060 | 1  | 108  | calcium binding protein 1 (Cabp1) alternative variant cSep08, mRNA.                                         |
| <a href="#">Cabp2</a>   | <a href="#">Cabp2.aSep08</a>   | <a href="#">499298</a> | 4867   | 562  |    | 34   | calcium binding protein 2 (3.4 kD) (Cabp2) mRNA.                                                            |
| <a href="#">Cachd1</a>  | <a href="#">Cachd1.aSep08</a>  | <a href="#">298267</a> | 140368 | 469  |    | 156  | VWA N-terminal (Cachd1) mRNA.                                                                               |
| <a href="#">Cacna1a</a> | <a href="#">Cacna1a.bSep08</a> | <a href="#">25398</a>  | 36845  | 1796 | 16 | 371  | calcium channel (Cacna1a) alternative variant bSep08, mRNA.                                                 |
| <a href="#">Cacna1a</a> | <a href="#">Cacna1a.cSep08</a> | <a href="#">25398</a>  | 15534  | 1348 | 6  | 236  | calcium channel (27.0 kD) (Cacna1a) alternative variant cSep08, mRNA.                                       |
| <a href="#">Cacna1a</a> | <a href="#">Cacna1a.dSep08</a> | <a href="#">25398</a>  | 17135  | 791  | 7  | 192  | calcium channel alpha (Cacna1a) alternative variant dSep08, mRNA.                                           |
| <a href="#">Cacna1a</a> | <a href="#">Cacna1a.eSep08</a> | <a href="#">25398</a>  | 9830   | 485  | 3  | 139  | calcium channel BI-1 (Cacna1a) alternative variant eSep08, mRNA.                                            |
| <a href="#">Cacna1a</a> | <a href="#">Cacna1a.gSep08</a> | <a href="#">25398</a>  | 710    | 341  | 2  | 113  | calcium channel (Cacna1a) alternative variant gSep08, mRNA.                                                 |
| <a href="#">Cacna1a</a> | <a href="#">Cacna1a.hSep08</a> | <a href="#">25398</a>  | 2393   | 500  | 2  | 110  | calcium channel (Cacna1a) alternative variant hSep08, mRNA.                                                 |
| <a href="#">Cacna1a</a> | <a href="#">Cacna1a.iSep08</a> | <a href="#">25398</a>  | 1408   | 746  | 2  | 91   | calcium channel alpha (Cacna1a) alternative variant iSep08, mRNA.                                           |
| <a href="#">Cacna1a</a> | <a href="#">Cacna1a.jSep08</a> | <a href="#">25398</a>  | 970    | 590  | 3  | 73   | calcium channel BI-2 (Cacna1a) alternative variant jSep08, mRNA.                                            |
| <a href="#">Cacna1c</a> | <a href="#">Cacna1c.aSep08</a> | <a href="#">24239</a>  | 526188 | 6908 | 48 | 2271 | calcium channel, voltage-dependent, L type, alpha 1C subunit (Cacna1c) alternative variant aSep08, mRNA.    |
| <a href="#">Cacna1c</a> | <a href="#">Cacna1c.cSep08</a> | <a href="#">24239</a>  | 496271 | 7206 | 48 | 2258 | calcium channel, voltage-dependent, L type, alpha 1C subunit (Cacna1c) alternative variant cSep08, mRNA.    |
| <a href="#">Cacna1c</a> | <a href="#">Cacna1c.dSep08</a> | <a href="#">24239</a>  | 7917   | 852  | 5  | 283  | calcium channel, voltage-dependent, L type, alpha 1C subunit (Cacna1c) alternative variant dSep08, mRNA.    |
| <a href="#">Cacna1c</a> | <a href="#">Cacna1c.fSep08</a> | <a href="#">24239</a>  | 3076   | 306  | 2  | 52   | calcium channel, voltage-dependent, L type, alpha 1C subunit (Cacna1c) alternative variant fSep08, mRNA.    |
| <a href="#">Cacna1d</a> | <a href="#">Cacna1d.bSep08</a> | <a href="#">29716</a>  | 32282  | 502  | 3  | 142  | calcium channel, voltage-dependent, L type, alpha 1D subunit (Cacna1d) alternative variant bSep08, mRNA.    |
| <a href="#">Cacna1d</a> | <a href="#">Cacna1d.cSep08</a> | <a href="#">29716</a>  | 8711   | 910  | 3  | 51   | calcium channel, voltage-dependent, L type, alpha 1D subunit (Cacna1d) alternative variant cSep08, mRNA.    |
| <a href="#">Cacna1e</a> | <a href="#">Cacna1e.bSep08</a> | <a href="#">54234</a>  | 4572   | 361  | 2  | 59   | calcium channel, voltage-dependent, R type, alpha 1E subunit (Cacna1e) alternative variant bSep08, mRNA.    |

|                          |                                 |                        |        |      |    |     |                                                                                                          |
|--------------------------|---------------------------------|------------------------|--------|------|----|-----|----------------------------------------------------------------------------------------------------------|
| <a href="#">Cacna1f</a>  | <a href="#">Cacna1f.bSep08</a>  | <a href="#">114493</a> | 1656   | 355  | 4  | 116 | calcium channel, voltage-dependent, alpha 1F subunit (Cacna1f) alternative variant bSep08, mRNA.         |
| <a href="#">Cacna1g</a>  | <a href="#">Cacna1g.bSep08</a>  | <a href="#">29717</a>  | 11346  | 1057 | 7  | 351 | calcium channel, voltage-dependent, T type, alpha 1G subunit (Cacna1g) alternative variant bSep08, mRNA. |
| <a href="#">Cacna1g</a>  | <a href="#">Cacna1g.cSep08</a>  | <a href="#">29717</a>  | 10195  | 882  | 9  | 293 | calcium channel, voltage-dependent, T type, alpha 1G subunit (Cacna1g) alternative variant cSep08, mRNA. |
| <a href="#">Cacna1g</a>  | <a href="#">Cacna1g.dSep08</a>  | <a href="#">29717</a>  | 4958   | 867  | 4  | 288 | calcium channel, voltage-dependent, T type, alpha 1G subunit (Cacna1g) alternative variant dSep08, mRNA. |
| <a href="#">Cacna1g</a>  | <a href="#">Cacna1g.eSep08</a>  | <a href="#">29717</a>  | 2059   | 381  | 5  | 127 | calcium channel, voltage-dependent, T type, alpha 1G subunit (Cacna1g) alternative variant eSep08, mRNA. |
| <a href="#">Cacna1g</a>  | <a href="#">Cacna1g.fSep08</a>  | <a href="#">29717</a>  | 2753   | 406  | 2  | 106 | calcium channel, voltage-dependent, T type, alpha 1G subunit (Cacna1g) alternative variant fSep08, mRNA. |
| <a href="#">Cacna1g</a>  | <a href="#">Cacna1g.hSep08</a>  | <a href="#">29717</a>  | 885    | 419  | 2  | 86  | calcium channel, voltage-dependent, T type, alpha 1G subunit (Cacna1g) alternative variant hSep08, mRNA. |
| <a href="#">Cacna1h</a>  | <a href="#">Cacna1h.cSep08</a>  | <a href="#">114862</a> | 787    | 505  | 2  | 79  | calcium channel, voltage-dependent, T type, alpha 1H subunit (Cacna1h) alternative variant cSep08, mRNA. |
| <a href="#">Cacna1i</a>  | <a href="#">Cacna1i.aSep08</a>  | <a href="#">56827</a>  | 4025   | 532  |    | 176 | calcium channel, voltage-dependent, alpha 1I subunit (Cacna1i) mRNA.                                     |
| <a href="#">Cacna2d1</a> | <a href="#">Cacna2d1.cSep08</a> | <a href="#">25399</a>  | 18203  | 1371 | 10 | 319 | calcium channel, voltage-dependent, alpha2/delta subunit 1 (Cacna2d1) alternative variant cSep08, mRNA.  |
| <a href="#">Cacna2d1</a> | <a href="#">Cacna2d1.dSep08</a> | <a href="#">25399</a>  | 2173   | 394  | 3  | 103 | calcium channel, voltage-dependent, alpha2/delta subunit 1 (Cacna2d1) alternative variant dSep08, mRNA.  |
| <a href="#">Cacna2d1</a> | <a href="#">Cacna2d1.eSep08</a> | <a href="#">25399</a>  | 15304  | 1045 | 2  | 49  | calcium channel, voltage-dependent, alpha2/delta subunit 1 (Cacna2d1) alternative variant eSep08, mRNA.  |
| <a href="#">Cacna2d2</a> | <a href="#">Cacna2d2.aSep08</a> | <a href="#">300992</a> | 2673   | 501  |    | 166 | calcium channel, voltage-dependent, alpha 2/delta subunit 2 (Cacna2d2) mRNA.                             |
| <a href="#">Cacna2d3</a> | <a href="#">Cacna2d3.bSep08</a> | <a href="#">306243</a> | 401844 | 634  | 7  | 120 | calcium channel, voltage-dependent, alpha2/delta subunit 3 (Cacna2d3) alternative variant bSep08, mRNA.  |
| <a href="#">Cacna2d4</a> | <a href="#">Cacna2d4.aSep08</a> | <a href="#">312668</a> | 3961   | 392  |    | 130 | calcium channel, voltage-dependent, alpha 2/delta subunit 4 (Cacna2d4) mRNA.                             |
| <a href="#">Cacnb1</a>   | <a href="#">Cacnb1.bSep08</a>   | <a href="#">50688</a>  | 5548   | 403  | 4  | 134 | calcium channel, voltage-dependent, beta 1 subunit (Cacnb1) alternative variant bSep08, mRNA.            |
| <a href="#">Cacnb1</a>   | <a href="#">Cacnb1.fSep08</a>   | <a href="#">50688</a>  | 1139   | 510  | 3  | 84  | calcium channel, voltage-dependent, beta 1 subunit (Cacnb1) alternative variant fSep08, mRNA.            |
| <a href="#">Cacnb2</a>   | <a href="#">Cacnb2.bSep08</a>   | <a href="#">116600</a> | 18100  | 403  | 1  | 134 | calcium channel, voltage-dependent, beta 2 subunit (Cacnb2) alternative variant bSep08, mRNA.            |
| <a href="#">Cacnb3</a>   | <a href="#">Cacnb3.bSep08</a>   | <a href="#">25297</a>  | 1707   | 779  | 4  | 239 | calcium channel, voltage-dependent, beta 3 subunit (Cacnb3) alternative variant bSep08, mRNA.            |
| <a href="#">Cacnb3</a>   | <a href="#">Cacnb3.cSep08</a>   | <a href="#">25297</a>  | 8410   | 687  | 6  | 147 | calcium channel, voltage-dependent, beta 3 subunit (Cacnb3) alternative variant cSep08, mRNA.            |
| <a href="#">Cacng6</a>   | <a href="#">Cacng6.bSep08</a>   | <a href="#">140727</a> | 12728  | 734  | 1  | 158 | calcium channel, voltage-dependent, gamma subunit 6 (Cacng6) alternative variant bSep08, mRNA.           |
| <a href="#">Cacybp</a>   | <a href="#">Cacybp.aSep08</a>   | <a href="#">289144</a> | 8081   | 696  | 5  | 231 | calcyclin binding protein (Cacybp) alternative variant aSep08, mRNA.                                     |
| <a href="#">Cacybp</a>   | <a href="#">Cacybp.cSep08</a>   | <a href="#">289144</a> | 4985   | 939  | 2  | 89  | calcyclin binding protein (10.1 kD) (Cacybp) alternative variant cSep08, mRNA.                           |

|                                |                                       |                        |        |      |    |     |                                                                                                                          |
|--------------------------------|---------------------------------------|------------------------|--------|------|----|-----|--------------------------------------------------------------------------------------------------------------------------|
| <a href="#">Cad</a>            | <a href="#">Cad.bSep08</a>            | <a href="#">24240</a>  | 2374   | 906  | 6  | 302 | carbamoyl-phosphate synthetase 2, aspartate transcarbamylase, and dihydroorotase (Cad) alternative variant bSep08, mRNA. |
| <a href="#">Cad</a>            | <a href="#">Cad.cSep08</a>            | <a href="#">24240</a>  | 1130   | 873  | 1  | 161 | carbamoyl-phosphate synthetase 2, aspartate transcarbamylase, and dihydroorotase (Cad) alternative variant cSep08, mRNA. |
| <a href="#">Cadherin.0</a>     | <a href="#">Cadherin.0.aSep08</a>     |                        | 116023 | 1038 | 6  | 208 | cadherin 11 (Cadherin.0) alternative variant aSep08, mRNA.                                                               |
| <a href="#">Cadherin.1</a>     | <a href="#">Cadherin.1.aSep08</a>     |                        | 9735   | 466  |    | 155 | cadherin 11 (Cadherin.1) mRNA.                                                                                           |
| <a href="#">Cadherin.2</a>     | <a href="#">Cadherin.2.aSep08</a>     |                        | 9391   | 1129 |    | 370 | beta protocadherin 1 (Cadherin.2) mRNA.                                                                                  |
| <a href="#">Cadherin.3</a>     | <a href="#">Cadherin.3.aSep08</a>     |                        | 8741   | 1256 | 2  | 391 | protocadherin 24 (Cadherin.3) alternative variant aSep08, mRNA.                                                          |
| <a href="#">Cadherin.3</a>     | <a href="#">Cadherin.3.bSep08</a>     |                        | 4534   | 742  | 1  | 90  | protocadherin LKC CRA a (Cadherin.3) alternative variant bSep08, mRNA.                                                   |
| <a href="#">Cadherin.6</a>     | <a href="#">Cadherin.6.aSep08</a>     |                        | 36762  | 550  |    | 183 | cadherin 18 type 2 (Cadherin.6) mRNA.                                                                                    |
| <a href="#">Cadherin_C.0</a>   | <a href="#">Cadherin_C.0.aSep08</a>   |                        | 29963  | 3499 | 6  | 397 | cadherin 11 CRA b (Cadherin_C.0) alternative variant aSep08, mRNA.                                                       |
| <a href="#">Cadherin_pro.0</a> | <a href="#">Cadherin_pro.0.aSep08</a> |                        | 11846  | 827  |    | 182 | desmocollin 2 (Cadherin_pro.0) mRNA.                                                                                     |
| <a href="#">Cadm1</a>          | <a href="#">Cadm1.bSep08</a>          | <a href="#">363058</a> | 38926  | 606  | 6  | 201 | cell adhesion molecule 1 (Cadm1) alternative variant bSep08, mRNA.                                                       |
| <a href="#">Cadm1</a>          | <a href="#">Cadm1.cSep08</a>          | <a href="#">363058</a> | 53056  | 3529 | 6  | 189 | cell adhesion molecule 1 (Cadm1) alternative variant cSep08, mRNA.                                                       |
| <a href="#">Cadm1</a>          | <a href="#">Cadm1.dSep08</a>          | <a href="#">363058</a> | 35957  | 701  | 5  | 181 | cell adhesion molecule 1 (Cadm1) alternative variant dSep08, mRNA.                                                       |
| <a href="#">Cadm1</a>          | <a href="#">Cadm1.eSep08</a>          | <a href="#">363058</a> | 31315  | 687  | 3  | 99  | cell adhesion molecule 1 (Cadm1) alternative variant eSep08, mRNA.                                                       |
| <a href="#">Cadm3</a>          | <a href="#">Cadm3.bSep08</a>          | <a href="#">360882</a> | 22754  | 726  | 1  | 241 | cell adhesion molecule 3 (Cadm3) alternative variant bSep08, mRNA.                                                       |
| <a href="#">Cadps</a>          | <a href="#">Cadps.bSep08</a>          | <a href="#">26989</a>  | 147441 | 2030 | 19 | 676 | secretion activator (Cadps) alternative variant bSep08, mRNA.                                                            |
| <a href="#">Cadps</a>          | <a href="#">Cadps.cSep08</a>          | <a href="#">26989</a>  | 83601  | 941  | 6  | 276 | secretion activator CRA a (Cadps) alternative variant cSep08, mRNA.                                                      |
| <a href="#">Cadps</a>          | <a href="#">Cadps.dSep08</a>          | <a href="#">26989</a>  | 86977  | 800  | 2  | 221 | secretion activator CRA b (Cadps) alternative variant dSep08, mRNA.                                                      |
| <a href="#">Cadps</a>          | <a href="#">Cadps.eSep08</a>          | <a href="#">26989</a>  | 16329  | 683  | 4  | 194 | secretion activator CRA e (Cadps) alternative variant eSep08, mRNA.                                                      |
| <a href="#">Cadps</a>          | <a href="#">Cadps.fSep08</a>          | <a href="#">26989</a>  | 23947  | 483  | 6  | 160 | activator secretion (Cadps) alternative variant fSep08, mRNA.                                                            |
| <a href="#">Cadps</a>          | <a href="#">Cadps.gSep08</a>          | <a href="#">26989</a>  | 3523   | 645  | 2  | 98  | secretion activator CRA b (Cadps) alternative variant gSep08, mRNA.                                                      |
| <a href="#">Cadps</a>          | <a href="#">Cadps.iSep08</a>          | <a href="#">26989</a>  | 591    | 276  | 2  | 59  | putative protein (Cadps) alternative variant iSep08, mRNA.                                                               |
| <a href="#">Cadps2</a>         | <a href="#">Cadps2.aSep08</a>         | <a href="#">312166</a> | 69570  | 1523 | 6  | 256 | ca2+-dependent activator protein for secretion 2 (Cadps2) alternative variant aSep08, mRNA.                              |
| <a href="#">Cadps2</a>         | <a href="#">Cadps2.bSep08</a>         | <a href="#">312166</a> | 29407  | 410  | 1  | 108 | ca2+-dependent activator protein for secretion 2 (Cadps2) alternative variant bSep08, mRNA.                              |
| <a href="#">CAF1.0</a>         | <a href="#">CAF1.0.aSep08</a>         |                        | 23544  | 1119 |    | 256 | poly-specific ribonuclease CRA c (CAF1.0) mRNA.                                                                          |

|                             |                                    |                        |        |      |    |     |                                                                                                  |
|-----------------------------|------------------------------------|------------------------|--------|------|----|-----|--------------------------------------------------------------------------------------------------|
| <a href="#">Calb1</a>       | <a href="#">Calb1.bSep08</a>       | <a href="#">83839</a>  | 23229  | 745  | 9  | 246 | calbindin 1 (Calb1) alternative variant bSep08, mRNA.                                            |
| <a href="#">Calb2</a>       | <a href="#">Calb2.bSep08</a>       | <a href="#">117059</a> | 15510  | 597  | 1  | 113 | calbindin 2 (12.8 kD) (Calb2) alternative variant bSep08, mRNA.                                  |
| <a href="#">Calca</a>       | <a href="#">Calca.aSep08</a>       | <a href="#">24241</a>  | 4002   | 587  | 4  | 172 | calcitonin/calcitonin-related polypeptide, alpha (Calca) alternative variant aSep08, mRNA.       |
| <a href="#">Calcoco1</a>    | <a href="#">Calcoco1.bSep08</a>    | <a href="#">246047</a> | 2872   | 412  | 3  | 78  | calcium binding and coiled coil domain 1 (Calcoco1) alternative variant bSep08, mRNA.            |
| <a href="#">Calcl</a>       | <a href="#">Calcl.bSep08</a>       | <a href="#">25029</a>  | 50974  | 1772 | 8  | 432 | calcitonin receptor-like (Calcl) alternative variant bSep08, mRNA.                               |
| <a href="#">Calcl</a>       | <a href="#">Calcl.cSep08</a>       | <a href="#">25029</a>  | 54330  | 767  | 6  | 101 | calcitonin receptor-like (Calcl) alternative variant cSep08, mRNA.                               |
| <a href="#">Calcl</a>       | <a href="#">Calcl.dSep08</a>       | <a href="#">25029</a>  | 2662   | 366  | 3  | 92  | calcitonin receptor-like (Calcl) alternative variant dSep08, mRNA.                               |
| <a href="#">Cald1</a>       | <a href="#">Cald1.bSep08</a>       | <a href="#">25687</a>  | 149130 | 760  | 4  | 204 | caldesmon 1 (Cald1) alternative variant bSep08, mRNA.                                            |
| <a href="#">Cald1</a>       | <a href="#">Cald1.cSep08</a>       | <a href="#">25687</a>  | 2140   | 1098 | 2  | 141 | caldesmon 1 (14.8 kD) (Cald1) alternative variant cSep08, mRNA.                                  |
| <a href="#">Cald1</a>       | <a href="#">Cald1.dSep08</a>       | <a href="#">25687</a>  | 7289   | 418  | 3  | 139 | caldesmon 1 (Cald1) alternative variant dSep08, mRNA.                                            |
| <a href="#">Cald1</a>       | <a href="#">Cald1.eSep08</a>       | <a href="#">25687</a>  | 62374  | 577  | 4  | 86  | caldesmon 1 (Cald1) alternative variant eSep08, mRNA.                                            |
| <a href="#">Calm3</a>       | <a href="#">Calm3.cSep08</a>       | <a href="#">24244</a>  | 6759   | 474  | 1  | 119 | calmodulin 3 (Calm3) alternative variant cSep08, mRNA.                                           |
| <a href="#">Calr</a>        | <a href="#">Calr.bSep08</a>        | <a href="#">64202</a>  | 4338   | 1654 | 8  | 366 | calreticulin (Calr) alternative variant bSep08, mRNA.                                            |
| <a href="#">Calr</a>        | <a href="#">Calr.cSep08</a>        | <a href="#">64202</a>  | 2108   | 709  | 4  | 166 | calreticulin (Calr) alternative variant cSep08, mRNA.                                            |
| <a href="#">Calr</a>        | <a href="#">Calr.dSep08</a>        | <a href="#">64202</a>  | 580    | 414  | 3  | 137 | calreticulin (Calr) alternative variant dSep08, mRNA.                                            |
| <a href="#">Calr4</a>       | <a href="#">Calr4.aSep08</a>       | <a href="#">689537</a> | 9199   | 1052 |    | 178 | calreticulin 4 (21.2 kD) (Calr4) mRNA.                                                           |
| <a href="#">Calu</a>        | <a href="#">Calu.cSep08</a>        | <a href="#">64366</a>  | 17306  | 368  |    | 96  | calumenin (Calu) alternative variant cSep08, mRNA.                                               |
| <a href="#">Calu</a>        | <a href="#">Calu.cSep08</a>        | <a href="#">360380</a> | 17306  | 368  |    | 96  | calumenin (Calu) alternative variant cSep08, mRNA.                                               |
| <a href="#">Calx-beta.0</a> | <a href="#">Calx-beta.0.aSep08</a> |                        | 3530   | 433  |    | 144 | fras1 related extracellular matrix protein 2 (Calx-beta.0) alternative variant aSep08, mRNA.     |
| <a href="#">Caly</a>        | <a href="#">Caly.bSep08</a>        | <a href="#">192349</a> | 10584  | 636  | 5  | 212 | calcyon neuron-specific vesicular protein (Caly) alternative variant bSep08, mRNA.               |
| <a href="#">Camk1</a>       | <a href="#">Camk1.aSep08</a>       | <a href="#">171503</a> | 6405   | 864  |    | 255 | calcium/calmodulin-dependent protein kinase I (Camk1) alternative variant aSep08, mRNA.          |
| <a href="#">Camk1</a>       | <a href="#">Camk1.bSep08</a>       | <a href="#">171503</a> | 2062   | 498  |    | 165 | calcium/calmodulin-dependent protein kinase I (Camk1) alternative variant bSep08, mRNA.          |
| <a href="#">Camk1g</a>      | <a href="#">Camk1g.bSep08</a>      | <a href="#">171358</a> | 2358   | 1003 | 3  | 88  | calcium/calmodulin-dependent protein kinase I gamma (Camk1g) alternative variant bSep08, mRNA.   |
| <a href="#">Camk1g</a>      | <a href="#">Camk1g.cSep08</a>      | <a href="#">171358</a> | 1833   | 413  | 2  | 80  | calcium/calmodulin-dependent protein kinase I gamma (Camk1g) alternative variant cSep08, mRNA.   |
| <a href="#">Camk2a</a>      | <a href="#">Camk2a.aSep08</a>      | <a href="#">25400</a>  | 4000   | 517  | 5  | 152 | calcium/calmodulin-dependent protein kinase II, alpha (Camk2a) alternative variant aSep08, mRNA. |
| <a href="#">Camk2a</a>      | <a href="#">Camk2a.cSep08</a>      | <a href="#">25400</a>  | 13947  | 573  | 4  |     |                                                                                                  |
| <a href="#">Camk2b</a>      | <a href="#">Camk2b.dSep08</a>      | <a href="#">24245</a>  | 4424   | 712  | 1  | 144 | calcium/calmodulin-dependent protein kinase II, beta (Camk2b) alternative variant dSep08, mRNA.  |
| <a href="#">Camk2d</a>      | <a href="#">Camk2d.bSep08</a>      | <a href="#">24246</a>  | 71597  | 1264 | 11 | 317 | calcium/calmodulin-dependent protein kinase II, delta (Camk2d) alternative variant bSep08, mRNA. |

|                             |                                    |                        |        |      |    |     |                                                                                                           |
|-----------------------------|------------------------------------|------------------------|--------|------|----|-----|-----------------------------------------------------------------------------------------------------------|
| <a href="#">Camk2d</a>      | <a href="#">Camk2d.cSep08</a>      | <a href="#">24246</a>  | 178286 | 1500 | 8  | 301 | calcium/calmodulin-dependent protein kinase II, delta (Camk2d) alternative variant cSep08, mRNA.          |
| <a href="#">Camk2d</a>      | <a href="#">Camk2d.dSep08</a>      | <a href="#">24246</a>  | 52823  | 340  | 6  | 112 | calcium/calmodulin-dependent protein kinase II, delta (Camk2d) alternative variant dSep08, mRNA.          |
| <a href="#">Camk2g</a>      | <a href="#">Camk2g.bSep08</a>      | <a href="#">171140</a> | 36683  | 3341 | 17 | 451 | calcium calmodulin-dependent protein kinase II gamma CRA o (Camk2g) alternative variant bSep08, mRNA.     |
| <a href="#">Camk2g</a>      | <a href="#">Camk2g.cSep08</a>      | <a href="#">171140</a> | 52690  | 1140 | 15 | 322 | calcium calmodulin-dependent protein kinase II gamma (Camk2g) alternative variant cSep08, mRNA.           |
| <a href="#">Camk2g</a>      | <a href="#">Camk2g.dSep08</a>      | <a href="#">171140</a> | 28375  | 918  | 9  | 277 | calcium calmodulin-dependent protein kinase II gamma (Camk2g) alternative variant dSep08, mRNA.           |
| <a href="#">Camk2g</a>      | <a href="#">Camk2g.eSep08</a>      | <a href="#">171140</a> | 23573  | 507  | 10 | 169 | calcium calmodulin-dependent protein kinase II gamma (Camk2g) alternative variant eSep08, mRNA.           |
| <a href="#">Camk2g</a>      | <a href="#">Camk2g.fSep08</a>      | <a href="#">171140</a> | 1653   | 1153 | 2  | 137 | putative protein (Camk2g) alternative variant fSep08, mRNA.                                               |
| <a href="#">Camk2g</a>      | <a href="#">Camk2g.gSep08</a>      | <a href="#">171140</a> | 8544   | 748  | 5  | 115 | calcium calmodulin-dependent protein kinase II gamma (12.9 kD) (Camk2g) alternative variant gSep08, mRNA. |
| <a href="#">Camk2g</a>      | <a href="#">Camk2g.hSep08</a>      | <a href="#">171140</a> | 816    | 325  | 2  | 107 | putative protein (Camk2g) alternative variant hSep08, mRNA.                                               |
| <a href="#">Camk2g</a>      | <a href="#">Camk2g.jSep08</a>      | <a href="#">171140</a> | 10336  | 589  | 8  | 57  | putative protein (6.2 kD) (Camk2g) alternative variant jSep08, mRNA.                                      |
| <a href="#">Camk4</a>       | <a href="#">Camk4.bSep08</a>       | <a href="#">25050</a>  | 31582  | 695  | 5  | 166 | calcium calmodulin-dependent protein kinase IV (Camk4) alternative variant bSep08, mRNA.                  |
| <a href="#">Camk4</a>       | <a href="#">Camk4.cSep08</a>       | <a href="#">25050</a>  | 113257 | 414  | 3  | 138 | calcium calmodulin-dependent protein kinase IV (Camk4) alternative variant cSep08, mRNA.                  |
| <a href="#">Camk4</a>       | <a href="#">Camk4.dSep08</a>       | <a href="#">25050</a>  | 1088   | 733  | 2  | 89  | calmodulin-dependent protein kinase IV (Camk4) alternative variant dSep08, mRNA.                          |
| <a href="#">CaMKII_AD.0</a> | <a href="#">CaMKII_AD.0.aSep08</a> |                        | 7975   | 3384 |    | 87  | calcium calmodulin-dependent protein kinase II alpha (CaMKII_AD.0) mRNA.                                  |
| <a href="#">Camkk1</a>      | <a href="#">Camkk1.aSep08</a>      | <a href="#">60341</a>  | 19505  | 1415 | 13 | 277 | calcium/calmodulin-dependent protein kinase kinase 1, alpha (Camkk1) alternative variant aSep08, mRNA.    |
| <a href="#">Camkk1</a>      | <a href="#">Camkk1.bSep08</a>      | <a href="#">60341</a>  | 4760   | 2235 | 3  | 144 | calcium/calmodulin-dependent protein kinase kinase 1, alpha (Camkk1) alternative variant bSep08, mRNA.    |
| <a href="#">Camkk1</a>      | <a href="#">Camkk1.cSep08</a>      | <a href="#">60341</a>  | 2765   | 738  | 1  | 108 | calcium/calmodulin-dependent protein kinase kinase 1, alpha (Camkk1) alternative variant cSep08, mRNA.    |
| <a href="#">Camkk2</a>      | <a href="#">Camkk2.cSep08</a>      | <a href="#">83506</a>  | 1230   | 448  | 2  | 41  | calcium/calmodulin-dependent protein kinase kinase 2, beta (Camkk2) alternative variant cSep08, mRNA.     |
| <a href="#">Camkk2</a>      | <a href="#">Camkk2.dSep08</a>      | <a href="#">83506</a>  | 6645   | 573  | 3  |     |                                                                                                           |
| <a href="#">Camkv</a>       | <a href="#">Camkv.bSep08</a>       | <a href="#">79011</a>  | 10078  | 620  | 1  | 149 | CaM kinase-like vesicle-associated (Camkv) alternative variant bSep08, mRNA.                              |
| <a href="#">Camlg</a>       | <a href="#">Camlg.aSep08</a>       | <a href="#">81715</a>  | 10848  | 1384 | 4  | 295 | calcium modulating ligand (32.8 kD) (Camlg) alternative variant aSep08, complete mRNA.                    |
| <a href="#">Camlg</a>       | <a href="#">Camlg.cSep08</a>       | <a href="#">81715</a>  | 10704  | 1652 | 4  | 229 | calcium modulating ligand (25.5 kD) (Camlg) alternative variant cSep08, mRNA.                             |
| <a href="#">Camsap1</a>     | <a href="#">Camsap1.aSep08</a>     | <a href="#">296580</a> | 12632  | 4136 | 6  | 886 | calmodulin regulated spectrin-associated protein 1 (Camsap1) alternative variant aSep08, mRNA.            |
| <a href="#">Camsap1</a>     | <a href="#">Camsap1.bSep08</a>     | <a href="#">296580</a> | 6196   | 619  | 2  | 117 | calmodulin regulated spectrin-associated protein 1 (Camsap1) alternative variant bSep08, mRNA.            |

|                                |                                       |                        |       |      |   |     |                                                                                                            |
|--------------------------------|---------------------------------------|------------------------|-------|------|---|-----|------------------------------------------------------------------------------------------------------------|
| <a href="#">Camsap1</a>        | <a href="#">Camsap1.cSep08</a>        | <a href="#">296580</a> | 5500  | 455  | 1 | 58  | calmodulin regulated spectrin-associated protein 1 (6.4 kD) (Camsap1) alternative variant cSep08, mRNA.    |
| <a href="#">Camta2andSpag7</a> | <a href="#">Camta2andSpag7.bSep08</a> | <a href="#">287462</a> | 4895  | 1146 | 7 | 381 | calmodulin binding transcription activator 2 like (Camta2andSpag7) alternative variant bSep08, mRNA.       |
| <a href="#">Camta2andSpag7</a> | <a href="#">Camta2andSpag7.bSep08</a> | <a href="#">303260</a> | 4895  | 1146 | 7 | 381 | calmodulin binding transcription activator 2 like (Camta2andSpag7) alternative variant bSep08, mRNA.       |
| <a href="#">Camta2andSpag7</a> | <a href="#">Camta2andSpag7.dSep08</a> | <a href="#">287462</a> | 4926  | 656  | 7 | 180 | calmodulin binding transcription activator 2 like (Camta2andSpag7) alternative variant dSep08, mRNA.       |
| <a href="#">Camta2andSpag7</a> | <a href="#">Camta2andSpag7.dSep08</a> | <a href="#">303260</a> | 4926  | 656  | 7 | 180 | calmodulin binding transcription activator 2 like (Camta2andSpag7) alternative variant dSep08, mRNA.       |
| <a href="#">Camta2andSpag7</a> | <a href="#">Camta2andSpag7.eSep08</a> | <a href="#">287462</a> | 5697  | 810  | 7 | 176 | sperm associated antigen 7 like (20.1 kD) (Camta2andSpag7) alternative variant eSep08, mRNA.               |
| <a href="#">Camta2andSpag7</a> | <a href="#">Camta2andSpag7.eSep08</a> | <a href="#">303260</a> | 5697  | 810  | 7 | 176 | sperm associated antigen 7 like (20.1 kD) (Camta2andSpag7) alternative variant eSep08, mRNA.               |
| <a href="#">Camta2andSpag7</a> | <a href="#">Camta2andSpag7.fSep08</a> | <a href="#">287462</a> | 857   | 371  | 3 | 95  | calmodulin binding transcription activator 2 CRA d like (Camta2andSpag7) alternative variant fSep08, mRNA. |
| <a href="#">Camta2andSpag7</a> | <a href="#">Camta2andSpag7.fSep08</a> | <a href="#">303260</a> | 857   | 371  | 3 | 95  | calmodulin binding transcription activator 2 CRA d like (Camta2andSpag7) alternative variant fSep08, mRNA. |
| <a href="#">Camta2andSpag7</a> | <a href="#">Camta2andSpag7.gSep08</a> | <a href="#">287462</a> | 899   | 802  | 2 | 46  | sperm associated antigen 7 like (5.2 kD) (Camta2andSpag7) alternative variant gSep08, mRNA.                |
| <a href="#">Camta2andSpag7</a> | <a href="#">Camta2andSpag7.gSep08</a> | <a href="#">303260</a> | 899   | 802  | 2 | 46  | sperm associated antigen 7 like (5.2 kD) (Camta2andSpag7) alternative variant gSep08, mRNA.                |
| <a href="#">Cand2</a>          | <a href="#">Cand2.aSep08</a>          | <a href="#">192226</a> | 13292 | 3408 | 6 | 677 | cullin-associated and neddylation-dissociated 2 (putative) (Cand2) alternative variant aSep08, mRNA.       |
| <a href="#">Cand2</a>          | <a href="#">Cand2.bSep08</a>          | <a href="#">192226</a> | 13159 | 963  | 3 | 34  | cullin-associated and neddylation-dissociated 2 (putative) (Cand2) alternative variant bSep08, mRNA.       |
| <a href="#">Cant1</a>          | <a href="#">Cant1.bSep08</a>          | <a href="#">246272</a> | 9425  | 647  | 2 | 215 | calcium activated nucleotidase 1 (Cant1) alternative variant bSep08, mRNA.                                 |
| <a href="#">Cant1</a>          | <a href="#">Cant1.cSep08</a>          | <a href="#">246272</a> | 5531  | 404  | 2 | 134 | calcium activated nucleotidase 1 (Cant1) alternative variant cSep08, mRNA.                                 |
| <a href="#">Canx</a>           | <a href="#">Canx.bSep08</a>           | <a href="#">29144</a>  | 24430 | 1618 | 9 | 343 | calnexin precursor (39.0 kD) (Canx) alternative variant bSep08, mRNA.                                      |
| <a href="#">Canx</a>           | <a href="#">Canx.cSep08</a>           | <a href="#">29144</a>  | 18375 | 853  | 7 | 235 | calnexin (Canx) alternative variant cSep08, mRNA.                                                          |
| <a href="#">Canx</a>           | <a href="#">Canx.dSep08</a>           | <a href="#">29144</a>  | 3835  | 896  | 5 | 193 | calnexin (Canx) alternative variant dSep08, mRNA.                                                          |
| <a href="#">Canx</a>           | <a href="#">Canx.eSep08</a>           | <a href="#">29144</a>  | 18201 | 711  | 7 | 187 | calnexin (Canx) alternative variant eSep08, mRNA.                                                          |
| <a href="#">Canx</a>           | <a href="#">Canx.fSep08</a>           | <a href="#">29144</a>  | 6639  | 3703 | 5 | 175 | calnexin (19.8 kD) (Canx) alternative variant fSep08, mRNA.                                                |
| <a href="#">Cap1</a>           | <a href="#">Cap1.aSep08</a>           | <a href="#">64185</a>  | 26691 | 2574 | 6 | 474 | CAP, adenylate cyclase-associated protein 1 (yeast) (51.6 kD) (Cap1) alternative variant aSep08, mRNA.     |
| <a href="#">Cap1</a>           | <a href="#">Cap1.bSep08</a>           | <a href="#">64185</a>  | 21620 | 848  | 3 | 282 | CAP, adenylate cyclase-associated protein 1 (yeast) (Cap1) alternative variant bSep08, mRNA.               |
| <a href="#">Cap1</a>           | <a href="#">Cap1.cSep08</a>           | <a href="#">64185</a>  | 21521 | 771  | 3 | 239 | CAP, adenylate cyclase-associated protein 1 (yeast) (Cap1) alternative variant cSep08, mRNA.               |
| <a href="#">Cap1</a>           | <a href="#">Cap1.dSep08</a>           | <a href="#">64185</a>  | 21449 | 696  | 3 | 214 | CAP, adenylate cyclase-associated protein 1 (yeast) (Cap1) alternative variant dSep08, mRNA.               |
| <a href="#">Cap1</a>           | <a href="#">Cap1.eSep08</a>           | <a href="#">64185</a>  | 18561 | 495  | 3 | 165 | CAP, adenylate cyclase-associated protein 1 (yeast) (Cap1) alternative variant eSep08, mRNA.               |

|                         |                                |                        |       |      |    |     |                                                                                              |
|-------------------------|--------------------------------|------------------------|-------|------|----|-----|----------------------------------------------------------------------------------------------|
| <a href="#">Cap1</a>    | <a href="#">Cap1.fSep08</a>    | <a href="#">64185</a>  | 2590  | 745  | 4  | 139 | CAP, adenylate cyclase-associated protein 1 (yeast) (Cap1) alternative variant fSep08, mRNA. |
| <a href="#">Cap1</a>    | <a href="#">Cap1.gSep08</a>    | <a href="#">64185</a>  | 1097  | 814  | 1  | 118 | CAP, adenylate cyclase-associated protein 1 (yeast) (Cap1) alternative variant gSep08, mRNA. |
| <a href="#">Cap1</a>    | <a href="#">Cap1.hSep08</a>    | <a href="#">64185</a>  | 752   | 552  | 2  | 43  | CAP, adenylate cyclase-associated protein 1 (yeast) (Cap1) alternative variant hSep08, mRNA. |
| <a href="#">Capg</a>    | <a href="#">Capg.bSep08</a>    | <a href="#">297339</a> | 13386 | 692  | 7  | 199 | capping protein (actin filament), gelsolin-like (Capg) alternative variant bSep08, mRNA.     |
| <a href="#">Capg</a>    | <a href="#">Capg.cSep08</a>    | <a href="#">297339</a> | 6199  | 442  | 5  | 146 | capping protein (actin filament), gelsolin-like (Capg) alternative variant cSep08, mRNA.     |
| <a href="#">Capg</a>    | <a href="#">Capg.dSep08</a>    | <a href="#">297339</a> | 11880 | 509  | 6  | 130 | capping protein (actin filament), gelsolin-like (Capg) alternative variant dSep08, mRNA.     |
| <a href="#">Capg</a>    | <a href="#">Capg.eSep08</a>    | <a href="#">297339</a> | 1547  | 411  | 2  | 98  | capping protein (actin filament), gelsolin-like (Capg) alternative variant eSep08, mRNA.     |
| <a href="#">Capn1</a>   | <a href="#">Capn1.aSep08</a>   | <a href="#">29153</a>  | 21088 | 1855 | 18 | 618 | calpain 1 (Capn1) alternative variant aSep08, mRNA.                                          |
| <a href="#">Capn1</a>   | <a href="#">Capn1.bSep08</a>   | <a href="#">29153</a>  | 4382  | 772  | 6  | 230 | calpain 1 (Capn1) alternative variant bSep08, mRNA.                                          |
| <a href="#">Capn2</a>   | <a href="#">Capn2.bSep08</a>   | <a href="#">29154</a>  | 15016 | 703  | 6  | 180 | calpain 2 (Capn2) alternative variant bSep08, mRNA.                                          |
| <a href="#">Capn2</a>   | <a href="#">Capn2.bSep08</a>   | <a href="#">690477</a> | 15016 | 703  | 6  | 180 | calpain 2 (Capn2) alternative variant bSep08, mRNA.                                          |
| <a href="#">Capn2</a>   | <a href="#">Capn2.cSep08</a>   | <a href="#">29154</a>  | 9079  | 690  | 7  | 121 | calpain 2 (14.2 kD) (Capn2) alternative variant cSep08, mRNA.                                |
| <a href="#">Capn2</a>   | <a href="#">Capn2.cSep08</a>   | <a href="#">690477</a> | 9079  | 690  | 7  | 121 | calpain 2 (14.2 kD) (Capn2) alternative variant cSep08, mRNA.                                |
| <a href="#">Capn2</a>   | <a href="#">Capn2.eSep08</a>   | <a href="#">29154</a>  | 21626 | 478  | 3  | 92  | putative protein (Capn2) alternative variant eSep08, mRNA.                                   |
| <a href="#">Capn2</a>   | <a href="#">Capn2.eSep08</a>   | <a href="#">690477</a> | 21626 | 478  | 3  | 92  | putative protein (Capn2) alternative variant eSep08, mRNA.                                   |
| <a href="#">Capn2</a>   | <a href="#">Capn2.fSep08</a>   | <a href="#">29154</a>  | 5135  | 521  | 3  | 88  | calpain 2 (Capn2) alternative variant fSep08, mRNA.                                          |
| <a href="#">Capn2</a>   | <a href="#">Capn2.fSep08</a>   | <a href="#">690477</a> | 5135  | 521  | 3  | 88  | calpain 2 (Capn2) alternative variant fSep08, mRNA.                                          |
| <a href="#">Capn3</a>   | <a href="#">Capn3.bSep08</a>   | <a href="#">29155</a>  | 8521  | 718  | 1  | 239 | calpain 3 (Capn3) alternative variant bSep08, mRNA.                                          |
| <a href="#">Capn5</a>   | <a href="#">Capn5.bSep08</a>   | <a href="#">171495</a> | 11345 | 354  | 3  | 84  | calpain 5 (Capn5) alternative variant bSep08, mRNA.                                          |
| <a href="#">Capn7</a>   | <a href="#">Capn7.bSep08</a>   | <a href="#">306260</a> | 2329  | 743  | 4  | 160 | calpain 7 (Capn7) alternative variant bSep08, mRNA.                                          |
| <a href="#">Capn7</a>   | <a href="#">Capn7.cSep08</a>   | <a href="#">306260</a> | 2316  | 401  | 2  | 107 | putative protein (Capn7) alternative variant cSep08, mRNA.                                   |
| <a href="#">Capn7</a>   | <a href="#">Capn7.dSep08</a>   | <a href="#">306260</a> | 10549 | 713  | 4  | 103 | calpain 7 (Capn7) alternative variant dSep08, mRNA.                                          |
| <a href="#">Capn7</a>   | <a href="#">Capn7.eSep08</a>   | <a href="#">306260</a> | 2980  | 350  | 3  | 79  | calpain 7 (Capn7) alternative variant eSep08, mRNA.                                          |
| <a href="#">Capn12</a>  | <a href="#">Capn12.bSep08</a>  | <a href="#">308476</a> | 1249  | 633  | 4  | 210 | calpain 12 (Capn12) alternative variant bSep08, mRNA.                                        |
| <a href="#">Capn13</a>  | <a href="#">Capn13.bSep08</a>  | <a href="#">362701</a> | 3577  | 294  | 1  | 89  | calpain 13 (Capn13) alternative variant bSep08, mRNA.                                        |
| <a href="#">Capns1</a>  | <a href="#">Capns1.bSep08</a>  | <a href="#">29156</a>  | 6052  | 675  | 8  | 224 | calpain, small subunit 1 (Capns1) alternative variant bSep08, mRNA.                          |
| <a href="#">Capns1</a>  | <a href="#">Capns1.cSep08</a>  | <a href="#">29156</a>  | 1015  | 400  | 1  | 104 | calpain, small subunit 1 (Capns1) alternative variant cSep08, mRNA.                          |
| <a href="#">Caprin1</a> | <a href="#">Caprin1.bSep08</a> | <a href="#">362173</a> | 25476 | 1381 | 11 | 460 | cell cycle associated protein 1 (Caprin1) alternative variant bSep08, mRNA.                  |
| <a href="#">Caprin1</a> | <a href="#">Caprin1.cSep08</a> | <a href="#">362173</a> | 7651  | 1084 | 6  | 349 | cell cycle associated protein 1 (Caprin1) alternative variant cSep08, mRNA.                  |

|                           |                                  |                        |       |      |    |     |                                                                                                                      |
|---------------------------|----------------------------------|------------------------|-------|------|----|-----|----------------------------------------------------------------------------------------------------------------------|
| <a href="#">Caprin1</a>   | <a href="#">Caprin1.dSep08</a>   | <a href="#">362173</a> | 5043  | 1837 | 4  | 178 | cell cycle associated protein 1 (Caprin1) alternative variant dSep08, mRNA.                                          |
| <a href="#">Caprin1</a>   | <a href="#">Caprin1.eSep08</a>   | <a href="#">362173</a> | 1002  | 489  | 2  | 163 | cell cycle associated protein 1 (Caprin1) alternative variant eSep08, mRNA.                                          |
| <a href="#">Caprin1</a>   | <a href="#">Caprin1.fSep08</a>   | <a href="#">362173</a> | 3703  | 772  | 3  | 133 | cell cycle associated protein 1 (Caprin1) alternative variant fSep08, mRNA.                                          |
| <a href="#">Caprin1</a>   | <a href="#">Caprin1.gSep08</a>   | <a href="#">362173</a> | 1842  | 1266 | 3  | 50  | cell cycle associated protein 1 (5.2 kD) (Caprin1) alternative variant gSep08, mRNA.                                 |
| <a href="#">Caps2</a>     | <a href="#">Caps2.bSep08</a>     | <a href="#">366891</a> | 28244 | 636  | 3  | 211 | calcyphosphine 2 (Caps2) alternative variant bSep08, mRNA.                                                           |
| <a href="#">Caps2</a>     | <a href="#">Caps2.cSep08</a>     | <a href="#">366891</a> | 16395 | 755  | 2  | 175 | calcyphosphine 2 (Caps2) alternative variant cSep08, mRNA.                                                           |
| <a href="#">Capza1</a>    | <a href="#">Capza1.bSep08</a>    | <a href="#">310756</a> | 2781  | 693  | 5  | 230 | capping protein (actin filament) muscle Z-line, alpha 1 (Capza1) alternative variant bSep08, mRNA.                   |
| <a href="#">Capza1</a>    | <a href="#">Capza1.cSep08</a>    | <a href="#">310756</a> | 2301  | 978  | 6  | 216 | capping protein (actin filament) muscle Z-line, alpha 1 (Capza1) alternative variant cSep08, mRNA.                   |
| <a href="#">Capza1</a>    | <a href="#">Capza1.dSep08</a>    | <a href="#">310756</a> | 813   | 683  | 2  | 140 | capping protein (actin filament) muscle Z-line, alpha 1 (15.8 kD) (Capza1) alternative variant dSep08, mRNA.         |
| <a href="#">Capza1</a>    | <a href="#">Capza1.eSep08</a>    | <a href="#">310756</a> | 645   | 391  | 2  | 129 | capping protein (actin filament) muscle Z-line, alpha 1 (Capza1) alternative variant eSep08, mRNA.                   |
| <a href="#">Capza1</a>    | <a href="#">Capza1.fSep08</a>    | <a href="#">310756</a> | 1183  | 1083 | 2  | 49  | capping protein (actin filament) muscle Z-line, alpha 1 (5.1 kD) (Capza1) alternative variant fSep08, mRNA.          |
| <a href="#">Capza2</a>    | <a href="#">Capza2.aSep08</a>    | <a href="#">493810</a> | 36049 | 2464 | 6  | 309 | capping protein (actin filament) muscle Z-line, alpha 2 (Capza2) alternative variant aSep08, mRNA.                   |
| <a href="#">Capza2</a>    | <a href="#">Capza2.bSep08</a>    | <a href="#">493810</a> | 19300 | 735  | 1  | 161 | capping protein (actin filament) muscle Z-line, alpha 2 (18.5 kD) (Capza2) alternative variant bSep08, mRNA.         |
| <a href="#">Capzb</a>     | <a href="#">Capzb.bSep08</a>     | <a href="#">298584</a> | 99228 | 1161 | 10 | 277 | capping protein (actin filament) muscle Z-line, beta (31.3 kD) (Capzb) alternative variant bSep08, complete mRNA.    |
| <a href="#">Capzb</a>     | <a href="#">Capzb.cSep08</a>     | <a href="#">298584</a> | 96891 | 768  | 8  | 239 | capping protein (actin filament) muscle Z-line, beta (27.0 kD) (Capzb) alternative variant cSep08, mRNA.             |
| <a href="#">Capzb</a>     | <a href="#">Capzb.dSep08</a>     | <a href="#">298584</a> | 64760 | 733  | 3  | 85  | capping protein (actin filament) muscle Z-line, beta (Capzb) alternative variant dSep08, mRNA.                       |
| <a href="#">CAP_GLY.0</a> | <a href="#">CAP_GLY.0.aSep08</a> |                        | 10584 | 963  |    | 254 | ubiquitin carboxyl-terminal hydrolase cyld (CAP_GLY.0) mRNA.                                                         |
| <a href="#">Car2</a>      | <a href="#">Car2.bSep08</a>      | <a href="#">54231</a>  | 14326 | 742  | 7  | 247 | carbonic anhydrase II and hypothetical protein LOC686037 (Car2) alternative variant bSep08, mRNA.                    |
| <a href="#">Car2</a>      | <a href="#">Car2.bSep08</a>      | <a href="#">686037</a> | 14326 | 742  | 7  | 247 | carbonic anhydrase II and hypothetical protein LOC686037 (Car2) alternative variant bSep08, mRNA.                    |
| <a href="#">Car2</a>      | <a href="#">Car2.dSep08</a>      | <a href="#">54231</a>  | 7772  | 378  | 3  | 99  | carbonic anhydrase II and hypothetical protein LOC686037 (10.8 kD) (Car2) alternative variant dSep08, complete mRNA. |
| <a href="#">Car2</a>      | <a href="#">Car2.dSep08</a>      | <a href="#">686037</a> | 7772  | 378  | 3  | 99  | carbonic anhydrase II and hypothetical protein LOC686037 (10.8 kD) (Car2) alternative variant dSep08, complete mRNA. |
| <a href="#">Car4</a>      | <a href="#">Car4.bSep08</a>      | <a href="#">29242</a>  | 6441  | 1581 | 6  | 184 | carbonic anhydrase 4 (20.7 kD) (Car4) alternative variant bSep08, mRNA.                                              |



|                         |                                |                        |       |      |    |     |                                                                                          |
|-------------------------|--------------------------------|------------------------|-------|------|----|-----|------------------------------------------------------------------------------------------|
| <a href="#">Car5b</a>   | <a href="#">Car5b.bSep08</a>   | <a href="#">302669</a> | 26436 | 680  | 1  | 167 | carbonic anhydrase 5b, mitochondrial (Car5b) alternative variant bSep08, mRNA.           |
| <a href="#">Car5b</a>   | <a href="#">Car5b.cSep08</a>   | <a href="#">302669</a> | 33239 | 804  | 1  | 167 | carbonic anhydrase 5b, mitochondrial (19.5 kD) (Car5b) alternative variant cSep08, mRNA. |
| <a href="#">Car6</a>    | <a href="#">Car6.bSep08</a>    | <a href="#">298657</a> | 7531  | 738  | 4  | 91  | carbonic anhydrase 6 (Car6) alternative variant bSep08, mRNA.                            |
| <a href="#">Car6</a>    | <a href="#">Car6.cSep08</a>    | <a href="#">298657</a> | 3980  | 522  | 2  | 56  | carbonic anhydrase 6 (Car6) alternative variant cSep08, mRNA.                            |
| <a href="#">Car7</a>    | <a href="#">Car7.bSep08</a>    | <a href="#">291819</a> | 2482  | 421  | 1  | 140 | carbonic anhydrase 7 (Car7) alternative variant bSep08, mRNA.                            |
| <a href="#">Car11</a>   | <a href="#">Car11.bSep08</a>   | <a href="#">308588</a> | 4142  | 828  | 7  | 252 | carbonic anhydrase 11 (27.9 kD) (Car11) alternative variant bSep08, mRNA.                |
| <a href="#">Car11</a>   | <a href="#">Car11.cSep08</a>   | <a href="#">308588</a> | 5296  | 1637 | 8  | 193 | carbonic anhydrase 11 (20.8 kD) (Car11) alternative variant cSep08, mRNA.                |
| <a href="#">Car11</a>   | <a href="#">Car11.dSep08</a>   | <a href="#">308588</a> | 4813  | 1410 | 5  | 177 | carbonic anhydrase 11 (Car11) alternative variant dSep08, mRNA.                          |
| <a href="#">Car12</a>   | <a href="#">Car12.bSep08</a>   | <a href="#">363085</a> | 38059 | 1271 | 10 | 336 | carbonic anhydrase 12 (37.4 kD) (Car12) alternative variant bSep08, mRNA.                |
| <a href="#">Car12</a>   | <a href="#">Car12.cSep08</a>   | <a href="#">363085</a> | 12448 | 686  | 4  | 127 | carbonic anhydrase 12 (Car12) alternative variant cSep08, mRNA.                          |
| <a href="#">Car13</a>   | <a href="#">Car13.aSep08</a>   | <a href="#">499566</a> | 37411 | 1964 |    | 262 | carbonic anhydrase 13 (29.6 kD) (Car13) mRNA.                                            |
| <a href="#">Car14</a>   | <a href="#">Car14.aSep08</a>   | <a href="#">791259</a> | 5386  | 934  | 9  | 311 | carbonic anhydrase 14 (Car14) alternative variant aSep08, mRNA.                          |
| <a href="#">Car14</a>   | <a href="#">Car14.bSep08</a>   | <a href="#">791259</a> | 2824  | 658  | 6  | 219 | carbonic anhydrase 14 (Car14) alternative variant bSep08, mRNA.                          |
| <a href="#">Car14</a>   | <a href="#">Car14.cSep08</a>   | <a href="#">791259</a> | 4915  | 842  | 6  | 176 | carbonic anhydrase 14 (Car14) alternative variant cSep08, mRNA.                          |
| <a href="#">Car14</a>   | <a href="#">Car14.dSep08</a>   | <a href="#">791259</a> | 1037  | 372  | 2  | 97  | carbonic anhydrase 14 (Car14) alternative variant dSep08, mRNA.                          |
| <a href="#">Car14</a>   | <a href="#">Car14.eSep08</a>   | <a href="#">791259</a> | 2708  | 531  | 2  | 57  | carbonic anhydrase 14 (6.2 kD) (Car14) alternative variant eSep08, complete mRNA.        |
| <a href="#">Car14</a>   | <a href="#">Car14.fSep08</a>   | <a href="#">791259</a> | 6943  | 1784 | 3  | 55  | carbonic anhydrase 14 (Car14) alternative variant fSep08, mRNA.                          |
| <a href="#">Car15</a>   | <a href="#">Car15.bSep08</a>   | <a href="#">288360</a> | 1177  | 753  | 2  | 82  | carbonic anhydrase 15 (9.2 kD) (Car15) alternative variant bSep08, mRNA.                 |
| <a href="#">CARD.0</a>  | <a href="#">CARD.0.aSep08</a>  |                        | 1135  | 732  |    | 110 | NACHT- LRR- PYD-containing protein 1 paralog B (CARD.0) mRNA.                            |
| <a href="#">Card9</a>   | <a href="#">Card9.bSep08</a>   | <a href="#">64171</a>  | 3317  | 663  | 6  | 177 | caspase recruitment domain family, member 9 (Card9) alternative variant bSep08, mRNA.    |
| <a href="#">Card10</a>  | <a href="#">Card10.bSep08</a>  | <a href="#">315120</a> | 2809  | 739  | 5  | 234 | caspase recruitment domain family, member 10 (Card10) alternative variant bSep08, mRNA.  |
| <a href="#">Carf</a>    | <a href="#">Carf.bSep08</a>    | <a href="#">301446</a> | 27314 | 958  | 7  | 150 | putative protein of vertebrate origin (Carf) alternative variant bSep08, mRNA.           |
| <a href="#">Carf</a>    | <a href="#">Carf.cSep08</a>    | <a href="#">301446</a> | 7312  | 429  | 4  | 107 | putative protein of metazoan origin (Carf) alternative variant cSep08, mRNA.             |
| <a href="#">Carhsp1</a> | <a href="#">Carhsp1.bSep08</a> | <a href="#">260416</a> | 8393  | 322  | 3  | 107 | calcium regulated heat stable protein 1 (Carhsp1) alternative variant bSep08, mRNA.      |

|                         |                                |                        |        |      |    |     |                                                                                                                     |
|-------------------------|--------------------------------|------------------------|--------|------|----|-----|---------------------------------------------------------------------------------------------------------------------|
| <a href="#">Carhsp1</a> | <a href="#">Carhsp1.cSep08</a> | <a href="#">260416</a> | 11300  | 446  | 1  | 88  | calcium regulated heat stable protein 1 (9.2 kD) (Carhsp1) alternative variant cSep08, complete mRNA.               |
| <a href="#">Carm1</a>   | <a href="#">Carm1.cSep08</a>   | <a href="#">363026</a> | 8579   | 733  | 1  | 209 | coactivator-associated arginine methyltransferase 1 (Carm1) alternative variant cSep08, mRNA.                       |
| <a href="#">Cars</a>    | <a href="#">Cars.bSep08</a>    | <a href="#">293638</a> | 37952  | 2024 | 19 | 650 | cysteinyI-tRNA synthetase (Cars) alternative variant bSep08, mRNA.                                                  |
| <a href="#">Cars</a>    | <a href="#">Cars.cSep08</a>    | <a href="#">293638</a> | 42217  | 1949 | 8  | 539 | cysteinyI-tRNA synthetase (Cars) alternative variant cSep08, mRNA.                                                  |
| <a href="#">Cars</a>    | <a href="#">Cars.eSep08</a>    | <a href="#">293638</a> | 1349   | 697  | 4  | 128 | cysteinyI-tRNA synthetase (Cars) alternative variant eSep08, mRNA.                                                  |
| <a href="#">Cartpt</a>  | <a href="#">Cartpt.bSep08</a>  | <a href="#">29131</a>  | 1695   | 475  | 2  | 122 | CART prepropeptide (Cartpt) alternative variant bSep08, mRNA.                                                       |
| <a href="#">Casc1</a>   | <a href="#">Casc1.bSep08</a>   | <a href="#">297720</a> | 6830   | 1533 | 4  | 348 | cancer susceptibility candidate 1 (Casc1) alternative variant bSep08, mRNA.                                         |
| <a href="#">Casc1</a>   | <a href="#">Casc1.cSep08</a>   | <a href="#">297720</a> | 7810   | 556  | 3  | 66  | cancer susceptibility candidate 1 (Casc1) alternative variant cSep08, mRNA.                                         |
| <a href="#">Casc3</a>   | <a href="#">Casc3.bSep08</a>   | <a href="#">259170</a> | 10066  | 1111 | 6  | 369 | cancer susceptibility candidate 3 (Casc3) alternative variant bSep08, mRNA.                                         |
| <a href="#">Casc3</a>   | <a href="#">Casc3.dSep08</a>   | <a href="#">259170</a> | 416    | 263  | 2  | 45  | cancer susceptibility candidate 3 (Casc3) alternative variant dSep08, mRNA.                                         |
| <a href="#">Casc4</a>   | <a href="#">Casc4.aSep08</a>   | <a href="#">362204</a> | 33097  | 2862 | 2  | 171 | cancer susceptibility candidate 4 (Casc4) alternative variant aSep08, mRNA.                                         |
| <a href="#">Casc4</a>   | <a href="#">Casc4.bSep08</a>   | <a href="#">362204</a> | 25182  | 929  | 1  | 153 | cancer susceptibility candidate 4 (Casc4) alternative variant bSep08, mRNA.                                         |
| <a href="#">Casc5</a>   | <a href="#">Casc5.aSep08</a>   | <a href="#">311327</a> | 16879  | 1791 |    | 543 | cancer susceptibility candidate 5 (Casc5) alternative variant aSep08, mRNA.                                         |
| <a href="#">Casc5</a>   | <a href="#">Casc5.bSep08</a>   | <a href="#">311327</a> | 25932  | 1200 |    | 299 | cancer susceptibility candidate 5 (35.0 kD) (Casc5) alternative variant bSep08, mRNA.                               |
| <a href="#">Cask</a>    | <a href="#">Cask.bSep08</a>    | <a href="#">29647</a>  | 44661  | 2569 | 12 | 464 | calcium/calmodulin-dependent serine protein kinase (MAGUK family) (Cask) alternative variant bSep08, mRNA.          |
| <a href="#">Cask</a>    | <a href="#">Cask.cSep08</a>    | <a href="#">29647</a>  | 287403 | 1197 | 12 | 334 | calcium/calmodulin-dependent serine protein kinase (MAGUK family) (Cask) alternative variant cSep08, mRNA.          |
| <a href="#">Cask</a>    | <a href="#">Cask.dSep08</a>    | <a href="#">29647</a>  | 747    | 653  | 2  | 44  | calcium/calmodulin-dependent serine protein kinase (MAGUK family) (4.6 kD) (Cask) alternative variant dSep08, mRNA. |
| <a href="#">Caskin1</a> | <a href="#">Caskin1.bSep08</a> | <a href="#">140722</a> | 2232   | 2151 | 2  | 613 | cask interacting protein 1 CRA b (Caskin1) alternative variant bSep08, mRNA.                                        |
| <a href="#">Caskin1</a> | <a href="#">Caskin1.cSep08</a> | <a href="#">140722</a> | 791    | 605  | 3  | 170 | cask interacting protein 1 CRA c (Caskin1) alternative variant cSep08, mRNA.                                        |
| <a href="#">Caskin1</a> | <a href="#">Caskin1.dSep08</a> | <a href="#">140722</a> | 678    | 588  | 2  | 139 | cask interacting protein 1 CRA b (Caskin1) alternative variant dSep08, mRNA.                                        |
| <a href="#">Caskin2</a> | <a href="#">Caskin2.bSep08</a> | <a href="#">303678</a> | 1711   | 544  | 6  | 181 | cask-interacting protein 2 (Caskin2) alternative variant bSep08, mRNA.                                              |
| <a href="#">Casp1</a>   | <a href="#">Casp1.bSep08</a>   | <a href="#">25166</a>  | 3475   | 670  | 1  | 183 | caspase 1 (Casp1) alternative variant bSep08, mRNA.                                                                 |
| <a href="#">Casp2</a>   | <a href="#">Casp2.bSep08</a>   | <a href="#">64314</a>  | 2749   | 2271 | 2  | 63  | caspase 2 (7.2 kD) (Casp2) alternative variant bSep08, mRNA.                                                        |

|                          |                                 |                        |        |      |    |     |                                                                                                     |
|--------------------------|---------------------------------|------------------------|--------|------|----|-----|-----------------------------------------------------------------------------------------------------|
| <a href="#">Casp3</a>    | <a href="#">Casp3.aSep08</a>    | <a href="#">25402</a>  | 16869  | 1141 | 6  | 288 | caspace 3, apoptosis related cysteine protease (Casp3) alternative variant aSep08, mRNA.            |
| <a href="#">Casp3</a>    | <a href="#">Casp3.cSep08</a>    | <a href="#">25402</a>  | 1401   | 413  | 1  | 100 | caspace 3, apoptosis related cysteine protease (Casp3) alternative variant cSep08, mRNA.            |
| <a href="#">Casp4</a>    | <a href="#">Casp4.bSep08</a>    | <a href="#">114555</a> | 25250  | 1421 | 3  | 141 | caspace 4, apoptosis-related cysteine peptidase (16.4 kD) (Casp4) alternative variant bSep08, mRNA. |
| <a href="#">Casp4</a>    | <a href="#">Casp4.cSep08</a>    | <a href="#">114555</a> | 21617  | 413  | 1  | 126 | caspace 4, apoptosis-related cysteine peptidase (Casp4) alternative variant cSep08, mRNA.           |
| <a href="#">Casp4</a>    | <a href="#">Casp4.dSep08</a>    | <a href="#">114555</a> | 700    | 299  | 2  | 32  | caspace 4, apoptosis-related cysteine peptidase (3.8 kD) (Casp4) alternative variant dSep08, mRNA.  |
| <a href="#">Casp6</a>    | <a href="#">Casp6.bSep08</a>    | <a href="#">83584</a>  | 11619  | 704  | 7  | 217 | caspace 6 (Casp6) alternative variant bSep08, mRNA.                                                 |
| <a href="#">Casp6</a>    | <a href="#">Casp6.cSep08</a>    | <a href="#">83584</a>  | 5266   | 789  | 4  | 153 | caspace 6 (17.7 kD) (Casp6) alternative variant cSep08, mRNA.                                       |
| <a href="#">Casp7</a>    | <a href="#">Casp7.bSep08</a>    | <a href="#">64026</a>  | 14596  | 601  | 1  | 67  | caspace 7 (Casp7) alternative variant bSep08, mRNA.                                                 |
| <a href="#">Casp12</a>   | <a href="#">Casp12.bSep08</a>   | <a href="#">156117</a> | 11408  | 1890 | 2  | 325 | caspace 12 (Casp12) alternative variant bSep08, mRNA.                                               |
| <a href="#">Casq1</a>    | <a href="#">Casq1.aSep08</a>    | <a href="#">686019</a> | 6964   | 1789 | 2  | 468 | calsequestrin 1 (Casq1) alternative variant aSep08, mRNA.                                           |
| <a href="#">Casq1</a>    | <a href="#">Casq1.bSep08</a>    | <a href="#">686019</a> | 5102   | 1089 | 4  | 335 | calsequestrin 1 (Casq1) alternative variant bSep08, mRNA.                                           |
| <a href="#">Casq1</a>    | <a href="#">Casq1.cSep08</a>    | <a href="#">686019</a> | 3780   | 887  | 5  | 140 | calsequestrin 1 (Casq1) alternative variant cSep08, mRNA.                                           |
| <a href="#">Casq1</a>    | <a href="#">Casq1.dSep08</a>    | <a href="#">686019</a> | 1557   | 581  | 1  | 104 | calsequestrin 1 (Casq1) alternative variant dSep08, mRNA.                                           |
| <a href="#">Cast</a>     | <a href="#">Cast.aSep08</a>     | <a href="#">25403</a>  | 111473 | 2667 | 29 | 800 | calpastatin (86.4 kD) (Cast) alternative variant aSep08, complete mRNA.                             |
| <a href="#">Cast</a>     | <a href="#">Cast.bSep08</a>     | <a href="#">25403</a>  | 111348 | 2473 | 28 | 777 | calpastatin (83.8 kD) (Cast) alternative variant bSep08, complete mRNA.                             |
| <a href="#">Cast</a>     | <a href="#">Cast.cSep08</a>     | <a href="#">25403</a>  | 111348 | 2389 | 27 | 749 | calpastatin (80.8 kD) (Cast) alternative variant cSep08, complete mRNA.                             |
| <a href="#">Cast</a>     | <a href="#">Cast.fSep08</a>     | <a href="#">25403</a>  | 37138  | 935  | 10 | 299 | calpastatin (Cast) alternative variant fSep08, mRNA.                                                |
| <a href="#">Cast</a>     | <a href="#">Cast.gSep08</a>     | <a href="#">25403</a>  | 59099  | 711  | 9  | 237 | calpastatin (Cast) alternative variant gSep08, mRNA.                                                |
| <a href="#">Cast</a>     | <a href="#">Cast.hSep08</a>     | <a href="#">25403</a>  | 55319  | 730  | 7  | 187 | calpastatin (Cast) alternative variant hSep08, mRNA.                                                |
| <a href="#">Cast</a>     | <a href="#">Cast.iSep08</a>     | <a href="#">25403</a>  | 7483   | 404  | 6  | 117 | calpastatin (Cast) alternative variant iSep08, mRNA.                                                |
| <a href="#">Cat</a>      | <a href="#">Cat.bSep08</a>      | <a href="#">24248</a>  | 12464  | 834  | 5  | 200 | catalase (Cat) alternative variant bSep08, mRNA.                                                    |
| <a href="#">Cat</a>      | <a href="#">Cat.cSep08</a>      | <a href="#">24248</a>  | 602    | 258  | 2  | 53  | catalase (Cat) alternative variant cSep08, complete mRNA.                                           |
| <a href="#">Catsper2</a> | <a href="#">Catsper2.bSep08</a> | <a href="#">366174</a> | 3300   | 471  | 2  | 50  | cation channel, sperm associated 2 (6.3 kD) (Catsper2) alternative variant bSep08, mRNA.            |
| <a href="#">Catsper4</a> | <a href="#">Catsper4.aSep08</a> | <a href="#">362623</a> | 13406  | 728  |    | 242 | channel, sperm associated 4 (Catsper4) mRNA.                                                        |
| <a href="#">Cav1</a>     | <a href="#">Cav1.aSep08</a>     | <a href="#">25404</a>  | 31048  | 655  | 3  | 203 | caveolin, caveolae protein 1 (Cav1) alternative variant aSep08, mRNA.                               |
| <a href="#">Cav1</a>     | <a href="#">Cav1.dSep08</a>     | <a href="#">25404</a>  | 36833  | 736  | 3  | 146 | caveolin, caveolae protein 1 (Cav1) alternative variant dSep08, mRNA.                               |
| <a href="#">Cav2</a>     | <a href="#">Cav2.aSep08</a>     | <a href="#">363425</a> | 7479   | 2591 | 2  | 162 | caveolin 2 (18.2 kD) (Cav2) alternative variant aSep08, mRNA.                                       |
| <a href="#">Cav2</a>     | <a href="#">Cav2.bSep08</a>     | <a href="#">363425</a> | 4899   | 377  | 1  | 125 | caveolin 2 (Cav2) alternative variant bSep08, mRNA.                                                 |
| <a href="#">Cav2.1</a>   | <a href="#">Cav2.1.aSep08</a>   | <a href="#">363425</a> | 7479   | 2591 | 2  | 162 | caveolin 2 (18.2 kD) (Cav2.1) alternative variant aSep08, mRNA.                                     |
| <a href="#">Cav2.1</a>   | <a href="#">Cav2.1.bSep08</a>   | <a href="#">363425</a> | 4899   | 377  | 1  | 125 | caveolin 2 (Cav2.1) alternative variant bSep08, mRNA.                                               |

|                          |                                 |                        |       |      |   |     |                                                                                                                           |
|--------------------------|---------------------------------|------------------------|-------|------|---|-----|---------------------------------------------------------------------------------------------------------------------------|
| <a href="#">CB741658</a> | <a href="#">CB741658.aSep08</a> | <a href="#">415051</a> | 1652  | 1285 | 2 | 355 | CB741658 gene (CB741658) alternative variant aSep08, mRNA.                                                                |
| <a href="#">CB741658</a> | <a href="#">CB741658.cSep08</a> | <a href="#">415051</a> | 3252  | 454  | 2 | 150 | CB741658 gene (CB741658) alternative variant cSep08, mRNA.                                                                |
| <a href="#">CB741658</a> | <a href="#">CB741658.dSep08</a> | <a href="#">415051</a> | 5416  | 411  | 2 | 59  | CB741658 gene (CB741658) alternative variant dSep08, mRNA.                                                                |
| <a href="#">Cbfa2t2</a>  | <a href="#">Cbfa2t2.aSep08</a>  | <a href="#">296293</a> | 12160 | 752  |   | 173 | core-binding factor, runt domain, alpha subunit 2, translocated to, 2 (human) (18.4 kD) (Cbfa2t2) mRNA.                   |
| <a href="#">Cbfa2t3</a>  | <a href="#">Cbfa2t3.bSep08</a>  | <a href="#">361431</a> | 39359 | 600  | 5 | 200 | core-binding factor, runt domain, alpha subunit 2, translocated to, 3 (human) (Cbfa2t3) alternative variant bSep08, mRNA. |
| <a href="#">Cbfb</a>     | <a href="#">Cbfb.aSep08</a>     | <a href="#">361391</a> | 41642 | 949  | 2 | 186 | core binding factor beta (22.0 kD) (Cbfb) alternative variant aSep08, mRNA.                                               |
| <a href="#">Cbl</a>      | <a href="#">Cbl.aSep08</a>      | <a href="#">500985</a> | 6907  | 626  |   | 208 | casitas B-lineage lymphoma (Cbl) mRNA.                                                                                    |
| <a href="#">Cbhc</a>     | <a href="#">Cbhc.bSep08</a>     | <a href="#">292699</a> | 5460  | 532  | 5 | 156 | casitas B-lineage lymphoma c (Cbhc) alternative variant bSep08, mRNA.                                                     |
| <a href="#">Cbhc</a>     | <a href="#">Cbhc.cSep08</a>     | <a href="#">292699</a> | 4289  | 422  | 4 | 134 | casitas B-lineage lymphoma c (Cbhc) alternative variant cSep08, mRNA.                                                     |
| <a href="#">Cbl1</a>     | <a href="#">Cbl1.bSep08</a>     | <a href="#">314028</a> | 11049 | 1113 | 4 | 370 | casitas B-lineage lymphoma-like 1 (Cbl1) alternative variant bSep08, mRNA.                                                |
| <a href="#">Cbl1</a>     | <a href="#">Cbl1.cSep08</a>     | <a href="#">314028</a> | 6390  | 741  | 3 | 246 | casitas B-lineage lymphoma-like 1 (Cbl1) alternative variant cSep08, mRNA.                                                |
| <a href="#">Cbr1</a>     | <a href="#">Cbr1.bSep08</a>     | <a href="#">29224</a>  | 1526  | 1056 | 2 | 207 | carbonyl reductase 1 (22.9 kD) (Cbr1) alternative variant bSep08, mRNA.                                                   |
| <a href="#">Cbr4</a>     | <a href="#">Cbr4.aSep08</a>     | <a href="#">359725</a> | 6201  | 448  | 3 | 132 | carbonyl reductase 4 (Cbr4) alternative variant aSep08, mRNA.                                                             |
| <a href="#">Cbr4</a>     | <a href="#">Cbr4.bSep08</a>     | <a href="#">359725</a> | 12747 | 605  | 2 | 82  | carbonyl reductase 4 (Cbr4) alternative variant bSep08, mRNA.                                                             |
| <a href="#">Cbs</a>      | <a href="#">Cbs.bSep08</a>      | <a href="#">24250</a>  | 8686  | 782  | 6 | 220 | cystathionine beta synthase (Cbs) alternative variant bSep08, mRNA.                                                       |
| <a href="#">Cbs</a>      | <a href="#">Cbs.cSep08</a>      | <a href="#">24250</a>  | 2710  | 632  | 1 | 122 | cystathionine beta synthase (Cbs) alternative variant cSep08, mRNA.                                                       |
| <a href="#">Cbwd1</a>    | <a href="#">Cbwd1.bSep08</a>    | <a href="#">171057</a> | 15745 | 401  | 6 | 133 | cobalamin (vitamin B12) biosynthesis P47K (Cbwd1) alternative variant bSep08, mRNA.                                       |
| <a href="#">Cbwd1</a>    | <a href="#">Cbwd1.cSep08</a>    | <a href="#">171057</a> | 5749  | 555  | 2 | 41  | putative protein of vertebrate origin (Cbwd1) alternative variant cSep08, mRNA.                                           |
| <a href="#">Cbx1</a>     | <a href="#">Cbx1.aSep08</a>     | <a href="#">360609</a> | 15128 | 746  | 4 | 206 | chromobox homolog 1 (HP1 beta homolog Drosophila ) (Cbx1) alternative variant aSep08, mRNA.                               |
| <a href="#">Cbx1</a>     | <a href="#">Cbx1.bSep08</a>     | <a href="#">360609</a> | 6870  | 591  | 3 | 95  | chromobox homolog 1 (HP1 beta homolog Drosophila ) (Cbx1) alternative variant bSep08, mRNA.                               |
| <a href="#">Cbx1</a>     | <a href="#">Cbx1.cSep08</a>     | <a href="#">360609</a> | 4689  | 846  | 2 | 78  | chromobox homolog 1 (HP1 beta homolog Drosophila ) (Cbx1) alternative variant cSep08, mRNA.                               |
| <a href="#">Cbx1</a>     | <a href="#">Cbx1.dSep08</a>     | <a href="#">360609</a> | 1780  | 381  | 2 | 66  | chromobox homolog 1 (HP1 beta homolog Drosophila ) (Cbx1) alternative variant dSep08, mRNA.                               |
| <a href="#">Cbx3.1</a>   | <a href="#">Cbx3.1.aSep08</a>   | <a href="#">297093</a> | 14250 | 1792 | 7 | 183 | chromobox homolog 3 (HP1 gamma homolog, Drosophila) (20.8 kD) (Cbx3.1) alternative variant aSep08, mRNA.                  |

|                        |                               |                        |       |      |    |     |                                                                                                                     |
|------------------------|-------------------------------|------------------------|-------|------|----|-----|---------------------------------------------------------------------------------------------------------------------|
| <a href="#">Cbx3.1</a> | <a href="#">Cbx3.1.bSep08</a> | <a href="#">297093</a> | 11599 | 1222 | 5  | 183 | chromobox homolog 3 (HP1 gamma homolog, Drosophila) (20.8 kD) (Cbx3.1) alternative variant bSep08, mRNA.            |
| <a href="#">Cbx3.1</a> | <a href="#">Cbx3.1.cSep08</a> | <a href="#">297093</a> | 12955 | 1444 | 6  | 183 | chromobox homolog 3 (HP1 gamma homolog, Drosophila) (20.8 kD) (Cbx3.1) alternative variant cSep08, mRNA.            |
| <a href="#">Cbx3.1</a> | <a href="#">Cbx3.1.dSep08</a> | <a href="#">297093</a> | 12566 | 1050 | 6  | 183 | chromobox homolog 3 (HP1 gamma homolog, Drosophila) (20.8 kD) (Cbx3.1) alternative variant dSep08, mRNA.            |
| <a href="#">Cbx3.1</a> | <a href="#">Cbx3.1.eSep08</a> | <a href="#">297093</a> | 12016 | 1310 | 6  | 158 | chromobox homolog 3 (HP1 gamma homolog, Drosophila) (Cbx3.1) alternative variant eSep08, mRNA.                      |
| <a href="#">Cbx3.1</a> | <a href="#">Cbx3.1.hSep08</a> | <a href="#">297093</a> | 7729  | 395  | 4  | 23  | chromobox homolog 3 (HP1 gamma homolog, Drosophila) (Cbx3.1) alternative variant hSep08, mRNA.                      |
| <a href="#">Cbx4</a>   | <a href="#">Cbx4.aSep08</a>   | <a href="#">501403</a> | 510   | 363  |    | 38  | chromobox homolog 4 (Drosophila Pc class) (4.5 kD) (Cbx4) mRNA.                                                     |
| <a href="#">Cbx5</a>   | <a href="#">Cbx5.bSep08</a>   | <a href="#">300266</a> | 35214 | 462  | 3  | 104 | chromobox homolog 5 (Drosophila HP1a) (Cbx5) alternative variant bSep08, mRNA.                                      |
| <a href="#">Cbx5</a>   | <a href="#">Cbx5.cSep08</a>   | <a href="#">300266</a> | 11002 | 478  | 3  | 100 | chromobox homolog 5 (Drosophila HP1a) (Cbx5) alternative variant cSep08, mRNA.                                      |
| <a href="#">Cbx6</a>   | <a href="#">Cbx6.bSep08</a>   | <a href="#">315136</a> | 5540  | 931  | 1  | 278 | chromobox homolog 6 (Cbx6) alternative variant bSep08, mRNA.                                                        |
| <a href="#">Cbx6</a>   | <a href="#">Cbx6.cSep08</a>   | <a href="#">315136</a> | 10020 | 4981 | 2  | 225 | chromobox homolog 6 (Cbx6) alternative variant cSep08, mRNA.                                                        |
| <a href="#">Cbx7</a>   | <a href="#">Cbx7.bSep08</a>   | <a href="#">362962</a> | 17308 | 2967 | 7  | 158 | chromobox homolog 7 (18.0 kD) (Cbx7) alternative variant bSep08, complete mRNA.                                     |
| <a href="#">Cbx7</a>   | <a href="#">Cbx7.cSep08</a>   | <a href="#">362962</a> | 15416 | 803  | 5  | 151 | chromobox homolog 7 (17.4 kD) (Cbx7) alternative variant cSep08, mRNA.                                              |
| <a href="#">Cbx7</a>   | <a href="#">Cbx7.dSep08</a>   | <a href="#">362962</a> | 12206 | 339  | 4  | 112 | chromobox homolog 7 (Cbx7) alternative variant dSep08, mRNA.                                                        |
| <a href="#">Cby1</a>   | <a href="#">Cby1.aSep08</a>   | <a href="#">246768</a> | 3691  | 437  | 2  | 145 | chibby homolog 1 (Drosophila) (Cby1) alternative variant aSep08, mRNA.                                              |
| <a href="#">Cc2d1a</a> | <a href="#">Cc2d1a.bSep08</a> | <a href="#">288908</a> | 14991 | 1931 | 11 | 466 | putative protein, with a coiled coil domain, of metazoan origin (Cc2d1a) alternative variant bSep08, complete mRNA. |
| <a href="#">Cc2d1a</a> | <a href="#">Cc2d1a.eSep08</a> | <a href="#">288908</a> | 1258  | 661  | 4  | 67  | putative protein of vertebrate origin (7.8 kD) (Cc2d1a) alternative variant eSep08, mRNA.                           |
| <a href="#">Cc2d1b</a> | <a href="#">Cc2d1b.aSep08</a> | <a href="#">313478</a> | 4548  | 843  | 10 | 255 | c2 calcium-dependent membrane targeting (Cc2d1b) alternative variant aSep08, mRNA.                                  |
| <a href="#">Cc2d1b</a> | <a href="#">Cc2d1b.bSep08</a> | <a href="#">313478</a> | 3776  | 1255 | 7  | 158 | c2 calcium-dependent membrane targeting (18.2 kD) (Cc2d1b) alternative variant bSep08, mRNA.                        |
| <a href="#">Ccar1</a>  | <a href="#">Ccar1.bSep08</a>  | <a href="#">361849</a> | 17950 | 2053 | 11 | 587 | cell division cycle and apoptosis regulator 1 (Ccar1) alternative variant bSep08, mRNA.                             |
| <a href="#">Ccar1</a>  | <a href="#">Ccar1.cSep08</a>  | <a href="#">361849</a> | 9506  | 1587 | 4  | 237 | cell division cycle and apoptosis regulator 1 (28.4 kD) (Ccar1) alternative variant cSep08, mRNA.                   |
| <a href="#">Ccar1</a>  | <a href="#">Ccar1.dSep08</a>  | <a href="#">361849</a> | 6221  | 656  | 5  | 155 | cell division cycle and apoptosis regulator 1 (Ccar1) alternative variant dSep08, mRNA.                             |
| <a href="#">Ccar1</a>  | <a href="#">Ccar1.hSep08</a>  | <a href="#">361849</a> | 2227  | 494  | 2  | 54  | cell division cycle and apoptosis regulator 1 (Ccar1) alternative variant hSep08, mRNA.                             |
| <a href="#">Ccar1</a>  | <a href="#">Ccar1.jSep08</a>  | <a href="#">361849</a> | 6267  | 258  | 3  | 50  | cell division cycle and apoptosis regulator 1 (Ccar1) alternative variant jSep08, mRNA.                             |

|                         |                                |                        |       |      |    |     |                                                                                                                              |
|-------------------------|--------------------------------|------------------------|-------|------|----|-----|------------------------------------------------------------------------------------------------------------------------------|
| <a href="#">Ccbe1</a>   | <a href="#">Ccbe1.aSep08</a>   | <a href="#">361341</a> | 18631 | 410  |    | 136 | collagen and calcium binding EGF domains 1 (Ccbe1) mRNA.                                                                     |
| <a href="#">Ccbl1</a>   | <a href="#">Ccbl1.bSep08</a>   | <a href="#">311844</a> | 64281 | 1802 | 7  | 426 | cysteine conjugate-beta lyase 1 (Ccbl1) alternative variant bSep08, mRNA.                                                    |
| <a href="#">Ccbl1</a>   | <a href="#">Ccbl1.cSep08</a>   | <a href="#">311844</a> | 67491 | 2034 | 12 | 241 | cysteine conjugate-beta lyase 1 (26.7 kD) (Ccbl1) alternative variant cSep08, mRNA.                                          |
| <a href="#">Ccbl1</a>   | <a href="#">Ccbl1.dSep08</a>   | <a href="#">311844</a> | 62547 | 848  | 8  | 240 | cysteine conjugate-beta lyase 1 (Ccbl1) alternative variant dSep08, mRNA.                                                    |
| <a href="#">Ccbl1</a>   | <a href="#">Ccbl1.eSep08</a>   | <a href="#">311844</a> | 1139  | 891  | 2  | 96  | cysteine conjugate-beta lyase 1 (10.3 kD) (Ccbl1) alternative variant eSep08, mRNA.                                          |
| <a href="#">Ccdc5</a>   | <a href="#">Ccdc5.bSep08</a>   | <a href="#">192228</a> | 4485  | 290  | 5  | 89  | putative protein (Ccdc5) alternative variant bSep08, mRNA.                                                                   |
| <a href="#">Ccdc6</a>   | <a href="#">Ccdc6.aSep08</a>   | <a href="#">691155</a> | 21689 | 418  |    | 139 | putative protein, with 2 coiled coil domains, of metazoan origin (Ccdc6) mRNA.                                               |
| <a href="#">Ccdc11</a>  | <a href="#">Ccdc11.aSep08</a>  | <a href="#">364899</a> | 52705 | 658  |    | 187 | putative protein, with 2 coiled coil domains, of vertebrate origin (Ccdc11) mRNA.                                            |
| <a href="#">Ccdc12</a>  | <a href="#">Ccdc12.bSep08</a>  | <a href="#">363151</a> | 50639 | 675  |    | 115 | mRNA splicing factor, Cwf18 (13.1 kD) (Ccdc12) alternative variant bSep08, mRNA.                                             |
| <a href="#">Ccdc14</a>  | <a href="#">Ccdc14.aSep08</a>  | <a href="#">288054</a> | 1325  | 397  |    | 131 | putative protein, with a coiled coil domain, of metazoan origin (Ccdc14) mRNA.                                               |
| <a href="#">Ccdc17</a>  | <a href="#">Ccdc17.bSep08</a>  | <a href="#">500528</a> | 2673  | 650  | 3  | 144 | putative protein of metazoan origin (Ccdc17) alternative variant bSep08, mRNA.                                               |
| <a href="#">Ccdc17</a>  | <a href="#">Ccdc17.cSep08</a>  | <a href="#">500528</a> | 1634  | 1289 | 4  | 122 | putative protein of vertebrate origin (Ccdc17) alternative variant cSep08, mRNA.                                             |
| <a href="#">Ccdc17</a>  | <a href="#">Ccdc17.dSep08</a>  | <a href="#">500528</a> | 1219  | 485  | 6  | 87  | putative protein, with a coiled coil domain, of mammalian origin (Ccdc17) alternative variant dSep08, mRNA.                  |
| <a href="#">Ccdc17</a>  | <a href="#">Ccdc17.eSep08</a>  | <a href="#">500528</a> | 1563  | 764  | 3  | 86  | putative protein of mammalian origin (Ccdc17) alternative variant eSep08, mRNA.                                              |
| <a href="#">Ccdc18</a>  | <a href="#">Ccdc18.aSep08</a>  | <a href="#">305628</a> | 15359 | 719  |    | 124 | putative protein, with 2 coiled coil domains (Ccdc18) mRNA.                                                                  |
| <a href="#">Ccdc19</a>  | <a href="#">Ccdc19.bSep08</a>  | <a href="#">304984</a> | 7887  | 506  | 1  | 109 | putative protein of mammalian origin (Ccdc19) alternative variant bSep08, mRNA.                                              |
| <a href="#">Ccdc21</a>  | <a href="#">Ccdc21.bSep08</a>  | <a href="#">362622</a> | 16524 | 1786 | 8  | 418 | putative protein, with 3 coiled coil domains, of metazoan origin (Ccdc21) alternative variant bSep08, mRNA.                  |
| <a href="#">Ccdc21</a>  | <a href="#">Ccdc21.cSep08</a>  | <a href="#">362622</a> | 14555 | 1082 | 7  | 289 | putative protein, with 3 coiled coil domains, of metazoan origin (Ccdc21) alternative variant cSep08, mRNA.                  |
| <a href="#">Ccdc21</a>  | <a href="#">Ccdc21.dSep08</a>  | <a href="#">362622</a> | 2379  | 837  | 2  | 102 | putative nuclear protein, with a coiled coil domain, of metazoan origin (11.2 kD) (Ccdc21) alternative variant dSep08, mRNA. |
| <a href="#">Ccdc22</a>  | <a href="#">Ccdc22.aSep08</a>  | <a href="#">317381</a> | 7047  | 1911 | 3  | 553 | putative protein, with 3 coiled coil domains, of eukaryotic origin (Ccdc22) alternative variant aSep08, mRNA.                |
| <a href="#">Ccdc22</a>  | <a href="#">Ccdc22.bSep08</a>  | <a href="#">317381</a> | 1495  | 1136 | 1  | 146 | putative protein, with a coiled coil domain, of eukaryotic origin (Ccdc22) alternative variant bSep08, mRNA.                 |
| <a href="#">Ccdc25</a>  | <a href="#">Ccdc25.aSep08</a>  | <a href="#">361059</a> | 32963 | 2402 |    | 234 | putative protein, with 2 coiled coil domains, of ancient origin (Ccdc25) mRNA.                                               |
| <a href="#">Ccdc27</a>  | <a href="#">Ccdc27.aSep08</a>  | <a href="#">679584</a> | 1300  | 264  |    | 56  | putative protein of mammalian origin (Ccdc27) mRNA.                                                                          |
| <a href="#">Ccdc28a</a> | <a href="#">Ccdc28a.aSep08</a> | <a href="#">361454</a> | 15208 | 1793 | 2  | 553 | putative protein of metazoan origin (Ccdc28a) alternative variant aSep08, mRNA.                                              |

|                         |                                |                        |       |      |   |     |                                                                                                                                 |
|-------------------------|--------------------------------|------------------------|-------|------|---|-----|---------------------------------------------------------------------------------------------------------------------------------|
| <a href="#">Ccgc28a</a> | <a href="#">Ccgc28a.cSep08</a> | <a href="#">361454</a> | 8735  | 544  | 1 | 140 | putative protein of metazoan origin (Ccgc28a) alternative variant cSep08, mRNA.                                                 |
| <a href="#">Ccgc33</a>  | <a href="#">Ccgc33.bSep08</a>  | <a href="#">315712</a> | 2946  | 444  | 1 | 119 | putative protein, with a coiled coil domain, of mammalian origin (Ccgc33) alternative variant bSep08, mRNA.                     |
| <a href="#">Ccgc34</a>  | <a href="#">Ccgc34.bSep08</a>  | <a href="#">362187</a> | 5128  | 753  | 3 | 165 | putative protein, with a coiled coil domain, of vertebrate origin (Ccgc34) alternative variant bSep08, mRNA.                    |
| <a href="#">Ccgc34</a>  | <a href="#">Ccgc34.cSep08</a>  | <a href="#">362187</a> | 30514 | 632  | 3 | 95  | putative protein, with a coiled coil domain, of mammalian origin (Ccgc34) alternative variant cSep08, mRNA.                     |
| <a href="#">Ccgc37</a>  | <a href="#">Ccgc37.aSep08</a>  | <a href="#">297444</a> | 2581  | 678  |   | 177 | putative protein, with a coiled coil domain, of metazoan origin (Ccgc37) mRNA.                                                  |
| <a href="#">Ccgc39</a>  | <a href="#">Ccgc39.bSep08</a>  | <a href="#">310315</a> | 5624  | 632  | 3 | 140 | putative protein, with 2 coiled coil domains, of eukaryotic origin (16.3 kD) (Ccgc39) alternative variant bSep08, mRNA.         |
| <a href="#">Ccgc39</a>  | <a href="#">Ccgc39.cSep08</a>  | <a href="#">310315</a> | 4014  | 362  | 2 | 99  | putative protein, with 2 coiled coil domains (Ccgc39) alternative variant cSep08, mRNA.                                         |
| <a href="#">Ccgc40</a>  | <a href="#">Ccgc40.cSep08</a>  | <a href="#">287867</a> | 560   | 477  | 2 | 101 | putative protein, with 2 coiled coil domains (Ccgc40) alternative variant cSep08, mRNA.                                         |
| <a href="#">Ccgc40</a>  | <a href="#">Ccgc40.dSep08</a>  | <a href="#">287867</a> | 3659  | 627  | 2 | 64  | putative protein (Ccgc40) alternative variant dSep08, mRNA.                                                                     |
| <a href="#">Ccgc40</a>  | <a href="#">Ccgc40.eSep08</a>  | <a href="#">287867</a> | 535   | 333  | 2 | 41  | putative protein, with a coiled coil domain (Ccgc40) alternative variant eSep08, mRNA.                                          |
| <a href="#">Ccgc41</a>  | <a href="#">Ccgc41.bSep08</a>  | <a href="#">366872</a> | 41756 | 768  | 4 | 176 | putative nuclear protein, with 2 coiled coil domains, of vertebrate origin (21.0 kD) (Ccgc41) alternative variant bSep08, mRNA. |
| <a href="#">Ccgc41</a>  | <a href="#">Ccgc41.cSep08</a>  | <a href="#">366872</a> | 25009 | 674  | 2 | 174 | putative nuclear protein, with 2 coiled coil domains, of vertebrate origin (20.7 kD) (Ccgc41) alternative variant cSep08, mRNA. |
| <a href="#">Ccgc41</a>  | <a href="#">Ccgc41.dSep08</a>  | <a href="#">366872</a> | 29272 | 442  | 2 | 147 | putative protein, with a coiled coil domain, of vertebrate origin (Ccgc41) alternative variant dSep08, mRNA.                    |
| <a href="#">Ccgc41</a>  | <a href="#">Ccgc41.eSep08</a>  | <a href="#">366872</a> | 4234  | 885  | 1 | 132 | putative protein, with a coiled coil domain, of vertebrate origin (Ccgc41) alternative variant eSep08, mRNA.                    |
| <a href="#">Ccgc41</a>  | <a href="#">Ccgc41.fSep08</a>  | <a href="#">366872</a> | 24974 | 635  | 2 | 114 | putative protein, with a coiled coil domain, of vertebrate origin (Ccgc41) alternative variant fSep08, mRNA.                    |
| <a href="#">Ccgc43</a>  | <a href="#">Ccgc43.aSep08</a>  | <a href="#">360637</a> | 10690 | 1085 | 5 | 333 | putative protein, with 2 coiled coil domains, of bilateral origin (Ccgc43) alternative variant aSep08, mRNA.                    |
| <a href="#">Ccgc44</a>  | <a href="#">Ccgc44.bSep08</a>  | <a href="#">360645</a> | 5573  | 672  | 3 | 169 | putative mitochondrial protein of ancient origin (18.6 kD) (Ccgc44) alternative variant bSep08, mRNA.                           |
| <a href="#">Ccgc44</a>  | <a href="#">Ccgc44.cSep08</a>  | <a href="#">360645</a> | 8078  | 1505 | 4 | 169 | putative protein of ancient origin (18.6 kD) (Ccgc44) alternative variant cSep08, mRNA.                                         |
| <a href="#">Ccgc45</a>  | <a href="#">Ccgc45.bSep08</a>  | <a href="#">287766</a> | 3503  | 1174 | 4 | 222 | putative nuclear protein, with a coiled coil domain, of metazoan origin (Ccgc45) alternative variant bSep08, mRNA.              |
| <a href="#">Ccgc45</a>  | <a href="#">Ccgc45.cSep08</a>  | <a href="#">287766</a> | 2099  | 368  | 2 | 102 | putative protein of mammalian origin (Ccgc45) alternative variant cSep08, mRNA.                                                 |
| <a href="#">Ccgc45</a>  | <a href="#">Ccgc45.eSep08</a>  | <a href="#">287766</a> | 2964  | 697  | 3 | 52  | putative protein (Ccgc45) alternative variant eSep08, mRNA.                                                                     |

|                        |                               |                        |        |      |    |     |                                                                                                                                  |
|------------------------|-------------------------------|------------------------|--------|------|----|-----|----------------------------------------------------------------------------------------------------------------------------------|
| <a href="#">Ccdc45</a> | <a href="#">Ccdc45.gSep08</a> | <a href="#">287766</a> | 532    | 307  | 2  | 32  | putative protein (Ccdc45) alternative variant gSep08, mRNA.                                                                      |
| <a href="#">Ccdc46</a> | <a href="#">Ccdc46.bSep08</a> | <a href="#">287776</a> | 204050 | 2258 | 19 | 334 | putative protein, with a coiled coil domain, of eukaryotic origin (Ccdc46) alternative variant bSep08, mRNA.                     |
| <a href="#">Ccdc49</a> | <a href="#">Ccdc49.bSep08</a> | <a href="#">360613</a> | 8140   | 676  | 1  | 143 | putative protein, with a coiled coil domain, of eukaryotic origin (Ccdc49) alternative variant bSep08, mRNA.                     |
| <a href="#">Ccdc50</a> | <a href="#">Ccdc50.bSep08</a> | <a href="#">288022</a> | 18337  | 426  | 3  | 80  | putative nuclear protein of bilateral origin (9.2 kD) (Ccdc50) alternative variant bSep08, complete mRNA.                        |
| <a href="#">Ccdc50</a> | <a href="#">Ccdc50.cSep08</a> | <a href="#">288022</a> | 1524   | 765  | 3  | 70  | putative protein of vertebrate origin (Ccdc50) alternative variant cSep08, mRNA.                                                 |
| <a href="#">Ccdc51</a> | <a href="#">Ccdc51.bSep08</a> | <a href="#">316008</a> | 15754  | 572  | 1  | 121 | putative protein of vertebrate origin (Ccdc51) alternative variant bSep08, mRNA.                                                 |
| <a href="#">Ccdc52</a> | <a href="#">Ccdc52.bSep08</a> | <a href="#">288111</a> | 8101   | 1170 | 5  | 257 | putative protein, with a coiled coil domain, of vertebrate origin (Ccdc52) alternative variant bSep08, mRNA.                     |
| <a href="#">Ccdc53</a> | <a href="#">Ccdc53.bSep08</a> | <a href="#">299707</a> | 47281  | 615  | 7  | 186 | putative protein, with a coiled coil domain, of eukaryotic origin (Ccdc53) alternative variant bSep08, mRNA.                     |
| <a href="#">Ccdc53</a> | <a href="#">Ccdc53.cSep08</a> | <a href="#">299707</a> | 34461  | 662  | 6  | 105 | putative protein of metazoan origin (Ccdc53) alternative variant cSep08, mRNA.                                                   |
| <a href="#">Ccdc53</a> | <a href="#">Ccdc53.dSep08</a> | <a href="#">299707</a> | 8162   | 383  | 2  | 60  | putative protein (Ccdc53) alternative variant dSep08, mRNA.                                                                      |
| <a href="#">Ccdc55</a> | <a href="#">Ccdc55.bSep08</a> | <a href="#">303346</a> | 30897  | 622  | 6  | 207 | putative protein, with a coiled coil domain, of eukaryotic origin (Ccdc55) alternative variant bSep08, mRNA.                     |
| <a href="#">Ccdc58</a> | <a href="#">Ccdc58.aSep08</a> | <a href="#">288065</a> | 10458  | 681  | 3  | 147 | putative protein, with a coiled coil domain, of eukaryotic origin (Ccdc58) alternative variant aSep08, mRNA.                     |
| <a href="#">Ccdc58</a> | <a href="#">Ccdc58.cSep08</a> | <a href="#">288065</a> | 20402  | 385  | 1  | 50  | putative protein of metazoan origin (Ccdc58) alternative variant cSep08, mRNA.                                                   |
| <a href="#">Ccdc60</a> | <a href="#">Ccdc60.bSep08</a> | <a href="#">498190</a> | 41634  | 688  |    | 228 | putative protein of metazoan origin (Ccdc60) alternative variant bSep08, mRNA.                                                   |
| <a href="#">Ccdc62</a> | <a href="#">Ccdc62.bSep08</a> | <a href="#">689909</a> | 25556  | 1400 | 9  | 147 | putative protein, with 2 coiled coil domains, of metazoan origin (17.5 kD) (Ccdc62) alternative variant bSep08, mRNA.            |
| <a href="#">Ccdc62</a> | <a href="#">Ccdc62.cSep08</a> | <a href="#">689909</a> | 9167   | 483  | 3  | 114 | putative protein, with a coiled coil domain, of metazoan origin (Ccdc62) alternative variant cSep08, mRNA.                       |
| <a href="#">Ccdc63</a> | <a href="#">Ccdc63.aSep08</a> | <a href="#">304484</a> | 4653   | 676  | 3  | 205 | putative protein, with a coiled coil domain, of eukaryotic origin (Ccdc63) alternative variant aSep08, mRNA.                     |
| <a href="#">Ccdc63</a> | <a href="#">Ccdc63.bSep08</a> | <a href="#">304484</a> | 1480   | 406  | 1  | 79  | putative protein of mammalian origin (Ccdc63) alternative variant bSep08, mRNA.                                                  |
| <a href="#">Ccdc64</a> | <a href="#">Ccdc64.aSep08</a> | <a href="#">304537</a> | 82036  | 2512 | 8  | 408 | putative protein, with 5 coiled coil domains, of metazoan origin (Ccdc64) alternative variant aSep08, mRNA.                      |
| <a href="#">Ccdc64</a> | <a href="#">Ccdc64.bSep08</a> | <a href="#">304537</a> | 19206  | 983  | 6  | 279 | putative protein, with 4 coiled coil domains, of vertebrate origin (Ccdc64) alternative variant bSep08, mRNA.                    |
| <a href="#">Ccdc64</a> | <a href="#">Ccdc64.cSep08</a> | <a href="#">304537</a> | 7328   | 1050 | 4  | 93  | putative protein, with a coiled coil domain, of bilateral origin (10.9 kD) (Ccdc64) alternative variant cSep08, mRNA.            |
| <a href="#">Ccdc65</a> | <a href="#">Ccdc65.bSep08</a> | <a href="#">362994</a> | 9168   | 841  | 4  | 204 | putative protein, with 3 coiled coil domains, of eukaryotic origin (24.4 kD) (Ccdc65) alternative variant bSep08, complete mRNA. |



|                          |                                 |                        |        |      |   |     |                                                                                                                                 |
|--------------------------|---------------------------------|------------------------|--------|------|---|-----|---------------------------------------------------------------------------------------------------------------------------------|
| <a href="#">Ccfdc65</a>  | <a href="#">Ccfdc65.cSep08</a>  | <a href="#">362994</a> | 4892   | 580  | 3 | 186 | putative protein, with a coiled coil domain, of eukaryotic origin (Ccfdc65) alternative variant cSep08, mRNA.                   |
| <a href="#">Ccfdc65</a>  | <a href="#">Ccfdc65.eSep08</a>  | <a href="#">362994</a> | 2481   | 927  | 4 | 111 | putative protein, with a coiled coil domain, of eukaryotic origin (Ccfdc65) alternative variant eSep08, mRNA.                   |
| <a href="#">Ccfdc65</a>  | <a href="#">Ccfdc65.fSep08</a>  | <a href="#">362994</a> | 4239   | 583  | 2 | 83  | putative protein (Ccfdc65) alternative variant fSep08, mRNA.                                                                    |
| <a href="#">Ccfdc65</a>  | <a href="#">Ccfdc65.gSep08</a>  | <a href="#">362994</a> | 499    | 333  | 2 | 80  | putative protein (Ccfdc65) alternative variant gSep08, mRNA.                                                                    |
| <a href="#">Ccfdc67</a>  | <a href="#">Ccfdc67.bSep08</a>  | <a href="#">315438</a> | 21698  | 709  | 5 | 199 | putative protein, with a coiled coil domain, of vertebrate origin (Ccfdc67) alternative variant bSep08, mRNA.                   |
| <a href="#">Ccfdc67</a>  | <a href="#">Ccfdc67.cSep08</a>  | <a href="#">315438</a> | 25789  | 672  | 6 | 170 | putative protein, with 2 coiled coil domains, of metazoan origin (Ccfdc67) alternative variant cSep08, mRNA.                    |
| <a href="#">Ccfdc67</a>  | <a href="#">Ccfdc67.dSep08</a>  | <a href="#">315438</a> | 2399   | 261  | 3 | 69  | putative protein of mammalian origin (Ccfdc67) alternative variant dSep08, mRNA.                                                |
| <a href="#">Ccfdc68</a>  | <a href="#">Ccfdc68.bSep08</a>  | <a href="#">291530</a> | 21431  | 1140 | 2 | 227 | putative protein, with 3 coiled coil domains, of vertebrate origin (Ccfdc68) alternative variant bSep08, mRNA.                  |
| <a href="#">Ccfdc69</a>  | <a href="#">Ccfdc69.bSep08</a>  | <a href="#">497906</a> | 26013  | 756  | 6 | 184 | putative protein, with a coiled coil domain, of vertebrate origin (Ccfdc69) alternative variant bSep08, mRNA.                   |
| <a href="#">Ccfdc71</a>  | <a href="#">Ccfdc71.cSep08</a>  | <a href="#">498678</a> | 610    | 300  | 2 | 51  | putative protein (Ccfdc71) alternative variant cSep08, mRNA.                                                                    |
| <a href="#">Ccfdc77</a>  | <a href="#">Ccfdc77.aSep08</a>  | <a href="#">312677</a> | 15902  | 605  | 4 | 201 | putative protein, with a coiled coil domain, of eukaryotic origin (Ccfdc77) alternative variant aSep08, mRNA.                   |
| <a href="#">Ccfdc77</a>  | <a href="#">Ccfdc77.bSep08</a>  | <a href="#">312677</a> | 7666   | 388  | 3 | 129 | putative protein, with a coiled coil domain, of metazoan origin (Ccfdc77) alternative variant bSep08, mRNA.                     |
| <a href="#">Ccfdc79</a>  | <a href="#">Ccfdc79.aSep08</a>  | <a href="#">307615</a> | 5171   | 389  |   | 129 | putative protein of vertebrate origin (Ccfdc79) mRNA.                                                                           |
| <a href="#">Ccfdc81</a>  | <a href="#">Ccfdc81.bSep08</a>  | <a href="#">308810</a> | 2176   | 630  | 1 | 85  | putative protein of metazoan origin (Ccfdc81) alternative variant bSep08, mRNA.                                                 |
| <a href="#">Ccfdc82</a>  | <a href="#">Ccfdc82.bSep08</a>  | <a href="#">300359</a> | 4230   | 467  | 1 | 86  | putative protein of mammalian origin (Ccfdc82) alternative variant bSep08, mRNA.                                                |
| <a href="#">Ccfdc84</a>  | <a href="#">Ccfdc84.aSep08</a>  | <a href="#">689046</a> | 6572   | 1048 | 8 | 179 | putative secreted or extracellular protein precursor of eukaryotic origin (19.6 kD) (Ccfdc84) alternative variant aSep08, mRNA. |
| <a href="#">Ccfdc84</a>  | <a href="#">Ccfdc84.bSep08</a>  | <a href="#">689046</a> | 5942   | 1276 | 6 | 162 | putative secreted or extracellular protein precursor of eukaryotic origin (17.7 kD) (Ccfdc84) alternative variant bSep08, mRNA. |
| <a href="#">Ccfdc84</a>  | <a href="#">Ccfdc84.cSep08</a>  | <a href="#">689046</a> | 1628   | 584  | 4 | 110 | putative nuclear protein of metazoan origin (12.6 kD) (Ccfdc84) alternative variant cSep08, mRNA.                               |
| <a href="#">Ccfdc84</a>  | <a href="#">Ccfdc84.dSep08</a>  | <a href="#">689046</a> | 2108   | 1932 | 3 | 88  | putative nuclear protein of metazoan origin (10.1 kD) (Ccfdc84) alternative variant dSep08, mRNA.                               |
| <a href="#">Ccfdc84</a>  | <a href="#">Ccfdc84.fSep08</a>  | <a href="#">689046</a> | 775    | 632  | 3 | 48  | putative protein (5.0 kD) (Ccfdc84) alternative variant fSep08, mRNA.                                                           |
| <a href="#">Ccfdc85a</a> | <a href="#">Ccfdc85a.aSep08</a> | <a href="#">289855</a> | 229619 | 757  |   | 233 | putative protein of vertebrate origin (Ccfdc85a) mRNA.                                                                          |
| <a href="#">Ccfdc88a</a> | <a href="#">Ccfdc88a.aSep08</a> | <a href="#">305605</a> | 17298  | 1299 | 9 | 433 | girdin (Ccfdc88a) alternative variant aSep08, mRNA.                                                                             |
| <a href="#">Ccfdc88a</a> | <a href="#">Ccfdc88a.bSep08</a> | <a href="#">305605</a> | 3283   | 1212 | 3 | 404 | putative protein of vertebrate origin (Ccfdc88a) alternative variant bSep08, mRNA.                                              |
| <a href="#">Ccfdc88a</a> | <a href="#">Ccfdc88a.cSep08</a> | <a href="#">305605</a> | 4734   | 714  | 3 | 138 | girdin (Ccfdc88a) alternative variant cSep08, mRNA.                                                                             |
| <a href="#">Ccfdc88a</a> | <a href="#">Ccfdc88a.dSep08</a> | <a href="#">305605</a> | 4081   | 659  | 2 | 86  | girdin (Ccfdc88a) alternative variant dSep08, mRNA.                                                                             |

|                          |                                 |                        |       |      |    |     |                                                                                                                                                 |
|--------------------------|---------------------------------|------------------------|-------|------|----|-----|-------------------------------------------------------------------------------------------------------------------------------------------------|
| <a href="#">Ccdc88b</a>  | <a href="#">Ccdc88b.aSep08</a>  | <a href="#">361715</a> | 10730 | 3087 | 3  | 784 | protein kinase and protein kinase, C-terminal and tyrosine protein kinase (Ccdc88b) alternative variant aSep08, mRNA.                           |
| <a href="#">Ccdc88b</a>  | <a href="#">Ccdc88b.bSep08</a>  | <a href="#">361715</a> | 2305  | 539  | 2  | 179 | putative protein of eukaryotic origin (Ccdc88b) alternative variant bSep08, mRNA.                                                               |
| <a href="#">Ccdc88b</a>  | <a href="#">Ccdc88b.cSep08</a>  | <a href="#">361715</a> | 3172  | 763  | 3  | 171 | protein kinase and tyrosine protein kinase (Ccdc88b) alternative variant cSep08, mRNA.                                                          |
| <a href="#">Ccdc88c</a>  | <a href="#">Ccdc88c.aSep08</a>  | <a href="#">362770</a> | 62911 | 561  |    | 187 | CRA a (Ccdc88c) mRNA.                                                                                                                           |
| <a href="#">Ccdc90a</a>  | <a href="#">Ccdc90a.aSep08</a>  | <a href="#">291034</a> | 16866 | 773  | 8  | 249 | putative protein, with a coiled coil domain, of eukaryotic origin (Ccdc90a) alternative variant aSep08, mRNA.                                   |
| <a href="#">Ccdc90a</a>  | <a href="#">Ccdc90a.bSep08</a>  | <a href="#">291034</a> | 1754  | 627  | 1  | 32  | putative protein of vertebrate origin (3.7 kD) (Ccdc90a) alternative variant bSep08, mRNA.                                                      |
| <a href="#">Ccdc90b</a>  | <a href="#">Ccdc90b.bSep08</a>  | <a href="#">308820</a> | 7491  | 1535 | 4  | 149 | putative mitochondrial protein, with a coiled coil domain, of metazoan origin (17.3 kD) (Ccdc90b) alternative variant bSep08, mRNA.             |
| <a href="#">Ccdc91</a>   | <a href="#">Ccdc91.bSep08</a>   | <a href="#">312863</a> | 70999 | 1698 |    | 250 | protein CRA c (Ccdc91) alternative variant bSep08, mRNA.                                                                                        |
| <a href="#">Ccdc93</a>   | <a href="#">Ccdc93.bSep08</a>   | <a href="#">304743</a> | 1458  | 282  | 1  | 54  | putative protein, with a coiled coil domain, of metazoan origin (Ccdc93) alternative variant bSep08, mRNA.                                      |
| <a href="#">Ccdc95</a>   | <a href="#">Ccdc95.bSep08</a>   | <a href="#">293494</a> | 9419  | 869  | 7  | 242 | putative nuclear protein, with a coiled coil domain, of metazoan origin (26.2 kD) (Ccdc95) alternative variant bSep08, mRNA.                    |
| <a href="#">Ccdc95</a>   | <a href="#">Ccdc95.cSep08</a>   | <a href="#">293494</a> | 9106  | 603  | 5  | 155 | putative protein of bilateral origin (Ccdc95) alternative variant cSep08, mRNA.                                                                 |
| <a href="#">Ccdc95</a>   | <a href="#">Ccdc95.dSep08</a>   | <a href="#">293494</a> | 10565 | 571  | 5  | 124 | putative protein (Ccdc95) alternative variant dSep08, mRNA.                                                                                     |
| <a href="#">Ccdc95</a>   | <a href="#">Ccdc95.eSep08</a>   | <a href="#">293494</a> | 1099  | 600  | 2  | 83  | putative protein of mammalian origin (Ccdc95) alternative variant eSep08, mRNA.                                                                 |
| <a href="#">Ccdc97</a>   | <a href="#">Ccdc97.bSep08</a>   | <a href="#">292724</a> | 3323  | 677  | 1  | 193 | putative protein of metazoan origin (Ccdc97) alternative variant bSep08, mRNA.                                                                  |
| <a href="#">Ccdc99</a>   | <a href="#">Ccdc99.bSep08</a>   | <a href="#">303037</a> | 3708  | 1219 | 2  | 145 | putative nuclear protein of mammalian origin (16.0 kD) (Ccdc99) alternative variant bSep08, mRNA.                                               |
| <a href="#">Ccdc100</a>  | <a href="#">Ccdc100.aSep08</a>  | <a href="#">307302</a> | 41787 | 3194 | 12 | 563 | protein CRA a (Ccdc100) alternative variant aSep08, mRNA.                                                                                       |
| <a href="#">Ccdc101</a>  | <a href="#">Ccdc101.bSep08</a>  | <a href="#">293488</a> | 7833  | 824  | 7  | 242 | putative protein, with a coiled coil domain, of eukaryotic origin (Ccdc101) alternative variant bSep08, mRNA.                                   |
| <a href="#">Ccdc101</a>  | <a href="#">Ccdc101.cSep08</a>  | <a href="#">293488</a> | 660   | 376  | 4  | 93  | putative protein of metazoan origin (Ccdc101) alternative variant cSep08, mRNA.                                                                 |
| <a href="#">Ccdc101</a>  | <a href="#">Ccdc101.dSep08</a>  | <a href="#">293488</a> | 30627 | 2404 | 5  | 82  | putative protein, with a coiled coil domain, of metazoan origin (9.3 kD) (Ccdc101) alternative variant dSep08, mRNA.                            |
| <a href="#">Ccdc102a</a> | <a href="#">Ccdc102a.bSep08</a> | <a href="#">361363</a> | 6400  | 1379 |    | 392 | putative protein, with at least 3 transmembrane domains, 2 coiled coil domains, of metazoan origin (Ccdc102a) alternative variant bSep08, mRNA. |
| <a href="#">Ccdc102a</a> | <a href="#">Ccdc102a.cSep08</a> | <a href="#">361363</a> | 8112  | 858  |    | 154 | putative protein, with a coiled coil domain, of metazoan origin (Ccdc102a) alternative variant cSep08, mRNA.                                    |
| <a href="#">Ccdc102a</a> | <a href="#">Ccdc102a.dSep08</a> | <a href="#">361363</a> | 4247  | 680  |    | 94  | putative protein of vertebrate origin (Ccdc102a) alternative variant dSep08, mRNA.                                                              |

|                          |                                 |                        |       |      |   |     |                                                                                                                                              |
|--------------------------|---------------------------------|------------------------|-------|------|---|-----|----------------------------------------------------------------------------------------------------------------------------------------------|
| <a href="#">Ccdc104</a>  | <a href="#">Ccdc104.bSep08</a>  | <a href="#">289859</a> | 3349  | 716  | 3 | 102 | putative cytoplasmic protein, with a coiled coil domain, of eukaryotic origin (11.8 kD) (Ccdc104) alternative variant bSep08, complete mRNA. |
| <a href="#">Ccdc104</a>  | <a href="#">Ccdc104.cSep08</a>  | <a href="#">289859</a> | 25476 | 1792 | 6 | 79  | putative protein, with a coiled coil domain, of eukaryotic origin (Ccdc104) alternative variant cSep08, mRNA.                                |
| <a href="#">Ccdc104</a>  | <a href="#">Ccdc104.dSep08</a>  | <a href="#">289859</a> | 1953  | 502  | 2 | 54  | putative protein (Ccdc104) alternative variant dSep08, mRNA.                                                                                 |
| <a href="#">Ccdc105</a>  | <a href="#">Ccdc105.bSep08</a>  | <a href="#">500800</a> | 2271  | 881  | 1 | 255 | putative protein, with a coiled coil domain, of metazoan origin (Ccdc105) alternative variant bSep08, mRNA.                                  |
| <a href="#">Ccdc107</a>  | <a href="#">Ccdc107.aSep08</a>  | <a href="#">313496</a> | 3384  | 1626 | 6 | 266 | putative protein, with a coiled coil domain, of mammalian origin (Ccdc107) alternative variant aSep08, mRNA.                                 |
| <a href="#">Ccdc107</a>  | <a href="#">Ccdc107.bSep08</a>  | <a href="#">313496</a> | 3418  | 1153 | 6 | 261 | putative protein, with a coiled coil domain, of mammalian origin (Ccdc107) alternative variant bSep08, mRNA.                                 |
| <a href="#">Ccdc107</a>  | <a href="#">Ccdc107.cSep08</a>  | <a href="#">313496</a> | 2653  | 898  | 6 | 253 | putative protein, with a coiled coil domain, of mammalian origin (Ccdc107) alternative variant cSep08, mRNA.                                 |
| <a href="#">Ccdc107</a>  | <a href="#">Ccdc107.eSep08</a>  | <a href="#">313496</a> | 2294  | 1590 | 3 | 107 | protein CRA e (Ccdc107) alternative variant eSep08, mRNA.                                                                                    |
| <a href="#">Ccdc107</a>  | <a href="#">Ccdc107.fSep08</a>  | <a href="#">313496</a> | 585   | 396  | 3 | 46  | putative protein (5.3 kD) (Ccdc107) alternative variant fSep08, mRNA.                                                                        |
| <a href="#">Ccdc109b</a> | <a href="#">Ccdc109b.aSep08</a> | <a href="#">295462</a> | 3862  | 678  |   | 181 | putative protein of eukaryotic origin (Ccdc109b) mRNA.                                                                                       |
| <a href="#">Ccdc110</a>  | <a href="#">Ccdc110.aSep08</a>  | <a href="#">290755</a> | 5814  | 2427 | 5 | 800 | putative protein, with 4 coiled coil domains, of vertebrate origin (Ccdc110) alternative variant aSep08, mRNA.                               |
| <a href="#">Ccdc110</a>  | <a href="#">Ccdc110.bSep08</a>  | <a href="#">290755</a> | 12152 | 2636 | 4 | 776 | putative protein, with 4 coiled coil domains, of vertebrate origin (Ccdc110) alternative variant bSep08, mRNA.                               |
| <a href="#">Ccdc111</a>  | <a href="#">Ccdc111.aSep08</a>  | <a href="#">361147</a> | 16256 | 1018 |   | 264 | DNA primase, small subunit (Ccdc111) mRNA.                                                                                                   |
| <a href="#">Ccdc112</a>  | <a href="#">Ccdc112.bSep08</a>  | <a href="#">498858</a> | 26711 | 642  |   | 213 | putative protein, with a coiled coil domain, of eukaryotic origin (Ccdc112) alternative variant bSep08, mRNA.                                |
| <a href="#">Ccdc113</a>  | <a href="#">Ccdc113.aSep08</a>  | <a href="#">291847</a> | 19953 | 1783 | 6 | 576 | putative protein, with a coiled coil domain, of eukaryotic origin (Ccdc113) alternative variant aSep08, mRNA.                                |
| <a href="#">Ccdc113</a>  | <a href="#">Ccdc113.bSep08</a>  | <a href="#">291847</a> | 8805  | 682  | 5 | 209 | putative protein, with a coiled coil domain, of eukaryotic origin (Ccdc113) alternative variant bSep08, mRNA.                                |
| <a href="#">Ccdc113</a>  | <a href="#">Ccdc113.cSep08</a>  | <a href="#">291847</a> | 7029  | 790  | 4 | 131 | putative protein, with a coiled coil domain, of eukaryotic origin (Ccdc113) alternative variant cSep08, mRNA.                                |
| <a href="#">Ccdc113</a>  | <a href="#">Ccdc113.dSep08</a>  | <a href="#">291847</a> | 1655  | 299  | 2 | 80  | putative protein, with a coiled coil domain, of metazoan origin (Ccdc113) alternative variant dSep08, mRNA.                                  |
| <a href="#">Ccdc113</a>  | <a href="#">Ccdc113.eSep08</a>  | <a href="#">291847</a> | 1605  | 608  | 2 | 46  | putative protein of mammalian origin (Ccdc113) alternative variant eSep08, mRNA.                                                             |
| <a href="#">Ccdc115</a>  | <a href="#">Ccdc115.bSep08</a>  | <a href="#">363213</a> | 3770  | 986  | 4 | 165 | putative protein of metazoan origin (17.9 kD) (Ccdc115) alternative variant bSep08, mRNA.                                                    |
| <a href="#">Ccdc115</a>  | <a href="#">Ccdc115.cSep08</a>  | <a href="#">363213</a> | 2011  | 848  | 4 | 147 | putative protein, with a coiled coil domain, of eukaryotic origin (Ccdc115) alternative variant cSep08, mRNA.                                |
| <a href="#">Ccdc115</a>  | <a href="#">Ccdc115.dSep08</a>  | <a href="#">363213</a> | 2314  | 613  | 2 | 119 | putative protein of metazoan origin (13.4 kD) (Ccdc115) alternative variant dSep08, mRNA.                                                    |
| <a href="#">Ccdc117</a>  | <a href="#">Ccdc117.aSep08</a>  | <a href="#">498404</a> | 10430 | 1797 | 3 | 489 | putative protein of mammalian origin (Ccdc117) alternative variant aSep08, mRNA.                                                             |
| <a href="#">Ccdc117</a>  | <a href="#">Ccdc117.cSep08</a>  | <a href="#">498404</a> | 4268  | 445  | 1 | 86  | putative cytoplasmic protein (9.8 kD) (Ccdc117) alternative variant cSep08, mRNA.                                                            |

|                                  |                                         |                        |       |      |    |     |                                                                                                                                |
|----------------------------------|-----------------------------------------|------------------------|-------|------|----|-----|--------------------------------------------------------------------------------------------------------------------------------|
| <a href="#">Ccdc120</a>          | <a href="#">Ccdc120.aSep08</a>          | <a href="#">317377</a> | 5443  | 3033 | 3  | 505 | putative protein of vertebrate origin (Ccdc120) alternative variant aSep08, mRNA.                                              |
| <a href="#">Ccdc120</a>          | <a href="#">Ccdc120.bSep08</a>          | <a href="#">317377</a> | 1978  | 621  | 1  | 140 | putative protein of vertebrate origin (Ccdc120) alternative variant bSep08, mRNA.                                              |
| <a href="#">Ccdc124</a>          | <a href="#">Ccdc124.bSep08</a>          | <a href="#">290642</a> | 4766  | 672  | 2  | 194 | putative protein, with 2 coiled coil domains, of eukaryotic origin (Ccdc124) alternative variant bSep08, mRNA.                 |
| <a href="#">Ccdc125</a>          | <a href="#">Ccdc125.bSep08</a>          | <a href="#">499518</a> | 12865 | 1978 | 3  | 326 | putative nuclear protein, with 3 coiled coil domains, of metazoan origin (36.8 kD) (Ccdc125) alternative variant bSep08, mRNA. |
| <a href="#">Ccdc125</a>          | <a href="#">Ccdc125.cSep08</a>          | <a href="#">499518</a> | 6042  | 409  | 1  | 83  | putative protein, with a coiled coil domain (Ccdc125) alternative variant cSep08, mRNA.                                        |
| <a href="#">Ccdc129</a>          | <a href="#">Ccdc129.aSep08</a>          | <a href="#">500139</a> | 10318 | 966  |    | 191 | putative protein, with a coiled coil domain, of mammalian origin (21.7 kD) (Ccdc129) mRNA.                                     |
| <a href="#">Ccdc130</a>          | <a href="#">Ccdc130.bSep08</a>          | <a href="#">304656</a> | 9657  | 726  | 8  | 149 | putative protein of eukaryotic origin (Ccdc130) alternative variant bSep08, mRNA.                                              |
| <a href="#">Ccdc130</a>          | <a href="#">Ccdc130.cSep08</a>          | <a href="#">304656</a> | 4675  | 763  | 5  | 140 | putative protein of eukaryotic origin (Ccdc130) alternative variant cSep08, mRNA.                                              |
| <a href="#">Ccdc130</a>          | <a href="#">Ccdc130.dSep08</a>          | <a href="#">304656</a> | 860   | 771  | 2  | 83  | putative nuclear protein of metazoan origin (9.3 kD) (Ccdc130) alternative variant dSep08, mRNA.                               |
| <a href="#">Ccdc132</a>          | <a href="#">Ccdc132.aSep08</a>          | <a href="#">312083</a> | 48677 | 2364 | 13 | 543 | putative protein of eukaryotic origin (Ccdc132) alternative variant aSep08, mRNA.                                              |
| <a href="#">Ccdc132</a>          | <a href="#">Ccdc132.bSep08</a>          | <a href="#">312083</a> | 1144  | 518  | 2  | 50  | putative protein of metazoan origin (Ccdc132) alternative variant bSep08, mRNA.                                                |
| <a href="#">Ccdc132</a>          | <a href="#">Ccdc132.cSep08</a>          | <a href="#">312083</a> | 1882  | 704  | 2  | 57  | putative protein (Ccdc132) alternative variant cSep08, mRNA.                                                                   |
| <a href="#">Ccdc136</a>          | <a href="#">Ccdc136.aSep08</a>          | <a href="#">362331</a> | 29739 | 1637 | 9  | 470 | protein CRA b (Ccdc136) alternative variant aSep08, mRNA.                                                                      |
| <a href="#">Ccdc136</a>          | <a href="#">Ccdc136.bSep08</a>          | <a href="#">362331</a> | 12317 | 1482 | 5  | 418 | CRA b (Ccdc136) alternative variant bSep08, mRNA.                                                                              |
| <a href="#">Ccdc136</a>          | <a href="#">Ccdc136.cSep08</a>          | <a href="#">362331</a> | 17825 | 852  | 5  | 172 | protein CRA b (Ccdc136) alternative variant cSep08, mRNA.                                                                      |
| <a href="#">Ccdc136</a>          | <a href="#">Ccdc136.dSep08</a>          | <a href="#">362331</a> | 7517  | 948  | 2  | 123 | CRA a like (14.2 kD) (Ccdc136) alternative variant dSep08, mRNA.                                                               |
| <a href="#">Ccdc142andMrpl53</a> | <a href="#">Ccdc142andMrpl53.bSep08</a> | <a href="#">297380</a> | 2329  | 1837 | 5  | 119 | mitochondrial ribosomal protein L53 (12.7 kD) (Ccdc142andMrpl53) alternative variant bSep08, mRNA.                             |
| <a href="#">Ccdc142andMrpl53</a> | <a href="#">Ccdc142andMrpl53.bSep08</a> | <a href="#">362388</a> | 2329  | 1837 | 5  | 119 | mitochondrial ribosomal protein L53 (12.7 kD) (Ccdc142andMrpl53) alternative variant bSep08, mRNA.                             |
| <a href="#">Ccdc142andMrpl53</a> | <a href="#">Ccdc142andMrpl53.cSep08</a> | <a href="#">297380</a> | 612   | 347  | 4  | 115 | putative protein of mammalian origin (Ccdc142andMrpl53) alternative variant cSep08, mRNA.                                      |
| <a href="#">Ccdc142andMrpl53</a> | <a href="#">Ccdc142andMrpl53.cSep08</a> | <a href="#">362388</a> | 612   | 347  | 4  | 115 | putative protein of mammalian origin (Ccdc142andMrpl53) alternative variant cSep08, mRNA.                                      |
| <a href="#">Ccdc142andMrpl53</a> | <a href="#">Ccdc142andMrpl53.eSep08</a> | <a href="#">297380</a> | 886   | 656  | 3  | 51  | mitochondrial ribosomal protein L53 (5.7 kD) (Ccdc142andMrpl53) alternative variant eSep08, complete mRNA.                     |
| <a href="#">Ccdc142andMrpl53</a> | <a href="#">Ccdc142andMrpl53.eSep08</a> | <a href="#">362388</a> | 886   | 656  | 3  | 51  | mitochondrial ribosomal protein L53 (5.7 kD) (Ccdc142andMrpl53) alternative variant eSep08, complete mRNA.                     |

|                         |                                |                        |        |      |    |     |                                                                                                                                         |
|-------------------------|--------------------------------|------------------------|--------|------|----|-----|-----------------------------------------------------------------------------------------------------------------------------------------|
| <a href="#">Ccdc147</a> | <a href="#">Ccdc147.aSep08</a> | <a href="#">309467</a> | 63497  | 760  |    | 252 | putative protein, with 2 coiled coil domains, of eukaryotic origin (Ccdc147) mRNA.                                                      |
| <a href="#">Ccdc148</a> | <a href="#">Ccdc148.aSep08</a> | <a href="#">311051</a> | 101170 | 1776 | 7  | 485 | putative protein, with a coiled coil domain, of vertebrate origin (Ccdc148) alternative variant aSep08, mRNA.                           |
| <a href="#">Ccdc148</a> | <a href="#">Ccdc148.cSep08</a> | <a href="#">311051</a> | 101281 | 1492 | 10 | 263 | putative nuclear protein, with 2 coiled coil domains, of metazoan origin (30.7 kD) (Ccdc148) alternative variant cSep08, complete mRNA. |
| <a href="#">Ccdc150</a> | <a href="#">Ccdc150.aSep08</a> | <a href="#">316399</a> | 1898   | 244  |    | 81  | putative protein, with a coiled coil domain, of mammalian origin (Ccdc150) mRNA.                                                        |
| <a href="#">Ccdc151</a> | <a href="#">Ccdc151.aSep08</a> | <a href="#">315465</a> | 3911   | 798  |    | 265 | putative protein, with 2 coiled coil domains, of eukaryotic origin (Ccdc151) mRNA.                                                      |
| <a href="#">Ccl1</a>    | <a href="#">Ccl1.aSep08</a>    | <a href="#">688605</a> | 1586   | 293  |    | 39  | chemokine (C-C motif) ligand 1 (Ccl1) mRNA.                                                                                             |
| <a href="#">Ccl9</a>    | <a href="#">Ccl9.bSep08</a>    | <a href="#">360579</a> | 4569   | 917  |    | 98  | chemokine (C-C motif) ligand 9 (11.0 kD) (Ccl9) alternative variant bSep08, mRNA.                                                       |
| <a href="#">Ccl25</a>   | <a href="#">Ccl25.bSep08</a>   | <a href="#">360750</a> | 4292   | 413  | 1  | 137 | chemokine (C-C motif) ligand 25 (Ccl25) alternative variant bSep08, mRNA.                                                               |
| <a href="#">Ccl27</a>   | <a href="#">Ccl27.bSep08</a>   | <a href="#">362505</a> | 1710   | 1210 | 3  | 147 | putative protein (Ccl27) alternative variant bSep08, mRNA.                                                                              |
| <a href="#">Ccl27</a>   | <a href="#">Ccl27.cSep08</a>   | <a href="#">362505</a> | 4474   | 454  | 6  | 131 | chemokine ligand 27 CRA b (Ccl27) alternative variant cSep08, mRNA.                                                                     |
| <a href="#">Ccl27</a>   | <a href="#">Ccl27.dSep08</a>   | <a href="#">362505</a> | 1855   | 575  | 3  | 127 | chemokine ligand 27 (14.6 kD) (Ccl27) alternative variant dSep08, mRNA.                                                                 |
| <a href="#">Ccl27</a>   | <a href="#">Ccl27.eSep08</a>   | <a href="#">362505</a> | 725    | 412  | 3  | 126 | chemokine ligand 27 (Ccl27) alternative variant eSep08, mRNA.                                                                           |
| <a href="#">Ccl27</a>   | <a href="#">Ccl27.fSep08</a>   | <a href="#">362505</a> | 4225   | 425  | 5  | 112 | chemokine ligand 27 (Ccl27) alternative variant fSep08, mRNA.                                                                           |
| <a href="#">Ccl27</a>   | <a href="#">Ccl27.gSep08</a>   | <a href="#">362505</a> | 930    | 316  | 4  | 87  | chemokine ligand 27 CRA g (10.1 kD) (Ccl27) alternative variant gSep08, mRNA.                                                           |
| <a href="#">Ccna1</a>   | <a href="#">Ccna1.bSep08</a>   | <a href="#">295052</a> | 9482   | 1317 | 8  | 377 | cyclin A1 (42.6 kD) (Ccna1) alternative variant bSep08, mRNA.                                                                           |
| <a href="#">Ccna1</a>   | <a href="#">Ccna1.cSep08</a>   | <a href="#">295052</a> | 5334   | 750  | 5  | 194 | cyclin A1 (Ccna1) alternative variant cSep08, mRNA.                                                                                     |
| <a href="#">Ccna1</a>   | <a href="#">Ccna1.dSep08</a>   | <a href="#">295052</a> | 5161   | 777  | 4  | 175 | cyclin A1 (Ccna1) alternative variant dSep08, mRNA.                                                                                     |
| <a href="#">Ccna1</a>   | <a href="#">Ccna1.eSep08</a>   | <a href="#">295052</a> | 4119   | 613  | 4  | 164 | cyclin A1 (Ccna1) alternative variant eSep08, mRNA.                                                                                     |
| <a href="#">Ccna1</a>   | <a href="#">Ccna1.fSep08</a>   | <a href="#">295052</a> | 6236   | 761  | 4  | 155 | cyclin A1 (Ccna1) alternative variant fSep08, mRNA.                                                                                     |
| <a href="#">Ccna1</a>   | <a href="#">Ccna1.gSep08</a>   | <a href="#">295052</a> | 4174   | 725  | 2  | 135 | cyclin A1 (Ccna1) alternative variant gSep08, mRNA.                                                                                     |
| <a href="#">Ccna2</a>   | <a href="#">Ccna2.bSep08</a>   | <a href="#">114494</a> | 4439   | 1090 | 6  | 260 | cyclin A2 (Ccna2) alternative variant bSep08, mRNA.                                                                                     |
| <a href="#">Ccna2</a>   | <a href="#">Ccna2.cSep08</a>   | <a href="#">114494</a> | 1101   | 452  | 2  | 127 | cyclin A2 (Ccna2) alternative variant cSep08, mRNA.                                                                                     |
| <a href="#">Ccnb1</a>   | <a href="#">Ccnb1.bSep08</a>   | <a href="#">25203</a>  | 2062   | 1204 | 2  | 302 | cyclin B1 (Ccnb1) alternative variant bSep08, mRNA.                                                                                     |
| <a href="#">Ccnb2</a>   | <a href="#">Ccnb2.aSep08</a>   | <a href="#">363088</a> | 14100  | 1514 | 1  | 430 | cyclin B2 (Ccnb2) alternative variant aSep08, mRNA.                                                                                     |
| <a href="#">Ccnb2</a>   | <a href="#">Ccnb2.bSep08</a>   | <a href="#">363088</a> | 9946   | 734  | 1  | 225 | cyclin B2 (Ccnb2) alternative variant bSep08, mRNA.                                                                                     |
| <a href="#">Ccnc</a>    | <a href="#">Ccnc.aSep08</a>    | <a href="#">114839</a> | 15038  | 940  | 12 | 313 | cyclin C (Ccnc) alternative variant aSep08, mRNA.                                                                                       |
| <a href="#">Ccnc</a>    | <a href="#">Ccnc.bSep08</a>    | <a href="#">114839</a> | 8221   | 601  | 9  | 167 | cyclin C (Ccnc) alternative variant bSep08, mRNA.                                                                                       |
| <a href="#">Ccnc</a>    | <a href="#">Ccnc.cSep08</a>    | <a href="#">114839</a> | 15549  | 1504 | 13 | 151 | cyclin C (17.7 kD) (Ccnc) alternative variant cSep08, mRNA.                                                                             |
| <a href="#">Ccnd2</a>   | <a href="#">Ccnd2.aSep08</a>   | <a href="#">64033</a>  | 27494  | 6223 | 5  | 384 | cyclin D2 (Ccnd2) alternative variant aSep08, mRNA.                                                                                     |
| <a href="#">Ccnd2</a>   | <a href="#">Ccnd2.bSep08</a>   | <a href="#">64033</a>  | 2377   | 711  | 2  | 153 | cyclin D2 (Ccnd2) alternative variant bSep08, mRNA.                                                                                     |

|                         |                                |                        |        |      |    |     |                                                                                       |
|-------------------------|--------------------------------|------------------------|--------|------|----|-----|---------------------------------------------------------------------------------------|
| <a href="#">Ccnd2</a>   | <a href="#">Ccnd2.cSep08</a>   | <a href="#">64033</a>  | 3119   | 498  | 2  | 79  | cyclin D2 (Ccnd2) alternative variant cSep08, mRNA.                                   |
| <a href="#">Ccndbp1</a> | <a href="#">Ccndbp1.bSep08</a> | <a href="#">362201</a> | 9618   | 1318 | 7  | 235 | cyclin D-type binding-protein 1 (25.8 kD) (Ccndbp1) alternative variant bSep08, mRNA. |
| <a href="#">Ccndbp1</a> | <a href="#">Ccndbp1.cSep08</a> | <a href="#">362201</a> | 848    | 697  | 2  | 104 | cyclin D-type binding-protein 1 (Ccndbp1) alternative variant cSep08, mRNA.           |
| <a href="#">Ccne1</a>   | <a href="#">Ccne1.bSep08</a>   | <a href="#">25729</a>  | 9153   | 1958 | 11 | 411 | cyclin E1 (47.4 kD) (Ccne1) alternative variant bSep08, mRNA.                         |
| <a href="#">Ccne1</a>   | <a href="#">Ccne1.cSep08</a>   | <a href="#">25729</a>  | 6182   | 639  | 5  | 210 | cyclin E1 (Ccne1) alternative variant cSep08, mRNA.                                   |
| <a href="#">Ccne1</a>   | <a href="#">Ccne1.dSep08</a>   | <a href="#">25729</a>  | 8573   | 462  | 2  | 37  | cyclin E1 (Ccne1) alternative variant dSep08, mRNA.                                   |
| <a href="#">Ccne2</a>   | <a href="#">Ccne2.bSep08</a>   | <a href="#">362485</a> | 867    | 770  | 2  | 38  | cyclin E2 (Ccne2) alternative variant bSep08, mRNA.                                   |
| <a href="#">Ccng1</a>   | <a href="#">Ccng1.aSep08</a>   | <a href="#">25405</a>  | 6400   | 3223 | 5  | 294 | cyclin G1 (33.9 kD) (Ccng1) alternative variant aSep08, mRNA.                         |
| <a href="#">Ccng1</a>   | <a href="#">Ccng1.bSep08</a>   | <a href="#">25405</a>  | 2817   | 734  | 3  | 235 | cyclin G1 (Ccng1) alternative variant bSep08, mRNA.                                   |
| <a href="#">Ccng1</a>   | <a href="#">Ccng1.cSep08</a>   | <a href="#">25405</a>  | 2740   | 847  | 3  | 153 | cyclin G1 (Ccng1) alternative variant cSep08, mRNA.                                   |
| <a href="#">Ccnh</a>    | <a href="#">Ccnh.bSep08</a>    | <a href="#">84389</a>  | 12539  | 748  | 5  | 218 | cyclin H (Ccnh) alternative variant bSep08, mRNA.                                     |
| <a href="#">Ccni</a>    | <a href="#">Ccni.bSep08</a>    | <a href="#">289500</a> | 15500  | 905  | 4  | 106 | cyclin I (Ccni) alternative variant bSep08, mRNA.                                     |
| <a href="#">Ccni</a>    | <a href="#">Ccni.cSep08</a>    | <a href="#">289500</a> | 1457   | 1374 | 2  | 62  | cyclin I (Ccni) alternative variant cSep08, mRNA.                                     |
| <a href="#">Ccnk</a>    | <a href="#">Ccnk.bSep08</a>    | <a href="#">500715</a> | 7023   | 1065 | 4  | 254 | cyclin K (Ccnk) alternative variant bSep08, mRNA.                                     |
| <a href="#">Ccnl1</a>   | <a href="#">Ccnl1.bSep08</a>   | <a href="#">114121</a> | 12548  | 2442 | 12 | 371 | cyclin L1 (43.3 kD) (Ccnl1) alternative variant bSep08, complete mRNA.                |
| <a href="#">Ccnl1</a>   | <a href="#">Ccnl1.cSep08</a>   | <a href="#">114121</a> | 2968   | 1620 | 6  | 305 | cyclin L1 (35.6 kD) (Ccnl1) alternative variant cSep08, mRNA.                         |
| <a href="#">Ccnl1</a>   | <a href="#">Ccnl1.dSep08</a>   | <a href="#">114121</a> | 10414  | 1318 | 10 | 242 | cyclin L1 (Ccnl1) alternative variant dSep08, mRNA.                                   |
| <a href="#">Ccnl1</a>   | <a href="#">Ccnl1.gSep08</a>   | <a href="#">114121</a> | 725    | 469  | 2  | 63  | cyclin L1 (7.1 kD) (Ccnl1) alternative variant gSep08, mRNA.                          |
| <a href="#">Ccnl1</a>   | <a href="#">Ccnl1.hSep08</a>   | <a href="#">114121</a> | 3074   | 359  | 5  | 22  | cyclin L1 (Ccnl1) alternative variant hSep08, mRNA.                                   |
| <a href="#">Ccnl2</a>   | <a href="#">Ccnl2.aSep08</a>   | <a href="#">298686</a> | 11251  | 2213 | 11 | 520 | cyclin L2 CRA c (58.2 kD) (Ccnl2) alternative variant aSep08, complete mRNA.          |
| <a href="#">Ccnl2</a>   | <a href="#">Ccnl2.bSep08</a>   | <a href="#">298686</a> | 3744   | 1885 | 6  | 349 | cyclin L2 (39.8 kD) (Ccnl2) alternative variant bSep08, mRNA.                         |
| <a href="#">Ccnl2</a>   | <a href="#">Ccnl2.cSep08</a>   | <a href="#">298686</a> | 3823   | 2046 | 5  | 327 | cyclin L2 CRA d (36.7 kD) (Ccnl2) alternative variant cSep08, mRNA.                   |
| <a href="#">Ccnl2</a>   | <a href="#">Ccnl2.dSep08</a>   | <a href="#">298686</a> | 7955   | 793  | 7  | 233 | cyclin L2 (Ccnl2) alternative variant dSep08, mRNA.                                   |
| <a href="#">Ccnl2</a>   | <a href="#">Ccnl2.fSep08</a>   | <a href="#">298686</a> | 3686   | 1283 | 7  | 209 | cyclin L2 CRA c (23.3 kD) (Ccnl2) alternative variant fSep08, mRNA.                   |
| <a href="#">Ccnl2</a>   | <a href="#">Ccnl2.gSep08</a>   | <a href="#">298686</a> | 2472   | 853  | 5  | 198 | cyclin L2 CRA c (Ccnl2) alternative variant gSep08, mRNA.                             |
| <a href="#">Ccno</a>    | <a href="#">Ccno.aSep08</a>    | <a href="#">499528</a> | 3284   | 2069 | 2  | 352 | cyclin O (38.9 kD) (Ccno) alternative variant aSep08, mRNA.                           |
| <a href="#">Ccnt2</a>   | <a href="#">Ccnt2.bSep08</a>   | <a href="#">304758</a> | 1253   | 1155 | 2  | 344 | cyclin T2 (Ccnt2) alternative variant bSep08, mRNA.                                   |
| <a href="#">Ccny</a>    | <a href="#">Ccny.aSep08</a>    | <a href="#">361261</a> | 102578 | 984  | 3  | 328 | cyclin Y (Ccny) alternative variant aSep08, mRNA.                                     |
| <a href="#">Ccny</a>    | <a href="#">Ccny.bSep08</a>    | <a href="#">361261</a> | 94356  | 424  | 2  | 93  | cyclin Y (Ccny) alternative variant bSep08, mRNA.                                     |
| <a href="#">Ccnyl1</a>  | <a href="#">Ccnyl1.aSep08</a>  | <a href="#">316452</a> | 24020  | 2819 | 7  | 217 | cyclin Y-like 1 (25.5 kD) (Ccnyl1) alternative variant aSep08, mRNA.                  |
| <a href="#">Ccnyl1</a>  | <a href="#">Ccnyl1.bSep08</a>  | <a href="#">316452</a> | 2321   | 377  | 2  | 36  | cyclin Y-like 1 (Ccnyl1) alternative variant bSep08, mRNA.                            |

|                        |                               |                        |       |      |    |     |                                                                                                               |
|------------------------|-------------------------------|------------------------|-------|------|----|-----|---------------------------------------------------------------------------------------------------------------|
| <a href="#">Ccp1</a>   | <a href="#">Ccp1.aSep08</a>   | <a href="#">363098</a> | 17562 | 2782 | 8  | 760 | cell cycle progression 1 (Ccp1) alternative variant aSep08, mRNA.                                             |
| <a href="#">Ccp1</a>   | <a href="#">Ccp1.cSep08</a>   | <a href="#">363098</a> | 3081  | 490  | 3  | 137 | cell cycle progression 1 (Ccp1) alternative variant cSep08, mRNA.                                             |
| <a href="#">Ccrk</a>   | <a href="#">Ccrk.bSep08</a>   | <a href="#">364666</a> | 4769  | 962  | 1  | 187 | cell cycle related kinase (20.8 kD) (Ccrk) alternative variant bSep08, mRNA.                                  |
| <a href="#">Cct2</a>   | <a href="#">Cct2.bSep08</a>   | <a href="#">299809</a> | 2589  | 693  | 6  | 174 | chaperonin containing TCP1, subunit 2 (beta) (Cct2) alternative variant bSep08, mRNA.                         |
| <a href="#">Cct2</a>   | <a href="#">Cct2.cSep08</a>   | <a href="#">299809</a> | 1493  | 751  | 2  | 103 | chaperonin containing TCP1, subunit 2 (beta) (Cct2) alternative variant cSep08, mRNA.                         |
| <a href="#">Cct2</a>   | <a href="#">Cct2.dSep08</a>   | <a href="#">299809</a> | 2126  | 649  | 5  | 76  | chaperonin containing TCP1, subunit 2 (beta) (Cct2) alternative variant dSep08, mRNA.                         |
| <a href="#">Cct3</a>   | <a href="#">Cct3.bSep08</a>   | <a href="#">295230</a> | 43430 | 913  | 7  | 304 | chaperonin subunit 3 (gamma) (Cct3) alternative variant bSep08, mRNA.                                         |
| <a href="#">Cct3</a>   | <a href="#">Cct3.eSep08</a>   | <a href="#">295230</a> | 4851  | 651  | 4  | 49  | chaperonin subunit 3 (gamma) (Cct3) alternative variant eSep08, mRNA.                                         |
| <a href="#">Cct4</a>   | <a href="#">Cct4.cSep08</a>   | <a href="#">29374</a>  | 1231  | 751  | 3  | 60  | chaperonin subunit 4 (delta) (Cct4) alternative variant cSep08, mRNA.                                         |
| <a href="#">Cct5</a>   | <a href="#">Cct5.bSep08</a>   | <a href="#">294864</a> | 11791 | 2969 | 10 | 248 | chaperonin containing Tcp1 (27.0 kD) (Cct5) alternative variant bSep08, complete mRNA.                        |
| <a href="#">Cct5</a>   | <a href="#">Cct5.cSep08</a>   | <a href="#">294864</a> | 4286  | 529  | 3  | 165 | chaperonin CRA e (17.9 kD) (Cct5) alternative variant cSep08, mRNA.                                           |
| <a href="#">Cct5</a>   | <a href="#">Cct5.dSep08</a>   | <a href="#">294864</a> | 2223  | 955  | 3  | 163 | chaperonin containing Tcp1 (Cct5) alternative variant dSep08, mRNA.                                           |
| <a href="#">Cct5</a>   | <a href="#">Cct5.eSep08</a>   | <a href="#">294864</a> | 6540  | 1246 | 5  | 153 | chaperonin CRA c (16.4 kD) (Cct5) alternative variant eSep08, complete mRNA.                                  |
| <a href="#">Cct6a</a>  | <a href="#">Cct6a.bSep08</a>  | <a href="#">288620</a> | 4692  | 691  | 7  | 105 | chaperonin subunit 6a (zeta) (Cct6a) alternative variant bSep08, mRNA.                                        |
| <a href="#">Cct7</a>   | <a href="#">Cct7.bSep08</a>   | <a href="#">297406</a> | 15045 | 1330 | 10 | 380 | chaperonin subunit 7 (eta) (41.7 kD) (Cct7) alternative variant bSep08, complete mRNA.                        |
| <a href="#">Cct7</a>   | <a href="#">Cct7.cSep08</a>   | <a href="#">297406</a> | 10106 | 704  | 4  | 143 | chaperonin subunit 7 (eta) (15.3 kD) (Cct7) alternative variant cSep08, mRNA.                                 |
| <a href="#">Cct8</a>   | <a href="#">Cct8.bSep08</a>   | <a href="#">288305</a> | 10250 | 1524 | 14 | 507 | chaperonin subunit 8 (theta) (Cct8) alternative variant bSep08, mRNA.                                         |
| <a href="#">Cct8</a>   | <a href="#">Cct8.cSep08</a>   | <a href="#">288305</a> | 1708  | 563  | 5  | 178 | chaperonin subunit 8 (theta) (Cct8) alternative variant cSep08, mRNA.                                         |
| <a href="#">Cct8</a>   | <a href="#">Cct8.dSep08</a>   | <a href="#">288305</a> | 1565  | 723  | 3  | 145 | chaperonin subunit 8 (theta) (Cct8) alternative variant dSep08, mRNA.                                         |
| <a href="#">Cd2ap</a>  | <a href="#">Cd2ap.bSep08</a>  | <a href="#">316258</a> | 34645 | 761  | 4  | 61  | CD2-associated protein (6.9 kD) (Cd2ap) alternative variant bSep08, mRNA.                                     |
| <a href="#">Cd2bp2</a> | <a href="#">Cd2bp2.bSep08</a> | <a href="#">293505</a> | 1140  | 457  | 3  | 106 | CD2 antigen (cytoplasmic tail) binding protein 2 (Cd2bp2) alternative variant bSep08, mRNA.                   |
| <a href="#">Cd2bp2</a> | <a href="#">Cd2bp2.dSep08</a> | <a href="#">293505</a> | 365   | 221  | 2  | 40  | CD2 antigen (cytoplasmic tail) binding protein 2 (4.3 kD) (Cd2bp2) alternative variant dSep08, complete mRNA. |
| <a href="#">Cd3d</a>   | <a href="#">Cd3d.bSep08</a>   | <a href="#">25710</a>  | 622   | 324  | 1  | 79  | CD3 molecule delta polypeptide (8.8 kD) (Cd3d) alternative variant bSep08, mRNA.                              |

|                      |                             |                        |       |      |    |     |                                                                                      |
|----------------------|-----------------------------|------------------------|-------|------|----|-----|--------------------------------------------------------------------------------------|
| <a href="#">Cd3e</a> | <a href="#">Cd3e.aSep08</a> | <a href="#">315609</a> | 9037  | 504  | 6  | 167 | CD3 molecule, epsilon polypeptide (Cd3e) alternative variant aSep08, mRNA.           |
| <a href="#">Cd3e</a> | <a href="#">Cd3e.bSep08</a> | <a href="#">315609</a> | 8736  | 1033 | 5  | 140 | CD3 molecule, epsilon polypeptide (15.7 kD) (Cd3e) alternative variant bSep08, mRNA. |
| <a href="#">Cd3g</a> | <a href="#">Cd3g.aSep08</a> | <a href="#">300678</a> | 6598  | 756  | 7  | 203 | CD3 molecule, gamma polypeptide (Cd3g) alternative variant aSep08, mRNA.             |
| <a href="#">Cd3g</a> | <a href="#">Cd3g.cSep08</a> | <a href="#">300678</a> | 1347  | 342  | 2  | 44  | CD3 molecule, gamma polypeptide (Cd3g) alternative variant cSep08, mRNA.             |
| <a href="#">Cd4</a>  | <a href="#">Cd4.bSep08</a>  | <a href="#">24932</a>  | 776   | 648  | 2  | 98  | CD4 antigen (Cd4) alternative variant bSep08, mRNA.                                  |
| <a href="#">Cd5</a>  | <a href="#">Cd5.bSep08</a>  | <a href="#">54236</a>  | 15771 | 1031 | 7  | 307 | CD5 antigen (Cd5) alternative variant bSep08, mRNA.                                  |
| <a href="#">Cd6</a>  | <a href="#">Cd6.bSep08</a>  | <a href="#">25752</a>  | 4345  | 767  | 3  | 222 | CD6 antigen (Cd6) alternative variant bSep08, mRNA.                                  |
| <a href="#">Cd6</a>  | <a href="#">Cd6.cSep08</a>  | <a href="#">25752</a>  | 4102  | 483  | 2  | 160 | CD6 antigen (Cd6) alternative variant cSep08, mRNA.                                  |
| <a href="#">Cd8a</a> | <a href="#">Cd8a.aSep08</a> | <a href="#">24930</a>  | 4828  | 2065 | 5  | 239 | CD8 antigen, alpha chain (26.4 kD) (Cd8a) alternative variant aSep08, mRNA.          |
| <a href="#">Cd8a</a> | <a href="#">Cd8a.cSep08</a> | <a href="#">24930</a>  | 798   | 712  | 2  | 141 | CD8 antigen, alpha chain (Cd8a) alternative variant cSep08, mRNA.                    |
| <a href="#">Cd8a</a> | <a href="#">Cd8a.dSep08</a> | <a href="#">24930</a>  | 1734  | 750  | 2  | 100 | CD8 antigen, alpha chain (Cd8a) alternative variant dSep08, mRNA.                    |
| <a href="#">Cd14</a> | <a href="#">Cd14.bSep08</a> | <a href="#">60350</a>  | 1595  | 1544 | 2  | 369 | CD14 molecule (39.7 kD) (Cd14) alternative variant bSep08, mRNA.                     |
| <a href="#">Cd14</a> | <a href="#">Cd14.cSep08</a> | <a href="#">60350</a>  | 31733 | 315  | 2  | 56  | CD14 molecule (Cd14) alternative variant cSep08, mRNA.                               |
| <a href="#">Cd19</a> | <a href="#">Cd19.aSep08</a> | <a href="#">365367</a> | 5679  | 2167 | 13 | 470 | CD19 molecule (51.5 kD) (Cd19) alternative variant aSep08, mRNA.                     |
| <a href="#">Cd19</a> | <a href="#">Cd19.bSep08</a> | <a href="#">365367</a> | 3245  | 814  | 9  | 271 | CD19 molecule (Cd19) alternative variant bSep08, mRNA.                               |
| <a href="#">Cd19</a> | <a href="#">Cd19.cSep08</a> | <a href="#">365367</a> | 1468  | 988  | 3  | 58  | CD19 molecule (Cd19) alternative variant cSep08, mRNA.                               |
| <a href="#">Cd19</a> | <a href="#">Cd19.dSep08</a> | <a href="#">365367</a> | 1216  | 1086 | 2  | 52  | CD19 molecule (5.7 kD) (Cd19) alternative variant dSep08, mRNA.                      |
| <a href="#">Cd22</a> | <a href="#">Cd22.bSep08</a> | <a href="#">308501</a> | 2670  | 1882 | 2  | 44  | CD22 molecule (5.0 kD) (Cd22) alternative variant bSep08, mRNA.                      |
| <a href="#">Cd24</a> | <a href="#">Cd24.aSep08</a> | <a href="#">25145</a>  | 3027  | 418  | 2  | 118 | CD24 molecule (Cd24) alternative variant aSep08, mRNA.                               |
| <a href="#">Cd24</a> | <a href="#">Cd24.dSep08</a> | <a href="#">25145</a>  | 5212  | 492  | 3  | 70  | CD24 molecule (Cd24) alternative variant dSep08, mRNA.                               |
| <a href="#">Cd27</a> | <a href="#">Cd27.aSep08</a> | <a href="#">500318</a> | 3912  | 818  | 5  | 252 | CD27 molecule (Cd27) alternative variant aSep08, mRNA.                               |
| <a href="#">Cd27</a> | <a href="#">Cd27.cSep08</a> | <a href="#">500318</a> | 1728  | 796  | 4  | 202 | CD27 molecule (Cd27) alternative variant cSep08, mRNA.                               |
| <a href="#">Cd27</a> | <a href="#">Cd27.dSep08</a> | <a href="#">500318</a> | 2869  | 554  | 3  | 180 | CD27 molecule (Cd27) alternative variant dSep08, mRNA.                               |
| <a href="#">Cd28</a> | <a href="#">Cd28.bSep08</a> | <a href="#">25660</a>  | 87433 | 732  | 5  | 65  | cd28 molecule (Cd28) alternative variant bSep08, mRNA.                               |
| <a href="#">Cd28</a> | <a href="#">Cd28.cSep08</a> | <a href="#">25660</a>  | 1368  | 535  | 2  | 44  | cd28 molecule (4.8 kD) (Cd28) alternative variant cSep08, mRNA.                      |
| <a href="#">Cd34</a> | <a href="#">Cd34.bSep08</a> | <a href="#">305081</a> | 19295 | 1478 | 1  | 384 | CD34 molecule (Cd34) alternative variant bSep08, mRNA.                               |
| <a href="#">Cd36</a> | <a href="#">Cd36.bSep08</a> | <a href="#">29184</a>  | 17550 | 791  | 7  | 263 | cd36 antigen (Cd36) alternative variant bSep08, mRNA.                                |
| <a href="#">Cd36</a> | <a href="#">Cd36.cSep08</a> | <a href="#">29184</a>  | 36740 | 776  | 5  | 230 | cd36 antigen (Cd36) alternative variant cSep08, mRNA.                                |
| <a href="#">Cd36</a> | <a href="#">Cd36.dSep08</a> | <a href="#">29184</a>  | 35624 | 737  | 5  | 185 | cd36 antigen (Cd36) alternative variant dSep08, mRNA.                                |
| <a href="#">Cd36</a> | <a href="#">Cd36.eSep08</a> | <a href="#">29184</a>  | 9577  | 506  | 3  | 105 | cd36 antigen (Cd36) alternative variant eSep08, mRNA.                                |
| <a href="#">Cd37</a> | <a href="#">Cd37.bSep08</a> | <a href="#">29185</a>  | 4633  | 1961 | 2  | 192 | CD37 antigen like precursor (21.2 kD) (Cd37) alternative variant bSep08, mRNA.       |



|                      |                             |                        |       |      |    |     |                                                                                                                                      |
|----------------------|-----------------------------|------------------------|-------|------|----|-----|--------------------------------------------------------------------------------------------------------------------------------------|
| <a href="#">Cd37</a> | <a href="#">Cd37.cSep08</a> | <a href="#">29185</a>  | 1471  | 798  | 2  | 69  | CD37 antigen like (7.9 kD) (Cd37) alternative variant cSep08, mRNA.                                                                  |
| <a href="#">Cd40</a> | <a href="#">Cd40.bSep08</a> | <a href="#">171369</a> | 13442 | 768  | 7  | 234 | CD40 molecule, TNF receptor superfamily member 5 (25.6 kD) (Cd40) alternative variant bSep08, mRNA.                                  |
| <a href="#">Cd40</a> | <a href="#">Cd40.cSep08</a> | <a href="#">171369</a> | 10716 | 603  | 6  | 194 | CD40 molecule, TNF receptor superfamily member 5 (Cd40) alternative variant cSep08, mRNA.                                            |
| <a href="#">Cd40</a> | <a href="#">Cd40.dSep08</a> | <a href="#">171369</a> | 1527  | 677  | 4  | 107 | CD40 molecule, TNF receptor superfamily member 5 (Cd40) alternative variant dSep08, mRNA.                                            |
| <a href="#">Cd44</a> | <a href="#">Cd44.aSep08</a> | <a href="#">25406</a>  | 88627 | 3984 | 5  | 410 | CD44 antigen (Cd44) alternative variant aSep08, mRNA.                                                                                |
| <a href="#">Cd44</a> | <a href="#">Cd44.bSep08</a> | <a href="#">25406</a>  | 18162 | 537  | 2  | 50  | CD44 antigen (Cd44) alternative variant bSep08, mRNA.                                                                                |
| <a href="#">Cd46</a> | <a href="#">Cd46.bSep08</a> | <a href="#">29333</a>  | 9378  | 487  | 1  | 42  | CD46 antigen, complement regulatory protein (Cd46) alternative variant bSep08, mRNA.                                                 |
| <a href="#">Cd47</a> | <a href="#">Cd47.aSep08</a> | <a href="#">29364</a>  | 59069 | 1368 | 12 | 359 | CD47 antigen (Rh-related antigen, integrin-associated signal transducer) (38.9 kD) (Cd47) alternative variant aSep08, complete mRNA. |
| <a href="#">Cd47</a> | <a href="#">Cd47.cSep08</a> | <a href="#">29364</a>  | 13832 | 735  | 3  | 225 | CD47 antigen (Rh-related antigen, integrin-associated signal transducer) (24.6 kD) (Cd47) alternative variant cSep08, complete mRNA. |
| <a href="#">Cd47</a> | <a href="#">Cd47.dSep08</a> | <a href="#">29364</a>  | 17165 | 691  | 7  | 132 | CD47 antigen (Rh-related antigen, integrin-associated signal transducer) (Cd47) alternative variant dSep08, mRNA.                    |
| <a href="#">Cd47</a> | <a href="#">Cd47.eSep08</a> | <a href="#">29364</a>  | 4551  | 819  | 2  | 49  | CD47 antigen (Rh-related antigen, integrin-associated signal transducer) (5.8 kD) (Cd47) alternative variant eSep08, mRNA.           |
| <a href="#">Cd47</a> | <a href="#">Cd47.fSep08</a> | <a href="#">29364</a>  | 14951 | 482  | 6  | 61  | CD47 antigen (Rh-related antigen, integrin-associated signal transducer) (Cd47) alternative variant fSep08, mRNA.                    |
| <a href="#">Cd47</a> | <a href="#">Cd47.gSep08</a> | <a href="#">29364</a>  | 14895 | 401  | 5  | 42  | CD47 antigen (Rh-related antigen, integrin-associated signal transducer) (Cd47) alternative variant gSep08, mRNA.                    |
| <a href="#">Cd48</a> | <a href="#">Cd48.bSep08</a> | <a href="#">245962</a> | 18198 | 654  | 3  | 192 | CD48 antigen (Cd48) alternative variant bSep08, mRNA.                                                                                |
| <a href="#">Cd48</a> | <a href="#">Cd48.cSep08</a> | <a href="#">245962</a> | 17550 | 537  | 3  | 177 | CD48 antigen (Cd48) alternative variant cSep08, mRNA.                                                                                |
| <a href="#">Cd48</a> | <a href="#">Cd48.dSep08</a> | <a href="#">245962</a> | 23544 | 1275 | 4  | 117 | CD48 antigen (13.5 kD) (Cd48) alternative variant dSep08, complete mRNA.                                                             |
| <a href="#">Cd55</a> | <a href="#">Cd55.aSep08</a> | <a href="#">64036</a>  | 16764 | 1765 | 9  | 430 | CD55 antigen (48.5 kD) (Cd55) alternative variant aSep08, mRNA.                                                                      |
| <a href="#">Cd55</a> | <a href="#">Cd55.cSep08</a> | <a href="#">64036</a>  | 11277 | 1421 | 3  | 381 | CD55 antigen (Cd55) alternative variant cSep08, mRNA.                                                                                |
| <a href="#">Cd55</a> | <a href="#">Cd55.dSep08</a> | <a href="#">64036</a>  | 1810  | 704  | 2  | 218 | CD55 antigen (Cd55) alternative variant dSep08, mRNA.                                                                                |
| <a href="#">Cd55</a> | <a href="#">Cd55.eSep08</a> | <a href="#">64036</a>  | 20521 | 1370 | 6  | 189 | CD55 antigen (Cd55) alternative variant eSep08, mRNA.                                                                                |
| <a href="#">Cd63</a> | <a href="#">Cd63.bSep08</a> | <a href="#">29186</a>  | 1425  | 752  |    | 218 | CD63 antigen (Cd63) alternative variant bSep08, mRNA.                                                                                |
| <a href="#">Cd68</a> | <a href="#">Cd68.bSep08</a> | <a href="#">287435</a> | 835   | 704  | 1  | 234 | CD68 antigen (Cd68) alternative variant bSep08, mRNA.                                                                                |
| <a href="#">Cd69</a> | <a href="#">Cd69.bSep08</a> | <a href="#">29187</a>  | 7179  | 741  |    | 158 | CD69 antigen (17.9 kD) (Cd69) alternative variant bSep08, mRNA.                                                                      |
| <a href="#">Cd72</a> | <a href="#">Cd72.bSep08</a> | <a href="#">313498</a> | 1575  | 932  | 1  | 144 | CD72 antigen (15.7 kD) (Cd72) alternative variant bSep08, mRNA.                                                                      |

|                        |                               |                        |       |      |   |     |                                                                                                                                                          |
|------------------------|-------------------------------|------------------------|-------|------|---|-----|----------------------------------------------------------------------------------------------------------------------------------------------------------|
| <a href="#">Cd74</a>   | <a href="#">Cd74.aSep08</a>   | <a href="#">25599</a>  | 9202  | 1394 | 9 | 312 | CD74 antigen (invariant polypeptide of major histocompatibility complex, class II antigen-associated) (Cd74) alternative variant aSep08, mRNA.           |
| <a href="#">Cd74</a>   | <a href="#">Cd74.bSep08</a>   | <a href="#">25599</a>  | 8651  | 2341 | 6 | 297 | CD74 antigen (invariant polypeptide of major histocompatibility complex, class II antigen-associated) (Cd74) alternative variant bSep08, mRNA.           |
| <a href="#">Cd74</a>   | <a href="#">Cd74.dSep08</a>   | <a href="#">25599</a>  | 828   | 652  | 2 | 165 | CD74 antigen (invariant polypeptide of major histocompatibility complex, class II antigen-associated) (17.1 kD) (Cd74) alternative variant dSep08, mRNA. |
| <a href="#">Cd74</a>   | <a href="#">Cd74.fSep08</a>   | <a href="#">25599</a>  | 3418  | 768  | 5 | 103 | CD74 antigen (invariant polypeptide of major histocompatibility complex, class II antigen-associated) (Cd74) alternative variant fSep08, mRNA.           |
| <a href="#">Cd79a</a>  | <a href="#">Cd79a.aSep08</a>  | <a href="#">681236</a> | 2702  | 936  | 2 | 311 | CD79A antigen (immunoglobulin-associated alpha) (Cd79a) alternative variant aSep08, mRNA.                                                                |
| <a href="#">Cd79a</a>  | <a href="#">Cd79a.bSep08</a>  | <a href="#">681236</a> | 4337  | 1196 | 2 | 94  | CD79A antigen (immunoglobulin-associated alpha) (10.2 kD) (Cd79a) alternative variant bSep08, mRNA.                                                      |
| <a href="#">Cd81</a>   | <a href="#">Cd81.bSep08</a>   | <a href="#">25621</a>  | 14034 | 681  | 4 | 168 | CD 81 antigen (Cd81) alternative variant bSep08, mRNA.                                                                                                   |
| <a href="#">Cd81</a>   | <a href="#">Cd81.cSep08</a>   | <a href="#">25621</a>  | 2210  | 1452 | 4 | 123 | CD 81 antigen (13.6 kD) (Cd81) alternative variant cSep08, mRNA.                                                                                         |
| <a href="#">Cd81</a>   | <a href="#">Cd81.dSep08</a>   | <a href="#">25621</a>  | 5924  | 2327 | 6 | 101 | CD 81 antigen (11.0 kD) (Cd81) alternative variant dSep08, mRNA.                                                                                         |
| <a href="#">Cd82</a>   | <a href="#">Cd82.bSep08</a>   | <a href="#">83628</a>  | 43078 | 1034 | 8 | 238 | cd82 antigen CRA c like (Cd82) alternative variant bSep08, mRNA.                                                                                         |
| <a href="#">Cd82</a>   | <a href="#">Cd82.cSep08</a>   | <a href="#">83628</a>  | 43038 | 753  | 8 | 202 | cd82 antigen CRA c like (Cd82) alternative variant cSep08, mRNA.                                                                                         |
| <a href="#">Cd82</a>   | <a href="#">Cd82.dSep08</a>   | <a href="#">83628</a>  | 6625  | 892  | 5 | 150 | cd82 antigen like (16.8 kD) (Cd82) alternative variant dSep08, mRNA.                                                                                     |
| <a href="#">Cd82</a>   | <a href="#">Cd82.eSep08</a>   | <a href="#">83628</a>  | 33225 | 380  | 5 | 126 | putative protein (Cd82) alternative variant eSep08, mRNA.                                                                                                |
| <a href="#">Cd82</a>   | <a href="#">Cd82.fSep08</a>   | <a href="#">83628</a>  | 33538 | 391  | 5 | 95  | cd82 antigen CRA c like (Cd82) alternative variant fSep08, mRNA.                                                                                         |
| <a href="#">Cd82</a>   | <a href="#">Cd82.gSep08</a>   | <a href="#">83628</a>  | 1909  | 822  | 2 | 95  | cd82 antigen like (Cd82) alternative variant gSep08, mRNA.                                                                                               |
| <a href="#">Cd82</a>   | <a href="#">Cd82.hSep08</a>   | <a href="#">83628</a>  | 29750 | 401  | 4 | 83  | putative protein (Cd82) alternative variant hSep08, mRNA.                                                                                                |
| <a href="#">Cd82</a>   | <a href="#">Cd82.iSep08</a>   | <a href="#">83628</a>  | 827   | 533  | 2 | 51  | cd82 antigen like (5.7 kD) (Cd82) alternative variant iSep08, mRNA.                                                                                      |
| <a href="#">Cd96</a>   | <a href="#">Cd96.bSep08</a>   | <a href="#">498079</a> | 31459 | 846  | 1 | 158 | CD96 antigen (17.8 kD) (Cd96) alternative variant bSep08, mRNA.                                                                                          |
| <a href="#">Cd97</a>   | <a href="#">Cd97.bSep08</a>   | <a href="#">361383</a> | 2391  | 844  | 5 | 274 | CD97 antigen (Cd97) alternative variant bSep08, mRNA.                                                                                                    |
| <a href="#">Cd97</a>   | <a href="#">Cd97.cSep08</a>   | <a href="#">361383</a> | 5788  | 710  | 6 | 236 | CD97 antigen (Cd97) alternative variant cSep08, mRNA.                                                                                                    |
| <a href="#">Cd97</a>   | <a href="#">Cd97.eSep08</a>   | <a href="#">361383</a> | 843   | 763  | 2 | 99  | CD97 antigen (11.2 kD) (Cd97) alternative variant eSep08, mRNA.                                                                                          |
| <a href="#">Cd99I2</a> | <a href="#">Cd99I2.bSep08</a> | <a href="#">171485</a> | 3496  | 284  | 1 | 54  | cd99 antigen-like 2 (6.2 kD) (Cd99I2) alternative variant bSep08, mRNA.                                                                                  |
| <a href="#">Cd151</a>  | <a href="#">Cd151.aSep08</a>  | <a href="#">64315</a>  | 4013  | 1782 | 6 | 493 | CD151 molecule (Raph blood group) (Cd151) alternative variant aSep08, complete mRNA.                                                                     |
| <a href="#">Cd151</a>  | <a href="#">Cd151.bSep08</a>  | <a href="#">64315</a>  | 2645  | 1574 | 6 | 253 | CD151 molecule (Raph blood group) (28.4 kD) (Cd151) alternative variant bSep08, mRNA.                                                                    |

|                         |                                |                        |       |      |   |     |                                                                                       |
|-------------------------|--------------------------------|------------------------|-------|------|---|-----|---------------------------------------------------------------------------------------|
| <a href="#">Cd151</a>   | <a href="#">Cd151.cSep08</a>   | <a href="#">64315</a>  | 2938  | 1540 | 6 | 253 | CD151 molecule (Raph blood group) (28.4 kD) (Cd151) alternative variant cSep08, mRNA. |
| <a href="#">Cd151</a>   | <a href="#">Cd151.eSep08</a>   | <a href="#">64315</a>  | 2884  | 717  | 5 | 172 | CD151 molecule (Raph blood group) (18.9 kD) (Cd151) alternative variant eSep08, mRNA. |
| <a href="#">Cd151</a>   | <a href="#">Cd151.fSep08</a>   | <a href="#">64315</a>  | 2680  | 744  | 6 | 167 | CD151 molecule (Raph blood group) (Cd151) alternative variant fSep08, mRNA.           |
| <a href="#">Cd151</a>   | <a href="#">Cd151.gSep08</a>   | <a href="#">64315</a>  | 3395  | 1430 | 5 | 123 | CD151 molecule (Raph blood group) (13.2 kD) (Cd151) alternative variant gSep08, mRNA. |
| <a href="#">Cd151</a>   | <a href="#">Cd151.hSep08</a>   | <a href="#">64315</a>  | 1703  | 526  | 3 | 68  | CD151 molecule (Raph blood group) (Cd151) alternative variant hSep08, mRNA.           |
| <a href="#">Cd151</a>   | <a href="#">Cd151.iSep08</a>   | <a href="#">64315</a>  | 1299  | 389  | 2 | 41  | CD151 molecule (Raph blood group) (4.4 kD) (Cd151) alternative variant iSep08, mRNA.  |
| <a href="#">Cd163</a>   | <a href="#">Cd163.bSep08</a>   | <a href="#">312701</a> | 2499  | 1419 | 2 | 51  | CD163 molecule (Cd163) alternative variant bSep08, mRNA.                              |
| <a href="#">Cd163</a>   | <a href="#">Cd163.cSep08</a>   | <a href="#">312701</a> | 3940  | 325  | 3 | 32  | CD163 molecule (Cd163) alternative variant cSep08, mRNA.                              |
| <a href="#">Cd177</a>   | <a href="#">Cd177.aSep08</a>   | <a href="#">499099</a> | 1272  | 640  |   | 128 | CD177 antigen (Cd177) mRNA.                                                           |
| <a href="#">Cd200</a>   | <a href="#">Cd200.aSep08</a>   | <a href="#">24560</a>  | 32663 | 1105 | 5 | 313 | cd200 molecule (Cd200) alternative variant aSep08, mRNA.                              |
| <a href="#">Cd200</a>   | <a href="#">Cd200.cSep08</a>   | <a href="#">24560</a>  | 17680 | 936  | 5 | 184 | cd200 molecule (Cd200) alternative variant cSep08, mRNA.                              |
| <a href="#">Cd200</a>   | <a href="#">Cd200.dSep08</a>   | <a href="#">24560</a>  | 15330 | 666  | 3 | 157 | cd200 molecule (Cd200) alternative variant dSep08, mRNA.                              |
| <a href="#">Cd200</a>   | <a href="#">Cd200.eSep08</a>   | <a href="#">24560</a>  | 13775 | 787  | 4 | 140 | cd200 molecule (Cd200) alternative variant eSep08, mRNA.                              |
| <a href="#">Cd209b</a>  | <a href="#">Cd209b.aSep08</a>  | <a href="#">288378</a> | 8540  | 1148 |   | 333 | CD209b antigen (Cd209b) mRNA.                                                         |
| <a href="#">Cd209g</a>  | <a href="#">Cd209g.aSep08</a>  | <a href="#">688750</a> | 1510  | 393  |   | 130 | CD209g molecule (Cd209g) mRNA.                                                        |
| <a href="#">CD225.0</a> | <a href="#">CD225.0.aSep08</a> |                        | 780   | 612  |   | 91  | interferon-induced transmembrane protein (CD225.0) mRNA.                              |
| <a href="#">CD225.1</a> | <a href="#">CD225.1.aSep08</a> |                        | 1339  | 791  |   | 134 | interferon induced transmembrane protein 5 like (14.6 kD) (CD225.1) mRNA.             |
| <a href="#">Cd226</a>   | <a href="#">Cd226.bSep08</a>   | <a href="#">307199</a> | 72384 | 388  | 1 | 68  | CD226 molecule (Cd226) alternative variant bSep08, mRNA.                              |
| <a href="#">Cd247</a>   | <a href="#">Cd247.bSep08</a>   | <a href="#">25300</a>  | 78452 | 743  |   | 137 | cd247 molecule (15.4 kD) (Cd247) alternative variant bSep08, mRNA.                    |
| <a href="#">Cd276</a>   | <a href="#">Cd276.bSep08</a>   | <a href="#">315716</a> | 3005  | 331  | 3 | 36  | cd276 molecule (Cd276) alternative variant bSep08, mRNA.                              |
| <a href="#">Cd276</a>   | <a href="#">Cd276.cSep08</a>   | <a href="#">315716</a> | 2128  | 714  | 2 | 44  | cd276 molecule (5.0 kD) (Cd276) alternative variant cSep08, mRNA.                     |
| <a href="#">Cd300le</a> | <a href="#">Cd300le.aSep08</a> | <a href="#">360655</a> | 5632  | 899  |   | 206 | CD300 molecule-like family member E (Cd300le) mRNA.                                   |
| <a href="#">Cd300lf</a> | <a href="#">Cd300lf.aSep08</a> | <a href="#">287818</a> | 15908 | 1174 | 1 | 370 | CD300 molecule-like family member f (Cd300lf) alternative variant aSep08, mRNA.       |
| <a href="#">Cd320</a>   | <a href="#">Cd320.bSep08</a>   | <a href="#">362851</a> | 4889  | 716  | 3 | 203 | CD320 molecule (Cd320) alternative variant bSep08, mRNA.                              |
| <a href="#">Cd320</a>   | <a href="#">Cd320.cSep08</a>   | <a href="#">362851</a> | 2538  | 1017 | 4 | 130 | CD320 molecule (Cd320) alternative variant cSep08, complete mRNA.                     |

|                        |                               |                        |        |      |    |     |                                                                                                                           |
|------------------------|-------------------------------|------------------------|--------|------|----|-----|---------------------------------------------------------------------------------------------------------------------------|
| <a href="#">Cd320</a>  | <a href="#">Cd320.dSep08</a>  | <a href="#">362851</a> | 1108   | 603  | 3  | 91  | CD320 molecule (Cd320) alternative variant dSep08, mRNA.                                                                  |
| <a href="#">Cdadc1</a> | <a href="#">Cdadc1.aSep08</a> | <a href="#">361052</a> | 28110  | 2209 | 9  | 478 | CMP/dCMP deaminase, zinc-binding (54.2 kD) (Cdadc1) alternative variant aSep08, mRNA.                                     |
| <a href="#">Cdadc1</a> | <a href="#">Cdadc1.cSep08</a> | <a href="#">361052</a> | 11352  | 772  | 4  | 151 | putative protein of ancient origin (Cdadc1) alternative variant cSep08, mRNA.                                             |
| <a href="#">Cdadc1</a> | <a href="#">Cdadc1.dSep08</a> | <a href="#">361052</a> | 6613   | 741  | 3  | 147 | putative protein of ancient origin (Cdadc1) alternative variant dSep08, mRNA.                                             |
| <a href="#">Cdadc1</a> | <a href="#">Cdadc1.eSep08</a> | <a href="#">361052</a> | 615    | 427  | 2  | 83  | putative protein of mammalian origin (9.2 kD) (Cdadc1) alternative variant eSep08, mRNA.                                  |
| <a href="#">Cdadc1</a> | <a href="#">Cdadc1.gSep08</a> | <a href="#">361052</a> | 4686   | 441  | 3  | 51  | putative protein of vertebrate origin (Cdadc1) alternative variant gSep08, mRNA.                                          |
| <a href="#">Cdc2a</a>  | <a href="#">Cdc2a.bSep08</a>  | <a href="#">54237</a>  | 7048   | 800  | 6  | 220 | cell division cycle 2 homolog A (S. pombe) (Cdc2a) alternative variant bSep08, mRNA.                                      |
| <a href="#">Cdc2a</a>  | <a href="#">Cdc2a.cSep08</a>  | <a href="#">54237</a>  | 12416  | 797  | 7  | 204 | cell division cycle 2 homolog A (S. pombe) (Cdc2a) alternative variant cSep08, mRNA.                                      |
| <a href="#">Cdc2l1</a> | <a href="#">Cdc2l1.aSep08</a> | <a href="#">252879</a> | 25175  | 2027 | 15 | 563 | cell division cycle 2 homolog (S.pombe)-like 1 (Cdc2l1) alternative variant aSep08, mRNA.                                 |
| <a href="#">Cdc2l1</a> | <a href="#">Cdc2l1.bSep08</a> | <a href="#">252879</a> | 2396   | 1143 | 8  | 330 | cell division cycle 2 homolog (S.pombe)-like 1 (Cdc2l1) alternative variant bSep08, mRNA.                                 |
| <a href="#">Cdc2l1</a> | <a href="#">Cdc2l1.cSep08</a> | <a href="#">252879</a> | 5374   | 368  | 4  | 122 | cell division cycle 2 homolog (S.pombe)-like 1 (Cdc2l1) alternative variant cSep08, mRNA.                                 |
| <a href="#">Cdc2l1</a> | <a href="#">Cdc2l1.dSep08</a> | <a href="#">252879</a> | 1036   | 726  | 2  | 64  | cell division cycle 2 homolog (S.pombe)-like 1 (Cdc2l1) alternative variant dSep08, mRNA.                                 |
| <a href="#">Cdc2l5</a> | <a href="#">Cdc2l5.aSep08</a> | <a href="#">306998</a> | 53229  | 3281 | 5  | 803 | cell division cycle 2-like 5 (cholinesterase-related cell division controller) (Cdc2l5) alternative variant aSep08, mRNA. |
| <a href="#">Cdc2l5</a> | <a href="#">Cdc2l5.bSep08</a> | <a href="#">306998</a> | 9611   | 919  | 5  | 306 | cell division cycle 2-like 5 (cholinesterase-related cell division controller) (Cdc2l5) alternative variant bSep08, mRNA. |
| <a href="#">Cdc2l5</a> | <a href="#">Cdc2l5.cSep08</a> | <a href="#">306998</a> | 12209  | 773  | 1  | 51  | cell division cycle 2-like 5 (cholinesterase-related cell division controller) (Cdc2l5) alternative variant cSep08, mRNA. |
| <a href="#">Cdc2l6</a> | <a href="#">Cdc2l6.bSep08</a> | <a href="#">309804</a> | 97216  | 735  | 4  | 111 | cell division cycle 2-like 6 (CDK8-like) (12.4 kD) (Cdc2l6) alternative variant bSep08, mRNA.                             |
| <a href="#">Cdc2l6</a> | <a href="#">Cdc2l6.eSep08</a> | <a href="#">309804</a> | 110859 | 1007 | 6  | 87  | cell division cycle 2-like 6 (CDK8-like) (9.5 kD) (Cdc2l6) alternative variant eSep08, mRNA.                              |
| <a href="#">Cdc2l6</a> | <a href="#">Cdc2l6.fSep08</a> | <a href="#">309804</a> | 3045   | 722  | 3  | 30  | cell division cycle 2-like 6 (CDK8-like) (Cdc2l6) alternative variant fSep08, mRNA.                                       |
| <a href="#">Cdc5l</a>  | <a href="#">Cdc5l.bSep08</a>  | <a href="#">85434</a>  | 22787  | 1021 | 6  | 340 | cell division cycle 5-like (S. pombe) (Cdc5l) alternative variant bSep08, mRNA.                                           |
| <a href="#">Cdc5l</a>  | <a href="#">Cdc5l.cSep08</a>  | <a href="#">85434</a>  | 11289  | 754  | 2  | 100 | cell division cycle 5-like (S. pombe) (12.0 kD) (Cdc5l) alternative variant cSep08, mRNA.                                 |
| <a href="#">Cdc7</a>   | <a href="#">Cdc7.bSep08</a>   | <a href="#">360908</a> | 7881   | 862  | 2  | 205 | cell division cycle 7 (S. cerevisiae) (Cdc7) alternative variant bSep08, mRNA.                                            |
| <a href="#">Cdc7</a>   | <a href="#">Cdc7.cSep08</a>   | <a href="#">360908</a> | 9305   | 1493 | 3  | 88  | cell division cycle 7 (S. cerevisiae) (9.4 kD) (Cdc7) alternative variant cSep08, mRNA.                                   |

|                        |                               |                        |       |      |   |     |                                                                                                                     |
|------------------------|-------------------------------|------------------------|-------|------|---|-----|---------------------------------------------------------------------------------------------------------------------|
| <a href="#">Cdc14a</a> | <a href="#">Cdc14a.cSep08</a> | <a href="#">310806</a> | 41638 | 384  | 4 | 43  | CDC14 cell division cycle 14 homolog A ( <i>S. cerevisiae</i> ) (5.0 kD) (Cdc14a) alternative variant cSep08, mRNA. |
| <a href="#">Cdc14b</a> | <a href="#">Cdc14b.aSep08</a> | <a href="#">361195</a> | 25569 | 748  |   | 212 | CDC14 cell division cycle 14 homolog B ( <i>S. cerevisiae</i> ) (Cdc14b) mRNA.                                      |
| <a href="#">Cdc16</a>  | <a href="#">Cdc16.bSep08</a>  | <a href="#">290875</a> | 9904  | 731  | 6 | 212 | CDC16 cell division cycle 16 homolog ( <i>S. cerevisiae</i> ) (Cdc16) alternative variant bSep08, mRNA.             |
| <a href="#">Cdc16</a>  | <a href="#">Cdc16.cSep08</a>  | <a href="#">290875</a> | 5615  | 865  | 4 | 129 | CDC16 cell division cycle 16 homolog ( <i>S. cerevisiae</i> ) (14.8 kD) (Cdc16) alternative variant cSep08, mRNA.   |
| <a href="#">Cdc23</a>  | <a href="#">Cdc23.bSep08</a>  | <a href="#">291689</a> | 6013  | 955  | 8 | 205 | CDC23 (cell division cycle 23, yeast, homolog) (Cdc23) alternative variant bSep08, mRNA.                            |
| <a href="#">Cdc23</a>  | <a href="#">Cdc23.cSep08</a>  | <a href="#">291689</a> | 8595  | 819  | 5 | 176 | CDC23 (cell division cycle 23, yeast, homolog) (Cdc23) alternative variant cSep08, mRNA.                            |
| <a href="#">Cdc23</a>  | <a href="#">Cdc23.dSep08</a>  | <a href="#">291689</a> | 1303  | 748  | 3 | 86  | CDC23 (cell division cycle 23, yeast, homolog) (Cdc23) alternative variant dSep08, mRNA.                            |
| <a href="#">Cdc23</a>  | <a href="#">Cdc23.fSep08</a>  | <a href="#">291689</a> | 2123  | 851  | 2 | 38  | CDC23 (cell division cycle 23, yeast, homolog) (Cdc23) alternative variant fSep08, mRNA.                            |
| <a href="#">Cdc23</a>  | <a href="#">Cdc23.hSep08</a>  | <a href="#">291689</a> | 1841  | 564  | 2 | 16  | CDC23 (cell division cycle 23, yeast, homolog) (2.0 kD) (Cdc23) alternative variant hSep08, mRNA.                   |
| <a href="#">Cdc23</a>  | <a href="#">Cdc23.iSep08</a>  | <a href="#">291689</a> | 3621  | 539  | 3 | 54  | CDC23 (cell division cycle 23, yeast, homolog) (Cdc23) alternative variant iSep08, mRNA.                            |
| <a href="#">Cdc25b</a> | <a href="#">Cdc25b.bSep08</a> | <a href="#">171103</a> | 4741  | 772  | 7 | 232 | cell division cycle 25 homolog B CRA b (Cdc25b) alternative variant bSep08, mRNA.                                   |
| <a href="#">Cdc25b</a> | <a href="#">Cdc25b.cSep08</a> | <a href="#">171103</a> | 3235  | 728  | 4 | 152 | M-phase inducer phosphatase (Cdc25b) alternative variant cSep08, mRNA.                                              |
| <a href="#">Cdc25b</a> | <a href="#">Cdc25b.dSep08</a> | <a href="#">171103</a> | 2008  | 441  | 5 | 146 | cell division cycle 25 homolog B (Cdc25b) alternative variant dSep08, mRNA.                                         |
| <a href="#">Cdc25b</a> | <a href="#">Cdc25b.eSep08</a> | <a href="#">171103</a> | 1731  | 753  | 3 | 125 | cell division cycle 25 homolog B CRA b (Cdc25b) alternative variant eSep08, mRNA.                                   |
| <a href="#">Cdc25b</a> | <a href="#">Cdc25b.fSep08</a> | <a href="#">171103</a> | 1414  | 671  | 2 | 86  | cell division cycle 25 homolog B CRA a (Cdc25b) alternative variant fSep08, mRNA.                                   |
| <a href="#">Cdc25b</a> | <a href="#">Cdc25b.gSep08</a> | <a href="#">171103</a> | 501   | 415  | 2 | 82  | cell division cycle 25 homolog B CRA b (Cdc25b) alternative variant gSep08, mRNA.                                   |
| <a href="#">Cdc25b</a> | <a href="#">Cdc25b.hSep08</a> | <a href="#">171103</a> | 1309  | 517  | 2 | 64  | cell division cycle 25 homolog B (Cdc25b) alternative variant hSep08, mRNA.                                         |
| <a href="#">Cdc25c</a> | <a href="#">Cdc25c.bSep08</a> | <a href="#">307511</a> | 5472  | 677  | 5 | 138 | cell division cycle 25C (Cdc25c) alternative variant bSep08, mRNA.                                                  |
| <a href="#">Cdc25c</a> | <a href="#">Cdc25c.cSep08</a> | <a href="#">307511</a> | 14272 | 1799 | 1 | 95  | cdc25 like (10.4 kD) (Cdc25c) alternative variant cSep08, mRNA.                                                     |
| <a href="#">Cdc26</a>  | <a href="#">Cdc26.aSep08</a>  | <a href="#">366381</a> | 14911 | 2712 | 2 | 85  | cell division cycle 26 (9.8 kD) (Cdc26) alternative variant aSep08, complete mRNA.                                  |
| <a href="#">Cdc26</a>  | <a href="#">Cdc26.cSep08</a>  | <a href="#">366381</a> | 12886 | 723  | 3 | 85  | cell division cycle 26 (9.8 kD) (Cdc26) alternative variant cSep08, complete mRNA.                                  |
| <a href="#">Cdc26</a>  | <a href="#">Cdc26.eSep08</a>  | <a href="#">366381</a> | 8834  | 398  | 2 | 19  | cell division cycle 26 (Cdc26) alternative variant eSep08, mRNA.                                                    |
| <a href="#">Cdc27</a>  | <a href="#">Cdc27.bSep08</a>  | <a href="#">360643</a> | 9598  | 858  | 6 | 259 | cell division cycle 27 homolog ( <i>S. cerevisiae</i> ) (Cdc27) alternative variant bSep08, mRNA.                   |

|                          |                                 |                        |       |      |    |     |                                                                                                             |
|--------------------------|---------------------------------|------------------------|-------|------|----|-----|-------------------------------------------------------------------------------------------------------------|
| <a href="#">Cdc27</a>    | <a href="#">Cdc27.cSep08</a>    | <a href="#">360643</a> | 11151 | 735  | 6  | 244 | cell division cycle 27 homolog ( <i>S. cerevisiae</i> ) (Cdc27) alternative variant cSep08, mRNA.           |
| <a href="#">Cdc34</a>    | <a href="#">Cdc34.bSep08</a>    | <a href="#">299602</a> | 3169  | 1262 | 2  | 153 | cell division cycle 34 homolog ( <i>S. cerevisiae</i> ) (17.1 kD) (Cdc34) alternative variant bSep08, mRNA. |
| <a href="#">Cdc34</a>    | <a href="#">Cdc34.cSep08</a>    | <a href="#">299602</a> | 2106  | 393  | 4  | 130 | cell division cycle 34 homolog ( <i>S. cerevisiae</i> ) (Cdc34) alternative variant cSep08, mRNA.           |
| <a href="#">Cdc37</a>    | <a href="#">Cdc37.bSep08</a>    | <a href="#">114562</a> | 8330  | 560  | 3  | 174 | cell division cycle 37 homolog ( <i>S. cerevisiae</i> ) (Cdc37) alternative variant bSep08, mRNA.           |
| <a href="#">Cdc37</a>    | <a href="#">Cdc37.cSep08</a>    | <a href="#">114562</a> | 1018  | 846  | 3  | 168 | cell division cycle 37 homolog ( <i>S. cerevisiae</i> ) (19.6 kD) (Cdc37) alternative variant cSep08, mRNA. |
| <a href="#">Cdc37</a>    | <a href="#">Cdc37.dSep08</a>    | <a href="#">114562</a> | 9994  | 1374 | 5  | 159 | cell division cycle 37 homolog ( <i>S. cerevisiae</i> ) (Cdc37) alternative variant dSep08, mRNA.           |
| <a href="#">Cdc3711</a>  | <a href="#">Cdc3711.bSep08</a>  | <a href="#">293886</a> | 9034  | 458  | 4  | 115 | cell division cycle 37 homolog ( <i>S. cerevisiae</i> )-like 1 (Cdc3711) alternative variant bSep08, mRNA.  |
| <a href="#">Cdc3711</a>  | <a href="#">Cdc3711.cSep08</a>  | <a href="#">293886</a> | 10605 | 723  | 3  | 72  | cell division cycle 37 homolog ( <i>S. cerevisiae</i> )-like 1 (Cdc3711) alternative variant cSep08, mRNA.  |
| <a href="#">Cdc3711</a>  | <a href="#">Cdc3711.fSep08</a>  | <a href="#">293886</a> | 8244  | 514  | 3  | 44  | cell division cycle 37 homolog ( <i>S. cerevisiae</i> )-like 1 (Cdc3711) alternative variant fSep08, mRNA.  |
| <a href="#">Cdc40</a>    | <a href="#">Cdc40.aSep08</a>    | <a href="#">361859</a> | 22111 | 2669 | 12 | 444 | cell division cycle 40 homolog (yeast) (Cdc40) alternative variant aSep08, mRNA.                            |
| <a href="#">Cdc42</a>    | <a href="#">Cdc42.aSep08</a>    | <a href="#">64465</a>  | 35130 | 2573 | 2  | 191 | cell division cycle 42 homolog ( <i>S. cerevisiae</i> ) (21.3 kD) (Cdc42) alternative variant aSep08, mRNA. |
| <a href="#">Cdc42</a>    | <a href="#">Cdc42.cSep08</a>    | <a href="#">64465</a>  | 37145 | 2603 | 2  | 191 | cell division cycle 42 homolog ( <i>S. cerevisiae</i> ) (21.3 kD) (Cdc42) alternative variant cSep08, mRNA. |
| <a href="#">Cdc42bpa</a> | <a href="#">Cdc42bpa.bSep08</a> | <a href="#">114116</a> | 33255 | 868  | 9  | 289 | CDC42 binding protein kinase alpha (Cdc42bpa) alternative variant bSep08, mRNA.                             |
| <a href="#">Cdc42bpb</a> | <a href="#">Cdc42bpb.bSep08</a> | <a href="#">113960</a> | 1370  | 616  | 3  | 152 | cdc42 binding protein kinase beta (Cdc42bpb) alternative variant bSep08, mRNA.                              |
| <a href="#">Cdc42bpb</a> | <a href="#">Cdc42bpb.cSep08</a> | <a href="#">113960</a> | 495   | 446  | 2  | 57  | cdc42 binding protein kinase beta (Cdc42bpb) alternative variant cSep08, mRNA.                              |
| <a href="#">Cdc42bpg</a> | <a href="#">Cdc42bpg.bSep08</a> | <a href="#">293693</a> | 4915  | 495  | 1  | 165 | CDC42 binding protein kinase gamma (DMPK-like) (Cdc42bpg) alternative variant bSep08, mRNA.                 |
| <a href="#">Cdc42ep1</a> | <a href="#">Cdc42ep1.bSep08</a> | <a href="#">315121</a> | 4208  | 494  | 3  | 48  | putative protein (Cdc42ep1) alternative variant bSep08, mRNA.                                               |
| <a href="#">Cdc42ep2</a> | <a href="#">Cdc42ep2.bSep08</a> | <a href="#">309175</a> | 8865  | 1507 | 2  | 214 | putative protein (Cdc42ep2) alternative variant bSep08, mRNA.                                               |
| <a href="#">Cdc42ep2</a> | <a href="#">Cdc42ep2.cSep08</a> | <a href="#">309175</a> | 7150  | 603  | 2  | 117 | putative nuclear protein (12.8 kD) (Cdc42ep2) alternative variant cSep08, mRNA.                             |
| <a href="#">Cdc42ep2</a> | <a href="#">Cdc42ep2.dSep08</a> | <a href="#">309175</a> | 7822  | 642  | 3  | 114 | putative protein (12.6 kD) (Cdc42ep2) alternative variant dSep08, mRNA.                                     |
| <a href="#">Cdc42ep2</a> | <a href="#">Cdc42ep2.eSep08</a> | <a href="#">309175</a> | 7656  | 1005 | 3  | 88  | putative nuclear protein (9.6 kD) (Cdc42ep2) alternative variant eSep08, mRNA.                              |
| <a href="#">Cdc42ep2</a> | <a href="#">Cdc42ep2.fSep08</a> | <a href="#">309175</a> | 4638  | 703  | 3  | 85  | putative protein (9.3 kD) (Cdc42ep2) alternative variant fSep08, mRNA.                                      |
| <a href="#">Cdc42ep2</a> | <a href="#">Cdc42ep2.gSep08</a> | <a href="#">309175</a> | 7496  | 361  | 3  | 71  | putative protein (Cdc42ep2) alternative variant gSep08, mRNA.                                               |

|                          |                                 |                        |       |      |    |     |                                                                                                         |
|--------------------------|---------------------------------|------------------------|-------|------|----|-----|---------------------------------------------------------------------------------------------------------|
| <a href="#">Cdc42ep4</a> | <a href="#">Cdc42ep4.bSep08</a> | <a href="#">303653</a> | 22141 | 1187 | 1  | 92  | CDC42 effector protein (Rho GTPase binding) 4 (10.4 kD) (Cdc42ep4) alternative variant bSep08, mRNA.    |
| <a href="#">Cdc42ep4</a> | <a href="#">Cdc42ep4.cSep08</a> | <a href="#">303653</a> | 10192 | 754  | 1  | 203 | CDC42 effector protein (Rho GTPase binding) 4 (Cdc42ep4) alternative variant cSep08, mRNA.              |
| <a href="#">Cdc42ep4</a> | <a href="#">Cdc42ep4.dSep08</a> | <a href="#">303653</a> | 658   | 347  | 1  | 62  | CDC42 effector protein (Rho GTPase binding) 4 (Cdc42ep4) alternative variant dSep08, mRNA.              |
| <a href="#">Cdc42ep5</a> | <a href="#">Cdc42ep5.aSep08</a> | <a href="#">361505</a> | 1729  | 620  | 2  | 161 | CDC42 effector protein (Rho GTPase binding) 5 (Cdc42ep5) alternative variant aSep08, mRNA.              |
| <a href="#">Cdc42ep5</a> | <a href="#">Cdc42ep5.bSep08</a> | <a href="#">361505</a> | 2124  | 765  | 2  | 153 | CDC42 effector protein (Rho GTPase binding) 5 (15.7 kD) (Cdc42ep5) alternative variant bSep08, mRNA.    |
| <a href="#">Cdc42se1</a> | <a href="#">Cdc42se1.aSep08</a> | <a href="#">499672</a> | 3957  | 740  | 5  | 79  | cdc42 small effector 1 (9.0 kD) (Cdc42se1) alternative variant aSep08, mRNA.                            |
| <a href="#">Cdc42se1</a> | <a href="#">Cdc42se1.cSep08</a> | <a href="#">499672</a> | 3527  | 736  | 2  | 76  | putative protein (Cdc42se1) alternative variant cSep08, mRNA.                                           |
| <a href="#">Cdc42se1</a> | <a href="#">Cdc42se1.dSep08</a> | <a href="#">499672</a> | 3181  | 1257 | 3  | 33  | cdc42 small effector 1 (3.5 kD) (Cdc42se1) alternative variant dSep08, mRNA.                            |
| <a href="#">Cdc42se2</a> | <a href="#">Cdc42se2.aSep08</a> | <a href="#">502327</a> | 1293  | 1047 |    | 84  | CDC42 small effector 2 (9.2 kD) (Cdc42se2) mRNA.                                                        |
| <a href="#">Cdc45l</a>   | <a href="#">Cdc45l.cSep08</a>   | <a href="#">287961</a> | 2976  | 783  | 2  | 94  | cell division cycle 45 homolog (S. cerevisiae)-like (Cdc45l) alternative variant cSep08, mRNA.          |
| <a href="#">Cdc45l</a>   | <a href="#">Cdc45l.dSep08</a>   | <a href="#">287961</a> | 807   | 527  | 2  | 56  | cell division cycle 45 homolog (S. cerevisiae)-like (6.4 kD) (Cdc45l) alternative variant dSep08, mRNA. |
| <a href="#">Cdc9111</a>  | <a href="#">Cdc9111.aSep08</a>  | <a href="#">353304</a> | 17636 | 777  | 4  | 160 | CDC91 cell division cycle 91-like 1 (S. cerevisiae) (Cdc9111) alternative variant aSep08, mRNA.         |
| <a href="#">Cdc123</a>   | <a href="#">Cdc123.bSep08</a>   | <a href="#">116656</a> | 42715 | 1464 | 11 | 219 | cell division cycle 123 (25.7 kD) (Cdc123) alternative variant bSep08, complete mRNA.                   |
| <a href="#">Cdc123</a>   | <a href="#">Cdc123.cSep08</a>   | <a href="#">116656</a> | 10617 | 879  | 5  | 122 | cell division cycle 123 (13.9 kD) (Cdc123) alternative variant cSep08, mRNA.                            |
| <a href="#">Cdc123</a>   | <a href="#">Cdc123.dSep08</a>   | <a href="#">116656</a> | 812   | 274  | 2  | 44  | cell division cycle 123 (Cdc123) alternative variant dSep08, mRNA.                                      |
| <a href="#">Cdca2</a>    | <a href="#">Cdca2.bSep08</a>    | <a href="#">305984</a> | 25579 | 1599 | 8  | 532 | cell division cycle associated 2 (Cdca2) alternative variant bSep08, mRNA.                              |
| <a href="#">Cdca2</a>    | <a href="#">Cdca2.cSep08</a>    | <a href="#">305984</a> | 8864  | 742  | 5  | 180 | cell division cycle associated 2 (Cdca2) alternative variant cSep08, mRNA.                              |
| <a href="#">Cdca2</a>    | <a href="#">Cdca2.dSep08</a>    | <a href="#">305984</a> | 9221  | 691  | 5  | 149 | cell division cycle associated 2 (Cdca2) alternative variant dSep08, mRNA.                              |
| <a href="#">Cdca3</a>    | <a href="#">Cdca3.aSep08</a>    | <a href="#">297594</a> | 3344  | 1342 | 4  | 300 | cell division cycle associated 3 (Cdca3) alternative variant aSep08, mRNA.                              |
| <a href="#">Cdca3</a>    | <a href="#">Cdca3.cSep08</a>    | <a href="#">297594</a> | 2557  | 744  | 4  | 128 | cell division cycle associated 3 (Cdca3) alternative variant cSep08, mRNA.                              |
| <a href="#">Cdca3</a>    | <a href="#">Cdca3.dSep08</a>    | <a href="#">297594</a> | 1381  | 731  | 1  | 111 | cell division cycle associated 3 (Cdca3) alternative variant dSep08, mRNA.                              |
| <a href="#">Cdca4</a>    | <a href="#">Cdca4.aSep08</a>    | <a href="#">500727</a> | 7143  | 1738 | 2  | 243 | cell division cycle associated 4 (26.8 kD) (Cdca4) alternative variant aSep08, mRNA.                    |
| <a href="#">Cdca7</a>    | <a href="#">Cdca7.bSep08</a>    | <a href="#">311742</a> | 7178  | 750  | 5  | 250 | cell division cycle associated 7 (Cdca7) alternative variant bSep08, mRNA.                              |
| <a href="#">Cdca7</a>    | <a href="#">Cdca7.cSep08</a>    | <a href="#">311742</a> | 6981  | 985  | 4  | 208 | cell division cycle associated 7 (Cdca7) alternative variant cSep08, mRNA.                              |

|                         |                                |                        |       |      |    |     |                                                                                                                                                     |
|-------------------------|--------------------------------|------------------------|-------|------|----|-----|-----------------------------------------------------------------------------------------------------------------------------------------------------|
| <a href="#">Cdca7l</a>  | <a href="#">Cdca7l.bSep08</a>  | <a href="#">619566</a> | 41021 | 799  |    | 251 | cell division cycle associated 7 like (Cdca7l) alternative variant bSep08, mRNA.                                                                    |
| <a href="#">Cdca8</a>   | <a href="#">Cdca8.aSep08</a>   | <a href="#">500545</a> | 25275 | 2208 | 8  | 180 | cell division cycle associated 8 (19.7 kD) (Cdca8) alternative variant aSep08, mRNA.                                                                |
| <a href="#">Cdca8</a>   | <a href="#">Cdca8.bSep08</a>   | <a href="#">500545</a> | 19721 | 497  | 6  | 165 | cell division cycle associated 8 (Cdca8) alternative variant bSep08, mRNA.                                                                          |
| <a href="#">Cdca8</a>   | <a href="#">Cdca8.eSep08</a>   | <a href="#">500545</a> | 2614  | 929  | 3  | 125 | cell division cycle associated 8 (13.4 kD) (Cdca8) alternative variant eSep08, mRNA.                                                                |
| <a href="#">Cdh1</a>    | <a href="#">Cdh1.bSep08</a>    | <a href="#">83502</a>  | 10957 | 809  | 1  | 182 | cadherin 1 (Cdh1) alternative variant bSep08, mRNA.                                                                                                 |
| <a href="#">Cdh2</a>    | <a href="#">Cdh2.bSep08</a>    | <a href="#">83501</a>  | 2364  | 545  | 1  | 89  | cadherin 2 (Cdh2) alternative variant bSep08, mRNA.                                                                                                 |
| <a href="#">Cdh3</a>    | <a href="#">Cdh3.aSep08</a>    | <a href="#">116777</a> | 14332 | 1955 |    | 436 | cadherin 3, type 1, P-cadherin (placental) (Cdh3) mRNA.                                                                                             |
| <a href="#">Cdh5</a>    | <a href="#">Cdh5.bSep08</a>    | <a href="#">307618</a> | 12494 | 3139 | 4  | 514 | cadherin 5 (Cdh5) alternative variant bSep08, mRNA.                                                                                                 |
| <a href="#">Cdh9</a>    | <a href="#">Cdh9.aSep08</a>    | <a href="#">29163</a>  | 28235 | 1917 |    | 638 | cadherin 9 (Cdh9) mRNA.                                                                                                                             |
| <a href="#">Cdh10</a>   | <a href="#">Cdh10.aSep08</a>   | <a href="#">29181</a>  | 6752  | 559  |    | 186 | cadherin 10 (Cdh10) mRNA.                                                                                                                           |
| <a href="#">Cdh17</a>   | <a href="#">Cdh17.bSep08</a>   | <a href="#">117048</a> | 3635  | 582  | 4  | 102 | cadherin 17 (Cdh17) alternative variant bSep08, mRNA.                                                                                               |
| <a href="#">Cdh18</a>   | <a href="#">Cdh18.aSep08</a>   | <a href="#">310174</a> | 31667 | 1129 |    | 77  | cadherin 18, type 2 (Cdh18) mRNA.                                                                                                                   |
| <a href="#">Cdh19</a>   | <a href="#">Cdh19.bSep08</a>   | <a href="#">360835</a> | 48251 | 1777 | 1  | 454 | cadherin 19, type 2 (Cdh19) alternative variant bSep08, mRNA.                                                                                       |
| <a href="#">Cdh22</a>   | <a href="#">Cdh22.bSep08</a>   | <a href="#">29182</a>  | 4968  | 1424 | 2  | 262 | cadherin 22 (Cdh22) alternative variant bSep08, mRNA.                                                                                               |
| <a href="#">Cdh23</a>   | <a href="#">Cdh23.cSep08</a>   | <a href="#">114102</a> | 854   | 386  | 2  | 128 | cadherin 23 (otocadherin) (Cdh23) alternative variant cSep08, mRNA.                                                                                 |
| <a href="#">Cdh24</a>   | <a href="#">Cdh24.aSep08</a>   | <a href="#">498515</a> | 1951  | 430  |    | 139 | cadherin-like 24 (Cdh24) mRNA.                                                                                                                      |
| <a href="#">Cdig2</a>   | <a href="#">Cdig2.aSep08</a>   | <a href="#">266732</a> | 10622 | 2931 | 12 | 566 | cdig2 protein (Cdig2) alternative variant aSep08, mRNA.                                                                                             |
| <a href="#">Cdipt</a>   | <a href="#">Cdipt.bSep08</a>   | <a href="#">192260</a> | 3590  | 1410 | 5  | 185 | CDP-diacylglycerol--inositol 3-phosphatidyltransferase (phosphatidylinositol synthase) (20.3 kD) (Cdipt) alternative variant bSep08, mRNA.          |
| <a href="#">Cdipt</a>   | <a href="#">Cdipt.cSep08</a>   | <a href="#">192260</a> | 4074  | 828  | 6  | 103 | CDP-diacylglycerol--inositol 3-phosphatidyltransferase (phosphatidylinositol synthase) (11.7 kD) (Cdipt) alternative variant cSep08, complete mRNA. |
| <a href="#">Cdk2</a>    | <a href="#">Cdk2.bSep08</a>    | <a href="#">362817</a> | 5086  | 742  | 5  | 139 | cyclin dependent kinase 2 (Cdk2) alternative variant bSep08, mRNA.                                                                                  |
| <a href="#">Cdk2</a>    | <a href="#">Cdk2.cSep08</a>    | <a href="#">362817</a> | 1168  | 915  | 2  | 132 | cyclin dependent kinase 2 (Cdk2) alternative variant cSep08, mRNA.                                                                                  |
| <a href="#">Cdk2ap2</a> | <a href="#">Cdk2ap2.aSep08</a> | <a href="#">688405</a> | 1334  | 429  | 3  | 128 | CDK2-associated protein 2 (Cdk2ap2) alternative variant aSep08, mRNA.                                                                               |
| <a href="#">Cdk2ap2</a> | <a href="#">Cdk2ap2.bSep08</a> | <a href="#">688405</a> | 1197  | 830  | 2  | 128 | CDK2-associated protein 2 (Cdk2ap2) alternative variant bSep08, mRNA.                                                                               |
| <a href="#">Cdk2ap2</a> | <a href="#">Cdk2ap2.dSep08</a> | <a href="#">688405</a> | 1112  | 400  | 3  | 60  | CDK2-associated protein 2 (Cdk2ap2) alternative variant dSep08, mRNA.                                                                               |
| <a href="#">Cdk4</a>    | <a href="#">Cdk4.bSep08</a>    | <a href="#">94201</a>  | 1142  | 348  | 3  | 47  | cyclin-dependent kinase 4 (Cdk4) alternative variant bSep08, mRNA.                                                                                  |
| <a href="#">Cdk5</a>    | <a href="#">Cdk5.bSep08</a>    | <a href="#">140908</a> | 2534  | 1524 | 6  | 191 | cyclin-dependent kinase 5 (Cdk5) alternative variant bSep08, mRNA.                                                                                  |
| <a href="#">Cdk5</a>    | <a href="#">Cdk5.cSep08</a>    | <a href="#">140908</a> | 3021  | 548  | 8  | 92  | cyclin-dependent kinase 5 (10.5 kD) (Cdk5) alternative variant cSep08, mRNA.                                                                        |



|                          |                                 |                        |        |      |    |     |                                                                                                                              |
|--------------------------|---------------------------------|------------------------|--------|------|----|-----|------------------------------------------------------------------------------------------------------------------------------|
| <a href="#">Cdk5</a>     | <a href="#">Cdk5.dSep08</a>     | <a href="#">140908</a> | 823    | 696  | 2  | 74  | putative protein (7.7 kD) (Cdk5) alternative variant dSep08, mRNA.                                                           |
| <a href="#">Cdk5rap1</a> | <a href="#">Cdk5rap1.bSep08</a> | <a href="#">252827</a> | 18678  | 758  | 6  | 201 | CDK5 regulatory subunit associated protein 1 (Cdk5rap1) alternative variant bSep08, mRNA.                                    |
| <a href="#">Cdk5rap1</a> | <a href="#">Cdk5rap1.cSep08</a> | <a href="#">252827</a> | 2306   | 481  | 2  | 131 | CDK5 regulatory subunit associated protein 1 (14.7 kD) (Cdk5rap1) alternative variant cSep08, complete mRNA.                 |
| <a href="#">Cdk5rap1</a> | <a href="#">Cdk5rap1.dSep08</a> | <a href="#">252827</a> | 8360   | 460  | 3  | 53  | CDK5 regulatory subunit associated protein 1 (Cdk5rap1) alternative variant dSep08, mRNA.                                    |
| <a href="#">Cdk5rap2</a> | <a href="#">Cdk5rap2.aSep08</a> | <a href="#">286919</a> | 42822  | 2215 | 9  | 725 | CDK5 regulatory subunit associated protein 2 (Cdk5rap2) alternative variant aSep08, mRNA.                                    |
| <a href="#">Cdk5rap2</a> | <a href="#">Cdk5rap2.bSep08</a> | <a href="#">286919</a> | 20717  | 1217 | 4  | 377 | CDK5 regulatory subunit associated protein 2 (Cdk5rap2) alternative variant bSep08, mRNA.                                    |
| <a href="#">Cdk5rap2</a> | <a href="#">Cdk5rap2.cSep08</a> | <a href="#">286919</a> | 13168  | 862  | 2  | 111 | CDK5 regulatory subunit associated protein 2 (12.6 kD) (Cdk5rap2) alternative variant cSep08, mRNA.                          |
| <a href="#">Cdk6</a>     | <a href="#">Cdk6.aSep08</a>     | <a href="#">114483</a> | 254613 | 765  | 2  | 237 | cyclin-dependent kinase 6 (Cdk6) alternative variant aSep08, mRNA.                                                           |
| <a href="#">Cdk6</a>     | <a href="#">Cdk6.bSep08</a>     | <a href="#">114483</a> | 253274 | 682  | 2  | 152 | cyclin-dependent kinase 6 (Cdk6) alternative variant bSep08, mRNA.                                                           |
| <a href="#">Cdk7</a>     | <a href="#">Cdk7.aSep08</a>     | <a href="#">171150</a> | 24679  | 1340 | 12 | 346 | cyclin-dependent kinase 7 (homolog of Xenopus MO15 cdk-activating kinase) (39.0 kD) (Cdk7) alternative variant aSep08, mRNA. |
| <a href="#">Cdk7</a>     | <a href="#">Cdk7.bSep08</a>     | <a href="#">171150</a> | 24548  | 1775 | 8  | 78  | cyclin-dependent kinase 7 (homolog of Xenopus MO15 cdk-activating kinase) (Cdk7) alternative variant bSep08, mRNA.           |
| <a href="#">Cdk7</a>     | <a href="#">Cdk7.eSep08</a>     | <a href="#">171150</a> | 1212   | 316  | 2  | 53  | cyclin-dependent kinase 7 (homolog of Xenopus MO15 cdk-activating kinase) (5.6 kD) (Cdk7) alternative variant eSep08, mRNA.  |
| <a href="#">Cdk9</a>     | <a href="#">Cdk9.bSep08</a>     | <a href="#">362110</a> | 1577   | 1088 | 3  | 204 | cyclin-dependent kinase 9 (CDC2-related kinase) (Cdk9) alternative variant bSep08, mRNA.                                     |
| <a href="#">Cdk9</a>     | <a href="#">Cdk9.cSep08</a>     | <a href="#">362110</a> | 3128   | 1098 | 5  | 118 | cyclin-dependent kinase 9 (CDC2-related kinase) (Cdk9) alternative variant cSep08, mRNA.                                     |
| <a href="#">Cdk10</a>    | <a href="#">Cdk10.aSep08</a>    | <a href="#">361434</a> | 6587   | 1784 | 4  | 541 | cyclin-dependent kinase (CDC2-like) 10 (Cdk10) alternative variant aSep08, mRNA.                                             |
| <a href="#">Cdk10</a>    | <a href="#">Cdk10.eSep08</a>    | <a href="#">361434</a> | 1829   | 699  | 2  | 90  | cyclin-dependent kinase (CDC2-like) 10 (Cdk10) alternative variant eSep08, mRNA.                                             |
| <a href="#">Cdk10</a>    | <a href="#">Cdk10.fSep08</a>    | <a href="#">361434</a> | 3840   | 553  | 4  | 84  | cyclin-dependent kinase (CDC2-like) 10 (Cdk10) alternative variant fSep08, mRNA.                                             |
| <a href="#">Cdk10</a>    | <a href="#">Cdk10.gSep08</a>    | <a href="#">361434</a> | 1942   | 908  | 2  | 70  | cyclin-dependent kinase (CDC2-like) 10 (Cdk10) alternative variant gSep08, mRNA.                                             |
| <a href="#">Cdkal1</a>   | <a href="#">Cdkal1.aSep08</a>   | <a href="#">361243</a> | 356977 | 1179 | 8  | 387 | CDK5 regulatory subunit associated protein 1-like 1 (Cdkal1) alternative variant aSep08, mRNA.                               |
| <a href="#">Cdkl2</a>    | <a href="#">Cdkl2.bSep08</a>    | <a href="#">305242</a> | 14049  | 973  | 6  | 213 | cyclin-dependent kinase-like 2 (CDC2-related kinase) (24.6 kD) (Cdkl2) alternative variant bSep08, mRNA.                     |
| <a href="#">Cdkl2</a>    | <a href="#">Cdkl2.cSep08</a>    | <a href="#">305242</a> | 12740  | 2397 | 6  | 148 | cyclin-dependent kinase-like 2 (CDC2-related kinase) (Cdkl2) alternative variant cSep08, mRNA.                               |
| <a href="#">Cdkl3</a>    | <a href="#">Cdkl3.bSep08</a>    | <a href="#">60396</a>  | 63454  | 1214 | 9  | 344 | cyclin-dependent kinase-like 3 (Cdkl3) alternative variant bSep08, mRNA.                                                     |

|                          |                                 |                           |       |      |   |     |                                                                                                                 |
|--------------------------|---------------------------------|---------------------------|-------|------|---|-----|-----------------------------------------------------------------------------------------------------------------|
| <a href="#">Cdkl3</a>    | <a href="#">Cdkl3.cSep08</a>    | <a href="#">60396</a>     | 23817 | 1075 | 6 | 266 | cyclin-dependent kinase-like 3 (30.6 kD) (Cdkl3) alternative variant cSep08, mRNA.                              |
| <a href="#">Cdkl3</a>    | <a href="#">Cdkl3.dSep08</a>    | <a href="#">60396</a>     | 20599 | 718  | 5 | 191 | cyclin-dependent kinase-like 3 (Cdkl3) alternative variant dSep08, mRNA.                                        |
| <a href="#">Cdkl4</a>    | <a href="#">Cdkl4.aSep08</a>    | <a href="#">503009</a>    | 12358 | 367  |   | 114 | cyclin-dependent kinase-like 4 (Cdkl4) mRNA.                                                                    |
| <a href="#">Cdkn1a</a>   | <a href="#">Cdkn1a.aSep08</a>   | <a href="#">114851</a>    | 6269  | 795  | 3 | 196 | cyclin-dependent kinase inhibitor 1A (p21, Cip1) (Cdkn1a) alternative variant aSep08, mRNA.                     |
| <a href="#">Cdkn1a</a>   | <a href="#">Cdkn1a.bSep08</a>   | <a href="#">114851</a>    | 1296  | 714  | 2 | 173 | cyclin-dependent kinase inhibitor 1A (p21, Cip1) (Cdkn1a) alternative variant bSep08, mRNA.                     |
| <a href="#">Cdkn1c</a>   | <a href="#">Cdkn1c.cSep08</a>   | <a href="#">246060</a>    | 1442  | 1268 | 2 | 255 | cyclin-dependent kinase inhibitor 1C (P57) (Cdkn1c) alternative variant cSep08, mRNA.                           |
| <a href="#">Cdkn1c</a>   | <a href="#">Cdkn1c.dSep08</a>   | <a href="#">246060</a>    | 1166  | 989  | 2 | 255 | cyclin-dependent kinase inhibitor 1C (P57) (Cdkn1c) alternative variant dSep08, mRNA.                           |
| <a href="#">Cdkn2aip</a> | <a href="#">Cdkn2aip.cSep08</a> | <a href="#">306455</a>    | 3629  | 2574 | 3 | 164 | CDKN2A interacting protein (Cdkn2aip) alternative variant cSep08, mRNA.                                         |
| <a href="#">Cdkn2b</a>   | <a href="#">Cdkn2b.bSep08</a>   | <a href="#">25164</a>     | 4821  | 1382 | 3 | 189 | cyclin-dependent kinase inhibitor 2B (p15, inhibits CDK4) (19.6 kD) (Cdkn2b) alternative variant bSep08, mRNA.  |
| <a href="#">Cdkn2b</a>   | <a href="#">Cdkn2b.cSep08</a>   | <a href="#">25164</a>     | 5224  | 762  | 2 | 107 | cyclin-dependent kinase inhibitor 2B (p15, inhibits CDK4) (Cdkn2b) alternative variant cSep08, mRNA.            |
| <a href="#">Cdkn2c</a>   | <a href="#">Cdkn2c.aSep08</a>   | <a href="#">54238</a>     | 4322  | 1051 | 2 | 168 | cyclin-dependent kinase inhibitor 2C (p18, inhibits CDK4) (18.2 kD) (Cdkn2c) alternative variant aSep08, mRNA.  |
| <a href="#">Cdkn3</a>    | <a href="#">Cdkn3.aSep08</a>    | <a href="#">289993</a>    | 11329 | 798  | 8 | 212 | cyclin-dependent kinase inhibitor 3 (23.8 kD) (Cdkn3) alternative variant aSep08, complete mRNA.                |
| <a href="#">Cdo1</a>     | <a href="#">Cdo1.bSep08</a>     | <a href="#">81718</a>     | 12495 | 753  | 4 | 188 | cysteine dioxygenase 1, cytosolic (Cdo1) alternative variant bSep08, mRNA.                                      |
| <a href="#">Cdr2l</a>    | <a href="#">Cdr2l.aSep08</a>    | <a href="#">360656</a>    | 21793 | 1802 | 2 | 495 | cerebellar degeneration-related protein 2-like (Cdr2l) alternative variant aSep08, mRNA.                        |
| <a href="#">Cdr2l</a>    | <a href="#">Cdr2l.bSep08</a>    | <a href="#">360656</a>    | 4105  | 745  | 3 | 100 | cerebellar degeneration-related protein 2-like (Cdr2l) alternative variant bSep08, mRNA.                        |
| <a href="#">Cds1</a>     | <a href="#">Cds1.bSep08</a>     | <a href="#">81925</a>     | 36633 | 431  | 5 | 143 | CDP-diacylglycerol synthase 1 (Cds1) alternative variant bSep08, mRNA.                                          |
| <a href="#">Cds1</a>     | <a href="#">Cds1.cSep08</a>     | <a href="#">81925</a>     | 6879  | 1210 | 4 | 112 | CDP-diacylglycerol synthase 1 (12.9 kD) (Cds1) alternative variant cSep08, mRNA.                                |
| <a href="#">Cdx2</a>     | <a href="#">Cdx2.bSep08</a>     | <a href="#">66019</a>     | 6789  | 1575 |   | 174 | caudal type homeo box 2 (Cdx2) alternative variant bSep08, mRNA.                                                |
| <a href="#">Ceacam1</a>  | <a href="#">Ceacam1.eSep08</a>  | <a href="#">81613</a>     | 1925  | 272  | 3 | 72  | CEA-related cell adhesion molecule 1 (Ceacam1) alternative variant eSep08, mRNA.                                |
| <a href="#">Ceacam1</a>  | <a href="#">Ceacam1.fSep08</a>  | <a href="#">81613</a>     | 2313  | 1244 | 2 | 91  | CEA-related cell adhesion molecule 1 (9.6 kD) (Ceacam1) alternative variant fSep08, mRNA.                       |
| <a href="#">Ceacam6</a>  | <a href="#">Ceacam6.aSep08</a>  | <a href="#">100125369</a> | 16341 | 1618 | 1 | 452 | carcinoembryonic antigen-related cell adhesion molecule 6 (50.9 kD) (Ceacam6) alternative variant aSep08, mRNA. |
| <a href="#">Ceacam16</a> | <a href="#">Ceacam16.aSep08</a> | <a href="#">292700</a>    | 9896  | 1615 |   | 538 | CEA-related cell adhesion molecule 16 (Ceacam16) mRNA.                                                          |
| <a href="#">Ceacam20</a> | <a href="#">Ceacam20.aSep08</a> | <a href="#">292701</a>    | 3744  | 288  |   | 77  | CEA-related cell adhesion molecule 20 (Ceacam20) mRNA.                                                          |
| <a href="#">Cebpz</a>    | <a href="#">Cebpz.bSep08</a>    | <a href="#">362686</a>    | 3910  | 1017 | 6 | 197 | CCAAT/enhancer binding protein zeta (22.2 kD) (Cebpz) alternative variant bSep08, mRNA.                         |

|                        |                               |                        |       |      |   |     |                                                                                                                                    |
|------------------------|-------------------------------|------------------------|-------|------|---|-----|------------------------------------------------------------------------------------------------------------------------------------|
| <a href="#">Cebpz</a>  | <a href="#">Cebpz.cSep08</a>  | <a href="#">362686</a> | 2296  | 435  | 2 | 58  | CCAAT/enhancer binding protein zeta (7.1 kD) (Cebpz) alternative variant cSep08, mRNA.                                             |
| <a href="#">Cecr2</a>  | <a href="#">Cecr2.aSep08</a>  | <a href="#">500308</a> | 3608  | 741  |   | 221 | putative protein of vertebrate origin (Cecr2) mRNA.                                                                                |
| <a href="#">Cecr5</a>  | <a href="#">Cecr5.bSep08</a>  | <a href="#">312680</a> | 39923 | 873  | 8 | 254 | putative protein of eukaryotic origin (Cecr5) alternative variant bSep08, mRNA.                                                    |
| <a href="#">Cecr5</a>  | <a href="#">Cecr5.cSep08</a>  | <a href="#">312680</a> | 22706 | 687  | 4 | 96  | putative protein of eukaryotic origin (Cecr5) alternative variant cSep08, mRNA.                                                    |
| <a href="#">Cel</a>    | <a href="#">Cel.bSep08</a>    | <a href="#">24254</a>  | 3447  | 494  | 2 | 135 | carboxyl ester lipase (Cel) alternative variant bSep08, mRNA.                                                                      |
| <a href="#">Celsr1</a> | <a href="#">Celsr1.aSep08</a> | <a href="#">300128</a> | 2479  | 2260 |   | 69  | cadherin, EGF LAG seven-pass G-type receptor 1 (flamingo homolog, Drosophila) (Celsr1) mRNA.                                       |
| <a href="#">Celsr2</a> | <a href="#">Celsr2.aSep08</a> | <a href="#">83465</a>  | 3687  | 1916 | 7 | 597 | cadherin, EGF LAG seven-pass G-type receptor 2 (flamingo homolog, Drosophila) (Celsr2) alternative variant aSep08, mRNA.           |
| <a href="#">Celsr2</a> | <a href="#">Celsr2.bSep08</a> | <a href="#">83465</a>  | 5156  | 1785 | 8 | 554 | cadherin, EGF LAG seven-pass G-type receptor 2 (flamingo homolog, Drosophila) (Celsr2) alternative variant bSep08, mRNA.           |
| <a href="#">Celsr2</a> | <a href="#">Celsr2.cSep08</a> | <a href="#">83465</a>  | 1762  | 1103 | 3 | 213 | cadherin, EGF LAG seven-pass G-type receptor 2 (flamingo homolog, Drosophila) (22.5 kD) (Celsr2) alternative variant cSep08, mRNA. |
| <a href="#">Celsr2</a> | <a href="#">Celsr2.dSep08</a> | <a href="#">83465</a>  | 1402  | 1191 | 1 | 180 | cadherin, EGF LAG seven-pass G-type receptor 2 (flamingo homolog, Drosophila) (Celsr2) alternative variant dSep08, mRNA.           |
| <a href="#">Celsr2</a> | <a href="#">Celsr2.eSep08</a> | <a href="#">83465</a>  | 815   | 324  | 2 | 67  | cadherin, EGF LAG seven-pass G-type receptor 2 (flamingo homolog, Drosophila) (Celsr2) alternative variant eSep08, mRNA.           |
| <a href="#">Celsr3</a> | <a href="#">Celsr3.bSep08</a> | <a href="#">83466</a>  | 3955  | 2264 | 2 | 204 | cadherin, EGF LAG seven-pass G-type receptor 3 (flamingo homolog, Drosophila) (Celsr3) alternative variant bSep08, mRNA.           |
| <a href="#">Celsr3</a> | <a href="#">Celsr3.cSep08</a> | <a href="#">83466</a>  | 934   | 638  | 2 | 152 | cadherin, EGF LAG seven-pass G-type receptor 3 (flamingo homolog, Drosophila) (15.7 kD) (Celsr3) alternative variant cSep08, mRNA. |
| <a href="#">Cenpa</a>  | <a href="#">Cenpa.bSep08</a>  | <a href="#">298850</a> | 7797  | 1865 | 3 | 159 | centromere protein A (17.8 kD) (Cenpa) alternative variant bSep08, mRNA.                                                           |
| <a href="#">Cenpa</a>  | <a href="#">Cenpa.cSep08</a>  | <a href="#">298850</a> | 6793  | 1761 | 2 | 125 | centromere protein A (Cenpa) alternative variant cSep08, mRNA.                                                                     |
| <a href="#">Cenpc1</a> | <a href="#">Cenpc1.bSep08</a> | <a href="#">305270</a> | 1680  | 595  | 2 | 29  | centromere protein C 1 (3.6 kD) (Cenpc1) alternative variant bSep08, mRNA.                                                         |
| <a href="#">Cenpe</a>  | <a href="#">Cenpe.aSep08</a>  | <a href="#">362044</a> | 19132 | 1833 |   | 400 | centromere protein E (45.9 kD) (Cenpe) mRNA.                                                                                       |
| <a href="#">Cenpf</a>  | <a href="#">Cenpf.aSep08</a>  | <a href="#">257649</a> | 10930 | 3422 |   | 559 | centromere protein F (62.4 kD) (Cenpf) mRNA.                                                                                       |
| <a href="#">Cenpi</a>  | <a href="#">Cenpi.bSep08</a>  | <a href="#">25448</a>  | 17633 | 890  | 5 | 209 | centromere protein I (Cenpi) alternative variant bSep08, mRNA.                                                                     |
| <a href="#">Cenpj</a>  | <a href="#">Cenpj.bSep08</a>  | <a href="#">305909</a> | 51327 | 2056 | 9 | 631 | centromere protein J (Cenpj) alternative variant bSep08, mRNA.                                                                     |
| <a href="#">Cenpj</a>  | <a href="#">Cenpj.cSep08</a>  | <a href="#">305909</a> | 6269  | 1086 | 5 | 138 | centromere protein J CRA b (15.9 kD) (Cenpj) alternative variant cSep08, mRNA.                                                     |

|                        |                               |                        |       |      |    |     |                                                                                   |
|------------------------|-------------------------------|------------------------|-------|------|----|-----|-----------------------------------------------------------------------------------|
| <a href="#">Cenpj</a>  | <a href="#">Cenpj.dSep08</a>  | <a href="#">305909</a> | 3019  | 401  | 2  | 79  | centromere protein J (Cenpj) alternative variant dSep08, mRNA.                    |
| <a href="#">Cenpj</a>  | <a href="#">Cenpj.eSep08</a>  | <a href="#">305909</a> | 1008  | 437  | 2  | 36  | putative protein (Cenpj) alternative variant eSep08, mRNA.                        |
| <a href="#">Cenpk</a>  | <a href="#">Cenpk.bSep08</a>  | <a href="#">294712</a> | 25215 | 956  | 10 | 286 | centromere protein K (Cenpk) alternative variant bSep08, mRNA.                    |
| <a href="#">Cenpk</a>  | <a href="#">Cenpk.cSep08</a>  | <a href="#">294712</a> | 16852 | 571  | 7  | 103 | centromere protein K (12.2 kD) (Cenpk) alternative variant cSep08, mRNA.          |
| <a href="#">Cenpl</a>  | <a href="#">Cenpl.bSep08</a>  | <a href="#">289150</a> | 14865 | 1625 | 5  | 236 | centromere protein L (26.9 kD) (Cenpl) alternative variant bSep08, complete mRNA. |
| <a href="#">Cenpl</a>  | <a href="#">Cenpl.cSep08</a>  | <a href="#">289150</a> | 5584  | 721  | 2  | 179 | centromere protein L (Cenpl) alternative variant cSep08, mRNA.                    |
| <a href="#">Cenpl</a>  | <a href="#">Cenpl.dSep08</a>  | <a href="#">289150</a> | 6521  | 789  | 3  | 124 | centromere protein L (Cenpl) alternative variant dSep08, mRNA.                    |
| <a href="#">Cenpm</a>  | <a href="#">Cenpm.bSep08</a>  | <a href="#">315164</a> | 6534  | 923  | 2  | 83  | centromere protein M (9.1 kD) (Cenpm) alternative variant bSep08, mRNA.           |
| <a href="#">Cenpn</a>  | <a href="#">Cenpn.bSep08</a>  | <a href="#">361416</a> | 9219  | 978  | 7  | 251 | centromere protein N (Cenpn) alternative variant bSep08, mRNA.                    |
| <a href="#">Cenpn</a>  | <a href="#">Cenpn.cSep08</a>  | <a href="#">361416</a> | 12651 | 773  | 7  | 197 | centromere protein N (Cenpn) alternative variant cSep08, mRNA.                    |
| <a href="#">Cenpn</a>  | <a href="#">Cenpn.dSep08</a>  | <a href="#">361416</a> | 15968 | 733  | 7  | 191 | centromere protein N (Cenpn) alternative variant dSep08, mRNA.                    |
| <a href="#">Cenpn</a>  | <a href="#">Cenpn.eSep08</a>  | <a href="#">361416</a> | 12737 | 639  | 6  | 116 | centromere protein N (Cenpn) alternative variant eSep08, mRNA.                    |
| <a href="#">Cenpn</a>  | <a href="#">Cenpn.fSep08</a>  | <a href="#">361416</a> | 7831  | 716  | 4  | 90  | centromere protein N (10.6 kD) (Cenpn) alternative variant fSep08, mRNA.          |
| <a href="#">Cenpq</a>  | <a href="#">Cenpq.aSep08</a>  | <a href="#">363198</a> | 14804 | 1145 | 3  | 224 | centromere protein Q (Cenpq) alternative variant aSep08, mRNA.                    |
| <a href="#">Cenpq</a>  | <a href="#">Cenpq.bSep08</a>  | <a href="#">363198</a> | 10814 | 787  | 2  | 202 | centromere protein Q (23.2 kD) (Cenpq) alternative variant bSep08, mRNA.          |
| <a href="#">Cenpt</a>  | <a href="#">Cenpt.bSep08</a>  | <a href="#">307805</a> | 591   | 432  | 2  | 143 | centromere protein T (Cenpt) alternative variant bSep08, mRNA.                    |
| <a href="#">Cenpt</a>  | <a href="#">Cenpt.cSep08</a>  | <a href="#">307805</a> | 888   | 596  | 3  | 65  | centromere protein T (Cenpt) alternative variant cSep08, mRNA.                    |
| <a href="#">Centa1</a> | <a href="#">Centa1.aSep08</a> | <a href="#">171097</a> | 52627 | 2360 | 11 | 374 | centaurin, alpha 1 (43.4 kD) (Centa1) alternative variant aSep08, mRNA.           |
| <a href="#">Centa1</a> | <a href="#">Centa1.bSep08</a> | <a href="#">171097</a> | 6654  | 739  | 6  | 157 | centaurin, alpha 1 (Centa1) alternative variant bSep08, mRNA.                     |
| <a href="#">Centa1</a> | <a href="#">Centa1.cSep08</a> | <a href="#">171097</a> | 1102  | 579  | 2  | 80  | centaurin, alpha 1 (Centa1) alternative variant cSep08, mRNA.                     |
| <a href="#">Centb1</a> | <a href="#">Centb1.aSep08</a> | <a href="#">287443</a> | 10385 | 1825 | 13 | 337 | centaurin beta 1 CRA a (Centb1) alternative variant aSep08, mRNA.                 |
| <a href="#">Centb1</a> | <a href="#">Centb1.bSep08</a> | <a href="#">287443</a> | 5063  | 1006 | 8  | 335 | centaurin beta 1 CRA a (Centb1) alternative variant bSep08, mRNA.                 |
| <a href="#">Centb1</a> | <a href="#">Centb1.cSep08</a> | <a href="#">287443</a> | 5490  | 839  | 7  | 218 | centaurin beta 1 CRA a (Centb1) alternative variant cSep08, mRNA.                 |
| <a href="#">Centb1</a> | <a href="#">Centb1.eSep08</a> | <a href="#">287443</a> | 4239  | 734  | 5  | 117 | centaurin beta (13.3 kD) (Centb1) alternative variant eSep08, mRNA.               |

|                        |                               |                        |        |      |    |     |                                                                            |
|------------------------|-------------------------------|------------------------|--------|------|----|-----|----------------------------------------------------------------------------|
| <a href="#">Centb2</a> | <a href="#">Centb2.bSep08</a> | <a href="#">619382</a> | 16916  | 951  | 6  | 190 | centaurin, beta 2 (22.3 kD) (Centb2) alternative variant bSep08, mRNA.     |
| <a href="#">Centb5</a> | <a href="#">Centb5.bSep08</a> | <a href="#">313772</a> | 1089   | 905  | 3  | 129 | centaurin, beta 5 (Centb5) alternative variant bSep08, mRNA.               |
| <a href="#">Centb5</a> | <a href="#">Centb5.cSep08</a> | <a href="#">313772</a> | 5876   | 397  | 5  | 105 | centaurin, beta 5 (Centb5) alternative variant cSep08, mRNA.               |
| <a href="#">Centb5</a> | <a href="#">Centb5.dSep08</a> | <a href="#">313772</a> | 2666   | 327  | 2  | 97  | centaurin, beta 5 (Centb5) alternative variant dSep08, mRNA.               |
| <a href="#">Centd1</a> | <a href="#">Centd1.bSep08</a> | <a href="#">305367</a> | 45011  | 879  | 10 | 293 | centaurin, delta 1 (Centd1) alternative variant bSep08, mRNA.              |
| <a href="#">Centd1</a> | <a href="#">Centd1.cSep08</a> | <a href="#">305367</a> | 5626   | 672  | 4  | 175 | centaurin, delta 1 (Centd1) alternative variant cSep08, mRNA.              |
| <a href="#">Centd2</a> | <a href="#">Centd2.aSep08</a> | <a href="#">361617</a> | 65464  | 5486 | 32 | 943 | centaurin, delta 2 (103.7 kD) (Centd2) alternative variant aSep08, mRNA.   |
| <a href="#">Centd2</a> | <a href="#">Centd2.bSep08</a> | <a href="#">361617</a> | 12516  | 2183 | 16 | 538 | centaurin, delta 2 (Centd2) alternative variant bSep08, mRNA.              |
| <a href="#">Centd2</a> | <a href="#">Centd2.cSep08</a> | <a href="#">361617</a> | 7835   | 1368 | 7  | 391 | centaurin, delta 2 (Centd2) alternative variant cSep08, mRNA.              |
| <a href="#">Centd2</a> | <a href="#">Centd2.dSep08</a> | <a href="#">361617</a> | 10306  | 1005 | 10 | 335 | centaurin, delta 2 (Centd2) alternative variant dSep08, mRNA.              |
| <a href="#">Centd2</a> | <a href="#">Centd2.eSep08</a> | <a href="#">361617</a> | 4113   | 396  | 4  | 132 | centaurin, delta 2 (Centd2) alternative variant eSep08, mRNA.              |
| <a href="#">Centd2</a> | <a href="#">Centd2.iSep08</a> | <a href="#">361617</a> | 6661   | 409  | 2  | 70  | centaurin, delta 2 (Centd2) alternative variant iSep08, mRNA.              |
| <a href="#">Centd3</a> | <a href="#">Centd3.aSep08</a> | <a href="#">361314</a> | 16443  | 1942 | 1  | 516 | centaurin, delta 3 (Centd3) alternative variant aSep08, mRNA.              |
| <a href="#">Centd3</a> | <a href="#">Centd3.bSep08</a> | <a href="#">361314</a> | 1689   | 921  | 4  | 239 | centaurin, delta 3 (Centd3) alternative variant bSep08, mRNA.              |
| <a href="#">Centd3</a> | <a href="#">Centd3.cSep08</a> | <a href="#">361314</a> | 1960   | 1526 | 2  | 160 | centaurin, delta 3 (17.6 kD) (Centd3) alternative variant cSep08, mRNA.    |
| <a href="#">Centg1</a> | <a href="#">Centg1.aSep08</a> | <a href="#">65218</a>  | 2058   | 401  |    | 133 | centaurin, gamma 1 (Centg1) mRNA.                                          |
| <a href="#">Centg2</a> | <a href="#">Centg2.bSep08</a> | <a href="#">316611</a> | 180519 | 1442 | 11 | 401 | centaurin, gamma 2 (Centg2) alternative variant bSep08, mRNA.              |
| <a href="#">Centg2</a> | <a href="#">Centg2.cSep08</a> | <a href="#">316611</a> | 98909  | 821  | 5  | 273 | centaurin, gamma 2 (Centg2) alternative variant cSep08, mRNA.              |
| <a href="#">Centg3</a> | <a href="#">Centg3.aSep08</a> | <a href="#">362300</a> | 25655  | 1836 | 14 | 612 | centaurin gamma 3 CRA b (Centg3) alternative variant aSep08, mRNA.         |
| <a href="#">Centg3</a> | <a href="#">Centg3.cSep08</a> | <a href="#">362300</a> | 6289   | 1631 | 6  | 179 | centaurin gamma 3 (Centg3) alternative variant cSep08, mRNA.               |
| <a href="#">Cep57</a>  | <a href="#">Cep57.bSep08</a>  | <a href="#">315423</a> | 9005   | 706  | 6  | 160 | centrosomal protein 57 (Cep57) alternative variant bSep08, mRNA.           |
| <a href="#">Cep57</a>  | <a href="#">Cep57.cSep08</a>  | <a href="#">315423</a> | 8396   | 741  | 7  | 115 | centrosomal protein 57 (Cep57) alternative variant cSep08, mRNA.           |
| <a href="#">Cep57</a>  | <a href="#">Cep57.dSep08</a>  | <a href="#">315423</a> | 2438   | 1416 | 2  | 93  | centrosomal protein 57 (10.7 kD) (Cep57) alternative variant dSep08, mRNA. |
| <a href="#">Cep57</a>  | <a href="#">Cep57.eSep08</a>  | <a href="#">315423</a> | 1503   | 816  | 2  | 71  | centrosomal protein 57 (Cep57) alternative variant eSep08, mRNA.           |

|                        |                               |                        |       |      |   |     |                                                                              |
|------------------------|-------------------------------|------------------------|-------|------|---|-----|------------------------------------------------------------------------------|
| <a href="#">Cep57</a>  | <a href="#">Cep57.fSep08</a>  | <a href="#">315423</a> | 2660  | 193  | 2 | 36  | centrosomal protein 57 (Cep57) alternative variant fSep08, mRNA.             |
| <a href="#">Cep68</a>  | <a href="#">Cep68.aSep08</a>  | <a href="#">289822</a> | 10103 | 871  | 5 | 228 | centrosomal protein 68 (Cep68) alternative variant aSep08, mRNA.             |
| <a href="#">Cep68</a>  | <a href="#">Cep68.bSep08</a>  | <a href="#">289822</a> | 1298  | 676  | 2 | 211 | centrosomal protein 68 (Cep68) alternative variant bSep08, mRNA.             |
| <a href="#">Cep68</a>  | <a href="#">Cep68.dSep08</a>  | <a href="#">289822</a> | 1504  | 566  | 2 | 44  | centrosomal protein 68 (Cep68) alternative variant dSep08, mRNA.             |
| <a href="#">Cep70</a>  | <a href="#">Cep70.bSep08</a>  | <a href="#">367153</a> | 17795 | 746  | 5 | 141 | centrosomal protein 70 (Cep70) alternative variant bSep08, mRNA.             |
| <a href="#">Cep70</a>  | <a href="#">Cep70.cSep08</a>  | <a href="#">367153</a> | 4197  | 373  | 4 | 105 | centrosomal protein 70 (Cep70) alternative variant cSep08, mRNA.             |
| <a href="#">Cep70</a>  | <a href="#">Cep70.eSep08</a>  | <a href="#">367153</a> | 14139 | 749  | 6 | 51  | centrosomal protein 70 (5.5 kD) (Cep70) alternative variant eSep08, mRNA.    |
| <a href="#">Cep72</a>  | <a href="#">Cep72.aSep08</a>  | <a href="#">308064</a> | 29911 | 2137 | 7 | 622 | centrosomal protein 72 (Cep72) alternative variant aSep08, complete mRNA.    |
| <a href="#">Cep72</a>  | <a href="#">Cep72.bSep08</a>  | <a href="#">308064</a> | 12225 | 2454 | 7 | 376 | centrosomal protein 72 (Cep72) alternative variant bSep08, mRNA.             |
| <a href="#">Cep76</a>  | <a href="#">Cep76.aSep08</a>  | <a href="#">291540</a> | 21270 | 1090 | 8 | 334 | centrosomal protein 76 (Cep76) alternative variant aSep08, mRNA.             |
| <a href="#">Cep76</a>  | <a href="#">Cep76.bSep08</a>  | <a href="#">291540</a> | 16883 | 1232 | 8 | 244 | centrosomal protein 76 (27.8 kD) (Cep76) alternative variant bSep08, mRNA.   |
| <a href="#">Cep78</a>  | <a href="#">Cep78.bSep08</a>  | <a href="#">60347</a>  | 10635 | 1342 | 5 | 181 | centrosomal protein 78 (Cep78) alternative variant bSep08, mRNA.             |
| <a href="#">Cep110</a> | <a href="#">Cep110.bSep08</a> | <a href="#">311886</a> | 8694  | 788  | 5 | 262 | centrosomal protein 110 (Cep110) alternative variant bSep08, mRNA.           |
| <a href="#">Cep110</a> | <a href="#">Cep110.cSep08</a> | <a href="#">311886</a> | 4816  | 713  | 5 | 237 | centrosomal protein 110 (Cep110) alternative variant cSep08, mRNA.           |
| <a href="#">Cep110</a> | <a href="#">Cep110.dSep08</a> | <a href="#">311886</a> | 4934  | 502  | 4 | 167 | centrosomal protein 110 (Cep110) alternative variant dSep08, mRNA.           |
| <a href="#">Cep110</a> | <a href="#">Cep110.eSep08</a> | <a href="#">311886</a> | 1423  | 460  | 3 | 109 | centrosomal protein 110 (Cep110) alternative variant eSep08, mRNA.           |
| <a href="#">Cep135</a> | <a href="#">Cep135.aSep08</a> | <a href="#">305288</a> | 20267 | 2070 |   | 298 | centrosomal protein 135 (Cep135) alternative variant aSep08, mRNA.           |
| <a href="#">Cep152</a> | <a href="#">Cep152.aSep08</a> | <a href="#">311391</a> | 48731 | 1800 |   | 532 | centrosomal protein 152 (Cep152) alternative variant aSep08, mRNA.           |
| <a href="#">Cep152</a> | <a href="#">Cep152.bSep08</a> | <a href="#">311391</a> | 12838 | 558  |   | 186 | centrosomal protein 152 (Cep152) alternative variant bSep08, mRNA.           |
| <a href="#">Cep164</a> | <a href="#">Cep164.aSep08</a> | <a href="#">363055</a> | 34029 | 752  | 1 | 193 | centrosomal protein 164 (Cep164) alternative variant aSep08, mRNA.           |
| <a href="#">Cep164</a> | <a href="#">Cep164.bSep08</a> | <a href="#">363055</a> | 26042 | 631  | 1 | 117 | centrosomal protein 164 (Cep164) alternative variant bSep08, mRNA.           |
| <a href="#">Cep250</a> | <a href="#">Cep250.aSep08</a> | <a href="#">311573</a> | 4623  | 1478 | 3 | 227 | centrosomal protein 250 (25.3 kD) (Cep250) alternative variant aSep08, mRNA. |
| <a href="#">Cep250</a> | <a href="#">Cep250.bSep08</a> | <a href="#">311573</a> | 1168  | 703  | 1 | 173 | centrosomal protein 250 (Cep250) alternative variant bSep08, mRNA.           |
| <a href="#">Cep350</a> | <a href="#">Cep350.aSep08</a> | <a href="#">246304</a> | 38018 | 967  |   | 322 | centrosomal protein 350 (Cep350) mRNA.                                       |

|                        |                               |                        |       |      |   |     |                                                                                                  |
|------------------------|-------------------------------|------------------------|-------|------|---|-----|--------------------------------------------------------------------------------------------------|
| <a href="#">Cept1</a>  | <a href="#">Cept1.bSep08</a>  | <a href="#">310773</a> | 39245 | 1314 | 4 | 390 | choline/ethanolamine phosphotransferase 1 (Cept1) alternative variant bSep08, mRNA.              |
| <a href="#">Cercam</a> | <a href="#">Cercam.bSep08</a> | <a href="#">296616</a> | 2057  | 938  | 3 | 115 | cerebral endothelial cell adhesion molecule (11.9 kD) (Cercam) alternative variant bSep08, mRNA. |
| <a href="#">Cercam</a> | <a href="#">Cercam.cSep08</a> | <a href="#">296616</a> | 3526  | 427  | 3 | 62  | cerebral endothelial cell adhesion molecule (Cercam) alternative variant cSep08, mRNA.           |
| <a href="#">Ces3</a>   | <a href="#">Ces3.bSep08</a>   | <a href="#">113902</a> | 13986 | 695  | 4 | 179 | carboxylesterase 3 (Ces3) alternative variant bSep08, mRNA.                                      |
| <a href="#">Ces5</a>   | <a href="#">Ces5.aSep08</a>   | <a href="#">192257</a> | 2048  | 586  |   | 180 | carboxylesterase 5 (21.3 kD) (Ces5) mRNA.                                                        |
| <a href="#">Cetn2</a>  | <a href="#">Cetn2.aSep08</a>  | <a href="#">84593</a>  | 4094  | 558  | 3 | 185 | centrin 2 (Cetn2) alternative variant aSep08, mRNA.                                              |
| <a href="#">Cetn2</a>  | <a href="#">Cetn2.bSep08</a>  | <a href="#">84593</a>  | 5131  | 1236 | 4 | 172 | centrin 2 (19.8 kD) (Cetn2) alternative variant bSep08, complete mRNA.                           |
| <a href="#">Cetn2</a>  | <a href="#">Cetn2.cSep08</a>  | <a href="#">84593</a>  | 3956  | 438  | 3 | 135 | centrin 2 (Cetn2) alternative variant cSep08, mRNA.                                              |
| <a href="#">Cetn2</a>  | <a href="#">Cetn2.dSep08</a>  | <a href="#">84593</a>  | 3894  | 494  | 3 | 126 | centrin 2 (Cetn2) alternative variant dSep08, mRNA.                                              |
| <a href="#">Cetn2</a>  | <a href="#">Cetn2.eSep08</a>  | <a href="#">84593</a>  | 2888  | 685  | 2 | 99  | centrin 2 (11.3 kD) (Cetn2) alternative variant eSep08, mRNA.                                    |
| <a href="#">Cetn3</a>  | <a href="#">Cetn3.aSep08</a>  | <a href="#">170895</a> | 11501 | 870  | 3 | 174 | centrin 3 (Cetn3) alternative variant aSep08, mRNA.                                              |
| <a href="#">Cetn3</a>  | <a href="#">Cetn3.bSep08</a>  | <a href="#">170895</a> | 12275 | 799  | 3 | 167 | centrin 3 (19.5 kD) (Cetn3) alternative variant bSep08, mRNA.                                    |
| <a href="#">Cetn3</a>  | <a href="#">Cetn3.cSep08</a>  | <a href="#">170895</a> | 9691  | 820  | 2 | 160 | centrin 3 (18.8 kD) (Cetn3) alternative variant cSep08, mRNA.                                    |
| <a href="#">Cetn4</a>  | <a href="#">Cetn4.aSep08</a>  | <a href="#">688611</a> | 1537  | 964  |   | 169 | centrin 4 (Cetn4) mRNA.                                                                          |
| <a href="#">Cfdp1</a>  | <a href="#">Cfdp1.bSep08</a>  | <a href="#">292027</a> | 76976 | 890  | 6 | 216 | craniofacial development protein 1 (Cfdp1) alternative variant bSep08, mRNA.                     |
| <a href="#">Cfdp1</a>  | <a href="#">Cfdp1.cSep08</a>  | <a href="#">292027</a> | 79621 | 821  | 5 | 201 | craniofacial development protein 1 (Cfdp1) alternative variant cSep08, mRNA.                     |
| <a href="#">Cfdp1</a>  | <a href="#">Cfdp1.dSep08</a>  | <a href="#">292027</a> | 2407  | 367  | 2 | 48  | craniofacial development protein 1 (Cfdp1) alternative variant dSep08, mRNA.                     |
| <a href="#">Cfh</a>    | <a href="#">Cfh.bSep08</a>    | <a href="#">155012</a> | 37239 | 418  |   | 138 | complement component factor H (Cfh) alternative variant bSep08, mRNA.                            |
| <a href="#">Cfi</a>    | <a href="#">Cfi.bSep08</a>    | <a href="#">79126</a>  | 30002 | 957  |   | 312 | complement factor I (Cfi) alternative variant bSep08, mRNA.                                      |
| <a href="#">Cfi</a>    | <a href="#">Cfi.cSep08</a>    | <a href="#">79126</a>  | 10448 | 733  |   | 243 | complement factor I (Cfi) alternative variant cSep08, mRNA.                                      |
| <a href="#">Cfi</a>    | <a href="#">Cfi.dSep08</a>    | <a href="#">79126</a>  | 8006  | 821  |   | 89  | complement factor I (Cfi) alternative variant dSep08, mRNA.                                      |
| <a href="#">Cfi</a>    | <a href="#">Cfi.eSep08</a>    | <a href="#">79126</a>  | 763   | 455  |   | 86  | complement factor I (Cfi) alternative variant eSep08, mRNA.                                      |
| <a href="#">Cfl1</a>   | <a href="#">Cfl1.bSep08</a>   | <a href="#">29271</a>  | 2861  | 628  | 3 | 170 | cofilin 1, non-muscle (18.9 kD) (Cfl1) alternative variant bSep08, mRNA.                         |
| <a href="#">Cfl2</a>   | <a href="#">Cfl2.bSep08</a>   | <a href="#">366624</a> | 826   | 741  | 2 | 94  | cofilin 2, muscle (Cfl2) alternative variant bSep08, mRNA.                                       |
| <a href="#">Cfl2</a>   | <a href="#">Cfl2.cSep08</a>   | <a href="#">366624</a> | 2251  | 875  | 4 | 21  | cofilin 2, muscle (Cfl2) alternative variant cSep08, complete mRNA.                              |
| <a href="#">Cflar</a>  | <a href="#">Cflar.cSep08</a>  | <a href="#">117279</a> | 2652  | 622  | 2 | 32  | CASP8 and FADD-like apoptosis regulator (3.3 kD) (Cflar) alternative variant cSep08, mRNA.       |

|                        |                               |                        |       |      |   |     |                                                                                                 |
|------------------------|-------------------------------|------------------------|-------|------|---|-----|-------------------------------------------------------------------------------------------------|
| <a href="#">Cflar</a>  | <a href="#">Cflar.dSep08</a>  | <a href="#">117279</a> | 18186 | 529  | 3 | 58  | CASP8 and FADD-like apoptosis regulator (Cflar) alternative variant dSep08, mRNA.               |
| <a href="#">Cfp</a>    | <a href="#">Cfp.cSep08</a>    | <a href="#">299314</a> | 1987  | 482  | 2 | 40  | complement factor properdin (4.4 kD) (Cfp) alternative variant cSep08, mRNA.                    |
| <a href="#">Cga</a>    | <a href="#">Cga.bSep08</a>    | <a href="#">116700</a> | 12132 | 796  | 1 | 120 | glycoprotein hormones, alpha subunit (13.5 kD) (Cga) alternative variant bSep08, complete mRNA. |
| <a href="#">Cga</a>    | <a href="#">Cga.cSep08</a>    | <a href="#">116700</a> | 11897 | 703  | 1 | 117 | glycoprotein hormones, alpha subunit (Cga) alternative variant cSep08, mRNA.                    |
| <a href="#">Cgi-96</a> | <a href="#">Cgi-96.bSep08</a> | <a href="#">362967</a> | 5327  | 381  |   | 125 | CGI-96 protein (Cgi-96) alternative variant bSep08, mRNA.                                       |
| <a href="#">Cgm4</a>   | <a href="#">Cgm4.bSep08</a>   | <a href="#">24257</a>  | 1948  | 446  | 2 | 123 | carcinoembryonic antigen gene family 4 (Cgm4) alternative variant bSep08, mRNA.                 |
| <a href="#">Cgn</a>    | <a href="#">Cgn.aSep08</a>    | <a href="#">310655</a> | 7596  | 887  |   | 295 | cingulin (Cgn) mRNA.                                                                            |
| <a href="#">Cgnl1</a>  | <a href="#">Cgnl1.bSep08</a>  | <a href="#">315795</a> | 48153 | 1564 | 2 | 491 | cingulin-like 1 (Cgnl1) alternative variant bSep08, mRNA.                                       |
| <a href="#">Cgnl1</a>  | <a href="#">Cgnl1.cSep08</a>  | <a href="#">315795</a> | 4366  | 1532 | 5 | 203 | cingulin-like 1 (Cgnl1) alternative variant cSep08, mRNA.                                       |
| <a href="#">Cgrf1</a>  | <a href="#">Cgrf1.bSep08</a>  | <a href="#">116679</a> | 11128 | 1043 | 5 | 290 | cell growth regulator with ring finger domain 1 CRA d (Cgrf1) alternative variant bSep08, mRNA. |
| <a href="#">Cgrf1</a>  | <a href="#">Cgrf1.cSep08</a>  | <a href="#">116679</a> | 8858  | 451  | 2 | 147 | cell growth regulator with ring finger domain 1 CRA c (Cgrf1) alternative variant cSep08, mRNA. |
| <a href="#">Cgrf1</a>  | <a href="#">Cgrf1.dSep08</a>  | <a href="#">116679</a> | 19763 | 783  | 5 | 135 | cell growth regulator with ring finger domain 1 CRA d (Cgrf1) alternative variant dSep08, mRNA. |
| <a href="#">CH.0</a>   | <a href="#">CH.0.aSep08</a>   |                        | 19827 | 1392 | 7 | 228 | calponin-like actin-binding (CH.0) alternative variant aSep08, mRNA.                            |
| <a href="#">CH.0</a>   | <a href="#">CH.0.bSep08</a>   |                        | 12202 | 397  | 4 | 132 | calponin-like actin-binding (CH.0) alternative variant bSep08, mRNA.                            |
| <a href="#">CH.1</a>   | <a href="#">CH.1.aSep08</a>   |                        | 12261 | 683  |   | 227 | microtubule-actin crosslinking factor 1 (CH.1) mRNA.                                            |
| <a href="#">CH.2</a>   | <a href="#">CH.2.aSep08</a>   |                        | 12439 | 759  |   | 252 | calponin-like actin-binding (CH.2) mRNA.                                                        |
| <a href="#">CH.3</a>   | <a href="#">CH.3.aSep08</a>   |                        | 3000  | 518  |   | 172 | calponin-like actin-binding (CH.3) mRNA.                                                        |
| <a href="#">chabor</a> | <a href="#">chabor.aSep08</a> |                        | 14368 | 977  |   | 148 | putative protein (15.9 kD) (chabor) mRNA.                                                       |
| <a href="#">Chac1</a>  | <a href="#">Chac1.aSep08</a>  | <a href="#">362196</a> | 3222  | 1580 |   | 222 | ChaC, cation transport regulator-like 1 (E. coli) (24.5 kD) (Chac1) mRNA.                       |
| <a href="#">Chac2</a>  | <a href="#">Chac2.bSep08</a>  | <a href="#">360994</a> | 6745  | 395  | 1 | 131 | ChaC, cation transport regulator homolog 2 (E. coli) (Chac2) alternative variant bSep08, mRNA.  |
| <a href="#">chachy</a> | <a href="#">chachy.aSep08</a> |                        | 7681  | 693  |   | 128 | adaptor-related protein complex (chachy) mRNA.                                                  |
| <a href="#">Chad</a>   | <a href="#">Chad.bSep08</a>   | <a href="#">29195</a>  | 1239  | 1003 | 1 | 133 | chondroadherin (Chad) alternative variant bSep08, mRNA.                                         |
| <a href="#">chadar</a> | <a href="#">chadar.aSep08</a> |                        | 19291 | 550  |   | 130 | putative cytoplasmic protein (14.7 kD) (chadar) mRNA.                                           |
| <a href="#">chadoy</a> | <a href="#">chadoy.aSep08</a> |                        | 30655 | 1413 |   | 404 | protein 130kDa CRA b (44.1 kD) (chadoy) mRNA.                                                   |
| <a href="#">Chaf1a</a> | <a href="#">Chaf1a.aSep08</a> | <a href="#">363333</a> | 13495 | 1147 |   | 345 | chromatin assembly factor 1, subunit A (p150) (Chaf1a) mRNA.                                    |
| <a href="#">Chaf1b</a> | <a href="#">Chaf1b.bSep08</a> | <a href="#">288242</a> | 20730 | 1793 | 7 | 515 | chromatin assembly factor 1, subunit B (p60) (Chaf1b) alternative variant bSep08, mRNA.         |
| <a href="#">Chaf1b</a> | <a href="#">Chaf1b.cSep08</a> | <a href="#">288242</a> | 6666  | 933  | 6 | 303 | chromatin assembly factor 1, subunit B (p60) (Chaf1b) alternative variant cSep08, mRNA.         |
| <a href="#">chaflu</a> | <a href="#">chaflu.aSep08</a> |                        | 13679 | 758  |   | 252 | CRA a (chaflu) mRNA.                                                                            |
| <a href="#">chafly</a> | <a href="#">chafly.aSep08</a> |                        | 6252  | 394  |   | 130 | laminin alpha 2 CRA a (chafly) mRNA.                                                            |
| <a href="#">chagar</a> | <a href="#">chagar.aSep08</a> |                        | 3356  | 285  |   | 39  | putative protein (4.3 kD) (chagar) mRNA.                                                        |



|                          |                                 |  |       |      |   |     |                                                                      |
|--------------------------|---------------------------------|--|-------|------|---|-----|----------------------------------------------------------------------|
| <a href="#">chaja</a>    | <a href="#">chaja.aSep08</a>    |  | 5907  | 638  | 4 | 42  | putative protein (chaja) alternative variant aSep08, mRNA.           |
| <a href="#">chajey</a>   | <a href="#">chajey.aSep08</a>   |  | 8151  | 2408 |   | 218 | transmembrane anterior posterior transformation 1 (chajey) mRNA.     |
| <a href="#">chakee</a>   | <a href="#">chakee.aSep08</a>   |  | 1130  | 676  | 2 | 24  | putative protein (2.8 kD) (chakee) alternative variant aSep08, mRNA. |
| <a href="#">chakler</a>  | <a href="#">chakler.aSep08</a>  |  | 17999 | 945  | 4 | 281 | CRA a (chakler) alternative variant aSep08, mRNA.                    |
| <a href="#">chakler</a>  | <a href="#">chakler.cSep08</a>  |  | 21889 | 633  | 4 | 133 | CRA b (14.0 kD) (chakler) alternative variant cSep08, mRNA.          |
| <a href="#">chalo</a>    | <a href="#">chalo.aSep08</a>    |  | 6544  | 487  |   | 119 | putative protein (chalo) mRNA.                                       |
| <a href="#">chamee</a>   | <a href="#">chamee.aSep08</a>   |  | 3271  | 1155 |   | 51  | putative protein of metazoan origin (chamee) mRNA.                   |
| <a href="#">chanoy</a>   | <a href="#">chanoy.aSep08</a>   |  | 3576  | 239  |   | 79  | kinesin family member 1A CRA b (chanoy) mRNA.                        |
| <a href="#">chapor</a>   | <a href="#">chapor.aSep08</a>   |  | 3174  | 727  |   | 82  | putative mitochondrial protein (9.7 kD) (chapor) mRNA.               |
| <a href="#">charbor</a>  | <a href="#">charbor.aSep08</a>  |  | 1007  | 249  | 2 | 69  | putative protein (charbor) alternative variant aSep08, mRNA.         |
| <a href="#">charchy</a>  | <a href="#">charchy.aSep08</a>  |  | 14212 | 700  |   | 98  | putative protein (10.1 kD) (charchy) mRNA.                           |
| <a href="#">chardoy</a>  | <a href="#">chardoy.aSep08</a>  |  | 3947  | 599  |   | 199 | myosin VIIIb (chardoy) mRNA.                                         |
| <a href="#">charflu</a>  | <a href="#">charflu.aSep08</a>  |  | 14990 | 431  |   | 53  | putative protein (charflu) mRNA.                                     |
| <a href="#">charfly</a>  | <a href="#">charfly.aSep08</a>  |  | 95566 | 479  |   | 86  | putative protein (charfly) mRNA.                                     |
| <a href="#">chargar</a>  | <a href="#">chargar.aSep08</a>  |  | 7568  | 767  | 2 | 93  | finger protein 42 (chargar) alternative variant aSep08, mRNA.        |
| <a href="#">chargar</a>  | <a href="#">chargar.bSep08</a>  |  | 7593  | 721  | 1 | 113 | finger protein 42 (chargar) alternative variant bSep08, mRNA.        |
| <a href="#">chargar</a>  | <a href="#">chargar.cSep08</a>  |  | 7669  | 717  |   | 113 | finger protein 42 (chargar) alternative variant cSep08, mRNA.        |
| <a href="#">charja</a>   | <a href="#">charja.aSep08</a>   |  | 3912  | 909  |   | 55  | putative protein (charja) mRNA.                                      |
| <a href="#">charjey</a>  | <a href="#">charjey.aSep08</a>  |  | 16942 | 401  |   | 133 | putative protein of metazoan origin (charjey) mRNA.                  |
| <a href="#">charkee</a>  | <a href="#">charkee.aSep08</a>  |  | 2552  | 637  |   | 212 | transcription factor ELYS (charkee) mRNA.                            |
| <a href="#">charkler</a> | <a href="#">charkler.aSep08</a> |  | 13291 | 309  |   | 73  | putative protein (charkler) mRNA.                                    |
| <a href="#">charlo</a>   | <a href="#">charlo.aSep08</a>   |  | 1881  | 342  |   | 37  | putative protein (4.4 kD) (charlo) mRNA.                             |
| <a href="#">charmee</a>  | <a href="#">charmee.aSep08</a>  |  | 2882  | 424  |   | 141 | putative protein (charmee) mRNA.                                     |
| <a href="#">charnoy</a>  | <a href="#">charnoy.aSep08</a>  |  | 1326  | 698  |   | 53  | cytosine deaminase like (6.0 kD) (charnoy) mRNA.                     |
| <a href="#">charoy</a>   | <a href="#">charoy.bSep08</a>   |  | 720   | 592  | 2 | 41  | putative protein (charoy) alternative variant bSep08, mRNA.          |
| <a href="#">charpor</a>  | <a href="#">charpor.aSep08</a>  |  | 5944  | 820  |   | 63  | putative protein (6.7 kD) (charpor) mRNA.                            |
| <a href="#">charroy</a>  | <a href="#">charroy.aSep08</a>  |  | 1398  | 450  |   | 49  | putative protein (charroy) mRNA.                                     |
| <a href="#">charsa</a>   | <a href="#">charsa.aSep08</a>   |  | 16244 | 477  |   | 37  | putative protein (charsa) mRNA.                                      |
| <a href="#">charshee</a> | <a href="#">charshee.aSep08</a> |  | 954   | 750  |   | 57  | putative protein (charshee) mRNA.                                    |
| <a href="#">chartu</a>   | <a href="#">chartu.aSep08</a>   |  | 4867  | 575  | 3 | 79  | putative protein (8.9 kD) (chartu) alternative variant aSep08, mRNA. |
| <a href="#">charvar</a>  | <a href="#">charvar.aSep08</a>  |  | 1286  | 405  |   | 56  | CRA b like (charvar) mRNA.                                           |
| <a href="#">charvo</a>   | <a href="#">charvo.aSep08</a>   |  | 6933  | 676  |   | 51  | putative protein (charvo) mRNA.                                      |
| <a href="#">charwer</a>  | <a href="#">charwer.bSep08</a>  |  | 5039  | 354  |   | 48  | putative protein (charwer) alternative variant bSep08, mRNA.         |

|                                |                                       |                        |       |      |   |     |                                                                                          |
|--------------------------------|---------------------------------------|------------------------|-------|------|---|-----|------------------------------------------------------------------------------------------|
| <a href="#">charwey</a>        | <a href="#">charwey.aSep08</a>        |                        | 6990  | 454  |   | 151 | guanylate cyclase 2C (charwey) mRNA.                                                     |
| <a href="#">chasa</a>          | <a href="#">chasa.aSep08</a>          |                        | 10325 | 648  |   | 77  | putative protein (chasa) mRNA.                                                           |
| <a href="#">chashee</a>        | <a href="#">chashee.aSep08</a>        |                        | 1363  | 545  |   |     |                                                                                          |
| <a href="#">chatu</a>          | <a href="#">chatu.aSep08</a>          |                        | 42751 | 458  |   | 117 | histone deacetylase 9 CRA a (chatu) mRNA.                                                |
| <a href="#">Chat_predicted</a> | <a href="#">Chat_predicted.aSep08</a> | <a href="#">290567</a> | 17862 | 910  |   | 303 | choline acetyltransferase (predicted) (Chat_predicted) alternative variant aSep08, mRNA. |
| <a href="#">Chat_predicted</a> | <a href="#">Chat_predicted.bSep08</a> | <a href="#">290567</a> | 6731  | 902  |   | 300 | choline acetyltransferase (predicted) (Chat_predicted) alternative variant bSep08, mRNA. |
| <a href="#">Chat_predicted</a> | <a href="#">Chat_predicted.cSep08</a> | <a href="#">290567</a> | 2602  | 350  |   | 116 | choline acetyltransferase (predicted) (Chat_predicted) alternative variant cSep08, mRNA. |
| <a href="#">chavar</a>         | <a href="#">chavar.aSep08</a>         |                        | 2486  | 1071 |   | 78  | putative protein (chavar) mRNA.                                                          |
| <a href="#">chavo</a>          | <a href="#">chavo.aSep08</a>          |                        | 41763 | 801  |   | 226 | centrosome spindle pole associated protein 1 (chavo) mRNA.                               |
| <a href="#">chawbor</a>        | <a href="#">chawbor.aSep08</a>        |                        | 6335  | 1002 | 2 | 55  | ring finger protein 8 (6.6 kD) (chawbor) alternative variant aSep08, mRNA.               |
| <a href="#">chawchy</a>        | <a href="#">chawchy.aSep08</a>        |                        | 5044  | 523  |   | 38  | putative protein (chawchy) mRNA.                                                         |
| <a href="#">chawdoy</a>        | <a href="#">chawdoy.aSep08</a>        |                        | 22144 | 513  |   | 134 | myosin VIIb (chawdoy) mRNA.                                                              |
| <a href="#">chawer</a>         | <a href="#">chawer.aSep08</a>         |                        | 2041  | 418  |   | 138 | RNA binding motif protein 33 like (chawer) mRNA.                                         |
| <a href="#">chawey</a>         | <a href="#">chawey.aSep08</a>         |                        | 1352  | 367  | 1 | 120 | putative protein (chawey) alternative variant aSep08, mRNA.                              |
| <a href="#">chawey</a>         | <a href="#">chawey.bSep08</a>         |                        | 1614  | 241  | 2 | 68  | putative protein (chawey) alternative variant bSep08, mRNA.                              |
| <a href="#">chawflu</a>        | <a href="#">chawflu.aSep08</a>        |                        | 1874  | 408  |   | 107 | CRA c (chawflu) mRNA.                                                                    |
| <a href="#">chawfly</a>        | <a href="#">chawfly.aSep08</a>        |                        | 1355  | 731  |   | 50  | putative protein (5.8 kD) (chawfly) mRNA.                                                |
| <a href="#">chawgar</a>        | <a href="#">chawgar.aSep08</a>        |                        | 22790 | 765  | 1 | 101 | putative protein (chawgar) alternative variant aSep08, mRNA.                             |
| <a href="#">chawgar</a>        | <a href="#">chawgar.bSep08</a>        |                        | 30586 | 843  | 2 | 94  | putative protein (10.3 kD) (chawgar) alternative variant bSep08, mRNA.                   |
| <a href="#">chawgar</a>        | <a href="#">chawgar.cSep08</a>        |                        | 6675  | 728  | 2 | 94  | putative protein (10.3 kD) (chawgar) alternative variant cSep08, mRNA.                   |
| <a href="#">chawja</a>         | <a href="#">chawja.aSep08</a>         |                        | 1672  | 289  |   | 54  | putative protein (chawja) mRNA.                                                          |
| <a href="#">chawjey</a>        | <a href="#">chawjey.aSep08</a>        |                        | 8516  | 399  |   | 42  | putative protein (chawjey) mRNA.                                                         |
| <a href="#">chawkee</a>        | <a href="#">chawkee.aSep08</a>        |                        | 3756  | 404  |   | 134 | transcription factor (chawkee) mRNA.                                                     |
| <a href="#">chawkler</a>       | <a href="#">chawkler.aSep08</a>       |                        | 1425  | 977  |   | 60  | putative protein (6.8 kD) (chawkler) mRNA.                                               |
| <a href="#">chawlo</a>         | <a href="#">chawlo.aSep08</a>         |                        | 4333  | 346  | 3 | 47  | putative protein (chawlo) mRNA.                                                          |
| <a href="#">chawmee</a>        | <a href="#">chawmee.aSep08</a>        |                        | 9278  | 383  |   | 127 | dynein axonemal heavy (chawmee) mRNA.                                                    |
| <a href="#">chawnoy</a>        | <a href="#">chawnoy.aSep08</a>        |                        | 17161 | 558  |   | 44  | putative protein (chawnoy) mRNA.                                                         |
| <a href="#">chawpor</a>        | <a href="#">chawpor.aSep08</a>        |                        | 4300  | 520  |   | 61  | putative protein (chawpor) mRNA.                                                         |
| <a href="#">chawroy</a>        | <a href="#">chawroy.aSep08</a>        |                        | 14113 | 718  |   | 59  | putative protein (chawroy) mRNA.                                                         |
| <a href="#">chawsa</a>         | <a href="#">chawsa.bSep08</a>         |                        | 2586  | 404  | 2 | 51  | putative protein (chawsa) alternative variant bSep08, mRNA.                              |
| <a href="#">chawshee</a>       | <a href="#">chawshee.aSep08</a>       |                        | 6425  | 405  |   | 45  | putative protein (4.6 kD) (chawshee) mRNA.                                               |
| <a href="#">chawtu</a>         | <a href="#">chawtu.aSep08</a>         |                        | 42585 | 833  |   | 172 | dedicator of cytokinesis 4 CRA b (chawtu) mRNA.                                          |
| <a href="#">chawvar</a>        | <a href="#">chawvar.aSep08</a>        |                        | 5503  | 707  |   | 134 | CRA a (chawvar) mRNA.                                                                    |

|                         |                                |                        |        |      |    |      |                                                                                                      |
|-------------------------|--------------------------------|------------------------|--------|------|----|------|------------------------------------------------------------------------------------------------------|
| <a href="#">chawvo</a>  | <a href="#">chawvo.aSep08</a>  |                        | 3356   | 411  |    | 76   | putative cytoplasmic protein (8.4 kD) (chawvo) mRNA.                                                 |
| <a href="#">chawwer</a> | <a href="#">chawwer.aSep08</a> |                        | 6169   | 429  | 2  | 79   | putative protein (chawwer) alternative variant aSep08, mRNA.                                         |
| <a href="#">chawwer</a> | <a href="#">chawwer.bSep08</a> |                        | 14289  | 468  | 3  | 51   | putative protein (chawwer) alternative variant bSep08, mRNA.                                         |
| <a href="#">chawwey</a> | <a href="#">chawwey.aSep08</a> |                        | 2638   | 444  |    | 104  | CRA a like (chawwey) mRNA.                                                                           |
| <a href="#">CHCH.0</a>  | <a href="#">CHCH.0.aSep08</a>  |                        | 1905   | 345  | 2  | 55   | CHCH (CHCH.0) alternative variant aSep08, mRNA.                                                      |
| <a href="#">Chchd1</a>  | <a href="#">Chchd1.bSep08</a>  | <a href="#">361005</a> | 1169   | 561  | 3  | 70   | putative protein of bilateral origin (8.1 kD) (Chchd1) alternative variant bSep08, complete mRNA.    |
| <a href="#">Chchd1</a>  | <a href="#">Chchd1.cSep08</a>  | <a href="#">361005</a> | 1557   | 1027 | 2  | 70   | putative protein of bilateral origin (8.1 kD) (Chchd1) alternative variant cSep08, mRNA.             |
| <a href="#">Chchd3</a>  | <a href="#">Chchd3.bSep08</a>  | <a href="#">296966</a> | 278737 | 967  | 9  | 236  | CHCH (Chchd3) alternative variant bSep08, mRNA.                                                      |
| <a href="#">Chchd3</a>  | <a href="#">Chchd3.cSep08</a>  | <a href="#">296966</a> | 269193 | 706  | 7  | 235  | CHCH (Chchd3) alternative variant cSep08, mRNA.                                                      |
| <a href="#">Chchd3</a>  | <a href="#">Chchd3.dSep08</a>  | <a href="#">296966</a> | 278590 | 726  | 7  | 154  | CHCH (Chchd3) alternative variant dSep08, mRNA.                                                      |
| <a href="#">Chchd3</a>  | <a href="#">Chchd3.eSep08</a>  | <a href="#">296966</a> | 205780 | 654  | 5  | 132  | CHCH (Chchd3) alternative variant eSep08, mRNA.                                                      |
| <a href="#">Chchd5</a>  | <a href="#">Chchd5.aSep08</a>  | <a href="#">296147</a> | 44580  | 935  | 4  | 157  | CHCH (Chchd5) alternative variant aSep08, mRNA.                                                      |
| <a href="#">Chchd5</a>  | <a href="#">Chchd5.bSep08</a>  | <a href="#">296147</a> | 1743   | 685  | 4  | 140  | CHCH (15.7 kD) (Chchd5) alternative variant bSep08, mRNA.                                            |
| <a href="#">Chchd5</a>  | <a href="#">Chchd5.dSep08</a>  | <a href="#">296147</a> | 4494   | 1617 | 4  | 110  | CHCH (12.3 kD) (Chchd5) alternative variant dSep08, mRNA.                                            |
| <a href="#">Chchd6</a>  | <a href="#">Chchd6.bSep08</a>  | <a href="#">297436</a> | 87619  | 555  | 1  | 60   | putative protein of vertebrate origin (Chchd6) alternative variant bSep08, mRNA.                     |
| <a href="#">Chchd8</a>  | <a href="#">Chchd8.aSep08</a>  | <a href="#">499214</a> | 2362   | 887  | 2  | 111  | CHCH (12.9 kD) (Chchd8) alternative variant aSep08, mRNA.                                            |
| <a href="#">Chd1l</a>   | <a href="#">Chd1l.aSep08</a>   | <a href="#">310707</a> | 37477  | 2263 | 14 | 605  | chromodomain helicase DNA binding protein 1-like (67.7 kD) (Chd1l) alternative variant aSep08, mRNA. |
| <a href="#">Chd1l</a>   | <a href="#">Chd1l.bSep08</a>   | <a href="#">310707</a> | 14149  | 945  | 7  | 314  | chromodomain helicase DNA binding protein 1-like (Chd1l) alternative variant bSep08, mRNA.           |
| <a href="#">Chd2</a>    | <a href="#">Chd2.bSep08</a>    | <a href="#">308738</a> | 11015  | 1338 | 5  | 242  | chromodomain helicase DNA binding protein 2 (Chd2) alternative variant bSep08, mRNA.                 |
| <a href="#">Chd2</a>    | <a href="#">Chd2.cSep08</a>    | <a href="#">308738</a> | 8347   | 2403 | 3  | 68   | chromodomain helicase DNA binding protein 2 (Chd2) alternative variant cSep08, mRNA.                 |
| <a href="#">Chd3</a>    | <a href="#">Chd3.aSep08</a>    | <a href="#">303241</a> | 12940  | 4255 | 19 | 1079 | chromodomain helicase DNA binding protein 3 (Chd3) alternative variant aSep08, mRNA.                 |
| <a href="#">Chd3</a>    | <a href="#">Chd3.bSep08</a>    | <a href="#">303241</a> | 6736   | 2287 | 7  | 580  | chromodomain helicase DNA binding protein 3 (Chd3) alternative variant bSep08, mRNA.                 |
| <a href="#">Chd3</a>    | <a href="#">Chd3.cSep08</a>    | <a href="#">303241</a> | 3563   | 888  | 2  | 266  | chromodomain helicase DNA binding protein 3 (Chd3) alternative variant cSep08, mRNA.                 |
| <a href="#">Chd3</a>    | <a href="#">Chd3.dSep08</a>    | <a href="#">303241</a> | 4503   | 2204 | 2  | 172  | chromodomain helicase DNA binding protein 3 (19.4 kD) (Chd3) alternative variant dSep08, mRNA.       |
| <a href="#">Chd4</a>    | <a href="#">Chd4.aSep08</a>    | <a href="#">117535</a> | 20858  | 3989 | 25 | 1131 | chromodomain helicase DNA binding protein 4 (Chd4) alternative variant aSep08, mRNA.                 |
| <a href="#">Chd4</a>    | <a href="#">Chd4.bSep08</a>    | <a href="#">117535</a> | 7120   | 1232 | 9  | 410  | chromodomain helicase DNA binding protein 4 (Chd4) alternative variant bSep08, mRNA.                 |
| <a href="#">Chd4</a>    | <a href="#">Chd4.cSep08</a>    | <a href="#">117535</a> | 6026   | 870  | 4  | 182  | chromodomain helicase DNA binding protein 4 (Chd4) alternative variant cSep08, mRNA.                 |

|                          |                                 |                        |       |      |   |     |                                                                                                    |
|--------------------------|---------------------------------|------------------------|-------|------|---|-----|----------------------------------------------------------------------------------------------------|
| <a href="#">Chd4</a>     | <a href="#">Chd4.dSep08</a>     | <a href="#">117535</a> | 7274  | 914  | 8 | 160 | chromodomain helicase DNA binding protein 4 (Chd4) alternative variant dSep08, mRNA.               |
| <a href="#">Chd5</a>     | <a href="#">Chd5.aSep08</a>     | <a href="#">691589</a> | 15407 | 269  |   | 89  | chromodomain helicase DNA binding protein 5 (Chd5) mRNA.                                           |
| <a href="#">Chd6</a>     | <a href="#">Chd6.bSep08</a>     | <a href="#">311607</a> | 408   | 269  | 2 | 89  | chromodomain helicase DNA binding protein 6 (Chd6) alternative variant bSep08, mRNA.               |
| <a href="#">Chd6</a>     | <a href="#">Chd6.cSep08</a>     | <a href="#">311607</a> | 3961  | 360  | 2 | 75  | chromodomain helicase DNA binding protein 6 (Chd6) alternative variant cSep08, mRNA.               |
| <a href="#">Chd6</a>     | <a href="#">Chd6.fSep08</a>     | <a href="#">311607</a> | 9799  | 503  | 2 | 44  | chromodomain helicase DNA binding protein 6 (Chd6) alternative variant fSep08, mRNA.               |
| <a href="#">Chd8</a>     | <a href="#">Chd8.cSep08</a>     | <a href="#">65027</a>  | 3853  | 1130 | 2 | 230 | chromodomain helicase DNA binding protein 8 (Chd8) alternative variant cSep08, mRNA.               |
| <a href="#">CHDNT.0</a>  | <a href="#">CHDNT.0.aSep08</a>  |                        | 3059  | 789  | 1 | 262 | chromodomain helicase DNA binding protein 3 like (CHDNT.0) alternative variant aSep08, mRNA.       |
| <a href="#">CHDNT.0</a>  | <a href="#">CHDNT.0.bSep08</a>  |                        | 2319  | 426  | 1 | 141 | chromodomain helicase DNA binding protein 3 like (CHDNT.0) alternative variant bSep08, mRNA.       |
| <a href="#">CHDNT.1</a>  | <a href="#">CHDNT.1.aSep08</a>  |                        | 10085 | 2128 | 9 | 655 | chromodomain helicase DNA binding protein 4 like (CHDNT.1) alternative variant aSep08, mRNA.       |
| <a href="#">CHDNT.1</a>  | <a href="#">CHDNT.1.bSep08</a>  |                        | 5187  | 626  | 1 | 160 | chromodomain helicase DNA binding protein 4 CRA a like (CHDNT.1) alternative variant bSep08, mRNA. |
| <a href="#">cheebor</a>  | <a href="#">cheebor.aSep08</a>  |                        | 6419  | 487  |   | 132 | putative protein (cheebor) mRNA.                                                                   |
| <a href="#">cheechy</a>  | <a href="#">cheechy.aSep08</a>  |                        | 4398  | 501  |   | 84  | putative protein (cheechy) mRNA.                                                                   |
| <a href="#">cheedoy</a>  | <a href="#">cheedoy.aSep08</a>  |                        | 9547  | 768  |   | 48  | putative protein (5.2 kD) (cheedoy) mRNA.                                                          |
| <a href="#">cheeflu</a>  | <a href="#">cheeflu.aSep08</a>  |                        | 17733 | 513  |   | 87  | caseinolytic peptidase B like (cheeflu) mRNA.                                                      |
| <a href="#">cheefly</a>  | <a href="#">cheefly.aSep08</a>  |                        | 3671  | 406  |   | 108 | mediator SUR2 (cheefly) mRNA.                                                                      |
| <a href="#">cheegar</a>  | <a href="#">cheegar.aSep08</a>  |                        | 5081  | 576  |   | 191 | pericentriolar material 1 (cheegar) mRNA.                                                          |
| <a href="#">cheeja</a>   | <a href="#">cheeja.aSep08</a>   |                        | 5375  | 736  | 2 | 116 | putative protein (12.7 kD) (cheeja) alternative variant aSep08, mRNA.                              |
| <a href="#">cheejey</a>  | <a href="#">cheejey.aSep08</a>  |                        | 8746  | 539  |   | 64  | putative protein (cheejey) mRNA.                                                                   |
| <a href="#">cheekee</a>  | <a href="#">cheekee.aSep08</a>  |                        | 3770  | 348  |   | 115 | putative protein (cheekee) mRNA.                                                                   |
| <a href="#">cheekler</a> | <a href="#">cheekler.aSep08</a> |                        | 485   | 362  |   | 10  | putative protein (1.1 kD) (cheekler) mRNA.                                                         |
| <a href="#">cheelo</a>   | <a href="#">cheelo.aSep08</a>   |                        | 4863  | 364  |   | 69  | putative protein (8.2 kD) (cheelo) mRNA.                                                           |
| <a href="#">cheemee</a>  | <a href="#">cheemee.aSep08</a>  |                        | 3296  | 356  |   | 74  | polyprotein (cheemee) mRNA.                                                                        |
| <a href="#">cheenoy</a>  | <a href="#">cheenoy.aSep08</a>  |                        | 36908 | 1652 | 6 | 359 | histidine acid phosphatase and phosphoglycerate mutase (cheenoy) alternative variant aSep08, mRNA. |
| <a href="#">cheenoy</a>  | <a href="#">cheenoy.bSep08</a>  |                        | 34818 | 1099 | 7 | 308 | putative protein of eukaryotic origin (cheenoy) alternative variant bSep08, mRNA.                  |
| <a href="#">cheenoy</a>  | <a href="#">cheenoy.cSep08</a>  |                        | 15939 | 755  | 3 | 169 | putative protein (cheenoy) alternative variant cSep08, mRNA.                                       |
| <a href="#">cheenoy</a>  | <a href="#">cheenoy.dSep08</a>  |                        | 6145  | 463  | 3 | 153 | putative protein of eukaryotic origin (cheenoy) alternative variant dSep08, mRNA.                  |
| <a href="#">cheenoy</a>  | <a href="#">cheenoy.eSep08</a>  |                        | 6629  | 1855 | 1 | 99  | putative protein of mammalian origin (cheenoy) alternative variant eSep08, mRNA.                   |
| <a href="#">cheenoy</a>  | <a href="#">cheenoy.fSep08</a>  |                        | 43116 | 338  | 2 | 70  | putative protein of vertebrate origin (cheenoy) alternative variant fSep08, mRNA.                  |

|                          |                                 |                        |       |      |   |     |                                                                                                               |
|--------------------------|---------------------------------|------------------------|-------|------|---|-----|---------------------------------------------------------------------------------------------------------------|
| <a href="#">cheepor</a>  | <a href="#">cheepor.aSep08</a>  |                        | 19343 | 784  |   | 51  | putative protein (5.7 kD) (cheepor) mRNA.                                                                     |
| <a href="#">cheeroy</a>  | <a href="#">cheeroy.aSep08</a>  |                        | 4788  | 380  | 4 | 126 | zinc finger protein subfamily 1A 4 (cheeroy) alternative variant aSep08, mRNA.                                |
| <a href="#">cheeroy</a>  | <a href="#">cheeroy.bSep08</a>  |                        | 21737 | 630  | 4 | 40  | CRA c like (4.5 kD) (cheeroy) alternative variant bSep08, mRNA.                                               |
| <a href="#">cheeroy</a>  | <a href="#">cheeroy.dSep08</a>  |                        | 27579 | 420  | 3 | 62  | putative protein (cheeroy) alternative variant dSep08, mRNA.                                                  |
| <a href="#">cheesa</a>   | <a href="#">cheesa.aSep08</a>   |                        | 18443 | 657  | 2 | 64  | putative protein (cheesa) alternative variant aSep08, mRNA.                                                   |
| <a href="#">cheesa</a>   | <a href="#">cheesa.bSep08</a>   |                        | 3267  | 460  | 1 | 47  | putative protein (cheesa) alternative variant bSep08, mRNA.                                                   |
| <a href="#">cheeshee</a> | <a href="#">cheeshee.aSep08</a> |                        | 10858 | 461  | 2 | 61  | putative protein (cheeshee) alternative variant aSep08, mRNA.                                                 |
| <a href="#">cheeshee</a> | <a href="#">cheeshee.bSep08</a> |                        | 67643 | 376  | 1 | 30  | putative protein (3.3 kD) (cheeshee) alternative variant bSep08, mRNA.                                        |
| <a href="#">cheetu</a>   | <a href="#">cheetu.aSep08</a>   |                        | 12619 | 3031 |   | 263 | dedicator of cytokinesis 4 CRA e (cheetu) mRNA.                                                               |
| <a href="#">cheevar</a>  | <a href="#">cheevar.aSep08</a>  |                        | 6669  | 767  | 2 | 84  | putative cytoplasmic protein (9.3 kD) (cheevar) mRNA.                                                         |
| <a href="#">cheevo</a>   | <a href="#">cheevo.aSep08</a>   |                        | 53387 | 406  |   | 108 | regulator of G-protein signaling 20 like (cheevo) mRNA.                                                       |
| <a href="#">cheewer</a>  | <a href="#">cheewer.aSep08</a>  |                        | 8839  | 261  |   | 86  | mlI3 (cheewer) mRNA.                                                                                          |
| <a href="#">cheewey</a>  | <a href="#">cheewey.aSep08</a>  |                        | 4652  | 708  |   | 83  | putative protein (cheewey) mRNA.                                                                              |
| <a href="#">Chek1</a>    | <a href="#">Chek1.bSep08</a>    | <a href="#">140583</a> | 13009 | 497  | 4 | 165 | checkpoint kinase 1 homolog (S. pombe) (Chek1) alternative variant bSep08, mRNA.                              |
| <a href="#">Chek1</a>    | <a href="#">Chek1.cSep08</a>    | <a href="#">140583</a> | 9835  | 651  | 3 | 143 | checkpoint kinase 1 homolog (S. pombe) (Chek1) alternative variant cSep08, mRNA.                              |
| <a href="#">Chek2</a>    | <a href="#">Chek2.bSep08</a>    | <a href="#">114212</a> | 7981  | 723  | 4 | 204 | CHK2 checkpoint homolog (S. pombe) (Chek2) alternative variant bSep08, mRNA.                                  |
| <a href="#">Chek2</a>    | <a href="#">Chek2.cSep08</a>    | <a href="#">114212</a> | 8419  | 688  | 4 | 204 | CHK2 checkpoint homolog (S. pombe) (Chek2) alternative variant cSep08, mRNA.                                  |
| <a href="#">Chek2</a>    | <a href="#">Chek2.eSep08</a>    | <a href="#">114212</a> | 2368  | 1255 | 2 | 52  | CHK2 checkpoint homolog (S. pombe) (5.8 kD) (Chek2) alternative variant eSep08, mRNA.                         |
| <a href="#">cherbor</a>  | <a href="#">cherbor.aSep08</a>  |                        | 7598  | 446  |   | 48  | putative protein (cherbor) mRNA.                                                                              |
| <a href="#">cherchy</a>  | <a href="#">cherchy.aSep08</a>  |                        | 1374  | 672  |   | 44  | putative protein (4.8 kD) (cherchy) mRNA.                                                                     |
| <a href="#">cherdoy</a>  | <a href="#">cherdoy.aSep08</a>  |                        | 33523 | 402  |   | 51  | putative protein (5.5 kD) (cherdoy) mRNA.                                                                     |
| <a href="#">cherflu</a>  | <a href="#">cherflu.aSep08</a>  |                        | 8757  | 344  |   | 109 | nuclear mitotic apparatus protein 1 (cherflu) mRNA.                                                           |
| <a href="#">cherfly</a>  | <a href="#">cherfly.aSep08</a>  |                        | 763   | 329  |   | 73  | putative mitochondrial protein (7.8 kD) (cherfly) mRNA.                                                       |
| <a href="#">chergar</a>  | <a href="#">chergar.aSep08</a>  |                        | 6251  | 516  |   | 171 | pericentriolar material 1 (chergar) mRNA.                                                                     |
| <a href="#">cherja</a>   | <a href="#">cherja.aSep08</a>   |                        | 17973 | 799  |   | 44  | putative protein (cherja) mRNA.                                                                               |
| <a href="#">cherjey</a>  | <a href="#">cherjey.aSep08</a>  |                        | 94467 | 1703 |   | 56  | putative protein (5.9 kD) (cherjey) mRNA.                                                                     |
| <a href="#">cherkee</a>  | <a href="#">cherkee.aSep08</a>  |                        | 1763  | 671  |   | 39  | putative protein (cherkee) mRNA.                                                                              |
| <a href="#">cherkler</a> | <a href="#">cherkler.aSep08</a> |                        | 2143  | 805  | 1 | 124 | putative protein, with a coiled coil domain, of mammalian origin (cherkler) alternative variant aSep08, mRNA. |
| <a href="#">cherkler</a> | <a href="#">cherkler.bSep08</a> |                        | 2123  | 667  | 2 | 117 | putative protein, with a coiled coil domain, of mammalian origin (cherkler) alternative variant bSep08, mRNA. |
| <a href="#">cherlo</a>   | <a href="#">cherlo.aSep08</a>   |                        | 5041  | 312  |   | 61  | putative protein (cherlo) mRNA.                                                                               |
| <a href="#">chermee</a>  | <a href="#">chermee.aSep08</a>  |                        | 5788  | 503  |   | 56  | putative protein (chermee) mRNA.                                                                              |

|                          |                                 |                        |        |      |   |     |                                                                                                             |
|--------------------------|---------------------------------|------------------------|--------|------|---|-----|-------------------------------------------------------------------------------------------------------------|
| <a href="#">chernoy</a>  | <a href="#">chernoy.aSep08</a>  |                        | 3469   | 681  |   | 70  | putative protein (chernoy) mRNA.                                                                            |
| <a href="#">Cherp</a>    | <a href="#">Cherp.bSep08</a>    | <a href="#">290614</a> | 1914   | 1533 | 4 | 240 | calcium homeostasis endoplasmic reticulum protein CRA a (25.8 kD) (Cherp) alternative variant bSep08, mRNA. |
| <a href="#">Cherp</a>    | <a href="#">Cherp.cSep08</a>    | <a href="#">290614</a> | 3862   | 2245 | 4 | 192 | calcium homeostasis endoplasmic reticulum protein (Cherp) alternative variant cSep08, mRNA.                 |
| <a href="#">Cherp</a>    | <a href="#">Cherp.dSep08</a>    | <a href="#">290614</a> | 1168   | 906  | 2 | 133 | calcium homeostasis endoplasmic reticulum protein CRA a (Cherp) alternative variant dSep08, mRNA.           |
| <a href="#">Cherp</a>    | <a href="#">Cherp.eSep08</a>    | <a href="#">290614</a> | 922    | 694  | 3 | 80  | putative protein (Cherp) alternative variant eSep08, mRNA.                                                  |
| <a href="#">cherpor</a>  | <a href="#">cherpor.aSep08</a>  |                        | 5740   | 232  | 1 | 76  | putative protein (cherpor) alternative variant aSep08, mRNA.                                                |
| <a href="#">cherpor</a>  | <a href="#">cherpor.bSep08</a>  |                        | 62287  | 583  | 3 | 46  | putative protein (5.4 kD) (cherpor) alternative variant bSep08, mRNA.                                       |
| <a href="#">cherroy</a>  | <a href="#">cherroy.aSep08</a>  |                        | 9153   | 590  |   | 27  | putative protein (2.9 kD) (cherroy) alternative variant aSep08, mRNA.                                       |
| <a href="#">cherroy</a>  | <a href="#">cherroy.bSep08</a>  |                        | 1847   | 291  |   | 26  | putative protein (cherroy) alternative variant bSep08, mRNA.                                                |
| <a href="#">chersa</a>   | <a href="#">chersa.aSep08</a>   |                        | 3868   | 1233 | 5 | 101 | putative protein (chersa) alternative variant aSep08, mRNA.                                                 |
| <a href="#">chersa</a>   | <a href="#">chersa.bSep08</a>   |                        | 1060   | 385  | 3 | 62  | putative protein (chersa) alternative variant bSep08, mRNA.                                                 |
| <a href="#">chershee</a> | <a href="#">chershee.aSep08</a> |                        | 3175   | 650  |   | 72  | putative protein (8.1 kD) (chershee) mRNA.                                                                  |
| <a href="#">chertu</a>   | <a href="#">chertu.aSep08</a>   |                        | 110987 | 421  | 2 | 140 | inner mitochondrial membrane -like (chertu) alternative variant aSep08, mRNA.                               |
| <a href="#">chertu</a>   | <a href="#">chertu.bSep08</a>   |                        | 57413  | 382  | 1 | 100 | putative protein (chertu) alternative variant bSep08, mRNA.                                                 |
| <a href="#">chervar</a>  | <a href="#">chervar.aSep08</a>  |                        | 4250   | 478  | 3 | 94  | putative protein of eukaryotic origin (chervar) alternative variant aSep08, mRNA.                           |
| <a href="#">chervo</a>   | <a href="#">chervo.aSep08</a>   |                        | 2560   | 591  |   | 49  | putative protein (chervo) mRNA.                                                                             |
| <a href="#">cherwer</a>  | <a href="#">cherwer.aSep08</a>  |                        | 4695   | 330  |   | 109 | mixed-lineage leukemia 3 like (cherwer) mRNA.                                                               |
| <a href="#">cherwey</a>  | <a href="#">cherwey.aSep08</a>  |                        | 2262   | 359  |   | 41  | putative protein (cherwey) mRNA.                                                                            |
| <a href="#">cheybor</a>  | <a href="#">cheybor.aSep08</a>  |                        | 1364   | 596  |   | 42  | putative protein (4.3 kD) (cheybor) mRNA.                                                                   |
| <a href="#">cheychy</a>  | <a href="#">cheychy.aSep08</a>  |                        | 57777  | 552  | 1 | 40  | putative protein (4.4 kD) (cheychy) alternative variant aSep08, mRNA.                                       |
| <a href="#">cheychy</a>  | <a href="#">cheychy.bSep08</a>  |                        | 57827  | 475  | 2 | 40  | putative protein (4.4 kD) (cheychy) alternative variant bSep08, mRNA.                                       |
| <a href="#">cheydoy</a>  | <a href="#">cheydoy.aSep08</a>  |                        | 2132   | 748  |   | 45  | putative protein (cheydoy) mRNA.                                                                            |
| <a href="#">cheyflu</a>  | <a href="#">cheyflu.aSep08</a>  |                        | 2973   | 606  |   | 202 | nuclear mitotic apparatus protein 1 (cheyflu) mRNA.                                                         |
| <a href="#">cheyfly</a>  | <a href="#">cheyfly.aSep08</a>  |                        | 3666   | 751  |   | 65  | putative protein (7.0 kD) (cheyfly) mRNA.                                                                   |
| <a href="#">cheygar</a>  | <a href="#">cheygar.aSep08</a>  |                        | 3476   | 380  |   | 126 | pericentriolar material 1 (cheygar) mRNA.                                                                   |
| <a href="#">cheyja</a>   | <a href="#">cheyja.aSep08</a>   |                        | 1130   | 278  |   | 50  | putative protein (4.4 kD) (cheyja) mRNA.                                                                    |
| <a href="#">cheyjey</a>  | <a href="#">cheyjey.aSep08</a>  |                        | 3240   | 770  |   | 52  | putative protein (6.2 kD) (cheyjey) mRNA.                                                                   |
| <a href="#">cheykee</a>  | <a href="#">cheykee.aSep08</a>  |                        | 1092   | 612  | 1 | 122 | putative protein (13.8 kD) (cheykee) alternative variant aSep08, mRNA.                                      |
| <a href="#">cheykee</a>  | <a href="#">cheykee.bSep08</a>  |                        | 812    | 329  | 1 | 75  | putative protein (cheykee) alternative variant bSep08, mRNA.                                                |
| <a href="#">cheykler</a> | <a href="#">cheykler.aSep08</a> |                        | 3513   | 329  |   | 40  | putative protein (cheykler) mRNA.                                                                           |

|                          |                                 |                        |       |      |   |     |                                                                                            |
|--------------------------|---------------------------------|------------------------|-------|------|---|-----|--------------------------------------------------------------------------------------------|
| <a href="#">chevlo</a>   | <a href="#">chevlo.aSep08</a>   |                        | 5112  | 662  |   | 86  | putative mitochondrial protein (9.1 kD) (chevlo) mRNA.                                     |
| <a href="#">cheymee</a>  | <a href="#">cheymee.aSep08</a>  |                        | 3137  | 1081 |   | 88  | putative protein (9.8 kD) (cheymee) mRNA.                                                  |
| <a href="#">cheynoy</a>  | <a href="#">cheynoy.aSep08</a>  |                        | 16998 | 255  |   | 36  | putative protein (3.9 kD) (cheynoy) mRNA.                                                  |
| <a href="#">cheypor</a>  | <a href="#">cheypor.aSep08</a>  |                        | 12749 | 911  |   | 173 | putative protein (cheypor) mRNA.                                                           |
| <a href="#">cheyro</a>   | <a href="#">cheyro.aSep08</a>   |                        | 197   | 123  |   | 40  | putative protein (cheyro) mRNA.                                                            |
| <a href="#">cheysa</a>   | <a href="#">cheysa.aSep08</a>   |                        | 727   | 336  |   | 112 | histone deacetylase 7A CRA b (cheysa) mRNA.                                                |
| <a href="#">cheyshee</a> | <a href="#">cheyshee.bSep08</a> |                        | 36053 | 699  |   | 35  | putative protein (4.0 kD) (cheyshee) alternative variant bSep08, mRNA.                     |
| <a href="#">cheytu</a>   | <a href="#">cheytu.aSep08</a>   |                        | 29908 | 467  |   | 72  | putative cytoplasmic protein (7.5 kD) (cheytu) mRNA.                                       |
| <a href="#">cheyvar</a>  | <a href="#">cheyvar.aSep08</a>  |                        | 3551  | 789  |   | 262 | putative protein of metazoan origin (cheyvar) mRNA.                                        |
| <a href="#">cheyvo</a>   | <a href="#">cheyvo.aSep08</a>   |                        | 11972 | 836  |   | 84  | putative protein (cheyvo) mRNA.                                                            |
| <a href="#">cheywer</a>  | <a href="#">cheywer.aSep08</a>  |                        | 7082  | 868  |   | 61  | mixed-lineage leukemia 3 like (cheywer) mRNA.                                              |
| <a href="#">cheywey</a>  | <a href="#">cheywey.aSep08</a>  |                        | 42140 | 206  |   | 39  | putative protein (cheywey) mRNA.                                                           |
| <a href="#">Chfr</a>     | <a href="#">Chfr.bSep08</a>     | <a href="#">288734</a> | 6653  | 757  | 5 | 232 | checkpoint with forkhead and ring finger domains (Chfr) alternative variant bSep08, mRNA.  |
| <a href="#">Chga</a>     | <a href="#">Chga.bSep08</a>     | <a href="#">24258</a>  | 1228  | 464  | 1 | 133 | chromogranin A (Chga) alternative variant bSep08, mRNA.                                    |
| <a href="#">Chi311</a>   | <a href="#">Chi311.bSep08</a>   | <a href="#">89824</a>  | 4659  | 767  | 5 | 176 | chitinase 3-like 1 (Chi311) alternative variant bSep08, mRNA.                              |
| <a href="#">Chi311</a>   | <a href="#">Chi311.cSep08</a>   | <a href="#">89824</a>  | 4382  | 519  | 6 | 172 | chitinase 3-like 1 (Chi311) alternative variant cSep08, mRNA.                              |
| <a href="#">Chia</a>     | <a href="#">Chia.bSep08</a>     | <a href="#">113901</a> | 9774  | 618  |   | 172 | chitinase, acidic (Chia) alternative variant bSep08, mRNA.                                 |
| <a href="#">Chic1</a>    | <a href="#">Chic1.aSep08</a>    | <a href="#">363484</a> | 19584 | 392  | 2 | 130 | cysteine-rich hydrophobic domain 1 (Chic1) alternative variant aSep08, mRNA.               |
| <a href="#">Chic1</a>    | <a href="#">Chic1.bSep08</a>    | <a href="#">363484</a> | 5597  | 382  | 1 | 64  | cysteine-rich hydrophobic domain 1 (Chic1) alternative variant bSep08, mRNA.               |
| <a href="#">Chid1</a>    | <a href="#">Chid1.bSep08</a>    | <a href="#">293628</a> | 5572  | 719  | 5 | 66  | putative protein (6.6 kD) (Chid1) alternative variant bSep08, mRNA.                        |
| <a href="#">Chid1</a>    | <a href="#">Chid1.dSep08</a>    | <a href="#">293628</a> | 1139  | 612  | 3 | 86  | putative protein (Chid1) alternative variant dSep08, mRNA.                                 |
| <a href="#">Chit1</a>    | <a href="#">Chit1.aSep08</a>    | <a href="#">289032</a> | 20420 | 2177 | 1 | 464 | chitinase 1 (chitotriosidase) (50.8 kD) (Chit1) alternative variant aSep08, complete mRNA. |
| <a href="#">Chit1</a>    | <a href="#">Chit1.bSep08</a>    | <a href="#">289032</a> | 20429 | 1835 | 2 | 464 | chitinase 1 (chitotriosidase) (50.8 kD) (Chit1) alternative variant bSep08, complete mRNA. |
| <a href="#">Chit1</a>    | <a href="#">Chit1.cSep08</a>    | <a href="#">289032</a> | 20430 | 1735 | 1 | 464 | chitinase 1 (chitotriosidase) (50.8 kD) (Chit1) alternative variant cSep08, complete mRNA. |
| <a href="#">Chka</a>     | <a href="#">Chka.bSep08</a>     | <a href="#">29194</a>  | 41865 | 1103 | 6 | 278 | choline kinase alpha (Chka) alternative variant bSep08, mRNA.                              |
| <a href="#">Chka</a>     | <a href="#">Chka.cSep08</a>     | <a href="#">29194</a>  | 17062 | 680  | 7 | 226 | choline kinase alpha (Chka) alternative variant cSep08, mRNA.                              |
| <a href="#">Chkb</a>     | <a href="#">Chkb.bSep08</a>     | <a href="#">29367</a>  | 2534  | 1608 | 7 | 258 | choline kinase beta (29.8 kD) (Chkb) alternative variant bSep08, mRNA.                     |
| <a href="#">Chkb</a>     | <a href="#">Chkb.cSep08</a>     | <a href="#">29367</a>  | 2399  | 1247 | 8 | 198 | choline kinase beta (Chkb) alternative variant cSep08, mRNA.                               |
| <a href="#">Chkb</a>     | <a href="#">Chkb.dSep08</a>     | <a href="#">29367</a>  | 1216  | 779  | 3 | 160 | choline kinase beta (Chkb) alternative variant dSep08, mRNA.                               |

|                        |                               |                        |        |      |    |     |                                                                                              |
|------------------------|-------------------------------|------------------------|--------|------|----|-----|----------------------------------------------------------------------------------------------|
| <a href="#">Chkb</a>   | <a href="#">Chkb.eSep08</a>   | <a href="#">29367</a>  | 833    | 475  | 3  | 109 | choline kinase beta (Chkb) alternative variant eSep08, mRNA.                                 |
| <a href="#">Chm</a>    | <a href="#">Chm.bSep08</a>    | <a href="#">24942</a>  | 45632  | 912  | 4  | 111 | choroideremia (Chm) alternative variant bSep08, mRNA.                                        |
| <a href="#">Chmp1a</a> | <a href="#">Chmp1a.bSep08</a> | <a href="#">365024</a> | 7144   | 881  | 5  | 170 | chromatin modifying protein 1A (18.7 kD) (Chmp1a) alternative variant bSep08, mRNA.          |
| <a href="#">Chmp1a</a> | <a href="#">Chmp1a.cSep08</a> | <a href="#">365024</a> | 2769   | 406  | 1  | 69  | chromatin modifying protein 1A (Chmp1a) alternative variant cSep08, mRNA.                    |
| <a href="#">Chmp2a</a> | <a href="#">Chmp2a.aSep08</a> | <a href="#">365191</a> | 2498   | 1970 | 5  | 418 | chromatin modifying protein 2A (Chmp2a) alternative variant aSep08, complete mRNA.           |
| <a href="#">Chmp2a</a> | <a href="#">Chmp2a.bSep08</a> | <a href="#">365191</a> | 2501   | 900  | 6  | 222 | chromatin modifying protein 2A (25.1 kD) (Chmp2a) alternative variant bSep08, complete mRNA. |
| <a href="#">Chmp2a</a> | <a href="#">Chmp2a.dSep08</a> | <a href="#">365191</a> | 2472   | 721  | 6  | 172 | chromatin modifying protein 2A (19.4 kD) (Chmp2a) alternative variant dSep08, mRNA.          |
| <a href="#">Chmp2b</a> | <a href="#">Chmp2b.aSep08</a> | <a href="#">363720</a> | 40890  | 533  |    | 177 | chromatin modifying protein 2B (Chmp2b) alternative variant aSep08, mRNA.                    |
| <a href="#">Chmp2b</a> | <a href="#">Chmp2b.bSep08</a> | <a href="#">363720</a> | 6983   | 1849 |    | 107 | chromatin modifying protein 2B (Chmp2b) alternative variant bSep08, mRNA.                    |
| <a href="#">Chmp6</a>  | <a href="#">Chmp6.aSep08</a>  | <a href="#">287873</a> | 5664   | 1496 | 4  | 240 | chromatin modifying protein 6 (27.7 kD) (Chmp6) alternative variant aSep08, complete mRNA.   |
| <a href="#">Chmp6</a>  | <a href="#">Chmp6.bSep08</a>  | <a href="#">287873</a> | 5298   | 1185 | 5  | 200 | chromatin modifying protein 6 (23.3 kD) (Chmp6) alternative variant bSep08, mRNA.            |
| <a href="#">Chmp6</a>  | <a href="#">Chmp6.cSep08</a>  | <a href="#">287873</a> | 5340   | 687  | 5  | 114 | chromatin modifying protein 6 (12.8 kD) (Chmp6) alternative variant cSep08, mRNA.            |
| <a href="#">Chmp6</a>  | <a href="#">Chmp6.dSep08</a>  | <a href="#">287873</a> | 2298   | 733  | 2  | 112 | chromatin modifying protein 6 (Chmp6) alternative variant dSep08, mRNA.                      |
| <a href="#">Chmp6</a>  | <a href="#">Chmp6.eSep08</a>  | <a href="#">287873</a> | 2428   | 778  | 2  | 83  | chromatin modifying protein 6 (Chmp6) alternative variant eSep08, mRNA.                      |
| <a href="#">Chmp7</a>  | <a href="#">Chmp7.bSep08</a>  | <a href="#">364419</a> | 614    | 389  | 2  | 57  | CHMP family, member 7 (Chmp7) alternative variant bSep08, mRNA.                              |
| <a href="#">Chn1</a>   | <a href="#">Chn1.aSep08</a>   | <a href="#">84030</a>  | 224797 | 2184 | 14 | 455 | chimerin (chimaerin) 1 (52.8 kD) (Chn1) alternative variant aSep08, mRNA.                    |
| <a href="#">Chn1</a>   | <a href="#">Chn1.cSep08</a>   | <a href="#">84030</a>  | 41102  | 1053 | 7  | 258 | chimerin (chimaerin) 1 (Chn1) alternative variant cSep08, mRNA.                              |
| <a href="#">Chn1</a>   | <a href="#">Chn1.dSep08</a>   | <a href="#">84030</a>  | 5375   | 1051 | 3  | 128 | chimerin (chimaerin) 1 (14.8 kD) (Chn1) alternative variant dSep08, mRNA.                    |
| <a href="#">Chn2</a>   | <a href="#">Chn2.aSep08</a>   | <a href="#">84031</a>  | 108373 | 2942 | 12 | 458 | chimerin (chimaerin) 2 (Chn2) alternative variant aSep08, mRNA.                              |
| <a href="#">Chn2</a>   | <a href="#">Chn2.cSep08</a>   | <a href="#">84031</a>  | 24692  | 839  | 5  | 240 | chimerin (chimaerin) 2 (Chn2) alternative variant cSep08, mRNA.                              |
| <a href="#">Chn2</a>   | <a href="#">Chn2.dSep08</a>   | <a href="#">84031</a>  | 98331  | 719  | 7  | 217 | chimerin (chimaerin) 2 (Chn2) alternative variant dSep08, mRNA.                              |
| <a href="#">Chn2</a>   | <a href="#">Chn2.eSep08</a>   | <a href="#">84031</a>  | 194264 | 583  | 6  | 194 | chimerin (chimaerin) 2 (Chn2) alternative variant eSep08, mRNA.                              |
| <a href="#">chobor</a> | <a href="#">chobor.aSep08</a> |                        | 3532   | 529  |    | 62  | putative protein (7.1 kD) (chobor) mRNA.                                                     |
| <a href="#">chochy</a> | <a href="#">chochy.aSep08</a> |                        | 756    | 460  |    | 32  | putative protein (3.8 kD) (chochy) mRNA.                                                     |
| <a href="#">Chodl</a>  | <a href="#">Chodl.bSep08</a>  | <a href="#">288289</a> | 6928   | 1577 | 2  | 68  | chondrolectin (Chodl) alternative variant bSep08, mRNA.                                      |



|                          |                                 |                        |       |      |   |     |                                                                                                                           |
|--------------------------|---------------------------------|------------------------|-------|------|---|-----|---------------------------------------------------------------------------------------------------------------------------|
| <a href="#">chodoy</a>   | <a href="#">chodoy.aSep08</a>   |                        | 11750 | 635  |   | 211 | myosin VIIb (chodoy) mRNA.                                                                                                |
| <a href="#">choflu</a>   | <a href="#">choflu.aSep08</a>   |                        | 1413  | 348  | 5 | 115 | rho guanine nucleotide exchange factor 17 (choflu) alternative variant aSep08, mRNA.                                      |
| <a href="#">chofly</a>   | <a href="#">chofly.aSep08</a>   |                        | 5682  | 429  |   | 36  | putative protein (chofly) mRNA.                                                                                           |
| <a href="#">chogar</a>   | <a href="#">chogar.aSep08</a>   |                        | 5597  | 1776 |   | 518 | CRA b (chogar) alternative variant aSep08, mRNA.                                                                          |
| <a href="#">choja</a>    | <a href="#">choja.aSep08</a>    |                        | 1511  | 286  |   | 67  | putative protein (7.2 kD) (choja) alternative variant aSep08, mRNA.                                                       |
| <a href="#">chojey</a>   | <a href="#">chojey.aSep08</a>   |                        | 27410 | 1643 |   | 521 | putative protein of bilateral origin (chojey) mRNA.                                                                       |
| <a href="#">chokee</a>   | <a href="#">chokee.aSep08</a>   |                        | 3870  | 598  |   | 198 | AT hook containing transcription factor 1 (chokee) mRNA.                                                                  |
| <a href="#">chokler</a>  | <a href="#">chokler.aSep08</a>  |                        | 7374  | 419  |   | 36  | putative protein (4.1 kD) (chokler) mRNA.                                                                                 |
| <a href="#">cholo</a>    | <a href="#">cholo.aSep08</a>    |                        | 1135  | 304  |   | 45  | putative protein (4.9 kD) (cholo) mRNA.                                                                                   |
| <a href="#">chomee</a>   | <a href="#">chomee.aSep08</a>   |                        | 22373 | 1812 | 7 | 410 | rho GTPase-activating protein rich2 (chomee) alternative variant aSep08, mRNA.                                            |
| <a href="#">chomee</a>   | <a href="#">chomee.bSep08</a>   |                        | 12540 | 548  | 4 | 182 | rho gtpase-activating protein rich2 (chomee) alternative variant bSep08, mRNA.                                            |
| <a href="#">chomee</a>   | <a href="#">chomee.cSep08</a>   |                        | 6605  | 1819 | 3 | 95  | rho GTPase-activating protein rich2 like (chomee) alternative variant cSep08, mRNA.                                       |
| <a href="#">chonoy</a>   | <a href="#">chonoy.aSep08</a>   |                        | 10981 | 820  |   | 62  | putative protein (chonoy) mRNA.                                                                                           |
| <a href="#">chopor</a>   | <a href="#">chopor.aSep08</a>   |                        | 1944  | 266  |   | 34  | putative protein (chopor) mRNA.                                                                                           |
| <a href="#">chorbor</a>  | <a href="#">chorbor.aSep08</a>  |                        | 2002  | 317  |   | 73  | putative protein (chorbor) mRNA.                                                                                          |
| <a href="#">chorchy</a>  | <a href="#">chorchy.aSep08</a>  |                        | 3267  | 456  | 2 | 40  | putative protein (chorchy) alternative variant aSep08, mRNA.                                                              |
| <a href="#">Chordc1</a>  | <a href="#">Chordc1.bSep08</a>  | <a href="#">315447</a> | 16335 | 550  | 1 | 62  | cysteine and histidine-rich domain (CHORD)-containing, zinc-binding protein 1 (Chordc1) alternative variant bSep08, mRNA. |
| <a href="#">chordoy</a>  | <a href="#">chordoy.aSep08</a>  |                        | 941   | 687  | 2 | 33  | CRA b like (3.8 kD) (chordoy) alternative variant aSep08, mRNA.                                                           |
| <a href="#">chordoy</a>  | <a href="#">chordoy.cSep08</a>  |                        | 1007  | 500  | 3 | 38  | putative protein (chordoy) alternative variant cSep08, mRNA.                                                              |
| <a href="#">chorflu</a>  | <a href="#">chorflu.bSep08</a>  |                        | 19044 | 414  |   | 46  | putative protein (4.5 kD) (chorflu) alternative variant bSep08, mRNA.                                                     |
| <a href="#">chorfly</a>  | <a href="#">chorfly.aSep08</a>  |                        | 8222  | 710  |   | 44  | putative protein (chorfly) mRNA.                                                                                          |
| <a href="#">chorgar</a>  | <a href="#">chorgar.aSep08</a>  |                        | 1872  | 208  |   | 69  | pericentriolar material 1 CRA b (chorgar) mRNA.                                                                           |
| <a href="#">chorja</a>   | <a href="#">chorja.aSep08</a>   |                        | 25050 | 693  |   | 145 | putative protein of mammalian origin (16.0 kD) (chorja) mRNA.                                                             |
| <a href="#">chorjey</a>  | <a href="#">chorjey.aSep08</a>  |                        | 4092  | 527  |   | 33  | putative protein (chorjey) mRNA.                                                                                          |
| <a href="#">chorkee</a>  | <a href="#">chorkee.aSep08</a>  |                        | 14914 | 481  |   | 53  | putative protein (chorkee) mRNA.                                                                                          |
| <a href="#">chorkler</a> | <a href="#">chorkler.aSep08</a> |                        | 36001 | 663  |   | 220 | calcium binding atopy-related autoantigen 1 CRA c like (chorkler) mRNA.                                                   |
| <a href="#">chorlo</a>   | <a href="#">chorlo.aSep08</a>   |                        | 11110 | 440  |   | 36  | putative protein (4.0 kD) (chorlo) mRNA.                                                                                  |
| <a href="#">chormee</a>  | <a href="#">chormee.aSep08</a>  |                        | 4058  | 966  |   | 279 | myosin heavy chain skeletal muscle adult (chormee) mRNA.                                                                  |
| <a href="#">chornoy</a>  | <a href="#">chornoy.aSep08</a>  |                        | 11752 | 478  |   | 38  | putative protein (4.4 kD) (chornoy) mRNA.                                                                                 |
| <a href="#">choroy</a>   | <a href="#">choroy.aSep08</a>   |                        | 7181  | 511  |   | 31  | putative protein (3.7 kD) (choroy) mRNA.                                                                                  |

|                          |                                 |  |       |      |   |     |                                                                         |
|--------------------------|---------------------------------|--|-------|------|---|-----|-------------------------------------------------------------------------|
| <a href="#">chorpor</a>  | <a href="#">chorpor.aSep08</a>  |  | 2885  | 751  |   | 201 | angiotenin like 2 CRA b (chorpor) mRNA.                                 |
| <a href="#">chorroy</a>  | <a href="#">chorroy.aSep08</a>  |  | 6003  | 254  |   | 73  | putative protein (chorroy) mRNA.                                        |
| <a href="#">chorsa</a>   | <a href="#">chorsa.aSep08</a>   |  | 5045  | 1906 |   | 82  | specific peptidase 1 CRA c (chorsa) mRNA.                               |
| <a href="#">chorshee</a> | <a href="#">chorshee.aSep08</a> |  | 30921 | 480  |   | 88  | putative cytoplasmic protein (10.4 kD) (chorshee) mRNA.                 |
| <a href="#">chortu</a>   | <a href="#">chortu.aSep08</a>   |  | 5136  | 261  |   | 50  | putative protein (chortu) mRNA.                                         |
| <a href="#">chorvar</a>  | <a href="#">chorvar.aSep08</a>  |  | 1702  | 882  |   | 191 | CRA a (chorvar) mRNA.                                                   |
| <a href="#">chorvo</a>   | <a href="#">chorvo.aSep08</a>   |  | 1129  | 896  | 2 | 36  | putative protein (4.1 kD) (chorvo) alternative variant aSep08, mRNA.    |
| <a href="#">chorvo</a>   | <a href="#">chorvo.bSep08</a>   |  | 5088  | 665  | 4 | 18  | putative protein (1.9 kD) (chorvo) alternative variant bSep08, mRNA.    |
| <a href="#">chorvo</a>   | <a href="#">chorvo.dSep08</a>   |  | 5152  | 565  | 4 |     |                                                                         |
| <a href="#">chorwer</a>  | <a href="#">chorwer.aSep08</a>  |  | 3296  | 759  |   | 147 | putative protein (chorwer) alternative variant aSep08, mRNA.            |
| <a href="#">chorwey</a>  | <a href="#">chorwey.aSep08</a>  |  | 2429  | 390  |   | 39  | putative protein (4.3 kD) (chorwey) mRNA.                               |
| <a href="#">chosa</a>    | <a href="#">chosa.aSep08</a>    |  | 2055  | 379  |   | 44  | putative protein (chosa) mRNA.                                          |
| <a href="#">choshee</a>  | <a href="#">choshee.aSep08</a>  |  | 1007  | 460  |   | 138 | putative protein (choshee) mRNA.                                        |
| <a href="#">chotu</a>    | <a href="#">chotu.aSep08</a>    |  | 3357  | 721  |   | 75  | putative protein (chotu) mRNA.                                          |
| <a href="#">chovar</a>   | <a href="#">chovar.aSep08</a>   |  | 6924  | 709  |   | 44  | putative protein (4.5 kD) (chovar) mRNA.                                |
| <a href="#">chovo</a>    | <a href="#">chovo.aSep08</a>    |  | 20819 | 1788 | 5 | 75  | putative protein (8.6 kD) (chovo) alternative variant aSep08, mRNA.     |
| <a href="#">chovo</a>    | <a href="#">chovo.bSep08</a>    |  | 2087  | 720  | 3 | 61  | putative protein (chovo) alternative variant bSep08, mRNA.              |
| <a href="#">chovo</a>    | <a href="#">chovo.cSep08</a>    |  | 1994  | 703  | 2 | 36  | putative protein (chovo) alternative variant cSep08, mRNA.              |
| <a href="#">chovo</a>    | <a href="#">chovo.dSep08</a>    |  | 2071  | 629  | 3 | 33  | putative protein (chovo) alternative variant dSep08, mRNA.              |
| <a href="#">chower</a>   | <a href="#">chower.aSep08</a>   |  | 3306  | 354  |   | 64  | polyprotein (chower) mRNA.                                              |
| <a href="#">chowey</a>   | <a href="#">chowey.aSep08</a>   |  | 1741  | 686  |   | 65  | putative protein (chowey) mRNA.                                         |
| <a href="#">choybor</a>  | <a href="#">choybor.aSep08</a>  |  | 1275  | 253  |   | 39  | putative protein (4.4 kD) (choybor) mRNA.                               |
| <a href="#">choychy</a>  | <a href="#">choychy.aSep08</a>  |  | 869   | 416  |   | 25  | putative protein (2.9 kD) (choychy) mRNA.                               |
| <a href="#">choydoy</a>  | <a href="#">choydoy.aSep08</a>  |  | 9328  | 715  |   | 79  | putative protein (8.9 kD) (choydoy) mRNA.                               |
| <a href="#">choyflu</a>  | <a href="#">choyflu.aSep08</a>  |  | 9993  | 2116 | 6 | 383 | nucleoporin 98kDa CRA b (choyflu) alternative variant aSep08, mRNA.     |
| <a href="#">choyflu</a>  | <a href="#">choyflu.bSep08</a>  |  | 384   | 298  | 1 | 46  | nucleoporin 98kDa CRA b (choyflu) alternative variant bSep08, mRNA.     |
| <a href="#">choyfly</a>  | <a href="#">choyfly.aSep08</a>  |  | 719   | 536  |   | 49  | putative protein (5.6 kD) (choyfly) mRNA.                               |
| <a href="#">choygar</a>  | <a href="#">choygar.aSep08</a>  |  | 4641  | 412  |   | 137 | pericentriolar material 1 CRA b (choygar) mRNA.                         |
| <a href="#">choyja</a>   | <a href="#">choyja.aSep08</a>   |  | 3946  | 758  |   | 72  | putative cytoplasmic protein (8.1 kD) (choyja) mRNA.                    |
| <a href="#">choyjey</a>  | <a href="#">choyjey.aSep08</a>  |  | 1227  | 306  |   | 32  | putative protein (choyjey) mRNA.                                        |
| <a href="#">choykee</a>  | <a href="#">choykee.aSep08</a>  |  | 47119 | 779  |   | 107 | putative protein (11.7 kD) (choykee) mRNA.                              |
| <a href="#">choykler</a> | <a href="#">choykler.aSep08</a> |  | 35358 | 663  |   | 220 | calcium binding atopy-related autoantigen 1 CRA c like (choykler) mRNA. |
| <a href="#">choylo</a>   | <a href="#">choylo.aSep08</a>   |  | 1254  | 304  |   | 55  | putative protein (choylo) mRNA.                                         |
| <a href="#">choymee</a>  | <a href="#">choymee.aSep08</a>  |  | 1076  | 233  |   | 77  | myosin heavy chain skeletal muscle (choymee) mRNA.                      |
| <a href="#">choynoy</a>  | <a href="#">choynoy.aSep08</a>  |  | 735   | 625  |   | 28  | putative protein (3.0 kD) (choynoy) mRNA.                               |
| <a href="#">choypor</a>  | <a href="#">choypor.aSep08</a>  |  | 14786 | 483  |   | 26  | putative protein (3.0 kD) (choypor) mRNA.                               |

|                          |                                 |                        |       |      |   |     |                                                                                                                  |
|--------------------------|---------------------------------|------------------------|-------|------|---|-----|------------------------------------------------------------------------------------------------------------------|
| <a href="#">choyroy</a>  | <a href="#">choyroy.aSep08</a>  |                        | 13158 | 340  |   | 60  | putative protein (choyroy) mRNA.                                                                                 |
| <a href="#">choysa</a>   | <a href="#">choysa.aSep08</a>   |                        | 2061  | 407  |   | 83  | putative protein (choysa) mRNA.                                                                                  |
| <a href="#">choyshee</a> | <a href="#">choyshee.aSep08</a> |                        | 2403  | 323  |   | 107 | antigen 17 like (choyshee) mRNA.                                                                                 |
| <a href="#">choytu</a>   | <a href="#">choytu.aSep08</a>   |                        | 947   | 723  |   | 99  | putative protein (choytu) mRNA.                                                                                  |
| <a href="#">choyvar</a>  | <a href="#">choyvar.aSep08</a>  |                        | 5065  | 614  | 4 | 113 | CRA b (choyvar) alternative variant aSep08, mRNA.                                                                |
| <a href="#">choyvo</a>   | <a href="#">choyvo.aSep08</a>   |                        | 2042  | 757  |   | 44  | putative protein (4.7 kD) (choyvo) mRNA.                                                                         |
| <a href="#">choywer</a>  | <a href="#">choywer.aSep08</a>  |                        | 435   | 243  |   | 61  | putative protein (choywer) alternative variant aSep08, mRNA.                                                     |
| <a href="#">choywey</a>  | <a href="#">choywey.aSep08</a>  |                        | 25809 | 544  |   | 26  | putative protein (3.1 kD) (choywey) mRNA.                                                                        |
| <a href="#">Chp</a>      | <a href="#">Chp.aSep08</a>      | <a href="#">64152</a>  | 33769 | 1035 | 7 | 195 | calcium binding protein p22 (22.4 kD) (Chp) alternative variant aSep08, mRNA.                                    |
| <a href="#">Chp</a>      | <a href="#">Chp.bSep08</a>      | <a href="#">64152</a>  | 29485 | 331  | 5 | 110 | calcium binding protein p22 (Chp) alternative variant bSep08, mRNA.                                              |
| <a href="#">Chp</a>      | <a href="#">Chp.cSep08</a>      | <a href="#">64152</a>  | 13791 | 2043 | 3 | 72  | calcium binding protein p22 (8.0 kD) (Chp) alternative variant cSep08, mRNA.                                     |
| <a href="#">Chp</a>      | <a href="#">Chp.dSep08</a>      | <a href="#">64152</a>  | 991   | 546  | 2 | 55  | calcium binding protein p22 (6.2 kD) (Chp) alternative variant dSep08, mRNA.                                     |
| <a href="#">Chpt1</a>    | <a href="#">Chpt1.aSep08</a>    | <a href="#">362866</a> | 26943 | 1801 | 6 | 549 | choline phosphotransferase 1 CRA c (Chpt1) alternative variant aSep08, mRNA.                                     |
| <a href="#">Chpt1</a>    | <a href="#">Chpt1.cSep08</a>    | <a href="#">362866</a> | 8330  | 655  | 5 | 175 | choline phosphotransferase 1 (Chpt1) alternative variant cSep08, mRNA.                                           |
| <a href="#">Chpt1</a>    | <a href="#">Chpt1.dSep08</a>    | <a href="#">362866</a> | 24760 | 1062 | 2 | 86  | putative cytoplasmic protein (9.5 kD) (Chpt1) alternative variant dSep08, mRNA.                                  |
| <a href="#">Chrac1</a>   | <a href="#">Chrac1.cSep08</a>   | <a href="#">315058</a> | 2950  | 827  | 3 | 31  | chromatin accessibility complex 1 (3.5 kD) (Chrac1) alternative variant cSep08, mRNA.                            |
| <a href="#">Chrd</a>     | <a href="#">Chrd.aSep08</a>     | <a href="#">117275</a> | 812   | 476  |   | 105 | chordin (Chrd) mRNA.                                                                                             |
| <a href="#">Chrd1</a>    | <a href="#">Chrd1.bSep08</a>    | <a href="#">363455</a> | 26338 | 1115 | 1 | 188 | kojirin (Chrd1) alternative variant bSep08, mRNA.                                                                |
| <a href="#">Chrna3</a>   | <a href="#">Chrna3.bSep08</a>   | <a href="#">25101</a>  | 7976  | 377  | 4 | 29  | cholinergic receptor, nicotinic, alpha polypeptide 3 (Chrna3) alternative variant bSep08, mRNA.                  |
| <a href="#">Chrna4</a>   | <a href="#">Chrna4.bSep08</a>   | <a href="#">25590</a>  | 36692 | 511  | 3 | 97  | cholinergic receptor, nicotinic, alpha polypeptide 4 (Chrna4) alternative variant bSep08, mRNA.                  |
| <a href="#">Chrb1</a>    | <a href="#">Chrb1.bSep08</a>    | <a href="#">24261</a>  | 5736  | 963  | 2 | 229 | cholinergic receptor, nicotinic, beta polypeptide 1 (muscle) (26.2 kD) (Chrb1) alternative variant bSep08, mRNA. |
| <a href="#">Chrne</a>    | <a href="#">Chrne.bSep08</a>    | <a href="#">29422</a>  | 1823  | 828  | 6 | 217 | cholinergic receptor, nicotinic, epsilon polypeptide (Chrne) alternative variant bSep08, mRNA.                   |
| <a href="#">Chromo.0</a> | <a href="#">Chromo.0.aSep08</a> |                        | 3580  | 1213 |   | 403 | chromodomain helicase DNA binding protein 3 like (Chromo.0) mRNA.                                                |
| <a href="#">Chst5</a>    | <a href="#">Chst5.bSep08</a>    | <a href="#">307859</a> | 18574 | 370  | 2 | 91  | carbohydrate (N-acetylglucosamine 6-O) sulfotransferase 5 (Chst5) alternative variant bSep08, mRNA.              |
| <a href="#">Chst5</a>    | <a href="#">Chst5.cSep08</a>    | <a href="#">307859</a> | 1572  | 412  | 1 | 58  | carbohydrate (N-acetylglucosamine 6-O) sulfotransferase 5 (Chst5) alternative variant cSep08, mRNA.              |
| <a href="#">Chst5</a>    | <a href="#">Chst5.dSep08</a>    | <a href="#">307859</a> | 18391 | 347  | 2 | 81  | carbohydrate (N-acetylglucosamine 6-O) sulfotransferase 5 (Chst5) alternative variant dSep08, mRNA.              |
| <a href="#">Chst10</a>   | <a href="#">Chst10.bSep08</a>   | <a href="#">140568</a> | 12343 | 395  | 1 | 76  | carbohydrate sulfotransferase 10 (Chst10) alternative variant bSep08, mRNA.                                      |

|                         |                                |                        |       |      |    |     |                                                                                                                   |
|-------------------------|--------------------------------|------------------------|-------|------|----|-----|-------------------------------------------------------------------------------------------------------------------|
| <a href="#">Chst14</a>  | <a href="#">Chst14.bSep08</a>  | <a href="#">691394</a> | 1130  | 560  | 2  | 92  | carbohydrate (N-acetylgalactosamine 4-0) sulfotransferase 14 (10.2 kD) (Chst14) alternative variant bSep08, mRNA. |
| <a href="#">chubor</a>  | <a href="#">chubor.aSep08</a>  |                        | 10373 | 688  | 4  | 184 | serine threonine kinase 38 CRA a (chubor) alternative variant aSep08, mRNA.                                       |
| <a href="#">chuchy</a>  | <a href="#">chuchy.aSep08</a>  |                        | 2679  | 494  |    | 127 | activating signal cointegrator 1 complex (chuchy) mRNA.                                                           |
| <a href="#">chudoy</a>  | <a href="#">chudoy.aSep08</a>  |                        | 1974  | 627  |    | 154 | myosin VIIIb CRA a (chudoy) mRNA.                                                                                 |
| <a href="#">chufly</a>  | <a href="#">chufly.aSep08</a>  |                        | 71993 | 650  |    | 71  | putative protein (chufly) mRNA.                                                                                   |
| <a href="#">chugar</a>  | <a href="#">chugar.aSep08</a>  |                        | 5714  | 752  |    | 71  | putative mitochondrial protein (8.1 kD) (chugar) mRNA.                                                            |
| <a href="#">chujey</a>  | <a href="#">chujey.aSep08</a>  |                        | 12605 | 1140 |    | 314 | putative protein of eukaryotic origin (chujey) mRNA.                                                              |
| <a href="#">Chuk</a>    | <a href="#">Chuk.bSep08</a>    | <a href="#">309361</a> | 35518 | 3502 | 21 | 719 | conserved helix-loop-helix ubiquitous kinase (82.2 kD) (Chuk) alternative variant bSep08, mRNA.                   |
| <a href="#">Chuk</a>    | <a href="#">Chuk.cSep08</a>    | <a href="#">309361</a> | 3646  | 956  | 3  | 85  | conserved helix-loop-helix ubiquitous kinase (9.8 kD) (Chuk) alternative variant cSep08, mRNA.                    |
| <a href="#">chukee</a>  | <a href="#">chukee.aSep08</a>  |                        | 536   | 373  | 2  | 82  | putative protein of mammalian origin (chukee) alternative variant aSep08, mRNA.                                   |
| <a href="#">chukler</a> | <a href="#">chukler.aSep08</a> |                        | 4421  | 649  |    | 86  | uncharacterized protein c3orf1 homolog like (chukler) mRNA.                                                       |
| <a href="#">chulo</a>   | <a href="#">chulo.aSep08</a>   |                        | 818   | 361  |    | 26  | putative protein (2.9 kD) (chulo) mRNA.                                                                           |
| <a href="#">chumee</a>  | <a href="#">chumee.aSep08</a>  |                        | 5160  | 668  |    | 222 | elac homolog 2 (chumee) mRNA.                                                                                     |
| <a href="#">chunoy</a>  | <a href="#">chunoy.aSep08</a>  |                        | 2522  | 1270 |    | 83  | putative nuclear protein (9.3 kD) (chunoy) mRNA.                                                                  |
| <a href="#">chupor</a>  | <a href="#">chupor.aSep08</a>  |                        | 455   | 279  |    | 88  | putative protein (chupor) mRNA.                                                                                   |
| <a href="#">Churc1</a>  | <a href="#">Churc1.bSep08</a>  | <a href="#">299154</a> | 14696 | 258  | 3  | 85  | churchill (Churc1) alternative variant bSep08, mRNA.                                                              |
| <a href="#">Churc1</a>  | <a href="#">Churc1.cSep08</a>  | <a href="#">299154</a> | 8953  | 583  | 3  | 74  | churchill (8.7 kD) (Churc1) alternative variant cSep08, mRNA.                                                     |
| <a href="#">Churc1</a>  | <a href="#">Churc1.dSep08</a>  | <a href="#">299154</a> | 10177 | 396  | 4  | 74  | churchill (8.7 kD) (Churc1) alternative variant dSep08, mRNA.                                                     |
| <a href="#">Churc1</a>  | <a href="#">Churc1.eSep08</a>  | <a href="#">299154</a> | 14580 | 1136 | 4  | 74  | churchill (8.7 kD) (Churc1) alternative variant eSep08, mRNA.                                                     |
| <a href="#">Churc1</a>  | <a href="#">Churc1.fSep08</a>  | <a href="#">299154</a> | 6701  | 585  | 2  | 35  | putative protein of vertebrate origin (4.1 kD) (Churc1) alternative variant fSep08, mRNA.                         |
| <a href="#">churoy</a>  | <a href="#">churoy.aSep08</a>  |                        | 17594 | 693  |    | 131 | nidogen 2 CRA a (14.1 kD) (churoy) mRNA.                                                                          |
| <a href="#">chusa</a>   | <a href="#">chusa.aSep08</a>   |                        | 10123 | 730  |    | 33  | putative protein (3.7 kD) (chusa) mRNA.                                                                           |
| <a href="#">chushee</a> | <a href="#">chushee.aSep08</a> |                        | 6309  | 665  | 2  | 164 | putative protein (chushee) alternative variant aSep08, mRNA.                                                      |
| <a href="#">chushee</a> | <a href="#">chushee.bSep08</a> |                        | 3278  | 650  | 1  | 159 | putative protein (chushee) alternative variant bSep08, mRNA.                                                      |
| <a href="#">chutu</a>   | <a href="#">chutu.aSep08</a>   |                        | 3029  | 701  |    | 60  | putative protein (6.9 kD) (chutu) mRNA.                                                                           |
| <a href="#">chuvar</a>  | <a href="#">chuvar.aSep08</a>  |                        | 4012  | 535  |    | 41  | putative protein (chuvar) mRNA.                                                                                   |
| <a href="#">chuvo</a>   | <a href="#">chuvo.aSep08</a>   |                        | 810   | 723  |    | 50  | chaperonin containing Tcp1 (chuvo) mRNA.                                                                          |
| <a href="#">chuwer</a>  | <a href="#">chuwer.aSep08</a>  |                        | 32766 | 611  |    | 121 | putative protein (13.3 kD) (chuwer) mRNA.                                                                         |
| <a href="#">chuwey</a>  | <a href="#">chuwey.aSep08</a>  |                        | 1830  | 711  |    | 41  | putative protein (chuwey) mRNA.                                                                                   |

|                         |                                |                        |       |      |   |     |                                                                                                                     |
|-------------------------|--------------------------------|------------------------|-------|------|---|-----|---------------------------------------------------------------------------------------------------------------------|
| <a href="#">chybor</a>  | <a href="#">chybor.aSep08</a>  |                        | 2606  | 468  |   | 155 | putative protein of eukaryotic origin (chybor) mRNA.                                                                |
| <a href="#">chychy</a>  | <a href="#">chychy.aSep08</a>  |                        | 7862  | 371  |   | 36  | complex protein 4 like (chychy) mRNA.                                                                               |
| <a href="#">chydar</a>  | <a href="#">chydar.aSep08</a>  |                        | 7677  | 742  |   | 78  | putative mitochondrial protein (8.7 kD) (chydar) mRNA.                                                              |
| <a href="#">chydoy</a>  | <a href="#">chydoy.aSep08</a>  |                        | 9631  | 738  | 2 | 38  | putative protein (4.1 kD) (chydoy) alternative variant aSep08, mRNA.                                                |
| <a href="#">chyflu</a>  | <a href="#">chyflu.aSep08</a>  |                        | 5810  | 670  |   | 74  | putative endoplasmic reticulum protein (8.1 kD) (chyflu) mRNA.                                                      |
| <a href="#">chyfly</a>  | <a href="#">chyfly.aSep08</a>  |                        | 48961 | 595  |   | 198 | laminin alpha 2 CRA b (chyfly) mRNA.                                                                                |
| <a href="#">chygar</a>  | <a href="#">chygar.aSep08</a>  |                        | 5396  | 784  |   | 55  | putative protein (6.1 kD) (chygar) mRNA.                                                                            |
| <a href="#">chyja</a>   | <a href="#">chyja.aSep08</a>   |                        | 7987  | 261  |   | 86  | putative protein (chyja) alternative variant aSep08, mRNA.                                                          |
| <a href="#">chyjey</a>  | <a href="#">chyjey.aSep08</a>  |                        | 6727  | 648  |   | 177 | putative protein of eukaryotic origin (chyjey) mRNA.                                                                |
| <a href="#">chykee</a>  | <a href="#">chykee.aSep08</a>  |                        | 46147 | 666  |   | 222 | putative protein of vertebrate origin (chykee) mRNA.                                                                |
| <a href="#">chykler</a> | <a href="#">chykler.aSep08</a> |                        | 1205  | 291  |   | 48  | putative protein (chykler) mRNA.                                                                                    |
| <a href="#">chylo</a>   | <a href="#">chylo.aSep08</a>   |                        | 2285  | 475  | 2 | 111 | putative protein (chylo) alternative variant aSep08, mRNA.                                                          |
| <a href="#">chymee</a>  | <a href="#">chymee.aSep08</a>  |                        | 661   | 348  |   | 27  | putative protein (chymee) mRNA.                                                                                     |
| <a href="#">chynoy</a>  | <a href="#">chynoy.aSep08</a>  |                        | 3973  | 458  | 1 | 54  | putative protein (6.3 kD) (chynoy) alternative variant aSep08, mRNA.                                                |
| <a href="#">chynoy</a>  | <a href="#">chynoy.bSep08</a>  |                        | 4669  | 309  | 1 | 45  | putative protein (chynoy) alternative variant bSep08, mRNA.                                                         |
| <a href="#">chypor</a>  | <a href="#">chypor.aSep08</a>  |                        | 24048 | 1784 |   | 61  | putative protein (7.1 kD) (chypor) alternative variant aSep08, mRNA.                                                |
| <a href="#">chyroy</a>  | <a href="#">chyroy.aSep08</a>  |                        | 28512 | 777  | 3 | 31  | putative protein (chyroy) alternative variant aSep08, mRNA.                                                         |
| <a href="#">chyroy</a>  | <a href="#">chyroy.bSep08</a>  |                        | 44112 | 751  | 5 | 31  | putative protein (3.3 kD) (chyroy) alternative variant bSep08, mRNA.                                                |
| <a href="#">chyroy</a>  | <a href="#">chyroy.cSep08</a>  |                        | 42802 | 747  | 5 | 64  | putative protein (chyroy) alternative variant cSep08, mRNA.                                                         |
| <a href="#">chyroy</a>  | <a href="#">chyroy.dSep08</a>  |                        | 28530 | 677  | 5 | 43  | putative protein (4.4 kD) (chyroy) alternative variant dSep08, complete mRNA.                                       |
| <a href="#">chyroy</a>  | <a href="#">chyroy.eSep08</a>  |                        | 28597 | 672  | 4 | 59  | putative protein (6.3 kD) (chyroy) alternative variant eSep08, mRNA.                                                |
| <a href="#">chysa</a>   | <a href="#">chysa.aSep08</a>   |                        | 5101  | 753  |   | 79  | putative protein (chysa) mRNA.                                                                                      |
| <a href="#">chyshee</a> | <a href="#">chyshee.aSep08</a> |                        | 17003 | 1797 | 3 | 546 | putative protein (chyshee) alternative variant aSep08, mRNA.                                                        |
| <a href="#">chytu</a>   | <a href="#">chytu.aSep08</a>   |                        | 11778 | 732  |   | 87  | putative protein (chytu) mRNA.                                                                                      |
| <a href="#">chyvar</a>  | <a href="#">chyvar.aSep08</a>  |                        | 421   | 236  | 2 | 36  | putative protein (chyvar) alternative variant aSep08, mRNA.                                                         |
| <a href="#">chyvo</a>   | <a href="#">chyvo.aSep08</a>   |                        | 6538  | 423  |   | 41  | putative protein (chyvo) mRNA.                                                                                      |
| <a href="#">chywer</a>  | <a href="#">chywer.aSep08</a>  |                        | 31864 | 645  |   | 214 | CRA a (chywer) mRNA.                                                                                                |
| <a href="#">chywey</a>  | <a href="#">chywey.aSep08</a>  |                        | 1695  | 349  |   | 71  | putative protein (chywey) mRNA.                                                                                     |
| <a href="#">Ciao1</a>   | <a href="#">Ciao1.bSep08</a>   | <a href="#">29231</a>  | 4889  | 2572 | 3 | 194 | cytosolic iron-sulfur protein assembly 1 homolog ( <i>S. cerevisiae</i> ) (Ciao1) alternative variant bSep08, mRNA. |
| <a href="#">Ciapin1</a> | <a href="#">Ciapin1.aSep08</a> | <a href="#">307649</a> | 4230  | 1319 | 4 | 316 | cytokine induced apoptosis inhibitor 1 (Ciapin1) alternative variant aSep08, mRNA.                                  |

|                         |                                |                        |       |      |    |     |                                                                                                                       |
|-------------------------|--------------------------------|------------------------|-------|------|----|-----|-----------------------------------------------------------------------------------------------------------------------|
| <a href="#">Ciapin1</a> | <a href="#">Ciapin1.cSep08</a> | <a href="#">307649</a> | 10673 | 812  | 7  | 246 | cytokine induced apoptosis inhibitor 1 (Ciapin1) alternative variant cSep08, mRNA.                                    |
| <a href="#">Ciapin1</a> | <a href="#">Ciapin1.dSep08</a> | <a href="#">307649</a> | 10677 | 813  | 7  | 246 | cytokine induced apoptosis inhibitor 1 (Ciapin1) alternative variant dSep08, mRNA.                                    |
| <a href="#">Ciapin1</a> | <a href="#">Ciapin1.eSep08</a> | <a href="#">307649</a> | 6667  | 822  | 4  | 151 | cytokine induced apoptosis inhibitor 1 (Ciapin1) alternative variant eSep08, mRNA.                                    |
| <a href="#">Ciapin1</a> | <a href="#">Ciapin1.fSep08</a> | <a href="#">307649</a> | 4590  | 741  | 2  | 74  | cytokine induced apoptosis inhibitor 1 (7.9 kD) (Ciapin1) alternative variant fSep08, complete mRNA.                  |
| <a href="#">Cib1</a>    | <a href="#">Cib1.aSep08</a>    | <a href="#">81823</a>  | 13232 | 1548 | 1  | 203 | calcium and integrin binding 1 (calmyrin) (23.2 kD) (Cib1) alternative variant aSep08, mRNA.                          |
| <a href="#">Cib4</a>    | <a href="#">Cib4.aSep08</a>    | <a href="#">688819</a> | 2580  | 341  |    | 58  | calcium and integrin binding family member 4 (Cib4) mRNA.                                                             |
| <a href="#">Cic</a>     | <a href="#">Cic.bSep08</a>     | <a href="#">308435</a> | 1868  | 1159 | 5  | 386 | capicua homolog (Drosophila) (Cic) alternative variant bSep08, mRNA.                                                  |
| <a href="#">Cic</a>     | <a href="#">Cic.cSep08</a>     | <a href="#">308435</a> | 1270  | 848  | 3  | 282 | capicua homolog (Drosophila) (Cic) alternative variant cSep08, mRNA.                                                  |
| <a href="#">Cic</a>     | <a href="#">Cic.dSep08</a>     | <a href="#">308435</a> | 1074  | 817  | 2  | 135 | capicua homolog (Drosophila) (Cic) alternative variant dSep08, mRNA.                                                  |
| <a href="#">Cidea</a>   | <a href="#">Cidea.aSep08</a>   | <a href="#">291541</a> | 25906 | 1379 |    | 215 | cell death-inducing DNA fragmentation factor, alpha subunit-like effector A (24.3 kD) (Cidea) mRNA.                   |
| <a href="#">Cideb</a>   | <a href="#">Cideb.bSep08</a>   | <a href="#">364388</a> | 3900  | 819  | 2  | 240 | cell death-inducing DNA fragmentation factor, alpha subunit-like effector B (Cideb) alternative variant bSep08, mRNA. |
| <a href="#">Ciita</a>   | <a href="#">Ciita.bSep08</a>   | <a href="#">85483</a>  | 2701  | 2186 | 2  | 67  | class II transactivator (Ciita) alternative variant bSep08, mRNA.                                                     |
| <a href="#">Cinp</a>    | <a href="#">Cinp.bSep08</a>    | <a href="#">299334</a> | 11931 | 614  | 5  | 158 | cyclin-dependent kinase 2-interacting protein (17.7 kD) (Cinp) alternative variant bSep08, complete mRNA.             |
| <a href="#">Cinp</a>    | <a href="#">Cinp.cSep08</a>    | <a href="#">299334</a> | 13279 | 724  | 4  | 118 | cyclin-dependent kinase 2-interacting protein (13.0 kD) (Cinp) alternative variant cSep08, mRNA.                      |
| <a href="#">Cinp</a>    | <a href="#">Cinp.dSep08</a>    | <a href="#">299334</a> | 3575  | 648  | 2  | 37  | cyclin-dependent kinase 2-interacting protein (Cinp) alternative variant dSep08, mRNA.                                |
| <a href="#">Cip29</a>   | <a href="#">Cip29.bSep08</a>   | <a href="#">362819</a> | 44177 | 859  | 9  | 175 | cytokine induced protein 29 kDa (Cip29) alternative variant bSep08, mRNA.                                             |
| <a href="#">Cip29</a>   | <a href="#">Cip29.cSep08</a>   | <a href="#">362819</a> | 61376 | 974  | 13 | 127 | cytokine induced protein 29 kDa (14.1 kD) (Cip29) alternative variant cSep08, mRNA.                                   |
| <a href="#">Cip29</a>   | <a href="#">Cip29.dSep08</a>   | <a href="#">362819</a> | 50871 | 813  | 10 | 103 | cytokine induced protein 29 kDa (11.4 kD) (Cip29) alternative variant dSep08, mRNA.                                   |
| <a href="#">Cip29</a>   | <a href="#">Cip29.eSep08</a>   | <a href="#">362819</a> | 5235  | 575  | 2  | 97  | cytokine induced protein 29 kDa (11.4 kD) (Cip29) alternative variant eSep08, mRNA.                                   |
| <a href="#">Cip98</a>   | <a href="#">Cip98.bSep08</a>   | <a href="#">313255</a> | 15672 | 1120 | 5  | 324 | CASK-interacting protein CIP98 (Cip98) alternative variant bSep08, mRNA.                                              |
| <a href="#">Cip98</a>   | <a href="#">Cip98.cSep08</a>   | <a href="#">313255</a> | 38027 | 1287 | 3  | 176 | CASK-interacting protein CIP98 (Cip98) alternative variant cSep08, mRNA.                                              |
| <a href="#">Cip98</a>   | <a href="#">Cip98.dSep08</a>   | <a href="#">313255</a> | 62152 | 390  | 3  | 129 | CASK-interacting protein CIP98 (Cip98) alternative variant dSep08, mRNA.                                              |
| <a href="#">Cip98</a>   | <a href="#">Cip98.eSep08</a>   | <a href="#">313255</a> | 3487  | 413  | 3  | 84  | CASK-interacting protein CIP98 (Cip98) alternative variant eSep08, mRNA.                                              |

|                        |                               |                        |       |      |    |      |                                                                                                                            |
|------------------------|-------------------------------|------------------------|-------|------|----|------|----------------------------------------------------------------------------------------------------------------------------|
| <a href="#">Cipar1</a> | <a href="#">Cipar1.aSep08</a> | <a href="#">286894</a> | 32640 | 1250 |    | 282  | castration induced prostatic apoptosis-related protein 1 (Cipar1) mRNA.                                                    |
| <a href="#">Cir</a>    | <a href="#">Cir.aSep08</a>    | <a href="#">362149</a> | 30115 | 1916 | 8  | 451  | CBF1 interacting corepressor (51.4 kD) (Cir) alternative variant aSep08, complete mRNA.                                    |
| <a href="#">Cir</a>    | <a href="#">Cir.bSep08</a>    | <a href="#">362149</a> | 29993 | 1783 | 7  | 376  | CBF1 interacting corepressor (42.6 kD) (Cir) alternative variant bSep08, complete mRNA.                                    |
| <a href="#">Cir</a>    | <a href="#">Cir.cSep08</a>    | <a href="#">362149</a> | 3289  | 781  | 1  | 201  | CBF1 interacting corepressor (Cir) alternative variant cSep08, mRNA.                                                       |
| <a href="#">Cirbp</a>  | <a href="#">Cirbp.bSep08</a>  | <a href="#">81825</a>  | 4943  | 2518 | 7  | 176  | cold inducible RNA binding protein (18.8 kD) (Cirbp) alternative variant bSep08, complete mRNA.                            |
| <a href="#">Cirbp</a>  | <a href="#">Cirbp.cSep08</a>  | <a href="#">81825</a>  | 3036  | 761  | 7  | 174  | cold inducible RNA binding protein (Cirbp) alternative variant cSep08, mRNA.                                               |
| <a href="#">Cirbp</a>  | <a href="#">Cirbp.eSep08</a>  | <a href="#">81825</a>  | 4953  | 909  | 9  | 172  | cold inducible RNA binding protein (18.6 kD) (Cirbp) alternative variant eSep08, complete mRNA.                            |
| <a href="#">Cirh1a</a> | <a href="#">Cirh1a.bSep08</a> | <a href="#">291987</a> | 10915 | 734  | 1  | 233  | cirrhosis, autosomal recessive 1A (human) (Cirh1a) alternative variant bSep08, mRNA.                                       |
| <a href="#">Cisd2</a>  | <a href="#">Cisd2.aSep08</a>  | <a href="#">295457</a> | 24810 | 2883 |    | 147  | CDGSH iron sulfur domain 2 (Cisd2) mRNA.                                                                                   |
| <a href="#">Cit</a>    | <a href="#">Cit.bSep08</a>    | <a href="#">83620</a>  | 20781 | 522  | 4  | 134  | citron (rho-interacting, serine/threonine kinase 21) (Cit) alternative variant bSep08, mRNA.                               |
| <a href="#">Cit</a>    | <a href="#">Cit.dSep08</a>    | <a href="#">83620</a>  | 29272 | 672  | 3  | 63   | citron (rho-interacting, serine/threonine kinase 21) (Cit) alternative variant dSep08, mRNA.                               |
| <a href="#">Cit</a>    | <a href="#">Cit.eSep08</a>    | <a href="#">83620</a>  | 18323 | 1182 | 3  | 64   | citron (rho-interacting, serine/threonine kinase 21) (Cit) alternative variant eSep08, mRNA.                               |
| <a href="#">Cited1</a> | <a href="#">Cited1.bSep08</a> | <a href="#">64466</a>  | 3172  | 607  | 1  | 120  | cbp/p300-interacting transactivator with Glu/Asp-rich carboxy-terminal domain 1 (Cited1) alternative variant bSep08, mRNA. |
| <a href="#">Ciz1</a>   | <a href="#">Ciz1.bSep08</a>   | <a href="#">296639</a> | 15030 | 2590 | 18 | 818  | CDKN1A interacting zinc finger protein 1 (Ciz1) alternative variant bSep08, mRNA.                                          |
| <a href="#">Ciz1</a>   | <a href="#">Ciz1.cSep08</a>   | <a href="#">296639</a> | 4065  | 440  | 4  | 146  | CDKN1A interacting zinc finger protein 1 (Ciz1) alternative variant cSep08, mRNA.                                          |
| <a href="#">Ciz1</a>   | <a href="#">Ciz1.dSep08</a>   | <a href="#">296639</a> | 4399  | 760  | 5  | 146  | CDKN1A interacting zinc finger protein 1 (Ciz1) alternative variant dSep08, mRNA.                                          |
| <a href="#">Ciz1</a>   | <a href="#">Ciz1.eSep08</a>   | <a href="#">296639</a> | 3395  | 737  | 4  | 143  | CDKN1A interacting zinc finger protein 1 (Ciz1) alternative variant eSep08, mRNA.                                          |
| <a href="#">Ciz1</a>   | <a href="#">Ciz1.fSep08</a>   | <a href="#">296639</a> | 7113  | 427  | 4  | 142  | CDKN1A interacting zinc finger protein 1 (Ciz1) alternative variant fSep08, mRNA.                                          |
| <a href="#">Ciz1</a>   | <a href="#">Ciz1.gSep08</a>   | <a href="#">296639</a> | 3800  | 675  | 4  | 137  | CDKN1A interacting zinc finger protein 1 (Ciz1) alternative variant gSep08, mRNA.                                          |
| <a href="#">Ciz1</a>   | <a href="#">Ciz1.hSep08</a>   | <a href="#">296639</a> | 1918  | 816  | 3  | 104  | CDKN1A interacting zinc finger protein 1 (11.5 kD) (Ciz1) alternative variant hSep08, mRNA.                                |
| <a href="#">Ckap2</a>  | <a href="#">Ckap2.aSep08</a>  | <a href="#">306575</a> | 26590 | 2616 | 4  | 675  | cytoskeleton associated protein 2 (Ckap2) alternative variant aSep08, mRNA.                                                |
| <a href="#">Ckap2l</a> | <a href="#">Ckap2l.aSep08</a> | <a href="#">680515</a> | 3870  | 629  |    | 157  | cytoskeleton associated protein 2-like (Ckap2l) mRNA.                                                                      |
| <a href="#">Ckap5</a>  | <a href="#">Ckap5.aSep08</a>  | <a href="#">311191</a> | 40531 | 3958 | 3  | 1166 | cytoskeleton associated protein 5 (Ckap5) alternative variant aSep08, mRNA.                                                |
| <a href="#">Ckap5</a>  | <a href="#">Ckap5.bSep08</a>  | <a href="#">311191</a> | 1686  | 701  | 1  | 189  | cytoskeleton associated protein 5 (Ckap5) alternative variant bSep08, mRNA.                                                |

|                        |                               |                        |       |      |   |     |                                                                                                |
|------------------------|-------------------------------|------------------------|-------|------|---|-----|------------------------------------------------------------------------------------------------|
| <a href="#">Ckb</a>    | <a href="#">Ckb.bSep08</a>    | <a href="#">24264</a>  | 1503  | 652  | 4 | 129 | creatine kinase, brain (Ckb) alternative variant bSep08, mRNA.                                 |
| <a href="#">Cklf</a>   | <a href="#">Cklf.bSep08</a>   | <a href="#">245978</a> | 9280  | 452  | 3 | 98  | chemokine-like factor (10.8 kD) (Cklf) alternative variant bSep08, mRNA.                       |
| <a href="#">Cklf</a>   | <a href="#">Cklf.cSep08</a>   | <a href="#">245978</a> | 2368  | 701  | 2 | 61  | chemokine-like factor (6.6 kD) (Cklf) alternative variant cSep08, mRNA.                        |
| <a href="#">Ckmt1</a>  | <a href="#">Ckmt1.bSep08</a>  | <a href="#">29593</a>  | 2981  | 780  | 5 | 219 | creatine kinase, mitochondrial 1, ubiquitous (Ckmt1) alternative variant bSep08, mRNA.         |
| <a href="#">Ckmt2</a>  | <a href="#">Ckmt2.aSep08</a>  | <a href="#">688698</a> | 21055 | 802  |   | 244 | creatine kinase, mitochondrial 2, sarcomeric (Ckmt2) alternative variant aSep08, mRNA.         |
| <a href="#">Ckmt2</a>  | <a href="#">Ckmt2.bSep08</a>  | <a href="#">688698</a> | 1593  | 278  |   | 92  | creatine kinase, mitochondrial 2, sarcomeric (Ckmt2) alternative variant bSep08, mRNA.         |
| <a href="#">Clasp2</a> | <a href="#">Clasp2.bSep08</a> | <a href="#">114514</a> | 14468 | 434  | 4 | 144 | CLIP associating protein 2 (Clasp2) alternative variant bSep08, mRNA.                          |
| <a href="#">Clasp2</a> | <a href="#">Clasp2.cSep08</a> | <a href="#">114514</a> | 2819  | 1446 | 2 | 113 | CLIP associating protein 2 (12.9 kD) (Clasp2) alternative variant cSep08, mRNA.                |
| <a href="#">Clca2</a>  | <a href="#">Clca2.bSep08</a>  | <a href="#">362052</a> | 22295 | 3210 |   | 514 | chloride channel calcium activated 2 (58.7 kD) (Clca2) alternative variant bSep08, mRNA.       |
| <a href="#">Clca4</a>  | <a href="#">Clca4.bSep08</a>  | <a href="#">362053</a> | 1611  | 719  | 2 | 97  | chloride channel, calcium activated, family member 4 (Clca4) alternative variant bSep08, mRNA. |
| <a href="#">Clca4</a>  | <a href="#">Clca4.cSep08</a>  | <a href="#">362053</a> | 4941  | 319  | 3 | 61  | chloride channel, calcium activated, family member 4 (Clca4) alternative variant cSep08, mRNA. |
| <a href="#">Clca5</a>  | <a href="#">Clca5.bSep08</a>  | <a href="#">308016</a> | 1657  | 577  | 2 | 38  | chloride channel calcium activated 5 (Clca5) alternative variant bSep08, mRNA.                 |
| <a href="#">Clcc1</a>  | <a href="#">Clcc1.bSep08</a>  | <a href="#">170927</a> | 4234  | 1293 | 3 | 170 | chloride channel CLIC-like 1 (Clcc1) alternative variant bSep08, mRNA.                         |
| <a href="#">Clcc1</a>  | <a href="#">Clcc1.cSep08</a>  | <a href="#">170927</a> | 23079 | 603  | 5 | 159 | chloride channel CLIC-like 1 (Clcc1) alternative variant cSep08, mRNA.                         |
| <a href="#">Clcn1</a>  | <a href="#">Clcn1.bSep08</a>  | <a href="#">25688</a>  | 7611  | 1609 | 6 | 374 | chloride channel 1 (Clcn1) alternative variant bSep08, mRNA.                                   |
| <a href="#">Clcn2</a>  | <a href="#">Clcn2.bSep08</a>  | <a href="#">29232</a>  | 2758  | 719  | 6 | 239 | chloride channel 2 (Clcn2) alternative variant bSep08, mRNA.                                   |
| <a href="#">Clcn2</a>  | <a href="#">Clcn2.cSep08</a>  | <a href="#">29232</a>  | 5822  | 1468 | 6 | 176 | chloride channel 2 (Clcn2) alternative variant cSep08, mRNA.                                   |
| <a href="#">Clcn2</a>  | <a href="#">Clcn2.dSep08</a>  | <a href="#">29232</a>  | 1737  | 737  | 7 | 118 | chloride channel 2 (Clcn2) alternative variant dSep08, mRNA.                                   |
| <a href="#">Clcn2</a>  | <a href="#">Clcn2.eSep08</a>  | <a href="#">29232</a>  | 848   | 724  | 2 | 84  | chloride channel 2 (9.1 kD) (Clcn2) alternative variant eSep08, mRNA.                          |
| <a href="#">Clcn3</a>  | <a href="#">Clcn3.bSep08</a>  | <a href="#">84360</a>  | 14720 | 1407 | 4 | 230 | chloride channel 3 (25.2 kD) (Clcn3) alternative variant bSep08, mRNA.                         |
| <a href="#">Clcn3</a>  | <a href="#">Clcn3.cSep08</a>  | <a href="#">84360</a>  | 21614 | 440  | 4 | 146 | chloride channel 3 (Clcn3) alternative variant cSep08, mRNA.                                   |
| <a href="#">Clcn6</a>  | <a href="#">Clcn6.bSep08</a>  | <a href="#">295586</a> | 2674  | 973  | 3 | 149 | chloride channel 6 (Clcn6) alternative variant bSep08, mRNA.                                   |
| <a href="#">Clcn6</a>  | <a href="#">Clcn6.cSep08</a>  | <a href="#">295586</a> | 2321  | 696  | 3 | 110 | chloride channel 6 (Clcn6) alternative variant cSep08, mRNA.                                   |



|                        |                               |                        |       |      |    |     |                                                                                                                 |
|------------------------|-------------------------------|------------------------|-------|------|----|-----|-----------------------------------------------------------------------------------------------------------------|
| <a href="#">Clcn7</a>  | <a href="#">Clcn7.bSep08</a>  | <a href="#">29233</a>  | 6082  | 2300 | 7  | 250 | chloride channel 7 (Clcn7) alternative variant bSep08, mRNA.                                                    |
| <a href="#">Clcn7</a>  | <a href="#">Clcn7.cSep08</a>  | <a href="#">29233</a>  | 2238  | 767  | 5  | 188 | chloride channel 7 (Clcn7) alternative variant cSep08, mRNA.                                                    |
| <a href="#">Clcn7</a>  | <a href="#">Clcn7.dSep08</a>  | <a href="#">29233</a>  | 4481  | 738  | 7  | 104 | chloride channel 7 (Clcn7) alternative variant dSep08, mRNA.                                                    |
| <a href="#">Clcnka</a> | <a href="#">Clcnka.bSep08</a> | <a href="#">79425</a>  | 15973 | 2460 | 15 | 687 | chloride channel Ka (Clcnka) alternative variant bSep08, mRNA.                                                  |
| <a href="#">Clcnka</a> | <a href="#">Clcnka.cSep08</a> | <a href="#">79425</a>  | 2995  | 669  | 1  | 183 | chloride channel Ka (Clcnka) alternative variant cSep08, mRNA.                                                  |
| <a href="#">Clcnkb</a> | <a href="#">Clcnkb.aSep08</a> | <a href="#">79430</a>  | 11751 | 2229 | 19 | 644 | chloride channel Kb CRA b (70.4 kD) (Clcnkb) alternative variant aSep08, complete mRNA.                         |
| <a href="#">Clcnkb</a> | <a href="#">Clcnkb.bSep08</a> | <a href="#">79430</a>  | 11751 | 2279 | 19 | 585 | chloride channel Kb CRA b (63.4 kD) (Clcnkb) alternative variant bSep08, complete mRNA.                         |
| <a href="#">Clcnkb</a> | <a href="#">Clcnkb.cSep08</a> | <a href="#">79430</a>  | 11751 | 2251 | 20 | 583 | chloride channel Kb CRA b (63.1 kD) (Clcnkb) alternative variant cSep08, complete mRNA.                         |
| <a href="#">Clcnkb</a> | <a href="#">Clcnkb.dSep08</a> | <a href="#">79430</a>  | 11751 | 2301 | 20 | 583 | chloride channel Kb CRA b (63.1 kD) (Clcnkb) alternative variant dSep08, complete mRNA.                         |
| <a href="#">Clcnkb</a> | <a href="#">Clcnkb.eSep08</a> | <a href="#">79430</a>  | 11728 | 2729 | 18 | 340 | chloride channel Kb CRA b (37.0 kD) (Clcnkb) alternative variant eSep08, complete mRNA.                         |
| <a href="#">Clcnkb</a> | <a href="#">Clcnkb.fSep08</a> | <a href="#">79430</a>  | 1828  | 805  | 4  | 234 | chloride channel Kb CRA b (Clcnkb) alternative variant fSep08, mRNA.                                            |
| <a href="#">Clcnkb</a> | <a href="#">Clcnkb.gSep08</a> | <a href="#">79430</a>  | 4799  | 661  | 7  | 212 | chloride channel Kb CRA b (Clcnkb) alternative variant gSep08, mRNA.                                            |
| <a href="#">Clcnkb</a> | <a href="#">Clcnkb.iSep08</a> | <a href="#">79430</a>  | 2084  | 802  | 3  | 43  | putative protein (Clcnkb) alternative variant iSep08, mRNA.                                                     |
| <a href="#">Cldn6</a>  | <a href="#">Cldn6.aSep08</a>  | <a href="#">287098</a> | 2550  | 967  | 2  | 236 | claudin 6 (26.0 kD) (Cldn6) alternative variant aSep08, mRNA.                                                   |
| <a href="#">Cldn10</a> | <a href="#">Cldn10.bSep08</a> | <a href="#">290485</a> | 20802 | 1827 | 2  | 196 | claudin 10 (Cldn10) alternative variant bSep08, mRNA.                                                           |
| <a href="#">Cldn11</a> | <a href="#">Cldn11.bSep08</a> | <a href="#">84588</a>  | 7245  | 342  | 1  | 114 | claudin 11 (Cldn11) alternative variant bSep08, mRNA.                                                           |
| <a href="#">Cldn19</a> | <a href="#">Cldn19.aSep08</a> | <a href="#">298487</a> | 4761  | 912  | 5  | 224 | claudin 19 (23.3 kD) (Cldn19) alternative variant aSep08, complete mRNA.                                        |
| <a href="#">Cldnd1</a> | <a href="#">Cldnd1.bSep08</a> | <a href="#">288182</a> | 5031  | 875  | 3  | 291 | putative protein, with at least 3 transmembrane domains (Cldnd1) alternative variant bSep08, mRNA.              |
| <a href="#">Cldnd1</a> | <a href="#">Cldnd1.cSep08</a> | <a href="#">288182</a> | 5070  | 840  | 2  | 213 | putative endoplasmic reticulum protein of bilateral origin (23.7 kD) (Cldnd1) alternative variant cSep08, mRNA. |
| <a href="#">Cldnd1</a> | <a href="#">Cldnd1.dSep08</a> | <a href="#">288182</a> | 4983  | 748  | 2  | 191 | putative protein (Cldnd1) alternative variant dSep08, mRNA.                                                     |
| <a href="#">Cldnd1</a> | <a href="#">Cldnd1.eSep08</a> | <a href="#">288182</a> | 4644  | 594  | 2  | 165 | putative protein of vertebrate origin (Cldnd1) alternative variant eSep08, mRNA.                                |
| <a href="#">Cldnd1</a> | <a href="#">Cldnd1.fSep08</a> | <a href="#">288182</a> | 4641  | 611  | 2  | 159 | putative protein of vertebrate origin (Cldnd1) alternative variant fSep08, mRNA.                                |
| <a href="#">Cldnd1</a> | <a href="#">Cldnd1.gSep08</a> | <a href="#">288182</a> | 3290  | 408  | 2  | 124 | putative protein of vertebrate origin (Cldnd1) alternative variant gSep08, mRNA.                                |
| <a href="#">Clec1b</a> | <a href="#">Clec1b.aSep08</a> | <a href="#">500336</a> | 8099  | 707  | 2  | 197 | C-type lectin domain family 1, member b (22.9 kD) (Clec1b) alternative variant aSep08, mRNA.                    |
| <a href="#">Clec1b</a> | <a href="#">Clec1b.bSep08</a> | <a href="#">500336</a> | 8184  | 514  |    | 59  | C-type lectin domain family 1, member b (6.8 kD) (Clec1b) alternative variant bSep08, mRNA.                     |

|                         |                                |                        |       |      |    |     |                                                                                                                                      |
|-------------------------|--------------------------------|------------------------|-------|------|----|-----|--------------------------------------------------------------------------------------------------------------------------------------|
| <a href="#">Clec2d</a>  | <a href="#">Clec2d.bSep08</a>  | <a href="#">113937</a> | 20983 | 387  | 3  | 104 | C-type lectin domain family 2, member d (Clec2d) alternative variant bSep08, mRNA.                                                   |
| <a href="#">Clec2h</a>  | <a href="#">Clec2h.aSep08</a>  | <a href="#">312745</a> | 2354  | 1457 |    | 83  | C-type lectin domain family 2, member h (Clec2h) mRNA.                                                                               |
| <a href="#">Clec4a1</a> | <a href="#">Clec4a1.bSep08</a> | <a href="#">362430</a> | 2375  | 1008 | 2  | 81  | C-type lectin domain family 4, member a1 (9.3 kD) (Clec4a1) alternative variant bSep08, mRNA.                                        |
| <a href="#">Clec4b2</a> | <a href="#">Clec4b2.bSep08</a> | <a href="#">450222</a> | 24130 | 421  |    | 89  | C-type lectin domain family 4, member b2 (10.1 kD) (Clec4b2) alternative variant bSep08, mRNA.                                       |
| <a href="#">Clec7a</a>  | <a href="#">Clec7a.aSep08</a>  | <a href="#">502902</a> | 11166 | 2518 | 2  | 235 | C-type lectin domain family 7, member a (26.5 kD) (Clec7a) alternative variant aSep08, mRNA.                                         |
| <a href="#">Clec7a</a>  | <a href="#">Clec7a.bSep08</a>  | <a href="#">502902</a> | 9516  | 733  | 1  | 190 | C-type lectin domain family 7, member a (21.3 kD) (Clec7a) alternative variant bSep08, mRNA.                                         |
| <a href="#">Clec16a</a> | <a href="#">Clec16a.aSep08</a> | <a href="#">287044</a> | 50072 | 1785 | 2  | 440 | C-type lectin domain family 16, member A (Clec16a) alternative variant aSep08, mRNA.                                                 |
| <a href="#">Clec16a</a> | <a href="#">Clec16a.bSep08</a> | <a href="#">287044</a> | 31034 | 666  | 2  | 179 | C-type lectin domain family 16, member A (Clec16a) alternative variant bSep08, mRNA.                                                 |
| <a href="#">Clecsf6</a> | <a href="#">Clecsf6.bSep08</a> | <a href="#">474143</a> | 17711 | 809  | 2  | 63  | C-type (calcium dependent, carbohydrate recognition domain) lectin, superfamily member 6 (Clecsf6) alternative variant bSep08, mRNA. |
| <a href="#">Clgn</a>    | <a href="#">Clgn.bSep08</a>    | <a href="#">685504</a> | 2567  | 609  | 3  | 93  | calmegin (Clgn) alternative variant bSep08, mRNA.                                                                                    |
| <a href="#">Clgn</a>    | <a href="#">Clgn.cSep08</a>    | <a href="#">685504</a> | 7891  | 257  | 3  | 63  | calmegin (Clgn) alternative variant cSep08, mRNA.                                                                                    |
| <a href="#">Clc2</a>    | <a href="#">Clc2.bSep08</a>    | <a href="#">294141</a> | 1405  | 761  | 1  | 114 | chloride intracellular channel 2 (Clc2) alternative variant bSep08, mRNA.                                                            |
| <a href="#">Clc5</a>    | <a href="#">Clc5.bSep08</a>    | <a href="#">94272</a>  | 37554 | 5756 | 2  | 123 | chloride intracellular channel 5 (14.1 kD) (Clc5) alternative variant bSep08, mRNA.                                                  |
| <a href="#">Clc6</a>    | <a href="#">Clc6.bSep08</a>    | <a href="#">304081</a> | 9460  | 1067 | 2  | 163 | chloride intracellular channel 6 (Clc6) alternative variant bSep08, mRNA.                                                            |
| <a href="#">Clip1</a>   | <a href="#">Clip1.bSep08</a>   | <a href="#">65201</a>  | 40973 | 2811 | 11 | 462 | restin CRA c (Clip1) alternative variant bSep08, mRNA.                                                                               |
| <a href="#">Clip1</a>   | <a href="#">Clip1.cSep08</a>   | <a href="#">65201</a>  | 17950 | 1337 | 6  | 445 | restin CRA b (Clip1) alternative variant cSep08, mRNA.                                                                               |
| <a href="#">Clip1</a>   | <a href="#">Clip1.dSep08</a>   | <a href="#">65201</a>  | 18143 | 1567 | 6  | 340 | restin CRA a (35.5 kD) (Clip1) alternative variant dSep08, mRNA.                                                                     |
| <a href="#">Clip1</a>   | <a href="#">Clip1.eSep08</a>   | <a href="#">65201</a>  | 31688 | 619  | 6  | 197 | restin CRA a (Clip1) alternative variant eSep08, mRNA.                                                                               |
| <a href="#">Clip1</a>   | <a href="#">Clip1.fSep08</a>   | <a href="#">65201</a>  | 29473 | 781  | 6  | 189 | restin CRA b (Clip1) alternative variant fSep08, mRNA.                                                                               |
| <a href="#">Clip2</a>   | <a href="#">Clip2.bSep08</a>   | <a href="#">29264</a>  | 22947 | 1636 | 8  | 451 | linker 2 (Clip2) alternative variant bSep08, mRNA.                                                                                   |
| <a href="#">Clip3</a>   | <a href="#">Clip3.bSep08</a>   | <a href="#">308493</a> | 5042  | 572  | 5  | 190 | putative protein of metazoan origin (Clip3) alternative variant bSep08, mRNA.                                                        |
| <a href="#">Clip4</a>   | <a href="#">Clip4.bSep08</a>   | <a href="#">298801</a> | 46490 | 1429 | 10 | 409 | restin-like 2 CRA a (Clip4) alternative variant bSep08, mRNA.                                                                        |
| <a href="#">Clip4</a>   | <a href="#">Clip4.cSep08</a>   | <a href="#">298801</a> | 15939 | 753  | 4  | 165 | restin-like 2 CRA e (Clip4) alternative variant cSep08, mRNA.                                                                        |
| <a href="#">Clip4</a>   | <a href="#">Clip4.dSep08</a>   | <a href="#">298801</a> | 1028  | 330  | 2  | 76  | restin-like 2 CRA d (Clip4) alternative variant dSep08, mRNA.                                                                        |
| <a href="#">Clk1</a>    | <a href="#">Clk1.bSep08</a>    | <a href="#">301434</a> | 11219 | 3034 | 11 | 330 | CDC-like kinase 1 (38.6 kD) (Clk1) alternative variant bSep08, complete mRNA.                                                        |
| <a href="#">Clk1</a>    | <a href="#">Clk1.cSep08</a>    | <a href="#">301434</a> | 3821  | 730  | 4  | 179 | CDC-like kinase 1 (21.6 kD) (Clk1) alternative variant cSep08, complete mRNA.                                                        |

|                      |                             |                        |       |      |   |     |                                                                      |
|----------------------|-----------------------------|------------------------|-------|------|---|-----|----------------------------------------------------------------------|
| <a href="#">Clk1</a> | <a href="#">Clk1.dSep08</a> | <a href="#">301434</a> | 1061  | 975  | 2 | 177 | CDC-like kinase 1 (Clk1) alternative variant dSep08, mRNA.           |
| <a href="#">Clk1</a> | <a href="#">Clk1.eSep08</a> | <a href="#">301434</a> | 6097  | 717  | 6 | 135 | CDC-like kinase 1 (16.4 kD) (Clk1) alternative variant eSep08, mRNA. |
| <a href="#">Clk1</a> | <a href="#">Clk1.fSep08</a> | <a href="#">301434</a> | 1115  | 613  | 3 | 95  | CDC-like kinase 1 (11.5 kD) (Clk1) alternative variant fSep08, mRNA. |
| <a href="#">Clk1</a> | <a href="#">Clk1.hSep08</a> | <a href="#">301434</a> | 860   | 487  | 2 | 45  | CDC-like kinase 1 (5.4 kD) (Clk1) alternative variant hSep08, mRNA.  |
| <a href="#">Clk2</a> | <a href="#">Clk2.bSep08</a> | <a href="#">365842</a> | 7828  | 2858 | 8 | 307 | CDC-like kinase 2 (35.1 kD) (Clk2) alternative variant bSep08, mRNA. |
| <a href="#">Clk2</a> | <a href="#">Clk2.cSep08</a> | <a href="#">365842</a> | 4491  | 633  | 5 | 211 | CDC-like kinase 2 (Clk2) alternative variant cSep08, mRNA.           |
| <a href="#">Clk2</a> | <a href="#">Clk2.dSep08</a> | <a href="#">365842</a> | 4467  | 623  | 5 | 100 | CDC-like kinase 2 (Clk2) alternative variant dSep08, mRNA.           |
| <a href="#">Clk2</a> | <a href="#">Clk2.fSep08</a> | <a href="#">365842</a> | 1685  | 402  | 4 | 81  | CDC-like kinase 2 (Clk2) alternative variant fSep08, mRNA.           |
| <a href="#">Clk3</a> | <a href="#">Clk3.bSep08</a> | <a href="#">171305</a> | 11483 | 939  | 8 | 312 | CDC-like kinase 3 (Clk3) alternative variant bSep08, mRNA.           |
| <a href="#">Clk3</a> | <a href="#">Clk3.cSep08</a> | <a href="#">171305</a> | 9473  | 1531 | 7 | 272 | CDC-like kinase 3 (Clk3) alternative variant cSep08, mRNA.           |
| <a href="#">Clk3</a> | <a href="#">Clk3.dSep08</a> | <a href="#">171305</a> | 5180  | 893  | 6 | 259 | CDC-like kinase 3 (Clk3) alternative variant dSep08, mRNA.           |
| <a href="#">Clk3</a> | <a href="#">Clk3.eSep08</a> | <a href="#">171305</a> | 7353  | 774  | 6 | 183 | CDC-like kinase 3 (Clk3) alternative variant eSep08, mRNA.           |
| <a href="#">Clk3</a> | <a href="#">Clk3.fSep08</a> | <a href="#">171305</a> | 4718  | 559  | 3 | 151 | CDC-like kinase 3 (Clk3) alternative variant fSep08, mRNA.           |
| <a href="#">Clk3</a> | <a href="#">Clk3.gSep08</a> | <a href="#">171305</a> | 3804  | 849  | 3 | 117 | CDC-like kinase 3 (Clk3) alternative variant gSep08, mRNA.           |
| <a href="#">Clk4</a> | <a href="#">Clk4.aSep08</a> | <a href="#">287269</a> | 12142 | 794  | 7 | 224 | CDC like kinase 4 (Clk4) alternative variant aSep08, mRNA.           |
| <a href="#">Clk4</a> | <a href="#">Clk4.bSep08</a> | <a href="#">287269</a> | 13401 | 625  | 6 | 134 | CDC like kinase 4 (16.6 kD) (Clk4) alternative variant bSep08, mRNA. |
| <a href="#">Clk4</a> | <a href="#">Clk4.cSep08</a> | <a href="#">287269</a> | 8590  | 443  | 5 | 122 | CDC like kinase 4 (Clk4) alternative variant cSep08, mRNA.           |
| <a href="#">Clk4</a> | <a href="#">Clk4.dSep08</a> | <a href="#">287269</a> | 8742  | 654  | 6 | 113 | CDC like kinase 4 (Clk4) alternative variant dSep08, mRNA.           |
| <a href="#">Clk4</a> | <a href="#">Clk4.eSep08</a> | <a href="#">287269</a> | 5248  | 726  | 2 | 113 | CDC like kinase 4 (Clk4) alternative variant eSep08, mRNA.           |
| <a href="#">Clk4</a> | <a href="#">Clk4.fSep08</a> | <a href="#">287269</a> | 8621  | 408  | 4 | 102 | CDC like kinase 4 (Clk4) alternative variant fSep08, mRNA.           |
| <a href="#">Clk4</a> | <a href="#">Clk4.gSep08</a> | <a href="#">287269</a> | 2697  | 1157 | 2 | 58  | CDC like kinase 4 (6.7 kD) (Clk4) alternative variant gSep08, mRNA.  |
| <a href="#">Clk4</a> | <a href="#">Clk4.hSep08</a> | <a href="#">287269</a> | 9922  | 658  | 5 | 59  | CDC like kinase 4 (6.6 kD) (Clk4) alternative variant hSep08, mRNA.  |
| <a href="#">Clk4</a> | <a href="#">Clk4.iSep08</a> | <a href="#">287269</a> | 11648 | 562  | 5 | 59  | CDC like kinase 4 (6.6 kD) (Clk4) alternative variant iSep08, mRNA.  |
| <a href="#">Clmn</a> | <a href="#">Clmn.bSep08</a> | <a href="#">299285</a> | 3862  | 654  | 1 | 177 | calmin (Clmn) alternative variant bSep08, mRNA.                      |

|                               |                                      |                        |       |      |    |     |                                                                                                                                |
|-------------------------------|--------------------------------------|------------------------|-------|------|----|-----|--------------------------------------------------------------------------------------------------------------------------------|
| <a href="#">Cln3</a>          | <a href="#">Cln3.bSep08</a>          | <a href="#">293485</a> | 7343  | 1244 | 12 | 237 | ceroid lipofuscinosis, neuronal 3, juvenile (Batten, Spielmeyer-Vogt disease) (Cln3) alternative variant bSep08, mRNA.         |
| <a href="#">Cln3</a>          | <a href="#">Cln3.cSep08</a>          | <a href="#">293485</a> | 5475  | 730  | 8  | 198 | ceroid lipofuscinosis, neuronal 3, juvenile (Batten, Spielmeyer-Vogt disease) (Cln3) alternative variant cSep08, mRNA.         |
| <a href="#">Cln3</a>          | <a href="#">Cln3.dSep08</a>          | <a href="#">293485</a> | 5433  | 801  | 8  | 195 | ceroid lipofuscinosis, neuronal 3, juvenile (Batten, Spielmeyer-Vogt disease) (Cln3) alternative variant dSep08, mRNA.         |
| <a href="#">Cln3</a>          | <a href="#">Cln3.eSep08</a>          | <a href="#">293485</a> | 3879  | 811  | 8  | 193 | ceroid lipofuscinosis, neuronal 3, juvenile (Batten, Spielmeyer-Vogt disease) (Cln3) alternative variant eSep08, mRNA.         |
| <a href="#">Cln3</a>          | <a href="#">Cln3.fSep08</a>          | <a href="#">293485</a> | 3989  | 755  | 10 | 123 | ceroid lipofuscinosis, neuronal 3, juvenile (Batten, Spielmeyer-Vogt disease) (Cln3) alternative variant fSep08, mRNA.         |
| <a href="#">Cln5</a>          | <a href="#">Cln5.aSep08</a>          | <a href="#">306128</a> | 9423  | 2258 |    | 339 | ceroid-lipofuscinosis, neuronal 5 (Cln5) mRNA.                                                                                 |
| <a href="#">Cln6andCalml4</a> | <a href="#">Cln6andCalml4.aSep08</a> | <a href="#">315746</a> | 15005 | 2006 | 7  | 329 | ceroid-lipofuscinosis neuronal 6 (Cln6andCalml4) alternative variant aSep08, mRNA.                                             |
| <a href="#">Cln6andCalml4</a> | <a href="#">Cln6andCalml4.aSep08</a> | <a href="#">691455</a> | 15005 | 2006 | 7  | 329 | ceroid-lipofuscinosis neuronal 6 (Cln6andCalml4) alternative variant aSep08, mRNA.                                             |
| <a href="#">Cln6andCalml4</a> | <a href="#">Cln6andCalml4.cSep08</a> | <a href="#">315746</a> | 24314 | 678  | 7  | 165 | ceroid-lipofuscinosis neuronal 6 (19.5 kD) (Cln6andCalml4) alternative variant cSep08, mRNA.                                   |
| <a href="#">Cln6andCalml4</a> | <a href="#">Cln6andCalml4.cSep08</a> | <a href="#">691455</a> | 24314 | 678  | 7  | 165 | ceroid-lipofuscinosis neuronal 6 (19.5 kD) (Cln6andCalml4) alternative variant cSep08, mRNA.                                   |
| <a href="#">Clns1a</a>        | <a href="#">Clns1a.bSep08</a>        | <a href="#">65160</a>  | 20281 | 1456 | 1  | 241 | chloride channel, nucleotide-sensitive, 1A (26.6 kD) (Clns1a) alternative variant bSep08, complete mRNA.                       |
| <a href="#">Clp1</a>          | <a href="#">Clp1.bSep08</a>          | <a href="#">311166</a> | 3041  | 1229 | 2  | 346 | CLP1, cleavage and polyadenylation factor I subunit, homolog (S. cerevisiae) (Clp1) alternative variant bSep08, mRNA.          |
| <a href="#">Clp1</a>          | <a href="#">Clp1.cSep08</a>          | <a href="#">311166</a> | 2683  | 343  | 2  | 85  | CLP1, cleavage and polyadenylation factor I subunit, homolog (S. cerevisiae) (Clp1) alternative variant cSep08, mRNA.          |
| <a href="#">Clp1</a>          | <a href="#">Clp1.dSep08</a>          | <a href="#">311166</a> | 2629  | 432  | 2  | 78  | CLP1, cleavage and polyadenylation factor I subunit, homolog (S. cerevisiae) (8.9 kD) (Clp1) alternative variant dSep08, mRNA. |
| <a href="#">Clpb</a>          | <a href="#">Clpb.cSep08</a>          | <a href="#">65041</a>  | 4110  | 311  | 2  | 69  | ClpB caseinolytic peptidase B homolog (E. coli) (Clpb) alternative variant cSep08, mRNA.                                       |
| <a href="#">Clpp</a>          | <a href="#">Clpp.aSep08</a>          | <a href="#">301117</a> | 5679  | 1024 | 6  | 282 | caseinolytic peptidase, ATP-dependent, proteolytic subunit homolog (E. coli) (Clpp) alternative variant aSep08, mRNA.          |
| <a href="#">Clpp</a>          | <a href="#">Clpp.bSep08</a>          | <a href="#">301117</a> | 2973  | 471  | 3  | 100 | caseinolytic peptidase, ATP-dependent, proteolytic subunit homolog (E. coli) (Clpp) alternative variant bSep08, mRNA.          |
| <a href="#">Clptm1</a>        | <a href="#">Clptm1.bSep08</a>        | <a href="#">292696</a> | 849   | 770  | 2  | 110 | cleft lip and palate associated transmembrane protein 1 (Clptm1) alternative variant bSep08, mRNA.                             |
| <a href="#">Clptm1</a>        | <a href="#">Clptm1.cSep08</a>        | <a href="#">292696</a> | 11468 | 327  | 2  | 108 | cleft lip and palate associated transmembrane protein 1 (Clptm1) alternative variant cSep08, mRNA.                             |
| <a href="#">Clptm1l</a>       | <a href="#">Clptm1l.bSep08</a>       | <a href="#">316916</a> | 8379  | 1114 | 8  | 324 | CLPTM1-like (Clptm1l) alternative variant bSep08, mRNA.                                                                        |
| <a href="#">Clptm1l</a>       | <a href="#">Clptm1l.cSep08</a>       | <a href="#">316916</a> | 9591  | 884  | 9  | 294 | CLPTM1-like (Clptm1l) alternative variant cSep08, mRNA.                                                                        |

|                         |                                |                        |       |      |   |     |                                                                                                                                     |
|-------------------------|--------------------------------|------------------------|-------|------|---|-----|-------------------------------------------------------------------------------------------------------------------------------------|
| <a href="#">Clptm1l</a> | <a href="#">Clptm1l.dSep08</a> | <a href="#">316916</a> | 7373  | 1173 | 7 | 190 | CLPTM1-like (Clptm1l) alternative variant dSep08, mRNA.                                                                             |
| <a href="#">Clptm1l</a> | <a href="#">Clptm1l.fSep08</a> | <a href="#">316916</a> | 1879  | 801  | 2 | 42  | CLPTM1-like (Clptm1l) alternative variant fSep08, mRNA.                                                                             |
| <a href="#">Clpx</a>    | <a href="#">Clpx.bSep08</a>    | <a href="#">300786</a> | 20267 | 728  | 6 | 159 | caseinolytic peptidase X (E.coli) (Clpx) alternative variant bSep08, mRNA.                                                          |
| <a href="#">Clrn1</a>   | <a href="#">Clrn1.bSep08</a>   | <a href="#">261738</a> | 49925 | 876  | 1 | 115 | clarin 1 (13.1 kD) (Clrn1) alternative variant bSep08, mRNA.                                                                        |
| <a href="#">Clspn</a>   | <a href="#">Clspn.bSep08</a>   | <a href="#">298534</a> | 2848  | 1206 | 3 | 152 | claspin homolog (Xenopus laevis) (Clspn) alternative variant bSep08, mRNA.                                                          |
| <a href="#">Clstn1</a>  | <a href="#">Clstn1.aSep08</a>  | <a href="#">313717</a> | 45258 | 591  | 1 | 196 | calsyntenin 1 (Clstn1) alternative variant aSep08, mRNA.                                                                            |
| <a href="#">Clstn1</a>  | <a href="#">Clstn1.bSep08</a>  | <a href="#">313717</a> | 45480 | 783  |   | 173 | calsyntenin 1 (Clstn1) alternative variant bSep08, mRNA.                                                                            |
| <a href="#">Clstn3</a>  | <a href="#">Clstn3.bSep08</a>  | <a href="#">171393</a> | 20607 | 1800 | 6 | 547 | calsyntenin 3 (Clstn3) alternative variant bSep08, mRNA.                                                                            |
| <a href="#">Clstn3</a>  | <a href="#">Clstn3.cSep08</a>  | <a href="#">171393</a> | 2802  | 958  | 5 | 315 | calsyntenin 3 (Clstn3) alternative variant cSep08, mRNA.                                                                            |
| <a href="#">Clstn3</a>  | <a href="#">Clstn3.dSep08</a>  | <a href="#">171393</a> | 593   | 386  | 2 | 120 | calsyntenin 3 CRA a (Clstn3) alternative variant dSep08, mRNA.                                                                      |
| <a href="#">Clstn3</a>  | <a href="#">Clstn3.eSep08</a>  | <a href="#">171393</a> | 830   | 458  | 2 | 72  | calsyntenin 3 (Clstn3) alternative variant eSep08, mRNA.                                                                            |
| <a href="#">Clstn3</a>  | <a href="#">Clstn3.fSep08</a>  | <a href="#">171393</a> | 11675 | 741  | 2 | 48  | calsyntenin 3 CRA a (Clstn3) alternative variant fSep08, mRNA.                                                                      |
| <a href="#">Clta</a>    | <a href="#">Clta.bSep08</a>    | <a href="#">83800</a>  | 18030 | 1068 | 5 | 265 | clathrin, light polypeptide (Lca) (Clta) alternative variant bSep08, mRNA.                                                          |
| <a href="#">Clta</a>    | <a href="#">Clta.cSep08</a>    | <a href="#">83800</a>  | 18457 | 1549 | 6 | 236 | clathrin, light polypeptide (Lca) (25.6 kD) (Clta) alternative variant cSep08, mRNA.                                                |
| <a href="#">Cltb</a>    | <a href="#">Cltb.bSep08</a>    | <a href="#">116561</a> | 18146 | 1511 | 1 | 188 | clathrin, light polypeptide (Lcb) (Cltb) alternative variant bSep08, mRNA.                                                          |
| <a href="#">Cltc</a>    | <a href="#">Cltc.bSep08</a>    | <a href="#">54241</a>  | 10112 | 2186 | 7 | 328 | clathrin, heavy polypeptide (Hc) (Cltc) alternative variant bSep08, mRNA.                                                           |
| <a href="#">Cltc</a>    | <a href="#">Cltc.dSep08</a>    | <a href="#">54241</a>  | 2643  | 1111 | 2 | 51  | clathrin, heavy polypeptide (Hc) (5.6 kD) (Cltc) alternative variant dSep08, mRNA.                                                  |
| <a href="#">Clu</a>     | <a href="#">Clu.bSep08</a>     | <a href="#">24854</a>  | 7469  | 1004 | 5 | 275 | clusterin CRA a (Clu) alternative variant bSep08, mRNA.                                                                             |
| <a href="#">Clu</a>     | <a href="#">Clu.cSep08</a>     | <a href="#">24854</a>  | 7176  | 735  | 5 | 221 | clusterin CRA a (Clu) alternative variant cSep08, mRNA.                                                                             |
| <a href="#">Clu</a>     | <a href="#">Clu.dSep08</a>     | <a href="#">24854</a>  | 2218  | 768  | 3 | 219 | clusterin CRA a (Clu) alternative variant dSep08, mRNA.                                                                             |
| <a href="#">Clu</a>     | <a href="#">Clu.eSep08</a>     | <a href="#">24854</a>  | 7346  | 732  | 4 | 208 | clusterin CRA a (Clu) alternative variant eSep08, mRNA.                                                                             |
| <a href="#">Clu</a>     | <a href="#">Clu.fSep08</a>     | <a href="#">24854</a>  | 7113  | 640  | 5 | 193 | clusterin CRA a (Clu) alternative variant fSep08, mRNA.                                                                             |
| <a href="#">Clu</a>     | <a href="#">Clu.gSep08</a>     | <a href="#">24854</a>  | 6747  | 618  | 5 | 167 | clusterin (Clu) alternative variant gSep08, mRNA.                                                                                   |
| <a href="#">Clu</a>     | <a href="#">Clu.hSep08</a>     | <a href="#">24854</a>  | 3682  | 489  | 3 | 93  | putative secreted or extracellular protein precursor of mammalian origin (10.4 kD) (Clu) alternative variant hSep08, complete mRNA. |
| <a href="#">Clu</a>     | <a href="#">Clu.iSep08</a>     | <a href="#">24854</a>  | 7142  | 732  | 5 | 119 | clusterin CRA a (Clu) alternative variant iSep08, mRNA.                                                                             |
| <a href="#">Clu</a>     | <a href="#">Clu.jSep08</a>     | <a href="#">24854</a>  | 7319  | 727  | 5 | 181 | clusterin CRA a (Clu) alternative variant jSep08, mRNA.                                                                             |
| <a href="#">Cluap1</a>  | <a href="#">Cluap1.bSep08</a>  | <a href="#">363544</a> | 15992 | 1243 | 7 | 285 | clusterin associated protein 1 (Cluap1) alternative variant bSep08, mRNA.                                                           |
| <a href="#">Cluap1</a>  | <a href="#">Cluap1.cSep08</a>  | <a href="#">363544</a> | 15665 | 804  | 6 | 193 | clusterin associated protein 1 (Cluap1) alternative variant cSep08, mRNA.                                                           |
| <a href="#">Cluap1</a>  | <a href="#">Cluap1.dSep08</a>  | <a href="#">363544</a> | 16694 | 1031 | 5 | 172 | clusterin associated protein 1 (20.3 kD) (Cluap1) alternative variant dSep08, mRNA.                                                 |

|                        |                               |                        |       |      |    |     |                                                                                                    |
|------------------------|-------------------------------|------------------------|-------|------|----|-----|----------------------------------------------------------------------------------------------------|
| <a href="#">Clybl</a>  | <a href="#">Clybl.aSep08</a>  | <a href="#">306198</a> | 97328 | 1162 | 1  | 322 | citrate lyase beta like (Clybl) alternative variant aSep08, mRNA.                                  |
| <a href="#">Clybl</a>  | <a href="#">Clybl.bSep08</a>  | <a href="#">306198</a> | 70666 | 379  |    | 126 | citrate lyase beta like (Clybl) alternative variant bSep08, mRNA.                                  |
| <a href="#">Cma1</a>   | <a href="#">Cma1.aSep08</a>   | <a href="#">25627</a>  | 3256  | 953  |    | 249 | chymase 1, mast cell and similar to mast cell protease 1 (Cma1) alternative variant aSep08, mRNA.  |
| <a href="#">Cma1</a>   | <a href="#">Cma1.aSep08</a>   | <a href="#">691558</a> | 3256  | 953  |    | 249 | chymase 1, mast cell and similar to mast cell protease 1 (Cma1) alternative variant aSep08, mRNA.  |
| <a href="#">Cma1</a>   | <a href="#">Cma1.cSep08</a>   | <a href="#">25627</a>  | 913   | 602  |    | 132 | chymase 1, mast cell and similar to mast cell protease 1 (Cma1) alternative variant cSep08, mRNA.  |
| <a href="#">Cma1</a>   | <a href="#">Cma1.cSep08</a>   | <a href="#">691558</a> | 913   | 602  |    | 132 | chymase 1, mast cell and similar to mast cell protease 1 (Cma1) alternative variant cSep08, mRNA.  |
| <a href="#">Cmah</a>   | <a href="#">Cmah.bSep08</a>   | <a href="#">361245</a> | 7409  | 812  | 5  | 233 | cytidine monophospho-N-acetylneuraminic acid hydroxylase (Cmah) alternative variant bSep08, mRNA.  |
| <a href="#">Cmah</a>   | <a href="#">Cmah.cSep08</a>   | <a href="#">361245</a> | 17435 | 874  | 6  | 187 | cytidine monophospho-N-acetylneuraminic acid hydroxylase (Cmah) alternative variant cSep08, mRNA.  |
| <a href="#">Cmas</a>   | <a href="#">Cmas.bSep08</a>   | <a href="#">312826</a> | 3582  | 769  | 1  | 125 | cytidine monophospho-N-acetylneuraminic acid synthetase (Cmas) alternative variant bSep08, mRNA.   |
| <a href="#">Cmb1</a>   | <a href="#">Cmb1.cSep08</a>   | <a href="#">310201</a> | 10742 | 720  | 2  | 70  | carboxymethylenebutenolidase homolog (Pseudomonas) (Cmb1) alternative variant cSep08, mRNA.        |
| <a href="#">Cmc1.0</a> | <a href="#">Cmc1.0.aSep08</a> |                        | 26002 | 631  | 1  | 80  | putative protein of vertebrate origin (9.6 kD) (Cmc1.0) alternative variant aSep08, complete mRNA. |
| <a href="#">Cmc1.0</a> | <a href="#">Cmc1.0.bSep08</a> |                        | 26020 | 618  | 2  | 79  | putative protein of eukaryotic origin (9.4 kD) (Cmc1.0) alternative variant bSep08, complete mRNA. |
| <a href="#">Cmip</a>   | <a href="#">Cmip.aSep08</a>   | <a href="#">292051</a> | 81791 | 4147 | 20 | 675 | c-Maf-inducing protein (Cmip) alternative variant aSep08, mRNA.                                    |
| <a href="#">Cmip</a>   | <a href="#">Cmip.bSep08</a>   | <a href="#">292051</a> | 8259  | 1210 | 2  | 134 | c-Maf-inducing protein (14.6 kD) (Cmip) alternative variant bSep08, mRNA.                          |
| <a href="#">Cmip</a>   | <a href="#">Cmip.cSep08</a>   | <a href="#">292051</a> | 23391 | 377  | 5  | 125 | c-Maf-inducing protein (Cmip) alternative variant cSep08, mRNA.                                    |
| <a href="#">Cmklr1</a> | <a href="#">Cmklr1.bSep08</a> | <a href="#">60669</a>  | 97696 | 511  | 3  | 38  | chemokine-like receptor 1 (Cmklr1) alternative variant bSep08, mRNA.                               |
| <a href="#">Cmtm3</a>  | <a href="#">Cmtm3.aSep08</a>  | <a href="#">291813</a> | 6331  | 982  | 1  | 184 | marvel (20.3 kD) (Cmtm3) alternative variant aSep08, mRNA.                                         |
| <a href="#">Cmtm4</a>  | <a href="#">Cmtm4.aSep08</a>  | <a href="#">498902</a> | 43640 | 4557 |    | 208 | 4-like (22.8 kD) (Cmtm4) mRNA.                                                                     |
| <a href="#">Cmtm6</a>  | <a href="#">Cmtm6.aSep08</a>  | <a href="#">316035</a> | 18108 | 3254 |    | 201 | marvel (Cmtm6) mRNA.                                                                               |
| <a href="#">Cmtm7</a>  | <a href="#">Cmtm7.bSep08</a>  | <a href="#">501065</a> | 2442  | 1147 | 2  | 61  | putative protein (Cmtm7) alternative variant bSep08, mRNA.                                         |
| <a href="#">Cnbp</a>   | <a href="#">Cnbp.bSep08</a>   | <a href="#">64530</a>  | 8788  | 1554 | 5  | 227 | cellular nucleic acid binding protein (Cnbp) alternative variant bSep08, mRNA.                     |
| <a href="#">Cnbp</a>   | <a href="#">Cnbp.cSep08</a>   | <a href="#">64530</a>  | 8066  | 835  | 5  | 217 | cellular nucleic acid binding protein (Cnbp) alternative variant cSep08, mRNA.                     |
| <a href="#">Cnbp</a>   | <a href="#">Cnbp.dSep08</a>   | <a href="#">64530</a>  | 8377  | 1196 | 5  | 186 | cellular nucleic acid binding protein (Cnbp) alternative variant dSep08, mRNA.                     |
| <a href="#">Cnbp</a>   | <a href="#">Cnbp.eSep08</a>   | <a href="#">64530</a>  | 8112  | 864  | 5  | 175 | cellular nucleic acid binding protein (Cnbp) alternative variant eSep08, mRNA.                     |

|                                |                                       |                        |       |      |    |     |                                                                                             |
|--------------------------------|---------------------------------------|------------------------|-------|------|----|-----|---------------------------------------------------------------------------------------------|
| <a href="#">Cnbp</a>           | <a href="#">Cnbp.gSep08</a>           | <a href="#">64530</a>  | 6388  | 442  | 3  | 117 | cellular nucleic acid binding protein (Cnbp) alternative variant gSep08, mRNA.              |
| <a href="#">Cnbp</a>           | <a href="#">Cnbp.hSep08</a>           | <a href="#">64530</a>  | 7981  | 902  | 4  | 94  | cellular nucleic acid binding protein (Cnbp) alternative variant hSep08, mRNA.              |
| <a href="#">Cndp2</a>          | <a href="#">Cndp2.bSep08</a>          | <a href="#">291394</a> | 8882  | 825  | 6  | 247 | CNDP dipeptidase 2 (metallopeptidase M20 family) (Cndp2) alternative variant bSep08, mRNA.  |
| <a href="#">Cndp2</a>          | <a href="#">Cndp2.cSep08</a>          | <a href="#">291394</a> | 3893  | 1279 | 5  | 238 | CNDP dipeptidase 2 (metallopeptidase M20 family) (Cndp2) alternative variant cSep08, mRNA.  |
| <a href="#">Cndp2</a>          | <a href="#">Cndp2.dSep08</a>          | <a href="#">291394</a> | 6974  | 801  | 5  | 134 | CNDP dipeptidase 2 (metallopeptidase M20 family) (Cndp2) alternative variant dSep08, mRNA.  |
| <a href="#">Cngb1</a>          | <a href="#">Cngb1.aSep08</a>          | <a href="#">83686</a>  | 5011  | 399  |    | 133 | cyclic nucleotide gated channel beta 1 (Cngb1) mRNA.                                        |
| <a href="#">CNH.0</a>          | <a href="#">CNH.0.aSep08</a>          |                        | 4244  | 2422 | 5  | 467 | misshapen-like kinase 1 (52.2 kD) (CNH.0) alternative variant aSep08, mRNA.                 |
| <a href="#">CNH.0</a>          | <a href="#">CNH.0.bSep08</a>          |                        | 2266  | 1433 | 3  | 215 | misshapen-like kinase 1 (CNH.0) alternative variant bSep08, mRNA.                           |
| <a href="#">CNH.0</a>          | <a href="#">CNH.0.cSep08</a>          |                        | 987   | 393  | 2  | 130 | misshapen-like kinase 1 (CNH.0) alternative variant cSep08, mRNA.                           |
| <a href="#">CNH.0</a>          | <a href="#">CNH.0.dSep08</a>          |                        | 824   | 733  | 2  | 67  | misshapen-like kinase 1 (CNH.0) alternative variant dSep08, mRNA.                           |
| <a href="#">Cnksr2</a>         | <a href="#">Cnksr2.cSep08</a>         | <a href="#">59322</a>  | 65076 | 566  |    | 188 | connector enhancer of kinase suppressor of Ras 2 (Cnksr2) alternative variant cSep08, mRNA. |
| <a href="#">Cnksr3</a>         | <a href="#">Cnksr3.bSep08</a>         | <a href="#">308113</a> | 10979 | 3206 | 4  | 267 | cnksr family member 3 (Cnksr3) alternative variant bSep08, mRNA.                            |
| <a href="#">Cnksr3</a>         | <a href="#">Cnksr3.cSep08</a>         | <a href="#">308113</a> | 16561 | 478  | 4  | 158 | cnksr family member 3 (Cnksr3) alternative variant cSep08, mRNA.                            |
| <a href="#">cNMP_binding.0</a> | <a href="#">cNMP_binding.0.aSep08</a> |                        | 816   | 374  |    | 124 | cyclic nucleotide-binding (cNMP_binding.0) mRNA.                                            |
| <a href="#">cNMP_binding.1</a> | <a href="#">cNMP_binding.1.aSep08</a> |                        | 6394  | 812  |    | 270 | cyclic nucleotide-binding (cNMP_binding.1) mRNA.                                            |
| <a href="#">Cnn1</a>           | <a href="#">Cnn1.bSep08</a>           | <a href="#">65204</a>  | 968   | 882  | 2  | 125 | calponin 1 (Cnn1) alternative variant bSep08, mRNA.                                         |
| <a href="#">Cnn1</a>           | <a href="#">Cnn1.cSep08</a>           | <a href="#">65204</a>  | 3285  | 257  | 2  | 85  | calponin 1 (Cnn1) alternative variant cSep08, mRNA.                                         |
| <a href="#">Cnn1</a>           | <a href="#">Cnn1.dSep08</a>           | <a href="#">65204</a>  | 3734  | 228  | 3  | 76  | calponin 1 (Cnn1) alternative variant dSep08, mRNA.                                         |
| <a href="#">Cnn3</a>           | <a href="#">Cnn3.bSep08</a>           | <a href="#">54321</a>  | 7436  | 1239 | 5  | 288 | calponin 3, acidic (Cnn3) alternative variant bSep08, mRNA.                                 |
| <a href="#">Cnnm1</a>          | <a href="#">Cnnm1.bSep08</a>          | <a href="#">309387</a> | 22338 | 569  | 6  | 189 | cyclin M1 (Cnnm1) alternative variant bSep08, mRNA.                                         |
| <a href="#">Cnnm2</a>          | <a href="#">Cnnm2.bSep08</a>          | <a href="#">294014</a> | 10390 | 1215 | 3  | 161 | cyclin M2 (Cnnm2) alternative variant bSep08, mRNA.                                         |
| <a href="#">Cnnm3</a>          | <a href="#">Cnnm3.bSep08</a>          | <a href="#">301345</a> | 3361  | 881  | 3  | 100 | cyclin M3 (Cnnm3) alternative variant bSep08, mRNA.                                         |
| <a href="#">Cnnm4</a>          | <a href="#">Cnnm4.aSep08</a>          | <a href="#">363216</a> | 9168  | 2724 | 4  | 148 | cyclin M4 (Cnnm4) alternative variant aSep08, mRNA.                                         |
| <a href="#">Cnnm4</a>          | <a href="#">Cnnm4.bSep08</a>          | <a href="#">363216</a> | 9654  | 511  | 3  | 105 | cyclin M4 (Cnnm4) alternative variant bSep08, mRNA.                                         |
| <a href="#">Cnnm4</a>          | <a href="#">Cnnm4.cSep08</a>          | <a href="#">363216</a> | 1598  | 386  | 2  | 79  | cyclin M4 (Cnnm4) alternative variant cSep08, mRNA.                                         |
| <a href="#">Cnot2</a>          | <a href="#">Cnot2.aSep08</a>          | <a href="#">299805</a> | 91144 | 2643 | 15 | 455 | transcription complex CRA b (50.2 kD) (Cnot2) alternative variant aSep08, complete mRNA.    |
| <a href="#">Cnot2</a>          | <a href="#">Cnot2.cSep08</a>          | <a href="#">299805</a> | 84556 | 1426 | 13 | 349 | transcription complex (38.4 kD) (Cnot2) alternative variant cSep08, mRNA.                   |
| <a href="#">Cnot2</a>          | <a href="#">Cnot2.dSep08</a>          | <a href="#">299805</a> | 78739 | 1299 | 11 | 256 | transcription complex CRA I (28.0 kD) (Cnot2) alternative variant dSep08, mRNA.             |

|                        |                               |                        |       |      |    |     |                                                                                                |
|------------------------|-------------------------------|------------------------|-------|------|----|-----|------------------------------------------------------------------------------------------------|
| <a href="#">Cnot2</a>  | <a href="#">Cnot2.eSep08</a>  | <a href="#">299805</a> | 48893 | 776  | 7  | 191 | transcription complex (Cnot2) alternative variant eSep08, mRNA.                                |
| <a href="#">Cnot2</a>  | <a href="#">Cnot2.fSep08</a>  | <a href="#">299805</a> | 71447 | 821  | 7  | 190 | transcription complex (20.7 kD) (Cnot2) alternative variant fSep08, mRNA.                      |
| <a href="#">Cnot2</a>  | <a href="#">Cnot2.gSep08</a>  | <a href="#">299805</a> | 60345 | 574  | 5  | 69  | transcription complex (Cnot2) alternative variant gSep08, mRNA.                                |
| <a href="#">Cnot2</a>  | <a href="#">Cnot2.hSep08</a>  | <a href="#">299805</a> | 6553  | 918  | 2  | 56  | transcription complex (6.9 kD) (Cnot2) alternative variant hSep08, mRNA.                       |
| <a href="#">Cnot3</a>  | <a href="#">Cnot3.bSep08</a>  | <a href="#">308311</a> | 8070  | 926  | 8  | 198 | CCR4-NOT transcription complex, subunit 3 (Cnot3) alternative variant bSep08, mRNA.            |
| <a href="#">Cnot3</a>  | <a href="#">Cnot3.dSep08</a>  | <a href="#">308311</a> | 1537  | 544  | 3  | 31  | CCR4-NOT transcription complex, subunit 3 (Cnot3) alternative variant dSep08, mRNA.            |
| <a href="#">Cnot4</a>  | <a href="#">Cnot4.bSep08</a>  | <a href="#">312227</a> | 7245  | 1100 | 3  | 173 | CCR4-NOT transcription complex, subunit 4 (18.6 kD) (Cnot4) alternative variant bSep08, mRNA.  |
| <a href="#">Cnot6</a>  | <a href="#">Cnot6.bSep08</a>  | <a href="#">287249</a> | 11566 | 5173 | 1  | 373 | CCR4-NOT transcription complex, subunit 6 (Cnot6) alternative variant bSep08, mRNA.            |
| <a href="#">Cnot6</a>  | <a href="#">Cnot6.cSep08</a>  | <a href="#">287249</a> | 3908  | 519  | 2  | 97  | CCR4-NOT transcription complex, subunit 6 (Cnot6) alternative variant cSep08, mRNA.            |
| <a href="#">Cnot7</a>  | <a href="#">Cnot7.bSep08</a>  | <a href="#">306492</a> | 2732  | 570  | 2  | 116 | CCR4-NOT transcription complex, subunit 7 (Cnot7) alternative variant bSep08, mRNA.            |
| <a href="#">Cnot7</a>  | <a href="#">Cnot7.cSep08</a>  | <a href="#">306492</a> | 2737  | 580  | 2  | 71  | CCR4-NOT transcription complex, subunit 7 (Cnot7) alternative variant cSep08, mRNA.            |
| <a href="#">Cnot7</a>  | <a href="#">Cnot7.dSep08</a>  | <a href="#">306492</a> | 4998  | 786  | 3  | 50  | CCR4-NOT transcription complex, subunit 7 (5.6 kD) (Cnot7) alternative variant dSep08, mRNA.   |
| <a href="#">Cnot8</a>  | <a href="#">Cnot8.bSep08</a>  | <a href="#">363603</a> | 9634  | 896  | 6  | 242 | transcription complex (Cnot8) alternative variant bSep08, mRNA.                                |
| <a href="#">Cnot8</a>  | <a href="#">Cnot8.cSep08</a>  | <a href="#">363603</a> | 2406  | 583  | 3  | 171 | transcription complex (Cnot8) alternative variant cSep08, mRNA.                                |
| <a href="#">Cnot8</a>  | <a href="#">Cnot8.dSep08</a>  | <a href="#">363603</a> | 5140  | 726  | 3  | 136 | CRA d like (Cnot8) alternative variant dSep08, mRNA.                                           |
| <a href="#">Cnot8</a>  | <a href="#">Cnot8.fSep08</a>  | <a href="#">363603</a> | 2037  | 703  | 2  | 55  | oculocerebrorrenal syndrome of Lowe like (6.2 kD) (Cnot8) alternative variant fSep08, mRNA.    |
| <a href="#">Cnot10</a> | <a href="#">Cnot10.aSep08</a> | <a href="#">316034</a> | 34359 | 2497 | 13 | 739 | CCR4-NOT transcription complex, subunit 10 (Cnot10) alternative variant aSep08, mRNA.          |
| <a href="#">Cnot10</a> | <a href="#">Cnot10.bSep08</a> | <a href="#">316034</a> | 22296 | 1057 | 9  | 251 | CCR4-NOT transcription complex, subunit 10 (Cnot10) alternative variant bSep08, mRNA.          |
| <a href="#">Cnot10</a> | <a href="#">Cnot10.cSep08</a> | <a href="#">316034</a> | 17502 | 1408 | 6  | 129 | CCR4-NOT transcription complex, subunit 10 (Cnot10) alternative variant cSep08, mRNA.          |
| <a href="#">Cnp</a>    | <a href="#">Cnp.bSep08</a>    | <a href="#">25275</a>  | 4197  | 1294 | 3  | 266 | 2',3'-cyclic nucleotide 3' phosphodiesterase (30.3 kD) (Cnp) alternative variant bSep08, mRNA. |
| <a href="#">Cnp</a>    | <a href="#">Cnp.dSep08</a>    | <a href="#">25275</a>  | 866   | 481  | 2  | 160 | 2',3'-cyclic nucleotide 3' phosphodiesterase (Cnp) alternative variant dSep08, mRNA.           |
| <a href="#">Cnpy2</a>  | <a href="#">Cnpy2.aSep08</a>  | <a href="#">685814</a> | 4168  | 886  | 5  | 274 | canopy 2 homolog (zebrafish) (Cnpy2) alternative variant aSep08, mRNA.                         |
| <a href="#">Cnpy3</a>  | <a href="#">Cnpy3.aSep08</a>  | <a href="#">685174</a> | 14599 | 1800 | 5  | 276 | canopy 3 homolog (zebrafish) (30.6 kD) (Cnpy3) alternative variant aSep08, complete mRNA.      |
| <a href="#">Cnpy3</a>  | <a href="#">Cnpy3.bSep08</a>  | <a href="#">685174</a> | 13483 | 587  | 4  | 102 | canopy 3 homolog (zebrafish) (Cnpy3) alternative variant bSep08, mRNA.                         |



|                                     |                                            |                        |        |      |    |      |                                                                                                                                           |
|-------------------------------------|--------------------------------------------|------------------------|--------|------|----|------|-------------------------------------------------------------------------------------------------------------------------------------------|
| <a href="#">Cnpy3</a>               | <a href="#">Cnpy3.cSep08</a>               | <a href="#">685174</a> | 4467   | 948  | 3  | 20   | canopy 3 homolog (zebrafish) (Cnpy3) alternative variant cSep08, mRNA.                                                                    |
| <a href="#">Cntfr</a>               | <a href="#">Cntfr.aSep08</a>               | <a href="#">313173</a> | 30089  | 1953 | 1  | 373  | ciliary neurotrophic factor receptor (41.0 kD) (Cntfr) alternative variant aSep08, mRNA.                                                  |
| <a href="#">Cntn1</a>               | <a href="#">Cntn1.bSep08</a>               | <a href="#">117258</a> | 5821   | 635  | 2  | 51   | contactin 1 (5.6 kD) (Cntn1) alternative variant bSep08, mRNA.                                                                            |
| <a href="#">Cntn2</a>               | <a href="#">Cntn2.bSep08</a>               | <a href="#">25356</a>  | 13777  | 533  | 1  | 97   | contactin 2 (Cntn2) alternative variant bSep08, mRNA.                                                                                     |
| <a href="#">Cntn3</a>               | <a href="#">Cntn3.bSep08</a>               | <a href="#">54279</a>  | 23926  | 419  |    | 139  | contactin 3 (Cntn3) alternative variant bSep08, mRNA.                                                                                     |
| <a href="#">Cntn4</a>               | <a href="#">Cntn4.bSep08</a>               | <a href="#">116658</a> | 178048 | 496  | 1  | 91   | contactin 4 (10.3 kD) (Cntn4) alternative variant bSep08, mRNA.                                                                           |
| <a href="#">Cntnap1</a>             | <a href="#">Cntnap1.aSep08</a>             | <a href="#">84008</a>  | 9917   | 3143 |    | 1047 | contactin associated protein 1 (Cntnap1) mRNA.                                                                                            |
| <a href="#">Cntnap4</a>             | <a href="#">Cntnap4.bSep08</a>             | <a href="#">307865</a> | 11478  | 601  |    | 200  | contactin associated protein-like 4 (Cntnap4) alternative variant bSep08, mRNA.                                                           |
| <a href="#">Cntrob</a>              | <a href="#">Cntrob.bSep08</a>              | <a href="#">303240</a> | 996    | 719  | 2  | 53   | centrobin, centrosomal BRCA2 interacting protein (5.7 kD) (Cntrob) alternative variant bSep08, mRNA.                                      |
| <a href="#">Coasy</a>               | <a href="#">Coasy.bSep08</a>               | <a href="#">287711</a> | 3838   | 1779 | 3  | 398  | coenzyme A synthase (Coasy) alternative variant bSep08, mRNA.                                                                             |
| <a href="#">Coasy</a>               | <a href="#">Coasy.dSep08</a>               | <a href="#">287711</a> | 858    | 755  | 2  | 85   | coenzyme A synthase (9.6 kD) (Coasy) alternative variant dSep08, mRNA.                                                                    |
| <a href="#">Cobl</a>                | <a href="#">Cobl.bSep08</a>                | <a href="#">305497</a> | 89778  | 2585 | 4  | 861  | cordons-bleu (Cobl) alternative variant bSep08, mRNA.                                                                                     |
| <a href="#">Cobl</a>                | <a href="#">Cobl.cSep08</a>                | <a href="#">305497</a> | 90850  | 761  | 4  | 227  | cordons-bleu (Cobl) alternative variant cSep08, mRNA.                                                                                     |
| <a href="#">Cobl</a>                | <a href="#">Cobl.dSep08</a>                | <a href="#">305497</a> | 74204  | 631  | 3  | 150  | cordons-bleu (Cobl) alternative variant dSep08, mRNA.                                                                                     |
| <a href="#">Cobra1andRGD1308019</a> | <a href="#">Cobra1andRGD1308019.bSep08</a> | <a href="#">311795</a> | 16356  | 2672 | 12 | 475  | similar to hypothetical protein FLJ20245 and cofactor of BRCA1 (53.9 kD) (Cobra1andRGD1308019) alternative variant bSep08, complete mRNA. |
| <a href="#">Cobra1andRGD1308019</a> | <a href="#">Cobra1andRGD1308019.bSep08</a> | <a href="#">311796</a> | 16356  | 2672 | 12 | 475  | similar to hypothetical protein FLJ20245 and cofactor of BRCA1 (53.9 kD) (Cobra1andRGD1308019) alternative variant bSep08, complete mRNA. |
| <a href="#">Cobra1andRGD1308019</a> | <a href="#">Cobra1andRGD1308019.cSep08</a> | <a href="#">311795</a> | 2262   | 1798 | 3  | 132  | similar to hypothetical protein FLJ20245 and cofactor of BRCA1 (14.4 kD) (Cobra1andRGD1308019) alternative variant cSep08, mRNA.          |
| <a href="#">Cobra1andRGD1308019</a> | <a href="#">Cobra1andRGD1308019.cSep08</a> | <a href="#">311796</a> | 2262   | 1798 | 3  | 132  | similar to hypothetical protein FLJ20245 and cofactor of BRCA1 (14.4 kD) (Cobra1andRGD1308019) alternative variant cSep08, mRNA.          |
| <a href="#">Coch</a>                | <a href="#">Coch.aSep08</a>                | <a href="#">362735</a> | 13428  | 2495 | 7  | 552  | coagulation factor C precursor (Coch) alternative variant aSep08, complete mRNA.                                                          |
| <a href="#">Coch</a>                | <a href="#">Coch.bSep08</a>                | <a href="#">362735</a> | 13350  | 3319 | 6  | 357  | coagulation factor C homolog CRA a (39.2 kD) (Coch) alternative variant bSep08, complete mRNA.                                            |
| <a href="#">Cog1</a>                | <a href="#">Cog1.aSep08</a>                | <a href="#">303652</a> | 13752  | 3947 | 14 | 979  | component of oligomeric golgi complex 1 (Cog1) alternative variant aSep08, mRNA.                                                          |
| <a href="#">Cog1</a>                | <a href="#">Cog1.bSep08</a>                | <a href="#">303652</a> | 4113   | 791  | 5  | 263  | component of oligomeric golgi complex 1 (Cog1) alternative variant bSep08, mRNA.                                                          |
| <a href="#">Cog1</a>                | <a href="#">Cog1.dSep08</a>                | <a href="#">303652</a> | 2895   | 543  | 6  | 109  | component of oligomeric golgi complex 1 (Cog1) alternative variant dSep08, mRNA.                                                          |
| <a href="#">Cog2</a>                | <a href="#">Cog2.bSep08</a>                | <a href="#">690961</a> | 6322   | 1786 | 3  | 328  | putative protein (Cog2) alternative variant bSep08, mRNA.                                                                                 |

|                        |                               |                        |       |      |    |      |                                                                                                           |
|------------------------|-------------------------------|------------------------|-------|------|----|------|-----------------------------------------------------------------------------------------------------------|
| <a href="#">Cog2</a>   | <a href="#">Cog2.cSep08</a>   | <a href="#">690961</a> | 3316  | 782  | 3  | 175  | component of oligomeric golgi complex 2 (Cog2) alternative variant cSep08, mRNA.                          |
| <a href="#">Cog2</a>   | <a href="#">Cog2.dSep08</a>   | <a href="#">690961</a> | 9563  | 542  | 5  | 162  | component of oligomeric golgi complex 2 (Cog2) alternative variant dSep08, mRNA.                          |
| <a href="#">Cog2</a>   | <a href="#">Cog2.eSep08</a>   | <a href="#">690961</a> | 1304  | 744  | 2  | 155  | component of oligomeric golgi complex 2 (16.9 kD) (Cog2) alternative variant eSep08, mRNA.                |
| <a href="#">Cog2</a>   | <a href="#">Cog2.fSep08</a>   | <a href="#">690961</a> | 7131  | 683  | 6  | 139  | component of oligomeric golgi complex 2 (Cog2) alternative variant fSep08, mRNA.                          |
| <a href="#">Cog2</a>   | <a href="#">Cog2.gSep08</a>   | <a href="#">690961</a> | 6530  | 423  | 4  | 118  | component of oligomeric golgi complex 2 (Cog2) alternative variant gSep08, mRNA.                          |
| <a href="#">Cog2</a>   | <a href="#">Cog2.hSep08</a>   | <a href="#">690961</a> | 1661  | 634  | 2  | 74   | component of oligomeric golgi complex 2 (Cog2) alternative variant hSep08, mRNA.                          |
| <a href="#">Cog2</a>   | <a href="#">Cog2.iSep08</a>   | <a href="#">690961</a> | 1954  | 263  | 2  | 35   | component of oligomeric golgi complex 2 (Cog2) alternative variant iSep08, mRNA.                          |
| <a href="#">Cog2</a>   | <a href="#">Cog2.jSep08</a>   | <a href="#">690961</a> | 451   | 354  | 2  | 52   | putative protein (Cog2) alternative variant jSep08, mRNA.                                                 |
| <a href="#">Cog3</a>   | <a href="#">Cog3.bSep08</a>   | <a href="#">361073</a> | 31026 | 2548 | 15 | 619  | component of oligomeric golgi complex 3 (Cog3) alternative variant bSep08, mRNA.                          |
| <a href="#">Cog3</a>   | <a href="#">Cog3.cSep08</a>   | <a href="#">361073</a> | 10238 | 892  | 4  |      |                                                                                                           |
| <a href="#">Cog3</a>   | <a href="#">Cog3.dSep08</a>   | <a href="#">361073</a> | 3844  | 344  | 3  | 14   | component of oligomeric golgi complex 3 (Cog3) alternative variant dSep08, mRNA.                          |
| <a href="#">Cog4</a>   | <a href="#">Cog4.bSep08</a>   | <a href="#">361407</a> | 34460 | 3038 | 19 | 716  | component of oligomeric golgi complex 4 CRA d (80.3 kD) (Cog4) alternative variant bSep08, complete mRNA. |
| <a href="#">Cog4</a>   | <a href="#">Cog4.cSep08</a>   | <a href="#">361407</a> | 11278 | 1446 | 6  | 244  | component of oligomeric golgi complex 4 CRA d (Cog4) alternative variant cSep08, mRNA.                    |
| <a href="#">Cog4</a>   | <a href="#">Cog4.dSep08</a>   | <a href="#">361407</a> | 1419  | 838  | 3  | 61   | component of oligomeric golgi complex 4 CRA d (Cog4) alternative variant dSep08, mRNA.                    |
| <a href="#">Cog6</a>   | <a href="#">Cog6.bSep08</a>   | <a href="#">310411</a> | 15845 | 710  | 8  | 121  | component of oligomeric golgi complex 6 (Cog6) alternative variant bSep08, mRNA.                          |
| <a href="#">Cog8</a>   | <a href="#">Cog8.bSep08</a>   | <a href="#">291990</a> | 2517  | 466  | 1  | 155  | component of oligomeric golgi complex 8 (Cog8) alternative variant bSep08, mRNA.                          |
| <a href="#">Coil</a>   | <a href="#">Coil.bSep08</a>   | <a href="#">50998</a>  | 9265  | 1700 |    | 400  | coilin (43.5 kD) (Coil) alternative variant bSep08, complete mRNA.                                        |
| <a href="#">Col1a1</a> | <a href="#">Col1a1.bSep08</a> | <a href="#">29393</a>  | 5528  | 1794 | 11 | 517  | collagen, type I, alpha 1 (Col1a1) alternative variant bSep08, mRNA.                                      |
| <a href="#">Col1a1</a> | <a href="#">Col1a1.cSep08</a> | <a href="#">29393</a>  | 1752  | 648  | 6  | 215  | collagen, type I, alpha 1 (Col1a1) alternative variant cSep08, mRNA.                                      |
| <a href="#">Col1a2</a> | <a href="#">Col1a2.aSep08</a> | <a href="#">84352</a>  | 35582 | 5188 | 5  | 1395 | collagen, type I, alpha 2 (132.0 kD) (Col1a2) alternative variant aSep08, mRNA.                           |
| <a href="#">Col1a2</a> | <a href="#">Col1a2.bSep08</a> | <a href="#">84352</a>  | 19542 | 3233 |    | 789  | collagen, type I, alpha 2 (Col1a2) alternative variant bSep08, mRNA.                                      |
| <a href="#">Col1a2</a> | <a href="#">Col1a2.cSep08</a> | <a href="#">84352</a>  | 13677 | 1485 |    | 495  | collagen, type I, alpha 2 (Col1a2) alternative variant cSep08, mRNA.                                      |
| <a href="#">Col1a2</a> | <a href="#">Col1a2.dSep08</a> | <a href="#">84352</a>  | 12488 | 991  |    | 121  | collagen, type I, alpha 2 (Col1a2) alternative variant dSep08, mRNA.                                      |
| <a href="#">Col1a2</a> | <a href="#">Col1a2.eSep08</a> | <a href="#">84352</a>  | 2542  | 1496 | 1  | 101  | collagen, type I, alpha 2 (10.8 kD) (Col1a2) alternative variant eSep08, mRNA.                            |

|                                  |                                         |                        |        |      |    |      |                                                                                                               |
|----------------------------------|-----------------------------------------|------------------------|--------|------|----|------|---------------------------------------------------------------------------------------------------------------|
| <a href="#">Col2a1</a>           | <a href="#">Col2a1.aSep08</a>           | <a href="#">25412</a>  | 14169  | 3854 | 36 | 1136 | collagen, type II, alpha 1 (Col2a1) alternative variant aSep08, mRNA.                                         |
| <a href="#">Col2a1</a>           | <a href="#">Col2a1.bSep08</a>           | <a href="#">25412</a>  | 1466   | 1020 | 2  | 194  | collagen, type II, alpha 1 (Col2a1) alternative variant bSep08, mRNA.                                         |
| <a href="#">Col2a1</a>           | <a href="#">Col2a1.dSep08</a>           | <a href="#">25412</a>  | 5768   | 364  | 6  | 121  | collagen, type II, alpha 1 (Col2a1) alternative variant dSep08, mRNA.                                         |
| <a href="#">Col2a1</a>           | <a href="#">Col2a1.eSep08</a>           | <a href="#">25412</a>  | 9802   | 535  | 3  | 33   | collagen, type II, alpha 1 (Col2a1) alternative variant eSep08, mRNA.                                         |
| <a href="#">Col3a1</a>           | <a href="#">Col3a1.bSep08</a>           | <a href="#">84032</a>  | 4198   | 870  | 10 | 234  | collagen, type III, alpha 1 (Col3a1) alternative variant bSep08, mRNA.                                        |
| <a href="#">Col3a1</a>           | <a href="#">Col3a1.cSep08</a>           | <a href="#">84032</a>  | 1041   | 719  | 2  | 141  | collagen, type III, alpha 1 (Col3a1) alternative variant cSep08, mRNA.                                        |
| <a href="#">Col3a1</a>           | <a href="#">Col3a1.eSep08</a>           | <a href="#">84032</a>  | 759    | 599  | 2  | 43   | collagen, type III, alpha 1 (Col3a1) alternative variant eSep08, mRNA.                                        |
| <a href="#">Col4a1</a>           | <a href="#">Col4a1.aSep08</a>           | <a href="#">290905</a> | 33953  | 5063 | 31 | 1230 | alpha-1 type IV collagen (Col4a1) alternative variant aSep08, mRNA.                                           |
| <a href="#">Col4a1</a>           | <a href="#">Col4a1.bSep08</a>           | <a href="#">290905</a> | 1697   | 436  | 5  | 145  | procollagen type IV alpha 1 (Col4a1) alternative variant bSep08, mRNA.                                        |
| <a href="#">Col4a1</a>           | <a href="#">Col4a1.cSep08</a>           | <a href="#">290905</a> | 3332   | 720  | 3  | 114  | alpha-1 type IV collagen (12.6 kD) (Col4a1) alternative variant cSep08, mRNA.                                 |
| <a href="#">Col4a1</a>           | <a href="#">Col4a1.dSep08</a>           | <a href="#">290905</a> | 641    | 514  | 2  | 91   | collagen triple helix repeat (Col4a1) alternative variant dSep08, mRNA.                                       |
| <a href="#">Col4a2_predicted</a> | <a href="#">Col4a2_predicted.aSep08</a> | <a href="#">306628</a> | 105913 | 1119 |    | 280  | procollagen, type IV, alpha 2 (predicted) (Col4a2_predicted) mRNA.                                            |
| <a href="#">Col4a3bp</a>         | <a href="#">Col4a3bp.bSep08</a>         | <a href="#">365652</a> | 25703  | 757  | 1  | 169  | collagen, type IV, alpha 3 (Goodpasture antigen) binding protein (Col4a3bp) alternative variant bSep08, mRNA. |
| <a href="#">Col4a5</a>           | <a href="#">Col4a5.aSep08</a>           | <a href="#">363457</a> | 42559  | 3237 | 18 | 715  | type IV alpha (Col4a5) alternative variant aSep08, mRNA.                                                      |
| <a href="#">Col4a5</a>           | <a href="#">Col4a5.bSep08</a>           | <a href="#">363457</a> | 10169  | 419  | 4  | 129  | collagen triple helix repeat (Col4a5) alternative variant bSep08, mRNA.                                       |
| <a href="#">Col4a5</a>           | <a href="#">Col4a5.cSep08</a>           | <a href="#">363457</a> | 2335   | 412  | 2  | 96   | collagen triple helix repeat (Col4a5) alternative variant cSep08, mRNA.                                       |
| <a href="#">Col5a1</a>           | <a href="#">Col5a1.aSep08</a>           | <a href="#">85490</a>  | 45811  | 5329 | 1  | 946  | collagen, type V, alpha 1 (Col5a1) alternative variant aSep08, mRNA.                                          |
| <a href="#">Col5a1</a>           | <a href="#">Col5a1.bSep08</a>           | <a href="#">85490</a>  | 17010  | 1433 | 1  | 339  | collagen, type V, alpha 1 (Col5a1) alternative variant bSep08, mRNA.                                          |
| <a href="#">Col5a2</a>           | <a href="#">Col5a2.aSep08</a>           | <a href="#">85250</a>  | 29684  | 4284 | 30 | 954  | collagen, type V, alpha 2 (Col5a2) alternative variant aSep08, mRNA.                                          |
| <a href="#">Col5a2</a>           | <a href="#">Col5a2.bSep08</a>           | <a href="#">85250</a>  | 27238  | 1783 | 15 | 533  | collagen, type V, alpha 2 (Col5a2) alternative variant bSep08, mRNA.                                          |
| <a href="#">Col5a3</a>           | <a href="#">Col5a3.bSep08</a>           | <a href="#">60379</a>  | 6486   | 474  | 1  | 106  | collagen, type V, alpha 3 (Col5a3) alternative variant bSep08, mRNA.                                          |
| <a href="#">Col6a1</a>           | <a href="#">Col6a1.aSep08</a>           | <a href="#">294337</a> | 10713  | 2932 | 23 | 706  | collagen, type VI, alpha 1 (Col6a1) alternative variant aSep08, mRNA.                                         |
| <a href="#">Col6a1</a>           | <a href="#">Col6a1.bSep08</a>           | <a href="#">294337</a> | 1636   | 747  | 4  | 248  | collagen, type VI, alpha 1 (Col6a1) alternative variant bSep08, mRNA.                                         |
| <a href="#">Col6a1</a>           | <a href="#">Col6a1.cSep08</a>           | <a href="#">294337</a> | 4005   | 804  | 9  | 163  | collagen, type VI, alpha 1 (Col6a1) alternative variant cSep08, mRNA.                                         |

|                         |                                |                        |       |      |    |     |                                                                                 |
|-------------------------|--------------------------------|------------------------|-------|------|----|-----|---------------------------------------------------------------------------------|
| <a href="#">Col6a2</a>  | <a href="#">Col6a2.aSep08</a>  | <a href="#">361821</a> | 19571 | 3604 | 13 | 799 | collagen, type VI, alpha 2 (Col6a2) alternative variant aSep08, mRNA.           |
| <a href="#">Col6a2</a>  | <a href="#">Col6a2.bSep08</a>  | <a href="#">361821</a> | 7084  | 739  | 2  | 246 | collagen, type VI, alpha 2 (Col6a2) alternative variant bSep08, mRNA.           |
| <a href="#">Col6a2</a>  | <a href="#">Col6a2.cSep08</a>  | <a href="#">361821</a> | 5741  | 1709 | 1  | 158 | collagen, type VI, alpha 2 (Col6a2) alternative variant cSep08, mRNA.           |
| <a href="#">Col6a3</a>  | <a href="#">Col6a3.bSep08</a>  | <a href="#">367313</a> | 4991  | 337  | 6  | 112 | procollagen, type VI, alpha 3 (Col6a3) alternative variant bSep08, mRNA.        |
| <a href="#">Col7a1</a>  | <a href="#">Col7a1.aSep08</a>  | <a href="#">301012</a> | 1170  | 665  |    | 107 | procollagen, type VII, alpha 1 (Col7a1) mRNA.                                   |
| <a href="#">Col9a1</a>  | <a href="#">Col9a1.aSep08</a>  | <a href="#">305104</a> | 63102 | 1786 |    | 378 | collagen, type IX, alpha 1 (Col9a1) alternative variant aSep08, mRNA.           |
| <a href="#">Col9a1</a>  | <a href="#">Col9a1.bSep08</a>  | <a href="#">305104</a> | 41836 | 1306 | 1  | 254 | collagen, type IX, alpha 1 (Col9a1) alternative variant bSep08, mRNA.           |
| <a href="#">Col9a1</a>  | <a href="#">Col9a1.cSep08</a>  | <a href="#">305104</a> | 16894 | 1409 | 1  | 201 | collagen, type IX, alpha 1 (Col9a1) alternative variant cSep08, mRNA.           |
| <a href="#">Col9a1</a>  | <a href="#">Col9a1.dSep08</a>  | <a href="#">305104</a> | 7384  | 566  | 1  | 110 | collagen, type IX, alpha 1 (Col9a1) alternative variant dSep08, mRNA.           |
| <a href="#">Col9a2</a>  | <a href="#">Col9a2.aSep08</a>  | <a href="#">362584</a> | 4487  | 1774 | 12 | 286 | collagen, type IX, alpha 2 (32.3 kD) (Col9a2) alternative variant aSep08, mRNA. |
| <a href="#">Col9a2</a>  | <a href="#">Col9a2.bSep08</a>  | <a href="#">362584</a> | 1489  | 915  | 3  | 138 | collagen, type IX, alpha 2 (Col9a2) alternative variant bSep08, mRNA.           |
| <a href="#">Col9a3</a>  | <a href="#">Col9a3.aSep08</a>  | <a href="#">362285</a> | 11320 | 1194 | 11 | 230 | procollagen, type IX, alpha 3 (Col9a3) alternative variant aSep08, mRNA.        |
| <a href="#">Col9a3</a>  | <a href="#">Col9a3.cSep08</a>  | <a href="#">362285</a> | 2718  | 704  | 5  | 159 | procollagen, type IX, alpha 3 (Col9a3) alternative variant cSep08, mRNA.        |
| <a href="#">Col11a1</a> | <a href="#">Col11a1.aSep08</a> | <a href="#">25654</a>  | 27124 | 2766 |    | 426 | collagen, type XI, alpha 1 (Col11a1) mRNA.                                      |
| <a href="#">Col11a2</a> | <a href="#">Col11a2.bSep08</a> | <a href="#">294279</a> | 3616  | 547  | 10 | 181 | procollagen, type XI, alpha 2 (Col11a2) alternative variant bSep08, mRNA.       |
| <a href="#">Col11a2</a> | <a href="#">Col11a2.cSep08</a> | <a href="#">294279</a> | 3893  | 415  | 6  | 138 | procollagen, type XI, alpha 2 (Col11a2) alternative variant cSep08, mRNA.       |
| <a href="#">Col11a2</a> | <a href="#">Col11a2.dSep08</a> | <a href="#">294279</a> | 2542  | 391  | 3  | 130 | procollagen, type XI, alpha 2 (Col11a2) alternative variant dSep08, mRNA.       |
| <a href="#">Col11a2</a> | <a href="#">Col11a2.eSep08</a> | <a href="#">294279</a> | 1189  | 608  | 6  | 129 | procollagen, type XI, alpha 2 (Col11a2) alternative variant eSep08, mRNA.       |
| <a href="#">Col12a1</a> | <a href="#">Col12a1.aSep08</a> | <a href="#">25683</a>  | 78357 | 1778 | 1  | 473 | collagen, type XII, alpha 1 (Col12a1) alternative variant aSep08, mRNA.         |
| <a href="#">Col12a1</a> | <a href="#">Col12a1.bSep08</a> | <a href="#">25683</a>  | 16586 | 1691 | 8  | 293 | collagen, type XII, alpha 1 (Col12a1) alternative variant bSep08, mRNA.         |
| <a href="#">Col12a1</a> | <a href="#">Col12a1.cSep08</a> | <a href="#">25683</a>  | 2563  | 1529 | 1  | 72  | collagen, type XII, alpha 1 (Col12a1) alternative variant cSep08, mRNA.         |
| <a href="#">Col13a1</a> | <a href="#">Col13a1.aSep08</a> | <a href="#">499431</a> | 19798 | 837  |    | 121 | collagen, type XIII, alpha 1 (Col13a1) mRNA.                                    |
| <a href="#">Col14a1</a> | <a href="#">Col14a1.bSep08</a> | <a href="#">314981</a> | 23796 | 1385 | 3  | 202 | collagen, type XIV, alpha 1 (Col14a1) alternative variant bSep08, mRNA.         |
| <a href="#">Col14a1</a> | <a href="#">Col14a1.cSep08</a> | <a href="#">314981</a> | 19817 | 1972 | 1  | 119 | collagen, type XIV, alpha 1 (Col14a1) alternative variant cSep08, mRNA.         |
| <a href="#">Col15a1</a> | <a href="#">Col15a1.aSep08</a> | <a href="#">298069</a> | 43296 | 3136 |    | 755 | collagen, type XV, alpha 1 (Col15a1) alternative variant aSep08, mRNA.          |

|                            |                                   |                        |        |      |    |     |                                                                                     |
|----------------------------|-----------------------------------|------------------------|--------|------|----|-----|-------------------------------------------------------------------------------------|
| <a href="#">Col15a1</a>    | <a href="#">Col15a1.bSep08</a>    | <a href="#">298069</a> | 104727 | 1772 |    | 349 | collagen, type XV, alpha 1 (Col15a1) alternative variant bSep08, mRNA.              |
| <a href="#">Col15a1</a>    | <a href="#">Col15a1.cSep08</a>    | <a href="#">298069</a> | 39775  | 801  |    | 266 | collagen, type XV, alpha 1 (Col15a1) alternative variant cSep08, mRNA.              |
| <a href="#">Col16a1</a>    | <a href="#">Col16a1.aSep08</a>    | <a href="#">366474</a> | 15150  | 2050 | 19 | 415 | type XVI alpha 1 (39.9 kD) (Col16a1) alternative variant aSep08, mRNA.              |
| <a href="#">Col16a1</a>    | <a href="#">Col16a1.bSep08</a>    | <a href="#">366474</a> | 9388   | 711  | 13 | 236 | procollagen type xvi alpha 1 (Col16a1) alternative variant bSep08, mRNA.            |
| <a href="#">Col16a1</a>    | <a href="#">Col16a1.cSep08</a>    | <a href="#">366474</a> | 4390   | 389  | 7  | 129 | type XVI alpha 1 (Col16a1) alternative variant cSep08, mRNA.                        |
| <a href="#">Col16a1</a>    | <a href="#">Col16a1.eSep08</a>    | <a href="#">366474</a> | 2708   | 578  | 3  | 102 | collagen triple helix repeat (Col16a1) alternative variant eSep08, mRNA.            |
| <a href="#">Col16a1</a>    | <a href="#">Col16a1.fSep08</a>    | <a href="#">366474</a> | 1413   | 726  | 2  | 65  | putative protein (7.0 kD) (Col16a1) alternative variant fSep08, mRNA.               |
| <a href="#">Col16a1</a>    | <a href="#">Col16a1.gSep08</a>    | <a href="#">366474</a> | 1780   | 731  | 4  | 31  | putative protein (Col16a1) alternative variant gSep08, mRNA.                        |
| <a href="#">Col17a1</a>    | <a href="#">Col17a1.bSep08</a>    | <a href="#">294027</a> | 2020   | 766  | 5  | 254 | collagen, type XVII, alpha 1 (Col17a1) alternative variant bSep08, mRNA.            |
| <a href="#">Col17a1</a>    | <a href="#">Col17a1.cSep08</a>    | <a href="#">294027</a> | 3229   | 693  | 7  | 230 | collagen, type XVII, alpha 1 (Col17a1) alternative variant cSep08, mRNA.            |
| <a href="#">Col18a1</a>    | <a href="#">Col18a1.aSep08</a>    | <a href="#">85251</a>  | 14312  | 2672 | 1  | 561 | collagen, type XVIII, alpha 1 (Col18a1) alternative variant aSep08, mRNA.           |
| <a href="#">Col18a1</a>    | <a href="#">Col18a1.bSep08</a>    | <a href="#">85251</a>  | 109979 | 1926 |    | 509 | collagen, type XVIII, alpha 1 (Col18a1) alternative variant bSep08, complete mRNA.  |
| <a href="#">Col18a1</a>    | <a href="#">Col18a1.cSep08</a>    | <a href="#">85251</a>  | 6836   | 1832 | 1  | 440 | collagen, type XVIII, alpha 1 (Col18a1) alternative variant cSep08, mRNA.           |
| <a href="#">Col18a1</a>    | <a href="#">Col18a1.dSep08</a>    | <a href="#">85251</a>  | 19240  | 1319 |    | 326 | collagen, type XVIII, alpha 1 (Col18a1) alternative variant dSep08, mRNA.           |
| <a href="#">Col20a1</a>    | <a href="#">Col20a1.aSep08</a>    | <a href="#">311716</a> | 3209   | 441  |    | 146 | collagen, type XX, alpha 1 (Col20a1) mRNA.                                          |
| <a href="#">Col22a1</a>    | <a href="#">Col22a1.aSep08</a>    | <a href="#">315071</a> | 37272  | 766  |    | 186 | collagen, type XXII, alpha 1 (Col22a1) mRNA.                                        |
| <a href="#">Col23a1</a>    | <a href="#">Col23a1.aSep08</a>    | <a href="#">353303</a> | 4119   | 1180 | 2  | 57  | collagen, type XXIII, alpha 1 (Col23a1) alternative variant aSep08, mRNA.           |
| <a href="#">Col23a1</a>    | <a href="#">Col23a1.bSep08</a>    | <a href="#">353303</a> | 3503   | 733  | 1  | 128 | collagen, type XXIII, alpha 1 (14.3 kD) (Col23a1) alternative variant bSep08, mRNA. |
| <a href="#">Col24a1</a>    | <a href="#">Col24a1.aSep08</a>    | <a href="#">499723</a> | 34251  | 728  | 8  | 242 | collagen, type XXIV, alpha 1 (Col24a1) alternative variant aSep08, mRNA.            |
| <a href="#">Col24a1</a>    | <a href="#">Col24a1.bSep08</a>    | <a href="#">499723</a> | 9746   | 705  | 2  | 187 | collagen, type XXIV, alpha 1 (Col24a1) alternative variant bSep08, mRNA.            |
| <a href="#">Col27a1</a>    | <a href="#">Col27a1.aSep08</a>    | <a href="#">298101</a> | 17672  | 1027 |    | 342 | collagen, type XXVII, alpha 1 (Col27a1) mRNA.                                       |
| <a href="#">Colec12</a>    | <a href="#">Colec12.bSep08</a>    | <a href="#">361289</a> | 16546  | 801  | 4  | 264 | collectin sub-family member 12 (Colec12) alternative variant bSep08, mRNA.          |
| <a href="#">Colec12</a>    | <a href="#">Colec12.cSep08</a>    | <a href="#">361289</a> | 151887 | 911  | 3  | 91  | collectin sub-family member 12 (Colec12) alternative variant cSep08, mRNA.          |
| <a href="#">COLFI.0</a>    | <a href="#">COLFI.0.aSep08</a>    |                        | 7490   | 2413 |    | 244 | type XXVII alpha 1 (COLFI.0) mRNA.                                                  |
| <a href="#">Collagen.0</a> | <a href="#">Collagen.0.aSep08</a> |                        | 11008  | 388  |    | 129 | collagen triple helix repeat (Collagen.0) mRNA.                                     |
| <a href="#">Collagen.1</a> | <a href="#">Collagen.1.aSep08</a> |                        | 20567  | 1010 |    | 336 | collagen type IV alpha (Collagen.1) mRNA.                                           |

|                             |                                    |                        |        |      |    |     |                                                                                                                                 |
|-----------------------------|------------------------------------|------------------------|--------|------|----|-----|---------------------------------------------------------------------------------------------------------------------------------|
| <a href="#">Collagen.2</a>  | <a href="#">Collagen.2.aSep08</a>  |                        | 3249   | 383  |    | 127 | collagen type IV (Collagen.2) mRNA.                                                                                             |
| <a href="#">Collagen.3</a>  | <a href="#">Collagen.3.aSep08</a>  |                        | 2930   | 352  |    | 117 | collagen (Collagen.3) mRNA.                                                                                                     |
| <a href="#">Collagen.4</a>  | <a href="#">Collagen.4.aSep08</a>  |                        | 1040   | 968  |    | 322 | type X alpha 1 (Collagen.4) mRNA.                                                                                               |
| <a href="#">Collagen.5</a>  | <a href="#">Collagen.5.aSep08</a>  |                        | 25522  | 1999 |    | 666 | procollagen type IV alpha 2 (Collagen.5) mRNA.                                                                                  |
| <a href="#">Collagen.6</a>  | <a href="#">Collagen.6.aSep08</a>  |                        | 73386  | 1096 |    | 314 | collagen type IV alpha 1 CRA a (Collagen.6) mRNA.                                                                               |
| <a href="#">Collagen.7</a>  | <a href="#">Collagen.7.aSep08</a>  |                        | 10963  | 542  |    | 180 | collagen triple helix repeat (Collagen.7) mRNA.                                                                                 |
| <a href="#">Collagen.8</a>  | <a href="#">Collagen.8.aSep08</a>  |                        | 145002 | 488  |    | 143 | collagen (Collagen.8) mRNA.                                                                                                     |
| <a href="#">Collagen.9</a>  | <a href="#">Collagen.9.aSep08</a>  |                        | 1003   | 292  |    | 97  | collagen triple helix repeat (Collagen.9) mRNA.                                                                                 |
| <a href="#">Collagen.10</a> | <a href="#">Collagen.10.aSep08</a> |                        | 6284   | 275  |    | 79  | alpha 2 type V Collagen (Collagen.10) mRNA.                                                                                     |
| <a href="#">Collagen.11</a> | <a href="#">Collagen.11.aSep08</a> |                        | 9396   | 752  |    | 250 | procollagen type IV alpha 4 CRA a (Collagen.11) mRNA.                                                                           |
| <a href="#">Collagen.12</a> | <a href="#">Collagen.12.aSep08</a> |                        | 5606   | 577  |    | 191 | procollagen type IV alpha 4 CRA b like (Collagen.12) mRNA.                                                                      |
| <a href="#">Collagen.13</a> | <a href="#">Collagen.13.aSep08</a> |                        | 1878   | 428  |    | 142 | procollagen type VII alpha 1 (Collagen.13) mRNA.                                                                                |
| <a href="#">Collagen.14</a> | <a href="#">Collagen.14.aSep08</a> |                        | 4369   | 517  |    | 172 | type XXVII alpha 1 (Collagen.14) mRNA.                                                                                          |
| <a href="#">Collagen.15</a> | <a href="#">Collagen.15.aSep08</a> |                        | 11059  | 1003 | 15 | 324 | alpha type IX collagen (Collagen.15) alternative variant aSep08, mRNA.                                                          |
| <a href="#">Collagen.15</a> | <a href="#">Collagen.15.bSep08</a> |                        | 1377   | 848  | 2  | 93  | putative protein (Collagen.15) alternative variant bSep08, mRNA.                                                                |
| <a href="#">Collagen.16</a> | <a href="#">Collagen.16.aSep08</a> |                        | 3498   | 572  |    | 190 | procollagen type XVI alpha 1 (Collagen.16) mRNA.                                                                                |
| <a href="#">Collagen.17</a> | <a href="#">Collagen.17.aSep08</a> |                        | 7182   | 630  |    | 209 | type XVI alpha 1 (Collagen.17) mRNA.                                                                                            |
| <a href="#">Collagen.18</a> | <a href="#">Collagen.18.aSep08</a> |                        | 34141  | 1285 |    | 428 | collagen type V alpha 1 CRA c (Collagen.18) mRNA.                                                                               |
| <a href="#">Collagen.19</a> | <a href="#">Collagen.19.aSep08</a> |                        | 8727   | 404  |    | 134 | collagen triple helix repeat (Collagen.19) mRNA.                                                                                |
| <a href="#">Collagen.20</a> | <a href="#">Collagen.20.aSep08</a> |                        | 7991   | 712  | 14 | 198 | procollagen type IX alpha 3 CRA a like (Collagen.20) alternative variant aSep08, mRNA.                                          |
| <a href="#">Collagen.21</a> | <a href="#">Collagen.21.aSep08</a> |                        | 6178   | 430  |    | 142 | collagen type XX alpha 1 CRA a (Collagen.21) mRNA.                                                                              |
| <a href="#">Collagen.22</a> | <a href="#">Collagen.22.aSep08</a> |                        | 8383   | 393  |    | 130 | collagen triple helix repeat (Collagen.22) mRNA.                                                                                |
| <a href="#">Collagen.23</a> | <a href="#">Collagen.23.aSep08</a> |                        | 7222   | 439  | 6  | 127 | collagen triple helix repeat (Collagen.23) alternative variant aSep08, mRNA.                                                    |
| <a href="#">Collagen.23</a> | <a href="#">Collagen.23.bSep08</a> |                        | 15782  | 339  | 5  | 112 | procollagen type XI alpha 1 CRA b (Collagen.23) alternative variant bSep08, mRNA.                                               |
| <a href="#">Collagen.24</a> | <a href="#">Collagen.24.aSep08</a> |                        | 10023  | 525  |    | 122 | collagen chain like (Collagen.24) mRNA.                                                                                         |
| <a href="#">Commd1</a>      | <a href="#">Commd1.bSep08</a>      | <a href="#">289831</a> | 96215  | 616  |    | 94  | putative protein, with a coiled coil domain, of vertebrate origin (10.4 kD) (Commd1) alternative variant bSep08, complete mRNA. |
| <a href="#">Commd2</a>      | <a href="#">Commd2.bSep08</a>      | <a href="#">688478</a> | 916    | 820  | 1  | 108 | putative cytoplasmic protein of eukaryotic origin (11.7 kD) (Commd2) alternative variant bSep08, mRNA.                          |
| <a href="#">Commd3</a>      | <a href="#">Commd3.bSep08</a>      | <a href="#">291339</a> | 3454   | 655  | 8  | 82  | putative protein (Commd3) alternative variant bSep08, mRNA.                                                                     |
| <a href="#">Commd3</a>      | <a href="#">Commd3.cSep08</a>      | <a href="#">291339</a> | 1971   | 743  | 2  | 75  | putative protein of vertebrate origin (Commd3) alternative variant cSep08, mRNA.                                                |
| <a href="#">Commd3</a>      | <a href="#">Commd3.dSep08</a>      | <a href="#">291339</a> | 1617   | 669  | 3  | 52  | putative protein of metazoan origin (5.8 kD) (Commd3) alternative variant dSep08, mRNA.                                         |
| <a href="#">Commd3</a>      | <a href="#">Commd3.eSep08</a>      | <a href="#">291339</a> | 1922   | 711  | 2  | 49  | putative protein (Commd3) alternative variant eSep08, mRNA.                                                                     |

|                                |                                       |                        |        |      |   |     |                                                                                         |
|--------------------------------|---------------------------------------|------------------------|--------|------|---|-----|-----------------------------------------------------------------------------------------|
| <a href="#">Commd4</a>         | <a href="#">Commd4.aSep08</a>         | <a href="#">363068</a> | 3459   | 837  | 8 | 199 | HCaRG (21.9 kD) (Commd4) alternative variant aSep08, complete mRNA.                     |
| <a href="#">Commd4</a>         | <a href="#">Commd4.cSep08</a>         | <a href="#">363068</a> | 2950   | 729  | 7 | 160 | HCaRG (Commd4) alternative variant cSep08, mRNA.                                        |
| <a href="#">Commd4</a>         | <a href="#">Commd4.dSep08</a>         | <a href="#">363068</a> | 3451   | 1245 | 6 | 148 | HCaRG (16.1 kD) (Commd4) alternative variant dSep08, complete mRNA.                     |
| <a href="#">Commd4</a>         | <a href="#">Commd4.eSep08</a>         | <a href="#">363068</a> | 1340   | 689  | 4 | 134 | HCaRG precursor (14.6 kD) (Commd4) alternative variant eSep08, mRNA.                    |
| <a href="#">Commd4</a>         | <a href="#">Commd4.fSep08</a>         | <a href="#">363068</a> | 1818   | 695  | 2 | 39  | putative protein of metazoan origin (4.4 kD) (Commd4) alternative variant fSep08, mRNA. |
| <a href="#">Commd4</a>         | <a href="#">Commd4.gSep08</a>         | <a href="#">363068</a> | 2141   | 399  | 4 | 37  | putative protein (4.1 kD) (Commd4) alternative variant gSep08, mRNA.                    |
| <a href="#">Commd4</a>         | <a href="#">Commd4.iSep08</a>         | <a href="#">363068</a> | 1589   | 241  | 3 |     |                                                                                         |
| <a href="#">Commd5</a>         | <a href="#">Commd5.cSep08</a>         | <a href="#">245974</a> | 1150   | 782  | 2 | 220 | HCaRG (Commd5) alternative variant cSep08, mRNA.                                        |
| <a href="#">Commd6</a>         | <a href="#">Commd6.bSep08</a>         | <a href="#">498559</a> | 6251   | 863  | 3 | 74  | putative protein of eukaryotic origin (Commd6) alternative variant bSep08, mRNA.        |
| <a href="#">Commd6</a>         | <a href="#">Commd6.cSep08</a>         | <a href="#">498559</a> | 803    | 714  | 2 | 60  | putative protein (Commd6) alternative variant cSep08, mRNA.                             |
| <a href="#">Commd7</a>         | <a href="#">Commd7.aSep08</a>         | <a href="#">296285</a> | 15204  | 1525 | 9 | 248 | HCaRG (Commd7) alternative variant aSep08, mRNA.                                        |
| <a href="#">Commd7</a>         | <a href="#">Commd7.dSep08</a>         | <a href="#">296285</a> | 4646   | 585  | 3 | 104 | putative protein of metazoan origin (Commd7) alternative variant dSep08, mRNA.          |
| <a href="#">Commd7</a>         | <a href="#">Commd7.eSep08</a>         | <a href="#">296285</a> | 3118   | 734  | 3 | 75  | putative protein of eukaryotic origin (Commd7) alternative variant eSep08, mRNA.        |
| <a href="#">Commd8</a>         | <a href="#">Commd8.bSep08</a>         | <a href="#">289603</a> | 9720   | 658  | 5 | 90  | putative protein of eukaryotic origin (Commd8) alternative variant bSep08, mRNA.        |
| <a href="#">Commd9</a>         | <a href="#">Commd9.bSep08</a>         | <a href="#">295956</a> | 6359   | 892  | 6 | 169 | HCaRG (Commd9) alternative variant bSep08, mRNA.                                        |
| <a href="#">Commd9</a>         | <a href="#">Commd9.cSep08</a>         | <a href="#">295956</a> | 8393   | 409  | 2 | 136 | putative protein of vertebrate origin (Commd9) alternative variant cSep08, mRNA.        |
| <a href="#">Commd9</a>         | <a href="#">Commd9.dSep08</a>         | <a href="#">295956</a> | 14435  | 683  | 4 | 99  | putative protein of eukaryotic origin (Commd9) alternative variant dSep08, mRNA.        |
| <a href="#">Commd9</a>         | <a href="#">Commd9.eSep08</a>         | <a href="#">295956</a> | 1009   | 467  | 2 | 68  | putative protein (Commd9) alternative variant eSep08, mRNA.                             |
| <a href="#">Commd9</a>         | <a href="#">Commd9.fSep08</a>         | <a href="#">295956</a> | 2128   | 1154 | 2 | 64  | putative protein (Commd9) alternative variant fSep08, mRNA.                             |
| <a href="#">Commd10</a>        | <a href="#">Commd10.bSep08</a>        | <a href="#">361323</a> | 134492 | 597  | 6 | 191 | HCaRG (Commd10) alternative variant bSep08, mRNA.                                       |
| <a href="#">Commd10</a>        | <a href="#">Commd10.cSep08</a>        | <a href="#">361323</a> | 136088 | 1399 | 6 | 165 | HCaRG (18.8 kD) (Commd10) alternative variant cSep08, complete mRNA.                    |
| <a href="#">Complex1_LYR.0</a> | <a href="#">Complex1_LYR.0.aSep08</a> |                        | 113693 | 965  |   | 91  | LYR motif containing 4 (10.8 kD) (Complex1_LYR.0) mRNA.                                 |
| <a href="#">Comt</a>           | <a href="#">Comt.bSep08</a>           | <a href="#">24267</a>  | 9191   | 1184 | 4 | 200 | catechol-O-methyltransferase (22.6 kD) (Comt) alternative variant bSep08, mRNA.         |
| <a href="#">Comtd1</a>         | <a href="#">Comtd1.bSep08</a>         | <a href="#">305685</a> | 1003   | 698  | 2 | 111 | O-methyltransferase, family 3 (12.5 kD) (Comtd1) alternative variant bSep08, mRNA.      |
| <a href="#">Copa</a>           | <a href="#">Copa.bSep08</a>           | <a href="#">304978</a> | 4725   | 733  | 8 | 244 | coatomer protein complex subunit alpha (Copa) alternative variant bSep08, mRNA.         |
| <a href="#">Copa</a>           | <a href="#">Copa.cSep08</a>           | <a href="#">304978</a> | 2670   | 260  | 3 | 81  | coatomer protein complex subunit alpha (Copa) alternative variant cSep08, mRNA.         |

|                          |                                 |                        |       |      |    |     |                                                                                                                          |
|--------------------------|---------------------------------|------------------------|-------|------|----|-----|--------------------------------------------------------------------------------------------------------------------------|
| <a href="#">Copb1</a>    | <a href="#">Copb1.bSep08</a>    | <a href="#">114023</a> | 8684  | 735  | 5  | 202 | coatomer protein complex, subunit beta 1 (Copb1) alternative variant bSep08, mRNA.                                       |
| <a href="#">Copb1</a>    | <a href="#">Copb1.cSep08</a>    | <a href="#">114023</a> | 901   | 320  | 2  | 38  | coatomer protein complex, subunit beta 1 (Copb1) alternative variant cSep08, mRNA.                                       |
| <a href="#">Cope</a>     | <a href="#">Cope.aSep08</a>     | <a href="#">290659</a> | 10787 | 1253 | 10 | 308 | coatomer protein complex CRA c (34.7 kD) (Cope) alternative variant aSep08, complete mRNA.                               |
| <a href="#">Cope</a>     | <a href="#">Cope.bSep08</a>     | <a href="#">290659</a> | 6065  | 662  | 5  | 217 | coatomer protein complex CRA b (Cope) alternative variant bSep08, mRNA.                                                  |
| <a href="#">Cope</a>     | <a href="#">Cope.cSep08</a>     | <a href="#">290659</a> | 6797  | 697  | 8  | 203 | coatomer protein complex CRA c (Cope) alternative variant cSep08, mRNA.                                                  |
| <a href="#">Cope</a>     | <a href="#">Cope.eSep08</a>     | <a href="#">290659</a> | 10771 | 2236 | 8  | 166 | coatomer protein complex CRA b (18.7 kD) (Cope) alternative variant eSep08, complete mRNA.                               |
| <a href="#">Cope</a>     | <a href="#">Cope.fSep08</a>     | <a href="#">290659</a> | 1504  | 439  | 2  | 123 | putative protein of eukaryotic origin (Cope) alternative variant fSep08, mRNA.                                           |
| <a href="#">Cope</a>     | <a href="#">Cope.gSep08</a>     | <a href="#">290659</a> | 3700  | 445  | 4  | 119 | coatomer protein complex CRA c (Cope) alternative variant gSep08, mRNA.                                                  |
| <a href="#">Cope</a>     | <a href="#">Cope.hSep08</a>     | <a href="#">290659</a> | 2364  | 740  | 2  | 58  | coatomer protein complex CRA c (Cope) alternative variant hSep08, mRNA.                                                  |
| <a href="#">Cope</a>     | <a href="#">Cope.iSep08</a>     | <a href="#">290659</a> | 1009  | 932  | 2  | 36  | putative protein (4.1 kD) (Cope) alternative variant iSep08, mRNA.                                                       |
| <a href="#">Copg</a>     | <a href="#">Copg.bSep08</a>     | <a href="#">297428</a> | 24767 | 1803 | 11 | 507 | coatomer protein complex (Copg) alternative variant bSep08, mRNA.                                                        |
| <a href="#">Copg</a>     | <a href="#">Copg.cSep08</a>     | <a href="#">297428</a> | 7196  | 977  | 3  | 180 | coatomer protein complex (20.4 kD) (Copg) alternative variant cSep08, mRNA.                                              |
| <a href="#">Copg</a>     | <a href="#">Copg.dSep08</a>     | <a href="#">297428</a> | 2266  | 961  | 3  | 127 | coatomer protein complex CRA c (14.5 kD) (Copg) alternative variant dSep08, mRNA.                                        |
| <a href="#">Copine.0</a> | <a href="#">Copine.0.aSep08</a> |                        | 1041  | 892  |    | 212 | copine VI (Copine.0) mRNA.                                                                                               |
| <a href="#">Copine.1</a> | <a href="#">Copine.1.aSep08</a> |                        | 6407  | 1080 | 8  | 281 | copine I (Copine.1) alternative variant aSep08, mRNA.                                                                    |
| <a href="#">Copine.1</a> | <a href="#">Copine.1.bSep08</a> |                        | 6322  | 2422 | 4  | 197 | copine I (21.2 kD) (Copine.1) alternative variant bSep08, mRNA.                                                          |
| <a href="#">Cops2</a>    | <a href="#">Cops2.bSep08</a>    | <a href="#">261736</a> | 19762 | 1079 | 10 | 354 | COP9 (constitutive photomorphogenic) homolog, subunit 2 (Arabidopsis thaliana) (Cops2) alternative variant bSep08, mRNA. |
| <a href="#">Cops2</a>    | <a href="#">Cops2.cSep08</a>    | <a href="#">261736</a> | 16765 | 661  | 8  | 219 | COP9 (constitutive photomorphogenic) homolog, subunit 2 (Arabidopsis thaliana) (Cops2) alternative variant cSep08, mRNA. |
| <a href="#">Cops2</a>    | <a href="#">Cops2.dSep08</a>    | <a href="#">261736</a> | 2984  | 925  | 2  | 79  | COP9 (constitutive photomorphogenic) homolog, subunit 2 (Arabidopsis thaliana) (Cops2) alternative variant dSep08, mRNA. |
| <a href="#">Cops3</a>    | <a href="#">Cops3.bSep08</a>    | <a href="#">287367</a> | 8704  | 656  | 6  | 102 | cop9 (11.6 kD) (Cops3) alternative variant bSep08, mRNA.                                                                 |
| <a href="#">Cops3</a>    | <a href="#">Cops3.cSep08</a>    | <a href="#">287367</a> | 9826  | 735  | 6  | 89  | cop9 (Cops3) alternative variant cSep08, mRNA.                                                                           |
| <a href="#">Cops3</a>    | <a href="#">Cops3.dSep08</a>    | <a href="#">287367</a> | 2994  | 556  | 3  | 67  | cop9 constitutive photomorphogenic homolog (7.7 kD) (Cops3) alternative variant dSep08, mRNA.                            |
| <a href="#">Cops4</a>    | <a href="#">Cops4.bSep08</a>    | <a href="#">360915</a> | 20663 | 780  | 7  | 260 | cop9 constitutive photomorphogenic homolog (Cops4) alternative variant bSep08, mRNA.                                     |
| <a href="#">Cops4</a>    | <a href="#">Cops4.cSep08</a>    | <a href="#">360915</a> | 1009  | 874  | 2  | 182 | cop9 constitutive photomorphogenic homolog (Cops4) alternative variant cSep08, mRNA.                                     |



|                        |                               |                        |       |      |   |     |                                                                                                                            |
|------------------------|-------------------------------|------------------------|-------|------|---|-----|----------------------------------------------------------------------------------------------------------------------------|
| <a href="#">Cops4</a>  | <a href="#">Cops4.dSep08</a>  | <a href="#">360915</a> | 13417 | 418  | 3 | 92  | cop9 homolog CRA c (10.6 kD) (Cops4) alternative variant dSep08, mRNA.                                                     |
| <a href="#">Cops5</a>  | <a href="#">Cops5.bSep08</a>  | <a href="#">312916</a> | 15013 | 723  | 6 | 211 | COP9 (constitutive photomorphogenic) homolog, subunit 5 (Arabidopsis thaliana) (Cops5) alternative variant bSep08, mRNA.   |
| <a href="#">Cops5</a>  | <a href="#">Cops5.cSep08</a>  | <a href="#">312916</a> | 5727  | 719  | 5 | 199 | COP9 (constitutive photomorphogenic) homolog, subunit 5 (Arabidopsis thaliana) (Cops5) alternative variant cSep08, mRNA.   |
| <a href="#">Cops6</a>  | <a href="#">Cops6.bSep08</a>  | <a href="#">304343</a> | 642   | 470  | 3 | 107 | COP9 (constitutive photomorphogenic) homolog, subunit 6 (Arabidopsis thaliana) (Cops6) alternative variant bSep08, mRNA.   |
| <a href="#">Cops6</a>  | <a href="#">Cops6.cSep08</a>  | <a href="#">304343</a> | 1201  | 614  | 5 | 89  | COP9 (constitutive photomorphogenic) homolog, subunit 6 (Arabidopsis thaliana) (Cops6) alternative variant cSep08, mRNA.   |
| <a href="#">Cops7a</a> | <a href="#">Cops7a.bSep08</a> | <a href="#">312710</a> | 2862  | 826  | 4 | 188 | COP9 (constitutive photomorphogenic) homolog, subunit 7a (Arabidopsis thaliana) (Cops7a) alternative variant bSep08, mRNA. |
| <a href="#">Cops7a</a> | <a href="#">Cops7a.cSep08</a> | <a href="#">312710</a> | 1486  | 1324 | 2 | 20  | COP9 (constitutive photomorphogenic) homolog, subunit 7a (Arabidopsis thaliana) (Cops7a) alternative variant cSep08, mRNA. |
| <a href="#">Copz1</a>  | <a href="#">Copz1.bSep08</a>  | <a href="#">315345</a> | 9155  | 617  | 8 | 172 | copz1 (Copz1) alternative variant bSep08, mRNA.                                                                            |
| <a href="#">Copz1</a>  | <a href="#">Copz1.cSep08</a>  | <a href="#">315345</a> | 22521 | 390  | 6 | 110 | coatomer protein complex zeta 1 CRA b (Copz1) alternative variant cSep08, mRNA.                                            |
| <a href="#">Copz1</a>  | <a href="#">Copz1.dSep08</a>  | <a href="#">315345</a> | 25076 | 759  | 7 | 89  | copz1 (10.0 kD) (Copz1) alternative variant dSep08, mRNA.                                                                  |
| <a href="#">Copz1</a>  | <a href="#">Copz1.eSep08</a>  | <a href="#">315345</a> | 18028 | 857  | 3 | 83  | coatomer protein complex zeta 1 CRA b (9.5 kD) (Copz1) alternative variant eSep08, mRNA.                                   |
| <a href="#">Coq2</a>   | <a href="#">Coq2.bSep08</a>   | <a href="#">498332</a> | 2830  | 560  | 2 | 167 | coenzyme Q2 homolog, prenyltransferase (yeast) (Coq2) alternative variant bSep08, mRNA.                                    |
| <a href="#">Coq4</a>   | <a href="#">Coq4.bSep08</a>   | <a href="#">366013</a> | 2737  | 815  | 3 | 77  | coenzyme Q4 homolog (yeast) (Coq4) alternative variant bSep08, mRNA.                                                       |
| <a href="#">Coq6</a>   | <a href="#">Coq6.bSep08</a>   | <a href="#">299195</a> | 2416  | 681  | 5 | 138 | coenzyme Q6 homolog CRA a (Coq6) alternative variant bSep08, mRNA.                                                         |
| <a href="#">Coq6</a>   | <a href="#">Coq6.cSep08</a>   | <a href="#">299195</a> | 5647  | 726  | 3 | 138 | coenzyme Q6 homolog (Coq6) alternative variant cSep08, mRNA.                                                               |
| <a href="#">Coq6</a>   | <a href="#">Coq6.dSep08</a>   | <a href="#">299195</a> | 1413  | 526  | 3 | 88  | coenzyme Q6 homolog CRA a (9.6 kD) (Coq6) alternative variant dSep08, mRNA.                                                |
| <a href="#">Coq6</a>   | <a href="#">Coq6.eSep08</a>   | <a href="#">299195</a> | 1230  | 458  | 2 | 63  | coenzyme Q6 homolog CRA a (7.1 kD) (Coq6) alternative variant eSep08, mRNA.                                                |
| <a href="#">Coq6</a>   | <a href="#">Coq6.fSep08</a>   | <a href="#">299195</a> | 1024  | 399  | 2 | 25  | putative protein (Coq6) alternative variant fSep08, mRNA.                                                                  |
| <a href="#">Coq7</a>   | <a href="#">Coq7.bSep08</a>   | <a href="#">25249</a>  | 12327 | 523  | 1 | 173 | demethyl-Q 7 (Coq7) alternative variant bSep08, mRNA.                                                                      |
| <a href="#">Coq10a</a> | <a href="#">Coq10a.bSep08</a> | <a href="#">362810</a> | 5319  | 885  | 4 | 185 | coenzyme Q10 homolog A (yeast) (Coq10a) alternative variant bSep08, mRNA.                                                  |
| <a href="#">Corin</a>  | <a href="#">Corin.bSep08</a>  | <a href="#">289596</a> | 41553 | 701  | 3 | 128 | corin (Corin) alternative variant bSep08, mRNA.                                                                            |
| <a href="#">Corin</a>  | <a href="#">Corin.cSep08</a>  | <a href="#">289596</a> | 62272 | 407  | 3 | 111 | corin (Corin) alternative variant cSep08, mRNA.                                                                            |
| <a href="#">Coro1a</a> | <a href="#">Coro1a.bSep08</a> | <a href="#">155151</a> | 3648  | 1683 | 6 | 273 | coronin, actin binding protein 1A (29.6 kD) (Coro1a) alternative variant bSep08, mRNA.                                     |

|                        |                               |                        |        |      |    |     |                                                                                         |
|------------------------|-------------------------------|------------------------|--------|------|----|-----|-----------------------------------------------------------------------------------------|
| <a href="#">Coro1a</a> | <a href="#">Coro1a.dSep08</a> | <a href="#">155151</a> | 874    | 675  | 3  | 106 | coronin, actin binding protein 1A (Coro1a) alternative variant dSep08, mRNA.            |
| <a href="#">Coro1b</a> | <a href="#">Coro1b.bSep08</a> | <a href="#">29474</a>  | 3370   | 1315 | 5  | 274 | coronin, actin-binding protein, 1B (Coro1b) alternative variant bSep08, mRNA.           |
| <a href="#">Coro1b</a> | <a href="#">Coro1b.cSep08</a> | <a href="#">29474</a>  | 1337   | 1257 | 2  | 134 | coronin, actin-binding protein, 1B (14.8 kD) (Coro1b) alternative variant cSep08, mRNA. |
| <a href="#">Coro1c</a> | <a href="#">Coro1c.bSep08</a> | <a href="#">501841</a> | 67672  | 1894 | 4  | 366 | coronin, actin binding protein 1C (Coro1c) alternative variant bSep08, mRNA.            |
| <a href="#">Coro1c</a> | <a href="#">Coro1c.cSep08</a> | <a href="#">501841</a> | 63660  | 424  |    | 140 | coronin, actin binding protein 1C (Coro1c) alternative variant cSep08, mRNA.            |
| <a href="#">Coro2a</a> | <a href="#">Coro2a.bSep08</a> | <a href="#">313235</a> | 6932   | 1603 | 7  | 241 | coronin, actin binding protein 2A (27.9 kD) (Coro2a) alternative variant bSep08, mRNA.  |
| <a href="#">Coro2a</a> | <a href="#">Coro2a.cSep08</a> | <a href="#">313235</a> | 23357  | 728  | 5  | 189 | coronin, actin binding protein 2A (Coro2a) alternative variant cSep08, mRNA.            |
| <a href="#">Coro2a</a> | <a href="#">Coro2a.dSep08</a> | <a href="#">313235</a> | 45198  | 527  | 4  | 175 | coronin, actin binding protein 2A (Coro2a) alternative variant dSep08, mRNA.            |
| <a href="#">Coro2a</a> | <a href="#">Coro2a.eSep08</a> | <a href="#">313235</a> | 4195   | 642  | 3  | 104 | coronin, actin binding protein 2A (Coro2a) alternative variant eSep08, mRNA.            |
| <a href="#">Coro2b</a> | <a href="#">Coro2b.aSep08</a> | <a href="#">300768</a> | 112271 | 1133 | 5  | 370 | coronin, actin binding protein, 2B (Coro2b) alternative variant aSep08, mRNA.           |
| <a href="#">Coro2b</a> | <a href="#">Coro2b.bSep08</a> | <a href="#">300768</a> | 67092  | 568  | 3  | 181 | coronin, actin binding protein, 2B (Coro2b) alternative variant bSep08, mRNA.           |
| <a href="#">Coro6</a>  | <a href="#">Coro6.bSep08</a>  | <a href="#">245982</a> | 1189   | 1099 | 1  | 70  | coronin, actin binding protein 6 (Coro6) alternative variant bSep08, mRNA.              |
| <a href="#">Coro7</a>  | <a href="#">Coro7.aSep08</a>  | <a href="#">192276</a> | 27622  | 2754 | 20 | 688 | coronin 7 (75.0 kD) (Coro7) alternative variant aSep08, mRNA.                           |
| <a href="#">Coro7</a>  | <a href="#">Coro7.bSep08</a>  | <a href="#">192276</a> | 681    | 425  | 4  | 141 | coronin 7 (Coro7) alternative variant bSep08, mRNA.                                     |
| <a href="#">Coro7</a>  | <a href="#">Coro7.dSep08</a>  | <a href="#">192276</a> | 2084   | 1092 | 4  | 64  | coronin 7 (7.3 kD) (Coro7) alternative variant dSep08, mRNA.                            |
| <a href="#">Cotl1</a>  | <a href="#">Cotl1.bSep08</a>  | <a href="#">361422</a> | 9012   | 756  | 1  | 159 | coactosin-like 1 (Dictyostelium) (Cotl1) alternative variant bSep08, mRNA.              |
| <a href="#">Cotl1</a>  | <a href="#">Cotl1.cSep08</a>  | <a href="#">361422</a> | 21618  | 411  | 2  | 64  | coactosin-like 1 (Dictyostelium) (Cotl1) alternative variant cSep08, mRNA.              |
| <a href="#">Cox4i1</a> | <a href="#">Cox4i1.aSep08</a> | <a href="#">29445</a>  | 6242   | 717  | 3  | 205 | cytochrome c oxidase subunit IV isoform 1 (Cox4i1) alternative variant aSep08, mRNA.    |
| <a href="#">Cox4i1</a> | <a href="#">Cox4i1.cSep08</a> | <a href="#">29445</a>  | 5754   | 546  | 3  | 181 | cytochrome c oxidase subunit IV isoform 1 (Cox4i1) alternative variant cSep08, mRNA.    |
| <a href="#">Cox4i1</a> | <a href="#">Cox4i1.dSep08</a> | <a href="#">29445</a>  | 1856   | 590  | 1  | 163 | cytochrome c oxidase subunit IV isoform 1 (Cox4i1) alternative variant dSep08, mRNA.    |
| <a href="#">Cox4i1</a> | <a href="#">Cox4i1.eSep08</a> | <a href="#">29445</a>  | 5995   | 474  | 3  | 132 | cytochrome c oxidase subunit IV isoform 1 (Cox4i1) alternative variant eSep08, mRNA.    |
| <a href="#">Cox4i2</a> | <a href="#">Cox4i2.bSep08</a> | <a href="#">84683</a>  | 2762   | 357  | 3  | 118 | cytochrome c oxidase subunit IV isoform 2 (Cox4i2) alternative variant bSep08, mRNA.    |
| <a href="#">Cox4i2</a> | <a href="#">Cox4i2.cSep08</a> | <a href="#">84683</a>  | 2441   | 270  | 3  | 89  | cytochrome c oxidase subunit IV isoform 2 (Cox4i2) alternative variant cSep08, mRNA.    |
| <a href="#">Cox4nb</a> | <a href="#">Cox4nb.bSep08</a> | <a href="#">361425</a> | 781    | 532  | 1  | 118 | COX4 neighbor (Cox4nb) alternative variant bSep08, mRNA.                                |

|                                |                                       |                        |       |      |   |     |                                                                                                                          |
|--------------------------------|---------------------------------------|------------------------|-------|------|---|-----|--------------------------------------------------------------------------------------------------------------------------|
| <a href="#">Cox5a</a>          | <a href="#">Cox5a.bSep08</a>          | <a href="#">252934</a> | 3648  | 572  | 1 | 77  | cytochrome c oxidase, subunit Va (8.6 kD) (Cox5a) alternative variant bSep08, mRNA.                                      |
| <a href="#">Cox5b</a>          | <a href="#">Cox5b.bSep08</a>          | <a href="#">94194</a>  | 1260  | 738  | 1 | 55  | cytochrome c oxidase subunit Vb (5.8 kD) (Cox5b) alternative variant bSep08, complete mRNA.                              |
| <a href="#">Cox7a2l</a>        | <a href="#">Cox7a2l.bSep08</a>        | <a href="#">298762</a> | 27143 | 1070 | 2 | 113 | cytochrome c oxidase subunit VIIa polypeptide 2 like (12.6 kD) (Cox7a2l) alternative variant bSep08, complete mRNA.      |
| <a href="#">Cox7a2l</a>        | <a href="#">Cox7a2l.cSep08</a>        | <a href="#">298762</a> | 26780 | 821  | 3 | 42  | cytochrome c oxidase subunit VIIa polypeptide 2 like (4.6 kD) (Cox7a2l) alternative variant cSep08, mRNA.                |
| <a href="#">Cox7a2l</a>        | <a href="#">Cox7a2l.dSep08</a>        | <a href="#">298762</a> | 26602 | 766  | 4 | 68  | cytochrome c oxidase subunit VIIa polypeptide 2 like (Cox7a2l) alternative variant dSep08, mRNA.                         |
| <a href="#">Cox7a2l</a>        | <a href="#">Cox7a2l.eSep08</a>        | <a href="#">298762</a> | 26348 | 696  | 4 | 41  | cytochrome c oxidase subunit VIIa polypeptide 2 like (Cox7a2l) alternative variant eSep08, mRNA.                         |
| <a href="#">Cox15</a>          | <a href="#">Cox15.bSep08</a>          | <a href="#">309391</a> | 5262  | 827  | 1 | 257 | COX15 homolog, cytochrome c oxidase assembly protein (yeast) (Cox15) alternative variant bSep08, mRNA.                   |
| <a href="#">Cox17andPopdc2</a> | <a href="#">Cox17andPopdc2.bSep08</a> | <a href="#">89786</a>  | 27854 | 1051 | 4 | 207 | popeye 2 (23.5 kD) (Cox17andPopdc2) alternative variant bSep08, complete mRNA.                                           |
| <a href="#">Cox17andPopdc2</a> | <a href="#">Cox17andPopdc2.bSep08</a> | <a href="#">360718</a> | 27854 | 1051 | 4 | 207 | popeye 2 (23.5 kD) (Cox17andPopdc2) alternative variant bSep08, complete mRNA.                                           |
| <a href="#">Cox17andPopdc2</a> | <a href="#">Cox17andPopdc2.cSep08</a> | <a href="#">89786</a>  | 26324 | 530  | 2 | 145 | putative protein of vertebrate origin (Cox17andPopdc2) alternative variant cSep08, mRNA.                                 |
| <a href="#">Cox17andPopdc2</a> | <a href="#">Cox17andPopdc2.cSep08</a> | <a href="#">360718</a> | 26324 | 530  | 2 | 145 | putative protein of vertebrate origin (Cox17andPopdc2) alternative variant cSep08, mRNA.                                 |
| <a href="#">Cox17andPopdc2</a> | <a href="#">Cox17andPopdc2.eSep08</a> | <a href="#">89786</a>  | 5768  | 518  | 3 | 63  | cytochrome c oxidase (6.9 kD) (Cox17andPopdc2) alternative variant eSep08, mRNA.                                         |
| <a href="#">Cox17andPopdc2</a> | <a href="#">Cox17andPopdc2.eSep08</a> | <a href="#">360718</a> | 5768  | 518  | 3 | 63  | cytochrome c oxidase (6.9 kD) (Cox17andPopdc2) alternative variant eSep08, mRNA.                                         |
| <a href="#">Cox17andPopdc2</a> | <a href="#">Cox17andPopdc2.fSep08</a> | <a href="#">89786</a>  | 5775  | 425  | 3 | 63  | cytochrome c oxidase (6.8 kD) (Cox17andPopdc2) alternative variant fSep08, mRNA.                                         |
| <a href="#">Cox17andPopdc2</a> | <a href="#">Cox17andPopdc2.fSep08</a> | <a href="#">360718</a> | 5775  | 425  | 3 | 63  | cytochrome c oxidase (6.8 kD) (Cox17andPopdc2) alternative variant fSep08, mRNA.                                         |
| <a href="#">Cox17andPopdc2</a> | <a href="#">Cox17andPopdc2.gSep08</a> | <a href="#">89786</a>  | 6793  | 1273 | 3 | 166 | popeye 2 (18.6 kD) (Cox17andPopdc2) alternative variant gSep08, mRNA.                                                    |
| <a href="#">Cox17andPopdc2</a> | <a href="#">Cox17andPopdc2.gSep08</a> | <a href="#">360718</a> | 6793  | 1273 | 3 | 166 | popeye 2 (18.6 kD) (Cox17andPopdc2) alternative variant gSep08, mRNA.                                                    |
| <a href="#">Cox18</a>          | <a href="#">Cox18.bSep08</a>          | <a href="#">289522</a> | 11462 | 1179 | 3 | 266 | COX18 cytochrome c oxidase assembly homolog (S. cerevisiae) (29.7 kD) (Cox18) alternative variant bSep08, complete mRNA. |
| <a href="#">Cox18</a>          | <a href="#">Cox18.cSep08</a>          | <a href="#">289522</a> | 6558  | 714  |   | 151 | COX18 cytochrome c oxidase assembly homolog (S. cerevisiae) (Cox18) alternative variant cSep08, mRNA.                    |
| <a href="#">Cox19</a>          | <a href="#">Cox19.aSep08</a>          | <a href="#">304330</a> | 6707  | 932  | 3 | 111 | COX19 cytochrome c oxidase assembly homolog (S. cerevisiae) (13.1 kD) (Cox19) alternative variant aSep08, mRNA.          |
| <a href="#">Cp</a>             | <a href="#">Cp.bSep08</a>             | <a href="#">24268</a>  | 20064 | 1591 | 5 | 176 | ceruloplasmin (Cp) alternative variant bSep08, mRNA.                                                                     |
| <a href="#">Cp</a>             | <a href="#">Cp.cSep08</a>             | <a href="#">24268</a>  | 18777 | 826  | 5 | 130 | ceruloplasmin (Cp) alternative variant cSep08, mRNA.                                                                     |
| <a href="#">Cp110</a>          | <a href="#">Cp110.bSep08</a>          | <a href="#">361634</a> | 7889  | 2230 | 6 | 146 | CP110 protein (Cp110) alternative variant bSep08, mRNA.                                                                  |
| <a href="#">Cpa1</a>           | <a href="#">Cpa1.bSep08</a>           | <a href="#">24269</a>  | 1984  | 517  | 1 | 99  | carboxypeptidase A1 (11.1 kD) (Cpa1) alternative variant bSep08, mRNA.                                                   |

|                       |                              |                        |        |      |   |     |                                                                                                                                    |
|-----------------------|------------------------------|------------------------|--------|------|---|-----|------------------------------------------------------------------------------------------------------------------------------------|
| <a href="#">Cpa1</a>  | <a href="#">Cpa1.cSep08</a>  | <a href="#">24269</a>  | 1994   | 405  | 2 | 73  | carboxypeptidase A1 (8.3 kD) (Cpa1) alternative variant cSep08, mRNA.                                                              |
| <a href="#">Cpa2</a>  | <a href="#">Cpa2.bSep08</a>  | <a href="#">296959</a> | 7459   | 468  | 1 | 156 | carboxypeptidase A2 (pancreatic) (Cpa2) alternative variant bSep08, mRNA.                                                          |
| <a href="#">Cpa3</a>  | <a href="#">Cpa3.aSep08</a>  | <a href="#">54242</a>  | 18435  | 727  |   | 112 | carboxypeptidase A3, mast cell (Cpa3) mRNA.                                                                                        |
| <a href="#">Cpa6</a>  | <a href="#">Cpa6.bSep08</a>  | <a href="#">312913</a> | 110277 | 1352 | 7 | 314 | carboxypeptidase A6 (Cpa6) alternative variant bSep08, mRNA.                                                                       |
| <a href="#">Cpa6</a>  | <a href="#">Cpa6.cSep08</a>  | <a href="#">312913</a> | 56381  | 701  | 2 | 96  | carboxypeptidase A6 (Cpa6) alternative variant cSep08, mRNA.                                                                       |
| <a href="#">Cpa6</a>  | <a href="#">Cpa6.dSep08</a>  | <a href="#">312913</a> | 1898   | 681  | 1 | 55  | carboxypeptidase A6 (6.4 kD) (Cpa6) alternative variant dSep08, mRNA.                                                              |
| <a href="#">Cpb1</a>  | <a href="#">Cpb1.bSep08</a>  | <a href="#">24271</a>  | 11989  | 762  | 2 | 208 | carboxypeptidase B1 (tissue) (Cpb1) alternative variant bSep08, mRNA.                                                              |
| <a href="#">Cpb2</a>  | <a href="#">Cpb2.bSep08</a>  | <a href="#">113936</a> | 34485  | 674  | 1 | 161 | carboxypeptidase B2 (plasma) (Cpb2) alternative variant bSep08, mRNA.                                                              |
| <a href="#">Cpd</a>   | <a href="#">Cpd.bSep08</a>   | <a href="#">25306</a>  | 4614   | 1537 | 4 | 174 | carboxypeptidase D (19.5 kD) (Cpd) alternative variant bSep08, mRNA.                                                               |
| <a href="#">Cpd</a>   | <a href="#">Cpd.cSep08</a>   | <a href="#">25306</a>  | 9217   | 1326 | 5 | 132 | carboxypeptidase D (Cpd) alternative variant cSep08, mRNA.                                                                         |
| <a href="#">Cpd</a>   | <a href="#">Cpd.dSep08</a>   | <a href="#">25306</a>  | 2012   | 391  | 2 | 130 | carboxypeptidase D (Cpd) alternative variant dSep08, mRNA.                                                                         |
| <a href="#">Cpeb1</a> | <a href="#">Cpeb1.bSep08</a> | <a href="#">293056</a> | 11165  | 595  | 2 | 98  | cytoplasmic polyadenylation element binding protein 1 (Cpeb1) alternative variant bSep08, mRNA.                                    |
| <a href="#">Cpeb1</a> | <a href="#">Cpeb1.cSep08</a> | <a href="#">293056</a> | 14072  | 1800 | 3 |     |                                                                                                                                    |
| <a href="#">Cpeb2</a> | <a href="#">Cpeb2.bSep08</a> | <a href="#">360949</a> | 41504  | 768  | 8 | 256 | cytoplasmic polyadenylation element binding protein 2 (Cpeb2) alternative variant bSep08, mRNA.                                    |
| <a href="#">Cpeb2</a> | <a href="#">Cpeb2.cSep08</a> | <a href="#">360949</a> | 39127  | 655  | 7 | 218 | cytoplasmic polyadenylation element binding protein 2 (Cpeb2) alternative variant cSep08, mRNA.                                    |
| <a href="#">Cpeb2</a> | <a href="#">Cpeb2.dSep08</a> | <a href="#">360949</a> | 31741  | 575  | 5 | 191 | cytoplasmic polyadenylation element binding protein 2 (Cpeb2) alternative variant dSep08, mRNA.                                    |
| <a href="#">Cpeb3</a> | <a href="#">Cpeb3.aSep08</a> | <a href="#">309510</a> | 78927  | 731  | 6 | 243 | cytoplasmic polyadenylation element binding protein 3 (Cpeb3) alternative variant aSep08, mRNA.                                    |
| <a href="#">Cpeb4</a> | <a href="#">Cpeb4.bSep08</a> | <a href="#">303010</a> | 49713  | 435  | 4 | 145 | cytoplasmic polyadenylation element binding protein 4 and hypothetical protein LOC685957 (Cpeb4) alternative variant bSep08, mRNA. |
| <a href="#">Cpeb4</a> | <a href="#">Cpeb4.bSep08</a> | <a href="#">685957</a> | 49713  | 435  | 4 | 145 | cytoplasmic polyadenylation element binding protein 4 and hypothetical protein LOC685957 (Cpeb4) alternative variant bSep08, mRNA. |
| <a href="#">Cplx2</a> | <a href="#">Cplx2.bSep08</a> | <a href="#">116657</a> | 70249  | 304  | 3 | 100 | complexin 2 (Cplx2) alternative variant bSep08, mRNA.                                                                              |
| <a href="#">Cplx4</a> | <a href="#">Cplx4.aSep08</a> | <a href="#">361342</a> | 15291  | 455  |   | 151 | complexin 4 (Cplx4) mRNA.                                                                                                          |
| <a href="#">Cpm</a>   | <a href="#">Cpm.bSep08</a>   | <a href="#">314855</a> | 745    | 670  | 2 | 48  | carboxypeptidase M (Cpm) alternative variant bSep08, mRNA.                                                                         |
| <a href="#">Cpn1</a>  | <a href="#">Cpn1.bSep08</a>  | <a href="#">365466</a> | 7368   | 281  | 1 | 75  | carboxypeptidase N, polypeptide 1 (Cpn1) alternative variant bSep08, mRNA.                                                         |
| <a href="#">Cpne2</a> | <a href="#">Cpne2.aSep08</a> | <a href="#">291861</a> | 11163  | 689  |   | 228 | copine II (Cpne2) mRNA.                                                                                                            |
| <a href="#">Cpne3</a> | <a href="#">Cpne3.bSep08</a> | <a href="#">313087</a> | 5302   | 4081 | 2 | 85  | copine III (Cpne3) alternative variant bSep08, mRNA.                                                                               |

|                        |                               |                        |        |      |    |      |                                                                                                       |
|------------------------|-------------------------------|------------------------|--------|------|----|------|-------------------------------------------------------------------------------------------------------|
| <a href="#">Cpne5</a>  | <a href="#">Cpne5.bSep08</a>  | <a href="#">309650</a> | 16073  | 727  | 5  | 141  | copine V (Cpne5) alternative variant bSep08, mRNA.                                                    |
| <a href="#">Cpne5</a>  | <a href="#">Cpne5.cSep08</a>  | <a href="#">309650</a> | 9115   | 714  | 2  | 62   | copine V (7.1 kD) (Cpne5) alternative variant cSep08, mRNA.                                           |
| <a href="#">Cpne6</a>  | <a href="#">Cpne6.aSep08</a>  | <a href="#">691478</a> | 4794   | 1439 | 12 | 327  | copine VI (Cpne6) alternative variant aSep08, mRNA.                                                   |
| <a href="#">Cpne6</a>  | <a href="#">Cpne6.bSep08</a>  | <a href="#">691478</a> | 2950   | 634  | 6  | 178  | copine VI (Cpne6) alternative variant bSep08, mRNA.                                                   |
| <a href="#">Cpne7</a>  | <a href="#">Cpne7.bSep08</a>  | <a href="#">361433</a> | 7201   | 584  | 4  | 156  | copine VII (Cpne7) alternative variant bSep08, mRNA.                                                  |
| <a href="#">Cpne7</a>  | <a href="#">Cpne7.cSep08</a>  | <a href="#">361433</a> | 4420   | 2145 | 5  | 140  | copine VII (15.5 kD) (Cpne7) alternative variant cSep08, mRNA.                                        |
| <a href="#">Cpne8</a>  | <a href="#">Cpne8.bSep08</a>  | <a href="#">362988</a> | 50513  | 734  | 8  | 218  | copine VIII (Cpne8) alternative variant bSep08, mRNA.                                                 |
| <a href="#">Cpne9</a>  | <a href="#">Cpne9.bSep08</a>  | <a href="#">297516</a> | 11181  | 736  | 5  | 175  | copine family member IX (Cpne9) alternative variant bSep08, mRNA.                                     |
| <a href="#">Cps1</a>   | <a href="#">Cps1.aSep08</a>   | <a href="#">497840</a> | 110842 | 4517 | 37 | 1469 | carbamoyl-phosphate synthetase 1, mitochondrial (Cps1) alternative variant aSep08, mRNA.              |
| <a href="#">Cps1</a>   | <a href="#">Cps1.bSep08</a>   | <a href="#">497840</a> | 32374  | 664  | 4  | 109  | carbamoyl-phosphate synthetase 1, mitochondrial (Cps1) alternative variant bSep08, mRNA.              |
| <a href="#">Cps1</a>   | <a href="#">Cps1.cSep08</a>   | <a href="#">497840</a> | 1893   | 521  | 2  | 84   | carbamoyl-phosphate synthetase 1, mitochondrial (Cps1) alternative variant cSep08, mRNA.              |
| <a href="#">Cps1</a>   | <a href="#">Cps1.dSep08</a>   | <a href="#">497840</a> | 29113  | 288  | 3  | 66   | carbamoyl-phosphate synthetase 1, mitochondrial (Cps1) alternative variant dSep08, mRNA.              |
| <a href="#">Cpsf1</a>  | <a href="#">Cpsf1.aSep08</a>  | <a href="#">366952</a> | 7809   | 4133 | 35 | 1349 | cleavage and polyadenylation specific factor 1 (Cpsf1) alternative variant aSep08, mRNA.              |
| <a href="#">Cpsf1</a>  | <a href="#">Cpsf1.bSep08</a>  | <a href="#">366952</a> | 447    | 366  | 2  | 92   | cleavage and polyadenylation specific factor 1 (Cpsf1) alternative variant bSep08, mRNA.              |
| <a href="#">Cpsf1</a>  | <a href="#">Cpsf1.cSep08</a>  | <a href="#">366952</a> | 363    | 286  | 2  | 67   | cleavage and polyadenylation specific factor 1 (Cpsf1) alternative variant cSep08, mRNA.              |
| <a href="#">Cpsf3</a>  | <a href="#">Cpsf3.bSep08</a>  | <a href="#">298916</a> | 13624  | 1212 | 10 | 190  | cleavage and polyadenylation specificity factor 3 (21.8 kD) (Cpsf3) alternative variant bSep08, mRNA. |
| <a href="#">Cpsf3</a>  | <a href="#">Cpsf3.cSep08</a>  | <a href="#">298916</a> | 2967   | 968  | 3  | 142  | cleavage and polyadenylation specificity factor 3 (Cpsf3) alternative variant cSep08, mRNA.           |
| <a href="#">Cpsf3</a>  | <a href="#">Cpsf3.eSep08</a>  | <a href="#">298916</a> | 1498   | 616  | 2  | 39   | cleavage and polyadenylation specificity factor 3 (4.4 kD) (Cpsf3) alternative variant eSep08, mRNA.  |
| <a href="#">Cpsf3l</a> | <a href="#">Cpsf3l.bSep08</a> | <a href="#">298688</a> | 14610  | 886  | 9  | 211  | cleavage polyadenylation specific factor 3-like (Cpsf3l) alternative variant bSep08, mRNA.            |
| <a href="#">Cpsf3l</a> | <a href="#">Cpsf3l.cSep08</a> | <a href="#">298688</a> | 15823  | 806  | 6  | 105  | cleavage polyadenylation specific factor 3-like (12.2 kD) (Cpsf3l) alternative variant cSep08, mRNA.  |
| <a href="#">Cpsf3l</a> | <a href="#">Cpsf3l.dSep08</a> | <a href="#">298688</a> | 815    | 725  | 2  | 69   | cleavage polyadenylation specific factor 3-like (7.4 kD) (Cpsf3l) alternative variant dSep08, mRNA.   |
| <a href="#">Cpsf6</a>  | <a href="#">Cpsf6.bSep08</a>  | <a href="#">299811</a> | 41096  | 2332 | 11 | 537  | cleavage and polyadenylation specific factor 6 (57.8 kD) (Cpsf6) alternative variant bSep08, mRNA.    |
| <a href="#">Cpsf6</a>  | <a href="#">Cpsf6.cSep08</a>  | <a href="#">299811</a> | 11639  | 1027 | 5  | 184  | cleavage and polyadenylation specific factor 6 (Cpsf6) alternative variant cSep08, mRNA.              |
| <a href="#">Cpsf6</a>  | <a href="#">Cpsf6.dSep08</a>  | <a href="#">299811</a> | 27435  | 755  | 5  | 102  | cleavage and polyadenylation specific factor 6 (Cpsf6) alternative variant dSep08, mRNA.              |
| <a href="#">Cpt1b</a>  | <a href="#">Cpt1b.bSep08</a>  | <a href="#">25756</a>  | 3325   | 1303 | 7  | 277  | carnitine palmitoyltransferase 1b, muscle (Cpt1b) alternative variant bSep08, mRNA.                   |

|                         |                                |                        |        |      |    |     |                                                                                                |
|-------------------------|--------------------------------|------------------------|--------|------|----|-----|------------------------------------------------------------------------------------------------|
| <a href="#">Cpt1b</a>   | <a href="#">Cpt1b.cSep08</a>   | <a href="#">25756</a>  | 2355   | 765  | 5  | 187 | carnitine palmitoyltransferase 1b, muscle (Cpt1b) alternative variant cSep08, mRNA.            |
| <a href="#">Cpt1b</a>   | <a href="#">Cpt1b.dSep08</a>   | <a href="#">25756</a>  | 1970   | 1140 | 4  | 130 | carnitine palmitoyltransferase 1b, muscle (Cpt1b) alternative variant dSep08, mRNA.            |
| <a href="#">Cpt1b</a>   | <a href="#">Cpt1b.eSep08</a>   | <a href="#">25756</a>  | 1039   | 413  | 3  | 120 | carnitine palmitoyltransferase 1b, muscle (Cpt1b) alternative variant eSep08, mRNA.            |
| <a href="#">Cpt1c</a>   | <a href="#">Cpt1c.bSep08</a>   | <a href="#">308579</a> | 4433   | 775  | 6  | 257 | carnitine palmitoyltransferase 1c (Cpt1c) alternative variant bSep08, mRNA.                    |
| <a href="#">Cpt1c</a>   | <a href="#">Cpt1c.cSep08</a>   | <a href="#">308579</a> | 7427   | 1417 | 10 | 208 | carnitine palmitoyltransferase 1c (Cpt1c) alternative variant cSep08, mRNA.                    |
| <a href="#">Cpt1c</a>   | <a href="#">Cpt1c.dSep08</a>   | <a href="#">308579</a> | 3308   | 455  | 5  | 151 | carnitine palmitoyltransferase 1c (Cpt1c) alternative variant dSep08, mRNA.                    |
| <a href="#">Cpt1c</a>   | <a href="#">Cpt1c.fSep08</a>   | <a href="#">308579</a> | 1691   | 414  | 3  | 53  | carnitine palmitoyltransferase 1c (6.0 kD) (Cpt1c) alternative variant fSep08, mRNA.           |
| <a href="#">Cpvl</a>    | <a href="#">Cpvl.bSep08</a>    | <a href="#">502774</a> | 19495  | 523  | 6  | 174 | carboxypeptidase, vitellogenic-like (Cpvl) alternative variant bSep08, mRNA.                   |
| <a href="#">Cpvl</a>    | <a href="#">Cpvl.cSep08</a>    | <a href="#">502774</a> | 10115  | 353  | 2  | 79  | carboxypeptidase, vitellogenic-like (Cpvl) alternative variant cSep08, mRNA.                   |
| <a href="#">Cpxm2</a>   | <a href="#">Cpxm2.bSep08</a>   | <a href="#">293566</a> | 28442  | 2457 | 8  | 459 | carboxypeptidase X 2 (M14 family) (Cpxm2) alternative variant bSep08, mRNA.                    |
| <a href="#">Cpxm2</a>   | <a href="#">Cpxm2.cSep08</a>   | <a href="#">293566</a> | 13916  | 852  | 4  | 189 | carboxypeptidase X 2 (M14 family) (Cpxm2) alternative variant cSep08, mRNA.                    |
| <a href="#">Cr1l</a>    | <a href="#">Cr1l.aSep08</a>    | <a href="#">54243</a>  | 43634  | 1802 | 9  | 573 | complement component (3b/4b) receptor 1-like (Cr1l) alternative variant aSep08, mRNA.          |
| <a href="#">Cr1l</a>    | <a href="#">Cr1l.dSep08</a>    | <a href="#">54243</a>  | 22303  | 707  | 6  | 205 | complement component (3b/4b) receptor 1-like (Cr1l) alternative variant dSep08, mRNA.          |
| <a href="#">Cr1l</a>    | <a href="#">Cr1l.eSep08</a>    | <a href="#">54243</a>  | 17896  | 530  | 6  | 149 | complement component (3b/4b) receptor 1-like (Cr1l) alternative variant eSep08, mRNA.          |
| <a href="#">Cr2</a>     | <a href="#">Cr2.bSep08</a>     | <a href="#">289395</a> | 4167   | 1851 | 7  | 408 | complement receptor 2 (Cr2) alternative variant bSep08, mRNA.                                  |
| <a href="#">Cr2</a>     | <a href="#">Cr2.cSep08</a>     | <a href="#">289395</a> | 8088   | 830  | 5  | 186 | complement receptor 2 (Cr2) alternative variant cSep08, mRNA.                                  |
| <a href="#">Cr2</a>     | <a href="#">Cr2.dSep08</a>     | <a href="#">289395</a> | 12917  | 643  | 6  | 124 | complement receptor 2 (Cr2) alternative variant dSep08, mRNA.                                  |
| <a href="#">Cr2</a>     | <a href="#">Cr2.eSep08</a>     | <a href="#">289395</a> | 5701   | 685  | 2  | 55  | complement receptor 2 (6.2 kD) (Cr2) alternative variant eSep08, mRNA.                         |
| <a href="#">Crabp2</a>  | <a href="#">Crabp2.aSep08</a>  | <a href="#">29563</a>  | 4063   | 832  | 3  | 183 | cellular retinoic acid binding protein 2 (20.4 kD) (Crabp2) alternative variant aSep08, mRNA.  |
| <a href="#">Crabp2</a>  | <a href="#">Crabp2.dSep08</a>  | <a href="#">29563</a>  | 2015   | 399  | 3  | 86  | cellular retinoic acid binding protein 2 (Crabp2) alternative variant dSep08, mRNA.            |
| <a href="#">Cradd</a>   | <a href="#">Cradd.aSep08</a>   | <a href="#">314756</a> | 158845 | 1177 | 1  | 199 | adaptor death (22.7 kD) (Cradd) alternative variant aSep08, mRNA.                              |
| <a href="#">Cramp1l</a> | <a href="#">Cramp1l.aSep08</a> | <a href="#">287127</a> | 11050  | 793  |    | 183 | crm, cramped-like (Drosophila) (Cramp1l) mRNA.                                                 |
| <a href="#">Crat</a>    | <a href="#">Crat.aSep08</a>    | <a href="#">311849</a> | 14291  | 3562 | 14 | 626 | carnitine acetyltransferase In Complex With (71.0 kD) (Crat) alternative variant aSep08, mRNA. |
| <a href="#">Crat</a>    | <a href="#">Crat.bSep08</a>    | <a href="#">311849</a> | 8791   | 2031 | 6  | 309 | carnitine acetyltransferase (35.4 kD) (Crat) alternative variant bSep08, mRNA.                 |

|                         |                                |                        |       |      |   |     |                                                                                                               |
|-------------------------|--------------------------------|------------------------|-------|------|---|-----|---------------------------------------------------------------------------------------------------------------|
| <a href="#">Crat</a>    | <a href="#">Crat.cSep08</a>    | <a href="#">311849</a> | 2952  | 659  | 4 | 219 | carnitine acetyltransferase (Crat) alternative variant cSep08, mRNA.                                          |
| <a href="#">Crat</a>    | <a href="#">Crat.dSep08</a>    | <a href="#">311849</a> | 1311  | 527  | 1 | 85  | carnitine acetyltransferase (Crat) alternative variant dSep08, mRNA.                                          |
| <a href="#">Crat</a>    | <a href="#">Crat.eSep08</a>    | <a href="#">311849</a> | 529   | 342  | 2 | 58  | carnitine acetyltransferase (Crat) alternative variant eSep08, mRNA.                                          |
| <a href="#">Crb1</a>    | <a href="#">Crb1.bSep08</a>    | <a href="#">304825</a> | 7961  | 1095 | 3 | 364 | crumbs homolog 1 (Drosophila) (Crb1) alternative variant bSep08, mRNA.                                        |
| <a href="#">Crb1</a>    | <a href="#">Crb1.dSep08</a>    | <a href="#">304825</a> | 5609  | 354  | 1 | 85  | crumbs homolog 1 (Drosophila) (Crb1) alternative variant dSep08, mRNA.                                        |
| <a href="#">Crb3</a>    | <a href="#">Crb3.aSep08</a>    | <a href="#">301112</a> | 2832  | 671  | 2 | 118 | crumbs homolog 3 (Drosophila) (12.4 kD) (Crb3) alternative variant aSep08, mRNA.                              |
| <a href="#">Crbn</a>    | <a href="#">Crbn.cSep08</a>    | <a href="#">297498</a> | 1269  | 612  | 2 | 112 | cereblon (Crbn) alternative variant cSep08, mRNA.                                                             |
| <a href="#">Crcp</a>    | <a href="#">Crcp.bSep08</a>    | <a href="#">114205</a> | 34940 | 691  | 7 | 112 | calcitonin gene-related peptide-receptor component protein (12.5 kD) (Crcp) alternative variant bSep08, mRNA. |
| <a href="#">Crcp</a>    | <a href="#">Crcp.cSep08</a>    | <a href="#">114205</a> | 11661 | 1253 | 2 | 83  | calcitonin gene-related peptide-receptor component protein (Crcp) alternative variant cSep08, mRNA.           |
| <a href="#">Crcp</a>    | <a href="#">Crcp.dSep08</a>    | <a href="#">114205</a> | 54352 | 736  | 5 | 76  | calcitonin gene-related peptide-receptor component protein (8.5 kD) (Crcp) alternative variant dSep08, mRNA.  |
| <a href="#">Creb1</a>   | <a href="#">Creb1.cSep08</a>   | <a href="#">81646</a>  | 32434 | 646  | 5 | 90  | cAMP responsive element binding protein 1 (9.3 kD) (Creb1) alternative variant cSep08, mRNA.                  |
| <a href="#">Creb3</a>   | <a href="#">Creb3.aSep08</a>   | <a href="#">298400</a> | 4609  | 1529 | 7 | 387 | cAMP responsive element binding protein 3 (42.9 kD) (Creb3) alternative variant aSep08, complete mRNA.        |
| <a href="#">Creb3</a>   | <a href="#">Creb3.cSep08</a>   | <a href="#">298400</a> | 3603  | 758  | 4 | 112 | cAMP responsive element binding protein 3 (Creb3) alternative variant cSep08, mRNA.                           |
| <a href="#">Creb311</a> | <a href="#">Creb311.bSep08</a> | <a href="#">362165</a> | 7169  | 775  | 1 | 257 | cAMP responsive element binding protein 3-like 1 (Creb311) alternative variant bSep08, mRNA.                  |
| <a href="#">Creb312</a> | <a href="#">Creb312.bSep08</a> | <a href="#">362339</a> | 26873 | 983  | 7 | 325 | cAMP responsive element binding protein 3-like 2 (Creb312) alternative variant bSep08, mRNA.                  |
| <a href="#">Creb312</a> | <a href="#">Creb312.cSep08</a> | <a href="#">362339</a> | 4095  | 900  | 2 | 179 | cAMP responsive element binding protein 3-like 2 (19.5 kD) (Creb312) alternative variant cSep08, mRNA.        |
| <a href="#">Creb313</a> | <a href="#">Creb313.bSep08</a> | <a href="#">314638</a> | 1679  | 473  | 3 | 106 | cAMP responsive element binding protein 3-like 3 (Creb313) alternative variant bSep08, mRNA.                  |
| <a href="#">Creb314</a> | <a href="#">Creb314.bSep08</a> | <a href="#">310616</a> | 5483  | 1539 | 9 | 222 | cAMP responsive element binding protein 3-like 4 (23.7 kD) (Creb314) alternative variant bSep08, mRNA.        |
| <a href="#">Creb314</a> | <a href="#">Creb314.dSep08</a> | <a href="#">310616</a> | 873   | 692  | 2 | 67  | cAMP responsive element binding protein 3-like 4 (7.3 kD) (Creb314) alternative variant dSep08, mRNA.         |
| <a href="#">Crebbp</a>  | <a href="#">Crebbp.bSep08</a>  | <a href="#">54244</a>  | 9374  | 1792 | 8 | 596 | CREB binding protein (Crebbp) alternative variant bSep08, mRNA.                                               |
| <a href="#">Crebl1</a>  | <a href="#">Crebl1.bSep08</a>  | <a href="#">406169</a> | 3283  | 1341 | 8 | 254 | cAMP responsive element binding protein-like 1 (Crebl1) alternative variant bSep08, mRNA.                     |
| <a href="#">Crebl1</a>  | <a href="#">Crebl1.cSep08</a>  | <a href="#">406169</a> | 2047  | 720  | 6 | 239 | cAMP responsive element binding protein-like 1 (Crebl1) alternative variant cSep08, mRNA.                     |
| <a href="#">Crebl1</a>  | <a href="#">Crebl1.dSep08</a>  | <a href="#">406169</a> | 1278  | 792  | 3 | 195 | cAMP responsive element binding protein-like 1 (21.2 kD) (Crebl1) alternative variant dSep08, mRNA.           |
| <a href="#">Crel1</a>   | <a href="#">Crel1.bSep08</a>   | <a href="#">312638</a> | 7211  | 1942 | 5 | 214 | cysteine-rich with EGF-like domains 1 (23.4 kD) (Crel1) alternative variant bSep08, mRNA.                     |

|                        |                               |                        |        |      |    |     |                                                                                                               |
|------------------------|-------------------------------|------------------------|--------|------|----|-----|---------------------------------------------------------------------------------------------------------------|
| <a href="#">Creld1</a> | <a href="#">Creld1.cSep08</a> | <a href="#">312638</a> | 5922   | 723  | 5  | 155 | cysteine-rich with EGF-like domains 1 (Creld1) alternative variant cSep08, mRNA.                              |
| <a href="#">Creld1</a> | <a href="#">Creld1.dSep08</a> | <a href="#">312638</a> | 1085   | 669  | 2  | 86  | cysteine-rich with EGF-like domains 1 (9.7 kD) (Creld1) alternative variant dSep08, mRNA.                     |
| <a href="#">Creld2</a> | <a href="#">Creld2.bSep08</a> | <a href="#">362978</a> | 6854   | 1174 | 9  | 290 | cysteine-rich with EGF-like domains 2 (32.0 kD) (Creld2) alternative variant bSep08, complete mRNA.           |
| <a href="#">Creld2</a> | <a href="#">Creld2.cSep08</a> | <a href="#">362978</a> | 3309   | 676  | 5  | 225 | cysteine-rich with EGF-like domains 2 (Creld2) alternative variant cSep08, mRNA.                              |
| <a href="#">Crem</a>   | <a href="#">Crem.bSep08</a>   | <a href="#">25620</a>  | 65855  | 1505 | 10 | 357 | cAMP responsive element modulator (38.5 kD) (Crem) alternative variant bSep08, complete mRNA.                 |
| <a href="#">Crem</a>   | <a href="#">Crem.cSep08</a>   | <a href="#">25620</a>  | 14354  | 1042 | 5  | 290 | cAMP responsive element modulator (Crem) alternative variant cSep08, mRNA.                                    |
| <a href="#">Crem</a>   | <a href="#">Crem.dSep08</a>   | <a href="#">25620</a>  | 30923  | 818  | 7  | 239 | cAMP responsive element modulator (Crem) alternative variant dSep08, mRNA.                                    |
| <a href="#">Crem</a>   | <a href="#">Crem.eSep08</a>   | <a href="#">25620</a>  | 30998  | 746  | 6  | 208 | cAMP responsive element modulator (22.1 kD) (Crem) alternative variant eSep08, mRNA.                          |
| <a href="#">Crem</a>   | <a href="#">Crem.gSep08</a>   | <a href="#">25620</a>  | 14093  | 698  | 3  | 123 | cAMP responsive element modulator (Crem) alternative variant gSep08, mRNA.                                    |
| <a href="#">Crem</a>   | <a href="#">Crem.hSep08</a>   | <a href="#">25620</a>  | 13779  | 780  | 3  | 121 | cAMP responsive element modulator (Crem) alternative variant hSep08, mRNA.                                    |
| <a href="#">Crem</a>   | <a href="#">Crem.iSep08</a>   | <a href="#">25620</a>  | 12908  | 710  | 3  | 95  | cAMP responsive element modulator (10.9 kD) (Crem) alternative variant iSep08, mRNA.                          |
| <a href="#">Crem</a>   | <a href="#">Crem.jSep08</a>   | <a href="#">25620</a>  | 13640  | 1046 | 3  | 95  | cAMP responsive element modulator (10.8 kD) (Crem) alternative variant jSep08, mRNA.                          |
| <a href="#">Crem</a>   | <a href="#">Crem.lSep08</a>   | <a href="#">25620</a>  | 53484  | 301  | 3  | 59  | cAMP responsive element modulator (Crem) alternative variant lSep08, mRNA.                                    |
| <a href="#">Crhr1</a>  | <a href="#">Crhr1.bSep08</a>  | <a href="#">58959</a>  | 42842  | 2262 | 13 | 414 | corticotropin releasing hormone receptor 1 (47.7 kD) (Crhr1) alternative variant bSep08, complete mRNA.       |
| <a href="#">Crhr1</a>  | <a href="#">Crhr1.cSep08</a>  | <a href="#">58959</a>  | 1209   | 1038 | 3  | 304 | corticotropin releasing hormone receptor 1 (Crhr1) alternative variant cSep08, mRNA.                          |
| <a href="#">Crhr1</a>  | <a href="#">Crhr1.dSep08</a>  | <a href="#">58959</a>  | 41825  | 1313 | 13 | 290 | corticotropin releasing hormone receptor 1 (33.7 kD) (Crhr1) alternative variant dSep08, mRNA.                |
| <a href="#">Crhr1</a>  | <a href="#">Crhr1.eSep08</a>  | <a href="#">58959</a>  | 41825  | 1094 | 12 | 224 | corticotropin releasing hormone receptor 1 (24.9 kD) (Crhr1) alternative variant eSep08, mRNA.                |
| <a href="#">Crim1</a>  | <a href="#">Crim1.aSep08</a>  | <a href="#">298744</a> | 138769 | 1801 | 8  | 589 | cysteine rich transmembrane BMP regulator 1 (chordin like) (Crim1) alternative variant aSep08, mRNA.          |
| <a href="#">Crim1</a>  | <a href="#">Crim1.bSep08</a>  | <a href="#">298744</a> | 111968 | 1106 | 8  | 368 | cysteine rich transmembrane BMP regulator 1 (chordin like) (Crim1) alternative variant bSep08, mRNA.          |
| <a href="#">Crim1</a>  | <a href="#">Crim1.cSep08</a>  | <a href="#">298744</a> | 23775  | 3367 | 6  | 319 | cysteine rich transmembrane BMP regulator 1 (chordin like) (Crim1) alternative variant cSep08, mRNA.          |
| <a href="#">Crim1</a>  | <a href="#">Crim1.dSep08</a>  | <a href="#">298744</a> | 72933  | 447  | 4  | 148 | cysteine rich transmembrane BMP regulator 1 (chordin like) (Crim1) alternative variant dSep08, mRNA.          |
| <a href="#">Crim1</a>  | <a href="#">Crim1.eSep08</a>  | <a href="#">298744</a> | 20211  | 536  | 3  | 34  | cysteine rich transmembrane BMP regulator 1 (chordin like) (3.8 kD) (Crim1) alternative variant eSep08, mRNA. |
| <a href="#">Crim2</a>  | <a href="#">Crim2.aSep08</a>  | <a href="#">296952</a> | 5981   | 843  | 6  | 280 | cysteine rich BMP regulator 2 (chordin like) (Crim2) alternative variant aSep08, mRNA.                        |



|                          |                                 |                        |       |      |    |     |                                                                                                              |
|--------------------------|---------------------------------|------------------------|-------|------|----|-----|--------------------------------------------------------------------------------------------------------------|
| <a href="#">Crim2</a>    | <a href="#">Crim2.bSep08</a>    | <a href="#">296952</a> | 2891  | 715  | 3  | 224 | cysteine rich BMP regulator 2 (chordin like) (Crim2) alternative variant bSep08, mRNA.                       |
| <a href="#">Crip2</a>    | <a href="#">Crip2.bSep08</a>    | <a href="#">338401</a> | 4157  | 775  | 2  | 174 | cysteine-rich protein 2 (18.9 kD) (Crip2) alternative variant bSep08, mRNA.                                  |
| <a href="#">Crip2</a>    | <a href="#">Crip2.cSep08</a>    | <a href="#">338401</a> | 1517  | 752  | 2  | 151 | cysteine-rich protein 2 (Crip2) alternative variant cSep08, mRNA.                                            |
| <a href="#">Crip2</a>    | <a href="#">Crip2.dSep08</a>    | <a href="#">338401</a> | 4885  | 1392 | 3  | 144 | cysteine-rich protein 2 (15.6 kD) (Crip2) alternative variant dSep08, complete mRNA.                         |
| <a href="#">Cript</a>    | <a href="#">Cript.bSep08</a>    | <a href="#">56725</a>  | 2920  | 413  | 1  | 58  | cysteine-rich PDZ-binding protein (Cript) alternative variant bSep08, mRNA.                                  |
| <a href="#">Crisp1</a>   | <a href="#">Crisp1.bSep08</a>   | <a href="#">64827</a>  | 9470  | 770  | 2  | 80  | cysteine-rich secretory protein 1 (Crisp1) alternative variant bSep08, mRNA.                                 |
| <a href="#">Crispld1</a> | <a href="#">Crispld1.aSep08</a> | <a href="#">316482</a> | 39181 | 3334 | 11 | 500 | allergen V5/Tpx-1 related and LCCL precursor (57.0 kD) (Crispld1) alternative variant aSep08, complete mRNA. |
| <a href="#">Crispld1</a> | <a href="#">Crispld1.bSep08</a> | <a href="#">316482</a> | 4129  | 558  | 1  | 40  | putative protein (4.5 kD) (Crispld1) alternative variant bSep08, mRNA.                                       |
| <a href="#">Crk</a>      | <a href="#">Crk.bSep08</a>      | <a href="#">54245</a>  | 22432 | 583  | 3  | 169 | v-crk sarcoma virus CT10 oncogene homolog (avian) (Crk) alternative variant bSep08, mRNA.                    |
| <a href="#">Crkrs</a>    | <a href="#">Crkrs.cSep08</a>    | <a href="#">192350</a> | 7601  | 381  | 1  | 127 | cdc2-related kinase, arginine/serine-rich (Crkrs) alternative variant cSep08, mRNA.                          |
| <a href="#">Crif1</a>    | <a href="#">Crif1.bSep08</a>    | <a href="#">290655</a> | 1814  | 1497 | 3  | 131 | cytokine receptor-like factor 1 (14.3 kD) (Crif1) alternative variant bSep08, mRNA.                          |
| <a href="#">Crmp1</a>    | <a href="#">Crmp1.cSep08</a>    | <a href="#">25415</a>  | 28884 | 274  | 3  | 37  | collapsin response mediator protein 1 (4.0 kD) (Crmp1) alternative variant cSep08, mRNA.                     |
| <a href="#">Crnk1.1</a>  | <a href="#">Crnk1.1.aSep08</a>  | <a href="#">116481</a> | 9422  | 1535 |    | 428 | crn, crooked neck-like 1 (Drosophila) (Crnk1.1) mRNA.                                                        |
| <a href="#">Crocc</a>    | <a href="#">Crocc.bSep08</a>    | <a href="#">313663</a> | 2978  | 978  | 6  | 276 | ciliary rootlet coiled-coil, rootletin (Crocc) alternative variant bSep08, mRNA.                             |
| <a href="#">Crop</a>     | <a href="#">Crop.bSep08</a>     | <a href="#">360602</a> | 7895  | 1571 | 9  | 281 | cisplatin resistance-associated overexpressed protein (34.0 kD) (Crop) alternative variant bSep08, mRNA.     |
| <a href="#">Crop</a>     | <a href="#">Crop.cSep08</a>     | <a href="#">360602</a> | 6114  | 995  | 4  | 172 | cisplatin resistance-associated overexpressed protein (Crop) alternative variant cSep08, mRNA.               |
| <a href="#">Crop</a>     | <a href="#">Crop.dSep08</a>     | <a href="#">360602</a> | 26968 | 506  | 6  | 168 | cisplatin resistance-associated overexpressed protein (Crop) alternative variant dSep08, mRNA.               |
| <a href="#">Crop</a>     | <a href="#">Crop.eSep08</a>     | <a href="#">360602</a> | 4296  | 668  | 3  | 158 | cisplatin resistance-associated overexpressed protein (Crop) alternative variant eSep08, mRNA.               |
| <a href="#">Crop</a>     | <a href="#">Crop.fSep08</a>     | <a href="#">360602</a> | 2032  | 594  | 3  | 66  | cisplatin resistance-associated overexpressed protein (Crop) alternative variant fSep08, mRNA.               |
| <a href="#">Crop</a>     | <a href="#">Crop.gSep08</a>     | <a href="#">360602</a> | 3331  | 731  | 3  | 75  | cisplatin resistance-associated overexpressed protein (8.8 kD) (Crop) alternative variant gSep08, mRNA.      |
| <a href="#">Crop</a>     | <a href="#">Crop.hSep08</a>     | <a href="#">360602</a> | 25747 | 524  | 5  | 45  | cisplatin resistance-associated overexpressed protein (5.0 kD) (Crop) alternative variant hSep08, mRNA.      |
| <a href="#">Crot</a>     | <a href="#">Crot.bSep08</a>     | <a href="#">83842</a>  | 16777 | 409  | 4  | 136 | carnitine O-octanoyltransferase (Crot) alternative variant bSep08, mRNA.                                     |
| <a href="#">Crtac1</a>   | <a href="#">Crtac1.bSep08</a>   | <a href="#">171438</a> | 9331  | 536  | 3  | 143 | cartilage acidic protein 1 (Crtac1) alternative variant bSep08, mRNA.                                        |
| <a href="#">Crtac1</a>   | <a href="#">Crtac1.cSep08</a>   | <a href="#">171438</a> | 92936 | 389  | 3  | 129 | cartilage acidic protein 1 (Crtac1) alternative variant cSep08, mRNA.                                        |

|                            |                                   |                        |       |      |   |     |                                                                                                 |
|----------------------------|-----------------------------------|------------------------|-------|------|---|-----|-------------------------------------------------------------------------------------------------|
| <a href="#">Crtam</a>      | <a href="#">Crtam.bSep08</a>      | <a href="#">300649</a> | 18883 | 602  | 2 | 196 | cytotoxic and regulatory T cell molecule (Crtam) alternative variant bSep08, mRNA.              |
| <a href="#">Crtap</a>      | <a href="#">Crtap.aSep08</a>      | <a href="#">363158</a> | 19633 | 1617 | 5 | 397 | cartilage associated protein (Crtap) alternative variant aSep08, mRNA.                          |
| <a href="#">Crtc2</a>      | <a href="#">Crtc2.bSep08</a>      | <a href="#">310615</a> | 2366  | 1850 | 4 | 164 | CREB regulated transcription coactivator 2 (17.3 kD) (Crtc2) alternative variant bSep08, mRNA.  |
| <a href="#">Crtc2</a>      | <a href="#">Crtc2.dSep08</a>      | <a href="#">310615</a> | 2026  | 694  | 2 | 93  | CREB regulated transcription coactivator 2 (Crtc2) alternative variant dSep08, mRNA.            |
| <a href="#">Crtc2</a>      | <a href="#">Crtc2.eSep08</a>      | <a href="#">310615</a> | 2600  | 1222 | 5 | 61  | CREB regulated transcription coactivator 2 (Crtc2) alternative variant eSep08, mRNA.            |
| <a href="#">Crtc3</a>      | <a href="#">Crtc3.aSep08</a>      | <a href="#">365297</a> | 1410  | 962  |   | 80  | CREB regulated transcription coactivator 3 (Crtc3) mRNA.                                        |
| <a href="#">Cry1</a>       | <a href="#">Cry1.bSep08</a>       | <a href="#">299691</a> | 11870 | 591  | 5 | 118 | cryptochrome 1 (photolyase-like) (Cry1) alternative variant bSep08, mRNA.                       |
| <a href="#">Cry2</a>       | <a href="#">Cry2.bSep08</a>       | <a href="#">170917</a> | 10972 | 716  | 5 | 219 | cryptochrome 2 (photolyase-like) (Cry2) alternative variant bSep08, mRNA.                       |
| <a href="#">Cry2</a>       | <a href="#">Cry2.cSep08</a>       | <a href="#">170917</a> | 9569  | 682  | 4 | 184 | cryptochrome 2 (photolyase-like) (Cry2) alternative variant cSep08, mRNA.                       |
| <a href="#">Cryab</a>      | <a href="#">Cryab.aSep08</a>      | <a href="#">25420</a>  | 3817  | 718  | 2 | 175 | crystallin, alpha B (20.1 kD) (Cryab) alternative variant aSep08, mRNA.                         |
| <a href="#">Cryab</a>      | <a href="#">Cryab.cSep08</a>      | <a href="#">25420</a>  | 2682  | 484  | 1 | 114 | crystallin, alpha B (Cryab) alternative variant cSep08, mRNA.                                   |
| <a href="#">Cryab</a>      | <a href="#">Cryab.dSep08</a>      | <a href="#">25420</a>  | 2593  | 505  | 1 | 108 | crystallin, alpha B (12.2 kD) (Cryab) alternative variant dSep08, mRNA.                         |
| <a href="#">Cryba1</a>     | <a href="#">Cryba1.aSep08</a>     | <a href="#">25583</a>  | 6523  | 781  |   | 215 | crystallin, beta A1 (25.3 kD) (Cryba1) complete mRNA.                                           |
| <a href="#">Cryba2</a>     | <a href="#">Cryba2.bSep08</a>     | <a href="#">286925</a> | 1328  | 477  | 1 | 133 | crystallin, beta A2 (Cryba2) alternative variant bSep08, mRNA.                                  |
| <a href="#">Crygd</a>      | <a href="#">Crygd.aSep08</a>      | <a href="#">24278</a>  | 1420  | 529  | 1 | 175 | crystallin, gamma D (Crygd) alternative variant aSep08, mRNA.                                   |
| <a href="#">Crygs</a>      | <a href="#">Crygs.bSep08</a>      | <a href="#">689897</a> | 20143 | 425  |   | 97  | crystallin, gamma S (11.3 kD) (Crygs) alternative variant bSep08, complete mRNA.                |
| <a href="#">Cryl1</a>      | <a href="#">Cryl1.bSep08</a>      | <a href="#">290277</a> | 50985 | 847  | 1 | 254 | crystallin, lambda 1 (Cryl1) alternative variant bSep08, mRNA.                                  |
| <a href="#">Crystall.0</a> | <a href="#">Crystall.0.aSep08</a> |                        | 15849 | 2118 |   | 286 | in melanoma 1 like (Crystall.0) mRNA.                                                           |
| <a href="#">Cryzl1</a>     | <a href="#">Cryzl1.bSep08</a>     | <a href="#">288256</a> | 10995 | 278  | 3 | 92  | crystallin, zeta (quinone reductase)-like 1 (Cryzl1) alternative variant bSep08, mRNA.          |
| <a href="#">Cryzl1</a>     | <a href="#">Cryzl1.cSep08</a>     | <a href="#">288256</a> | 2539  | 1699 | 2 | 42  | crystallin, zeta (quinone reductase)-like 1 (4.9 kD) (Cryzl1) alternative variant cSep08, mRNA. |
| <a href="#">Cs</a>         | <a href="#">Cs.bSep08</a>         | <a href="#">170587</a> | 2344  | 983  | 4 | 145 | citrate synthase (Cs) alternative variant bSep08, mRNA.                                         |
| <a href="#">Cs</a>         | <a href="#">Cs.cSep08</a>         | <a href="#">170587</a> | 24583 | 850  | 1 | 130 | citrate synthase (Cs) alternative variant cSep08, mRNA.                                         |
| <a href="#">Cs</a>         | <a href="#">Cs.dSep08</a>         | <a href="#">170587</a> | 490   | 409  | 2 | 70  | citrate synthase (7.7 kD) (Cs) alternative variant dSep08, mRNA.                                |
| <a href="#">CS.1</a>       | <a href="#">CS.1.aSep08</a>       |                        | 10200 | 1231 |   | 146 | CS (CS.1) mRNA.                                                                                 |
| <a href="#">Csad</a>       | <a href="#">Csad.cSep08</a>       | <a href="#">60356</a>  | 19081 | 731  | 7 | 243 | cysteine sulfinic acid decarboxylase (Csad) alternative variant cSep08, mRNA.                   |
| <a href="#">Csad</a>       | <a href="#">Csad.dSep08</a>       | <a href="#">60356</a>  | 1804  | 745  | 5 | 172 | cysteine sulfinic acid decarboxylase (Csad) alternative variant dSep08, mRNA.                   |

|                            |                                   |                        |       |      |    |     |                                                                                                                              |
|----------------------------|-----------------------------------|------------------------|-------|------|----|-----|------------------------------------------------------------------------------------------------------------------------------|
| <a href="#">Csda</a>       | <a href="#">Csda.aSep08</a>       | <a href="#">83807</a>  | 23336 | 1663 | 9  | 365 | cold shock domain protein A (Csda) alternative variant aSep08, mRNA.                                                         |
| <a href="#">Csda</a>       | <a href="#">Csda.bSep08</a>       | <a href="#">83807</a>  | 19510 | 1406 | 9  | 272 | cold shock domain protein A (Csda) alternative variant bSep08, mRNA.                                                         |
| <a href="#">Csda</a>       | <a href="#">Csda.cSep08</a>       | <a href="#">83807</a>  | 7521  | 580  | 4  | 191 | cold shock domain protein A (Csda) alternative variant cSep08, mRNA.                                                         |
| <a href="#">Csdc2</a>      | <a href="#">Csdc2.aSep08</a>      | <a href="#">266600</a> | 32794 | 1768 |    | 232 | PIPPin protein (24.8 kD) (Csdc2) mRNA.                                                                                       |
| <a href="#">Csde1</a>      | <a href="#">Csde1.bSep08</a>      | <a href="#">117180</a> | 10239 | 2596 | 10 | 448 | cold-shock protein, DNA-binding (Csde1) alternative variant bSep08, mRNA.                                                    |
| <a href="#">Csde1</a>      | <a href="#">Csde1.cSep08</a>      | <a href="#">117180</a> | 15396 | 1440 | 7  | 262 | upstream of NRAS CRA a (29.6 kD) (Csde1) alternative variant cSep08, mRNA.                                                   |
| <a href="#">Csde1</a>      | <a href="#">Csde1.dSep08</a>      | <a href="#">117180</a> | 4715  | 590  | 5  | 143 | cold-shock protein, DNA-binding (Csde1) alternative variant dSep08, mRNA.                                                    |
| <a href="#">Csde1</a>      | <a href="#">Csde1.eSep08</a>      | <a href="#">117180</a> | 3481  | 388  | 3  | 129 | cold-shock protein, DNA-binding (Csde1) alternative variant eSep08, mRNA.                                                    |
| <a href="#">Csde1</a>      | <a href="#">Csde1.fSep08</a>      | <a href="#">117180</a> | 9019  | 365  | 3  | 81  | putative protein of vertebrate origin (Csde1) alternative variant fSep08, mRNA.                                              |
| <a href="#">Csf1r</a>      | <a href="#">Csf1r.bSep08</a>      | <a href="#">307403</a> | 4673  | 598  | 3  | 177 | colony stimulating factor 1 receptor (Csf1r) alternative variant bSep08, mRNA.                                               |
| <a href="#">Csf1r</a>      | <a href="#">Csf1r.cSep08</a>      | <a href="#">307403</a> | 25372 | 701  | 4  | 139 | colony stimulating factor 1 receptor (Csf1r) alternative variant cSep08, mRNA.                                               |
| <a href="#">Csf2rb</a>     | <a href="#">Csf2rb.bSep08</a>     | <a href="#">171081</a> | 447   | 333  | 2  | 97  | colony stimulating factor 2 receptor, beta, low-affinity (granulocyte-macrophage) (Csf2rb) alternative variant bSep08, mRNA. |
| <a href="#">Csf3r</a>      | <a href="#">Csf3r.bSep08</a>      | <a href="#">298518</a> | 1714  | 349  | 2  | 51  | colony stimulating factor 3 receptor (granulocyte) (5.6 kD) (Csf3r) alternative variant bSep08, mRNA.                        |
| <a href="#">Csgalnact2</a> | <a href="#">Csgalnact2.bSep08</a> | <a href="#">297554</a> | 22980 | 1785 | 1  | 376 | chondroitin sulfate N-acetylgalactosaminyltransferase 2 (Csgalnact2) alternative variant bSep08, mRNA.                       |
| <a href="#">Csgalnact2</a> | <a href="#">Csgalnact2.cSep08</a> | <a href="#">297554</a> | 1465  | 225  | 1  | 51  | chondroitin sulfate N-acetylgalactosaminyltransferase 2 (Csgalnact2) alternative variant cSep08, mRNA.                       |
| <a href="#">Csk</a>        | <a href="#">Csk.bSep08</a>        | <a href="#">315707</a> | 1427  | 777  | 6  | 199 | c-src tyrosine kinase (Csk) alternative variant bSep08, mRNA.                                                                |
| <a href="#">Csk</a>        | <a href="#">Csk.dSep08</a>        | <a href="#">315707</a> | 1660  | 1560 | 2  | 108 | c-src tyrosine kinase (Csk) alternative variant dSep08, mRNA.                                                                |
| <a href="#">Csmd1</a>      | <a href="#">Csmd1.aSep08</a>      | <a href="#">364634</a> | 7794  | 859  |    | 286 | CUB and Sushi multiple domains 1 (Csmd1) mRNA.                                                                               |
| <a href="#">Csn1s1</a>     | <a href="#">Csn1s1.aSep08</a>     | <a href="#">24284</a>  | 16178 | 1779 |    | 487 | casein alpha s1 (Csn1s1) alternative variant aSep08, mRNA.                                                                   |
| <a href="#">Csn1s1</a>     | <a href="#">Csn1s1.bSep08</a>     | <a href="#">24284</a>  | 1740  | 493  |    | 35  | casein alpha s1 (Csn1s1) alternative variant bSep08, mRNA.                                                                   |
| <a href="#">Csn3</a>       | <a href="#">Csn3.aSep08</a>       | <a href="#">29188</a>  | 2465  | 427  |    | 71  | casein kappa (Csn3) mRNA.                                                                                                    |
| <a href="#">Csnk1a1</a>    | <a href="#">Csnk1a1.bSep08</a>    | <a href="#">113927</a> | 3274  | 1515 | 2  | 86  | casein kinase 1, alpha 1 (Csnk1a1) alternative variant bSep08, mRNA.                                                         |
| <a href="#">Csnk1a1</a>    | <a href="#">Csnk1a1.cSep08</a>    | <a href="#">113927</a> | 7860  | 1000 | 2  | 50  | casein kinase 1, alpha 1 (Csnk1a1) alternative variant cSep08, mRNA.                                                         |
| <a href="#">Csnk1d</a>     | <a href="#">Csnk1d.bSep08</a>     | <a href="#">64462</a>  | 34613 | 1901 | 11 | 211 | casein kinase 1, delta (24.3 kD) (Csnk1d) alternative variant bSep08, complete mRNA.                                         |

|                         |                                |                        |       |      |    |     |                                                                                               |
|-------------------------|--------------------------------|------------------------|-------|------|----|-----|-----------------------------------------------------------------------------------------------|
| <a href="#">Csnk1d</a>  | <a href="#">Csnk1d.cSep08</a>  | <a href="#">64462</a>  | 8863  | 1407 | 5  | 149 | casein kinase 1, delta (16.4 kD) (Csnk1d) alternative variant cSep08, mRNA.                   |
| <a href="#">Csnk1e</a>  | <a href="#">Csnk1e.bSep08</a>  | <a href="#">58822</a>  | 2968  | 1813 | 4  | 135 | casein kinase 1, epsilon (Csnk1e) alternative variant bSep08, mRNA.                           |
| <a href="#">Csnk1e</a>  | <a href="#">Csnk1e.cSep08</a>  | <a href="#">58822</a>  | 3096  | 1408 | 4  | 114 | casein kinase 1, epsilon (Csnk1e) alternative variant cSep08, mRNA.                           |
| <a href="#">Csnk1e</a>  | <a href="#">Csnk1e.eSep08</a>  | <a href="#">58822</a>  | 2661  | 1204 | 4  | 107 | casein kinase 1, epsilon (Csnk1e) alternative variant eSep08, mRNA.                           |
| <a href="#">Csnk1e</a>  | <a href="#">Csnk1e.fSep08</a>  | <a href="#">58822</a>  | 2628  | 586  | 4  | 98  | casein kinase 1, epsilon (10.6 kD) (Csnk1e) alternative variant fSep08, mRNA.                 |
| <a href="#">Csnk1g2</a> | <a href="#">Csnk1g2.aSep08</a> | <a href="#">65278</a>  | 18314 | 2325 | 12 | 441 | casein kinase 1 gamma 2 CRA a (50.1 kD) (Csnk1g2) alternative variant aSep08, mRNA.           |
| <a href="#">Csnk1g2</a> | <a href="#">Csnk1g2.bSep08</a> | <a href="#">65278</a>  | 6213  | 1494 | 10 | 400 | casein kinase 1 gamma 2 (46.0 kD) (Csnk1g2) alternative variant bSep08, mRNA.                 |
| <a href="#">Csnk1g2</a> | <a href="#">Csnk1g2.cSep08</a> | <a href="#">65278</a>  | 3215  | 1795 | 11 | 299 | casein kinase 1 gamma 2 CRA a (34.7 kD) (Csnk1g2) alternative variant cSep08, mRNA.           |
| <a href="#">Csnk1g2</a> | <a href="#">Csnk1g2.dSep08</a> | <a href="#">65278</a>  | 8505  | 753  | 5  | 155 | casein kinase 1 gamma 2 (Csnk1g2) alternative variant dSep08, mRNA.                           |
| <a href="#">Csnk1g2</a> | <a href="#">Csnk1g2.eSep08</a> | <a href="#">65278</a>  | 3522  | 326  | 5  | 108 | casein kinase 1 gamma 2 (Csnk1g2) alternative variant eSep08, mRNA.                           |
| <a href="#">Csnk1g2</a> | <a href="#">Csnk1g2.fSep08</a> | <a href="#">65278</a>  | 1305  | 314  | 2  | 45  | casein kinase 1 gamma 2 (Csnk1g2) alternative variant fSep08, mRNA.                           |
| <a href="#">Csnk1g3</a> | <a href="#">Csnk1g3.bSep08</a> | <a href="#">64823</a>  | 25696 | 599  | 6  | 199 | casein kinase 1, gamma 3 (Csnk1g3) alternative variant bSep08, mRNA.                          |
| <a href="#">Csnk1g3</a> | <a href="#">Csnk1g3.cSep08</a> | <a href="#">64823</a>  | 24404 | 1023 | 2  | 119 | casein kinase 1, gamma 3 (Csnk1g3) alternative variant cSep08, mRNA.                          |
| <a href="#">Csnk1g3</a> | <a href="#">Csnk1g3.dSep08</a> | <a href="#">64823</a>  | 23760 | 403  | 3  | 109 | casein kinase 1, gamma 3 (Csnk1g3) alternative variant dSep08, mRNA.                          |
| <a href="#">Csnk2a1</a> | <a href="#">Csnk2a1.aSep08</a> | <a href="#">116549</a> | 47172 | 4156 | 13 | 391 | casein kinase II (45.1 kD) (Csnk2a1) alternative variant aSep08, mRNA.                        |
| <a href="#">Csnk2a1</a> | <a href="#">Csnk2a1.cSep08</a> | <a href="#">116549</a> | 33930 | 633  | 7  | 158 | casein kinase II (Csnk2a1) alternative variant cSep08, mRNA.                                  |
| <a href="#">Csnk2a1</a> | <a href="#">Csnk2a1.dSep08</a> | <a href="#">116549</a> | 4052  | 504  | 4  | 145 | casein kinase II (15.9 kD) (Csnk2a1) alternative variant dSep08, mRNA.                        |
| <a href="#">Csnk2a1</a> | <a href="#">Csnk2a1.eSep08</a> | <a href="#">116549</a> | 30300 | 335  | 4  | 78  | casein kinase II alpha (Csnk2a1) alternative variant eSep08, mRNA.                            |
| <a href="#">Csnk2a1</a> | <a href="#">Csnk2a1.fSep08</a> | <a href="#">116549</a> | 3071  | 602  | 2  | 78  | casein kinase II (Csnk2a1) alternative variant fSep08, mRNA.                                  |
| <a href="#">Csnk2a1</a> | <a href="#">Csnk2a1.gSep08</a> | <a href="#">116549</a> | 1635  | 442  | 2  | 54  | casein kinase II (Csnk2a1) alternative variant gSep08, mRNA.                                  |
| <a href="#">Csnk2a2</a> | <a href="#">Csnk2a2.bSep08</a> | <a href="#">307641</a> | 35630 | 2687 | 9  | 313 | casein kinase 2, alpha prime polypeptide (Csnk2a2) alternative variant bSep08, mRNA.          |
| <a href="#">Csnk2a2</a> | <a href="#">Csnk2a2.cSep08</a> | <a href="#">307641</a> | 7731  | 809  | 3  | 31  | casein kinase 2, alpha prime polypeptide (3.5 kD) (Csnk2a2) alternative variant cSep08, mRNA. |
| <a href="#">Csnk2b</a>  | <a href="#">Csnk2b.cSep08</a>  | <a href="#">81650</a>  | 4180  | 735  | 6  | 198 | casein kinase 2, beta subunit (Csnk2b) alternative variant cSep08, mRNA.                      |

|                         |                                |                        |        |      |    |     |                                                                                                                |
|-------------------------|--------------------------------|------------------------|--------|------|----|-----|----------------------------------------------------------------------------------------------------------------|
| <a href="#">Csnk2b</a>  | <a href="#">Csnk2b.dSep08</a>  | <a href="#">81650</a>  | 730    | 594  | 2  | 140 | casein kinase 2, beta subunit (Csnk2b) alternative variant dSep08, mRNA.                                       |
| <a href="#">Cspg4</a>   | <a href="#">Cspg4.bSep08</a>   | <a href="#">81651</a>  | 7375   | 594  | 2  | 60  | chondroitin sulfate proteoglycan 4 (Cspg4) alternative variant bSep08, mRNA.                                   |
| <a href="#">Csrnp3</a>  | <a href="#">Csrnp3.aSep08</a>  | <a href="#">311093</a> | 135560 | 402  |    | 106 | cysteine-serine-rich nuclear protein 3 (Csrnp3) mRNA.                                                          |
| <a href="#">Csrp1</a>   | <a href="#">Csrp1.bSep08</a>   | <a href="#">29276</a>  | 23765  | 1694 | 6  | 181 | cysteine and glycine-rich protein 1 (19.4 kD) (Csrp1) alternative variant bSep08, mRNA.                        |
| <a href="#">Csrp1</a>   | <a href="#">Csrp1.cSep08</a>   | <a href="#">29276</a>  | 24791  | 744  | 5  | 112 | cysteine and glycine-rich protein 1 (11.8 kD) (Csrp1) alternative variant cSep08, mRNA.                        |
| <a href="#">Csrp2</a>   | <a href="#">Csrp2.bSep08</a>   | <a href="#">29317</a>  | 19116  | 1187 | 4  | 184 | cysteine and glycine-rich protein 2 (20.1 kD) (Csrp2) alternative variant bSep08, mRNA.                        |
| <a href="#">Csrp2</a>   | <a href="#">Csrp2.cSep08</a>   | <a href="#">29317</a>  | 4025   | 575  | 3  | 120 | cysteine and glycine-rich protein 2 (Csrp2) alternative variant cSep08, mRNA.                                  |
| <a href="#">Csrp2bp</a> | <a href="#">Csrp2bp.aSep08</a> | <a href="#">362224</a> | 6917   | 1430 | 2  | 186 | cysteine and glycine-rich protein 2 binding protein (Csrp2bp) alternative variant aSep08, mRNA.                |
| <a href="#">Csrp2bp</a> | <a href="#">Csrp2bp.bSep08</a> | <a href="#">362224</a> | 5100   | 1423 | 1  | 129 | cysteine and glycine-rich protein 2 binding protein (15.3 kD) (Csrp2bp) alternative variant bSep08, mRNA.      |
| <a href="#">Csrp3</a>   | <a href="#">Csrp3.bSep08</a>   | <a href="#">117505</a> | 5329   | 708  | 1  | 94  | cysteine and glycine-rich protein 3 (10.2 kD) (Csrp3) alternative variant bSep08, mRNA.                        |
| <a href="#">Cst3</a>    | <a href="#">Cst3.bSep08</a>    | <a href="#">25307</a>  | 3787   | 233  | 2  | 76  | cystatin C (Cst3) alternative variant bSep08, mRNA.                                                            |
| <a href="#">Cst7</a>    | <a href="#">Cst7.aSep08</a>    | <a href="#">296257</a> | 10548  | 1073 | 3  | 172 | cystatin F (leukocystatin) (Cst7) alternative variant aSep08, mRNA.                                            |
| <a href="#">Cst7</a>    | <a href="#">Cst7.cSep08</a>    | <a href="#">296257</a> | 8080   | 390  | 2  | 86  | cystatin F (leukocystatin) (Cst7) alternative variant cSep08, mRNA.                                            |
| <a href="#">Cst10</a>   | <a href="#">Cst10.bSep08</a>   | <a href="#">366219</a> | 8338   | 369  | 1  | 49  | cystatin 10 (chondrocytes) (5.7 kD) (Cst10) alternative variant bSep08, mRNA.                                  |
| <a href="#">Cst12</a>   | <a href="#">Cst12.bSep08</a>   | <a href="#">266776</a> | 3549   | 341  | 1  | 52  | cystatin 12 (5.9 kD) (Cst12) alternative variant bSep08, mRNA.                                                 |
| <a href="#">Cst13</a>   | <a href="#">Cst13.bSep08</a>   | <a href="#">502679</a> | 1389   | 268  | 1  | 30  | cystatin 13 (Cst13) alternative variant bSep08, mRNA.                                                          |
| <a href="#">Cstb</a>    | <a href="#">Cstb.bSep08</a>    | <a href="#">25308</a>  | 1039   | 554  | 1  | 86  | cystatin B (10.0 kD) (Cstb) alternative variant bSep08, mRNA.                                                  |
| <a href="#">Cstf1</a>   | <a href="#">Cstf1.bSep08</a>   | <a href="#">311670</a> | 7044   | 877  | 3  | 291 | cleavage stimulation factor, 3' pre-RNA, subunit 1 (Cstf1) alternative variant bSep08, mRNA.                   |
| <a href="#">Cstf1</a>   | <a href="#">Cstf1.cSep08</a>   | <a href="#">311670</a> | 6898   | 904  | 3  | 269 | cleavage stimulation factor, 3' pre-RNA, subunit 1 (Cstf1) alternative variant cSep08, mRNA.                   |
| <a href="#">Cstf1</a>   | <a href="#">Cstf1.dSep08</a>   | <a href="#">311670</a> | 5446   | 725  | 2  | 241 | cleavage stimulation factor, 3' pre-RNA, subunit 1 (Cstf1) alternative variant dSep08, mRNA.                   |
| <a href="#">Cstf1</a>   | <a href="#">Cstf1.eSep08</a>   | <a href="#">311670</a> | 5220   | 641  | 2  | 197 | cleavage stimulation factor, 3' pre-RNA, subunit 1 (Cstf1) alternative variant eSep08, mRNA.                   |
| <a href="#">Cstf3</a>   | <a href="#">Cstf3.aSep08</a>   | <a href="#">362178</a> | 18740  | 2194 | 14 | 563 | cleavage stimulation factor, 3' pre-RNA, subunit 3 (Cstf3) alternative variant aSep08, mRNA.                   |
| <a href="#">Cstf3</a>   | <a href="#">Cstf3.cSep08</a>   | <a href="#">362178</a> | 18699  | 1417 | 2  | 44  | cleavage stimulation factor, 3' pre-RNA, subunit 3 (4.9 kD) (Cstf3) alternative variant cSep08, complete mRNA. |
| <a href="#">Ctage5</a>  | <a href="#">Ctage5.aSep08</a>  | <a href="#">299078</a> | 52425  | 3142 | 20 | 636 | ctage family member 5 CRA e (71.8 kD) (Ctage5) alternative variant aSep08, mRNA.                               |
| <a href="#">Ctage5</a>  | <a href="#">Ctage5.bSep08</a>  | <a href="#">299078</a> | 54044  | 1486 | 16 | 378 | ctage family member 5 (Ctage5) alternative variant bSep08, mRNA.                                               |

|                         |                                |                        |       |      |    |     |                                                                                                                                             |
|-------------------------|--------------------------------|------------------------|-------|------|----|-----|---------------------------------------------------------------------------------------------------------------------------------------------|
| <a href="#">Ctage5</a>  | <a href="#">Ctage5.cSep08</a>  | <a href="#">299078</a> | 24008 | 999  | 10 | 333 | ctage family member 5 CRA d (Ctage5) alternative variant cSep08, mRNA.                                                                      |
| <a href="#">Ctage5</a>  | <a href="#">Ctage5.dSep08</a>  | <a href="#">299078</a> | 2400  | 380  | 2  | 108 | meningioma expressed antigen 6 CRA b like (Ctage5) alternative variant dSep08, mRNA.                                                        |
| <a href="#">Ctage5</a>  | <a href="#">Ctage5.eSep08</a>  | <a href="#">299078</a> | 4018  | 652  | 2  | 93  | meningioma expressed antigen 6 CRA b like (Ctage5) alternative variant eSep08, mRNA.                                                        |
| <a href="#">Ctage5</a>  | <a href="#">Ctage5.fSep08</a>  | <a href="#">299078</a> | 3666  | 509  | 3  | 82  | meningioma expressed antigen 6 CRA b like (Ctage5) alternative variant fSep08, mRNA.                                                        |
| <a href="#">Ctbp1</a>   | <a href="#">Ctbp1.bSep08</a>   | <a href="#">29382</a>  | 3706  | 1928 | 5  | 267 | C-terminal binding protein 1 (28.9 kD) (Ctbp1) alternative variant bSep08, mRNA.                                                            |
| <a href="#">Ctbp1</a>   | <a href="#">Ctbp1.cSep08</a>   | <a href="#">29382</a>  | 14665 | 620  | 5  | 140 | C-terminal binding protein 1 (Ctbp1) alternative variant cSep08, mRNA.                                                                      |
| <a href="#">Ctbp1</a>   | <a href="#">Ctbp1.dSep08</a>   | <a href="#">29382</a>  | 2142  | 642  | 5  | 118 | C-terminal binding protein 1 (Ctbp1) alternative variant dSep08, mRNA.                                                                      |
| <a href="#">Ctbp2</a>   | <a href="#">Ctbp2.bSep08</a>   | <a href="#">81717</a>  | 55805 | 1034 | 7  | 287 | C-terminal binding protein 2 (Ctbp2) alternative variant bSep08, mRNA.                                                                      |
| <a href="#">Ctbp2</a>   | <a href="#">Ctbp2.cSep08</a>   | <a href="#">81717</a>  | 21098 | 740  | 5  | 246 | C-terminal binding protein 2 (Ctbp2) alternative variant cSep08, mRNA.                                                                      |
| <a href="#">Ctbp2</a>   | <a href="#">Ctbp2.dSep08</a>   | <a href="#">81717</a>  | 2946  | 818  | 3  | 127 | C-terminal binding protein 2 (14.0 kD) (Ctbp2) alternative variant dSep08, mRNA.                                                            |
| <a href="#">Ctbp2</a>   | <a href="#">Ctbp2.eSep08</a>   | <a href="#">81717</a>  | 82482 | 373  | 3  | 92  | C-terminal binding protein 2 (Ctbp2) alternative variant eSep08, mRNA.                                                                      |
| <a href="#">Ctbp2</a>   | <a href="#">Ctbp2.gSep08</a>   | <a href="#">81717</a>  | 96292 | 440  | 3  | 84  | C-terminal binding protein 2 (Ctbp2) alternative variant gSep08, mRNA.                                                                      |
| <a href="#">Ctcf</a>    | <a href="#">Ctcf.bSep08</a>    | <a href="#">83726</a>  | 20102 | 3525 | 10 | 740 | CCCTC-binding factor (Ctcf) alternative variant bSep08, mRNA.                                                                               |
| <a href="#">Ctcf</a>    | <a href="#">Ctcf.cSep08</a>    | <a href="#">83726</a>  | 12263 | 2383 | 7  | 357 | CCCTC-binding factor (Ctcf) alternative variant cSep08, mRNA.                                                                               |
| <a href="#">Ctcf</a>    | <a href="#">Ctcf.dSep08</a>    | <a href="#">83726</a>  | 5475  | 753  | 4  | 192 | CCCTC-binding factor (Ctcf) alternative variant dSep08, mRNA.                                                                               |
| <a href="#">Ctdp1</a>   | <a href="#">Ctdp1.bSep08</a>   | <a href="#">291414</a> | 40588 | 1789 | 4  | 422 | CTD (carboxy-terminal domain, RNA polymerase II, polypeptide A) phosphatase, subunit 1 (Ctdp1) alternative variant bSep08, mRNA.            |
| <a href="#">Ctdp1</a>   | <a href="#">Ctdp1.cSep08</a>   | <a href="#">291414</a> | 10963 | 560  | 4  | 186 | CTD (carboxy-terminal domain, RNA polymerase II, polypeptide A) phosphatase, subunit 1 (Ctdp1) alternative variant cSep08, mRNA.            |
| <a href="#">Ctdsp1</a>  | <a href="#">Ctdsp1.bSep08</a>  | <a href="#">363249</a> | 1637  | 437  | 5  | 145 | CTD (carboxy-terminal domain, RNA polymerase II, polypeptide A) small phosphatase 1 (Ctdsp1) alternative variant bSep08, mRNA.              |
| <a href="#">Ctdspl</a>  | <a href="#">Ctdspl.bSep08</a>  | <a href="#">301056</a> | 8045  | 868  | 3  | 95  | CTD (carboxy-terminal domain, RNA polymerase II, polypeptide A) small phosphatase-like (10.5 kD) (Ctdspl) alternative variant bSep08, mRNA. |
| <a href="#">Ctdspl2</a> | <a href="#">Ctdspl2.bSep08</a> | <a href="#">311368</a> | 26201 | 2692 | 8  | 236 | CTD (carboxy-terminal domain, RNA polymerase II, polypeptide A) small phosphatase like 2 (Ctdspl2) alternative variant bSep08, mRNA.        |

|                          |                                 |                        |        |      |   |     |                                                                                                                                      |
|--------------------------|---------------------------------|------------------------|--------|------|---|-----|--------------------------------------------------------------------------------------------------------------------------------------|
| <a href="#">Ctdspl2</a>  | <a href="#">Ctdspl2.cSep08</a>  | <a href="#">311368</a> | 21341  | 772  | 3 | 72  | CTD (carboxy-terminal domain, RNA polymerase II, polypeptide A) small phosphatase like 2 (Ctdspl2) alternative variant cSep08, mRNA. |
| <a href="#">Ctf8</a>     | <a href="#">Ctf8.bSep08</a>     | <a href="#">364996</a> | 1120   | 455  | 3 | 132 | putative protein of eukaryotic origin (Ctf8) alternative variant bSep08, mRNA.                                                       |
| <a href="#">Ctf8</a>     | <a href="#">Ctf8.bSep08</a>     | <a href="#">690176</a> | 1120   | 455  | 3 | 132 | putative protein of eukaryotic origin (Ctf8) alternative variant bSep08, mRNA.                                                       |
| <a href="#">Ctf8</a>     | <a href="#">Ctf8.cSep08</a>     | <a href="#">364996</a> | 5920   | 952  | 3 | 129 | putative protein (14.3 kD) (Ctf8) alternative variant cSep08, mRNA.                                                                  |
| <a href="#">Ctf8</a>     | <a href="#">Ctf8.cSep08</a>     | <a href="#">690176</a> | 5920   | 952  | 3 | 129 | putative protein (14.3 kD) (Ctf8) alternative variant cSep08, mRNA.                                                                  |
| <a href="#">Ctf8</a>     | <a href="#">Ctf8.dSep08</a>     | <a href="#">364996</a> | 35399  | 396  | 4 | 63  | putative protein (Ctf8) alternative variant dSep08, mRNA.                                                                            |
| <a href="#">Ctf8</a>     | <a href="#">Ctf8.dSep08</a>     | <a href="#">690176</a> | 35399  | 396  | 4 | 63  | putative protein (Ctf8) alternative variant dSep08, mRNA.                                                                            |
| <a href="#">Ctf8</a>     | <a href="#">Ctf8.eSep08</a>     | <a href="#">364996</a> | 6837   | 479  | 2 | 32  | putative protein (Ctf8) alternative variant eSep08, mRNA.                                                                            |
| <a href="#">Ctf8</a>     | <a href="#">Ctf8.eSep08</a>     | <a href="#">690176</a> | 6837   | 479  | 2 | 32  | putative protein (Ctf8) alternative variant eSep08, mRNA.                                                                            |
| <a href="#">Cth</a>      | <a href="#">Cth.bSep08</a>      | <a href="#">24962</a>  | 10818  | 772  | 1 | 178 | cystathionase (cystathionine gamma-lyase) (Cth) alternative variant bSep08, mRNA.                                                    |
| <a href="#">Ctla2a</a>   | <a href="#">Ctla2a.bSep08</a>   | <a href="#">498690</a> | 1284   | 591  | 3 | 135 | cytotoxic T lymphocyte-associated protein 2 alpha (Ctla2a) alternative variant bSep08, mRNA.                                         |
| <a href="#">Ctla2a</a>   | <a href="#">Ctla2a.cSep08</a>   | <a href="#">498690</a> | 917    | 816  | 1 | 48  | cytotoxic T lymphocyte-associated protein 2 alpha (Ctla2a) alternative variant cSep08, mRNA.                                         |
| <a href="#">Ctnna1</a>   | <a href="#">Ctnna1.cSep08</a>   | <a href="#">307505</a> | 4574   | 267  | 3 | 41  | catenin (cadherin associated protein), alpha 1 (Ctnna1) alternative variant cSep08, mRNA.                                            |
| <a href="#">Ctnnal1</a>  | <a href="#">Ctnnal1.bSep08</a>  | <a href="#">298019</a> | 22147  | 764  | 6 | 254 | catenin (cadherin associated protein), alpha-like 1 (Ctnnal1) alternative variant bSep08, mRNA.                                      |
| <a href="#">Ctnnal1</a>  | <a href="#">Ctnnal1.cSep08</a>  | <a href="#">298019</a> | 3219   | 409  | 3 | 108 | catenin (cadherin associated protein), alpha-like 1 (Ctnnal1) alternative variant cSep08, mRNA.                                      |
| <a href="#">Ctnnb1</a>   | <a href="#">Ctnnb1.bSep08</a>   | <a href="#">84353</a>  | 8296   | 2858 | 8 | 417 | catenin (cadherin associated protein), beta 1 (45.7 kD) (Ctnnb1) alternative variant bSep08, mRNA.                                   |
| <a href="#">Ctnnb1</a>   | <a href="#">Ctnnb1.cSep08</a>   | <a href="#">84353</a>  | 2845   | 1037 | 5 | 143 | catenin (cadherin associated protein), beta 1 (Ctnnb1) alternative variant cSep08, mRNA.                                             |
| <a href="#">Ctnnbip1</a> | <a href="#">Ctnnbip1.aSep08</a> | <a href="#">503000</a> | 47174  | 630  | 3 | 128 | catenin, beta-interacting protein 1 (Ctnnbip1) alternative variant aSep08, mRNA.                                                     |
| <a href="#">Ctnnbip1</a> | <a href="#">Ctnnbip1.bSep08</a> | <a href="#">503000</a> | 47465  | 709  | 1 | 114 | catenin, beta-interacting protein 1 (Ctnnbip1) alternative variant bSep08, mRNA.                                                     |
| <a href="#">Ctnnbip1</a> | <a href="#">Ctnnbip1.cSep08</a> | <a href="#">503000</a> | 49010  | 2551 | 4 | 81  | catenin, beta-interacting protein 1 (9.2 kD) (Ctnnbip1) alternative variant cSep08, complete mRNA.                                   |
| <a href="#">Ctnnd1</a>   | <a href="#">Ctnnd1.bSep08</a>   | <a href="#">311163</a> | 15970  | 1784 | 4 | 524 | catenin (cadherin associated protein), delta 1 (Ctnnd1) alternative variant bSep08, mRNA.                                            |
| <a href="#">Ctnnd1</a>   | <a href="#">Ctnnd1.cSep08</a>   | <a href="#">311163</a> | 9625   | 1390 | 9 | 322 | catenin (cadherin associated protein), delta 1 (Ctnnd1) alternative variant cSep08, mRNA.                                            |
| <a href="#">Ctnnd1</a>   | <a href="#">Ctnnd1.dSep08</a>   | <a href="#">311163</a> | 3991   | 1771 | 4 | 85  | catenin (cadherin associated protein), delta 1 (Ctnnd1) alternative variant dSep08, mRNA.                                            |
| <a href="#">Ctnnd2</a>   | <a href="#">Ctnnd2.aSep08</a>   | <a href="#">114028</a> | 123985 | 1782 |   | 404 | catenin (cadherin-associated protein), delta 2 (Ctnnd2) alternative variant aSep08, mRNA.                                            |
| <a href="#">Ctnnd2</a>   | <a href="#">Ctnnd2.bSep08</a>   | <a href="#">114028</a> | 17758  | 1447 |   | 164 | catenin (cadherin-associated protein), delta 2 (Ctnnd2) alternative variant bSep08, mRNA.                                            |

|                        |                               |                        |       |      |    |      |                                                                                                                           |
|------------------------|-------------------------------|------------------------|-------|------|----|------|---------------------------------------------------------------------------------------------------------------------------|
| <a href="#">Ctns</a>   | <a href="#">Ctns.aSep08</a>   | <a href="#">287478</a> | 15143 | 2054 |    | 367  | cystinosis, nephropathic (41.9 kD) (Ctns) mRNA.                                                                           |
| <a href="#">Ctps</a>   | <a href="#">Ctps.bSep08</a>   | <a href="#">313560</a> | 4785  | 369  | 3  | 123  | cytidine 5'-triphosphate synthase (Ctps) alternative variant bSep08, mRNA.                                                |
| <a href="#">Ctps</a>   | <a href="#">Ctps.cSep08</a>   | <a href="#">313560</a> | 1194  | 254  | 3  | 78   | cytidine 5'-triphosphate synthase (Ctps) alternative variant cSep08, mRNA.                                                |
| <a href="#">Ctps2</a>  | <a href="#">Ctps2.bSep08</a>  | <a href="#">619580</a> | 34806 | 716  | 6  | 213  | cytidine 5'-triphosphate synthase 2 (Ctps2) alternative variant bSep08, mRNA.                                             |
| <a href="#">Ctps2</a>  | <a href="#">Ctps2.cSep08</a>  | <a href="#">619580</a> | 28440 | 729  | 5  | 178  | cytidine 5'-triphosphate synthase 2 (Ctps2) alternative variant cSep08, mRNA.                                             |
| <a href="#">Ctps2</a>  | <a href="#">Ctps2.dSep08</a>  | <a href="#">619580</a> | 27968 | 759  | 5  | 167  | cytidine 5'-triphosphate synthase 2 (Ctps2) alternative variant dSep08, mRNA.                                             |
| <a href="#">Ctr9</a>   | <a href="#">Ctr9.aSep08</a>   | <a href="#">293184</a> | 30595 | 4234 | 25 | 1214 | ctr9, Paf1/RNA polymerase II complex component, homolog (S. cerevisiae) (Ctr9) alternative variant aSep08, mRNA.          |
| <a href="#">Ctr9</a>   | <a href="#">Ctr9.bSep08</a>   | <a href="#">293184</a> | 527   | 371  | 2  | 75   | ctr9, Paf1/RNA polymerase II complex component, homolog (S. cerevisiae) (Ctr9) alternative variant bSep08, mRNA.          |
| <a href="#">Ctr9</a>   | <a href="#">Ctr9.eSep08</a>   | <a href="#">293184</a> | 6098  | 408  | 3  | 13   | ctr9, Paf1/RNA polymerase II complex component, homolog (S. cerevisiae) (1.6 kD) (Ctr9) alternative variant eSep08, mRNA. |
| <a href="#">Ctr9</a>   | <a href="#">Ctr9.fSep08</a>   | <a href="#">293184</a> | 2128  | 301  | 3  | 59   | ctr9, Paf1/RNA polymerase II complex component, homolog (S. cerevisiae) (Ctr9) alternative variant fSep08, mRNA.          |
| <a href="#">Ctr9</a>   | <a href="#">Ctr9.gSep08</a>   | <a href="#">293184</a> | 1457  | 263  | 3  | 48   | ctr9, Paf1/RNA polymerase II complex component, homolog (S. cerevisiae) (Ctr9) alternative variant gSep08, mRNA.          |
| <a href="#">Ctrl</a>   | <a href="#">Ctrl.cSep08</a>   | <a href="#">117184</a> | 820   | 663  | 3  | 147  | chymotrypsin-like (15.6 kD) (Ctrl) alternative variant cSep08, mRNA.                                                      |
| <a href="#">Ctsb</a>   | <a href="#">Ctsb.bSep08</a>   | <a href="#">64529</a>  | 2890  | 597  | 1  | 67   | cathepsin B (Ctsb) alternative variant bSep08, mRNA.                                                                      |
| <a href="#">Ctsc</a>   | <a href="#">Ctsc.bSep08</a>   | <a href="#">25423</a>  | 2058  | 836  | 2  | 198  | cathepsin C (22.1 kD) (Ctsc) alternative variant bSep08, mRNA.                                                            |
| <a href="#">Ctsc</a>   | <a href="#">Ctsc.cSep08</a>   | <a href="#">25423</a>  | 3123  | 477  | 2  | 107  | cathepsin C CRA b (Ctsc) alternative variant cSep08, mRNA.                                                                |
| <a href="#">Ctsd</a>   | <a href="#">Ctsd.bSep08</a>   | <a href="#">171293</a> | 10386 | 809  | 6  | 168  | cathepsin D (Ctsd) alternative variant bSep08, mRNA.                                                                      |
| <a href="#">Ctsd</a>   | <a href="#">Ctsd.cSep08</a>   | <a href="#">171293</a> | 1800  | 1254 | 5  | 167  | cathepsin D (18.4 kD) (Ctsd) alternative variant cSep08, mRNA.                                                            |
| <a href="#">Ctse</a>   | <a href="#">Ctse.bSep08</a>   | <a href="#">25424</a>  | 9586  | 1456 | 7  | 304  | cathepsin E (Ctse) alternative variant bSep08, mRNA.                                                                      |
| <a href="#">Ctse</a>   | <a href="#">Ctse.cSep08</a>   | <a href="#">25424</a>  | 680   | 582  | 2  | 46   | cathepsin E (Ctse) alternative variant cSep08, mRNA.                                                                      |
| <a href="#">Ctsf</a>   | <a href="#">Ctsf.bSep08</a>   | <a href="#">361704</a> | 993   | 387  | 1  | 128  | cathepsin F (Ctsf) alternative variant bSep08, mRNA.                                                                      |
| <a href="#">Ctsl</a>   | <a href="#">Ctsl.bSep08</a>   | <a href="#">25697</a>  | 6773  | 2093 | 3  | 279  | cathepsin L (31.1 kD) (Ctsl) alternative variant bSep08, complete mRNA.                                                   |
| <a href="#">Ctsl</a>   | <a href="#">Ctsl.cSep08</a>   | <a href="#">25697</a>  | 2273  | 780  | 1  | 80   | cathepsin L (Ctsl) alternative variant cSep08, mRNA.                                                                      |
| <a href="#">Ctsm</a>   | <a href="#">Ctsm.bSep08</a>   | <a href="#">306720</a> | 2629  | 511  | 1  | 170  | cathepsin M (Ctsm) alternative variant bSep08, mRNA.                                                                      |
| <a href="#">Ctsq</a>   | <a href="#">Ctsq.bSep08</a>   | <a href="#">246147</a> | 3638  | 785  |    | 236  | cathepsin Q (Ctsq) alternative variant bSep08, mRNA.                                                                      |
| <a href="#">Ctsql2</a> | <a href="#">Ctsql2.bSep08</a> | <a href="#">408201</a> | 1899  | 712  | 3  | 144  | cathepsin Q-like 2 (Ctsql2) alternative variant bSep08, mRNA.                                                             |



|                        |                               |                           |        |      |    |     |                                                                                                       |
|------------------------|-------------------------------|---------------------------|--------|------|----|-----|-------------------------------------------------------------------------------------------------------|
| <a href="#">Ctsql2</a> | <a href="#">Ctsql2.cSep08</a> | <a href="#">408201</a>    | 1592   | 383  | 3  | 127 | cathepsin Q-like 2 (Ctsql2) alternative variant cSep08, mRNA.                                         |
| <a href="#">Ctss</a>   | <a href="#">Ctss.aSep08</a>   | <a href="#">50654</a>     | 44298  | 1393 | 1  | 342 | cathepsin S (Ctss) alternative variant aSep08, complete mRNA.                                         |
| <a href="#">Ctss</a>   | <a href="#">Ctss.cSep08</a>   | <a href="#">50654</a>     | 12211  | 914  |    | 200 | cathepsin S (Ctss) alternative variant cSep08, mRNA.                                                  |
| <a href="#">Ctss</a>   | <a href="#">Ctss.dSep08</a>   | <a href="#">50654</a>     | 10248  | 390  | 1  | 95  | cathepsin S (Ctss) alternative variant dSep08, mRNA.                                                  |
| <a href="#">Cttn</a>   | <a href="#">Cttn.bSep08</a>   | <a href="#">60465</a>     | 17231  | 1013 | 10 | 337 | cortactin (Cttn) alternative variant bSep08, mRNA.                                                    |
| <a href="#">Cttn</a>   | <a href="#">Cttn.cSep08</a>   | <a href="#">60465</a>     | 15531  | 640  | 7  | 213 | cortactin (Cttn) alternative variant cSep08, mRNA.                                                    |
| <a href="#">Cttn</a>   | <a href="#">Cttn.eSep08</a>   | <a href="#">60465</a>     | 1535   | 741  | 2  | 79  | cortactin (9.1 kD) (Cttn) alternative variant eSep08, mRNA.                                           |
| <a href="#">Ctxn3</a>  | <a href="#">Ctxn3.bSep08</a>  | <a href="#">100188934</a> | 10393  | 1245 | 3  | 37  | cortixin 3 (4.0 kD) (Ctxn3) alternative variant bSep08, mRNA.                                         |
| <a href="#">Ctxn3</a>  | <a href="#">Ctxn3.cSep08</a>  | <a href="#">100188934</a> | 4492   | 415  | 1  | 50  | cortixin 3 (Ctxn3) alternative variant cSep08, mRNA.                                                  |
| <a href="#">CUB.0</a>  | <a href="#">CUB.0.aSep08</a>  |                           | 2674   | 449  |    | 149 | deleted in malignant brain tumors 1 like (CUB.0) mRNA.                                                |
| <a href="#">Cubn</a>   | <a href="#">Cubn.aSep08</a>   | <a href="#">80848</a>     | 15332  | 1594 | 7  | 440 | cubilin (intrinsic factor-cobalamin receptor) (Cubn) alternative variant aSep08, mRNA.                |
| <a href="#">Cubn</a>   | <a href="#">Cubn.bSep08</a>   | <a href="#">80848</a>     | 2248   | 629  | 2  | 79  | cubilin (intrinsic factor-cobalamin receptor) (Cubn) alternative variant bSep08, mRNA.                |
| <a href="#">Cuedc2</a> | <a href="#">Cuedc2.aSep08</a> | <a href="#">294009</a>    | 8269   | 1012 | 9  | 270 | putative cytoplasmic protein of bilateral origin (30.7 kD) (Cuedc2) alternative variant aSep08, mRNA. |
| <a href="#">Cuedc2</a> | <a href="#">Cuedc2.cSep08</a> | <a href="#">294009</a>    | 8098   | 829  | 9  | 250 | putative protein of bilateral origin (Cuedc2) alternative variant cSep08, mRNA.                       |
| <a href="#">Cuedc2</a> | <a href="#">Cuedc2.dSep08</a> | <a href="#">294009</a>    | 8220   | 941  | 7  | 146 | putative cytoplasmic protein (16.3 kD) (Cuedc2) alternative variant dSep08, mRNA.                     |
| <a href="#">Cuedc2</a> | <a href="#">Cuedc2.eSep08</a> | <a href="#">294009</a>    | 1860   | 911  | 5  | 121 | putative protein of vertebrate origin (13.4 kD) (Cuedc2) alternative variant eSep08, mRNA.            |
| <a href="#">Cuedc2</a> | <a href="#">Cuedc2.gSep08</a> | <a href="#">294009</a>    | 427    | 370  | 2  | 73  | putative protein (Cuedc2) alternative variant gSep08, mRNA.                                           |
| <a href="#">Cuedc2</a> | <a href="#">Cuedc2.hSep08</a> | <a href="#">294009</a>    | 7020   | 769  | 3  | 32  | putative protein of mammalian origin (Cuedc2) alternative variant hSep08, mRNA.                       |
| <a href="#">Cugbp1</a> | <a href="#">Cugbp1.bSep08</a> | <a href="#">362160</a>    | 75256  | 1804 | 7  | 374 | CUG triplet repeat, RNA binding protein 1 (Cugbp1) alternative variant bSep08, mRNA.                  |
| <a href="#">Cugbp1</a> | <a href="#">Cugbp1.cSep08</a> | <a href="#">362160</a>    | 8556   | 686  | 4  | 132 | CUG triplet repeat, RNA binding protein 1 (Cugbp1) alternative variant cSep08, mRNA.                  |
| <a href="#">Cugbp1</a> | <a href="#">Cugbp1.dSep08</a> | <a href="#">362160</a>    | 14286  | 399  | 3  | 132 | CUG triplet repeat, RNA binding protein 1 (Cugbp1) alternative variant dSep08, mRNA.                  |
| <a href="#">Cugbp1</a> | <a href="#">Cugbp1.eSep08</a> | <a href="#">362160</a>    | 4456   | 2135 | 3  | 104 | CUG triplet repeat, RNA binding protein 1 (Cugbp1) alternative variant eSep08, mRNA.                  |
| <a href="#">Cugbp2</a> | <a href="#">Cugbp2.aSep08</a> | <a href="#">29428</a>     | 264960 | 1791 | 5  | 582 | CUG triplet repeat RNA binding protein 2 like (Cugbp2) alternative variant aSep08, mRNA.              |
| <a href="#">Cugbp2</a> | <a href="#">Cugbp2.dSep08</a> | <a href="#">29428</a>     | 44202  | 5958 | 5  | 235 | CUG triplet repeat RNA binding protein 2 like (Cugbp2) alternative variant dSep08, mRNA.              |
| <a href="#">Cugbp2</a> | <a href="#">Cugbp2.eSep08</a> | <a href="#">29428</a>     | 40846  | 1219 | 6  | 196 | CUG triplet repeat RNA binding protein 2 like (Cugbp2) alternative variant eSep08, mRNA.              |
| <a href="#">Cugbp2</a> | <a href="#">Cugbp2.fSep08</a> | <a href="#">29428</a>     | 15311  | 766  | 5  | 177 | CUG triplet repeat RNA binding protein 2 like (18.6 kD) (Cugbp2) alternative variant fSep08, mRNA.    |

|                        |                               |                        |        |      |    |     |                                                                                                                             |
|------------------------|-------------------------------|------------------------|--------|------|----|-----|-----------------------------------------------------------------------------------------------------------------------------|
| <a href="#">Cugbp2</a> | <a href="#">Cugbp2.gSep08</a> | <a href="#">29428</a>  | 228298 | 382  | 4  | 127 | CUG triplet repeat RNA binding protein 2 like (Cugbp2) alternative variant gSep08, mRNA.                                    |
| <a href="#">Cul1</a>   | <a href="#">Cul1.bSep08</a>   | <a href="#">362356</a> | 9202   | 1609 | 10 | 327 | cullin 1 (38.1 kD) (Cul1) alternative variant bSep08, mRNA.                                                                 |
| <a href="#">Cul1</a>   | <a href="#">Cul1.cSep08</a>   | <a href="#">362356</a> | 38157  | 678  | 4  | 145 | cullin 1 (Cul1) alternative variant cSep08, mRNA.                                                                           |
| <a href="#">Cul1</a>   | <a href="#">Cul1.eSep08</a>   | <a href="#">362356</a> | 36427  | 635  | 3  | 95  | cullin 1 (Cul1) alternative variant eSep08, mRNA.                                                                           |
| <a href="#">Cul2</a>   | <a href="#">Cul2.bSep08</a>   | <a href="#">361258</a> | 2862   | 339  | 4  | 112 | cullin 2 (Cul2) alternative variant bSep08, mRNA.                                                                           |
| <a href="#">Cul3</a>   | <a href="#">Cul3.aSep08</a>   | <a href="#">301555</a> | 77797  | 2743 | 16 | 768 | cullin 3 (88.9 kD) (Cul3) alternative variant aSep08, complete mRNA.                                                        |
| <a href="#">Cul3</a>   | <a href="#">Cul3.cSep08</a>   | <a href="#">301555</a> | 77514  | 1780 | 8  | 503 | cullin 3 (Cul3) alternative variant cSep08, mRNA.                                                                           |
| <a href="#">Cul3</a>   | <a href="#">Cul3.dSep08</a>   | <a href="#">301555</a> | 37420  | 549  | 6  | 131 | cullin 3 (Cul3) alternative variant dSep08, mRNA.                                                                           |
| <a href="#">Cul3</a>   | <a href="#">Cul3.eSep08</a>   | <a href="#">301555</a> | 5231   | 787  | 4  | 129 | cullin 3 (Cul3) alternative variant eSep08, mRNA.                                                                           |
| <a href="#">Cul3</a>   | <a href="#">Cul3.fSep08</a>   | <a href="#">301555</a> | 2750   | 739  | 2  | 58  | cullin 3 (6.9 kD) (Cul3) alternative variant fSep08, mRNA.                                                                  |
| <a href="#">Cul4b</a>  | <a href="#">Cul4b.bSep08</a>  | <a href="#">302502</a> | 766    | 606  | 2  | 201 | cullin 4B (Cul4b) alternative variant bSep08, mRNA.                                                                         |
| <a href="#">Cul5</a>   | <a href="#">Cul5.bSep08</a>   | <a href="#">64624</a>  | 29862  | 1785 | 9  | 404 | cullin 5 (Cul5) alternative variant bSep08, mRNA.                                                                           |
| <a href="#">Cul5</a>   | <a href="#">Cul5.cSep08</a>   | <a href="#">64624</a>  | 20919  | 753  | 6  | 251 | cullin 5 (Cul5) alternative variant cSep08, mRNA.                                                                           |
| <a href="#">Cul5</a>   | <a href="#">Cul5.dSep08</a>   | <a href="#">64624</a>  | 2374   | 1062 | 3  | 95  | cullin 5 (Cul5) alternative variant dSep08, mRNA.                                                                           |
| <a href="#">CUT.0</a>  | <a href="#">CUT.0.aSep08</a>  |                        | 4405   | 751  |    | 250 | cut-like 1 CRA a (CUT.0) mRNA.                                                                                              |
| <a href="#">CUT.1</a>  | <a href="#">CUT.1.aSep08</a>  |                        | 31212  | 2174 | 4  | 460 | cut-like 1 CRA a (49.1 kD) (CUT.1) alternative variant aSep08, complete mRNA.                                               |
| <a href="#">CUT.1</a>  | <a href="#">CUT.1.bSep08</a>  |                        | 4286   | 623  | 1  | 174 | cut-like 1 CRA a (CUT.1) alternative variant bSep08, mRNA.                                                                  |
| <a href="#">Cuta</a>   | <a href="#">Cuta.aSep08</a>   | <a href="#">294288</a> | 1576   | 664  | 6  | 189 | cutA (Cuta) alternative variant aSep08, mRNA.                                                                               |
| <a href="#">Cuta</a>   | <a href="#">Cuta.bSep08</a>   | <a href="#">294288</a> | 1421   | 644  | 6  | 183 | cutA (Cuta) alternative variant bSep08, mRNA.                                                                               |
| <a href="#">Cuta</a>   | <a href="#">Cuta.cSep08</a>   | <a href="#">294288</a> | 1500   | 938  | 5  | 154 | cutA (16.4 kD) (Cuta) alternative variant cSep08, mRNA.                                                                     |
| <a href="#">Cuta</a>   | <a href="#">Cuta.dSep08</a>   | <a href="#">294288</a> | 710    | 627  | 2  | 108 | putative protein (Cuta) alternative variant dSep08, mRNA.                                                                   |
| <a href="#">Cuta</a>   | <a href="#">Cuta.eSep08</a>   | <a href="#">294288</a> | 648    | 406  | 2  | 58  | divalent cation cutA (6.3 kD) (Cuta) alternative variant eSep08, mRNA.                                                      |
| <a href="#">Cuta</a>   | <a href="#">Cuta.fSep08</a>   | <a href="#">294288</a> | 1447   | 789  | 5  | 126 | putative secreted or extracellular protein precursor of mammalian origin (12.9 kD) (Cuta) alternative variant fSep08, mRNA. |
| <a href="#">Cuta</a>   | <a href="#">Cuta.gSep08</a>   | <a href="#">294288</a> | 1508   | 715  | 5  | 59  | divalent cation cutA (6.5 kD) (Cuta) alternative variant gSep08, mRNA.                                                      |
| <a href="#">Cutc</a>   | <a href="#">Cutc.bSep08</a>   | <a href="#">361760</a> | 8871   | 922  | 6  | 195 | cutC copper transporter homolog (E.coli) (Cutc) alternative variant bSep08, mRNA.                                           |
| <a href="#">Cutc</a>   | <a href="#">Cutc.cSep08</a>   | <a href="#">361760</a> | 14813  | 2171 | 7  | 187 | cutC copper transporter homolog (E.coli) (20.0 kD) (Cutc) alternative variant cSep08, mRNA.                                 |
| <a href="#">Cutc</a>   | <a href="#">Cutc.dSep08</a>   | <a href="#">361760</a> | 8561   | 572  | 5  | 149 | cutC copper transporter homolog (E.coli) (Cutc) alternative variant dSep08, mRNA.                                           |
| <a href="#">Cutc</a>   | <a href="#">Cutc.eSep08</a>   | <a href="#">361760</a> | 8764   | 779  | 5  | 147 | cutC copper transporter homolog (E.coli) (Cutc) alternative variant eSep08, mRNA.                                           |
| <a href="#">Cutc</a>   | <a href="#">Cutc.fSep08</a>   | <a href="#">361760</a> | 8058   | 751  | 5  | 119 | cutC copper transporter homolog (E.coli) (12.6 kD) (Cutc) alternative variant fSep08, mRNA.                                 |
| <a href="#">Cutc</a>   | <a href="#">Cutc.gSep08</a>   | <a href="#">361760</a> | 5728   | 947  | 3  | 45  | cutC copper transporter homolog (E.coli) (4.8 kD) (Cutc) alternative variant gSep08, mRNA.                                  |

|                         |                                |                        |        |      |    |     |                                                                                                 |
|-------------------------|--------------------------------|------------------------|--------|------|----|-----|-------------------------------------------------------------------------------------------------|
| <a href="#">Cux1</a>    | <a href="#">Cux1.aSep08</a>    | <a href="#">116639</a> | 317072 | 3100 | 1  | 773 | cut-like homeobox 1 (Cux1) alternative variant aSep08, mRNA.                                    |
| <a href="#">Cux1</a>    | <a href="#">Cux1.bSep08</a>    | <a href="#">116639</a> | 47210  | 590  | 1  | 196 | cut-like homeobox 1 (Cux1) alternative variant bSep08, mRNA.                                    |
| <a href="#">Cuzd1</a>   | <a href="#">Cuzd1.bSep08</a>   | <a href="#">117179</a> | 33813  | 1410 | 8  | 194 | CUB and zona pellucida-like domains 1 (22.0 kD) (Cuzd1) alternative variant bSep08, mRNA.       |
| <a href="#">Cuzd1</a>   | <a href="#">Cuzd1.cSep08</a>   | <a href="#">117179</a> | 29313  | 678  | 5  | 148 | CUB and zona pellucida-like domains 1 (Cuzd1) alternative variant cSep08, mRNA.                 |
| <a href="#">Cuzd1</a>   | <a href="#">Cuzd1.dSep08</a>   | <a href="#">117179</a> | 29360  | 620  | 4  | 123 | CUB and zona pellucida-like domains 1 (Cuzd1) alternative variant dSep08, mRNA.                 |
| <a href="#">Cuzd1</a>   | <a href="#">Cuzd1.eSep08</a>   | <a href="#">117179</a> | 1277   | 743  | 2  | 32  | CUB and zona pellucida-like domains 1 (3.8 kD) (Cuzd1) alternative variant eSep08, mRNA.        |
| <a href="#">Cwc15</a>   | <a href="#">Cwc15.aSep08</a>   | <a href="#">300361</a> | 10404  | 856  | 6  | 229 | CWC15 homolog (S. cerevisiae) (26.6 kD) (Cwc15) alternative variant aSep08, complete mRNA.      |
| <a href="#">Cwc15</a>   | <a href="#">Cwc15.cSep08</a>   | <a href="#">300361</a> | 1809   | 661  | 1  | 73  | CWC15 homolog (S. cerevisiae) (Cwc15) alternative variant cSep08, mRNA.                         |
| <a href="#">Cwf191</a>  | <a href="#">Cwf191.cSep08</a>  | <a href="#">365465</a> | 3859   | 1349 | 3  | 82  | CWF19-like 1, cell cycle control (S. pombe) (9.7 kD) (Cwf191) alternative variant cSep08, mRNA. |
| <a href="#">Cwf192</a>  | <a href="#">Cwf192.aSep08</a>  | <a href="#">362804</a> | 8117   | 1805 | 1  | 148 | CWF19-like 2, cell cycle control (S. pombe) (Cwf192) alternative variant aSep08, mRNA.          |
| <a href="#">Cwf192</a>  | <a href="#">Cwf192.bSep08</a>  | <a href="#">362804</a> | 7561   | 1172 | 1  | 116 | CWF19-like 2, cell cycle control (S. pombe) (Cwf192) alternative variant bSep08, mRNA.          |
| <a href="#">cwf21.0</a> | <a href="#">cwf21.0.aSep08</a> |                        | 4957   | 867  | 8  | 288 | serine arginine repetitive matrix 2 CRA b (cwf21.0) alternative variant aSep08, mRNA.           |
| <a href="#">Cxcl3</a>   | <a href="#">Cxcl3.aSep08</a>   | <a href="#">171551</a> | 12753  | 1524 | 3  | 129 | chemokine (C-X-C motif) ligand 3 (14.8 kD) (Cxcl3) alternative variant aSep08, mRNA.            |
| <a href="#">Cxcl3</a>   | <a href="#">Cxcl3.bSep08</a>   | <a href="#">171551</a> | 12123  | 1164 | 2  | 128 | chemokine (C-X-C motif) ligand 3 (14.8 kD) (Cxcl3) alternative variant bSep08, complete mRNA.   |
| <a href="#">Cxcl13</a>  | <a href="#">Cxcl13.aSep08</a>  | <a href="#">498335</a> | 5071   | 1126 | 2  | 109 | chemokine (C-X-C motif) ligand 13 (12.1 kD) (Cxcl13) alternative variant aSep08, mRNA.          |
| <a href="#">Cxcl13</a>  | <a href="#">Cxcl13.cSep08</a>  | <a href="#">498335</a> | 4945   | 914  | 2  | 75  | chemokine (C-X-C motif) ligand 13 (8.5 kD) (Cxcl13) alternative variant cSep08, mRNA.           |
| <a href="#">Cxcl13</a>  | <a href="#">Cxcl13.dSep08</a>  | <a href="#">498335</a> | 4819   | 741  | 1  | 41  | chemokine (C-X-C motif) ligand 13 (Cxcl13) alternative variant dSep08, mRNA.                    |
| <a href="#">Cxcl14</a>  | <a href="#">Cxcl14.bSep08</a>  | <a href="#">306748</a> | 4840   | 2085 | 2  | 64  | chemokine (C-X-C motif) ligand 14 (6.5 kD) (Cxcl14) alternative variant bSep08, mRNA.           |
| <a href="#">Cxcl17</a>  | <a href="#">Cxcl17.bSep08</a>  | <a href="#">308436</a> | 11716  | 563  |    | 58  | chemokine (C-X-C motif) ligand 17 (6.6 kD) (Cxcl17) alternative variant bSep08, mRNA.           |
| <a href="#">Cxcr7</a>   | <a href="#">Cxcr7.bSep08</a>   | <a href="#">84348</a>  | 10504  | 1062 | 3  | 277 | chemokine (C-X-C motif) receptor 7 (Cxcr7) alternative variant bSep08, mRNA.                    |
| <a href="#">Cxcr7</a>   | <a href="#">Cxcr7.cSep08</a>   | <a href="#">84348</a>  | 10432  | 901  | 3  | 272 | chemokine (C-X-C motif) receptor 7 (Cxcr7) alternative variant cSep08, mRNA.                    |
| <a href="#">Cxxc1</a>   | <a href="#">Cxxc1.aSep08</a>   | <a href="#">291440</a> | 5237   | 2693 | 14 | 698 | CXXC finger 1 (79.7 kD) (Cxxc1) alternative variant aSep08, mRNA.                               |
| <a href="#">Cxxc1</a>   | <a href="#">Cxxc1.bSep08</a>   | <a href="#">291440</a> | 3023   | 1845 | 9  | 350 | CXXC finger 1 (41.2 kD) (Cxxc1) alternative variant bSep08, mRNA.                               |

|                          |                                 |                        |       |      |   |     |                                                                                           |
|--------------------------|---------------------------------|------------------------|-------|------|---|-----|-------------------------------------------------------------------------------------------|
| <a href="#">Cxxc1</a>    | <a href="#">Cxxc1.cSep08</a>    | <a href="#">291440</a> | 2473  | 977  | 6 | 285 | CXXC finger 1 (31.5 kD) (Cxxc1) alternative variant cSep08, mRNA.                         |
| <a href="#">Cxxc1</a>    | <a href="#">Cxxc1.dSep08</a>    | <a href="#">291440</a> | 1845  | 856  | 6 | 285 | CXXC finger 1 (Cxxc1) alternative variant dSep08, mRNA.                                   |
| <a href="#">Cxxc1</a>    | <a href="#">Cxxc1.eSep08</a>    | <a href="#">291440</a> | 1130  | 1002 | 2 | 167 | CXXC finger 1 (Cxxc1) alternative variant eSep08, mRNA.                                   |
| <a href="#">Cxxc1</a>    | <a href="#">Cxxc1.fSep08</a>    | <a href="#">291440</a> | 1807  | 753  | 4 | 162 | CXXC finger 1 (17.9 kD) (Cxxc1) alternative variant fSep08, mRNA.                         |
| <a href="#">Cxxc5</a>    | <a href="#">Cxxc5.bSep08</a>    | <a href="#">291670</a> | 30499 | 2367 | 3 | 306 | CXXC finger 5 (31.4 kD) (Cxxc5) alternative variant bSep08, mRNA.                         |
| <a href="#">Cyb5</a>     | <a href="#">Cyb5.bSep08</a>     | <a href="#">64001</a>  | 36496 | 571  | 4 | 96  | cytochrome b-5 (Cyb5) alternative variant bSep08, mRNA.                                   |
| <a href="#">Cyb5</a>     | <a href="#">Cyb5.cSep08</a>     | <a href="#">64001</a>  | 4390  | 1770 | 2 | 53  | cytochrome b-5 (6.1 kD) (Cyb5) alternative variant cSep08, mRNA.                          |
| <a href="#">Cyb5</a>     | <a href="#">Cyb5.dSep08</a>     | <a href="#">64001</a>  | 17626 | 462  | 5 | 17  | cytochrome b-5 (Cyb5) alternative variant dSep08, mRNA.                                   |
| <a href="#">Cyb5b</a>    | <a href="#">Cyb5b.bSep08</a>    | <a href="#">80773</a>  | 3642  | 775  | 2 | 94  | cytochrome b5 type B (10.4 kD) (Cyb5b) alternative variant bSep08, mRNA.                  |
| <a href="#">Cyb5r1</a>   | <a href="#">Cyb5r1.bSep08</a>   | <a href="#">304805</a> | 3645  | 1155 | 5 | 125 | cytochrome b5 reductase 1 CRA d (14.3 kD) (Cyb5r1) alternative variant bSep08, mRNA.      |
| <a href="#">Cyb5r1</a>   | <a href="#">Cyb5r1.cSep08</a>   | <a href="#">304805</a> | 815   | 420  | 3 | 83  | cytochrome b5 reductase 1 CRA b (Cyb5r1) alternative variant cSep08, mRNA.                |
| <a href="#">Cyb5r2</a>   | <a href="#">Cyb5r2.bSep08</a>   | <a href="#">365345</a> | 5806  | 798  | 7 | 170 | cytochrome b5 reductase 2 (Cyb5r2) alternative variant bSep08, mRNA.                      |
| <a href="#">Cyb5r3</a>   | <a href="#">Cyb5r3.bSep08</a>   | <a href="#">25035</a>  | 10702 | 739  | 1 | 246 | cytochrome b5 reductase 3 (Cyb5r3) alternative variant bSep08, mRNA.                      |
| <a href="#">Cyb5r4</a>   | <a href="#">Cyb5r4.aSep08</a>   | <a href="#">171015</a> | 65381 | 2551 | 3 | 564 | cytochrome b5 reductase 4 CRA a (Cyb5r4) alternative variant aSep08, mRNA.                |
| <a href="#">Cyb5r4</a>   | <a href="#">Cyb5r4.bSep08</a>   | <a href="#">171015</a> | 49288 | 855  | 1 | 169 | flavoheмоprotein b5 b5r (Cyb5r4) alternative variant bSep08, mRNA.                        |
| <a href="#">Cyb5r4</a>   | <a href="#">Cyb5r4.cSep08</a>   | <a href="#">171015</a> | 70596 | 1796 | 2 | 97  | putative protein (Cyb5r4) alternative variant cSep08, mRNA.                               |
| <a href="#">Cyb561</a>   | <a href="#">Cyb561.bSep08</a>   | <a href="#">303601</a> | 2652  | 2144 |   | 151 | cytochrome b-561 (Cyb561) alternative variant bSep08, mRNA.                               |
| <a href="#">Cyb561d2</a> | <a href="#">Cyb561d2.aSep08</a> | <a href="#">363137</a> | 2190  | 745  | 2 | 248 | cytochrome b561 (Cyb561d2) alternative variant aSep08, mRNA.                              |
| <a href="#">Cyba</a>     | <a href="#">Cyba.bSep08</a>     | <a href="#">79129</a>  | 1505  | 386  | 2 | 98  | cytochrome b-245, alpha polypeptide (Cyba) alternative variant bSep08, mRNA.              |
| <a href="#">Cybasc3</a>  | <a href="#">Cybasc3.aSep08</a>  | <a href="#">361729</a> | 11635 | 2131 | 6 | 275 | cytochrome b, ascorbate dependent 3 (Cybasc3) alternative variant aSep08, mRNA.           |
| <a href="#">Cybasc3</a>  | <a href="#">Cybasc3.bSep08</a>  | <a href="#">361729</a> | 5905  | 912  | 5 | 261 | cytochrome b, ascorbate dependent 3 (Cybasc3) alternative variant bSep08, mRNA.           |
| <a href="#">Cybasc3</a>  | <a href="#">Cybasc3.dSep08</a>  | <a href="#">361729</a> | 5212  | 794  | 3 | 235 | cytochrome b, ascorbate dependent 3 (Cybasc3) alternative variant dSep08, mRNA.           |
| <a href="#">Cybasc3</a>  | <a href="#">Cybasc3.eSep08</a>  | <a href="#">361729</a> | 6166  | 974  | 4 | 191 | cytochrome b, ascorbate dependent 3 (21.3 kD) (Cybasc3) alternative variant eSep08, mRNA. |
| <a href="#">Cybasc3</a>  | <a href="#">Cybasc3.fSep08</a>  | <a href="#">361729</a> | 5962  | 835  | 3 | 135 | cytochrome b, ascorbate dependent 3 (15.0 kD) (Cybasc3) alternative variant fSep08, mRNA. |
| <a href="#">Cybasc3</a>  | <a href="#">Cybasc3.gSep08</a>  | <a href="#">361729</a> | 8414  | 1074 | 4 | 130 | cytochrome b, ascorbate dependent 3 (Cybasc3) alternative variant gSep08, mRNA.           |

|                         |                                |                        |        |      |   |     |                                                                                                                     |
|-------------------------|--------------------------------|------------------------|--------|------|---|-----|---------------------------------------------------------------------------------------------------------------------|
| <a href="#">Cybasc3</a> | <a href="#">Cybasc3.hSep08</a> | <a href="#">361729</a> | 7885   | 712  | 4 | 78  | cytochrome b, ascorbate dependent 3 (Cybasc3) alternative variant hSep08, mRNA.                                     |
| <a href="#">Cyc1</a>    | <a href="#">Cyc1.aSep08</a>    | <a href="#">300047</a> | 2001   | 900  | 6 | 291 | cytochrome c-1 (Cyc1) alternative variant aSep08, mRNA.                                                             |
| <a href="#">Cyc1</a>    | <a href="#">Cyc1.bSep08</a>    | <a href="#">300047</a> | 2361   | 1752 | 6 | 266 | cytochrome c-1 (29.5 kD) (Cyc1) alternative variant bSep08, complete mRNA.                                          |
| <a href="#">Cyc1</a>    | <a href="#">Cyc1.eSep08</a>    | <a href="#">300047</a> | 1269   | 556  | 4 | 107 | cytochrome c-1 (Cyc1) alternative variant eSep08, mRNA.                                                             |
| <a href="#">Cyc1</a>    | <a href="#">Cyc1.gSep08</a>    | <a href="#">300047</a> | 1007   | 892  | 2 | 63  | cytochrome c-1 (6.4 kD) (Cyc1) alternative variant gSep08, mRNA.                                                    |
| <a href="#">Cyfip1</a>  | <a href="#">Cyfip1.bSep08</a>  | <a href="#">308666</a> | 7964   | 675  | 6 | 225 | cytoplasmic FMR1 interacting protein 1 CRA a (Cyfip1) alternative variant bSep08, mRNA.                             |
| <a href="#">Cyfip1</a>  | <a href="#">Cyfip1.bSep08</a>  | <a href="#">691443</a> | 7964   | 675  | 6 | 225 | cytoplasmic FMR1 interacting protein 1 CRA a (Cyfip1) alternative variant bSep08, mRNA.                             |
| <a href="#">Cyfip1</a>  | <a href="#">Cyfip1.cSep08</a>  | <a href="#">308666</a> | 11886  | 739  | 7 | 158 | cytoplasmic fmr1 interacting protein 1 CRA b (Cyfip1) alternative variant cSep08, mRNA.                             |
| <a href="#">Cyfip1</a>  | <a href="#">Cyfip1.cSep08</a>  | <a href="#">691443</a> | 11886  | 739  | 7 | 158 | cytoplasmic fmr1 interacting protein 1 CRA b (Cyfip1) alternative variant cSep08, mRNA.                             |
| <a href="#">Cyfip1</a>  | <a href="#">Cyfip1.dSep08</a>  | <a href="#">308666</a> | 31893  | 420  | 3 | 84  | cytoplasmic fmr1 interacting protein 1 CRA a (9.4 kD) (Cyfip1) alternative variant dSep08, mRNA.                    |
| <a href="#">Cyfip1</a>  | <a href="#">Cyfip1.dSep08</a>  | <a href="#">691443</a> | 31893  | 420  | 3 | 84  | cytoplasmic fmr1 interacting protein 1 CRA a (9.4 kD) (Cyfip1) alternative variant dSep08, mRNA.                    |
| <a href="#">Cyhr1</a>   | <a href="#">Cyhr1.aSep08</a>   | <a href="#">315097</a> | 1659   | 923  | 2 | 192 | cysteine and histidine rich 1 (20.2 kD) (Cyhr1) alternative variant aSep08, mRNA.                                   |
| <a href="#">Cyld</a>    | <a href="#">Cyld.aSep08</a>    | <a href="#">312937</a> | 25580  | 2424 |   | 383 | cyliodromatosis (turban tumor syndrome) (Cyld) mRNA.                                                                |
| <a href="#">Cyp2a1</a>  | <a href="#">Cyp2a1.bSep08</a>  | <a href="#">24894</a>  | 8343   | 821  | 5 | 273 | cytochrome P450 IIA1 (hepatic steroid hydroxylase IIA1) gene (Cyp2a1) alternative variant bSep08, mRNA.             |
| <a href="#">Cyp2a3a</a> | <a href="#">Cyp2a3a.bSep08</a> | <a href="#">24299</a>  | 1611   | 428  |   | 75  | cytochrome P450, family 2, subfamily A, polypeptide 3a (Cyp2a3a) alternative variant bSep08, mRNA.                  |
| <a href="#">Cyp2b2</a>  | <a href="#">Cyp2b2.aSep08</a>  | <a href="#">361523</a> | 13797  | 1691 | 8 | 491 | cytochrome P450, family 2, subfamily b, polypeptide 2 (Cyp2b2) alternative variant aSep08, mRNA.                    |
| <a href="#">Cyp2b2</a>  | <a href="#">Cyp2b2.bSep08</a>  | <a href="#">361523</a> | 738    | 300  | 1 | 99  | cytochrome P450, family 2, subfamily b, polypeptide 2 (Cyp2b2) alternative variant bSep08, mRNA.                    |
| <a href="#">Cyp2b3</a>  | <a href="#">Cyp2b3.bSep08</a>  | <a href="#">286953</a> | 31045  | 739  | 1 | 216 | cytochrome P450IIB3 (24.6 kD) (Cyp2b3) alternative variant bSep08, complete mRNA.                                   |
| <a href="#">Cyp2b21</a> | <a href="#">Cyp2b21.aSep08</a> | <a href="#">292728</a> | 28979  | 1784 |   | 575 | cytochrome P450, family 2, subfamily b, polypeptide 21 (Cyp2b21) alternative variant aSep08, mRNA.                  |
| <a href="#">Cyp2c</a>   | <a href="#">Cyp2c.bSep08</a>   | <a href="#">29277</a>  | 1289   | 547  | 2 | 118 | cytochrome P450, subfamily IIC (mephenytoin 4-hydroxylase) (Cyp2c) alternative variant bSep08, mRNA.                |
| <a href="#">Cyp2c</a>   | <a href="#">Cyp2c.cSep08</a>   | <a href="#">29277</a>  | 1038   | 254  | 2 | 84  | cytochrome P450, subfamily IIC (mephenytoin 4-hydroxylase) (Cyp2c) alternative variant cSep08, mRNA.                |
| <a href="#">Cyp2c6</a>  | <a href="#">Cyp2c6.aSep08</a>  | <a href="#">246070</a> | 3562   | 794  |   | 177 | cytochrome P450, subfamily IIC6 (Cyp2c6) mRNA.                                                                      |
| <a href="#">Cyp2c7</a>  | <a href="#">Cyp2c7.aSep08</a>  | <a href="#">29298</a>  | 19751  | 906  | 2 | 199 | cytochrome P450, family 2, subfamily c, polypeptide 7 (22.6 kD) (Cyp2c7) alternative variant aSep08, mRNA.          |
| <a href="#">Cyp2c7</a>  | <a href="#">Cyp2c7.bSep08</a>  | <a href="#">29298</a>  | 615727 | 913  | 2 | 199 | cytochrome P450, family 2, subfamily c, polypeptide 7 (22.7 kD) (Cyp2c7) alternative variant bSep08, complete mRNA. |
| <a href="#">Cyp2c12</a> | <a href="#">Cyp2c12.bSep08</a> | <a href="#">25011</a>  | 47998  | 1066 | 3 | 287 | cytochrome P450, family 2, subfamily c, polypeptide 12 (Cyp2c12) alternative variant bSep08, mRNA.                  |

|                            |                                   |                        |       |      |   |     |                                                                                                                   |
|----------------------------|-----------------------------------|------------------------|-------|------|---|-----|-------------------------------------------------------------------------------------------------------------------|
| <a href="#">Cyp2c12</a>    | <a href="#">Cyp2c12.cSep08</a>    | <a href="#">25011</a>  | 9599  | 1111 | 1 | 119 | cytochrome P450, family 2, subfamily c, polypeptide 12 (Cyp2c12) alternative variant cSep08, mRNA.                |
| <a href="#">Cyp2c13</a>    | <a href="#">Cyp2c13.bSep08</a>    | <a href="#">171521</a> | 5776  | 296  | 3 | 98  | cytochrome P450 2c13 (Cyp2c13) alternative variant bSep08, mRNA.                                                  |
| <a href="#">Cyp2c13</a>    | <a href="#">Cyp2c13.cSep08</a>    | <a href="#">171521</a> | 18124 | 290  | 3 | 96  | cytochrome P450 2c13 (Cyp2c13) alternative variant cSep08, mRNA.                                                  |
| <a href="#">Cyp2c22</a>    | <a href="#">Cyp2c22.bSep08</a>    | <a href="#">171518</a> | 17136 | 732  | 2 | 244 | cytochrome P450, family 2, subfamily c, polypeptide 22 (Cyp2c22) alternative variant bSep08, mRNA.                |
| <a href="#">Cyp2c22</a>    | <a href="#">Cyp2c22.cSep08</a>    | <a href="#">171518</a> | 24548 | 914  | 3 | 231 | cytochrome P450, family 2, subfamily c, polypeptide 22 (Cyp2c22) alternative variant cSep08, mRNA.                |
| <a href="#">Cyp2c23</a>    | <a href="#">Cyp2c23.bSep08</a>    | <a href="#">83790</a>  | 5527  | 843  | 2 | 133 | cytochrome P-450 S-mephenytoin (Cyp2c23) alternative variant bSep08, mRNA.                                        |
| <a href="#">Cyp2c23</a>    | <a href="#">Cyp2c23.cSep08</a>    | <a href="#">83790</a>  | 6548  | 645  | 4 | 106 | cytochrome 2C78 (Cyp2c23) alternative variant cSep08, mRNA.                                                       |
| <a href="#">Cyp2c23</a>    | <a href="#">Cyp2c23.eSep08</a>    | <a href="#">83790</a>  | 2637  | 919  | 3 | 101 | cytochrome 2C78 (11.5 kD) (Cyp2c23) alternative variant eSep08, mRNA.                                             |
| <a href="#">Cyp2c23</a>    | <a href="#">Cyp2c23.fSep08</a>    | <a href="#">83790</a>  | 2656  | 1047 | 2 | 101 | cytochrome 2C78 (11.5 kD) (Cyp2c23) alternative variant fSep08, mRNA.                                             |
| <a href="#">Cyp2c23</a>    | <a href="#">Cyp2c23.gSep08</a>    | <a href="#">83790</a>  | 1045  | 280  | 2 | 93  | putative protein (Cyp2c23) alternative variant gSep08, mRNA.                                                      |
| <a href="#">Cyp2c24</a>    | <a href="#">Cyp2c24.aSep08</a>    | <a href="#">499353</a> | 3385  | 454  |   | 151 | cytochrome P450, family 2, subfamily c, polypeptide 24 (Cyp2c24) mRNA.                                            |
| <a href="#">Cyp2c37</a>    | <a href="#">Cyp2c37.aSep08</a>    | <a href="#">29296</a>  | 47247 | 1753 | 9 | 286 | cytochrome P450, 2c37 (32.9 kD) (Cyp2c37) alternative variant aSep08, mRNA.                                       |
| <a href="#">Cyp2c37</a>    | <a href="#">Cyp2c37.bSep08</a>    | <a href="#">29296</a>  | 21982 | 727  | 4 | 147 | cytochrome P450, 2c37 (17.3 kD) (Cyp2c37) alternative variant bSep08, mRNA.                                       |
| <a href="#">Cyp2c37</a>    | <a href="#">Cyp2c37.cSep08</a>    | <a href="#">29296</a>  | 1952  | 341  | 2 | 113 | cytochrome P450, 2c37 (Cyp2c37) alternative variant cSep08, mRNA.                                                 |
| <a href="#">Cyp2c37</a>    | <a href="#">Cyp2c37.dSep08</a>    | <a href="#">29296</a>  | 1846  | 237  | 3 | 79  | cytochrome P450, 2c37 (Cyp2c37) alternative variant dSep08, mRNA.                                                 |
| <a href="#">Cyp2c37</a>    | <a href="#">Cyp2c37.eSep08</a>    | <a href="#">29296</a>  | 1970  | 207  | 2 | 68  | cytochrome P450, 2c37 (Cyp2c37) alternative variant eSep08, mRNA.                                                 |
| <a href="#">Cyp2c37</a>    | <a href="#">Cyp2c37.hSep08</a>    | <a href="#">29296</a>  | 309   | 217  | 2 | 19  | cytochrome P450, 2c37 (2.4 kD) (Cyp2c37) alternative variant hSep08, mRNA.                                        |
| <a href="#">Cyp2c77-ps</a> | <a href="#">Cyp2c77-ps.aSep08</a> | <a href="#">686022</a> | 51260 | 1000 | 7 | 142 | cytochrome P450, family 2, subfamily c, polypeptide 77, pseudogene (Cyp2c77-ps) alternative variant aSep08, mRNA. |
| <a href="#">Cyp2c77-ps</a> | <a href="#">Cyp2c77-ps.bSep08</a> | <a href="#">686022</a> | 3264  | 522  | 3 | 135 | cytochrome P450, family 2, subfamily c, polypeptide 77, pseudogene (Cyp2c77-ps) alternative variant bSep08, mRNA. |
| <a href="#">Cyp2c77-ps</a> | <a href="#">Cyp2c77-ps.cSep08</a> | <a href="#">686022</a> | 2085  | 343  | 2 | 110 | cytochrome P450, family 2, subfamily c, polypeptide 77, pseudogene (Cyp2c77-ps) alternative variant cSep08, mRNA. |
| <a href="#">Cyp2c77-ps</a> | <a href="#">Cyp2c77-ps.dSep08</a> | <a href="#">686022</a> | 20859 | 351  | 3 |     |                                                                                                                   |
| <a href="#">Cyp2c80</a>    | <a href="#">Cyp2c80.aSep08</a>    | <a href="#">292330</a> | 18733 | 1590 |   | 341 | cytochrome P450, family 2, subfamily c, polypeptide 80 (Cyp2c80) mRNA.                                            |

|                             |                                    |                        |       |      |   |     |                                                                                                              |
|-----------------------------|------------------------------------|------------------------|-------|------|---|-----|--------------------------------------------------------------------------------------------------------------|
| <a href="#">Cyp2d2</a>      | <a href="#">Cyp2d2.bSep08</a>      | <a href="#">25053</a>  | 1730  | 877  | 3 | 195 | p450 cytochrome 2d2 (Cyp2d2) alternative variant bSep08, mRNA.                                               |
| <a href="#">Cyp2d2</a>      | <a href="#">Cyp2d2.cSep08</a>      | <a href="#">25053</a>  | 1524  | 1308 | 3 | 130 | p450 cytochrome 2d2 (14.9 kD) (Cyp2d2) alternative variant cSep08, mRNA.                                     |
| <a href="#">Cyp2d3</a>      | <a href="#">Cyp2d3.bSep08</a>      | <a href="#">24303</a>  | 1684  | 828  | 1 | 187 | cytochrome P450, family 2, subfamily d, polypeptide 3 (21.0 kD) (Cyp2d3) alternative variant bSep08, mRNA.   |
| <a href="#">Cyp2d4v1</a>    | <a href="#">Cyp2d4v1.bSep08</a>    | <a href="#">171522</a> | 1111  | 539  | 4 | 149 | cytochrome p450 (Cyp2d4v1) alternative variant bSep08, mRNA.                                                 |
| <a href="#">Cyp2d4v1</a>    | <a href="#">Cyp2d4v1.cSep08</a>    | <a href="#">171522</a> | 787   | 687  | 2 | 115 | cytochrome p450 (12.9 kD) (Cyp2d4v1) alternative variant cSep08, mRNA.                                       |
| <a href="#">Cyp2d5</a>      | <a href="#">Cyp2d5.bSep08</a>      | <a href="#">286963</a> | 1908  | 777  | 5 | 259 | cytochrome P450, family 2, subfamily d, polypeptide 5 (Cyp2d5) alternative variant bSep08, mRNA.             |
| <a href="#">Cyp2e1</a>      | <a href="#">Cyp2e1.bSep08</a>      | <a href="#">25086</a>  | 5709  | 863  | 1 | 285 | cytochrome P450, family 2, subfamily e, polypeptide 1 (Cyp2e1) alternative variant bSep08, mRNA.             |
| <a href="#">Cyp2f4</a>      | <a href="#">Cyp2f4.bSep08</a>      | <a href="#">54246</a>  | 5448  | 751  | 3 | 221 | cytochrome P450, family 2, subfamily f, polypeptide 4 (Cyp2f4) alternative variant bSep08, mRNA.             |
| <a href="#">Cyp2f4</a>      | <a href="#">Cyp2f4.cSep08</a>      | <a href="#">54246</a>  | 10103 | 660  | 5 | 184 | cytochrome P450, family 2, subfamily f, polypeptide 4 (Cyp2f4) alternative variant cSep08, mRNA.             |
| <a href="#">Cyp2f4</a>      | <a href="#">Cyp2f4.dSep08</a>      | <a href="#">54246</a>  | 5239  | 615  | 3 | 106 | cytochrome P450, family 2, subfamily f, polypeptide 4 (Cyp2f4) alternative variant dSep08, mRNA.             |
| <a href="#">Cyp2j10</a>     | <a href="#">Cyp2j10.aSep08</a>     | <a href="#">313373</a> | 36914 | 1926 | 8 | 502 | cytochrome P450, family 2, subfamily j, polypeptide 10 (57.7 kD) (Cyp2j10) alternative variant aSep08, mRNA. |
| <a href="#">Cyp2j10</a>     | <a href="#">Cyp2j10.bSep08</a>     | <a href="#">313373</a> | 2524  | 754  | 1 | 82  | cytochrome P450, family 2, subfamily j, polypeptide 10 (9.0 kD) (Cyp2j10) alternative variant bSep08, mRNA.  |
| <a href="#">Cyp2j13</a>     | <a href="#">Cyp2j13.aSep08</a>     | <a href="#">313372</a> | 18073 | 1018 |   | 167 | cytochrome P450, family 2, subfamily j, polypeptide 13 (Cyp2j13) mRNA.                                       |
| <a href="#">Cyp2r1</a>      | <a href="#">Cyp2r1.aSep08</a>      | <a href="#">361631</a> | 13791 | 2813 | 3 | 431 | cytochrome P450, family 2, subfamily r, polypeptide 1 (Cyp2r1) alternative variant aSep08, mRNA.             |
| <a href="#">Cyp2r1</a>      | <a href="#">Cyp2r1.cSep08</a>      | <a href="#">361631</a> | 9247  | 383  | 2 | 127 | cytochrome P450, family 2, subfamily r, polypeptide 1 (Cyp2r1) alternative variant cSep08, mRNA.             |
| <a href="#">Cyp2t1</a>      | <a href="#">Cyp2t1.bSep08</a>      | <a href="#">171380</a> | 1703  | 701  | 5 | 197 | cytochrome p450 monooxygenase CYP2T1 CRA a (Cyp2t1) alternative variant bSep08, mRNA.                        |
| <a href="#">Cyp2t1</a>      | <a href="#">Cyp2t1.cSep08</a>      | <a href="#">171380</a> | 1534  | 392  | 2 | 97  | cytochrome P450 monooxygenase CYP2T1 like (10.8 kD) (Cyp2t1) alternative variant cSep08, mRNA.               |
| <a href="#">Cyp2t1</a>      | <a href="#">Cyp2t1.dSep08</a>      | <a href="#">171380</a> | 961   | 740  | 2 | 90  | cytochrome p450 monooxygenase CYP2T1 CRA a (Cyp2t1) alternative variant dSep08, mRNA.                        |
| <a href="#">Cyp2w1</a>      | <a href="#">Cyp2w1.aSep08</a>      | <a href="#">288517</a> | 1680  | 457  |   | 151 | cytochrome P450, family 2, subfamily W, polypeptide 1 (Cyp2w1) mRNA.                                         |
| <a href="#">Cyp3a2</a>      | <a href="#">Cyp3a2.bSep08</a>      | <a href="#">266682</a> | 3389  | 629  | 1 | 64  | cytochrome P450, family 3, subfamily a, polypeptide 2 (Cyp3a2) alternative variant bSep08, mRNA.             |
| <a href="#">Cyp3a2</a>      | <a href="#">Cyp3a2.cSep08</a>      | <a href="#">266682</a> | 873   | 220  | 1 | 30  | cytochrome P450, family 3, subfamily a, polypeptide 2 (3.5 kD) (Cyp3a2) alternative variant cSep08, mRNA.    |
| <a href="#">Cyp3a9</a>      | <a href="#">Cyp3a9.bSep08</a>      | <a href="#">171352</a> | 14088 | 774  | 1 | 101 | cytochrome P450, family 3, subfamily a, polypeptide 9 (11.4 kD) (Cyp3a9) alternative variant bSep08, mRNA.   |
| <a href="#">Cyp3a23/3a1</a> | <a href="#">Cyp3a23/3a1.bSep08</a> | <a href="#">25642</a>  | 5341  | 927  | 6 | 220 | cytochrome p450 (Cyp3a23/3a1) alternative variant bSep08, mRNA.                                              |

|                             |                                    |                        |       |      |   |     |                                                                                                                                                                          |
|-----------------------------|------------------------------------|------------------------|-------|------|---|-----|--------------------------------------------------------------------------------------------------------------------------------------------------------------------------|
| <a href="#">Cyp3a23/3a1</a> | <a href="#">Cyp3a23/3a1.bSep08</a> | <a href="#">286929</a> | 5341  | 927  | 6 | 220 | cytochrome p450 (Cyp3a23/3a1) alternative variant bSep08, mRNA.                                                                                                          |
| <a href="#">Cyp4a3</a>      | <a href="#">Cyp4a3.aSep08</a>      | <a href="#">298423</a> | 8458  | 2143 | 9 | 386 | cytochrome P450, family 4, subfamily a, polypeptide 3 (Cyp4a3) alternative variant aSep08, mRNA.                                                                         |
| <a href="#">Cyp4a3</a>      | <a href="#">Cyp4a3.bSep08</a>      | <a href="#">298423</a> | 11808 | 967  | 7 | 317 | cytochrome P450, family 4, subfamily a, polypeptide 3 (Cyp4a3) alternative variant bSep08, mRNA.                                                                         |
| <a href="#">Cyp4a10.1</a>   | <a href="#">Cyp4a10.1.bSep08</a>   | <a href="#">50549</a>  | 5877  | 847  | 2 | 257 | cytochrome P450, family 4, subfamily a, polypeptide 10 and cytochrome P450, family 4, subfamily a, polypeptide 1 (Cyp4a10.1) alternative variant bSep08, mRNA.           |
| <a href="#">Cyp4a10.1</a>   | <a href="#">Cyp4a10.1.bSep08</a>   | <a href="#">170544</a> | 5877  | 847  | 2 | 257 | cytochrome P450, family 4, subfamily a, polypeptide 10 and cytochrome P450, family 4, subfamily a, polypeptide 1 (Cyp4a10.1) alternative variant bSep08, mRNA.           |
| <a href="#">Cyp4a10.1</a>   | <a href="#">Cyp4a10.1.cSep08</a>   | <a href="#">50549</a>  | 12131 | 1145 | 6 | 254 | cytochrome P450, family 4, subfamily a, polypeptide 10 and cytochrome P450, family 4, subfamily a, polypeptide 1 (28.9 kD) (Cyp4a10.1) alternative variant cSep08, mRNA. |
| <a href="#">Cyp4a10.1</a>   | <a href="#">Cyp4a10.1.cSep08</a>   | <a href="#">170544</a> | 12131 | 1145 | 6 | 254 | cytochrome P450, family 4, subfamily a, polypeptide 10 and cytochrome P450, family 4, subfamily a, polypeptide 1 (28.9 kD) (Cyp4a10.1) alternative variant cSep08, mRNA. |
| <a href="#">Cyp4b1</a>      | <a href="#">Cyp4b1.bSep08</a>      | <a href="#">24307</a>  | 5640  | 709  | 1 | 236 | cytochrome P450, family 4, subfamily b, polypeptide 1 (Cyp4b1) alternative variant bSep08, mRNA.                                                                         |
| <a href="#">Cyp4f1</a>      | <a href="#">Cyp4f1.bSep08</a>      | <a href="#">56266</a>  | 5127  | 911  | 1 | 220 | cytochrome P450, family 4, subfamily f, polypeptide 1 (Cyp4f1) alternative variant bSep08, mRNA.                                                                         |
| <a href="#">Cyp4f1</a>      | <a href="#">Cyp4f1.cSep08</a>      | <a href="#">56266</a>  | 1418  | 256  |   | 84  | cytochrome P450, family 4, subfamily f, polypeptide 1 (Cyp4f1) alternative variant cSep08, mRNA.                                                                         |
| <a href="#">Cyp4f6</a>      | <a href="#">Cyp4f6.bSep08</a>      | <a href="#">266689</a> | 8926  | 1166 | 7 | 263 | cytochrome p450 4F6 (30.3 kD) (Cyp4f6) alternative variant bSep08, mRNA.                                                                                                 |
| <a href="#">Cyp4f6</a>      | <a href="#">Cyp4f6.cSep08</a>      | <a href="#">266689</a> | 9068  | 1443 | 7 | 212 | cytochrome P450 4F6 (24.2 kD) (Cyp4f6) alternative variant cSep08, mRNA.                                                                                                 |
| <a href="#">Cyp4f6</a>      | <a href="#">Cyp4f6.dSep08</a>      | <a href="#">266689</a> | 20479 | 839  | 6 | 181 | cytochrome P450 4F6 (Cyp4f6) alternative variant dSep08, mRNA.                                                                                                           |
| <a href="#">Cyp4f17</a>     | <a href="#">Cyp4f17.aSep08</a>     | <a href="#">500801</a> | 6167  | 1590 | 2 | 335 | cytochrome P450, family 4, subfamily f, polypeptide 17 (Cyp4f17) alternative variant aSep08, mRNA.                                                                       |
| <a href="#">Cyp4f17</a>     | <a href="#">Cyp4f17.bSep08</a>     | <a href="#">500801</a> | 1769  | 853  | 1 | 140 | cytochrome P450, family 4, subfamily f, polypeptide 17 (Cyp4f17) alternative variant bSep08, mRNA.                                                                       |
| <a href="#">Cyp4f37</a>     | <a href="#">Cyp4f37.aSep08</a>     | <a href="#">691312</a> | 3969  | 745  |   | 183 | cytochrome P450, family 4, subfamily f, polypeptide 37 (Cyp4f37) mRNA.                                                                                                   |
| <a href="#">Cyp4f39</a>     | <a href="#">Cyp4f39.aSep08</a>     | <a href="#">299566</a> | 16320 | 756  |   | 251 | cytochrome P450, family 4, subfamily f, polypeptide 39 (Cyp4f39) mRNA.                                                                                                   |
| <a href="#">Cyp4v3</a>      | <a href="#">Cyp4v3.aSep08</a>      | <a href="#">266761</a> | 24938 | 3191 |   | 525 | cytochrome P450, family 4, subfamily v, polypeptide 3 (60.6 kD) (Cyp4v3) mRNA.                                                                                           |
| <a href="#">Cyp11a1</a>     | <a href="#">Cyp11a1.bSep08</a>     | <a href="#">29680</a>  | 4647  | 700  | 5 | 233 | cytochrome P450, family 11, subfamily a, polypeptide 1 (Cyp11a1) alternative variant bSep08, mRNA.                                                                       |
| <a href="#">Cyp11a1</a>     | <a href="#">Cyp11a1.cSep08</a>     | <a href="#">29680</a>  | 2514  | 1355 | 4 | 197 | cytochrome P450, family 11, subfamily a, polypeptide 1 (22.9 kD) (Cyp11a1) alternative variant cSep08, mRNA.                                                             |
| <a href="#">Cyp11a1</a>     | <a href="#">Cyp11a1.dSep08</a>     | <a href="#">29680</a>  | 4554  | 708  | 4 | 150 | cytochrome P450, family 11, subfamily a, polypeptide 1 (Cyp11a1) alternative variant dSep08, mRNA.                                                                       |



|                            |                                   |                        |        |      |    |     |                                                                                                              |
|----------------------------|-----------------------------------|------------------------|--------|------|----|-----|--------------------------------------------------------------------------------------------------------------|
| <a href="#">Cyp11a1</a>    | <a href="#">Cyp11a1.eSep08</a>    | <a href="#">29680</a>  | 6128   | 760  | 6  | 148 | cytochrome P450, family 11, subfamily a, polypeptide 1 (Cyp11a1) alternative variant eSep08, mRNA.           |
| <a href="#">Cyp11a1</a>    | <a href="#">Cyp11a1.fSep08</a>    | <a href="#">29680</a>  | 5388   | 763  | 3  |     |                                                                                                              |
| <a href="#">Cyp17a1</a>    | <a href="#">Cyp17a1.bSep08</a>    | <a href="#">25146</a>  | 2508   | 855  | 5  | 285 | cytochrome P450, family 17, subfamily a, polypeptide 1 (Cyp17a1) alternative variant bSep08, mRNA.           |
| <a href="#">Cyp17a1</a>    | <a href="#">Cyp17a1.cSep08</a>    | <a href="#">25146</a>  | 4085   | 870  | 4  | 215 | cytochrome P450, family 17, subfamily a, polypeptide 1 (Cyp17a1) alternative variant cSep08, mRNA.           |
| <a href="#">Cyp20a1</a>    | <a href="#">Cyp20a1.bSep08</a>    | <a href="#">316435</a> | 40702  | 725  |    | 148 | cytochrome P450, family 20, subfamily A, polypeptide 1 (Cyp20a1) alternative variant bSep08, mRNA.           |
| <a href="#">Cyp24a1</a>    | <a href="#">Cyp24a1.bSep08</a>    | <a href="#">25279</a>  | 8580   | 780  | 7  | 223 | cytochrome P450 family 24 subfamily a polypeptide 1 (Cyp24a1) alternative variant bSep08, mRNA.              |
| <a href="#">Cyp24a1</a>    | <a href="#">Cyp24a1.cSep08</a>    | <a href="#">25279</a>  | 1640   | 441  | 3  | 124 | putative protein (Cyp24a1) alternative variant cSep08, mRNA.                                                 |
| <a href="#">Cyp27a1</a>    | <a href="#">Cyp27a1.bSep08</a>    | <a href="#">301517</a> | 2083   | 693  | 2  | 121 | cytochrome p450 family 27 subfamily a polypeptide 1 (Cyp27a1) alternative variant bSep08, mRNA.              |
| <a href="#">Cyp27a1</a>    | <a href="#">Cyp27a1.cSep08</a>    | <a href="#">301517</a> | 1981   | 739  | 1  | 110 | cytochrome p450 family 27 subfamily a polypeptide 1 (Cyp27a1) alternative variant cSep08, mRNA.              |
| <a href="#">Cyp46a1</a>    | <a href="#">Cyp46a1.aSep08</a>    | <a href="#">362782</a> | 27169  | 2160 | 15 | 500 | cytochrome P450, family 46, subfamily a, polypeptide 1 (56.7 kD) (Cyp46a1) alternative variant aSep08, mRNA. |
| <a href="#">Cystatin.0</a> | <a href="#">Cystatin.0.aSep08</a> |                        | 1961   | 437  |    | 104 | kininogen 2 (Cystatin.0) mRNA.                                                                               |
| <a href="#">Cystatin.1</a> | <a href="#">Cystatin.1.aSep08</a> |                        | 3930   | 404  |    | 134 | histidine-rich glycoprotein (Cystatin.1) mRNA.                                                               |
| <a href="#">Cyt11</a>      | <a href="#">Cyt11.bSep08</a>      | <a href="#">498392</a> | 2255   | 727  | 2  | 110 | cytokine like 1 (Cyt11) alternative variant bSep08, mRNA.                                                    |
| <a href="#">D2hgdh</a>     | <a href="#">D2hgdh.aSep08</a>     | <a href="#">301624</a> | 18588  | 2811 | 9  | 542 | D-2-hydroxyglutarate dehydrogenase (D2hgdh) alternative variant aSep08, mRNA.                                |
| <a href="#">D2hgdh</a>     | <a href="#">D2hgdh.cSep08</a>     | <a href="#">301624</a> | 8968   | 833  | 5  | 277 | D-2-hydroxyglutarate dehydrogenase (D2hgdh) alternative variant cSep08, mRNA.                                |
| <a href="#">D2hgdh</a>     | <a href="#">D2hgdh.dSep08</a>     | <a href="#">301624</a> | 1055   | 314  | 2  | 104 | D-2-hydroxyglutarate dehydrogenase (D2hgdh) alternative variant dSep08, mRNA.                                |
| <a href="#">Daam1</a>      | <a href="#">Daam1.bSep08</a>      | <a href="#">314212</a> | 4673   | 1034 | 3  | 181 | activator of morphogenesis 1 (21.2 kD) (Daam1) alternative variant bSep08, mRNA.                             |
| <a href="#">Daam1</a>      | <a href="#">Daam1.cSep08</a>      | <a href="#">314212</a> | 8788   | 526  | 4  | 149 | activator of morphogenesis 1 (Daam1) alternative variant cSep08, mRNA.                                       |
| <a href="#">Daam1</a>      | <a href="#">Daam1.dSep08</a>      | <a href="#">314212</a> | 112987 | 610  | 5  | 136 | activator of morphogenesis 1 (Daam1) alternative variant dSep08, mRNA.                                       |
| <a href="#">Daam1</a>      | <a href="#">Daam1.fSep08</a>      | <a href="#">314212</a> | 22046  | 452  | 3  | 106 | activator of morphogenesis 1 (Daam1) alternative variant fSep08, mRNA.                                       |
| <a href="#">Daam1</a>      | <a href="#">Daam1.gSep08</a>      | <a href="#">314212</a> | 84338  | 384  | 3  | 75  | activator of morphogenesis 1 (Daam1) alternative variant gSep08, mRNA.                                       |
| <a href="#">Daam1</a>      | <a href="#">Daam1.hSep08</a>      | <a href="#">314212</a> | 63711  | 426  | 3  | 71  | putative protein (Daam1) alternative variant hSep08, mRNA.                                                   |
| <a href="#">Daam2</a>      | <a href="#">Daam2.aSep08</a>      | <a href="#">316201</a> | 7620   | 1800 | 5  | 509 | dishevelled associated activator of morphogenesis 2 (Daam2) alternative variant aSep08, mRNA.                |
| <a href="#">Daam2</a>      | <a href="#">Daam2.bSep08</a>      | <a href="#">316201</a> | 19190  | 1299 | 7  | 290 | dishevelled associated activator of morphogenesis 2 (Daam2) alternative variant bSep08, mRNA.                |
| <a href="#">Daam2</a>      | <a href="#">Daam2.cSep08</a>      | <a href="#">316201</a> | 2167   | 553  | 3  | 154 | dishevelled associated activator of morphogenesis 2 (Daam2) alternative variant cSep08, mRNA.                |

|                            |                                   |                        |        |      |   |     |                                                                                                             |
|----------------------------|-----------------------------------|------------------------|--------|------|---|-----|-------------------------------------------------------------------------------------------------------------|
| <a href="#">Daam2</a>      | <a href="#">Daam2.dSep08</a>      | <a href="#">316201</a> | 3899   | 383  | 1 | 113 | dishevelled associated activator of morphogenesis 2 (Daam2) alternative variant dSep08, mRNA.               |
| <a href="#">Daam2</a>      | <a href="#">Daam2.fSep08</a>      | <a href="#">316201</a> | 4902   | 542  | 5 | 48  | dishevelled associated activator of morphogenesis 2 (Daam2) alternative variant fSep08, mRNA.               |
| <a href="#">Dab1</a>       | <a href="#">Dab1.bSep08</a>       | <a href="#">266729</a> | 309892 | 1783 | 5 | 535 | disabled homolog 1 (Drosophila) (Dab1) alternative variant bSep08, mRNA.                                    |
| <a href="#">Dab1</a>       | <a href="#">Dab1.cSep08</a>       | <a href="#">266729</a> | 14307  | 1855 | 4 | 132 | disabled homolog 1 (Drosophila) (Dab1) alternative variant cSep08, mRNA.                                    |
| <a href="#">Dab1</a>       | <a href="#">Dab1.dSep08</a>       | <a href="#">266729</a> | 1679   | 571  | 3 | 115 | disabled homolog 1 (Drosophila) (Dab1) alternative variant dSep08, mRNA.                                    |
| <a href="#">Dab2</a>       | <a href="#">Dab2.bSep08</a>       | <a href="#">79128</a>  | 6126   | 2007 | 2 | 182 | disabled homolog 2, mitogen-responsive phosphoprotein (Drosophila) (Dab2) alternative variant bSep08, mRNA. |
| <a href="#">Dab2</a>       | <a href="#">Dab2.cSep08</a>       | <a href="#">79128</a>  | 2474   | 570  | 5 | 127 | disabled homolog 2, mitogen-responsive phosphoprotein (Drosophila) (Dab2) alternative variant cSep08, mRNA. |
| <a href="#">Dab2ip</a>     | <a href="#">Dab2ip.bSep08</a>     | <a href="#">192126</a> | 18173  | 674  | 4 | 224 | disabled homolog 2 (Drosophila) interacting protein (Dab2ip) alternative variant bSep08, mRNA.              |
| <a href="#">Dab2ip</a>     | <a href="#">Dab2ip.cSep08</a>     | <a href="#">192126</a> | 1544   | 515  | 2 | 171 | disabled homolog 2 (Drosophila) interacting protein (Dab2ip) alternative variant cSep08, mRNA.              |
| <a href="#">Dab2ip</a>     | <a href="#">Dab2ip.dSep08</a>     | <a href="#">192126</a> | 5223   | 750  | 3 | 151 | disabled homolog 2 (Drosophila) interacting protein (Dab2ip) alternative variant dSep08, mRNA.              |
| <a href="#">Dab2ip</a>     | <a href="#">Dab2ip.eSep08</a>     | <a href="#">192126</a> | 933    | 444  | 2 | 47  | disabled homolog 2 (Drosophila) interacting protein (Dab2ip) alternative variant eSep08, mRNA.              |
| <a href="#">daby</a>       | <a href="#">daby.aSep08</a>       |                        | 7530   | 684  |   | 114 | dedicator of cytokinesis 11 (daby) mRNA.                                                                    |
| <a href="#">dachy</a>      | <a href="#">dachy.aSep08</a>      |                        | 563    | 320  |   | 97  | putative protein (dachy) mRNA.                                                                              |
| <a href="#">Dact1</a>      | <a href="#">Dact1.aSep08</a>      | <a href="#">500666</a> | 10251  | 2306 | 4 | 656 | dapper homolog 1, antagonist of beta-catenin (xenopus) (Dact1) alternative variant aSep08, mRNA.            |
| <a href="#">Dact1</a>      | <a href="#">Dact1.cSep08</a>      | <a href="#">500666</a> | 8321   | 648  | 1 | 48  | dapper homolog 1, antagonist of beta-catenin (xenopus) (Dact1) alternative variant cSep08, mRNA.            |
| <a href="#">Dact2</a>      | <a href="#">Dact2.bSep08</a>      | <a href="#">308212</a> | 7197   | 462  | 1 | 154 | dapper homolog 2, antagonist of beta-catenin (xenopus) (Dact2) alternative variant bSep08, mRNA.            |
| <a href="#">dafer</a>      | <a href="#">dafer.aSep08</a>      |                        | 29072  | 320  |   | 54  | putative protein (dafer) mRNA.                                                                              |
| <a href="#">daflo</a>      | <a href="#">daflo.aSep08</a>      |                        | 23697  | 498  |   | 69  | putative protein (daflo) mRNA.                                                                              |
| <a href="#">daflu</a>      | <a href="#">daflu.aSep08</a>      |                        | 604    | 410  |   | 94  | putative mitochondrial protein (10.0 kD) (daflu) mRNA.                                                      |
| <a href="#">Dag1</a>       | <a href="#">Dag1.aSep08</a>       | <a href="#">114489</a> | 12684  | 5171 |   | 893 | dystroglycan 1 (96.7 kD) (Dag1) mRNA.                                                                       |
| <a href="#">DAGK_acc.0</a> | <a href="#">DAGK_acc.0.aSep08</a> |                        | 8172   | 337  |   | 112 | diacylglycerol kinase eta CRA d (DAGK_acc.0) mRNA.                                                          |
| <a href="#">DAGK_acc.1</a> | <a href="#">DAGK_acc.1.aSep08</a> |                        | 2764   | 2192 |   | 184 | diacylglycerol kinase theta CRA a (DAGK_acc.1) mRNA.                                                        |
| <a href="#">DAGK_cat.0</a> | <a href="#">DAGK_cat.0.aSep08</a> |                        | 1047   | 709  | 2 | 149 | diacylglycerol kinase theta (DAGK_cat.0) alternative variant aSep08, mRNA.                                  |
| <a href="#">DAGK_cat.0</a> | <a href="#">DAGK_cat.0.bSep08</a> |                        | 495    | 285  | 1 | 94  | diacylglycerol kinase theta (DAGK_cat.0) alternative variant bSep08, mRNA.                                  |
| <a href="#">DAGK_cat.1</a> | <a href="#">DAGK_cat.1.aSep08</a> |                        | 7276   | 678  | 5 | 226 | diacylglycerol kinase delta (DAGK_cat.1) alternative variant aSep08, mRNA.                                  |
| <a href="#">DAGK_cat.1</a> | <a href="#">DAGK_cat.1.bSep08</a> |                        | 2833   | 537  | 1 | 127 | diacylglycerol kinase delta (DAGK_cat.1) alternative variant bSep08, mRNA.                                  |
| <a href="#">Dagla</a>      | <a href="#">Dagla.bSep08</a>      | <a href="#">309207</a> | 1582   | 522  | 2 | 132 | diacylglycerol lipase, alpha (Dagla) alternative variant bSep08, mRNA.                                      |

|                        |                               |                        |       |      |    |      |                                                                                            |
|------------------------|-------------------------------|------------------------|-------|------|----|------|--------------------------------------------------------------------------------------------|
| <a href="#">Daglb</a>  | <a href="#">Daglb.bSep08</a>  | <a href="#">304289</a> | 8736  | 808  | 2  | 261  | diacylglycerol lipase, beta (Daglb) alternative variant bSep08, mRNA.                      |
| <a href="#">Dak</a>    | <a href="#">Dak.bSep08</a>    | <a href="#">361730</a> | 13855 | 2990 | 18 | 365  | dihydroxyacetone kinase 2 (37.9 kD) (Dak) alternative variant bSep08, complete mRNA.       |
| <a href="#">Dak</a>    | <a href="#">Dak.cSep08</a>    | <a href="#">361730</a> | 10688 | 1161 | 11 | 308  | dihydroxyacetone kinase 2 (Dak) alternative variant cSep08, mRNA.                          |
| <a href="#">Dak</a>    | <a href="#">Dak.dSep08</a>    | <a href="#">361730</a> | 7579  | 802  | 6  | 267  | dihydroxyacetone kinase 2 (Dak) alternative variant dSep08, mRNA.                          |
| <a href="#">Dak</a>    | <a href="#">Dak.eSep08</a>    | <a href="#">361730</a> | 8694  | 768  | 7  | 255  | dihydroxyacetone kinase 2 (Dak) alternative variant eSep08, mRNA.                          |
| <a href="#">Dak</a>    | <a href="#">Dak.fSep08</a>    | <a href="#">361730</a> | 3184  | 794  | 9  | 241  | dihydroxyacetone kinase 2 (Dak) alternative variant fSep08, mRNA.                          |
| <a href="#">Dak</a>    | <a href="#">Dak.gSep08</a>    | <a href="#">361730</a> | 13235 | 448  | 4  | 122  | dihydroxyacetone kinase 2 (Dak) alternative variant gSep08, mRNA.                          |
| <a href="#">Dak</a>    | <a href="#">Dak.hSep08</a>    | <a href="#">361730</a> | 3229  | 650  | 4  | 95   | putative protein (Dak) alternative variant hSep08, mRNA.                                   |
| <a href="#">dakee</a>  | <a href="#">dakee.aSep08</a>  |                        | 28285 | 1001 |    | 148  | phosphatidylinositol glycan anchor biosynthesis class N (dakee) mRNA.                      |
| <a href="#">daloy</a>  | <a href="#">daloy.aSep08</a>  |                        | 16889 | 742  | 2  | 162  | leukemia nup98 fusion partner 1 like (daloy) alternative variant aSep08, mRNA.             |
| <a href="#">daloy</a>  | <a href="#">daloy.bSep08</a>  |                        | 20637 | 537  | 3  | 68   | putative protein of mammalian origin (7.8 kD) (daloy) alternative variant bSep08, mRNA.    |
| <a href="#">Dalrd3</a> | <a href="#">Dalrd3.bSep08</a> | <a href="#">363146</a> | 1549  | 1435 | 2  | 192  | putative protein of vertebrate origin (21.0 kD) (Dalrd3) alternative variant bSep08, mRNA. |
| <a href="#">Dalrd3</a> | <a href="#">Dalrd3.cSep08</a> | <a href="#">363146</a> | 1194  | 1009 | 3  | 63   | putative protein of metazoan origin (7.3 kD) (Dalrd3) alternative variant cSep08, mRNA.    |
| <a href="#">damer</a>  | <a href="#">damer.aSep08</a>  |                        | 1589  | 938  |    | 43   | putative protein human specific (4.7 kD) (damer) mRNA.                                     |
| <a href="#">danoy</a>  | <a href="#">danoy.aSep08</a>  |                        | 39244 | 1035 |    | 51   | putative protein (6.0 kD) (danoy) mRNA.                                                    |
| <a href="#">Dao1</a>   | <a href="#">Dao1.aSep08</a>   | <a href="#">114027</a> | 20136 | 1100 | 6  | 329  | D-amino acid oxidase 1 (Dao1) alternative variant aSep08, mRNA.                            |
| <a href="#">Dao1</a>   | <a href="#">Dao1.bSep08</a>   | <a href="#">114027</a> | 12901 | 622  | 1  | 207  | D-amino acid oxidase 1 (Dao1) alternative variant bSep08, mRNA.                            |
| <a href="#">Dap</a>    | <a href="#">Dap.bSep08</a>    | <a href="#">64322</a>  | 13335 | 1728 | 3  | 97   | death-associated protein (Dap) alternative variant bSep08, mRNA.                           |
| <a href="#">Dap</a>    | <a href="#">Dap.dSep08</a>    | <a href="#">64322</a>  | 38362 | 438  | 3  | 56   | death-associated protein (6.2 kD) (Dap) alternative variant dSep08, complete mRNA.         |
| <a href="#">Dap3</a>   | <a href="#">Dap3.bSep08</a>   | <a href="#">295238</a> | 26914 | 1109 | 8  | 197  | death associated protein 3 (22.4 kD) (Dap3) alternative variant bSep08, mRNA.              |
| <a href="#">Dap3</a>   | <a href="#">Dap3.cSep08</a>   | <a href="#">295238</a> | 21317 | 740  | 7  | 194  | death associated protein 3 (Dap3) alternative variant cSep08, mRNA.                        |
| <a href="#">Dap3</a>   | <a href="#">Dap3.dSep08</a>   | <a href="#">295238</a> | 396   | 321  | 2  | 106  | death associated protein 3 (Dap3) alternative variant dSep08, mRNA.                        |
| <a href="#">Dap3</a>   | <a href="#">Dap3.eSep08</a>   | <a href="#">295238</a> | 2174  | 835  | 2  | 74   | death associated protein 3 (8.8 kD) (Dap3) alternative variant eSep08, mRNA.               |
| <a href="#">Dap3</a>   | <a href="#">Dap3.fSep08</a>   | <a href="#">295238</a> | 2967  | 702  | 3  | 42   | death associated protein 3 (Dap3) alternative variant fSep08, mRNA.                        |
| <a href="#">Dapk1</a>  | <a href="#">Dapk1.aSep08</a>  | <a href="#">306722</a> | 52840 | 4937 | 19 | 1207 | death associated protein kinase 1 (Dapk1) alternative variant aSep08, mRNA.                |

|                         |                                |                        |        |      |   |     |                                                                                        |
|-------------------------|--------------------------------|------------------------|--------|------|---|-----|----------------------------------------------------------------------------------------|
| <a href="#">Dapk1</a>   | <a href="#">Dapk1.cSep08</a>   | <a href="#">306722</a> | 105779 | 519  | 4 | 120 | death associated protein kinase 1 (Dapk1) alternative variant cSep08, mRNA.            |
| <a href="#">Dapk2</a>   | <a href="#">Dapk2.aSep08</a>   | <a href="#">300799</a> | 101528 | 849  | 8 | 282 | death-associated kinase 2 (Dapk2) alternative variant aSep08, mRNA.                    |
| <a href="#">Dapk2</a>   | <a href="#">Dapk2.bSep08</a>   | <a href="#">300799</a> | 94347  | 729  | 6 | 243 | death-associated kinase 2 (Dapk2) alternative variant bSep08, mRNA.                    |
| <a href="#">Dapk2</a>   | <a href="#">Dapk2.dSep08</a>   | <a href="#">300799</a> | 18796  | 1108 | 6 | 162 | death-associated kinase 2 (18.9 kD) (Dapk2) alternative variant dSep08, mRNA.          |
| <a href="#">Dapk2</a>   | <a href="#">Dapk2.eSep08</a>   | <a href="#">300799</a> | 4151   | 784  | 3 | 38  | death-associated kinase 2 (4.5 kD) (Dapk2) alternative variant eSep08, mRNA.           |
| <a href="#">Dapk3</a>   | <a href="#">Dapk3.bSep08</a>   | <a href="#">64391</a>  | 6189   | 1408 | 4 | 286 | death-associated protein kinase 3 (32.3 kD) (Dapk3) alternative variant bSep08, mRNA.  |
| <a href="#">Dapk3</a>   | <a href="#">Dapk3.cSep08</a>   | <a href="#">64391</a>  | 6001   | 1043 | 3 | 259 | death-associated protein kinase 3 (29.1 kD) (Dapk3) alternative variant cSep08, mRNA.  |
| <a href="#">Dapk3</a>   | <a href="#">Dapk3.dSep08</a>   | <a href="#">64391</a>  | 6166   | 795  | 6 | 209 | death-associated protein kinase 3 (Dapk3) alternative variant dSep08, mRNA.            |
| <a href="#">Dapk3</a>   | <a href="#">Dapk3.eSep08</a>   | <a href="#">64391</a>  | 6343   | 753  | 6 | 209 | death-associated protein kinase 3 (Dapk3) alternative variant eSep08, mRNA.            |
| <a href="#">Dapk3</a>   | <a href="#">Dapk3.fSep08</a>   | <a href="#">64391</a>  | 5918   | 791  | 5 | 184 | death-associated protein kinase 3 (Dapk3) alternative variant fSep08, mRNA.            |
| <a href="#">Dapk3</a>   | <a href="#">Dapk3.gSep08</a>   | <a href="#">64391</a>  | 5353   | 728  | 3 | 61  | death-associated protein kinase 3 (6.4 kD) (Dapk3) alternative variant gSep08, mRNA.   |
| <a href="#">dapor</a>   | <a href="#">dapor.aSep08</a>   |                        | 1939   | 357  |   | 119 | pleckstrin homology-like domain family B member 1 CRA a (dapor) mRNA.                  |
| <a href="#">darby</a>   | <a href="#">darby.aSep08</a>   |                        | 9291   | 617  |   | 205 | WD repeat domain 44 (darby) mRNA.                                                      |
| <a href="#">darchy</a>  | <a href="#">darchy.aSep08</a>  |                        | 11997  | 388  | 1 | 78  | putative protein (darchy) alternative variant aSep08, mRNA.                            |
| <a href="#">darchy</a>  | <a href="#">darchy.bSep08</a>  |                        | 8320   | 245  | 1 | 14  | putative protein (darchy) alternative variant bSep08, mRNA.                            |
| <a href="#">darfer</a>  | <a href="#">darfer.aSep08</a>  |                        | 7443   | 1783 |   | 22  | putative protein (darfer) alternative variant aSep08, mRNA.                            |
| <a href="#">darfer</a>  | <a href="#">darfer.bSep08</a>  |                        | 4275   | 485  |   | 36  | putative protein (darfer) alternative variant bSep08, mRNA.                            |
| <a href="#">darflo</a>  | <a href="#">darflo.aSep08</a>  |                        | 26034  | 506  |   | 168 | bnip2 motif-containing molecule at the c-terminal region 1 (darflo) mRNA.              |
| <a href="#">darflu</a>  | <a href="#">darflu.aSep08</a>  |                        | 1921   | 691  |   | 230 | n-methyltransferase mll4 like (darflu) mRNA.                                           |
| <a href="#">darkee</a>  | <a href="#">darkee.aSep08</a>  |                        | 16098  | 483  |   | 104 | putative protein (darkee) mRNA.                                                        |
| <a href="#">darloy</a>  | <a href="#">darloy.aSep08</a>  |                        | 10980  | 758  |   | 252 | specific 7 (darloy) mRNA.                                                              |
| <a href="#">darmer</a>  | <a href="#">darmer.aSep08</a>  |                        | 1764   | 259  |   | 85  | rap guanine nucleotide exchange factor -like 1 (darmer) mRNA.                          |
| <a href="#">darnoy</a>  | <a href="#">darnoy.aSep08</a>  |                        | 1999   | 838  |   | 120 | putative nuclear protein (12.9 kD) (darnoy) mRNA.                                      |
| <a href="#">darpor</a>  | <a href="#">darpor.aSep08</a>  |                        | 11855  | 625  |   | 208 | CRA a (darpor) mRNA.                                                                   |
| <a href="#">darsa</a>   | <a href="#">darsa.aSep08</a>   |                        | 1459   | 431  |   | 109 | putative protein (darsa) mRNA.                                                         |
| <a href="#">darshee</a> | <a href="#">darshee.aSep08</a> |                        | 542    | 312  |   | 38  | putative protein (4.3 kD) (darshee) mRNA.                                              |
| <a href="#">darto</a>   | <a href="#">darto.aSep08</a>   |                        | 3452   | 855  |   | 285 | necrosis factor alpha-induced protein 2 like (darto) alternative variant aSep08, mRNA. |
| <a href="#">darto</a>   | <a href="#">darto.bSep08</a>   |                        | 2249   | 513  |   | 170 | necrosis factor alpha-induced protein 2 like (darto) alternative variant bSep08, mRNA. |

|                         |                                |                        |        |      |   |     |                                                                                                    |
|-------------------------|--------------------------------|------------------------|--------|------|---|-----|----------------------------------------------------------------------------------------------------|
| <a href="#">darvar</a>  | <a href="#">darvar.aSep08</a>  |                        | 477    | 361  |   | 41  | putative protein (darvar) mRNA.                                                                    |
| <a href="#">darwey</a>  | <a href="#">darwey.aSep08</a>  |                        | 1309   | 546  | 3 | 86  | putative protein (9.1 kD) (darwey) alternative variant aSep08, mRNA.                               |
| <a href="#">dasa</a>    | <a href="#">dasa.aSep08</a>    |                        | 2549   | 650  |   | 216 | regulator of G-protein 22 (dasa) mRNA.                                                             |
| <a href="#">dashee</a>  | <a href="#">dashee.aSep08</a>  |                        | 47712  | 666  |   | 50  | putative protein (dashee) mRNA.                                                                    |
| <a href="#">dato</a>    | <a href="#">dato.aSep08</a>    |                        | 8298   | 431  |   | 21  | putative protein (2.3 kD) (dato) mRNA.                                                             |
| <a href="#">davar</a>   | <a href="#">davar.aSep08</a>   |                        | 2811   | 387  |   | 41  | putative protein (4.5 kD) (davar) mRNA.                                                            |
| <a href="#">dawby</a>   | <a href="#">dawby.aSep08</a>   |                        | 27177  | 365  |   | 69  | putative protein (dawby) mRNA.                                                                     |
| <a href="#">dawchy</a>  | <a href="#">dawchy.bSep08</a>  |                        | 7953   | 752  | 4 | 122 | putative protein human specific (dawchy) alternative variant bSep08, mRNA.                         |
| <a href="#">dawchy</a>  | <a href="#">dawchy.cSep08</a>  |                        | 3314   | 709  | 2 | 94  | putative mitochondrial protein human specific (10.2 kD) (dawchy) alternative variant cSep08, mRNA. |
| <a href="#">dawey</a>   | <a href="#">dawey.aSep08</a>   |                        | 19055  | 487  |   | 35  | putative protein (4.3 kD) (dawey) mRNA.                                                            |
| <a href="#">dawfer</a>  | <a href="#">dawfer.aSep08</a>  |                        | 10795  | 589  |   | 88  | putative protein (dawfer) mRNA.                                                                    |
| <a href="#">dawflo</a>  | <a href="#">dawflo.aSep08</a>  |                        | 980    | 678  |   | 121 | putative protein (13.4 kD) (dawflo) mRNA.                                                          |
| <a href="#">dawflu</a>  | <a href="#">dawflu.aSep08</a>  |                        | 4630   | 1060 |   | 275 | uncharacterized protein (dawflu) mRNA.                                                             |
| <a href="#">dawkee</a>  | <a href="#">dawkee.aSep08</a>  |                        | 3011   | 1083 |   | 156 | putative protein of mammalian origin (dawkee) mRNA.                                                |
| <a href="#">dawloy</a>  | <a href="#">dawloy.aSep08</a>  |                        | 599    | 253  |   | 59  | putative protein (dawloy) mRNA.                                                                    |
| <a href="#">dawmer</a>  | <a href="#">dawmer.aSep08</a>  |                        | 29961  | 1793 |   |     |                                                                                                    |
| <a href="#">dawnoy</a>  | <a href="#">dawnoy.aSep08</a>  |                        | 1681   | 1132 |   | 113 | protein tyrosine phosphatase non-receptor type 18 CRA e (dawnoy) mRNA.                             |
| <a href="#">dawpor</a>  | <a href="#">dawpor.aSep08</a>  |                        | 1983   | 762  |   | 239 | CRA c (dawpor) mRNA.                                                                               |
| <a href="#">dawsa</a>   | <a href="#">dawsa.aSep08</a>   |                        | 7991   | 1768 |   | 60  | putative protein (6.9 kD) (dawsa) mRNA.                                                            |
| <a href="#">dawshee</a> | <a href="#">dawshee.aSep08</a> |                        | 108556 | 355  |   | 25  | putative protein (2.8 kD) (dawshee) mRNA.                                                          |
| <a href="#">dawto</a>   | <a href="#">dawto.aSep08</a>   |                        | 56148  | 757  | 2 | 60  | putative protein (dawto) mRNA.                                                                     |
| <a href="#">dawvar</a>  | <a href="#">dawvar.aSep08</a>  |                        | 2301   | 386  |   | 128 | apolipoprotein E receptor 2 (dawvar) mRNA.                                                         |
| <a href="#">dawwey</a>  | <a href="#">dawwey.aSep08</a>  |                        | 2268   | 1248 |   | 64  | putative protein (dawwey) mRNA.                                                                    |
| <a href="#">Daxx</a>    | <a href="#">Daxx.cSep08</a>    | <a href="#">140926</a> | 1853   | 501  | 3 | 104 | fas death domain-associated protein (Daxx) alternative variant cSep08, mRNA.                       |
| <a href="#">Daxx</a>    | <a href="#">Daxx.dSep08</a>    | <a href="#">140926</a> | 1852   | 600  | 2 | 87  | fas death domain-associated protein (9.2 kD) (Daxx) alternative variant dSep08, mRNA.              |
| <a href="#">Dazap1</a>  | <a href="#">Dazap1.bSep08</a>  | <a href="#">362836</a> | 8030   | 2228 | 6 | 234 | DAZ associated protein 1 (24.0 kD) (Dazap1) alternative variant bSep08, mRNA.                      |
| <a href="#">Dazap1</a>  | <a href="#">Dazap1.cSep08</a>  | <a href="#">362836</a> | 16101  | 695  | 7 | 156 | DAZ associated protein 1 (17.3 kD) (Dazap1) alternative variant cSep08, mRNA.                      |
| <a href="#">Dazap2</a>  | <a href="#">Dazap2.aSep08</a>  | <a href="#">300235</a> | 4644   | 1171 | 5 | 234 | DAZ associated protein 2 (24.6 kD) (Dazap2) alternative variant aSep08, mRNA.                      |
| <a href="#">Dazap2</a>  | <a href="#">Dazap2.bSep08</a>  | <a href="#">300235</a> | 4440   | 623  | 5 | 207 | DAZ associated protein 2 (Dazap2) alternative variant bSep08, mRNA.                                |
| <a href="#">Dazap2</a>  | <a href="#">Dazap2.cSep08</a>  | <a href="#">300235</a> | 4442   | 862  | 5 | 168 | DAZ associated protein 2 (17.3 kD) (Dazap2) alternative variant cSep08, mRNA.                      |
| <a href="#">Dazap2</a>  | <a href="#">Dazap2.dSep08</a>  | <a href="#">300235</a> | 4263   | 914  | 4 | 168 | DAZ associated protein 2 (17.3 kD) (Dazap2) alternative variant dSep08, mRNA.                      |

|                        |                               |                        |       |      |    |     |                                                                                                            |
|------------------------|-------------------------------|------------------------|-------|------|----|-----|------------------------------------------------------------------------------------------------------------|
| <a href="#">Dazap2</a> | <a href="#">Dazap2.eSep08</a> | <a href="#">300235</a> | 2912  | 1079 | 3  | 167 | DAZ associated protein 2 (17.4 kD) (Dazap2) alternative variant eSep08, mRNA.                              |
| <a href="#">Dazap2</a> | <a href="#">Dazap2.gSep08</a> | <a href="#">300235</a> | 5513  | 1673 | 4  | 139 | DAZ associated protein 2 (Dazap2) alternative variant gSep08, mRNA.                                        |
| <a href="#">Dazap2</a> | <a href="#">Dazap2.hSep08</a> | <a href="#">300235</a> | 4387  | 736  | 4  | 108 | DAZ associated protein 2 (10.8 kD) (Dazap2) alternative variant hSep08, mRNA.                              |
| <a href="#">Dazap2</a> | <a href="#">Dazap2.iSep08</a> | <a href="#">300235</a> | 4337  | 742  | 3  | 86  | DAZ associated protein 2 (9.2 kD) (Dazap2) alternative variant iSep08, mRNA.                               |
| <a href="#">Dazl</a>   | <a href="#">Dazl.bSep08</a>   | <a href="#">680486</a> | 7551  | 700  | 1  | 126 | deleted in azoospermia-like (Dazl) alternative variant bSep08, mRNA.                                       |
| <a href="#">Dbf4</a>   | <a href="#">Dbf4.aSep08</a>   | <a href="#">312046</a> | 15861 | 1667 |    | 543 | DBF4 homolog (S. cerevisiae) (Dbf4) mRNA.                                                                  |
| <a href="#">Dbh</a>    | <a href="#">Dbh.bSep08</a>    | <a href="#">25699</a>  | 5663  | 970  | 1  | 200 | dopamine beta hydroxylase (Dbh) alternative variant bSep08, mRNA.                                          |
| <a href="#">Dbi</a>    | <a href="#">Dbi.aSep08</a>    | <a href="#">25045</a>  | 5014  | 761  | 2  | 115 | diazepam binding inhibitor (Dbi) alternative variant aSep08, mRNA.                                         |
| <a href="#">Dbi</a>    | <a href="#">Dbi.cSep08</a>    | <a href="#">25045</a>  | 7626  | 454  | 3  | 63  | diazepam binding inhibitor (7.3 kD) (Dbi) alternative variant cSep08, mRNA.                                |
| <a href="#">Dbn1</a>   | <a href="#">Dbn1.aSep08</a>   | <a href="#">81653</a>  | 14343 | 2907 | 14 | 702 | drebrin E2 (Dbn1) alternative variant aSep08, mRNA.                                                        |
| <a href="#">Dbn1</a>   | <a href="#">Dbn1.bSep08</a>   | <a href="#">81653</a>  | 8355  | 2197 | 10 | 535 | drebrin E2 (Dbn1) alternative variant bSep08, mRNA.                                                        |
| <a href="#">Dbn1</a>   | <a href="#">Dbn1.cSep08</a>   | <a href="#">81653</a>  | 6287  | 1382 | 5  | 218 | drebrin E2 (Dbn1) alternative variant cSep08, mRNA.                                                        |
| <a href="#">Dbn1</a>   | <a href="#">Dbn1.dSep08</a>   | <a href="#">81653</a>  | 5876  | 598  | 5  | 199 | drebrin 1 CRA b (Dbn1) alternative variant dSep08, mRNA.                                                   |
| <a href="#">Dbn1</a>   | <a href="#">Dbn1.eSep08</a>   | <a href="#">81653</a>  | 11595 | 585  | 7  | 178 | drebrin E2 (Dbn1) alternative variant eSep08, mRNA.                                                        |
| <a href="#">Dbn1</a>   | <a href="#">Dbn1.fSep08</a>   | <a href="#">81653</a>  | 4867  | 739  | 6  | 110 | drebrin E2 (Dbn1) alternative variant fSep08, mRNA.                                                        |
| <a href="#">Dbn1</a>   | <a href="#">Dbn1.gSep08</a>   | <a href="#">81653</a>  | 4608  | 414  | 2  | 63  | drebrin 1 CRA a (Dbn1) alternative variant gSep08, mRNA.                                                   |
| <a href="#">Dbnl</a>   | <a href="#">Dbnl.bSep08</a>   | <a href="#">83527</a>  | 14344 | 1597 | 13 | 432 | drebrin-like (48.3 kD) (Dbnl) alternative variant bSep08, mRNA.                                            |
| <a href="#">Dbnl</a>   | <a href="#">Dbnl.cSep08</a>   | <a href="#">83527</a>  | 13446 | 1175 | 12 | 390 | drebrin-like (Dbnl) alternative variant cSep08, mRNA.                                                      |
| <a href="#">Dbnl</a>   | <a href="#">Dbnl.dSep08</a>   | <a href="#">83527</a>  | 10321 | 976  | 5  | 178 | drebrin-like (19.1 kD) (Dbnl) alternative variant dSep08, complete mRNA.                                   |
| <a href="#">Dbnl</a>   | <a href="#">Dbnl.eSep08</a>   | <a href="#">83527</a>  | 5027  | 748  | 4  | 122 | drebrin-like (Dbnl) alternative variant eSep08, mRNA.                                                      |
| <a href="#">Dbnl</a>   | <a href="#">Dbnl.fSep08</a>   | <a href="#">83527</a>  | 4753  | 406  | 2  | 72  | drebrin-like (8.0 kD) (Dbnl) alternative variant fSep08, mRNA.                                             |
| <a href="#">Dbnl</a>   | <a href="#">Dbnl.gSep08</a>   | <a href="#">83527</a>  | 543   | 343  | 2  | 43  | putative protein (Dbnl) alternative variant gSep08, mRNA.                                                  |
| <a href="#">Dbp</a>    | <a href="#">Dbp.bSep08</a>    | <a href="#">24309</a>  | 1511  | 669  | 2  | 221 | D site albumin promoter binding protein (Dbp) alternative variant bSep08, mRNA.                            |
| <a href="#">Dbp</a>    | <a href="#">Dbp.cSep08</a>    | <a href="#">24309</a>  | 2210  | 722  | 3  | 154 | D site albumin promoter binding protein (Dbp) alternative variant cSep08, mRNA.                            |
| <a href="#">Dbt</a>    | <a href="#">Dbt.bSep08</a>    | <a href="#">29611</a>  | 16241 | 845  | 6  | 203 | dihydrolipoamide branched chain transacylase E2 (22.9 kD) (Dbt) alternative variant bSep08, complete mRNA. |
| <a href="#">Dcakd</a>  | <a href="#">Dcakd.bSep08</a>  | <a href="#">360639</a> | 25233 | 584  | 5  | 147 | dephospho-CoA kinase (Dcakd) alternative variant bSep08, mRNA.                                             |
| <a href="#">Dcakd</a>  | <a href="#">Dcakd.cSep08</a>  | <a href="#">360639</a> | 26447 | 941  | 4  | 119 | dephospho-CoA kinase (13.2 kD) (Dcakd) alternative variant cSep08, mRNA.                                   |
| <a href="#">Dcakd</a>  | <a href="#">Dcakd.dSep08</a>  | <a href="#">360639</a> | 16421 | 354  | 2  | 63  | putative protein of ancient origin (Dcakd) alternative variant dSep08, mRNA.                               |

|                         |                                |                        |       |      |   |     |                                                                                                                      |
|-------------------------|--------------------------------|------------------------|-------|------|---|-----|----------------------------------------------------------------------------------------------------------------------|
| <a href="#">Dcbl1</a>   | <a href="#">Dcbl1.aSep08</a>   | <a href="#">309773</a> | 15505 | 1690 | 6 | 318 | putative protein of eukaryotic origin (Dcbl1) alternative variant aSep08, mRNA.                                      |
| <a href="#">Dcdc5</a>   | <a href="#">Dcdc5.bSep08</a>   | <a href="#">295980</a> | 29913 | 872  | 5 | 53  | putative protein (Dcdc5) alternative variant bSep08, mRNA.                                                           |
| <a href="#">Dcdc5</a>   | <a href="#">Dcdc5.cSep08</a>   | <a href="#">295980</a> | 3686  | 480  | 2 | 36  | putative protein (4.1 kD) (Dcdc5) alternative variant cSep08, mRNA.                                                  |
| <a href="#">Dchs1</a>   | <a href="#">Dchs1.bSep08</a>   | <a href="#">308912</a> | 426   | 334  | 1 | 111 | dachsous 1 (Drosophila) (Dchs1) alternative variant bSep08, mRNA.                                                    |
| <a href="#">Dci</a>     | <a href="#">Dci.bSep08</a>     | <a href="#">29740</a>  | 12617 | 613  | 4 | 203 | dodecenoyl-Coenzyme A delta isomerase (3,2 trans-enoyl-Coenzyme A isomerase) (Dci) alternative variant bSep08, mRNA. |
| <a href="#">Dclk1</a>   | <a href="#">Dclk1.aSep08</a>   | <a href="#">83825</a>  | 48636 | 932  | 7 | 310 | doublecortin-like kinase 1 (Dclk1) alternative variant aSep08, mRNA.                                                 |
| <a href="#">Dclk1</a>   | <a href="#">Dclk1.bSep08</a>   | <a href="#">83825</a>  | 29357 | 406  |   | 112 | doublecortin-like kinase 1 (Dclk1) alternative variant bSep08, mRNA.                                                 |
| <a href="#">Dclk2</a>   | <a href="#">Dclk2.bSep08</a>   | <a href="#">310698</a> | 23676 | 522  | 7 | 174 | doublecortin-like kinase 2 (Dclk2) alternative variant bSep08, mRNA.                                                 |
| <a href="#">Dclk2</a>   | <a href="#">Dclk2.dSep08</a>   | <a href="#">310698</a> | 6317  | 692  | 4 | 71  | doublecortin-like kinase 2 (Dclk2) alternative variant dSep08, mRNA.                                                 |
| <a href="#">Dclk2</a>   | <a href="#">Dclk2.eSep08</a>   | <a href="#">310698</a> | 3025  | 1125 | 2 | 83  | doublecortin-like kinase 2 (8.7 kD) (Dclk2) alternative variant eSep08, mRNA.                                        |
| <a href="#">Dclk3</a>   | <a href="#">Dclk3.aSep08</a>   | <a href="#">316023</a> | 30137 | 637  |   | 155 | doublecortin-like kinase 3 (Dclk3) mRNA.                                                                             |
| <a href="#">Dclre1a</a> | <a href="#">Dclre1a.cSep08</a> | <a href="#">292127</a> | 816   | 343  | 2 | 15  | DNA cross-link repair 1A, PSO2 homolog (S. cerevisiae) (Dclre1a) alternative variant cSep08, mRNA.                   |
| <a href="#">Dclre1b</a> | <a href="#">Dclre1b.bSep08</a> | <a href="#">310745</a> | 5284  | 530  | 2 | 166 | DNA cross-link repair 1B, PSO2 homolog (S. cerevisiae) (Dclre1b) alternative variant bSep08, mRNA.                   |
| <a href="#">Dclre1b</a> | <a href="#">Dclre1b.cSep08</a> | <a href="#">310745</a> | 1742  | 576  | 3 | 128 | DNA cross-link repair 1B, PSO2 homolog (S. cerevisiae) (Dclre1b) alternative variant cSep08, mRNA.                   |
| <a href="#">Dclre1b</a> | <a href="#">Dclre1b.dSep08</a> | <a href="#">310745</a> | 4504  | 920  | 2 | 73  | DNA cross-link repair 1B, PSO2 homolog (S. cerevisiae) (Dclre1b) alternative variant dSep08, mRNA.                   |
| <a href="#">Dclre1c</a> | <a href="#">Dclre1c.bSep08</a> | <a href="#">259171</a> | 9583  | 2558 | 4 | 347 | DNA cross-link repair 1C PSO2 homolog (37.8 kD) (Dclre1c) alternative variant bSep08, mRNA.                          |
| <a href="#">Dclre1c</a> | <a href="#">Dclre1c.cSep08</a> | <a href="#">259171</a> | 7185  | 982  | 5 | 299 | artemis protein (Dclre1c) alternative variant cSep08, mRNA.                                                          |
| <a href="#">Dclre1c</a> | <a href="#">Dclre1c.dSep08</a> | <a href="#">259171</a> | 13564 | 914  | 8 | 174 | artemis protein (Dclre1c) alternative variant dSep08, mRNA.                                                          |
| <a href="#">Dclre1c</a> | <a href="#">Dclre1c.eSep08</a> | <a href="#">259171</a> | 5175  | 793  | 3 | 111 | artemis protein (Dclre1c) alternative variant eSep08, mRNA.                                                          |
| <a href="#">Dclre1c</a> | <a href="#">Dclre1c.fSep08</a> | <a href="#">259171</a> | 971   | 528  | 2 | 58  | artemis protein (6.6 kD) (Dclre1c) alternative variant fSep08, mRNA.                                                 |
| <a href="#">Dclre1c</a> | <a href="#">Dclre1c.gSep08</a> | <a href="#">259171</a> | 2292  | 415  | 2 | 42  | artemis protein (Dclre1c) alternative variant gSep08, mRNA.                                                          |
| <a href="#">Dcn</a>     | <a href="#">Dcn.bSep08</a>     | <a href="#">29139</a>  | 37290 | 1787 | 1 | 354 | decorin (39.8 kD) (Dcn) alternative variant bSep08, mRNA.                                                            |
| <a href="#">DCP1.0</a>  | <a href="#">DCP1.0.aSep08</a>  |                        | 32242 | 744  | 7 | 248 | decapping enzyme Dcp1b (DCP1.0) alternative variant aSep08, mRNA.                                                    |
| <a href="#">DCP1.0</a>  | <a href="#">DCP1.0.bSep08</a>  |                        | 27622 | 734  | 7 | 197 | decapping enzyme Dcp1b (DCP1.0) alternative variant bSep08, mRNA.                                                    |

|                                |                                       |                        |       |      |    |     |                                                                                                              |
|--------------------------------|---------------------------------------|------------------------|-------|------|----|-----|--------------------------------------------------------------------------------------------------------------|
| <a href="#">Dcp1a</a>          | <a href="#">Dcp1a.aSep08</a>          | <a href="#">361109</a> | 21298 | 394  | 4  | 118 | DCP1 decapping enzyme homolog A ( <i>S. cerevisiae</i> ) (Dcp1a) mRNA.                                       |
| <a href="#">Dcp1b</a>          | <a href="#">Dcp1b.aSep08</a>          | <a href="#">500305</a> | 4766  | 486  | 2  | 118 | DCP1 decapping enzyme homolog b ( <i>S. cerevisiae</i> ) (Dcp1b) alternative variant aSep08, mRNA.           |
| <a href="#">Dcp1b</a>          | <a href="#">Dcp1b.bSep08</a>          | <a href="#">500305</a> | 2628  | 560  | 1  | 72  | DCP1 decapping enzyme homolog b ( <i>S. cerevisiae</i> ) (7.9 kD) (Dcp1b) alternative variant bSep08, mRNA.  |
| <a href="#">Dcps</a>           | <a href="#">Dcps.bSep08</a>           | <a href="#">266605</a> | 4720  | 354  | 3  | 68  | decapping enzyme, scavenger (Dcps) alternative variant bSep08, mRNA.                                         |
| <a href="#">Dcst1andAdam15</a> | <a href="#">Dcst1andAdam15.bSep08</a> | <a href="#">57025</a>  | 2695  | 744  | 6  | 158 | a disintegrin and metallopeptidase domain 15 (metargidin) (Dcst1andAdam15) alternative variant bSep08, mRNA. |
| <a href="#">Dcst1andAdam15</a> | <a href="#">Dcst1andAdam15.bSep08</a> | <a href="#">295246</a> | 2695  | 744  | 6  | 158 | a disintegrin and metallopeptidase domain 15 (metargidin) (Dcst1andAdam15) alternative variant bSep08, mRNA. |
| <a href="#">Dcst1andAdam15</a> | <a href="#">Dcst1andAdam15.cSep08</a> | <a href="#">57025</a>  | 2326  | 467  | 4  | 65  | a disintegrin and metallopeptidase domain 15 (metargidin) (Dcst1andAdam15) alternative variant cSep08, mRNA. |
| <a href="#">Dcst1andAdam15</a> | <a href="#">Dcst1andAdam15.cSep08</a> | <a href="#">295246</a> | 2326  | 467  | 4  | 65  | a disintegrin and metallopeptidase domain 15 (metargidin) (Dcst1andAdam15) alternative variant cSep08, mRNA. |
| <a href="#">Dcst2</a>          | <a href="#">Dcst2.aSep08</a>          | <a href="#">295247</a> | 7304  | 709  |    | 169 | putative protein of bilateral origin (Dcst2) mRNA.                                                           |
| <a href="#">Dct</a>            | <a href="#">Dct.aSep08</a>            | <a href="#">290484</a> | 33529 | 1817 | 2  | 462 | dopachrome tautomerase (Dct) alternative variant aSep08, mRNA.                                               |
| <a href="#">Dct</a>            | <a href="#">Dct.bSep08</a>            | <a href="#">290484</a> | 12153 | 608  | 2  | 136 | dopachrome tautomerase (Dct) alternative variant bSep08, mRNA.                                               |
| <a href="#">Dctd</a>           | <a href="#">Dctd.bSep08</a>           | <a href="#">290741</a> | 19715 | 779  | 5  | 160 | dCMP deaminase (Dctd) alternative variant bSep08, mRNA.                                                      |
| <a href="#">Dctn1</a>          | <a href="#">Dctn1.bSep08</a>          | <a href="#">29167</a>  | 4570  | 1254 | 9  | 400 | dynactin 1 (Dctn1) alternative variant bSep08, mRNA.                                                         |
| <a href="#">Dctn1</a>          | <a href="#">Dctn1.cSep08</a>          | <a href="#">29167</a>  | 1599  | 964  | 5  | 320 | dynactin 1 (Dctn1) alternative variant cSep08, mRNA.                                                         |
| <a href="#">Dctn1</a>          | <a href="#">Dctn1.dSep08</a>          | <a href="#">29167</a>  | 3233  | 425  | 4  | 141 | dynactin 1 (Dctn1) alternative variant dSep08, mRNA.                                                         |
| <a href="#">Dctn1</a>          | <a href="#">Dctn1.eSep08</a>          | <a href="#">29167</a>  | 22407 | 463  | 8  | 141 | dynactin 1 (Dctn1) alternative variant eSep08, mRNA.                                                         |
| <a href="#">Dctn1</a>          | <a href="#">Dctn1.fSep08</a>          | <a href="#">29167</a>  | 6566  | 419  | 4  | 139 | dynactin 1 (Dctn1) alternative variant fSep08, mRNA.                                                         |
| <a href="#">Dctn1</a>          | <a href="#">Dctn1.gSep08</a>          | <a href="#">29167</a>  | 2865  | 353  | 3  | 117 | dynactin 1 (Dctn1) alternative variant gSep08, mRNA.                                                         |
| <a href="#">Dctn2</a>          | <a href="#">Dctn2.aSep08</a>          | <a href="#">299850</a> | 15220 | 1689 | 15 | 415 | dynactin 2 (Dctn2) alternative variant aSep08, mRNA.                                                         |
| <a href="#">Dctn2</a>          | <a href="#">Dctn2.cSep08</a>          | <a href="#">299850</a> | 15424 | 1836 | 12 | 300 | dynactin 2 (32.4 kD) (Dctn2) alternative variant cSep08, complete mRNA.                                      |
| <a href="#">Dctn2</a>          | <a href="#">Dctn2.dSep08</a>          | <a href="#">299850</a> | 8515  | 710  | 5  | 164 | dynactin 2 (Dctn2) alternative variant dSep08, mRNA.                                                         |
| <a href="#">Dctn2</a>          | <a href="#">Dctn2.eSep08</a>          | <a href="#">299850</a> | 10257 | 789  | 5  | 154 | dynactin 2 (17.4 kD) (Dctn2) alternative variant eSep08, complete mRNA.                                      |
| <a href="#">Dctn2</a>          | <a href="#">Dctn2.fSep08</a>          | <a href="#">299850</a> | 865   | 439  | 4  | 107 | dynactin 2 (Dctn2) alternative variant fSep08, mRNA.                                                         |
| <a href="#">Dctn2</a>          | <a href="#">Dctn2.gSep08</a>          | <a href="#">299850</a> | 15009 | 457  | 4  | 89  | dynactin 2 (Dctn2) alternative variant gSep08, mRNA.                                                         |
| <a href="#">Dctn2</a>          | <a href="#">Dctn2.hSep08</a>          | <a href="#">299850</a> | 2782  | 1943 | 3  | 79  | dynactin 2 (Dctn2) alternative variant hSep08, mRNA.                                                         |
| <a href="#">Dctn3</a>          | <a href="#">Dctn3.bSep08</a>          | <a href="#">362504</a> | 744   | 594  | 2  | 71  | dynactin 3 (8.1 kD) (Dctn3) alternative variant bSep08, mRNA.                                                |
| <a href="#">Dctn4</a>          | <a href="#">Dctn4.bSep08</a>          | <a href="#">84428</a>  | 27007 | 3801 | 11 | 460 | dynactin 4 (52.3 kD) (Dctn4) alternative variant bSep08, complete mRNA.                                      |
| <a href="#">Dctn4</a>          | <a href="#">Dctn4.cSep08</a>          | <a href="#">84428</a>  | 7347  | 558  | 1  | 138 | dynactin 4 (Dctn4) alternative variant cSep08, mRNA.                                                         |
| <a href="#">Dctn5</a>          | <a href="#">Dctn5.bSep08</a>          | <a href="#">308961</a> | 15564 | 2058 | 1  | 163 | dynactin 5 (Dctn5) alternative variant bSep08, mRNA.                                                         |
| <a href="#">Dctn6</a>          | <a href="#">Dctn6.bSep08</a>          | <a href="#">290798</a> | 7121  | 531  | 5  | 167 | dynactin 6 (Dctn6) alternative variant bSep08, mRNA.                                                         |



|                         |                                |                        |        |      |    |      |                                                                                     |
|-------------------------|--------------------------------|------------------------|--------|------|----|------|-------------------------------------------------------------------------------------|
| <a href="#">Dctn6</a>   | <a href="#">Dctn6.dSep08</a>   | <a href="#">290798</a> | 7290   | 952  | 3  | 32   | dynactin 6 (3.4 kD) (Dctn6) alternative variant dSep08, mRNA.                       |
| <a href="#">Dcun1d1</a> | <a href="#">Dcun1d1.aSep08</a> | <a href="#">310324</a> | 44132  | 2404 | 7  | 275  | putative protein of eukaryotic origin (Dcun1d1) alternative variant aSep08, mRNA.   |
| <a href="#">Dcun1d1</a> | <a href="#">Dcun1d1.cSep08</a> | <a href="#">310324</a> | 28756  | 2562 | 5  | 100  | putative protein of eukaryotic origin (Dcun1d1) alternative variant cSep08, mRNA.   |
| <a href="#">Dcun1d4</a> | <a href="#">Dcun1d4.bSep08</a> | <a href="#">360928</a> | 8959   | 1158 | 2  | 57   | putative protein (6.2 kD) (Dcun1d4) alternative variant bSep08, mRNA.               |
| <a href="#">Dcx</a>     | <a href="#">Dcx.aSep08</a>     | <a href="#">84394</a>  | 9684   | 521  |    | 173  | doublecortin (Dcx) mRNA.                                                            |
| <a href="#">DCX.1</a>   | <a href="#">DCX.1.aSep08</a>   |                        | 4837   | 477  |    | 158  | doublecortin-like kinase 1 (DCX.1) mRNA.                                            |
| <a href="#">Dd5</a>     | <a href="#">Dd5.aSep08</a>     | <a href="#">117060</a> | 24949  | 3354 | 21 | 1079 | progesterone induced protein (Dd5) alternative variant aSep08, mRNA.                |
| <a href="#">Dd5</a>     | <a href="#">Dd5.bSep08</a>     | <a href="#">117060</a> | 6221   | 1233 | 4  | 270  | progesterone induced protein (Dd5) alternative variant bSep08, mRNA.                |
| <a href="#">Dd5</a>     | <a href="#">Dd5.cSep08</a>     | <a href="#">117060</a> | 4077   | 380  | 4  | 126  | progesterone induced protein (Dd5) alternative variant cSep08, mRNA.                |
| <a href="#">Dd5</a>     | <a href="#">Dd5.dSep08</a>     | <a href="#">117060</a> | 1753   | 324  | 1  | 81   | progesterone induced protein (Dd5) alternative variant dSep08, mRNA.                |
| <a href="#">Dd25</a>    | <a href="#">Dd25.bSep08</a>    | <a href="#">360863</a> | 17039  | 3540 | 7  | 670  | hypothetical protein Dd25 (Dd25) alternative variant bSep08, mRNA.                  |
| <a href="#">Dd25</a>    | <a href="#">Dd25.cSep08</a>    | <a href="#">360863</a> | 8271   | 649  | 6  | 111  | hypothetical protein Dd25 (Dd25) alternative variant cSep08, mRNA.                  |
| <a href="#">Dd25</a>    | <a href="#">Dd25.dSep08</a>    | <a href="#">360863</a> | 14316  | 485  | 3  | 80   | hypothetical protein Dd25 (Dd25) alternative variant dSep08, mRNA.                  |
| <a href="#">Dda1</a>    | <a href="#">Dda1.aSep08</a>    | <a href="#">688813</a> | 6626   | 908  | 5  | 132  | DET1 and DDB1 associated 1 (Dda1) alternative variant aSep08, mRNA.                 |
| <a href="#">Ddah1</a>   | <a href="#">Ddah1.bSep08</a>   | <a href="#">64157</a>  | 100257 | 319  | 2  | 106  | dimethylarginine dimethylaminohydrolase 1 (Ddah1) alternative variant bSep08, mRNA. |
| <a href="#">Ddah2</a>   | <a href="#">Ddah2.bSep08</a>   | <a href="#">294239</a> | 721    | 585  | 2  | 169  | dimethylarginine dimethylaminohydrolase 2 (Ddah2) alternative variant bSep08, mRNA. |
| <a href="#">Ddah2</a>   | <a href="#">Ddah2.cSep08</a>   | <a href="#">294239</a> | 915    | 514  | 3  | 108  | dimethylarginine dimethylaminohydrolase 2 (Ddah2) alternative variant cSep08, mRNA. |
| <a href="#">Ddah2</a>   | <a href="#">Ddah2.dSep08</a>   | <a href="#">294239</a> | 1033   | 424  | 3  | 86   | dimethylarginine dimethylaminohydrolase 2 (Ddah2) alternative variant dSep08, mRNA. |
| <a href="#">Ddb1</a>    | <a href="#">Ddb1.aSep08</a>    | <a href="#">64470</a>  | 25800  | 4249 |    | 1140 | damage-specific DNA binding protein 1 (126.9 kD) (Ddb1) mRNA.                       |
| <a href="#">Ddc</a>     | <a href="#">Ddc.bSep08</a>     | <a href="#">24311</a>  | 40440  | 1253 | 8  | 296  | dopa decarboxylase CRA b (Ddc) alternative variant bSep08, mRNA.                    |
| <a href="#">Ddc</a>     | <a href="#">Ddc.cSep08</a>     | <a href="#">24311</a>  | 49215  | 701  | 6  | 216  | dopa decarboxylase CRA b (Ddc) alternative variant cSep08, mRNA.                    |
| <a href="#">Ddc</a>     | <a href="#">Ddc.dSep08</a>     | <a href="#">24311</a>  | 18211  | 422  | 4  | 123  | dopa decarboxylase CRA b (Ddc) alternative variant dSep08, mRNA.                    |
| <a href="#">Ddc</a>     | <a href="#">Ddc.eSep08</a>     | <a href="#">24311</a>  | 7217   | 569  | 3  | 112  | putative protein of ancient origin (Ddc) alternative variant eSep08, mRNA.          |
| <a href="#">Ddc</a>     | <a href="#">Ddc.fSep08</a>     | <a href="#">24311</a>  | 4343   | 444  | 2  | 97   | dopa decarboxylase CRA b (11.3 kD) (Ddc) alternative variant fSep08, mRNA.          |

|                         |                                |                        |       |      |    |     |                                                                                                                      |
|-------------------------|--------------------------------|------------------------|-------|------|----|-----|----------------------------------------------------------------------------------------------------------------------|
| <a href="#">Ddc8</a>    | <a href="#">Ddc8.aSep08</a>    | <a href="#">498028</a> | 7937  | 1934 | 2  | 591 | differential display clone 8 (68.2 kD) (Ddc8) alternative variant aSep08, mRNA.                                      |
| <a href="#">Ddc8</a>    | <a href="#">Ddc8.cSep08</a>    | <a href="#">498028</a> | 7843  | 711  | 2  | 195 | differential display clone 8 (Ddc8) alternative variant cSep08, mRNA.                                                |
| <a href="#">Ddc8</a>    | <a href="#">Ddc8.dSep08</a>    | <a href="#">498028</a> | 8313  | 709  | 3  | 72  | differential display clone 8 (Ddc8) alternative variant dSep08, mRNA.                                                |
| <a href="#">Ddc8</a>    | <a href="#">Ddc8.eSep08</a>    | <a href="#">498028</a> | 8082  | 707  | 3  | 58  | differential display clone 8 (6.3 kD) (Ddc8) alternative variant eSep08, mRNA.                                       |
| <a href="#">Ddc8</a>    | <a href="#">Ddc8.fSep08</a>    | <a href="#">498028</a> | 7649  | 687  | 2  | 58  | differential display clone 8 (6.3 kD) (Ddc8) alternative variant fSep08, mRNA.                                       |
| <a href="#">Ddc8</a>    | <a href="#">Ddc8.gSep08</a>    | <a href="#">498028</a> | 8393  | 583  | 3  | 97  | differential display clone 8 (Ddc8) alternative variant gSep08, mRNA.                                                |
| <a href="#">Ddc8</a>    | <a href="#">Ddc8.hSep08</a>    | <a href="#">498028</a> | 8083  | 443  | 3  | 33  | differential display clone 8 (3.7 kD) (Ddc8) alternative variant hSep08, mRNA.                                       |
| <a href="#">Ddef1</a>   | <a href="#">Ddef1.bSep08</a>   | <a href="#">314961</a> | 30618 | 536  | 7  | 178 | development and differentiation enhancing (Ddef1) alternative variant bSep08, mRNA.                                  |
| <a href="#">Ddef1</a>   | <a href="#">Ddef1.cSep08</a>   | <a href="#">314961</a> | 18145 | 276  | 4  | 73  | development and differentiation enhancing (Ddef1) alternative variant cSep08, mRNA.                                  |
| <a href="#">Ddef1</a>   | <a href="#">Ddef1.dSep08</a>   | <a href="#">314961</a> | 855   | 409  | 2  | 61  | development and differentiation enhancing (Ddef1) alternative variant dSep08, mRNA.                                  |
| <a href="#">Ddef1</a>   | <a href="#">Ddef1.eSep08</a>   | <a href="#">314961</a> | 1532  | 735  | 3  | 94  | development and differentiation enhancing (11.1 kD) (Ddef1) alternative variant eSep08, mRNA.                        |
| <a href="#">Ddef2</a>   | <a href="#">Ddef2.bSep08</a>   | <a href="#">362719</a> | 3150  | 577  | 3  | 151 | arf GTPase activating protein (Ddef2) alternative variant bSep08, mRNA.                                              |
| <a href="#">Ddef2</a>   | <a href="#">Ddef2.dSep08</a>   | <a href="#">362719</a> | 4201  | 2559 | 2  | 96  | putative protein (11.2 kD) (Ddef2) alternative variant dSep08, mRNA.                                                 |
| <a href="#">dDENN.0</a> | <a href="#">dDENN.0.aSep08</a> |                        | 3801  | 1677 | 13 | 558 | SET binding factor 1 like (dDENN.0) alternative variant aSep08, mRNA.                                                |
| <a href="#">dDENN.1</a> | <a href="#">dDENN.1.aSep08</a> |                        | 5095  | 1523 |    | 507 | denn 4B (dDENN.1) mRNA.                                                                                              |
| <a href="#">Ddhd1</a>   | <a href="#">Ddhd1.bSep08</a>   | <a href="#">305816</a> | 7342  | 390  | 1  | 129 | putative protein of eukaryotic origin (Ddhd1) alternative variant bSep08, mRNA.                                      |
| <a href="#">Ddhd2</a>   | <a href="#">Ddhd2.aSep08</a>   | <a href="#">680971</a> | 11582 | 1790 | 4  | 158 | ddhd 2 (Ddhd2) alternative variant aSep08, mRNA.                                                                     |
| <a href="#">Ddhd2</a>   | <a href="#">Ddhd2.bSep08</a>   | <a href="#">680971</a> | 10898 | 1041 | 4  | 117 | ddhd 2 (Ddhd2) alternative variant bSep08, mRNA.                                                                     |
| <a href="#">Ddit4</a>   | <a href="#">Ddit4.bSep08</a>   | <a href="#">140942</a> | 2065  | 1941 | 1  | 117 | DNA-damage-inducible transcript 4 (Ddit4) alternative variant bSep08, mRNA.                                          |
| <a href="#">Ddit4l</a>  | <a href="#">Ddit4l.bSep08</a>  | <a href="#">140582</a> | 743   | 488  | 1  | 51  | DNA-damage-inducible transcript 4-like and hypothetical protein LOC680872 (Ddit4l) alternative variant bSep08, mRNA. |
| <a href="#">Ddit4l</a>  | <a href="#">Ddit4l.bSep08</a>  | <a href="#">680872</a> | 743   | 488  | 1  | 51  | DNA-damage-inducible transcript 4-like and hypothetical protein LOC680872 (Ddit4l) alternative variant bSep08, mRNA. |
| <a href="#">Ddo</a>     | <a href="#">Ddo.bSep08</a>     | <a href="#">685325</a> | 10814 | 1027 | 1  | 194 | D-aspartate oxidase (Ddo) alternative variant bSep08, mRNA.                                                          |
| <a href="#">Ddost</a>   | <a href="#">Ddost.bSep08</a>   | <a href="#">313648</a> | 1107  | 1018 | 2  | 127 | dolichyl-di-phosphooligosaccharide-protein glycotransferase (Ddost) alternative variant bSep08, mRNA.                |

|                       |                              |                        |       |      |    |     |                                                                                                                   |
|-----------------------|------------------------------|------------------------|-------|------|----|-----|-------------------------------------------------------------------------------------------------------------------|
| <a href="#">Ddost</a> | <a href="#">Ddost.cSep08</a> | <a href="#">313648</a> | 1509  | 543  | 2  | 96  | dolichyl-di-phosphooligosaccharide-protein glycotransferase (Ddost) alternative variant cSep08, mRNA.             |
| <a href="#">Ddr1</a>  | <a href="#">Ddr1.aSep08</a>  | <a href="#">25678</a>  | 18005 | 2875 | 18 | 932 | discoidin domain receptor family, member 1 (Ddr1) alternative variant aSep08, mRNA.                               |
| <a href="#">Ddr1</a>  | <a href="#">Ddr1.cSep08</a>  | <a href="#">25678</a>  | 10625 | 555  | 5  | 184 | discoidin domain receptor family, member 1 (Ddr1) alternative variant cSep08, mRNA.                               |
| <a href="#">Ddr1</a>  | <a href="#">Ddr1.dSep08</a>  | <a href="#">25678</a>  | 6465  | 873  | 5  | 155 | discoidin domain receptor family, member 1 (Ddr1) alternative variant dSep08, mRNA.                               |
| <a href="#">Ddr1</a>  | <a href="#">Ddr1.eSep08</a>  | <a href="#">25678</a>  | 3345  | 408  | 3  | 135 | discoidin domain receptor family, member 1 (Ddr1) alternative variant eSep08, mRNA.                               |
| <a href="#">Ddr1</a>  | <a href="#">Ddr1.gSep08</a>  | <a href="#">25678</a>  | 10709 | 356  | 4  | 118 | discoidin domain receptor family, member 1 (Ddr1) alternative variant gSep08, mRNA.                               |
| <a href="#">Ddt</a>   | <a href="#">Ddt.bSep08</a>   | <a href="#">29318</a>  | 2950  | 1392 | 2  | 73  | D-dopachrome tautomerase (8.3 kD) (Ddt) alternative variant bSep08, mRNA.                                         |
| <a href="#">Ddt</a>   | <a href="#">Ddt.dSep08</a>   | <a href="#">29318</a>  | 3929  | 534  | 2  | 56  | D-dopachrome tautomerase (Ddt) alternative variant dSep08, mRNA.                                                  |
| <a href="#">DDT.2</a> | <a href="#">DDT.2.aSep08</a> |                        | 8015  | 704  |    | 234 | bromodomain adjacent zinc finger domain 1A (DDT.2) mRNA.                                                          |
| <a href="#">Ddx1</a>  | <a href="#">Ddx1.aSep08</a>  | <a href="#">84474</a>  | 30881 | 2472 | 26 | 740 | DEAD (Asp-Glu-Ala-Asp) box polypeptide 1 (82.5 kD) (Ddx1) alternative variant aSep08, complete mRNA.              |
| <a href="#">Ddx1</a>  | <a href="#">Ddx1.bSep08</a>  | <a href="#">84474</a>  | 11259 | 675  | 10 | 215 | DEAD (Asp-Glu-Ala-Asp) box polypeptide 1 (Ddx1) alternative variant bSep08, mRNA.                                 |
| <a href="#">Ddx1</a>  | <a href="#">Ddx1.cSep08</a>  | <a href="#">84474</a>  | 1582  | 653  | 3  | 85  | DEAD (Asp-Glu-Ala-Asp) box polypeptide 1 (9.5 kD) (Ddx1) alternative variant cSep08, mRNA.                        |
| <a href="#">Ddx1</a>  | <a href="#">Ddx1.dSep08</a>  | <a href="#">84474</a>  | 1468  | 385  | 3  | 76  | DEAD (Asp-Glu-Ala-Asp) box polypeptide 1 (Ddx1) alternative variant dSep08, mRNA.                                 |
| <a href="#">Ddx3x</a> | <a href="#">Ddx3x.aSep08</a> | <a href="#">317335</a> | 11487 | 2265 | 17 | 683 | DEAD/H (Asp-Glu-Ala-Asp/His) box polypeptide 3, X-linked (Ddx3x) alternative variant aSep08, mRNA.                |
| <a href="#">Ddx3x</a> | <a href="#">Ddx3x.cSep08</a> | <a href="#">317335</a> | 6932  | 775  | 6  | 175 | DEAD/H (Asp-Glu-Ala-Asp/His) box polypeptide 3, X-linked (Ddx3x) alternative variant cSep08, mRNA.                |
| <a href="#">Ddx3x</a> | <a href="#">Ddx3x.dSep08</a> | <a href="#">317335</a> | 6881  | 721  | 6  | 173 | DEAD/H (Asp-Glu-Ala-Asp/His) box polypeptide 3, X-linked (Ddx3x) alternative variant dSep08, mRNA.                |
| <a href="#">Ddx4</a>  | <a href="#">Ddx4.aSep08</a>  | <a href="#">310090</a> | 12282 | 900  |    | 247 | DEAD (Asp-Glu-Ala-Asp) box polypeptide 4 (Ddx4) mRNA.                                                             |
| <a href="#">Ddx5</a>  | <a href="#">Ddx5.bSep08</a>  | <a href="#">287765</a> | 8158  | 4794 | 11 | 406 | dead box polypeptide 5 (46.1 kD) (Ddx5) alternative variant bSep08, mRNA.                                         |
| <a href="#">Ddx5</a>  | <a href="#">Ddx5.cSep08</a>  | <a href="#">287765</a> | 1876  | 1776 | 2  | 127 | dead box polypeptide 5 (13.9 kD) (Ddx5) alternative variant cSep08, mRNA.                                         |
| <a href="#">Ddx5</a>  | <a href="#">Ddx5.dSep08</a>  | <a href="#">287765</a> | 1655  | 426  | 2  | 79  | putative protein of ancient origin (Ddx5) alternative variant dSep08, mRNA.                                       |
| <a href="#">Ddx11</a> | <a href="#">Ddx11.aSep08</a> | <a href="#">316767</a> | 1819  | 1583 |    | 145 | DEAD/H (Asp-Glu-Ala-Asp/His) box polypeptide 11 (CHL1-like helicase homolog, <i>S. cerevisiae</i> ) (Ddx11) mRNA. |
| <a href="#">Ddx17</a> | <a href="#">Ddx17.aSep08</a> | <a href="#">315133</a> | 20210 | 4575 | 13 | 501 | dead box polypeptide 17 CRA b (Ddx17) alternative variant aSep08, mRNA.                                           |
| <a href="#">Ddx17</a> | <a href="#">Ddx17.cSep08</a> | <a href="#">315133</a> | 7949  | 742  | 5  | 246 | dead box polypeptide 17 CRA h (Ddx17) alternative variant cSep08, mRNA.                                           |

|                       |                              |                        |       |      |    |     |                                                                                              |
|-----------------------|------------------------------|------------------------|-------|------|----|-----|----------------------------------------------------------------------------------------------|
| <a href="#">Ddx17</a> | <a href="#">Ddx17.dSep08</a> | <a href="#">315133</a> | 2883  | 1637 | 2  | 202 | dead box polypeptide 17 (Ddx17) alternative variant dSep08, mRNA.                            |
| <a href="#">Ddx17</a> | <a href="#">Ddx17.eSep08</a> | <a href="#">315133</a> | 3326  | 773  | 5  | 168 | dead box polypeptide 17 (Ddx17) alternative variant eSep08, mRNA.                            |
| <a href="#">Ddx17</a> | <a href="#">Ddx17.gSep08</a> | <a href="#">315133</a> | 3297  | 447  | 2  | 32  | putative protein (Ddx17) alternative variant gSep08, mRNA.                                   |
| <a href="#">Ddx18</a> | <a href="#">Ddx18.cSep08</a> | <a href="#">308490</a> | 1626  | 400  | 2  | 63  | DEAD (Asp-Glu-Ala-Asp) box polypeptide 18 (Ddx18) alternative variant cSep08, mRNA.          |
| <a href="#">Ddx20</a> | <a href="#">Ddx20.aSep08</a> | <a href="#">84473</a>  | 7988  | 2748 | 11 | 821 | DEAD (Asp-Glu-Ala-Asp) box polypeptide 20 (Ddx20) alternative variant aSep08, mRNA.          |
| <a href="#">Ddx21</a> | <a href="#">Ddx21.aSep08</a> | <a href="#">317399</a> | 9719  | 3072 | 8  | 360 | DEAD (Asp-Glu-Ala-Asp) box polypeptide 21 (Ddx21) alternative variant aSep08, mRNA.          |
| <a href="#">Ddx21</a> | <a href="#">Ddx21.bSep08</a> | <a href="#">317399</a> | 21858 | 1809 | 1  | 358 | DEAD (Asp-Glu-Ala-Asp) box polypeptide 21 (Ddx21) alternative variant bSep08, complete mRNA. |
| <a href="#">Ddx21</a> | <a href="#">Ddx21.cSep08</a> | <a href="#">317399</a> | 1758  | 748  |    | 104 | DEAD (Asp-Glu-Ala-Asp) box polypeptide 21 (Ddx21) alternative variant cSep08, mRNA.          |
| <a href="#">Ddx23</a> | <a href="#">Ddx23.aSep08</a> | <a href="#">300208</a> | 17231 | 3109 | 17 | 819 | DEAD box polypeptide 23 (95.5 kD) (Ddx23) alternative variant aSep08, mRNA.                  |
| <a href="#">Ddx23</a> | <a href="#">Ddx23.bSep08</a> | <a href="#">300208</a> | 11201 | 915  | 8  | 284 | DEAD box polypeptide 23 (Ddx23) alternative variant bSep08, mRNA.                            |
| <a href="#">Ddx23</a> | <a href="#">Ddx23.dSep08</a> | <a href="#">300208</a> | 2787  | 742  | 4  | 246 | DEAD box polypeptide 23 (Ddx23) alternative variant dSep08, mRNA.                            |
| <a href="#">Ddx23</a> | <a href="#">Ddx23.eSep08</a> | <a href="#">300208</a> | 3412  | 755  | 5  | 135 | DEAD box polypeptide 23 (Ddx23) alternative variant eSep08, mRNA.                            |
| <a href="#">Ddx23</a> | <a href="#">Ddx23.fSep08</a> | <a href="#">300208</a> | 1115  | 750  | 2  | 121 | DEAD box polypeptide 23 (Ddx23) alternative variant fSep08, mRNA.                            |
| <a href="#">Ddx24</a> | <a href="#">Ddx24.bSep08</a> | <a href="#">373065</a> | 6271  | 766  | 3  | 254 | dead box polypeptide 24 (Ddx24) alternative variant bSep08, mRNA.                            |
| <a href="#">Ddx24</a> | <a href="#">Ddx24.cSep08</a> | <a href="#">373065</a> | 3502  | 1136 | 3  | 169 | dead box polypeptide 24 CRA a (19.9 kD) (Ddx24) alternative variant cSep08, mRNA.            |
| <a href="#">Ddx24</a> | <a href="#">Ddx24.dSep08</a> | <a href="#">373065</a> | 1782  | 706  | 2  | 115 | putative mitochondrial protein (12.5 kD) (Ddx24) alternative variant dSep08, mRNA.           |
| <a href="#">Ddx24</a> | <a href="#">Ddx24.eSep08</a> | <a href="#">373065</a> | 1529  | 612  | 2  | 108 | putative mitochondrial protein (11.6 kD) (Ddx24) alternative variant eSep08, mRNA.           |
| <a href="#">Ddx24</a> | <a href="#">Ddx24.fSep08</a> | <a href="#">373065</a> | 1667  | 384  | 2  | 69  | putative protein (7.4 kD) (Ddx24) alternative variant fSep08, mRNA.                          |
| <a href="#">Ddx25</a> | <a href="#">Ddx25.bSep08</a> | <a href="#">58856</a>  | 9048  | 1634 | 4  | 313 | hydrolethalus syndrome 1 like (35.7 kD) (Ddx25) alternative variant bSep08, complete mRNA.   |
| <a href="#">Ddx25</a> | <a href="#">Ddx25.bSep08</a> | <a href="#">680262</a> | 9048  | 1634 | 4  | 313 | hydrolethalus syndrome 1 like (35.7 kD) (Ddx25) alternative variant bSep08, complete mRNA.   |
| <a href="#">Ddx25</a> | <a href="#">Ddx25.cSep08</a> | <a href="#">58856</a>  | 16770 | 705  | 8  | 146 | dead box polypeptide 25 CRA a (Ddx25) alternative variant cSep08, mRNA.                      |
| <a href="#">Ddx25</a> | <a href="#">Ddx25.cSep08</a> | <a href="#">680262</a> | 16770 | 705  | 8  | 146 | dead box polypeptide 25 CRA a (Ddx25) alternative variant cSep08, mRNA.                      |
| <a href="#">Ddx25</a> | <a href="#">Ddx25.dSep08</a> | <a href="#">58856</a>  | 7826  | 741  | 4  | 129 | hydrolethalus syndrome 1 like (Ddx25) alternative variant dSep08, mRNA.                      |

|                       |                              |                        |       |      |    |     |                                                                                               |
|-----------------------|------------------------------|------------------------|-------|------|----|-----|-----------------------------------------------------------------------------------------------|
| <a href="#">Ddx25</a> | <a href="#">Ddx25.dSep08</a> | <a href="#">680262</a> | 7826  | 741  | 4  | 129 | hydrolethalus syndrome 1 like (Ddx25) alternative variant dSep08, mRNA.                       |
| <a href="#">Ddx25</a> | <a href="#">Ddx25.eSep08</a> | <a href="#">58856</a>  | 1007  | 755  | 2  | 118 | DEAD box polypeptide 25 (12.6 kD) (Ddx25) alternative variant eSep08, mRNA.                   |
| <a href="#">Ddx25</a> | <a href="#">Ddx25.eSep08</a> | <a href="#">680262</a> | 1007  | 755  | 2  | 118 | DEAD box polypeptide 25 (12.6 kD) (Ddx25) alternative variant eSep08, mRNA.                   |
| <a href="#">Ddx25</a> | <a href="#">Ddx25.fSep08</a> | <a href="#">58856</a>  | 2330  | 392  | 2  | 103 | DEAD box polypeptide (Ddx25) alternative variant fSep08, mRNA.                                |
| <a href="#">Ddx25</a> | <a href="#">Ddx25.fSep08</a> | <a href="#">680262</a> | 2330  | 392  | 2  | 103 | DEAD box polypeptide (Ddx25) alternative variant fSep08, mRNA.                                |
| <a href="#">Ddx25</a> | <a href="#">Ddx25.hSep08</a> | <a href="#">58856</a>  | 1741  | 261  | 2  | 47  | putative protein (Ddx25) alternative variant hSep08, mRNA.                                    |
| <a href="#">Ddx25</a> | <a href="#">Ddx25.hSep08</a> | <a href="#">680262</a> | 1741  | 261  | 2  | 47  | putative protein (Ddx25) alternative variant hSep08, mRNA.                                    |
| <a href="#">Ddx27</a> | <a href="#">Ddx27.aSep08</a> | <a href="#">362274</a> | 19831 | 2595 | 21 | 768 | dead box polypeptide 27 (Ddx27) alternative variant aSep08, mRNA.                             |
| <a href="#">Ddx27</a> | <a href="#">Ddx27.bSep08</a> | <a href="#">362274</a> | 2313  | 1410 | 3  | 146 | dead box polypeptide 27 (Ddx27) alternative variant bSep08, mRNA.                             |
| <a href="#">Ddx27</a> | <a href="#">Ddx27.cSep08</a> | <a href="#">362274</a> | 3370  | 1929 | 3  | 134 | dead box polypeptide 27 (15.4 kD) (Ddx27) alternative variant cSep08, mRNA.                   |
| <a href="#">Ddx31</a> | <a href="#">Ddx31.bSep08</a> | <a href="#">311835</a> | 17729 | 905  | 4  | 139 | DEAD/H (Asp-Glu-Ala-Asp/His) box polypeptide 31 (Ddx31) alternative variant bSep08, mRNA.     |
| <a href="#">Ddx39</a> | <a href="#">Ddx39.bSep08</a> | <a href="#">89827</a>  | 8042  | 1480 | 9  | 345 | DEAD (Asp-Glu-Ala-Asp) box polypeptide 39 (Ddx39) alternative variant bSep08, mRNA.           |
| <a href="#">Ddx39</a> | <a href="#">Ddx39.cSep08</a> | <a href="#">89827</a>  | 7564  | 1532 | 8  | 208 | DEAD (Asp-Glu-Ala-Asp) box polypeptide 39 (23.2 kD) (Ddx39) alternative variant cSep08, mRNA. |
| <a href="#">Ddx39</a> | <a href="#">Ddx39.eSep08</a> | <a href="#">89827</a>  | 1626  | 742  | 3  | 114 | DEAD (Asp-Glu-Ala-Asp) box polypeptide 39 (Ddx39) alternative variant eSep08, mRNA.           |
| <a href="#">Ddx41</a> | <a href="#">Ddx41.bSep08</a> | <a href="#">314336</a> | 976   | 806  | 3  | 115 | DEAD (Asp-Glu-Ala-Asp) box polypeptide 41 (12.9 kD) (Ddx41) alternative variant bSep08, mRNA. |
| <a href="#">Ddx41</a> | <a href="#">Ddx41.cSep08</a> | <a href="#">314336</a> | 1062  | 716  | 5  | 107 | DEAD (Asp-Glu-Ala-Asp) box polypeptide 41 (Ddx41) alternative variant cSep08, mRNA.           |
| <a href="#">Ddx41</a> | <a href="#">Ddx41.eSep08</a> | <a href="#">314336</a> | 470   | 368  | 2  | 73  | DEAD (Asp-Glu-Ala-Asp) box polypeptide 41 (8.3 kD) (Ddx41) alternative variant eSep08, mRNA.  |
| <a href="#">Ddx42</a> | <a href="#">Ddx42.bSep08</a> | <a href="#">303607</a> | 3344  | 1489 | 3  | 283 | DEAD (Asp-Glu-Ala-Asp) box polypeptide 42 (Ddx42) alternative variant bSep08, mRNA.           |
| <a href="#">Ddx42</a> | <a href="#">Ddx42.cSep08</a> | <a href="#">303607</a> | 13039 | 615  | 5  | 204 | DEAD (Asp-Glu-Ala-Asp) box polypeptide 42 (Ddx42) alternative variant cSep08, mRNA.           |
| <a href="#">Ddx42</a> | <a href="#">Ddx42.eSep08</a> | <a href="#">303607</a> | 3557  | 541  | 3  | 75  | DEAD (Asp-Glu-Ala-Asp) box polypeptide 42 (Ddx42) alternative variant eSep08, mRNA.           |
| <a href="#">Ddx47</a> | <a href="#">Ddx47.bSep08</a> | <a href="#">297685</a> | 2050  | 726  | 4  | 125 | DEAD (Asp-Glu-Ala-Asp) box polypeptide 47 (Ddx47) alternative variant bSep08, mRNA.           |
| <a href="#">Ddx47</a> | <a href="#">Ddx47.cSep08</a> | <a href="#">297685</a> | 4586  | 1778 | 3  | 61  | DEAD (Asp-Glu-Ala-Asp) box polypeptide 47 (Ddx47) alternative variant cSep08, mRNA.           |
| <a href="#">Ddx49</a> | <a href="#">Ddx49.bSep08</a> | <a href="#">290660</a> | 3103  | 672  | 8  | 161 | DEAD (Asp-Glu-Ala-Asp) box polypeptide 49 (Ddx49) alternative variant bSep08, mRNA.           |
| <a href="#">Ddx50</a> | <a href="#">Ddx50.bSep08</a> | <a href="#">361848</a> | 13294 | 735  | 6  | 228 | CRA a (Ddx50) alternative variant bSep08, mRNA.                                               |

|                         |                                |                        |       |      |    |     |                                                                                                             |
|-------------------------|--------------------------------|------------------------|-------|------|----|-----|-------------------------------------------------------------------------------------------------------------|
| <a href="#">Ddx50</a>   | <a href="#">Ddx50.cSep08</a>   | <a href="#">361848</a> | 8472  | 1577 | 5  | 160 | DEAD box polypeptide 50 (Ddx50) alternative variant cSep08, mRNA.                                           |
| <a href="#">Ddx50</a>   | <a href="#">Ddx50.eSep08</a>   | <a href="#">361848</a> | 903   | 316  | 2  | 46  | DEAD box polypeptide 50 like (5.3 kD) (Ddx50) alternative variant eSep08, mRNA.                             |
| <a href="#">Ddx51</a>   | <a href="#">Ddx51.bSep08</a>   | <a href="#">304570</a> | 934   | 495  | 4  | 93  | DEAD (Asp-Glu-Ala-Asp) box polypeptide 51 (Ddx51) alternative variant bSep08, mRNA.                         |
| <a href="#">Ddx51</a>   | <a href="#">Ddx51.cSep08</a>   | <a href="#">304570</a> | 514   | 282  | 3  | 64  | DEAD (Asp-Glu-Ala-Asp) box polypeptide 51 (Ddx51) alternative variant cSep08, mRNA.                         |
| <a href="#">Ddx54</a>   | <a href="#">Ddx54.aSep08</a>   | <a href="#">360815</a> | 15247 | 2166 | 12 | 613 | DEAD box polypeptide 54 (Ddx54) alternative variant aSep08, mRNA.                                           |
| <a href="#">Ddx54</a>   | <a href="#">Ddx54.bSep08</a>   | <a href="#">360815</a> | 4184  | 1669 | 8  | 402 | DEAD box polypeptide 54 (Ddx54) alternative variant bSep08, mRNA.                                           |
| <a href="#">Ddx54</a>   | <a href="#">Ddx54.cSep08</a>   | <a href="#">360815</a> | 5355  | 1879 | 7  | 369 | DEAD box polypeptide 54 (Ddx54) alternative variant cSep08, mRNA.                                           |
| <a href="#">Ddx54</a>   | <a href="#">Ddx54.dSep08</a>   | <a href="#">360815</a> | 1698  | 1587 | 3  | 348 | putative protein (Ddx54) alternative variant dSep08, mRNA.                                                  |
| <a href="#">Ddx56</a>   | <a href="#">Ddx56.bSep08</a>   | <a href="#">289780</a> | 3714  | 1140 | 8  | 374 | DEAD (Asp-Glu-Ala-Asp) box polypeptide 56 (Ddx56) alternative variant bSep08, mRNA.                         |
| <a href="#">Ddx56</a>   | <a href="#">Ddx56.cSep08</a>   | <a href="#">289780</a> | 332   | 252  | 2  | 79  | DEAD (Asp-Glu-Ala-Asp) box polypeptide 56 (Ddx56) alternative variant cSep08, mRNA.                         |
| <a href="#">Ddx58</a>   | <a href="#">Ddx58.bSep08</a>   | <a href="#">297989</a> | 18545 | 1033 | 1  | 115 | DEAD (Asp-Glu-Ala-Asp) box polypeptide 58 (13.6 kD) (Ddx58) alternative variant bSep08, mRNA.               |
| <a href="#">Ddx59</a>   | <a href="#">Ddx59.bSep08</a>   | <a href="#">289402</a> | 15813 | 1215 | 1  | 404 | DEAD (Asp-Glu-Ala-Asp) box polypeptide 59 (Ddx59) alternative variant bSep08, mRNA.                         |
| <a href="#">Ddx60</a>   | <a href="#">Ddx60.aSep08</a>   | <a href="#">306409</a> | 7325  | 571  |    | 189 | DEAD (Asp-Glu-Ala-Asp) box polypeptide 60 (Ddx60) mRNA.                                                     |
| <a href="#">DEAD.0</a>  | <a href="#">DEAD.0.aSep08</a>  |                        | 13638 | 1378 | 12 | 444 | dead box polypeptide 55 CRA a (DEAD.0) alternative variant aSep08, mRNA.                                    |
| <a href="#">DEAD.0</a>  | <a href="#">DEAD.0.bSep08</a>  |                        | 4756  | 746  | 5  | 248 | dead box polypeptide 55 (DEAD.0) alternative variant bSep08, mRNA.                                          |
| <a href="#">DEAD.0</a>  | <a href="#">DEAD.0.cSep08</a>  |                        | 5506  | 698  | 4  | 163 | dead box polypeptide 55 (DEAD.0) alternative variant cSep08, mRNA.                                          |
| <a href="#">DEAD.0</a>  | <a href="#">DEAD.0.dSep08</a>  |                        | 1932  | 415  | 3  | 79  | dead box polypeptide 55 (DEAD.0) alternative variant dSep08, mRNA.                                          |
| <a href="#">DEAD.1</a>  | <a href="#">DEAD.1.aSep08</a>  |                        | 6841  | 1080 |    | 360 | DEAH box polypeptide 29 (DEAD.1) mRNA.                                                                      |
| <a href="#">Deadc1</a>  | <a href="#">Deadc1.aSep08</a>  | <a href="#">361453</a> | 14491 | 545  | 1  | 181 | CMP/dCMP deaminase, zinc-binding (Deadc1) alternative variant aSep08, mRNA.                                 |
| <a href="#">Deadc1</a>  | <a href="#">Deadc1.bSep08</a>  | <a href="#">361453</a> | 14404 | 429  | 1  | 124 | CMP/dCMP deaminase, zinc-binding (Deadc1) alternative variant bSep08, mRNA.                                 |
| <a href="#">Deaf1</a>   | <a href="#">Deaf1.bSep08</a>   | <a href="#">83632</a>  | 30546 | 2250 | 1  | 207 | deformed epidermal autoregulatory factor 1 (Drosophila) (21.8 kD) (Deaf1) alternative variant bSep08, mRNA. |
| <a href="#">Death.0</a> | <a href="#">Death.0.aSep08</a> |                        | 5626  | 1122 | 3  | 373 | ankyrin 2 (Death.0) alternative variant aSep08, mRNA.                                                       |
| <a href="#">Death.0</a> | <a href="#">Death.0.bSep08</a> |                        | 2767  | 401  | 2  | 133 | ankyrin 2 (Death.0) alternative variant bSep08, mRNA.                                                       |
| <a href="#">Decr1</a>   | <a href="#">Decr1.bSep08</a>   | <a href="#">117543</a> | 22312 | 750  | 5  | 100 | 2,4-dienoyl CoA reductase 1, mitochondrial (10.5 kD) (Decr1) alternative variant bSep08, mRNA.              |
| <a href="#">Decr1</a>   | <a href="#">Decr1.cSep08</a>   | <a href="#">117543</a> | 10000 | 682  | 6  | 82  | 2,4-dienoyl CoA reductase 1, mitochondrial (Decr1) alternative variant cSep08, mRNA.                        |

|                         |                                |                        |       |      |   |     |                                                                                                             |
|-------------------------|--------------------------------|------------------------|-------|------|---|-----|-------------------------------------------------------------------------------------------------------------|
| <a href="#">Decr2</a>   | <a href="#">Decr2.bSep08</a>   | <a href="#">64461</a>  | 7547  | 881  | 7 | 252 | 2-4-dienoyl-Coenzyme A reductase 2, peroxisomal (Decr2) alternative variant bSep08, mRNA.                   |
| <a href="#">Decr2</a>   | <a href="#">Decr2.cSep08</a>   | <a href="#">64461</a>  | 5594  | 677  | 8 | 225 | 2-4-dienoyl-Coenzyme A reductase 2, peroxisomal (Decr2) alternative variant cSep08, mRNA.                   |
| <a href="#">Decr2</a>   | <a href="#">Decr2.dSep08</a>   | <a href="#">64461</a>  | 3279  | 1434 | 3 | 202 | 2-4-dienoyl-Coenzyme A reductase 2, peroxisomal (Decr2) alternative variant dSep08, mRNA.                   |
| <a href="#">Dedd</a>    | <a href="#">Dedd.bSep08</a>    | <a href="#">83631</a>  | 10242 | 725  | 4 | 170 | death effector domain-containing (Dedd) alternative variant bSep08, mRNA.                                   |
| <a href="#">Dedd</a>    | <a href="#">Dedd.cSep08</a>    | <a href="#">83631</a>  | 11980 | 679  | 5 | 160 | death effector domain-containing (Dedd) alternative variant cSep08, mRNA.                                   |
| <a href="#">Dedd</a>    | <a href="#">Dedd.eSep08</a>    | <a href="#">83631</a>  | 9769  | 405  | 3 | 35  | putative protein (Dedd) alternative variant eSep08, mRNA.                                                   |
| <a href="#">Dedd</a>    | <a href="#">Dedd.fSep08</a>    | <a href="#">83631</a>  | 1546  | 360  | 2 | 30  | putative protein (3.6 kD) (Dedd) alternative variant fSep08, mRNA.                                          |
| <a href="#">deeby</a>   | <a href="#">deeby.bSep08</a>   |                        | 1310  | 751  | 2 | 38  | putative protein (4.6 kD) (deeby) alternative variant bSep08, mRNA.                                         |
| <a href="#">deechy</a>  | <a href="#">deechy.aSep08</a>  |                        | 8195  | 653  |   | 46  | putative protein (deechy) mRNA.                                                                             |
| <a href="#">deefer</a>  | <a href="#">deefer.aSep08</a>  |                        | 2021  | 1065 |   | 38  | putative protein (4.2 kD) (deefer) mRNA.                                                                    |
| <a href="#">deeflo</a>  | <a href="#">deeflo.aSep08</a>  |                        | 19582 | 1645 |   | 317 | proprotein convertase subtilisin kexin type 5 (deeflo) mRNA.                                                |
| <a href="#">deeflu</a>  | <a href="#">deeflu.aSep08</a>  |                        | 3260  | 362  | 2 | 120 | CRA a like (deeflu) alternative variant aSep08, mRNA.                                                       |
| <a href="#">deeflu</a>  | <a href="#">deeflu.bSep08</a>  |                        | 5763  | 1083 | 6 | 118 | uncharacterized protein like (13.6 kD) (deeflu) alternative variant bSep08, mRNA.                           |
| <a href="#">deekee</a>  | <a href="#">deekee.aSep08</a>  |                        | 2639  | 753  |   | 121 | putative protein of mammalian origin (deekee) mRNA.                                                         |
| <a href="#">deeloy</a>  | <a href="#">deeloy.aSep08</a>  |                        | 6366  | 755  | 1 | 54  | putative protein (deeloy) alternative variant aSep08, mRNA.                                                 |
| <a href="#">deeloy</a>  | <a href="#">deeloy.bSep08</a>  |                        | 1450  | 239  | 1 | 45  | putative protein (deeloy) alternative variant bSep08, mRNA.                                                 |
| <a href="#">deemer</a>  | <a href="#">deemer.aSep08</a>  |                        | 2724  | 395  |   | 98  | dna topoisomerase (deemer) mRNA.                                                                            |
| <a href="#">deenoy</a>  | <a href="#">deenoy.aSep08</a>  |                        | 512   | 453  |   | 52  | putative protein (6.2 kD) (deenoy) mRNA.                                                                    |
| <a href="#">deepor</a>  | <a href="#">deepor.aSep08</a>  |                        | 6983  | 810  |   | 65  | putative protein of mammalian origin (7.1 kD) (deepor) mRNA.                                                |
| <a href="#">deesa</a>   | <a href="#">deesa.aSep08</a>   |                        | 24646 | 695  |   | 76  | putative cytoplasmic protein (8.8 kD) (deesa) mRNA.                                                         |
| <a href="#">deeshee</a> | <a href="#">deeshee.aSep08</a> |                        | 25553 | 3401 | 7 | 353 | family with sequence similarity 105 member B (40.4 kD) (deeshee) alternative variant aSep08, complete mRNA. |
| <a href="#">deeshee</a> | <a href="#">deeshee.bSep08</a> |                        | 19507 | 633  | 5 | 186 | sertolin (deeshee) alternative variant bSep08, mRNA.                                                        |
| <a href="#">deeto</a>   | <a href="#">deeto.aSep08</a>   |                        | 841   | 522  |   | 71  | putative cytoplasmic protein (7.8 kD) (deeto) mRNA.                                                         |
| <a href="#">deever</a>  | <a href="#">deever.aSep08</a>  |                        | 2062  | 394  |   | 104 | putative protein (deever) mRNA.                                                                             |
| <a href="#">deewey</a>  | <a href="#">deewey.aSep08</a>  |                        | 4079  | 355  |   | 56  | mob1 Mps One Binder kinase activator-like 1A CRA a (deewey) mRNA.                                           |
| <a href="#">Def6</a>    | <a href="#">Def6.aSep08</a>    | <a href="#">309642</a> | 16235 | 984  |   | 323 | differentially expressed in FDCP 6 (Def6) mRNA.                                                             |
| <a href="#">Def8</a>    | <a href="#">Def8.bSep08</a>    | <a href="#">307973</a> | 14517 | 945  | 8 | 247 | differentially expressed in FDCP 8 (Def8) alternative variant bSep08, mRNA.                                 |
| <a href="#">Def8</a>    | <a href="#">Def8.cSep08</a>    | <a href="#">307973</a> | 2133  | 289  | 2 | 65  | differentially expressed in FDCP 8 (Def8) alternative variant cSep08, mRNA.                                 |

|                                    |                                           |                        |        |      |    |     |                                                                                            |
|------------------------------------|-------------------------------------------|------------------------|--------|------|----|-----|--------------------------------------------------------------------------------------------|
| <a href="#">Def8</a>               | <a href="#">Def8.dSep08</a>               | <a href="#">307973</a> | 950    | 450  | 2  | 63  | differentially expressed in FDCP 8 (Def8) alternative variant dSep08, mRNA.                |
| <a href="#">Defa</a>               | <a href="#">Defa.aSep08</a>               | <a href="#">286995</a> | 1149   | 632  | 1  | 135 | defensin, alpha 5, Paneth cell-specific (15.3 kD) (Defa) alternative variant aSep08, mRNA. |
| <a href="#">Defb11</a>             | <a href="#">Defb11.bSep08</a>             | <a href="#">641630</a> | 1053   | 300  | 2  | 64  | defensin beta 11 (Defb11) alternative variant bSep08, mRNA.                                |
| <a href="#">Defb17andDefb16-ps</a> | <a href="#">Defb17andDefb16-ps.bSep08</a> | <a href="#">641622</a> | 8530   | 189  | 1  | 35  | putative protein (Defb17andDefb16-ps) alternative variant bSep08, mRNA.                    |
| <a href="#">Defb17andDefb16-ps</a> | <a href="#">Defb17andDefb16-ps.bSep08</a> | <a href="#">641658</a> | 8530   | 189  | 1  | 35  | putative protein (Defb17andDefb16-ps) alternative variant bSep08, mRNA.                    |
| <a href="#">Degs1</a>              | <a href="#">Degs1.bSep08</a>              | <a href="#">58970</a>  | 2650   | 695  | 3  | 115 | degenerative spermatocyte homolog 1 (Drosophila) (Degs1) alternative variant bSep08, mRNA. |
| <a href="#">Dek</a>                | <a href="#">Dek.bSep08</a>                | <a href="#">306817</a> | 13598  | 735  | 6  | 148 | DEK oncogene (DNA binding) (Dek) alternative variant bSep08, mRNA.                         |
| <a href="#">Dek</a>                | <a href="#">Dek.cSep08</a>                | <a href="#">306817</a> | 4304   | 408  | 3  | 119 | DEK oncogene (DNA binding) (Dek) alternative variant cSep08, mRNA.                         |
| <a href="#">DENN.0</a>             | <a href="#">DENN.0.aSep08</a>             |                        | 773    | 361  |    | 120 | DENN (DENN.0) mRNA.                                                                        |
| <a href="#">DENN.1</a>             | <a href="#">DENN.1.aSep08</a>             |                        | 12759  | 1074 | 3  | 358 | rab6 interacting protein 1 (DENN.1) alternative variant aSep08, mRNA.                      |
| <a href="#">Dennd1a</a>            | <a href="#">Dennd1a.aSep08</a>            | <a href="#">311913</a> | 158468 | 3853 | 9  | 767 | dDENN (Dennd1a) alternative variant aSep08, mRNA.                                          |
| <a href="#">Dennd1a</a>            | <a href="#">Dennd1a.bSep08</a>            | <a href="#">311913</a> | 14921  | 740  | 1  | 182 | putative protein of vertebrate origin (Dennd1a) alternative variant bSep08, mRNA.          |
| <a href="#">Dennd1a</a>            | <a href="#">Dennd1a.cSep08</a>            | <a href="#">311913</a> | 33972  | 592  | 6  | 128 | putative protein of bilateral origin (Dennd1a) alternative variant cSep08, mRNA.           |
| <a href="#">Dennd1b</a>            | <a href="#">Dennd1b.aSep08</a>            | <a href="#">289051</a> | 45266  | 400  | 5  | 133 | uDENN (Dennd1b) alternative variant aSep08, mRNA.                                          |
| <a href="#">Dennd1b</a>            | <a href="#">Dennd1b.bSep08</a>            | <a href="#">289051</a> | 36843  | 294  | 3  | 97  | putative protein of eukaryotic origin (Dennd1b) alternative variant bSep08, mRNA.          |
| <a href="#">Dennd2a</a>            | <a href="#">Dennd2a.aSep08</a>            | <a href="#">312257</a> | 18913  | 1226 | 2  | 298 | denn 2A (Dennd2a) alternative variant aSep08, mRNA.                                        |
| <a href="#">Dennd2a</a>            | <a href="#">Dennd2a.bSep08</a>            | <a href="#">312257</a> | 2251   | 875  | 1  | 148 | denn 2A (Dennd2a) alternative variant bSep08, mRNA.                                        |
| <a href="#">Dennd2c</a>            | <a href="#">Dennd2c.aSep08</a>            | <a href="#">295333</a> | 13477  | 1154 |    | 336 | DENN (Dennd2c) mRNA.                                                                       |
| <a href="#">Dennd3</a>             | <a href="#">Dennd3.aSep08</a>             | <a href="#">315055</a> | 7849   | 2063 |    | 242 | WD-40 repeat (Dennd3) mRNA.                                                                |
| <a href="#">Dennd4b</a>            | <a href="#">Dennd4b.aSep08</a>            | <a href="#">361987</a> | 3097   | 1768 |    | 339 | putative protein of eukaryotic origin (Dennd4b) mRNA.                                      |
| <a href="#">DEP.0</a>              | <a href="#">DEP.0.aSep08</a>              |                        | 369    | 298  |    | 72  | regulator of G-protein 11 (DEP.0) mRNA.                                                    |
| <a href="#">DEP.1</a>              | <a href="#">DEP.1.aSep08</a>              |                        | 4048   | 2025 | 10 | 490 | dishevelled homolog (51.8 kD) (DEP.1) alternative variant aSep08, complete mRNA.           |
| <a href="#">DEP.1</a>              | <a href="#">DEP.1.bSep08</a>              |                        | 1376   | 877  | 4  | 194 | dishevelled homolog (21.1 kD) (DEP.1) alternative variant bSep08, mRNA.                    |
| <a href="#">DEP.1</a>              | <a href="#">DEP.1.cSep08</a>              |                        | 948    | 860  | 2  | 138 | dishevelled homolog precursor (15.0 kD) (DEP.1) alternative variant cSep08, mRNA.          |
| <a href="#">DEP.1</a>              | <a href="#">DEP.1.dSep08</a>              |                        | 660    | 458  | 3  | 75  | dishevelled homolog (DEP.1) alternative variant dSep08, mRNA.                              |
| <a href="#">DEP.2</a>              | <a href="#">DEP.2.aSep08</a>              |                        | 12266  | 745  |    | 248 | phosphatidylinositol 3 4 5-trisphosphate-dependent Rac exchanger 1 (DEP.2) mRNA.           |
| <a href="#">Depdc1a</a>            | <a href="#">Depdc1a.aSep08</a>            | <a href="#">295538</a> | 2901   | 139  |    | 45  | putative protein of bilateral origin (Depdc1a) mRNA.                                       |
| <a href="#">Depdc1b</a>            | <a href="#">Depdc1b.bSep08</a>            | <a href="#">310074</a> | 13714  | 747  | 1  | 81  | DEP domain-containing protein 1B (Depdc1b) alternative variant bSep08, mRNA.               |



|                         |                                |                        |       |      |   |     |                                                                                      |
|-------------------------|--------------------------------|------------------------|-------|------|---|-----|--------------------------------------------------------------------------------------|
| <a href="#">Depdc2</a>  | <a href="#">Depdc2.bSep08</a>  | <a href="#">312912</a> | 28294 | 827  | 8 | 275 | ptdins-dependent rac exchanger 2a (Depdc2) alternative variant bSep08, mRNA.         |
| <a href="#">Depdc2</a>  | <a href="#">Depdc2.dSep08</a>  | <a href="#">312912</a> | 34148 | 1311 | 4 | 84  | putative protein of metazoan origin (Depdc2) alternative variant dSep08, mRNA.       |
| <a href="#">Depdc5</a>  | <a href="#">Depdc5.bSep08</a>  | <a href="#">305464</a> | 16902 | 755  | 5 | 154 | putative protein of metazoan origin (Depdc5) alternative variant bSep08, mRNA.       |
| <a href="#">Depdc5</a>  | <a href="#">Depdc5.cSep08</a>  | <a href="#">305464</a> | 4483  | 425  | 4 | 68  | putative protein (Depdc5) alternative variant cSep08, mRNA.                          |
| <a href="#">Depdc7</a>  | <a href="#">Depdc7.bSep08</a>  | <a href="#">295971</a> | 2556  | 1230 | 2 | 109 | putative protein of vertebrate origin (Depdc7) alternative variant bSep08, mRNA.     |
| <a href="#">derby</a>   | <a href="#">derby.aSep08</a>   |                        | 3558  | 685  |   | 49  | putative protein (5.8 kD) (derby) mRNA.                                              |
| <a href="#">derchy</a>  | <a href="#">derchy.aSep08</a>  |                        | 3982  | 292  |   | 34  | putative protein (derchy) mRNA.                                                      |
| <a href="#">derfer</a>  | <a href="#">derfer.aSep08</a>  |                        | 26258 | 553  |   | 69  | putative protein (derfer) mRNA.                                                      |
| <a href="#">derflo</a>  | <a href="#">derflo.aSep08</a>  |                        | 14231 | 374  | 2 | 85  | putative mitochondrial protein (9.7 kD) (derflo) alternative variant aSep08, mRNA.   |
| <a href="#">derflo</a>  | <a href="#">derflo.bSep08</a>  |                        | 16980 | 466  | 3 | 24  | putative protein (2.6 kD) (derflo) alternative variant bSep08, mRNA.                 |
| <a href="#">derflo</a>  | <a href="#">derflo.cSep08</a>  |                        | 17344 | 398  | 3 | 40  | putative protein (derflo) alternative variant cSep08, mRNA.                          |
| <a href="#">derflu</a>  | <a href="#">derflu.aSep08</a>  |                        | 1161  | 380  |   | 34  | putative protein (derflu) mRNA.                                                      |
| <a href="#">derkee</a>  | <a href="#">derkee.aSep08</a>  |                        | 24134 | 475  |   | 42  | putative protein (4.8 kD) (derkee) mRNA.                                             |
| <a href="#">Der1</a>    | <a href="#">Der1.bSep08</a>    | <a href="#">362912</a> | 4245  | 524  | 2 | 65  | der1-like domain family, member 1 (7.2 kD) (Der1) alternative variant bSep08, mRNA.  |
| <a href="#">Der1</a>    | <a href="#">Der1.cSep08</a>    | <a href="#">362912</a> | 8786  | 260  | 2 | 34  | der1-like domain family, member 1 (4.0 kD) (Der1) alternative variant cSep08, mRNA.  |
| <a href="#">Der2</a>    | <a href="#">Der2.aSep08</a>    | <a href="#">691956</a> | 9142  | 1146 | 7 | 246 | der1-like domain family, member 2 (Der2) alternative variant aSep08, mRNA.           |
| <a href="#">Der2</a>    | <a href="#">Der2.bSep08</a>    | <a href="#">691956</a> | 6399  | 792  | 5 | 61  | der1-like domain family, member 2 (Der2) alternative variant bSep08, mRNA.           |
| <a href="#">Der2</a>    | <a href="#">Der2.cSep08</a>    | <a href="#">691956</a> | 5218  | 437  | 3 | 60  | der1-like domain family, member 2 (Der2) alternative variant cSep08, mRNA.           |
| <a href="#">Der3</a>    | <a href="#">Der3.bSep08</a>    | <a href="#">690315</a> | 3442  | 1117 | 6 | 222 | der1-like domain family, member 3 (Der3) alternative variant bSep08, mRNA.           |
| <a href="#">Der3</a>    | <a href="#">Der3.cSep08</a>    | <a href="#">690315</a> | 12336 | 774  | 5 | 154 | der1-like domain family, member 3 (17.7 kD) (Der3) alternative variant cSep08, mRNA. |
| <a href="#">Der3</a>    | <a href="#">Der3.dSep08</a>    | <a href="#">690315</a> | 1787  | 1083 | 2 | 79  | der1-like domain family, member 3 (Der3) alternative variant dSep08, mRNA.           |
| <a href="#">derloy</a>  | <a href="#">derloy.aSep08</a>  |                        | 882   | 456  | 2 | 25  | putative protein (derloy) alternative variant aSep08, mRNA.                          |
| <a href="#">dermer</a>  | <a href="#">dermer.aSep08</a>  |                        | 1793  | 928  |   | 74  | putative cytoplasmic protein (8.5 kD) (dermer) mRNA.                                 |
| <a href="#">dernoy</a>  | <a href="#">dernoy.bSep08</a>  |                        | 25627 | 447  | 3 | 19  | putative protein (dernoy) alternative variant bSep08, mRNA.                          |
| <a href="#">derpor</a>  | <a href="#">derpor.aSep08</a>  |                        | 5136  | 599  |   | 26  | putative protein (2.8 kD) (derpor) mRNA.                                             |
| <a href="#">dersa</a>   | <a href="#">dersa.aSep08</a>   |                        | 6426  | 1247 |   | 415 | putative protein of metazoan origin (dersa) alternative variant aSep08, mRNA.        |
| <a href="#">dershee</a> | <a href="#">dershee.aSep08</a> |                        | 20897 | 527  |   | 118 | putative protein (dershee) mRNA.                                                     |
| <a href="#">derto</a>   | <a href="#">derto.aSep08</a>   |                        | 4711  | 545  |   | 47  | putative protein (derto) mRNA.                                                       |

|                         |                                |                        |        |      |    |     |                                                                                           |
|-------------------------|--------------------------------|------------------------|--------|------|----|-----|-------------------------------------------------------------------------------------------|
| <a href="#">dervar</a>  | <a href="#">dervar.aSep08</a>  |                        | 12988  | 794  | 4  | 108 | putative protein (dervar) alternative variant aSep08, mRNA.                               |
| <a href="#">dervar</a>  | <a href="#">dervar.bSep08</a>  |                        | 3744   | 219  | 1  | 73  | putative protein (dervar) alternative variant bSep08, mRNA.                               |
| <a href="#">derwey</a>  | <a href="#">derwey.aSep08</a>  |                        | 3650   | 507  |    | 81  | putative protein of eukaryotic origin (derwey) mRNA.                                      |
| <a href="#">Det1</a>    | <a href="#">Det1.bSep08</a>    | <a href="#">308775</a> | 10350  | 1207 | 4  | 392 | de-etiolated homolog 1 (Arabidopsis) (Det1) alternative variant bSep08, mRNA.             |
| <a href="#">Dexi</a>    | <a href="#">Dexi.cSep08</a>    | <a href="#">497857</a> | 4344   | 1463 | 2  | 50  | dexamethasone-induced transcript (Dexi) alternative variant cSep08, mRNA.                 |
| <a href="#">deyby</a>   | <a href="#">deyby.aSep08</a>   |                        | 4113   | 405  |    | 134 | putative protein of metazoan origin (deyby) mRNA.                                         |
| <a href="#">deychy</a>  | <a href="#">deychy.aSep08</a>  |                        | 20247  | 347  |    | 27  | putative protein (deychy) mRNA.                                                           |
| <a href="#">deyfer</a>  | <a href="#">deyfer.aSep08</a>  |                        | 2748   | 546  | 1  | 66  | CRA c like (7.9 kD) (deyfer) alternative variant aSep08, mRNA.                            |
| <a href="#">deyfer</a>  | <a href="#">deyfer.bSep08</a>  |                        | 17160  | 663  | 2  | 61  | CRA b like (7.4 kD) (deyfer) alternative variant bSep08, mRNA.                            |
| <a href="#">deyflo</a>  | <a href="#">deyflo.aSep08</a>  |                        | 4325   | 666  |    | 36  | putative protein (3.9 kD) (deyflo) mRNA.                                                  |
| <a href="#">deyflu</a>  | <a href="#">deyflu.aSep08</a>  |                        | 957    | 774  |    | 32  | putative protein (3.4 kD) (deyflu) mRNA.                                                  |
| <a href="#">deykee</a>  | <a href="#">deykee.aSep08</a>  |                        | 2702   | 1033 |    | 83  | putative protein (9.3 kD) (deykee) mRNA.                                                  |
| <a href="#">deyloy</a>  | <a href="#">deyloy.aSep08</a>  |                        | 6375   | 590  |    | 57  | putative protein (deyloy) mRNA.                                                           |
| <a href="#">deymer</a>  | <a href="#">deymer.aSep08</a>  |                        | 5661   | 427  | 3  | 72  | truncated type I keratin KA21 (deymer) alternative variant aSep08, mRNA.                  |
| <a href="#">deynoy</a>  | <a href="#">deynoy.aSep08</a>  |                        | 3135   | 343  |    | 84  | putative protein (deynoy) mRNA.                                                           |
| <a href="#">deypor</a>  | <a href="#">deypor.aSep08</a>  |                        | 18263  | 570  |    | 40  | putative protein (4.5 kD) (deypor) alternative variant aSep08, mRNA.                      |
| <a href="#">deypor</a>  | <a href="#">deypor.bSep08</a>  |                        | 18037  | 493  | 1  | 40  | putative protein (4.5 kD) (deypor) alternative variant bSep08, mRNA.                      |
| <a href="#">deysa</a>   | <a href="#">deysa.aSep08</a>   |                        | 2041   | 242  |    | 80  | ubiquitin protein ligase E3 component n-recognin 5 (deysa) mRNA.                          |
| <a href="#">deyshee</a> | <a href="#">deyshee.aSep08</a> |                        | 312424 | 510  |    | 107 | catenin delta 2 (11.3 kD) (deyshee) mRNA.                                                 |
| <a href="#">deyto</a>   | <a href="#">deyto.aSep08</a>   |                        | 1247   | 213  |    | 71  | atp-dependent rna helicase tdr9 (deyto) mRNA.                                             |
| <a href="#">deyvar</a>  | <a href="#">deyvar.aSep08</a>  |                        | 14301  | 451  |    | 149 | putative protein of vertebrate origin (deyvar) mRNA.                                      |
| <a href="#">deywey</a>  | <a href="#">deywey.aSep08</a>  |                        | 2538   | 754  |    | 69  | activator-like MOB1 Mps One Binder kinase 1 (deywey) mRNA.                                |
| <a href="#">Dffb</a>    | <a href="#">Dffb.bSep08</a>    | <a href="#">84359</a>  | 5006   | 713  | 6  | 197 | DNA fragmentation factor, beta subunit (Dffb) alternative variant bSep08, mRNA.           |
| <a href="#">Dfna5h</a>  | <a href="#">Dfna5h.aSep08</a>  | <a href="#">353316</a> | 15057  | 1308 | 6  | 278 | deafness, autosomal dominant 5 homolog (human) (Dfna5h) alternative variant aSep08, mRNA. |
| <a href="#">Dfnb59</a>  | <a href="#">Dfnb59.aSep08</a>  | <a href="#">679552</a> | 5898   | 639  | 2  | 206 | deafness, autosomal recessive 59 (human) (Dfnb59) alternative variant aSep08, mRNA.       |
| <a href="#">Dfnb59</a>  | <a href="#">Dfnb59.bSep08</a>  | <a href="#">679552</a> | 2008   | 460  | 2  | 118 | deafness, autosomal recessive 59 (human) (Dfnb59) alternative variant bSep08, mRNA.       |
| <a href="#">Dgat1</a>   | <a href="#">Dgat1.bSep08</a>   | <a href="#">84497</a>  | 1590   | 744  | 10 | 238 | diacylglycerol O-acyltransferase 1 (Dgat1) alternative variant bSep08, mRNA.              |
| <a href="#">Dgat1</a>   | <a href="#">Dgat1.cSep08</a>   | <a href="#">84497</a>  | 4686   | 1574 | 14 | 214 | diacylglycerol O-acyltransferase 1 (Dgat1) alternative variant cSep08, mRNA.              |
| <a href="#">Dgat1</a>   | <a href="#">Dgat1.dSep08</a>   | <a href="#">84497</a>  | 1043   | 662  | 5  | 149 | diacylglycerol O-acyltransferase 1 (Dgat1) alternative variant dSep08, mRNA.              |

|                        |                               |                        |        |      |    |     |                                                                                             |
|------------------------|-------------------------------|------------------------|--------|------|----|-----|---------------------------------------------------------------------------------------------|
| <a href="#">Dgat1</a>  | <a href="#">Dgat1.eSep08</a>  | <a href="#">84497</a>  | 1164   | 819  | 5  | 107 | diacylglycerol O-acyltransferase 1 (12.4 kD) (Dgat1) alternative variant eSep08, mRNA.      |
| <a href="#">Dgat2</a>  | <a href="#">Dgat2.bSep08</a>  | <a href="#">252900</a> | 25783  | 747  | 3  | 171 | diacylglycerol O-acyltransferase 2 (Dgat2) alternative variant bSep08, mRNA.                |
| <a href="#">Dgat2</a>  | <a href="#">Dgat2.cSep08</a>  | <a href="#">252900</a> | 19837  | 728  | 2  | 84  | diacylglycerol O-acyltransferase 2 (9.2 kD) (Dgat2) alternative variant cSep08, mRNA.       |
| <a href="#">Dgcr2</a>  | <a href="#">Dgcr2.aSep08</a>  | <a href="#">360742</a> | 33000  | 730  |    | 150 | DiGeorge syndrome critical region gene 2 (Dgcr2) mRNA.                                      |
| <a href="#">Dgcr6</a>  | <a href="#">Dgcr6.bSep08</a>  | <a href="#">303794</a> | 4659   | 607  | 4  | 197 | DiGeorge syndrome critical region gene 6 (Dgcr6) alternative variant bSep08, mRNA.          |
| <a href="#">Dgcr6</a>  | <a href="#">Dgcr6.cSep08</a>  | <a href="#">303794</a> | 1383   | 775  | 1  | 62  | DiGeorge syndrome critical region gene 6 (7.0 kD) (Dgcr6) alternative variant cSep08, mRNA. |
| <a href="#">Dgcr14</a> | <a href="#">Dgcr14.bSep08</a> | <a href="#">360741</a> | 5406   | 2138 | 2  | 283 | DiGeorge syndrome critical region gene 14 (Dgcr14) alternative variant bSep08, mRNA.        |
| <a href="#">Dgka</a>   | <a href="#">Dgka.bSep08</a>   | <a href="#">140866</a> | 13915  | 2012 | 12 | 226 | diacylglycerol kinase alpha (25.4 kD) (Dgka) alternative variant bSep08, mRNA.              |
| <a href="#">Dgka</a>   | <a href="#">Dgka.cSep08</a>   | <a href="#">140866</a> | 2729   | 595  | 6  | 198 | diacylglycerol kinase alpha (Dgka) alternative variant cSep08, mRNA.                        |
| <a href="#">Dgka</a>   | <a href="#">Dgka.dSep08</a>   | <a href="#">140866</a> | 1614   | 645  | 5  | 193 | diacylglycerol kinase alpha (Dgka) alternative variant dSep08, mRNA.                        |
| <a href="#">Dgka</a>   | <a href="#">Dgka.eSep08</a>   | <a href="#">140866</a> | 2228   | 538  | 3  | 127 | diacylglycerol kinase alpha (13.8 kD) (Dgka) alternative variant eSep08, mRNA.              |
| <a href="#">Dgkb</a>   | <a href="#">Dgkb.bSep08</a>   | <a href="#">54248</a>  | 38185  | 3953 | 3  | 90  | diacylglycerol kinase, beta (Dgkb) alternative variant bSep08, mRNA.                        |
| <a href="#">Dgkb</a>   | <a href="#">Dgkb.cSep08</a>   | <a href="#">54248</a>  | 242553 | 1785 | 5  | 75  | diacylglycerol kinase, beta (Dgkb) alternative variant cSep08, mRNA.                        |
| <a href="#">Dgkg</a>   | <a href="#">Dgkg.aSep08</a>   | <a href="#">25666</a>  | 105378 | 1795 | 7  | 572 | diacylglycerol kinase gamma (Dgkg) alternative variant aSep08, mRNA.                        |
| <a href="#">Dgkg</a>   | <a href="#">Dgkg.bSep08</a>   | <a href="#">25666</a>  | 88371  | 1801 | 10 | 428 | diacylglycerol kinase gamma (Dgkg) alternative variant bSep08, mRNA.                        |
| <a href="#">Dgkg</a>   | <a href="#">Dgkg.dSep08</a>   | <a href="#">25666</a>  | 1164   | 327  | 2  | 101 | putative protein (Dgkg) alternative variant dSep08, mRNA.                                   |
| <a href="#">Dgki</a>   | <a href="#">Dgki.bSep08</a>   | <a href="#">688705</a> | 209956 | 1060 | 1  | 150 | diacylglycerol kinase, iota (Dgki) alternative variant bSep08, mRNA.                        |
| <a href="#">Dgkz</a>   | <a href="#">Dgkz.bSep08</a>   | <a href="#">81821</a>  | 9161   | 1454 | 9  | 459 | diacylglycerol kinase zeta 104kDa (Dgkz) alternative variant bSep08, mRNA.                  |
| <a href="#">Dgkz</a>   | <a href="#">Dgkz.cSep08</a>   | <a href="#">81821</a>  | 4906   | 1882 | 13 | 250 | diacylglycerol kinase zeta (27.6 kD) (Dgkz) alternative variant cSep08, mRNA.               |
| <a href="#">Dgkz</a>   | <a href="#">Dgkz.dSep08</a>   | <a href="#">81821</a>  | 2092   | 669  | 7  | 222 | diacylglycerol kinase zeta CRA a (Dgkz) alternative variant dSep08, mRNA.                   |
| <a href="#">Dgkz</a>   | <a href="#">Dgkz.fSep08</a>   | <a href="#">81821</a>  | 4147   | 1415 | 10 | 164 | diacylglycerol kinase zeta CRA a (Dgkz) alternative variant fSep08, mRNA.                   |
| <a href="#">Dgkz</a>   | <a href="#">Dgkz.gSep08</a>   | <a href="#">81821</a>  | 31271  | 397  | 4  | 131 | diacylglycerol kinase zeta (Dgkz) alternative variant gSep08, mRNA.                         |
| <a href="#">Dgkz</a>   | <a href="#">Dgkz.hSep08</a>   | <a href="#">81821</a>  | 5176   | 2261 | 12 | 126 | diacylglycerol kinase zeta 104kDa (13.8 kD) (Dgkz) alternative variant hSep08, mRNA.        |
| <a href="#">Dgkz</a>   | <a href="#">Dgkz.iSep08</a>   | <a href="#">81821</a>  | 946    | 397  | 3  | 74  | diacylglycerol kinase zeta (Dgkz) alternative variant iSep08, mRNA.                         |

|                       |                              |                        |       |      |   |     |                                                                                            |
|-----------------------|------------------------------|------------------------|-------|------|---|-----|--------------------------------------------------------------------------------------------|
| <a href="#">Dguok</a> | <a href="#">Dguok.bSep08</a> | <a href="#">297389</a> | 17480 | 1676 | 6 | 259 | deoxyguanosine kinase (30.0 kD) (Dguok) alternative variant bSep08, mRNA.                  |
| <a href="#">Dguok</a> | <a href="#">Dguok.cSep08</a> | <a href="#">297389</a> | 6460  | 742  | 4 | 247 | deoxyguanosine kinase (Dguok) alternative variant cSep08, mRNA.                            |
| <a href="#">Dguok</a> | <a href="#">Dguok.dSep08</a> | <a href="#">297389</a> | 21230 | 733  | 5 | 244 | deoxyguanosine kinase (Dguok) alternative variant dSep08, mRNA.                            |
| <a href="#">Dguok</a> | <a href="#">Dguok.eSep08</a> | <a href="#">297389</a> | 26937 | 739  | 5 | 201 | deoxyguanosine kinase (Dguok) alternative variant eSep08, mRNA.                            |
| <a href="#">Dguok</a> | <a href="#">Dguok.fSep08</a> | <a href="#">297389</a> | 7458  | 1198 | 3 | 159 | deoxyguanosine kinase (Dguok) alternative variant fSep08, mRNA.                            |
| <a href="#">Dguok</a> | <a href="#">Dguok.gSep08</a> | <a href="#">297389</a> | 6450  | 597  | 4 | 132 | deoxyguanosine kinase (Dguok) alternative variant gSep08, mRNA.                            |
| <a href="#">Dguok</a> | <a href="#">Dguok.hSep08</a> | <a href="#">297389</a> | 6773  | 508  | 3 | 121 | deoxyguanosine kinase (Dguok) alternative variant hSep08, mRNA.                            |
| <a href="#">Dhdds</a> | <a href="#">Dhdds.bSep08</a> | <a href="#">298541</a> | 23600 | 2802 | 7 | 229 | dehydrodolichyl diphosphate synthase (26.4 kD) (Dhdds) alternative variant bSep08, mRNA.   |
| <a href="#">Dhdds</a> | <a href="#">Dhdds.cSep08</a> | <a href="#">298541</a> | 21545 | 662  | 6 | 220 | dehydrodolichyl diphosphate synthase (Dhdds) alternative variant cSep08, mRNA.             |
| <a href="#">Dhdds</a> | <a href="#">Dhdds.dSep08</a> | <a href="#">298541</a> | 7226  | 766  | 6 | 191 | dehydrodolichyl diphosphate synthase (Dhdds) alternative variant dSep08, mRNA.             |
| <a href="#">Dhdds</a> | <a href="#">Dhdds.eSep08</a> | <a href="#">298541</a> | 21422 | 653  | 7 | 186 | dehydrodolichyl diphosphate synthase (Dhdds) alternative variant eSep08, mRNA.             |
| <a href="#">Dhh</a>   | <a href="#">Dhh.bSep08</a>   | <a href="#">84380</a>  | 3356  | 606  | 2 | 126 | desert hedgehog (Dhh) alternative variant bSep08, mRNA.                                    |
| <a href="#">Dhodh</a> | <a href="#">Dhodh.bSep08</a> | <a href="#">65156</a>  | 12875 | 861  | 7 | 262 | dihydroorotate dehydrogenase (Dhodh) alternative variant bSep08, mRNA.                     |
| <a href="#">Dhps</a>  | <a href="#">Dhps.bSep08</a>  | <a href="#">288923</a> | 1629  | 787  | 4 | 171 | deoxyhypusine synthase (Dhps) alternative variant bSep08, mRNA.                            |
| <a href="#">Dhps</a>  | <a href="#">Dhps.cSep08</a>  | <a href="#">288923</a> | 1505  | 1104 | 2 | 128 | deoxyhypusine synthase (13.9 kD) (Dhps) alternative variant cSep08, complete mRNA.         |
| <a href="#">Dhrs1</a> | <a href="#">Dhrs1.bSep08</a> | <a href="#">290234</a> | 5690  | 909  | 6 | 226 | dehydrogenase reductase member 1 (24.3 kD) (Dhrs1) alternative variant bSep08, mRNA.       |
| <a href="#">Dhrs1</a> | <a href="#">Dhrs1.cSep08</a> | <a href="#">290234</a> | 5263  | 815  | 6 | 208 | dehydrogenase reductase member 1 (Dhrs1) alternative variant cSep08, mRNA.                 |
| <a href="#">Dhrs1</a> | <a href="#">Dhrs1.dSep08</a> | <a href="#">290234</a> | 5508  | 773  | 7 | 196 | dehydrogenase reductase member 1 (Dhrs1) alternative variant dSep08, mRNA.                 |
| <a href="#">Dhrs1</a> | <a href="#">Dhrs1.eSep08</a> | <a href="#">290234</a> | 2822  | 698  | 3 | 101 | dehydrogenase reductase member 1 (10.8 kD) (Dhrs1) alternative variant eSep08, mRNA.       |
| <a href="#">Dhrs1</a> | <a href="#">Dhrs1.fSep08</a> | <a href="#">290234</a> | 3136  | 898  | 4 | 101 | dehydrogenase reductase member 1 (10.8 kD) (Dhrs1) alternative variant fSep08, mRNA.       |
| <a href="#">Dhrs1</a> | <a href="#">Dhrs1.gSep08</a> | <a href="#">290234</a> | 1264  | 833  | 3 | 95  | dehydrogenase reductase member 1 CRA a (10.5 kD) (Dhrs1) alternative variant gSep08, mRNA. |
| <a href="#">Dhrs1</a> | <a href="#">Dhrs1.iSep08</a> | <a href="#">290234</a> | 3197  | 615  | 4 | 54  | dehydrogenase reductase member 1 (Dhrs1) alternative variant iSep08, mRNA.                 |
| <a href="#">Dhrs3</a> | <a href="#">Dhrs3.bSep08</a> | <a href="#">313689</a> | 26299 | 737  | 5 | 245 | dehydrogenase/reductase (SDR family) member 3 (Dhrs3) alternative variant bSep08, mRNA.    |
| <a href="#">Dhrs3</a> | <a href="#">Dhrs3.cSep08</a> | <a href="#">313689</a> | 26439 | 752  | 4 | 147 | dehydrogenase/reductase (SDR family) member 3 (Dhrs3) alternative variant cSep08, mRNA.    |

|                        |                               |                        |       |      |    |     |                                                                                                              |
|------------------------|-------------------------------|------------------------|-------|------|----|-----|--------------------------------------------------------------------------------------------------------------|
| <a href="#">Dhrs3</a>  | <a href="#">Dhrs3.dSep08</a>  | <a href="#">313689</a> | 23992 | 757  | 4  | 129 | dehydrogenase/reductase (SDR family) member 3 (Dhrs3) alternative variant dSep08, mRNA.                      |
| <a href="#">Dhrs4</a>  | <a href="#">Dhrs4.bSep08</a>  | <a href="#">266686</a> | 9036  | 737  | 6  | 183 | dehydrogenase/reductase (SDR family) member 4 (19.4 kD) (Dhrs4) alternative variant bSep08, mRNA.            |
| <a href="#">Dhrs4</a>  | <a href="#">Dhrs4.cSep08</a>  | <a href="#">266686</a> | 9502  | 721  | 7  | 156 | dehydrogenase/reductase (SDR family) member 4 (16.6 kD) (Dhrs4) alternative variant cSep08, mRNA.            |
| <a href="#">Dhrs4</a>  | <a href="#">Dhrs4.dSep08</a>  | <a href="#">266686</a> | 1942  | 955  | 2  | 128 | dehydrogenase/reductase (SDR family) member 4 (13.7 kD) (Dhrs4) alternative variant dSep08, mRNA.            |
| <a href="#">Dhrs4</a>  | <a href="#">Dhrs4.eSep08</a>  | <a href="#">266686</a> | 7721  | 531  | 4  | 112 | dehydrogenase/reductase (SDR family) member 4 (Dhrs4) alternative variant eSep08, mRNA.                      |
| <a href="#">Dhrs4</a>  | <a href="#">Dhrs4.gSep08</a>  | <a href="#">266686</a> | 2463  | 711  | 3  | 47  | dehydrogenase/reductase (SDR family) member 4 (5.1 kD) (Dhrs4) alternative variant gSep08, mRNA.             |
| <a href="#">Dhrs7b</a> | <a href="#">Dhrs7b.bSep08</a> | <a href="#">287380</a> | 32536 | 1325 | 6  | 316 | dehydrogenase/reductase (SDR family) member 7B (34.4 kD) (Dhrs7b) alternative variant bSep08, complete mRNA. |
| <a href="#">Dhrs7b</a> | <a href="#">Dhrs7b.cSep08</a> | <a href="#">287380</a> | 32375 | 1071 | 5  | 308 | dehydrogenase/reductase (SDR family) member 7B (Dhrs7b) alternative variant cSep08, mRNA.                    |
| <a href="#">Dhrs7b</a> | <a href="#">Dhrs7b.dSep08</a> | <a href="#">287380</a> | 31868 | 1343 | 5  | 286 | dehydrogenase/reductase (SDR family) member 7B (30.8 kD) (Dhrs7b) alternative variant dSep08, mRNA.          |
| <a href="#">Dhrs7b</a> | <a href="#">Dhrs7b.eSep08</a> | <a href="#">287380</a> | 17497 | 849  | 5  | 256 | dehydrogenase/reductase (SDR family) member 7B (Dhrs7b) alternative variant eSep08, mRNA.                    |
| <a href="#">Dhrs7b</a> | <a href="#">Dhrs7b.fSep08</a> | <a href="#">287380</a> | 28830 | 1781 | 4  | 223 | dehydrogenase/reductase (SDR family) member 7B (24.2 kD) (Dhrs7b) alternative variant fSep08, complete mRNA. |
| <a href="#">Dhrs7b</a> | <a href="#">Dhrs7b.gSep08</a> | <a href="#">287380</a> | 27296 | 747  | 4  | 174 | dehydrogenase/reductase (SDR family) member 7B (Dhrs7b) alternative variant gSep08, mRNA.                    |
| <a href="#">Dhrs7b</a> | <a href="#">Dhrs7b.hSep08</a> | <a href="#">287380</a> | 9118  | 766  | 2  | 163 | dehydrogenase/reductase (SDR family) member 7B (Dhrs7b) alternative variant hSep08, mRNA.                    |
| <a href="#">Dhrs7c</a> | <a href="#">Dhrs7c.aSep08</a> | <a href="#">287411</a> | 18047 | 1107 |    | 311 | dehydrogenase/reductase (SDR family) member 7C (34.4 kD) (Dhrs7c) mRNA.                                      |
| <a href="#">Dhrsx</a>  | <a href="#">Dhrsx.aSep08</a>  | <a href="#">288525</a> | 1482  | 636  | 3  | 202 | dhrsx protein (Dhrsx) alternative variant aSep08, mRNA.                                                      |
| <a href="#">Dhrsx</a>  | <a href="#">Dhrsx.bSep08</a>  | <a href="#">288525</a> | 3190  | 1026 | 5  | 201 | dhrsx protein (21.4 kD) (Dhrsx) alternative variant bSep08, mRNA.                                            |
| <a href="#">Dhrsx</a>  | <a href="#">Dhrsx.cSep08</a>  | <a href="#">288525</a> | 4559  | 1057 | 6  | 201 | dhrsx protein (21.4 kD) (Dhrsx) alternative variant cSep08, complete mRNA.                                   |
| <a href="#">Dhrsx</a>  | <a href="#">Dhrsx.eSep08</a>  | <a href="#">288525</a> | 2377  | 2136 | 2  | 150 | putative protein of ancient origin (15.8 kD) (Dhrsx) alternative variant eSep08, mRNA.                       |
| <a href="#">Dhrsx</a>  | <a href="#">Dhrsx.fSep08</a>  | <a href="#">288525</a> | 1266  | 296  | 2  | 83  | putative protein (Dhrsx) alternative variant fSep08, mRNA.                                                   |
| <a href="#">Dhtkd1</a> | <a href="#">Dhtkd1.bSep08</a> | <a href="#">361272</a> | 4138  | 250  |    | 61  | putative protein of ancient origin (Dhtkd1) alternative variant bSep08, mRNA.                                |
| <a href="#">Dhtkd1</a> | <a href="#">Dhtkd1.cSep08</a> | <a href="#">361272</a> | 2724  | 1613 |    | 61  | putative protein of ancient origin (Dhtkd1) alternative variant cSep08, mRNA.                                |
| <a href="#">Dhx8</a>   | <a href="#">Dhx8.bSep08</a>   | <a href="#">287727</a> | 14943 | 2399 | 11 | 630 | DEAH (Asp-Glu-Ala-His) box polypeptide 8 (Dhx8) alternative variant bSep08, mRNA.                            |
| <a href="#">Dhx8</a>   | <a href="#">Dhx8.cSep08</a>   | <a href="#">287727</a> | 10835 | 824  | 6  | 274 | DEAH (Asp-Glu-Ala-His) box polypeptide 8 (Dhx8) alternative variant cSep08, mRNA.                            |
| <a href="#">Dhx8</a>   | <a href="#">Dhx8.dSep08</a>   | <a href="#">287727</a> | 2812  | 726  | 4  | 227 | DEAH (Asp-Glu-Ala-His) box polypeptide 8 (Dhx8) alternative variant dSep08, mRNA.                            |

|                       |                              |                        |       |      |    |     |                                                                                               |
|-----------------------|------------------------------|------------------------|-------|------|----|-----|-----------------------------------------------------------------------------------------------|
| <a href="#">Dhx8</a>  | <a href="#">Dhx8.eSep08</a>  | <a href="#">287727</a> | 10331 | 760  | 6  | 226 | DEAH (Asp-Glu-Ala-His) box polypeptide 8 (Dhx8) alternative variant eSep08, mRNA.             |
| <a href="#">Dhx9</a>  | <a href="#">Dhx9.bSep08</a>  | <a href="#">304859</a> | 10721 | 406  | 1  | 134 | DEAH (Asp-Glu-Ala-His) box polypeptide 9 (Dhx9) alternative variant bSep08, mRNA.             |
| <a href="#">Dhx15</a> | <a href="#">Dhx15.aSep08</a> | <a href="#">289693</a> | 37924 | 2981 | 9  | 795 | DEAH (Asp-Glu-Ala-His) box polypeptide 15 (91.0 kD) (Dhx15) alternative variant aSep08, mRNA. |
| <a href="#">Dhx15</a> | <a href="#">Dhx15.bSep08</a> | <a href="#">289693</a> | 18530 | 1175 | 2  | 391 | DEAH (Asp-Glu-Ala-His) box polypeptide 15 (Dhx15) alternative variant bSep08, mRNA.           |
| <a href="#">Dhx15</a> | <a href="#">Dhx15.cSep08</a> | <a href="#">289693</a> | 5296  | 1134 | 1  | 256 | DEAH (Asp-Glu-Ala-His) box polypeptide 15 (Dhx15) alternative variant cSep08, mRNA.           |
| <a href="#">Dhx15</a> | <a href="#">Dhx15.dSep08</a> | <a href="#">289693</a> | 7692  | 1609 | 4  | 218 | DEAH (Asp-Glu-Ala-His) box polypeptide 15 (25.9 kD) (Dhx15) alternative variant dSep08, mRNA. |
| <a href="#">Dhx16</a> | <a href="#">Dhx16.bSep08</a> | <a href="#">294232</a> | 9588  | 1958 | 14 | 415 | deah box polypeptide 16 (47.2 kD) (Dhx16) alternative variant bSep08, mRNA.                   |
| <a href="#">Dhx16</a> | <a href="#">Dhx16.cSep08</a> | <a href="#">294232</a> | 2212  | 732  | 4  | 133 | deah box polypeptide 16 (15.3 kD) (Dhx16) alternative variant cSep08, mRNA.                   |
| <a href="#">Dhx16</a> | <a href="#">Dhx16.dSep08</a> | <a href="#">294232</a> | 2648  | 730  | 6  | 127 | deah box polypeptide 16 (Dhx16) alternative variant dSep08, mRNA.                             |
| <a href="#">Dhx16</a> | <a href="#">Dhx16.eSep08</a> | <a href="#">294232</a> | 2335  | 653  | 5  | 99  | deah box polypeptide 16 (11.4 kD) (Dhx16) alternative variant eSep08, mRNA.                   |
| <a href="#">Dhx16</a> | <a href="#">Dhx16.gSep08</a> | <a href="#">294232</a> | 1877  | 677  | 2  | 45  | deah box polypeptide 16 (5.3 kD) (Dhx16) alternative variant gSep08, mRNA.                    |
| <a href="#">Dhx30</a> | <a href="#">Dhx30.bSep08</a> | <a href="#">367172</a> | 1207  | 743  | 5  | 247 | DEAH (Asp-Glu-Ala-His) box polypeptide 30 (Dhx30) alternative variant bSep08, mRNA.           |
| <a href="#">Dhx30</a> | <a href="#">Dhx30.cSep08</a> | <a href="#">367172</a> | 1089  | 809  | 3  | 159 | DEAH (Asp-Glu-Ala-His) box polypeptide 30 (18.0 kD) (Dhx30) alternative variant cSep08, mRNA. |
| <a href="#">Dhx30</a> | <a href="#">Dhx30.dSep08</a> | <a href="#">367172</a> | 6465  | 462  | 4  | 153 | DEAH (Asp-Glu-Ala-His) box polypeptide 30 (Dhx30) alternative variant dSep08, mRNA.           |
| <a href="#">Dhx30</a> | <a href="#">Dhx30.eSep08</a> | <a href="#">367172</a> | 8689  | 747  | 4  | 143 | DEAH (Asp-Glu-Ala-His) box polypeptide 30 (Dhx30) alternative variant eSep08, mRNA.           |
| <a href="#">Dhx30</a> | <a href="#">Dhx30.fSep08</a> | <a href="#">367172</a> | 9047  | 431  | 4  | 54  | DEAH (Asp-Glu-Ala-His) box polypeptide 30 (6.1 kD) (Dhx30) alternative variant fSep08, mRNA.  |
| <a href="#">Dhx32</a> | <a href="#">Dhx32.bSep08</a> | <a href="#">361667</a> | 1697  | 960  | 2  | 104 | DEAH (Asp-Glu-Ala-His) box polypeptide 32 (11.9 kD) (Dhx32) alternative variant bSep08, mRNA. |
| <a href="#">Dhx35</a> | <a href="#">Dhx35.bSep08</a> | <a href="#">362260</a> | 7575  | 350  | 4  | 116 | DEAH (Asp-Glu-Ala-His) box polypeptide 35 (Dhx35) alternative variant bSep08, mRNA.           |
| <a href="#">Dhx35</a> | <a href="#">Dhx35.cSep08</a> | <a href="#">362260</a> | 2824  | 504  | 2  | 62  | DEAH (Asp-Glu-Ala-His) box polypeptide 35 (Dhx35) alternative variant cSep08, mRNA.           |
| <a href="#">Dhx36</a> | <a href="#">Dhx36.bSep08</a> | <a href="#">310461</a> | 2391  | 931  | 2  | 37  | DEAH (Asp-Glu-Ala-His) box polypeptide 36 (4.2 kD) (Dhx36) alternative variant bSep08, mRNA.  |
| <a href="#">Dhx36</a> | <a href="#">Dhx36.cSep08</a> | <a href="#">310461</a> | 1883  | 889  | 2  | 33  | DEAH (Asp-Glu-Ala-His) box polypeptide 36 (3.6 kD) (Dhx36) alternative variant cSep08, mRNA.  |
| <a href="#">Dhx37</a> | <a href="#">Dhx37.bSep08</a> | <a href="#">288647</a> | 2171  | 1132 | 7  | 180 | DEAH (Asp-Glu-Ala-His) box polypeptide 37 (Dhx37) alternative variant bSep08, mRNA.           |
| <a href="#">Dhx37</a> | <a href="#">Dhx37.dSep08</a> | <a href="#">288647</a> | 1804  | 468  | 4  | 95  | DEAH (Asp-Glu-Ala-His) box polypeptide 37 (Dhx37) alternative variant dSep08, mRNA.           |

|                        |                               |                        |       |      |    |     |                                                                                                              |
|------------------------|-------------------------------|------------------------|-------|------|----|-----|--------------------------------------------------------------------------------------------------------------|
| <a href="#">Dhx38</a>  | <a href="#">Dhx38.bSep08</a>  | <a href="#">292007</a> | 2025  | 686  | 6  | 141 | DEAH box polypeptide 38 (Dhx38) alternative variant bSep08, mRNA.                                            |
| <a href="#">Dhx38</a>  | <a href="#">Dhx38.cSep08</a>  | <a href="#">292007</a> | 3344  | 493  | 3  | 122 | DEAH box polypeptide 38 (Dhx38) alternative variant cSep08, mRNA.                                            |
| <a href="#">Dhx38</a>  | <a href="#">Dhx38.dSep08</a>  | <a href="#">292007</a> | 682   | 415  | 3  | 76  | DEAH box polypeptide 38 (Dhx38) alternative variant dSep08, mRNA.                                            |
| <a href="#">Dhx40</a>  | <a href="#">Dhx40.bSep08</a>  | <a href="#">287595</a> | 7438  | 1905 | 2  | 137 | DEAH (Asp-Glu-Ala-His) box polypeptide 40 (16.2 kD) (Dhx40) alternative variant bSep08, mRNA.                |
| <a href="#">Dhx57</a>  | <a href="#">Dhx57.aSep08</a>  | <a href="#">366532</a> | 23417 | 2297 | 1  | 600 | DEAH (Asp-Glu-Ala-Asp/His) box polypeptide 57 (Dhx57) alternative variant aSep08, mRNA.                      |
| <a href="#">Dhx57</a>  | <a href="#">Dhx57.bSep08</a>  | <a href="#">366532</a> | 3118  | 757  | 1  | 88  | DEAH (Asp-Glu-Ala-Asp/His) box polypeptide 57 (9.8 kD) (Dhx57) alternative variant bSep08, mRNA.             |
| <a href="#">Dhx58</a>  | <a href="#">Dhx58.bSep08</a>  | <a href="#">303538</a> | 624   | 385  | 1  | 127 | DEXH (Asp-Glu-X-His) box polypeptide 58 (Dhx58) alternative variant bSep08, mRNA.                            |
| <a href="#">Diablo</a> | <a href="#">Diablo.bSep08</a> | <a href="#">288753</a> | 2568  | 1178 | 2  | 117 | diablo homolog (Drosophila) (Diablo) alternative variant bSep08, mRNA.                                       |
| <a href="#">Diap1</a>  | <a href="#">Diap1.aSep08</a>  | <a href="#">307483</a> | 43290 | 1800 | 12 | 600 | diaphanous homolog 1 (Drosophila) (Diap1) alternative variant aSep08, mRNA.                                  |
| <a href="#">Diap1</a>  | <a href="#">Diap1.cSep08</a>  | <a href="#">307483</a> | 56248 | 1785 | 3  | 368 | diaphanous homolog 1 (Drosophila) (Diap1) alternative variant cSep08, mRNA.                                  |
| <a href="#">Diap1</a>  | <a href="#">Diap1.dSep08</a>  | <a href="#">307483</a> | 10198 | 2206 | 4  | 160 | diaphanous homolog 1 (Drosophila) (Diap1) alternative variant dSep08, mRNA.                                  |
| <a href="#">Diap1</a>  | <a href="#">Diap1.fSep08</a>  | <a href="#">307483</a> | 633   | 486  | 2  | 84  | diaphanous homolog 1 (Drosophila) (Diap1) alternative variant fSep08, mRNA.                                  |
| <a href="#">Diap3</a>  | <a href="#">Diap3.aSep08</a>  | <a href="#">290396</a> | 66568 | 628  |    | 209 | diaphanous homolog 3 (Drosophila) (Diap3) mRNA.                                                              |
| <a href="#">Dicer1</a> | <a href="#">Dicer1.aSep08</a> | <a href="#">299284</a> | 13196 | 2650 | 7  | 725 | dicer1, Dcr-1 homolog (Drosophila) (Dicer1) alternative variant aSep08, mRNA.                                |
| <a href="#">Dido1</a>  | <a href="#">Dido1.bSep08</a>  | <a href="#">362286</a> | 15215 | 1312 | 1  | 75  | death inducer-obliterator 1 (8.5 kD) (Dido1) alternative variant bSep08, mRNA.                               |
| <a href="#">Dimt1</a>  | <a href="#">Dimt1.bSep08</a>  | <a href="#">294718</a> | 4983  | 671  | 7  | 190 | DIM1 dimethyladenosine transferase 1-like (S. cerevisiae) (Dimt1) alternative variant bSep08, mRNA.          |
| <a href="#">Dimt1</a>  | <a href="#">Dimt1.cSep08</a>  | <a href="#">294718</a> | 4946  | 428  | 5  | 142 | DIM1 dimethyladenosine transferase 1-like (S. cerevisiae) (Dimt1) alternative variant cSep08, mRNA.          |
| <a href="#">Dimt1</a>  | <a href="#">Dimt1.dSep08</a>  | <a href="#">294718</a> | 2426  | 653  | 3  | 72  | DIM1 dimethyladenosine transferase 1-like (S. cerevisiae) (Dimt1) alternative variant dSep08, mRNA.          |
| <a href="#">Dimt1</a>  | <a href="#">Dimt1.eSep08</a>  | <a href="#">294718</a> | 3552  | 1975 | 2  | 79  | DIM1 dimethyladenosine transferase 1-like (S. cerevisiae) (9.2 kD) (Dimt1) alternative variant eSep08, mRNA. |
| <a href="#">Dimt1</a>  | <a href="#">Dimt1.fSep08</a>  | <a href="#">294718</a> | 13339 | 1005 | 6  | 86  | DIM1 dimethyladenosine transferase 1-like (S. cerevisiae) (9.5 kD) (Dimt1) alternative variant fSep08, mRNA. |
| <a href="#">Dimt1</a>  | <a href="#">Dimt1.gSep08</a>  | <a href="#">294718</a> | 2002  | 851  | 3  | 73  | DIM1 dimethyladenosine transferase 1-like (S. cerevisiae) (8.5 kD) (Dimt1) alternative variant gSep08, mRNA. |
| <a href="#">Dio1</a>   | <a href="#">Dio1.aSep08</a>   | <a href="#">25430</a>  | 18219 | 710  | 3  | 141 | deiodinase, iodothyronine, type I (15.9 kD) (Dio1) alternative variant aSep08, mRNA.                         |
| <a href="#">Dio1</a>   | <a href="#">Dio1.bSep08</a>   | <a href="#">25430</a>  | 17631 | 751  | 3  | 125 | deiodinase, iodothyronine, type I (14.5 kD) (Dio1) alternative variant bSep08, mRNA.                         |
| <a href="#">Dip2a</a>  | <a href="#">Dip2a.aSep08</a>  | <a href="#">690211</a> | 15152 | 940  |    | 313 | DIP2 disco-interacting protein 2 homolog A (Drosophila) (Dip2a) mRNA.                                        |

|                        |                               |                        |        |      |    |      |                                                                                                              |
|------------------------|-------------------------------|------------------------|--------|------|----|------|--------------------------------------------------------------------------------------------------------------|
| <a href="#">Dip2b</a>  | <a href="#">Dip2b.aSep08</a>  | <a href="#">300231</a> | 22544  | 1970 |    | 547  | DIP2 disco-interacting protein 2 homolog B (Drosophila) (Dip2b) alternative variant aSep08, mRNA.            |
| <a href="#">Dis3l</a>  | <a href="#">Dis3l.bSep08</a>  | <a href="#">363077</a> | 2767   | 844  | 3  | 169  | DIS3 mitotic control homolog (S. cerevisiae)-like (Dis3l) alternative variant bSep08, mRNA.                  |
| <a href="#">Dis3l</a>  | <a href="#">Dis3l.cSep08</a>  | <a href="#">363077</a> | 4051   | 445  | 2  | 148  | DIS3 mitotic control homolog (S. cerevisiae)-like (Dis3l) alternative variant cSep08, mRNA.                  |
| <a href="#">Dis3l2</a> | <a href="#">Dis3l2.aSep08</a> | <a href="#">367307</a> | 379823 | 2001 | 13 | 626  | DIS3 mitotic control homolog (S. cerevisiae)-like 2 (Dis3l2) alternative variant aSep08, mRNA.               |
| <a href="#">Dis3l2</a> | <a href="#">Dis3l2.bSep08</a> | <a href="#">367307</a> | 55081  | 223  | 2  | 67   | DIS3 mitotic control homolog (S. cerevisiae)-like 2 (Dis3l2) alternative variant bSep08, mRNA.               |
| <a href="#">Disp1</a>  | <a href="#">Disp1.bSep08</a>  | <a href="#">289338</a> | 6568   | 356  | 1  | 118  | dispatched homolog 1 (Drosophila) (Disp1) alternative variant bSep08, mRNA.                                  |
| <a href="#">Disp2</a>  | <a href="#">Disp2.aSep08</a>  | <a href="#">311324</a> | 8393   | 6176 | 3  | 1260 | dispatched homolog 2 (Drosophila) (139.0 kD) (Disp2) alternative variant aSep08, mRNA.                       |
| <a href="#">DIX.0</a>  | <a href="#">DIX.0.aSep08</a>  |                        | 5342   | 931  |    | 244  | dishevelled 2 (DIX.0) mRNA.                                                                                  |
| <a href="#">Dixdc1</a> | <a href="#">Dixdc1.bSep08</a> | <a href="#">363062</a> | 3477   | 607  | 3  | 82   | DIX (Dixdc1) alternative variant bSep08, mRNA.                                                               |
| <a href="#">Dixdc1</a> | <a href="#">Dixdc1.cSep08</a> | <a href="#">363062</a> | 701    | 248  | 2  | 55   | putative protein, with a coiled coil domain, of vertebrate origin (Dixdc1) alternative variant cSep08, mRNA. |
| <a href="#">Dkk2</a>   | <a href="#">Dkk2.bSep08</a>   | <a href="#">295445</a> | 6469   | 2810 | 2  | 159  | dickkopf homolog 2 (Xenopus laevis) (18.1 kD) (Dkk2) alternative variant bSep08, mRNA.                       |
| <a href="#">Dkk3</a>   | <a href="#">Dkk3.bSep08</a>   | <a href="#">171548</a> | 29908  | 1010 | 2  | 176  | dickkopf homolog 3 (Xenopus laevis) (18.3 kD) (Dkk3) alternative variant bSep08, mRNA.                       |
| <a href="#">Dkk3</a>   | <a href="#">Dkk3.cSep08</a>   | <a href="#">171548</a> | 6440   | 386  | 2  | 128  | dickkopf homolog 3 (Xenopus laevis) (Dkk3) alternative variant cSep08, mRNA.                                 |
| <a href="#">Dlc1</a>   | <a href="#">Dlc1.bSep08</a>   | <a href="#">58834</a>  | 1768   | 653  | 2  | 87   | deleted in liver cancer 1 (Dlc1) alternative variant bSep08, mRNA.                                           |
| <a href="#">Dld</a>    | <a href="#">Dld.bSep08</a>    | <a href="#">298942</a> | 8354   | 2552 | 6  | 255  | dihydrolipoamide dehydrogenase (27.3 kD) (Dld) alternative variant bSep08, mRNA.                             |
| <a href="#">Dld</a>    | <a href="#">Dld.cSep08</a>    | <a href="#">298942</a> | 10604  | 772  | 8  | 226  | dihydrolipoamide dehydrogenase (Dld) alternative variant cSep08, mRNA.                                       |
| <a href="#">Dld</a>    | <a href="#">Dld.dSep08</a>    | <a href="#">298942</a> | 13665  | 847  | 9  | 139  | dihydrolipoamide dehydrogenase (Dld) alternative variant dSep08, mRNA.                                       |
| <a href="#">Dld</a>    | <a href="#">Dld.eSep08</a>    | <a href="#">298942</a> | 711    | 616  | 2  | 65   | dihydrolipoamide dehydrogenase (Dld) alternative variant eSep08, mRNA.                                       |
| <a href="#">Dlec1</a>  | <a href="#">Dlec1.aSep08</a>  | <a href="#">501070</a> | 7736   | 694  |    | 230  | deleted in lung and esophageal cancer 1 isoform DLEC1-N1 (Dlec1) mRNA.                                       |
| <a href="#">Dleu7</a>  | <a href="#">Dleu7.bSep08</a>  | <a href="#">290308</a> | 16186  | 1584 |    | 209  | deleted in lymphocytic leukemia, 7 (22.6 kD) (Dleu7) alternative variant bSep08, mRNA.                       |
| <a href="#">Dlg1</a>   | <a href="#">Dlg1.bSep08</a>   | <a href="#">25252</a>  | 196138 | 2882 | 13 | 467  | discs, large homolog 1 (Drosophila) (Dlg1) alternative variant bSep08, mRNA.                                 |
| <a href="#">Dlg1</a>   | <a href="#">Dlg1.cSep08</a>   | <a href="#">25252</a>  | 28300  | 730  | 9  | 242  | discs, large homolog 1 (Drosophila) (Dlg1) alternative variant cSep08, mRNA.                                 |
| <a href="#">Dlg1</a>   | <a href="#">Dlg1.dSep08</a>   | <a href="#">25252</a>  | 39323  | 725  | 8  | 241  | discs, large homolog 1 (Drosophila) (Dlg1) alternative variant dSep08, mRNA.                                 |
| <a href="#">Dlg1</a>   | <a href="#">Dlg1.eSep08</a>   | <a href="#">25252</a>  | 18010  | 725  | 8  | 241  | discs, large homolog 1 (Drosophila) (Dlg1) alternative variant eSep08, mRNA.                                 |



|                      |                             |                        |        |      |    |     |                                                                                         |
|----------------------|-----------------------------|------------------------|--------|------|----|-----|-----------------------------------------------------------------------------------------|
| <a href="#">Dlg1</a> | <a href="#">Dlg1.fSep08</a> | <a href="#">25252</a>  | 9945   | 755  | 5  | 208 | discs, large homolog 1 (Drosophila) (Dlg1) alternative variant fSep08, mRNA.            |
| <a href="#">Dlg1</a> | <a href="#">Dlg1.gSep08</a> | <a href="#">25252</a>  | 14610  | 1138 | 4  | 136 | discs, large homolog 1 (Drosophila) (15.8 kD) (Dlg1) alternative variant gSep08, mRNA.  |
| <a href="#">Dlg1</a> | <a href="#">Dlg1.hSep08</a> | <a href="#">25252</a>  | 39640  | 539  | 4  | 134 | discs, large homolog 1 (Drosophila) (Dlg1) alternative variant hSep08, mRNA.            |
| <a href="#">Dlg1</a> | <a href="#">Dlg1.iSep08</a> | <a href="#">25252</a>  | 24229  | 731  | 9  | 132 | discs, large homolog 1 (Drosophila) (Dlg1) alternative variant iSep08, mRNA.            |
| <a href="#">Dlg1</a> | <a href="#">Dlg1.jSep08</a> | <a href="#">25252</a>  | 21938  | 397  | 6  | 131 | discs, large homolog 1 (Drosophila) (Dlg1) alternative variant jSep08, mRNA.            |
| <a href="#">Dlg1</a> | <a href="#">Dlg1.kSep08</a> | <a href="#">25252</a>  | 11484  | 626  | 4  | 100 | discs, large homolog 1 (Drosophila) (Dlg1) alternative variant kSep08, mRNA.            |
| <a href="#">Dlg1</a> | <a href="#">Dlg1.mSep08</a> | <a href="#">25252</a>  | 11365  | 312  | 4  | 69  | discs, large homolog 1 (Drosophila) (Dlg1) alternative variant mSep08, mRNA.            |
| <a href="#">Dlg1</a> | <a href="#">Dlg1.nSep08</a> | <a href="#">25252</a>  | 196198 | 1645 | 7  | 133 | discs, large homolog 1 (Drosophila) (14.7 kD) (Dlg1) alternative variant nSep08, mRNA.  |
| <a href="#">Dlg2</a> | <a href="#">Dlg2.bSep08</a> | <a href="#">64053</a>  | 183445 | 456  | 4  | 99  | discs large homolog 2 CRA b (Dlg2) alternative variant bSep08, mRNA.                    |
| <a href="#">Dlg2</a> | <a href="#">Dlg2.cSep08</a> | <a href="#">64053</a>  | 21512  | 404  | 2  | 66  | putative protein (Dlg2) alternative variant cSep08, mRNA.                               |
| <a href="#">Dlg2</a> | <a href="#">Dlg2.dSep08</a> | <a href="#">64053</a>  | 2704   | 1009 | 2  | 64  | discs large homolog 2 CRA b (7.6 kD) (Dlg2) alternative variant dSep08, mRNA.           |
| <a href="#">Dlg2</a> | <a href="#">Dlg2.eSep08</a> | <a href="#">64053</a>  | 331628 | 458  | 4  | 62  | putative protein of vertebrate origin (7.2 kD) (Dlg2) alternative variant eSep08, mRNA. |
| <a href="#">Dlg2</a> | <a href="#">Dlg2.fSep08</a> | <a href="#">64053</a>  | 93309  | 393  | 2  | 64  | putative protein (Dlg2) alternative variant fSep08, mRNA.                               |
| <a href="#">Dlg3</a> | <a href="#">Dlg3.bSep08</a> | <a href="#">58948</a>  | 37122  | 638  | 8  | 212 | discs, large homolog 3 (Drosophila) (Dlg3) alternative variant bSep08, mRNA.            |
| <a href="#">Dlg3</a> | <a href="#">Dlg3.cSep08</a> | <a href="#">58948</a>  | 23461  | 637  | 6  | 154 | discs, large homolog 3 (Drosophila) (Dlg3) alternative variant cSep08, mRNA.            |
| <a href="#">Dlg3</a> | <a href="#">Dlg3.dSep08</a> | <a href="#">58948</a>  | 4173   | 2873 | 3  | 66  | discs, large homolog 3 (Drosophila) (7.9 kD) (Dlg3) alternative variant dSep08, mRNA.   |
| <a href="#">Dlg4</a> | <a href="#">Dlg4.aSep08</a> | <a href="#">29495</a>  | 5100   | 1110 | 10 | 249 | discs, large homolog 4 (Drosophila) (Dlg4) alternative variant aSep08, mRNA.            |
| <a href="#">Dlg4</a> | <a href="#">Dlg4.cSep08</a> | <a href="#">29495</a>  | 831    | 681  | 2  | 125 | discs, large homolog 4 (Drosophila) (Dlg4) alternative variant cSep08, mRNA.            |
| <a href="#">Dlg4</a> | <a href="#">Dlg4.dSep08</a> | <a href="#">29495</a>  | 1854   | 1141 | 4  | 101 | discs, large homolog 4 (Drosophila) (Dlg4) alternative variant dSep08, mRNA.            |
| <a href="#">Dlg5</a> | <a href="#">Dlg5.cSep08</a> | <a href="#">305645</a> | 10096  | 572  | 5  | 190 | discs, large homolog 5 (Drosophila) (Dlg5) alternative variant cSep08, mRNA.            |
| <a href="#">Dlg5</a> | <a href="#">Dlg5.dSep08</a> | <a href="#">305645</a> | 9065   | 358  | 3  | 118 | discs, large homolog 5 (Drosophila) (Dlg5) alternative variant dSep08, mRNA.            |
| <a href="#">Dlg5</a> | <a href="#">Dlg5.eSep08</a> | <a href="#">305645</a> | 2415   | 897  | 3  | 109 | discs, large homolog 5 (Drosophila) (Dlg5) alternative variant eSep08, mRNA.            |
| <a href="#">Dlg7</a> | <a href="#">Dlg7.aSep08</a> | <a href="#">289997</a> | 34803  | 2739 | 19 | 815 | discs, large homolog 7 (Drosophila) (90.5 kD) (Dlg7) alternative variant aSep08, mRNA.  |
| <a href="#">Dlg7</a> | <a href="#">Dlg7.bSep08</a> | <a href="#">289997</a> | 5096   | 408  | 2  | 63  | discs, large homolog 7 (Drosophila) (Dlg7) alternative variant bSep08, mRNA.            |

|                                |                                       |                        |        |      |    |     |                                                                                                                                             |
|--------------------------------|---------------------------------------|------------------------|--------|------|----|-----|---------------------------------------------------------------------------------------------------------------------------------------------|
| <a href="#">Dlgap1</a>         | <a href="#">Dlgap1.bSep08</a>         | <a href="#">65040</a>  | 141481 | 748  | 4  | 249 | discs, large (Drosophila) homolog-associated protein 1 (Dlgap1) alternative variant bSep08, mRNA.                                           |
| <a href="#">Dlgap1</a>         | <a href="#">Dlgap1.cSep08</a>         | <a href="#">65040</a>  | 5627   | 388  | 3  | 63  | discs, large (Drosophila) homolog-associated protein 1 (Dlgap1) alternative variant cSep08, mRNA.                                           |
| <a href="#">Dlgap4</a>         | <a href="#">Dlgap4.bSep08</a>         | <a href="#">286930</a> | 27821  | 842  | 4  | 280 | discs, large homolog-associated protein 4 (Drosophila) (Dlgap4) alternative variant bSep08, mRNA.                                           |
| <a href="#">Dlgap4</a>         | <a href="#">Dlgap4.cSep08</a>         | <a href="#">286930</a> | 27787  | 817  | 4  | 271 | discs, large homolog-associated protein 4 (Drosophila) (Dlgap4) alternative variant cSep08, mRNA.                                           |
| <a href="#">Dlgap4</a>         | <a href="#">Dlgap4.dSep08</a>         | <a href="#">286930</a> | 7051   | 787  | 4  | 194 | discs, large homolog-associated protein 4 (Drosophila) (Dlgap4) alternative variant dSep08, mRNA.                                           |
| <a href="#">Dlgap4</a>         | <a href="#">Dlgap4.fSep08</a>         | <a href="#">286930</a> | 783    | 477  | 2  | 49  | discs, large homolog-associated protein 4 (Drosophila) (Dlgap4) alternative variant fSep08, mRNA.                                           |
| <a href="#">Dlk1</a>           | <a href="#">Dlk1.bSep08</a>           | <a href="#">114587</a> | 5835   | 1400 | 1  | 383 | delta-like 1 homolog (Drosophila) (Dlk1) alternative variant bSep08, mRNA.                                                                  |
| <a href="#">Dlk2</a>           | <a href="#">Dlk2.bSep08</a>           | <a href="#">316232</a> | 4344   | 1781 | 2  | 331 | delta-like 2 homolog (Drosophila) (Dlk2) alternative variant bSep08, mRNA.                                                                  |
| <a href="#">Dlst</a>           | <a href="#">Dlst.bSep08</a>           | <a href="#">299201</a> | 13620  | 753  | 9  | 250 | dihydrolipoamide S-succinyltransferase (E2 component of 2-oxo-glutarate complex) (Dlst) alternative variant bSep08, mRNA.                   |
| <a href="#">Dlst</a>           | <a href="#">Dlst.cSep08</a>           | <a href="#">299201</a> | 8697   | 3385 | 6  | 164 | dihydrolipoamide S-succinyltransferase (E2 component of 2-oxo-glutarate complex) (Dlst) alternative variant cSep08, mRNA.                   |
| <a href="#">Dlst</a>           | <a href="#">Dlst.dSep08</a>           | <a href="#">299201</a> | 8379   | 453  | 7  | 102 | dihydrolipoamide S-succinyltransferase (E2 component of 2-oxo-glutarate complex) (Dlst) alternative variant dSep08, mRNA.                   |
| <a href="#">Dlst</a>           | <a href="#">Dlst.eSep08</a>           | <a href="#">299201</a> | 7565   | 432  | 6  | 48  | dihydrolipoamide S-succinyltransferase (E2 component of 2-oxo-glutarate complex) (Dlst) alternative variant eSep08, mRNA.                   |
| <a href="#">Dlx1</a>           | <a href="#">Dlx1.aSep08</a>           | <a href="#">296500</a> | 2825   | 2171 | 2  | 189 | distal-less homeobox 1 (20.2 kD) (Dlx1) alternative variant aSep08, mRNA.                                                                   |
| <a href="#">Dlx1</a>           | <a href="#">Dlx1.bSep08</a>           | <a href="#">296500</a> | 1583   | 403  | 2  | 89  | distal-less homeobox 1 (Dlx1) alternative variant bSep08, mRNA.                                                                             |
| <a href="#">Dlx2</a>           | <a href="#">Dlx2.aSep08</a>           | <a href="#">296499</a> | 1112   | 631  |    | 165 | distal-less homeobox 2 (Dlx2) mRNA.                                                                                                         |
| <a href="#">Dmap1</a>          | <a href="#">Dmap1.aSep08</a>          | <a href="#">298447</a> | 7676   | 1460 | 10 | 449 | DNA methyltransferase 1 associated protein (Dmap1) alternative variant aSep08, mRNA.                                                        |
| <a href="#">Dmap1</a>          | <a href="#">Dmap1.bSep08</a>          | <a href="#">298447</a> | 2039   | 882  | 6  | 275 | DNA methyltransferase 1 associated protein (Dmap1) alternative variant bSep08, mRNA.                                                        |
| <a href="#">Dmap1</a>          | <a href="#">Dmap1.cSep08</a>          | <a href="#">298447</a> | 958    | 624  | 3  | 142 | DNA methyltransferase protein 1 (15.2 kD) (Dmap1) alternative variant cSep08, mRNA.                                                         |
| <a href="#">Dmap1</a>          | <a href="#">Dmap1.dSep08</a>          | <a href="#">298447</a> | 1164   | 498  | 3  | 95  | CRA a like (10.4 kD) (Dmap1) alternative variant dSep08, mRNA.                                                                              |
| <a href="#">DMAP_binding_0</a> | <a href="#">DMAP_binding_0.aSep08</a> |                        | 28972  | 580  |    | 151 | dip2 Disco-interacting protein 2 homolog A (16.8 kD) (DMAP_binding_0) complete mRNA.                                                        |
| <a href="#">Dmbt1</a>          | <a href="#">Dmbt1.aSep08</a>          | <a href="#">170568</a> | 19319  | 1316 |    | 309 | deleted in malignant brain tumors 1 (Dmbt1) mRNA.                                                                                           |
| <a href="#">Dmc1</a>           | <a href="#">Dmc1.bSep08</a>           | <a href="#">362960</a> | 5399   | 797  | 6  | 60  | DMC1 dosage suppressor of mck1 homolog, meiosis-specific homologous recombination (yeast) (7.0 kD) (Dmc1) alternative variant bSep08, mRNA. |

|                                 |                                        |                        |       |      |    |      |                                                                                                                 |
|---------------------------------|----------------------------------------|------------------------|-------|------|----|------|-----------------------------------------------------------------------------------------------------------------|
| <a href="#">Dmkn</a>            | <a href="#">Dmkn.aSep08</a>            | <a href="#">361548</a> | 17396 | 2033 | 14 | 569  | dermokine (Dmkn) alternative variant aSep08, mRNA.                                                              |
| <a href="#">Dmkn</a>            | <a href="#">Dmkn.bSep08</a>            | <a href="#">361548</a> | 4668  | 644  | 1  | 107  | dermokine (Dmkn) alternative variant bSep08, mRNA.                                                              |
| <a href="#">Dmn</a>             | <a href="#">Dmn.bSep08</a>             | <a href="#">308709</a> | 23516 | 3317 | 3  | 1032 | desmuslin (Dmn) alternative variant bSep08, mRNA.                                                               |
| <a href="#">Dmn</a>             | <a href="#">Dmn.cSep08</a>             | <a href="#">308709</a> | 1424  | 518  | 2  | 172  | desmuslin (Dmn) alternative variant cSep08, mRNA.                                                               |
| <a href="#">Dmpk</a>            | <a href="#">Dmpk.aSep08</a>            | <a href="#">308405</a> | 11001 | 2910 | 14 | 687  | myotonic dystrophy kinase (76.1 kD) (Dmpk) alternative variant aSep08, mRNA.                                    |
| <a href="#">Dmpk</a>            | <a href="#">Dmpk.bSep08</a>            | <a href="#">308405</a> | 6904  | 1360 | 9  | 387  | myotonic dystrophy kinase (Dmpk) alternative variant bSep08, mRNA.                                              |
| <a href="#">Dmpk</a>            | <a href="#">Dmpk.dSep08</a>            | <a href="#">308405</a> | 1612  | 730  | 5  | 173  | myotonic dystrophy kinase (Dmpk) alternative variant dSep08, mRNA.                                              |
| <a href="#">Dmpk</a>            | <a href="#">Dmpk.eSep08</a>            | <a href="#">308405</a> | 1443  | 1348 | 2  | 164  | myotonic dystrophy kinase (18.0 kD) (Dmpk) alternative variant eSep08, mRNA.                                    |
| <a href="#">Dmpk</a>            | <a href="#">Dmpk.fSep08</a>            | <a href="#">308405</a> | 927   | 383  | 4  | 127  | myotonic dystrophy kinase (Dmpk) alternative variant fSep08, mRNA.                                              |
| <a href="#">Dmpk</a>            | <a href="#">Dmpk.hSep08</a>            | <a href="#">308405</a> | 528   | 358  | 2  | 96   | myotonic dystrophy kinase (Dmpk) alternative variant hSep08, mRNA.                                              |
| <a href="#">Dmrt2</a>           | <a href="#">Dmrt2.bSep08</a>           | <a href="#">309430</a> | 4973  | 982  | 4  | 123  | doublesex and mab-3 related transcription factor 2 (13.6 kD) (Dmrt2) alternative variant bSep08, complete mRNA. |
| <a href="#">Dmrta2</a>          | <a href="#">Dmrta2.bSep08</a>          | <a href="#">313471</a> | 2010  | 731  | 1  | 243  | doublesex and mab-3 related transcription factor like family A2 (Dmrta2) alternative variant bSep08, mRNA.      |
| <a href="#">Dmrtb1</a>          | <a href="#">Dmrtb1.aSep08</a>          | <a href="#">313484</a> | 6951  | 1280 | 4  | 189  | DMRT-like family B with proline-rich C-terminal, 1 (Dmrtb1) alternative variant aSep08, mRNA.                   |
| <a href="#">Dmrta1a</a>         | <a href="#">Dmrta1a.bSep08</a>         | <a href="#">501668</a> | 2894  | 680  | 1  | 125  | DMRT-like family C1a (13.5 kD) (Dmrta1a) alternative variant bSep08, mRNA.                                      |
| <a href="#">Dmrta1b</a>         | <a href="#">Dmrta1b.aSep08</a>         | <a href="#">680068</a> | 33763 | 856  | 3  | 251  | DMRT-like family C1b (Dmrta1b) alternative variant aSep08, mRNA.                                                |
| <a href="#">Dmrta1b</a>         | <a href="#">Dmrta1b.bSep08</a>         | <a href="#">680068</a> | 7884  | 431  | 1  | 131  | DMRT-like family C1b (Dmrta1b) alternative variant bSep08, mRNA.                                                |
| <a href="#">Dmrta1c</a>         | <a href="#">Dmrta1c.bSep08</a>         | <a href="#">363483</a> | 5927  | 1318 | 8  | 224  | DMRT-like family C1c (24.4 kD) (Dmrta1c) alternative variant bSep08, mRNA.                                      |
| <a href="#">Dmrta2</a>          | <a href="#">Dmrta2.bSep08</a>          | <a href="#">499100</a> | 1701  | 458  | 1  | 139  | doublesex and mab-3 related transcription factor like family C2 (Dmrta2) alternative variant bSep08, mRNA.      |
| <a href="#">Dmtf1</a>           | <a href="#">Dmtf1.bSep08</a>           | <a href="#">114485</a> | 19133 | 782  | 5  | 110  | cyclin D binding myb-like transcription factor 1 (11.9 kD) (Dmtf1) alternative variant bSep08, mRNA.            |
| <a href="#">Dmxl1</a>           | <a href="#">Dmxl1.aSep08</a>           | <a href="#">307429</a> | 28434 | 974  |    | 324  | dmx-like 1 (Dmxl1) mRNA.                                                                                        |
| <a href="#">Dmxl2</a>           | <a href="#">Dmxl2.aSep08</a>           | <a href="#">315676</a> | 11621 | 742  | 8  | 247  | dmx-like 2 (Dmxl2) alternative variant aSep08, mRNA.                                                            |
| <a href="#">Dmxl2</a>           | <a href="#">Dmxl2.bSep08</a>           | <a href="#">315676</a> | 9175  | 745  | 7  | 247  | dmx-like 2 (Dmxl2) alternative variant bSep08, mRNA.                                                            |
| <a href="#">Dmxl2</a>           | <a href="#">Dmxl2.cSep08</a>           | <a href="#">315676</a> | 9486  | 707  | 6  | 140  | dmx-like 2 (Dmxl2) alternative variant cSep08, mRNA.                                                            |
| <a href="#">Dmxl2</a>           | <a href="#">Dmxl2.dSep08</a>           | <a href="#">315676</a> | 4704  | 488  | 5  | 120  | dmx-like 2 (Dmxl2) alternative variant dSep08, mRNA.                                                            |
| <a href="#">Dna2</a>            | <a href="#">Dna2.aSep08</a>            | <a href="#">309762</a> | 5650  | 966  | 3  | 322  | DNA replication helicase 2 homolog (yeast) (Dna2) alternative variant aSep08, mRNA.                             |
| <a href="#">Dna2</a>            | <a href="#">Dna2.bSep08</a>            | <a href="#">309762</a> | 1909  | 1091 | 1  | 129  | DNA replication helicase 2 homolog (yeast) (Dna2) alternative variant bSep08, mRNA.                             |
| <a href="#">Dna2.1</a>          | <a href="#">Dna2.1.aSep08</a>          |                        | 8324  | 780  |    | 260  | putative protein of eukaryotic origin (Dna2.1) mRNA.                                                            |
| <a href="#">Dnah3_predicted</a> | <a href="#">Dnah3_predicted.aSep08</a> | <a href="#">293539</a> | 2827  | 502  |    | 149  | dynein, axonemal, heavy polypeptide 3 (predicted) (Dnah3_predicted) mRNA.                                       |

|                         |                                |                        |        |      |   |     |                                                                                                  |
|-------------------------|--------------------------------|------------------------|--------|------|---|-----|--------------------------------------------------------------------------------------------------|
| <a href="#">Dnah9</a>   | <a href="#">Dnah9.aSep08</a>   | <a href="#">117251</a> | 8320   | 923  |   | 233 | dynein, axonemal, heavy polypeptide 9 (Dnah9) mRNA.                                              |
| <a href="#">Dnah10</a>  | <a href="#">Dnah10.aSep08</a>  | <a href="#">117252</a> | 1719   | 743  |   | 247 | dynein, axonemal, heavy polypeptide 10 (Dnah10) mRNA.                                            |
| <a href="#">Dnah12</a>  | <a href="#">Dnah12.aSep08</a>  | <a href="#">252959</a> | 13903  | 1366 | 3 | 454 | dynein, axonemal, heavy polypeptide 12 (Dnah12) alternative variant aSep08, mRNA.                |
| <a href="#">Dnah12</a>  | <a href="#">Dnah12.bSep08</a>  | <a href="#">252959</a> | 5038   | 655  | 1 | 163 | dynein, axonemal, heavy polypeptide 12 (Dnah12) alternative variant bSep08, mRNA.                |
| <a href="#">Dnahc2</a>  | <a href="#">Dnahc2.aSep08</a>  | <a href="#">303242</a> | 1762   | 749  |   | 249 | dynein, axonemal, heavy chain 2 (Dnahc2) mRNA.                                                   |
| <a href="#">Dnahc5</a>  | <a href="#">Dnahc5.aSep08</a>  | <a href="#">294854</a> | 12545  | 1320 |   | 118 | dynein, axonemal, heavy chain 5 (Dnahc5) mRNA.                                                   |
| <a href="#">Dnahc6</a>  | <a href="#">Dnahc6.aSep08</a>  | <a href="#">117250</a> | 8994   | 767  |   | 255 | dynein, axonemal, heavy chain 6 (Dnahc6) mRNA.                                                   |
| <a href="#">Dnahc8</a>  | <a href="#">Dnahc8.aSep08</a>  | <a href="#">207117</a> | 23161  | 716  |   | 146 | dynein, axonemal, heavy chain 8 (16.5 kD) (Dnahc8) mRNA.                                         |
| <a href="#">Dnahc11</a> | <a href="#">Dnahc11.aSep08</a> | <a href="#">117253</a> | 5235   | 977  | 4 | 194 | dynein, axonemal, heavy chain 11 (Dnahc11) alternative variant aSep08, mRNA.                     |
| <a href="#">Dnahc17</a> | <a href="#">Dnahc17.bSep08</a> | <a href="#">287845</a> | 3304   | 361  | 1 | 107 | dynein heavy axonemal (Dnahc17) alternative variant bSep08, mRNA.                                |
| <a href="#">DnaJ.0</a>  | <a href="#">DnaJ.0.aSep08</a>  |                        | 156795 | 2088 | 7 | 565 | DnaJ homolog subfamily C member 1 (65.4 kD) (DnaJ.0) alternative variant aSep08, mRNA.           |
| <a href="#">DnaJ.0</a>  | <a href="#">DnaJ.0.bSep08</a>  |                        | 36455  | 583  | 1 | 39  | putative protein (4.7 kD) (DnaJ.0) alternative variant bSep08, mRNA.                             |
| <a href="#">DnaJ.1</a>  | <a href="#">DnaJ.1.bSep08</a>  |                        | 1052   | 305  | 2 | 70  | DnaJ homolog subfamily B member 4 (DnaJ.1) alternative variant bSep08, mRNA.                     |
| <a href="#">Dnaja1</a>  | <a href="#">Dnaja1.bSep08</a>  | <a href="#">65028</a>  | 11883  | 3506 | 8 | 336 | DnaJ homolog subfamily A member 1 (37.6 kD) (Dnaja1) alternative variant bSep08, mRNA.           |
| <a href="#">Dnaja1</a>  | <a href="#">Dnaja1.cSep08</a>  | <a href="#">65028</a>  | 6448   | 1228 | 5 | 217 | DnaJ homolog subfamily A member 1 (24.2 kD) (Dnaja1) alternative variant cSep08, mRNA.           |
| <a href="#">Dnaja1</a>  | <a href="#">Dnaja1.dSep08</a>  | <a href="#">65028</a>  | 4560   | 2872 | 4 | 182 | DnaJ homolog subfamily A member 1 (20.9 kD) (Dnaja1) alternative variant dSep08, mRNA.           |
| <a href="#">Dnaja1</a>  | <a href="#">Dnaja1.eSep08</a>  | <a href="#">65028</a>  | 9447   | 686  | 6 | 103 | DnaJ homolog subfamily A member 1 (Dnaja1) alternative variant eSep08, mRNA.                     |
| <a href="#">Dnaja2</a>  | <a href="#">Dnaja2.bSep08</a>  | <a href="#">84026</a>  | 6404   | 408  | 4 | 135 | DnaJ (Hsp40) homolog, subfamily A, member 2 (Dnaja2) alternative variant bSep08, mRNA.           |
| <a href="#">Dnaja3</a>  | <a href="#">Dnaja3.bSep08</a>  | <a href="#">360481</a> | 21442  | 1388 | 2 | 342 | DnaJ (Hsp40) homolog, subfamily A, member 3 (Dnaja3) alternative variant bSep08, mRNA.           |
| <a href="#">Dnaja3</a>  | <a href="#">Dnaja3.cSep08</a>  | <a href="#">360481</a> | 15162  | 1233 | 1 | 271 | DnaJ (Hsp40) homolog, subfamily A, member 3 (Dnaja3) alternative variant cSep08, mRNA.           |
| <a href="#">Dnaja4</a>  | <a href="#">Dnaja4.bSep08</a>  | <a href="#">300721</a> | 10449  | 1505 | 4 | 220 | DnaJ homolog subfamily A member (24.5 kD) (Dnaja4) alternative variant bSep08, mRNA.             |
| <a href="#">Dnaja4</a>  | <a href="#">Dnaja4.cSep08</a>  | <a href="#">300721</a> | 5912   | 2172 | 3 | 181 | DnaJ homolog subfamily A member 4 (20.8 kD) (Dnaja4) alternative variant cSep08, mRNA.           |
| <a href="#">Dnaja4</a>  | <a href="#">Dnaja4.dSep08</a>  | <a href="#">300721</a> | 1227   | 1127 | 2 | 89  | DnaJ homolog subfamily A member 4 (10.5 kD) (Dnaja4) alternative variant dSep08, mRNA.           |
| <a href="#">Dnajb1</a>  | <a href="#">Dnajb1.aSep08</a>  | <a href="#">361384</a> | 3674   | 2176 | 3 | 340 | DnaJ (Hsp40) homolog, subfamily B, member 1 (38.1 kD) (Dnajb1) alternative variant aSep08, mRNA. |
| <a href="#">Dnajb1</a>  | <a href="#">Dnajb1.bSep08</a>  | <a href="#">361384</a> | 1829   | 726  | 2 | 242 | DnaJ (Hsp40) homolog, subfamily B, member 1 (Dnajb1) alternative variant bSep08, mRNA.           |

|                           |                                  |                        |       |      |   |     |                                                                                                    |
|---------------------------|----------------------------------|------------------------|-------|------|---|-----|----------------------------------------------------------------------------------------------------|
| <a href="#">Dnajb5</a>    | <a href="#">Dnajb5.bSep08</a>    | <a href="#">313811</a> | 9219  | 2960 | 2 | 402 | DnaJ (Hsp40) homolog, subfamily B, member 5 (Dnajb5) alternative variant bSep08, mRNA.             |
| <a href="#">Dnajb5</a>    | <a href="#">Dnajb5.cSep08</a>    | <a href="#">313811</a> | 5724  | 614  | 1 | 188 | DnaJ (Hsp40) homolog, subfamily B, member 5 (Dnajb5) alternative variant cSep08, mRNA.             |
| <a href="#">Dnajb6</a>    | <a href="#">Dnajb6.aSep08</a>    | <a href="#">362293</a> | 59175 | 1371 | 3 | 364 | DnaJ (Hsp40) homolog, subfamily B, member 6 (39.3 kD) (Dnajb6) alternative variant aSep08, mRNA.   |
| <a href="#">Dnajb6</a>    | <a href="#">Dnajb6.cSep08</a>    | <a href="#">362293</a> | 11526 | 985  | 1 | 91  | DnaJ (Hsp40) homolog, subfamily B, member 6 (Dnajb6) alternative variant cSep08, mRNA.             |
| <a href="#">Dnajb11</a>   | <a href="#">Dnajb11.bSep08</a>   | <a href="#">360734</a> | 12694 | 809  | 5 | 262 | DnaJ (Hsp40) homolog, subfamily B, member 11 (Dnajb11) alternative variant bSep08, mRNA.           |
| <a href="#">Dnajb11</a>   | <a href="#">Dnajb11.cSep08</a>   | <a href="#">360734</a> | 14749 | 819  | 8 | 260 | DnaJ (Hsp40) homolog, subfamily B, member 11 (Dnajb11) alternative variant cSep08, mRNA.           |
| <a href="#">Dnajb11</a>   | <a href="#">Dnajb11.dSep08</a>   | <a href="#">360734</a> | 2436  | 317  | 3 | 105 | DnaJ (Hsp40) homolog, subfamily B, member 11 (Dnajb11) alternative variant dSep08, mRNA.           |
| <a href="#">Dnajb12</a>   | <a href="#">Dnajb12.bSep08</a>   | <a href="#">294513</a> | 6699  | 1269 | 7 | 238 | DnaJ homolog subfamily B member 12 (Dnajb12) alternative variant bSep08, mRNA.                     |
| <a href="#">Dnajb12</a>   | <a href="#">Dnajb12.cSep08</a>   | <a href="#">294513</a> | 2085  | 535  | 3 | 161 | DnaJ homolog subfamily B member 12 (Dnajb12) alternative variant cSep08, mRNA.                     |
| <a href="#">Dnajb12</a>   | <a href="#">Dnajb12.dSep08</a>   | <a href="#">294513</a> | 4441  | 409  | 4 | 131 | DnaJ homolog subfamily B member 12 (Dnajb12) alternative variant dSep08, mRNA.                     |
| <a href="#">Dnajb12</a>   | <a href="#">Dnajb12.fSep08</a>   | <a href="#">294513</a> | 1949  | 811  | 2 | 114 | putative protein (12.0 kD) (Dnajb12) alternative variant fSep08, mRNA.                             |
| <a href="#">Dnajb12.1</a> | <a href="#">Dnajb12.1.bSep08</a> | <a href="#">294513</a> | 6699  | 1269 | 7 | 238 | DnaJ homolog subfamily B member 12 (Dnajb12.1) alternative variant bSep08, mRNA.                   |
| <a href="#">Dnajb12.1</a> | <a href="#">Dnajb12.1.cSep08</a> | <a href="#">294513</a> | 2085  | 535  | 3 | 161 | DnaJ homolog subfamily B member 12 (Dnajb12.1) alternative variant cSep08, mRNA.                   |
| <a href="#">Dnajb12.1</a> | <a href="#">Dnajb12.1.dSep08</a> | <a href="#">294513</a> | 4441  | 409  | 4 | 131 | DnaJ homolog subfamily B member 12 (Dnajb12.1) alternative variant dSep08, mRNA.                   |
| <a href="#">Dnajb12.1</a> | <a href="#">Dnajb12.1.fSep08</a> | <a href="#">294513</a> | 1949  | 811  | 2 | 114 | putative protein (12.0 kD) (Dnajb12.1) alternative variant fSep08, mRNA.                           |
| <a href="#">Dnajb13</a>   | <a href="#">Dnajb13.bSep08</a>   | <a href="#">308857</a> | 13190 | 649  | 3 | 167 | DnaJ (Hsp40) related, subfamily B, member 13 (Dnajb13) alternative variant bSep08, mRNA.           |
| <a href="#">Dnajb13</a>   | <a href="#">Dnajb13.cSep08</a>   | <a href="#">308857</a> | 4322  | 528  | 2 | 127 | DnaJ (Hsp40) related, subfamily B, member 13 (Dnajb13) alternative variant cSep08, mRNA.           |
| <a href="#">Dnajb14</a>   | <a href="#">Dnajb14.aSep08</a>   | <a href="#">499716</a> | 43277 | 1726 | 8 | 338 | DnaJ (Hsp40) homolog, subfamily B, member 14 (37.9 kD) (Dnajb14) alternative variant aSep08, mRNA. |
| <a href="#">Dnajb14</a>   | <a href="#">Dnajb14.bSep08</a>   | <a href="#">499716</a> | 24094 | 451  | 3 | 140 | DnaJ (Hsp40) homolog, subfamily B, member 14 (Dnajb14) alternative variant bSep08, mRNA.           |
| <a href="#">Dnajb14</a>   | <a href="#">Dnajb14.cSep08</a>   | <a href="#">499716</a> | 15503 | 610  | 2 | 102 | DnaJ (Hsp40) homolog, subfamily B, member 14 (Dnajb14) alternative variant cSep08, complete mRNA.  |
| <a href="#">Dnajb14</a>   | <a href="#">Dnajb14.dSep08</a>   | <a href="#">499716</a> | 16083 | 1189 | 3 | 102 | DnaJ (Hsp40) homolog, subfamily B, member 14 (10.9 kD) (Dnajb14) alternative variant dSep08, mRNA. |
| <a href="#">Dnajc2</a>    | <a href="#">Dnajc2.bSep08</a>    | <a href="#">116456</a> | 6197  | 1171 | 1 | 233 | DnaJ (Hsp40) homolog, subfamily C, member 2 (Dnajc2) alternative variant bSep08, mRNA.             |
| <a href="#">Dnajc4</a>    | <a href="#">Dnajc4.bSep08</a>    | <a href="#">361717</a> | 2323  | 1236 | 4 | 188 | DnaJ (Hsp40) homolog, subfamily C, member 4 (21.8 kD) (Dnajc4) alternative variant bSep08, mRNA.   |

|                         |                                |                        |       |      |    |     |                                                                                                           |
|-------------------------|--------------------------------|------------------------|-------|------|----|-----|-----------------------------------------------------------------------------------------------------------|
| <a href="#">Dnajc4</a>  | <a href="#">Dnajc4.cSep08</a>  | <a href="#">361717</a> | 1553  | 457  | 4  | 122 | DnaJ (Hsp40) homolog, subfamily C, member 4 (Dnajc4) alternative variant cSep08, mRNA.                    |
| <a href="#">Dnajc4</a>  | <a href="#">Dnajc4.dSep08</a>  | <a href="#">361717</a> | 1826  | 892  | 3  | 77  | DnaJ (Hsp40) homolog, subfamily C, member 4 (9.0 kD) (Dnajc4) alternative variant dSep08, mRNA.           |
| <a href="#">Dnajc4</a>  | <a href="#">Dnajc4.eSep08</a>  | <a href="#">361717</a> | 846   | 767  | 2  | 55  | DnaJ (Hsp40) homolog, subfamily C, member 4 (6.4 kD) (Dnajc4) alternative variant eSep08, mRNA.           |
| <a href="#">Dnajc5</a>  | <a href="#">Dnajc5.bSep08</a>  | <a href="#">79130</a>  | 34608 | 4879 | 2  | 198 | DnaJ (Hsp40) homolog, subfamily C, member 5 (22.1 kD) (Dnajc5) alternative variant bSep08, mRNA.          |
| <a href="#">Dnajc5</a>  | <a href="#">Dnajc5.cSep08</a>  | <a href="#">79130</a>  | 3413  | 1114 | 2  | 145 | DnaJ (Hsp40) homolog, subfamily C, member 5 (Dnajc5) alternative variant cSep08, mRNA.                    |
| <a href="#">Dnajc5g</a> | <a href="#">Dnajc5g.bSep08</a> | <a href="#">366567</a> | 3730  | 1073 |    | 164 | DnaJ (Hsp40) homolog, subfamily C, member 5 gamma (18.4 kD) (Dnajc5g) alternative variant bSep08, mRNA.   |
| <a href="#">Dnajc6</a>  | <a href="#">Dnajc6.bSep08</a>  | <a href="#">313409</a> | 2044  | 518  | 3  | 172 | DnaJ (Hsp40) homolog, subfamily C, member 6 (Dnajc6) alternative variant bSep08, mRNA.                    |
| <a href="#">Dnajc7</a>  | <a href="#">Dnajc7.bSep08</a>  | <a href="#">303536</a> | 36847 | 2404 | 12 | 253 | DnaJ (Hsp40) homolog, subfamily C, member 7 (28.7 kD) (Dnajc7) alternative variant bSep08, complete mRNA. |
| <a href="#">Dnajc8</a>  | <a href="#">Dnajc8.bSep08</a>  | <a href="#">313035</a> | 16078 | 1001 | 7  | 216 | DnaJ (Hsp40) homolog, subfamily C, member 8 (25.2 kD) (Dnajc8) alternative variant bSep08, mRNA.          |
| <a href="#">Dnajc8</a>  | <a href="#">Dnajc8.cSep08</a>  | <a href="#">313035</a> | 15737 | 603  | 6  | 196 | DnaJ (Hsp40) homolog, subfamily C, member 8 (Dnajc8) alternative variant cSep08, mRNA.                    |
| <a href="#">Dnajc8</a>  | <a href="#">Dnajc8.dSep08</a>  | <a href="#">313035</a> | 18858 | 739  | 8  | 184 | DnaJ (Hsp40) homolog, subfamily C, member 8 (Dnajc8) alternative variant dSep08, mRNA.                    |
| <a href="#">Dnajc8</a>  | <a href="#">Dnajc8.eSep08</a>  | <a href="#">313035</a> | 15696 | 640  | 7  | 141 | DnaJ (Hsp40) homolog, subfamily C, member 8 (Dnajc8) alternative variant eSep08, mRNA.                    |
| <a href="#">Dnajc8</a>  | <a href="#">Dnajc8.fSep08</a>  | <a href="#">313035</a> | 14636 | 1093 | 5  | 109 | DnaJ (Hsp40) homolog, subfamily C, member 8 (12.2 kD) (Dnajc8) alternative variant fSep08, complete mRNA. |
| <a href="#">Dnajc8</a>  | <a href="#">Dnajc8.gSep08</a>  | <a href="#">313035</a> | 6759  | 1074 | 2  | 47  | DnaJ (Hsp40) homolog, subfamily C, member 8 (Dnajc8) alternative variant gSep08, mRNA.                    |
| <a href="#">Dnajc8</a>  | <a href="#">Dnajc8.hSep08</a>  | <a href="#">313035</a> | 2651  | 716  | 2  | 30  | DnaJ (Hsp40) homolog, subfamily C, member 8 (Dnajc8) alternative variant hSep08, mRNA.                    |
| <a href="#">Dnajc9</a>  | <a href="#">Dnajc9.cSep08</a>  | <a href="#">364240</a> | 26918 | 363  | 3  | 35  | DnaJ (Hsp40) homolog, subfamily C, member 9 (Dnajc9) alternative variant cSep08, mRNA.                    |
| <a href="#">Dnajc10</a> | <a href="#">Dnajc10.aSep08</a> | <a href="#">295690</a> | 41041 | 4998 | 23 | 793 | DnaJ homolog subfamily C member 10 (90.7 kD) (Dnajc10) alternative variant aSep08, mRNA.                  |
| <a href="#">Dnajc10</a> | <a href="#">Dnajc10.bSep08</a> | <a href="#">295690</a> | 5375  | 1292 | 6  | 226 | DnaJ homolog subfamily C member 10 (Dnajc10) alternative variant bSep08, mRNA.                            |
| <a href="#">Dnajc10</a> | <a href="#">Dnajc10.cSep08</a> | <a href="#">295690</a> | 8004  | 1313 | 6  | 179 | DnaJ homolog subfamily C member 10 (20.9 kD) (Dnajc10) alternative variant cSep08, mRNA.                  |
| <a href="#">Dnajc10</a> | <a href="#">Dnajc10.dSep08</a> | <a href="#">295690</a> | 5097  | 373  | 2  | 90  | DnaJ homolog subfamily C member 10 (Dnajc10) alternative variant dSep08, mRNA.                            |
| <a href="#">Dnajc11</a> | <a href="#">Dnajc11.bSep08</a> | <a href="#">362666</a> | 3781  | 1664 | 2  | 122 | DnaJ (Hsp40) homolog, subfamily C, member 11 (13.6 kD) (Dnajc11) alternative variant bSep08, mRNA.        |
| <a href="#">Dnajc13</a> | <a href="#">Dnajc13.bSep08</a> | <a href="#">363127</a> | 6467  | 707  | 7  | 235 | DnaJ (Hsp40) homolog, subfamily C, member 13 (Dnajc13) alternative variant bSep08, mRNA.                  |
| <a href="#">Dnajc13</a> | <a href="#">Dnajc13.cSep08</a> | <a href="#">363127</a> | 10703 | 1088 | 6  | 171 | DnaJ (Hsp40) homolog, subfamily C, member 13 (Dnajc13) alternative variant cSep08, mRNA.                  |

|                               |                                      |                        |       |      |    |     |                                                                                                    |
|-------------------------------|--------------------------------------|------------------------|-------|------|----|-----|----------------------------------------------------------------------------------------------------|
| <a href="#">Dnajc13</a>       | <a href="#">Dnajc13.dSep08</a>       | <a href="#">363127</a> | 2748  | 556  | 3  | 104 | DnaJ (Hsp40) homolog, subfamily C, member 13 (Dnajc13) alternative variant dSep08, mRNA.           |
| <a href="#">Dnajc14</a>       | <a href="#">Dnajc14.bSep08</a>       | <a href="#">114481</a> | 6575  | 735  | 6  | 245 | DnaJ (Hsp40) homolog, subfamily C, member 14 (Dnajc14) alternative variant bSep08, mRNA.           |
| <a href="#">Dnajc14</a>       | <a href="#">Dnajc14.cSep08</a>       | <a href="#">114481</a> | 6735  | 701  | 6  | 233 | DnaJ (Hsp40) homolog, subfamily C, member 14 (Dnajc14) alternative variant cSep08, mRNA.           |
| <a href="#">Dnajc14</a>       | <a href="#">Dnajc14.dSep08</a>       | <a href="#">114481</a> | 6587  | 838  | 7  | 179 | DnaJ (Hsp40) homolog, subfamily C, member 14 (Dnajc14) alternative variant dSep08, mRNA.           |
| <a href="#">Dnajc14</a>       | <a href="#">Dnajc14.eSep08</a>       | <a href="#">114481</a> | 6288  | 741  | 5  | 172 | DnaJ (Hsp40) homolog, subfamily C, member 14 (Dnajc14) alternative variant eSep08, mRNA.           |
| <a href="#">Dnajc14</a>       | <a href="#">Dnajc14.fSep08</a>       | <a href="#">114481</a> | 6539  | 1057 | 6  | 168 | DnaJ (Hsp40) homolog, subfamily C, member 14 (Dnajc14) alternative variant fSep08, mRNA.           |
| <a href="#">Dnajc14</a>       | <a href="#">Dnajc14.gSep08</a>       | <a href="#">114481</a> | 6483  | 731  | 5  | 148 | DnaJ (Hsp40) homolog, subfamily C, member 14 (Dnajc14) alternative variant gSep08, mRNA.           |
| <a href="#">Dnajc14</a>       | <a href="#">Dnajc14.hSep08</a>       | <a href="#">114481</a> | 3125  | 706  | 3  | 108 | DnaJ (Hsp40) homolog, subfamily C, member 14 (12.6 kD) (Dnajc14) alternative variant hSep08, mRNA. |
| <a href="#">Dnajc14</a>       | <a href="#">Dnajc14.iSep08</a>       | <a href="#">114481</a> | 6136  | 772  | 5  | 88  | DnaJ (Hsp40) homolog, subfamily C, member 14 (10.3 kD) (Dnajc14) alternative variant iSep08, mRNA. |
| <a href="#">Dnajc14</a>       | <a href="#">Dnajc14.jSep08</a>       | <a href="#">114481</a> | 6095  | 727  | 5  | 57  | DnaJ (Hsp40) homolog, subfamily C, member 14 (6.5 kD) (Dnajc14) alternative variant jSep08, mRNA.  |
| <a href="#">Dnajc15</a>       | <a href="#">Dnajc15.bSep08</a>       | <a href="#">290370</a> | 66369 | 390  | 2  | 129 | DnaJ (Hsp40) homolog, subfamily C, member 15 (Dnajc15) alternative variant bSep08, mRNA.           |
| <a href="#">Dnajc15</a>       | <a href="#">Dnajc15.cSep08</a>       | <a href="#">290370</a> | 24444 | 386  | 1  | 40  | DnaJ (Hsp40) homolog, subfamily C, member 15 (Dnajc15) alternative variant cSep08, mRNA.           |
| <a href="#">Dnajc17</a>       | <a href="#">Dnajc17.aSep08</a>       | <a href="#">311329</a> | 34465 | 980  | 10 | 304 | DnaJ (Hsp40) homolog, subfamily C, member 17 (Dnajc17) alternative variant aSep08, mRNA.           |
| <a href="#">Dnajc17</a>       | <a href="#">Dnajc17.bSep08</a>       | <a href="#">311329</a> | 3091  | 363  | 1  | 33  | DnaJ (Hsp40) homolog, subfamily C, member 17 (Dnajc17) alternative variant bSep08, mRNA.           |
| <a href="#">Dnajc18</a>       | <a href="#">Dnajc18.aSep08</a>       | <a href="#">291677</a> | 23154 | 1207 | 1  | 339 | DnaJ (Hsp40) homolog, subfamily C, member 18 (39.0 kD) (Dnajc18) alternative variant aSep08, mRNA. |
| <a href="#">Dnalc1</a>        | <a href="#">Dnalc1.bSep08</a>        | <a href="#">685664</a> | 21650 | 2857 | 2  | 77  | dynein, axonemal, light chain 1 (8.9 kD) (Dnalc1) alternative variant bSep08, mRNA.                |
| <a href="#">Dnase1</a>        | <a href="#">Dnase1.bSep08</a>        | <a href="#">25633</a>  | 2066  | 745  | 8  | 200 | deoxyribonuclease I (Dnase1) alternative variant bSep08, mRNA.                                     |
| <a href="#">Dnase111</a>      | <a href="#">Dnase111.bSep08</a>      | <a href="#">363522</a> | 3248  | 1230 | 6  | 262 | deoxyribonuclease 1-like 1 (Dnase111) alternative variant bSep08, mRNA.                            |
| <a href="#">Dnase111</a>      | <a href="#">Dnase111.cSep08</a>      | <a href="#">363522</a> | 7830  | 868  | 6  | 237 | deoxyribonuclease 1-like 1 (Dnase111) alternative variant cSep08, mRNA.                            |
| <a href="#">Dnase111</a>      | <a href="#">Dnase111.dSep08</a>      | <a href="#">363522</a> | 8482  | 1379 | 8  | 197 | deoxyribonuclease 1-like 1 (22.4 kD) (Dnase111) alternative variant dSep08, complete mRNA.         |
| <a href="#">Dnase112</a>      | <a href="#">Dnase112.aSep08</a>      | <a href="#">681124</a> | 1439  | 1053 |    | 226 | deoxyribonuclease 1-like 2 (Dnase112) mRNA.                                                        |
| <a href="#">Dnase2b</a>       | <a href="#">Dnase2b.bSep08</a>       | <a href="#">59296</a>  | 21177 | 447  | 2  | 81  | putative protein (Dnase2b) alternative variant bSep08, mRNA.                                       |
| <a href="#">Dnase2b</a>       | <a href="#">Dnase2b.cSep08</a>       | <a href="#">59296</a>  | 5961  | 436  | 2  | 68  | putative protein (Dnase2b) alternative variant cSep08, mRNA.                                       |
| <a href="#">DNA_pol_E_B.0</a> | <a href="#">DNA_pol_E_B.0.aSep08</a> |                        | 5610  | 583  | 6  | 163 | polymerase epsilon (DNA_pol_E_B.0) alternative variant aSep08, mRNA.                               |

|                                  |                                         |                        |        |      |    |     |                                                                                           |
|----------------------------------|-----------------------------------------|------------------------|--------|------|----|-----|-------------------------------------------------------------------------------------------|
| <a href="#">DNA_pol_E_B.0</a>    | <a href="#">DNA_pol_E_B.0.bSep08</a>    |                        | 4251   | 648  | 4  | 105 | polymerase epsilon (11.9 kD) (DNA_pol_E_B.0) alternative variant bSep08, mRNA.            |
| <a href="#">DNA_pol_E_B.0</a>    | <a href="#">DNA_pol_E_B.0.cSep08</a>    |                        | 2276   | 914  | 2  | 93  | polymerase epsilon (10.7 kD) (DNA_pol_E_B.0) alternative variant cSep08, mRNA.            |
| <a href="#">DNA_RNApol_7kD.0</a> | <a href="#">DNA_RNApol_7kD.0.aSep08</a> |                        | 3371   | 528  | 4  | 58  | putative protein (DNA_RNApol_7kD.0) alternative variant aSep08, mRNA.                     |
| <a href="#">DNA_RNApol_7kD.0</a> | <a href="#">DNA_RNApol_7kD.0.cSep08</a> |                        | 1199   | 288  | 3  | 42  | polymerase II (DNA_RNApol_7kD.0) alternative variant cSep08, mRNA.                        |
| <a href="#">Dnd1</a>             | <a href="#">Dnd1.aSep08</a>             | <a href="#">307492</a> | 7038   | 1599 | 10 | 404 | dead end homolog 1 (zebrafish) (Dnd1) alternative variant aSep08, mRNA.                   |
| <a href="#">Dnd1</a>             | <a href="#">Dnd1.cSep08</a>             | <a href="#">307492</a> | 822    | 618  | 2  | 102 | dead end homolog 1 (zebrafish) (Dnd1) alternative variant cSep08, mRNA.                   |
| <a href="#">Dnd1</a>             | <a href="#">Dnd1.dSep08</a>             | <a href="#">307492</a> | 54119  | 296  | 3  | 98  | dead end homolog 1 (zebrafish) (Dnd1) alternative variant dSep08, mRNA.                   |
| <a href="#">Dnd1</a>             | <a href="#">Dnd1.eSep08</a>             | <a href="#">307492</a> | 8872   | 845  | 3  | 53  | dead end homolog 1 (zebrafish) (5.8 kD) (Dnd1) alternative variant eSep08, complete mRNA. |
| <a href="#">Dner</a>             | <a href="#">Dner.aSep08</a>             | <a href="#">316573</a> | 105476 | 2129 | 6  | 371 | delta/notch-like EGF-related receptor (40.6 kD) (Dner) alternative variant aSep08, mRNA.  |
| <a href="#">Dner</a>             | <a href="#">Dner.bSep08</a>             | <a href="#">316573</a> | 30451  | 564  | 1  | 120 | delta/notch-like EGF-related receptor (Dner) alternative variant bSep08, mRNA.            |
| <a href="#">Dnhd1</a>            | <a href="#">Dnhd1.aSep08</a>            | <a href="#">690115</a> | 925    | 730  |    | 242 | dynein heavy chain domain 1 (Dnhd1) mRNA.                                                 |
| <a href="#">Dnm1</a>             | <a href="#">Dnm1.bSep08</a>             | <a href="#">140694</a> | 24023  | 1285 | 14 | 427 | dynamin 1 (Dnm1) alternative variant bSep08, mRNA.                                        |
| <a href="#">Dnm1</a>             | <a href="#">Dnm1.cSep08</a>             | <a href="#">140694</a> | 6626   | 1127 | 4  | 199 | dynamin 1 (Dnm1) alternative variant cSep08, mRNA.                                        |
| <a href="#">Dnm1</a>             | <a href="#">Dnm1.dSep08</a>             | <a href="#">140694</a> | 9080   | 526  | 4  | 146 | dynamin 1 (Dnm1) alternative variant dSep08, mRNA.                                        |
| <a href="#">Dnm1</a>             | <a href="#">Dnm1.eSep08</a>             | <a href="#">140694</a> | 11431  | 1040 | 5  | 117 | dynamin 1 (Dnm1) alternative variant eSep08, mRNA.                                        |
| <a href="#">Dnm1l</a>            | <a href="#">Dnm1l.bSep08</a>            | <a href="#">114114</a> | 18960  | 3827 | 10 | 391 | dynamin 1-like (Dnm1l) alternative variant bSep08, mRNA.                                  |
| <a href="#">Dnm1l</a>            | <a href="#">Dnm1l.cSep08</a>            | <a href="#">114114</a> | 23001  | 647  | 6  | 215 | dynamin 1-like (Dnm1l) alternative variant cSep08, mRNA.                                  |
| <a href="#">Dnm1l</a>            | <a href="#">Dnm1l.dSep08</a>            | <a href="#">114114</a> | 11455  | 630  | 7  | 209 | dynamin 1-like (Dnm1l) alternative variant dSep08, mRNA.                                  |
| <a href="#">Dnm1l</a>            | <a href="#">Dnm1l.eSep08</a>            | <a href="#">114114</a> | 930    | 646  | 2  | 66  | dynamin 1-like (7.6 kD) (Dnm1l) alternative variant eSep08, mRNA.                         |
| <a href="#">Dnm2</a>             | <a href="#">Dnm2.aSep08</a>             | <a href="#">25751</a>  | 83642  | 3470 | 20 | 909 | dynamin 2 (Dnm2) alternative variant aSep08, mRNA.                                        |
| <a href="#">Dnm2</a>             | <a href="#">Dnm2.bSep08</a>             | <a href="#">25751</a>  | 28094  | 1645 | 12 | 430 | dynamin 2 (Dnm2) alternative variant bSep08, mRNA.                                        |
| <a href="#">Dnm2</a>             | <a href="#">Dnm2.cSep08</a>             | <a href="#">25751</a>  | 15543  | 526  | 7  | 175 | dynamin 2 (Dnm2) alternative variant cSep08, mRNA.                                        |
| <a href="#">Dnm2</a>             | <a href="#">Dnm2.dSep08</a>             | <a href="#">25751</a>  | 3238   | 800  | 3  | 159 | dynamin 2 (Dnm2) alternative variant dSep08, mRNA.                                        |
| <a href="#">Dnm2</a>             | <a href="#">Dnm2.eSep08</a>             | <a href="#">25751</a>  | 1616   | 714  | 2  | 126 | dynamin 2 (Dnm2) alternative variant eSep08, mRNA.                                        |
| <a href="#">Dnm2</a>             | <a href="#">Dnm2.fSep08</a>             | <a href="#">25751</a>  | 43959  | 373  | 3  | 124 | dynamin 2 (Dnm2) alternative variant fSep08, mRNA.                                        |
| <a href="#">Dnm2</a>             | <a href="#">Dnm2.hSep08</a>             | <a href="#">25751</a>  | 13918  | 530  | 5  | 117 | dynamin 2 (Dnm2) alternative variant hSep08, mRNA.                                        |
| <a href="#">Dnm2</a>             | <a href="#">Dnm2.iSep08</a>             | <a href="#">25751</a>  | 4022   | 433  | 2  | 36  | dynamin 2 (Dnm2) alternative variant iSep08, mRNA.                                        |
| <a href="#">Dnm3</a>             | <a href="#">Dnm3.bSep08</a>             | <a href="#">171574</a> | 464697 | 2951 | 20 | 894 | dynamin 3 (Dnm3) alternative variant bSep08, mRNA.                                        |
| <a href="#">Dnm3</a>             | <a href="#">Dnm3.cSep08</a>             | <a href="#">171574</a> | 479861 | 1748 | 4  | 430 | dynamin 3 (Dnm3) alternative variant cSep08, mRNA.                                        |
| <a href="#">Dnm3</a>             | <a href="#">Dnm3.eSep08</a>             | <a href="#">171574</a> | 34883  | 468  | 5  | 145 | dynamin 3 (Dnm3) alternative variant eSep08, mRNA.                                        |
| <a href="#">Dnmbp</a>            | <a href="#">Dnmbp.aSep08</a>            | <a href="#">309362</a> | 32442  | 747  | 4  | 249 | dynamin binding protein (Dnmbp) alternative variant aSep08, mRNA.                         |



|                         |                                |                        |        |      |    |     |                                                                                                                   |
|-------------------------|--------------------------------|------------------------|--------|------|----|-----|-------------------------------------------------------------------------------------------------------------------|
| <a href="#">Dnmt1</a>   | <a href="#">Dnmt1.bSep08</a>   | <a href="#">84350</a>  | 2576   | 1265 | 4  | 319 | DNA methyltransferase (cytosine-5) 1 (Dnmt1) alternative variant bSep08, mRNA.                                    |
| <a href="#">Dnmt1</a>   | <a href="#">Dnmt1.cSep08</a>   | <a href="#">84350</a>  | 5664   | 939  | 5  | 313 | DNA methyltransferase (cytosine-5) 1 (Dnmt1) alternative variant cSep08, mRNA.                                    |
| <a href="#">Dnmt1</a>   | <a href="#">Dnmt1.dSep08</a>   | <a href="#">84350</a>  | 3814   | 988  | 4  | 169 | DNA methyltransferase (cytosine-5) 1 (Dnmt1) alternative variant dSep08, mRNA.                                    |
| <a href="#">Dnmt1</a>   | <a href="#">Dnmt1.eSep08</a>   | <a href="#">84350</a>  | 1009   | 732  | 1  | 144 | DNA methyltransferase (cytosine-5) 1 (Dnmt1) alternative variant eSep08, mRNA.                                    |
| <a href="#">Dnmt3a</a>  | <a href="#">Dnmt3a.dSep08</a>  | <a href="#">444984</a> | 15183  | 639  | 3  | 69  | DNA methyltransferase 3A (7.8 kD) (Dnmt3a) alternative variant dSep08, mRNA.                                      |
| <a href="#">Dnmt3a</a>  | <a href="#">Dnmt3a.eSep08</a>  | <a href="#">444984</a> | 1568   | 398  | 2  | 44  | DNA methyltransferase 3A (4.6 kD) (Dnmt3a) alternative variant eSep08, mRNA.                                      |
| <a href="#">Dnmt3b</a>  | <a href="#">Dnmt3b.cSep08</a>  | <a href="#">444985</a> | 7135   | 418  | 2  | 72  | DNA methyltransferase 3B (Dnmt3b) alternative variant cSep08, mRNA.                                               |
| <a href="#">Dnpep</a>   | <a href="#">Dnpep.bSep08</a>   | <a href="#">301529</a> | 1798   | 752  | 3  | 219 | aspartyl aminopeptidase CRA a (Dnpep) alternative variant bSep08, mRNA.                                           |
| <a href="#">Dnpep</a>   | <a href="#">Dnpep.cSep08</a>   | <a href="#">301529</a> | 2110   | 928  | 2  | 190 | aspartyl aminopeptidase CRA e (Dnpep) alternative variant cSep08, mRNA.                                           |
| <a href="#">Dnpep</a>   | <a href="#">Dnpep.dSep08</a>   | <a href="#">301529</a> | 4084   | 1264 | 4  | 177 | aspartyl aminopeptidase (Dnpep) alternative variant dSep08, mRNA.                                                 |
| <a href="#">Dnpep</a>   | <a href="#">Dnpep.eSep08</a>   | <a href="#">301529</a> | 1276   | 750  | 2  | 150 | aspartyl aminopeptidase CRA e (16.7 kD) (Dnpep) alternative variant eSep08, mRNA.                                 |
| <a href="#">Dnttip1</a> | <a href="#">Dnttip1.bSep08</a> | <a href="#">171437</a> | 3079   | 886  | 2  | 52  | deoxynucleotidyltransferase, terminal, interacting protein 1 (5.7 kD) (Dnttip1) alternative variant bSep08, mRNA. |
| <a href="#">doby</a>    | <a href="#">doby.aSep08</a>    |                        | 48942  | 441  |    | 146 | dedicator of cytokinesis 11 (doby) mRNA.                                                                          |
| <a href="#">Doc2a</a>   | <a href="#">Doc2a.bSep08</a>   | <a href="#">65031</a>  | 1352   | 306  | 2  | 101 | double C2, alpha (Doc2a) alternative variant bSep08, mRNA.                                                        |
| <a href="#">Doc2g</a>   | <a href="#">Doc2g.bSep08</a>   | <a href="#">293654</a> | 2266   | 555  | 1  | 92  | double C2, gamma (Doc2g) alternative variant bSep08, mRNA.                                                        |
| <a href="#">dochy</a>   | <a href="#">dochy.aSep08</a>   | <a href="#">499795</a> | 133010 | 550  | 1  | 171 | rho GTPase activating protein 15 (dochy) alternative variant aSep08, mRNA.                                        |
| <a href="#">dochy</a>   | <a href="#">dochy.bSep08</a>   | <a href="#">499795</a> | 132965 | 436  |    | 145 | rho GTPase activating protein 15 (dochy) alternative variant bSep08, mRNA.                                        |
| <a href="#">Dock1</a>   | <a href="#">Dock1.aSep08</a>   | <a href="#">309081</a> | 33729  | 2653 | 2  | 408 | dedicator of cyto-kinesis 1 (45.6 kD) (Dock1) alternative variant aSep08, mRNA.                                   |
| <a href="#">Dock2</a>   | <a href="#">Dock2.aSep08</a>   | <a href="#">360509</a> | 44778  | 2007 |    | 668 | dedicator of cytokinesis 2 (Dock2) mRNA.                                                                          |
| <a href="#">Dock3</a>   | <a href="#">Dock3.bSep08</a>   | <a href="#">315992</a> | 10092  | 497  | 5  | 165 | dedicator of cyto-kinesis 3 (Dock3) alternative variant bSep08, mRNA.                                             |
| <a href="#">Dock5</a>   | <a href="#">Dock5.bSep08</a>   | <a href="#">305987</a> | 12633  | 833  | 3  | 277 | dedicator of cytokinesis 5 (Dock5) alternative variant bSep08, mRNA.                                              |
| <a href="#">Dock6</a>   | <a href="#">Dock6.aSep08</a>   | <a href="#">367039</a> | 38966  | 1785 |    | 528 | dedicator of cytokinesis 6 (Dock6) alternative variant aSep08, mRNA.                                              |
| <a href="#">Dock6</a>   | <a href="#">Dock6.bSep08</a>   | <a href="#">367039</a> | 2713   | 1186 |    | 139 | dedicator of cytokinesis 6 (16.1 kD) (Dock6) alternative variant bSep08, mRNA.                                    |
| <a href="#">Dock7</a>   | <a href="#">Dock7.aSep08</a>   | <a href="#">313388</a> | 37278  | 2407 | 16 | 802 | dedicator of cytokinesis 7 (Dock7) alternative variant aSep08, mRNA.                                              |

|                         |                                |                        |       |      |    |     |                                                                                           |
|-------------------------|--------------------------------|------------------------|-------|------|----|-----|-------------------------------------------------------------------------------------------|
| <a href="#">Dock7</a>   | <a href="#">Dock7.bSep08</a>   | <a href="#">313388</a> | 15994 | 1510 | 7  | 303 | dedicator of cytokinesis 7 (35.6 kD) (Dock7) alternative variant bSep08, complete mRNA.   |
| <a href="#">Dock7</a>   | <a href="#">Dock7.cSep08</a>   | <a href="#">313388</a> | 22339 | 1116 | 8  | 301 | dedicator of cytokinesis 7 (34.0 kD) (Dock7) alternative variant cSep08, mRNA.            |
| <a href="#">Dock7</a>   | <a href="#">Dock7.dSep08</a>   | <a href="#">313388</a> | 8835  | 587  | 4  | 195 | dedicator of cytokinesis 7 (Dock7) alternative variant dSep08, mRNA.                      |
| <a href="#">Dock7.1</a> | <a href="#">Dock7.1.aSep08</a> | <a href="#">313388</a> | 60964 | 1437 |    | 479 | dedicator of cytokinesis 7 (Dock7.1) mRNA.                                                |
| <a href="#">Dock8</a>   | <a href="#">Dock8.bSep08</a>   | <a href="#">499337</a> | 11728 | 734  | 6  | 244 | dedicator of cytokinesis 8 (Dock8) alternative variant bSep08, mRNA.                      |
| <a href="#">Dock8</a>   | <a href="#">Dock8.cSep08</a>   | <a href="#">499337</a> | 26735 | 1001 | 8  | 205 | dedicator of cytokinesis 8 CRA a (23.4 kD) (Dock8) alternative variant cSep08, mRNA.      |
| <a href="#">Dock8</a>   | <a href="#">Dock8.dSep08</a>   | <a href="#">499337</a> | 8656  | 1880 | 4  | 148 | dedicator of cytokinesis 8 (17.3 kD) (Dock8) alternative variant dSep08, mRNA.            |
| <a href="#">Dock8</a>   | <a href="#">Dock8.fSep08</a>   | <a href="#">499337</a> | 975   | 264  | 2  | 35  | dedicator of cytokinesis 8 (Dock8) alternative variant fSep08, mRNA.                      |
| <a href="#">Dock9</a>   | <a href="#">Dock9.bSep08</a>   | <a href="#">259237</a> | 20566 | 889  | 10 | 296 | dedicator of cytokinesis 9 (Dock9) alternative variant bSep08, mRNA.                      |
| <a href="#">Dock9</a>   | <a href="#">Dock9.cSep08</a>   | <a href="#">259237</a> | 22573 | 823  | 9  | 274 | dedicator of cytokinesis 9 (Dock9) alternative variant cSep08, mRNA.                      |
| <a href="#">Dock9</a>   | <a href="#">Dock9.dSep08</a>   | <a href="#">259237</a> | 17137 | 576  | 7  | 192 | dedicator of cytokinesis 9 CRA i (Dock9) alternative variant dSep08, mRNA.                |
| <a href="#">Dock9</a>   | <a href="#">Dock9.eSep08</a>   | <a href="#">259237</a> | 4807  | 785  | 4  | 121 | dedicator of cytokinesis 9 (13.6 kD) (Dock9) alternative variant eSep08, mRNA.            |
| <a href="#">Dock9</a>   | <a href="#">Dock9.fSep08</a>   | <a href="#">259237</a> | 2812  | 447  | 2  | 88  | dedicator of cytokinesis 9 (Dock9) alternative variant fSep08, mRNA.                      |
| <a href="#">Dock9</a>   | <a href="#">Dock9.gSep08</a>   | <a href="#">259237</a> | 5447  | 351  | 2  | 86  | dedicator of cytokinesis 9 (Dock9) alternative variant gSep08, mRNA.                      |
| <a href="#">Dock9</a>   | <a href="#">Dock9.hSep08</a>   | <a href="#">259237</a> | 4081  | 382  | 3  | 63  | dedicator of cytokinesis 9 (Dock9) alternative variant hSep08, mRNA.                      |
| <a href="#">Dock11</a>  | <a href="#">Dock11.aSep08</a>  | <a href="#">313438</a> | 25714 | 1291 |    | 430 | dedicator of cytokinesis 11 (Dock11) mRNA.                                                |
| <a href="#">dofer</a>   | <a href="#">dofer.aSep08</a>   |                        | 96944 | 823  |    | 72  | putative cytoplasmic protein (8.1 kD) (dofer) mRNA.                                       |
| <a href="#">doflo</a>   | <a href="#">doflo.aSep08</a>   |                        | 3385  | 458  |    | 152 | vacuolar protein sorting 13A (doflo) mRNA.                                                |
| <a href="#">doflu</a>   | <a href="#">doflu.aSep08</a>   |                        | 686   | 383  |    | 127 | myeloid lymphoid leukemia like (doflu) mRNA.                                              |
| <a href="#">Dohh</a>    | <a href="#">Dohh.bSep08</a>    | <a href="#">314644</a> | 3743  | 700  | 3  | 185 | deoxyhypusine hydroxylase/monooxygenase (Dohh) alternative variant bSep08, mRNA.          |
| <a href="#">Dohh</a>    | <a href="#">Dohh.cSep08</a>    | <a href="#">314644</a> | 4771  | 538  | 4  | 178 | deoxyhypusine hydroxylase/monooxygenase (Dohh) alternative variant cSep08, mRNA.          |
| <a href="#">Dohh</a>    | <a href="#">Dohh.dSep08</a>    | <a href="#">314644</a> | 2872  | 618  | 3  | 108 | deoxyhypusine hydroxylase/monooxygenase (Dohh) alternative variant dSep08, mRNA.          |
| <a href="#">Dok4</a>    | <a href="#">Dok4.bSep08</a>    | <a href="#">361364</a> | 3571  | 386  | 2  | 58  | docking protein 4 (Dok4) alternative variant bSep08, mRNA.                                |
| <a href="#">dokee</a>   | <a href="#">dokee.aSep08</a>   |                        | 766   | 505  |    | 33  | putative protein (3.8 kD) (dokee) mRNA.                                                   |
| <a href="#">doloy</a>   | <a href="#">doloy.aSep08</a>   |                        | 4167  | 377  |    | 125 | specific 7 (doloy) mRNA.                                                                  |
| <a href="#">Dolpp1</a>  | <a href="#">Dolpp1.aSep08</a>  | <a href="#">296624</a> | 8486  | 2276 | 8  | 238 | dolichyl pyrophosphate phosphatase 1 (27.1 kD) (Dolpp1) alternative variant aSep08, mRNA. |

|                           |                                  |                        |       |      |    |     |                                                                                 |
|---------------------------|----------------------------------|------------------------|-------|------|----|-----|---------------------------------------------------------------------------------|
| <a href="#">Dolpp1</a>    | <a href="#">Dolpp1.dSep08</a>    | <a href="#">296624</a> | 2692  | 333  | 2  | 60  | dolichyl pyrophosphate phosphatase 1 (Dolpp1) alternative variant dSep08, mRNA. |
| <a href="#">Dom3z</a>     | <a href="#">Dom3z.bSep08</a>     | <a href="#">361799</a> | 2091  | 1455 | 6  | 392 | RAI1 like (Dom3z) alternative variant bSep08, mRNA.                             |
| <a href="#">domer</a>     | <a href="#">domer.aSep08</a>     |                        | 810   | 431  |    | 66  | putative protein (domer) mRNA.                                                  |
| <a href="#">donoy</a>     | <a href="#">donoy.aSep08</a>     |                        | 415   | 317  |    | 50  | putative protein (5.3 kD) (donoy) mRNA.                                         |
| <a href="#">Donson</a>    | <a href="#">Donson.aSep08</a>    | <a href="#">288257</a> | 9651  | 2385 | 9  | 546 | downstream neighbor of SON (60.5 kD) (Donson) alternative variant aSep08, mRNA. |
| <a href="#">Donson</a>    | <a href="#">Donson.cSep08</a>    | <a href="#">288257</a> | 1989  | 758  | 2  | 42  | downstream neighbor of SON (Donson) alternative variant cSep08, mRNA.           |
| <a href="#">Dopey2</a>    | <a href="#">Dopey2.aSep08</a>    | <a href="#">304077</a> | 39015 | 1931 | 13 | 490 | dopey family member 2 (55.7 kD) (Dopey2) alternative variant aSep08, mRNA.      |
| <a href="#">Dopey_N.0</a> | <a href="#">Dopey_N.0.aSep08</a> |                        | 37100 | 989  |    | 329 | dopey family member 2 CRA b (Dopey_N.0) mRNA.                                   |
| <a href="#">Dopey_N.1</a> | <a href="#">Dopey_N.1.aSep08</a> |                        | 36380 | 603  |    | 140 | dopey family member 1 (Dopey_N.1) mRNA.                                         |
| <a href="#">dopor</a>     | <a href="#">dopor.aSep08</a>     |                        | 1307  | 689  |    | 229 | centrosomal protein 164kDa CRA d (dopor) mRNA.                                  |
| <a href="#">dorby</a>     | <a href="#">dorby.aSep08</a>     |                        | 6240  | 818  |    | 272 | putative protein of vertebrate origin (dorby) mRNA.                             |
| <a href="#">dorchy</a>    | <a href="#">dorchy.aSep08</a>    |                        | 5455  | 630  |    | 209 | methyl-CpG binding domain protein 5 like (dorchy) mRNA.                         |
| <a href="#">dorfer</a>    | <a href="#">dorfer.aSep08</a>    |                        | 1768  | 298  |    | 76  | putative protein (dorfer) mRNA.                                                 |
| <a href="#">dorflo</a>    | <a href="#">dorflo.aSep08</a>    |                        | 9091  | 489  |    | 163 | transient receptor potential cation channel subfamily M member 6 (dorflo) mRNA. |
| <a href="#">dorflu</a>    | <a href="#">dorflu.aSep08</a>    |                        | 547   | 374  |    | 43  | putative protein (dorflu) mRNA.                                                 |
| <a href="#">dorkee</a>    | <a href="#">dorkee.bSep08</a>    |                        | 523   | 266  | 2  | 38  | putative protein (dorkee) alternative variant bSep08, mRNA.                     |
| <a href="#">dorloy</a>    | <a href="#">dorloy.aSep08</a>    |                        | 1053  | 623  |    | 81  | CRA a like (9.4 kD) (dorloy) mRNA.                                              |
| <a href="#">dormer</a>    | <a href="#">dormer.aSep08</a>    |                        | 1578  | 290  |    | 69  | keratin 2 (dormer) mRNA.                                                        |
| <a href="#">dornoy</a>    | <a href="#">dornoy.aSep08</a>    |                        | 4715  | 1366 |    | 91  | CRA a like (dornoy) mRNA.                                                       |
| <a href="#">dorpor</a>    | <a href="#">dorpor.aSep08</a>    |                        | 1049  | 626  | 2  | 165 | putative protein (dorpor) alternative variant aSep08, mRNA.                     |
| <a href="#">dorsa</a>     | <a href="#">dorsa.aSep08</a>     |                        | 2515  | 452  |    | 46  | putative protein (5.0 kD) (dorsa) mRNA.                                         |
| <a href="#">dorshee</a>   | <a href="#">dorshee.aSep08</a>   |                        | 649   | 401  |    | 41  | putative protein (4.4 kD) (dorshee) mRNA.                                       |
| <a href="#">dorto</a>     | <a href="#">dorto.aSep08</a>     |                        | 3689  | 780  |    | 70  | atp-dependent rna helicase tdrd9 (dorto) mRNA.                                  |
| <a href="#">dorvar</a>    | <a href="#">dorvar.aSep08</a>    |                        | 4388  | 705  | 2  | 165 | zyg-11 homolog B (dorvar) alternative variant aSep08, mRNA.                     |
| <a href="#">dorvar</a>    | <a href="#">dorvar.bSep08</a>    |                        | 4269  | 710  | 1  | 121 | zyg-11 homolog B (14.0 kD) (dorvar) alternative variant bSep08, mRNA.           |
| <a href="#">dorwey</a>    | <a href="#">dorwey.aSep08</a>    |                        | 1149  | 551  | 2  | 69  | putative protein (7.3 kD) (dorwey) alternative variant aSep08, mRNA.            |
| <a href="#">Dos</a>       | <a href="#">Dos.bSep08</a>       | <a href="#">314622</a> | 1947  | 1349 | 4  | 179 | putative protein of vertebrate origin (Dos) alternative variant bSep08, mRNA.   |
| <a href="#">Dos</a>       | <a href="#">Dos.eSep08</a>       | <a href="#">314622</a> | 1974  | 296  | 2  | 98  | putative protein (Dos) alternative variant eSep08, mRNA.                        |
| <a href="#">Dos</a>       | <a href="#">Dos.fSep08</a>       | <a href="#">314622</a> | 1449  | 399  | 5  | 92  | putative protein (Dos) alternative variant fSep08, mRNA.                        |
| <a href="#">dosa</a>      | <a href="#">dosa.aSep08</a>      |                        | 1614  | 1366 | 3  | 74  | putative protein (dosa) alternative variant aSep08, mRNA.                       |
| <a href="#">dosa</a>      | <a href="#">dosa.bSep08</a>      |                        | 20327 | 715  | 3  | 111 | putative protein (dosa) alternative variant bSep08, mRNA.                       |
| <a href="#">doshee</a>    | <a href="#">doshee.aSep08</a>    |                        | 2058  | 632  |    | 67  | putative protein (7.6 kD) (doshee) mRNA.                                        |

|                         |                                |                        |        |      |   |     |                                                                                                            |
|-------------------------|--------------------------------|------------------------|--------|------|---|-----|------------------------------------------------------------------------------------------------------------|
| <a href="#">Dot1l</a>   | <a href="#">Dot1l.bSep08</a>   | <a href="#">362831</a> | 26817  | 737  | 6 | 240 | DOT1-like, histone H3 methyltransferase ( <i>S. cerevisiae</i> ) (Dot1l) alternative variant bSep08, mRNA. |
| <a href="#">Dot1l</a>   | <a href="#">Dot1l.dSep08</a>   | <a href="#">362831</a> | 13729  | 442  | 5 | 141 | DOT1-like, histone H3 methyltransferase ( <i>S. cerevisiae</i> ) (Dot1l) alternative variant dSep08, mRNA. |
| <a href="#">doto</a>    | <a href="#">doto.aSep08</a>    |                        | 3312   | 738  |   | 178 | putative protein of mammalian origin (doto) mRNA.                                                          |
| <a href="#">dovar</a>   | <a href="#">dovar.aSep08</a>   |                        | 460    | 362  |   | 51  | putative protein (5.6 kD) (dovar) mRNA.                                                                    |
| <a href="#">dowey</a>   | <a href="#">dowey.aSep08</a>   |                        | 3897   | 753  |   | 87  | putative mitochondrial protein (9.7 kD) (dowey) mRNA.                                                      |
| <a href="#">doyby</a>   | <a href="#">doyby.aSep08</a>   |                        | 3398   | 353  |   | 73  | polyprotein (doyby) mRNA.                                                                                  |
| <a href="#">doychy</a>  | <a href="#">doychy.aSep08</a>  |                        | 10065  | 641  |   | 40  | putative protein (4.7 kD) (doychy) mRNA.                                                                   |
| <a href="#">doyfer</a>  | <a href="#">doyfer.aSep08</a>  |                        | 1802   | 725  |   | 60  | putative protein (6.8 kD) (doyfer) mRNA.                                                                   |
| <a href="#">doyflo</a>  | <a href="#">doyflo.aSep08</a>  |                        | 3911   | 472  | 3 | 47  | putative protein (5.2 kD) (doyflo) alternative variant aSep08, mRNA.                                       |
| <a href="#">doyflu</a>  | <a href="#">doyflu.aSep08</a>  |                        | 26811  | 476  |   | 63  | putative protein (6.6 kD) (doyflu) mRNA.                                                                   |
| <a href="#">doykee</a>  | <a href="#">doykee.aSep08</a>  |                        | 119126 | 1240 |   | 117 | CLIP-associating protein 1 (13.2 kD) (doykee) mRNA.                                                        |
| <a href="#">doyloy</a>  | <a href="#">doyloy.aSep08</a>  |                        | 5401   | 1191 | 2 | 114 | CRA a like (13.7 kD) (doyloy) alternative variant aSep08, mRNA.                                            |
| <a href="#">doyloy</a>  | <a href="#">doyloy.cSep08</a>  |                        | 4102   | 386  | 2 | 39  | putative protein (4.3 kD) (doyloy) alternative variant cSep08, mRNA.                                       |
| <a href="#">doymer</a>  | <a href="#">doymer.aSep08</a>  |                        | 3453   | 661  |   | 150 | putative protein (16.8 kD) (doymer) mRNA.                                                                  |
| <a href="#">doynoy</a>  | <a href="#">doynoy.aSep08</a>  |                        | 1506   | 360  |   | 63  | putative protein (doynoy) mRNA.                                                                            |
| <a href="#">doypor</a>  | <a href="#">doypor.aSep08</a>  |                        | 5726   | 844  | 2 | 70  | ab2-143 like (doypor) alternative variant aSep08, mRNA.                                                    |
| <a href="#">doysa</a>   | <a href="#">doysa.aSep08</a>   |                        | 4729   | 723  |   | 69  | putative protein (7.6 kD) (doysa) mRNA.                                                                    |
| <a href="#">doyshee</a> | <a href="#">doyshee.aSep08</a> |                        | 34088  | 588  |   | 196 | catenin delta 2 (doyshee) mRNA.                                                                            |
| <a href="#">doyto</a>   | <a href="#">doyto.bSep08</a>   |                        | 22506  | 329  | 4 | 69  | putative protein (7.6 kD) (doyto) alternative variant bSep08, mRNA.                                        |
| <a href="#">doyvar</a>  | <a href="#">doyvar.aSep08</a>  |                        | 1303   | 627  |   | 53  | putative protein (doyvar) mRNA.                                                                            |
| <a href="#">doywey</a>  | <a href="#">doywey.aSep08</a>  |                        | 4262   | 610  |   | 93  | putative protein (doywey) mRNA.                                                                            |
| <a href="#">Dpagt1</a>  | <a href="#">Dpagt1.bSep08</a>  | <a href="#">300668</a> | 6651   | 2393 | 8 | 301 | transferase (34.5 kD) (Dpagt1) alternative variant bSep08, mRNA.                                           |
| <a href="#">Dpagt1</a>  | <a href="#">Dpagt1.cSep08</a>  | <a href="#">300668</a> | 4915   | 953  | 5 | 198 | transferase (Dpagt1) alternative variant cSep08, mRNA.                                                     |
| <a href="#">Dpagt1</a>  | <a href="#">Dpagt1.dSep08</a>  | <a href="#">300668</a> | 1730   | 560  | 4 | 152 | transferase (16.9 kD) (Dpagt1) alternative variant dSep08, mRNA.                                           |
| <a href="#">Dpagt1</a>  | <a href="#">Dpagt1.eSep08</a>  | <a href="#">300668</a> | 7083   | 701  | 4 | 119 | transferase (Dpagt1) alternative variant eSep08, mRNA.                                                     |
| <a href="#">Dpagt1</a>  | <a href="#">Dpagt1.fSep08</a>  | <a href="#">300668</a> | 2974   | 774  | 4 | 118 | transferase (13.0 kD) (Dpagt1) alternative variant fSep08, mRNA.                                           |
| <a href="#">Dpagt1</a>  | <a href="#">Dpagt1.gSep08</a>  | <a href="#">300668</a> | 1947   | 739  | 3 | 93  | transferase (Dpagt1) alternative variant gSep08, mRNA.                                                     |
| <a href="#">Dpagt1</a>  | <a href="#">Dpagt1.hSep08</a>  | <a href="#">300668</a> | 648    | 524  | 2 | 63  | putative protein (Dpagt1) alternative variant hSep08, mRNA.                                                |
| <a href="#">Dpep1</a>   | <a href="#">Dpep1.bSep08</a>   | <a href="#">94199</a>  | 23477  | 720  | 7 | 240 | dipeptidase 1 (renal) (Dpep1) alternative variant bSep08, mRNA.                                            |
| <a href="#">Dpep2</a>   | <a href="#">Dpep2.bSep08</a>   | <a href="#">291984</a> | 6661   | 1633 | 8 | 310 | dipeptidase 2 (34.2 kD) (Dpep2) alternative variant bSep08, mRNA.                                          |
| <a href="#">Dpep2</a>   | <a href="#">Dpep2.cSep08</a>   | <a href="#">291984</a> | 2683   | 1107 | 4 | 251 | dipeptidase 2 (Dpep2) alternative variant cSep08, mRNA.                                                    |

|                              |                                     |                        |        |      |   |     |                                                                                                                                   |
|------------------------------|-------------------------------------|------------------------|--------|------|---|-----|-----------------------------------------------------------------------------------------------------------------------------------|
| <a href="#">Dpf1</a>         | <a href="#">Dpf1.bSep08</a>         | <a href="#">50545</a>  | 3838   | 630  | 6 | 189 | d4 zinc double phd fingers family 1 CRA a (Dpf1) alternative variant bSep08, mRNA.                                                |
| <a href="#">Dpf1</a>         | <a href="#">Dpf1.cSep08</a>         | <a href="#">50545</a>  | 4794   | 561  | 5 | 186 | d4 zinc double phd fingers family 1 CRA c (Dpf1) alternative variant cSep08, mRNA.                                                |
| <a href="#">Dpf1</a>         | <a href="#">Dpf1.dSep08</a>         | <a href="#">50545</a>  | 3349   | 1616 | 4 | 77  | d4 zinc double PHD fingers family 1 (8.8 kD) (Dpf1) alternative variant dSep08, mRNA.                                             |
| <a href="#">Dpf2</a>         | <a href="#">Dpf2.bSep08</a>         | <a href="#">361711</a> | 14006  | 2552 | 7 | 384 | d4, zinc and double PHD fingers family 2 (43.6 kD) (Dpf2) alternative variant bSep08, mRNA.                                       |
| <a href="#">Dpf2</a>         | <a href="#">Dpf2.cSep08</a>         | <a href="#">361711</a> | 4918   | 943  | 6 | 313 | d4, zinc and double PHD fingers family 2 (Dpf2) alternative variant cSep08, mRNA.                                                 |
| <a href="#">Dpf2</a>         | <a href="#">Dpf2.dSep08</a>         | <a href="#">361711</a> | 4336   | 751  | 2 | 143 | d4, zinc and double PHD fingers family 2 (Dpf2) alternative variant dSep08, mRNA.                                                 |
| <a href="#">Dpf2</a>         | <a href="#">Dpf2.eSep08</a>         | <a href="#">361711</a> | 2422   | 813  | 3 | 136 | d4, zinc and double PHD fingers family 2 (Dpf2) alternative variant eSep08, mRNA.                                                 |
| <a href="#">Dpf3</a>         | <a href="#">Dpf3.aSep08</a>         | <a href="#">299186</a> | 224699 | 1677 | 1 | 367 | d4, zinc and double PHD fingers, family 3 (Dpf3) alternative variant aSep08, mRNA.                                                |
| <a href="#">Dpf3</a>         | <a href="#">Dpf3.bSep08</a>         | <a href="#">299186</a> | 59722  | 519  | 1 | 172 | d4, zinc and double PHD fingers, family 3 (Dpf3) alternative variant bSep08, mRNA.                                                |
| <a href="#">Dph1andOvca2</a> | <a href="#">Dph1andOvca2.cSep08</a> | <a href="#">287523</a> | 8306   | 770  | 5 | 253 | diphtheria toxin resistance protein required for diphthamide biosynthesis-like 1 (Dph1andOvca2) alternative variant cSep08, mRNA. |
| <a href="#">Dph1andOvca2</a> | <a href="#">Dph1andOvca2.cSep08</a> | <a href="#">497954</a> | 8306   | 770  | 5 | 253 | diphtheria toxin resistance protein required for diphthamide biosynthesis-like 1 (Dph1andOvca2) alternative variant cSep08, mRNA. |
| <a href="#">Dph1andOvca2</a> | <a href="#">Dph1andOvca2.eSep08</a> | <a href="#">287523</a> | 2505   | 800  | 6 | 139 | tumor suppressor like (Dph1andOvca2) alternative variant eSep08, mRNA.                                                            |
| <a href="#">Dph1andOvca2</a> | <a href="#">Dph1andOvca2.eSep08</a> | <a href="#">497954</a> | 2505   | 800  | 6 | 139 | tumor suppressor like (Dph1andOvca2) alternative variant eSep08, mRNA.                                                            |
| <a href="#">Dph3</a>         | <a href="#">Dph3.bSep08</a>         | <a href="#">680594</a> | 2832   | 2425 | 2 | 73  | DPH3, KTI11 homolog (S. cerevisiae) (8.2 kD) (Dph3) alternative variant bSep08, mRNA.                                             |
| <a href="#">Dph3</a>         | <a href="#">Dph3.cSep08</a>         | <a href="#">680594</a> | 2792   | 542  | 2 | 57  | DPH3, KTI11 homolog (S. cerevisiae) (6.5 kD) (Dph3) alternative variant cSep08, mRNA.                                             |
| <a href="#">Dph3</a>         | <a href="#">Dph3.dSep08</a>         | <a href="#">680594</a> | 2524   | 756  | 2 | 54  | DPH3, KTI11 homolog (S. cerevisiae) (Dph3) alternative variant dSep08, mRNA.                                                      |
| <a href="#">Dph4</a>         | <a href="#">Dph4.aSep08</a>         | <a href="#">362184</a> | 34328  | 534  | 3 | 128 | DPH4 homolog (JJJ3, S. cerevisiae) (Dph4) alternative variant aSep08, mRNA.                                                       |
| <a href="#">Dph4</a>         | <a href="#">Dph4.bSep08</a>         | <a href="#">362184</a> | 14937  | 614  | 3 | 72  | DPH4 homolog (JJJ3, S. cerevisiae) (Dph4) alternative variant bSep08, mRNA.                                                       |
| <a href="#">Dph4</a>         | <a href="#">Dph4.cSep08</a>         | <a href="#">362184</a> | 35372  | 773  | 3 | 48  | DPH4 homolog (JJJ3, S. cerevisiae) (5.4 kD) (Dph4) alternative variant cSep08, mRNA.                                              |
| <a href="#">Dph5</a>         | <a href="#">Dph5.aSep08</a>         | <a href="#">295394</a> | 33460  | 1776 | 2 | 468 | DPH5 homolog (S. cerevisiae) (Dph5) alternative variant aSep08, mRNA.                                                             |
| <a href="#">Dph5</a>         | <a href="#">Dph5.cSep08</a>         | <a href="#">295394</a> | 31099  | 729  | 1 | 211 | DPH5 homolog (S. cerevisiae) (Dph5) alternative variant cSep08, mRNA.                                                             |
| <a href="#">Dpm1</a>         | <a href="#">Dpm1.bSep08</a>         | <a href="#">296394</a> | 6082   | 400  | 5 | 127 | dolichol-phosphate (beta-D) mannosyltransferase 1 (Dpm1) alternative variant bSep08, mRNA.                                        |

|                           |                                  |                        |        |      |    |     |                                                                                            |
|---------------------------|----------------------------------|------------------------|--------|------|----|-----|--------------------------------------------------------------------------------------------|
| <a href="#">Dpm1</a>      | <a href="#">Dpm1.cSep08</a>      | <a href="#">296394</a> | 9903   | 332  | 4  | 110 | dolichol-phosphate (beta-D) mannosyltransferase 1 (Dpm1) alternative variant cSep08, mRNA. |
| <a href="#">Dpm1</a>      | <a href="#">Dpm1.dSep08</a>      | <a href="#">296394</a> | 10159  | 982  | 4  | 102 | dolichol-phosphate (beta-D) mannosyltransferase 1 (Dpm1) alternative variant dSep08, mRNA. |
| <a href="#">Dpp4</a>      | <a href="#">Dpp4.aSep08</a>      | <a href="#">25253</a>  | 52079  | 2378 |    | 703 | dipeptidylpeptidase 4 (Dpp4) alternative variant aSep08, mRNA.                             |
| <a href="#">Dpp4</a>      | <a href="#">Dpp4.bSep08</a>      | <a href="#">25253</a>  | 23512  | 1327 |    | 323 | dipeptidylpeptidase 4 (Dpp4) alternative variant bSep08, mRNA.                             |
| <a href="#">Dpp6</a>      | <a href="#">Dpp6.bSep08</a>      | <a href="#">29272</a>  | 562440 | 1791 | 4  | 544 | dipeptidylpeptidase 6 CRA a (Dpp6) alternative variant bSep08, mRNA.                       |
| <a href="#">Dpp6</a>      | <a href="#">Dpp6.cSep08</a>      | <a href="#">29272</a>  | 471784 | 641  | 8  | 192 | dipeptidylpeptidase 6 CRA c (Dpp6) alternative variant cSep08, mRNA.                       |
| <a href="#">Dpp6</a>      | <a href="#">Dpp6.dSep08</a>      | <a href="#">29272</a>  | 6502   | 540  | 4  | 116 | dipeptidylpeptidase 6 CRA c (Dpp6) alternative variant dSep08, mRNA.                       |
| <a href="#">Dpp7</a>      | <a href="#">Dpp7.bSep08</a>      | <a href="#">83799</a>  | 1351   | 764  | 4  | 152 | dipeptidylpeptidase 7 CRA c (15.9 kD) (Dpp7) alternative variant bSep08, mRNA.             |
| <a href="#">Dpp7</a>      | <a href="#">Dpp7.cSep08</a>      | <a href="#">83799</a>  | 1431   | 729  | 4  | 150 | dipeptidylpeptidase 7 CRA a (Dpp7) alternative variant cSep08, mRNA.                       |
| <a href="#">Dpp7</a>      | <a href="#">Dpp7.dSep08</a>      | <a href="#">83799</a>  | 861    | 773  | 2  | 122 | dipeptidylpeptidase 7 (Dpp7) alternative variant dSep08, mRNA.                             |
| <a href="#">Dpp7</a>      | <a href="#">Dpp7.eSep08</a>      | <a href="#">83799</a>  | 861    | 755  | 2  | 116 | dipeptidylpeptidase 7 CRA a (Dpp7) alternative variant eSep08, mRNA.                       |
| <a href="#">Dpp7</a>      | <a href="#">Dpp7.fSep08</a>      | <a href="#">83799</a>  | 877    | 721  | 2  | 103 | dipeptidylpeptidase 7 CRA a (Dpp7) alternative variant fSep08, mRNA.                       |
| <a href="#">Dpp7</a>      | <a href="#">Dpp7.gSep08</a>      | <a href="#">83799</a>  | 712    | 220  | 3  | 73  | dipeptidyl-peptidase 7 (Dpp7) alternative variant gSep08, mRNA.                            |
| <a href="#">Dpp7</a>      | <a href="#">Dpp7.iSep08</a>      | <a href="#">83799</a>  | 396    | 287  | 2  | 58  | dipeptidyl-peptidase 7 (Dpp7) alternative variant iSep08, mRNA.                            |
| <a href="#">Dpp8</a>      | <a href="#">Dpp8.bSep08</a>      | <a href="#">315758</a> | 26397  | 1777 | 12 | 494 | dipeptidylpeptidase 8 (Dpp8) alternative variant bSep08, mRNA.                             |
| <a href="#">Dpp8</a>      | <a href="#">Dpp8.cSep08</a>      | <a href="#">315758</a> | 21947  | 1264 | 10 | 359 | dipeptidylpeptidase 8 (Dpp8) alternative variant cSep08, mRNA.                             |
| <a href="#">Dpp8</a>      | <a href="#">Dpp8.dSep08</a>      | <a href="#">315758</a> | 9226   | 373  | 3  | 124 | dipeptidylpeptidase 8 (Dpp8) alternative variant dSep08, mRNA.                             |
| <a href="#">Dpp8</a>      | <a href="#">Dpp8.hSep08</a>      | <a href="#">315758</a> | 3531   | 721  | 5  | 58  | dipeptidylpeptidase 8 (Dpp8) alternative variant hSep08, mRNA.                             |
| <a href="#">Dpp9</a>      | <a href="#">Dpp9.aSep08</a>      | <a href="#">301130</a> | 15502  | 769  |    | 255 | dipeptidyl peptidase 9 (Dpp9) mRNA.                                                        |
| <a href="#">DPPIV_N.0</a> | <a href="#">DPPIV_N.0.aSep08</a> |                        | 12891  | 1028 |    | 342 | dipeptidylpeptidase 9 (DPPIV_N.0) mRNA.                                                    |
| <a href="#">Dpt</a>       | <a href="#">Dpt.aSep08</a>       | <a href="#">289178</a> | 28723  | 1975 | 3  | 202 | dermatopontin (24.2 kD) (Dpt) alternative variant aSep08, mRNA.                            |
| <a href="#">Dpt</a>       | <a href="#">Dpt.cSep08</a>       | <a href="#">289178</a> | 27608  | 734  | 2  | 160 | dermatopontin (19.0 kD) (Dpt) alternative variant cSep08, complete mRNA.                   |
| <a href="#">Dpy1911</a>   | <a href="#">Dpy1911.aSep08</a>   | <a href="#">315496</a> | 65262  | 4203 | 19 | 592 | CRA a (Dpy1911) alternative variant aSep08, mRNA.                                          |
| <a href="#">Dpy1911</a>   | <a href="#">Dpy1911.bSep08</a>   | <a href="#">315496</a> | 7507   | 786  | 3  | 85  | CRA a (Dpy1911) alternative variant bSep08, mRNA.                                          |
| <a href="#">Dpy1911</a>   | <a href="#">Dpy1911.cSep08</a>   | <a href="#">315496</a> | 6117   | 635  | 2  | 46  | putative protein (5.1 kD) (Dpy1911) alternative variant cSep08, mRNA.                      |

|                           |                                  |                        |        |      |   |     |                                                                                                             |
|---------------------------|----------------------------------|------------------------|--------|------|---|-----|-------------------------------------------------------------------------------------------------------------|
| <a href="#">Dpy1914</a>   | <a href="#">Dpy1914.aSep08</a>   | <a href="#">297824</a> | 20341  | 2037 |   | 249 | CRA a (Dpy1914) alternative variant aSep08, mRNA.                                                           |
| <a href="#">Dpy1914</a>   | <a href="#">Dpy1914.bSep08</a>   | <a href="#">297824</a> | 7946   | 1067 |   | 141 | CRA a (Dpy1914) alternative variant bSep08, mRNA.                                                           |
| <a href="#">Dpy30</a>     | <a href="#">Dpy30.bSep08</a>     | <a href="#">286897</a> | 14753  | 673  | 4 | 99  | protein CRA b (11.2 kD) (Dpy30) alternative variant bSep08, mRNA.                                           |
| <a href="#">Dpy30</a>     | <a href="#">Dpy30.cSep08</a>     | <a href="#">286897</a> | 14711  | 488  | 3 | 69  | dpy-30 homolog like (Dpy30) alternative variant cSep08, mRNA.                                               |
| <a href="#">Dpy30</a>     | <a href="#">Dpy30.dSep08</a>     | <a href="#">286897</a> | 5711   | 598  | 1 | 51  | dosage compensation-related protein DPY30 like (6.3 kD) (Dpy30) alternative variant dSep08, mRNA.           |
| <a href="#">Dpyd</a>      | <a href="#">Dpyd.aSep08</a>      | <a href="#">81656</a>  | 322931 | 2380 |   | 386 | dihydropyrimidine dehydrogenase (Dpyd) mRNA.                                                                |
| <a href="#">Dpys</a>      | <a href="#">Dpys.bSep08</a>      | <a href="#">65135</a>  | 40448  | 351  | 3 | 60  | dihydropyrimidinase (Dpys) alternative variant bSep08, mRNA.                                                |
| <a href="#">Dpys</a>      | <a href="#">Dpys.cSep08</a>      | <a href="#">65135</a>  | 40533  | 290  | 2 | 60  | dihydropyrimidinase (Dpys) alternative variant cSep08, mRNA.                                                |
| <a href="#">Dpysl2</a>    | <a href="#">Dpysl2.bSep08</a>    | <a href="#">25416</a>  | 44696  | 602  | 3 | 200 | dihydropyrimidinase-like 2 (Dpysl2) alternative variant bSep08, mRNA.                                       |
| <a href="#">Dpysl3</a>    | <a href="#">Dpysl3.bSep08</a>    | <a href="#">25418</a>  | 19269  | 710  | 6 | 204 | dihydropyrimidinase-like 3 (Dpysl3) alternative variant bSep08, mRNA.                                       |
| <a href="#">Dpysl3</a>    | <a href="#">Dpysl3.cSep08</a>    | <a href="#">25418</a>  | 76149  | 593  | 4 | 197 | dihydropyrimidinase-like 3 (Dpysl3) alternative variant cSep08, mRNA.                                       |
| <a href="#">Dr1</a>       | <a href="#">Dr1.bSep08</a>       | <a href="#">289881</a> | 4657   | 2207 | 1 | 116 | down-regulator of transcription 1 (Dr1) alternative variant bSep08, mRNA.                                   |
| <a href="#">Drap1</a>     | <a href="#">Drap1.aSep08</a>     | <a href="#">293674</a> | 2004   | 793  | 7 | 229 | dr1 associated protein 1 (negative cofactor 2 alpha) (Drap1) alternative variant aSep08, mRNA.              |
| <a href="#">DREV.0</a>    | <a href="#">DREV.0.aSep08</a>    |                        | 45235  | 1649 | 3 | 318 | methyltransferase like 9 precursor (36.4 kD) (DREV.0) alternative variant aSep08, mRNA.                     |
| <a href="#">DREV.0</a>    | <a href="#">DREV.0.bSep08</a>    |                        | 44979  | 1390 | 3 | 296 | methyltransferase like 9 (DREV.0) alternative variant bSep08, mRNA.                                         |
| <a href="#">DREV.0</a>    | <a href="#">DREV.0.cSep08</a>    |                        | 28534  | 870  | 3 | 238 | methyltransferase like 9 (27.4 kD) (DREV.0) alternative variant cSep08, mRNA.                               |
| <a href="#">Drf_DAD.0</a> | <a href="#">Drf_DAD.0.aSep08</a> |                        | 64096  | 610  |   | 200 | diaphanous homolog 3 CRA a (Drf_DAD.0) mRNA.                                                                |
| <a href="#">Drf_FH3.0</a> | <a href="#">Drf_FH3.0.aSep08</a> |                        | 11975  | 881  |   | 240 | dishevelled associated activator of morphogenesis 2 CRA a (Drf_FH3.0) mRNA.                                 |
| <a href="#">Drf_FH3.1</a> | <a href="#">Drf_FH3.1.aSep08</a> |                        | 2498   | 652  |   | 217 | formin-like 3 CRA c (Drf_FH3.1) mRNA.                                                                       |
| <a href="#">Drg1</a>      | <a href="#">Drg1.bSep08</a>      | <a href="#">305470</a> | 6533   | 634  | 4 | 178 | developmentally regulated GTP binding protein 1 (Drg1) alternative variant bSep08, mRNA.                    |
| <a href="#">Drg2</a>      | <a href="#">Drg2.aSep08</a>      | <a href="#">497915</a> | 14046  | 1784 | 3 | 430 | developmentally regulated GTP binding protein 2 (Drg2) alternative variant aSep08, complete mRNA.           |
| <a href="#">Drg2</a>      | <a href="#">Drg2.bSep08</a>      | <a href="#">497915</a> | 8387   | 1067 | 5 | 269 | developmentally regulated GTP binding protein 2 (29.7 kD) (Drg2) alternative variant bSep08, complete mRNA. |
| <a href="#">Drg2</a>      | <a href="#">Drg2.cSep08</a>      | <a href="#">497915</a> | 13808  | 1459 | 6 | 188 | developmentally regulated GTP binding protein 2 (20.9 kD) (Drg2) alternative variant cSep08, mRNA.          |
| <a href="#">Drg2</a>      | <a href="#">Drg2.dSep08</a>      | <a href="#">497915</a> | 2797   | 503  | 3 | 135 | developmentally regulated GTP binding protein 2 (Drg2) alternative variant dSep08, mRNA.                    |
| <a href="#">Drg2</a>      | <a href="#">Drg2.eSep08</a>      | <a href="#">497915</a> | 1057   | 726  | 1 | 46  | developmentally regulated GTP binding protein 2 (Drg2) alternative variant eSep08, mRNA.                    |

|                              |                                     |                        |       |      |   |     |                                                                                                                                                    |
|------------------------------|-------------------------------------|------------------------|-------|------|---|-----|----------------------------------------------------------------------------------------------------------------------------------------------------|
| <a href="#">Drp2</a>         | <a href="#">Drp2.bSep08</a>         | <a href="#">66027</a>  | 6652  | 595  | 5 | 198 | dystrophin related protein 2 (Drp2) alternative variant bSep08, mRNA.                                                                              |
| <a href="#">Drp2</a>         | <a href="#">Drp2.cSep08</a>         | <a href="#">66027</a>  | 645   | 385  | 2 | 33  | dystrophin related protein 2 (Drp2) alternative variant cSep08, mRNA.                                                                              |
| <a href="#">Dsc1</a>         | <a href="#">Dsc1.bSep08</a>         | <a href="#">291759</a> | 7068  | 748  | 2 | 249 | desmocollin 1 (Dsc1) alternative variant bSep08, mRNA.                                                                                             |
| <a href="#">Dsc2</a>         | <a href="#">Dsc2.aSep08</a>         | <a href="#">291760</a> | 9236  | 1042 |   | 347 | desmocollin 2 (Dsc2) mRNA.                                                                                                                         |
| <a href="#">Dsc3</a>         | <a href="#">Dsc3.bSep08</a>         | <a href="#">307563</a> | 4102  | 1135 | 2 | 119 | desmocollin 3 (Dsc3) alternative variant bSep08, mRNA.                                                                                             |
| <a href="#">Dscam</a>        | <a href="#">Dscam.aSep08</a>        | <a href="#">171119</a> | 18652 | 1431 |   | 284 | down syndrome cell adhesion molecule (Dscam) mRNA.                                                                                                 |
| <a href="#">Dsccl1</a>       | <a href="#">Dsccl1.aSep08</a>       | <a href="#">299933</a> | 15467 | 1369 |   | 413 | defective in sister chromatid cohesion 1 homolog (S. cerevisiae) (Dsccl1) mRNA.                                                                    |
| <a href="#">Dscr3</a>        | <a href="#">Dscr3.aSep08</a>        | <a href="#">360703</a> | 25162 | 1112 | 6 | 219 | down syndrome critical region gene 3 (Dscr3) alternative variant aSep08, mRNA.                                                                     |
| <a href="#">Dscr3</a>        | <a href="#">Dscr3.bSep08</a>        | <a href="#">360703</a> | 22674 | 665  | 5 | 177 | down syndrome critical region gene 3 (Dscr3) alternative variant bSep08, mRNA.                                                                     |
| <a href="#">Dscr3</a>        | <a href="#">Dscr3.eSep08</a>        | <a href="#">360703</a> | 14804 | 641  | 2 | 62  | down syndrome critical region gene 3 (6.5 kD) (Dscr3) alternative variant eSep08, mRNA.                                                            |
| <a href="#">Dsg1b</a>        | <a href="#">Dsg1b.aSep08</a>        | <a href="#">291755</a> | 3427  | 547  | 3 | 158 | desmoglein 1 beta (Dsg1b) alternative variant aSep08, mRNA.                                                                                        |
| <a href="#">Dsg2</a>         | <a href="#">Dsg2.aSep08</a>         | <a href="#">307562</a> | 2707  | 346  |   | 115 | desmoglein 2 (Dsg2) mRNA.                                                                                                                          |
| <a href="#">Dsg3</a>         | <a href="#">Dsg3.aSep08</a>         | <a href="#">291752</a> | 3794  | 424  |   | 141 | desmoglein 3 (Dsg3) mRNA.                                                                                                                          |
| <a href="#">DSHCT.0</a>      | <a href="#">DSHCT.0.aSep08</a>      |                        | 11981 | 761  | 6 | 211 | superkiller viralicidic activity 2-like 2 (DSHCT.0) alternative variant aSep08, mRNA.                                                              |
| <a href="#">DSHCT.0</a>      | <a href="#">DSHCT.0.bSep08</a>      |                        | 6466  | 692  | 4 | 210 | superkiller viralicidic activity 2-like 2 (DSHCT.0) alternative variant bSep08, mRNA.                                                              |
| <a href="#">DSHCT.0</a>      | <a href="#">DSHCT.0.cSep08</a>      |                        | 15882 | 879  | 6 | 196 | superkiller viralicidic activity 2-like 2 (DSHCT.0) alternative variant cSep08, mRNA.                                                              |
| <a href="#">DSHCT.0</a>      | <a href="#">DSHCT.0.dSep08</a>      |                        | 12029 | 688  | 5 | 161 | superkiller viralicidic activity 2-like 2 (DSHCT.0) alternative variant dSep08, mRNA.                                                              |
| <a href="#">DSHCT.0</a>      | <a href="#">DSHCT.0.eSep08</a>      |                        | 10789 | 732  | 5 | 150 | superkiller viralicidic activity 2-like 2 (17.2 kD) (DSHCT.0) alternative variant eSep08, mRNA.                                                    |
| <a href="#">DSL.0</a>        | <a href="#">DSL.0.aSep08</a>        |                        | 13744 | 1244 |   | 414 | jagged 2 (DSL.0) mRNA.                                                                                                                             |
| <a href="#">Dsn1</a>         | <a href="#">Dsn1.bSep08</a>         | <a href="#">499933</a> | 4618  | 449  | 2 | 128 | DSN1, MIND kinetochore complex component, homolog (S. cerevisiae) and similar to 40S ribosomal protein S2 (Dsn1) alternative variant bSep08, mRNA. |
| <a href="#">Dsn1</a>         | <a href="#">Dsn1.bSep08</a>         | <a href="#">679915</a> | 4618  | 449  | 2 | 128 | DSN1, MIND kinetochore complex component, homolog (S. cerevisiae) and similar to 40S ribosomal protein S2 (Dsn1) alternative variant bSep08, mRNA. |
| <a href="#">Dsn1</a>         | <a href="#">Dsn1.cSep08</a>         | <a href="#">499933</a> | 3412  | 362  | 2 | 33  | DSN1, MIND kinetochore complex component, homolog (S. cerevisiae) and similar to 40S ribosomal protein S2 (Dsn1) alternative variant cSep08, mRNA. |
| <a href="#">Dsn1</a>         | <a href="#">Dsn1.cSep08</a>         | <a href="#">679915</a> | 3412  | 362  | 2 | 33  | DSN1, MIND kinetochore complex component, homolog (S. cerevisiae) and similar to 40S ribosomal protein S2 (Dsn1) alternative variant cSep08, mRNA. |
| <a href="#">dsRNA_bind.0</a> | <a href="#">dsRNA_bind.0.aSep08</a> |                        | 5141  | 423  |   | 140 | dicer1 (dsRNA_bind.0) mRNA.                                                                                                                        |
| <a href="#">Dst</a>          | <a href="#">Dst.bSep08</a>          | <a href="#">316313</a> | 13766 | 1986 | 9 | 398 | dystonin (Dst) alternative variant bSep08, mRNA.                                                                                                   |
| <a href="#">Dst</a>          | <a href="#">Dst.cSep08</a>          | <a href="#">316313</a> | 12039 | 766  | 7 | 254 | dystonin (Dst) alternative variant cSep08, mRNA.                                                                                                   |



|                       |                              |                        |        |      |   |     |                                                                                                                |
|-----------------------|------------------------------|------------------------|--------|------|---|-----|----------------------------------------------------------------------------------------------------------------|
| <a href="#">Dst</a>   | <a href="#">Dst.dSep08</a>   | <a href="#">316313</a> | 3804   | 717  | 6 | 238 | dystonin (Dst) alternative variant dSep08, mRNA.                                                               |
| <a href="#">Dst</a>   | <a href="#">Dst.eSep08</a>   | <a href="#">316313</a> | 12331  | 665  | 4 | 221 | dystonin (Dst) alternative variant eSep08, mRNA.                                                               |
| <a href="#">Dst</a>   | <a href="#">Dst.fSep08</a>   | <a href="#">316313</a> | 11235  | 565  | 7 | 188 | dystonin (Dst) alternative variant fSep08, mRNA.                                                               |
| <a href="#">Dst</a>   | <a href="#">Dst.gSep08</a>   | <a href="#">316313</a> | 1474   | 856  | 2 | 142 | dystonin (15.0 kD) (Dst) alternative variant gSep08, mRNA.                                                     |
| <a href="#">Dst</a>   | <a href="#">Dst.hSep08</a>   | <a href="#">316313</a> | 5234   | 413  | 3 | 137 | dystonin CRA f (Dst) alternative variant hSep08, mRNA.                                                         |
| <a href="#">Dst</a>   | <a href="#">Dst.iSep08</a>   | <a href="#">316313</a> | 4207   | 738  | 3 | 127 | dystonin (Dst) alternative variant iSep08, mRNA.                                                               |
| <a href="#">Dstn</a>  | <a href="#">Dstn.bSep08</a>  | <a href="#">502674</a> | 3033   | 796  | 2 | 51  | destrin (5.5 kD) (Dstn) alternative variant bSep08, mRNA.                                                      |
| <a href="#">Dtd1</a>  | <a href="#">Dtd1.aSep08</a>  | <a href="#">362227</a> | 169273 | 1245 | 1 | 209 | D-tyrosyl-tRNA deacylase 1 homolog (S. cerevisiae) (23.4 kD) (Dtd1) alternative variant aSep08, complete mRNA. |
| <a href="#">Dtl</a>   | <a href="#">Dtl.aSep08</a>   | <a href="#">305073</a> | 24218  | 1063 | 2 | 353 | denticleless homolog (Drosophila) (Dtl) alternative variant aSep08, mRNA.                                      |
| <a href="#">Dtl</a>   | <a href="#">Dtl.bSep08</a>   | <a href="#">305073</a> | 28747  | 948  | 4 | 315 | denticleless homolog (Drosophila) (Dtl) alternative variant bSep08, mRNA.                                      |
| <a href="#">Dtna</a>  | <a href="#">Dtna.aSep08</a>  | <a href="#">307548</a> | 11894  | 761  | 5 | 174 | dystrobrevin alpha (Dtna) alternative variant aSep08, mRNA.                                                    |
| <a href="#">Dtna</a>  | <a href="#">Dtna.bSep08</a>  | <a href="#">307548</a> | 20621  | 733  | 6 | 172 | dystrobrevin alpha (Dtna) alternative variant bSep08, mRNA.                                                    |
| <a href="#">Dtna</a>  | <a href="#">Dtna.cSep08</a>  | <a href="#">307548</a> | 28783  | 785  | 6 | 168 | dystrobrevin alpha (Dtna) alternative variant cSep08, mRNA.                                                    |
| <a href="#">Dtna</a>  | <a href="#">Dtna.dSep08</a>  | <a href="#">307548</a> | 20993  | 403  | 4 | 134 | dystrobrevin alpha (Dtna) alternative variant dSep08, mRNA.                                                    |
| <a href="#">Dtnb</a>  | <a href="#">Dtnb.bSep08</a>  | <a href="#">362715</a> | 200332 | 1797 | 7 | 572 | dystrobrevin beta CRA a (Dtnb) alternative variant bSep08, mRNA.                                               |
| <a href="#">Dtnb</a>  | <a href="#">Dtnb.cSep08</a>  | <a href="#">362715</a> | 71007  | 768  | 7 | 255 | dystrobrevin beta CRA a (Dtnb) alternative variant cSep08, mRNA.                                               |
| <a href="#">Dtnb</a>  | <a href="#">Dtnb.dSep08</a>  | <a href="#">362715</a> | 49921  | 1192 | 9 | 190 | dystrobrevin beta (21.1 kD) (Dtnb) alternative variant dSep08, mRNA.                                           |
| <a href="#">Dtnb</a>  | <a href="#">Dtnb.eSep08</a>  | <a href="#">362715</a> | 8365   | 668  | 6 | 135 | CRA a like (Dtnb) alternative variant eSep08, mRNA.                                                            |
| <a href="#">Dtnb</a>  | <a href="#">Dtnb.fSep08</a>  | <a href="#">362715</a> | 30380  | 350  | 3 | 116 | dystrobrevin beta CRA a (Dtnb) alternative variant fSep08, mRNA.                                               |
| <a href="#">Dtnb</a>  | <a href="#">Dtnb.gSep08</a>  | <a href="#">362715</a> | 8332   | 455  | 4 | 116 | CRA a like (Dtnb) alternative variant gSep08, mRNA.                                                            |
| <a href="#">Dtnb</a>  | <a href="#">Dtnb.iSep08</a>  | <a href="#">362715</a> | 1896   | 414  | 2 | 98  | putative protein (Dtnb) alternative variant iSep08, mRNA.                                                      |
| <a href="#">Dtnb</a>  | <a href="#">Dtnb.jSep08</a>  | <a href="#">362715</a> | 26706  | 601  | 5 | 91  | dystrobrevin beta (Dtnb) alternative variant jSep08, mRNA.                                                     |
| <a href="#">Dtnb</a>  | <a href="#">Dtnb.kSep08</a>  | <a href="#">362715</a> | 8131   | 295  | 4 | 76  | putative protein (Dtnb) alternative variant kSep08, mRNA.                                                      |
| <a href="#">Dtwd1</a> | <a href="#">Dtwd1.cSep08</a> | <a href="#">296119</a> | 2914   | 365  | 2 | 56  | putative protein of mammalian origin (Dtwd1) alternative variant cSep08, mRNA.                                 |
| <a href="#">Dtwd2</a> | <a href="#">Dtwd2.bSep08</a> | <a href="#">361326</a> | 90241  | 2044 | 1 | 184 | CRA c (20.3 kD) (Dtwd2) alternative variant bSep08, mRNA.                                                      |
| <a href="#">Dtx2</a>  | <a href="#">Dtx2.bSep08</a>  | <a href="#">304591</a> | 39604  | 2589 | 6 | 619 | deltex 2 homolog (Drosophila) (67.2 kD) (Dtx2) alternative variant bSep08, mRNA.                               |
| <a href="#">Dtx2</a>  | <a href="#">Dtx2.cSep08</a>  | <a href="#">304591</a> | 11876  | 858  | 1 | 271 | deltex 2 homolog (Drosophila) (Dtx2) alternative variant cSep08, mRNA.                                         |
| <a href="#">Dtx3</a>  | <a href="#">Dtx3.aSep08</a>  | <a href="#">500847</a> | 1210   | 898  | 2 | 97  | deltex 3 homolog (Drosophila) (Dtx3) alternative variant aSep08, mRNA.                                         |

|                          |                                 |                        |       |      |    |     |                                                                                                                         |
|--------------------------|---------------------------------|------------------------|-------|------|----|-----|-------------------------------------------------------------------------------------------------------------------------|
| <a href="#">Dtymk</a>    | <a href="#">Dtymk.bSep08</a>    | <a href="#">301622</a> | 8613  | 1169 | 6  | 195 | deoxythymidylate kinase (Dtymk) alternative variant bSep08, mRNA.                                                       |
| <a href="#">Dtymk</a>    | <a href="#">Dtymk.cSep08</a>    | <a href="#">301622</a> | 1334  | 418  | 2  | 130 | deoxythymidylate kinase (Dtymk) alternative variant cSep08, mRNA.                                                       |
| <a href="#">Dtymk</a>    | <a href="#">Dtymk.dSep08</a>    | <a href="#">301622</a> | 7456  | 778  | 4  | 121 | deoxythymidylate kinase (Dtymk) alternative variant dSep08, mRNA.                                                       |
| <a href="#">Dtymk</a>    | <a href="#">Dtymk.fSep08</a>    | <a href="#">301622</a> | 4982  | 578  | 3  | 94  | deoxythymidylate kinase CRA d (10.6 kD) (Dtymk) alternative variant fSep08, mRNA.                                       |
| <a href="#">Dtymk</a>    | <a href="#">Dtymk.iSep08</a>    | <a href="#">301622</a> | 3611  | 707  | 3  | 45  | putative protein (6.4 kD) (Dtymk) alternative variant iSep08, mRNA.                                                     |
| <a href="#">duby</a>     | <a href="#">duby.aSep08</a>     |                        | 13712 | 1791 |    | 597 | dedicator of cytokinesis 11 (duby) alternative variant aSep08, mRNA.                                                    |
| <a href="#">duby</a>     | <a href="#">duby.bSep08</a>     |                        | 11116 | 563  |    | 187 | dedicator of cytokinesis 11 (duby) alternative variant bSep08, mRNA.                                                    |
| <a href="#">duchy</a>    | <a href="#">duchy.aSep08</a>    |                        | 65997 | 783  |    | 49  | putative protein (5.5 kD) (duchy) mRNA.                                                                                 |
| <a href="#">DUF590.0</a> | <a href="#">DUF590.0.aSep08</a> |                        | 585   | 396  |    | 132 | transmembrane protein 16h (DUF590.0) mRNA.                                                                              |
| <a href="#">DUF618.0</a> | <a href="#">DUF618.0.aSep08</a> |                        | 5784  | 668  | 3  | 222 | cleavage polyadenylation factor homolog (DUF618.0) alternative variant aSep08, mRNA.                                    |
| <a href="#">DUF622.0</a> | <a href="#">DUF622.0.aSep08</a> |                        | 10020 | 1092 |    | 240 | putative protein, with a coiled coil domain, of vertebrate origin (DUF622.0) mRNA.                                      |
| <a href="#">DUF622.1</a> | <a href="#">DUF622.1.aSep08</a> | <a href="#">501248</a> | 13465 | 709  |    | 154 | putative protein, with 2 coiled coil domains, of mammalian origin (DUF622.1) mRNA.                                      |
| <a href="#">DUF622.2</a> | <a href="#">DUF622.2.aSep08</a> |                        | 1861  | 545  |    | 83  | putative protein, with 2 coiled coil domains, of mammalian origin (DUF622.2) mRNA.                                      |
| <a href="#">DUF622.3</a> | <a href="#">DUF622.3.bSep08</a> |                        | 37707 | 751  | 3  | 121 | putative protein, with a coiled coil domain, of mammalian origin (14.5 kD) (DUF622.3) alternative variant bSep08, mRNA. |
| <a href="#">DUF622.4</a> | <a href="#">DUF622.4.aSep08</a> |                        | 2485  | 437  |    | 145 | putative protein, with a coiled coil domain, of mammalian origin (DUF622.4) mRNA.                                       |
| <a href="#">DUF622.6</a> | <a href="#">DUF622.6.aSep08</a> |                        | 8366  | 779  | 3  | 206 | putative protein, with 2 coiled coil domains, of mammalian origin (DUF622.6) alternative variant aSep08, mRNA.          |
| <a href="#">DUF622.6</a> | <a href="#">DUF622.6.bSep08</a> |                        | 3293  | 735  | 1  | 122 | putative protein, with 2 coiled coil domains, of mammalian origin (DUF622.6) alternative variant bSep08, mRNA.          |
| <a href="#">DUF663.0</a> | <a href="#">DUF663.0.aSep08</a> |                        | 7669  | 2212 | 10 | 444 | tsr1 20S rRNA accumulation (DUF663.0) alternative variant aSep08, mRNA.                                                 |
| <a href="#">DUF663.0</a> | <a href="#">DUF663.0.bSep08</a> |                        | 2378  | 783  | 5  | 214 | tsr1 20S rRNA accumulation homolog (24.6 kD) (DUF663.0) alternative variant bSep08, mRNA.                               |
| <a href="#">DUF663.0</a> | <a href="#">DUF663.0.cSep08</a> |                        | 5342  | 737  | 6  | 171 | tsr1 20S rRNA accumulation (DUF663.0) alternative variant cSep08, mRNA.                                                 |
| <a href="#">DUF663.0</a> | <a href="#">DUF663.0.dSep08</a> |                        | 1084  | 837  | 2  | 64  | tsr1 20S rRNA accumulation (DUF663.0) alternative variant dSep08, mRNA.                                                 |
| <a href="#">DUF729.0</a> | <a href="#">DUF729.0.aSep08</a> |                        | 15705 | 1930 | 8  | 404 | putative protein, with a coiled coil domain, of eukaryotic origin (DUF729.0) alternative variant aSep08, mRNA.          |
| <a href="#">DUF729.0</a> | <a href="#">DUF729.0.bSep08</a> |                        | 4222  | 1018 | 3  | 175 | aa2-041 (19.2 kD) (DUF729.0) alternative variant bSep08, mRNA.                                                          |
| <a href="#">DUF729.0</a> | <a href="#">DUF729.0.dSep08</a> |                        | 6661  | 315  | 3  | 49  | putative protein (5.4 kD) (DUF729.0) alternative variant dSep08, mRNA.                                                  |

|                             |                                    |                        |        |      |   |     |                                                                                                                    |
|-----------------------------|------------------------------------|------------------------|--------|------|---|-----|--------------------------------------------------------------------------------------------------------------------|
| <a href="#">DUF814.0</a>    | <a href="#">DUF814.0.aSep08</a>    |                        | 18165  | 1394 |   | 463 | serologically defined colon cancer antigen 1 like (DUF814.0) alternative variant aSep08, mRNA.                     |
| <a href="#">DUF814.0</a>    | <a href="#">DUF814.0.bSep08</a>    |                        | 3515   | 542  |   | 180 | serologically defined colon cancer antigen 1 CRA f like (DUF814.0) alternative variant bSep08, mRNA.               |
| <a href="#">DUF908.0</a>    | <a href="#">DUF908.0.aSep08</a>    |                        | 5859   | 771  |   | 256 | putative protein of eukaryotic origin (DUF908.0) mRNA.                                                             |
| <a href="#">DUF913.0</a>    | <a href="#">DUF913.0.aSep08</a>    |                        | 10665  | 864  | 4 | 287 | putative protein of metazoan origin (DUF913.0) alternative variant aSep08, mRNA.                                   |
| <a href="#">DUF913.0</a>    | <a href="#">DUF913.0.bSep08</a>    |                        | 8038   | 1119 | 3 | 240 | putative protein of eukaryotic origin (DUF913.0) alternative variant bSep08, mRNA.                                 |
| <a href="#">DUF947.0</a>    | <a href="#">DUF947.0.aSep08</a>    |                        | 7901   | 1095 | 7 | 254 | CRA a (DUF947.0) alternative variant aSep08, mRNA.                                                                 |
| <a href="#">DUF947.0</a>    | <a href="#">DUF947.0.bSep08</a>    |                        | 7870   | 1061 | 7 | 244 | CRA a (28.5 kD) (DUF947.0) alternative variant bSep08, mRNA.                                                       |
| <a href="#">DUF947.0</a>    | <a href="#">DUF947.0.cSep08</a>    |                        | 6148   | 795  | 6 | 207 | CRA a (DUF947.0) alternative variant cSep08, mRNA.                                                                 |
| <a href="#">DUF947.0</a>    | <a href="#">DUF947.0.dSep08</a>    |                        | 2385   | 752  | 4 | 196 | CRA b (DUF947.0) alternative variant dSep08, mRNA.                                                                 |
| <a href="#">DUF1041.0</a>   | <a href="#">DUF1041.0.aSep08</a>   |                        | 1541   | 384  |   | 128 | unc-13 homolog (DUF1041.0) mRNA.                                                                                   |
| <a href="#">DUF1041.1</a>   | <a href="#">DUF1041.1.aSep08</a>   |                        | 22281  | 281  |   | 74  | activator protein for secretion 2 (DUF1041.1) mRNA.                                                                |
| <a href="#">DUF1227.0</a>   | <a href="#">DUF1227.0.aSep08</a>   |                        | 1721   | 698  |   | 232 | excision repair cross-complementing rodent deficiency complementation group 2 (DUF1227.0) mRNA.                    |
| <a href="#">DUF1242.1</a>   | <a href="#">DUF1242.1.aSep08</a>   |                        | 18181  | 3273 | 4 | 72  | transmembrane protein 167 (8.1 kD) (DUF1242.1) alternative variant aSep08, mRNA.                                   |
| <a href="#">DUF1242.1</a>   | <a href="#">DUF1242.1.bSep08</a>   |                        | 14470  | 875  | 4 | 39  | putative protein (4.5 kD) (DUF1242.1) alternative variant bSep08, mRNA.                                            |
| <a href="#">DUF1242.1</a>   | <a href="#">DUF1242.1.cSep08</a>   |                        | 6488   | 595  | 3 | 39  | putative protein (4.5 kD) (DUF1242.1) alternative variant cSep08, mRNA.                                            |
| <a href="#">DUF1358.0</a>   | <a href="#">DUF1358.0.aSep08</a>   |                        | 26747  | 967  | 3 | 144 | putative protein of metazoan origin (DUF1358.0) alternative variant aSep08, mRNA.                                  |
| <a href="#">DUF1358.0</a>   | <a href="#">DUF1358.0.bSep08</a>   |                        | 12744  | 562  | 3 | 142 | putative cytoplasmic protein of bilaterial origin (14.9 kD) (DUF1358.0) alternative variant bSep08, complete mRNA. |
| <a href="#">DUF1358.0</a>   | <a href="#">DUF1358.0.cSep08</a>   |                        | 1543   | 1003 | 1 | 65  | putative protein of vertebrate origin (6.6 kD) (DUF1358.0) alternative variant cSep08, mRNA.                       |
| <a href="#">DUF1387.0</a>   | <a href="#">DUF1387.0.bSep08</a>   | <a href="#">501207</a> | 88105  | 473  | 3 | 123 | CRA b (DUF1387.0) alternative variant bSep08, mRNA.                                                                |
| <a href="#">DUF1387.0</a>   | <a href="#">DUF1387.0.cSep08</a>   | <a href="#">501207</a> | 88142  | 425  | 2 | 116 | CRA b (DUF1387.0) alternative variant cSep08, mRNA.                                                                |
| <a href="#">DUF1387.0</a>   | <a href="#">DUF1387.0.dSep08</a>   | <a href="#">501207</a> | 85018  | 363  | 2 | 34  | putative protein (4.0 kD) (DUF1387.0) alternative variant dSep08, mRNA.                                            |
| <a href="#">DUF1725.115</a> | <a href="#">DUF1725.115.aSep08</a> |                        | 143333 | 676  |   | 73  | endonuclease reverse transcriptase like (8.7 kD) (DUF1725.115) mRNA.                                               |
| <a href="#">DUF1725.254</a> | <a href="#">DUF1725.254.aSep08</a> |                        | 29459  | 722  |   | 228 | reverse transcriptase (DUF1725.254) mRNA.                                                                          |
| <a href="#">DUF1725.282</a> | <a href="#">DUF1725.282.aSep08</a> |                        | 1545   | 750  |   | 61  | endonuclease reverse transcriptase like (7.7 kD) (DUF1725.282) mRNA.                                               |
| <a href="#">DUF1725.308</a> | <a href="#">DUF1725.308.bSep08</a> |                        | 98844  | 313  | 1 | 52  | novel protein containing a Zinc carboxypeptidase domain (DUF1725.308) alternative variant bSep08, mRNA.            |
| <a href="#">DUF1781.0</a>   | <a href="#">DUF1781.0.aSep08</a>   |                        | 892    | 709  |   | 178 | CRA b (DUF1781.0) mRNA.                                                                                            |
| <a href="#">DUF1855.0</a>   | <a href="#">DUF1855.0.aSep08</a>   |                        | 17987  | 628  |   | 155 | axin dorsalization (DUF1855.0) mRNA.                                                                               |
| <a href="#">DUF2039.0</a>   | <a href="#">DUF2039.0.aSep08</a>   |                        | 1271   | 867  |   | 168 | uncharacterized protein c9orf85 like (DUF2039.0) mRNA.                                                             |
| <a href="#">DUF2346.0</a>   | <a href="#">DUF2346.0.aSep08</a>   |                        | 1657   | 320  | 4 | 82  | CRA a (DUF2346.0) alternative variant aSep08, mRNA.                                                                |

|                           |                                  |                        |       |      |   |     |                                                                                                                            |
|---------------------------|----------------------------------|------------------------|-------|------|---|-----|----------------------------------------------------------------------------------------------------------------------------|
| <a href="#">DUF2346.0</a> | <a href="#">DUF2346.0.bSep08</a> |                        | 1657  | 441  | 4 | 67  | CRA a (8.4 kD) (DUF2346.0) alternative variant bSep08, mRNA.                                                               |
| <a href="#">DUF2346.0</a> | <a href="#">DUF2346.0.cSep08</a> |                        | 1493  | 748  | 2 | 41  | CRA a like (DUF2346.0) alternative variant cSep08, mRNA.                                                                   |
| <a href="#">DUF2356.0</a> | <a href="#">DUF2356.0.aSep08</a> |                        | 11999 | 788  |   | 262 | integrator complex CRA a (DUF2356.0) mRNA.                                                                                 |
| <a href="#">DUF2372.0</a> | <a href="#">DUF2372.0.aSep08</a> |                        | 2890  | 773  | 3 | 122 | proteasome chaperone 3 (13.3 kD) (DUF2372.0) alternative variant aSep08, complete mRNA.                                    |
| <a href="#">DUF2372.0</a> | <a href="#">DUF2372.0.bSep08</a> |                        | 2424  | 395  | 3 | 85  | proteasome chaperone 3 (DUF2372.0) alternative variant bSep08, mRNA.                                                       |
| <a href="#">DUF2372.0</a> | <a href="#">DUF2372.0.cSep08</a> |                        | 2347  | 587  | 2 | 56  | proteasome chaperone 3 (DUF2372.0) alternative variant cSep08, mRNA.                                                       |
| <a href="#">DUF2372.0</a> | <a href="#">DUF2372.0.dSep08</a> |                        | 903   | 457  | 2 | 96  | proteasome chaperone 3 (10.6 kD) (DUF2372.0) alternative variant dSep08, mRNA.                                             |
| <a href="#">DUF2450.0</a> | <a href="#">DUF2450.0.aSep08</a> |                        | 56815 | 1224 |   | 407 | putative protein, with 2 coiled coil domains, of eukaryotic origin (DUF2450.0) mRNA.                                       |
| <a href="#">dufer</a>     | <a href="#">dufer.aSep08</a>     |                        | 13534 | 468  |   | 53  | putative protein (dufer) mRNA.                                                                                             |
| <a href="#">duflo</a>     | <a href="#">duflo.aSep08</a>     |                        | 7609  | 712  |   | 167 | putative protein (18.3 kD) (duflo) mRNA.                                                                                   |
| <a href="#">duflu</a>     | <a href="#">duflu.aSep08</a>     |                        | 572   | 325  |   | 108 | WW domain binding protein 7 like (duflu) mRNA.                                                                             |
| <a href="#">dukee</a>     | <a href="#">dukee.aSep08</a>     |                        | 5436  | 428  |   | 36  | putative protein (4.1 kD) (dukee) mRNA.                                                                                    |
| <a href="#">Dullard</a>   | <a href="#">Dullard.aSep08</a>   | <a href="#">287447</a> | 9640  | 1603 | 7 | 309 | dullard homolog (Xenopus laevis) (Dullard) alternative variant aSep08, mRNA.                                               |
| <a href="#">Dullard</a>   | <a href="#">Dullard.bSep08</a>   | <a href="#">287447</a> | 1542  | 957  | 1 | 40  | dullard homolog (Xenopus laevis) (Dullard) alternative variant bSep08, mRNA.                                               |
| <a href="#">duloy</a>     | <a href="#">duloy.aSep08</a>     |                        | 6166  | 373  |   | 124 | putative protein of mammalian origin (duloy) mRNA.                                                                         |
| <a href="#">dumer</a>     | <a href="#">dumer.aSep08</a>     |                        | 1551  | 788  |   | 40  | putative protein (dumer) mRNA.                                                                                             |
| <a href="#">dunoy</a>     | <a href="#">dunoy.aSep08</a>     |                        | 3443  | 1001 | 2 | 83  | putative protein (dunoy) alternative variant aSep08, mRNA.                                                                 |
| <a href="#">dunoy</a>     | <a href="#">dunoy.bSep08</a>     |                        | 619   | 230  | 1 | 35  | putative protein (4.1 kD) (dunoy) alternative variant bSep08, mRNA.                                                        |
| <a href="#">Duox2</a>     | <a href="#">Duox2.aSep08</a>     | <a href="#">79107</a>  | 882   | 743  |   | 80  | dual oxidase 2 (Duox2) mRNA.                                                                                               |
| <a href="#">dupor</a>     | <a href="#">dupor.aSep08</a>     |                        | 3634  | 1801 |   | 169 | CRA a (dupor) alternative variant aSep08, mRNA.                                                                            |
| <a href="#">Dus3l</a>     | <a href="#">Dus3l.bSep08</a>     | <a href="#">301122</a> | 1975  | 1447 | 2 | 298 | dihydrouridine synthase 3-like (33.1 kD) (Dus3l) alternative variant bSep08, mRNA.                                         |
| <a href="#">Dus3l</a>     | <a href="#">Dus3l.cSep08</a>     | <a href="#">301122</a> | 1788  | 850  | 5 | 174 | dihydrouridine synthase 3-like (19.9 kD) (Dus3l) alternative variant cSep08, mRNA.                                         |
| <a href="#">Dus3l</a>     | <a href="#">Dus3l.dSep08</a>     | <a href="#">301122</a> | 1058  | 787  | 3 | 141 | dihydrouridine synthase 3-like (Dus3l) alternative variant dSep08, mRNA.                                                   |
| <a href="#">dusa</a>      | <a href="#">dusa.bSep08</a>      |                        | 421   | 293  | 2 | 59  | putative protein (dusa) alternative variant bSep08, mRNA.                                                                  |
| <a href="#">dushee</a>    | <a href="#">dushee.aSep08</a>    |                        | 1450  | 310  |   | 34  | putative protein (dushee) mRNA.                                                                                            |
| <a href="#">Dusp3</a>     | <a href="#">Dusp3.aSep08</a>     | <a href="#">498003</a> | 11824 | 4232 | 2 | 193 | dual specificity phosphatase 3 (vaccinia virus phosphatase VH1-related) (Dusp3) alternative variant aSep08, mRNA.          |
| <a href="#">Dusp3</a>     | <a href="#">Dusp3.bSep08</a>     | <a href="#">498003</a> | 1409  | 389  | 1 | 26  | dual specificity phosphatase 3 (vaccinia virus phosphatase VH1-related) (2.8 kD) (Dusp3) alternative variant bSep08, mRNA. |
| <a href="#">Dusp5</a>     | <a href="#">Dusp5.cSep08</a>     | <a href="#">171109</a> | 7752  | 323  | 2 | 107 | dual specificity phosphatase 5 (Dusp5) alternative variant cSep08, mRNA.                                                   |

|                        |                               |                        |        |      |   |     |                                                                                                            |
|------------------------|-------------------------------|------------------------|--------|------|---|-----|------------------------------------------------------------------------------------------------------------|
| <a href="#">Dusp7</a>  | <a href="#">Dusp7.aSep08</a>  | <a href="#">300980</a> | 1979   | 565  |   | 188 | dual specificity phosphatase 7 (Dusp7) mRNA.                                                               |
| <a href="#">Dusp8</a>  | <a href="#">Dusp8.bSep08</a>  | <a href="#">361679</a> | 5012   | 3940 | 4 | 514 | dual specificity phosphatase 8 (Dusp8) alternative variant bSep08, mRNA.                                   |
| <a href="#">Dusp11</a> | <a href="#">Dusp11.bSep08</a> | <a href="#">297412</a> | 3818   | 638  | 1 | 75  | dual specificity phosphatase 11 (RNA/RNP complex 1-interacting) (Dusp11) alternative variant bSep08, mRNA. |
| <a href="#">Dusp12</a> | <a href="#">Dusp12.bSep08</a> | <a href="#">64014</a>  | 4998   | 387  | 1 | 23  | dual specificity phosphatase 12 (Dusp12) alternative variant bSep08, mRNA.                                 |
| <a href="#">Dusp13</a> | <a href="#">Dusp13.aSep08</a> | <a href="#">361002</a> | 15369  | 1747 | 8 | 326 | dual specificity phosphatase 13 CRA b (36.4 kD) (Dusp13) alternative variant aSep08, complete mRNA.        |
| <a href="#">Dusp13</a> | <a href="#">Dusp13.cSep08</a> | <a href="#">361002</a> | 1732   | 751  | 3 | 99  | dual specificity phosphatase 13 like (10.7 kD) (Dusp13) alternative variant cSep08, complete mRNA.         |
| <a href="#">Dusp14</a> | <a href="#">Dusp14.aSep08</a> | <a href="#">360580</a> | 18395  | 1363 | 2 | 258 | dual specificity phosphatase 14 (Dusp14) alternative variant aSep08, mRNA.                                 |
| <a href="#">Dusp15</a> | <a href="#">Dusp15.bSep08</a> | <a href="#">362238</a> | 10505  | 3109 | 1 | 236 | dual specificity phosphatase-like 15 (26.3 kD) (Dusp15) alternative variant bSep08, mRNA.                  |
| <a href="#">Dusp16</a> | <a href="#">Dusp16.bSep08</a> | <a href="#">297682</a> | 40174  | 782  | 3 | 215 | dual specificity phosphatase 16 (Dusp16) alternative variant bSep08, mRNA.                                 |
| <a href="#">Dusp16</a> | <a href="#">Dusp16.cSep08</a> | <a href="#">297682</a> | 22769  | 694  | 2 | 189 | dual specificity phosphatase 16 (Dusp16) alternative variant cSep08, mRNA.                                 |
| <a href="#">Dusp19</a> | <a href="#">Dusp19.bSep08</a> | <a href="#">311151</a> | 140026 | 525  | 4 | 92  | dual specificity phosphatase 19 (Dusp19) alternative variant bSep08, mRNA.                                 |
| <a href="#">Dusp19</a> | <a href="#">Dusp19.cSep08</a> | <a href="#">311151</a> | 5409   | 433  | 2 | 91  | dual specificity phosphatase 19 (Dusp19) alternative variant cSep08, mRNA.                                 |
| <a href="#">Dusp19</a> | <a href="#">Dusp19.dSep08</a> | <a href="#">311151</a> | 12515  | 810  | 4 | 56  | dual specificity phosphatase 19 (6.0 kD) (Dusp19) alternative variant dSep08, mRNA.                        |
| <a href="#">Dusp22</a> | <a href="#">Dusp22.bSep08</a> | <a href="#">361242</a> | 51513  | 963  | 7 | 143 | dual specificity phosphatase 22 (16.4 kD) (Dusp22) alternative variant bSep08, mRNA.                       |
| <a href="#">Dusp22</a> | <a href="#">Dusp22.dSep08</a> | <a href="#">361242</a> | 4118   | 893  | 3 | 142 | dual specificity phosphatase 22 (Dusp22) alternative variant dSep08, mRNA.                                 |
| <a href="#">Dusp23</a> | <a href="#">Dusp23.aSep08</a> | <a href="#">360881</a> | 1607   | 867  | 2 | 181 | dual specificity phosphatase 23 (Dusp23) alternative variant aSep08, mRNA.                                 |
| <a href="#">Dusp26</a> | <a href="#">Dusp26.aSep08</a> | <a href="#">306527</a> | 5722   | 1952 | 1 | 211 | dual specificity phosphatase 26 (putative) (23.9 kD) (Dusp26) alternative variant aSep08, mRNA.            |
| <a href="#">Dusp26</a> | <a href="#">Dusp26.cSep08</a> | <a href="#">306527</a> | 6762   | 595  | 2 | 151 | dual specificity phosphatase 26 (putative) (Dusp26) alternative variant cSep08, mRNA.                      |
| <a href="#">Dusp27</a> | <a href="#">Dusp27.aSep08</a> | <a href="#">498267</a> | 19246  | 760  |   | 237 | dual specificity phosphatase 27 (putative) (26.6 kD) (Dusp27) mRNA.                                        |
| <a href="#">Dut-ps</a> | <a href="#">Dut-ps.cSep08</a> | <a href="#">94200</a>  | 11679  | 1480 | 6 | 129 | deoxyuridine triphosphatase pseudogene (Dut-ps) alternative variant cSep08, mRNA.                          |
| <a href="#">Dut-ps</a> | <a href="#">Dut-ps.dSep08</a> | <a href="#">94200</a>  | 8036   | 930  | 5 | 102 | deoxyuridine triphosphatase pseudogene (Dut-ps) alternative variant dSep08, mRNA.                          |
| <a href="#">Dut-ps</a> | <a href="#">Dut-ps.eSep08</a> | <a href="#">94200</a>  | 2183   | 1815 | 3 | 52  | deoxyuridine triphosphatase pseudogene (5.7 kD) (Dut-ps) alternative variant eSep08, mRNA.                 |
| <a href="#">Dut-ps</a> | <a href="#">Dut-ps.hSep08</a> | <a href="#">94200</a>  | 869    | 430  | 2 | 39  | deoxyuridine triphosphatase pseudogene (4.2 kD) (Dut-ps) alternative variant hSep08, mRNA.                 |
| <a href="#">duto</a>   | <a href="#">duto.aSep08</a>   |                        | 3025   | 389  |   | 90  | rest corepressor 1 (duto) mRNA.                                                                            |

|                         |                                |                        |        |      |    |     |                                                                                       |
|-------------------------|--------------------------------|------------------------|--------|------|----|-----|---------------------------------------------------------------------------------------|
| <a href="#">duvar</a>   | <a href="#">duvar.aSep08</a>   |                        | 21135  | 1511 | 8  | 345 | transmembrane protein 59 (duvar) alternative variant aSep08, mRNA.                    |
| <a href="#">duvar</a>   | <a href="#">duvar.bSep08</a>   |                        | 8623   | 862  | 3  | 154 | transmembrane protein 59 (17.2 kD) (duvar) alternative variant bSep08, mRNA.          |
| <a href="#">duvar</a>   | <a href="#">duvar.cSep08</a>   |                        | 3258   | 497  | 2  | 81  | transmembrane protein 59 (duvar) alternative variant cSep08, mRNA.                    |
| <a href="#">duwey</a>   | <a href="#">duwey.aSep08</a>   |                        | 2859   | 1780 |    | 33  | putative protein (3.6 kD) (duwey) mRNA.                                               |
| <a href="#">Duxbl</a>   | <a href="#">Duxbl.aSep08</a>   | <a href="#">306226</a> | 9305   | 1782 | 4  | 263 | double homeobox B-like (Duxbl) alternative variant aSep08, mRNA.                      |
| <a href="#">Duxbl</a>   | <a href="#">Duxbl.cSep08</a>   | <a href="#">306226</a> | 3792   | 447  | 2  | 104 | double homeobox B-like (Duxbl) alternative variant cSep08, mRNA.                      |
| <a href="#">Dvl3</a>    | <a href="#">Dvl3.bSep08</a>    | <a href="#">303811</a> | 489    | 295  | 1  | 97  | dishevelled 3, dsh homolog (Drosophila) (Dvl3) alternative variant bSep08, mRNA.      |
| <a href="#">DWNN.0</a>  | <a href="#">DWNN.0.aSep08</a>  |                        | 8501   | 1109 |    | 123 | retinoblastoma binding protein 6 CRA g like (13.8 kD) (DWNN.0) mRNA.                  |
| <a href="#">dyby</a>    | <a href="#">dyby.aSep08</a>    |                        | 10330  | 514  |    | 171 | dedicator of cytokinesis (dyby) mRNA.                                                 |
| <a href="#">dychy</a>   | <a href="#">dychy.aSep08</a>   |                        | 6392   | 429  |    | 83  | putative protein (dychy) mRNA.                                                        |
| <a href="#">Dydc2</a>   | <a href="#">Dydc2.aSep08</a>   | <a href="#">688422</a> | 13669  | 735  | 1  | 139 | dpy-30 (15.7 kD) (Dydc2) alternative variant aSep08, mRNA.                            |
| <a href="#">dyfer</a>   | <a href="#">dyfer.aSep08</a>   |                        | 7957   | 377  |    | 58  | putative protein (dyfer) mRNA.                                                        |
| <a href="#">dyflo</a>   | <a href="#">dyflo.aSep08</a>   |                        | 8589   | 309  |    | 103 | putative protein (dyflo) mRNA.                                                        |
| <a href="#">dyflu</a>   | <a href="#">dyflu.aSep08</a>   |                        | 3702   | 773  |    | 246 | sorting nexin 26 (dyflu) mRNA.                                                        |
| <a href="#">dykee</a>   | <a href="#">dykee.aSep08</a>   |                        | 2797   | 733  |    | 66  | phosphatidylinositol glycan anchor biosynthesis class N (dykee) mRNA.                 |
| <a href="#">dyloy</a>   | <a href="#">dyloy.aSep08</a>   |                        | 59815  | 606  |    | 201 | ABI gene family member 3 binding protein like (dyloy) mRNA.                           |
| <a href="#">Dym</a>     | <a href="#">Dym.aSep08</a>     | <a href="#">291433</a> | 299222 | 2538 | 17 | 674 | dymeclin (76.5 kD) (Dym) alternative variant aSep08, complete mRNA.                   |
| <a href="#">Dym</a>     | <a href="#">Dym.cSep08</a>     | <a href="#">291433</a> | 48950  | 712  | 6  | 236 | dymeclin (Dym) alternative variant cSep08, mRNA.                                      |
| <a href="#">Dym</a>     | <a href="#">Dym.dSep08</a>     | <a href="#">291433</a> | 72139  | 733  | 6  | 98  | dymeclin (10.9 kD) (Dym) alternative variant dSep08, mRNA.                            |
| <a href="#">Dym</a>     | <a href="#">Dym.eSep08</a>     | <a href="#">291433</a> | 49462  | 675  | 5  | 96  | dymeclin (Dym) alternative variant eSep08, mRNA.                                      |
| <a href="#">Dym</a>     | <a href="#">Dym.fSep08</a>     | <a href="#">291433</a> | 108923 | 1777 | 4  | 53  | dymeclin (Dym) alternative variant fSep08, mRNA.                                      |
| <a href="#">dymer</a>   | <a href="#">dymer.aSep08</a>   |                        | 951    | 784  | 2  | 93  | putative protein (dymer) mRNA.                                                        |
| <a href="#">Dync1i1</a> | <a href="#">Dync1i1.bSep08</a> | <a href="#">29564</a>  | 191899 | 690  | 4  | 182 | dynein cytoplasmic 1 intermediate chain 1 (Dync1i1) alternative variant bSep08, mRNA. |
| <a href="#">Dync1i1</a> | <a href="#">Dync1i1.cSep08</a> | <a href="#">29564</a>  | 64996  | 578  | 3  | 146 | dynein cytoplasmic 1 intermediate chain 1 (Dync1i1) alternative variant cSep08, mRNA. |
| <a href="#">Dync1i1</a> | <a href="#">Dync1i1.dSep08</a> | <a href="#">29564</a>  | 84135  | 542  | 2  | 141 | dynein cytoplasmic 1 intermediate chain 1 (Dync1i1) alternative variant dSep08, mRNA. |
| <a href="#">Dync1i1</a> | <a href="#">Dync1i1.eSep08</a> | <a href="#">29564</a>  | 84042  | 500  | 2  | 137 | dynein cytoplasmic 1 intermediate chain 1 (Dync1i1) alternative variant eSep08, mRNA. |
| <a href="#">Dync1i2</a> | <a href="#">Dync1i2.bSep08</a> | <a href="#">116659</a> | 52471  | 2675 | 17 | 632 | dynein cytoplasmic intermediate (70.6 kD) (Dync1i2) alternative variant bSep08, mRNA. |
| <a href="#">Dync1i2</a> | <a href="#">Dync1i2.cSep08</a> | <a href="#">116659</a> | 34072  | 939  | 9  | 313 | dynein cytoplasmic intermediate CRA c (Dync1i2) alternative variant cSep08, mRNA.     |

|                          |                                 |                        |       |      |    |     |                                                                                               |
|--------------------------|---------------------------------|------------------------|-------|------|----|-----|-----------------------------------------------------------------------------------------------|
| <a href="#">Dync1i2</a>  | <a href="#">Dync1i2.dSep08</a>  | <a href="#">116659</a> | 35516 | 1045 | 9  | 289 | dynein cytoplasmic intermediate CRA c (Dync1i2) alternative variant dSep08, mRNA.             |
| <a href="#">Dync1i2</a>  | <a href="#">Dync1i2.eSep08</a>  | <a href="#">116659</a> | 33293 | 874  | 8  | 255 | dynein cytoplasmic intermediate CRA c (Dync1i2) alternative variant eSep08, mRNA.             |
| <a href="#">Dync1i2</a>  | <a href="#">Dync1i2.fSep08</a>  | <a href="#">116659</a> | 32810 | 669  | 7  | 180 | cytoplasmic dynein intermediate (Dync1i2) alternative variant fSep08, mRNA.                   |
| <a href="#">Dync1i2</a>  | <a href="#">Dync1i2.gSep08</a>  | <a href="#">116659</a> | 23383 | 503  | 7  | 167 | dynein cytoplasmic intermediate (Dync1i2) alternative variant gSep08, mRNA.                   |
| <a href="#">Dync1i2</a>  | <a href="#">Dync1i2.hSep08</a>  | <a href="#">116659</a> | 4878  | 1206 | 3  | 108 | dynein cytoplasmic intermediate CRA a (11.8 kD) (Dync1i2) alternative variant hSep08, mRNA.   |
| <a href="#">Dync1i2</a>  | <a href="#">Dync1i2.iSep08</a>  | <a href="#">116659</a> | 2019  | 614  | 2  | 91  | cytoplasmic dynein intermediate (Dync1i2) alternative variant iSep08, mRNA.                   |
| <a href="#">Dync1i2</a>  | <a href="#">Dync1i2.jSep08</a>  | <a href="#">116659</a> | 2431  | 729  | 2  | 61  | cytoplasmic dynein intermediate (Dync1i2) alternative variant jSep08, mRNA.                   |
| <a href="#">Dync1i2</a>  | <a href="#">Dync1i2.kSep08</a>  | <a href="#">116659</a> | 32788 | 814  | 6  | 52  | putative protein (6.4 kD) (Dync1i2) alternative variant kSep08, mRNA.                         |
| <a href="#">Dync1i2</a>  | <a href="#">Dync1i2.mSep08</a>  | <a href="#">116659</a> | 4584  | 635  | 3  | 47  | putative protein (Dync1i2) alternative variant mSep08, mRNA.                                  |
| <a href="#">Dync1li1</a> | <a href="#">Dync1li1.cSep08</a> | <a href="#">252902</a> | 1168  | 614  | 3  | 84  | dynein cytoplasmic 1 light intermediate chain 1 (Dync1li1) alternative variant cSep08, mRNA.  |
| <a href="#">Dync1li1</a> | <a href="#">Dync1li1.dSep08</a> | <a href="#">252902</a> | 4695  | 1801 | 5  | 53  | dynein cytoplasmic 1 light intermediate chain 1 (Dync1li1) alternative variant dSep08, mRNA.  |
| <a href="#">Dync1li2</a> | <a href="#">Dync1li2.aSep08</a> | <a href="#">81655</a>  | 38981 | 1783 | 13 | 520 | dynein, cytoplasmic 1 light intermediate chain 2 (Dync1li2) alternative variant aSep08, mRNA. |
| <a href="#">Dync1li2</a> | <a href="#">Dync1li2.cSep08</a> | <a href="#">81655</a>  | 4784  | 372  | 4  | 55  | dynein, cytoplasmic 1 light intermediate chain 2 (Dync1li2) alternative variant cSep08, mRNA. |
| <a href="#">Dync1li2</a> | <a href="#">Dync1li2.dSep08</a> | <a href="#">81655</a>  | 2675  | 1086 | 2  | 62  | dynein, cytoplasmic 1 light intermediate chain 2 (Dync1li2) alternative variant dSep08, mRNA. |
| <a href="#">Dync1li2</a> | <a href="#">Dync1li2.eSep08</a> | <a href="#">81655</a>  | 2702  | 415  | 3  | 13  | dynein, cytoplasmic 1 light intermediate chain 2 (Dync1li2) alternative variant eSep08, mRNA. |
| <a href="#">Dync2h1</a>  | <a href="#">Dync2h1.aSep08</a>  | <a href="#">65209</a>  | 24101 | 1109 |    | 369 | dynein cytoplasmic 2 heavy chain 1 (Dync2h1) mRNA.                                            |
| <a href="#">Dync2li1</a> | <a href="#">Dync2li1.bSep08</a> | <a href="#">298767</a> | 14353 | 815  | 8  | 197 | dynein cytoplasmic 2 light intermediate chain 1 (Dync2li1) alternative variant bSep08, mRNA.  |
| <a href="#">Dync2li1</a> | <a href="#">Dync2li1.dSep08</a> | <a href="#">298767</a> | 1236  | 420  | 2  | 68  | dynein cytoplasmic 2 light intermediate chain 1 (Dync2li1) alternative variant dSep08, mRNA.  |
| <a href="#">Dyntl1</a>   | <a href="#">Dyntl1.aSep08</a>   | <a href="#">58945</a>  | 2291  | 611  | 2  | 89  | dynein light chain LC8-type 1 (10.4 kD) (Dyntl1) alternative variant aSep08, complete mRNA.   |
| <a href="#">Dyntl2</a>   | <a href="#">Dyntl2.bSep08</a>   | <a href="#">140734</a> | 14371 | 157  | 1  | 31  | dynein light chain LC8-type 2 (Dyntl2) alternative variant bSep08, mRNA.                      |
| <a href="#">Dynlrb1</a>  | <a href="#">Dynlrb1.bSep08</a>  | <a href="#">170714</a> | 11241 | 647  | 3  | 63  | dynein light chain roadblock-type 1 (7.4 kD) (Dynlrb1) alternative variant bSep08, mRNA.      |
| <a href="#">Dynlrb1</a>  | <a href="#">Dynlrb1.cSep08</a>  | <a href="#">170714</a> | 10987 | 593  | 4  | 63  | dynein light chain roadblock-type 1 (7.4 kD) (Dynlrb1) alternative variant cSep08, mRNA.      |
| <a href="#">Dynlrb2</a>  | <a href="#">Dynlrb2.bSep08</a>  | <a href="#">361415</a> | 3139  | 419  | 2  | 55  | dynein light chain roadblock-type 2 (6.3 kD) (Dynlrb2) alternative variant bSep08, mRNA.      |
| <a href="#">Dyntl1</a>   | <a href="#">Dyntl1.aSep08</a>   | <a href="#">83462</a>  | 6186  | 466  | 4  | 119 | dynein light chain Tctex-type 1 (13.0 kD) (Dyntl1) alternative variant aSep08, mRNA.          |

|                        |                               |                        |       |      |    |     |                                                                                                              |
|------------------------|-------------------------------|------------------------|-------|------|----|-----|--------------------------------------------------------------------------------------------------------------|
| <a href="#">Dyntl3</a> | <a href="#">Dyntl3.bSep08</a> | <a href="#">363448</a> | 2845  | 2231 | 1  | 48  | dynein light chain Tctex-type 3 (Dyntl3) alternative variant bSep08, mRNA.                                   |
| <a href="#">dynoy</a>  | <a href="#">dynoy.aSep08</a>  |                        | 1239  | 586  |    | 29  | putative protein (3.1 kD) (dynoy) mRNA.                                                                      |
| <a href="#">dypor</a>  | <a href="#">dypor.aSep08</a>  |                        | 28977 | 570  |    | 82  | putative protein (dypor) mRNA.                                                                               |
| <a href="#">Dyrk1a</a> | <a href="#">Dyrk1a.bSep08</a> | <a href="#">25255</a>  | 50260 | 392  | 1  | 105 | dual-specificity tyrosine-(Y)-phosphorylation regulated kinase 1A (Dyrk1a) alternative variant bSep08, mRNA. |
| <a href="#">Dyrk1b</a> | <a href="#">Dyrk1b.bSep08</a> | <a href="#">308468</a> | 852   | 425  | 3  | 141 | dual-specificity tyrosine-(Y)-phosphorylation regulated kinase 1b (Dyrk1b) alternative variant bSep08, mRNA. |
| <a href="#">Dyrk1b</a> | <a href="#">Dyrk1b.cSep08</a> | <a href="#">308468</a> | 1345  | 568  | 3  | 111 | dual-specificity tyrosine-(Y)-phosphorylation regulated kinase 1b (Dyrk1b) alternative variant cSep08, mRNA. |
| <a href="#">Dyrk3</a>  | <a href="#">Dyrk3.aSep08</a>  | <a href="#">304775</a> | 7654  | 1012 |    | 337 | dual-specificity tyrosine-(Y)-phosphorylation regulated kinase 3 (Dyrk3) mRNA.                               |
| <a href="#">dysa</a>   | <a href="#">dysa.aSep08</a>   |                        | 1814  | 505  |    | 36  | putative protein (dysa) mRNA.                                                                                |
| <a href="#">Dysf</a>   | <a href="#">Dysf.aSep08</a>   | <a href="#">312492</a> | 60139 | 2223 | 16 | 665 | dysferlin (Dysf) alternative variant aSep08, mRNA.                                                           |
| <a href="#">Dysf</a>   | <a href="#">Dysf.bSep08</a>   | <a href="#">312492</a> | 1383  | 290  | 1  | 75  | dysferlin (Dysf) alternative variant bSep08, mRNA.                                                           |
| <a href="#">dyshee</a> | <a href="#">dyshee.aSep08</a> |                        | 15294 | 422  |    | 34  | putative protein (dyshee) mRNA.                                                                              |
| <a href="#">Dyt1</a>   | <a href="#">Dyt1.bSep08</a>   | <a href="#">266606</a> | 5989  | 712  | 4  | 139 | dystonia 1 (Dyt1) alternative variant bSep08, mRNA.                                                          |
| <a href="#">dyto</a>   | <a href="#">dyto.aSep08</a>   |                        | 2159  | 688  | 4  | 112 | putative protein (12.7 kD) (dyto) alternative variant aSep08, mRNA.                                          |
| <a href="#">dyvar</a>  | <a href="#">dyvar.aSep08</a>  |                        | 5137  | 754  |    | 37  | putative protein (4.5 kD) (dyvar) mRNA.                                                                      |
| <a href="#">dywey</a>  | <a href="#">dywey.aSep08</a>  |                        | 3166  | 750  |    | 69  | putative protein (dywey) mRNA.                                                                               |
| <a href="#">Dzip1</a>  | <a href="#">Dzip1.aSep08</a>  | <a href="#">364475</a> | 68419 | 3803 | 8  | 875 | zinc finger protein dzip1 (100.2 kD) (Dzip1) alternative variant aSep08, complete mRNA.                      |
| <a href="#">Dzip1</a>  | <a href="#">Dzip1.bSep08</a>  | <a href="#">364475</a> | 2974  | 1165 | 5  | 186 | putative protein (Dzip1) alternative variant bSep08, mRNA.                                                   |
| <a href="#">Dzip1</a>  | <a href="#">Dzip1.cSep08</a>  | <a href="#">364475</a> | 7375  | 668  | 2  | 169 | DAZ interacting protein 1 (Dzip1) alternative variant cSep08, mRNA.                                          |
| <a href="#">Dzip1</a>  | <a href="#">Dzip1.dSep08</a>  | <a href="#">364475</a> | 591   | 192  | 1  | 51  | DAZ interacting protein 1 (Dzip1) alternative variant dSep08, mRNA.                                          |
| <a href="#">Dzip1l</a> | <a href="#">Dzip1l.bSep08</a> | <a href="#">315952</a> | 5817  | 683  | 1  | 227 | DAZ interacting protein 1-like (Dzip1l) alternative variant bSep08, mRNA.                                    |
| <a href="#">E2f1</a>   | <a href="#">E2f1.bSep08</a>   | <a href="#">399489</a> | 3793  | 1039 | 5  | 346 | E2F transcription factor 1 (E2f1) alternative variant bSep08, mRNA.                                          |
| <a href="#">E2f1</a>   | <a href="#">E2f1.cSep08</a>   | <a href="#">399489</a> | 3313  | 654  | 4  | 217 | E2F transcription factor 1 (E2f1) alternative variant cSep08, mRNA.                                          |
| <a href="#">E2f1</a>   | <a href="#">E2f1.eSep08</a>   | <a href="#">399489</a> | 1564  | 382  | 2  | 127 | E2F transcription factor 1 (E2f1) alternative variant eSep08, mRNA.                                          |
| <a href="#">E2f6</a>   | <a href="#">E2f6.aSep08</a>   | <a href="#">313978</a> | 15587 | 1395 | 7  | 203 | E2F transcription factor 6 (E2f6) alternative variant aSep08, mRNA.                                          |
| <a href="#">E2f6</a>   | <a href="#">E2f6.bSep08</a>   | <a href="#">313978</a> | 2213  | 1539 | 2  | 117 | E2F transcription factor 6 (13.1 kD) (E2f6) alternative variant bSep08, mRNA.                                |
| <a href="#">E2f6</a>   | <a href="#">E2f6.cSep08</a>   | <a href="#">313978</a> | 16352 | 338  | 3  | 50  | E2F transcription factor 6 (5.6 kD) (E2f6) alternative variant cSep08, mRNA.                                 |
| <a href="#">E2f7</a>   | <a href="#">E2f7.bSep08</a>   | <a href="#">314818</a> | 8236  | 674  | 3  | 142 | E2F transcription factor 7 (16.1 kD) (E2f7) alternative variant bSep08, mRNA.                                |
| <a href="#">E2f8</a>   | <a href="#">E2f8.aSep08</a>   | <a href="#">308607</a> | 3354  | 772  |    | 257 | E2F transcription factor 8 (E2f8) mRNA.                                                                      |



|                               |                                      |                        |        |      |    |     |                                                                                                |
|-------------------------------|--------------------------------------|------------------------|--------|------|----|-----|------------------------------------------------------------------------------------------------|
| <a href="#">E2F_TDP.0</a>     | <a href="#">E2F_TDP.0.aSep08</a>     |                        | 7400   | 2023 | 1  | 412 | E2F transcription factor 4 (43.9 kD) (E2F_TDP.0) alternative variant aSep08, mRNA.             |
| <a href="#">E2F_TDP.0</a>     | <a href="#">E2F_TDP.0.bSep08</a>     |                        | 5853   | 904  | 1  | 301 | E2F transcription factor 4 (E2F_TDP.0) alternative variant bSep08, mRNA.                       |
| <a href="#">E2F_TDP.1</a>     | <a href="#">E2F_TDP.1.aSep08</a>     |                        | 4195   | 764  |    | 254 | e2f transcription factor 8 (E2F_TDP.1) mRNA.                                                   |
| <a href="#">E4f1</a>          | <a href="#">E4f1.aSep08</a>          | <a href="#">681359</a> | 11400  | 2519 | 13 | 401 | transcription factor (E4f1) alternative variant aSep08, mRNA.                                  |
| <a href="#">E4f1</a>          | <a href="#">E4f1.bSep08</a>          | <a href="#">681359</a> | 3497   | 2016 | 10 | 393 | transcription factor (42.8 kD) (E4f1) alternative variant bSep08, mRNA.                        |
| <a href="#">E4f1</a>          | <a href="#">E4f1.cSep08</a>          | <a href="#">681359</a> | 2344   | 874  | 6  | 291 | transcription factor (E4f1) alternative variant cSep08, mRNA.                                  |
| <a href="#">E4f1</a>          | <a href="#">E4f1.dSep08</a>          | <a href="#">681359</a> | 958    | 813  | 3  | 181 | transcription factor (18.9 kD) (E4f1) alternative variant dSep08, mRNA.                        |
| <a href="#">E4f1</a>          | <a href="#">E4f1.eSep08</a>          | <a href="#">681359</a> | 874    | 703  | 2  | 137 | transcription factor (E4f1) alternative variant eSep08, mRNA.                                  |
| <a href="#">E030032D13Rik</a> | <a href="#">E030032D13Rik.aSep08</a> | <a href="#">415052</a> | 734    | 367  | 3  | 82  | E030032D13Rik gene (E030032D13Rik) alternative variant aSep08, mRNA.                           |
| <a href="#">E230034O05Rik</a> | <a href="#">E230034O05Rik.aSep08</a> | <a href="#">415065</a> | 2158   | 1470 |    | 63  | E230034O05Rik gene (E230034O05Rik) mRNA.                                                       |
| <a href="#">Eapa2</a>         | <a href="#">Eapa2.bSep08</a>         | <a href="#">494321</a> | 1596   | 314  | 2  | 104 | experimental autoimmune prostatitis antigen 2 (Eapa2) alternative variant bSep08, mRNA.        |
| <a href="#">Eapa2</a>         | <a href="#">Eapa2.cSep08</a>         | <a href="#">494321</a> | 2649   | 757  | 2  | 103 | experimental autoimmune prostatitis antigen 2 (Eapa2) alternative variant cSep08, mRNA.        |
| <a href="#">Eapp</a>          | <a href="#">Eapp.aSep08</a>          | <a href="#">299043</a> | 27216  | 1418 | 7  | 280 | E2F-associated phosphoprotein (32.2 kD) (Eapp) alternative variant aSep08, mRNA.               |
| <a href="#">Eapp</a>          | <a href="#">Eapp.bSep08</a>          | <a href="#">299043</a> | 14318  | 2450 | 4  | 190 | E2F-associated phosphoprotein (Eapp) alternative variant bSep08, mRNA.                         |
| <a href="#">Eapp</a>          | <a href="#">Eapp.dSep08</a>          | <a href="#">299043</a> | 32361  | 705  | 3  | 113 | E2F-associated phosphoprotein (Eapp) alternative variant dSep08, mRNA.                         |
| <a href="#">Ears2</a>         | <a href="#">Ears2.aSep08</a>         | <a href="#">361641</a> | 21688  | 1785 |    | 550 | glutamyl-tRNA synthetase 2 mitochondrial (putative) (Ears2) mRNA.                              |
| <a href="#">Ebag9</a>         | <a href="#">Ebag9.aSep08</a>         | <a href="#">299864</a> | 17625  | 1783 | 2  | 361 | estrogen receptor-binding fragment-associated gene 9 (Ebag9) alternative variant aSep08, mRNA. |
| <a href="#">Ebag9</a>         | <a href="#">Ebag9.cSep08</a>         | <a href="#">299864</a> | 9989   | 508  | 1  | 143 | estrogen receptor-binding fragment-associated gene 9 (Ebag9) alternative variant cSep08, mRNA. |
| <a href="#">Ebf1</a>          | <a href="#">Ebf1.bSep08</a>          | <a href="#">116543</a> | 379021 | 1530 | 14 | 448 | early B-cell factor 1 (Ebf1) alternative variant bSep08, mRNA.                                 |
| <a href="#">Ebf1</a>          | <a href="#">Ebf1.cSep08</a>          | <a href="#">116543</a> | 9020   | 1077 | 2  | 68  | early B-cell factor 1 (6.9 kD) (Ebf1) alternative variant cSep08, mRNA.                        |
| <a href="#">Ebf3</a>          | <a href="#">Ebf3.bSep08</a>          | <a href="#">361668</a> | 2236   | 1089 | 4  | 152 | early B-cell factor 3 (17.4 kD) (Ebf3) alternative variant bSep08, mRNA.                       |
| <a href="#">Ebf4</a>          | <a href="#">Ebf4.aSep08</a>          | <a href="#">680751</a> | 5512   | 1393 | 1  | 210 | early B-cell factor 4 (10.9 kD) (Ebf4) alternative variant aSep08, mRNA.                       |
| <a href="#">Ebf4</a>          | <a href="#">Ebf4.bSep08</a>          | <a href="#">680751</a> | 8195   | 860  | 3  | 124 | early B-cell factor 4 (Ebf4) alternative variant bSep08, mRNA.                                 |
| <a href="#">Ebf4</a>          | <a href="#">Ebf4.cSep08</a>          | <a href="#">680751</a> | 7534   | 400  | 2  | 121 | early B-cell factor 4 (Ebf4) alternative variant cSep08, mRNA.                                 |

|                        |                               |                        |       |      |   |     |                                                                                                     |
|------------------------|-------------------------------|------------------------|-------|------|---|-----|-----------------------------------------------------------------------------------------------------|
| <a href="#">Ebp</a>    | <a href="#">Ebp.bSep08</a>    | <a href="#">117278</a> | 5889  | 563  | 5 | 187 | phenylalkylamine Ca2+ antagonist (emopamil) binding protein (Ebp) alternative variant bSep08, mRNA. |
| <a href="#">Ebp</a>    | <a href="#">Ebp.cSep08</a>    | <a href="#">117278</a> | 6339  | 428  | 2 | 54  | phenylalkylamine Ca2+ antagonist (emopamil) binding protein (Ebp) alternative variant cSep08, mRNA. |
| <a href="#">Ebpl</a>   | <a href="#">Ebpl.aSep08</a>   | <a href="#">361054</a> | 21988 | 1118 | 3 | 211 | emopamil binding protein-like (Ebpl) alternative variant aSep08, mRNA.                              |
| <a href="#">Ebpl</a>   | <a href="#">Ebpl.bSep08</a>   | <a href="#">361054</a> | 1140  | 319  | 1 | 45  | emopamil binding protein-like (Ebpl) alternative variant bSep08, mRNA.                              |
| <a href="#">Ece1</a>   | <a href="#">Ece1.bSep08</a>   | <a href="#">94204</a>  | 5980  | 372  | 2 | 123 | endothelin converting enzyme 1 (Ece1) alternative variant bSep08, mRNA.                             |
| <a href="#">Ece2</a>   | <a href="#">Ece2.bSep08</a>   | <a href="#">408243</a> | 15717 | 2021 | 6 | 258 | endothelin-converting enzyme 2 (29.3 kD) (Ece2) alternative variant bSep08, mRNA.                   |
| <a href="#">Ece2</a>   | <a href="#">Ece2.cSep08</a>   | <a href="#">408243</a> | 4899  | 742  | 7 | 247 | endothelin-converting enzyme 2 (Ece2) alternative variant cSep08, mRNA.                             |
| <a href="#">Ecel1</a>  | <a href="#">Ecel1.bSep08</a>  | <a href="#">60417</a>  | 6221  | 1796 | 5 | 598 | endothelin converting enzyme-like 1 (Ecel1) alternative variant bSep08, mRNA.                       |
| <a href="#">ECH.0</a>  | <a href="#">ECH.0.aSep08</a>  | <a href="#">500621</a> | 17657 | 713  | 6 | 225 | mitochondrial trifunctional protein (ECH.0) alternative variant aSep08, mRNA.                       |
| <a href="#">ECH.0</a>  | <a href="#">ECH.0.bSep08</a>  | <a href="#">500621</a> | 3708  | 349  | 1 | 48  | putative protein (ECH.0) alternative variant bSep08, mRNA.                                          |
| <a href="#">Ech1</a>   | <a href="#">Ech1.bSep08</a>   | <a href="#">64526</a>  | 4385  | 701  | 4 | 226 | enoyl coenzyme A hydratase 1, peroxisomal (25.1 kD) (Ech1) alternative variant bSep08, mRNA.        |
| <a href="#">Ech1</a>   | <a href="#">Ech1.cSep08</a>   | <a href="#">64526</a>  | 4891  | 742  | 5 | 194 | enoyl coenzyme A hydratase 1, peroxisomal (21.8 kD) (Ech1) alternative variant cSep08, mRNA.        |
| <a href="#">Ech1</a>   | <a href="#">Ech1.dSep08</a>   | <a href="#">64526</a>  | 4328  | 835  | 3 | 170 | enoyl coenzyme A hydratase 1, peroxisomal (19.0 kD) (Ech1) alternative variant dSep08, mRNA.        |
| <a href="#">Ech1</a>   | <a href="#">Ech1.eSep08</a>   | <a href="#">64526</a>  | 3790  | 483  | 1 | 92  | enoyl coenzyme A hydratase 1, peroxisomal (10.6 kD) (Ech1) alternative variant eSep08, mRNA.        |
| <a href="#">Echdc1</a> | <a href="#">Echdc1.bSep08</a> | <a href="#">361465</a> | 29437 | 669  | 2 | 223 | enoyl-CoA hydratase/isomerase (Echdc1) alternative variant bSep08, mRNA.                            |
| <a href="#">Echdc1</a> | <a href="#">Echdc1.cSep08</a> | <a href="#">361465</a> | 29174 | 741  | 2 | 218 | enoyl-CoA hydratase/isomerase (Echdc1) alternative variant cSep08, mRNA.                            |
| <a href="#">Echdc2</a> | <a href="#">Echdc2.bSep08</a> | <a href="#">298381</a> | 15108 | 946  | 2 | 191 | enoyl-CoA hydratase/isomerase (20.1 kD) (Echdc2) alternative variant bSep08, mRNA.                  |
| <a href="#">Ecm1</a>   | <a href="#">Ecm1.bSep08</a>   | <a href="#">116662</a> | 5163  | 1506 | 8 | 436 | extracellular matrix protein 1 (48.7 kD) (Ecm1) alternative variant bSep08, complete mRNA.          |
| <a href="#">Ecm1</a>   | <a href="#">Ecm1.cSep08</a>   | <a href="#">116662</a> | 2701  | 731  | 7 | 243 | extracellular matrix protein 1 (Ecm1) alternative variant cSep08, mRNA.                             |
| <a href="#">Ecm1</a>   | <a href="#">Ecm1.dSep08</a>   | <a href="#">116662</a> | 1130  | 514  | 1 | 66  | extracellular matrix protein 1 (Ecm1) alternative variant dSep08, mRNA.                             |
| <a href="#">Ecop</a>   | <a href="#">Ecop.bSep08</a>   | <a href="#">362374</a> | 68778 | 919  |   | 96  | EGFR-coamplified and overexpressed protein (Ecop) alternative variant bSep08, mRNA.                 |
| <a href="#">Ecsit</a>  | <a href="#">Ecsit.bSep08</a>  | <a href="#">300447</a> | 3709  | 724  | 5 | 240 | ECSIT homolog (Drosophila) (Ecsit) alternative variant bSep08, mRNA.                                |
| <a href="#">Ecsit</a>  | <a href="#">Ecsit.cSep08</a>  | <a href="#">300447</a> | 880   | 469  | 2 | 106 | ECSIT homolog (Drosophila) (11.8 kD) (Ecsit) alternative variant cSep08, mRNA.                      |
| <a href="#">Ect2</a>   | <a href="#">Ect2.bSep08</a>   | <a href="#">361921</a> | 30506 | 1275 | 5 | 241 | ect2 oncogene (Ect2) alternative variant bSep08, mRNA.                                              |

|                          |                                 |                        |       |      |   |     |                                                                                                               |
|--------------------------|---------------------------------|------------------------|-------|------|---|-----|---------------------------------------------------------------------------------------------------------------|
| <a href="#">Ect2</a>     | <a href="#">Ect2.cSep08</a>     | <a href="#">361921</a> | 31589 | 1757 | 4 | 196 | ect2 oncogene (Ect2) alternative variant cSep08, mRNA.                                                        |
| <a href="#">Ect2</a>     | <a href="#">Ect2.dSep08</a>     | <a href="#">361921</a> | 5167  | 412  | 2 | 88  | ect2 oncogene (Ect2) alternative variant dSep08, mRNA.                                                        |
| <a href="#">Edaradd</a>  | <a href="#">Edaradd.aSep08</a>  | <a href="#">498769</a> | 1032  | 522  | 1 | 108 | EDAR (ectodysplasin-A receptor)-associated death domain (Edaradd) alternative variant aSep08, mRNA.           |
| <a href="#">Edaradd</a>  | <a href="#">Edaradd.bSep08</a>  | <a href="#">498769</a> | 660   | 472  | 1 | 74  | EDAR (ectodysplasin-A receptor)-associated death domain (8.7 kD) (Edaradd) alternative variant bSep08, mRNA.  |
| <a href="#">Edem2</a>    | <a href="#">Edem2.bSep08</a>    | <a href="#">296304</a> | 9401  | 747  | 5 | 184 | ER degradation enhancer mannosidase alpha-like 2 (Edem2) alternative variant bSep08, mRNA.                    |
| <a href="#">Edem2</a>    | <a href="#">Edem2.cSep08</a>    | <a href="#">296304</a> | 9977  | 436  | 4 | 89  | ER degradation enhancer mannosidase alpha-like 2 (Edem2) alternative variant cSep08, mRNA.                    |
| <a href="#">Edem2</a>    | <a href="#">Edem2.dSep08</a>    | <a href="#">296304</a> | 10292 | 416  | 4 | 87  | ER degradation enhancer mannosidase alpha-like 2 precursor (9.8 kD) (Edem2) alternative variant dSep08, mRNA. |
| <a href="#">Edem3</a>    | <a href="#">Edem3.aSep08</a>    | <a href="#">289085</a> | 28747 | 2007 |   | 483 | ER degradation enhancer, mannosidase alpha-like 3 (Edem3) alternative variant aSep08, mRNA.                   |
| <a href="#">Edem3</a>    | <a href="#">Edem3.bSep08</a>    | <a href="#">289085</a> | 2744  | 373  |   | 124 | ER degradation enhancer, mannosidase alpha-like 3 (Edem3) alternative variant bSep08, mRNA.                   |
| <a href="#">Edf1</a>     | <a href="#">Edf1.cSep08</a>     | <a href="#">296570</a> | 1085  | 698  | 2 | 71  | endothelial differentiation-related factor 1 (Edf1) alternative variant cSep08, mRNA.                         |
| <a href="#">Edn3</a>     | <a href="#">Edn3.bSep08</a>     | <a href="#">366270</a> | 4921  | 326  | 1 | 89  | endothelin 3 (Edn3) alternative variant bSep08, mRNA.                                                         |
| <a href="#">Ednra</a>    | <a href="#">Ednra.bSep08</a>    | <a href="#">24326</a>  | 60855 | 3684 | 3 | 399 | endothelin receptor type A (45.3 kD) (Ednra) alternative variant bSep08, complete mRNA.                       |
| <a href="#">Ednra</a>    | <a href="#">Ednra.cSep08</a>    | <a href="#">24326</a>  | 58930 | 1487 | 4 | 267 | endothelin receptor type A (30.9 kD) (Ednra) alternative variant cSep08, mRNA.                                |
| <a href="#">Ednra</a>    | <a href="#">Ednra.dSep08</a>    | <a href="#">24326</a>  | 58930 | 1429 | 4 | 259 | endothelin receptor type A (28.5 kD) (Ednra) alternative variant dSep08, mRNA.                                |
| <a href="#">Ednra</a>    | <a href="#">Ednra.eSep08</a>    | <a href="#">24326</a>  | 59130 | 1427 | 2 | 247 | endothelin receptor type A (28.8 kD) (Ednra) alternative variant eSep08, mRNA.                                |
| <a href="#">Ednra</a>    | <a href="#">Ednra.fSep08</a>    | <a href="#">24326</a>  | 26100 | 697  | 2 | 195 | endothelin receptor type A (Ednra) alternative variant fSep08, mRNA.                                          |
| <a href="#">Eea1</a>     | <a href="#">Eea1.bSep08</a>     | <a href="#">314764</a> | 15496 | 457  | 4 | 123 | early endosome antigen 1 162kD CRA b like (Eea1) alternative variant bSep08, mRNA.                            |
| <a href="#">Eea1</a>     | <a href="#">Eea1.cSep08</a>     | <a href="#">314764</a> | 8603  | 468  | 2 | 81  | early endosome antigen 1 CRA a like (Eea1) alternative variant cSep08, mRNA.                                  |
| <a href="#">Eed</a>      | <a href="#">Eed.bSep08</a>      | <a href="#">293104</a> | 1489  | 429  | 3 | 66  | embryonic ectoderm development (7.5 kD) (Eed) alternative variant bSep08, mRNA.                               |
| <a href="#">Eed</a>      | <a href="#">Eed.cSep08</a>      | <a href="#">293104</a> | 1335  | 978  | 2 | 66  | embryonic ectoderm development (7.5 kD) (Eed) alternative variant cSep08, mRNA.                               |
| <a href="#">Eef1a1.1</a> | <a href="#">Eef1a1.1.aSep08</a> | <a href="#">29652</a>  | 5893  | 4400 | 8 | 462 | eukaryotic translation elongation factor 1 alpha 1 (50.1 kD) (Eef1a1.1) alternative variant aSep08, mRNA.     |
| <a href="#">Eef1a1.1</a> | <a href="#">Eef1a1.1.aSep08</a> | <a href="#">171361</a> | 5893  | 4400 | 8 | 462 | eukaryotic translation elongation factor 1 alpha 1 (50.1 kD) (Eef1a1.1) alternative variant aSep08, mRNA.     |
| <a href="#">Eef1a1.1</a> | <a href="#">Eef1a1.1.bSep08</a> | <a href="#">29652</a>  | 2289  | 740  | 5 | 246 | eukaryotic translation elongation factor 1 alpha 1 (Eef1a1.1) alternative variant bSep08, mRNA.               |
| <a href="#">Eef1a1.1</a> | <a href="#">Eef1a1.1.bSep08</a> | <a href="#">171361</a> | 2289  | 740  | 5 | 246 | eukaryotic translation elongation factor 1 alpha 1 (Eef1a1.1) alternative variant bSep08, mRNA.               |

|                          |                                 |                        |       |      |   |     |                                                                                                                                  |
|--------------------------|---------------------------------|------------------------|-------|------|---|-----|----------------------------------------------------------------------------------------------------------------------------------|
| <a href="#">Eef1a1.1</a> | <a href="#">Eef1a1.1.cSep08</a> | <a href="#">29652</a>  | 2426  | 1313 | 4 | 232 | eukaryotic translation elongation factor 1 alpha 1 (25.6 kD) (Eef1a1.1) alternative variant cSep08, mRNA.                        |
| <a href="#">Eef1a1.1</a> | <a href="#">Eef1a1.1.cSep08</a> | <a href="#">171361</a> | 2426  | 1313 | 4 | 232 | eukaryotic translation elongation factor 1 alpha 1 (25.6 kD) (Eef1a1.1) alternative variant cSep08, mRNA.                        |
| <a href="#">Eef1a1.1</a> | <a href="#">Eef1a1.1.dSep08</a> | <a href="#">29652</a>  | 1769  | 679  | 4 | 197 | eukaryotic translation elongation factor 1 alpha 1 (Eef1a1.1) alternative variant dSep08, mRNA.                                  |
| <a href="#">Eef1a1.1</a> | <a href="#">Eef1a1.1.dSep08</a> | <a href="#">171361</a> | 1769  | 679  | 4 | 197 | eukaryotic translation elongation factor 1 alpha 1 (Eef1a1.1) alternative variant dSep08, mRNA.                                  |
| <a href="#">Eef1a1.1</a> | <a href="#">Eef1a1.1.fSep08</a> | <a href="#">29652</a>  | 1644  | 1172 | 4 | 156 | eukaryotic translation elongation factor 1 alpha 1 (Eef1a1.1) alternative variant fSep08, mRNA.                                  |
| <a href="#">Eef1a1.1</a> | <a href="#">Eef1a1.1.fSep08</a> | <a href="#">171361</a> | 1644  | 1172 | 4 | 156 | eukaryotic translation elongation factor 1 alpha 1 (Eef1a1.1) alternative variant fSep08, mRNA.                                  |
| <a href="#">Eef1a1.1</a> | <a href="#">Eef1a1.1.gSep08</a> | <a href="#">29652</a>  | 760   | 658  | 2 | 124 | eukaryotic translation elongation factor 1 alpha 1 (Eef1a1.1) alternative variant gSep08, mRNA.                                  |
| <a href="#">Eef1a1.1</a> | <a href="#">Eef1a1.1.gSep08</a> | <a href="#">171361</a> | 760   | 658  | 2 | 124 | eukaryotic translation elongation factor 1 alpha 1 (Eef1a1.1) alternative variant gSep08, mRNA.                                  |
| <a href="#">Eef1a2</a>   | <a href="#">Eef1a2.bSep08</a>   | <a href="#">24799</a>  | 7646  | 444  | 3 | 133 | eukaryotic translation elongation factor 1 alpha 2 (Eef1a2) alternative variant bSep08, mRNA.                                    |
| <a href="#">Eef1a2</a>   | <a href="#">Eef1a2.cSep08</a>   | <a href="#">24799</a>  | 1818  | 384  | 2 | 127 | eukaryotic translation elongation factor 1 alpha 2 (Eef1a2) alternative variant cSep08, mRNA.                                    |
| <a href="#">Eef1b2</a>   | <a href="#">Eef1b2.bSep08</a>   | <a href="#">363241</a> | 2461  | 1266 | 3 | 157 | eukaryotic translation elongation factor 1 beta 2 (17.2 kD) (Eef1b2) alternative variant bSep08, complete mRNA.                  |
| <a href="#">Eef1b2</a>   | <a href="#">Eef1b2.cSep08</a>   | <a href="#">363241</a> | 2382  | 1224 | 2 | 141 | eukaryotic translation elongation factor 1 beta 2 (Eef1b2) alternative variant cSep08, mRNA.                                     |
| <a href="#">Eef1d</a>    | <a href="#">Eef1d.bSep08</a>    | <a href="#">300033</a> | 2622  | 1162 | 2 | 387 | eukaryotic translation elongation factor 1 delta (guanine nucleotide exchange protein) (Eef1d) alternative variant bSep08, mRNA. |
| <a href="#">Eef1d</a>    | <a href="#">Eef1d.cSep08</a>    | <a href="#">300033</a> | 15024 | 1142 | 8 | 314 | eukaryotic translation elongation factor 1 delta (guanine nucleotide exchange protein) (Eef1d) alternative variant cSep08, mRNA. |
| <a href="#">Eef1d</a>    | <a href="#">Eef1d.dSep08</a>    | <a href="#">300033</a> | 13864 | 716  | 7 | 223 | eukaryotic translation elongation factor 1 delta (guanine nucleotide exchange protein) (Eef1d) alternative variant dSep08, mRNA. |
| <a href="#">Eef1d</a>    | <a href="#">Eef1d.eSep08</a>    | <a href="#">300033</a> | 14150 | 730  | 6 | 204 | eukaryotic translation elongation factor 1 delta (guanine nucleotide exchange protein) (Eef1d) alternative variant eSep08, mRNA. |
| <a href="#">Eef1d</a>    | <a href="#">Eef1d.fSep08</a>    | <a href="#">300033</a> | 14448 | 648  | 7 | 195 | eukaryotic translation elongation factor 1 delta (guanine nucleotide exchange protein) (Eef1d) alternative variant fSep08, mRNA. |
| <a href="#">Eef1d</a>    | <a href="#">Eef1d.gSep08</a>    | <a href="#">300033</a> | 14529 | 589  | 5 | 195 | eukaryotic translation elongation factor 1 delta (guanine nucleotide exchange protein) (Eef1d) alternative variant gSep08, mRNA. |
| <a href="#">Eef1d</a>    | <a href="#">Eef1d.hSep08</a>    | <a href="#">300033</a> | 13810 | 590  | 6 | 177 | eukaryotic translation elongation factor 1 delta (guanine nucleotide exchange protein) (Eef1d) alternative variant hSep08, mRNA. |

|                         |                                |                        |        |      |   |     |                                                                                                                                            |
|-------------------------|--------------------------------|------------------------|--------|------|---|-----|--------------------------------------------------------------------------------------------------------------------------------------------|
| <a href="#">Eef1d</a>   | <a href="#">Eef1d.iSep08</a>   | <a href="#">300033</a> | 1635   | 879  | 4 | 147 | eukaryotic translation elongation factor 1 delta (guanine nucleotide exchange protein) (16.6 kD) (Eef1d) alternative variant iSep08, mRNA. |
| <a href="#">Eef1d</a>   | <a href="#">Eef1d.jSep08</a>   | <a href="#">300033</a> | 13951  | 459  | 5 | 125 | eukaryotic translation elongation factor 1 delta (guanine nucleotide exchange protein) (Eef1d) alternative variant jSep08, mRNA.           |
| <a href="#">Eef1d</a>   | <a href="#">Eef1d.kSep08</a>   | <a href="#">300033</a> | 13679  | 402  | 5 | 118 | eukaryotic translation elongation factor 1 delta (guanine nucleotide exchange protein) (Eef1d) alternative variant kSep08, mRNA.           |
| <a href="#">Eef1g</a>   | <a href="#">Eef1g.bSep08</a>   | <a href="#">293725</a> | 1631   | 1355 | 2 | 136 | eukaryotic translation elongation factor 1 gamma (Eef1g) alternative variant bSep08, mRNA.                                                 |
| <a href="#">Eef1g</a>   | <a href="#">Eef1g.cSep08</a>   | <a href="#">293725</a> | 1105   | 766  | 2 | 82  | elongation factor 1 gamma (Eef1g) alternative variant cSep08, mRNA.                                                                        |
| <a href="#">Eef2</a>    | <a href="#">Eef2.bSep08</a>    | <a href="#">29565</a>  | 3702   | 2864 | 8 | 703 | eukaryotic translation elongation factor 2 (78.4 kD) (Eef2) alternative variant bSep08, mRNA.                                              |
| <a href="#">Eef2</a>    | <a href="#">Eef2.cSep08</a>    | <a href="#">29565</a>  | 4122   | 3231 | 6 | 316 | eukaryotic translation elongation factor 2 (35.2 kD) (Eef2) alternative variant cSep08, mRNA.                                              |
| <a href="#">Eef2</a>    | <a href="#">Eef2.dSep08</a>    | <a href="#">29565</a>  | 3972   | 768  | 6 | 253 | eukaryotic translation elongation factor 2 (Eef2) alternative variant dSep08, mRNA.                                                        |
| <a href="#">Eef2k</a>   | <a href="#">Eef2k.bSep08</a>   | <a href="#">25435</a>  | 1701   | 1303 | 2 | 84  | eukaryotic elongation factor-2 kinase (9.0 kD) (Eef2k) alternative variant bSep08, mRNA.                                                   |
| <a href="#">Eefsec</a>  | <a href="#">Eefsec.aSep08</a>  | <a href="#">500255</a> | 198640 | 2116 | 7 | 589 | eukaryotic elongation factor, selenocysteine-tRNA-specific (Eefsec) alternative variant aSep08, mRNA.                                      |
| <a href="#">Efcab2</a>  | <a href="#">Efcab2.bSep08</a>  | <a href="#">289280</a> | 1538   | 472  | 4 | 63  | EF-hand calcium binding domain 2 (Efcab2) alternative variant bSep08, mRNA.                                                                |
| <a href="#">Efcab3</a>  | <a href="#">Efcab3.bSep08</a>  | <a href="#">303589</a> | 14662  | 626  |   | 50  | EF-hand calcium binding domain 3 (Efcab3) alternative variant bSep08, mRNA.                                                                |
| <a href="#">Efcab4a</a> | <a href="#">Efcab4a.bSep08</a> | <a href="#">309112</a> | 1886   | 1083 | 4 | 261 | EF-hand calcium binding domain 4A (Efcab4a) alternative variant bSep08, mRNA.                                                              |
| <a href="#">Efcab4a</a> | <a href="#">Efcab4a.cSep08</a> | <a href="#">309112</a> | 1608   | 1509 | 2 | 236 | EF-hand calcium binding domain 4A (25.7 kD) (Efcab4a) alternative variant cSep08, mRNA.                                                    |
| <a href="#">Efcab4a</a> | <a href="#">Efcab4a.dSep08</a> | <a href="#">309112</a> | 3981   | 750  | 6 | 224 | EF-hand calcium binding domain 4A (Efcab4a) alternative variant dSep08, mRNA.                                                              |
| <a href="#">Efcab4a</a> | <a href="#">Efcab4a.eSep08</a> | <a href="#">309112</a> | 3966   | 748  | 6 | 224 | EF-hand calcium binding domain 4A (Efcab4a) alternative variant eSep08, mRNA.                                                              |
| <a href="#">Efcab5</a>  | <a href="#">Efcab5.aSep08</a>  | <a href="#">363653</a> | 13637  | 648  |   | 215 | EF-hand calcium binding domain 5 (Efcab5) mRNA.                                                                                            |
| <a href="#">Efcab6</a>  | <a href="#">Efcab6.aSep08</a>  | <a href="#">315179</a> | 42686  | 1406 | 9 | 468 | EF-hand calcium binding domain 6 (Efcab6) alternative variant aSep08, mRNA.                                                                |
| <a href="#">Efcab6</a>  | <a href="#">Efcab6.bSep08</a>  | <a href="#">315179</a> | 22452  | 763  | 6 | 254 | EF-hand calcium binding domain 6 (Efcab6) alternative variant bSep08, mRNA.                                                                |
| <a href="#">Efcab6</a>  | <a href="#">Efcab6.cSep08</a>  | <a href="#">315179</a> | 22155  | 759  | 6 | 253 | EF-hand calcium binding domain 6 (Efcab6) alternative variant cSep08, mRNA.                                                                |
| <a href="#">Efcab6</a>  | <a href="#">Efcab6.dSep08</a>  | <a href="#">315179</a> | 13120  | 734  | 4 | 244 | EF-hand calcium binding domain 6 (Efcab6) alternative variant dSep08, mRNA.                                                                |
| <a href="#">Efcab6</a>  | <a href="#">Efcab6.eSep08</a>  | <a href="#">315179</a> | 4627   | 697  | 3 | 77  | EF-hand calcium binding domain 6 (Efcab6) alternative variant eSep08, mRNA.                                                                |
| <a href="#">Efcab7</a>  | <a href="#">Efcab7.aSep08</a>  | <a href="#">362549</a> | 15666  | 730  |   | 211 | EF-hand calcium binding domain 7 (Efcab7) mRNA.                                                                                            |

|                            |                                   |                        |        |      |    |     |                                                                                                                           |
|----------------------------|-----------------------------------|------------------------|--------|------|----|-----|---------------------------------------------------------------------------------------------------------------------------|
| <a href="#">Efemp1</a>     | <a href="#">Efemp1.bSep08</a>     | <a href="#">305604</a> | 84964  | 1784 | 8  | 451 | epidermal growth factor-containing fibulin-like extracellular matrix protein 1 (Efemp1) alternative variant bSep08, mRNA. |
| <a href="#">Efemp1</a>     | <a href="#">Efemp1.cSep08</a>     | <a href="#">305604</a> | 75238  | 779  | 5  | 259 | epidermal growth factor-containing fibulin-like extracellular matrix protein 1 (Efemp1) alternative variant cSep08, mRNA. |
| <a href="#">Efemp1</a>     | <a href="#">Efemp1.dSep08</a>     | <a href="#">305604</a> | 19339  | 645  | 6  | 187 | epidermal growth factor-containing fibulin-like extracellular matrix protein 1 (Efemp1) alternative variant dSep08, mRNA. |
| <a href="#">Efemp1</a>     | <a href="#">Efemp1.eSep08</a>     | <a href="#">305604</a> | 343    | 257  | 2  | 56  | epidermal growth factor-containing fibulin-like extracellular matrix protein 1 (Efemp1) alternative variant eSep08, mRNA. |
| <a href="#">Efemp1</a>     | <a href="#">Efemp1.fSep08</a>     | <a href="#">305604</a> | 10472  | 699  | 4  | 172 | epidermal growth factor-containing fibulin-like extracellular matrix protein 1 (Efemp1) alternative variant fSep08, mRNA. |
| <a href="#">Efemp2</a>     | <a href="#">Efemp2.bSep08</a>     | <a href="#">293677</a> | 5875   | 869  | 8  | 275 | EGF-containing fibulin-like extracellular matrix protein 2 (Efemp2) alternative variant bSep08, mRNA.                     |
| <a href="#">Efemp2</a>     | <a href="#">Efemp2.cSep08</a>     | <a href="#">293677</a> | 6752   | 1325 | 12 | 255 | EGF-containing fibulin-like extracellular matrix protein 2 (Efemp2) alternative variant cSep08, mRNA.                     |
| <a href="#">Efemp2</a>     | <a href="#">Efemp2.dSep08</a>     | <a href="#">293677</a> | 1207   | 688  | 3  | 215 | EGF-containing fibulin-like extracellular matrix protein 2 (Efemp2) alternative variant dSep08, mRNA.                     |
| <a href="#">Efha1</a>      | <a href="#">Efha1.bSep08</a>      | <a href="#">171433</a> | 70876  | 623  | 8  | 207 | ef-hand domain family member A1 (Efha1) alternative variant bSep08, mRNA.                                                 |
| <a href="#">Efha1</a>      | <a href="#">Efha1.cSep08</a>      | <a href="#">171433</a> | 39724  | 742  | 8  | 188 | ef-hand domain family member A1 (Efha1) alternative variant cSep08, mRNA.                                                 |
| <a href="#">Efha1</a>      | <a href="#">Efha1.dSep08</a>      | <a href="#">171433</a> | 28114  | 863  | 5  | 103 | ef-hand domain family member A1 (Efha1) alternative variant dSep08, mRNA.                                                 |
| <a href="#">Efha1</a>      | <a href="#">Efha1.eSep08</a>      | <a href="#">171433</a> | 1048   | 672  | 2  | 48  | putative protein of bilateral origin (Efha1) alternative variant eSep08, mRNA.                                            |
| <a href="#">Efha2</a>      | <a href="#">Efha2.aSep08</a>      | <a href="#">364601</a> | 34030  | 3716 | 8  | 261 | EF hand domain family, member A2 (Efha2) alternative variant aSep08, mRNA.                                                |
| <a href="#">efhand.0</a>   | <a href="#">efhand.0.aSep08</a>   |                        | 21021  | 1104 |    | 111 | calcium binding atopy-related autoantigen 1 like (efhand.0) mRNA.                                                         |
| <a href="#">efhand.1</a>   | <a href="#">efhand.1.aSep08</a>   |                        | 8556   | 652  |    | 122 | lysophosphatidylcholine acyltransferase 2 (efhand.1) mRNA.                                                                |
| <a href="#">efhand.2</a>   | <a href="#">efhand.2.aSep08</a>   |                        | 30699  | 1372 |    | 454 | intersectin 1 (efhand.2) mRNA.                                                                                            |
| <a href="#">efhand.3</a>   | <a href="#">efhand.3.aSep08</a>   |                        | 14247  | 542  |    | 94  | interacting protein 3 (efhand.3) mRNA.                                                                                    |
| <a href="#">efhand.4</a>   | <a href="#">efhand.4.aSep08</a>   |                        | 7733   | 1022 | 4  | 230 | myosin light chain regulatory B-like (efhand.4) alternative variant aSep08, mRNA.                                         |
| <a href="#">efhand.4</a>   | <a href="#">efhand.4.bSep08</a>   |                        | 6181   | 1202 | 3  | 119 | myosin light (13.5 kD) (efhand.4) alternative variant bSep08, mRNA.                                                       |
| <a href="#">efhand.4</a>   | <a href="#">efhand.4.cSep08</a>   |                        | 4807   | 356  | 2  | 118 | myosin light (efhand.4) alternative variant cSep08, mRNA.                                                                 |
| <a href="#">efhand.6</a>   | <a href="#">efhand.6.aSep08</a>   |                        | 11335  | 688  |    | 218 | intersectin 2 (efhand.6) mRNA.                                                                                            |
| <a href="#">efhand_1.0</a> | <a href="#">efhand_1.0.aSep08</a> |                        | 125412 | 630  | 6  | 164 | dystrobrevin (efhand_1.0) alternative variant aSep08, mRNA.                                                               |
| <a href="#">efhand_2.0</a> | <a href="#">efhand_2.0.aSep08</a> |                        | 48866  | 3136 | 12 | 326 | utrophin CRA a (37.1 kD) (efhand_2.0) alternative variant aSep08, mRNA.                                                   |

|                        |                               |                        |       |      |    |     |                                                                                                                                                                                        |
|------------------------|-------------------------------|------------------------|-------|------|----|-----|----------------------------------------------------------------------------------------------------------------------------------------------------------------------------------------|
| <a href="#">Efhb</a>   | <a href="#">Efhb.bSep08</a>   | <a href="#">301168</a> | 71886 | 3163 | 1  | 768 | EF hand domain family, member B (86.0 kD) (Efhb) alternative variant bSep08, complete mRNA.                                                                                            |
| <a href="#">Efhc1</a>  | <a href="#">Efhc1.bSep08</a>  | <a href="#">301295</a> | 6586  | 762  | 3  | 193 | EF-hand domain (C-terminal) containing 1 (Efhc1) alternative variant bSep08, mRNA.                                                                                                     |
| <a href="#">Efhd2</a>  | <a href="#">Efhd2.bSep08</a>  | <a href="#">298609</a> | 1493  | 1405 | 2  | 102 | putative protein (Efhd2) alternative variant bSep08, mRNA.                                                                                                                             |
| <a href="#">Efna2</a>  | <a href="#">Efna2.aSep08</a>  | <a href="#">84358</a>  | 687   | 495  |    | 61  | ephrin A2 (Efna2) mRNA.                                                                                                                                                                |
| <a href="#">Efna4</a>  | <a href="#">Efna4.bSep08</a>  | <a href="#">310643</a> | 1131  | 784  | 1  | 146 | ephrin A4 (Efna4) alternative variant bSep08, mRNA.                                                                                                                                    |
| <a href="#">Efnb1</a>  | <a href="#">Efnb1.aSep08</a>  | <a href="#">25186</a>  | 12844 | 3296 |    | 501 | ephrin B1 (54.0 kD) (Efnb1) mRNA.                                                                                                                                                      |
| <a href="#">Efr3a</a>  | <a href="#">Efr3a.aSep08</a>  | <a href="#">362923</a> | 18609 | 1362 |    | 453 | EFR3 homolog A ( <i>S. cerevisiae</i> ) (Efr3a) mRNA.                                                                                                                                  |
| <a href="#">Efs</a>    | <a href="#">Efs.bSep08</a>    | <a href="#">290212</a> | 872   | 518  | 2  | 172 | embryonal Fyn-associated substrate (Efs) alternative variant bSep08, mRNA.                                                                                                             |
| <a href="#">Eftud1</a> | <a href="#">Eftud1.bSep08</a> | <a href="#">308789</a> | 14479 | 1434 | 3  | 423 | elongation factor G, C-terminal (Eftud1) alternative variant bSep08, mRNA.                                                                                                             |
| <a href="#">Eftud1</a> | <a href="#">Eftud1.cSep08</a> | <a href="#">308789</a> | 7530  | 1567 | 3  | 101 | putative protein of ancient origin (11.2 kD) (Eftud1) alternative variant cSep08, mRNA.                                                                                                |
| <a href="#">Eftud1</a> | <a href="#">Eftud1.eSep08</a> | <a href="#">308789</a> | 3481  | 387  | 3  | 58  | putative protein of ancient origin (6.3 kD) (Eftud1) alternative variant eSep08, mRNA.                                                                                                 |
| <a href="#">Eftud2</a> | <a href="#">Eftud2.aSep08</a> | <a href="#">287739</a> | 24939 | 2521 | 19 | 738 | elongation factor Tu, domain 2 containing protein and elongation factor G, domain IV containing protein and elongation factor G, C-terminal (Eftud2) alternative variant aSep08, mRNA. |
| <a href="#">Eftud2</a> | <a href="#">Eftud2.bSep08</a> | <a href="#">287739</a> | 5969  | 1249 | 7  | 213 | putative cytoplasmic protein of eukaryotic origin (23.6 kD) (Eftud2) alternative variant bSep08, mRNA.                                                                                 |
| <a href="#">Eftud2</a> | <a href="#">Eftud2.cSep08</a> | <a href="#">287739</a> | 5118  | 712  | 5  | 187 | putative protein of eukaryotic origin (Eftud2) alternative variant cSep08, mRNA.                                                                                                       |
| <a href="#">Egf</a>    | <a href="#">Egf.cSep08</a>    | <a href="#">25313</a>  | 3965  | 1299 | 2  | 67  | epidermal growth factor (7.5 kD) (Egf) alternative variant cSep08, mRNA.                                                                                                               |
| <a href="#">Egf</a>    | <a href="#">Egf.dSep08</a>    | <a href="#">25313</a>  | 4870  | 373  | 3  | 58  | epidermal growth factor (6.1 kD) (Egf) alternative variant dSep08, mRNA.                                                                                                               |
| <a href="#">EGF.1</a>  | <a href="#">EGF.1.aSep08</a>  |                        | 784   | 341  |    | 113 | stabilin 1 (EGF.1) mRNA.                                                                                                                                                               |
| <a href="#">EGF.2</a>  | <a href="#">EGF.2.aSep08</a>  |                        | 7470  | 443  |    | 147 | sushi nidogen egf-like 1 (EGF.2) mRNA.                                                                                                                                                 |
| <a href="#">EGF.4</a>  | <a href="#">EGF.4.aSep08</a>  |                        | 1628  | 547  | 5  | 181 | jagged 2 (EGF.4) alternative variant aSep08, mRNA.                                                                                                                                     |
| <a href="#">EGF.5</a>  | <a href="#">EGF.5.aSep08</a>  |                        | 809   | 536  |    | 178 | cadherin egf lag seven-pass g-type receptor 2 (EGF.5) mRNA.                                                                                                                            |
| <a href="#">EGF.6</a>  | <a href="#">EGF.6.aSep08</a>  |                        | 1318  | 465  |    | 154 | cadherin egf lag seven-pass g-type receptor 2 (EGF.6) mRNA.                                                                                                                            |
| <a href="#">EGF.7</a>  | <a href="#">EGF.7.aSep08</a>  |                        | 3861  | 535  |    | 178 | latent transforming growth factor beta binding protein 4 like (EGF.7) mRNA.                                                                                                            |
| <a href="#">EGF.8</a>  | <a href="#">EGF.8.aSep08</a>  |                        | 3139  | 382  |    | 127 | latent transforming growth factor beta binding protein 3 like (EGF.8) mRNA.                                                                                                            |
| <a href="#">Egfl6</a>  | <a href="#">Egfl6.bSep08</a>  | <a href="#">317470</a> | 15162 | 1078 | 5  | 247 | EGF-like-domain, multiple 6 (Egfl6) alternative variant bSep08, mRNA.                                                                                                                  |
| <a href="#">Egfl6</a>  | <a href="#">Egfl6.cSep08</a>  | <a href="#">317470</a> | 14956 | 609  | 4  | 150 | EGF-like-domain, multiple 6 (Egfl6) alternative variant cSep08, mRNA.                                                                                                                  |
| <a href="#">Egfl7</a>  | <a href="#">Egfl7.bSep08</a>  | <a href="#">245963</a> | 7176  | 858  | 7  | 171 | EGF-like domain 7 (Egfl7) alternative variant bSep08, mRNA.                                                                                                                            |

|                          |                                 |                        |        |      |    |     |                                                                                                                               |
|--------------------------|---------------------------------|------------------------|--------|------|----|-----|-------------------------------------------------------------------------------------------------------------------------------|
| <a href="#">Egfl7</a>    | <a href="#">Egfl7.cSep08</a>    | <a href="#">245963</a> | 6874   | 675  | 6  | 125 | EGF-like domain 7 (Egfl7) alternative variant cSep08, mRNA.                                                                   |
| <a href="#">Egfl7</a>    | <a href="#">Egfl7.dSep08</a>    | <a href="#">245963</a> | 1313   | 488  | 4  | 97  | EGF-like domain 7 (10.7 kD) (Egfl7) alternative variant dSep08, mRNA.                                                         |
| <a href="#">Egfl7</a>    | <a href="#">Egfl7.eSep08</a>    | <a href="#">245963</a> | 6554   | 548  | 5  | 74  | EGF-like domain 7 (Egfl7) alternative variant eSep08, mRNA.                                                                   |
| <a href="#">Egfl7</a>    | <a href="#">Egfl7.fSep08</a>    | <a href="#">245963</a> | 2360   | 2244 | 2  | 80  | EGF-like domain 7 (8.6 kD) (Egfl7) alternative variant fSep08, mRNA.                                                          |
| <a href="#">Egfl7</a>    | <a href="#">Egfl7.gSep08</a>    | <a href="#">245963</a> | 911    | 342  | 2  | 44  | EGF-like domain 7 (Egfl7) alternative variant gSep08, mRNA.                                                                   |
| <a href="#">Egfl8</a>    | <a href="#">Egfl8.bSep08</a>    | <a href="#">406166</a> | 2356   | 1377 | 7  | 334 | EGF-like domain 8 (Egfl8) alternative variant bSep08, mRNA.                                                                   |
| <a href="#">Egfl8</a>    | <a href="#">Egfl8.cSep08</a>    | <a href="#">406166</a> | 1421   | 633  | 6  | 138 | EGF-like domain 8 (Egfl8) alternative variant cSep08, mRNA.                                                                   |
| <a href="#">Egfr</a>     | <a href="#">Egfr.aSep08</a>     | <a href="#">24329</a>  | 20568  | 2099 |    | 428 | epidermal growth factor receptor (Egfr) mRNA.                                                                                 |
| <a href="#">EGF_2.0</a>  | <a href="#">EGF_2.0.aSep08</a>  |                        | 676    | 301  |    | 100 | tenascin XB (EGF_2.0) mRNA.                                                                                                   |
| <a href="#">EGF_2.1</a>  | <a href="#">EGF_2.1.aSep08</a>  |                        | 9766   | 1235 |    | 126 | tenascin-X precursor (13.0 kD) (EGF_2.1) mRNA.                                                                                |
| <a href="#">EGF_2.2</a>  | <a href="#">EGF_2.2.aSep08</a>  |                        | 6673   | 626  |    | 208 | odd Oz ten-m homolog 3 (EGF_2.2) mRNA.                                                                                        |
| <a href="#">EGF_2.3</a>  | <a href="#">EGF_2.3.aSep08</a>  |                        | 32147  | 542  | 1  | 175 | A disintegrin metallopeptidase domain 32 (EGF_2.3) alternative variant aSep08, mRNA.                                          |
| <a href="#">EGF_2.3</a>  | <a href="#">EGF_2.3.bSep08</a>  |                        | 28622  | 568  | 2  | 76  | putative secreted or extracellular protein precursor of mammalian origin (8.4 kD) (EGF_2.3) alternative variant bSep08, mRNA. |
| <a href="#">EGF_CA.0</a> | <a href="#">EGF_CA.0.aSep08</a> |                        | 18256  | 712  |    | 236 | nidogen (EGF_CA.0) mRNA.                                                                                                      |
| <a href="#">EGF_CA.1</a> | <a href="#">EGF_CA.1.aSep08</a> |                        | 46946  | 1312 |    | 436 | latent transforming growth factor beta binding protein 1 like (EGF_CA.1) mRNA.                                                |
| <a href="#">EGF_CA.2</a> | <a href="#">EGF_CA.2.aSep08</a> |                        | 1355   | 1104 |    | 158 | CRA b (EGF_CA.2) mRNA.                                                                                                        |
| <a href="#">EGF_CA.3</a> | <a href="#">EGF_CA.3.aSep08</a> |                        | 1698   | 606  | 5  | 202 | latent transforming growth factor beta binding protein 3 CRA e like (EGF_CA.3) alternative variant aSep08, mRNA.              |
| <a href="#">EGF_CA.3</a> | <a href="#">EGF_CA.3.bSep08</a> |                        | 600    | 423  | 1  | 85  | latent transforming growth factor binding protein like (EGF_CA.3) alternative variant bSep08, mRNA.                           |
| <a href="#">Egr3</a>     | <a href="#">Egr3.bSep08</a>     | <a href="#">25148</a>  | 1895   | 655  | 1  | 71  | early growth response 3 (7.7 kD) (Egr3) alternative variant bSep08, mRNA.                                                     |
| <a href="#">Ehbp1</a>    | <a href="#">Ehbp1.aSep08</a>    | <a href="#">305556</a> | 122934 | 3197 | 5  | 753 | EH domain binding protein 1 (Ehbp1) alternative variant aSep08, mRNA.                                                         |
| <a href="#">Ehbp1</a>    | <a href="#">Ehbp1.bSep08</a>    | <a href="#">305556</a> | 58454  | 965  | 2  | 321 | EH domain binding protein 1 (Ehbp1) alternative variant bSep08, mRNA.                                                         |
| <a href="#">Ehbp111</a>  | <a href="#">Ehbp111.bSep08</a>  | <a href="#">309169</a> | 18128  | 3171 | 16 | 844 | calponin-like actin-binding (90.9 kD) (Ehbp111) alternative variant bSep08, complete mRNA.                                    |
| <a href="#">Ehbp111</a>  | <a href="#">Ehbp111.cSep08</a>  | <a href="#">309169</a> | 10567  | 3470 | 5  | 813 | CRA d (Ehbp111) alternative variant cSep08, mRNA.                                                                             |
| <a href="#">Ehbp111</a>  | <a href="#">Ehbp111.eSep08</a>  | <a href="#">309169</a> | 18091  | 2603 | 15 | 667 | tangerin (72.5 kD) (Ehbp111) alternative variant eSep08, complete mRNA.                                                       |
| <a href="#">Ehbp111</a>  | <a href="#">Ehbp111.fSep08</a>  | <a href="#">309169</a> | 7227   | 1392 | 2  | 247 | tangerin (25.5 kD) (Ehbp111) alternative variant fSep08, mRNA.                                                                |
| <a href="#">Ehd1</a>     | <a href="#">Ehd1.aSep08</a>     | <a href="#">293692</a> | 22381  | 3240 |    | 558 | hpast (Ehd1) mRNA.                                                                                                            |



|                         |                                |                        |       |      |    |     |                                                                                                                |
|-------------------------|--------------------------------|------------------------|-------|------|----|-----|----------------------------------------------------------------------------------------------------------------|
| <a href="#">Ehmt1</a>   | <a href="#">Ehmt1.bSep08</a>   | <a href="#">362078</a> | 24025 | 627  | 6  | 208 | euchromatic histone methyltransferase 1 (Ehmt1) alternative variant bSep08, mRNA.                              |
| <a href="#">Ehmt1</a>   | <a href="#">Ehmt1.cSep08</a>   | <a href="#">362078</a> | 58757 | 398  | 3  | 132 | euchromatic histone methyltransferase 1 (Ehmt1) alternative variant cSep08, mRNA.                              |
| <a href="#">Ehmt2</a>   | <a href="#">Ehmt2.bSep08</a>   | <a href="#">361798</a> | 9303  | 2987 | 19 | 582 | euchromatic histone lysine N-methyltransferase 2 (Ehmt2) alternative variant bSep08, mRNA.                     |
| <a href="#">Ehmt2</a>   | <a href="#">Ehmt2.dSep08</a>   | <a href="#">361798</a> | 538   | 370  | 2  | 123 | euchromatic histone lysine N-methyltransferase 2 (Ehmt2) alternative variant dSep08, mRNA.                     |
| <a href="#">Ei24</a>    | <a href="#">Ei24.bSep08</a>    | <a href="#">300514</a> | 12400 | 909  | 8  | 222 | etoposide induced 2.4 mRNA (Ei24) alternative variant bSep08, mRNA.                                            |
| <a href="#">Ei24</a>    | <a href="#">Ei24.cSep08</a>    | <a href="#">300514</a> | 1711  | 542  | 2  | 56  | etoposide induced 2.4 mRNA (Ei24) alternative variant cSep08, mRNA.                                            |
| <a href="#">Eid1</a>    | <a href="#">Eid1.bSep08</a>    | <a href="#">499882</a> | 1426  | 1256 | 2  | 67  | EP300 interacting inhibitor of differentiation 1 (7.8 kD) (Eid1) alternative variant bSep08, mRNA.             |
| <a href="#">Eif1</a>    | <a href="#">Eif1.aSep08</a>    | <a href="#">287703</a> | 2304  | 1594 | 3  | 196 | eukaryotic translation initiation factor 1 (Eif1) alternative variant aSep08, mRNA.                            |
| <a href="#">Eif1</a>    | <a href="#">Eif1.cSep08</a>    | <a href="#">287703</a> | 1673  | 1251 | 3  | 164 | eukaryotic translation initiation factor 1 (18.5 kD) (Eif1) alternative variant cSep08, complete mRNA.         |
| <a href="#">Eif1a</a>   | <a href="#">Eif1a.aSep08</a>   | <a href="#">317163</a> | 9271  | 589  | 2  | 101 | eukaryotic translation initiation factor 1A (11.1 kD) (Eif1a) alternative variant aSep08, mRNA.                |
| <a href="#">Eif1ad</a>  | <a href="#">Eif1ad.bSep08</a>  | <a href="#">293673</a> | 3487  | 520  | 5  | 86  | putative protein of eukaryotic origin (Eif1ad) alternative variant bSep08, mRNA.                               |
| <a href="#">Eif1ad</a>  | <a href="#">Eif1ad.eSep08</a>  | <a href="#">293673</a> | 421   | 275  | 2  | 51  | eukaryotic initiation factor 1A (Eif1ad) alternative variant eSep08, mRNA.                                     |
| <a href="#">Eif2a</a>   | <a href="#">Eif2a.bSep08</a>   | <a href="#">502531</a> | 3134  | 985  | 4  | 299 | eukaryotic translation initiation factor 2A (Eif2a) alternative variant bSep08, mRNA.                          |
| <a href="#">Eif2a</a>   | <a href="#">Eif2a.cSep08</a>   | <a href="#">502531</a> | 23449 | 883  | 10 | 294 | eukaryotic translation initiation factor 2A (Eif2a) alternative variant cSep08, mRNA.                          |
| <a href="#">Eif2ak1</a> | <a href="#">Eif2ak1.bSep08</a> | <a href="#">27137</a>  | 13636 | 830  | 7  | 276 | eukaryotic translation initiation factor 2 alpha kinase 1 (Eif2ak1) alternative variant bSep08, mRNA.          |
| <a href="#">Eif2ak1</a> | <a href="#">Eif2ak1.cSep08</a> | <a href="#">27137</a>  | 2040  | 429  | 2  | 78  | eukaryotic translation initiation factor 2 alpha kinase 1 (Eif2ak1) alternative variant cSep08, mRNA.          |
| <a href="#">Eif2ak2</a> | <a href="#">Eif2ak2.bSep08</a> | <a href="#">54287</a>  | 3240  | 735  | 1  | 195 | eukaryotic translation initiation factor 2-alpha kinase 2 (Eif2ak2) alternative variant bSep08, mRNA.          |
| <a href="#">Eif2ak3</a> | <a href="#">Eif2ak3.bSep08</a> | <a href="#">29702</a>  | 3369  | 360  |    | 119 | eukaryotic translation initiation factor 2 alpha kinase 3 (Eif2ak3) alternative variant bSep08, mRNA.          |
| <a href="#">Eif2ak4</a> | <a href="#">Eif2ak4.aSep08</a> | <a href="#">114859</a> | 20724 | 1723 | 15 | 512 | eukaryotic translation initiation factor 2 alpha kinase 4 (Eif2ak4) alternative variant aSep08, mRNA.          |
| <a href="#">Eif2ak4</a> | <a href="#">Eif2ak4.bSep08</a> | <a href="#">114859</a> | 2719  | 648  | 3  | 81  | eukaryotic translation initiation factor 2 alpha kinase 4 (9.9 kD) (Eif2ak4) alternative variant bSep08, mRNA. |
| <a href="#">Eif2ak4</a> | <a href="#">Eif2ak4.cSep08</a> | <a href="#">114859</a> | 1563  | 740  | 2  | 44  | eukaryotic translation initiation factor 2 alpha kinase 4 (5.3 kD) (Eif2ak4) alternative variant cSep08, mRNA. |
| <a href="#">Eif2b4</a>  | <a href="#">Eif2b4.bSep08</a>  | <a href="#">117019</a> | 4052  | 2143 | 9  | 289 | eukaryotic translation initiation factor 2B, subunit 4 delta (Eif2b4) alternative variant bSep08, mRNA.        |
| <a href="#">Eif2b4</a>  | <a href="#">Eif2b4.cSep08</a>  | <a href="#">117019</a> | 3187  | 1799 | 3  | 127 | eukaryotic translation initiation factor 2B, subunit 4 delta (Eif2b4) alternative variant cSep08, mRNA.        |
| <a href="#">Eif2c1</a>  | <a href="#">Eif2c1.aSep08</a>  | <a href="#">313594</a> | 20612 | 5166 |    | 511 | eukaryotic translation initiation factor 2C, 1 (Eif2c1) mRNA.                                                  |

|                         |                                |                        |       |      |   |     |                                                                                                                             |
|-------------------------|--------------------------------|------------------------|-------|------|---|-----|-----------------------------------------------------------------------------------------------------------------------------|
| <a href="#">Eif2c3</a>  | <a href="#">Eif2c3.aSep08</a>  | <a href="#">313593</a> | 18371 | 806  |   | 205 | eukaryotic translation initiation factor 2C, 3 (Eif2c3) mRNA.                                                               |
| <a href="#">Eif2s2</a>  | <a href="#">Eif2s2.bSep08</a>  | <a href="#">296302</a> | 14660 | 773  | 5 | 188 | eukaryotic translation initiation factor 2 beta (21.9 kD) (Eif2s2) alternative variant bSep08, complete mRNA.               |
| <a href="#">Eif2s2</a>  | <a href="#">Eif2s2.cSep08</a>  | <a href="#">296302</a> | 5769  | 2109 | 3 | 90  | eukaryotic translation initiation factor 2 beta 38kDa (10.2 kD) (Eif2s2) alternative variant cSep08, mRNA.                  |
| <a href="#">Eif2s2</a>  | <a href="#">Eif2s2.dSep08</a>  | <a href="#">296302</a> | 2382  | 1709 | 2 | 88  | CRA b like (10.1 kD) (Eif2s2) alternative variant dSep08, mRNA.                                                             |
| <a href="#">Eif2s2</a>  | <a href="#">Eif2s2.eSep08</a>  | <a href="#">296302</a> | 9185  | 521  | 4 | 44  | putative protein (5.5 kD) (Eif2s2) alternative variant eSep08, complete mRNA.                                               |
| <a href="#">Eif2s2</a>  | <a href="#">Eif2s2.fSep08</a>  | <a href="#">296302</a> | 6272  | 457  | 3 | 44  | putative protein (5.5 kD) (Eif2s2) alternative variant fSep08, complete mRNA.                                               |
| <a href="#">Eif2s3x</a> | <a href="#">Eif2s3x.bSep08</a> | <a href="#">299027</a> | 12505 | 886  | 5 | 286 | eukaryotic translation initiation factor 2, subunit 3, structural gene X-linked (Eif2s3x) alternative variant bSep08, mRNA. |
| <a href="#">Eif2s3x</a> | <a href="#">Eif2s3x.cSep08</a> | <a href="#">299027</a> | 6536  | 707  | 2 | 196 | eukaryotic translation initiation factor 2, subunit 3, structural gene X-linked (Eif2s3x) alternative variant cSep08, mRNA. |
| <a href="#">Eif3c</a>   | <a href="#">Eif3c.bSep08</a>   | <a href="#">293484</a> | 8097  | 744  | 4 | 242 | eukaryotic translation initiation factor C-like (Eif3c) alternative variant bSep08, mRNA.                                   |
| <a href="#">Eif3c</a>   | <a href="#">Eif3c.cSep08</a>   | <a href="#">293484</a> | 7966  | 702  | 3 | 223 | eukaryotic translation initiation factor C-like (Eif3c) alternative variant cSep08, mRNA.                                   |
| <a href="#">Eif3c</a>   | <a href="#">Eif3c.dSep08</a>   | <a href="#">293484</a> | 2366  | 655  | 6 | 218 | eukaryotic translation initiation factor C-like (Eif3c) alternative variant dSep08, mRNA.                                   |
| <a href="#">Eif3c</a>   | <a href="#">Eif3c.eSep08</a>   | <a href="#">293484</a> | 1521  | 761  | 4 | 211 | eukaryotic translation initiation factor 3 (Eif3c) alternative variant eSep08, mRNA.                                        |
| <a href="#">Eif3c</a>   | <a href="#">Eif3c.fSep08</a>   | <a href="#">293484</a> | 895   | 775  | 2 | 116 | eukaryotic translation initiation factor 3 110kDa CRA a (Eif3c) alternative variant fSep08, mRNA.                           |
| <a href="#">Eif3c</a>   | <a href="#">Eif3c.gSep08</a>   | <a href="#">293484</a> | 629   | 528  | 2 | 74  | putative protein (Eif3c) alternative variant gSep08, mRNA.                                                                  |
| <a href="#">Eif3d</a>   | <a href="#">Eif3d.bSep08</a>   | <a href="#">362952</a> | 8292  | 1194 | 9 | 298 | eukaryotic translation initiation factor 3 CRA c (35.2 kD) (Eif3d) alternative variant bSep08, complete mRNA.               |
| <a href="#">Eif3d</a>   | <a href="#">Eif3d.cSep08</a>   | <a href="#">362952</a> | 6818  | 736  | 8 | 237 | eukaryotic translation initiation factor 3 CRA c (Eif3d) alternative variant cSep08, mRNA.                                  |
| <a href="#">Eif3d</a>   | <a href="#">Eif3d.dSep08</a>   | <a href="#">362952</a> | 7125  | 900  | 8 | 235 | eukaryotic translation initiation factor 3 CRA c (Eif3d) alternative variant dSep08, mRNA.                                  |
| <a href="#">Eif3d</a>   | <a href="#">Eif3d.eSep08</a>   | <a href="#">362952</a> | 7179  | 790  | 8 | 134 | eukaryotic translation initiation factor 3 CRA c (Eif3d) alternative variant eSep08, mRNA.                                  |
| <a href="#">Eif3d</a>   | <a href="#">Eif3d.fSep08</a>   | <a href="#">362952</a> | 3517  | 458  | 4 | 93  | eukaryotic translation initiation factor 3 CRA c (Eif3d) alternative variant fSep08, mRNA.                                  |
| <a href="#">Eif3d</a>   | <a href="#">Eif3d.gSep08</a>   | <a href="#">362952</a> | 2954  | 416  | 3 | 76  | eukaryotic translation initiation factor 3 CRA c (8.7 kD) (Eif3d) alternative variant gSep08, complete mRNA.                |
| <a href="#">Eif3e</a>   | <a href="#">Eif3e.bSep08</a>   | <a href="#">299872</a> | 14882 | 726  | 6 | 133 | eukaryotic translation initiation factor 3, subunit E (Eif3e) alternative variant bSep08, mRNA.                             |
| <a href="#">Eif3f</a>   | <a href="#">Eif3f.aSep08</a>   | <a href="#">293427</a> | 9026  | 1251 | 8 | 363 | eukaryotic translation initiation factor 3, subunit F (Eif3f) alternative variant aSep08, mRNA.                             |
| <a href="#">Eif3g</a>   | <a href="#">Eif3g.bSep08</a>   | <a href="#">298700</a> | 861   | 769  | 2 | 222 | eukaryotic translation initiation factor 3, subunit G (Eif3g) alternative variant bSep08, mRNA.                             |
| <a href="#">Eif3h</a>   | <a href="#">Eif3h.bSep08</a>   | <a href="#">299899</a> | 72148 | 620  | 1 | 91  | eukaryotic translation initiation factor 3, subunit H (Eif3h) alternative variant bSep08, mRNA.                             |

|                          |                                 |                        |       |      |    |     |                                                                                                                        |
|--------------------------|---------------------------------|------------------------|-------|------|----|-----|------------------------------------------------------------------------------------------------------------------------|
| <a href="#">Eif3j</a>    | <a href="#">Eif3j.cSep08</a>    | <a href="#">691947</a> | 12241 | 302  | 2  | 36  | eukaryotic translation initiation factor 3, subunit J (Eif3j) alternative variant cSep08, mRNA.                        |
| <a href="#">Eif3k</a>    | <a href="#">Eif3k.aSep08</a>    | <a href="#">292762</a> | 9301  | 1523 | 7  | 264 | eukaryotic translation initiation factor 3 (30.1 kD) (Eif3k) alternative variant aSep08, mRNA.                         |
| <a href="#">Eif3k</a>    | <a href="#">Eif3k.bSep08</a>    | <a href="#">292762</a> | 10318 | 1212 | 8  | 218 | eukaryotic translation initiation factor 3 (25.1 kD) (Eif3k) alternative variant bSep08, mRNA.                         |
| <a href="#">Eif3k</a>    | <a href="#">Eif3k.cSep08</a>    | <a href="#">292762</a> | 5335  | 1063 | 5  | 119 | eukaryotic translation initiation factor 3 CRA f (13.9 kD) (Eif3k) alternative variant cSep08, mRNA.                   |
| <a href="#">Eif3k</a>    | <a href="#">Eif3k.dSep08</a>    | <a href="#">292762</a> | 3584  | 598  | 4  | 109 | eukaryotic translation initiation factor 3 (12.3 kD) (Eif3k) alternative variant dSep08, mRNA.                         |
| <a href="#">Eif3k</a>    | <a href="#">Eif3k.fSep08</a>    | <a href="#">292762</a> | 2952  | 690  | 2  | 41  | putative protein (4.9 kD) (Eif3k) alternative variant fSep08, mRNA.                                                    |
| <a href="#">Eif3s6ip</a> | <a href="#">Eif3s6ip.aSep08</a> | <a href="#">300069</a> | 20809 | 1913 | 1  | 583 | eukaryotic translation initiation factor 3, subunit 6 interacting protein (Eif3s6ip) alternative variant aSep08, mRNA. |
| <a href="#">Eif3s9</a>   | <a href="#">Eif3s9.bSep08</a>   | <a href="#">288516</a> | 9665  | 757  | 8  | 191 | eukaryotic translation initiation factor 3, subunit 9 (eta) (Eif3s9) alternative variant bSep08, mRNA.                 |
| <a href="#">Eif3s10</a>  | <a href="#">Eif3s10.bSep08</a>  | <a href="#">292148</a> | 3537  | 443  | 4  | 141 | eukaryotic translation initiation factor 3, subunit 10 (theta) (Eif3s10) alternative variant bSep08, mRNA.             |
| <a href="#">Eif4a1</a>   | <a href="#">Eif4a1.bSep08</a>   | <a href="#">287436</a> | 5275  | 1853 | 10 | 332 | eukaryotic translation initiation factor 4A1 (37.9 kD) (Eif4a1) alternative variant bSep08, mRNA.                      |
| <a href="#">Eif4a1</a>   | <a href="#">Eif4a1.cSep08</a>   | <a href="#">287436</a> | 1034  | 859  | 3  | 128 | eukaryotic translation initiation factor 4A1 (Eif4a1) alternative variant cSep08, mRNA.                                |
| <a href="#">Eif4a1</a>   | <a href="#">Eif4a1.gSep08</a>   | <a href="#">287436</a> | 475   | 315  | 2  | 58  | eukaryotic translation initiation factor 4A1 (Eif4a1) alternative variant gSep08, mRNA.                                |
| <a href="#">Eif4a2</a>   | <a href="#">Eif4a2.bSep08</a>   | <a href="#">303831</a> | 6611  | 2011 | 12 | 363 | factor Eukaryotic initiation 4 (41.4 kD) (Eif4a2) alternative variant bSep08, complete mRNA.                           |
| <a href="#">Eif4a2</a>   | <a href="#">Eif4a2.cSep08</a>   | <a href="#">303831</a> | 6597  | 2560 | 10 | 235 | eukaryotic initiation factor 4 (27.4 kD) (Eif4a2) alternative variant cSep08, complete mRNA.                           |
| <a href="#">Eif4a2</a>   | <a href="#">Eif4a2.dSep08</a>   | <a href="#">303831</a> | 5830  | 2265 | 9  | 233 | eukaryotic initiation factor 4 (27.1 kD) (Eif4a2) alternative variant dSep08, mRNA.                                    |
| <a href="#">Eif4a2</a>   | <a href="#">Eif4a2.eSep08</a>   | <a href="#">303831</a> | 4027  | 1558 | 7  | 115 | factor eukaryotic initiation 4 (12.6 kD) (Eif4a2) alternative variant eSep08, mRNA.                                    |
| <a href="#">Eif4a2</a>   | <a href="#">Eif4a2.fSep08</a>   | <a href="#">303831</a> | 3332  | 869  | 6  | 146 | factor eukaryotic initiation 4 (17.3 kD) (Eif4a2) alternative variant fSep08, mRNA.                                    |
| <a href="#">Eif4a2</a>   | <a href="#">Eif4a2.gSep08</a>   | <a href="#">303831</a> | 2323  | 768  | 4  | 86  | eukaryotic initiation factor 4 (9.5 kD) (Eif4a2) alternative variant gSep08, mRNA.                                     |
| <a href="#">Eif4a2</a>   | <a href="#">Eif4a2.hSep08</a>   | <a href="#">303831</a> | 1205  | 744  | 3  | 68  | initiation factor eukaryotic 4 (7.9 kD) (Eif4a2) alternative variant hSep08, mRNA.                                     |
| <a href="#">Eif4b</a>    | <a href="#">Eif4b.bSep08</a>    | <a href="#">300253</a> | 2937  | 795  | 3  | 142 | eukaryotic translation initiation factor 4B (Eif4b) alternative variant bSep08, mRNA.                                  |
| <a href="#">Eif4e</a>    | <a href="#">Eif4e.bSep08</a>    | <a href="#">117045</a> | 30641 | 1178 | 8  | 212 | eukaryotic translation initiation factor 4E (24.6 kD) (Eif4e) alternative variant bSep08, mRNA.                        |
| <a href="#">Eif4e2</a>   | <a href="#">Eif4e2.aSep08</a>   | <a href="#">363275</a> | 16220 | 1286 | 7  | 240 | eukaryotic translation initiation factor 4E member 2 (27.6 kD) (Eif4e2) alternative variant aSep08, mRNA.              |
| <a href="#">Eif4e2</a>   | <a href="#">Eif4e2.cSep08</a>   | <a href="#">363275</a> | 12240 | 466  | 5  | 154 | eukaryotic translation initiation factor 4E member 2 (Eif4e2) alternative variant cSep08, mRNA.                        |

|                                  |                                         |                        |        |      |    |      |                                                                                                                      |
|----------------------------------|-----------------------------------------|------------------------|--------|------|----|------|----------------------------------------------------------------------------------------------------------------------|
| <a href="#">Eif4e2</a>           | <a href="#">Eif4e2.dSep08</a>           | <a href="#">363275</a> | 8925   | 287  | 3  | 85   | eukaryotic translation initiation factor 4E member 2 (Eif4e2) alternative variant dSep08, mRNA.                      |
| <a href="#">Eif4e3</a>           | <a href="#">Eif4e3.bSep08</a>           | <a href="#">297481</a> | 39155  | 582  | 1  | 101  | eukaryotic translation initiation factor 4E member 3 (Eif4e3) alternative variant bSep08, mRNA.                      |
| <a href="#">Eif4ebp1</a>         | <a href="#">Eif4ebp1.cSep08</a>         | <a href="#">116636</a> | 13748  | 770  | 3  | 126  | eukaryotic translation initiation factor 4E binding protein 1 (13.6 kD) (Eif4ebp1) alternative variant cSep08, mRNA. |
| <a href="#">Eif4g1</a>           | <a href="#">Eif4g1.aSep08</a>           | <a href="#">287986</a> | 20174  | 5413 | 32 | 1591 | eukaryotic translation initiation factor 4 gamma, 1 (175.0 kD) (Eif4g1) alternative variant aSep08, mRNA.            |
| <a href="#">Eif4g1</a>           | <a href="#">Eif4g1.bSep08</a>           | <a href="#">287986</a> | 3104   | 1121 | 8  | 373  | eukaryotic translation initiation factor 4 gamma, 1 (Eif4g1) alternative variant bSep08, mRNA.                       |
| <a href="#">Eif4g1</a>           | <a href="#">Eif4g1.cSep08</a>           | <a href="#">287986</a> | 4974   | 670  | 7  | 223  | eukaryotic translation initiation factor 4 gamma, 1 (Eif4g1) alternative variant cSep08, mRNA.                       |
| <a href="#">Eif4g1</a>           | <a href="#">Eif4g1.dSep08</a>           | <a href="#">287986</a> | 5311   | 607  | 6  | 119  | eukaryotic translation initiation factor 4 gamma, 1 (Eif4g1) alternative variant dSep08, mRNA.                       |
| <a href="#">Eif4g1</a>           | <a href="#">Eif4g1.eSep08</a>           | <a href="#">287986</a> | 744    | 339  | 3  | 112  | eukaryotic translation initiation factor 4 gamma, 1 (Eif4g1) alternative variant eSep08, mRNA.                       |
| <a href="#">Eif4g2_predicted</a> | <a href="#">Eif4g2_predicted.bSep08</a> | <a href="#">361628</a> | 7073   | 1723 | 14 | 473  | eukaryotic translation initiation factor 4, gamma 2 (predicted) (Eif4g2_predicted) alternative variant bSep08, mRNA. |
| <a href="#">Eif4g2_predicted</a> | <a href="#">Eif4g2_predicted.cSep08</a> | <a href="#">361628</a> | 5070   | 3340 | 8  | 409  | eukaryotic translation initiation factor 4, gamma 2 (predicted) (Eif4g2_predicted) alternative variant cSep08, mRNA. |
| <a href="#">Eif4g2_predicted</a> | <a href="#">Eif4g2_predicted.dSep08</a> | <a href="#">361628</a> | 5832   | 1221 | 12 | 381  | eukaryotic translation initiation factor 4, gamma 2 (predicted) (Eif4g2_predicted) alternative variant dSep08, mRNA. |
| <a href="#">Eif4g2_predicted</a> | <a href="#">Eif4g2_predicted.eSep08</a> | <a href="#">361628</a> | 2033   | 802  | 6  | 267  | eukaryotic translation initiation factor 4, gamma 2 (predicted) (Eif4g2_predicted) alternative variant eSep08, mRNA. |
| <a href="#">Eif4g2_predicted</a> | <a href="#">Eif4g2_predicted.fSep08</a> | <a href="#">361628</a> | 1301   | 261  | 3  | 8    | eukaryotic translation initiation factor 4, gamma 2 (predicted) (Eif4g2_predicted) alternative variant fSep08, mRNA. |
| <a href="#">Eif4g3</a>           | <a href="#">Eif4g3.bSep08</a>           | <a href="#">298573</a> | 139868 | 1196 | 11 | 398  | eukaryotic translation initiation factor 4 gamma 3 (Eif4g3) alternative variant bSep08, mRNA.                        |
| <a href="#">Eif4g3</a>           | <a href="#">Eif4g3.cSep08</a>           | <a href="#">298573</a> | 17216  | 1112 | 9  | 370  | eukaryotic translation initiation factor 4 gamma 3 CRA a (Eif4g3) alternative variant cSep08, mRNA.                  |
| <a href="#">Eif4g3</a>           | <a href="#">Eif4g3.dSep08</a>           | <a href="#">298573</a> | 66544  | 706  | 6  | 235  | eukaryotic translation initiation factor 4 gamma 3 CRA c (Eif4g3) alternative variant dSep08, mRNA.                  |
| <a href="#">Eif4g3</a>           | <a href="#">Eif4g3.eSep08</a>           | <a href="#">298573</a> | 64529  | 687  | 7  | 229  | eukaryotic translation initiation factor 4 gamma 3 (Eif4g3) alternative variant eSep08, mRNA.                        |
| <a href="#">Eif4g3</a>           | <a href="#">Eif4g3.fSep08</a>           | <a href="#">298573</a> | 14181  | 1066 | 6  | 214  | eukaryotic translation initiation factor 4 gamma 3 CRA a (Eif4g3) alternative variant fSep08, mRNA.                  |
| <a href="#">Eif4g3</a>           | <a href="#">Eif4g3.gSep08</a>           | <a href="#">298573</a> | 13408  | 1534 | 5  | 208  | eukaryotic translation initiation factor 4 gamma 3 CRA b (Eif4g3) alternative variant gSep08, mRNA.                  |
| <a href="#">Eif4g3</a>           | <a href="#">Eif4g3.hSep08</a>           | <a href="#">298573</a> | 45028  | 456  | 5  | 152  | eukaryotic translation initiation factor 4 gamma 3 (Eif4g3) alternative variant hSep08, mRNA.                        |
| <a href="#">Eif4g3</a>           | <a href="#">Eif4g3.iSep08</a>           | <a href="#">298573</a> | 21759  | 1414 | 8  | 151  | eukaryotic translation initiation factor 4 gamma 3 CRA b (17.2 kD) (Eif4g3) alternative variant iSep08, mRNA.        |

|                        |                               |                        |       |      |    |     |                                                                                                                                 |
|------------------------|-------------------------------|------------------------|-------|------|----|-----|---------------------------------------------------------------------------------------------------------------------------------|
| <a href="#">Eif4g3</a> | <a href="#">Eif4g3.jSep08</a> | <a href="#">298573</a> | 96884 | 497  | 4  | 139 | eukaryotic translation initiation factor 4 gamma 3 like (Eif4g3) alternative variant jSep08, mRNA.                              |
| <a href="#">Eif4g3</a> | <a href="#">Eif4g3.kSep08</a> | <a href="#">298573</a> | 58025 | 408  | 4  | 136 | eukaryotic translation initiation factor 4 gamma 3 (Eif4g3) alternative variant kSep08, mRNA.                                   |
| <a href="#">Eif4g3</a> | <a href="#">Eif4g3.mSep08</a> | <a href="#">298573</a> | 1159  | 390  | 2  | 38  | eukaryotic translation initiation factor 4 gamma 3 CRA b (Eif4g3) alternative variant mSep08, mRNA.                             |
| <a href="#">Eif4h</a>  | <a href="#">Eif4h.aSep08</a>  | <a href="#">288599</a> | 3753  | 3309 | 2  | 69  | putative protein (31.7 kD) (Eif4h) alternative variant aSep08, mRNA.                                                            |
| <a href="#">Eif4h</a>  | <a href="#">Eif4h.cSep08</a>  | <a href="#">288599</a> | 15908 | 1611 | 6  | 228 | eukaryotic translation initiation factor 4H (25.2 kD) (Eif4h) alternative variant cSep08, mRNA.                                 |
| <a href="#">Eif4h</a>  | <a href="#">Eif4h.eSep08</a>  | <a href="#">288599</a> | 3059  | 1020 | 4  | 84  | eukaryotic translation initiation factor 4H (Eif4h) alternative variant eSep08, mRNA.                                           |
| <a href="#">Eif5</a>   | <a href="#">Eif5.bSep08</a>   | <a href="#">56783</a>  | 3639  | 949  | 7  | 163 | eukaryotic translation initiation factor 5 (Eif5) alternative variant bSep08, mRNA.                                             |
| <a href="#">Eif5</a>   | <a href="#">Eif5.dSep08</a>   | <a href="#">56783</a>  | 1771  | 1232 | 4  | 59  | eukaryotic translation initiation factor 5 (Eif5) alternative variant dSep08, mRNA.                                             |
| <a href="#">Eif5</a>   | <a href="#">Eif5.eSep08</a>   | <a href="#">56783</a>  | 788   | 518  | 2  | 68  | eukaryotic translation initiation factor 5 (Eif5) alternative variant eSep08, mRNA.                                             |
| <a href="#">Eif5a</a>  | <a href="#">Eif5a.aSep08</a>  | <a href="#">287444</a> | 3640  | 820  | 6  | 154 | eukaryotic translation initiation factor 5A (16.8 kD) (Eif5a) alternative variant aSep08, mRNA.                                 |
| <a href="#">Eif5a</a>  | <a href="#">Eif5a.bSep08</a>  | <a href="#">287444</a> | 4365  | 1525 | 6  | 154 | eukaryotic translation initiation factor 5A (16.8 kD) (Eif5a) alternative variant bSep08, mRNA.                                 |
| <a href="#">Eif5a</a>  | <a href="#">Eif5a.cSep08</a>  | <a href="#">287444</a> | 3759  | 1381 | 6  | 154 | eukaryotic translation initiation factor 5A (16.8 kD) (Eif5a) alternative variant cSep08, mRNA.                                 |
| <a href="#">Eif5a</a>  | <a href="#">Eif5a.dSep08</a>  | <a href="#">287444</a> | 3986  | 878  | 7  | 154 | eukaryotic translation initiation factor 5A (16.8 kD) (Eif5a) alternative variant dSep08, mRNA.                                 |
| <a href="#">Eif5a</a>  | <a href="#">Eif5a.fSep08</a>  | <a href="#">287444</a> | 3698  | 854  | 3  | 140 | eukaryotic translation initiation factor 5A (Eif5a) alternative variant fSep08, mRNA.                                           |
| <a href="#">Eif5a</a>  | <a href="#">Eif5a.gSep08</a>  | <a href="#">287444</a> | 3855  | 739  | 5  | 130 | eukaryotic translation initiation factor 5A (Eif5a) alternative variant gSep08, mRNA.                                           |
| <a href="#">Eif5a</a>  | <a href="#">Eif5a.hSep08</a>  | <a href="#">287444</a> | 4121  | 733  | 5  | 116 | eukaryotic translation initiation factor 5A (Eif5a) alternative variant hSep08, mRNA.                                           |
| <a href="#">Eif5a2</a> | <a href="#">Eif5a2.aSep08</a> | <a href="#">310261</a> | 13815 | 1920 |    | 188 | eukaryotic translation initiation factor 5A2 (Eif5a2) mRNA.                                                                     |
| <a href="#">Eif5b</a>  | <a href="#">Eif5b.aSep08</a>  | <a href="#">308306</a> | 27742 | 1308 |    | 383 | eukaryotic translation initiation factor 5B (Eif5b) mRNA.                                                                       |
| <a href="#">Ela1</a>   | <a href="#">Ela1.bSep08</a>   | <a href="#">24331</a>  | 6821  | 627  | 2  | 113 | elastase 1, pancreatic (Ela1) alternative variant bSep08, mRNA.                                                                 |
| <a href="#">Elac2</a>  | <a href="#">Elac2.aSep08</a>  | <a href="#">282826</a> | 18334 | 2957 | 18 | 611 | elaC homolog 2 (E. coli) (Elac2) alternative variant aSep08, mRNA.                                                              |
| <a href="#">Elac2</a>  | <a href="#">Elac2.bSep08</a>  | <a href="#">282826</a> | 1453  | 722  | 4  | 109 | elaC homolog 2 (E. coli) (Elac2) alternative variant bSep08, mRNA.                                                              |
| <a href="#">Elac2</a>  | <a href="#">Elac2.eSep08</a>  | <a href="#">282826</a> | 4234  | 508  | 3  | 50  | elaC homolog 2 (E. coli) (Elac2) alternative variant eSep08, mRNA.                                                              |
| <a href="#">Elavl1</a> | <a href="#">Elavl1.bSep08</a> | <a href="#">363854</a> | 5967  | 1210 | 4  | 111 | ELAV (embryonic lethal, abnormal vision, Drosophila)-like 1 (Hu antigen R) (12.2 kD) (Elavl1) alternative variant bSep08, mRNA. |
| <a href="#">Elavl2</a> | <a href="#">Elavl2.bSep08</a> | <a href="#">286973</a> | 7243  | 440  | 3  | 146 | ELAV (embryonic lethal, abnormal vision, Drosophila)-like 2 (Hu antigen B) (Elavl2) alternative variant bSep08, mRNA.           |

|                        |                               |                        |       |      |    |     |                                                                                                                                 |
|------------------------|-------------------------------|------------------------|-------|------|----|-----|---------------------------------------------------------------------------------------------------------------------------------|
| <a href="#">Elavl2</a> | <a href="#">Elavl2.cSep08</a> | <a href="#">286973</a> | 94868 | 410  | 3  | 105 | ELAV (embryonic lethal, abnormal vision, Drosophila)-like 2 (Hu antigen B) (Elavl2) alternative variant cSep08, mRNA.           |
| <a href="#">Elavl3</a> | <a href="#">Elavl3.bSep08</a> | <a href="#">282824</a> | 14866 | 536  | 2  | 178 | ELAV (embryonic lethal, abnormal vision, Drosophila)-like 3 (Hu antigen C) (Elavl3) alternative variant bSep08, mRNA.           |
| <a href="#">Elavl3</a> | <a href="#">Elavl3.cSep08</a> | <a href="#">282824</a> | 8538  | 1205 | 3  | 160 | ELAV (embryonic lethal, abnormal vision, Drosophila)-like 3 (Hu antigen C) (Elavl3) alternative variant cSep08, mRNA.           |
| <a href="#">Elavl3</a> | <a href="#">Elavl3.dSep08</a> | <a href="#">282824</a> | 1891  | 521  | 3  | 108 | ELAV (embryonic lethal, abnormal vision, Drosophila)-like 3 (Hu antigen C) (Elavl3) alternative variant dSep08, mRNA.           |
| <a href="#">Elavl4</a> | <a href="#">Elavl4.aSep08</a> | <a href="#">432358</a> | 98375 | 3880 | 7  | 385 | ELAV (embryonic lethal, abnormal vision, Drosophila)-like 4 (Hu antigen D) (42.4 kD) (Elavl4) alternative variant aSep08, mRNA. |
| <a href="#">Elavl4</a> | <a href="#">Elavl4.bSep08</a> | <a href="#">432358</a> | 21380 | 1785 | 4  | 13  | ELAV (embryonic lethal, abnormal vision, Drosophila)-like 4 (Hu antigen D) (1.4 kD) (Elavl4) alternative variant bSep08, mRNA.  |
| <a href="#">Elavl4</a> | <a href="#">Elavl4.cSep08</a> | <a href="#">432358</a> | 35951 | 387  | 2  | 37  | ELAV (embryonic lethal, abnormal vision, Drosophila)-like 4 (Hu antigen D) (Elavl4) alternative variant cSep08, mRNA.           |
| <a href="#">Elf1</a>   | <a href="#">Elf1.bSep08</a>   | <a href="#">85424</a>  | 32300 | 568  | 3  | 81  | e74-like factor 1 (Elf1) alternative variant bSep08, mRNA.                                                                      |
| <a href="#">Elf1</a>   | <a href="#">Elf1.cSep08</a>   | <a href="#">85424</a>  | 13412 | 403  | 2  | 45  | e74-like factor 1 (5.3 kD) (Elf1) alternative variant cSep08, mRNA.                                                             |
| <a href="#">Elf2</a>   | <a href="#">Elf2.cSep08</a>   | <a href="#">361944</a> | 10956 | 630  | 2  | 100 | e74-like factor 2 (10.7 kD) (Elf2) alternative variant cSep08, mRNA.                                                            |
| <a href="#">Elf2</a>   | <a href="#">Elf2.dSep08</a>   | <a href="#">361944</a> | 42976 | 541  | 2  | 99  | e74-like factor 2 (Elf2) alternative variant dSep08, mRNA.                                                                      |
| <a href="#">Elf2</a>   | <a href="#">Elf2.eSep08</a>   | <a href="#">361944</a> | 43788 | 418  | 3  | 33  | e74-like factor 2 (4.0 kD) (Elf2) alternative variant eSep08, mRNA.                                                             |
| <a href="#">Elf3</a>   | <a href="#">Elf3.bSep08</a>   | <a href="#">304815</a> | 2057  | 751  | 6  | 250 | e74-like factor 3 (Elf3) alternative variant bSep08, mRNA.                                                                      |
| <a href="#">Elf3</a>   | <a href="#">Elf3.cSep08</a>   | <a href="#">304815</a> | 1400  | 851  | 2  | 79  | e74-like factor 3 (9.6 kD) (Elf3) alternative variant cSep08, mRNA.                                                             |
| <a href="#">Elf4</a>   | <a href="#">Elf4.aSep08</a>   | <a href="#">302811</a> | 2885  | 853  |    | 283 | e74-like factor 4 (ets domain transcription factor) (Elf4) mRNA.                                                                |
| <a href="#">Elk3</a>   | <a href="#">Elk3.aSep08</a>   | <a href="#">362871</a> | 62241 | 3952 | 6  | 462 | ELK3, member of ETS oncogene family (Elk3) alternative variant aSep08, mRNA.                                                    |
| <a href="#">Elk3</a>   | <a href="#">Elk3.bSep08</a>   | <a href="#">362871</a> | 1759  | 478  | 3  | 103 | ELK3, member of ETS oncogene family (Elk3) alternative variant bSep08, mRNA.                                                    |
| <a href="#">Elk3</a>   | <a href="#">Elk3.cSep08</a>   | <a href="#">362871</a> | 5379  | 975  | 2  | 63  | ELK3, member of ETS oncogene family (Elk3) alternative variant cSep08, mRNA.                                                    |
| <a href="#">Elk4</a>   | <a href="#">Elk4.aSep08</a>   | <a href="#">304786</a> | 14340 | 2168 | 5  | 533 | ELK4, member of ETS oncogene family (Elk4) alternative variant aSep08, mRNA.                                                    |
| <a href="#">Elk4</a>   | <a href="#">Elk4.dSep08</a>   | <a href="#">304786</a> | 3417  | 438  | 2  | 52  | ELK4, member of ETS oncogene family (5.6 kD) (Elk4) alternative variant dSep08, mRNA.                                           |
| <a href="#">EII2</a>   | <a href="#">EII2.aSep08</a>   | <a href="#">309918</a> | 68739 | 3542 | 12 | 640 | elongation factor RNA polymerase II 2 (72.3 kD) (EII2) alternative variant aSep08, complete mRNA.                               |
| <a href="#">EII2</a>   | <a href="#">EII2.bSep08</a>   | <a href="#">309918</a> | 7823  | 1192 | 6  | 263 | elongation factor RNA polymerase II 2 (EII2) alternative variant bSep08, mRNA.                                                  |
| <a href="#">EII2</a>   | <a href="#">EII2.cSep08</a>   | <a href="#">309918</a> | 21114 | 367  | 4  | 95  | elongation factor RNA polymerase II 2 (EII2) alternative variant cSep08, mRNA.                                                  |
| <a href="#">EII2</a>   | <a href="#">EII2.dSep08</a>   | <a href="#">309918</a> | 881   | 619  | 2  | 80  | elongation factor RNA polymerase II 2 (EII2) alternative variant dSep08, mRNA.                                                  |

|                              |                                     |                        |        |      |    |     |                                                                                                                           |
|------------------------------|-------------------------------------|------------------------|--------|------|----|-----|---------------------------------------------------------------------------------------------------------------------------|
| <a href="#">EII2</a>         | <a href="#">EII2.eSep08</a>         | <a href="#">309918</a> | 604    | 341  | 2  | 72  | elongation factor RNA polymerase II 2 (7.9 kD) (EII2) alternative variant eSep08, mRNA.                                   |
| <a href="#">ELM2.0</a>       | <a href="#">ELM2.0.aSep08</a>       |                        | 2324   | 470  | 5  | 156 | ELM2 (ELM2.0) alternative variant aSep08, mRNA.                                                                           |
| <a href="#">Elmo1</a>        | <a href="#">Elmo1.bSep08</a>        | <a href="#">361251</a> | 266306 | 2331 | 9  | 365 | engulfment cell motility 1 (Elmo1) alternative variant bSep08, mRNA.                                                      |
| <a href="#">Elmo1</a>        | <a href="#">Elmo1.cSep08</a>        | <a href="#">361251</a> | 101158 | 548  | 4  | 116 | engulfment cell motility 1 (Elmo1) alternative variant cSep08, mRNA.                                                      |
| <a href="#">Elmo1</a>        | <a href="#">Elmo1.dSep08</a>        | <a href="#">361251</a> | 161084 | 479  | 6  | 105 | engulfment cell motility (Elmo1) alternative variant dSep08, mRNA.                                                        |
| <a href="#">Elmo1</a>        | <a href="#">Elmo1.eSep08</a>        | <a href="#">361251</a> | 161194 | 593  | 6  | 105 | engulfment cell motility (Elmo1) alternative variant eSep08, mRNA.                                                        |
| <a href="#">Elmo2</a>        | <a href="#">Elmo2.aSep08</a>        | <a href="#">362271</a> | 35744  | 2791 | 21 | 746 | engulfment cell motility 2 (Elmo2) alternative variant aSep08, mRNA.                                                      |
| <a href="#">Elmo2</a>        | <a href="#">Elmo2.bSep08</a>        | <a href="#">362271</a> | 20733  | 816  | 9  | 260 | engulfment cell motility 2 (Elmo2) alternative variant bSep08, mRNA.                                                      |
| <a href="#">Elmo2</a>        | <a href="#">Elmo2.cSep08</a>        | <a href="#">362271</a> | 9894   | 749  | 5  | 243 | engulfment cell motility 2 (Elmo2) alternative variant cSep08, mRNA.                                                      |
| <a href="#">Elmo2</a>        | <a href="#">Elmo2.dSep08</a>        | <a href="#">362271</a> | 6381   | 2633 | 5  | 181 | engulfment cell motility 2 (Elmo2) alternative variant dSep08, mRNA.                                                      |
| <a href="#">Elmo2</a>        | <a href="#">Elmo2.eSep08</a>        | <a href="#">362271</a> | 2607   | 683  | 2  | 65  | putative protein (7.0 kD) (Elmo2) alternative variant eSep08, mRNA.                                                       |
| <a href="#">Elmo3</a>        | <a href="#">Elmo3.aSep08</a>        | <a href="#">291962</a> | 2534   | 1310 | 12 | 384 | engulfment cell motility 3 (Elmo3) alternative variant aSep08, mRNA.                                                      |
| <a href="#">Elmo3</a>        | <a href="#">Elmo3.bSep08</a>        | <a href="#">291962</a> | 821    | 415  | 4  | 92  | engulfment cell motility 3 (Elmo3) alternative variant bSep08, mRNA.                                                      |
| <a href="#">Elmo3</a>        | <a href="#">Elmo3.cSep08</a>        | <a href="#">291962</a> | 496    | 413  | 2  | 46  | engulfment cell motility 3 (Elmo3) alternative variant cSep08, mRNA.                                                      |
| <a href="#">Elmod1</a>       | <a href="#">Elmod1.aSep08</a>       | <a href="#">315670</a> | 44301  | 1793 | 2  | 504 | putative protein of eukaryotic origin (Elmod1) alternative variant aSep08, mRNA.                                          |
| <a href="#">Elmod1</a>       | <a href="#">Elmod1.bSep08</a>       | <a href="#">315670</a> | 43823  | 825  | 1  | 207 | engulfment and cell motility, ELM (Elmod1) alternative variant bSep08, mRNA.                                              |
| <a href="#">ELMO_CED12.0</a> | <a href="#">ELMO_CED12.0.aSep08</a> |                        | 1319   | 867  | 6  | 252 | engulfment cell motility 3 (ELMO_CED12.0) alternative variant aSep08, mRNA.                                               |
| <a href="#">ELMO_CED12.0</a> | <a href="#">ELMO_CED12.0.bSep08</a> |                        | 1177   | 779  | 5  | 178 | engulfment cell motility 3 (ELMO_CED12.0) alternative variant bSep08, mRNA.                                               |
| <a href="#">Eln</a>          | <a href="#">Eln.aSep08</a>          | <a href="#">25043</a>  | 43387  | 3593 | 37 | 877 | elastin (Eln) alternative variant aSep08, mRNA.                                                                           |
| <a href="#">Elof1</a>        | <a href="#">Elof1.bSep08</a>        | <a href="#">691193</a> | 5709   | 725  | 3  | 83  | elongation factor 1 homolog (S. cerevisiae) (9.5 kD) (Elof1) alternative variant bSep08, mRNA.                            |
| <a href="#">Elof1</a>        | <a href="#">Elof1.cSep08</a>        | <a href="#">691193</a> | 4601   | 177  | 1  | 46  | elongation factor 1 homolog (S. cerevisiae) (Elof1) alternative variant cSep08, mRNA.                                     |
| <a href="#">Elov13</a>       | <a href="#">Elov13.bSep08</a>       | <a href="#">309449</a> | 891    | 675  | 2  | 207 | elongation of very long chain fatty acids (FEN1/Elo2, SUR4/Elo3, yeast)-like 3 (Elov13) alternative variant bSep08, mRNA. |
| <a href="#">Elov14</a>       | <a href="#">Elov14.aSep08</a>       | <a href="#">315851</a> | 17136  | 375  | 1  | 124 | elongation of very long chain fatty acids (FEN1/Elo2, SUR4/Elo3, yeast)-like 4 (Elov14) alternative variant aSep08, mRNA. |

|                         |                                |                        |        |      |    |     |                                                                                                                            |
|-------------------------|--------------------------------|------------------------|--------|------|----|-----|----------------------------------------------------------------------------------------------------------------------------|
| <a href="#">Elov4</a>   | <a href="#">Elov4.bSep08</a>   | <a href="#">315851</a> | 16635  | 401  | 1  | 62  | elongation of very long chain fatty acids (FEN1/Elo2, SUR4/Elo3, yeast)-like 4 (Elov4) alternative variant bSep08, mRNA.   |
| <a href="#">Elov6</a>   | <a href="#">Elov6.aSep08</a>   | <a href="#">171402</a> | 106329 | 1190 | 4  | 267 | ELOVL family member 6, elongation of long chain fatty acids (yeast) (31.6 kD) (Elov6) alternative variant aSep08, mRNA.    |
| <a href="#">Elov7</a>   | <a href="#">Elov7.aSep08</a>   | <a href="#">361895</a> | 68081  | 958  | 3  | 265 | ELOVL family member 7, elongation of long chain fatty acids (yeast) (Elov7) alternative variant aSep08, mRNA.              |
| <a href="#">Elov7</a>   | <a href="#">Elov7.bSep08</a>   | <a href="#">361895</a> | 58780  | 486  | 1  | 71  | ELOVL family member 7, elongation of long chain fatty acids (yeast) (8.3 kD) (Elov7) alternative variant bSep08, mRNA.     |
| <a href="#">Elp4</a>    | <a href="#">Elp4.aSep08</a>    | <a href="#">691133</a> | 4426   | 267  |    | 84  | elongation protein 4 homolog ( <i>S. cerevisiae</i> ) (Elp4) mRNA.                                                         |
| <a href="#">Elt1</a>    | <a href="#">Elt1.bSep08</a>    | <a href="#">64124</a>  | 60589  | 725  | 6  | 241 | EGF calcium-binding (Elt1) alternative variant bSep08, mRNA.                                                               |
| <a href="#">Emcn</a>    | <a href="#">Emcn.bSep08</a>    | <a href="#">295490</a> | 67535  | 644  | 8  | 214 | endomucin (Emcn) alternative variant bSep08, mRNA.                                                                         |
| <a href="#">Eme1</a>    | <a href="#">Eme1.bSep08</a>    | <a href="#">287634</a> | 3206   | 765  | 1  | 246 | essential meiotic endonuclease 1 homolog 1 ( <i>S. pombe</i> ) (Eme1) alternative variant bSep08, mRNA.                    |
| <a href="#">EMI.0</a>   | <a href="#">EMI.0.aSep08</a>   |                        | 45785  | 508  |    | 169 | MEGF11 (EMI.0) mRNA.                                                                                                       |
| <a href="#">Emid1</a>   | <a href="#">Emid1.bSep08</a>   | <a href="#">685462</a> | 18217  | 483  | 5  | 161 | EMI (Emid1) alternative variant bSep08, mRNA.                                                                              |
| <a href="#">Emilin1</a> | <a href="#">Emilin1.bSep08</a> | <a href="#">298845</a> | 5226   | 2628 | 3  | 867 | elastin microfibril interfacier 1 (Emilin1) alternative variant bSep08, mRNA.                                              |
| <a href="#">Emilin1</a> | <a href="#">Emilin1.cSep08</a> | <a href="#">298845</a> | 897    | 391  | 1  | 38  | elastin microfibril interfacier 1 (Emilin1) alternative variant cSep08, mRNA.                                              |
| <a href="#">Emilin2</a> | <a href="#">Emilin2.aSep08</a> | <a href="#">316736</a> | 18000  | 1093 |    | 363 | elastin microfibril interfacier 2 (Emilin2) mRNA.                                                                          |
| <a href="#">Eml1</a>    | <a href="#">Eml1.aSep08</a>    | <a href="#">362783</a> | 70972  | 760  | 2  | 187 | echinoderm microtubule associated protein like 1 (20.0 kD) (Eml1) alternative variant aSep08, mRNA.                        |
| <a href="#">Eml1</a>    | <a href="#">Eml1.cSep08</a>    | <a href="#">362783</a> | 96789  | 535  | 2  | 150 | echinoderm microtubule associated protein like 1 (Eml1) alternative variant cSep08, mRNA.                                  |
| <a href="#">Eml2</a>    | <a href="#">Eml2.aSep08</a>    | <a href="#">192360</a> | 26315  | 2247 | 19 | 656 | echinoderm microtubule associated protein like 2 (Eml2) alternative variant aSep08, mRNA.                                  |
| <a href="#">Eml2</a>    | <a href="#">Eml2.bSep08</a>    | <a href="#">192360</a> | 5818   | 561  | 6  | 186 | echinoderm microtubule associated protein like 2 (Eml2) alternative variant bSep08, mRNA.                                  |
| <a href="#">Eml2</a>    | <a href="#">Eml2.cSep08</a>    | <a href="#">192360</a> | 1591   | 547  | 4  | 149 | echinoderm microtubule associated protein like 2 (Eml2) alternative variant cSep08, mRNA.                                  |
| <a href="#">Eml2</a>    | <a href="#">Eml2.dSep08</a>    | <a href="#">192360</a> | 600    | 426  | 2  | 136 | echinoderm microtubule associated protein like 2 (Eml2) alternative variant dSep08, mRNA.                                  |
| <a href="#">Eml2</a>    | <a href="#">Eml2.eSep08</a>    | <a href="#">192360</a> | 1803   | 368  | 3  | 107 | echinoderm microtubule associated protein like 2 (Eml2) alternative variant eSep08, mRNA.                                  |
| <a href="#">Eml4</a>    | <a href="#">Eml4.bSep08</a>    | <a href="#">313861</a> | 6494   | 440  | 3  | 146 | echinoderm microtubule associated protein like 4 (Eml4) alternative variant bSep08, mRNA.                                  |
| <a href="#">Eml4</a>    | <a href="#">Eml4.cSep08</a>    | <a href="#">313861</a> | 2970   | 727  | 3  | 38  | echinoderm microtubule associated protein like 4 (Eml4) alternative variant cSep08, mRNA.                                  |
| <a href="#">Eml5</a>    | <a href="#">Eml5.aSep08</a>    | <a href="#">444982</a> | 4130   | 384  |    | 127 | echinoderm microtubule associated protein like 5 (Eml5) mRNA.                                                              |
| <a href="#">Emr1</a>    | <a href="#">Emr1.bSep08</a>    | <a href="#">316137</a> | 3995   | 593  | 1  | 62  | EGF-like module containing, mucin-like, hormone receptor-like sequence 1 (7.0 kD) (Emr1) alternative variant bSep08, mRNA. |



|                        |                               |                        |        |      |    |     |                                                                                                    |
|------------------------|-------------------------------|------------------------|--------|------|----|-----|----------------------------------------------------------------------------------------------------|
| <a href="#">Emx2</a>   | <a href="#">Emx2.bSep08</a>   | <a href="#">499380</a> | 979    | 412  | 1  | 67  | empty spiracles homeobox 2 (Emx2) alternative variant bSep08, mRNA.                                |
| <a href="#">Enah</a>   | <a href="#">Enah.bSep08</a>   | <a href="#">360891</a> | 96802  | 1359 | 7  | 375 | enabled homolog (Drosophila) (Enah) alternative variant bSep08, mRNA.                              |
| <a href="#">Enah</a>   | <a href="#">Enah.cSep08</a>   | <a href="#">360891</a> | 1442   | 733  | 2  | 132 | enabled homolog (Drosophila) (Enah) alternative variant cSep08, mRNA.                              |
| <a href="#">Enah</a>   | <a href="#">Enah.dSep08</a>   | <a href="#">360891</a> | 28417  | 328  | 4  | 108 | enabled homolog (Drosophila) (Enah) alternative variant dSep08, mRNA.                              |
| <a href="#">Enah</a>   | <a href="#">Enah.eSep08</a>   | <a href="#">360891</a> | 1889   | 291  | 2  | 96  | enabled homolog (Drosophila) (Enah) alternative variant eSep08, mRNA.                              |
| <a href="#">Enah</a>   | <a href="#">Enah.fSep08</a>   | <a href="#">360891</a> | 7447   | 255  | 2  | 77  | enabled homolog (Drosophila) (Enah) alternative variant fSep08, mRNA.                              |
| <a href="#">Eno1</a>   | <a href="#">Eno1.cSep08</a>   | <a href="#">24333</a>  | 7981   | 933  | 7  | 238 | enolase 1, alpha non-neuron (25.6 kD) (Eno1) alternative variant cSep08, mRNA.                     |
| <a href="#">Eno1</a>   | <a href="#">Eno1.dSep08</a>   | <a href="#">24333</a>  | 4096   | 389  | 3  | 129 | enolase 1, alpha non-neuron (Eno1) alternative variant dSep08, mRNA.                               |
| <a href="#">Eno1</a>   | <a href="#">Eno1.eSep08</a>   | <a href="#">24333</a>  | 3105   | 806  | 4  | 121 | enolase 1, alpha non-neuron (Eno1) alternative variant eSep08, mRNA.                               |
| <a href="#">Eno2</a>   | <a href="#">Eno2.bSep08</a>   | <a href="#">24334</a>  | 8840   | 1318 | 11 | 404 | enolase 2 (43.6 kD) (Eno2) alternative variant bSep08, complete mRNA.                              |
| <a href="#">Eno2</a>   | <a href="#">Eno2.cSep08</a>   | <a href="#">24334</a>  | 2451   | 883  | 4  | 146 | enolase 2 (16.2 kD) (Eno2) alternative variant cSep08, mRNA.                                       |
| <a href="#">Eno2</a>   | <a href="#">Eno2.dSep08</a>   | <a href="#">24334</a>  | 2222   | 398  | 2  | 128 | enolase 2 (Eno2) alternative variant dSep08, mRNA.                                                 |
| <a href="#">Eno2</a>   | <a href="#">Eno2.eSep08</a>   | <a href="#">24334</a>  | 2489   | 581  | 5  | 100 | enolase 2 (Eno2) alternative variant eSep08, mRNA.                                                 |
| <a href="#">Eno2</a>   | <a href="#">Eno2.fSep08</a>   | <a href="#">24334</a>  | 454    | 286  | 2  | 89  | putative protein (Eno2) alternative variant fSep08, mRNA.                                          |
| <a href="#">Eno3</a>   | <a href="#">Eno3.bSep08</a>   | <a href="#">25438</a>  | 3677   | 715  | 7  | 218 | enolase 3, beta, muscle (Eno3) alternative variant bSep08, mRNA.                                   |
| <a href="#">Eno3</a>   | <a href="#">Eno3.cSep08</a>   | <a href="#">25438</a>  | 575    | 380  | 2  | 126 | enolase 3, beta, muscle (Eno3) alternative variant cSep08, mRNA.                                   |
| <a href="#">Eno3</a>   | <a href="#">Eno3.dSep08</a>   | <a href="#">25438</a>  | 2998   | 747  | 5  | 115 | enolase 3, beta, muscle (Eno3) alternative variant dSep08, mRNA.                                   |
| <a href="#">Eno3</a>   | <a href="#">Eno3.eSep08</a>   | <a href="#">25438</a>  | 1219   | 712  | 4  | 102 | enolase 3, beta, muscle (Eno3) alternative variant eSep08, mRNA.                                   |
| <a href="#">Eno3</a>   | <a href="#">Eno3.fSep08</a>   | <a href="#">25438</a>  | 1147   | 476  | 4  | 78  | enolase 3, beta, muscle (Eno3) alternative variant fSep08, mRNA.                                   |
| <a href="#">Enoph1</a> | <a href="#">Enoph1.bSep08</a> | <a href="#">305177</a> | 19813  | 597  | 1  | 84  | enolase-phosphatase 1 (Enoph1) alternative variant bSep08, mRNA.                                   |
| <a href="#">Enox1</a>  | <a href="#">Enox1.aSep08</a>  | <a href="#">306038</a> | 49365  | 822  |    | 126 | ecto-NOX disulfide-thiol exchanger 1 (Enox1) mRNA.                                                 |
| <a href="#">Enpp1</a>  | <a href="#">Enpp1.bSep08</a>  | <a href="#">85496</a>  | 13060  | 2165 | 2  | 309 | ectonucleotide pyrophosphatase/phosphodiesterase 1 (Enpp1) alternative variant bSep08, mRNA.       |
| <a href="#">Enpp2</a>  | <a href="#">Enpp2.aSep08</a>  | <a href="#">84050</a>  | 125394 | 3350 | 25 | 887 | pyrophosphatase phosphodiesterase (Enpp2) alternative variant aSep08, mRNA.                        |
| <a href="#">Enpp2</a>  | <a href="#">Enpp2.cSep08</a>  | <a href="#">84050</a>  | 26360  | 1697 | 10 | 408 | pyrophosphatase phosphodiesterase (Enpp2) alternative variant cSep08, mRNA.                        |
| <a href="#">Enpp2</a>  | <a href="#">Enpp2.dSep08</a>  | <a href="#">84050</a>  | 30453  | 1208 | 9  | 380 | ectonucleotide pyrophosphatase phosphodiesterase 2 CRA a (Enpp2) alternative variant dSep08, mRNA. |

|                        |                               |                        |        |      |    |     |                                                                                                                                 |
|------------------------|-------------------------------|------------------------|--------|------|----|-----|---------------------------------------------------------------------------------------------------------------------------------|
| <a href="#">Enpp2</a>  | <a href="#">Enpp2.eSep08</a>  | <a href="#">84050</a>  | 81239  | 1203 | 11 | 356 | ectonucleotide pyrophosphatase phosphodiesterase 2 (Enpp2) alternative variant eSep08, mRNA.                                    |
| <a href="#">Enpp3</a>  | <a href="#">Enpp3.bSep08</a>  | <a href="#">54410</a>  | 3556   | 713  | 3  | 124 | ectonucleotide pyrophosphatase/phosphodiesterase 3 (Enpp3) alternative variant bSep08, mRNA.                                    |
| <a href="#">Enpp4</a>  | <a href="#">Enpp4.bSep08</a>  | <a href="#">301261</a> | 1840   | 918  | 1  | 305 | ectonucleotide pyrophosphatase/phosphodiesterase 4 (Enpp4) alternative variant bSep08, mRNA.                                    |
| <a href="#">Enpp4</a>  | <a href="#">Enpp4.cSep08</a>  | <a href="#">301261</a> | 3448   | 483  | 1  | 160 | ectonucleotide pyrophosphatase/phosphodiesterase 4 (Enpp4) alternative variant cSep08, mRNA.                                    |
| <a href="#">Enpp5</a>  | <a href="#">Enpp5.cSep08</a>  | <a href="#">316249</a> | 1779   | 385  | 2  | 99  | ectonucleotide pyrophosphatase/phosphodiesterase 5 (Enpp5) alternative variant cSep08, mRNA.                                    |
| <a href="#">Enpp6</a>  | <a href="#">Enpp6.aSep08</a>  | <a href="#">306460</a> | 124226 | 1503 | 8  | 440 | ectonucleotide pyrophosphatase/phosphodiesterase 6 (50.7 kD) (Enpp6) alternative variant aSep08, complete mRNA.                 |
| <a href="#">ENT.0</a>  | <a href="#">ENT.0.aSep08</a>  |                        | 10573  | 381  |    | 91  | putative protein (10.4 kD) (ENT.0) mRNA.                                                                                        |
| <a href="#">Enth</a>   | <a href="#">Enth.bSep08</a>   | <a href="#">360515</a> | 14413  | 1362 | 6  | 384 | clathrin interactor 1 (Enth) alternative variant bSep08, mRNA.                                                                  |
| <a href="#">Enth</a>   | <a href="#">Enth.cSep08</a>   | <a href="#">360515</a> | 15583  | 2478 | 6  | 384 | clathrin interactor 1 (Enth) alternative variant cSep08, mRNA.                                                                  |
| <a href="#">Enth</a>   | <a href="#">Enth.dSep08</a>   | <a href="#">360515</a> | 3181   | 750  | 3  | 244 | clathrin interactor 1 (Enth) alternative variant dSep08, mRNA.                                                                  |
| <a href="#">Enth</a>   | <a href="#">Enth.eSep08</a>   | <a href="#">360515</a> | 28661  | 373  | 3  | 63  | enthoprotin (Enth) alternative variant eSep08, mRNA.                                                                            |
| <a href="#">Enth</a>   | <a href="#">Enth.gSep08</a>   | <a href="#">360515</a> | 1776   | 769  | 2  | 62  | CRA b (Enth) alternative variant gSep08, mRNA.                                                                                  |
| <a href="#">ENTH.1</a> | <a href="#">ENTH.1.aSep08</a> |                        | 36411  | 553  | 4  | 162 | synaptosomal-associated protein 91kDa homolog (ENTH.1) alternative variant aSep08, mRNA.                                        |
| <a href="#">ENTH.1</a> | <a href="#">ENTH.1.bSep08</a> |                        | 34472  | 450  | 2  | 73  | synaptosomal-associated protein 91kDa homolog CRA d (ENTH.1) alternative variant bSep08, mRNA.                                  |
| <a href="#">Enthd1</a> | <a href="#">Enthd1.aSep08</a> | <a href="#">685815</a> | 114318 | 2672 | 7  | 616 | hypothetical protein LOC685815 and hypothetical protein LOC685869 (67.9 kD) (Enthd1) alternative variant aSep08, complete mRNA. |
| <a href="#">Enthd1</a> | <a href="#">Enthd1.aSep08</a> | <a href="#">685869</a> | 114318 | 2672 | 7  | 616 | hypothetical protein LOC685815 and hypothetical protein LOC685869 (67.9 kD) (Enthd1) alternative variant aSep08, complete mRNA. |
| <a href="#">Enthd1</a> | <a href="#">Enthd1.aSep08</a> | <a href="#">685900</a> | 114318 | 2672 | 7  | 616 | hypothetical protein LOC685815 and hypothetical protein LOC685869 (67.9 kD) (Enthd1) alternative variant aSep08, complete mRNA. |
| <a href="#">Enthd1</a> | <a href="#">Enthd1.bSep08</a> | <a href="#">685815</a> | 19291  | 345  | 3  | 62  | hypothetical protein LOC685815 and hypothetical protein LOC685869 (Enthd1) alternative variant bSep08, mRNA.                    |
| <a href="#">Enthd1</a> | <a href="#">Enthd1.bSep08</a> | <a href="#">685869</a> | 19291  | 345  | 3  | 62  | hypothetical protein LOC685815 and hypothetical protein LOC685869 (Enthd1) alternative variant bSep08, mRNA.                    |
| <a href="#">Enthd1</a> | <a href="#">Enthd1.bSep08</a> | <a href="#">685900</a> | 19291  | 345  | 3  | 62  | hypothetical protein LOC685815 and hypothetical protein LOC685869 (Enthd1) alternative variant bSep08, mRNA.                    |
| <a href="#">Entpd2</a> | <a href="#">Entpd2.aSep08</a> | <a href="#">64467</a>  | 2702   | 1783 | 5  | 592 | ectonucleoside triphosphate diphosphohydrolase 2 (Entpd2) alternative variant aSep08, mRNA.                                     |
| <a href="#">Entpd2</a> | <a href="#">Entpd2.cSep08</a> | <a href="#">64467</a>  | 2400   | 1108 | 6  | 350 | ectonucleoside triphosphate diphosphohydrolase 2 (Entpd2) alternative variant cSep08, mRNA.                                     |
| <a href="#">Entpd2</a> | <a href="#">Entpd2.dSep08</a> | <a href="#">64467</a>  | 1949   | 594  | 3  | 82  | ectonucleoside triphosphate diphosphohydrolase 2 (12.4 kD) (Entpd2) alternative variant dSep08, mRNA.                           |

|                        |                               |                        |        |      |    |     |                                                                                                             |
|------------------------|-------------------------------|------------------------|--------|------|----|-----|-------------------------------------------------------------------------------------------------------------|
| <a href="#">Entpd4</a> | <a href="#">Entpd4.aSep08</a> | <a href="#">361063</a> | 11026  | 1560 | 8  | 410 | ectonucleoside triphosphate diphosphohydrolase 4 CRA b (Entpd4) alternative variant aSep08, mRNA.           |
| <a href="#">Entpd4</a> | <a href="#">Entpd4.cSep08</a> | <a href="#">361063</a> | 17958  | 1278 | 8  | 309 | ectonucleoside triphosphate diphosphohydrolase 4 CRA b (34.4 kD) (Entpd4) alternative variant cSep08, mRNA. |
| <a href="#">Entpd4</a> | <a href="#">Entpd4.dSep08</a> | <a href="#">361063</a> | 2484   | 785  | 3  | 133 | ectonucleoside triphosphate diphosphohydrolase 4 CRA b (Entpd4) alternative variant dSep08, mRNA.           |
| <a href="#">Entpd4</a> | <a href="#">Entpd4.eSep08</a> | <a href="#">361063</a> | 1329   | 769  | 2  | 90  | ectonucleoside triphosphate diphosphohydrolase 4 CRA b (Entpd4) alternative variant eSep08, mRNA.           |
| <a href="#">Entpd4</a> | <a href="#">Entpd4.iSep08</a> | <a href="#">361063</a> | 9724   | 374  | 3  | 79  | putative protein (Entpd4) alternative variant iSep08, mRNA.                                                 |
| <a href="#">Entpd6</a> | <a href="#">Entpd6.bSep08</a> | <a href="#">85260</a>  | 7784   | 510  | 4  | 153 | ectonucleoside triphosphate diphosphohydrolase 6 (Entpd6) alternative variant bSep08, mRNA.                 |
| <a href="#">Entpd6</a> | <a href="#">Entpd6.cSep08</a> | <a href="#">85260</a>  | 4177   | 747  | 5  | 144 | ectonucleoside triphosphate diphosphohydrolase 6 (16.2 kD) (Entpd6) alternative variant cSep08, mRNA.       |
| <a href="#">Entpd7</a> | <a href="#">Entpd7.bSep08</a> | <a href="#">309390</a> | 4793   | 712  | 3  | 101 | ectonucleoside triphosphate diphosphohydrolase 7 (Entpd7) alternative variant bSep08, mRNA.                 |
| <a href="#">Entpd8</a> | <a href="#">Entpd8.bSep08</a> | <a href="#">613267</a> | 802    | 488  | 1  | 162 | ectonucleoside triphosphate diphosphohydrolase 8 (Entpd8) alternative variant bSep08, mRNA.                 |
| <a href="#">Eny2</a>   | <a href="#">Eny2.bSep08</a>   | <a href="#">685258</a> | 7348   | 525  | 5  | 96  | enhancer of yellow 2 homolog (Drosophila) (11.0 kD) (Eny2) alternative variant bSep08, complete mRNA.       |
| <a href="#">Eny2</a>   | <a href="#">Eny2.cSep08</a>   | <a href="#">685258</a> | 7298   | 472  | 4  | 93  | enhancer of yellow 2 homolog (Drosophila) (Eny2) alternative variant cSep08, mRNA.                          |
| <a href="#">Eny2</a>   | <a href="#">Eny2.eSep08</a>   | <a href="#">685258</a> | 5987   | 551  | 4  | 54  | enhancer of yellow 2 homolog (Drosophila) (Eny2) alternative variant eSep08, mRNA.                          |
| <a href="#">Eny2</a>   | <a href="#">Eny2.fSep08</a>   | <a href="#">685258</a> | 4520   | 248  | 4  | 43  | enhancer of yellow 2 homolog (Drosophila) (Eny2) alternative variant fSep08, mRNA.                          |
| <a href="#">Eny2</a>   | <a href="#">Eny2.gSep08</a>   | <a href="#">685258</a> | 2522   | 1071 | 3  | 36  | enhancer of yellow 2 homolog (Drosophila) (4.4 kD) (Eny2) alternative variant gSep08, mRNA.                 |
| <a href="#">Eny2</a>   | <a href="#">Eny2.iSep08</a>   | <a href="#">685258</a> | 7384   | 559  | 5  | 48  | enhancer of yellow 2 homolog (Drosophila) (5.6 kD) (Eny2) alternative variant iSep08, complete mRNA.        |
| <a href="#">Eny2</a>   | <a href="#">Eny2.jSep08</a>   | <a href="#">685258</a> | 7339   | 511  | 4  | 9   | enhancer of yellow 2 homolog (Drosophila) (1.0 kD) (Eny2) alternative variant jSep08, complete mRNA.        |
| <a href="#">Ep300</a>  | <a href="#">Ep300.aSep08</a>  | <a href="#">170915</a> | 3591   | 3409 |    | 775 | E1A binding protein p300 (Ep300) mRNA.                                                                      |
| <a href="#">Ep400</a>  | <a href="#">Ep400.bSep08</a>  | <a href="#">304569</a> | 12622  | 1615 | 2  | 434 | E1A binding protein p400 (Ep400) alternative variant bSep08, mRNA.                                          |
| <a href="#">Ep400</a>  | <a href="#">Ep400.cSep08</a>  | <a href="#">304569</a> | 6442   | 725  | 5  | 241 | E1A binding protein p400 (Ep400) alternative variant cSep08, mRNA.                                          |
| <a href="#">Ep400</a>  | <a href="#">Ep400.dSep08</a>  | <a href="#">304569</a> | 1184   | 684  | 2  | 160 | E1A binding protein p400 (Ep400) alternative variant dSep08, mRNA.                                          |
| <a href="#">Ep400</a>  | <a href="#">Ep400.eSep08</a>  | <a href="#">304569</a> | 686    | 523  | 2  | 111 | E1A binding protein p400 (Ep400) alternative variant eSep08, mRNA.                                          |
| <a href="#">Epb4.1</a> | <a href="#">Epb4.1.aSep08</a> | <a href="#">313052</a> | 154264 | 5007 | 18 | 838 | erythrocyte membrane protein band 4.1 (Epb4.1) alternative variant aSep08, mRNA.                            |
| <a href="#">Epb4.1</a> | <a href="#">Epb4.1.bSep08</a> | <a href="#">313052</a> | 48022  | 749  | 3  | 213 | erythrocyte membrane protein band 4.1 (Epb4.1) alternative variant bSep08, mRNA.                            |
| <a href="#">Epb4.1</a> | <a href="#">Epb4.1.cSep08</a> | <a href="#">313052</a> | 13004  | 1333 | 6  | 201 | erythrocyte membrane protein band 4.1 (Epb4.1) alternative variant cSep08, mRNA.                            |

|                           |                                  |                        |        |      |    |     |                                                                                                |
|---------------------------|----------------------------------|------------------------|--------|------|----|-----|------------------------------------------------------------------------------------------------|
| <a href="#">Epb4.111</a>  | <a href="#">Epb4.111.cSep08</a>  | <a href="#">59317</a>  | 35668  | 1771 | 5  | 590 | erythrocyte protein band 4.1-like 1 (Epb4.111) alternative variant cSep08, mRNA.               |
| <a href="#">Epb4.111</a>  | <a href="#">Epb4.111.dSep08</a>  | <a href="#">59317</a>  | 30663  | 1145 | 11 | 381 | erythrocyte protein band 4.1-like 1 (Epb4.111) alternative variant dSep08, mRNA.               |
| <a href="#">Epb4.112</a>  | <a href="#">Epb4.112.aSep08</a>  | <a href="#">309557</a> | 43753  | 2777 | 10 | 512 | erythrocyte membrane protein band 4.1-like 2 (Epb4.112) alternative variant aSep08, mRNA.      |
| <a href="#">Epb4.112</a>  | <a href="#">Epb4.112.bSep08</a>  | <a href="#">309557</a> | 20342  | 897  | 5  | 268 | erythrocyte membrane protein band 4.1-like 2 (Epb4.112) alternative variant bSep08, mRNA.      |
| <a href="#">Epb4.112</a>  | <a href="#">Epb4.112.cSep08</a>  | <a href="#">309557</a> | 27475  | 534  | 4  | 177 | erythrocyte membrane protein band 4.1-like 2 (Epb4.112) alternative variant cSep08, mRNA.      |
| <a href="#">Epb4.112</a>  | <a href="#">Epb4.112.dSep08</a>  | <a href="#">309557</a> | 5041   | 422  | 1  | 138 | erythrocyte membrane protein band 4.1-like 2 (Epb4.112) alternative variant dSep08, mRNA.      |
| <a href="#">Epb4.112</a>  | <a href="#">Epb4.112.eSep08</a>  | <a href="#">309557</a> | 4103   | 369  | 3  | 123 | erythrocyte membrane protein band 4.1-like 2 (Epb4.112) alternative variant eSep08, mRNA.      |
| <a href="#">Epb4.113</a>  | <a href="#">Epb4.113.bSep08</a>  | <a href="#">116724</a> | 19523  | 978  | 7  | 325 | erythrocyte protein band 4.1-like 3 (Epb4.113) alternative variant bSep08, mRNA.               |
| <a href="#">Epb4.113</a>  | <a href="#">Epb4.113.cSep08</a>  | <a href="#">116724</a> | 5271   | 1249 | 5  | 214 | erythrocyte protein band 4.1-like 3 (Epb4.113) alternative variant cSep08, mRNA.               |
| <a href="#">Epb4.113</a>  | <a href="#">Epb4.113.dSep08</a>  | <a href="#">116724</a> | 20555  | 610  | 5  | 202 | erythrocyte protein band 4.1-like 3 (Epb4.113) alternative variant dSep08, mRNA.               |
| <a href="#">Epb4.113</a>  | <a href="#">Epb4.113.eSep08</a>  | <a href="#">116724</a> | 154092 | 804  | 5  | 190 | erythrocyte protein band 4.1-like 3 (Epb4.113) alternative variant eSep08, mRNA.               |
| <a href="#">Epb4.113</a>  | <a href="#">Epb4.113.fSep08</a>  | <a href="#">116724</a> | 71432  | 574  | 4  | 164 | erythrocyte protein band 4.1-like 3 (Epb4.113) alternative variant fSep08, mRNA.               |
| <a href="#">Epb4.114a</a> | <a href="#">Epb4.114a.bSep08</a> | <a href="#">307514</a> | 8314   | 544  | 5  | 122 | erythrocyte protein band 4.1-like 4a (Epb4.114a) alternative variant bSep08, mRNA.             |
| <a href="#">Epb4.114b</a> | <a href="#">Epb4.114b.aSep08</a> | <a href="#">366376</a> | 16816  | 386  |    | 128 | erythrocyte protein band 4.1-like 4b (Epb4.114b) mRNA.                                         |
| <a href="#">Epb4.115</a>  | <a href="#">Epb4.115.bSep08</a>  | <a href="#">304733</a> | 26166  | 445  | 2  | 148 | erythrocyte protein band 4.1-like 5 (Epb4.115) alternative variant bSep08, mRNA.               |
| <a href="#">Epb4.9</a>    | <a href="#">Epb4.9.aSep08</a>    | <a href="#">361069</a> | 24638  | 3390 | 14 | 354 | erythrocyte protein band 4.9 (39.5 kD) (Epb4.9) alternative variant aSep08, mRNA.              |
| <a href="#">Epb4.9</a>    | <a href="#">Epb4.9.bSep08</a>    | <a href="#">361069</a> | 26873  | 1858 | 16 | 343 | erythrocyte protein band 4.9 (37.9 kD) (Epb4.9) alternative variant bSep08, mRNA.              |
| <a href="#">Epb4.9</a>    | <a href="#">Epb4.9.dSep08</a>    | <a href="#">361069</a> | 13801  | 715  | 7  | 173 | erythrocyte protein band 4.9 (Epb4.9) alternative variant dSep08, mRNA.                        |
| <a href="#">Epb4.9</a>    | <a href="#">Epb4.9.eSep08</a>    | <a href="#">361069</a> | 18092  | 423  | 4  | 140 | erythrocyte protein band 4.9 (Epb4.9) alternative variant eSep08, mRNA.                        |
| <a href="#">Epb4.9</a>    | <a href="#">Epb4.9.fSep08</a>    | <a href="#">361069</a> | 8853   | 341  | 3  | 65  | erythrocyte protein band 4.9 (Epb4.9) alternative variant fSep08, mRNA.                        |
| <a href="#">Epb4.9</a>    | <a href="#">Epb4.9.gSep08</a>    | <a href="#">361069</a> | 10679  | 318  | 3  | 55  | erythrocyte protein band 4.9 (Epb4.9) alternative variant gSep08, mRNA.                        |
| <a href="#">Epc1</a>      | <a href="#">Epc1.aSep08</a>      | <a href="#">307042</a> | 3203   | 794  |    | 146 | enhancer of polycomb homolog 1 (Drosophila) (Epc1) mRNA.                                       |
| <a href="#">Epc2</a>      | <a href="#">Epc2.bSep08</a>      | <a href="#">362132</a> | 4399   | 1223 | 4  | 282 | enhancer of polycomb homolog 2 (Drosophila) (Epc2) alternative variant bSep08, mRNA.           |
| <a href="#">Epc2</a>      | <a href="#">Epc2.cSep08</a>      | <a href="#">362132</a> | 2355   | 751  | 2  | 164 | enhancer of polycomb homolog 2 (Drosophila) (18.2 kD) (Epc2) alternative variant cSep08, mRNA. |

|                              |                                     |                        |       |      |   |     |                                                                                    |
|------------------------------|-------------------------------------|------------------------|-------|------|---|-----|------------------------------------------------------------------------------------|
| <a href="#">Epgn</a>         | <a href="#">Epgn.aSep08</a>         | <a href="#">289515</a> | 5415  | 591  |   | 163 | epithelial mitogen (Epgn) mRNA.                                                    |
| <a href="#">Epha2</a>        | <a href="#">Epha2.bSep08</a>        | <a href="#">366492</a> | 8521  | 1732 | 6 | 287 | eph receptor A2 (Epha2) alternative variant bSep08, mRNA.                          |
| <a href="#">Epha2</a>        | <a href="#">Epha2.cSep08</a>        | <a href="#">366492</a> | 973   | 353  | 4 | 117 | eph receptor A2 (Epha2) alternative variant cSep08, mRNA.                          |
| <a href="#">Epha4</a>        | <a href="#">Epha4.aSep08</a>        | <a href="#">316539</a> | 74579 | 1784 |   | 404 | eph receptor A4 (Epha4) alternative variant aSep08, mRNA.                          |
| <a href="#">Epha4</a>        | <a href="#">Epha4.bSep08</a>        | <a href="#">316539</a> | 5861  | 2700 |   | 86  | eph receptor A4 (10.0 kD) (Epha4) alternative variant bSep08, mRNA.                |
| <a href="#">Epha5</a>        | <a href="#">Epha5.aSep08</a>        | <a href="#">79208</a>  | 34040 | 1783 |   | 558 | EphA5 (Epha5) alternative variant aSep08, mRNA.                                    |
| <a href="#">Epha5</a>        | <a href="#">Epha5.bSep08</a>        | <a href="#">79208</a>  | 10445 | 396  |   | 131 | EphA5 (Epha5) alternative variant bSep08, mRNA.                                    |
| <a href="#">Epha6</a>        | <a href="#">Epha6.aSep08</a>        | <a href="#">29202</a>  | 33050 | 1049 |   | 281 | eph receptor A6 (Epha6) mRNA.                                                      |
| <a href="#">Epha7</a>        | <a href="#">Epha7.bSep08</a>        | <a href="#">171287</a> | 13016 | 865  | 8 | 277 | eph receptor A7 (Epha7) alternative variant bSep08, mRNA.                          |
| <a href="#">Epha7</a>        | <a href="#">Epha7.cSep08</a>        | <a href="#">171287</a> | 17402 | 756  | 7 | 187 | eph receptor A7 (Epha7) alternative variant cSep08, mRNA.                          |
| <a href="#">Epha8</a>        | <a href="#">Epha8.aSep08</a>        | <a href="#">60589</a>  | 7486  | 487  |   | 161 | eph receptor A8 (Epha8) mRNA.                                                      |
| <a href="#">Ephb3</a>        | <a href="#">Ephb3.bSep08</a>        | <a href="#">287989</a> | 575   | 369  | 3 | 101 | eph receptor B3 (Ephb3) alternative variant bSep08, mRNA.                          |
| <a href="#">Ephb6</a>        | <a href="#">Ephb6.aSep08</a>        | <a href="#">312275</a> | 2525  | 1032 | 8 | 277 | eph receptor B6 (Ephb6) alternative variant aSep08, mRNA.                          |
| <a href="#">Ephb6</a>        | <a href="#">Ephb6.bSep08</a>        | <a href="#">312275</a> | 1720  | 740  | 5 | 246 | eph receptor B6 (Ephb6) alternative variant bSep08, mRNA.                          |
| <a href="#">Ephb6</a>        | <a href="#">Ephb6.cSep08</a>        | <a href="#">312275</a> | 823   | 470  | 2 | 81  | eph receptor B6 (Ephb6) alternative variant cSep08, mRNA.                          |
| <a href="#">Ephrin_lbd.0</a> | <a href="#">Ephrin_lbd.0.aSep08</a> |                        | 25210 | 735  |   | 158 | EPH receptor A5 CRA c (Ephrin_lbd.0) mRNA.                                         |
| <a href="#">Ephrin_lbd.1</a> | <a href="#">Ephrin_lbd.1.aSep08</a> |                        | 8046  | 405  |   | 124 | epha4 (Ephrin_lbd.1) mRNA.                                                         |
| <a href="#">Ephx1</a>        | <a href="#">Ephx1.cSep08</a>        | <a href="#">25315</a>  | 23739 | 747  | 1 | 152 | epoxide hydrolase 1, microsomal (Ephx1) alternative variant cSep08, mRNA.          |
| <a href="#">Ephx2</a>        | <a href="#">Ephx2.bSep08</a>        | <a href="#">65030</a>  | 4771  | 864  | 7 | 166 | epoxide hydrolase (Ephx2) alternative variant bSep08, mRNA.                        |
| <a href="#">Ephx2</a>        | <a href="#">Ephx2.cSep08</a>        | <a href="#">65030</a>  | 3771  | 1263 | 6 | 131 | epoxide hydrolase (15.3 kD) (Ephx2) alternative variant cSep08, mRNA.              |
| <a href="#">EPL1.0</a>       | <a href="#">EPL1.0.aSep08</a>       |                        | 9958  | 265  |   | 88  | enhancer of polycomb 1 (EPL1.0) mRNA.                                              |
| <a href="#">EPL1.1</a>       | <a href="#">EPL1.1.bSep08</a>       |                        | 1606  | 477  | 2 | 63  | enhancer of polycomb homolog 1 (7.1 kD) (EPL1.1) alternative variant bSep08, mRNA. |
| <a href="#">EPL1.2</a>       | <a href="#">EPL1.2.aSep08</a>       |                        | 4118  | 762  |   | 254 | bromodomain PHD finger containing 1 CRA d (EPL1.2) mRNA.                           |
| <a href="#">Epn1</a>         | <a href="#">Epn1.bSep08</a>         | <a href="#">117277</a> | 6014  | 734  | 2 | 244 | epsin 1 (Epn1) alternative variant bSep08, mRNA.                                   |
| <a href="#">Epn1</a>         | <a href="#">Epn1.cSep08</a>         | <a href="#">117277</a> | 4509  | 733  | 4 | 244 | epsin 1 (Epn1) alternative variant cSep08, mRNA.                                   |
| <a href="#">Epn2</a>         | <a href="#">Epn2.cSep08</a>         | <a href="#">60443</a>  | 23651 | 852  | 6 | 283 | epsin 2 (Epn2) alternative variant cSep08, mRNA.                                   |
| <a href="#">Epn3</a>         | <a href="#">Epn3.bSep08</a>         | <a href="#">360605</a> | 1430  | 1248 | 3 | 358 | epsin 3 (Epn3) alternative variant bSep08, mRNA.                                   |
| <a href="#">Epn3</a>         | <a href="#">Epn3.cSep08</a>         | <a href="#">360605</a> | 3763  | 784  | 2 | 162 | epsin 3 (Epn3) alternative variant cSep08, mRNA.                                   |
| <a href="#">Epor</a>         | <a href="#">Epor.bSep08</a>         | <a href="#">24336</a>  | 1757  | 1075 | 2 | 292 | erythropoietin receptor (31.7 kD) (Epor) alternative variant bSep08, mRNA.         |

|                         |                                |                        |        |      |    |     |                                                                                                                          |
|-------------------------|--------------------------------|------------------------|--------|------|----|-----|--------------------------------------------------------------------------------------------------------------------------|
| <a href="#">Epor</a>    | <a href="#">Epor.cSep08</a>    | <a href="#">24336</a>  | 1755   | 682  | 4  | 171 | erythropoietin receptor (Epor) alternative variant cSep08, mRNA.                                                         |
| <a href="#">Eprs</a>    | <a href="#">Eprs.bSep08</a>    | <a href="#">289352</a> | 33418  | 1988 | 16 | 622 | glutaryl-prolyl-tRNA synthetase (Eprs) alternative variant bSep08, mRNA.                                                 |
| <a href="#">Eprs</a>    | <a href="#">Eprs.cSep08</a>    | <a href="#">289352</a> | 6579   | 1114 | 3  | 268 | glutaryl-prolyl-tRNA synthetase (Eprs) alternative variant cSep08, mRNA.                                                 |
| <a href="#">Eprs</a>    | <a href="#">Eprs.dSep08</a>    | <a href="#">289352</a> | 3238   | 830  | 5  | 159 | glutaryl-prolyl-tRNA synthetase (Eprs) alternative variant dSep08, mRNA.                                                 |
| <a href="#">Eprs</a>    | <a href="#">Eprs.eSep08</a>    | <a href="#">289352</a> | 8591   | 329  | 4  | 109 | glutaryl-prolyl-tRNA synthetase (Eprs) alternative variant eSep08, mRNA.                                                 |
| <a href="#">Eprs</a>    | <a href="#">Eprs.gSep08</a>    | <a href="#">289352</a> | 2842   | 574  | 2  | 55  | glutaryl-prolyl-tRNA synthetase (Eprs) alternative variant gSep08, mRNA.                                                 |
| <a href="#">Eprs</a>    | <a href="#">Eprs.hSep08</a>    | <a href="#">289352</a> | 1430   | 544  | 2  | 49  | putative protein (5.3 kD) (Eprs) alternative variant hSep08, mRNA.                                                       |
| <a href="#">Eprs</a>    | <a href="#">Eprs.iSep08</a>    | <a href="#">289352</a> | 9494   | 406  | 4  | 47  | putative protein (5.4 kD) (Eprs) alternative variant iSep08, mRNA.                                                       |
| <a href="#">Eps8</a>    | <a href="#">Eps8.aSep08</a>    | <a href="#">312812</a> | 50546  | 2211 |    | 619 | epidermal growth factor receptor pathway substrate 8 (Eps8) alternative variant aSep08, mRNA.                            |
| <a href="#">Eps8</a>    | <a href="#">Eps8.bSep08</a>    | <a href="#">312812</a> | 13815  | 1968 |    | 213 | epidermal growth factor receptor pathway substrate 8 (Eps8) alternative variant bSep08, mRNA.                            |
| <a href="#">Eps8l2</a>  | <a href="#">Eps8l2.aSep08</a>  | <a href="#">361674</a> | 25481  | 3282 | 21 | 729 | epidermal growth factor receptor pathway substrate 8-like protein 2 (82.3 kD) (Eps8l2) alternative variant aSep08, mRNA. |
| <a href="#">Eps8l2</a>  | <a href="#">Eps8l2.cSep08</a>  | <a href="#">361674</a> | 24829  | 1186 | 9  | 320 | epidermal growth factor receptor pathway substrate 8-like protein 2 (36.3 kD) (Eps8l2) alternative variant cSep08, mRNA. |
| <a href="#">Eps8l2</a>  | <a href="#">Eps8l2.dSep08</a>  | <a href="#">361674</a> | 1609   | 765  | 5  | 195 | epidermal growth factor receptor pathway substrate 8-like protein 2 (Eps8l2) alternative variant dSep08, mRNA.           |
| <a href="#">Eps8l2</a>  | <a href="#">Eps8l2.eSep08</a>  | <a href="#">361674</a> | 507    | 421  | 2  | 111 | epidermal growth factor receptor pathway substrate 8-like protein 2 (Eps8l2) alternative variant eSep08, mRNA.           |
| <a href="#">Eps8l2</a>  | <a href="#">Eps8l2.fSep08</a>  | <a href="#">361674</a> | 17425  | 415  | 4  | 43  | 2 CRA b (4.4 kD) (Eps8l2) alternative variant fSep08, mRNA.                                                              |
| <a href="#">Eps15</a>   | <a href="#">Eps15.bSep08</a>   | <a href="#">313474</a> | 101245 | 5067 | 25 | 693 | epidermal growth factor receptor pathway substrate 15 (Eps15) alternative variant bSep08, mRNA.                          |
| <a href="#">Eps15</a>   | <a href="#">Eps15.cSep08</a>   | <a href="#">313474</a> | 11129  | 516  | 3  | 132 | epidermal growth factor receptor pathway substrate 15 like (Eps15) alternative variant cSep08, mRNA.                     |
| <a href="#">Eps15</a>   | <a href="#">Eps15.dSep08</a>   | <a href="#">313474</a> | 15561  | 738  | 5  | 128 | epidermal growth factor receptor pathway substrate 15 (Eps15) alternative variant dSep08, mRNA.                          |
| <a href="#">Eps15</a>   | <a href="#">Eps15.eSep08</a>   | <a href="#">313474</a> | 1835   | 515  | 2  | 82  | epidermal growth factor receptor pathway substrate 15 (Eps15) alternative variant eSep08, mRNA.                          |
| <a href="#">Eps15</a>   | <a href="#">Eps15.fSep08</a>   | <a href="#">313474</a> | 3720   | 755  | 3  | 74  | epidermal growth factor receptor pathway substrate 15 (Eps15) alternative variant fSep08, mRNA.                          |
| <a href="#">Eps15l1</a> | <a href="#">Eps15l1.bSep08</a> | <a href="#">361120</a> | 43396  | 1785 | 8  | 464 | epidermal growth factor receptor pathway substrate 15-like 1 CRA a (Eps15l1) alternative variant bSep08, mRNA.           |
| <a href="#">Eps15l1</a> | <a href="#">Eps15l1.cSep08</a> | <a href="#">361120</a> | 3877   | 868  | 5  | 220 | epidermal growth factor receptor pathway substrate 15-like 1 (Eps15l1) alternative variant cSep08, mRNA.                 |

|                         |                                |                        |       |      |    |     |                                                                                                                                                         |
|-------------------------|--------------------------------|------------------------|-------|------|----|-----|---------------------------------------------------------------------------------------------------------------------------------------------------------|
| <a href="#">Eps151</a>  | <a href="#">Eps151.dSep08</a>  | <a href="#">361120</a> | 7203  | 470  | 4  | 156 | epidermal growth factor receptor pathway substrate 15-like 1 (Eps151) alternative variant dSep08, mRNA.                                                 |
| <a href="#">Eps151</a>  | <a href="#">Eps151.eSep08</a>  | <a href="#">361120</a> | 10876 | 821  | 6  | 129 | putative protein (14.3 kD) (Eps151) alternative variant eSep08, mRNA.                                                                                   |
| <a href="#">Eps151</a>  | <a href="#">Eps151.fSep08</a>  | <a href="#">361120</a> | 30285 | 980  | 4  | 81  | epidermal growth factor receptor pathway substrate 15-like 1 CRA c (8.9 kD) (Eps151) alternative variant fSep08, mRNA.                                  |
| <a href="#">Eps151</a>  | <a href="#">Eps151.gSep08</a>  | <a href="#">361120</a> | 4482  | 603  | 2  | 38  | putative protein (Eps151) alternative variant gSep08, mRNA.                                                                                             |
| <a href="#">Eps151</a>  | <a href="#">Eps151.hSep08</a>  | <a href="#">361120</a> | 64712 | 358  | 2  | 22  | putative protein (Eps151) alternative variant hSep08, mRNA.                                                                                             |
| <a href="#">EPTP.0</a>  | <a href="#">EPTP.0.aSep08</a>  |                        | 21852 | 1727 |    | 458 | leucine-rich glioma inactivated 1 CRA a (EPTP.0) mRNA.                                                                                                  |
| <a href="#">Epyc</a>    | <a href="#">Epyc.bSep08</a>    | <a href="#">314772</a> | 34394 | 2055 | 2  | 322 | epiphyccan (36.8 kD) (Epyc) alternative variant bSep08, mRNA.                                                                                           |
| <a href="#">Eral1</a>   | <a href="#">Eral1.bSep08</a>   | <a href="#">363646</a> | 2543  | 1514 | 1  | 259 | era (G-protein)-like 1 (E. coli) (Eral1) alternative variant bSep08, mRNA.                                                                              |
| <a href="#">Erap1</a>   | <a href="#">Erap1.aSep08</a>   | <a href="#">80897</a>  | 38836 | 2953 | 19 | 930 | endoplasmic reticulum aminopeptidase 1 (106.4 kD) (Erap1) alternative variant aSep08, complete mRNA.                                                    |
| <a href="#">Erap1</a>   | <a href="#">Erap1.bSep08</a>   | <a href="#">80897</a>  | 16837 | 784  | 6  | 245 | endoplasmic reticulum aminopeptidase 1 (Erap1) alternative variant bSep08, mRNA.                                                                        |
| <a href="#">Erap1</a>   | <a href="#">Erap1.cSep08</a>   | <a href="#">80897</a>  | 5280  | 819  | 6  | 223 | endoplasmic reticulum aminopeptidase 1 (Erap1) alternative variant cSep08, mRNA.                                                                        |
| <a href="#">Erb2</a>    | <a href="#">Erb2.bSep08</a>    | <a href="#">24337</a>  | 11181 | 1055 | 7  | 351 | v-erb-b2 erythroblastic leukemia viral oncogene homolog 2, neuro/glioblastoma derived oncogene homolog (avian) (Erb2) alternative variant bSep08, mRNA. |
| <a href="#">Erb2</a>    | <a href="#">Erb2.cSep08</a>    | <a href="#">24337</a>  | 514   | 386  | 2  | 44  | v-erb-b2 erythroblastic leukemia viral oncogene homolog 2, neuro/glioblastoma derived oncogene homolog (avian) (Erb2) alternative variant cSep08, mRNA. |
| <a href="#">Erc1</a>    | <a href="#">Erc1.cSep08</a>    | <a href="#">266806</a> | 27732 | 600  | 3  | 98  | rab6 interacting protein 2 CRA b (Erc1) alternative variant cSep08, mRNA.                                                                               |
| <a href="#">Erc1</a>    | <a href="#">Erc1.dSep08</a>    | <a href="#">266806</a> | 4907  | 424  | 2  | 73  | rab6 interacting protein 2 (Erc1) alternative variant dSep08, mRNA.                                                                                     |
| <a href="#">Ercc1</a>   | <a href="#">Ercc1.aSep08</a>   | <a href="#">292673</a> | 10870 | 1524 | 7  | 471 | excision repair cross-complementing rodent repair deficiency, complementation group 1 (Ercc1) alternative variant aSep08, mRNA.                         |
| <a href="#">Ercc1</a>   | <a href="#">Ercc1.cSep08</a>   | <a href="#">292673</a> | 4098  | 395  | 1  | 131 | excision repair cross-complementing rodent repair deficiency, complementation group 1 (Ercc1) alternative variant cSep08, mRNA.                         |
| <a href="#">Ercc3</a>   | <a href="#">Ercc3.bSep08</a>   | <a href="#">291703</a> | 8890  | 737  | 5  | 195 | excision repair cross-complementing rodent repair deficiency, complementation group 3 (Ercc3) alternative variant bSep08, mRNA.                         |
| <a href="#">Ercc4</a>   | <a href="#">Ercc4.aSep08</a>   | <a href="#">304719</a> | 10178 | 906  | 5  | 302 | excision repair cross-complementing rodent repair deficiency, complementation group 4 (Ercc4) alternative variant aSep08, mRNA.                         |
| <a href="#">ERCC4.1</a> | <a href="#">ERCC4.1.aSep08</a> |                        | 9828  | 1744 |    | 304 | excision repair cross-complementing rodent deficiency complementation group 4 CRA b (ERCC4.1) mRNA.                                                     |

|                        |                               |                        |       |      |    |     |                                                                                                                                                    |
|------------------------|-------------------------------|------------------------|-------|------|----|-----|----------------------------------------------------------------------------------------------------------------------------------------------------|
| <a href="#">Ercc6</a>  | <a href="#">Ercc6.bSep08</a>  | <a href="#">306274</a> | 7576  | 1070 | 4  | 356 | excision repair cross-complementing rodent repair deficiency, complementation group 6 (Ercc6) alternative variant bSep08, mRNA.                    |
| <a href="#">Ercc6</a>  | <a href="#">Ercc6.cSep08</a>  | <a href="#">306274</a> | 13373 | 994  | 8  | 331 | excision repair cross-complementing rodent repair deficiency, complementation group 6 (Ercc6) alternative variant cSep08, mRNA.                    |
| <a href="#">Ercc6</a>  | <a href="#">Ercc6.dSep08</a>  | <a href="#">306274</a> | 3416  | 793  | 4  | 247 | excision repair cross-complementing rodent repair deficiency, complementation group 6 (26.5 kD) (Ercc6) alternative variant dSep08, mRNA.          |
| <a href="#">Ercc8</a>  | <a href="#">Ercc8.aSep08</a>  | <a href="#">310071</a> | 36904 | 1606 | 13 | 201 | excision repair cross-complementing rodent repair deficiency, complementation group 8 (Ercc8) alternative variant aSep08, mRNA.                    |
| <a href="#">Ercc8</a>  | <a href="#">Ercc8.bSep08</a>  | <a href="#">310071</a> | 18710 | 874  | 6  | 194 | excision repair cross-complementing rodent repair deficiency, complementation group 8 (Ercc8) alternative variant bSep08, mRNA.                    |
| <a href="#">Ercc8</a>  | <a href="#">Ercc8.cSep08</a>  | <a href="#">310071</a> | 37825 | 2308 | 11 | 184 | excision repair cross-complementing rodent repair deficiency, complementation group 8 (20.3 kD) (Ercc8) alternative variant cSep08, complete mRNA. |
| <a href="#">Ercc8</a>  | <a href="#">Ercc8.dSep08</a>  | <a href="#">310071</a> | 7323  | 864  | 2  | 53  | excision repair cross-complementing rodent repair deficiency, complementation group 8 (5.7 kD) (Ercc8) alternative variant dSep08, mRNA.           |
| <a href="#">Erf</a>    | <a href="#">Erf.aSep08</a>    | <a href="#">292721</a> | 2289  | 1832 | 3  | 519 | ets2 repressor factor (Erf) alternative variant aSep08, mRNA.                                                                                      |
| <a href="#">Erg</a>    | <a href="#">Erg.bSep08</a>    | <a href="#">170909</a> | 19383 | 1144 | 1  | 230 | avian erythroblastosis virus E-26 (v-ets) oncogene related (Erg) alternative variant bSep08, mRNA.                                                 |
| <a href="#">Ergic1</a> | <a href="#">Ergic1.aSep08</a> | <a href="#">287177</a> | 26888 | 2415 |    | 178 | endoplasmic reticulum-golgi intermediate compartment (ERGIC) 1 (Ergic1) mRNA.                                                                      |
| <a href="#">Ergic3</a> | <a href="#">Ergic3.bSep08</a> | <a href="#">296306</a> | 8532  | 958  | 10 | 217 | ERGIC and golgi 3 (24.7 kD) (Ergic3) alternative variant bSep08, mRNA.                                                                             |
| <a href="#">Ergic3</a> | <a href="#">Ergic3.cSep08</a> | <a href="#">296306</a> | 7609  | 550  | 7  | 183 | ERGIC and golgi 3 (Ergic3) alternative variant cSep08, mRNA.                                                                                       |
| <a href="#">Ergic3</a> | <a href="#">Ergic3.dSep08</a> | <a href="#">296306</a> | 1347  | 543  | 4  | 134 | ERGIC and golgi 3 (Ergic3) alternative variant dSep08, mRNA.                                                                                       |
| <a href="#">Ergic3</a> | <a href="#">Ergic3.eSep08</a> | <a href="#">296306</a> | 1010  | 374  | 2  | 36  | ERGIC and golgi 3 (3.9 kD) (Ergic3) alternative variant eSep08, mRNA.                                                                              |
| <a href="#">Erh</a>    | <a href="#">Erh.bSep08</a>    | <a href="#">681415</a> | 10921 | 1468 | 2  | 104 | enhancer of rudimentary homolog (Drosophila) (12.3 kD) (Erh) alternative variant bSep08, mRNA.                                                     |
| <a href="#">Erh</a>    | <a href="#">Erh.cSep08</a>    | <a href="#">681415</a> | 5806  | 785  | 1  | 70  | enhancer of rudimentary homolog (Drosophila) (8.4 kD) (Erh) alternative variant cSep08, mRNA.                                                      |
| <a href="#">Erich1</a> | <a href="#">Erich1.bSep08</a> | <a href="#">306622</a> | 62012 | 402  |    | 133 | glutamate-rich 1 (Erich1) alternative variant bSep08, mRNA.                                                                                        |
| <a href="#">Erlin1</a> | <a href="#">Erlin1.bSep08</a> | <a href="#">293939</a> | 14375 | 432  | 5  | 143 | ER lipid raft associated 1 (Erlin1) alternative variant bSep08, mRNA.                                                                              |
| <a href="#">Erlin2</a> | <a href="#">Erlin2.aSep08</a> | <a href="#">290823</a> | 12873 | 1785 | 9  | 530 | ER lipid raft associated 2 (Erlin2) alternative variant aSep08, mRNA.                                                                              |
| <a href="#">Ermap</a>  | <a href="#">Ermap.aSep08</a>  | <a href="#">298485</a> | 2017  | 215  |    | 71  | erythroblast membrane-associated protein (Ermap) mRNA.                                                                                             |



|                        |                               |                        |       |      |    |     |                                                                                                               |
|------------------------|-------------------------------|------------------------|-------|------|----|-----|---------------------------------------------------------------------------------------------------------------|
| <a href="#">Ernm</a>   | <a href="#">Ernm.bSep08</a>   | <a href="#">295619</a> | 759   | 342  | 2  | 98  | ermin, ERM-like protein (Ernm) alternative variant bSep08, mRNA.                                              |
| <a href="#">Ern1</a>   | <a href="#">Ern1.aSep08</a>   | <a href="#">498013</a> | 5166  | 505  |    | 148 | endoplasmic reticulum (ER) to nucleus signalling 1 (Ern1) mRNA.                                               |
| <a href="#">Ero1l</a>  | <a href="#">Ero1l.aSep08</a>  | <a href="#">171562</a> | 35608 | 1834 |    | 476 | ERO1-like (S. cerevisiae) (Ero1l) mRNA.                                                                       |
| <a href="#">Ero1lb</a> | <a href="#">Ero1lb.aSep08</a> | <a href="#">364755</a> | 34530 | 991  |    | 329 | ERO1-like beta (S. cerevisiae) (Ero1lb) alternative variant aSep08, mRNA.                                     |
| <a href="#">Ero1lb</a> | <a href="#">Ero1lb.bSep08</a> | <a href="#">364755</a> | 11125 | 1069 |    | 179 | ERO1-like beta (S. cerevisiae) (Ero1lb) alternative variant bSep08, mRNA.                                     |
| <a href="#">Ero1lb</a> | <a href="#">Ero1lb.cSep08</a> | <a href="#">364755</a> | 3216  | 887  |    | 65  | ERO1-like beta (S. cerevisiae) (Ero1lb) alternative variant cSep08, mRNA.                                     |
| <a href="#">Erp29</a>  | <a href="#">Erp29.bSep08</a>  | <a href="#">117030</a> | 2824  | 2436 | 2  | 238 | endoplasmic reticulum protein 29 (26.7 kD) (Erp29) alternative variant bSep08, mRNA.                          |
| <a href="#">Erp29</a>  | <a href="#">Erp29.cSep08</a>  | <a href="#">117030</a> | 6293  | 978  | 2  | 209 | endoplasmic reticulum protein 29 precursor (22.9 kD) (Erp29) alternative variant cSep08, mRNA.                |
| <a href="#">Erp29</a>  | <a href="#">Erp29.eSep08</a>  | <a href="#">117030</a> | 434   | 235  | 2  | 78  | putative protein (Erp29) alternative variant eSep08, mRNA.                                                    |
| <a href="#">Erp29</a>  | <a href="#">Erp29.fSep08</a>  | <a href="#">117030</a> | 4866  | 715  | 3  | 78  | putative secreted or extracellular protein precursor (Erp29) alternative variant fSep08, mRNA.                |
| <a href="#">Es1</a>    | <a href="#">Es1.bSep08</a>    | <a href="#">24346</a>  | 8350  | 545  |    | 126 | esterase 1 (Es1) alternative variant bSep08, mRNA.                                                            |
| <a href="#">Es22</a>   | <a href="#">Es22.bSep08</a>   | <a href="#">29225</a>  | 14073 | 822  | 1  | 118 | esterase 22 (13.4 kD) (Es22) alternative variant bSep08, mRNA.                                                |
| <a href="#">Esam</a>   | <a href="#">Esam.bSep08</a>   | <a href="#">300519</a> | 1622  | 1100 | 1  | 192 | endothelial cell adhesion molecule (Esam) alternative variant bSep08, mRNA.                                   |
| <a href="#">Esco1</a>  | <a href="#">Esco1.aSep08</a>  | <a href="#">680014</a> | 39163 | 3884 | 9  | 840 | establishment of cohesion 1 homolog 1 (S. cerevisiae) (94.6 kD) (Esco1) alternative variant aSep08, mRNA.     |
| <a href="#">Esd</a>    | <a href="#">Esd.bSep08</a>    | <a href="#">290401</a> | 14275 | 601  | 5  | 152 | esterase D/formylglutathione hydrolase (Esd) alternative variant bSep08, mRNA.                                |
| <a href="#">Esd</a>    | <a href="#">Esd.dSep08</a>    | <a href="#">290401</a> | 4511  | 550  | 2  | 55  | esterase D/formylglutathione hydrolase (5.9 kD) (Esd) alternative variant dSep08, mRNA.                       |
| <a href="#">Esf1</a>   | <a href="#">Esf1.aSep08</a>   | <a href="#">366203</a> | 70302 | 3336 | 14 | 861 | ESF1, nucleolar pre-rRNA processing protein, homolog (S. cerevisiae) (Esf1) alternative variant aSep08, mRNA. |
| <a href="#">Esf1</a>   | <a href="#">Esf1.bSep08</a>   | <a href="#">366203</a> | 2660  | 829  | 2  | 207 | ESF1, nucleolar pre-rRNA processing protein, homolog (S. cerevisiae) (Esf1) alternative variant bSep08, mRNA. |
| <a href="#">Esp1l</a>  | <a href="#">Esp1l.aSep08</a>  | <a href="#">315330</a> | 7668  | 1785 | 6  | 543 | extra spindle poles like 1 (S. cerevisiae) (Esp1l) alternative variant aSep08, mRNA.                          |
| <a href="#">Esp1l</a>  | <a href="#">Esp1l.bSep08</a>  | <a href="#">315330</a> | 4696  | 1938 | 10 | 443 | extra spindle poles like 1 (S. cerevisiae) (Esp1l) alternative variant bSep08, mRNA.                          |
| <a href="#">Esp1l</a>  | <a href="#">Esp1l.cSep08</a>  | <a href="#">315330</a> | 6225  | 585  | 3  | 146 | extra spindle poles like 1 (S. cerevisiae) (Esp1l) alternative variant cSep08, mRNA.                          |
| <a href="#">Espn</a>   | <a href="#">Espn.aSep08</a>   | <a href="#">56227</a>  | 5731  | 423  |    | 140 | espin (Espn) mRNA.                                                                                            |
| <a href="#">Esr1</a>   | <a href="#">Esr1.bSep08</a>   | <a href="#">24890</a>  | 730   | 424  | 1  | 70  | estrogen receptor 1 (alpha) (Esr1) alternative variant bSep08, mRNA.                                          |
| <a href="#">Esrra</a>  | <a href="#">Esrra.bSep08</a>  | <a href="#">293701</a> | 8345  | 699  | 1  | 117 | estrogen related receptor, alpha (12.4 kD) (Esrra) alternative variant bSep08, mRNA.                          |
| <a href="#">EST1.0</a> | <a href="#">EST1.0.aSep08</a> |                        | 39793 | 572  |    | 161 | smg-7 homolog (EST1.0) mRNA.                                                                                  |

|                       |                              |                        |       |      |    |     |                                                                                                         |
|-----------------------|------------------------------|------------------------|-------|------|----|-----|---------------------------------------------------------------------------------------------------------|
| <a href="#">Etaa1</a> | <a href="#">Etaa1.bSep08</a> | <a href="#">498420</a> | 7583  | 2533 | 5  | 669 | ewing's tumor-associated antigen 1 (Etaa1) alternative variant bSep08, mRNA.                            |
| <a href="#">Etaa1</a> | <a href="#">Etaa1.dSep08</a> | <a href="#">498420</a> | 5666  | 561  | 5  | 93  | ewing's tumor-associated antigen 1 (10.1 kD) (Etaa1) alternative variant dSep08, mRNA.                  |
| <a href="#">Etf1</a>  | <a href="#">Etf1.bSep08</a>  | <a href="#">307503</a> | 21469 | 754  | 5  | 251 | eukaryotic translation termination factor 1 (Etf1) alternative variant bSep08, mRNA.                    |
| <a href="#">Etfb</a>  | <a href="#">Etfb.bSep08</a>  | <a href="#">292845</a> | 19941 | 899  | 3  | 221 | electron transferring flavoprotein, beta polypeptide (24.1 kD) (Etfb) alternative variant bSep08, mRNA. |
| <a href="#">Etfb</a>  | <a href="#">Etfb.cSep08</a>  | <a href="#">292845</a> | 12995 | 614  | 1  | 198 | electron transferring flavoprotein, beta polypeptide (Etfb) alternative variant cSep08, mRNA.           |
| <a href="#">Etnk2</a> | <a href="#">Etnk2.aSep08</a> | <a href="#">360843</a> | 17730 | 1754 | 3  | 506 | ethanolamine kinase 2 (Etnk2) alternative variant aSep08, mRNA.                                         |
| <a href="#">Etnk2</a> | <a href="#">Etnk2.cSep08</a> | <a href="#">360843</a> | 9071  | 500  | 2  | 166 | ethanolamine kinase 2 (Etnk2) alternative variant cSep08, mRNA.                                         |
| <a href="#">Ets.0</a> | <a href="#">Ets.0.aSep08</a> |                        | 3159  | 644  |    | 214 | spi-B transcription factor (Ets.0) mRNA.                                                                |
| <a href="#">Ets2</a>  | <a href="#">Ets2.bSep08</a>  | <a href="#">304063</a> | 1295  | 376  | 2  | 118 | e26 avian leukemia oncogene 2, 3' domain (Ets2) alternative variant bSep08, mRNA.                       |
| <a href="#">Etv1</a>  | <a href="#">Etv1.aSep08</a>  | <a href="#">362733</a> | 78264 | 1204 | 11 | 339 | ets variant gene 1 (Etv1) alternative variant aSep08, mRNA.                                             |
| <a href="#">Etv2</a>  | <a href="#">Etv2.aSep08</a>  | <a href="#">361544</a> | 1139  | 459  |    | 146 | ets variant gene 2 (Etv2) mRNA.                                                                         |
| <a href="#">Etv3</a>  | <a href="#">Etv3.bSep08</a>  | <a href="#">295297</a> | 4093  | 2342 | 3  | 147 | ets variant gene 3 (17.5 kD) (Etv3) alternative variant bSep08, complete mRNA.                          |
| <a href="#">Etv3</a>  | <a href="#">Etv3.cSep08</a>  | <a href="#">295297</a> | 1850  | 635  | 2  | 47  | ets variant gene 3 (Etv3) alternative variant cSep08, mRNA.                                             |
| <a href="#">Etv3l</a> | <a href="#">Etv3l.bSep08</a> | <a href="#">499651</a> | 11824 | 1035 | 1  | 290 | ets variant gene 3-like (Etv3l) alternative variant bSep08, mRNA.                                       |
| <a href="#">Etv3l</a> | <a href="#">Etv3l.cSep08</a> | <a href="#">499651</a> | 6449  | 703  | 1  | 108 | ets variant gene 3-like (Etv3l) alternative variant cSep08, mRNA.                                       |
| <a href="#">Etv4</a>  | <a href="#">Etv4.bSep08</a>  | <a href="#">360635</a> | 15133 | 2202 | 13 | 487 | ets gene 4 CRA b (54.1 kD) (Etv4) alternative variant bSep08, mRNA.                                     |
| <a href="#">Etv4</a>  | <a href="#">Etv4.cSep08</a>  | <a href="#">360635</a> | 11374 | 1390 | 6  | 267 | ets gene 4 (29.3 kD) (Etv4) alternative variant cSep08, mRNA.                                           |
| <a href="#">Etv4</a>  | <a href="#">Etv4.dSep08</a>  | <a href="#">360635</a> | 1111  | 802  | 3  | 111 | ets gene 4 CRA b (Etv4) alternative variant dSep08, mRNA.                                               |
| <a href="#">Etv5</a>  | <a href="#">Etv5.bSep08</a>  | <a href="#">303828</a> | 56309 | 1800 | 1  | 474 | ets variant gene 5 (Etv5) alternative variant bSep08, mRNA.                                             |
| <a href="#">Etv6</a>  | <a href="#">Etv6.bSep08</a>  | <a href="#">312777</a> | 1132  | 720  | 2  | 115 | putative protein, with a transmembrane domain (Etv6) alternative variant bSep08, mRNA.                  |
| <a href="#">Evc</a>   | <a href="#">Evc.aSep08</a>   | <a href="#">289712</a> | 11618 | 1186 |    | 266 | ellis van Creveld gene homolog (human) (Evc) mRNA.                                                      |
| <a href="#">Evc2</a>  | <a href="#">Evc2.bSep08</a>  | <a href="#">289711</a> | 3259  | 418  | 1  | 63  | ellis van Creveld syndrome 2 homolog (human) (Evc2) alternative variant bSep08, mRNA.                   |
| <a href="#">Evl</a>   | <a href="#">Evl.aSep08</a>   | <a href="#">79115</a>  | 50400 | 2922 | 2  | 420 | ena-vasodilator stimulated phosphoprotein (45.1 kD) (Evl) alternative variant aSep08, mRNA.             |
| <a href="#">Evl</a>   | <a href="#">Evl.cSep08</a>   | <a href="#">79115</a>  | 7000  | 1218 | 3  | 118 | ena-vasodilator stimulated phosphoprotein (Evl) alternative variant cSep08, mRNA.                       |
| <a href="#">Ewsr1</a> | <a href="#">Ewsr1.bSep08</a> | <a href="#">289752</a> | 11405 | 935  | 8  | 304 | ewing sarcoma breakpoint region 1 (Ewsr1) alternative variant bSep08, mRNA.                             |

|                                  |                                         |                        |        |      |    |     |                                                                                      |
|----------------------------------|-----------------------------------------|------------------------|--------|------|----|-----|--------------------------------------------------------------------------------------|
| <a href="#">Ewsr1</a>            | <a href="#">Ewsr1.cSep08</a>            | <a href="#">289752</a> | 11314  | 718  | 6  | 239 | ewing sarcoma breakpoint region 1 (Ewsr1) alternative variant cSep08, mRNA.          |
| <a href="#">Ewsr1</a>            | <a href="#">Ewsr1.dSep08</a>            | <a href="#">289752</a> | 7795   | 1712 | 5  | 189 | ewing sarcoma breakpoint region 1 (Ewsr1) alternative variant dSep08, mRNA.          |
| <a href="#">Ewsr1</a>            | <a href="#">Ewsr1.eSep08</a>            | <a href="#">289752</a> | 6493   | 400  | 5  | 132 | ewing sarcoma breakpoint region 1 (Ewsr1) alternative variant eSep08, mRNA.          |
| <a href="#">Ewsr1</a>            | <a href="#">Ewsr1.fSep08</a>            | <a href="#">289752</a> | 1637   | 724  | 3  | 65  | ewing sarcoma breakpoint region 1 (7.3 kD) (Ewsr1) alternative variant fSep08, mRNA. |
| <a href="#">Exdl2</a>            | <a href="#">Exdl2.bSep08</a>            | <a href="#">362759</a> | 20238  | 798  | 1  | 234 | exonuclease 3"-5" domain-like 2 (Exdl2) alternative variant bSep08, mRNA.            |
| <a href="#">Exo1</a>             | <a href="#">Exo1.bSep08</a>             | <a href="#">305000</a> | 1279   | 612  | 1  | 21  | exonuclease 1 (Exo1) alternative variant bSep08, mRNA.                               |
| <a href="#">Exoc3</a>            | <a href="#">Exoc3.bSep08</a>            | <a href="#">252881</a> | 30746  | 1798 | 5  | 408 | exocyst complex component 3 (Exoc3) alternative variant bSep08, complete mRNA.       |
| <a href="#">Exoc3l</a>           | <a href="#">Exoc3l.bSep08</a>           | <a href="#">291961</a> | 2307   | 1151 | 3  | 326 | exocyst complex component 3-like (Exoc3l) alternative variant bSep08, mRNA.          |
| <a href="#">Exoc3l</a>           | <a href="#">Exoc3l.cSep08</a>           | <a href="#">291961</a> | 1218   | 858  | 5  | 191 | exocyst complex component 3-like (Exoc3l) alternative variant cSep08, mRNA.          |
| <a href="#">Exoc4</a>            | <a href="#">Exoc4.aSep08</a>            | <a href="#">116654</a> | 260412 | 688  | 1  | 174 | exocyst complex component 4 (Exoc4) alternative variant aSep08, mRNA.                |
| <a href="#">Exoc4</a>            | <a href="#">Exoc4.bSep08</a>            | <a href="#">116654</a> | 538972 | 753  | 1  | 168 | exocyst complex component 4 (Exoc4) alternative variant bSep08, mRNA.                |
| <a href="#">Exoc4</a>            | <a href="#">Exoc4.cSep08</a>            | <a href="#">116654</a> | 163612 | 591  | 2  | 74  | exocyst complex component 4 (Exoc4) alternative variant cSep08, mRNA.                |
| <a href="#">Exoc5</a>            | <a href="#">Exoc5.bSep08</a>            | <a href="#">60627</a>  | 10139  | 769  | 7  | 110 | exocyst complex component 5 (Exoc5) alternative variant bSep08, mRNA.                |
| <a href="#">Exoc7</a>            | <a href="#">Exoc7.bSep08</a>            | <a href="#">64632</a>  | 8866   | 645  | 7  | 214 | exocyst complex component 7 (Exoc7) alternative variant bSep08, mRNA.                |
| <a href="#">Exoc7</a>            | <a href="#">Exoc7.cSep08</a>            | <a href="#">64632</a>  | 1488   | 478  | 3  | 146 | exocyst complex component 7 (Exoc7) alternative variant cSep08, mRNA.                |
| <a href="#">Exosc2</a>           | <a href="#">Exosc2.bSep08</a>           | <a href="#">366017</a> | 3853   | 409  | 5  | 67  | exosome component 2 (Exosc2) alternative variant bSep08, mRNA.                       |
| <a href="#">Exosc3</a>           | <a href="#">Exosc3.aSep08</a>           | <a href="#">313243</a> | 5170   | 1038 |    | 274 | exosome component 3 (Exosc3) mRNA.                                                   |
| <a href="#">Exosc5</a>           | <a href="#">Exosc5.aSep08</a>           | <a href="#">308441</a> | 9151   | 1026 | 6  | 235 | exosome component 5 (25.2 kD) (Exosc5) alternative variant aSep08, mRNA.             |
| <a href="#">Exosc5</a>           | <a href="#">Exosc5.bSep08</a>           | <a href="#">308441</a> | 5585   | 551  | 3  | 183 | exosome component 5 (Exosc5) alternative variant bSep08, mRNA.                       |
| <a href="#">Exosc7</a>           | <a href="#">Exosc7.aSep08</a>           | <a href="#">316098</a> | 25359  | 1035 |    | 298 | exosome component 7 (Exosc7) mRNA.                                                   |
| <a href="#">Exosc8</a>           | <a href="#">Exosc8.aSep08</a>           | <a href="#">295050</a> | 6520   | 947  | 11 | 281 | exosome component 8 (Exosc8) alternative variant aSep08, mRNA.                       |
| <a href="#">Exosc9</a>           | <a href="#">Exosc9.bSep08</a>           | <a href="#">294975</a> | 5279   | 1919 | 6  | 167 | exosome component 9 (Exosc9) alternative variant bSep08, mRNA.                       |
| <a href="#">Exosc9</a>           | <a href="#">Exosc9.cSep08</a>           | <a href="#">294975</a> | 1148   | 504  | 2  | 129 | exosome component 9 (Exosc9) alternative variant cSep08, mRNA.                       |
| <a href="#">Exosc9</a>           | <a href="#">Exosc9.dSep08</a>           | <a href="#">294975</a> | 3828   | 1752 | 3  | 64  | exosome component 9 (7.0 kD) (Exosc9) alternative variant dSep08, mRNA.              |
| <a href="#">Exo_endo_phos.11</a> | <a href="#">Exo_endo_phos.11.aSep08</a> |                        | 6664   | 745  |    | 247 | synaptojanin 1 (Exo_endo_phos.11) mRNA.                                              |

|                                  |                                         |                        |        |      |    |     |                                                                                             |
|----------------------------------|-----------------------------------------|------------------------|--------|------|----|-----|---------------------------------------------------------------------------------------------|
| <a href="#">Exo_endo_phos.21</a> | <a href="#">Exo_endo_phos.21.aSep08</a> |                        | 4078   | 2299 | 5  | 341 | inositol e (Exo_endo_phos.21) alternative variant aSep08, mRNA.                             |
| <a href="#">Exo_endo_phos.21</a> | <a href="#">Exo_endo_phos.21.bSep08</a> |                        | 2410   | 1198 | 4  | 208 | inositol e (Exo_endo_phos.21) alternative variant bSep08, mRNA.                             |
| <a href="#">Exo_endo_phos.21</a> | <a href="#">Exo_endo_phos.21.cSep08</a> |                        | 2259   | 1271 | 3  | 81  | CRA c like (Exo_endo_phos.21) alternative variant cSep08, mRNA.                             |
| <a href="#">Ext1</a>             | <a href="#">Ext1.aSep08</a>             | <a href="#">299907</a> | 277872 | 3366 | 11 | 749 | exostoses (multiple) 1 (Ext1) alternative variant aSep08, mRNA.                             |
| <a href="#">Ext2</a>             | <a href="#">Ext2.aSep08</a>             | <a href="#">311215</a> | 133015 | 2882 | 13 | 787 | exostoses (multiple) 2 (Ext2) alternative variant aSep08, mRNA.                             |
| <a href="#">Ext2</a>             | <a href="#">Ext2.cSep08</a>             | <a href="#">311215</a> | 66300  | 419  | 2  | 99  | exostoses (multiple) 2 (Ext2) alternative variant cSep08, mRNA.                             |
| <a href="#">Extl2</a>            | <a href="#">Extl2.cSep08</a>            | <a href="#">310803</a> | 14964  | 460  | 3  | 35  | exostoses (multiple)-like 2 (4.0 kD) (Extl2) alternative variant cSep08, mRNA.              |
| <a href="#">Extl3</a>            | <a href="#">Extl3.bSep08</a>            | <a href="#">56819</a>  | 22935  | 1604 | 1  | 457 | exostoses (multiple)-like 3 (Extl3) alternative variant bSep08, mRNA.                       |
| <a href="#">Eya1</a>             | <a href="#">Eya1.aSep08</a>             | <a href="#">502935</a> | 22884  | 394  |    | 42  | eyes absent 1 homolog (Drosophila) (4.4 kD) (Eya1) mRNA.                                    |
| <a href="#">Eya2</a>             | <a href="#">Eya2.bSep08</a>             | <a href="#">156826</a> | 51275  | 359  | 4  | 119 | eyes absent 2 homolog (Drosophila) (Eya2) alternative variant bSep08, mRNA.                 |
| <a href="#">Eya4</a>             | <a href="#">Eya4.aSep08</a>             | <a href="#">292172</a> | 13383  | 783  |    | 228 | eyes absent 4 homolog (Drosophila) (Eya4) mRNA.                                             |
| <a href="#">Ezh2</a>             | <a href="#">Ezh2.aSep08</a>             | <a href="#">312299</a> | 63760  | 3233 | 20 | 790 | enhancer of zeste homolog 2 (Drosophila) (Ezh2) alternative variant aSep08, mRNA.           |
| <a href="#">Ezh2</a>             | <a href="#">Ezh2.bSep08</a>             | <a href="#">312299</a> | 46424  | 2198 | 18 | 404 | enhancer of zeste homolog 2 (Drosophila) (45.9 kD) (Ezh2) alternative variant bSep08, mRNA. |
| <a href="#">Ezh2</a>             | <a href="#">Ezh2.cSep08</a>             | <a href="#">312299</a> | 40439  | 431  | 5  | 143 | enhancer of zeste homolog 2 (Drosophila) (Ezh2) alternative variant cSep08, mRNA.           |
| <a href="#">Ezh2</a>             | <a href="#">Ezh2.dSep08</a>             | <a href="#">312299</a> | 5411   | 463  | 3  | 117 | enhancer of zeste homolog 2 (Drosophila) (Ezh2) alternative variant dSep08, mRNA.           |
| <a href="#">Ezh2</a>             | <a href="#">Ezh2.eSep08</a>             | <a href="#">312299</a> | 793    | 410  | 2  | 95  | enhancer of zeste homolog 2 (Drosophila) (Ezh2) alternative variant eSep08, mRNA.           |
| <a href="#">Ezh2</a>             | <a href="#">Ezh2.fSep08</a>             | <a href="#">312299</a> | 5765   | 719  | 3  | 45  | enhancer of zeste homolog 2 (Drosophila) (Ezh2) alternative variant fSep08, mRNA.           |
| <a href="#">Ezr</a>              | <a href="#">Ezr.bSep08</a>              | <a href="#">54319</a>  | 1693   | 717  | 3  | 131 | ezrin (Ezr) alternative variant bSep08, mRNA.                                               |
| <a href="#">F-box.0</a>          | <a href="#">F-box.0.aSep08</a>          |                        | 10672  | 2243 |    | 380 | F-box leucine-rich repeat protein 10 (F-box.0) mRNA.                                        |
| <a href="#">F-box.1</a>          | <a href="#">F-box.1.aSep08</a>          |                        | 31380  | 1038 | 3  | 227 | F-box wd-40 domain protein 8 (F-box.1) alternative variant aSep08, mRNA.                    |
| <a href="#">F-box.1</a>          | <a href="#">F-box.1.bSep08</a>          |                        | 26157  | 553  | 1  | 184 | F-box wd-40 domain protein 8 (F-box.1) alternative variant bSep08, mRNA.                    |
| <a href="#">F-box.2</a>          | <a href="#">F-box.2.aSep08</a>          |                        | 156498 | 1401 |    | 466 | F-box leucine-rich repeat protein 13 (F-box.2) mRNA.                                        |
| <a href="#">F2</a>               | <a href="#">F2.bSep08</a>               | <a href="#">29251</a>  | 2216   | 1200 | 5  | 216 | coagulation factor II (F2) alternative variant bSep08, mRNA.                                |
| <a href="#">F2</a>               | <a href="#">F2.cSep08</a>               | <a href="#">29251</a>  | 328    | 249  | 2  | 82  | coagulation factor II (F2) alternative variant cSep08, mRNA.                                |
| <a href="#">F5</a>               | <a href="#">F5.bSep08</a>               | <a href="#">304929</a> | 8355   | 2877 | 3  | 959 | coagulation factor V (F5) alternative variant bSep08, mRNA.                                 |

|                                |                                       |                        |        |      |    |      |                                                                                                      |
|--------------------------------|---------------------------------------|------------------------|--------|------|----|------|------------------------------------------------------------------------------------------------------|
| <a href="#">F5</a>             | <a href="#">F5.cSep08</a>             | <a href="#">304929</a> | 22927  | 708  | 5  | 235  | coagulation factor V (F5) alternative variant cSep08, mRNA.                                          |
| <a href="#">F5</a>             | <a href="#">F5.dSep08</a>             | <a href="#">304929</a> | 9785   | 764  | 5  | 233  | coagulation factor V (F5) alternative variant dSep08, mRNA.                                          |
| <a href="#">F5</a>             | <a href="#">F5.eSep08</a>             | <a href="#">304929</a> | 3090   | 559  | 3  |      |                                                                                                      |
| <a href="#">F5_F8_type_C.0</a> | <a href="#">F5_F8_type_C.0.aSep08</a> |                        | 1477   | 642  | 4  | 214  | contactin associated protein 1 CRA a (F5_F8_type_C.0) alternative variant aSep08, mRNA.              |
| <a href="#">F5_F8_type_C.1</a> | <a href="#">F5_F8_type_C.1.aSep08</a> |                        | 1994   | 286  | 1  | 95   | EGF-like repeats discoidin I-like domains 3 (F5_F8_type_C.1) alternative variant aSep08, mRNA.       |
| <a href="#">F5_F8_type_C.1</a> | <a href="#">F5_F8_type_C.1.bSep08</a> |                        | 560    | 253  | 1  | 46   | EGF-like repeats discoidin I-like domains 3 (F5_F8_type_C.1) alternative variant bSep08, mRNA.       |
| <a href="#">F5_F8_type_C.2</a> | <a href="#">F5_F8_type_C.2.aSep08</a> |                        | 178862 | 537  |    | 144  | EGF-like repeats discoidin I-like domains 3 (F5_F8_type_C.2) mRNA.                                   |
| <a href="#">F8</a>             | <a href="#">F8.bSep08</a>             | <a href="#">302470</a> | 6799   | 3007 | 2  | 1002 | coagulation factor VIII and hypothetical protein LOC679968 (F8) alternative variant bSep08, mRNA.    |
| <a href="#">F8</a>             | <a href="#">F8.bSep08</a>             | <a href="#">679968</a> | 6799   | 3007 | 2  | 1002 | coagulation factor VIII and hypothetical protein LOC679968 (F8) alternative variant bSep08, mRNA.    |
| <a href="#">F8</a>             | <a href="#">F8.cSep08</a>             | <a href="#">302470</a> | 3748   | 1094 | 5  | 236  | coagulation factor VIII and hypothetical protein LOC679968 (F8) alternative variant cSep08, mRNA.    |
| <a href="#">F8</a>             | <a href="#">F8.cSep08</a>             | <a href="#">679968</a> | 3748   | 1094 | 5  | 236  | coagulation factor VIII and hypothetical protein LOC679968 (F8) alternative variant cSep08, mRNA.    |
| <a href="#">F8</a>             | <a href="#">F8.dSep08</a>             | <a href="#">302470</a> | 3989   | 325  | 3  | 75   | coagulation factor VIII and hypothetical protein LOC679968 (F8) alternative variant dSep08, mRNA.    |
| <a href="#">F8</a>             | <a href="#">F8.dSep08</a>             | <a href="#">679968</a> | 3989   | 325  | 3  | 75   | coagulation factor VIII and hypothetical protein LOC679968 (F8) alternative variant dSep08, mRNA.    |
| <a href="#">F9</a>             | <a href="#">F9.aSep08</a>             | <a href="#">24946</a>  | 43629  | 1857 |    | 153  | coagulation factor IX (F9) mRNA.                                                                     |
| <a href="#">F11</a>            | <a href="#">F11.bSep08</a>            | <a href="#">290757</a> | 8817   | 1209 | 5  | 402  | coagulation factor XI (F11) alternative variant bSep08, mRNA.                                        |
| <a href="#">F11r</a>           | <a href="#">F11r.aSep08</a>           | <a href="#">116479</a> | 21526  | 971  |    | 267  | f11 receptor (F11r) mRNA.                                                                            |
| <a href="#">F13b</a>           | <a href="#">F13b.aSep08</a>           | <a href="#">289055</a> | 21570  | 2352 | 11 | 669  | coagulation factor XIII, beta subunit (F13b) alternative variant aSep08, mRNA.                       |
| <a href="#">F13b</a>           | <a href="#">F13b.cSep08</a>           | <a href="#">289055</a> | 5542   | 689  | 4  | 229  | coagulation factor XIII, beta subunit (F13b) alternative variant cSep08, mRNA.                       |
| <a href="#">F13b</a>           | <a href="#">F13b.dSep08</a>           | <a href="#">289055</a> | 5314   | 817  | 3  | 119  | coagulation factor XIII, beta subunit (F13b) alternative variant dSep08, mRNA.                       |
| <a href="#">Faah</a>           | <a href="#">Faah.bSep08</a>           | <a href="#">29347</a>  | 1781   | 1060 | 3  | 227  | fatty acid amide hydrolase (25.2 kD) (Faah) alternative variant bSep08, mRNA.                        |
| <a href="#">Fabp3</a>          | <a href="#">Fabp3.aSep08</a>          | <a href="#">79131</a>  | 6300   | 1355 | 3  | 136  | fatty acid binding protein 3, muscle and heart (Fabp3) alternative variant aSep08, mRNA.             |
| <a href="#">Fabp4</a>          | <a href="#">Fabp4.aSep08</a>          | <a href="#">79451</a>  | 3556   | 610  | 3  | 142  | fatty acid binding protein 4, adipocyte (15.7 kD) (Fabp4) alternative variant aSep08, mRNA.          |
| <a href="#">Fabp4</a>          | <a href="#">Fabp4.cSep08</a>          | <a href="#">79451</a>  | 4672   | 818  | 4  | 97   | fatty acid binding protein 4, adipocyte (10.9 kD) (Fabp4) alternative variant cSep08, complete mRNA. |
| <a href="#">Fabp7</a>          | <a href="#">Fabp7.aSep08</a>          | <a href="#">80841</a>  | 2242   | 1152 | 4  | 224  | fatty acid binding protein 7, brain (Fabp7) alternative variant aSep08, complete mRNA.               |
| <a href="#">Fabp7</a>          | <a href="#">Fabp7.cSep08</a>          | <a href="#">80841</a>  | 1549   | 458  | 3  | 130  | fatty acid binding protein 7, brain (Fabp7) alternative variant cSep08, mRNA.                        |

|                        |                               |                        |        |      |    |     |                                                                                                         |
|------------------------|-------------------------------|------------------------|--------|------|----|-----|---------------------------------------------------------------------------------------------------------|
| <a href="#">faby</a>   | <a href="#">faby.aSep08</a>   |                        | 46795  | 1605 | 3  | 86  | putative secreted or extracellular protein precursor (10.1 kD) (faby) alternative variant aSep08, mRNA. |
| <a href="#">faby</a>   | <a href="#">faby.bSep08</a>   |                        | 5384   | 748  | 3  | 43  | putative protein (faby) alternative variant bSep08, mRNA.                                               |
| <a href="#">faby</a>   | <a href="#">faby.cSep08</a>   |                        | 5338   | 717  | 3  | 52  | putative protein (faby) alternative variant cSep08, mRNA.                                               |
| <a href="#">faby</a>   | <a href="#">faby.dSep08</a>   |                        | 5395   | 554  | 4  | 77  | putative protein (faby) alternative variant dSep08, mRNA.                                               |
| <a href="#">fachy</a>  | <a href="#">fachy.aSep08</a>  |                        | 1149   | 229  |    | 76  | nebulin (fachy) mRNA.                                                                                   |
| <a href="#">Fads1</a>  | <a href="#">Fads1.bSep08</a>  | <a href="#">84575</a>  | 1312   | 463  | 1  | 116 | fatty acid desaturase 1 (Fads1) alternative variant bSep08, mRNA.                                       |
| <a href="#">Fads3</a>  | <a href="#">Fads3.bSep08</a>  | <a href="#">286922</a> | 18750  | 3091 | 12 | 219 | fatty acid desaturase 3 (25.6 kD) (Fads3) alternative variant bSep08, mRNA.                             |
| <a href="#">Faf1</a>   | <a href="#">Faf1.bSep08</a>   | <a href="#">140657</a> | 117612 | 671  | 6  | 169 | fas-associated factor 1 (Faf1) alternative variant bSep08, mRNA.                                        |
| <a href="#">Faf1</a>   | <a href="#">Faf1.cSep08</a>   | <a href="#">140657</a> | 66289  | 418  | 3  | 56  | fas-associated factor 1 (Faf1) alternative variant cSep08, mRNA.                                        |
| <a href="#">fafer</a>  | <a href="#">fafer.aSep08</a>  |                        | 51685  | 325  |    | 28  | putative protein (3.0 kD) (fafer) mRNA.                                                                 |
| <a href="#">faflo</a>  | <a href="#">faflo.aSep08</a>  |                        | 1427   | 1274 |    | 58  | putative protein (6.6 kD) (faflo) alternative variant aSep08, mRNA.                                     |
| <a href="#">faflu</a>  | <a href="#">faflu.aSep08</a>  |                        | 3144   | 2629 |    | 129 | CRA a (faflu) mRNA.                                                                                     |
| <a href="#">Fahd2a</a> | <a href="#">Fahd2a.bSep08</a> | <a href="#">296131</a> | 7926   | 959  | 6  | 216 | putative protein of ancient origin (Fahd2a) alternative variant bSep08, mRNA.                           |
| <a href="#">Fahd2a</a> | <a href="#">Fahd2a.cSep08</a> | <a href="#">296131</a> | 827    | 726  | 2  | 93  | putative protein of ancient origin (10.3 kD) (Fahd2a) alternative variant cSep08, mRNA.                 |
| <a href="#">Fahd2a</a> | <a href="#">Fahd2a.dSep08</a> | <a href="#">296131</a> | 7553   | 417  | 3  | 85  | putative protein of metazoan origin (Fahd2a) alternative variant dSep08, mRNA.                          |
| <a href="#">Faim</a>   | <a href="#">Faim.aSep08</a>   | <a href="#">140930</a> | 16013  | 1004 | 6  | 201 | fas apoptotic inhibitory molecule (22.7 kD) (Faim) alternative variant aSep08, complete mRNA.           |
| <a href="#">Faim.1</a> | <a href="#">Faim.1.aSep08</a> | <a href="#">140930</a> | 16738  | 1004 | 6  | 201 | fas apoptotic inhibitory molecule (22.7 kD) (Faim.1) alternative variant aSep08, complete mRNA.         |
| <a href="#">Faim2</a>  | <a href="#">Faim2.bSep08</a>  | <a href="#">246274</a> | 10653  | 796  | 9  | 167 | fas apoptotic inhibitory molecule 2 (Faim2) alternative variant bSep08, mRNA.                           |
| <a href="#">Faim2</a>  | <a href="#">Faim2.cSep08</a>  | <a href="#">246274</a> | 6783   | 440  | 5  | 120 | fas apoptotic inhibitory molecule 2 (Faim2) alternative variant cSep08, mRNA.                           |
| <a href="#">Faim2</a>  | <a href="#">Faim2.dSep08</a>  | <a href="#">246274</a> | 1276   | 410  | 2  | 59  | fas apoptotic inhibitory molecule 2 (Faim2) alternative variant dSep08, mRNA.                           |
| <a href="#">Faim3</a>  | <a href="#">Faim3.bSep08</a>  | <a href="#">548326</a> | 5569   | 1558 | 2  | 161 | fas apoptotic inhibitory molecule 3 (18.3 kD) (Faim3) alternative variant bSep08, mRNA.                 |
| <a href="#">fakee</a>  | <a href="#">fakee.aSep08</a>  |                        | 25942  | 895  |    | 297 | CLIP-associating protein 1 (fakee) mRNA.                                                                |
| <a href="#">faloy</a>  | <a href="#">faloy.aSep08</a>  |                        | 1451   | 933  |    | 64  | putative protein of eukaryotic origin (7.1 kD) (faloy) mRNA.                                            |
| <a href="#">Fam3a</a>  | <a href="#">Fam3a.bSep08</a>  | <a href="#">501664</a> | 2314   | 1480 | 4  | 143 | family with sequence similarity 3, member A (15.8 kD) (Fam3a) alternative variant bSep08, mRNA.         |
| <a href="#">Fam3a</a>  | <a href="#">Fam3a.cSep08</a>  | <a href="#">501664</a> | 2159   | 595  | 2  | 118 | family with sequence similarity 3, member A (Fam3a) alternative variant cSep08, mRNA.                   |
| <a href="#">Fam3a</a>  | <a href="#">Fam3a.dSep08</a>  | <a href="#">501664</a> | 2021   | 1230 | 4  | 103 | family with sequence similarity 3, member A (Fam3a) alternative variant dSep08, mRNA.                   |
| <a href="#">Fam8a1</a> | <a href="#">Fam8a1.aSep08</a> | <a href="#">291031</a> | 7110   | 3025 |    | 162 | family with sequence similarity 8, member A1 (Fam8a1) mRNA.                                             |

|                         |                                |                        |        |      |    |      |                                                                                                                        |
|-------------------------|--------------------------------|------------------------|--------|------|----|------|------------------------------------------------------------------------------------------------------------------------|
| <a href="#">Fam13c1</a> | <a href="#">Fam13c1.aSep08</a> | <a href="#">294565</a> | 88269  | 821  | 6  | 190  | CRA a (Fam13c1) alternative variant aSep08, mRNA.                                                                      |
| <a href="#">Fam13c1</a> | <a href="#">Fam13c1.bSep08</a> | <a href="#">294565</a> | 24433  | 701  | 3  | 116  | CRA a (Fam13c1) alternative variant bSep08, mRNA.                                                                      |
| <a href="#">Fam13c1</a> | <a href="#">Fam13c1.cSep08</a> | <a href="#">294565</a> | 7729   | 348  | 2  | 67   | CRA b (Fam13c1) alternative variant cSep08, mRNA.                                                                      |
| <a href="#">Fam19a2</a> | <a href="#">Fam19a2.aSep08</a> | <a href="#">680647</a> | 47301  | 2259 |    | 44   | family with sequence similarity 19 (chemokine (C-C motif)-like), member A2 (Fam19a2) mRNA.                             |
| <a href="#">Fam19a5</a> | <a href="#">Fam19a5.aSep08</a> | <a href="#">500915</a> | 139624 | 1134 | 2  | 129  | family with sequence similarity 19 (chemokine (C-C motif)-like), member A5 (Fam19a5) alternative variant aSep08, mRNA. |
| <a href="#">Fam19a5</a> | <a href="#">Fam19a5.bSep08</a> | <a href="#">500915</a> | 43032  | 1668 | 1  | 83   | family with sequence similarity 19 (chemokine (C-C motif)-like), member A5 (Fam19a5) alternative variant bSep08, mRNA. |
| <a href="#">Fam20a</a>  | <a href="#">Fam20a.bSep08</a>  | <a href="#">303635</a> | 932    | 328  | 1  | 66   | family with sequence similarity 20, member A (Fam20a) alternative variant bSep08, mRNA.                                |
| <a href="#">Fam20b</a>  | <a href="#">Fam20b.bSep08</a>  | <a href="#">304885</a> | 1978   | 749  | 2  | 117  | family with sequence similarity 20, member B (Fam20b) alternative variant bSep08, mRNA.                                |
| <a href="#">Fam20b</a>  | <a href="#">Fam20b.cSep08</a>  | <a href="#">304885</a> | 2149   | 1965 | 2  | 67   | family with sequence similarity 20, member B (7.8 kD) (Fam20b) alternative variant cSep08, mRNA.                       |
| <a href="#">Fam20c</a>  | <a href="#">Fam20c.bSep08</a>  | <a href="#">304334</a> | 48252  | 776  | 4  | 199  | family with sequence similarity 20, member C (Fam20c) alternative variant bSep08, mRNA.                                |
| <a href="#">Fam20c</a>  | <a href="#">Fam20c.cSep08</a>  | <a href="#">304334</a> | 15526  | 694  | 4  | 122  | family with sequence similarity 20, member C (Fam20c) alternative variant cSep08, mRNA.                                |
| <a href="#">Fam21c</a>  | <a href="#">Fam21c.bSep08</a>  | <a href="#">297530</a> | 37160  | 3293 | 22 | 1035 | DNA segment Chr 6 Wayne State University 116 expressed (Fam21c) alternative variant bSep08, mRNA.                      |
| <a href="#">Fam21c</a>  | <a href="#">Fam21c.cSep08</a>  | <a href="#">297530</a> | 17403  | 614  | 5  | 204  | DNA segment Chr 6 Wayne State University 116 expressed (Fam21c) alternative variant cSep08, mRNA.                      |
| <a href="#">Fam21c</a>  | <a href="#">Fam21c.dSep08</a>  | <a href="#">297530</a> | 3595   | 1092 | 3  | 200  | DNA segment Chr 6 Wayne State University 116 expressed (Fam21c) alternative variant dSep08, mRNA.                      |
| <a href="#">Fam21c</a>  | <a href="#">Fam21c.eSep08</a>  | <a href="#">297530</a> | 1843   | 1204 | 3  | 118  | DNA segment Chr 6 Wayne State University 116 expressed (Fam21c) alternative variant eSep08, mRNA.                      |
| <a href="#">Fam24a</a>  | <a href="#">Fam24a.aSep08</a>  | <a href="#">499278</a> | 2265   | 1455 | 2  | 98   | family with sequence similarity 24, member A (10.7 kD) (Fam24a) alternative variant aSep08, mRNA.                      |
| <a href="#">Fam24a</a>  | <a href="#">Fam24a.cSep08</a>  | <a href="#">499278</a> | 4240   | 1850 | 3  | 98   | family with sequence similarity 24, member A (10.7 kD) (Fam24a) alternative variant cSep08, mRNA.                      |
| <a href="#">Fam26f</a>  | <a href="#">Fam26f.bSep08</a>  | <a href="#">294430</a> | 1658   | 834  | 1  | 242  | family with sequence similarity 26, member F (27.0 kD) (Fam26f) alternative variant bSep08, complete mRNA.             |
| <a href="#">Fam26f</a>  | <a href="#">Fam26f.cSep08</a>  | <a href="#">294430</a> | 17728  | 681  | 1  | 184  | family with sequence similarity 26, member F (21.4 kD) (Fam26f) alternative variant cSep08, mRNA.                      |
| <a href="#">Fam26f</a>  | <a href="#">Fam26f.dSep08</a>  | <a href="#">294430</a> | 5255   | 585  | 1  | 170  | family with sequence similarity 26, member F (Fam26f) alternative variant dSep08, mRNA.                                |
| <a href="#">Fam29a</a>  | <a href="#">Fam29a.aSep08</a>  | <a href="#">366403</a> | 4361   | 1771 | 1  | 410  | family with sequence similarity 29, member A (Fam29a) alternative variant aSep08, mRNA.                                |
| <a href="#">Fam29a</a>  | <a href="#">Fam29a.bSep08</a>  | <a href="#">366403</a> | 2866   | 591  | 1  | 58   | family with sequence similarity 29, member A (6.4 kD) (Fam29a) alternative variant bSep08, mRNA.                       |
| <a href="#">Fam32a</a>  | <a href="#">Fam32a.aSep08</a>  | <a href="#">498600</a> | 2838   | 678  | 3  | 176  | family with sequence similarity 32, member A (Fam32a) alternative variant aSep08, mRNA.                                |
| <a href="#">Fam35a</a>  | <a href="#">Fam35a.aSep08</a>  | <a href="#">364514</a> | 89131  | 1006 | 6  | 243  | family with sequence similarity 35, member A (Fam35a) alternative variant aSep08, mRNA.                                |

|                        |                               |                        |        |      |    |     |                                                                                                                            |
|------------------------|-------------------------------|------------------------|--------|------|----|-----|----------------------------------------------------------------------------------------------------------------------------|
| <a href="#">Fam35a</a> | <a href="#">Fam35a.bSep08</a> | <a href="#">364514</a> | 23992  | 355  | 4  | 118 | family with sequence similarity 35, member A (Fam35a) alternative variant bSep08, mRNA.                                    |
| <a href="#">Fam35a</a> | <a href="#">Fam35a.cSep08</a> | <a href="#">364514</a> | 60764  | 1157 | 4  | 130 | family with sequence similarity 35, member A (Fam35a) alternative variant cSep08, mRNA.                                    |
| <a href="#">Fam36a</a> | <a href="#">Fam36a.bSep08</a> | <a href="#">289278</a> | 5147   | 1825 | 2  | 86  | family with sequence similarity 36, member A (10.0 kD) (Fam36a) alternative variant bSep08, mRNA.                          |
| <a href="#">Fam36a</a> | <a href="#">Fam36a.cSep08</a> | <a href="#">289278</a> | 1562   | 1009 | 3  | 84  | family with sequence similarity 36, member A (9.5 kD) (Fam36a) alternative variant cSep08, mRNA.                           |
| <a href="#">Fam36a</a> | <a href="#">Fam36a.dSep08</a> | <a href="#">289278</a> | 3567   | 488  | 4  | 82  | family with sequence similarity 36, member A (Fam36a) alternative variant dSep08, mRNA.                                    |
| <a href="#">Fam36a</a> | <a href="#">Fam36a.eSep08</a> | <a href="#">289278</a> | 3580   | 373  | 3  | 73  | family with sequence similarity 36, member A (Fam36a) alternative variant eSep08, mRNA.                                    |
| <a href="#">Fam38b</a> | <a href="#">Fam38b.aSep08</a> | <a href="#">688934</a> | 8299   | 1986 |    | 230 | family with sequence similarity 38, member B (Fam38b) mRNA.                                                                |
| <a href="#">Fam40a</a> | <a href="#">Fam40a.aSep08</a> | <a href="#">362012</a> | 20395  | 3200 |    | 839 | family with sequence similarity 40, member A (Fam40a) mRNA.                                                                |
| <a href="#">Fam43a</a> | <a href="#">Fam43a.aSep08</a> | <a href="#">288031</a> | 3132   | 2539 | 2  | 430 | family with sequence similarity 43, member A (47.0 kD) (Fam43a) alternative variant aSep08, complete mRNA.                 |
| <a href="#">Fam45a</a> | <a href="#">Fam45a.bSep08</a> | <a href="#">308009</a> | 13974  | 621  | 1  | 200 | family with sequence similarity 45, member A (Fam45a) alternative variant bSep08, mRNA.                                    |
| <a href="#">Fam46a</a> | <a href="#">Fam46a.bSep08</a> | <a href="#">300870</a> | 2655   | 1385 | 3  | 427 | family with sequence similarity 46, member A (48.5 kD) (Fam46a) alternative variant bSep08, complete mRNA.                 |
| <a href="#">Fam48a</a> | <a href="#">Fam48a.bSep08</a> | <a href="#">361946</a> | 13750  | 1519 | 9  | 407 | family with sequence similarity 48, member A (Fam48a) alternative variant bSep08, mRNA.                                    |
| <a href="#">Fam48a</a> | <a href="#">Fam48a.cSep08</a> | <a href="#">361946</a> | 8608   | 941  | 11 | 313 | family with sequence similarity 48, member A (Fam48a) alternative variant cSep08, mRNA.                                    |
| <a href="#">Fam48a</a> | <a href="#">Fam48a.dSep08</a> | <a href="#">361946</a> | 11064  | 1005 | 5  | 223 | family with sequence similarity 48, member A (Fam48a) alternative variant dSep08, mRNA.                                    |
| <a href="#">Fam48a</a> | <a href="#">Fam48a.eSep08</a> | <a href="#">361946</a> | 13531  | 894  | 10 | 221 | family with sequence similarity 48, member A (Fam48a) alternative variant eSep08, mRNA.                                    |
| <a href="#">Fam48a</a> | <a href="#">Fam48a.fSep08</a> | <a href="#">361946</a> | 12517  | 820  | 10 | 190 | family with sequence similarity 48, member A (Fam48a) alternative variant fSep08, mRNA.                                    |
| <a href="#">Fam48a</a> | <a href="#">Fam48a.gSep08</a> | <a href="#">361946</a> | 12474  | 673  | 9  | 99  | family with sequence similarity 48, member A (11.4 kD) (Fam48a) alternative variant gSep08, complete mRNA.                 |
| <a href="#">Fam48a</a> | <a href="#">Fam48a.hSep08</a> | <a href="#">361946</a> | 13387  | 755  | 9  | 98  | family with sequence similarity 48, member A (11.3 kD) (Fam48a) alternative variant hSep08, mRNA.                          |
| <a href="#">Fam49b</a> | <a href="#">Fam49b.bSep08</a> | <a href="#">299909</a> | 116430 | 700  | 7  | 232 | family with sequence similarity 49, member B and hypothetical protein LOC690541 (Fam49b) alternative variant bSep08, mRNA. |
| <a href="#">Fam49b</a> | <a href="#">Fam49b.bSep08</a> | <a href="#">690541</a> | 116430 | 700  | 7  | 232 | family with sequence similarity 49, member B and hypothetical protein LOC690541 (Fam49b) alternative variant bSep08, mRNA. |
| <a href="#">Fam49b</a> | <a href="#">Fam49b.cSep08</a> | <a href="#">299909</a> | 9551   | 764  | 5  | 179 | family with sequence similarity 49, member B and hypothetical protein LOC690541 (Fam49b) alternative variant cSep08, mRNA. |



|                        |                               |                        |        |      |    |      |                                                                                                                            |
|------------------------|-------------------------------|------------------------|--------|------|----|------|----------------------------------------------------------------------------------------------------------------------------|
| <a href="#">Fam49b</a> | <a href="#">Fam49b.cSep08</a> | <a href="#">690541</a> | 9551   | 764  | 5  | 179  | family with sequence similarity 49, member B and hypothetical protein LOC690541 (Fam49b) alternative variant cSep08, mRNA. |
| <a href="#">Fam49b</a> | <a href="#">Fam49b.dSep08</a> | <a href="#">299909</a> | 51165  | 725  | 7  | 172  | family with sequence similarity 49, member B and hypothetical protein LOC690541 (Fam49b) alternative variant dSep08, mRNA. |
| <a href="#">Fam49b</a> | <a href="#">Fam49b.dSep08</a> | <a href="#">690541</a> | 51165  | 725  | 7  | 172  | family with sequence similarity 49, member B and hypothetical protein LOC690541 (Fam49b) alternative variant dSep08, mRNA. |
| <a href="#">Fam49b</a> | <a href="#">Fam49b.eSep08</a> | <a href="#">299909</a> | 114310 | 738  | 7  | 155  | family with sequence similarity 49, member B and hypothetical protein LOC690541 (Fam49b) alternative variant eSep08, mRNA. |
| <a href="#">Fam49b</a> | <a href="#">Fam49b.eSep08</a> | <a href="#">690541</a> | 114310 | 738  | 7  | 155  | family with sequence similarity 49, member B and hypothetical protein LOC690541 (Fam49b) alternative variant eSep08, mRNA. |
| <a href="#">FAM50A</a> | <a href="#">FAM50A.bSep08</a> | <a href="#">293862</a> | 5499   | 1134 | 11 | 241  | family with sequence similarity 50, member A (FAM50A) alternative variant bSep08, mRNA.                                    |
| <a href="#">Fam53a</a> | <a href="#">Fam53a.bSep08</a> | <a href="#">305461</a> | 24268  | 726  | 3  | 151  | family with sequence similarity 53, member A (16.2 kD) (Fam53a) alternative variant bSep08, mRNA.                          |
| <a href="#">Fam53a</a> | <a href="#">Fam53a.cSep08</a> | <a href="#">305461</a> | 5295   | 415  | 2  | 61   | family with sequence similarity 53, member A (6.8 kD) (Fam53a) alternative variant cSep08, mRNA.                           |
| <a href="#">Fam53a</a> | <a href="#">Fam53a.dSep08</a> | <a href="#">305461</a> | 34267  | 1777 | 4  | 31   | family with sequence similarity 53, member A (Fam53a) alternative variant dSep08, mRNA.                                    |
| <a href="#">Fam53a</a> | <a href="#">Fam53a.fSep08</a> | <a href="#">305461</a> | 17151  | 803  | 4  | 83   | family with sequence similarity 53, member A (8.9 kD) (Fam53a) alternative variant fSep08, mRNA.                           |
| <a href="#">Fam54b</a> | <a href="#">Fam54b.aSep08</a> | <a href="#">298549</a> | 9630   | 1799 | 4  | 468  | family with sequence similarity 54, member B (Fam54b) alternative variant aSep08, complete mRNA.                           |
| <a href="#">Fam54b</a> | <a href="#">Fam54b.cSep08</a> | <a href="#">298549</a> | 6309   | 836  | 5  | 224  | family with sequence similarity 54, member B (Fam54b) alternative variant cSep08, mRNA.                                    |
| <a href="#">Fam54b</a> | <a href="#">Fam54b.dSep08</a> | <a href="#">298549</a> | 5890   | 761  | 5  | 163  | family with sequence similarity 54, member B (Fam54b) alternative variant dSep08, mRNA.                                    |
| <a href="#">Fam54b</a> | <a href="#">Fam54b.eSep08</a> | <a href="#">298549</a> | 4653   | 660  | 3  | 77   | family with sequence similarity 54, member B (8.5 kD) (Fam54b) alternative variant eSep08, mRNA.                           |
| <a href="#">Fam55c</a> | <a href="#">Fam55c.bSep08</a> | <a href="#">681096</a> | 30537  | 627  | 2  | 116  | family with sequence similarity 55, member C (Fam55c) alternative variant bSep08, mRNA.                                    |
| <a href="#">Fam62c</a> | <a href="#">Fam62c.aSep08</a> | <a href="#">363120</a> | 4625   | 934  |    | 281  | DNA segment chr 9 ERATO Doi 280 expressed (Fam62c) mRNA.                                                                   |
| <a href="#">Fam63a</a> | <a href="#">Fam63a.bSep08</a> | <a href="#">310665</a> | 1000   | 714  | 1  | 84   | family with sequence similarity 63, member A (Fam63a) alternative variant bSep08, mRNA.                                    |
| <a href="#">Fam64a</a> | <a href="#">Fam64a.bSep08</a> | <a href="#">360559</a> | 3871   | 774  | 1  | 250  | family with sequence similarity 64, member A (Fam64a) alternative variant bSep08, mRNA.                                    |
| <a href="#">Fam65a</a> | <a href="#">Fam65a.aSep08</a> | <a href="#">291974</a> | 7812   | 4135 | 21 | 1211 | family with sequence similarity 65, member A (Fam65a) alternative variant aSep08, mRNA.                                    |
| <a href="#">Fam65a</a> | <a href="#">Fam65a.bSep08</a> | <a href="#">291974</a> | 1122   | 798  | 4  | 149  | family with sequence similarity 65, member A (Fam65a) alternative variant bSep08, mRNA.                                    |
| <a href="#">Fam65a</a> | <a href="#">Fam65a.cSep08</a> | <a href="#">291974</a> | 437    | 325  | 2  | 80   | family with sequence similarity 65, member A (Fam65a) alternative variant cSep08, mRNA.                                    |

|                         |                                |                        |       |      |    |     |                                                                                                   |
|-------------------------|--------------------------------|------------------------|-------|------|----|-----|---------------------------------------------------------------------------------------------------|
| <a href="#">Fam65a</a>  | <a href="#">Fam65a.dSep08</a>  | <a href="#">291974</a> | 785   | 686  | 2  | 72  | family with sequence similarity 65, member A (Fam65a) alternative variant dSep08, mRNA.           |
| <a href="#">Fam69a</a>  | <a href="#">Fam69a.aSep08</a>  | <a href="#">360906</a> | 71325 | 2754 | 5  | 426 | family with sequence similarity 69, member A (Fam69a) alternative variant aSep08, mRNA.           |
| <a href="#">Fam69a</a>  | <a href="#">Fam69a.bSep08</a>  | <a href="#">360906</a> | 1757  | 502  | 2  | 167 | family with sequence similarity 69, member A (Fam69a) alternative variant bSep08, mRNA.           |
| <a href="#">Fam69b</a>  | <a href="#">Fam69b.cSep08</a>  | <a href="#">362090</a> | 547   | 298  | 2  | 92  | family with sequence similarity 69, member B (Fam69b) alternative variant cSep08, mRNA.           |
| <a href="#">Fam70a</a>  | <a href="#">Fam70a.bSep08</a>  | <a href="#">313453</a> | 6795  | 393  | 2  | 93  | family with sequence similarity 70, member A (Fam70a) alternative variant bSep08, mRNA.           |
| <a href="#">Fam70b</a>  | <a href="#">Fam70b.bSep08</a>  | <a href="#">290877</a> | 11465 | 1157 | 1  | 66  | family with sequence similarity 70, member B (Fam70b) alternative variant bSep08, mRNA.           |
| <a href="#">Fam71d</a>  | <a href="#">Fam71d.bSep08</a>  | <a href="#">366671</a> | 19192 | 757  | 1  | 154 | family with sequence similarity 71, member D (Fam71d) alternative variant bSep08, mRNA.           |
| <a href="#">Fam71f1</a> | <a href="#">Fam71f1.bSep08</a> | <a href="#">500061</a> | 8151  | 741  | 2  | 134 | family with sequence similarity 71, member F1 (Fam71f1) alternative variant bSep08, mRNA.         |
| <a href="#">Fam71f1</a> | <a href="#">Fam71f1.cSep08</a> | <a href="#">500061</a> | 8159  | 561  | 2  | 74  | family with sequence similarity 71, member F1 (Fam71f1) alternative variant cSep08, mRNA.         |
| <a href="#">Fam72a</a>  | <a href="#">Fam72a.aSep08</a>  | <a href="#">681249</a> | 15898 | 632  |    | 77  | family with sequence similarity 72, member A (8.7 kD) (Fam72a) mRNA.                              |
| <a href="#">Fam73b</a>  | <a href="#">Fam73b.bSep08</a>  | <a href="#">296623</a> | 8187  | 1764 | 10 | 334 | family with sequence similarity 73, member B (37.6 kD) (Fam73b) alternative variant bSep08, mRNA. |
| <a href="#">Fam73b</a>  | <a href="#">Fam73b.cSep08</a>  | <a href="#">296623</a> | 22651 | 284  | 3  | 79  | family with sequence similarity 73, member B (Fam73b) alternative variant cSep08, mRNA.           |
| <a href="#">Fam76a</a>  | <a href="#">Fam76a.bSep08</a>  | <a href="#">362618</a> | 20476 | 737  | 4  | 209 | family with sequence similarity 76, member A (Fam76a) alternative variant bSep08, mRNA.           |
| <a href="#">Fam76a</a>  | <a href="#">Fam76a.cSep08</a>  | <a href="#">362618</a> | 27785 | 1794 | 3  | 119 | family with sequence similarity 76, member A (13.7 kD) (Fam76a) alternative variant cSep08, mRNA. |
| <a href="#">Fam78a</a>  | <a href="#">Fam78a.aSep08</a>  | <a href="#">499776</a> | 14489 | 1803 |    | 283 | family with sequence similarity 78, member A (32.1 kD) (Fam78a) mRNA.                             |
| <a href="#">Fam80b</a>  | <a href="#">Fam80b.aSep08</a>  | <a href="#">362428</a> | 47353 | 3387 | 6  | 387 | family with sequence similarity 80, member B (42.5 kD) (Fam80b) alternative variant aSep08, mRNA. |
| <a href="#">Fam80b</a>  | <a href="#">Fam80b.bSep08</a>  | <a href="#">362428</a> | 4387  | 411  | 3  | 87  | family with sequence similarity 80, member B (Fam80b) alternative variant bSep08, mRNA.           |
| <a href="#">Fam80b</a>  | <a href="#">Fam80b.cSep08</a>  | <a href="#">362428</a> | 15384 | 624  | 2  | 30  | family with sequence similarity 80, member B (Fam80b) alternative variant cSep08, mRNA.           |
| <a href="#">Fam81a</a>  | <a href="#">Fam81a.bSep08</a>  | <a href="#">315789</a> | 46053 | 798  | 6  | 204 | family with sequence similarity 81, member A (Fam81a) alternative variant bSep08, mRNA.           |
| <a href="#">Fam81a</a>  | <a href="#">Fam81a.cSep08</a>  | <a href="#">315789</a> | 10316 | 752  | 4  | 105 | family with sequence similarity 81, member A (Fam81a) alternative variant cSep08, mRNA.           |
| <a href="#">Fam81b</a>  | <a href="#">Fam81b.aSep08</a>  | <a href="#">309925</a> | 91390 | 762  | 4  | 227 | family with sequence similarity 81, member B (Fam81b) alternative variant aSep08, mRNA.           |
| <a href="#">Fam81b</a>  | <a href="#">Fam81b.bSep08</a>  | <a href="#">309925</a> | 91477 | 730  | 3  | 118 | family with sequence similarity 81, member B (Fam81b) alternative variant bSep08, mRNA.           |
| <a href="#">Fam81b</a>  | <a href="#">Fam81b.cSep08</a>  | <a href="#">309925</a> | 96488 | 814  | 3  | 98  | family with sequence similarity 81, member B (11.6 kD) (Fam81b) alternative variant cSep08, mRNA. |

|                          |                                 |                        |       |      |   |     |                                                                                                                |
|--------------------------|---------------------------------|------------------------|-------|------|---|-----|----------------------------------------------------------------------------------------------------------------|
| <a href="#">Fam82a</a>   | <a href="#">Fam82a.aSep08</a>   | <a href="#">313840</a> | 71786 | 2267 | 8 | 615 | of microtubule dynamics protein 2 (Fam82a) alternative variant aSep08, mRNA.                                   |
| <a href="#">Fam82a</a>   | <a href="#">Fam82a.cSep08</a>   | <a href="#">313840</a> | 46314 | 721  | 3 | 240 | of microtubule dynamics protein 2 (Fam82a) alternative variant cSep08, mRNA.                                   |
| <a href="#">Fam82a</a>   | <a href="#">Fam82a.dSep08</a>   | <a href="#">313840</a> | 22694 | 716  | 2 | 238 | putative protein of mammalian origin (Fam82a) alternative variant dSep08, mRNA.                                |
| <a href="#">Fam82a</a>   | <a href="#">Fam82a.eSep08</a>   | <a href="#">313840</a> | 4884  | 1763 | 2 | 206 | of microtubule dynamics protein 2 (23.5 kD) (Fam82a) alternative variant eSep08, mRNA.                         |
| <a href="#">Fam82a</a>   | <a href="#">Fam82a.fSep08</a>   | <a href="#">313840</a> | 17625 | 677  | 8 | 189 | of microtubule dynamics protein 2 (Fam82a) alternative variant fSep08, mRNA.                                   |
| <a href="#">Fam82a</a>   | <a href="#">Fam82a.gSep08</a>   | <a href="#">313840</a> | 29657 | 781  | 4 | 107 | of microtubule dynamics protein 2 (Fam82a) alternative variant gSep08, mRNA.                                   |
| <a href="#">Fam82c</a>   | <a href="#">Fam82c.bSep08</a>   | <a href="#">311328</a> | 15010 | 1090 | 5 | 239 | family with sequence similarity 82, member C (Fam82c) alternative variant bSep08, mRNA.                        |
| <a href="#">Fam83e</a>   | <a href="#">Fam83e.aSep08</a>   | <a href="#">292913</a> | 2639  | 1072 |   | 229 | family with sequence similarity 83, member E (Fam83e) mRNA.                                                    |
| <a href="#">Fam84a</a>   | <a href="#">Fam84a.bSep08</a>   | <a href="#">313969</a> | 4663  | 3651 | 1 | 94  | family with sequence similarity 84, member A (10.6 kD) (Fam84a) alternative variant bSep08, mRNA.              |
| <a href="#">Fam86a</a>   | <a href="#">Fam86a.bSep08</a>   | <a href="#">302931</a> | 10287 | 1247 | 1 | 93  | family with sequence similarity 86, member A (Fam86a) alternative variant bSep08, mRNA.                        |
| <a href="#">Fam92a1</a>  | <a href="#">Fam92a1.aSep08</a>  | <a href="#">297903</a> | 18109 | 1801 | 7 | 587 | family with sequence similarity 92, member A1 (Fam92a1) alternative variant aSep08, mRNA.                      |
| <a href="#">Fam92a1</a>  | <a href="#">Fam92a1.bSep08</a>  | <a href="#">297903</a> | 11526 | 612  | 4 | 140 | family with sequence similarity 92, member A1 (Fam92a1) alternative variant bSep08, mRNA.                      |
| <a href="#">Fam92a1</a>  | <a href="#">Fam92a1.cSep08</a>  | <a href="#">297903</a> | 14900 | 978  | 6 | 103 | family with sequence similarity 92, member A1 (Fam92a1) alternative variant cSep08, mRNA.                      |
| <a href="#">Fam92a1</a>  | <a href="#">Fam92a1.dSep08</a>  | <a href="#">297903</a> | 2690  | 249  | 3 | 83  | family with sequence similarity 92, member A1 (Fam92a1) alternative variant dSep08, mRNA.                      |
| <a href="#">Fam92a1</a>  | <a href="#">Fam92a1.eSep08</a>  | <a href="#">297903</a> | 13257 | 847  | 5 | 44  | family with sequence similarity 92, member A1 (Fam92a1) alternative variant eSep08, mRNA.                      |
| <a href="#">Fam92b</a>   | <a href="#">Fam92b.aSep08</a>   | <a href="#">361423</a> | 5238  | 488  |   | 162 | family with sequence similarity 92, member B (Fam92b) mRNA.                                                    |
| <a href="#">Fam96b</a>   | <a href="#">Fam96b.aSep08</a>   | <a href="#">680987</a> | 1890  | 717  | 5 | 165 | family with sequence similarity 96, member B (17.8 kD) (Fam96b) alternative variant aSep08, mRNA.              |
| <a href="#">Fam96b</a>   | <a href="#">Fam96b.bSep08</a>   | <a href="#">680987</a> | 1814  | 1039 | 4 | 135 | family with sequence similarity 96, member B (Fam96b) alternative variant bSep08, mRNA.                        |
| <a href="#">Fam96b</a>   | <a href="#">Fam96b.cSep08</a>   | <a href="#">680987</a> | 1810  | 454  | 3 | 100 | family with sequence similarity 96, member B (Fam96b) alternative variant cSep08, mRNA.                        |
| <a href="#">Fam96b</a>   | <a href="#">Fam96b.dSep08</a>   | <a href="#">680987</a> | 1615  | 599  | 4 | 57  | family with sequence similarity 96, member B (Fam96b) alternative variant dSep08, mRNA.                        |
| <a href="#">Fam98b</a>   | <a href="#">Fam98b.aSep08</a>   | <a href="#">499866</a> | 17065 | 438  |   | 137 | family with sequence similarity 98, member B (Fam98b) mRNA.                                                    |
| <a href="#">Fam100b</a>  | <a href="#">Fam100b.aSep08</a>  | <a href="#">287840</a> | 4593  | 1293 |   | 163 | family with sequence similarity 100, member B (17.6 kD) (Fam100b) complete mRNA.                               |
| <a href="#">Fam103a1</a> | <a href="#">Fam103a1.bSep08</a> | <a href="#">293058</a> | 5879  | 1445 | 1 | 109 | family with sequence similarity 103, member A1 (13.4 kD) (Fam103a1) alternative variant bSep08, complete mRNA. |

|                          |                                 |                        |        |      |   |     |                                                                                                              |
|--------------------------|---------------------------------|------------------------|--------|------|---|-----|--------------------------------------------------------------------------------------------------------------|
| <a href="#">Fam107b</a>  | <a href="#">Fam107b.aSep08</a>  | <a href="#">498796</a> | 61865  | 3059 | 3 | 193 | family with sequence similarity 107, member B (Fam107b) alternative variant aSep08, mRNA.                    |
| <a href="#">Fam107b</a>  | <a href="#">Fam107b.bSep08</a>  | <a href="#">498796</a> | 32676  | 751  | 3 | 131 | family with sequence similarity 107, member B (15.6 kD) (Fam107b) alternative variant bSep08, mRNA.          |
| <a href="#">Fam107b</a>  | <a href="#">Fam107b.cSep08</a>  | <a href="#">498796</a> | 32413  | 651  | 3 | 131 | family with sequence similarity 107, member B (15.6 kD) (Fam107b) alternative variant cSep08, mRNA.          |
| <a href="#">Fam107b</a>  | <a href="#">Fam107b.eSep08</a>  | <a href="#">498796</a> | 3770   | 491  | 2 | 99  | family with sequence similarity 107, member B (11.7 kD) (Fam107b) alternative variant eSep08, complete mRNA. |
| <a href="#">Fam108a1</a> | <a href="#">Fam108a1.bSep08</a> | <a href="#">299617</a> | 1588   | 723  | 3 | 148 | family with sequence similarity 108, member A1 (Fam108a1) alternative variant bSep08, mRNA.                  |
| <a href="#">Fam108b1</a> | <a href="#">Fam108b1.aSep08</a> | <a href="#">309399</a> | 34477  | 2379 | 4 | 288 | family with sequence similarity 108, member B1 (32.2 kD) (Fam108b1) alternative variant aSep08, mRNA.        |
| <a href="#">Fam108b1</a> | <a href="#">Fam108b1.cSep08</a> | <a href="#">309399</a> | 4942   | 754  | 2 | 121 | family with sequence similarity 108, member B1 (Fam108b1) alternative variant cSep08, mRNA.                  |
| <a href="#">Fam108b1</a> | <a href="#">Fam108b1.dSep08</a> | <a href="#">309399</a> | 32895  | 571  | 4 | 94  | family with sequence similarity 108, member B1 (Fam108b1) alternative variant dSep08, mRNA.                  |
| <a href="#">Fam108c1</a> | <a href="#">Fam108c1.bSep08</a> | <a href="#">361601</a> | 57719  | 770  | 3 | 160 | family with sequence similarity 108, member C1 (18.0 kD) (Fam108c1) alternative variant bSep08, mRNA.        |
| <a href="#">Fam108c1</a> | <a href="#">Fam108c1.cSep08</a> | <a href="#">361601</a> | 9015   | 360  | 2 | 119 | family with sequence similarity 108, member C1 (Fam108c1) alternative variant cSep08, mRNA.                  |
| <a href="#">Fam108c1</a> | <a href="#">Fam108c1.dSep08</a> | <a href="#">361601</a> | 39306  | 772  | 2 | 94  | family with sequence similarity 108, member C1 (10.7 kD) (Fam108c1) alternative variant dSep08, mRNA.        |
| <a href="#">Fam108c1</a> | <a href="#">Fam108c1.eSep08</a> | <a href="#">361601</a> | 57637  | 602  | 2 | 69  | family with sequence similarity 108, member C1 (Fam108c1) alternative variant eSep08, mRNA.                  |
| <a href="#">Fam110a</a>  | <a href="#">Fam110a.aSep08</a>  | <a href="#">311535</a> | 10594  | 1728 | 2 | 386 | family with sequence similarity 110, member A (Fam110a) alternative variant aSep08, mRNA.                    |
| <a href="#">Fam110a</a>  | <a href="#">Fam110a.cSep08</a>  | <a href="#">311535</a> | 3415   | 425  | 2 | 141 | family with sequence similarity 110, member A (Fam110a) alternative variant cSep08, mRNA.                    |
| <a href="#">Fam110a</a>  | <a href="#">Fam110a.eSep08</a>  | <a href="#">311535</a> | 3449   | 752  | 2 | 136 | family with sequence similarity 110, member A (Fam110a) alternative variant eSep08, mRNA.                    |
| <a href="#">Fam110a</a>  | <a href="#">Fam110a.fSep08</a>  | <a href="#">311535</a> | 3031   | 805  | 3 | 98  | family with sequence similarity 110, member A (Fam110a) alternative variant fSep08, mRNA.                    |
| <a href="#">Fam110b</a>  | <a href="#">Fam110b.bSep08</a>  | <a href="#">500400</a> | 139849 | 502  | 3 | 37  | family with sequence similarity 110, member B (Fam110b) alternative variant bSep08, mRNA.                    |
| <a href="#">Fam110b</a>  | <a href="#">Fam110b.cSep08</a>  | <a href="#">500400</a> | 139737 | 477  | 4 | 37  | family with sequence similarity 110, member B (Fam110b) alternative variant cSep08, mRNA.                    |
| <a href="#">Fam110b</a>  | <a href="#">Fam110b.dSep08</a>  | <a href="#">500400</a> | 23712  | 386  | 2 | 50  | family with sequence similarity 110, member B (Fam110b) alternative variant dSep08, mRNA.                    |
| <a href="#">Fam113a</a>  | <a href="#">Fam113a.aSep08</a>  | <a href="#">296158</a> | 6059   | 1735 | 8 | 318 | family with sequence similarity 113, member A (36.5 kD) (Fam113a) alternative variant aSep08, mRNA.          |
| <a href="#">Fam113a</a>  | <a href="#">Fam113a.cSep08</a>  | <a href="#">296158</a> | 5082   | 1502 | 4 | 123 | family with sequence similarity 113, member A (Fam113a) alternative variant cSep08, mRNA.                    |
| <a href="#">Fam113b</a>  | <a href="#">Fam113b.aSep08</a>  | <a href="#">315283</a> | 23542  | 1202 | 2 | 219 | putative protein of metazoan origin (Fam113b) alternative variant aSep08, mRNA.                              |
| <a href="#">Fam113b</a>  | <a href="#">Fam113b.bSep08</a>  | <a href="#">315283</a> | 7668   | 898  | 2 | 200 | putative protein of metazoan origin (Fam113b) alternative variant bSep08, mRNA.                              |

|                          |                                 |                        |       |      |   |     |                                                                                                     |
|--------------------------|---------------------------------|------------------------|-------|------|---|-----|-----------------------------------------------------------------------------------------------------|
| <a href="#">Fam113b</a>  | <a href="#">Fam113b.dSep08</a>  | <a href="#">315283</a> | 7297  | 562  | 2 | 101 | putative protein (Fam113b) alternative variant dSep08, mRNA.                                        |
| <a href="#">Fam114a1</a> | <a href="#">Fam114a1.aSep08</a> | <a href="#">498366</a> | 56076 | 935  |   | 311 | family with sequence similarity 114, member A1 (Fam114a1) mRNA.                                     |
| <a href="#">Fam116a</a>  | <a href="#">Fam116a.bSep08</a>  | <a href="#">306229</a> | 2895  | 1574 | 2 | 115 | family with sequence similarity 116, member A (Fam116a) alternative variant bSep08, mRNA.           |
| <a href="#">Fam116a</a>  | <a href="#">Fam116a.cSep08</a>  | <a href="#">306229</a> | 8557  | 380  | 2 | 84  | family with sequence similarity 116, member A (Fam116a) alternative variant cSep08, mRNA.           |
| <a href="#">Fam116a</a>  | <a href="#">Fam116a.dSep08</a>  | <a href="#">306229</a> | 550   | 479  | 2 | 38  | family with sequence similarity 116, member A (4.0 kD) (Fam116a) alternative variant dSep08, mRNA.  |
| <a href="#">Fam116a</a>  | <a href="#">Fam116a.eSep08</a>  | <a href="#">306229</a> | 1228  | 311  | 2 | 14  | family with sequence similarity 116, member A (Fam116a) alternative variant eSep08, mRNA.           |
| <a href="#">Fam116b</a>  | <a href="#">Fam116b.bSep08</a>  | <a href="#">362983</a> | 1929  | 1065 | 5 | 170 | family with sequence similarity 116, member B (19.9 kD) (Fam116b) alternative variant bSep08, mRNA. |
| <a href="#">Fam116b</a>  | <a href="#">Fam116b.cSep08</a>  | <a href="#">362983</a> | 1179  | 408  | 4 | 73  | family with sequence similarity 116, member B (Fam116b) alternative variant cSep08, mRNA.           |
| <a href="#">Fam117a</a>  | <a href="#">Fam117a.bSep08</a>  | <a href="#">497983</a> | 4348  | 1286 | 3 | 181 | family with sequence similarity 117, member A (19.5 kD) (Fam117a) alternative variant bSep08, mRNA. |
| <a href="#">Fam117a</a>  | <a href="#">Fam117a.cSep08</a>  | <a href="#">497983</a> | 4080  | 712  | 3 | 61  | family with sequence similarity 117, member A (Fam117a) alternative variant cSep08, mRNA.           |
| <a href="#">Fam117a</a>  | <a href="#">Fam117a.dSep08</a>  | <a href="#">497983</a> | 10506 | 734  | 4 | 61  | family with sequence similarity 117, member A (Fam117a) alternative variant dSep08, mRNA.           |
| <a href="#">Fam118a</a>  | <a href="#">Fam118a.aSep08</a>  | <a href="#">300120</a> | 26526 | 2444 | 8 | 390 | family with sequence similarity 118, member A (Fam118a) alternative variant aSep08, mRNA.           |
| <a href="#">Fam118a</a>  | <a href="#">Fam118a.bSep08</a>  | <a href="#">300120</a> | 9950  | 753  | 2 | 81  | family with sequence similarity 118, member A (Fam118a) alternative variant bSep08, mRNA.           |
| <a href="#">Fam118a</a>  | <a href="#">Fam118a.cSep08</a>  | <a href="#">300120</a> | 9132  | 734  | 2 | 80  | family with sequence similarity 118, member A (Fam118a) alternative variant cSep08, mRNA.           |
| <a href="#">Fam119a</a>  | <a href="#">Fam119a.aSep08</a>  | <a href="#">301466</a> | 9269  | 1260 | 5 | 177 | family with sequence similarity 119, member A (Fam119a) alternative variant aSep08, mRNA.           |
| <a href="#">Fam120a</a>  | <a href="#">Fam120a.aSep08</a>  | <a href="#">291019</a> | 91021 | 4953 | 9 | 908 | family with sequence similarity 120A (Fam120a) alternative variant aSep08, mRNA.                    |
| <a href="#">Fam120b</a>  | <a href="#">Fam120b.bSep08</a>  | <a href="#">308218</a> | 5265  | 1334 | 2 | 319 | family with sequence similarity 120B (Fam120b) alternative variant bSep08, mRNA.                    |
| <a href="#">Fam120b</a>  | <a href="#">Fam120b.cSep08</a>  | <a href="#">308218</a> | 8276  | 771  | 2 | 104 | family with sequence similarity 120B (Fam120b) alternative variant cSep08, mRNA.                    |
| <a href="#">Fam120b</a>  | <a href="#">Fam120b.eSep08</a>  | <a href="#">308218</a> | 8048  | 739  | 4 | 93  | family with sequence similarity 120B (Fam120b) alternative variant eSep08, mRNA.                    |
| <a href="#">FAM120C</a>  | <a href="#">FAM120C.aSep08</a>  | <a href="#">317423</a> | 27739 | 992  |   | 300 | family with sequence similarity 120C (FAM120C) mRNA.                                                |
| <a href="#">Fam122b</a>  | <a href="#">Fam122b.aSep08</a>  | <a href="#">501647</a> | 9408  | 1784 |   | 59  | family with sequence similarity 122B (Fam122b) alternative variant aSep08, mRNA.                    |
| <a href="#">Fam122c</a>  | <a href="#">Fam122c.aSep08</a>  | <a href="#">685701</a> | 42301 | 365  |   | 45  | family with sequence similarity 122C (Fam122c) mRNA.                                                |
| <a href="#">Fam124a</a>  | <a href="#">Fam124a.aSep08</a>  | <a href="#">691938</a> | 34831 | 1636 |   | 301 | family with sequence similarity 124A (34.5 kD) (Fam124a) mRNA.                                      |
| <a href="#">Fam125a</a>  | <a href="#">Fam125a.bSep08</a>  | <a href="#">290635</a> | 2964  | 761  | 6 | 253 | family with sequence similarity 125, member A (Fam125a) alternative variant bSep08, mRNA.           |

|                         |                                |                        |       |      |    |     |                                                                                                     |
|-------------------------|--------------------------------|------------------------|-------|------|----|-----|-----------------------------------------------------------------------------------------------------|
| <a href="#">Fam125a</a> | <a href="#">Fam125a.cSep08</a> | <a href="#">290635</a> | 2505  | 767  | 5  | 137 | family with sequence similarity 125, member A (14.0 kD) (Fam125a) alternative variant cSep08, mRNA. |
| <a href="#">Fam125a</a> | <a href="#">Fam125a.dSep08</a> | <a href="#">290635</a> | 2637  | 684  | 6  | 137 | family with sequence similarity 125, member A (14.0 kD) (Fam125a) alternative variant dSep08, mRNA. |
| <a href="#">Fam125a</a> | <a href="#">Fam125a.eSep08</a> | <a href="#">290635</a> | 933   | 724  | 3  | 117 | family with sequence similarity 125, member A (12.1 kD) (Fam125a) alternative variant eSep08, mRNA. |
| <a href="#">Fam125b</a> | <a href="#">Fam125b.aSep08</a> | <a href="#">362118</a> | 60535 | 622  | 6  | 206 | family with sequence similarity 125, member B (Fam125b) alternative variant aSep08, mRNA.           |
| <a href="#">Fam125b</a> | <a href="#">Fam125b.bSep08</a> | <a href="#">362118</a> | 45442 | 437  | 4  | 145 | family with sequence similarity 125, member B (Fam125b) alternative variant bSep08, mRNA.           |
| <a href="#">Fam126a</a> | <a href="#">Fam126a.aSep08</a> | <a href="#">499975</a> | 37976 | 857  |    | 285 | family with sequence similarity 126, member A (Fam126a) mRNA.                                       |
| <a href="#">Fam126b</a> | <a href="#">Fam126b.bSep08</a> | <a href="#">316415</a> | 56943 | 747  | 8  | 192 | family with sequence similarity 126, member B (Fam126b) alternative variant bSep08, mRNA.           |
| <a href="#">Fam126b</a> | <a href="#">Fam126b.cSep08</a> | <a href="#">316415</a> | 5640  | 401  | 3  | 104 | family with sequence similarity 126, member B (Fam126b) alternative variant cSep08, mRNA.           |
| <a href="#">Fam128b</a> | <a href="#">Fam128b.aSep08</a> | <a href="#">287929</a> | 5817  | 680  | 4  | 179 | family with sequence similarity 128, member B (Fam128b) alternative variant aSep08, mRNA.           |
| <a href="#">Fam128b</a> | <a href="#">Fam128b.bSep08</a> | <a href="#">287929</a> | 5790  | 774  | 4  | 158 | family with sequence similarity 128, member B (16.4 kD) (Fam128b) alternative variant bSep08, mRNA. |
| <a href="#">Fam128b</a> | <a href="#">Fam128b.dSep08</a> | <a href="#">287929</a> | 7217  | 2463 | 3  | 133 | family with sequence similarity 128, member B (Fam128b) alternative variant dSep08, mRNA.           |
| <a href="#">Fam128b</a> | <a href="#">Fam128b.eSep08</a> | <a href="#">287929</a> | 5431  | 761  | 3  | 102 | family with sequence similarity 128, member B (Fam128b) alternative variant eSep08, mRNA.           |
| <a href="#">Fam129b</a> | <a href="#">Fam129b.bSep08</a> | <a href="#">362115</a> | 1054  | 726  | 1  | 240 | family with sequence similarity 129, member B (Fam129b) alternative variant bSep08, mRNA.           |
| <a href="#">Fam131c</a> | <a href="#">Fam131c.aSep08</a> | <a href="#">690880</a> | 1138  | 249  |    | 82  | family with sequence similarity 131, member C (Fam131c) mRNA.                                       |
| <a href="#">Fam132b</a> | <a href="#">Fam132b.aSep08</a> | <a href="#">681056</a> | 1697  | 780  |    | 91  | family with sequence similarity 132, member B (10.0 kD) (Fam132b) mRNA.                             |
| <a href="#">Fam133b</a> | <a href="#">Fam133b.bSep08</a> | <a href="#">362320</a> | 25101 | 748  | 11 | 138 | CRA a like (Fam133b) alternative variant bSep08, mRNA.                                              |
| <a href="#">Fam133b</a> | <a href="#">Fam133b.cSep08</a> | <a href="#">362320</a> | 11509 | 986  | 7  | 121 | CRA a like (Fam133b) alternative variant cSep08, mRNA.                                              |
| <a href="#">Fam133b</a> | <a href="#">Fam133b.dSep08</a> | <a href="#">362320</a> | 16662 | 968  | 7  | 98  | protein CRA f (11.6 kD) (Fam133b) alternative variant dSep08, mRNA.                                 |
| <a href="#">Fam133b</a> | <a href="#">Fam133b.eSep08</a> | <a href="#">362320</a> | 4688  | 814  | 3  | 63  | CRA a like (7.2 kD) (Fam133b) alternative variant eSep08, mRNA.                                     |
| <a href="#">Fam133b</a> | <a href="#">Fam133b.fSep08</a> | <a href="#">362320</a> | 3000  | 1623 | 2  | 51  | CRA a like (5.9 kD) (Fam133b) alternative variant fSep08, mRNA.                                     |
| <a href="#">Fam133b</a> | <a href="#">Fam133b.gSep08</a> | <a href="#">362320</a> | 1619  | 727  | 4  | 21  | putative protein (2.6 kD) (Fam133b) alternative variant gSep08, mRNA.                               |
| <a href="#">Fam134a</a> | <a href="#">Fam134a.aSep08</a> | <a href="#">363252</a> | 6239  | 2931 | 9  | 558 | family with sequence similarity 134, member A (Fam134a) alternative variant aSep08, mRNA.           |
| <a href="#">Fam134a</a> | <a href="#">Fam134a.bSep08</a> | <a href="#">363252</a> | 3670  | 731  | 8  | 243 | family with sequence similarity 134, member A (Fam134a) alternative variant bSep08, mRNA.           |
| <a href="#">Fam134a</a> | <a href="#">Fam134a.cSep08</a> | <a href="#">363252</a> | 2829  | 523  | 6  | 124 | family with sequence similarity 134, member A (Fam134a) alternative variant cSep08, mRNA.           |

|                          |                                 |                        |       |      |    |     |                                                                                                              |
|--------------------------|---------------------------------|------------------------|-------|------|----|-----|--------------------------------------------------------------------------------------------------------------|
| <a href="#">Fam134b</a>  | <a href="#">Fam134b.bSep08</a>  | <a href="#">619558</a> | 35521 | 650  | 6  | 184 | family with sequence similarity 134, member B (Fam134b) alternative variant bSep08, mRNA.                    |
| <a href="#">Fam134b</a>  | <a href="#">Fam134b.dSep08</a>  | <a href="#">619558</a> | 2122  | 435  | 2  | 69  | family with sequence similarity 134, member B (7.7 kD) (Fam134b) alternative variant dSep08, mRNA.           |
| <a href="#">Fam134c</a>  | <a href="#">Fam134c.aSep08</a>  | <a href="#">360632</a> | 24149 | 3079 | 9  | 476 | family with sequence similarity 134, member C (Fam134c) alternative variant aSep08, mRNA.                    |
| <a href="#">Fam134c</a>  | <a href="#">Fam134c.bSep08</a>  | <a href="#">360632</a> | 1154  | 752  | 2  | 162 | family with sequence similarity 134, member C (Fam134c) alternative variant bSep08, mRNA.                    |
| <a href="#">Fam134c</a>  | <a href="#">Fam134c.cSep08</a>  | <a href="#">360632</a> | 16755 | 388  | 3  | 129 | family with sequence similarity 134, member C (Fam134c) alternative variant cSep08, mRNA.                    |
| <a href="#">Fam139a</a>  | <a href="#">Fam139a.aSep08</a>  | <a href="#">680422</a> | 4904  | 2411 |    | 318 | family with sequence similarity 139, member A (Fam139a) mRNA.                                                |
| <a href="#">Fam148b</a>  | <a href="#">Fam148b.aSep08</a>  | <a href="#">501015</a> | 1496  | 1327 |    | 340 | family with sequence similarity 148, member B (37.2 kD) (Fam148b) mRNA.                                      |
| <a href="#">Fam149a</a>  | <a href="#">Fam149a.aSep08</a>  | <a href="#">361153</a> | 6046  | 508  |    | 80  | family with sequence similarity 149, member A (9.0 kD) (Fam149a) mRNA.                                       |
| <a href="#">Fam149b1</a> | <a href="#">Fam149b1.bSep08</a> | <a href="#">289900</a> | 10409 | 652  | 4  | 211 | family with sequence similarity 149, member B1 (Fam149b1) alternative variant bSep08, mRNA.                  |
| <a href="#">Fam149b1</a> | <a href="#">Fam149b1.cSep08</a> | <a href="#">289900</a> | 4908  | 668  | 3  | 143 | family with sequence similarity 149, member B1 (Fam149b1) alternative variant cSep08, mRNA.                  |
| <a href="#">Fam149b1</a> | <a href="#">Fam149b1.dSep08</a> | <a href="#">289900</a> | 2238  | 588  | 2  | 84  | family with sequence similarity 149, member B1 (Fam149b1) alternative variant dSep08, mRNA.                  |
| <a href="#">Fam151b</a>  | <a href="#">Fam151b.bSep08</a>  | <a href="#">499507</a> | 10331 | 756  | 4  | 202 | family with sequence similarity 151, member B (Fam151b) alternative variant bSep08, mRNA.                    |
| <a href="#">Fam151b</a>  | <a href="#">Fam151b.cSep08</a>  | <a href="#">499507</a> | 15663 | 786  | 3  | 107 | family with sequence similarity 151, member B (11.7 kD) (Fam151b) alternative variant cSep08, complete mRNA. |
| <a href="#">Fam151b</a>  | <a href="#">Fam151b.dSep08</a>  | <a href="#">499507</a> | 35558 | 346  | 2  | 93  | family with sequence similarity 151, member B (Fam151b) alternative variant dSep08, mRNA.                    |
| <a href="#">Fam151b</a>  | <a href="#">Fam151b.eSep08</a>  | <a href="#">499507</a> | 4945  | 897  | 1  | 59  | family with sequence similarity 151, member B (6.5 kD) (Fam151b) alternative variant eSep08, mRNA.           |
| <a href="#">Fam152b</a>  | <a href="#">Fam152b.aSep08</a>  | <a href="#">315160</a> | 22766 | 2929 | 2  | 214 | family with sequence similarity 152, member B (Fam152b) alternative variant aSep08, mRNA.                    |
| <a href="#">Fam152b</a>  | <a href="#">Fam152b.bSep08</a>  | <a href="#">315160</a> | 21909 | 2106 | 2  | 213 | family with sequence similarity 152, member B (Fam152b) alternative variant bSep08, mRNA.                    |
| <a href="#">Fam152b</a>  | <a href="#">Fam152b.dSep08</a>  | <a href="#">315160</a> | 16866 | 701  | 3  | 138 | family with sequence similarity 152, member B (Fam152b) alternative variant dSep08, mRNA.                    |
| <a href="#">Fam166a</a>  | <a href="#">Fam166a.bSep08</a>  | <a href="#">311797</a> | 5460  | 1405 | 8  | 128 | family with sequence similarity 166, member A (14.4 kD) (Fam166a) alternative variant bSep08, mRNA.          |
| <a href="#">Fam166a</a>  | <a href="#">Fam166a.cSep08</a>  | <a href="#">311797</a> | 5291  | 685  | 7  | 66  | family with sequence similarity 166, member A (Fam166a) alternative variant cSep08, mRNA.                    |
| <a href="#">famer</a>    | <a href="#">famer.aSep08</a>    |                        | 1406  | 517  |    | 56  | keratin 12 (famer) mRNA.                                                                                     |
| <a href="#">Fanca</a>    | <a href="#">Fanca.aSep08</a>    | <a href="#">361435</a> | 14902 | 1667 |    | 473 | fanconi anemia, complementation group A (Fanca) mRNA.                                                        |
| <a href="#">Fancc</a>    | <a href="#">Fancc.bSep08</a>    | <a href="#">24361</a>  | 8147  | 382  | 1  | 115 | fanconi anemia, complementation group C (Fancc) alternative variant bSep08, mRNA.                            |
| <a href="#">Fandc2</a>   | <a href="#">Fandc2.bSep08</a>   | <a href="#">312641</a> | 28890 | 1784 | 12 | 485 | fanconi anemia, complementation group D2 (Fandc2) alternative variant bSep08, mRNA.                          |

|                        |                               |                        |       |      |    |     |                                                                                                  |
|------------------------|-------------------------------|------------------------|-------|------|----|-----|--------------------------------------------------------------------------------------------------|
| <a href="#">Fancd2</a> | <a href="#">Fancd2.cSep08</a> | <a href="#">312641</a> | 13907 | 1237 | 10 | 302 | fanconi anemia, complementation group D2 (Fancd2) alternative variant cSep08, mRNA.              |
| <a href="#">Fancd2</a> | <a href="#">Fancd2.dSep08</a> | <a href="#">312641</a> | 4423  | 667  | 3  | 106 | fanconi anemia, complementation group D2 (Fancd2) alternative variant dSep08, mRNA.              |
| <a href="#">Fancd2</a> | <a href="#">Fancd2.eSep08</a> | <a href="#">312641</a> | 1650  | 730  | 2  | 78  | fanconi anemia, complementation group D2 (Fancd2) alternative variant eSep08, mRNA.              |
| <a href="#">Fance</a>  | <a href="#">Fance.aSep08</a>  | <a href="#">309643</a> | 11115 | 1938 | 10 | 531 | fanconi anemia, complementation group E (57.7 kD) (Fance) alternative variant aSep08, mRNA.      |
| <a href="#">Fance</a>  | <a href="#">Fance.bSep08</a>  | <a href="#">309643</a> | 2702  | 386  | 4  | 128 | fanconi anemia, complementation group E (Fance) alternative variant bSep08, mRNA.                |
| <a href="#">Fance</a>  | <a href="#">Fance.cSep08</a>  | <a href="#">309643</a> | 4987  | 500  | 3  | 123 | fanconi anemia, complementation group E (Fance) alternative variant cSep08, mRNA.                |
| <a href="#">Fance</a>  | <a href="#">Fance.dSep08</a>  | <a href="#">309643</a> | 3304  | 733  | 2  | 112 | fanconi anemia, complementation group E (11.5 kD) (Fance) alternative variant dSep08, mRNA.      |
| <a href="#">Fancg</a>  | <a href="#">Fancg.aSep08</a>  | <a href="#">691105</a> | 2638  | 790  |    | 263 | fanconi anemia, complementation group G (Fancg) mRNA.                                            |
| <a href="#">Fancl</a>  | <a href="#">Fancl.aSep08</a>  | <a href="#">305600</a> | 65356 | 1787 |    | 435 | fanconi anemia, complementation group L (Fancl) alternative variant aSep08, mRNA.                |
| <a href="#">Fancl</a>  | <a href="#">Fancl.bSep08</a>  | <a href="#">305600</a> | 65386 | 1658 | 5  | 377 | fanconi anemia, complementation group L (Fancl) alternative variant bSep08, mRNA.                |
| <a href="#">Fancl</a>  | <a href="#">Fancl.cSep08</a>  | <a href="#">305600</a> | 61655 | 773  | 4  | 179 | fanconi anemia, complementation group L (Fancl) alternative variant cSep08, mRNA.                |
| <a href="#">fanoy</a>  | <a href="#">fanoy.cSep08</a>  |                        | 1763  | 768  | 2  | 109 | putative protein (fanoy) alternative variant cSep08, mRNA.                                       |
| <a href="#">Fap</a>    | <a href="#">Fap.bSep08</a>    | <a href="#">192203</a> | 23127 | 703  | 9  | 234 | fibroblast activation protein (Fap) alternative variant bSep08, mRNA.                            |
| <a href="#">Fap</a>    | <a href="#">Fap.cSep08</a>    | <a href="#">192203</a> | 16415 | 725  | 1  | 163 | fibroblast activation protein (Fap) alternative variant cSep08, mRNA.                            |
| <a href="#">fapor</a>  | <a href="#">fapor.aSep08</a>  |                        | 6926  | 596  |    | 17  | putative protein (2.1 kD) (fapor) mRNA.                                                          |
| <a href="#">farby</a>  | <a href="#">farby.aSep08</a>  |                        | 9521  | 401  |    | 133 | cofactor required for Sp1 transcriptional activation 150kDa CRA b (farby) mRNA.                  |
| <a href="#">farchy</a> | <a href="#">farchy.aSep08</a> |                        | 568   | 300  | 2  | 63  | putative protein (farchy) alternative variant aSep08, mRNA.                                      |
| <a href="#">farchy</a> | <a href="#">farchy.bSep08</a> |                        | 7346  | 1057 | 2  | 61  | putative protein (farchy) alternative variant bSep08, mRNA.                                      |
| <a href="#">farfer</a> | <a href="#">farfer.aSep08</a> |                        | 10527 | 958  |    | 319 | putative protein of metazoan origin (farfer) mRNA.                                               |
| <a href="#">farflo</a> | <a href="#">farflo.aSep08</a> |                        | 17516 | 587  |    | 195 | transient receptor potential cation channel subfamily M member 3 (farflo) mRNA.                  |
| <a href="#">farflu</a> | <a href="#">farflu.aSep08</a> |                        | 1260  | 433  |    | 35  | putative protein (farflu) mRNA.                                                                  |
| <a href="#">farkee</a> | <a href="#">farkee.aSep08</a> |                        | 983   | 413  |    | 64  | putative protein (farkee) mRNA.                                                                  |
| <a href="#">farloy</a> | <a href="#">farloy.aSep08</a> |                        | 8887  | 241  |    | 33  | putative protein (farloy) mRNA.                                                                  |
| <a href="#">farmer</a> | <a href="#">farmer.aSep08</a> |                        | 1503  | 641  |    | 75  | putative cytoplasmic protein (8.4 kD) (farmer) mRNA.                                             |
| <a href="#">farnoy</a> | <a href="#">farnoy.aSep08</a> |                        | 1807  | 471  |    | 150 | CRA a (farnoy) mRNA.                                                                             |
| <a href="#">Farp2</a>  | <a href="#">Farp2.bSep08</a>  | <a href="#">316639</a> | 2662  | 722  | 4  | 156 | FERM, RhoGEF and pleckstrin domain protein 2 (18.2 kD) (Farp2) alternative variant bSep08, mRNA. |
| <a href="#">Farp2</a>  | <a href="#">Farp2.cSep08</a>  | <a href="#">316639</a> | 52500 | 481  | 5  | 132 | FERM, RhoGEF and pleckstrin domain protein 2 (Farp2) alternative variant cSep08, mRNA.           |
| <a href="#">farpor</a> | <a href="#">farpor.aSep08</a> |                        | 1257  | 514  |    | 50  | nicotinamide N-methyltransferase (farpor) mRNA.                                                  |



|                             |                                    |                        |        |      |    |     |                                                                                                     |
|-----------------------------|------------------------------------|------------------------|--------|------|----|-----|-----------------------------------------------------------------------------------------------------|
| <a href="#">Fars2</a>       | <a href="#">Fars2.bSep08</a>       | <a href="#">306879</a> | 375166 | 1366 | 5  | 403 | phenylalanine-tRNA synthetase 2 (mitochondrial) (Fars2) alternative variant bSep08, mRNA.           |
| <a href="#">Fars2</a>       | <a href="#">Fars2.cSep08</a>       | <a href="#">306879</a> | 20256  | 727  | 2  | 118 | phenylalanine-tRNA synthetase 2 (mitochondrial) (13.1 kD) (Fars2) alternative variant cSep08, mRNA. |
| <a href="#">Farsa</a>       | <a href="#">Farsa.bSep08</a>       | <a href="#">288917</a> | 1052   | 612  | 2  | 117 | phenylalanyl-tRNA synthetase, alpha subunit (Farsa) alternative variant bSep08, mRNA.               |
| <a href="#">Farsa</a>       | <a href="#">Farsa.cSep08</a>       | <a href="#">288917</a> | 3666   | 713  | 3  | 113 | phenylalanyl-tRNA synthetase, alpha subunit (Farsa) alternative variant cSep08, mRNA.               |
| <a href="#">farshee</a>     | <a href="#">farshee.aSep08</a>     |                        | 10921  | 540  |    | 179 | membrane-associated ring finger 6 (farshee) mRNA.                                                   |
| <a href="#">farto</a>       | <a href="#">farto.aSep08</a>       |                        | 2366   | 1304 |    | 117 | putative protein (farto) mRNA.                                                                      |
| <a href="#">farvar</a>      | <a href="#">farvar.aSep08</a>      |                        | 12547  | 648  |    | 47  | putative protein (5.5 kD) (farvar) mRNA.                                                            |
| <a href="#">farwey</a>      | <a href="#">farwey.aSep08</a>      |                        | 5062   | 633  |    | 86  | putative protein of eukaryotic origin (9.4 kD) (farwey) mRNA.                                       |
| <a href="#">Fas</a>         | <a href="#">Fas.aSep08</a>         | <a href="#">246097</a> | 14538  | 1705 |    | 304 | fas (TNF receptor superfamily, member 6) (34.6 kD) (Fas) mRNA.                                      |
| <a href="#">fasa</a>        | <a href="#">fasa.aSep08</a>        |                        | 1314   | 733  | 1  | 89  | putative protein (fasa) alternative variant aSep08, mRNA.                                           |
| <a href="#">fasa</a>        | <a href="#">fasa.bSep08</a>        |                        | 6386   | 692  | 2  | 38  | putative protein (4.3 kD) (fasa) alternative variant bSep08, mRNA.                                  |
| <a href="#">Fasciclin.0</a> | <a href="#">Fasciclin.0.aSep08</a> |                        | 1036   | 382  |    | 127 | stabilin 1 (Fasciclin.0) mRNA.                                                                      |
| <a href="#">fashee</a>      | <a href="#">fashee.aSep08</a>      |                        | 17657  | 750  |    | 87  | putative protein (9.6 kD) (fashee) mRNA.                                                            |
| <a href="#">Fastk</a>       | <a href="#">Fastk.aSep08</a>       | <a href="#">296741</a> | 4028   | 1824 | 10 | 545 | fas-activated serine/threonine kinase (61.3 kD) (Fastk) alternative variant aSep08, complete mRNA.  |
| <a href="#">Fastk</a>       | <a href="#">Fastk.cSep08</a>       | <a href="#">296741</a> | 4027   | 2289 | 7  | 255 | fas-activated serine/threonine kinase (28.9 kD) (Fastk) alternative variant cSep08, mRNA.           |
| <a href="#">Fastk</a>       | <a href="#">Fastk.dSep08</a>       | <a href="#">296741</a> | 1875   | 1427 | 2  | 177 | fas-activated serine/threonine kinase (Fastk) alternative variant dSep08, mRNA.                     |
| <a href="#">Fastk</a>       | <a href="#">Fastk.eSep08</a>       | <a href="#">296741</a> | 1848   | 551  | 4  | 166 | fas-activated serine/threonine kinase (Fastk) alternative variant eSep08, mRNA.                     |
| <a href="#">Fastk</a>       | <a href="#">Fastk.fSep08</a>       | <a href="#">296741</a> | 1353   | 694  | 4  | 137 | fas-activated serine/threonine kinase (Fastk) alternative variant fSep08, mRNA.                     |
| <a href="#">Fastk</a>       | <a href="#">Fastk.gSep08</a>       | <a href="#">296741</a> | 565    | 488  | 2  | 77  | fas-activated serine/threonine kinase (Fastk) alternative variant gSep08, mRNA.                     |
| <a href="#">Fastk</a>       | <a href="#">Fastk.hSep08</a>       | <a href="#">296741</a> | 983    | 694  | 2  | 48  | fas-activated serine/threonine kinase (Fastk) alternative variant hSep08, mRNA.                     |
| <a href="#">Fastk</a>       | <a href="#">Fastk.iSep08</a>       | <a href="#">296741</a> | 880    | 679  | 2  | 63  | fas-activated serine/threonine kinase (Fastk) alternative variant iSep08, mRNA.                     |
| <a href="#">Fastkd1</a>     | <a href="#">Fastkd1.aSep08</a>     | <a href="#">311112</a> | 7874   | 878  |    | 292 | FAST kinase domains 1 (Fastkd1) mRNA.                                                               |
| <a href="#">Fastkd2</a>     | <a href="#">Fastkd2.bSep08</a>     | <a href="#">301463</a> | 1270   | 325  | 2  | 82  | FAST kinase domains 2 (Fastkd2) alternative variant bSep08, mRNA.                                   |
| <a href="#">Fastkd3</a>     | <a href="#">Fastkd3.bSep08</a>     | <a href="#">290946</a> | 7307   | 2057 | 5  | 515 | fast kinase domains 3 CRA a (Fastkd3) alternative variant bSep08, mRNA.                             |
| <a href="#">Fastkd3</a>     | <a href="#">Fastkd3.dSep08</a>     | <a href="#">290946</a> | 3089   | 1005 | 3  | 102 | kinase 3 (11.9 kD) (Fastkd3) alternative variant dSep08, mRNA.                                      |
| <a href="#">Fastkd3</a>     | <a href="#">Fastkd3.eSep08</a>     | <a href="#">290946</a> | 5249   | 708  | 4  | 95  | kinase 3 (10.8 kD) (Fastkd3) alternative variant eSep08, mRNA.                                      |

|                         |                                |                        |       |      |   |     |                                                                                                                                        |
|-------------------------|--------------------------------|------------------------|-------|------|---|-----|----------------------------------------------------------------------------------------------------------------------------------------|
| <a href="#">Fat1</a>    | <a href="#">Fat1.bSep08</a>    | <a href="#">83720</a>  | 8346  | 2117 | 4 | 437 | FAT tumor suppressor homolog 1 (Drosophila) (Fat1) alternative variant bSep08, mRNA.                                                   |
| <a href="#">Fat1</a>    | <a href="#">Fat1.cSep08</a>    | <a href="#">83720</a>  | 7150  | 938  | 4 | 126 | FAT tumor suppressor homolog 1 (Drosophila) (Fat1) alternative variant cSep08, mRNA.                                                   |
| <a href="#">Fat1</a>    | <a href="#">Fat1.dSep08</a>    | <a href="#">83720</a>  | 3314  | 1206 | 2 | 98  | FAT tumor suppressor homolog 1 (Drosophila) (11.2 kD) (Fat1) alternative variant dSep08, mRNA.                                         |
| <a href="#">Fat1</a>    | <a href="#">Fat1.eSep08</a>    | <a href="#">83720</a>  | 6021  | 456  | 4 | 26  | FAT tumor suppressor homolog 1 (Drosophila) (Fat1) alternative variant eSep08, mRNA.                                                   |
| <a href="#">Fat2</a>    | <a href="#">Fat2.bSep08</a>    | <a href="#">65048</a>  | 3259  | 2234 | 2 | 284 | FAT tumor suppressor homolog 2 (Drosophila) (Fat2) alternative variant bSep08, mRNA.                                                   |
| <a href="#">Fat2</a>    | <a href="#">Fat2.cSep08</a>    | <a href="#">65048</a>  | 4133  | 347  | 3 | 115 | FAT tumor suppressor homolog 2 (Drosophila) (Fat2) alternative variant cSep08, mRNA.                                                   |
| <a href="#">Fat4</a>    | <a href="#">Fat4.aSep08</a>    | <a href="#">310341</a> | 64424 | 2139 |   | 712 | FAT tumor suppressor homolog 4 (Drosophila) (Fat4) mRNA.                                                                               |
| <a href="#">FATC.0</a>  | <a href="#">FATC.0.aSep08</a>  |                        | 5627  | 410  |   | 127 | ataxia telangiectasia Rad3 related (FATC.0) mRNA.                                                                                      |
| <a href="#">fato</a>    | <a href="#">fato.aSep08</a>    |                        | 5186  | 346  |   | 93  | putative secreted or extracellular protein precursor (10.1 kD) (fato) alternative variant aSep08, mRNA.                                |
| <a href="#">Fau</a>     | <a href="#">Fau.aSep08</a>     | <a href="#">29752</a>  | 1509  | 504  | 2 | 133 | finkel-Biskis-Reilly murine sarcoma virus (FBR-MuSV) ubiquitously expressed (14.4 kD) (Fau) alternative variant aSep08, complete mRNA. |
| <a href="#">Fau</a>     | <a href="#">Fau.bSep08</a>     | <a href="#">29752</a>  | 1488  | 485  | 2 | 133 | finkel-Biskis-Reilly murine sarcoma virus (FBR-MuSV) ubiquitously expressed (14.4 kD) (Fau) alternative variant bSep08, complete mRNA. |
| <a href="#">favar</a>   | <a href="#">favar.aSep08</a>   |                        | 6133  | 852  |   | 255 | putative protein, with 2 coiled coil domains, of vertebrate origin (favar) mRNA.                                                       |
| <a href="#">fawby</a>   | <a href="#">fawby.aSep08</a>   |                        | 5019  | 2434 | 2 | 72  | cofactor required for Sp1 transcriptional activation CRA a (fawby) alternative variant aSep08, mRNA.                                   |
| <a href="#">fawchy</a>  | <a href="#">fawchy.aSep08</a>  |                        | 2306  | 289  |   | 54  | putative protein (6.3 kD) (fawchy) mRNA.                                                                                               |
| <a href="#">fawey</a>   | <a href="#">fawey.aSep08</a>   |                        | 13820 | 793  |   | 118 | putative protein (fawey) mRNA.                                                                                                         |
| <a href="#">fawfer</a>  | <a href="#">fawfer.aSep08</a>  |                        | 13217 | 585  |   | 107 | putative protein (fawfer) mRNA.                                                                                                        |
| <a href="#">fawflo</a>  | <a href="#">fawflo.aSep08</a>  |                        | 5793  | 261  | 2 | 36  | putative protein (4.0 kD) (fawflo) alternative variant aSep08, mRNA.                                                                   |
| <a href="#">fawflo</a>  | <a href="#">fawflo.bSep08</a>  |                        | 6486  | 823  | 3 | 35  | putative protein (3.9 kD) (fawflo) alternative variant bSep08, mRNA.                                                                   |
| <a href="#">fawflu</a>  | <a href="#">fawflu.aSep08</a>  |                        | 786   | 694  |   | 92  | putative protein (10.4 kD) (fawflu) mRNA.                                                                                              |
| <a href="#">fawkee</a>  | <a href="#">fawkee.aSep08</a>  |                        | 7674  | 1108 | 2 | 87  | putative protein (9.6 kD) (fawkee) alternative variant aSep08, mRNA.                                                                   |
| <a href="#">fawkee</a>  | <a href="#">fawkee.bSep08</a>  |                        | 7088  | 412  |   | 32  | putative protein (fawkee) alternative variant bSep08, mRNA.                                                                            |
| <a href="#">fawloy</a>  | <a href="#">fawloy.aSep08</a>  |                        | 14814 | 640  |   | 13  | putative protein (1.5 kD) (fawloy) mRNA.                                                                                               |
| <a href="#">fawmer</a>  | <a href="#">fawmer.aSep08</a>  |                        | 5800  | 634  |   | 64  | putative protein (fawmer) mRNA.                                                                                                        |
| <a href="#">fawnoy</a>  | <a href="#">fawnoy.aSep08</a>  |                        | 9291  | 621  |   | 51  | CRA a like (fawnoy) mRNA.                                                                                                              |
| <a href="#">fawpor</a>  | <a href="#">fawpor.aSep08</a>  |                        | 1262  | 293  |   | 50  | putative protein (fawpor) mRNA.                                                                                                        |
| <a href="#">fawsa</a>   | <a href="#">fawsa.aSep08</a>   |                        | 2346  | 251  |   | 38  | putative protein (fawsa) mRNA.                                                                                                         |
| <a href="#">fawshee</a> | <a href="#">fawshee.aSep08</a> |                        | 79754 | 725  |   | 60  | putative protein (6.7 kD) (fawshee) mRNA.                                                                                              |

|                        |                               |                        |       |      |    |      |                                                                                   |
|------------------------|-------------------------------|------------------------|-------|------|----|------|-----------------------------------------------------------------------------------|
| <a href="#">fawto</a>  | <a href="#">fawto.aSep08</a>  |                        | 398   | 271  |    | 41   | putative protein (fawto) mRNA.                                                    |
| <a href="#">fawvar</a> | <a href="#">fawvar.aSep08</a> |                        | 22064 | 1380 |    | 24   | putative protein (fawvar) mRNA.                                                   |
| <a href="#">fawwey</a> | <a href="#">fawwey.bSep08</a> |                        | 4720  | 362  | 2  | 29   | putative protein (3.5 kD) (fawwey) alternative variant bSep08, mRNA.              |
| <a href="#">FBA.0</a>  | <a href="#">FBA.0.bSep08</a>  | <a href="#">685932</a> | 4671  | 1009 | 2  | 257  | F-box protein 27 (FBA.0) alternative variant bSep08, mRNA.                        |
| <a href="#">FBA.0</a>  | <a href="#">FBA.0.cSep08</a>  | <a href="#">685932</a> | 2612  | 1071 | 1  | 80   | f-box protein 27 (FBA.0) alternative variant cSep08, mRNA.                        |
| <a href="#">Fbf1</a>   | <a href="#">Fbf1.aSep08</a>   | <a href="#">287836</a> | 8009  | 2035 | 15 | 632  | fas (TNFRSF6) binding factor 1 (Fbf1) alternative variant aSep08, mRNA.           |
| <a href="#">Fbf1</a>   | <a href="#">Fbf1.cSep08</a>   | <a href="#">287836</a> | 2900  | 750  | 4  | 205  | fas (TNFRSF6) binding factor 1 (Fbf1) alternative variant cSep08, mRNA.           |
| <a href="#">Fbf1</a>   | <a href="#">Fbf1.dSep08</a>   | <a href="#">287836</a> | 3815  | 629  | 2  | 56   | fas (TNFRSF6) binding factor 1 (Fbf1) alternative variant dSep08, mRNA.           |
| <a href="#">Fblim1</a> | <a href="#">Fblim1.bSep08</a> | <a href="#">362650</a> | 11887 | 2215 | 4  | 181  | filamin binding LIM protein 1 (Fblim1) alternative variant bSep08, mRNA.          |
| <a href="#">Fblim1</a> | <a href="#">Fblim1.cSep08</a> | <a href="#">362650</a> | 14585 | 440  | 4  | 146  | filamin binding LIM protein 1 (Fblim1) alternative variant cSep08, mRNA.          |
| <a href="#">Fblim1</a> | <a href="#">Fblim1.dSep08</a> | <a href="#">362650</a> | 4488  | 401  | 3  | 133  | filamin binding LIM protein 1 (Fblim1) alternative variant dSep08, mRNA.          |
| <a href="#">Fblim1</a> | <a href="#">Fblim1.eSep08</a> | <a href="#">362650</a> | 5826  | 856  | 2  | 56   | filamin binding LIM protein 1 (Fblim1) alternative variant eSep08, mRNA.          |
| <a href="#">Fbln1</a>  | <a href="#">Fbln1.bSep08</a>  | <a href="#">315191</a> | 44517 | 2232 | 15 | 685  | fibulin 1 (75.4 kD) (Fbln1) alternative variant bSep08, complete mRNA.            |
| <a href="#">Fbln2</a>  | <a href="#">Fbln2.aSep08</a>  | <a href="#">282583</a> | 60530 | 4193 | 14 | 1174 | fibulin 2 (126.0 kD) (Fbln2) alternative variant aSep08, mRNA.                    |
| <a href="#">Fbln2</a>  | <a href="#">Fbln2.bSep08</a>  | <a href="#">282583</a> | 9026  | 738  | 3  | 245  | fibulin 2 (Fbln2) alternative variant bSep08, mRNA.                               |
| <a href="#">Fbln5</a>  | <a href="#">Fbln5.bSep08</a>  | <a href="#">29158</a>  | 59504 | 686  | 1  | 228  | fibulin 5 (Fbln5) alternative variant bSep08, mRNA.                               |
| <a href="#">Fbln7</a>  | <a href="#">Fbln7.aSep08</a>  | <a href="#">296145</a> | 15723 | 407  |    | 135  | fibulin 7 (Fbln7) mRNA.                                                           |
| <a href="#">Fbn1</a>   | <a href="#">Fbn1.bSep08</a>   | <a href="#">83727</a>  | 4537  | 430  | 3  | 95   | fibrillin 1 (Fbn1) alternative variant bSep08, mRNA.                              |
| <a href="#">Fbn1</a>   | <a href="#">Fbn1.cSep08</a>   | <a href="#">83727</a>  | 8567  | 499  | 5  | 36   | fibrillin 1 (3.7 kD) (Fbn1) alternative variant cSep08, mRNA.                     |
| <a href="#">Fbn2</a>   | <a href="#">Fbn2.aSep08</a>   | <a href="#">689008</a> | 32564 | 4192 | 6  | 861  | fibrillin 2 (Fbn2) alternative variant aSep08, mRNA.                              |
| <a href="#">Fbn2</a>   | <a href="#">Fbn2.bSep08</a>   | <a href="#">689008</a> | 2235  | 728  | 1  | 202  | fibrillin 2 (Fbn2) alternative variant bSep08, mRNA.                              |
| <a href="#">Fbp1</a>   | <a href="#">Fbp1.bSep08</a>   | <a href="#">24362</a>  | 17884 | 966  | 4  | 282  | fructose-1,6- biphosphatase 1 (Fbp1) alternative variant bSep08, mRNA.            |
| <a href="#">Fbp1</a>   | <a href="#">Fbp1.cSep08</a>   | <a href="#">24362</a>  | 8140  | 909  | 5  | 252  | fructose-1,6- biphosphatase 1 (Fbp1) alternative variant cSep08, mRNA.            |
| <a href="#">Fbp1</a>   | <a href="#">Fbp1.dSep08</a>   | <a href="#">24362</a>  | 4703  | 753  | 3  | 201  | fructose-1,6- biphosphatase 1 (Fbp1) alternative variant dSep08, mRNA.            |
| <a href="#">Fbp2</a>   | <a href="#">Fbp2.bSep08</a>   | <a href="#">114508</a> | 3821  | 673  | 2  | 127  | fructose-1,6-bisphosphatase 2 (13.9 kD) (Fbp2) alternative variant bSep08, mRNA.  |
| <a href="#">Fbp2</a>   | <a href="#">Fbp2.cSep08</a>   | <a href="#">114508</a> | 2960  | 658  | 1  | 91   | fructose-1,6-bisphosphatase 2 (10.0 kD) (Fbp2) alternative variant cSep08, mRNA.  |
| <a href="#">Fbrs</a>   | <a href="#">Fbrs.aSep08</a>   | <a href="#">691899</a> | 6125  | 2645 | 11 | 482  | fibrosin (Fbrs) alternative variant aSep08, mRNA.                                 |
| <a href="#">Fbxl2</a>  | <a href="#">Fbxl2.aSep08</a>  | <a href="#">363156</a> | 26413 | 659  | 1  | 207  | F-box and leucine-rich repeat protein 2 (Fbxl2) alternative variant aSep08, mRNA. |

|                        |                               |                        |        |      |    |     |                                                                                               |
|------------------------|-------------------------------|------------------------|--------|------|----|-----|-----------------------------------------------------------------------------------------------|
| <a href="#">Fbxl2</a>  | <a href="#">Fbxl2.bSep08</a>  | <a href="#">363156</a> | 29652  | 748  | 2  | 162 | F-box and leucine-rich repeat protein 2 (Fbxl2) alternative variant bSep08, mRNA.             |
| <a href="#">Fbxl3</a>  | <a href="#">Fbxl3.aSep08</a>  | <a href="#">306129</a> | 18210  | 1623 | 1  | 478 | F-box and leucine-rich repeat protein 3 (Fbxl3) alternative variant aSep08, mRNA.             |
| <a href="#">Fbxl3</a>  | <a href="#">Fbxl3.bSep08</a>  | <a href="#">306129</a> | 10375  | 593  | 1  | 197 | F-box and leucine-rich repeat protein 3 (Fbxl3) alternative variant bSep08, mRNA.             |
| <a href="#">Fbxl4</a>  | <a href="#">Fbxl4.aSep08</a>  | <a href="#">313101</a> | 73323  | 2487 | 9  | 621 | F-box and leucine-rich repeat protein 4 (70.2 kD) (Fbxl4) alternative variant aSep08, mRNA.   |
| <a href="#">Fbxl5</a>  | <a href="#">Fbxl5.bSep08</a>  | <a href="#">305424</a> | 10554  | 1240 | 6  | 412 | F-box and leucine-rich repeat protein 5 (Fbxl5) alternative variant bSep08, mRNA.             |
| <a href="#">Fbxl6</a>  | <a href="#">Fbxl6.bSep08</a>  | <a href="#">362941</a> | 2878   | 2111 | 6  | 324 | F-box and leucine-rich repeat protein 6 (34.8 kD) (Fbxl6) alternative variant bSep08, mRNA.   |
| <a href="#">Fbxl6</a>  | <a href="#">Fbxl6.cSep08</a>  | <a href="#">362941</a> | 1296   | 730  | 5  | 212 | F-box and leucine-rich repeat protein 6 (Fbxl6) alternative variant cSep08, mRNA.             |
| <a href="#">Fbxl10</a> | <a href="#">Fbxl10.aSep08</a> | <a href="#">304495</a> | 55141  | 694  |    | 218 | F-box and leucine-rich repeat protein 10 (Fbxl10) alternative variant aSep08, mRNA.           |
| <a href="#">Fbxl11</a> | <a href="#">Fbxl11.bSep08</a> | <a href="#">361700</a> | 3137   | 571  | 2  | 94  | F-box and leucine-rich repeat protein 11 (Fbxl11) alternative variant bSep08, mRNA.           |
| <a href="#">Fbxl12</a> | <a href="#">Fbxl12.bSep08</a> | <a href="#">313782</a> | 3579   | 751  | 2  | 179 | F-box and leucine-rich repeat protein 12 (Fbxl12) alternative variant bSep08, mRNA.           |
| <a href="#">Fbxl17</a> | <a href="#">Fbxl17.bSep08</a> | <a href="#">316663</a> | 156019 | 529  | 5  | 159 | F-box and leucine-rich repeat protein 17 (Fbxl17) alternative variant bSep08, mRNA.           |
| <a href="#">Fbxl17</a> | <a href="#">Fbxl17.cSep08</a> | <a href="#">316663</a> | 99794  | 644  | 3  | 57  | F-box and leucine-rich repeat protein 17 (Fbxl17) alternative variant cSep08, mRNA.           |
| <a href="#">Fbxl17</a> | <a href="#">Fbxl17.dSep08</a> | <a href="#">316663</a> | 86107  | 1450 | 4  | 135 | F-box and leucine-rich repeat protein 17 (15.4 kD) (Fbxl17) alternative variant dSep08, mRNA. |
| <a href="#">Fbxl19</a> | <a href="#">Fbxl19.bSep08</a> | <a href="#">308999</a> | 15897  | 2445 | 3  | 298 | F-box and leucine-rich repeat protein 19 (Fbxl19) alternative variant bSep08, mRNA.           |
| <a href="#">Fbxl20</a> | <a href="#">Fbxl20.aSep08</a> | <a href="#">64039</a>  | 49202  | 1794 | 4  | 585 | F-box and leucine-rich repeat protein 20 (Fbxl20) alternative variant aSep08, mRNA.           |
| <a href="#">Fbxl20</a> | <a href="#">Fbxl20.bSep08</a> | <a href="#">64039</a>  | 57840  | 2450 | 15 | 438 | F-box and leucine-rich repeat protein 20 (48.5 kD) (Fbxl20) alternative variant bSep08, mRNA. |
| <a href="#">Fbxl20</a> | <a href="#">Fbxl20.eSep08</a> | <a href="#">64039</a>  | 2478   | 228  | 2  | 76  | F-box and leucine-rich repeat protein 20 (Fbxl20) alternative variant eSep08, mRNA.           |
| <a href="#">Fbxo3</a>  | <a href="#">Fbxo3.bSep08</a>  | <a href="#">690634</a> | 7646   | 772  | 3  | 97  | F-box protein 3 (Fbxo3) alternative variant bSep08, mRNA.                                     |
| <a href="#">Fbxo3</a>  | <a href="#">Fbxo3.cSep08</a>  | <a href="#">690634</a> | 16485  | 753  | 4  | 94  | F-box protein 3 (Fbxo3) alternative variant cSep08, mRNA.                                     |
| <a href="#">Fbxo6</a>  | <a href="#">Fbxo6.bSep08</a>  | <a href="#">192351</a> | 4980   | 785  | 5  | 204 | F-box protein 6 (Fbxo6) alternative variant bSep08, mRNA.                                     |
| <a href="#">Fbxo6</a>  | <a href="#">Fbxo6.cSep08</a>  | <a href="#">192351</a> | 2282   | 380  | 2  | 126 | F-box protein 6 (Fbxo6) alternative variant cSep08, mRNA.                                     |
| <a href="#">Fbxo7</a>  | <a href="#">Fbxo7.bSep08</a>  | <a href="#">366854</a> | 11136  | 625  | 5  | 208 | F-box protein 7 (Fbxo7) alternative variant bSep08, mRNA.                                     |
| <a href="#">Fbxo7</a>  | <a href="#">Fbxo7.cSep08</a>  | <a href="#">366854</a> | 11497  | 1138 | 5  | 194 | F-box protein 7 (Fbxo7) alternative variant cSep08, mRNA.                                     |
| <a href="#">Fbxo7</a>  | <a href="#">Fbxo7.dSep08</a>  | <a href="#">366854</a> | 11403  | 707  | 5  | 137 | F-box protein 7 (Fbxo7) alternative variant dSep08, mRNA.                                     |
| <a href="#">Fbxo7</a>  | <a href="#">Fbxo7.eSep08</a>  | <a href="#">366854</a> | 2138   | 702  | 2  | 85  | F-box protein 7 (Fbxo7) alternative variant eSep08, mRNA.                                     |
| <a href="#">Fbxo8</a>  | <a href="#">Fbxo8.bSep08</a>  | <a href="#">306436</a> | 21871  | 466  | 4  | 63  | F-box protein 8 (7.5 kD) (Fbxo8) alternative variant bSep08, mRNA.                            |
| <a href="#">Fbxo8</a>  | <a href="#">Fbxo8.cSep08</a>  | <a href="#">306436</a> | 1472   | 694  | 2  | 45  | F-box protein 8 (5.6 kD) (Fbxo8) alternative variant cSep08, mRNA.                            |

|                        |                               |                        |       |      |   |     |                                                                       |
|------------------------|-------------------------------|------------------------|-------|------|---|-----|-----------------------------------------------------------------------|
| <a href="#">Fbxo9</a>  | <a href="#">Fbxo9.bSep08</a>  | <a href="#">300849</a> | 13178 | 1710 | 8 | 167 | f-box protein 9 (20.2 kD) (Fbxo9) alternative variant bSep08, mRNA.   |
| <a href="#">Fbxo9</a>  | <a href="#">Fbxo9.cSep08</a>  | <a href="#">300849</a> | 20072 | 807  | 8 | 147 | f-box protein 9 (Fbxo9) alternative variant cSep08, mRNA.             |
| <a href="#">Fbxo9</a>  | <a href="#">Fbxo9.dSep08</a>  | <a href="#">300849</a> | 3832  | 864  | 2 | 136 | f-box protein 9 (Fbxo9) alternative variant dSep08, mRNA.             |
| <a href="#">Fbxo10</a> | <a href="#">Fbxo10.aSep08</a> | <a href="#">362511</a> | 6070  | 1019 | 4 | 300 | F-box protein 10 (Fbxo10) alternative variant aSep08, mRNA.           |
| <a href="#">Fbxo10</a> | <a href="#">Fbxo10.bSep08</a> | <a href="#">362511</a> | 6573  | 971  | 2 | 101 | F-box protein 10 (Fbxo10) alternative variant bSep08, mRNA.           |
| <a href="#">Fbxo11</a> | <a href="#">Fbxo11.bSep08</a> | <a href="#">301674</a> | 554   | 343  | 2 | 95  | F-box protein 11 (Fbxo11) alternative variant bSep08, mRNA.           |
| <a href="#">Fbxo16</a> | <a href="#">Fbxo16.bSep08</a> | <a href="#">305970</a> | 23101 | 537  | 1 | 92  | F-box protein 16 (Fbxo16) alternative variant bSep08, mRNA.           |
| <a href="#">Fbxo17</a> | <a href="#">Fbxo17.bSep08</a> | <a href="#">292757</a> | 15475 | 1697 | 7 | 250 | F-box protein 17 (28.2 kD) (Fbxo17) alternative variant bSep08, mRNA. |
| <a href="#">Fbxo17</a> | <a href="#">Fbxo17.cSep08</a> | <a href="#">292757</a> | 2317  | 519  | 3 | 152 | F-box protein 17 (Fbxo17) alternative variant cSep08, mRNA.           |
| <a href="#">Fbxo18</a> | <a href="#">Fbxo18.bSep08</a> | <a href="#">291293</a> | 6258  | 756  | 6 | 252 | F-box protein 18 (Fbxo18) alternative variant bSep08, mRNA.           |
| <a href="#">Fbxo18</a> | <a href="#">Fbxo18.cSep08</a> | <a href="#">291293</a> | 2697  | 608  | 4 | 166 | F-box protein 18 (Fbxo18) alternative variant cSep08, mRNA.           |
| <a href="#">Fbxo18</a> | <a href="#">Fbxo18.dSep08</a> | <a href="#">291293</a> | 4103  | 554  | 5 | 145 | F-box protein 18 (Fbxo18) alternative variant dSep08, mRNA.           |
| <a href="#">Fbxo18</a> | <a href="#">Fbxo18.eSep08</a> | <a href="#">291293</a> | 1138  | 751  | 2 | 123 | F-box protein 18 (14.7 kD) (Fbxo18) alternative variant eSep08, mRNA. |
| <a href="#">Fbxo18</a> | <a href="#">Fbxo18.gSep08</a> | <a href="#">291293</a> | 13356 | 840  | 3 | 175 | F-box protein 18 (Fbxo18) alternative variant gSep08, mRNA.           |
| <a href="#">Fbxo21</a> | <a href="#">Fbxo21.bSep08</a> | <a href="#">360818</a> | 19247 | 1492 | 1 | 486 | F-box protein 21 (55.3 kD) (Fbxo21) alternative variant bSep08, mRNA. |
| <a href="#">Fbxo22</a> | <a href="#">Fbxo22.bSep08</a> | <a href="#">300724</a> | 12611 | 796  | 5 | 251 | F-box protein 22 (Fbxo22) alternative variant bSep08, mRNA.           |
| <a href="#">Fbxo22</a> | <a href="#">Fbxo22.cSep08</a> | <a href="#">300724</a> | 15149 | 744  | 5 | 226 | F-box protein 22 (Fbxo22) alternative variant cSep08, mRNA.           |
| <a href="#">Fbxo22</a> | <a href="#">Fbxo22.dSep08</a> | <a href="#">300724</a> | 12695 | 806  | 5 | 155 | F-box protein 22 (Fbxo22) alternative variant dSep08, mRNA.           |
| <a href="#">Fbxo22</a> | <a href="#">Fbxo22.eSep08</a> | <a href="#">300724</a> | 12271 | 706  | 5 | 126 | F-box protein 22 (Fbxo22) alternative variant eSep08, mRNA.           |
| <a href="#">Fbxo22</a> | <a href="#">Fbxo22.fSep08</a> | <a href="#">300724</a> | 9858  | 781  | 3 | 100 | F-box protein 22 (Fbxo22) alternative variant fSep08, mRNA.           |
| <a href="#">Fbxo23</a> | <a href="#">Fbxo23.bSep08</a> | <a href="#">306771</a> | 3383  | 583  | 4 | 138 | F-box only protein 23 (Fbxo23) alternative variant bSep08, mRNA.      |
| <a href="#">Fbxo23</a> | <a href="#">Fbxo23.cSep08</a> | <a href="#">306771</a> | 1356  | 550  | 3 | 130 | F-box only protein 23 (Fbxo23) alternative variant cSep08, mRNA.      |
| <a href="#">Fbxo23</a> | <a href="#">Fbxo23.dSep08</a> | <a href="#">306771</a> | 1776  | 507  | 4 | 118 | F-box only protein 23 (Fbxo23) alternative variant dSep08, mRNA.      |
| <a href="#">Fbxo23</a> | <a href="#">Fbxo23.eSep08</a> | <a href="#">306771</a> | 3238  | 376  | 3 | 70  | F-box only protein 23 (Fbxo23) alternative variant eSep08, mRNA.      |

|                        |                               |                        |       |      |   |     |                                                                       |
|------------------------|-------------------------------|------------------------|-------|------|---|-----|-----------------------------------------------------------------------|
| <a href="#">Fbxo24</a> | <a href="#">Fbxo24.aSep08</a> | <a href="#">304374</a> | 5915  | 1314 | 3 | 438 | F-box protein 24 (Fbxo24) alternative variant aSep08, mRNA.           |
| <a href="#">Fbxo24</a> | <a href="#">Fbxo24.cSep08</a> | <a href="#">304374</a> | 2915  | 755  | 1 | 251 | F-box protein 24 (Fbxo24) alternative variant cSep08, mRNA.           |
| <a href="#">Fbxo25</a> | <a href="#">Fbxo25.aSep08</a> | <a href="#">364637</a> | 11308 | 1385 | 4 | 147 | F-box protein 25 (Fbxo25) alternative variant aSep08, mRNA.           |
| <a href="#">Fbxo25</a> | <a href="#">Fbxo25.dSep08</a> | <a href="#">364637</a> | 4162  | 755  | 2 | 60  | F-box protein 25 (7.1 kD) (Fbxo25) alternative variant dSep08, mRNA.  |
| <a href="#">Fbxo25</a> | <a href="#">Fbxo25.eSep08</a> | <a href="#">364637</a> | 3980  | 600  | 3 | 48  | F-box protein 25 (Fbxo25) alternative variant eSep08, mRNA.           |
| <a href="#">Fbxo25</a> | <a href="#">Fbxo25.fSep08</a> | <a href="#">364637</a> | 1323  | 746  | 2 | 40  | F-box protein 25 (4.9 kD) (Fbxo25) alternative variant fSep08, mRNA.  |
| <a href="#">Fbxo28</a> | <a href="#">Fbxo28.bSep08</a> | <a href="#">305105</a> | 24718 | 699  | 5 | 176 | F-box protein 28 (Fbxo28) alternative variant bSep08, mRNA.           |
| <a href="#">Fbxo30</a> | <a href="#">Fbxo30.bSep08</a> | <a href="#">308283</a> | 8290  | 762  | 2 | 200 | F-box protein 30 (Fbxo30) alternative variant bSep08, mRNA.           |
| <a href="#">Fbxo33</a> | <a href="#">Fbxo33.aSep08</a> | <a href="#">314157</a> | 32088 | 3429 | 4 | 558 | F-box protein 33 (Fbxo33) alternative variant aSep08, mRNA.           |
| <a href="#">Fbxo34</a> | <a href="#">Fbxo34.bSep08</a> | <a href="#">305830</a> | 72728 | 3102 | 2 | 681 | F-box protein 34 (74.9 kD) (Fbxo34) alternative variant bSep08, mRNA. |
| <a href="#">Fbxo34</a> | <a href="#">Fbxo34.cSep08</a> | <a href="#">305830</a> | 70206 | 810  | 3 | 66  | F-box protein 34 (Fbxo34) alternative variant cSep08, mRNA.           |
| <a href="#">Fbxo36</a> | <a href="#">Fbxo36.bSep08</a> | <a href="#">363268</a> | 79257 | 707  | 1 | 138 | F-box protein 36 (Fbxo36) alternative variant bSep08, mRNA.           |
| <a href="#">Fbxo36</a> | <a href="#">Fbxo36.cSep08</a> | <a href="#">363268</a> | 78917 | 303  | 1 | 62  | F-box protein 36 (Fbxo36) alternative variant cSep08, mRNA.           |
| <a href="#">Fbxo38</a> | <a href="#">Fbxo38.bSep08</a> | <a href="#">307390</a> | 23325 | 1095 | 8 | 154 | F-box protein 38 (17.9 kD) (Fbxo38) alternative variant bSep08, mRNA. |
| <a href="#">Fbxo38</a> | <a href="#">Fbxo38.cSep08</a> | <a href="#">307390</a> | 7555  | 431  | 4 | 143 | F-box protein 38 (Fbxo38) alternative variant cSep08, mRNA.           |
| <a href="#">Fbxo39</a> | <a href="#">Fbxo39.bSep08</a> | <a href="#">303287</a> | 2246  | 693  | 2 | 126 | F-box protein 39 (3.8 kD) (Fbxo39) alternative variant bSep08, mRNA.  |
| <a href="#">Fbxo39</a> | <a href="#">Fbxo39.cSep08</a> | <a href="#">303287</a> | 1047  | 476  | 1 | 80  | F-box protein 39 (10.0 kD) (Fbxo39) alternative variant cSep08, mRNA. |
| <a href="#">Fbxo40</a> | <a href="#">Fbxo40.aSep08</a> | <a href="#">363790</a> | 4060  | 1741 |   | 101 | F-box protein 40 (Fbxo40) mRNA.                                       |
| <a href="#">Fbxo42</a> | <a href="#">Fbxo42.bSep08</a> | <a href="#">362646</a> | 6700  | 2185 | 5 | 467 | F-box protein 42 (Fbxo42) alternative variant bSep08, mRNA.           |
| <a href="#">Fbxo43</a> | <a href="#">Fbxo43.aSep08</a> | <a href="#">315034</a> | 2097  | 752  | 2 | 155 | F-box protein 43 (Fbxo43) alternative variant aSep08, mRNA.           |
| <a href="#">Fbxo44</a> | <a href="#">Fbxo44.aSep08</a> | <a href="#">500587</a> | 9154  | 1682 | 6 | 255 | F-box protein 44 (29.8 kD) (Fbxo44) alternative variant aSep08, mRNA. |
| <a href="#">Fbxo44</a> | <a href="#">Fbxo44.bSep08</a> | <a href="#">500587</a> | 4076  | 760  | 4 | 150 | F-box protein 44 (Fbxo44) alternative variant bSep08, mRNA.           |
| <a href="#">Fbxo44</a> | <a href="#">Fbxo44.cSep08</a> | <a href="#">500587</a> | 1286  | 424  | 2 | 141 | F-box protein 44 (Fbxo44) alternative variant cSep08, mRNA.           |
| <a href="#">Fbxo44</a> | <a href="#">Fbxo44.dSep08</a> | <a href="#">500587</a> | 4039  | 451  | 4 | 139 | F-box protein 44 (Fbxo44) alternative variant dSep08, mRNA.           |

|                        |                               |                        |        |      |   |     |                                                                                                           |
|------------------------|-------------------------------|------------------------|--------|------|---|-----|-----------------------------------------------------------------------------------------------------------|
| <a href="#">Fbxo46</a> | <a href="#">Fbxo46.bSep08</a> | <a href="#">292686</a> | 14420  | 1062 | 2 | 271 | F-box protein 46 (Fbxo46) alternative variant bSep08, mRNA.                                               |
| <a href="#">Fbxo46</a> | <a href="#">Fbxo46.cSep08</a> | <a href="#">292686</a> | 3636   | 378  | 1 | 80  | F-box protein 46 (Fbxo46) alternative variant cSep08, mRNA.                                               |
| <a href="#">Fbxw2</a>  | <a href="#">Fbxw2.bSep08</a>  | <a href="#">311881</a> | 21212  | 1991 | 6 | 354 | F-box wd-40 domain protein 2 (40.4 kD) (Fbxw2) alternative variant bSep08, mRNA.                          |
| <a href="#">Fbxw2</a>  | <a href="#">Fbxw2.cSep08</a>  | <a href="#">311881</a> | 20709  | 1423 | 4 | 193 | repeat-containing protein 2 (22.1 kD) (Fbxw2) alternative variant cSep08, mRNA.                           |
| <a href="#">Fbxw2</a>  | <a href="#">Fbxw2.fSep08</a>  | <a href="#">311881</a> | 15489  | 652  | 4 | 43  | putative protein (Fbxw2) alternative variant fSep08, mRNA.                                                |
| <a href="#">Fbxw2</a>  | <a href="#">Fbxw2.hSep08</a>  | <a href="#">311881</a> | 798    | 697  | 2 | 91  | putative protein (Fbxw2) alternative variant hSep08, mRNA.                                                |
| <a href="#">Fbxw2</a>  | <a href="#">Fbxw2.iSep08</a>  | <a href="#">311881</a> | 3230   | 472  | 3 | 33  | putative protein (3.7 kD) (Fbxw2) alternative variant iSep08, mRNA.                                       |
| <a href="#">Fbxw4</a>  | <a href="#">Fbxw4.bSep08</a>  | <a href="#">309444</a> | 102643 | 1964 | 7 | 238 | F-box and WD-40 domain protein 4 (25.9 kD) (Fbxw4) alternative variant bSep08, mRNA.                      |
| <a href="#">Fbxw4</a>  | <a href="#">Fbxw4.cSep08</a>  | <a href="#">309444</a> | 102002 | 1149 | 7 | 122 | F-box and WD-40 domain protein 4 (Fbxw4) alternative variant cSep08, mRNA.                                |
| <a href="#">Fbxw5</a>  | <a href="#">Fbxw5.bSep08</a>  | <a href="#">362081</a> | 4194   | 1770 | 9 | 494 | F-box WD-40 domain protein 5 (55.9 kD) (Fbxw5) alternative variant bSep08, mRNA.                          |
| <a href="#">Fbxw5</a>  | <a href="#">Fbxw5.cSep08</a>  | <a href="#">362081</a> | 1359   | 788  | 4 | 222 | WD-40 repeat (Fbxw5) alternative variant cSep08, mRNA.                                                    |
| <a href="#">Fbxw5</a>  | <a href="#">Fbxw5.dSep08</a>  | <a href="#">362081</a> | 1701   | 1411 | 4 | 198 | WD-40 repeat (Fbxw5) alternative variant dSep08, mRNA.                                                    |
| <a href="#">Fbxw5</a>  | <a href="#">Fbxw5.eSep08</a>  | <a href="#">362081</a> | 1957   | 839  | 4 | 156 | cyclin-like F-box and WD-40 repeat (18.1 kD) (Fbxw5) alternative variant eSep08, mRNA.                    |
| <a href="#">Fbxw5</a>  | <a href="#">Fbxw5.fSep08</a>  | <a href="#">362081</a> | 1007   | 939  | 2 | 150 | WD-40 repeat (Fbxw5) alternative variant fSep08, mRNA.                                                    |
| <a href="#">Fbxw8</a>  | <a href="#">Fbxw8.aSep08</a>  | <a href="#">304522</a> | 30058  | 2441 | 5 | 211 | F-box and WD-40 domain protein 8 (Fbxw8) alternative variant aSep08, mRNA.                                |
| <a href="#">Fbxw8</a>  | <a href="#">Fbxw8.bSep08</a>  | <a href="#">304522</a> | 31818  | 583  | 3 | 151 | F-box and WD-40 domain protein 8 (Fbxw8) alternative variant bSep08, mRNA.                                |
| <a href="#">Fbxw9</a>  | <a href="#">Fbxw9.cSep08</a>  | <a href="#">288921</a> | 1061   | 901  | 3 | 121 | F-box and WD-40 domain protein 9 (Fbxw9) alternative variant cSep08, mRNA.                                |
| <a href="#">Fbxw11</a> | <a href="#">Fbxw11.bSep08</a> | <a href="#">303024</a> | 19448  | 3422 | 9 | 344 | F-box and WD-40 domain protein 11 (Fbxw11) alternative variant bSep08, mRNA.                              |
| <a href="#">Fbxw11</a> | <a href="#">Fbxw11.cSep08</a> | <a href="#">303024</a> | 76583  | 517  | 3 | 172 | F-box and WD-40 domain protein 11 (Fbxw11) alternative variant cSep08, mRNA.                              |
| <a href="#">Fcer1a</a> | <a href="#">Fcer1a.aSep08</a> | <a href="#">25047</a>  | 4338   | 805  |   | 161 | fc receptor, IgE, high affinity I, alpha polypeptide (Fcer1a) mRNA.                                       |
| <a href="#">Fcer1g</a> | <a href="#">Fcer1g.cSep08</a> | <a href="#">25441</a>  | 3717   | 715  | 2 | 13  | fc receptor, IgE, high affinity I, gamma polypeptide (1.5 kD) (Fcer1g) alternative variant cSep08, mRNA.  |
| <a href="#">Fcer1g</a> | <a href="#">Fcer1g.dSep08</a> | <a href="#">25441</a>  | 4799   | 576  | 5 | 13  | fc receptor, IgE, high affinity I, gamma polypeptide (1.5 kD) (Fcer1g) alternative variant dSep08, mRNA.  |
| <a href="#">Fcer2a</a> | <a href="#">Fcer2a.cSep08</a> | <a href="#">171075</a> | 1088   | 765  | 2 | 98  | fc receptor, IgE, low affinity II, alpha polypeptide (10.7 kD) (Fcer2a) alternative variant cSep08, mRNA. |
| <a href="#">Fcer2a</a> | <a href="#">Fcer2a.dSep08</a> | <a href="#">171075</a> | 936    | 829  | 2 | 37  | fc receptor, IgE, low affinity II, alpha polypeptide (4.2 kD) (Fcer2a) alternative variant dSep08, mRNA.  |
| <a href="#">Fcf2.0</a> | <a href="#">Fcf2.0.aSep08</a> |                        | 11327  | 2531 | 6 | 772 | deoxynucleotidyltransferase terminal interacting protein 2 (Fcf2.0) alternative variant aSep08, mRNA.     |

|                        |                               |                        |        |      |    |     |                                                                                                        |
|------------------------|-------------------------------|------------------------|--------|------|----|-----|--------------------------------------------------------------------------------------------------------|
| <a href="#">Fcf2.0</a> | <a href="#">Fcf2.0.bSep08</a> |                        | 1819   | 1169 | 1  | 96  | putative nuclear protein human specific (11.4 kD) (Fcf2.0) alternative variant bSep08, mRNA.           |
| <a href="#">Fcgr2b</a> | <a href="#">Fcgr2b.aSep08</a> | <a href="#">289211</a> | 14595  | 1535 | 8  | 342 | fc receptor, IgG, low affinity IIb (38.0 kD) (Fcgr2b) alternative variant aSep08, complete mRNA.       |
| <a href="#">Fcgr2b</a> | <a href="#">Fcgr2b.cSep08</a> | <a href="#">289211</a> | 13821  | 713  | 6  | 237 | fc receptor, IgG, low affinity IIb (Fcgr2b) alternative variant cSep08, mRNA.                          |
| <a href="#">Fcgr2b</a> | <a href="#">Fcgr2b.dSep08</a> | <a href="#">289211</a> | 7497   | 791  | 4  | 196 | fc receptor, IgG, low affinity IIb (Fcgr2b) alternative variant dSep08, mRNA.                          |
| <a href="#">Fcgr2b</a> | <a href="#">Fcgr2b.eSep08</a> | <a href="#">289211</a> | 1445   | 831  | 2  | 109 | fc receptor, IgG, low affinity IIb (Fcgr2b) alternative variant eSep08, mRNA.                          |
| <a href="#">Fcgr2b</a> | <a href="#">Fcgr2b.fSep08</a> | <a href="#">289211</a> | 737    | 641  | 2  | 74  | fc receptor, IgG, low affinity IIb (Fcgr2b) alternative variant fSep08, mRNA.                          |
| <a href="#">Fcgr3</a>  | <a href="#">Fcgr3.aSep08</a>  | <a href="#">116591</a> | 7516   | 1067 | 3  | 186 | fc receptor, IgG, low affinity III (Fcgr3) alternative variant aSep08, mRNA.                           |
| <a href="#">Fcgrt</a>  | <a href="#">Fcgrt.bSep08</a>  | <a href="#">29558</a>  | 9377   | 1267 | 5  | 274 | fc receptor, IgG, alpha chain transporter (29.8 kD) (Fcgrt) alternative variant bSep08, complete mRNA. |
| <a href="#">Fcgrt</a>  | <a href="#">Fcgrt.cSep08</a>  | <a href="#">29558</a>  | 1777   | 668  | 3  | 171 | fc receptor, IgG, alpha chain transporter (Fcgrt) alternative variant cSep08, mRNA.                    |
| <a href="#">Fcgrt</a>  | <a href="#">Fcgrt.dSep08</a>  | <a href="#">29558</a>  | 2390   | 1591 | 2  | 121 | fc receptor, IgG, alpha chain transporter (13.7 kD) (Fcgrt) alternative variant dSep08, mRNA.          |
| <a href="#">Fcgrt</a>  | <a href="#">Fcgrt.eSep08</a>  | <a href="#">29558</a>  | 7691   | 1200 | 3  | 75  | fc receptor, IgG, alpha chain transporter (Fcgrt) alternative variant eSep08, mRNA.                    |
| <a href="#">FCH.0</a>  | <a href="#">FCH.0.aSep08</a>  |                        | 37498  | 418  | 6  | 139 | proline-serine-threonine phosphatase interacting protein 2 (FCH.0) mRNA.                               |
| <a href="#">FCH.1</a>  | <a href="#">FCH.1.aSep08</a>  |                        | 271681 | 1282 | 3  | 148 | tyrosine kinase (17.1 kD) (FCH.1) alternative variant aSep08, mRNA.                                    |
| <a href="#">FCH.2</a>  | <a href="#">FCH.2.aSep08</a>  |                        | 59391  | 1794 |    | 517 | FCH domain only 2 (FCH.2) alternative variant aSep08, mRNA.                                            |
| <a href="#">FCH.2</a>  | <a href="#">FCH.2.bSep08</a>  |                        | 22588  | 652  |    | 217 | FCH domain only 2 (FCH.2) alternative variant bSep08, mRNA.                                            |
| <a href="#">Fcho1</a>  | <a href="#">Fcho1.bSep08</a>  | <a href="#">290639</a> | 4827   | 2131 | 12 | 486 | FCH domain only 1 (51.8 kD) (Fcho1) alternative variant bSep08, mRNA.                                  |
| <a href="#">Fcho1</a>  | <a href="#">Fcho1.cSep08</a>  | <a href="#">290639</a> | 6719   | 706  | 8  | 193 | FCH domain only 1 (Fcho1) alternative variant cSep08, mRNA.                                            |
| <a href="#">Fcho1</a>  | <a href="#">Fcho1.dSep08</a>  | <a href="#">290639</a> | 1632   | 969  | 4  | 165 | FCH domain only 1 (Fcho1) alternative variant dSep08, mRNA.                                            |
| <a href="#">Fcho2</a>  | <a href="#">Fcho2.aSep08</a>  | <a href="#">309129</a> | 30156  | 1782 |    | 347 | FCH domain only 2 (Fcho2) alternative variant aSep08, mRNA.                                            |
| <a href="#">Fcho2</a>  | <a href="#">Fcho2.bSep08</a>  | <a href="#">309129</a> | 6810   | 524  |    | 174 | FCH domain only 2 (Fcho2) alternative variant bSep08, mRNA.                                            |
| <a href="#">Fcho2</a>  | <a href="#">Fcho2.cSep08</a>  | <a href="#">309129</a> | 7519   | 2585 | 1  | 95  | FCH domain only 2 (Fcho2) alternative variant cSep08, mRNA.                                            |
| <a href="#">Fchsd1</a> | <a href="#">Fchsd1.bSep08</a> | <a href="#">307482</a> | 3361   | 709  | 3  | 236 | FCH and double SH3 domains 1 (Fchsd1) alternative variant bSep08, mRNA.                                |
| <a href="#">Fchsd2</a> | <a href="#">Fchsd2.bSep08</a> | <a href="#">308864</a> | 142258 | 1910 | 7  | 482 | FCH and double SH3 domains 2 (Fchsd2) alternative variant bSep08, mRNA.                                |



|                        |                               |                        |       |      |   |     |                                                                                       |
|------------------------|-------------------------------|------------------------|-------|------|---|-----|---------------------------------------------------------------------------------------|
| <a href="#">Fchsd2</a> | <a href="#">Fchsd2.cSep08</a> | <a href="#">308864</a> | 49083 | 920  | 9 | 306 | FCH and double SH3 domains 2 (Fchsd2) alternative variant cSep08, mRNA.               |
| <a href="#">Fchsd2</a> | <a href="#">Fchsd2.dSep08</a> | <a href="#">308864</a> | 8942  | 344  | 2 | 79  | FCH and double SH3 domains 2 (Fchsd2) alternative variant dSep08, mRNA.               |
| <a href="#">Fchsd2</a> | <a href="#">Fchsd2.fSep08</a> | <a href="#">308864</a> | 10049 | 2089 | 3 | 73  | FCH and double SH3 domains 2 (Fchsd2) alternative variant fSep08, mRNA.               |
| <a href="#">Fcna</a>   | <a href="#">Fcna.bSep08</a>   | <a href="#">83517</a>  | 2585  | 724  | 6 | 241 | ficolin A (Fcna) alternative variant bSep08, mRNA.                                    |
| <a href="#">Fcrl1</a>  | <a href="#">Fcrl1.aSep08</a>  | <a href="#">680665</a> | 8510  | 1370 | 1 | 299 | fc receptor-like 1 (Fcrl1) alternative variant aSep08, mRNA.                          |
| <a href="#">Fcrl1</a>  | <a href="#">Fcrl1.bSep08</a>  | <a href="#">680665</a> | 6437  | 678  | 1 | 160 | fc receptor-like 1 (Fcrl1) alternative variant bSep08, mRNA.                          |
| <a href="#">Fcrla</a>  | <a href="#">Fcrla.aSep08</a>  | <a href="#">304965</a> | 10149 | 1285 | 6 | 363 | fc receptor-like A (Fcrla) alternative variant aSep08, mRNA.                          |
| <a href="#">Fcrla</a>  | <a href="#">Fcrla.bSep08</a>  | <a href="#">304965</a> | 4269  | 802  | 3 | 215 | fc receptor-like A (Fcrla) alternative variant bSep08, mRNA.                          |
| <a href="#">Fcrla</a>  | <a href="#">Fcrla.cSep08</a>  | <a href="#">304965</a> | 4906  | 446  | 2 | 104 | fc receptor-like A (11.4 kD) (Fcrla) alternative variant cSep08, mRNA.                |
| <a href="#">Fcrla</a>  | <a href="#">Fcrla.dSep08</a>  | <a href="#">304965</a> | 2097  | 420  | 2 | 89  | fc receptor-like A (Fcrla) alternative variant dSep08, mRNA.                          |
| <a href="#">Fcrla</a>  | <a href="#">Fcrla.eSep08</a>  | <a href="#">304965</a> | 2613  | 458  | 3 | 87  | fc receptor-like A (Fcrla) alternative variant eSep08, mRNA.                          |
| <a href="#">Fcrlb</a>  | <a href="#">Fcrlb.aSep08</a>  | <a href="#">498275</a> | 966   | 814  |   | 226 | fc receptor-like B (Fcrlb) mRNA.                                                      |
| <a href="#">Fdft1</a>  | <a href="#">Fdft1.bSep08</a>  | <a href="#">29580</a>  | 6409  | 659  | 3 | 219 | farnesyl diphosphate farnesyl transferase 1 (Fdft1) alternative variant bSep08, mRNA. |
| <a href="#">Fdft1</a>  | <a href="#">Fdft1.cSep08</a>  | <a href="#">29580</a>  | 20913 | 696  | 5 | 168 | farnesyl diphosphate farnesyl transferase 1 (Fdft1) alternative variant cSep08, mRNA. |
| <a href="#">Fdps</a>   | <a href="#">Fdps.bSep08</a>   | <a href="#">83791</a>  | 8776  | 2156 | 2 | 259 | farnesyl diphosphate synthetase (30.0 kD) (Fdps) alternative variant bSep08, mRNA.    |
| <a href="#">Fdps</a>   | <a href="#">Fdps.cSep08</a>   | <a href="#">83791</a>  | 8106  | 718  | 3 | 115 | farnesyl diphosphate synthetase (13.0 kD) (Fdps) alternative variant cSep08, mRNA.    |
| <a href="#">Fdx1l</a>  | <a href="#">Fdx1l.bSep08</a>  | <a href="#">313786</a> | 5219  | 1143 | 4 | 153 | ferredoxin 1-like (16.8 kD) (Fdx1l) alternative variant bSep08, mRNA.                 |
| <a href="#">Fdx1l</a>  | <a href="#">Fdx1l.cSep08</a>  | <a href="#">313786</a> | 4834  | 633  | 4 | 114 | ferredoxin 1-like (12.7 kD) (Fdx1l) alternative variant cSep08, mRNA.                 |
| <a href="#">Fdx1l</a>  | <a href="#">Fdx1l.dSep08</a>  | <a href="#">313786</a> | 4827  | 770  | 4 | 114 | ferredoxin 1-like (12.7 kD) (Fdx1l) alternative variant dSep08, mRNA.                 |
| <a href="#">Fdx1l</a>  | <a href="#">Fdx1l.eSep08</a>  | <a href="#">313786</a> | 4870  | 1782 | 6 | 103 | ferredoxin 1-like (Fdx1l) alternative variant eSep08, mRNA.                           |
| <a href="#">feeby</a>  | <a href="#">feeby.aSep08</a>  |                        | 1598  | 258  |   | 31  | putative protein (feeby) mRNA.                                                        |
| <a href="#">feechy</a> | <a href="#">feechy.aSep08</a> |                        | 1933  | 612  |   | 28  | putative protein (3.2 kD) (feechy) mRNA.                                              |
| <a href="#">feefer</a> | <a href="#">feefer.aSep08</a> |                        | 31719 | 430  |   | 143 | leucine rich repeat containing 16A (feefer) mRNA.                                     |
| <a href="#">feeflo</a> | <a href="#">feeflo.aSep08</a> |                        | 5147  | 604  |   | 201 | transient receptor potential cation channel subfamily M member 3 (feeflo) mRNA.       |
| <a href="#">feeflu</a> | <a href="#">feeflu.bSep08</a> |                        | 1990  | 611  |   | 126 | repeat-containing protein (feeflu) alternative variant bSep08, mRNA.                  |
| <a href="#">feekee</a> | <a href="#">feekee.aSep08</a> |                        | 15750 | 324  |   | 31  | putative protein (feekee) mRNA.                                                       |
| <a href="#">feeloy</a> | <a href="#">feeloy.bSep08</a> |                        | 3480  | 419  | 3 | 74  | CRA b like (8.1 kD) (feeloy) alternative variant bSep08, mRNA.                        |
| <a href="#">feemer</a> | <a href="#">feemer.aSep08</a> |                        | 793   | 463  | 1 | 121 | d11lgp1 like precursor (13.5 kD) (feemer) alternative variant aSep08, mRNA.           |
| <a href="#">feemer</a> | <a href="#">feemer.bSep08</a> |                        | 1032  | 421  | 2 | 110 | d11lgp1 like (feemer) alternative variant bSep08, mRNA.                               |
| <a href="#">feenoy</a> | <a href="#">feenoy.aSep08</a> |                        | 11052 | 428  |   | 60  | CRA a like (feenoy) mRNA.                                                             |

|                            |                                   |                        |       |      |    |     |                                                                                 |
|----------------------------|-----------------------------------|------------------------|-------|------|----|-----|---------------------------------------------------------------------------------|
| <a href="#">feepor</a>     | <a href="#">feepor.aSep08</a>     |                        | 25043 | 658  |    | 190 | tetratricopeptide repeat 12 (feepor) mRNA.                                      |
| <a href="#">feesa</a>      | <a href="#">feesa.aSep08</a>      |                        | 1402  | 284  |    | 48  | putative protein (5.9 kD) (feesa) mRNA.                                         |
| <a href="#">feeshee</a>    | <a href="#">feeshee.aSep08</a>    |                        | 14715 | 262  |    | 87  | protein tyrosine phosphatase non-receptor type substrate I like (feeshee) mRNA. |
| <a href="#">feeto</a>      | <a href="#">feeto.aSep08</a>      |                        | 548   | 390  |    | 109 | putative protein (feeto) mRNA.                                                  |
| <a href="#">feevar</a>     | <a href="#">feevar.aSep08</a>     |                        | 1531  | 620  |    | 103 | putative protein (feevar) mRNA.                                                 |
| <a href="#">feewey</a>     | <a href="#">feewey.aSep08</a>     |                        | 21024 | 629  | 4  | 55  | CRA b like (feewey) alternative variant aSep08, mRNA.                           |
| <a href="#">feewey</a>     | <a href="#">feewey.bSep08</a>     |                        | 10493 | 757  | 4  | 43  | CRA b like (4.9 kD) (feewey) alternative variant bSep08, complete mRNA.         |
| <a href="#">feewey</a>     | <a href="#">feewey.cSep08</a>     |                        | 20980 | 1083 | 3  | 42  | CRA c like (4.8 kD) (feewey) alternative variant cSep08, mRNA.                  |
| <a href="#">feewey</a>     | <a href="#">feewey.dSep08</a>     |                        | 17536 | 827  | 2  | 42  | CRA c like (4.8 kD) (feewey) alternative variant dSep08, mRNA.                  |
| <a href="#">feewey</a>     | <a href="#">feewey.eSep08</a>     |                        | 22013 | 624  | 4  | 10  | putative protein (1.2 kD) (feewey) alternative variant eSep08, mRNA.            |
| <a href="#">Feld-I_B.0</a> | <a href="#">Feld-I_B.0.aSep08</a> |                        | 1929  | 494  |    | 69  | putative protein of mammalian origin (Feld-I_B.0) mRNA.                         |
| <a href="#">Fen1</a>       | <a href="#">Fen1.bSep08</a>       | <a href="#">84490</a>  | 3058  | 850  | 1  | 205 | flap structure-specific endonuclease 1 (Fen1) alternative variant bSep08, mRNA. |
| <a href="#">Fer1I3</a>     | <a href="#">Fer1I3.aSep08</a>     | <a href="#">309499</a> | 28403 | 2449 | 16 | 616 | myoferlin (71.4 kD) (Fer1I3) alternative variant aSep08, mRNA.                  |
| <a href="#">Fer1I3</a>     | <a href="#">Fer1I3.bSep08</a>     | <a href="#">309499</a> | 7836  | 780  | 5  | 166 | myoferlin (Fer1I3) alternative variant bSep08, mRNA.                            |
| <a href="#">Fer1I3</a>     | <a href="#">Fer1I3.dSep08</a>     | <a href="#">309499</a> | 2245  | 234  | 3  | 47  | putative protein (5.1 kD) (Fer1I3) alternative variant dSep08, mRNA.            |
| <a href="#">Fer2.0</a>     | <a href="#">Fer2.0.aSep08</a>     |                        | 7816  | 620  |    | 67  | aldehyde oxidase (7.4 kD) (Fer2.0) mRNA.                                        |
| <a href="#">FerB.0</a>     | <a href="#">FerB.0.aSep08</a>     |                        | 9336  | 399  |    | 133 | myoferlin (FerB.0) mRNA.                                                        |
| <a href="#">ferby</a>      | <a href="#">ferby.aSep08</a>      |                        | 2057  | 512  |    | 38  | putative protein (ferby) mRNA.                                                  |
| <a href="#">ferchy</a>     | <a href="#">ferchy.aSep08</a>     |                        | 1206  | 822  |    | 44  | putative protein (5.2 kD) (ferchy) mRNA.                                        |
| <a href="#">ferfer</a>     | <a href="#">ferfer.aSep08</a>     |                        | 32208 | 720  |    | 238 | leucine rich repeat containing 16A (ferfer) mRNA.                               |
| <a href="#">ferflo</a>     | <a href="#">ferflo.aSep08</a>     |                        | 6292  | 854  |    | 51  | putative protein (6.1 kD) (ferflo) mRNA.                                        |
| <a href="#">ferflu</a>     | <a href="#">ferflu.aSep08</a>     |                        | 13690 | 685  |    | 108 | putative protein (ferflu) mRNA.                                                 |
| <a href="#">ferkee</a>     | <a href="#">ferkee.aSep08</a>     |                        | 3672  | 598  |    | 68  | putative protein (ferkee) mRNA.                                                 |
| <a href="#">ferloy</a>     | <a href="#">ferloy.aSep08</a>     |                        | 7737  | 970  |    | 211 | solute carrier family 35 member A5 (24.2 kD) (ferloy) mRNA.                     |
| <a href="#">fermer</a>     | <a href="#">fermer.aSep08</a>     |                        | 2131  | 670  | 1  | 223 | alpha-N-acetylglucosaminidase (fermer) alternative variant aSep08, mRNA.        |
| <a href="#">fermer</a>     | <a href="#">fermer.bSep08</a>     |                        | 1862  | 466  | 1  | 137 | alpha-N-acetylglucosaminidase (fermer) alternative variant bSep08, mRNA.        |
| <a href="#">Fermt2</a>     | <a href="#">Fermt2.bSep08</a>     | <a href="#">289992</a> | 11424 | 1344 | 7  | 320 | fermitin family homolog 2 (Fermt2) alternative variant bSep08, mRNA.            |
| <a href="#">Fermt2</a>     | <a href="#">Fermt2.cSep08</a>     | <a href="#">289992</a> | 5558  | 932  | 5  | 227 | fermitin family homolog 2 (Fermt2) alternative variant cSep08, mRNA.            |
| <a href="#">Fermt2</a>     | <a href="#">Fermt2.dSep08</a>     | <a href="#">289992</a> | 44076 | 747  | 3  | 133 | fermitin family homolog 2 (Fermt2) alternative variant dSep08, mRNA.            |
| <a href="#">Fermt2</a>     | <a href="#">Fermt2.eSep08</a>     | <a href="#">289992</a> | 2970  | 849  | 3  | 132 | fermitin family homolog 2 (15.5 kD) (Fermt2) alternative variant eSep08, mRNA.  |

|                          |                                 |                        |       |      |    |      |                                                                                                   |
|--------------------------|---------------------------------|------------------------|-------|------|----|------|---------------------------------------------------------------------------------------------------|
| <a href="#">Fermt2</a>   | <a href="#">Fermt2.fSep08</a>   | <a href="#">289992</a> | 568   | 259  | 2  | 82   | fermitin family homolog 2 (Fermt2) alternative variant fSep08, mRNA.                              |
| <a href="#">Fermt3</a>   | <a href="#">Fermt3.cSep08</a>   | <a href="#">309186</a> | 773   | 630  | 2  | 71   | fermitin family homolog 3 (Drosophila) (Fermt3) alternative variant cSep08, mRNA.                 |
| <a href="#">FERM_C.0</a> | <a href="#">FERM_C.0.aSep08</a> |                        | 16720 | 1857 |    | 489  | putative protein of eukaryotic origin (FERM_C.0) alternative variant aSep08, mRNA.                |
| <a href="#">FERM_C.0</a> | <a href="#">FERM_C.0.bSep08</a> |                        | 7506  | 1801 |    | 164  | putative protein of vertebrate origin (FERM_C.0) alternative variant bSep08, mRNA.                |
| <a href="#">FERM_N.0</a> | <a href="#">FERM_N.0.aSep08</a> |                        | 11381 | 1006 |    | 335  | protein Tyrosine phosphatase non-receptor type 13 (FERM_N.0) mRNA.                                |
| <a href="#">FERM_N.1</a> | <a href="#">FERM_N.1.aSep08</a> |                        | 55714 | 777  | 5  | 206  | putative protein of bilateral origin (FERM_N.1) alternative variant aSep08, mRNA.                 |
| <a href="#">FERM_N.1</a> | <a href="#">FERM_N.1.bSep08</a> |                        | 33853 | 398  | 1  | 69   | putative protein (FERM_N.1) alternative variant bSep08, mRNA.                                     |
| <a href="#">fernoy</a>   | <a href="#">fernoy.aSep08</a>   |                        | 27330 | 4160 | 18 | 1145 | transmembrane protein 131 (fernoy) alternative variant aSep08, mRNA.                              |
| <a href="#">fernoy</a>   | <a href="#">fernoy.bSep08</a>   |                        | 3850  | 1332 | 2  | 298  | transmembrane protein 131 (31.1 kD) (fernoy) alternative variant bSep08, mRNA.                    |
| <a href="#">fernoy</a>   | <a href="#">fernoy.cSep08</a>   |                        | 4559  | 715  | 2  | 167  | transmembrane protein 131 (fernoy) alternative variant cSep08, mRNA.                              |
| <a href="#">ferpor</a>   | <a href="#">ferpor.aSep08</a>   |                        | 1440  | 300  |    | 40   | putative protein (ferpor) mRNA.                                                                   |
| <a href="#">fersa</a>    | <a href="#">fersa.aSep08</a>    |                        | 6313  | 769  |    | 50   | putative protein (6.1 kD) (fersa) mRNA.                                                           |
| <a href="#">fershee</a>  | <a href="#">fershee.aSep08</a>  |                        | 636   | 329  |    | 31   | putative protein (fershee) mRNA.                                                                  |
| <a href="#">Fert2</a>    | <a href="#">Fert2.bSep08</a>    | <a href="#">301737</a> | 46902 | 398  | 4  | 115  | fer (fms/fps related) protein kinase, testis specific 2 (Fert2) alternative variant bSep08, mRNA. |
| <a href="#">Fert2</a>    | <a href="#">Fert2.cSep08</a>    | <a href="#">301737</a> | 66784 | 374  | 3  | 86   | fer (fms/fps related) protein kinase, testis specific 2 (Fert2) alternative variant cSep08, mRNA. |
| <a href="#">ferto</a>    | <a href="#">ferto.aSep08</a>    |                        | 1940  | 771  |    | 133  | putative protein of mammalian origin (ferto) mRNA.                                                |
| <a href="#">fervar</a>   | <a href="#">fervar.aSep08</a>   |                        | 52070 | 329  |    | 92   | carboxypeptidase 6 (fervar) mRNA.                                                                 |
| <a href="#">ferwey</a>   | <a href="#">ferwey.aSep08</a>   |                        | 18596 | 543  |    | 180  | kinase 1 (ferwey) mRNA.                                                                           |
| <a href="#">Fes</a>      | <a href="#">Fes.bSep08</a>      | <a href="#">361597</a> | 9160  | 3235 | 18 | 500  | feline sarcoma oncogene CRA d (Fes) alternative variant bSep08, mRNA.                             |
| <a href="#">Fes</a>      | <a href="#">Fes.cSep08</a>      | <a href="#">361597</a> | 923   | 556  | 3  | 182  | feline sarcoma oncogene (Fes) alternative variant cSep08, mRNA.                                   |
| <a href="#">Fes</a>      | <a href="#">Fes.dSep08</a>      | <a href="#">361597</a> | 1183  | 919  | 2  | 123  | feline sarcoma oncogene (13.9 kD) (Fes) alternative variant dSep08, mRNA.                         |
| <a href="#">Fes</a>      | <a href="#">Fes.eSep08</a>      | <a href="#">361597</a> | 1471  | 469  | 4  | 110  | feline sarcoma oncogene CRA d (Fes) alternative variant eSep08, mRNA.                             |
| <a href="#">Fes</a>      | <a href="#">Fes.gSep08</a>      | <a href="#">361597</a> | 1330  | 401  | 3  | 82   | feline sarcoma oncogene (Fes) alternative variant gSep08, mRNA.                                   |
| <a href="#">Fetub</a>    | <a href="#">Fetub.bSep08</a>    | <a href="#">83928</a>  | 8003  | 1141 | 7  | 331  | fetuin beta (Fetub) alternative variant bSep08, mRNA.                                             |
| <a href="#">Fetub</a>    | <a href="#">Fetub.cSep08</a>    | <a href="#">83928</a>  | 9220  | 1229 | 7  | 281  | fetuin beta (Fetub) alternative variant cSep08, mRNA.                                             |
| <a href="#">Fetub</a>    | <a href="#">Fetub.dSep08</a>    | <a href="#">83928</a>  | 7794  | 976  | 7  | 278  | fetuin beta (Fetub) alternative variant dSep08, mRNA.                                             |
| <a href="#">Fetub</a>    | <a href="#">Fetub.eSep08</a>    | <a href="#">83928</a>  | 7008  | 764  | 5  | 222  | fetuin beta (24.5 kD) (Fetub) alternative variant eSep08, mRNA.                                   |
| <a href="#">Fetub</a>    | <a href="#">Fetub.fSep08</a>    | <a href="#">83928</a>  | 5069  | 713  | 4  | 138  | fetuin beta (Fetub) alternative variant fSep08, mRNA.                                             |

|                           |                                  |                        |       |      |    |     |                                                                                                               |
|---------------------------|----------------------------------|------------------------|-------|------|----|-----|---------------------------------------------------------------------------------------------------------------|
| <a href="#">Fetub</a>     | <a href="#">Fetub.hSep08</a>     | <a href="#">83928</a>  | 1481  | 641  | 2  | 53  | fetuin beta (5.9 kD) (Fetub) alternative variant hSep08, mRNA.                                                |
| <a href="#">feyby</a>     | <a href="#">feyby.aSep08</a>     |                        | 20165 | 580  |    | 103 | bcl-6 corepressor (feyby) mRNA.                                                                               |
| <a href="#">feychy</a>    | <a href="#">feychy.aSep08</a>    |                        | 773   | 673  |    | 34  | putative protein (3.8 kD) (feychy) mRNA.                                                                      |
| <a href="#">feyfer</a>    | <a href="#">feyfer.aSep08</a>    |                        | 6419  | 241  |    | 80  | leucine rich repeat containing 16A (feyfer) mRNA.                                                             |
| <a href="#">feyflo</a>    | <a href="#">feyflo.aSep08</a>    |                        | 10141 | 342  |    | 113 | putative protein of bilateral origin (feyflo) mRNA.                                                           |
| <a href="#">feyflu</a>    | <a href="#">feyflu.aSep08</a>    |                        | 16510 | 871  | 3  | 55  | putative protein (6.4 kD) (feyflu) alternative variant aSep08, mRNA.                                          |
| <a href="#">feyflu</a>    | <a href="#">feyflu.bSep08</a>    |                        | 12709 | 306  | 2  | 54  | putative protein (feyflu) alternative variant bSep08, mRNA.                                                   |
| <a href="#">feykee</a>    | <a href="#">feykee.aSep08</a>    |                        | 7265  | 769  |    | 256 | putative protein of ancient origin (feykee) mRNA.                                                             |
| <a href="#">feyloy</a>    | <a href="#">feyloy.aSep08</a>    |                        | 824   | 750  |    | 25  | putative protein (2.9 kD) (feyloy) mRNA.                                                                      |
| <a href="#">feymer</a>    | <a href="#">feymer.aSep08</a>    |                        | 1148  | 376  |    | 124 | tubulin gamma 1 (feymer) mRNA.                                                                                |
| <a href="#">feynoy</a>    | <a href="#">feynoy.aSep08</a>    |                        | 4159  | 627  |    | 149 | transmembrane protein 131 (feynoy) mRNA.                                                                      |
| <a href="#">feypor</a>    | <a href="#">feypor.aSep08</a>    |                        | 784   | 730  |    | 75  | putative cytoplasmic protein (8.9 kD) (feypor) mRNA.                                                          |
| <a href="#">feysa</a>     | <a href="#">feysa.aSep08</a>     |                        | 950   | 425  |    | 124 | putative protein (feysa) mRNA.                                                                                |
| <a href="#">feyshee</a>   | <a href="#">feyshee.aSep08</a>   |                        | 4627  | 1326 | 4  | 104 | putative protein, with a coiled coil domain, of vertebrate origin (feyshee) alternative variant aSep08, mRNA. |
| <a href="#">feyto</a>     | <a href="#">feyto.aSep08</a>     |                        | 3917  | 891  |    | 86  | putative protein (feyto) mRNA.                                                                                |
| <a href="#">feyvar</a>    | <a href="#">feyvar.aSep08</a>    |                        | 8504  | 565  |    | 98  | putative protein, with a transmembrane domain, of mammalian origin (feyvar) mRNA.                             |
| <a href="#">feywey</a>    | <a href="#">feywey.aSep08</a>    |                        | 5524  | 1725 | 4  | 128 | kinase 1 (feywey) alternative variant aSep08, mRNA.                                                           |
| <a href="#">Fez1</a>      | <a href="#">Fez1.bSep08</a>      | <a href="#">81730</a>  | 9608  | 610  | 1  | 73  | fasciculation and elongation protein zeta 1 (zygin I) (Fez1) alternative variant bSep08, mRNA.                |
| <a href="#">Fez2</a>      | <a href="#">Fez2.bSep08</a>      | <a href="#">94269</a>  | 23809 | 747  | 6  | 198 | fasciculation and elongation protein zeta 2 (zygin II) (Fez2) alternative variant bSep08, mRNA.               |
| <a href="#">Fez2</a>      | <a href="#">Fez2.cSep08</a>      | <a href="#">94269</a>  | 24151 | 776  | 3  | 176 | fasciculation and elongation protein zeta 2 (zygin II) (Fez2) alternative variant cSep08, mRNA.               |
| <a href="#">Fez2</a>      | <a href="#">Fez2.dSep08</a>      | <a href="#">94269</a>  | 24601 | 1368 | 5  | 172 | fasciculation and elongation protein zeta 2 (zygin II) (Fez2) alternative variant dSep08, mRNA.               |
| <a href="#">Fez2</a>      | <a href="#">Fez2.eSep08</a>      | <a href="#">94269</a>  | 5030  | 396  | 2  | 131 | fasciculation and elongation protein zeta 2 (zygin II) (Fez2) alternative variant eSep08, mRNA.               |
| <a href="#">FFD_TFG.0</a> | <a href="#">FFD_TFG.0.aSep08</a> |                        | 2214  | 734  |    | 87  | lsm14 homolog b CRA e (FFD_TFG.0) mRNA.                                                                       |
| <a href="#">FG-GAP.0</a>  | <a href="#">FG-GAP.0.aSep08</a>  |                        | 68113 | 1541 |    | 513 | integrin alpha 8 CRA a (FG-GAP.0) mRNA.                                                                       |
| <a href="#">Fga</a>       | <a href="#">Fga.aSep08</a>       | <a href="#">361969</a> | 3387  | 2015 | 4  | 604 | fibrinogen, alpha polypeptide (Fga) alternative variant aSep08, mRNA.                                         |
| <a href="#">Fgb</a>       | <a href="#">Fgb.bSep08</a>       | <a href="#">24366</a>  | 5356  | 814  | 5  | 271 | fibrinogen, B beta polypeptide (Fgb) alternative variant bSep08, mRNA.                                        |
| <a href="#">Fgd1</a>      | <a href="#">Fgd1.bSep08</a>      | <a href="#">363460</a> | 18530 | 1785 | 1  | 390 | DH (Fgd1) alternative variant bSep08, mRNA.                                                                   |
| <a href="#">Fgd2</a>      | <a href="#">Fgd2.bSep08</a>      | <a href="#">309653</a> | 13426 | 2357 | 14 | 319 | pleckstrin-like and zinc finger, FYVE-type (36.3 kD) (Fgd2) alternative variant bSep08, mRNA.                 |
| <a href="#">Fgd2</a>      | <a href="#">Fgd2.cSep08</a>      | <a href="#">309653</a> | 7449  | 711  | 6  | 196 | zinc finger, FYVE-type (Fgd2) alternative variant cSep08, mRNA.                                               |
| <a href="#">Fgd2</a>      | <a href="#">Fgd2.dSep08</a>      | <a href="#">309653</a> | 2186  | 691  | 3  | 96  | putative protein (Fgd2) alternative variant dSep08, mRNA.                                                     |
| <a href="#">Fgd3</a>      | <a href="#">Fgd3.bSep08</a>      | <a href="#">361223</a> | 10163 | 417  | 4  | 139 | zinc finger, FYVE-type (Fgd3) alternative variant bSep08, mRNA.                                               |

|                          |                                 |                        |        |      |    |     |                                                                                         |
|--------------------------|---------------------------------|------------------------|--------|------|----|-----|-----------------------------------------------------------------------------------------|
| <a href="#">Fgd4</a>     | <a href="#">Fgd4.bSep08</a>     | <a href="#">246174</a> | 24108  | 508  |    | 71  | putative protein of mammalian origin (Fgd4) alternative variant bSep08, mRNA.           |
| <a href="#">Fgd5</a>     | <a href="#">Fgd5.bSep08</a>     | <a href="#">362402</a> | 3771   | 369  | 5  | 122 | putative protein of eukaryotic origin (Fgd5) alternative variant bSep08, mRNA.          |
| <a href="#">Fgd5</a>     | <a href="#">Fgd5.cSep08</a>     | <a href="#">362402</a> | 4269   | 801  | 3  | 72  | putative protein of bilateral origin (Fgd5) alternative variant cSep08, mRNA.           |
| <a href="#">Fgd6</a>     | <a href="#">Fgd6.aSep08</a>     | <a href="#">500824</a> | 3253   | 533  | 3  | 104 | pleckstrin-like (Fgd6) alternative variant aSep08, mRNA.                                |
| <a href="#">Fgf1</a>     | <a href="#">Fgf1.aSep08</a>     | <a href="#">25317</a>  | 73472  | 989  | 5  | 155 | fibroblast growth factor 1 (17.4 kD) (Fgf1) alternative variant aSep08, mRNA.           |
| <a href="#">Fgf1</a>     | <a href="#">Fgf1.cSep08</a>     | <a href="#">25317</a>  | 57080  | 385  | 2  | 68  | fibroblast growth factor 1 (Fgf1) alternative variant cSep08, mRNA.                     |
| <a href="#">Fgf7</a>     | <a href="#">Fgf7.bSep08</a>     | <a href="#">29348</a>  | 2820   | 1827 | 1  | 25  | fibroblast growth factor 7 (Fgf7) alternative variant bSep08, mRNA.                     |
| <a href="#">Fgf9</a>     | <a href="#">Fgf9.bSep08</a>     | <a href="#">25444</a>  | 38212  | 448  | 2  | 129 | fibroblast growth factor 9 (Fgf9) alternative variant bSep08, mRNA.                     |
| <a href="#">Fgf9</a>     | <a href="#">Fgf9.cSep08</a>     | <a href="#">25444</a>  | 37549  | 624  | 2  | 126 | fibroblast growth factor 9 (Fgf9) alternative variant cSep08, mRNA.                     |
| <a href="#">Fgf9</a>     | <a href="#">Fgf9.dSep08</a>     | <a href="#">25444</a>  | 37556  | 1545 | 2  | 91  | fibroblast growth factor 9 (10.9 kD) (Fgf9) alternative variant dSep08, mRNA.           |
| <a href="#">Fgf12</a>    | <a href="#">Fgf12.bSep08</a>    | <a href="#">170630</a> | 577082 | 1299 | 6  | 181 | fibroblast growth factor 12 (20.4 kD) (Fgf12) alternative variant bSep08, mRNA.         |
| <a href="#">Fgf13</a>    | <a href="#">Fgf13.bSep08</a>    | <a href="#">84488</a>  | 294827 | 790  | 1  | 185 | fibroblast growth factor 13 (Fgf13) alternative variant bSep08, mRNA.                   |
| <a href="#">Fgf21</a>    | <a href="#">Fgf21.bSep08</a>    | <a href="#">170580</a> | 4879   | 720  | 3  | 106 | fibroblast growth factor 21 (11.8 kD) (Fgf21) alternative variant bSep08, mRNA.         |
| <a href="#">Fgfr1</a>    | <a href="#">Fgfr1.aSep08</a>    | <a href="#">79114</a>  | 55088  | 3802 | 10 | 822 | fibroblast growth factor receptor 1 (91.9 kD) (Fgfr1) alternative variant aSep08, mRNA. |
| <a href="#">Fgfr1</a>    | <a href="#">Fgfr1.bSep08</a>    | <a href="#">79114</a>  | 9070   | 1783 | 3  | 434 | fibroblast growth factor receptor 1 (Fgfr1) alternative variant bSep08, mRNA.           |
| <a href="#">Fgfr1</a>    | <a href="#">Fgfr1.cSep08</a>    | <a href="#">79114</a>  | 4425   | 701  | 2  | 182 | fibroblast growth factor receptor 1 (Fgfr1) alternative variant cSep08, mRNA.           |
| <a href="#">Fgfr1</a>    | <a href="#">Fgfr1.dSep08</a>    | <a href="#">79114</a>  | 43932  | 1255 | 6  | 180 | fibroblast growth factor receptor 1 (Fgfr1) alternative variant dSep08, mRNA.           |
| <a href="#">Fgfr1op2</a> | <a href="#">Fgfr1op2.bSep08</a> | <a href="#">362463</a> | 19320  | 1110 | 6  | 215 | FGFR1 oncogene partner 2 (24.9 kD) (Fgfr1op2) alternative variant bSep08, mRNA.         |
| <a href="#">Fgfr1op2</a> | <a href="#">Fgfr1op2.cSep08</a> | <a href="#">362463</a> | 2874   | 330  | 2  | 75  | FGFR1 oncogene partner 2 (Fgfr1op2) alternative variant cSep08, mRNA.                   |
| <a href="#">Fgfr1op2</a> | <a href="#">Fgfr1op2.dSep08</a> | <a href="#">362463</a> | 1475   | 358  | 2  | 69  | FGFR1 oncogene partner 2 (Fgfr1op2) alternative variant dSep08, mRNA.                   |
| <a href="#">Fgfr2</a>    | <a href="#">Fgfr2.dSep08</a>    | <a href="#">25022</a>  | 8977   | 607  | 5  | 157 | fibroblast growth factor receptor 2 (Fgfr2) alternative variant dSep08, mRNA.           |
| <a href="#">Fgfr2</a>    | <a href="#">Fgfr2.eSep08</a>    | <a href="#">25022</a>  | 10371  | 375  | 3  | 77  | fibroblast growth factor receptor 2 (Fgfr2) alternative variant eSep08, mRNA.           |
| <a href="#">Fgfr3</a>    | <a href="#">Fgfr3.bSep08</a>    | <a href="#">84489</a>  | 975    | 691  | 3  | 184 | fibroblast growth factor receptor 3 (Fgfr3) alternative variant bSep08, mRNA.           |
| <a href="#">Fgfr3</a>    | <a href="#">Fgfr3.cSep08</a>    | <a href="#">84489</a>  | 2468   | 2162 | 3  | 184 | fibroblast growth factor receptor 3 (20.4 kD) (Fgfr3) alternative variant cSep08, mRNA. |

|                       |                              |                        |        |      |   |     |                                                                                                              |
|-----------------------|------------------------------|------------------------|--------|------|---|-----|--------------------------------------------------------------------------------------------------------------|
| <a href="#">Fgfr4</a> | <a href="#">Fgfr4.bSep08</a> | <a href="#">25114</a>  | 2765   | 1298 | 5 | 237 | fibroblast growth factor receptor 4 (26.4 kD) (Fgfr4) alternative variant bSep08, mRNA.                      |
| <a href="#">Fgfr4</a> | <a href="#">Fgfr4.cSep08</a> | <a href="#">25114</a>  | 512    | 396  | 2 | 81  | fibroblast growth factor receptor 4 (9.0 kD) (Fgfr4) alternative variant cSep08, mRNA.                       |
| <a href="#">Fgfr1</a> | <a href="#">Fgfr1.bSep08</a> | <a href="#">360903</a> | 977    | 738  | 1 | 245 | fibroblast growth factor receptor-like 1 (Fgfr1) alternative variant bSep08, mRNA.                           |
| <a href="#">Fgg</a>   | <a href="#">Fgg.aSep08</a>   | <a href="#">24367</a>  | 7281   | 2056 | 3 | 444 | fibrinogen, gamma polypeptide (50.5 kD) (Fgg) alternative variant aSep08, complete mRNA.                     |
| <a href="#">Fgg</a>   | <a href="#">Fgg.cSep08</a>   | <a href="#">24367</a>  | 2596   | 350  | 2 | 116 | fibrinogen, gamma polypeptide (Fgg) alternative variant cSep08, mRNA.                                        |
| <a href="#">Fgr</a>   | <a href="#">Fgr.bSep08</a>   | <a href="#">79113</a>  | 12446  | 803  | 2 | 198 | gardner-Rasheed feline sarcoma viral (Fgr) oncogene homolog (Fgr) alternative variant bSep08, mRNA.          |
| <a href="#">Fgr</a>   | <a href="#">Fgr.cSep08</a>   | <a href="#">79113</a>  | 21648  | 650  | 1 | 165 | gardner-Rasheed feline sarcoma viral (Fgr) oncogene homolog (Fgr) alternative variant cSep08, mRNA.          |
| <a href="#">FH2.0</a> | <a href="#">FH2.0.aSep08</a> |                        | 2771   | 1598 | 6 | 446 | actin-binding FH2 (FH2.0) alternative variant aSep08, mRNA.                                                  |
| <a href="#">FH2.0</a> | <a href="#">FH2.0.bSep08</a> |                        | 3170   | 1504 | 7 | 428 | actin-binding FH2 (FH2.0) alternative variant bSep08, mRNA.                                                  |
| <a href="#">FH2.0</a> | <a href="#">FH2.0.cSep08</a> |                        | 1361   | 529  | 3 | 145 | putative protein, with a coiled coil domain, of eukaryotic origin (FH2.0) alternative variant cSep08, mRNA.  |
| <a href="#">FH2.1</a> | <a href="#">FH2.1.aSep08</a> |                        | 27206  | 952  |   | 317 | actin-binding FH2 (FH2.1) mRNA.                                                                              |
| <a href="#">FH2.2</a> | <a href="#">FH2.2.aSep08</a> |                        | 2175   | 636  |   | 211 | diaphanous 1 (FH2.2) mRNA.                                                                                   |
| <a href="#">FH2.3</a> | <a href="#">FH2.3.aSep08</a> |                        | 2238   | 1068 |   | 355 | formin-like 3 CRA a (FH2.3) mRNA.                                                                            |
| <a href="#">FH2.4</a> | <a href="#">FH2.4.aSep08</a> |                        | 5842   | 1728 |   | 575 | inverted (FH2.4) mRNA.                                                                                       |
| <a href="#">FHA.0</a> | <a href="#">FHA.0.aSep08</a> |                        | 3924   | 738  | 3 | 245 | mediator of DNA damage checkpoint 1 (FHA.0) alternative variant aSep08, mRNA.                                |
| <a href="#">FHA.0</a> | <a href="#">FHA.0.bSep08</a> |                        | 2479   | 331  | 1 | 45  | mediator of DNA damage checkpoint 1 (FHA.0) alternative variant bSep08, mRNA.                                |
| <a href="#">FHA.1</a> | <a href="#">FHA.1.aSep08</a> |                        | 50688  | 544  |   | 73  | centrosomal protein 170kDa (FHA.1) mRNA.                                                                     |
| <a href="#">Fhdc1</a> | <a href="#">Fhdc1.bSep08</a> | <a href="#">295161</a> | 11853  | 2899 |   | 823 | putative protein, with 2 coiled coil domains, of eukaryotic origin (Fhdc1) alternative variant bSep08, mRNA. |
| <a href="#">Fhit</a>  | <a href="#">Fhit.aSep08</a>  | <a href="#">60398</a>  | 30210  | 414  |   | 34  | fragile histidine triad gene (Fhit) alternative variant aSep08, mRNA.                                        |
| <a href="#">Fhit</a>  | <a href="#">Fhit.bSep08</a>  | <a href="#">60398</a>  | 846925 | 1803 |   | 6   | fragile histidine triad gene (0.8 kD) (Fhit) alternative variant bSep08, mRNA.                               |
| <a href="#">Fhl1</a>  | <a href="#">Fhl1.aSep08</a>  | <a href="#">25177</a>  | 57705  | 1046 | 8 | 310 | four and a half LIM domains 1 (Fhl1) alternative variant aSep08, mRNA.                                       |
| <a href="#">Fhl1</a>  | <a href="#">Fhl1.bSep08</a>  | <a href="#">25177</a>  | 5258   | 926  | 6 | 305 | four and a half LIM domains 1 (Fhl1) alternative variant bSep08, mRNA.                                       |
| <a href="#">Fhl1</a>  | <a href="#">Fhl1.eSep08</a>  | <a href="#">25177</a>  | 55648  | 691  | 5 | 167 | four and a half LIM domains 1 (Fhl1) alternative variant eSep08, mRNA.                                       |
| <a href="#">Fhl2</a>  | <a href="#">Fhl2.bSep08</a>  | <a href="#">63839</a>  | 72683  | 1404 | 6 | 279 | four and a half LIM domains 2 (32.1 kD) (Fhl2) alternative variant bSep08, complete mRNA.                    |
| <a href="#">Fhl2</a>  | <a href="#">Fhl2.cSep08</a>  | <a href="#">63839</a>  | 4700   | 879  | 2 | 129 | four and a half LIM domains 2 (14.6 kD) (Fhl2) alternative variant cSep08, mRNA.                             |

|                                |                                       |                        |       |      |    |     |                                                                                                                   |
|--------------------------------|---------------------------------------|------------------------|-------|------|----|-----|-------------------------------------------------------------------------------------------------------------------|
| <a href="#">Fhod1</a>          | <a href="#">Fhod1.aSep08</a>          | <a href="#">291964</a> | 11053 | 855  | 7  | 284 | putative protein of metazoan origin (Fhod1) alternative variant aSep08, mRNA.                                     |
| <a href="#">Fhod1</a>          | <a href="#">Fhod1.bSep08</a>          | <a href="#">291964</a> | 1040  | 694  | 4  | 230 | putative protein, with a coiled coil domain, of metazoan origin (Fhod1) alternative variant bSep08, mRNA.         |
| <a href="#">Fibp</a>           | <a href="#">Fibp.bSep08</a>           | <a href="#">282837</a> | 4191  | 1099 | 4  | 346 | fibroblast growth factor (acidic) intracellular binding protein (Fibp) alternative variant bSep08, mRNA.          |
| <a href="#">Fibp</a>           | <a href="#">Fibp.cSep08</a>           | <a href="#">282837</a> | 1142  | 619  | 2  | 83  | fibroblast growth factor (acidic) intracellular binding protein (9.7 kD) (Fibp) alternative variant cSep08, mRNA. |
| <a href="#">Fibp</a>           | <a href="#">Fibp.dSep08</a>           | <a href="#">282837</a> | 1178  | 379  | 3  | 82  | fibroblast growth factor (acidic) intracellular binding protein (Fibp) alternative variant dSep08, mRNA.          |
| <a href="#">Fibrinogen_C.0</a> | <a href="#">Fibrinogen_C.0.aSep08</a> |                        | 1499  | 405  |    | 134 | angiopoietin-like 7 (Fibrinogen_C.0) mRNA.                                                                        |
| <a href="#">Ficd</a>           | <a href="#">Ficd.aSep08</a>           | <a href="#">288741</a> | 4863  | 3188 | 3  | 458 | filamentation induced by cAMP protein Fic precursor (51.8 kD) (Ficd) alternative variant aSep08, mRNA.            |
| <a href="#">Fig4</a>           | <a href="#">Fig4.bSep08</a>           | <a href="#">309855</a> | 58670 | 1784 | 6  | 463 | FIG4 homolog (S. cerevisiae) (Fig4) alternative variant bSep08, mRNA.                                             |
| <a href="#">Fig4</a>           | <a href="#">Fig4.cSep08</a>           | <a href="#">309855</a> | 13760 | 684  | 5  | 125 | FIG4 homolog (S. cerevisiae) (Fig4) alternative variant cSep08, mRNA.                                             |
| <a href="#">Fig4</a>           | <a href="#">Fig4.dSep08</a>           | <a href="#">309855</a> | 20734 | 433  | 5  | 73  | FIG4 homolog (S. cerevisiae) (Fig4) alternative variant dSep08, mRNA.                                             |
| <a href="#">Filamin.0</a>      | <a href="#">Filamin.0.aSep08</a>      |                        | 782   | 427  |    | 142 | filamin Gamma (Filamin.0) mRNA.                                                                                   |
| <a href="#">Filip1</a>         | <a href="#">Filip1.bSep08</a>         | <a href="#">246776</a> | 41315 | 934  | 2  | 82  | filamin A interacting protein 1 (Filip1) alternative variant bSep08, mRNA.                                        |
| <a href="#">Filip1</a>         | <a href="#">Filip1.cSep08</a>         | <a href="#">246776</a> | 24674 | 230  | 2  | 24  | filamin A interacting protein 1 (Filip1) alternative variant cSep08, mRNA.                                        |
| <a href="#">Fip111</a>         | <a href="#">Fip111.bSep08</a>         | <a href="#">289582</a> | 53464 | 1541 | 15 | 471 | FIP1 like 1 (S. cerevisiae) (Fip111) alternative variant bSep08, mRNA.                                            |
| <a href="#">Fip111</a>         | <a href="#">Fip111.cSep08</a>         | <a href="#">289582</a> | 39090 | 761  | 9  | 253 | FIP1 like 1 (S. cerevisiae) (Fip111) alternative variant cSep08, mRNA.                                            |
| <a href="#">Fip111</a>         | <a href="#">Fip111.dSep08</a>         | <a href="#">289582</a> | 37343 | 735  | 7  | 244 | FIP1 like 1 (S. cerevisiae) (Fip111) alternative variant dSep08, mRNA.                                            |
| <a href="#">Fip111</a>         | <a href="#">Fip111.eSep08</a>         | <a href="#">289582</a> | 10990 | 650  | 7  | 177 | FIP1 like 1 (S. cerevisiae) (Fip111) alternative variant eSep08, mRNA.                                            |
| <a href="#">Fis1</a>           | <a href="#">Fis1.aSep08</a>           | <a href="#">288584</a> | 4105  | 780  | 5  | 185 | fission 1 (mitochondrial outer membrane) homolog (yeast) (Fis1) alternative variant aSep08, mRNA.                 |
| <a href="#">Fis1</a>           | <a href="#">Fis1.bSep08</a>           | <a href="#">288584</a> | 14936 | 1188 | 4  | 179 | fission 1 (mitochondrial outer membrane) homolog (yeast) (20.2 kD) (Fis1) alternative variant bSep08, mRNA.       |
| <a href="#">Fiz1</a>           | <a href="#">Fiz1.bSep08</a>           | <a href="#">292584</a> | 1982  | 625  | 2  | 176 | FLT3-interacting zinc finger 1 (Fiz1) alternative variant bSep08, mRNA.                                           |
| <a href="#">Fkbp1a</a>         | <a href="#">Fkbp1a.bSep08</a>         | <a href="#">25639</a>  | 3398  | 1218 | 2  | 75  | FK506 binding protein 1a (Fkbp1a) alternative variant bSep08, mRNA.                                               |
| <a href="#">Fkbp2</a>          | <a href="#">Fkbp2.dSep08</a>          | <a href="#">293702</a> | 1346  | 402  | 4  | 55  | FK506 binding protein 2 (6.2 kD) (Fkbp2) alternative variant dSep08, mRNA.                                        |
| <a href="#">Fkbp2</a>          | <a href="#">Fkbp2.eSep08</a>          | <a href="#">293702</a> | 731   | 359  | 3  | 47  | FK506 binding protein 2 (5.2 kD) (Fkbp2) alternative variant eSep08, mRNA.                                        |
| <a href="#">Fkbp3</a>          | <a href="#">Fkbp3.aSep08</a>          | <a href="#">299104</a> | 11536 | 956  | 7  | 224 | FK506 binding protein 3 (25.2 kD) (Fkbp3) alternative variant aSep08, complete mRNA.                              |

|                        |                               |                        |       |      |   |     |                                                                                                   |
|------------------------|-------------------------------|------------------------|-------|------|---|-----|---------------------------------------------------------------------------------------------------|
| <a href="#">Fkbp4</a>  | <a href="#">Fkbp4.aSep08</a>  | <a href="#">260321</a> | 8400  | 2790 | 2 | 512 | FK506 binding protein 4 (Fkbp4) alternative variant aSep08, mRNA.                                 |
| <a href="#">Fkbp4</a>  | <a href="#">Fkbp4.bSep08</a>  | <a href="#">260321</a> | 2234  | 713  | 1 | 148 | FK506 binding protein 4 (16.6 kD) (Fkbp4) alternative variant bSep08, mRNA.                       |
| <a href="#">Fkbp7</a>  | <a href="#">Fkbp7.aSep08</a>  | <a href="#">295672</a> | 11683 | 869  | 4 | 241 | FK506 binding protein 7 (Fkbp7) alternative variant aSep08, mRNA.                                 |
| <a href="#">Fkbp7</a>  | <a href="#">Fkbp7.bSep08</a>  | <a href="#">295672</a> | 11572 | 761  | 4 | 206 | FK506 binding protein 7 (Fkbp7) alternative variant bSep08, mRNA.                                 |
| <a href="#">Fkbp7</a>  | <a href="#">Fkbp7.fSep08</a>  | <a href="#">295672</a> | 1436  | 752  | 2 | 41  | FK506 binding protein 7 (4.9 kD) (Fkbp7) alternative variant fSep08, mRNA.                        |
| <a href="#">Fkbp8</a>  | <a href="#">Fkbp8.bSep08</a>  | <a href="#">290652</a> | 4438  | 991  | 7 | 330 | FK506 binding protein 8 (Fkbp8) alternative variant bSep08, mRNA.                                 |
| <a href="#">Fkbp8</a>  | <a href="#">Fkbp8.cSep08</a>  | <a href="#">290652</a> | 4543  | 1706 | 5 | 292 | FK506 binding protein 8 (31.1 kD) (Fkbp8) alternative variant cSep08, mRNA.                       |
| <a href="#">Fkbp8</a>  | <a href="#">Fkbp8.dSep08</a>  | <a href="#">290652</a> | 2791  | 803  | 5 | 212 | FK506 binding protein 8 (Fkbp8) alternative variant dSep08, mRNA.                                 |
| <a href="#">Fkbp8</a>  | <a href="#">Fkbp8.eSep08</a>  | <a href="#">290652</a> | 2784  | 1586 | 2 | 161 | FK506 binding protein 8 (16.9 kD) (Fkbp8) alternative variant eSep08, mRNA.                       |
| <a href="#">Fkbp8</a>  | <a href="#">Fkbp8.fSep08</a>  | <a href="#">290652</a> | 1021  | 763  | 2 | 91  | FK506 binding protein 8 (Fkbp8) alternative variant fSep08, mRNA.                                 |
| <a href="#">Fkbp9</a>  | <a href="#">Fkbp9.bSep08</a>  | <a href="#">297123</a> | 46266 | 843  | 3 | 280 | FK506 binding protein 9 (Fkbp9) alternative variant bSep08, mRNA.                                 |
| <a href="#">Fkbp9</a>  | <a href="#">Fkbp9.cSep08</a>  | <a href="#">297123</a> | 24165 | 855  | 2 | 202 | FK506 binding protein 9 (Fkbp9) alternative variant cSep08, mRNA.                                 |
| <a href="#">Fkbp10</a> | <a href="#">Fkbp10.bSep08</a> | <a href="#">360627</a> | 11999 | 389  | 2 | 73  | FK506 binding protein 10 (Fkbp10) alternative variant bSep08, mRNA.                               |
| <a href="#">Fkbp10</a> | <a href="#">Fkbp10.cSep08</a> | <a href="#">360627</a> | 518   | 312  | 2 | 42  | FK506 binding protein 10 (Fkbp10) alternative variant cSep08, mRNA.                               |
| <a href="#">Fkbp14</a> | <a href="#">Fkbp14.bSep08</a> | <a href="#">362366</a> | 3514  | 747  | 2 | 101 | FK506 binding protein 14 (Fkbp14) alternative variant bSep08, mRNA.                               |
| <a href="#">Fkbp15</a> | <a href="#">Fkbp15.aSep08</a> | <a href="#">362528</a> | 32240 | 1051 | 7 | 350 | fk506 binding protein 15 like (Fkbp15) alternative variant aSep08, mRNA.                          |
| <a href="#">Fkbp15</a> | <a href="#">Fkbp15.bSep08</a> | <a href="#">362528</a> | 42931 | 1279 | 3 | 222 | putative nuclear protein of mammalian origin (23.8 kD) (Fkbp15) alternative variant bSep08, mRNA. |
| <a href="#">Fkbp15</a> | <a href="#">Fkbp15.cSep08</a> | <a href="#">362528</a> | 3794  | 1009 | 3 | 159 | putative protein of mammalian origin (Fkbp15) alternative variant cSep08, mRNA.                   |
| <a href="#">Fkbp15</a> | <a href="#">Fkbp15.dSep08</a> | <a href="#">362528</a> | 29034 | 815  | 6 | 128 | fk506 binding protein 15 like (Fkbp15) alternative variant dSep08, mRNA.                          |
| <a href="#">Fktn</a>   | <a href="#">Fktn.bSep08</a>   | <a href="#">362520</a> | 15281 | 536  | 1 | 178 | fukutin (Fktn) alternative variant bSep08, mRNA.                                                  |
| <a href="#">flabor</a> | <a href="#">flabor.aSep08</a> |                        | 5017  | 1138 |   | 47  | putative protein (flabor) mRNA.                                                                   |
| <a href="#">flachy</a> | <a href="#">flachy.aSep08</a> |                        | 2369  | 727  |   | 72  | putative nuclear protein (8.0 kD) (flachy) mRNA.                                                  |
| <a href="#">fladoy</a> | <a href="#">fladoy.aSep08</a> |                        | 1954  | 563  |   | 83  | putative protein (fladoy) mRNA.                                                                   |
| <a href="#">flafu</a>  | <a href="#">flafu.aSep08</a>  |                        | 2370  | 410  |   | 136 | PI-3-kinase-related kinase smg-1 (flafu) mRNA.                                                    |
| <a href="#">flafly</a> | <a href="#">flafly.aSep08</a> |                        | 35041 | 394  |   | 34  | putative protein (flafly) mRNA.                                                                   |
| <a href="#">flagar</a> | <a href="#">flagar.aSep08</a> |                        | 793   | 230  |   | 30  | putative protein (flagar) mRNA.                                                                   |
| <a href="#">flaja</a>  | <a href="#">flaja.aSep08</a>  |                        | 1317  | 727  |   | 167 | putative protein (18.8 kD) (flaja) mRNA.                                                          |



|                         |                                |  |       |      |    |     |                                                                                                             |
|-------------------------|--------------------------------|--|-------|------|----|-----|-------------------------------------------------------------------------------------------------------------|
| <a href="#">flajey</a>  | <a href="#">flajey.aSep08</a>  |  | 727   | 378  |    | 50  | putative protein (flajey) mRNA.                                                                             |
| <a href="#">flakee</a>  | <a href="#">flakee.aSep08</a>  |  | 23340 | 1825 |    | 608 | centromere protein F (flakee) alternative variant aSep08, mRNA.                                             |
| <a href="#">flakee</a>  | <a href="#">flakee.bSep08</a>  |  | 10685 | 586  |    | 195 | centromere protein F (flakee) alternative variant bSep08, mRNA.                                             |
| <a href="#">flalo</a>   | <a href="#">flalo.aSep08</a>   |  | 1852  | 613  | 6  | 204 | phosphatidylinositol transfer protein membrane-associated 2 CRA b (flalo) alternative variant aSep08, mRNA. |
| <a href="#">flamee</a>  | <a href="#">flamee.aSep08</a>  |  | 1901  | 1063 |    | 42  | putative protein (4.4 kD) (flamee) mRNA.                                                                    |
| <a href="#">flanoy</a>  | <a href="#">flanoy.aSep08</a>  |  | 5496  | 968  |    | 322 | elastin microfibril interfacier 2 (flanoy) mRNA.                                                            |
| <a href="#">flapor</a>  | <a href="#">flapor.bSep08</a>  |  | 1071  | 487  | 2  | 88  | putative protein (flapor) alternative variant bSep08, mRNA.                                                 |
| <a href="#">flarbor</a> | <a href="#">flarbor.aSep08</a> |  | 3544  | 302  |    | 21  | putative protein (2.6 kD) (flarbor) mRNA.                                                                   |
| <a href="#">flarchy</a> | <a href="#">flarchy.aSep08</a> |  | 1550  | 523  |    | 40  | putative protein (flarchy) mRNA.                                                                            |
| <a href="#">flardoy</a> | <a href="#">flardoy.aSep08</a> |  | 21618 | 392  |    | 130 | dmx-like 1 (flardoy) mRNA.                                                                                  |
| <a href="#">flarflu</a> | <a href="#">flarflu.aSep08</a> |  | 2342  | 635  |    | 96  | PI-3-kinase-related kinase smg-1 (flarflu) mRNA.                                                            |
| <a href="#">flarfly</a> | <a href="#">flarfly.aSep08</a> |  | 1192  | 622  |    | 70  | neural cell expressed developmentally gene 4 (7.6 kD) (flarfly) mRNA.                                       |
| <a href="#">flargar</a> | <a href="#">flargar.aSep08</a> |  | 7268  | 377  |    | 36  | putative protein (flargar) mRNA.                                                                            |
| <a href="#">flarja</a>  | <a href="#">flarja.aSep08</a>  |  | 3763  | 335  |    | 63  | putative protein (6.7 kD) (flarja) mRNA.                                                                    |
| <a href="#">flarjey</a> | <a href="#">flarjey.aSep08</a> |  | 3512  | 755  |    | 71  | putative nuclear protein (8.0 kD) (flarjey) mRNA.                                                           |
| <a href="#">flarkee</a> | <a href="#">flarkee.aSep08</a> |  | 3542  | 405  |    | 134 | angel homolog 2 CRA b (flarkee) mRNA.                                                                       |
| <a href="#">flarlo</a>  | <a href="#">flarlo.aSep08</a>  |  | 2146  | 310  |    | 102 | vacuolar sorting protein 33A (flarlo) mRNA.                                                                 |
| <a href="#">flarmee</a> | <a href="#">flarmee.aSep08</a> |  | 10343 | 763  |    | 84  | putative protein (flarmee) mRNA.                                                                            |
| <a href="#">flaroy</a>  | <a href="#">flaroy.aSep08</a>  |  | 732   | 411  |    | 67  | putative protein (flaroy) mRNA.                                                                             |
| <a href="#">flarpor</a> | <a href="#">flarpor.aSep08</a> |  | 14869 | 404  |    | 124 | protein tyrosine phosphatase non-receptor type 23 CRA a (flarpor) mRNA.                                     |
| <a href="#">flarroy</a> | <a href="#">flarroy.aSep08</a> |  | 6421  | 2100 | 14 | 650 | ATP-binding cassette sub-family A member 7 like (flarroy) alternative variant aSep08, mRNA.                 |
| <a href="#">flarroy</a> | <a href="#">flarroy.bSep08</a> |  | 1120  | 1017 | 1  | 168 | member 7 (flarroy) alternative variant bSep08, mRNA.                                                        |
| <a href="#">flarsa</a>  | <a href="#">flarsa.aSep08</a>  |  | 3992  | 1755 | 3  | 22  | putative protein (flarsa) alternative variant aSep08, mRNA.                                                 |
| <a href="#">flartu</a>  | <a href="#">flartu.aSep08</a>  |  | 2333  | 373  |    | 107 | serologically defined colon cancer antigen 1 CRA f like (flartu) mRNA.                                      |
| <a href="#">flarvo</a>  | <a href="#">flarvo.bSep08</a>  |  | 1581  | 1167 |    | 71  | putative mitochondrial protein (8.1 kD) (flarvo) alternative variant bSep08, mRNA.                          |
| <a href="#">flarwer</a> | <a href="#">flarwer.aSep08</a> |  | 19951 | 794  |    | 264 | CRA b (flarwer) mRNA.                                                                                       |
| <a href="#">flasa</a>   | <a href="#">flasa.aSep08</a>   |  | 1398  | 855  | 1  | 67  | putative protein (flasa) alternative variant aSep08, mRNA.                                                  |
| <a href="#">flasa</a>   | <a href="#">flasa.bSep08</a>   |  | 9781  | 576  | 3  | 60  | putative protein (6.9 kD) (flasa) alternative variant bSep08, mRNA.                                         |
| <a href="#">flashee</a> | <a href="#">flashee.aSep08</a> |  | 3593  | 1088 | 2  | 74  | putative protein (8.5 kD) (flashee) alternative variant aSep08, mRNA.                                       |
| <a href="#">flashee</a> | <a href="#">flashee.bSep08</a> |  | 2002  | 738  | 1  | 58  | putative protein (6.7 kD) (flashee) alternative variant bSep08, mRNA.                                       |
| <a href="#">flatu</a>   | <a href="#">flatu.aSep08</a>   |  | 2375  | 373  |    | 123 | fam179b (flatu) mRNA.                                                                                       |
| <a href="#">flavo</a>   | <a href="#">flavo.aSep08</a>   |  | 11900 | 556  |    | 89  | putative protein (9.8 kD) (flavo) mRNA.                                                                     |
| <a href="#">flawbor</a> | <a href="#">flawbor.aSep08</a> |  | 65011 | 654  |    | 73  | putative protein (flawbor) mRNA.                                                                            |

|                          |                                 |                        |       |      |   |     |                                                                                     |
|--------------------------|---------------------------------|------------------------|-------|------|---|-----|-------------------------------------------------------------------------------------|
| <a href="#">flawchy</a>  | <a href="#">flawchy.bSep08</a>  |                        | 3489  | 424  | 4 | 33  | putative protein (3.8 kD) (flawchy) alternative variant bSep08, mRNA.               |
| <a href="#">flawdoy</a>  | <a href="#">flawdoy.aSep08</a>  |                        | 5166  | 1897 |   | 537 | dmx-like 1 (flawdoy) mRNA.                                                          |
| <a href="#">flower</a>   | <a href="#">flower.aSep08</a>   |                        | 818   | 529  | 1 | 87  | putative protein (flower) alternative variant aSep08, mRNA.                         |
| <a href="#">flower</a>   | <a href="#">flower.bSep08</a>   |                        | 1560  | 510  | 2 | 49  | putative protein (flower) alternative variant bSep08, mRNA.                         |
| <a href="#">flawflu</a>  | <a href="#">flawflu.aSep08</a>  |                        | 792   | 683  |   | 67  | PI-3-kinase-related kinase smg-1 (flawflu) mRNA.                                    |
| <a href="#">flawfly</a>  | <a href="#">flawfly.aSep08</a>  |                        | 11558 | 386  |   | 116 | serine active site containing 1 (flawfly) mRNA.                                     |
| <a href="#">flawgar</a>  | <a href="#">flawgar.aSep08</a>  |                        | 22241 | 728  |   | 156 | putative protein (flawgar) mRNA.                                                    |
| <a href="#">flawja</a>   | <a href="#">flawja.bSep08</a>   |                        | 931   | 333  | 3 | 71  | putative protein (flawja) alternative variant bSep08, mRNA.                         |
| <a href="#">flawjey</a>  | <a href="#">flawjey.aSep08</a>  |                        | 1049  | 783  | 2 | 64  | putative protein (flawjey) alternative variant aSep08, mRNA.                        |
| <a href="#">flawjey</a>  | <a href="#">flawjey.bSep08</a>  |                        | 2990  | 605  | 4 | 61  | putative protein (flawjey) alternative variant bSep08, mRNA.                        |
| <a href="#">flawkee</a>  | <a href="#">flawkee.aSep08</a>  |                        | 2281  | 576  |   | 38  | putative protein (4.7 kD) (flawkee) mRNA.                                           |
| <a href="#">flawlo</a>   | <a href="#">flawlo.aSep08</a>   |                        | 3787  | 493  |   | 150 | leucine rich repeat containing 43 CRA b (flawlo) mRNA.                              |
| <a href="#">flawmee</a>  | <a href="#">flawmee.aSep08</a>  |                        | 16938 | 1542 |   | 50  | putative protein (5.4 kD) (flawmee) alternative variant aSep08, mRNA.               |
| <a href="#">flawpor</a>  | <a href="#">flawpor.aSep08</a>  |                        | 975   | 618  |   | 108 | CRA c like (flawpor) mRNA.                                                          |
| <a href="#">flawroy</a>  | <a href="#">flawroy.aSep08</a>  |                        | 916   | 468  | 2 | 84  | putative mitochondrial protein (9.1 kD) (flawroy) alternative variant aSep08, mRNA. |
| <a href="#">flawroy</a>  | <a href="#">flawroy.bSep08</a>  |                        | 1059  | 459  | 2 | 41  | putative protein (flawroy) alternative variant bSep08, mRNA.                        |
| <a href="#">flawsa</a>   | <a href="#">flawsa.aSep08</a>   |                        | 456   | 410  |   | 39  | putative protein (4.4 kD) (flawsa) mRNA.                                            |
| <a href="#">flawshee</a> | <a href="#">flawshee.aSep08</a> |                        | 655   | 247  |   | 22  | putative protein (flawshee) mRNA.                                                   |
| <a href="#">flawtu</a>   | <a href="#">flawtu.aSep08</a>   |                        | 24409 | 2727 | 8 | 451 | son of sevenless 2 (flawtu) alternative variant aSep08, mRNA.                       |
| <a href="#">flawtu</a>   | <a href="#">flawtu.bSep08</a>   |                        | 3985  | 931  | 3 | 213 | son of sevenless homolog 2 (flawtu) alternative variant bSep08, mRNA.               |
| <a href="#">flawtu</a>   | <a href="#">flawtu.cSep08</a>   |                        | 1884  | 928  | 2 | 78  | putative protein (flawtu) alternative variant cSep08, mRNA.                         |
| <a href="#">flawtu</a>   | <a href="#">flawtu.dSep08</a>   |                        | 5024  | 376  | 4 | 64  | son of sevenless homolog 2 (flawtu) alternative variant dSep08, mRNA.               |
| <a href="#">flawvo</a>   | <a href="#">flawvo.aSep08</a>   |                        | 43052 | 443  |   | 44  | putative protein (4.9 kD) (flawvo) mRNA.                                            |
| <a href="#">flawwer</a>  | <a href="#">flawwer.aSep08</a>  |                        | 5389  | 741  |   | 211 | CRA b (flawwer) mRNA.                                                               |
| <a href="#">Flcn</a>     | <a href="#">Flcn.bSep08</a>     | <a href="#">303185</a> | 2742  | 686  | 3 | 206 | folliculin (Flcn) alternative variant bSep08, mRNA.                                 |
| <a href="#">Flcn</a>     | <a href="#">Flcn.cSep08</a>     | <a href="#">303185</a> | 9020  | 962  | 5 | 189 | folliculin (Flcn) alternative variant cSep08, mRNA.                                 |
| <a href="#">Flcn</a>     | <a href="#">Flcn.dSep08</a>     | <a href="#">303185</a> | 8824  | 806  | 5 | 173 | folliculin (Flcn) alternative variant dSep08, mRNA.                                 |
| <a href="#">Flcn</a>     | <a href="#">Flcn.eSep08</a>     | <a href="#">303185</a> | 3818  | 1260 | 4 | 167 | folliculin (18.0 kD) (Flcn) alternative variant eSep08, mRNA.                       |
| <a href="#">Flcn</a>     | <a href="#">Flcn.fSep08</a>     | <a href="#">303185</a> | 3437  | 422  | 2 | 14  | folliculin (Flcn) alternative variant fSep08, mRNA.                                 |
| <a href="#">fleebor</a>  | <a href="#">fleebor.aSep08</a>  |                        | 989   | 379  |   | 26  | putative protein (3.0 kD) (fleebor) mRNA.                                           |
| <a href="#">fleechy</a>  | <a href="#">fleechy.aSep08</a>  |                        | 44050 | 677  |   | 56  | putative protein (6.5 kD) (fleechy) mRNA.                                           |
| <a href="#">fleadoy</a>  | <a href="#">fleadoy.aSep08</a>  |                        | 22521 | 884  |   | 294 | dmx-like 1 (fleadoy) mRNA.                                                          |
| <a href="#">fleeflu</a>  | <a href="#">fleeflu.aSep08</a>  |                        | 937   | 141  |   | 47  | kinase (fleeflu) mRNA.                                                              |

|                          |                                 |  |       |      |   |     |                                                                                  |
|--------------------------|---------------------------------|--|-------|------|---|-----|----------------------------------------------------------------------------------|
| <a href="#">fleefly</a>  | <a href="#">fleefly.aSep08</a>  |  | 26292 | 381  |   | 24  | putative protein (2.3 kD) (fleefly) mRNA.                                        |
| <a href="#">fleegar</a>  | <a href="#">fleegar.aSep08</a>  |  | 2057  | 1050 |   | 105 | putative protein (fleegar) mRNA.                                                 |
| <a href="#">fleeja</a>   | <a href="#">fleeja.aSep08</a>   |  | 4116  | 534  |   | 54  | putative protein (fleeja) mRNA.                                                  |
| <a href="#">fleejey</a>  | <a href="#">fleejey.aSep08</a>  |  | 3613  | 499  | 3 | 141 | putative protein of mammalian origin (fleejey) alternative variant aSep08, mRNA. |
| <a href="#">fleekee</a>  | <a href="#">fleekee.aSep08</a>  |  | 5399  | 327  |   | 21  | putative protein (fleekee) mRNA.                                                 |
| <a href="#">fleelo</a>   | <a href="#">fleelo.aSep08</a>   |  | 2274  | 436  |   | 145 | mlx interacting protein CRA a (fleelo) mRNA.                                     |
| <a href="#">fleemee</a>  | <a href="#">fleemee.aSep08</a>  |  | 6357  | 356  |   | 118 | pitpnm family member 3 (fleemee) mRNA.                                           |
| <a href="#">fleepor</a>  | <a href="#">fleepor.aSep08</a>  |  | 936   | 540  |   | 180 | CRA a (fleepor) mRNA.                                                            |
| <a href="#">fleeroy</a>  | <a href="#">fleeroy.aSep08</a>  |  | 760   | 643  |   | 37  | putative protein (fleeroy) mRNA.                                                 |
| <a href="#">fleesa</a>   | <a href="#">fleesa.aSep08</a>   |  | 16156 | 445  |   | 34  | putative protein (fleesa) mRNA.                                                  |
| <a href="#">fleeshee</a> | <a href="#">fleeshee.aSep08</a> |  | 6705  | 845  |   | 42  | putative protein (4.9 kD) (fleeshee) mRNA.                                       |
| <a href="#">fleetu</a>   | <a href="#">fleetu.aSep08</a>   |  | 4504  | 649  |   | 102 | ninein (fleetu) mRNA.                                                            |
| <a href="#">fleevo</a>   | <a href="#">fleevo.aSep08</a>   |  | 10862 | 164  |   | 40  | putative protein (fleevo) mRNA.                                                  |
| <a href="#">fleewer</a>  | <a href="#">fleewer.aSep08</a>  |  | 6173  | 340  |   | 59  | CRA b like (fleewer) mRNA.                                                       |
| <a href="#">flerbor</a>  | <a href="#">flerbor.aSep08</a>  |  | 13835 | 550  |   | 51  | putative protein (5.8 kD) (flerbor) mRNA.                                        |
| <a href="#">flerchy</a>  | <a href="#">flerchy.aSep08</a>  |  | 6381  | 557  |   | 98  | putative protein (flerchy) mRNA.                                                 |
| <a href="#">flerdoy</a>  | <a href="#">flerdoy.aSep08</a>  |  | 1504  | 487  |   | 35  | putative protein (4.0 kD) (flerdoy) mRNA.                                        |
| <a href="#">flerflu</a>  | <a href="#">flerflu.aSep08</a>  |  | 17632 | 451  |   | 97  | transmembrane channel-like 5 (flerflu) mRNA.                                     |
| <a href="#">flerfly</a>  | <a href="#">flerfly.aSep08</a>  |  | 1602  | 1418 |   | 61  | putative protein (6.8 kD) (flerfly) mRNA.                                        |
| <a href="#">flergar</a>  | <a href="#">flergar.aSep08</a>  |  | 5133  | 448  |   | 148 | histone acetyltransferase myst3 (flergar) mRNA.                                  |
| <a href="#">flerja</a>   | <a href="#">flerja.aSep08</a>   |  | 599   | 381  |   | 111 | putative protein (flerja) mRNA.                                                  |
| <a href="#">flerjey</a>  | <a href="#">flerjey.aSep08</a>  |  | 6633  | 504  |   | 33  | putative protein (flerjey) mRNA.                                                 |
| <a href="#">flerkee</a>  | <a href="#">flerkee.aSep08</a>  |  | 11286 | 815  |   | 59  | putative protein (6.8 kD) (flerkee) mRNA.                                        |
| <a href="#">flerlo</a>   | <a href="#">flerlo.aSep08</a>   |  | 25028 | 535  | 4 | 123 | putative protein (13.7 kD) (flerlo) alternative variant aSep08, mRNA.            |
| <a href="#">flerlo</a>   | <a href="#">flerlo.bSep08</a>   |  | 25575 | 545  | 4 | 123 | putative protein (13.7 kD) (flerlo) alternative variant bSep08, mRNA.            |
| <a href="#">flermee</a>  | <a href="#">flermee.aSep08</a>  |  | 5132  | 229  |   | 75  | uncharacterized protein like (flermee) mRNA.                                     |
| <a href="#">flerpor</a>  | <a href="#">flerpor.aSep08</a>  |  | 699   | 403  |   | 134 | CRA c like (flerpor) mRNA.                                                       |
| <a href="#">flerroy</a>  | <a href="#">flerroy.aSep08</a>  |  | 12227 | 349  |   | 51  | putative protein (flerroy) mRNA.                                                 |
| <a href="#">flersa</a>   | <a href="#">flersa.aSep08</a>   |  | 3569  | 401  |   | 133 | putative protein (flersa) mRNA.                                                  |
| <a href="#">flershee</a> | <a href="#">flershee.aSep08</a> |  | 13834 | 677  | 7 | 225 | sortilin (flershee) alternative variant aSep08, mRNA.                            |
| <a href="#">flershee</a> | <a href="#">flershee.bSep08</a> |  | 49214 | 605  | 8 | 201 | sortilin (flershee) alternative variant bSep08, mRNA.                            |
| <a href="#">flershee</a> | <a href="#">flershee.cSep08</a> |  | 26487 | 528  | 3 | 52  | sortilin (flershee) alternative variant cSep08, mRNA.                            |
| <a href="#">flertu</a>   | <a href="#">flertu.aSep08</a>   |  | 6230  | 1266 | 4 | 46  | putative protein (4.9 kD) (flertu) alternative variant aSep08, mRNA.             |
| <a href="#">flervo</a>   | <a href="#">flervo.aSep08</a>   |  | 362   | 253  |   | 83  | putative protein (flervo) mRNA.                                                  |
| <a href="#">flerwer</a>  | <a href="#">flerwer.aSep08</a>  |  | 5697  | 345  |   | 55  | CRA b like (flerwer) mRNA.                                                       |
| <a href="#">fleybor</a>  | <a href="#">fleybor.aSep08</a>  |  | 1044  | 392  |   | 53  | putative protein (6.2 kD) (fleybor) mRNA.                                        |
| <a href="#">fleychy</a>  | <a href="#">fleychy.aSep08</a>  |  | 11486 | 728  |   | 28  | putative protein (3.2 kD) (fleychy) mRNA.                                        |
| <a href="#">fleydoy</a>  | <a href="#">fleydoy.aSep08</a>  |  | 1706  | 355  |   | 51  | putative protein (6.0 kD) (fleydoy) mRNA.                                        |

|                          |                                 |                        |       |      |    |      |                                                                                       |
|--------------------------|---------------------------------|------------------------|-------|------|----|------|---------------------------------------------------------------------------------------|
| <a href="#">fleyflu</a>  | <a href="#">fleyflu.aSep08</a>  |                        | 16034 | 256  |    | 18   | putative protein (fleyflu) mRNA.                                                      |
| <a href="#">fleyfly</a>  | <a href="#">fleyfly.aSep08</a>  |                        | 588   | 290  |    | 24   | putative protein (fleyfly) mRNA.                                                      |
| <a href="#">fleygar</a>  | <a href="#">fleygar.aSep08</a>  |                        | 3116  | 954  |    | 193  | myst histone acetyltransferase 3 (fleygar) alternative variant aSep08, mRNA.          |
| <a href="#">fleygar</a>  | <a href="#">fleygar.bSep08</a>  |                        | 2516  | 441  | 1  | 51   | putative protein (fleygar) alternative variant bSep08, mRNA.                          |
| <a href="#">fleyja</a>   | <a href="#">fleyja.aSep08</a>   |                        | 3066  | 621  |    | 66   | putative protein (7.9 kD) (fleyja) mRNA.                                              |
| <a href="#">fleyjey</a>  | <a href="#">fleyjey.aSep08</a>  |                        | 4408  | 227  |    | 75   | adenylate cyclase 1 (fleyjey) mRNA.                                                   |
| <a href="#">fleykee</a>  | <a href="#">fleykee.aSep08</a>  |                        | 2921  | 1243 |    | 163  | integrator complex (fleykee) mRNA.                                                    |
| <a href="#">fleylo</a>   | <a href="#">fleylo.aSep08</a>   |                        | 8199  | 737  |    | 245  | WD repeat domain 66 (fleylo) mRNA.                                                    |
| <a href="#">fleymee</a>  | <a href="#">fleymee.aSep08</a>  |                        | 741   | 356  |    | 79   | uncharacterized protein like (fleymee) mRNA.                                          |
| <a href="#">fleypor</a>  | <a href="#">fleypor.aSep08</a>  |                        | 10508 | 420  |    | 139  | putative protein (fleypor) mRNA.                                                      |
| <a href="#">fleyroy</a>  | <a href="#">fleyroy.aSep08</a>  |                        | 707   | 544  |    | 180  | putative protein of mammalian origin (fleyroy) mRNA.                                  |
| <a href="#">fleysa</a>   | <a href="#">fleysa.aSep08</a>   |                        | 5398  | 359  |    | 119  | extra spindle poles like 1 (fleysa) mRNA.                                             |
| <a href="#">fleyshee</a> | <a href="#">fleyshee.aSep08</a> |                        | 5158  | 642  |    | 214  | cadherin EGF LAG seven-pass G-type receptor (fleyshee) mRNA.                          |
| <a href="#">fleytu</a>   | <a href="#">fleytu.aSep08</a>   |                        | 824   | 720  |    | 81   | putative protein (fleytu) mRNA.                                                       |
| <a href="#">fleyvo</a>   | <a href="#">fleyvo.aSep08</a>   |                        | 15045 | 457  | 2  | 55   | putative protein (fleyvo) alternative variant aSep08, mRNA.                           |
| <a href="#">fleyvo</a>   | <a href="#">fleyvo.bSep08</a>   |                        | 1368  | 334  | 1  | 39   | putative protein (fleyvo) alternative variant bSep08, mRNA.                           |
| <a href="#">fleywer</a>  | <a href="#">fleywer.aSep08</a>  |                        | 4295  | 745  |    | 82   | putative cytoplasmic protein (10.2 kD) (fleywer) mRNA.                                |
| <a href="#">Flii</a>     | <a href="#">Flii.aSep08</a>     | <a href="#">287375</a> | 14647 | 4725 | 14 | 1270 | flightless I homolog (Drosophila) (144.9 kD) (Flii) alternative variant aSep08, mRNA. |
| <a href="#">Flii</a>     | <a href="#">Flii.bSep08</a>     | <a href="#">287375</a> | 1616  | 744  | 1  | 247  | flightless I homolog (Drosophila) (Flii) alternative variant bSep08, mRNA.            |
| <a href="#">Flii</a>     | <a href="#">Flii.cSep08</a>     | <a href="#">287375</a> | 2235  | 1734 | 2  | 174  | flightless I homolog (Drosophila) (Flii) alternative variant cSep08, mRNA.            |
| <a href="#">Flna</a>     | <a href="#">Flna.bSep08</a>     | <a href="#">293860</a> | 4922  | 1092 | 9  | 363  | filamin A (Flna) alternative variant bSep08, mRNA.                                    |
| <a href="#">Flna</a>     | <a href="#">Flna.cSep08</a>     | <a href="#">293860</a> | 3426  | 1821 | 5  | 223  | filamin alpha (23.4 kD) (Flna) alternative variant cSep08, mRNA.                      |
| <a href="#">Flna</a>     | <a href="#">Flna.dSep08</a>     | <a href="#">293860</a> | 2013  | 657  | 4  | 195  | filamin Alpha (Flna) alternative variant dSep08, mRNA.                                |
| <a href="#">Flna</a>     | <a href="#">Flna.eSep08</a>     | <a href="#">293860</a> | 1166  | 707  | 4  | 191  | filamin Alpha (Flna) alternative variant eSep08, mRNA.                                |
| <a href="#">Flna</a>     | <a href="#">Flna.fSep08</a>     | <a href="#">293860</a> | 425   | 280  | 3  | 93   | filamin alpha (Flna) alternative variant fSep08, mRNA.                                |
| <a href="#">Flnb</a>     | <a href="#">Flnb.bSep08</a>     | <a href="#">306204</a> | 9556  | 720  | 7  | 240  | filamin, beta (Flnb) alternative variant bSep08, mRNA.                                |
| <a href="#">Flnc</a>     | <a href="#">Flnc.aSep08</a>     | <a href="#">362332</a> | 10962 | 4339 | 23 | 1219 | filamin C, gamma (actin binding protein 280) (Flnc) alternative variant aSep08, mRNA. |
| <a href="#">Flnc</a>     | <a href="#">Flnc.bSep08</a>     | <a href="#">362332</a> | 14670 | 654  | 4  | 159  | filamin C, gamma (actin binding protein 280) (Flnc) alternative variant bSep08, mRNA. |
| <a href="#">flobor</a>   | <a href="#">flobor.aSep08</a>   |                        | 8205  | 735  |    | 34   | putative protein (flobor) mRNA.                                                       |
| <a href="#">flochy</a>   | <a href="#">flochy.aSep08</a>   |                        | 6781  | 271  |    | 76   | putative protein (flochy) mRNA.                                                       |
| <a href="#">flodoy</a>   | <a href="#">flodoy.aSep08</a>   |                        | 1481  | 523  |    | 174  | dmx-like 1 (flodoy) mRNA.                                                             |
| <a href="#">floflu</a>   | <a href="#">floflu.aSep08</a>   |                        | 1346  | 432  |    | 143  | PI-3-kinase-related kinase smg-1 (floflu) mRNA.                                       |
| <a href="#">flofly</a>   | <a href="#">flofly.aSep08</a>   |                        | 10892 | 927  | 5  | 86   | putative protein (9.5 kD) (flofly) alternative variant aSep08, mRNA.                  |

|                          |                                 |                       |       |      |    |     |                                                                                                               |
|--------------------------|---------------------------------|-----------------------|-------|------|----|-----|---------------------------------------------------------------------------------------------------------------|
| <a href="#">flofly</a>   | <a href="#">flofly.cSep08</a>   |                       | 5811  | 329  | 2  | 54  | putative protein (5.9 kD) (flofly) alternative variant cSep08, mRNA.                                          |
| <a href="#">flogar</a>   | <a href="#">flogar.aSep08</a>   |                       | 27549 | 697  |    | 86  | putative protein (flogar) mRNA.                                                                               |
| <a href="#">floja</a>    | <a href="#">floja.aSep08</a>    |                       | 3630  | 305  |    | 101 | exportin 7 (floja) mRNA.                                                                                      |
| <a href="#">flojey</a>   | <a href="#">flojey.aSep08</a>   |                       | 558   | 351  |    | 117 | zinc finger MIZ-type containing 2 (flojey) mRNA.                                                              |
| <a href="#">flokee</a>   | <a href="#">flokee.aSep08</a>   |                       | 3767  | 708  |    | 75  | putative protein (8.2 kD) (flokee) mRNA.                                                                      |
| <a href="#">flogo</a>    | <a href="#">flogo.aSep08</a>    |                       | 13620 | 330  |    | 103 | putative protein (flogo) mRNA.                                                                                |
| <a href="#">flomee</a>   | <a href="#">flomee.aSep08</a>   |                       | 3651  | 355  |    | 45  | putative protein (flomee) mRNA.                                                                               |
| <a href="#">flonoy</a>   | <a href="#">flonoy.aSep08</a>   |                       | 1811  | 1481 |    | 67  | putative protein (7.7 kD) (flonoy) mRNA.                                                                      |
| <a href="#">flopore</a>  | <a href="#">flopore.aSep08</a>  |                       | 2336  | 608  | 4  | 71  | putative protein (7.7 kD) (flopore) alternative variant aSep08, mRNA.                                         |
| <a href="#">flopore</a>  | <a href="#">flopore.cSep08</a>  |                       | 2823  | 608  | 2  | 75  | putative mitochondrial protein (8.2 kD) (flopore) alternative variant cSep08, mRNA.                           |
| <a href="#">florbor</a>  | <a href="#">florbor.aSep08</a>  |                       | 2944  | 965  | 1  | 37  | putative protein (florbor) alternative variant aSep08, mRNA.                                                  |
| <a href="#">florbor</a>  | <a href="#">florbor.bSep08</a>  |                       | 2522  | 699  | 1  | 50  | putative protein (5.4 kD) (florbor) alternative variant bSep08, mRNA.                                         |
| <a href="#">florchy</a>  | <a href="#">florchy.aSep08</a>  |                       | 1196  | 389  |    | 73  | putative protein (florchy) mRNA.                                                                              |
| <a href="#">flordoy</a>  | <a href="#">flordoy.aSep08</a>  |                       | 6760  | 608  |    | 14  | putative protein (flordoy) mRNA.                                                                              |
| <a href="#">florflu</a>  | <a href="#">florflu.aSep08</a>  |                       | 29572 | 1777 |    | 35  | putative protein (florflu) mRNA.                                                                              |
| <a href="#">florfly</a>  | <a href="#">florfly.aSep08</a>  |                       | 1239  | 574  |    | 39  | putative protein (4.6 kD) (florfly) mRNA.                                                                     |
| <a href="#">florgar</a>  | <a href="#">florgar.aSep08</a>  |                       | 5940  | 426  |    | 92  | putative protein (florgar) mRNA.                                                                              |
| <a href="#">florja</a>   | <a href="#">florja.aSep08</a>   |                       | 49673 | 384  |    | 56  | reverse transcriptase like (6.7 kD) (florja) mRNA.                                                            |
| <a href="#">florjey</a>  | <a href="#">florjey.aSep08</a>  |                       | 16473 | 561  | 1  | 156 | tensin 3 (florjey) alternative variant aSep08, mRNA.                                                          |
| <a href="#">florjey</a>  | <a href="#">florjey.bSep08</a>  |                       | 14573 | 267  | 1  | 71  | putative protein (florjey) alternative variant bSep08, mRNA.                                                  |
| <a href="#">florkee</a>  | <a href="#">florkee.aSep08</a>  |                       | 1456  | 522  |    | 124 | putative protein (13.7 kD) (florkee) mRNA.                                                                    |
| <a href="#">florlo</a>   | <a href="#">florlo.aSep08</a>   |                       | 1879  | 741  | 2  | 122 | putative protein (florlo) alternative variant aSep08, mRNA.                                                   |
| <a href="#">flormee</a>  | <a href="#">flormee.aSep08</a>  |                       | 1311  | 322  |    | 106 | uncharacterized protein (flormee) mRNA.                                                                       |
| <a href="#">floroy</a>   | <a href="#">floroy.aSep08</a>   |                       | 536   | 256  |    | 84  | ABC transporter (floroy) mRNA.                                                                                |
| <a href="#">florpor</a>  | <a href="#">florpor.aSep08</a>  |                       | 1898  | 244  |    | 80  | putative protein (florpor) mRNA.                                                                              |
| <a href="#">florroy</a>  | <a href="#">florroy.aSep08</a>  |                       | 6854  | 3792 | 5  | 369 | putative protein, with a coiled coil domain, of vertebrate origin (florroy) alternative variant aSep08, mRNA. |
| <a href="#">florroy</a>  | <a href="#">florroy.bSep08</a>  |                       | 643   | 415  | 1  | 138 | putative protein of vertebrate origin (florroy) alternative variant bSep08, mRNA.                             |
| <a href="#">florsa</a>   | <a href="#">florsa.aSep08</a>   |                       | 12174 | 514  |    | 43  | putative protein (florsa) mRNA.                                                                               |
| <a href="#">florshee</a> | <a href="#">florshee.aSep08</a> |                       | 14300 | 422  |    | 39  | modulator 2 (florshee) mRNA.                                                                                  |
| <a href="#">flortu</a>   | <a href="#">flortu.aSep08</a>   |                       | 12523 | 717  | 2  | 80  | putative protein (flortu) alternative variant aSep08, mRNA.                                                   |
| <a href="#">flortu</a>   | <a href="#">flortu.bSep08</a>   |                       | 12616 | 491  | 3  | 33  | putative protein (flortu) alternative variant bSep08, mRNA.                                                   |
| <a href="#">florvo</a>   | <a href="#">florvo.aSep08</a>   |                       | 2297  | 370  |    | 123 | midasin (florvo) mRNA.                                                                                        |
| <a href="#">florwer</a>  | <a href="#">florwer.aSep08</a>  |                       | 516   | 410  |    | 41  | putative protein (4.7 kD) (florwer) mRNA.                                                                     |
| <a href="#">flosa</a>    | <a href="#">flosa.aSep08</a>    |                       | 5960  | 413  |    | 49  | putative protein (flosa) mRNA.                                                                                |
| <a href="#">floshee</a>  | <a href="#">floshee.aSep08</a>  |                       | 2352  | 383  |    | 39  | putative protein (4.5 kD) (floshee) mRNA.                                                                     |
| <a href="#">Flot1</a>    | <a href="#">Flot1.bSep08</a>    | <a href="#">64665</a> | 7670  | 1242 | 10 | 352 | flotillin (39.8 kD) (Flot1) alternative variant bSep08, mRNA.                                                 |

|                            |                                   |                        |        |      |   |     |                                                                                             |
|----------------------------|-----------------------------------|------------------------|--------|------|---|-----|---------------------------------------------------------------------------------------------|
| <a href="#">Flot1</a>      | <a href="#">Flot1.cSep08</a>      | <a href="#">64665</a>  | 7242   | 817  | 8 | 176 | flotillin 1 (Flot1) alternative variant cSep08, mRNA.                                       |
| <a href="#">Flot1</a>      | <a href="#">Flot1.dSep08</a>      | <a href="#">64665</a>  | 2339   | 636  | 7 | 143 | flotillin 1 CRA a (Flot1) alternative variant dSep08, mRNA.                                 |
| <a href="#">Flot1</a>      | <a href="#">Flot1.eSep08</a>      | <a href="#">64665</a>  | 563    | 415  | 2 | 84  | flotillin 1 CRA a (Flot1) alternative variant eSep08, mRNA.                                 |
| <a href="#">Flot1</a>      | <a href="#">Flot1.fSep08</a>      | <a href="#">64665</a>  | 2136   | 467  | 2 | 75  | flotillin 1 (Flot1) alternative variant fSep08, mRNA.                                       |
| <a href="#">Flot1</a>      | <a href="#">Flot1.hSep08</a>      | <a href="#">64665</a>  | 560    | 315  | 2 | 32  | putative protein (Flot1) alternative variant hSep08, mRNA.                                  |
| <a href="#">Flot2</a>      | <a href="#">Flot2.bSep08</a>      | <a href="#">83764</a>  | 19870  | 769  | 7 | 256 | flotillin 2 (Flot2) alternative variant bSep08, mRNA.                                       |
| <a href="#">Flot2</a>      | <a href="#">Flot2.cSep08</a>      | <a href="#">83764</a>  | 20031  | 754  | 7 | 181 | flotillin 2 (Flot2) alternative variant cSep08, mRNA.                                       |
| <a href="#">Flot2</a>      | <a href="#">Flot2.eSep08</a>      | <a href="#">83764</a>  | 18022  | 397  | 4 | 81  | flotillin (Flot2) alternative variant eSep08, mRNA.                                         |
| <a href="#">flotu</a>      | <a href="#">flotu.aSep08</a>      |                        | 6260   | 2058 | 6 | 175 | serologically defined colon cancer antigen 1 like (flotu) alternative variant aSep08, mRNA. |
| <a href="#">flovo</a>      | <a href="#">flovo.aSep08</a>      |                        | 4764   | 1361 | 4 | 93  | putative protein (flovo) alternative variant aSep08, mRNA.                                  |
| <a href="#">flower</a>     | <a href="#">flower.aSep08</a>     |                        | 7711   | 524  |   | 89  | carrier family (flower) mRNA.                                                               |
| <a href="#">floybor</a>    | <a href="#">floybor.aSep08</a>    |                        | 1511   | 618  |   | 68  | putative protein (floybor) mRNA.                                                            |
| <a href="#">floychy</a>    | <a href="#">floychy.aSep08</a>    |                        | 1345   | 370  |   | 35  | putative protein (floychy) mRNA.                                                            |
| <a href="#">floydoy</a>    | <a href="#">floydoy.aSep08</a>    |                        | 899    | 330  |   | 39  | putative protein of mammalian origin (floydoy) mRNA.                                        |
| <a href="#">floyflu</a>    | <a href="#">floyflu.aSep08</a>    |                        | 1351   | 985  |   | 44  | putative protein (5.1 kD) (floyflu) mRNA.                                                   |
| <a href="#">floyfly</a>    | <a href="#">floyfly.aSep08</a>    |                        | 7941   | 1681 | 4 | 98  | ab2-076 like (floyfly) alternative variant aSep08, mRNA.                                    |
| <a href="#">floygar</a>    | <a href="#">floygar.bSep08</a>    |                        | 14865  | 3307 | 4 | 225 | putative protein of vertebrate origin (floygar) alternative variant bSep08, mRNA.           |
| <a href="#">floyja</a>     | <a href="#">floyja.aSep08</a>     |                        | 2941   | 311  |   | 65  | putative protein (floyja) mRNA.                                                             |
| <a href="#">floyjey</a>    | <a href="#">floyjey.aSep08</a>    |                        | 13684  | 406  |   | 135 | tensin 3 (floyjey) mRNA.                                                                    |
| <a href="#">floykee</a>    | <a href="#">floykee.aSep08</a>    |                        | 123300 | 386  |   | 128 | hedgehog acyltransferase (floykee) mRNA.                                                    |
| <a href="#">floylo</a>     | <a href="#">floylo.aSep08</a>     |                        | 4083   | 603  | 2 | 33  | putative protein (floylo) alternative variant aSep08, mRNA.                                 |
| <a href="#">floylo</a>     | <a href="#">floylo.cSep08</a>     |                        | 4083   | 316  | 2 | 12  | putative protein (floylo) alternative variant cSep08, mRNA.                                 |
| <a href="#">floymee</a>    | <a href="#">floymee.aSep08</a>    |                        | 2478   | 792  |   | 70  | putative protein (floymee) mRNA.                                                            |
| <a href="#">floypor</a>    | <a href="#">floypor.aSep08</a>    |                        | 2225   | 471  |   | 111 | als2 C-terminal like (floypor) mRNA.                                                        |
| <a href="#">floyroy</a>    | <a href="#">floyroy.aSep08</a>    |                        | 1340   | 349  |   | 50  | putative protein (floyroy) mRNA.                                                            |
| <a href="#">floyrsa</a>    | <a href="#">floyrsa.aSep08</a>    |                        | 991    | 558  |   | 183 | putative protein (floyrsa) mRNA.                                                            |
| <a href="#">floyrshee</a>  | <a href="#">floyrshee.aSep08</a>  |                        | 4061   | 374  |   | 75  | putative protein (floyrshee) mRNA.                                                          |
| <a href="#">floytu</a>     | <a href="#">floytu.aSep08</a>     |                        | 10143  | 840  |   | 280 | CRA a (floytu) mRNA.                                                                        |
| <a href="#">floyvo</a>     | <a href="#">floyvo.aSep08</a>     |                        | 14822  | 1781 |   | 573 | midasin (floyvo) mRNA.                                                                      |
| <a href="#">floywer</a>    | <a href="#">floywer.aSep08</a>    |                        | 1451   | 525  |   | 135 | putative protein (15.0 kD) (floywer) mRNA.                                                  |
| <a href="#">Flt1</a>       | <a href="#">Flt1.bSep08</a>       | <a href="#">54251</a>  | 17386  | 2454 | 1 | 185 | FMS-like tyrosine kinase 1 (Flt1) alternative variant bSep08, mRNA.                         |
| <a href="#">Flt3</a>       | <a href="#">Flt3.aSep08</a>       | <a href="#">140635</a> | 13173  | 1255 |   | 274 | FMS-like tyrosine kinase 3 (Flt3) mRNA.                                                     |
| <a href="#">Flt3_lig.0</a> | <a href="#">Flt3_lig.0.aSep08</a> |                        | 5187   | 1161 | 6 | 253 | flt3 ligand (Flt3_lig.0) alternative variant aSep08, mRNA.                                  |
| <a href="#">Flt3_lig.0</a> | <a href="#">Flt3_lig.0.bSep08</a> |                        | 2706   | 395  | 1 | 131 | CRA d like (Flt3_lig.0) alternative variant bSep08, mRNA.                                   |
| <a href="#">Flt3_lig.0</a> | <a href="#">Flt3_lig.0.cSep08</a> |                        | 2052   | 390  | 5 | 115 | ligand (Flt3_lig.0) alternative variant cSep08, mRNA.                                       |
| <a href="#">flubor</a>     | <a href="#">flubor.aSep08</a>     |                        | 905    | 759  |   | 60  | putative protein (flubor) mRNA.                                                             |
| <a href="#">fluchy</a>     | <a href="#">fluchy.aSep08</a>     |                        | 77776  | 412  |   | 85  | putative protein (fluchy) mRNA.                                                             |
| <a href="#">flufly</a>     | <a href="#">flufly.aSep08</a>     |                        | 1752   | 557  |   | 185 | kinase smg1 (flufly) mRNA.                                                                  |

|                         |                                |                        |       |      |   |     |                                                                                                                |
|-------------------------|--------------------------------|------------------------|-------|------|---|-----|----------------------------------------------------------------------------------------------------------------|
| <a href="#">flufly</a>  | <a href="#">flufly.aSep08</a>  |                        | 28561 | 529  |   | 176 | AT rich interactive domain 1B (flufly) mRNA.                                                                   |
| <a href="#">flugar</a>  | <a href="#">flugar.bSep08</a>  |                        | 811   | 305  | 2 | 75  | putative protein (flugar) alternative variant bSep08, mRNA.                                                    |
| <a href="#">fluja</a>   | <a href="#">fluja.aSep08</a>   |                        | 2476  | 447  |   | 60  | putative protein (fluja) mRNA.                                                                                 |
| <a href="#">flujey</a>  | <a href="#">flujey.aSep08</a>  |                        | 6867  | 985  | 1 | 77  | zinc finger MIZ-type containing 2 (8.0 kD) (flujey) alternative variant aSep08, mRNA.                          |
| <a href="#">flujey</a>  | <a href="#">flujey.bSep08</a>  |                        | 6284  | 399  | 1 | 67  | putative protein (flujey) alternative variant bSep08, mRNA.                                                    |
| <a href="#">flukee</a>  | <a href="#">flukee.aSep08</a>  |                        | 88055 | 706  |   | 35  | putative protein (flukee) mRNA.                                                                                |
| <a href="#">flulo</a>   | <a href="#">flulo.aSep08</a>   |                        | 17908 | 419  | 4 | 78  | putative protein (7.9 kD) (flulo) alternative variant aSep08, mRNA.                                            |
| <a href="#">flulo</a>   | <a href="#">flulo.bSep08</a>   |                        | 944   | 469  | 2 | 51  | putative protein (flulo) alternative variant bSep08, mRNA.                                                     |
| <a href="#">flumee</a>  | <a href="#">flumee.aSep08</a>  |                        | 945   | 480  |   | 111 | containing 1 (flumee) mRNA.                                                                                    |
| <a href="#">flunoy</a>  | <a href="#">flunoy.aSep08</a>  |                        | 27450 | 1183 |   | 332 | putative protein of eukaryotic origin (flunoy) mRNA.                                                           |
| <a href="#">flupor</a>  | <a href="#">flupor.aSep08</a>  |                        | 1429  | 437  |   | 41  | type VII collagen (flupor) mRNA.                                                                               |
| <a href="#">fluoy</a>   | <a href="#">fluoy.aSep08</a>   |                        | 919   | 255  |   | 54  | solute carrier family 37 member 3 like (fluoy) mRNA.                                                           |
| <a href="#">flusa</a>   | <a href="#">flusa.aSep08</a>   |                        | 745   | 229  |   | 46  | putative protein (flusa) mRNA.                                                                                 |
| <a href="#">flushee</a> | <a href="#">flushee.aSep08</a> |                        | 55432 | 1396 |   | 75  | putative nuclear protein (8.6 kD) (flushee) mRNA.                                                              |
| <a href="#">flutu</a>   | <a href="#">flutu.aSep08</a>   |                        | 5754  | 370  | 2 | 47  | putative protein (flutu) alternative variant aSep08, mRNA.                                                     |
| <a href="#">flutu</a>   | <a href="#">flutu.bSep08</a>   |                        | 6353  | 273  | 2 | 26  | putative protein (flutu) alternative variant bSep08, mRNA.                                                     |
| <a href="#">fluvo</a>   | <a href="#">fluvo.aSep08</a>   |                        | 9611  | 471  |   | 24  | putative protein (2.5 kD) (fluvo) mRNA.                                                                        |
| <a href="#">fluwer</a>  | <a href="#">fluwer.aSep08</a>  |                        | 2284  | 306  |   | 102 | domain 22 (fluwer) mRNA.                                                                                       |
| <a href="#">Flvcr2</a>  | <a href="#">Flvcr2.bSep08</a>  | <a href="#">314323</a> | 9654  | 1690 |   | 73  | feline leukemia virus subgroup C cellular receptor family, member 2 (Flvcr2) alternative variant bSep08, mRNA. |
| <a href="#">flybor</a>  | <a href="#">flybor.aSep08</a>  |                        | 3119  | 245  |   | 25  | putative protein (flybor) mRNA.                                                                                |
| <a href="#">flychy</a>  | <a href="#">flychy.aSep08</a>  |                        | 12240 | 501  |   | 166 | akt substrate as250 (flychy) mRNA.                                                                             |
| <a href="#">flydoy</a>  | <a href="#">flydoy.aSep08</a>  |                        | 1471  | 764  |   | 54  | putative protein (5.9 kD) (flydoy) mRNA.                                                                       |
| <a href="#">flyflu</a>  | <a href="#">flyflu.aSep08</a>  |                        | 4703  | 642  |   | 213 | kinase (flyflu) mRNA.                                                                                          |
| <a href="#">flyfly</a>  | <a href="#">flyfly.aSep08</a>  |                        | 2933  | 699  | 3 | 67  | putative protein (flyfly) alternative variant aSep08, mRNA.                                                    |
| <a href="#">flyfly</a>  | <a href="#">flyfly.bSep08</a>  |                        | 1895  | 343  | 1 | 32  | CRA a like (flyfly) alternative variant bSep08, mRNA.                                                          |
| <a href="#">flygar</a>  | <a href="#">flygar.aSep08</a>  |                        | 5000  | 383  |   | 127 | heparan-alpha-glucosaminide n-acetyltransferase (flygar) mRNA.                                                 |
| <a href="#">flyja</a>   | <a href="#">flyja.aSep08</a>   |                        | 11356 | 515  | 2 | 171 | bone morphogenetic protein 1 (flyja) alternative variant aSep08, mRNA.                                         |
| <a href="#">flyja</a>   | <a href="#">flyja.bSep08</a>   |                        | 8522  | 516  | 1 | 112 | bone morphogenetic protein 1 CRA c (flyja) alternative variant bSep08, mRNA.                                   |
| <a href="#">flyjey</a>  | <a href="#">flyjey.aSep08</a>  |                        | 22535 | 773  |   | 34  | putative protein (3.7 kD) (flyjey) mRNA.                                                                       |
| <a href="#">flykee</a>  | <a href="#">flykee.aSep08</a>  |                        | 4381  | 777  |   | 52  | putative protein (6.0 kD) (flykee) mRNA.                                                                       |
| <a href="#">flylo</a>   | <a href="#">flylo.aSep08</a>   |                        | 1425  | 692  | 2 | 161 | putative protein (6.2 kD) (flylo) alternative variant aSep08, mRNA.                                            |
| <a href="#">flylo</a>   | <a href="#">flylo.cSep08</a>   |                        | 469   | 335  | 2 | 34  | putative protein (4.0 kD) (flylo) alternative variant cSep08, mRNA.                                            |
| <a href="#">flymee</a>  | <a href="#">flymee.aSep08</a>  |                        | 1743  | 1154 |   | 151 | putative protein (15.8 kD) (flymee) mRNA.                                                                      |
| <a href="#">flynoy</a>  | <a href="#">flynoy.aSep08</a>  |                        | 10113 | 736  |   | 244 | putative protein of metazoan origin (flynoy) mRNA.                                                             |

|                               |                                      |                        |       |      |   |     |                                                                                    |
|-------------------------------|--------------------------------------|------------------------|-------|------|---|-----|------------------------------------------------------------------------------------|
| <a href="#">flypor</a>        | <a href="#">flypor.aSep08</a>        |                        | 1453  | 727  | 4 | 209 | solute carrier family 26 member 6 CRA a (flypor) alternative variant aSep08, mRNA. |
| <a href="#">flypor</a>        | <a href="#">flypor.bSep08</a>        |                        | 2018  | 393  | 1 | 90  | solute carrier family 26 member 6 CRA a (flypor) alternative variant bSep08, mRNA. |
| <a href="#">flyroy</a>        | <a href="#">flyroy.aSep08</a>        |                        | 687   | 322  | 2 | 91  | putative protein (flyroy) alternative variant aSep08, mRNA.                        |
| <a href="#">flysa</a>         | <a href="#">flysa.aSep08</a>         |                        | 2466  | 1543 | 2 | 116 | putative protein (flysa) alternative variant aSep08, mRNA.                         |
| <a href="#">flyshee</a>       | <a href="#">flyshee.aSep08</a>       |                        | 2845  | 470  |   | 65  | putative protein of mammalian origin (7.5 kD) (flyshee) mRNA.                      |
| <a href="#">flytu</a>         | <a href="#">flytu.aSep08</a>         |                        | 2160  | 325  |   | 23  | putative protein (flytu) mRNA.                                                     |
| <a href="#">flyvo</a>         | <a href="#">flyvo.aSep08</a>         |                        | 12581 | 734  |   | 69  | putative protein (7.8 kD) (flyvo) mRNA.                                            |
| <a href="#">Flywch1</a>       | <a href="#">Flywch1.aSep08</a>       | <a href="#">360488</a> | 16307 | 2264 | 7 | 662 | zinc finger, FLYWCH-type (Flywch1) alternative variant aSep08, mRNA.               |
| <a href="#">Flywch1</a>       | <a href="#">Flywch1.bSep08</a>       | <a href="#">360488</a> | 8510  | 1807 | 5 | 464 | zinc finger, FLYWCH-type (Flywch1) alternative variant bSep08, mRNA.               |
| <a href="#">Flywch1</a>       | <a href="#">Flywch1.cSep08</a>       | <a href="#">360488</a> | 8662  | 1833 | 4 | 263 | zinc finger, FLYWCH-type (Flywch1) alternative variant cSep08, mRNA.               |
| <a href="#">Flywch1</a>       | <a href="#">Flywch1.dSep08</a>       | <a href="#">360488</a> | 5836  | 318  | 2 | 63  | CRA a like (Flywch1) alternative variant dSep08, mRNA.                             |
| <a href="#">Flywch1</a>       | <a href="#">Flywch1.eSep08</a>       | <a href="#">360488</a> | 8231  | 727  | 4 | 98  | putative protein (10.8 kD) (Flywch1) alternative variant eSep08, mRNA.             |
| <a href="#">flywer</a>        | <a href="#">flywer.aSep08</a>        |                        | 4789  | 576  |   | 103 | putative protein (11.8 kD) (flywer) mRNA.                                          |
| <a href="#">Fmnl1</a>         | <a href="#">Fmnl1.bSep08</a>         | <a href="#">287746</a> | 7721  | 970  | 9 | 322 | formin-like 1 (Fmnl1) alternative variant bSep08, mRNA.                            |
| <a href="#">Fmnl1</a>         | <a href="#">Fmnl1.cSep08</a>         | <a href="#">287746</a> | 3136  | 1139 | 8 | 281 | formin-like 1 (Fmnl1) alternative variant cSep08, mRNA.                            |
| <a href="#">Fmo1</a>          | <a href="#">Fmo1.bSep08</a>          | <a href="#">25256</a>  | 15889 | 693  | 4 | 181 | flavin containing monooxygenase 1 (Fmo1) alternative variant bSep08, mRNA.         |
| <a href="#">Fmo2</a>          | <a href="#">Fmo2.bSep08</a>          | <a href="#">246245</a> | 11562 | 753  | 5 | 192 | flavin containing monooxygenase 2 (Fmo2) alternative variant bSep08, mRNA.         |
| <a href="#">Fmo2</a>          | <a href="#">Fmo2.dSep08</a>          | <a href="#">246245</a> | 31125 | 957  | 3 | 68  | flavin containing monooxygenase 2 (Fmo2) alternative variant dSep08, mRNA.         |
| <a href="#">Fmo4</a>          | <a href="#">Fmo4.cSep08</a>          | <a href="#">246247</a> | 13139 | 1779 | 4 | 464 | flavin containing monooxygenase 4 (Fmo4) alternative variant cSep08, mRNA.         |
| <a href="#">Fmo4</a>          | <a href="#">Fmo4.dSep08</a>          | <a href="#">246247</a> | 3994  | 663  | 3 | 153 | flavin containing monooxygenase 4 (Fmo4) alternative variant dSep08, mRNA.         |
| <a href="#">Fmo4</a>          | <a href="#">Fmo4.eSep08</a>          | <a href="#">246247</a> | 2627  | 377  | 2 | 107 | flavin containing monooxygenase 4 (Fmo4) alternative variant eSep08, mRNA.         |
| <a href="#">Fmo4</a>          | <a href="#">Fmo4.fSep08</a>          | <a href="#">246247</a> | 1803  | 749  | 2 | 77  | putative protein (8.6 kD) (Fmo4) alternative variant fSep08, mRNA.                 |
| <a href="#">Fmo5</a>          | <a href="#">Fmo5.bSep08</a>          | <a href="#">246248</a> | 10073 | 747  | 4 | 238 | flavin containing monooxygenase 5 (Fmo5) alternative variant bSep08, mRNA.         |
| <a href="#">Fmo5</a>          | <a href="#">Fmo5.cSep08</a>          | <a href="#">246248</a> | 8516  | 749  | 3 | 207 | flavin containing monooxygenase 5 (Fmo5) alternative variant cSep08, mRNA.         |
| <a href="#">Fmo5</a>          | <a href="#">Fmo5.dSep08</a>          | <a href="#">246248</a> | 10053 | 683  | 5 | 119 | flavin containing monooxygenase 5 (Fmo5) alternative variant dSep08, mRNA.         |
| <a href="#">Fmo6</a>          | <a href="#">Fmo6.aSep08</a>          | <a href="#">304922</a> | 11613 | 562  |   | 146 | flavin containing monooxygenase 6 (Fmo6) mRNA.                                     |
| <a href="#">Fmp27_GFWDK.0</a> | <a href="#">Fmp27_GFWDK.0.aSep08</a> |                        | 2644  | 1180 |   | 393 | CRA a (Fmp27_GFWDK.0) mRNA.                                                        |



|                        |                               |                        |       |      |    |      |                                                                                                        |
|------------------------|-------------------------------|------------------------|-------|------|----|------|--------------------------------------------------------------------------------------------------------|
| <a href="#">Fmr1</a>   | <a href="#">Fmr1.bSep08</a>   | <a href="#">24948</a>  | 23117 | 3835 | 13 | 450  | fragile X mental retardation syndrome 1 homolog (50.0 kD) (Fmr1) alternative variant bSep08, mRNA.     |
| <a href="#">Fmr1</a>   | <a href="#">Fmr1.cSep08</a>   | <a href="#">24948</a>  | 26026 | 1204 | 12 | 243  | fragile X mental retardation syndrome 1 homolog (Fmr1) alternative variant cSep08, mRNA.               |
| <a href="#">Fmr1</a>   | <a href="#">Fmr1.eSep08</a>   | <a href="#">24948</a>  | 1409  | 770  | 2  | 65   | fragile X mental retardation syndrome 1 homolog (Fmr1) alternative variant eSep08, mRNA.               |
| <a href="#">Fmr1nb</a> | <a href="#">Fmr1nb.aSep08</a> | <a href="#">293918</a> | 22651 | 849  | 2  | 242  | fragile X mental retardation 1 neighbor (27.1 kD) (Fmr1nb) alternative variant aSep08, mRNA.           |
| <a href="#">Fmr1nb</a> | <a href="#">Fmr1nb.bSep08</a> | <a href="#">293918</a> | 20600 | 544  |    | 145  | fragile X mental retardation 1 neighbor (Fmr1nb) alternative variant bSep08, mRNA.                     |
| <a href="#">Fn1</a>    | <a href="#">Fn1.bSep08</a>    | <a href="#">25661</a>  | 32960 | 3111 | 22 | 1036 | fibronectin 1 (Fn1) alternative variant bSep08, mRNA.                                                  |
| <a href="#">Fn1</a>    | <a href="#">Fn1.cSep08</a>    | <a href="#">25661</a>  | 8082  | 1249 | 8  | 416  | fibronectin 1 (Fn1) alternative variant cSep08, mRNA.                                                  |
| <a href="#">Fn1</a>    | <a href="#">Fn1.dSep08</a>    | <a href="#">25661</a>  | 1601  | 495  | 2  | 164  | fibronectin 1 (Fn1) alternative variant dSep08, mRNA.                                                  |
| <a href="#">fn3.0</a>  | <a href="#">fn3.0.aSep08</a>  |                        | 5391  | 997  | 4  | 320  | novel protein containing fibronectin type 3 FN3 domains (fn3.0) alternative variant aSep08, mRNA.      |
| <a href="#">fn3.0</a>  | <a href="#">fn3.0.bSep08</a>  |                        | 2938  | 653  | 1  | 126  | novel protein containing fibronectin type 3 FN3 domains like (fn3.0) alternative variant bSep08, mRNA. |
| <a href="#">fn3.1</a>  | <a href="#">fn3.1.aSep08</a>  |                        | 1964  | 1682 | 1  | 209  | tenascin XB (fn3.1) alternative variant aSep08, mRNA.                                                  |
| <a href="#">fn3.1</a>  | <a href="#">fn3.1.bSep08</a>  |                        | 4808  | 406  | 2  | 135  | tenascin XB (fn3.1) alternative variant bSep08, mRNA.                                                  |
| <a href="#">fn3.2</a>  | <a href="#">fn3.2.aSep08</a>  |                        | 13182 | 709  |    | 236  | myomesin 2 (fn3.2) mRNA.                                                                               |
| <a href="#">fn3.3</a>  | <a href="#">fn3.3.aSep08</a>  |                        | 4079  | 354  |    | 118  | usherin (fn3.3) mRNA.                                                                                  |
| <a href="#">fn3.4</a>  | <a href="#">fn3.4.aSep08</a>  |                        | 33109 | 428  |    | 142  | sidekick 1 (fn3.4) mRNA.                                                                               |
| <a href="#">fn3.5</a>  | <a href="#">fn3.5.aSep08</a>  |                        | 9633  | 1027 |    | 342  | 2 -binding protein like (fn3.5) mRNA.                                                                  |
| <a href="#">fn3.6</a>  | <a href="#">fn3.6.aSep08</a>  |                        | 71693 | 3900 | 5  | 522  | roundabout 1 (fn3.6) alternative variant aSep08, mRNA.                                                 |
| <a href="#">fn3.6</a>  | <a href="#">fn3.6.bSep08</a>  |                        | 18708 | 775  | 2  | 258  | roundabout homolog 1 (fn3.6) alternative variant bSep08, mRNA.                                         |
| <a href="#">fn3.7</a>  | <a href="#">fn3.7.aSep08</a>  |                        | 37997 | 1672 |    | 449  | roundabout homolog 2 (fn3.7) mRNA.                                                                     |
| <a href="#">fn3.8</a>  | <a href="#">fn3.8.aSep08</a>  |                        | 32125 | 2466 | 11 | 437  | ABI gene family member 3 binding protein like (fn3.8) alternative variant aSep08, mRNA.                |
| <a href="#">fn3.8</a>  | <a href="#">fn3.8.bSep08</a>  |                        | 2350  | 742  | 1  | 98   | ABI gene family member 3 binding protein like (fn3.8) alternative variant bSep08, mRNA.                |
| <a href="#">fn3.9</a>  | <a href="#">fn3.9.aSep08</a>  |                        | 14675 | 612  |    | 203  | sidekick homolog 2 (fn3.9) mRNA.                                                                       |
| <a href="#">fn3.10</a> | <a href="#">fn3.10.aSep08</a> |                        | 17327 | 773  |    | 193  | myomesin 1 (fn3.10) mRNA.                                                                              |
| <a href="#">fn3.11</a> | <a href="#">fn3.11.aSep08</a> |                        | 11054 | 775  | 5  | 258  | neogenin (fn3.11) alternative variant aSep08, mRNA.                                                    |
| <a href="#">fn3.11</a> | <a href="#">fn3.11.bSep08</a> |                        | 5778  | 340  | 1  | 80   | neogenin (fn3.11) alternative variant bSep08, mRNA.                                                    |
| <a href="#">fn3.12</a> | <a href="#">fn3.12.aSep08</a> |                        | 14024 | 1786 |    | 506  | neogenin (fn3.12) alternative variant aSep08, mRNA.                                                    |
| <a href="#">fn3.12</a> | <a href="#">fn3.12.bSep08</a> |                        | 16786 | 831  |    | 276  | neogenin (fn3.12) alternative variant bSep08, mRNA.                                                    |
| <a href="#">fn3.13</a> | <a href="#">fn3.13.aSep08</a> |                        | 1761  | 357  |    | 118  | type XII alpha 1 (fn3.13) mRNA.                                                                        |
| <a href="#">fn3.14</a> | <a href="#">fn3.14.aSep08</a> |                        | 3422  | 501  |    | 167  | type XII alpha 1 (fn3.14) mRNA.                                                                        |
| <a href="#">fn3.15</a> | <a href="#">fn3.15.aSep08</a> |                        | 14267 | 758  |    | 252  | type XII alpha 1 (fn3.15) mRNA.                                                                        |
| <a href="#">fn3.16</a> | <a href="#">fn3.16.aSep08</a> |                        | 6798  | 2611 | 5  | 182  | fibronectin, type III (fn3.16) mRNA.                                                                   |
| <a href="#">fn3.17</a> | <a href="#">fn3.17.aSep08</a> |                        | 16353 | 413  |    | 137  | receptor protein tyrosine phosphatase hPTP-J (fn3.17) mRNA.                                            |
| <a href="#">fn3.19</a> | <a href="#">fn3.19.aSep08</a> |                        | 854   | 644  |    | 214  | titin (fn3.19) mRNA.                                                                                   |

|                        |                               |                        |        |      |    |     |                                                                                   |
|------------------------|-------------------------------|------------------------|--------|------|----|-----|-----------------------------------------------------------------------------------|
| <a href="#">fn3.20</a> | <a href="#">fn3.20.aSep08</a> |                        | 1607   | 464  |    | 154 | titin CRA a (fn3.20) mRNA.                                                        |
| <a href="#">fn3.21</a> | <a href="#">fn3.21.aSep08</a> |                        | 3982   | 1175 |    | 391 | titin CRA a (fn3.21) mRNA.                                                        |
| <a href="#">fn3.22</a> | <a href="#">fn3.22.aSep08</a> |                        | 1956   | 824  |    | 274 | titin N2-B (fn3.22) mRNA.                                                         |
| <a href="#">fn3.24</a> | <a href="#">fn3.24.aSep08</a> |                        | 6423   | 971  |    | 148 | fibronectin, type III (fn3.24) mRNA.                                              |
| <a href="#">fn3.25</a> | <a href="#">fn3.25.aSep08</a> |                        | 83432  | 1069 | 9  | 189 | fibronectin, type III (fn3.25) alternative variant aSep08, mRNA.                  |
| <a href="#">fn3.25</a> | <a href="#">fn3.25.bSep08</a> |                        | 17052  | 368  | 2  | 45  | putative protein (5.0 kD) (fn3.25) alternative variant bSep08, mRNA.              |
| <a href="#">Fnbp1</a>  | <a href="#">Fnbp1.bSep08</a>  | <a href="#">192348</a> | 20866  | 1218 | 6  | 278 | formin binding protein 1 (Fnbp1) alternative variant bSep08, mRNA.                |
| <a href="#">Fnbp1</a>  | <a href="#">Fnbp1.dSep08</a>  | <a href="#">192348</a> | 10057  | 2575 | 5  | 185 | formin binding protein 1 (Fnbp1) alternative variant dSep08, mRNA.                |
| <a href="#">Fnbp1</a>  | <a href="#">Fnbp1.eSep08</a>  | <a href="#">192348</a> | 19510  | 515  | 5  | 171 | formin binding protein 1 (Fnbp1) alternative variant eSep08, mRNA.                |
| <a href="#">Fnbp1</a>  | <a href="#">Fnbp1.fSep08</a>  | <a href="#">192348</a> | 3032   | 298  | 3  | 99  | formin binding protein 1 (Fnbp1) alternative variant fSep08, mRNA.                |
| <a href="#">Fnbp1l</a> | <a href="#">Fnbp1l.bSep08</a> | <a href="#">310839</a> | 37645  | 612  | 2  | 90  | formin binding protein 1-like (Fnbp1l) alternative variant bSep08, mRNA.          |
| <a href="#">Fnbp1l</a> | <a href="#">Fnbp1l.cSep08</a> | <a href="#">310839</a> | 2061   | 826  | 2  | 51  | formin binding protein 1-like (5.8 kD) (Fnbp1l) alternative variant cSep08, mRNA. |
| <a href="#">Fnbp4</a>  | <a href="#">Fnbp4.bSep08</a>  | <a href="#">311183</a> | 30343  | 3769 | 17 | 967 | formin binding protein 4 (Fnbp4) alternative variant bSep08, mRNA.                |
| <a href="#">Fnbp4</a>  | <a href="#">Fnbp4.cSep08</a>  | <a href="#">311183</a> | 6229   | 485  | 5  | 147 | formin binding protein 4 (Fnbp4) alternative variant cSep08, mRNA.                |
| <a href="#">Fnbp4</a>  | <a href="#">Fnbp4.eSep08</a>  | <a href="#">311183</a> | 1667   | 334  | 2  | 71  | formin binding protein 4 (Fnbp4) alternative variant eSep08, mRNA.                |
| <a href="#">Fndc3a</a> | <a href="#">Fndc3a.bSep08</a> | <a href="#">306022</a> | 152666 | 1317 | 10 | 439 | fibronectin, type III (Fndc3a) alternative variant bSep08, mRNA.                  |
| <a href="#">Fndc3a</a> | <a href="#">Fndc3a.cSep08</a> | <a href="#">306022</a> | 4695   | 463  | 5  | 153 | putative protein of ancient origin (Fndc3a) alternative variant cSep08, mRNA.     |
| <a href="#">Fndc3a</a> | <a href="#">Fndc3a.dSep08</a> | <a href="#">306022</a> | 130479 | 439  | 5  | 146 | putative protein (Fndc3a) alternative variant dSep08, mRNA.                       |
| <a href="#">Fndc3a</a> | <a href="#">Fndc3a.eSep08</a> | <a href="#">306022</a> | 12932  | 418  | 3  | 139 | putative protein (Fndc3a) alternative variant eSep08, mRNA.                       |
| <a href="#">Fndc3b</a> | <a href="#">Fndc3b.aSep08</a> | <a href="#">294925</a> | 7064   | 875  | 6  | 252 | fibronectin, type III (Fndc3b) alternative variant aSep08, mRNA.                  |
| <a href="#">Fndc3b</a> | <a href="#">Fndc3b.bSep08</a> | <a href="#">294925</a> | 22674  | 801  | 3  | 181 | fibronectin, type III (Fndc3b) alternative variant bSep08, mRNA.                  |
| <a href="#">Fndc7</a>  | <a href="#">Fndc7.bSep08</a>  | <a href="#">310787</a> | 7887   | 409  | 2  | 83  | putative protein of vertebrate origin (Fndc7) alternative variant bSep08, mRNA.   |
| <a href="#">Fntb</a>   | <a href="#">Fntb.bSep08</a>   | <a href="#">64511</a>  | 33937  | 756  | 7  | 251 | farnesyltransferase, CAAX box, beta (Fntb) alternative variant bSep08, mRNA.      |
| <a href="#">foby</a>   | <a href="#">foby.aSep08</a>   |                        | 3091   | 1389 | 2  | 117 | putative protein (foby) alternative variant aSep08, mRNA.                         |
| <a href="#">foby</a>   | <a href="#">foby.bSep08</a>   |                        | 2952   | 547  | 3  | 71  | putative protein (foby) alternative variant bSep08, mRNA.                         |
| <a href="#">foby</a>   | <a href="#">foby.cSep08</a>   |                        | 3085   | 505  | 4  | 79  | putative protein (foby) alternative variant cSep08, mRNA.                         |
| <a href="#">foby</a>   | <a href="#">foby.dSep08</a>   |                        | 3120   | 456  | 3  | 61  | putative protein (foby) alternative variant dSep08, mRNA.                         |

|                         |                                |                        |        |      |   |     |                                                                                        |
|-------------------------|--------------------------------|------------------------|--------|------|---|-----|----------------------------------------------------------------------------------------|
| <a href="#">fochy</a>   | <a href="#">fochy.aSep08</a>   |                        | 17057  | 768  |   | 83  | putative cytoplasmic protein (9.5 kD) (fochy) mRNA.                                    |
| <a href="#">fofer</a>   | <a href="#">fofer.aSep08</a>   |                        | 991    | 830  |   | 62  | putative protein (fofer) mRNA.                                                         |
| <a href="#">foflo</a>   | <a href="#">foflo.aSep08</a>   |                        | 47944  | 415  |   | 31  | putative protein (foflo) mRNA.                                                         |
| <a href="#">foflu</a>   | <a href="#">foflu.aSep08</a>   |                        | 4197   | 321  |   | 32  | putative protein (3.4 kD) (foflu) mRNA.                                                |
| <a href="#">fokee</a>   | <a href="#">fokee.aSep08</a>   |                        | 853    | 694  |   | 49  | putative protein (5.3 kD) (fokee) mRNA.                                                |
| <a href="#">Folh1</a>   | <a href="#">Folh1.bSep08</a>   | <a href="#">85309</a>  | 37471  | 691  |   | 183 | folate hydrolase (Folh1) alternative variant bSep08, mRNA.                             |
| <a href="#">foloy</a>   | <a href="#">foloy.aSep08</a>   |                        | 1916   | 550  |   | 75  | putative protein of vertebrate origin (foloy) mRNA.                                    |
| <a href="#">Folr1</a>   | <a href="#">Folr1.bSep08</a>   | <a href="#">171049</a> | 626    | 197  | 1 | 42  | folate receptor 1 (adult) (Folr1) alternative variant bSep08, mRNA.                    |
| <a href="#">Folr2</a>   | <a href="#">Folr2.bSep08</a>   | <a href="#">293154</a> | 5658   | 1785 | 2 | 6   | folate receptor 2 (fetal) (0.6 kD) (Folr2) alternative variant bSep08, mRNA.           |
| <a href="#">fomer</a>   | <a href="#">fomer.aSep08</a>   |                        | 702    | 333  |   | 35  | putative protein (4.0 kD) (fomer) mRNA.                                                |
| <a href="#">fonoy</a>   | <a href="#">fonoy.aSep08</a>   |                        | 499    | 291  |   | 96  | sema domain immunoglobulin transmembrane short cytoplasmic 4C CRA a (fonoy) mRNA.      |
| <a href="#">fopor</a>   | <a href="#">fopor.aSep08</a>   |                        | 815    | 501  |   | 88  | putative protein (10.0 kD) (fopor) mRNA.                                               |
| <a href="#">forby</a>   | <a href="#">forby.aSep08</a>   |                        | 22702  | 724  |   | 240 | retinitis pigmentosa GTPase regulator (forby) mRNA.                                    |
| <a href="#">forchy</a>  | <a href="#">forchy.aSep08</a>  |                        | 2135   | 395  |   | 131 | lymphocyte antigen 75 like (forchy) mRNA.                                              |
| <a href="#">forfer</a>  | <a href="#">forfer.aSep08</a>  |                        | 28792  | 831  |   | 276 | leucine rich repeat containing 16A (forfer) mRNA.                                      |
| <a href="#">forflo</a>  | <a href="#">forflo.aSep08</a>  |                        | 14150  | 846  |   | 35  | putative protein (4.0 kD) (forflo) mRNA.                                               |
| <a href="#">forflu</a>  | <a href="#">forflu.aSep08</a>  |                        | 1280   | 262  |   | 65  | putative protein (forflu) mRNA.                                                        |
| <a href="#">forkee</a>  | <a href="#">forkee.aSep08</a>  |                        | 2953   | 1026 |   | 154 | putative mitochondrial protein (16.7 kD) (forkee) mRNA.                                |
| <a href="#">forloy</a>  | <a href="#">forloy.aSep08</a>  |                        | 4309   | 421  |   | 110 | sid1 transmembrane family member 1 (forloy) mRNA.                                      |
| <a href="#">former</a>  | <a href="#">former.aSep08</a>  |                        | 724    | 607  |   | 51  | putative protein (former) mRNA.                                                        |
| <a href="#">fornoy</a>  | <a href="#">fornoy.aSep08</a>  |                        | 2183   | 355  |   | 118 | transmembrane protein 131 (fornoy) mRNA.                                               |
| <a href="#">forpor</a>  | <a href="#">forpor.aSep08</a>  |                        | 6940   | 186  |   | 54  | putative protein (forpor) mRNA.                                                        |
| <a href="#">forsa</a>   | <a href="#">forsa.aSep08</a>   |                        | 207762 | 469  |   | 76  | oxidation resistance 1 (forsa) alternative variant aSep08, mRNA.                       |
| <a href="#">forsa</a>   | <a href="#">forsa.bSep08</a>   |                        | 207717 | 483  | 1 | 74  | oxidation resistance 1 like (forsa) alternative variant bSep08, mRNA.                  |
| <a href="#">forsa</a>   | <a href="#">forsa.cSep08</a>   |                        | 207687 | 641  | 1 | 71  | putative protein (forsa) alternative variant cSep08, mRNA.                             |
| <a href="#">forshee</a> | <a href="#">forshee.aSep08</a> |                        | 1102   | 718  | 1 | 161 | gag-pro-pol polyprotein (17.7 kD) (forshee) alternative variant aSep08, mRNA.          |
| <a href="#">forshee</a> | <a href="#">forshee.bSep08</a> |                        | 5075   | 1966 | 1 | 149 | putative protein (16.5 kD) (forshee) alternative variant bSep08, complete mRNA.        |
| <a href="#">forshee</a> | <a href="#">forshee.cSep08</a> |                        | 2622   | 705  | 2 | 74  | putative nuclear protein (8.6 kD) (forshee) alternative variant cSep08, complete mRNA. |
| <a href="#">forto</a>   | <a href="#">forto.aSep08</a>   |                        | 571    | 446  |   | 73  | putative nuclear protein (8.9 kD) (forto) mRNA.                                        |
| <a href="#">forvar</a>  | <a href="#">forvar.aSep08</a>  |                        | 3495   | 701  |   | 81  | putative protein (9.4 kD) (forvar) mRNA.                                               |
| <a href="#">forwey</a>  | <a href="#">forwey.aSep08</a>  |                        | 14056  | 846  | 5 | 236 | glutamine transaminase 1 CRA a (forwey) alternative variant aSep08, mRNA.              |
| <a href="#">forwey</a>  | <a href="#">forwey.bSep08</a>  |                        | 1694   | 241  | 2 | 80  | transaminase 1 CRA b (forwey) alternative variant bSep08, mRNA.                        |
| <a href="#">fosa</a>    | <a href="#">fosa.aSep08</a>    |                        | 12156  | 1768 |   | 66  | putative protein (fosa) mRNA.                                                          |

|                        |                               |                        |        |      |   |     |                                                                                      |
|------------------------|-------------------------------|------------------------|--------|------|---|-----|--------------------------------------------------------------------------------------|
| <a href="#">foshee</a> | <a href="#">foshee.aSep08</a> |                        | 363    | 140  |   | 46  | membrane-associated ring finger 6 CRA a (foshee) mRNA.                               |
| <a href="#">foto</a>   | <a href="#">foto.aSep08</a>   |                        | 3222   | 1476 | 6 | 263 | putative protein, with a coiled coil domain (foto) alternative variant aSep08, mRNA. |
| <a href="#">foto</a>   | <a href="#">foto.cSep08</a>   |                        | 810    | 716  | 2 | 106 | putative protein of vertebrate origin (foto) alternative variant cSep08, mRNA.       |
| <a href="#">fovar</a>  | <a href="#">fovar.aSep08</a>  |                        | 9272   | 490  |   | 49  | putative protein (5.7 kD) (fovar) mRNA.                                              |
| <a href="#">fowey</a>  | <a href="#">fowey.aSep08</a>  |                        | 8051   | 237  |   | 66  | putative protein (fowey) mRNA.                                                       |
| <a href="#">Foxa2</a>  | <a href="#">Foxa2.aSep08</a>  | <a href="#">25099</a>  | 3019   | 2010 |   | 450 | forkhead box A2 (Foxa2) mRNA.                                                        |
| <a href="#">Foxh1</a>  | <a href="#">Foxh1.aSep08</a>  | <a href="#">300054</a> | 2031   | 1629 | 1 | 373 | forkhead box H1 (Foxh1) alternative variant aSep08, mRNA.                            |
| <a href="#">Foxh1</a>  | <a href="#">Foxh1.bSep08</a>  | <a href="#">300054</a> | 1116   | 756  | 1 | 252 | forkhead box H1 (Foxh1) alternative variant bSep08, mRNA.                            |
| <a href="#">Foxk2</a>  | <a href="#">Foxk2.aSep08</a>  | <a href="#">303753</a> | 23863  | 2154 | 8 | 514 | forkhead box K2 (Foxk2) alternative variant aSep08, mRNA.                            |
| <a href="#">Foxk2</a>  | <a href="#">Foxk2.cSep08</a>  | <a href="#">303753</a> | 17612  | 1782 | 6 | 397 | forkhead box K2 (Foxk2) alternative variant cSep08, mRNA.                            |
| <a href="#">Foxk2</a>  | <a href="#">Foxk2.dSep08</a>  | <a href="#">303753</a> | 30678  | 535  | 2 | 98  | forkhead box K2 (Foxk2) alternative variant dSep08, mRNA.                            |
| <a href="#">Foxm1</a>  | <a href="#">Foxm1.bSep08</a>  | <a href="#">58921</a>  | 3457   | 485  | 5 | 161 | forkhead box M1 CRA a (Foxm1) alternative variant bSep08, mRNA.                      |
| <a href="#">Foxm1</a>  | <a href="#">Foxm1.cSep08</a>  | <a href="#">58921</a>  | 9929   | 872  | 2 | 112 | putative protein (12.2 kD) (Foxm1) alternative variant cSep08, mRNA.                 |
| <a href="#">Foxn3</a>  | <a href="#">Foxn3.bSep08</a>  | <a href="#">314374</a> | 4106   | 545  | 2 | 133 | forkhead box N3 (Foxn3) alternative variant bSep08, mRNA.                            |
| <a href="#">Foxn3</a>  | <a href="#">Foxn3.cSep08</a>  | <a href="#">314374</a> | 4084   | 587  | 3 | 72  | forkhead box N3 (Foxn3) alternative variant cSep08, mRNA.                            |
| <a href="#">Foxn3</a>  | <a href="#">Foxn3.dSep08</a>  | <a href="#">314374</a> | 84990  | 774  | 4 | 62  | forkhead box N3 (7.3 kD) (Foxn3) alternative variant dSep08, mRNA.                   |
| <a href="#">Foxo1</a>  | <a href="#">Foxo1.aSep08</a>  | <a href="#">84482</a>  | 73563  | 641  |   | 213 | forkhead box O1 (Foxo1) mRNA.                                                        |
| <a href="#">Foxo3a</a> | <a href="#">Foxo3a.bSep08</a> | <a href="#">294515</a> | 1188   | 386  | 3 | 94  | forkhead box O3a (Foxo3a) alternative variant bSep08, mRNA.                          |
| <a href="#">Foxp1</a>  | <a href="#">Foxp1.bSep08</a>  | <a href="#">297480</a> | 37746  | 2244 | 9 | 329 | forkhead box P1 (Foxp1) alternative variant bSep08, mRNA.                            |
| <a href="#">Foxp1</a>  | <a href="#">Foxp1.cSep08</a>  | <a href="#">297480</a> | 49070  | 727  | 6 | 242 | forkhead box P1 (Foxp1) alternative variant cSep08, mRNA.                            |
| <a href="#">Foxp1</a>  | <a href="#">Foxp1.dSep08</a>  | <a href="#">297480</a> | 264071 | 773  | 6 | 187 | forkhead box P1 (Foxp1) alternative variant dSep08, mRNA.                            |
| <a href="#">Foxp2</a>  | <a href="#">Foxp2.aSep08</a>  | <a href="#">500037</a> | 31479  | 1965 |   | 227 | forkhead box P2 (Foxp2) alternative variant aSep08, mRNA.                            |
| <a href="#">Foxp2</a>  | <a href="#">Foxp2.bSep08</a>  | <a href="#">500037</a> | 24935  | 723  |   | 85  | forkhead box P2 (Foxp2) alternative variant bSep08, mRNA.                            |
| <a href="#">Foxp4</a>  | <a href="#">Foxp4.bSep08</a>  | <a href="#">363185</a> | 2976   | 2217 | 3 | 120 | forkhead box P4 CRA a (12.4 kD) (Foxp4) alternative variant bSep08, mRNA.            |
| <a href="#">Foxp4</a>  | <a href="#">Foxp4.cSep08</a>  | <a href="#">363185</a> | 2345   | 420  | 3 | 72  | putative protein (8.2 kD) (Foxp4) alternative variant cSep08, mRNA.                  |

|                         |                                |                        |       |      |    |     |                                                                                                      |
|-------------------------|--------------------------------|------------------------|-------|------|----|-----|------------------------------------------------------------------------------------------------------|
| <a href="#">Foxr1</a>   | <a href="#">Foxr1.aSep08</a>   | <a href="#">315601</a> | 1999  | 397  | 3  | 119 | forkhead box R1 (Foxr1) alternative variant aSep08, mRNA.                                            |
| <a href="#">Foxred1</a> | <a href="#">Foxred1.aSep08</a> | <a href="#">315547</a> | 5667  | 969  | 8  | 306 | FAD dependent oxidoreductase (Foxred1) alternative variant aSep08, mRNA.                             |
| <a href="#">Foxred1</a> | <a href="#">Foxred1.bSep08</a> | <a href="#">315547</a> | 7418  | 2177 | 11 | 299 | FAD dependent oxidoreductase (33.4 kD) (Foxred1) alternative variant bSep08, complete mRNA.          |
| <a href="#">Foxred1</a> | <a href="#">Foxred1.cSep08</a> | <a href="#">315547</a> | 5442  | 846  | 7  | 271 | FAD-dependent oxidoreductase domain-containing protein 1 (Foxred1) alternative variant cSep08, mRNA. |
| <a href="#">Foxred1</a> | <a href="#">Foxred1.dSep08</a> | <a href="#">315547</a> | 5346  | 746  | 7  | 175 | FAD-dependent oxidoreductase domain-containing protein 1 (Foxred1) alternative variant dSep08, mRNA. |
| <a href="#">Foxred1</a> | <a href="#">Foxred1.eSep08</a> | <a href="#">315547</a> | 1145  | 393  | 2  | 116 | putative protein of vertebrate origin (Foxred1) alternative variant eSep08, mRNA.                    |
| <a href="#">Foxred1</a> | <a href="#">Foxred1.fSep08</a> | <a href="#">315547</a> | 3439  | 684  | 5  | 98  | putative protein of ancient origin (Foxred1) alternative variant fSep08, mRNA.                       |
| <a href="#">Foxred1</a> | <a href="#">Foxred1.hSep08</a> | <a href="#">315547</a> | 3963  | 1013 | 5  | 90  | putative protein of ancient origin (Foxred1) alternative variant hSep08, mRNA.                       |
| <a href="#">Foxred1</a> | <a href="#">Foxred1.iSep08</a> | <a href="#">315547</a> | 2328  | 772  | 4  | 55  | putative protein of ancient origin (Foxred1) alternative variant iSep08, mRNA.                       |
| <a href="#">Foxred2</a> | <a href="#">Foxred2.aSep08</a> | <a href="#">315112</a> | 2847  | 380  |    | 126 | putative protein of metazoan origin (Foxred2) mRNA.                                                  |
| <a href="#">foyby</a>   | <a href="#">foyby.aSep08</a>   |                        | 4088  | 688  | 1  | 76  | retinitis pigmentosa GTPase regulator (foyby) alternative variant aSep08, mRNA.                      |
| <a href="#">foyby</a>   | <a href="#">foyby.bSep08</a>   |                        | 6001  | 430  | 2  | 43  | retinitis pigmentosa GTPase regulator (foyby) alternative variant bSep08, mRNA.                      |
| <a href="#">foychy</a>  | <a href="#">foychy.aSep08</a>  |                        | 12994 | 669  |    | 106 | phospholipase A2 receptor 1 (foychy) mRNA.                                                           |
| <a href="#">foyer</a>   | <a href="#">foyer.aSep08</a>   |                        | 27619 | 616  | 5  | 205 | leucine rich repeat containing 16A (foyer) alternative variant aSep08, mRNA.                         |
| <a href="#">foyflo</a>  | <a href="#">foyflo.aSep08</a>  |                        | 5348  | 740  |    | 84  | putative nuclear protein (9.6 kD) (foyflo) mRNA.                                                     |
| <a href="#">foyflu</a>  | <a href="#">foyflu.aSep08</a>  |                        | 19872 | 707  |    | 32  | putative protein (3.7 kD) (foyflu) mRNA.                                                             |
| <a href="#">foykee</a>  | <a href="#">foykee.aSep08</a>  |                        | 1528  | 353  |    | 117 | lactase-phlorizin hydrolase (foykee) mRNA.                                                           |
| <a href="#">foyloy</a>  | <a href="#">foyloy.aSep08</a>  |                        | 10896 | 341  |    | 15  | putative protein (1.7 kD) (foyloy) mRNA.                                                             |
| <a href="#">foymee</a>  | <a href="#">foymee.aSep08</a>  |                        | 13263 | 743  |    | 139 | ATP-binding cassette sub-family C member 1 like (foymee) mRNA.                                       |
| <a href="#">foymer</a>  | <a href="#">foymer.aSep08</a>  |                        | 4240  | 677  |    | 38  | putative protein (foymer) mRNA.                                                                      |
| <a href="#">foynoy</a>  | <a href="#">foynoy.aSep08</a>  |                        | 17950 | 710  |    | 86  | CRA a (foynoy) mRNA.                                                                                 |
| <a href="#">foypor</a>  | <a href="#">foypor.aSep08</a>  |                        | 43220 | 534  |    | 39  | putative protein (4.1 kD) (foypor) mRNA.                                                             |
| <a href="#">foysa</a>   | <a href="#">foysa.aSep08</a>   |                        | 1091  | 479  |    | 53  | putative protein (foysa) mRNA.                                                                       |
| <a href="#">foyshee</a> | <a href="#">foyshee.aSep08</a> |                        | 83856 | 432  |    | 94  | putative protein (10.7 kD) (foyshee) mRNA.                                                           |
| <a href="#">foyto</a>   | <a href="#">foyto.aSep08</a>   |                        | 2686  | 759  |    | 123 | putative protein of mammalian origin (foyto) mRNA.                                                   |
| <a href="#">foyvar</a>  | <a href="#">foyvar.aSep08</a>  |                        | 13029 | 801  |    | 29  | putative protein (3.0 kD) (foyvar) mRNA.                                                             |
| <a href="#">foywey</a>  | <a href="#">foywey.aSep08</a>  |                        | 2201  | 720  |    | 89  | putative protein (10.2 kD) (foywey) mRNA.                                                            |
| <a href="#">Fpgt</a>    | <a href="#">Fpgt.bSep08</a>    | <a href="#">310935</a> | 20822 | 1721 | 2  | 137 | fucose-1-phosphate guanylyltransferase (15.4 kD) (Fpgt) alternative variant bSep08, complete mRNA.   |
| <a href="#">Frag1</a>   | <a href="#">Frag1.bSep08</a>   | <a href="#">116675</a> | 7911  | 1949 | 6  | 281 | FGF receptor activating protein 1 (Frag1) alternative variant bSep08, mRNA.                          |

|                        |                               |                        |        |      |   |      |                                                                                                                             |
|------------------------|-------------------------------|------------------------|--------|------|---|------|-----------------------------------------------------------------------------------------------------------------------------|
| <a href="#">Frag1</a>  | <a href="#">Frag1.cSep08</a>  | <a href="#">116675</a> | 12558  | 717  | 4 | 238  | FGF receptor activating protein 1 (Frag1) alternative variant cSep08, mRNA.                                                 |
| <a href="#">Frag1</a>  | <a href="#">Frag1.dSep08</a>  | <a href="#">116675</a> | 12806  | 688  | 5 | 228  | FGF receptor activating protein 1 (Frag1) alternative variant dSep08, mRNA.                                                 |
| <a href="#">Frag1</a>  | <a href="#">Frag1.eSep08</a>  | <a href="#">116675</a> | 1600   | 759  | 4 | 164  | FGF receptor activating protein 1 (Frag1) alternative variant eSep08, mRNA.                                                 |
| <a href="#">Frag1</a>  | <a href="#">Frag1.fSep08</a>  | <a href="#">116675</a> | 12836  | 717  | 4 | 69   | FGF receptor activating protein 1 (Frag1) alternative variant fSep08, mRNA.                                                 |
| <a href="#">Frag1</a>  | <a href="#">Frag1.gSep08</a>  | <a href="#">116675</a> | 11814  | 580  | 2 | 35   | FGF receptor activating protein 1 (3.8 kD) (Frag1) alternative variant gSep08, mRNA.                                        |
| <a href="#">Fras1</a>  | <a href="#">Fras1.aSep08</a>  | <a href="#">289486</a> | 30484  | 1781 |   | 387  | fraser syndrome 1 homolog (human) (Fras1) mRNA.                                                                             |
| <a href="#">Frem1</a>  | <a href="#">Frem1.aSep08</a>  | <a href="#">298185</a> | 14851  | 2242 |   | 309  | fras1 related extracellular matrix 1 (Frem1) mRNA.                                                                          |
| <a href="#">Frem2</a>  | <a href="#">Frem2.aSep08</a>  | <a href="#">310418</a> | 23669  | 373  |   | 124  | fras1 related extracellular matrix protein 2 (Frem2) mRNA.                                                                  |
| <a href="#">Frem3</a>  | <a href="#">Frem3.aSep08</a>  | <a href="#">307767</a> | 5145   | 577  |   | 118  | fras1 related extracellular matrix protein 3 (Frem3) mRNA.                                                                  |
| <a href="#">Frmd4a</a> | <a href="#">Frmd4a.aSep08</a> | <a href="#">307128</a> | 9425   | 1102 |   | 366  | putative protein of vertebrate origin (Frmd4a) mRNA.                                                                        |
| <a href="#">Frmd4b</a> | <a href="#">Frmd4b.aSep08</a> | <a href="#">252858</a> | 16986  | 408  |   | 135  | putative protein of eukaryotic origin (Frmd4b) mRNA.                                                                        |
| <a href="#">Frmd5</a>  | <a href="#">Frmd5.aSep08</a>  | <a href="#">311362</a> | 231937 | 435  |   | 110  | putative protein of metazoan origin (Frmd5) mRNA.                                                                           |
| <a href="#">Frmd6</a>  | <a href="#">Frmd6.aSep08</a>  | <a href="#">257646</a> | 50889  | 494  |   | 82   | putative protein (Frmd6) mRNA.                                                                                              |
| <a href="#">Frmd8</a>  | <a href="#">Frmd8.bSep08</a>  | <a href="#">309172</a> | 20583  | 1784 | 7 | 354  | putative protein of eukaryotic origin (Frmd8) alternative variant bSep08, mRNA.                                             |
| <a href="#">Frmd8</a>  | <a href="#">Frmd8.cSep08</a>  | <a href="#">309172</a> | 846    | 302  | 2 | 81   | putative protein of vertebrate origin (Frmd8) alternative variant cSep08, mRNA.                                             |
| <a href="#">Frmpd1</a> | <a href="#">Frmpd1.aSep08</a> | <a href="#">313244</a> | 6304   | 3185 | 2 | 1003 | putative protein of vertebrate origin (Frmpd1) alternative variant aSep08, mRNA.                                            |
| <a href="#">Frmpd1</a> | <a href="#">Frmpd1.cSep08</a> | <a href="#">313244</a> | 4816   | 409  | 2 | 103  | putative protein of metazoan origin (Frmpd1) alternative variant cSep08, mRNA.                                              |
| <a href="#">Frrs1</a>  | <a href="#">Frrs1.aSep08</a>  | <a href="#">310810</a> | 19076  | 414  |   | 79   | ferric-chelate reductase 1 (Frrs1) mRNA.                                                                                    |
| <a href="#">Frs3</a>   | <a href="#">Frs3.bSep08</a>   | <a href="#">316213</a> | 1324   | 336  | 3 | 111  | fibroblast growth factor receptor substrate 3 (Frs3) alternative variant bSep08, mRNA.                                      |
| <a href="#">Fscn2</a>  | <a href="#">Fscn2.bSep08</a>  | <a href="#">303741</a> | 1667   | 1157 | 1 | 280  | fascin homolog 2, actin-bundling protein, retinal (Strongylocentrotus purpuratus) (Fscn2) alternative variant bSep08, mRNA. |
| <a href="#">Fsd1</a>   | <a href="#">Fsd1.aSep08</a>   | <a href="#">301506</a> | 6471   | 1259 |   | 336  | fibronectin type 3 and SPRY domain-containing protein (Fsd1) mRNA.                                                          |
| <a href="#">Fsd2</a>   | <a href="#">Fsd2.aSep08</a>   | <a href="#">308779</a> | 7946   | 1258 |   | 189  | SPla/Ryanodine receptor SPRY (Fsd2) mRNA.                                                                                   |
| <a href="#">Fsip1</a>  | <a href="#">Fsip1.bSep08</a>  | <a href="#">296074</a> | 19265  | 955  | 4 | 317  | fibrous sheath interacting protein 1 (Fsip1) alternative variant bSep08, mRNA.                                              |
| <a href="#">Fsip1</a>  | <a href="#">Fsip1.cSep08</a>  | <a href="#">296074</a> | 13121  | 1062 | 4 | 204  | fibrous sheath interacting protein 1 (22.9 kD) (Fsip1) alternative variant cSep08, mRNA.                                    |
| <a href="#">Fsip1</a>  | <a href="#">Fsip1.dSep08</a>  | <a href="#">296074</a> | 5125   | 586  | 1 | 195  | fibrous sheath interacting protein 1 (Fsip1) alternative variant dSep08, mRNA.                                              |
| <a href="#">Fstl4</a>  | <a href="#">Fstl4.bSep08</a>  | <a href="#">303130</a> | 56248  | 877  | 2 | 292  | folliculin-like 4 (Fstl4) alternative variant bSep08, mRNA.                                                                 |
| <a href="#">Ftcd</a>   | <a href="#">Ftcd.bSep08</a>   | <a href="#">89833</a>  | 6184   | 910  | 5 | 169  | formiminotransferase cyclodeaminase CRA b (18.6 kD) (Ftcd) alternative variant bSep08, mRNA.                                |
| <a href="#">Ftcd</a>   | <a href="#">Ftcd.cSep08</a>   | <a href="#">89833</a>  | 3257   | 764  | 3 | 151  | formiminotransferase cyclodeaminase CRA b (Ftcd) alternative variant cSep08, mRNA.                                          |

|                       |                              |                        |        |      |    |     |                                                                                                                   |
|-----------------------|------------------------------|------------------------|--------|------|----|-----|-------------------------------------------------------------------------------------------------------------------|
| <a href="#">Ftcd</a>  | <a href="#">Ftcd.dSep08</a>  | <a href="#">89833</a>  | 3520   | 720  | 4  | 122 | formiminotransferase cyclodeaminase CRA a (Ftcd) alternative variant dSep08, mRNA.                                |
| <a href="#">Ftcd</a>  | <a href="#">Ftcd.eSep08</a>  | <a href="#">89833</a>  | 6835   | 1070 | 3  | 76  | formiminotransferase cyclodeaminase CRA c (8.4 kD) (Ftcd) alternative variant eSep08, mRNA.                       |
| <a href="#">Ftl1</a>  | <a href="#">Ftl1.bSep08</a>  | <a href="#">29292</a>  | 1052   | 764  | 2  | 101 | ferritin light (11.6 kD) (Ftl1) alternative variant bSep08, mRNA.                                                 |
| <a href="#">Ftl1</a>  | <a href="#">Ftl1.cSep08</a>  | <a href="#">29292</a>  | 1459   | 815  | 3  | 87  | ferritin light (9.7 kD) (Ftl1) alternative variant cSep08, mRNA.                                                  |
| <a href="#">Fto</a>   | <a href="#">Fto.bSep08</a>   | <a href="#">291905</a> | 182710 | 792  | 2  | 106 | fat mass and obesity associated (12.4 kD) (Fto) alternative variant bSep08, mRNA.                                 |
| <a href="#">Fts</a>   | <a href="#">Fts.bSep08</a>   | <a href="#">291906</a> | 9141   | 971  | 10 | 272 | fused toes (Fts) alternative variant bSep08, mRNA.                                                                |
| <a href="#">Fts</a>   | <a href="#">Fts.cSep08</a>   | <a href="#">291906</a> | 6800   | 622  | 5  | 124 | fused toes (Fts) alternative variant cSep08, mRNA.                                                                |
| <a href="#">Fts</a>   | <a href="#">Fts.dSep08</a>   | <a href="#">291906</a> | 7726   | 740  | 7  | 107 | fused toes (Fts) alternative variant dSep08, mRNA.                                                                |
| <a href="#">Ftsj1</a> | <a href="#">Ftsj1.aSep08</a> | <a href="#">363450</a> | 3199   | 1005 | 6  | 193 | ftsj homolog 1 (E. coli) and similar to ribosomal protein L31 (Ftsj1) alternative variant aSep08, mRNA.           |
| <a href="#">Ftsj1</a> | <a href="#">Ftsj1.aSep08</a> | <a href="#">679519</a> | 3199   | 1005 | 6  | 193 | ftsj homolog 1 (E. coli) and similar to ribosomal protein L31 (Ftsj1) alternative variant aSep08, mRNA.           |
| <a href="#">Ftsj1</a> | <a href="#">Ftsj1.bSep08</a> | <a href="#">363450</a> | 1820   | 828  | 4  | 186 | ftsj homolog 1 (E. coli) and similar to ribosomal protein L31 (20.8 kD) (Ftsj1) alternative variant bSep08, mRNA. |
| <a href="#">Ftsj1</a> | <a href="#">Ftsj1.bSep08</a> | <a href="#">679519</a> | 1820   | 828  | 4  | 186 | ftsj homolog 1 (E. coli) and similar to ribosomal protein L31 (20.8 kD) (Ftsj1) alternative variant bSep08, mRNA. |
| <a href="#">Ftsj2</a> | <a href="#">Ftsj2.bSep08</a> | <a href="#">304323</a> | 543    | 304  | 1  | 46  | FtsJ homolog 2 (E. coli) (Ftsj2) alternative variant bSep08, mRNA.                                                |
| <a href="#">Ftsj3</a> | <a href="#">Ftsj3.bSep08</a> | <a href="#">303608</a> | 1080   | 772  | 1  | 169 | FtsJ homolog 3 (E. coli) (Ftsj3) alternative variant bSep08, mRNA.                                                |
| <a href="#">Fubp1</a> | <a href="#">Fubp1.aSep08</a> | <a href="#">654496</a> | 5587   | 1045 | 1  | 169 | far upstream element (FUZE) binding protein 1 (Fubp1) alternative variant aSep08, mRNA.                           |
| <a href="#">Fubp1</a> | <a href="#">Fubp1.bSep08</a> | <a href="#">654496</a> | 4890   | 357  | 1  | 119 | far upstream element (FUZE) binding protein 1 (Fubp1) alternative variant bSep08, mRNA.                           |
| <a href="#">Fubp3</a> | <a href="#">Fubp3.bSep08</a> | <a href="#">362106</a> | 28177  | 420  | 6  | 140 | far upstream element (FUZE) binding protein 3 (Fubp3) alternative variant bSep08, mRNA.                           |
| <a href="#">Fubp3</a> | <a href="#">Fubp3.cSep08</a> | <a href="#">362106</a> | 4659   | 954  | 7  | 115 | far upstream element (FUZE) binding protein 3 (12.4 kD) (Fubp3) alternative variant cSep08, mRNA.                 |
| <a href="#">Fubp3</a> | <a href="#">Fubp3.dSep08</a> | <a href="#">362106</a> | 3997   | 685  | 4  | 105 | far upstream element (FUZE) binding protein 3 (Fubp3) alternative variant dSep08, mRNA.                           |
| <a href="#">fuby</a>  | <a href="#">fuby.aSep08</a>  |                        | 14931  | 396  |    | 132 | ubiquitin specific peptidase 9 X-linked CRA a (fuby) mRNA.                                                        |
| <a href="#">Fuca1</a> | <a href="#">Fuca1.bSep08</a> | <a href="#">24375</a>  | 9862   | 1159 | 4  | 185 | fucosidase, alpha-L- 1, tissue (Fuca1) alternative variant bSep08, mRNA.                                          |
| <a href="#">Fuca2</a> | <a href="#">Fuca2.cSep08</a> | <a href="#">292485</a> | 7260   | 410  | 2  | 44  | fucosidase, alpha-L- 2, plasma (Fuca2) alternative variant cSep08, mRNA.                                          |
| <a href="#">fuchy</a> | <a href="#">fuchy.aSep08</a> |                        | 30394  | 752  |    | 44  | putative protein (fuchy) mRNA.                                                                                    |
| <a href="#">fufer</a> | <a href="#">fufer.aSep08</a> |                        | 3576   | 584  |    | 58  | putative protein (fufer) mRNA.                                                                                    |
| <a href="#">fuflo</a> | <a href="#">fuflo.aSep08</a> |                        | 1829   | 346  |    | 48  | putative protein of mammalian origin (fuflo) mRNA.                                                                |
| <a href="#">fuflu</a> | <a href="#">fuflu.aSep08</a> |                        | 1074   | 627  | 2  | 90  | putative protein (fuflu) alternative variant aSep08, mRNA.                                                        |
| <a href="#">Fuk</a>   | <a href="#">Fuk.bSep08</a>   | <a href="#">307848</a> | 4412   | 1361 | 6  | 281 | fucokinase (Fuk) alternative variant bSep08, mRNA.                                                                |
| <a href="#">Fuk</a>   | <a href="#">Fuk.cSep08</a>   | <a href="#">307848</a> | 3834   | 332  | 3  | 99  | fucokinase (Fuk) alternative variant cSep08, mRNA.                                                                |

|                              |                                     |                        |       |      |   |     |                                                                                                                |
|------------------------------|-------------------------------------|------------------------|-------|------|---|-----|----------------------------------------------------------------------------------------------------------------|
| <a href="#">fukee</a>        | <a href="#">fukee.aSep08</a>        |                        | 2793  | 376  |   | 53  | putative protein (fukee) mRNA.                                                                                 |
| <a href="#">fuloy</a>        | <a href="#">fuloy.aSep08</a>        |                        | 17880 | 452  |   | 51  | putative protein of mammalian origin (fuloy) mRNA.                                                             |
| <a href="#">fumer</a>        | <a href="#">fumer.aSep08</a>        |                        | 4163  | 418  |   | 38  | putative protein (fumer) mRNA.                                                                                 |
| <a href="#">funoy</a>        | <a href="#">funoy.aSep08</a>        |                        | 415   | 266  |   | 64  | sema domain immunoglobulin transmembrane short cytoplasmic 4C CRA a (funoy) mRNA.                              |
| <a href="#">fupor</a>        | <a href="#">fupor.aSep08</a>        |                        | 86681 | 821  |   | 56  | putative protein (6.2 kD) (fupor) mRNA.                                                                        |
| <a href="#">Furin</a>        | <a href="#">Furin.bSep08</a>        | <a href="#">54281</a>  | 7629  | 435  | 1 | 57  | furin (paired basic amino acid cleaving enzyme) (Furin) alternative variant bSep08, mRNA.                      |
| <a href="#">Furin-like.0</a> | <a href="#">Furin-like.0.aSep08</a> |                        | 11994 | 757  |   | 193 | epidermal growth factor receptor CRA b (Furin-like.0) mRNA.                                                    |
| <a href="#">Fus</a>          | <a href="#">Fus.bSep08</a>          | <a href="#">317385</a> | 7996  | 870  | 8 | 269 | fusion, derived from t(12;16) malignant liposarcoma (human) (Fus) alternative variant bSep08, mRNA.            |
| <a href="#">Fus</a>          | <a href="#">Fus.dSep08</a>          | <a href="#">317385</a> | 1982  | 807  | 3 | 110 | fusion, derived from t(12;16) malignant liposarcoma (human) (Fus) alternative variant dSep08, mRNA.            |
| <a href="#">Fus</a>          | <a href="#">Fus.eSep08</a>          | <a href="#">317385</a> | 3006  | 1621 | 2 | 55  | fusion, derived from t(12;16) malignant liposarcoma (human) (6.2 kD) (Fus) alternative variant eSep08, mRNA.   |
| <a href="#">fusa</a>         | <a href="#">fusa.aSep08</a>         |                        | 4865  | 351  |   | 44  | putative protein (4.7 kD) (fusa) mRNA.                                                                         |
| <a href="#">fushee</a>       | <a href="#">fushee.aSep08</a>       |                        | 1403  | 796  |   | 50  | putative protein (5.5 kD) (fushee) mRNA.                                                                       |
| <a href="#">Fusip1</a>       | <a href="#">Fusip1.aSep08</a>       | <a href="#">362630</a> | 8408  | 1068 | 6 | 262 | FUS interacting protein (serine-arginine rich) 1 (31.3 kD) (Fusip1) alternative variant aSep08, mRNA.          |
| <a href="#">Fusip1</a>       | <a href="#">Fusip1.bSep08</a>       | <a href="#">362630</a> | 10005 | 2662 | 6 | 261 | FUS interacting protein (serine-arginine rich) 1 (31.2 kD) (Fusip1) alternative variant bSep08, complete mRNA. |
| <a href="#">Fusip1</a>       | <a href="#">Fusip1.cSep08</a>       | <a href="#">362630</a> | 13330 | 2606 | 6 | 183 | FUS interacting protein (serine-arginine rich) 1 (22.2 kD) (Fusip1) alternative variant cSep08, complete mRNA. |
| <a href="#">Fusip1</a>       | <a href="#">Fusip1.dSep08</a>       | <a href="#">362630</a> | 11414 | 687  | 6 | 182 | FUS interacting protein (serine-arginine rich) 1 (22.1 kD) (Fusip1) alternative variant dSep08, mRNA.          |
| <a href="#">Fusip1</a>       | <a href="#">Fusip1.fSep08</a>       | <a href="#">362630</a> | 1790  | 428  | 2 | 88  | FUS interacting protein (serine-arginine rich) 1 (Fusip1) alternative variant fSep08, mRNA.                    |
| <a href="#">Fut2</a>         | <a href="#">Fut2.aSep08</a>         | <a href="#">58924</a>  | 18910 | 1276 | 3 | 284 | fucosyltransferase 2 (secretor status included) (Fut2) alternative variant aSep08, mRNA.                       |
| <a href="#">Fut2</a>         | <a href="#">Fut2.cSep08</a>         | <a href="#">58924</a>  | 16629 | 800  | 4 | 163 | fucosyltransferase 2 (secretor status included) (Fut2) alternative variant cSep08, mRNA.                       |
| <a href="#">Fut2</a>         | <a href="#">Fut2.dSep08</a>         | <a href="#">58924</a>  | 16427 | 595  | 4 | 71  | fucosyltransferase 2 (secretor status included) (Fut2) alternative variant dSep08, mRNA.                       |
| <a href="#">Fut2</a>         | <a href="#">Fut2.eSep08</a>         | <a href="#">58924</a>  | 16217 | 375  | 4 | 41  | fucosyltransferase 2 (secretor status included) (Fut2) alternative variant eSep08, mRNA.                       |
| <a href="#">futo</a>         | <a href="#">futo.aSep08</a>         |                        | 2369  | 559  |   | 185 | putative protein of vertebrate origin (futo) mRNA.                                                             |
| <a href="#">fuvar</a>        | <a href="#">fuvar.aSep08</a>        |                        | 1204  | 790  |   | 32  | putative protein (3.5 kD) (fuvar) mRNA.                                                                        |
| <a href="#">fuwey</a>        | <a href="#">fuwey.aSep08</a>        |                        | 639   | 291  |   | 30  | putative protein (3.5 kD) (fuwey) mRNA.                                                                        |
| <a href="#">Fuz</a>          | <a href="#">Fuz.aSep08</a>          | <a href="#">308577</a> | 2121  | 1224 | 4 | 407 | fuzzy homolog (Drosophila) (Fuz) alternative variant aSep08, mRNA.                                             |
| <a href="#">Fuz</a>          | <a href="#">Fuz.cSep08</a>          | <a href="#">308577</a> | 2917  | 812  | 6 | 223 | fuzzy homolog (Drosophila) (Fuz) alternative variant cSep08, mRNA.                                             |
| <a href="#">Fuz</a>          | <a href="#">Fuz.dSep08</a>          | <a href="#">308577</a> | 757   | 402  | 3 | 123 | fuzzy homolog (Drosophila) (Fuz) alternative variant dSep08, mRNA.                                             |



|                               |                                      |                        |       |      |    |     |                                                                                                                             |
|-------------------------------|--------------------------------------|------------------------|-------|------|----|-----|-----------------------------------------------------------------------------------------------------------------------------|
| <a href="#">Fxc1</a>          | <a href="#">Fxc1.aSep08</a>          | <a href="#">84384</a>  | 2847  | 670  | 4  | 100 | fractured callus expressed transcript 1 (11.4 kD) (Fxc1) alternative variant aSep08, complete mRNA.                         |
| <a href="#">Fxn</a>           | <a href="#">Fxn.aSep08</a>           | <a href="#">499335</a> | 23885 | 668  | 5  | 145 | frataxin (Fxn) alternative variant aSep08, mRNA.                                                                            |
| <a href="#">Fxr1</a>          | <a href="#">Fxr1.aSep08</a>          | <a href="#">361927</a> | 44972 | 1268 | 13 | 367 | fragile X mental retardation, autosomal homolog 1 (Fxr1) alternative variant aSep08, mRNA.                                  |
| <a href="#">Fxr1</a>          | <a href="#">Fxr1.bSep08</a>          | <a href="#">361927</a> | 2495  | 422  | 2  | 131 | fragile X mental retardation, autosomal homolog 1 (Fxr1) alternative variant bSep08, mRNA.                                  |
| <a href="#">Fxr1</a>          | <a href="#">Fxr1.cSep08</a>          | <a href="#">361927</a> | 1250  | 640  | 2  | 77  | fragile X mental retardation, autosomal homolog 1 (8.6 kD) (Fxr1) alternative variant cSep08, mRNA.                         |
| <a href="#">Fxr2</a>          | <a href="#">Fxr2.bSep08</a>          | <a href="#">287433</a> | 1790  | 1167 | 5  | 280 | fragile X mental retardation 2 (30.4 kD) (Fxr2) alternative variant bSep08, mRNA.                                           |
| <a href="#">Fxr2</a>          | <a href="#">Fxr2.cSep08</a>          | <a href="#">287433</a> | 10628 | 1952 | 8  | 219 | fragile X mental retardation autosomal homolog 2 (Fxr2) alternative variant cSep08, mRNA.                                   |
| <a href="#">Fxyd1andFxyd7</a> | <a href="#">Fxyd1andFxyd7.aSep08</a> | <a href="#">58971</a>  | 3283  | 615  | 7  | 114 | fxyd domain-containing ion transport regulator 1 CRA c (12.6 kD) (Fxyd1andFxyd7) alternative variant aSep08, mRNA.          |
| <a href="#">Fxyd1andFxyd7</a> | <a href="#">Fxyd1andFxyd7.aSep08</a> | <a href="#">63848</a>  | 3283  | 615  | 7  | 114 | fxyd domain-containing ion transport regulator 1 CRA c (12.6 kD) (Fxyd1andFxyd7) alternative variant aSep08, mRNA.          |
| <a href="#">Fxyd1andFxyd7</a> | <a href="#">Fxyd1andFxyd7.bSep08</a> | <a href="#">58971</a>  | 1506  | 1243 | 2  | 108 | FXYP domain-containing ion transport regulator 1 (11.7 kD) (Fxyd1andFxyd7) alternative variant bSep08, mRNA.                |
| <a href="#">Fxyd1andFxyd7</a> | <a href="#">Fxyd1andFxyd7.bSep08</a> | <a href="#">63848</a>  | 1506  | 1243 | 2  | 108 | FXYP domain-containing ion transport regulator 1 (11.7 kD) (Fxyd1andFxyd7) alternative variant bSep08, mRNA.                |
| <a href="#">Fxyd1andFxyd7</a> | <a href="#">Fxyd1andFxyd7.dSep08</a> | <a href="#">58971</a>  | 4085  | 434  | 6  | 104 | FXYP domain-containing ion transport regulator 1 (Fxyd1andFxyd7) alternative variant dSep08, mRNA.                          |
| <a href="#">Fxyd1andFxyd7</a> | <a href="#">Fxyd1andFxyd7.dSep08</a> | <a href="#">63848</a>  | 4085  | 434  | 6  | 104 | FXYP domain-containing ion transport regulator 1 (Fxyd1andFxyd7) alternative variant dSep08, mRNA.                          |
| <a href="#">Fxyd1andFxyd7</a> | <a href="#">Fxyd1andFxyd7.eSep08</a> | <a href="#">58971</a>  | 4353  | 777  | 7  | 95  | fxyd domain-containing ion transport regulator 1 CRA c (10.6 kD) (Fxyd1andFxyd7) alternative variant eSep08, complete mRNA. |
| <a href="#">Fxyd1andFxyd7</a> | <a href="#">Fxyd1andFxyd7.eSep08</a> | <a href="#">63848</a>  | 4353  | 777  | 7  | 95  | fxyd domain-containing ion transport regulator 1 CRA c (10.6 kD) (Fxyd1andFxyd7) alternative variant eSep08, complete mRNA. |
| <a href="#">Fxyd1andFxyd7</a> | <a href="#">Fxyd1andFxyd7.fSep08</a> | <a href="#">58971</a>  | 3126  | 370  | 7  | 92  | fxyd domain-containing ion transport regulator 1 CRA c (Fxyd1andFxyd7) alternative variant fSep08, mRNA.                    |
| <a href="#">Fxyd1andFxyd7</a> | <a href="#">Fxyd1andFxyd7.fSep08</a> | <a href="#">63848</a>  | 3126  | 370  | 7  | 92  | fxyd domain-containing ion transport regulator 1 CRA c (Fxyd1andFxyd7) alternative variant fSep08, mRNA.                    |
| <a href="#">Fxyd1andFxyd7</a> | <a href="#">Fxyd1andFxyd7.gSep08</a> | <a href="#">58971</a>  | 2529  | 375  | 4  | 56  | FXYP (Fxyd1andFxyd7) alternative variant gSep08, mRNA.                                                                      |
| <a href="#">Fxyd1andFxyd7</a> | <a href="#">Fxyd1andFxyd7.gSep08</a> | <a href="#">63848</a>  | 2529  | 375  | 4  | 56  | FXYP (Fxyd1andFxyd7) alternative variant gSep08, mRNA.                                                                      |
| <a href="#">Fxyd1andFxyd7</a> | <a href="#">Fxyd1andFxyd7.hSep08</a> | <a href="#">58971</a>  | 3115  | 294  | 6  | 50  | FXYP domain-containing ion transport regulator 1 (5.4 kD) (Fxyd1andFxyd7) alternative variant hSep08, mRNA.                 |
| <a href="#">Fxyd1andFxyd7</a> | <a href="#">Fxyd1andFxyd7.hSep08</a> | <a href="#">63848</a>  | 3115  | 294  | 6  | 50  | FXYP domain-containing ion transport regulator 1 (5.4 kD) (Fxyd1andFxyd7) alternative variant hSep08, mRNA.                 |
| <a href="#">Fxyd2</a>         | <a href="#">Fxyd2.aSep08</a>         | <a href="#">29639</a>  | 2017  | 407  | 5  | 75  | FXYP domain-containing ion transport regulator 2 (Fxyd2) alternative variant aSep08, mRNA.                                  |

|                        |                               |                        |       |      |    |     |                                                                                                   |
|------------------------|-------------------------------|------------------------|-------|------|----|-----|---------------------------------------------------------------------------------------------------|
| <a href="#">Fxd2</a>   | <a href="#">Fxd2.bSep08</a>   | <a href="#">29639</a>  | 4259  | 595  | 6  | 74  | FXD domain-containing ion transport regulator 2 (Fxd2) alternative variant bSep08, mRNA.          |
| <a href="#">Fxd2</a>   | <a href="#">Fxd2.dSep08</a>   | <a href="#">29639</a>  | 4715  | 928  | 6  | 66  | FXD domain-containing ion transport regulator 2 (7.3 kD) (Fxd2) alternative variant dSep08, mRNA. |
| <a href="#">Fxd3</a>   | <a href="#">Fxd3.bSep08</a>   | <a href="#">116831</a> | 881   | 464  | 2  | 56  | FXD domain-containing ion transport regulator 3 (Fxd3) alternative variant bSep08, mRNA.          |
| <a href="#">Fxd4</a>   | <a href="#">Fxd4.aSep08</a>   | <a href="#">64190</a>  | 1556  | 370  |    | 46  | FXD domain-containing ion transport regulator 4 (4.7 kD) (Fxd4) mRNA.                             |
| <a href="#">Fxd5</a>   | <a href="#">Fxd5.aSep08</a>   | <a href="#">60338</a>  | 9388  | 820  | 9  | 188 | FXD domain-containing ion transport regulator 5 (Fxd5) alternative variant aSep08, mRNA.          |
| <a href="#">Fxd6</a>   | <a href="#">Fxd6.aSep08</a>   | <a href="#">63847</a>  | 23218 | 531  | 1  | 169 | FXD domain-containing ion transport regulator 6 (Fxd6) alternative variant aSep08, mRNA.          |
| <a href="#">Fxd6</a>   | <a href="#">Fxd6.cSep08</a>   | <a href="#">63847</a>  | 23212 | 522  | 1  | 166 | FXD domain-containing ion transport regulator 6 (Fxd6) alternative variant cSep08, mRNA.          |
| <a href="#">Fyb</a>    | <a href="#">Fyb.bSep08</a>    | <a href="#">499537</a> | 95065 | 1662 | 5  | 478 | FYN binding protein (Fyb) alternative variant bSep08, mRNA.                                       |
| <a href="#">Fyb</a>    | <a href="#">Fyb.cSep08</a>    | <a href="#">499537</a> | 24426 | 1000 | 9  | 255 | FYN binding protein (Fyb) alternative variant cSep08, mRNA.                                       |
| <a href="#">Fyb</a>    | <a href="#">Fyb.dSep08</a>    | <a href="#">499537</a> | 9903  | 405  | 5  | 134 | FYN binding protein (Fyb) alternative variant dSep08, mRNA.                                       |
| <a href="#">fyby</a>   | <a href="#">fyby.aSep08</a>   |                        | 4284  | 481  |    | 160 | ubiquitin specific peptidase 9 X-linked CRA a (fyby) mRNA.                                        |
| <a href="#">fyby</a>   | <a href="#">fyby.aSep08</a>   |                        | 46338 | 555  |    | 185 | formin-like 2 CRA a (fyby) mRNA.                                                                  |
| <a href="#">Fyco1</a>  | <a href="#">Fyco1.bSep08</a>  | <a href="#">301085</a> | 26942 | 411  | 3  | 136 | putative protein of vertebrate origin (Fyco1) alternative variant bSep08, mRNA.                   |
| <a href="#">Fyco1</a>  | <a href="#">Fyco1.cSep08</a>  | <a href="#">301085</a> | 14240 | 442  | 4  | 67  | putative protein, with a coiled coil domain (Fyco1) alternative variant cSep08, mRNA.             |
| <a href="#">fyfer</a>  | <a href="#">fyfer.aSep08</a>  |                        | 25563 | 353  |    | 10  | putative protein (1.1 kD) (fyfer) mRNA.                                                           |
| <a href="#">fyflo</a>  | <a href="#">fyflo.aSep08</a>  |                        | 35171 | 853  | 4  | 97  | putative protein (fyflo) alternative variant aSep08, mRNA.                                        |
| <a href="#">fyflo</a>  | <a href="#">fyflo.bSep08</a>  |                        | 25792 | 273  | 2  | 27  | putative protein (3.0 kD) (fyflo) alternative variant bSep08, mRNA.                               |
| <a href="#">fyflu</a>  | <a href="#">fyflu.aSep08</a>  |                        | 2773  | 871  |    | 116 | CRA a (fyflu) mRNA.                                                                               |
| <a href="#">fykee</a>  | <a href="#">fykee.aSep08</a>  |                        | 3736  | 688  |    | 44  | putative protein (fykee) mRNA.                                                                    |
| <a href="#">fyloy</a>  | <a href="#">fyloy.aSep08</a>  |                        | 56651 | 377  |    | 61  | heavy like (fyloy) mRNA.                                                                          |
| <a href="#">fymer</a>  | <a href="#">fymer.aSep08</a>  |                        | 7391  | 554  |    | 67  | putative protein (7.4 kD) (fymer) mRNA.                                                           |
| <a href="#">Fyn</a>    | <a href="#">Fyn.bSep08</a>    | <a href="#">25150</a>  | 54146 | 2690 | 11 | 537 | fyn proto-oncogene (Fyn) alternative variant bSep08, mRNA.                                        |
| <a href="#">Fyn</a>    | <a href="#">Fyn.cSep08</a>    | <a href="#">25150</a>  | 51171 | 2926 | 11 | 426 | fyn proto-oncogene (48.7 kD) (Fyn) alternative variant cSep08, mRNA.                              |
| <a href="#">Fyn</a>    | <a href="#">Fyn.dSep08</a>    | <a href="#">25150</a>  | 19443 | 1028 | 4  | 160 | fyn proto-oncogene (Fyn) alternative variant dSep08, mRNA.                                        |
| <a href="#">fynoy</a>  | <a href="#">fynoy.aSep08</a>  |                        | 10687 | 767  |    | 84  | v-crk sarcoma virus CT10 oncogene homolog like (9.6 kD) (fynoy) mRNA.                             |
| <a href="#">fypor</a>  | <a href="#">fypor.aSep08</a>  |                        | 2806  | 664  |    | 45  | putative protein (5.3 kD) (fypor) mRNA.                                                           |
| <a href="#">FYRN.0</a> | <a href="#">FYRN.0.aSep08</a> |                        | 2975  | 1161 |    | 386 | mixed-lineage leukemia 3 like (FYRN.0) mRNA.                                                      |
| <a href="#">FYRN.1</a> | <a href="#">FYRN.1.aSep08</a> |                        | 1934  | 467  |    | 155 | myeloid lymphoid mixed-lineage leukemia like (FYRN.1) mRNA.                                       |

|                           |                                  |                        |        |      |    |     |                                                                                                        |
|---------------------------|----------------------------------|------------------------|--------|------|----|-----|--------------------------------------------------------------------------------------------------------|
| <a href="#">fysa</a>      | <a href="#">fysa.aSep08</a>      |                        | 7180   | 629  |    | 104 | polyprotein (11.7 kD) (fysa) mRNA.                                                                     |
| <a href="#">fyshee</a>    | <a href="#">fyshee.aSep08</a>    |                        | 633    | 453  |    | 27  | putative protein (fyshee) mRNA.                                                                        |
| <a href="#">fyto</a>      | <a href="#">fyto.aSep08</a>      |                        | 11127  | 300  |    | 100 | inverted (fyto) mRNA.                                                                                  |
| <a href="#">Fytt1</a>     | <a href="#">Fytt1.aSep08</a>     | <a href="#">360726</a> | 29402  | 3576 | 9  | 306 | forty-two-three domain-containing protein 1 (Fytt1) alternative variant aSep08, mRNA.                  |
| <a href="#">Fytt1</a>     | <a href="#">Fytt1.bSep08</a>     | <a href="#">360726</a> | 22126  | 682  | 5  | 207 | putative protein of vertebrate origin (Fytt1) alternative variant bSep08, mRNA.                        |
| <a href="#">Fytt1</a>     | <a href="#">Fytt1.dSep08</a>     | <a href="#">360726</a> | 6228   | 722  | 4  | 87  | putative protein of vertebrate origin (Fytt1) alternative variant dSep08, mRNA.                        |
| <a href="#">Fytt1</a>     | <a href="#">Fytt1.eSep08</a>     | <a href="#">360726</a> | 2225   | 614  | 2  | 31  | putative protein (3.7 kD) (Fytt1) alternative variant eSep08, mRNA.                                    |
| <a href="#">fyvar</a>     | <a href="#">fyvar.aSep08</a>     |                        | 1857   | 698  |    | 232 | putative protein of metazoan origin (fyvar) mRNA.                                                      |
| <a href="#">fywey</a>     | <a href="#">fywey.aSep08</a>     |                        | 2180   | 629  |    | 58  | putative protein (fywey) mRNA.                                                                         |
| <a href="#">Fzr1</a>      | <a href="#">Fzr1.aSep08</a>      | <a href="#">314642</a> | 12517  | 2386 | 14 | 493 | fizzy/cell division cycle 20 related 1 (Drosophila) (54.6 kD) (Fzr1) alternative variant aSep08, mRNA. |
| <a href="#">Fzr1</a>      | <a href="#">Fzr1.bSep08</a>      | <a href="#">314642</a> | 1266   | 757  | 3  | 240 | fizzy/cell division cycle 20 related 1 (Drosophila) (Fzr1) alternative variant bSep08, mRNA.           |
| <a href="#">Fzr1</a>      | <a href="#">Fzr1.cSep08</a>      | <a href="#">314642</a> | 533    | 453  | 2  | 54  | fizzy/cell division cycle 20 related 1 (Drosophila) (Fzr1) alternative variant cSep08, mRNA.           |
| <a href="#">G-patch.0</a> | <a href="#">G-patch.0.aSep08</a> |                        | 122388 | 2943 |    | 182 | d111/G-patch (G-patch.0) mRNA.                                                                         |
| <a href="#">G2F.0</a>     | <a href="#">G2F.0.aSep08</a>     |                        | 9666   | 535  | 2  | 178 | nidogen (G2F.0) alternative variant aSep08, mRNA.                                                      |
| <a href="#">G3bp1</a>     | <a href="#">G3bp1.aSep08</a>     | <a href="#">171092</a> | 29685  | 2708 | 12 | 502 | ras-GTPase-activating protein SH3-domain-binding like (G3bp1) alternative variant aSep08, mRNA.        |
| <a href="#">G3bp1</a>     | <a href="#">G3bp1.bSep08</a>     | <a href="#">171092</a> | 3732   | 982  | 5  | 209 | ras-GTPase-activating protein SH3-domain-binding like (G3bp1) alternative variant bSep08, mRNA.        |
| <a href="#">G3bp1</a>     | <a href="#">G3bp1.cSep08</a>     | <a href="#">171092</a> | 5119   | 915  | 3  | 73  | ras-GTPase-activating protein SH3-domain-binding like (G3bp1) alternative variant cSep08, mRNA.        |
| <a href="#">G3bp2</a>     | <a href="#">G3bp2.aSep08</a>     | <a href="#">305240</a> | 32703  | 3571 | 12 | 562 | GTPase activating protein (SH3 domain) binding protein 2 (G3bp2) alternative variant aSep08, mRNA.     |
| <a href="#">G3bp2</a>     | <a href="#">G3bp2.cSep08</a>     | <a href="#">305240</a> | 98855  | 944  | 8  | 275 | GTPase activating protein (SH3 domain) binding protein 2 (G3bp2) alternative variant cSep08, mRNA.     |
| <a href="#">G6pc</a>      | <a href="#">G6pc.bSep08</a>      | <a href="#">25634</a>  | 7915   | 1641 | 4  | 286 | glucose-6-phosphatase, catalytic (G6pc) alternative variant bSep08, mRNA.                              |
| <a href="#">G6pc</a>      | <a href="#">G6pc.cSep08</a>      | <a href="#">25634</a>  | 7636   | 1037 | 4  | 171 | glucose-6-phosphatase, catalytic (19.1 kD) (G6pc) alternative variant cSep08, mRNA.                    |
| <a href="#">G6pc</a>      | <a href="#">G6pc.dSep08</a>      | <a href="#">25634</a>  | 2820   | 626  | 2  | 105 | glucose-6-phosphatase, catalytic (G6pc) alternative variant dSep08, mRNA.                              |
| <a href="#">G6pc3</a>     | <a href="#">G6pc3.bSep08</a>     | <a href="#">303565</a> | 5248   | 914  | 7  | 285 | glucose 6 phosphatase, catalytic, 3 (G6pc3) alternative variant bSep08, mRNA.                          |
| <a href="#">G6pc3</a>     | <a href="#">G6pc3.cSep08</a>     | <a href="#">303565</a> | 3451   | 721  | 5  | 209 | glucose 6 phosphatase, catalytic, 3 (G6pc3) alternative variant cSep08, mRNA.                          |
| <a href="#">G6pc3</a>     | <a href="#">G6pc3.dSep08</a>     | <a href="#">303565</a> | 2996   | 757  | 4  | 162 | glucose 6 phosphatase, catalytic, 3 (G6pc3) alternative variant dSep08, mRNA.                          |
| <a href="#">G6pc3</a>     | <a href="#">G6pc3.eSep08</a>     | <a href="#">303565</a> | 2896   | 1115 | 2  | 125 | glucose 6 phosphatase, catalytic, 3 (14.5 kD) (G6pc3) alternative variant eSep08, mRNA.                |

|                           |                                  |                        |       |      |   |     |                                                                                                        |
|---------------------------|----------------------------------|------------------------|-------|------|---|-----|--------------------------------------------------------------------------------------------------------|
| <a href="#">G6pdx</a>     | <a href="#">G6pdx.bSep08</a>     | <a href="#">24377</a>  | 1559  | 789  | 4 | 193 | glucose-6-phosphate dehydrogenase X-linked (G6pdx) alternative variant bSep08, mRNA.                   |
| <a href="#">G6pdx</a>     | <a href="#">G6pdx.cSep08</a>     | <a href="#">24377</a>  | 1797  | 1005 | 4 | 178 | glucose-6-phosphate dehydrogenase X-linked (G6pdx) alternative variant cSep08, mRNA.                   |
| <a href="#">G6pdx</a>     | <a href="#">G6pdx.dSep08</a>     | <a href="#">24377</a>  | 832   | 729  | 1 | 43  | glucose-6-phosphate dehydrogenase X-linked (G6pdx) alternative variant dSep08, mRNA.                   |
| <a href="#">G7c</a>       | <a href="#">G7c.bSep08</a>       | <a href="#">309611</a> | 5106  | 1263 | 4 | 23  | g7c protein (G7c) alternative variant bSep08, mRNA.                                                    |
| <a href="#">Gaa</a>       | <a href="#">Gaa.bSep08</a>       | <a href="#">367562</a> | 6510  | 1054 | 4 | 312 | glucosidase, alpha, acid (Gaa) alternative variant bSep08, mRNA.                                       |
| <a href="#">Gaa</a>       | <a href="#">Gaa.cSep08</a>       | <a href="#">367562</a> | 6080  | 1142 | 5 | 250 | glucosidase, alpha, acid (Gaa) alternative variant cSep08, mRNA.                                       |
| <a href="#">Gaa</a>       | <a href="#">Gaa.dSep08</a>       | <a href="#">367562</a> | 1027  | 312  | 3 | 103 | glucosidase, alpha, acid (Gaa) alternative variant dSep08, mRNA.                                       |
| <a href="#">Gab1</a>      | <a href="#">Gab1.bSep08</a>      | <a href="#">361388</a> | 67326 | 757  | 5 | 214 | binding protein 1 like (Gab1) alternative variant bSep08, mRNA.                                        |
| <a href="#">Gab1</a>      | <a href="#">Gab1.cSep08</a>      | <a href="#">361388</a> | 10578 | 774  | 6 | 160 | binding protein 1 like (Gab1) alternative variant cSep08, mRNA.                                        |
| <a href="#">Gab1</a>      | <a href="#">Gab1.dSep08</a>      | <a href="#">361388</a> | 10613 | 719  | 5 | 152 | growth factor receptor bound protein 1 CRA b (Gab1) alternative variant dSep08, mRNA.                  |
| <a href="#">Gab1</a>      | <a href="#">Gab1.eSep08</a>      | <a href="#">361388</a> | 9661  | 327  | 2 | 59  | growth factor receptor bound protein 1 CRA a (Gab1) alternative variant eSep08, mRNA.                  |
| <a href="#">Gab1</a>      | <a href="#">Gab1.gSep08</a>      | <a href="#">361388</a> | 836   | 592  | 2 | 27  | putative protein (Gab1) alternative variant gSep08, mRNA.                                              |
| <a href="#">Gabarapl2</a> | <a href="#">Gabarapl2.bSep08</a> | <a href="#">64670</a>  | 9658  | 618  | 2 | 40  | GABA(A) receptor-associated protein like 2 (Gabarapl2) alternative variant bSep08, mRNA.               |
| <a href="#">Gabbr1</a>    | <a href="#">Gabbr1.bSep08</a>    | <a href="#">81657</a>  | 3366  | 1552 | 4 | 298 | gamma-aminobutyric acid (GABA) B receptor 1 (Gabbr1) alternative variant bSep08, mRNA.                 |
| <a href="#">Gabbr1</a>    | <a href="#">Gabbr1.cSep08</a>    | <a href="#">81657</a>  | 1148  | 603  | 2 | 121 | gamma-aminobutyric acid (GABA) B receptor 1 (Gabbr1) alternative variant cSep08, mRNA.                 |
| <a href="#">Gabbr1</a>    | <a href="#">Gabbr1.dSep08</a>    | <a href="#">81657</a>  | 3237  | 303  | 2 | 100 | gamma-aminobutyric acid (GABA) B receptor 1 (Gabbr1) alternative variant dSep08, mRNA.                 |
| <a href="#">Gabbr2</a>    | <a href="#">Gabbr2.bSep08</a>    | <a href="#">83633</a>  | 15596 | 786  | 5 | 226 | gamma-aminobutyric acid (GABA) B receptor 2 (Gabbr2) alternative variant bSep08, mRNA.                 |
| <a href="#">Gabbr2</a>    | <a href="#">Gabbr2.dSep08</a>    | <a href="#">83633</a>  | 87119 | 754  | 5 | 95  | gamma-aminobutyric acid (GABA) B receptor 2 (Gabbr2) alternative variant dSep08, mRNA.                 |
| <a href="#">Gabra1</a>    | <a href="#">Gabra1.bSep08</a>    | <a href="#">29705</a>  | 30036 | 861  | 1 | 150 | gamma-aminobutyric acid (GABA-A) receptor, subunit alpha 1 (Gabra1) alternative variant bSep08, mRNA.  |
| <a href="#">Gabrd</a>     | <a href="#">Gabrd.aSep08</a>     | <a href="#">29689</a>  | 11893 | 1782 |   | 449 | gamma-aminobutyric acid (GABA-A) receptor, subunit delta (50.6 kD) (Gabrd) mRNA.                       |
| <a href="#">Gabrg1</a>    | <a href="#">Gabrg1.bSep08</a>    | <a href="#">140674</a> | 12523 | 391  | 3 | 95  | gamma-aminobutyric acid (GABA) A receptor, gamma 1 (Gabrg1) alternative variant bSep08, mRNA.          |
| <a href="#">Gabrg1</a>    | <a href="#">Gabrg1.cSep08</a>    | <a href="#">140674</a> | 21631 | 499  | 3 | 37  | gamma-aminobutyric acid (GABA) A receptor, gamma 1 (4.2 kD) (Gabrg1) alternative variant cSep08, mRNA. |
| <a href="#">Gabrg2</a>    | <a href="#">Gabrg2.bSep08</a>    | <a href="#">29709</a>  | 51675 | 2805 | 2 | 229 | gamma-aminobutyric acid (GABA-A) receptor, subunit gamma 2 (Gabrg2) alternative variant bSep08, mRNA.  |
| <a href="#">Gabrp</a>     | <a href="#">Gabrp.bSep08</a>     | <a href="#">81658</a>  | 11628 | 537  | 5 | 135 | gamma-aminobutyric acid (GABA-A) receptor, pi (Gabrp) alternative variant bSep08, mRNA.                |

|                            |                                   |                        |       |      |   |     |                                                                                                 |
|----------------------------|-----------------------------------|------------------------|-------|------|---|-----|-------------------------------------------------------------------------------------------------|
| <a href="#">gaby</a>       | <a href="#">gaby.aSep08</a>       |                        | 16853 | 311  | 2 | 22  | putative protein (2.7 kD) (gaby) alternative variant aSep08, mRNA.                              |
| <a href="#">gaby</a>       | <a href="#">gaby.bSep08</a>       |                        | 1654  | 191  | 1 | 45  | putative protein (gaby) alternative variant bSep08, mRNA.                                       |
| <a href="#">gachy</a>      | <a href="#">gachy.aSep08</a>      |                        | 2111  | 392  |   | 21  | putative protein (gachy) mRNA.                                                                  |
| <a href="#">Gad1</a>       | <a href="#">Gad1.bSep08</a>       | <a href="#">24379</a>  | 33940 | 3105 | 1 | 444 | glutamic acid decarboxylase 1 (Gad1) alternative variant bSep08, mRNA.                          |
| <a href="#">Gad2</a>       | <a href="#">Gad2.bSep08</a>       | <a href="#">24380</a>  | 4297  | 572  | 3 | 88  | glutamic acid decarboxylase 2 (Gad2) alternative variant bSep08, mRNA.                          |
| <a href="#">Gadd45b</a>    | <a href="#">Gadd45b.bSep08</a>    | <a href="#">299626</a> | 1409  | 743  | 2 | 128 | growth arrest and DNA-damage-inducible 45 beta (Gadd45b) alternative variant bSep08, mRNA.      |
| <a href="#">Gadd45gip1</a> | <a href="#">Gadd45gip1.aSep08</a> | <a href="#">288916</a> | 2562  | 1224 |   | 228 | growth arrest and DNA-damage-inducible, gamma interacting protein 1 (Gadd45gip1) complete mRNA. |
| <a href="#">gafer</a>      | <a href="#">gafer.aSep08</a>      |                        | 9772  | 486  | 2 | 64  | putative protein (7.3 kD) (gafer) alternative variant aSep08, mRNA.                             |
| <a href="#">gafer</a>      | <a href="#">gafer.bSep08</a>      |                        | 9679  | 532  | 3 | 51  | putative protein (5.8 kD) (gafer) alternative variant bSep08, mRNA.                             |
| <a href="#">gafer</a>      | <a href="#">gafer.cSep08</a>      |                        | 1311  | 405  | 1 | 28  | putative protein (3.4 kD) (gafer) alternative variant cSep08, mRNA.                             |
| <a href="#">gaflo</a>      | <a href="#">gaflo.aSep08</a>      |                        | 2701  | 730  | 1 | 61  | putative protein (gaflo) mRNA.                                                                  |
| <a href="#">gaflu</a>      | <a href="#">gaflu.aSep08</a>      |                        | 2091  | 420  |   | 77  | putative protein (gaflu) mRNA.                                                                  |
| <a href="#">Gag_p30.0</a>  | <a href="#">Gag_p30.0.bSep08</a>  |                        | 4427  | 355  | 2 | 105 | polyprotein (Gag_p30.0) alternative variant bSep08, mRNA.                                       |
| <a href="#">Gag_p30.1</a>  | <a href="#">Gag_p30.1.aSep08</a>  |                        | 4218  | 367  |   | 109 | polyprotein (Gag_p30.1) mRNA.                                                                   |
| <a href="#">Gag_p30.2</a>  | <a href="#">Gag_p30.2.aSep08</a>  |                        | 3355  | 358  |   | 106 | polyprotein (Gag_p30.2) mRNA.                                                                   |
| <a href="#">Gag_p30.6</a>  | <a href="#">Gag_p30.6.aSep08</a>  |                        | 3439  | 355  |   | 105 | polyprotein (Gag_p30.6) mRNA.                                                                   |
| <a href="#">Gag_p30.8</a>  | <a href="#">Gag_p30.8.bSep08</a>  |                        | 3272  | 367  | 3 | 109 | polyprotein (Gag_p30.8) alternative variant bSep08, mRNA.                                       |
| <a href="#">Gag_p30.9</a>  | <a href="#">Gag_p30.9.bSep08</a>  |                        | 4641  | 1685 | 2 | 122 | polyprotein (13.8 kD) (Gag_p30.9) alternative variant bSep08, mRNA.                             |
| <a href="#">Gag_p30.9</a>  | <a href="#">Gag_p30.9.cSep08</a>  |                        | 7801  | 737  | 3 | 88  | polyprotein (9.7 kD) (Gag_p30.9) alternative variant cSep08, mRNA.                              |
| <a href="#">Gag_p30.9</a>  | <a href="#">Gag_p30.9.dSep08</a>  |                        | 1865  | 759  | 2 | 59  | polyprotein -pol (6.4 kD) (Gag_p30.9) alternative variant dSep08, mRNA.                         |
| <a href="#">Gag_p30.11</a> | <a href="#">Gag_p30.11.aSep08</a> |                        | 3333  | 356  |   | 85  | polyprotein (Gag_p30.11) mRNA.                                                                  |
| <a href="#">Gag_p30.12</a> | <a href="#">Gag_p30.12.aSep08</a> |                        | 3283  | 367  | 3 | 109 | polyprotein (Gag_p30.12) alternative variant aSep08, mRNA.                                      |
| <a href="#">Gag_p30.17</a> | <a href="#">Gag_p30.17.aSep08</a> |                        | 3395  | 355  |   | 105 | polyprotein (Gag_p30.17) mRNA.                                                                  |
| <a href="#">Gag_p30.18</a> | <a href="#">Gag_p30.18.bSep08</a> |                        | 2197  | 355  | 2 | 105 | polyprotein (Gag_p30.18) alternative variant bSep08, mRNA.                                      |
| <a href="#">Gag_p30.19</a> | <a href="#">Gag_p30.19.bSep08</a> |                        | 3310  | 355  | 2 | 48  | putative protein (Gag_p30.19) alternative variant bSep08, mRNA.                                 |
| <a href="#">Gag_p30.20</a> | <a href="#">Gag_p30.20.bSep08</a> |                        | 3397  | 355  | 2 | 105 | polyprotein (Gag_p30.20) alternative variant bSep08, mRNA.                                      |
| <a href="#">Gag_p30.23</a> | <a href="#">Gag_p30.23.aSep08</a> |                        | 3325  | 355  |   | 105 | polyprotein (Gag_p30.23) mRNA.                                                                  |
| <a href="#">Gak</a>        | <a href="#">Gak.cSep08</a>        | <a href="#">81659</a>  | 466   | 284  | 2 | 29  | cyclin G associated kinase (3.2 kD) (Gak) alternative variant cSep08, mRNA.                     |

|                                |                                       |                        |        |      |    |     |                                                                                                                                        |
|--------------------------------|---------------------------------------|------------------------|--------|------|----|-----|----------------------------------------------------------------------------------------------------------------------------------------|
| <a href="#">gakee</a>          | <a href="#">gakee.aSep08</a>          |                        | 5308   | 712  |    | 237 | lactase-phlorizin hydrolase (gakee) mRNA.                                                                                              |
| <a href="#">Gal3st4</a>        | <a href="#">Gal3st4.bSep08</a>        | <a href="#">498166</a> | 1469   | 363  | 1  | 41  | galactose-3-O-sulfotransferase 4 (Gal3st4) alternative variant bSep08, mRNA.                                                           |
| <a href="#">Galactosyl_T.0</a> | <a href="#">Galactosyl_T.0.aSep08</a> |                        | 16745  | 3017 | 8  | 315 | 2 beta 1 3 (Galactosyl_T.0) alternative variant aSep08, mRNA.                                                                          |
| <a href="#">Galc</a>           | <a href="#">Galc.bSep08</a>           | <a href="#">314360</a> | 25081  | 725  | 8  | 241 | galactosylceramidase (Galc) alternative variant bSep08, mRNA.                                                                          |
| <a href="#">Galc</a>           | <a href="#">Galc.cSep08</a>           | <a href="#">314360</a> | 19555  | 808  | 8  | 216 | galactosylceramidase (Galc) alternative variant cSep08, mRNA.                                                                          |
| <a href="#">Gale</a>           | <a href="#">Gale.bSep08</a>           | <a href="#">114860</a> | 1609   | 517  | 4  | 172 | galactose-4-epimerase, UDP (Gale) alternative variant bSep08, mRNA.                                                                    |
| <a href="#">Gale</a>           | <a href="#">Gale.cSep08</a>           | <a href="#">114860</a> | 1908   | 774  | 7  | 171 | galactose-4-epimerase, UDP (Gale) alternative variant cSep08, mRNA.                                                                    |
| <a href="#">Gale</a>           | <a href="#">Gale.dSep08</a>           | <a href="#">114860</a> | 961    | 719  | 3  | 131 | galactose-4-epimerase, UDP (Gale) alternative variant dSep08, mRNA.                                                                    |
| <a href="#">Gale</a>           | <a href="#">Gale.eSep08</a>           | <a href="#">114860</a> | 1772   | 1349 | 5  | 69  | galactose-4-epimerase, UDP (7.6 kD) (Gale) alternative variant eSep08, mRNA.                                                           |
| <a href="#">Galk1</a>          | <a href="#">Galk1.bSep08</a>          | <a href="#">287835</a> | 9225   | 1501 | 4  | 217 | galactokinase 1 (Galk1) alternative variant bSep08, mRNA.                                                                              |
| <a href="#">Galk1</a>          | <a href="#">Galk1.cSep08</a>          | <a href="#">287835</a> | 954    | 387  | 3  | 63  | galactokinase 1 (Galk1) alternative variant cSep08, mRNA.                                                                              |
| <a href="#">Galk2</a>          | <a href="#">Galk2.bSep08</a>          | <a href="#">296117</a> | 251830 | 1784 | 10 | 402 | galactokinase 2 (44.0 kD) (Galk2) alternative variant bSep08, mRNA.                                                                    |
| <a href="#">Galk2</a>          | <a href="#">Galk2.cSep08</a>          | <a href="#">296117</a> | 220468 | 934  | 7  | 256 | galactokinase 2 (Galk2) alternative variant cSep08, mRNA.                                                                              |
| <a href="#">Galk2</a>          | <a href="#">Galk2.dSep08</a>          | <a href="#">296117</a> | 7716   | 726  | 2  | 95  | galactokinase 2 (10.3 kD) (Galk2) alternative variant dSep08, mRNA.                                                                    |
| <a href="#">Galk2</a>          | <a href="#">Galk2.eSep08</a>          | <a href="#">296117</a> | 167385 | 367  | 3  | 74  | galactokinase 2 (Galk2) alternative variant eSep08, mRNA.                                                                              |
| <a href="#">Galnac4s-6st</a>   | <a href="#">Galnac4s-6st.bSep08</a>   | <a href="#">286974</a> | 59906  | 2592 | 2  | 403 | B cell RAG associated protein (46.6 kD) (Galnac4s-6st) alternative variant bSep08, mRNA.                                               |
| <a href="#">Galns</a>          | <a href="#">Galns.bSep08</a>          | <a href="#">292073</a> | 18523  | 1228 | 8  | 284 | galactosamine (N-acetyl)-6-sulfate sulfatase (Galns) alternative variant bSep08, mRNA.                                                 |
| <a href="#">Galns</a>          | <a href="#">Galns.cSep08</a>          | <a href="#">292073</a> | 2453   | 792  | 2  | 72  | galactosamine (N-acetyl)-6-sulfate sulfatase (Galns) alternative variant cSep08, mRNA.                                                 |
| <a href="#">Galnt1</a>         | <a href="#">Galnt1.bSep08</a>         | <a href="#">79214</a>  | 18779  | 467  | 1  | 29  | UDP-N-acetyl-alpha-D-galactosamine:polypeptide N-acetylgalactosaminyltransferase 1 (3.5 kD) (Galnt1) alternative variant bSep08, mRNA. |
| <a href="#">Galnt2</a>         | <a href="#">Galnt2.aSep08</a>         | <a href="#">292090</a> | 48058  | 2116 | 2  | 529 | UDP-N-acetyl-alpha-D-galactosamine:polypeptide N-acetylgalactosaminyltransferase 2 (Galnt2) alternative variant aSep08, mRNA.          |
| <a href="#">Galnt3</a>         | <a href="#">Galnt3.bSep08</a>         | <a href="#">366061</a> | 5930   | 345  | 2  | 77  | UDP-N-acetyl-alpha-D-galactosamine:polypeptide N-acetylgalactosaminyltransferase 3 (Galnt3) alternative variant bSep08, mRNA.          |
| <a href="#">Galnt7</a>         | <a href="#">Galnt7.bSep08</a>         | <a href="#">29750</a>  | 20641  | 3673 | 7  | 303 | UDP-N-acetyl-alpha-D-galactosamine:polypeptide N-acetylgalactosaminyltransferase 7 (Galnt7) alternative variant bSep08, mRNA.          |
| <a href="#">Galnt7</a>         | <a href="#">Galnt7.cSep08</a>         | <a href="#">29750</a>  | 27066  | 2345 | 6  | 300 | UDP-N-acetyl-alpha-D-galactosamine:polypeptide N-acetylgalactosaminyltransferase 7 (Galnt7) alternative variant cSep08, mRNA.          |

|                         |                                |                        |        |      |    |     |                                                                                                                                          |
|-------------------------|--------------------------------|------------------------|--------|------|----|-----|------------------------------------------------------------------------------------------------------------------------------------------|
| <a href="#">Galnt7</a>  | <a href="#">Galnt7.dSep08</a>  | <a href="#">29750</a>  | 28984  | 582  | 3  | 99  | UDP-N-acetyl-alpha-D-galactosamine:polypeptide N-acetylgalactosaminyltransferase 7 (Galnt7) alternative variant dSep08, mRNA.            |
| <a href="#">Galnt10</a> | <a href="#">Galnt10.bSep08</a> | <a href="#">170501</a> | 66617  | 440  | 2  | 134 | putative protein (Galnt10) alternative variant bSep08, mRNA.                                                                             |
| <a href="#">Galnt10</a> | <a href="#">Galnt10.cSep08</a> | <a href="#">170501</a> | 77426  | 374  | 2  | 124 | N-acetylgalactosaminyltransferase 10 (Galnt10) alternative variant cSep08, mRNA.                                                         |
| <a href="#">Galnt10</a> | <a href="#">Galnt10.dSep08</a> | <a href="#">170501</a> | 2854   | 889  | 3  | 103 | N-acetylgalactosaminyltransferase 10 (Galnt10) alternative variant dSep08, mRNA.                                                         |
| <a href="#">Galnt11</a> | <a href="#">Galnt11.bSep08</a> | <a href="#">311952</a> | 16252  | 851  | 5  | 283 | UDP-N-acetyl-alpha-D-galactosamine:polypeptide N-acetylgalactosaminyltransferase 11 (Galnt11) alternative variant bSep08, mRNA.          |
| <a href="#">Galnt11</a> | <a href="#">Galnt11.cSep08</a> | <a href="#">311952</a> | 6219   | 771  | 5  | 220 | UDP-N-acetyl-alpha-D-galactosamine:polypeptide N-acetylgalactosaminyltransferase 11 (Galnt11) alternative variant cSep08, mRNA.          |
| <a href="#">Galnt11</a> | <a href="#">Galnt11.dSep08</a> | <a href="#">311952</a> | 6256   | 751  | 3  | 141 | UDP-N-acetyl-alpha-D-galactosamine:polypeptide N-acetylgalactosaminyltransferase 11 (Galnt11) alternative variant dSep08, mRNA.          |
| <a href="#">Galnt11</a> | <a href="#">Galnt11.eSep08</a> | <a href="#">311952</a> | 3689   | 971  | 2  | 82  | UDP-N-acetyl-alpha-D-galactosamine:polypeptide N-acetylgalactosaminyltransferase 11 (Galnt11) alternative variant eSep08, mRNA.          |
| <a href="#">Galnt12</a> | <a href="#">Galnt12.aSep08</a> | <a href="#">313233</a> | 2825   | 755  |    | 88  | UDP-N-acetyl-alpha-D-galactosamine:polypeptide N-acetylgalactosaminyltransferase 12 (Galnt12) mRNA.                                      |
| <a href="#">Galnt13</a> | <a href="#">Galnt13.bSep08</a> | <a href="#">311039</a> | 137433 | 876  | 3  | 100 | UDP-N-acetyl-alpha-D-galactosamine:polypeptide N-acetylgalactosaminyltransferase 13 (Galnt13) alternative variant bSep08, mRNA.          |
| <a href="#">Galnt13</a> | <a href="#">Galnt13.cSep08</a> | <a href="#">311039</a> | 72434  | 1210 | 4  | 41  | UDP-N-acetyl-alpha-D-galactosamine:polypeptide N-acetylgalactosaminyltransferase 13 (Galnt13) alternative variant cSep08, mRNA.          |
| <a href="#">Galnt13</a> | <a href="#">Galnt13.dSep08</a> | <a href="#">311039</a> | 8915   | 675  | 2  | 33  | UDP-N-acetyl-alpha-D-galactosamine:polypeptide N-acetylgalactosaminyltransferase 13 (3.6 kD) (Galnt13) alternative variant dSep08, mRNA. |
| <a href="#">Galnt13</a> | <a href="#">Galnt13.eSep08</a> | <a href="#">311039</a> | 71839  | 614  | 3  | 56  | UDP-N-acetyl-alpha-D-galactosamine:polypeptide N-acetylgalactosaminyltransferase 13 (6.6 kD) (Galnt13) alternative variant eSep08, mRNA. |
| <a href="#">Galnt13</a> | <a href="#">Galnt13.fSep08</a> | <a href="#">311039</a> | 70802  | 427  | 3  | 41  | UDP-N-acetyl-alpha-D-galactosamine:polypeptide N-acetylgalactosaminyltransferase 13 (Galnt13) alternative variant fSep08, mRNA.          |
| <a href="#">Galnt11</a> | <a href="#">Galnt11.aSep08</a> | <a href="#">362760</a> | 26041  | 1269 | 13 | 220 | UDP-N-acetyl-alpha-D-galactosamine:polypeptide N-acetylgalactosaminyltransferase-like 1 (Galnt11) mRNA.                                  |
| <a href="#">galoy</a>   | <a href="#">galoy.aSep08</a>   |                        | 5789   | 645  |    | 116 | putative protein of vertebrate origin (galoy) mRNA.                                                                                      |
| <a href="#">Galt</a>    | <a href="#">Galt.bSep08</a>    | <a href="#">298003</a> | 1453   | 709  | 5  | 175 | uridyl transferase CRA b (19.5 kD) (Galt) alternative variant bSep08, mRNA.                                                              |
| <a href="#">Galt</a>    | <a href="#">Galt.cSep08</a>    | <a href="#">298003</a> | 1291   | 612  | 4  | 170 | uridyl transferase (Galt) alternative variant cSep08, mRNA.                                                                              |
| <a href="#">Galt</a>    | <a href="#">Galt.dSep08</a>    | <a href="#">298003</a> | 2002   | 766  | 8  | 129 | uridyl transferase CRA b (Galt) alternative variant dSep08, mRNA.                                                                        |
| <a href="#">Galt</a>    | <a href="#">Galt.eSep08</a>    | <a href="#">298003</a> | 1205   | 893  | 2  | 111 | uridyl transferase (Galt) alternative variant eSep08, mRNA.                                                                              |

|                        |                               |                        |       |      |    |     |                                                                                                              |
|------------------------|-------------------------------|------------------------|-------|------|----|-----|--------------------------------------------------------------------------------------------------------------|
| <a href="#">Galt</a>   | <a href="#">Galt.fSep08</a>   | <a href="#">298003</a> | 1345  | 723  | 4  | 88  | uridyl transferase CRA b (Galt) alternative variant fSep08, mRNA.                                            |
| <a href="#">Galt</a>   | <a href="#">Galt.gSep08</a>   | <a href="#">298003</a> | 796   | 525  | 2  | 75  | uridyl transferase (8.6 kD) (Galt) alternative variant gSep08, mRNA.                                         |
| <a href="#">Galt</a>   | <a href="#">Galt.hSep08</a>   | <a href="#">298003</a> | 1730  | 1629 | 2  | 97  | uridyl transferase CRA b (11.0 kD) (Galt) alternative variant hSep08, mRNA.                                  |
| <a href="#">Galt</a>   | <a href="#">Galt.iSep08</a>   | <a href="#">298003</a> | 865   | 775  | 2  | 87  | uridyl transferase CRA b (9.7 kD) (Galt) alternative variant iSep08, mRNA.                                   |
| <a href="#">gamer</a>  | <a href="#">gamer.aSep08</a>  |                        | 3226  | 258  |    | 35  | putative protein (gamer) mRNA.                                                                               |
| <a href="#">Gamt</a>   | <a href="#">Gamt.bSep08</a>   | <a href="#">25257</a>  | 2006  | 507  | 4  | 169 | guanidinoacetate methyltransferase (Gamt) alternative variant bSep08, mRNA.                                  |
| <a href="#">Gan</a>    | <a href="#">Gan.bSep08</a>    | <a href="#">307893</a> | 29112 | 399  | 2  | 132 | giant axonal neuropathy (Gan) alternative variant bSep08, mRNA.                                              |
| <a href="#">Ganab</a>  | <a href="#">Ganab.bSep08</a>  | <a href="#">293721</a> | 15185 | 1372 | 11 | 457 | alpha glucosidase 2 alpha neutral subunit (Ganab) alternative variant bSep08, mRNA.                          |
| <a href="#">Ganab</a>  | <a href="#">Ganab.cSep08</a>  | <a href="#">293721</a> | 1040  | 376  | 3  | 67  | alpha glucosidase 2 alpha neutral subunit (Ganab) alternative variant cSep08, mRNA.                          |
| <a href="#">ganoy</a>  | <a href="#">ganoy.aSep08</a>  |                        | 2019  | 779  | 1  | 115 | putative protein (ganoy) alternative variant aSep08, mRNA.                                                   |
| <a href="#">ganoy</a>  | <a href="#">ganoy.bSep08</a>  |                        | 2061  | 612  |    | 83  | putative mitochondrial protein (9.4 kD) (ganoy) alternative variant bSep08, complete mRNA.                   |
| <a href="#">Gap43</a>  | <a href="#">Gap43.bSep08</a>  | <a href="#">29423</a>  | 7209  | 554  | 1  | 54  | growth associated protein 43 (Gap43) alternative variant bSep08, mRNA.                                       |
| <a href="#">Gapdh</a>  | <a href="#">Gapdh.bSep08</a>  | <a href="#">24383</a>  | 4143  | 976  | 7  | 325 | glyceraldehyde-3-phosphate dehydrogenase (Gapdh) alternative variant bSep08, mRNA.                           |
| <a href="#">Gapdh</a>  | <a href="#">Gapdh.cSep08</a>  | <a href="#">24383</a>  | 3150  | 736  | 6  | 229 | glyceraldehyde-3-phosphate dehydrogenase (Gapdh) alternative variant cSep08, mRNA.                           |
| <a href="#">Gapdhs</a> | <a href="#">Gapdhs.bSep08</a> | <a href="#">66020</a>  | 10120 | 1496 | 9  | 432 | glyceraldehyde-3-phosphate dehydrogenase, spermatogenic (46.7 kD) (Gapdhs) alternative variant bSep08, mRNA. |
| <a href="#">Gapdhs</a> | <a href="#">Gapdhs.cSep08</a> | <a href="#">66020</a>  | 8152  | 562  | 2  | 174 | glyceraldehyde-3-phosphate dehydrogenase, spermatogenic (19.2 kD) (Gapdhs) alternative variant cSep08, mRNA. |
| <a href="#">Gapdhs</a> | <a href="#">Gapdhs.dSep08</a> | <a href="#">66020</a>  | 8146  | 621  | 2  | 142 | glyceraldehyde-3-phosphate dehydrogenase, spermatogenic (15.4 kD) (Gapdhs) alternative variant dSep08, mRNA. |
| <a href="#">gapor</a>  | <a href="#">gapor.aSep08</a>  |                        | 2593  | 521  |    | 173 | kinase 2 CRA b (gapor) mRNA.                                                                                 |
| <a href="#">Gapvd1</a> | <a href="#">Gapvd1.aSep08</a> | <a href="#">311880</a> | 29000 | 4042 | 16 | 591 | GTPase activating protein and VPS9 domains 1 (Gapvd1) alternative variant aSep08, mRNA.                      |
| <a href="#">Gapvd1</a> | <a href="#">Gapvd1.bSep08</a> | <a href="#">311880</a> | 13106 | 719  | 6  | 239 | GTPase activating protein and VPS9 domains 1 (Gapvd1) alternative variant bSep08, mRNA.                      |
| <a href="#">Gapvd1</a> | <a href="#">Gapvd1.dSep08</a> | <a href="#">311880</a> | 7384  | 772  | 4  | 111 | GTPase activating protein and VPS9 domains 1 (Gapvd1) alternative variant dSep08, mRNA.                      |
| <a href="#">garby</a>  | <a href="#">garby.aSep08</a>  |                        | 451   | 301  |    | 63  | putative protein (7.3 kD) (garby) mRNA.                                                                      |
| <a href="#">garchy</a> | <a href="#">garchy.aSep08</a> |                        | 4542  | 275  |    | 87  | putative protein (garchy) mRNA.                                                                              |
| <a href="#">garfer</a> | <a href="#">garfer.aSep08</a> |                        | 3793  | 1062 | 2  | 108 | ab2-143 like (11.6 kD) (garfer) alternative variant aSep08, mRNA.                                            |



|                         |                                |                        |        |      |    |     |                                                                                                |
|-------------------------|--------------------------------|------------------------|--------|------|----|-----|------------------------------------------------------------------------------------------------|
| <a href="#">garflo</a>  | <a href="#">garflo.aSep08</a>  |                        | 18413  | 802  | 2  | 88  | putative protein (garflo) alternative variant aSep08, mRNA.                                    |
| <a href="#">garflo</a>  | <a href="#">garflo.bSep08</a>  |                        | 2737   | 642  | 3  | 59  | putative protein (garflo) alternative variant bSep08, mRNA.                                    |
| <a href="#">garflu</a>  | <a href="#">garflu.aSep08</a>  |                        | 14803  | 726  |    | 65  | putative protein (7.1 kD) (garflu) mRNA.                                                       |
| <a href="#">garkee</a>  | <a href="#">garkee.aSep08</a>  |                        | 7204   | 735  |    | 54  | putative protein (5.8 kD) (garkee) mRNA.                                                       |
| <a href="#">garloy</a>  | <a href="#">garloy.aSep08</a>  |                        | 1134   | 571  |    | 59  | putative protein (6.1 kD) (garloy) mRNA.                                                       |
| <a href="#">garmee</a>  | <a href="#">garmee.aSep08</a>  |                        | 107995 | 739  |    | 50  | putative protein (5.5 kD) (garmee) mRNA.                                                       |
| <a href="#">garmer</a>  | <a href="#">garmer.aSep08</a>  |                        | 12755  | 748  |    | 178 | putative cytoplasmic protein of eukaryotic origin (20.8 kD) (garmer) mRNA.                     |
| <a href="#">Garnl1</a>  | <a href="#">Garnl1.aSep08</a>  | <a href="#">56785</a>  | 137638 | 3741 | 15 | 802 | GTPase activating RANGAP domain-like 1 (Garnl1) alternative variant aSep08, mRNA.              |
| <a href="#">Garnl1</a>  | <a href="#">Garnl1.bSep08</a>  | <a href="#">56785</a>  | 38418  | 370  | 2  | 105 | GTPase activating RANGAP domain-like 1 (Garnl1) alternative variant bSep08, mRNA.              |
| <a href="#">Garnl4</a>  | <a href="#">Garnl4.bSep08</a>  | <a href="#">303298</a> | 8524   | 432  | 4  | 144 | GTPase activating RANGAP domain-like 4 (Garnl4) alternative variant bSep08, mRNA.              |
| <a href="#">Garnl4</a>  | <a href="#">Garnl4.cSep08</a>  | <a href="#">303298</a> | 5780   | 395  | 5  | 93  | GTPase activating RANGAP domain-like 4 (Garnl4) alternative variant cSep08, mRNA.              |
| <a href="#">garnoy</a>  | <a href="#">garnoy.aSep08</a>  |                        | 517    | 400  |    | 133 | family member 3 (garnoy) mRNA.                                                                 |
| <a href="#">Garp</a>    | <a href="#">Garp.aSep08</a>    | <a href="#">293135</a> | 9016   | 370  |    | 80  | glycoprotein A repetitions predominant (Garp) mRNA.                                            |
| <a href="#">garpor</a>  | <a href="#">garpor.aSep08</a>  |                        | 7592   | 684  |    | 100 | putative secreted or extracellular protein precursor (11.0 kD) (garpor) mRNA.                  |
| <a href="#">Gars</a>    | <a href="#">Gars.aSep08</a>    | <a href="#">297113</a> | 41014  | 2459 |    | 751 | glycyl-tRNA synthetase (Gars) mRNA.                                                            |
| <a href="#">garsa</a>   | <a href="#">garsa.aSep08</a>   |                        | 9502   | 601  |    | 100 | putative protein (garsa) mRNA.                                                                 |
| <a href="#">garshee</a> | <a href="#">garshee.aSep08</a> |                        | 7690   | 631  |    | 90  | putative protein (9.6 kD) (garshee) mRNA.                                                      |
| <a href="#">Gart</a>    | <a href="#">Gart.aSep08</a>    | <a href="#">288259</a> | 15090  | 2463 | 14 | 732 | phosphoribosylglycinamide formyltransferase (Gart) alternative variant aSep08, mRNA.           |
| <a href="#">Gart</a>    | <a href="#">Gart.bSep08</a>    | <a href="#">288259</a> | 12512  | 1850 | 11 | 433 | phosphoribosylglycinamide formyltransferase (45.7 kD) (Gart) alternative variant bSep08, mRNA. |
| <a href="#">Gart</a>    | <a href="#">Gart.cSep08</a>    | <a href="#">288259</a> | 7487   | 481  | 5  | 155 | phosphoribosylglycinamide formyltransferase (Gart) alternative variant cSep08, mRNA.           |
| <a href="#">Gart</a>    | <a href="#">Gart.dSep08</a>    | <a href="#">288259</a> | 1782   | 278  | 2  | 92  | phosphoribosylglycinamide formyltransferase (Gart) alternative variant dSep08, mRNA.           |
| <a href="#">garto</a>   | <a href="#">garto.aSep08</a>   |                        | 36244  | 476  |    | 103 | guanine nucleotide exchange factor (garto) mRNA.                                               |
| <a href="#">garvar</a>  | <a href="#">garvar.aSep08</a>  |                        | 945    | 835  |    | 74  | putative protein of mammalian origin (garvar) mRNA.                                            |
| <a href="#">garwey</a>  | <a href="#">garwey.aSep08</a>  |                        | 3000   | 506  |    | 27  | putative protein (garwey) mRNA.                                                                |
| <a href="#">Gas2</a>    | <a href="#">Gas2.bSep08</a>    | <a href="#">499156</a> | 18709  | 1562 | 2  | 85  | growth arrest-specific 2 (9.6 kD) (Gas2) alternative variant bSep08, mRNA.                     |
| <a href="#">Gas2</a>    | <a href="#">Gas2.cSep08</a>    | <a href="#">499156</a> | 7806   | 300  | 3  | 42  | growth arrest-specific 2 (Gas2) alternative variant cSep08, mRNA.                              |
| <a href="#">Gas2l1</a>  | <a href="#">Gas2l1.aSep08</a>  | <a href="#">360973</a> | 4977   | 2555 | 6  | 712 | growth arrest-specific 2 like 1 (Gas2l1) alternative variant aSep08, mRNA.                     |
| <a href="#">Gas2l1</a>  | <a href="#">Gas2l1.dSep08</a>  | <a href="#">360973</a> | 3670   | 647  | 3  | 134 | growth arrest-specific 2 like 1 (Gas2l1) alternative variant dSep08, mRNA.                     |
| <a href="#">Gas2l1</a>  | <a href="#">Gas2l1.eSep08</a>  | <a href="#">360973</a> | 1147   | 601  | 4  | 56  | growth arrest-specific 2 like 1 (Gas2l1) alternative variant eSep08, mRNA.                     |
| <a href="#">Gas2l3</a>  | <a href="#">Gas2l3.aSep08</a>  | <a href="#">680280</a> | 10138  | 654  |    | 195 | growth arrest-specific 2 like 3 (Gas2l3) mRNA.                                                 |

|                         |                                |                        |       |      |   |     |                                                                                                               |
|-------------------------|--------------------------------|------------------------|-------|------|---|-----|---------------------------------------------------------------------------------------------------------------|
| <a href="#">Gas5</a>    | <a href="#">Gas5.aSep08</a>    | <a href="#">81714</a>  | 3326  | 2549 | 2 | 37  | growth arrest specific 5 (4.1 kD) (Gas5) alternative variant aSep08, complete mRNA.                           |
| <a href="#">Gas5</a>    | <a href="#">Gas5.bSep08</a>    | <a href="#">81714</a>  | 3314  | 1144 | 6 | 38  | growth arrest specific 5 (4.4 kD) (Gas5) alternative variant bSep08, complete mRNA.                           |
| <a href="#">Gas5</a>    | <a href="#">Gas5.dSep08</a>    | <a href="#">81714</a>  | 3319  | 974  | 6 | 37  | growth arrest specific 5 (4.1 kD) (Gas5) alternative variant dSep08, complete mRNA.                           |
| <a href="#">Gas5</a>    | <a href="#">Gas5.eSep08</a>    | <a href="#">81714</a>  | 3315  | 871  | 8 | 38  | growth arrest specific 5 (4.4 kD) (Gas5) alternative variant eSep08, complete mRNA.                           |
| <a href="#">Gas5</a>    | <a href="#">Gas5.fSep08</a>    | <a href="#">81714</a>  | 1675  | 714  | 4 | 23  | growth arrest specific 5 (Gas5) alternative variant fSep08, mRNA.                                             |
| <a href="#">Gas5</a>    | <a href="#">Gas5.gSep08</a>    | <a href="#">81714</a>  | 3303  | 694  | 8 | 38  | growth arrest specific 5 (4.4 kD) (Gas5) alternative variant gSep08, complete mRNA.                           |
| <a href="#">Gas5</a>    | <a href="#">Gas5.hSep08</a>    | <a href="#">81714</a>  | 3327  | 613  | 8 | 37  | growth arrest specific 5 (4.1 kD) (Gas5) alternative variant hSep08, complete mRNA.                           |
| <a href="#">Gas5</a>    | <a href="#">Gas5.iSep08</a>    | <a href="#">81714</a>  | 1984  | 515  | 4 | 41  | growth arrest specific 5 (Gas5) alternative variant iSep08, mRNA.                                             |
| <a href="#">Gas5</a>    | <a href="#">Gas5.jSep08</a>    | <a href="#">81714</a>  | 3322  | 429  | 9 | 38  | growth arrest specific 5 (4.4 kD) (Gas5) alternative variant jSep08, complete mRNA.                           |
| <a href="#">Gas6</a>    | <a href="#">Gas6.bSep08</a>    | <a href="#">58935</a>  | 13506 | 405  | 4 | 82  | growth arrest specific 6 (Gas6) alternative variant bSep08, mRNA.                                             |
| <a href="#">Gas8</a>    | <a href="#">Gas8.bSep08</a>    | <a href="#">361438</a> | 5598  | 341  | 1 | 113 | growth arrest specific 8 (Gas8) alternative variant bSep08, mRNA.                                             |
| <a href="#">gasa</a>    | <a href="#">gasa.aSep08</a>    |                        | 12742 | 686  |   | 71  | putative protein (8.5 kD) (gasa) mRNA.                                                                        |
| <a href="#">gashee</a>  | <a href="#">gashee.aSep08</a>  |                        | 994   | 510  |   | 87  | putative protein (gashee) mRNA.                                                                               |
| <a href="#">Gata2</a>   | <a href="#">Gata2.bSep08</a>   | <a href="#">25159</a>  | 7582  | 2168 | 5 | 362 | GATA binding protein 2 (37.6 kD) (Gata2) alternative variant bSep08, mRNA.                                    |
| <a href="#">Gata3</a>   | <a href="#">Gata3.bSep08</a>   | <a href="#">85471</a>  | 9210  | 710  | 1 | 236 | GATA binding protein 3 (Gata3) alternative variant bSep08, mRNA.                                              |
| <a href="#">Gata4</a>   | <a href="#">Gata4.bSep08</a>   | <a href="#">54254</a>  | 67555 | 1409 | 2 | 268 | GATA binding protein 4 (Gata4) alternative variant bSep08, mRNA.                                              |
| <a href="#">Gatad1</a>  | <a href="#">Gatad1.aSep08</a>  | <a href="#">500005</a> | 11521 | 2483 | 4 | 370 | putative protein of metazoan origin (Gatad1) alternative variant aSep08, mRNA.                                |
| <a href="#">Gatad1</a>  | <a href="#">Gatad1.bSep08</a>  | <a href="#">500005</a> | 7771  | 811  | 4 | 197 | putative protein of metazoan origin (Gatad1) alternative variant bSep08, mRNA.                                |
| <a href="#">Gatad1</a>  | <a href="#">Gatad1.cSep08</a>  | <a href="#">500005</a> | 9283  | 738  | 3 | 185 | putative protein of metazoan origin (21.1 kD) (Gatad1) alternative variant cSep08, mRNA.                      |
| <a href="#">Gatad1</a>  | <a href="#">Gatad1.dSep08</a>  | <a href="#">500005</a> | 1119  | 626  | 2 | 171 | putative protein of vertebrate origin (Gatad1) alternative variant dSep08, mRNA.                              |
| <a href="#">Gatad2a</a> | <a href="#">Gatad2a.aSep08</a> | <a href="#">290669</a> | 30406 | 4551 | 9 | 580 | putative protein, with a coiled coil domain, of metazoan origin (Gatad2a) alternative variant aSep08, mRNA.   |
| <a href="#">Gatad2a</a> | <a href="#">Gatad2a.bSep08</a> | <a href="#">290669</a> | 6049  | 2316 | 4 | 262 | putative nuclear protein of metazoan origin (28.6 kD) (Gatad2a) alternative variant bSep08, mRNA.             |
| <a href="#">Gatad2a</a> | <a href="#">Gatad2a.cSep08</a> | <a href="#">290669</a> | 3686  | 757  | 6 | 252 | putative protein, with a coiled coil domain, of vertebrate origin (Gatad2a) alternative variant cSep08, mRNA. |
| <a href="#">Gatad2a</a> | <a href="#">Gatad2a.dSep08</a> | <a href="#">290669</a> | 21397 | 755  | 6 | 251 | putative protein, with a coiled coil domain, of vertebrate origin (Gatad2a) alternative variant dSep08, mRNA. |

|                         |                                |                        |       |      |    |     |                                                                                                             |
|-------------------------|--------------------------------|------------------------|-------|------|----|-----|-------------------------------------------------------------------------------------------------------------|
| <a href="#">Gatad2a</a> | <a href="#">Gatad2a.eSep08</a> | <a href="#">290669</a> | 2057  | 844  | 1  | 82  | putative protein of vertebrate origin (8.8 kD) (Gatad2a) alternative variant eSep08, mRNA.                  |
| <a href="#">Gatc</a>    | <a href="#">Gatc.aSep08</a>    | <a href="#">360821</a> | 5464  | 561  | 1  | 164 | glutamyl-tRNA(Gln) amidotransferase, subunit C homolog (bacterial) (Gatc) alternative variant aSep08, mRNA. |
| <a href="#">Gatc</a>    | <a href="#">Gatc.cSep08</a>    | <a href="#">360821</a> | 1897  | 497  | 1  | 99  | glutamyl-tRNA(Gln) amidotransferase, subunit C homolog (bacterial) (Gatc) alternative variant cSep08, mRNA. |
| <a href="#">gato</a>    | <a href="#">gato.aSep08</a>    |                        | 12338 | 346  |    | 114 | WD repeat domain 60 like (gato) mRNA.                                                                       |
| <a href="#">Gats</a>    | <a href="#">Gats.aSep08</a>    | <a href="#">304410</a> | 3302  | 807  |    | 268 | opposite strand transcription unit to Stag3 (Gats) mRNA.                                                    |
| <a href="#">gavar</a>   | <a href="#">gavar.aSep08</a>   |                        | 11504 | 587  |    | 36  | putative protein (4.0 kD) (gavar) mRNA.                                                                     |
| <a href="#">gawby</a>   | <a href="#">gawby.aSep08</a>   |                        | 1095  | 295  |    | 67  | putative protein (gawby) mRNA.                                                                              |
| <a href="#">gawchy</a>  | <a href="#">gawchy.aSep08</a>  |                        | 5621  | 448  |    | 149 | cobl-like 1 (gawchy) mRNA.                                                                                  |
| <a href="#">gawdar</a>  | <a href="#">gawdar.aSep08</a>  |                        | 1625  | 509  |    | 169 | carboxylesterase (gawdar) mRNA.                                                                             |
| <a href="#">gawey</a>   | <a href="#">gawey.bSep08</a>   |                        | 768   | 653  | 2  | 75  | putative protein (8.7 kD) (gawey) alternative variant bSep08, mRNA.                                         |
| <a href="#">gawfer</a>  | <a href="#">gawfer.aSep08</a>  |                        | 1620  | 454  |    | 54  | putative protein (gawfer) mRNA.                                                                             |
| <a href="#">gawflo</a>  | <a href="#">gawflo.aSep08</a>  |                        | 441   | 299  |    | 48  | putative protein (gawflo) mRNA.                                                                             |
| <a href="#">gawflu</a>  | <a href="#">gawflu.aSep08</a>  |                        | 2547  | 526  |    | 92  | putative protein (gawflu) mRNA.                                                                             |
| <a href="#">gawkee</a>  | <a href="#">gawkee.aSep08</a>  |                        | 4576  | 1815 | 2  | 191 | slit-robo Rho GTPase activating protein 2 (20.4 kD) (gawkee) alternative variant aSep08, mRNA.              |
| <a href="#">gawloy</a>  | <a href="#">gawloy.aSep08</a>  |                        | 27114 | 251  |    | 29  | putative protein (gawloy) alternative variant aSep08, mRNA.                                                 |
| <a href="#">gawloy</a>  | <a href="#">gawloy.bSep08</a>  |                        | 26965 | 186  | 1  | 18  | putative protein (2.0 kD) (gawloy) alternative variant bSep08, mRNA.                                        |
| <a href="#">gawmee</a>  | <a href="#">gawmee.aSep08</a>  |                        | 8881  | 259  |    | 41  | putative protein (gawmee) mRNA.                                                                             |
| <a href="#">gawmer</a>  | <a href="#">gawmer.aSep08</a>  |                        | 472   | 415  |    | 52  | putative protein (gawmer) mRNA.                                                                             |
| <a href="#">gawnoy</a>  | <a href="#">gawnoy.aSep08</a>  |                        | 4739  | 1446 |    | 312 | tbc1 domain family member 8 (gawnoy) mRNA.                                                                  |
| <a href="#">gawpor</a>  | <a href="#">gawpor.aSep08</a>  |                        | 48187 | 244  |    | 26  | putative protein (2.9 kD) (gawpor) mRNA.                                                                    |
| <a href="#">gawsa</a>   | <a href="#">gawsa.aSep08</a>   |                        | 8833  | 539  | 3  | 179 | transcription initiation factor tfiid (gawsa) alternative variant aSep08, mRNA.                             |
| <a href="#">gawsa</a>   | <a href="#">gawsa.bSep08</a>   |                        | 5046  | 597  | 2  | 114 | transcription initiation factor tfiid (gawsa) alternative variant bSep08, mRNA.                             |
| <a href="#">gawshee</a> | <a href="#">gawshee.aSep08</a> |                        | 8426  | 835  |    | 94  | putative protein (gawshee) mRNA.                                                                            |
| <a href="#">gawto</a>   | <a href="#">gawto.aSep08</a>   |                        | 1669  | 635  | 2  | 95  | putative protein (gawto) alternative variant aSep08, mRNA.                                                  |
| <a href="#">gawto</a>   | <a href="#">gawto.bSep08</a>   |                        | 4989  | 489  | 4  | 97  | putative protein (gawto) alternative variant bSep08, mRNA.                                                  |
| <a href="#">gawvar</a>  | <a href="#">gawvar.aSep08</a>  |                        | 3617  | 563  |    | 113 | putative protein (gawvar) mRNA.                                                                             |
| <a href="#">gawwey</a>  | <a href="#">gawwey.aSep08</a>  |                        | 1323  | 558  |    | 42  | putative protein (gawwey) mRNA.                                                                             |
| <a href="#">Gba2</a>    | <a href="#">Gba2.aSep08</a>    | <a href="#">298399</a> | 12554 | 4096 | 16 | 500 | glucosidase beta 2 CRA a (56.8 kD) (Gba2) alternative variant aSep08, mRNA.                                 |
| <a href="#">Gba2</a>    | <a href="#">Gba2.bSep08</a>    | <a href="#">298399</a> | 2695  | 1332 | 9  | 443 | glucosidase beta 2 CRA a (Gba2) alternative variant bSep08, mRNA.                                           |
| <a href="#">Gba2</a>    | <a href="#">Gba2.cSep08</a>    | <a href="#">298399</a> | 5465  | 1619 | 3  | 195 | glucosidase beta 2 CRA a (22.0 kD) (Gba2) alternative variant cSep08, mRNA.                                 |
| <a href="#">Gba2</a>    | <a href="#">Gba2.eSep08</a>    | <a href="#">298399</a> | 784   | 705  | 2  | 76  | glucosidase beta 2 CRA a (Gba2) alternative variant eSep08, mRNA.                                           |

|                        |                               |                        |        |      |    |      |                                                                                         |
|------------------------|-------------------------------|------------------------|--------|------|----|------|-----------------------------------------------------------------------------------------|
| <a href="#">Gba3</a>   | <a href="#">Gba3.aSep08</a>   | <a href="#">289687</a> | 141913 | 2022 |    | 459  | glucosidase, beta, acid 3 (cytosolic) (Gba3) mRNA.                                      |
| <a href="#">Gbas</a>   | <a href="#">Gbas.bSep08</a>   | <a href="#">498174</a> | 13694  | 1738 | 1  | 185  | glioblastoma amplified sequence (Gbas) alternative variant bSep08, mRNA.                |
| <a href="#">Gbe1</a>   | <a href="#">Gbe1.aSep08</a>   | <a href="#">288333</a> | 156881 | 1119 |    | 330  | glucan (1,4-alpha-), branching enzyme 1 (Gbe1) mRNA.                                    |
| <a href="#">Gbf1</a>   | <a href="#">Gbf1.aSep08</a>   | <a href="#">309451</a> | 32902  | 5744 | 35 | 1722 | golgi-specific brefeldin A-resistance factor 1 (Gbf1) alternative variant aSep08, mRNA. |
| <a href="#">Gbf1</a>   | <a href="#">Gbf1.bSep08</a>   | <a href="#">309451</a> | 3798   | 892  | 7  | 297  | golgi-specific brefeldin A-resistance factor 1 (Gbf1) alternative variant bSep08, mRNA. |
| <a href="#">Gbf1</a>   | <a href="#">Gbf1.cSep08</a>   | <a href="#">309451</a> | 2080   | 719  | 5  | 185  | golgi-specific brefeldin A-resistance factor 1 (Gbf1) alternative variant cSep08, mRNA. |
| <a href="#">Gbf1</a>   | <a href="#">Gbf1.dSep08</a>   | <a href="#">309451</a> | 1108   | 709  | 4  | 138  | golgi-specific brefeldin A-resistance factor 1 (Gbf1) alternative variant dSep08, mRNA. |
| <a href="#">Gbf1</a>   | <a href="#">Gbf1.eSep08</a>   | <a href="#">309451</a> | 13615  | 368  | 3  | 92   | golgi-specific brefeldin A-resistance factor 1 (Gbf1) alternative variant eSep08, mRNA. |
| <a href="#">Gbf1</a>   | <a href="#">Gbf1.gSep08</a>   | <a href="#">309451</a> | 5831   | 519  | 2  | 73   | golgi-specific brefeldin A-resistance factor 1 (Gbf1) alternative variant gSep08, mRNA. |
| <a href="#">Gbf1</a>   | <a href="#">Gbf1.iSep08</a>   | <a href="#">309451</a> | 979    | 316  | 2  | 12   | golgi-specific brefeldin A-resistance factor 1 (Gbf1) alternative variant iSep08, mRNA. |
| <a href="#">Gbp2</a>   | <a href="#">Gbp2.bSep08</a>   | <a href="#">171164</a> | 6029   | 1282 |    | 277  | guanylate nucleotide binding protein 2 (Gbp2) alternative variant bSep08, mRNA.         |
| <a href="#">Gbp4</a>   | <a href="#">Gbp4.aSep08</a>   | <a href="#">310917</a> | 1996   | 360  |    | 119  | guanylate binding protein 4 (Gbp4) mRNA.                                                |
| <a href="#">Gbp5</a>   | <a href="#">Gbp5.bSep08</a>   | <a href="#">362050</a> | 4032   | 1442 | 4  | 209  | guanylate nucleotide binding protein 5 (Gbp5) alternative variant bSep08, mRNA.         |
| <a href="#">Gc</a>     | <a href="#">Gc.bSep08</a>     | <a href="#">24384</a>  | 9876   | 217  | 2  | 72   | group specific component (Gc) alternative variant bSep08, mRNA.                         |
| <a href="#">Gc</a>     | <a href="#">Gc.cSep08</a>     | <a href="#">24384</a>  | 6528   | 207  | 3  | 59   | group specific component (Gc) alternative variant cSep08, mRNA.                         |
| <a href="#">Gca</a>    | <a href="#">Gca.aSep08</a>    | <a href="#">295647</a> | 24956  | 458  | 5  | 122  | grancalcin (Gca) alternative variant aSep08, mRNA.                                      |
| <a href="#">Gcap14</a> | <a href="#">Gcap14.aSep08</a> | <a href="#">306306</a> | 67063  | 938  | 6  | 312  | granule cell antiserum positive 14 (Gcap14) alternative variant aSep08, mRNA.           |
| <a href="#">Gcap14</a> | <a href="#">Gcap14.bSep08</a> | <a href="#">306306</a> | 55741  | 667  | 5  | 191  | granule cell antiserum positive 14 (Gcap14) alternative variant bSep08, mRNA.           |
| <a href="#">Gcap14</a> | <a href="#">Gcap14.cSep08</a> | <a href="#">306306</a> | 26660  | 675  | 4  | 159  | granule cell antiserum positive 14 (Gcap14) alternative variant cSep08, mRNA.           |
| <a href="#">Gcap14</a> | <a href="#">Gcap14.dSep08</a> | <a href="#">306306</a> | 2760   | 284  | 1  | 94   | granule cell antiserum positive 14 (Gcap14) alternative variant dSep08, mRNA.           |
| <a href="#">Gcdh</a>   | <a href="#">Gcdh.bSep08</a>   | <a href="#">364975</a> | 3138   | 1385 | 5  | 213  | glutaryl-Coenzyme A dehydrogenase (23.4 kD) (Gcdh) alternative variant bSep08, mRNA.    |
| <a href="#">Gcdh</a>   | <a href="#">Gcdh.dSep08</a>   | <a href="#">364975</a> | 1216   | 978  | 3  | 67   | glutaryl-Coenzyme A dehydrogenase (Gcdh) alternative variant dSep08, mRNA.              |
| <a href="#">Gcgr</a>   | <a href="#">Gcgr.bSep08</a>   | <a href="#">24953</a>  | 7986   | 1885 | 10 | 287  | glucagon receptor (32.4 kD) (Gcgr) alternative variant bSep08, mRNA.                    |
| <a href="#">Gcgr</a>   | <a href="#">Gcgr.cSep08</a>   | <a href="#">24953</a>  | 619    | 349  | 2  | 115  | glucagon receptor (Gcgr) alternative variant cSep08, mRNA.                              |
| <a href="#">Gch1</a>   | <a href="#">Gch1.bSep08</a>   | <a href="#">29244</a>  | 115314 | 531  | 1  | 147  | GTP cyclohydrolase 1 (Gch1) alternative variant bSep08, mRNA.                           |

|                         |                                |                        |       |      |    |      |                                                                                                               |
|-------------------------|--------------------------------|------------------------|-------|------|----|------|---------------------------------------------------------------------------------------------------------------|
| <a href="#">Gch1</a>    | <a href="#">Gch1.cSep08</a>    | <a href="#">29244</a>  | 4579  | 2157 | 1  | 83   | GTP cyclohydrolase 1 (Gch1) alternative variant cSep08, mRNA.                                                 |
| <a href="#">Gck</a>     | <a href="#">Gck.bSep08</a>     | <a href="#">24385</a>  | 1222  | 755  | 2  | 85   | glucokinase (9.2 kD) (Gck) alternative variant bSep08, mRNA.                                                  |
| <a href="#">Gclc</a>    | <a href="#">Gclc.bSep08</a>    | <a href="#">25283</a>  | 6974  | 1814 | 5  | 198  | glutamate-cysteine ligase, catalytic subunit (Gclc) alternative variant bSep08, mRNA.                         |
| <a href="#">Gclc</a>    | <a href="#">Gclc.cSep08</a>    | <a href="#">25283</a>  | 4640  | 727  | 3  | 126  | glutamate-cysteine ligase, catalytic subunit (Gclc) alternative variant cSep08, mRNA.                         |
| <a href="#">Gclm</a>    | <a href="#">Gclm.bSep08</a>    | <a href="#">29739</a>  | 9833  | 907  | 6  | 177  | glutamate cysteine ligase, modifier subunit (Gclm) alternative variant bSep08, mRNA.                          |
| <a href="#">Gcn111</a>  | <a href="#">Gcn111.aSep08</a>  | <a href="#">690632</a> | 25016 | 4471 | 25 | 1315 | gcn1 general control of amino-acid synthesis 1-like 1 (Gcn111) alternative variant aSep08, mRNA.              |
| <a href="#">Gcn111</a>  | <a href="#">Gcn111.bSep08</a>  | <a href="#">690632</a> | 3202  | 524  | 3  | 167  | gcn1 general control of amino-acid synthesis 1-like 1 (Gcn111) alternative variant bSep08, mRNA.              |
| <a href="#">Gcn111</a>  | <a href="#">Gcn111.dSep08</a>  | <a href="#">690632</a> | 496   | 410  | 2  | 91   | gcn1 general control of amino-acid synthesis 1-like 1 CRA b (Gcn111) alternative variant dSep08, mRNA.        |
| <a href="#">Gcn111</a>  | <a href="#">Gcn111.eSep08</a>  | <a href="#">690632</a> | 970   | 479  | 2  | 74   | gcn1 1 (Gcn111) alternative variant eSep08, mRNA.                                                             |
| <a href="#">Gcn5l2</a>  | <a href="#">Gcn5l2.bSep08</a>  | <a href="#">303539</a> | 2003  | 352  | 1  | 117  | GCN5 general control of amino acid synthesis-like 2 (yeast) (Gcn5l2) alternative variant bSep08, mRNA.        |
| <a href="#">Gcnt2</a>   | <a href="#">Gcnt2.bSep08</a>   | <a href="#">306860</a> | 31368 | 424  | 1  | 89   | glucosaminyl (N-acetyl) transferase 2, I-branching enzyme (10.3 kD) (Gcnt2) alternative variant bSep08, mRNA. |
| <a href="#">Gcom1</a>   | <a href="#">Gcom1.bSep08</a>   | <a href="#">363091</a> | 35395 | 777  | 6  | 233  | GRINL1A combined protein (Gcom1) alternative variant bSep08, mRNA.                                            |
| <a href="#">Gcsh</a>    | <a href="#">Gcsh.bSep08</a>    | <a href="#">171133</a> | 5933  | 891  | 1  | 80   | glycine cleavage system protein H (aminomethyl carrier) (Gcsh) alternative variant bSep08, mRNA.              |
| <a href="#">Gda</a>     | <a href="#">Gda.bSep08</a>     | <a href="#">83585</a>  | 79286 | 5152 | 13 | 380  | guanine deaminase (42.3 kD) (Gda) alternative variant bSep08, mRNA.                                           |
| <a href="#">Gda</a>     | <a href="#">Gda.cSep08</a>     | <a href="#">83585</a>  | 20974 | 951  | 8  | 236  | guanine deaminase (26.1 kD) (Gda) alternative variant cSep08, mRNA.                                           |
| <a href="#">Gda</a>     | <a href="#">Gda.fSep08</a>     | <a href="#">83585</a>  | 1306  | 568  | 2  | 33   | guanine deaminase (3.6 kD) (Gda) alternative variant fSep08, mRNA.                                            |
| <a href="#">Gdap111</a> | <a href="#">Gdap111.dSep08</a> | <a href="#">311616</a> | 14748 | 283  | 2  | 78   | ganglioside-induced differentiation-associated protein 1-like 1 (Gdap111) alternative variant dSep08, mRNA.   |
| <a href="#">Gdap111</a> | <a href="#">Gdap111.eSep08</a> | <a href="#">311616</a> | 1101  | 1004 | 3  | 67   | ganglioside-induced differentiation-associated protein 1-like 1 (Gdap111) alternative variant eSep08, mRNA.   |
| <a href="#">Gdap2</a>   | <a href="#">Gdap2.bSep08</a>   | <a href="#">362004</a> | 13441 | 1823 | 2  | 120  | ganglioside-induced differentiation-associated-protein 2 (14.1 kD) (Gdap2) alternative variant bSep08, mRNA.  |
| <a href="#">Gdf10</a>   | <a href="#">Gdf10.aSep08</a>   | <a href="#">79216</a>  | 8861  | 780  | 2  | 260  | growth differentiation factor 10 (Gdf10) alternative variant aSep08, mRNA.                                    |
| <a href="#">Gdi1</a>    | <a href="#">Gdi1.bSep08</a>    | <a href="#">25183</a>  | 6665  | 2554 | 8  | 266  | dissociation inhibitor (30.0 kD) (Gdi1) alternative variant bSep08, complete mRNA.                            |
| <a href="#">Gdi1</a>    | <a href="#">Gdi1.cSep08</a>    | <a href="#">25183</a>  | 6673  | 3369 | 7  | 241  | dissociation inhibitor (Gdi1) alternative variant cSep08, mRNA.                                               |
| <a href="#">Gdi1</a>    | <a href="#">Gdi1.dSep08</a>    | <a href="#">25183</a>  | 1744  | 1548 | 1  | 112  | dissociation inhibitor (12.5 kD) (Gdi1) alternative variant dSep08, mRNA.                                     |
| <a href="#">Gdi2</a>    | <a href="#">Gdi2.bSep08</a>    | <a href="#">29662</a>  | 979   | 750  | 3  | 137  | GDP dissociation inhibitor 2 (15.9 kD) (Gdi2) alternative variant bSep08, mRNA.                               |

|                         |                                |                        |       |      |    |     |                                                                                                                                               |
|-------------------------|--------------------------------|------------------------|-------|------|----|-----|-----------------------------------------------------------------------------------------------------------------------------------------------|
| <a href="#">Gdnf</a>    | <a href="#">Gdnf.aSep08</a>    | <a href="#">25453</a>  | 20206 | 573  |    | 185 | glial cell line derived neurotrophic factor (20.7 kD) (Gdnf) complete mRNA.                                                                   |
| <a href="#">Gdpd1</a>   | <a href="#">Gdpd1.aSep08</a>   | <a href="#">303407</a> | 43457 | 1776 | 1  | 533 | putative protein of ancient origin (Gdpd1) alternative variant aSep08, mRNA.                                                                  |
| <a href="#">Gdpd1</a>   | <a href="#">Gdpd1.cSep08</a>   | <a href="#">303407</a> | 8132  | 1604 | 1  | 117 | putative protein of ancient origin (Gdpd1) alternative variant cSep08, mRNA.                                                                  |
| <a href="#">Gdpd2</a>   | <a href="#">Gdpd2.bSep08</a>   | <a href="#">302421</a> | 1990  | 919  | 5  | 134 | putative protein (15.3 kD) (Gdpd2) alternative variant bSep08, mRNA.                                                                          |
| <a href="#">Gdpd2</a>   | <a href="#">Gdpd2.cSep08</a>   | <a href="#">302421</a> | 2899  | 605  | 5  | 123 | putative endoplasmic reticulum protein, with a transmembrane domain, of vertebrate origin (14.4 kD) (Gdpd2) alternative variant cSep08, mRNA. |
| <a href="#">Gdpd2</a>   | <a href="#">Gdpd2.dSep08</a>   | <a href="#">302421</a> | 2699  | 425  | 4  | 112 | putative endoplasmic reticulum protein, with a transmembrane domain, of vertebrate origin (13.0 kD) (Gdpd2) alternative variant dSep08, mRNA. |
| <a href="#">Gdpd2</a>   | <a href="#">Gdpd2.eSep08</a>   | <a href="#">302421</a> | 791   | 647  | 2  | 78  | putative protein of vertebrate origin (Gdpd2) alternative variant eSep08, mRNA.                                                               |
| <a href="#">Gdpd3</a>   | <a href="#">Gdpd3.aSep08</a>   | <a href="#">293490</a> | 9458  | 998  | 9  | 156 | putative protein of ancient origin (18.4 kD) (Gdpd3) alternative variant aSep08, mRNA.                                                        |
| <a href="#">geeby</a>   | <a href="#">geeby.aSep08</a>   |                        | 5887  | 915  | 10 | 256 | histone deacetylase 6 (geeby) alternative variant aSep08, mRNA.                                                                               |
| <a href="#">geechy</a>  | <a href="#">geechy.aSep08</a>  |                        | 15964 | 1018 |    | 339 | nuclear protein 3 (geechy) mRNA.                                                                                                              |
| <a href="#">geedar</a>  | <a href="#">geedar.aSep08</a>  |                        | 218   | 149  |    | 44  | putative protein (geedar) mRNA.                                                                                                               |
| <a href="#">geefer</a>  | <a href="#">geefer.aSep08</a>  |                        | 12600 | 672  |    | 11  | putative protein (1.3 kD) (geefer) mRNA.                                                                                                      |
| <a href="#">geeflo</a>  | <a href="#">geeflo.aSep08</a>  |                        | 691   | 571  |    | 34  | putative protein (geeflo) mRNA.                                                                                                               |
| <a href="#">geeflu</a>  | <a href="#">geeflu.aSep08</a>  |                        | 14617 | 488  |    | 39  | putative protein (geeflu) mRNA.                                                                                                               |
| <a href="#">geekee</a>  | <a href="#">geekee.aSep08</a>  |                        | 9034  | 542  |    | 40  | putative protein (geekee) mRNA.                                                                                                               |
| <a href="#">geeloy</a>  | <a href="#">geeloy.aSep08</a>  |                        | 26180 | 725  |    | 34  | putative protein (4.0 kD) (geeloy) mRNA.                                                                                                      |
| <a href="#">geemee</a>  | <a href="#">geemee.aSep08</a>  |                        | 13709 | 734  |    | 55  | putative protein (geemee) mRNA.                                                                                                               |
| <a href="#">geemer</a>  | <a href="#">geemer.aSep08</a>  |                        | 8352  | 748  | 2  | 130 | putative protein of mammalian origin (geemer) alternative variant aSep08, mRNA.                                                               |
| <a href="#">geemer</a>  | <a href="#">geemer.bSep08</a>  |                        | 8341  | 632  | 1  | 129 | putative protein of mammalian origin (geemer) alternative variant bSep08, mRNA.                                                               |
| <a href="#">geenoy</a>  | <a href="#">geenoy.aSep08</a>  |                        | 5276  | 584  | 5  | 194 | tbc1 domain family member 8 (geenoy) alternative variant aSep08, mRNA.                                                                        |
| <a href="#">geepor</a>  | <a href="#">geepor.aSep08</a>  |                        | 2654  | 413  | 2  | 111 | putative protein of mammalian origin (geepor) alternative variant aSep08, mRNA.                                                               |
| <a href="#">geesa</a>   | <a href="#">geesa.aSep08</a>   |                        | 2154  | 381  |    | 127 | transcription initiation factor tfiid (geesa) mRNA.                                                                                           |
| <a href="#">geeshee</a> | <a href="#">geeshee.aSep08</a> |                        | 3962  | 383  |    | 51  | putative protein (5.8 kD) (geeshee) mRNA.                                                                                                     |
| <a href="#">geeto</a>   | <a href="#">geeto.aSep08</a>   |                        | 7219  | 500  |    | 118 | putative protein (geeto) mRNA.                                                                                                                |
| <a href="#">geevar</a>  | <a href="#">geevar.aSep08</a>  |                        | 26779 | 604  |    | 31  | putative protein (3.7 kD) (geevar) mRNA.                                                                                                      |
| <a href="#">geewey</a>  | <a href="#">geewey.aSep08</a>  |                        | 1391  | 710  |    | 44  | putative protein (5.0 kD) (geewey) mRNA.                                                                                                      |
| <a href="#">Geft</a>    | <a href="#">Geft.bSep08</a>    | <a href="#">314904</a> | 6829  | 2260 | 15 | 531 | RhoA/RAC/CDC42 exchange factor (59.0 kD) (Geft) alternative variant bSep08, mRNA.                                                             |
| <a href="#">Geft</a>    | <a href="#">Geft.cSep08</a>    | <a href="#">314904</a> | 3076  | 658  | 5  | 172 | RhoA/RAC/CDC42 exchange factor (Geft) alternative variant cSep08, mRNA.                                                                       |

|                            |                                   |                        |       |      |   |     |                                                                                                            |
|----------------------------|-----------------------------------|------------------------|-------|------|---|-----|------------------------------------------------------------------------------------------------------------|
| <a href="#">Geft</a>       | <a href="#">Geft.dSep08</a>       | <a href="#">314904</a> | 1058  | 801  | 3 | 99  | RhoA/RAC/CDC42 exchange factor (Geft) alternative variant dSep08, mRNA.                                    |
| <a href="#">Gelsolin.0</a> | <a href="#">Gelsolin.0.aSep08</a> |                        | 7999  | 429  | 5 | 142 | villin-like (Gelsolin.0) alternative variant aSep08, mRNA.                                                 |
| <a href="#">Gemin6</a>     | <a href="#">Gemin6.aSep08</a>     | <a href="#">362688</a> | 4435  | 1312 | 2 | 179 | gem (nuclear organelle) associated protein 6 (19.9 kD) (Gemin6) alternative variant aSep08, complete mRNA. |
| <a href="#">Gemin6</a>     | <a href="#">Gemin6.cSep08</a>     | <a href="#">362688</a> | 2051  | 519  | 1 | 51  | gem (nuclear organelle) associated protein 6 (6.1 kD) (Gemin6) alternative variant cSep08, mRNA.           |
| <a href="#">Gen1</a>       | <a href="#">Gen1.bSep08</a>       | <a href="#">298884</a> | 4553  | 353  | 1 | 72  | putative protein (Gen1) alternative variant bSep08, mRNA.                                                  |
| <a href="#">gerby</a>      | <a href="#">gerby.aSep08</a>      |                        | 3822  | 491  | 2 | 144 | transcription factor E3 CRA b (gerby) alternative variant aSep08, mRNA.                                    |
| <a href="#">gerby</a>      | <a href="#">gerby.bSep08</a>      |                        | 3902  | 590  | 2 | 140 | transcription factor (gerby) alternative variant bSep08, mRNA.                                             |
| <a href="#">gerby</a>      | <a href="#">gerby.cSep08</a>      |                        | 2722  | 328  | 2 | 109 | transcription factor E3 CRA b (gerby) alternative variant cSep08, mRNA.                                    |
| <a href="#">gerchy</a>     | <a href="#">gerchy.aSep08</a>     |                        | 1960  | 457  |   | 16  | putative protein (2.0 kD) (gerchy) mRNA.                                                                   |
| <a href="#">gerdar</a>     | <a href="#">gerdar.aSep08</a>     |                        | 1187  | 584  |   | 68  | putative protein (gerdar) mRNA.                                                                            |
| <a href="#">gerfer</a>     | <a href="#">gerfer.aSep08</a>     |                        | 610   | 424  |   | 59  | putative protein (gerfer) mRNA.                                                                            |
| <a href="#">gerflo</a>     | <a href="#">gerflo.aSep08</a>     |                        | 625   | 335  |   | 67  | putative protein (gerflo) mRNA.                                                                            |
| <a href="#">gerflu</a>     | <a href="#">gerflu.aSep08</a>     |                        | 3366  | 368  |   | 122 | putative protein of eukaryotic origin (gerflu) mRNA.                                                       |
| <a href="#">gerkee</a>     | <a href="#">gerkee.aSep08</a>     |                        | 10092 | 725  |   | 66  | putative protein (gerkee) mRNA.                                                                            |
| <a href="#">gerloy</a>     | <a href="#">gerloy.aSep08</a>     |                        | 8906  | 382  |   | 85  | CRA b like (gerloy) mRNA.                                                                                  |
| <a href="#">germee</a>     | <a href="#">germee.aSep08</a>     |                        | 8698  | 673  | 2 | 40  | putative protein (4.8 kD) (germee) alternative variant aSep08, mRNA.                                       |
| <a href="#">germer</a>     | <a href="#">germer.aSep08</a>     |                        | 15892 | 843  |   | 40  | putative protein (4.3 kD) (germer) mRNA.                                                                   |
| <a href="#">gernoy</a>     | <a href="#">gernoy.bSep08</a>     |                        | 1762  | 507  | 2 | 35  | putative protein (gernoy) alternative variant bSep08, mRNA.                                                |
| <a href="#">gerpor</a>     | <a href="#">gerpor.aSep08</a>     |                        | 3065  | 313  |   | 63  | putative protein (gerpor) mRNA.                                                                            |
| <a href="#">gersa</a>      | <a href="#">gersa.aSep08</a>      |                        | 7139  | 623  |   | 136 | transcription initiation factor tfiid (gersa) mRNA.                                                        |
| <a href="#">gershee</a>    | <a href="#">gershee.aSep08</a>    |                        | 26550 | 1684 |   | 76  | putative secreted or extracellular protein precursor (8.8 kD) (gershee) mRNA.                              |
| <a href="#">gerto</a>      | <a href="#">gerto.aSep08</a>      |                        | 1076  | 338  |   | 112 | fam59b (gerto) mRNA.                                                                                       |
| <a href="#">gervar</a>     | <a href="#">gervar.aSep08</a>     |                        | 8590  | 224  |   | 69  | putative protein (gervar) mRNA.                                                                            |
| <a href="#">gerwey</a>     | <a href="#">gerwey.aSep08</a>     |                        | 37748 | 532  |   | 66  | putative protein (7.3 kD) (gerwey) mRNA.                                                                   |
| <a href="#">geyby</a>      | <a href="#">geyby.aSep08</a>      |                        | 5146  | 610  | 1 | 115 | putative protein, with a coiled coil domain, of bilateral origin (geyby) alternative variant aSep08, mRNA. |
| <a href="#">geyby</a>      | <a href="#">geyby.bSep08</a>      |                        | 3483  | 349  | 1 | 79  | JM11 protein CRA c like (geyby) alternative variant bSep08, mRNA.                                          |
| <a href="#">geychy</a>     | <a href="#">geychy.aSep08</a>     |                        | 3266  | 1007 |   | 335 | sodium channel voltage-gated type VII alpha (geychy) mRNA.                                                 |
| <a href="#">geydar</a>     | <a href="#">geydar.aSep08</a>     |                        | 34778 | 636  |   | 41  | putative protein (4.7 kD) (geydar) mRNA.                                                                   |
| <a href="#">geyfer</a>     | <a href="#">geyfer.aSep08</a>     |                        | 37337 | 311  |   | 36  | putative protein (geyfer) mRNA.                                                                            |
| <a href="#">geyflo</a>     | <a href="#">geyflo.aSep08</a>     |                        | 43886 | 791  |   | 54  | putative protein (geyflo) mRNA.                                                                            |
| <a href="#">geyflu</a>     | <a href="#">geyflu.aSep08</a>     |                        | 6479  | 366  |   | 121 | somatostatin receptor-interacting protein splice like (geyflu) mRNA.                                       |

|                         |                                |                        |        |      |    |     |                                                                                                                         |
|-------------------------|--------------------------------|------------------------|--------|------|----|-----|-------------------------------------------------------------------------------------------------------------------------|
| <a href="#">geykee</a>  | <a href="#">geykee.aSep08</a>  |                        | 15471  | 672  |    | 83  | CRA a like (9.7 kD) (geykee) mRNA.                                                                                      |
| <a href="#">geyloy</a>  | <a href="#">geyloy.aSep08</a>  |                        | 31947  | 252  |    | 38  | putative protein (geyloy) mRNA.                                                                                         |
| <a href="#">geymee</a>  | <a href="#">geymee.aSep08</a>  |                        | 16561  | 754  |    | 71  | putative protein (8.3 kD) (geymee) mRNA.                                                                                |
| <a href="#">geymer</a>  | <a href="#">geymer.bSep08</a>  |                        | 2594   | 1448 | 3  | 6   | putative protein (0.8 kD) (geymer) alternative variant bSep08, mRNA.                                                    |
| <a href="#">geynoy</a>  | <a href="#">geynoy.aSep08</a>  |                        | 1413   | 410  |    | 71  | putative nuclear protein (7.8 kD) (geynoy) mRNA.                                                                        |
| <a href="#">geypor</a>  | <a href="#">geypor.aSep08</a>  |                        | 18586  | 1195 | 2  | 60  | putative protein (geypor) alternative variant aSep08, mRNA.                                                             |
| <a href="#">geypor</a>  | <a href="#">geypor.bSep08</a>  |                        | 24623  | 695  | 3  | 57  | putative protein (geypor) alternative variant bSep08, mRNA.                                                             |
| <a href="#">geysa</a>   | <a href="#">geysa.aSep08</a>   |                        | 1420   | 1308 |    | 14  | putative protein (1.7 kD) (geysa) mRNA.                                                                                 |
| <a href="#">geyshee</a> | <a href="#">geyshee.aSep08</a> |                        | 21022  | 388  |    | 106 | putative protein (geyshee) mRNA.                                                                                        |
| <a href="#">geyto</a>   | <a href="#">geyto.aSep08</a>   |                        | 1282   | 479  |    | 37  | putative protein (geyto) mRNA.                                                                                          |
| <a href="#">geyvar</a>  | <a href="#">geyvar.aSep08</a>  |                        | 7063   | 696  |    | 93  | CRA a like (geyvar) mRNA.                                                                                               |
| <a href="#">geywey</a>  | <a href="#">geywey.aSep08</a>  |                        | 2536   | 204  |    | 47  | putative protein (geywey) mRNA.                                                                                         |
| <a href="#">Gfap</a>    | <a href="#">Gfap.bSep08</a>    | <a href="#">24387</a>  | 6453   | 1080 | 7  | 299 | glial fibrillary acidic protein (Gfap) alternative variant bSep08, mRNA.                                                |
| <a href="#">Gfap</a>    | <a href="#">Gfap.cSep08</a>    | <a href="#">24387</a>  | 2537   | 996  | 4  | 160 | glial fibrillary acidic protein (Gfap) alternative variant cSep08, mRNA.                                                |
| <a href="#">Gfi1</a>    | <a href="#">Gfi1.bSep08</a>    | <a href="#">24388</a>  | 4713   | 422  | 1  | 101 | growth factor independent 1 (Gfi1) alternative variant bSep08, mRNA.                                                    |
| <a href="#">Gfm2</a>    | <a href="#">Gfm2.aSep08</a>    | <a href="#">294672</a> | 11019  | 2024 | 2  | 352 | G elongation factor, mitochondrial 2 (Gfm2) alternative variant aSep08, mRNA.                                           |
| <a href="#">Gfm2</a>    | <a href="#">Gfm2.cSep08</a>    | <a href="#">294672</a> | 722    | 560  | 2  | 58  | G elongation factor, mitochondrial 2 (Gfm2) alternative variant cSep08, mRNA.                                           |
| <a href="#">Gfod1</a>   | <a href="#">Gfod1.aSep08</a>   | <a href="#">306842</a> | 101943 | 355  |    | 118 | putative protein of ancient origin (Gfod1) mRNA.                                                                        |
| <a href="#">Gfpt1</a>   | <a href="#">Gfpt1.aSep08</a>   | <a href="#">297417</a> | 18647  | 1444 |    | 324 | glutamine fructose-6-phosphate transaminase 1 (Gfpt1) mRNA.                                                             |
| <a href="#">Gfra1</a>   | <a href="#">Gfra1.bSep08</a>   | <a href="#">25454</a>  | 191527 | 728  | 3  | 211 | glial cell line derived neurotrophic factor family receptor alpha 1 (Gfra1) alternative variant bSep08, mRNA.           |
| <a href="#">Gfra1</a>   | <a href="#">Gfra1.cSep08</a>   | <a href="#">25454</a>  | 218035 | 785  | 3  | 131 | glial cell line derived neurotrophic factor family receptor alpha 1 (13.7 kD) (Gfra1) alternative variant cSep08, mRNA. |
| <a href="#">Gga1</a>    | <a href="#">Gga1.bSep08</a>    | <a href="#">300066</a> | 10877  | 1201 | 10 | 296 | golgi associated, gamma adaptin ear containing, ARF binding protein 1 (Gga1) alternative variant bSep08, mRNA.          |
| <a href="#">Gga1</a>    | <a href="#">Gga1.cSep08</a>    | <a href="#">300066</a> | 3027   | 777  | 4  | 115 | golgi associated, gamma adaptin ear containing, ARF binding protein 1 (Gga1) alternative variant cSep08, mRNA.          |
| <a href="#">Gga2</a>    | <a href="#">Gga2.aSep08</a>    | <a href="#">293455</a> | 33574  | 2770 |    | 604 | golgi associated, gamma adaptin ear containing, ARF binding protein 2 (66.2 kD) (Gga2) complete mRNA.                   |
| <a href="#">Gga3</a>    | <a href="#">Gga3.bSep08</a>    | <a href="#">360658</a> | 2741   | 1178 | 7  | 392 | golgi associated, gamma adaptin ear containing, ARF binding protein 3 (Gga3) alternative variant bSep08, mRNA.          |



|                        |                               |                        |       |      |   |     |                                                                                                                         |
|------------------------|-------------------------------|------------------------|-------|------|---|-----|-------------------------------------------------------------------------------------------------------------------------|
| <a href="#">Gga3</a>   | <a href="#">Gga3.cSep08</a>   | <a href="#">360658</a> | 619   | 503  | 2 | 167 | golgi associated, gamma adaptin ear containing, ARF binding protein 3 (Gga3) alternative variant cSep08, mRNA.          |
| <a href="#">Gga3</a>   | <a href="#">Gga3.dSep08</a>   | <a href="#">360658</a> | 790   | 419  | 3 | 71  | golgi associated, gamma adaptin ear containing, ARF binding protein 3 (Gga3) alternative variant dSep08, mRNA.          |
| <a href="#">Gga3</a>   | <a href="#">Gga3.eSep08</a>   | <a href="#">360658</a> | 789   | 693  | 2 | 34  | golgi associated, gamma adaptin ear containing, ARF binding protein 3 (3.7 kD) (Gga3) alternative variant eSep08, mRNA. |
| <a href="#">Ggcx</a>   | <a href="#">Ggcx.bSep08</a>   | <a href="#">81716</a>  | 2803  | 1290 | 6 | 230 | gamma-glutamyl carboxylase CRA c (26.5 kD) (Ggcx) alternative variant bSep08, mRNA.                                     |
| <a href="#">Ggcx</a>   | <a href="#">Ggcx.cSep08</a>   | <a href="#">81716</a>  | 5682  | 2005 | 5 | 224 | gamma-glutamyl carboxylase CRA b (26.0 kD) (Ggcx) alternative variant cSep08, complete mRNA.                            |
| <a href="#">Ggcx</a>   | <a href="#">Ggcx.dSep08</a>   | <a href="#">81716</a>  | 5429  | 701  | 5 | 201 | gamma-glutamyl carboxylase CRA c (Ggcx) alternative variant dSep08, mRNA.                                               |
| <a href="#">Ggcx</a>   | <a href="#">Ggcx.eSep08</a>   | <a href="#">81716</a>  | 2880  | 856  | 3 | 95  | gamma-glutamyl carboxylase CRA c (10.7 kD) (Ggcx) alternative variant eSep08, mRNA.                                     |
| <a href="#">Ggn</a>    | <a href="#">Ggn.bSep08</a>    | <a href="#">292765</a> | 1976  | 1398 | 2 | 438 | gametogenetin (Ggn) alternative variant bSep08, mRNA.                                                                   |
| <a href="#">Ggnbp2</a> | <a href="#">Ggnbp2.bSep08</a> | <a href="#">360584</a> | 15164 | 1148 | 7 | 382 | gametogenetin binding protein 2 (Ggnbp2) alternative variant bSep08, mRNA.                                              |
| <a href="#">Ggps1</a>  | <a href="#">Ggps1.bSep08</a>  | <a href="#">291211</a> | 2198  | 714  | 2 | 226 | geranylgeranyl diphosphate synthase 1 (Ggps1) alternative variant bSep08, mRNA.                                         |
| <a href="#">Ggt7</a>   | <a href="#">Ggt7.bSep08</a>   | <a href="#">156275</a> | 7371  | 730  | 7 | 242 | gamma-glutamyltransferase 7 (Ggt7) alternative variant bSep08, mRNA.                                                    |
| <a href="#">Ggt7</a>   | <a href="#">Ggt7.cSep08</a>   | <a href="#">156275</a> | 5360  | 571  | 4 | 167 | gamma-glutamyltransferase 7 (Ggt7) alternative variant cSep08, mRNA.                                                    |
| <a href="#">Ggt7</a>   | <a href="#">Ggt7.dSep08</a>   | <a href="#">156275</a> | 3558  | 423  | 3 | 140 | gamma-glutamyltransferase 7 (Ggt7) alternative variant dSep08, mRNA.                                                    |
| <a href="#">Ggta1</a>  | <a href="#">Ggta1.bSep08</a>  | <a href="#">246766</a> | 77632 | 3396 | 7 | 371 | glycoprotein galactosyltransferase alpha 1 3 (43.5 kD) (Ggta1) alternative variant bSep08, mRNA.                        |
| <a href="#">Ggta1</a>  | <a href="#">Ggta1.cSep08</a>  | <a href="#">246766</a> | 40759 | 735  | 2 | 88  | putative mitochondrial protein (9.9 kD) (Ggta1) alternative variant cSep08, mRNA.                                       |
| <a href="#">Gh1</a>    | <a href="#">Gh1.bSep08</a>    | <a href="#">24391</a>  | 1753  | 583  | 4 | 173 | growth hormone 1 (Gh1) alternative variant bSep08, mRNA.                                                                |
| <a href="#">Gh1</a>    | <a href="#">Gh1.cSep08</a>    | <a href="#">24391</a>  | 1979  | 665  | 4 | 167 | growth hormone 1 (19.1 kD) (Gh1) alternative variant cSep08, complete mRNA.                                             |
| <a href="#">Gh1</a>    | <a href="#">Gh1.dSep08</a>    | <a href="#">24391</a>  | 1977  | 337  | 1 | 79  | growth hormone 1 (Gh1) alternative variant dSep08, mRNA.                                                                |
| <a href="#">Gh1</a>    | <a href="#">Gh1.eSep08</a>    | <a href="#">24391</a>  | 1144  | 348  | 2 | 32  | growth hormone 1 (Gh1) alternative variant eSep08, mRNA.                                                                |
| <a href="#">Ghdc</a>   | <a href="#">Ghdc.aSep08</a>   | <a href="#">303542</a> | 2044  | 1140 | 5 | 215 | ghdc mouse gh3 domain-containing protein like (Ghdc) alternative variant aSep08, mRNA.                                  |
| <a href="#">Ghdc</a>   | <a href="#">Ghdc.bSep08</a>   | <a href="#">303542</a> | 1662  | 487  | 3 | 85  | ghdc mouse gh3 domain-containing protein like (Ghdc) alternative variant bSep08, mRNA.                                  |
| <a href="#">Ghitm</a>  | <a href="#">Ghitm.bSep08</a>  | <a href="#">290596</a> | 5190  | 643  | 3 | 151 | growth hormone inducible transmembrane protein (15.7 kD) (Ghitm) alternative variant bSep08, mRNA.                      |

|                        |                               |                        |        |      |    |     |                                                                                                                          |
|------------------------|-------------------------------|------------------------|--------|------|----|-----|--------------------------------------------------------------------------------------------------------------------------|
| <a href="#">Ghitm</a>  | <a href="#">Ghitm.cSep08</a>  | <a href="#">290596</a> | 3342   | 624  | 4  | 106 | growth hormone inducible transmembrane protein (Ghitm) alternative variant cSep08, mRNA.                                 |
| <a href="#">Ghr</a>    | <a href="#">Ghr.bSep08</a>    | <a href="#">25235</a>  | 255541 | 1183 | 8  | 279 | growth hormone receptor (32.0 kD) (Ghr) alternative variant bSep08, mRNA.                                                |
| <a href="#">Ghr</a>    | <a href="#">Ghr.cSep08</a>    | <a href="#">25235</a>  | 248858 | 725  | 7  | 176 | growth hormone receptor (Ghr) alternative variant cSep08, mRNA.                                                          |
| <a href="#">Gigyf1</a> | <a href="#">Gigyf1.bSep08</a> | <a href="#">304378</a> | 802    | 486  | 4  | 143 | GRB10 interacting GYF protein 1 (Gigyf1) alternative variant bSep08, mRNA.                                               |
| <a href="#">Gigyf1</a> | <a href="#">Gigyf1.cSep08</a> | <a href="#">304378</a> | 863    | 785  | 2  | 142 | GRB10 interacting GYF protein 1 (Gigyf1) alternative variant cSep08, mRNA.                                               |
| <a href="#">Gimap1</a> | <a href="#">Gimap1.cSep08</a> | <a href="#">312312</a> | 859    | 365  | 2  | 60  | putative protein (Gimap1) alternative variant cSep08, mRNA.                                                              |
| <a href="#">Gimap5</a> | <a href="#">Gimap5.dSep08</a> | <a href="#">246774</a> | 57380  | 734  | 4  | 40  | GTPase, IMAP family member 5 (Gimap5) alternative variant dSep08, mRNA.                                                  |
| <a href="#">Gimap8</a> | <a href="#">Gimap8.bSep08</a> | <a href="#">500112</a> | 3260   | 705  | 1  | 161 | GTPase, IMAP family member 8 (Gimap8) alternative variant bSep08, mRNA.                                                  |
| <a href="#">Gin1</a>   | <a href="#">Gin1.bSep08</a>   | <a href="#">316687</a> | 7023   | 1435 | 3  | 312 | gypsy retrotransposon integrase 1 (Gin1) alternative variant bSep08, mRNA.                                               |
| <a href="#">Gin1</a>   | <a href="#">Gin1.cSep08</a>   | <a href="#">316687</a> | 9581   | 1897 | 5  | 273 | gypsy retrotransposon integrase 1 (Gin1) alternative variant cSep08, mRNA.                                               |
| <a href="#">Gin1</a>   | <a href="#">Gin1.eSep08</a>   | <a href="#">316687</a> | 2253   | 382  | 2  | 69  | gypsy retrotransposon integrase 1 (Gin1) alternative variant eSep08, mRNA.                                               |
| <a href="#">Gin1</a>   | <a href="#">Gin1.fSep08</a>   | <a href="#">316687</a> | 9688   | 288  | 3  | 69  | gypsy retrotransposon integrase 1 (Gin1) alternative variant fSep08, mRNA.                                               |
| <a href="#">Gins1</a>  | <a href="#">Gins1.aSep08</a>  | <a href="#">499914</a> | 22200  | 1044 | 3  | 196 | GINS complex subunit 1 (Psf1 homolog) (22.9 kD) (Gins1) alternative variant aSep08, mRNA.                                |
| <a href="#">Gins3</a>  | <a href="#">Gins3.bSep08</a>  | <a href="#">307639</a> | 3136   | 651  | 1  | 61  | GINS complex subunit 3 (Psf3 homolog) and similar to 60S ribosomal protein L21 (Gins3) alternative variant bSep08, mRNA. |
| <a href="#">Gins3</a>  | <a href="#">Gins3.bSep08</a>  | <a href="#">688952</a> | 3136   | 651  | 1  | 61  | GINS complex subunit 3 (Psf3 homolog) and similar to 60S ribosomal protein L21 (Gins3) alternative variant bSep08, mRNA. |
| <a href="#">Gins4</a>  | <a href="#">Gins4.bSep08</a>  | <a href="#">290842</a> | 11188  | 783  | 8  | 198 | GINS complex subunit 4 (Sld5 homolog) (22.9 kD) (Gins4) alternative variant bSep08, complete mRNA.                       |
| <a href="#">Gip</a>    | <a href="#">Gip.bSep08</a>    | <a href="#">25040</a>  | 7669   | 608  | 1  | 164 | gastric inhibitory polypeptide (Gip) alternative variant bSep08, mRNA.                                                   |
| <a href="#">Gipc1</a>  | <a href="#">Gipc1.bSep08</a>  | <a href="#">83823</a>  | 8404   | 680  | 1  | 141 | putative protein (Gipc1) alternative variant bSep08, mRNA.                                                               |
| <a href="#">Git1</a>   | <a href="#">Git1.bSep08</a>   | <a href="#">83709</a>  | 4900   | 3029 | 12 | 481 | G protein-coupled receptor kinase interactor 1 (53.2 kD) (Git1) alternative variant bSep08, mRNA.                        |
| <a href="#">Git1</a>   | <a href="#">Git1.cSep08</a>   | <a href="#">83709</a>  | 1046   | 730  | 4  | 164 | G protein-coupled receptor kinase interactor 1 (Git1) alternative variant cSep08, mRNA.                                  |
| <a href="#">Git1</a>   | <a href="#">Git1.dSep08</a>   | <a href="#">83709</a>  | 7436   | 581  | 7  | 153 | G protein-coupled receptor kinase interactor 1 (Git1) alternative variant dSep08, mRNA.                                  |
| <a href="#">Git2</a>   | <a href="#">Git2.bSep08</a>   | <a href="#">304546</a> | 3673   | 1778 | 3  | 513 | G protein-coupled receptor kinase 2 (Git2) alternative variant bSep08, mRNA.                                             |
| <a href="#">Git2</a>   | <a href="#">Git2.cSep08</a>   | <a href="#">304546</a> | 29021  | 1537 | 13 | 502 | G protein-coupled receptor kinase 2 (Git2) alternative variant cSep08, mRNA.                                             |

|                       |                              |                        |       |      |    |     |                                                                                                         |
|-----------------------|------------------------------|------------------------|-------|------|----|-----|---------------------------------------------------------------------------------------------------------|
| <a href="#">Git2</a>  | <a href="#">Git2.dSep08</a>  | <a href="#">304546</a> | 18849 | 1777 | 7  | 471 | G protein-coupled receptor kinase-interactor 2 (Git2) alternative variant dSep08, mRNA.                 |
| <a href="#">Git2</a>  | <a href="#">Git2.eSep08</a>  | <a href="#">304546</a> | 31442 | 1753 | 12 | 443 | G protein-coupled receptor kinase 2 (Git2) alternative variant eSep08, mRNA.                            |
| <a href="#">Git2</a>  | <a href="#">Git2.fSep08</a>  | <a href="#">304546</a> | 25403 | 1351 | 11 | 356 | G protein-coupled receptor kinase interacting ArfGAP 2 (Git2) alternative variant fSep08, mRNA.         |
| <a href="#">Git2</a>  | <a href="#">Git2.gSep08</a>  | <a href="#">304546</a> | 14378 | 737  | 6  | 245 | G protein-coupled receptor kinase 2 (Git2) alternative variant gSep08, mRNA.                            |
| <a href="#">Git2</a>  | <a href="#">Git2.hSep08</a>  | <a href="#">304546</a> | 10293 | 403  | 4  | 133 | G protein-coupled receptor kinase interacting ArfGAP 2 (Git2) alternative variant hSep08, mRNA.         |
| <a href="#">Git2</a>  | <a href="#">Git2.iSep08</a>  | <a href="#">304546</a> | 10446 | 637  | 6  | 127 | G protein-coupled receptor kinase-interactor 2 (Git2) alternative variant iSep08, mRNA.                 |
| <a href="#">Git2</a>  | <a href="#">Git2.jSep08</a>  | <a href="#">304546</a> | 10811 | 875  | 5  | 126 | G protein-coupled receptor kinase-interactor 2 (Git2) alternative variant jSep08, mRNA.                 |
| <a href="#">Git2</a>  | <a href="#">Git2.kSep08</a>  | <a href="#">304546</a> | 3078  | 533  | 3  | 100 | G protein-coupled receptor kinase interactor 2 (Git2) alternative variant kSep08, mRNA.                 |
| <a href="#">Giyd2</a> | <a href="#">Giyd2.bSep08</a> | <a href="#">293489</a> | 3830  | 1114 | 4  | 258 | putative mitochondrial protein of eukaryotic origin (28.8 kD) (Giyd2) alternative variant bSep08, mRNA. |
| <a href="#">Giyd2</a> | <a href="#">Giyd2.cSep08</a> | <a href="#">293489</a> | 1128  | 935  | 4  | 212 | putative protein of eukaryotic origin (Giyd2) alternative variant cSep08, mRNA.                         |
| <a href="#">Giyd2</a> | <a href="#">Giyd2.dSep08</a> | <a href="#">293489</a> | 1402  | 972  | 4  | 163 | putative protein of eukaryotic origin (Giyd2) alternative variant dSep08, mRNA.                         |
| <a href="#">Giyd2</a> | <a href="#">Giyd2.eSep08</a> | <a href="#">293489</a> | 1310  | 575  | 5  | 159 | putative protein of mammalian origin (Giyd2) alternative variant eSep08, mRNA.                          |
| <a href="#">Giyd2</a> | <a href="#">Giyd2.fSep08</a> | <a href="#">293489</a> | 512   | 393  | 2  | 73  | putative mitochondrial protein of eukaryotic origin (8.2 kD) (Giyd2) alternative variant fSep08, mRNA.  |
| <a href="#">Gja1</a>  | <a href="#">Gja1.bSep08</a>  | <a href="#">24392</a>  | 8097  | 542  | 2  | 149 | gap junction protein, alpha 1 (Gja1) alternative variant bSep08, mRNA.                                  |
| <a href="#">Gjb1</a>  | <a href="#">Gjb1.bSep08</a>  | <a href="#">29584</a>  | 890   | 553  | 1  | 174 | gap junction protein, beta 1 (Gjb1) alternative variant bSep08, mRNA.                                   |
| <a href="#">Gjb3</a>  | <a href="#">Gjb3.bSep08</a>  | <a href="#">29585</a>  | 2938  | 484  | 2  | 69  | gap junction protein, beta 3 (Gjb3) alternative variant bSep08, mRNA.                                   |
| <a href="#">Gjb6</a>  | <a href="#">Gjb6.bSep08</a>  | <a href="#">84403</a>  | 10336 | 2092 | 2  | 106 | putative mitochondrial protein (11.7 kD) (Gjb6) alternative variant bSep08, mRNA.                       |
| <a href="#">Gjb6</a>  | <a href="#">Gjb6.cSep08</a>  | <a href="#">84403</a>  | 7487  | 429  | 2  | 42  | gap junction protein beta (Gjb6) alternative variant cSep08, mRNA.                                      |
| <a href="#">Gjc2</a>  | <a href="#">Gjc2.aSep08</a>  | <a href="#">497913</a> | 6796  | 1051 |    | 350 | gap junction protein, gamma 2 (Gjc2) mRNA.                                                              |
| <a href="#">Gk5</a>   | <a href="#">Gk5.aSep08</a>   | <a href="#">367146</a> | 7943  | 663  |    | 148 | glycerol kinase 5 (putative) (Gk5) mRNA.                                                                |
| <a href="#">Gkap1</a> | <a href="#">Gkap1.aSep08</a> | <a href="#">361202</a> | 39749 | 1778 | 8  | 442 | G kinase anchoring protein 1 (Gkap1) alternative variant aSep08, mRNA.                                  |
| <a href="#">Gkap1</a> | <a href="#">Gkap1.cSep08</a> | <a href="#">361202</a> | 30957 | 827  | 7  | 254 | G kinase anchoring protein 1 (Gkap1) alternative variant cSep08, mRNA.                                  |
| <a href="#">Gkap1</a> | <a href="#">Gkap1.dSep08</a> | <a href="#">361202</a> | 21991 | 710  | 7  | 236 | G kinase anchoring protein 1 (Gkap1) alternative variant dSep08, mRNA.                                  |
| <a href="#">Gkap1</a> | <a href="#">Gkap1.eSep08</a> | <a href="#">361202</a> | 28591 | 733  | 6  | 177 | G kinase anchoring protein 1 (Gkap1) alternative variant eSep08, mRNA.                                  |

|                         |                                |                        |       |      |   |     |                                                                                          |
|-------------------------|--------------------------------|------------------------|-------|------|---|-----|------------------------------------------------------------------------------------------|
| <a href="#">Gkap1</a>   | <a href="#">Gkap1.fSep08</a>   | <a href="#">361202</a> | 34980 | 499  | 7 | 165 | G kinase anchoring protein 1 (Gkap1) alternative variant fSep08, mRNA.                   |
| <a href="#">Gkap1</a>   | <a href="#">Gkap1.gSep08</a>   | <a href="#">361202</a> | 16104 | 545  | 5 | 160 | G kinase anchoring protein 1 (Gkap1) alternative variant gSep08, mRNA.                   |
| <a href="#">Gkap1</a>   | <a href="#">Gkap1.hSep08</a>   | <a href="#">361202</a> | 30907 | 453  | 6 | 139 | G kinase anchoring protein 1 (Gkap1) alternative variant hSep08, mRNA.                   |
| <a href="#">Gkap1</a>   | <a href="#">Gkap1.iSep08</a>   | <a href="#">361202</a> | 15876 | 307  | 2 | 102 | G kinase anchoring protein 1 (Gkap1) alternative variant iSep08, mRNA.                   |
| <a href="#">Gkap1</a>   | <a href="#">Gkap1.jSep08</a>   | <a href="#">361202</a> | 8914  | 1336 | 5 | 71  | G kinase anchoring protein 1 (8.0 kD) (Gkap1) alternative variant jSep08, mRNA.          |
| <a href="#">Gkap1</a>   | <a href="#">Gkap1.kSep08</a>   | <a href="#">361202</a> | 39791 | 791  | 6 | 71  | G kinase anchoring protein 1 (8.0 kD) (Gkap1) alternative variant kSep08, complete mRNA. |
| <a href="#">glabor</a>  | <a href="#">glabor.aSep08</a>  |                        | 1977  | 397  |   | 108 | putative protein (glabor) mRNA.                                                          |
| <a href="#">glachy</a>  | <a href="#">glachy.aSep08</a>  |                        | 23630 | 2250 |   | 58  | putative protein (6.8 kD) (glachy) mRNA.                                                 |
| <a href="#">gladoy</a>  | <a href="#">gladoy.aSep08</a>  |                        | 8838  | 478  | 3 | 121 | protein CRA a (gladoy) alternative variant aSep08, mRNA.                                 |
| <a href="#">gladoy</a>  | <a href="#">gladoy.bSep08</a>  |                        | 5894  | 447  | 1 | 89  | protein CRA a (gladoy) alternative variant bSep08, mRNA.                                 |
| <a href="#">glafly</a>  | <a href="#">glafly.aSep08</a>  |                        | 6235  | 664  |   | 33  | putative protein (3.8 kD) (glafly) mRNA.                                                 |
| <a href="#">glafly</a>  | <a href="#">glafly.aSep08</a>  |                        | 2690  | 665  |   | 58  | acetyl-Coenzyme A acetyltransferase 3 like (6.2 kD) (glafly) mRNA.                       |
| <a href="#">glagar</a>  | <a href="#">glagar.aSep08</a>  |                        | 7307  | 365  |   | 121 | nima -related kinase 5 (glagar) mRNA.                                                    |
| <a href="#">glaja</a>   | <a href="#">glaja.aSep08</a>   |                        | 4388  | 1014 |   | 255 | CRA b (glaja) mRNA.                                                                      |
| <a href="#">glajey</a>  | <a href="#">glajey.aSep08</a>  |                        | 23515 | 762  |   | 55  | putative protein (6.1 kD) (glajey) mRNA.                                                 |
| <a href="#">glakee</a>  | <a href="#">glakee.aSep08</a>  |                        | 947   | 581  |   | 83  | putative protein (9.0 kD) (glakee) mRNA.                                                 |
| <a href="#">glalo</a>   | <a href="#">glalo.aSep08</a>   |                        | 1682  | 379  |   | 63  | putative protein (glalo) mRNA.                                                           |
| <a href="#">glamee</a>  | <a href="#">glamee.aSep08</a>  |                        | 21383 | 617  |   | 9   | putative protein (1.1 kD) (glamee) mRNA.                                                 |
| <a href="#">glapor</a>  | <a href="#">glapor.aSep08</a>  |                        | 856   | 357  |   | 39  | putative protein (glapor) mRNA.                                                          |
| <a href="#">glarbor</a> | <a href="#">glarbor.aSep08</a> |                        | 17854 | 594  | 2 | 36  | putative protein (3.9 kD) (glarbor) alternative variant aSep08, mRNA.                    |
| <a href="#">glarbor</a> | <a href="#">glarbor.bSep08</a> |                        | 15021 | 434  | 2 | 44  | putative protein (glarbor) alternative variant bSep08, mRNA.                             |
| <a href="#">glarchy</a> | <a href="#">glarchy.aSep08</a> |                        | 37453 | 809  | 1 | 105 | putative protein (11.5 kD) (glarchy) alternative variant aSep08, mRNA.                   |
| <a href="#">glarchy</a> | <a href="#">glarchy.bSep08</a> |                        | 52943 | 751  | 1 | 69  | putative protein (7.6 kD) (glarchy) alternative variant bSep08, mRNA.                    |
| <a href="#">glardoy</a> | <a href="#">glardoy.aSep08</a> |                        | 1670  | 314  |   | 42  | putative protein (glardoy) mRNA.                                                         |
| <a href="#">glarfee</a> | <a href="#">glarfee.aSep08</a> |                        | 3661  | 394  |   | 62  | putative protein (6.9 kD) (glarfee) mRNA.                                                |
| <a href="#">glarflu</a> | <a href="#">glarflu.aSep08</a> |                        | 4483  | 886  |   | 165 | putative protein (17.5 kD) (glarflu) mRNA.                                               |
| <a href="#">glarfly</a> | <a href="#">glarfly.aSep08</a> |                        | 9891  | 255  |   | 51  | putative protein (glarfly) mRNA.                                                         |
| <a href="#">glargar</a> | <a href="#">glargar.aSep08</a> |                        | 4915  | 628  |   | 209 | microcephaly primary autosomal recessive 1 (glargar) mRNA.                               |
| <a href="#">glarja</a>  | <a href="#">glarja.aSep08</a>  |                        | 4387  | 584  |   | 119 | putative protein (glarja) mRNA.                                                          |
| <a href="#">glarjey</a> | <a href="#">glarjey.aSep08</a> |                        | 12875 | 806  |   | 183 | epidermal growth factor receptor CRA b (glarjey) mRNA.                                   |
| <a href="#">glarkee</a> | <a href="#">glarkee.aSep08</a> |                        | 30571 | 499  | 1 | 88  | putative protein (glarkee) alternative variant aSep08, mRNA.                             |

|                          |                                 |  |        |      |   |     |                                                                                                   |
|--------------------------|---------------------------------|--|--------|------|---|-----|---------------------------------------------------------------------------------------------------|
| <a href="#">glarkee</a>  | <a href="#">glarkee.bSep08</a>  |  | 1487   | 758  | 1 | 82  | putative protein (glarkee) alternative variant bSep08, mRNA.                                      |
| <a href="#">glarlo</a>   | <a href="#">glarlo.aSep08</a>   |  | 5111   | 507  |   | 168 | tectonic (glarlo) mRNA.                                                                           |
| <a href="#">glarmee</a>  | <a href="#">glarmee.aSep08</a>  |  | 1107   | 292  |   | 97  | zinc finger zz-type ef-hand domain-containing protein 1 (glarmee) mRNA.                           |
| <a href="#">glaroy</a>   | <a href="#">glaroy.aSep08</a>   |  | 8391   | 925  |   | 171 | CRA b precursor (19.4 kD) (glaroy) mRNA.                                                          |
| <a href="#">glarpor</a>  | <a href="#">glarpor.aSep08</a>  |  | 32263  | 651  |   | 217 | cyclic AMP-regulated phosphoprotein (glarpor) mRNA.                                               |
| <a href="#">glarroy</a>  | <a href="#">glarroy.aSep08</a>  |  | 60651  | 778  | 2 | 79  | putative protein (8.7 kD) (glarroy) alternative variant aSep08, mRNA.                             |
| <a href="#">glarroy</a>  | <a href="#">glarroy.bSep08</a>  |  | 3835   | 631  | 1 | 60  | putative protein (glarroy) alternative variant bSep08, mRNA.                                      |
| <a href="#">glarsa</a>   | <a href="#">glarsa.aSep08</a>   |  | 3073   | 492  |   | 35  | putative protein (4.1 kD) (glarsa) mRNA.                                                          |
| <a href="#">glarshee</a> | <a href="#">glarshee.aSep08</a> |  | 225855 | 592  |   | 197 | dihydropyrimidine dehydrogenase (glarshee) mRNA.                                                  |
| <a href="#">glartu</a>   | <a href="#">glartu.aSep08</a>   |  | 3769   | 334  |   | 110 | uncharacterized protein homolog (glartu) mRNA.                                                    |
| <a href="#">glarvo</a>   | <a href="#">glarvo.aSep08</a>   |  | 7390   | 806  |   | 50  | putative protein (5.3 kD) (glarvo) mRNA.                                                          |
| <a href="#">glarwer</a>  | <a href="#">glarwer.aSep08</a>  |  | 3602   | 1430 |   | 363 | a kinase anchor protein 9 CRA b (glarwer) mRNA.                                                   |
| <a href="#">glasa</a>    | <a href="#">glasa.bSep08</a>    |  | 49941  | 400  | 2 | 47  | putative protein (glasa) alternative variant bSep08, mRNA.                                        |
| <a href="#">glashee</a>  | <a href="#">glashee.aSep08</a>  |  | 1018   | 264  |   | 87  | pancreatic alpha-amylase (glashee) mRNA.                                                          |
| <a href="#">glatu</a>    | <a href="#">glatu.aSep08</a>    |  | 888    | 722  |   | 44  | putative protein (5.0 kD) (glatu) mRNA.                                                           |
| <a href="#">glavo</a>    | <a href="#">glavo.aSep08</a>    |  | 1404   | 387  |   | 129 | midasin (glavo) mRNA.                                                                             |
| <a href="#">glawbor</a>  | <a href="#">glawbor.aSep08</a>  |  | 2531   | 691  |   | 35  | putative protein (glawbor) mRNA.                                                                  |
| <a href="#">glawchy</a>  | <a href="#">glawchy.aSep08</a>  |  | 364    | 304  |   | 29  | putative protein (3.2 kD) (glawchy) mRNA.                                                         |
| <a href="#">glawdoy</a>  | <a href="#">glawdoy.aSep08</a>  |  | 1936   | 518  |   | 48  | putative protein (glawdoy) mRNA.                                                                  |
| <a href="#">glawer</a>   | <a href="#">glawer.aSep08</a>   |  | 7877   | 692  |   | 83  | putative protein (glawer) mRNA.                                                                   |
| <a href="#">glawfee</a>  | <a href="#">glawfee.aSep08</a>  |  | 1927   | 890  |   | 51  | putative protein (5.8 kD) (glawfee) mRNA.                                                         |
| <a href="#">glawflu</a>  | <a href="#">glawflu.aSep08</a>  |  | 1396   | 750  |   | 49  | CRA b like (glawflu) mRNA.                                                                        |
| <a href="#">glawfly</a>  | <a href="#">glawfly.aSep08</a>  |  | 105940 | 283  |   | 60  | putative protein (glawfly) mRNA.                                                                  |
| <a href="#">glawgar</a>  | <a href="#">glawgar.aSep08</a>  |  | 2049   | 245  |   | 75  | putative protein (glawgar) mRNA.                                                                  |
| <a href="#">glawja</a>   | <a href="#">glawja.aSep08</a>   |  | 2175   | 266  | 2 | 28  | putative protein (glawja) alternative variant aSep08, mRNA.                                       |
| <a href="#">glawjey</a>  | <a href="#">glawjey.aSep08</a>  |  | 460    | 318  |   | 105 | putative protein (glawjey) mRNA.                                                                  |
| <a href="#">glawkee</a>  | <a href="#">glawkee.aSep08</a>  |  | 11560  | 412  |   | 70  | putative protein (glawkee) mRNA.                                                                  |
| <a href="#">glawlo</a>   | <a href="#">glawlo.aSep08</a>   |  | 1223   | 944  |   | 49  | CRA a (glawlo) mRNA.                                                                              |
| <a href="#">glawmee</a>  | <a href="#">glawmee.aSep08</a>  |  | 11000  | 380  |   | 126 | zinc finger zz-type ef-hand domain-containing protein 1 (glawmee) mRNA.                           |
| <a href="#">glawpor</a>  | <a href="#">glawpor.aSep08</a>  |  | 12271  | 691  | 4 | 117 | cyclic AMP-regulated phosphoprotein 21 CRA c (glawpor) alternative variant aSep08, mRNA.          |
| <a href="#">glawpor</a>  | <a href="#">glawpor.bSep08</a>  |  | 4008   | 470  | 3 | 88  | cyclic AMP-regulated phosphoprotein 21 CRA e (9.6 kD) (glawpor) alternative variant bSep08, mRNA. |
| <a href="#">glawpor</a>  | <a href="#">glawpor.cSep08</a>  |  | 4772   | 634  | 3 | 88  | cyclic AMP-regulated phosphoprotein 21 CRA e (9.6 kD) (glawpor) alternative variant cSep08, mRNA. |
| <a href="#">glawpor</a>  | <a href="#">glawpor.dSep08</a>  |  | 2444   | 652  | 2 | 87  | cyclic AMP-regulated phosphoprotein 21 CRA e (9.5 kD) (glawpor) alternative variant dSep08, mRNA. |

|                          |                                 |                        |        |      |    |     |                                                                                            |
|--------------------------|---------------------------------|------------------------|--------|------|----|-----|--------------------------------------------------------------------------------------------|
| <a href="#">glawroy</a>  | <a href="#">glawroy.aSep08</a>  |                        | 13973  | 362  |    | 111 | heterogeneous nuclear ribonucleoprotein M (glawroy) mRNA.                                  |
| <a href="#">glawsa</a>   | <a href="#">glawsa.aSep08</a>   |                        | 2167   | 349  |    | 116 | p450 2c2 (glawsa) mRNA.                                                                    |
| <a href="#">glawshee</a> | <a href="#">glawshee.aSep08</a> |                        | 100398 | 454  |    | 151 | dihydropyrimidine dehydrogenase (glawshee) mRNA.                                           |
| <a href="#">glawtu</a>   | <a href="#">glawtu.aSep08</a>   |                        | 1419   | 139  |    | 45  | leucine rich repeat containing 9 like (glawtu) mRNA.                                       |
| <a href="#">glawvo</a>   | <a href="#">glawvo.aSep08</a>   |                        | 1508   | 415  |    | 25  | putative protein (glawvo) mRNA.                                                            |
| <a href="#">glawwer</a>  | <a href="#">glawwer.aSep08</a>  |                        | 684    | 537  |    | 83  | putative protein (glawwer) mRNA.                                                           |
| <a href="#">Glb1</a>     | <a href="#">Glb1.bSep08</a>     | <a href="#">316033</a> | 50453  | 1514 | 12 | 337 | galactosidase beta 1 (37.3 kD) (Glb1) alternative variant bSep08, mRNA.                    |
| <a href="#">Glb1</a>     | <a href="#">Glb1.cSep08</a>     | <a href="#">316033</a> | 15904  | 727  | 6  | 242 | galactosidase beta 1 CRA b (Glb1) alternative variant cSep08, mRNA.                        |
| <a href="#">Glb1</a>     | <a href="#">Glb1.dSep08</a>     | <a href="#">316033</a> | 10797  | 738  | 5  | 163 | galactosidase beta 1 CRA b (Glb1) alternative variant dSep08, mRNA.                        |
| <a href="#">Glb112</a>   | <a href="#">Glb112.aSep08</a>   | <a href="#">503194</a> | 72133  | 2866 |    | 637 | galactosidase, beta 1-like 2 (Glb112) mRNA.                                                |
| <a href="#">Glce</a>     | <a href="#">Glce.aSep08</a>     | <a href="#">363073</a> | 54646  | 394  |    | 62  | glucuronic acid epimerase (Glce) mRNA.                                                     |
| <a href="#">Gldc</a>     | <a href="#">Gldc.bSep08</a>     | <a href="#">309312</a> | 47923  | 2061 | 2  | 620 | glycine dehydrogenase (decarboxylating) (Gldc) alternative variant bSep08, mRNA.           |
| <a href="#">Gldc</a>     | <a href="#">Gldc.cSep08</a>     | <a href="#">309312</a> | 25243  | 2428 | 9  | 361 | glycine dehydrogenase (decarboxylating) (40.1 kD) (Gldc) alternative variant cSep08, mRNA. |
| <a href="#">Gldc</a>     | <a href="#">Gldc.dSep08</a>     | <a href="#">309312</a> | 52835  | 697  | 1  | 169 | glycine dehydrogenase (decarboxylating) (Gldc) alternative variant dSep08, complete mRNA.  |
| <a href="#">Gldc</a>     | <a href="#">Gldc.eSep08</a>     | <a href="#">309312</a> | 1174   | 514  | 1  | 74  | glycine dehydrogenase (decarboxylating) (8.5 kD) (Gldc) alternative variant eSep08, mRNA.  |
| <a href="#">Gle1</a>     | <a href="#">Gle1.bSep08</a>     | <a href="#">362098</a> | 9804   | 634  | 6  | 187 | GLE1 RNA export mediator (Gle1) alternative variant bSep08, mRNA.                          |
| <a href="#">Gle1</a>     | <a href="#">Gle1.cSep08</a>     | <a href="#">362098</a> | 15782  | 1778 | 7  | 151 | RNA export mediator (Gle1) alternative variant cSep08, mRNA.                               |
| <a href="#">Gle1</a>     | <a href="#">Gle1.eSep08</a>     | <a href="#">362098</a> | 4642   | 508  | 3  | 65  | GLE1 RNA export mediator (7.9 kD) (Gle1) alternative variant eSep08, mRNA.                 |
| <a href="#">Gle1</a>     | <a href="#">Gle1.fSep08</a>     | <a href="#">362098</a> | 1524   | 892  | 2  | 60  | GLE1 RNA export mediator (6.8 kD) (Gle1) alternative variant fSep08, mRNA.                 |
| <a href="#">Gle1</a>     | <a href="#">Gle1.gSep08</a>     | <a href="#">362098</a> | 2739   | 768  | 2  | 44  | GLE1 RNA export mediator (4.9 kD) (Gle1) alternative variant gSep08, mRNA.                 |
| <a href="#">gleebor</a>  | <a href="#">gleebor.aSep08</a>  |                        | 845    | 652  |    | 60  | putative protein (6.8 kD) (gleebor) mRNA.                                                  |
| <a href="#">gleechy</a>  | <a href="#">gleechy.aSep08</a>  |                        | 4090   | 345  |    | 49  | putative protein (gleechy) mRNA.                                                           |
| <a href="#">gleedoy</a>  | <a href="#">gleedoy.aSep08</a>  |                        | 18375  | 619  |    | 66  | putative protein (7.9 kD) (gleedoy) mRNA.                                                  |
| <a href="#">gleefee</a>  | <a href="#">gleefee.aSep08</a>  |                        | 2505   | 254  |    | 65  | putative protein (7.3 kD) (gleefee) mRNA.                                                  |
| <a href="#">gleeflu</a>  | <a href="#">gleeflu.aSep08</a>  |                        | 6614   | 366  |    | 119 | CRA b (gleeflu) mRNA.                                                                      |
| <a href="#">gleefly</a>  | <a href="#">gleefly.aSep08</a>  |                        | 3281   | 213  |    | 23  | putative protein (2.7 kD) (gleefly) mRNA.                                                  |
| <a href="#">gleegar</a>  | <a href="#">gleegar.bSep08</a>  |                        | 3241   | 199  |    | 63  | gag protein like (gleegar) alternative variant bSep08, mRNA.                               |
| <a href="#">gleeja</a>   | <a href="#">gleeja.aSep08</a>   |                        | 870    | 262  |    | 43  | putative protein (gleeja) mRNA.                                                            |
| <a href="#">gleejey</a>  | <a href="#">gleejey.aSep08</a>  |                        | 7563   | 609  |    | 50  | putative protein (5.8 kD) (gleejey) mRNA.                                                  |
| <a href="#">gleekee</a>  | <a href="#">gleekee.aSep08</a>  |                        | 552    | 457  |    | 63  | putative protein (gleekee) mRNA.                                                           |
| <a href="#">gleelo</a>   | <a href="#">gleelo.bSep08</a>   |                        | 2139   | 676  |    | 60  | tectonic (gleelo) alternative variant bSep08, mRNA.                                        |

|                          |                                 |                        |       |      |   |     |                                                                                      |
|--------------------------|---------------------------------|------------------------|-------|------|---|-----|--------------------------------------------------------------------------------------|
| <a href="#">gleemee</a>  | <a href="#">gleemee.aSep08</a>  |                        | 2734  | 567  |   | 129 | zinc finger ZZ-type with EF hand domain 1 (gleemee) mRNA.                            |
| <a href="#">gleepor</a>  | <a href="#">gleepor.aSep08</a>  |                        | 23148 | 791  |   | 78  | putative protein (8.7 kD) (gleepor) mRNA.                                            |
| <a href="#">gleeroy</a>  | <a href="#">gleeroy.aSep08</a>  |                        | 3215  | 199  |   | 63  | gag protein like (gleeroy) mRNA.                                                     |
| <a href="#">gleesa</a>   | <a href="#">gleesa.aSep08</a>   |                        | 1368  | 1057 |   | 200 | CRA a like (gleesa) mRNA.                                                            |
| <a href="#">gleeshee</a> | <a href="#">gleeshee.aSep08</a> |                        | 10191 | 375  |   | 45  | putative protein (4.9 kD) (gleeshee) mRNA.                                           |
| <a href="#">gleetu</a>   | <a href="#">gleetu.aSep08</a>   |                        | 9307  | 511  |   | 161 | repeat containing 9 (gleetu) mRNA.                                                   |
| <a href="#">gleevo</a>   | <a href="#">gleevo.aSep08</a>   |                        | 6804  | 800  |   | 97  | putative protein (gleevo) mRNA.                                                      |
| <a href="#">gleewer</a>  | <a href="#">gleewer.aSep08</a>  |                        | 3998  | 657  |   | 33  | putative protein (3.8 kD) (gleewer) mRNA.                                            |
| <a href="#">glerbor</a>  | <a href="#">glerbor.aSep08</a>  |                        | 1041  | 516  |   | 89  | putative protein (glerbor) mRNA.                                                     |
| <a href="#">glerchy</a>  | <a href="#">glerchy.aSep08</a>  |                        | 628   | 311  |   | 66  | putative protein (glerchy) mRNA.                                                     |
| <a href="#">glerdoy</a>  | <a href="#">glerdoy.aSep08</a>  |                        | 2516  | 410  |   | 77  | putative protein (glerdoy) mRNA.                                                     |
| <a href="#">glerfee</a>  | <a href="#">glerfee.aSep08</a>  |                        | 2844  | 659  |   | 96  | putative protein (glerfee) mRNA.                                                     |
| <a href="#">glerflu</a>  | <a href="#">glerflu.aSep08</a>  |                        | 7979  | 588  |   | 140 | otoancorin (glerflu) mRNA.                                                           |
| <a href="#">glerfly</a>  | <a href="#">glerfly.aSep08</a>  |                        | 7309  | 547  | 2 | 122 | putative mitochondrial protein (13.7 kD) (glerfly) alternative variant aSep08, mRNA. |
| <a href="#">glerfly</a>  | <a href="#">glerfly.bSep08</a>  |                        | 1465  | 879  | 2 | 87  | putative mitochondrial protein (9.8 kD) (glerfly) alternative variant bSep08, mRNA.  |
| <a href="#">glergar</a>  | <a href="#">glergar.aSep08</a>  |                        | 65896 | 377  |   | 70  | putative protein (glergar) mRNA.                                                     |
| <a href="#">glerja</a>   | <a href="#">glerja.aSep08</a>   |                        | 23889 | 393  |   | 59  | putative protein (glerja) mRNA.                                                      |
| <a href="#">glerjey</a>  | <a href="#">glerjey.aSep08</a>  |                        | 5932  | 774  |   | 56  | putative protein (6.4 kD) (glerjey) mRNA.                                            |
| <a href="#">glerkee</a>  | <a href="#">glerkee.aSep08</a>  |                        | 1077  | 532  |   | 109 | putative protein (glerkee) mRNA.                                                     |
| <a href="#">glerlo</a>   | <a href="#">glerlo.aSep08</a>   |                        | 20310 | 454  |   | 150 | CRA a (glerlo) mRNA.                                                                 |
| <a href="#">glermee</a>  | <a href="#">glermee.aSep08</a>  |                        | 4684  | 702  |   | 229 | CRA b (glermee) mRNA.                                                                |
| <a href="#">glerpor</a>  | <a href="#">glerpor.aSep08</a>  |                        | 13652 | 777  |   | 26  | putative protein (glerpor) mRNA.                                                     |
| <a href="#">glerroy</a>  | <a href="#">glerroy.bSep08</a>  |                        | 1852  | 517  | 2 | 34  | putative protein (glerroy) alternative variant bSep08, mRNA.                         |
| <a href="#">glerroy</a>  | <a href="#">glerroy.cSep08</a>  |                        | 19159 | 413  | 3 | 35  | putative protein (glerroy) alternative variant cSep08, mRNA.                         |
| <a href="#">glersa</a>   | <a href="#">glersa.aSep08</a>   | <a href="#">503178</a> | 6772  | 680  |   | 97  | tubulin tyrosine ligase-like 1 (glersa) mRNA.                                        |
| <a href="#">glershee</a> | <a href="#">glershee.aSep08</a> |                        | 1609  | 731  |   | 84  | putative protein (glershee) mRNA.                                                    |
| <a href="#">glertu</a>   | <a href="#">glertu.aSep08</a>   |                        | 618   | 407  |   | 135 | CRA b (glertu) mRNA.                                                                 |
| <a href="#">glervo</a>   | <a href="#">glervo.aSep08</a>   |                        | 12112 | 407  |   | 74  | putative protein (glervo) mRNA.                                                      |
| <a href="#">glerwer</a>  | <a href="#">glerwer.aSep08</a>  |                        | 2488  | 442  |   | 76  | putative nuclear protein (8.8 kD) (glerwer) mRNA.                                    |
| <a href="#">gleybor</a>  | <a href="#">gleybor.aSep08</a>  |                        | 1288  | 579  |   | 39  | putative protein (gleybor) mRNA.                                                     |
| <a href="#">gleychy</a>  | <a href="#">gleychy.aSep08</a>  |                        | 3906  | 673  |   | 50  | putative protein (5.3 kD) (gleychy) mRNA.                                            |
| <a href="#">gleydoy</a>  | <a href="#">gleydoy.aSep08</a>  |                        | 12956 | 806  |   | 256 | treacher Collins Franceschetti syndrome 1 homolog like (gleydoy) mRNA.               |
| <a href="#">gleyfee</a>  | <a href="#">gleyfee.aSep08</a>  |                        | 941   | 423  |   | 95  | putative secreted or extracellular protein precursor (10.7 kD) (gleyfee) mRNA.       |
| <a href="#">gleyflu</a>  | <a href="#">gleyflu.aSep08</a>  |                        | 1361  | 531  |   | 42  | putative protein (gleyflu) mRNA.                                                     |
| <a href="#">gleyfly</a>  | <a href="#">gleyfly.aSep08</a>  |                        | 10278 | 542  |   | 66  | putative protein (6.9 kD) (gleyfly) mRNA.                                            |
| <a href="#">gleygar</a>  | <a href="#">gleygar.aSep08</a>  |                        | 8064  | 284  |   | 56  | putative protein (gleygar) mRNA.                                                     |

|                          |                                 |                        |       |      |    |     |                                                                                                              |
|--------------------------|---------------------------------|------------------------|-------|------|----|-----|--------------------------------------------------------------------------------------------------------------|
| <a href="#">gleyja</a>   | <a href="#">gleyja.aSep08</a>   |                        | 1587  | 741  | 2  | 59  | putative protein (6.7 kD) (gleyja) alternative variant aSep08, mRNA.                                         |
| <a href="#">gleyjey</a>  | <a href="#">gleyjey.aSep08</a>  |                        | 8566  | 875  |    | 241 | centrosomal protein 68 (gleyjey) mRNA.                                                                       |
| <a href="#">gleykee</a>  | <a href="#">gleykee.aSep08</a>  |                        | 1276  | 535  | 1  | 38  | putative protein (gleykee) alternative variant aSep08, mRNA.                                                 |
| <a href="#">gleykee</a>  | <a href="#">gleykee.bSep08</a>  |                        | 1294  | 471  | 1  | 43  | putative protein (4.9 kD) (gleykee) alternative variant bSep08, mRNA.                                        |
| <a href="#">gleylo</a>   | <a href="#">gleylo.aSep08</a>   |                        | 11681 | 505  | 2  | 138 | putative protein, with a coiled coil domain, of vertebrate origin (gleylo) alternative variant aSep08, mRNA. |
| <a href="#">gleylo</a>   | <a href="#">gleylo.bSep08</a>   |                        | 5924  | 376  | 2  | 125 | putative protein, with a coiled coil domain, of vertebrate origin (gleylo) alternative variant bSep08, mRNA. |
| <a href="#">gleylo</a>   | <a href="#">gleylo.cSep08</a>   |                        | 5924  | 477  | 3  | 120 | putative protein (gleylo) alternative variant cSep08, mRNA.                                                  |
| <a href="#">gleylo</a>   | <a href="#">gleylo.dSep08</a>   |                        | 11651 | 576  | 3  | 120 | putative protein, with a coiled coil domain, of vertebrate origin (gleylo) alternative variant dSep08, mRNA. |
| <a href="#">gleylo</a>   | <a href="#">gleylo.eSep08</a>   |                        | 11674 | 666  | 3  | 119 | putative protein, with a coiled coil domain, of vertebrate origin (gleylo) alternative variant eSep08, mRNA. |
| <a href="#">gleymee</a>  | <a href="#">gleymee.aSep08</a>  |                        | 2717  | 677  |    | 100 | putative protein (gleymee) mRNA.                                                                             |
| <a href="#">gleypor</a>  | <a href="#">gleypor.aSep08</a>  |                        | 1086  | 313  |    | 84  | putative protein (gleypor) mRNA.                                                                             |
| <a href="#">gleyroy</a>  | <a href="#">gleyroy.aSep08</a>  |                        | 2707  | 799  |    | 66  | putative protein (gleyroy) mRNA.                                                                             |
| <a href="#">gleyshee</a> | <a href="#">gleyshee.aSep08</a> |                        | 15421 | 816  |    | 72  | putative protein (gleyshee) mRNA.                                                                            |
| <a href="#">gleytu</a>   | <a href="#">gleytu.aSep08</a>   |                        | 3351  | 571  |    | 111 | pol protein (gleytu) mRNA.                                                                                   |
| <a href="#">gleyvo</a>   | <a href="#">gleyvo.aSep08</a>   |                        | 80310 | 376  |    | 60  | putative protein (gleyvo) mRNA.                                                                              |
| <a href="#">gleywer</a>  | <a href="#">gleywer.aSep08</a>  |                        | 466   | 364  |    | 18  | putative protein (gleywer) mRNA.                                                                             |
| <a href="#">Glg1</a>     | <a href="#">Glg1.bSep08</a>     | <a href="#">29476</a>  | 3684  | 602  | 4  | 160 | golgi apparatus protein 1 (Glg1) alternative variant bSep08, mRNA.                                           |
| <a href="#">Glg1</a>     | <a href="#">Glg1.cSep08</a>     | <a href="#">29476</a>  | 4162  | 2524 | 2  | 107 | golgi apparatus protein 1 (Glg1) alternative variant cSep08, mRNA.                                           |
| <a href="#">Glg1</a>     | <a href="#">Glg1.dSep08</a>     | <a href="#">29476</a>  | 1131  | 426  | 2  | 88  | golgi apparatus protein 1 (Glg1) alternative variant dSep08, mRNA.                                           |
| <a href="#">Glg1</a>     | <a href="#">Glg1.eSep08</a>     | <a href="#">29476</a>  | 2176  | 277  | 3  | 80  | golgi apparatus protein 1 (Glg1) alternative variant eSep08, mRNA.                                           |
| <a href="#">Gli3</a>     | <a href="#">Gli3.aSep08</a>     | <a href="#">140588</a> | 75556 | 404  |    | 122 | GLI-Kruppel family member GLI3 (Gli3) mRNA.                                                                  |
| <a href="#">Glipr1</a>   | <a href="#">Glipr1.bSep08</a>   | <a href="#">299783</a> | 10973 | 792  | 4  | 177 | GLI pathogenesis-related 1 (glioma) (20.2 kD) (Glipr1) alternative variant bSep08, mRNA.                     |
| <a href="#">Glipr1</a>   | <a href="#">Glipr1.cSep08</a>   | <a href="#">299783</a> | 10882 | 787  | 5  | 91  | GLI pathogenesis-related 1 (glioma) (Glipr1) alternative variant cSep08, mRNA.                               |
| <a href="#">Glipr2</a>   | <a href="#">Glipr2.aSep08</a>   | <a href="#">679819</a> | 20177 | 686  |    | 169 | GLI pathogenesis-related 2 (Glipr2) mRNA.                                                                    |
| <a href="#">Glis1</a>    | <a href="#">Glis1.aSep08</a>    | <a href="#">298732</a> | 7839  | 914  | 4  | 197 | GLIS family zinc finger 1 (Glis1) alternative variant aSep08, mRNA.                                          |
| <a href="#">Glis1</a>    | <a href="#">Glis1.cSep08</a>    | <a href="#">298732</a> | 3113  | 542  | 2  | 74  | GLIS family zinc finger 1 (Glis1) alternative variant cSep08, mRNA.                                          |
| <a href="#">Glmn</a>     | <a href="#">Glmn.bSep08</a>     | <a href="#">289437</a> | 44369 | 1965 | 19 | 458 | glomulin (51.6 kD) (Glmn) alternative variant bSep08, mRNA.                                                  |
| <a href="#">Glmn</a>     | <a href="#">Glmn.cSep08</a>     | <a href="#">289437</a> | 17144 | 817  | 7  | 242 | glomulin (Glmn) alternative variant cSep08, mRNA.                                                            |
| <a href="#">Glmn</a>     | <a href="#">Glmn.dSep08</a>     | <a href="#">289437</a> | 13026 | 588  | 5  | 177 | glomulin (Glmn) alternative variant dSep08, mRNA.                                                            |



|                          |                                 |                        |        |      |   |     |                                                                                     |
|--------------------------|---------------------------------|------------------------|--------|------|---|-----|-------------------------------------------------------------------------------------|
| <a href="#">Glmn</a>     | <a href="#">Glmn.eSep08</a>     | <a href="#">289437</a> | 12426  | 495  | 4 | 129 | glomulin (Glmn) alternative variant eSep08, mRNA.                                   |
| <a href="#">Glmn</a>     | <a href="#">Glmn.fSep08</a>     | <a href="#">289437</a> | 12415  | 523  | 4 | 127 | glomulin (14.1 kD) (Glmn) alternative variant fSep08, mRNA.                         |
| <a href="#">Glmn</a>     | <a href="#">Glmn.gSep08</a>     | <a href="#">289437</a> | 9229   | 389  | 5 | 125 | glomulin (Glmn) alternative variant gSep08, mRNA.                                   |
| <a href="#">Glmn</a>     | <a href="#">Glmn.hSep08</a>     | <a href="#">289437</a> | 15438  | 762  | 6 | 97  | glomulin (11.4 kD) (Glmn) alternative variant hSep08, mRNA.                         |
| <a href="#">Glmn</a>     | <a href="#">Glmn.iSep08</a>     | <a href="#">289437</a> | 3164   | 620  | 4 | 82  | glomulin (9.6 kD) (Glmn) alternative variant iSep08, complete mRNA.                 |
| <a href="#">Globin.0</a> | <a href="#">Globin.0.aSep08</a> |                        | 1248   | 1043 |   | 201 | hemoglobin theta (Globin.0) mRNA.                                                   |
| <a href="#">Globin.1</a> | <a href="#">Globin.1.aSep08</a> |                        | 1485   | 595  | 2 | 142 | hemoglobin zeta (16.1 kD) (Globin.1) alternative variant aSep08, complete mRNA.     |
| <a href="#">Globin.1</a> | <a href="#">Globin.1.bSep08</a> |                        | 623    | 518  | 1 | 102 | hemoglobin zeta (11.5 kD) (Globin.1) alternative variant bSep08, mRNA.              |
| <a href="#">globor</a>   | <a href="#">globor.aSep08</a>   |                        | 5409   | 369  |   | 119 | putative protein (globor) mRNA.                                                     |
| <a href="#">glochy</a>   | <a href="#">glochy.aSep08</a>   |                        | 11648  | 1801 | 6 | 458 | ninein-like (glochy) alternative variant aSep08, mRNA.                              |
| <a href="#">Glod4</a>    | <a href="#">Glod4.aSep08</a>    | <a href="#">363644</a> | 6963   | 649  |   | 88  | putative protein (Glod4) mRNA.                                                      |
| <a href="#">glodoy</a>   | <a href="#">glodoy.aSep08</a>   |                        | 2584   | 400  |   | 132 | multiple EGF-like-domains 10 (glodoy) mRNA.                                         |
| <a href="#">glofee</a>   | <a href="#">glofee.aSep08</a>   |                        | 3083   | 723  |   | 46  | putative protein (5.1 kD) (glofee) mRNA.                                            |
| <a href="#">gloflu</a>   | <a href="#">gloflu.aSep08</a>   |                        | 67005  | 1210 |   | 174 | CRA b (gloflu) mRNA.                                                                |
| <a href="#">glofly</a>   | <a href="#">glofly.aSep08</a>   |                        | 10640  | 682  |   | 81  | putative cytoplasmic protein (9.0 kD) (glofly) mRNA.                                |
| <a href="#">glogar</a>   | <a href="#">glogar.aSep08</a>   |                        | 10718  | 356  |   | 27  | putative protein (glogar) mRNA.                                                     |
| <a href="#">gloja</a>    | <a href="#">gloja.aSep08</a>    |                        | 8315   | 1388 |   | 225 | zinc finger ccch domain-containing protein 13 (gloja) mRNA.                         |
| <a href="#">glojey</a>   | <a href="#">glojey.aSep08</a>   |                        | 9509   | 293  |   | 41  | putative protein (glojey) mRNA.                                                     |
| <a href="#">glokee</a>   | <a href="#">glokee.aSep08</a>   |                        | 13771  | 449  |   | 58  | putative protein (glokee) mRNA.                                                     |
| <a href="#">glolo</a>    | <a href="#">glolo.aSep08</a>    |                        | 684    | 410  |   | 99  | putative protein (glolo) mRNA.                                                      |
| <a href="#">glomee</a>   | <a href="#">glomee.aSep08</a>   |                        | 31337  | 390  |   | 130 | spinster (glomee) mRNA.                                                             |
| <a href="#">glopor</a>   | <a href="#">glopor.aSep08</a>   |                        | 16432  | 361  |   | 120 | cysteine rich domain (glopor) mRNA.                                                 |
| <a href="#">glorbor</a>  | <a href="#">glorbor.aSep08</a>  |                        | 2130   | 452  |   | 56  | putative protein (6.5 kD) (glorbor) mRNA.                                           |
| <a href="#">glorchy</a>  | <a href="#">glorchy.aSep08</a>  |                        | 1231   | 400  |   | 42  | putative protein (glorchy) mRNA.                                                    |
| <a href="#">glordoy</a>  | <a href="#">glordoy.aSep08</a>  |                        | 10206  | 748  |   | 78  | putative protein (8.7 kD) (glordoy) mRNA.                                           |
| <a href="#">glorfee</a>  | <a href="#">glorfee.aSep08</a>  |                        | 5760   | 556  |   | 79  | putative protein (glorfee) mRNA.                                                    |
| <a href="#">glorflu</a>  | <a href="#">glorflu.aSep08</a>  |                        | 7840   | 1786 |   | 167 | glutamyl-tRNA synthetase 2 (glorflu) alternative variant aSep08, mRNA.              |
| <a href="#">glorfly</a>  | <a href="#">glorfly.aSep08</a>  |                        | 139487 | 610  |   | 82  | putative protein of eukaryotic origin (glorfly) mRNA.                               |
| <a href="#">glorgar</a>  | <a href="#">glorgar.aSep08</a>  |                        | 5356   | 277  |   | 50  | myomesin 2 (glorgar) mRNA.                                                          |
| <a href="#">glorja</a>   | <a href="#">glorja.aSep08</a>   |                        | 27522  | 798  |   | 42  | putative protein (4.8 kD) (glorja) mRNA.                                            |
| <a href="#">glorjey</a>  | <a href="#">glorjey.aSep08</a>  |                        | 4102   | 733  | 4 | 80  | putative mitochondrial protein (8.6 kD) (glorjey) alternative variant aSep08, mRNA. |
| <a href="#">glorjey</a>  | <a href="#">glorjey.bSep08</a>  |                        | 5103   | 773  | 4 | 65  | putative protein (7.2 kD) (glorjey) alternative variant bSep08, mRNA.               |
| <a href="#">glorjey</a>  | <a href="#">glorjey.cSep08</a>  |                        | 5047   | 734  | 4 | 67  | putative protein (7.4 kD) (glorjey) alternative variant cSep08, mRNA.               |

|                          |                                 |  |        |      |   |     |                                                                                             |
|--------------------------|---------------------------------|--|--------|------|---|-----|---------------------------------------------------------------------------------------------|
| <a href="#">glorlo</a>   | <a href="#">glorlo.aSep08</a>   |  | 2623   | 326  |   | 31  | putative protein (3.1 kD) (glorlo) mRNA.                                                    |
| <a href="#">glormee</a>  | <a href="#">glormee.aSep08</a>  |  | 12148  | 407  |   | 58  | putative protein (glormee) mRNA.                                                            |
| <a href="#">gloroy</a>   | <a href="#">gloroy.aSep08</a>   |  | 58248  | 404  |   | 50  | putative protein (5.5 kD) (gloroy) mRNA.                                                    |
| <a href="#">glorpor</a>  | <a href="#">glorpor.aSep08</a>  |  | 18046  | 1789 | 4 | 471 | putative protein (glorpor) alternative variant aSep08, mRNA.                                |
| <a href="#">glorpor</a>  | <a href="#">glorpor.bSep08</a>  |  | 24249  | 731  | 5 | 89  | putative protein (9.9 kD) (glorpor) alternative variant bSep08, mRNA.                       |
| <a href="#">glorroy</a>  | <a href="#">glorroy.aSep08</a>  |  | 782    | 644  |   | 36  | putative protein (4.0 kD) (glorroy) mRNA.                                                   |
| <a href="#">glorshee</a> | <a href="#">glorshee.aSep08</a> |  | 2492   | 790  |   | 69  | putative protein (7.6 kD) (glorshee) mRNA.                                                  |
| <a href="#">glortu</a>   | <a href="#">glortu.aSep08</a>   |  | 4764   | 534  |   | 85  | putative mitochondrial protein (9.3 kD) (glortu) mRNA.                                      |
| <a href="#">glorvo</a>   | <a href="#">glorvo.aSep08</a>   |  | 5807   | 310  |   | 21  | putative protein (2.3 kD) (glorvo) mRNA.                                                    |
| <a href="#">glorwer</a>  | <a href="#">glorwer.aSep08</a>  |  | 1110   | 596  |   | 73  | putative protein (glorwer) mRNA.                                                            |
| <a href="#">glosa</a>    | <a href="#">glosa.aSep08</a>    |  | 122020 | 442  |   | 85  | putative protein (glosa) mRNA.                                                              |
| <a href="#">gloshee</a>  | <a href="#">gloshee.aSep08</a>  |  | 5178   | 701  |   | 85  | putative protein (gloshee) mRNA.                                                            |
| <a href="#">glotu</a>    | <a href="#">glotu.aSep08</a>    |  | 5246   | 616  | 3 | 63  | uncharacterized protein homolog like (glotu) alternative variant aSep08, mRNA.              |
| <a href="#">glovo</a>    | <a href="#">glovo.aSep08</a>    |  | 12346  | 2842 |   | 524 | midasin (glovo) mRNA.                                                                       |
| <a href="#">glower</a>   | <a href="#">glower.aSep08</a>   |  | 1467   | 542  |   | 102 | a kinase anchor protein 9 (glower) mRNA.                                                    |
| <a href="#">gloybor</a>  | <a href="#">gloybor.aSep08</a>  |  | 27497  | 437  | 1 | 114 | putative protein of eukaryotic origin (gloybor) alternative variant aSep08, mRNA.           |
| <a href="#">gloybor</a>  | <a href="#">gloybor.bSep08</a>  |  | 35246  | 1247 | 2 | 114 | putative protein of eukaryotic origin (13.2 kD) (gloybor) alternative variant bSep08, mRNA. |
| <a href="#">gloychy</a>  | <a href="#">gloychy.aSep08</a>  |  | 597    | 521  |   | 39  | putative protein (4.5 kD) (gloychy) mRNA.                                                   |
| <a href="#">gloydoy</a>  | <a href="#">gloydoy.aSep08</a>  |  | 4772   | 298  |   | 57  | putative protein (gloydoy) mRNA.                                                            |
| <a href="#">gloyfee</a>  | <a href="#">gloyfee.aSep08</a>  |  | 6950   | 399  |   | 62  | uncharacterized protein like (gloyfee) mRNA.                                                |
| <a href="#">gloyflu</a>  | <a href="#">gloyflu.aSep08</a>  |  | 1962   | 474  |   | 157 | glutamyl-tRNA synthetase 2 (gloyflu) mRNA.                                                  |
| <a href="#">gloyfly</a>  | <a href="#">gloyfly.aSep08</a>  |  | 10342  | 348  |   | 115 | ribosomal S6 kinase (gloyfly) mRNA.                                                         |
| <a href="#">gloygar</a>  | <a href="#">gloygar.aSep08</a>  |  | 15154  | 303  |   | 63  | putative protein (gloygar) mRNA.                                                            |
| <a href="#">gloyja</a>   | <a href="#">gloyja.aSep08</a>   |  | 759    | 407  |   | 36  | CRA a like (gloyja) mRNA.                                                                   |
| <a href="#">gloyjey</a>  | <a href="#">gloyjey.bSep08</a>  |  | 5478   | 810  | 4 | 51  | putative protein (5.6 kD) (gloyjey) alternative variant bSep08, complete mRNA.              |
| <a href="#">gloyjey</a>  | <a href="#">gloyjey.cSep08</a>  |  | 5674   | 1026 | 3 | 50  | putative protein (5.7 kD) (gloyjey) alternative variant cSep08, complete mRNA.              |
| <a href="#">gloylo</a>   | <a href="#">gloylo.aSep08</a>   |  | 2808   | 1069 |   | 356 | putative protein of vertebrate origin (gloylo) mRNA.                                        |
| <a href="#">gloymee</a>  | <a href="#">gloymee.aSep08</a>  |  | 1901   | 1762 |   | 233 | putative protein of vertebrate origin (26.1 kD) (gloymee) mRNA.                             |
| <a href="#">gloypor</a>  | <a href="#">gloypor.aSep08</a>  |  | 7259   | 1166 |   | 125 | F-box leucine-rich repeat protein 2 (gloypor) mRNA.                                         |
| <a href="#">gloyroy</a>  | <a href="#">gloyroy.aSep08</a>  |  | 66869  | 836  |   | 123 | putative protein (14.5 kD) (gloyroy) mRNA.                                                  |
| <a href="#">gloyshee</a> | <a href="#">gloyshee.aSep08</a> |  | 2487   | 471  |   | 78  | putative protein (8.9 kD) (gloyshee) mRNA.                                                  |
| <a href="#">gloytu</a>   | <a href="#">gloytu.aSep08</a>   |  | 9276   | 385  |   | 122 | putative protein (gloytu) mRNA.                                                             |
| <a href="#">gloyvo</a>   | <a href="#">gloyvo.aSep08</a>   |  | 651    | 371  |   | 109 | putative protein of mammalian origin (gloyvo) mRNA.                                         |
| <a href="#">gloywer</a>  | <a href="#">gloywer.aSep08</a>  |  | 5022   | 477  | 3 | 18  | putative protein (1.8 kD) (gloywer) alternative variant aSep08, mRNA.                       |

|                                  |                                         |                        |       |      |   |     |                                                                                                          |
|----------------------------------|-----------------------------------------|------------------------|-------|------|---|-----|----------------------------------------------------------------------------------------------------------|
| <a href="#">Glx2</a>             | <a href="#">Glx2.aSep08</a>             | <a href="#">114022</a> | 8704  | 1193 | 4 | 218 | glutaredoxin 2 (thioltransferase) (23.5 kD) (Glx2) alternative variant aSep08, mRNA.                     |
| <a href="#">Glx2</a>             | <a href="#">Glx2.bSep08</a>             | <a href="#">114022</a> | 13010 | 823  | 6 | 124 | glutaredoxin 2 (thioltransferase) (14.0 kD) (Glx2) alternative variant bSep08, mRNA.                     |
| <a href="#">Glx2</a>             | <a href="#">Glx2.cSep08</a>             | <a href="#">114022</a> | 9147  | 599  | 5 | 124 | glutaredoxin 2 (thioltransferase) (14.0 kD) (Glx2) alternative variant cSep08, mRNA.                     |
| <a href="#">Glx2</a>             | <a href="#">Glx2.dSep08</a>             | <a href="#">114022</a> | 10757 | 1984 | 5 | 124 | glutaredoxin 2 (thioltransferase) (14.0 kD) (Glx2) alternative variant dSep08, mRNA.                     |
| <a href="#">Glx2</a>             | <a href="#">Glx2.eSep08</a>             | <a href="#">114022</a> | 6771  | 331  | 3 | 109 | glutaredoxin 2 (thioltransferase) (Glx2) alternative variant eSep08, mRNA.                               |
| <a href="#">Glx3</a>             | <a href="#">Glx3.cSep08</a>             | <a href="#">58815</a>  | 15882 | 679  | 3 | 43  | glutaredoxin 3 (Glx3) alternative variant cSep08, mRNA.                                                  |
| <a href="#">Glx3</a>             | <a href="#">Glx3.dSep08</a>             | <a href="#">58815</a>  | 3017  | 456  | 3 | 24  | glutaredoxin 3 (2.9 kD) (Glx3) alternative variant dSep08, mRNA.                                         |
| <a href="#">Gls</a>              | <a href="#">Gls.cSep08</a>              | <a href="#">24398</a>  | 6362  | 392  | 5 | 130 | glutaminase and similar to High mobility group protein 2 (HMG-2) (Gls) alternative variant cSep08, mRNA. |
| <a href="#">Gls</a>              | <a href="#">Gls.cSep08</a>              | <a href="#">685445</a> | 6362  | 392  | 5 | 130 | glutaminase and similar to High mobility group protein 2 (HMG-2) (Gls) alternative variant cSep08, mRNA. |
| <a href="#">Gls</a>              | <a href="#">Gls.dSep08</a>              | <a href="#">24398</a>  | 9178  | 390  | 3 | 45  | glutaminase and similar to High mobility group protein 2 (HMG-2) (Gls) alternative variant dSep08, mRNA. |
| <a href="#">Gls</a>              | <a href="#">Gls.dSep08</a>              | <a href="#">685445</a> | 9178  | 390  | 3 | 45  | glutaminase and similar to High mobility group protein 2 (HMG-2) (Gls) alternative variant dSep08, mRNA. |
| <a href="#">Gls2</a>             | <a href="#">Gls2.bSep08</a>             | <a href="#">192268</a> | 8014  | 992  | 6 | 259 | glutaminase 2 (liver, mitochondrial) (Gls2) alternative variant bSep08, mRNA.                            |
| <a href="#">Gls2</a>             | <a href="#">Gls2.cSep08</a>             | <a href="#">192268</a> | 3660  | 757  | 6 | 145 | glutaminase 2 (liver, mitochondrial) (Gls2) alternative variant cSep08, mRNA.                            |
| <a href="#">Gls2</a>             | <a href="#">Gls2.dSep08</a>             | <a href="#">192268</a> | 2407  | 289  | 3 | 96  | glutaminase 2 (liver, mitochondrial) (Gls2) alternative variant dSep08, mRNA.                            |
| <a href="#">Glt1d1</a>           | <a href="#">Glt1d1.aSep08</a>           | <a href="#">304445</a> | 54887 | 752  |   | 161 | putative protein of ancient origin (Glt1d1) mRNA.                                                        |
| <a href="#">Glt6d1_predicted</a> | <a href="#">Glt6d1_predicted.aSep08</a> | <a href="#">296577</a> | 8432  | 1083 | 3 | 297 | glycosyl transferase, family 6 (Glt6d1_predicted) alternative variant aSep08, mRNA.                      |
| <a href="#">Glt8d1</a>           | <a href="#">Glt8d1.bSep08</a>           | <a href="#">306253</a> | 13853 | 751  | 7 | 250 | glycosyl transferase, family 8 (Glt8d1) alternative variant bSep08, mRNA.                                |
| <a href="#">Glt8d1</a>           | <a href="#">Glt8d1.cSep08</a>           | <a href="#">306253</a> | 3497  | 475  | 4 | 158 | glycosyl transferase, family 8 (Glt8d1) alternative variant cSep08, mRNA.                                |
| <a href="#">Glt8d1</a>           | <a href="#">Glt8d1.eSep08</a>           | <a href="#">306253</a> | 1077  | 830  | 2 | 70  | putative protein (8.2 kD) (Glt8d1) alternative variant eSep08, mRNA.                                     |
| <a href="#">Glt8d1</a>           | <a href="#">Glt8d1.gSep08</a>           | <a href="#">306253</a> | 819   | 533  | 2 | 25  | putative protein (Glt8d1) alternative variant gSep08, mRNA.                                              |
| <a href="#">Glt8d2</a>           | <a href="#">Glt8d2.aSep08</a>           | <a href="#">366859</a> | 9004  | 1167 |   | 277 | glycosyl transferase, family 8 (Glt8d2) mRNA.                                                            |
| <a href="#">Glt8d3</a>           | <a href="#">Glt8d3.aSep08</a>           | <a href="#">300173</a> | 16240 | 1592 | 4 | 359 | glycosyl transferase, family 8 (42.4 kD) (Glt8d3) alternative variant aSep08, mRNA.                      |
| <a href="#">Glt8d3</a>           | <a href="#">Glt8d3.bSep08</a>           | <a href="#">300173</a> | 25274 | 1022 | 3 | 340 | putative protein of ancient origin (Glt8d3) alternative variant bSep08, mRNA.                            |
| <a href="#">Glt8d3</a>           | <a href="#">Glt8d3.cSep08</a>           | <a href="#">300173</a> | 23743 | 1039 | 2 | 248 | putative protein of eukaryotic origin (Glt8d3) alternative variant cSep08, mRNA.                         |
| <a href="#">Glt8d4</a>           | <a href="#">Glt8d4.aSep08</a>           | <a href="#">688618</a> | 15262 | 604  |   | 126 | putative protein of metazoan origin (15.0 kD) (Glt8d4) mRNA.                                             |

|                         |                                |                        |       |      |   |     |                                                                                                    |
|-------------------------|--------------------------------|------------------------|-------|------|---|-----|----------------------------------------------------------------------------------------------------|
| <a href="#">Glt25d2</a> | <a href="#">Glt25d2.aSep08</a> | <a href="#">289081</a> | 69192 | 681  |   | 226 | putative protein of ancient origin (Glt25d2) mRNA.                                                 |
| <a href="#">Gltp</a>    | <a href="#">Gltp.bSep08</a>    | <a href="#">288707</a> | 2334  | 776  | 2 | 86  | glycolipid transfer protein (Gltp) alternative variant bSep08, mRNA.                               |
| <a href="#">Gltpd1</a>  | <a href="#">Gltpd1.bSep08</a>  | <a href="#">313771</a> | 2934  | 911  | 2 | 153 | putative protein of eukaryotic origin (Gltpd1) alternative variant bSep08, mRNA.                   |
| <a href="#">Gltpd1</a>  | <a href="#">Gltpd1.cSep08</a>  | <a href="#">313771</a> | 2983  | 735  | 1 | 137 | putative protein of eukaryotic origin (Gltpd1) alternative variant cSep08, mRNA.                   |
| <a href="#">Gltpd2</a>  | <a href="#">Gltpd2.bSep08</a>  | <a href="#">497943</a> | 2567  | 1078 | 1 | 197 | putative protein of mammalian origin (21.6 kD) (Gltpd2) alternative variant bSep08, complete mRNA. |
| <a href="#">Gltscr1</a> | <a href="#">Gltscr1.aSep08</a> | <a href="#">292622</a> | 3943  | 2032 |   | 414 | glioma tumor suppressor candidate region gene 1 (Gltscr1) mRNA.                                    |
| <a href="#">Gltscr2</a> | <a href="#">Gltscr2.bSep08</a> | <a href="#">292624</a> | 1116  | 506  | 1 | 63  | glioma tumor suppressor candidate region gene 2 (Gltscr2) alternative variant bSep08, mRNA.        |
| <a href="#">glubor</a>  | <a href="#">glubor.aSep08</a>  |                        | 15136 | 2092 |   | 242 | family with sequence similarity 13 member C1 (glubor) mRNA.                                        |
| <a href="#">gluchy</a>  | <a href="#">gluchy.aSep08</a>  |                        | 8236  | 784  |   | 232 | CRA c (gluchy) mRNA.                                                                               |
| <a href="#">gludoy</a>  | <a href="#">gludoy.aSep08</a>  |                        | 2501  | 340  |   | 77  | putative protein (gludoy) mRNA.                                                                    |
| <a href="#">gluflu</a>  | <a href="#">gluflu.aSep08</a>  |                        | 11229 | 305  |   | 59  | putative protein (gluflu) mRNA.                                                                    |
| <a href="#">gluflly</a> | <a href="#">gluflly.aSep08</a> |                        | 5503  | 436  |   | 32  | putative protein (gluflly) mRNA.                                                                   |
| <a href="#">glugar</a>  | <a href="#">glugar.aSep08</a>  |                        | 1659  | 301  |   | 55  | putative protein (glugar) mRNA.                                                                    |
| <a href="#">gluja</a>   | <a href="#">gluja.aSep08</a>   |                        | 813   | 381  |   | 126 | CRA b like (gluja) mRNA.                                                                           |
| <a href="#">glujey</a>  | <a href="#">glujey.aSep08</a>  |                        | 6205  | 241  |   | 57  | putative protein (glujey) mRNA.                                                                    |
| <a href="#">glukee</a>  | <a href="#">glukee.aSep08</a>  |                        | 798   | 393  |   | 71  | putative mitochondrial protein (8.1 kD) (glukee) mRNA.                                             |
| <a href="#">Glul</a>    | <a href="#">Glul.bSep08</a>    | <a href="#">24957</a>  | 27174 | 2458 | 2 | 314 | glutamate-ammonia ligase (glutamine synthetase) (35.1 kD) (Glul) alternative variant bSep08, mRNA. |
| <a href="#">Glul</a>    | <a href="#">Glul.cSep08</a>    | <a href="#">24957</a>  | 25104 | 740  | 3 | 114 | glutamate-ammonia ligase (glutamine synthetase) (Glul) alternative variant cSep08, mRNA.           |
| <a href="#">glulo</a>   | <a href="#">glulo.aSep08</a>   |                        | 2402  | 504  |   | 36  | putative protein (glulo) mRNA.                                                                     |
| <a href="#">glumee</a>  | <a href="#">glumee.aSep08</a>  |                        | 3828  | 990  | 2 | 301 | spinster homolog 2 (glumee) alternative variant aSep08, mRNA.                                      |
| <a href="#">glumee</a>  | <a href="#">glumee.bSep08</a>  |                        | 2564  | 2129 | 2 | 197 | CRA a (21.6 kD) (glumee) alternative variant bSep08, mRNA.                                         |
| <a href="#">glumee</a>  | <a href="#">glumee.cSep08</a>  |                        | 3734  | 719  | 3 | 148 | spinster homolog 2 (glumee) alternative variant cSep08, mRNA.                                      |
| <a href="#">glupor</a>  | <a href="#">glupor.aSep08</a>  |                        | 7004  | 1305 |   | 133 | doublecortin-like kinase 3 (glupor) mRNA.                                                          |
| <a href="#">gluroy</a>  | <a href="#">gluroy.aSep08</a>  |                        | 10415 | 1026 |   | 99  | putative protein (gluroy) mRNA.                                                                    |
| <a href="#">glusa</a>   | <a href="#">glusa.aSep08</a>   |                        | 2091  | 452  | 2 | 55  | putative protein (6.3 kD) (glusa) mRNA.                                                            |
| <a href="#">glushee</a> | <a href="#">glushee.aSep08</a> |                        | 1190  | 845  | 1 | 131 | polyprotein (glushee) alternative variant aSep08, mRNA.                                            |
| <a href="#">glushee</a> | <a href="#">glushee.bSep08</a> |                        | 3797  | 822  | 1 | 62  | putative protein (7.0 kD) (glushee) alternative variant bSep08, mRNA.                              |
| <a href="#">glutu</a>   | <a href="#">glutu.aSep08</a>   |                        | 3236  | 1286 |   | 79  | putative protein (8.7 kD) (glutu) mRNA.                                                            |
| <a href="#">gluvo</a>   | <a href="#">gluvo.aSep08</a>   |                        | 1220  | 273  |   | 90  | midasin (gluvo) mRNA.                                                                              |
| <a href="#">gluwer</a>  | <a href="#">gluwer.aSep08</a>  |                        | 8556  | 773  |   | 257 | a kinase anchor protein 9 (gluwer) mRNA.                                                           |
| <a href="#">Glyat</a>   | <a href="#">Glyat.aSep08</a>   | <a href="#">293779</a> | 20912 | 1877 | 4 | 296 | glycine-N-acyltransferase (33.9 kD) (Glyat) alternative variant aSep08, complete mRNA.             |

|                                   |                                          |                        |       |      |    |      |                                                                                             |
|-----------------------------------|------------------------------------------|------------------------|-------|------|----|------|---------------------------------------------------------------------------------------------|
| <a href="#">Glyat</a>             | <a href="#">Glyat.cSep08</a>             | <a href="#">293779</a> | 18756 | 745  | 4  | 118  | glycine-N-acyltransferase (Glyat) alternative variant cSep08, mRNA.                         |
| <a href="#">Glyat</a>             | <a href="#">Glyat.dSep08</a>             | <a href="#">293779</a> | 13495 | 476  | 1  | 102  | glycine-N-acyltransferase (Glyat) alternative variant dSep08, mRNA.                         |
| <a href="#">glybor</a>            | <a href="#">glybor.aSep08</a>            |                        | 616   | 286  |    | 25   | putative protein (glybor) mRNA.                                                             |
| <a href="#">glychy</a>            | <a href="#">glychy.aSep08</a>            |                        | 596   | 246  |    | 36   | putative protein (glychy) mRNA.                                                             |
| <a href="#">Glyco_hydro_1.0</a>   | <a href="#">Glyco_hydro_1.0.aSep08</a>   |                        | 5119  | 594  |    | 197  | lactase (Glyco_hydro_1.0) mRNA.                                                             |
| <a href="#">Glyco_hydro_20b.0</a> | <a href="#">Glyco_hydro_20b.0.aSep08</a> |                        | 9201  | 586  |    | 166  | hexosaminidase B (Glyco_hydro_20b.0) mRNA.                                                  |
| <a href="#">Glyco_hydro_31.0</a>  | <a href="#">Glyco_hydro_31.0.aSep08</a>  |                        | 24320 | 1513 | 13 | 503  | glucosidase alpha (Glyco_hydro_31.0) alternative variant aSep08, mRNA.                      |
| <a href="#">Glyco_hydro_38.0</a>  | <a href="#">Glyco_hydro_38.0.aSep08</a>  |                        | 25307 | 3252 | 18 | 1083 | mannosidase 2 alpha (Glyco_hydro_38.0) alternative variant aSep08, mRNA.                    |
| <a href="#">Glyco_hydro_38.0</a>  | <a href="#">Glyco_hydro_38.0.bSep08</a>  |                        | 6256  | 778  | 5  | 258  | mannosidase 2 alpha B2 (Glyco_hydro_38.0) alternative variant bSep08, mRNA.                 |
| <a href="#">Glyco_hydro_38.0</a>  | <a href="#">Glyco_hydro_38.0.cSep08</a>  |                        | 1763  | 586  | 1  | 110  | CRA f (Glyco_hydro_38.0) alternative variant cSep08, mRNA.                                  |
| <a href="#">Glyco_hydro_38.0</a>  | <a href="#">Glyco_hydro_38.0.dSep08</a>  |                        | 5506  | 551  | 4  | 86   | mannosidase 2 alpha (Glyco_hydro_38.0) alternative variant dSep08, mRNA.                    |
| <a href="#">Glyco_hydro_39.0</a>  | <a href="#">Glyco_hydro_39.0.aSep08</a>  |                        | 3026  | 1473 | 10 | 490  | alpha-L-iduronidase (Glyco_hydro_39.0) alternative variant aSep08, mRNA.                    |
| <a href="#">Glyco_hydro_39.0</a>  | <a href="#">Glyco_hydro_39.0.bSep08</a>  |                        | 11619 | 840  | 7  | 247  | iduronidase alpha-L- CRA b (Glyco_hydro_39.0) alternative variant bSep08, mRNA.             |
| <a href="#">Glyco_hydro_39.0</a>  | <a href="#">Glyco_hydro_39.0.cSep08</a>  |                        | 2706  | 1911 | 4  | 160  | alpha-L-iduronidase (18.1 kD) (Glyco_hydro_39.0) alternative variant cSep08, mRNA.          |
| <a href="#">Glyco_hydro_39.0</a>  | <a href="#">Glyco_hydro_39.0.dSep08</a>  |                        | 1978  | 798  | 4  | 139  | iduronidase alpha-L- CRA e (Glyco_hydro_39.0) alternative variant dSep08, mRNA.             |
| <a href="#">Glyco_hydro_39.0</a>  | <a href="#">Glyco_hydro_39.0.eSep08</a>  |                        | 1837  | 734  | 5  | 131  | alpha-L-iduronidase (Glyco_hydro_39.0) alternative variant eSep08, mRNA.                    |
| <a href="#">Glyco_hydro_39.0</a>  | <a href="#">Glyco_hydro_39.0.fSep08</a>  |                        | 1138  | 949  | 3  | 109  | iduronidase alpha-L- CRA b (Glyco_hydro_39.0) alternative variant fSep08, mRNA.             |
| <a href="#">Glyco_hydro_39.0</a>  | <a href="#">Glyco_hydro_39.0.gSep08</a>  |                        | 1541  | 750  | 4  | 87   | alpha-L-iduronidase (9.4 kD) (Glyco_hydro_39.0) alternative variant gSep08, mRNA.           |
| <a href="#">Glyco_hydro_39.0</a>  | <a href="#">Glyco_hydro_39.0.iSep08</a>  |                        | 1520  | 1095 | 2  | 65   | putative protein (Glyco_hydro_39.0) alternative variant iSep08, mRNA.                       |
| <a href="#">Glyco_transf_6.0</a>  | <a href="#">Glyco_transf_6.0.aSep08</a>  |                        | 20636 | 1517 | 2  | 340  | histo-blood group ABO transferase like (Glyco_transf_6.0) alternative variant aSep08, mRNA. |
| <a href="#">Glyco_transf_6.0</a>  | <a href="#">Glyco_transf_6.0.bSep08</a>  |                        | 5358  | 500  | 1  | 166  | ABO blood group like (Glyco_transf_6.0) alternative variant bSep08, mRNA.                   |
| <a href="#">Glyco_transf_25.0</a> | <a href="#">Glyco_transf_25.0.aSep08</a> |                        | 4566  | 406  |    | 135  | glycosyl transferase, family 25 (Glyco_transf_25.0) mRNA.                                   |
| <a href="#">glydoy</a>            | <a href="#">glydoy.aSep08</a>            |                        | 5860  | 672  |    | 95   | putative protein (glydoy) mRNA.                                                             |
| <a href="#">glyflu</a>            | <a href="#">glyflu.aSep08</a>            |                        | 5559  | 885  |    | 62   | putative protein (7.1 kD) (glyflu) mRNA.                                                    |
| <a href="#">glyfly</a>            | <a href="#">glyfly.aSep08</a>            |                        | 3617  | 397  |    | 86   | putative protein (glyfly) mRNA.                                                             |
| <a href="#">glygar</a>            | <a href="#">glygar.aSep08</a>            |                        | 9077  | 623  |    | 115  | serine threonine-protein kinase nek5 like (glygar) mRNA.                                    |

|                         |                                |                        |        |      |   |     |                                                                                               |
|-------------------------|--------------------------------|------------------------|--------|------|---|-----|-----------------------------------------------------------------------------------------------|
| <a href="#">glyja</a>   | <a href="#">glyja.aSep08</a>   |                        | 2595   | 784  |   | 261 | CRA b like (glyja) mRNA.                                                                      |
| <a href="#">glyjey</a>  | <a href="#">glyjey.aSep08</a>  |                        | 4346   | 679  | 2 | 39  | putative protein (4.6 kD) (glyjey) alternative variant aSep08, mRNA.                          |
| <a href="#">glykee</a>  | <a href="#">glykee.bSep08</a>  |                        | 919    | 665  | 2 | 54  | putative protein (glykee) alternative variant bSep08, mRNA.                                   |
| <a href="#">glylo</a>   | <a href="#">glylo.aSep08</a>   |                        | 3022   | 745  |   | 89  | putative protein (9.6 kD) (glylo) mRNA.                                                       |
| <a href="#">glymee</a>  | <a href="#">glymee.aSep08</a>  |                        | 970    | 711  |   | 167 | putative mitochondrial protein (18.3 kD) (glymee) mRNA.                                       |
| <a href="#">glypor</a>  | <a href="#">glypor.aSep08</a>  |                        | 1074   | 319  |   | 28  | putative protein (3.1 kD) (glypor) mRNA.                                                      |
| <a href="#">glyroy</a>  | <a href="#">glyroy.aSep08</a>  |                        | 4724   | 244  | 1 | 73  | putative protein (glyroy) alternative variant aSep08, mRNA.                                   |
| <a href="#">glyroy</a>  | <a href="#">glyroy.bSep08</a>  |                        | 5353   | 749  | 1 | 119 | putative protein (13.1 kD) (glyroy) alternative variant bSep08, mRNA.                         |
| <a href="#">glysa</a>   | <a href="#">glysa.aSep08</a>   |                        | 1805   | 951  |   | 61  | putative protein (7.0 kD) (glysa) mRNA.                                                       |
| <a href="#">glyshee</a> | <a href="#">glyshee.aSep08</a> |                        | 9546   | 270  |   | 70  | CRA b like (7.4 kD) (glyshee) alternative variant aSep08, mRNA.                               |
| <a href="#">glyshee</a> | <a href="#">glyshee.bSep08</a> |                        | 9528   | 399  | 1 | 61  | CRA a like (glyshee) alternative variant bSep08, mRNA.                                        |
| <a href="#">glytu</a>   | <a href="#">glytu.aSep08</a>   |                        | 1387   | 279  |   | 26  | putative protein (glytu) mRNA.                                                                |
| <a href="#">glyvo</a>   | <a href="#">glyvo.aSep08</a>   |                        | 2187   | 330  |   | 110 | midasin (glyvo) mRNA.                                                                         |
| <a href="#">glywer</a>  | <a href="#">glywer.aSep08</a>  |                        | 8230   | 719  |   | 83  | putative protein (glywer) mRNA.                                                               |
| <a href="#">Gmcl1</a>   | <a href="#">Gmcl1.cSep08</a>   | <a href="#">312516</a> | 14316  | 832  | 5 | 200 | germ cell-less homolog 1 (Drosophila) (22.3 kD) (Gmcl1) alternative variant cSep08, mRNA.     |
| <a href="#">Gmcl1</a>   | <a href="#">Gmcl1.eSep08</a>   | <a href="#">312516</a> | 6988   | 646  | 3 | 71  | germ cell-less homolog 1 (Drosophila) (Gmcl1) alternative variant eSep08, mRNA.               |
| <a href="#">Gmnds</a>   | <a href="#">Gmnds.bSep08</a>   | <a href="#">291095</a> | 279052 | 825  | 5 | 114 | GDP-mannose 4, 6-dehydratase (13.3 kD) (Gmnds) alternative variant bSep08, mRNA.              |
| <a href="#">Gmeb2</a>   | <a href="#">Gmeb2.bSep08</a>   | <a href="#">83635</a>  | 8480   | 1781 | 1 | 403 | glucocorticoid modulatory element binding protein 2 (Gmeb2) alternative variant bSep08, mRNA. |
| <a href="#">Gmfb</a>    | <a href="#">Gmfb.bSep08</a>    | <a href="#">81661</a>  | 12991  | 4047 | 7 | 105 | glia maturation factor, beta (12.4 kD) (Gmfb) alternative variant bSep08, complete mRNA.      |
| <a href="#">Gmfb</a>    | <a href="#">Gmfb.cSep08</a>    | <a href="#">81661</a>  | 9565   | 592  | 7 | 102 | glia maturation factor, beta (11.4 kD) (Gmfb) alternative variant cSep08, complete mRNA.      |
| <a href="#">Gmfb</a>    | <a href="#">Gmfb.dSep08</a>    | <a href="#">81661</a>  | 9505   | 723  | 8 | 69  | glia maturation factor, beta (7.6 kD) (Gmfb) alternative variant dSep08, mRNA.                |
| <a href="#">Gmfg</a>    | <a href="#">Gmfg.bSep08</a>    | <a href="#">113940</a> | 4817   | 479  | 1 | 101 | glia maturation factor, gamma (11.9 kD) (Gmfg) alternative variant bSep08, mRNA.              |
| <a href="#">Gmfg</a>    | <a href="#">Gmfg.cSep08</a>    | <a href="#">113940</a> | 10373  | 586  | 2 | 101 | glia maturation factor, gamma (11.9 kD) (Gmfg) alternative variant cSep08, mRNA.              |
| <a href="#">Gmfg</a>    | <a href="#">Gmfg.dSep08</a>    | <a href="#">113940</a> | 5439   | 468  | 2 | 101 | glia maturation factor, gamma (11.9 kD) (Gmfg) alternative variant dSep08, mRNA.              |
| <a href="#">Gmip</a>    | <a href="#">Gmip.bSep08</a>    | <a href="#">306357</a> | 1521   | 1406 | 2 | 154 | gem-interacting protein (11.3 kD) (Gmip) alternative variant bSep08, mRNA.                    |
| <a href="#">Gmnn</a>    | <a href="#">Gmnn.aSep08</a>    | <a href="#">291137</a> | 8212   | 918  | 6 | 206 | geminin (23.1 kD) (Gmnn) alternative variant aSep08, mRNA.                                    |
| <a href="#">Gmnn</a>    | <a href="#">Gmnn.cSep08</a>    | <a href="#">291137</a> | 557    | 362  | 1 | 91  | geminin (Gmnn) alternative variant cSep08, mRNA.                                              |
| <a href="#">Gmppa</a>   | <a href="#">Gmppa.bSep08</a>   | <a href="#">501167</a> | 5899   | 815  | 8 | 246 | GDP-mannose pyrophosphorylase A (Gmppa) alternative variant bSep08, mRNA.                     |

|                       |                              |                        |        |      |   |     |                                                                                                              |
|-----------------------|------------------------------|------------------------|--------|------|---|-----|--------------------------------------------------------------------------------------------------------------|
| <a href="#">Gmppa</a> | <a href="#">Gmppa.cSep08</a> | <a href="#">501167</a> | 3402   | 692  | 6 | 163 | GDP-mannose pyrophosphorylase A (Gmppa) alternative variant cSep08, mRNA.                                    |
| <a href="#">Gmppa</a> | <a href="#">Gmppa.dSep08</a> | <a href="#">501167</a> | 2106   | 383  | 3 | 127 | GDP-mannose pyrophosphorylase A (Gmppa) alternative variant dSep08, mRNA.                                    |
| <a href="#">Gmppa</a> | <a href="#">Gmppa.eSep08</a> | <a href="#">501167</a> | 1609   | 1302 | 3 | 88  | GDP-mannose pyrophosphorylase A (9.7 kD) (Gmppa) alternative variant eSep08, mRNA.                           |
| <a href="#">Gmppa</a> | <a href="#">Gmppa.fSep08</a> | <a href="#">501167</a> | 7460   | 610  | 3 | 17  | GDP-mannose pyrophosphorylase A (1.8 kD) (Gmppa) alternative variant fSep08, complete mRNA.                  |
| <a href="#">Gmppb</a> | <a href="#">Gmppb.aSep08</a> | <a href="#">363145</a> | 2608   | 1763 |   | 360 | GDP-mannose pyrophosphorylase B (39.9 kD) (Gmppb) mRNA.                                                      |
| <a href="#">Gmpr</a>  | <a href="#">Gmpr.bSep08</a>  | <a href="#">117533</a> | 10436  | 540  | 3 | 112 | guanosine monophosphate reductase (Gmpr) alternative variant bSep08, mRNA.                                   |
| <a href="#">Gmpr</a>  | <a href="#">Gmpr.cSep08</a>  | <a href="#">117533</a> | 7327   | 1138 | 3 | 106 | guanosine monophosphate reductase (11.5 kD) (Gmpr) alternative variant cSep08, mRNA.                         |
| <a href="#">Gmpr2</a> | <a href="#">Gmpr2.aSep08</a> | <a href="#">192357</a> | 6228   | 1069 | 7 | 330 | guanosine monophosphate reductase 2 (Gmpr2) alternative variant aSep08, mRNA.                                |
| <a href="#">Gmpr2</a> | <a href="#">Gmpr2.cSep08</a> | <a href="#">192357</a> | 5653   | 736  | 7 | 157 | guanosine monophosphate reductase 2 (Gmpr2) alternative variant cSep08, mRNA.                                |
| <a href="#">Gmpr2</a> | <a href="#">Gmpr2.dSep08</a> | <a href="#">192357</a> | 5593   | 754  | 8 | 152 | guanosine monophosphate reductase 2 (Gmpr2) alternative variant dSep08, mRNA.                                |
| <a href="#">Gmpr2</a> | <a href="#">Gmpr2.eSep08</a> | <a href="#">192357</a> | 1925   | 1007 | 3 | 130 | guanosine monophosphate reductase 2 (Gmpr2) alternative variant eSep08, mRNA.                                |
| <a href="#">Gmps</a>  | <a href="#">Gmps.bSep08</a>  | <a href="#">295088</a> | 10101  | 663  | 5 | 214 | guanine monphosphate synthetase (Gmps) alternative variant bSep08, mRNA.                                     |
| <a href="#">Gmps</a>  | <a href="#">Gmps.cSep08</a>  | <a href="#">295088</a> | 2589   | 476  | 3 | 151 | guanine monphosphate synthetase (Gmps) alternative variant cSep08, mRNA.                                     |
| <a href="#">Gmps</a>  | <a href="#">Gmps.dSep08</a>  | <a href="#">295088</a> | 8728   | 709  | 4 | 112 | guanine monphosphate synthetase (Gmps) alternative variant dSep08, mRNA.                                     |
| <a href="#">Gmps</a>  | <a href="#">Gmps.eSep08</a>  | <a href="#">295088</a> | 9537   | 457  | 4 | 85  | guanine monphosphate synthetase (Gmps) alternative variant eSep08, mRNA.                                     |
| <a href="#">Gna11</a> | <a href="#">Gna11.bSep08</a> | <a href="#">81662</a>  | 711    | 525  | 2 | 102 | guanine nucleotide binding protein, alpha 11 (Gna11) alternative variant bSep08, mRNA.                       |
| <a href="#">Gna12</a> | <a href="#">Gna12.cSep08</a> | <a href="#">81663</a>  | 44164  | 659  | 1 | 213 | guanine nucleotide binding protein, alpha 12 (Gna12) alternative variant cSep08, mRNA.                       |
| <a href="#">Gnai1</a> | <a href="#">Gnai1.aSep08</a> | <a href="#">25686</a>  | 30631  | 2749 | 6 | 287 | guanine nucleotide binding protein (G protein), alpha inhibiting 1 (Gnai1) alternative variant aSep08, mRNA. |
| <a href="#">Gnai2</a> | <a href="#">Gnai2.bSep08</a> | <a href="#">81664</a>  | 1869   | 551  | 4 | 127 | guanine nucleotide binding protein (G protein), alpha inhibiting 2 (Gnai2) alternative variant bSep08, mRNA. |
| <a href="#">Gnai2</a> | <a href="#">Gnai2.cSep08</a> | <a href="#">81664</a>  | 1275   | 390  | 3 | 91  | guanine nucleotide binding protein (G protein), alpha inhibiting 2 (Gnai2) alternative variant cSep08, mRNA. |
| <a href="#">Gnal</a>  | <a href="#">Gnal.aSep08</a>  | <a href="#">24611</a>  | 47836  | 716  |   | 182 | guanine nucleotide binding protein, alpha stimulating, olfactory type (Gnal) mRNA.                           |
| <a href="#">Gnao1</a> | <a href="#">Gnao1.cSep08</a> | <a href="#">50664</a>  | 127928 | 449  | 1 | 78  | guanine nucleotide binding protein, alpha O (Gnao1) alternative variant cSep08, mRNA.                        |
| <a href="#">Gnaq</a>  | <a href="#">Gnaq.aSep08</a>  | <a href="#">81666</a>  | 244572 | 1800 | 4 | 558 | guanine nucleotide binding protein, alpha q polypeptide (Gnaq) alternative variant aSep08, mRNA.             |

|                        |                               |                        |       |      |   |     |                                                                                                                                         |
|------------------------|-------------------------------|------------------------|-------|------|---|-----|-----------------------------------------------------------------------------------------------------------------------------------------|
| <a href="#">Gnaq</a>   | <a href="#">Gnaq.cSep08</a>   | <a href="#">81666</a>  | 1387  | 422  | 1 | 61  | guanine nucleotide binding protein, alpha q polypeptide (6.6 kD) (Gnaq) alternative variant cSep08, mRNA.                               |
| <a href="#">Gnas</a>   | <a href="#">Gnas.aSep08</a>   | <a href="#">24896</a>  | 1154  | 973  | 2 | 264 | neuroendocrine secretory protein 55 (29.8 kD) (Gnas) alternative variant aSep08, complete mRNA.                                         |
| <a href="#">Gnas</a>   | <a href="#">Gnas.bSep08</a>   | <a href="#">24896</a>  | 656   | 564  | 1 | 105 | putative protein (Gnas) alternative variant bSep08, mRNA.                                                                               |
| <a href="#">Gnas</a>   | <a href="#">Gnas.cSep08</a>   | <a href="#">24896</a>  | 488   | 393  | 1 | 71  | putative protein (Gnas) alternative variant cSep08, mRNA.                                                                               |
| <a href="#">Gnat2</a>  | <a href="#">Gnat2.aSep08</a>  | <a href="#">365901</a> | 2300  | 349  |   | 116 | guanine nucleotide binding protein, alpha transducing 2 (Gnat2) mRNA.                                                                   |
| <a href="#">Gnb1.1</a> | <a href="#">Gnb1.1.aSep08</a> | <a href="#">24400</a>  | 45922 | 1797 | 3 | 340 | guanine nucleotide binding protein (G protein), beta 1 (37.4 kD) (Gnb1.1) alternative variant aSep08, mRNA.                             |
| <a href="#">Gnb1.1</a> | <a href="#">Gnb1.1.bSep08</a> | <a href="#">24400</a>  | 68956 | 3097 | 3 | 340 | guanine nucleotide binding protein (G protein), beta 1 (37.4 kD) (Gnb1.1) alternative variant bSep08, mRNA.                             |
| <a href="#">Gnb1.1</a> | <a href="#">Gnb1.1.cSep08</a> | <a href="#">24400</a>  | 61090 | 697  | 2 | 148 | guanine nucleotide binding protein (G protein), beta 1 (Gnb1.1) alternative variant cSep08, mRNA.                                       |
| <a href="#">Gnb1.1</a> | <a href="#">Gnb1.1.dSep08</a> | <a href="#">24400</a>  | 53253 | 695  | 1 | 141 | guanine nucleotide binding protein (G protein), beta 1 (Gnb1.1) alternative variant dSep08, mRNA.                                       |
| <a href="#">Gnb1l</a>  | <a href="#">Gnb1l.aSep08</a>  | <a href="#">680266</a> | 73816 | 1331 | 5 | 223 | guanine nucleotide binding protein (G protein), beta polypeptide 1-like (24.4 kD) (Gnb1l) alternative variant aSep08, mRNA.             |
| <a href="#">Gnb1l</a>  | <a href="#">Gnb1l.bSep08</a>  | <a href="#">680266</a> | 4096  | 2197 | 1 | 75  | guanine nucleotide binding protein (G protein), beta polypeptide 1-like (8.2 kD) (Gnb1l) alternative variant bSep08, mRNA.              |
| <a href="#">Gnb2</a>   | <a href="#">Gnb2.bSep08</a>   | <a href="#">81667</a>  | 1824  | 869  | 6 | 289 | guanine nucleotide binding protein (G protein), beta 2 (Gnb2) alternative variant bSep08, mRNA.                                         |
| <a href="#">Gnb2</a>   | <a href="#">Gnb2.cSep08</a>   | <a href="#">81667</a>  | 2016  | 724  | 7 | 241 | guanine nucleotide binding protein (G protein), beta 2 (Gnb2) alternative variant cSep08, mRNA.                                         |
| <a href="#">Gnb2</a>   | <a href="#">Gnb2.dSep08</a>   | <a href="#">81667</a>  | 980   | 817  | 3 | 179 | guanine nucleotide binding protein (G protein), beta 2 (Gnb2) alternative variant dSep08, mRNA.                                         |
| <a href="#">Gnb2</a>   | <a href="#">Gnb2.eSep08</a>   | <a href="#">81667</a>  | 3681  | 763  | 5 | 174 | guanine nucleotide binding protein (G protein), beta 2 (Gnb2) alternative variant eSep08, mRNA.                                         |
| <a href="#">Gnb2</a>   | <a href="#">Gnb2.fSep08</a>   | <a href="#">81667</a>  | 1316  | 837  | 4 | 122 | guanine nucleotide binding protein (G protein), beta 2 (13.6 kD) (Gnb2) alternative variant fSep08, mRNA.                               |
| <a href="#">Gnb2l1</a> | <a href="#">Gnb2l1.bSep08</a> | <a href="#">83427</a>  | 5543  | 1747 | 7 | 238 | guanine nucleotide binding protein (G protein), beta polypeptide 2 like 1 (26.2 kD) (Gnb2l1) alternative variant bSep08, complete mRNA. |
| <a href="#">Gnb2l1</a> | <a href="#">Gnb2l1.dSep08</a> | <a href="#">83427</a>  | 1219  | 742  | 2 | 56  | guanine nucleotide binding protein (G protein), beta polypeptide 2 like 1 (Gnb2l1) alternative variant dSep08, mRNA.                    |
| <a href="#">Gnb3</a>   | <a href="#">Gnb3.bSep08</a>   | <a href="#">60449</a>  | 2868  | 875  | 7 | 148 | guanine nucleotide binding protein (G protein), beta 3 (Gnb3) alternative variant bSep08, mRNA.                                         |
| <a href="#">Gnb3</a>   | <a href="#">Gnb3.cSep08</a>   | <a href="#">60449</a>  | 2303  | 420  | 5 | 96  | guanine nucleotide binding protein (G protein), beta 3 (Gnb3) alternative variant cSep08, mRNA.                                         |
| <a href="#">Gnb3</a>   | <a href="#">Gnb3.dSep08</a>   | <a href="#">60449</a>  | 2444  | 762  | 4 | 68  | guanine nucleotide binding protein (G protein), beta 3 (7.6 kD) (Gnb3) alternative variant dSep08, mRNA.                                |
| <a href="#">Gnb3</a>   | <a href="#">Gnb3.eSep08</a>   | <a href="#">60449</a>  | 2319  | 713  | 3 | 47  | guanine nucleotide binding protein (G protein), beta 3 (5.5 kD) (Gnb3) alternative variant eSep08, mRNA.                                |



|                        |                               |                        |        |      |    |     |                                                                                                                      |
|------------------------|-------------------------------|------------------------|--------|------|----|-----|----------------------------------------------------------------------------------------------------------------------|
| <a href="#">Gnb4</a>   | <a href="#">Gnb4.aSep08</a>   | <a href="#">294962</a> | 9075   | 910  | 4  | 249 | guanine nucleotide binding protein (G protein), beta 4 (Gnb4) alternative variant aSep08, mRNA.                      |
| <a href="#">Gnb4</a>   | <a href="#">Gnb4.bSep08</a>   | <a href="#">294962</a> | 28493  | 715  | 7  | 73  | guanine nucleotide binding protein (G protein), beta 4 (8.5 kD) (Gnb4) alternative variant bSep08, mRNA.             |
| <a href="#">Gnb5</a>   | <a href="#">Gnb5.aSep08</a>   | <a href="#">83579</a>  | 41846  | 2067 | 10 | 298 | guanine nucleotide binding protein (G protein), beta 5 (Gnb5) alternative variant aSep08, mRNA.                      |
| <a href="#">Gnb5</a>   | <a href="#">Gnb5.cSep08</a>   | <a href="#">83579</a>  | 5933   | 1277 | 4  | 103 | guanine nucleotide binding protein (G protein), beta 5 (Gnb5) alternative variant cSep08, mRNA.                      |
| <a href="#">Gne</a>    | <a href="#">Gne.bSep08</a>    | <a href="#">114711</a> | 16951  | 772  | 2  | 226 | glucosamine (Gne) alternative variant bSep08, mRNA.                                                                  |
| <a href="#">Gne</a>    | <a href="#">Gne.cSep08</a>    | <a href="#">114711</a> | 19315  | 396  | 1  | 109 | glucosamine (Gne) alternative variant cSep08, mRNA.                                                                  |
| <a href="#">Gng3</a>   | <a href="#">Gng3.aSep08</a>   | <a href="#">114117</a> | 1431   | 817  |    | 75  | guanine nucleotide binding protein (G protein), gamma 3 (8.3 kD) (Gng3) mRNA.                                        |
| <a href="#">Gng7</a>   | <a href="#">Gng7.bSep08</a>   | <a href="#">58979</a>  | 88013  | 398  | 4  | 54  | putative protein (Gng7) alternative variant bSep08, mRNA.                                                            |
| <a href="#">Gng7</a>   | <a href="#">Gng7.cSep08</a>   | <a href="#">58979</a>  | 66083  | 473  | 4  | 48  | putative protein (Gng7) alternative variant cSep08, mRNA.                                                            |
| <a href="#">Gng8</a>   | <a href="#">Gng8.bSep08</a>   | <a href="#">245986</a> | 3345   | 577  |    | 43  | guanine nucleotide binding protein (G protein), gamma 8 (Gng8) alternative variant bSep08, mRNA.                     |
| <a href="#">Gng12</a>  | <a href="#">Gng12.aSep08</a>  | <a href="#">114120</a> | 135295 | 342  | 1  | 57  | guanine nucleotide binding protein (G protein), gamma 12 (Gng12) alternative variant aSep08, mRNA.                   |
| <a href="#">Gng12</a>  | <a href="#">Gng12.bSep08</a>  | <a href="#">114120</a> | 138129 | 395  | 1  | 45  | guanine nucleotide binding protein (G protein), gamma 12 (Gng12) alternative variant bSep08, mRNA.                   |
| <a href="#">Gng12</a>  | <a href="#">Gng12.cSep08</a>  | <a href="#">114120</a> | 140081 | 801  | 2  | 72  | guanine nucleotide binding protein (G protein), gamma 12 (8.0 kD) (Gng12) alternative variant cSep08, complete mRNA. |
| <a href="#">Gng13</a>  | <a href="#">Gng13.aSep08</a>  | <a href="#">685451</a> | 1905   | 354  |    | 92  | guanine nucleotide binding protein (G protein), gamma 13 (Gng13) mRNA.                                               |
| <a href="#">Gnl1</a>   | <a href="#">Gnl1.bSep08</a>   | <a href="#">309593</a> | 2726   | 677  | 6  | 225 | guanine nucleotide binding protein-like 1 (Gnl1) alternative variant bSep08, mRNA.                                   |
| <a href="#">Gnl1</a>   | <a href="#">Gnl1.cSep08</a>   | <a href="#">309593</a> | 1385   | 902  | 3  | 180 | guanine nucleotide binding protein-like 1 (19.8 kD) (Gnl1) alternative variant cSep08, mRNA.                         |
| <a href="#">Gnl1</a>   | <a href="#">Gnl1.dSep08</a>   | <a href="#">309593</a> | 1359   | 741  | 3  | 155 | guanine nucleotide binding protein-like 1 (Gnl1) alternative variant dSep08, mRNA.                                   |
| <a href="#">Gnl2</a>   | <a href="#">Gnl2.bSep08</a>   | <a href="#">362593</a> | 1649   | 666  | 2  | 101 | guanine nucleotide binding protein-like 2 (nucleolar) (11.9 kD) (Gnl2) alternative variant bSep08, mRNA.             |
| <a href="#">Gnl2</a>   | <a href="#">Gnl2.cSep08</a>   | <a href="#">362593</a> | 14778  | 605  | 5  | 65  | guanine nucleotide binding protein-like 2 (nucleolar) (Gnl2) alternative variant cSep08, mRNA.                       |
| <a href="#">Gnl3</a>   | <a href="#">Gnl3.bSep08</a>   | <a href="#">290556</a> | 1691   | 1377 | 4  | 353 | guanine nucleotide binding protein-like 3 (Gnl3) alternative variant bSep08, mRNA.                                   |
| <a href="#">Gnl3</a>   | <a href="#">Gnl3.cSep08</a>   | <a href="#">290556</a> | 4386   | 1491 | 12 | 265 | guanine nucleotide binding protein-like 3 (29.0 kD) (Gnl3) alternative variant cSep08, mRNA.                         |
| <a href="#">Gnl3</a>   | <a href="#">Gnl3.dSep08</a>   | <a href="#">290556</a> | 5945   | 2850 | 10 | 115 | guanine nucleotide binding protein-like 3 (13.9 kD) (Gnl3) alternative variant dSep08, complete mRNA.                |
| <a href="#">Gnl3</a>   | <a href="#">Gnl3.eSep08</a>   | <a href="#">290556</a> | 483    | 389  | 2  | 35  | guanine nucleotide binding protein-like 3 (3.9 kD) (Gnl3) alternative variant eSep08, mRNA.                          |
| <a href="#">Gnpat</a>  | <a href="#">Gnpat.cSep08</a>  | <a href="#">84470</a>  | 1757   | 507  | 2  | 53  | glyceronephosphate O-acyltransferase (6.0 kD) (Gnpat) alternative variant cSep08, mRNA.                              |
| <a href="#">Gnpda2</a> | <a href="#">Gnpda2.bSep08</a> | <a href="#">289608</a> | 13434  | 645  | 5  | 214 | glucosamine-6-phosphate deaminase 2 (Gnpda2) alternative variant bSep08, mRNA.                                       |

|                        |                               |                        |       |      |    |     |                                                                                                                      |
|------------------------|-------------------------------|------------------------|-------|------|----|-----|----------------------------------------------------------------------------------------------------------------------|
| <a href="#">Gnpda2</a> | <a href="#">Gnpda2.cSep08</a> | <a href="#">289608</a> | 15915 | 708  | 5  | 166 | glucosamine-6-phosphate deaminase 2 (Gnpda2) alternative variant cSep08, mRNA.                                       |
| <a href="#">Gnpda2</a> | <a href="#">Gnpda2.dSep08</a> | <a href="#">289608</a> | 8018  | 553  | 4  | 152 | glucosamine-6-phosphate deaminase 2 (Gnpda2) alternative variant dSep08, mRNA.                                       |
| <a href="#">Gnpda2</a> | <a href="#">Gnpda2.fSep08</a> | <a href="#">289608</a> | 15874 | 725  | 6  | 69  | glucosamine-6-phosphate deaminase 2 (7.8 kD) (Gnpda2) alternative variant fSep08, mRNA.                              |
| <a href="#">Gnptab</a> | <a href="#">Gnptab.aSep08</a> | <a href="#">362865</a> | 5462  | 1098 | 1  | 365 | N-acetylglucosamine-1-phosphate transferase, alpha and beta subunits (Gnptab) alternative variant aSep08, mRNA.      |
| <a href="#">Gnptab</a> | <a href="#">Gnptab.bSep08</a> | <a href="#">362865</a> | 6008  | 861  | 3  | 286 | N-acetylglucosamine-1-phosphate transferase, alpha and beta subunits (Gnptab) alternative variant bSep08, mRNA.      |
| <a href="#">Gnptab</a> | <a href="#">Gnptab.cSep08</a> | <a href="#">362865</a> | 13134 | 1478 | 6  | 221 | N-acetylglucosamine-1-phosphate transferase, alpha and beta subunits (Gnptab) alternative variant cSep08, mRNA.      |
| <a href="#">Gnptg</a>  | <a href="#">Gnptg.aSep08</a>  | <a href="#">287134</a> | 6852  | 3183 | 5  | 331 | N-acetylglucosamine-1-phosphotransferase, gamma subunit (36.8 kD) (Gnptg) alternative variant aSep08, complete mRNA. |
| <a href="#">Gnptg</a>  | <a href="#">Gnptg.cSep08</a>  | <a href="#">287134</a> | 4881  | 1296 | 4  | 281 | N-acetylglucosamine-1-phosphotransferase, gamma subunit (31.1 kD) (Gnptg) alternative variant cSep08, complete mRNA. |
| <a href="#">Gnptg</a>  | <a href="#">Gnptg.dSep08</a>  | <a href="#">287134</a> | 4632  | 910  | 4  | 224 | N-acetylglucosamine-1-phosphotransferase, gamma subunit (Gnptg) alternative variant dSep08, mRNA.                    |
| <a href="#">Gnptg</a>  | <a href="#">Gnptg.eSep08</a>  | <a href="#">287134</a> | 4137  | 717  | 2  | 180 | N-acetylglucosamine-1-phosphotransferase, gamma subunit (Gnptg) alternative variant eSep08, mRNA.                    |
| <a href="#">Gns</a>    | <a href="#">Gns.bSep08</a>    | <a href="#">299825</a> | 21702 | 3263 | 3  | 352 | glucosamine (N-acetyl)-6-sulfatase (40.0 kD) (Gns) alternative variant bSep08, mRNA.                                 |
| <a href="#">goby</a>   | <a href="#">goby.aSep08</a>   |                        | 1485  | 394  |    | 63  | ftsj homolog 1 (goby) mRNA.                                                                                          |
| <a href="#">gochy</a>  | <a href="#">gochy.aSep08</a>  |                        | 36387 | 680  |    | 88  | putative protein (9.3 kD) (gochy) mRNA.                                                                              |
| <a href="#">gofer</a>  | <a href="#">gofer.aSep08</a>  |                        | 3952  | 1118 |    |     |                                                                                                                      |
| <a href="#">goflo</a>  | <a href="#">goflo.aSep08</a>  |                        | 3287  | 420  |    | 33  | putative protein (3.8 kD) (goflo) mRNA.                                                                              |
| <a href="#">goflu</a>  | <a href="#">goflu.aSep08</a>  |                        | 3376  | 775  |    | 166 | putative protein of mammalian origin (goflu) mRNA.                                                                   |
| <a href="#">gokee</a>  | <a href="#">gokee.aSep08</a>  |                        | 2070  | 981  |    | 326 | specifically androgen-regulated protein (gokee) mRNA.                                                                |
| <a href="#">Golga1</a> | <a href="#">Golga1.bSep08</a> | <a href="#">311919</a> | 11039 | 601  | 5  | 87  | golgi autoantigen, golgin subfamily a, 1 (Golga1) alternative variant bSep08, mRNA.                                  |
| <a href="#">Golga1</a> | <a href="#">Golga1.cSep08</a> | <a href="#">311919</a> | 822   | 382  | 2  | 73  | golgi autoantigen, golgin subfamily a, 1 (Golga1) alternative variant cSep08, mRNA.                                  |
| <a href="#">Golga2</a> | <a href="#">Golga2.aSep08</a> | <a href="#">64528</a>  | 3835  | 2570 | 8  | 419 | golgi autoantigen, golgin subfamily a, 2 (Golga2) alternative variant aSep08, mRNA.                                  |
| <a href="#">Golga2</a> | <a href="#">Golga2.bSep08</a> | <a href="#">64528</a>  | 7775  | 895  | 5  | 286 | golgi autoantigen, golgin subfamily a, 2 (Golga2) alternative variant bSep08, mRNA.                                  |
| <a href="#">Golga2</a> | <a href="#">Golga2.cSep08</a> | <a href="#">64528</a>  | 1778  | 806  | 5  | 268 | golgi autoantigen, golgin subfamily a, 2 (Golga2) alternative variant cSep08, mRNA.                                  |
| <a href="#">Golga3</a> | <a href="#">Golga3.bSep08</a> | <a href="#">312077</a> | 30378 | 1784 | 10 | 569 | golgi autoantigen, golgin subfamily a, 3 (Golga3) alternative variant bSep08, mRNA.                                  |
| <a href="#">Golga3</a> | <a href="#">Golga3.cSep08</a> | <a href="#">312077</a> | 2506  | 718  | 3  | 144 | golgi autoantigen, golgin subfamily a, 3 (15.8 kD) (Golga3) alternative variant cSep08, mRNA.                        |
| <a href="#">Golga3</a> | <a href="#">Golga3.dSep08</a> | <a href="#">312077</a> | 7736  | 425  | 4  | 141 | golgi autoantigen, golgin subfamily a, 3 (Golga3) alternative variant dSep08, mRNA.                                  |

|                          |                                 |                        |       |      |    |     |                                                                                                           |
|--------------------------|---------------------------------|------------------------|-------|------|----|-----|-----------------------------------------------------------------------------------------------------------|
| <a href="#">Golga3</a>   | <a href="#">Golga3.eSep08</a>   | <a href="#">312077</a> | 1288  | 581  | 2  | 117 | golgi autoantigen, golgin subfamily a, 3 (Golga3) alternative variant eSep08, mRNA.                       |
| <a href="#">Golga4</a>   | <a href="#">Golga4.aSep08</a>   | <a href="#">501069</a> | 23087 | 3001 | 10 | 791 | golgi autoantigen, golgin subfamily a, 4 (Golga4) alternative variant aSep08, mRNA.                       |
| <a href="#">Golga4</a>   | <a href="#">Golga4.bSep08</a>   | <a href="#">501069</a> | 12139 | 549  | 5  | 88  | golgi autoantigen, golgin subfamily a, 4 (Golga4) alternative variant bSep08, mRNA.                       |
| <a href="#">Golga5</a>   | <a href="#">Golga5.bSep08</a>   | <a href="#">299258</a> | 2358  | 826  | 2  | 28  | golgi autoantigen, golgin subfamily a, 5 (Golga5) alternative variant bSep08, mRNA.                       |
| <a href="#">Golga7</a>   | <a href="#">Golga7.aSep08</a>   | <a href="#">361171</a> | 14712 | 1335 | 2  | 137 | golgi autoantigen, golgin subfamily a, 7 (15.8 kD) (Golga7) alternative variant aSep08, mRNA.             |
| <a href="#">Golgb1</a>   | <a href="#">Golgb1.bSep08</a>   | <a href="#">192243</a> | 4850  | 595  | 5  | 148 | golgi autoantigen, golgin subfamily b, macrogolgin 1 (Golgb1) alternative variant bSep08, mRNA.           |
| <a href="#">Golgb1</a>   | <a href="#">Golgb1.cSep08</a>   | <a href="#">192243</a> | 1738  | 1533 | 2  | 88  | golgi autoantigen, golgin subfamily b, macrogolgin 1 (10.0 kD) (Golgb1) alternative variant cSep08, mRNA. |
| <a href="#">Golim4</a>   | <a href="#">Golim4.aSep08</a>   | <a href="#">310526</a> | 20891 | 3035 | 9  | 392 | golgi 4 (45.7 kD) (Golim4) alternative variant aSep08, mRNA.                                              |
| <a href="#">Golim4</a>   | <a href="#">Golim4.bSep08</a>   | <a href="#">310526</a> | 66634 | 1013 | 7  | 310 | golgi 4 (Golim4) alternative variant bSep08, mRNA.                                                        |
| <a href="#">Golim4</a>   | <a href="#">Golim4.cSep08</a>   | <a href="#">310526</a> | 91991 | 1595 | 4  | 249 | golgi 4 (Golim4) alternative variant cSep08, mRNA.                                                        |
| <a href="#">Golim4</a>   | <a href="#">Golim4.dSep08</a>   | <a href="#">310526</a> | 9770  | 738  | 5  | 245 | golgi 4 (Golim4) alternative variant dSep08, mRNA.                                                        |
| <a href="#">GoLoco.0</a> | <a href="#">GoLoco.0.aSep08</a> |                        | 2028  | 734  |    | 84  | LGN protein (GoLoco.0) mRNA.                                                                              |
| <a href="#">goloy</a>    | <a href="#">goloy.aSep08</a>    |                        | 13396 | 938  |    | 58  | limbic system-associated membrane protein (6.5 kD) (goloy) mRNA.                                          |
| <a href="#">Golph2</a>   | <a href="#">Golph2.aSep08</a>   | <a href="#">306725</a> | 17128 | 809  |    | 105 | golgi phosphoprotein 2 and hypothetical protein LOC681199 (Golph2) mRNA.                                  |
| <a href="#">Golph2</a>   | <a href="#">Golph2.aSep08</a>   | <a href="#">681199</a> | 17128 | 809  |    | 105 | golgi phosphoprotein 2 and hypothetical protein LOC681199 (Golph2) mRNA.                                  |
| <a href="#">Golph3</a>   | <a href="#">Golph3.bSep08</a>   | <a href="#">78961</a>  | 20796 | 739  | 1  | 162 | golgi phosphoprotein 3 (18.0 kD) (Golph3) alternative variant bSep08, mRNA.                               |
| <a href="#">Golsyn</a>   | <a href="#">Golsyn.aSep08</a>   | <a href="#">500865</a> | 83984 | 1813 | 8  | 546 | golgi-localized protein (Golsyn) alternative variant aSep08, mRNA.                                        |
| <a href="#">Golsyn</a>   | <a href="#">Golsyn.bSep08</a>   | <a href="#">500865</a> | 36042 | 410  | 2  | 92  | golgi-localized protein (Golsyn) alternative variant bSep08, mRNA.                                        |
| <a href="#">Golsyn</a>   | <a href="#">Golsyn.cSep08</a>   | <a href="#">500865</a> | 27066 | 383  | 3  | 59  | golgi-localized protein (Golsyn) alternative variant cSep08, mRNA.                                        |
| <a href="#">Golt1b</a>   | <a href="#">Golt1b.cSep08</a>   | <a href="#">362460</a> | 6571  | 460  | 3  | 99  | golgi transport 1 homolog B (S. cerevisiae) (11.2 kD) (Golt1b) alternative variant cSep08, mRNA.          |
| <a href="#">gomee</a>    | <a href="#">gomee.aSep08</a>    |                        | 15307 | 371  |    | 123 | dna repair endonuclease (gomee) mRNA.                                                                     |
| <a href="#">gomer</a>    | <a href="#">gomer.aSep08</a>    |                        | 876   | 780  |    | 64  | putative protein (7.7 kD) (gomer) mRNA.                                                                   |
| <a href="#">gonoy</a>    | <a href="#">gonoy.aSep08</a>    |                        | 1916  | 291  |    | 95  | family member 3 (gonoy) mRNA.                                                                             |
| <a href="#">Gopc</a>     | <a href="#">Gopc.bSep08</a>     | <a href="#">309774</a> | 1319  | 334  | 1  | 27  | golgi associated PDZ and coiled-coil motif containing (3.2 kD) (Gopc) alternative variant bSep08, mRNA.   |
| <a href="#">gopor</a>    | <a href="#">gopor.aSep08</a>    |                        | 2289  | 662  | 4  | 82  | putative protein (9.2 kD) (gopor) alternative variant aSep08, mRNA.                                       |
| <a href="#">gopor</a>    | <a href="#">gopor.bSep08</a>    |                        | 905   | 710  | 2  | 109 | putative protein (12.2 kD) (gopor) alternative variant bSep08, mRNA.                                      |

|                         |                                |                        |       |      |    |     |                                                                                                   |
|-------------------------|--------------------------------|------------------------|-------|------|----|-----|---------------------------------------------------------------------------------------------------|
| <a href="#">Gorasp1</a> | <a href="#">Gorasp1.bSep08</a> | <a href="#">56082</a>  | 6117  | 1926 | 3  | 194 | golgi reassembly stacking protein 1 (Gorasp1) alternative variant bSep08, mRNA.                   |
| <a href="#">Gorasp1</a> | <a href="#">Gorasp1.cSep08</a> | <a href="#">56082</a>  | 4490  | 768  | 4  | 183 | golgi reassembly stacking protein 1 (Gorasp1) alternative variant cSep08, mRNA.                   |
| <a href="#">Gorasp2</a> | <a href="#">Gorasp2.bSep08</a> | <a href="#">113961</a> | 1604  | 252  | 2  | 71  | golgi reassembly stacking protein 2 (Gorasp2) alternative variant bSep08, mRNA.                   |
| <a href="#">gorby</a>   | <a href="#">gorby.aSep08</a>   |                        | 1206  | 243  |    | 57  | putative protein of eukaryotic origin (gorby) mRNA.                                               |
| <a href="#">gorchy</a>  | <a href="#">gorchy.aSep08</a>  |                        | 4559  | 491  |    | 115 | putative protein of eukaryotic origin (gorchy) mRNA.                                              |
| <a href="#">gordar</a>  | <a href="#">gordar.aSep08</a>  |                        | 2377  | 234  |    | 37  | putative protein (gordar) mRNA.                                                                   |
| <a href="#">gorfer</a>  | <a href="#">gorfer.aSep08</a>  |                        | 1954  | 449  |    | 83  | putative protein (9.3 kD) (gorfer) mRNA.                                                          |
| <a href="#">gorflo</a>  | <a href="#">gorflo.aSep08</a>  |                        | 1328  | 620  |    | 131 | putative protein of mammalian origin (14.1 kD) (gorflo) mRNA.                                     |
| <a href="#">gorflu</a>  | <a href="#">gorflu.aSep08</a>  |                        | 7572  | 524  |    | 87  | putative protein (gorflu) mRNA.                                                                   |
| <a href="#">gorkee</a>  | <a href="#">gorkee.aSep08</a>  |                        | 2606  | 909  |    | 88  | putative protein (gorkee) mRNA.                                                                   |
| <a href="#">gorloy</a>  | <a href="#">gorloy.aSep08</a>  |                        | 4137  | 410  |    | 136 | poly polymerase 14 (gorloy) mRNA.                                                                 |
| <a href="#">gormee</a>  | <a href="#">gormee.aSep08</a>  |                        | 9051  | 404  |    | 134 | C-type lectin domain family 16 member A (gormee) mRNA.                                            |
| <a href="#">gormer</a>  | <a href="#">gormer.aSep08</a>  |                        | 916   | 838  |    | 67  | putative protein (gormer) mRNA.                                                                   |
| <a href="#">gornoy</a>  | <a href="#">gornoy.aSep08</a>  |                        | 18573 | 697  | 4  | 56  | putative protein of mammalian origin (6.0 kD) (gornoy) mRNA.                                      |
| <a href="#">gorpor</a>  | <a href="#">gorpor.aSep08</a>  |                        | 2278  | 507  |    | 89  | putative protein (gorpor) mRNA.                                                                   |
| <a href="#">gorsa</a>   | <a href="#">gorsa.aSep08</a>   |                        | 1890  | 784  |    | 81  | putative protein (9.2 kD) (gorsa) mRNA.                                                           |
| <a href="#">gorshee</a> | <a href="#">gorshee.aSep08</a> |                        | 6710  | 456  |    | 60  | putative protein (6.8 kD) (gorshee) mRNA.                                                         |
| <a href="#">gorto</a>   | <a href="#">gorto.aSep08</a>   |                        | 1712  | 907  |    | 43  | putative protein (gorto) mRNA.                                                                    |
| <a href="#">gorvar</a>  | <a href="#">gorvar.bSep08</a>  |                        | 406   | 364  | 2  | 30  | putative protein (gorvar) alternative variant bSep08, mRNA.                                       |
| <a href="#">gorwey</a>  | <a href="#">gorwey.aSep08</a>  |                        | 2639  | 740  |    | 95  | putative nuclear protein (10.4 kD) (gorwey) mRNA.                                                 |
| <a href="#">gosa</a>    | <a href="#">gosa.aSep08</a>    |                        | 13307 | 548  |    | 182 | finger transcription factor trps1 (gosa) mRNA.                                                    |
| <a href="#">goshee</a>  | <a href="#">goshee.aSep08</a>  |                        | 1916  | 354  |    | 15  | putative protein (goshee) mRNA.                                                                   |
| <a href="#">Gosr2</a>   | <a href="#">Gosr2.bSep08</a>   | <a href="#">64154</a>  | 10022 | 611  | 4  | 155 | golgi SNAP receptor complex member 2 (Gosr2) alternative variant bSep08, mRNA.                    |
| <a href="#">Got1</a>    | <a href="#">Got1.bSep08</a>    | <a href="#">24401</a>  | 16046 | 1975 | 10 | 327 | glutamate oxaloacetate transaminase 1, soluble (36.8 kD) (Got1) alternative variant bSep08, mRNA. |
| <a href="#">Got1</a>    | <a href="#">Got1.cSep08</a>    | <a href="#">24401</a>  | 14554 | 592  | 3  | 118 | glutamate oxaloacetate transaminase 1, soluble (Got1) alternative variant cSep08, mRNA.           |
| <a href="#">Got111</a>  | <a href="#">Got111.bSep08</a>  | <a href="#">306540</a> | 1427  | 649  | 1  | 154 | glutamic-oxaloacetic transaminase 1-like 1 (17.5 kD) (Got111) alternative variant bSep08, mRNA.   |
| <a href="#">Got111</a>  | <a href="#">Got111.cSep08</a>  | <a href="#">306540</a> | 789   | 422  | 1  | 83  | glutamic-oxaloacetic transaminase 1-like 1 (9.6 kD) (Got111) alternative variant cSep08, mRNA.    |
| <a href="#">Got2</a>    | <a href="#">Got2.bSep08</a>    | <a href="#">25721</a>  | 13866 | 618  | 4  | 191 | aspartate aminotransferase (Got2) alternative variant bSep08, mRNA.                               |
| <a href="#">Got2</a>    | <a href="#">Got2.dSep08</a>    | <a href="#">25721</a>  | 1359  | 656  | 2  | 63  | aspartate aminotransferase (7.0 kD) (Got2) alternative variant dSep08, mRNA.                      |
| <a href="#">goto</a>    | <a href="#">goto.aSep08</a>    |                        | 43323 | 235  |    | 58  | putative protein (goto) mRNA.                                                                     |
| <a href="#">govar</a>   | <a href="#">govar.aSep08</a>   |                        | 5490  | 713  | 1  | 60  | putative protein (govar) alternative variant aSep08, mRNA.                                        |

|                         |                                |                        |       |      |   |     |                                                                                     |
|-------------------------|--------------------------------|------------------------|-------|------|---|-----|-------------------------------------------------------------------------------------|
| <a href="#">govar</a>   | <a href="#">govar.bSep08</a>   |                        | 5370  | 288  | 3 | 31  | putative protein (3.8 kD) (govar) alternative variant bSep08, mRNA.                 |
| <a href="#">gowey</a>   | <a href="#">gowey.aSep08</a>   |                        | 26343 | 394  | 1 | 109 | putative protein (gowey) alternative variant aSep08, mRNA.                          |
| <a href="#">gowey</a>   | <a href="#">gowey.bSep08</a>   |                        | 26454 | 417  | 1 | 105 | putative protein (gowey) alternative variant bSep08, mRNA.                          |
| <a href="#">goyby</a>   | <a href="#">goyby.aSep08</a>   |                        | 8895  | 531  |   | 93  | putative protein (goyby) mRNA.                                                      |
| <a href="#">goychy</a>  | <a href="#">goychy.aSep08</a>  |                        | 5265  | 377  |   | 125 | sodium channel voltage-gated type VII alpha (goychy) mRNA.                          |
| <a href="#">goydar</a>  | <a href="#">goydar.aSep08</a>  |                        | 75241 | 303  | 1 | 32  | putative protein (3.7 kD) (goydar) alternative variant aSep08, mRNA.                |
| <a href="#">goydar</a>  | <a href="#">goydar.bSep08</a>  |                        | 17863 | 302  | 2 | 48  | putative protein (goydar) alternative variant bSep08, mRNA.                         |
| <a href="#">goyfer</a>  | <a href="#">goyfer.aSep08</a>  |                        | 5267  | 344  |   | 42  | putative protein (4.7 kD) (goyfer) mRNA.                                            |
| <a href="#">goyflo</a>  | <a href="#">goyflo.aSep08</a>  |                        | 6821  | 292  |   | 65  | putative protein (goyflo) mRNA.                                                     |
| <a href="#">goyflu</a>  | <a href="#">goyflu.aSep08</a>  |                        | 706   | 598  |   | 94  | putative protein of mammalian origin (10.1 kD) (goyflu) mRNA.                       |
| <a href="#">goykee</a>  | <a href="#">goykee.aSep08</a>  |                        | 1847  | 466  |   | 33  | putative protein (goykee) mRNA.                                                     |
| <a href="#">goyloy</a>  | <a href="#">goyloy.aSep08</a>  |                        | 6255  | 745  |   | 99  | putative nuclear protein (10.8 kD) (goyloy) mRNA.                                   |
| <a href="#">goymee</a>  | <a href="#">goymee.aSep08</a>  |                        | 97138 | 804  | 2 | 63  | CRA a like (6.8 kD) (goymee) alternative variant aSep08, mRNA.                      |
| <a href="#">goymee</a>  | <a href="#">goymee.bSep08</a>  |                        | 40156 | 591  | 1 | 60  | putative protein (goymee) alternative variant bSep08, mRNA.                         |
| <a href="#">goymer</a>  | <a href="#">goymer.bSep08</a>  |                        | 883   | 367  |   | 24  | putative protein (goymer) alternative variant bSep08, mRNA.                         |
| <a href="#">goynoy</a>  | <a href="#">goynoy.aSep08</a>  |                        | 1747  | 777  |   | 101 | putative protein (goynoy) mRNA.                                                     |
| <a href="#">goypor</a>  | <a href="#">goypor.aSep08</a>  |                        | 8750  | 1579 | 2 | 101 | putative protein of eukaryotic origin (goypor) alternative variant aSep08, mRNA.    |
| <a href="#">goysa</a>   | <a href="#">goysa.aSep08</a>   |                        | 3905  | 585  |   | 118 | putative protein (13.2 kD) (goysa) alternative variant aSep08, mRNA.                |
| <a href="#">goysa</a>   | <a href="#">goysa.bSep08</a>   |                        | 3795  | 614  | 1 | 59  | putative protein (6.8 kD) (goysa) alternative variant bSep08, mRNA.                 |
| <a href="#">goyshee</a> | <a href="#">goyshee.aSep08</a> |                        | 7256  | 622  |   | 162 | epithelial cell transforming 2 (goyshee) mRNA.                                      |
| <a href="#">goyto</a>   | <a href="#">goyto.aSep08</a>   |                        | 1275  | 472  | 2 | 37  | putative protein (goyto) alternative variant aSep08, mRNA.                          |
| <a href="#">goyvar</a>  | <a href="#">goyvar.aSep08</a>  |                        | 4389  | 367  |   | 50  | putative protein (goyvar) mRNA.                                                     |
| <a href="#">goywey</a>  | <a href="#">goywey.aSep08</a>  |                        | 2108  | 693  |   | 230 | plexin A1 CRA c (goywey) mRNA.                                                      |
| <a href="#">Gp2</a>     | <a href="#">Gp2.aSep08</a>     | <a href="#">171459</a> | 7613  | 814  |   | 190 | glycoprotein 2 (zymogen granule membrane) (Gp2) mRNA.                               |
| <a href="#">Gpa33</a>   | <a href="#">Gpa33.aSep08</a>   | <a href="#">360873</a> | 20605 | 538  | 2 | 179 | glycoprotein A33 (transmembrane) (Gpa33) alternative variant aSep08, mRNA.          |
| <a href="#">Gpa33</a>   | <a href="#">Gpa33.bSep08</a>   | <a href="#">360873</a> | 25480 | 515  | 3 | 69  | glycoprotein A33 (transmembrane) (8.0 kD) (Gpa33) alternative variant bSep08, mRNA. |
| <a href="#">Gpaa1</a>   | <a href="#">Gpaa1.bSep08</a>   | <a href="#">300046</a> | 2387  | 1542 | 2 | 262 | GPI anchor attachment protein 1 (Gpaa1) alternative variant bSep08, mRNA.           |
| <a href="#">Gpaa1</a>   | <a href="#">Gpaa1.cSep08</a>   | <a href="#">300046</a> | 1125  | 716  | 2 | 180 | GPI anchor attachment protein 1 (Gpaa1) alternative variant cSep08, mRNA.           |

|                         |                                |                        |       |      |   |     |                                                                                                                                          |
|-------------------------|--------------------------------|------------------------|-------|------|---|-----|------------------------------------------------------------------------------------------------------------------------------------------|
| <a href="#">Gpam</a>    | <a href="#">Gpam.bSep08</a>    | <a href="#">29653</a>  | 14205 | 561  | 6 | 161 | glycerol-3-phosphate acyltransferase, mitochondrial (Gpam) alternative variant bSep08, mRNA.                                             |
| <a href="#">Gpatc2</a>  | <a href="#">Gpatc2.bSep08</a>  | <a href="#">289362</a> | 9590  | 738  | 1 | 158 | putative protein of vertebrate origin (Gpatc2) alternative variant bSep08, mRNA.                                                         |
| <a href="#">Gpatch1</a> | <a href="#">Gpatch1.bSep08</a> | <a href="#">292810</a> | 8537  | 436  | 2 | 56  | putative protein (Gpatch1) alternative variant bSep08, mRNA.                                                                             |
| <a href="#">Gpatch3</a> | <a href="#">Gpatch3.aSep08</a> | <a href="#">362615</a> | 3049  | 655  |   | 218 | putative protein of eukaryotic origin (Gpatch3) mRNA.                                                                                    |
| <a href="#">Gpatch4</a> | <a href="#">Gpatch4.bSep08</a> | <a href="#">295228</a> | 7025  | 614  | 6 | 142 | d111/G-patch (15.9 kD) (Gpatch4) alternative variant bSep08, complete mRNA.                                                              |
| <a href="#">Gpatch4</a> | <a href="#">Gpatch4.cSep08</a> | <a href="#">295228</a> | 11530 | 2114 | 3 | 104 | putative protein (11.7 kD) (Gpatch4) alternative variant cSep08, mRNA.                                                                   |
| <a href="#">Gbbp1</a>   | <a href="#">Gbbp1.bSep08</a>   | <a href="#">294734</a> | 48217 | 2038 | 1 | 538 | GC-rich promoter binding protein 1 like (Gbbp1) alternative variant bSep08, mRNA.                                                        |
| <a href="#">Gbbp1</a>   | <a href="#">Gbbp1.cSep08</a>   | <a href="#">294734</a> | 30749 | 2223 | 2 | 465 | GC-rich promoter binding protein 1 like (Gbbp1) alternative variant cSep08, mRNA.                                                        |
| <a href="#">Gbbp1</a>   | <a href="#">Gbbp1.dSep08</a>   | <a href="#">294734</a> | 29941 | 1478 | 1 | 368 | GC-rich promoter binding protein 1 like (Gbbp1) alternative variant dSep08, mRNA.                                                        |
| <a href="#">Gbbp1</a>   | <a href="#">Gbbp1.eSep08</a>   | <a href="#">294734</a> | 2627  | 1448 |   | 127 | putative protein of mammalian origin (13.3 kD) (Gbbp1) alternative variant eSep08, mRNA.                                                 |
| <a href="#">Gpc4</a>    | <a href="#">Gpc4.bSep08</a>    | <a href="#">317322</a> | 71938 | 380  | 2 | 87  | glypican 4 (Gpc4) alternative variant bSep08, mRNA.                                                                                      |
| <a href="#">Gpc5</a>    | <a href="#">Gpc5.bSep08</a>    | <a href="#">306157</a> | 95212 | 342  | 1 | 103 | glypican 5 (Gpc5) alternative variant bSep08, mRNA.                                                                                      |
| <a href="#">Gpd1l</a>   | <a href="#">Gpd1l.aSep08</a>   | <a href="#">363159</a> | 13104 | 565  |   | 120 | glycerol-3-phosphate dehydrogenase 1-like (Gpd1l) mRNA.                                                                                  |
| <a href="#">Gpd2</a>    | <a href="#">Gpd2.bSep08</a>    | <a href="#">25062</a>  | 42178 | 710  | 5 | 220 | glycerol-3-phosphate dehydrogenase 2, mitochondrial and hypothetical protein LOC680324 (Gpd2) alternative variant bSep08, mRNA.          |
| <a href="#">Gpd2</a>    | <a href="#">Gpd2.bSep08</a>    | <a href="#">680324</a> | 42178 | 710  | 5 | 220 | glycerol-3-phosphate dehydrogenase 2, mitochondrial and hypothetical protein LOC680324 (Gpd2) alternative variant bSep08, mRNA.          |
| <a href="#">Gpd2</a>    | <a href="#">Gpd2.cSep08</a>    | <a href="#">25062</a>  | 42167 | 719  | 5 | 220 | glycerol-3-phosphate dehydrogenase 2, mitochondrial and hypothetical protein LOC680324 (Gpd2) alternative variant cSep08, mRNA.          |
| <a href="#">Gpd2</a>    | <a href="#">Gpd2.cSep08</a>    | <a href="#">680324</a> | 42167 | 719  | 5 | 220 | glycerol-3-phosphate dehydrogenase 2, mitochondrial and hypothetical protein LOC680324 (Gpd2) alternative variant cSep08, mRNA.          |
| <a href="#">Gpd2</a>    | <a href="#">Gpd2.dSep08</a>    | <a href="#">25062</a>  | 9923  | 514  | 5 | 161 | glycerol-3-phosphate dehydrogenase 2, mitochondrial and hypothetical protein LOC680324 (Gpd2) alternative variant dSep08, mRNA.          |
| <a href="#">Gpd2</a>    | <a href="#">Gpd2.dSep08</a>    | <a href="#">680324</a> | 9923  | 514  | 5 | 161 | glycerol-3-phosphate dehydrogenase 2, mitochondrial and hypothetical protein LOC680324 (Gpd2) alternative variant dSep08, mRNA.          |
| <a href="#">Gpd2</a>    | <a href="#">Gpd2.fSep08</a>    | <a href="#">25062</a>  | 3280  | 460  | 2 | 69  | glycerol-3-phosphate dehydrogenase 2, mitochondrial and hypothetical protein LOC680324 (7.7 kD) (Gpd2) alternative variant fSep08, mRNA. |
| <a href="#">Gpd2</a>    | <a href="#">Gpd2.fSep08</a>    | <a href="#">680324</a> | 3280  | 460  | 2 | 69  | glycerol-3-phosphate dehydrogenase 2, mitochondrial and hypothetical protein LOC680324 (7.7 kD) (Gpd2) alternative variant fSep08, mRNA. |

|                       |                              |                        |        |      |    |     |                                                                                                  |
|-----------------------|------------------------------|------------------------|--------|------|----|-----|--------------------------------------------------------------------------------------------------|
| <a href="#">Gpha2</a> | <a href="#">Gpha2.aSep08</a> | <a href="#">171158</a> | 725    | 423  | 2  | 141 | glycoprotein hormone alpha 2 (Gpha2) alternative variant aSep08, mRNA.                           |
| <a href="#">Gpha2</a> | <a href="#">Gpha2.cSep08</a> | <a href="#">171158</a> | 1080   | 995  | 2  | 40  | glycoprotein hormone alpha 2 (Gpha2) alternative variant cSep08, mRNA.                           |
| <a href="#">Gphn</a>  | <a href="#">Gphn.bSep08</a>  | <a href="#">64845</a>  | 69288  | 1543 | 7  | 224 | gephyrin (Gphn) alternative variant bSep08, mRNA.                                                |
| <a href="#">Gphn</a>  | <a href="#">Gphn.cSep08</a>  | <a href="#">64845</a>  | 123630 | 420  | 4  | 139 | gephyrin (Gphn) alternative variant cSep08, mRNA.                                                |
| <a href="#">Gphn</a>  | <a href="#">Gphn.dSep08</a>  | <a href="#">64845</a>  | 23414  | 372  | 4  | 53  | gephyrin (Gphn) alternative variant dSep08, mRNA.                                                |
| <a href="#">Gphn</a>  | <a href="#">Gphn.eSep08</a>  | <a href="#">64845</a>  | 1883   | 722  | 2  | 48  | gephyrin (Gphn) alternative variant eSep08, mRNA.                                                |
| <a href="#">Gpi</a>   | <a href="#">Gpi.aSep08</a>   | <a href="#">292804</a> | 27927  | 2064 | 18 | 558 | glucose phosphate isomerase (62.8 kD) (Gpi) alternative variant aSep08, mRNA.                    |
| <a href="#">Gpi</a>   | <a href="#">Gpi.bSep08</a>   | <a href="#">292804</a> | 10957  | 690  | 7  | 192 | glucose phosphate isomerase (Gpi) alternative variant bSep08, mRNA.                              |
| <a href="#">Gpi</a>   | <a href="#">Gpi.cSep08</a>   | <a href="#">292804</a> | 4034   | 547  | 5  | 148 | glucose phosphate isomerase (Gpi) alternative variant cSep08, mRNA.                              |
| <a href="#">Gpi</a>   | <a href="#">Gpi.dSep08</a>   | <a href="#">292804</a> | 24423  | 815  | 3  | 62  | glucose phosphate isomerase (6.7 kD) (Gpi) alternative variant dSep08, mRNA.                     |
| <a href="#">Gpi</a>   | <a href="#">Gpi.eSep08</a>   | <a href="#">292804</a> | 976    | 576  | 3  | 64  | glucose phosphate isomerase (7.4 kD) (Gpi) alternative variant eSep08, mRNA.                     |
| <a href="#">Gpkow</a> | <a href="#">Gpkow.bSep08</a> | <a href="#">679890</a> | 2499   | 486  | 5  | 129 | gpkow protein (Gpkow) alternative variant bSep08, mRNA.                                          |
| <a href="#">Gpkow</a> | <a href="#">Gpkow.cSep08</a> | <a href="#">679890</a> | 8468   | 770  | 5  | 113 | G patch domain KOW motifs (Gpkow) alternative variant cSep08, mRNA.                              |
| <a href="#">Gpld1</a> | <a href="#">Gpld1.aSep08</a> | <a href="#">291132</a> | 19919  | 2325 | 15 | 559 | glycosylphosphatidylinositol specific phospholipase D1 (Gpld1) alternative variant aSep08, mRNA. |
| <a href="#">Gpld1</a> | <a href="#">Gpld1.bSep08</a> | <a href="#">291132</a> | 11685  | 625  | 7  | 208 | glycosylphosphatidylinositol specific phospholipase D1 (Gpld1) alternative variant bSep08, mRNA. |
| <a href="#">Gpld1</a> | <a href="#">Gpld1.cSep08</a> | <a href="#">291132</a> | 3416   | 791  | 2  | 48  | glycosylphosphatidylinositol specific phospholipase D1 (Gpld1) alternative variant cSep08, mRNA. |
| <a href="#">Gpm6a</a> | <a href="#">Gpm6a.bSep08</a> | <a href="#">306439</a> | 334934 | 654  | 4  | 217 | glycoprotein m6a (Gpm6a) alternative variant bSep08, mRNA.                                       |
| <a href="#">Gpm6a</a> | <a href="#">Gpm6a.cSep08</a> | <a href="#">306439</a> | 88095  | 396  | 2  | 17  | glycoprotein m6a (1.9 kD) (Gpm6a) alternative variant cSep08, mRNA.                              |
| <a href="#">Gpm6b</a> | <a href="#">Gpm6b.aSep08</a> | <a href="#">192179</a> | 147903 | 2885 | 7  | 321 | glycoprotein m6b (Gpm6b) alternative variant aSep08, mRNA.                                       |
| <a href="#">Gpm6b</a> | <a href="#">Gpm6b.eSep08</a> | <a href="#">192179</a> | 8851   | 470  | 2  | 61  | glycoprotein m6b (Gpm6b) alternative variant eSep08, mRNA.                                       |
| <a href="#">Gpm6b</a> | <a href="#">Gpm6b.fSep08</a> | <a href="#">192179</a> | 1818   | 399  | 2  | 36  | glycoprotein m6b (Gpm6b) alternative variant fSep08, mRNA.                                       |
| <a href="#">Gpn2</a>  | <a href="#">Gpn2.aSep08</a>  | <a href="#">362614</a> | 7123   | 887  | 4  | 270 | GNP-loop GTPase 2 (Gpn2) alternative variant aSep08, mRNA.                                       |
| <a href="#">Gpn2</a>  | <a href="#">Gpn2.bSep08</a>  | <a href="#">362614</a> | 6483   | 1144 | 4  | 145 | GNP-loop GTPase 2 (16.5 kD) (Gpn2) alternative variant bSep08, mRNA.                             |
| <a href="#">Gpn3</a>  | <a href="#">Gpn3.bSep08</a>  | <a href="#">360810</a> | 8234   | 1405 | 6  | 230 | GNP-loop GTPase 3 (Gpn3) alternative variant bSep08, mRNA.                                       |
| <a href="#">Gpn3</a>  | <a href="#">Gpn3.cSep08</a>  | <a href="#">360810</a> | 4795   | 406  | 3  | 113 | GNP-loop GTPase 3 (12.6 kD) (Gpn3) alternative variant cSep08, mRNA.                             |

|                         |                                |                        |       |      |    |     |                                                                                     |
|-------------------------|--------------------------------|------------------------|-------|------|----|-----|-------------------------------------------------------------------------------------|
| <a href="#">Gpr19</a>   | <a href="#">Gpr19.bSep08</a>   | <a href="#">312787</a> | 26536 | 882  | 3  | 264 | G protein-coupled receptor 19 (Gpr19) alternative variant bSep08, mRNA.             |
| <a href="#">Gpr19</a>   | <a href="#">Gpr19.bSep08</a>   | <a href="#">690642</a> | 26536 | 882  | 3  | 264 | G protein-coupled receptor 19 (Gpr19) alternative variant bSep08, mRNA.             |
| <a href="#">Gpr19</a>   | <a href="#">Gpr19.cSep08</a>   | <a href="#">312787</a> | 4529  | 411  | 3  | 73  | putative protein (Gpr19) alternative variant cSep08, mRNA.                          |
| <a href="#">Gpr19</a>   | <a href="#">Gpr19.cSep08</a>   | <a href="#">690642</a> | 4529  | 411  | 3  | 73  | putative protein (Gpr19) alternative variant cSep08, mRNA.                          |
| <a href="#">Gpr3711</a> | <a href="#">Gpr3711.aSep08</a> | <a href="#">252939</a> | 6851  | 2281 | 2  | 495 | G protein-coupled receptor 37-like 1 (Gpr3711) alternative variant aSep08, mRNA.    |
| <a href="#">Gpr3711</a> | <a href="#">Gpr3711.bSep08</a> | <a href="#">252939</a> | 10218 | 685  | 2  | 144 | G protein-coupled receptor 37-like 1 (Gpr3711) alternative variant bSep08, mRNA.    |
| <a href="#">Gpr56</a>   | <a href="#">Gpr56.aSep08</a>   | <a href="#">260326</a> | 19781 | 3428 | 11 | 687 | G protein-coupled receptor 56 (77.3 kD) (Gpr56) alternative variant aSep08, mRNA.   |
| <a href="#">Gpr56</a>   | <a href="#">Gpr56.bSep08</a>   | <a href="#">260326</a> | 29302 | 1433 | 2  | 265 | G protein-coupled receptor 56 (30.2 kD) (Gpr56) alternative variant bSep08, mRNA.   |
| <a href="#">Gpr56</a>   | <a href="#">Gpr56.cSep08</a>   | <a href="#">260326</a> | 3585  | 764  | 2  | 254 | G protein-coupled receptor 56 (Gpr56) alternative variant cSep08, mRNA.             |
| <a href="#">Gpr56</a>   | <a href="#">Gpr56.dSep08</a>   | <a href="#">260326</a> | 10438 | 692  | 1  | 181 | G protein-coupled receptor 56 (Gpr56) alternative variant dSep08, mRNA.             |
| <a href="#">Gpr68</a>   | <a href="#">Gpr68.cSep08</a>   | <a href="#">314386</a> | 56258 | 673  | 6  | 129 | putative protein (Gpr68) alternative variant cSep08, mRNA.                          |
| <a href="#">Gpr85</a>   | <a href="#">Gpr85.bSep08</a>   | <a href="#">64020</a>  | 2149  | 663  | 1  | 155 | G protein-coupled receptor 85 (Gpr85) alternative variant bSep08, mRNA.             |
| <a href="#">Gpr88</a>   | <a href="#">Gpr88.bSep08</a>   | <a href="#">64443</a>  | 6296  | 709  | 3  | 85  | G-protein coupled receptor 88 (9.0 kD) (Gpr88) alternative variant bSep08, mRNA.    |
| <a href="#">Gpr89</a>   | <a href="#">Gpr89.aSep08</a>   | <a href="#">362003</a> | 23831 | 1488 | 11 | 335 | G protein-coupled receptor 89 (38.4 kD) (Gpr89) alternative variant aSep08, mRNA.   |
| <a href="#">Gpr89</a>   | <a href="#">Gpr89.bSep08</a>   | <a href="#">362003</a> | 24219 | 1556 | 6  | 330 | G protein-coupled receptor 89 (Gpr89) alternative variant bSep08, mRNA.             |
| <a href="#">Gpr89</a>   | <a href="#">Gpr89.cSep08</a>   | <a href="#">362003</a> | 15843 | 711  | 7  | 237 | G protein-coupled receptor 89 (Gpr89) alternative variant cSep08, mRNA.             |
| <a href="#">Gpr89</a>   | <a href="#">Gpr89.dSep08</a>   | <a href="#">362003</a> | 12540 | 403  | 4  | 134 | G protein-coupled receptor 89 (Gpr89) alternative variant dSep08, mRNA.             |
| <a href="#">Gpr97</a>   | <a href="#">Gpr97.aSep08</a>   | <a href="#">291854</a> | 20924 | 637  | 6  | 189 | G protein-coupled receptor 97 (Gpr97) alternative variant aSep08, mRNA.             |
| <a href="#">Gpr97</a>   | <a href="#">Gpr97.bSep08</a>   | <a href="#">291854</a> | 19247 | 517  | 4  | 155 | G protein-coupled receptor 97 (Gpr97) alternative variant bSep08, mRNA.             |
| <a href="#">Gpr97</a>   | <a href="#">Gpr97.cSep08</a>   | <a href="#">291854</a> | 3012  | 733  | 3  | 108 | G protein-coupled receptor 97 (Gpr97) alternative variant cSep08, mRNA.             |
| <a href="#">Gpr98</a>   | <a href="#">Gpr98.aSep08</a>   | <a href="#">685383</a> | 57485 | 6658 |    | 869 | G protein-coupled receptor 98 (94.3 kD) (Gpr98) mRNA.                               |
| <a href="#">Gpr107</a>  | <a href="#">Gpr107.bSep08</a>  | <a href="#">311857</a> | 4451  | 803  | 2  | 35  | G protein-coupled receptor 107 (3.7 kD) (Gpr107) alternative variant bSep08, mRNA.  |
| <a href="#">Gpr108</a>  | <a href="#">Gpr108.bSep08</a>  | <a href="#">316136</a> | 8952  | 1587 | 9  | 357 | G protein-coupled receptor 108 (39.3 kD) (Gpr108) alternative variant bSep08, mRNA. |
| <a href="#">Gpr108</a>  | <a href="#">Gpr108.cSep08</a>  | <a href="#">316136</a> | 9823  | 2015 | 13 | 281 | G protein-coupled receptor 108 (30.9 kD) (Gpr108) alternative variant cSep08, mRNA. |
| <a href="#">Gpr108</a>  | <a href="#">Gpr108.dSep08</a>  | <a href="#">316136</a> | 7218  | 742  | 7  | 207 | G protein-coupled receptor 108 (Gpr108) alternative variant dSep08, mRNA.           |



|                         |                                |                        |        |      |   |     |                                                                                              |
|-------------------------|--------------------------------|------------------------|--------|------|---|-----|----------------------------------------------------------------------------------------------|
| <a href="#">Gpr108</a>  | <a href="#">Gpr108.eSep08</a>  | <a href="#">316136</a> | 1475   | 751  | 3 | 124 | G protein-coupled receptor 108 (Gpr108) alternative variant eSep08, mRNA.                    |
| <a href="#">Gpr110</a>  | <a href="#">Gpr110.aSep08</a>  | <a href="#">301266</a> | 12571  | 617  |   | 196 | G protein-coupled receptor 110 (Gpr110) mRNA.                                                |
| <a href="#">Gpr114</a>  | <a href="#">Gpr114.bSep08</a>  | <a href="#">307645</a> | 4724   | 821  | 1 | 273 | G protein-coupled receptor 114 (Gpr114) alternative variant bSep08, mRNA.                    |
| <a href="#">Gpr115</a>  | <a href="#">Gpr115.aSep08</a>  | <a href="#">501106</a> | 8010   | 803  |   | 53  | G protein-coupled receptor 115 (Gpr115) mRNA.                                                |
| <a href="#">Gpr116</a>  | <a href="#">Gpr116.bSep08</a>  | <a href="#">245977</a> | 11344  | 2318 | 8 | 666 | G protein-coupled receptor 116 (Gpr116) alternative variant bSep08, mRNA.                    |
| <a href="#">Gpr116</a>  | <a href="#">Gpr116.cSep08</a>  | <a href="#">245977</a> | 11138  | 814  | 5 | 271 | G protein-coupled receptor 116 (Gpr116) alternative variant cSep08, mRNA.                    |
| <a href="#">Gpr116</a>  | <a href="#">Gpr116.dSep08</a>  | <a href="#">245977</a> | 4848   | 722  | 3 | 184 | G protein-coupled receptor 116 (Gpr116) alternative variant dSep08, mRNA.                    |
| <a href="#">Gpr116</a>  | <a href="#">Gpr116.eSep08</a>  | <a href="#">245977</a> | 43723  | 679  | 5 | 150 | G protein-coupled receptor 116 (Gpr116) alternative variant eSep08, mRNA.                    |
| <a href="#">Gpr120</a>  | <a href="#">Gpr120.bSep08</a>  | <a href="#">294075</a> | 12989  | 863  | 1 | 201 | G protein-coupled receptor 120 (Gpr120) alternative variant bSep08, mRNA.                    |
| <a href="#">Gpr125</a>  | <a href="#">Gpr125.aSep08</a>  | <a href="#">305408</a> | 44679  | 2947 |   | 875 | G protein-coupled receptor 125 (Gpr125) mRNA.                                                |
| <a href="#">Gpr126</a>  | <a href="#">Gpr126.aSep08</a>  | <a href="#">308376</a> | 19766  | 1771 | 7 | 349 | G protein-coupled receptor 126 (39.5 kD) (Gpr126) alternative variant aSep08, complete mRNA. |
| <a href="#">Gpr137</a>  | <a href="#">Gpr137.bSep08</a>  | <a href="#">689984</a> | 2193   | 882  | 1 | 141 | G protein-coupled receptor 137 (Gpr137) alternative variant bSep08, mRNA.                    |
| <a href="#">Gpr137b</a> | <a href="#">Gpr137b.bSep08</a> | <a href="#">289287</a> | 25036  | 571  | 3 | 160 | G protein-coupled receptor 137B (Gpr137b) alternative variant bSep08, mRNA.                  |
| <a href="#">Gpr137b</a> | <a href="#">Gpr137b.cSep08</a> | <a href="#">289287</a> | 6587   | 2240 | 4 | 145 | G protein-coupled receptor 137B (Gpr137b) alternative variant cSep08, mRNA.                  |
| <a href="#">Gpr137b</a> | <a href="#">Gpr137b.dSep08</a> | <a href="#">289287</a> | 833    | 383  | 2 | 88  | G protein-coupled receptor 137B (Gpr137b) alternative variant dSep08, mRNA.                  |
| <a href="#">Gpr155</a>  | <a href="#">Gpr155.bSep08</a>  | <a href="#">311730</a> | 3559   | 644  | 4 | 129 | G protein-coupled receptor 155 (15.5 kD) (Gpr155) alternative variant bSep08, mRNA.          |
| <a href="#">Gpr155</a>  | <a href="#">Gpr155.cSep08</a>  | <a href="#">311730</a> | 3279   | 587  | 3 | 89  | G protein-coupled receptor 155 (Gpr155) alternative variant cSep08, mRNA.                    |
| <a href="#">Gpr155</a>  | <a href="#">Gpr155.dSep08</a>  | <a href="#">311730</a> | 4986   | 642  | 3 | 125 | G protein-coupled receptor 155 (Gpr155) alternative variant dSep08, mRNA.                    |
| <a href="#">Gpr158</a>  | <a href="#">Gpr158.aSep08</a>  | <a href="#">291352</a> | 346925 | 617  |   | 205 | G protein-coupled receptor 158 (Gpr158) mRNA.                                                |
| <a href="#">Gpr160</a>  | <a href="#">Gpr160.cSep08</a>  | <a href="#">499588</a> | 56876  | 735  | 3 | 172 | G protein-coupled receptor 160 (Gpr160) alternative variant cSep08, mRNA.                    |
| <a href="#">Gpr162</a>  | <a href="#">Gpr162.bSep08</a>  | <a href="#">362436</a> | 1510   | 1363 | 2 | 41  | G protein-coupled receptor 162 (4.8 kD) (Gpr162) alternative variant bSep08, mRNA.           |
| <a href="#">Gpr172b</a> | <a href="#">Gpr172b.aSep08</a> | <a href="#">362942</a> | 5459   | 5044 | 2 | 532 | G protein-coupled receptor 172B (56.0 kD) (Gpr172b) alternative variant aSep08, mRNA.        |
| <a href="#">Gpr175</a>  | <a href="#">Gpr175.bSep08</a>  | <a href="#">85494</a>  | 9367   | 1465 | 8 | 265 | G protein-coupled receptor 175 (29.2 kD) (Gpr175) alternative variant bSep08, mRNA.          |
| <a href="#">Gpr175</a>  | <a href="#">Gpr175.cSep08</a>  | <a href="#">85494</a>  | 8465   | 732  | 8 | 199 | G protein-coupled receptor 175 (Gpr175) alternative variant cSep08, mRNA.                    |
| <a href="#">Gpr175</a>  | <a href="#">Gpr175.dSep08</a>  | <a href="#">85494</a>  | 5055   | 671  | 8 | 121 | G protein-coupled receptor 175 (Gpr175) alternative variant dSep08, mRNA.                    |

|                        |                               |                        |        |      |   |     |                                                                                                              |
|------------------------|-------------------------------|------------------------|--------|------|---|-----|--------------------------------------------------------------------------------------------------------------|
| <a href="#">Gpr175</a> | <a href="#">Gpr175.eSep08</a> | <a href="#">85494</a>  | 5280   | 765  | 7 | 112 | G protein-coupled receptor 175 (12.2 kD) (Gpr175) alternative variant eSep08, mRNA.                          |
| <a href="#">Gpr175</a> | <a href="#">Gpr175.fSep08</a> | <a href="#">85494</a>  | 8628   | 755  | 7 | 112 | G protein-coupled receptor 175 (12.2 kD) (Gpr175) alternative variant fSep08, mRNA.                          |
| <a href="#">Gpr175</a> | <a href="#">Gpr175.hSep08</a> | <a href="#">85494</a>  | 3165   | 709  | 2 | 50  | G protein-coupled receptor 175 (Gpr175) alternative variant hSep08, mRNA.                                    |
| <a href="#">Gpr176</a> | <a href="#">Gpr176.aSep08</a> | <a href="#">117257</a> | 6983   | 3441 |   | 447 | G protein-coupled receptor 176 (Gpr176) mRNA.                                                                |
| <a href="#">Gpr177</a> | <a href="#">Gpr177.bSep08</a> | <a href="#">362065</a> | 113588 | 1785 | 5 | 306 | G protein-coupled receptor 177 (Gpr177) alternative variant bSep08, mRNA.                                    |
| <a href="#">Gpr177</a> | <a href="#">Gpr177.cSep08</a> | <a href="#">362065</a> | 29911  | 2904 | 4 | 163 | G protein-coupled receptor 177 (18.5 kD) (Gpr177) alternative variant cSep08, mRNA.                          |
| <a href="#">Gpr177</a> | <a href="#">Gpr177.eSep08</a> | <a href="#">362065</a> | 3543   | 641  | 3 | 74  | G protein-coupled receptor 177 (Gpr177) alternative variant eSep08, mRNA.                                    |
| <a href="#">Gpr180</a> | <a href="#">Gpr180.bSep08</a> | <a href="#">306165</a> | 16772  | 877  | 6 | 292 | G protein-coupled receptor 180 (Gpr180) alternative variant bSep08, mRNA.                                    |
| <a href="#">Gpr180</a> | <a href="#">Gpr180.cSep08</a> | <a href="#">306165</a> | 8176   | 444  | 3 | 78  | G protein-coupled receptor 180 (Gpr180) alternative variant cSep08, mRNA.                                    |
| <a href="#">Gpr180</a> | <a href="#">Gpr180.eSep08</a> | <a href="#">306165</a> | 1907   | 539  | 2 | 50  | G protein-coupled receptor 180 (Gpr180) alternative variant eSep08, mRNA.                                    |
| <a href="#">Gpr182</a> | <a href="#">Gpr182.aSep08</a> | <a href="#">29307</a>  | 2330   | 1824 | 1 | 398 | G protein-coupled receptor 182 (45.2 kD) (Gpr182) alternative variant aSep08, complete mRNA.                 |
| <a href="#">Gpr182</a> | <a href="#">Gpr182.cSep08</a> | <a href="#">29307</a>  | 1794   | 409  | 2 | 136 | G protein-coupled receptor 182 (Gpr182) alternative variant cSep08, mRNA.                                    |
| <a href="#">Gprc5b</a> | <a href="#">Gprc5b.aSep08</a> | <a href="#">293546</a> | 20930  | 1419 | 4 | 458 | G protein-coupled receptor, family C, group 5, member B (Gprc5b) alternative variant aSep08, mRNA.           |
| <a href="#">Gprc5b</a> | <a href="#">Gprc5b.cSep08</a> | <a href="#">293546</a> | 4708   | 3443 | 2 | 99  | G protein-coupled receptor, family C, group 5, member B (Gprc5b) alternative variant cSep08, mRNA.           |
| <a href="#">Gprc5c</a> | <a href="#">Gprc5c.aSep08</a> | <a href="#">287805</a> | 18244  | 1827 | 2 | 467 | G protein-coupled receptor, family C, group 5, member C (Gprc5c) alternative variant aSep08, mRNA.           |
| <a href="#">Gprc5c</a> | <a href="#">Gprc5c.bSep08</a> | <a href="#">287805</a> | 21766  | 3605 | 3 | 464 | G protein-coupled receptor, family C, group 5, member C (50.8 kD) (Gprc5c) alternative variant bSep08, mRNA. |
| <a href="#">Gprc5c</a> | <a href="#">Gprc5c.cSep08</a> | <a href="#">287805</a> | 12093  | 863  | 1 | 178 | G protein-coupled receptor, family C, group 5, member C (Gprc5c) alternative variant cSep08, mRNA.           |
| <a href="#">Gprc5c</a> | <a href="#">Gprc5c.dSep08</a> | <a href="#">287805</a> | 12448  | 642  | 1 | 176 | G protein-coupled receptor, family C, group 5, member C (Gprc5c) alternative variant dSep08, mRNA.           |
| <a href="#">Gprc5d</a> | <a href="#">Gprc5d.bSep08</a> | <a href="#">500349</a> | 10026  | 407  |   | 40  | G protein-coupled receptor, family C, group 5, member D (Gprc5d) alternative variant bSep08, mRNA.           |
| <a href="#">GPS.0</a>  | <a href="#">GPS.0.aSep08</a>  |                        | 5773   | 1777 | 7 | 395 | g-protein coupled receptor 124 (GPS.0) alternative variant aSep08, mRNA.                                     |
| <a href="#">GPS.0</a>  | <a href="#">GPS.0.bSep08</a>  |                        | 2232   | 787  | 6 | 262 | G-protein coupled receptor 124 (GPS.0) alternative variant bSep08, mRNA.                                     |
| <a href="#">Gps2</a>   | <a href="#">Gps2.bSep08</a>   | <a href="#">497941</a> | 1885   | 785  | 8 | 261 | G protein pathway suppressor 2 (Gps2) alternative variant bSep08, mRNA.                                      |
| <a href="#">Gps2</a>   | <a href="#">Gps2.cSep08</a>   | <a href="#">497941</a> | 1883   | 1186 | 7 | 208 | G protein pathway suppressor 2 (Gps2) alternative variant cSep08, mRNA.                                      |
| <a href="#">Gps2</a>   | <a href="#">Gps2.dSep08</a>   | <a href="#">497941</a> | 1364   | 678  | 5 | 173 | G protein pathway suppressor 2 (Gps2) alternative variant dSep08, mRNA.                                      |

|                       |                              |                        |       |      |    |     |                                                                                                      |
|-----------------------|------------------------------|------------------------|-------|------|----|-----|------------------------------------------------------------------------------------------------------|
| <a href="#">Gps2</a>  | <a href="#">Gps2.eSep08</a>  | <a href="#">497941</a> | 661   | 399  | 4  | 116 | G protein pathway suppressor 2 (Gps2) alternative variant eSep08, mRNA.                              |
| <a href="#">Gps2</a>  | <a href="#">Gps2.fSep08</a>  | <a href="#">497941</a> | 942   | 745  | 2  | 97  | G protein pathway suppressor 2 (10.7 kD) (Gps2) alternative variant fSep08, mRNA.                    |
| <a href="#">Gps2l</a> | <a href="#">Gps2l.bSep08</a> | <a href="#">303248</a> | 1537  | 673  | 6  | 224 | G protein pathway suppressor 2-like (Gps2l) alternative variant bSep08, mRNA.                        |
| <a href="#">Gps2l</a> | <a href="#">Gps2l.cSep08</a> | <a href="#">303248</a> | 1254  | 789  | 5  | 140 | G protein pathway suppressor 2-like (Gps2l) alternative variant cSep08, mRNA.                        |
| <a href="#">Gpsm1</a> | <a href="#">Gpsm1.bSep08</a> | <a href="#">246254</a> | 10919 | 2239 | 6  | 227 | GoLoco (25.1 kD) (Gpsm1) alternative variant bSep08, mRNA.                                           |
| <a href="#">Gpsm1</a> | <a href="#">Gpsm1.cSep08</a> | <a href="#">246254</a> | 8831  | 643  | 4  | 213 | tetratricopeptide TPR 1 (Gpsm1) alternative variant cSep08, mRNA.                                    |
| <a href="#">Gpsm1</a> | <a href="#">Gpsm1.dSep08</a> | <a href="#">246254</a> | 4585  | 774  | 4  | 166 | GoLoco (18.1 kD) (Gpsm1) alternative variant dSep08, mRNA.                                           |
| <a href="#">Gpsm1</a> | <a href="#">Gpsm1.eSep08</a> | <a href="#">246254</a> | 2748  | 942  | 3  | 166 | GoLoco (18.1 kD) (Gpsm1) alternative variant eSep08, mRNA.                                           |
| <a href="#">Gpsm1</a> | <a href="#">Gpsm1.fSep08</a> | <a href="#">246254</a> | 5147  | 294  | 3  | 97  | putative protein of vertebrate origin (Gpsm1) alternative variant fSep08, mRNA.                      |
| <a href="#">Gpsm1</a> | <a href="#">Gpsm1.gSep08</a> | <a href="#">246254</a> | 1100  | 265  | 2  | 88  | putative protein (Gpsm1) alternative variant gSep08, mRNA.                                           |
| <a href="#">Gpsm2</a> | <a href="#">Gpsm2.aSep08</a> | <a href="#">362021</a> | 10213 | 909  | 4  | 302 | LGN protein (Gpsm2) alternative variant aSep08, mRNA.                                                |
| <a href="#">Gpsm2</a> | <a href="#">Gpsm2.bSep08</a> | <a href="#">362021</a> | 15375 | 709  | 3  | 236 | modulator 2 (Gpsm2) alternative variant bSep08, mRNA.                                                |
| <a href="#">Gpsn2</a> | <a href="#">Gpsn2.bSep08</a> | <a href="#">191576</a> | 26142 | 820  | 10 | 272 | glycoprotein, synaptic 2 (Gpsn2) alternative variant bSep08, mRNA.                                   |
| <a href="#">Gpsn2</a> | <a href="#">Gpsn2.cSep08</a> | <a href="#">191576</a> | 25913 | 737  | 10 | 227 | glycoprotein, synaptic 2 (Gpsn2) alternative variant cSep08, mRNA.                                   |
| <a href="#">Gpsn2</a> | <a href="#">Gpsn2.dSep08</a> | <a href="#">191576</a> | 1980  | 716  | 6  | 189 | glycoprotein, synaptic 2 (Gpsn2) alternative variant dSep08, mRNA.                                   |
| <a href="#">Gpsn2</a> | <a href="#">Gpsn2.eSep08</a> | <a href="#">191576</a> | 40590 | 709  | 8  | 182 | glycoprotein, synaptic 2 (Gpsn2) alternative variant eSep08, mRNA.                                   |
| <a href="#">Gpsn2</a> | <a href="#">Gpsn2.fSep08</a> | <a href="#">191576</a> | 1247  | 695  | 2  | 131 | glycoprotein, synaptic 2 (Gpsn2) alternative variant fSep08, mRNA.                                   |
| <a href="#">Gpsn2</a> | <a href="#">Gpsn2.gSep08</a> | <a href="#">191576</a> | 25286 | 449  | 5  | 113 | glycoprotein, synaptic 2 (13.2 kD) (Gpsn2) alternative variant gSep08, mRNA.                         |
| <a href="#">Gpsn2</a> | <a href="#">Gpsn2.hSep08</a> | <a href="#">191576</a> | 25083 | 777  | 4  | 106 | glycoprotein, synaptic 2 (Gpsn2) alternative variant hSep08, mRNA.                                   |
| <a href="#">Gpsn2</a> | <a href="#">Gpsn2.iSep08</a> | <a href="#">191576</a> | 26647 | 201  | 3  | 60  | glycoprotein, synaptic 2 (Gpsn2) alternative variant iSep08, mRNA.                                   |
| <a href="#">Gpt</a>   | <a href="#">Gpt.bSep08</a>   | <a href="#">81670</a>  | 1587  | 704  | 6  | 216 | glutamic pyruvic transaminase soluble (Gpt) alternative variant bSep08, mRNA.                        |
| <a href="#">Gpt</a>   | <a href="#">Gpt.cSep08</a>   | <a href="#">81670</a>  | 1034  | 792  | 3  | 88  | glutamic-pyruvate transaminase (10.0 kD) (Gpt) alternative variant cSep08, mRNA.                     |
| <a href="#">Gpt</a>   | <a href="#">Gpt.dSep08</a>   | <a href="#">81670</a>  | 1148  | 987  | 3  | 85  | glutamic transaminase (9.7 kD) (Gpt) alternative variant dSep08, mRNA.                               |
| <a href="#">Gpt2</a>  | <a href="#">Gpt2.bSep08</a>  | <a href="#">307759</a> | 10833 | 411  | 3  | 136 | glutamic pyruvate transaminase (alanine aminotransferase) 2 (Gpt2) alternative variant bSep08, mRNA. |

|                         |                                |                        |        |      |    |     |                                                                                                     |
|-------------------------|--------------------------------|------------------------|--------|------|----|-----|-----------------------------------------------------------------------------------------------------|
| <a href="#">Gpx3</a>    | <a href="#">Gpx3.bSep08</a>    | <a href="#">64317</a>  | 7427   | 921  | 4  | 85  | glutathione peroxidase 3 (9.3 kD) (Gpx3) alternative variant bSep08, mRNA.                          |
| <a href="#">Gpx4</a>    | <a href="#">Gpx4.cSep08</a>    | <a href="#">29328</a>  | 1619   | 726  | 4  | 69  | glutathione peroxidase 4 (8.0 kD) (Gpx4) alternative variant cSep08, mRNA.                          |
| <a href="#">Gpx4</a>    | <a href="#">Gpx4.eSep08</a>    | <a href="#">29328</a>  | 844    | 678  | 3  | 52  | glutathione peroxidase 4 (Gpx4) alternative variant eSep08, mRNA.                                   |
| <a href="#">Gpx6</a>    | <a href="#">Gpx6.bSep08</a>    | <a href="#">259233</a> | 2049   | 927  | 1  | 74  | glutathione peroxidase 6 (Gpx6) alternative variant bSep08, mRNA.                                   |
| <a href="#">GRAM.0</a>  | <a href="#">GRAM.0.aSep08</a>  |                        | 49413  | 783  | 6  | 260 | GRAM (GRAM.0) alternative variant aSep08, mRNA.                                                     |
| <a href="#">GRAM.0</a>  | <a href="#">GRAM.0.bSep08</a>  |                        | 6757   | 438  | 1  | 52  | putative protein of mammalian origin (GRAM.0) alternative variant bSep08, mRNA.                     |
| <a href="#">Gramd1a</a> | <a href="#">Gramd1a.bSep08</a> | <a href="#">361550</a> | 21531  | 1601 | 8  | 302 | putative protein of eukaryotic origin (Gramd1a) alternative variant bSep08, mRNA.                   |
| <a href="#">Gramd1a</a> | <a href="#">Gramd1a.cSep08</a> | <a href="#">361550</a> | 5923   | 2004 | 6  | 239 | gram 1A (27.0 kD) (Gramd1a) alternative variant cSep08, mRNA.                                       |
| <a href="#">Gramd1a</a> | <a href="#">Gramd1a.dSep08</a> | <a href="#">361550</a> | 4448   | 626  | 6  | 174 | gram 1A (Gramd1a) alternative variant dSep08, mRNA.                                                 |
| <a href="#">Gramd1a</a> | <a href="#">Gramd1a.eSep08</a> | <a href="#">361550</a> | 3326   | 715  | 3  | 48  | putative protein (Gramd1a) alternative variant eSep08, mRNA.                                        |
| <a href="#">Gramd1b</a> | <a href="#">Gramd1b.aSep08</a> | <a href="#">300644</a> | 180076 | 2603 | 20 | 758 | gram 1B (87.8 kD) (Gramd1b) alternative variant aSep08, mRNA.                                       |
| <a href="#">Gramd1b</a> | <a href="#">Gramd1b.bSep08</a> | <a href="#">300644</a> | 151906 | 750  | 8  | 249 | gram 1B (Gramd1b) alternative variant bSep08, mRNA.                                                 |
| <a href="#">Gramd1b</a> | <a href="#">Gramd1b.cSep08</a> | <a href="#">300644</a> | 5863   | 399  | 4  | 132 | gram 1B (Gramd1b) alternative variant cSep08, mRNA.                                                 |
| <a href="#">Gramd1b</a> | <a href="#">Gramd1b.dSep08</a> | <a href="#">300644</a> | 77948  | 392  | 4  | 83  | putative protein (9.0 kD) (Gramd1b) alternative variant dSep08, mRNA.                               |
| <a href="#">Gramd1b</a> | <a href="#">Gramd1b.fSep08</a> | <a href="#">300644</a> | 60673  | 404  | 3  | 43  | putative protein (Gramd1b) alternative variant fSep08, mRNA.                                        |
| <a href="#">Gramd1c</a> | <a href="#">Gramd1c.aSep08</a> | <a href="#">360717</a> | 29923  | 939  | 7  | 313 | putative protein of eukaryotic origin (Gramd1c) alternative variant aSep08, mRNA.                   |
| <a href="#">Gramd1c</a> | <a href="#">Gramd1c.bSep08</a> | <a href="#">360717</a> | 3976   | 703  | 2  | 98  | putative nuclear protein of vertebrate origin (11.2 kD) (Gramd1c) alternative variant bSep08, mRNA. |
| <a href="#">Gramd2</a>  | <a href="#">Gramd2.aSep08</a>  | <a href="#">300761</a> | 6092   | 994  | 6  | 260 | GRAM (Gramd2) alternative variant aSep08, mRNA.                                                     |
| <a href="#">Gramd2</a>  | <a href="#">Gramd2.bSep08</a>  | <a href="#">300761</a> | 2947   | 842  | 1  | 110 | putative nuclear protein of vertebrate origin (12.4 kD) (Gramd2) alternative variant bSep08, mRNA.  |
| <a href="#">Gramd3</a>  | <a href="#">Gramd3.bSep08</a>  | <a href="#">307288</a> | 50851  | 770  | 7  | 256 | GRAM (Gramd3) alternative variant bSep08, mRNA.                                                     |
| <a href="#">Gramd3</a>  | <a href="#">Gramd3.cSep08</a>  | <a href="#">307288</a> | 24021  | 842  | 9  | 246 | GRAM (Gramd3) alternative variant cSep08, mRNA.                                                     |
| <a href="#">Gramd4</a>  | <a href="#">Gramd4.aSep08</a>  | <a href="#">315203</a> | 64306  | 1018 |    | 337 | death-inducing-protein (Gramd4) mRNA.                                                               |
| <a href="#">Grap</a>    | <a href="#">Grap.bSep08</a>    | <a href="#">363616</a> | 2625   | 803  | 2  | 152 | GRB2-related adaptor protein (17.2 kD) (Grap) alternative variant bSep08, mRNA.                     |
| <a href="#">Grap2</a>   | <a href="#">Grap2.bSep08</a>   | <a href="#">366962</a> | 2245   | 470  | 3  | 103 | GRB2-related adaptor protein 2 (Grap2) alternative variant bSep08, mRNA.                            |
| <a href="#">Grap2</a>   | <a href="#">Grap2.cSep08</a>   | <a href="#">366962</a> | 5885   | 442  | 2  | 35  | GRB2-related adaptor protein 2 (3.9 kD) (Grap2) alternative variant cSep08, mRNA.                   |
| <a href="#">Grb2</a>    | <a href="#">Grb2.bSep08</a>    | <a href="#">81504</a>  | 85503  | 1108 | 5  | 175 | growth factor receptor bound protein 2 (20.3 kD) (Grb2) alternative variant bSep08, mRNA.           |
| <a href="#">Grb2</a>    | <a href="#">Grb2.dSep08</a>    | <a href="#">81504</a>  | 79287  | 308  | 2  | 36  | growth factor receptor bound protein 2 (Grb2) alternative variant dSep08, mRNA.                     |

|                         |                                |                        |       |      |   |     |                                                                                                                   |
|-------------------------|--------------------------------|------------------------|-------|------|---|-----|-------------------------------------------------------------------------------------------------------------------|
| <a href="#">Grb2</a>    | <a href="#">Grb2.eSep08</a>    | <a href="#">81504</a>  | 84613 | 396  | 3 | 78  | growth factor receptor bound protein 2 (Grb2) alternative variant eSep08, mRNA.                                   |
| <a href="#">Grb7</a>    | <a href="#">Grb7.bSep08</a>    | <a href="#">84427</a>  | 971   | 761  | 3 | 119 | growth factor receptor bound protein 7 (Grb7) alternative variant bSep08, mRNA.                                   |
| <a href="#">Grb7</a>    | <a href="#">Grb7.cSep08</a>    | <a href="#">84427</a>  | 4530  | 867  | 3 | 103 | growth factor receptor bound protein 7 (Grb7) alternative variant cSep08, mRNA.                                   |
| <a href="#">Grb10</a>   | <a href="#">Grb10.bSep08</a>   | <a href="#">498416</a> | 3734  | 565  | 2 | 130 | growth factor receptor bound protein 10 (Grb10) alternative variant bSep08, mRNA.                                 |
| <a href="#">Grb10</a>   | <a href="#">Grb10.cSep08</a>   | <a href="#">498416</a> | 7319  | 3107 | 4 | 88  | factor receptor-bound protein 10 (Grb10) alternative variant cSep08, mRNA.                                        |
| <a href="#">Grhl1</a>   | <a href="#">Grhl1.aSep08</a>   | <a href="#">313993</a> | 9026  | 645  |   | 214 | grainyhead-like 1 (Drosophila) (Grhl1) mRNA.                                                                      |
| <a href="#">Grhl2</a>   | <a href="#">Grhl2.bSep08</a>   | <a href="#">299979</a> | 33538 | 887  | 2 | 184 | grainyhead-like 2 (Drosophila) (Grhl2) alternative variant bSep08, mRNA.                                          |
| <a href="#">Grhpr</a>   | <a href="#">Grhpr.aSep08</a>   | <a href="#">680021</a> | 9230  | 1784 | 5 | 528 | glyoxylate reductase/hydroxypyruvate reductase (Grhpr) alternative variant aSep08, complete mRNA.                 |
| <a href="#">Grhpr</a>   | <a href="#">Grhpr.bSep08</a>   | <a href="#">680021</a> | 4349  | 634  | 4 | 148 | glyoxylate reductase/hydroxypyruvate reductase (Grhpr) alternative variant bSep08, mRNA.                          |
| <a href="#">Grhpr</a>   | <a href="#">Grhpr.cSep08</a>   | <a href="#">680021</a> | 3173  | 422  | 2 | 128 | glyoxylate reductase/hydroxypyruvate reductase (Grhpr) alternative variant cSep08, mRNA.                          |
| <a href="#">Grhpr</a>   | <a href="#">Grhpr.dSep08</a>   | <a href="#">680021</a> | 3179  | 1799 | 1 | 93  | glyoxylate reductase/hydroxypyruvate reductase (10.0 kD) (Grhpr) alternative variant dSep08, complete mRNA.       |
| <a href="#">Gria2</a>   | <a href="#">Gria2.dSep08</a>   | <a href="#">29627</a>  | 2369  | 1977 | 2 | 56  | glutamate receptor, ionotropic, AMPA 2 (6.4 kD) (Gria2) alternative variant dSep08, mRNA.                         |
| <a href="#">Grid1</a>   | <a href="#">Grid1.bSep08</a>   | <a href="#">79219</a>  | 36550 | 330  | 2 | 110 | glutamate receptor, ionotropic, delta 1 (Grid1) alternative variant bSep08, mRNA.                                 |
| <a href="#">Grid2ip</a> | <a href="#">Grid2ip.bSep08</a> | <a href="#">288484</a> | 690   | 404  | 1 | 121 | glutamate receptor, ionotropic, delta 2 (Grid2) interacting protein 1 (Grid2ip) alternative variant bSep08, mRNA. |
| <a href="#">Grifin</a>  | <a href="#">Grifin.bSep08</a>  | <a href="#">117130</a> | 1492  | 426  | 1 | 141 | galectin-related inter-fiber protein (Grifin) alternative variant bSep08, mRNA.                                   |
| <a href="#">Grik1</a>   | <a href="#">Grik1.dSep08</a>   | <a href="#">29559</a>  | 1761  | 478  | 2 | 128 | glutamate receptor, ionotropic, kainate 1 (Grik1) alternative variant dSep08, mRNA.                               |
| <a href="#">Grik1</a>   | <a href="#">Grik1.eSep08</a>   | <a href="#">29559</a>  | 19399 | 772  | 2 | 113 | glutamate receptor, ionotropic, kainate 1 (12.7 kD) (Grik1) alternative variant eSep08, mRNA.                     |
| <a href="#">Grik4</a>   | <a href="#">Grik4.bSep08</a>   | <a href="#">24406</a>  | 22142 | 749  | 1 | 179 | glutamate receptor, ionotropic, kainate 4 (Grik4) alternative variant bSep08, mRNA.                               |
| <a href="#">Grik5</a>   | <a href="#">Grik5.bSep08</a>   | <a href="#">24407</a>  | 70192 | 1788 | 4 | 595 | glutamate receptor, ionotropic, kainate 5 (Grik5) alternative variant bSep08, mRNA.                               |
| <a href="#">Grik5</a>   | <a href="#">Grik5.cSep08</a>   | <a href="#">24407</a>  | 4890  | 1021 | 7 | 340 | glutamate receptor, ionotropic, kainate 5 (Grik5) alternative variant cSep08, mRNA.                               |
| <a href="#">Grik5</a>   | <a href="#">Grik5.dSep08</a>   | <a href="#">24407</a>  | 3238  | 394  | 3 | 131 | glutamate receptor, ionotropic, kainate 5 (Grik5) alternative variant dSep08, mRNA.                               |
| <a href="#">Grik5</a>   | <a href="#">Grik5.eSep08</a>   | <a href="#">24407</a>  | 1005  | 740  | 2 | 90  | glutamate receptor, ionotropic, kainate 5 (Grik5) alternative variant eSep08, mRNA.                               |
| <a href="#">Grin1</a>   | <a href="#">Grin1.bSep08</a>   | <a href="#">24408</a>  | 5266  | 867  | 6 | 221 | glutamate receptor, ionotropic, N-methyl D-aspartate 1 (Grin1) alternative variant bSep08, mRNA.                  |

|                         |                                |                        |        |      |   |      |                                                                                                                                         |
|-------------------------|--------------------------------|------------------------|--------|------|---|------|-----------------------------------------------------------------------------------------------------------------------------------------|
| <a href="#">Grina</a>   | <a href="#">Grina.bSep08</a>   | <a href="#">266668</a> | 1451   | 511  | 1 | 170  | glutamate receptor, ionotropic, N-methyl D-aspartate-associated protein 1 (glutamate binding) (Grina) alternative variant bSep08, mRNA. |
| <a href="#">Grin1a</a>  | <a href="#">Grin1a.bSep08</a>  | <a href="#">192147</a> | 1611   | 780  | 1 | 28   | glutamate receptor, ionotropic, N-methyl D-aspartate-like 1A (Grin1a) alternative variant bSep08, mRNA.                                 |
| <a href="#">Grip1</a>   | <a href="#">Grip1.bSep08</a>   | <a href="#">84016</a>  | 28376  | 971  | 6 | 273  | glutamate receptor interacting protein 1 (Grip1) alternative variant bSep08, mRNA.                                                      |
| <a href="#">Grip1</a>   | <a href="#">Grip1.cSep08</a>   | <a href="#">84016</a>  | 14098  | 585  | 3 | 111  | glutamate receptor interacting protein 1 (Grip1) alternative variant cSep08, mRNA.                                                      |
| <a href="#">Grip2</a>   | <a href="#">Grip2.bSep08</a>   | <a href="#">171571</a> | 3075   | 726  | 1 | 179  | glutamate receptor interacting protein 2 (Grip2) alternative variant bSep08, mRNA.                                                      |
| <a href="#">Gripap1</a> | <a href="#">Gripap1.bSep08</a> | <a href="#">116493</a> | 8513   | 562  | 8 | 187  | GRIP1 associated protein 1 (Gripap1) alternative variant bSep08, mRNA.                                                                  |
| <a href="#">Gripap1</a> | <a href="#">Gripap1.dSep08</a> | <a href="#">116493</a> | 611    | 472  | 2 | 52   | GRIP1 associated protein 1 (Gripap1) alternative variant dSep08, mRNA.                                                                  |
| <a href="#">Gripap1</a> | <a href="#">Gripap1.eSep08</a> | <a href="#">116493</a> | 9681   | 390  | 3 | 42   | GRIP1 associated protein 1 (Gripap1) alternative variant eSep08, mRNA.                                                                  |
| <a href="#">Grit</a>    | <a href="#">Grit.aSep08</a>    | <a href="#">315530</a> | 41311  | 536  | 4 | 178  | rho GTPase-activating protein (Grit) alternative variant aSep08, mRNA.                                                                  |
| <a href="#">Grit</a>    | <a href="#">Grit.bSep08</a>    | <a href="#">315530</a> | 22203  | 380  | 3 | 91   | rho GTPase-activating protein (Grit) alternative variant bSep08, mRNA.                                                                  |
| <a href="#">Grit</a>    | <a href="#">Grit.cSep08</a>    | <a href="#">315530</a> | 15575  | 410  | 1 | 20   | rho GTPase-activating protein (Grit) alternative variant cSep08, mRNA.                                                                  |
| <a href="#">Grk4</a>    | <a href="#">Grk4.bSep08</a>    | <a href="#">59077</a>  | 37084  | 1102 | 7 | 317  | G protein-coupled receptor kinase 4 (Grk4) alternative variant bSep08, mRNA.                                                            |
| <a href="#">Grk4</a>    | <a href="#">Grk4.cSep08</a>    | <a href="#">59077</a>  | 12897  | 731  | 5 | 205  | G protein-coupled receptor kinase 4 (Grk4) alternative variant cSep08, mRNA.                                                            |
| <a href="#">Grk4</a>    | <a href="#">Grk4.dSep08</a>    | <a href="#">59077</a>  | 8165   | 610  | 3 | 196  | G protein-coupled receptor kinase 4 (Grk4) alternative variant dSep08, mRNA.                                                            |
| <a href="#">Grk4</a>    | <a href="#">Grk4.eSep08</a>    | <a href="#">59077</a>  | 7433   | 560  | 3 | 76   | G protein-coupled receptor kinase 4 (Grk4) alternative variant eSep08, mRNA.                                                            |
| <a href="#">Grk4</a>    | <a href="#">Grk4.fSep08</a>    | <a href="#">59077</a>  | 4894   | 457  | 4 | 53   | G protein-coupled receptor kinase 4 (Grk4) alternative variant fSep08, mRNA.                                                            |
| <a href="#">Grk4</a>    | <a href="#">Grk4.hSep08</a>    | <a href="#">59077</a>  | 12125  | 445  | 5 | 40   | G protein-coupled receptor kinase 4 (Grk4) alternative variant hSep08, mRNA.                                                            |
| <a href="#">Grk6</a>    | <a href="#">Grk6.cSep08</a>    | <a href="#">59076</a>  | 8160   | 1455 | 2 | 300  | G protein-coupled receptor kinase 6 (33.9 kD) (Grk6) alternative variant cSep08, mRNA.                                                  |
| <a href="#">Grif1</a>   | <a href="#">Grif1.aSep08</a>   | <a href="#">306400</a> | 64111  | 1606 |   | 408  | glucocorticoid receptor DNA binding factor 1 (Grif1) mRNA.                                                                              |
| <a href="#">Grm5</a>    | <a href="#">Grm5.aSep08</a>    | <a href="#">24418</a>  | 613778 | 3612 | 1 | 1203 | glutamate receptor, metabotropic 5 (Grm5) alternative variant aSep08, mRNA.                                                             |
| <a href="#">Grm7</a>    | <a href="#">Grm7.bSep08</a>    | <a href="#">81672</a>  | 182695 | 1513 | 1 | 416  | glutamate receptor, metabotropic 7 (Grm7) alternative variant bSep08, mRNA.                                                             |
| <a href="#">Grn</a>     | <a href="#">Grn.bSep08</a>     | <a href="#">29143</a>  | 689    | 591  | 2 | 158  | granulin (Grn) alternative variant bSep08, mRNA.                                                                                        |
| <a href="#">Grn</a>     | <a href="#">Grn.cSep08</a>     | <a href="#">29143</a>  | 701    | 174  | 2 | 58   | granulin (Grn) alternative variant cSep08, mRNA.                                                                                        |
| <a href="#">Grpca</a>   | <a href="#">Grpca.bSep08</a>   | <a href="#">192266</a> | 68999  | 650  | 4 | 216  | glutamine glutamic acid-rich protein (Grpca) alternative variant bSep08, mRNA.                                                          |

|                        |                               |                        |       |      |   |     |                                                                                           |
|------------------------|-------------------------------|------------------------|-------|------|---|-----|-------------------------------------------------------------------------------------------|
| <a href="#">Grpca</a>  | <a href="#">Grpca.bSep08</a>  | <a href="#">360395</a> | 68999 | 650  | 4 | 216 | glutamine glutamic acid-rich protein (Grpca) alternative variant bSep08, mRNA.            |
| <a href="#">Grpca</a>  | <a href="#">Grpca.cSep08</a>  | <a href="#">192266</a> | 5146  | 732  | 4 | 212 | glutamine glutamic acid-rich protein (Grpca) alternative variant cSep08, mRNA.            |
| <a href="#">Grpca</a>  | <a href="#">Grpca.cSep08</a>  | <a href="#">360395</a> | 5146  | 732  | 4 | 212 | glutamine glutamic acid-rich protein (Grpca) alternative variant cSep08, mRNA.            |
| <a href="#">Grpca</a>  | <a href="#">Grpca.dSep08</a>  | <a href="#">192266</a> | 68615 | 691  | 3 | 198 | glutamine glutamic acid-rich protein (Grpca) alternative variant dSep08, mRNA.            |
| <a href="#">Grpca</a>  | <a href="#">Grpca.dSep08</a>  | <a href="#">360395</a> | 68615 | 691  | 3 | 198 | glutamine glutamic acid-rich protein (Grpca) alternative variant dSep08, mRNA.            |
| <a href="#">Grpca</a>  | <a href="#">Grpca.eSep08</a>  | <a href="#">192266</a> | 5047  | 657  | 5 | 187 | submandibular gland secretory protein like (Grpca) alternative variant eSep08, mRNA.      |
| <a href="#">Grpca</a>  | <a href="#">Grpca.eSep08</a>  | <a href="#">360395</a> | 5047  | 657  | 5 | 187 | submandibular gland secretory protein like (Grpca) alternative variant eSep08, mRNA.      |
| <a href="#">Grpca</a>  | <a href="#">Grpca.fSep08</a>  | <a href="#">192266</a> | 3619  | 621  | 4 | 175 | submandibular gland secretory protein (Grpca) alternative variant fSep08, mRNA.           |
| <a href="#">Grpca</a>  | <a href="#">Grpca.fSep08</a>  | <a href="#">360395</a> | 3619  | 621  | 4 | 175 | submandibular gland secretory protein (Grpca) alternative variant fSep08, mRNA.           |
| <a href="#">Grpca</a>  | <a href="#">Grpca.gSep08</a>  | <a href="#">192266</a> | 1804  | 571  | 2 |     |                                                                                           |
| <a href="#">Grpca</a>  | <a href="#">Grpca.gSep08</a>  | <a href="#">360395</a> | 1804  | 571  | 2 |     |                                                                                           |
| <a href="#">Grpca</a>  | <a href="#">Grpca.hSep08</a>  | <a href="#">192266</a> | 1403  | 180  | 2 | 15  | putative protein (1.7 kD) (Grpca) alternative variant hSep08, mRNA.                       |
| <a href="#">Grpca</a>  | <a href="#">Grpca.hSep08</a>  | <a href="#">360395</a> | 1403  | 180  | 2 | 15  | putative protein (1.7 kD) (Grpca) alternative variant hSep08, mRNA.                       |
| <a href="#">Grpel1</a> | <a href="#">Grpel1.aSep08</a> | <a href="#">79563</a>  | 6517  | 1857 | 2 | 230 | GrpE-like 1, mitochondrial (25.8 kD) (Grpel1) alternative variant aSep08, mRNA.           |
| <a href="#">Grpel2</a> | <a href="#">Grpel2.bSep08</a> | <a href="#">688777</a> | 10821 | 759  | 5 | 207 | GrpE-like 2, mitochondrial (Grpel2) alternative variant bSep08, mRNA.                     |
| <a href="#">Grpel2</a> | <a href="#">Grpel2.cSep08</a> | <a href="#">688777</a> | 5514  | 418  | 2 | 41  | GrpE-like 2, mitochondrial (Grpel2) alternative variant cSep08, mRNA.                     |
| <a href="#">Grsf1</a>  | <a href="#">Grsf1.aSep08</a>  | <a href="#">305256</a> | 15937 | 2420 | 9 | 393 | G-rich RNA sequence binding factor 1 (Grsf1) alternative variant aSep08, mRNA.            |
| <a href="#">Grsf1</a>  | <a href="#">Grsf1.bSep08</a>  | <a href="#">305256</a> | 9191  | 768  | 6 | 256 | G-rich RNA sequence binding factor 1 (Grsf1) alternative variant bSep08, mRNA.            |
| <a href="#">Grsf1</a>  | <a href="#">Grsf1.cSep08</a>  | <a href="#">305256</a> | 4990  | 613  | 5 | 204 | G-rich RNA sequence binding factor 1 (Grsf1) alternative variant cSep08, mRNA.            |
| <a href="#">Grsf1</a>  | <a href="#">Grsf1.dSep08</a>  | <a href="#">305256</a> | 1447  | 709  | 2 | 81  | G-rich RNA sequence binding factor 1 (Grsf1) alternative variant dSep08, mRNA.            |
| <a href="#">Grsf1</a>  | <a href="#">Grsf1.eSep08</a>  | <a href="#">305256</a> | 3156  | 730  | 1 | 49  | G-rich RNA sequence binding factor 1 (5.7 kD) (Grsf1) alternative variant eSep08, mRNA.   |
| <a href="#">Grwd1</a>  | <a href="#">Grwd1.bSep08</a>  | <a href="#">308592</a> | 3490  | 2190 |   | 313 | glutamate-rich WD repeat containing 1 (34.5 kD) (Grwd1) alternative variant bSep08, mRNA. |
| <a href="#">Gsbs</a>   | <a href="#">Gsbs.bSep08</a>   | <a href="#">266705</a> | 15880 | 731  |   | 149 | G substrate (Gsbs) alternative variant bSep08, mRNA.                                      |
| <a href="#">Gsdma1</a> | <a href="#">Gsdma1.bSep08</a> | <a href="#">360619</a> | 11240 | 2545 | 8 | 235 | gasdermin A1 (26.2 kD) (Gsdma1) alternative variant bSep08, complete mRNA.                |
| <a href="#">Gsdma1</a> | <a href="#">Gsdma1.cSep08</a> | <a href="#">360619</a> | 3607  | 651  | 2 | 141 | gasdermin A1 (Gsdma1) alternative variant cSep08, mRNA.                                   |

|                       |                              |                        |        |      |   |     |                                                                                                                                                              |
|-----------------------|------------------------------|------------------------|--------|------|---|-----|--------------------------------------------------------------------------------------------------------------------------------------------------------------|
| <a href="#">Gsdmd</a> | <a href="#">Gsdmd.bSep08</a> | <a href="#">315084</a> | 1179   | 395  | 2 | 131 | gasdermin D (Gsdmd) alternative variant bSep08, mRNA.                                                                                                        |
| <a href="#">Gsdmd</a> | <a href="#">Gsdmd.dSep08</a> | <a href="#">315084</a> | 1473   | 576  | 3 | 91  | gasdermin D (Gsdmd) alternative variant dSep08, mRNA.                                                                                                        |
| <a href="#">Gsg1</a>  | <a href="#">Gsg1.bSep08</a>  | <a href="#">312793</a> | 4643   | 705  | 1 | 157 | germ cell associated 1 (Gsg1) alternative variant bSep08, mRNA.                                                                                              |
| <a href="#">Gsg1l</a> | <a href="#">Gsg1l.aSep08</a> | <a href="#">499263</a> | 155264 | 1372 | 2 | 230 | GSg1-like (26.2 kD) (Gsg1l) alternative variant aSep08, mRNA.                                                                                                |
| <a href="#">Gsg1l</a> | <a href="#">Gsg1l.bSep08</a> | <a href="#">499263</a> | 129452 | 472  | 1 | 97  | GSg1-like (Gsg1l) alternative variant bSep08, mRNA.                                                                                                          |
| <a href="#">Gsk3b</a> | <a href="#">Gsk3b.bSep08</a> | <a href="#">84027</a>  | 75347  | 1349 | 9 | 366 | glycogen synthase kinase 3 beta (41.6 kD) (Gsk3b) alternative variant bSep08, mRNA.                                                                          |
| <a href="#">Gsk3b</a> | <a href="#">Gsk3b.cSep08</a> | <a href="#">84027</a>  | 20294  | 494  | 4 | 128 | glycogen synthase kinase 3 beta (Gsk3b) alternative variant cSep08, mRNA.                                                                                    |
| <a href="#">Gsk3b</a> | <a href="#">Gsk3b.dSep08</a> | <a href="#">84027</a>  | 8356   | 281  | 3 | 80  | glycogen synthase kinase 3 beta (Gsk3b) alternative variant dSep08, mRNA.                                                                                    |
| <a href="#">Gsn</a>   | <a href="#">Gsn.aSep08</a>   | <a href="#">296654</a> | 26858  | 3372 | 1 | 491 | gelsolin (54.6 kD) (Gsn) alternative variant aSep08, mRNA.                                                                                                   |
| <a href="#">Gsn</a>   | <a href="#">Gsn.bSep08</a>   | <a href="#">296654</a> | 5026   | 1023 |   | 260 | gelsolin (Gsn) alternative variant bSep08, mRNA.                                                                                                             |
| <a href="#">Gsn</a>   | <a href="#">Gsn.cSep08</a>   | <a href="#">296654</a> | 11135  | 744  | 2 | 245 | gelsolin (Gsn) alternative variant cSep08, mRNA.                                                                                                             |
| <a href="#">Gsn</a>   | <a href="#">Gsn.dSep08</a>   | <a href="#">296654</a> | 37523  | 827  | 2 | 220 | gelsolin (Gsn) alternative variant dSep08, mRNA.                                                                                                             |
| <a href="#">Gsn</a>   | <a href="#">Gsn.eSep08</a>   | <a href="#">296654</a> | 26284  | 726  | 1 | 206 | gelsolin (Gsn) alternative variant eSep08, mRNA.                                                                                                             |
| <a href="#">Gspt1</a> | <a href="#">Gspt1.bSep08</a> | <a href="#">24420</a>  | 5748   | 771  | 4 | 180 | g1 to S phase transition 1 (Gspt1) alternative variant bSep08, mRNA.                                                                                         |
| <a href="#">Gspt1</a> | <a href="#">Gspt1.cSep08</a> | <a href="#">24420</a>  | 12993  | 517  | 6 | 120 | g1 to S phase transition 1 (Gspt1) alternative variant cSep08, mRNA.                                                                                         |
| <a href="#">Gspt1</a> | <a href="#">Gspt1.dSep08</a> | <a href="#">24420</a>  | 5087   | 361  | 4 | 120 | g1 to S phase transition 1 (Gspt1) alternative variant dSep08, mRNA.                                                                                         |
| <a href="#">Gsr</a>   | <a href="#">Gsr.bSep08</a>   | <a href="#">116686</a> | 17335  | 319  | 5 | 106 | glutathione reductase (Gsr) alternative variant bSep08, mRNA.                                                                                                |
| <a href="#">Gstcd</a> | <a href="#">Gstcd.bSep08</a> | <a href="#">310855</a> | 78420  | 859  | 7 | 286 | putative protein, with a transmembrane domain, of ancient origin (Gstcd) alternative variant bSep08, mRNA.                                                   |
| <a href="#">Gstcd</a> | <a href="#">Gstcd.cSep08</a> | <a href="#">310855</a> | 68369  | 669  | 6 | 223 | putative protein of ancient origin (Gstcd) alternative variant cSep08, mRNA.                                                                                 |
| <a href="#">Gstcd</a> | <a href="#">Gstcd.eSep08</a> | <a href="#">310855</a> | 5766   | 390  | 2 | 76  | putative protein (Gstcd) alternative variant eSep08, mRNA.                                                                                                   |
| <a href="#">Gstcd</a> | <a href="#">Gstcd.fSep08</a> | <a href="#">310855</a> | 1616   | 579  | 2 | 66  | putative protein of bilateral origin (7.0 kD) (Gstcd) alternative variant fSep08, mRNA.                                                                      |
| <a href="#">Gstk1</a> | <a href="#">Gstk1.bSep08</a> | <a href="#">297029</a> | 969    | 785  | 1 | 63  | glutathione S-transferase kappa 1 (7.3 kD) (Gstk1) alternative variant bSep08, mRNA.                                                                         |
| <a href="#">Gstm1</a> | <a href="#">Gstm1.bSep08</a> | <a href="#">24423</a>  | 3363   | 879  | 8 | 206 | glutathione S-transferase mu 1 (24.3 kD) (Gstm1) alternative variant bSep08, mRNA.                                                                           |
| <a href="#">Gstm1</a> | <a href="#">Gstm1.cSep08</a> | <a href="#">24423</a>  | 1212   | 287  | 4 | 93  | A First-Sphere Second-Sphere Electrostatic Effects In The Active Site Of Class mu glutathione transferase (Gstm1) alternative variant cSep08, mRNA.          |
| <a href="#">Gstm1</a> | <a href="#">Gstm1.eSep08</a> | <a href="#">24423</a>  | 1408   | 593  | 2 | 43  | a First-Sphere Second-Sphere Electrostatic Effects In The Active Site Of Class mu glutathione transferase (5.0 kD) (Gstm1) alternative variant eSep08, mRNA. |
| <a href="#">Gstm2</a> | <a href="#">Gstm2.bSep08</a> | <a href="#">24424</a>  | 2307   | 402  | 6 | 133 | glutathione S-transferase, mu 2 (Gstm2) alternative variant bSep08, mRNA.                                                                                    |



|                        |                               |                        |       |      |   |     |                                                                                                |
|------------------------|-------------------------------|------------------------|-------|------|---|-----|------------------------------------------------------------------------------------------------|
| <a href="#">Gstm2</a>  | <a href="#">Gstm2.dSep08</a>  | <a href="#">24424</a>  | 4323  | 1807 | 6 | 160 | glutathione S-transferase, mu 2 (17.8 kD) (Gstm2) alternative variant dSep08, mRNA.            |
| <a href="#">Gstm3</a>  | <a href="#">Gstm3.bSep08</a>  | <a href="#">81869</a>  | 5048  | 745  | 7 | 182 | glutathione S-transferase M2 (21.4 kD) (Gstm3) alternative variant bSep08, mRNA.               |
| <a href="#">Gstm3</a>  | <a href="#">Gstm3.cSep08</a>  | <a href="#">81869</a>  | 2640  | 585  | 6 | 170 | glutathione S-transferase mu (Gstm3) alternative variant cSep08, mRNA.                         |
| <a href="#">Gstm3</a>  | <a href="#">Gstm3.dSep08</a>  | <a href="#">81869</a>  | 832   | 747  | 2 | 46  | glutathione S-transferase M2 (Gstm3) alternative variant dSep08, mRNA.                         |
| <a href="#">Gstm3</a>  | <a href="#">Gstm3.eSep08</a>  | <a href="#">81869</a>  | 1156  | 889  | 2 | 42  | glutathione S-transferase M1 (4.9 kD) (Gstm3) alternative variant eSep08, mRNA.                |
| <a href="#">Gstm4</a>  | <a href="#">Gstm4.bSep08</a>  | <a href="#">57298</a>  | 5205  | 765  | 4 | 112 | glutathione S-transferase M4 (Gstm4) alternative variant bSep08, mRNA.                         |
| <a href="#">Gstm4</a>  | <a href="#">Gstm4.cSep08</a>  | <a href="#">57298</a>  | 2351  | 652  | 2 | 75  | glutathione S-transferase M4 (Gstm4) alternative variant cSep08, mRNA.                         |
| <a href="#">Gstm5</a>  | <a href="#">Gstm5.bSep08</a>  | <a href="#">64352</a>  | 2566  | 793  | 1 | 158 | glutathione S-transferase, mu 5 (18.7 kD) (Gstm5) alternative variant bSep08, mRNA.            |
| <a href="#">Gstm6l</a> | <a href="#">Gstm6l.aSep08</a> | <a href="#">295362</a> | 6125  | 1755 | 3 | 244 | glutathione S-transferase, mu 6-like (Gstm6l) alternative variant aSep08, mRNA.                |
| <a href="#">Gstm6l</a> | <a href="#">Gstm6l.cSep08</a> | <a href="#">295362</a> | 2390  | 599  | 2 | 47  | glutathione S-transferase, mu 6-like (Gstm6l) alternative variant cSep08, mRNA.                |
| <a href="#">Gsto1</a>  | <a href="#">Gsto1.bSep08</a>  | <a href="#">114846</a> | 10372 | 1357 | 5 | 213 | glutathione S-transferase omega 1 (24.9 kD) (Gsto1) alternative variant bSep08, complete mRNA. |
| <a href="#">Gsto1</a>  | <a href="#">Gsto1.cSep08</a>  | <a href="#">114846</a> | 2651  | 687  | 2 | 97  | glutathione S-transferase omega 1 (Gsto1) alternative variant cSep08, mRNA.                    |
| <a href="#">Gsto1</a>  | <a href="#">Gsto1.dSep08</a>  | <a href="#">114846</a> | 1611  | 814  | 2 | 85  | glutathione S-transferase omega 1 (9.9 kD) (Gsto1) alternative variant dSep08, mRNA.           |
| <a href="#">Gsto1</a>  | <a href="#">Gsto1.eSep08</a>  | <a href="#">114846</a> | 1467  | 285  | 3 | 60  | glutathione S-transferase omega (Gsto1) alternative variant eSep08, mRNA.                      |
| <a href="#">Gsto2</a>  | <a href="#">Gsto2.bSep08</a>  | <a href="#">309465</a> | 35394 | 1187 | 8 | 134 | glutathione S-transferase omega 2 (15.4 kD) (Gsto2) alternative variant bSep08, mRNA.          |
| <a href="#">Gsto2</a>  | <a href="#">Gsto2.fSep08</a>  | <a href="#">309465</a> | 4893  | 148  | 2 | 48  | glutathione S-transferase omega 2 (Gsto2) alternative variant fSep08, mRNA.                    |
| <a href="#">Gstp1</a>  | <a href="#">Gstp1.bSep08</a>  | <a href="#">24426</a>  | 617   | 461  | 2 | 132 | glutathione S-transferase (Gstp1) alternative variant bSep08, mRNA.                            |
| <a href="#">Gstp1</a>  | <a href="#">Gstp1.bSep08</a>  | <a href="#">29438</a>  | 617   | 461  | 2 | 132 | glutathione S-transferase (Gstp1) alternative variant bSep08, mRNA.                            |
| <a href="#">Gstp1</a>  | <a href="#">Gstp1.cSep08</a>  | <a href="#">24426</a>  | 1250  | 425  | 5 | 123 | glutathione (Gstp1) alternative variant cSep08, mRNA.                                          |
| <a href="#">Gstp1</a>  | <a href="#">Gstp1.cSep08</a>  | <a href="#">29438</a>  | 1250  | 425  | 5 | 123 | glutathione (Gstp1) alternative variant cSep08, mRNA.                                          |
| <a href="#">Gstt1</a>  | <a href="#">Gstt1.bSep08</a>  | <a href="#">25260</a>  | 15918 | 559  | 1 | 131 | glutathione S-transferase theta 1 (Gstt1) alternative variant bSep08, mRNA.                    |
| <a href="#">Gstt2</a>  | <a href="#">Gstt2.cSep08</a>  | <a href="#">29487</a>  | 735   | 441  | 2 | 139 | glutathione S-transferase, theta 2 (Gstt2) alternative variant cSep08, mRNA.                   |
| <a href="#">Gstt3</a>  | <a href="#">Gstt3.aSep08</a>  | <a href="#">499422</a> | 6851  | 1661 | 4 | 300 | glutathione S-transferase, theta 3 (Gstt3) alternative variant aSep08, mRNA.                   |
| <a href="#">Gstt3</a>  | <a href="#">Gstt3.bSep08</a>  | <a href="#">499422</a> | 4701  | 1084 | 4 | 223 | glutathione S-transferase, theta 3 (Gstt3) alternative variant bSep08, mRNA.                   |

|                        |                               |                        |       |      |    |     |                                                                                                                      |
|------------------------|-------------------------------|------------------------|-------|------|----|-----|----------------------------------------------------------------------------------------------------------------------|
| <a href="#">Gstt3</a>  | <a href="#">Gstt3.dSep08</a>  | <a href="#">499422</a> | 4323  | 656  | 3  | 85  | glutathione S-transferase, theta 3 (Gstt3) alternative variant dSep08, mRNA.                                         |
| <a href="#">Gtdc1</a>  | <a href="#">Gtdc1.bSep08</a>  | <a href="#">362129</a> | 41535 | 798  | 1  | 137 | putative protein of ancient origin (Gtdc1) alternative variant bSep08, mRNA.                                         |
| <a href="#">Gtf2a2</a> | <a href="#">Gtf2a2.cSep08</a> | <a href="#">83828</a>  | 13128 | 795  | 6  | 61  | general transcription factor IIa 2 (7.1 kD) (Gtf2a2) alternative variant cSep08, complete mRNA.                      |
| <a href="#">Gtf2e1</a> | <a href="#">Gtf2e1.aSep08</a> | <a href="#">303918</a> | 33821 | 2882 |    | 438 | general transcription factor II E, polypeptide 1 (alpha subunit) (49.2 kD) (Gtf2e1) mRNA.                            |
| <a href="#">Gtf2e2</a> | <a href="#">Gtf2e2.bSep08</a> | <a href="#">306516</a> | 35270 | 726  | 6  | 241 | general transcription factor II E, polypeptide 2 (beta subunit) (Gtf2e2) alternative variant bSep08, mRNA.           |
| <a href="#">Gtf2e2</a> | <a href="#">Gtf2e2.cSep08</a> | <a href="#">306516</a> | 1478  | 1083 | 2  | 93  | general transcription factor II E, polypeptide 2 (beta subunit) (10.9 kD) (Gtf2e2) alternative variant cSep08, mRNA. |
| <a href="#">Gtf2f1</a> | <a href="#">Gtf2f1.bSep08</a> | <a href="#">316123</a> | 5562  | 746  | 6  | 194 | general transcription factor IIF polypeptide 1 CRA a (Gtf2f1) alternative variant bSep08, mRNA.                      |
| <a href="#">Gtf2f1</a> | <a href="#">Gtf2f1.cSep08</a> | <a href="#">316123</a> | 5527  | 729  | 6  | 184 | general transcription factor IIF polypeptide 1 74kDa CRA b (Gtf2f1) alternative variant cSep08, mRNA.                |
| <a href="#">Gtf2f1</a> | <a href="#">Gtf2f1.dSep08</a> | <a href="#">316123</a> | 3705  | 701  | 5  | 109 | general transcription factor IIF polypeptide 1 CRA a (12.6 kD) (Gtf2f1) alternative variant dSep08, mRNA.            |
| <a href="#">Gtf2f1</a> | <a href="#">Gtf2f1.eSep08</a> | <a href="#">316123</a> | 748   | 558  | 3  | 84  | general transcription factor iif (9.5 kD) (Gtf2f1) alternative variant eSep08, mRNA.                                 |
| <a href="#">Gtf2f2</a> | <a href="#">Gtf2f2.bSep08</a> | <a href="#">81674</a>  | 55825 | 483  | 1  | 102 | general transcription factor IIF, polypeptide 2 (Gtf2f2) alternative variant bSep08, mRNA.                           |
| <a href="#">Gtf2h1</a> | <a href="#">Gtf2h1.bSep08</a> | <a href="#">361580</a> | 10192 | 1229 | 3  | 279 | general transcription factor II H, polypeptide 1 (Gtf2h1) alternative variant bSep08, mRNA.                          |
| <a href="#">Gtf2h2</a> | <a href="#">Gtf2h2.bSep08</a> | <a href="#">294693</a> | 28144 | 2174 | 15 | 317 | general transcription factor II H polypeptide 2 CRA b (35.5 kD) (Gtf2h2) alternative variant bSep08, complete mRNA.  |
| <a href="#">Gtf2h2</a> | <a href="#">Gtf2h2.cSep08</a> | <a href="#">294693</a> | 16984 | 1027 | 11 | 285 | general transcription factor II H polypeptide 2 CRA b (32.3 kD) (Gtf2h2) alternative variant cSep08, mRNA.           |
| <a href="#">Gtf2h2</a> | <a href="#">Gtf2h2.dSep08</a> | <a href="#">294693</a> | 16804 | 881  | 11 | 191 | general transcription factor II H polypeptide 2 CRA b (Gtf2h2) alternative variant dSep08, mRNA.                     |
| <a href="#">Gtf2h2</a> | <a href="#">Gtf2h2.eSep08</a> | <a href="#">294693</a> | 8070  | 815  | 4  | 110 | transcription factor 2 (12.4 kD) (Gtf2h2) alternative variant eSep08, mRNA.                                          |
| <a href="#">Gtf2h2</a> | <a href="#">Gtf2h2.fSep08</a> | <a href="#">294693</a> | 8448  | 515  | 5  | 76  | general transcription factor IIH polypeptide 2B (Gtf2h2) alternative variant fSep08, mRNA.                           |
| <a href="#">Gtf2h3</a> | <a href="#">Gtf2h3.bSep08</a> | <a href="#">288651</a> | 12364 | 616  | 9  | 139 | general transcription factor IIH, polypeptide 3 (15.5 kD) (Gtf2h3) alternative variant bSep08, mRNA.                 |
| <a href="#">Gtf2h3</a> | <a href="#">Gtf2h3.cSep08</a> | <a href="#">288651</a> | 1146  | 399  | 2  | 74  | general transcription factor IIH, polypeptide 3 (Gtf2h3) alternative variant cSep08, mRNA.                           |
| <a href="#">Gtf2h4</a> | <a href="#">Gtf2h4.bSep08</a> | <a href="#">294236</a> | 2971  | 790  | 4  | 221 | general transcription factor II H, polypeptide 4 (Gtf2h4) alternative variant bSep08, mRNA.                          |
| <a href="#">Gtf2h4</a> | <a href="#">Gtf2h4.cSep08</a> | <a href="#">294236</a> | 2695  | 764  | 2  | 210 | general transcription factor II H, polypeptide 4 (Gtf2h4) alternative variant cSep08, mRNA.                          |
| <a href="#">Gtf2h5</a> | <a href="#">Gtf2h5.bSep08</a> | <a href="#">502227</a> | 5857  | 780  | 3  | 63  | general transcription factor IIH, polypeptide 5 (Gtf2h5) alternative variant bSep08, mRNA.                           |
| <a href="#">Gtf2h5</a> | <a href="#">Gtf2h5.cSep08</a> | <a href="#">502227</a> | 5807  | 818  | 4  | 48  | general transcription factor IIH, polypeptide 5 (Gtf2h5) alternative variant cSep08, mRNA.                           |

|                                |                                       |                        |       |      |    |     |                                                                                                                    |
|--------------------------------|---------------------------------------|------------------------|-------|------|----|-----|--------------------------------------------------------------------------------------------------------------------|
| <a href="#">Gtf2i</a>          | <a href="#">Gtf2i.bSep08</a>          | <a href="#">353256</a> | 45453 | 1974 | 11 | 461 | general transcription factor II I (Gtf2i) alternative variant bSep08, mRNA.                                        |
| <a href="#">Gtf2i</a>          | <a href="#">Gtf2i.cSep08</a>          | <a href="#">353256</a> | 52713 | 1783 | 12 | 400 | general transcription factor II I (Gtf2i) alternative variant cSep08, mRNA.                                        |
| <a href="#">Gtf2i</a>          | <a href="#">Gtf2i.dSep08</a>          | <a href="#">353256</a> | 29540 | 1061 | 11 | 347 | general transcription factor II I (Gtf2i) alternative variant dSep08, mRNA.                                        |
| <a href="#">Gtf2i</a>          | <a href="#">Gtf2i.eSep08</a>          | <a href="#">353256</a> | 22439 | 873  | 9  | 290 | general transcription factor II I (Gtf2i) alternative variant eSep08, mRNA.                                        |
| <a href="#">Gtf2i</a>          | <a href="#">Gtf2i.fSep08</a>          | <a href="#">353256</a> | 3791  | 737  | 7  | 245 | general transcription factor II I (Gtf2i) alternative variant fSep08, mRNA.                                        |
| <a href="#">Gtf2i</a>          | <a href="#">Gtf2i.gSep08</a>          | <a href="#">353256</a> | 4629  | 566  | 5  | 142 | general transcription factor II I (Gtf2i) alternative variant gSep08, mRNA.                                        |
| <a href="#">Gtf2i</a>          | <a href="#">Gtf2i.iSep08</a>          | <a href="#">353256</a> | 1166  | 590  | 2  | 69  | general transcription factor II I (Gtf2i) alternative variant iSep08, mRNA.                                        |
| <a href="#">Gtf2ird1</a>       | <a href="#">Gtf2ird1.bSep08</a>       | <a href="#">246770</a> | 24360 | 1283 | 11 | 371 | general transcription factor II I repeat domain-containing 1 (Gtf2ird1) alternative variant bSep08, mRNA.          |
| <a href="#">Gtf2ird1</a>       | <a href="#">Gtf2ird1.cSep08</a>       | <a href="#">246770</a> | 22137 | 762  | 9  | 253 | general transcription factor II I repeat domain-containing 1 (Gtf2ird1) alternative variant cSep08, mRNA.          |
| <a href="#">Gtf2ird1</a>       | <a href="#">Gtf2ird1.dSep08</a>       | <a href="#">246770</a> | 56501 | 540  | 5  | 180 | general transcription factor II I repeat domain-containing 1 (Gtf2ird1) alternative variant dSep08, mRNA.          |
| <a href="#">Gtf2ird1</a>       | <a href="#">Gtf2ird1.eSep08</a>       | <a href="#">246770</a> | 7599  | 629  | 5  | 154 | general transcription factor II I repeat domain-containing 1 (Gtf2ird1) alternative variant eSep08, mRNA.          |
| <a href="#">Gtf3c1</a>         | <a href="#">Gtf3c1.bSep08</a>         | <a href="#">171063</a> | 12947 | 741  | 6  | 195 | general transcription factor III C 1 CRA b (22.6 kD) (Gtf3c1) alternative variant bSep08, mRNA.                    |
| <a href="#">Gtf3c1</a>         | <a href="#">Gtf3c1.cSep08</a>         | <a href="#">171063</a> | 1479  | 688  | 2  | 133 | general transcription factor III C 1 CRA c (Gtf3c1) alternative variant cSep08, mRNA.                              |
| <a href="#">Gtf3c1</a>         | <a href="#">Gtf3c1.dSep08</a>         | <a href="#">171063</a> | 1304  | 388  | 3  | 119 | general transcription factor III C 1 CRA b (Gtf3c1) alternative variant dSep08, mRNA.                              |
| <a href="#">Gtf3c1</a>         | <a href="#">Gtf3c1.eSep08</a>         | <a href="#">171063</a> | 2802  | 473  | 3  | 103 | general transcription factor III C 1 CRA b (Gtf3c1) alternative variant eSep08, mRNA.                              |
| <a href="#">Gtf3c1</a>         | <a href="#">Gtf3c1.gSep08</a>         | <a href="#">171063</a> | 20913 | 770  | 3  | 74  | general transcription factor 1 (Gtf3c1) alternative variant gSep08, mRNA.                                          |
| <a href="#">Gtf3c2</a>         | <a href="#">Gtf3c2.aSep08</a>         | <a href="#">313914</a> | 10934 | 2746 | 4  | 388 | general transcription factor IIIC, polypeptide 2, beta (Gtf3c2) alternative variant aSep08, mRNA.                  |
| <a href="#">Gtf3c2</a>         | <a href="#">Gtf3c2.bSep08</a>         | <a href="#">313914</a> | 1610  | 737  | 1  | 124 | general transcription factor IIIC, polypeptide 2, beta (Gtf3c2) alternative variant bSep08, mRNA.                  |
| <a href="#">Gtf3c3</a>         | <a href="#">Gtf3c3.bSep08</a>         | <a href="#">316810</a> | 1957  | 1314 | 2  | 74  | general transcription factor IIIC, polypeptide 3 (Gtf3c3) alternative variant bSep08, mRNA.                        |
| <a href="#">Gtf3c5</a>         | <a href="#">Gtf3c5.bSep08</a>         | <a href="#">362095</a> | 3947  | 1030 | 5  | 145 | general transcription factor IIIC, polypeptide 5 (Gtf3c5) alternative variant bSep08, mRNA.                        |
| <a href="#">Gtf3c6andBxdc1</a> | <a href="#">Gtf3c6andBxdc1.cSep08</a> | <a href="#">294436</a> | 9617  | 840  | 6  | 194 | general transcription factor IIIC polypeptide 6 alpha (21.6 kD) (Gtf3c6andBxdc1) alternative variant cSep08, mRNA. |
| <a href="#">Gtf3c6andBxdc1</a> | <a href="#">Gtf3c6andBxdc1.cSep08</a> | <a href="#">361858</a> | 9617  | 840  | 6  | 194 | general transcription factor IIIC polypeptide 6 alpha (21.6 kD) (Gtf3c6andBxdc1) alternative variant cSep08, mRNA. |
| <a href="#">Gtf3c6andBxdc1</a> | <a href="#">Gtf3c6andBxdc1.dSep08</a> | <a href="#">294436</a> | 8099  | 367  | 5  | 122 | brix (Gtf3c6andBxdc1) alternative variant dSep08, mRNA.                                                            |

|                                |                                       |                        |       |      |    |     |                                                                                  |
|--------------------------------|---------------------------------------|------------------------|-------|------|----|-----|----------------------------------------------------------------------------------|
| <a href="#">Gtf3c6andBxdc1</a> | <a href="#">Gtf3c6andBxdc1.dSep08</a> | <a href="#">361858</a> | 8099  | 367  | 5  | 122 | brix (Gtf3c6andBxdc1) alternative variant dSep08, mRNA.                          |
| <a href="#">Gtl3</a>           | <a href="#">Gtl3.aSep08</a>           | <a href="#">307642</a> | 13988 | 1194 | 6  | 193 | gene trap locus 3 (22.7 kD) (Gtl3) alternative variant aSep08, complete mRNA.    |
| <a href="#">Gtl3</a>           | <a href="#">Gtl3.cSep08</a>           | <a href="#">307642</a> | 1576  | 1083 | 2  | 91  | gene trap locus 3 (11.1 kD) (Gtl3) alternative variant cSep08, mRNA.             |
| <a href="#">Gtlf3b</a>         | <a href="#">Gtlf3b.aSep08</a>         | <a href="#">363614</a> | 7548  | 765  | 3  | 118 | gene trap locus F3b (Gtlf3b) alternative variant aSep08, mRNA.                   |
| <a href="#">Gtlf3b</a>         | <a href="#">Gtlf3b.cSep08</a>         | <a href="#">363614</a> | 10581 | 1374 | 3  | 65  | gene trap locus F3b (7.1 kD) (Gtlf3b) alternative variant cSep08, mRNA.          |
| <a href="#">Gtlf3b</a>         | <a href="#">Gtlf3b.dSep08</a>         | <a href="#">363614</a> | 24773 | 549  | 3  | 48  | gene trap locus F3b (5.5 kD) (Gtlf3b) alternative variant dSep08, mRNA.          |
| <a href="#">Gtpbp1</a>         | <a href="#">Gtpbp1.aSep08</a>         | <a href="#">300077</a> | 11457 | 3314 | 9  | 395 | GTP binding protein 1 (Gtpbp1) alternative variant aSep08, mRNA.                 |
| <a href="#">Gtpbp1</a>         | <a href="#">Gtpbp1.bSep08</a>         | <a href="#">300077</a> | 17803 | 1049 | 5  | 338 | GTP binding protein 1 (Gtpbp1) alternative variant bSep08, mRNA.                 |
| <a href="#">Gtpbp1</a>         | <a href="#">Gtpbp1.cSep08</a>         | <a href="#">300077</a> | 12737 | 1243 | 8  | 336 | GTP binding protein 1 (Gtpbp1) alternative variant cSep08, mRNA.                 |
| <a href="#">Gtpbp1</a>         | <a href="#">Gtpbp1.eSep08</a>         | <a href="#">300077</a> | 3204  | 776  | 3  | 258 | GTP binding protein 1 (Gtpbp1) alternative variant eSep08, mRNA.                 |
| <a href="#">Gtpbp1</a>         | <a href="#">Gtpbp1.fSep08</a>         | <a href="#">300077</a> | 5923  | 659  | 3  | 217 | GTP binding protein 1 (Gtpbp1) alternative variant fSep08, mRNA.                 |
| <a href="#">Gtpbp1</a>         | <a href="#">Gtpbp1.gSep08</a>         | <a href="#">300077</a> | 2634  | 1060 | 3  | 70  | GTP binding protein 1 (7.6 kD) (Gtpbp1) alternative variant gSep08, mRNA.        |
| <a href="#">Gtpbp2</a>         | <a href="#">Gtpbp2.aSep08</a>         | <a href="#">363195</a> | 8350  | 3267 | 11 | 596 | GTP binding protein 2 (Gtpbp2) alternative variant aSep08, mRNA.                 |
| <a href="#">Gtpbp2</a>         | <a href="#">Gtpbp2.bSep08</a>         | <a href="#">363195</a> | 4813  | 748  | 6  | 249 | GTP binding protein 2 (Gtpbp2) alternative variant bSep08, mRNA.                 |
| <a href="#">Gtpbp2</a>         | <a href="#">Gtpbp2.cSep08</a>         | <a href="#">363195</a> | 2537  | 744  | 5  | 156 | GTP binding protein 2 (Gtpbp2) alternative variant cSep08, mRNA.                 |
| <a href="#">Gtpbp2</a>         | <a href="#">Gtpbp2.dSep08</a>         | <a href="#">363195</a> | 2000  | 1689 | 2  | 106 | GTP binding protein 2 (Gtpbp2) alternative variant dSep08, mRNA.                 |
| <a href="#">Gtpbp2</a>         | <a href="#">Gtpbp2.eSep08</a>         | <a href="#">363195</a> | 1491  | 1348 | 1  | 56  | GTP binding protein 2 (Gtpbp2) alternative variant eSep08, mRNA.                 |
| <a href="#">Gtpbp3</a>         | <a href="#">Gtpbp3.bSep08</a>         | <a href="#">290633</a> | 3104  | 759  | 7  | 202 | GTP binding protein 3 (mitochondrial) (Gtpbp3) alternative variant bSep08, mRNA. |
| <a href="#">Gtpbp3</a>         | <a href="#">Gtpbp3.cSep08</a>         | <a href="#">290633</a> | 850   | 744  | 2  | 40  | GTP binding protein 3 (mitochondrial) (Gtpbp3) alternative variant cSep08, mRNA. |
| <a href="#">Gtpbp3</a>         | <a href="#">Gtpbp3.dSep08</a>         | <a href="#">290633</a> | 742   | 367  | 2  | 31  | GTP binding protein 3 (mitochondrial) (Gtpbp3) alternative variant dSep08, mRNA. |
| <a href="#">Gtpbp4</a>         | <a href="#">Gtpbp4.aSep08</a>         | <a href="#">114300</a> | 7644  | 793  | 6  | 264 | GTP binding protein 4 (Gtpbp4) alternative variant aSep08, mRNA.                 |
| <a href="#">Gtpbp4</a>         | <a href="#">Gtpbp4.bSep08</a>         | <a href="#">114300</a> | 3309  | 404  | 1  | 40  | GTP binding protein 4 (4.9 kD) (Gtpbp4) alternative variant bSep08, mRNA.        |
| <a href="#">Gtpbp5</a>         | <a href="#">Gtpbp5.bSep08</a>         | <a href="#">296462</a> | 12381 | 870  | 6  | 289 | GTP binding protein 5 (Gtpbp5) alternative variant bSep08, mRNA.                 |

|                                 |                                        |                        |       |      |    |     |                                                                                            |
|---------------------------------|----------------------------------------|------------------------|-------|------|----|-----|--------------------------------------------------------------------------------------------|
| <a href="#">Gtpbp5</a>          | <a href="#">Gtpbp5.cSep08</a>          | <a href="#">296462</a> | 13986 | 797  | 6  | 219 | GTP binding protein 5 (Gtpbp5) alternative variant cSep08, mRNA.                           |
| <a href="#">Gtpbp5</a>          | <a href="#">Gtpbp5.dSep08</a>          | <a href="#">296462</a> | 13894 | 724  | 6  | 200 | GTP binding protein 5 (Gtpbp5) alternative variant dSep08, mRNA.                           |
| <a href="#">Gtpbp5</a>          | <a href="#">Gtpbp5.fSep08</a>          | <a href="#">296462</a> | 14527 | 1498 | 6  | 113 | GTP binding protein 5 (12.3 kD) (Gtpbp5) alternative variant fSep08, mRNA.                 |
| <a href="#">Gtpbp5</a>          | <a href="#">Gtpbp5.gSep08</a>          | <a href="#">296462</a> | 1426  | 488  | 2  | 62  | GTP binding protein 5 (Gtpbp5) alternative variant gSep08, mRNA.                           |
| <a href="#">Gtpbp6</a>          | <a href="#">Gtpbp6.aSep08</a>          | <a href="#">363931</a> | 3808  | 1510 | 10 | 492 | GTP binding protein 6 like (Gtpbp6) alternative variant aSep08, mRNA.                      |
| <a href="#">Gtpbp6</a>          | <a href="#">Gtpbp6.bSep08</a>          | <a href="#">363931</a> | 2198  | 665  | 4  | 205 | GTP-binding protein 6 like (Gtpbp6) alternative variant bSep08, mRNA.                      |
| <a href="#">Gtpbp6</a>          | <a href="#">Gtpbp6.cSep08</a>          | <a href="#">363931</a> | 2401  | 786  | 7  | 167 | GTP binding protein 6 like (Gtpbp6) alternative variant cSep08, mRNA.                      |
| <a href="#">Gtpbp6</a>          | <a href="#">Gtpbp6.dSep08</a>          | <a href="#">363931</a> | 844   | 579  | 3  | 154 | putative protein (Gtpbp6) alternative variant dSep08, mRNA.                                |
| <a href="#">Gtpbp6</a>          | <a href="#">Gtpbp6.eSep08</a>          | <a href="#">363931</a> | 2303  | 743  | 7  | 136 | GTP binding protein 6 like (Gtpbp6) alternative variant eSep08, mRNA.                      |
| <a href="#">Gtpbp6</a>          | <a href="#">Gtpbp6.fSep08</a>          | <a href="#">363931</a> | 2389  | 1262 | 5  | 131 | GTP binding protein 6 like (Gtpbp6) alternative variant fSep08, mRNA.                      |
| <a href="#">Gtpbp6</a>          | <a href="#">Gtpbp6.gSep08</a>          | <a href="#">363931</a> | 2294  | 764  | 6  | 107 | GTP binding protein 6 like (Gtpbp6) alternative variant gSep08, mRNA.                      |
| <a href="#">Gtpbp6</a>          | <a href="#">Gtpbp6.hSep08</a>          | <a href="#">363931</a> | 970   | 555  | 2  | 102 | putative protein (Gtpbp6) alternative variant hSep08, mRNA.                                |
| <a href="#">Gtpbp6</a>          | <a href="#">Gtpbp6.iSep08</a>          | <a href="#">363931</a> | 382   | 279  | 2  | 93  | GTP binding protein 6 like (Gtpbp6) alternative variant iSep08, mRNA.                      |
| <a href="#">Gtpbp6</a>          | <a href="#">Gtpbp6.jSep08</a>          | <a href="#">363931</a> | 1862  | 319  | 2  | 31  | putative protein (3.3 kD) (Gtpbp6) alternative variant jSep08, mRNA.                       |
| <a href="#">Gtpbp8</a>          | <a href="#">Gtpbp8.bSep08</a>          | <a href="#">360714</a> | 9791  | 1775 | 5  | 146 | GTP-binding protein 8 (putative) (Gtpbp8) alternative variant bSep08, mRNA.                |
| <a href="#">GTP_EFTU.1</a>      | <a href="#">GTP_EFTU.1.aSep08</a>      |                        | 9169  | 1270 | 1  | 423 | eukaryotic translation initiation factor 5B (GTP_EFTU.1) alternative variant aSep08, mRNA. |
| <a href="#">GTP_EFTU.1</a>      | <a href="#">GTP_EFTU.1.bSep08</a>      |                        | 3895  | 670  | 1  | 222 | eukaryotic translation initiation factor 5B (GTP_EFTU.1) alternative variant bSep08, mRNA. |
| <a href="#">GTP_EFTU.2</a>      | <a href="#">GTP_EFTU.2.aSep08</a>      |                        | 11803 | 542  |    | 180 | mitochondrial elongation factor G2 (GTP_EFTU.2) mRNA.                                      |
| <a href="#">Gtse1</a>           | <a href="#">Gtse1.bSep08</a>           | <a href="#">300126</a> | 1723  | 1001 | 3  | 219 | G two S phase expressed protein 1 (Gtse1) alternative variant bSep08, mRNA.                |
| <a href="#">Gtsf1</a>           | <a href="#">Gtsf1.aSep08</a>           | <a href="#">315347</a> | 18092 | 676  | 2  | 185 | gametocyte specific factor 1 (Gtsf1) alternative variant aSep08, mRNA.                     |
| <a href="#">Guanylate_kin.0</a> | <a href="#">Guanylate_kin.0.aSep08</a> |                        | 48190 | 1112 |    | 235 | membrane protein palmitoylated 7 CRA b (Guanylate_kin.0) mRNA.                             |
| <a href="#">Guanylate_kin.1</a> | <a href="#">Guanylate_kin.1.aSep08</a> |                        | 3421  | 1198 |    | 273 | membrane protein palmitoylated 2 (Guanylate_kin.1) alternative variant aSep08, mRNA.       |
| <a href="#">Guanylate_kin.1</a> | <a href="#">Guanylate_kin.1.bSep08</a> |                        | 3908  | 2464 |    | 105 | membrane protein palmitoylated 2 (Guanylate_kin.1) alternative variant bSep08, mRNA.       |
| <a href="#">guby</a>            | <a href="#">guby.aSep08</a>            |                        | 4851  | 779  | 2  | 48  | putative protein (guby) alternative variant aSep08, mRNA.                                  |
| <a href="#">guby</a>            | <a href="#">guby.bSep08</a>            |                        | 50583 | 885  | 5  | 75  | putative protein (guby) alternative variant bSep08, mRNA.                                  |

|                         |                                |                        |       |      |   |     |                                                                                            |
|-------------------------|--------------------------------|------------------------|-------|------|---|-----|--------------------------------------------------------------------------------------------|
| <a href="#">Guca1a</a>  | <a href="#">Guca1a.aSep08</a>  | <a href="#">301233</a> | 1596  | 471  |   | 122 | guanylate cyclase activator 1a (retina) (Guca1a) mRNA.                                     |
| <a href="#">guchy</a>   | <a href="#">guchy.aSep08</a>   |                        | 4521  | 299  |   | 37  | putative protein (4.3 kD) (guchy) mRNA.                                                    |
| <a href="#">Gucy1b2</a> | <a href="#">Gucy1b2.bSep08</a> | <a href="#">25206</a>  | 37000 | 727  | 1 | 193 | guanylate cyclase 1, soluble, beta 2 (Gucy1b2) alternative variant bSep08, mRNA.           |
| <a href="#">Gucy1b3</a> | <a href="#">Gucy1b3.bSep08</a> | <a href="#">25202</a>  | 2081  | 450  | 3 | 135 | guanylate cyclase 1, soluble, beta 3 (Gucy1b3) alternative variant bSep08, mRNA.           |
| <a href="#">Gucy1b3</a> | <a href="#">Gucy1b3.cSep08</a> | <a href="#">25202</a>  | 16294 | 627  | 4 | 105 | guanylate cyclase 1, soluble, beta 3 (12.1 kD) (Gucy1b3) alternative variant cSep08, mRNA. |
| <a href="#">Gucy1b3</a> | <a href="#">Gucy1b3.dSep08</a> | <a href="#">25202</a>  | 13535 | 633  | 3 | 96  | guanylate cyclase 1, soluble, beta 3 (10.9 kD) (Gucy1b3) alternative variant dSep08, mRNA. |
| <a href="#">Gucy2c</a>  | <a href="#">Gucy2c.aSep08</a>  | <a href="#">25711</a>  | 15975 | 635  |   | 211 | guanylate cyclase 2C (Gucy2c) mRNA.                                                        |
| <a href="#">Gucy2d</a>  | <a href="#">Gucy2d.bSep08</a>  | <a href="#">113911</a> | 5811  | 679  | 1 | 167 | guanylate cyclase 2d (Gucy2d) alternative variant bSep08, mRNA.                            |
| <a href="#">gufer</a>   | <a href="#">gufer.aSep08</a>   |                        | 7912  | 496  |   | 77  | solute carrier family 17 member 1 (gufer) mRNA.                                            |
| <a href="#">guflo</a>   | <a href="#">guflo.aSep08</a>   |                        | 2071  | 653  |   | 89  | putative protein (10.6 kD) (guflo) mRNA.                                                   |
| <a href="#">guflu</a>   | <a href="#">guflu.bSep08</a>   |                        | 384   | 261  | 2 | 87  | CRA a like (guflu) alternative variant bSep08, mRNA.                                       |
| <a href="#">Guk1</a>    | <a href="#">Guk1.aSep08</a>    | <a href="#">303179</a> | 2724  | 1108 | 5 | 226 | guanylate kinase 1 (Guk1) alternative variant aSep08, mRNA.                                |
| <a href="#">Guk1</a>    | <a href="#">Guk1.bSep08</a>    | <a href="#">303179</a> | 7715  | 670  | 7 | 208 | guanylate kinase 1 (Guk1) alternative variant bSep08, mRNA.                                |
| <a href="#">Guk1</a>    | <a href="#">Guk1.cSep08</a>    | <a href="#">303179</a> | 8046  | 423  | 4 |     |                                                                                            |
| <a href="#">gukee</a>   | <a href="#">gukee.aSep08</a>   |                        | 1042  | 374  |   | 42  | putative protein (gukee) mRNA.                                                             |
| <a href="#">Gulo</a>    | <a href="#">Gulo.bSep08</a>    | <a href="#">60671</a>  | 8975  | 696  | 5 | 190 | gulonolactone (L-) oxidase (Gulo) alternative variant bSep08, mRNA.                        |
| <a href="#">Gulo</a>    | <a href="#">Gulo.cSep08</a>    | <a href="#">60671</a>  | 3842  | 1363 | 4 | 180 | gulonolactone (L-) oxidase (Gulo) alternative variant cSep08, mRNA.                        |
| <a href="#">Gulo</a>    | <a href="#">Gulo.dSep08</a>    | <a href="#">60671</a>  | 1244  | 759  | 2 | 54  | gulonolactone (L-) oxidase (6.6 kD) (Gulo) alternative variant dSep08, mRNA.               |
| <a href="#">guloy</a>   | <a href="#">guloy.aSep08</a>   |                        | 11478 | 585  |   | 34  | putative protein (3.8 kD) (guloy) mRNA.                                                    |
| <a href="#">gumee</a>   | <a href="#">gumee.aSep08</a>   |                        | 16654 | 762  |   | 56  | putative protein (6.1 kD) (gumee) mRNA.                                                    |
| <a href="#">gumer</a>   | <a href="#">gumer.aSep08</a>   |                        | 3596  | 790  |   | 88  | putative secreted or extracellular protein precursor (9.5 kD) (gumer) mRNA.                |
| <a href="#">gunoy</a>   | <a href="#">gunoy.aSep08</a>   |                        | 6536  | 2260 |   | 289 | eukaryotic translation initiation factor 5B CRA b (gunoy) mRNA.                            |
| <a href="#">gupor</a>   | <a href="#">gupor.aSep08</a>   |                        | 654   | 216  |   | 45  | putative protein (gupor) mRNA.                                                             |
| <a href="#">gusa</a>    | <a href="#">gusa.aSep08</a>    |                        | 12417 | 321  |   | 11  | putative protein (gusa) mRNA.                                                              |
| <a href="#">Gusb</a>    | <a href="#">Gusb.bSep08</a>    | <a href="#">24434</a>  | 3389  | 973  | 3 | 122 | glucuronidase beta CRA a (14.4 kD) (Gusb) alternative variant bSep08, mRNA.                |
| <a href="#">Gusb</a>    | <a href="#">Gusb.cSep08</a>    | <a href="#">24434</a>  | 5412  | 871  | 1 | 105 | glucuronidase beta CRA a (Gusb) alternative variant cSep08, mRNA.                          |
| <a href="#">gushee</a>  | <a href="#">gushee.aSep08</a>  |                        | 9357  | 870  |   | 87  | CRA b like (gushee) mRNA.                                                                  |
| <a href="#">guto</a>    | <a href="#">guto.aSep08</a>    |                        | 3546  | 350  |   | 85  | putative protein (guto) mRNA.                                                              |
| <a href="#">guvar</a>   | <a href="#">guvar.aSep08</a>   |                        | 935   | 361  |   | 88  | putative protein of mammalian origin (guvar) mRNA.                                         |
| <a href="#">guwey</a>   | <a href="#">guwey.aSep08</a>   |                        | 1582  | 414  |   | 29  | putative protein (3.4 kD) (guwey) mRNA.                                                    |
| <a href="#">gyby</a>    | <a href="#">gyby.aSep08</a>    |                        | 4966  | 486  |   | 88  | putative protein (9.6 kD) (gyby) mRNA.                                                     |

|                         |                                |                        |        |      |    |     |                                                                                         |
|-------------------------|--------------------------------|------------------------|--------|------|----|-----|-----------------------------------------------------------------------------------------|
| <a href="#">gychy</a>   | <a href="#">gychy.aSep08</a>   |                        | 5167   | 608  |    | 202 | grancalcin (gychy) mRNA.                                                                |
| <a href="#">GYF.0</a>   | <a href="#">GYF.0.aSep08</a>   |                        | 13483  | 738  |    | 245 | trinucleotide repeat containing 15 CRA c (GYF.0) mRNA.                                  |
| <a href="#">gyfer</a>   | <a href="#">gyfer.aSep08</a>   |                        | 557    | 437  |    | 37  | putative protein (4.6 kD) (gyfer) mRNA.                                                 |
| <a href="#">gyflo</a>   | <a href="#">gyflo.aSep08</a>   |                        | 947    | 511  |    | 86  | putative protein, with a transmembrane domain (gyflo) mRNA.                             |
| <a href="#">gyflu</a>   | <a href="#">gyflu.aSep08</a>   |                        | 2539   | 469  |    | 56  | putative protein (6.4 kD) (gyflu) mRNA.                                                 |
| <a href="#">Gyg1</a>    | <a href="#">Gyg1.bSep08</a>    | <a href="#">81675</a>  | 41493  | 1155 | 8  | 270 | glycogenin 1 (Gyg1) alternative variant bSep08, mRNA.                                   |
| <a href="#">Gyg1</a>    | <a href="#">Gyg1.cSep08</a>    | <a href="#">81675</a>  | 42004  | 728  | 4  | 182 | glycogenin 1 (Gyg1) alternative variant cSep08, mRNA.                                   |
| <a href="#">Gyg1</a>    | <a href="#">Gyg1.dSep08</a>    | <a href="#">81675</a>  | 5893   | 606  | 3  | 140 | glycogenin 1 (Gyg1) alternative variant dSep08, mRNA.                                   |
| <a href="#">Gyk</a>     | <a href="#">Gyk.bSep08</a>     | <a href="#">79223</a>  | 11965  | 755  | 5  | 138 | glycerol kinase (Gyk) alternative variant bSep08, mRNA.                                 |
| <a href="#">Gyk</a>     | <a href="#">Gyk.cSep08</a>     | <a href="#">79223</a>  | 8208   | 293  | 4  | 84  | glycerol kinase (Gyk) alternative variant cSep08, mRNA.                                 |
| <a href="#">gykee</a>   | <a href="#">gykee.aSep08</a>   |                        | 5407   | 711  |    | 152 | putative cytoplasmic protein of mammalian origin (16.5 kD) (gykee) mRNA.                |
| <a href="#">gyloy</a>   | <a href="#">gyloy.aSep08</a>   |                        | 302    | 195  |    | 64  | putative protein (gyloy) mRNA.                                                          |
| <a href="#">Gyltl1b</a> | <a href="#">Gyltl1b.aSep08</a> | <a href="#">311202</a> | 6111   | 2381 | 15 | 691 | glycosyltransferase-like 1B (79.4 kD) (Gyltl1b) alternative variant aSep08, mRNA.       |
| <a href="#">Gyltl1b</a> | <a href="#">Gyltl1b.cSep08</a> | <a href="#">311202</a> | 7902   | 926  | 7  | 229 | glycosyltransferase-like 1B (Gyltl1b) alternative variant cSep08, mRNA.                 |
| <a href="#">gymee</a>   | <a href="#">gymee.aSep08</a>   |                        | 17094  | 762  |    | 56  | putative protein (6.1 kD) (gymee) mRNA.                                                 |
| <a href="#">gymer</a>   | <a href="#">gymer.aSep08</a>   |                        | 18989  | 367  |    | 52  | putative protein of vertebrate origin (gymer) mRNA.                                     |
| <a href="#">gynoy</a>   | <a href="#">gynoy.aSep08</a>   |                        | 43188  | 590  |    | 74  | putative protein (gynoy) mRNA.                                                          |
| <a href="#">gypor</a>   | <a href="#">gypor.aSep08</a>   |                        | 922    | 359  |    | 90  | kinase 2 (gypor) mRNA.                                                                  |
| <a href="#">Gys2</a>    | <a href="#">Gys2.bSep08</a>    | <a href="#">25623</a>  | 3742   | 750  | 1  | 123 | glycogen synthase 2 (Gys2) alternative variant bSep08, mRNA.                            |
| <a href="#">Gys2</a>    | <a href="#">Gys2.cSep08</a>    | <a href="#">25623</a>  | 993    | 456  | 2  | 56  | glycogen synthase 2 (6.3 kD) (Gys2) alternative variant cSep08, mRNA.                   |
| <a href="#">gysa</a>    | <a href="#">gysa.aSep08</a>    |                        | 140651 | 463  |    | 84  | putative protein (9.3 kD) (gysa) mRNA.                                                  |
| <a href="#">gyshee</a>  | <a href="#">gyshee.aSep08</a>  |                        | 59851  | 733  |    | 54  | putative protein (6.1 kD) (gyshee) mRNA.                                                |
| <a href="#">gyto</a>    | <a href="#">gyto.aSep08</a>    |                        | 36879  | 636  |    | 212 | CRA a 2 (gyto) mRNA.                                                                    |
| <a href="#">gyvar</a>   | <a href="#">gyvar.aSep08</a>   |                        | 3126   | 803  |    | 69  | putative protein (7.6 kD) (gyvar) mRNA.                                                 |
| <a href="#">gywey</a>   | <a href="#">gywey.aSep08</a>   |                        | 3222   | 199  | 2  | 63  | gag protein like (gywey) alternative variant aSep08, mRNA.                              |
| <a href="#">Gzf1</a>    | <a href="#">Gzf1.bSep08</a>    | <a href="#">311508</a> | 8302   | 2459 |    | 217 | GDNF-inducible zinc finger protein 1 (24.4 kD) (Gzf1) alternative variant bSep08, mRNA. |
| <a href="#">Gzmb</a>    | <a href="#">Gzmb.bSep08</a>    | <a href="#">171528</a> | 2099   | 740  | 4  | 246 | granzyme B (Gzmb) alternative variant bSep08, mRNA.                                     |
| <a href="#">Gzmn</a>    | <a href="#">Gzmn.aSep08</a>    | <a href="#">691668</a> | 1709   | 401  | 2  | 97  | granzyme N (Gzmn) alternative variant aSep08, mRNA.                                     |
| <a href="#">Gzmn</a>    | <a href="#">Gzmn.bSep08</a>    | <a href="#">691668</a> | 661    | 271  | 1  | 53  | granzyme N (Gzmn) alternative variant bSep08, mRNA.                                     |
| <a href="#">H2-T18</a>  | <a href="#">H2-T18.bSep08</a>  | <a href="#">406194</a> | 8046   | 2465 | 7  | 268 | histocompatibility 2, T region locus 18 (H2-T18) alternative variant bSep08, mRNA.      |
| <a href="#">H2-T18</a>  | <a href="#">H2-T18.cSep08</a>  | <a href="#">406194</a> | 3968   | 1437 | 5  | 231 | histocompatibility 2, T region locus 18 (H2-T18) alternative variant cSep08, mRNA.      |
| <a href="#">H2-T18</a>  | <a href="#">H2-T18.eSep08</a>  | <a href="#">406194</a> | 610    | 475  | 2  | 121 | histocompatibility 2, T region locus 18 (H2-T18) alternative variant eSep08, mRNA.      |
| <a href="#">H2-T18</a>  | <a href="#">H2-T18.fSep08</a>  | <a href="#">406194</a> | 3695   | 740  | 3  | 89  | histocompatibility 2, T region locus 18 (H2-T18) alternative variant fSep08, mRNA.      |

|                             |                                    |                        |       |      |    |     |                                                                                                |
|-----------------------------|------------------------------------|------------------------|-------|------|----|-----|------------------------------------------------------------------------------------------------|
| <a href="#">H2-T18</a>      | <a href="#">H2-T18.gSep08</a>      | <a href="#">406194</a> | 701   | 551  | 2  | 59  | histocompatibility 2, T region locus 18 (H2-T18) alternative variant gSep08, mRNA.             |
| <a href="#">H2afy</a>       | <a href="#">H2afy.aSep08</a>       | <a href="#">29384</a>  | 63678 | 1865 | 9  | 372 | histone (39.6 kD) (H2afy) alternative variant aSep08, mRNA.                                    |
| <a href="#">H2afy</a>       | <a href="#">H2afy.cSep08</a>       | <a href="#">29384</a>  | 56818 | 1356 | 8  | 341 | histone H2A.1 (H2afy) alternative variant cSep08, mRNA.                                        |
| <a href="#">H2afy</a>       | <a href="#">H2afy.dSep08</a>       | <a href="#">29384</a>  | 42322 | 742  | 6  | 228 | histone (H2afy) alternative variant dSep08, mRNA.                                              |
| <a href="#">H2afy</a>       | <a href="#">H2afy.eSep08</a>       | <a href="#">29384</a>  | 8822  | 508  | 4  | 141 | histone (H2afy) alternative variant eSep08, mRNA.                                              |
| <a href="#">H2afy</a>       | <a href="#">H2afy.fSep08</a>       | <a href="#">29384</a>  | 12147 | 1203 | 3  | 117 | histone H2A.1 (H2afy) alternative variant fSep08, mRNA.                                        |
| <a href="#">H2afy</a>       | <a href="#">H2afy.gSep08</a>       | <a href="#">29384</a>  | 567   | 290  | 2  | 49  | putative protein (H2afy) alternative variant gSep08, mRNA.                                     |
| <a href="#">H2afy2</a>      | <a href="#">H2afy2.aSep08</a>      | <a href="#">361844</a> | 50489 | 2063 | 9  | 372 | H2A histone family, member Y2 (40.1 kD) (H2afy2) alternative variant aSep08, mRNA.             |
| <a href="#">H2afz.1</a>     | <a href="#">H2afz.1.aSep08</a>     | <a href="#">58940</a>  | 1017  | 386  | 3  | 128 | H2A histone family, member Z (H2afz.1) alternative variant aSep08, mRNA.                       |
| <a href="#">H2afz.1</a>     | <a href="#">H2afz.1.bSep08</a>     | <a href="#">58940</a>  | 2299  | 997  | 5  | 128 | H2A histone family, member Z (13.6 kD) (H2afz.1) alternative variant bSep08, mRNA.             |
| <a href="#">H3f3b</a>       | <a href="#">H3f3b.aSep08</a>       | <a href="#">117056</a> | 11588 | 1071 | 4  | 136 | h3 histone, family 3B (15.3 kD) (H3f3b) alternative variant aSep08, mRNA.                      |
| <a href="#">H3f3b</a>       | <a href="#">H3f3b.bSep08</a>       | <a href="#">117056</a> | 11084 | 416  | 3  | 116 | h3 histone, family 3B (H3f3b) alternative variant bSep08, mRNA.                                |
| <a href="#">H3f3b.1</a>     | <a href="#">H3f3b.1.bSep08</a>     | <a href="#">117056</a> | 2223  | 1739 | 3  | 125 | h3 histone, family 3B (14.0 kD) (H3f3b.1) alternative variant bSep08, complete mRNA.           |
| <a href="#">H13</a>         | <a href="#">H13.aSep08</a>         | <a href="#">311545</a> | 35521 | 1973 | 13 | 419 | histocompatibility 13 (H13) alternative variant aSep08, mRNA.                                  |
| <a href="#">H13</a>         | <a href="#">H13.bSep08</a>         | <a href="#">311545</a> | 16053 | 885  | 7  | 182 | histocompatibility 13 CRA d (H13) alternative variant bSep08, mRNA.                            |
| <a href="#">H13</a>         | <a href="#">H13.cSep08</a>         | <a href="#">311545</a> | 22116 | 443  | 5  | 114 | histocompatibility 13 CRA e (H13) alternative variant cSep08, mRNA.                            |
| <a href="#">H13</a>         | <a href="#">H13.dSep08</a>         | <a href="#">311545</a> | 3206  | 304  | 2  | 88  | histocompatibility 13 CRA f (H13) alternative variant dSep08, mRNA.                            |
| <a href="#">H13</a>         | <a href="#">H13.eSep08</a>         | <a href="#">311545</a> | 5944  | 382  | 4  | 60  | histocompatibility 13 CRA c (H13) alternative variant eSep08, mRNA.                            |
| <a href="#">H28</a>         | <a href="#">H28.aSep08</a>         | <a href="#">310968</a> | 31898 | 689  | 5  | 229 | histocompatibility 28 (H28) alternative variant aSep08, mRNA.                                  |
| <a href="#">H28</a>         | <a href="#">H28.bSep08</a>         | <a href="#">310968</a> | 1766  | 596  | 2  | 198 | histocompatibility 28 (H28) alternative variant bSep08, mRNA.                                  |
| <a href="#">H28</a>         | <a href="#">H28.cSep08</a>         | <a href="#">310968</a> | 29765 | 704  | 3  | 163 | histocompatibility 28 (H28) alternative variant cSep08, mRNA.                                  |
| <a href="#">HA2.0</a>       | <a href="#">HA2.0.aSep08</a>       |                        | 17589 | 1764 |    | 450 | DEAH box polypeptide 29 (50.2 kD) (HA2.0) mRNA.                                                |
| <a href="#">Habp2</a>       | <a href="#">Habp2.bSep08</a>       | <a href="#">292126</a> | 35053 | 2049 |    | 521 | hyaluronic acid binding protein 2 (57.7 kD) (Habp2) alternative variant bSep08, complete mRNA. |
| <a href="#">Hace1</a>       | <a href="#">Hace1.bSep08</a>       | <a href="#">361866</a> | 12581 | 1776 | 1  | 513 | putative protein (Hace1) alternative variant bSep08, mRNA.                                     |
| <a href="#">Hac1andColq</a> | <a href="#">Hac1andColq.cSep08</a> | <a href="#">29755</a>  | 6305  | 534  | 5  | 123 | 2-hydroxyphytanoyl-CoA lyase (Hac1andColq) alternative variant cSep08, mRNA.                   |
| <a href="#">Hac1andColq</a> | <a href="#">Hac1andColq.cSep08</a> | <a href="#">85255</a>  | 6305  | 534  | 5  | 123 | 2-hydroxyphytanoyl-CoA lyase (Hac1andColq) alternative variant cSep08, mRNA.                   |



|                              |                                     |                        |       |      |   |     |                                                                                                                                                                                           |
|------------------------------|-------------------------------------|------------------------|-------|------|---|-----|-------------------------------------------------------------------------------------------------------------------------------------------------------------------------------------------|
| <a href="#">Hacl1andColq</a> | <a href="#">Hacl1andColq.dSep08</a> | <a href="#">29755</a>  | 13275 | 693  | 5 | 118 | 2-hydroxyacyl-CoA lyase 1 (Hacl1andColq) alternative variant dSep08, mRNA.                                                                                                                |
| <a href="#">Hacl1andColq</a> | <a href="#">Hacl1andColq.dSep08</a> | <a href="#">85255</a>  | 13275 | 693  | 5 | 118 | 2-hydroxyacyl-CoA lyase 1 (Hacl1andColq) alternative variant dSep08, mRNA.                                                                                                                |
| <a href="#">Hacl1andColq</a> | <a href="#">Hacl1andColq.eSep08</a> | <a href="#">29755</a>  | 9873  | 697  | 5 | 96  | 2-hydroxyphytanoyl-CoA lyase (Hacl1andColq) alternative variant eSep08, mRNA.                                                                                                             |
| <a href="#">Hacl1andColq</a> | <a href="#">Hacl1andColq.eSep08</a> | <a href="#">85255</a>  | 9873  | 697  | 5 | 96  | 2-hydroxyphytanoyl-CoA lyase (Hacl1andColq) alternative variant eSep08, mRNA.                                                                                                             |
| <a href="#">Hacl1andColq</a> | <a href="#">Hacl1andColq.fSep08</a> | <a href="#">29755</a>  | 68106 | 1024 | 6 | 76  | acetylcholinesterase collagen-like tail VIII (Hacl1andColq) alternative variant fSep08, mRNA.                                                                                             |
| <a href="#">Hacl1andColq</a> | <a href="#">Hacl1andColq.fSep08</a> | <a href="#">85255</a>  | 68106 | 1024 | 6 | 76  | acetylcholinesterase collagen-like tail VIII (Hacl1andColq) alternative variant fSep08, mRNA.                                                                                             |
| <a href="#">Hadha</a>        | <a href="#">Hadha.bSep08</a>        | <a href="#">170670</a> | 9960  | 1417 | 8 | 328 | hydroxyacyl-Coenzyme A dehydrogenase/3-ketoacyl-Coenzyme A thiolase/enoyl-Coenzyme A hydratase (trifunctional protein), alpha subunit (35.3 kD) (Hadha) alternative variant bSep08, mRNA. |
| <a href="#">Hadha</a>        | <a href="#">Hadha.cSep08</a>        | <a href="#">170670</a> | 3512  | 783  | 4 | 223 | hydroxyacyl-Coenzyme A dehydrogenase/3-ketoacyl-Coenzyme A thiolase/enoyl-Coenzyme A hydratase (trifunctional protein), alpha subunit (Hadha) alternative variant cSep08, mRNA.           |
| <a href="#">Hadha</a>        | <a href="#">Hadha.dSep08</a>        | <a href="#">170670</a> | 5016  | 1006 | 3 | 83  | hydroxyacyl-Coenzyme A dehydrogenase/3-ketoacyl-Coenzyme A thiolase/enoyl-Coenzyme A hydratase (trifunctional protein), alpha subunit (Hadha) alternative variant dSep08, mRNA.           |
| <a href="#">Hadha</a>        | <a href="#">Hadha.eSep08</a>        | <a href="#">170670</a> | 1395  | 961  | 3 | 72  | hydroxyacyl-Coenzyme A dehydrogenase/3-ketoacyl-Coenzyme A thiolase/enoyl-Coenzyme A hydratase (trifunctional protein), alpha subunit (7.6 kD) (Hadha) alternative variant eSep08, mRNA.  |
| <a href="#">Hadha</a>        | <a href="#">Hadha.iSep08</a>        | <a href="#">170670</a> | 2826  | 408  | 3 | 46  | hydroxyacyl-Coenzyme A dehydrogenase/3-ketoacyl-Coenzyme A thiolase/enoyl-Coenzyme A hydratase (trifunctional protein), alpha subunit (Hadha) alternative variant iSep08, mRNA.           |
| <a href="#">Hadhb</a>        | <a href="#">Hadhb.bSep08</a>        | <a href="#">171155</a> | 20004 | 709  | 6 | 211 | hydroxyacyl-Coenzyme A dehydrogenase/3-ketoacyl-Coenzyme A thiolase/enoyl-Coenzyme A hydratase (trifunctional protein), beta subunit (Hadhb) alternative variant bSep08, mRNA.            |
| <a href="#">Hadhb</a>        | <a href="#">Hadhb.cSep08</a>        | <a href="#">171155</a> | 22759 | 598  | 6 | 198 | hydroxyacyl-Coenzyme A dehydrogenase/3-ketoacyl-Coenzyme A thiolase/enoyl-Coenzyme A hydratase (trifunctional protein), beta subunit (Hadhb) alternative variant cSep08, mRNA.            |
| <a href="#">Hadhb</a>        | <a href="#">Hadhb.dSep08</a>        | <a href="#">171155</a> | 17287 | 683  | 5 | 112 | hydroxyacyl-Coenzyme A dehydrogenase/3-ketoacyl-Coenzyme A thiolase/enoyl-Coenzyme A hydratase (trifunctional protein), beta subunit (Hadhb) alternative variant dSep08, mRNA.            |

|                         |                                |                        |       |      |    |     |                                                                                                                                                                                                  |
|-------------------------|--------------------------------|------------------------|-------|------|----|-----|--------------------------------------------------------------------------------------------------------------------------------------------------------------------------------------------------|
| <a href="#">Hadhb</a>   | <a href="#">Hadhb.eSep08</a>   | <a href="#">171155</a> | 11050 | 274  | 2  | 71  | hydroxyacyl-Coenzyme A dehydrogenase/3-ketoacyl-Coenzyme A thiolase/enoyl-Coenzyme A hydratase (trifunctional protein), beta subunit (7.7 kD) (Hadhb) alternative variant eSep08, complete mRNA. |
| <a href="#">Hagh</a>    | <a href="#">Hagh.bSep08</a>    | <a href="#">24439</a>  | 4095  | 1245 | 3  | 102 | hydroxyacyl glutathione hydrolase (11.8 kD) (Hagh) alternative variant bSep08, mRNA.                                                                                                             |
| <a href="#">Haghl</a>   | <a href="#">Haghl.bSep08</a>   | <a href="#">302995</a> | 2707  | 2015 | 5  | 132 | hydroxyacylglutathione hydrolase-like (14.3 kD) (Haghl) alternative variant bSep08, complete mRNA.                                                                                               |
| <a href="#">Haghl</a>   | <a href="#">Haghl.cSep08</a>   | <a href="#">302995</a> | 734   | 415  | 2  | 80  | hydroxyacylglutathione hydrolase-like (Haghl) alternative variant cSep08, mRNA.                                                                                                                  |
| <a href="#">Haghl</a>   | <a href="#">Haghl.dSep08</a>   | <a href="#">302995</a> | 1384  | 699  | 6  | 73  | hydroxyacylglutathione hydrolase-like (Haghl) alternative variant dSep08, mRNA.                                                                                                                  |
| <a href="#">Hand2</a>   | <a href="#">Hand2.aSep08</a>   | <a href="#">64637</a>  | 2509  | 1113 |    | 112 | heart and neural crest derivatives expressed transcript 2 (Hand2) mRNA.                                                                                                                          |
| <a href="#">Hao2</a>    | <a href="#">Hao2.aSep08</a>    | <a href="#">84029</a>  | 22586 | 1088 | 7  | 362 | hydroxyacid oxidase 2 (long chain) (Hao2) alternative variant aSep08, mRNA.                                                                                                                      |
| <a href="#">Hao2</a>    | <a href="#">Hao2.cSep08</a>    | <a href="#">84029</a>  | 4678  | 838  | 5  | 251 | hydroxyacid oxidase 2 (long chain) (Hao2) alternative variant cSep08, mRNA.                                                                                                                      |
| <a href="#">Hao2</a>    | <a href="#">Hao2.dSep08</a>    | <a href="#">84029</a>  | 4550  | 719  | 5  | 229 | hydroxyacid oxidase 2 (long chain) (Hao2) alternative variant dSep08, mRNA.                                                                                                                      |
| <a href="#">Hao2</a>    | <a href="#">Hao2.eSep08</a>    | <a href="#">84029</a>  | 12657 | 715  | 5  | 216 | hydroxyacid oxidase 2 (long chain) (Hao2) alternative variant eSep08, mRNA.                                                                                                                      |
| <a href="#">Hap1</a>    | <a href="#">Hap1.cSep08</a>    | <a href="#">29430</a>  | 880   | 594  | 2  | 108 | huntingtin-associated protein 1 (12.2 kD) (Hap1) alternative variant cSep08, mRNA.                                                                                                               |
| <a href="#">Hap1</a>    | <a href="#">Hap1.dSep08</a>    | <a href="#">29430</a>  | 814   | 437  | 2  | 86  | huntingtin-associated protein 1 (Hap1) alternative variant dSep08, mRNA.                                                                                                                         |
| <a href="#">Hapln2</a>  | <a href="#">Hapln2.aSep08</a>  | <a href="#">64057</a>  | 5175  | 1430 | 4  | 453 | hyaluronan and proteoglycan link protein 2 (Hapln2) alternative variant aSep08, mRNA.                                                                                                            |
| <a href="#">Hapln2</a>  | <a href="#">Hapln2.cSep08</a>  | <a href="#">64057</a>  | 3783  | 590  | 1  | 101 | hyaluronan and proteoglycan link protein 2 (10.6 kD) (Hapln2) alternative variant cSep08, mRNA.                                                                                                  |
| <a href="#">Hapln2</a>  | <a href="#">Hapln2.dSep08</a>  | <a href="#">64057</a>  | 3660  | 434  | 1  | 90  | hyaluronan and proteoglycan link protein 2 (9.6 kD) (Hapln2) alternative variant dSep08, mRNA.                                                                                                   |
| <a href="#">Hapln4</a>  | <a href="#">Hapln4.bSep08</a>  | <a href="#">361129</a> | 808   | 485  | 1  | 142 | hyaluronan and proteoglycan link protein 4 (Hapln4) alternative variant bSep08, mRNA.                                                                                                            |
| <a href="#">Harbi1l</a> | <a href="#">Harbi1l.aSep08</a> | <a href="#">362164</a> | 35211 | 3742 | 16 | 479 | harbinger transposase derived 1-like (52.6 kD) (Harbi1l) alternative variant aSep08, mRNA.                                                                                                       |
| <a href="#">Harbi1l</a> | <a href="#">Harbi1l.bSep08</a> | <a href="#">362164</a> | 6531  | 721  | 8  | 240 | harbinger transposase derived 1-like (Harbi1l) alternative variant bSep08, mRNA.                                                                                                                 |
| <a href="#">Harbi1l</a> | <a href="#">Harbi1l.cSep08</a> | <a href="#">362164</a> | 8472  | 502  | 6  | 133 | harbinger transposase derived 1-like (Harbi1l) alternative variant cSep08, mRNA.                                                                                                                 |
| <a href="#">Harbi1l</a> | <a href="#">Harbi1l.dSep08</a> | <a href="#">362164</a> | 2453  | 516  | 3  | 133 | harbinger transposase derived 1-like (Harbi1l) alternative variant dSep08, mRNA.                                                                                                                 |
| <a href="#">HAT.0</a>   | <a href="#">HAT.0.aSep08</a>   |                        | 3989  | 718  |    | 209 | crooked neck-like 1 (HAT.0) mRNA.                                                                                                                                                                |
| <a href="#">Hat1</a>    | <a href="#">Hat1.bSep08</a>    | <a href="#">296501</a> | 40062 | 884  | 4  | 287 | histone aminotransferase 1 (Hat1) alternative variant bSep08, mRNA.                                                                                                                              |
| <a href="#">Hat1</a>    | <a href="#">Hat1.cSep08</a>    | <a href="#">296501</a> | 29121 | 721  | 2  | 204 | histone aminotransferase 1 (23.8 kD) (Hat1) alternative variant cSep08, mRNA.                                                                                                                    |

|                         |                                |                        |       |      |    |     |                                                                                                        |
|-------------------------|--------------------------------|------------------------|-------|------|----|-----|--------------------------------------------------------------------------------------------------------|
| <a href="#">Havcr1</a>  | <a href="#">Havcr1.bSep08</a>  | <a href="#">286934</a> | 32924 | 1997 | 9  | 307 | hepatitis A virus cellular receptor 1 (34.0 kD) (Havcr1) alternative variant bSep08, mRNA.             |
| <a href="#">Hba-a2</a>  | <a href="#">Hba-a2.bSep08</a>  | <a href="#">25632</a>  | 601   | 416  | 1  | 138 | hemoglobin alpha, adult chain 2 (Hba-a2) alternative variant bSep08, mRNA.                             |
| <a href="#">Hbb</a>     | <a href="#">Hbb.bSep08</a>     | <a href="#">24440</a>  | 909   | 800  | 2  | 133 | hemoglobin, beta (14.5 kD) (Hbb) alternative variant bSep08, mRNA.                                     |
| <a href="#">Hbegf</a>   | <a href="#">Hbegf.aSep08</a>   | <a href="#">25433</a>  | 10929 | 2100 | 6  | 208 | heparin-binding EGF-like growth factor (Hbegf) alternative variant aSep08, complete mRNA.              |
| <a href="#">Hbg1</a>    | <a href="#">Hbg1.bSep08</a>    | <a href="#">94164</a>  | 1475  | 447  | 2  | 107 | hemoglobin, gamma A (Hbg1) alternative variant bSep08, mRNA.                                           |
| <a href="#">Hbs1l</a>   | <a href="#">Hbs1l.bSep08</a>   | <a href="#">293408</a> | 35767 | 781  | 5  | 260 | CRA d (Hbs1l) alternative variant bSep08, mRNA.                                                        |
| <a href="#">Hbs1l</a>   | <a href="#">Hbs1l.cSep08</a>   | <a href="#">293408</a> | 35822 | 641  | 4  | 213 | CRA d (Hbs1l) alternative variant cSep08, mRNA.                                                        |
| <a href="#">Hbs1l</a>   | <a href="#">Hbs1l.dSep08</a>   | <a href="#">293408</a> | 35172 | 1043 | 10 | 162 | CRA c (17.8 kD) (Hbs1l) alternative variant dSep08, mRNA.                                              |
| <a href="#">Hbs1l</a>   | <a href="#">Hbs1l.eSep08</a>   | <a href="#">293408</a> | 5020  | 662  | 3  | 156 | CRA d (Hbs1l) alternative variant eSep08, mRNA.                                                        |
| <a href="#">Hbs1l</a>   | <a href="#">Hbs1l.fSep08</a>   | <a href="#">293408</a> | 25567 | 427  | 4  | 108 | CRA b (Hbs1l) alternative variant fSep08, mRNA.                                                        |
| <a href="#">Hbs1l</a>   | <a href="#">Hbs1l.gSep08</a>   | <a href="#">293408</a> | 28387 | 507  | 3  | 92  | CRA b like (Hbs1l) alternative variant gSep08, mRNA.                                                   |
| <a href="#">Hbs1l</a>   | <a href="#">Hbs1l.iSep08</a>   | <a href="#">293408</a> | 2725  | 757  | 2  | 47  | CRA c like (Hbs1l) alternative variant iSep08, mRNA.                                                   |
| <a href="#">Hbxip</a>   | <a href="#">Hbxip.bSep08</a>   | <a href="#">295357</a> | 2766  | 1135 | 2  | 70  | hepatitis B virus x interacting protein (7.5 kD) (Hbxip) alternative variant bSep08, mRNA.             |
| <a href="#">Hcca2</a>   | <a href="#">Hcca2.bSep08</a>   | <a href="#">499288</a> | 16875 | 688  | 4  | 229 | HCCA2 protein (Hcca2) alternative variant bSep08, mRNA.                                                |
| <a href="#">Hcca2</a>   | <a href="#">Hcca2.cSep08</a>   | <a href="#">499288</a> | 27832 | 704  | 4  | 218 | HCCA2 protein (Hcca2) alternative variant cSep08, mRNA.                                                |
| <a href="#">Hcca2</a>   | <a href="#">Hcca2.dSep08</a>   | <a href="#">499288</a> | 17188 | 1011 | 4  | 150 | HCCA2 protein (17.0 kD) (Hcca2) alternative variant dSep08, mRNA.                                      |
| <a href="#">Hcca2</a>   | <a href="#">Hcca2.eSep08</a>   | <a href="#">499288</a> | 56899 | 1446 | 4  | 142 | HCCA2 protein (16.5 kD) (Hcca2) alternative variant eSep08, complete mRNA.                             |
| <a href="#">Hcca2</a>   | <a href="#">Hcca2.fSep08</a>   | <a href="#">499288</a> | 6215  | 387  | 1  | 67  | HCCA2 protein (Hcca2) alternative variant fSep08, mRNA.                                                |
| <a href="#">Hccs</a>    | <a href="#">Hccs.aSep08</a>    | <a href="#">317444</a> | 9294  | 2145 | 4  | 184 | holocytochrome c synthetase (22.0 kD) (Hccs) alternative variant aSep08, complete mRNA.                |
| <a href="#">Hccs</a>    | <a href="#">Hccs.bSep08</a>    | <a href="#">317444</a> | 3137  | 392  | 1  | 81  | holocytochrome c synthetase (Hccs) alternative variant bSep08, mRNA.                                   |
| <a href="#">Hcfc1</a>   | <a href="#">Hcfc1.aSep08</a>   | <a href="#">363519</a> | 4160  | 2425 | 5  | 240 | host cell factor C1 (Hcfc1) mRNA.                                                                      |
| <a href="#">Hcfc1r1</a> | <a href="#">Hcfc1r1.aSep08</a> | <a href="#">287097</a> | 2219  | 1269 | 4  | 157 | host cell factor C1 regulator 1 (XPO1-dependent) (Hcfc1r1) alternative variant aSep08, mRNA.           |
| <a href="#">Hcfc1r1</a> | <a href="#">Hcfc1r1.bSep08</a> | <a href="#">287097</a> | 1668  | 979  | 3  | 119 | host cell factor C1 regulator 1 (XPO1-dependent) (13.5 kD) (Hcfc1r1) alternative variant bSep08, mRNA. |
| <a href="#">Hcfc1r1</a> | <a href="#">Hcfc1r1.cSep08</a> | <a href="#">287097</a> | 1377  | 560  | 4  | 119 | host cell factor C1 regulator 1 (XPO1-dependent) (13.5 kD) (Hcfc1r1) alternative variant cSep08, mRNA. |
| <a href="#">Hcfc1r1</a> | <a href="#">Hcfc1r1.dSep08</a> | <a href="#">287097</a> | 855   | 333  | 3  | 111 | host cell factor C1 regulator 1 (XPO1-dependent) (Hcfc1r1) alternative variant dSep08, mRNA.           |
| <a href="#">Hcfc1r1</a> | <a href="#">Hcfc1r1.eSep08</a> | <a href="#">287097</a> | 1244  | 376  | 3  | 93  | host cell factor C1 regulator 1 (XPO1-dependent) (Hcfc1r1) alternative variant eSep08, mRNA.           |
| <a href="#">Hcfc1r1</a> | <a href="#">Hcfc1r1.fSep08</a> | <a href="#">287097</a> | 1305  | 487  | 2  | 76  | host cell factor C1 regulator 1 (XPO1-dependent) (Hcfc1r1) alternative variant fSep08, complete mRNA.  |
| <a href="#">Hcls1</a>   | <a href="#">Hcls1.bSep08</a>   | <a href="#">288077</a> | 19184 | 696  | 1  | 171 | hematopoietic cell specific Lyn substrate 1 (Hcls1) alternative variant bSep08, mRNA.                  |

|                                 |                                        |                        |        |      |    |     |                                                                                                                  |
|---------------------------------|----------------------------------------|------------------------|--------|------|----|-----|------------------------------------------------------------------------------------------------------------------|
| <a href="#">Hcn3</a>            | <a href="#">Hcn3.bSep08</a>            | <a href="#">114245</a> | 8008   | 744  | 4  | 248 | hyperpolarization-activated cyclic nucleotide-gated potassium channel 3 (Hcn3) alternative variant bSep08, mRNA. |
| <a href="#">Hcrt</a>            | <a href="#">Hcrt.aSep08</a>            | <a href="#">25723</a>  | 1833   | 506  | 2  | 143 | hypocretin (Hcrt) alternative variant aSep08, mRNA.                                                              |
| <a href="#">Hcst</a>            | <a href="#">Hcst.cSep08</a>            | <a href="#">474146</a> | 2045   | 431  | 4  | 78  | hematopoietic cell signal transducer (8.1 kD) (Hcst) alternative variant cSep08, mRNA.                           |
| <a href="#">HD.0</a>            | <a href="#">HD.0.aSep08</a>            |                        | 10058  | 579  |    | 193 | SAM domain HD 1 (HD.0) mRNA.                                                                                     |
| <a href="#">Hdac1_predicted</a> | <a href="#">Hdac1_predicted.bSep08</a> | <a href="#">297893</a> | 1413   | 746  | 3  | 118 | histone deacetylase 1 (predicted) (Hdac1_predicted) alternative variant bSep08, mRNA.                            |
| <a href="#">Hdac2</a>           | <a href="#">Hdac2.aSep08</a>           | <a href="#">84577</a>  | 24400  | 2178 | 14 | 554 | histone deacetylase 2 (Hdac2) alternative variant aSep08, mRNA.                                                  |
| <a href="#">Hdac2</a>           | <a href="#">Hdac2.bSep08</a>           | <a href="#">84577</a>  | 8659   | 698  | 3  | 58  | histone deacetylase 2 (Hdac2) alternative variant bSep08, mRNA.                                                  |
| <a href="#">Hdac3</a>           | <a href="#">Hdac3.aSep08</a>           | <a href="#">84578</a>  | 9420   | 1618 | 12 | 334 | histone deacetylase 3 (Hdac3) alternative variant aSep08, mRNA.                                                  |
| <a href="#">Hdac3</a>           | <a href="#">Hdac3.bSep08</a>           | <a href="#">84578</a>  | 5781   | 1813 | 10 | 294 | histone deacetylase 3 (Hdac3) alternative variant bSep08, mRNA.                                                  |
| <a href="#">Hdac3</a>           | <a href="#">Hdac3.cSep08</a>           | <a href="#">84578</a>  | 11677  | 875  | 9  | 272 | histone deacetylase 3 (Hdac3) alternative variant cSep08, mRNA.                                                  |
| <a href="#">Hdac3</a>           | <a href="#">Hdac3.dSep08</a>           | <a href="#">84578</a>  | 7134   | 871  | 7  | 198 | histone deacetylase 3 (Hdac3) alternative variant dSep08, mRNA.                                                  |
| <a href="#">Hdac4</a>           | <a href="#">Hdac4.aSep08</a>           | <a href="#">363287</a> | 46325  | 1905 | 5  | 634 | histone deacetylase 4 (Hdac4) alternative variant aSep08, mRNA.                                                  |
| <a href="#">Hdac6</a>           | <a href="#">Hdac6.aSep08</a>           | <a href="#">84581</a>  | 5945   | 1849 |    | 500 | histone deacetylase 6 (Hdac6) alternative variant aSep08, mRNA.                                                  |
| <a href="#">Hdac6</a>           | <a href="#">Hdac6.bSep08</a>           | <a href="#">84581</a>  | 9205   | 1789 |    | 486 | histone deacetylase 6 (Hdac6) alternative variant bSep08, mRNA.                                                  |
| <a href="#">Hdac6</a>           | <a href="#">Hdac6.cSep08</a>           | <a href="#">84581</a>  | 8683   | 1122 |    | 374 | histone deacetylase 6 (Hdac6) alternative variant cSep08, mRNA.                                                  |
| <a href="#">Hdac7a</a>          | <a href="#">Hdac7a.aSep08</a>          | <a href="#">84582</a>  | 15801  | 2919 | 17 | 640 | histone deacetylase 7A (Hdac7a) alternative variant aSep08, mRNA.                                                |
| <a href="#">Hdac7a</a>          | <a href="#">Hdac7a.bSep08</a>          | <a href="#">84582</a>  | 3356   | 879  | 4  | 246 | histone deacetylase 7A (Hdac7a) alternative variant bSep08, mRNA.                                                |
| <a href="#">Hdac7a</a>          | <a href="#">Hdac7a.cSep08</a>          | <a href="#">84582</a>  | 1556   | 425  | 3  | 141 | histone deacetylase 7A (Hdac7a) alternative variant cSep08, mRNA.                                                |
| <a href="#">Hdac7a</a>          | <a href="#">Hdac7a.dSep08</a>          | <a href="#">84582</a>  | 1001   | 740  | 2  | 107 | histone deacetylase 7A (11.2 kD) (Hdac7a) alternative variant dSep08, mRNA.                                      |
| <a href="#">Hdac8</a>           | <a href="#">Hdac8.aSep08</a>           | <a href="#">363481</a> | 208503 | 1964 | 1  | 377 | histone deacetylase 8 (41.8 kD) (Hdac8) alternative variant aSep08, mRNA.                                        |
| <a href="#">Hdac10</a>          | <a href="#">Hdac10.aSep08</a>          | <a href="#">362981</a> | 3677   | 1658 | 12 | 430 | histone deacetylase 10 (Hdac10) alternative variant aSep08, mRNA.                                                |
| <a href="#">Hdac10</a>          | <a href="#">Hdac10.bSep08</a>          | <a href="#">362981</a> | 1845   | 747  | 7  | 248 | histone deacetylase 10 (Hdac10) alternative variant bSep08, mRNA.                                                |
| <a href="#">Hdac10</a>          | <a href="#">Hdac10.cSep08</a>          | <a href="#">362981</a> | 1001   | 719  | 2  | 171 | histone deacetylase 10 (Hdac10) alternative variant cSep08, mRNA.                                                |
| <a href="#">Hdac10</a>          | <a href="#">Hdac10.dSep08</a>          | <a href="#">362981</a> | 1014   | 648  | 3  | 166 | histone deacetylase 10 (Hdac10) alternative variant dSep08, mRNA.                                                |

|                         |                                |                        |       |      |    |     |                                                                                                                               |
|-------------------------|--------------------------------|------------------------|-------|------|----|-----|-------------------------------------------------------------------------------------------------------------------------------|
| <a href="#">Hdac10</a>  | <a href="#">Hdac10.eSep08</a>  | <a href="#">362981</a> | 1167  | 587  | 5  | 132 | histone deacetylase 10 (Hdac10) alternative variant eSep08, mRNA.                                                             |
| <a href="#">Hdac11</a>  | <a href="#">Hdac11.bSep08</a>  | <a href="#">297453</a> | 3954  | 470  | 3  | 138 | histone deacetylase 11 CRA a (Hdac11) alternative variant bSep08, mRNA.                                                       |
| <a href="#">Hdac11</a>  | <a href="#">Hdac11.cSep08</a>  | <a href="#">297453</a> | 7069  | 1407 | 3  | 94  | putative protein (10.0 kD) (Hdac11) alternative variant cSep08, mRNA.                                                         |
| <a href="#">Hdac11</a>  | <a href="#">Hdac11.dSep08</a>  | <a href="#">297453</a> | 2919  | 481  | 3  | 57  | putative protein (Hdac11) alternative variant dSep08, mRNA.                                                                   |
| <a href="#">Hdac11</a>  | <a href="#">Hdac11.eSep08</a>  | <a href="#">297453</a> | 2323  | 729  | 2  | 31  | histone deacetylase 11 (Hdac11) alternative variant eSep08, mRNA.                                                             |
| <a href="#">Hdc</a>     | <a href="#">Hdc.bSep08</a>     | <a href="#">24443</a>  | 8470  | 1252 | 5  | 326 | histidine decarboxylase (Hdc) alternative variant bSep08, mRNA.                                                               |
| <a href="#">Hdc</a>     | <a href="#">Hdc.cSep08</a>     | <a href="#">24443</a>  | 3275  | 904  | 1  | 63  | histidine decarboxylase (Hdc) alternative variant cSep08, mRNA.                                                               |
| <a href="#">Hddc2</a>   | <a href="#">Hddc2.bSep08</a>   | <a href="#">361462</a> | 19446 | 910  | 6  | 155 | metal-dependent phosphohydrolase, HD region, subdomain containing protein (18.0 kD) (Hddc2) alternative variant bSep08, mRNA. |
| <a href="#">Hddc3</a>   | <a href="#">Hddc3.bSep08</a>   | <a href="#">308758</a> | 1391  | 825  | 4  | 144 | metal-dependent phosphohydrolase, HD region, subdomain containing protein (16.4 kD) (Hddc3) alternative variant bSep08, mRNA. |
| <a href="#">Hddc3</a>   | <a href="#">Hddc3.cSep08</a>   | <a href="#">308758</a> | 1261  | 810  | 3  | 129 | putative protein of ancient origin (14.8 kD) (Hddc3) alternative variant cSep08, mRNA.                                        |
| <a href="#">Hdgf</a>    | <a href="#">Hdgf.bSep08</a>    | <a href="#">114499</a> | 10344 | 967  | 5  | 229 | hepatoma-derived growth factor (Hdgf) alternative variant bSep08, mRNA.                                                       |
| <a href="#">Hdgf</a>    | <a href="#">Hdgf.cSep08</a>    | <a href="#">114499</a> | 8030  | 800  | 5  | 213 | hepatoma-derived growth factor (Hdgf) alternative variant cSep08, mRNA.                                                       |
| <a href="#">Hdgfrp2</a> | <a href="#">Hdgfrp2.bSep08</a> | <a href="#">171073</a> | 16872 | 1502 | 9  | 450 | hepatoma-derived growth factor, related protein 2 (Hdgfrp2) alternative variant bSep08, mRNA.                                 |
| <a href="#">Hdgfrp2</a> | <a href="#">Hdgfrp2.cSep08</a> | <a href="#">171073</a> | 1430  | 695  | 4  | 181 | hepatoma-derived growth factor, related protein 2 (Hdgfrp2) alternative variant cSep08, mRNA.                                 |
| <a href="#">Hdgfrp2</a> | <a href="#">Hdgfrp2.dSep08</a> | <a href="#">171073</a> | 1600  | 1357 | 2  | 103 | hepatoma-derived growth factor, related protein 2 (11.0 kD) (Hdgfrp2) alternative variant dSep08, mRNA.                       |
| <a href="#">Hdgfrp2</a> | <a href="#">Hdgfrp2.eSep08</a> | <a href="#">171073</a> | 2357  | 708  | 2  | 63  | hepatoma-derived growth factor, related protein 2 (Hdgfrp2) alternative variant eSep08, mRNA.                                 |
| <a href="#">Hdhd2</a>   | <a href="#">Hdhd2.bSep08</a>   | <a href="#">361351</a> | 23086 | 889  | 7  | 259 | haloacid dehalogenase-like hydrolase (28.8 kD) (Hdhd2) alternative variant bSep08, mRNA.                                      |
| <a href="#">Hdhd2</a>   | <a href="#">Hdhd2.cSep08</a>   | <a href="#">361351</a> | 39868 | 1532 | 7  | 259 | haloacid dehalogenase-like hydrolase (28.8 kD) (Hdhd2) alternative variant cSep08, complete mRNA.                             |
| <a href="#">Hdhd2</a>   | <a href="#">Hdhd2.dSep08</a>   | <a href="#">361351</a> | 11119 | 1405 | 3  | 82  | immediate early response protein 1 (9.0 kD) (Hdhd2) alternative variant dSep08, complete mRNA.                                |
| <a href="#">Hdhd2</a>   | <a href="#">Hdhd2.eSep08</a>   | <a href="#">361351</a> | 53147 | 1799 | 4  | 40  | immediate early response protein 1 (4.6 kD) (Hdhd2) alternative variant eSep08, mRNA.                                         |
| <a href="#">Hdlbp</a>   | <a href="#">Hdlbp.bSep08</a>   | <a href="#">64474</a>  | 35892 | 2176 | 10 | 407 | high density lipoprotein binding protein CRA f like (Hdlbp) alternative variant bSep08, mRNA.                                 |
| <a href="#">Hdlbp</a>   | <a href="#">Hdlbp.cSep08</a>   | <a href="#">64474</a>  | 16251 | 1882 | 8  | 373 | high density lipoprotein binding protein CRA b like (41.3 kD) (Hdlbp) alternative variant cSep08, mRNA.                       |

|                         |                                |                        |       |      |    |      |                                                                                                                |
|-------------------------|--------------------------------|------------------------|-------|------|----|------|----------------------------------------------------------------------------------------------------------------|
| <a href="#">Hdlbp</a>   | <a href="#">Hdlbp.dSep08</a>   | <a href="#">64474</a>  | 5885  | 3080 | 5  | 214  | high density lipoprotein binding protein CRA e like (23.8 kD) (Hdlbp) alternative variant dSep08, mRNA.        |
| <a href="#">Hdlbp</a>   | <a href="#">Hdlbp.eSep08</a>   | <a href="#">64474</a>  | 1112  | 733  | 3  | 112  | high density lipoprotein binding protein CRA e like (Hdlbp) alternative variant eSep08, mRNA.                  |
| <a href="#">Hdlbp</a>   | <a href="#">Hdlbp.fSep08</a>   | <a href="#">64474</a>  | 1115  | 978  | 2  | 58   | high density lipoprotein binding protein CRA e like (6.3 kD) (Hdlbp) alternative variant fSep08, mRNA.         |
| <a href="#">Hdmcp</a>   | <a href="#">Hdmcp.bSep08</a>   | <a href="#">299316</a> | 2448  | 1593 | 1  | 131  | mitochondrial hepatocellular carcinoma-downregulated carrier protein (Hdmcp) alternative variant bSep08, mRNA. |
| <a href="#">HEAT.0</a>  | <a href="#">HEAT.0.aSep08</a>  |                        | 30892 | 3561 |    | 369  | CLIP-associating protein 1 (HEAT.0) mRNA.                                                                      |
| <a href="#">HEAT.1</a>  | <a href="#">HEAT.1.aSep08</a>  |                        | 2573  | 1267 | 8  | 330  | CRA b (36.5 kD) (HEAT.1) alternative variant aSep08, mRNA.                                                     |
| <a href="#">HEAT.1</a>  | <a href="#">HEAT.1.bSep08</a>  |                        | 1112  | 600  | 4  | 118  | CRA b (HEAT.1) alternative variant bSep08, mRNA.                                                               |
| <a href="#">HEAT.1</a>  | <a href="#">HEAT.1.cSep08</a>  |                        | 1251  | 738  | 4  | 84   | CRA a like (9.5 kD) (HEAT.1) alternative variant cSep08, mRNA.                                                 |
| <a href="#">HEAT.1</a>  | <a href="#">HEAT.1.dSep08</a>  |                        | 714   | 641  | 2  | 34   | CRA b like (HEAT.1) alternative variant dSep08, mRNA.                                                          |
| <a href="#">Heatr1</a>  | <a href="#">Heatr1.bSep08</a>  | <a href="#">361262</a> | 3509  | 781  | 2  | 215  | HEAT repeat containing 1 (Heatr1) alternative variant bSep08, mRNA.                                            |
| <a href="#">Heatr1</a>  | <a href="#">Heatr1.cSep08</a>  | <a href="#">361262</a> | 3742  | 714  | 2  | 165  | HEAT repeat containing 1 (Heatr1) alternative variant cSep08, mRNA.                                            |
| <a href="#">Heatr2</a>  | <a href="#">Heatr2.bSep08</a>  | <a href="#">304332</a> | 32653 | 1814 | 2  | 413  | HEAT repeat containing 2 (Heatr2) alternative variant bSep08, mRNA.                                            |
| <a href="#">Heatr3</a>  | <a href="#">Heatr3.aSep08</a>  | <a href="#">361375</a> | 15612 | 1933 |    | 244  | HEAT repeat containing 3 (Heatr3) mRNA.                                                                        |
| <a href="#">Heatr5a</a> | <a href="#">Heatr5a.aSep08</a> | <a href="#">362737</a> | 16717 | 3037 |    | 539  | HEAT repeat containing 5A (Heatr5a) mRNA.                                                                      |
| <a href="#">Heatr5b</a> | <a href="#">Heatr5b.aSep08</a> | <a href="#">362683</a> | 49310 | 3946 | 16 | 1127 | HEAT repeat containing 5B (Heatr5b) alternative variant aSep08, mRNA.                                          |
| <a href="#">Heatr5b</a> | <a href="#">Heatr5b.bSep08</a> | <a href="#">362683</a> | 10222 | 1895 | 6  | 443  | HEAT repeat containing 5B (Heatr5b) alternative variant bSep08, mRNA.                                          |
| <a href="#">Heatr5b</a> | <a href="#">Heatr5b.cSep08</a> | <a href="#">362683</a> | 7196  | 723  | 5  | 240  | HEAT repeat containing 5B (Heatr5b) alternative variant cSep08, mRNA.                                          |
| <a href="#">Heatr5b</a> | <a href="#">Heatr5b.dSep08</a> | <a href="#">362683</a> | 2809  | 389  | 3  | 129  | HEAT repeat containing 5B (Heatr5b) alternative variant dSep08, mRNA.                                          |
| <a href="#">Heatr6</a>  | <a href="#">Heatr6.bSep08</a>  | <a href="#">497972</a> | 25053 | 1784 | 7  | 493  | HEAT repeat containing 6 (Heatr6) alternative variant bSep08, mRNA.                                            |
| <a href="#">Heatr6</a>  | <a href="#">Heatr6.cSep08</a>  | <a href="#">497972</a> | 3561  | 1323 | 3  | 272  | HEAT repeat containing 6 (29.7 kD) (Heatr6) alternative variant cSep08, mRNA.                                  |
| <a href="#">Hebp1</a>   | <a href="#">Hebp1.aSep08</a>   | <a href="#">362454</a> | 36605 | 1050 | 2  | 225  | heme binding protein 1 (Hebp1) alternative variant aSep08, mRNA.                                               |
| <a href="#">HECT.0</a>  | <a href="#">HECT.0.aSep08</a>  |                        | 10563 | 1934 | 2  | 264  | HECT (HECT.0) alternative variant aSep08, mRNA.                                                                |
| <a href="#">HECT.0</a>  | <a href="#">HECT.0.bSep08</a>  |                        | 3655  | 777  | 1  | 164  | HECT (HECT.0) alternative variant bSep08, mRNA.                                                                |
| <a href="#">Hectd1</a>  | <a href="#">Hectd1.aSep08</a>  | <a href="#">362736</a> | 46195 | 6390 | 30 | 1864 | sad1/UNC-like, C-terminal and mib herc2 and HECT (Hectd1) alternative variant aSep08, mRNA.                    |
| <a href="#">Hectd1</a>  | <a href="#">Hectd1.bSep08</a>  | <a href="#">362736</a> | 32137 | 1819 | 8  | 606  | ankyrin (Hectd1) alternative variant bSep08, mRNA.                                                             |
| <a href="#">Hectd1</a>  | <a href="#">Hectd1.cSep08</a>  | <a href="#">362736</a> | 62160 | 1788 | 4  | 469  | putative protein of eukaryotic origin (Hectd1) alternative variant cSep08, mRNA.                               |
| <a href="#">Hectd1</a>  | <a href="#">Hectd1.dSep08</a>  | <a href="#">362736</a> | 5232  | 1178 | 6  | 260  | ankyrin (Hectd1) alternative variant dSep08, mRNA.                                                             |
| <a href="#">Hectd1</a>  | <a href="#">Hectd1.eSep08</a>  | <a href="#">362736</a> | 6164  | 572  | 4  | 150  | ankyrin (Hectd1) alternative variant eSep08, mRNA.                                                             |

|                                    |                                         |                        |       |      |    |     |                                                                                                                                               |
|------------------------------------|-----------------------------------------|------------------------|-------|------|----|-----|-----------------------------------------------------------------------------------------------------------------------------------------------|
| <a href="#">Hectd2</a>             | <a href="#">Hectd2.bSep08</a>           | <a href="#">309514</a> | 45221 | 753  | 3  | 240 | putative protein of metazoan origin (Hectd2) alternative variant bSep08, mRNA.                                                                |
| <a href="#">Hectd2</a>             | <a href="#">Hectd2.cSep08</a>           | <a href="#">309514</a> | 45884 | 743  | 3  | 182 | putative protein of metazoan origin (Hectd2) alternative variant cSep08, mRNA.                                                                |
| <a href="#">Hel308</a>             | <a href="#">Hel308.aSep08</a>           | <a href="#">360912</a> | 17539 | 1038 |    | 346 | DNA helicase HEL308 (Hel308) mRNA.                                                                                                            |
| <a href="#">Helb</a>               | <a href="#">Helb.aSep08</a>             | <a href="#">500837</a> | 5067  | 382  |    | 126 | helicase (DNA) B (Helb) mRNA.                                                                                                                 |
| <a href="#">Helicase_C.0</a>       | <a href="#">Helicase_C.0.aSep08</a>     |                        | 6421  | 401  |    | 133 | SWI SNF related matrix associated actin dependent regulator of chromatin subfamily a member 1 (Helicase_C.0) mRNA.                            |
| <a href="#">Helicase_C.1</a>       | <a href="#">Helicase_C.1.aSep08</a>     |                        | 2474  | 368  |    | 122 | chromodomain helicase binding protein 9 like (Helicase_C.1) mRNA.                                                                             |
| <a href="#">Helicase_C.2</a>       | <a href="#">Helicase_C.2.aSep08</a>     |                        | 3552  | 748  |    | 151 | responsive protein zinc zd10 (Helicase_C.2) alternative variant aSep08, mRNA.                                                                 |
| <a href="#">Helicase_C.3</a>       | <a href="#">Helicase_C.3.aSep08</a>     |                        | 19398 | 2042 |    | 498 | dead box polypeptide 46 (Helicase_C.3) mRNA.                                                                                                  |
| <a href="#">Helicase_C.4</a>       | <a href="#">Helicase_C.4.aSep08</a>     |                        | 23611 | 713  |    | 237 | atp-dependent rna helicase tdrd9 (Helicase_C.4) mRNA.                                                                                         |
| <a href="#">Helicase_C.5</a>       | <a href="#">Helicase_C.5.aSep08</a>     |                        | 2996  | 522  |    | 173 | CBP activator (Helicase_C.5) mRNA.                                                                                                            |
| <a href="#">HELP.0</a>             | <a href="#">HELP.0.aSep08</a>           |                        | 12185 | 3924 | 22 | 896 | echinoderm microtubule associated protein like 3 (95.6 kD) (HELP.0) alternative variant aSep08, mRNA.                                         |
| <a href="#">HELP.0</a>             | <a href="#">HELP.0.bSep08</a>           |                        | 3797  | 1244 | 6  | 337 | echinoderm microtubule associated protein like 3 (HELP.0) alternative variant bSep08, mRNA.                                                   |
| <a href="#">HELP.0</a>             | <a href="#">HELP.0.cSep08</a>           |                        | 3742  | 1244 | 7  | 179 | echinoderm microtubule associated protein like 3 CRA e (19.7 kD) (HELP.0) alternative variant cSep08, mRNA.                                   |
| <a href="#">HELP.0</a>             | <a href="#">HELP.0.dSep08</a>           |                        | 867   | 707  | 3  | 179 | echinoderm microtubule associated protein like 3 (HELP.0) alternative variant dSep08, mRNA.                                                   |
| <a href="#">HELP.0</a>             | <a href="#">HELP.0.eSep08</a>           |                        | 1587  | 414  | 4  | 66  | echinoderm microtubule associated protein like 3 CRA f (HELP.0) alternative variant eSep08, mRNA.                                             |
| <a href="#">Helz</a>               | <a href="#">Helz.bSep08</a>             | <a href="#">287773</a> | 11562 | 730  | 3  | 243 | helicase with zinc finger domain (Helz) alternative variant bSep08, mRNA.                                                                     |
| <a href="#">Helz</a>               | <a href="#">Helz.cSep08</a>             | <a href="#">287773</a> | 13358 | 1247 | 3  | 107 | helicase with zinc finger domain (Helz) alternative variant cSep08, mRNA.                                                                     |
| <a href="#">Helz</a>               | <a href="#">Helz.eSep08</a>             | <a href="#">287773</a> | 29057 | 406  | 5  | 80  | helicase with zinc finger domain (Helz) alternative variant eSep08, mRNA.                                                                     |
| <a href="#">Heme_oxygenase_e.0</a> | <a href="#">Heme_oxygenase.0.aSep08</a> |                        | 2169  | 1403 |    | 232 | heme (Heme_oxygenase.0) mRNA.                                                                                                                 |
| <a href="#">Hemgn</a>              | <a href="#">Hemgn.bSep08</a>            | <a href="#">113882</a> | 15985 | 1341 | 2  | 385 | hemogen (Hemgn) alternative variant bSep08, mRNA.                                                                                             |
| <a href="#">Hemk1</a>              | <a href="#">Hemk1.bSep08</a>            | <a href="#">300989</a> | 19362 | 797  | 1  | 265 | HemK methyltransferase family member 1 (Hemk1) alternative variant bSep08, mRNA.                                                              |
| <a href="#">Heph</a>               | <a href="#">Heph.bSep08</a>             | <a href="#">117240</a> | 12029 | 756  | 1  | 74  | hephaestin (Heph) alternative variant bSep08, mRNA.                                                                                           |
| <a href="#">Herc1</a>              | <a href="#">Herc1.aSep08</a>            | <a href="#">315771</a> | 19424 | 2391 | 11 | 645 | hect (homologous to the E6-AP (UBE3A) carboxyl terminus) domain and RCC1 (CHC1)-like domain (RLD) 1 (Herc1) alternative variant aSep08, mRNA. |
| <a href="#">Herc1</a>              | <a href="#">Herc1.bSep08</a>            | <a href="#">315771</a> | 1031  | 541  | 1  | 153 | hect (homologous to the E6-AP (UBE3A) carboxyl terminus) domain and RCC1 (CHC1)-like domain (RLD) 1 (Herc1) alternative variant bSep08, mRNA. |
| <a href="#">Herc1</a>              | <a href="#">Herc1.cSep08</a>            | <a href="#">315771</a> | 6721  | 684  | 2  |     |                                                                                                                                               |

|                         |                                |                        |       |      |    |     |                                                                                                                                                     |
|-------------------------|--------------------------------|------------------------|-------|------|----|-----|-----------------------------------------------------------------------------------------------------------------------------------------------------|
| <a href="#">Herc2</a>   | <a href="#">Herc2.bSep08</a>   | <a href="#">308669</a> | 697   | 412  | 2  | 136 | hect (homologous to the E6-AP (UBE3A) carboxyl terminus) domain and RCC1 (CHC1)-like domain (RLD) 2 (Herc2) alternative variant bSep08, mRNA.       |
| <a href="#">Herc2</a>   | <a href="#">Herc2.dSep08</a>   | <a href="#">308669</a> | 2540  | 401  | 4  | 67  | hect (homologous to the E6-AP (UBE3A) carboxyl terminus) domain and RCC1 (CHC1)-like domain (RLD) 2 (Herc2) alternative variant dSep08, mRNA.       |
| <a href="#">Herc3</a>   | <a href="#">Herc3.cSep08</a>   | <a href="#">362377</a> | 12345 | 716  | 4  | 97  | hect domain and RLD 3 (Herc3) alternative variant cSep08, mRNA.                                                                                     |
| <a href="#">Herc3</a>   | <a href="#">Herc3.eSep08</a>   | <a href="#">362377</a> | 4812  | 376  | 3  | 39  | hect domain and RLD 3 (Herc3) alternative variant eSep08, mRNA.                                                                                     |
| <a href="#">Herc4</a>   | <a href="#">Herc4.bSep08</a>   | <a href="#">309758</a> | 32029 | 2067 | 12 | 511 | hect domain and RLD 4 (Herc4) alternative variant bSep08, mRNA.                                                                                     |
| <a href="#">Herc4</a>   | <a href="#">Herc4.cSep08</a>   | <a href="#">309758</a> | 8952  | 505  | 4  | 164 | hect domain and RLD 4 (Herc4) alternative variant cSep08, mRNA.                                                                                     |
| <a href="#">Herc6</a>   | <a href="#">Herc6.aSep08</a>   | <a href="#">362376</a> | 3883  | 1792 | 5  | 211 | potential ubiquitin ligase (Herc6) alternative variant aSep08, mRNA.                                                                                |
| <a href="#">Herpud1</a> | <a href="#">Herpud1.bSep08</a> | <a href="#">85430</a>  | 6706  | 749  | 6  | 222 | homocysteine-inducible, endoplasmic reticulum stress-inducible, ubiquitin-like domain member 1 (Herpud1) alternative variant bSep08, mRNA.          |
| <a href="#">Herpud1</a> | <a href="#">Herpud1.cSep08</a> | <a href="#">85430</a>  | 5460  | 751  | 6  | 177 | homocysteine-inducible, endoplasmic reticulum stress-inducible, ubiquitin-like domain member 1 (Herpud1) alternative variant cSep08, mRNA.          |
| <a href="#">Herpud1</a> | <a href="#">Herpud1.eSep08</a> | <a href="#">85430</a>  | 1492  | 409  | 2  | 32  | homocysteine-inducible, endoplasmic reticulum stress-inducible, ubiquitin-like domain member 1 (3.7 kD) (Herpud1) alternative variant eSep08, mRNA. |
| <a href="#">Herpud2</a> | <a href="#">Herpud2.aSep08</a> | <a href="#">300463</a> | 23369 | 1234 | 4  | 202 | HERPUD family member 2 (Herpud2) alternative variant aSep08, mRNA.                                                                                  |
| <a href="#">Herpud2</a> | <a href="#">Herpud2.bSep08</a> | <a href="#">300463</a> | 2175  | 1037 | 3  | 195 | HERPUD family member 2 (Herpud2) alternative variant bSep08, mRNA.                                                                                  |
| <a href="#">Herpud2</a> | <a href="#">Herpud2.dSep08</a> | <a href="#">300463</a> | 2256  | 1089 | 3  | 111 | HERPUD family member 2 (Herpud2) alternative variant dSep08, mRNA.                                                                                  |
| <a href="#">Herpud2</a> | <a href="#">Herpud2.eSep08</a> | <a href="#">300463</a> | 2431  | 1973 | 2  | 54  | member 2 (5.8 kD) (Herpud2) alternative variant eSep08, mRNA.                                                                                       |
| <a href="#">Hes6</a>    | <a href="#">Hes6.bSep08</a>    | <a href="#">316626</a> | 1719  | 1325 | 4  | 224 | hairy and enhancer of split 6 (Drosophila) (24.6 kD) (Hes6) alternative variant bSep08, complete mRNA.                                              |
| <a href="#">Hes6</a>    | <a href="#">Hes6.cSep08</a>    | <a href="#">316626</a> | 1214  | 995  | 3  | 221 | hairy and enhancer of split 6 (Drosophila) (Hes6) alternative variant cSep08, mRNA.                                                                 |
| <a href="#">Hes6</a>    | <a href="#">Hes6.dSep08</a>    | <a href="#">316626</a> | 1206  | 1050 | 3  | 126 | hairy and enhancer of split 6 (Drosophila) (14.0 kD) (Hes6) alternative variant dSep08, mRNA.                                                       |
| <a href="#">Hexa</a>    | <a href="#">Hexa.bSep08</a>    | <a href="#">300757</a> | 5849  | 548  | 4  | 125 | hexosaminidase A (Hexa) alternative variant bSep08, mRNA.                                                                                           |
| <a href="#">Hexb</a>    | <a href="#">Hexb.cSep08</a>    | <a href="#">294673</a> | 4246  | 750  | 6  | 78  | hexosaminidase B (Hexb) alternative variant cSep08, mRNA.                                                                                           |
| <a href="#">Hexb</a>    | <a href="#">Hexb.dSep08</a>    | <a href="#">294673</a> | 1023  | 617  | 2  | 53  | hexosaminidase B (Hexb) alternative variant dSep08, mRNA.                                                                                           |



|                        |                               |                        |       |      |    |     |                                                                                                                                 |
|------------------------|-------------------------------|------------------------|-------|------|----|-----|---------------------------------------------------------------------------------------------------------------------------------|
| <a href="#">Hexim2</a> | <a href="#">Hexim2.aSep08</a> | <a href="#">303580</a> | 4426  | 1289 | 1  | 313 | hexamethylene bis-acetamide inducible 2 and hypothetical protein LOC685659 (35.5 kD) (Hexim2) alternative variant aSep08, mRNA. |
| <a href="#">Hexim2</a> | <a href="#">Hexim2.aSep08</a> | <a href="#">685659</a> | 4426  | 1289 | 1  | 313 | hexamethylene bis-acetamide inducible 2 and hypothetical protein LOC685659 (35.5 kD) (Hexim2) alternative variant aSep08, mRNA. |
| <a href="#">Hexim2</a> | <a href="#">Hexim2.cSep08</a> | <a href="#">303580</a> | 4689  | 862  | 2  | 262 | hexamethylene bis-acetamide inducible 2 and hypothetical protein LOC685659 (Hexim2) alternative variant cSep08, mRNA.           |
| <a href="#">Hexim2</a> | <a href="#">Hexim2.cSep08</a> | <a href="#">685659</a> | 4689  | 862  | 2  | 262 | hexamethylene bis-acetamide inducible 2 and hypothetical protein LOC685659 (Hexim2) alternative variant cSep08, mRNA.           |
| <a href="#">Hexim2</a> | <a href="#">Hexim2.dSep08</a> | <a href="#">303580</a> | 4670  | 934  | 2  | 214 | hexamethylene bis-acetamide inducible 2 and hypothetical protein LOC685659 (Hexim2) alternative variant dSep08, mRNA.           |
| <a href="#">Hexim2</a> | <a href="#">Hexim2.dSep08</a> | <a href="#">685659</a> | 4670  | 934  | 2  | 214 | hexamethylene bis-acetamide inducible 2 and hypothetical protein LOC685659 (Hexim2) alternative variant dSep08, mRNA.           |
| <a href="#">Hexim2</a> | <a href="#">Hexim2.eSep08</a> | <a href="#">303580</a> | 4492  | 721  | 2  | 196 | hexamethylene bis-acetamide inducible 2 and hypothetical protein LOC685659 (Hexim2) alternative variant eSep08, mRNA.           |
| <a href="#">Hexim2</a> | <a href="#">Hexim2.eSep08</a> | <a href="#">685659</a> | 4492  | 721  | 2  | 196 | hexamethylene bis-acetamide inducible 2 and hypothetical protein LOC685659 (Hexim2) alternative variant eSep08, mRNA.           |
| <a href="#">Hexim2</a> | <a href="#">Hexim2.fSep08</a> | <a href="#">303580</a> | 5162  | 709  | 3  | 131 | hexamethylene bis-acetamide inducible 2 and hypothetical protein LOC685659 (Hexim2) alternative variant fSep08, mRNA.           |
| <a href="#">Hexim2</a> | <a href="#">Hexim2.fSep08</a> | <a href="#">685659</a> | 5162  | 709  | 3  | 131 | hexamethylene bis-acetamide inducible 2 and hypothetical protein LOC685659 (Hexim2) alternative variant fSep08, mRNA.           |
| <a href="#">Hey1</a>   | <a href="#">Hey1.aSep08</a>   | <a href="#">155437</a> | 2024  | 562  |    | 165 | hairy/enhancer-of-split related with YRPW motif 1 (Hey1) mRNA.                                                                  |
| <a href="#">Hey2</a>   | <a href="#">Hey2.aSep08</a>   | <a href="#">155430</a> | 6212  | 567  |    | 188 | hairy/enhancer-of-split related with YRPW motif 2 (Hey2) mRNA.                                                                  |
| <a href="#">Hfm1</a>   | <a href="#">Hfm1.aSep08</a>   | <a href="#">690161</a> | 8031  | 896  | 3  | 24  | HFM1, ATP-dependent DNA helicase homolog (S. cerevisiae) (2.7 kD) (Hfm1) alternative variant aSep08, mRNA.                      |
| <a href="#">Hgd</a>    | <a href="#">Hgd.bSep08</a>    | <a href="#">360719</a> | 37679 | 758  | 10 | 237 | homogentisate 1, 2-dioxygenase (Hgd) alternative variant bSep08, mRNA.                                                          |
| <a href="#">Hgd</a>    | <a href="#">Hgd.cSep08</a>    | <a href="#">360719</a> | 30287 | 668  | 9  | 222 | homogentisate 1, 2-dioxygenase (Hgd) alternative variant cSep08, mRNA.                                                          |
| <a href="#">Hgd</a>    | <a href="#">Hgd.dSep08</a>    | <a href="#">360719</a> | 51862 | 1558 | 9  | 145 | homogentisate 1, 2-dioxygenase (16.2 kD) (Hgd) alternative variant dSep08, complete mRNA.                                       |
| <a href="#">Hgd</a>    | <a href="#">Hgd.eSep08</a>    | <a href="#">360719</a> | 31399 | 720  | 6  | 145 | homogentisate 1, 2-dioxygenase (16.2 kD) (Hgd) alternative variant eSep08, mRNA.                                                |
| <a href="#">Hgd</a>    | <a href="#">Hgd.fSep08</a>    | <a href="#">360719</a> | 4229  | 422  | 2  | 118 | homogentisate 1, 2-dioxygenase (Hgd) alternative variant fSep08, mRNA.                                                          |

|                                  |                                         |                           |       |      |    |     |                                                                                                                     |
|----------------------------------|-----------------------------------------|---------------------------|-------|------|----|-----|---------------------------------------------------------------------------------------------------------------------|
| <a href="#">Hgfac</a>            | <a href="#">Hgfac.bSep08</a>            | <a href="#">58947</a>     | 2830  | 787  | 3  | 229 | hepatocyte growth factor activator (Hgfac) alternative variant bSep08, mRNA.                                        |
| <a href="#">Hgfac</a>            | <a href="#">Hgfac.cSep08</a>            | <a href="#">58947</a>     | 1768  | 698  | 2  | 209 | hepatocyte growth factor activator (Hgfac) alternative variant cSep08, mRNA.                                        |
| <a href="#">Hgs</a>              | <a href="#">Hgs.aSep08</a>              | <a href="#">56084</a>     | 1450  | 941  |    | 150 | HGF-regulated tyrosine kinase substrate (Hgs) alternative variant aSep08, mRNA.                                     |
| <a href="#">HGTP_anticodon_0</a> | <a href="#">HGTP_anticodon.0.aSep08</a> |                           | 8890  | 1296 |    | 207 | threonyl-tRNA synthetase (HGTP_anticodon.0) mRNA.                                                                   |
| <a href="#">Hhat</a>             | <a href="#">Hhat.aSep08</a>             | <a href="#">289344</a>    | 41219 | 689  |    | 45  | hedgehog acyltransferase (Hhat) mRNA.                                                                               |
| <a href="#">Hhatl</a>            | <a href="#">Hhatl.bSep08</a>            | <a href="#">301073</a>    | 3415  | 766  | 5  | 221 | hedgehog acyltransferase-like (Hhatl) alternative variant bSep08, mRNA.                                             |
| <a href="#">Hhatl</a>            | <a href="#">Hhatl.cSep08</a>            | <a href="#">301073</a>    | 1225  | 1056 | 2  | 82  | hedgehog acyltransferase-like (9.5 kD) (Hhatl) alternative variant cSep08, mRNA.                                    |
| <a href="#">Hhatl</a>            | <a href="#">Hhatl.eSep08</a>            | <a href="#">301073</a>    | 3523  | 729  | 4  | 82  | hedgehog acyltransferase-like (9.5 kD) (Hhatl) alternative variant eSep08, mRNA.                                    |
| <a href="#">Hhex</a>             | <a href="#">Hhex.bSep08</a>             | <a href="#">79237</a>     | 2610  | 765  | 2  | 12  | hematopoietically expressed homeobox (1.3 kD) (Hhex) alternative variant bSep08, mRNA.                              |
| <a href="#">Hhex</a>             | <a href="#">Hhex.cSep08</a>             | <a href="#">79237</a>     | 649   | 327  | 2  | 53  | hematopoietically expressed homeobox (6.0 kD) (Hhex) alternative variant cSep08, mRNA.                              |
| <a href="#">Hhip</a>             | <a href="#">Hhip.aSep08</a>             | <a href="#">291936</a>    | 3209  | 727  |    | 94  | hedgehog-interacting protein (Hhip) mRNA.                                                                           |
| <a href="#">Hhipl1</a>           | <a href="#">Hhipl1.aSep08</a>           | <a href="#">362781</a>    | 5606  | 548  |    | 176 | hedgehog interacting protein-like 1 (Hhipl1) mRNA.                                                                  |
| <a href="#">Hiat1</a>            | <a href="#">Hiat1.bSep08</a>            | <a href="#">100134827</a> | 3461  | 1762 | 3  | 155 | hippocampus abundant gene transcript 1 (16.5 kD) (Hiat1) alternative variant bSep08, mRNA.                          |
| <a href="#">Hiat1</a>            | <a href="#">Hiat1.cSep08</a>            | <a href="#">100134827</a> | 5018  | 837  | 2  | 58  | hippocampus abundant gene transcript 1 (Hiat1) alternative variant cSep08, mRNA.                                    |
| <a href="#">Hibch</a>            | <a href="#">Hibch.aSep08</a>            | <a href="#">301384</a>    | 58494 | 1673 | 2  | 355 | 3-hydroxyisobutyryl-Coenzyme A hydrolase (Hibch) alternative variant aSep08, mRNA.                                  |
| <a href="#">Hic2</a>             | <a href="#">Hic2.aSep08</a>             | <a href="#">287940</a>    | 25985 | 728  |    | 174 | hypermethylated in cancer 2 (Hic2) mRNA.                                                                            |
| <a href="#">Hif1a</a>            | <a href="#">Hif1a.aSep08</a>            | <a href="#">29560</a>     | 45782 | 4620 | 15 | 828 | hypoxia inducible factor 1, alpha subunit (92.7 kD) (Hif1a) alternative variant aSep08, mRNA.                       |
| <a href="#">Hif1a</a>            | <a href="#">Hif1a.bSep08</a>            | <a href="#">29560</a>     | 5240  | 2120 | 5  | 307 | hypoxia inducible factor 1, alpha subunit (Hif1a) alternative variant bSep08, mRNA.                                 |
| <a href="#">Hif1a</a>            | <a href="#">Hif1a.cSep08</a>            | <a href="#">29560</a>     | 24627 | 501  | 5  | 134 | hypoxia inducible factor 1, alpha subunit (Hif1a) alternative variant cSep08, mRNA.                                 |
| <a href="#">Hif1an</a>           | <a href="#">Hif1an.bSep08</a>           | <a href="#">309434</a>    | 9847  | 982  |    | 197 | hypoxia-inducible factor 1, alpha subunit inhibitor (22.8 kD) (Hif1an) alternative variant bSep08, mRNA.            |
| <a href="#">Higd1a</a>           | <a href="#">Higd1a.bSep08</a>           | <a href="#">140937</a>    | 8056  | 519  | 4  | 136 | HIG1 domain family, member 1A (Higd1a) alternative variant bSep08, mRNA.                                            |
| <a href="#">Higd1b</a>           | <a href="#">Higd1b.aSep08</a>           | <a href="#">287738</a>    | 2204  | 500  | 2  | 98  | HIG1 domain family, member 1B (10.9 kD) (Higd1b) alternative variant aSep08, mRNA.                                  |
| <a href="#">Higd2aandFaf2</a>    | <a href="#">Higd2aandFaf2.bSep08</a>    | <a href="#">290999</a>    | 30942 | 867  | 8  | 279 | putative protein of eukaryotic origin (Higd2aandFaf2) alternative variant bSep08, mRNA.                             |
| <a href="#">Higd2aandFaf2</a>    | <a href="#">Higd2aandFaf2.bSep08</a>    | <a href="#">291000</a>    | 30942 | 867  | 8  | 279 | putative protein of eukaryotic origin (Higd2aandFaf2) alternative variant bSep08, mRNA.                             |
| <a href="#">Higd2aandFaf2</a>    | <a href="#">Higd2aandFaf2.cSep08</a>    | <a href="#">290999</a>    | 34519 | 817  | 7  | 262 | putative protein, with a coiled coil domain, of eukaryotic origin (Higd2aandFaf2) alternative variant cSep08, mRNA. |

|                               |                                      |                        |       |      |    |     |                                                                                                                      |
|-------------------------------|--------------------------------------|------------------------|-------|------|----|-----|----------------------------------------------------------------------------------------------------------------------|
| <a href="#">Higd2aandFaf2</a> | <a href="#">Higd2aandFaf2.cSep08</a> | <a href="#">291000</a> | 34519 | 817  | 7  | 262 | putative protein, with a coiled coil domain, of eukaryotic origin (Higd2aandFaf2) alternative variant cSep08, mRNA.  |
| <a href="#">Higd2aandFaf2</a> | <a href="#">Higd2aandFaf2.dSep08</a> | <a href="#">290999</a> | 29005 | 623  | 7  | 201 | putative protein of eukaryotic origin (Higd2aandFaf2) alternative variant dSep08, mRNA.                              |
| <a href="#">Higd2aandFaf2</a> | <a href="#">Higd2aandFaf2.dSep08</a> | <a href="#">291000</a> | 29005 | 623  | 7  | 201 | putative protein of eukaryotic origin (Higd2aandFaf2) alternative variant dSep08, mRNA.                              |
| <a href="#">Higd2aandFaf2</a> | <a href="#">Higd2aandFaf2.eSep08</a> | <a href="#">290999</a> | 34431 | 806  | 8  | 154 | putative cytoplasmic protein of metazoan origin (17.9 kD) (Higd2aandFaf2) alternative variant eSep08, complete mRNA. |
| <a href="#">Higd2aandFaf2</a> | <a href="#">Higd2aandFaf2.eSep08</a> | <a href="#">291000</a> | 34431 | 806  | 8  | 154 | putative cytoplasmic protein of metazoan origin (17.9 kD) (Higd2aandFaf2) alternative variant eSep08, complete mRNA. |
| <a href="#">Higd2aandFaf2</a> | <a href="#">Higd2aandFaf2.hSep08</a> | <a href="#">290999</a> | 57601 | 378  | 4  | 68  | putative protein of bilateral origin (Higd2aandFaf2) alternative variant hSep08, mRNA.                               |
| <a href="#">Higd2aandFaf2</a> | <a href="#">Higd2aandFaf2.hSep08</a> | <a href="#">291000</a> | 57601 | 378  | 4  | 68  | putative protein of bilateral origin (Higd2aandFaf2) alternative variant hSep08, mRNA.                               |
| <a href="#">HIN.0</a>         | <a href="#">HIN.0.aSep08</a>         |                        | 3496  | 509  |    | 121 | activated gene Interferon 20 (HIN.0) mRNA.                                                                           |
| <a href="#">Hint2</a>         | <a href="#">Hint2.bSep08</a>         | <a href="#">313491</a> | 2205  | 641  | 3  | 110 | histidine triad nucleotide binding protein 2 CRA b like (11.6 kD) (Hint2) alternative variant bSep08, complete mRNA. |
| <a href="#">Hint2</a>         | <a href="#">Hint2.cSep08</a>         | <a href="#">313491</a> | 880   | 778  | 1  | 67  | putative protein (Hint2) alternative variant cSep08, mRNA.                                                           |
| <a href="#">Hint3</a>         | <a href="#">Hint3.aSep08</a>         | <a href="#">246769</a> | 9862  | 958  | 5  | 175 | histidine triad nucleotide binding protein 3 (19.7 kD) (Hint3) alternative variant aSep08, mRNA.                     |
| <a href="#">Hint3</a>         | <a href="#">Hint3.bSep08</a>         | <a href="#">246769</a> | 9588  | 557  | 4  | 120 | histidine triad nucleotide binding protein 3 (Hint3) alternative variant bSep08, mRNA.                               |
| <a href="#">Hint3</a>         | <a href="#">Hint3.eSep08</a>         | <a href="#">246769</a> | 5644  | 256  | 2  | 43  | histidine triad nucleotide binding protein 3 (Hint3) alternative variant eSep08, mRNA.                               |
| <a href="#">Hip1</a>          | <a href="#">Hip1.aSep08</a>          | <a href="#">192154</a> | 61715 | 2608 | 25 | 808 | huntingtin interacting protein 1 (Hip1) alternative variant aSep08, mRNA.                                            |
| <a href="#">Hipk1</a>         | <a href="#">Hipk1.bSep08</a>         | <a href="#">365895</a> | 10280 | 743  | 6  | 155 | homeodomain interacting protein kinase 1 (Hipk1) alternative variant bSep08, mRNA.                                   |
| <a href="#">Hipk1</a>         | <a href="#">Hipk1.cSep08</a>         | <a href="#">365895</a> | 3767  | 372  | 3  | 87  | homeodomain interacting protein kinase 1 (Hipk1) alternative variant cSep08, mRNA.                                   |
| <a href="#">Hipk1</a>         | <a href="#">Hipk1.dSep08</a>         | <a href="#">365895</a> | 763   | 232  | 2  | 69  | homeodomain interacting protein kinase 1 (Hipk1) alternative variant dSep08, mRNA.                                   |
| <a href="#">Hipk2</a>         | <a href="#">Hipk2.bSep08</a>         | <a href="#">362342</a> | 33066 | 1216 | 8  | 405 | putative protein of metazoan origin (Hipk2) alternative variant bSep08, mRNA.                                        |
| <a href="#">Hipk2</a>         | <a href="#">Hipk2.cSep08</a>         | <a href="#">362342</a> | 13737 | 412  | 4  | 137 | putative protein of fungal and metazoan origin (Hipk2) alternative variant cSep08, mRNA.                             |
| <a href="#">Hipk2</a>         | <a href="#">Hipk2.dSep08</a>         | <a href="#">362342</a> | 3345  | 2673 | 3  | 116 | putative protein (12.9 kD) (Hipk2) alternative variant dSep08, mRNA.                                                 |
| <a href="#">Hipk3</a>         | <a href="#">Hipk3.bSep08</a>         | <a href="#">83617</a>  | 2921  | 758  | 3  | 252 | homeodomain interacting protein kinase 3 (Hipk3) alternative variant bSep08, mRNA.                                   |
| <a href="#">Hipk3</a>         | <a href="#">Hipk3.cSep08</a>         | <a href="#">83617</a>  | 2884  | 724  | 3  | 241 | homeodomain interacting protein kinase 3 (Hipk3) alternative variant cSep08, mRNA.                                   |
| <a href="#">Hipk3</a>         | <a href="#">Hipk3.dSep08</a>         | <a href="#">83617</a>  | 2577  | 835  | 3  | 237 | homeodomain interacting protein kinase 3 (Hipk3) alternative variant dSep08, mRNA.                                   |

|                                 |                                        |                        |       |      |   |      |                                                                                                           |
|---------------------------------|----------------------------------------|------------------------|-------|------|---|------|-----------------------------------------------------------------------------------------------------------|
| <a href="#">Hipk3</a>           | <a href="#">Hipk3.eSep08</a>           | <a href="#">83617</a>  | 2544  | 697  | 2 | 54   | homeodomain interacting protein kinase 3 (Hipk3) alternative variant eSep08, mRNA.                        |
| <a href="#">Hirip3</a>          | <a href="#">Hirip3.bSep08</a>          | <a href="#">361650</a> | 2551  | 2041 | 5 | 432  | HIRA interacting protein 3 (Hirip3) alternative variant bSep08, mRNA.                                     |
| <a href="#">Hirip3</a>          | <a href="#">Hirip3.cSep08</a>          | <a href="#">361650</a> | 766   | 686  | 2 | 91   | HIRA interacting protein 3 (Hirip3) alternative variant cSep08, mRNA.                                     |
| <a href="#">Hisppd2a</a>        | <a href="#">Hisppd2a.cSep08</a>        | <a href="#">311355</a> | 12720 | 759  | 7 | 253  | putative protein of bilateral origin (Hisppd2a) alternative variant cSep08, mRNA.                         |
| <a href="#">Hisppd2a</a>        | <a href="#">Hisppd2a.dSep08</a>        | <a href="#">311355</a> | 14327 | 718  | 6 | 239  | putative protein of metazoan origin (Hisppd2a) alternative variant dSep08, mRNA.                          |
| <a href="#">Hisppd2a</a>        | <a href="#">Hisppd2a.eSep08</a>        | <a href="#">311355</a> | 12444 | 595  | 5 | 197  | putative protein (Hisppd2a) alternative variant eSep08, mRNA.                                             |
| <a href="#">Hisppd2a</a>        | <a href="#">Hisppd2a.fSep08</a>        | <a href="#">311355</a> | 6150  | 640  | 5 | 181  | putative protein of eukaryotic origin (Hisppd2a) alternative variant fSep08, mRNA.                        |
| <a href="#">Hisppd2a</a>        | <a href="#">Hisppd2a.gSep08</a>        | <a href="#">311355</a> | 1007  | 353  | 4 | 117  | putative protein of eukaryotic origin (Hisppd2a) alternative variant gSep08, mRNA.                        |
| <a href="#">Hisppd2a</a>        | <a href="#">Hisppd2a.hSep08</a>        | <a href="#">311355</a> | 790   | 350  | 3 | 116  | putative protein of eukaryotic origin (Hisppd2a) alternative variant hSep08, mRNA.                        |
| <a href="#">Hisppd2a</a>        | <a href="#">Hisppd2a.iSep08</a>        | <a href="#">311355</a> | 1046  | 458  | 3 | 107  | putative protein of eukaryotic origin (Hisppd2a) alternative variant iSep08, mRNA.                        |
| <a href="#">Hist1h2bn</a>       | <a href="#">Hist1h2bn.bSep08</a>       | <a href="#">291157</a> | 2300  | 425  | 2 | 124  | histone cluster 1, H2bn (Hist1h2bn) alternative variant bSep08, mRNA.                                     |
| <a href="#">Hist2h2bb</a>       | <a href="#">Hist2h2bb.aSep08</a>       | <a href="#">295278</a> | 6022  | 629  | 2 | 131  | histone cluster 2, H2bb (14.4 kD) (Hist2h2bb) alternative variant aSep08, mRNA.                           |
| <a href="#">Histone.7</a>       | <a href="#">Histone.7.bSep08</a>       |                        | 724   | 392  | 2 | 125  | histone H3.2 (Histone.7) alternative variant bSep08, mRNA.                                                |
| <a href="#">Histone.8</a>       | <a href="#">Histone.8.aSep08</a>       |                        | 19549 | 639  |   | 212  | son of sevenless (Histone.8) mRNA.                                                                        |
| <a href="#">Hist_deacetyl.0</a> | <a href="#">Hist_deacetyl.0.aSep08</a> |                        | 11346 | 2985 | 7 | 913  | histone deacetylase 5 (Hist_deacetyl.0) alternative variant aSep08, mRNA.                                 |
| <a href="#">Hist_deacetyl.0</a> | <a href="#">Hist_deacetyl.0.bSep08</a> |                        | 3309  | 337  | 2 | 97   | histone deacetylase 5 (Hist_deacetyl.0) alternative variant bSep08, mRNA.                                 |
| <a href="#">Hivep1</a>          | <a href="#">Hivep1.bSep08</a>          | <a href="#">117140</a> | 3637  | 2052 | 2 | 512  | human immunodeficiency virus type I enhancer binding protein 1 (Hivep1) alternative variant bSep08, mRNA. |
| <a href="#">Hivep1</a>          | <a href="#">Hivep1.eSep08</a>          | <a href="#">117140</a> | 45848 | 374  | 3 | 124  | human immunodeficiency virus type I enhancer binding protein 1 (Hivep1) alternative variant eSep08, mRNA. |
| <a href="#">Hivep1</a>          | <a href="#">Hivep1.gSep08</a>          | <a href="#">117140</a> | 942   | 230  | 2 | 76   | human immunodeficiency virus type I enhancer binding protein 1 (Hivep1) alternative variant gSep08, mRNA. |
| <a href="#">Hivep2</a>          | <a href="#">Hivep2.bSep08</a>          | <a href="#">29721</a>  | 6154  | 5393 |   | 1652 | human immunodeficiency virus type I enhancer binding protein 2 (Hivep2) alternative variant bSep08, mRNA. |
| <a href="#">Hivep2</a>          | <a href="#">Hivep2.cSep08</a>          | <a href="#">29721</a>  | 8357  | 3319 |   | 555  | human immunodeficiency virus type I enhancer binding protein 2 (Hivep2) alternative variant cSep08, mRNA. |
| <a href="#">Hjurp</a>           | <a href="#">Hjurp.aSep08</a>           | <a href="#">316602</a> | 2136  | 775  |   | 258  | holliday junction recognition protein (Hjurp) mRNA.                                                       |
| <a href="#">Hk2</a>             | <a href="#">Hk2.bSep08</a>             | <a href="#">25059</a>  | 6039  | 2912 | 2 | 231  | hexokinase 2 (25.6 kD) (Hk2) alternative variant bSep08, mRNA.                                            |
| <a href="#">Hkr3</a>            | <a href="#">Hkr3.bSep08</a>            | <a href="#">362668</a> | 2607  | 1411 | 5 | 292  | GLI-Kruppel family member HKR3 (32.4 kD) (Hkr3) alternative variant bSep08, mRNA.                         |

|                         |                                |                        |       |      |    |     |                                                                                                               |
|-------------------------|--------------------------------|------------------------|-------|------|----|-----|---------------------------------------------------------------------------------------------------------------|
| <a href="#">Hkr3</a>    | <a href="#">Hkr3.cSep08</a>    | <a href="#">362668</a> | 1206  | 703  | 2  | 223 | GLI-Kruppel family member HKR3 (Hkr3) alternative variant cSep08, mRNA.                                       |
| <a href="#">Hla-dma</a> | <a href="#">Hla-dma.bSep08</a> | <a href="#">294274</a> | 3356  | 1913 | 2  | 195 | major histocompatibility complex, class II, DM alpha (21.7 kD) (Hla-dma) alternative variant bSep08, mRNA.    |
| <a href="#">Hla-dmb</a> | <a href="#">Hla-dmb.bSep08</a> | <a href="#">294273</a> | 775   | 511  | 2  | 40  | major histocompatibility complex, class II, DM beta (4.6 kD) (Hla-dmb) alternative variant bSep08, mRNA.      |
| <a href="#">Hlcs</a>    | <a href="#">Hlcs.aSep08</a>    | <a href="#">288240</a> | 811   | 572  |    | 190 | holocarboxylase synthetase (biotin- [propionyl-Coenzyme A-carboxylase (ATP-hydrolysing)] ligase) (Hlcs) mRNA. |
| <a href="#">HLH.1</a>   | <a href="#">HLH.1.aSep08</a>   |                        | 1945  | 732  |    | 131 | basic helix-loop-helix dimerisation region bHLH (HLH.1) mRNA.                                                 |
| <a href="#">HLH.2</a>   | <a href="#">HLH.2.bSep08</a>   |                        | 27516 | 756  | 5  | 154 | max 1 (17.6 kD) (HLH.2) alternative variant bSep08, mRNA.                                                     |
| <a href="#">HLH.3</a>   | <a href="#">HLH.3.aSep08</a>   |                        | 3759  | 1995 |    | 149 | max 1 (HLH.3) mRNA.                                                                                           |
| <a href="#">Hmbox1</a>  | <a href="#">Hmbox1.aSep08</a>  | <a href="#">305968</a> | 27236 | 1830 | 4  | 159 | homeobox containing 1 (Hmbox1) alternative variant aSep08, mRNA.                                              |
| <a href="#">Hmbox1</a>  | <a href="#">Hmbox1.bSep08</a>  | <a href="#">305968</a> | 2452  | 872  | 1  | 49  | homeobox containing 1 (Hmbox1) alternative variant bSep08, mRNA.                                              |
| <a href="#">Hmbs</a>    | <a href="#">Hmbs.bSep08</a>    | <a href="#">25709</a>  | 4447  | 781  | 11 | 260 | hydroxymethylbilane synthase (Hmbs) alternative variant bSep08, mRNA.                                         |
| <a href="#">Hmbs</a>    | <a href="#">Hmbs.cSep08</a>    | <a href="#">25709</a>  | 4495  | 751  | 10 | 250 | hydroxymethylbilane synthase (Hmbs) alternative variant cSep08, mRNA.                                         |
| <a href="#">Hmbs</a>    | <a href="#">Hmbs.dSep08</a>    | <a href="#">25709</a>  | 3925  | 731  | 9  | 243 | hydroxymethylbilane synthase (Hmbs) alternative variant dSep08, mRNA.                                         |
| <a href="#">Hmbs</a>    | <a href="#">Hmbs.eSep08</a>    | <a href="#">25709</a>  | 2574  | 682  | 7  | 149 | hydroxymethylbilane synthase (Hmbs) alternative variant eSep08, mRNA.                                         |
| <a href="#">Hmbs</a>    | <a href="#">Hmbs.fSep08</a>    | <a href="#">25709</a>  | 2633  | 567  | 4  | 105 | hydroxymethylbilane synthase CRA a (Hmbs) alternative variant fSep08, mRNA.                                   |
| <a href="#">Hmbs</a>    | <a href="#">Hmbs.gSep08</a>    | <a href="#">25709</a>  | 2308  | 361  | 2  | 97  | putative protein of mammalian origin (Hmbs) alternative variant gSep08, mRNA.                                 |
| <a href="#">Hmcn1</a>   | <a href="#">Hmcn1.aSep08</a>   | <a href="#">289094</a> | 21441 | 2004 | 6  | 328 | hemicentin 1 (Hmcn1) alternative variant aSep08, mRNA.                                                        |
| <a href="#">Hmcn2</a>   | <a href="#">Hmcn2.bSep08</a>   | <a href="#">686132</a> | 818   | 381  | 2  | 112 | hemicentin 2 (Hmcn2) alternative variant bSep08, mRNA.                                                        |
| <a href="#">Hmg20b</a>  | <a href="#">Hmg20b.bSep08</a>  | <a href="#">362825</a> | 3733  | 828  | 8  | 275 | high mobility group 20 B (Hmg20b) alternative variant bSep08, mRNA.                                           |
| <a href="#">Hmg20b</a>  | <a href="#">Hmg20b.cSep08</a>  | <a href="#">362825</a> | 831   | 661  | 3  | 186 | high mobility group 20 B (Hmg20b) alternative variant cSep08, mRNA.                                           |
| <a href="#">Hmg20b</a>  | <a href="#">Hmg20b.dSep08</a>  | <a href="#">362825</a> | 2680  | 1005 | 5  | 71  | high mobility group 20 B (Hmg20b) alternative variant dSep08, mRNA.                                           |
| <a href="#">Hmg20b</a>  | <a href="#">Hmg20b.eSep08</a>  | <a href="#">362825</a> | 669   | 586  | 2  | 160 | high mobility group 20 B (Hmg20b) alternative variant eSep08, mRNA.                                           |
| <a href="#">Hmg20b</a>  | <a href="#">Hmg20b.gSep08</a>  | <a href="#">362825</a> | 1437  | 765  | 2  | 66  | high mobility group 20 B (Hmg20b) alternative variant gSep08, mRNA.                                           |
| <a href="#">Hmga1</a>   | <a href="#">Hmga1.aSep08</a>   | <a href="#">117062</a> | 6499  | 927  | 3  | 120 | high mobility group AT-hook 1 and hypothetical protein LOC689053 (Hmga1) alternative variant aSep08, mRNA.    |
| <a href="#">Hmga1</a>   | <a href="#">Hmga1.aSep08</a>   | <a href="#">689053</a> | 6499  | 927  | 3  | 120 | high mobility group AT-hook 1 and hypothetical protein LOC689053 (Hmga1) alternative variant aSep08, mRNA.    |

|                       |                              |                        |       |      |   |     |                                                                                                                               |
|-----------------------|------------------------------|------------------------|-------|------|---|-----|-------------------------------------------------------------------------------------------------------------------------------|
| <a href="#">Hmga1</a> | <a href="#">Hmga1.bSep08</a> | <a href="#">117062</a> | 6527  | 988  | 3 | 107 | high mobility group AT-hook 1 and hypothetical protein LOC689053 (11.7 kD) (Hmga1) alternative variant bSep08, mRNA.          |
| <a href="#">Hmga1</a> | <a href="#">Hmga1.bSep08</a> | <a href="#">689053</a> | 6527  | 988  | 3 | 107 | high mobility group AT-hook 1 and hypothetical protein LOC689053 (11.7 kD) (Hmga1) alternative variant bSep08, mRNA.          |
| <a href="#">Hmga1</a> | <a href="#">Hmga1.cSep08</a> | <a href="#">117062</a> | 6094  | 667  | 4 | 107 | high mobility group AT-hook 1 and hypothetical protein LOC689053 (11.7 kD) (Hmga1) alternative variant cSep08, mRNA.          |
| <a href="#">Hmga1</a> | <a href="#">Hmga1.cSep08</a> | <a href="#">689053</a> | 6094  | 667  | 4 | 107 | high mobility group AT-hook 1 and hypothetical protein LOC689053 (11.7 kD) (Hmga1) alternative variant cSep08, mRNA.          |
| <a href="#">Hmga1</a> | <a href="#">Hmga1.eSep08</a> | <a href="#">117062</a> | 6956  | 868  | 3 | 96  | high mobility group AT-hook 1 and hypothetical protein LOC689053 (10.7 kD) (Hmga1) alternative variant eSep08, mRNA.          |
| <a href="#">Hmga1</a> | <a href="#">Hmga1.eSep08</a> | <a href="#">689053</a> | 6956  | 868  | 3 | 96  | high mobility group AT-hook 1 and hypothetical protein LOC689053 (10.7 kD) (Hmga1) alternative variant eSep08, mRNA.          |
| <a href="#">Hmga1</a> | <a href="#">Hmga1.fSep08</a> | <a href="#">117062</a> | 6494  | 922  | 3 | 96  | high mobility group AT-hook 1 and hypothetical protein LOC689053 (10.7 kD) (Hmga1) alternative variant fSep08, mRNA.          |
| <a href="#">Hmga1</a> | <a href="#">Hmga1.fSep08</a> | <a href="#">689053</a> | 6494  | 922  | 3 | 96  | high mobility group AT-hook 1 and hypothetical protein LOC689053 (10.7 kD) (Hmga1) alternative variant fSep08, mRNA.          |
| <a href="#">Hmga1</a> | <a href="#">Hmga1.gSep08</a> | <a href="#">117062</a> | 6221  | 761  | 4 | 96  | high mobility group AT-hook 1 and hypothetical protein LOC689053 (10.7 kD) (Hmga1) alternative variant gSep08, mRNA.          |
| <a href="#">Hmga1</a> | <a href="#">Hmga1.gSep08</a> | <a href="#">689053</a> | 6221  | 761  | 4 | 96  | high mobility group AT-hook 1 and hypothetical protein LOC689053 (10.7 kD) (Hmga1) alternative variant gSep08, mRNA.          |
| <a href="#">Hmga1</a> | <a href="#">Hmga1.hSep08</a> | <a href="#">117062</a> | 5124  | 691  | 3 | 96  | high mobility group AT-hook 1 and hypothetical protein LOC689053 (10.7 kD) (Hmga1) alternative variant hSep08, mRNA.          |
| <a href="#">Hmga1</a> | <a href="#">Hmga1.hSep08</a> | <a href="#">689053</a> | 5124  | 691  | 3 | 96  | high mobility group AT-hook 1 and hypothetical protein LOC689053 (10.7 kD) (Hmga1) alternative variant hSep08, mRNA.          |
| <a href="#">Hmga1</a> | <a href="#">Hmga1.iSep08</a> | <a href="#">117062</a> | 7132  | 1558 | 3 | 96  | high mobility group AT-hook 1 and hypothetical protein LOC689053 (10.7 kD) (Hmga1) alternative variant iSep08, complete mRNA. |
| <a href="#">Hmga1</a> | <a href="#">Hmga1.iSep08</a> | <a href="#">689053</a> | 7132  | 1558 | 3 | 96  | high mobility group AT-hook 1 and hypothetical protein LOC689053 (10.7 kD) (Hmga1) alternative variant iSep08, complete mRNA. |
| <a href="#">Hmgb1</a> | <a href="#">Hmgb1.aSep08</a> | <a href="#">25459</a>  | 23295 | 759  |   | 205 | high mobility group box 1 (Hmgb1) mRNA.                                                                                       |
| <a href="#">Hmgb2</a> | <a href="#">Hmgb2.bSep08</a> | <a href="#">29395</a>  | 1898  | 1078 | 4 | 164 | high mobility group box 2 (19.0 kD) (Hmgb2) alternative variant bSep08, mRNA.                                                 |
| <a href="#">Hmgb2</a> | <a href="#">Hmgb2.cSep08</a> | <a href="#">29395</a>  | 1297  | 783  | 2 | 82  | high mobility group box 2 (9.1 kD) (Hmgb2) alternative variant cSep08, mRNA.                                                  |

|                           |                                  |                        |       |      |   |     |                                                                                                               |
|---------------------------|----------------------------------|------------------------|-------|------|---|-----|---------------------------------------------------------------------------------------------------------------|
| <a href="#">Hmgb2</a>     | <a href="#">Hmgb2.dSep08</a>     | <a href="#">29395</a>  | 520   | 172  | 2 | 46  | high mobility group box 2 (Hmgb2) alternative variant dSep08, mRNA.                                           |
| <a href="#">Hmgb2l1</a>   | <a href="#">Hmgb2l1.bSep08</a>   | <a href="#">307667</a> | 11373 | 2466 | 6 | 184 | high mobility group box 2-like 1 (Hmgb2l1) alternative variant bSep08, mRNA.                                  |
| <a href="#">Hmgb2l1</a>   | <a href="#">Hmgb2l1.dSep08</a>   | <a href="#">307667</a> | 1504  | 738  | 2 | 91  | high mobility group box 2-like 1 (10.3 kD) (Hmgb2l1) alternative variant dSep08, mRNA.                        |
| <a href="#">Hmgb3</a>     | <a href="#">Hmgb3.aSep08</a>     | <a href="#">305373</a> | 5028  | 1467 | 1 | 241 | high mobility group box 3 (27.6 kD) (Hmgb3) alternative variant aSep08, mRNA.                                 |
| <a href="#">Hmgb3</a>     | <a href="#">Hmgb3.bSep08</a>     | <a href="#">305373</a> | 5241  | 1527 | 1 | 200 | high mobility group box 3 (23.0 kD) (Hmgb3) alternative variant bSep08, mRNA.                                 |
| <a href="#">Hmgb3</a>     | <a href="#">Hmgb3.cSep08</a>     | <a href="#">305373</a> | 1584  | 651  | 1 | 114 | high mobility group box 3 (Hmgb3) alternative variant cSep08, mRNA.                                           |
| <a href="#">Hmgcl</a>     | <a href="#">Hmgcl.bSep08</a>     | <a href="#">79238</a>  | 1580  | 673  | 2 | 144 | 3-hydroxy-3-methylglutaryl-Coenzyme A lyase (Hmgcl) alternative variant bSep08, mRNA.                         |
| <a href="#">Hmgcr</a>     | <a href="#">Hmgcr.aSep08</a>     | <a href="#">25675</a>  | 10327 | 3626 |   | 673 | 3-hydroxy-3-methylglutaryl-Coenzyme A reductase (Hmgcr) mRNA.                                                 |
| <a href="#">Hmgcs1</a>    | <a href="#">Hmgcs1.bSep08</a>    | <a href="#">29637</a>  | 10767 | 940  | 4 | 225 | 3-hydroxy-3-methylglutaryl-Coenzyme A synthase 1 (Hmgcs1) alternative variant bSep08, mRNA.                   |
| <a href="#">Hmgcs1</a>    | <a href="#">Hmgcs1.cSep08</a>    | <a href="#">29637</a>  | 8713  | 624  | 3 | 37  | 3-hydroxy-3-methylglutaryl-Coenzyme A synthase 1 (Hmgcs1) alternative variant cSep08, mRNA.                   |
| <a href="#">Hmgcs2</a>    | <a href="#">Hmgcs2.bSep08</a>    | <a href="#">24450</a>  | 7670  | 1590 | 1 | 146 | 3-hydroxy-3-methylglutaryl-Coenzyme A synthase 2 (16.5 kD) (Hmgcs2) alternative variant bSep08, mRNA.         |
| <a href="#">Hmgn1</a>     | <a href="#">Hmgn1.aSep08</a>     | <a href="#">360704</a> | 2902  | 477  | 4 | 102 | high mobility group nucleosomal binding domain 1 (Hmgn1) alternative variant aSep08, mRNA.                    |
| <a href="#">Hmgn1</a>     | <a href="#">Hmgn1.cSep08</a>     | <a href="#">360704</a> | 5996  | 1255 | 6 | 95  | high mobility group nucleosomal binding domain 1 (10.0 kD) (Hmgn1) alternative variant cSep08, complete mRNA. |
| <a href="#">Hmgn1</a>     | <a href="#">Hmgn1.dSep08</a>     | <a href="#">360704</a> | 3064  | 878  | 2 | 46  | high mobility group nucleosomal binding domain 1 (5.4 kD) (Hmgn1) alternative variant dSep08, mRNA.           |
| <a href="#">Hmgn2</a>     | <a href="#">Hmgn2.bSep08</a>     | <a href="#">114637</a> | 2722  | 870  | 3 | 72  | high mobility group nucleosomal binding domain 2 (7.5 kD) (Hmgn2) alternative variant bSep08, mRNA.           |
| <a href="#">Hmgn2</a>     | <a href="#">Hmgn2.cSep08</a>     | <a href="#">114637</a> | 1326  | 730  | 2 | 42  | high mobility group nucleosomal binding domain 2 (5.2 kD) (Hmgn2) alternative variant cSep08, mRNA.           |
| <a href="#">Hmgn3</a>     | <a href="#">Hmgn3.bSep08</a>     | <a href="#">113990</a> | 36634 | 828  | 6 | 126 | high mobility group nucleosomal binding domain 3 (Hmgn3) alternative variant bSep08, mRNA.                    |
| <a href="#">Hmgn3</a>     | <a href="#">Hmgn3.cSep08</a>     | <a href="#">113990</a> | 36669 | 822  | 6 | 119 | high mobility group nucleosomal binding domain 3 (Hmgn3) alternative variant cSep08, mRNA.                    |
| <a href="#">Hmgn3</a>     | <a href="#">Hmgn3.dSep08</a>     | <a href="#">113990</a> | 2419  | 657  | 3 | 43  | high mobility group nucleosomal binding domain 3 (5.0 kD) (Hmgn3) alternative variant dSep08, mRNA.           |
| <a href="#">HMG_box.2</a> | <a href="#">HMG_box.2.aSep08</a> |                        | 12365 | 723  |   | 241 | SRY -box 30 (HMG_box.2) mRNA.                                                                                 |
| <a href="#">HMG_box.4</a> | <a href="#">HMG_box.4.aSep08</a> |                        | 1224  | 574  |   | 191 | myeloid lymphoid mixed-lineage leukemia 2 CRA a like (HMG_box.4) mRNA.                                        |
| <a href="#">Hmha1</a>     | <a href="#">Hmha1.bSep08</a>     | <a href="#">314618</a> | 4654  | 1213 | 6 | 208 | histocompatibility ha-1 (Hmha1) alternative variant bSep08, mRNA.                                             |
| <a href="#">Hmha1</a>     | <a href="#">Hmha1.cSep08</a>     | <a href="#">314618</a> | 1496  | 642  | 2 | 190 | histocompatibility ha-1 (Hmha1) alternative variant cSep08, mRNA.                                             |
| <a href="#">Hmha1</a>     | <a href="#">Hmha1.dSep08</a>     | <a href="#">314618</a> | 1549  | 762  | 3 | 151 | histocompatibility ha-1 (Hmha1) alternative variant dSep08, mRNA.                                             |

|                           |                                  |                        |       |      |    |     |                                                                                                       |
|---------------------------|----------------------------------|------------------------|-------|------|----|-----|-------------------------------------------------------------------------------------------------------|
| <a href="#">Hmha1</a>     | <a href="#">Hmha1.eSep08</a>     | <a href="#">314618</a> | 1356  | 662  | 2  | 92  | histocompatibility ha-1 (10.5 kD) (Hmha1) alternative variant eSep08, mRNA.                           |
| <a href="#">Hmha1</a>     | <a href="#">Hmha1.fSep08</a>     | <a href="#">314618</a> | 761   | 467  | 3  | 45  | putative protein (Hmha1) alternative variant fSep08, mRNA.                                            |
| <a href="#">Hmnr</a>      | <a href="#">Hmnr.aSep08</a>      | <a href="#">25460</a>  | 21236 | 2514 | 12 | 396 | hyaluronan mediated motility receptor (RHAMM) (Hmnr) alternative variant aSep08, mRNA.                |
| <a href="#">Hmnr</a>      | <a href="#">Hmnr.cSep08</a>      | <a href="#">25460</a>  | 1198  | 493  | 2  | 63  | hyaluronan mediated motility receptor (RHAMM) (Hmnr) alternative variant cSep08, mRNA.                |
| <a href="#">Hmox1</a>     | <a href="#">Hmox1.bSep08</a>     | <a href="#">24451</a>  | 3584  | 982  | 2  | 139 | heme oxygenase (decycling) 1 (Hmox1) alternative variant bSep08, mRNA.                                |
| <a href="#">Hmox2</a>     | <a href="#">Hmox2.bSep08</a>     | <a href="#">79239</a>  | 45256 | 900  | 3  | 262 | heme oxygenase (decycling) 2 (Hmox2) alternative variant bSep08, mRNA.                                |
| <a href="#">Hmox2</a>     | <a href="#">Hmox2.cSep08</a>     | <a href="#">79239</a>  | 44535 | 865  | 2  | 238 | heme oxygenase (decycling) 2 (Hmox2) alternative variant cSep08, mRNA.                                |
| <a href="#">Hmox2</a>     | <a href="#">Hmox2.dSep08</a>     | <a href="#">79239</a>  | 44237 | 777  | 2  | 171 | heme oxygenase (decycling) 2 (Hmox2) alternative variant dSep08, mRNA.                                |
| <a href="#">Hmx1</a>      | <a href="#">Hmx1.bSep08</a>      | <a href="#">360960</a> | 1367  | 1277 | 1  | 177 | h6 homeo box 1 (Hmx1) alternative variant bSep08, mRNA.                                               |
| <a href="#">Hmx2</a>      | <a href="#">Hmx2.bSep08</a>      | <a href="#">293538</a> | 7640  | 1206 |    | 81  | h6 homeo box 2 (8.9 kD) (Hmx2) alternative variant bSep08, mRNA.                                      |
| <a href="#">Hn1</a>       | <a href="#">Hn1.bSep08</a>       | <a href="#">287828</a> | 16274 | 852  | 5  | 132 | hematological and neurological expressed sequence 1 (13.8 kD) (Hn1) alternative variant bSep08, mRNA. |
| <a href="#">Hn1l</a>      | <a href="#">Hn1l.aSep08</a>      | <a href="#">360492</a> | 19484 | 1092 | 6  | 205 | hematological and neurological expressed 1-like (Hn1l) alternative variant aSep08, mRNA.              |
| <a href="#">Hn1l</a>      | <a href="#">Hn1l.cSep08</a>      | <a href="#">360492</a> | 13447 | 416  | 3  | 112 | hematological and neurological expressed 1-like (Hn1l) alternative variant cSep08, mRNA.              |
| <a href="#">Hnf1b</a>     | <a href="#">Hnf1b.bSep08</a>     | <a href="#">25640</a>  | 5315  | 695  |    | 181 | HNF1 homeobox B (Hnf1b) alternative variant bSep08, mRNA.                                             |
| <a href="#">Hnf4g</a>     | <a href="#">Hnf4g.bSep08</a>     | <a href="#">365744</a> | 17434 | 1302 | 7  | 414 | hepatocyte nuclear factor 4, gamma (Hnf4g) alternative variant bSep08, mRNA.                          |
| <a href="#">Hnf4g</a>     | <a href="#">Hnf4g.cSep08</a>     | <a href="#">365744</a> | 18391 | 1318 | 8  | 364 | hepatocyte nuclear factor 4, gamma (Hnf4g) alternative variant cSep08, mRNA.                          |
| <a href="#">Hnrnpa1</a>   | <a href="#">Hnrnpa1.aSep08</a>   | <a href="#">29578</a>  | 3350  | 1464 | 10 | 328 | heterogeneous nuclear ribonucleoprotein A1 (33.7 kD) (Hnrnpa1) alternative variant aSep08, mRNA.      |
| <a href="#">Hnrnpa1</a>   | <a href="#">Hnrnpa1.cSep08</a>   | <a href="#">29578</a>  | 3126  | 442  | 4  | 43  | heterogeneous nuclear ribonucleoprotein A1 (4.4 kD) (Hnrnpa1) alternative variant cSep08, mRNA.       |
| <a href="#">Hnrnpa1</a>   | <a href="#">Hnrnpa1.dSep08</a>   | <a href="#">29578</a>  | 1125  | 1024 | 2  | 69  | heterogeneous nuclear ribonucleoprotein A1 (8.0 kD) (Hnrnpa1) alternative variant dSep08, mRNA.       |
| <a href="#">Hnrnpa1</a>   | <a href="#">Hnrnpa1.eSep08</a>   | <a href="#">29578</a>  | 1599  | 528  | 3  | 39  | heterogeneous nuclear ribonucleoprotein A1 (4.2 kD) (Hnrnpa1) alternative variant eSep08, mRNA.       |
| <a href="#">Hnrnpa2b1</a> | <a href="#">Hnrnpa2b1.bSep08</a> | <a href="#">362361</a> | 6278  | 1544 | 8  | 261 | nuclear ribonucleoprotein A2 B1 (27.6 kD) (Hnrnpa2b1) alternative variant bSep08, mRNA.               |
| <a href="#">Hnrnpa2b1</a> | <a href="#">Hnrnpa2b1.bSep08</a> | <a href="#">685548</a> | 6278  | 1544 | 8  | 261 | nuclear ribonucleoprotein A2 B1 (27.6 kD) (Hnrnpa2b1) alternative variant bSep08, mRNA.               |
| <a href="#">Hnrnpa2b1</a> | <a href="#">Hnrnpa2b1.cSep08</a> | <a href="#">362361</a> | 5333  | 2867 | 7  | 232 | nuclear ribonucleoprotein A2 B1 (Hnrnpa2b1) alternative variant cSep08, mRNA.                         |



|                           |                                  |                        |       |      |   |     |                                                                                                         |
|---------------------------|----------------------------------|------------------------|-------|------|---|-----|---------------------------------------------------------------------------------------------------------|
| <a href="#">Hnrnpa2b1</a> | <a href="#">Hnrnpa2b1.cSep08</a> | <a href="#">685548</a> | 5333  | 2867 | 7 | 232 | nuclear ribonucleoprotein A2 B1 (Hnrnpa2b1) alternative variant cSep08, mRNA.                           |
| <a href="#">Hnrnpa2b1</a> | <a href="#">Hnrnpa2b1.dSep08</a> | <a href="#">362361</a> | 3639  | 1053 | 6 | 178 | nuclear ribonucleoprotein A2 b1 (Hnrnpa2b1) alternative variant dSep08, mRNA.                           |
| <a href="#">Hnrnpa2b1</a> | <a href="#">Hnrnpa2b1.dSep08</a> | <a href="#">685548</a> | 3639  | 1053 | 6 | 178 | nuclear ribonucleoprotein A2 b1 (Hnrnpa2b1) alternative variant dSep08, mRNA.                           |
| <a href="#">Hnrnpa2b1</a> | <a href="#">Hnrnpa2b1.eSep08</a> | <a href="#">362361</a> | 3166  | 658  | 3 | 96  | CRA d like (10.4 kD) (Hnrnpa2b1) alternative variant eSep08, mRNA.                                      |
| <a href="#">Hnrnpa2b1</a> | <a href="#">Hnrnpa2b1.eSep08</a> | <a href="#">685548</a> | 3166  | 658  | 3 | 96  | CRA d like (10.4 kD) (Hnrnpa2b1) alternative variant eSep08, mRNA.                                      |
| <a href="#">Hnrnpa2b1</a> | <a href="#">Hnrnpa2b1.fSep08</a> | <a href="#">362361</a> | 1274  | 497  | 3 | 86  | CRA d like (9.4 kD) (Hnrnpa2b1) alternative variant fSep08, mRNA.                                       |
| <a href="#">Hnrnpa2b1</a> | <a href="#">Hnrnpa2b1.fSep08</a> | <a href="#">685548</a> | 1274  | 497  | 3 | 86  | CRA d like (9.4 kD) (Hnrnpa2b1) alternative variant fSep08, mRNA.                                       |
| <a href="#">Hnrnpa2b1</a> | <a href="#">Hnrnpa2b1.gSep08</a> | <a href="#">362361</a> | 3469  | 697  | 4 | 75  | CRA c like (8.3 kD) (Hnrnpa2b1) alternative variant gSep08, mRNA.                                       |
| <a href="#">Hnrnpa2b1</a> | <a href="#">Hnrnpa2b1.gSep08</a> | <a href="#">685548</a> | 3469  | 697  | 4 | 75  | CRA c like (8.3 kD) (Hnrnpa2b1) alternative variant gSep08, mRNA.                                       |
| <a href="#">Hnrnpa2b1</a> | <a href="#">Hnrnpa2b1.hSep08</a> | <a href="#">362361</a> | 1302  | 811  | 2 | 63  | CRA d like (6.8 kD) (Hnrnpa2b1) alternative variant hSep08, mRNA.                                       |
| <a href="#">Hnrnpa2b1</a> | <a href="#">Hnrnpa2b1.hSep08</a> | <a href="#">685548</a> | 1302  | 811  | 2 | 63  | CRA d like (6.8 kD) (Hnrnpa2b1) alternative variant hSep08, mRNA.                                       |
| <a href="#">Hnrnpa2b1</a> | <a href="#">Hnrnpa2b1.iSep08</a> | <a href="#">362361</a> | 1329  | 775  | 2 | 42  | CRA c like (4.7 kD) (Hnrnpa2b1) alternative variant iSep08, mRNA.                                       |
| <a href="#">Hnrnpa2b1</a> | <a href="#">Hnrnpa2b1.iSep08</a> | <a href="#">685548</a> | 1329  | 775  | 2 | 42  | CRA c like (4.7 kD) (Hnrnpa2b1) alternative variant iSep08, mRNA.                                       |
| <a href="#">Hnrnpa3</a>   | <a href="#">Hnrnpa3.cSep08</a>   | <a href="#">362152</a> | 4404  | 4317 | 1 | 79  | heterogeneous nuclear ribonucleoprotein A3 (8.9 kD) (Hnrnpa3) alternative variant cSep08, mRNA.         |
| <a href="#">Hnrnpa3</a>   | <a href="#">Hnrnpa3.dSep08</a>   | <a href="#">362152</a> | 4394  | 1602 | 2 | 55  | heterogeneous nuclear ribonucleoprotein A3 (6.2 kD) (Hnrnpa3) alternative variant dSep08, mRNA.         |
| <a href="#">Hnrnpa3</a>   | <a href="#">Hnrnpa3.eSep08</a>   | <a href="#">362152</a> | 1109  | 929  | 2 | 48  | heterogeneous nuclear ribonucleoprotein A3 (5.3 kD) (Hnrnpa3) alternative variant eSep08, mRNA.         |
| <a href="#">Hnrnpa3</a>   | <a href="#">Hnrnpa3.fSep08</a>   | <a href="#">362152</a> | 1908  | 660  | 2 | 58  | heterogeneous nuclear ribonucleoprotein A3 (Hnrnpa3) alternative variant fSep08, mRNA.                  |
| <a href="#">Hnrnpab</a>   | <a href="#">Hnrnpab.bSep08</a>   | <a href="#">83498</a>  | 4545  | 1214 | 6 | 224 | heterogeneous nuclear ribonucleoprotein A/B (Hnrnpab) alternative variant bSep08, mRNA.                 |
| <a href="#">Hnrnpab</a>   | <a href="#">Hnrnpab.cSep08</a>   | <a href="#">83498</a>  | 653   | 570  | 2 | 75  | heterogeneous nuclear ribonucleoprotein A/B (7.1 kD) (Hnrnpab) alternative variant cSep08, mRNA.        |
| <a href="#">Hnrnpc</a>    | <a href="#">Hnrnpc.aSep08</a>    | <a href="#">290046</a> | 30366 | 1951 | 9 | 313 | heterogeneous nuclear ribonucleoprotein C (34.4 kD) (Hnrnpc) alternative variant aSep08, mRNA.          |
| <a href="#">Hnrnpc</a>    | <a href="#">Hnrnpc.bSep08</a>    | <a href="#">290046</a> | 29660 | 1198 | 8 | 306 | heterogeneous nuclear ribonucleoprotein C (33.7 kD) (Hnrnpc) alternative variant bSep08, mRNA.          |
| <a href="#">Hnrnpc</a>    | <a href="#">Hnrnpc.cSep08</a>    | <a href="#">290046</a> | 30161 | 2914 | 9 | 305 | heterogeneous nuclear ribonucleoprotein C (33.6 kD) (Hnrnpc) alternative variant cSep08, complete mRNA. |
| <a href="#">Hnrnpc</a>    | <a href="#">Hnrnpc.dSep08</a>    | <a href="#">290046</a> | 29684 | 1230 | 9 | 300 | heterogeneous nuclear ribonucleoprotein C (33.1 kD) (Hnrnpc) alternative variant dSep08, mRNA.          |

|                         |                                |                        |       |      |    |     |                                                                                                         |
|-------------------------|--------------------------------|------------------------|-------|------|----|-----|---------------------------------------------------------------------------------------------------------|
| <a href="#">Hnrnpc</a>  | <a href="#">Hnrnpc.eSep08</a>  | <a href="#">290046</a> | 29820 | 1345 | 9  | 293 | heterogeneous nuclear ribonucleoprotein C (32.3 kD) (Hnrnpc) alternative variant eSep08, complete mRNA. |
| <a href="#">Hnrnpc</a>  | <a href="#">Hnrnpc.fSep08</a>  | <a href="#">290046</a> | 30171 | 1667 | 8  | 292 | heterogeneous nuclear ribonucleoprotein C (32.2 kD) (Hnrnpc) alternative variant fSep08, complete mRNA. |
| <a href="#">Hnrnpc</a>  | <a href="#">Hnrnpc.gSep08</a>  | <a href="#">290046</a> | 29491 | 1013 | 9  | 290 | heterogeneous nuclear ribonucleoprotein C (Hnrnpc) alternative variant gSep08, mRNA.                    |
| <a href="#">Hnrnpc</a>  | <a href="#">Hnrnpc.hSep08</a>  | <a href="#">290046</a> | 22592 | 1257 | 6  | 213 | heterogeneous nuclear ribonucleoprotein C (Hnrnpc) alternative variant hSep08, mRNA.                    |
| <a href="#">Hnrnpc</a>  | <a href="#">Hnrnpc.iSep08</a>  | <a href="#">290046</a> | 28847 | 754  | 8  | 190 | heterogeneous nuclear ribonucleoprotein C (Hnrnpc) alternative variant iSep08, mRNA.                    |
| <a href="#">Hnrnpc</a>  | <a href="#">Hnrnpc.jSep08</a>  | <a href="#">290046</a> | 27467 | 825  | 7  | 167 | heterogeneous nuclear ribonucleoprotein C (Hnrnpc) alternative variant jSep08, mRNA.                    |
| <a href="#">Hnrnpc</a>  | <a href="#">Hnrnpc.mSep08</a>  | <a href="#">290046</a> | 7736  | 1594 | 2  | 72  | heterogeneous nuclear ribonucleoprotein C (7.8 kD) (Hnrnpc) alternative variant mSep08, mRNA.           |
| <a href="#">Hnrmpf</a>  | <a href="#">Hnrmpf.dSep08</a>  | <a href="#">64200</a>  | 18408 | 424  | 4  | 113 | heterogeneous nuclear ribonucleoprotein F (Hnrmpf) alternative variant dSep08, mRNA.                    |
| <a href="#">Hnrmpf</a>  | <a href="#">Hnrmpf.fSep08</a>  | <a href="#">64200</a>  | 21754 | 3068 | 4  | 94  | heterogeneous nuclear ribonucleoprotein F (10.8 kD) (Hnrmpf) alternative variant fSep08, mRNA.          |
| <a href="#">Hnrmpf</a>  | <a href="#">Hnrmpf.gSep08</a>  | <a href="#">64200</a>  | 15158 | 900  | 3  | 102 | heterogeneous nuclear ribonucleoprotein F (Hnrmpf) alternative variant gSep08, mRNA.                    |
| <a href="#">Hnrnph2</a> | <a href="#">Hnrnph2.bSep08</a> | <a href="#">308650</a> | 5889  | 2380 | 2  | 66  | putative protein (Hnrnph2) alternative variant bSep08, mRNA.                                            |
| <a href="#">Hnrnph3</a> | <a href="#">Hnrnph3.bSep08</a> | <a href="#">361838</a> | 3029  | 1494 | 6  | 177 | heterogeneous nuclear ribonucleoprotein H3 (18.0 kD) (Hnrnph3) alternative variant bSep08, mRNA.        |
| <a href="#">Hnrnph3</a> | <a href="#">Hnrnph3.cSep08</a> | <a href="#">361838</a> | 1768  | 1088 | 2  | 88  | heterogeneous nuclear ribonucleoprotein H3 (Hnrnph3) alternative variant cSep08, mRNA.                  |
| <a href="#">Hnrnpk</a>  | <a href="#">Hnrnpk.aSep08</a>  | <a href="#">117282</a> | 11280 | 2994 | 16 | 464 | heterogeneous nuclear ribonucleoprotein K (51.0 kD) (Hnrnpk) alternative variant aSep08, mRNA.          |
| <a href="#">Hnrnpk</a>  | <a href="#">Hnrnpk.cSep08</a>  | <a href="#">117282</a> | 7846  | 1006 | 9  | 289 | heterogeneous nuclear ribonucleoprotein K (Hnrnpk) alternative variant cSep08, mRNA.                    |
| <a href="#">Hnrnpk</a>  | <a href="#">Hnrnpk.dSep08</a>  | <a href="#">117282</a> | 1441  | 867  | 4  | 118 | heterogeneous nuclear ribonucleoprotein K (Hnrnpk) alternative variant dSep08, mRNA.                    |
| <a href="#">Hnrnpk</a>  | <a href="#">Hnrnpk.eSep08</a>  | <a href="#">117282</a> | 3355  | 972  | 4  | 97  | heterogeneous nuclear ribonucleoprotein K (Hnrnpk) alternative variant eSep08, mRNA.                    |
| <a href="#">Hnrnpl</a>  | <a href="#">Hnrnpl.cSep08</a>  | <a href="#">80846</a>  | 3478  | 1208 | 4  | 295 | heterogeneous nuclear ribonucleoprotein L (32.6 kD) (Hnrnpl) alternative variant cSep08, mRNA.          |
| <a href="#">Hnrnpl</a>  | <a href="#">Hnrnpl.dSep08</a>  | <a href="#">80846</a>  | 9372  | 820  | 8  | 272 | heterogeneous nuclear ribonucleoprotein L CRA b (Hnrnpl) alternative variant dSep08, mRNA.              |
| <a href="#">Hnrnpl</a>  | <a href="#">Hnrnpl.eSep08</a>  | <a href="#">80846</a>  | 4214  | 826  | 7  | 270 | heterogeneous nuclear ribonucleoprotein L (Hnrnpl) alternative variant eSep08, mRNA.                    |
| <a href="#">Hnrnpl</a>  | <a href="#">Hnrnpl.gSep08</a>  | <a href="#">80846</a>  | 1331  | 1220 | 2  | 135 | putative protein of mammalian origin (Hnrnpl) alternative variant gSep08, mRNA.                         |
| <a href="#">Hnrnpl</a>  | <a href="#">Hnrnpl.hSep08</a>  | <a href="#">80846</a>  | 961   | 847  | 2  | 120 | heterogeneous nuclear ribonucleoprotein hnRNP-L (Hnrnpl) alternative variant hSep08, mRNA.              |
| <a href="#">Hnrnpl</a>  | <a href="#">Hnrnpl.iSep08</a>  | <a href="#">80846</a>  | 1092  | 810  | 2  | 90  | heterogeneous nuclear ribonucleoprotein L (Hnrnpl) alternative variant iSep08, mRNA.                    |

|                          |                                 |                        |       |      |    |     |                                                                                                         |
|--------------------------|---------------------------------|------------------------|-------|------|----|-----|---------------------------------------------------------------------------------------------------------|
| <a href="#">Hnrnpl</a>   | <a href="#">Hnrnpl.kSep08</a>   | <a href="#">80846</a>  | 5252  | 791  | 7  | 141 | heterogeneous nuclear ribonucleoprotein L (Hnrnpl) alternative variant kSep08, mRNA.                    |
| <a href="#">Hnrnpr</a>   | <a href="#">Hnrnpr.cSep08</a>   | <a href="#">319110</a> | 17107 | 648  | 6  | 185 | heterogeneous nuclear ribonucleoprotein R (Hnrnpr) alternative variant cSep08, mRNA.                    |
| <a href="#">Hnrnpr</a>   | <a href="#">Hnrnpr.dSep08</a>   | <a href="#">319110</a> | 32971 | 2582 | 8  | 177 | heterogeneous nuclear ribonucleoprotein R (19.6 kD) (Hnrnpr) alternative variant dSep08, complete mRNA. |
| <a href="#">Hnrnpr</a>   | <a href="#">Hnrnpr.fSep08</a>   | <a href="#">319110</a> | 5819  | 413  | 2  | 95  | heterogeneous nuclear ribonucleoprotein R (10.5 kD) (Hnrnpr) alternative variant fSep08, mRNA.          |
| <a href="#">Hnrnpu</a>   | <a href="#">Hnrnpu.bSep08</a>   | <a href="#">117280</a> | 2083  | 993  | 4  | 103 | heterogeneous nuclear ribonucleoprotein U (Hnrnpu) alternative variant bSep08, mRNA.                    |
| <a href="#">Hnrnpu</a>   | <a href="#">Hnrnpu.cSep08</a>   | <a href="#">117280</a> | 922   | 834  | 2  | 63  | heterogeneous nuclear ribonucleoprotein U (Hnrnpu) alternative variant cSep08, mRNA.                    |
| <a href="#">Hnrnpul1</a> | <a href="#">Hnrnpul1.bSep08</a> | <a href="#">361522</a> | 5721  | 908  | 4  | 274 | heterogeneous nuclear ribonucleoprotein U-like 1 (Hnrnpul1) alternative variant bSep08, mRNA.           |
| <a href="#">Hnrnpul1</a> | <a href="#">Hnrnpul1.cSep08</a> | <a href="#">361522</a> | 6088  | 361  | 3  | 120 | heterogeneous nuclear ribonucleoprotein U-like 1 (Hnrnpul1) alternative variant cSep08, mRNA.           |
| <a href="#">Hnrnpul1</a> | <a href="#">Hnrnpul1.dSep08</a> | <a href="#">361522</a> | 3829  | 392  | 2  | 93  | heterogeneous nuclear ribonucleoprotein U-like 1 (10.7 kD) (Hnrnpul1) alternative variant dSep08, mRNA. |
| <a href="#">Hnrnpul1</a> | <a href="#">Hnrnpul1.eSep08</a> | <a href="#">361522</a> | 1515  | 1416 | 2  | 100 | heterogeneous nuclear ribonucleoprotein U-like 1 (10.5 kD) (Hnrnpul1) alternative variant eSep08, mRNA. |
| <a href="#">Hnrnpul2</a> | <a href="#">Hnrnpul2.aSep08</a> | <a href="#">309197</a> | 6213  | 899  | 7  | 294 | heterogeneous nuclear ribonucleoprotein U-like 2 (Hnrnpul2) alternative variant aSep08, mRNA.           |
| <a href="#">Hnrnpul2</a> | <a href="#">Hnrnpul2.bSep08</a> | <a href="#">309197</a> | 2207  | 1028 | 3  | 140 | heterogeneous nuclear ribonucleoprotein U-like 2 (Hnrnpul2) alternative variant bSep08, mRNA.           |
| <a href="#">Hnrpd</a>    | <a href="#">Hnrpd.eSep08</a>    | <a href="#">79256</a>  | 3148  | 639  | 4  | 166 | heterogeneous nuclear ribonucleoprotein D (Hnrpd) alternative variant eSep08, mRNA.                     |
| <a href="#">Hnrpd</a>    | <a href="#">Hnrpd.fSep08</a>    | <a href="#">79256</a>  | 2284  | 675  | 3  | 120 | heterogeneous nuclear ribonucleoprotein D (Hnrpd) alternative variant fSep08, mRNA.                     |
| <a href="#">Hnrpd</a>    | <a href="#">Hnrpd.gSep08</a>    | <a href="#">79256</a>  | 3135  | 2044 | 2  | 54  | heterogeneous nuclear ribonucleoprotein D (Hnrpd) alternative variant gSep08, mRNA.                     |
| <a href="#">Hnrpd</a>    | <a href="#">Hnrpd.hSep08</a>    | <a href="#">79256</a>  | 707   | 269  | 2  | 35  | heterogeneous nuclear ribonucleoprotein D (Hnrpd) alternative variant hSep08, mRNA.                     |
| <a href="#">Hnrpdl</a>   | <a href="#">Hnrpdl.aSep08</a>   | <a href="#">305178</a> | 4140  | 1397 | 9  | 333 | heterogeneous nuclear ribonucleoprotein D-like (Hnrpdl) alternative variant aSep08, mRNA.               |
| <a href="#">Hnrpdl</a>   | <a href="#">Hnrpdl.cSep08</a>   | <a href="#">305178</a> | 3763  | 2747 | 6  | 270 | heterogeneous nuclear ribonucleoprotein D-like (30.1 kD) (Hnrpdl) alternative variant cSep08, mRNA.     |
| <a href="#">Hnrpdl</a>   | <a href="#">Hnrpdl.dSep08</a>   | <a href="#">305178</a> | 4707  | 2482 | 8  | 270 | heterogeneous nuclear ribonucleoprotein D-like (30.1 kD) (Hnrpdl) alternative variant dSep08, mRNA.     |
| <a href="#">Hnrpdl</a>   | <a href="#">Hnrpdl.eSep08</a>   | <a href="#">305178</a> | 476   | 388  | 2  | 98  | heterogeneous nuclear ribonucleoprotein D-like (Hnrpdl) alternative variant eSep08, mRNA.               |
| <a href="#">Hnrpdl</a>   | <a href="#">Hnrpdl.fSep08</a>   | <a href="#">305178</a> | 917   | 812  | 2  | 66  | heterogeneous nuclear ribonucleoprotein D-like (Hnrpdl) alternative variant fSep08, mRNA.               |
| <a href="#">Hnrpdl</a>   | <a href="#">Hnrpdl.gSep08</a>   | <a href="#">305178</a> | 988   | 642  | 2  | 61  | heterogeneous nuclear ribonucleoprotein D-like (Hnrpdl) alternative variant gSep08, mRNA.               |
| <a href="#">Hnrph1</a>   | <a href="#">Hnrph1.aSep08</a>   | <a href="#">140931</a> | 9246  | 2130 | 13 | 496 | heterogeneous nuclear ribonucleoprotein (Hnrph1) alternative variant aSep08, mRNA.                      |

|                            |                                   |                        |       |      |    |     |                                                                                              |
|----------------------------|-----------------------------------|------------------------|-------|------|----|-----|----------------------------------------------------------------------------------------------|
| <a href="#">Hnrph1</a>     | <a href="#">Hnrph1.cSep08</a>     | <a href="#">140931</a> | 6381  | 1156 | 10 | 306 | heterogeneous nuclear ribonucleoprotein (Hnrph1) alternative variant cSep08, mRNA.           |
| <a href="#">Hnrph1</a>     | <a href="#">Hnrph1.dSep08</a>     | <a href="#">140931</a> | 4796  | 1772 | 8  | 248 | heterogeneous nuclear ribonucleoprotein (Hnrph1) alternative variant dSep08, mRNA.           |
| <a href="#">Hnrph1</a>     | <a href="#">Hnrph1.eSep08</a>     | <a href="#">140931</a> | 4082  | 1289 | 8  | 226 | heterogeneous nuclear ribonucleoprotein (24.1 kD) (Hnrph1) alternative variant eSep08, mRNA. |
| <a href="#">Hnrph1</a>     | <a href="#">Hnrph1.fSep08</a>     | <a href="#">140931</a> | 8723  | 2187 | 11 | 203 | heterogeneous nuclear ribonucleoprotein H1 CRA b (Hnrph1) alternative variant fSep08, mRNA.  |
| <a href="#">Hnrph1</a>     | <a href="#">Hnrph1.gSep08</a>     | <a href="#">140931</a> | 3047  | 1146 | 4  | 161 | heterogeneous nuclear ribonucleoprotein H1 CRA b (Hnrph1) alternative variant gSep08, mRNA.  |
| <a href="#">Hnrph1</a>     | <a href="#">Hnrph1.hSep08</a>     | <a href="#">140931</a> | 2087  | 382  | 3  | 115 | heterogeneous nuclear ribonucleoprotein H1 CRA a (Hnrph1) alternative variant hSep08, mRNA.  |
| <a href="#">Hnrph1</a>     | <a href="#">Hnrph1.iSep08</a>     | <a href="#">140931</a> | 1365  | 562  | 3  | 93  | heterogeneous nuclear ribonucleoprotein (Hnrph1) alternative variant iSep08, mRNA.           |
| <a href="#">Hnrph1</a>     | <a href="#">Hnrph1.jSep08</a>     | <a href="#">140931</a> | 2425  | 679  | 3  | 77  | putative protein (7.4 kD) (Hnrph1) alternative variant jSep08, mRNA.                         |
| <a href="#">Hnrph1</a>     | <a href="#">Hnrph1.kSep08</a>     | <a href="#">140931</a> | 2102  | 1696 | 2  | 39  | putative protein (Hnrph1) alternative variant kSep08, mRNA.                                  |
| <a href="#">Hnrpll</a>     | <a href="#">Hnrpll.aSep08</a>     | <a href="#">313842</a> | 31027 | 2967 | 13 | 661 | heterogeneous nuclear ribonucleoprotein L-like (Hnrpll) alternative variant aSep08, mRNA.    |
| <a href="#">Hnrpll</a>     | <a href="#">Hnrpll.bSep08</a>     | <a href="#">313842</a> | 10428 | 734  | 3  | 244 | heterogeneous nuclear ribonucleoprotein L-like (Hnrpll) alternative variant bSep08, mRNA.    |
| <a href="#">Hnrpll</a>     | <a href="#">Hnrpll.cSep08</a>     | <a href="#">313842</a> | 3576  | 721  | 4  | 135 | heterogeneous nuclear ribonucleoprotein L-like (Hnrpll) alternative variant cSep08, mRNA.    |
| <a href="#">Hnrpm</a>      | <a href="#">Hnrpm.aSep08</a>      | <a href="#">116655</a> | 19207 | 1683 | 9  | 472 | heterogeneous nuclear ribonucleoprotein M (Hnrpm) alternative variant aSep08, mRNA.          |
| <a href="#">Hnrpm</a>      | <a href="#">Hnrpm.bSep08</a>      | <a href="#">116655</a> | 2888  | 701  | 1  | 63  | heterogeneous nuclear ribonucleoprotein M (7.1 kD) (Hnrpm) alternative variant bSep08, mRNA. |
| <a href="#">Hnt</a>        | <a href="#">Hnt.bSep08</a>        | <a href="#">50864</a>  | 2240  | 333  | 2  | 42  | neurotrimin (Hnt) alternative variant bSep08, mRNA.                                          |
| <a href="#">Homeobox.1</a> | <a href="#">Homeobox.1.aSep08</a> |                        | 6029  | 614  | 5  | 82  | putative mitochondrial protein (8.8 kD) (Homeobox.1) alternative variant aSep08, mRNA.       |
| <a href="#">Homeobox.1</a> | <a href="#">Homeobox.1.cSep08</a> |                        | 6067  | 432  | 4  | 72  | otx2 (Homeobox.1) alternative variant cSep08, mRNA.                                          |
| <a href="#">Homeobox.1</a> | <a href="#">Homeobox.1.dSep08</a> |                        | 5815  | 388  | 3  | 50  | otx2 (Homeobox.1) alternative variant dSep08, mRNA.                                          |
| <a href="#">Homeobox.7</a> | <a href="#">Homeobox.7.aSep08</a> |                        | 8062  | 580  |    | 193 | zinc finger 4 (Homeobox.7) mRNA.                                                             |
| <a href="#">Homeobox.9</a> | <a href="#">Homeobox.9.aSep08</a> |                        | 3585  | 625  |    | 199 | iroquois protein (Homeobox.9) mRNA.                                                          |
| <a href="#">Homer2</a>     | <a href="#">Homer2.bSep08</a>     | <a href="#">29547</a>  | 30933 | 837  | 7  | 278 | homer homolog 2 (Drosophila) (Homer2) alternative variant bSep08, mRNA.                      |
| <a href="#">Homer3</a>     | <a href="#">Homer3.aSep08</a>     | <a href="#">29548</a>  | 2273  | 1796 | 5  | 474 | putative protein (Homer3) alternative variant aSep08, mRNA.                                  |
| <a href="#">Homer3</a>     | <a href="#">Homer3.bSep08</a>     | <a href="#">29548</a>  | 8169  | 1210 | 9  | 369 | homer homolog 3 CRA a (Homer3) alternative variant bSep08, mRNA.                             |
| <a href="#">Homer3</a>     | <a href="#">Homer3.dSep08</a>     | <a href="#">29548</a>  | 4129  | 965  | 6  | 145 | homer homolog 3 CRA b (16.4 kD) (Homer3) alternative variant dSep08, mRNA.                   |
| <a href="#">Homer3</a>     | <a href="#">Homer3.fSep08</a>     | <a href="#">29548</a>  | 3323  | 949  | 4  | 119 | homer homolog 3 (13.3 kD) (Homer3) alternative variant fSep08, mRNA.                         |

|                            |                                   |                        |       |      |   |     |                                                                                 |
|----------------------------|-----------------------------------|------------------------|-------|------|---|-----|---------------------------------------------------------------------------------|
| <a href="#">Homer3</a>     | <a href="#">Homer3.gSep08</a>     | <a href="#">29548</a>  | 2750  | 614  | 4 | 104 | homer homolog 3 (Homer3) alternative variant gSep08, mRNA.                      |
| <a href="#">Homer3</a>     | <a href="#">Homer3.hSep08</a>     | <a href="#">29548</a>  | 2162  | 669  | 3 | 94  | homer homolog 3 CRA e (Homer3) alternative variant hSep08, mRNA.                |
| <a href="#">Homer3</a>     | <a href="#">Homer3.iSep08</a>     | <a href="#">29548</a>  | 1073  | 463  | 3 | 88  | homer homolog 3 CRA b (Homer3) alternative variant iSep08, mRNA.                |
| <a href="#">Hook1</a>      | <a href="#">Hook1.bSep08</a>      | <a href="#">313370</a> | 11060 | 1756 | 1 | 488 | hook homolog 1 (Drosophila) (Hook1) alternative variant bSep08, mRNA.           |
| <a href="#">Hook2</a>      | <a href="#">Hook2.aSep08</a>      | <a href="#">304669</a> | 4522  | 1042 | 8 | 345 | hook homolog 2 (Drosophila) (Hook2) alternative variant aSep08, mRNA.           |
| <a href="#">Hook2</a>      | <a href="#">Hook2.bSep08</a>      | <a href="#">304669</a> | 4246  | 866  | 7 | 288 | hook homolog 2 (Drosophila) (Hook2) alternative variant bSep08, mRNA.           |
| <a href="#">Hook2</a>      | <a href="#">Hook2.cSep08</a>      | <a href="#">304669</a> | 2163  | 564  | 6 | 177 | hook homolog 2 (Drosophila) (20.7 kD) (Hook2) alternative variant cSep08, mRNA. |
| <a href="#">Hook3</a>      | <a href="#">Hook3.aSep08</a>      | <a href="#">306548</a> | 85818 | 2494 |   | 701 | hook homolog 3 (Drosophila) (Hook3) alternative variant aSep08, mRNA.           |
| <a href="#">Hopx</a>       | <a href="#">Hopx.aSep08</a>       | <a href="#">171160</a> | 7000  | 418  | 2 | 110 | HOP homeobox (Hopx) alternative variant aSep08, mRNA.                           |
| <a href="#">Hopx</a>       | <a href="#">Hopx.bSep08</a>       | <a href="#">171160</a> | 26582 | 870  | 3 | 99  | HOP homeobox (11.2 kD) (Hopx) alternative variant bSep08, mRNA.                 |
| <a href="#">Hopx</a>       | <a href="#">Hopx.cSep08</a>       | <a href="#">171160</a> | 27830 | 965  | 4 | 87  | HOP homeobox (Hopx) alternative variant cSep08, mRNA.                           |
| <a href="#">Hopx</a>       | <a href="#">Hopx.eSep08</a>       | <a href="#">171160</a> | 25999 | 426  | 4 | 70  | HOP homeobox (7.4 kD) (Hopx) alternative variant eSep08, mRNA.                  |
| <a href="#">Hox9_act.0</a> | <a href="#">Hox9_act.0.aSep08</a> |                        | 2804  | 1046 |   | 246 | homeobox protein (Hox9_act.0) mRNA.                                             |
| <a href="#">Hoxa1</a>      | <a href="#">Hoxa1.bSep08</a>      | <a href="#">25607</a>  | 1519  | 830  | 3 | 128 | homeo box A1 (14.4 kD) (Hoxa1) alternative variant bSep08, mRNA.                |
| <a href="#">Hoxa5</a>      | <a href="#">Hoxa5.aSep08</a>      | <a href="#">79241</a>  | 2904  | 1947 | 2 | 375 | homeo box A5 (Hoxa5) alternative variant aSep08, mRNA.                          |
| <a href="#">Hoxa5</a>      | <a href="#">Hoxa5.bSep08</a>      | <a href="#">79241</a>  | 1523  | 1032 | 2 | 126 | homeo box A5 (Hoxa5) alternative variant bSep08, mRNA.                          |
| <a href="#">Hoxa5</a>      | <a href="#">Hoxa5.cSep08</a>      | <a href="#">79241</a>  | 21172 | 727  | 3 | 72  | homeo box A5 (Hoxa5) alternative variant cSep08, mRNA.                          |
| <a href="#">Hoxa5</a>      | <a href="#">Hoxa5.dSep08</a>      | <a href="#">79241</a>  | 8929  | 591  | 2 | 23  | homeo box A5 (2.6 kD) (Hoxa5) alternative variant dSep08, mRNA.                 |
| <a href="#">Hoxa9</a>      | <a href="#">Hoxa9.aSep08</a>      | <a href="#">500126</a> | 1734  | 585  | 1 | 181 | homeobox A9 (Hoxa9) alternative variant aSep08, mRNA.                           |
| <a href="#">Hoxa9</a>      | <a href="#">Hoxa9.bSep08</a>      | <a href="#">500126</a> | 2237  | 915  | 2 | 138 | homeobox A9 (16.6 kD) (Hoxa9) alternative variant bSep08, mRNA.                 |
| <a href="#">Hoxa10</a>     | <a href="#">Hoxa10.aSep08</a>     | <a href="#">368057</a> | 3015  | 1844 | 2 | 175 | homeo box A10 (Hoxa10) alternative variant aSep08, mRNA.                        |
| <a href="#">Hoxa10</a>     | <a href="#">Hoxa10.bSep08</a>     | <a href="#">368057</a> | 1196  | 961  | 2 | 136 | homeo box A10 (Hoxa10) alternative variant bSep08, mRNA.                        |
| <a href="#">Hoxa10</a>     | <a href="#">Hoxa10.dSep08</a>     | <a href="#">368057</a> | 8589  | 1061 | 2 | 94  | homeo box A10 (11.5 kD) (Hoxa10) alternative variant dSep08, mRNA.              |
| <a href="#">Hoxa10</a>     | <a href="#">Hoxa10.eSep08</a>     | <a href="#">368057</a> | 8414  | 717  | 2 | 79  | homeo box A10 (8.8 kD) (Hoxa10) alternative variant eSep08, mRNA.               |
| <a href="#">Hoxa13</a>     | <a href="#">Hoxa13.aSep08</a>     | <a href="#">500129</a> | 1378  | 654  |   | 141 | homeo box A13 (Hoxa13) mRNA.                                                    |
| <a href="#">Hoxb1</a>      | <a href="#">Hoxb1.aSep08</a>      | <a href="#">303491</a> | 1224  | 788  |   | 239 | homeo box B1 (Hoxb1) mRNA.                                                      |
| <a href="#">Hoxb2</a>      | <a href="#">Hoxb2.aSep08</a>      | <a href="#">303489</a> | 1551  | 810  | 2 | 270 | homeo box B2 (Hoxb2) alternative variant aSep08, mRNA.                          |
| <a href="#">Hoxb3</a>      | <a href="#">Hoxb3.bSep08</a>      | <a href="#">303488</a> | 14383 | 2405 | 4 | 428 | homeo box B3 (44.1 kD) (Hoxb3) alternative variant bSep08, mRNA.                |

|                        |                               |                        |        |      |    |     |                                                                                                   |
|------------------------|-------------------------------|------------------------|--------|------|----|-----|---------------------------------------------------------------------------------------------------|
| <a href="#">Hoxb3</a>  | <a href="#">Hoxb3.cSep08</a>  | <a href="#">303488</a> | 52740  | 599  | 4  | 129 | homeo box B3 (Hoxb3) alternative variant cSep08, mRNA.                                            |
| <a href="#">Hoxb6</a>  | <a href="#">Hoxb6.bSep08</a>  | <a href="#">497986</a> | 2001   | 911  | 2  | 219 | homeo box B6 (Hoxb6) alternative variant bSep08, mRNA.                                            |
| <a href="#">Hoxc6</a>  | <a href="#">Hoxc6.aSep08</a>  | <a href="#">252885</a> | 2359   | 1635 | 3  | 421 | homeo box C6 (Hoxc6) alternative variant aSep08, mRNA.                                            |
| <a href="#">Hoxc10</a> | <a href="#">Hoxc10.aSep08</a> | <a href="#">315338</a> | 4098   | 739  | 2  | 181 | homeo box C10 (Hoxc10) alternative variant aSep08, mRNA.                                          |
| <a href="#">Hoxc10</a> | <a href="#">Hoxc10.bSep08</a> | <a href="#">315338</a> | 4465   | 251  | 3  | 68  | homeo box C10 (Hoxc10) alternative variant bSep08, mRNA.                                          |
| <a href="#">Hoxd9</a>  | <a href="#">Hoxd9.aSep08</a>  | <a href="#">688999</a> | 2387   | 1833 |    | 366 | homeo box D9 (Hoxd9) alternative variant aSep08, mRNA.                                            |
| <a href="#">Hoxd10</a> | <a href="#">Hoxd10.aSep08</a> | <a href="#">303991</a> | 11662  | 758  | 2  | 96  | homeo box D10 (Hoxd10) alternative variant aSep08, mRNA.                                          |
| <a href="#">Hoxd10</a> | <a href="#">Hoxd10.bSep08</a> | <a href="#">303991</a> | 4139   | 1229 | 1  | 70  | homeo box D10 (8.1 kD) (Hoxd10) alternative variant bSep08, mRNA.                                 |
| <a href="#">Hp</a>     | <a href="#">Hp.bSep08</a>     | <a href="#">24464</a>  | 4165   | 871  | 5  | 260 | haptoglobin (Hp) alternative variant bSep08, mRNA.                                                |
| <a href="#">Hp</a>     | <a href="#">Hp.cSep08</a>     | <a href="#">24464</a>  | 3707   | 332  | 5  | 110 | haptoglobin (Hp) alternative variant cSep08, mRNA.                                                |
| <a href="#">Hp</a>     | <a href="#">Hp.eSep08</a>     | <a href="#">24464</a>  | 1127   | 259  | 3  | 86  | haptoglobin (Hp) alternative variant eSep08, mRNA.                                                |
| <a href="#">Hp</a>     | <a href="#">Hp.fSep08</a>     | <a href="#">24464</a>  | 2331   | 358  | 3  | 67  | haptoglobin (7.5 kD) (Hp) alternative variant fSep08, complete mRNA.                              |
| <a href="#">Hp1bp3</a> | <a href="#">Hp1bp3.bSep08</a> | <a href="#">313647</a> | 16270  | 785  | 7  | 261 | heterochromatin protein 1, binding protein 3 (Hp1bp3) alternative variant bSep08, mRNA.           |
| <a href="#">Hp1bp3</a> | <a href="#">Hp1bp3.cSep08</a> | <a href="#">313647</a> | 13622  | 1337 | 6  | 238 | heterochromatin protein 1, binding protein 3 (26.3 kD) (Hp1bp3) alternative variant cSep08, mRNA. |
| <a href="#">Hp1bp3</a> | <a href="#">Hp1bp3.dSep08</a> | <a href="#">313647</a> | 5336   | 2074 | 4  | 229 | heterochromatin protein 1, binding protein 3 (Hp1bp3) alternative variant dSep08, mRNA.           |
| <a href="#">Hp1bp3</a> | <a href="#">Hp1bp3.fSep08</a> | <a href="#">313647</a> | 4612   | 502  | 3  | 71  | heterochromatin protein 1, binding protein 3 (Hp1bp3) alternative variant fSep08, mRNA.           |
| <a href="#">Hpcal1</a> | <a href="#">Hpcal1.aSep08</a> | <a href="#">50871</a>  | 116414 | 1721 | 5  | 193 | hippocalcin-like 1 CRA b (22.3 kD) (Hpcal1) alternative variant aSep08, mRNA.                     |
| <a href="#">Hpcal1</a> | <a href="#">Hpcal1.cSep08</a> | <a href="#">50871</a>  | 111934 | 544  | 2  | 97  | CRA a like (Hpcal1) alternative variant cSep08, mRNA.                                             |
| <a href="#">Hpcal1</a> | <a href="#">Hpcal1.dSep08</a> | <a href="#">50871</a>  | 78828  | 768  | 4  | 93  | CRA a like (10.0 kD) (Hpcal1) alternative variant dSep08, mRNA.                                   |
| <a href="#">Hpcal1</a> | <a href="#">Hpcal1.eSep08</a> | <a href="#">50871</a>  | 38274  | 368  | 4  | 76  | putative protein (Hpcal1) alternative variant eSep08, mRNA.                                       |
| <a href="#">Hpcal1</a> | <a href="#">Hpcal1.fSep08</a> | <a href="#">50871</a>  | 109232 | 783  | 7  | 81  | putative protein (Hpcal1) alternative variant fSep08, mRNA.                                       |
| <a href="#">Hpcal1</a> | <a href="#">Hpcal1.gSep08</a> | <a href="#">50871</a>  | 72477  | 387  | 4  | 52  | putative protein (Hpcal1) alternative variant gSep08, mRNA.                                       |
| <a href="#">Hpd</a>    | <a href="#">Hpd.aSep08</a>    | <a href="#">29531</a>  | 10223  | 1362 | 10 | 401 | 4-hydroxyphenylpyruvic acid dioxygenase (Hpd) alternative variant aSep08, mRNA.                   |
| <a href="#">Hpd</a>    | <a href="#">Hpd.bSep08</a>    | <a href="#">29531</a>  | 7925   | 868  | 9  | 289 | 4-hydroxyphenylpyruvic acid dioxygenase (Hpd) alternative variant bSep08, mRNA.                   |
| <a href="#">Hpd</a>    | <a href="#">Hpd.cSep08</a>    | <a href="#">29531</a>  | 6263   | 726  | 8  | 241 | 4-hydroxyphenylpyruvic acid dioxygenase (Hpd) alternative variant cSep08, mRNA.                   |
| <a href="#">Hpd</a>    | <a href="#">Hpd.eSep08</a>    | <a href="#">29531</a>  | 4715   | 777  | 5  | 104 | 4-hydroxyphenylpyruvic acid dioxygenase (Hpd) alternative variant eSep08, mRNA.                   |
| <a href="#">Hpn</a>    | <a href="#">Hpn.bSep08</a>    | <a href="#">29135</a>  | 11578  | 1054 | 1  | 351 | hepsin (Hpn) alternative variant bSep08, mRNA.                                                    |
| <a href="#">Hpn</a>    | <a href="#">Hpn.cSep08</a>    | <a href="#">29135</a>  | 4634   | 1147 | 4  | 279 | hepsin (Hpn) alternative variant cSep08, mRNA.                                                    |

|                        |                               |                        |       |      |    |     |                                                                                                |
|------------------------|-------------------------------|------------------------|-------|------|----|-----|------------------------------------------------------------------------------------------------|
| <a href="#">Hprt1</a>  | <a href="#">Hprt1.aSep08</a>  | <a href="#">24465</a>  | 43060 | 4356 | 11 | 364 | PHD finger protein 6 (41.1 kD) (Hprt1) alternative variant aSep08, mRNA.                       |
| <a href="#">Hprt1</a>  | <a href="#">Hprt1.bSep08</a>  | <a href="#">24465</a>  | 43070 | 1802 | 7  | 351 | PHD finger protein 6 (Hprt1) alternative variant bSep08, mRNA.                                 |
| <a href="#">Hprt1</a>  | <a href="#">Hprt1.dSep08</a>  | <a href="#">24465</a>  | 30551 | 720  | 8  | 197 | hypoxanthine phosphoribosyltransferase (Hprt1) alternative variant dSep08, mRNA.               |
| <a href="#">Hprt1</a>  | <a href="#">Hprt1.eSep08</a>  | <a href="#">24465</a>  | 26666 | 689  | 6  | 161 | hypoxanthine phosphoribosyltransferase (Hprt1) alternative variant eSep08, mRNA.               |
| <a href="#">Hprt1</a>  | <a href="#">Hprt1.fSep08</a>  | <a href="#">24465</a>  | 5292  | 496  | 4  | 92  | PHD finger protein 6 (10.3 kD) (Hprt1) alternative variant fSep08, mRNA.                       |
| <a href="#">Hprt1</a>  | <a href="#">Hprt1.gSep08</a>  | <a href="#">24465</a>  | 91856 | 300  | 3  | 39  | putative protein (Hprt1) alternative variant gSep08, mRNA.                                     |
| <a href="#">Hps1</a>   | <a href="#">Hps1.aSep08</a>   | <a href="#">114638</a> | 20383 | 1806 | 16 | 531 | hermansky-Pudlak syndrome 1 homolog (human) (Hps1) alternative variant aSep08, mRNA.           |
| <a href="#">Hps1</a>   | <a href="#">Hps1.bSep08</a>   | <a href="#">114638</a> | 12809 | 737  | 7  | 191 | hermansky-Pudlak syndrome 1 homolog (human) (Hps1) alternative variant bSep08, mRNA.           |
| <a href="#">Hps1</a>   | <a href="#">Hps1.cSep08</a>   | <a href="#">114638</a> | 2854  | 839  | 2  | 81  | hermansky-Pudlak syndrome 1 homolog (human) (Hps1) alternative variant cSep08, mRNA.           |
| <a href="#">Hps1</a>   | <a href="#">Hps1.eSep08</a>   | <a href="#">114638</a> | 1580  | 593  | 2  | 50  | hermansky-Pudlak syndrome 1 homolog (human) (Hps1) alternative variant eSep08, mRNA.           |
| <a href="#">Hps3</a>   | <a href="#">Hps3.bSep08</a>   | <a href="#">310288</a> | 15264 | 1345 | 5  | 79  | hermansky-Pudlak syndrome 3 homolog (human) (9.0 kD) (Hps3) alternative variant bSep08, mRNA.  |
| <a href="#">Hps4</a>   | <a href="#">Hps4.bSep08</a>   | <a href="#">304555</a> | 6250  | 1569 | 4  | 351 | hermansky-Pudlak syndrome 4 homolog (human) (37.6 kD) (Hps4) alternative variant bSep08, mRNA. |
| <a href="#">Hps4</a>   | <a href="#">Hps4.cSep08</a>   | <a href="#">304555</a> | 8048  | 1539 | 6  | 323 | hermansky-Pudlak syndrome 4 homolog (human) (34.3 kD) (Hps4) alternative variant cSep08, mRNA. |
| <a href="#">Hpse</a>   | <a href="#">Hpse.bSep08</a>   | <a href="#">64537</a>  | 7949  | 1888 | 3  | 141 | heparanase (Hpse) alternative variant bSep08, mRNA.                                            |
| <a href="#">Hpx</a>    | <a href="#">Hpx.bSep08</a>    | <a href="#">58917</a>  | 5825  | 1501 | 7  | 445 | hemopexin (Hpx) alternative variant bSep08, mRNA.                                              |
| <a href="#">Hpx</a>    | <a href="#">Hpx.cSep08</a>    | <a href="#">58917</a>  | 6585  | 912  | 7  | 299 | hemopexin (Hpx) alternative variant cSep08, mRNA.                                              |
| <a href="#">Hpx</a>    | <a href="#">Hpx.dSep08</a>    | <a href="#">58917</a>  | 958   | 877  | 2  | 119 | hemopexin (13.0 kD) (Hpx) alternative variant dSep08, mRNA.                                    |
| <a href="#">Hr</a>     | <a href="#">Hr.bSep08</a>     | <a href="#">60563</a>  | 754   | 377  | 3  | 125 | hairless (Hr) alternative variant bSep08, mRNA.                                                |
| <a href="#">Hr</a>     | <a href="#">Hr.cSep08</a>     | <a href="#">60563</a>  | 1873  | 379  | 3  | 114 | hairless (Hr) alternative variant cSep08, mRNA.                                                |
| <a href="#">Hr</a>     | <a href="#">Hr.dSep08</a>     | <a href="#">60563</a>  | 849   | 532  | 3  | 107 | hairless (Hr) alternative variant dSep08, mRNA.                                                |
| <a href="#">Hr</a>     | <a href="#">Hr.eSep08</a>     | <a href="#">60563</a>  | 915   | 283  | 2  | 48  | putative protein (Hr) alternative variant eSep08, mRNA.                                        |
| <a href="#">Hras</a>   | <a href="#">Hras.cSep08</a>   | <a href="#">293621</a> | 6921  | 695  | 3  | 63  | harvey rat sarcoma virus oncogene (Hras) alternative variant cSep08, mRNA.                     |
| <a href="#">Hrasls</a> | <a href="#">Hrasls.bSep08</a> | <a href="#">288025</a> | 16136 | 482  | 1  | 61  | HRAS-like suppressor (7.0 kD) (Hrasls) alternative variant bSep08, mRNA.                       |
| <a href="#">Hrbl</a>   | <a href="#">Hrbl.aSep08</a>   | <a href="#">304375</a> | 14621 | 1927 | 7  | 510 | HIV-1 Rev binding protein-like (Hrbl) alternative variant aSep08, mRNA.                        |
| <a href="#">Hrbl</a>   | <a href="#">Hrbl.cSep08</a>   | <a href="#">304375</a> | 2085  | 451  | 3  | 95  | HIV-1 Rev binding protein-like (Hrbl) alternative variant cSep08, mRNA.                        |
| <a href="#">Hrg</a>    | <a href="#">Hrg.bSep08</a>    | <a href="#">171016</a> | 33424 | 1501 | 7  | 497 | histidine-rich glycoprotein (Hrg) alternative variant bSep08, mRNA.                            |

|                         |                                |                        |       |      |   |     |                                                                                                                                         |
|-------------------------|--------------------------------|------------------------|-------|------|---|-----|-----------------------------------------------------------------------------------------------------------------------------------------|
| <a href="#">Hrh3</a>    | <a href="#">Hrh3.aSep08</a>    | <a href="#">85268</a>  | 5416  | 2237 | 3 | 379 | histamine receptor H3 and similar to SR protein related family member (rsr-1) (Hrh3) alternative variant aSep08, mRNA.                  |
| <a href="#">Hrh3</a>    | <a href="#">Hrh3.aSep08</a>    | <a href="#">690396</a> | 5416  | 2237 | 3 | 379 | histamine receptor H3 and similar to SR protein related family member (rsr-1) (Hrh3) alternative variant aSep08, mRNA.                  |
| <a href="#">Hrh3</a>    | <a href="#">Hrh3.bSep08</a>    | <a href="#">85268</a>  | 1163  | 992  | 2 | 245 | histamine receptor H3 and similar to SR protein related family member (rsr-1) (Hrh3) alternative variant bSep08, mRNA.                  |
| <a href="#">Hrh3</a>    | <a href="#">Hrh3.bSep08</a>    | <a href="#">690396</a> | 1163  | 992  | 2 | 245 | histamine receptor H3 and similar to SR protein related family member (rsr-1) (Hrh3) alternative variant bSep08, mRNA.                  |
| <a href="#">Hrh3</a>    | <a href="#">Hrh3.cSep08</a>    | <a href="#">85268</a>  | 3202  | 888  | 3 | 184 | histamine receptor H3 and similar to SR protein related family member (rsr-1) (Hrh3) alternative variant cSep08, mRNA.                  |
| <a href="#">Hrh3</a>    | <a href="#">Hrh3.cSep08</a>    | <a href="#">690396</a> | 3202  | 888  | 3 | 184 | histamine receptor H3 and similar to SR protein related family member (rsr-1) (Hrh3) alternative variant cSep08, mRNA.                  |
| <a href="#">HRM.0</a>   | <a href="#">HRM.0.aSep08</a>   |                        | 3514  | 634  |   | 210 | brain-specific angiogenesis inhibitor 1 (HRM.0) mRNA.                                                                                   |
| <a href="#">HRM.1</a>   | <a href="#">HRM.1.aSep08</a>   |                        | 18057 | 388  |   | 129 | vasoactive intestinal peptide receptor 2 (HRM.1) mRNA.                                                                                  |
| <a href="#">HRM.2</a>   | <a href="#">HRM.2.aSep08</a>   |                        | 1970  | 506  |   | 168 | cadherin EGF LAG seven-pass G-type receptor (HRM.2) mRNA.                                                                               |
| <a href="#">Hrpap20</a> | <a href="#">Hrpap20.bSep08</a> | <a href="#">362495</a> | 5268  | 2410 | 2 | 136 | hormone-regulated proliferation associated protein 20 (15.7 kD) (Hrpap20) alternative variant bSep08, complete mRNA.                    |
| <a href="#">Hrpap20</a> | <a href="#">Hrpap20.cSep08</a> | <a href="#">362495</a> | 3922  | 952  | 3 | 115 | hormone-regulated proliferation associated protein 20 (13.2 kD) (Hrpap20) alternative variant cSep08, mRNA.                             |
| <a href="#">Hs1bp3</a>  | <a href="#">Hs1bp3.aSep08</a>  | <a href="#">313950</a> | 20100 | 2414 |   | 192 | HCLS1 binding protein 3 (Hs1bp3) mRNA.                                                                                                  |
| <a href="#">Hs2st1</a>  | <a href="#">Hs2st1.aSep08</a>  | <a href="#">292155</a> | 32060 | 2693 | 4 | 259 | heparan sulfate 2-O-sulfotransferase 1 (Hs2st1) alternative variant aSep08, mRNA.                                                       |
| <a href="#">Hs2st1</a>  | <a href="#">Hs2st1.bSep08</a>  | <a href="#">292155</a> | 3523  | 658  | 1 | 134 | heparan sulfate 2-O-sulfotransferase 1 (Hs2st1) alternative variant bSep08, mRNA.                                                       |
| <a href="#">Hs3st5</a>  | <a href="#">Hs3st5.bSep08</a>  | <a href="#">294449</a> | 2338  | 560  | 2 | 43  | heparan sulfate (glucosamine) 3-O-sulfotransferase 5 (Hs3st5) alternative variant bSep08, mRNA.                                         |
| <a href="#">Hs3st6</a>  | <a href="#">Hs3st6.bSep08</a>  | <a href="#">684979</a> | 921   | 406  | 1 | 59  | heparan sulfate (glucosamine) 3-O-sulfotransferase 6 (Hs3st6) alternative variant bSep08, mRNA.                                         |
| <a href="#">HS6ST.0</a> | <a href="#">HS6ST.0.aSep08</a> |                        | 1363  | 568  |   | 189 | heparan sulfate 6-O-sulfotransferase 2 (HS6ST.0) mRNA.                                                                                  |
| <a href="#">HSA.0</a>   | <a href="#">HSA.0.aSep08</a>   |                        | 6195  | 589  |   | 196 | CBP activator (HSA.0) mRNA.                                                                                                             |
| <a href="#">HSA.1</a>   | <a href="#">HSA.1.aSep08</a>   |                        | 13715 | 584  | 5 | 194 | SWI SNF related matrix associated actin dependent regulator of chromatin subfamily a member 2 (HSA.1) alternative variant aSep08, mRNA. |
| <a href="#">Hsbp1</a>   | <a href="#">Hsbp1.bSep08</a>   | <a href="#">286899</a> | 1042  | 744  | 2 | 75  | heat shock factor binding protein 1 (9.0 kD) (Hsbp1) alternative variant bSep08, mRNA.                                                  |
| <a href="#">Hsbp1</a>   | <a href="#">Hsbp1.cSep08</a>   | <a href="#">286899</a> | 5084  | 1227 | 5 | 76  | heat shock factor binding protein 1 (8.6 kD) (Hsbp1) alternative variant cSep08, complete mRNA.                                         |
| <a href="#">HSBP1.1</a> | <a href="#">HSBP1.1.aSep08</a> |                        | 5801  | 440  |   | 72  | CRA a (8.1 kD) (HSBP1.1) mRNA.                                                                                                          |



|                          |                                 |                        |       |      |   |     |                                                                                                                         |
|--------------------------|---------------------------------|------------------------|-------|------|---|-----|-------------------------------------------------------------------------------------------------------------------------|
| <a href="#">Hscb</a>     | <a href="#">Hscb.bSep08</a>     | <a href="#">360826</a> | 10339 | 781  | 6 | 152 | HscB iron-sulfur cluster co-chaperone homolog (E. coli) (Hscb) alternative variant bSep08, mRNA.                        |
| <a href="#">Hscb</a>     | <a href="#">Hscb.cSep08</a>     | <a href="#">360826</a> | 10301 | 593  | 5 | 146 | HscB iron-sulfur cluster co-chaperone homolog (E. coli) (Hscb) alternative variant cSep08, mRNA.                        |
| <a href="#">Hsd3b</a>    | <a href="#">Hsd3b.aSep08</a>    | <a href="#">24470</a>  | 18753 | 687  | 1 | 228 | steroid delta-isomerase, 3 beta (Hsd3b) alternative variant aSep08, mRNA.                                               |
| <a href="#">Hsd3b</a>    | <a href="#">Hsd3b.bSep08</a>    | <a href="#">24470</a>  | 18840 | 847  | 1 | 142 | steroid delta-isomerase, 3 beta (Hsd3b) alternative variant bSep08, mRNA.                                               |
| <a href="#">Hsd3b7</a>   | <a href="#">Hsd3b7.bSep08</a>   | <a href="#">246211</a> | 2375  | 992  | 3 | 330 | hydroxy-delta-5-steroid dehydrogenase, 3 beta- and steroid delta-isomerase 7 (Hsd3b7) alternative variant bSep08, mRNA. |
| <a href="#">Hsd3b7</a>   | <a href="#">Hsd3b7.cSep08</a>   | <a href="#">246211</a> | 2375  | 989  | 3 | 329 | hydroxy-delta-5-steroid dehydrogenase, 3 beta- and steroid delta-isomerase 7 (Hsd3b7) alternative variant cSep08, mRNA. |
| <a href="#">Hsd11b1</a>  | <a href="#">Hsd11b1.aSep08</a>  | <a href="#">25116</a>  | 50064 | 1216 | 4 | 288 | hydroxysteroid 11-beta dehydrogenase 1 (31.9 kD) (Hsd11b1) alternative variant aSep08, mRNA.                            |
| <a href="#">Hsd11b1</a>  | <a href="#">Hsd11b1.cSep08</a>  | <a href="#">25116</a>  | 24578 | 835  | 2 | 278 | hydroxysteroid 11-beta dehydrogenase 1 (Hsd11b1) alternative variant cSep08, mRNA.                                      |
| <a href="#">Hsd11b1</a>  | <a href="#">Hsd11b1.dSep08</a>  | <a href="#">25116</a>  | 28495 | 874  | 3 | 201 | hydroxysteroid 11-beta dehydrogenase 1 (Hsd11b1) alternative variant dSep08, mRNA.                                      |
| <a href="#">Hsd11b2</a>  | <a href="#">Hsd11b2.cSep08</a>  | <a href="#">25117</a>  | 1421  | 1306 | 2 | 95  | hydroxysteroid 11-beta dehydrogenase 2 (Hsd11b2) alternative variant cSep08, mRNA.                                      |
| <a href="#">Hsd17b2</a>  | <a href="#">Hsd17b2.bSep08</a>  | <a href="#">79243</a>  | 21437 | 1019 | 3 | 144 | hydroxysteroid (17-beta) dehydrogenase 2 (15.9 kD) (Hsd17b2) alternative variant bSep08, mRNA.                          |
| <a href="#">Hsd17b2</a>  | <a href="#">Hsd17b2.cSep08</a>  | <a href="#">79243</a>  | 43032 | 687  | 3 | 112 | hydroxysteroid (17-beta) dehydrogenase 2 (Hsd17b2) alternative variant cSep08, mRNA.                                    |
| <a href="#">Hsd17b4</a>  | <a href="#">Hsd17b4.bSep08</a>  | <a href="#">79244</a>  | 13408 | 524  | 7 | 174 | hydroxysteroid (17-beta) dehydrogenase 4 (Hsd17b4) alternative variant bSep08, mRNA.                                    |
| <a href="#">Hsd17b4</a>  | <a href="#">Hsd17b4.cSep08</a>  | <a href="#">79244</a>  | 8383  | 1615 | 2 | 41  | hydroxysteroid (17-beta) dehydrogenase 4 (4.7 kD) (Hsd17b4) alternative variant cSep08, mRNA.                           |
| <a href="#">Hsd17b6</a>  | <a href="#">Hsd17b6.bSep08</a>  | <a href="#">286964</a> | 3345  | 606  |   | 96  | hydroxysteroid (17-beta) dehydrogenase 6 (Hsd17b6) alternative variant bSep08, mRNA.                                    |
| <a href="#">Hsd17b7</a>  | <a href="#">Hsd17b7.bSep08</a>  | <a href="#">29540</a>  | 4578  | 655  | 3 | 66  | hydroxysteroid (17-beta) dehydrogenase 7 (Hsd17b7) alternative variant bSep08, mRNA.                                    |
| <a href="#">Hsd17b7</a>  | <a href="#">Hsd17b7.cSep08</a>  | <a href="#">29540</a>  | 802   | 597  | 2 | 38  | hydroxysteroid (17-beta) dehydrogenase 7 (Hsd17b7) alternative variant cSep08, mRNA.                                    |
| <a href="#">Hsd17b10</a> | <a href="#">Hsd17b10.cSep08</a> | <a href="#">63864</a>  | 1041  | 684  | 2 | 92  | hydroxysteroid (17-beta) dehydrogenase 10 (9.2 kD) (Hsd17b10) alternative variant cSep08, mRNA.                         |
| <a href="#">Hsd17b11</a> | <a href="#">Hsd17b11.bSep08</a> | <a href="#">289456</a> | 31284 | 791  | 5 | 185 | hydroxysteroid (17-beta) dehydrogenase 11 (Hsd17b11) alternative variant bSep08, mRNA.                                  |
| <a href="#">Hsd17b11</a> | <a href="#">Hsd17b11.cSep08</a> | <a href="#">289456</a> | 27476 | 749  | 5 | 173 | hydroxysteroid (17-beta) dehydrogenase 11 (Hsd17b11) alternative variant cSep08, mRNA.                                  |
| <a href="#">Hsd17b12</a> | <a href="#">Hsd17b12.bSep08</a> | <a href="#">84013</a>  | 89900 | 366  | 4 | 115 | hydroxysteroid (17-beta) dehydrogenase 12 (Hsd17b12) alternative variant bSep08, mRNA.                                  |
| <a href="#">Hsd17b12</a> | <a href="#">Hsd17b12.cSep08</a> | <a href="#">84013</a>  | 1011  | 740  | 2 | 35  | hydroxysteroid (17-beta) dehydrogenase 12 (4.2 kD) (Hsd17b12) alternative variant cSep08, mRNA.                         |

|                          |                                 |                        |       |      |   |     |                                                                                                                     |
|--------------------------|---------------------------------|------------------------|-------|------|---|-----|---------------------------------------------------------------------------------------------------------------------|
| <a href="#">Hsd17b13</a> | <a href="#">Hsd17b13.bSep08</a> | <a href="#">305150</a> | 2227  | 730  | 1 | 45  | hydroxysteroid (17-beta) dehydrogenase 13 (5.4 kD) (Hsd17b13) alternative variant bSep08, mRNA.                     |
| <a href="#">Hsd17b14</a> | <a href="#">Hsd17b14.aSep08</a> | <a href="#">691018</a> | 9875  | 673  |   | 167 | hydroxysteroid (17-beta) dehydrogenase 14 (Hsd17b14) mRNA.                                                          |
| <a href="#">Hsd11</a>    | <a href="#">Hsd11.bSep08</a>    | <a href="#">361418</a> | 9186  | 518  | 3 | 172 | hydroxysteroid dehydrogenase like 1 (Hsd11) alternative variant bSep08, mRNA.                                       |
| <a href="#">Hsf1</a>     | <a href="#">Hsf1.aSep08</a>     | <a href="#">79245</a>  | 26698 | 2157 | 5 | 582 | heat shock transcription factor 1 (Hsf1) alternative variant aSep08, mRNA.                                          |
| <a href="#">Hsf1</a>     | <a href="#">Hsf1.bSep08</a>     | <a href="#">79245</a>  | 25857 | 1417 | 1 | 218 | heat shock transcription factor 1 (Hsf1) alternative variant bSep08, mRNA.                                          |
| <a href="#">Hsf1</a>     | <a href="#">Hsf1.cSep08</a>     | <a href="#">79245</a>  | 986   | 694  | 3 | 109 | heat shock transcription factor 1 (Hsf1) alternative variant cSep08, mRNA.                                          |
| <a href="#">Hsf2</a>     | <a href="#">Hsf2.bSep08</a>     | <a href="#">64441</a>  | 1814  | 552  | 3 | 121 | heat shock factor 2 (Hsf2) alternative variant bSep08, mRNA.                                                        |
| <a href="#">Hsf2</a>     | <a href="#">Hsf2.cSep08</a>     | <a href="#">64441</a>  | 4956  | 389  | 4 | 92  | heat shock factor 2 CRA b (Hsf2) alternative variant cSep08, mRNA.                                                  |
| <a href="#">Hsf2bp</a>   | <a href="#">Hsf2bp.bSep08</a>   | <a href="#">499413</a> | 84091 | 1531 | 2 | 192 | heat shock transcription factor 2 binding protein (Hsf2bp) alternative variant bSep08, mRNA.                        |
| <a href="#">Hsf4</a>     | <a href="#">Hsf4.bSep08</a>     | <a href="#">291960</a> | 3059  | 883  | 6 | 236 | heat shock transcription factor 4 (Hsf4) alternative variant bSep08, mRNA.                                          |
| <a href="#">Hsf4</a>     | <a href="#">Hsf4.cSep08</a>     | <a href="#">291960</a> | 1025  | 352  | 3 | 117 | heat shock transcription factor 4 (Hsf4) alternative variant cSep08, mRNA.                                          |
| <a href="#">Hsf4</a>     | <a href="#">Hsf4.dSep08</a>     | <a href="#">291960</a> | 1312  | 370  | 5 | 111 | heat shock transcription factor 4 (Hsf4) alternative variant dSep08, mRNA.                                          |
| <a href="#">HSP70.0</a>  | <a href="#">HSP70.0.aSep08</a>  |                        | 3815  | 2135 | 8 | 627 | heat shock protein (HSP70.0) alternative variant aSep08, mRNA.                                                      |
| <a href="#">HSP70.0</a>  | <a href="#">HSP70.0.bSep08</a>  |                        | 698   | 613  | 2 | 107 | shock protein (HSP70.0) alternative variant bSep08, mRNA.                                                           |
| <a href="#">Hsp90aa1</a> | <a href="#">Hsp90aa1.bSep08</a> | <a href="#">299331</a> | 690   | 592  | 2 | 157 | heat shock protein 90, alpha (cytosolic), class A member 1 (Hsp90aa1) alternative variant bSep08, mRNA.             |
| <a href="#">Hsp90aa1</a> | <a href="#">Hsp90aa1.cSep08</a> | <a href="#">299331</a> | 1834  | 1337 | 2 | 123 | heat shock protein 90, alpha (cytosolic), class A member 1 (13.8 kD) (Hsp90aa1) alternative variant cSep08, mRNA.   |
| <a href="#">Hsp90ab1</a> | <a href="#">Hsp90ab1.bSep08</a> | <a href="#">301252</a> | 4030  | 1649 | 8 | 518 | heat shock protein 90kDa alpha (cytosolic), class B member 1 (59.6 kD) (Hsp90ab1) alternative variant bSep08, mRNA. |
| <a href="#">Hsp90ab1</a> | <a href="#">Hsp90ab1.cSep08</a> | <a href="#">301252</a> | 1747  | 1219 | 3 | 293 | heat shock protein 90kDa alpha (cytosolic), class B member 1 (Hsp90ab1) alternative variant cSep08, mRNA.           |
| <a href="#">Hsp90ab1</a> | <a href="#">Hsp90ab1.dSep08</a> | <a href="#">301252</a> | 1704  | 940  | 4 | 282 | heat shock protein 90kDa alpha (cytosolic), class B member 1 (Hsp90ab1) alternative variant dSep08, mRNA.           |
| <a href="#">Hsp90ab1</a> | <a href="#">Hsp90ab1.eSep08</a> | <a href="#">301252</a> | 2501  | 890  | 4 | 199 | heat shock protein 90kDa alpha (cytosolic), class B member 1 (21.8 kD) (Hsp90ab1) alternative variant eSep08, mRNA. |
| <a href="#">Hspa2</a>    | <a href="#">Hspa2.aSep08</a>    | <a href="#">60460</a>  | 2717  | 2476 | 2 | 662 | heat shock protein 2 (Hspa2) alternative variant aSep08, mRNA.                                                      |
| <a href="#">Hspa4</a>    | <a href="#">Hspa4.bSep08</a>    | <a href="#">266759</a> | 5487  | 507  | 5 | 168 | heat shock protein 4 CRA c (Hspa4) alternative variant bSep08, mRNA.                                                |

|                         |                                |                        |       |      |   |     |                                                                                                               |
|-------------------------|--------------------------------|------------------------|-------|------|---|-----|---------------------------------------------------------------------------------------------------------------|
| <a href="#">Hspa4</a>   | <a href="#">Hspa4.cSep08</a>   | <a href="#">266759</a> | 1371  | 567  | 3 | 131 | heat shock protein 4 (14.4 kD) (Hspa4) alternative variant cSep08, mRNA.                                      |
| <a href="#">Hspa4</a>   | <a href="#">Hspa4.dSep08</a>   | <a href="#">266759</a> | 831   | 479  | 2 | 110 | heat shock protein 4 CRA d (12.0 kD) (Hspa4) alternative variant dSep08, mRNA.                                |
| <a href="#">Hspa4</a>   | <a href="#">Hspa4.eSep08</a>   | <a href="#">266759</a> | 3172  | 838  | 2 | 95  | heat shock protein 4 (Hspa4) alternative variant eSep08, mRNA.                                                |
| <a href="#">Hspa4</a>   | <a href="#">Hspa4.fSep08</a>   | <a href="#">266759</a> | 1103  | 401  | 2 | 47  | heat shock protein 4 CRA d (Hspa4) alternative variant fSep08, mRNA.                                          |
| <a href="#">Hspa4l</a>  | <a href="#">Hspa4l.bSep08</a>  | <a href="#">294993</a> | 21138 | 637  | 1 | 212 | heat shock protein 4 like (Hspa4l) alternative variant bSep08, mRNA.                                          |
| <a href="#">Hspa5</a>   | <a href="#">Hspa5.bSep08</a>   | <a href="#">25617</a>  | 1710  | 830  | 2 | 202 | heat shock protein 5 (22.1 kD) (Hspa5) alternative variant bSep08, mRNA.                                      |
| <a href="#">Hspa5</a>   | <a href="#">Hspa5.cSep08</a>   | <a href="#">25617</a>  | 1335  | 771  | 1 | 174 | heat shock protein 5 (19.0 kD) (Hspa5) alternative variant cSep08, mRNA.                                      |
| <a href="#">Hspa9</a>   | <a href="#">Hspa9.bSep08</a>   | <a href="#">291671</a> | 5296  | 2059 | 7 | 281 | heat shock 70kDa protein 9 (30.6 kD) (Hspa9) alternative variant bSep08, mRNA.                                |
| <a href="#">Hspa9</a>   | <a href="#">Hspa9.cSep08</a>   | <a href="#">291671</a> | 5127  | 925  | 2 | 105 | heat shock 70kDa protein 9A (11.6 kD) (Hspa9) alternative variant cSep08, mRNA.                               |
| <a href="#">Hspa12b</a> | <a href="#">Hspa12b.aSep08</a> | <a href="#">311427</a> | 3845  | 1196 | 6 | 398 | heat shock protein 12B (Hspa12b) alternative variant aSep08, mRNA.                                            |
| <a href="#">Hspa12b</a> | <a href="#">Hspa12b.cSep08</a> | <a href="#">311427</a> | 11687 | 841  | 8 | 193 | heat shock protein 12B (Hspa12b) alternative variant cSep08, mRNA.                                            |
| <a href="#">Hspa12b</a> | <a href="#">Hspa12b.dSep08</a> | <a href="#">311427</a> | 6070  | 639  | 5 | 95  | heat shock protein 12B (Hspa12b) alternative variant dSep08, mRNA.                                            |
| <a href="#">Hspa12b</a> | <a href="#">Hspa12b.eSep08</a> | <a href="#">311427</a> | 4265  | 605  | 3 | 65  | heat shock protein 12B (6.9 kD) (Hspa12b) alternative variant eSep08, mRNA.                                   |
| <a href="#">Hspa14</a>  | <a href="#">Hspa14.bSep08</a>  | <a href="#">307133</a> | 5942  | 581  | 6 | 189 | heat shock protein 14 (Hspa14) alternative variant bSep08, mRNA.                                              |
| <a href="#">Hspa14</a>  | <a href="#">Hspa14.cSep08</a>  | <a href="#">307133</a> | 2046  | 1414 | 2 | 44  | heat shock protein 14 (4.8 kD) (Hspa14) alternative variant cSep08, mRNA.                                     |
| <a href="#">Hspb1</a>   | <a href="#">Hspb1.cSep08</a>   | <a href="#">24471</a>  | 696   | 585  | 2 | 84  | heat shock protein 1 (9.5 kD) (Hspb1) alternative variant cSep08, mRNA.                                       |
| <a href="#">Hspb2</a>   | <a href="#">Hspb2.bSep08</a>   | <a href="#">161476</a> | 1208  | 503  | 2 | 100 | heat shock protein 2 (Hspb2) alternative variant bSep08, mRNA.                                                |
| <a href="#">Hspb2</a>   | <a href="#">Hspb2.cSep08</a>   | <a href="#">161476</a> | 1232  | 628  | 2 | 61  | heat shock protein 2 (6.6 kD) (Hspb2) alternative variant cSep08, mRNA.                                       |
| <a href="#">Hspb6</a>   | <a href="#">Hspb6.bSep08</a>   | <a href="#">192245</a> | 2915  | 1289 | 1 | 127 | heat shock protein, alpha-crystallin-related, B6 (13.8 kD) (Hspb6) alternative variant bSep08, complete mRNA. |
| <a href="#">Hspb7</a>   | <a href="#">Hspb7.bSep08</a>   | <a href="#">50565</a>  | 1949  | 711  | 1 | 95  | heat shock protein family, member 7 (cardiovascular) (Hspb7) alternative variant bSep08, mRNA.                |
| <a href="#">Hspb8</a>   | <a href="#">Hspb8.bSep08</a>   | <a href="#">113906</a> | 26854 | 588  | 2 | 128 | heat shock protein 8 (Hspb8) alternative variant bSep08, mRNA.                                                |
| <a href="#">Hspb8</a>   | <a href="#">Hspb8.cSep08</a>   | <a href="#">113906</a> | 7432  | 529  | 2 | 27  | heat shock protein 8 (Hspb8) alternative variant cSep08, mRNA.                                                |
| <a href="#">Hspb11</a>  | <a href="#">Hspb11.bSep08</a>  | <a href="#">685284</a> | 29374 | 707  | 6 | 141 | heat shock protein family B (small), member 11 (Hspb11) alternative variant bSep08, mRNA.                     |

|                         |                                |                        |       |      |   |     |                                                                                                     |
|-------------------------|--------------------------------|------------------------|-------|------|---|-----|-----------------------------------------------------------------------------------------------------|
| <a href="#">Hspb11</a>  | <a href="#">Hspb11.cSep08</a>  | <a href="#">685284</a> | 19312 | 329  | 4 | 109 | heat shock protein family B (small), member 11 (Hspb11) alternative variant cSep08, mRNA.           |
| <a href="#">Hspb11</a>  | <a href="#">Hspb11.dSep08</a>  | <a href="#">685284</a> | 20831 | 306  | 3 | 67  | heat shock protein family B (small), member 11 (Hspb11) alternative variant dSep08, mRNA.           |
| <a href="#">Hsppb1</a>  | <a href="#">Hsppb1.aSep08</a>  | <a href="#">246146</a> | 23489 | 1431 | 6 | 357 | hsp70-interacting protein (39.2 kD) (Hsppb1) alternative variant aSep08, mRNA.                      |
| <a href="#">Hsppb1</a>  | <a href="#">Hsppb1.cSep08</a>  | <a href="#">246146</a> | 11360 | 766  | 3 | 211 | hsp70-interacting protein (Hsppb1) alternative variant cSep08, mRNA.                                |
| <a href="#">Hsppb1</a>  | <a href="#">Hsppb1.dSep08</a>  | <a href="#">246146</a> | 6385  | 963  | 2 | 204 | hsp70-interacting protein (Hsppb1) alternative variant dSep08, mRNA.                                |
| <a href="#">Hsppb1</a>  | <a href="#">Hsppb1.eSep08</a>  | <a href="#">246146</a> | 5884  | 788  | 1 | 194 | hsp70-interacting protein (Hsppb1) alternative variant eSep08, mRNA.                                |
| <a href="#">Hspc105</a> | <a href="#">Hspc105.aSep08</a> | <a href="#">307897</a> | 11168 | 383  |   | 127 | NAD(P) dependent steroid dehydrogenase-like (Hspc105) mRNA.                                         |
| <a href="#">Hspc159</a> | <a href="#">Hspc159.bSep08</a> | <a href="#">360983</a> | 3174  | 544  | 2 | 102 | galectin-related protein (11.6 kD) (Hspc159) alternative variant bSep08, mRNA.                      |
| <a href="#">Hspc159</a> | <a href="#">Hspc159.cSep08</a> | <a href="#">360983</a> | 1458  | 716  | 3 | 58  | galectin-related protein (Hspc159) alternative variant cSep08, mRNA.                                |
| <a href="#">Hspd1</a>   | <a href="#">Hspd1.bSep08</a>   | <a href="#">63868</a>  | 8063  | 1367 | 8 | 341 | heat shock protein 1 (chaperonin) (Hspd1) alternative variant bSep08, mRNA.                         |
| <a href="#">Hspd1</a>   | <a href="#">Hspd1.cSep08</a>   | <a href="#">63868</a>  | 3735  | 896  | 6 | 298 | heat shock protein 1 (chaperonin) (Hspd1) alternative variant cSep08, mRNA.                         |
| <a href="#">Hspd1</a>   | <a href="#">Hspd1.dSep08</a>   | <a href="#">63868</a>  | 6597  | 883  | 7 | 272 | heat shock protein 1 (chaperonin) (Hspd1) alternative variant dSep08, mRNA.                         |
| <a href="#">Hspd1</a>   | <a href="#">Hspd1.eSep08</a>   | <a href="#">63868</a>  | 1984  | 597  | 3 | 199 | heat shock protein 1 (chaperonin) (Hspd1) alternative variant eSep08, mRNA.                         |
| <a href="#">Hspd1</a>   | <a href="#">Hspd1.fSep08</a>   | <a href="#">63868</a>  | 4497  | 532  | 4 | 164 | heat shock protein 1 (chaperonin) (Hspd1) alternative variant fSep08, mRNA.                         |
| <a href="#">Hspd1</a>   | <a href="#">Hspd1.gSep08</a>   | <a href="#">63868</a>  | 3566  | 630  | 5 | 160 | heat shock protein 1 (chaperonin) (Hspd1) alternative variant gSep08, mRNA.                         |
| <a href="#">Hspd1</a>   | <a href="#">Hspd1.hSep08</a>   | <a href="#">63868</a>  | 1577  | 656  | 2 | 45  | heat shock protein 1 (chaperonin) (Hspd1) alternative variant hSep08, mRNA.                         |
| <a href="#">Hspe1</a>   | <a href="#">Hspe1.aSep08</a>   | <a href="#">25462</a>  | 2928  | 502  | 2 | 114 | heat shock 10 kDa protein 1 (chaperonin 10) (12.5 kD) (Hspe1) alternative variant aSep08, mRNA.     |
| <a href="#">Hspe1</a>   | <a href="#">Hspe1.cSep08</a>   | <a href="#">25462</a>  | 2458  | 535  | 2 | 71  | heat shock 10 kDa protein 1 (chaperonin 10) (7.5 kD) (Hspe1) alternative variant cSep08, mRNA.      |
| <a href="#">Hsph1</a>   | <a href="#">Hsph1.bSep08</a>   | <a href="#">288444</a> | 1779  | 371  | 4 | 123 | heat shock 105kDa/110kDa protein 1 (Hsph1) alternative variant bSep08, mRNA.                        |
| <a href="#">Htatif</a>  | <a href="#">Htatif.bSep08</a>  | <a href="#">192218</a> | 4483  | 901  | 9 | 300 | HIV-1 tat interactive protein, homolog (human) (Htatif) alternative variant bSep08, mRNA.           |
| <a href="#">Htatif</a>  | <a href="#">Htatif.cSep08</a>  | <a href="#">192218</a> | 2021  | 718  | 7 | 238 | HIV-1 tat interactive protein, homolog (human) (Htatif) alternative variant cSep08, mRNA.           |
| <a href="#">Htatif</a>  | <a href="#">Htatif.dSep08</a>  | <a href="#">192218</a> | 2424  | 726  | 7 | 229 | HIV-1 tat interactive protein, homolog (human) (26.0 kD) (Htatif) alternative variant dSep08, mRNA. |
| <a href="#">Htatif</a>  | <a href="#">Htatif.eSep08</a>  | <a href="#">192218</a> | 1753  | 687  | 6 | 227 | HIV-1 tat interactive protein, homolog (human) (Htatif) alternative variant eSep08, mRNA.           |

|                                   |                                          |                        |       |      |   |     |                                                                                                        |
|-----------------------------------|------------------------------------------|------------------------|-------|------|---|-----|--------------------------------------------------------------------------------------------------------|
| <a href="#">Htatif</a>            | <a href="#">Htatif.fSep08</a>            | <a href="#">192218</a> | 1150  | 384  | 5 | 126 | HIV-1 tat interactive protein, homolog (human) (Htatif) alternative variant fSep08, mRNA.              |
| <a href="#">Htatif</a>            | <a href="#">Htatif.gSep08</a>            | <a href="#">192218</a> | 908   | 401  | 4 | 119 | HIV-1 tat interactive protein, homolog (human) (13.6 kD) (Htatif) alternative variant gSep08, mRNA.    |
| <a href="#">Htatif</a>            | <a href="#">Htatif.iSep08</a>            | <a href="#">192218</a> | 459   | 371  | 2 | 26  | HIV-1 tat interactive protein, homolog (human) (Htatif) alternative variant iSep08, mRNA.              |
| <a href="#">Htatif2</a>           | <a href="#">Htatif2.aSep08</a>           | <a href="#">292935</a> | 14777 | 939  | 4 | 242 | HIV-1 tat interactive protein 2, homolog (human) (26.9 kD) (Htatif2) alternative variant aSep08, mRNA. |
| <a href="#">Htatif2</a>           | <a href="#">Htatif2.cSep08</a>           | <a href="#">292935</a> | 11793 | 486  | 2 | 161 | HIV-1 tat interactive protein 2, homolog (human) (Htatif2) alternative variant cSep08, mRNA.           |
| <a href="#">Htatsf1</a>           | <a href="#">Htatsf1.bSep08</a>           | <a href="#">317612</a> | 4111  | 761  | 4 | 253 | HIV TAT specific factor 1 (Htatsf1) alternative variant bSep08, mRNA.                                  |
| <a href="#">Htatsf1</a>           | <a href="#">Htatsf1.cSep08</a>           | <a href="#">317612</a> | 4175  | 738  | 5 | 222 | HIV TAT specific factor 1 (Htatsf1) alternative variant cSep08, mRNA.                                  |
| <a href="#">Htatsf1</a>           | <a href="#">Htatsf1.dSep08</a>           | <a href="#">317612</a> | 2231  | 967  | 1 | 54  | HIV TAT specific factor 1 (Htatsf1) alternative variant dSep08, mRNA.                                  |
| <a href="#">Htf9c</a>             | <a href="#">Htf9c.bSep08</a>             | <a href="#">287953</a> | 2437  | 1133 | 4 | 341 | HpaII tiny fragments locus 9c (38.0 kD) (Htf9c) alternative variant bSep08, mRNA.                      |
| <a href="#">Htf9c</a>             | <a href="#">Htf9c.cSep08</a>             | <a href="#">287953</a> | 2074  | 992  | 7 | 221 | HpaII tiny fragments locus 9c (24.1 kD) (Htf9c) alternative variant cSep08, mRNA.                      |
| <a href="#">Htf9c</a>             | <a href="#">Htf9c.dSep08</a>             | <a href="#">287953</a> | 1090  | 723  | 4 | 153 | HpaII tiny fragments locus 9c (16.9 kD) (Htf9c) alternative variant dSep08, mRNA.                      |
| <a href="#">Htf9c</a>             | <a href="#">Htf9c.eSep08</a>             | <a href="#">287953</a> | 1044  | 553  | 2 | 112 | HpaII tiny fragments locus 9c (Htf9c) alternative variant eSep08, mRNA.                                |
| <a href="#">Htr3a</a>             | <a href="#">Htr3a.bSep08</a>             | <a href="#">79246</a>  | 1187  | 661  | 1 | 150 | 5-hydroxytryptamine (serotonin) receptor 3a (Htr3a) alternative variant bSep08, mRNA.                  |
| <a href="#">Htr3b</a>             | <a href="#">Htr3b.bSep08</a>             | <a href="#">58963</a>  | 18064 | 568  | 2 | 97  | 5-hydroxytryptamine (serotonin) receptor 3b (Htr3b) alternative variant bSep08, mRNA.                  |
| <a href="#">Htr3b</a>             | <a href="#">Htr3b.cSep08</a>             | <a href="#">58963</a>  | 18743 | 388  | 1 | 57  | 5-hydroxytryptamine (serotonin) receptor 3b (3.4 kD) (Htr3b) alternative variant cSep08, mRNA.         |
| <a href="#">Htra1</a>             | <a href="#">Htra1.bSep08</a>             | <a href="#">65164</a>  | 31645 | 633  | 1 | 153 | HtrA serine peptidase 1 (Htra1) alternative variant bSep08, mRNA.                                      |
| <a href="#">Htra2</a>             | <a href="#">Htra2.bSep08</a>             | <a href="#">297376</a> | 2161  | 698  | 6 | 171 | protease serine (Htra2) alternative variant bSep08, mRNA.                                              |
| <a href="#">Htra2</a>             | <a href="#">Htra2.cSep08</a>             | <a href="#">297376</a> | 2577  | 1219 | 4 | 158 | serine protease (16.4 kD) (Htra2) alternative variant cSep08, mRNA.                                    |
| <a href="#">Htra2</a>             | <a href="#">Htra2.dSep08</a>             | <a href="#">297376</a> | 2189  | 826  | 6 | 136 | protease serine precursor (15.2 kD) (Htra2) alternative variant dSep08, mRNA.                          |
| <a href="#">Htra2</a>             | <a href="#">Htra2.eSep08</a>             | <a href="#">297376</a> | 2998  | 1368 | 7 | 136 | protease serine precursor (15.2 kD) (Htra2) alternative variant eSep08, mRNA.                          |
| <a href="#">Htra2</a>             | <a href="#">Htra2.fSep08</a>             | <a href="#">297376</a> | 1013  | 924  | 2 | 132 | serine protease (Htra2) alternative variant fSep08, mRNA.                                              |
| <a href="#">Htra2</a>             | <a href="#">Htra2.hSep08</a>             | <a href="#">297376</a> | 1856  | 364  | 5 | 65  | serine protease (Htra2) alternative variant hSep08, mRNA.                                              |
| <a href="#">Htra3</a>             | <a href="#">Htra3.aSep08</a>             | <a href="#">360959</a> | 28359 | 2070 |   | 391 | HtrA serine peptidase 3 (Htra3) mRNA.                                                                  |
| <a href="#">Hunk</a>              | <a href="#">Hunk.aSep08</a>              | <a href="#">288275</a> | 6069  | 1785 |   | 356 | hormonally upregulated Neu-associated kinase (Hunk) alternative variant aSep08, mRNA.                  |
| <a href="#">Hus1andRGD1566034</a> | <a href="#">Hus1andRGD1566034.cSep08</a> | <a href="#">364193</a> | 3561  | 599  | 4 | 116 | checkpoint protein Hus1 (Hus1andRGD1566034) alternative variant cSep08, mRNA.                          |

|                                   |                                          |                        |        |      |   |     |                                                                                      |
|-----------------------------------|------------------------------------------|------------------------|--------|------|---|-----|--------------------------------------------------------------------------------------|
| <a href="#">Hus1andRGD1566034</a> | <a href="#">Hus1andRGD1566034.cSep08</a> | <a href="#">498411</a> | 3561   | 599  | 4 | 116 | checkpoint protein Hus1 (Hus1andRGD1566034) alternative variant cSep08, mRNA.        |
| <a href="#">Hyal2</a>             | <a href="#">Hyal2.bSep08</a>             | <a href="#">64468</a>  | 2948   | 827  | 1 | 226 | hyaluronoglucosaminidase 2 (Hyal2) alternative variant bSep08, mRNA.                 |
| <a href="#">Hyal3</a>             | <a href="#">Hyal3.bSep08</a>             | <a href="#">300993</a> | 3287   | 1425 | 2 | 334 | N-acetyltransferase 6 (36.6 kD) (Hyal3) alternative variant bSep08, complete mRNA.   |
| <a href="#">Hyal3</a>             | <a href="#">Hyal3.cSep08</a>             | <a href="#">300993</a> | 3329   | 1502 | 2 | 312 | N-acetyltransferase 6 (34.2 kD) (Hyal3) alternative variant cSep08, mRNA.            |
| <a href="#">Hyal3</a>             | <a href="#">Hyal3.dSep08</a>             | <a href="#">300993</a> | 6390   | 1243 | 4 | 259 | hyaluronoglucosaminidase 3 CRA b (Hyal3) alternative variant dSep08, mRNA.           |
| <a href="#">Hyal3</a>             | <a href="#">Hyal3.fSep08</a>             | <a href="#">300993</a> | 2730   | 743  | 2 | 129 | N-acetyltransferase 6 (Hyal3) alternative variant fSep08, mRNA.                      |
| <a href="#">Hyal3</a>             | <a href="#">Hyal3.gSep08</a>             | <a href="#">300993</a> | 5461   | 1221 | 2 | 118 | hyaluronoglucosaminidase 3 CRA b (Hyal3) alternative variant gSep08, mRNA.           |
| <a href="#">Hyal3</a>             | <a href="#">Hyal3.hSep08</a>             | <a href="#">300993</a> | 6162   | 924  | 2 | 98  | hyaluronoglucosaminidase 3 CRA b (11.3 kD) (Hyal3) alternative variant hSep08, mRNA. |
| <a href="#">Hyal5</a>             | <a href="#">Hyal5.bSep08</a>             | <a href="#">500052</a> | 13921  | 757  | 2 | 45  | hyaluronoglucosaminidase 5 (5.3 kD) (Hyal5) alternative variant bSep08, mRNA.        |
| <a href="#">Hydin</a>             | <a href="#">Hydin.aSep08</a>             | <a href="#">292017</a> | 18146  | 2781 |   | 665 | hydrocephalus inducing (74.8 kD) (Hydin) mRNA.                                       |
| <a href="#">Hyd_WA.0</a>          | <a href="#">Hyd_WA.0.aSep08</a>          |                        | 3473   | 476  |   | 158 | CRA a (Hyd_WA.0) mRNA.                                                               |
| <a href="#">Hyou1</a>             | <a href="#">Hyou1.cSep08</a>             | <a href="#">192235</a> | 2395   | 627  | 3 | 208 | hypoxia up-regulated 1 (Hyou1) alternative variant cSep08, mRNA.                     |
| <a href="#">Hyou1</a>             | <a href="#">Hyou1.dSep08</a>             | <a href="#">192235</a> | 1831   | 402  | 1 | 133 | hypoxia up-regulated 1 (Hyou1) alternative variant dSep08, mRNA.                     |
| <a href="#">Hypk</a>              | <a href="#">Hypk.aSep08</a>              | <a href="#">311359</a> | 1377   | 613  | 3 | 130 | huntingtin interacting protein K (Hypk) alternative variant aSep08, mRNA.            |
| <a href="#">Hypk</a>              | <a href="#">Hypk.bSep08</a>              | <a href="#">311359</a> | 771    | 413  | 1 | 75  | huntingtin interacting protein K (Hypk) alternative variant bSep08, mRNA.            |
| <a href="#">I-set.0</a>           | <a href="#">I-set.0.aSep08</a>           |                        | 78246  | 2118 | 5 | 670 | palladin (I-set.0) alternative variant aSep08, mRNA.                                 |
| <a href="#">I-set.0</a>           | <a href="#">I-set.0.bSep08</a>           |                        | 13196  | 2084 | 6 | 294 | palladin (I-set.0) alternative variant bSep08, mRNA.                                 |
| <a href="#">I-set.0</a>           | <a href="#">I-set.0.cSep08</a>           |                        | 140593 | 788  | 2 | 262 | palladin (I-set.0) alternative variant cSep08, mRNA.                                 |
| <a href="#">I-set.2</a>           | <a href="#">I-set.2.aSep08</a>           |                        | 731103 | 652  |   | 152 | roundabout homolog 2 (I-set.2) mRNA.                                                 |
| <a href="#">I-set.3</a>           | <a href="#">I-set.3.aSep08</a>           |                        | 6309   | 420  |   | 139 | down syndrome cell adhesion molecule CHD2-42 like (I-set.3) mRNA.                    |
| <a href="#">I-set.4</a>           | <a href="#">I-set.4.aSep08</a>           |                        | 46630  | 410  |   | 114 | down syndrome cell adhesion molecule CHD2-42 like (I-set.4) mRNA.                    |
| <a href="#">I-set.5</a>           | <a href="#">I-set.5.aSep08</a>           |                        | 442    | 358  |   | 119 | obscurin (I-set.5) mRNA.                                                             |
| <a href="#">I-set.6</a>           | <a href="#">I-set.6.aSep08</a>           |                        | 2155   | 713  | 5 | 199 | obscurin-like 1 (I-set.6) alternative variant aSep08, mRNA.                          |
| <a href="#">I-set.6</a>           | <a href="#">I-set.6.bSep08</a>           |                        | 1618   | 624  | 3 | 88  | obscurin-like 1 (9.8 kD) (I-set.6) alternative variant bSep08, mRNA.                 |
| <a href="#">I-set.7</a>           | <a href="#">I-set.7.aSep08</a>           |                        | 4170   | 1549 | 6 | 516 | CRA a (I-set.7) alternative variant aSep08, mRNA.                                    |
| <a href="#">I-set.7</a>           | <a href="#">I-set.7.bSep08</a>           |                        | 1279   | 1164 | 2 | 246 | obscurin-like 1 (27.3 kD) (I-set.7) alternative variant bSep08, mRNA.                |
| <a href="#">I-set.8</a>           | <a href="#">I-set.8.aSep08</a>           |                        | 25696  | 1163 |   | 387 | neogenin (I-set.8) mRNA.                                                             |
| <a href="#">I-set.9</a>           | <a href="#">I-set.9.aSep08</a>           |                        | 5109   | 667  |   | 111 | peroxidasin (I-set.9) mRNA.                                                          |

|                                |                                       |                        |        |      |    |     |                                                                                                 |
|--------------------------------|---------------------------------------|------------------------|--------|------|----|-----|-------------------------------------------------------------------------------------------------|
| <a href="#">I-set.10</a>       | <a href="#">I-set.10.aSep08</a>       |                        | 3726   | 1265 |    | 421 | heparan sulfate proteoglycan (I-set.10) mRNA.                                                   |
| <a href="#">I-set.11</a>       | <a href="#">I-set.11.aSep08</a>       |                        | 5519   | 1653 |    | 535 | leucine-rich repeats immunoglobulin-like domains 1 (I-set.11) alternative variant aSep08, mRNA. |
| <a href="#">I-set.11</a>       | <a href="#">I-set.11.bSep08</a>       |                        | 4424   | 1777 |    | 403 | leucine-rich repeats immunoglobulin-like domains 1 (I-set.11) alternative variant bSep08, mRNA. |
| <a href="#">I-set.12</a>       | <a href="#">I-set.12.aSep08</a>       |                        | 868    | 593  |    | 183 | titin CRA a (I-set.12) mRNA.                                                                    |
| <a href="#">I-set.13</a>       | <a href="#">I-set.13.aSep08</a>       |                        | 485    | 378  |    | 125 | titin (I-set.13) mRNA.                                                                          |
| <a href="#">I-set.14</a>       | <a href="#">I-set.14.aSep08</a>       |                        | 924    | 467  |    | 155 | titin (I-set.14) mRNA.                                                                          |
| <a href="#">I-set.15</a>       | <a href="#">I-set.15.aSep08</a>       |                        | 1063   | 705  |    | 235 | titin (I-set.15) mRNA.                                                                          |
| <a href="#">I-set.16</a>       | <a href="#">I-set.16.aSep08</a>       |                        | 1594   | 1171 |    | 390 | titin (I-set.16) mRNA.                                                                          |
| <a href="#">I-set.17</a>       | <a href="#">I-set.17.aSep08</a>       |                        | 4366   | 952  |    | 317 | titin (I-set.17) mRNA.                                                                          |
| <a href="#">lapp</a>           | <a href="#">lapp.bSep08</a>           | <a href="#">24476</a>  | 2430   | 1089 | 2  | 80  | islet amyloid polypeptide (lapp) alternative variant bSep08, mRNA.                              |
| <a href="#">lars2</a>          | <a href="#">lars2.aSep08</a>          | <a href="#">364070</a> | 39435  | 1783 | 8  | 443 | isoleucine-tRNA synthetase 2, mitochondrial (lars2) alternative variant aSep08, mRNA.           |
| <a href="#">lars2</a>          | <a href="#">lars2.bSep08</a>          | <a href="#">364070</a> | 7856   | 921  | 6  | 251 | isoleucine-tRNA synthetase 2, mitochondrial (lars2) alternative variant bSep08, mRNA.           |
| <a href="#">lars2</a>          | <a href="#">lars2.cSep08</a>          | <a href="#">364070</a> | 3043   | 673  | 6  | 224 | isoleucine-tRNA synthetase 2, mitochondrial (lars2) alternative variant cSep08, mRNA.           |
| <a href="#">lars2</a>          | <a href="#">lars2.dSep08</a>          | <a href="#">364070</a> | 3343   | 797  | 4  | 181 | isoleucine-tRNA synthetase 2, mitochondrial (lars2) alternative variant dSep08, mRNA.           |
| <a href="#">lars_predicted</a> | <a href="#">lars_predicted.aSep08</a> | <a href="#">306804</a> | 31000  | 3293 |    | 931 | isoleucine-tRNA synthetase (predicted) (lars_predicted) mRNA.                                   |
| <a href="#">IBB.0</a>          | <a href="#">IBB.0.aSep08</a>          |                        | 21386  | 365  |    | 110 | karyopherin alpha 6 (IBB.0) mRNA.                                                               |
| <a href="#">IBN_N.0</a>        | <a href="#">IBN_N.0.aSep08</a>        |                        | 37826  | 406  |    | 135 | transportin 1 (IBN_N.0) mRNA.                                                                   |
| <a href="#">lbtck</a>          | <a href="#">lbtck.aSep08</a>          | <a href="#">315858</a> | 27104  | 2563 | 6  | 255 | CRA c (lbtck) alternative variant aSep08, mRNA.                                                 |
| <a href="#">lbtck</a>          | <a href="#">lbtck.bSep08</a>          | <a href="#">315858</a> | 24909  | 1461 | 4  | 193 | inhibitor of Bruton's tyrosine kinase (20.9 kD) (lbtck) alternative variant bSep08, mRNA.       |
| <a href="#">lbtck</a>          | <a href="#">lbtck.cSep08</a>          | <a href="#">315858</a> | 16498  | 1087 | 9  | 159 | inhibitor of Bruton's tyrosine kinase (17.9 kD) (lbtck) alternative variant cSep08, mRNA.       |
| <a href="#">lbtck</a>          | <a href="#">lbtck.dSep08</a>          | <a href="#">315858</a> | 13011  | 459  | 3  | 152 | inhibitor of Bruton's tyrosine kinase (lbtck) alternative variant dSep08, mRNA.                 |
| <a href="#">lbtck</a>          | <a href="#">lbtck.eSep08</a>          | <a href="#">315858</a> | 3414   | 737  | 1  | 31  | putative protein (3.6 kD) (lbtck) alternative variant eSep08, mRNA.                             |
| <a href="#">Ica1</a>           | <a href="#">Ica1.bSep08</a>           | <a href="#">81024</a>  | 149262 | 1832 | 12 | 459 | islet cell autoantigen 1 (52.7 kD) (Ica1) alternative variant bSep08, mRNA.                     |
| <a href="#">Ica1</a>           | <a href="#">Ica1.cSep08</a>           | <a href="#">81024</a>  | 110118 | 877  | 7  | 234 | islet cell autoantigen 1 (Ica1) alternative variant cSep08, mRNA.                               |
| <a href="#">Ica1</a>           | <a href="#">Ica1.dSep08</a>           | <a href="#">81024</a>  | 39402  | 717  | 6  | 192 | islet cell autoantigen 1 (Ica1) alternative variant dSep08, mRNA.                               |
| <a href="#">Ica1</a>           | <a href="#">Ica1.eSep08</a>           | <a href="#">81024</a>  | 12745  | 518  | 1  | 143 | islet cell autoantigen 1 (Ica1) alternative variant eSep08, mRNA.                               |
| <a href="#">Ica1l</a>          | <a href="#">Ica1l.bSep08</a>          | <a href="#">316432</a> | 7397   | 1576 | 2  | 112 | islet cell autoantigen 1-like (Ica1l) alternative variant bSep08, mRNA.                         |
| <a href="#">Icam2</a>          | <a href="#">Icam2.bSep08</a>          | <a href="#">360647</a> | 4324   | 1340 | 4  | 127 | intercellular adhesion molecule 2 (14.1 kD) (Icam2) alternative variant bSep08, mRNA.           |

|                       |                              |                        |       |      |    |     |                                                                                                        |
|-----------------------|------------------------------|------------------------|-------|------|----|-----|--------------------------------------------------------------------------------------------------------|
| <a href="#">Icam2</a> | <a href="#">Icam2.cSep08</a> | <a href="#">360647</a> | 5330  | 679  | 5  | 116 | intercellular adhesion molecule 2 (Icam2) alternative variant cSep08, mRNA.                            |
| <a href="#">Icam2</a> | <a href="#">Icam2.eSep08</a> | <a href="#">360647</a> | 4047  | 589  | 4  | 72  | intercellular adhesion molecule 2 (Icam2) alternative variant eSep08, mRNA.                            |
| <a href="#">Icam5</a> | <a href="#">Icam5.aSep08</a> | <a href="#">313785</a> | 1364  | 752  |    | 245 | intercellular adhesion molecule 5, telencephalin (Icam5) mRNA.                                         |
| <a href="#">Ick</a>   | <a href="#">Ick.bSep08</a>   | <a href="#">84411</a>  | 1597  | 644  | 2  | 159 | intestinal cell kinase (Ick) alternative variant bSep08, mRNA.                                         |
| <a href="#">Ick</a>   | <a href="#">Ick.dSep08</a>   | <a href="#">84411</a>  | 22381 | 517  | 2  | 39  | intestinal cell kinase (4.6 kD) (Ick) alternative variant dSep08, mRNA.                                |
| <a href="#">Ick</a>   | <a href="#">Ick.eSep08</a>   | <a href="#">84411</a>  | 3232  | 385  | 2  | 54  | intestinal cell kinase (Ick) alternative variant eSep08, mRNA.                                         |
| <a href="#">Icmt</a>  | <a href="#">Icmt.bSep08</a>  | <a href="#">170818</a> | 2033  | 532  | 1  | 155 | isoprenylcysteine carboxyl methyltransferase (Icmt) alternative variant bSep08, mRNA.                  |
| <a href="#">Icosl</a> | <a href="#">Icosl.aSep08</a> | <a href="#">499415</a> | 5824  | 2073 | 1  | 354 | icos ligand (Icosl) alternative variant aSep08, mRNA.                                                  |
| <a href="#">Icosl</a> | <a href="#">Icosl.bSep08</a> | <a href="#">499415</a> | 4625  | 871  | 1  | 290 | icos ligand (Icosl) alternative variant bSep08, mRNA.                                                  |
| <a href="#">Ict1</a>  | <a href="#">Ict1.aSep08</a>  | <a href="#">303673</a> | 6495  | 826  | 3  | 205 | immature colon carcinoma transcript 1 (Ict1) alternative variant aSep08, mRNA.                         |
| <a href="#">Ict1</a>  | <a href="#">Ict1.bSep08</a>  | <a href="#">303673</a> | 6347  | 1282 | 1  | 101 | immature colon carcinoma transcript 1 (Ict1) alternative variant bSep08, mRNA.                         |
| <a href="#">Id1</a>   | <a href="#">Id1.bSep08</a>   | <a href="#">25261</a>  | 1129  | 913  | 2  | 154 | inhibitor of DNA binding 1 (16.3 kD) (Id1) alternative variant bSep08, complete mRNA.                  |
| <a href="#">Id3</a>   | <a href="#">Id3.aSep08</a>   | <a href="#">25585</a>  | 948   | 833  | 1  | 119 | inhibitor of DNA binding 3 (13.1 kD) (Id3) alternative variant aSep08, mRNA.                           |
| <a href="#">Ide</a>   | <a href="#">Ide.bSep08</a>   | <a href="#">25700</a>  | 30419 | 1781 | 8  | 431 | insulin degrading enzyme (Ide) alternative variant bSep08, mRNA.                                       |
| <a href="#">Idh1</a>  | <a href="#">Idh1.bSep08</a>  | <a href="#">24479</a>  | 15787 | 397  | 3  | 102 | isocitrate dehydrogenase 1 (NADP+), soluble (Idh1) alternative variant bSep08, mRNA.                   |
| <a href="#">Idh1</a>  | <a href="#">Idh1.cSep08</a>  | <a href="#">24479</a>  | 4002  | 338  | 2  | 41  | isocitrate dehydrogenase 1 (NADP+), soluble (4.9 kD) (Idh1) alternative variant cSep08, complete mRNA. |
| <a href="#">Idh2</a>  | <a href="#">Idh2.bSep08</a>  | <a href="#">361596</a> | 16360 | 925  | 6  | 259 | isocitrate dehydrogenase 2 (NADP+), mitochondrial (Idh2) alternative variant bSep08, mRNA.             |
| <a href="#">Idh3a</a> | <a href="#">Idh3a.bSep08</a> | <a href="#">114096</a> | 14606 | 787  | 8  | 259 | isocitrate dehydrogenase 3 (NAD+) alpha (Idh3a) alternative variant bSep08, mRNA.                      |
| <a href="#">Idh3a</a> | <a href="#">Idh3a.cSep08</a> | <a href="#">114096</a> | 9561  | 663  | 6  | 221 | isocitrate dehydrogenase 3 (NAD+) alpha (Idh3a) alternative variant cSep08, mRNA.                      |
| <a href="#">Idh3a</a> | <a href="#">Idh3a.dSep08</a> | <a href="#">114096</a> | 17210 | 617  | 8  | 195 | isocitrate dehydrogenase 3 (NAD+) alpha (Idh3a) alternative variant dSep08, mRNA.                      |
| <a href="#">Idh3B</a> | <a href="#">Idh3B.bSep08</a> | <a href="#">94173</a>  | 2271  | 670  | 7  | 207 | isocitrate dehydrogenase 3 (NAD+) beta (Idh3B) alternative variant bSep08, mRNA.                       |
| <a href="#">Idh3g</a> | <a href="#">Idh3g.bSep08</a> | <a href="#">25179</a>  | 8882  | 1668 | 10 | 339 | isocitrate dehydrogenase 3 gamma CRA c (37.0 kD) (Idh3g) alternative variant bSep08, mRNA.             |
| <a href="#">Idh3g</a> | <a href="#">Idh3g.cSep08</a> | <a href="#">25179</a>  | 7567  | 731  | 9  | 243 | isocitrate dehydrogenase 3 gamma (Idh3g) alternative variant cSep08, mRNA.                             |
| <a href="#">Idh3g</a> | <a href="#">Idh3g.dSep08</a> | <a href="#">25179</a>  | 7430  | 1552 | 5  | 187 | isocitrate dehydrogenase 3 gamma (20.7 kD) (Idh3g) alternative variant dSep08, mRNA.                   |



|                        |                               |                        |       |      |   |     |                                                                                        |
|------------------------|-------------------------------|------------------------|-------|------|---|-----|----------------------------------------------------------------------------------------|
| <a href="#">ldh3g</a>  | <a href="#">ldh3g.eSep08</a>  | <a href="#">25179</a>  | 7110  | 746  | 7 | 180 | isocitrate dehydrogenase 3 gamma (ldh3g) alternative variant eSep08, mRNA.             |
| <a href="#">ldh3g</a>  | <a href="#">ldh3g.fSep08</a>  | <a href="#">25179</a>  | 7223  | 672  | 7 | 166 | isocitrate dehydrogenase 3 gamma CRA a (ldh3g) alternative variant fSep08, mRNA.       |
| <a href="#">ldh3g</a>  | <a href="#">ldh3g.gSep08</a>  | <a href="#">25179</a>  | 6860  | 511  | 7 | 95  | isocitrate dehydrogenase 3 gamma (ldh3g) alternative variant gSep08, mRNA.             |
| <a href="#">ldh3g</a>  | <a href="#">ldh3g.hSep08</a>  | <a href="#">25179</a>  | 805   | 428  | 3 | 60  | isocitrate dehydrogenase 3 gamma (6.6 kD) (ldh3g) alternative variant hSep08, mRNA.    |
| <a href="#">ldh3g</a>  | <a href="#">ldh3g.iSep08</a>  | <a href="#">25179</a>  | 5060  | 696  | 2 | 35  | putative protein (ldh3g) alternative variant iSep08, mRNA.                             |
| <a href="#">lds</a>    | <a href="#">lds.aSep08</a>    | <a href="#">363513</a> | 16253 | 1255 | 2 | 417 | iduronate 2-sulfatase (lds) alternative variant aSep08, mRNA.                          |
| <a href="#">lds</a>    | <a href="#">lds.bSep08</a>    | <a href="#">363513</a> | 6487  | 846  | 1 | 281 | iduronate 2-sulfatase (lds) alternative variant bSep08, mRNA.                          |
| <a href="#">lds</a>    | <a href="#">lds.cSep08</a>    | <a href="#">363513</a> | 4299  | 1200 | 1 | 191 | iduronate 2-sulfatase (21.7 kD) (lds) alternative variant cSep08, mRNA.                |
| <a href="#">lds</a>    | <a href="#">lds.dSep08</a>    | <a href="#">363513</a> | 3776  | 673  | 1 | 63  | iduronate 2-sulfatase (lds) alternative variant dSep08, mRNA.                          |
| <a href="#">ler3</a>   | <a href="#">ler3.aSep08</a>   | <a href="#">294235</a> | 1208  | 1101 | 2 | 160 | immediate early response 3 (17.6 kD) (ler3) alternative variant aSep08, complete mRNA. |
| <a href="#">ler3</a>   | <a href="#">ler3.bSep08</a>   | <a href="#">294235</a> | 1258  | 439  | 3 | 146 | immediate early response 3 (ler3) alternative variant bSep08, mRNA.                    |
| <a href="#">lfi27l</a> | <a href="#">lfi27l.aSep08</a> | <a href="#">170512</a> | 6529  | 857  | 6 | 226 | CRA b like (lfi27l) alternative variant aSep08, mRNA.                                  |
| <a href="#">lfi27l</a> | <a href="#">lfi27l.aSep08</a> | <a href="#">360415</a> | 6529  | 857  | 6 | 226 | CRA b like (lfi27l) alternative variant aSep08, mRNA.                                  |
| <a href="#">lfi27l</a> | <a href="#">lfi27l.bSep08</a> | <a href="#">170512</a> | 4668  | 405  | 4 | 134 | CRA b like (lfi27l) alternative variant bSep08, mRNA.                                  |
| <a href="#">lfi27l</a> | <a href="#">lfi27l.bSep08</a> | <a href="#">360415</a> | 4668  | 405  | 4 | 134 | CRA b like (lfi27l) alternative variant bSep08, mRNA.                                  |
| <a href="#">lfi27l</a> | <a href="#">lfi27l.cSep08</a> | <a href="#">170512</a> | 3281  | 717  | 3 | 119 | CRA b like (lfi27l) alternative variant cSep08, mRNA.                                  |
| <a href="#">lfi27l</a> | <a href="#">lfi27l.cSep08</a> | <a href="#">360415</a> | 3281  | 717  | 3 | 119 | CRA b like (lfi27l) alternative variant cSep08, mRNA.                                  |
| <a href="#">lfi30</a>  | <a href="#">lfi30.bSep08</a>  | <a href="#">290644</a> | 3171  | 1134 | 1 | 212 | interferon gamma inducible protein 30 (lfi30) alternative variant bSep08, mRNA.        |
| <a href="#">lfi35</a>  | <a href="#">lfi35.bSep08</a>  | <a href="#">287719</a> | 7815  | 833  | 6 | 277 | interferon-induced protein 35 (lfi35) alternative variant bSep08, mRNA.                |
| <a href="#">lfi44</a>  | <a href="#">lfi44.bSep08</a>  | <a href="#">310969</a> | 17749 | 1490 | 8 | 416 | interferon-induced protein 44 (lfi44) alternative variant bSep08, mRNA.                |
| <a href="#">lfi44</a>  | <a href="#">lfi44.cSep08</a>  | <a href="#">310969</a> | 4039  | 765  | 5 | 187 | interferon-induced protein 44 (lfi44) alternative variant cSep08, mRNA.                |
| <a href="#">lfi44</a>  | <a href="#">lfi44.dSep08</a>  | <a href="#">310969</a> | 8426  | 715  | 4 | 135 | interferon-induced protein 44 (lfi44) alternative variant dSep08, mRNA.                |
| <a href="#">lfi203</a> | <a href="#">lfi203.aSep08</a> | <a href="#">498288</a> | 5378  | 545  |   | 101 | interferon activated gene 203 (lfi203) mRNA.                                           |
| <a href="#">lfi204</a> | <a href="#">lfi204.bSep08</a> | <a href="#">304988</a> | 7560  | 916  | 1 | 192 | interferon activated gene 204 (lfi204) alternative variant bSep08, mRNA.               |
| <a href="#">lfih1</a>  | <a href="#">lfih1.bSep08</a>  | <a href="#">499801</a> | 7920  | 693  | 3 | 85  | interferon induced with helicase C domain 1 (lfih1) alternative variant bSep08, mRNA.  |
| <a href="#">lfit3</a>  | <a href="#">lfit3.aSep08</a>  | <a href="#">309526</a> | 4920  | 1816 |   | 411 | interferon-induced protein with tetratricopeptide repeats 3 (48.1 kD) (lfit3) mRNA.    |
| <a href="#">lfitm2</a> | <a href="#">lfitm2.bSep08</a> | <a href="#">114709</a> | 624   | 382  | 2 | 98  | interferon induced transmembrane protein 2 (lfitm2) alternative variant bSep08, mRNA.  |

|                        |                               |                        |       |      |    |     |                                                                                                          |
|------------------------|-------------------------------|------------------------|-------|------|----|-----|----------------------------------------------------------------------------------------------------------|
| <a href="#">Ifitm2</a> | <a href="#">Ifitm2.cSep08</a> | <a href="#">114709</a> | 4384  | 536  | 2  | 85  | interferon induced transmembrane protein 2 (9.4 kD) (Ifitm2) alternative variant cSep08, complete mRNA.  |
| <a href="#">Ifitm3</a> | <a href="#">Ifitm3.aSep08</a> | <a href="#">361673</a> | 1158  | 652  | 2  | 169 | interferon induced transmembrane protein 3 (Ifitm3) alternative variant aSep08, mRNA.                    |
| <a href="#">Ifitm6</a> | <a href="#">Ifitm6.aSep08</a> | <a href="#">309104</a> | 1310  | 687  |    | 129 | interferon induced transmembrane protein 6 (Ifitm6) mRNA.                                                |
| <a href="#">Ifitd1</a> | <a href="#">Ifitd1.aSep08</a> | <a href="#">500362</a> | 8015  | 759  |    | 180 | putative protein of mammalian origin (Ifitd1) mRNA.                                                      |
| <a href="#">Ifnar1</a> | <a href="#">Ifnar1.bSep08</a> | <a href="#">288264</a> | 5863  | 1761 | 4  | 216 | interferon (alpha and beta) receptor 1 (Ifnar1) alternative variant bSep08, mRNA.                        |
| <a href="#">Ifngr1</a> | <a href="#">Ifngr1.bSep08</a> | <a href="#">116465</a> | 16723 | 967  | 6  | 231 | interferon gamma receptor 1 (Ifngr1) alternative variant bSep08, mRNA.                                   |
| <a href="#">Ifngr1</a> | <a href="#">Ifngr1.cSep08</a> | <a href="#">116465</a> | 1724  | 884  | 2  | 202 | interferon gamma receptor 1 (Ifngr1) alternative variant cSep08, mRNA.                                   |
| <a href="#">Ifrd2</a>  | <a href="#">Ifrd2.bSep08</a>  | <a href="#">300994</a> | 1560  | 718  | 1  | 139 | interferon-related developmental regulator 2 (Ifrd2) alternative variant bSep08, mRNA.                   |
| <a href="#">Ifit20</a> | <a href="#">Ifit20.bSep08</a> | <a href="#">287541</a> | 5488  | 890  | 4  | 132 | intraflagellar transport 20 homolog (Chlamydomonas) (15.3 kD) (Ifit20) alternative variant bSep08, mRNA. |
| <a href="#">Ifit20</a> | <a href="#">Ifit20.cSep08</a> | <a href="#">287541</a> | 3236  | 967  | 3  | 131 | intraflagellar transport 20 homolog (Chlamydomonas) (14.9 kD) (Ifit20) alternative variant cSep08, mRNA. |
| <a href="#">Ifit20</a> | <a href="#">Ifit20.dSep08</a> | <a href="#">287541</a> | 5081  | 586  | 4  | 114 | intraflagellar transport 20 homolog (Chlamydomonas) (13.2 kD) (Ifit20) alternative variant dSep08, mRNA. |
| <a href="#">Ifit52</a> | <a href="#">Ifit52.aSep08</a> | <a href="#">362265</a> | 24393 | 2140 | 13 | 394 | intraflagellar transport 52 homolog (Chlamydomonas) (Ifit52) alternative variant aSep08, mRNA.           |
| <a href="#">Ifit52</a> | <a href="#">Ifit52.bSep08</a> | <a href="#">362265</a> | 24468 | 2143 | 13 | 343 | intraflagellar transport 52 homolog (Chlamydomonas) (Ifit52) alternative variant bSep08, complete mRNA.  |
| <a href="#">Ifit52</a> | <a href="#">Ifit52.cSep08</a> | <a href="#">362265</a> | 2218  | 704  | 4  | 120 | intraflagellar transport 52 homolog (Chlamydomonas) (Ifit52) alternative variant cSep08, mRNA.           |
| <a href="#">Ifit57</a> | <a href="#">Ifit57.bSep08</a> | <a href="#">303968</a> | 8641  | 262  |    | 86  | intraflagellar transport 57 homolog (Chlamydomonas) (Ifit57) alternative variant bSep08, mRNA.           |
| <a href="#">Ifit74</a> | <a href="#">Ifit74.bSep08</a> | <a href="#">313365</a> | 28347 | 742  | 5  | 149 | intraflagellar transport 74 homolog (Chlamydomonas) (Ifit74) alternative variant bSep08, mRNA.           |
| <a href="#">Ifit74</a> | <a href="#">Ifit74.cSep08</a> | <a href="#">313365</a> | 16694 | 744  | 7  | 115 | intraflagellar transport 74 homolog (Chlamydomonas) (Ifit74) alternative variant cSep08, mRNA.           |
| <a href="#">Ifit74</a> | <a href="#">Ifit74.dSep08</a> | <a href="#">313365</a> | 2144  | 979  | 2  | 42  | intraflagellar transport 74 homolog (Chlamydomonas) (4.8 kD) (Ifit74) alternative variant dSep08, mRNA.  |
| <a href="#">Ifit80</a> | <a href="#">Ifit80.bSep08</a> | <a href="#">295106</a> | 8261  | 616  | 2  | 139 | intraflagellar transport 80 homolog (Chlamydomonas) (15.6 kD) (Ifit80) alternative variant bSep08, mRNA. |
| <a href="#">Ifit81</a> | <a href="#">Ifit81.bSep08</a> | <a href="#">373066</a> | 59149 | 1260 | 11 | 343 | carnitine deficiency-associated expressed in ventricle 1 (Ifit81) alternative variant bSep08, mRNA.      |
| <a href="#">Ifit81</a> | <a href="#">Ifit81.cSep08</a> | <a href="#">373066</a> | 3798  | 428  | 2  | 81  | putative protein (Ifit81) alternative variant cSep08, mRNA.                                              |
| <a href="#">Ifit81</a> | <a href="#">Ifit81.dSep08</a> | <a href="#">373066</a> | 4923  | 347  | 3  | 68  | intraflagellar transport 81 homolog CRA a (Ifit81) alternative variant dSep08, mRNA.                     |
| <a href="#">Ifit81</a> | <a href="#">Ifit81.eSep08</a> | <a href="#">373066</a> | 2049  | 296  | 2  | 48  | intraflagellar transport 81 homolog CRA a (Ifit81) alternative variant eSep08, mRNA.                     |
| <a href="#">Ifit81</a> | <a href="#">Ifit81.fSep08</a> | <a href="#">373066</a> | 646   | 297  | 2  | 39  | intraflagellar transport 81 homolog CRA a (Ifit81) alternative variant fSep08, mRNA.                     |

|                         |                                |                        |        |      |    |     |                                                                                                           |
|-------------------------|--------------------------------|------------------------|--------|------|----|-----|-----------------------------------------------------------------------------------------------------------|
| <a href="#">lft88</a>   | <a href="#">lft88.bSep08</a>   | <a href="#">305918</a> | 6091   | 403  | 4  | 90  | intraflagellar transport 88 homolog (Chlamydomonas) (lft88) alternative variant bSep08, mRNA.             |
| <a href="#">lft122</a>  | <a href="#">lft122.aSep08</a>  | <a href="#">312651</a> | 55588  | 2392 | 18 | 739 | intraflagellar transport 122 homolog (Chlamydomonas) (83.6 kD) (lft122) alternative variant aSep08, mRNA. |
| <a href="#">lft122</a>  | <a href="#">lft122.bSep08</a>  | <a href="#">312651</a> | 14343  | 646  | 6  | 215 | intraflagellar transport 122 homolog (Chlamydomonas) (lft122) alternative variant bSep08, mRNA.           |
| <a href="#">ig.0</a>    | <a href="#">ig.0.aSep08</a>    |                        | 15111  | 1365 | 2  | 273 | gamma receptor iii (30.8 kD) (ig.0) alternative variant aSep08, mRNA.                                     |
| <a href="#">ig.0</a>    | <a href="#">ig.0.bSep08</a>    |                        | 7389   | 703  | 1  | 148 | receptor (ig.0) alternative variant bSep08, mRNA.                                                         |
| <a href="#">ig.1</a>    | <a href="#">ig.1.aSep08</a>    |                        | 23374  | 330  |    | 109 | sidekick 1 (ig.1) mRNA.                                                                                   |
| <a href="#">ig.4</a>    | <a href="#">ig.4.aSep08</a>    |                        | 2539   | 856  |    | 285 | heparan sulfate proteoglycan (ig.4) mRNA.                                                                 |
| <a href="#">ig.5</a>    | <a href="#">ig.5.aSep08</a>    |                        | 1546   | 553  |    | 112 | glycoprotein pregnancy specific 1 (ig.5) mRNA.                                                            |
| <a href="#">lgbp1</a>   | <a href="#">lgbp1.bSep08</a>   | <a href="#">58845</a>  | 11944  | 820  | 1  | 100 | immunoglobulin (CD79A) binding protein 1 (11.7 kD) (lgbp1) alternative variant bSep08, mRNA.              |
| <a href="#">lgf1</a>    | <a href="#">lgf1.fSep08</a>    | <a href="#">24482</a>  | 72949  | 756  | 5  | 121 | insulin-like growth factor 1 (lgf1) alternative variant fSep08, mRNA.                                     |
| <a href="#">lgf1</a>    | <a href="#">lgf1.gSep08</a>    | <a href="#">24482</a>  | 5524   | 304  | 3  | 73  | insulin-like growth factor 1 (lgf1) alternative variant gSep08, mRNA.                                     |
| <a href="#">lgf1r</a>   | <a href="#">lgf1r.bSep08</a>   | <a href="#">25718</a>  | 21998  | 2541 | 3  | 356 | insulin-like growth factor I receptor (lgf1r) alternative variant bSep08, mRNA.                           |
| <a href="#">lgf2</a>    | <a href="#">lgf2.bSep08</a>    | <a href="#">24483</a>  | 3969   | 885  | 3  | 180 | insulin-like growth factor 2 (20.1 kD) (lgf2) alternative variant bSep08, mRNA.                           |
| <a href="#">lgf2</a>    | <a href="#">lgf2.cSep08</a>    | <a href="#">24483</a>  | 6744   | 368  | 2  | 122 | insulin-like growth factor 2 (lgf2) alternative variant cSep08, mRNA.                                     |
| <a href="#">lgf2</a>    | <a href="#">lgf2.dSep08</a>    | <a href="#">24483</a>  | 1684   | 467  | 1  | 84  | insulin-like growth factor 2 (lgf2) alternative variant dSep08, mRNA.                                     |
| <a href="#">lgf2bp2</a> | <a href="#">lgf2bp2.aSep08</a> | <a href="#">303824</a> | 30983  | 3309 | 10 | 513 | insulin-like growth factor 2 mRNA binding protein 2 (lgf2bp2) mRNA.                                       |
| <a href="#">lgf2bp3</a> | <a href="#">lgf2bp3.aSep08</a> | <a href="#">312320</a> | 133540 | 1816 | 11 | 457 | insulin-like growth factor 2 mRNA binding protein 3 (lgf2bp3) alternative variant aSep08, mRNA.           |
| <a href="#">lgf2bp3</a> | <a href="#">lgf2bp3.bSep08</a> | <a href="#">312320</a> | 21564  | 2629 | 6  | 188 | insulin-like growth factor 2 mRNA binding protein 3 (lgf2bp3) alternative variant bSep08, mRNA.           |
| <a href="#">lgf2bp3</a> | <a href="#">lgf2bp3.cSep08</a> | <a href="#">312320</a> | 28290  | 667  | 5  | 186 | insulin-like growth factor 2 mRNA binding protein 3 (lgf2bp3) alternative variant cSep08, mRNA.           |
| <a href="#">lgf2bp3</a> | <a href="#">lgf2bp3.eSep08</a> | <a href="#">312320</a> | 28180  | 701  | 5  | 145 | insulin-like growth factor 2 mRNA binding protein 3 (lgf2bp3) alternative variant eSep08, mRNA.           |
| <a href="#">lgf2r</a>   | <a href="#">lgf2r.bSep08</a>   | <a href="#">25151</a>  | 2083   | 416  | 3  | 138 | insulin-like growth factor 2 receptor (lgf2r) alternative variant bSep08, mRNA.                           |
| <a href="#">lgf2r</a>   | <a href="#">lgf2r.dSep08</a>   | <a href="#">25151</a>  | 1605   | 747  | 2  | 34  | insulin-like growth factor 2 receptor (lgf2r) alternative variant dSep08, mRNA.                           |
| <a href="#">lgfbp7</a>  | <a href="#">lgfbp7.bSep08</a>  | <a href="#">289560</a> | 2750   | 512  | 3  | 94  | insulin-like growth factor binding protein 7 (lgfbp7) alternative variant bSep08, mRNA.                   |
| <a href="#">lgn1</a>    | <a href="#">lgn1.aSep08</a>    | <a href="#">304823</a> | 992    | 472  |    | 42  | putative protein (lgn1) mRNA.                                                                             |
| <a href="#">lghg</a>    | <a href="#">lghg.bSep08</a>    | <a href="#">299354</a> | 1646   | 1087 |    | 326 | immunoglobulin heavy chain (gamma polypeptide) (lghg) alternative variant bSep08, mRNA.                   |

|                         |                                |                        |        |      |   |     |                                                                                          |
|-------------------------|--------------------------------|------------------------|--------|------|---|-----|------------------------------------------------------------------------------------------|
| <a href="#">Ighmbp2</a> | <a href="#">Ighmbp2.bSep08</a> | <a href="#">29532</a>  | 3202   | 751  | 2 | 76  | immunoglobulin mu binding protein 2 (Ighmbp2) alternative variant bSep08, mRNA.          |
| <a href="#">Igj</a>     | <a href="#">Igj.aSep08</a>     | <a href="#">360922</a> | 7058   | 1046 | 1 | 159 | immunoglobulin joining chain (17.8 kD) (Igj) alternative variant aSep08, mRNA.           |
| <a href="#">Igj</a>     | <a href="#">Igj.bSep08</a>     | <a href="#">360922</a> | 6836   | 743  |   | 132 | immunoglobulin joining chain (14.7 kD) (Igj) alternative variant bSep08, mRNA.           |
| <a href="#">Igsf1</a>   | <a href="#">Igsf1.bSep08</a>   | <a href="#">302822</a> | 2203   | 927  | 5 | 308 | immunoglobulin superfamily, member 1 (Igsf1) alternative variant bSep08, mRNA.           |
| <a href="#">Igsf1</a>   | <a href="#">Igsf1.cSep08</a>   | <a href="#">302822</a> | 2107   | 1162 | 4 | 261 | immunoglobulin superfamily, member 1 (Igsf1) alternative variant cSep08, mRNA.           |
| <a href="#">Igsf1</a>   | <a href="#">Igsf1.dSep08</a>   | <a href="#">302822</a> | 4870   | 1721 | 5 | 232 | immunoglobulin superfamily, member 1 (26.4 kD) (Igsf1) alternative variant dSep08, mRNA. |
| <a href="#">Igsf1</a>   | <a href="#">Igsf1.fSep08</a>   | <a href="#">302822</a> | 406    | 309  | 2 | 87  | immunoglobulin superfamily, member 1 (Igsf1) alternative variant fSep08, mRNA.           |
| <a href="#">Igsf2</a>   | <a href="#">Igsf2.aSep08</a>   | <a href="#">310727</a> | 4678   | 727  |   | 242 | immunoglobulin superfamily, member 2 (Igsf2) mRNA.                                       |
| <a href="#">Igsf7</a>   | <a href="#">Igsf7.aSep08</a>   | <a href="#">287813</a> | 4253   | 687  | 2 | 190 | immunoglobulin superfamily, member 7 (Igsf7) alternative variant aSep08, mRNA.           |
| <a href="#">Igsf7</a>   | <a href="#">Igsf7.bSep08</a>   | <a href="#">287813</a> | 2538   | 757  | 1 | 103 | immunoglobulin superfamily, member 7 (11.4 kD) (Igsf7) alternative variant bSep08, mRNA. |
| <a href="#">Igsf8</a>   | <a href="#">Igsf8.bSep08</a>   | <a href="#">304979</a> | 3844   | 442  | 2 | 147 | immunoglobulin superfamily, member 8 (Igsf8) alternative variant bSep08, mRNA.           |
| <a href="#">Igsf11</a>  | <a href="#">Igsf11.bSep08</a>  | <a href="#">303926</a> | 123977 | 664  | 2 | 120 | immunoglobulin superfamily, member 11 (Igsf11) alternative variant bSep08, mRNA.         |
| <a href="#">Igsf21</a>  | <a href="#">Igsf21.aSep08</a>  | <a href="#">298591</a> | 1449   | 467  |   | 104 | immunoglobulin superfamily, member 21 (Igsf21) mRNA.                                     |
| <a href="#">Igtp</a>    | <a href="#">Igtp.aSep08</a>    | <a href="#">303163</a> | 9302   | 2692 | 3 | 474 | interferon gamma induced GTPase (Igtp) alternative variant aSep08, mRNA.                 |
| <a href="#">Igtp</a>    | <a href="#">Igtp.bSep08</a>    | <a href="#">303163</a> | 837    | 434  | 2 | 125 | interferon gamma induced GTPase (Igtp) alternative variant bSep08, mRNA.                 |
| <a href="#">Igtp</a>    | <a href="#">Igtp.cSep08</a>    | <a href="#">303163</a> | 1256   | 1107 | 3 | 55  | interferon gamma induced GTPase (Igtp) alternative variant cSep08, mRNA.                 |
| <a href="#">Ihpk2</a>   | <a href="#">Ihpk2.bSep08</a>   | <a href="#">59268</a>  | 9370   | 2207 | 4 | 345 | inositol hexaphosphate kinase 2 (Ihpk2) alternative variant bSep08, mRNA.                |
| <a href="#">Ihpk2</a>   | <a href="#">Ihpk2.cSep08</a>   | <a href="#">59268</a>  | 1298   | 521  | 3 | 173 | inositol hexaphosphate kinase 2 CRA d (Ihpk2) alternative variant cSep08, mRNA.          |
| <a href="#">Ihpk2</a>   | <a href="#">Ihpk2.eSep08</a>   | <a href="#">59268</a>  | 1490   | 604  | 2 | 111 | inositol hexaphosphate kinase 2 (Ihpk2) alternative variant eSep08, mRNA.                |
| <a href="#">Ihpk2</a>   | <a href="#">Ihpk2.fSep08</a>   | <a href="#">59268</a>  | 948    | 520  | 2 | 53  | putative protein (Ihpk2) alternative variant fSep08, mRNA.                               |
| <a href="#">Iip45</a>   | <a href="#">Iip45.bSep08</a>   | <a href="#">298643</a> | 4775   | 857  | 6 | 244 | invasion inhibitory protein 45 (Iip45) alternative variant bSep08, mRNA.                 |
| <a href="#">Iip45</a>   | <a href="#">Iip45.cSep08</a>   | <a href="#">298643</a> | 4840   | 784  | 4 | 196 | invasion inhibitory protein 45 (Iip45) alternative variant cSep08, mRNA.                 |
| <a href="#">Iip45</a>   | <a href="#">Iip45.dSep08</a>   | <a href="#">298643</a> | 2311   | 675  | 3 | 162 | invasion inhibitory protein 45 (Iip45) alternative variant dSep08, mRNA.                 |
| <a href="#">Iip45</a>   | <a href="#">Iip45.eSep08</a>   | <a href="#">298643</a> | 1818   | 697  | 4 | 155 | invasion inhibitory protein 45 (Iip45) alternative variant eSep08, mRNA.                 |
| <a href="#">Iip45</a>   | <a href="#">Iip45.fSep08</a>   | <a href="#">298643</a> | 1633   | 459  | 4 | 153 | invasion inhibitory protein 45 (Iip45) alternative variant fSep08, mRNA.                 |

|                        |                               |                        |       |      |    |     |                                                                                                                                        |
|------------------------|-------------------------------|------------------------|-------|------|----|-----|----------------------------------------------------------------------------------------------------------------------------------------|
| <a href="#">lip45</a>  | <a href="#">lip45.gSep08</a>  | <a href="#">298643</a> | 2192  | 560  | 3  | 123 | invasion inhibitory protein 45 (lip45) alternative variant gSep08, mRNA.                                                               |
| <a href="#">lip45</a>  | <a href="#">lip45.hSep08</a>  | <a href="#">298643</a> | 1903  | 427  | 2  | 99  | invasion inhibitory protein 45 (10.9 kD) (lip45) alternative variant hSep08, mRNA.                                                     |
| <a href="#">lk</a>     | <a href="#">lk.bSep08</a>     | <a href="#">291659</a> | 4590  | 605  | 6  | 177 | IK cytokine down-regulator of HLA II (20.5 kD) (lk) alternative variant bSep08, mRNA.                                                  |
| <a href="#">lk</a>     | <a href="#">lk.cSep08</a>     | <a href="#">291659</a> | 4632  | 790  | 5  | 135 | ik cytokine (15.8 kD) (lk) alternative variant cSep08, mRNA.                                                                           |
| <a href="#">lk</a>     | <a href="#">lk.dSep08</a>     | <a href="#">291659</a> | 5133  | 630  | 4  | 115 | IK cytokine down-regulator of HLA II (lk) alternative variant dSep08, mRNA.                                                            |
| <a href="#">lk</a>     | <a href="#">lk.eSep08</a>     | <a href="#">291659</a> | 2152  | 747  | 5  | 105 | IK cytokine (12.4 kD) (lk) alternative variant eSep08, mRNA.                                                                           |
| <a href="#">lk</a>     | <a href="#">lk.fSep08</a>     | <a href="#">291659</a> | 1330  | 781  | 3  | 91  | IK cytokine (10.7 kD) (lk) alternative variant fSep08, mRNA.                                                                           |
| <a href="#">lk</a>     | <a href="#">lk.gSep08</a>     | <a href="#">291659</a> | 1061  | 234  | 2  | 48  | putative protein (lk) alternative variant gSep08, mRNA.                                                                                |
| <a href="#">lkbkap</a> | <a href="#">lkbkap.bSep08</a> | <a href="#">140934</a> | 40714 | 1779 | 7  | 441 | inhibitor of kappa light polypeptide enhancer in B-cells, kinase complex-associated protein (lkbkap) alternative variant bSep08, mRNA. |
| <a href="#">lkbkb</a>  | <a href="#">lkbkb.bSep08</a>  | <a href="#">84351</a>  | 3450  | 700  | 5  | 214 | inhibitor of kappaB kinase beta (lkbkb) alternative variant bSep08, mRNA.                                                              |
| <a href="#">lkbkb</a>  | <a href="#">lkbkb.dSep08</a>  | <a href="#">84351</a>  | 1293  | 725  | 2  | 100 | inhibitor of kappaB kinase beta (lkbkb) alternative variant dSep08, mRNA.                                                              |
| <a href="#">lkbkb</a>  | <a href="#">lkbkb.gSep08</a>  | <a href="#">84351</a>  | 8702  | 502  | 2  | 30  | inhibitor of kappaB kinase beta (lkbkb) alternative variant gSep08, mRNA.                                                              |
| <a href="#">lkbke</a>  | <a href="#">lkbke.bSep08</a>  | <a href="#">363984</a> | 11256 | 730  | 8  | 174 | inhibitor of kappaB kinase epsilon (lkbke) alternative variant bSep08, mRNA.                                                           |
| <a href="#">lkbke</a>  | <a href="#">lkbke.cSep08</a>  | <a href="#">363984</a> | 3110  | 736  | 4  | 166 | inhibitor of kappaB kinase epsilon (lkbke) alternative variant cSep08, mRNA.                                                           |
| <a href="#">lkbke</a>  | <a href="#">lkbke.dSep08</a>  | <a href="#">363984</a> | 3553  | 679  | 4  | 44  | inhibitor of kappaB kinase epsilon (lkbke) alternative variant dSep08, mRNA.                                                           |
| <a href="#">lkzf2</a>  | <a href="#">lkzf2.bSep08</a>  | <a href="#">301476</a> | 1367  | 530  | 1  | 63  | IKAROS family zinc finger 2 (lkzf2) alternative variant bSep08, mRNA.                                                                  |
| <a href="#">lkzf5</a>  | <a href="#">lkzf5.bSep08</a>  | <a href="#">309031</a> | 14444 | 370  | 3  | 83  | IKAROS family zinc finger 5 (lkzf5) alternative variant bSep08, mRNA.                                                                  |
| <a href="#">lkzf5</a>  | <a href="#">lkzf5.cSep08</a>  | <a href="#">309031</a> | 12555 | 339  | 2  | 57  | IKAROS family zinc finger 5 (6.5 kD) (lkzf5) alternative variant cSep08, mRNA.                                                         |
| <a href="#">ll1a</a>   | <a href="#">ll1a.bSep08</a>   | <a href="#">24493</a>  | 6900  | 1685 | 3  | 186 | interleukin 1 alpha (ll1a) alternative variant bSep08, mRNA.                                                                           |
| <a href="#">ll1a</a>   | <a href="#">ll1a.cSep08</a>   | <a href="#">24493</a>  | 2580  | 701  | 1  | 74  | interleukin 1 alpha (ll1a) alternative variant cSep08, mRNA.                                                                           |
| <a href="#">ll1r1</a>  | <a href="#">ll1r1.bSep08</a>  | <a href="#">25663</a>  | 40566 | 2521 | 13 | 573 | interleukin 1 receptor, type I (66.3 kD) (ll1r1) alternative variant bSep08, mRNA.                                                     |
| <a href="#">ll1r1</a>  | <a href="#">ll1r1.cSep08</a>  | <a href="#">25663</a>  | 38643 | 1763 | 12 | 525 | interleukin 1 receptor, type I (60.8 kD) (ll1r1) alternative variant cSep08, mRNA.                                                     |
| <a href="#">ll1r2</a>  | <a href="#">ll1r2.bSep08</a>  | <a href="#">117022</a> | 7310  | 614  | 1  | 185 | interleukin 1 receptor, type II (20.6 kD) (ll1r2) alternative variant bSep08, mRNA.                                                    |
| <a href="#">ll1rap</a> | <a href="#">ll1rap.bSep08</a> | <a href="#">25466</a>  | 25162 | 1334 | 6  | 295 | interleukin 1 receptor accessory protein (ll1rap) alternative variant bSep08, mRNA.                                                    |

|                          |                                 |                        |       |      |   |     |                                                                                            |
|--------------------------|---------------------------------|------------------------|-------|------|---|-----|--------------------------------------------------------------------------------------------|
| <a href="#">Il1rap</a>   | <a href="#">Il1rap.cSep08</a>   | <a href="#">25466</a>  | 10664 | 650  | 3 | 150 | interleukin 1 receptor accessory protein (Il1rap) alternative variant cSep08, mRNA.        |
| <a href="#">Il1rapl2</a> | <a href="#">Il1rapl2.aSep08</a> | <a href="#">300913</a> | 52304 | 423  |   | 89  | interleukin 1 receptor accessory protein-like 2 (Il1rapl2) mRNA.                           |
| <a href="#">Il1rl2</a>   | <a href="#">Il1rl2.bSep08</a>   | <a href="#">171106</a> | 3351  | 499  | 1 | 121 | interleukin 1 receptor-like 2 (Il1rl2) alternative variant bSep08, mRNA.                   |
| <a href="#">Il1rn</a>    | <a href="#">Il1rn.bSep08</a>    | <a href="#">60582</a>  | 4170  | 517  | 3 | 172 | interleukin 1 receptor antagonist (Il1rn) alternative variant bSep08, mRNA.                |
| <a href="#">Il2rg</a>    | <a href="#">Il2rg.bSep08</a>    | <a href="#">140924</a> | 2799  | 854  | 6 | 206 | interleukin 2 receptor (Il2rg) alternative variant bSep08, mRNA.                           |
| <a href="#">Il2rg</a>    | <a href="#">Il2rg.cSep08</a>    | <a href="#">140924</a> | 1135  | 692  | 3 | 192 | interleukin 2 receptor CRA a precursor (22.2 kD) (Il2rg) alternative variant cSep08, mRNA. |
| <a href="#">Il2rg</a>    | <a href="#">Il2rg.dSep08</a>    | <a href="#">140924</a> | 1239  | 712  | 3 | 148 | interleukin 2 receptor (16.3 kD) (Il2rg) alternative variant dSep08, mRNA.                 |
| <a href="#">Il2rg</a>    | <a href="#">Il2rg.eSep08</a>    | <a href="#">140924</a> | 1077  | 740  | 2 | 61  | interleukin 2 receptor (Il2rg) alternative variant eSep08, mRNA.                           |
| <a href="#">Il3ra</a>    | <a href="#">Il3ra.aSep08</a>    | <a href="#">246144</a> | 6092  | 1655 | 9 | 275 | interleukin 3 receptor, alpha chain (29.9 kD) (Il3ra) alternative variant aSep08, mRNA.    |
| <a href="#">Il3ra</a>    | <a href="#">Il3ra.cSep08</a>    | <a href="#">246144</a> | 4133  | 643  | 6 | 196 | interleukin 3 receptor, alpha chain (Il3ra) alternative variant cSep08, mRNA.              |
| <a href="#">Il3ra</a>    | <a href="#">Il3ra.dSep08</a>    | <a href="#">246144</a> | 1266  | 646  | 5 | 155 | interleukin 3 receptor, alpha chain (Il3ra) alternative variant dSep08, mRNA.              |
| <a href="#">Il4ra</a>    | <a href="#">Il4ra.bSep08</a>    | <a href="#">25084</a>  | 4139  | 1241 | 2 | 306 | interleukin 4 receptor, alpha (Il4ra) alternative variant bSep08, mRNA.                    |
| <a href="#">Il4ra</a>    | <a href="#">Il4ra.cSep08</a>    | <a href="#">25084</a>  | 1519  | 773  | 1 | 257 | interleukin 4 receptor, alpha (Il4ra) alternative variant cSep08, mRNA.                    |
| <a href="#">Il6st</a>    | <a href="#">Il6st.bSep08</a>    | <a href="#">25205</a>  | 12150 | 5949 | 6 | 421 | interleukin 6 signal transducer (Il6st) alternative variant bSep08, mRNA.                  |
| <a href="#">Il6st</a>    | <a href="#">Il6st.cSep08</a>    | <a href="#">25205</a>  | 15871 | 749  | 6 | 176 | interleukin 6 signal transducer (Il6st) alternative variant cSep08, mRNA.                  |
| <a href="#">Il6st</a>    | <a href="#">Il6st.dSep08</a>    | <a href="#">25205</a>  | 5290  | 479  | 4 | 159 | interleukin 6 signal transducer (Il6st) alternative variant dSep08, mRNA.                  |
| <a href="#">Il6st</a>    | <a href="#">Il6st.eSep08</a>    | <a href="#">25205</a>  | 14808 | 633  | 4 | 138 | interleukin 6 signal transducer (Il6st) alternative variant eSep08, mRNA.                  |
| <a href="#">Il6st</a>    | <a href="#">Il6st.fSep08</a>    | <a href="#">25205</a>  | 3037  | 732  | 3 | 155 | interleukin 6 signal transducer (Il6st) alternative variant fSep08, mRNA.                  |
| <a href="#">Il6st</a>    | <a href="#">Il6st.gSep08</a>    | <a href="#">25205</a>  | 14517 | 394  | 5 | 36  | interleukin 6 signal transducer (Il6st) alternative variant gSep08, mRNA.                  |
| <a href="#">Il9</a>      | <a href="#">Il9.bSep08</a>      | <a href="#">116558</a> | 46485 | 527  | 1 | 141 | interleukin 9 (Il9) alternative variant bSep08, mRNA.                                      |
| <a href="#">Il10rb</a>   | <a href="#">Il10rb.bSep08</a>   | <a href="#">304091</a> | 13205 | 834  | 2 | 253 | interleukin 10 receptor, beta (Il10rb) alternative variant bSep08, mRNA.                   |
| <a href="#">Il11ra1</a>  | <a href="#">Il11ra1.bSep08</a>  | <a href="#">245983</a> | 6000  | 814  | 8 | 254 | interleukin 11 receptor, alpha chain 1 (Il11ra1) alternative variant bSep08, mRNA.         |
| <a href="#">Il11ra1</a>  | <a href="#">Il11ra1.cSep08</a>  | <a href="#">245983</a> | 1799  | 601  | 5 | 199 | interleukin 11 receptor, alpha chain 1 (Il11ra1) alternative variant cSep08, mRNA.         |
| <a href="#">Il11ra1</a>  | <a href="#">Il11ra1.eSep08</a>  | <a href="#">245983</a> | 1273  | 434  | 2 | 62  | interleukin 11 receptor, alpha chain 1 (Il11ra1) alternative variant eSep08, mRNA.         |

|                         |                                |                        |       |      |    |     |                                                                                      |
|-------------------------|--------------------------------|------------------------|-------|------|----|-----|--------------------------------------------------------------------------------------|
| <a href="#">Il12a</a>   | <a href="#">Il12a.aSep08</a>   | <a href="#">84405</a>  | 3535  | 761  |    | 101 | interleukin 12a (11.6 kD) (Il12a) mRNA.                                              |
| <a href="#">Il12rb1</a> | <a href="#">Il12rb1.aSep08</a> | <a href="#">171333</a> | 4294  | 903  |    | 301 | interleukin 12 receptor, beta 1 (Il12rb1) mRNA.                                      |
| <a href="#">Il12rb2</a> | <a href="#">Il12rb2.aSep08</a> | <a href="#">171334</a> | 40214 | 770  |    | 256 | interleukin 12 receptor, beta 2 (Il12rb2) mRNA.                                      |
| <a href="#">Il15</a>    | <a href="#">Il15.bSep08</a>    | <a href="#">25670</a>  | 6410  | 744  | 4  | 67  | interleukin 15 (7.8 kD) (Il15) alternative variant bSep08, mRNA.                     |
| <a href="#">Il16</a>    | <a href="#">Il16.bSep08</a>    | <a href="#">116996</a> | 22200 | 1662 | 7  | 242 | interleukin 16 (Il16) alternative variant bSep08, mRNA.                              |
| <a href="#">Il16</a>    | <a href="#">Il16.cSep08</a>    | <a href="#">116996</a> | 32058 | 569  | 2  | 78  | interleukin 16 (Il16) alternative variant cSep08, mRNA.                              |
| <a href="#">Il17b</a>   | <a href="#">Il17b.aSep08</a>   | <a href="#">116472</a> | 4382  | 694  | 2  | 180 | interleukin 17B (20.4 kD) (Il17b) alternative variant aSep08, mRNA.                  |
| <a href="#">Il17b</a>   | <a href="#">Il17b.bSep08</a>   | <a href="#">116472</a> | 2766  | 971  | 1  | 122 | interleukin 17B (13.9 kD) (Il17b) alternative variant bSep08, mRNA.                  |
| <a href="#">Il17d</a>   | <a href="#">Il17d.aSep08</a>   | <a href="#">691799</a> | 1996  | 1613 | 3  | 108 | interleukin 17D (Il17d) alternative variant aSep08, mRNA.                            |
| <a href="#">Il17ra</a>  | <a href="#">Il17ra.bSep08</a>  | <a href="#">312679</a> | 8948  | 3331 | 8  | 684 | interleukin 17 receptor A (Il17ra) alternative variant bSep08, mRNA.                 |
| <a href="#">Il17rc</a>  | <a href="#">Il17rc.aSep08</a>  | <a href="#">297520</a> | 6402  | 1316 | 10 | 379 | interleukin 17 receptor C CRA c (42.2 kD) (Il17rc) alternative variant aSep08, mRNA. |
| <a href="#">Il17rc</a>  | <a href="#">Il17rc.bSep08</a>  | <a href="#">297520</a> | 6692  | 858  | 11 | 285 | interleukin 17 receptor C (Il17rc) alternative variant bSep08, mRNA.                 |
| <a href="#">Il17rc</a>  | <a href="#">Il17rc.cSep08</a>  | <a href="#">297520</a> | 1584  | 827  | 5  | 175 | interleukin 17 receptor C (19.0 kD) (Il17rc) alternative variant cSep08, mRNA.       |
| <a href="#">Il17rc</a>  | <a href="#">Il17rc.dSep08</a>  | <a href="#">297520</a> | 10504 | 976  | 12 | 166 | interleukin 17 receptor C (18.4 kD) (Il17rc) alternative variant dSep08, mRNA.       |
| <a href="#">Il18</a>    | <a href="#">Il18.bSep08</a>    | <a href="#">29197</a>  | 4180  | 715  | 3  | 149 | interleukin 18 (17.2 kD) (Il18) alternative variant bSep08, mRNA.                    |
| <a href="#">Il18</a>    | <a href="#">Il18.cSep08</a>    | <a href="#">29197</a>  | 10286 | 1093 | 7  | 147 | interleukin 18 (17.1 kD) (Il18) alternative variant cSep08, mRNA.                    |
| <a href="#">Il18</a>    | <a href="#">Il18.dSep08</a>    | <a href="#">29197</a>  | 9817  | 745  | 2  | 71  | interleukin 18 (7.5 kD) (Il18) alternative variant dSep08, mRNA.                     |
| <a href="#">Il18</a>    | <a href="#">Il18.eSep08</a>    | <a href="#">29197</a>  | 3562  | 340  | 3  | 66  | interleukin 18 (Il18) alternative variant eSep08, mRNA.                              |
| <a href="#">Il18bp</a>  | <a href="#">Il18bp.bSep08</a>  | <a href="#">84388</a>  | 736   | 438  | 2  | 39  | interleukin 18 binding protein (Il18bp) alternative variant bSep08, mRNA.            |
| <a href="#">Il20rb</a>  | <a href="#">Il20rb.aSep08</a>  | <a href="#">501043</a> | 12037 | 1267 |    | 171 | interleukin 20 receptor beta (18.9 kD) (Il20rb) mRNA.                                |
| <a href="#">Il21r</a>   | <a href="#">Il21r.bSep08</a>   | <a href="#">308977</a> | 2307  | 812  | 1  | 270 | interleukin 21 receptor (Il21r) alternative variant bSep08, mRNA.                    |
| <a href="#">Il22ra1</a> | <a href="#">Il22ra1.aSep08</a> | <a href="#">362629</a> | 9780  | 622  |    | 159 | interleukin 22 receptor, alpha 1 (Il22ra1) mRNA.                                     |
| <a href="#">Il27ra</a>  | <a href="#">Il27ra.bSep08</a>  | <a href="#">288905</a> | 3611  | 1214 | 1  | 257 | interleukin 27 receptor, alpha (Il27ra) alternative variant bSep08, mRNA.            |
| <a href="#">Il28ra</a>  | <a href="#">Il28ra.aSep08</a>  | <a href="#">362628</a> | 14329 | 496  |    | 165 | interleukin 28 receptor alpha (Il28ra) mRNA.                                         |
| <a href="#">Il33</a>    | <a href="#">Il33.aSep08</a>    | <a href="#">361749</a> | 35610 | 1144 | 9  | 264 | interleukin 33 (29.5 kD) (Il33) alternative variant aSep08, mRNA.                    |
| <a href="#">Il33</a>    | <a href="#">Il33.cSep08</a>    | <a href="#">361749</a> | 7114  | 637  | 6  | 165 | interleukin 33 (Il33) alternative variant cSep08, mRNA.                              |
| <a href="#">Ilf2</a>    | <a href="#">Ilf2.bSep08</a>    | <a href="#">310612</a> | 11839 | 1604 | 14 | 422 | interleukin enhancer binding factor 2 (Ilf2) alternative variant bSep08, mRNA.       |
| <a href="#">Ilf2</a>    | <a href="#">Ilf2.cSep08</a>    | <a href="#">310612</a> | 4689  | 1114 | 8  | 334 | interleukin enhancer binding factor 2 (Ilf2) alternative variant cSep08, mRNA.       |

|                        |                               |                        |       |      |    |     |                                                                                                                                 |
|------------------------|-------------------------------|------------------------|-------|------|----|-----|---------------------------------------------------------------------------------------------------------------------------------|
| <a href="#">Ilf2</a>   | <a href="#">Ilf2.dSep08</a>   | <a href="#">310612</a> | 6057  | 768  | 5  | 119 | interleukin enhancer binding factor 2 (Ilf2) alternative variant dSep08, mRNA.                                                  |
| <a href="#">Ilf2</a>   | <a href="#">Ilf2.eSep08</a>   | <a href="#">310612</a> | 5252  | 276  | 4  | 80  | interleukin enhancer binding factor 2 (Ilf2) alternative variant eSep08, mRNA.                                                  |
| <a href="#">Ilf2</a>   | <a href="#">Ilf2.fSep08</a>   | <a href="#">310612</a> | 6171  | 675  | 5  | 70  | interleukin enhancer binding factor 2 (Ilf2) alternative variant fSep08, mRNA.                                                  |
| <a href="#">Ilf3</a>   | <a href="#">Ilf3.bSep08</a>   | <a href="#">84472</a>  | 13895 | 2306 | 12 | 537 | interleukin enhancer binding factor 3 (Ilf3) alternative variant bSep08, mRNA.                                                  |
| <a href="#">Ilf3</a>   | <a href="#">Ilf3.cSep08</a>   | <a href="#">84472</a>  | 4536  | 2416 | 7  | 296 | interleukin enhancer binding factor 3 (Ilf3) alternative variant cSep08, mRNA.                                                  |
| <a href="#">Ilf3</a>   | <a href="#">Ilf3.dSep08</a>   | <a href="#">84472</a>  | 27851 | 1073 | 8  | 286 | interleukin enhancer binding factor 3 (Ilf3) alternative variant dSep08, mRNA.                                                  |
| <a href="#">Ilk</a>    | <a href="#">Ilk.bSep08</a>    | <a href="#">170922</a> | 6112  | 1806 | 11 | 287 | integrin linked kinase (Ilk) alternative variant bSep08, mRNA.                                                                  |
| <a href="#">Ilk</a>    | <a href="#">Ilk.cSep08</a>    | <a href="#">170922</a> | 5230  | 1734 | 6  | 228 | integrin linked kinase (25.7 kD) (Ilk) alternative variant cSep08, mRNA.                                                        |
| <a href="#">Ilk</a>    | <a href="#">Ilk.dSep08</a>    | <a href="#">170922</a> | 1252  | 840  | 4  | 150 | integrin linked kinase (Ilk) alternative variant dSep08, mRNA.                                                                  |
| <a href="#">Ilkap</a>  | <a href="#">Ilkap.bSep08</a>  | <a href="#">64538</a>  | 15316 | 683  | 6  | 227 | integrin-linked kinase-associated serine threonine phosphatase 2C (Ilkap) alternative variant bSep08, mRNA.                     |
| <a href="#">Ilkap</a>  | <a href="#">Ilkap.cSep08</a>  | <a href="#">64538</a>  | 6559  | 1039 | 5  | 193 | integrin-linked kinase-associated serine threonine phosphatase 2C precursor (21.6 kD) (Ilkap) alternative variant cSep08, mRNA. |
| <a href="#">Ilkap</a>  | <a href="#">Ilkap.dSep08</a>  | <a href="#">64538</a>  | 9355  | 769  | 7  | 150 | integrin-linked kinase-associated serine threonine phosphatase 2C (Ilkap) alternative variant dSep08, mRNA.                     |
| <a href="#">Ilkap</a>  | <a href="#">Ilkap.eSep08</a>  | <a href="#">64538</a>  | 5130  | 729  | 4  | 148 | integrin-linked kinase-associated serine threonine phosphatase 2C (Ilkap) alternative variant eSep08, mRNA.                     |
| <a href="#">Ilkap</a>  | <a href="#">Ilkap.fSep08</a>  | <a href="#">64538</a>  | 15376 | 735  | 7  | 138 | integrin-linked kinase-associated serine threonine phosphatase 2C (Ilkap) alternative variant fSep08, mRNA.                     |
| <a href="#">Ilkap</a>  | <a href="#">Ilkap.gSep08</a>  | <a href="#">64538</a>  | 2609  | 924  | 3  | 109 | integrin-linked kinase-associated serine threonine phosphatase 2C (12.0 kD) (Ilkap) alternative variant gSep08, mRNA.           |
| <a href="#">Ilkap</a>  | <a href="#">Ilkap.hSep08</a>  | <a href="#">64538</a>  | 14441 | 556  | 6  | 105 | integrin-linked kinase-associated serine threonine phosphatase 2C CRA c (Ilkap) alternative variant hSep08, mRNA.               |
| <a href="#">Ilkap</a>  | <a href="#">Ilkap.iSep08</a>  | <a href="#">64538</a>  | 11864 | 478  | 5  | 87  | integrin-linked kinase-associated serine threonine phosphatase 2C CRA c (Ilkap) alternative variant iSep08, mRNA.               |
| <a href="#">Ilkap</a>  | <a href="#">Ilkap.kSep08</a>  | <a href="#">64538</a>  | 601   | 367  | 2  | 71  | integrin-linked kinase-associated serine threonine phosphatase 2C (7.8 kD) (Ilkap) alternative variant kSep08, mRNA.            |
| <a href="#">Ilvbl</a>  | <a href="#">Ilvbl.bSep08</a>  | <a href="#">362843</a> | 1080  | 714  | 1  | 156 | ilvB (bacterial acetolactate synthase)-like (Ilvbl) alternative variant bSep08, mRNA.                                           |
| <a href="#">Immp1l</a> | <a href="#">Immp1l.aSep08</a> | <a href="#">691145</a> | 27746 | 474  |    | 157 | IMP1 inner mitochondrial membrane peptidase-like (S. cerevisiae) (Immp1l) mRNA.                                                 |
| <a href="#">Immt</a>   | <a href="#">Immt.bSep08</a>   | <a href="#">312444</a> | 36170 | 2490 | 13 | 717 | inner membrane protein, mitochondrial (Immt) alternative variant bSep08, mRNA.                                                  |



|                        |                               |                        |       |      |    |     |                                                                                                               |
|------------------------|-------------------------------|------------------------|-------|------|----|-----|---------------------------------------------------------------------------------------------------------------|
| <a href="#">Immt</a>   | <a href="#">Immt.cSep08</a>   | <a href="#">312444</a> | 23246 | 818  | 7  | 272 | inner membrane protein, mitochondrial (Immt) alternative variant cSep08, mRNA.                                |
| <a href="#">Immt</a>   | <a href="#">Immt.dSep08</a>   | <a href="#">312444</a> | 6462  | 387  | 4  | 128 | inner membrane protein, mitochondrial (Immt) alternative variant dSep08, mRNA.                                |
| <a href="#">Immt</a>   | <a href="#">Immt.eSep08</a>   | <a href="#">312444</a> | 4629  | 366  | 4  | 121 | inner membrane protein, mitochondrial (Immt) alternative variant eSep08, mRNA.                                |
| <a href="#">Immt</a>   | <a href="#">Immt.fSep08</a>   | <a href="#">312444</a> | 4418  | 417  | 3  | 77  | inner membrane protein, mitochondrial (Immt) alternative variant fSep08, mRNA.                                |
| <a href="#">Immt</a>   | <a href="#">Immt.gSep08</a>   | <a href="#">312444</a> | 15502 | 375  | 4  | 68  | inner membrane protein, mitochondrial (Immt) alternative variant gSep08, mRNA.                                |
| <a href="#">Immt</a>   | <a href="#">Immt.jSep08</a>   | <a href="#">312444</a> | 9802  | 364  | 4  | 13  | inner membrane protein, mitochondrial (1.6 kD) (Immt) alternative variant jSep08, mRNA.                       |
| <a href="#">Immt</a>   | <a href="#">Immt.kSep08</a>   | <a href="#">312444</a> | 1294  | 318  | 2  | 28  | inner membrane protein, mitochondrial (3.1 kD) (Immt) alternative variant kSep08, mRNA.                       |
| <a href="#">Imp4</a>   | <a href="#">Imp4.bSep08</a>   | <a href="#">316317</a> | 5777  | 2862 | 6  | 206 | imp4 U3 small nucleolar ribonucleoprotein homolog (23.6 kD) (Imp4) alternative variant bSep08, complete mRNA. |
| <a href="#">Imp4</a>   | <a href="#">Imp4.cSep08</a>   | <a href="#">316317</a> | 889   | 659  | 4  | 169 | imp4 U3 small nucleolar ribonucleoprotein homolog CRA b (Imp4) alternative variant cSep08, mRNA.              |
| <a href="#">Imp4</a>   | <a href="#">Imp4.dSep08</a>   | <a href="#">316317</a> | 3672  | 718  | 2  | 75  | imp4 U3 small nucleolar ribonucleoprotein (8.9 kD) (Imp4) alternative variant dSep08, mRNA.                   |
| <a href="#">Impa1</a>  | <a href="#">Impa1.aSep08</a>  | <a href="#">83523</a>  | 19399 | 1800 | 5  | 436 | 4-monophosphatase 1 (Impa1) alternative variant aSep08, mRNA.                                                 |
| <a href="#">Impa1</a>  | <a href="#">Impa1.cSep08</a>  | <a href="#">83523</a>  | 22380 | 1999 | 8  | 161 | 4-monophosphatase 1 (17.4 kD) (Impa1) alternative variant cSep08, complete mRNA.                              |
| <a href="#">Impa1</a>  | <a href="#">Impa1.dSep08</a>  | <a href="#">83523</a>  | 3598  | 820  | 3  | 101 | putative protein (Impa1) alternative variant dSep08, mRNA.                                                    |
| <a href="#">Impa1</a>  | <a href="#">Impa1.eSep08</a>  | <a href="#">83523</a>  | 3291  | 1929 | 2  | 78  | 4-monophosphatase 1 (8.3 kD) (Impa1) alternative variant eSep08, mRNA.                                        |
| <a href="#">Impa2</a>  | <a href="#">Impa2.bSep08</a>  | <a href="#">282636</a> | 11103 | 722  | 4  | 154 | inositol (myo)-1(or 4)-monophosphatase 2 (Impa2) alternative variant bSep08, mRNA.                            |
| <a href="#">Impa2</a>  | <a href="#">Impa2.cSep08</a>  | <a href="#">282636</a> | 18507 | 392  | 3  | 130 | inositol (myo)-1(or 4)-monophosphatase 2 (Impa2) alternative variant cSep08, mRNA.                            |
| <a href="#">Impad1</a> | <a href="#">Impad1.aSep08</a> | <a href="#">312952</a> | 10860 | 2587 |    | 192 | inositol monophosphatase (Impad1) mRNA.                                                                       |
| <a href="#">Impdh1</a> | <a href="#">Impdh1.bSep08</a> | <a href="#">362329</a> | 8681  | 1162 | 10 | 386 | inosine 5'-phosphate dehydrogenase 1 (Impdh1) alternative variant bSep08, mRNA.                               |
| <a href="#">Impdh2</a> | <a href="#">Impdh2.bSep08</a> | <a href="#">301005</a> | 4595  | 1800 | 14 | 366 | dehydrogenase 2 (39.5 kD) (Impdh2) alternative variant bSep08, complete mRNA.                                 |
| <a href="#">Impdh2</a> | <a href="#">Impdh2.cSep08</a> | <a href="#">301005</a> | 746   | 669  | 2  | 115 | inosine monophosphate dehydrogenase 2 (Impdh2) alternative variant cSep08, mRNA.                              |
| <a href="#">Impdh2</a> | <a href="#">Impdh2.dSep08</a> | <a href="#">301005</a> | 2296  | 652  | 7  | 104 | dehydrogenase 2 (11.0 kD) (Impdh2) alternative variant dSep08, mRNA.                                          |
| <a href="#">Impg1</a>  | <a href="#">Impg1.aSep08</a>  | <a href="#">66014</a>  | 29423 | 401  |    | 89  | interphotoreceptor matrix proteoglycan 1 (Impg1) mRNA.                                                        |
| <a href="#">Inca1</a>  | <a href="#">Inca1.aSep08</a>  | <a href="#">360555</a> | 10345 | 700  | 2  | 232 | inhibitor of CDK interacting with cyclin A1 (Inca1) alternative variant aSep08, mRNA.                         |
| <a href="#">Incenp</a> | <a href="#">Incenp.bSep08</a> | <a href="#">293733</a> | 11885 | 1901 | 4  | 447 | inner centromere protein (Incenp) alternative variant bSep08, mRNA.                                           |
| <a href="#">Incenp</a> | <a href="#">Incenp.cSep08</a> | <a href="#">293733</a> | 2700  | 570  | 2  | 50  | inner centromere protein (Incenp) alternative variant cSep08, mRNA.                                           |

|                        |                               |                        |        |      |    |     |                                                                                                  |
|------------------------|-------------------------------|------------------------|--------|------|----|-----|--------------------------------------------------------------------------------------------------|
| <a href="#">Ing3</a>   | <a href="#">Ing3.bSep08</a>   | <a href="#">312154</a> | 16104  | 601  | 5  | 150 | inhibitor of growth family, member 3 (Ing3) alternative variant bSep08, mRNA.                    |
| <a href="#">Ing3</a>   | <a href="#">Ing3.cSep08</a>   | <a href="#">312154</a> | 17895  | 454  | 5  | 103 | inhibitor of growth family, member 3 (Ing3) alternative variant cSep08, mRNA.                    |
| <a href="#">Ing3</a>   | <a href="#">Ing3.dSep08</a>   | <a href="#">312154</a> | 2689   | 402  | 3  | 86  | inhibitor of growth family, member 3 (10.4 kD) (Ing3) alternative variant dSep08, mRNA.          |
| <a href="#">Ing4</a>   | <a href="#">Ing4.bSep08</a>   | <a href="#">297597</a> | 7839   | 878  | 6  | 244 | inhibitor of growth family, member 4 (28.1 kD) (Ing4) alternative variant bSep08, mRNA.          |
| <a href="#">Ing4</a>   | <a href="#">Ing4.cSep08</a>   | <a href="#">297597</a> | 7827   | 869  | 6  | 222 | inhibitor of growth family, member 4 (25.3 kD) (Ing4) alternative variant cSep08, mRNA.          |
| <a href="#">Ing4</a>   | <a href="#">Ing4.dSep08</a>   | <a href="#">297597</a> | 7682   | 715  | 6  | 217 | inhibitor of growth family, member 4 (Ing4) alternative variant dSep08, mRNA.                    |
| <a href="#">Ing4</a>   | <a href="#">Ing4.eSep08</a>   | <a href="#">297597</a> | 6292   | 595  | 4  | 198 | inhibitor of growth family, member 4 (Ing4) alternative variant eSep08, mRNA.                    |
| <a href="#">Ing4</a>   | <a href="#">Ing4.fSep08</a>   | <a href="#">297597</a> | 8081   | 1002 | 6  | 164 | inhibitor of growth family, member 4 (19.1 kD) (Ing4) alternative variant fSep08, mRNA.          |
| <a href="#">Ing4</a>   | <a href="#">Ing4.gSep08</a>   | <a href="#">297597</a> | 8117   | 1353 | 5  | 163 | inhibitor of growth family, member 4 (18.8 kD) (Ing4) alternative variant gSep08, mRNA.          |
| <a href="#">Ing4</a>   | <a href="#">Ing4.hSep08</a>   | <a href="#">297597</a> | 7000   | 775  | 2  | 158 | inhibitor of growth family, member 4 (18.4 kD) (Ing4) alternative variant hSep08, complete mRNA. |
| <a href="#">Ing4</a>   | <a href="#">Ing4.iSep08</a>   | <a href="#">297597</a> | 1162   | 1039 | 2  | 72  | inhibitor of growth family, member 4 (7.9 kD) (Ing4) alternative variant iSep08, mRNA.           |
| <a href="#">Inoc1</a>  | <a href="#">Inoc1.aSep08</a>  | <a href="#">296084</a> | 37003  | 2319 | 12 | 493 | INO80 complex homolog 1 ( <i>S. cerevisiae</i> ) (Inoc1) alternative variant aSep08, mRNA.       |
| <a href="#">Inpp1</a>  | <a href="#">Inpp1.aSep08</a>  | <a href="#">316376</a> | 30008  | 2162 | 4  | 396 | inositol polyphosphate-1-phosphatase (43.4 kD) (Inpp1) alternative variant aSep08, mRNA.         |
| <a href="#">Inpp1</a>  | <a href="#">Inpp1.cSep08</a>  | <a href="#">316376</a> | 29005  | 1045 | 4  | 230 | inositol polyphosphate-1-phosphatase (Inpp1) alternative variant cSep08, mRNA.                   |
| <a href="#">Inpp4a</a> | <a href="#">Inpp4a.bSep08</a> | <a href="#">80849</a>  | 16650  | 1006 | 9  | 278 | inositol polyphosphate-4-phosphatase, type 1 (Inpp4a) alternative variant bSep08, mRNA.          |
| <a href="#">Inpp5a</a> | <a href="#">Inpp5a.bSep08</a> | <a href="#">365382</a> | 156942 | 776  | 8  | 258 | inositol polyphosphate-5-phosphatase A (Inpp5a) alternative variant bSep08, mRNA.                |
| <a href="#">Inpp5a</a> | <a href="#">Inpp5a.cSep08</a> | <a href="#">365382</a> | 121949 | 659  | 7  | 219 | inositol polyphosphate-5-phosphatase A (Inpp5a) alternative variant cSep08, mRNA.                |
| <a href="#">Inpp5a</a> | <a href="#">Inpp5a.dSep08</a> | <a href="#">365382</a> | 20135  | 369  | 3  | 64  | inositol polyphosphate-5-phosphatase A (Inpp5a) alternative variant dSep08, mRNA.                |
| <a href="#">Inpp5b</a> | <a href="#">Inpp5b.aSep08</a> | <a href="#">362590</a> | 59932  | 3211 | 20 | 841 | inositol polyphosphate-5-phosphatase B (Inpp5b) alternative variant aSep08, mRNA.                |
| <a href="#">Inpp5b</a> | <a href="#">Inpp5b.bSep08</a> | <a href="#">362590</a> | 30457  | 545  | 5  | 181 | inositol polyphosphate-5-phosphatase B (Inpp5b) alternative variant bSep08, mRNA.                |
| <a href="#">Inpp5b</a> | <a href="#">Inpp5b.cSep08</a> | <a href="#">362590</a> | 6681   | 507  | 5  | 90  | inositol polyphosphate-5-phosphatase B (Inpp5b) alternative variant cSep08, mRNA.                |
| <a href="#">Inpp5b</a> | <a href="#">Inpp5b.dSep08</a> | <a href="#">362590</a> | 1962   | 995  | 1  | 59  | inositol polyphosphate-5-phosphatase B (6.7 kD) (Inpp5b) alternative variant dSep08, mRNA.       |
| <a href="#">Inpp5f</a> | <a href="#">Inpp5f.bSep08</a> | <a href="#">309008</a> | 5196   | 859  | 5  | 156 | inositol polyphosphate-5-phosphatase F (Inpp5f) alternative variant bSep08, mRNA.                |

|                                   |                                          |                        |        |      |    |     |                                                                                       |
|-----------------------------------|------------------------------------------|------------------------|--------|------|----|-----|---------------------------------------------------------------------------------------|
| <a href="#">Inpp5f</a>            | <a href="#">Inpp5f.eSep08</a>            | <a href="#">309008</a> | 725    | 314  | 2  | 34  | inositol polyphosphate-5-phosphatase F (Inpp5f) alternative variant eSep08, mRNA.     |
| <a href="#">Inpp1</a>             | <a href="#">Inpp1.bSep08</a>             | <a href="#">65038</a>  | 3984   | 645  | 4  | 113 | inositol polyphosphate phosphatase-like 1 (Inpp1) alternative variant bSep08, mRNA.   |
| <a href="#">Ins2</a>              | <a href="#">Ins2.aSep08</a>              | <a href="#">24506</a>  | 1077   | 459  | 3  | 141 | insulin 2 (Ins2) alternative variant aSep08, mRNA.                                    |
| <a href="#">Ins145_P3_rec.0</a>   | <a href="#">Ins145_P3_rec.0.aSep08</a>   |                        | 229802 | 443  |    | 123 | ryanodine receptor (Ins145_P3_rec.0) mRNA.                                            |
| <a href="#">Ins145_P3_rec.1</a>   | <a href="#">Ins145_P3_rec.1.aSep08</a>   |                        | 17144  | 577  |    | 192 | inositol 1 receptor CRA b (Ins145_P3_rec.1) mRNA.                                     |
| <a href="#">Insc</a>              | <a href="#">Insc.bSep08</a>              | <a href="#">293166</a> | 48031  | 513  | 1  | 170 | inscuteable homolog (Drosophila) (Insc) alternative variant bSep08, mRNA.             |
| <a href="#">Insig1</a>            | <a href="#">Insig1.bSep08</a>            | <a href="#">64194</a>  | 2313   | 579  | 2  | 182 | insulin induced gene 1 (Insig1) alternative variant bSep08, mRNA.                     |
| <a href="#">Insig1</a>            | <a href="#">Insig1.cSep08</a>            | <a href="#">64194</a>  | 8137   | 2309 | 5  | 165 | insulin induced gene 1 (Insig1) alternative variant cSep08, mRNA.                     |
| <a href="#">Insig2</a>            | <a href="#">Insig2.bSep08</a>            | <a href="#">288985</a> | 27526  | 2514 | 2  | 225 | insulin induced gene 2 (25.0 kD) (Insig2) alternative variant bSep08, mRNA.           |
| <a href="#">Insl3</a>             | <a href="#">Insl3.bSep08</a>             | <a href="#">114215</a> | 1576   | 1444 | 1  | 97  | insulin-like 3 (10.5 kD) (Insl3) alternative variant bSep08, mRNA.                    |
| <a href="#">Insrr</a>             | <a href="#">Insrr.aSep08</a>             | <a href="#">60663</a>  | 5899   | 1410 | 1  | 469 | insulin receptor-related receptor (Insrr) alternative variant aSep08, mRNA.           |
| <a href="#">Insrr</a>             | <a href="#">Insrr.bSep08</a>             | <a href="#">60663</a>  | 5899   | 1233 | 2  | 410 | insulin receptor-related receptor (44.8 kD) (Insrr) alternative variant bSep08, mRNA. |
| <a href="#">Integrase.2</a>       | <a href="#">Integrase.2.aSep08</a>       |                        | 1508   | 1365 |    | 115 | integrase like (12.8 kD) (Integrase.2) mRNA.                                          |
| <a href="#">Integrin_alpha.0</a>  | <a href="#">Integrin_alpha.0.aSep08</a>  |                        | 2854   | 619  |    | 132 | integrin alpha 2b (14.9 kD) (Integrin_alpha.0) mRNA.                                  |
| <a href="#">Integrin_alpha.1</a>  | <a href="#">Integrin_alpha.1.aSep08</a>  |                        | 11140  | 2954 | 5  | 194 | integrin (Integrin_alpha.1) alternative variant aSep08, mRNA.                         |
| <a href="#">Integrin_alpha.1</a>  | <a href="#">Integrin_alpha.1.bSep08</a>  |                        | 6259   | 409  | 3  | 71  | integrin alpha 6 CRA c (Integrin_alpha.1) alternative variant bSep08, mRNA.           |
| <a href="#">Integrin_alpha2.0</a> | <a href="#">Integrin_alpha2.0.aSep08</a> |                        | 60602  | 758  |    | 252 | integrin alpha 8 CRA a (Integrin_alpha2.0) mRNA.                                      |
| <a href="#">Integrin_b_cyt.0</a>  | <a href="#">Integrin_b_cyt.0.aSep08</a>  |                        | 4414   | 2553 |    | 78  | putative protein (11.6 kD) (Integrin_b_cyt.0) mRNA.                                   |
| <a href="#">Integrin_b_cyt.1</a>  | <a href="#">Integrin_b_cyt.1.aSep08</a>  |                        | 1048   | 665  |    | 145 | integrin (Integrin_b_cyt.1) mRNA.                                                     |
| <a href="#">Ints3</a>             | <a href="#">Ints3.aSep08</a>             | <a href="#">361988</a> | 18030  | 2363 | 17 | 564 | integrator complex subunit 3 (Ints3) alternative variant aSep08, mRNA.                |
| <a href="#">Ints3</a>             | <a href="#">Ints3.bSep08</a>             | <a href="#">361988</a> | 12443  | 842  | 7  | 247 | integrator complex subunit 3 (Ints3) alternative variant bSep08, mRNA.                |
| <a href="#">Ints4</a>             | <a href="#">Ints4.aSep08</a>             | <a href="#">308837</a> | 63755  | 3152 |    | 583 | integrator complex subunit 4 (65.9 kD) (Ints4) mRNA.                                  |
| <a href="#">Ints6</a>             | <a href="#">Ints6.aSep08</a>             | <a href="#">361057</a> | 52033  | 3261 | 15 | 768 | integrator complex (Ints6) alternative variant aSep08, mRNA.                          |
| <a href="#">Ints6</a>             | <a href="#">Ints6.cSep08</a>             | <a href="#">361057</a> | 9673   | 1568 | 5  | 288 | integrator complex (32.6 kD) (Ints6) alternative variant cSep08, mRNA.                |
| <a href="#">Ints6</a>             | <a href="#">Ints6.dSep08</a>             | <a href="#">361057</a> | 1909   | 776  | 3  | 226 | putative protein (Ints6) alternative variant dSep08, mRNA.                            |

|                             |                                    |                        |       |      |    |      |                                                                                       |
|-----------------------------|------------------------------------|------------------------|-------|------|----|------|---------------------------------------------------------------------------------------|
| <a href="#">Ints6</a>       | <a href="#">Ints6.eSep08</a>       | <a href="#">361057</a> | 26826 | 700  | 6  | 182  | integrator complex (20.1 kD) (Ints6) alternative variant eSep08, mRNA.                |
| <a href="#">Ints7</a>       | <a href="#">Ints7.aSep08</a>       | <a href="#">289382</a> | 17641 | 795  |    | 247  | integrator complex subunit 7 (Ints7) mRNA.                                            |
| <a href="#">Ints9</a>       | <a href="#">Ints9.aSep08</a>       | <a href="#">290322</a> | 83591 | 2612 | 17 | 658  | integrator complex subunit 9 (74.1 kD) (Ints9) alternative variant aSep08, mRNA.      |
| <a href="#">Ints10</a>      | <a href="#">Ints10.bSep08</a>      | <a href="#">290679</a> | 7335  | 592  | 5  | 164  | integrator complex subunit 10 (Ints10) alternative variant bSep08, mRNA.              |
| <a href="#">Ints10</a>      | <a href="#">Ints10.cSep08</a>      | <a href="#">290679</a> | 5757  | 730  | 2  | 80   | integrator complex subunit 10 (9.3 kD) (Ints10) alternative variant cSep08, mRNA.     |
| <a href="#">Ints12</a>      | <a href="#">Ints12.bSep08</a>      | <a href="#">295448</a> | 14607 | 873  | 6  | 248  | integrator complex subunit 12 (Ints12) alternative variant bSep08, mRNA.              |
| <a href="#">Intu</a>        | <a href="#">Intu.aSep08</a>        | <a href="#">361938</a> | 33644 | 922  |    | 281  | inturned planar cell polarity effector homolog (Drosophila) (Intu) mRNA.              |
| <a href="#">Invs</a>        | <a href="#">Invs.cSep08</a>        | <a href="#">313228</a> | 9498  | 648  | 5  | 156  | inversin (Invs) alternative variant cSep08, mRNA.                                     |
| <a href="#">Invs</a>        | <a href="#">Invs.dSep08</a>        | <a href="#">313228</a> | 7949  | 425  | 2  | 141  | inversin (Invs) alternative variant dSep08, mRNA.                                     |
| <a href="#">Invs</a>        | <a href="#">Invs.eSep08</a>        | <a href="#">313228</a> | 5623  | 2642 | 3  | 125  | inversin (Invs) alternative variant eSep08, mRNA.                                     |
| <a href="#">Invs</a>        | <a href="#">Invs.fSep08</a>        | <a href="#">313228</a> | 8965  | 373  | 3  | 124  | inversin (Invs) alternative variant fSep08, mRNA.                                     |
| <a href="#">Ion_trans.0</a> | <a href="#">Ion_trans.0.aSep08</a> |                        | 14266 | 583  |    | 193  | sodium channel Nav1.5a (Ion_trans.0) mRNA.                                            |
| <a href="#">Ipmk</a>        | <a href="#">Ipmk.bSep08</a>        | <a href="#">171458</a> | 31578 | 1614 | 4  | 296  | inositol polyphosphate multikinase (33.7 kD) (Ipmk) alternative variant bSep08, mRNA. |
| <a href="#">Ipmk</a>        | <a href="#">Ipmk.cSep08</a>        | <a href="#">171458</a> | 26257 | 935  | 5  | 173  | inositol polyphosphate multikinase (19.7 kD) (Ipmk) alternative variant cSep08, mRNA. |
| <a href="#">Ipo4</a>        | <a href="#">Ipo4.bSep08</a>        | <a href="#">290228</a> | 3709  | 1340 | 9  | 382  | importin 4 (Ipo4) alternative variant bSep08, mRNA.                                   |
| <a href="#">Ipo4</a>        | <a href="#">Ipo4.cSep08</a>        | <a href="#">290228</a> | 1992  | 728  | 8  | 201  | importin 4 (Ipo4) alternative variant cSep08, mRNA.                                   |
| <a href="#">Ipo5</a>        | <a href="#">Ipo5.aSep08</a>        | <a href="#">306182</a> | 35724 | 4552 | 16 | 1099 | importin 5 (Ipo5) alternative variant aSep08, mRNA.                                   |
| <a href="#">Ipo5</a>        | <a href="#">Ipo5.bSep08</a>        | <a href="#">306182</a> | 2026  | 422  | 1  | 90   | importin 5 (Ipo5) alternative variant bSep08, mRNA.                                   |
| <a href="#">Ipo7</a>        | <a href="#">Ipo7.bSep08</a>        | <a href="#">308939</a> | 1995  | 266  | 2  | 76   | importin 7 (Ipo7) alternative variant bSep08, mRNA.                                   |
| <a href="#">Ipo9</a>        | <a href="#">Ipo9.bSep08</a>        | <a href="#">304817</a> | 38511 | 1988 | 11 | 580  | importin 9 (Ipo9) alternative variant bSep08, mRNA.                                   |
| <a href="#">Ipo9</a>        | <a href="#">Ipo9.cSep08</a>        | <a href="#">304817</a> | 12221 | 822  | 5  | 241  | importin 9 (Ipo9) alternative variant cSep08, mRNA.                                   |
| <a href="#">Ipo9</a>        | <a href="#">Ipo9.dSep08</a>        | <a href="#">304817</a> | 5111  | 2543 | 6  | 235  | importin 9 (27.1 kD) (Ipo9) alternative variant dSep08, mRNA.                         |
| <a href="#">Ipo9</a>        | <a href="#">Ipo9.eSep08</a>        | <a href="#">304817</a> | 1110  | 519  | 2  | 109  | importin 9 (Ipo9) alternative variant eSep08, mRNA.                                   |
| <a href="#">Ipo11</a>       | <a href="#">Ipo11.aSep08</a>       | <a href="#">310056</a> | 23147 | 630  |    | 169  | importin 11 (Ipo11) mRNA.                                                             |
| <a href="#">Ipo13</a>       | <a href="#">Ipo13.bSep08</a>       | <a href="#">116458</a> | 3629  | 759  | 7  | 252  | importin 13 (Ipo13) alternative variant bSep08, mRNA.                                 |
| <a href="#">Ipo13</a>       | <a href="#">Ipo13.cSep08</a>       | <a href="#">116458</a> | 3049  | 759  | 6  | 182  | importin 13 (Ipo13) alternative variant cSep08, mRNA.                                 |
| <a href="#">Ipo13</a>       | <a href="#">Ipo13.dSep08</a>       | <a href="#">116458</a> | 1046  | 833  | 3  | 67   | importin 13 (Ipo13) alternative variant dSep08, mRNA.                                 |
| <a href="#">Ipp</a>         | <a href="#">Ipp.bSep08</a>         | <a href="#">298439</a> | 9538  | 559  | 4  | 122  | IAP promoted placental gene (Ipp) alternative variant bSep08, mRNA.                   |
| <a href="#">IQ.0</a>        | <a href="#">IQ.0.aSep08</a>        |                        | 1047  | 379  |    | 126  | myosin 5B CRA b (IQ.0) mRNA.                                                          |
| <a href="#">IQ.1</a>        | <a href="#">IQ.1.aSep08</a>        |                        | 1269  | 378  |    | 87   | IQ motif containing e (IQ.1) mRNA.                                                    |
| <a href="#">IQ.2</a>        | <a href="#">IQ.2.aSep08</a>        |                        | 35262 | 4266 | 3  | 1047 | myosin 18A (IQ.2) alternative variant aSep08, mRNA.                                   |
| <a href="#">IQ.2</a>        | <a href="#">IQ.2.bSep08</a>        |                        | 15016 | 1269 | 2  | 261  | CRA a (IQ.2) alternative variant bSep08, mRNA.                                        |
| <a href="#">IQ.2</a>        | <a href="#">IQ.2.cSep08</a>        |                        | 886   | 574  | 2  | 73   | putative protein (IQ.2) alternative variant cSep08, mRNA.                             |

|                        |                               |                        |       |      |    |     |                                                                                             |
|------------------------|-------------------------------|------------------------|-------|------|----|-----|---------------------------------------------------------------------------------------------|
| <a href="#">IQ.2</a>   | <a href="#">IQ.2.dSep08</a>   |                        | 1412  | 328  | 1  | 18  | putative protein (2.4 kD) (IQ.2) alternative variant dSep08, mRNA.                          |
| <a href="#">IQ.3</a>   | <a href="#">IQ.3.aSep08</a>   |                        | 3476  | 703  |    | 124 | myosin-xix (IQ.3) alternative variant aSep08, mRNA.                                         |
| <a href="#">IQ.4</a>   | <a href="#">IQ.4.aSep08</a>   |                        | 17767 | 1066 | 9  | 354 | myosin Ib (IQ.4) alternative variant aSep08, mRNA.                                          |
| <a href="#">IQ.4</a>   | <a href="#">IQ.4.bSep08</a>   |                        | 4793  | 816  | 1  | 105 | myosin ib (IQ.4) alternative variant bSep08, mRNA.                                          |
| <a href="#">IQ.5</a>   | <a href="#">IQ.5.aSep08</a>   |                        | 1267  | 267  |    | 89  | calmodulin binding transcription activator 1 like (IQ.5) mRNA.                              |
| <a href="#">IQ.6</a>   | <a href="#">IQ.6.aSep08</a>   |                        | 2774  | 618  |    | 206 | iqcal iq aaa domain-containing protein homolog (IQ.6) mRNA.                                 |
| <a href="#">IQ.7</a>   | <a href="#">IQ.7.aSep08</a>   |                        | 18702 | 856  | 7  | 284 | IQ motif containing GTPase activating protein 2 (IQ.7) alternative variant aSep08, mRNA.    |
| <a href="#">IQ.8</a>   | <a href="#">IQ.8.aSep08</a>   |                        | 8738  | 244  |    | 66  | leucine-rich repeats IQ motif containing 4 like (IQ.8) mRNA.                                |
| <a href="#">lqcb1</a>  | <a href="#">lqcb1.bSep08</a>  | <a href="#">303915</a> | 29903 | 1337 | 6  | 306 | IQ calmodulin-binding motif containing 1 (lqcb1) alternative variant bSep08, mRNA.          |
| <a href="#">lqcb1</a>  | <a href="#">lqcb1.cSep08</a>  | <a href="#">303915</a> | 20869 | 798  | 7  | 235 | IQ calmodulin-binding motif containing 1 (lqcb1) alternative variant cSep08, mRNA.          |
| <a href="#">lqcb1</a>  | <a href="#">lqcb1.dSep08</a>  | <a href="#">303915</a> | 20823 | 822  | 8  | 215 | IQ calmodulin-binding motif containing 1 (lqcb1) alternative variant dSep08, mRNA.          |
| <a href="#">lqcb1</a>  | <a href="#">lqcb1.eSep08</a>  | <a href="#">303915</a> | 16346 | 699  | 7  | 182 | IQ calmodulin-binding motif containing 1 (lqcb1) alternative variant eSep08, mRNA.          |
| <a href="#">lqcb1</a>  | <a href="#">lqcb1.fSep08</a>  | <a href="#">303915</a> | 3238  | 391  | 3  | 77  | IQ calmodulin-binding motif containing 1 (lqcb1) alternative variant fSep08, mRNA.          |
| <a href="#">lqcb1</a>  | <a href="#">lqcb1.gSep08</a>  | <a href="#">303915</a> | 849   | 383  | 2  | 7   | IQ calmodulin-binding motif containing 1 (0.9 kD) (lqcb1) alternative variant gSep08, mRNA. |
| <a href="#">lqcd</a>   | <a href="#">lqcd.aSep08</a>   | <a href="#">498184</a> | 11489 | 2113 | 5  | 366 | IQ motif containing D (41.6 kD) (lqcd) alternative variant aSep08, mRNA.                    |
| <a href="#">lqcd</a>   | <a href="#">lqcd.bSep08</a>   | <a href="#">498184</a> | 10180 | 563  | 1  | 187 | IQ motif containing D (lqcd) alternative variant bSep08, mRNA.                              |
| <a href="#">lqce</a>   | <a href="#">lqce.aSep08</a>   | <a href="#">304318</a> | 16214 | 1090 |    | 363 | IQ motif containing E (lqce) mRNA.                                                          |
| <a href="#">lqcg</a>   | <a href="#">lqcg.bSep08</a>   | <a href="#">363796</a> | 15248 | 747  | 1  | 167 | IQ motif containing G (lqcg) alternative variant bSep08, mRNA.                              |
| <a href="#">lqch</a>   | <a href="#">lqch.bSep08</a>   | <a href="#">300776</a> | 11337 | 727  | 2  | 242 | IQ motif containing H (lqch) alternative variant bSep08, mRNA.                              |
| <a href="#">lqgap1</a> | <a href="#">lqgap1.bSep08</a> | <a href="#">361598</a> | 5137  | 610  | 4  | 197 | IQ motif containing GTPase activating protein 1 (lqgap1) alternative variant bSep08, mRNA.  |
| <a href="#">lqgap3</a> | <a href="#">lqgap3.aSep08</a> | <a href="#">310621</a> | 10949 | 1758 |    | 576 | IQ motif containing GTPase activating protein 3 (lqgap3) alternative variant aSep08, mRNA.  |
| <a href="#">lqwd1</a>  | <a href="#">lqwd1.aSep08</a>  | <a href="#">289181</a> | 96496 | 2468 | 17 | 721 | IQ motif and WD repeats 1 (lqwd1) alternative variant aSep08, mRNA.                         |
| <a href="#">lqwd1</a>  | <a href="#">lqwd1.bSep08</a>  | <a href="#">289181</a> | 36697 | 741  | 7  | 246 | IQ motif and WD repeats 1 (lqwd1) alternative variant bSep08, mRNA.                         |
| <a href="#">lqwd1</a>  | <a href="#">lqwd1.cSep08</a>  | <a href="#">289181</a> | 41744 | 720  | 6  | 240 | IQ motif and WD repeats 1 (lqwd1) alternative variant cSep08, mRNA.                         |
| <a href="#">Irak1</a>  | <a href="#">Irak1.bSep08</a>  | <a href="#">363520</a> | 6056  | 1207 | 7  | 348 | receptor-associated kinase 1 (Irak1) alternative variant bSep08, mRNA.                      |

|                          |                                 |                        |       |      |   |     |                                                                                                           |
|--------------------------|---------------------------------|------------------------|-------|------|---|-----|-----------------------------------------------------------------------------------------------------------|
| <a href="#">Irak1</a>    | <a href="#">Irak1.cSep08</a>    | <a href="#">363520</a> | 1605  | 1138 | 3 | 173 | receptor-associated kinase 1 (19.3 kD) (Irak1) alternative variant cSep08, mRNA.                          |
| <a href="#">Irak1</a>    | <a href="#">Irak1.dSep08</a>    | <a href="#">363520</a> | 2877  | 427  | 4 | 141 | receptor-associated kinase 1 (Irak1) alternative variant dSep08, mRNA.                                    |
| <a href="#">Irak1bp1</a> | <a href="#">Irak1bp1.aSep08</a> | <a href="#">300862</a> | 16520 | 1067 | 4 | 270 | interleukin-1 receptor-associated kinase 1 binding protein 1 (Irak1bp1) alternative variant aSep08, mRNA. |
| <a href="#">Irak1bp1</a> | <a href="#">Irak1bp1.cSep08</a> | <a href="#">300862</a> | 7074  | 419  | 2 | 62  | interleukin-1 receptor-associated kinase 1 binding protein 1 (Irak1bp1) alternative variant cSep08, mRNA. |
| <a href="#">Irak1bp1</a> | <a href="#">Irak1bp1.dSep08</a> | <a href="#">300862</a> | 16327 | 1195 | 5 | 42  | interleukin-1 receptor-associated kinase 1 binding protein 1 (Irak1bp1) alternative variant dSep08, mRNA. |
| <a href="#">Irak2</a>    | <a href="#">Irak2.bSep08</a>    | <a href="#">362418</a> | 27432 | 468  | 3 | 151 | interleukin-1 receptor-associated kinase 2 (Irak2) alternative variant bSep08, mRNA.                      |
| <a href="#">Ireb2</a>    | <a href="#">Ireb2.bSep08</a>    | <a href="#">64831</a>  | 3829  | 3184 | 2 | 96  | iron responsive element binding protein 2 (10.5 kD) (Ireb2) alternative variant bSep08, mRNA.             |
| <a href="#">Ireb2</a>    | <a href="#">Ireb2.cSep08</a>    | <a href="#">64831</a>  | 2595  | 375  | 2 | 44  | iron responsive element binding protein 2 (Ireb2) alternative variant cSep08, mRNA.                       |
| <a href="#">Irf1</a>     | <a href="#">Irf1.bSep08</a>     | <a href="#">24508</a>  | 1295  | 295  | 1 | 98  | interferon regulatory factor 1 (Irf1) alternative variant bSep08, mRNA.                                   |
| <a href="#">Irf3</a>     | <a href="#">Irf3.bSep08</a>     | <a href="#">292892</a> | 4928  | 2291 | 7 | 360 | interferon regulatory factor 3 CRA a (40.4 kD) (Irf3) alternative variant bSep08, complete mRNA.          |
| <a href="#">Irf3</a>     | <a href="#">Irf3.cSep08</a>     | <a href="#">292892</a> | 16955 | 794  | 6 | 196 | interferon regulatory factor 3 (21.4 kD) (Irf3) alternative variant cSep08, mRNA.                         |
| <a href="#">Irf3</a>     | <a href="#">Irf3.dSep08</a>     | <a href="#">292892</a> | 2852  | 1314 | 4 | 172 | interferon regulatory factor 3 (Irf3) alternative variant dSep08, mRNA.                                   |
| <a href="#">Irf3</a>     | <a href="#">Irf3.eSep08</a>     | <a href="#">292892</a> | 3455  | 1491 | 5 | 158 | interferon regulatory factor 3 (18.2 kD) (Irf3) alternative variant eSep08, mRNA.                         |
| <a href="#">Irf3</a>     | <a href="#">Irf3.fSep08</a>     | <a href="#">292892</a> | 3126  | 734  | 6 | 143 | interferon regulatory factor 3 (16.3 kD) (Irf3) alternative variant fSep08, mRNA.                         |
| <a href="#">Irf3</a>     | <a href="#">Irf3.gSep08</a>     | <a href="#">292892</a> | 3258  | 824  | 5 | 142 | interferon regulatory factor 3 (16.0 kD) (Irf3) alternative variant gSep08, mRNA.                         |
| <a href="#">Irf3</a>     | <a href="#">Irf3.hSep08</a>     | <a href="#">292892</a> | 2694  | 715  | 4 | 141 | interferon regulatory factor 3 (16.1 kD) (Irf3) alternative variant hSep08, mRNA.                         |
| <a href="#">Irf3</a>     | <a href="#">Irf3.iSep08</a>     | <a href="#">292892</a> | 2807  | 802  | 4 | 141 | interferon regulatory factor 3 (16.1 kD) (Irf3) alternative variant iSep08, mRNA.                         |
| <a href="#">Irf3</a>     | <a href="#">Irf3.jSep08</a>     | <a href="#">292892</a> | 1428  | 468  | 3 | 134 | interferon regulatory factor 3 (14.9 kD) (Irf3) alternative variant jSep08, mRNA.                         |
| <a href="#">Irf3</a>     | <a href="#">Irf3.kSep08</a>     | <a href="#">292892</a> | 3776  | 427  | 4 | 72  | putative protein human specific (Irf3) alternative variant kSep08, mRNA.                                  |
| <a href="#">Irf3</a>     | <a href="#">Irf3.nSep08</a>     | <a href="#">292892</a> | 1062  | 748  | 2 | 58  | putative protein (Irf3) alternative variant nSep08, mRNA.                                                 |
| <a href="#">Irf5</a>     | <a href="#">Irf5.bSep08</a>     | <a href="#">296953</a> | 1799  | 848  | 4 | 282 | interferon regulatory factor 5 (Irf5) alternative variant bSep08, mRNA.                                   |
| <a href="#">Irf5</a>     | <a href="#">Irf5.cSep08</a>     | <a href="#">296953</a> | 626   | 416  | 1 | 138 | interferon regulatory factor 5 (Irf5) alternative variant cSep08, mRNA.                                   |
| <a href="#">Irf7</a>     | <a href="#">Irf7.bSep08</a>     | <a href="#">293624</a> | 1473  | 766  | 4 | 203 | interferon regulatory factor 7 (Irf7) alternative variant bSep08, mRNA.                                   |
| <a href="#">Irs2</a>     | <a href="#">Irs2.aSep08</a>     | <a href="#">29376</a>  | 19954 | 2021 |   | 176 | insulin receptor substrate 2 (Irs2) mRNA.                                                                 |

|                          |                                 |                        |       |      |    |     |                                                                                                     |
|--------------------------|---------------------------------|------------------------|-------|------|----|-----|-----------------------------------------------------------------------------------------------------|
| <a href="#">Irx1</a>     | <a href="#">Irx1.aSep08</a>     | <a href="#">306659</a> | 5144  | 1659 |    | 418 | iroquois related homeobox 1 (Drosophila) (Irx1) complete mRNA.                                      |
| <a href="#">Irx2</a>     | <a href="#">Irx2.cSep08</a>     | <a href="#">306657</a> | 2006  | 663  | 4  | 81  | iroquois related homeobox 2 (Drosophila) (Irx2) alternative variant cSep08, mRNA.                   |
| <a href="#">Irx3</a>     | <a href="#">Irx3.aSep08</a>     | <a href="#">307721</a> | 1341  | 682  |    | 103 | iroquois related homeobox 3 (Drosophila) (Irx3) mRNA.                                               |
| <a href="#">Irx4</a>     | <a href="#">Irx4.cSep08</a>     | <a href="#">306655</a> | 6277  | 615  | 4  | 60  | putative protein (6.6 kD) (Irx4) alternative variant cSep08, mRNA.                                  |
| <a href="#">Irx4</a>     | <a href="#">Irx4.dSep08</a>     | <a href="#">306655</a> | 946   | 477  | 2  | 31  | iroquois 4a protein like (Irx4) alternative variant dSep08, mRNA.                                   |
| <a href="#">Irx4</a>     | <a href="#">Irx4.eSep08</a>     | <a href="#">306655</a> | 1524  | 1054 | 3  | 31  | iroquois 4a protein like (Irx4) alternative variant eSep08, mRNA.                                   |
| <a href="#">Isca1</a>    | <a href="#">Isca1.bSep08</a>    | <a href="#">290985</a> | 11404 | 735  | 4  | 126 | iron-sulfur cluster assembly 1 homolog (S. cerevisiae) (Isca1) alternative variant bSep08, mRNA.    |
| <a href="#">Isca1</a>    | <a href="#">Isca1.cSep08</a>    | <a href="#">290985</a> | 9761  | 878  | 3  | 86  | iron-sulfur cluster assembly 1 homolog (S. cerevisiae) (Isca1) alternative variant cSep08, mRNA.    |
| <a href="#">Iscu</a>     | <a href="#">Iscu.bSep08</a>     | <a href="#">288740</a> | 1769  | 383  | 3  | 101 | IscU iron-sulfur cluster scaffold homolog (E. coli) (Iscu) alternative variant bSep08, mRNA.        |
| <a href="#">Iscu</a>     | <a href="#">Iscu.cSep08</a>     | <a href="#">288740</a> | 1599  | 345  | 2  | 75  | IscU iron-sulfur cluster scaffold homolog (E. coli) (Iscu) alternative variant cSep08, mRNA.        |
| <a href="#">isg12(b)</a> | <a href="#">isg12(b).aSep08</a> | <a href="#">299269</a> | 1467  | 540  | 1  | 136 | putative ISG12(b) protein (15.3 kD) (isg12(b)) alternative variant aSep08, mRNA.                    |
| <a href="#">Isg2011</a>  | <a href="#">Isg2011.bSep08</a>  | <a href="#">361594</a> | 6828  | 767  | 1  | 255 | interferon stimulated exonuclease gene 20-like 1 (Isg2011) alternative variant bSep08, mRNA.        |
| <a href="#">Isl1</a>     | <a href="#">Isl1.bSep08</a>     | <a href="#">64444</a>  | 4864  | 1716 | 3  | 209 | ISL1 transcription factor, LIM/homeodomain 1 (23.5 kD) (Isl1) alternative variant bSep08, mRNA.     |
| <a href="#">Isl1</a>     | <a href="#">Isl1.cSep08</a>     | <a href="#">64444</a>  | 2013  | 436  | 3  | 145 | ISL1 transcription factor, LIM/homeodomain 1 (Isl1) alternative variant cSep08, mRNA.               |
| <a href="#">Isl2</a>     | <a href="#">Isl2.aSep08</a>     | <a href="#">57233</a>  | 4011  | 1337 | 3  | 153 | insulin related protein 2 (islet 2) (Isl2) alternative variant aSep08, mRNA.                        |
| <a href="#">Isl2</a>     | <a href="#">Isl2.bSep08</a>     | <a href="#">57233</a>  | 2093  | 595  | 2  | 126 | insulin related protein 2 (islet 2) (Isl2) alternative variant bSep08, mRNA.                        |
| <a href="#">Isoc2b</a>   | <a href="#">Isoc2b.bSep08</a>   | <a href="#">361501</a> | 13897 | 769  | 4  | 141 | isochorismatase hydrolase (Isoc2b) alternative variant bSep08, mRNA.                                |
| <a href="#">Isoc2b</a>   | <a href="#">Isoc2b.cSep08</a>   | <a href="#">361501</a> | 7240  | 699  | 2  | 128 | putative protein of ancient origin (Isoc2b) alternative variant cSep08, mRNA.                       |
| <a href="#">Isoc2b</a>   | <a href="#">Isoc2b.dSep08</a>   | <a href="#">361501</a> | 13843 | 530  | 2  | 121 | putative cytoplasmic protein of ancient origin (13.4 kD) (Isoc2b) alternative variant dSep08, mRNA. |
| <a href="#">Isoc2b</a>   | <a href="#">Isoc2b.eSep08</a>   | <a href="#">361501</a> | 21066 | 1237 | 2  | 69  | putative protein (Isoc2b) alternative variant eSep08, mRNA.                                         |
| <a href="#">Isy1</a>     | <a href="#">Isy1.bSep08</a>     | <a href="#">362394</a> | 8512  | 790  | 6  | 165 | ISY1 splicing factor homolog (S. cerevisiae) (Isy1) alternative variant bSep08, mRNA.               |
| <a href="#">Isyna1</a>   | <a href="#">Isyna1.bSep08</a>   | <a href="#">290651</a> | 2803  | 1920 | 10 | 441 | myo-inositol 1-phosphate synthase A1 (48.0 kD) (Isyna1) alternative variant bSep08, complete mRNA.  |
| <a href="#">Isyna1</a>   | <a href="#">Isyna1.cSep08</a>   | <a href="#">290651</a> | 1545  | 1174 | 5  | 158 | myo-inositol 1-phosphate synthase A1 (Isyna1) alternative variant cSep08, mRNA.                     |
| <a href="#">Isyna1</a>   | <a href="#">Isyna1.dSep08</a>   | <a href="#">290651</a> | 941   | 705  | 3  | 148 | myo-inositol 1-phosphate synthase A1 (16.0 kD) (Isyna1) alternative variant dSep08, mRNA.           |

|                          |                                 |                        |       |      |    |     |                                                                                               |
|--------------------------|---------------------------------|------------------------|-------|------|----|-----|-----------------------------------------------------------------------------------------------|
| <a href="#">Itfg1</a>    | <a href="#">Itfg1.bSep08</a>    | <a href="#">171083</a> | 6232  | 877  | 4  | 133 | integrin alpha fg-gap repeat containing 1 (Itfg1) alternative variant bSep08, mRNA.           |
| <a href="#">Itfg1</a>    | <a href="#">Itfg1.cSep08</a>    | <a href="#">171083</a> | 6637  | 772  | 3  | 99  | integrin alpha fg-gap repeat containing 1 (11.4 kD) (Itfg1) alternative variant cSep08, mRNA. |
| <a href="#">Itfg2</a>    | <a href="#">Itfg2.aSep08</a>    | <a href="#">362441</a> | 12501 | 1397 | 7  | 431 | integrin alpha FG-GAP repeat containing 2 (Itfg2) alternative variant aSep08, mRNA.           |
| <a href="#">Itfg2</a>    | <a href="#">Itfg2.bSep08</a>    | <a href="#">362441</a> | 8642  | 619  | 1  | 205 | integrin alpha FG-GAP repeat containing 2 (Itfg2) alternative variant bSep08, mRNA.           |
| <a href="#">Itfg3</a>    | <a href="#">Itfg3.bSep08</a>    | <a href="#">360502</a> | 25803 | 763  | 3  | 192 | integrin alpha FG-GAP repeat containing 3 (Itfg3) alternative variant bSep08, mRNA.           |
| <a href="#">Itfg3</a>    | <a href="#">Itfg3.cSep08</a>    | <a href="#">360502</a> | 25262 | 837  | 5  | 109 | oculocerebrorenal syndrome of Lowe like (Itfg3) alternative variant cSep08, mRNA.             |
| <a href="#">Itfg3</a>    | <a href="#">Itfg3.dSep08</a>    | <a href="#">360502</a> | 23103 | 415  | 2  | 73  | putative protein (Itfg3) alternative variant dSep08, mRNA.                                    |
| <a href="#">Itga1</a>    | <a href="#">Itga1.bSep08</a>    | <a href="#">25118</a>  | 12615 | 760  | 5  | 248 | integrin alpha 1 (Itga1) alternative variant bSep08, mRNA.                                    |
| <a href="#">Itga1</a>    | <a href="#">Itga1.cSep08</a>    | <a href="#">25118</a>  | 15502 | 352  | 2  | 82  | integrin alpha 1 (Itga1) alternative variant cSep08, mRNA.                                    |
| <a href="#">Itga2</a>    | <a href="#">Itga2.aSep08</a>    | <a href="#">170921</a> | 4435  | 508  |    | 168 | integrin, alpha 2 (Itga2) mRNA.                                                               |
| <a href="#">Itga3</a>    | <a href="#">Itga3.bSep08</a>    | <a href="#">360606</a> | 10961 | 1769 | 1  | 209 | integrin alpha 3 (Itga3) alternative variant bSep08, mRNA.                                    |
| <a href="#">Itga5</a>    | <a href="#">Itga5.bSep08</a>    | <a href="#">315346</a> | 2270  | 374  | 4  | 124 | integrin alpha 5 (fibronectin receptor alpha) (Itga5) alternative variant bSep08, mRNA.       |
| <a href="#">Itga6</a>    | <a href="#">Itga6.aSep08</a>    | <a href="#">114517</a> | 19337 | 1871 | 12 | 623 | integrin, alpha 6 (Itga6) alternative variant aSep08, mRNA.                                   |
| <a href="#">Itga6</a>    | <a href="#">Itga6.bSep08</a>    | <a href="#">114517</a> | 1532  | 381  | 1  | 111 | integrin, alpha 6 (Itga6) alternative variant bSep08, mRNA.                                   |
| <a href="#">Itga7</a>    | <a href="#">Itga7.bSep08</a>    | <a href="#">81008</a>  | 741   | 232  | 2  | 76  | integrin alpha 7 (Itga7) alternative variant bSep08, mRNA.                                    |
| <a href="#">Itga9</a>    | <a href="#">Itga9.aSep08</a>    | <a href="#">685004</a> | 54056 | 2230 |    | 250 | integrin alpha 9 (Itga9) mRNA.                                                                |
| <a href="#">Itga11</a>   | <a href="#">Itga11.bSep08</a>   | <a href="#">315744</a> | 13211 | 994  | 9  | 290 | integrin, alpha 11 (Itga11) alternative variant bSep08, mRNA.                                 |
| <a href="#">Itga11</a>   | <a href="#">Itga11.cSep08</a>   | <a href="#">315744</a> | 14446 | 1305 | 8  | 278 | integrin, alpha 11 (Itga11) alternative variant cSep08, mRNA.                                 |
| <a href="#">Itgal</a>    | <a href="#">Itgal.bSep08</a>    | <a href="#">308995</a> | 9306  | 2190 | 2  | 293 | integrin alpha L (32.6 kD) (Itgal) alternative variant bSep08, mRNA.                          |
| <a href="#">Itgam</a>    | <a href="#">Itgam.aSep08</a>    | <a href="#">25021</a>  | 10927 | 287  |    | 95  | integrin alpha M (Itgam) mRNA.                                                                |
| <a href="#">Itgav</a>    | <a href="#">Itgav.bSep08</a>    | <a href="#">296456</a> | 9117  | 1452 | 6  | 199 | integrin alpha V (Itgav) alternative variant bSep08, mRNA.                                    |
| <a href="#">Itgax</a>    | <a href="#">Itgax.aSep08</a>    | <a href="#">499271</a> | 4094  | 648  |    | 215 | integrin alpha X (Itgax) mRNA.                                                                |
| <a href="#">Itgb1bp1</a> | <a href="#">Itgb1bp1.bSep08</a> | <a href="#">298914</a> | 13441 | 800  | 6  | 177 | integrin 1 protein (Itgb1bp1) alternative variant bSep08, mRNA.                               |
| <a href="#">Itgb1bp1</a> | <a href="#">Itgb1bp1.cSep08</a> | <a href="#">298914</a> | 10216 | 708  | 6  | 159 | integrin 1 protein (Itgb1bp1) alternative variant cSep08, mRNA.                               |
| <a href="#">Itgb1bp1</a> | <a href="#">Itgb1bp1.dSep08</a> | <a href="#">298914</a> | 13048 | 558  | 5  | 127 | integrin 1 protein (Itgb1bp1) alternative variant dSep08, mRNA.                               |
| <a href="#">Itgb1bp1</a> | <a href="#">Itgb1bp1.eSep08</a> | <a href="#">298914</a> | 5407  | 1388 | 3  | 106 | integrin 1 protein (11.2 kD) (Itgb1bp1) alternative variant eSep08, mRNA.                     |
| <a href="#">Itgb1bp1</a> | <a href="#">Itgb1bp1.gSep08</a> | <a href="#">298914</a> | 2095  | 1631 | 2  | 60  | integrin 1 protein (6.5 kD) (Itgb1bp1) alternative variant gSep08, mRNA.                      |
| <a href="#">Itgb1bp2</a> | <a href="#">Itgb1bp2.aSep08</a> | <a href="#">317258</a> | 4624  | 1270 |    | 349 | integrin beta 1 binding protein 2 (38.6 kD) (Itgb1bp2) mRNA.                                  |



|                            |                                   |                        |        |      |    |     |                                                                                                                              |
|----------------------------|-----------------------------------|------------------------|--------|------|----|-----|------------------------------------------------------------------------------------------------------------------------------|
| <a href="#">Itgb3bp</a>    | <a href="#">Itgb3bp.aSep08</a>    | <a href="#">362548</a> | 66032  | 1296 | 8  | 225 | integrin beta 3 binding protein (beta3-endonexin) (Itgb3bp) alternative variant aSep08, mRNA.                                |
| <a href="#">Itgb3bp</a>    | <a href="#">Itgb3bp.bSep08</a>    | <a href="#">362548</a> | 65611  | 851  | 7  | 222 | integrin beta 3 binding protein (beta3-endonexin) (Itgb3bp) alternative variant bSep08, mRNA.                                |
| <a href="#">Itgb3bp</a>    | <a href="#">Itgb3bp.cSep08</a>    | <a href="#">362548</a> | 65653  | 744  | 5  | 180 | integrin beta 3 binding protein (beta3-endonexin) (Itgb3bp) alternative variant cSep08, mRNA.                                |
| <a href="#">Itgb3bp</a>    | <a href="#">Itgb3bp.eSep08</a>    | <a href="#">362548</a> | 34046  | 620  | 3  | 163 | integrin beta 3 binding protein (beta3-endonexin) (Itgb3bp) alternative variant eSep08, mRNA.                                |
| <a href="#">Itgb3bp</a>    | <a href="#">Itgb3bp.fSep08</a>    | <a href="#">362548</a> | 24295  | 390  | 3  | 37  | integrin beta 3 binding protein (beta3-endonexin) (Itgb3bp) alternative variant fSep08, mRNA.                                |
| <a href="#">Itgb4</a>      | <a href="#">Itgb4.bSep08</a>      | <a href="#">25724</a>  | 4145   | 1112 | 6  | 370 | integrin beta 4 (Itgb4) alternative variant bSep08, mRNA.                                                                    |
| <a href="#">Itgb4</a>      | <a href="#">Itgb4.cSep08</a>      | <a href="#">25724</a>  | 377    | 297  | 2  | 98  | integrin beta 4 (Itgb4) alternative variant cSep08, mRNA.                                                                    |
| <a href="#">Itgb4</a>      | <a href="#">Itgb4.dSep08</a>      | <a href="#">25724</a>  | 1200   | 481  | 2  | 98  | integrin beta 4 (Itgb4) alternative variant dSep08, mRNA.                                                                    |
| <a href="#">Itgb5</a>      | <a href="#">Itgb5.bSep08</a>      | <a href="#">257645</a> | 74476  | 3089 | 12 | 618 | integrin, beta 5 (Itgb5) alternative variant bSep08, mRNA.                                                                   |
| <a href="#">Itgb5</a>      | <a href="#">Itgb5.cSep08</a>      | <a href="#">257645</a> | 33130  | 600  | 3  | 144 | integrin, beta 5 (Itgb5) alternative variant cSep08, mRNA.                                                                   |
| <a href="#">Itgb5</a>      | <a href="#">Itgb5.dSep08</a>      | <a href="#">257645</a> | 10308  | 389  | 4  | 129 | integrin, beta 5 (Itgb5) alternative variant dSep08, mRNA.                                                                   |
| <a href="#">Itgb5</a>      | <a href="#">Itgb5.eSep08</a>      | <a href="#">257645</a> | 9735   | 921  | 2  | 95  | integrin, beta 5 (Itgb5) alternative variant eSep08, mRNA.                                                                   |
| <a href="#">Itgb7</a>      | <a href="#">Itgb7.aSep08</a>      | <a href="#">25713</a>  | 11644  | 1899 |    | 633 | integrin, beta 7 (Itgb7) mRNA.                                                                                               |
| <a href="#">Itgb8</a>      | <a href="#">Itgb8.bSep08</a>      | <a href="#">362800</a> | 38931  | 605  | 3  | 118 | integrin beta 8 (Itgb8) alternative variant bSep08, mRNA.                                                                    |
| <a href="#">Itgb8</a>      | <a href="#">Itgb8.dSep08</a>      | <a href="#">362800</a> | 49054  | 396  | 3  | 70  | integrin beta 8 (Itgb8) alternative variant dSep08, mRNA.                                                                    |
| <a href="#">Itih1</a>      | <a href="#">Itih1.aSep08</a>      | <a href="#">306251</a> | 14348  | 3078 | 19 | 904 | inter-alpha trypsin inhibitor, heavy chain 1 (100.6 kD) (Itih1) alternative variant aSep08, complete mRNA.                   |
| <a href="#">Itih1</a>      | <a href="#">Itih1.bSep08</a>      | <a href="#">306251</a> | 2443   | 812  | 1  | 170 | inter-alpha trypsin inhibitor, heavy chain 1 (Itih1) alternative variant bSep08, mRNA.                                       |
| <a href="#">Itih3</a>      | <a href="#">Itih3.aSep08</a>      | <a href="#">50693</a>  | 8660   | 2046 | 7  | 607 | inter-alpha trypsin inhibitor, heavy chain 3 (Itih3) alternative variant aSep08, mRNA.                                       |
| <a href="#">Itih3</a>      | <a href="#">Itih3.bSep08</a>      | <a href="#">50693</a>  | 1433   | 383  | 1  | 88  | inter-alpha trypsin inhibitor, heavy chain 3 (Itih3) alternative variant bSep08, mRNA.                                       |
| <a href="#">ITI_HC_C.0</a> | <a href="#">ITI_HC_C.0.aSep08</a> |                        | 7498   | 1777 | 3  | 558 | inter-alpha inhibitor (ITI_HC_C.0) alternative variant aSep08, mRNA.                                                         |
| <a href="#">ITI_HC_C.0</a> | <a href="#">ITI_HC_C.0.bSep08</a> |                        | 7447   | 1239 | 1  | 293 | inter-alpha-trypsin inhibitor heavy chain H3 (32.2 kD) (ITI_HC_C.0) alternative variant bSep08, mRNA.                        |
| <a href="#">Itpa</a>       | <a href="#">Itpa.bSep08</a>       | <a href="#">311422</a> | 11741  | 1240 | 7  | 130 | inosine triphosphatase (nucleoside triphosphate pyrophosphatase) (14.5 kD) (Itpa) alternative variant bSep08, complete mRNA. |
| <a href="#">Itpk1</a>      | <a href="#">Itpk1.aSep08</a>      | <a href="#">500709</a> | 121799 | 740  | 2  | 246 | inositol 1,3,4-triphosphate 5/6 kinase (Itpk1) alternative variant aSep08, mRNA.                                             |
| <a href="#">Itpk1</a>      | <a href="#">Itpk1.bSep08</a>      | <a href="#">500709</a> | 42576  | 476  | 1  | 100 | inositol 1,3,4-triphosphate 5/6 kinase (Itpk1) alternative variant bSep08, mRNA.                                             |
| <a href="#">Itpk1</a>      | <a href="#">Itpk1.cSep08</a>      | <a href="#">500709</a> | 25562  | 364  | 1  | 100 | inositol 1,3,4-triphosphate 5/6 kinase (Itpk1) alternative variant cSep08, mRNA.                                             |
| <a href="#">Itpka</a>      | <a href="#">Itpka.bSep08</a>      | <a href="#">81677</a>  | 717    | 501  | 1  | 97  | inositol 1,4,5-trisphosphate 3-kinase A (Itpka) alternative variant bSep08, mRNA.                                            |
| <a href="#">Itpkb</a>      | <a href="#">Itpkb.bSep08</a>      | <a href="#">54260</a>  | 4013   | 620  | 4  | 206 | inositol 1,4,5-trisphosphate 3-kinase B (Itpkb) alternative variant bSep08, mRNA.                                            |

|                          |                                 |                        |        |      |    |     |                                                                                             |
|--------------------------|---------------------------------|------------------------|--------|------|----|-----|---------------------------------------------------------------------------------------------|
| <a href="#">Itpkb</a>    | <a href="#">Itpkb.cSep08</a>    | <a href="#">54260</a>  | 4608   | 361  | 2  | 120 | inositol 1,4,5-trisphosphate 3-kinase B (Itpkb) alternative variant cSep08, mRNA.           |
| <a href="#">Itpr1</a>    | <a href="#">Itpr1.aSep08</a>    | <a href="#">25262</a>  | 115496 | 395  |    | 62  | inositol 1,4,5-triphosphate receptor 1 (Itpr1) mRNA.                                        |
| <a href="#">Itpr2</a>    | <a href="#">Itpr2.aSep08</a>    | <a href="#">81678</a>  | 64478  | 1788 | 5  | 290 | inositol 1,4,5-triphosphate receptor 2 (32.9 kD) (Itpr2) alternative variant aSep08, mRNA.  |
| <a href="#">Itpr2</a>    | <a href="#">Itpr2.bSep08</a>    | <a href="#">81678</a>  | 26549  | 738  | 4  | 246 | inositol 1,4,5-triphosphate receptor 2 (Itpr2) alternative variant bSep08, mRNA.            |
| <a href="#">Itsn2</a>    | <a href="#">Itsn2.aSep08</a>    | <a href="#">313934</a> | 18864  | 2351 | 10 | 495 | intersectin 2 (57.3 kD) (Itsn2) alternative variant aSep08, mRNA.                           |
| <a href="#">Itsn2</a>    | <a href="#">Itsn2.bSep08</a>    | <a href="#">313934</a> | 1849   | 997  | 1  | 126 | intersectin 2 (14.7 kD) (Itsn2) alternative variant bSep08, mRNA.                           |
| <a href="#">Ivd</a>      | <a href="#">Ivd.bSep08</a>      | <a href="#">24513</a>  | 5948   | 761  | 6  | 253 | isovaleryl coenzyme A dehydrogenase (Ivd) alternative variant bSep08, mRNA.                 |
| <a href="#">Ivd</a>      | <a href="#">Ivd.cSep08</a>      | <a href="#">24513</a>  | 8653   | 2119 | 7  | 193 | isovaleryl coenzyme A dehydrogenase (21.2 kD) (Ivd) alternative variant cSep08, mRNA.       |
| <a href="#">Ivns1abp</a> | <a href="#">Ivns1abp.bSep08</a> | <a href="#">289089</a> | 8129   | 824  | 6  | 274 | influenza virus NS1A binding protein (Ivns1abp) alternative variant bSep08, mRNA.           |
| <a href="#">Ivns1abp</a> | <a href="#">Ivns1abp.cSep08</a> | <a href="#">289089</a> | 12467  | 490  | 4  | 135 | influenza virus NS1A binding protein (15.2 kD) (Ivns1abp) alternative variant cSep08, mRNA. |
| <a href="#">Ivns1abp</a> | <a href="#">Ivns1abp.dSep08</a> | <a href="#">289089</a> | 1048   | 843  | 2  | 131 | influenza virus NS1A binding protein (Ivns1abp) alternative variant dSep08, mRNA.           |
| <a href="#">Iws1</a>     | <a href="#">Iws1.bSep08</a>     | <a href="#">291705</a> | 3397   | 733  | 2  | 244 | IWS1 homolog (S. cerevisiae) (Iws1) alternative variant bSep08, mRNA.                       |
| <a href="#">Iws1</a>     | <a href="#">Iws1.cSep08</a>     | <a href="#">291705</a> | 14382  | 799  | 6  | 188 | IWS1 homolog (S. cerevisiae) (Iws1) alternative variant cSep08, mRNA.                       |
| <a href="#">Iws1</a>     | <a href="#">Iws1.dSep08</a>     | <a href="#">291705</a> | 9331   | 261  | 2  | 75  | IWS1 homolog (S. cerevisiae) (Iws1) alternative variant dSep08, mRNA.                       |
| <a href="#">Iws1</a>     | <a href="#">Iws1.eSep08</a>     | <a href="#">291705</a> | 3082   | 482  | 2  | 53  | IWS1 homolog (S. cerevisiae) (Iws1) alternative variant eSep08, mRNA.                       |
| <a href="#">I_LWEQ.0</a> | <a href="#">I_LWEQ.0.aSep08</a> |                        | 11379  | 2749 | 1  | 184 | huntingtin interacting protein 1 (I_LWEQ.0) alternative variant aSep08, mRNA.               |
| <a href="#">I_LWEQ.0</a> | <a href="#">I_LWEQ.0.bSep08</a> |                        | 5819   | 558  | 2  | 82  | huntingtin interacting protein 1 (I_LWEQ.0) alternative variant bSep08, mRNA.               |
| <a href="#">jaby</a>     | <a href="#">jaby.aSep08</a>     |                        | 2459   | 256  |    | 29  | putative protein (jaby) mRNA.                                                               |
| <a href="#">jachy</a>    | <a href="#">jachy.aSep08</a>    |                        | 6846   | 417  |    | 35  | putative protein (jachy) mRNA.                                                              |
| <a href="#">jadar</a>    | <a href="#">jadar.aSep08</a>    |                        | 17430  | 586  | 3  | 43  | putative protein (jadar) alternative variant aSep08, mRNA.                                  |
| <a href="#">jadar</a>    | <a href="#">jadar.bSep08</a>    |                        | 17882  | 512  | 3  | 54  | CRA a like (6.4 kD) (jadar) alternative variant bSep08, mRNA.                               |
| <a href="#">jadar</a>    | <a href="#">jadar.cSep08</a>    |                        | 1547   | 479  | 3  | 54  | CRA a like (6.4 kD) (jadar) alternative variant cSep08, mRNA.                               |
| <a href="#">jafer</a>    | <a href="#">jafer.aSep08</a>    |                        | 4554   | 389  |    | 72  | putative protein of ancient origin (jafer) mRNA.                                            |
| <a href="#">jaflo</a>    | <a href="#">jaflo.aSep08</a>    |                        | 3190   | 199  |    | 63  | gag protein like (jaflo) mRNA.                                                              |
| <a href="#">jaflu</a>    | <a href="#">jaflu.aSep08</a>    |                        | 907    | 367  | 2  | 122 | putative protein of mammalian origin (jaflu) alternative variant aSep08, mRNA.              |
| <a href="#">jaflu</a>    | <a href="#">jaflu.bSep08</a>    |                        | 786    | 304  | 2  | 90  | putative protein (jaflu) alternative variant bSep08, mRNA.                                  |
| <a href="#">Jag2</a>     | <a href="#">Jag2.aSep08</a>     | <a href="#">29147</a>  | 6336   | 2819 | 9  | 561 | jagged 2 (Jag2) alternative variant aSep08, mRNA.                                           |

|                         |                                |                        |       |      |   |     |                                                                                                              |
|-------------------------|--------------------------------|------------------------|-------|------|---|-----|--------------------------------------------------------------------------------------------------------------|
| <a href="#">Jag2</a>    | <a href="#">Jag2.bSep08</a>    | <a href="#">29147</a>  | 713   | 525  | 1 | 163 | jagged 2 (Jag2) alternative variant bSep08, mRNA.                                                            |
| <a href="#">Jak1</a>    | <a href="#">Jak1.cSep08</a>    | <a href="#">84598</a>  | 1828  | 633  | 3 | 88  | janus kinase 1 (Jak1) alternative variant cSep08, mRNA.                                                      |
| <a href="#">Jak3</a>    | <a href="#">Jak3.bSep08</a>    | <a href="#">25326</a>  | 1345  | 764  | 2 | 74  | janus kinase 3 (Jak3) alternative variant bSep08, mRNA.                                                      |
| <a href="#">jakee</a>   | <a href="#">jakee.aSep08</a>   |                        | 19028 | 1444 | 1 | 481 | putative protein, with 2 coiled coil domains, of vertebrate origin (jakee) alternative variant aSep08, mRNA. |
| <a href="#">jakee</a>   | <a href="#">jakee.bSep08</a>   |                        | 12855 | 748  |   | 248 | putative protein, with 2 coiled coil domains, of vertebrate origin (jakee) alternative variant bSep08, mRNA. |
| <a href="#">Jakmip1</a> | <a href="#">Jakmip1.bSep08</a> | <a href="#">305434</a> | 65262 | 436  | 1 | 69  | janus kinase and microtubule interacting protein 1 (Jakmip1) alternative variant bSep08, mRNA.               |
| <a href="#">Jakmip2</a> | <a href="#">Jakmip2.bSep08</a> | <a href="#">307479</a> | 10372 | 666  | 2 | 37  | janus kinase and microtubule interacting protein 2 (4.2 kD) (Jakmip2) alternative variant bSep08, mRNA.      |
| <a href="#">jaloy</a>   | <a href="#">jaloy.aSep08</a>   |                        | 2038  | 686  |   | 123 | putative nuclear protein (13.6 kD) (jaloy) mRNA.                                                             |
| <a href="#">jamee</a>   | <a href="#">jamee.aSep08</a>   |                        | 2295  | 278  |   | 62  | putative protein (jamee) mRNA.                                                                               |
| <a href="#">jamer</a>   | <a href="#">jamer.aSep08</a>   |                        | 1062  | 462  |   | 52  | putative protein (jamer) mRNA.                                                                               |
| <a href="#">janoy</a>   | <a href="#">janoy.aSep08</a>   |                        | 999   | 556  |   | 56  | putative protein (janoy) mRNA.                                                                               |
| <a href="#">japor</a>   | <a href="#">japor.aSep08</a>   |                        | 12529 | 724  |   | 38  | putative protein (4.1 kD) (japor) mRNA.                                                                      |
| <a href="#">jarby</a>   | <a href="#">jarby.aSep08</a>   |                        | 6625  | 1742 |   | 527 | putative protein (jarby) mRNA.                                                                               |
| <a href="#">jarchy</a>  | <a href="#">jarchy.aSep08</a>  |                        | 1485  | 812  |   | 31  | putative protein (3.6 kD) (jarchy) mRNA.                                                                     |
| <a href="#">jardar</a>  | <a href="#">jardar.aSep08</a>  |                        | 7407  | 420  |   | 139 | cyclic nucleotide-gated channel beta like (jardar) mRNA.                                                     |
| <a href="#">jarfer</a>  | <a href="#">jarfer.aSep08</a>  |                        | 19149 | 465  |   | 154 | gli3 (jarfer) mRNA.                                                                                          |
| <a href="#">jarflo</a>  | <a href="#">jarflo.aSep08</a>  |                        | 2389  | 302  |   | 28  | putative protein (jarflo) mRNA.                                                                              |
| <a href="#">jarflu</a>  | <a href="#">jarflu.aSep08</a>  |                        | 1844  | 830  | 1 | 187 | transient receptor potential cation channel subfamily M member 4 (jarflu) alternative variant aSep08, mRNA.  |
| <a href="#">jarflu</a>  | <a href="#">jarflu.bSep08</a>  |                        | 2000  | 708  | 2 | 128 | transient receptor potential cation channel subfamily M member 4 (jarflu) alternative variant bSep08, mRNA.  |
| <a href="#">Jarid1b</a> | <a href="#">Jarid1b.bSep08</a> | <a href="#">304809</a> | 7255  | 678  | 4 | 216 | jumonji, AT rich interactive domain 1B (Rbp2 like) (Jarid1b) alternative variant bSep08, mRNA.               |
| <a href="#">Jarid1b</a> | <a href="#">Jarid1b.cSep08</a> | <a href="#">304809</a> | 3180  | 754  | 3 | 205 | jumonji, AT rich interactive domain 1B (Rbp2 like) (Jarid1b) alternative variant cSep08, mRNA.               |
| <a href="#">jarkee</a>  | <a href="#">jarkee.aSep08</a>  |                        | 1778  | 590  |   | 57  | putative protein (6.3 kD) (jarkee) mRNA.                                                                     |
| <a href="#">jarloy</a>  | <a href="#">jarloy.aSep08</a>  |                        | 4809  | 781  |   | 123 | putative protein (jarloy) mRNA.                                                                              |
| <a href="#">jarmee</a>  | <a href="#">jarmee.aSep08</a>  |                        | 10871 | 403  |   | 134 | putative protein of metazoan origin (jarmee) mRNA.                                                           |
| <a href="#">jarmer</a>  | <a href="#">jarmer.aSep08</a>  |                        | 679   | 403  |   | 75  | putative nuclear protein (9.0 kD) (jarmer) mRNA.                                                             |
| <a href="#">jarnoy</a>  | <a href="#">jarnoy.aSep08</a>  |                        | 3824  | 357  |   | 114 | ankyrin armadillo repeat containing (jarnoy) mRNA.                                                           |
| <a href="#">jarpor</a>  | <a href="#">jarpor.aSep08</a>  |                        | 948   | 327  |   | 108 | dmx-like 2 (jarpor) mRNA.                                                                                    |
| <a href="#">jarsa</a>   | <a href="#">jarsa.aSep08</a>   |                        | 6442  | 1028 |   | 125 | gag-pol protein like (jarsa) mRNA.                                                                           |
| <a href="#">jarshee</a> | <a href="#">jarshee.aSep08</a> |                        | 4984  | 440  |   | 76  | putative nuclear protein (8.5 kD) (jarshee) mRNA.                                                            |
| <a href="#">jarvar</a>  | <a href="#">jarvar.aSep08</a>  |                        | 2880  | 227  |   | 75  | WD repeat domain 65 like (jarvar) mRNA.                                                                      |
| <a href="#">jarwey</a>  | <a href="#">jarwey.aSep08</a>  |                        | 1090  | 838  |   | 169 | putative protein (jarwey) mRNA.                                                                              |
| <a href="#">jasa</a>    | <a href="#">jasa.aSep08</a>    |                        | 1378  | 432  |   | 38  | putative protein (4.2 kD) (jasa) mRNA.                                                                       |
| <a href="#">jashee</a>  | <a href="#">jashee.aSep08</a>  |                        | 709   | 488  |   | 89  | putative protein (jashee) mRNA.                                                                              |
| <a href="#">jato</a>    | <a href="#">jato.aSep08</a>    |                        | 526   | 416  |   | 119 | immunoglobulin heavy chain (jato) mRNA.                                                                      |
| <a href="#">javar</a>   | <a href="#">javar.aSep08</a>   |                        | 4623  | 746  |   | 248 | putative protein of bilateral origin (javar) mRNA.                                                           |

|                         |                                |                        |        |      |   |     |                                                                                             |
|-------------------------|--------------------------------|------------------------|--------|------|---|-----|---------------------------------------------------------------------------------------------|
| <a href="#">jawby</a>   | <a href="#">jawby.aSep08</a>   |                        | 4070   | 674  |   | 29  | putative protein (jawby) mRNA.                                                              |
| <a href="#">jawchy</a>  | <a href="#">jawchy.aSep08</a>  |                        | 5257   | 751  |   | 85  | putative protein of mammalian origin (jawchy) mRNA.                                         |
| <a href="#">jawdar</a>  | <a href="#">jawdar.aSep08</a>  |                        | 9710   | 365  | 3 | 95  | putative protein (jawdar) alternative variant aSep08, mRNA.                                 |
| <a href="#">jawey</a>   | <a href="#">jawey.aSep08</a>   |                        | 1547   | 498  |   | 70  | putative protein (jawey) mRNA.                                                              |
| <a href="#">jawfer</a>  | <a href="#">jawfer.aSep08</a>  |                        | 541    | 440  |   | 83  | putative mitochondrial protein (9.3 kD) (jawfer) mRNA.                                      |
| <a href="#">jawflo</a>  | <a href="#">jawflo.aSep08</a>  |                        | 1844   | 1048 | 2 | 57  | putative protein (jawflo) alternative variant aSep08, mRNA.                                 |
| <a href="#">jawflu</a>  | <a href="#">jawflu.aSep08</a>  |                        | 2979   | 344  |   | 114 | transient receptor potential cation channel subfamily M member 4 (jawflu) mRNA.             |
| <a href="#">jawkee</a>  | <a href="#">jawkee.aSep08</a>  |                        | 1451   | 652  |   | 89  | putative protein (9.6 kD) (jawkee) mRNA.                                                    |
| <a href="#">jawloy</a>  | <a href="#">jawloy.aSep08</a>  |                        | 4581   | 602  |   | 36  | putative protein (4.4 kD) (jawloy) mRNA.                                                    |
| <a href="#">jawmee</a>  | <a href="#">jawmee.aSep08</a>  |                        | 2884   | 513  | 2 | 76  | putative protein (jawmee) alternative variant aSep08, mRNA.                                 |
| <a href="#">jawmer</a>  | <a href="#">jawmer.aSep08</a>  |                        | 9989   | 670  |   | 54  | putative protein (jawmer) mRNA.                                                             |
| <a href="#">jawnoy</a>  | <a href="#">jawnoy.aSep08</a>  |                        | 3437   | 885  |   | 27  | putative protein (3.3 kD) (jawnoy) alternative variant aSep08, mRNA.                        |
| <a href="#">jawnoy</a>  | <a href="#">jawnoy.bSep08</a>  |                        | 3168   | 677  | 1 | 20  | putative protein (2.2 kD) (jawnoy) alternative variant bSep08, mRNA.                        |
| <a href="#">jawpor</a>  | <a href="#">jawpor.aSep08</a>  |                        | 5003   | 457  |   | 59  | putative protein (jawpor) mRNA.                                                             |
| <a href="#">jawsa</a>   | <a href="#">jawsa.aSep08</a>   |                        | 2235   | 348  |   | 39  | putative protein (4.5 kD) (jawsa) mRNA.                                                     |
| <a href="#">jawshee</a> | <a href="#">jawshee.aSep08</a> |                        | 1271   | 395  | 2 | 83  | ski-like (jawshee) alternative variant aSep08, mRNA.                                        |
| <a href="#">jawvar</a>  | <a href="#">jawvar.aSep08</a>  |                        | 5657   | 568  |   | 26  | putative protein (3.1 kD) (jawvar) mRNA.                                                    |
| <a href="#">jawwey</a>  | <a href="#">jawwey.aSep08</a>  |                        | 8127   | 712  |   | 16  | putative protein (jawwey) mRNA.                                                             |
| <a href="#">Jazf1</a>   | <a href="#">Jazf1.aSep08</a>   | <a href="#">685879</a> | 200215 | 771  | 5 | 251 | JAZF zinc finger 1 (Jazf1) alternative variant aSep08, mRNA.                                |
| <a href="#">Jazf1</a>   | <a href="#">Jazf1.bSep08</a>   | <a href="#">685879</a> | 146476 | 448  | 4 | 102 | JAZF zinc finger 1 (Jazf1) alternative variant bSep08, mRNA.                                |
| <a href="#">jeeby</a>   | <a href="#">jeeby.aSep08</a>   |                        | 7717   | 2097 |   | 85  | putative nuclear protein (9.6 kD) (jeeby) mRNA.                                             |
| <a href="#">jeechy</a>  | <a href="#">jeechy.aSep08</a>  |                        | 24631  | 873  | 3 | 46  | putative protein (jeechy) alternative variant aSep08, mRNA.                                 |
| <a href="#">jeechy</a>  | <a href="#">jeechy.bSep08</a>  |                        | 22840  | 396  | 1 | 43  | putative protein (jeechy) alternative variant bSep08, mRNA.                                 |
| <a href="#">jeedar</a>  | <a href="#">jeedar.aSep08</a>  |                        | 627    | 556  | 2 | 61  | putative protein (jeedar) alternative variant aSep08, mRNA.                                 |
| <a href="#">jeefer</a>  | <a href="#">jeefer.aSep08</a>  |                        | 1395   | 786  |   | 125 | putative protein of mammalian origin (jeefer) mRNA.                                         |
| <a href="#">jeeflo</a>  | <a href="#">jeeflo.aSep08</a>  |                        | 25773  | 401  |   | 45  | putative protein (jeeflo) mRNA.                                                             |
| <a href="#">jeeflu</a>  | <a href="#">jeeflu.aSep08</a>  |                        | 6536   | 646  |   | 214 | transient receptor potential cation channel subfamily M member 4 (jeeflu) mRNA.             |
| <a href="#">jeekee</a>  | <a href="#">jeekee.aSep08</a>  |                        | 3733   | 387  |   | 82  | protein tyrosine phosphatase receptor type f polypeptide interacting alpha 4 (jeekee) mRNA. |
| <a href="#">jeeloy</a>  | <a href="#">jeeloy.aSep08</a>  |                        | 35868  | 484  |   | 61  | putative protein (6.0 kD) (jeeloy) mRNA.                                                    |
| <a href="#">jeemee</a>  | <a href="#">jeemee.aSep08</a>  |                        | 8401   | 427  |   | 142 | cyclase 9 (jeemee) mRNA.                                                                    |
| <a href="#">jeemer</a>  | <a href="#">jeemer.aSep08</a>  |                        | 1263   | 1006 | 1 | 191 | putative protein (jeemer) alternative variant aSep08, mRNA.                                 |

|                         |                                |                        |        |      |   |     |                                                                                           |
|-------------------------|--------------------------------|------------------------|--------|------|---|-----|-------------------------------------------------------------------------------------------|
| <a href="#">jeemer</a>  | <a href="#">jeemer.bSep08</a>  |                        | 1451   | 720  | 2 | 142 | putative protein (jeemer) alternative variant bSep08, mRNA.                               |
| <a href="#">jeenoy</a>  | <a href="#">jeenoy.aSep08</a>  |                        | 543    | 456  |   | 35  | putative protein (jeenoy) alternative variant aSep08, mRNA.                               |
| <a href="#">jeepor</a>  | <a href="#">jeepor.aSep08</a>  |                        | 3929   | 220  |   | 73  | putative protein (jeepor) mRNA.                                                           |
| <a href="#">jeesa</a>   | <a href="#">jeesa.aSep08</a>   |                        | 22297  | 655  |   | 66  | putative protein (7.3 kD) (jeesa) mRNA.                                                   |
| <a href="#">jeeshee</a> | <a href="#">jeeshee.aSep08</a> |                        | 4490   | 434  |   | 62  | putative protein (jeeshee) mRNA.                                                          |
| <a href="#">jeevar</a>  | <a href="#">jeevar.aSep08</a>  |                        | 3428   | 763  | 1 | 41  | putative protein (jeevar) alternative variant aSep08, mRNA.                               |
| <a href="#">jeevar</a>  | <a href="#">jeevar.bSep08</a>  |                        | 4518   | 316  | 2 | 36  | peptidyl prolyl isomerase H (jeevar) alternative variant bSep08, mRNA.                    |
| <a href="#">jeevar</a>  | <a href="#">jeevar.cSep08</a>  |                        | 9679   | 303  | 2 | 36  | peptidyl prolyl isomerase H (jeevar) alternative variant cSep08, mRNA.                    |
| <a href="#">jeewey</a>  | <a href="#">jeewey.aSep08</a>  |                        | 1162   | 342  | 1 | 67  | putative protein (jeewey) alternative variant aSep08, mRNA.                               |
| <a href="#">jeewey</a>  | <a href="#">jeewey.bSep08</a>  |                        | 34545  | 1324 | 7 | 70  | putative protein (8.0 kD) (jeewey) alternative variant bSep08, mRNA.                      |
| <a href="#">jerby</a>   | <a href="#">jerby.aSep08</a>   | <a href="#">367754</a> | 4398   | 499  |   | 165 | putative protein of vertebrate origin (jerby) mRNA.                                       |
| <a href="#">jerchy</a>  | <a href="#">jerchy.aSep08</a>  |                        | 16446  | 1368 |   | 94  | guanine nucleotide exchange factor (jerchy) mRNA.                                         |
| <a href="#">jerdar</a>  | <a href="#">jerdar.aSep08</a>  |                        | 10212  | 656  |   | 74  | putative protein (jerdar) mRNA.                                                           |
| <a href="#">jerfer</a>  | <a href="#">jerfer.aSep08</a>  |                        | 18139  | 407  | 2 | 96  | 2 beta 1 3 (jerfer) alternative variant aSep08, mRNA.                                     |
| <a href="#">jerfer</a>  | <a href="#">jerfer.bSep08</a>  |                        | 12215  | 730  | 1 | 88  | 2 beta 1 3 precursor (10.1 kD) (jerfer) alternative variant bSep08, mRNA.                 |
| <a href="#">jerflo</a>  | <a href="#">jerflo.aSep08</a>  |                        | 2969   | 1595 |   | 61  | pantothenate kinase (jerflo) mRNA.                                                        |
| <a href="#">jerflu</a>  | <a href="#">jerflu.aSep08</a>  |                        | 2094   | 353  |   | 117 | alpha 3 (jerflu) mRNA.                                                                    |
| <a href="#">jerkee</a>  | <a href="#">jerkee.aSep08</a>  |                        | 533    | 325  |   | 68  | protein tyrosine phosphatase receptor type f polypeptide interacting alpha (jerkee) mRNA. |
| <a href="#">jerloy</a>  | <a href="#">jerloy.aSep08</a>  |                        | 1041   | 588  |   | 63  | putative protein (jerloy) mRNA.                                                           |
| <a href="#">jermee</a>  | <a href="#">jermee.aSep08</a>  |                        | 1568   | 872  |   | 290 | putative protein of vertebrate origin (jermee) mRNA.                                      |
| <a href="#">jermer</a>  | <a href="#">jermer.aSep08</a>  |                        | 33940  | 676  |   | 38  | putative protein (4.3 kD) (jermer) mRNA.                                                  |
| <a href="#">jernoy</a>  | <a href="#">jernoy.aSep08</a>  |                        | 410    | 273  |   | 41  | putative protein (jernoy) mRNA.                                                           |
| <a href="#">jerpor</a>  | <a href="#">jerpor.aSep08</a>  |                        | 146771 | 701  |   | 233 | zinc finger protein 291 (jerpor) mRNA.                                                    |
| <a href="#">jersa</a>   | <a href="#">jersa.aSep08</a>   |                        | 57603  | 698  |   | 44  | putative protein (5.1 kD) (jersa) mRNA.                                                   |
| <a href="#">jershee</a> | <a href="#">jershee.aSep08</a> |                        | 9173   | 619  | 2 | 38  | putative protein (jershee) alternative variant aSep08, mRNA.                              |
| <a href="#">jershee</a> | <a href="#">jershee.bSep08</a> |                        | 8597   | 585  | 1 | 14  | putative protein (jershee) alternative variant bSep08, mRNA.                              |
| <a href="#">jervar</a>  | <a href="#">jervar.aSep08</a>  |                        | 2462   | 362  |   | 120 | CRA b (jervar) mRNA.                                                                      |
| <a href="#">jerwey</a>  | <a href="#">jerwey.aSep08</a>  |                        | 5554   | 682  |   | 43  | putative protein (jerwey) mRNA.                                                           |
| <a href="#">jeyby</a>   | <a href="#">jeyby.aSep08</a>   |                        | 6129   | 458  |   | 124 | interleukin 13 receptor alpha 2 (jeyby) mRNA.                                             |
| <a href="#">jeychy</a>  | <a href="#">jeychy.aSep08</a>  |                        | 548    | 379  |   | 107 | putative protein (jeychy) mRNA.                                                           |
| <a href="#">jeydar</a>  | <a href="#">jeydar.aSep08</a>  |                        | 2125   | 716  | 2 | 62  | putative protein (6.6 kD) (jeydar) alternative variant aSep08, mRNA.                      |
| <a href="#">jeyfer</a>  | <a href="#">jeyfer.aSep08</a>  |                        | 29364  | 459  |   | 75  | putative protein (jeyfer) mRNA.                                                           |
| <a href="#">jeyflo</a>  | <a href="#">jeyflo.aSep08</a>  |                        | 1664   | 724  |   | 66  | putative protein (7.3 kD) (jeyflo) mRNA.                                                  |

|                         |                                |                        |        |      |    |     |                                                                                  |
|-------------------------|--------------------------------|------------------------|--------|------|----|-----|----------------------------------------------------------------------------------|
| <a href="#">jeyflu</a>  | <a href="#">jeyflu.aSep08</a>  |                        | 1902   | 746  |    | 248 | putative protein of metazoan origin (jeyflu) mRNA.                               |
| <a href="#">jeykee</a>  | <a href="#">jeykee.aSep08</a>  |                        | 1323   | 623  |    | 47  | putative protein of mammalian origin (jeykee) mRNA.                              |
| <a href="#">jeyloy</a>  | <a href="#">jeyloy.aSep08</a>  |                        | 1990   | 525  | 3  | 108 | putative protein (jeyloy) alternative variant aSep08, mRNA.                      |
| <a href="#">jeymee</a>  | <a href="#">jeymee.aSep08</a>  |                        | 2142   | 313  |    | 84  | putative protein (jeymee) mRNA.                                                  |
| <a href="#">jeymer</a>  | <a href="#">jeymer.aSep08</a>  |                        | 2286   | 713  |    | 237 | peptidase M2, peptidyl-dipeptidase A (jeymer) mRNA.                              |
| <a href="#">jeynoy</a>  | <a href="#">jeynoy.aSep08</a>  |                        | 1762   | 390  |    | 90  | myosin Ib CRA b (jeynoy) mRNA.                                                   |
| <a href="#">jeypor</a>  | <a href="#">jeypor.aSep08</a>  |                        | 12969  | 470  |    | 53  | putative protein (5.9 kD) (jeypor) mRNA.                                         |
| <a href="#">jeysa</a>   | <a href="#">jeysa.aSep08</a>   |                        | 1162   | 398  |    | 132 | putative protein of mammalian origin (jeysa) mRNA.                               |
| <a href="#">jeyshee</a> | <a href="#">jeyshee.aSep08</a> |                        | 9530   | 576  | 2  | 176 | putative protein (jeyshee) alternative variant aSep08, mRNA.                     |
| <a href="#">jeyshee</a> | <a href="#">jeyshee.cSep08</a> |                        | 1744   | 759  | 2  | 57  | putative protein (6.3 kD) (jeyshee) alternative variant cSep08, mRNA.            |
| <a href="#">jeyvar</a>  | <a href="#">jeyvar.aSep08</a>  |                        | 21171  | 593  |    | 197 | family with sequence similarity 80 member (jeyvar) mRNA.                         |
| <a href="#">jeywey</a>  | <a href="#">jeywey.bSep08</a>  |                        | 2797   | 478  |    | 59  | putative protein (6.5 kD) (jeywey) alternative variant bSep08, mRNA.             |
| <a href="#">JmjC.0</a>  | <a href="#">JmjC.0.aSep08</a>  |                        | 15133  | 1759 |    | 586 | CRA a (JmjC.0) alternative variant aSep08, mRNA.                                 |
| <a href="#">JmjC.0</a>  | <a href="#">JmjC.0.bSep08</a>  |                        | 33744  | 1790 |    | 447 | CRA b (JmjC.0) alternative variant bSep08, mRNA.                                 |
| <a href="#">JmjC.0</a>  | <a href="#">JmjC.0.cSep08</a>  |                        | 10509  | 1230 | 7  | 394 | CRA a (JmjC.0) alternative variant cSep08, mRNA.                                 |
| <a href="#">JmjC.0</a>  | <a href="#">JmjC.0.dSep08</a>  |                        | 15528  | 2672 | 7  | 340 | CRA b (38.7 kD) (JmjC.0) alternative variant dSep08, mRNA.                       |
| <a href="#">JmjC.1</a>  | <a href="#">JmjC.1.aSep08</a>  |                        | 95069  | 1130 |    | 261 | transcription factor jumonji, JmjN (30.3 kD) (JmjC.1) mRNA.                      |
| <a href="#">Jmjd1a</a>  | <a href="#">Jmjd1a.bSep08</a>  | <a href="#">312440</a> | 23076  | 3470 | 17 | 955 | transcription factor jumonji (Jmjd1a) alternative variant bSep08, mRNA.          |
| <a href="#">Jmjd1a</a>  | <a href="#">Jmjd1a.cSep08</a>  | <a href="#">312440</a> | 11102  | 711  | 5  | 183 | putative protein (Jmjd1a) alternative variant cSep08, mRNA.                      |
| <a href="#">Jmjd1c</a>  | <a href="#">Jmjd1c.aSep08</a>  | <a href="#">171120</a> | 120674 | 807  | 4  | 268 | CRA b (Jmjd1c) alternative variant aSep08, mRNA.                                 |
| <a href="#">Jmjd1c</a>  | <a href="#">Jmjd1c.bSep08</a>  | <a href="#">171120</a> | 3412   | 349  | 2  | 83  | putative protein (Jmjd1c) alternative variant bSep08, mRNA.                      |
| <a href="#">Jmjd2a</a>  | <a href="#">Jmjd2a.bSep08</a>  | <a href="#">313539</a> | 7942   | 1057 | 5  | 229 | putative protein of eukaryotic origin (Jmjd2a) alternative variant bSep08, mRNA. |
| <a href="#">Jmjd2a</a>  | <a href="#">Jmjd2a.cSep08</a>  | <a href="#">313539</a> | 11148  | 521  | 5  | 173 | transcription factor jumonji, JmjN (Jmjd2a) alternative variant cSep08, mRNA.    |
| <a href="#">Jmjd2a</a>  | <a href="#">Jmjd2a.dSep08</a>  | <a href="#">313539</a> | 583    | 246  | 2  | 62  | putative protein of metazoan origin (Jmjd2a) alternative variant dSep08, mRNA.   |
| <a href="#">Jmjd2a</a>  | <a href="#">Jmjd2a.eSep08</a>  | <a href="#">313539</a> | 1627   | 339  | 2  | 41  | putative protein (4.4 kD) (Jmjd2a) alternative variant eSep08, mRNA.             |
| <a href="#">Jmjd2c</a>  | <a href="#">Jmjd2c.aSep08</a>  | <a href="#">298144</a> | 12634  | 950  | 5  | 310 | putative protein (Jmjd2c) alternative variant aSep08, mRNA.                      |
| <a href="#">Jmjd2c</a>  | <a href="#">Jmjd2c.bSep08</a>  | <a href="#">298144</a> | 52122  | 1756 | 7  | 293 | putative protein of eukaryotic origin (Jmjd2c) alternative variant bSep08, mRNA. |
| <a href="#">Jmjd2c</a>  | <a href="#">Jmjd2c.cSep08</a>  | <a href="#">298144</a> | 46795  | 1111 | 8  | 250 | putative protein (Jmjd2c) alternative variant cSep08, mRNA.                      |
| <a href="#">Jmjd2c</a>  | <a href="#">Jmjd2c.dSep08</a>  | <a href="#">298144</a> | 20287  | 504  | 4  | 105 | putative protein of eukaryotic origin (Jmjd2c) alternative variant dSep08, mRNA. |

|                                 |                                        |                        |       |      |   |     |                                                                                                      |
|---------------------------------|----------------------------------------|------------------------|-------|------|---|-----|------------------------------------------------------------------------------------------------------|
| <a href="#">Jmjd3</a>           | <a href="#">Jmjd3.bSep08</a>           | <a href="#">363630</a> | 1356  | 650  | 5 | 155 | putative protein of metazoan origin (Jmjd3) alternative variant bSep08, mRNA.                        |
| <a href="#">Jmjd3</a>           | <a href="#">Jmjd3.cSep08</a>           | <a href="#">363630</a> | 742   | 636  | 2 | 116 | putative protein of metazoan origin (Jmjd3) alternative variant cSep08, mRNA.                        |
| <a href="#">Jmjd5</a>           | <a href="#">Jmjd5.bSep08</a>           | <a href="#">308976</a> | 14905 | 1059 | 5 | 291 | putative protein of ancient origin (33.1 kD) (Jmjd5) alternative variant bSep08, complete mRNA.      |
| <a href="#">Jmjd5</a>           | <a href="#">Jmjd5.cSep08</a>           | <a href="#">308976</a> | 3979  | 737  | 3 | 130 | putative cytoplasmic protein of ancient origin (14.9 kD) (Jmjd5) alternative variant cSep08, mRNA.   |
| <a href="#">Jmjd5</a>           | <a href="#">Jmjd5.eSep08</a>           | <a href="#">308976</a> | 3291  | 664  | 3 | 43  | putative protein of eukaryotic origin (Jmjd5) alternative variant eSep08, mRNA.                      |
| <a href="#">Jmjd6</a>           | <a href="#">Jmjd6.bSep08</a>           | <a href="#">360665</a> | 5731  | 1684 | 6 | 454 | phosphatidylserine receptor CRA b (Jmjd6) alternative variant bSep08, mRNA.                          |
| <a href="#">Jmjd6</a>           | <a href="#">Jmjd6.cSep08</a>           | <a href="#">360665</a> | 3013  | 611  | 3 | 135 | putative protein of eukaryotic origin (Jmjd6) alternative variant cSep08, mRNA.                      |
| <a href="#">Jmjd6</a>           | <a href="#">Jmjd6.eSep08</a>           | <a href="#">360665</a> | 2536  | 693  | 3 | 98  | putative nuclear protein of vertebrate origin (10.4 kD) (Jmjd6) alternative variant eSep08, mRNA.    |
| <a href="#">Jmjd6</a>           | <a href="#">Jmjd6.fSep08</a>           | <a href="#">360665</a> | 1807  | 670  | 2 | 88  | putative protein of vertebrate origin (9.2 kD) (Jmjd6) alternative variant fSep08, mRNA.             |
| <a href="#">Jmjd6</a>           | <a href="#">Jmjd6.gSep08</a>           | <a href="#">360665</a> | 2939  | 631  | 4 | 60  | phosphatidylserine receptor transcript like (Jmjd6) alternative variant gSep08, mRNA.                |
| <a href="#">Jnk-SapK_ap_N.0</a> | <a href="#">Jnk-SapK_ap_N.0.aSep08</a> |                        | 23739 | 1194 | 7 | 365 | mitogen-activated protein kinase 8 interacting 3 (Jnk-SapK_ap_N.0) alternative variant aSep08, mRNA. |
| <a href="#">joby</a>            | <a href="#">joby.aSep08</a>            |                        | 5015  | 543  |   | 180 | shroom family member 4 (joby) mRNA.                                                                  |
| <a href="#">jochy</a>           | <a href="#">jochy.aSep08</a>           |                        | 10026 | 536  | 3 | 68  | putative protein (jochy) mRNA.                                                                       |
| <a href="#">jodar</a>           | <a href="#">jodar.aSep08</a>           |                        | 2263  | 532  | 2 | 126 | putative protein (jodar) alternative variant aSep08, mRNA.                                           |
| <a href="#">jofer</a>           | <a href="#">jofer.aSep08</a>           |                        | 34414 | 937  |   | 312 | cell division cycle 2-like 5 (jofer) mRNA.                                                           |
| <a href="#">joflo</a>           | <a href="#">joflo.aSep08</a>           |                        | 1174  | 970  |   | 15  | putative protein (1.8 kD) (joflo) mRNA.                                                              |
| <a href="#">joflu</a>           | <a href="#">joflu.aSep08</a>           |                        | 1277  | 712  |   | 67  | putative protein (joflu) mRNA.                                                                       |
| <a href="#">jokee</a>           | <a href="#">jokee.aSep08</a>           |                        | 1876  | 785  |   | 56  | putative protein (6.2 kD) (jokee) mRNA.                                                              |
| <a href="#">joloy</a>           | <a href="#">joloy.aSep08</a>           |                        | 1027  | 682  |   | 46  | putative protein (joloy) mRNA.                                                                       |
| <a href="#">jomee</a>           | <a href="#">jomee.aSep08</a>           |                        | 3742  | 743  |   | 81  | putative protein (jomee) mRNA.                                                                       |
| <a href="#">jomer</a>           | <a href="#">jomer.aSep08</a>           |                        | 1716  | 728  |   | 76  | putative mitochondrial protein (8.9 kD) (jomer) mRNA.                                                |
| <a href="#">jonoy</a>           | <a href="#">jonoy.aSep08</a>           |                        | 15753 | 1885 |   | 182 | basic immunoglobulin-like variable motif containing CRA b (jonoy) mRNA.                              |
| <a href="#">jopor</a>           | <a href="#">jopor.aSep08</a>           |                        | 47192 | 462  |   | 154 | dmx-like 2 (jopor) mRNA.                                                                             |
| <a href="#">jorby</a>           | <a href="#">jorby.aSep08</a>           |                        | 744   | 416  |   | 76  | angiominin (jorby) mRNA.                                                                             |
| <a href="#">jorchy</a>          | <a href="#">jorchy.aSep08</a>          |                        | 9676  | 1651 |   | 327 | putative protein of vertebrate origin (jorchy) mRNA.                                                 |
| <a href="#">jordar</a>          | <a href="#">jordar.aSep08</a>          |                        | 7030  | 361  |   | 27  | putative protein (jordar) mRNA.                                                                      |
| <a href="#">jorfer</a>          | <a href="#">jorfer.aSep08</a>          |                        | 24665 | 743  |   | 54  | putative protein (6.2 kD) (jorfer) mRNA.                                                             |
| <a href="#">jorflo</a>          | <a href="#">jorflo.aSep08</a>          |                        | 8484  | 489  |   | 52  | putative protein (5.7 kD) (jorflo) mRNA.                                                             |
| <a href="#">jorflu</a>          | <a href="#">jorflu.aSep08</a>          |                        | 7272  | 487  |   | 24  | putative protein (jorflu) mRNA.                                                                      |
| <a href="#">jorkee</a>          | <a href="#">jorkee.aSep08</a>          |                        | 4918  | 967  | 1 | 50  | putative protein (jorkee) alternative variant aSep08, mRNA.                                          |
| <a href="#">jorkee</a>          | <a href="#">jorkee.bSep08</a>          |                        | 4892  | 765  |   | 44  | putative protein (jorkee) alternative variant bSep08, mRNA.                                          |
| <a href="#">jorloy</a>          | <a href="#">jorloy.aSep08</a>          |                        | 1115  | 438  | 1 | 102 | mucin 4 (jorloy) alternative variant aSep08, mRNA.                                                   |

|                         |                                |                        |       |      |    |     |                                                                                                    |
|-------------------------|--------------------------------|------------------------|-------|------|----|-----|----------------------------------------------------------------------------------------------------|
| <a href="#">jorloy</a>  | <a href="#">jorloy.bSep08</a>  |                        | 2153  | 603  | 2  | 94  | mucin 4 (jorloy) alternative variant bSep08, mRNA.                                                 |
| <a href="#">jormee</a>  | <a href="#">jormee.aSep08</a>  |                        | 2643  | 753  |    | 121 | putative protein of mammalian origin (jormee) mRNA.                                                |
| <a href="#">jormer</a>  | <a href="#">jormer.aSep08</a>  |                        | 7550  | 693  | 2  | 42  | putative protein (4.9 kD) (jormer) alternative variant aSep08, mRNA.                               |
| <a href="#">jornoy</a>  | <a href="#">jornoy.aSep08</a>  |                        | 5107  | 1603 |    | 60  | myosin lb (jornoy) mRNA.                                                                           |
| <a href="#">jorpor</a>  | <a href="#">jorpor.aSep08</a>  |                        | 6016  | 483  |    | 66  | putative protein (7.3 kD) (jorpor) mRNA.                                                           |
| <a href="#">jorsa</a>   | <a href="#">jorsa.aSep08</a>   |                        | 96217 | 764  | 3  | 52  | putative protein (jorsa) alternative variant aSep08, mRNA.                                         |
| <a href="#">jorsa</a>   | <a href="#">jorsa.bSep08</a>   |                        | 76999 | 578  | 2  | 56  | putative protein (jorsa) alternative variant bSep08, mRNA.                                         |
| <a href="#">jorsa</a>   | <a href="#">jorsa.cSep08</a>   |                        | 75019 | 463  | 1  | 44  | putative protein (jorsa) alternative variant cSep08, mRNA.                                         |
| <a href="#">jorsa</a>   | <a href="#">jorsa.dSep08</a>   |                        | 75496 | 384  | 1  | 32  | putative protein (jorsa) alternative variant dSep08, mRNA.                                         |
| <a href="#">jorshee</a> | <a href="#">jorshee.aSep08</a> |                        | 1413  | 354  |    | 46  | putative protein (jorshee) mRNA.                                                                   |
| <a href="#">jorvar</a>  | <a href="#">jorvar.aSep08</a>  |                        | 82274 | 302  |    | 25  | putative protein (jorvar) mRNA.                                                                    |
| <a href="#">jorwey</a>  | <a href="#">jorwey.aSep08</a>  |                        | 7531  | 807  |    | 27  | putative protein (jorwey) mRNA.                                                                    |
| <a href="#">josa</a>    | <a href="#">josa.aSep08</a>    |                        | 21495 | 741  |    | 63  | putative protein (josa) mRNA.                                                                      |
| <a href="#">Josd2</a>   | <a href="#">Josd2.aSep08</a>   | <a href="#">292876</a> | 3431  | 1339 | 5  | 362 | putative protein of eukaryotic origin (Josd2) alternative variant aSep08, mRNA.                    |
| <a href="#">Josd2</a>   | <a href="#">Josd2.cSep08</a>   | <a href="#">292876</a> | 3792  | 928  | 5  | 188 | machado-Joseph disease protein MJD (20.8 kD) (Josd2) alternative variant cSep08, mRNA.             |
| <a href="#">Josd2</a>   | <a href="#">Josd2.dSep08</a>   | <a href="#">292876</a> | 2899  | 443  | 3  | 98  | putative protein of eukaryotic origin (Josd2) alternative variant dSep08, mRNA.                    |
| <a href="#">Josd3</a>   | <a href="#">Josd3.bSep08</a>   | <a href="#">363017</a> | 6400  | 1447 | 7  | 285 | putative nuclear protein of vertebrate origin (32.7 kD) (Josd3) alternative variant bSep08, mRNA.  |
| <a href="#">Josd3</a>   | <a href="#">Josd3.cSep08</a>   | <a href="#">363017</a> | 7642  | 1255 | 11 | 185 | putative protein of vertebrate origin (Josd3) alternative variant cSep08, mRNA.                    |
| <a href="#">Josd3</a>   | <a href="#">Josd3.dSep08</a>   | <a href="#">363017</a> | 6377  | 759  | 11 | 113 | putative protein of vertebrate origin (Josd3) alternative variant dSep08, mRNA.                    |
| <a href="#">Josd3</a>   | <a href="#">Josd3.eSep08</a>   | <a href="#">363017</a> | 1297  | 1093 | 2  | 49  | putative protein (5.9 kD) (Josd3) alternative variant eSep08, mRNA.                                |
| <a href="#">Josd3</a>   | <a href="#">Josd3.gSep08</a>   | <a href="#">363017</a> | 2921  | 688  | 7  | 42  | putative protein (4.8 kD) (Josd3) alternative variant gSep08, mRNA.                                |
| <a href="#">Josd3</a>   | <a href="#">Josd3.iSep08</a>   | <a href="#">363017</a> | 1515  | 518  | 5  | 35  | putative protein (4.1 kD) (Josd3) alternative variant iSep08, mRNA.                                |
| <a href="#">Josd3</a>   | <a href="#">Josd3.jSep08</a>   | <a href="#">363017</a> | 1277  | 484  | 4  | 8   | putative protein (Josd3) alternative variant jSep08, mRNA.                                         |
| <a href="#">Josd3</a>   | <a href="#">Josd3.kSep08</a>   | <a href="#">363017</a> | 4560  | 352  | 7  | 38  | putative protein (4.5 kD) (Josd3) alternative variant kSep08, mRNA.                                |
| <a href="#">joshee</a>  | <a href="#">joshee.aSep08</a>  |                        | 8194  | 267  |    | 89  | putative protein (joshee) mRNA.                                                                    |
| <a href="#">jovar</a>   | <a href="#">jovar.aSep08</a>   |                        | 1019  | 791  |    | 183 | transmembrane protein 125 (jovar) mRNA.                                                            |
| <a href="#">jowey</a>   | <a href="#">jowey.aSep08</a>   |                        | 8780  | 436  |    | 94  | putative mitochondrial protein (9.9 kD) (jowey) mRNA.                                              |
| <a href="#">joyby</a>   | <a href="#">joyby.aSep08</a>   |                        | 54481 | 396  |    | 60  | putative protein (6.5 kD) (joyby) mRNA.                                                            |
| <a href="#">joychy</a>  | <a href="#">joychy.aSep08</a>  |                        | 1847  | 267  |    | 72  | putative protein (joychy) mRNA.                                                                    |
| <a href="#">joydar</a>  | <a href="#">joydar.aSep08</a>  |                        | 9593  | 448  |    | 38  | putative protein (joydar) mRNA.                                                                    |
| <a href="#">joyfer</a>  | <a href="#">joyfer.aSep08</a>  |                        | 2937  | 198  |    | 66  | putative protein (joyfer) mRNA.                                                                    |
| <a href="#">joyflo</a>  | <a href="#">joyflo.bSep08</a>  | <a href="#">687730</a> | 19577 | 995  | 1  | 122 | putative protein, with a transmembrane domain (13.3 kD) (joyflo) alternative variant bSep08, mRNA. |



|                         |                                |                        |       |      |   |     |                                                                                                |
|-------------------------|--------------------------------|------------------------|-------|------|---|-----|------------------------------------------------------------------------------------------------|
| <a href="#">joyflu</a>  | <a href="#">joyflu.aSep08</a>  |                        | 4039  | 772  |   | 119 | CRA b like (12.4 kD) (joyflu) mRNA.                                                            |
| <a href="#">joykee</a>  | <a href="#">joykee.aSep08</a>  |                        | 16315 | 564  | 4 | 81  | protein phosphatase 1 regulatory (joykee) alternative variant aSep08, mRNA.                    |
| <a href="#">joyloy</a>  | <a href="#">joyloy.aSep08</a>  |                        | 6497  | 749  |   | 149 | putative mitochondrial protein (16.5 kD) (joyloy) mRNA.                                        |
| <a href="#">joymee</a>  | <a href="#">joymee.aSep08</a>  |                        | 1302  | 736  |   | 127 | putative protein (14.1 kD) (joymee) mRNA.                                                      |
| <a href="#">joymer</a>  | <a href="#">joymer.aSep08</a>  |                        | 2048  | 674  |   | 80  | putative secreted or extracellular protein precursor (9.0 kD) (joymer) mRNA.                   |
| <a href="#">joynoy</a>  | <a href="#">joynoy.aSep08</a>  |                        | 42476 | 302  |   | 33  | putative protein (joynoy) mRNA.                                                                |
| <a href="#">joypor</a>  | <a href="#">joypor.aSep08</a>  |                        | 11662 | 304  |   | 40  | putative protein (joypor) mRNA.                                                                |
| <a href="#">joysa</a>   | <a href="#">joysa.aSep08</a>   |                        | 5129  | 1591 | 2 | 56  | putative protein (6.2 kD) (joysa) alternative variant aSep08, mRNA.                            |
| <a href="#">joysa</a>   | <a href="#">joysa.bSep08</a>   |                        | 42742 | 921  | 4 | 81  | putative protein (9.2 kD) (joysa) alternative variant bSep08, mRNA.                            |
| <a href="#">joysa</a>   | <a href="#">joysa.cSep08</a>   |                        | 4043  | 505  | 1 | 26  | putative protein (joysa) alternative variant cSep08, mRNA.                                     |
| <a href="#">joyshee</a> | <a href="#">joyshee.aSep08</a> |                        | 51709 | 527  |   | 102 | putative protein (joyshee) mRNA.                                                               |
| <a href="#">joyvar</a>  | <a href="#">joyvar.aSep08</a>  |                        | 494   | 257  |   | 85  | putative protein (joyvar) mRNA.                                                                |
| <a href="#">joywey</a>  | <a href="#">joywey.aSep08</a>  |                        | 9600  | 678  |   | 83  | putative protein (joywey) mRNA.                                                                |
| <a href="#">Jph2</a>    | <a href="#">Jph2.bSep08</a>    | <a href="#">296345</a> | 3133  | 1759 | 3 | 46  | junctional protein 2 (Jph2) alternative variant bSep08, mRNA.                                  |
| <a href="#">Jph2</a>    | <a href="#">Jph2.cSep08</a>    | <a href="#">296345</a> | 67582 | 839  | 2 | 65  | junctional protein 2 (7.1 kD) (Jph2) alternative variant cSep08, mRNA.                         |
| <a href="#">Jph4</a>    | <a href="#">Jph4.bSep08</a>    | <a href="#">445271</a> | 3765  | 2690 | 3 | 393 | junctional protein 4 (42.0 kD) (Jph4) alternative variant bSep08, mRNA.                        |
| <a href="#">Jph4</a>    | <a href="#">Jph4.cSep08</a>    | <a href="#">445271</a> | 1451  | 729  | 2 | 242 | junctional protein 4 (Jph4) alternative variant cSep08, mRNA.                                  |
| <a href="#">Jph4</a>    | <a href="#">Jph4.dSep08</a>    | <a href="#">445271</a> | 3576  | 2411 | 3 | 221 | junctional protein 4 (23.0 kD) (Jph4) alternative variant dSep08, mRNA.                        |
| <a href="#">Jsrp1</a>   | <a href="#">Jsrp1.bSep08</a>   | <a href="#">690423</a> | 1693  | 687  | 2 | 66  | junctional sarcoplasmic reticulum protein 1 (Jsrp1) alternative variant bSep08, mRNA.          |
| <a href="#">Jsrp1</a>   | <a href="#">Jsrp1.cSep08</a>   | <a href="#">690423</a> | 1809  | 410  | 4 | 55  | junctional sarcoplasmic reticulum protein 1 (5.9 kD) (Jsrp1) alternative variant cSep08, mRNA. |
| <a href="#">Jtb</a>     | <a href="#">Jtb.bSep08</a>     | <a href="#">29439</a>  | 5342  | 1041 | 5 | 32  | jumping translocation breakpoint (3.5 kD) (Jtb) alternative variant bSep08, mRNA.              |
| <a href="#">Jtb</a>     | <a href="#">Jtb.dSep08</a>     | <a href="#">29439</a>  | 5086  | 747  | 4 | 32  | jumping translocation breakpoint (3.5 kD) (Jtb) alternative variant dSep08, mRNA.              |
| <a href="#">Jtb</a>     | <a href="#">Jtb.eSep08</a>     | <a href="#">29439</a>  | 1678  | 736  | 3 | 56  | jumping translocation breakpoint (Jtb) alternative variant eSep08, mRNA.                       |
| <a href="#">Jtv1</a>    | <a href="#">Jtv1.bSep08</a>    | <a href="#">288480</a> | 9324  | 815  | 1 | 253 | JTV1 gene (Jtv1) alternative variant bSep08, mRNA.                                             |
| <a href="#">juby</a>    | <a href="#">juby.aSep08</a>    |                        | 30171 | 605  |   | 201 | shroom family member 4 (juby) mRNA.                                                            |
| <a href="#">juchy</a>   | <a href="#">juchy.aSep08</a>   |                        | 556   | 294  |   | 27  | putative protein (juchy) mRNA.                                                                 |
| <a href="#">judar</a>   | <a href="#">judar.aSep08</a>   |                        | 12069 | 911  |   | 60  | putative protein (6.7 kD) (judar) mRNA.                                                        |
| <a href="#">jufer</a>   | <a href="#">jufer.aSep08</a>   |                        | 596   | 409  |   | 32  | putative protein (jufer) mRNA.                                                                 |
| <a href="#">juflo</a>   | <a href="#">juflo.aSep08</a>   |                        | 1457  | 294  | 2 | 31  | putative protein (juflo) alternative variant aSep08, mRNA.                                     |
| <a href="#">juflu</a>   | <a href="#">juflu.aSep08</a>   |                        | 421   | 342  |   | 113 | proline rich 12 (juflu) mRNA.                                                                  |
| <a href="#">jukee</a>   | <a href="#">jukee.aSep08</a>   |                        | 10464 | 340  |   | 55  | putative protein (jukee) mRNA.                                                                 |
| <a href="#">juloy</a>   | <a href="#">juloy.aSep08</a>   |                        | 812   | 470  |   | 61  | putative protein (juloy) mRNA.                                                                 |

|                        |                               |                        |        |      |   |     |                                                                                 |
|------------------------|-------------------------------|------------------------|--------|------|---|-----|---------------------------------------------------------------------------------|
| <a href="#">jumee</a>  | <a href="#">jumee.aSep08</a>  |                        | 13225  | 359  |   | 53  | putative protein (jumee) mRNA.                                                  |
| <a href="#">jumer</a>  | <a href="#">jumer.aSep08</a>  |                        | 2758   | 876  |   | 84  | putative protein (jumer) mRNA.                                                  |
| <a href="#">junoy</a>  | <a href="#">junoy.aSep08</a>  |                        | 13650  | 814  |   | 189 | basic immunoglobulin-like variable motif containing CRA b (junoy) mRNA.         |
| <a href="#">Jup</a>    | <a href="#">Jup.bSep08</a>    | <a href="#">81679</a>  | 14713  | 858  | 2 | 285 | junction plakoglobin (Jup) alternative variant bSep08, mRNA.                    |
| <a href="#">Jup</a>    | <a href="#">Jup.cSep08</a>    | <a href="#">81679</a>  | 14288  | 568  | 1 | 189 | junction plakoglobin (Jup) alternative variant cSep08, mRNA.                    |
| <a href="#">jupor</a>  | <a href="#">jupor.aSep08</a>  |                        | 3553   | 481  |   | 160 | CRA a (jupor) mRNA.                                                             |
| <a href="#">jusa</a>   | <a href="#">jusa.aSep08</a>   |                        | 867    | 781  |   | 99  | putative protein (jusa) mRNA.                                                   |
| <a href="#">jushee</a> | <a href="#">jushee.aSep08</a> |                        | 112917 | 663  | 4 | 171 | putative protein (18.8 kD) (jushee) alternative variant aSep08, mRNA.           |
| <a href="#">juvar</a>  | <a href="#">juvar.aSep08</a>  |                        | 806    | 444  |   | 86  | putative protein of bilateral origin (juvar) mRNA.                              |
| <a href="#">juwey</a>  | <a href="#">juwey.aSep08</a>  |                        | 16035  | 454  |   | 70  | putative protein (juwey) mRNA.                                                  |
| <a href="#">jyby</a>   | <a href="#">jyby.aSep08</a>   |                        | 55211  | 373  |   | 96  | putative protein (jyby) mRNA.                                                   |
| <a href="#">jychy</a>  | <a href="#">jychy.aSep08</a>  |                        | 5570   | 479  |   | 37  | putative protein (jychy) mRNA.                                                  |
| <a href="#">jydar</a>  | <a href="#">jydar.aSep08</a>  |                        | 1390   | 421  |   | 108 | putative protein (jydar) mRNA.                                                  |
| <a href="#">jyfer</a>  | <a href="#">jyfer.aSep08</a>  |                        | 2408   | 666  |   | 80  | putative protein (jyfer) mRNA.                                                  |
| <a href="#">jyflo</a>  | <a href="#">jyflo.aSep08</a>  |                        | 5977   | 1190 |   | 129 | putative protein (14.8 kD) (jyflo) mRNA.                                        |
| <a href="#">jyflu</a>  | <a href="#">jyflu.aSep08</a>  |                        | 891    | 759  |   | 230 | interleukin 4 induced 1 like (jyflu) mRNA.                                      |
| <a href="#">jykee</a>  | <a href="#">jykee.bSep08</a>  |                        | 5753   | 506  | 4 | 131 | putative protein of vertebrate origin (jykee) alternative variant bSep08, mRNA. |
| <a href="#">jykee</a>  | <a href="#">jykee.cSep08</a>  |                        | 8766   | 3869 | 2 | 65  | putative protein of vertebrate origin (jykee) alternative variant cSep08, mRNA. |
| <a href="#">jykee</a>  | <a href="#">jykee.eSep08</a>  |                        | 1071   | 419  | 2 | 107 | putative protein (jykee) alternative variant eSep08, mRNA.                      |
| <a href="#">jykee</a>  | <a href="#">jykee.gSep08</a>  |                        | 419    | 328  | 2 | 30  | putative protein (3.1 kD) (jykee) alternative variant gSep08, mRNA.             |
| <a href="#">jyloy</a>  | <a href="#">jyloy.aSep08</a>  |                        | 2352   | 434  |   | 119 | putative protein (jyloy) mRNA.                                                  |
| <a href="#">jymee</a>  | <a href="#">jymee.aSep08</a>  |                        | 618    | 384  |   | 31  | putative protein (jymee) mRNA.                                                  |
| <a href="#">jymer</a>  | <a href="#">jymer.aSep08</a>  |                        | 4013   | 544  |   | 103 | putative nuclear protein (11.9 kD) (jymer) mRNA.                                |
| <a href="#">jynoy</a>  | <a href="#">jynoy.aSep08</a>  |                        | 9323   | 735  |   | 74  | putative protein (jynoy) mRNA.                                                  |
| <a href="#">jypor</a>  | <a href="#">jypor.aSep08</a>  |                        | 2770   | 390  |   | 129 | dmx-like 2 (jypor) mRNA.                                                        |
| <a href="#">jysa</a>   | <a href="#">jysa.aSep08</a>   |                        | 20723  | 922  | 2 | 57  | putative protein (jysa) alternative variant aSep08, mRNA.                       |
| <a href="#">jysa</a>   | <a href="#">jysa.bSep08</a>   |                        | 14958  | 770  | 2 | 67  | putative protein (jysa) alternative variant bSep08, mRNA.                       |
| <a href="#">jyshee</a> | <a href="#">jyshee.aSep08</a> |                        | 5250   | 354  |   | 118 | putative protein of ancient origin (jyshee) mRNA.                               |
| <a href="#">jyvar</a>  | <a href="#">jyvar.aSep08</a>  |                        | 5689   | 1801 |   | 600 | putative protein of bilateral origin (jyvar) alternative variant aSep08, mRNA.  |
| <a href="#">jyvar</a>  | <a href="#">jyvar.bSep08</a>  |                        | 1356   | 417  |   | 138 | putative protein of bilateral origin (jyvar) alternative variant bSep08, mRNA.  |
| <a href="#">jywey</a>  | <a href="#">jywey.aSep08</a>  |                        | 3853   | 369  |   | 123 | putative protein of ancient origin (jywey) mRNA.                                |
| <a href="#">Kab</a>    | <a href="#">Kab.aSep08</a>    | <a href="#">171457</a> | 9218   | 2627 |   | 208 | KARP-1 binding protein 1 (Kab) mRNA.                                            |
| <a href="#">kaby</a>   | <a href="#">kaby.aSep08</a>   |                        | 2925   | 716  |   | 42  | putative protein (4.9 kD) (kaby) mRNA.                                          |
| <a href="#">kachy</a>  | <a href="#">kachy.aSep08</a>  |                        | 481    | 295  |   | 28  | putative protein (kachy) mRNA.                                                  |

|                        |                               |                        |       |      |   |     |                                                                                         |
|------------------------|-------------------------------|------------------------|-------|------|---|-----|-----------------------------------------------------------------------------------------|
| <a href="#">kadar</a>  | <a href="#">kadar.aSep08</a>  |                        | 4148  | 540  |   | 96  | putative protein (kadar) mRNA.                                                          |
| <a href="#">kafer</a>  | <a href="#">kafer.aSep08</a>  |                        | 4674  | 502  | 3 | 90  | putative protein (10.2 kD) (kafer) alternative variant aSep08, mRNA.                    |
| <a href="#">kafer</a>  | <a href="#">kafer.bSep08</a>  |                        | 4297  | 436  | 3 | 35  | putative protein (4.2 kD) (kafer) alternative variant bSep08, mRNA.                     |
| <a href="#">kaflo</a>  | <a href="#">kaflo.aSep08</a>  |                        | 405   | 281  |   | 62  | putative protein (kaflo) mRNA.                                                          |
| <a href="#">kaflu</a>  | <a href="#">kaflu.aSep08</a>  |                        | 1356  | 663  |   | 111 | putative protein (kaflu) mRNA.                                                          |
| <a href="#">kakee</a>  | <a href="#">kakee.aSep08</a>  |                        | 994   | 183  |   | 60  | protein phosphatase 1 regulatory (kakee) mRNA.                                          |
| <a href="#">kaloy</a>  | <a href="#">kaloy.aSep08</a>  |                        | 39492 | 390  |   | 105 | putative protein (kaloy) mRNA.                                                          |
| <a href="#">Kalrn</a>  | <a href="#">Kalrn.bSep08</a>  | <a href="#">84009</a>  | 22707 | 803  | 5 | 250 | kalirin RhoGEF kinase CRA c (28.6 kD) (Kalrn) alternative variant bSep08, mRNA.         |
| <a href="#">Kalrn</a>  | <a href="#">Kalrn.cSep08</a>  | <a href="#">84009</a>  | 59065 | 737  | 4 | 245 | kalirin RhoGEF kinase (Kalrn) alternative variant cSep08, mRNA.                         |
| <a href="#">Kalrn</a>  | <a href="#">Kalrn.dSep08</a>  | <a href="#">84009</a>  | 5688  | 950  | 4 | 200 | kalirin RhoGEF kinase CRA c (Kalrn) alternative variant dSep08, mRNA.                   |
| <a href="#">Kalrn</a>  | <a href="#">Kalrn.eSep08</a>  | <a href="#">84009</a>  | 22854 | 387  | 4 | 124 | kalirin RhoGEF kinase (Kalrn) alternative variant eSep08, mRNA.                         |
| <a href="#">Kalrn</a>  | <a href="#">Kalrn.fSep08</a>  | <a href="#">84009</a>  | 2935  | 584  | 2 | 84  | kalirin RhoGEF kinase CRA f (Kalrn) alternative variant fSep08, mRNA.                   |
| <a href="#">Kalrn</a>  | <a href="#">Kalrn.gSep08</a>  | <a href="#">84009</a>  | 40057 | 417  | 2 | 67  | putative protein (Kalrn) alternative variant gSep08, mRNA.                              |
| <a href="#">kamee</a>  | <a href="#">kamee.aSep08</a>  |                        | 1054  | 573  |   | 103 | putative protein (kamee) mRNA.                                                          |
| <a href="#">kamer</a>  | <a href="#">kamer.aSep08</a>  |                        | 47320 | 277  |   | 65  | testis expressed 2 (kamer) mRNA.                                                        |
| <a href="#">Kank3</a>  | <a href="#">Kank3.bSep08</a>  | <a href="#">366848</a> | 2798  | 2002 | 5 | 615 | putative protein, with 2 coiled coil domains (Kank3) alternative variant bSep08, mRNA.  |
| <a href="#">Kank3</a>  | <a href="#">Kank3.cSep08</a>  | <a href="#">366848</a> | 856   | 762  | 2 | 70  | putative protein (7.6 kD) (Kank3) alternative variant cSep08, mRNA.                     |
| <a href="#">Kank4</a>  | <a href="#">Kank4.bSep08</a>  | <a href="#">313385</a> | 19345 | 1764 | 5 | 422 | ankyrin (Kank4) alternative variant bSep08, mRNA.                                       |
| <a href="#">Kank4</a>  | <a href="#">Kank4.cSep08</a>  | <a href="#">313385</a> | 5345  | 758  | 3 | 62  | putative protein of mammalian origin (7.0 kD) (Kank4) alternative variant cSep08, mRNA. |
| <a href="#">kanoy</a>  | <a href="#">kanoy.aSep08</a>  |                        | 1458  | 411  |   | 47  | putative protein (kanoy) mRNA.                                                          |
| <a href="#">kapor</a>  | <a href="#">kapor.aSep08</a>  |                        | 7481  | 208  | 2 | 68  | putative protein (kapor) alternative variant aSep08, mRNA.                              |
| <a href="#">kapor</a>  | <a href="#">kapor.bSep08</a>  |                        | 8274  | 1026 | 2 | 51  | putative protein (5.8 kD) (kapor) alternative variant bSep08, complete mRNA.            |
| <a href="#">kapor</a>  | <a href="#">kapor.dSep08</a>  |                        | 9011  | 398  | 3 | 51  | putative protein (5.8 kD) (kapor) alternative variant dSep08, mRNA.                     |
| <a href="#">karby</a>  | <a href="#">karby.aSep08</a>  |                        | 5346  | 1034 |   | 74  | putative protein (karby) mRNA.                                                          |
| <a href="#">karchy</a> | <a href="#">karchy.aSep08</a> |                        | 5452  | 463  | 1 | 40  | putative protein (karchy) alternative variant aSep08, mRNA.                             |
| <a href="#">karchy</a> | <a href="#">karchy.bSep08</a> |                        | 1452  | 99   | 1 | 32  | putative protein (karchy) alternative variant bSep08, mRNA.                             |
| <a href="#">kardar</a> | <a href="#">kardar.aSep08</a> |                        | 11180 | 300  |   | 64  | putative protein (kardar) mRNA.                                                         |
| <a href="#">karfer</a> | <a href="#">karfer.aSep08</a> |                        | 24214 | 714  |   | 237 | supervillin (karfer) mRNA.                                                              |
| <a href="#">karflo</a> | <a href="#">karflo.aSep08</a> |                        | 1010  | 229  | 1 | 66  | putative protein (karflo) alternative variant aSep08, mRNA.                             |
| <a href="#">karflo</a> | <a href="#">karflo.bSep08</a> |                        | 835   | 299  | 1 | 32  | putative protein (3.5 kD) (karflo) alternative variant bSep08, mRNA.                    |

|                         |                                |                        |        |      |    |     |                                                                                   |
|-------------------------|--------------------------------|------------------------|--------|------|----|-----|-----------------------------------------------------------------------------------|
| <a href="#">karflu</a>  | <a href="#">karflu.aSep08</a>  |                        | 21785  | 674  |    | 224 | guanine nucleotide exchange factor (karflu) mRNA.                                 |
| <a href="#">karjey</a>  | <a href="#">karjey.aSep08</a>  |                        | 6812   | 681  | 3  | 182 | putative protein of vertebrate origin (karjey) alternative variant aSep08, mRNA.  |
| <a href="#">karkee</a>  | <a href="#">karkee.aSep08</a>  |                        | 2106   | 428  |    | 47  | putative protein (karkee) mRNA.                                                   |
| <a href="#">karloy</a>  | <a href="#">karloy.aSep08</a>  |                        | 2328   | 1213 |    | 41  | putative protein (karloy) mRNA.                                                   |
| <a href="#">karmee</a>  | <a href="#">karmee.aSep08</a>  |                        | 8145   | 816  | 3  | 178 | putative protein (karmee) alternative variant aSep08, mRNA.                       |
| <a href="#">karmee</a>  | <a href="#">karmee.bSep08</a>  |                        | 9444   | 752  | 2  | 37  | putative protein (4.4 kD) (karmee) alternative variant bSep08, mRNA.              |
| <a href="#">karmer</a>  | <a href="#">karmer.aSep08</a>  |                        | 18068  | 629  |    | 115 | CRA b like (karmer) mRNA.                                                         |
| <a href="#">karnoy</a>  | <a href="#">karnoy.aSep08</a>  |                        | 2490   | 412  |    | 42  | putative protein (karnoy) mRNA.                                                   |
| <a href="#">karpor</a>  | <a href="#">karpor.aSep08</a>  |                        | 2465   | 493  |    | 39  | putative protein (karpor) mRNA.                                                   |
| <a href="#">Kars</a>    | <a href="#">Kars.bSep08</a>    | <a href="#">292028</a> | 14015  | 1564 | 10 | 499 | lysyl-tRNA synthetase (Kars) alternative variant bSep08, mRNA.                    |
| <a href="#">Kars</a>    | <a href="#">Kars.cSep08</a>    | <a href="#">292028</a> | 4276   | 875  | 2  | 107 | lysyl-tRNA synthetase (Kars) alternative variant cSep08, mRNA.                    |
| <a href="#">karsa</a>   | <a href="#">karsa.aSep08</a>   |                        | 18521  | 724  | 6  | 241 | PHD finger protein 20-like 1 (karsa) alternative variant aSep08, mRNA.            |
| <a href="#">karsa</a>   | <a href="#">karsa.bSep08</a>   |                        | 649    | 417  | 2  | 99  | tudor domain-containing protein Phf2011 (karsa) alternative variant bSep08, mRNA. |
| <a href="#">karshee</a> | <a href="#">karshee.aSep08</a> |                        | 3181   | 199  | 2  | 63  | putative protein (karshee) alternative variant aSep08, mRNA.                      |
| <a href="#">kartu</a>   | <a href="#">kartu.aSep08</a>   |                        | 3521   | 330  |    | 25  | putative protein (2.9 kD) (kartu) mRNA.                                           |
| <a href="#">karvar</a>  | <a href="#">karvar.aSep08</a>  |                        | 8727   | 1010 |    | 336 | rearranged L-myc fusion (karvar) mRNA.                                            |
| <a href="#">karwey</a>  | <a href="#">karwey.aSep08</a>  |                        | 1438   | 634  |    | 51  | putative protein (5.7 kD) (karwey) mRNA.                                          |
| <a href="#">kasa</a>    | <a href="#">kasa.aSep08</a>    |                        | 19188  | 661  | 3  | 23  | putative protein (2.5 kD) (kasa) alternative variant aSep08, mRNA.                |
| <a href="#">kasa</a>    | <a href="#">kasa.bSep08</a>    |                        | 77452  | 615  | 4  | 46  | putative protein (kasa) alternative variant bSep08, mRNA.                         |
| <a href="#">kashee</a>  | <a href="#">kashee.aSep08</a>  |                        | 38533  | 546  | 2  | 131 | CRA b like (kashee) alternative variant aSep08, mRNA.                             |
| <a href="#">kashee</a>  | <a href="#">kashee.bSep08</a>  |                        | 39961  | 960  | 3  | 91  | CRA b like (10.4 kD) (kashee) alternative variant bSep08, mRNA.                   |
| <a href="#">kashee</a>  | <a href="#">kashee.cSep08</a>  |                        | 25845  | 584  | 3  | 67  | putative protein (8.0 kD) (kashee) alternative variant cSep08, mRNA.              |
| <a href="#">kashee</a>  | <a href="#">kashee.dSep08</a>  |                        | 124315 | 1405 | 5  | 91  | CRA b like (10.4 kD) (kashee) alternative variant dSep08, mRNA.                   |
| <a href="#">kashee</a>  | <a href="#">kashee.fSep08</a>  |                        | 24908  | 661  | 3  | 55  | CRA c like (6.1 kD) (kashee) alternative variant fSep08, mRNA.                    |
| <a href="#">kashee</a>  | <a href="#">kashee.gSep08</a>  |                        | 25743  | 658  | 3  | 60  | putative protein (7.3 kD) (kashee) alternative variant gSep08, mRNA.              |
| <a href="#">Kat3</a>    | <a href="#">Kat3.aSep08</a>    | <a href="#">541589</a> | 14327  | 636  |    | 167 | kynurenine aminotransferase III (Kat3) alternative variant aSep08, mRNA.          |
| <a href="#">Kat3</a>    | <a href="#">Kat3.bSep08</a>    | <a href="#">541589</a> | 7950   | 431  |    | 74  | kynurenine aminotransferase III (Kat3) alternative variant bSep08, mRNA.          |
| <a href="#">Katnal1</a> | <a href="#">Katnal1.bSep08</a> | <a href="#">288449</a> | 44133  | 798  | 6  | 240 | katanin p60 subunit A-like 1 (Katnal1) alternative variant bSep08, mRNA.          |

|                         |                                |                        |       |      |    |     |                                                                                                |
|-------------------------|--------------------------------|------------------------|-------|------|----|-----|------------------------------------------------------------------------------------------------|
| <a href="#">Katnal1</a> | <a href="#">Katnal1.cSep08</a> | <a href="#">288449</a> | 43268 | 720  | 5  | 196 | katanin p60 subunit A-like 1 (Katnal1) alternative variant cSep08, mRNA.                       |
| <a href="#">Katnal1</a> | <a href="#">Katnal1.dSep08</a> | <a href="#">288449</a> | 24034 | 772  | 4  | 135 | katanin p60 subunit A-like 1 (Katnal1) alternative variant dSep08, mRNA.                       |
| <a href="#">Katnal1</a> | <a href="#">Katnal1.eSep08</a> | <a href="#">288449</a> | 2579  | 426  | 2  | 112 | katanin p60 subunit A-like 1 (Katnal1) alternative variant eSep08, mRNA.                       |
| <a href="#">Katnal1</a> | <a href="#">Katnal1.fSep08</a> | <a href="#">288449</a> | 8095  | 686  | 2  | 71  | katanin p60 subunit A-like 1 (8.1 kD) (Katnal1) alternative variant fSep08, mRNA.              |
| <a href="#">Katnb1</a>  | <a href="#">Katnb1.aSep08</a>  | <a href="#">291852</a> | 19722 | 2936 | 20 | 659 | katanin p80 (WD40-containing) subunit B 1 (72.6 kD) (Katnb1) alternative variant aSep08, mRNA. |
| <a href="#">Katnb1</a>  | <a href="#">Katnb1.bSep08</a>  | <a href="#">291852</a> | 1863  | 974  | 7  | 230 | katanin p80 (WD40-containing) subunit B 1 (Katnb1) alternative variant bSep08, mRNA.           |
| <a href="#">Katnb1</a>  | <a href="#">Katnb1.cSep08</a>  | <a href="#">291852</a> | 1163  | 697  | 4  | 138 | katanin p80 (WD40-containing) subunit B 1 (Katnb1) alternative variant cSep08, mRNA.           |
| <a href="#">Katnb1</a>  | <a href="#">Katnb1.eSep08</a>  | <a href="#">291852</a> | 1500  | 505  | 2  | 79  | katanin p80 (WD40-containing) subunit B 1 (Katnb1) alternative variant eSep08, mRNA.           |
| <a href="#">katu</a>    | <a href="#">katu.aSep08</a>    |                        | 39750 | 636  |    | 188 | cysteine-rich motor neuron 1 (katu) mRNA.                                                      |
| <a href="#">kavar</a>   | <a href="#">kavar.aSep08</a>   |                        | 6639  | 747  |    | 90  | putative cytoplasmic protein (9.9 kD) (kavar) mRNA.                                            |
| <a href="#">kawby</a>   | <a href="#">kawby.aSep08</a>   |                        | 1765  | 684  |    | 163 | inter-alpha inhibitor H5-like (kawby) mRNA.                                                    |
| <a href="#">kawchy</a>  | <a href="#">kawchy.aSep08</a>  |                        | 23229 | 568  | 3  | 131 | putative protein (kawchy) alternative variant aSep08, mRNA.                                    |
| <a href="#">kawchy</a>  | <a href="#">kawchy.bSep08</a>  |                        | 6390  | 411  | 3  | 40  | putative protein (kawchy) alternative variant bSep08, mRNA.                                    |
| <a href="#">kawdar</a>  | <a href="#">kawdar.aSep08</a>  |                        | 1957  | 817  |    | 31  | putative protein (3.7 kD) (kawdar) mRNA.                                                       |
| <a href="#">kawey</a>   | <a href="#">kawey.aSep08</a>   |                        | 15116 | 298  |    | 32  | putative protein (kawey) mRNA.                                                                 |
| <a href="#">kawfer</a>  | <a href="#">kawfer.aSep08</a>  |                        | 2453  | 445  |    | 148 | supervillin (kawfer) mRNA.                                                                     |
| <a href="#">kawflo</a>  | <a href="#">kawflo.aSep08</a>  |                        | 8464  | 343  |    | 114 | kinesin family member 11 CRA b (kawflo) mRNA.                                                  |
| <a href="#">kawflu</a>  | <a href="#">kawflu.aSep08</a>  |                        | 4193  | 818  | 3  | 94  | ab2-143 like (10.9 kD) (kawflu) alternative variant aSep08, mRNA.                              |
| <a href="#">kawjey</a>  | <a href="#">kawjey.aSep08</a>  |                        | 7327  | 460  |    | 153 | putative protein, with 2 coiled coil domains, of vertebrate origin (kawjey) mRNA.              |
| <a href="#">kawkee</a>  | <a href="#">kawkee.aSep08</a>  |                        | 11826 | 1958 | 4  | 610 | neuron navigator 1 (kawkee) alternative variant aSep08, mRNA.                                  |
| <a href="#">kawkee</a>  | <a href="#">kawkee.bSep08</a>  |                        | 3827  | 761  | 3  | 253 | neuron navigator 1 (kawkee) alternative variant bSep08, mRNA.                                  |
| <a href="#">kawkee</a>  | <a href="#">kawkee.cSep08</a>  |                        | 7468  | 1488 | 5  | 213 | neuron navigator 1 (kawkee) alternative variant cSep08, mRNA.                                  |
| <a href="#">kawloy</a>  | <a href="#">kawloy.aSep08</a>  |                        | 813   | 742  |    | 82  | putative cytoplasmic protein (9.2 kD) (kawloy) mRNA.                                           |
| <a href="#">kawmee</a>  | <a href="#">kawmee.aSep08</a>  |                        | 1015  | 685  |    | 41  | putative protein (kawmee) mRNA.                                                                |
| <a href="#">kawmer</a>  | <a href="#">kawmer.aSep08</a>  |                        | 1228  | 247  |    | 34  | putative protein (kawmer) mRNA.                                                                |
| <a href="#">kawnoy</a>  | <a href="#">kawnoy.bSep08</a>  |                        | 902   | 380  | 3  | 26  | putative protein (3.0 kD) (kawnoy) alternative variant bSep08, mRNA.                           |
| <a href="#">kawpor</a>  | <a href="#">kawpor.aSep08</a>  |                        | 2771  | 927  |    | 107 | putative protein (kawpor) mRNA.                                                                |
| <a href="#">kawsa</a>   | <a href="#">kawsa.aSep08</a>   |                        | 5183  | 2332 | 3  | 118 | PHD finger protein 20-like 1 (kawsa) alternative variant aSep08, mRNA.                         |

|                         |                                |                        |       |      |   |     |                                                                                                                                                                                                   |
|-------------------------|--------------------------------|------------------------|-------|------|---|-----|---------------------------------------------------------------------------------------------------------------------------------------------------------------------------------------------------|
| <a href="#">kawsa</a>   | <a href="#">kawsa.bSep08</a>   |                        | 5032  | 1782 | 3 | 58  | PHD finger protein 20 (kawsa) alternative variant bSep08, mRNA.                                                                                                                                   |
| <a href="#">kawshee</a> | <a href="#">kawshee.aSep08</a> |                        | 30761 | 434  |   | 63  | e1-E2 ATPase like (kawshee) mRNA.                                                                                                                                                                 |
| <a href="#">kawtu</a>   | <a href="#">kawtu.aSep08</a>   |                        | 2547  | 226  |   | 15  | putative protein (1.6 kD) (kawtu) mRNA.                                                                                                                                                           |
| <a href="#">kawvar</a>  | <a href="#">kawvar.aSep08</a>  |                        | 1193  | 245  |   | 39  | putative protein (kawvar) mRNA.                                                                                                                                                                   |
| <a href="#">kawwey</a>  | <a href="#">kawwey.aSep08</a>  |                        | 19755 | 3931 | 2 | 123 | putative protein of vertebrate origin (13.9 kD) (kawwey) alternative variant aSep08, mRNA.                                                                                                        |
| <a href="#">kawwey</a>  | <a href="#">kawwey.bSep08</a>  |                        | 16257 | 344  | 1 | 76  | guanylate kinase 1 (kawwey) alternative variant bSep08, mRNA.                                                                                                                                     |
| <a href="#">Kazald1</a> | <a href="#">Kazald1.bSep08</a> | <a href="#">293997</a> | 3083  | 763  | 3 | 105 | kazal-type serine peptidase inhibitor domain 1 (11.7 kD) (Kazald1) alternative variant bSep08, mRNA.                                                                                              |
| <a href="#">Kazald1</a> | <a href="#">Kazald1.cSep08</a> | <a href="#">293997</a> | 2475  | 2208 | 2 | 105 | kazal-type serine peptidase inhibitor domain 1 (11.7 kD) (Kazald1) alternative variant cSep08, mRNA.                                                                                              |
| <a href="#">Kb23</a>    | <a href="#">Kb23.bSep08</a>    | <a href="#">407759</a> | 6516  | 1562 |   | 479 | type II keratin Kb23 (52.7 kD) (Kb23) alternative variant bSep08, mRNA.                                                                                                                           |
| <a href="#">Kbtbd3</a>  | <a href="#">Kbtbd3.bSep08</a>  | <a href="#">315394</a> | 24057 | 2624 | 3 | 607 | BTB/POZ and BTB/Kelch-associated and Kelch repeat containing protein and kelch (69.5 kD) (Kbtbd3) alternative variant bSep08, mRNA.                                                               |
| <a href="#">Kbtbd4</a>  | <a href="#">Kbtbd4.aSep08</a>  | <a href="#">311185</a> | 5993  | 2410 | 4 | 518 | BTB/POZ and K <sup>+</sup> channel tetramerisation containing protein and BTB/Kelch-associated and kelch and Kelch repeat containing protein (58.1 kD) (Kbtbd4) alternative variant aSep08, mRNA. |
| <a href="#">Kbtbd8</a>  | <a href="#">Kbtbd8.bSep08</a>  | <a href="#">500262</a> | 5377  | 420  | 1 | 83  | kelch repeat (Kbtbd8) alternative variant bSep08, mRNA.                                                                                                                                           |
| <a href="#">Kcnab2</a>  | <a href="#">Kcnab2.aSep08</a>  | <a href="#">29738</a>  | 27770 | 596  | 1 | 198 | potassium voltage-gated channel, shaker-related subfamily, beta member 2 (Kcnab2) alternative variant aSep08, mRNA.                                                                               |
| <a href="#">Kcnab2</a>  | <a href="#">Kcnab2.bSep08</a>  | <a href="#">29738</a>  | 78426 | 456  | 1 | 99  | potassium voltage-gated channel, shaker-related subfamily, beta member 2 (Kcnab2) alternative variant bSep08, mRNA.                                                                               |
| <a href="#">Kcnc1</a>   | <a href="#">Kcnc1.bSep08</a>   | <a href="#">25327</a>  | 29978 | 1249 | 2 | 416 | potassium voltage gated channel, Shaw-related subfamily, member 1 (Kcnc1) alternative variant bSep08, mRNA.                                                                                       |
| <a href="#">Kcnc1</a>   | <a href="#">Kcnc1.cSep08</a>   | <a href="#">25327</a>  | 4038  | 2107 | 2 | 98  | potassium voltage gated channel, Shaw-related subfamily, member 1 (10.6 kD) (Kcnc1) alternative variant cSep08, mRNA.                                                                             |
| <a href="#">Kcnd2</a>   | <a href="#">Kcnd2.bSep08</a>   | <a href="#">65180</a>  | 2218  | 727  | 1 | 111 | potassium voltage gated channel, Shal-related family, member 2 (Kcnd2) alternative variant bSep08, mRNA.                                                                                          |
| <a href="#">Kcnd3</a>   | <a href="#">Kcnd3.bSep08</a>   | <a href="#">65195</a>  | 3641  | 493  | 4 | 164 | potassium voltage gated channel, Shal-related family, member 3 (Kcnd3) alternative variant bSep08, mRNA.                                                                                          |
| <a href="#">Kcne1</a>   | <a href="#">Kcne1.bSep08</a>   | <a href="#">25471</a>  | 10332 | 736  | 2 | 130 | potassium voltage-gated channel, Isk-related subfamily, member 1 (14.7 kD) (Kcne1) alternative variant bSep08, mRNA.                                                                              |
| <a href="#">Kcne3</a>   | <a href="#">Kcne3.bSep08</a>   | <a href="#">63883</a>  | 6621  | 956  | 2 | 107 | potassium voltage-gated channel, Isk-related subfamily, gene 3 (12.0 kD) (Kcne3) alternative variant bSep08, complete mRNA.                                                                       |
| <a href="#">Kcng2</a>   | <a href="#">Kcng2.cSep08</a>   | <a href="#">307234</a> | 19718 | 520  | 3 | 57  | potassium voltage-gated channel, subfamily G, member 2 (6.3 kD) (Kcng2) alternative variant cSep08, mRNA.                                                                                         |

|                                |                                       |                        |       |      |   |     |                                                                                                                             |
|--------------------------------|---------------------------------------|------------------------|-------|------|---|-----|-----------------------------------------------------------------------------------------------------------------------------|
| <a href="#">Kcng4</a>          | <a href="#">Kcng4.bSep08</a>          | <a href="#">307900</a> | 776   | 414  | 2 | 107 | potassium voltage-gated channel, subfamily G, member 4 (Kcng4) alternative variant bSep08, mRNA.                            |
| <a href="#">Kcnh2</a>          | <a href="#">Kcnh2.bSep08</a>          | <a href="#">117018</a> | 597   | 374  | 2 | 113 | potassium voltage-gated channel, subfamily H (eag-related), member 2 (Kcnh2) alternative variant bSep08, mRNA.              |
| <a href="#">Kcnp1</a>          | <a href="#">Kcnp1.aSep08</a>          | <a href="#">65023</a>  | 15104 | 1260 |   | 151 | kv channel-interacting protein 1 (Kcnp1) mRNA.                                                                              |
| <a href="#">Kcnp2andKchip2</a> | <a href="#">Kcnp2andKchip2.cSep08</a> | <a href="#">56817</a>  | 18647 | 869  | 7 | 246 | channel-interacting protein 2 (Kcnp2andKchip2) alternative variant cSep08, mRNA.                                            |
| <a href="#">Kcnp2andKchip2</a> | <a href="#">Kcnp2andKchip2.cSep08</a> | <a href="#">619380</a> | 18647 | 869  | 7 | 246 | channel-interacting protein 2 (Kcnp2andKchip2) alternative variant cSep08, mRNA.                                            |
| <a href="#">Kcnp2andKchip2</a> | <a href="#">Kcnp2andKchip2.fSep08</a> | <a href="#">56817</a>  | 1662  | 407  | 3 | 38  | CRA e like (4.4 kD) (Kcnp2andKchip2) alternative variant fSep08, mRNA.                                                      |
| <a href="#">Kcnp2andKchip2</a> | <a href="#">Kcnp2andKchip2.fSep08</a> | <a href="#">619380</a> | 1662  | 407  | 3 | 38  | CRA e like (4.4 kD) (Kcnp2andKchip2) alternative variant fSep08, mRNA.                                                      |
| <a href="#">Kcnp2andKchip2</a> | <a href="#">Kcnp2andKchip2.gSep08</a> | <a href="#">56817</a>  | 1895  | 301  | 3 | 46  | CRA e like (Kcnp2andKchip2) alternative variant gSep08, mRNA.                                                               |
| <a href="#">Kcnp2andKchip2</a> | <a href="#">Kcnp2andKchip2.gSep08</a> | <a href="#">619380</a> | 1895  | 301  | 3 | 46  | CRA e like (Kcnp2andKchip2) alternative variant gSep08, mRNA.                                                               |
| <a href="#">Kcnp3</a>          | <a href="#">Kcnp3.bSep08</a>          | <a href="#">65199</a>  | 18959 | 803  | 4 | 122 | kv channel interacting protein 3, calsenilin (Kcnp3) alternative variant bSep08, mRNA.                                      |
| <a href="#">Kcnp3</a>          | <a href="#">Kcnp3.cSep08</a>          | <a href="#">65199</a>  | 3832  | 2166 | 4 | 116 | kv channel interacting protein 3, calsenilin (Kcnp3) alternative variant cSep08, mRNA.                                      |
| <a href="#">Kcnp4</a>          | <a href="#">Kcnp4.bSep08</a>          | <a href="#">259243</a> | 3049  | 744  | 2 | 35  | kv channel interacting protein 4 (4.1 kD) (Kcnp4) alternative variant bSep08, mRNA.                                         |
| <a href="#">Kcnj1</a>          | <a href="#">Kcnj1.bSep08</a>          | <a href="#">24521</a>  | 29861 | 2298 | 2 | 264 | potassium inwardly-rectifying channel, subfamily J, member 1 (29.8 kD) (Kcnj1) alternative variant bSep08, mRNA.            |
| <a href="#">Kcnj1</a>          | <a href="#">Kcnj1.cSep08</a>          | <a href="#">24521</a>  | 3654  | 755  | 2 | 63  | potassium inwardly-rectifying channel, subfamily J, member 1 (7.0 kD) (Kcnj1) alternative variant cSep08, mRNA.             |
| <a href="#">Kcnj3</a>          | <a href="#">Kcnj3.bSep08</a>          | <a href="#">50599</a>  | 10264 | 1357 | 1 | 323 | potassium inwardly-rectifying channel, subfamily J, member 3 (Kcnj3) alternative variant bSep08, mRNA.                      |
| <a href="#">Kcnj6</a>          | <a href="#">Kcnj6.aSep08</a>          | <a href="#">25743</a>  | 12392 | 535  |   | 44  | potassium inwardly-rectifying channel, subfamily J, member 6 (Kcnj6) mRNA.                                                  |
| <a href="#">Kcnj8</a>          | <a href="#">Kcnj8.bSep08</a>          | <a href="#">25472</a>  | 3488  | 1822 | 2 | 303 | potassium inwardly-rectifying channel, subfamily J, member 8 (Kcnj8) alternative variant bSep08, mRNA.                      |
| <a href="#">Kcnj9</a>          | <a href="#">Kcnj9.cSep08</a>          | <a href="#">116560</a> | 7268  | 1595 | 3 | 116 | potassium inwardly-rectifying channel, subfamily J, member 9 (12.9 kD) (Kcnj9) alternative variant cSep08, mRNA.            |
| <a href="#">Kcnj13</a>         | <a href="#">Kcnj13.bSep08</a>         | <a href="#">94341</a>  | 6495  | 646  | 1 | 171 | potassium inwardly-rectifying channel, subfamily J, member 13 (19.6 kD) (Kcnj13) alternative variant bSep08, complete mRNA. |
| <a href="#">Kcnj15</a>         | <a href="#">Kcnj15.bSep08</a>         | <a href="#">170847</a> | 41854 | 1659 | 3 | 375 | potassium inwardly-rectifying channel, subfamily J, member 15 (42.6 kD) (Kcnj15) alternative variant bSep08, mRNA.          |
| <a href="#">Kcnj16</a>         | <a href="#">Kcnj16.bSep08</a>         | <a href="#">29719</a>  | 27730 | 324  | 2 | 26  | potassium inwardly-rectifying channel, subfamily J, member 16 (Kcnj16) alternative variant bSep08, mRNA.                    |

|                        |                               |                        |        |      |    |     |                                                                                                                                                 |
|------------------------|-------------------------------|------------------------|--------|------|----|-----|-------------------------------------------------------------------------------------------------------------------------------------------------|
| <a href="#">Kcnk1</a>  | <a href="#">Kcnk1.bSep08</a>  | <a href="#">59324</a>  | 1288   | 968  | 2  | 59  | potassium channel, subfamily K, member 1 (Kcnk1) alternative variant bSep08, mRNA.                                                              |
| <a href="#">Kcnk1</a>  | <a href="#">Kcnk1.cSep08</a>  | <a href="#">59324</a>  | 1055   | 735  | 2  | 62  | potassium channel, subfamily K, member 1 (Kcnk1) alternative variant cSep08, mRNA.                                                              |
| <a href="#">Kcnk1</a>  | <a href="#">Kcnk1.dSep08</a>  | <a href="#">59324</a>  | 773    | 453  | 2  | 39  | potassium channel, subfamily K, member 1 (Kcnk1) alternative variant dSep08, mRNA.                                                              |
| <a href="#">Kcnk4</a>  | <a href="#">Kcnk4.aSep08</a>  | <a href="#">116489</a> | 6466   | 1782 | 1  | 520 | potassium channel, subfamily K, member 4 (Kcnk4) alternative variant aSep08, mRNA.                                                              |
| <a href="#">Kcnk4</a>  | <a href="#">Kcnk4.cSep08</a>  | <a href="#">116489</a> | 1367   | 811  | 2  | 129 | potassium channel, subfamily K, member 4 (13.5 kD) (Kcnk4) alternative variant cSep08, mRNA.                                                    |
| <a href="#">Kcnk6</a>  | <a href="#">Kcnk6.bSep08</a>  | <a href="#">116491</a> | 877    | 803  | 2  | 216 | potassium inwardly-rectifying channel, subfamily K, member 6 (Kcnk6) alternative variant bSep08, mRNA.                                          |
| <a href="#">Kcnk18</a> | <a href="#">Kcnk18.bSep08</a> | <a href="#">445371</a> | 15450  | 1200 |    | 362 | potassium channel, subfamily K, member 18 (40.3 kD) (Kcnk18) alternative variant bSep08, mRNA.                                                  |
| <a href="#">Kcnma1</a> | <a href="#">Kcnma1.aSep08</a> | <a href="#">83731</a>  | 356431 | 3271 | 26 | 997 | potassium large conductance calcium-activated channel, subfamily M, alpha member 1 (Kcnma1) alternative variant aSep08, mRNA.                   |
| <a href="#">Kcnma1</a> | <a href="#">Kcnma1.bSep08</a> | <a href="#">83731</a>  | 14538  | 851  | 4  | 187 | potassium large conductance calcium-activated channel, subfamily M, alpha member 1 (Kcnma1) alternative variant bSep08, mRNA.                   |
| <a href="#">Kcnmb1</a> | <a href="#">Kcnmb1.bSep08</a> | <a href="#">29747</a>  | 4913   | 1058 | 2  | 87  | potassium large conductance calcium-activated channel, subfamily M, beta member 1 (Kcnmb1) alternative variant bSep08, mRNA.                    |
| <a href="#">Kcnmb2</a> | <a href="#">Kcnmb2.bSep08</a> | <a href="#">294961</a> | 321839 | 1544 | 5  | 174 | potassium large conductance calcium-activated channel, subfamily M, beta member 2 (20.0 kD) (Kcnmb2) alternative variant bSep08, complete mRNA. |
| <a href="#">Kcnmb2</a> | <a href="#">Kcnmb2.cSep08</a> | <a href="#">294961</a> | 37674  | 341  | 1  | 110 | potassium large conductance calcium-activated channel, subfamily M, beta member 2 (12.9 kD) (Kcnmb2) alternative variant cSep08, mRNA.          |
| <a href="#">Kcnn1</a>  | <a href="#">Kcnn1.bSep08</a>  | <a href="#">54261</a>  | 4451   | 608  | 4  | 202 | potassium intermediate/small conductance calcium-activated channel, subfamily N, member 1 (Kcnn1) alternative variant bSep08, mRNA.             |
| <a href="#">Kcnn1</a>  | <a href="#">Kcnn1.cSep08</a>  | <a href="#">54261</a>  | 2108   | 700  | 2  | 96  | potassium intermediate/small conductance calcium-activated channel, subfamily N, member 1 (Kcnn1) alternative variant cSep08, mRNA.             |
| <a href="#">Kcnn3</a>  | <a href="#">Kcnn3.bSep08</a>  | <a href="#">54263</a>  | 6401   | 691  | 1  | 116 | potassium intermediate/small conductance calcium-activated channel, subfamily N, member 3 (12.7 kD) (Kcnn3) alternative variant bSep08, mRNA.   |
| <a href="#">Kcnn4</a>  | <a href="#">Kcnn4.bSep08</a>  | <a href="#">65206</a>  | 7556   | 935  | 6  | 310 | potassium intermediate/small conductance calcium-activated channel, subfamily N, member 4 (Kcnn4) alternative variant bSep08, mRNA.             |
| <a href="#">Kcnn4</a>  | <a href="#">Kcnn4.cSep08</a>  | <a href="#">65206</a>  | 5386   | 896  | 5  | 135 | potassium intermediate/small conductance calcium-activated channel, subfamily N, member 4 (15.8 kD) (Kcnn4) alternative variant cSep08, mRNA.   |
| <a href="#">Kcnn4</a>  | <a href="#">Kcnn4.dSep08</a>  | <a href="#">65206</a>  | 3114   | 787  | 3  | 77  | potassium intermediate/small conductance calcium-activated channel, subfamily N, member 4 (Kcnn4) alternative variant dSep08, mRNA.             |



|                                |                                       |                        |        |      |   |     |                                                                                                                               |
|--------------------------------|---------------------------------------|------------------------|--------|------|---|-----|-------------------------------------------------------------------------------------------------------------------------------|
| <a href="#">Kcnq1</a>          | <a href="#">Kcnq1.bSep08</a>          | <a href="#">84020</a>  | 22824  | 862  | 3 | 206 | potassium voltage-gated channel, subfamily Q, member 1 (Kcnq1) alternative variant bSep08, mRNA.                              |
| <a href="#">Kcnq1</a>          | <a href="#">Kcnq1.cSep08</a>          | <a href="#">84020</a>  | 3215   | 406  | 1 | 129 | potassium voltage-gated channel, subfamily Q, member 1 (Kcnq1) alternative variant cSep08, mRNA.                              |
| <a href="#">Kcnq1</a>          | <a href="#">Kcnq1.dSep08</a>          | <a href="#">84020</a>  | 66139  | 1252 | 3 | 103 | potassium voltage-gated channel, subfamily Q, member 1 (Kcnq1) alternative variant dSep08, mRNA.                              |
| <a href="#">Kcnq5l</a>         | <a href="#">Kcnq5l.aSep08</a>         | <a href="#">259273</a> | 499563 | 1792 | 4 | 597 | potassium voltage-gated channel, subfamily Q, member 5-like (Kcnq5l) alternative variant aSep08, mRNA.                        |
| <a href="#">Kcnq5l</a>         | <a href="#">Kcnq5l.bSep08</a>         | <a href="#">259273</a> | 448899 | 465  | 3 | 154 | potassium voltage-gated channel, subfamily Q, member 5-like (Kcnq5l) alternative variant bSep08, mRNA.                        |
| <a href="#">KCNQ_channel.0</a> | <a href="#">KCNQ_channel.0.aSep08</a> | <a href="#">689123</a> | 61242  | 421  |   | 139 | voltage-gated potassium channel KCNQ5 (KCNQ_channel.0) mRNA.                                                                  |
| <a href="#">Kcns3</a>          | <a href="#">Kcns3.bSep08</a>          | <a href="#">83588</a>  | 58971  | 2329 | 1 | 491 | potassium voltage-gated channel, delayed-rectifier, subfamily S, member 3 (55.9 kD) (Kcns3) alternative variant bSep08, mRNA. |
| <a href="#">Kcnt1</a>          | <a href="#">Kcnt1.bSep08</a>          | <a href="#">60444</a>  | 6429   | 1021 | 5 | 287 | potassium channel subfamily T member 1 (Kcnt1) alternative variant bSep08, mRNA.                                              |
| <a href="#">Kcnt1</a>          | <a href="#">Kcnt1.cSep08</a>          | <a href="#">60444</a>  | 6321   | 1877 | 3 | 193 | potassium channel subfamily T member 1 (21.5 kD) (Kcnt1) alternative variant cSep08, mRNA.                                    |
| <a href="#">Kcnt1</a>          | <a href="#">Kcnt1.dSep08</a>          | <a href="#">60444</a>  | 750    | 625  | 2 | 140 | putative protein (15.3 kD) (Kcnt1) alternative variant dSep08, mRNA.                                                          |
| <a href="#">Kcnt2</a>          | <a href="#">Kcnt2.aSep08</a>          | <a href="#">304827</a> | 88321  | 406  |   | 71  | potassium channel, subfamily T, member 2 (Kcnt2) mRNA.                                                                        |
| <a href="#">Kctd1</a>          | <a href="#">Kctd1.aSep08</a>          | <a href="#">291772</a> | 100561 | 2071 | 5 | 257 | hypothetical protein LOC680411 (29.4 kD) (Kctd1) alternative variant aSep08, mRNA.                                            |
| <a href="#">Kctd1</a>          | <a href="#">Kctd1.aSep08</a>          | <a href="#">680411</a> | 100561 | 2071 | 5 | 257 | hypothetical protein LOC680411 (29.4 kD) (Kctd1) alternative variant aSep08, mRNA.                                            |
| <a href="#">Kctd1</a>          | <a href="#">Kctd1.bSep08</a>          | <a href="#">291772</a> | 21609  | 760  | 4 | 175 | hypothetical protein LOC680411 (20.4 kD) (Kctd1) alternative variant bSep08, mRNA.                                            |
| <a href="#">Kctd1</a>          | <a href="#">Kctd1.bSep08</a>          | <a href="#">680411</a> | 21609  | 760  | 4 | 175 | hypothetical protein LOC680411 (20.4 kD) (Kctd1) alternative variant bSep08, mRNA.                                            |
| <a href="#">Kctd2</a>          | <a href="#">Kctd2.aSep08</a>          | <a href="#">498024</a> | 11655  | 1463 |   | 171 | BTB POZ domain-containing protein kctd2 (Kctd2) mRNA.                                                                         |
| <a href="#">Kctd3</a>          | <a href="#">Kctd3.bSep08</a>          | <a href="#">305055</a> | 3610   | 1783 | 1 | 216 | putative protein of vertebrate origin (Kctd3) alternative variant bSep08, mRNA.                                               |
| <a href="#">Kctd9</a>          | <a href="#">Kctd9.bSep08</a>          | <a href="#">364410</a> | 3637   | 1202 | 3 | 110 | pentapeptide repeat (11.7 kD) (Kctd9) alternative variant bSep08, mRNA.                                                       |
| <a href="#">Kctd9</a>          | <a href="#">Kctd9.cSep08</a>          | <a href="#">364410</a> | 8863   | 596  | 6 | 80  | putative protein of bilateral origin (Kctd9) alternative variant cSep08, mRNA.                                                |
| <a href="#">Kctd11</a>         | <a href="#">Kctd11.bSep08</a>         | <a href="#">363634</a> | 3569   | 686  | 2 | 33  | putative protein (Kctd11) alternative variant bSep08, mRNA.                                                                   |
| <a href="#">Kctd13</a>         | <a href="#">Kctd13.bSep08</a>         | <a href="#">293497</a> | 3841   | 1336 | 2 | 159 | containing potassium channel tetramerisation domain 1 (18.0 kD) (Kctd13) alternative variant bSep08, mRNA.                    |
| <a href="#">Kctd13</a>         | <a href="#">Kctd13.cSep08</a>         | <a href="#">293497</a> | 6473   | 820  | 3 | 152 | containing potassium channel tetramerisation domain 1 (16.1 kD) (Kctd13) alternative variant cSep08, mRNA.                    |
| <a href="#">Kctd14</a>         | <a href="#">Kctd14.aSep08</a>         | <a href="#">308836</a> | 4359   | 688  | 2 | 229 | K <sup>+</sup> channel tetramerisation containing protein (Kctd14) alternative variant aSep08, mRNA.                          |
| <a href="#">Kctd14</a>         | <a href="#">Kctd14.bSep08</a>         | <a href="#">308836</a> | 2404   | 1191 | 2 | 202 | K <sup>+</sup> channel tetramerisation containing protein (23.4 kD) (Kctd14) alternative variant bSep08, mRNA.                |

|                        |                               |                        |       |      |    |     |                                                                                                                      |
|------------------------|-------------------------------|------------------------|-------|------|----|-----|----------------------------------------------------------------------------------------------------------------------|
| <a href="#">Kctd15</a> | <a href="#">Kctd15.bSep08</a> | <a href="#">499129</a> | 14859 | 2403 | 2  | 283 | K+ channel tetramerisation containing protein (31.9 kD) (Kctd15) alternative variant bSep08, mRNA.                   |
| <a href="#">Kctd18</a> | <a href="#">Kctd18.bSep08</a> | <a href="#">301436</a> | 7331  | 1088 | 4  | 209 | putative nuclear protein of vertebrate origin (22.3 kD) (Kctd18) alternative variant bSep08, mRNA.                   |
| <a href="#">Kctd18</a> | <a href="#">Kctd18.cSep08</a> | <a href="#">301436</a> | 7348  | 820  | 4  | 117 | K+ channel tetramerisation containing protein (13.4 kD) (Kctd18) alternative variant cSep08, mRNA.                   |
| <a href="#">Kctd20</a> | <a href="#">Kctd20.aSep08</a> | <a href="#">294307</a> | 10051 | 408  |    | 135 | putative protein of eukaryotic origin (Kctd20) mRNA.                                                                 |
| <a href="#">Kdelc1</a> | <a href="#">Kdelc1.aSep08</a> | <a href="#">316370</a> | 12263 | 2137 | 10 | 502 | KDEL (Lys-Asp-Glu-Leu) containing 1 (58.1 kD) (Kdelc1) alternative variant aSep08, mRNA.                             |
| <a href="#">Kdelc1</a> | <a href="#">Kdelc1.cSep08</a> | <a href="#">316370</a> | 4819  | 673  | 5  | 184 | KDEL (Lys-Asp-Glu-Leu) containing 1 (Kdelc1) alternative variant cSep08, mRNA.                                       |
| <a href="#">Kdelc1</a> | <a href="#">Kdelc1.dSep08</a> | <a href="#">316370</a> | 3773  | 684  | 4  | 161 | KDEL (Lys-Asp-Glu-Leu) containing 1 (Kdelc1) alternative variant dSep08, mRNA.                                       |
| <a href="#">Kdelc1</a> | <a href="#">Kdelc1.eSep08</a> | <a href="#">316370</a> | 45204 | 641  | 5  | 146 | KDEL (Lys-Asp-Glu-Leu) containing 1 (Kdelc1) alternative variant eSep08, mRNA.                                       |
| <a href="#">Kdelc2</a> | <a href="#">Kdelc2.bSep08</a> | <a href="#">315664</a> | 4155  | 644  | 3  | 146 | KDEL (Lys-Asp-Glu-Leu) containing 2 (Kdelc2) alternative variant bSep08, mRNA.                                       |
| <a href="#">Kdelr1</a> | <a href="#">Kdelr1.bSep08</a> | <a href="#">361577</a> | 3542  | 287  | 3  | 95  | KDEL (Lys-Asp-Glu-Leu) endoplasmic reticulum protein retention receptor 1 (Kdelr1) alternative variant bSep08, mRNA. |
| <a href="#">Kdelr2</a> | <a href="#">Kdelr2.aSep08</a> | <a href="#">304290</a> | 15124 | 719  | 3  | 203 | KDEL (Lys-Asp-Glu-Leu) endoplasmic reticulum protein retention receptor 2 (Kdelr2) alternative variant aSep08, mRNA. |
| <a href="#">Kdelr2</a> | <a href="#">Kdelr2.bSep08</a> | <a href="#">304290</a> | 2064  | 726  | 1  | 122 | KDEL (Lys-Asp-Glu-Leu) endoplasmic reticulum protein retention receptor 2 (Kdelr2) alternative variant bSep08, mRNA. |
| <a href="#">Kdelr3</a> | <a href="#">Kdelr3.bSep08</a> | <a href="#">315131</a> | 7958  | 580  | 5  | 159 | kdel receptor (Kdelr3) alternative variant bSep08, mRNA.                                                             |
| <a href="#">Kdelr3</a> | <a href="#">Kdelr3.cSep08</a> | <a href="#">315131</a> | 2782  | 872  | 3  | 106 | ER lumen protein retaining receptor (Kdelr3) alternative variant cSep08, mRNA.                                       |
| <a href="#">Kdelr3</a> | <a href="#">Kdelr3.dSep08</a> | <a href="#">315131</a> | 2134  | 907  | 2  | 78  | kdel receptor 3 (9.2 kD) (Kdelr3) alternative variant dSep08, mRNA.                                                  |
| <a href="#">Ke2</a>    | <a href="#">Ke2.bSep08</a>    | <a href="#">309629</a> | 1474  | 587  | 5  | 127 | prefoldin (14.5 kD) (Ke2) alternative variant bSep08, mRNA.                                                          |
| <a href="#">keeby</a>  | <a href="#">keeby.aSep08</a>  |                        | 34748 | 718  |    | 238 | constitutive coactivator of ppar-gamma-like Protein 2 (keeby) mRNA.                                                  |
| <a href="#">keechy</a> | <a href="#">keechy.aSep08</a> |                        | 1447  | 729  |    | 35  | putative protein (3.9 kD) (keechy) mRNA.                                                                             |
| <a href="#">keedar</a> | <a href="#">keedar.aSep08</a> |                        | 2724  | 760  |    | 83  | putative protein (keedar) mRNA.                                                                                      |
| <a href="#">keefer</a> | <a href="#">keefer.aSep08</a> |                        | 31489 | 580  | 1  | 157 | CRA a (keefer) alternative variant aSep08, mRNA.                                                                     |
| <a href="#">keefer</a> | <a href="#">keefer.bSep08</a> |                        | 22220 | 638  | 3  | 120 | CRA b (13.2 kD) (keefer) alternative variant bSep08, mRNA.                                                           |
| <a href="#">keeflo</a> | <a href="#">keeflo.aSep08</a> |                        | 9830  | 376  |    | 125 | kinesin family member 11 CRA b (keeflo) mRNA.                                                                        |
| <a href="#">keeflu</a> | <a href="#">keeflu.aSep08</a> |                        | 694   | 364  |    | 43  | putative protein (4.7 kD) (keeflu) mRNA.                                                                             |
| <a href="#">keejey</a> | <a href="#">keejey.aSep08</a> |                        | 1105  | 329  |    | 67  | putative protein (keejey) mRNA.                                                                                      |
| <a href="#">keekee</a> | <a href="#">keekee.aSep08</a> |                        | 11254 | 1292 |    | 430 | neuron navigator 1 (keekee) mRNA.                                                                                    |
| <a href="#">keeloy</a> | <a href="#">keeloy.aSep08</a> |                        | 6115  | 538  | 3  | 35  | putative protein (keeloy) alternative variant aSep08, mRNA.                                                          |

|                           |                                  |                        |       |      |    |     |                                                                                            |
|---------------------------|----------------------------------|------------------------|-------|------|----|-----|--------------------------------------------------------------------------------------------|
| <a href="#">keemee</a>    | <a href="#">keemee.aSep08</a>    |                        | 15001 | 1091 |    | 166 | putative protein (keemee) mRNA.                                                            |
| <a href="#">keemer</a>    | <a href="#">keemer.aSep08</a>    |                        | 36928 | 678  |    | 40  | putative protein (4.3 kD) (keemer) mRNA.                                                   |
| <a href="#">keenoy</a>    | <a href="#">keenoy.aSep08</a>    |                        | 3468  | 468  |    | 55  | putative protein (keenoy) mRNA.                                                            |
| <a href="#">keepor</a>    | <a href="#">keepor.aSep08</a>    |                        | 7543  | 612  |    | 150 | enhancer of mRNA decapping 3 (keepor) mRNA.                                                |
| <a href="#">keesa</a>     | <a href="#">keesa.aSep08</a>     |                        | 5843  | 700  |    | 33  | putative protein (3.7 kD) (keesa) mRNA.                                                    |
| <a href="#">keeshee</a>   | <a href="#">keeshee.aSep08</a>   |                        | 8078  | 434  |    | 91  | probable phospholipid-transporting ATPase if like (keeshee) mRNA.                          |
| <a href="#">keetu</a>     | <a href="#">keetu.aSep08</a>     |                        | 1568  | 770  |    | 97  | putative protein (10.5 kD) (keetu) mRNA.                                                   |
| <a href="#">keevar</a>    | <a href="#">keevar.aSep08</a>    |                        | 4927  | 738  |    | 108 | putative protein (11.5 kD) (keevar) mRNA.                                                  |
| <a href="#">keewey</a>    | <a href="#">keewey.aSep08</a>    |                        | 6318  | 826  |    | 31  | putative protein (keewey) mRNA.                                                            |
| <a href="#">Kel</a>       | <a href="#">Kel.aSep08</a>       | <a href="#">297025</a> | 11220 | 2236 | 8  | 292 | kell blood group like (Kel) alternative variant aSep08, mRNA.                              |
| <a href="#">Kel</a>       | <a href="#">Kel.bSep08</a>       | <a href="#">297025</a> | 12568 | 1123 | 10 | 276 | kell blood group like (Kel) alternative variant bSep08, mRNA.                              |
| <a href="#">Kel</a>       | <a href="#">Kel.cSep08</a>       | <a href="#">297025</a> | 3681  | 642  | 4  | 213 | kell blood group like (Kel) alternative variant cSep08, mRNA.                              |
| <a href="#">Kel</a>       | <a href="#">Kel.dSep08</a>       | <a href="#">297025</a> | 9800  | 761  | 8  | 209 | kell blood group like (Kel) alternative variant dSep08, mRNA.                              |
| <a href="#">Kel</a>       | <a href="#">Kel.eSep08</a>       | <a href="#">297025</a> | 2750  | 474  | 4  | 120 | kell blood group like (Kel) alternative variant eSep08, mRNA.                              |
| <a href="#">Kel</a>       | <a href="#">Kel.fSep08</a>       | <a href="#">297025</a> | 2094  | 821  | 3  | 60  | kell blood group like (Kel) alternative variant fSep08, mRNA.                              |
| <a href="#">Kelch_1.1</a> | <a href="#">Kelch_1.1.aSep08</a> |                        | 4166  | 409  |    | 136 | kelch-like 18 CRA c (Kelch_1.1) mRNA.                                                      |
| <a href="#">Kelch_1.2</a> | <a href="#">Kelch_1.2.aSep08</a> |                        | 29907 | 1783 |    | 533 | kelch-like 32 (Kelch_1.2) alternative variant aSep08, mRNA.                                |
| <a href="#">Kelch_1.2</a> | <a href="#">Kelch_1.2.bSep08</a> |                        | 12693 | 508  |    | 108 | kelch-like 32 (Kelch_1.2) alternative variant bSep08, mRNA.                                |
| <a href="#">kerby</a>     | <a href="#">kerby.aSep08</a>     |                        | 1309  | 530  |    | 102 | enolase 1 like (10.9 kD) (kerby) mRNA.                                                     |
| <a href="#">kerchy</a>    | <a href="#">kerchy.aSep08</a>    |                        | 675   | 523  |    | 34  | putative protein (kerchy) mRNA.                                                            |
| <a href="#">kerdar</a>    | <a href="#">kerdar.aSep08</a>    |                        | 4848  | 319  |    | 89  | putative protein (kerdar) mRNA.                                                            |
| <a href="#">kerfer</a>    | <a href="#">kerfer.aSep08</a>    |                        | 12384 | 516  |    | 50  | putative protein (kerfer) mRNA.                                                            |
| <a href="#">kerflo</a>    | <a href="#">kerflo.aSep08</a>    |                        | 6792  | 545  |    | 40  | putative protein (kerflo) mRNA.                                                            |
| <a href="#">kerflu</a>    | <a href="#">kerflu.aSep08</a>    |                        | 6698  | 678  | 5  | 139 | hermansky-Pudlak syndrome 5 like (kerflu) alternative variant aSep08, mRNA.                |
| <a href="#">kerflu</a>    | <a href="#">kerflu.bSep08</a>    |                        | 4438  | 1391 | 4  | 120 | hermansky-Pudlak syndrome 5 like (kerflu) alternative variant bSep08, mRNA.                |
| <a href="#">kerjey</a>    | <a href="#">kerjey.aSep08</a>    |                        | 11956 | 680  |    | 101 | putative mitochondrial protein (11.3 kD) (kerjey) mRNA.                                    |
| <a href="#">kerkee</a>    | <a href="#">kerkee.aSep08</a>    |                        | 1934  | 772  |    | 257 | neuron navigator 1 (kerkee) mRNA.                                                          |
| <a href="#">kerloy</a>    | <a href="#">kerloy.aSep08</a>    |                        | 3571  | 779  |    | 93  | putative protein (10.1 kD) (kerloy) mRNA.                                                  |
| <a href="#">kermee</a>    | <a href="#">kermee.aSep08</a>    |                        | 11101 | 542  |    | 180 | ATP-binding cassette sub-family A member 3 like (kermee) alternative variant aSep08, mRNA. |
| <a href="#">kermer</a>    | <a href="#">kermer.aSep08</a>    |                        | 1493  | 459  | 1  | 56  | putative protein (6.5 kD) (kermer) alternative variant aSep08, mRNA.                       |
| <a href="#">kermer</a>    | <a href="#">kermer.bSep08</a>    |                        | 2630  | 1589 | 2  | 51  | putative protein (kermer) alternative variant bSep08, mRNA.                                |

|                         |                                |  |       |      |   |     |                                                                                                  |
|-------------------------|--------------------------------|--|-------|------|---|-----|--------------------------------------------------------------------------------------------------|
| <a href="#">kernoy</a>  | <a href="#">kernoy.aSep08</a>  |  | 7702  | 560  |   | 45  | putative protein (5.0 kD) (kernoy) mRNA.                                                         |
| <a href="#">kerpor</a>  | <a href="#">kerpor.aSep08</a>  |  | 32080 | 792  | 2 | 34  | CRA a like (kerpor) alternative variant aSep08, mRNA.                                            |
| <a href="#">kerpor</a>  | <a href="#">kerpor.bSep08</a>  |  | 20872 | 652  | 3 | 37  | CRA a like (4.2 kD) (kerpor) alternative variant bSep08, mRNA.                                   |
| <a href="#">kerpor</a>  | <a href="#">kerpor.cSep08</a>  |  | 20821 | 468  | 2 | 46  | CRA b like (5.3 kD) (kerpor) alternative variant cSep08, mRNA.                                   |
| <a href="#">kersa</a>   | <a href="#">kersa.aSep08</a>   |  | 25718 | 692  | 3 | 64  | putative protein (kersa) alternative variant aSep08, mRNA.                                       |
| <a href="#">kersa</a>   | <a href="#">kersa.bSep08</a>   |  | 10323 | 394  | 2 | 48  | putative protein (5.6 kD) (kersa) alternative variant bSep08, mRNA.                              |
| <a href="#">kershee</a> | <a href="#">kershee.aSep08</a> |  | 21907 | 1939 | 6 | 288 | ATPase Class VI type 11B (kershee) alternative variant aSep08, mRNA.                             |
| <a href="#">kershee</a> | <a href="#">kershee.cSep08</a> |  | 5935  | 466  | 2 | 26  | putative protein (3.0 kD) (kershee) alternative variant cSep08, mRNA.                            |
| <a href="#">kertu</a>   | <a href="#">kertu.aSep08</a>   |  | 6666  | 871  | 3 | 290 | deah box polypeptide 57 (kertu) alternative variant aSep08, mRNA.                                |
| <a href="#">kertu</a>   | <a href="#">kertu.bSep08</a>   |  | 8839  | 613  | 5 | 204 | deah box polypeptide 57 (kertu) alternative variant bSep08, mRNA.                                |
| <a href="#">kervar</a>  | <a href="#">kervar.aSep08</a>  |  | 3367  | 391  |   | 130 | microtubule-actin crosslinking factor 1 (kervar) mRNA.                                           |
| <a href="#">kerwey</a>  | <a href="#">kerwey.aSep08</a>  |  | 1306  | 418  |   | 61  | putative protein (kerwey) mRNA.                                                                  |
| <a href="#">keyby</a>   | <a href="#">keyby.aSep08</a>   |  | 1279  | 409  |   | 33  | putative protein (3.9 kD) (keyby) mRNA.                                                          |
| <a href="#">keychy</a>  | <a href="#">keychy.aSep08</a>  |  | 13296 | 641  |   | 63  | putative protein (7.5 kD) (keychy) mRNA.                                                         |
| <a href="#">keydar</a>  | <a href="#">keydar.aSep08</a>  |  | 962   | 359  |   | 63  | putative protein (7.1 kD) (keydar) mRNA.                                                         |
| <a href="#">keyfer</a>  | <a href="#">keyfer.aSep08</a>  |  | 8110  | 630  | 2 | 143 | enhancer of polycomb 1 (keyfer) alternative variant aSep08, mRNA.                                |
| <a href="#">keyfer</a>  | <a href="#">keyfer.bSep08</a>  |  | 1379  | 390  | 3 | 130 | enhancer of polycomb 1 (keyfer) alternative variant bSep08, mRNA.                                |
| <a href="#">keyflo</a>  | <a href="#">keyflo.aSep08</a>  |  | 1049  | 646  |   | 51  | putative protein (5.7 kD) (keyflo) mRNA.                                                         |
| <a href="#">keyflu</a>  | <a href="#">keyflu.aSep08</a>  |  | 4408  | 1220 | 2 | 370 | hermansky-Pudlak syndrome 5 like (keyflu) alternative variant aSep08, mRNA.                      |
| <a href="#">keyflu</a>  | <a href="#">keyflu.bSep08</a>  |  | 3764  | 706  | 3 | 122 | CRA a like (keyflu) alternative variant bSep08, mRNA.                                            |
| <a href="#">keyflu</a>  | <a href="#">keyflu.cSep08</a>  |  | 2982  | 400  | 1 | 82  | hermansky-Pudlak syndrome 5 like (keyflu) alternative variant cSep08, mRNA.                      |
| <a href="#">keyjey</a>  | <a href="#">keyjey.aSep08</a>  |  | 46769 | 653  | 4 | 154 | ecotropic viral integration site 5 (keyjey) alternative variant aSep08, mRNA.                    |
| <a href="#">keyjey</a>  | <a href="#">keyjey.bSep08</a>  |  | 46304 | 761  | 3 | 127 | ecotropic viral integration site 5 (14.0 kD) (keyjey) alternative variant bSep08, complete mRNA. |
| <a href="#">keyjey</a>  | <a href="#">keyjey.cSep08</a>  |  | 18749 | 400  | 2 | 40  | putative protein (keyjey) alternative variant cSep08, mRNA.                                      |
| <a href="#">keyjey</a>  | <a href="#">keyjey.dSep08</a>  |  | 24079 | 368  | 2 | 50  | putative protein (keyjey) alternative variant dSep08, mRNA.                                      |
| <a href="#">keykee</a>  | <a href="#">keykee.aSep08</a>  |  | 2787  | 226  |   | 75  | putative protein (keykee) mRNA.                                                                  |
| <a href="#">keyloy</a>  | <a href="#">keyloy.aSep08</a>  |  | 36794 | 771  |   | 50  | putative protein (5.7 kD) (keyloy) mRNA.                                                         |
| <a href="#">keymee</a>  | <a href="#">keymee.aSep08</a>  |  | 3777  | 618  | 4 | 206 | ATP-binding cassette sub-family A member 3 like (keymee) alternative variant aSep08, mRNA.       |
| <a href="#">keymer</a>  | <a href="#">keymer.aSep08</a>  |  | 11831 | 390  |   | 58  | putative protein (keymer) mRNA.                                                                  |
| <a href="#">keynoy</a>  | <a href="#">keynoy.aSep08</a>  |  | 16362 | 297  |   | 99  | putative protein (keynoy) mRNA.                                                                  |
| <a href="#">keypor</a>  | <a href="#">keypor.aSep08</a>  |  | 2705  | 449  |   | 92  | putative protein (9.2 kD) (keypor) mRNA.                                                         |

|                           |                                  |                        |       |      |   |     |                                                                                                                 |
|---------------------------|----------------------------------|------------------------|-------|------|---|-----|-----------------------------------------------------------------------------------------------------------------|
| <a href="#">keysa</a>     | <a href="#">keysa.aSep08</a>     |                        | 18850 | 244  |   | 37  | putative protein (keysa) mRNA.                                                                                  |
| <a href="#">keyshee</a>   | <a href="#">keyshee.aSep08</a>   |                        | 641   | 453  |   | 38  | putative protein (keyshee) mRNA.                                                                                |
| <a href="#">keytu</a>     | <a href="#">keytu.aSep08</a>     |                        | 4149  | 405  |   | 129 | putative protein (keytu) mRNA.                                                                                  |
| <a href="#">keyvar</a>    | <a href="#">keyvar.aSep08</a>    |                        | 5332  | 559  | 4 | 185 | microtubule-actin crosslinking factor 1 (keyvar) alternative variant aSep08, mRNA.                              |
| <a href="#">keywey</a>    | <a href="#">keywey.aSep08</a>    |                        | 3420  | 327  |   | 54  | putative protein (keywey) mRNA.                                                                                 |
| <a href="#">Khdrbs1</a>   | <a href="#">Khdrbs1.aSep08</a>   | <a href="#">117268</a> | 19948 | 1036 | 5 | 273 | putative protein of metazoan origin (Khdrbs1) alternative variant aSep08, mRNA.                                 |
| <a href="#">Khdrbs1</a>   | <a href="#">Khdrbs1.bSep08</a>   | <a href="#">117268</a> | 8943  | 846  | 3 | 212 | putative protein of metazoan origin (Khdrbs1) alternative variant bSep08, mRNA.                                 |
| <a href="#">Khdrbs1</a>   | <a href="#">Khdrbs1.cSep08</a>   | <a href="#">117268</a> | 13150 | 1383 | 2 | 51  | putative protein of vertebrate origin (Khdrbs1) alternative variant cSep08, mRNA.                               |
| <a href="#">Khdrbs1</a>   | <a href="#">Khdrbs1.dSep08</a>   | <a href="#">117268</a> | 23009 | 446  | 4 | 45  | putative protein of vertebrate origin (Khdrbs1) alternative variant dSep08, mRNA.                               |
| <a href="#">Khdrbs3</a>   | <a href="#">Khdrbs3.bSep08</a>   | <a href="#">64015</a>  | 67798 | 788  | 6 | 124 | putative protein of vertebrate origin (Khdrbs3) alternative variant bSep08, mRNA.                               |
| <a href="#">Khdrbs3</a>   | <a href="#">Khdrbs3.cSep08</a>   | <a href="#">64015</a>  | 60175 | 598  | 4 | 103 | putative protein of vertebrate origin (Khdrbs3) alternative variant cSep08, mRNA.                               |
| <a href="#">Khk</a>       | <a href="#">Khk.bSep08</a>       | <a href="#">25659</a>  | 8350  | 682  | 5 | 162 | ketohehexokinase (Khk) alternative variant bSep08, mRNA.                                                        |
| <a href="#">Khk</a>       | <a href="#">Khk.dSep08</a>       | <a href="#">25659</a>  | 3162  | 770  | 5 | 150 | ketohehexokinase (16.2 kD) (Khk) alternative variant dSep08, mRNA.                                              |
| <a href="#">Khk</a>       | <a href="#">Khk.fSep08</a>       | <a href="#">25659</a>  | 4239  | 1288 | 2 | 70  | ketohehexokinase (7.7 kD) (Khk) alternative variant fSep08, mRNA.                                               |
| <a href="#">Khsrp</a>     | <a href="#">Khsrp.bSep08</a>     | <a href="#">171137</a> | 2888  | 1782 | 6 | 405 | KH-type splicing regulatory protein (Khsrp) alternative variant bSep08, mRNA.                                   |
| <a href="#">Khsrp</a>     | <a href="#">Khsrp.cSep08</a>     | <a href="#">171137</a> | 1189  | 593  | 3 | 32  | KH-type splicing regulatory protein (Khsrp) alternative variant cSep08, mRNA.                                   |
| <a href="#">KH_1.3</a>    | <a href="#">KH_1.3.aSep08</a>    |                        | 9265  | 455  |   | 151 | neuro-oncological ventral antigen like (KH_1.3) mRNA.                                                           |
| <a href="#">Kiaa0415</a>  | <a href="#">Kiaa0415.aSep08</a>  | <a href="#">641386</a> | 1662  | 1549 |   | 110 | KIAA0415 protein (Kiaa0415) mRNA.                                                                               |
| <a href="#">Kidins220</a> | <a href="#">Kidins220.bSep08</a> | <a href="#">116478</a> | 18161 | 3636 | 5 | 592 | kinase D-interacting (Kidins220) alternative variant bSep08, mRNA.                                              |
| <a href="#">Kidins220</a> | <a href="#">Kidins220.cSep08</a> | <a href="#">116478</a> | 20201 | 913  | 7 | 280 | kinase D-interacting (Kidins220) alternative variant cSep08, mRNA.                                              |
| <a href="#">Kidins220</a> | <a href="#">Kidins220.dSep08</a> | <a href="#">116478</a> | 12098 | 1256 | 4 | 246 | putative protein, with a coiled coil domain, of vertebrate origin (Kidins220) alternative variant dSep08, mRNA. |
| <a href="#">Kidins220</a> | <a href="#">Kidins220.eSep08</a> | <a href="#">116478</a> | 23795 | 1093 | 6 | 208 | kinase D-interacting (Kidins220) alternative variant eSep08, mRNA.                                              |
| <a href="#">Kidins220</a> | <a href="#">Kidins220.fSep08</a> | <a href="#">116478</a> | 5360  | 548  | 4 | 110 | kinase D-interacting (Kidins220) alternative variant fSep08, mRNA.                                              |
| <a href="#">Kif1a</a>     | <a href="#">Kif1a.aSep08</a>     | <a href="#">363288</a> | 23855 | 2573 | 2 | 706 | kinesin family member 1A (Kif1a) alternative variant aSep08, mRNA.                                              |
| <a href="#">Kif1a</a>     | <a href="#">Kif1a.bSep08</a>     | <a href="#">363288</a> | 1640  | 573  | 1 | 70  | kinesin family member 1A (Kif1a) alternative variant bSep08, mRNA.                                              |
| <a href="#">Kif1b</a>     | <a href="#">Kif1b.bSep08</a>     | <a href="#">117548</a> | 10521 | 1028 | 7 | 221 | kinesin family member 1B (Kif1b) alternative variant bSep08, mRNA.                                              |

|                       |                              |                        |       |      |    |     |                                                                              |
|-----------------------|------------------------------|------------------------|-------|------|----|-----|------------------------------------------------------------------------------|
| <a href="#">Kif1b</a> | <a href="#">Kif1b.cSep08</a> | <a href="#">117548</a> | 6765  | 599  | 3  | 199 | kinesin family member 1B (Kif1b) alternative variant cSep08, mRNA.           |
| <a href="#">Kif1b</a> | <a href="#">Kif1b.dSep08</a> | <a href="#">117548</a> | 40953 | 506  | 5  | 109 | kinesin family member 1B (Kif1b) alternative variant dSep08, mRNA.           |
| <a href="#">Kif1b</a> | <a href="#">Kif1b.eSep08</a> | <a href="#">117548</a> | 40864 | 444  | 4  | 85  | kinesin family member 1B (Kif1b) alternative variant eSep08, mRNA.           |
| <a href="#">Kif1b</a> | <a href="#">Kif1b.fSep08</a> | <a href="#">117548</a> | 1853  | 410  | 2  | 36  | kinesin family member 1B (Kif1b) alternative variant fSep08, mRNA.           |
| <a href="#">Kif1c</a> | <a href="#">Kif1c.bSep08</a> | <a href="#">113886</a> | 29436 | 1789 | 6  | 574 | kinesin family member 1C (Kif1c) alternative variant bSep08, mRNA.           |
| <a href="#">Kif2a</a> | <a href="#">Kif2a.aSep08</a> | <a href="#">84391</a>  | 17286 | 3283 | 11 | 400 | kinesin family member 2A (Kif2a) alternative variant aSep08, mRNA.           |
| <a href="#">Kif2a</a> | <a href="#">Kif2a.cSep08</a> | <a href="#">84391</a>  | 2859  | 456  | 2  | 34  | kinesin family member 2A (3.7 kD) (Kif2a) alternative variant cSep08, mRNA.  |
| <a href="#">Kif2c</a> | <a href="#">Kif2c.cSep08</a> | <a href="#">171529</a> | 3959  | 757  | 4  | 115 | kinesin family member 2C (Kif2c) alternative variant cSep08, mRNA.           |
| <a href="#">Kif2c</a> | <a href="#">Kif2c.dSep08</a> | <a href="#">171529</a> | 3868  | 831  | 2  | 110 | kinesin family member 2C (Kif2c) alternative variant dSep08, mRNA.           |
| <a href="#">Kif2c</a> | <a href="#">Kif2c.eSep08</a> | <a href="#">171529</a> | 14829 | 763  | 4  | 45  | kinesin family member 2C (Kif2c) alternative variant eSep08, mRNA.           |
| <a href="#">Kif3a</a> | <a href="#">Kif3a.aSep08</a> | <a href="#">84392</a>  | 19571 | 1345 | 1  | 448 | kinesin family member 3a (Kif3a) alternative variant aSep08, mRNA.           |
| <a href="#">Kif3a</a> | <a href="#">Kif3a.bSep08</a> | <a href="#">84392</a>  | 12231 | 692  | 1  | 169 | kinesin family member 3a (Kif3a) alternative variant bSep08, mRNA.           |
| <a href="#">Kif3b</a> | <a href="#">Kif3b.bSep08</a> | <a href="#">296284</a> | 22267 | 780  | 1  | 197 | kinesin family member 3B (Kif3b) alternative variant bSep08, mRNA.           |
| <a href="#">Kif3b</a> | <a href="#">Kif3b.cSep08</a> | <a href="#">296284</a> | 4828  | 499  | 1  | 118 | kinesin family member 3B (Kif3b) alternative variant cSep08, mRNA.           |
| <a href="#">Kif3c</a> | <a href="#">Kif3c.bSep08</a> | <a href="#">85248</a>  | 15677 | 2005 | 6  | 239 | kinesin family member 3C (28.0 kD) (Kif3c) alternative variant bSep08, mRNA. |
| <a href="#">Kif4</a>  | <a href="#">Kif4.aSep08</a>  | <a href="#">84393</a>  | 44425 | 2466 | 2  | 517 | kinesin family member 4 (Kif4) alternative variant aSep08, mRNA.             |
| <a href="#">Kif4</a>  | <a href="#">Kif4.bSep08</a>  | <a href="#">84393</a>  | 30723 | 762  | 2  | 231 | kinesin family member 4 (Kif4) alternative variant bSep08, mRNA.             |
| <a href="#">Kif5a</a> | <a href="#">Kif5a.bSep08</a> | <a href="#">314906</a> | 767   | 388  | 3  | 95  | kinesin family member 5A (Kif5a) alternative variant bSep08, mRNA.           |
| <a href="#">Kif5b</a> | <a href="#">Kif5b.bSep08</a> | <a href="#">117550</a> | 13763 | 1785 | 8  | 482 | kinesin family member 5B (Kif5b) alternative variant bSep08, mRNA.           |
| <a href="#">Kif5b</a> | <a href="#">Kif5b.cSep08</a> | <a href="#">117550</a> | 11363 | 3521 | 7  | 195 | kinesin family member 5B (Kif5b) alternative variant cSep08, mRNA.           |
| <a href="#">Kif5b</a> | <a href="#">Kif5b.dSep08</a> | <a href="#">117550</a> | 3150  | 797  | 6  | 96  | kinesin family member 5B (Kif5b) alternative variant dSep08, mRNA.           |
| <a href="#">Kif5c</a> | <a href="#">Kif5c.bSep08</a> | <a href="#">311024</a> | 26422 | 4097 | 4  | 142 | kinesin family member 5C (Kif5c) alternative variant bSep08, mRNA.           |
| <a href="#">Kif5c</a> | <a href="#">Kif5c.cSep08</a> | <a href="#">311024</a> | 2974  | 529  | 2  | 130 | kinesin family member 5C (Kif5c) alternative variant cSep08, mRNA.           |

|                        |                               |                        |       |      |    |     |                                                                             |
|------------------------|-------------------------------|------------------------|-------|------|----|-----|-----------------------------------------------------------------------------|
| <a href="#">Kif5c</a>  | <a href="#">Kif5c.dSep08</a>  | <a href="#">311024</a> | 24414 | 443  | 3  | 102 | kinesin family member 5C (Kif5c) alternative variant dSep08, mRNA.          |
| <a href="#">Kif6</a>   | <a href="#">Kif6.aSep08</a>   | <a href="#">171291</a> | 36654 | 387  |    | 128 | kinesin family member 6 (Kif6) mRNA.                                        |
| <a href="#">Kif7</a>   | <a href="#">Kif7.aSep08</a>   | <a href="#">293047</a> | 1417  | 1165 |    | 158 | kinesin family member 7 (Kif7) mRNA.                                        |
| <a href="#">Kif9</a>   | <a href="#">Kif9.aSep08</a>   | <a href="#">501059</a> | 14329 | 527  |    | 175 | kinesin family member 9 (Kif9) mRNA.                                        |
| <a href="#">Kif11</a>  | <a href="#">Kif11.aSep08</a>  | <a href="#">171304</a> | 11452 | 2535 | 7  | 388 | kinesin family member 11 (Kif11) alternative variant aSep08, mRNA.          |
| <a href="#">Kif12</a>  | <a href="#">Kif12.bSep08</a>  | <a href="#">313254</a> | 1240  | 438  | 4  | 139 | kinesin family member 12 (Kif12) alternative variant bSep08, mRNA.          |
| <a href="#">Kif12</a>  | <a href="#">Kif12.cSep08</a>  | <a href="#">313254</a> | 974   | 796  | 2  | 77  | kinesin family member 12 (Kif12) alternative variant cSep08, mRNA.          |
| <a href="#">Kif12</a>  | <a href="#">Kif12.dSep08</a>  | <a href="#">313254</a> | 739   | 501  | 2  | 72  | kinesin family member 12 (7.6 kD) (Kif12) alternative variant dSep08, mRNA. |
| <a href="#">Kif13a</a> | <a href="#">Kif13a.bSep08</a> | <a href="#">308173</a> | 13399 | 859  | 7  | 286 | kinesin family member 13A (Kif13a) alternative variant bSep08, mRNA.        |
| <a href="#">Kif13a</a> | <a href="#">Kif13a.cSep08</a> | <a href="#">308173</a> | 13459 | 2316 | 3  | 275 | kinesin family member 13A (Kif13a) alternative variant cSep08, mRNA.        |
| <a href="#">Kif13a</a> | <a href="#">Kif13a.dSep08</a> | <a href="#">308173</a> | 3630  | 408  | 3  | 136 | kinesin family member 13A (Kif13a) alternative variant dSep08, mRNA.        |
| <a href="#">Kif14</a>  | <a href="#">Kif14.bSep08</a>  | <a href="#">360849</a> | 4819  | 439  | 2  | 146 | kinesin family member 14 (Kif14) alternative variant bSep08, mRNA.          |
| <a href="#">Kif14</a>  | <a href="#">Kif14.cSep08</a>  | <a href="#">360849</a> | 5451  | 401  | 4  | 133 | kinesin family member 14 (Kif14) alternative variant cSep08, mRNA.          |
| <a href="#">Kif16b</a> | <a href="#">Kif16b.bSep08</a> | <a href="#">311478</a> | 49697 | 1793 | 8  | 579 | kinesin family member 16B (Kif16b) alternative variant bSep08, mRNA.        |
| <a href="#">Kif16b</a> | <a href="#">Kif16b.cSep08</a> | <a href="#">311478</a> | 5590  | 378  | 4  | 125 | kinesin family member 16B (Kif16b) alternative variant cSep08, mRNA.        |
| <a href="#">Kif18a</a> | <a href="#">Kif18a.aSep08</a> | <a href="#">362186</a> | 26298 | 537  |    | 159 | kinesin family member 18A (Kif18a) mRNA.                                    |
| <a href="#">Kif18b</a> | <a href="#">Kif18b.bSep08</a> | <a href="#">303575</a> | 10120 | 771  | 4  | 256 | kinesin family member 18B (Kif18b) alternative variant bSep08, mRNA.        |
| <a href="#">Kif18b</a> | <a href="#">Kif18b.cSep08</a> | <a href="#">303575</a> | 11001 | 1402 | 4  | 121 | kinesin family member 18B (Kif18b) alternative variant cSep08, mRNA.        |
| <a href="#">Kif19a</a> | <a href="#">Kif19a.aSep08</a> | <a href="#">303659</a> | 1556  | 416  | 4  | 138 | kinesin family member 19A (Kif19a) alternative variant aSep08, mRNA.        |
| <a href="#">Kif19a</a> | <a href="#">Kif19a.bSep08</a> | <a href="#">303659</a> | 1544  | 300  | 2  | 100 | kinesin family member 19A (Kif19a) alternative variant bSep08, mRNA.        |
| <a href="#">Kif21a</a> | <a href="#">Kif21a.bSep08</a> | <a href="#">300158</a> | 15867 | 801  | 6  | 267 | kinesin family member 21A (Kif21a) alternative variant bSep08, mRNA.        |
| <a href="#">Kif21a</a> | <a href="#">Kif21a.cSep08</a> | <a href="#">300158</a> | 10883 | 1233 | 7  | 246 | kinesin family member 21A (Kif21a) alternative variant cSep08, mRNA.        |
| <a href="#">Kif21a</a> | <a href="#">Kif21a.dSep08</a> | <a href="#">300158</a> | 7589  | 727  | 5  | 154 | kinesin family member 21A (Kif21a) alternative variant dSep08, mRNA.        |
| <a href="#">Kif21a</a> | <a href="#">Kif21a.eSep08</a> | <a href="#">300158</a> | 10848 | 525  | 4  | 147 | kinesin family member 21A (Kif21a) alternative variant eSep08, mRNA.        |
| <a href="#">Kif21b</a> | <a href="#">Kif21b.bSep08</a> | <a href="#">289397</a> | 10312 | 2175 | 13 | 708 | kinesin family member 21B (Kif21b) alternative variant bSep08, mRNA.        |

|                           |                                  |                        |       |      |    |     |                                                                                  |
|---------------------------|----------------------------------|------------------------|-------|------|----|-----|----------------------------------------------------------------------------------|
| <a href="#">Kif21b</a>    | <a href="#">Kif21b.cSep08</a>    | <a href="#">289397</a> | 8352  | 801  | 8  | 266 | kinesin family member 21B (Kif21b) alternative variant cSep08, mRNA.             |
| <a href="#">Kif22</a>     | <a href="#">Kif22.bSep08</a>     | <a href="#">293502</a> | 628   | 449  | 3  | 97  | kinesin family member 22 (11.0 kD) (Kif22) alternative variant bSep08, mRNA.     |
| <a href="#">Kif22</a>     | <a href="#">Kif22.cSep08</a>     | <a href="#">293502</a> | 841   | 724  | 2  | 67  | kinesin family member 22 (Kif22) alternative variant cSep08, mRNA.               |
| <a href="#">Kif23</a>     | <a href="#">Kif23.bSep08</a>     | <a href="#">315740</a> | 4706  | 682  | 4  | 227 | kinesin family member 23 (Kif23) alternative variant bSep08, mRNA.               |
| <a href="#">Kif23</a>     | <a href="#">Kif23.cSep08</a>     | <a href="#">315740</a> | 2577  | 1208 | 3  | 70  | kinesin family member 23 (Kif23) alternative variant cSep08, mRNA.               |
| <a href="#">Kifap3</a>    | <a href="#">Kifap3.bSep08</a>    | <a href="#">289168</a> | 25802 | 693  | 6  | 230 | kinesin-associated protein 3 (Kifap3) alternative variant bSep08, mRNA.          |
| <a href="#">Kifap3</a>    | <a href="#">Kifap3.cSep08</a>    | <a href="#">289168</a> | 55203 | 1004 | 6  | 203 | kinesin-associated protein 3 (Kifap3) alternative variant cSep08, mRNA.          |
| <a href="#">Kifap3</a>    | <a href="#">Kifap3.dSep08</a>    | <a href="#">289168</a> | 15481 | 935  | 6  | 198 | kinesin-associated protein 3 (Kifap3) alternative variant dSep08, mRNA.          |
| <a href="#">Kifap3</a>    | <a href="#">Kifap3.eSep08</a>    | <a href="#">289168</a> | 6188  | 379  | 3  | 126 | kinesin-associated protein 3 (Kifap3) alternative variant eSep08, mRNA.          |
| <a href="#">Kifap3</a>    | <a href="#">Kifap3.fSep08</a>    | <a href="#">289168</a> | 26613 | 405  | 2  | 72  | kinesin-associated protein 3 (8.0 kD) (Kifap3) alternative variant fSep08, mRNA. |
| <a href="#">Kifc1</a>     | <a href="#">Kifc1.bSep08</a>     | <a href="#">294286</a> | 9545  | 1929 | 8  | 589 | kinesin family member C1 (Kifc1) alternative variant bSep08, mRNA.               |
| <a href="#">KIFC2</a>     | <a href="#">KIFC2.bSep08</a>     | <a href="#">300053</a> | 3285  | 1331 | 3  | 328 | kinesin family member C2 (36.0 kD) (KIFC2) alternative variant bSep08, mRNA.     |
| <a href="#">KIFC2</a>     | <a href="#">KIFC2.cSep08</a>     | <a href="#">300053</a> | 4507  | 1641 | 9  | 208 | kinesin family member C2 (KIFC2) alternative variant cSep08, mRNA.               |
| <a href="#">KIFC2</a>     | <a href="#">KIFC2.dSep08</a>     | <a href="#">300053</a> | 471   | 385  | 2  | 128 | kinesin family member C2 CRA c (KIFC2) alternative variant dSep08, mRNA.         |
| <a href="#">KIFC2</a>     | <a href="#">KIFC2.eSep08</a>     | <a href="#">300053</a> | 1909  | 850  | 2  | 86  | kinesin family member C2 (8.9 kD) (KIFC2) alternative variant eSep08, mRNA.      |
| <a href="#">Kifc3</a>     | <a href="#">Kifc3.bSep08</a>     | <a href="#">307644</a> | 1664  | 704  | 3  | 184 | kinesin family member C3 (Kifc3) alternative variant bSep08, mRNA.               |
| <a href="#">Kifc3</a>     | <a href="#">Kifc3.cSep08</a>     | <a href="#">307644</a> | 23081 | 609  | 5  | 170 | kinesin family member C3 (Kifc3) alternative variant cSep08, mRNA.               |
| <a href="#">Kifc3</a>     | <a href="#">Kifc3.dSep08</a>     | <a href="#">307644</a> | 23726 | 385  | 4  | 84  | kinesin family member C3 (Kifc3) alternative variant dSep08, mRNA.               |
| <a href="#">Kinesin.0</a> | <a href="#">Kinesin.0.aSep08</a> |                        | 10735 | 1025 |    | 341 | kinesin family member 1A CRA b (Kinesin.0) mRNA.                                 |
| <a href="#">Kinesin.1</a> | <a href="#">Kinesin.1.aSep08</a> |                        | 644   | 513  |    | 170 | kinesin family member 7 (Kinesin.1) mRNA.                                        |
| <a href="#">Kirrel3</a>   | <a href="#">Kirrel3.bSep08</a>   | <a href="#">315546</a> | 28112 | 2017 | 12 | 553 | kin of irre like 3 (Kirrel3) alternative variant bSep08, mRNA.                   |
| <a href="#">Kirrel3</a>   | <a href="#">Kirrel3.cSep08</a>   | <a href="#">315546</a> | 13244 | 794  | 6  | 171 | kin of irre like 3 CRA b (Kirrel3) alternative variant cSep08, mRNA.             |
| <a href="#">Kirrel3</a>   | <a href="#">Kirrel3.dSep08</a>   | <a href="#">315546</a> | 42829 | 474  | 4  | 128 | kin of irre like 3 (Kirrel3) alternative variant dSep08, mRNA.                   |
| <a href="#">Kitl</a>      | <a href="#">Kitl.bSep08</a>      | <a href="#">60427</a>  | 20101 | 5190 | 3  | 91  | kit ligand (10.0 kD) (Kitl) alternative variant bSep08, mRNA.                    |
| <a href="#">klabor</a>    | <a href="#">klabor.aSep08</a>    |                        | 2194  | 1800 |    | 131 | putative protein of mammalian origin (13.8 kD) (klabor) mRNA.                    |



|                          |                                 |  |       |      |   |     |                                                                        |
|--------------------------|---------------------------------|--|-------|------|---|-----|------------------------------------------------------------------------|
| <a href="#">klachy</a>   | <a href="#">klachy.aSep08</a>   |  | 1700  | 364  |   | 86  | putative protein (klachy) mRNA.                                        |
| <a href="#">kladoy</a>   | <a href="#">kladoy.aSep08</a>   |  | 2142  | 1530 |   | 214 | protein SMF (kladoy) mRNA.                                             |
| <a href="#">klafee</a>   | <a href="#">klafee.aSep08</a>   |  | 2077  | 382  |   | 37  | putative protein (klafee) mRNA.                                        |
| <a href="#">klaflu</a>   | <a href="#">klaflu.aSep08</a>   |  | 4646  | 1589 |   | 529 | partner localizer of BRCA2 (klaflu) mRNA.                              |
| <a href="#">klafly</a>   | <a href="#">klafly.aSep08</a>   |  | 5545  | 276  |   | 24  | putative protein (2.8 kD) (klafly) mRNA.                               |
| <a href="#">klagar</a>   | <a href="#">klagar.aSep08</a>   |  | 9722  | 672  |   | 57  | putative protein (klagar) mRNA.                                        |
| <a href="#">klaja</a>    | <a href="#">klaja.aSep08</a>    |  | 16524 | 478  |   | 27  | putative protein (2.9 kD) (klaja) mRNA.                                |
| <a href="#">klajey</a>   | <a href="#">klajey.aSep08</a>   |  | 5589  | 1167 |   | 143 | putative protein (16.0 kD) (klajey) mRNA.                              |
| <a href="#">klalo</a>    | <a href="#">klalo.aSep08</a>    |  | 5196  | 379  |   | 126 | putative protein of vertebrate origin (klalo) mRNA.                    |
| <a href="#">klamee</a>   | <a href="#">klamee.aSep08</a>   |  | 2076  | 389  |   | 65  | putative protein (7.5 kD) (klamee) mRNA.                               |
| <a href="#">klapey</a>   | <a href="#">klapey.aSep08</a>   |  | 30509 | 410  |   | 51  | putative protein (klapey) mRNA.                                        |
| <a href="#">klapor</a>   | <a href="#">klapor.aSep08</a>   |  | 14255 | 714  | 3 | 238 | transcription complex CRA b (klapor) alternative variant aSep08, mRNA. |
| <a href="#">klapor</a>   | <a href="#">klapor.bSep08</a>   |  | 7702  | 416  | 1 | 95  | transcription complex CRA b (klapor) alternative variant bSep08, mRNA. |
| <a href="#">klarbor</a>  | <a href="#">klarbor.aSep08</a>  |  | 803   | 288  |   | 56  | putative protein (klarbor) mRNA.                                       |
| <a href="#">klarchy</a>  | <a href="#">klarchy.aSep08</a>  |  | 45479 | 655  |   | 24  | putative protein (2.8 kD) (klarchy) mRNA.                              |
| <a href="#">klardoy</a>  | <a href="#">klardoy.aSep08</a>  |  | 4358  | 631  |   | 53  | putative protein (5.6 kD) (klardoy) mRNA.                              |
| <a href="#">klarfee</a>  | <a href="#">klarfee.aSep08</a>  |  | 19045 | 498  |   | 33  | putative protein (3.5 kD) (klarfee) mRNA.                              |
| <a href="#">klarflu</a>  | <a href="#">klarflu.aSep08</a>  |  | 2646  | 674  |   | 68  | putative protein (7.4 kD) (klarflu) mRNA.                              |
| <a href="#">klarfly</a>  | <a href="#">klarfly.aSep08</a>  |  | 2251  | 621  | 3 | 81  | myeloid lymphoid mixed-lineage leukemia like (klarfly) mRNA.           |
| <a href="#">klargar</a>  | <a href="#">klargar.aSep08</a>  |  | 3699  | 272  |   | 70  | putative protein (klargar) mRNA.                                       |
| <a href="#">klarja</a>   | <a href="#">klarja.aSep08</a>   |  | 1308  | 398  |   | 31  | putative protein (3.7 kD) (klarja) mRNA.                               |
| <a href="#">klarjey</a>  | <a href="#">klarjey.aSep08</a>  |  | 48238 | 963  |   | 72  | putative protein (klarjey) mRNA.                                       |
| <a href="#">klarlo</a>   | <a href="#">klarlo.aSep08</a>   |  | 58333 | 419  |   | 43  | putative protein (klarlo) mRNA.                                        |
| <a href="#">klarmee</a>  | <a href="#">klarmee.aSep08</a>  |  | 4704  | 1501 | 2 | 159 | CRA b like (17.4 kD) (klarmee) alternative variant aSep08, mRNA.       |
| <a href="#">klarmee</a>  | <a href="#">klarmee.bSep08</a>  |  | 4541  | 1770 | 2 | 67  | putative protein (klarmee) alternative variant bSep08, mRNA.           |
| <a href="#">klarmee</a>  | <a href="#">klarmee.cSep08</a>  |  | 3577  | 1655 | 1 | 60  | putative protein (7.3 kD) (klarmee) alternative variant cSep08, mRNA.  |
| <a href="#">klarmee</a>  | <a href="#">klarmee.dSep08</a>  |  | 4064  | 548  | 2 | 47  | putative protein (klarmee) alternative variant dSep08, mRNA.           |
| <a href="#">klaroy</a>   | <a href="#">klaroy.aSep08</a>   |  | 1063  | 189  |   | 62  | putative protein (klaroy) mRNA.                                        |
| <a href="#">klarpey</a>  | <a href="#">klarpey.aSep08</a>  |  | 4687  | 639  |   | 213 | dynein 2 heavy (klarpey) mRNA.                                         |
| <a href="#">klarpor</a>  | <a href="#">klarpor.aSep08</a>  |  | 1077  | 495  |   | 57  | putative protein (6.8 kD) (klarpor) mRNA.                              |
| <a href="#">klarroy</a>  | <a href="#">klarroy.aSep08</a>  |  | 1734  | 760  |   | 56  | putative protein (6.1 kD) (klarroy) mRNA.                              |
| <a href="#">klarshee</a> | <a href="#">klarshee.aSep08</a> |  | 2717  | 358  |   | 119 | synaptopodin 2 (klarshee) mRNA.                                        |
| <a href="#">klartu</a>   | <a href="#">klartu.aSep08</a>   |  | 34515 | 337  |   | 46  | synaptotagmin XVI like (klartu) mRNA.                                  |
| <a href="#">klarvo</a>   | <a href="#">klarvo.aSep08</a>   |  | 813   | 276  |   | 58  | putative protein (klarvo) mRNA.                                        |
| <a href="#">klarwer</a>  | <a href="#">klarwer.aSep08</a>  |  | 7084  | 427  |   | 69  | putative protein of mammalian origin (7.8 kD) (klarwer) mRNA.          |

|                          |                                 |                        |       |      |    |     |                                                                         |
|--------------------------|---------------------------------|------------------------|-------|------|----|-----|-------------------------------------------------------------------------|
| <a href="#">klashee</a>  | <a href="#">klashee.aSep08</a>  |                        | 21245 | 1035 |    | 8   | putative protein (9.8 kD) (klashee) mRNA.                               |
| <a href="#">klatu</a>    | <a href="#">klatu.aSep08</a>    |                        | 24165 | 414  |    | 49  | putative protein (5.4 kD) (klatu) mRNA.                                 |
| <a href="#">klavo</a>    | <a href="#">klavo.aSep08</a>    |                        | 14115 | 267  |    | 33  | putative protein (klavo) mRNA.                                          |
| <a href="#">klawbor</a>  | <a href="#">klawbor.aSep08</a>  |                        | 3048  | 282  |    | 43  | putative protein (klawbor) mRNA.                                        |
| <a href="#">klawchy</a>  | <a href="#">klawchy.aSep08</a>  |                        | 3005  | 553  |    | 184 | nuclear receptor coactivator 6 (klawchy) mRNA.                          |
| <a href="#">klawdoy</a>  | <a href="#">klawdoy.aSep08</a>  |                        | 3154  | 2462 |    | 110 | putative protein (12.5 kD) (klawdoy) mRNA.                              |
| <a href="#">klawer</a>   | <a href="#">klawer.aSep08</a>   |                        | 38494 | 2733 |    | 50  | putative protein (klawer) mRNA.                                         |
| <a href="#">klawfee</a>  | <a href="#">klawfee.aSep08</a>  |                        | 3858  | 1263 |    | 72  | ab2-143 like (8.0 kD) (klawfee) mRNA.                                   |
| <a href="#">klawflu</a>  | <a href="#">klawflu.aSep08</a>  |                        | 6765  | 479  | 3  | 106 | putative protein (11.6 kD) (klawflu) alternative variant aSep08, mRNA.  |
| <a href="#">klawfly</a>  | <a href="#">klawfly.aSep08</a>  |                        | 24077 | 748  |    | 69  | putative protein (7.7 kD) (klawfly) mRNA.                               |
| <a href="#">klawgar</a>  | <a href="#">klawgar.aSep08</a>  |                        | 5024  | 891  |    | 72  | putative protein (klawgar) mRNA.                                        |
| <a href="#">klawja</a>   | <a href="#">klawja.aSep08</a>   |                        | 5625  | 275  |    | 52  | diacylglycerol kinase eta like (klawja) mRNA.                           |
| <a href="#">klawjey</a>  | <a href="#">klawjey.aSep08</a>  |                        | 12361 | 583  |    | 103 | putative protein (klawjey) mRNA.                                        |
| <a href="#">klawlo</a>   | <a href="#">klawlo.aSep08</a>   |                        | 1561  | 208  |    | 62  | putative protein (klawlo) mRNA.                                         |
| <a href="#">klawmee</a>  | <a href="#">klawmee.aSep08</a>  |                        | 3271  | 747  |    | 32  | putative protein (3.5 kD) (klawmee) mRNA.                               |
| <a href="#">klawpey</a>  | <a href="#">klawpey.aSep08</a>  |                        | 5951  | 593  |    | 197 | dynein cytoplasmic 2 heavy (klawpey) mRNA.                              |
| <a href="#">klawpor</a>  | <a href="#">klawpor.aSep08</a>  |                        | 650   | 452  |    | 97  | putative protein (klawpor) mRNA.                                        |
| <a href="#">klawroy</a>  | <a href="#">klawroy.aSep08</a>  |                        | 17775 | 314  |    | 104 | regulatory factor X 4 CRA a (klawroy) mRNA.                             |
| <a href="#">klawshee</a> | <a href="#">klawshee.bSep08</a> |                        | 680   | 523  | 2  | 35  | CRA b like (4.1 kD) (klawshee) alternative variant bSep08, mRNA.        |
| <a href="#">klawshee</a> | <a href="#">klawshee.cSep08</a> |                        | 767   | 358  | 3  | 45  | CRA a like (klawshee) alternative variant cSep08, mRNA.                 |
| <a href="#">klawtu</a>   | <a href="#">klawtu.aSep08</a>   |                        | 18839 | 1313 |    | 83  | putative protein (klawtu) alternative variant aSep08, mRNA.             |
| <a href="#">klawvo</a>   | <a href="#">klawvo.aSep08</a>   |                        | 48017 | 750  |    | 106 | putative nuclear protein (11.9 kD) (klawvo) mRNA.                       |
| <a href="#">klawwer</a>  | <a href="#">klawwer.aSep08</a>  |                        | 1434  | 722  | 3  | 53  | putative protein (klawwer) alternative variant aSep08, mRNA.            |
| <a href="#">Klc1</a>     | <a href="#">Klc1.dSep08</a>     | <a href="#">171041</a> | 18783 | 788  | 5  | 130 | kinesin light chain 1 (Klc1) alternative variant dSep08, mRNA.          |
| <a href="#">Klc1</a>     | <a href="#">Klc1.eSep08</a>     | <a href="#">171041</a> | 8742  | 913  | 5  | 115 | kinesin light chain 1 (Klc1) alternative variant eSep08, mRNA.          |
| <a href="#">Klc1</a>     | <a href="#">Klc1.fSep08</a>     | <a href="#">171041</a> | 7197  | 724  | 4  | 52  | kinesin light chain 1 (Klc1) alternative variant fSep08, mRNA.          |
| <a href="#">Klc1</a>     | <a href="#">Klc1.hSep08</a>     | <a href="#">171041</a> | 1461  | 876  | 2  | 48  | kinesin light chain 1 (Klc1) alternative variant hSep08, mRNA.          |
| <a href="#">Klc1</a>     | <a href="#">Klc1.jSep08</a>     | <a href="#">171041</a> | 5589  | 619  | 2  | 59  | kinesin light chain 1 (6.1 kD) (Klc1) alternative variant jSep08, mRNA. |
| <a href="#">Klc2</a>     | <a href="#">Klc2.aSep08</a>     | <a href="#">309159</a> | 9947  | 2920 | 16 | 692 | kinesin light CRA b (Klc2) alternative variant aSep08, mRNA.            |
| <a href="#">Klc2</a>     | <a href="#">Klc2.cSep08</a>     | <a href="#">309159</a> | 4814  | 723  | 5  | 240 | kinesin light CRA b (Klc2) alternative variant cSep08, mRNA.            |
| <a href="#">Klc2</a>     | <a href="#">Klc2.dSep08</a>     | <a href="#">309159</a> | 4102  | 654  | 4  | 218 | kinesin light CRA b (Klc2) alternative variant dSep08, mRNA.            |
| <a href="#">Klc2</a>     | <a href="#">Klc2.eSep08</a>     | <a href="#">309159</a> | 4025  | 653  | 3  | 153 | kinesin light CRA b (Klc2) alternative variant eSep08, mRNA.            |

|                          |                                 |                        |        |     |   |     |                                                                                          |
|--------------------------|---------------------------------|------------------------|--------|-----|---|-----|------------------------------------------------------------------------------------------|
| <a href="#">Klc2</a>     | <a href="#">Klc2.fSep08</a>     | <a href="#">309159</a> | 1748   | 864 | 5 | 148 | kinesin light CRA b (15.5 kD) (Klc2) alternative variant fSep08, mRNA.                   |
| <a href="#">Klc2</a>     | <a href="#">Klc2.gSep08</a>     | <a href="#">309159</a> | 1089   | 426 | 2 | 87  | putative protein (Klc2) alternative variant gSep08, mRNA.                                |
| <a href="#">Klc2</a>     | <a href="#">Klc2.iSep08</a>     | <a href="#">309159</a> | 973    | 290 | 2 | 47  | putative protein (Klc2) alternative variant iSep08, mRNA.                                |
| <a href="#">Klc3</a>     | <a href="#">Klc3.bSep08</a>     | <a href="#">171549</a> | 426    | 265 | 2 | 40  | kinesin light chain 3 (Klc3) alternative variant bSep08, mRNA.                           |
| <a href="#">Klc4</a>     | <a href="#">Klc4.bSep08</a>     | <a href="#">316226</a> | 4980   | 706 | 5 | 190 | kinesin light chain 4 (Klc4) alternative variant bSep08, mRNA.                           |
| <a href="#">Klc4</a>     | <a href="#">Klc4.cSep08</a>     | <a href="#">316226</a> | 1391   | 818 | 4 | 146 | kinesin light chain 4 (Klc4) alternative variant cSep08, mRNA.                           |
| <a href="#">Klc4</a>     | <a href="#">Klc4.dSep08</a>     | <a href="#">316226</a> | 2542   | 617 | 3 | 119 | kinesin light chain 4 (Klc4) alternative variant dSep08, mRNA.                           |
| <a href="#">Klc4</a>     | <a href="#">Klc4.fSep08</a>     | <a href="#">316226</a> | 1278   | 591 | 4 | 58  | kinesin light chain 4 (Klc4) alternative variant fSep08, mRNA.                           |
| <a href="#">kleebor</a>  | <a href="#">kleebor.aSep08</a>  |                        | 2183   | 399 |   | 70  | putative protein (7.2 kD) (kleebor) mRNA.                                                |
| <a href="#">kleechy</a>  | <a href="#">kleechy.aSep08</a>  |                        | 5991   | 429 |   | 143 | nuclear receptor coactivator 6 (kleechy) mRNA.                                           |
| <a href="#">kleedoy</a>  | <a href="#">kleedoy.aSep08</a>  |                        | 7403   | 400 |   | 57  | putative protein (kleedoy) mRNA.                                                         |
| <a href="#">kleefee</a>  | <a href="#">kleefee.aSep08</a>  |                        | 9826   | 512 | 3 | 145 | cdc14 cell division cycle 14 homolog B CRA b (kleefee) alternative variant aSep08, mRNA. |
| <a href="#">kleefee</a>  | <a href="#">kleefee.bSep08</a>  |                        | 3817   | 282 | 1 | 68  | cdc14 cell division cycle 14 homolog B CRA b (kleefee) alternative variant bSep08, mRNA. |
| <a href="#">kleeflu</a>  | <a href="#">kleeflu.aSep08</a>  |                        | 2263   | 585 |   | 63  | putative protein (kleeflu) mRNA.                                                         |
| <a href="#">kleefly</a>  | <a href="#">kleefly.aSep08</a>  |                        | 12617  | 419 |   | 66  | putative protein (kleefly) mRNA.                                                         |
| <a href="#">kleegar</a>  | <a href="#">kleegar.aSep08</a>  |                        | 4664   | 764 |   | 66  | tumor necrosis factor superfamily member 13b like (kleegar) mRNA.                        |
| <a href="#">kleeja</a>   | <a href="#">kleeja.aSep08</a>   |                        | 15575  | 751 |   | 250 | putative protein of eukaryotic origin (kleeja) mRNA.                                     |
| <a href="#">kleejey</a>  | <a href="#">kleejey.aSep08</a>  |                        | 4697   | 542 |   | 105 | putative protein, with a coiled coil domain (kleejey) mRNA.                              |
| <a href="#">kleelo</a>   | <a href="#">kleelo.aSep08</a>   |                        | 6437   | 392 |   | 83  | putative protein (kleelo) mRNA.                                                          |
| <a href="#">kleemee</a>  | <a href="#">kleemee.aSep08</a>  |                        | 770    | 474 | 2 | 54  | putative protein (kleemee) alternative variant aSep08, mRNA.                             |
| <a href="#">kleemee</a>  | <a href="#">kleemee.bSep08</a>  |                        | 3631   | 425 | 3 | 39  | putative protein (4.5 kD) (kleemee) alternative variant bSep08, mRNA.                    |
| <a href="#">kleepey</a>  | <a href="#">kleepey.aSep08</a>  |                        | 26173  | 478 |   | 101 | putative protein (kleepey) mRNA.                                                         |
| <a href="#">kleepor</a>  | <a href="#">kleepor.aSep08</a>  |                        | 206352 | 473 |   | 94  | RNA binding motif single stranded interacting protein like (kleepor) mRNA.               |
| <a href="#">kleeroy</a>  | <a href="#">kleeroy.aSep08</a>  |                        | 19878  | 588 |   | 195 | polymerase III polypeptide B CRA b (kleeroy) mRNA.                                       |
| <a href="#">kleeshaw</a> | <a href="#">kleeshaw.aSep08</a> |                        | 11539  | 664 |   | 61  | putative protein (kleeshaw) mRNA.                                                        |
| <a href="#">kleeshee</a> | <a href="#">kleeshee.aSep08</a> |                        | 3522   | 377 | 1 | 33  | LYST-interacting protein 8 like (kleeshee) mRNA.                                         |
| <a href="#">kleetu</a>   | <a href="#">kleetu.aSep08</a>   |                        | 2935   | 837 |   | 43  | putative protein (4.9 kD) (kleetu) mRNA.                                                 |
| <a href="#">kleevo</a>   | <a href="#">kleevo.aSep08</a>   |                        | 3205   | 747 |   | 78  | putative protein of mammalian origin (kleevo) mRNA.                                      |
| <a href="#">kleewer</a>  | <a href="#">kleewer.aSep08</a>  |                        | 1425   | 977 |   | 60  | putative protein (6.8 kD) (kleewer) mRNA.                                                |
| <a href="#">klerbor</a>  | <a href="#">klerbor.aSep08</a>  |                        | 573    | 298 |   | 49  | putative protein (klerbor) mRNA.                                                         |
| <a href="#">klerchy</a>  | <a href="#">klerchy.aSep08</a>  |                        | 25826  | 447 |   | 45  | putative protein (klerchy) mRNA.                                                         |
| <a href="#">klerdoy</a>  | <a href="#">klerdoy.aSep08</a>  |                        | 18504  | 625 |   | 203 | SH3 domain tetratricopeptide repeats 2 (klerdoy) mRNA.                                   |

|                          |                                 |  |        |      |   |     |                                                                                    |
|--------------------------|---------------------------------|--|--------|------|---|-----|------------------------------------------------------------------------------------|
| <a href="#">klerflu</a>  | <a href="#">klerflu.aSep08</a>  |  | 38069  | 807  | 2 | 102 | putative cytoplasmic protein (11.1 kD) (klerflu) alternative variant aSep08, mRNA. |
| <a href="#">klerflu</a>  | <a href="#">klerflu.bSep08</a>  |  | 28392  | 872  | 3 | 102 | putative cytoplasmic protein (11.1 kD) (klerflu) alternative variant bSep08, mRNA. |
| <a href="#">klerfly</a>  | <a href="#">klerfly.aSep08</a>  |  | 1038   | 926  |   | 50  | putative protein (5.5 kD) (klerfly) mRNA.                                          |
| <a href="#">klergar</a>  | <a href="#">klergar.aSep08</a>  |  | 637    | 500  |   | 71  | putative protein (klergar) mRNA.                                                   |
| <a href="#">klerja</a>   | <a href="#">klerja.aSep08</a>   |  | 10854  | 673  |   | 223 | putative protein of metazoan origin (klerja) mRNA.                                 |
| <a href="#">klerjey</a>  | <a href="#">klerjey.aSep08</a>  |  | 16960  | 705  |   | 51  | putative protein (5.6 kD) (klerjey) mRNA.                                          |
| <a href="#">klerlo</a>   | <a href="#">klerlo.aSep08</a>   |  | 2597   | 337  |   | 104 | putative protein (klerlo) mRNA.                                                    |
| <a href="#">klermee</a>  | <a href="#">klermee.aSep08</a>  |  | 2573   | 1191 |   | 91  | putative protein (klermee) mRNA.                                                   |
| <a href="#">klerpey</a>  | <a href="#">klerpey.aSep08</a>  |  | 6122   | 170  |   | 56  | putative protein of mammalian origin (klerpey) mRNA.                               |
| <a href="#">klerpor</a>  | <a href="#">klerpor.aSep08</a>  |  | 9727   | 347  | 4 | 38  | putative protein (4.3 kD) (klerpor) alternative variant aSep08, mRNA.              |
| <a href="#">klerpor</a>  | <a href="#">klerpor.bSep08</a>  |  | 20316  | 342  | 3 | 76  | putative protein (klerpor) alternative variant bSep08, mRNA.                       |
| <a href="#">klerpor</a>  | <a href="#">klerpor.cSep08</a>  |  | 7666   | 315  | 3 | 38  | putative protein (4.3 kD) (klerpor) alternative variant cSep08, mRNA.              |
| <a href="#">klerroy</a>  | <a href="#">klerroy.aSep08</a>  |  | 4762   | 348  |   | 111 | polymerase III polypeptide B CRA b (klerroy) mRNA.                                 |
| <a href="#">klershaw</a> | <a href="#">klershaw.bSep08</a> |  | 2694   | 640  | 3 | 61  | putative protein (6.9 kD) (klershaw) alternative variant bSep08, mRNA.             |
| <a href="#">klershee</a> | <a href="#">klershee.aSep08</a> |  | 21838  | 439  |   | 44  | putative protein (klershee) mRNA.                                                  |
| <a href="#">klertu</a>   | <a href="#">klertu.bSep08</a>   |  | 13244  | 396  | 2 | 72  | putative protein (klertu) alternative variant bSep08, mRNA.                        |
| <a href="#">klervo</a>   | <a href="#">klervo.aSep08</a>   |  | 4548   | 778  |   | 28  | putative protein (klervo) mRNA.                                                    |
| <a href="#">klerwer</a>  | <a href="#">klerwer.aSep08</a>  |  | 1239   | 438  |   | 69  | putative protein (klerwer) mRNA.                                                   |
| <a href="#">kleybor</a>  | <a href="#">kleybor.aSep08</a>  |  | 5751   | 731  |   | 70  | putative protein (kleybor) mRNA.                                                   |
| <a href="#">kleychy</a>  | <a href="#">kleychy.aSep08</a>  |  | 6376   | 853  |   | 67  | putative protein (kleychy) mRNA.                                                   |
| <a href="#">kleydoy</a>  | <a href="#">kleydoy.aSep08</a>  |  | 1668   | 378  |   | 99  | putative protein (kleydoy) mRNA.                                                   |
| <a href="#">kleyfee</a>  | <a href="#">kleyfee.aSep08</a>  |  | 95937  | 421  |   | 139 | aminopeptidase O (kleyfee) mRNA.                                                   |
| <a href="#">kleyflu</a>  | <a href="#">kleyflu.aSep08</a>  |  | 2174   | 681  |   | 111 | putative protein (11.5 kD) (kleyflu) mRNA.                                         |
| <a href="#">kleyfly</a>  | <a href="#">kleyfly.bSep08</a>  |  | 5825   | 971  | 2 | 72  | ab2-143 like (8.0 kD) (kleyfly) alternative variant bSep08, mRNA.                  |
| <a href="#">kleygar</a>  | <a href="#">kleygar.aSep08</a>  |  | 144902 | 682  |   | 64  | putative protein (7.4 kD) (kleygar) mRNA.                                          |
| <a href="#">kleyja</a>   | <a href="#">kleyja.aSep08</a>   |  | 6026   | 393  |   | 48  | putative protein (kleyja) mRNA.                                                    |
| <a href="#">kleyjey</a>  | <a href="#">kleyjey.aSep08</a>  |  | 3048   | 657  |   | 44  | putative protein (kleyjey) mRNA.                                                   |
| <a href="#">kleylo</a>   | <a href="#">kleylo.aSep08</a>   |  | 687    | 304  |   | 60  | putative protein (6.9 kD) (kleylo) mRNA.                                           |
| <a href="#">kleymee</a>  | <a href="#">kleymee.aSep08</a>  |  | 963    | 258  |   | 85  | family with sequence similarity 57 member A like (kleymee) mRNA.                   |
| <a href="#">kleypey</a>  | <a href="#">kleypey.aSep08</a>  |  | 1722   | 692  |   | 103 | putative protein (kleypey) mRNA.                                                   |
| <a href="#">kleypor</a>  | <a href="#">kleypor.aSep08</a>  |  | 13792  | 480  | 1 | 45  | putative protein (4.7 kD) (kleypor) alternative variant aSep08, mRNA.              |
| <a href="#">kleypor</a>  | <a href="#">kleypor.bSep08</a>  |  | 2026   | 307  | 1 | 50  | putative protein (kleypor) alternative variant bSep08, mRNA.                       |
| <a href="#">kleyroy</a>  | <a href="#">kleyroy.aSep08</a>  |  | 3868   | 531  |   | 48  | putative protein (5.3 kD) (kleyroy) mRNA.                                          |

|                          |                                 |                        |       |      |    |     |                                                                                                |
|--------------------------|---------------------------------|------------------------|-------|------|----|-----|------------------------------------------------------------------------------------------------|
| <a href="#">kleyshaw</a> | <a href="#">kleyshaw.aSep08</a> |                        | 10911 | 440  |    | 51  | putative protein (kleyshaw) mRNA.                                                              |
| <a href="#">kleyshee</a> | <a href="#">kleyshee.aSep08</a> |                        | 393   | 262  |    | 51  | la ribonucleoprotein domain family member 7 (kleyshee) mRNA.                                   |
| <a href="#">kleytu</a>   | <a href="#">kleytu.aSep08</a>   |                        | 2002  | 571  |    | 88  | putative protein (kleytu) mRNA.                                                                |
| <a href="#">kleyvo</a>   | <a href="#">kleyvo.aSep08</a>   |                        | 1124  | 378  |    | 76  | fanconi anemia complementation group G (kleyvo) mRNA.                                          |
| <a href="#">kleywer</a>  | <a href="#">kleywer.aSep08</a>  |                        | 1222  | 837  |    |     |                                                                                                |
| <a href="#">Klf3</a>     | <a href="#">Klf3.bSep08</a>     | <a href="#">114845</a> | 10506 | 608  | 3  | 119 | kruppel-like factor 3 (Klf3) alternative variant bSep08, mRNA.                                 |
| <a href="#">Klf3</a>     | <a href="#">Klf3.cSep08</a>     | <a href="#">114845</a> | 3545  | 2565 | 2  | 101 | putative mitochondrial protein (11.8 kD) (Klf3) alternative variant cSep08, mRNA.              |
| <a href="#">Klf5</a>     | <a href="#">Klf5.bSep08</a>     | <a href="#">84410</a>  | 7247  | 853  | 2  | 222 | kruppel-like factor 5 (Klf5) alternative variant bSep08, mRNA.                                 |
| <a href="#">Klf8</a>     | <a href="#">Klf8.aSep08</a>     | <a href="#">302582</a> | 2980  | 379  |    | 125 | kruppel-like factor 8 (Klf8) mRNA.                                                             |
| <a href="#">Klf12</a>    | <a href="#">Klf12.bSep08</a>    | <a href="#">306110</a> | 58869 | 624  | 4  | 54  | kruppel-like factor 12 (Klf12) alternative variant bSep08, mRNA.                               |
| <a href="#">Klf12</a>    | <a href="#">Klf12.cSep08</a>    | <a href="#">306110</a> | 4539  | 557  | 3  | 65  | kruppel-like factor 12 (Klf12) alternative variant cSep08, mRNA.                               |
| <a href="#">Klf13</a>    | <a href="#">Klf13.bSep08</a>    | <a href="#">499171</a> | 42686 | 471  | 1  | 111 | kruppel-like factor 13 (Klf13) alternative variant bSep08, mRNA.                               |
| <a href="#">Klf15</a>    | <a href="#">Klf15.bSep08</a>    | <a href="#">85497</a>  | 4729  | 983  | 2  | 249 | kruppel-like factor 15 (Klf15) alternative variant bSep08, mRNA.                               |
| <a href="#">Klf15</a>    | <a href="#">Klf15.dSep08</a>    | <a href="#">85497</a>  | 12494 | 971  | 3  | 214 | kruppel-like factor 15 (Klf15) alternative variant dSep08, mRNA.                               |
| <a href="#">Klf15</a>    | <a href="#">Klf15.eSep08</a>    | <a href="#">85497</a>  | 1602  | 668  | 2  | 160 | kruppel-like factor 15 (Klf15) alternative variant eSep08, mRNA.                               |
| <a href="#">Klhdc1</a>   | <a href="#">Klhdc1.bSep08</a>   | <a href="#">314190</a> | 54483 | 2460 | 14 | 311 | kelch repeat containing protein and kelch (Klhdc1) alternative variant bSep08, mRNA.           |
| <a href="#">Klhdc1</a>   | <a href="#">Klhdc1.cSep08</a>   | <a href="#">314190</a> | 27939 | 767  | 5  | 208 | kelch repeat containing protein (Klhdc1) alternative variant cSep08, mRNA.                     |
| <a href="#">Klhdc1</a>   | <a href="#">Klhdc1.eSep08</a>   | <a href="#">314190</a> | 833   | 335  | 2  | 73  | putative protein of vertebrate origin (Klhdc1) alternative variant eSep08, mRNA.               |
| <a href="#">Klhdc2</a>   | <a href="#">Klhdc2.bSep08</a>   | <a href="#">299113</a> | 3919  | 2056 | 2  | 70  | putative protein (7.8 kD) (Klhdc2) alternative variant bSep08, mRNA.                           |
| <a href="#">Klhdc3</a>   | <a href="#">Klhdc3.bSep08</a>   | <a href="#">363192</a> | 1653  | 869  | 6  | 266 | kelch repeat containing protein and kelch (Klhdc3) alternative variant bSep08, mRNA.           |
| <a href="#">Klhdc3</a>   | <a href="#">Klhdc3.cSep08</a>   | <a href="#">363192</a> | 3464  | 773  | 6  | 209 | kelch repeat containing protein and kelch (Klhdc3) alternative variant cSep08, mRNA.           |
| <a href="#">Klhdc3</a>   | <a href="#">Klhdc3.dSep08</a>   | <a href="#">363192</a> | 1848  | 746  | 6  | 197 | kelch repeat containing protein and kelch (Klhdc3) alternative variant dSep08, mRNA.           |
| <a href="#">Klhdc3</a>   | <a href="#">Klhdc3.eSep08</a>   | <a href="#">363192</a> | 5501  | 2935 | 10 | 196 | kelch repeat containing protein and kelch (22.3 kD) (Klhdc3) alternative variant eSep08, mRNA. |
| <a href="#">Klhdc3</a>   | <a href="#">Klhdc3.fSep08</a>   | <a href="#">363192</a> | 5539  | 875  | 6  | 179 | kelch repeat containing protein and kelch (20.0 kD) (Klhdc3) alternative variant fSep08, mRNA. |
| <a href="#">Klhdc3</a>   | <a href="#">Klhdc3.hSep08</a>   | <a href="#">363192</a> | 3190  | 438  | 4  | 103 | kelch repeat containing protein and kelch (Klhdc3) alternative variant hSep08, mRNA.           |

|                         |                                |                        |        |      |    |     |                                                                                                 |
|-------------------------|--------------------------------|------------------------|--------|------|----|-----|-------------------------------------------------------------------------------------------------|
| <a href="#">Klhdc3</a>  | <a href="#">Klhdc3.jSep08</a>  | <a href="#">363192</a> | 4123   | 1625 | 7  | 115 | kelch repeat containing protein and kelch (Klhdc3) alternative variant jSep08, mRNA.            |
| <a href="#">Klhdc8a</a> | <a href="#">Klhdc8a.aSep08</a> | <a href="#">305096</a> | 4631   | 1297 | 2  | 252 | kelch repeat containing protein and kelch (Klhdc8a) alternative variant aSep08, mRNA.           |
| <a href="#">Klhdc8a</a> | <a href="#">Klhdc8a.bSep08</a> | <a href="#">305096</a> | 3717   | 1796 | 4  | 216 | kelch repeat containing protein and kelch (24.2 kD) (Klhdc8a) alternative variant bSep08, mRNA. |
| <a href="#">Klhdc8a</a> | <a href="#">Klhdc8a.cSep08</a> | <a href="#">305096</a> | 3575   | 528  | 3  | 95  | kelch repeat containing protein (Klhdc8a) alternative variant cSep08, mRNA.                     |
| <a href="#">Klhdc9</a>  | <a href="#">Klhdc9.bSep08</a>  | <a href="#">360878</a> | 2528   | 661  | 4  | 183 | kelch containing (Klhdc9) alternative variant bSep08, mRNA.                                     |
| <a href="#">Klh12</a>   | <a href="#">Klh12.aSep08</a>   | <a href="#">290692</a> | 40087  | 2496 | 11 | 467 | kelch-like 2, Mayven (Drosophila) (Klh12) alternative variant aSep08, mRNA.                     |
| <a href="#">Klh12</a>   | <a href="#">Klh12.cSep08</a>   | <a href="#">290692</a> | 2432   | 507  | 2  | 53  | kelch-like 2, Mayven (Drosophila) (Klh12) alternative variant cSep08, mRNA.                     |
| <a href="#">Klh15</a>   | <a href="#">Klh15.bSep08</a>   | <a href="#">305351</a> | 9502   | 1322 | 4  | 135 | kelch-like 5 (Drosophila) (Klh15) alternative variant bSep08, mRNA.                             |
| <a href="#">Klh16</a>   | <a href="#">Klh16.bSep08</a>   | <a href="#">287974</a> | 6219   | 2127 | 2  | 206 | kelch-like 6 (Drosophila) (22.5 kD) (Klh16) alternative variant bSep08, mRNA.                   |
| <a href="#">Klh18</a>   | <a href="#">Klh18.bSep08</a>   | <a href="#">289457</a> | 2169   | 367  | 2  | 76  | putative protein (Klh18) alternative variant bSep08, mRNA.                                      |
| <a href="#">Klh18</a>   | <a href="#">Klh18.dSep08</a>   | <a href="#">289457</a> | 20837  | 669  | 4  | 76  | putative protein (Klh18) alternative variant dSep08, mRNA.                                      |
| <a href="#">Klh12</a>   | <a href="#">Klh12.bSep08</a>   | <a href="#">266772</a> | 11171  | 827  | 3  | 108 | kelch-like 12 (Drosophila) (Klh12) alternative variant bSep08, mRNA.                            |
| <a href="#">Klh12</a>   | <a href="#">Klh12.cSep08</a>   | <a href="#">266772</a> | 3390   | 481  | 2  | 83  | kelch-like 12 (Drosophila) (Klh12) alternative variant cSep08, mRNA.                            |
| <a href="#">Klh13</a>   | <a href="#">Klh13.aSep08</a>   | <a href="#">313445</a> | 136072 | 457  |    | 78  | kelch-like 13 (Drosophila) (Klh13) mRNA.                                                        |
| <a href="#">Klh15</a>   | <a href="#">Klh15.cSep08</a>   | <a href="#">314111</a> | 1433   | 588  | 2  | 195 | kelch-like 15 (Drosophila) (Klh15) alternative variant cSep08, mRNA.                            |
| <a href="#">Klh18</a>   | <a href="#">Klh18.aSep08</a>   | <a href="#">316012</a> | 41287  | 506  | 3  | 168 | kelch-like 18 (Drosophila) (Klh18) alternative variant aSep08, mRNA.                            |
| <a href="#">Klh18</a>   | <a href="#">Klh18.bSep08</a>   | <a href="#">316012</a> | 3303   | 883  | 2  |     |                                                                                                 |
| <a href="#">Klh122</a>  | <a href="#">Klh122.bSep08</a>  | <a href="#">303792</a> | 20230  | 736  | 4  | 245 | kelch-like 22 (Drosophila) (Klh122) alternative variant bSep08, mRNA.                           |
| <a href="#">Klh122</a>  | <a href="#">Klh122.cSep08</a>  | <a href="#">303792</a> | 15957  | 643  | 4  | 125 | kelch-like 22 (Drosophila) (Klh122) alternative variant cSep08, mRNA.                           |
| <a href="#">Klh123</a>  | <a href="#">Klh123.bSep08</a>  | <a href="#">311114</a> | 2343   | 1208 | 2  | 166 | kelch-like 23 (Drosophila) (Klh123) alternative variant bSep08, mRNA.                           |
| <a href="#">Klh124</a>  | <a href="#">Klh124.aSep08</a>  | <a href="#">303803</a> | 24661  | 1754 |    | 535 | DRE1 (Klh124) alternative variant aSep08, mRNA.                                                 |
| <a href="#">Klh124</a>  | <a href="#">Klh124.bSep08</a>  | <a href="#">303803</a> | 10809  | 779  | 1  | 65  | putative protein (Klh124) alternative variant bSep08, mRNA.                                     |
| <a href="#">Klh125</a>  | <a href="#">Klh125.bSep08</a>  | <a href="#">293023</a> | 19310  | 1650 | 1  | 550 | kelch-like 25 (Drosophila) (Klh125) alternative variant bSep08, mRNA.                           |
| <a href="#">Klh129</a>  | <a href="#">Klh129.bSep08</a>  | <a href="#">298867</a> | 172214 | 1562 | 6  | 335 | kelch-like 29 (Drosophila) (Klh129) alternative variant bSep08, mRNA.                           |
| <a href="#">Klk1c10</a> | <a href="#">Klk1c10.aSep08</a> | <a href="#">292858</a> | 1980   | 670  |    | 207 | T-kininogenase (Klk1c10) mRNA.                                                                  |
| <a href="#">Klk6</a>    | <a href="#">Klk6.aSep08</a>    | <a href="#">29245</a>  | 6473   | 1778 | 1  | 467 | kallikrein related-peptidase 6 (Klk6) alternative variant aSep08, mRNA.                         |

|                          |                                 |  |       |      |   |     |                                                                                   |
|--------------------------|---------------------------------|--|-------|------|---|-----|-----------------------------------------------------------------------------------|
| <a href="#">klobor</a>   | <a href="#">klobor.aSep08</a>   |  | 2712  | 284  |   | 65  | putative protein (7.3 kD) (klobor) alternative variant aSep08, mRNA.              |
| <a href="#">klochy</a>   | <a href="#">klochy.aSep08</a>   |  | 23806 | 504  |   | 39  | putative protein (4.4 kD) (klochy) mRNA.                                          |
| <a href="#">klodoy</a>   | <a href="#">klodoy.aSep08</a>   |  | 5005  | 501  |   | 148 | SMF protein like (klodoy) mRNA.                                                   |
| <a href="#">klofee</a>   | <a href="#">klofee.aSep08</a>   |  | 3944  | 802  |   | 32  | putative protein (3.8 kD) (klofee) mRNA.                                          |
| <a href="#">kloflu</a>   | <a href="#">kloflu.aSep08</a>   |  | 7071  | 383  |   | 127 | trinucleotide repeat containing 6A (kloflu) mRNA.                                 |
| <a href="#">klofly</a>   | <a href="#">klofly.aSep08</a>   |  | 1038  | 926  |   | 50  | putative protein (5.5 kD) (klofly) mRNA.                                          |
| <a href="#">klogar</a>   | <a href="#">klogar.aSep08</a>   |  | 3674  | 313  | 2 | 43  | CRA a like (5.1 kD) (klogar) alternative variant aSep08, mRNA.                    |
| <a href="#">klogar</a>   | <a href="#">klogar.bSep08</a>   |  | 3576  | 410  | 3 | 55  | CRA a like (klogar) alternative variant bSep08, mRNA.                             |
| <a href="#">kloja</a>    | <a href="#">kloja.aSep08</a>    |  | 34666 | 641  |   | 59  | putative protein, with a coiled coil domain (6.9 kD) (kloja) mRNA.                |
| <a href="#">klojey</a>   | <a href="#">klojey.aSep08</a>   |  | 679   | 495  |   | 24  | putative protein (2.6 kD) (klojey) mRNA.                                          |
| <a href="#">klolo</a>    | <a href="#">klolo.aSep08</a>    |  | 13707 | 432  |   | 96  | putative protein (klolo) mRNA.                                                    |
| <a href="#">klomee</a>   | <a href="#">klomee.aSep08</a>   |  | 2641  | 1648 |   |     |                                                                                   |
| <a href="#">klopey</a>   | <a href="#">klopey.aSep08</a>   |  | 21162 | 1404 |   | 467 | dynein 2 heavy (klopey) mRNA.                                                     |
| <a href="#">klopor</a>   | <a href="#">klopor.aSep08</a>   |  | 5542  | 994  |   | 118 | oxysterol-binding protein-like protein 10 (klopor) mRNA.                          |
| <a href="#">klorbor</a>  | <a href="#">klorbor.aSep08</a>  |  | 4606  | 1007 |   | 335 | putative protein of vertebrate origin (klorbor) alternative variant aSep08, mRNA. |
| <a href="#">klorbor</a>  | <a href="#">klorbor.bSep08</a>  |  | 4886  | 926  |   | 308 | putative protein of vertebrate origin (klorbor) alternative variant bSep08, mRNA. |
| <a href="#">klorchy</a>  | <a href="#">klorchy.aSep08</a>  |  | 961   | 308  |   | 31  | CRA b like (klorchy) mRNA.                                                        |
| <a href="#">klordoy</a>  | <a href="#">klordoy.bSep08</a>  |  | 24261 | 440  | 3 | 48  | putative protein (5.7 kD) (klordoy) alternative variant bSep08, mRNA.             |
| <a href="#">klorfee</a>  | <a href="#">klorfee.aSep08</a>  |  | 10338 | 516  |   | 32  | putative protein (3.6 kD) (klorfee) mRNA.                                         |
| <a href="#">klorflu</a>  | <a href="#">klorflu.aSep08</a>  |  | 569   | 386  |   | 128 | CBP activator (klorflu) mRNA.                                                     |
| <a href="#">klorfly</a>  | <a href="#">klorfly.aSep08</a>  |  | 1794  | 322  |   | 63  | putative protein (klorfly) mRNA.                                                  |
| <a href="#">klogar</a>   | <a href="#">klogar.aSep08</a>   |  | 7432  | 1163 |   | 317 | putative protein (klogar) alternative variant aSep08, mRNA.                       |
| <a href="#">klogar</a>   | <a href="#">klogar.bSep08</a>   |  | 6796  | 526  |   | 61  | putative protein (6.7 kD) (klogar) alternative variant bSep08, mRNA.              |
| <a href="#">klorja</a>   | <a href="#">klorja.aSep08</a>   |  | 772   | 346  |   | 63  | putative protein (klorja) mRNA.                                                   |
| <a href="#">klorjey</a>  | <a href="#">klorjey.aSep08</a>  |  | 28848 | 655  |   | 40  | putative protein (4.7 kD) (klorjey) mRNA.                                         |
| <a href="#">klorlo</a>   | <a href="#">klorlo.aSep08</a>   |  | 7342  | 381  |   | 47  | putative protein (klorlo) mRNA.                                                   |
| <a href="#">klormee</a>  | <a href="#">klormee.aSep08</a>  |  | 4343  | 722  |   | 240 | gem associated protein 4 CRA b (klormee) mRNA.                                    |
| <a href="#">kloroy</a>   | <a href="#">kloroy.aSep08</a>   |  | 864   | 208  |   | 14  | putative protein (kloroy) mRNA.                                                   |
| <a href="#">klorpey</a>  | <a href="#">klorpey.bSep08</a>  |  | 1546  | 354  | 2 | 57  | putative protein (6.7 kD) (klorpey) alternative variant bSep08, mRNA.             |
| <a href="#">klorpor</a>  | <a href="#">klorpor.aSep08</a>  |  | 5228  | 306  |   | 41  | putative protein (klorpor) mRNA.                                                  |
| <a href="#">klorroy</a>  | <a href="#">klorroy.aSep08</a>  |  | 4303  | 288  |   | 28  | putative protein (3.4 kD) (klorroy) mRNA.                                         |
| <a href="#">klorshaw</a> | <a href="#">klorshaw.aSep08</a> |  | 6997  | 426  | 3 | 128 | multiple C2 domains transmembrane 1 (klorshaw) alternative variant aSep08, mRNA.  |
| <a href="#">klorshaw</a> | <a href="#">klorshaw.bSep08</a> |  | 1904  | 742  | 1 | 36  | putative protein (4.2 kD) (klorshaw) alternative variant bSep08, mRNA.            |

|                          |                                 |                        |       |      |   |     |                                                                                                             |
|--------------------------|---------------------------------|------------------------|-------|------|---|-----|-------------------------------------------------------------------------------------------------------------|
| <a href="#">klorshee</a> | <a href="#">klorshee.aSep08</a> |                        | 1218  | 403  |   | 134 | prematurely terminated mRNA decay factor-like (klorshee) mRNA.                                              |
| <a href="#">klortu</a>   | <a href="#">klortu.aSep08</a>   |                        | 29214 | 428  | 5 | 83  | spectrin repeat containing Nuclear envelope 2 (klortu) alternative variant aSep08, mRNA.                    |
| <a href="#">klorvo</a>   | <a href="#">klorvo.aSep08</a>   |                        | 2221  | 544  | 3 | 181 | phosphatidylinositol glycan class O (klorvo) alternative variant aSep08, mRNA.                              |
| <a href="#">klorvo</a>   | <a href="#">klorvo.bSep08</a>   |                        | 1067  | 415  | 1 | 112 | phosphatidylinositol glycan class O (klorvo) alternative variant bSep08, mRNA.                              |
| <a href="#">klorwer</a>  | <a href="#">klorwer.aSep08</a>  |                        | 16815 | 909  |   | 302 | protein CRA c (klorwer) mRNA.                                                                               |
| <a href="#">kloshee</a>  | <a href="#">kloshee.aSep08</a>  |                        | 3428  | 411  |   | 53  | putative protein (kloshee) mRNA.                                                                            |
| <a href="#">klotu</a>    | <a href="#">klotu.aSep08</a>    |                        | 3073  | 651  |   | 57  | putative protein (klotu) mRNA.                                                                              |
| <a href="#">klovo</a>    | <a href="#">klovo.aSep08</a>    |                        | 1279  | 738  |   | 46  | putative protein (5.1 kD) (klovo) mRNA.                                                                     |
| <a href="#">klower</a>   | <a href="#">klower.aSep08</a>   |                        | 11967 | 412  | 4 | 137 | thrombospondin type-1 domain-containing protein 7A (klower) alternative variant aSep08, mRNA.               |
| <a href="#">kloybor</a>  | <a href="#">kloybor.aSep08</a>  |                        | 685   | 411  |   | 137 | putative protein of vertebrate origin (kloybor) mRNA.                                                       |
| <a href="#">kloychy</a>  | <a href="#">kloychy.aSep08</a>  |                        | 4657  | 564  |   | 82  | putative protein (kloychy) mRNA.                                                                            |
| <a href="#">kloydoy</a>  | <a href="#">kloydoy.aSep08</a>  |                        | 3090  | 533  |   | 177 | CRA a (kloydoy) mRNA.                                                                                       |
| <a href="#">kloyfee</a>  | <a href="#">kloyfee.aSep08</a>  |                        | 1397  | 472  |   | 61  | cathepsin 7 CRA b (kloyfee) mRNA.                                                                           |
| <a href="#">kloyflu</a>  | <a href="#">kloyflu.aSep08</a>  |                        | 932   | 407  |   | 135 | CBP activator (kloyflu) mRNA.                                                                               |
| <a href="#">kloyfly</a>  | <a href="#">kloyfly.aSep08</a>  |                        | 11948 | 758  | 1 | 105 | putative protein (11.5 kD) (kloyfly) alternative variant aSep08, mRNA.                                      |
| <a href="#">kloyfly</a>  | <a href="#">kloyfly.bSep08</a>  |                        | 62891 | 788  | 1 | 104 | putative protein (11.5 kD) (kloyfly) alternative variant bSep08, mRNA.                                      |
| <a href="#">kloygar</a>  | <a href="#">kloygar.aSep08</a>  |                        | 893   | 725  |   | 84  | putative protein (10.0 kD) (kloygar) mRNA.                                                                  |
| <a href="#">kloyja</a>   | <a href="#">kloyja.aSep08</a>   |                        | 18413 | 685  |   | 228 | diaphanous homolog 3 CRA b (kloyja) mRNA.                                                                   |
| <a href="#">kloyjey</a>  | <a href="#">kloyjey.bSep08</a>  |                        | 712   | 473  | 2 | 129 | putative protein (kloyjey) alternative variant bSep08, mRNA.                                                |
| <a href="#">kloylo</a>   | <a href="#">kloylo.aSep08</a>   |                        | 624   | 299  |   | 90  | putative protein (kloylo) mRNA.                                                                             |
| <a href="#">kloymee</a>  | <a href="#">kloymee.aSep08</a>  |                        | 16987 | 698  |   | 232 | putative protein of eukaryotic origin (kloymee) alternative variant aSep08, mRNA.                           |
| <a href="#">kloymee</a>  | <a href="#">kloymee.bSep08</a>  |                        | 5680  | 370  |   | 123 | putative protein of ancient origin (kloymee) alternative variant bSep08, mRNA.                              |
| <a href="#">kloypey</a>  | <a href="#">kloypey.aSep08</a>  |                        | 19297 | 411  |   | 136 | gtpase-activating protein 10-like (kloypey) mRNA.                                                           |
| <a href="#">kloypor</a>  | <a href="#">kloypor.aSep08</a>  |                        | 6932  | 389  |   | 25  | putative protein (kloypor) mRNA.                                                                            |
| <a href="#">kloyroy</a>  | <a href="#">kloyroy.aSep08</a>  |                        | 1985  | 444  |   | 55  | putative protein (kloyroy) mRNA.                                                                            |
| <a href="#">kloyshaw</a> | <a href="#">kloyshaw.aSep08</a> |                        | 14197 | 386  |   | 81  | putative protein (kloyshaw) mRNA.                                                                           |
| <a href="#">kloyshee</a> | <a href="#">kloyshee.aSep08</a> |                        | 427   | 245  |   | 23  | putative protein (kloyshee) mRNA.                                                                           |
| <a href="#">kloytu</a>   | <a href="#">kloytu.aSep08</a>   |                        | 14363 | 953  |   | 317 | CRA a (kloytu) mRNA.                                                                                        |
| <a href="#">kloyvo</a>   | <a href="#">kloyvo.aSep08</a>   |                        | 1067  | 478  |   | 158 | talín (kloyvo) mRNA.                                                                                        |
| <a href="#">kloywer</a>  | <a href="#">kloywer.aSep08</a>  |                        | 1692  | 825  |   | 274 | protein CRA b (kloywer) mRNA.                                                                               |
| <a href="#">Klra2</a>    | <a href="#">Klra2.bSep08</a>    | <a href="#">494194</a> | 37003 | 3551 | 2 | 258 | killer cell lectin-like receptor, subfamily A, member 2 (30.1 kD) (Klra2) alternative variant bSep08, mRNA. |
| <a href="#">Klre1</a>    | <a href="#">Klre1.bSep08</a>    | <a href="#">297645</a> | 2370  | 585  | 1 | 151 | killer cell lectin-like receptor, family E, member 1 (Klre1) alternative variant bSep08, mRNA.              |



|                         |                                |                        |       |      |   |     |                                                                                                           |
|-------------------------|--------------------------------|------------------------|-------|------|---|-----|-----------------------------------------------------------------------------------------------------------|
| <a href="#">Klre1</a>   | <a href="#">Klre1.cSep08</a>   | <a href="#">297645</a> | 8779  | 811  | 4 | 99  | killer cell lectin-like receptor, family E, member 1 (11.4 kD) (Klre1) alternative variant cSep08, mRNA.  |
| <a href="#">Klrg1</a>   | <a href="#">Klrg1.bSep08</a>   | <a href="#">58975</a>  | 11230 | 545  | 1 | 77  | killer cell lectin-like receptor subfamily G, member 1 (8.7 kD) (Klrg1) alternative variant bSep08, mRNA. |
| <a href="#">klubor</a>  | <a href="#">klubor.aSep08</a>  |                        | 2763  | 333  |   | 51  | putative protein (klubor) mRNA.                                                                           |
| <a href="#">kluchy</a>  | <a href="#">kluchy.aSep08</a>  |                        | 6723  | 667  |   | 194 | core-binding factor runt domain alpha translocated 2 CRA a like (kluchy) mRNA.                            |
| <a href="#">kludoy</a>  | <a href="#">kludoy.aSep08</a>  |                        | 12289 | 690  | 3 | 230 | protein SMF (kludoy) alternative variant aSep08, mRNA.                                                    |
| <a href="#">kludoy</a>  | <a href="#">kludoy.bSep08</a>  |                        | 7091  | 408  | 1 | 88  | protein SMF (kludoy) alternative variant bSep08, mRNA.                                                    |
| <a href="#">klufee</a>  | <a href="#">klufee.aSep08</a>  |                        | 2161  | 701  |   | 48  | putative protein (klufee) mRNA.                                                                           |
| <a href="#">klufly</a>  | <a href="#">klufly.aSep08</a>  |                        | 1744  | 526  |   | 175 | retinoblastoma binding protein 6 like (klufly) mRNA.                                                      |
| <a href="#">klufly</a>  | <a href="#">klufly.aSep08</a>  |                        | 9293  | 886  |   | 69  | putative protein (klufly) mRNA.                                                                           |
| <a href="#">klugar</a>  | <a href="#">klugar.aSep08</a>  |                        | 1177  | 794  |   | 72  | putative protein (klugar) mRNA.                                                                           |
| <a href="#">kluja</a>   | <a href="#">kluja.aSep08</a>   |                        | 41308 | 683  |   | 100 | putative cytoplasmic protein (11.3 kD) (kluja) mRNA.                                                      |
| <a href="#">klujey</a>  | <a href="#">klujey.aSep08</a>  |                        | 1458  | 269  |   | 54  | putative protein (klujey) mRNA.                                                                           |
| <a href="#">klulo</a>   | <a href="#">klulo.aSep08</a>   |                        | 5508  | 850  |   | 283 | putative protein of metazoan origin (klulo) mRNA.                                                         |
| <a href="#">klumee</a>  | <a href="#">klumee.bSep08</a>  |                        | 6023  | 235  | 2 | 28  | putative protein (klumee) alternative variant bSep08, mRNA.                                               |
| <a href="#">klupey</a>  | <a href="#">klupey.aSep08</a>  |                        | 46547 | 1309 |   | 281 | dynein 2 heavy (klupey) mRNA.                                                                             |
| <a href="#">klupor</a>  | <a href="#">klupor.aSep08</a>  |                        | 2799  | 378  |   | 48  | putative protein (5.5 kD) (klupor) mRNA.                                                                  |
| <a href="#">kluroy</a>  | <a href="#">kluroy.aSep08</a>  |                        | 4557  | 485  |   | 77  | putative protein, with a coiled coil domain (8.6 kD) (kluroy) mRNA.                                       |
| <a href="#">klushee</a> | <a href="#">klushee.aSep08</a> |                        | 11271 | 633  |   | 95  | putative cytoplasmic protein (11.0 kD) (klushee) mRNA.                                                    |
| <a href="#">klutu</a>   | <a href="#">klutu.aSep08</a>   |                        | 480   | 324  |   | 57  | putative protein (klutu) mRNA.                                                                            |
| <a href="#">kluvo</a>   | <a href="#">kluvo.aSep08</a>   |                        | 841   | 531  | 2 | 84  | CRA b like (kluvo) alternative variant aSep08, mRNA.                                                      |
| <a href="#">kluvo</a>   | <a href="#">kluvo.bSep08</a>   |                        | 632   | 286  | 2 | 70  | putative protein (kluvo) alternative variant bSep08, mRNA.                                                |
| <a href="#">kluwer</a>  | <a href="#">kluwer.aSep08</a>  |                        | 7130  | 1575 | 1 | 432 | WD repeat-containing protein mio (kluwer) alternative variant aSep08, mRNA.                               |
| <a href="#">kluwer</a>  | <a href="#">kluwer.bSep08</a>  |                        | 5723  | 398  | 1 | 84  | WD repeat-containing protein mio like (kluwer) alternative variant bSep08, mRNA.                          |
| <a href="#">klybor</a>  | <a href="#">klybor.aSep08</a>  |                        | 905   | 370  |   | 28  | putative protein (klybor) mRNA.                                                                           |
| <a href="#">klychy</a>  | <a href="#">klychy.aSep08</a>  |                        | 2065  | 421  |   | 140 | core-binding factor runt domain alpha translocated 2 homolog CRA b like (klychy) mRNA.                    |
| <a href="#">klydoy</a>  | <a href="#">klydoy.aSep08</a>  |                        | 14417 | 1165 |   | 388 | SMF protein (klydoy) mRNA.                                                                                |
| <a href="#">klyfee</a>  | <a href="#">klyfee.aSep08</a>  |                        | 572   | 391  |   | 45  | putative protein (klyfee) mRNA.                                                                           |
| <a href="#">klyflu</a>  | <a href="#">klyflu.aSep08</a>  |                        | 4191  | 391  |   | 129 | CRA d like (klyflu) mRNA.                                                                                 |
| <a href="#">klyfly</a>  | <a href="#">klyfly.aSep08</a>  |                        | 9830  | 886  | 1 | 69  | putative protein (klyfly) alternative variant aSep08, mRNA.                                               |
| <a href="#">klyfly</a>  | <a href="#">klyfly.bSep08</a>  |                        | 8982  | 785  | 1 | 122 | putative protein (klyfly) alternative variant bSep08, mRNA.                                               |
| <a href="#">klygar</a>  | <a href="#">klygar.aSep08</a>  |                        | 7188  | 351  | 2 | 78  | CRA a like (klygar) alternative variant aSep08, mRNA.                                                     |
| <a href="#">klygar</a>  | <a href="#">klygar.bSep08</a>  |                        | 2030  | 609  | 3 | 42  | putative protein (5.1 kD) (klygar) alternative variant bSep08, mRNA.                                      |
| <a href="#">klyja</a>   | <a href="#">klyja.aSep08</a>   |                        | 4592  | 813  |   | 70  | putative protein (7.8 kD) (klyja) mRNA.                                                                   |
| <a href="#">klyjey</a>  | <a href="#">klyjey.aSep08</a>  |                        | 27151 | 751  |   | 155 | putative protein (17.1 kD) (klyjey) mRNA.                                                                 |

|                         |                                |                        |       |      |   |     |                                                                                               |
|-------------------------|--------------------------------|------------------------|-------|------|---|-----|-----------------------------------------------------------------------------------------------|
| <a href="#">klylo</a>   | <a href="#">klylo.aSep08</a>   |                        | 1016  | 404  |   | 134 | putative protein of vertebrate origin (klylo) mRNA.                                           |
| <a href="#">klymee</a>  | <a href="#">klymee.aSep08</a>  |                        | 2395  | 779  |   | 259 | tsr1 20S rRNA accumulation (klymee) mRNA.                                                     |
| <a href="#">klypey</a>  | <a href="#">klypey.aSep08</a>  |                        | 3178  | 295  |   | 46  | putative protein (klypey) mRNA.                                                               |
| <a href="#">klypor</a>  | <a href="#">klypor.aSep08</a>  |                        | 2248  | 1393 |   | 102 | putative protein (11.5 kD) (klypor) mRNA.                                                     |
| <a href="#">klyroy</a>  | <a href="#">klyroy.aSep08</a>  |                        | 852   | 208  |   | 14  | putative protein (klyroy) mRNA.                                                               |
| <a href="#">klyshee</a> | <a href="#">klyshee.aSep08</a> |                        | 8136  | 510  |   | 70  | putative protein (klyshee) mRNA.                                                              |
| <a href="#">klytu</a>   | <a href="#">klytu.aSep08</a>   |                        | 28130 | 588  |   | 58  | putative protein (klytu) mRNA.                                                                |
| <a href="#">klyvo</a>   | <a href="#">klyvo.aSep08</a>   |                        | 2330  | 289  |   | 81  | dead box polypeptide (klyvo) mRNA.                                                            |
| <a href="#">klywer</a>  | <a href="#">klywer.aSep08</a>  |                        | 1665  | 398  |   | 132 | collagen type XXVIII (klywer) mRNA.                                                           |
| <a href="#">Kmo</a>     | <a href="#">Kmo.bSep08</a>     | <a href="#">59113</a>  | 23779 | 906  | 9 | 249 | kynurenine 3-monooxygenase (kynurenine 3-hydroxylase) (Kmo) alternative variant bSep08, mRNA. |
| <a href="#">Kmo</a>     | <a href="#">Kmo.cSep08</a>     | <a href="#">59113</a>  | 23686 | 743  | 8 | 247 | kynurenine 3-monooxygenase (kynurenine 3-hydroxylase) (Kmo) alternative variant cSep08, mRNA. |
| <a href="#">Kntc1</a>   | <a href="#">Kntc1.bSep08</a>   | <a href="#">304477</a> | 2173  | 699  | 4 | 162 | kinetochore associated 1 (Kntc1) alternative variant bSep08, mRNA.                            |
| <a href="#">Kntc1</a>   | <a href="#">Kntc1.cSep08</a>   | <a href="#">304477</a> | 639   | 327  | 2 | 69  | kinetochore associated 1 (Kntc1) alternative variant cSep08, mRNA.                            |
| <a href="#">Kntc1</a>   | <a href="#">Kntc1.dSep08</a>   | <a href="#">304477</a> | 2715  | 561  | 3 | 65  | kinetochore associated 1 (Kntc1) alternative variant dSep08, mRNA.                            |
| <a href="#">koby</a>    | <a href="#">koby.aSep08</a>    |                        | 79944 | 376  |   | 116 | putative protein (koby) mRNA.                                                                 |
| <a href="#">kochy</a>   | <a href="#">kochy.aSep08</a>   |                        | 8474  | 734  |   | 53  | putative protein (6.1 kD) (kochy) mRNA.                                                       |
| <a href="#">kodar</a>   | <a href="#">kodar.aSep08</a>   |                        | 1071  | 322  |   | 106 | intestine specific homeobox like (kodar) mRNA.                                                |
| <a href="#">kofer</a>   | <a href="#">kofer.aSep08</a>   |                        | 12074 | 960  |   | 319 | supervillin CRA b (kofer) mRNA.                                                               |
| <a href="#">koflo</a>   | <a href="#">koflo.aSep08</a>   |                        | 37227 | 451  |   | 149 | cytoplasmic polyadenylation element binding protein 3 like (koflo) mRNA.                      |
| <a href="#">koflu</a>   | <a href="#">koflu.aSep08</a>   |                        | 5721  | 327  |   | 72  | putative protein (koflu) mRNA.                                                                |
| <a href="#">kojey</a>   | <a href="#">kojey.aSep08</a>   |                        | 1317  | 418  |   | 139 | phosphatidylinositol glycan class G CRA c (kojey) mRNA.                                       |
| <a href="#">kokee</a>   | <a href="#">kokee.aSep08</a>   |                        | 1375  | 687  |   | 190 | protein tyrosine phosphatase (kokee) mRNA.                                                    |
| <a href="#">koloy</a>   | <a href="#">koloy.aSep08</a>   |                        | 9756  | 1435 |   | 478 | specific peptidase 5 (koloy) mRNA.                                                            |
| <a href="#">komee</a>   | <a href="#">komee.aSep08</a>   |                        | 1033  | 447  |   | 38  | putative protein (komee) mRNA.                                                                |
| <a href="#">komer</a>   | <a href="#">komer.bSep08</a>   |                        | 1919  | 594  | 3 | 53  | putative protein (6.0 kD) (komer) alternative variant bSep08, mRNA.                           |
| <a href="#">konoy</a>   | <a href="#">konoy.aSep08</a>   |                        | 14811 | 390  |   | 129 | heavy axonemal (konoy) mRNA.                                                                  |
| <a href="#">kopor</a>   | <a href="#">kopor.aSep08</a>   |                        | 4887  | 594  |   | 101 | putative protein (kopor) mRNA.                                                                |
| <a href="#">korby</a>   | <a href="#">korby.aSep08</a>   |                        | 3697  | 526  |   | 175 | putative protein of metazoan origin (korby) mRNA.                                             |
| <a href="#">korchy</a>  | <a href="#">korchy.aSep08</a>  |                        | 1337  | 949  |   |     |                                                                                               |
| <a href="#">kordar</a>  | <a href="#">kordar.aSep08</a>  |                        | 5112  | 793  |   | 90  | putative protein (9.8 kD) (kordar) mRNA.                                                      |
| <a href="#">korfer</a>  | <a href="#">korfer.aSep08</a>  |                        | 4545  | 515  | 4 | 171 | enhancer of polycomb 1 (korfer) alternative variant aSep08, mRNA.                             |
| <a href="#">korflo</a>  | <a href="#">korflo.aSep08</a>  |                        | 2881  | 460  |   | 152 | cytochrome (korflo) mRNA.                                                                     |
| <a href="#">korflu</a>  | <a href="#">korflu.aSep08</a>  |                        | 5592  | 346  |   | 114 | hermansky-Pudlak syndrome 5 like (korflu) mRNA.                                               |
| <a href="#">korjey</a>  | <a href="#">korjey.aSep08</a>  |                        | 8239  | 527  |   | 174 | ecotropic viral integration site 5 (korjey) mRNA.                                             |
| <a href="#">korkee</a>  | <a href="#">korkee.aSep08</a>  |                        | 7890  | 496  |   | 43  | putative protein (4.9 kD) (korkee) mRNA.                                                      |

|                         |                                |  |       |      |   |     |                                                                                 |
|-------------------------|--------------------------------|--|-------|------|---|-----|---------------------------------------------------------------------------------|
| <a href="#">korloy</a>  | <a href="#">korloy.aSep08</a>  |  | 4089  | 606  |   | 75  | putative endoplasmic reticulum protein (8.4 kD) (korloy) mRNA.                  |
| <a href="#">kormee</a>  | <a href="#">kormee.aSep08</a>  |  | 504   | 299  |   | 38  | putative protein (kormee) mRNA.                                                 |
| <a href="#">kormer</a>  | <a href="#">kormer.aSep08</a>  |  | 2515  | 746  |   | 107 | putative cytoplasmic protein (12.3 kD) (kormer) mRNA.                           |
| <a href="#">kornoy</a>  | <a href="#">kornoy.aSep08</a>  |  | 49619 | 424  |   | 86  | putative protein (kornoy) mRNA.                                                 |
| <a href="#">korpor</a>  | <a href="#">korpor.aSep08</a>  |  | 4512  | 575  |   | 191 | promyelocytic leukemia like (korpor) mRNA.                                      |
| <a href="#">korsa</a>   | <a href="#">korsa.aSep08</a>   |  | 4582  | 722  |   | 21  | putative protein (2.2 kD) (korsa) mRNA.                                         |
| <a href="#">korshee</a> | <a href="#">korshee.aSep08</a> |  | 39974 | 361  | 3 | 86  | putative protein (korshee) alternative variant aSep08, mRNA.                    |
| <a href="#">korshee</a> | <a href="#">korshee.bSep08</a> |  | 4004  | 679  | 2 | 59  | putative protein (6.5 kD) (korshee) alternative variant bSep08, mRNA.           |
| <a href="#">kortu</a>   | <a href="#">kortu.aSep08</a>   |  | 6812  | 342  |   | 62  | putative protein (kortu) alternative variant aSep08, mRNA.                      |
| <a href="#">kortu</a>   | <a href="#">kortu.bSep08</a>   |  | 6823  | 407  | 1 | 54  | putative protein (5.9 kD) (kortu) alternative variant bSep08, mRNA.             |
| <a href="#">korvar</a>  | <a href="#">korvar.aSep08</a>  |  | 908   | 449  |   | 149 | microtubule-actin crosslinking factor 1 (korvar) mRNA.                          |
| <a href="#">korwey</a>  | <a href="#">korwey.aSep08</a>  |  | 3858  | 336  |   | 112 | leiomodoin 3 (korwey) mRNA.                                                     |
| <a href="#">kosa</a>    | <a href="#">kosa.aSep08</a>    |  | 4374  | 695  |   | 94  | putative protein of bilateral origin (kosa) mRNA.                               |
| <a href="#">koshee</a>  | <a href="#">koshee.aSep08</a>  |  | 5016  | 483  |   | 67  | putative protein (koshee) mRNA.                                                 |
| <a href="#">kotu</a>    | <a href="#">kotu.aSep08</a>    |  | 4585  | 478  | 5 | 84  | CRA a like (kotu) alternative variant aSep08, mRNA.                             |
| <a href="#">kotu</a>    | <a href="#">kotu.bSep08</a>    |  | 4347  | 958  | 5 | 81  | CRA a like (9.5 kD) (kotu) alternative variant bSep08, mRNA.                    |
| <a href="#">kotu</a>    | <a href="#">kotu.dSep08</a>    |  | 2620  | 427  | 4 | 54  | CRA a like (kotu) alternative variant dSep08, mRNA.                             |
| <a href="#">kovar</a>   | <a href="#">kovar.bSep08</a>   |  | 2810  | 857  | 3 | 83  | putative protein (9.0 kD) (kovar) alternative variant bSep08, mRNA.             |
| <a href="#">kovar</a>   | <a href="#">kovar.cSep08</a>   |  | 2714  | 740  | 3 | 52  | putative protein (6.0 kD) (kovar) alternative variant cSep08, mRNA.             |
| <a href="#">kowey</a>   | <a href="#">kowey.aSep08</a>   |  | 5935  | 632  |   | 40  | putative protein (4.7 kD) (kowey) mRNA.                                         |
| <a href="#">koyby</a>   | <a href="#">koyby.aSep08</a>   |  | 3572  | 831  | 3 | 113 | putative protein (koyby) alternative variant aSep08, mRNA.                      |
| <a href="#">koyby</a>   | <a href="#">koyby.bSep08</a>   |  | 3532  | 403  | 2 | 42  | putative protein (koyby) alternative variant bSep08, mRNA.                      |
| <a href="#">koyby</a>   | <a href="#">koyby.cSep08</a>   |  | 584   | 324  | 1 | 44  | putative protein (koyby) alternative variant cSep08, mRNA.                      |
| <a href="#">koychy</a>  | <a href="#">koychy.aSep08</a>  |  | 1243  | 1079 |   | 92  | putative protein of mammalian origin (koychy) alternative variant aSep08, mRNA. |
| <a href="#">koydar</a>  | <a href="#">koydar.aSep08</a>  |  | 622   | 512  |   | 21  | putative protein (2.3 kD) (koydar) mRNA.                                        |
| <a href="#">koyfer</a>  | <a href="#">koyfer.aSep08</a>  |  | 2807  | 2694 |   | 78  | mohawk (koyfer) mRNA.                                                           |
| <a href="#">koyflo</a>  | <a href="#">koyflo.aSep08</a>  |  | 1312  | 967  |   | 148 | polyprotein (17.1 kD) (koyflo) mRNA.                                            |
| <a href="#">koyflu</a>  | <a href="#">koyflu.aSep08</a>  |  | 1996  | 675  |   | 47  | putative protein (5.3 kD) (koyflu) mRNA.                                        |
| <a href="#">koyjey</a>  | <a href="#">koyjey.aSep08</a>  |  | 20452 | 669  |   | 223 | ecotropic viral integration site 5 (koyjey) mRNA.                               |
| <a href="#">koykee</a>  | <a href="#">koykee.aSep08</a>  |  | 2226  | 758  | 2 | 36  | putative protein (4.0 kD) (koykee) alternative variant aSep08, mRNA.            |
| <a href="#">koyloy</a>  | <a href="#">koyloy.aSep08</a>  |  | 1709  | 739  |   | 46  | putative protein (5.2 kD) (koyloy) mRNA.                                        |
| <a href="#">koymee</a>  | <a href="#">koymee.aSep08</a>  |  | 1664  | 455  |   | 151 | polycystic kidney disease 1 like (koymee) mRNA.                                 |
| <a href="#">koymer</a>  | <a href="#">koymer.aSep08</a>  |  | 1590  | 750  |   | 105 | A member ATP-binding cassette sub-family 8 like (koymer) mRNA.                  |

|                        |                               |                        |       |      |    |     |                                                                                             |
|------------------------|-------------------------------|------------------------|-------|------|----|-----|---------------------------------------------------------------------------------------------|
| <a href="#">koynoy</a> | <a href="#">koynoy.aSep08</a> |                        | 1013  | 605  | 2  | 16  | putative protein (1.9 kD) (koynoy) alternative variant aSep08, mRNA.                        |
| <a href="#">koypor</a> | <a href="#">koypor.aSep08</a> |                        | 3653  | 441  |    | 146 | stomatin 1 (koypor) mRNA.                                                                   |
| <a href="#">koysa</a>  | <a href="#">koysa.aSep08</a>  |                        | 17081 | 500  |    | 72  | putative secreted or extracellular protein precursor (8.5 kD) (koysa) mRNA.                 |
| <a href="#">koysee</a> | <a href="#">koysee.aSep08</a> |                        | 10787 | 749  | 3  | 157 | putative protein (koysee) alternative variant aSep08, mRNA.                                 |
| <a href="#">koysee</a> | <a href="#">koysee.dSep08</a> |                        | 8819  | 1147 | 3  | 81  | putative mitochondrial protein (9.3 kD) (koysee) alternative variant dSep08, mRNA.          |
| <a href="#">koytu</a>  | <a href="#">koytu.aSep08</a>  |                        | 16958 | 713  |    | 21  | putative protein (2.5 kD) (koytu) mRNA.                                                     |
| <a href="#">koyvar</a> | <a href="#">koyvar.aSep08</a> |                        | 4717  | 395  |    | 131 | microtubule-actin crosslinking factor 1 (koyvar) mRNA.                                      |
| <a href="#">koywey</a> | <a href="#">koywey.aSep08</a> |                        | 1802  | 830  |    | 36  | putative protein (4.2 kD) (koywey) mRNA.                                                    |
| <a href="#">Kpna2</a>  | <a href="#">Kpna2.aSep08</a>  | <a href="#">85245</a>  | 12152 | 1966 | 5  | 529 | karyopherin (importin) alpha 2 (57.8 kD) (Kpna2) alternative variant aSep08, complete mRNA. |
| <a href="#">Kpna2</a>  | <a href="#">Kpna2.bSep08</a>  | <a href="#">85245</a>  | 8401  | 1163 | 5  | 350 | karyopherin (importin) alpha 2 (Kpna2) alternative variant bSep08, mRNA.                    |
| <a href="#">Kpna2</a>  | <a href="#">Kpna2.cSep08</a>  | <a href="#">85245</a>  | 1406  | 790  | 1  | 263 | karyopherin (importin) alpha 2 (Kpna2) alternative variant cSep08, mRNA.                    |
| <a href="#">Kpna2</a>  | <a href="#">Kpna2.dSep08</a>  | <a href="#">85245</a>  | 1571  | 705  | 1  | 220 | karyopherin (importin) alpha 2 (Kpna2) alternative variant dSep08, mRNA.                    |
| <a href="#">Kpna3</a>  | <a href="#">Kpna3.bSep08</a>  | <a href="#">361055</a> | 11423 | 826  | 7  | 210 | karyopherin (importin) alpha 3 (Kpna3) alternative variant bSep08, mRNA.                    |
| <a href="#">Kpna3</a>  | <a href="#">Kpna3.cSep08</a>  | <a href="#">361055</a> | 9206  | 701  | 5  | 125 | karyopherin (importin) alpha 3 (Kpna3) alternative variant cSep08, mRNA.                    |
| <a href="#">Kpna3</a>  | <a href="#">Kpna3.dSep08</a>  | <a href="#">361055</a> | 49305 | 357  | 6  | 119 | karyopherin (importin) alpha 3 (Kpna3) alternative variant dSep08, mRNA.                    |
| <a href="#">Kpna4</a>  | <a href="#">Kpna4.bSep08</a>  | <a href="#">361959</a> | 29144 | 2278 | 1  | 486 | karyopherin (importin) alpha 4 (Kpna4) alternative variant bSep08, mRNA.                    |
| <a href="#">Kpna6</a>  | <a href="#">Kpna6.aSep08</a>  | <a href="#">362607</a> | 2421  | 526  |    | 175 | karyopherin (importin) alpha 6 (Kpna6) mRNA.                                                |
| <a href="#">Kpnb1</a>  | <a href="#">Kpnb1.bSep08</a>  | <a href="#">24917</a>  | 29063 | 1782 | 8  | 392 | karyopherin (importin) beta 1 (Kpnb1) alternative variant bSep08, mRNA.                     |
| <a href="#">Kpnb1</a>  | <a href="#">Kpnb1.cSep08</a>  | <a href="#">24917</a>  | 7753  | 3675 | 7  | 240 | karyopherin (importin) beta 1 (Kpnb1) alternative variant cSep08, mRNA.                     |
| <a href="#">Kpnb1</a>  | <a href="#">Kpnb1.dSep08</a>  | <a href="#">24917</a>  | 5162  | 657  | 7  | 218 | karyopherin (importin) beta 1 (Kpnb1) alternative variant dSep08, mRNA.                     |
| <a href="#">Kpnb1</a>  | <a href="#">Kpnb1.eSep08</a>  | <a href="#">24917</a>  | 3130  | 683  | 3  | 104 | karyopherin (importin) beta 1 (11.5 kD) (Kpnb1) alternative variant eSep08, mRNA.           |
| <a href="#">Kptn</a>   | <a href="#">Kptn.aSep08</a>   | <a href="#">308107</a> | 7697  | 1645 | 12 | 430 | kaptin CRA a (47.5 kD) (Kptn) alternative variant aSep08, complete mRNA.                    |
| <a href="#">Kptn</a>   | <a href="#">Kptn.bSep08</a>   | <a href="#">308107</a> | 3971  | 738  | 6  | 228 | kaptin CRA a (Kptn) alternative variant bSep08, mRNA.                                       |
| <a href="#">Kptn</a>   | <a href="#">Kptn.cSep08</a>   | <a href="#">308107</a> | 3924  | 947  | 5  | 184 | kaptin CRA a (Kptn) alternative variant cSep08, mRNA.                                       |
| <a href="#">Kptn</a>   | <a href="#">Kptn.dSep08</a>   | <a href="#">308107</a> | 1767  | 666  | 3  | 107 | kaptin CRA a (Kptn) alternative variant dSep08, mRNA.                                       |
| <a href="#">Kptn</a>   | <a href="#">Kptn.gSep08</a>   | <a href="#">308107</a> | 3603  | 414  | 2  | 33  | putative protein (Kptn) alternative variant gSep08, mRNA.                                   |
| <a href="#">KRAB.0</a> | <a href="#">KRAB.0.aSep08</a> |                        | 1331  | 657  | 1  | 33  | CRA b like (3.9 kD) (KRAB.0) alternative variant aSep08, mRNA.                              |

|                         |                                |  |       |      |   |     |                                                                                                   |
|-------------------------|--------------------------------|--|-------|------|---|-----|---------------------------------------------------------------------------------------------------|
| <a href="#">KRAB.0</a>  | <a href="#">KRAB.0.bSep08</a>  |  | 17877 | 658  | 2 | 42  | KRAB box (5.1 kD) (KRAB.0) alternative variant bSep08, mRNA.                                      |
| <a href="#">KRAB.1</a>  | <a href="#">KRAB.1.aSep08</a>  |  | 18701 | 1066 |   | 108 | KRAB box (KRAB.1) mRNA.                                                                           |
| <a href="#">KRAB.2</a>  | <a href="#">KRAB.2.aSep08</a>  |  | 25006 | 860  | 1 | 93  | predicted gene like (11.4 kD) (KRAB.2) alternative variant aSep08, mRNA.                          |
| <a href="#">KRAB.2</a>  | <a href="#">KRAB.2.bSep08</a>  |  | 24673 | 524  | 1 | 92  | KRAB box (11.3 kD) (KRAB.2) alternative variant bSep08, mRNA.                                     |
| <a href="#">KRAB.3</a>  | <a href="#">KRAB.3.aSep08</a>  |  | 36245 | 1192 |   | 117 | KRAB box (13.8 kD) (KRAB.3) mRNA.                                                                 |
| <a href="#">KRAB.4</a>  | <a href="#">KRAB.4.aSep08</a>  |  | 23106 | 485  | 2 | 118 | KRAB box (14.1 kD) (KRAB.4) alternative variant aSep08, mRNA.                                     |
| <a href="#">KRAB.4</a>  | <a href="#">KRAB.4.bSep08</a>  |  | 85631 | 627  | 4 | 71  | putative nuclear protein (8.1 kD) (KRAB.4) alternative variant bSep08, mRNA.                      |
| <a href="#">KRAB.5</a>  | <a href="#">KRAB.5.aSep08</a>  |  | 23119 | 440  |   | 117 | KRAB box (13.9 kD) (KRAB.5) mRNA.                                                                 |
| <a href="#">KRAB.6</a>  | <a href="#">KRAB.6.aSep08</a>  |  | 28659 | 1147 |   | 92  | KRAB box (11.2 kD) (KRAB.6) mRNA.                                                                 |
| <a href="#">KRAB.7</a>  | <a href="#">KRAB.7.bSep08</a>  |  | 39302 | 739  | 3 | 92  | predicted gene like (11.2 kD) (KRAB.7) alternative variant bSep08, mRNA.                          |
| <a href="#">KRAB.7</a>  | <a href="#">KRAB.7.cSep08</a>  |  | 9596  | 546  | 2 | 91  | predicted gene like (KRAB.7) alternative variant cSep08, mRNA.                                    |
| <a href="#">KRAB.7</a>  | <a href="#">KRAB.7.dSep08</a>  |  | 30224 | 517  | 3 | 89  | predicted gene like (10.9 kD) (KRAB.7) alternative variant dSep08, mRNA.                          |
| <a href="#">KRAB.7</a>  | <a href="#">KRAB.7.eSep08</a>  |  | 30087 | 514  | 4 | 58  | putative protein of mammalian origin (7.1 kD) (KRAB.7) alternative variant eSep08, complete mRNA. |
| <a href="#">KRAB.8</a>  | <a href="#">KRAB.8.aSep08</a>  |  | 20685 | 2710 | 2 | 423 | KRAB box and zinc finger, C2H2-type (49.5 kD) (KRAB.8) alternative variant aSep08, mRNA.          |
| <a href="#">KRAB.8</a>  | <a href="#">KRAB.8.bSep08</a>  |  | 18827 | 725  | 1 | 217 | zinc finger, C2H2-type (KRAB.8) alternative variant bSep08, mRNA.                                 |
| <a href="#">KRAB.8</a>  | <a href="#">KRAB.8.cSep08</a>  |  | 17246 | 295  | 1 | 43  | putative protein (KRAB.8) alternative variant cSep08, mRNA.                                       |
| <a href="#">KRAB.9</a>  | <a href="#">KRAB.9.aSep08</a>  |  | 9757  | 990  |   | 330 | KRAB box and zinc finger, C2H2-type (KRAB.9) mRNA.                                                |
| <a href="#">KRAB.10</a> | <a href="#">KRAB.10.aSep08</a> |  | 9971  | 1465 | 2 | 487 | KRAB box and zinc finger, C2H2-type (KRAB.10) alternative variant aSep08, mRNA.                   |
| <a href="#">KRAB.10</a> | <a href="#">KRAB.10.bSep08</a> |  | 8982  | 1122 | 1 | 102 | CRA b (KRAB.10) alternative variant bSep08, mRNA.                                                 |
| <a href="#">KRAB.11</a> | <a href="#">KRAB.11.aSep08</a> |  | 6925  | 1673 |   | 390 | KRAB box and zinc finger, C2H2-type (KRAB.11) mRNA.                                               |
| <a href="#">KRAB.12</a> | <a href="#">KRAB.12.aSep08</a> |  | 27407 | 587  |   | 127 | CRA a (KRAB.12) mRNA.                                                                             |
| <a href="#">KRAB.13</a> | <a href="#">KRAB.13.aSep08</a> |  | 17810 | 573  |   | 168 | KRAB box (KRAB.13) mRNA.                                                                          |
| <a href="#">KRAB.14</a> | <a href="#">KRAB.14.aSep08</a> |  | 48771 | 538  |   | 74  | CRA b (8.8 kD) (KRAB.14) mRNA.                                                                    |
| <a href="#">KRAB.15</a> | <a href="#">KRAB.15.aSep08</a> |  | 14996 | 1915 |   | 417 | KRAB box and zinc finger, C2H2-type (48.3 kD) (KRAB.15) mRNA.                                     |
| <a href="#">KRAB.16</a> | <a href="#">KRAB.16.aSep08</a> |  | 5826  | 3196 | 2 | 463 | CRA c (53.8 kD) (KRAB.16) alternative variant aSep08, mRNA.                                       |
| <a href="#">KRAB.16</a> | <a href="#">KRAB.16.bSep08</a> |  | 1885  | 1545 | 2 | 81  | CRA b (KRAB.16) alternative variant bSep08, mRNA.                                                 |
| <a href="#">KRAB.17</a> | <a href="#">KRAB.17.aSep08</a> |  | 5713  | 2793 |   | 497 | KRAB box and zinc finger, C2H2-type (KRAB.17) mRNA.                                               |
| <a href="#">KRAB.18</a> | <a href="#">KRAB.18.aSep08</a> |  | 22796 | 608  |   | 64  | CRA a (7.8 kD) (KRAB.18) mRNA.                                                                    |
| <a href="#">KRAB.19</a> | <a href="#">KRAB.19.aSep08</a> |  | 19135 | 732  | 2 | 211 | KRAB box and zinc finger, C2H2-type (KRAB.19) alternative variant aSep08, mRNA.                   |

|                         |                                |  |        |      |   |     |                                                                                        |
|-------------------------|--------------------------------|--|--------|------|---|-----|----------------------------------------------------------------------------------------|
| <a href="#">KRAB.19</a> | <a href="#">KRAB.19.bSep08</a> |  | 18260  | 650  | 2 | 100 | CRA a (11.7 kD) (KRAB.19) alternative variant bSep08, mRNA.                            |
| <a href="#">KRAB.19</a> | <a href="#">KRAB.19.cSep08</a> |  | 17400  | 342  | 1 | 64  | CRA a (7.7 kD) (KRAB.19) alternative variant cSep08, mRNA.                             |
| <a href="#">KRAB.19</a> | <a href="#">KRAB.19.dSep08</a> |  | 18643  | 509  | 2 | 64  | CRA a (7.7 kD) (KRAB.19) alternative variant dSep08, mRNA.                             |
| <a href="#">KRAB.20</a> | <a href="#">KRAB.20.aSep08</a> |  | 522    | 331  |   | 63  | CRA b (KRAB.20) mRNA.                                                                  |
| <a href="#">KRAB.21</a> | <a href="#">KRAB.21.aSep08</a> |  | 34784  | 381  |   | 127 | CRA a (KRAB.21) mRNA.                                                                  |
| <a href="#">KRAB.22</a> | <a href="#">KRAB.22.aSep08</a> |  | 492    | 301  |   | 55  | CRA a (KRAB.22) mRNA.                                                                  |
| <a href="#">KRAB.23</a> | <a href="#">KRAB.23.aSep08</a> |  | 2192   | 890  | 1 | 296 | KRAB box and zinc finger, C2H2-type (KRAB.23) alternative variant aSep08, mRNA.        |
| <a href="#">KRAB.23</a> | <a href="#">KRAB.23.bSep08</a> |  | 21041  | 586  | 2 | 133 | CRA b (KRAB.23) alternative variant bSep08, mRNA.                                      |
| <a href="#">KRAB.24</a> | <a href="#">KRAB.24.aSep08</a> |  | 10014  | 927  | 1 | 255 | CRA c (KRAB.24) alternative variant aSep08, mRNA.                                      |
| <a href="#">KRAB.24</a> | <a href="#">KRAB.24.bSep08</a> |  | 29355  | 391  | 1 | 129 | CRA a (KRAB.24) alternative variant bSep08, mRNA.                                      |
| <a href="#">KRAB.25</a> | <a href="#">KRAB.25.aSep08</a> |  | 15014  | 390  |   | 80  | CRA b (KRAB.25) mRNA.                                                                  |
| <a href="#">KRAB.26</a> | <a href="#">KRAB.26.bSep08</a> |  | 6440   | 443  | 4 | 53  | putative protein (6.0 kD) (KRAB.26) alternative variant bSep08, mRNA.                  |
| <a href="#">KRAB.26</a> | <a href="#">KRAB.26.cSep08</a> |  | 5643   | 445  | 4 | 40  | zinc finger protein 560 like (4.7 kD) (KRAB.26) alternative variant cSep08, mRNA.      |
| <a href="#">KRAB.26</a> | <a href="#">KRAB.26.dSep08</a> |  | 5726   | 608  | 3 | 39  | zinc finger protein 560 like (4.6 kD) (KRAB.26) alternative variant dSep08, mRNA.      |
| <a href="#">KRAB.26</a> | <a href="#">KRAB.26.eSep08</a> |  | 4591   | 407  | 2 | 44  | putative protein (KRAB.26) alternative variant eSep08, mRNA.                           |
| <a href="#">KRAB.27</a> | <a href="#">KRAB.27.aSep08</a> |  | 12087  | 443  | 2 | 103 | CRA a (KRAB.27) alternative variant aSep08, mRNA.                                      |
| <a href="#">KRAB.27</a> | <a href="#">KRAB.27.bSep08</a> |  | 8298   | 446  | 1 | 76  | CRA a (8.6 kD) (KRAB.27) alternative variant bSep08, mRNA.                             |
| <a href="#">KRAB.29</a> | <a href="#">KRAB.29.aSep08</a> |  | 30881  | 872  | 3 | 78  | CRA a like (8.9 kD) (KRAB.29) mRNA.                                                    |
| <a href="#">KRAB.30</a> | <a href="#">KRAB.30.aSep08</a> |  | 79626  | 487  |   | 86  | KRAB box (KRAB.30) mRNA.                                                               |
| <a href="#">KRAB.31</a> | <a href="#">KRAB.31.aSep08</a> |  | 14797  | 712  |   | 208 | CRA b (KRAB.31) mRNA.                                                                  |
| <a href="#">KRAB.32</a> | <a href="#">KRAB.32.aSep08</a> |  | 22766  | 570  | 1 | 190 | CRA a (KRAB.32) alternative variant aSep08, mRNA.                                      |
| <a href="#">KRAB.32</a> | <a href="#">KRAB.32.bSep08</a> |  | 22799  | 403  |   | 97  | CRA a (KRAB.32) alternative variant bSep08, mRNA.                                      |
| <a href="#">KRAB.33</a> | <a href="#">KRAB.33.aSep08</a> |  | 5391   | 405  |   | 134 | CRA b (KRAB.33) mRNA.                                                                  |
| <a href="#">KRAB.34</a> | <a href="#">KRAB.34.aSep08</a> |  | 6679   | 309  |   | 57  | zinc finger protein 625 CRA b like (KRAB.34) mRNA.                                     |
| <a href="#">KRAB.35</a> | <a href="#">KRAB.35.aSep08</a> |  | 126261 | 2882 |   | 545 | zinc finger protein 422 related sequence 1 (KRAB.35) alternative variant aSep08, mRNA. |
| <a href="#">KRAB.36</a> | <a href="#">KRAB.36.aSep08</a> |  | 4229   | 852  | 3 | 284 | zinc finger protein 7 (KRAB.36) alternative variant aSep08, mRNA.                      |
| <a href="#">KRAB.36</a> | <a href="#">KRAB.36.cSep08</a> |  | 2567   | 661  | 3 | 71  | zinc finger protein 7 CRA b (8.0 kD) (KRAB.36) alternative variant cSep08, mRNA.       |
| <a href="#">KRAB.36</a> | <a href="#">KRAB.36.dSep08</a> |  | 770    | 280  | 2 | 45  | zinc finger protein 7 (KRAB.36) alternative variant dSep08, mRNA.                      |
| <a href="#">KRAB.37</a> | <a href="#">KRAB.37.aSep08</a> |  | 4491   | 389  |   | 67  | finger protein zinc 4 (KRAB.37) mRNA.                                                  |
| <a href="#">KRAB.38</a> | <a href="#">KRAB.38.aSep08</a> |  | 16846  | 1365 |   | 64  | CRA a (7.7 kD) (KRAB.38) alternative variant aSep08, mRNA.                             |
| <a href="#">KRAB.40</a> | <a href="#">KRAB.40.aSep08</a> |  | 1388   | 458  |   | 152 | protein CRA d (KRAB.40) mRNA.                                                          |

|                         |                                |  |       |      |   |     |                                                                                           |
|-------------------------|--------------------------------|--|-------|------|---|-----|-------------------------------------------------------------------------------------------|
| <a href="#">KRAB.41</a> | <a href="#">KRAB.41.aSep08</a> |  | 8552  | 529  | 4 | 105 | CRA a (KRAB.41) alternative variant aSep08, mRNA.                                         |
| <a href="#">KRAB.42</a> | <a href="#">KRAB.42.aSep08</a> |  | 22697 | 2753 |   | 585 | zinc finger protein 248 CRA b (67.4 kD) (KRAB.42) alternative variant aSep08, mRNA.       |
| <a href="#">KRAB.43</a> | <a href="#">KRAB.43.aSep08</a> |  | 27298 | 819  | 6 | 85  | KRAB box (10.0 kD) (KRAB.43) alternative variant aSep08, mRNA.                            |
| <a href="#">KRAB.43</a> | <a href="#">KRAB.43.bSep08</a> |  | 28858 | 1904 | 4 | 70  | KRAB box (8.4 kD) (KRAB.43) alternative variant bSep08, mRNA.                             |
| <a href="#">KRAB.43</a> | <a href="#">KRAB.43.cSep08</a> |  | 10626 | 471  | 2 | 36  | putative protein (KRAB.43) alternative variant cSep08, mRNA.                              |
| <a href="#">KRAB.44</a> | <a href="#">KRAB.44.aSep08</a> |  | 14858 | 305  | 1 | 101 | KRAB box (KRAB.44) alternative variant aSep08, mRNA.                                      |
| <a href="#">KRAB.44</a> | <a href="#">KRAB.44.bSep08</a> |  | 46208 | 1261 | 1 | 72  | CRA b (8.4 kD) (KRAB.44) alternative variant bSep08, mRNA.                                |
| <a href="#">KRAB.45</a> | <a href="#">KRAB.45.aSep08</a> |  | 23846 | 335  |   | 104 | KRAB box (KRAB.45) mRNA.                                                                  |
| <a href="#">KRAB.46</a> | <a href="#">KRAB.46.aSep08</a> |  | 35867 | 726  |   | 150 | KRAB box and zinc finger, C2H2-type (KRAB.46) mRNA.                                       |
| <a href="#">KRAB.47</a> | <a href="#">KRAB.47.aSep08</a> |  | 8391  | 512  |   | 115 | KRAB box (KRAB.47) mRNA.                                                                  |
| <a href="#">KRAB.49</a> | <a href="#">KRAB.49.aSep08</a> |  | 10736 | 237  |   | 79  | CRA b (KRAB.49) mRNA.                                                                     |
| <a href="#">KRAB.50</a> | <a href="#">KRAB.50.aSep08</a> |  | 521   | 330  |   | 63  | CRA b (KRAB.50) mRNA.                                                                     |
| <a href="#">KRAB.51</a> | <a href="#">KRAB.51.aSep08</a> |  | 521   | 330  |   | 63  | CRA b (KRAB.51) mRNA.                                                                     |
| <a href="#">KRAB.52</a> | <a href="#">KRAB.52.aSep08</a> |  | 8642  | 367  |   | 80  | KRAB box (KRAB.52) mRNA.                                                                  |
| <a href="#">KRAB.53</a> | <a href="#">KRAB.53.aSep08</a> |  | 13857 | 386  |   | 89  | KRAB box (KRAB.53) mRNA.                                                                  |
| <a href="#">KRAB.54</a> | <a href="#">KRAB.54.aSep08</a> |  | 1263  | 394  |   | 131 | zinc finger protein 760 like (KRAB.54) mRNA.                                              |
| <a href="#">KRAB.55</a> | <a href="#">KRAB.55.aSep08</a> |  | 19241 | 2273 | 5 | 544 | KRAB box and zinc finger, C2H2-type (65.1 kD) (KRAB.55) alternative variant aSep08, mRNA. |
| <a href="#">KRAB.55</a> | <a href="#">KRAB.55.bSep08</a> |  | 31303 | 548  | 3 | 63  | KRAB box (7.4 kD) (KRAB.55) alternative variant bSep08, mRNA.                             |
| <a href="#">KRAB.55</a> | <a href="#">KRAB.55.cSep08</a> |  | 21782 | 486  | 2 | 63  | KRAB box (7.4 kD) (KRAB.55) alternative variant cSep08, mRNA.                             |
| <a href="#">KRAB.56</a> | <a href="#">KRAB.56.aSep08</a> |  | 3563  | 1655 |   | 336 | CRA b (KRAB.56) alternative variant aSep08, mRNA.                                         |
| <a href="#">KRAB.57</a> | <a href="#">KRAB.57.aSep08</a> |  | 3378  | 376  |   | 46  | finger protein zinc 41 like (KRAB.57) mRNA.                                               |
| <a href="#">KRAB.58</a> | <a href="#">KRAB.58.aSep08</a> |  | 22723 | 332  | 2 | 103 | zinc finger protein ZNF140 (KRAB.58) alternative variant aSep08, mRNA.                    |
| <a href="#">KRAB.58</a> | <a href="#">KRAB.58.bSep08</a> |  | 23278 | 595  | 2 | 42  | putative protein (KRAB.58) alternative variant bSep08, mRNA.                              |
| <a href="#">KRAB.59</a> | <a href="#">KRAB.59.aSep08</a> |  | 10563 | 401  |   | 106 | KRAB box (KRAB.59) mRNA.                                                                  |
| <a href="#">KRAB.60</a> | <a href="#">KRAB.60.aSep08</a> |  | 5748  | 738  | 3 | 139 | zinc finger protein 324 (KRAB.60) alternative variant aSep08, mRNA.                       |
| <a href="#">KRAB.60</a> | <a href="#">KRAB.60.bSep08</a> |  | 5602  | 1457 | 3 | 115 | zinc finger protein 324 (12.9 kD) (KRAB.60) alternative variant bSep08, mRNA.             |
| <a href="#">KRAB.61</a> | <a href="#">KRAB.61.aSep08</a> |  | 11917 | 449  |   | 143 | zinc finger (KRAB.61) mRNA.                                                               |
| <a href="#">KRAB.62</a> | <a href="#">KRAB.62.aSep08</a> |  | 12778 | 402  |   | 115 | KRAB box (13.3 kD) (KRAB.62) mRNA.                                                        |
| <a href="#">KRAB.63</a> | <a href="#">KRAB.63.aSep08</a> |  | 10314 | 729  | 5 | 104 | KRAB box (12.0 kD) (KRAB.63) alternative variant aSep08, mRNA.                            |
| <a href="#">KRAB.63</a> | <a href="#">KRAB.63.bSep08</a> |  | 8725  | 733  | 5 | 96  | KRAB box (10.7 kD) (KRAB.63) alternative variant bSep08, mRNA.                            |

|                         |                                |                        |       |      |   |     |                                                                                                            |
|-------------------------|--------------------------------|------------------------|-------|------|---|-----|------------------------------------------------------------------------------------------------------------|
| <a href="#">KRAB.64</a> | <a href="#">KRAB.64.bSep08</a> |                        | 8452  | 513  | 1 | 73  | CRA a like (8.6 kD) (KRAB.64) alternative variant bSep08, mRNA.                                            |
| <a href="#">KRAB.65</a> | <a href="#">KRAB.65.aSep08</a> |                        | 25913 | 750  |   | 219 | CRA c (KRAB.65) mRNA.                                                                                      |
| <a href="#">KRAB.66</a> | <a href="#">KRAB.66.aSep08</a> |                        | 17998 | 798  | 4 | 229 | CRA b (KRAB.66) alternative variant aSep08, mRNA.                                                          |
| <a href="#">KRAB.67</a> | <a href="#">KRAB.67.aSep08</a> |                        | 19295 | 539  |   | 155 | CRA c (KRAB.67) mRNA.                                                                                      |
| <a href="#">KRAB.68</a> | <a href="#">KRAB.68.aSep08</a> |                        | 10902 | 924  | 2 | 155 | putative protein of mammalian origin (KRAB.68) alternative variant aSep08, mRNA.                           |
| <a href="#">KRAB.68</a> | <a href="#">KRAB.68.bSep08</a> |                        | 10918 | 812  | 2 | 123 | putative protein of mammalian origin (KRAB.68) alternative variant bSep08, mRNA.                           |
| <a href="#">KRAB.69</a> | <a href="#">KRAB.69.aSep08</a> |                        | 13313 | 738  | 3 | 76  | KRAB box (KRAB.69) alternative variant aSep08, mRNA.                                                       |
| <a href="#">KRAB.73</a> | <a href="#">KRAB.73.aSep08</a> |                        | 26817 | 772  | 4 | 233 | CRA a (KRAB.73) alternative variant aSep08, mRNA.                                                          |
| <a href="#">Kras</a>    | <a href="#">Kras.aSep08</a>    | <a href="#">24525</a>  | 26389 | 1594 | 4 | 499 | v-Ki-ras2 Kirsten rat sarcoma viral oncogene homolog (Kras) alternative variant aSep08, mRNA.              |
| <a href="#">Kras</a>    | <a href="#">Kras.cSep08</a>    | <a href="#">24525</a>  | 29928 | 4545 | 3 | 78  | v-Ki-ras2 Kirsten rat sarcoma viral oncogene homolog (9.0 kD) (Kras) alternative variant cSep08, mRNA.     |
| <a href="#">Krba1</a>   | <a href="#">Krba1.aSep08</a>   | <a href="#">362358</a> | 4821  | 1969 | 1 | 500 | putative protein, with a coiled coil domain, of mammalian origin (Krba1) alternative variant aSep08, mRNA. |
| <a href="#">Krba1</a>   | <a href="#">Krba1.bSep08</a>   | <a href="#">362358</a> | 2840  | 426  | 1 | 141 | putative protein of mammalian origin (Krba1) alternative variant bSep08, mRNA.                             |
| <a href="#">Krcc1</a>   | <a href="#">Krcc1.bSep08</a>   | <a href="#">312437</a> | 12309 | 773  |   | 215 | lysine-rich coiled-coil 1 (Krcc1) alternative variant bSep08, mRNA.                                        |
| <a href="#">Kremen1</a> | <a href="#">Kremen1.bSep08</a> | <a href="#">114107</a> | 6612  | 2397 | 2 | 128 | kringle containing transmembrane protein 1 (Kremen1) alternative variant bSep08, mRNA.                     |
| <a href="#">Krit1</a>   | <a href="#">Krit1.bSep08</a>   | <a href="#">362317</a> | 5353  | 752  | 4 | 167 | krev interaction trapped 1 (Krit1) alternative variant bSep08, mRNA.                                       |
| <a href="#">Krit1</a>   | <a href="#">Krit1.cSep08</a>   | <a href="#">362317</a> | 1160  | 733  | 2 | 101 | krev interaction trapped 1 (Krit1) alternative variant cSep08, mRNA.                                       |
| <a href="#">Krit1</a>   | <a href="#">Krit1.dSep08</a>   | <a href="#">362317</a> | 4432  | 475  | 3 | 97  | krev interaction trapped 1 (Krit1) alternative variant dSep08, mRNA.                                       |
| <a href="#">Krt4</a>    | <a href="#">Krt4.bSep08</a>    | <a href="#">315323</a> | 1979  | 1052 | 2 | 189 | keratin 4 (Krt4) alternative variant bSep08, mRNA.                                                         |
| <a href="#">Krt7</a>    | <a href="#">Krt7.aSep08</a>    | <a href="#">300242</a> | 16119 | 2061 | 6 | 457 | keratin 7 (50.8 kD) (Krt7) alternative variant aSep08, mRNA.                                               |
| <a href="#">Krt7</a>    | <a href="#">Krt7.bSep08</a>    | <a href="#">300242</a> | 8396  | 840  | 1 | 279 | keratin 7 (Krt7) alternative variant bSep08, mRNA.                                                         |
| <a href="#">Krt7</a>    | <a href="#">Krt7.cSep08</a>    | <a href="#">300242</a> | 9559  | 1008 | 2 | 236 | keratin 7 (26.6 kD) (Krt7) alternative variant cSep08, mRNA.                                               |
| <a href="#">Krt8</a>    | <a href="#">Krt8.bSep08</a>    | <a href="#">25626</a>  | 6256  | 466  | 3 | 137 | keratin 8 (Krt8) alternative variant bSep08, mRNA.                                                         |
| <a href="#">Krt10</a>   | <a href="#">Krt10.bSep08</a>   | <a href="#">450225</a> | 2920  | 1929 | 6 | 290 | keratin 10 (29.8 kD) (Krt10) alternative variant bSep08, mRNA.                                             |
| <a href="#">Krt12</a>   | <a href="#">Krt12.aSep08</a>   | <a href="#">360625</a> | 4172  | 918  |   | 305 | keratin 12 (Meesmann corneal dystrophy) (Krt12) mRNA.                                                      |
| <a href="#">Krt15</a>   | <a href="#">Krt15.bSep08</a>   | <a href="#">287700</a> | 750   | 486  | 1 | 142 | keratin 15 (Krt15) alternative variant bSep08, mRNA.                                                       |
| <a href="#">Krt19</a>   | <a href="#">Krt19.bSep08</a>   | <a href="#">360626</a> | 1189  | 919  | 3 | 189 | keratin 19 (21.2 kD) (Krt19) alternative variant bSep08, mRNA.                                             |
| <a href="#">Krt19</a>   | <a href="#">Krt19.cSep08</a>   | <a href="#">360626</a> | 4500  | 256  | 2 | 85  | keratin 19 (Krt19) alternative variant cSep08, mRNA.                                                       |
| <a href="#">Krt20</a>   | <a href="#">Krt20.aSep08</a>   | <a href="#">286912</a> | 3915  | 837  |   | 186 | keratin 20 (21.9 kD) (Krt20) alternative variant aSep08, mRNA.                                             |



|                         |                                |                        |       |      |    |      |                                                                                                  |
|-------------------------|--------------------------------|------------------------|-------|------|----|------|--------------------------------------------------------------------------------------------------|
| <a href="#">Krt23</a>   | <a href="#">Krt23.aSep08</a>   | <a href="#">287678</a> | 6075  | 795  |    | 166  | keratin 23 (Krt23) mRNA.                                                                         |
| <a href="#">Krt25</a>   | <a href="#">Krt25.bSep08</a>   | <a href="#">303519</a> | 790   | 458  | 1  | 78   | keratin 25 (8.8 kD) (Krt25) alternative variant bSep08, mRNA.                                    |
| <a href="#">Krt26</a>   | <a href="#">Krt26.aSep08</a>   | <a href="#">407758</a> | 4771  | 764  |    | 108  | keratin 26 (Krt26) mRNA.                                                                         |
| <a href="#">Krt39</a>   | <a href="#">Krt39.bSep08</a>   | <a href="#">303523</a> | 2538  | 420  | 2  | 97   | keratin 39 (11.0 kD) (Krt39) alternative variant bSep08, mRNA.                                   |
| <a href="#">Krt76</a>   | <a href="#">Krt76.bSep08</a>   | <a href="#">407757</a> | 4312  | 753  | 7  | 251  | keratin 76 (Krt76) alternative variant bSep08, mRNA.                                             |
| <a href="#">Krt76</a>   | <a href="#">Krt76.cSep08</a>   | <a href="#">407757</a> | 2485  | 328  | 3  | 45   | keratin 76 (Krt76) alternative variant cSep08, mRNA.                                             |
| <a href="#">Krtcap2</a> | <a href="#">Krtcap2.aSep08</a> | <a href="#">295243</a> | 3251  | 536  | 5  | 163  | keratinocyte associated protein 2 (Krtcap2) alternative variant aSep08, mRNA.                    |
| <a href="#">Krtcap2</a> | <a href="#">Krtcap2.bSep08</a> | <a href="#">295243</a> | 3811  | 915  | 5  | 136  | keratinocyte associated protein 2 (14.7 kD) (Krtcap2) alternative variant bSep08, mRNA.          |
| <a href="#">Krtcap2</a> | <a href="#">Krtcap2.cSep08</a> | <a href="#">295243</a> | 3417  | 518  | 5  | 135  | keratinocyte associated protein 2 (14.6 kD) (Krtcap2) alternative variant cSep08, complete mRNA. |
| <a href="#">Krtcap2</a> | <a href="#">Krtcap2.eSep08</a> | <a href="#">295243</a> | 3418  | 455  | 4  | 117  | keratinocyte associated protein 2 (12.9 kD) (Krtcap2) alternative variant eSep08, complete mRNA. |
| <a href="#">Krtcap2</a> | <a href="#">Krtcap2.fSep08</a> | <a href="#">295243</a> | 3395  | 539  | 5  | 114  | keratinocyte associated protein 2 (12.5 kD) (Krtcap2) alternative variant fSep08, mRNA.          |
| <a href="#">Ktelc1</a>  | <a href="#">Ktelc1.aSep08</a>  | <a href="#">288091</a> | 28899 | 2892 | 10 | 416  | KTEL (Lys-Tyr-Glu-Leu) containing 1 (Ktelc1) alternative variant aSep08, mRNA.                   |
| <a href="#">Ktelc1</a>  | <a href="#">Ktelc1.bSep08</a>  | <a href="#">288091</a> | 1645  | 909  | 1  | 53   | KTEL (Lys-Tyr-Glu-Leu) containing 1 (6.2 kD) (Ktelc1) alternative variant bSep08, mRNA.          |
| <a href="#">Ktn1</a>    | <a href="#">Ktn1.aSep08</a>    | <a href="#">361029</a> | 71140 | 3928 | 41 | 1040 | kinectin 1 (Ktn1) alternative variant aSep08, mRNA.                                              |
| <a href="#">Ktn1</a>    | <a href="#">Ktn1.bSep08</a>    | <a href="#">361029</a> | 55572 | 2055 | 20 | 656  | kinectin 1 (Ktn1) alternative variant bSep08, mRNA.                                              |
| <a href="#">Ktn1</a>    | <a href="#">Ktn1.cSep08</a>    | <a href="#">361029</a> | 15130 | 1066 | 14 | 355  | kinectin 1 (Ktn1) alternative variant cSep08, mRNA.                                              |
| <a href="#">Ktn1</a>    | <a href="#">Ktn1.dSep08</a>    | <a href="#">361029</a> | 35370 | 1343 | 16 | 311  | kinectin (Ktn1) alternative variant dSep08, mRNA.                                                |
| <a href="#">Ktn1</a>    | <a href="#">Ktn1.eSep08</a>    | <a href="#">361029</a> | 15843 | 927  | 11 | 157  | kinectin 1 (18.2 kD) (Ktn1) alternative variant eSep08, mRNA.                                    |
| <a href="#">Ktn1</a>    | <a href="#">Ktn1.fSep08</a>    | <a href="#">361029</a> | 22337 | 1468 | 9  | 114  | kinectin (13.3 kD) (Ktn1) alternative variant fSep08, mRNA.                                      |
| <a href="#">Ktn1</a>    | <a href="#">Ktn1.gSep08</a>    | <a href="#">361029</a> | 8708  | 597  | 4  | 92   | kinectin (Ktn1) alternative variant gSep08, mRNA.                                                |
| <a href="#">Ktn1</a>    | <a href="#">Ktn1.hSep08</a>    | <a href="#">361029</a> | 9066  | 714  | 4  | 76   | kinectin (8.6 kD) (Ktn1) alternative variant hSep08, mRNA.                                       |
| <a href="#">Ktn1</a>    | <a href="#">Ktn1.iSep08</a>    | <a href="#">361029</a> | 5076  | 892  | 4  | 35   | putative protein, with a coiled coil domain (4.0 kD) (Ktn1) alternative variant iSep08, mRNA.    |
| <a href="#">Ktn1</a>    | <a href="#">Ktn1.jSep08</a>    | <a href="#">361029</a> | 7518  | 528  | 9  | 23   | putative protein (Ktn1) alternative variant jSep08, mRNA.                                        |
| <a href="#">kuby</a>    | <a href="#">kuby.aSep08</a>    |                        | 1333  | 484  |    | 55   | putative protein (kuby) alternative variant aSep08, mRNA.                                        |
| <a href="#">kuchy</a>   | <a href="#">kuchy.aSep08</a>   |                        | 1192  | 413  |    | 90   | enolase 1 like (kuchy) mRNA.                                                                     |
| <a href="#">kudar</a>   | <a href="#">kudar.aSep08</a>   |                        | 459   | 346  |    | 24   | putative protein (2.8 kD) (kudar) mRNA.                                                          |
| <a href="#">kufer</a>   | <a href="#">kufer.aSep08</a>   |                        | 36487 | 477  | 3  | 78   | CRA a like (kufer) alternative variant aSep08, mRNA.                                             |
| <a href="#">kufer</a>   | <a href="#">kufer.bSep08</a>   |                        | 37198 | 447  | 4  | 78   | CRA a like (kufer) alternative variant bSep08, mRNA.                                             |
| <a href="#">kufer</a>   | <a href="#">kufer.cSep08</a>   |                        | 82071 | 472  | 4  | 56   | putative protein (kufer) alternative variant cSep08, mRNA.                                       |
| <a href="#">kufer</a>   | <a href="#">kufer.dSep08</a>   |                        | 82089 | 984  | 7  | 60   | putative protein (kufer) alternative variant dSep08, mRNA.                                       |
| <a href="#">kufer</a>   | <a href="#">kufer.eSep08</a>   |                        | 3413  | 510  | 3  | 44   | CRA b like (4.7 kD) (kufer) alternative variant eSep08, mRNA.                                    |

|                        |                               |                        |       |      |   |     |                                                                                                           |
|------------------------|-------------------------------|------------------------|-------|------|---|-----|-----------------------------------------------------------------------------------------------------------|
| <a href="#">kufer</a>  | <a href="#">kufer.fSep08</a>  |                        | 8164  | 407  | 3 | 44  | CRA b like (4.7 kD) (kufer) alternative variant fSep08, mRNA.                                             |
| <a href="#">kuflo</a>  | <a href="#">kuflo.aSep08</a>  |                        | 2724  | 323  |   | 107 | 170 -associated factor (kuflo) mRNA.                                                                      |
| <a href="#">kuflu</a>  | <a href="#">kuflu.aSep08</a>  |                        | 3522  | 736  |   | 81  | putative protein (kuflu) mRNA.                                                                            |
| <a href="#">kujey</a>  | <a href="#">kujey.aSep08</a>  |                        | 6836  | 753  |   | 88  | CRA a (9.9 kD) (kujey) mRNA.                                                                              |
| <a href="#">kukee</a>  | <a href="#">kukee.aSep08</a>  |                        | 37378 | 706  |   | 101 | protein phosphatase 1 regulatory (kukee) mRNA.                                                            |
| <a href="#">kuloy</a>  | <a href="#">kuloy.aSep08</a>  |                        | 1673  | 767  |   | 61  | putative protein (kuloy) mRNA.                                                                            |
| <a href="#">kumee</a>  | <a href="#">kumee.aSep08</a>  |                        | 15645 | 531  |   | 87  | putative protein (kumee) mRNA.                                                                            |
| <a href="#">kumer</a>  | <a href="#">kumer.aSep08</a>  |                        | 9836  | 811  |   | 270 | bromodomain PHD finger transcription factor (kumer) mRNA.                                                 |
| <a href="#">kunoy</a>  | <a href="#">kunoy.aSep08</a>  |                        | 36791 | 1008 |   | 255 | heavy axonemal (29.1 kD) (kunoy) mRNA.                                                                    |
| <a href="#">kupor</a>  | <a href="#">kupor.aSep08</a>  |                        | 1555  | 724  |   | 76  | putative protein (kupor) mRNA.                                                                            |
| <a href="#">kusa</a>   | <a href="#">kusa.aSep08</a>   |                        | 39356 | 690  |   | 161 | putative protein of eukaryotic origin (kusa) mRNA.                                                        |
| <a href="#">kushee</a> | <a href="#">kushee.aSep08</a> |                        | 417   | 326  |   | 67  | putative protein (kushee) mRNA.                                                                           |
| <a href="#">kutu</a>   | <a href="#">kutu.aSep08</a>   |                        | 4534  | 388  |   | 107 | CRA a (kutu) mRNA.                                                                                        |
| <a href="#">kuvar</a>  | <a href="#">kuvar.aSep08</a>  |                        | 1745  | 822  |   | 51  | putative protein (5.5 kD) (kuvar) mRNA.                                                                   |
| <a href="#">kuwey</a>  | <a href="#">kuwey.aSep08</a>  |                        | 1149  | 300  |   | 59  | putative protein (kuwey) mRNA.                                                                            |
| <a href="#">Ky</a>     | <a href="#">Ky.bSep08</a>     | <a href="#">315962</a> | 19884 | 1087 | 8 | 315 | kyphoscoliosis peptidase (Ky) alternative variant bSep08, mRNA.                                           |
| <a href="#">Ky</a>     | <a href="#">Ky.cSep08</a>     | <a href="#">315962</a> | 17378 | 917  | 7 | 234 | kyphoscoliosis peptidase (Ky) alternative variant cSep08, mRNA.                                           |
| <a href="#">kyby</a>   | <a href="#">kyby.aSep08</a>   |                        | 17093 | 627  |   | 84  | putative protein of mammalian origin (10.0 kD) (kyby) mRNA.                                               |
| <a href="#">kychy</a>  | <a href="#">kychy.aSep08</a>  |                        | 714   | 595  |   | 93  | putative protein (10.6 kD) (kychy) mRNA.                                                                  |
| <a href="#">kydar</a>  | <a href="#">kydar.aSep08</a>  |                        | 2941  | 286  |   | 76  | putative protein (kydar) mRNA.                                                                            |
| <a href="#">kyfer</a>  | <a href="#">kyfer.aSep08</a>  |                        | 522   | 343  |   | 114 | putative protein (kyfer) mRNA.                                                                            |
| <a href="#">kyflo</a>  | <a href="#">kyflo.aSep08</a>  |                        | 10762 | 403  | 4 | 86  | BTAF1 RNA polymerase II B-TFIID transcription factor-associated (kyflo) alternative variant aSep08, mRNA. |
| <a href="#">kyflu</a>  | <a href="#">kyflu.aSep08</a>  |                        | 1381  | 411  |   | 136 | tyrosine kinase (kyflu) mRNA.                                                                             |
| <a href="#">kykee</a>  | <a href="#">kykee.aSep08</a>  |                        | 1932  | 382  | 2 | 123 | protein phosphatase 1 regulatory (kykee) alternative variant aSep08, mRNA.                                |
| <a href="#">kykee</a>  | <a href="#">kykee.bSep08</a>  |                        | 5943  | 349  | 2 | 105 | protein phosphatase 1 regulatory (kykee) alternative variant bSep08, mRNA.                                |
| <a href="#">kyloy</a>  | <a href="#">kyloy.aSep08</a>  |                        | 2940  | 374  |   | 37  | putative protein (4.0 kD) (kyloy) mRNA.                                                                   |
| <a href="#">kymee</a>  | <a href="#">kymee.aSep08</a>  |                        | 7560  | 674  | 2 | 139 | flywch family member 2 (14.2 kD) (kymee) alternative variant aSep08, mRNA.                                |
| <a href="#">kymee</a>  | <a href="#">kymee.bSep08</a>  |                        | 443   | 320  | 1 | 64  | flywch family member 2 (kymee) alternative variant bSep08, mRNA.                                          |
| <a href="#">kymee</a>  | <a href="#">kymee.cSep08</a>  |                        | 2672  | 200  | 1 | 38  | CRA b like (kymee) alternative variant cSep08, mRNA.                                                      |
| <a href="#">kymer</a>  | <a href="#">kymer.aSep08</a>  |                        | 1283  | 361  | 1 | 65  | putative protein (7.1 kD) (kymer) alternative variant aSep08, mRNA.                                       |
| <a href="#">kymer</a>  | <a href="#">kymer.bSep08</a>  |                        | 17762 | 1081 | 1 | 60  | putative protein (6.5 kD) (kymer) alternative variant bSep08, mRNA.                                       |
| <a href="#">kynoy</a>  | <a href="#">kynoy.bSep08</a>  |                        | 717   | 446  | 2 | 45  | putative protein (kynoy) alternative variant bSep08, mRNA.                                                |

|                         |                                |                        |        |      |   |     |                                                                                     |
|-------------------------|--------------------------------|------------------------|--------|------|---|-----|-------------------------------------------------------------------------------------|
| <a href="#">Kynu</a>    | <a href="#">Kynu.bSep08</a>    | <a href="#">116682</a> | 8747   | 581  | 3 | 145 | kynureninase (L-kynurenine hydrolase) (Kynu) alternative variant bSep08, mRNA.      |
| <a href="#">kypor</a>   | <a href="#">kypor.aSep08</a>   |                        | 3558   | 507  |   | 168 | septin 14 (kypor) mRNA.                                                             |
| <a href="#">kysa</a>    | <a href="#">kysa.aSep08</a>    |                        | 8558   | 517  |   | 62  | putative protein (7.0 kD) (kysa) mRNA.                                              |
| <a href="#">kyshee</a>  | <a href="#">kyshee.aSep08</a>  |                        | 29960  | 350  | 2 | 31  | putative protein (kyshee) alternative variant aSep08, mRNA.                         |
| <a href="#">kyshee</a>  | <a href="#">kyshee.bSep08</a>  |                        | 32675  | 313  | 1 | 36  | putative protein (kyshee) alternative variant bSep08, mRNA.                         |
| <a href="#">kytu</a>    | <a href="#">kytu.aSep08</a>    |                        | 826    | 703  |   | 65  | putative protein (kytu) mRNA.                                                       |
| <a href="#">kyvar</a>   | <a href="#">kyvar.aSep08</a>   |                        | 536    | 415  | 2 | 35  | putative protein (kyvar) alternative variant aSep08, mRNA.                          |
| <a href="#">kyvar</a>   | <a href="#">kyvar.bSep08</a>   |                        | 1140   | 390  | 2 | 35  | putative protein (kyvar) alternative variant bSep08, mRNA.                          |
| <a href="#">kywey</a>   | <a href="#">kywey.aSep08</a>   |                        | 199253 | 762  | 2 | 71  | putative protein (kywey) alternative variant aSep08, mRNA.                          |
| <a href="#">kywey</a>   | <a href="#">kywey.bSep08</a>   |                        | 254951 | 755  | 2 | 26  | putative protein (2.9 kD) (kywey) alternative variant bSep08, mRNA.                 |
| <a href="#">L1cam</a>   | <a href="#">L1cam.bSep08</a>   | <a href="#">50687</a>  | 3106   | 1874 | 1 | 230 | I1 cell adhesion molecule (L1cam) alternative variant bSep08, mRNA.                 |
| <a href="#">L2hgdh</a>  | <a href="#">L2hgdh.bSep08</a>  | <a href="#">314196</a> | 7487   | 1980 | 1 | 84  | L-2-hydroxyglutarate dehydrogenase (L2hgdh) alternative variant bSep08, mRNA.       |
| <a href="#">L3mbtl</a>  | <a href="#">L3mbtl.aSep08</a>  | <a href="#">311613</a> | 3610   | 551  |   | 108 | I(3)mbt-like (Drosophila) (12.1 kD) (L3mbtl) mRNA.                                  |
| <a href="#">L3mbtl2</a> | <a href="#">L3mbtl2.bSep08</a> | <a href="#">300320</a> | 2912   | 526  | 1 | 157 | I(3)mbt-like 2 (Drosophila) (17.4 kD) (L3mbtl2) alternative variant bSep08, mRNA.   |
| <a href="#">L3mbtl3</a> | <a href="#">L3mbtl3.aSep08</a> | <a href="#">309550</a> | 52881  | 1781 | 6 | 442 | I(3)mbt-like 3 (Drosophila) (L3mbtl3) alternative variant aSep08, mRNA.             |
| <a href="#">L3mbtl3</a> | <a href="#">L3mbtl3.cSep08</a> | <a href="#">309550</a> | 5835   | 2384 | 3 | 244 | I(3)mbt-like 3 (Drosophila) (L3mbtl3) alternative variant cSep08, mRNA.             |
| <a href="#">L27_2.0</a> | <a href="#">L27_2.0.aSep08</a> |                        | 32591  | 406  |   | 98  | InaD-like (L27_2.0) mRNA.                                                           |
| <a href="#">laby</a>    | <a href="#">laby.aSep08</a>    |                        | 2105   | 370  |   | 123 | putative protein of vertebrate origin (laby) mRNA.                                  |
| <a href="#">Lace1</a>   | <a href="#">Lace1.aSep08</a>   | <a href="#">502479</a> | 6635   | 904  | 1 | 139 | lactation elevated 1 (Lace1) alternative variant aSep08, mRNA.                      |
| <a href="#">lachy</a>   | <a href="#">lachy.aSep08</a>   |                        | 13014  | 846  |   | 57  | putative protein (6.7 kD) (lachy) mRNA.                                             |
| <a href="#">Lactb2</a>  | <a href="#">Lactb2.bSep08</a>  | <a href="#">297768</a> | 13098  | 835  | 3 | 91  | lactamase, beta 2 (Lactb2) alternative variant bSep08, mRNA.                        |
| <a href="#">ladar</a>   | <a href="#">ladar.aSep08</a>   |                        | 34068  | 872  | 8 | 193 | lysophosphatidylcholine acyltransferase 2 (ladar) alternative variant aSep08, mRNA. |
| <a href="#">lafer</a>   | <a href="#">lafer.aSep08</a>   |                        | 9462   | 663  |   | 162 | armadillo repeat containing 4 (18.3 kD) (lafer) mRNA.                               |
| <a href="#">laflo</a>   | <a href="#">laflo.aSep08</a>   |                        | 373    | 322  |   | 52  | putative protein (6.0 kD) (laflo) mRNA.                                             |
| <a href="#">laflu</a>   | <a href="#">laflu.aSep08</a>   |                        | 28664  | 437  |   | 21  | putative protein (laflu) mRNA.                                                      |
| <a href="#">Lag3</a>    | <a href="#">Lag3.bSep08</a>    | <a href="#">297596</a> | 6875   | 1294 | 7 | 350 | lymphocyte-activation gene 3 (38.5 kD) (Lag3) alternative variant bSep08, mRNA.     |
| <a href="#">Lag3</a>    | <a href="#">Lag3.cSep08</a>    | <a href="#">297596</a> | 1678   | 1082 | 2 | 269 | lymphocyte-activation gene 3 (Lag3) alternative variant cSep08, mRNA.               |
| <a href="#">Lag3</a>    | <a href="#">Lag3.dSep08</a>    | <a href="#">297596</a> | 1543   | 709  | 3 | 72  | lymphocyte-activation gene 3 (8.2 kD) (Lag3) alternative variant dSep08, mRNA.      |
| <a href="#">lajey</a>   | <a href="#">lajey.aSep08</a>   |                        | 5631   | 790  |   | 207 | uncharacterized protein (lajey) mRNA.                                               |
| <a href="#">lakee</a>   | <a href="#">lakee.aSep08</a>   |                        | 6776   | 718  |   | 108 | putative protein (lakee) mRNA.                                                      |

|                               |                                      |                        |       |      |    |      |                                                               |
|-------------------------------|--------------------------------------|------------------------|-------|------|----|------|---------------------------------------------------------------|
| <a href="#">laloy</a>         | <a href="#">laloy.aSep08</a>         |                        | 4566  | 414  |    | 138  | transmembrane protein 44 CRA j (laloy) mRNA.                  |
| <a href="#">Lama1</a>         | <a href="#">Lama1.bSep08</a>         | <a href="#">316758</a> | 16505 | 1799 | 1  | 599  | laminin, alpha 1 (Lama1) alternative variant bSep08, mRNA.    |
| <a href="#">Lama2</a>         | <a href="#">Lama2.aSep08</a>         | <a href="#">309368</a> | 84699 | 2478 |    | 826  | laminin, alpha 2 (Lama2) mRNA.                                |
| <a href="#">Lama3</a>         | <a href="#">Lama3.bSep08</a>         | <a href="#">307582</a> | 6762  | 616  | 1  | 175  | laminin, alpha 3 (Lama3) alternative variant bSep08, mRNA.    |
| <a href="#">Lama4</a>         | <a href="#">Lama4.aSep08</a>         | <a href="#">309816</a> | 34218 | 2804 | 16 | 882  | laminin, alpha 4 (Lama4) alternative variant aSep08, mRNA.    |
| <a href="#">Lama4</a>         | <a href="#">Lama4.bSep08</a>         | <a href="#">309816</a> | 2543  | 491  | 1  | 72   | laminin, alpha 4 (Lama4) alternative variant bSep08, mRNA.    |
| <a href="#">Lama5</a>         | <a href="#">Lama5.aSep08</a>         | <a href="#">140433</a> | 17020 | 1852 |    | 616  | laminin, alpha 5 (Lama5) alternative variant aSep08, mRNA.    |
| <a href="#">Lama5</a>         | <a href="#">Lama5.bSep08</a>         | <a href="#">140433</a> | 1389  | 431  |    | 143  | laminin, alpha 5 (Lama5) alternative variant bSep08, mRNA.    |
| <a href="#">Lamb1</a>         | <a href="#">Lamb1.aSep08</a>         | <a href="#">298941</a> | 34645 | 3948 | 21 | 1265 | laminin, beta 1 (Lamb1) alternative variant aSep08, mRNA.     |
| <a href="#">Lamb1</a>         | <a href="#">Lamb1.bSep08</a>         | <a href="#">298941</a> | 2963  | 615  | 3  | 204  | laminin, beta 1 (Lamb1) alternative variant bSep08, mRNA.     |
| <a href="#">Lamb1</a>         | <a href="#">Lamb1.cSep08</a>         | <a href="#">298941</a> | 3073  | 641  | 4  | 203  | laminin, beta 1 (Lamb1) alternative variant cSep08, mRNA.     |
| <a href="#">Lamb2</a>         | <a href="#">Lamb2.aSep08</a>         | <a href="#">25473</a>  | 12169 | 5615 | 33 | 1801 | laminin (196.5 kD) (Lamb2) alternative variant aSep08, mRNA.  |
| <a href="#">Lamb2</a>         | <a href="#">Lamb2.bSep08</a>         | <a href="#">25473</a>  | 1146  | 993  | 3  | 266  | laminin beta (Lamb2) alternative variant bSep08, mRNA.        |
| <a href="#">Lamb2</a>         | <a href="#">Lamb2.cSep08</a>         | <a href="#">25473</a>  | 1208  | 1135 | 2  | 150  | laminin (Lamb2) alternative variant cSep08, mRNA.             |
| <a href="#">Lamb2</a>         | <a href="#">Lamb2.dSep08</a>         | <a href="#">25473</a>  | 736   | 433  | 4  | 122  | laminin (Lamb2) alternative variant dSep08, mRNA.             |
| <a href="#">Lamb2</a>         | <a href="#">Lamb2.eSep08</a>         | <a href="#">25473</a>  | 616   | 507  | 2  | 117  | laminin (Lamb2) alternative variant eSep08, mRNA.             |
| <a href="#">Lamb2</a>         | <a href="#">Lamb2.fSep08</a>         | <a href="#">25473</a>  | 2905  | 401  | 2  | 36   | laminin (Lamb2) alternative variant fSep08, mRNA.             |
| <a href="#">Lamb3</a>         | <a href="#">Lamb3.aSep08</a>         | <a href="#">305078</a> | 8434  | 1575 | 6  | 397  | laminin, beta 3 (Lamb3) alternative variant aSep08, mRNA.     |
| <a href="#">Lamb3</a>         | <a href="#">Lamb3.bSep08</a>         | <a href="#">305078</a> | 620   | 323  | 1  | 100  | laminin, beta 3 (Lamb3) alternative variant bSep08, mRNA.     |
| <a href="#">Lamc1</a>         | <a href="#">Lamc1.aSep08</a>         | <a href="#">117036</a> | 32135 | 5440 |    | 957  | laminin, gamma 1 (Lamc1) mRNA.                                |
| <a href="#">Lamc2</a>         | <a href="#">Lamc2.aSep08</a>         | <a href="#">192362</a> | 9881  | 2400 | 2  | 373  | laminin, gamma 2 (Lamc2) alternative variant aSep08, mRNA.    |
| <a href="#">Lamc2</a>         | <a href="#">Lamc2.bSep08</a>         | <a href="#">192362</a> | 2642  | 462  | 1  | 126  | laminin, gamma 2 (Lamc2) alternative variant bSep08, mRNA.    |
| <a href="#">lamee</a>         | <a href="#">lamee.aSep08</a>         |                        | 1282  | 260  |    | 86   | polycystin 1 (lamee) mRNA.                                    |
| <a href="#">lamer</a>         | <a href="#">lamer.aSep08</a>         |                        | 4796  | 578  |    | 192  | A member ATP-binding cassette sub-family 8 like (lamer) mRNA. |
| <a href="#">Laminin_EGF.0</a> | <a href="#">Laminin_EGF.0.aSep08</a> |                        | 20328 | 442  |    | 147  | laminin alpha 4 (Laminin_EGF.0) mRNA.                         |
| <a href="#">Laminin_EGF.1</a> | <a href="#">Laminin_EGF.1.aSep08</a> |                        | 2589  | 473  |    | 157  | laminin (Laminin_EGF.1) mRNA.                                 |
| <a href="#">Laminin_EGF.2</a> | <a href="#">Laminin_EGF.2.aSep08</a> |                        | 22723 | 403  |    | 134  | laminin (Laminin_EGF.2) mRNA.                                 |
| <a href="#">Laminin_EGF.3</a> | <a href="#">Laminin_EGF.3.aSep08</a> |                        | 1514  | 540  |    | 179  | laminin (Laminin_EGF.3) mRNA.                                 |
| <a href="#">Laminin_EGF.4</a> | <a href="#">Laminin_EGF.4.aSep08</a> |                        | 10888 | 689  |    | 228  | laminin (Laminin_EGF.4) mRNA.                                 |

|                                |                                       |                        |        |      |    |     |                                                                                                       |
|--------------------------------|---------------------------------------|------------------------|--------|------|----|-----|-------------------------------------------------------------------------------------------------------|
| <a href="#">Laminin_EGF.5</a>  | <a href="#">Laminin_EGF.5.aSep08</a>  |                        | 3194   | 405  |    | 135 | laminin beta 3 (Laminin_EGF.5) mRNA.                                                                  |
| <a href="#">Laminin_EGF.6</a>  | <a href="#">Laminin_EGF.6.aSep08</a>  |                        | 1705   | 279  |    | 92  | laminin (Laminin_EGF.6) mRNA.                                                                         |
| <a href="#">Laminin_EGF.7</a>  | <a href="#">Laminin_EGF.7.aSep08</a>  |                        | 1520   | 349  |    | 115 | heparan sulfate proteoglycan (Laminin_EGF.7) mRNA.                                                    |
| <a href="#">Laminin_EGF.8</a>  | <a href="#">Laminin_EGF.8.aSep08</a>  |                        | 3906   | 413  |    | 137 | heparan sulfate proteoglycan (Laminin_EGF.8) mRNA.                                                    |
| <a href="#">Laminin_EGF.9</a>  | <a href="#">Laminin_EGF.9.aSep08</a>  |                        | 1320   | 690  |    | 224 | laminin (Laminin_EGF.9) mRNA.                                                                         |
| <a href="#">Laminin_EGF.10</a> | <a href="#">Laminin_EGF.10.aSep08</a> |                        | 5521   | 499  |    | 165 | laminin (Laminin_EGF.10) mRNA.                                                                        |
| <a href="#">Laminin_EGF.11</a> | <a href="#">Laminin_EGF.11.aSep08</a> |                        | 1187   | 410  |    | 136 | multiple -like domain (Laminin_EGF.11) mRNA.                                                          |
| <a href="#">Laminin_EGF.12</a> | <a href="#">Laminin_EGF.12.aSep08</a> |                        | 1365   | 408  |    | 135 | multiple -like domain (Laminin_EGF.12) mRNA.                                                          |
| <a href="#">Laminin_G_2.0</a>  | <a href="#">Laminin_G_2.0.aSep08</a>  |                        | 33543  | 548  |    | 182 | neurexin 1 CRA b (Laminin_G_2.0) mRNA.                                                                |
| <a href="#">Laminin_G_2.1</a>  | <a href="#">Laminin_G_2.1.aSep08</a>  |                        | 4841   | 3130 | 15 | 987 | laminin (Laminin_G_2.1) alternative variant aSep08, mRNA.                                             |
| <a href="#">Laminin_G_2.1</a>  | <a href="#">Laminin_G_2.1.bSep08</a>  |                        | 1436   | 1026 | 2  | 305 | laminin alpha (Laminin_G_2.1) alternative variant bSep08, mRNA.                                       |
| <a href="#">Laminin_G_2.1</a>  | <a href="#">Laminin_G_2.1.cSep08</a>  |                        | 1544   | 990  | 7  | 193 | laminin (Laminin_G_2.1) alternative variant cSep08, mRNA.                                             |
| <a href="#">Laminin_G_2.2</a>  | <a href="#">Laminin_G_2.2.aSep08</a>  |                        | 6713   | 542  |    | 180 | FAT 4 (Laminin_G_2.2) mRNA.                                                                           |
| <a href="#">Laminin_G_2.3</a>  | <a href="#">Laminin_G_2.3.aSep08</a>  |                        | 72774  | 1451 |    | 403 | type XI Collagen (Laminin_G_2.3) mRNA.                                                                |
| <a href="#">Laminin_G_2.4</a>  | <a href="#">Laminin_G_2.4.aSep08</a>  |                        | 3234   | 571  |    | 118 | laminin (Laminin_G_2.4) mRNA.                                                                         |
| <a href="#">Laminin_I.0</a>    | <a href="#">Laminin_I.0.bSep08</a>    |                        | 18267  | 715  | 6  | 237 | laminin (Laminin_I.0) alternative variant bSep08, mRNA.                                               |
| <a href="#">Laminin_I.1</a>    | <a href="#">Laminin_I.1.aSep08</a>    |                        | 5135   | 1838 |    | 612 | laminin (Laminin_I.1) mRNA.                                                                           |
| <a href="#">Laminin_II.0</a>   | <a href="#">Laminin_II.0.aSep08</a>   |                        | 2158   | 778  | 5  | 259 | laminin (Laminin_II.0) alternative variant aSep08, mRNA.                                              |
| <a href="#">Laminin_II.0</a>   | <a href="#">Laminin_II.0.bSep08</a>   |                        | 1056   | 764  | 1  | 118 | putative protein (Laminin_II.0) alternative variant bSep08, mRNA.                                     |
| <a href="#">Lamp1</a>          | <a href="#">Lamp1.bSep08</a>          | <a href="#">25328</a>  | 24883  | 4731 | 9  | 251 | lysosomal-associated membrane protein 1 (Lamp1) alternative variant bSep08, mRNA.                     |
| <a href="#">Lamp1</a>          | <a href="#">Lamp1.cSep08</a>          | <a href="#">25328</a>  | 9252   | 458  | 3  | 152 | lysosomal-associated membrane protein 1 (Lamp1) alternative variant cSep08, mRNA.                     |
| <a href="#">Lamp1</a>          | <a href="#">Lamp1.dSep08</a>          | <a href="#">25328</a>  | 2602   | 981  | 3  | 85  | lysosomal-associated membrane protein 1 (Lamp1) alternative variant dSep08, mRNA.                     |
| <a href="#">Lamp2</a>          | <a href="#">Lamp2.bSep08</a>          | <a href="#">24944</a>  | 138128 | 618  | 3  | 125 | lysosomal-associated membrane protein 2 (Lamp2) alternative variant bSep08, mRNA.                     |
| <a href="#">Lamp2</a>          | <a href="#">Lamp2.cSep08</a>          | <a href="#">24944</a>  | 15869  | 449  | 3  | 118 | lysosomal-associated membrane protein 2 (Lamp2) alternative variant cSep08, mRNA.                     |
| <a href="#">Lamp3</a>          | <a href="#">Lamp3.bSep08</a>          | <a href="#">303801</a> | 6482   | 366  | 1  | 58  | lysosomal-associated membrane protein 3 (Lamp3) alternative variant bSep08, mRNA.                     |
| <a href="#">Lancl2</a>         | <a href="#">Lancl2.bSep08</a>         | <a href="#">362375</a> | 25635  | 550  | 5  | 182 | LanC (bacterial lantibiotic synthetase component C)-like 2 (Lancl2) alternative variant bSep08, mRNA. |

|                         |                                |                        |        |      |    |     |                                                                                                       |
|-------------------------|--------------------------------|------------------------|--------|------|----|-----|-------------------------------------------------------------------------------------------------------|
| <a href="#">Lancl2</a>  | <a href="#">Lancl2.cSep08</a>  | <a href="#">362375</a> | 23812  | 470  | 3  | 126 | LanC (bacterial lantibiotic synthetase component C)-like 2 (Lancl2) alternative variant cSep08, mRNA. |
| <a href="#">lanoy</a>   | <a href="#">lanoy.aSep08</a>   |                        | 2601   | 703  |    | 38  | putative protein (4.5 kD) (lanoy) mRNA.                                                               |
| <a href="#">Lao1</a>    | <a href="#">Lao1.bSep08</a>    | <a href="#">298483</a> | 8782   | 647  |    | 204 | L-amino acid oxidase 1 (Lao1) alternative variant bSep08, mRNA.                                       |
| <a href="#">Lap3</a>    | <a href="#">Lap3.bSep08</a>    | <a href="#">289668</a> | 6818   | 739  | 1  | 151 | leucine aminopeptidase 3 (Lap3) alternative variant bSep08, mRNA.                                     |
| <a href="#">lapor</a>   | <a href="#">lapor.aSep08</a>   |                        | 590    | 285  |    | 44  | putative protein (lapor) mRNA.                                                                        |
| <a href="#">Laptm4a</a> | <a href="#">Laptm4a.bSep08</a> | <a href="#">298875</a> | 1717   | 511  | 1  | 87  | lysosomal-associated protein transmembrane 4A (Laptm4a) alternative variant bSep08, mRNA.             |
| <a href="#">Laptm5</a>  | <a href="#">Laptm5.bSep08</a>  | <a href="#">89783</a>  | 4128   | 1515 | 2  | 110 | lysosomal-associated protein transmembrane 5 (12.7 kD) (Laptm5) alternative variant bSep08, mRNA.     |
| <a href="#">larby</a>   | <a href="#">larby.bSep08</a>   |                        | 2802   | 569  |    | 63  | putative protein (larby) alternative variant bSep08, mRNA.                                            |
| <a href="#">larchy</a>  | <a href="#">larchy.aSep08</a>  |                        | 1206   | 399  |    | 80  | deafness autosomal recessive 59 (larchy) mRNA.                                                        |
| <a href="#">lardar</a>  | <a href="#">lardar.aSep08</a>  |                        | 2080   | 389  | 2  | 129 | chromodomain helicase DNA binding protein 9 CRA c like (lardar) alternative variant aSep08, mRNA.     |
| <a href="#">lardar</a>  | <a href="#">lardar.bSep08</a>  |                        | 1068   | 357  | 1  | 119 | chromodomain helicase binding protein 9 like (lardar) alternative variant bSep08, mRNA.               |
| <a href="#">larfer</a>  | <a href="#">larfer.aSep08</a>  |                        | 3863   | 753  |    | 121 | putative protein of mammalian origin (larfer) mRNA.                                                   |
| <a href="#">larflo</a>  | <a href="#">larflo.bSep08</a>  |                        | 639    | 531  | 2  | 41  | putative protein (larflo) alternative variant bSep08, mRNA.                                           |
| <a href="#">larflu</a>  | <a href="#">larflu.aSep08</a>  |                        | 26877  | 436  |    | 144 | neuron navigator 2 (larflu) mRNA.                                                                     |
| <a href="#">Large</a>   | <a href="#">Large.bSep08</a>   | <a href="#">361368</a> | 84386  | 1086 | 7  | 361 | like-glycosyltransferase (Large) alternative variant bSep08, mRNA.                                    |
| <a href="#">Large</a>   | <a href="#">Large.cSep08</a>   | <a href="#">361368</a> | 224097 | 512  | 4  | 69  | like-glycosyltransferase (Large) alternative variant cSep08, mRNA.                                    |
| <a href="#">larjey</a>  | <a href="#">larjey.aSep08</a>  |                        | 2685   | 758  |    | 104 | putative cytoplasmic protein of mammalian origin (11.5 kD) (larjey) mRNA.                             |
| <a href="#">larkee</a>  | <a href="#">larkee.aSep08</a>  |                        | 35831  | 605  |    | 67  | putative protein (larkee) mRNA.                                                                       |
| <a href="#">larloy</a>  | <a href="#">larloy.aSep08</a>  |                        | 4382   | 728  | 3  | 34  | putative protein (larloy) alternative variant aSep08, mRNA.                                           |
| <a href="#">larmee</a>  | <a href="#">larmee.aSep08</a>  |                        | 7353   | 533  |    | 39  | putative protein (larmee) mRNA.                                                                       |
| <a href="#">larmer</a>  | <a href="#">larmer.aSep08</a>  |                        | 2566   | 854  |    | 73  | ATP-binding cassette sub-family A member like (larmer) mRNA.                                          |
| <a href="#">larnoy</a>  | <a href="#">larnoy.aSep08</a>  |                        | 9389   | 275  |    | 39  | putative protein (larnoy) mRNA.                                                                       |
| <a href="#">Larp1</a>   | <a href="#">Larp1.aSep08</a>   | <a href="#">303158</a> | 21128  | 5928 | 16 | 869 | la ribonucleoprotein domain family, member 1 (Larp1) alternative variant aSep08, mRNA.                |
| <a href="#">Larp1</a>   | <a href="#">Larp1.bSep08</a>   | <a href="#">303158</a> | 19511  | 1793 | 6  | 580 | la ribonucleoprotein domain family, member 1 (Larp1) alternative variant bSep08, mRNA.                |
| <a href="#">Larp1</a>   | <a href="#">Larp1.cSep08</a>   | <a href="#">303158</a> | 1583   | 744  | 3  | 247 | la ribonucleoprotein domain family, member 1 (Larp1) alternative variant cSep08, mRNA.                |
| <a href="#">Larp1</a>   | <a href="#">Larp1.dSep08</a>   | <a href="#">303158</a> | 2345   | 486  | 3  | 103 | la ribonucleoprotein domain family, member 1 (Larp1) alternative variant dSep08, mRNA.                |
| <a href="#">Larp1</a>   | <a href="#">Larp1.eSep08</a>   | <a href="#">303158</a> | 2317   | 487  | 3  | 91  | la ribonucleoprotein domain family, member 1 (Larp1) alternative variant eSep08, mRNA.                |
| <a href="#">Larp1</a>   | <a href="#">Larp1.gSep08</a>   | <a href="#">303158</a> | 736    | 600  | 2  | 23  | la ribonucleoprotein domain family, member 1 (Larp1) alternative variant gSep08, mRNA.                |

|                         |                                |                        |       |      |    |     |                                                                                                                       |
|-------------------------|--------------------------------|------------------------|-------|------|----|-----|-----------------------------------------------------------------------------------------------------------------------|
| <a href="#">Larp5</a>   | <a href="#">Larp5.bSep08</a>   | <a href="#">307070</a> | 42908 | 674  | 1  | 124 | la ribonucleoprotein domain family, member 5 (Larp5) alternative variant bSep08, mRNA.                                |
| <a href="#">larpor</a>  | <a href="#">larpor.aSep08</a>  |                        | 45627 | 575  | 2  | 88  | CRA a like (larpor) alternative variant aSep08, mRNA.                                                                 |
| <a href="#">larpor</a>  | <a href="#">larpor.bSep08</a>  |                        | 12241 | 842  | 2  | 56  | CRA b like (larpor) alternative variant bSep08, mRNA.                                                                 |
| <a href="#">larpor</a>  | <a href="#">larpor.cSep08</a>  |                        | 45622 | 442  | 1  | 47  | putative protein, with a coiled coil domain (larpor) alternative variant cSep08, mRNA.                                |
| <a href="#">Lars2</a>   | <a href="#">Lars2.bSep08</a>   | <a href="#">363172</a> | 26824 | 356  | 4  | 118 | leucyl-tRNA synthetase, mitochondrial (Lars2) alternative variant bSep08, mRNA.                                       |
| <a href="#">Lars2</a>   | <a href="#">Lars2.cSep08</a>   | <a href="#">363172</a> | 4425  | 379  | 2  | 105 | leucyl-tRNA synthetase, mitochondrial (Lars2) alternative variant cSep08, mRNA.                                       |
| <a href="#">larsa</a>   | <a href="#">larsa.aSep08</a>   |                        | 9367  | 959  |    | 225 | trafficking protein particle complex 9 (larsa) mRNA.                                                                  |
| <a href="#">larshee</a> | <a href="#">larshee.aSep08</a> |                        | 9514  | 418  |    | 139 | putative protein of metazoan origin (larshee) mRNA.                                                                   |
| <a href="#">lartu</a>   | <a href="#">lartu.bSep08</a>   |                        | 18295 | 1378 | 2  | 31  | metastasis associated 3 like (lartu) alternative variant bSep08, mRNA.                                                |
| <a href="#">larvar</a>  | <a href="#">larvar.aSep08</a>  |                        | 696   | 594  |    | 108 | putative protein (larvar) mRNA.                                                                                       |
| <a href="#">larwey</a>  | <a href="#">larwey.aSep08</a>  |                        | 1213  | 565  |    | 39  | putative protein (4.8 kD) (larwey) mRNA.                                                                              |
| <a href="#">Las1.0</a>  | <a href="#">Las1.0.aSep08</a>  |                        | 4022  | 525  | 4  | 174 | CRA a (Las1.0) alternative variant aSep08, mRNA.                                                                      |
| <a href="#">Las1l</a>   | <a href="#">Las1l.aSep08</a>   | <a href="#">296865</a> | 14952 | 2380 | 6  | 438 | putative protein, with a coiled coil domain, of vertebrate origin (49.7 kD) (Las1l) alternative variant aSep08, mRNA. |
| <a href="#">Las1l</a>   | <a href="#">Las1l.bSep08</a>   | <a href="#">296865</a> | 14952 | 1318 | 8  | 262 | putative protein (Las1l) alternative variant bSep08, mRNA.                                                            |
| <a href="#">Las1l</a>   | <a href="#">Las1l.cSep08</a>   | <a href="#">296865</a> | 5865  | 599  | 3  | 133 | CRA b (Las1l) alternative variant cSep08, mRNA.                                                                       |
| <a href="#">Las1l</a>   | <a href="#">Las1l.dSep08</a>   | <a href="#">296865</a> | 2321  | 596  | 2  | 65  | CRA c like (7.2 kD) (Las1l) alternative variant dSep08, mRNA.                                                         |
| <a href="#">lasa</a>    | <a href="#">lasa.aSep08</a>    |                        | 16035 | 401  |    | 44  | putative protein (5.0 kD) (lasa) mRNA.                                                                                |
| <a href="#">lashee</a>  | <a href="#">lashee.aSep08</a>  |                        | 9776  | 377  |    | 125 | putative protein of eukaryotic origin (lashee) mRNA.                                                                  |
| <a href="#">Lasp1</a>   | <a href="#">Lasp1.aSep08</a>   | <a href="#">29278</a>  | 38521 | 1204 |    | 313 | LIM and SH3 protein 1 (Lasp1) mRNA.                                                                                   |
| <a href="#">Lass2</a>   | <a href="#">Lass2.bSep08</a>   | <a href="#">310667</a> | 9303  | 1729 | 11 | 407 | LAG1 2 (Lass2) alternative variant bSep08, mRNA.                                                                      |
| <a href="#">Lass2</a>   | <a href="#">Lass2.cSep08</a>   | <a href="#">310667</a> | 6583  | 789  | 9  | 262 | LAG1 homolog ceramide synthase 2 (Lass2) alternative variant cSep08, mRNA.                                            |
| <a href="#">Lass2</a>   | <a href="#">Lass2.dSep08</a>   | <a href="#">310667</a> | 1055  | 635  | 4  | 199 | LAG1 2 (Lass2) alternative variant dSep08, mRNA.                                                                      |
| <a href="#">Lass2</a>   | <a href="#">Lass2.eSep08</a>   | <a href="#">310667</a> | 5027  | 384  | 2  | 87  | LAG1 homolog ceramide synthase 2 (Lass2) alternative variant eSep08, mRNA.                                            |
| <a href="#">Lass2</a>   | <a href="#">Lass2.fSep08</a>   | <a href="#">310667</a> | 1628  | 259  | 2  | 57  | LAG1 homolog ceramide synthase 2 (Lass2) alternative variant fSep08, mRNA.                                            |
| <a href="#">Lass5</a>   | <a href="#">Lass5.bSep08</a>   | <a href="#">366984</a> | 37861 | 1911 | 10 | 427 | LAG1 homolog, ceramide synthase 5 (Lass5) alternative variant bSep08, mRNA.                                           |
| <a href="#">Lass5</a>   | <a href="#">Lass5.cSep08</a>   | <a href="#">366984</a> | 35373 | 936  | 7  | 311 | LAG1 homolog, ceramide synthase 5 (Lass5) alternative variant cSep08, mRNA.                                           |
| <a href="#">Lass5</a>   | <a href="#">Lass5.dSep08</a>   | <a href="#">366984</a> | 10268 | 1991 | 7  | 231 | LAG1 homolog, ceramide synthase 5 (Lass5) alternative variant dSep08, mRNA.                                           |
| <a href="#">Lat</a>     | <a href="#">Lat.bSep08</a>     | <a href="#">81511</a>  | 4987  | 1217 | 10 | 137 | linker for activation of T cells (15.1 kD) (Lat) alternative variant bSep08, complete mRNA.                           |
| <a href="#">Lat</a>     | <a href="#">Lat.cSep08</a>     | <a href="#">81511</a>  | 1435  | 785  | 4  | 123 | linker for activation of T cells (13.4 kD) (Lat) alternative variant cSep08, mRNA.                                    |

|                         |                                |                        |       |      |   |     |                                                                                                     |
|-------------------------|--------------------------------|------------------------|-------|------|---|-----|-----------------------------------------------------------------------------------------------------|
| <a href="#">Lat</a>     | <a href="#">Lat.dSep08</a>     | <a href="#">81511</a>  | 4091  | 1776 | 4 | 61  | linker for activation of T cells (Lat) alternative variant dSep08, mRNA.                            |
| <a href="#">Lat2</a>    | <a href="#">Lat2.bSep08</a>    | <a href="#">317676</a> | 4731  | 2331 | 3 | 89  | linker for activation of T cells family, member 2 (9.7 kD) (Lat2) alternative variant bSep08, mRNA. |
| <a href="#">Lats2</a>   | <a href="#">Lats2.bSep08</a>   | <a href="#">305922</a> | 1502  | 648  | 1 | 199 | large tumor suppressor 2 (Lats2) alternative variant bSep08, mRNA.                                  |
| <a href="#">latu</a>    | <a href="#">latu.aSep08</a>    |                        | 97410 | 893  |   | 157 | putative cytoplasmic protein (17.8 kD) (latu) mRNA.                                                 |
| <a href="#">lavar</a>   | <a href="#">lavar.aSep08</a>   |                        | 4122  | 345  |   | 114 | microtubule-actin crosslinking factor 1 CRA g (lavar) mRNA.                                         |
| <a href="#">lawby</a>   | <a href="#">lawby.aSep08</a>   |                        | 27481 | 413  | 3 | 73  | putative protein (lawby) alternative variant aSep08, mRNA.                                          |
| <a href="#">lawby</a>   | <a href="#">lawby.cSep08</a>   |                        | 512   | 386  | 2 | 27  | putative protein (lawby) alternative variant cSep08, mRNA.                                          |
| <a href="#">lawchy</a>  | <a href="#">lawchy.aSep08</a>  |                        | 36302 | 435  |   | 78  | putative protein (lawchy) mRNA.                                                                     |
| <a href="#">lawdar</a>  | <a href="#">lawdar.aSep08</a>  |                        | 6810  | 797  |   | 265 | chromodomain helicase DNA binding protein 9 CRA b like (lawdar) mRNA.                               |
| <a href="#">lawey</a>   | <a href="#">lawey.aSep08</a>   |                        | 795   | 591  |   | 74  | putative protein (lawey) mRNA.                                                                      |
| <a href="#">lawfer</a>  | <a href="#">lawfer.aSep08</a>  |                        | 28098 | 2602 |   | 151 | cyclin fold protein 1 (lawfer) mRNA.                                                                |
| <a href="#">lawflo</a>  | <a href="#">lawflo.aSep08</a>  |                        | 2521  | 535  |   | 91  | putative protein (10.3 kD) (lawflo) mRNA.                                                           |
| <a href="#">lawflu</a>  | <a href="#">lawflu.aSep08</a>  |                        | 10541 | 570  |   | 190 | neuron navigator 2 (lawflu) mRNA.                                                                   |
| <a href="#">lawjey</a>  | <a href="#">lawjey.aSep08</a>  |                        | 6096  | 1043 |   | 78  | putative cytoplasmic protein (8.2 kD) (lawjey) mRNA.                                                |
| <a href="#">lawkee</a>  | <a href="#">lawkee.aSep08</a>  |                        | 9536  | 878  |   | 21  | putative protein (2.3 kD) (lawkee) mRNA.                                                            |
| <a href="#">lawloy</a>  | <a href="#">lawloy.aSep08</a>  |                        | 1964  | 484  | 1 | 44  | putative protein (5.0 kD) (lawloy) alternative variant aSep08, mRNA.                                |
| <a href="#">lawloy</a>  | <a href="#">lawloy.bSep08</a>  |                        | 1923  | 345  | 1 | 86  | putative protein (9.8 kD) (lawloy) alternative variant bSep08, mRNA.                                |
| <a href="#">lawmee</a>  | <a href="#">lawmee.aSep08</a>  |                        | 17876 | 677  | 4 | 225 | intraflagellar transport 140 (lawmee) alternative variant aSep08, mRNA.                             |
| <a href="#">lawmee</a>  | <a href="#">lawmee.bSep08</a>  |                        | 4876  | 687  | 2 | 78  | intraflagellar transport 140 (lawmee) alternative variant bSep08, mRNA.                             |
| <a href="#">lawmer</a>  | <a href="#">lawmer.aSep08</a>  |                        | 6110  | 658  |   | 218 | ATP-binding cassette sub-family A member 6 like (lawmer) mRNA.                                      |
| <a href="#">lawnoy</a>  | <a href="#">lawnoy.aSep08</a>  |                        | 7565  | 277  |   | 92  | putative protein of mammalian origin (lawnoy) mRNA.                                                 |
| <a href="#">lawpor</a>  | <a href="#">lawpor.aSep08</a>  |                        | 2205  | 877  |   |     |                                                                                                     |
| <a href="#">lawsa</a>   | <a href="#">lawsa.aSep08</a>   |                        | 8877  | 715  |   | 238 | putative protein of metazoan origin (lawsa) mRNA.                                                   |
| <a href="#">lawshee</a> | <a href="#">lawshee.aSep08</a> |                        | 2310  | 383  |   | 127 | putative protein of metazoan origin (lawshee) mRNA.                                                 |
| <a href="#">lawtu</a>   | <a href="#">lawtu.aSep08</a>   |                        | 621   | 239  |   | 61  | putative protein (lawtu) mRNA.                                                                      |
| <a href="#">lawvar</a>  | <a href="#">lawvar.aSep08</a>  |                        | 1369  | 627  |   | 102 | eukaryotic translation initiation factor 2C (lawvar) mRNA.                                          |
| <a href="#">lawwey</a>  | <a href="#">lawwey.aSep08</a>  |                        | 17686 | 355  |   | 98  | putative protein of metazoan origin (lawwey) mRNA.                                                  |
| <a href="#">Lbp</a>     | <a href="#">Lbp.bSep08</a>     | <a href="#">29469</a>  | 12502 | 662  | 8 | 220 | lipopolysaccharide binding protein (Lbp) alternative variant bSep08, mRNA.                          |
| <a href="#">Lbp</a>     | <a href="#">Lbp.cSep08</a>     | <a href="#">29469</a>  | 5869  | 807  | 4 | 86  | lipopolysaccharide binding protein (10.2 kD) (Lbp) alternative variant cSep08, complete mRNA.       |
| <a href="#">Lca5</a>    | <a href="#">Lca5.bSep08</a>    | <a href="#">300866</a> | 36437 | 2205 | 9 | 454 | leber congenital amaurosis 5 (human) (52.1 kD) (Lca5) alternative variant bSep08, mRNA.             |
| <a href="#">Lca5l</a>   | <a href="#">Lca5l.bSep08</a>   | <a href="#">498065</a> | 4143  | 1280 | 1 | 375 | leber congenital amaurosis 5-like (Lca5l) alternative variant bSep08, mRNA.                         |



|                       |                              |                        |        |      |    |     |                                                                                          |
|-----------------------|------------------------------|------------------------|--------|------|----|-----|------------------------------------------------------------------------------------------|
| <a href="#">Lcat</a>  | <a href="#">Lcat.bSep08</a>  | <a href="#">24530</a>  | 2069   | 779  | 3  | 253 | lecithin cholesterol acyltransferase (Lcat) alternative variant bSep08, mRNA.            |
| <a href="#">Lcat</a>  | <a href="#">Lcat.cSep08</a>  | <a href="#">24530</a>  | 2144   | 845  | 4  | 218 | lecithin cholesterol acyltransferase (Lcat) alternative variant cSep08, mRNA.            |
| <a href="#">Lck</a>   | <a href="#">Lck.bSep08</a>   | <a href="#">313050</a> | 1973   | 792  | 6  | 263 | lymphocyte protein tyrosine kinase (Lck) alternative variant bSep08, mRNA.               |
| <a href="#">Lck</a>   | <a href="#">Lck.cSep08</a>   | <a href="#">313050</a> | 3299   | 756  | 5  | 251 | lymphocyte protein tyrosine kinase (Lck) alternative variant cSep08, mRNA.               |
| <a href="#">Lck</a>   | <a href="#">Lck.dSep08</a>   | <a href="#">313050</a> | 1444   | 823  | 4  | 228 | lymphocyte protein tyrosine kinase (Lck) alternative variant dSep08, mRNA.               |
| <a href="#">Lck</a>   | <a href="#">Lck.eSep08</a>   | <a href="#">313050</a> | 20175  | 906  | 7  | 219 | lymphocyte protein tyrosine kinase (24.6 kD) (Lck) alternative variant eSep08, mRNA.     |
| <a href="#">Lck</a>   | <a href="#">Lck.fSep08</a>   | <a href="#">313050</a> | 2818   | 770  | 8  | 205 | lymphocyte protein tyrosine kinase (Lck) alternative variant fSep08, mRNA.               |
| <a href="#">Lcmt1</a> | <a href="#">Lcmt1.bSep08</a> | <a href="#">361643</a> | 47411  | 994  | 8  | 277 | leucine carboxyl methyltransferase 1 (31.8 kD) (Lcmt1) alternative variant bSep08, mRNA. |
| <a href="#">Lcmt1</a> | <a href="#">Lcmt1.cSep08</a> | <a href="#">361643</a> | 2792   | 884  | 2  | 59  | leucine carboxyl methyltransferase 1 (6.6 kD) (Lcmt1) alternative variant cSep08, mRNA.  |
| <a href="#">Lcn2</a>  | <a href="#">Lcn2.bSep08</a>  | <a href="#">170496</a> | 2419   | 711  | 2  | 127 | lipocalin 2 (Lcn2) alternative variant bSep08, mRNA.                                     |
| <a href="#">Lcn3</a>  | <a href="#">Lcn3.aSep08</a>  | <a href="#">502611</a> | 1265   | 357  |    | 43  | lipocalin 3 (4.8 kD) (Lcn3) mRNA.                                                        |
| <a href="#">Lcn5</a>  | <a href="#">Lcn5.bSep08</a>  | <a href="#">29552</a>  | 1215   | 286  | 1  | 57  | lipocalin 5 (Lcn5) alternative variant bSep08, mRNA.                                     |
| <a href="#">Lcor</a>  | <a href="#">Lcor.aSep08</a>  | <a href="#">365462</a> | 52329  | 942  |    | 189 | ligand dependent nuclear receptor corepressor (Lcor) mRNA.                               |
| <a href="#">Lcp2</a>  | <a href="#">Lcp2.bSep08</a>  | <a href="#">155918</a> | 13945  | 748  | 1  | 128 | lymphocyte cytosolic protein 2 (Lcp2) alternative variant bSep08, mRNA.                  |
| <a href="#">Lct</a>   | <a href="#">Lct.aSep08</a>   | <a href="#">116569</a> | 6088   | 1014 |    | 337 | lactase (Lct) mRNA.                                                                      |
| <a href="#">Ldb1</a>  | <a href="#">Ldb1.aSep08</a>  | <a href="#">309447</a> | 13068  | 2131 | 11 | 534 | LIM domain binding 1 (Ldb1) alternative variant aSep08, mRNA.                            |
| <a href="#">Ldb1</a>  | <a href="#">Ldb1.cSep08</a>  | <a href="#">309447</a> | 3273   | 2170 | 6  | 267 | LIM domain binding 1 (Ldb1) alternative variant cSep08, mRNA.                            |
| <a href="#">Ldb2</a>  | <a href="#">Ldb2.bSep08</a>  | <a href="#">289664</a> | 321913 | 2499 | 8  | 371 | LIM domain binding 2 (42.5 kD) (Ldb2) alternative variant bSep08, mRNA.                  |
| <a href="#">Ldb2</a>  | <a href="#">Ldb2.cSep08</a>  | <a href="#">289664</a> | 6066   | 584  | 3  | 74  | LIM domain binding 2 (Ldb2) alternative variant cSep08, mRNA.                            |
| <a href="#">Ldb2</a>  | <a href="#">Ldb2.dSep08</a>  | <a href="#">289664</a> | 3185   | 471  | 2  | 33  | LIM domain binding 2 (3.7 kD) (Ldb2) alternative variant dSep08, mRNA.                   |
| <a href="#">Ldb3</a>  | <a href="#">Ldb3.aSep08</a>  | <a href="#">498587</a> | 20513  | 3655 | 5  | 299 | LIM domain binding 3 (Ldb3) alternative variant aSep08, mRNA.                            |
| <a href="#">Ldb3</a>  | <a href="#">Ldb3.bSep08</a>  | <a href="#">498587</a> | 1664   | 455  | 2  | 151 | LIM domain binding 3 (Ldb3) alternative variant bSep08, mRNA.                            |
| <a href="#">Ldb3</a>  | <a href="#">Ldb3.cSep08</a>  | <a href="#">498587</a> | 9629   | 554  | 2  | 89  | LIM domain binding 3 (Ldb3) alternative variant cSep08, mRNA.                            |
| <a href="#">Ldha</a>  | <a href="#">Ldha.bSep08</a>  | <a href="#">24533</a>  | 8178   | 2227 | 2  | 308 | lactate dehydrogenase A (33.9 kD) (Ldha) alternative variant bSep08, mRNA.               |
| <a href="#">Ldhb</a>  | <a href="#">Ldhb.bSep08</a>  | <a href="#">24534</a>  | 17966  | 1240 | 8  | 259 | lactate dehydrogenase B (28.1 kD) (Ldhb) alternative variant bSep08, complete mRNA.      |

|                                |                                       |                        |       |      |   |     |                                                                                                    |
|--------------------------------|---------------------------------------|------------------------|-------|------|---|-----|----------------------------------------------------------------------------------------------------|
| <a href="#">Ldhb</a>           | <a href="#">Ldhb.cSep08</a>           | <a href="#">24534</a>  | 2912  | 943  | 2 | 71  | lactate dehydrogenase B (8.1 kD) (Ldhb) alternative variant cSep08, mRNA.                          |
| <a href="#">Ldhc</a>           | <a href="#">Ldhc.aSep08</a>           | <a href="#">29634</a>  | 16215 | 1093 | 1 | 340 | lactate dehydrogenase C (Ldhc) alternative variant aSep08, mRNA.                                   |
| <a href="#">Ldhc</a>           | <a href="#">Ldhc.bSep08</a>           | <a href="#">29634</a>  | 11777 | 729  | 2 | 185 | lactate dehydrogenase C (Ldhc) alternative variant bSep08, mRNA.                                   |
| <a href="#">Ldhd</a>           | <a href="#">Ldhd.bSep08</a>           | <a href="#">307858</a> | 2016  | 884  | 6 | 294 | lactate dehydrogenase D (Ldhd) alternative variant bSep08, mRNA.                                   |
| <a href="#">Ldhd</a>           | <a href="#">Ldhd.cSep08</a>           | <a href="#">307858</a> | 2800  | 2023 | 5 | 189 | lactate dehydrogenase D (Ldhd) alternative variant cSep08, mRNA.                                   |
| <a href="#">Ldhd</a>           | <a href="#">Ldhd.dSep08</a>           | <a href="#">307858</a> | 593   | 355  | 3 | 82  | lactate dehydrogenase D (Ldhd) alternative variant dSep08, mRNA.                                   |
| <a href="#">Ldhd</a>           | <a href="#">Ldhd.eSep08</a>           | <a href="#">307858</a> | 588   | 506  | 2 | 67  | lactate dehydrogenase D (7.9 kD) (Ldhd) alternative variant eSep08, mRNA.                          |
| <a href="#">Ldlr</a>           | <a href="#">Ldlr.bSep08</a>           | <a href="#">300438</a> | 2792  | 2116 | 2 | 87  | low density lipoprotein receptor (18.5 kD) (Ldlr) alternative variant bSep08, mRNA.                |
| <a href="#">Ldlrad3</a>        | <a href="#">Ldlrad3.aSep08</a>        | <a href="#">366138</a> | 2228  | 498  |   | 116 | putative protein of vertebrate origin (Ldlrad3) mRNA.                                              |
| <a href="#">Ldl_recept_a.0</a> | <a href="#">Ldl_recept_a.0.aSep08</a> |                        | 11668 | 485  |   | 161 | receptor protein (Ldl_recept_a.0) mRNA.                                                            |
| <a href="#">Ldl_recept_a.1</a> | <a href="#">Ldl_recept_a.1.aSep08</a> |                        | 3835  | 1045 |   | 348 | low density lipoprotein-related protein 1B (Ldl_recept_a.1) mRNA.                                  |
| <a href="#">Ldl_recept_a.2</a> | <a href="#">Ldl_recept_a.2.aSep08</a> |                        | 3483  | 1251 |   | 416 | low density lipoprotein-related protein 1 CRA b (Ldl_recept_a.2) mRNA.                             |
| <a href="#">Ldl_recept_a.3</a> | <a href="#">Ldl_recept_a.3.aSep08</a> |                        | 7090  | 1182 | 8 | 394 | low density lipoprotein-related protein 1 CRA a (Ldl_recept_a.3) alternative variant aSep08, mRNA. |
| <a href="#">Ldl_recept_a.4</a> | <a href="#">Ldl_recept_a.4.aSep08</a> |                        | 10213 | 386  |   | 128 | low density lipoprotein-related protein 1 CRA a (Ldl_recept_a.4) mRNA.                             |
| <a href="#">Ldl_recept_a.6</a> | <a href="#">Ldl_recept_a.6.aSep08</a> |                        | 4491  | 740  |   | 219 | low density lipoprotein-related protein 2 (Ldl_recept_a.6) mRNA.                                   |
| <a href="#">Ldl_recept_a.8</a> | <a href="#">Ldl_recept_a.8.aSep08</a> |                        | 21680 | 734  | 5 | 221 | complement component 7 CRA b (Ldl_recept_a.8) alternative variant aSep08, mRNA.                    |
| <a href="#">Ldl_recept_a.8</a> | <a href="#">Ldl_recept_a.8.bSep08</a> |                        | 7600  | 760  | 2 | 153 | complement C7 (Ldl_recept_a.8) alternative variant bSep08, mRNA.                                   |
| <a href="#">Ldl_recept_b.0</a> | <a href="#">Ldl_recept_b.0.aSep08</a> |                        | 6097  | 682  |   | 227 | sortilin-related receptor (Ldl_recept_b.0) mRNA.                                                   |
| <a href="#">Ldl_recept_b.1</a> | <a href="#">Ldl_recept_b.1.aSep08</a> |                        | 2688  | 951  | 7 | 316 | low density lipoprotein-related protein 1B (Ldl_recept_b.1) alternative variant aSep08, mRNA.      |
| <a href="#">Leap2</a>          | <a href="#">Leap2.bSep08</a>          | <a href="#">497901</a> | 1045  | 399  | 2 | 75  | liver-expressed antimicrobial peptide 2 (Leap2) alternative variant bSep08, mRNA.                  |
| <a href="#">Lect1</a>          | <a href="#">Lect1.bSep08</a>          | <a href="#">81512</a>  | 25714 | 1330 | 7 | 332 | leukocyte cell derived chemotaxin 1 (37.1 kD) (Lect1) alternative variant bSep08, mRNA.            |
| <a href="#">Lect1</a>          | <a href="#">Lect1.cSep08</a>          | <a href="#">81512</a>  | 19777 | 1067 | 5 | 260 | leukocyte cell derived chemotaxin 1 (Lect1) alternative variant cSep08, mRNA.                      |
| <a href="#">Lect1</a>          | <a href="#">Lect1.dSep08</a>          | <a href="#">81512</a>  | 6493  | 822  | 3 | 145 | leukocyte cell derived chemotaxin 1 (15.5 kD) (Lect1) alternative variant dSep08, mRNA.            |
| <a href="#">leeby</a>          | <a href="#">leeby.aSep08</a>          |                        | 10639 | 1784 |   | 18  | putative protein (leeby) mRNA.                                                                     |
| <a href="#">leechy</a>         | <a href="#">leechy.aSep08</a>         |                        | 384   | 291  |   | 96  | titin CRA a (leechy) mRNA.                                                                         |

|                         |                                |                        |        |      |   |     |                                                                                      |
|-------------------------|--------------------------------|------------------------|--------|------|---|-----|--------------------------------------------------------------------------------------|
| <a href="#">leedar</a>  | <a href="#">leedar.aSep08</a>  |                        | 6213   | 303  |   | 98  | chromodomain helicase DNA binding protein 9 CRA c like (leedar) mRNA.                |
| <a href="#">leefer</a>  | <a href="#">leefer.bSep08</a>  |                        | 1770   | 355  |   | 53  | putative protein (leefer) alternative variant bSep08, mRNA.                          |
| <a href="#">leeflo</a>  | <a href="#">leeflo.bSep08</a>  |                        | 9451   | 617  |   | 41  | putative protein (4.6 kD) (leeflo) alternative variant bSep08, mRNA.                 |
| <a href="#">leeflu</a>  | <a href="#">leeflu.aSep08</a>  |                        | 8850   | 802  |   | 267 | neuron navigator 2 (leeflu) mRNA.                                                    |
| <a href="#">leejey</a>  | <a href="#">leejey.aSep08</a>  |                        | 1653   | 455  |   | 45  | putative protein (5.3 kD) (leejey) mRNA.                                             |
| <a href="#">leekee</a>  | <a href="#">leekee.aSep08</a>  |                        | 4101   | 486  |   | 114 | putative protein (leekee) mRNA.                                                      |
| <a href="#">leeloy</a>  | <a href="#">leeloy.aSep08</a>  |                        | 12068  | 1563 |   | 91  | putative protein (leeloy) mRNA.                                                      |
| <a href="#">leemee</a>  | <a href="#">leemee.aSep08</a>  |                        | 14857  | 820  | 6 | 273 | intraflagellar transport 140 (leemee) alternative variant aSep08, mRNA.              |
| <a href="#">leemee</a>  | <a href="#">leemee.bSep08</a>  |                        | 1175   | 377  | 1 | 77  | intraflagellar transport 140 (leemee) alternative variant bSep08, mRNA.              |
| <a href="#">leemer</a>  | <a href="#">leemer.aSep08</a>  |                        | 4002   | 431  |   | 143 | ATP-binding cassette sub-family A member 6 like (leemer) mRNA.                       |
| <a href="#">leenoy</a>  | <a href="#">leenoy.aSep08</a>  |                        | 2600   | 333  |   | 79  | putative protein, with a coiled coil domain, of mammalian origin (leenoy) mRNA.      |
| <a href="#">leepor</a>  | <a href="#">leepor.aSep08</a>  |                        | 34157  | 787  | 3 | 85  | putative protein (9.5 kD) (leepor) alternative variant aSep08, mRNA.                 |
| <a href="#">leepor</a>  | <a href="#">leepor.bSep08</a>  |                        | 2624   | 396  | 1 | 28  | putative protein (leepor) alternative variant bSep08, mRNA.                          |
| <a href="#">leesa</a>   | <a href="#">leesa.aSep08</a>   |                        | 7437   | 3135 | 4 | 560 | 45 4 (leesa) alternative variant aSep08, mRNA.                                       |
| <a href="#">leeshee</a> | <a href="#">leeshee.aSep08</a> |                        | 17695  | 373  | 5 | 124 | putative protein of vertebrate origin (leeshee) alternative variant aSep08, mRNA.    |
| <a href="#">leetu</a>   | <a href="#">leetu.aSep08</a>   |                        | 18740  | 1062 |   | 353 | death receptor protein (leetu) mRNA.                                                 |
| <a href="#">leever</a>  | <a href="#">leever.aSep08</a>  |                        | 7827   | 411  |   | 137 | eukaryotic translation initiation factor 2C 3 (leever) mRNA.                         |
| <a href="#">leewey</a>  | <a href="#">leewey.aSep08</a>  |                        | 1937   | 596  |   | 84  | putative protein (9.7 kD) (leewey) mRNA.                                             |
| <a href="#">Lef1</a>    | <a href="#">Lef1.bSep08</a>    | <a href="#">161452</a> | 137824 | 2083 | 9 | 315 | lymphoid enhancer binding factor 1 (Lef1) alternative variant bSep08, mRNA.          |
| <a href="#">Lef1</a>    | <a href="#">Lef1.cSep08</a>    | <a href="#">161452</a> | 31682  | 1152 | 8 | 208 | lymphoid enhancer binding factor 1 (Lef1) alternative variant cSep08, mRNA.          |
| <a href="#">Lef1</a>    | <a href="#">Lef1.dSep08</a>    | <a href="#">161452</a> | 26349  | 741  | 5 | 160 | lymphoid enhancer binding factor 1 (Lef1) alternative variant dSep08, mRNA.          |
| <a href="#">Lef1</a>    | <a href="#">Lef1.eSep08</a>    | <a href="#">161452</a> | 137169 | 761  | 3 | 101 | lymphoid enhancer binding factor 1 (Lef1) alternative variant eSep08, mRNA.          |
| <a href="#">LEM.0</a>   | <a href="#">LEM.0.aSep08</a>   |                        | 885    | 331  |   | 70  | CRA c (LEM.0) mRNA.                                                                  |
| <a href="#">Lemd2</a>   | <a href="#">Lemd2.bSep08</a>   | <a href="#">361807</a> | 6622   | 1654 | 6 | 216 | putative protein of metazoan origin (Lemd2) alternative variant bSep08, mRNA.        |
| <a href="#">Lemd2</a>   | <a href="#">Lemd2.cSep08</a>   | <a href="#">361807</a> | 2292   | 389  | 4 | 97  | putative protein of vertebrate origin (Lemd2) alternative variant cSep08, mRNA.      |
| <a href="#">Lemd3</a>   | <a href="#">Lemd3.aSep08</a>   | <a href="#">680066</a> | 49945  | 3723 | 1 | 577 | inner nuclear membrane protein (Lemd3) alternative variant aSep08, mRNA.             |
| <a href="#">Lemd3</a>   | <a href="#">Lemd3.bSep08</a>   | <a href="#">680066</a> | 41745  | 442  |   | 48  | inner nuclear membrane protein like (Lemd3) alternative variant bSep08, mRNA.        |
| <a href="#">Lenep</a>   | <a href="#">Lenep.bSep08</a>   | <a href="#">113917</a> | 8342   | 1736 | 8 | 474 | lens epithelial protein (52.6 kD) (Lenep) alternative variant bSep08, complete mRNA. |

|                         |                                |                        |       |      |    |     |                                                                                                                            |
|-------------------------|--------------------------------|------------------------|-------|------|----|-----|----------------------------------------------------------------------------------------------------------------------------|
| <a href="#">Lenep</a>   | <a href="#">Lenep.cSep08</a>   | <a href="#">113917</a> | 5183  | 1254 | 5  | 332 | lens epithelial protein (Lenep) alternative variant cSep08, mRNA.                                                          |
| <a href="#">Lenep</a>   | <a href="#">Lenep.dSep08</a>   | <a href="#">113917</a> | 4225  | 1312 | 2  | 258 | lens epithelial protein (28.3 kD) (Lenep) alternative variant dSep08, mRNA.                                                |
| <a href="#">Lenep</a>   | <a href="#">Lenep.eSep08</a>   | <a href="#">113917</a> | 3626  | 751  | 2  | 250 | lens epithelial protein (Lenep) alternative variant eSep08, mRNA.                                                          |
| <a href="#">Leng8</a>   | <a href="#">Leng8.bSep08</a>   | <a href="#">361506</a> | 1890  | 881  | 6  | 293 | leukocyte receptor cluster (LRC) member 8 (Leng8) alternative variant bSep08, mRNA.                                        |
| <a href="#">Leng8</a>   | <a href="#">Leng8.cSep08</a>   | <a href="#">361506</a> | 3518  | 502  | 5  | 129 | leukocyte receptor cluster (LRC) member 8 (Leng8) alternative variant cSep08, mRNA.                                        |
| <a href="#">Leng8</a>   | <a href="#">Leng8.dSep08</a>   | <a href="#">361506</a> | 2071  | 648  | 2  | 114 | leukocyte receptor cluster (LRC) member 8 (Leng8) alternative variant dSep08, mRNA.                                        |
| <a href="#">Leo1</a>    | <a href="#">Leo1.bSep08</a>    | <a href="#">300837</a> | 5999  | 1304 | 2  | 93  | leo1, Paf1/RNA polymerase II complex component, homolog (S. cerevisiae) (10.3 kD) (Leo1) alternative variant bSep08, mRNA. |
| <a href="#">Lepre1</a>  | <a href="#">Lepre1.bSep08</a>  | <a href="#">114200</a> | 15181 | 2763 | 14 | 411 | leprecan 1 (46.8 kD) (Lepre1) alternative variant bSep08, complete mRNA.                                                   |
| <a href="#">Leprel2</a> | <a href="#">Leprel2.aSep08</a> | <a href="#">297595</a> | 15856 | 2571 | 15 | 735 | leprecan-like 2 (Leprel2) alternative variant aSep08, mRNA.                                                                |
| <a href="#">Leprel2</a> | <a href="#">Leprel2.bSep08</a> | <a href="#">297595</a> | 1148  | 1033 | 2  | 208 | leprecan-like 2 (23.2 kD) (Leprel2) alternative variant bSep08, mRNA.                                                      |
| <a href="#">Leprel2</a> | <a href="#">Leprel2.dSep08</a> | <a href="#">297595</a> | 5665  | 406  | 5  | 104 | leprecan-like 2 (Leprel2) alternative variant dSep08, mRNA.                                                                |
| <a href="#">Leprel2</a> | <a href="#">Leprel2.fSep08</a> | <a href="#">297595</a> | 2872  | 667  | 3  | 90  | leprecan-like 2 (Leprel2) alternative variant fSep08, mRNA.                                                                |
| <a href="#">Leprot</a>  | <a href="#">Leprot.bSep08</a>  | <a href="#">24536</a>  | 37394 | 1782 | 10 | 380 | leptin receptor (Leprot) alternative variant bSep08, mRNA.                                                                 |
| <a href="#">Leprot</a>  | <a href="#">Leprot.bSep08</a>  | <a href="#">56766</a>  | 37394 | 1782 | 10 | 380 | leptin receptor (Leprot) alternative variant bSep08, mRNA.                                                                 |
| <a href="#">Leprot</a>  | <a href="#">Leprot.cSep08</a>  | <a href="#">24536</a>  | 9670  | 605  | 5  | 188 | leptin receptor (Leprot) alternative variant cSep08, mRNA.                                                                 |
| <a href="#">Leprot</a>  | <a href="#">Leprot.cSep08</a>  | <a href="#">56766</a>  | 9670  | 605  | 5  | 188 | leptin receptor (Leprot) alternative variant cSep08, mRNA.                                                                 |
| <a href="#">Leprot</a>  | <a href="#">Leprot.eSep08</a>  | <a href="#">24536</a>  | 9328  | 1231 | 3  | 113 | leptin receptor (12.2 kD) (Leprot) alternative variant eSep08, mRNA.                                                       |
| <a href="#">Leprot</a>  | <a href="#">Leprot.eSep08</a>  | <a href="#">56766</a>  | 9328  | 1231 | 3  | 113 | leptin receptor (12.2 kD) (Leprot) alternative variant eSep08, mRNA.                                                       |
| <a href="#">Ierby</a>   | <a href="#">Ierby.aSep08</a>   |                        | 11512 | 533  |    | 177 | WWC family member 3 (Ierby) mRNA.                                                                                          |
| <a href="#">Ierchy</a>  | <a href="#">Ierchy.aSep08</a>  |                        | 4329  | 258  |    | 85  | titin (Ierchy) mRNA.                                                                                                       |
| <a href="#">Ierdar</a>  | <a href="#">Ierdar.aSep08</a>  |                        | 15446 | 652  |    | 41  | putative protein (4.5 kD) (Ierdar) mRNA.                                                                                   |
| <a href="#">Ierfer</a>  | <a href="#">Ierfer.aSep08</a>  |                        | 1475  | 331  | 1  | 62  | putative protein (Ierfer) alternative variant aSep08, mRNA.                                                                |
| <a href="#">Ierfer</a>  | <a href="#">Ierfer.bSep08</a>  |                        | 1228  | 753  | 1  | 54  | putative protein (6.2 kD) (Ierfer) alternative variant bSep08, mRNA.                                                       |
| <a href="#">Ierflo</a>  | <a href="#">Ierflo.aSep08</a>  |                        | 2046  | 610  |    | 98  | putative protein (Ierflo) mRNA.                                                                                            |
| <a href="#">Ierflu</a>  | <a href="#">Ierflu.aSep08</a>  |                        | 41697 | 404  |    | 134 | NEL-like 1 (Ierflu) mRNA.                                                                                                  |
| <a href="#">Iergar</a>  | <a href="#">Iergar.aSep08</a>  |                        | 2576  | 516  |    | 69  | putative protein (Iergar) mRNA.                                                                                            |
| <a href="#">Ierjey</a>  | <a href="#">Ierjey.aSep08</a>  |                        | 1632  | 220  |    | 72  | polycystic kidney disease like (Ierjey) mRNA.                                                                              |
| <a href="#">Ierkee</a>  | <a href="#">Ierkee.aSep08</a>  |                        | 5152  | 263  |    | 87  | complement factor H-related protein (Ierkee) mRNA.                                                                         |
| <a href="#">Ierloy</a>  | <a href="#">Ierloy.aSep08</a>  |                        | 865   | 372  |    | 39  | putative protein (Ierloy) mRNA.                                                                                            |

|                         |                                |                        |       |      |   |     |                                                                                                               |
|-------------------------|--------------------------------|------------------------|-------|------|---|-----|---------------------------------------------------------------------------------------------------------------|
| <a href="#">lermee</a>  | <a href="#">lermee.aSep08</a>  |                        | 3745  | 1023 | 7 | 340 | intraflagellar transport 140 (lermee) alternative variant aSep08, mRNA.                                       |
| <a href="#">lermee</a>  | <a href="#">lermee.bSep08</a>  |                        | 837   | 396  | 2 | 114 | intraflagellar transport 140 (lermee) alternative variant bSep08, mRNA.                                       |
| <a href="#">lermer</a>  | <a href="#">lermer.aSep08</a>  |                        | 1138  | 393  |   | 29  | putative protein (lermer) mRNA.                                                                               |
| <a href="#">lernoy</a>  | <a href="#">lernoy.aSep08</a>  |                        | 6876  | 1829 | 1 | 567 | bone protein receptor type II (lernoy) alternative variant aSep08, mRNA.                                      |
| <a href="#">lernoy</a>  | <a href="#">lernoy.bSep08</a>  |                        | 1847  | 386  | 1 | 105 | bone protein receptor type II (lernoy) alternative variant bSep08, mRNA.                                      |
| <a href="#">lerpor</a>  | <a href="#">lerpor.aSep08</a>  |                        | 4093  | 467  |   | 76  | putative membrane protein (8.6 kD) (lerpor) mRNA.                                                             |
| <a href="#">lersa</a>   | <a href="#">lersa.aSep08</a>   |                        | 2987  | 276  |   | 28  | putative protein (lersa) mRNA.                                                                                |
| <a href="#">lershee</a> | <a href="#">lershee.aSep08</a> |                        | 7023  | 943  | 5 | 314 | putative protein of metazoan origin (lershee) alternative variant aSep08, mRNA.                               |
| <a href="#">lershee</a> | <a href="#">lershee.bSep08</a> |                        | 2480  | 393  | 2 | 131 | putative protein of bilateral origin (lershee) alternative variant bSep08, mRNA.                              |
| <a href="#">lershee</a> | <a href="#">lershee.cSep08</a> |                        | 2997  | 364  | 3 | 121 | putative protein of metazoan origin (lershee) alternative variant cSep08, mRNA.                               |
| <a href="#">lertu</a>   | <a href="#">lertu.aSep08</a>   |                        | 9039  | 405  |   | 134 | adenoma-associated protein homolog (lertu) mRNA.                                                              |
| <a href="#">lervar</a>  | <a href="#">lervar.aSep08</a>  |                        | 33896 | 696  |   | 60  | putative protein (6.5 kD) (lervar) mRNA.                                                                      |
| <a href="#">lerwey</a>  | <a href="#">lerwey.aSep08</a>  |                        | 12283 | 686  |   | 77  | putative protein (lerwey) mRNA.                                                                               |
| <a href="#">Letm2</a>   | <a href="#">Letm2.aSep08</a>   | <a href="#">361169</a> | 5611  | 1853 | 4 | 529 | leucine zipper-EF-hand containing transmembrane protein 2 (Letm2) alternative variant aSep08, mRNA.           |
| <a href="#">Letm2</a>   | <a href="#">Letm2.cSep08</a>   | <a href="#">361169</a> | 17804 | 1217 | 8 | 405 | leucine zipper-EF-hand containing transmembrane protein 2 (Letm2) alternative variant cSep08, mRNA.           |
| <a href="#">Letm2</a>   | <a href="#">Letm2.dSep08</a>   | <a href="#">361169</a> | 4223  | 624  | 3 | 181 | leucine zipper-EF-hand containing transmembrane protein 2 (Letm2) alternative variant dSep08, mRNA.           |
| <a href="#">Letm2</a>   | <a href="#">Letm2.fSep08</a>   | <a href="#">361169</a> | 3753  | 310  | 3 | 103 | leucine zipper-EF-hand containing transmembrane protein 2 (Letm2) alternative variant fSep08, mRNA.           |
| <a href="#">Letm2</a>   | <a href="#">Letm2.gSep08</a>   | <a href="#">361169</a> | 1778  | 401  | 3 | 55  | leucine zipper-EF-hand containing transmembrane protein 2 (Letm2) alternative variant gSep08, mRNA.           |
| <a href="#">Letm2</a>   | <a href="#">Letm2.iSep08</a>   | <a href="#">361169</a> | 1099  | 672  | 2 | 108 | leucine zipper-EF-hand containing transmembrane protein 2 (10.9 kD) (Letm2) alternative variant iSep08, mRNA. |
| <a href="#">Letm2</a>   | <a href="#">Letm2.lSep08</a>   | <a href="#">361169</a> | 837   | 326  | 2 | 36  | leucine zipper-EF-hand containing transmembrane protein 2 (Letm2) alternative variant lSep08, mRNA.           |
| <a href="#">Letmd1</a>  | <a href="#">Letmd1.aSep08</a>  | <a href="#">681352</a> | 13422 | 1344 | 9 | 371 | LETM1-like (43.1 kD) (Letmd1) alternative variant aSep08, complete mRNA.                                      |
| <a href="#">Letmd1</a>  | <a href="#">Letmd1.cSep08</a>  | <a href="#">681352</a> | 2978  | 688  | 3 | 217 | CRA c (24.8 kD) (Letmd1) alternative variant cSep08, mRNA.                                                    |
| <a href="#">Letmd1</a>  | <a href="#">Letmd1.dSep08</a>  | <a href="#">681352</a> | 4393  | 2114 | 7 | 145 | putative protein of vertebrate origin (Letmd1) alternative variant dSep08, mRNA.                              |
| <a href="#">Letmd1</a>  | <a href="#">Letmd1.eSep08</a>  | <a href="#">681352</a> | 1039  | 593  | 2 | 106 | putative protein of vertebrate origin (Letmd1) alternative variant eSep08, mRNA.                              |
| <a href="#">leyby</a>   | <a href="#">leyby.aSep08</a>   |                        | 3902  | 602  |   | 200 | WWC family member 3 (leyby) mRNA.                                                                             |
| <a href="#">leychy</a>  | <a href="#">leychy.aSep08</a>  |                        | 3443  | 313  |   | 104 | titin like (leychy) mRNA.                                                                                     |
| <a href="#">leydar</a>  | <a href="#">leydar.aSep08</a>  |                        | 66570 | 708  |   | 76  | putative protein (leydar) mRNA.                                                                               |
| <a href="#">leyfer</a>  | <a href="#">leyfer.aSep08</a>  |                        | 34333 | 750  |   | 33  | putative protein (leyfer) mRNA.                                                                               |

|                          |                                 |                        |       |      |    |     |                                                                                                                |
|--------------------------|---------------------------------|------------------------|-------|------|----|-----|----------------------------------------------------------------------------------------------------------------|
| <a href="#">leyflo</a>   | <a href="#">leyflo.aSep08</a>   |                        | 1245  | 1129 |    | 16  | putative protein (1.9 kD) (leyflo) alternative variant aSep08, mRNA.                                           |
| <a href="#">leyflu</a>   | <a href="#">leyflu.aSep08</a>   |                        | 19624 | 668  |    | 39  | putative protein (4.6 kD) (leyflu) mRNA.                                                                       |
| <a href="#">leygar</a>   | <a href="#">leygar.aSep08</a>   |                        | 1133  | 530  |    | 60  | putative protein (leygar) mRNA.                                                                                |
| <a href="#">leyjey</a>   | <a href="#">leyjey.aSep08</a>   |                        | 3272  | 462  |    | 153 | polycystic kidney disease like (leyjey) mRNA.                                                                  |
| <a href="#">leykee</a>   | <a href="#">leykee.aSep08</a>   |                        | 22001 | 785  |    | 152 | potassium channel subfamily T member 2 CRA a (leykee) mRNA.                                                    |
| <a href="#">leyloy</a>   | <a href="#">leyloy.aSep08</a>   |                        | 1170  | 701  |    | 30  | putative protein (leyloy) mRNA.                                                                                |
| <a href="#">leymee</a>   | <a href="#">leymee.aSep08</a>   |                        | 4536  | 884  |    | 111 | intraflagellar transport 140 (leymee) mRNA.                                                                    |
| <a href="#">leymer</a>   | <a href="#">leymer.aSep08</a>   |                        | 16167 | 601  |    | 55  | putative protein (6.0 kD) (leymer) mRNA.                                                                       |
| <a href="#">leynoy</a>   | <a href="#">leynoy.aSep08</a>   |                        | 928   | 713  |    | 46  | putative protein (leynoy) mRNA.                                                                                |
| <a href="#">leypor</a>   | <a href="#">leypor.aSep08</a>   |                        | 988   | 692  |    | 54  | putative protein (5.5 kD) (leypor) mRNA.                                                                       |
| <a href="#">leysa</a>    | <a href="#">leysa.aSep08</a>    |                        | 2586  | 689  |    | 110 | putative nuclear protein of mammalian origin (12.3 kD) (leysa) mRNA.                                           |
| <a href="#">leyshee</a>  | <a href="#">leyshee.aSep08</a>  |                        | 1248  | 230  |    | 76  | putative protein of vertebrate origin (leyshee) mRNA.                                                          |
| <a href="#">leytu</a>    | <a href="#">leytu.aSep08</a>    |                        | 34186 | 252  |    | 84  | putative protein, with a coiled coil domain, of vertebrate origin (leytu) mRNA.                                |
| <a href="#">leyvar</a>   | <a href="#">leyvar.aSep08</a>   |                        | 76329 | 1898 |    | 632 | polycystic kidney disease 1-like (leyvar) mRNA.                                                                |
| <a href="#">leywey</a>   | <a href="#">leywey.aSep08</a>   |                        | 2143  | 334  |    | 110 | inositol 1 receptor (leywey) mRNA.                                                                             |
| <a href="#">Lfng</a>     | <a href="#">Lfng.aSep08</a>     | <a href="#">170905</a> | 1540  | 1409 | 1  | 414 | putative protein (Lfng) alternative variant aSep08, mRNA.                                                      |
| <a href="#">Lgals1</a>   | <a href="#">Lgals1.cSep08</a>   | <a href="#">56646</a>  | 1353  | 1154 | 2  | 101 | lectin, galactose binding, soluble 1 (Lgals1) alternative variant cSep08, mRNA.                                |
| <a href="#">Lgals2</a>   | <a href="#">Lgals2.bSep08</a>   | <a href="#">171134</a> | 2382  | 1398 | 3  | 119 | lectin, galactoside-binding, soluble 2 (13.4 kD) (Lgals2) alternative variant bSep08, mRNA.                    |
| <a href="#">Lgals2</a>   | <a href="#">Lgals2.cSep08</a>   | <a href="#">171134</a> | 7473  | 1431 | 4  | 41  | lectin, galactoside-binding, soluble 2 (4.6 kD) (Lgals2) alternative variant cSep08, mRNA.                     |
| <a href="#">Lgals3</a>   | <a href="#">Lgals3.aSep08</a>   | <a href="#">83781</a>  | 11935 | 947  | 6  | 262 | lectin, galactose binding, soluble 3 (27.2 kD) (Lgals3) alternative variant aSep08, complete mRNA.             |
| <a href="#">Lgals3</a>   | <a href="#">Lgals3.cSep08</a>   | <a href="#">83781</a>  | 3947  | 390  | 3  | 129 | lectin, galactose binding, soluble 3 (Lgals3) alternative variant cSep08, mRNA.                                |
| <a href="#">Lgals3</a>   | <a href="#">Lgals3.dSep08</a>   | <a href="#">83781</a>  | 2498  | 1682 | 2  | 104 | lectin, galactose binding, soluble 3 (12.1 kD) (Lgals3) alternative variant dSep08, mRNA.                      |
| <a href="#">Lgals3bp</a> | <a href="#">Lgals3bp.bSep08</a> | <a href="#">245955</a> | 5866  | 2109 | 2  | 160 | lectin, galactoside-binding, soluble, 3 binding protein (17.5 kD) (Lgals3bp) alternative variant bSep08, mRNA. |
| <a href="#">Lgals7</a>   | <a href="#">Lgals7.aSep08</a>   | <a href="#">29518</a>  | 2413  | 1502 | 3  | 426 | lectin, galactose binding, soluble 7 (Lgals7) alternative variant aSep08, mRNA.                                |
| <a href="#">Lgals7</a>   | <a href="#">Lgals7.cSep08</a>   | <a href="#">29518</a>  | 868   | 525  | 1  | 100 | lectin, galactose binding, soluble 7 (11.4 kD) (Lgals7) alternative variant cSep08, mRNA.                      |
| <a href="#">Lgals8</a>   | <a href="#">Lgals8.bSep08</a>   | <a href="#">116641</a> | 8266  | 2121 | 2  | 123 | lectin, galactose binding, soluble 8 (14.0 kD) (Lgals8) alternative variant bSep08, mRNA.                      |
| <a href="#">Lgals9</a>   | <a href="#">Lgals9.bSep08</a>   | <a href="#">25476</a>  | 20406 | 916  | 10 | 291 | lectin, galactose binding, soluble 9 (Lgals9) alternative variant bSep08, mRNA.                                |
| <a href="#">Lgals9</a>   | <a href="#">Lgals9.cSep08</a>   | <a href="#">25476</a>  | 20395 | 773  | 8  | 248 | lectin, galactose binding, soluble 9 (Lgals9) alternative variant cSep08, mRNA.                                |

|                        |                               |                        |       |      |   |     |                                                                                                                                     |
|------------------------|-------------------------------|------------------------|-------|------|---|-----|-------------------------------------------------------------------------------------------------------------------------------------|
| <a href="#">Lgals9</a> | <a href="#">Lgals9.eSep08</a> | <a href="#">25476</a>  | 2494  | 1756 | 3 | 76  | lectin, galactose binding, soluble 9 (8.0 kD) (Lgals9) alternative variant eSep08, mRNA.                                            |
| <a href="#">Lgi2</a>   | <a href="#">Lgi2.aSep08</a>   | <a href="#">305417</a> | 27483 | 1758 | 8 | 551 | leucine-rich repeat LGI family, member 2 (Lgi2) alternative variant aSep08, mRNA.                                                   |
| <a href="#">Lgi3</a>   | <a href="#">Lgi3.bSep08</a>   | <a href="#">306013</a> | 3142  | 1092 | 5 | 241 | leucine-rich repeat LGI family member 3 CRA a (Lgi3) alternative variant bSep08, mRNA.                                              |
| <a href="#">Lgi3</a>   | <a href="#">Lgi3.cSep08</a>   | <a href="#">306013</a> | 3001  | 1579 | 3 | 208 | leucine-rich repeat Lgi family member 3 CRA a (Lgi3) alternative variant cSep08, mRNA.                                              |
| <a href="#">Lgi3</a>   | <a href="#">Lgi3.dSep08</a>   | <a href="#">306013</a> | 853   | 696  | 2 | 127 | leucine-rich repeat LGI family member 3 (Lgi3) alternative variant dSep08, mRNA.                                                    |
| <a href="#">Lgi4</a>   | <a href="#">Lgi4.bSep08</a>   | <a href="#">361549</a> | 8430  | 693  | 5 | 93  | leucine-rich repeat LGI family, member 4 (Lgi4) alternative variant bSep08, mRNA.                                                   |
| <a href="#">Lgmn</a>   | <a href="#">Lgmn.bSep08</a>   | <a href="#">63865</a>  | 31714 | 858  | 9 | 240 | legumain (Lgmn) alternative variant bSep08, mRNA.                                                                                   |
| <a href="#">Lgtn</a>   | <a href="#">Lgtn.bSep08</a>   | <a href="#">498225</a> | 1327  | 755  | 2 | 130 | ligatin (Lgtn) alternative variant bSep08, mRNA.                                                                                    |
| <a href="#">Lgtn</a>   | <a href="#">Lgtn.cSep08</a>   | <a href="#">498225</a> | 4910  | 425  | 3 | 107 | ligatin (Lgtn) alternative variant cSep08, mRNA.                                                                                    |
| <a href="#">Lgtn</a>   | <a href="#">Lgtn.dSep08</a>   | <a href="#">498225</a> | 11321 | 709  | 4 | 90  | ligatin (Lgtn) alternative variant dSep08, mRNA.                                                                                    |
| <a href="#">Lgtn</a>   | <a href="#">Lgtn.eSep08</a>   | <a href="#">498225</a> | 947   | 615  | 2 | 77  | ligatin (Lgtn) alternative variant eSep08, mRNA.                                                                                    |
| <a href="#">Lhpp</a>   | <a href="#">Lhpp.bSep08</a>   | <a href="#">361663</a> | 17317 | 707  | 4 | 159 | phospholysine phosphohistidine inorganic pyrophosphate phosphatase (Lhpp) alternative variant bSep08, mRNA.                         |
| <a href="#">Lhpp</a>   | <a href="#">Lhpp.cSep08</a>   | <a href="#">361663</a> | 9475  | 316  | 2 | 105 | phospholysine phosphohistidine inorganic pyrophosphate phosphatase (Lhpp) alternative variant cSep08, mRNA.                         |
| <a href="#">Lhx2</a>   | <a href="#">Lhx2.bSep08</a>   | <a href="#">296706</a> | 1529  | 659  | 1 | 165 | LIM homeobox protein 2 (Lhx2) alternative variant bSep08, mRNA.                                                                     |
| <a href="#">Lhx3</a>   | <a href="#">Lhx3.aSep08</a>   | <a href="#">170671</a> | 1171  | 492  |   | 164 | LIM homeobox protein 3 (Lhx3) mRNA.                                                                                                 |
| <a href="#">Lhx4</a>   | <a href="#">Lhx4.bSep08</a>   | <a href="#">360858</a> | 2595  | 512  | 2 | 146 | LIM homeobox protein 4 (Lhx4) alternative variant bSep08, mRNA.                                                                     |
| <a href="#">Lhx4</a>   | <a href="#">Lhx4.cSep08</a>   | <a href="#">360858</a> | 29978 | 408  | 2 | 127 | LIM homeobox protein 4 (Lhx4) alternative variant cSep08, mRNA.                                                                     |
| <a href="#">Lhx4</a>   | <a href="#">Lhx4.dSep08</a>   | <a href="#">360858</a> | 27114 | 529  | 2 | 94  | LIM homeobox protein 4 (Lhx4) alternative variant dSep08, mRNA.                                                                     |
| <a href="#">Lhx9</a>   | <a href="#">Lhx9.bSep08</a>   | <a href="#">289048</a> | 18783 | 1787 | 6 | 315 | LIM homeobox 9 (Lhx9) alternative variant bSep08, mRNA.                                                                             |
| <a href="#">Lias</a>   | <a href="#">Lias.bSep08</a>   | <a href="#">305348</a> | 4735  | 735  | 1 | 54  | lipoic acid synthetase (Lias) alternative variant bSep08, mRNA.                                                                     |
| <a href="#">Lifr</a>   | <a href="#">Lifr.bSep08</a>   | <a href="#">81680</a>  | 29426 | 449  | 4 | 128 | leukemia inhibitory factor receptor (Lifr) alternative variant bSep08, mRNA.                                                        |
| <a href="#">Lig1</a>   | <a href="#">Lig1.bSep08</a>   | <a href="#">81513</a>  | 1304  | 1208 | 1 | 48  | ligase I, DNA, ATP-dependent (5.5 kD) (Lig1) alternative variant bSep08, mRNA.                                                      |
| <a href="#">Lig1</a>   | <a href="#">Lig1.cSep08</a>   | <a href="#">81513</a>  | 1080  | 428  | 2 | 24  | ligase I, DNA, ATP-dependent (Lig1) alternative variant cSep08, mRNA.                                                               |
| <a href="#">Lig3</a>   | <a href="#">Lig3.bSep08</a>   | <a href="#">303369</a> | 4029  | 3014 | 1 | 93  | ligase III, DNA, ATP-dependent (Lig3) alternative variant bSep08, mRNA.                                                             |
| <a href="#">Lig4</a>   | <a href="#">Lig4.aSep08</a>   | <a href="#">290907</a> | 8273  | 4764 | 2 | 952 | ligase IV, DNA, ATP-dependent (Lig4) alternative variant aSep08, mRNA.                                                              |
| <a href="#">Lilrb3</a> | <a href="#">Lilrb3.bSep08</a> | <a href="#">361493</a> | 42459 | 564  | 2 | 136 | leukocyte immunoglobulin-like receptor, subfamily B (with TM and ITIM domains), member 3 (Lilrb3) alternative variant bSep08, mRNA. |

|                        |                               |                        |        |      |    |     |                                                                                                                   |
|------------------------|-------------------------------|------------------------|--------|------|----|-----|-------------------------------------------------------------------------------------------------------------------|
| <a href="#">Lilrb4</a> | <a href="#">Lilrb4.bSep08</a> | <a href="#">292594</a> | 5417   | 867  | 6  | 204 | leukocyte immunoglobulin-like receptor, subfamily B, member 4 (Lilrb4) alternative variant bSep08, mRNA.          |
| <a href="#">Lilrb4</a> | <a href="#">Lilrb4.cSep08</a> | <a href="#">292594</a> | 2454   | 653  | 5  | 131 | leukocyte immunoglobulin-like receptor, subfamily B, member 4 (Lilrb4) alternative variant cSep08, mRNA.          |
| <a href="#">Lilrb4</a> | <a href="#">Lilrb4.dSep08</a> | <a href="#">292594</a> | 2159   | 890  | 2  | 70  | leukocyte immunoglobulin-like receptor, subfamily B, member 4 (8.1 kD) (Lilrb4) alternative variant dSep08, mRNA. |
| <a href="#">Lilrc1</a> | <a href="#">Lilrc1.bSep08</a> | <a href="#">691533</a> | 3527   | 511  | 1  | 89  | leukocyte immunoglobulin-like receptor (Lilrc1) alternative variant bSep08, mRNA.                                 |
| <a href="#">Lilrc1</a> | <a href="#">Lilrc1.cSep08</a> | <a href="#">691533</a> | 3672   | 501  | 2  | 85  | leukocyte immunoglobulin-like receptor (Lilrc1) alternative variant cSep08, mRNA.                                 |
| <a href="#">LIM.0</a>  | <a href="#">LIM.0.aSep08</a>  |                        | 8646   | 288  |    | 63  | zinc finger protein 185 (LIM.0) mRNA.                                                                             |
| <a href="#">LIM.1</a>  | <a href="#">LIM.1.aSep08</a>  |                        | 4190   | 765  |    | 234 | lim domain actin binding 1 like (LIM.1) mRNA.                                                                     |
| <a href="#">LIM.2</a>  | <a href="#">LIM.2.aSep08</a>  |                        | 16124  | 750  | 5  | 249 | LIM, zinc-binding (LIM.2) alternative variant aSep08, mRNA.                                                       |
| <a href="#">LIM.2</a>  | <a href="#">LIM.2.bSep08</a>  |                        | 4647   | 688  | 5  | 229 | putative protein of mammalian origin (LIM.2) alternative variant bSep08, mRNA.                                    |
| <a href="#">LIM.2</a>  | <a href="#">LIM.2.cSep08</a>  |                        | 7868   | 604  | 5  | 169 | LIM, zinc-binding (LIM.2) alternative variant cSep08, mRNA.                                                       |
| <a href="#">LIM.2</a>  | <a href="#">LIM.2.dSep08</a>  |                        | 13015  | 493  | 5  | 163 | putative protein of vertebrate origin (LIM.2) alternative variant dSep08, mRNA.                                   |
| <a href="#">LIM.3</a>  | <a href="#">LIM.3.aSep08</a>  |                        | 86628  | 683  | 5  | 227 | actin-binding LIM protein 1 like (LIM.3) alternative variant aSep08, mRNA.                                        |
| <a href="#">LIM.3</a>  | <a href="#">LIM.3.bSep08</a>  |                        | 1372   | 597  | 1  | 62  | putative protein (LIM.3) alternative variant bSep08, mRNA.                                                        |
| <a href="#">Lim2</a>   | <a href="#">Lim2.bSep08</a>   | <a href="#">114903</a> | 3210   | 503  | 1  | 88  | lens intrinsic membrane protein 2 (Lim2) alternative variant bSep08, mRNA.                                        |
| <a href="#">Lima1</a>  | <a href="#">Lima1.aSep08</a>  | <a href="#">300228</a> | 59749  | 617  |    | 205 | LIM domain and actin binding 1 (Lima1) mRNA.                                                                      |
| <a href="#">Limd2</a>  | <a href="#">Limd2.aSep08</a>  | <a href="#">360646</a> | 3146   | 970  | 6  | 128 | LIM, zinc-binding (14.2 kD) (Limd2) alternative variant aSep08, mRNA.                                             |
| <a href="#">Lime1</a>  | <a href="#">Lime1.bSep08</a>  | <a href="#">362289</a> | 5692   | 4340 | 5  | 99  | lck interacting transmembrane adaptor 1 (11.0 kD) (Lime1) alternative variant bSep08, mRNA.                       |
| <a href="#">Lime1</a>  | <a href="#">Lime1.cSep08</a>  | <a href="#">362289</a> | 1316   | 1038 | 3  | 54  | lck interacting transmembrane adaptor 1 (6.1 kD) (Lime1) alternative variant cSep08, mRNA.                        |
| <a href="#">Lime1</a>  | <a href="#">Lime1.dSep08</a>  | <a href="#">362289</a> | 1398   | 749  | 3  | 43  | lck interacting transmembrane adaptor 1 (Lime1) alternative variant dSep08, mRNA.                                 |
| <a href="#">Limk1</a>  | <a href="#">Limk1.aSep08</a>  | <a href="#">65172</a>  | 26934  | 1556 | 11 | 518 | LIM domain kinase 1 (Limk1) alternative variant aSep08, mRNA.                                                     |
| <a href="#">Limk1</a>  | <a href="#">Limk1.bSep08</a>  | <a href="#">65172</a>  | 6534   | 1026 | 5  | 200 | LIM domain kinase 1 (23.2 kD) (Limk1) alternative variant bSep08, mRNA.                                           |
| <a href="#">Limk2</a>  | <a href="#">Limk2.bSep08</a>  | <a href="#">29524</a>  | 15240  | 938  | 5  | 197 | LIM motif-containing protein kinase 2 (Limk2) alternative variant bSep08, mRNA.                                   |
| <a href="#">Limk2</a>  | <a href="#">Limk2.cSep08</a>  | <a href="#">29524</a>  | 3077   | 747  | 5  | 171 | LIM motif-containing protein kinase 2 (Limk2) alternative variant cSep08, mRNA.                                   |
| <a href="#">Lims1</a>  | <a href="#">Lims1.aSep08</a>  | <a href="#">499443</a> | 105703 | 991  | 7  | 330 | LIM and senescent cell antigen-like domains 1 (Lims1) alternative variant aSep08, mRNA.                           |
| <a href="#">Lims1</a>  | <a href="#">Lims1.bSep08</a>  | <a href="#">499443</a> | 6063   | 318  | 1  | 81  | LIM and senescent cell antigen-like domains 1 (Lims1) alternative variant bSep08, mRNA.                           |



|                             |                                    |                        |        |      |    |     |                                                                                                                                                                                         |
|-----------------------------|------------------------------------|------------------------|--------|------|----|-----|-----------------------------------------------------------------------------------------------------------------------------------------------------------------------------------------|
| <a href="#">Lims1</a>       | <a href="#">Lims1.cSep08</a>       | <a href="#">499443</a> | 51408  | 302  | 2  | 22  | LIM and senescent cell antigen-like domains 1 (Lims1) alternative variant cSep08, mRNA.                                                                                                 |
| <a href="#">Lims2</a>       | <a href="#">Lims2.aSep08</a>       | <a href="#">361303</a> | 28243  | 1426 | 10 | 341 | LIM and senescent cell antigen like domains 2 (39.0 kD) (Lims2) alternative variant aSep08, mRNA.                                                                                       |
| <a href="#">Lims2</a>       | <a href="#">Lims2.dSep08</a>       | <a href="#">361303</a> | 1307   | 654  | 3  | 58  | LIM and senescent cell antigen like domains 2 (Lims2) alternative variant dSep08, mRNA.                                                                                                 |
| <a href="#">Lin7a</a>       | <a href="#">Lin7a.bSep08</a>       | <a href="#">85327</a>  | 43487  | 698  | 1  | 125 | lin-7 homolog A (Lin7a) alternative variant bSep08, mRNA.                                                                                                                               |
| <a href="#">Lin7b</a>       | <a href="#">Lin7b.aSep08</a>       | <a href="#">60377</a>  | 2600   | 1576 | 2  | 212 | lin-7 homolog C (22.7 kD) (Lin7b) alternative variant aSep08, mRNA.                                                                                                                     |
| <a href="#">Lin7b</a>       | <a href="#">Lin7b.cSep08</a>       | <a href="#">60377</a>  | 1316   | 384  | 2  | 52  | lin-7 homolog B (Lin7b) alternative variant cSep08, mRNA.                                                                                                                               |
| <a href="#">Lin9</a>        | <a href="#">Lin9.aSep08</a>        | <a href="#">689523</a> | 8952   | 348  |    | 116 | lin-9 homolog (Lin9) mRNA.                                                                                                                                                              |
| <a href="#">Lin28</a>       | <a href="#">Lin28.bSep08</a>       | <a href="#">500562</a> | 2191   | 406  | 1  | 94  | lin-28 homolog (Lin28) alternative variant bSep08, mRNA.                                                                                                                                |
| <a href="#">Lin37</a>       | <a href="#">Lin37.bSep08</a>       | <a href="#">292787</a> | 1429   | 570  | 2  | 163 | lin-37 homolog (Lin37) alternative variant bSep08, mRNA.                                                                                                                                |
| <a href="#">Lin37</a>       | <a href="#">Lin37.cSep08</a>       | <a href="#">292787</a> | 954    | 789  | 1  | 107 | putative nuclear protein (11.7 kD) (Lin37) alternative variant cSep08, mRNA.                                                                                                            |
| <a href="#">Lin52</a>       | <a href="#">Lin52.aSep08</a>       | <a href="#">362763</a> | 85841  | 2119 |    | 111 | lin-52 homolog (Lin52) mRNA.                                                                                                                                                            |
| <a href="#">Lingo1</a>      | <a href="#">Lingo1.aSep08</a>      | <a href="#">315691</a> | 201756 | 2874 | 4  | 614 | leucine-rich repeat, cysteine-rich flanking region, N-terminal and Leucine-rich repeat containing protein and immunoglobulin I-set (69.1 kD) (Lingo1) alternative variant aSep08, mRNA. |
| <a href="#">Lingo1</a>      | <a href="#">Lingo1.bSep08</a>      | <a href="#">315691</a> | 14606  | 933  | 3  | 111 | putative protein (11.5 kD) (Lingo1) alternative variant bSep08, mRNA.                                                                                                                   |
| <a href="#">Lingo1</a>      | <a href="#">Lingo1.cSep08</a>      | <a href="#">315691</a> | 14308  | 543  | 2  | 103 | leucine-rich repeat, cysteine-rich flanking region, N-terminal (Lingo1) alternative variant cSep08, mRNA.                                                                               |
| <a href="#">Lingo1</a>      | <a href="#">Lingo1.dSep08</a>      | <a href="#">315691</a> | 109454 | 400  | 3  | 74  | putative protein (Lingo1) alternative variant dSep08, mRNA.                                                                                                                             |
| <a href="#">Lipa</a>        | <a href="#">Lipa.bSep08</a>        | <a href="#">25055</a>  | 19257  | 723  | 5  | 177 | lysosomal acid lipase A (Lipa) alternative variant bSep08, mRNA.                                                                                                                        |
| <a href="#">Lipa</a>        | <a href="#">Lipa.dSep08</a>        | <a href="#">25055</a>  | 1590   | 775  | 2  | 67  | lysosomal acid lipase A (7.9 kD) (Lipa) alternative variant dSep08, mRNA.                                                                                                               |
| <a href="#">Lipc</a>        | <a href="#">Lipc.bSep08</a>        | <a href="#">24538</a>  | 107282 | 769  | 1  | 236 | lipase, hepatic (Lipc) alternative variant bSep08, mRNA.                                                                                                                                |
| <a href="#">Lipe</a>        | <a href="#">Lipe.bSep08</a>        | <a href="#">25330</a>  | 4011   | 1117 | 3  | 240 | lipase, hormone sensitive (Lipe) alternative variant bSep08, mRNA.                                                                                                                      |
| <a href="#">Lipe</a>        | <a href="#">Lipe.cSep08</a>        | <a href="#">25330</a>  | 7625   | 872  | 2  | 215 | lipase, hormone sensitive (Lipe) alternative variant cSep08, mRNA.                                                                                                                      |
| <a href="#">Lipn</a>        | <a href="#">Lipn.aSep08</a>        | <a href="#">499345</a> | 15390  | 975  |    | 325 | lipase, family member N (Lipn) mRNA.                                                                                                                                                    |
| <a href="#">Lipocalin.0</a> | <a href="#">Lipocalin.0.aSep08</a> |                        | 3293   | 653  |    | 177 | lipocalin 11 precursor (20.0 kD) (Lipocalin.0) mRNA.                                                                                                                                    |
| <a href="#">Lix1</a>        | <a href="#">Lix1.bSep08</a>        | <a href="#">292381</a> | 54219  | 1042 | 2  | 198 | limb expression 1 homolog (chicken) (22.3 kD) (Lix1) alternative variant bSep08, mRNA.                                                                                                  |
| <a href="#">Lix1</a>        | <a href="#">Lix1.cSep08</a>        | <a href="#">292381</a> | 34786  | 982  | 2  | 172 | limb expression 1 homolog (chicken) (Lix1) alternative variant cSep08, mRNA.                                                                                                            |
| <a href="#">Lkap</a>        | <a href="#">Lkap.bSep08</a>        | <a href="#">170946</a> | 3677   | 911  | 3  | 151 | limkain b1 (Lkap) alternative variant bSep08, mRNA.                                                                                                                                     |
| <a href="#">Lkap</a>        | <a href="#">Lkap.cSep08</a>        | <a href="#">170946</a> | 610    | 439  | 2  | 131 | limkain b1 (Lkap) alternative variant cSep08, mRNA.                                                                                                                                     |
| <a href="#">Llgl1</a>       | <a href="#">Llgl1.bSep08</a>       | <a href="#">54265</a>  | 3047   | 2013 | 6  | 321 | lethal giant larvae homolog 1 (Drosophila) (Llgl1) alternative variant bSep08, mRNA.                                                                                                    |

|                         |                                |                        |        |      |    |     |                                                                                                       |
|-------------------------|--------------------------------|------------------------|--------|------|----|-----|-------------------------------------------------------------------------------------------------------|
| <a href="#">Llgl1</a>   | <a href="#">Llgl1.cSep08</a>   | <a href="#">54265</a>  | 1101   | 769  | 3  | 82  | lethal giant larvae homolog 1 (Drosophila) (Llgl1) alternative variant cSep08, mRNA.                  |
| <a href="#">Llgl2</a>   | <a href="#">Llgl2.bSep08</a>   | <a href="#">360661</a> | 1984   | 783  | 3  | 214 | lethal giant larvae homolog 2 CRA c (Llgl2) alternative variant bSep08, mRNA.                         |
| <a href="#">Llgl2</a>   | <a href="#">Llgl2.cSep08</a>   | <a href="#">360661</a> | 1968   | 679  | 5  | 211 | lethal giant larvae homolog 2 CRA b (Llgl2) alternative variant cSep08, mRNA.                         |
| <a href="#">Llgl2</a>   | <a href="#">Llgl2.dSep08</a>   | <a href="#">360661</a> | 22299  | 426  | 5  | 141 | lethal giant larvae homolog 2 (Llgl2) alternative variant dSep08, mRNA.                               |
| <a href="#">Llgl2</a>   | <a href="#">Llgl2.eSep08</a>   | <a href="#">360661</a> | 1550   | 612  | 6  | 116 | lethal giant larvae homolog 2 CRA b (Llgl2) alternative variant eSep08, mRNA.                         |
| <a href="#">Lman1</a>   | <a href="#">Lman1.bSep08</a>   | <a href="#">116666</a> | 18701  | 1777 | 6  | 514 | lectin mannose-binding 1 CRA a like (Lman1) alternative variant bSep08, complete mRNA.                |
| <a href="#">Lman1</a>   | <a href="#">Lman1.cSep08</a>   | <a href="#">116666</a> | 9467   | 928  | 6  | 235 | lectin mannose-binding 1 CRA a like (Lman1) alternative variant cSep08, mRNA.                         |
| <a href="#">Lman1</a>   | <a href="#">Lman1.dSep08</a>   | <a href="#">116666</a> | 12158  | 2513 | 7  | 198 | lectin mannose-binding 1 CRA a like (Lman1) alternative variant dSep08, mRNA.                         |
| <a href="#">Lman1</a>   | <a href="#">Lman1.eSep08</a>   | <a href="#">116666</a> | 4757   | 354  | 4  | 84  | lectin mannose-binding 1 like (Lman1) alternative variant eSep08, mRNA.                               |
| <a href="#">Lman1</a>   | <a href="#">Lman1.fSep08</a>   | <a href="#">116666</a> | 2149   | 415  | 2  | 76  | lectin mannose-binding 1 CRA a like (Lman1) alternative variant fSep08, mRNA.                         |
| <a href="#">Lman1</a>   | <a href="#">Lman1.gSep08</a>   | <a href="#">116666</a> | 1688   | 303  | 3  | 54  | putative protein (5.9 kD) (Lman1) alternative variant gSep08, mRNA.                                   |
| <a href="#">Lman1</a>   | <a href="#">Lman1.hSep08</a>   | <a href="#">116666</a> | 375    | 275  | 2  | 32  | lectin mannose-binding 1 CRA a like (Lman1) alternative variant hSep08, mRNA.                         |
| <a href="#">Lman1l</a>  | <a href="#">Lman1l.bSep08</a>  | <a href="#">300743</a> | 3734   | 629  | 1  | 172 | lectin, mannose-binding, 1 like (Lman1l) alternative variant bSep08, mRNA.                            |
| <a href="#">Lman2</a>   | <a href="#">Lman2.bSep08</a>   | <a href="#">290994</a> | 1730   | 528  | 2  | 106 | lectin, mannose-binding 2 (12.1 kD) (Lman2) alternative variant bSep08, mRNA.                         |
| <a href="#">Lman2l</a>  | <a href="#">Lman2l.aSep08</a>  | <a href="#">301343</a> | 19257  | 806  | 6  | 261 | lectin mannose-binding 2-like (Lman2l) alternative variant aSep08, mRNA.                              |
| <a href="#">Lman2l</a>  | <a href="#">Lman2l.bSep08</a>  | <a href="#">301343</a> | 6072   | 2477 | 4  | 171 | lectin mannose-binding 2-like CRA c (19.8 kD) (Lman2l) alternative variant bSep08, mRNA.              |
| <a href="#">Lman2l</a>  | <a href="#">Lman2l.cSep08</a>  | <a href="#">301343</a> | 24166  | 1810 | 5  | 133 | putative mitochondrial protein of metazoan origin (Lman2l) alternative variant cSep08, complete mRNA. |
| <a href="#">Lmbr1</a>   | <a href="#">Lmbr1.aSep08</a>   | <a href="#">362295</a> | 98993  | 4281 | 13 | 367 | limb region 1 (Lmbr1) alternative variant aSep08, mRNA.                                               |
| <a href="#">Lmbr1</a>   | <a href="#">Lmbr1.bSep08</a>   | <a href="#">362295</a> | 101390 | 622  | 4  | 158 | limb region 1 (Lmbr1) alternative variant bSep08, mRNA.                                               |
| <a href="#">LMBR1.1</a> | <a href="#">LMBR1.1.aSep08</a> |                        | 4531   | 695  | 8  | 231 | limb region 1 like CRA b (LMBR1.1) alternative variant aSep08, mRNA.                                  |
| <a href="#">Lmbr1l</a>  | <a href="#">Lmbr1l.bSep08</a>  | <a href="#">300215</a> | 2960   | 716  | 3  | 88  | limb region 1-like homolog (mouse) (9.9 kD) (Lmbr1l) alternative variant bSep08, mRNA.                |
| <a href="#">Lmbrd1</a>  | <a href="#">Lmbrd1.bSep08</a>  | <a href="#">246046</a> | 8387   | 415  | 1  | 54  | putative protein (6.0 kD) (Lmbrd1) alternative variant bSep08, mRNA.                                  |
| <a href="#">Lmbrd1</a>  | <a href="#">Lmbrd1.cSep08</a>  | <a href="#">246046</a> | 31536  | 541  | 2  |     |                                                                                                       |
| <a href="#">Lmcd1</a>   | <a href="#">Lmcd1.bSep08</a>   | <a href="#">494021</a> | 58811  | 831  | 2  | 144 | LIM and cysteine-rich domains 1 (16.1 kD) (Lmcd1) alternative variant bSep08, mRNA.                   |
| <a href="#">Lmf1</a>    | <a href="#">Lmf1.aSep08</a>    | <a href="#">360495</a> | 69476  | 805  |    | 51  | lipase maturation factor 1 (Lmf1) mRNA.                                                               |

|                       |                              |                        |        |      |   |     |                                                                                              |
|-----------------------|------------------------------|------------------------|--------|------|---|-----|----------------------------------------------------------------------------------------------|
| <a href="#">Lmf2</a>  | <a href="#">Lmf2.bSep08</a>  | <a href="#">315218</a> | 1143   | 743  | 6 | 247 | lipase maturation factor 2 (Lmf2) alternative variant bSep08, mRNA.                          |
| <a href="#">Lmf2</a>  | <a href="#">Lmf2.cSep08</a>  | <a href="#">315218</a> | 1029   | 388  | 3 | 129 | lipase maturation factor 2 (Lmf2) alternative variant cSep08, mRNA.                          |
| <a href="#">Lmf2</a>  | <a href="#">Lmf2.dSep08</a>  | <a href="#">315218</a> | 1022   | 498  | 2 | 127 | lipase maturation factor 2 (Lmf2) alternative variant dSep08, mRNA.                          |
| <a href="#">Lmf2</a>  | <a href="#">Lmf2.fSep08</a>  | <a href="#">315218</a> | 749    | 504  | 2 | 88  | lipase maturation factor 2 (Lmf2) alternative variant fSep08, mRNA.                          |
| <a href="#">Lmna</a>  | <a href="#">Lmna.bSep08</a>  | <a href="#">60374</a>  | 3374   | 1353 | 6 | 277 | lamin A (Lmna) alternative variant bSep08, mRNA.                                             |
| <a href="#">Lmna</a>  | <a href="#">Lmna.dSep08</a>  | <a href="#">60374</a>  | 754    | 505  | 2 | 98  | lamin A (Lmna) alternative variant dSep08, mRNA.                                             |
| <a href="#">Lmnb1</a> | <a href="#">Lmnb1.bSep08</a> | <a href="#">116685</a> | 1578   | 706  | 2 | 116 | lamin B1 (Lmnb1) alternative variant bSep08, mRNA.                                           |
| <a href="#">Lmnb2</a> | <a href="#">Lmnb2.aSep08</a> | <a href="#">299625</a> | 16104  | 3632 | 4 | 616 | lamin B2 (68.8 kD) (Lmnb2) alternative variant aSep08, mRNA.                                 |
| <a href="#">Lmnb2</a> | <a href="#">Lmnb2.bSep08</a> | <a href="#">299625</a> | 1514   | 699  | 1 | 233 | lamin B2 (Lmnb2) alternative variant bSep08, mRNA.                                           |
| <a href="#">Lmo2</a>  | <a href="#">Lmo2.aSep08</a>  | <a href="#">362176</a> | 10623  | 714  | 3 | 237 | LIM domain only 2 (Lmo2) alternative variant aSep08, mRNA.                                   |
| <a href="#">Lmo2</a>  | <a href="#">Lmo2.bSep08</a>  | <a href="#">362176</a> | 22034  | 829  | 3 | 232 | LIM domain only 2 (25.7 kD) (Lmo2) alternative variant bSep08, mRNA.                         |
| <a href="#">Lmo2</a>  | <a href="#">Lmo2.dSep08</a>  | <a href="#">362176</a> | 11459  | 1782 | 2 | 158 | LIM domain only 2 (18.3 kD) (Lmo2) alternative variant dSep08, mRNA.                         |
| <a href="#">Lmo2</a>  | <a href="#">Lmo2.eSep08</a>  | <a href="#">362176</a> | 11766  | 1393 | 3 | 138 | LIM domain only 2 (Lmo2) alternative variant eSep08, mRNA.                                   |
| <a href="#">Lmo2</a>  | <a href="#">Lmo2.fSep08</a>  | <a href="#">362176</a> | 5119   | 695  | 1 | 100 | LIM domain only 2 (Lmo2) alternative variant fSep08, mRNA.                                   |
| <a href="#">Lmo4</a>  | <a href="#">Lmo4.aSep08</a>  | <a href="#">362051</a> | 12281  | 905  | 4 | 200 | LIM domain (Lmo4) alternative variant aSep08, mRNA.                                          |
| <a href="#">Lmo4</a>  | <a href="#">Lmo4.cSep08</a>  | <a href="#">362051</a> | 14056  | 1183 | 5 | 165 | LIM domain (18.0 kD) (Lmo4) alternative variant cSep08, mRNA.                                |
| <a href="#">Lmo4</a>  | <a href="#">Lmo4.dSep08</a>  | <a href="#">362051</a> | 1115   | 455  | 3 | 81  | LIM domain (8.8 kD) (Lmo4) alternative variant dSep08, mRNA.                                 |
| <a href="#">Lmo4</a>  | <a href="#">Lmo4.eSep08</a>  | <a href="#">362051</a> | 2228   | 1064 | 2 | 63  | putative protein (7.1 kD) (Lmo4) alternative variant eSep08, mRNA.                           |
| <a href="#">Lmo7</a>  | <a href="#">Lmo7.bSep08</a>  | <a href="#">361084</a> | 44132  | 785  | 5 | 187 | LIM domain only 7 (Lmo7) alternative variant bSep08, mRNA.                                   |
| <a href="#">Lmo7</a>  | <a href="#">Lmo7.cSep08</a>  | <a href="#">361084</a> | 10889  | 738  | 3 | 140 | LIM domain only 7 (Lmo7) alternative variant cSep08, mRNA.                                   |
| <a href="#">Lmod1</a> | <a href="#">Lmod1.aSep08</a> | <a href="#">304816</a> | 38920  | 679  |   | 179 | leiomodoin 1 (smooth muscle) (Lmod1) mRNA.                                                   |
| <a href="#">Lmod3</a> | <a href="#">Lmod3.aSep08</a> | <a href="#">500267</a> | 10359  | 1847 |   | 441 | leiomodoin 3 (fetal) (Lmod3) mRNA.                                                           |
| <a href="#">Lmtk2</a> | <a href="#">Lmtk2.aSep08</a> | <a href="#">304286</a> | 32792  | 437  |   | 82  | lemur tyrosine kinase 2 (Lmtk2) mRNA.                                                        |
| <a href="#">Lmx1a</a> | <a href="#">Lmx1a.bSep08</a> | <a href="#">289201</a> | 108387 | 572  | 3 | 190 | LIM homeobox transcription factor 1 alpha (Lmx1a) alternative variant bSep08, mRNA.          |
| <a href="#">Lmx1a</a> | <a href="#">Lmx1a.cSep08</a> | <a href="#">289201</a> | 96885  | 475  | 2 | 46  | LIM homeobox transcription factor 1 alpha (5.2 kD) (Lmx1a) alternative variant cSep08, mRNA. |
| <a href="#">Lmx1b</a> | <a href="#">Lmx1b.aSep08</a> | <a href="#">114501</a> | 78061  | 769  |   | 255 | LIM homeobox transcription factor 1 beta (Lmx1b) mRNA.                                       |
| <a href="#">Lnp</a>   | <a href="#">Lnp.bSep08</a>   | <a href="#">362151</a> | 8686   | 1056 | 2 | 102 | limb and neural patterns (Lnp) alternative variant bSep08, mRNA.                             |

|                              |                                     |                        |       |      |   |     |                                                                                                                          |
|------------------------------|-------------------------------------|------------------------|-------|------|---|-----|--------------------------------------------------------------------------------------------------------------------------|
| <a href="#">Lnp</a>          | <a href="#">Lnp.cSep08</a>          | <a href="#">362151</a> | 9786  | 383  | 4 | 75  | limb and neural patterns (Lnp) alternative variant cSep08, mRNA.                                                         |
| <a href="#">Lnx1</a>         | <a href="#">Lnx1.bSep08</a>         | <a href="#">360926</a> | 29474 | 1200 | 6 | 354 | ligand of numb-protein X 1 (Lnx1) alternative variant bSep08, mRNA.                                                      |
| <a href="#">Lnx1</a>         | <a href="#">Lnx1.cSep08</a>         | <a href="#">360926</a> | 48607 | 536  | 2 | 103 | ligand of numb-protein X 1 (Lnx1) alternative variant cSep08, mRNA.                                                      |
| <a href="#">Lnx1</a>         | <a href="#">Lnx1.dSep08</a>         | <a href="#">360926</a> | 1772  | 1426 | 2 | 43  | ligand of numb-protein X 1 (4.9 kD) (Lnx1) alternative variant dSep08, mRNA.                                             |
| <a href="#">Lnx2</a>         | <a href="#">Lnx2.bSep08</a>         | <a href="#">360761</a> | 36046 | 402  | 1 | 73  | ligand of numb-protein X 2 (Lnx2) alternative variant bSep08, mRNA.                                                      |
| <a href="#">loby</a>         | <a href="#">loby.aSep08</a>         |                        | 2805  | 1749 | 1 | 333 | motif Sec7 domain-containing protein 2 like (loby) mRNA.                                                                 |
| <a href="#">LOC56764</a>     | <a href="#">LOC56764.bSep08</a>     | <a href="#">56764</a>  | 37394 | 1497 | 3 | 162 | dnaj-like protein (LOC56764) alternative variant bSep08, mRNA.                                                           |
| <a href="#">LOC224733I-4</a> | <a href="#">LOC224733I-4.aSep08</a> | <a href="#">415070</a> | 1186  | 686  |   | 117 | LOC224733I-4 pseudogene (12.7 kD) (LOC224733I-4) mRNA.                                                                   |
| <a href="#">LOC224733I-6</a> | <a href="#">LOC224733I-6.aSep08</a> | <a href="#">415076</a> | 20984 | 564  |   | 25  | LOC224733I-6 pseudogene (3.2 kD) (LOC224733I-6) mRNA.                                                                    |
| <a href="#">LOC245925</a>    | <a href="#">LOC245925.aSep08</a>    | <a href="#">245925</a> | 3096  | 2024 |   | 607 | CTD-binding SR-like protein rA9 (LOC245925) alternative variant aSep08, mRNA.                                            |
| <a href="#">LOC245925</a>    | <a href="#">LOC245925.bSep08</a>    | <a href="#">245925</a> | 4219  | 1776 |   | 537 | CTD-binding SR-like protein rA9 (LOC245925) alternative variant bSep08, mRNA.                                            |
| <a href="#">LOC246295</a>    | <a href="#">LOC246295.aSep08</a>    | <a href="#">246295</a> | 14313 | 1797 |   | 517 | glycine-, glutamate-, thienylcyclohexylpiperidine-binding protein (LOC246295) alternative variant aSep08, mRNA.          |
| <a href="#">LOC246295</a>    | <a href="#">LOC246295.bSep08</a>    | <a href="#">246295</a> | 19261 | 3365 | 2 | 390 | glycine-, glutamate-, thienylcyclohexylpiperidine-binding protein (LOC246295) alternative variant bSep08, mRNA.          |
| <a href="#">LOC246295</a>    | <a href="#">LOC246295.cSep08</a>    | <a href="#">246295</a> | 10551 | 952  | 3 | 173 | glycine-, glutamate-, thienylcyclohexylpiperidine-binding protein (LOC246295) alternative variant cSep08, mRNA.          |
| <a href="#">LOC246295</a>    | <a href="#">LOC246295.dSep08</a>    | <a href="#">246295</a> | 6606  | 779  | 4 | 128 | glycine-, glutamate-, thienylcyclohexylpiperidine-binding protein (LOC246295) alternative variant dSep08, mRNA.          |
| <a href="#">LOC246295</a>    | <a href="#">LOC246295.eSep08</a>    | <a href="#">246295</a> | 9674  | 992  |   | 147 | glycine-, glutamate-, thienylcyclohexylpiperidine-binding protein (LOC246295) alternative variant eSep08, complete mRNA. |
| <a href="#">LOC252890</a>    | <a href="#">LOC252890.aSep08</a>    | <a href="#">252890</a> | 1870  | 1124 | 2 | 63  | z39 small nucleolar RNA (7.4 kD) (LOC252890) alternative variant aSep08, mRNA.                                           |
| <a href="#">LOC257643</a>    | <a href="#">LOC257643.bSep08</a>    | <a href="#">257643</a> | 1858  | 317  | 1 | 38  | cystatin SC (LOC257643) alternative variant bSep08, mRNA.                                                                |
| <a href="#">LOC257650</a>    | <a href="#">LOC257650.aSep08</a>    | <a href="#">257650</a> | 12472 | 741  | 2 | 140 | hippyrgranin (LOC257650) alternative variant aSep08, mRNA.                                                               |
| <a href="#">LOC257650</a>    | <a href="#">LOC257650.bSep08</a>    | <a href="#">257650</a> | 12170 | 533  | 3 | 97  | hippyrgranin (LOC257650) alternative variant bSep08, mRNA.                                                               |
| <a href="#">LOC257650</a>    | <a href="#">LOC257650.cSep08</a>    | <a href="#">257650</a> | 24459 | 1351 | 5 | 140 | hippyrgranin (LOC257650) alternative variant cSep08, mRNA.                                                               |
| <a href="#">LOC259246</a>    | <a href="#">LOC259246.aSep08</a>    | <a href="#">259246</a> | 3205  | 768  | 2 | 188 | globulin PGCL1 (LOC259246) alternative variant aSep08, mRNA.                                                             |
| <a href="#">LOC259246</a>    | <a href="#">LOC259246.aSep08</a>    | <a href="#">298116</a> | 3205  | 768  | 2 | 188 | globulin PGCL1 (LOC259246) alternative variant aSep08, mRNA.                                                             |

|                           |                                  |                        |       |      |   |     |                                                                                                                           |
|---------------------------|----------------------------------|------------------------|-------|------|---|-----|---------------------------------------------------------------------------------------------------------------------------|
| <a href="#">LOC259246</a> | <a href="#">LOC259246.dSep08</a> | <a href="#">259246</a> | 3147  | 676  | 2 | 181 | globulin PGCL1 precursor (20.7 kD) (LOC259246) alternative variant dSep08, mRNA.                                          |
| <a href="#">LOC259246</a> | <a href="#">LOC259246.dSep08</a> | <a href="#">298116</a> | 3147  | 676  | 2 | 181 | globulin PGCL1 precursor (20.7 kD) (LOC259246) alternative variant dSep08, mRNA.                                          |
| <a href="#">LOC287228</a> | <a href="#">LOC287228.aSep08</a> | <a href="#">287228</a> | 2762  | 814  |   | 173 | similar to GTPase activating protein testicular GAP1 (LOC287228) mRNA.                                                    |
| <a href="#">LOC287274</a> | <a href="#">LOC287274.aSep08</a> | <a href="#">287274</a> | 4166  | 974  | 1 | 140 | sedlin-like (16.5 kD) (LOC287274) alternative variant aSep08, complete mRNA.                                              |
| <a href="#">LOC287274</a> | <a href="#">LOC287274.bSep08</a> | <a href="#">287274</a> | 4254  | 864  | 1 | 140 | sedlin-like (16.5 kD) (LOC287274) alternative variant bSep08, mRNA.                                                       |
| <a href="#">LOC288526</a> | <a href="#">LOC288526.bSep08</a> | <a href="#">288526</a> | 4017  | 1596 | 4 | 307 | putative protein, with 3 coiled coil domains (LOC288526) alternative variant bSep08, mRNA.                                |
| <a href="#">LOC288913</a> | <a href="#">LOC288913.bSep08</a> | <a href="#">288913</a> | 3023  | 847  | 1 | 77  | similar to LEYDIG CELL TUMOR 10 KD PROTEIN (LOC288913) alternative variant bSep08, mRNA.                                  |
| <a href="#">LOC288978</a> | <a href="#">LOC288978.aSep08</a> | <a href="#">288978</a> | 65584 | 515  | 6 | 144 | hypothetical LOC288978 (LOC288978) alternative variant aSep08, mRNA.                                                      |
| <a href="#">LOC288978</a> | <a href="#">LOC288978.bSep08</a> | <a href="#">288978</a> | 64667 | 527  | 6 | 126 | hypothetical LOC288978 (14.7 kD) (LOC288978) alternative variant bSep08, mRNA.                                            |
| <a href="#">LOC288978</a> | <a href="#">LOC288978.dSep08</a> | <a href="#">288978</a> | 24295 | 400  | 5 | 105 | hypothetical LOC288978 (LOC288978) alternative variant dSep08, mRNA.                                                      |
| <a href="#">LOC288978</a> | <a href="#">LOC288978.eSep08</a> | <a href="#">288978</a> | 12204 | 256  | 3 | 85  | hypothetical LOC288978 (LOC288978) alternative variant eSep08, mRNA.                                                      |
| <a href="#">LOC288978</a> | <a href="#">LOC288978.fSep08</a> | <a href="#">288978</a> | 35324 | 316  | 3 | 79  | hypothetical LOC288978 (LOC288978) alternative variant fSep08, mRNA.                                                      |
| <a href="#">LOC289035</a> | <a href="#">LOC289035.bSep08</a> | <a href="#">289035</a> | 2904  | 328  | 1 | 40  | similar to UDP-N-acetylglucosamine:a-1,3-D-mannoside beta-1,4-N-acetylgluco (LOC289035) alternative variant bSep08, mRNA. |
| <a href="#">LOC289378</a> | <a href="#">LOC289378.bSep08</a> | <a href="#">289378</a> | 6843  | 964  | 2 | 117 | similar to B0432.8 (12.9 kD) (LOC289378) alternative variant bSep08, mRNA.                                                |
| <a href="#">LOC289471</a> | <a href="#">LOC289471.aSep08</a> | <a href="#">289471</a> | 4527  | 714  |   | 128 | similar to DNA helicase HEL308 (LOC289471) mRNA.                                                                          |
| <a href="#">LOC289606</a> | <a href="#">LOC289606.aSep08</a> | <a href="#">289606</a> | 94196 | 776  |   | 258 | similar to Gamma-aminobutyric-acid receptor alpha-2 subunit precursor (GABA(A) receptor) (LOC289606) mRNA.                |
| <a href="#">LOC289740</a> | <a href="#">LOC289740.bSep08</a> | <a href="#">289740</a> | 8883  | 921  | 6 | 239 | pescadillo (27.5 kD) (LOC289740) alternative variant bSep08, mRNA.                                                        |
| <a href="#">LOC289740</a> | <a href="#">LOC289740.cSep08</a> | <a href="#">289740</a> | 5847  | 755  | 4 | 184 | pescadillo (LOC289740) alternative variant cSep08, mRNA.                                                                  |
| <a href="#">LOC289740</a> | <a href="#">LOC289740.dSep08</a> | <a href="#">289740</a> | 1674  | 959  | 2 | 77  | pescadillo homolog 1 containing BRCT domain (9.2 kD) (LOC289740) alternative variant dSep08, mRNA.                        |
| <a href="#">LOC290577</a> | <a href="#">LOC290577.aSep08</a> | <a href="#">290577</a> | 14807 | 2156 | 9 | 333 | wings apart-like homolog CRA b (37.2 kD) (LOC290577) alternative variant aSep08, mRNA.                                    |
| <a href="#">LOC290577</a> | <a href="#">LOC290577.bSep08</a> | <a href="#">290577</a> | 11653 | 1183 | 7 | 332 | wings apart-like homolog (LOC290577) alternative variant bSep08, mRNA.                                                    |
| <a href="#">LOC290577</a> | <a href="#">LOC290577.cSep08</a> | <a href="#">290577</a> | 33610 | 1011 | 6 | 133 | wings apart-like homolog (LOC290577) alternative variant cSep08, mRNA.                                                    |
| <a href="#">LOC290577</a> | <a href="#">LOC290577.eSep08</a> | <a href="#">290577</a> | 6619  | 470  | 3 | 64  | wings apart-like homolog (LOC290577) alternative variant eSep08, mRNA.                                                    |

|                           |                                  |                        |       |      |    |     |                                                                                                                                                                                                |
|---------------------------|----------------------------------|------------------------|-------|------|----|-----|------------------------------------------------------------------------------------------------------------------------------------------------------------------------------------------------|
| <a href="#">LOC290763</a> | <a href="#">LOC290763.aSep08</a> | <a href="#">290763</a> | 2549  | 784  |    | 162 | similar to testase 4 (LOC290763) mRNA.                                                                                                                                                         |
| <a href="#">LOC290876</a> | <a href="#">LOC290876.bSep08</a> | <a href="#">290876</a> | 8010  | 547  | 7  | 170 | similar to RIKEN cDNA 1700029H14 (LOC290876) alternative variant bSep08, mRNA.                                                                                                                 |
| <a href="#">LOC290876</a> | <a href="#">LOC290876.dSep08</a> | <a href="#">290876</a> | 8198  | 739  | 7  | 90  | similar to RIKEN cDNA 1700029H14 (LOC290876) alternative variant dSep08, mRNA.                                                                                                                 |
| <a href="#">LOC291249</a> | <a href="#">LOC291249.aSep08</a> | <a href="#">291249</a> | 6877  | 732  |    | 244 | testis-specific transcript (LOC291249) mRNA.                                                                                                                                                   |
| <a href="#">LOC291863</a> | <a href="#">LOC291863.bSep08</a> | <a href="#">291863</a> | 9531  | 742  | 6  | 247 | carboxylesterase (LOC291863) alternative variant bSep08, mRNA.                                                                                                                                 |
| <a href="#">LOC291863</a> | <a href="#">LOC291863.cSep08</a> | <a href="#">291863</a> | 3524  | 359  | 2  | 86  | carboxylesterase precursor (9.4 kD) (LOC291863) alternative variant cSep08, mRNA.                                                                                                              |
| <a href="#">LOC291863</a> | <a href="#">LOC291863.dSep08</a> | <a href="#">291863</a> | 3529  | 876  | 2  | 73  | carboxylesterase (8.4 kD) (LOC291863) alternative variant dSep08, mRNA.                                                                                                                        |
| <a href="#">LOC291863</a> | <a href="#">LOC291863.eSep08</a> | <a href="#">291863</a> | 4332  | 658  | 3  | 51  | putative protein (5.9 kD) (LOC291863) alternative variant eSep08, mRNA.                                                                                                                        |
| <a href="#">LOC292069</a> | <a href="#">LOC292069.bSep08</a> | <a href="#">292069</a> | 1342  | 727  | 3  | 148 | similar to RIKEN cDNA 2310061F22 (LOC292069) alternative variant bSep08, mRNA.                                                                                                                 |
| <a href="#">LOC292069</a> | <a href="#">LOC292069.cSep08</a> | <a href="#">292069</a> | 865   | 761  | 1  | 123 | similar to RIKEN cDNA 2310061F22 (LOC292069) alternative variant cSep08, mRNA.                                                                                                                 |
| <a href="#">LOC292282</a> | <a href="#">LOC292282.aSep08</a> | <a href="#">292282</a> | 884   | 406  | 2  | 128 | similar to USE1-like protein (Hematopoietic stem/progenitor cells protein MDS032) (Putative MAPK-activating protein PM26) (Protein p31) (LOC292282) alternative variant aSep08, mRNA.          |
| <a href="#">LOC292282</a> | <a href="#">LOC292282.bSep08</a> | <a href="#">292282</a> | 971   | 749  | 1  | 84  | similar to USE1-like protein (Hematopoietic stem/progenitor cells protein MDS032) (Putative MAPK-activating protein PM26) (Protein p31) (9.7 kD) (LOC292282) alternative variant bSep08, mRNA. |
| <a href="#">LOC292666</a> | <a href="#">LOC292666.aSep08</a> | <a href="#">292666</a> | 16268 | 1783 | 4  | 541 | similar to pregnancy-specific beta 1-glycoprotein (LOC292666) alternative variant aSep08, mRNA.                                                                                                |
| <a href="#">LOC292666</a> | <a href="#">LOC292666.cSep08</a> | <a href="#">292666</a> | 16202 | 682  | 2  | 203 | similar to pregnancy-specific beta 1-glycoprotein (LOC292666) alternative variant cSep08, mRNA.                                                                                                |
| <a href="#">LOC292722</a> | <a href="#">LOC292722.aSep08</a> | <a href="#">292722</a> | 4993  | 1244 | 13 | 414 | similar to C15A7.2 (LOC292722) alternative variant aSep08, mRNA.                                                                                                                               |
| <a href="#">LOC292722</a> | <a href="#">LOC292722.bSep08</a> | <a href="#">292722</a> | 1034  | 414  | 5  | 138 | similar to C15A7.2 (LOC292722) alternative variant bSep08, mRNA.                                                                                                                               |
| <a href="#">LOC293103</a> | <a href="#">LOC293103.aSep08</a> | <a href="#">293103</a> | 18462 | 1775 | 3  | 412 | similar to RIKEN cDNA 0610007P06 (LOC293103) alternative variant aSep08, mRNA.                                                                                                                 |
| <a href="#">LOC293103</a> | <a href="#">LOC293103.bSep08</a> | <a href="#">293103</a> | 23947 | 1573 | 3  | 197 | similar to RIKEN cDNA 0610007P06 (21.6 kD) (LOC293103) alternative variant bSep08, mRNA.                                                                                                       |
| <a href="#">LOC293103</a> | <a href="#">LOC293103.cSep08</a> | <a href="#">293103</a> | 21956 | 736  | 2  | 180 | similar to RIKEN cDNA 0610007P06 (19.4 kD) (LOC293103) alternative variant cSep08, mRNA.                                                                                                       |
| <a href="#">LOC293989</a> | <a href="#">LOC293989.bSep08</a> | <a href="#">293989</a> | 20439 | 416  | 3  | 138 | p450 2c2 (LOC293989) alternative variant bSep08, mRNA.                                                                                                                                         |
| <a href="#">LOC293989</a> | <a href="#">LOC293989.cSep08</a> | <a href="#">293989</a> | 3302  | 558  | 3  | 123 | CRA a like (LOC293989) alternative variant cSep08, mRNA.                                                                                                                                       |
| <a href="#">LOC293989</a> | <a href="#">LOC293989.dSep08</a> | <a href="#">293989</a> | 7947  | 836  | 4  | 107 | putative cytoplasmic protein of vertebrate origin (12.5 kD) (LOC293989) alternative variant dSep08, mRNA.                                                                                      |
| <a href="#">LOC293989</a> | <a href="#">LOC293989.eSep08</a> | <a href="#">293989</a> | 17350 | 263  | 2  | 77  | cytochrome p450 family 2 subfamily c polypeptide (LOC293989) alternative variant eSep08, mRNA.                                                                                                 |

|                           |                                  |                        |        |      |   |     |                                                                                                                                    |
|---------------------------|----------------------------------|------------------------|--------|------|---|-----|------------------------------------------------------------------------------------------------------------------------------------|
| <a href="#">LOC294154</a> | <a href="#">LOC294154.aSep08</a> | <a href="#">294154</a> | 66261  | 2007 | 1 | 291 | putative protein of ancient origin (LOC294154) alternative variant aSep08, mRNA.                                                   |
| <a href="#">LOC294154</a> | <a href="#">LOC294154.bSep08</a> | <a href="#">294154</a> | 65764  | 1181 |   | 244 | putative protein of ancient origin (LOC294154) alternative variant bSep08, mRNA.                                                   |
| <a href="#">LOC294887</a> | <a href="#">LOC294887.aSep08</a> | <a href="#">294887</a> | 1215   | 275  |   | 91  | similar to GTPase activating protein testicular GAP1 (LOC294887) mRNA.                                                             |
| <a href="#">LOC295452</a> | <a href="#">LOC295452.aSep08</a> | <a href="#">295452</a> | 67948  | 919  |   | 66  | similar to Glyceraldehyde-3-phosphate dehydrogenase (GAPDH) (LOC295452) mRNA.                                                      |
| <a href="#">LOC295528</a> | <a href="#">LOC295528.aSep08</a> | <a href="#">295528</a> | 17133  | 689  |   | 229 | similar to T06D8.1a (LOC295528) mRNA.                                                                                              |
| <a href="#">LOC296637</a> | <a href="#">LOC296637.bSep08</a> | <a href="#">296637</a> | 948    | 392  | 2 | 130 | similar to HLA-B associated transcript-2 isoform a (LOC296637) alternative variant bSep08, mRNA.                                   |
| <a href="#">LOC298018</a> | <a href="#">LOC298018.aSep08</a> | <a href="#">298018</a> | 6029   | 2997 |   | 210 | hypothetical LOC298018 (LOC298018) mRNA.                                                                                           |
| <a href="#">LOC298109</a> | <a href="#">LOC298109.aSep08</a> | <a href="#">298109</a> | 3256   | 823  | 1 | 181 | alpha-2u globulin PGCL2 (20.7 kD) (LOC298109) alternative variant aSep08, mRNA.                                                    |
| <a href="#">LOC298138</a> | <a href="#">LOC298138.aSep08</a> | <a href="#">298138</a> | 31893  | 1261 | 3 | 420 | putative protein, with a coiled coil domain, of metazoan origin (LOC298138) alternative variant aSep08, mRNA.                      |
| <a href="#">LOC298138</a> | <a href="#">LOC298138.bSep08</a> | <a href="#">298138</a> | 31534  | 1236 | 3 | 194 | putative nuclear protein, with a coiled coil domain, of metazoan origin (22.7 kD) (LOC298138) alternative variant bSep08, mRNA.    |
| <a href="#">LOC298250</a> | <a href="#">LOC298250.bSep08</a> | <a href="#">298250</a> | 52380  | 630  | 5 | 185 | similar to hypothetical protein FLJ10986 (LOC298250) alternative variant bSep08, mRNA.                                             |
| <a href="#">LOC298442</a> | <a href="#">LOC298442.bSep08</a> | <a href="#">298442</a> | 4226   | 718  | 6 | 158 | putative protein, with 2 coiled coil domains, of mammalian origin (LOC298442) alternative variant bSep08, mRNA.                    |
| <a href="#">LOC298442</a> | <a href="#">LOC298442.cSep08</a> | <a href="#">298442</a> | 390    | 285  | 2 | 94  | putative protein of mammalian origin (LOC298442) alternative variant cSep08, mRNA.                                                 |
| <a href="#">LOC298442</a> | <a href="#">LOC298442.dSep08</a> | <a href="#">298442</a> | 1390   | 1093 | 2 | 63  | putative protein (LOC298442) alternative variant dSep08, mRNA.                                                                     |
| <a href="#">LOC298442</a> | <a href="#">LOC298442.eSep08</a> | <a href="#">298442</a> | 1120   | 437  | 2 | 62  | putative protein of mammalian origin (7.0 kD) (LOC298442) alternative variant eSep08, mRNA.                                        |
| <a href="#">LOC298977</a> | <a href="#">LOC298977.aSep08</a> | <a href="#">298977</a> | 47378  | 1285 |   | 361 | similar to zinc finger protein 277 isoform 1 (LOC298977) mRNA.                                                                     |
| <a href="#">LOC299282</a> | <a href="#">LOC299282.bSep08</a> | <a href="#">299282</a> | 7357   | 1668 | 5 | 413 | serine protease inhibitor (46.3 kD) (LOC299282) alternative variant bSep08, complete mRNA.                                         |
| <a href="#">LOC299282</a> | <a href="#">LOC299282.cSep08</a> | <a href="#">299282</a> | 4705   | 930  | 3 | 273 | serine protease inhibitor (LOC299282) alternative variant cSep08, mRNA.                                                            |
| <a href="#">LOC299282</a> | <a href="#">LOC299282.dSep08</a> | <a href="#">299282</a> | 4458   | 815  | 4 | 216 | serine protease inhibitor (LOC299282) alternative variant dSep08, mRNA.                                                            |
| <a href="#">LOC299282</a> | <a href="#">LOC299282.fSep08</a> | <a href="#">299282</a> | 1498   | 246  | 3 | 81  | serine protease inhibitor (LOC299282) alternative variant fSep08, mRNA.                                                            |
| <a href="#">LOC300024</a> | <a href="#">LOC300024.aSep08</a> | <a href="#">300024</a> | 2427   | 653  |   | 103 | similar to Ly6-B antigen gene (LOC300024) mRNA.                                                                                    |
| <a href="#">LOC300191</a> | <a href="#">LOC300191.bSep08</a> | <a href="#">300191</a> | 3039   | 2517 | 2 | 89  | similar to RIKEN cDNA 4930570C03 (10.6 kD) (LOC300191) alternative variant bSep08, mRNA.                                           |
| <a href="#">LOC300225</a> | <a href="#">LOC300225.aSep08</a> | <a href="#">300225</a> | 38417  | 672  |   | 200 | similar to formin-like 3 protein (LOC300225) mRNA.                                                                                 |
| <a href="#">LOC300308</a> | <a href="#">LOC300308.aSep08</a> | <a href="#">300308</a> | 205409 | 630  | 2 | 84  | similar to hypothetical protein 4930509O22 and similar to par-1 CG8201-PO, isoform O (LOC300308) alternative variant aSep08, mRNA. |

|                           |                                  |                        |        |      |    |     |                                                                                                                                             |
|---------------------------|----------------------------------|------------------------|--------|------|----|-----|---------------------------------------------------------------------------------------------------------------------------------------------|
| <a href="#">LOC300308</a> | <a href="#">LOC300308.aSep08</a> | <a href="#">500815</a> | 205409 | 630  | 2  | 84  | similar to hypothetical protein 4930509O22 and similar to par-1 CG8201-PO, isoform O (LOC300308) alternative variant aSep08, mRNA.          |
| <a href="#">LOC300308</a> | <a href="#">LOC300308.cSep08</a> | <a href="#">300308</a> | 6648   | 1474 | 5  | 183 | similar to hypothetical protein 4930509O22 and similar to par-1 CG8201-PO, isoform O (LOC300308) alternative variant cSep08, mRNA.          |
| <a href="#">LOC300308</a> | <a href="#">LOC300308.cSep08</a> | <a href="#">500815</a> | 6648   | 1474 | 5  | 183 | similar to hypothetical protein 4930509O22 and similar to par-1 CG8201-PO, isoform O (LOC300308) alternative variant cSep08, mRNA.          |
| <a href="#">LOC300308</a> | <a href="#">LOC300308.dSep08</a> | <a href="#">300308</a> | 5066   | 752  | 2  | 35  | similar to hypothetical protein 4930509O22 and similar to par-1 CG8201-PO, isoform O (4.1 kD) (LOC300308) alternative variant dSep08, mRNA. |
| <a href="#">LOC300308</a> | <a href="#">LOC300308.dSep08</a> | <a href="#">500815</a> | 5066   | 752  | 2  | 35  | similar to hypothetical protein 4930509O22 and similar to par-1 CG8201-PO, isoform O (4.1 kD) (LOC300308) alternative variant dSep08, mRNA. |
| <a href="#">LOC300308</a> | <a href="#">LOC300308.eSep08</a> | <a href="#">300308</a> | 4242   | 272  | 2  | 39  | similar to hypothetical protein 4930509O22 and similar to par-1 CG8201-PO, isoform O (LOC300308) alternative variant eSep08, mRNA.          |
| <a href="#">LOC300308</a> | <a href="#">LOC300308.eSep08</a> | <a href="#">500815</a> | 4242   | 272  | 2  | 39  | similar to hypothetical protein 4930509O22 and similar to par-1 CG8201-PO, isoform O (LOC300308) alternative variant eSep08, mRNA.          |
| <a href="#">LOC300314</a> | <a href="#">LOC300314.aSep08</a> | <a href="#">300314</a> | 7778   | 934  |    | 277 | similar to Protein KIAA0196 (LOC300314) mRNA.                                                                                               |
| <a href="#">LOC300963</a> | <a href="#">LOC300963.bSep08</a> | <a href="#">300963</a> | 43332  | 2241 | 13 | 538 | similar to centrosome protein Cep63 (62.7 kD) (LOC300963) alternative variant bSep08, complete mRNA.                                        |
| <a href="#">LOC300963</a> | <a href="#">LOC300963.cSep08</a> | <a href="#">300963</a> | 39633  | 1588 | 13 | 516 | similar to centrosome protein Cep63 (LOC300963) alternative variant cSep08, mRNA.                                                           |
| <a href="#">LOC300963</a> | <a href="#">LOC300963.dSep08</a> | <a href="#">300963</a> | 11350  | 955  | 4  | 213 | similar to centrosome protein Cep63 (LOC300963) alternative variant dSep08, mRNA.                                                           |
| <a href="#">LOC300963</a> | <a href="#">LOC300963.eSep08</a> | <a href="#">300963</a> | 22659  | 766  | 6  | 183 | similar to centrosome protein Cep63 (LOC300963) alternative variant eSep08, mRNA.                                                           |
| <a href="#">LOC300963</a> | <a href="#">LOC300963.fSep08</a> | <a href="#">300963</a> | 27749  | 799  | 6  | 140 | similar to centrosome protein Cep63 (LOC300963) alternative variant fSep08, mRNA.                                                           |
| <a href="#">LOC300963</a> | <a href="#">LOC300963.gSep08</a> | <a href="#">300963</a> | 2193   | 515  | 2  | 82  | similar to centrosome protein Cep63 (LOC300963) alternative variant gSep08, mRNA.                                                           |
| <a href="#">LOC300963</a> | <a href="#">LOC300963.iSep08</a> | <a href="#">300963</a> | 633    | 279  | 2  | 82  | similar to centrosome protein Cep63 (LOC300963) alternative variant iSep08, mRNA.                                                           |
| <a href="#">LOC301124</a> | <a href="#">LOC301124.aSep08</a> | <a href="#">301124</a> | 2076   | 1156 | 3  | 130 | hypothetical LOC301124 (14.3 kD) (LOC301124) alternative variant aSep08, mRNA.                                                              |
| <a href="#">LOC301124</a> | <a href="#">LOC301124.cSep08</a> | <a href="#">301124</a> | 1977   | 496  | 5  | 98  | hypothetical LOC301124 (11.2 kD) (LOC301124) alternative variant cSep08, mRNA.                                                              |
| <a href="#">LOC301124</a> | <a href="#">LOC301124.dSep08</a> | <a href="#">301124</a> | 1926   | 1428 | 2  | 71  | hypothetical LOC301124 (7.9 kD) (LOC301124) alternative variant dSep08, complete mRNA.                                                      |
| <a href="#">LOC301126</a> | <a href="#">LOC301126.aSep08</a> | <a href="#">301126</a> | 21114  | 2988 | 18 | 923 | scaffold attachment factor B2 (LOC301126) alternative variant aSep08, mRNA.                                                                 |
| <a href="#">LOC301126</a> | <a href="#">LOC301126.bSep08</a> | <a href="#">301126</a> | 11978  | 1913 | 13 | 492 | scaffold attachment factor B2 (58.5 kD) (LOC301126) alternative variant bSep08, mRNA.                                                       |



|                           |                                  |                        |       |      |   |     |                                                                                                                                           |
|---------------------------|----------------------------------|------------------------|-------|------|---|-----|-------------------------------------------------------------------------------------------------------------------------------------------|
| <a href="#">LOC301126</a> | <a href="#">LOC301126.cSep08</a> | <a href="#">301126</a> | 4193  | 1128 | 5 | 257 | scaffold attachment factor B2 (31.5 kD) (LOC301126) alternative variant cSep08, mRNA.                                                     |
| <a href="#">LOC301126</a> | <a href="#">LOC301126.eSep08</a> | <a href="#">301126</a> | 1662  | 691  | 3 | 148 | CRA b like (LOC301126) alternative variant eSep08, mRNA.                                                                                  |
| <a href="#">LOC301126</a> | <a href="#">LOC301126.fSep08</a> | <a href="#">301126</a> | 2382  | 1216 | 2 | 103 | scaffold attachment factor B2 (11.2 kD) (LOC301126) alternative variant fSep08, mRNA.                                                     |
| <a href="#">LOC301126</a> | <a href="#">LOC301126.gSep08</a> | <a href="#">301126</a> | 4741  | 391  | 3 | 90  | scaffold attachment factor B2 CRA b (LOC301126) alternative variant gSep08, mRNA.                                                         |
| <a href="#">LOC301126</a> | <a href="#">LOC301126.hSep08</a> | <a href="#">301126</a> | 1564  | 566  | 3 | 82  | scaffold attachment factor B2 CRA b (LOC301126) alternative variant hSep08, mRNA.                                                         |
| <a href="#">LOC301128</a> | <a href="#">LOC301128.bSep08</a> | <a href="#">301128</a> | 3225  | 777  | 5 | 112 | putative protein (LOC301128) alternative variant bSep08, mRNA.                                                                            |
| <a href="#">LOC301128</a> | <a href="#">LOC301128.cSep08</a> | <a href="#">301128</a> | 1863  | 414  | 3 | 58  | putative protein of metazoan origin (LOC301128) alternative variant cSep08, mRNA.                                                         |
| <a href="#">LOC301165</a> | <a href="#">LOC301165.aSep08</a> | <a href="#">301165</a> | 2203  | 1769 | 2 | 512 | similar to hypothetical protein 4932415M13 (57.3 kD) (LOC301165) alternative variant aSep08, mRNA.                                        |
| <a href="#">LOC301455</a> | <a href="#">LOC301455.aSep08</a> | <a href="#">301455</a> | 3016  | 394  |   | 130 | par-3 Partitioning defective 3 homolog b (LOC301455) mRNA.                                                                                |
| <a href="#">LOC301977</a> | <a href="#">LOC301977.aSep08</a> | <a href="#">301977</a> | 4668  | 838  |   | 174 | similar to spermatogenesis associated glutamate (E)-rich protein 4d (LOC301977) mRNA.                                                     |
| <a href="#">LOC302192</a> | <a href="#">LOC302192.aSep08</a> | <a href="#">302192</a> | 7638  | 1391 |   | 202 | similar to RIKEN cDNA 1700001E04 (24.1 kD) (LOC302192) complete mRNA.                                                                     |
| <a href="#">LOC302199</a> | <a href="#">LOC302199.aSep08</a> | <a href="#">302199</a> | 1946  | 468  |   | 119 | similar to spermatogenesis associated glutamate (E)-rich protein 4d (LOC302199) mRNA.                                                     |
| <a href="#">LOC302473</a> | <a href="#">LOC302473.bSep08</a> | <a href="#">302473</a> | 4053  | 302  | 1 | 100 | similar to SLIT and NTRK-like family, member 4 (LOC302473) alternative variant bSep08, mRNA.                                              |
| <a href="#">LOC302640</a> | <a href="#">LOC302640.bSep08</a> | <a href="#">302640</a> | 49063 | 871  | 1 | 212 | similar to acyl-CoA thioesterase (LOC302640) alternative variant bSep08, mRNA.                                                            |
| <a href="#">LOC302680</a> | <a href="#">LOC302680.bSep08</a> | <a href="#">302680</a> | 19811 | 839  | 5 | 271 | similar to CXORF15 (LOC302680) alternative variant bSep08, mRNA.                                                                          |
| <a href="#">LOC303059</a> | <a href="#">LOC303059.bSep08</a> | <a href="#">303059</a> | 15916 | 2622 | 1 | 77  | similar to novel protein (8.5 kD) (LOC303059) alternative variant bSep08, mRNA.                                                           |
| <a href="#">LOC303140</a> | <a href="#">LOC303140.aSep08</a> | <a href="#">303140</a> | 5496  | 1152 |   | 214 | up-regulator of carnitine transporter, OCTN2 (LOC303140) mRNA.                                                                            |
| <a href="#">LOC303259</a> | <a href="#">LOC303259.aSep08</a> | <a href="#">303259</a> | 40742 | 709  | 6 | 178 | similar to Map4k6-pending protein (LOC303259) alternative variant aSep08, mRNA.                                                           |
| <a href="#">LOC303259</a> | <a href="#">LOC303259.bSep08</a> | <a href="#">303259</a> | 35952 | 988  | 1 | 65  | similar to Map4k6-pending protein (LOC303259) alternative variant bSep08, mRNA.                                                           |
| <a href="#">LOC303448</a> | <a href="#">LOC303448.aSep08</a> | <a href="#">303448</a> | 6054  | 823  |   | 239 | similar to glyceraldehyde-3-phosphate dehydrogenase (LOC303448) mRNA.                                                                     |
| <a href="#">LOC303823</a> | <a href="#">LOC303823.bSep08</a> | <a href="#">303823</a> | 33567 | 759  | 3 | 190 | similar to mitogen-activated protein kinase kinase kinase 13; leucine zipper-bearing kinase (LOC303823) alternative variant bSep08, mRNA. |
| <a href="#">LOC303823</a> | <a href="#">LOC303823.cSep08</a> | <a href="#">303823</a> | 15761 | 1429 | 3 | 51  | similar to mitogen-activated protein kinase kinase kinase 13; leucine zipper-bearing kinase (LOC303823) alternative variant cSep08, mRNA. |

|                           |                                  |                        |        |      |    |      |                                                                                                                                                             |
|---------------------------|----------------------------------|------------------------|--------|------|----|------|-------------------------------------------------------------------------------------------------------------------------------------------------------------|
| <a href="#">LOC304000</a> | <a href="#">LOC304000.bSep08</a> | <a href="#">304000</a> | 21782  | 1308 | 2  | 227  | cell adhesion molecule JCAM (24.6 kD) (LOC304000) alternative variant bSep08, mRNA.                                                                         |
| <a href="#">LOC304000</a> | <a href="#">LOC304000.cSep08</a> | <a href="#">304000</a> | 21208  | 756  | 2  | 140  | cell adhesion molecule JCAM (15.3 kD) (LOC304000) alternative variant cSep08, mRNA.                                                                         |
| <a href="#">LOC304239</a> | <a href="#">LOC304239.aSep08</a> | <a href="#">304239</a> | 46258  | 3759 |    | 1194 | similar to RaIA binding protein 1 and similar to GTPase activating protein testicular GAP1 (LOC304239) mRNA.                                                |
| <a href="#">LOC304239</a> | <a href="#">LOC304239.aSep08</a> | <a href="#">689661</a> | 46258  | 3759 |    | 1194 | similar to RaIA binding protein 1 and similar to GTPase activating protein testicular GAP1 (LOC304239) mRNA.                                                |
| <a href="#">LOC304396</a> | <a href="#">LOC304396.aSep08</a> | <a href="#">304396</a> | 12179  | 1622 | 10 | 512  | similar to hypothetical protein DKFZp434K1815 (LOC304396) alternative variant aSep08, mRNA.                                                                 |
| <a href="#">LOC304396</a> | <a href="#">LOC304396.cSep08</a> | <a href="#">304396</a> | 2051   | 971  | 2  | 168  | similar to hypothetical protein DKFZp434K1815 (18.1 kD) (LOC304396) alternative variant cSep08, mRNA.                                                       |
| <a href="#">LOC304558</a> | <a href="#">LOC304558.aSep08</a> | <a href="#">304558</a> | 109544 | 504  | 1  | 67   | similar to TPR repeat-containing protein KIAA1043 (7.4 kD) (LOC304558) alternative variant aSep08, mRNA.                                                    |
| <a href="#">LOC304558</a> | <a href="#">LOC304558.bSep08</a> | <a href="#">304558</a> | 55178  | 562  | 2  | 53   | similar to TPR repeat-containing protein KIAA1043 (5.8 kD) (LOC304558) alternative variant bSep08, mRNA.                                                    |
| <a href="#">LOC304725</a> | <a href="#">LOC304725.aSep08</a> | <a href="#">304725</a> | 282524 | 473  | 2  | 135  | similar to contactin associated protein-like 5 isoform 1 (15.0 kD) (LOC304725) alternative variant aSep08, mRNA.                                            |
| <a href="#">LOC304725</a> | <a href="#">LOC304725.bSep08</a> | <a href="#">304725</a> | 36615  | 392  | 1  | 48   | similar to contactin associated protein-like 5 isoform 1 (LOC304725) alternative variant bSep08, mRNA.                                                      |
| <a href="#">LOC305076</a> | <a href="#">LOC305076.bSep08</a> | <a href="#">305076</a> | 6612   | 1309 | 6  | 131  | digestive-organ expansion factor homolog (LOC305076) alternative variant bSep08, mRNA.                                                                      |
| <a href="#">LOC305076</a> | <a href="#">LOC305076.cSep08</a> | <a href="#">305076</a> | 8185   | 957  | 4  | 120  | putative protein (13.2 kD) (LOC305076) alternative variant cSep08, mRNA.                                                                                    |
| <a href="#">LOC305633</a> | <a href="#">LOC305633.aSep08</a> | <a href="#">305633</a> | 95393  | 2547 | 8  | 221  | similar to Antxr2 protein (LOC305633) alternative variant aSep08, mRNA.                                                                                     |
| <a href="#">LOC305691</a> | <a href="#">LOC305691.bSep08</a> | <a href="#">305691</a> | 18908  | 266  | 1  | 64   | similar to hypothetical protein FLJ22419 (LOC305691) alternative variant bSep08, mRNA.                                                                      |
| <a href="#">LOC305771</a> | <a href="#">LOC305771.aSep08</a> | <a href="#">305771</a> | 47869  | 538  | 2  | 108  | similar to nidogen 2 and hypothetical LOC501227 (11.8 kD) (LOC305771) alternative variant aSep08, mRNA.                                                     |
| <a href="#">LOC305771</a> | <a href="#">LOC305771.aSep08</a> | <a href="#">501227</a> | 47869  | 538  | 2  | 108  | similar to nidogen 2 and hypothetical LOC501227 (11.8 kD) (LOC305771) alternative variant aSep08, mRNA.                                                     |
| <a href="#">LOC305771</a> | <a href="#">LOC305771.bSep08</a> | <a href="#">305771</a> | 49436  | 821  | 3  | 56   | similar to nidogen 2 and hypothetical LOC501227 (6.5 kD) (LOC305771) alternative variant bSep08, mRNA.                                                      |
| <a href="#">LOC305771</a> | <a href="#">LOC305771.bSep08</a> | <a href="#">501227</a> | 49436  | 821  | 3  | 56   | similar to nidogen 2 and hypothetical LOC501227 (6.5 kD) (LOC305771) alternative variant bSep08, mRNA.                                                      |
| <a href="#">LOC306096</a> | <a href="#">LOC306096.aSep08</a> | <a href="#">306096</a> | 379727 | 1917 | 9  | 220  | similar to Dachshund homolog 1 (Dach1) (24.8 kD) (LOC306096) alternative variant aSep08, mRNA.                                                              |
| <a href="#">LOC306312</a> | <a href="#">LOC306312.aSep08</a> | <a href="#">306312</a> | 1504   | 1161 |    | 340  | similar to RNA polymerase II transcription factor SIII subunit A2 (Elongin A2) (EloA2) (Transcription elongation factor B polypeptide 3B) (LOC306312) mRNA. |
| <a href="#">LOC306365</a> | <a href="#">LOC306365.aSep08</a> | <a href="#">306365</a> | 18164  | 568  |    | 189  | ankyrin (LOC306365) mRNA.                                                                                                                                   |
| <a href="#">LOC306766</a> | <a href="#">LOC306766.bSep08</a> | <a href="#">306766</a> | 13095  | 2345 | 5  | 160  | hypothetical LOC306766 (17.3 kD) (LOC306766) alternative variant bSep08, complete mRNA.                                                                     |
| <a href="#">LOC306766</a> | <a href="#">LOC306766.cSep08</a> | <a href="#">306766</a> | 10869  | 916  | 7  | 83   | hypothetical LOC306766 (LOC306766) alternative variant cSep08, mRNA.                                                                                        |

|                           |                                  |                        |       |      |    |     |                                                                                                               |
|---------------------------|----------------------------------|------------------------|-------|------|----|-----|---------------------------------------------------------------------------------------------------------------|
| <a href="#">LOC306766</a> | <a href="#">LOC306766.dSep08</a> | <a href="#">306766</a> | 10841 | 702  | 5  | 53  | hypothetical LOC306766 (LOC306766) alternative variant dSep08, mRNA.                                          |
| <a href="#">LOC306766</a> | <a href="#">LOC306766.fSep08</a> | <a href="#">306766</a> | 946   | 377  | 2  | 35  | hypothetical LOC306766 (LOC306766) alternative variant fSep08, mRNA.                                          |
| <a href="#">LOC306766</a> | <a href="#">LOC306766.gSep08</a> | <a href="#">306766</a> | 741   | 350  | 2  | 52  | hypothetical LOC306766 (LOC306766) alternative variant gSep08, mRNA.                                          |
| <a href="#">LOC307347</a> | <a href="#">LOC307347.aSep08</a> | <a href="#">307347</a> | 37091 | 2486 | 17 | 734 | hypothetical protein LOC307347 (LOC307347) alternative variant aSep08, mRNA.                                  |
| <a href="#">LOC307347</a> | <a href="#">LOC307347.bSep08</a> | <a href="#">307347</a> | 4893  | 413  | 3  | 137 | hypothetical protein LOC307347 (LOC307347) alternative variant bSep08, mRNA.                                  |
| <a href="#">LOC308320</a> | <a href="#">LOC308320.bSep08</a> | <a href="#">308320</a> | 2472  | 748  | 1  | 106 | similar to 5730403M16Rik protein (11.8 kD) (LOC308320) alternative variant bSep08, mRNA.                      |
| <a href="#">LOC308320</a> | <a href="#">LOC308320.cSep08</a> | <a href="#">308320</a> | 4761  | 753  | 4  | 78  | similar to 5730403M16Rik protein (8.7 kD) (LOC308320) alternative variant cSep08, mRNA.                       |
| <a href="#">LOC308398</a> | <a href="#">LOC308398.aSep08</a> | <a href="#">308398</a> | 28517 | 1392 | 3  | 333 | similar to F28C1.3a (LOC308398) alternative variant aSep08, mRNA.                                             |
| <a href="#">LOC308398</a> | <a href="#">LOC308398.bSep08</a> | <a href="#">308398</a> | 6917  | 629  | 1  | 180 | similar to F28C1.3a (LOC308398) alternative variant bSep08, mRNA.                                             |
| <a href="#">LOC308670</a> | <a href="#">LOC308670.cSep08</a> | <a href="#">308670</a> | 3821  | 397  | 3  | 67  | putative protein (LOC308670) alternative variant cSep08, mRNA.                                                |
| <a href="#">LOC308670</a> | <a href="#">LOC308670.cSep08</a> | <a href="#">691462</a> | 3821  | 397  | 3  | 67  | putative protein (LOC308670) alternative variant cSep08, mRNA.                                                |
| <a href="#">LOC308954</a> | <a href="#">LOC308954.bSep08</a> | <a href="#">308954</a> | 11804 | 672  | 1  | 206 | similar to hypothetical protein MGC50721 (LOC308954) alternative variant bSep08, mRNA.                        |
| <a href="#">LOC308990</a> | <a href="#">LOC308990.aSep08</a> | <a href="#">308990</a> | 2531  | 843  | 3  | 232 | hypothetical protein LOC308990 (25.4 kD) (LOC308990) alternative variant aSep08, mRNA.                        |
| <a href="#">LOC308990</a> | <a href="#">LOC308990.cSep08</a> | <a href="#">308990</a> | 1500  | 778  | 2  | 225 | hypothetical protein LOC308990 (LOC308990) alternative variant cSep08, mRNA.                                  |
| <a href="#">LOC308990</a> | <a href="#">LOC308990.dSep08</a> | <a href="#">308990</a> | 2263  | 1583 | 2  | 225 | hypothetical protein LOC308990 (24.5 kD) (LOC308990) alternative variant dSep08, mRNA.                        |
| <a href="#">LOC308990</a> | <a href="#">LOC308990.eSep08</a> | <a href="#">308990</a> | 1274  | 735  | 2  | 97  | hypothetical protein LOC308990 (LOC308990) alternative variant eSep08, mRNA.                                  |
| <a href="#">LOC309378</a> | <a href="#">LOC309378.aSep08</a> | <a href="#">309378</a> | 18516 | 798  | 6  | 235 | similar to golgi autoantigen, golgin subfamily a, 7 (LOC309378) alternative variant aSep08, mRNA.             |
| <a href="#">LOC309378</a> | <a href="#">LOC309378.bSep08</a> | <a href="#">309378</a> | 6977  | 550  | 2  | 182 | similar to golgi autoantigen, golgin subfamily a, 7 (LOC309378) alternative variant bSep08, mRNA.             |
| <a href="#">LOC309378</a> | <a href="#">LOC309378.cSep08</a> | <a href="#">309378</a> | 1522  | 379  | 2  | 78  | similar to golgi autoantigen, golgin subfamily a, 7 (LOC309378) alternative variant cSep08, mRNA.             |
| <a href="#">LOC309433</a> | <a href="#">LOC309433.aSep08</a> | <a href="#">309433</a> | 7081  | 1784 | 4  | 586 | similar to <i>S. cerevisiae</i> SEC31-like 2 isoform a (LOC309433) alternative variant aSep08, mRNA.          |
| <a href="#">LOC309433</a> | <a href="#">LOC309433.bSep08</a> | <a href="#">309433</a> | 5855  | 1039 | 7  | 345 | similar to <i>S. cerevisiae</i> SEC31-like 2 isoform a (LOC309433) alternative variant bSep08, mRNA.          |
| <a href="#">LOC309433</a> | <a href="#">LOC309433.cSep08</a> | <a href="#">309433</a> | 2036  | 321  | 5  | 107 | similar to <i>S. cerevisiae</i> SEC31-like 2 isoform a (LOC309433) alternative variant cSep08, mRNA.          |
| <a href="#">LOC309433</a> | <a href="#">LOC309433.dSep08</a> | <a href="#">309433</a> | 4137  | 435  | 4  | 21  | similar to <i>S. cerevisiae</i> SEC31-like 2 isoform a (2.4 kD) (LOC309433) alternative variant dSep08, mRNA. |

|                             |                                    |                        |       |      |    |      |                                                                                                              |
|-----------------------------|------------------------------------|------------------------|-------|------|----|------|--------------------------------------------------------------------------------------------------------------|
| <a href="#">LOC309433</a>   | <a href="#">LOC309433.eSep08</a>   | <a href="#">309433</a> | 1054  | 367  | 3  | 47   | similar to <i>S. cerevisiae</i> SEC31-like 2 isoform a (LOC309433) alternative variant eSep08, mRNA.         |
| <a href="#">LOC309692</a>   | <a href="#">LOC309692.aSep08</a>   | <a href="#">309692</a> | 13410 | 1785 |    | 444  | similar to pericentrin (LOC309692) mRNA.                                                                     |
| <a href="#">LOC310013</a>   | <a href="#">LOC310013.aSep08</a>   | <a href="#">310013</a> | 9882  | 2017 |    | 266  | hypothetical LOC310013 (LOC310013) mRNA.                                                                     |
| <a href="#">LOC310902</a>   | <a href="#">LOC310902.aSep08</a>   | <a href="#">310902</a> | 8248  | 576  |    | 104  | similar to Alcohol dehydrogenase 1A (Alcohol dehydrogenase alpha subunit) (LOC310902) mRNA.                  |
| <a href="#">LOC310926</a>   | <a href="#">LOC310926.cSep08</a>   | <a href="#">310926</a> | 1503  | 1337 | 2  | 257  | hypothetical protein LOC310926 (LOC310926) alternative variant cSep08, mRNA.                                 |
| <a href="#">LOC310958</a>   | <a href="#">LOC310958.bSep08</a>   | <a href="#">310958</a> | 6773  | 888  | 3  | 113  | putative protein of eukaryotic origin (LOC310958) alternative variant bSep08, mRNA.                          |
| <a href="#">LOC311026</a>   | <a href="#">LOC311026.aSep08</a>   | <a href="#">311026</a> | 30754 | 1104 | 2  | 155  | similar to mKIAA1461 protein (LOC311026) alternative variant aSep08, mRNA.                                   |
| <a href="#">LOC311026</a>   | <a href="#">LOC311026.bSep08</a>   | <a href="#">311026</a> | 30410 | 893  | 1  | 85   | similar to mKIAA1461 protein (9.7 kD) (LOC311026) alternative variant bSep08, mRNA.                          |
| <a href="#">LOC311134</a>   | <a href="#">LOC311134.aSep08</a>   | <a href="#">311134</a> | 95663 | 2158 |    | 547  | hypothetical LOC311134 (LOC311134) mRNA.                                                                     |
| <a href="#">LOC311352</a>   | <a href="#">LOC311352.bSep08</a>   | <a href="#">311352</a> | 5218  | 737  | 4  | 160  | similar to Adenosine deaminase CG11994-PA (LOC311352) alternative variant bSep08, mRNA.                      |
| <a href="#">LOC311984</a>   | <a href="#">LOC311984.bSep08</a>   | <a href="#">311984</a> | 17706 | 1665 | 12 | 288  | similar to RIKEN cDNA A530088I07 gene (33.3 kD) (LOC311984) alternative variant bSep08, mRNA.                |
| <a href="#">LOC311984</a>   | <a href="#">LOC311984.cSep08</a>   | <a href="#">311984</a> | 1518  | 718  | 2  | 46   | similar to RIKEN cDNA A530088I07 gene (LOC311984) alternative variant cSep08, mRNA.                          |
| <a href="#">LOC312502</a>   | <a href="#">LOC312502.aSep08</a>   | <a href="#">312502</a> | 26266 | 968  |    | 322  | similar to RAB11 family interacting protein 5 (class I) isoform 1 (LOC312502) mRNA.                          |
| <a href="#">LOC312678</a>   | <a href="#">LOC312678.aSep08</a>   | <a href="#">312678</a> | 34643 | 1803 | 11 | 601  | similar to Retinoblastoma-binding protein 2 (RBBP-2) (LOC312678) alternative variant aSep08, mRNA.           |
| <a href="#">LOC312678</a>   | <a href="#">LOC312678.bSep08</a>   | <a href="#">312678</a> | 33221 | 2315 | 12 | 579  | similar to Retinoblastoma-binding protein 2 (RBBP-2) (66.1 kD) (LOC312678) alternative variant bSep08, mRNA. |
| <a href="#">LOC312678</a>   | <a href="#">LOC312678.cSep08</a>   | <a href="#">312678</a> | 17450 | 1416 | 9  | 471  | similar to Retinoblastoma-binding protein 2 (RBBP-2) (LOC312678) alternative variant cSep08, mRNA.           |
| <a href="#">LOC312678</a>   | <a href="#">LOC312678.dSep08</a>   | <a href="#">312678</a> | 6728  | 1028 | 4  | 342  | similar to Retinoblastoma-binding protein 2 (RBBP-2) (LOC312678) alternative variant dSep08, mRNA.           |
| <a href="#">LOC312678</a>   | <a href="#">LOC312678.eSep08</a>   | <a href="#">312678</a> | 9031  | 716  | 4  | 188  | similar to Retinoblastoma-binding protein 2 (RBBP-2) (LOC312678) alternative variant eSep08, mRNA.           |
| <a href="#">LOC312831</a>   | <a href="#">LOC312831.bSep08</a>   | <a href="#">312831</a> | 29565 | 818  | 4  | 207  | similar to SRY (sex determining region Y)-box 5 isoform a (LOC312831) alternative variant bSep08, mRNA.      |
| <a href="#">LOC312831</a>   | <a href="#">LOC312831.cSep08</a>   | <a href="#">312831</a> | 34919 | 760  | 5  | 187  | similar to SRY (sex determining region Y)-box 5 isoform a (LOC312831) alternative variant cSep08, mRNA.      |
| <a href="#">LOC313149</a>   | <a href="#">LOC313149.aSep08</a>   | <a href="#">313149</a> | 6529  | 490  |    | 162  | hypothetical LOC313149 (LOC313149) mRNA.                                                                     |
| <a href="#">LOC313519.1</a> | <a href="#">LOC313519.1.aSep08</a> | <a href="#">313519</a> | 40898 | 3499 | 10 | 475  | similar to RIKEN cDNA 5330440M15 (52.4 kD) (LOC313519.1) alternative variant aSep08, complete mRNA.          |
| <a href="#">LOC313519.1</a> | <a href="#">LOC313519.1.bSep08</a> | <a href="#">313519</a> | 2521  | 1059 | 1  | 196  | similar to RIKEN cDNA 5330440M15 (22.0 kD) (LOC313519.1) alternative variant bSep08, mRNA.                   |
| <a href="#">LOC313519.1</a> | <a href="#">LOC313519.1.cSep08</a> | <a href="#">313519</a> | 13342 | 386  | 2  | 58   | similar to RIKEN cDNA 5330440M15 (LOC313519.1) alternative variant cSep08, mRNA.                             |
| <a href="#">LOC313641</a>   | <a href="#">LOC313641.aSep08</a>   | <a href="#">313641</a> | 19344 | 4886 | 26 | 1168 | perlecan (125.2 kD) (LOC313641) alternative variant aSep08, mRNA.                                            |

|                           |                                  |                        |       |      |    |     |                                                                                                                                                                  |
|---------------------------|----------------------------------|------------------------|-------|------|----|-----|------------------------------------------------------------------------------------------------------------------------------------------------------------------|
| <a href="#">LOC313641</a> | <a href="#">LOC313641.bSep08</a> | <a href="#">313641</a> | 2501  | 633  | 5  | 211 | perlecan (LOC313641) alternative variant bSep08, mRNA.                                                                                                           |
| <a href="#">LOC313641</a> | <a href="#">LOC313641.cSep08</a> | <a href="#">313641</a> | 3031  | 528  | 6  | 175 | perlecan (LOC313641) alternative variant cSep08, mRNA.                                                                                                           |
| <a href="#">LOC313672</a> | <a href="#">LOC313672.aSep08</a> | <a href="#">313672</a> | 91763 | 1796 | 2  | 598 | similar to CG11206-PA (LOC313672) alternative variant aSep08, mRNA.                                                                                              |
| <a href="#">LOC313707</a> | <a href="#">LOC313707.aSep08</a> | <a href="#">313707</a> | 23616 | 2759 | 25 | 537 | exosome component 10 CRA b (61.3 kD) (LOC313707) alternative variant aSep08, mRNA.                                                                               |
| <a href="#">LOC313707</a> | <a href="#">LOC313707.cSep08</a> | <a href="#">313707</a> | 2534  | 844  | 4  | 115 | exosome component 10 (12.9 kD) (LOC313707) alternative variant cSep08, mRNA.                                                                                     |
| <a href="#">LOC313707</a> | <a href="#">LOC313707.dSep08</a> | <a href="#">313707</a> | 3243  | 560  | 3  | 108 | exosome component 10 (LOC313707) alternative variant dSep08, mRNA.                                                                                               |
| <a href="#">LOC313707</a> | <a href="#">LOC313707.eSep08</a> | <a href="#">313707</a> | 13811 | 473  | 6  | 80  | exosome component 10 (8.8 kD) (LOC313707) alternative variant eSep08, mRNA.                                                                                      |
| <a href="#">LOC313707</a> | <a href="#">LOC313707.fSep08</a> | <a href="#">313707</a> | 1804  | 1298 | 2  | 112 | putative protein (11.9 kD) (LOC313707) alternative variant fSep08, mRNA.                                                                                         |
| <a href="#">LOC313936</a> | <a href="#">LOC313936.bSep08</a> | <a href="#">313936</a> | 13564 | 741  | 1  | 143 | hypothetical LOC313936 (LOC313936) alternative variant bSep08, mRNA.                                                                                             |
| <a href="#">LOC314140</a> | <a href="#">LOC314140.cSep08</a> | <a href="#">314140</a> | 6869  | 375  | 2  | 83  | putative protein (LOC314140) alternative variant cSep08, mRNA.                                                                                                   |
| <a href="#">LOC314140</a> | <a href="#">LOC314140.dSep08</a> | <a href="#">314140</a> | 6997  | 479  | 2  | 26  | putative protein (LOC314140) alternative variant dSep08, mRNA.                                                                                                   |
| <a href="#">LOC314328</a> | <a href="#">LOC314328.aSep08</a> | <a href="#">314328</a> | 9876  | 792  | 2  | 185 | uncharacterized protein (LOC314328) alternative variant aSep08, mRNA.                                                                                            |
| <a href="#">LOC314328</a> | <a href="#">LOC314328.bSep08</a> | <a href="#">314328</a> | 9880  | 765  | 2  | 169 | uncharacterized protein (19.1 kD) (LOC314328) alternative variant bSep08, complete mRNA.                                                                         |
| <a href="#">LOC314328</a> | <a href="#">LOC314328.cSep08</a> | <a href="#">314328</a> | 9851  | 723  | 2  | 128 | putative protein of metazoan origin (14.2 kD) (LOC314328) alternative variant cSep08, complete mRNA.                                                             |
| <a href="#">LOC314655</a> | <a href="#">LOC314655.aSep08</a> | <a href="#">314655</a> | 22702 | 3525 | 21 | 705 | similar to a disintegrin-like and metalloprotease (reprolysin type) with thrombospondin type 1 motif, 10 (77.0 kD) (LOC314655) alternative variant aSep08, mRNA. |
| <a href="#">LOC314655</a> | <a href="#">LOC314655.cSep08</a> | <a href="#">314655</a> | 5560  | 741  | 6  | 189 | similar to a disintegrin-like and metalloprotease (reprolysin type) with thrombospondin type 1 motif, 10 (LOC314655) alternative variant cSep08, mRNA.           |
| <a href="#">LOC314655</a> | <a href="#">LOC314655.dSep08</a> | <a href="#">314655</a> | 4456  | 663  | 3  | 145 | similar to a disintegrin-like and metalloprotease (reprolysin type) with thrombospondin type 1 motif, 10 (LOC314655) alternative variant dSep08, mRNA.           |
| <a href="#">LOC314655</a> | <a href="#">LOC314655.eSep08</a> | <a href="#">314655</a> | 889   | 748  | 2  | 144 | similar to a disintegrin-like and metalloprotease (reprolysin type) with thrombospondin type 1 motif, 10 (LOC314655) alternative variant eSep08, mRNA.           |
| <a href="#">LOC314655</a> | <a href="#">LOC314655.fSep08</a> | <a href="#">314655</a> | 618   | 536  | 2  | 106 | similar to a disintegrin-like and metalloprotease (reprolysin type) with thrombospondin type 1 motif, 10 (LOC314655) alternative variant fSep08, mRNA.           |
| <a href="#">LOC314776</a> | <a href="#">LOC314776.aSep08</a> | <a href="#">314776</a> | 37193 | 598  |    | 69  | similar to Peptidyl-prolyl cis-trans isomerase A (PPIase) (Rotamase) (Cyclophilin A) (Cyclosporin A-binding protein) (P31) (p1B15) (8.0 kD) (LOC314776) mRNA.    |
| <a href="#">LOC314942</a> | <a href="#">LOC314942.aSep08</a> | <a href="#">314942</a> | 18110 | 2708 |    | 301 | similar to CUB and Sushi multiple domains 3 isoform 1 (LOC314942) mRNA.                                                                                          |
| <a href="#">LOC315766</a> | <a href="#">LOC315766.aSep08</a> | <a href="#">315766</a> | 1540  | 392  |    | 130 | similar to zinc finger protein 609 (LOC315766) mRNA.                                                                                                             |

|                           |                                  |                        |       |      |   |     |                                                                                                                            |
|---------------------------|----------------------------------|------------------------|-------|------|---|-----|----------------------------------------------------------------------------------------------------------------------------|
| <a href="#">LOC315970</a> | <a href="#">LOC315970.bSep08</a> | <a href="#">315970</a> | 1816  | 776  | 1 | 65  | similar to CDV-3B (LOC315970) alternative variant bSep08, mRNA.                                                            |
| <a href="#">LOC316124</a> | <a href="#">LOC316124.bSep08</a> | <a href="#">316124</a> | 1957  | 696  | 4 | 231 | similar to gonadotropin-regulated long chain acyl-CoA synthetase (LOC316124) alternative variant bSep08, mRNA.             |
| <a href="#">LOC316124</a> | <a href="#">LOC316124.cSep08</a> | <a href="#">316124</a> | 5633  | 677  | 6 | 225 | similar to gonadotropin-regulated long chain acyl-CoA synthetase (LOC316124) alternative variant cSep08, mRNA.             |
| <a href="#">LOC316124</a> | <a href="#">LOC316124.dSep08</a> | <a href="#">316124</a> | 817   | 314  | 2 | 53  | similar to gonadotropin-regulated long chain acyl-CoA synthetase (LOC316124) alternative variant dSep08, mRNA.             |
| <a href="#">LOC316919</a> | <a href="#">LOC316919.bSep08</a> | <a href="#">316919</a> | 508   | 385  | 2 | 10  | similar to spermatogenesis associated glutamate (E)-rich protein 4d (1.1 kD) (LOC316919) alternative variant bSep08, mRNA. |
| <a href="#">LOC317416</a> | <a href="#">LOC317416.aSep08</a> | <a href="#">317416</a> | 21282 | 897  |   | 260 | similar to inter alpha-trypsin inhibitor, heavy chain 4 (29.4 kD) (LOC317416) mRNA.                                        |
| <a href="#">LOC360479</a> | <a href="#">LOC360479.bSep08</a> | <a href="#">360479</a> | 5114  | 483  | 4 | 105 | similar to hypothetical protein (LOC360479) alternative variant bSep08, mRNA.                                              |
| <a href="#">LOC360504</a> | <a href="#">LOC360504.bSep08</a> | <a href="#">360504</a> | 13923 | 366  | 3 | 93  | hemoglobin alpha 2 chain (LOC360504) alternative variant bSep08, mRNA.                                                     |
| <a href="#">LOC360684</a> | <a href="#">LOC360684.aSep08</a> | <a href="#">360684</a> | 13834 | 783  |   | 228 | similar to eyes absent 4 isoform a (LOC360684) mRNA.                                                                       |
| <a href="#">LOC360721</a> | <a href="#">LOC360721.bSep08</a> | <a href="#">360721</a> | 27070 | 993  | 5 | 155 | growth and transformation-dependent protein (17.8 kD) (LOC360721) alternative variant bSep08, mRNA.                        |
| <a href="#">LOC360721</a> | <a href="#">LOC360721.cSep08</a> | <a href="#">360721</a> | 27315 | 832  | 5 | 126 | growth and transformation-dependent protein (14.5 kD) (LOC360721) alternative variant cSep08, mRNA.                        |
| <a href="#">LOC360721</a> | <a href="#">LOC360721.fSep08</a> | <a href="#">360721</a> | 5214  | 589  | 2 | 19  | growth and transformation-dependent protein (LOC360721) alternative variant fSep08, complete mRNA.                         |
| <a href="#">LOC360807</a> | <a href="#">LOC360807.aSep08</a> | <a href="#">360807</a> | 17876 | 1260 | 9 | 419 | arginine serine-rich coiled-coil 2 (LOC360807) alternative variant aSep08, mRNA.                                           |
| <a href="#">LOC360807</a> | <a href="#">LOC360807.cSep08</a> | <a href="#">360807</a> | 9973  | 1718 | 6 | 293 | putative protein (LOC360807) alternative variant cSep08, mRNA.                                                             |
| <a href="#">LOC360807</a> | <a href="#">LOC360807.dSep08</a> | <a href="#">360807</a> | 10886 | 765  | 6 | 255 | arginine serine-rich coiled-coil 2 (LOC360807) alternative variant dSep08, mRNA.                                           |
| <a href="#">LOC360807</a> | <a href="#">LOC360807.eSep08</a> | <a href="#">360807</a> | 11869 | 743  | 6 | 233 | arginine serine-rich coiled-coil 2 (LOC360807) alternative variant eSep08, mRNA.                                           |
| <a href="#">LOC360807</a> | <a href="#">LOC360807.fSep08</a> | <a href="#">360807</a> | 3242  | 872  | 3 | 179 | arginine serine-rich coiled-coil 2 (LOC360807) alternative variant fSep08, mRNA.                                           |
| <a href="#">LOC360807</a> | <a href="#">LOC360807.gSep08</a> | <a href="#">360807</a> | 2879  | 984  | 2 | 156 | arginine serine-rich coiled-coil 2 (17.2 kD) (LOC360807) alternative variant gSep08, mRNA.                                 |
| <a href="#">LOC360807</a> | <a href="#">LOC360807.hSep08</a> | <a href="#">360807</a> | 2340  | 640  | 2 | 102 | CRA b like (LOC360807) alternative variant hSep08, mRNA.                                                                   |
| <a href="#">LOC360807</a> | <a href="#">LOC360807.iSep08</a> | <a href="#">360807</a> | 3135  | 770  | 3 | 101 | putative protein (LOC360807) alternative variant iSep08, mRNA.                                                             |
| <a href="#">LOC360807</a> | <a href="#">LOC360807.jSep08</a> | <a href="#">360807</a> | 5528  | 370  | 3 | 98  | arginine serine-rich coiled-coil 2 (LOC360807) alternative variant jSep08, mRNA.                                           |
| <a href="#">LOC360824</a> | <a href="#">LOC360824.aSep08</a> | <a href="#">360824</a> | 20157 | 991  | 3 | 282 | similar to CG9164-PA, isoform A (LOC360824) alternative variant aSep08, mRNA.                                              |

|                           |                                  |                        |       |      |    |     |                                                                                                                 |
|---------------------------|----------------------------------|------------------------|-------|------|----|-----|-----------------------------------------------------------------------------------------------------------------|
| <a href="#">LOC360824</a> | <a href="#">LOC360824.bSep08</a> | <a href="#">360824</a> | 7711  | 783  | 1  | 172 | similar to CG9164-PA, isoform A (LOC360824) alternative variant bSep08, mRNA.                                   |
| <a href="#">LOC360919</a> | <a href="#">LOC360919.aSep08</a> | <a href="#">360919</a> | 22976 | 858  | 7  | 286 | similar to alpha-fetoprotein (LOC360919) alternative variant aSep08, mRNA.                                      |
| <a href="#">LOC360919</a> | <a href="#">LOC360919.cSep08</a> | <a href="#">360919</a> | 6589  | 527  | 4  | 175 | similar to alpha-fetoprotein (LOC360919) alternative variant cSep08, mRNA.                                      |
| <a href="#">LOC360919</a> | <a href="#">LOC360919.dSep08</a> | <a href="#">360919</a> | 5215  | 1180 | 2  | 51  | similar to alpha-fetoprotein (5.7 kD) (LOC360919) alternative variant dSep08, mRNA.                             |
| <a href="#">LOC360919</a> | <a href="#">LOC360919.eSep08</a> | <a href="#">360919</a> | 943   | 451  | 2  | 30  | similar to alpha-fetoprotein (LOC360919) alternative variant eSep08, mRNA.                                      |
| <a href="#">LOC360990</a> | <a href="#">LOC360990.aSep08</a> | <a href="#">360990</a> | 23128 | 2708 | 13 | 715 | similar to ubiquitin specific protease 34 (LOC360990) alternative variant aSep08, mRNA.                         |
| <a href="#">LOC360990</a> | <a href="#">LOC360990.bSep08</a> | <a href="#">360990</a> | 17845 | 739  | 8  | 236 | similar to ubiquitin specific protease 34 (LOC360990) alternative variant bSep08, mRNA.                         |
| <a href="#">LOC360990</a> | <a href="#">LOC360990.cSep08</a> | <a href="#">360990</a> | 14544 | 698  | 6  | 232 | similar to ubiquitin specific protease 34 (LOC360990) alternative variant cSep08, mRNA.                         |
| <a href="#">LOC360990</a> | <a href="#">LOC360990.dSep08</a> | <a href="#">360990</a> | 4075  | 1068 | 3  | 87  | similar to ubiquitin specific protease 34 (10.1 kD) (LOC360990) alternative variant dSep08, mRNA.               |
| <a href="#">LOC360990</a> | <a href="#">LOC360990.eSep08</a> | <a href="#">360990</a> | 13221 | 663  | 4  | 85  | similar to ubiquitin specific protease 34 (LOC360990) alternative variant eSep08, mRNA.                         |
| <a href="#">LOC361016</a> | <a href="#">LOC361016.aSep08</a> | <a href="#">361016</a> | 50337 | 888  | 7  | 295 | similar to RIKEN cDNA 4933406L09 (LOC361016) alternative variant aSep08, mRNA.                                  |
| <a href="#">LOC361016</a> | <a href="#">LOC361016.bSep08</a> | <a href="#">361016</a> | 47831 | 717  | 5  | 239 | similar to RIKEN cDNA 4933406L09 (LOC361016) alternative variant bSep08, mRNA.                                  |
| <a href="#">LOC361016</a> | <a href="#">LOC361016.cSep08</a> | <a href="#">361016</a> | 66720 | 945  | 4  | 137 | similar to RIKEN cDNA 4933406L09 (LOC361016) alternative variant cSep08, mRNA.                                  |
| <a href="#">LOC361016</a> | <a href="#">LOC361016.dSep08</a> | <a href="#">361016</a> | 2966  | 604  | 3  | 121 | similar to RIKEN cDNA 4933406L09 (LOC361016) alternative variant dSep08, mRNA.                                  |
| <a href="#">LOC361041</a> | <a href="#">LOC361041.aSep08</a> | <a href="#">361041</a> | 5960  | 1678 | 7  | 559 | similar to hypothetical protein (LOC361041) alternative variant aSep08, mRNA.                                   |
| <a href="#">LOC361041</a> | <a href="#">LOC361041.bSep08</a> | <a href="#">361041</a> | 1276  | 425  | 3  | 122 | similar to hypothetical protein (LOC361041) alternative variant bSep08, mRNA.                                   |
| <a href="#">LOC361041</a> | <a href="#">LOC361041.cSep08</a> | <a href="#">361041</a> | 825   | 384  | 1  | 83  | similar to hypothetical protein (LOC361041) alternative variant cSep08, mRNA.                                   |
| <a href="#">LOC361098</a> | <a href="#">LOC361098.aSep08</a> | <a href="#">361098</a> | 5382  | 386  |    | 128 | similar to SGT1 protein homolog (Ecdysoneless homolog) (LOC361098) mRNA.                                        |
| <a href="#">LOC361100</a> | <a href="#">LOC361100.aSep08</a> | <a href="#">361100</a> | 12308 | 1619 |    | 431 | similar to topoisomerase (DNA) II beta (LOC361100) mRNA.                                                        |
| <a href="#">LOC361128</a> | <a href="#">LOC361128.bSep08</a> | <a href="#">361128</a> | 2267  | 1139 | 5  | 140 | similar to TR4 orphan receptor associated protein TRA16 (16.1 kD) (LOC361128) alternative variant bSep08, mRNA. |
| <a href="#">LOC361128</a> | <a href="#">LOC361128.cSep08</a> | <a href="#">361128</a> | 613   | 405  | 2  | 92  | similar to TR4 orphan receptor associated protein TRA16 (LOC361128) alternative variant cSep08, mRNA.           |
| <a href="#">LOC361128</a> | <a href="#">LOC361128.dSep08</a> | <a href="#">361128</a> | 1806  | 750  | 4  | 83  | similar to TR4 orphan receptor associated protein TRA16 (9.6 kD) (LOC361128) alternative variant dSep08, mRNA.  |
| <a href="#">LOC361187</a> | <a href="#">LOC361187.aSep08</a> | <a href="#">361187</a> | 5324  | 1780 | 1  | 538 | ankyrin (LOC361187) alternative variant aSep08, mRNA.                                                           |
| <a href="#">LOC361188</a> | <a href="#">LOC361188.aSep08</a> | <a href="#">361188</a> | 10504 | 655  |    | 159 | similar to WD repeat domain 17 (LOC361188) mRNA.                                                                |
| <a href="#">LOC361230</a> | <a href="#">LOC361230.aSep08</a> | <a href="#">361230</a> | 31855 | 893  |    | 116 | ac1258 (LOC361230) mRNA.                                                                                        |

|                           |                                  |                        |        |      |    |     |                                                                                                          |
|---------------------------|----------------------------------|------------------------|--------|------|----|-----|----------------------------------------------------------------------------------------------------------|
| <a href="#">LOC361346</a> | <a href="#">LOC361346.bSep08</a> | <a href="#">361346</a> | 4338   | 981  | 4  | 158 | CRA a like (LOC361346) alternative variant bSep08, mRNA.                                                 |
| <a href="#">LOC361346</a> | <a href="#">LOC361346.cSep08</a> | <a href="#">361346</a> | 4199   | 873  | 4  | 146 | CRA f like (LOC361346) alternative variant cSep08, mRNA.                                                 |
| <a href="#">LOC361399</a> | <a href="#">LOC361399.bSep08</a> | <a href="#">361399</a> | 3383   | 2042 | 13 | 680 | enhancer of mRNA decapping 4 CRA b (LOC361399) alternative variant bSep08, mRNA.                         |
| <a href="#">LOC361399</a> | <a href="#">LOC361399.cSep08</a> | <a href="#">361399</a> | 1682   | 837  | 8  | 278 | enhancer of mRNA decapping 4 CRA a (LOC361399) alternative variant cSep08, mRNA.                         |
| <a href="#">LOC361399</a> | <a href="#">LOC361399.dSep08</a> | <a href="#">361399</a> | 1877   | 1288 | 7  | 224 | enhancer of mRNA decapping 4 CRA a (LOC361399) alternative variant dSep08, mRNA.                         |
| <a href="#">LOC361399</a> | <a href="#">LOC361399.eSep08</a> | <a href="#">361399</a> | 1647   | 1015 | 3  | 180 | enhancer of mRNA decapping 4 CRA a (LOC361399) alternative variant eSep08, mRNA.                         |
| <a href="#">LOC361399</a> | <a href="#">LOC361399.gSep08</a> | <a href="#">361399</a> | 697    | 558  | 2  | 106 | neurtin 1-like (11.0 kD) (LOC361399) alternative variant gSep08, mRNA.                                   |
| <a href="#">LOC361399</a> | <a href="#">LOC361399.hSep08</a> | <a href="#">361399</a> | 457    | 382  | 2  | 105 | enhancer of mRNA decapping 4 CRA a (LOC361399) alternative variant hSep08, mRNA.                         |
| <a href="#">LOC361399</a> | <a href="#">LOC361399.iSep08</a> | <a href="#">361399</a> | 355    | 274  | 2  | 91  | putative protein (LOC361399) alternative variant iSep08, mRNA.                                           |
| <a href="#">LOC361414</a> | <a href="#">LOC361414.aSep08</a> | <a href="#">361414</a> | 102473 | 1765 | 4  | 473 | similar to Synaptic vesicle membrane protein VAT-1 homolog (LOC361414) alternative variant aSep08, mRNA. |
| <a href="#">LOC361414</a> | <a href="#">LOC361414.bSep08</a> | <a href="#">361414</a> | 100493 | 962  | 4  | 179 | similar to Synaptic vesicle membrane protein VAT-1 homolog (LOC361414) alternative variant bSep08, mRNA. |
| <a href="#">LOC361414</a> | <a href="#">LOC361414.cSep08</a> | <a href="#">361414</a> | 2320   | 657  | 1  | 75  | similar to Synaptic vesicle membrane protein VAT-1 homolog (LOC361414) alternative variant cSep08, mRNA. |
| <a href="#">LOC361635</a> | <a href="#">LOC361635.bSep08</a> | <a href="#">361635</a> | 51240  | 1229 | 14 | 409 | similar to RIKEN cDNA 9030624J02 (LOC361635) alternative variant bSep08, mRNA.                           |
| <a href="#">LOC361646</a> | <a href="#">LOC361646.bSep08</a> | <a href="#">361646</a> | 29492  | 975  | 5  | 324 | similar to K04F10.2 (LOC361646) alternative variant bSep08, mRNA.                                        |
| <a href="#">LOC361646</a> | <a href="#">LOC361646.cSep08</a> | <a href="#">361646</a> | 86610  | 767  | 6  | 241 | similar to K04F10.2 (LOC361646) alternative variant cSep08, mRNA.                                        |
| <a href="#">LOC361776</a> | <a href="#">LOC361776.aSep08</a> | <a href="#">361776</a> | 63686  | 1328 | 8  | 356 | LOC361776 (41.3 kD) (LOC361776) alternative variant aSep08, mRNA.                                        |
| <a href="#">LOC361776</a> | <a href="#">LOC361776.cSep08</a> | <a href="#">361776</a> | 15461  | 759  | 4  | 253 | LOC361776 (LOC361776) alternative variant cSep08, mRNA.                                                  |
| <a href="#">LOC361780</a> | <a href="#">LOC361780.aSep08</a> | <a href="#">361780</a> | 1831   | 530  | 4  | 142 | similar to CG3295-PA (LOC361780) alternative variant aSep08, mRNA.                                       |
| <a href="#">LOC361780</a> | <a href="#">LOC361780.bSep08</a> | <a href="#">361780</a> | 2073   | 1994 | 2  | 66  | similar to CG3295-PA (7.5 kD) (LOC361780) alternative variant bSep08, mRNA.                              |
| <a href="#">LOC361781</a> | <a href="#">LOC361781.aSep08</a> | <a href="#">361781</a> | 7001   | 694  |    | 230 | similar to helicase, lymphoid specific (LOC361781) mRNA.                                                 |
| <a href="#">LOC361990</a> | <a href="#">LOC361990.aSep08</a> | <a href="#">361990</a> | 10491  | 1981 | 6  | 249 | similar to DKFZP547E1010 protein (26.6 kD) (LOC361990) alternative variant aSep08, complete mRNA.        |
| <a href="#">LOC361990</a> | <a href="#">LOC361990.bSep08</a> | <a href="#">361990</a> | 6973   | 1268 | 4  | 223 | similar to DKFZP547E1010 protein (23.8 kD) (LOC361990) alternative variant bSep08, mRNA.                 |
| <a href="#">LOC361990</a> | <a href="#">LOC361990.cSep08</a> | <a href="#">361990</a> | 9429   | 916  | 6  | 220 | similar to DKFZP547E1010 protein (LOC361990) alternative variant cSep08, mRNA.                           |
| <a href="#">LOC361990</a> | <a href="#">LOC361990.eSep08</a> | <a href="#">361990</a> | 9335   | 687  | 5  | 147 | similar to DKFZP547E1010 protein (LOC361990) alternative variant eSep08, mRNA.                           |



|                           |                                  |                        |       |      |    |      |                                                                                                                                    |
|---------------------------|----------------------------------|------------------------|-------|------|----|------|------------------------------------------------------------------------------------------------------------------------------------|
| <a href="#">LOC361990</a> | <a href="#">LOC361990.fSep08</a> | <a href="#">361990</a> | 2814  | 852  | 2  | 141  | similar to DKFZP547E1010 protein (LOC361990) alternative variant fSep08, mRNA.                                                     |
| <a href="#">LOC361990</a> | <a href="#">LOC361990.gSep08</a> | <a href="#">361990</a> | 3680  | 647  | 2  | 72   | similar to DKFZP547E1010 protein (7.8 kD) (LOC361990) alternative variant gSep08, mRNA.                                            |
| <a href="#">LOC361990</a> | <a href="#">LOC361990.hSep08</a> | <a href="#">361990</a> | 2554  | 1046 | 2  | 61   | similar to DKFZP547E1010 protein (6.7 kD) (LOC361990) alternative variant hSep08, mRNA.                                            |
| <a href="#">LOC362464</a> | <a href="#">LOC362464.aSep08</a> | <a href="#">362464</a> | 11056 | 544  |    | 100  | similar to aryl hydrocarbon receptor nuclear translocator-like 2 (LOC362464) mRNA.                                                 |
| <a href="#">LOC362526</a> | <a href="#">LOC362526.bSep08</a> | <a href="#">362526</a> | 20158 | 1685 | 2  | 238  | hypothetical protein LOC362526 (28.9 kD) (LOC362526) alternative variant bSep08, mRNA.                                             |
| <a href="#">LOC362564</a> | <a href="#">LOC362564.bSep08</a> | <a href="#">362564</a> | 18030 | 613  | 2  | 118  | hypothetical LOC362564 (LOC362564) alternative variant bSep08, mRNA.                                                               |
| <a href="#">LOC362564</a> | <a href="#">LOC362564.cSep08</a> | <a href="#">362564</a> | 5343  | 390  | 2  | 91   | hypothetical LOC362564 (LOC362564) alternative variant cSep08, mRNA.                                                               |
| <a href="#">LOC362587</a> | <a href="#">LOC362587.aSep08</a> | <a href="#">362587</a> | 31827 | 4903 | 24 | 1200 | similar to microfilament and actin filament cross-linker protein isoform b (LOC362587) alternative variant aSep08, mRNA.           |
| <a href="#">LOC362587</a> | <a href="#">LOC362587.bSep08</a> | <a href="#">362587</a> | 19968 | 1369 | 10 | 456  | similar to microfilament and actin filament cross-linker protein isoform b (LOC362587) alternative variant bSep08, mRNA.           |
| <a href="#">LOC362587</a> | <a href="#">LOC362587.cSep08</a> | <a href="#">362587</a> | 14527 | 1272 | 6  | 268  | similar to microfilament and actin filament cross-linker protein isoform b (LOC362587) alternative variant cSep08, mRNA.           |
| <a href="#">LOC362587</a> | <a href="#">LOC362587.dSep08</a> | <a href="#">362587</a> | 1349  | 661  | 2  | 121  | similar to microfilament and actin filament cross-linker protein isoform b (12.4 kD) (LOC362587) alternative variant dSep08, mRNA. |
| <a href="#">LOC362710</a> | <a href="#">LOC362710.bSep08</a> | <a href="#">362710</a> | 2703  | 1691 | 3  | 173  | hypothetical LOC362710 (LOC362710) alternative variant bSep08, mRNA.                                                               |
| <a href="#">LOC362710</a> | <a href="#">LOC362710.cSep08</a> | <a href="#">362710</a> | 1780  | 503  | 3  | 114  | hypothetical LOC362710 (LOC362710) alternative variant cSep08, mRNA.                                                               |
| <a href="#">LOC362845</a> | <a href="#">LOC362845.aSep08</a> | <a href="#">362845</a> | 13660 | 1793 | 2  | 443  | similar to zinc finger protein 709 (LOC362845) alternative variant aSep08, mRNA.                                                   |
| <a href="#">LOC362845</a> | <a href="#">LOC362845.cSep08</a> | <a href="#">362845</a> | 11919 | 630  | 1  | 167  | similar to zinc finger protein 709 (LOC362845) alternative variant cSep08, mRNA.                                                   |
| <a href="#">LOC362855</a> | <a href="#">LOC362855.bSep08</a> | <a href="#">362855</a> | 4915  | 962  | 1  | 281  | p55 (LOC362855) alternative variant bSep08, mRNA.                                                                                  |
| <a href="#">LOC363060</a> | <a href="#">LOC363060.bSep08</a> | <a href="#">363060</a> | 11410 | 1351 | 2  | 254  | similar to RIKEN cDNA 1600029D21 (26.7 kD) (LOC363060) alternative variant bSep08, complete mRNA.                                  |
| <a href="#">LOC363060</a> | <a href="#">LOC363060.cSep08</a> | <a href="#">363060</a> | 6950  | 412  | 1  | 95   | similar to RIKEN cDNA 1600029D21 (LOC363060) alternative variant cSep08, mRNA.                                                     |
| <a href="#">LOC363181</a> | <a href="#">LOC363181.aSep08</a> | <a href="#">363181</a> | 7328  | 842  |    | 204  | similar to RIKEN cDNA 1700001E04 (LOC363181) mRNA.                                                                                 |
| <a href="#">LOC363188</a> | <a href="#">LOC363188.aSep08</a> | <a href="#">363188</a> | 81905 | 1792 | 3  | 546  | similar to ubiquitin protein ligase E3 component n-recognin 2 (LOC363188) alternative variant aSep08, mRNA.                        |
| <a href="#">LOC363188</a> | <a href="#">LOC363188.bSep08</a> | <a href="#">363188</a> | 5125  | 1345 | 3  | 214  | similar to ubiquitin protein ligase E3 component n-recognin 2 (LOC363188) alternative variant bSep08, mRNA.                        |
| <a href="#">LOC363188</a> | <a href="#">LOC363188.cSep08</a> | <a href="#">363188</a> | 8893  | 448  | 2  | 149  | similar to ubiquitin protein ligase E3 component n-recognin 2 (LOC363188) alternative variant cSep08, mRNA.                        |

|                           |                                  |                        |       |      |    |     |                                                                                                                        |
|---------------------------|----------------------------------|------------------------|-------|------|----|-----|------------------------------------------------------------------------------------------------------------------------|
| <a href="#">LOC363265</a> | <a href="#">LOC363265.aSep08</a> | <a href="#">363265</a> | 58052 | 800  | 3  | 84  | similar to procollagen, type IV, alpha 3 (8.7 kD) (LOC363265) alternative variant aSep08, mRNA.                        |
| <a href="#">LOC363265</a> | <a href="#">LOC363265.bSep08</a> | <a href="#">363265</a> | 22359 | 508  | 1  | 58  | similar to procollagen, type IV, alpha 3 (6.1 kD) (LOC363265) alternative variant bSep08, mRNA.                        |
| <a href="#">LOC363266</a> | <a href="#">LOC363266.aSep08</a> | <a href="#">363266</a> | 53288 | 3042 | 3  | 495 | similar to HIV-1 Rev binding protein (LOC363266) alternative variant aSep08, mRNA.                                     |
| <a href="#">LOC363266</a> | <a href="#">LOC363266.bSep08</a> | <a href="#">363266</a> | 60572 | 2496 | 4  | 331 | similar to HIV-1 Rev binding protein (33.3 kD) (LOC363266) alternative variant bSep08, mRNA.                           |
| <a href="#">LOC363266</a> | <a href="#">LOC363266.cSep08</a> | <a href="#">363266</a> | 16774 | 1040 | 2  | 328 | similar to HIV-1 Rev binding protein (LOC363266) alternative variant cSep08, mRNA.                                     |
| <a href="#">LOC363267</a> | <a href="#">LOC363267.bSep08</a> | <a href="#">363267</a> | 22134 | 715  | 5  | 219 | hypothetical protein LOC363267 (LOC363267) alternative variant bSep08, mRNA.                                           |
| <a href="#">LOC363267</a> | <a href="#">LOC363267.cSep08</a> | <a href="#">363267</a> | 26433 | 378  | 1  | 125 | hypothetical protein LOC363267 (LOC363267) alternative variant cSep08, mRNA.                                           |
| <a href="#">LOC363301</a> | <a href="#">LOC363301.bSep08</a> | <a href="#">363301</a> | 4849  | 500  | 4  | 84  | hypothetical LOC363301 (LOC363301) alternative variant bSep08, mRNA.                                                   |
| <a href="#">LOC363306</a> | <a href="#">LOC363306.aSep08</a> | <a href="#">363306</a> | 8293  | 1419 | 3  | 206 | hypothetical protein LOC363306 and similar to Reticulocalbin-1 precursor (LOC363306) alternative variant aSep08, mRNA. |
| <a href="#">LOC363306</a> | <a href="#">LOC363306.aSep08</a> | <a href="#">688719</a> | 8293  | 1419 | 3  | 206 | hypothetical protein LOC363306 and similar to Reticulocalbin-1 precursor (LOC363306) alternative variant aSep08, mRNA. |
| <a href="#">LOC363306</a> | <a href="#">LOC363306.bSep08</a> | <a href="#">363306</a> | 21263 | 495  | 1  | 102 | hypothetical protein LOC363306 and similar to Reticulocalbin-1 precursor (LOC363306) alternative variant bSep08, mRNA. |
| <a href="#">LOC363306</a> | <a href="#">LOC363306.bSep08</a> | <a href="#">688719</a> | 21263 | 495  | 1  | 102 | hypothetical protein LOC363306 and similar to Reticulocalbin-1 precursor (LOC363306) alternative variant bSep08, mRNA. |
| <a href="#">LOC363313</a> | <a href="#">LOC363313.aSep08</a> | <a href="#">363313</a> | 2782  | 846  |    | 177 | hypothetical LOC363313 (LOC363313) mRNA.                                                                               |
| <a href="#">LOC363326</a> | <a href="#">LOC363326.bSep08</a> | <a href="#">363326</a> | 776   | 587  | 3  | 195 | hypothetical LOC363326 (LOC363326) alternative variant bSep08, mRNA.                                                   |
| <a href="#">LOC363326</a> | <a href="#">LOC363326.cSep08</a> | <a href="#">363326</a> | 467   | 383  | 2  | 55  | hypothetical LOC363326 (LOC363326) alternative variant cSep08, mRNA.                                                   |
| <a href="#">LOC363336</a> | <a href="#">LOC363336.aSep08</a> | <a href="#">363336</a> | 7710  | 485  |    |     |                                                                                                                        |
| <a href="#">LOC363337</a> | <a href="#">LOC363337.aSep08</a> | <a href="#">363337</a> | 2703  | 776  | 2  | 154 | similar to RIKEN cDNA 1700081O22 (LOC363337) alternative variant aSep08, mRNA.                                         |
| <a href="#">LOC363410</a> | <a href="#">LOC363410.aSep08</a> | <a href="#">363410</a> | 1870  | 732  |    | 92  | similar to Ras-related protein Rab-27B (LOC363410) mRNA.                                                               |
| <a href="#">LOC363458</a> | <a href="#">LOC363458.aSep08</a> | <a href="#">363458</a> | 1015  | 318  |    | 105 | similar to procollagen, type IV, alpha 6 (LOC363458) alternative variant aSep08, mRNA.                                 |
| <a href="#">LOC363458</a> | <a href="#">LOC363458.bSep08</a> | <a href="#">363458</a> | 970   | 378  | 1  | 63  | similar to procollagen, type IV, alpha 6 (LOC363458) alternative variant bSep08, mRNA.                                 |
| <a href="#">LOC363711</a> | <a href="#">LOC363711.aSep08</a> | <a href="#">363711</a> | 7869  | 402  |    | 133 | similar to Ciliary dynein heavy chain 9 (Axonemal beta dynein heavy chain 9) (LOC363711) mRNA.                         |
| <a href="#">LOC363849</a> | <a href="#">LOC363849.aSep08</a> | <a href="#">363849</a> | 51466 | 2354 | 11 | 532 | similar to histone cell cycle regulation defective homolog A isoform 1 (LOC363849) alternative variant aSep08, mRNA.   |

|                           |                                  |                        |        |      |    |     |                                                                                                                      |
|---------------------------|----------------------------------|------------------------|--------|------|----|-----|----------------------------------------------------------------------------------------------------------------------|
| <a href="#">LOC363849</a> | <a href="#">LOC363849.bSep08</a> | <a href="#">363849</a> | 8483   | 889  | 8  | 274 | similar to histone cell cycle regulation defective homolog A isoform 1 (LOC363849) alternative variant bSep08, mRNA. |
| <a href="#">LOC363849</a> | <a href="#">LOC363849.cSep08</a> | <a href="#">363849</a> | 57650  | 840  | 3  | 151 | similar to histone cell cycle regulation defective homolog A isoform 1 (LOC363849) alternative variant cSep08, mRNA. |
| <a href="#">LOC363915</a> | <a href="#">LOC363915.aSep08</a> | <a href="#">363915</a> | 3113   | 709  |    | 236 | similar to CG14446-PA (LOC363915) mRNA.                                                                              |
| <a href="#">LOC364084</a> | <a href="#">LOC364084.aSep08</a> | <a href="#">364084</a> | 1437   | 321  |    | 106 | putative protein of ancient origin (LOC364084) mRNA.                                                                 |
| <a href="#">LOC364224</a> | <a href="#">LOC364224.aSep08</a> | <a href="#">364224</a> | 47020  | 467  |    | 107 | similar to Acylphosphatase, muscle type isozyme (Acylphosphate phosphohydrolase) (LOC364224) mRNA.                   |
| <a href="#">LOC364427</a> | <a href="#">LOC364427.bSep08</a> | <a href="#">364427</a> | 4750   | 749  | 1  | 174 | similar to CG5407-PA, isoform A (LOC364427) alternative variant bSep08, mRNA.                                        |
| <a href="#">LOC364558</a> | <a href="#">LOC364558.aSep08</a> | <a href="#">364558</a> | 25749  | 718  | 2  | 154 | similar to palladin; CGI-151 protein (LOC364558) alternative variant aSep08, mRNA.                                   |
| <a href="#">LOC364558</a> | <a href="#">LOC364558.bSep08</a> | <a href="#">364558</a> | 2200   | 316  | 1  | 36  | similar to palladin; CGI-151 protein (LOC364558) alternative variant bSep08, mRNA.                                   |
| <a href="#">LOC364653</a> | <a href="#">LOC364653.aSep08</a> | <a href="#">364653</a> | 1769   | 414  |    | 138 | similar to WD repeat domain 17 (LOC364653) mRNA.                                                                     |
| <a href="#">LOC364773</a> | <a href="#">LOC364773.bSep08</a> | <a href="#">364773</a> | 4941   | 522  | 1  | 168 | similar to liver regeneration-related protein LRRG07 (19.2 kD) (LOC364773) alternative variant bSep08, mRNA.         |
| <a href="#">LOC364802</a> | <a href="#">LOC364802.aSep08</a> | <a href="#">364802</a> | 1787   | 1585 | 2  | 221 | similar to CG8043-PA (LOC364802) alternative variant aSep08, mRNA.                                                   |
| <a href="#">LOC365052</a> | <a href="#">LOC365052.aSep08</a> | <a href="#">365052</a> | 41017  | 400  |    | 31  | similar to ribosomal protein L10a (LOC365052) mRNA.                                                                  |
| <a href="#">LOC365084</a> | <a href="#">LOC365084.aSep08</a> | <a href="#">365084</a> | 42822  | 599  |    | 63  | similar to nidogen 2 and similar to MIC2 like 1 (LOC365084) mRNA.                                                    |
| <a href="#">LOC365084</a> | <a href="#">LOC365084.aSep08</a> | <a href="#">679721</a> | 42822  | 599  |    | 63  | similar to nidogen 2 and similar to MIC2 like 1 (LOC365084) mRNA.                                                    |
| <a href="#">LOC365476</a> | <a href="#">LOC365476.aSep08</a> | <a href="#">365476</a> | 19419  | 2277 |    | 542 | wd repeat-containing protein (LOC365476) mRNA.                                                                       |
| <a href="#">LOC365601</a> | <a href="#">LOC365601.aSep08</a> | <a href="#">365601</a> | 91536  | 1033 | 7  | 344 | similar to autophagy 5-like (LOC365601) alternative variant aSep08, mRNA.                                            |
| <a href="#">LOC365601</a> | <a href="#">LOC365601.bSep08</a> | <a href="#">365601</a> | 74341  | 1935 | 6  | 241 | similar to autophagy 5-like (LOC365601) alternative variant bSep08, mRNA.                                            |
| <a href="#">LOC365601</a> | <a href="#">LOC365601.cSep08</a> | <a href="#">365601</a> | 24978  | 587  | 3  | 162 | similar to autophagy 5-like (LOC365601) alternative variant cSep08, mRNA.                                            |
| <a href="#">LOC365601</a> | <a href="#">LOC365601.dSep08</a> | <a href="#">365601</a> | 52573  | 714  | 4  | 151 | similar to autophagy 5-like (LOC365601) alternative variant dSep08, mRNA.                                            |
| <a href="#">LOC365778</a> | <a href="#">LOC365778.aSep08</a> | <a href="#">365778</a> | 2092   | 1206 | 2  | 176 | similar to RIKEN cDNA 1700034I23 (19.4 kD) (LOC365778) alternative variant aSep08, complete mRNA.                    |
| <a href="#">LOC365948</a> | <a href="#">LOC365948.aSep08</a> | <a href="#">365948</a> | 160847 | 2100 | 11 | 442 | putative protein, with a coiled coil domain, of bilateral origin (LOC365948) alternative variant aSep08, mRNA.       |
| <a href="#">LOC365948</a> | <a href="#">LOC365948.bSep08</a> | <a href="#">365948</a> | 43711  | 960  | 6  | 319 | putative protein, with a coiled coil domain (LOC365948) alternative variant bSep08, mRNA.                            |
| <a href="#">LOC365948</a> | <a href="#">LOC365948.cSep08</a> | <a href="#">365948</a> | 109222 | 762  | 4  | 142 | putative protein of bilateral origin (LOC365948) alternative variant cSep08, mRNA.                                   |
| <a href="#">LOC365948</a> | <a href="#">LOC365948.dSep08</a> | <a href="#">365948</a> | 34219  | 589  | 7  | 135 | putative protein, with a coiled coil domain (LOC365948) alternative variant dSep08, mRNA.                            |
| <a href="#">LOC365985</a> | <a href="#">LOC365985.bSep08</a> | <a href="#">365985</a> | 21510  | 1516 |    | 156 | similar to adenylate kinase 5 isoform 1 (LOC365985) alternative variant bSep08, mRNA.                                |

|                           |                                  |                        |       |      |   |     |                                                                                                                                                                            |
|---------------------------|----------------------------------|------------------------|-------|------|---|-----|----------------------------------------------------------------------------------------------------------------------------------------------------------------------------|
| <a href="#">LOC366057</a> | <a href="#">LOC366057.aSep08</a> | <a href="#">366057</a> | 1898  | 1451 |   | 256 | similar to Glyceraldehyde-3-phosphate dehydrogenase (GAPDH) (27.1 kD) (LOC366057) complete mRNA.                                                                           |
| <a href="#">LOC366300</a> | <a href="#">LOC366300.aSep08</a> | <a href="#">366300</a> | 71869 | 4150 | 7 | 372 | hypothetical LOC366300 (42.3 kD) (LOC366300) alternative variant aSep08, mRNA.                                                                                             |
| <a href="#">LOC366300</a> | <a href="#">LOC366300.bSep08</a> | <a href="#">366300</a> | 22833 | 813  | 5 | 133 | hypothetical LOC366300 (LOC366300) alternative variant bSep08, mRNA.                                                                                                       |
| <a href="#">LOC366300</a> | <a href="#">LOC366300.cSep08</a> | <a href="#">366300</a> | 16613 | 304  | 3 | 101 | hypothetical LOC366300 (LOC366300) alternative variant cSep08, mRNA.                                                                                                       |
| <a href="#">LOC366300</a> | <a href="#">LOC366300.eSep08</a> | <a href="#">366300</a> | 8578  | 473  | 4 | 25  | hypothetical LOC366300 (LOC366300) alternative variant eSep08, mRNA.                                                                                                       |
| <a href="#">LOC366431</a> | <a href="#">LOC366431.cSep08</a> | <a href="#">366431</a> | 31728 | 658  | 1 | 66  | putative protein (LOC366431) alternative variant cSep08, mRNA.                                                                                                             |
| <a href="#">LOC366473</a> | <a href="#">LOC366473.aSep08</a> | <a href="#">366473</a> | 2689  | 460  |   | 83  | similar to ornithine decarboxylase-like protein (LOC366473) mRNA.                                                                                                          |
| <a href="#">LOC366515</a> | <a href="#">LOC366515.aSep08</a> | <a href="#">366515</a> | 6052  | 447  |   | 140 | similar to Wdr8 protein (LOC366515) mRNA.                                                                                                                                  |
| <a href="#">LOC366669</a> | <a href="#">LOC366669.aSep08</a> | <a href="#">366669</a> | 11797 | 2200 |   | 437 | similar to mKIAA1011 protein (LOC366669) mRNA.                                                                                                                             |
| <a href="#">LOC366772</a> | <a href="#">LOC366772.aSep08</a> | <a href="#">366772</a> | 5634  | 1191 | 3 | 303 | similar to immunoglobulin heavy chain (32.9 kD) (LOC366772) alternative variant aSep08, mRNA.                                                                              |
| <a href="#">LOC367196</a> | <a href="#">LOC367196.aSep08</a> | <a href="#">367196</a> | 15130 | 770  | 6 | 232 | similar to Acyl-CoA dehydrogenase family member 8, mitochondrial precursor (ACAD-8) (Isobutyryl-CoA dehydrogenase) (LOC367196) alternative variant aSep08, mRNA.           |
| <a href="#">LOC367196</a> | <a href="#">LOC367196.bSep08</a> | <a href="#">367196</a> | 8516  | 468  | 2 | 112 | similar to Acyl-CoA dehydrogenase family member 8, mitochondrial precursor (ACAD-8) (Isobutyryl-CoA dehydrogenase) (12.3 kD) (LOC367196) alternative variant bSep08, mRNA. |
| <a href="#">LOC367196</a> | <a href="#">LOC367196.cSep08</a> | <a href="#">367196</a> | 5338  | 719  | 2 | 92  | similar to Acyl-CoA dehydrogenase family member 8, mitochondrial precursor (ACAD-8) (Isobutyryl-CoA dehydrogenase) (10.5 kD) (LOC367196) alternative variant cSep08, mRNA. |
| <a href="#">LOC367198</a> | <a href="#">LOC367198.aSep08</a> | <a href="#">367198</a> | 7752  | 649  |   | 215 | similar to Serine/threonine-protein kinase ATR (Ataxia telangiectasia and Rad3-related protein) (LOC367198) mRNA.                                                          |
| <a href="#">LOC367289</a> | <a href="#">LOC367289.aSep08</a> | <a href="#">367289</a> | 73412 | 1446 | 7 | 481 | similar to CG4699-PA, isoform A (LOC367289) alternative variant aSep08, mRNA.                                                                                              |
| <a href="#">LOC367289</a> | <a href="#">LOC367289.bSep08</a> | <a href="#">367289</a> | 46986 | 693  | 5 | 230 | similar to CG4699-PA, isoform A (LOC367289) alternative variant bSep08, mRNA.                                                                                              |
| <a href="#">LOC367289</a> | <a href="#">LOC367289.cSep08</a> | <a href="#">367289</a> | 2789  | 499  | 2 | 102 | similar to CG4699-PA, isoform A (11.7 kD) (LOC367289) alternative variant cSep08, mRNA.                                                                                    |
| <a href="#">LOC367409</a> | <a href="#">LOC367409.aSep08</a> | <a href="#">367409</a> | 15364 | 1158 |   | 93  | similar to Reticulocalbin-1 precursor and similar to Discs large homolog 5 (Placenta and prostate DLG) (Discs large protein P-dlg) (10.8 kD) (LOC367409) mRNA.             |
| <a href="#">LOC367409</a> | <a href="#">LOC367409.aSep08</a> | <a href="#">690474</a> | 15364 | 1158 |   | 93  | similar to Reticulocalbin-1 precursor and similar to Discs large homolog 5 (Placenta and prostate DLG) (Discs large protein P-dlg) (10.8 kD) (LOC367409) mRNA.             |
| <a href="#">LOC367597</a> | <a href="#">LOC367597.aSep08</a> | <a href="#">367597</a> | 10415 | 759  | 1 | 79  | similar to nidogen 2 (8.6 kD) (LOC367597) alternative variant aSep08, mRNA.                                                                                                |

|                           |                                  |                        |       |      |    |     |                                                                                                                                                                            |
|---------------------------|----------------------------------|------------------------|-------|------|----|-----|----------------------------------------------------------------------------------------------------------------------------------------------------------------------------|
| <a href="#">LOC367597</a> | <a href="#">LOC367597.bSep08</a> | <a href="#">367597</a> | 9622  | 691  | 1  | 79  | similar to nidogen 2 (8.6 kD) (LOC367597) alternative variant bSep08, mRNA.                                                                                                |
| <a href="#">LOC367653</a> | <a href="#">LOC367653.aSep08</a> | <a href="#">367653</a> | 4704  | 807  |    | 141 | similar to nidogen 2 (LOC367653) mRNA.                                                                                                                                     |
| <a href="#">LOC367746</a> | <a href="#">LOC367746.aSep08</a> | <a href="#">367746</a> | 1778  | 1067 |    | 335 | similar to Spindlin-like protein 2 (SPIN-2) (LOC367746) mRNA.                                                                                                              |
| <a href="#">LOC367808</a> | <a href="#">LOC367808.bSep08</a> | <a href="#">367808</a> | 1280  | 366  | 3  | 38  | similar to Sid3177p (4.2 kD) (LOC367808) alternative variant bSep08, mRNA.                                                                                                 |
| <a href="#">LOC367858</a> | <a href="#">LOC367858.aSep08</a> | <a href="#">367858</a> | 547   | 401  |    | 46  | similar to GTPase HRas precursor (Transforming protein p21) (p21ras) (H-Ras-1) (c-H-ras) (5.2 kD) (LOC367858) mRNA.                                                        |
| <a href="#">LOC367976</a> | <a href="#">LOC367976.aSep08</a> | <a href="#">367976</a> | 10406 | 2176 | 1  | 559 | similar to DNA replication licensing factor MCM3 (DNA polymerase alpha holoenzyme-associated protein P1) (P1-MCM3) (63.1 kD) (LOC367976) alternative variant aSep08, mRNA. |
| <a href="#">LOC367976</a> | <a href="#">LOC367976.bSep08</a> | <a href="#">367976</a> | 3678  | 710  | 2  | 236 | similar to DNA replication licensing factor MCM3 (DNA polymerase alpha holoenzyme-associated protein P1) (P1-MCM3) (LOC367976) alternative variant bSep08, mRNA.           |
| <a href="#">LOC367994</a> | <a href="#">LOC367994.bSep08</a> | <a href="#">367994</a> | 2618  | 508  | 1  | 111 | similar to uroplakin 3B isoform b (12.1 kD) (LOC367994) alternative variant bSep08, mRNA.                                                                                  |
| <a href="#">LOC368084</a> | <a href="#">LOC368084.aSep08</a> | <a href="#">368084</a> | 11193 | 1258 | 12 | 281 | methyltransferase type 11 and methyltransferase type 12 (31.6 kD) (LOC368084) alternative variant aSep08, complete mRNA.                                                   |
| <a href="#">LOC368084</a> | <a href="#">LOC368084.bSep08</a> | <a href="#">368084</a> | 927   | 842  | 2  | 88  | putative nuclear protein of mammalian origin (10.5 kD) (LOC368084) alternative variant bSep08, mRNA.                                                                       |
| <a href="#">LOC368084</a> | <a href="#">LOC368084.cSep08</a> | <a href="#">368084</a> | 2987  | 1555 | 4  | 77  | putative protein of eukaryotic origin (LOC368084) alternative variant cSep08, mRNA.                                                                                        |
| <a href="#">LOC474147</a> | <a href="#">LOC474147.aSep08</a> | <a href="#">474147</a> | 10161 | 671  |    | 138 | RBSC-skeletrophin (LOC474147) mRNA.                                                                                                                                        |
| <a href="#">LOC494499</a> | <a href="#">LOC494499.bSep08</a> | <a href="#">494499</a> | 2907  | 730  | 2  | 98  | LOC494499 protein (11.4 kD) (LOC494499) alternative variant bSep08, mRNA.                                                                                                  |
| <a href="#">LOC497842</a> | <a href="#">LOC497842.aSep08</a> | <a href="#">497842</a> | 49287 | 335  |    | 111 | similar to guanylate cyclase 1, soluble, alpha 2 (LOC497842) mRNA.                                                                                                         |
| <a href="#">LOC497940</a> | <a href="#">LOC497940.bSep08</a> | <a href="#">497940</a> | 2114  | 976  | 2  | 75  | similar to RIKEN cDNA 2810408A11 (LOC497940) alternative variant bSep08, mRNA.                                                                                             |
| <a href="#">LOC497959</a> | <a href="#">LOC497959.bSep08</a> | <a href="#">497959</a> | 13769 | 1526 | 5  | 263 | similar to novel protein (29.6 kD) (LOC497959) alternative variant bSep08, mRNA.                                                                                           |
| <a href="#">LOC497959</a> | <a href="#">LOC497959.cSep08</a> | <a href="#">497959</a> | 13249 | 746  | 3  | 75  | similar to novel protein (8.6 kD) (LOC497959) alternative variant cSep08, mRNA.                                                                                            |
| <a href="#">LOC497959</a> | <a href="#">LOC497959.dSep08</a> | <a href="#">497959</a> | 2991  | 738  | 2  | 89  | similar to novel protein (9.3 kD) (LOC497959) alternative variant dSep08, complete mRNA.                                                                                   |
| <a href="#">LOC497978</a> | <a href="#">LOC497978.bSep08</a> | <a href="#">497978</a> | 12458 | 3224 | 3  | 230 | similar to diacylglycerol kinase epsilon (26.0 kD) (LOC497978) alternative variant bSep08, mRNA.                                                                           |
| <a href="#">LOC498029</a> | <a href="#">LOC498029.aSep08</a> | <a href="#">498029</a> | 16323 | 1822 | 3  | 337 | similar to RIKEN cDNA A730011L01 gene (LOC498029) alternative variant aSep08, mRNA.                                                                                        |
| <a href="#">LOC498029</a> | <a href="#">LOC498029.bSep08</a> | <a href="#">498029</a> | 15840 | 1127 | 1  | 96  | similar to RIKEN cDNA A730011L01 gene (15.8 kD) (LOC498029) alternative variant bSep08, mRNA.                                                                              |
| <a href="#">LOC498029</a> | <a href="#">LOC498029.cSep08</a> | <a href="#">498029</a> | 14590 | 775  | 1  | 96  | similar to RIKEN cDNA A730011L01 gene (11.0 kD) (LOC498029) alternative variant cSep08, mRNA.                                                                              |

|                           |                                  |                        |       |      |   |     |                                                                                                  |
|---------------------------|----------------------------------|------------------------|-------|------|---|-----|--------------------------------------------------------------------------------------------------|
| <a href="#">LOC498154</a> | <a href="#">LOC498154.bSep08</a> | <a href="#">498154</a> | 14111 | 1363 | 4 | 176 | hypothetical protein LOC498154 (LOC498154) alternative variant bSep08, mRNA.                     |
| <a href="#">LOC498154</a> | <a href="#">LOC498154.cSep08</a> | <a href="#">498154</a> | 35715 | 621  | 4 | 137 | hypothetical protein LOC498154 (15.9 kD) (LOC498154) alternative variant cSep08, mRNA.           |
| <a href="#">LOC498154</a> | <a href="#">LOC498154.fSep08</a> | <a href="#">498154</a> | 8845  | 393  | 2 | 51  | hypothetical protein LOC498154 (LOC498154) alternative variant fSep08, mRNA.                     |
| <a href="#">LOC498201</a> | <a href="#">LOC498201.aSep08</a> | <a href="#">498201</a> | 10107 | 793  |   | 166 | hypothetical LOC498201 (LOC498201) mRNA.                                                         |
| <a href="#">LOC498236</a> | <a href="#">LOC498236.bSep08</a> | <a href="#">498236</a> | 13510 | 765  | 6 | 254 | LRRGT00186 (LOC498236) alternative variant bSep08, mRNA.                                         |
| <a href="#">LOC498236</a> | <a href="#">LOC498236.cSep08</a> | <a href="#">498236</a> | 2580  | 604  | 4 | 159 | LRRGT00186 (LOC498236) alternative variant cSep08, mRNA.                                         |
| <a href="#">LOC498276</a> | <a href="#">LOC498276.aSep08</a> | <a href="#">498276</a> | 10400 | 1404 | 6 | 267 | fc gamma receptor II beta (30.3 kD) (LOC498276) alternative variant aSep08, mRNA.                |
| <a href="#">LOC498276</a> | <a href="#">LOC498276.bSep08</a> | <a href="#">498276</a> | 8490  | 763  | 5 | 254 | fc gamma receptor II beta (LOC498276) alternative variant bSep08, mRNA.                          |
| <a href="#">LOC498276</a> | <a href="#">LOC498276.cSep08</a> | <a href="#">498276</a> | 8961  | 961  | 4 | 182 | fc gamma receptor II beta (20.4 kD) (LOC498276) alternative variant cSep08, mRNA.                |
| <a href="#">LOC498330</a> | <a href="#">LOC498330.aSep08</a> | <a href="#">498330</a> | 7094  | 749  | 1 | 117 | similar to hypothetical protein MGC26744 (13.3 kD) (LOC498330) alternative variant aSep08, mRNA. |
| <a href="#">LOC498350</a> | <a href="#">LOC498350.bSep08</a> | <a href="#">498350</a> | 21996 | 793  | 1 | 199 | CRA c (LOC498350) alternative variant bSep08, mRNA.                                              |
| <a href="#">LOC498353</a> | <a href="#">LOC498353.bSep08</a> | <a href="#">498353</a> | 75136 | 562  | 5 | 150 | putative protein of eukaryotic origin (LOC498353) alternative variant bSep08, mRNA.              |
| <a href="#">LOC498353</a> | <a href="#">LOC498353.dSep08</a> | <a href="#">498353</a> | 8613  | 753  | 3 | 44  | putative protein of vertebrate origin (4.9 kD) (LOC498353) alternative variant dSep08, mRNA.     |
| <a href="#">LOC498400</a> | <a href="#">LOC498400.aSep08</a> | <a href="#">498400</a> | 67458 | 1765 | 3 | 342 | putative protein of eukaryotic origin (LOC498400) alternative variant aSep08, mRNA.              |
| <a href="#">LOC498400</a> | <a href="#">LOC498400.cSep08</a> | <a href="#">498400</a> | 59214 | 1136 | 1 | 64  | putative protein of vertebrate origin (7.2 kD) (LOC498400) alternative variant cSep08, mRNA.     |
| <a href="#">LOC498435</a> | <a href="#">LOC498435.aSep08</a> | <a href="#">498435</a> | 8555  | 1211 |   | 170 | similar to ATP-binding cassette sub-family G member 3 (19.4 kD) (LOC498435) mRNA.                |
| <a href="#">LOC498465</a> | <a href="#">LOC498465.aSep08</a> | <a href="#">498465</a> | 3335  | 756  |   | 204 | similar to RIKEN cDNA 1700001F09 (23.9 kD) (LOC498465) mRNA.                                     |
| <a href="#">LOC498601</a> | <a href="#">LOC498601.aSep08</a> | <a href="#">498601</a> | 4214  | 458  |   | 124 | similar to cyclin B2 (LOC498601) alternative variant aSep08, mRNA.                               |
| <a href="#">LOC498601</a> | <a href="#">LOC498601.bSep08</a> | <a href="#">498601</a> | 4275  | 619  | 1 | 94  | similar to cyclin B2 (LOC498601) alternative variant bSep08, mRNA.                               |
| <a href="#">LOC498604</a> | <a href="#">LOC498604.aSep08</a> | <a href="#">498604</a> | 2913  | 750  |   | 249 | similar to B-cell novel protein 1 (LOC498604) mRNA.                                              |
| <a href="#">LOC498606</a> | <a href="#">LOC498606.aSep08</a> | <a href="#">498606</a> | 13677 | 1226 | 5 | 227 | CRA a (LOC498606) alternative variant aSep08, mRNA.                                              |
| <a href="#">LOC498606</a> | <a href="#">LOC498606.cSep08</a> | <a href="#">498606</a> | 9102  | 1096 | 6 | 177 | CRA a (19.9 kD) (LOC498606) alternative variant cSep08, mRNA.                                    |
| <a href="#">LOC498606</a> | <a href="#">LOC498606.dSep08</a> | <a href="#">498606</a> | 8859  | 817  | 5 | 173 | CRA a (LOC498606) alternative variant dSep08, mRNA.                                              |
| <a href="#">LOC498606</a> | <a href="#">LOC498606.eSep08</a> | <a href="#">498606</a> | 6480  | 1651 | 3 | 145 | protein CRA a (LOC498606) alternative variant eSep08, mRNA.                                      |
| <a href="#">LOC498606</a> | <a href="#">LOC498606.fSep08</a> | <a href="#">498606</a> | 6189  | 1599 | 5 | 108 | protein CRA a (LOC498606) alternative variant fSep08, mRNA.                                      |

|                           |                                  |                        |       |      |    |     |                                                                                                                                                                                |
|---------------------------|----------------------------------|------------------------|-------|------|----|-----|--------------------------------------------------------------------------------------------------------------------------------------------------------------------------------|
| <a href="#">LOC498606</a> | <a href="#">LOC498606.gSep08</a> | <a href="#">498606</a> | 9393  | 1491 | 4  | 96  | protein CRA a (11.4 kD) (LOC498606) alternative variant gSep08, complete mRNA.                                                                                                 |
| <a href="#">LOC498606</a> | <a href="#">LOC498606.hSep08</a> | <a href="#">498606</a> | 1906  | 818  | 2  | 91  | protein CRA a (9.8 kD) (LOC498606) alternative variant hSep08, mRNA.                                                                                                           |
| <a href="#">LOC498662</a> | <a href="#">LOC498662.aSep08</a> | <a href="#">498662</a> | 28475 | 2626 |    | 182 | similar to RIKEN cDNA 2610019F03 (20.2 kD) (LOC498662) alternative variant aSep08, complete mRNA.                                                                              |
| <a href="#">LOC498664</a> | <a href="#">LOC498664.bSep08</a> | <a href="#">498664</a> | 13162 | 349  | 4  | 69  | similar to hypothetical protein MGC35169 (LOC498664) alternative variant bSep08, mRNA.                                                                                         |
| <a href="#">LOC498664</a> | <a href="#">LOC498664.cSep08</a> | <a href="#">498664</a> | 430   | 314  | 1  | 67  | similar to hypothetical protein MGC35169 (LOC498664) alternative variant cSep08, mRNA.                                                                                         |
| <a href="#">LOC498685</a> | <a href="#">LOC498685.aSep08</a> | <a href="#">498685</a> | 17487 | 767  | 6  | 195 | similar to UPF0308 protein C9orf21 (LOC498685) alternative variant aSep08, mRNA.                                                                                               |
| <a href="#">LOC498685</a> | <a href="#">LOC498685.bSep08</a> | <a href="#">498685</a> | 17677 | 825  | 5  | 151 | similar to UPF0308 protein C9orf21 (LOC498685) alternative variant bSep08, mRNA.                                                                                               |
| <a href="#">LOC498735</a> | <a href="#">LOC498735.aSep08</a> | <a href="#">498735</a> | 10284 | 988  |    | 240 | similar to hypothetical protein MGC43581 (LOC498735) alternative variant aSep08, mRNA.                                                                                         |
| <a href="#">LOC498750</a> | <a href="#">LOC498750.aSep08</a> | <a href="#">498750</a> | 11957 | 4033 | 5  | 229 | putative protein, with 2 coiled coil domains, of metazoan origin (27.1 kD) (LOC498750) alternative variant aSep08, mRNA.                                                       |
| <a href="#">LOC498750</a> | <a href="#">LOC498750.bSep08</a> | <a href="#">498750</a> | 2772  | 800  | 2  | 90  | putative endoplasmic reticulum protein (10.2 kD) (LOC498750) alternative variant bSep08, mRNA.                                                                                 |
| <a href="#">LOC498781</a> | <a href="#">LOC498781.aSep08</a> | <a href="#">498781</a> | 6800  | 782  |    | 191 | similar to serine/threonine kinase (LOC498781) mRNA.                                                                                                                           |
| <a href="#">LOC498793</a> | <a href="#">LOC498793.aSep08</a> | <a href="#">498793</a> | 36911 | 3070 | 19 | 995 | similar to inter-alpha-inhibitor H2 chain (LOC498793) alternative variant aSep08, mRNA.                                                                                        |
| <a href="#">LOC498909</a> | <a href="#">LOC498909.aSep08</a> | <a href="#">498909</a> | 3363  | 1798 | 3  | 371 | similar to RIKEN cDNA 2310005O14 (LOC498909) alternative variant aSep08, mRNA.                                                                                                 |
| <a href="#">LOC498909</a> | <a href="#">LOC498909.cSep08</a> | <a href="#">498909</a> | 8796  | 673  | 5  | 163 | similar to RIKEN cDNA 2310005O14 (LOC498909) alternative variant cSep08, mRNA.                                                                                                 |
| <a href="#">LOC498909</a> | <a href="#">LOC498909.fSep08</a> | <a href="#">498909</a> | 3985  | 561  | 4  | 87  | similar to RIKEN cDNA 2310005O14 (LOC498909) alternative variant fSep08, mRNA.                                                                                                 |
| <a href="#">LOC498951</a> | <a href="#">LOC498951.aSep08</a> | <a href="#">498951</a> | 48682 | 1653 | 6  | 235 | similar to 2010004A03Rik protein (26.9 kD) (LOC498951) alternative variant aSep08, complete mRNA.                                                                              |
| <a href="#">LOC498951</a> | <a href="#">LOC498951.cSep08</a> | <a href="#">498951</a> | 5816  | 302  | 2  | 100 | similar to 2010004A03Rik protein (LOC498951) alternative variant cSep08, mRNA.                                                                                                 |
| <a href="#">LOC498957</a> | <a href="#">LOC498957.bSep08</a> | <a href="#">498957</a> | 7970  | 712  | 1  | 182 | kelch-like 36 (LOC498957) alternative variant bSep08, mRNA.                                                                                                                    |
| <a href="#">LOC498972</a> | <a href="#">LOC498972.aSep08</a> | <a href="#">498972</a> | 7338  | 929  |    | 176 | similar to copine II (LOC498972) mRNA.                                                                                                                                         |
| <a href="#">LOC498974</a> | <a href="#">LOC498974.aSep08</a> | <a href="#">498974</a> | 1417  | 1165 |    | 158 | similar to kinesin family member 7 (LOC498974) mRNA.                                                                                                                           |
| <a href="#">LOC499089</a> | <a href="#">LOC499089.aSep08</a> | <a href="#">499089</a> | 8411  | 1074 | 4  | 342 | similar to pregnancy-specific glycoprotein 25 (LOC499089) alternative variant aSep08, mRNA.                                                                                    |
| <a href="#">LOC499089</a> | <a href="#">LOC499089.bSep08</a> | <a href="#">499089</a> | 2659  | 624  | 2  | 135 | similar to pregnancy-specific glycoprotein 25 (15.2 kD) (LOC499089) alternative variant bSep08, mRNA.                                                                          |
| <a href="#">LOC499110</a> | <a href="#">LOC499110.aSep08</a> | <a href="#">499110</a> | 16398 | 571  |    | 173 | similar to Zinc finger protein 354A (Transcription factor 17) (Renal transcription factor Kid-1) (Kidney, ischemia, and developmentally regulated protein 1) (LOC499110) mRNA. |
| <a href="#">LOC499120</a> | <a href="#">LOC499120.aSep08</a> | <a href="#">499120</a> | 12434 | 2481 | 5  | 474 | hypothetical protein LOC499120 (54.4 kD) (LOC499120) alternative variant aSep08, mRNA.                                                                                         |

|                           |                                  |                        |       |      |   |     |                                                                                                                 |
|---------------------------|----------------------------------|------------------------|-------|------|---|-----|-----------------------------------------------------------------------------------------------------------------|
| <a href="#">LOC499120</a> | <a href="#">LOC499120.bSep08</a> | <a href="#">499120</a> | 9004  | 781  | 3 | 191 | hypothetical protein LOC499120 (LOC499120) alternative variant bSep08, mRNA.                                    |
| <a href="#">LOC499120</a> | <a href="#">LOC499120.cSep08</a> | <a href="#">499120</a> | 8467  | 397  | 2 | 132 | hypothetical protein LOC499120 (LOC499120) alternative variant cSep08, mRNA.                                    |
| <a href="#">LOC499234</a> | <a href="#">LOC499234.aSep08</a> | <a href="#">499234</a> | 5108  | 762  |   | 177 | similar to NACHT, leucine rich repeat and PYD containing 14-like (LOC499234) mRNA.                              |
| <a href="#">LOC499276</a> | <a href="#">LOC499276.aSep08</a> | <a href="#">499276</a> | 2464  | 738  |   | 245 | similar to RIKEN cDNA 1700022C21 (LOC499276) mRNA.                                                              |
| <a href="#">LOC499279</a> | <a href="#">LOC499279.bSep08</a> | <a href="#">499279</a> | 1687  | 269  | 1 | 35  | hypothetical gene supported by BC079265 (LOC499279) alternative variant bSep08, mRNA.                           |
| <a href="#">LOC499315</a> | <a href="#">LOC499315.aSep08</a> | <a href="#">499315</a> | 68331 | 981  | 6 | 186 | AHNAK 1 (20.1 kD) (LOC499315) alternative variant aSep08, mRNA.                                                 |
| <a href="#">LOC499315</a> | <a href="#">LOC499315.bSep08</a> | <a href="#">499315</a> | 1058  | 206  | 2 | 68  | AHNAK 1 (LOC499315) alternative variant bSep08, mRNA.                                                           |
| <a href="#">LOC499315</a> | <a href="#">LOC499315.cSep08</a> | <a href="#">499315</a> | 42362 | 742  | 2 | 41  | AHNAK 1 (LOC499315) alternative variant cSep08, mRNA.                                                           |
| <a href="#">LOC499330</a> | <a href="#">LOC499330.aSep08</a> | <a href="#">499330</a> | 25069 | 836  | 1 | 224 | similar to Nicotinamide riboside kinase 1 (LOC499330) alternative variant aSep08, mRNA.                         |
| <a href="#">LOC499339</a> | <a href="#">LOC499339.bSep08</a> | <a href="#">499339</a> | 3549  | 458  | 3 | 152 | hypothetical protein LOC499339 (LOC499339) alternative variant bSep08, mRNA.                                    |
| <a href="#">LOC499339</a> | <a href="#">LOC499339.cSep08</a> | <a href="#">499339</a> | 36896 | 749  | 5 | 108 | hypothetical protein LOC499339 (11.8 kD) (LOC499339) alternative variant cSep08, complete mRNA.                 |
| <a href="#">LOC499339</a> | <a href="#">LOC499339.dSep08</a> | <a href="#">499339</a> | 5768  | 557  | 3 | 55  | hypothetical protein LOC499339 (6.4 kD) (LOC499339) alternative variant dSep08, mRNA.                           |
| <a href="#">LOC499339</a> | <a href="#">LOC499339.eSep08</a> | <a href="#">499339</a> | 6625  | 904  | 3 | 62  | hypothetical protein LOC499339 (6.7 kD) (LOC499339) alternative variant eSep08, mRNA.                           |
| <a href="#">LOC499339</a> | <a href="#">LOC499339.fSep08</a> | <a href="#">499339</a> | 4371  | 654  | 2 | 62  | hypothetical protein LOC499339 (6.7 kD) (LOC499339) alternative variant fSep08, mRNA.                           |
| <a href="#">LOC499339</a> | <a href="#">LOC499339.hSep08</a> | <a href="#">499339</a> | 3634  | 275  | 3 | 51  | hypothetical protein LOC499339 (LOC499339) alternative variant hSep08, mRNA.                                    |
| <a href="#">LOC499376</a> | <a href="#">LOC499376.aSep08</a> | <a href="#">499376</a> | 582   | 309  |   | 70  | hypothetical LOC499376 (LOC499376) mRNA.                                                                        |
| <a href="#">LOC499391</a> | <a href="#">LOC499391.bSep08</a> | <a href="#">499391</a> | 9139  | 595  | 2 | 129 | similar to gem (nuclear organelle) associated protein 7 (14.3 kD) (LOC499391) alternative variant bSep08, mRNA. |
| <a href="#">LOC499587</a> | <a href="#">LOC499587.aSep08</a> | <a href="#">499587</a> | 60258 | 532  |   | 78  | similar to solute carrier family 7, member 14 (LOC499587) mRNA.                                                 |
| <a href="#">LOC499602</a> | <a href="#">LOC499602.aSep08</a> | <a href="#">499602</a> | 15950 | 1300 | 9 | 366 | hypothetical protein LOC499602 (LOC499602) alternative variant aSep08, mRNA.                                    |
| <a href="#">LOC499602</a> | <a href="#">LOC499602.bSep08</a> | <a href="#">499602</a> | 1585  | 615  | 2 | 79  | hypothetical protein LOC499602 (LOC499602) alternative variant bSep08, mRNA.                                    |
| <a href="#">LOC499602</a> | <a href="#">LOC499602.dSep08</a> | <a href="#">499602</a> | 8488  | 1157 | 5 | 61  | hypothetical protein LOC499602 (7.5 kD) (LOC499602) alternative variant dSep08, mRNA.                           |
| <a href="#">LOC499602</a> | <a href="#">LOC499602.eSep08</a> | <a href="#">499602</a> | 14009 | 530  | 2 | 59  | hypothetical protein LOC499602 (LOC499602) alternative variant eSep08, mRNA.                                    |
| <a href="#">LOC499618</a> | <a href="#">LOC499618.bSep08</a> | <a href="#">499618</a> | 20664 | 711  | 7 | 191 | CRA a (LOC499618) alternative variant bSep08, mRNA.                                                             |
| <a href="#">LOC499618</a> | <a href="#">LOC499618.cSep08</a> | <a href="#">499618</a> | 1518  | 352  | 3 | 43  | CRA b like (4.8 kD) (LOC499618) alternative variant cSep08, mRNA.                                               |
| <a href="#">LOC499653</a> | <a href="#">LOC499653.bSep08</a> | <a href="#">499653</a> | 19923 | 700  | 1 | 233 | dingo protein (LOC499653) alternative variant bSep08, mRNA.                                                     |



|                           |                                  |                        |       |      |    |     |                                                                                                                      |
|---------------------------|----------------------------------|------------------------|-------|------|----|-----|----------------------------------------------------------------------------------------------------------------------|
| <a href="#">LOC499677</a> | <a href="#">LOC499677.bSep08</a> | <a href="#">499677</a> | 13433 | 3182 | 5  | 240 | similar to Lix1 homolog (mouse) like (LOC499677) alternative variant bSep08, mRNA.                                   |
| <a href="#">LOC499677</a> | <a href="#">LOC499677.cSep08</a> | <a href="#">499677</a> | 11170 | 778  | 4  | 193 | similar to Lix1 homolog (mouse) like (LOC499677) alternative variant cSep08, mRNA.                                   |
| <a href="#">LOC499746</a> | <a href="#">LOC499746.aSep08</a> | <a href="#">499746</a> | 1295  | 752  | 2  | 250 | similar to hypothetical gene supported by AK097565; BC033939 (LOC499746) alternative variant aSep08, mRNA.           |
| <a href="#">LOC499746</a> | <a href="#">LOC499746.bSep08</a> | <a href="#">499746</a> | 6479  | 1673 | 3  | 151 | similar to hypothetical gene supported by AK097565; BC033939 (17.1 kD) (LOC499746) alternative variant bSep08, mRNA. |
| <a href="#">LOC499749</a> | <a href="#">LOC499749.bSep08</a> | <a href="#">499749</a> | 1181  | 675  | 2  | 103 | similar to RIKEN cDNA C430004E15 (11.1 kD) (LOC499749) alternative variant bSep08, mRNA.                             |
| <a href="#">LOC499770</a> | <a href="#">LOC499770.bSep08</a> | <a href="#">499770</a> | 3746  | 760  | 7  | 174 | similar to LOC495800 protein (LOC499770) alternative variant bSep08, mRNA.                                           |
| <a href="#">LOC499770</a> | <a href="#">LOC499770.dSep08</a> | <a href="#">499770</a> | 3252  | 378  | 5  | 125 | similar to LOC495800 protein (LOC499770) alternative variant dSep08, mRNA.                                           |
| <a href="#">LOC499770</a> | <a href="#">LOC499770.eSep08</a> | <a href="#">499770</a> | 1811  | 1118 | 4  | 90  | similar to LOC495800 protein (LOC499770) alternative variant eSep08, mRNA.                                           |
| <a href="#">LOC499779</a> | <a href="#">LOC499779.aSep08</a> | <a href="#">499779</a> | 4117  | 724  | 1  | 89  | similar to RIKEN cDNA 2900010J23 (10.3 kD) (LOC499779) alternative variant aSep08, mRNA.                             |
| <a href="#">LOC499779</a> | <a href="#">LOC499779.bSep08</a> | <a href="#">499779</a> | 9132  | 748  | 2  | 89  | similar to RIKEN cDNA 2900010J23 (10.3 kD) (LOC499779) alternative variant bSep08, mRNA.                             |
| <a href="#">LOC499781</a> | <a href="#">LOC499781.aSep08</a> | <a href="#">499781</a> | 4751  | 740  |    | 246 | similar to CG17122-PA (LOC499781) mRNA.                                                                              |
| <a href="#">LOC499782</a> | <a href="#">LOC499782.bSep08</a> | <a href="#">499782</a> | 2342  | 839  | 7  | 138 | ribosomal protein L11 (15.0 kD) (LOC499782) alternative variant bSep08, complete mRNA.                               |
| <a href="#">LOC499782</a> | <a href="#">LOC499782.cSep08</a> | <a href="#">499782</a> | 2407  | 1971 | 2  | 127 | putative protein (LOC499782) alternative variant cSep08, mRNA.                                                       |
| <a href="#">LOC499782</a> | <a href="#">LOC499782.dSep08</a> | <a href="#">499782</a> | 2349  | 835  | 7  | 118 | ribosomal protein L11 (12.9 kD) (LOC499782) alternative variant dSep08, complete mRNA.                               |
| <a href="#">LOC499782</a> | <a href="#">LOC499782.fSep08</a> | <a href="#">499782</a> | 1808  | 724  | 4  | 80  | ribosomal protein L11 (LOC499782) alternative variant fSep08, mRNA.                                                  |
| <a href="#">LOC499806</a> | <a href="#">LOC499806.bSep08</a> | <a href="#">499806</a> | 34884 | 1304 | 11 | 336 | similar to RIKEN cDNA 4933404M02 (LOC499806) alternative variant bSep08, mRNA.                                       |
| <a href="#">LOC499806</a> | <a href="#">LOC499806.cSep08</a> | <a href="#">499806</a> | 36633 | 2057 | 11 | 252 | similar to RIKEN cDNA 4933404M02 (26.8 kD) (LOC499806) alternative variant cSep08, mRNA.                             |
| <a href="#">LOC499806</a> | <a href="#">LOC499806.dSep08</a> | <a href="#">499806</a> | 11104 | 447  | 3  | 79  | similar to RIKEN cDNA 4933404M02 (LOC499806) alternative variant dSep08, mRNA.                                       |
| <a href="#">LOC499806</a> | <a href="#">LOC499806.eSep08</a> | <a href="#">499806</a> | 13164 | 556  | 3  |     |                                                                                                                      |
| <a href="#">LOC500007</a> | <a href="#">LOC500007.aSep08</a> | <a href="#">500007</a> | 6369  | 296  |    | 31  | similar to EF hand calcium binding domain 1 (3.6 kD) (LOC500007) mRNA.                                               |
| <a href="#">LOC500034</a> | <a href="#">LOC500034.aSep08</a> | <a href="#">500034</a> | 65879 | 1798 | 4  | 454 | similar to CG3570-PA (LOC500034) alternative variant aSep08, mRNA.                                                   |
| <a href="#">LOC500034</a> | <a href="#">LOC500034.cSep08</a> | <a href="#">500034</a> | 21994 | 2711 | 3  | 314 | similar to CG3570-PA (LOC500034) alternative variant cSep08, mRNA.                                                   |
| <a href="#">LOC500034</a> | <a href="#">LOC500034.eSep08</a> | <a href="#">500034</a> | 44816 | 417  | 2  | 138 | similar to CG3570-PA (LOC500034) alternative variant eSep08, mRNA.                                                   |

|                           |                                  |                        |        |      |   |     |                                                                                                                         |
|---------------------------|----------------------------------|------------------------|--------|------|---|-----|-------------------------------------------------------------------------------------------------------------------------|
| <a href="#">LOC500046</a> | <a href="#">LOC500046.aSep08</a> | <a href="#">500046</a> | 31794  | 1323 |   | 145 | similar to hypothetical protein FLJ21986 (LOC500046) mRNA.                                                              |
| <a href="#">LOC500054</a> | <a href="#">LOC500054.bSep08</a> | <a href="#">500054</a> | 46529  | 1156 | 8 | 241 | protection of telomeres 1A (27.0 kD) (LOC500054) alternative variant bSep08, mRNA.                                      |
| <a href="#">LOC500054</a> | <a href="#">LOC500054.cSep08</a> | <a href="#">500054</a> | 7260   | 513  | 6 | 170 | protection of telomeres 1A (LOC500054) alternative variant cSep08, mRNA.                                                |
| <a href="#">LOC500054</a> | <a href="#">LOC500054.dSep08</a> | <a href="#">500054</a> | 3437   | 881  | 3 | 90  | protection of telomeres 1A (LOC500054) alternative variant dSep08, mRNA.                                                |
| <a href="#">LOC500054</a> | <a href="#">LOC500054.eSep08</a> | <a href="#">500054</a> | 5772   | 708  | 2 | 97  | putative protein (LOC500054) alternative variant eSep08, mRNA.                                                          |
| <a href="#">LOC500066</a> | <a href="#">LOC500066.aSep08</a> | <a href="#">500066</a> | 1443   | 332  |   | 110 | similar to Protein FAM40B (LOC500066) mRNA.                                                                             |
| <a href="#">LOC500105</a> | <a href="#">LOC500105.aSep08</a> | <a href="#">500105</a> | 283582 | 622  |   | 191 | similar to contactin associated protein-like 2 isoform a (LOC500105) mRNA.                                              |
| <a href="#">LOC500118</a> | <a href="#">LOC500118.aSep08</a> | <a href="#">500118</a> | 14601  | 776  | 6 | 258 | similar to RIKEN cDNA D330028D13 (LOC500118) alternative variant aSep08, mRNA.                                          |
| <a href="#">LOC500118</a> | <a href="#">LOC500118.cSep08</a> | <a href="#">500118</a> | 21248  | 1131 | 6 | 206 | similar to RIKEN cDNA D330028D13 (LOC500118) alternative variant cSep08, mRNA.                                          |
| <a href="#">LOC500118</a> | <a href="#">LOC500118.dSep08</a> | <a href="#">500118</a> | 6743   | 752  | 2 | 51  | similar to RIKEN cDNA D330028D13 (5.8 kD) (LOC500118) alternative variant dSep08, mRNA.                                 |
| <a href="#">LOC500124</a> | <a href="#">LOC500124.bSep08</a> | <a href="#">500124</a> | 16034  | 799  | 4 | 198 | similar to RIKEN cDNA 4921507P07 (LOC500124) alternative variant bSep08, mRNA.                                          |
| <a href="#">LOC500124</a> | <a href="#">LOC500124.cSep08</a> | <a href="#">500124</a> | 13320  | 736  | 5 | 182 | similar to RIKEN cDNA 4921507P07 (LOC500124) alternative variant cSep08, mRNA.                                          |
| <a href="#">LOC500124</a> | <a href="#">LOC500124.dSep08</a> | <a href="#">500124</a> | 13289  | 691  | 4 | 141 | similar to RIKEN cDNA 4921507P07 (16.5 kD) (LOC500124) alternative variant dSep08, mRNA.                                |
| <a href="#">LOC500227</a> | <a href="#">LOC500227.bSep08</a> | <a href="#">500227</a> | 1290   | 1171 | 1 | 314 | hypothetical gene supported by BC079424 (LOC500227) alternative variant bSep08, mRNA.                                   |
| <a href="#">LOC500227</a> | <a href="#">LOC500227.cSep08</a> | <a href="#">500227</a> | 5748   | 1226 | 2 | 222 | hypothetical gene supported by BC079424 (LOC500227) alternative variant cSep08, mRNA.                                   |
| <a href="#">LOC500251</a> | <a href="#">LOC500251.bSep08</a> | <a href="#">500251</a> | 3474   | 801  | 2 | 145 | hypothetical protein LOC500251 (LOC500251) alternative variant bSep08, mRNA.                                            |
| <a href="#">LOC500251</a> | <a href="#">LOC500251.cSep08</a> | <a href="#">500251</a> | 3457   | 421  | 1 | 109 | hypothetical protein LOC500251 (LOC500251) alternative variant cSep08, mRNA.                                            |
| <a href="#">LOC500378</a> | <a href="#">LOC500378.bSep08</a> | <a href="#">500378</a> | 829    | 691  | 2 | 208 | similar to Protein C1orf77 homolog (LOC500378) alternative variant bSep08, mRNA.                                        |
| <a href="#">LOC500392</a> | <a href="#">LOC500392.bSep08</a> | <a href="#">500392</a> | 1119   | 512  | 4 | 102 | similar to hypothetical protein FLJ25692 (11.5 kD) (LOC500392) alternative variant bSep08, mRNA.                        |
| <a href="#">LOC500413</a> | <a href="#">LOC500413.aSep08</a> | <a href="#">500413</a> | 72855  | 873  | 2 | 86  | hypothetical protein LOC500413 (9.7 kD) (LOC500413) alternative variant aSep08, mRNA.                                   |
| <a href="#">LOC500413</a> | <a href="#">LOC500413.bSep08</a> | <a href="#">500413</a> | 73509  | 1532 | 2 | 86  | hypothetical protein LOC500413 (9.7 kD) (LOC500413) alternative variant bSep08, mRNA.                                   |
| <a href="#">LOC500413</a> | <a href="#">LOC500413.cSep08</a> | <a href="#">500413</a> | 72415  | 435  | 2 | 58  | hypothetical protein LOC500413 (LOC500413) alternative variant cSep08, mRNA.                                            |
| <a href="#">LOC500415</a> | <a href="#">LOC500415.bSep08</a> | <a href="#">500415</a> | 76605  | 748  | 1 | 188 | similar to Leucine-rich repeat protein SHOC-2 (Ras-binding protein Sur-8) (LOC500415) alternative variant bSep08, mRNA. |

|                           |                                  |                        |       |      |    |     |                                                                                                                         |
|---------------------------|----------------------------------|------------------------|-------|------|----|-----|-------------------------------------------------------------------------------------------------------------------------|
| <a href="#">LOC500420</a> | <a href="#">LOC500420.aSep08</a> | <a href="#">500420</a> | 9442  | 1512 | 2  | 157 | similar to CG12279-PA (17.5 kD) (LOC500420) alternative variant aSep08, complete mRNA.                                  |
| <a href="#">LOC500420</a> | <a href="#">LOC500420.bSep08</a> | <a href="#">500420</a> | 7546  | 462  | 1  | 132 | similar to CG12279-PA (LOC500420) alternative variant bSep08, mRNA.                                                     |
| <a href="#">LOC500445</a> | <a href="#">LOC500445.bSep08</a> | <a href="#">500445</a> | 5823  | 1654 | 5  | 248 | similar to hypothetical protein 4931430D02 (27.5 kD) (LOC500445) alternative variant bSep08, complete mRNA.             |
| <a href="#">LOC500475</a> | <a href="#">LOC500475.bSep08</a> | <a href="#">500475</a> | 1745  | 316  | 1  | 47  | similar to hypothetical protein 4933430I17 (LOC500475) alternative variant bSep08, mRNA.                                |
| <a href="#">LOC500502</a> | <a href="#">LOC500502.aSep08</a> | <a href="#">500502</a> | 1368  | 343  |    | 103 | similar to RIKEN cDNA 4930579C15 (LOC500502) mRNA.                                                                      |
| <a href="#">LOC500532</a> | <a href="#">LOC500532.aSep08</a> | <a href="#">500532</a> | 17692 | 1895 | 11 | 282 | ring finger protein 220 (31.8 kD) (LOC500532) alternative variant aSep08, complete mRNA.                                |
| <a href="#">LOC500532</a> | <a href="#">LOC500532.bSep08</a> | <a href="#">500532</a> | 11718 | 705  | 6  | 178 | finger protein 220 (LOC500532) alternative variant bSep08, mRNA.                                                        |
| <a href="#">LOC500532</a> | <a href="#">LOC500532.cSep08</a> | <a href="#">500532</a> | 11856 | 741  | 7  | 160 | ring finger protein 220 (LOC500532) alternative variant cSep08, mRNA.                                                   |
| <a href="#">LOC500532</a> | <a href="#">LOC500532.dSep08</a> | <a href="#">500532</a> | 12068 | 764  | 8  | 160 | ring finger protein 220 (LOC500532) alternative variant dSep08, mRNA.                                                   |
| <a href="#">LOC500532</a> | <a href="#">LOC500532.eSep08</a> | <a href="#">500532</a> | 4291  | 2095 | 3  | 149 | putative protein (LOC500532) alternative variant eSep08, mRNA.                                                          |
| <a href="#">LOC500532</a> | <a href="#">LOC500532.fSep08</a> | <a href="#">500532</a> | 1295  | 486  | 3  | 105 | ring finger protein 220 (LOC500532) alternative variant fSep08, mRNA.                                                   |
| <a href="#">LOC500532</a> | <a href="#">LOC500532.hSep08</a> | <a href="#">500532</a> | 3787  | 335  | 3  | 47  | ring finger protein 220 (LOC500532) alternative variant hSep08, mRNA.                                                   |
| <a href="#">LOC500584</a> | <a href="#">LOC500584.aSep08</a> | <a href="#">500584</a> | 2369  | 1366 | 3  | 125 | similar to casein kinase 1, gamma 3 isoform 2 (LOC500584) alternative variant aSep08, mRNA.                             |
| <a href="#">LOC500584</a> | <a href="#">LOC500584.bSep08</a> | <a href="#">500584</a> | 21710 | 2204 | 5  | 78  | similar to casein kinase 1, gamma 3 isoform 2 (9.0 kD) (LOC500584) alternative variant bSep08, complete mRNA.           |
| <a href="#">LOC500591</a> | <a href="#">LOC500591.aSep08</a> | <a href="#">500591</a> | 58141 | 1470 |    | 264 | similar to calmodulin-binding transcription activator 1 (LOC500591) mRNA.                                               |
| <a href="#">LOC500598</a> | <a href="#">LOC500598.bSep08</a> | <a href="#">500598</a> | 682   | 618  | 1  | 114 | tumor necrosis factor receptor superfamily member 18 CRA c like (12.9 kD) (LOC500598) alternative variant bSep08, mRNA. |
| <a href="#">LOC500668</a> | <a href="#">LOC500668.aSep08</a> | <a href="#">500668</a> | 26656 | 626  |    | 155 | similar to Centromeric protein E (CENP-E protein) (LOC500668) mRNA.                                                     |
| <a href="#">LOC500700</a> | <a href="#">LOC500700.aSep08</a> | <a href="#">500700</a> | 42096 | 699  |    | 205 | CRA b (LOC500700) mRNA.                                                                                                 |
| <a href="#">LOC500705</a> | <a href="#">LOC500705.aSep08</a> | <a href="#">500705</a> | 33833 | 475  |    | 158 | calcium-binding EF-hand containing protein (LOC500705) mRNA.                                                            |
| <a href="#">LOC500726</a> | <a href="#">LOC500726.aSep08</a> | <a href="#">500726</a> | 3779  | 2111 |    | 703 | similar to KARP-1 binding protein 1 (LOC500726) mRNA.                                                                   |
| <a href="#">LOC500797</a> | <a href="#">LOC500797.bSep08</a> | <a href="#">500797</a> | 1508  | 265  | 1  | 88  | hypothetical LOC500797 (LOC500797) alternative variant bSep08, mRNA.                                                    |
| <a href="#">LOC500797</a> | <a href="#">LOC500797.cSep08</a> | <a href="#">500797</a> | 5160  | 341  | 2  | 37  | hypothetical LOC500797 (LOC500797) alternative variant cSep08, mRNA.                                                    |
| <a href="#">LOC500827</a> | <a href="#">LOC500827.bSep08</a> | <a href="#">500827</a> | 23224 | 780  | 5  | 259 | similar to hypothetical protein FLJ35821 (LOC500827) alternative variant bSep08, mRNA.                                  |
| <a href="#">LOC500827</a> | <a href="#">LOC500827.cSep08</a> | <a href="#">500827</a> | 15092 | 652  | 2  | 97  | similar to hypothetical protein FLJ35821 (LOC500827) alternative variant cSep08, mRNA.                                  |

|                           |                                  |                        |       |      |    |     |                                                                                                                                                                                               |
|---------------------------|----------------------------------|------------------------|-------|------|----|-----|-----------------------------------------------------------------------------------------------------------------------------------------------------------------------------------------------|
| <a href="#">LOC500947</a> | <a href="#">LOC500947.aSep08</a> | <a href="#">500947</a> | 20236 | 1863 |    | 199 | hypothetical gene supported by BC088439 (22.5 kD) (LOC500947) mRNA.                                                                                                                           |
| <a href="#">LOC500956</a> | <a href="#">LOC500956.bSep08</a> | <a href="#">500956</a> | 3983  | 794  | 3  | 191 | hypothetical protein LOC500956 (LOC500956) alternative variant bSep08, mRNA.                                                                                                                  |
| <a href="#">LOC500956</a> | <a href="#">LOC500956.dSep08</a> | <a href="#">500956</a> | 1996  | 547  | 1  | 91  | hypothetical protein LOC500956 (LOC500956) alternative variant dSep08, mRNA.                                                                                                                  |
| <a href="#">LOC500974</a> | <a href="#">LOC500974.aSep08</a> | <a href="#">500974</a> | 26174 | 344  |    | 114 | putative protein of eukaryotic origin (LOC500974) mRNA.                                                                                                                                       |
| <a href="#">LOC500990</a> | <a href="#">LOC500990.bSep08</a> | <a href="#">500990</a> | 9217  | 703  | 3  | 205 | similar to RIKEN cDNA 4931429L15 (LOC500990) alternative variant bSep08, mRNA.                                                                                                                |
| <a href="#">LOC500990</a> | <a href="#">LOC500990.cSep08</a> | <a href="#">500990</a> | 10328 | 807  | 3  | 179 | similar to RIKEN cDNA 4931429L15 (LOC500990) alternative variant cSep08, mRNA.                                                                                                                |
| <a href="#">LOC501046</a> | <a href="#">LOC501046.aSep08</a> | <a href="#">501046</a> | 29194 | 820  | 4  | 194 | similar to Phakinin (Beaded filament structural protein 2) (Lens fiber cell beaded filament protein CP 49) (CP49) (49 kDa cytoskeletal protein) (LOC501046) alternative variant aSep08, mRNA. |
| <a href="#">LOC501046</a> | <a href="#">LOC501046.bSep08</a> | <a href="#">501046</a> | 7811  | 712  | 1  | 179 | similar to Phakinin (Beaded filament structural protein 2) (Lens fiber cell beaded filament protein CP 49) (CP49) (49 kDa cytoskeletal protein) (LOC501046) alternative variant bSep08, mRNA. |
| <a href="#">LOC501091</a> | <a href="#">LOC501091.aSep08</a> | <a href="#">501091</a> | 17763 | 1044 | 1  | 243 | similar to Discs large homolog 5 (Placenta and prostate DLG) (Discs large protein P-dlg) (LOC501091) alternative variant aSep08, mRNA.                                                        |
| <a href="#">LOC501091</a> | <a href="#">LOC501091.bSep08</a> | <a href="#">501091</a> | 23921 | 1026 | 1  | 157 | similar to Discs large homolog 5 (Placenta and prostate DLG) (Discs large protein P-dlg) (18.7 kD) (LOC501091) alternative variant bSep08, mRNA.                                              |
| <a href="#">LOC501092</a> | <a href="#">LOC501092.aSep08</a> | <a href="#">501092</a> | 19649 | 453  | 2  | 108 | hypothetical LOC501092 (LOC501092) alternative variant aSep08, mRNA.                                                                                                                          |
| <a href="#">LOC501092</a> | <a href="#">LOC501092.bSep08</a> | <a href="#">501092</a> | 3865  | 306  | 1  | 41  | hypothetical LOC501092 (LOC501092) alternative variant bSep08, mRNA.                                                                                                                          |
| <a href="#">LOC501098</a> | <a href="#">LOC501098.aSep08</a> | <a href="#">501098</a> | 3424  | 1537 |    | 108 | similar to ubiquitin specific protease 49 (LOC501098) mRNA.                                                                                                                                   |
| <a href="#">LOC501110</a> | <a href="#">LOC501110.bSep08</a> | <a href="#">501110</a> | 51852 | 719  | 6  | 78  | similar to Glutathione S-transferase A1 (GTH1) (HA subunit 1) (GST-epsilon) (GSTA1-1) (GST class-alpha) (LOC501110) alternative variant bSep08, mRNA.                                         |
| <a href="#">LOC501110</a> | <a href="#">LOC501110.cSep08</a> | <a href="#">501110</a> | 20659 | 669  | 2  | 63  | similar to Glutathione S-transferase A1 (GTH1) (HA subunit 1) (GST-epsilon) (GSTA1-1) (GST class-alpha) (7.3 kD) (LOC501110) alternative variant cSep08, mRNA.                                |
| <a href="#">LOC501126</a> | <a href="#">LOC501126.aSep08</a> | <a href="#">501126</a> | 67002 | 2019 | 14 | 611 | putative protein of metazoan origin (LOC501126) alternative variant aSep08, mRNA.                                                                                                             |
| <a href="#">LOC501126</a> | <a href="#">LOC501126.bSep08</a> | <a href="#">501126</a> | 21780 | 1026 | 8  | 266 | putative nuclear protein of metazoan origin (30.1 kD) (LOC501126) alternative variant bSep08, mRNA.                                                                                           |
| <a href="#">LOC501126</a> | <a href="#">LOC501126.cSep08</a> | <a href="#">501126</a> | 27438 | 988  | 6  | 224 | putative protein of metazoan origin (25.5 kD) (LOC501126) alternative variant cSep08, mRNA.                                                                                                   |
| <a href="#">LOC501126</a> | <a href="#">LOC501126.dSep08</a> | <a href="#">501126</a> | 26376 | 747  | 6  | 212 | putative protein of metazoan origin (LOC501126) alternative variant dSep08, mRNA.                                                                                                             |
| <a href="#">LOC501126</a> | <a href="#">LOC501126.eSep08</a> | <a href="#">501126</a> | 26360 | 728  | 6  | 206 | putative protein of metazoan origin (LOC501126) alternative variant eSep08, mRNA.                                                                                                             |

|                           |                                  |                        |        |      |   |     |                                                                                                                                                                   |
|---------------------------|----------------------------------|------------------------|--------|------|---|-----|-------------------------------------------------------------------------------------------------------------------------------------------------------------------|
| <a href="#">LOC501126</a> | <a href="#">LOC501126.fSep08</a> | <a href="#">501126</a> | 26376  | 721  | 6 | 203 | putative protein of metazoan origin (LOC501126) alternative variant fSep08, mRNA.                                                                                 |
| <a href="#">LOC501194</a> | <a href="#">LOC501194.bSep08</a> | <a href="#">501194</a> | 3436   | 648  | 3 | 163 | similar to hypothetical protein D330021B20 and hypothetical protein LOC685917 (LOC501194) alternative variant bSep08, mRNA.                                       |
| <a href="#">LOC501194</a> | <a href="#">LOC501194.bSep08</a> | <a href="#">685917</a> | 3436   | 648  | 3 | 163 | similar to hypothetical protein D330021B20 and hypothetical protein LOC685917 (LOC501194) alternative variant bSep08, mRNA.                                       |
| <a href="#">LOC501212</a> | <a href="#">LOC501212.aSep08</a> | <a href="#">501212</a> | 8884   | 341  |   | 113 | hypothetical LOC501212 (LOC501212) mRNA.                                                                                                                          |
| <a href="#">LOC501221</a> | <a href="#">LOC501221.aSep08</a> | <a href="#">501221</a> | 16045  | 689  | 2 | 81  | similar to Discs large homolog 5 (Placenta and prostate DLG) (Discs large protein P-dlg) (8.7 kD) (LOC501221) alternative variant aSep08, mRNA.                   |
| <a href="#">LOC501221</a> | <a href="#">LOC501221.bSep08</a> | <a href="#">501221</a> | 20903  | 492  | 2 | 36  | similar to Discs large homolog 5 (Placenta and prostate DLG) (Discs large protein P-dlg) (4.0 kD) (LOC501221) alternative variant bSep08, mRNA.                   |
| <a href="#">LOC501223</a> | <a href="#">LOC501223.aSep08</a> | <a href="#">501223</a> | 4656   | 881  |   | 35  | similar to Discs large homolog 5 (Placenta and prostate DLG) (Discs large protein P-dlg) (LOC501223) mRNA.                                                        |
| <a href="#">LOC501226</a> | <a href="#">LOC501226.aSep08</a> | <a href="#">501226</a> | 2492   | 437  |   | 145 | hypothetical LOC501226 (LOC501226) mRNA.                                                                                                                          |
| <a href="#">LOC501256</a> | <a href="#">LOC501256.aSep08</a> | <a href="#">501256</a> | 17005  | 761  |   | 91  | hypothetical LOC501256 (LOC501256) mRNA.                                                                                                                          |
| <a href="#">LOC501271</a> | <a href="#">LOC501271.aSep08</a> | <a href="#">501271</a> | 87575  | 469  |   | 79  | hypothetical LOC501271 (8.6 kD) (LOC501271) mRNA.                                                                                                                 |
| <a href="#">LOC501282</a> | <a href="#">LOC501282.aSep08</a> | <a href="#">501282</a> | 8113   | 1714 | 6 | 121 | similar to lymphocyte antigen 6 complex, locus E ligand (13.0 kD) (LOC501282) alternative variant aSep08, complete mRNA.                                          |
| <a href="#">LOC501282</a> | <a href="#">LOC501282.bSep08</a> | <a href="#">501282</a> | 7132   | 1411 | 6 | 98  | similar to lymphocyte antigen 6 complex, locus E ligand (LOC501282) alternative variant bSep08, mRNA.                                                             |
| <a href="#">LOC501283</a> | <a href="#">LOC501283.bSep08</a> | <a href="#">501283</a> | 2224   | 722  | 1 | 198 | similar to lipid droplet associated protein (LOC501283) alternative variant bSep08, mRNA.                                                                         |
| <a href="#">LOC501306</a> | <a href="#">LOC501306.aSep08</a> | <a href="#">501306</a> | 2331   | 836  | 2 | 144 | hypothetical gene supported by BC082068 (17.2 kD) (LOC501306) alternative variant aSep08, mRNA.                                                                   |
| <a href="#">LOC501306</a> | <a href="#">LOC501306.bSep08</a> | <a href="#">501306</a> | 18182  | 896  | 5 | 128 | hypothetical gene supported by BC082068 (15.2 kD) (LOC501306) alternative variant bSep08, mRNA.                                                                   |
| <a href="#">LOC501307</a> | <a href="#">LOC501307.aSep08</a> | <a href="#">501307</a> | 6026   | 766  |   | 114 | similar to spermatogenesis associated glutamate (E)-rich protein 4d and similar to glutamate receptor, ionotropic, N-methyl D-aspartate-like 1A (LOC501307) mRNA. |
| <a href="#">LOC501307</a> | <a href="#">LOC501307.aSep08</a> | <a href="#">503337</a> | 6026   | 766  |   | 114 | similar to spermatogenesis associated glutamate (E)-rich protein 4d and similar to glutamate receptor, ionotropic, N-methyl D-aspartate-like 1A (LOC501307) mRNA. |
| <a href="#">LOC501327</a> | <a href="#">LOC501327.aSep08</a> | <a href="#">501327</a> | 71357  | 737  |   | 42  | hypothetical gene supported by BC078986 (4.8 kD) (LOC501327) mRNA.                                                                                                |
| <a href="#">LOC501329</a> | <a href="#">LOC501329.aSep08</a> | <a href="#">501329</a> | 271090 | 1120 | 5 | 226 | hypothetical gene supported by BC082068 and hypothetical protein LOC690822 (26.4 kD) (LOC501329) alternative variant aSep08, mRNA.                                |
| <a href="#">LOC501329</a> | <a href="#">LOC501329.aSep08</a> | <a href="#">690822</a> | 271090 | 1120 | 5 | 226 | hypothetical gene supported by BC082068 and hypothetical protein LOC690822 (26.4 kD) (LOC501329) alternative variant aSep08, mRNA.                                |

|                           |                                  |                        |       |     |   |     |                                                                                                                                                                               |
|---------------------------|----------------------------------|------------------------|-------|-----|---|-----|-------------------------------------------------------------------------------------------------------------------------------------------------------------------------------|
| <a href="#">LOC501329</a> | <a href="#">LOC501329.bSep08</a> | <a href="#">501329</a> | 18717 | 715 | 2 | 83  | hypothetical gene supported by BC082068 and hypothetical protein LOC690822 (9.4 kD) (LOC501329) alternative variant bSep08, mRNA.                                             |
| <a href="#">LOC501329</a> | <a href="#">LOC501329.bSep08</a> | <a href="#">690822</a> | 18717 | 715 | 2 | 83  | hypothetical gene supported by BC082068 and hypothetical protein LOC690822 (9.4 kD) (LOC501329) alternative variant bSep08, mRNA.                                             |
| <a href="#">LOC501339</a> | <a href="#">LOC501339.aSep08</a> | <a href="#">501339</a> | 9093  | 389 | 4 | 90  | similar to spermatogenesis associated glutamate (E)-rich protein 4d and similar to zinc finger CCCH type, antiviral 1 (10.4 kD) (LOC501339) alternative variant aSep08, mRNA. |
| <a href="#">LOC501339</a> | <a href="#">LOC501339.aSep08</a> | <a href="#">690518</a> | 9093  | 389 | 4 | 90  | similar to spermatogenesis associated glutamate (E)-rich protein 4d and similar to zinc finger CCCH type, antiviral 1 (10.4 kD) (LOC501339) alternative variant aSep08, mRNA. |
| <a href="#">LOC501339</a> | <a href="#">LOC501339.bSep08</a> | <a href="#">501339</a> | 41715 | 596 | 4 | 81  | similar to spermatogenesis associated glutamate (E)-rich protein 4d and similar to zinc finger CCCH type, antiviral 1 (LOC501339) alternative variant bSep08, mRNA.           |
| <a href="#">LOC501339</a> | <a href="#">LOC501339.bSep08</a> | <a href="#">690518</a> | 41715 | 596 | 4 | 81  | similar to spermatogenesis associated glutamate (E)-rich protein 4d and similar to zinc finger CCCH type, antiviral 1 (LOC501339) alternative variant bSep08, mRNA.           |
| <a href="#">LOC501339</a> | <a href="#">LOC501339.cSep08</a> | <a href="#">501339</a> | 29066 | 423 | 2 | 49  | similar to spermatogenesis associated glutamate (E)-rich protein 4d and similar to zinc finger CCCH type, antiviral 1 (LOC501339) alternative variant cSep08, mRNA.           |
| <a href="#">LOC501339</a> | <a href="#">LOC501339.cSep08</a> | <a href="#">690518</a> | 29066 | 423 | 2 | 49  | similar to spermatogenesis associated glutamate (E)-rich protein 4d and similar to zinc finger CCCH type, antiviral 1 (LOC501339) alternative variant cSep08, mRNA.           |
| <a href="#">LOC501344</a> | <a href="#">LOC501344.aSep08</a> | <a href="#">501344</a> | 2142  | 668 |   | 117 | hypothetical gene supported by BC082068 (LOC501344) mRNA.                                                                                                                     |
| <a href="#">LOC501350</a> | <a href="#">LOC501350.aSep08</a> | <a href="#">501350</a> | 1215  | 213 |   | 58  | hypothetical gene supported by BC082068 (LOC501350) mRNA.                                                                                                                     |
| <a href="#">LOC501355</a> | <a href="#">LOC501355.aSep08</a> | <a href="#">501355</a> | 68288 | 573 |   | 122 | hypothetical gene supported by BC078986 (LOC501355) mRNA.                                                                                                                     |
| <a href="#">LOC501358</a> | <a href="#">LOC501358.aSep08</a> | <a href="#">501358</a> | 2143  | 668 |   | 117 | hypothetical gene supported by BC082068 (LOC501358) mRNA.                                                                                                                     |
| <a href="#">LOC501362</a> | <a href="#">LOC501362.aSep08</a> | <a href="#">501362</a> | 4753  | 666 |   | 117 | hypothetical gene supported by BC082068 and hypothetical protein LOC689545 (LOC501362) mRNA.                                                                                  |
| <a href="#">LOC501362</a> | <a href="#">LOC501362.aSep08</a> | <a href="#">689545</a> | 4753  | 666 |   | 117 | hypothetical gene supported by BC082068 and hypothetical protein LOC689545 (LOC501362) mRNA.                                                                                  |
| <a href="#">LOC501391</a> | <a href="#">LOC501391.aSep08</a> | <a href="#">501391</a> | 26739 | 725 | 2 | 95  | hypothetical LOC501391 (10.1 kD) (LOC501391) alternative variant aSep08, mRNA.                                                                                                |
| <a href="#">LOC501391</a> | <a href="#">LOC501391.bSep08</a> | <a href="#">501391</a> | 31399 | 810 | 3 | 51  | hypothetical LOC501391 (5.4 kD) (LOC501391) alternative variant bSep08, mRNA.                                                                                                 |
| <a href="#">LOC501391</a> | <a href="#">LOC501391.cSep08</a> | <a href="#">501391</a> | 28451 | 325 | 2 | 51  | hypothetical LOC501391 (5.4 kD) (LOC501391) alternative variant cSep08, mRNA.                                                                                                 |
| <a href="#">LOC501399</a> | <a href="#">LOC501399.aSep08</a> | <a href="#">501399</a> | 7919  | 522 |   | 161 | similar to Discs large homolog 5 (Placenta and prostate DLG) (Discs large protein P-dlg) (LOC501399) mRNA.                                                                    |
| <a href="#">LOC501463</a> | <a href="#">LOC501463.aSep08</a> | <a href="#">501463</a> | 1229  | 703 |   | 108 | similar to Iroquois-class homeodomain protein IRX-1 (Iroquois homeobox protein 1) (Homeodomain protein IRXA1) (LOC501463) mRNA.                                               |

|                           |                                  |                        |       |      |    |      |                                                                                                                                                                       |
|---------------------------|----------------------------------|------------------------|-------|------|----|------|-----------------------------------------------------------------------------------------------------------------------------------------------------------------------|
| <a href="#">LOC501477</a> | <a href="#">LOC501477.aSep08</a> | <a href="#">501477</a> | 2703  | 776  |    | 154  | hypothetical gene supported by BC059164; BC082068 (LOC501477) mRNA.                                                                                                   |
| <a href="#">LOC501488</a> | <a href="#">LOC501488.aSep08</a> | <a href="#">501488</a> | 2783  | 846  |    | 177  | hypothetical gene supported by BC082068 (LOC501488) mRNA.                                                                                                             |
| <a href="#">LOC501515</a> | <a href="#">LOC501515.aSep08</a> | <a href="#">501515</a> | 19200 | 2038 | 15 | 671  | similar to Zinc finger CCHC domain-containing protein 6 (LOC501515) alternative variant aSep08, mRNA.                                                                 |
| <a href="#">LOC501515</a> | <a href="#">LOC501515.bSep08</a> | <a href="#">501515</a> | 5798  | 514  | 4  | 171  | similar to Zinc finger CCHC domain-containing protein 6 (LOC501515) alternative variant bSep08, mRNA.                                                                 |
| <a href="#">LOC501515</a> | <a href="#">LOC501515.cSep08</a> | <a href="#">501515</a> | 13914 | 726  | 5  | 165  | similar to Zinc finger CCHC domain-containing protein 6 (LOC501515) alternative variant cSep08, mRNA.                                                                 |
| <a href="#">LOC501515</a> | <a href="#">LOC501515.dSep08</a> | <a href="#">501515</a> | 14080 | 1627 | 3  | 132  | similar to Zinc finger CCHC domain-containing protein 6 (LOC501515) alternative variant dSep08, mRNA.                                                                 |
| <a href="#">LOC501546</a> | <a href="#">LOC501546.aSep08</a> | <a href="#">501546</a> | 14046 | 3716 | 15 | 1067 | hypothetical protein LOC501546 (LOC501546) alternative variant aSep08, mRNA.                                                                                          |
| <a href="#">LOC501546</a> | <a href="#">LOC501546.bSep08</a> | <a href="#">501546</a> | 13032 | 1784 | 8  | 555  | hypothetical protein LOC501546 (LOC501546) alternative variant bSep08, mRNA.                                                                                          |
| <a href="#">LOC501546</a> | <a href="#">LOC501546.cSep08</a> | <a href="#">501546</a> | 7690  | 1370 | 7  | 456  | hypothetical protein LOC501546 (LOC501546) alternative variant cSep08, mRNA.                                                                                          |
| <a href="#">LOC501546</a> | <a href="#">LOC501546.dSep08</a> | <a href="#">501546</a> | 5718  | 1067 | 4  | 329  | hypothetical protein LOC501546 (LOC501546) alternative variant dSep08, mRNA.                                                                                          |
| <a href="#">LOC501546</a> | <a href="#">LOC501546.eSep08</a> | <a href="#">501546</a> | 5800  | 943  | 5  | 314  | hypothetical protein LOC501546 (LOC501546) alternative variant eSep08, mRNA.                                                                                          |
| <a href="#">LOC501546</a> | <a href="#">LOC501546.fSep08</a> | <a href="#">501546</a> | 2860  | 843  | 5  | 281  | hypothetical protein LOC501546 (LOC501546) alternative variant fSep08, mRNA.                                                                                          |
| <a href="#">LOC501546</a> | <a href="#">LOC501546.gSep08</a> | <a href="#">501546</a> | 1940  | 709  | 3  | 191  | hypothetical protein LOC501546 (LOC501546) alternative variant gSep08, mRNA.                                                                                          |
| <a href="#">LOC501736</a> | <a href="#">LOC501736.aSep08</a> | <a href="#">501736</a> | 2808  | 982  |    | 102  | similar to CD300A antigen (LOC501736) mRNA.                                                                                                                           |
| <a href="#">LOC501810</a> | <a href="#">LOC501810.aSep08</a> | <a href="#">501810</a> | 4957  | 1553 |    | 216  | similar to Leukosialin precursor (Leucocyte sialoglycoprotein) (Sialophorin) (Ly-48) (B cell differentiation antigen LP-3) (CD43 antigen) (23.0 kD) (LOC501810) mRNA. |
| <a href="#">LOC502201</a> | <a href="#">LOC502201.aSep08</a> | <a href="#">502201</a> | 15151 | 2306 | 7  | 607  | similar to CG8272-PA (LOC502201) alternative variant aSep08, mRNA.                                                                                                    |
| <a href="#">LOC502371</a> | <a href="#">LOC502371.aSep08</a> | <a href="#">502371</a> | 1151  | 1042 |    | 347  | similar to 40S ribosomal protein S21 (LOC502371) mRNA.                                                                                                                |
| <a href="#">LOC502374</a> | <a href="#">LOC502374.aSep08</a> | <a href="#">502374</a> | 2016  | 382  |    | 67   | hypothetical protein LOC502374 (7.6 kD) (LOC502374) complete mRNA.                                                                                                    |
| <a href="#">LOC502684</a> | <a href="#">LOC502684.aSep08</a> | <a href="#">502684</a> | 15601 | 794  | 6  | 264  | hypothetical protein LOC502684 (LOC502684) alternative variant aSep08, mRNA.                                                                                          |
| <a href="#">LOC502684</a> | <a href="#">LOC502684.cSep08</a> | <a href="#">502684</a> | 2107  | 357  | 2  | 52   | hypothetical protein LOC502684 (LOC502684) alternative variant cSep08, mRNA.                                                                                          |
| <a href="#">LOC502684</a> | <a href="#">LOC502684.dSep08</a> | <a href="#">502684</a> | 6960  | 1714 | 5  | 61   | hypothetical protein LOC502684 (LOC502684) alternative variant dSep08, mRNA.                                                                                          |
| <a href="#">LOC502684</a> | <a href="#">LOC502684.eSep08</a> | <a href="#">502684</a> | 29753 | 475  | 4  | 38   | hypothetical protein LOC502684 (LOC502684) alternative variant eSep08, mRNA.                                                                                          |

|                           |                                  |                        |       |      |   |     |                                                                                                                                                                                       |
|---------------------------|----------------------------------|------------------------|-------|------|---|-----|---------------------------------------------------------------------------------------------------------------------------------------------------------------------------------------|
| <a href="#">LOC502710</a> | <a href="#">LOC502710.aSep08</a> | <a href="#">502710</a> | 88070 | 502  | 1 | 144 | similar to Myeloid/lymphoid or mixed-lineage leukemia protein 3 homolog (Histone-lysine N-methyltransferase, H3 lysine-4 specific MLL3) (LOC502710) alternative variant aSep08, mRNA. |
| <a href="#">LOC502710</a> | <a href="#">LOC502710.bSep08</a> | <a href="#">502710</a> | 88074 | 503  | 1 | 144 | similar to Myeloid/lymphoid or mixed-lineage leukemia protein 3 homolog (Histone-lysine N-methyltransferase, H3 lysine-4 specific MLL3) (LOC502710) alternative variant bSep08, mRNA. |
| <a href="#">LOC502894</a> | <a href="#">LOC502894.aSep08</a> | <a href="#">502894</a> | 8864  | 844  | 2 | 257 | hypothetical protein LOC502894 (LOC502894) alternative variant aSep08, mRNA.                                                                                                          |
| <a href="#">LOC503175</a> | <a href="#">LOC503175.aSep08</a> | <a href="#">503175</a> | 2904  | 806  |   | 91  | similar to Protein KIAA0280 (LOC503175) mRNA.                                                                                                                                         |
| <a href="#">LOC503391</a> | <a href="#">LOC503391.aSep08</a> | <a href="#">503391</a> | 14065 | 727  |   | 71  | similar to nidogen 2 (LOC503391) mRNA.                                                                                                                                                |
| <a href="#">LOC619573</a> | <a href="#">LOC619573.bSep08</a> | <a href="#">619573</a> | 6718  | 398  | 1 | 105 | hypothetical protein LOC619573 (LOC619573) alternative variant bSep08, mRNA.                                                                                                          |
| <a href="#">LOC619574</a> | <a href="#">LOC619574.bSep08</a> | <a href="#">619574</a> | 2638  | 666  | 3 | 103 | hypothetical protein LOC619574 (LOC619574) alternative variant bSep08, mRNA.                                                                                                          |
| <a href="#">LOC619574</a> | <a href="#">LOC619574.dSep08</a> | <a href="#">619574</a> | 2183  | 466  | 3 | 49  | hypothetical protein LOC619574 (5.4 kD) (LOC619574) alternative variant dSep08, mRNA.                                                                                                 |
| <a href="#">LOC654482</a> | <a href="#">LOC654482.bSep08</a> | <a href="#">654482</a> | 489   | 325  | 2 | 108 | hypothetical protein LOC654482 (LOC654482) alternative variant bSep08, mRNA.                                                                                                          |
| <a href="#">LOC678701</a> | <a href="#">LOC678701.aSep08</a> | <a href="#">678701</a> | 10515 | 1553 | 5 | 461 | hypothetical protein LOC678701 (50.6 kD) (LOC678701) alternative variant aSep08, mRNA.                                                                                                |
| <a href="#">LOC678701</a> | <a href="#">LOC678701.bSep08</a> | <a href="#">678701</a> | 4334  | 986  | 4 | 328 | hypothetical protein LOC678701 (LOC678701) alternative variant bSep08, mRNA.                                                                                                          |
| <a href="#">LOC678701</a> | <a href="#">LOC678701.cSep08</a> | <a href="#">678701</a> | 9243  | 775  | 4 | 257 | hypothetical protein LOC678701 (LOC678701) alternative variant cSep08, mRNA.                                                                                                          |
| <a href="#">LOC678701</a> | <a href="#">LOC678701.dSep08</a> | <a href="#">678701</a> | 3393  | 740  | 4 | 206 | hypothetical protein LOC678701 (LOC678701) alternative variant dSep08, mRNA.                                                                                                          |
| <a href="#">LOC678701</a> | <a href="#">LOC678701.eSep08</a> | <a href="#">678701</a> | 5113  | 567  | 3 | 153 | hypothetical protein LOC678701 (LOC678701) alternative variant eSep08, mRNA.                                                                                                          |
| <a href="#">LOC678701</a> | <a href="#">LOC678701.gSep08</a> | <a href="#">678701</a> | 2623  | 725  | 3 | 151 | hypothetical protein LOC678701 (LOC678701) alternative variant gSep08, mRNA.                                                                                                          |
| <a href="#">LOC678701</a> | <a href="#">LOC678701.hSep08</a> | <a href="#">678701</a> | 1315  | 1196 | 2 | 144 | hypothetical protein LOC678701 (LOC678701) alternative variant hSep08, mRNA.                                                                                                          |
| <a href="#">LOC678701</a> | <a href="#">LOC678701.iSep08</a> | <a href="#">678701</a> | 9104  | 340  | 2 | 113 | hypothetical protein LOC678701 (LOC678701) alternative variant iSep08, mRNA.                                                                                                          |
| <a href="#">LOC678701</a> | <a href="#">LOC678701.kSep08</a> | <a href="#">678701</a> | 13945 | 216  | 2 | 71  | hypothetical protein LOC678701 (LOC678701) alternative variant kSep08, mRNA.                                                                                                          |
| <a href="#">LOC678701</a> | <a href="#">LOC678701.lSep08</a> | <a href="#">678701</a> | 14599 | 298  | 2 | 39  | hypothetical protein LOC678701 (LOC678701) alternative variant lSep08, mRNA.                                                                                                          |
| <a href="#">LOC678701</a> | <a href="#">LOC678701.mSep08</a> | <a href="#">678701</a> | 2302  | 288  | 2 | 33  | hypothetical protein LOC678701 (LOC678701) alternative variant mSep08, mRNA.                                                                                                          |
| <a href="#">LOC678704</a> | <a href="#">LOC678704.bSep08</a> | <a href="#">678704</a> | 1095  | 451  | 1 | 69  | putative protein (LOC678704) alternative variant bSep08, mRNA.                                                                                                                        |
| <a href="#">LOC678704</a> | <a href="#">LOC678704.cSep08</a> | <a href="#">678704</a> | 27543 | 1795 | 3 | 66  | putative protein (LOC678704) alternative variant cSep08, mRNA.                                                                                                                        |



|                           |                                  |                        |       |      |   |     |                                                                                                                                                          |
|---------------------------|----------------------------------|------------------------|-------|------|---|-----|----------------------------------------------------------------------------------------------------------------------------------------------------------|
| <a href="#">LOC678738</a> | <a href="#">LOC678738.aSep08</a> | <a href="#">678738</a> | 1873  | 926  |   | 108 | similar to High mobility group protein 1 (HMG-1) (High mobility group protein B1) (Amphoterin) (Heparin-binding protein p30) (12.4 kD) (LOC678738) mRNA. |
| <a href="#">LOC678741</a> | <a href="#">LOC678741.aSep08</a> | <a href="#">678741</a> | 20011 | 875  |   | 291 | zinc finger ccch domain-containing protein 4 like (LOC678741) mRNA.                                                                                      |
| <a href="#">LOC678756</a> | <a href="#">LOC678756.aSep08</a> | <a href="#">678756</a> | 12763 | 705  |   | 146 | similar to GTPase activating protein testicular GAP1 (LOC678756) mRNA.                                                                                   |
| <a href="#">LOC679532</a> | <a href="#">LOC679532.bSep08</a> | <a href="#">679532</a> | 4280  | 938  | 8 | 270 | similar to Elongation of very long chain fatty acids protein 1 (LOC679532) alternative variant bSep08, mRNA.                                             |
| <a href="#">LOC679532</a> | <a href="#">LOC679532.cSep08</a> | <a href="#">679532</a> | 2188  | 1028 | 8 | 233 | similar to Elongation of very long chain fatty acids protein 1 (LOC679532) alternative variant cSep08, mRNA.                                             |
| <a href="#">LOC679532</a> | <a href="#">LOC679532.dSep08</a> | <a href="#">679532</a> | 2242  | 811  | 8 | 229 | similar to Elongation of very long chain fatty acids protein 1 (LOC679532) alternative variant dSep08, mRNA.                                             |
| <a href="#">LOC679532</a> | <a href="#">LOC679532.eSep08</a> | <a href="#">679532</a> | 1210  | 751  | 5 | 125 | similar to Elongation of very long chain fatty acids protein 1 (LOC679532) alternative variant eSep08, mRNA.                                             |
| <a href="#">LOC679532</a> | <a href="#">LOC679532.fSep08</a> | <a href="#">679532</a> | 4103  | 1132 | 5 | 111 | similar to Elongation of very long chain fatty acids protein 1 (LOC679532) alternative variant fSep08, mRNA.                                             |
| <a href="#">LOC679534</a> | <a href="#">LOC679534.aSep08</a> | <a href="#">679534</a> | 56333 | 386  |   | 128 | hypothetical protein LOC679534 (LOC679534) mRNA.                                                                                                         |
| <a href="#">LOC679536</a> | <a href="#">LOC679536.aSep08</a> | <a href="#">679536</a> | 3467  | 371  | 2 | 123 | hypothetical protein LOC679536 (LOC679536) alternative variant aSep08, mRNA.                                                                             |
| <a href="#">LOC679536</a> | <a href="#">LOC679536.bSep08</a> | <a href="#">679536</a> | 901   | 380  | 2 | 77  | hypothetical protein LOC679536 (LOC679536) alternative variant bSep08, mRNA.                                                                             |
| <a href="#">LOC679543</a> | <a href="#">LOC679543.aSep08</a> | <a href="#">679543</a> | 71930 | 472  |   | 49  | similar to GTPase activating protein testicular GAP1 (5.6 kD) (LOC679543) mRNA.                                                                          |
| <a href="#">LOC679551</a> | <a href="#">LOC679551.aSep08</a> | <a href="#">679551</a> | 6829  | 399  |   | 91  | similar to MIC2 like 1 (LOC679551) mRNA.                                                                                                                 |
| <a href="#">LOC679554</a> | <a href="#">LOC679554.aSep08</a> | <a href="#">679554</a> | 57710 | 923  |   | 103 | hypothetical protein LOC679554 (11.5 kD) (LOC679554) mRNA.                                                                                               |
| <a href="#">LOC679572</a> | <a href="#">LOC679572.aSep08</a> | <a href="#">679572</a> | 1451  | 433  | 2 | 79  | similar to CG6878-PA (8.2 kD) (LOC679572) alternative variant aSep08, mRNA.                                                                              |
| <a href="#">LOC679572</a> | <a href="#">LOC679572.bSep08</a> | <a href="#">679572</a> | 1594  | 397  | 3 | 79  | similar to CG6878-PA (8.2 kD) (LOC679572) alternative variant bSep08, mRNA.                                                                              |
| <a href="#">LOC679585</a> | <a href="#">LOC679585.cSep08</a> | <a href="#">679585</a> | 13782 | 415  | 5 | 126 | similar to acid phosphatase 1 isoform b (LOC679585) alternative variant cSep08, mRNA.                                                                    |
| <a href="#">LOC679585</a> | <a href="#">LOC679585.dSep08</a> | <a href="#">679585</a> | 1830  | 735  | 2 | 36  | similar to acid phosphatase 1 isoform b (LOC679585) alternative variant dSep08, mRNA.                                                                    |
| <a href="#">LOC679587</a> | <a href="#">LOC679587.aSep08</a> | <a href="#">679587</a> | 64934 | 618  | 3 | 163 | hypothetical protein LOC679587 and hypothetical protein LOC679608 (LOC679587) alternative variant aSep08, mRNA.                                          |
| <a href="#">LOC679587</a> | <a href="#">LOC679587.aSep08</a> | <a href="#">679608</a> | 64934 | 618  | 3 | 163 | hypothetical protein LOC679587 and hypothetical protein LOC679608 (LOC679587) alternative variant aSep08, mRNA.                                          |
| <a href="#">LOC679587</a> | <a href="#">LOC679587.bSep08</a> | <a href="#">679587</a> | 29399 | 747  | 3 | 118 | hypothetical protein LOC679587 and hypothetical protein LOC679608 (12.8 kD) (LOC679587) alternative variant bSep08, mRNA.                                |
| <a href="#">LOC679587</a> | <a href="#">LOC679587.bSep08</a> | <a href="#">679608</a> | 29399 | 747  | 3 | 118 | hypothetical protein LOC679587 and hypothetical protein LOC679608 (12.8 kD) (LOC679587) alternative variant bSep08, mRNA.                                |

|                           |                                  |                        |       |      |   |      |                                                                                                                                                                                                                                                                                                                  |
|---------------------------|----------------------------------|------------------------|-------|------|---|------|------------------------------------------------------------------------------------------------------------------------------------------------------------------------------------------------------------------------------------------------------------------------------------------------------------------|
| <a href="#">LOC679587</a> | <a href="#">LOC679587.cSep08</a> | <a href="#">679587</a> | 6597  | 444  | 2 | 61   | hypothetical protein LOC679587 and hypothetical protein LOC679608 (7.0 kD) (LOC679587) alternative variant cSep08, mRNA.                                                                                                                                                                                         |
| <a href="#">LOC679587</a> | <a href="#">LOC679587.cSep08</a> | <a href="#">679608</a> | 6597  | 444  | 2 | 61   | hypothetical protein LOC679587 and hypothetical protein LOC679608 (7.0 kD) (LOC679587) alternative variant cSep08, mRNA.                                                                                                                                                                                         |
| <a href="#">LOC679610</a> | <a href="#">LOC679610.aSep08</a> | <a href="#">679610</a> | 34371 | 761  | 5 | 202  | CRA c (LOC679610) alternative variant aSep08, mRNA.                                                                                                                                                                                                                                                              |
| <a href="#">LOC679610</a> | <a href="#">LOC679610.bSep08</a> | <a href="#">679610</a> | 38353 | 882  | 4 | 140  | CRA c (15.7 kD) (LOC679610) alternative variant bSep08, mRNA.                                                                                                                                                                                                                                                    |
| <a href="#">LOC679610</a> | <a href="#">LOC679610.cSep08</a> | <a href="#">679610</a> | 13624 | 661  | 1 | 100  | CRA c like (11.3 kD) (LOC679610) alternative variant cSep08, mRNA.                                                                                                                                                                                                                                               |
| <a href="#">LOC679620</a> | <a href="#">LOC679620.aSep08</a> | <a href="#">679620</a> | 18591 | 648  |   | 213  | similar to CG4329-PA, isoform A (LOC679620) mRNA.                                                                                                                                                                                                                                                                |
| <a href="#">LOC679623</a> | <a href="#">LOC679623.aSep08</a> | <a href="#">679623</a> | 18809 | 1055 | 6 | 166  | similar to Nuclear autoantigen Sp-100 (Speckled 100 kDa) (Nuclear dot-associated Sp100 protein) (18.8 kD) (LOC679623) alternative variant aSep08, mRNA.                                                                                                                                                          |
| <a href="#">LOC679623</a> | <a href="#">LOC679623.bSep08</a> | <a href="#">679623</a> | 1434  | 870  | 2 | 56   | similar to Nuclear autoantigen Sp-100 (Speckled 100 kDa) (Nuclear dot-associated Sp100 protein) (6.6 kD) (LOC679623) alternative variant bSep08, mRNA.                                                                                                                                                           |
| <a href="#">LOC679651</a> | <a href="#">LOC679651.aSep08</a> | <a href="#">679651</a> | 38128 | 357  |   | 115  | hypothetical protein LOC679651 (LOC679651) mRNA.                                                                                                                                                                                                                                                                 |
| <a href="#">LOC679693</a> | <a href="#">LOC679693.aSep08</a> | <a href="#">679693</a> | 3738  | 1654 | 7 | 405  | similar to Mediator of RNA polymerase II transcription subunit 12 (Thyroid hormone receptor-associated protein complex 230 kDa component) (Trap230) (Activator-recruited cofactor 240 kDa component) (ARC240) (CAG repeat protein 45) (OPA-containing pr (43.7 kD) (LOC679693) alternative variant aSep08, mRNA. |
| <a href="#">LOC679693</a> | <a href="#">LOC679693.bSep08</a> | <a href="#">679693</a> | 555   | 382  | 2 | 127  | similar to Mediator of RNA polymerase II transcription subunit 12 (Thyroid hormone receptor-associated protein complex 230 kDa component) (Trap230) (Activator-recruited cofactor 240 kDa component) (ARC240) (CAG repeat protein 45) (OPA-containing pr (LOC679693) alternative variant bSep08, mRNA.           |
| <a href="#">LOC679693</a> | <a href="#">LOC679693.cSep08</a> | <a href="#">679693</a> | 1443  | 273  | 3 | 91   | similar to Mediator of RNA polymerase II transcription subunit 12 (Thyroid hormone receptor-associated protein complex 230 kDa component) (Trap230) (Activator-recruited cofactor 240 kDa component) (ARC240) (CAG repeat protein 45) (OPA-containing pr (LOC679693) alternative variant cSep08, mRNA.           |
| <a href="#">LOC679714</a> | <a href="#">LOC679714.aSep08</a> | <a href="#">679714</a> | 11572 | 1253 |   | 72   | similar to CG7220-PA, isoform A (LOC679714) mRNA.                                                                                                                                                                                                                                                                |
| <a href="#">LOC679725</a> | <a href="#">LOC679725.aSep08</a> | <a href="#">679725</a> | 14110 | 3515 | 9 | 1023 | CRA a (LOC679725) alternative variant aSep08, mRNA.                                                                                                                                                                                                                                                              |
| <a href="#">LOC679725</a> | <a href="#">LOC679725.bSep08</a> | <a href="#">679725</a> | 17642 | 2934 | 8 | 869  | CRA a (LOC679725) alternative variant bSep08, mRNA.                                                                                                                                                                                                                                                              |
| <a href="#">LOC679725</a> | <a href="#">LOC679725.cSep08</a> | <a href="#">679725</a> | 10648 | 949  | 2 | 210  | CRA a (22.1 kD) (LOC679725) alternative variant cSep08, mRNA.                                                                                                                                                                                                                                                    |
| <a href="#">LOC679725</a> | <a href="#">LOC679725.dSep08</a> | <a href="#">679725</a> | 1747  | 634  | 3 | 111  | eukaryotic translation initiation factor 4E binding protein like (LOC679725) alternative variant dSep08, mRNA.                                                                                                                                                                                                   |
| <a href="#">LOC679725</a> | <a href="#">LOC679725.eSep08</a> | <a href="#">679725</a> | 758   | 642  | 2 | 83   | CRA c like (9.1 kD) (LOC679725) alternative variant eSep08, mRNA.                                                                                                                                                                                                                                                |

|                           |                                  |                        |        |      |    |     |                                                                                                       |
|---------------------------|----------------------------------|------------------------|--------|------|----|-----|-------------------------------------------------------------------------------------------------------|
| <a href="#">LOC679739</a> | <a href="#">LOC679739.aSep08</a> | <a href="#">679739</a> | 8555   | 487  | 4  | 120 | NADH dehydrogenase (ubiquinone) Fe-S protein 6 (LOC679739) alternative variant aSep08, mRNA.          |
| <a href="#">LOC679739</a> | <a href="#">LOC679739.bSep08</a> | <a href="#">679739</a> | 8554   | 547  | 4  | 85  | NADH dehydrogenase (ubiquinone) Fe-S protein 6 (9.8 kD) (LOC679739) alternative variant bSep08, mRNA. |
| <a href="#">LOC679751</a> | <a href="#">LOC679751.aSep08</a> | <a href="#">679751</a> | 2152   | 254  |    | 60  | hypothetical protein LOC679751 (LOC679751) mRNA.                                                      |
| <a href="#">LOC679769</a> | <a href="#">LOC679769.aSep08</a> | <a href="#">679769</a> | 36199  | 670  |    | 41  | similar to nidogen 2 (4.5 kD) (LOC679769) mRNA.                                                       |
| <a href="#">LOC679801</a> | <a href="#">LOC679801.aSep08</a> | <a href="#">679801</a> | 1211   | 388  |    | 129 | similar to Pre-B-cell leukemia transcription factor 3 (Homeobox protein PBX3) (LOC679801) mRNA.       |
| <a href="#">LOC679811</a> | <a href="#">LOC679811.aSep08</a> | <a href="#">679811</a> | 30937  | 3469 | 16 | 934 | similar to RIKEN cDNA D930015E06 (LOC679811) alternative variant aSep08, mRNA.                        |
| <a href="#">LOC679811</a> | <a href="#">LOC679811.bSep08</a> | <a href="#">679811</a> | 10431  | 767  | 4  | 223 | similar to RIKEN cDNA D930015E06 (LOC679811) alternative variant bSep08, mRNA.                        |
| <a href="#">LOC679811</a> | <a href="#">LOC679811.cSep08</a> | <a href="#">679811</a> | 12620  | 444  | 5  | 147 | similar to RIKEN cDNA D930015E06 (LOC679811) alternative variant cSep08, mRNA.                        |
| <a href="#">LOC679811</a> | <a href="#">LOC679811.dSep08</a> | <a href="#">679811</a> | 1269   | 729  | 2  | 85  | similar to RIKEN cDNA D930015E06 (LOC679811) alternative variant dSep08, mRNA.                        |
| <a href="#">LOC679818</a> | <a href="#">LOC679818.aSep08</a> | <a href="#">679818</a> | 10175  | 506  |    | 168 | similar to Maltase-glucoamylase, intestinal (LOC679818) mRNA.                                         |
| <a href="#">LOC679824</a> | <a href="#">LOC679824.aSep08</a> | <a href="#">679824</a> | 5600   | 508  | 1  | 120 | hypothetical protein LOC679824 (13.1 kD) (LOC679824) alternative variant aSep08, mRNA.                |
| <a href="#">LOC679824</a> | <a href="#">LOC679824.bSep08</a> | <a href="#">679824</a> | 3831   | 380  | 1  | 80  | hypothetical protein LOC679824 (LOC679824) alternative variant bSep08, mRNA.                          |
| <a href="#">LOC679824</a> | <a href="#">LOC679824.cSep08</a> | <a href="#">679824</a> | 14430  | 515  | 1  | 59  | hypothetical protein LOC679824 (6.3 kD) (LOC679824) alternative variant cSep08, mRNA.                 |
| <a href="#">LOC679834</a> | <a href="#">LOC679834.aSep08</a> | <a href="#">679834</a> | 12439  | 550  | 1  | 88  | similar to Meiosis expressed protein 1 (10.8 kD) (LOC679834) alternative variant aSep08, mRNA.        |
| <a href="#">LOC679834</a> | <a href="#">LOC679834.cSep08</a> | <a href="#">679834</a> | 11923  | 508  | 1  | 88  | similar to Meiosis expressed protein 1 (10.8 kD) (LOC679834) alternative variant cSep08, mRNA.        |
| <a href="#">LOC679858</a> | <a href="#">LOC679858.aSep08</a> | <a href="#">679858</a> | 7153   | 493  |    | 163 | hypothetical protein LOC679858 (LOC679858) mRNA.                                                      |
| <a href="#">LOC679860</a> | <a href="#">LOC679860.aSep08</a> | <a href="#">679860</a> | 4701   | 360  |    | 60  | hypothetical protein LOC679860 (6.9 kD) (LOC679860) mRNA.                                             |
| <a href="#">LOC679861</a> | <a href="#">LOC679861.aSep08</a> | <a href="#">679861</a> | 6772   | 498  | 3  | 92  | similar to MIC2 like 1 (LOC679861) alternative variant aSep08, mRNA.                                  |
| <a href="#">LOC679863</a> | <a href="#">LOC679863.aSep08</a> | <a href="#">679863</a> | 1080   | 329  |    | 82  | similar to N-myc downstream regulated gene 3 (LOC679863) mRNA.                                        |
| <a href="#">LOC679869</a> | <a href="#">LOC679869.aSep08</a> | <a href="#">679869</a> | 178055 | 1788 | 3  | 595 | CRA f like (LOC679869) alternative variant aSep08, mRNA.                                              |
| <a href="#">LOC679869</a> | <a href="#">LOC679869.bSep08</a> | <a href="#">679869</a> | 13979  | 724  | 4  | 241 | transcription factor 7-like 2 CRA d (LOC679869) alternative variant bSep08, mRNA.                     |
| <a href="#">LOC679869</a> | <a href="#">LOC679869.cSep08</a> | <a href="#">679869</a> | 177261 | 724  | 7  | 240 | transcription factor 7-like 2 (LOC679869) alternative variant cSep08, mRNA.                           |
| <a href="#">LOC679869</a> | <a href="#">LOC679869.dSep08</a> | <a href="#">679869</a> | 171779 | 513  | 6  | 170 | T-cell Transcription C-terminal like (LOC679869) alternative variant dSep08, mRNA.                    |
| <a href="#">LOC679869</a> | <a href="#">LOC679869.eSep08</a> | <a href="#">679869</a> | 6081   | 815  | 4  | 157 | transcription factor 7-like 2 CRA a (LOC679869) alternative variant eSep08, mRNA.                     |
| <a href="#">LOC679869</a> | <a href="#">LOC679869.fSep08</a> | <a href="#">679869</a> | 15873  | 2545 | 4  | 151 | transcription factor 7-like 2 CRA h (LOC679869) alternative variant fSep08, mRNA.                     |

|                           |                                  |                        |       |      |   |     |                                                                                                                                                          |
|---------------------------|----------------------------------|------------------------|-------|------|---|-----|----------------------------------------------------------------------------------------------------------------------------------------------------------|
| <a href="#">LOC679869</a> | <a href="#">LOC679869.hSep08</a> | <a href="#">679869</a> | 5138  | 422  | 3 | 40  | transcription factor 7-like 2 CRA a (4.5 kD) (LOC679869) alternative variant hSep08, mRNA.                                                               |
| <a href="#">LOC679869</a> | <a href="#">LOC679869.jSep08</a> | <a href="#">679869</a> | 5026  | 329  | 3 | 6   | putative protein (0.7 kD) (LOC679869) alternative variant jSep08, mRNA.                                                                                  |
| <a href="#">LOC679873</a> | <a href="#">LOC679873.aSep08</a> | <a href="#">679873</a> | 1139  | 731  |   | 218 | similar to retinoic acid early transcript 1L (LOC679873) mRNA.                                                                                           |
| <a href="#">LOC679885</a> | <a href="#">LOC679885.aSep08</a> | <a href="#">679885</a> | 21185 | 689  | 3 | 38  | similar to N-myc downstream regulated gene 3 (4.2 kD) (LOC679885) alternative variant aSep08, mRNA.                                                      |
| <a href="#">LOC679896</a> | <a href="#">LOC679896.aSep08</a> | <a href="#">679896</a> | 8507  | 930  |   | 234 | hypothetical protein LOC679896 (24.9 kD) (LOC679896) mRNA.                                                                                               |
| <a href="#">LOC679898</a> | <a href="#">LOC679898.aSep08</a> | <a href="#">679898</a> | 4633  | 1806 | 6 | 198 | similar to zinc finger, matrin type 2 (LOC679898) alternative variant aSep08, mRNA.                                                                      |
| <a href="#">LOC679902</a> | <a href="#">LOC679902.aSep08</a> | <a href="#">679902</a> | 13266 | 770  |   | 73  | hypothetical protein LOC679902 (LOC679902) mRNA.                                                                                                         |
| <a href="#">LOC679924</a> | <a href="#">LOC679924.aSep08</a> | <a href="#">679924</a> | 2596  | 680  |   | 210 | similar to Kif19A CG9913-PB, isoform B (LOC679924) mRNA.                                                                                                 |
| <a href="#">LOC679934</a> | <a href="#">LOC679934.aSep08</a> | <a href="#">679934</a> | 15237 | 1106 |   | 75  | probable protein (8.8 kD) (LOC679934) complete mRNA.                                                                                                     |
| <a href="#">LOC679937</a> | <a href="#">LOC679937.aSep08</a> | <a href="#">679937</a> | 37061 | 2743 |   | 204 | similar to CG4025-PA (LOC679937) alternative variant aSep08, mRNA.                                                                                       |
| <a href="#">LOC679937</a> | <a href="#">LOC679937.bSep08</a> | <a href="#">679937</a> | 2604  | 2052 |   | 45  | similar to CG4025-PA (LOC679937) alternative variant bSep08, mRNA.                                                                                       |
| <a href="#">LOC679949</a> | <a href="#">LOC679949.aSep08</a> | <a href="#">679949</a> | 38782 | 1022 |   | 145 | similar to CG4502-PA, isoform A (LOC679949) mRNA.                                                                                                        |
| <a href="#">LOC679989</a> | <a href="#">LOC679989.aSep08</a> | <a href="#">679989</a> | 4619  | 623  |   | 141 | similar to t-complex 11 protein (LOC679989) mRNA.                                                                                                        |
| <a href="#">LOC680025</a> | <a href="#">LOC680025.aSep08</a> | <a href="#">680025</a> | 1035  | 686  | 2 | 72  | similar to nuclear RNA export factor 2 (LOC680025) alternative variant aSep08, mRNA.                                                                     |
| <a href="#">LOC680025</a> | <a href="#">LOC680025.bSep08</a> | <a href="#">680025</a> | 12270 | 684  | 3 | 62  | similar to nuclear RNA export factor 2 (LOC680025) alternative variant bSep08, mRNA.                                                                     |
| <a href="#">LOC680025</a> | <a href="#">LOC680025.cSep08</a> | <a href="#">680025</a> | 3239  | 1494 | 4 | 291 | similar to nuclear RNA export factor 2 (LOC680025) alternative variant cSep08, mRNA.                                                                     |
| <a href="#">LOC680025</a> | <a href="#">LOC680025.eSep08</a> | <a href="#">680025</a> | 24656 | 791  | 7 | 57  | similar to nuclear RNA export factor 2 (LOC680025) alternative variant eSep08, mRNA.                                                                     |
| <a href="#">LOC680036</a> | <a href="#">LOC680036.aSep08</a> | <a href="#">680036</a> | 50038 | 418  |   | 138 | similar to methionine sulfoxide reductase B3 isoform 2 (LOC680036) mRNA.                                                                                 |
| <a href="#">LOC680039</a> | <a href="#">LOC680039.bSep08</a> | <a href="#">680039</a> | 15555 | 2610 | 2 | 474 | hypothetical protein LOC680039 (LOC680039) alternative variant bSep08, mRNA.                                                                             |
| <a href="#">LOC680039</a> | <a href="#">LOC680039.cSep08</a> | <a href="#">680039</a> | 1953  | 237  | 2 | 36  | hypothetical protein LOC680039 (LOC680039) alternative variant cSep08, mRNA.                                                                             |
| <a href="#">LOC680045</a> | <a href="#">LOC680045.bSep08</a> | <a href="#">680045</a> | 7398  | 410  | 1 | 136 | hypothetical protein LOC680045 (LOC680045) alternative variant bSep08, mRNA.                                                                             |
| <a href="#">LOC680045</a> | <a href="#">LOC680045.cSep08</a> | <a href="#">680045</a> | 7569  | 682  | 1 | 121 | hypothetical protein LOC680045 (LOC680045) alternative variant cSep08, mRNA.                                                                             |
| <a href="#">LOC680069</a> | <a href="#">LOC680069.aSep08</a> | <a href="#">680069</a> | 58276 | 317  |   | 105 | similar to Pappalysin-2 precursor (Pregnancy-associated plasma protein-A2) (PAPP-A2) (Pregnancy-associated plasma protein-E1) (PAPP-E) (LOC680069) mRNA. |
| <a href="#">LOC680074</a> | <a href="#">LOC680074.aSep08</a> | <a href="#">680074</a> | 12390 | 264  |   | 40  | hypothetical protein LOC680074 (LOC680074) mRNA.                                                                                                         |
| <a href="#">LOC680079</a> | <a href="#">LOC680079.aSep08</a> | <a href="#">680079</a> | 3592  | 829  | 4 | 275 | similar to Chloride channel protein 6 (CIC-6) (LOC680079) alternative variant aSep08, mRNA.                                                              |

|                           |                                  |                        |        |      |   |     |                                                                                                                                                                                                                                     |
|---------------------------|----------------------------------|------------------------|--------|------|---|-----|-------------------------------------------------------------------------------------------------------------------------------------------------------------------------------------------------------------------------------------|
| <a href="#">LOC680079</a> | <a href="#">LOC680079.bSep08</a> | <a href="#">680079</a> | 2674   | 973  | 1 | 149 | similar to Chloride channel protein 6 (ClC-6) (LOC680079) alternative variant bSep08, mRNA.                                                                                                                                         |
| <a href="#">LOC680080</a> | <a href="#">LOC680080.aSep08</a> | <a href="#">680080</a> | 2836   | 636  | 2 | 51  | hypothetical protein LOC680080 (6.0 kD) (LOC680080) alternative variant aSep08, complete mRNA.                                                                                                                                      |
| <a href="#">LOC680096</a> | <a href="#">LOC680096.aSep08</a> | <a href="#">680096</a> | 123729 | 501  |   | 76  | similar to ribosomal protein L31 (LOC680096) mRNA.                                                                                                                                                                                  |
| <a href="#">LOC680117</a> | <a href="#">LOC680117.aSep08</a> | <a href="#">680117</a> | 1932   | 801  | 2 | 161 | similar to T-cell leukemia homeobox protein 2 (Homeobox protein Hox-11L1) (Homeobox TLX-2) (PMUR10F) (LOC680117) alternative variant aSep08, mRNA.                                                                                  |
| <a href="#">LOC680117</a> | <a href="#">LOC680117.bSep08</a> | <a href="#">680117</a> | 1698   | 463  | 2 | 126 | similar to T-cell leukemia homeobox protein 2 (Homeobox protein Hox-11L1) (Homeobox TLX-2) (PMUR10F) (LOC680117) alternative variant bSep08, mRNA.                                                                                  |
| <a href="#">LOC680117</a> | <a href="#">LOC680117.cSep08</a> | <a href="#">680117</a> | 1704   | 474  | 2 | 123 | similar to T-cell leukemia homeobox protein 2 (Homeobox protein Hox-11L1) (Homeobox TLX-2) (PMUR10F) (LOC680117) alternative variant cSep08, mRNA.                                                                                  |
| <a href="#">LOC680117</a> | <a href="#">LOC680117.dSep08</a> | <a href="#">680117</a> | 671    | 288  | 1 | 90  | similar to T-cell leukemia homeobox protein 2 (Homeobox protein Hox-11L1) (Homeobox TLX-2) (PMUR10F) (LOC680117) alternative variant dSep08, mRNA.                                                                                  |
| <a href="#">LOC680117</a> | <a href="#">LOC680117.eSep08</a> | <a href="#">680117</a> | 1718   | 592  | 2 | 90  | similar to T-cell leukemia homeobox protein 2 (Homeobox protein Hox-11L1) (Homeobox TLX-2) (PMUR10F) (LOC680117) alternative variant eSep08, mRNA.                                                                                  |
| <a href="#">LOC680133</a> | <a href="#">LOC680133.aSep08</a> | <a href="#">680133</a> | 19004  | 377  |   | 125 | similar to TBC1 domain family, member 8 (LOC680133) mRNA.                                                                                                                                                                           |
| <a href="#">LOC680149</a> | <a href="#">LOC680149.aSep08</a> | <a href="#">680149</a> | 2914   | 443  | 1 | 74  | similar to Guanine nucleotide-binding protein G(T) gamma-T1 subunit precursor (Transducin gamma chain) (8.6 kD) (LOC680149) alternative variant aSep08, mRNA.                                                                       |
| <a href="#">LOC680149</a> | <a href="#">LOC680149.bSep08</a> | <a href="#">680149</a> | 2985   | 498  | 1 | 74  | similar to Guanine nucleotide-binding protein G(T) gamma-T1 subunit precursor (Transducin gamma chain) (8.6 kD) (LOC680149) alternative variant bSep08, mRNA.                                                                       |
| <a href="#">LOC680149</a> | <a href="#">LOC680149.cSep08</a> | <a href="#">680149</a> | 2871   | 527  | 1 | 56  | similar to Guanine nucleotide-binding protein G(T) gamma-T1 subunit precursor (Transducin gamma chain) (LOC680149) alternative variant cSep08, mRNA.                                                                                |
| <a href="#">LOC680155</a> | <a href="#">LOC680155.aSep08</a> | <a href="#">680155</a> | 16317  | 825  |   | 260 | hypothetical protein LOC680155 (LOC680155) mRNA.                                                                                                                                                                                    |
| <a href="#">LOC680157</a> | <a href="#">LOC680157.aSep08</a> | <a href="#">680157</a> | 4382   | 725  | 2 | 87  | hypothetical protein LOC680157 (9.8 kD) (LOC680157) alternative variant aSep08, mRNA.                                                                                                                                               |
| <a href="#">LOC680157</a> | <a href="#">LOC680157.bSep08</a> | <a href="#">680157</a> | 2845   | 269  | 1 | 64  | hypothetical protein LOC680157 (LOC680157) alternative variant bSep08, mRNA.                                                                                                                                                        |
| <a href="#">LOC680162</a> | <a href="#">LOC680162.aSep08</a> | <a href="#">680162</a> | 3047   | 1958 |   | 429 | similar to Nucleosome binding protein 1 (Nucleosome binding protein 45) (NBP-45) (GARP45 protein) and similar to Nucleosome binding protein 1 (Nucleosome binding protein 45) (NBP-45) (GARP45 protein) (48.6 kD) (LOC680162) mRNA. |
| <a href="#">LOC680162</a> | <a href="#">LOC680162.aSep08</a> | <a href="#">680182</a> | 3047   | 1958 |   | 429 | similar to Nucleosome binding protein 1 (Nucleosome binding protein 45) (NBP-45) (GARP45 protein) and similar to Nucleosome binding protein 1 (Nucleosome binding protein 45) (NBP-45) (GARP45 protein) (48.6 kD) (LOC680162) mRNA. |
| <a href="#">LOC680164</a> | <a href="#">LOC680164.aSep08</a> | <a href="#">680164</a> | 5745   | 1344 |   | 413 | hypothetical protein LOC680164 (LOC680164) mRNA.                                                                                                                                                                                    |

|                           |                                  |                        |       |      |   |     |                                                                                                      |
|---------------------------|----------------------------------|------------------------|-------|------|---|-----|------------------------------------------------------------------------------------------------------|
| <a href="#">LOC680166</a> | <a href="#">LOC680166.aSep08</a> | <a href="#">680166</a> | 1351  | 522  |   | 69  | hypothetical protein LOC680166 (LOC680166) mRNA.                                                     |
| <a href="#">LOC680168</a> | <a href="#">LOC680168.aSep08</a> | <a href="#">680168</a> | 5338  | 1139 | 2 | 379 | similar to retinoblastoma-associated protein 140 (LOC680168) alternative variant aSep08, mRNA.       |
| <a href="#">LOC680168</a> | <a href="#">LOC680168.bSep08</a> | <a href="#">680168</a> | 1723  | 572  | 2 | 94  | similar to retinoblastoma-associated protein 140 (LOC680168) alternative variant bSep08, mRNA.       |
| <a href="#">LOC680185</a> | <a href="#">LOC680185.aSep08</a> | <a href="#">680185</a> | 1275  | 559  |   | 38  | similar to spermatogenesis associated glutamate (E)-rich protein 4d (LOC680185) mRNA.                |
| <a href="#">LOC680199</a> | <a href="#">LOC680199.aSep08</a> | <a href="#">680199</a> | 1108  | 696  |   | 133 | hypothetical protein LOC680199 (14.9 kD) (LOC680199) mRNA.                                           |
| <a href="#">LOC680200</a> | <a href="#">LOC680200.aSep08</a> | <a href="#">680200</a> | 17216 | 1513 | 4 | 470 | zinc finger protein 455 (55.4 kD) (LOC680200) alternative variant aSep08, mRNA.                      |
| <a href="#">LOC680200</a> | <a href="#">LOC680200.aSep08</a> | <a href="#">680222</a> | 17216 | 1513 | 4 | 470 | zinc finger protein 455 (55.4 kD) (LOC680200) alternative variant aSep08, mRNA.                      |
| <a href="#">LOC680200</a> | <a href="#">LOC680200.bSep08</a> | <a href="#">680200</a> | 16801 | 1578 | 4 | 470 | zinc finger protein 455 (55.4 kD) (LOC680200) alternative variant bSep08, mRNA.                      |
| <a href="#">LOC680200</a> | <a href="#">LOC680200.bSep08</a> | <a href="#">680222</a> | 16801 | 1578 | 4 | 470 | zinc finger protein 455 (55.4 kD) (LOC680200) alternative variant bSep08, mRNA.                      |
| <a href="#">LOC680200</a> | <a href="#">LOC680200.cSep08</a> | <a href="#">680200</a> | 11347 | 1057 | 4 | 171 | finger protein zinc 45 (LOC680200) alternative variant cSep08, mRNA.                                 |
| <a href="#">LOC680200</a> | <a href="#">LOC680200.cSep08</a> | <a href="#">680222</a> | 11347 | 1057 | 4 | 171 | finger protein zinc 45 (LOC680200) alternative variant cSep08, mRNA.                                 |
| <a href="#">LOC680200</a> | <a href="#">LOC680200.dSep08</a> | <a href="#">680200</a> | 9062  | 567  | 4 | 58  | KRAB box (7.1 kD) (LOC680200) alternative variant dSep08, mRNA.                                      |
| <a href="#">LOC680200</a> | <a href="#">LOC680200.dSep08</a> | <a href="#">680222</a> | 9062  | 567  | 4 | 58  | KRAB box (7.1 kD) (LOC680200) alternative variant dSep08, mRNA.                                      |
| <a href="#">LOC680200</a> | <a href="#">LOC680200.eSep08</a> | <a href="#">680200</a> | 55933 | 346  | 4 | 54  | KRAB box (6.3 kD) (LOC680200) alternative variant eSep08, mRNA.                                      |
| <a href="#">LOC680200</a> | <a href="#">LOC680200.eSep08</a> | <a href="#">680222</a> | 55933 | 346  | 4 | 54  | KRAB box (6.3 kD) (LOC680200) alternative variant eSep08, mRNA.                                      |
| <a href="#">LOC680200</a> | <a href="#">LOC680200.fSep08</a> | <a href="#">680200</a> | 10282 | 1676 | 3 | 53  | KRAB box (6.4 kD) (LOC680200) alternative variant fSep08, mRNA.                                      |
| <a href="#">LOC680200</a> | <a href="#">LOC680200.fSep08</a> | <a href="#">680222</a> | 10282 | 1676 | 3 | 53  | KRAB box (6.4 kD) (LOC680200) alternative variant fSep08, mRNA.                                      |
| <a href="#">LOC680230</a> | <a href="#">LOC680230.aSep08</a> | <a href="#">680230</a> | 38179 | 658  | 5 | 98  | hypothetical protein LOC680230 (LOC680230) alternative variant aSep08, mRNA.                         |
| <a href="#">LOC680230</a> | <a href="#">LOC680230.bSep08</a> | <a href="#">680230</a> | 17617 | 517  | 4 | 89  | hypothetical protein LOC680230 (LOC680230) alternative variant bSep08, mRNA.                         |
| <a href="#">LOC680230</a> | <a href="#">LOC680230.cSep08</a> | <a href="#">680230</a> | 17603 | 593  | 4 | 87  | hypothetical protein LOC680230 (LOC680230) alternative variant cSep08, mRNA.                         |
| <a href="#">LOC680230</a> | <a href="#">LOC680230.dSep08</a> | <a href="#">680230</a> | 13880 | 458  | 3 | 79  | hypothetical protein LOC680230 (LOC680230) alternative variant dSep08, mRNA.                         |
| <a href="#">LOC680230</a> | <a href="#">LOC680230.eSep08</a> | <a href="#">680230</a> | 38044 | 331  | 4 | 78  | hypothetical protein LOC680230 (LOC680230) alternative variant eSep08, mRNA.                         |
| <a href="#">LOC680230</a> | <a href="#">LOC680230.fSep08</a> | <a href="#">680230</a> | 38263 | 529  | 3 | 54  | hypothetical protein LOC680230 (6.2 kD) (LOC680230) alternative variant fSep08, mRNA.                |
| <a href="#">LOC680231</a> | <a href="#">LOC680231.aSep08</a> | <a href="#">680231</a> | 17274 | 1263 | 9 | 328 | similar to chromodomain helicase DNA binding protein 9 (LOC680231) alternative variant aSep08, mRNA. |

|                           |                                  |                        |        |      |    |     |                                                                                                                                                                                                 |
|---------------------------|----------------------------------|------------------------|--------|------|----|-----|-------------------------------------------------------------------------------------------------------------------------------------------------------------------------------------------------|
| <a href="#">LOC680231</a> | <a href="#">LOC680231.bSep08</a> | <a href="#">680231</a> | 19607  | 511  | 3  | 161 | similar to chromodomain helicase DNA binding protein 9 (LOC680231) alternative variant bSep08, mRNA.                                                                                            |
| <a href="#">LOC680235</a> | <a href="#">LOC680235.aSep08</a> | <a href="#">680235</a> | 10435  | 606  |    |     |                                                                                                                                                                                                 |
| <a href="#">LOC680241</a> | <a href="#">LOC680241.aSep08</a> | <a href="#">680241</a> | 4066   | 1703 |    | 536 | similar to zinc finger protein 87 (LOC680241) mRNA.                                                                                                                                             |
| <a href="#">LOC680252</a> | <a href="#">LOC680252.aSep08</a> | <a href="#">680252</a> | 6251   | 2037 | 5  | 533 | similar to Dystrophia myotonica WD repeat-containing protein (Dystrophia myotonica-containing WD repeat motif protein) (DMR-N9 protein) (LOC680252) alternative variant aSep08, mRNA.           |
| <a href="#">LOC680252</a> | <a href="#">LOC680252.cSep08</a> | <a href="#">680252</a> | 1927   | 820  | 2  | 135 | similar to Dystrophia myotonica WD repeat-containing protein (Dystrophia myotonica-containing WD repeat motif protein) (DMR-N9 protein) (14.5 kD) (LOC680252) alternative variant cSep08, mRNA. |
| <a href="#">LOC680259</a> | <a href="#">LOC680259.aSep08</a> | <a href="#">680259</a> | 82787  | 557  |    | 185 | hypothetical protein LOC680259 (LOC680259) mRNA.                                                                                                                                                |
| <a href="#">LOC680270</a> | <a href="#">LOC680270.aSep08</a> | <a href="#">680270</a> | 4956   | 544  |    | 159 | hypothetical protein LOC680270 (LOC680270) mRNA.                                                                                                                                                |
| <a href="#">LOC680282</a> | <a href="#">LOC680282.aSep08</a> | <a href="#">680282</a> | 2247   | 493  | 1  | 76  | hypothetical protein LOC680282 (LOC680282) alternative variant aSep08, mRNA.                                                                                                                    |
| <a href="#">LOC680282</a> | <a href="#">LOC680282.bSep08</a> | <a href="#">680282</a> | 2260   | 418  |    | 32  | hypothetical protein LOC680282 (LOC680282) alternative variant bSep08, mRNA.                                                                                                                    |
| <a href="#">LOC680290</a> | <a href="#">LOC680290.aSep08</a> | <a href="#">680290</a> | 34286  | 729  | 5  | 103 | similar to Zinc finger protein 208 (LOC680290) alternative variant aSep08, mRNA.                                                                                                                |
| <a href="#">LOC680290</a> | <a href="#">LOC680290.bSep08</a> | <a href="#">680290</a> | 29311  | 432  | 5  | 99  | similar to Zinc finger protein 208 (LOC680290) alternative variant bSep08, mRNA.                                                                                                                |
| <a href="#">LOC680290</a> | <a href="#">LOC680290.dSep08</a> | <a href="#">680290</a> | 34259  | 798  | 6  | 62  | similar to Zinc finger protein 208 (LOC680290) alternative variant dSep08, mRNA.                                                                                                                |
| <a href="#">LOC680308</a> | <a href="#">LOC680308.bSep08</a> | <a href="#">680308</a> | 5743   | 509  | 1  | 169 | similar to Bifunctional methylenetetrahydrofolate dehydrogenase/cyclohydrolase, mitochondrial precursor (LOC680308) alternative variant bSep08, mRNA.                                           |
| <a href="#">LOC680344</a> | <a href="#">LOC680344.aSep08</a> | <a href="#">680344</a> | 147621 | 627  | 4  | 208 | similar to Protein KIAA0574 (LOC680344) alternative variant aSep08, mRNA.                                                                                                                       |
| <a href="#">LOC680344</a> | <a href="#">LOC680344.bSep08</a> | <a href="#">680344</a> | 28941  | 655  | 1  | 105 | similar to Protein KIAA0574 (LOC680344) alternative variant bSep08, mRNA.                                                                                                                       |
| <a href="#">LOC680367</a> | <a href="#">LOC680367.aSep08</a> | <a href="#">680367</a> | 3605   | 554  |    | 101 | similar to Urinary protein 3 precursor (RUP-3) (11.1 kD) (LOC680367) mRNA.                                                                                                                      |
| <a href="#">LOC680392</a> | <a href="#">LOC680392.aSep08</a> | <a href="#">680392</a> | 19232  | 1044 | 2  | 243 | similar to Reticulocalbin-1 precursor (LOC680392) alternative variant aSep08, mRNA.                                                                                                             |
| <a href="#">LOC680392</a> | <a href="#">LOC680392.bSep08</a> | <a href="#">680392</a> | 6891   | 756  | 2  | 208 | similar to Reticulocalbin-1 precursor (LOC680392) alternative variant bSep08, mRNA.                                                                                                             |
| <a href="#">LOC680392</a> | <a href="#">LOC680392.cSep08</a> | <a href="#">680392</a> | 23462  | 830  | 2  | 156 | similar to Reticulocalbin-1 precursor (18.6 kD) (LOC680392) alternative variant cSep08, mRNA.                                                                                                   |
| <a href="#">LOC680406</a> | <a href="#">LOC680406.aSep08</a> | <a href="#">680406</a> | 579    | 118  |    | 39  | similar to Urinary protein 2 precursor (RUP-2) (LOC680406) mRNA.                                                                                                                                |
| <a href="#">LOC680409</a> | <a href="#">LOC680409.aSep08</a> | <a href="#">680409</a> | 17010  | 2022 | 12 | 554 | similar to Proline oxidase, mitochondrial precursor (Proline dehydrogenase) (LOC680409) alternative variant aSep08, mRNA.                                                                       |
| <a href="#">LOC680409</a> | <a href="#">LOC680409.bSep08</a> | <a href="#">680409</a> | 1414   | 550  | 1  | 107 | similar to Proline oxidase, mitochondrial precursor (Proline dehydrogenase) (12.1 kD) (LOC680409) alternative variant bSep08, mRNA.                                                             |

|                           |                                  |                        |        |      |    |      |                                                                                                                                                                                           |
|---------------------------|----------------------------------|------------------------|--------|------|----|------|-------------------------------------------------------------------------------------------------------------------------------------------------------------------------------------------|
| <a href="#">LOC680415</a> | <a href="#">LOC680415.aSep08</a> | <a href="#">680415</a> | 22012  | 643  |    | 214  | similar to pappalysin 2 isoform 1 (LOC680415) mRNA.                                                                                                                                       |
| <a href="#">LOC680433</a> | <a href="#">LOC680433.aSep08</a> | <a href="#">680433</a> | 2335   | 743  |    | 161  | hypothetical protein LOC680433 (LOC680433) mRNA.                                                                                                                                          |
| <a href="#">LOC680445</a> | <a href="#">LOC680445.bSep08</a> | <a href="#">680445</a> | 24076  | 1492 | 2  | 98   | muscleblind-like 2 CRA d (11.0 kD) (LOC680445) alternative variant bSep08, mRNA.                                                                                                          |
| <a href="#">LOC680445</a> | <a href="#">LOC680445.cSep08</a> | <a href="#">680445</a> | 38685  | 1136 | 3  | 94   | muscleblind-like 2 (10.4 kD) (LOC680445) alternative variant cSep08, mRNA.                                                                                                                |
| <a href="#">LOC680445</a> | <a href="#">LOC680445.dSep08</a> | <a href="#">680445</a> | 38445  | 991  | 4  | 88   | muscleblind-like 2 (9.2 kD) (LOC680445) alternative variant dSep08, complete mRNA.                                                                                                        |
| <a href="#">LOC680451</a> | <a href="#">LOC680451.aSep08</a> | <a href="#">680451</a> | 4697   | 1700 | 17 | 489  | similar to nuclear receptor binding protein (LOC680451) alternative variant aSep08, mRNA.                                                                                                 |
| <a href="#">LOC680451</a> | <a href="#">LOC680451.bSep08</a> | <a href="#">680451</a> | 4434   | 1593 | 16 | 295  | similar to nuclear receptor binding protein (33.5 kD) (LOC680451) alternative variant bSep08, mRNA.                                                                                       |
| <a href="#">LOC680451</a> | <a href="#">LOC680451.cSep08</a> | <a href="#">680451</a> | 5365   | 3357 | 11 | 258  | similar to nuclear receptor binding protein (29.6 kD) (LOC680451) alternative variant cSep08, mRNA.                                                                                       |
| <a href="#">LOC680451</a> | <a href="#">LOC680451.dSep08</a> | <a href="#">680451</a> | 2734   | 1247 | 5  | 100  | similar to nuclear receptor binding protein (11.1 kD) (LOC680451) alternative variant dSep08, mRNA.                                                                                       |
| <a href="#">LOC680451</a> | <a href="#">LOC680451.eSep08</a> | <a href="#">680451</a> | 1667   | 918  | 6  | 88   | similar to nuclear receptor binding protein (9.0 kD) (LOC680451) alternative variant eSep08, mRNA.                                                                                        |
| <a href="#">LOC680451</a> | <a href="#">LOC680451.fSep08</a> | <a href="#">680451</a> | 758    | 419  | 2  | 37   | similar to nuclear receptor binding protein (LOC680451) alternative variant fSep08, mRNA.                                                                                                 |
| <a href="#">LOC680453</a> | <a href="#">LOC680453.aSep08</a> | <a href="#">680453</a> | 1958   | 781  |    | 102  | hypothetical protein LOC680453 (LOC680453) mRNA.                                                                                                                                          |
| <a href="#">LOC680485</a> | <a href="#">LOC680485.bSep08</a> | <a href="#">680485</a> | 3622   | 489  | 3  | 45   | hypothetical protein LOC680485 (LOC680485) alternative variant bSep08, mRNA.                                                                                                              |
| <a href="#">LOC680494</a> | <a href="#">LOC680494.aSep08</a> | <a href="#">680494</a> | 16690  | 1136 |    | 67   | hypothetical protein LOC680494 (7.4 kD) (LOC680494) mRNA.                                                                                                                                 |
| <a href="#">LOC680513</a> | <a href="#">LOC680513.aSep08</a> | <a href="#">680513</a> | 1122   | 402  |    | 79   | similar to Alpha-N-acetylgalactosaminide alpha-2,6-sialyltransferase 5 (GalNAc alpha-2,6-sialyltransferase V) (ST6GalNAc V) (GD1 alpha synthase) (Sialyltransferase 7E) (LOC680513) mRNA. |
| <a href="#">LOC680545</a> | <a href="#">LOC680545.aSep08</a> | <a href="#">680545</a> | 4857   | 4592 |    | 1373 | hypothetical protein LOC680545 and hypothetical protein LOC680559 (LOC680545) mRNA.                                                                                                       |
| <a href="#">LOC680545</a> | <a href="#">LOC680545.aSep08</a> | <a href="#">680559</a> | 4857   | 4592 |    | 1373 | hypothetical protein LOC680545 and hypothetical protein LOC680559 (LOC680545) mRNA.                                                                                                       |
| <a href="#">LOC680549</a> | <a href="#">LOC680549.aSep08</a> | <a href="#">680549</a> | 24352  | 386  | 3  | 128  | similar to Pbx/knotted 1 homeobox 2 (LOC680549) alternative variant aSep08, mRNA.                                                                                                         |
| <a href="#">LOC680549</a> | <a href="#">LOC680549.bSep08</a> | <a href="#">680549</a> | 159036 | 529  | 5  | 77   | similar to Pbx/knotted 1 homeobox 2 (8.1 kD) (LOC680549) alternative variant bSep08, mRNA.                                                                                                |
| <a href="#">LOC680551</a> | <a href="#">LOC680551.bSep08</a> | <a href="#">680551</a> | 4202   | 1025 | 1  | 70   | similar to Apolipoprotein C-IV precursor (Apo-CIV) (ApoC-IV) (Apolipoprotein C2-linked) (ACL) (8.2 kD) (LOC680551) alternative variant bSep08, complete mRNA.                             |
| <a href="#">LOC680558</a> | <a href="#">LOC680558.aSep08</a> | <a href="#">680558</a> | 28238  | 397  | 5  | 120  | similar to solute carrier family 35 (UDP-glucuronic acid/UDP-N-acetylgalactosamine dual transporter), member D1 (LOC680558) alternative variant aSep08, mRNA.                             |
| <a href="#">LOC680586</a> | <a href="#">LOC680586.aSep08</a> | <a href="#">680586</a> | 38229  | 813  |    | 87   | hypothetical protein LOC680586 (9.6 kD) (LOC680586) mRNA.                                                                                                                                 |



|                           |                                  |                        |        |      |   |     |                                                                                                                                       |
|---------------------------|----------------------------------|------------------------|--------|------|---|-----|---------------------------------------------------------------------------------------------------------------------------------------|
| <a href="#">LOC680590</a> | <a href="#">LOC680590.aSep08</a> | <a href="#">680590</a> | 5990   | 546  | 4 | 95  | hypothetical protein LOC680590 (10.6 kD) (LOC680590) alternative variant aSep08, mRNA.                                                |
| <a href="#">LOC680590</a> | <a href="#">LOC680590.bSep08</a> | <a href="#">680590</a> | 19529  | 747  | 8 | 72  | hypothetical protein LOC680590 (8.3 kD) (LOC680590) alternative variant bSep08, mRNA.                                                 |
| <a href="#">LOC680590</a> | <a href="#">LOC680590.cSep08</a> | <a href="#">680590</a> | 5397   | 308  | 2 | 50  | hypothetical protein LOC680590 (LOC680590) alternative variant cSep08, mRNA.                                                          |
| <a href="#">LOC680590</a> | <a href="#">LOC680590.dSep08</a> | <a href="#">680590</a> | 15150  | 491  | 5 | 45  | hypothetical protein LOC680590 (LOC680590) alternative variant dSep08, mRNA.                                                          |
| <a href="#">LOC680606</a> | <a href="#">LOC680606.aSep08</a> | <a href="#">680606</a> | 12594  | 272  |   | 90  | hypothetical protein LOC680606 (LOC680606) mRNA.                                                                                      |
| <a href="#">LOC680614</a> | <a href="#">LOC680614.aSep08</a> | <a href="#">680614</a> | 1579   | 466  |   | 137 | similar to ETAA16 protein (LOC680614) mRNA.                                                                                           |
| <a href="#">LOC680633</a> | <a href="#">LOC680633.aSep08</a> | <a href="#">680633</a> | 11026  | 693  |   | 54  | hypothetical protein LOC680633 (LOC680633) mRNA.                                                                                      |
| <a href="#">LOC680666</a> | <a href="#">LOC680666.aSep08</a> | <a href="#">680666</a> | 5823   | 723  |   | 76  | hypothetical protein LOC680666 (LOC680666) mRNA.                                                                                      |
| <a href="#">LOC680682</a> | <a href="#">LOC680682.aSep08</a> | <a href="#">680682</a> | 12946  | 618  | 4 | 163 | hypothetical protein LOC680682 (LOC680682) alternative variant aSep08, mRNA.                                                          |
| <a href="#">LOC680682</a> | <a href="#">LOC680682.bSep08</a> | <a href="#">680682</a> | 12052  | 833  | 2 | 120 | hypothetical protein LOC680682 (14.0 kD) (LOC680682) alternative variant bSep08, mRNA.                                                |
| <a href="#">LOC680682</a> | <a href="#">LOC680682.cSep08</a> | <a href="#">680682</a> | 1725   | 694  | 2 | 114 | hypothetical protein LOC680682 (13.5 kD) (LOC680682) alternative variant cSep08, mRNA.                                                |
| <a href="#">LOC680682</a> | <a href="#">LOC680682.dSep08</a> | <a href="#">680682</a> | 28173  | 709  | 2 | 116 | hypothetical protein LOC680682 (LOC680682) alternative variant dSep08, mRNA.                                                          |
| <a href="#">LOC680687</a> | <a href="#">LOC680687.aSep08</a> | <a href="#">680687</a> | 5818   | 1221 | 4 | 41  | hypothetical protein LOC680687 (LOC680687) alternative variant aSep08, mRNA.                                                          |
| <a href="#">LOC680687</a> | <a href="#">LOC680687.cSep08</a> | <a href="#">680687</a> | 2478   | 415  | 2 | 72  | hypothetical protein LOC680687 (LOC680687) alternative variant cSep08, mRNA.                                                          |
| <a href="#">LOC680689</a> | <a href="#">LOC680689.aSep08</a> | <a href="#">680689</a> | 5608   | 672  |   | 106 | hypothetical protein LOC680689 (LOC680689) mRNA.                                                                                      |
| <a href="#">LOC680691</a> | <a href="#">LOC680691.aSep08</a> | <a href="#">680691</a> | 3651   | 353  |   | 83  | hypothetical protein LOC680691 (LOC680691) mRNA.                                                                                      |
| <a href="#">LOC680692</a> | <a href="#">LOC680692.aSep08</a> | <a href="#">680692</a> | 36311  | 1944 | 1 | 483 | similar to Golgi phosphoprotein 2 (Golgi membrane protein GP73) (54.3 kD) (LOC680692) alternative variant aSep08, complete mRNA.      |
| <a href="#">LOC680692</a> | <a href="#">LOC680692.bSep08</a> | <a href="#">680692</a> | 25306  | 486  | 1 | 121 | similar to Golgi phosphoprotein 2 (Golgi membrane protein GP73) (LOC680692) alternative variant bSep08, mRNA.                         |
| <a href="#">LOC680693</a> | <a href="#">LOC680693.aSep08</a> | <a href="#">680693</a> | 6113   | 956  | 6 | 180 | similar to Sperm flagellar protein 1 (20.7 kD) (LOC680693) alternative variant aSep08, mRNA.                                          |
| <a href="#">LOC680693</a> | <a href="#">LOC680693.bSep08</a> | <a href="#">680693</a> | 1588   | 827  | 2 | 112 | similar to Sperm flagellar protein 1 (LOC680693) alternative variant bSep08, mRNA.                                                    |
| <a href="#">LOC680711</a> | <a href="#">LOC680711.aSep08</a> | <a href="#">680711</a> | 11603  | 1112 |   | 252 | hypothetical protein LOC680711 (28.2 kD) (LOC680711) mRNA.                                                                            |
| <a href="#">LOC680722</a> | <a href="#">LOC680722.aSep08</a> | <a href="#">680722</a> | 2910   | 423  |   | 123 | hypothetical protein LOC680722 (LOC680722) mRNA.                                                                                      |
| <a href="#">LOC680724</a> | <a href="#">LOC680724.aSep08</a> | <a href="#">680724</a> | 5235   | 540  |   | 139 | similar to NS1-associated protein 1 isoform 2 (LOC680724) mRNA.                                                                       |
| <a href="#">LOC680726</a> | <a href="#">LOC680726.aSep08</a> | <a href="#">680726</a> | 324910 | 1421 | 5 | 269 | similar to RNA binding motif, single stranded interacting protein 3 isoform 1 (29.2 kD) (LOC680726) alternative variant aSep08, mRNA. |
| <a href="#">LOC680726</a> | <a href="#">LOC680726.bSep08</a> | <a href="#">680726</a> | 150860 | 714  | 1 | 178 | similar to RNA binding motif, single stranded interacting protein 3 isoform 1 (LOC680726) alternative variant bSep08, mRNA.           |

|                           |                                  |                        |       |      |    |      |                                                                                                                   |
|---------------------------|----------------------------------|------------------------|-------|------|----|------|-------------------------------------------------------------------------------------------------------------------|
| <a href="#">LOC680728</a> | <a href="#">LOC680728.aSep08</a> | <a href="#">680728</a> | 2224  | 542  |    | 120  | similar to Caspase-14 precursor (CASP-14) (LOC680728) alternative variant aSep08, mRNA.                           |
| <a href="#">LOC680745</a> | <a href="#">LOC680745.aSep08</a> | <a href="#">680745</a> | 1585  | 326  |    | 88   | hypothetical protein LOC680745 (LOC680745) mRNA.                                                                  |
| <a href="#">LOC680752</a> | <a href="#">LOC680752.aSep08</a> | <a href="#">680752</a> | 582   | 416  |    | 93   | hypothetical protein LOC680752 (LOC680752) mRNA.                                                                  |
| <a href="#">LOC680770</a> | <a href="#">LOC680770.bSep08</a> | <a href="#">680770</a> | 5882  | 938  | 3  | 52   | similar to dachshund b (LOC680770) alternative variant bSep08, mRNA.                                              |
| <a href="#">LOC680782</a> | <a href="#">LOC680782.aSep08</a> | <a href="#">680782</a> | 8140  | 3468 | 5  | 220  | similar to signal peptidase complex subunit 3 homolog (LOC680782) alternative variant aSep08, mRNA.               |
| <a href="#">LOC680787</a> | <a href="#">LOC680787.aSep08</a> | <a href="#">680787</a> | 5324  | 619  |    | 124  | similar to spermatogenesis associated glutamate (E)-rich protein 4d (LOC680787) mRNA.                             |
| <a href="#">LOC680796</a> | <a href="#">LOC680796.aSep08</a> | <a href="#">680796</a> | 17300 | 475  |    | 75   | hypothetical protein LOC680796 (LOC680796) mRNA.                                                                  |
| <a href="#">LOC680802</a> | <a href="#">LOC680802.aSep08</a> | <a href="#">680802</a> | 2985  | 1639 |    | 91   | similar to Zinc finger protein 45 (BRC1744) (10.1 kD) (LOC680802) mRNA.                                           |
| <a href="#">LOC680815</a> | <a href="#">LOC680815.aSep08</a> | <a href="#">680815</a> | 1743  | 1244 | 1  | 265  | hypothetical protein LOC680815 (29.8 kD) (LOC680815) alternative variant aSep08, mRNA.                            |
| <a href="#">LOC680815</a> | <a href="#">LOC680815.cSep08</a> | <a href="#">680815</a> | 1310  | 474  |    | 92   | hypothetical protein LOC680815 (LOC680815) alternative variant cSep08, mRNA.                                      |
| <a href="#">LOC680833</a> | <a href="#">LOC680833.aSep08</a> | <a href="#">680833</a> | 6895  | 934  |    | 311  | novel protein containing fibronectin type 3 FN3 domains (LOC680833) mRNA.                                         |
| <a href="#">LOC680835</a> | <a href="#">LOC680835.aSep08</a> | <a href="#">680835</a> | 8339  | 3224 | 19 | 1047 | similar to cullin 7 (LOC680835) alternative variant aSep08, mRNA.                                                 |
| <a href="#">LOC680835</a> | <a href="#">LOC680835.bSep08</a> | <a href="#">680835</a> | 1126  | 686  | 4  | 228  | similar to cullin 7 (LOC680835) alternative variant bSep08, mRNA.                                                 |
| <a href="#">LOC680875</a> | <a href="#">LOC680875.aSep08</a> | <a href="#">680875</a> | 6771  | 1789 | 4  | 491  | similar to dystonin isoform 1 (LOC680875) alternative variant aSep08, mRNA.                                       |
| <a href="#">LOC680875</a> | <a href="#">LOC680875.bSep08</a> | <a href="#">680875</a> | 1341  | 787  | 4  | 211  | similar to dystonin isoform 1 (LOC680875) alternative variant bSep08, mRNA.                                       |
| <a href="#">LOC680875</a> | <a href="#">LOC680875.cSep08</a> | <a href="#">680875</a> | 1200  | 800  | 4  | 194  | similar to dystonin isoform 1 (LOC680875) alternative variant cSep08, mRNA.                                       |
| <a href="#">LOC680889</a> | <a href="#">LOC680889.aSep08</a> | <a href="#">680889</a> | 1801  | 827  | 2  | 65   | hypothetical protein LOC680889 (7.0 kD) (LOC680889) alternative variant aSep08, mRNA.                             |
| <a href="#">LOC680889</a> | <a href="#">LOC680889.bSep08</a> | <a href="#">680889</a> | 1546  | 542  | 2  | 41   | hypothetical protein LOC680889 (4.7 kD) (LOC680889) alternative variant bSep08, mRNA.                             |
| <a href="#">LOC680893</a> | <a href="#">LOC680893.aSep08</a> | <a href="#">680893</a> | 16720 | 752  |    | 83   | hypothetical protein LOC680893 (LOC680893) mRNA.                                                                  |
| <a href="#">LOC680897</a> | <a href="#">LOC680897.aSep08</a> | <a href="#">680897</a> | 85151 | 287  |    | 95   | similar to protein tyrosine phosphatase, receptor type, T (LOC680897) mRNA.                                       |
| <a href="#">LOC680899</a> | <a href="#">LOC680899.aSep08</a> | <a href="#">680899</a> | 3786  | 373  |    | 110  | hypothetical protein LOC680899 (LOC680899) mRNA.                                                                  |
| <a href="#">LOC680906</a> | <a href="#">LOC680906.aSep08</a> | <a href="#">680906</a> | 5613  | 709  |    | 50   | hypothetical protein LOC680906 (LOC680906) mRNA.                                                                  |
| <a href="#">LOC680910</a> | <a href="#">LOC680910.aSep08</a> | <a href="#">680910</a> | 3003  | 1029 | 2  | 50   | similar to paired immunoglobulin-like type 2 receptor beta (LOC680910) alternative variant aSep08, mRNA.          |
| <a href="#">LOC680910</a> | <a href="#">LOC680910.bSep08</a> | <a href="#">680910</a> | 885   | 328  | 2  | 46   | similar to paired immunoglobulin-like type 2 receptor beta (5.1 kD) (LOC680910) alternative variant bSep08, mRNA. |
| <a href="#">LOC680918</a> | <a href="#">LOC680918.bSep08</a> | <a href="#">680918</a> | 16046 | 720  | 1  | 92   | similar to spermatogenesis and centriole associated 1 (10.7 kD) (LOC680918) alternative variant bSep08, mRNA.     |
| <a href="#">LOC680919</a> | <a href="#">LOC680919.aSep08</a> | <a href="#">680919</a> | 6928  | 522  |    | 75   | hypothetical protein LOC680919 (LOC680919) mRNA.                                                                  |

|                           |                                  |                        |       |      |    |     |                                                                                                                    |
|---------------------------|----------------------------------|------------------------|-------|------|----|-----|--------------------------------------------------------------------------------------------------------------------|
| <a href="#">LOC680923</a> | <a href="#">LOC680923.aSep08</a> | <a href="#">680923</a> | 869   | 625  |    | 208 | similar to paired immunoglobulin-like type 2 receptor beta (LOC680923) mRNA.                                       |
| <a href="#">LOC680929</a> | <a href="#">LOC680929.aSep08</a> | <a href="#">680929</a> | 8361  | 399  | 4  | 49  | similar to serine/threonine kinase (5.2 kD) (LOC680929) alternative variant aSep08, mRNA.                          |
| <a href="#">LOC680929</a> | <a href="#">LOC680929.bSep08</a> | <a href="#">680929</a> | 5788  | 634  | 4  | 31  | similar to serine/threonine kinase (3.5 kD) (LOC680929) alternative variant bSep08, mRNA.                          |
| <a href="#">LOC680929</a> | <a href="#">LOC680929.dSep08</a> | <a href="#">680929</a> | 10755 | 545  | 3  | 44  | similar to serine/threonine kinase (4.8 kD) (LOC680929) alternative variant dSep08, mRNA.                          |
| <a href="#">LOC680961</a> | <a href="#">LOC680961.aSep08</a> | <a href="#">680961</a> | 54717 | 952  | 4  | 246 | hypothetical protein LOC680961 (LOC680961) alternative variant aSep08, mRNA.                                       |
| <a href="#">LOC680961</a> | <a href="#">LOC680961.bSep08</a> | <a href="#">680961</a> | 54556 | 1413 | 3  | 246 | hypothetical protein LOC680961 (LOC680961) alternative variant bSep08, mRNA.                                       |
| <a href="#">LOC680961</a> | <a href="#">LOC680961.cSep08</a> | <a href="#">680961</a> | 52835 | 1222 | 1  | 54  | hypothetical protein LOC680961 (5.9 kD) (LOC680961) alternative variant cSep08, mRNA.                              |
| <a href="#">LOC680961</a> | <a href="#">LOC680961.dSep08</a> | <a href="#">680961</a> | 1625  | 739  | 2  | 54  | hypothetical protein LOC680961 (5.9 kD) (LOC680961) alternative variant dSep08, mRNA.                              |
| <a href="#">LOC680969</a> | <a href="#">LOC680969.aSep08</a> | <a href="#">680969</a> | 2633  | 523  |    | 111 | similar to uroplakin 3B isoform b (12.1 kD) (LOC680969) mRNA.                                                      |
| <a href="#">LOC681004</a> | <a href="#">LOC681004.aSep08</a> | <a href="#">681004</a> | 19313 | 1786 | 7  | 429 | similar to GC-rich sequence DNA-binding factor homolog (LOC681004) alternative variant aSep08, mRNA.               |
| <a href="#">LOC681004</a> | <a href="#">LOC681004.bSep08</a> | <a href="#">681004</a> | 19166 | 2437 | 12 | 411 | similar to GC-rich sequence DNA-binding factor homolog (47.9 kD) (LOC681004) alternative variant bSep08, mRNA.     |
| <a href="#">LOC681004</a> | <a href="#">LOC681004.cSep08</a> | <a href="#">681004</a> | 4705  | 1516 | 6  | 227 | similar to GC-rich sequence DNA-binding factor homolog (26.6 kD) (LOC681004) alternative variant cSep08, mRNA.     |
| <a href="#">LOC681018</a> | <a href="#">LOC681018.aSep08</a> | <a href="#">681018</a> | 964   | 455  | 1  | 111 | hypothetical protein LOC681018 (13.0 kD) (LOC681018) alternative variant aSep08, mRNA.                             |
| <a href="#">LOC681018</a> | <a href="#">LOC681018.bSep08</a> | <a href="#">681018</a> | 1004  | 378  |    | 104 | hypothetical protein LOC681018 (10.4 kD) (LOC681018) alternative variant bSep08, mRNA.                             |
| <a href="#">LOC681025</a> | <a href="#">LOC681025.aSep08</a> | <a href="#">681025</a> | 36767 | 750  |    | 250 | hypothetical protein LOC681025 and similar to bile acid Coenzyme A: amino acid N-acyltransferase (LOC681025) mRNA. |
| <a href="#">LOC681025</a> | <a href="#">LOC681025.aSep08</a> | <a href="#">681043</a> | 36767 | 750  |    | 250 | hypothetical protein LOC681025 and similar to bile acid Coenzyme A: amino acid N-acyltransferase (LOC681025) mRNA. |
| <a href="#">LOC681027</a> | <a href="#">LOC681027.aSep08</a> | <a href="#">681027</a> | 12770 | 625  |    | 104 | hypothetical protein LOC681027 (11.1 kD) (LOC681027) mRNA.                                                         |
| <a href="#">LOC681031</a> | <a href="#">LOC681031.aSep08</a> | <a href="#">681031</a> | 7468  | 335  | 4  | 76  | similar to small nuclear ribonucleoprotein polypeptide G (8.5 kD) (LOC681031) alternative variant aSep08, mRNA.    |
| <a href="#">LOC681031</a> | <a href="#">LOC681031.cSep08</a> | <a href="#">681031</a> | 3616  | 727  | 3  | 64  | similar to small nuclear ribonucleoprotein polypeptide G (7.1 kD) (LOC681031) alternative variant cSep08, mRNA.    |
| <a href="#">LOC681035</a> | <a href="#">LOC681035.aSep08</a> | <a href="#">681035</a> | 3827  | 397  |    | 97  | similar to paired immunoglobulin-like type 2 receptor beta (LOC681035) mRNA.                                       |
| <a href="#">LOC681048</a> | <a href="#">LOC681048.aSep08</a> | <a href="#">681048</a> | 5915  | 694  |    | 90  | similar to glutaredoxin cysteine-rich 1 protein (LOC681048) mRNA.                                                  |
| <a href="#">LOC681069</a> | <a href="#">LOC681069.aSep08</a> | <a href="#">681069</a> | 7731  | 1320 |    | 212 | similar to paired immunoglobulin-like type 2 receptor beta (23.9 kD) (LOC681069) mRNA.                             |

|                           |                                  |                        |       |      |   |     |                                                                                                                                           |
|---------------------------|----------------------------------|------------------------|-------|------|---|-----|-------------------------------------------------------------------------------------------------------------------------------------------|
| <a href="#">LOC681086</a> | <a href="#">LOC681086.aSep08</a> | <a href="#">681086</a> | 28055 | 968  | 7 | 181 | similar to Phosphatidylinositol-glycan biosynthesis, class F protein (PIG-F) (20.6 kD) (LOC681086) alternative variant aSep08, mRNA.      |
| <a href="#">LOC681086</a> | <a href="#">LOC681086.bSep08</a> | <a href="#">681086</a> | 24477 | 613  | 4 | 137 | similar to Phosphatidylinositol-glycan biosynthesis, class F protein (PIG-F) (LOC681086) alternative variant bSep08, mRNA.                |
| <a href="#">LOC681086</a> | <a href="#">LOC681086.cSep08</a> | <a href="#">681086</a> | 22874 | 591  | 4 | 88  | similar to Phosphatidylinositol-glycan biosynthesis, class F protein (PIG-F) (LOC681086) alternative variant cSep08, mRNA.                |
| <a href="#">LOC681086</a> | <a href="#">LOC681086.dSep08</a> | <a href="#">681086</a> | 12325 | 829  | 2 | 44  | similar to Phosphatidylinositol-glycan biosynthesis, class F protein (PIG-F) (4.9 kD) (LOC681086) alternative variant dSep08, mRNA.       |
| <a href="#">LOC681166</a> | <a href="#">LOC681166.aSep08</a> | <a href="#">681166</a> | 6205  | 310  |   | 62  | similar to MIC2 like 1 (LOC681166) mRNA.                                                                                                  |
| <a href="#">LOC681185</a> | <a href="#">LOC681185.aSep08</a> | <a href="#">681185</a> | 13289 | 856  | 6 | 129 | similar to centromere autoantigen H (LOC681185) alternative variant aSep08, mRNA.                                                         |
| <a href="#">LOC681185</a> | <a href="#">LOC681185.cSep08</a> | <a href="#">681185</a> | 16086 | 1778 | 6 | 112 | similar to centromere autoantigen H (LOC681185) alternative variant cSep08, mRNA.                                                         |
| <a href="#">LOC681185</a> | <a href="#">LOC681185.dSep08</a> | <a href="#">681185</a> | 2055  | 663  | 2 | 61  | similar to centromere autoantigen H (LOC681185) alternative variant dSep08, mRNA.                                                         |
| <a href="#">LOC681185</a> | <a href="#">LOC681185.eSep08</a> | <a href="#">681185</a> | 3926  | 672  | 1 | 44  | similar to centromere autoantigen H (LOC681185) alternative variant eSep08, mRNA.                                                         |
| <a href="#">LOC681186</a> | <a href="#">LOC681186.aSep08</a> | <a href="#">681186</a> | 2755  | 540  | 3 | 125 | hypothetical protein LOC681186 (LOC681186) alternative variant aSep08, mRNA.                                                              |
| <a href="#">LOC681186</a> | <a href="#">LOC681186.bSep08</a> | <a href="#">681186</a> | 2222  | 441  | 1 | 92  | hypothetical protein LOC681186 (LOC681186) alternative variant bSep08, mRNA.                                                              |
| <a href="#">LOC681200</a> | <a href="#">LOC681200.aSep08</a> | <a href="#">681200</a> | 33530 | 708  |   | 230 | similar to Ladybird homeobox corepressor 1 (LOC681200) mRNA.                                                                              |
| <a href="#">LOC681205</a> | <a href="#">LOC681205.aSep08</a> | <a href="#">681205</a> | 4235  | 440  |   | 75  | hypothetical protein LOC681205 (LOC681205) mRNA.                                                                                          |
| <a href="#">LOC681219</a> | <a href="#">LOC681219.aSep08</a> | <a href="#">681219</a> | 2428  | 852  |   | 71  | hypothetical protein LOC681219 (7.9 kD) (LOC681219) mRNA.                                                                                 |
| <a href="#">LOC681237</a> | <a href="#">LOC681237.aSep08</a> | <a href="#">681237</a> | 1689  | 264  |   | 65  | hypothetical protein LOC681237 (LOC681237) mRNA.                                                                                          |
| <a href="#">LOC681239</a> | <a href="#">LOC681239.aSep08</a> | <a href="#">681239</a> | 1208  | 945  |   | 114 | similar to Discs large homolog 5 (Placenta and prostate DLG) (Discs large protein P-dlg) (12.6 kD) (LOC681239) mRNA.                      |
| <a href="#">LOC681251</a> | <a href="#">LOC681251.aSep08</a> | <a href="#">681251</a> | 1674  | 561  |   | 186 | hypothetical protein LOC681251 (LOC681251) mRNA.                                                                                          |
| <a href="#">LOC681252</a> | <a href="#">LOC681252.aSep08</a> | <a href="#">681252</a> | 5705  | 4187 |   | 309 | similar to Myristoylated alanine-rich C-kinase substrate (MARCKS) (Protein kinase C substrate 80 kDa protein) (29.8 kD) (LOC681252) mRNA. |
| <a href="#">LOC681258</a> | <a href="#">LOC681258.aSep08</a> | <a href="#">681258</a> | 7601  | 355  |   | 28  | similar to La-related protein 4 (La ribonucleoprotein domain family member 4) (LOC681258) mRNA.                                           |
| <a href="#">LOC681272</a> | <a href="#">LOC681272.aSep08</a> | <a href="#">681272</a> | 4576  | 287  |   | 53  | hypothetical protein LOC681272 (LOC681272) mRNA.                                                                                          |
| <a href="#">LOC681282</a> | <a href="#">LOC681282.aSep08</a> | <a href="#">681282</a> | 1989  | 1078 |   | 164 | hypothetical protein LOC681282 (18.4 kD) (LOC681282) mRNA.                                                                                |
| <a href="#">LOC681302</a> | <a href="#">LOC681302.aSep08</a> | <a href="#">681302</a> | 28710 | 457  | 5 | 152 | similar to Multifunctional protein ADE2 (LOC681302) alternative variant aSep08, mRNA.                                                     |
| <a href="#">LOC681303</a> | <a href="#">LOC681303.aSep08</a> | <a href="#">681303</a> | 11008 | 690  |   | 229 | similar to tumor endothelial marker 8 isoform 1 precursor (LOC681303) mRNA.                                                               |

|                           |                                  |                        |        |      |   |     |                                                                                                            |
|---------------------------|----------------------------------|------------------------|--------|------|---|-----|------------------------------------------------------------------------------------------------------------|
| <a href="#">LOC681309</a> | <a href="#">LOC681309.aSep08</a> | <a href="#">681309</a> | 5654   | 1683 |   | 476 | similar to Thrombospondin-3 precursor (LOC681309) mRNA.                                                    |
| <a href="#">LOC681343</a> | <a href="#">LOC681343.aSep08</a> | <a href="#">681343</a> | 25208  | 327  |   | 81  | hypothetical protein LOC681343 (LOC681343) mRNA.                                                           |
| <a href="#">LOC681351</a> | <a href="#">LOC681351.aSep08</a> | <a href="#">681351</a> | 8646   | 1034 |   | 284 | similar to apolipoprotein L, 3 (LOC681351) mRNA.                                                           |
| <a href="#">LOC681370</a> | <a href="#">LOC681370.aSep08</a> | <a href="#">681370</a> | 445    | 349  |   | 77  | hypothetical protein LOC681370 (LOC681370) mRNA.                                                           |
| <a href="#">LOC681381</a> | <a href="#">LOC681381.aSep08</a> | <a href="#">681381</a> | 62540  | 582  | 6 | 152 | similar to Zinc finger CW-type PWWP domain protein 1 homolog (LOC681381) alternative variant aSep08, mRNA. |
| <a href="#">LOC681381</a> | <a href="#">LOC681381.bSep08</a> | <a href="#">681381</a> | 79438  | 487  | 4 | 108 | similar to Zinc finger CW-type PWWP domain protein 1 homolog (LOC681381) alternative variant bSep08, mRNA. |
| <a href="#">LOC681381</a> | <a href="#">LOC681381.cSep08</a> | <a href="#">681381</a> | 36425  | 470  | 2 | 89  | similar to Zinc finger CW-type PWWP domain protein 1 homolog (LOC681381) alternative variant cSep08, mRNA. |
| <a href="#">LOC681395</a> | <a href="#">LOC681395.bSep08</a> | <a href="#">681395</a> | 1797   | 793  | 1 | 24  | similar to ring finger protein 133 (LOC681395) alternative variant bSep08, mRNA.                           |
| <a href="#">LOC681397</a> | <a href="#">LOC681397.bSep08</a> | <a href="#">681397</a> | 1069   | 238  |   | 48  | fgfr1 oncogene partner (LOC681397) alternative variant bSep08, mRNA.                                       |
| <a href="#">LOC681397</a> | <a href="#">LOC681397.cSep08</a> | <a href="#">681397</a> | 2489   | 265  |   | 30  | putative protein (LOC681397) alternative variant cSep08, mRNA.                                             |
| <a href="#">LOC681398</a> | <a href="#">LOC681398.aSep08</a> | <a href="#">681398</a> | 53341  | 679  |   | 153 | hypothetical protein LOC681398 (16.2 kD) (LOC681398) mRNA.                                                 |
| <a href="#">LOC681405</a> | <a href="#">LOC681405.aSep08</a> | <a href="#">681405</a> | 2010   | 534  |   | 93  | similar to RIKEN cDNA 5031410I06 (LOC681405) mRNA.                                                         |
| <a href="#">LOC681578</a> | <a href="#">LOC681578.bSep08</a> | <a href="#">681578</a> | 127122 | 730  | 7 | 203 | similar to ring finger protein 13 (LOC681578) alternative variant bSep08, mRNA.                            |
| <a href="#">LOC681578</a> | <a href="#">LOC681578.cSep08</a> | <a href="#">681578</a> | 127101 | 709  | 7 | 202 | similar to ring finger protein 13 (LOC681578) alternative variant cSep08, mRNA.                            |
| <a href="#">LOC681578</a> | <a href="#">LOC681578.dSep08</a> | <a href="#">681578</a> | 13769  | 1817 | 3 | 148 | similar to ring finger protein 13 (16.4 kD) (LOC681578) alternative variant dSep08, mRNA.                  |
| <a href="#">LOC681578</a> | <a href="#">LOC681578.eSep08</a> | <a href="#">681578</a> | 127119 | 636  | 6 | 141 | similar to ring finger protein 13 (15.5 kD) (LOC681578) alternative variant eSep08, mRNA.                  |
| <a href="#">LOC681578</a> | <a href="#">LOC681578.fSep08</a> | <a href="#">681578</a> | 119432 | 548  | 6 | 138 | similar to ring finger protein 13 (LOC681578) alternative variant fSep08, mRNA.                            |
| <a href="#">LOC681578</a> | <a href="#">LOC681578.hSep08</a> | <a href="#">681578</a> | 127081 | 573  | 6 | 21  | similar to ring finger protein 13 (2.6 kD) (LOC681578) alternative variant hSep08, mRNA.                   |
| <a href="#">LOC683514</a> | <a href="#">LOC683514.bSep08</a> | <a href="#">683514</a> | 18700  | 602  | 1 | 67  | hypothetical protein LOC683514 (LOC683514) alternative variant bSep08, mRNA.                               |
| <a href="#">LOC684322</a> | <a href="#">LOC684322.bSep08</a> | <a href="#">684322</a> | 6309   | 765  | 2 | 144 | similar to potassium channel modulatory factor 1 (LOC684322) alternative variant bSep08, mRNA.             |
| <a href="#">LOC684964</a> | <a href="#">LOC684964.aSep08</a> | <a href="#">684964</a> | 110324 | 723  |   | 46  | hypothetical protein LOC684964 (5.3 kD) (LOC684964) mRNA.                                                  |
| <a href="#">LOC684989</a> | <a href="#">LOC684989.aSep08</a> | <a href="#">684989</a> | 2004   | 1121 |   | 96  | hypothetical protein LOC684989 (LOC684989) mRNA.                                                           |
| <a href="#">LOC684993</a> | <a href="#">LOC684993.bSep08</a> | <a href="#">684993</a> | 4812   | 1389 | 3 | 178 | hypothetical protein LOC684993 (LOC684993) alternative variant bSep08, mRNA.                               |
| <a href="#">LOC684993</a> | <a href="#">LOC684993.dSep08</a> | <a href="#">684993</a> | 623    | 315  | 2 | 40  | hypothetical protein LOC684993 (LOC684993) alternative variant dSep08, mRNA.                               |
| <a href="#">LOC684994</a> | <a href="#">LOC684994.aSep08</a> | <a href="#">684994</a> | 5959   | 398  | 1 | 110 | similar to retinoic acid receptor, beta (LOC684994) alternative variant aSep08, mRNA.                      |

|                           |                                  |                        |       |      |   |     |                                                                                                                                                                               |
|---------------------------|----------------------------------|------------------------|-------|------|---|-----|-------------------------------------------------------------------------------------------------------------------------------------------------------------------------------|
| <a href="#">LOC684994</a> | <a href="#">LOC684994.bSep08</a> | <a href="#">684994</a> | 27082 | 683  | 1 | 102 | similar to retinoic acid receptor, beta (LOC684994) alternative variant bSep08, mRNA.                                                                                         |
| <a href="#">LOC684996</a> | <a href="#">LOC684996.aSep08</a> | <a href="#">684996</a> | 3176  | 2003 | 3 | 178 | putative protein of vertebrate origin (19.1 kD) (LOC684996) alternative variant aSep08, mRNA.                                                                                 |
| <a href="#">LOC684998</a> | <a href="#">LOC684998.bSep08</a> | <a href="#">684998</a> | 54565 | 443  | 4 | 36  | hypothetical protein LOC684998 (LOC684998) alternative variant bSep08, mRNA.                                                                                                  |
| <a href="#">LOC685001</a> | <a href="#">LOC685001.aSep08</a> | <a href="#">685001</a> | 9237  | 3647 | 4 | 134 | similar to MIR-interacting saposin-like protein precursor (Transmembrane protein 4) (Putative secreted protein ZSIG9) (15.6 kD) (LOC685001) alternative variant aSep08, mRNA. |
| <a href="#">LOC685002</a> | <a href="#">LOC685002.aSep08</a> | <a href="#">685002</a> | 773   | 446  |   | 51  | hypothetical protein LOC685002 (5.6 kD) (LOC685002) mRNA.                                                                                                                     |
| <a href="#">LOC685009</a> | <a href="#">LOC685009.aSep08</a> | <a href="#">685009</a> | 9733  | 410  |   | 107 | hypothetical protein LOC685009 (LOC685009) mRNA.                                                                                                                              |
| <a href="#">LOC685019</a> | <a href="#">LOC685019.aSep08</a> | <a href="#">685019</a> | 6081  | 690  |   | 104 | similar to serine/threonine kinase (LOC685019) mRNA.                                                                                                                          |
| <a href="#">LOC685020</a> | <a href="#">LOC685020.aSep08</a> | <a href="#">685020</a> | 10706 | 1204 |   | 214 | similar to paired immunoglobulin-like type 2 receptor alpha (LOC685020) mRNA.                                                                                                 |
| <a href="#">LOC685029</a> | <a href="#">LOC685029.aSep08</a> | <a href="#">685029</a> | 7966  | 523  | 3 | 74  | similar to anaphase promoting complex subunit 13 (8.4 kD) (LOC685029) alternative variant aSep08, mRNA.                                                                       |
| <a href="#">LOC685029</a> | <a href="#">LOC685029.bSep08</a> | <a href="#">685029</a> | 8459  | 658  | 3 | 74  | similar to anaphase promoting complex subunit 13 (8.4 kD) (LOC685029) alternative variant bSep08, mRNA.                                                                       |
| <a href="#">LOC685030</a> | <a href="#">LOC685030.aSep08</a> | <a href="#">685030</a> | 3215  | 735  |   | 191 | similar to paired immunoglobulin-like type 2 receptor beta (LOC685030) mRNA.                                                                                                  |
| <a href="#">LOC685055</a> | <a href="#">LOC685055.aSep08</a> | <a href="#">685055</a> | 4129  | 631  |   | 210 | similar to Serine/threonine-protein kinase ATR (Ataxia telangiectasia and Rad3-related protein) (LOC685055) mRNA.                                                             |
| <a href="#">LOC685067</a> | <a href="#">LOC685067.aSep08</a> | <a href="#">685067</a> | 9624  | 774  |   | 257 | similar to guanylate binding protein family, member 6 (LOC685067) mRNA.                                                                                                       |
| <a href="#">LOC685072</a> | <a href="#">LOC685072.aSep08</a> | <a href="#">685072</a> | 10879 | 1759 | 6 | 485 | similar to Retinoic acid receptor gamma-A (RAR-gamma-A) (53.7 kD) (LOC685072) alternative variant aSep08, mRNA.                                                               |
| <a href="#">LOC685072</a> | <a href="#">LOC685072.bSep08</a> | <a href="#">685072</a> | 13416 | 613  | 3 | 204 | similar to Retinoic acid receptor gamma-A (RAR-gamma-A) (LOC685072) alternative variant bSep08, mRNA.                                                                         |
| <a href="#">LOC685072</a> | <a href="#">LOC685072.cSep08</a> | <a href="#">685072</a> | 1471  | 265  | 1 | 59  | similar to Retinoic acid receptor gamma-A (RAR-gamma-A) (LOC685072) alternative variant cSep08, mRNA.                                                                         |
| <a href="#">LOC685074</a> | <a href="#">LOC685074.aSep08</a> | <a href="#">685074</a> | 10785 | 1115 |   | 84  | hypothetical protein LOC685074 (9.4 kD) (LOC685074) mRNA.                                                                                                                     |
| <a href="#">LOC685079</a> | <a href="#">LOC685079.aSep08</a> | <a href="#">685079</a> | 4505  | 1756 | 4 | 259 | similar to Protein SYS1 homolog (LOC685079) mRNA.                                                                                                                             |
| <a href="#">LOC685080</a> | <a href="#">LOC685080.aSep08</a> | <a href="#">685080</a> | 7919  | 747  |   | 248 | similar to nipsnap homolog 3A (LOC685080) mRNA.                                                                                                                               |
| <a href="#">LOC685081</a> | <a href="#">LOC685081.aSep08</a> | <a href="#">685081</a> | 1390  | 786  | 2 | 165 | similar to solute carrier family 22 (organic cation transporter), member 13 (LOC685081) alternative variant aSep08, mRNA.                                                     |
| <a href="#">LOC685081</a> | <a href="#">LOC685081.bSep08</a> | <a href="#">685081</a> | 2528  | 755  | 2 | 99  | similar to solute carrier family 22 (organic cation transporter), member 13 (LOC685081) alternative variant bSep08, mRNA.                                                     |
| <a href="#">LOC685095</a> | <a href="#">LOC685095.aSep08</a> | <a href="#">685095</a> | 33433 | 1353 |   | 114 | hypothetical protein LOC685095 (13.0 kD) (LOC685095) mRNA.                                                                                                                    |
| <a href="#">LOC685099</a> | <a href="#">LOC685099.bSep08</a> | <a href="#">685099</a> | 3818  | 784  | 1 | 89  | similar to holdem CG15329-PA (LOC685099) alternative variant bSep08, mRNA.                                                                                                    |

|                           |                                  |                        |        |      |    |      |                                                                                                                                      |
|---------------------------|----------------------------------|------------------------|--------|------|----|------|--------------------------------------------------------------------------------------------------------------------------------------|
| <a href="#">LOC685114</a> | <a href="#">LOC685114.aSep08</a> | <a href="#">685114</a> | 2558   | 602  | 3  | 144  | hypothetical protein LOC685114 (LOC685114) alternative variant aSep08, mRNA.                                                         |
| <a href="#">LOC685114</a> | <a href="#">LOC685114.bSep08</a> | <a href="#">685114</a> | 2378   | 430  | 3  | 122  | hypothetical protein LOC685114 (LOC685114) alternative variant bSep08, mRNA.                                                         |
| <a href="#">LOC685128</a> | <a href="#">LOC685128.aSep08</a> | <a href="#">685128</a> | 4082   | 604  |    | 145  | similar to gastroke 1 (LOC685128) mRNA.                                                                                              |
| <a href="#">LOC685136</a> | <a href="#">LOC685136.aSep08</a> | <a href="#">685136</a> | 2332   | 452  |    | 98   | similar to alpha 3 type VI collagen isoform 1 precursor (LOC685136) mRNA.                                                            |
| <a href="#">LOC685144</a> | <a href="#">LOC685144.bSep08</a> | <a href="#">685144</a> | 21908  | 4460 | 23 | 1095 | protein transport sec24c C (118.5 kD) (LOC685144) alternative variant bSep08, mRNA.                                                  |
| <a href="#">LOC685144</a> | <a href="#">LOC685144.cSep08</a> | <a href="#">685144</a> | 1000   | 763  | 3  | 111  | sec24 related gene family member C (12.3 kD) (LOC685144) alternative variant cSep08, mRNA.                                           |
| <a href="#">LOC685144</a> | <a href="#">LOC685144.dSep08</a> | <a href="#">685144</a> | 717    | 400  | 3  | 107  | sec24 related gene family member C CRA b (LOC685144) alternative variant dSep08, mRNA.                                               |
| <a href="#">LOC685144</a> | <a href="#">LOC685144.eSep08</a> | <a href="#">685144</a> | 1821   | 447  | 2  | 71   | putative protein (LOC685144) alternative variant eSep08, mRNA.                                                                       |
| <a href="#">LOC685152</a> | <a href="#">LOC685152.aSep08</a> | <a href="#">685152</a> | 5755   | 2779 | 7  | 375  | ATPase class I type 8B member 2 (LOC685152) alternative variant aSep08, mRNA.                                                        |
| <a href="#">LOC685152</a> | <a href="#">LOC685152.bSep08</a> | <a href="#">685152</a> | 1259   | 877  | 3  | 153  | phospholipid-transporting ATPase ID (LOC685152) alternative variant bSep08, mRNA.                                                    |
| <a href="#">LOC685152</a> | <a href="#">LOC685152.cSep08</a> | <a href="#">685152</a> | 1026   | 783  | 2  | 112  | phospholipid-transporting ATPase ID (12.6 kD) (LOC685152) alternative variant cSep08, mRNA.                                          |
| <a href="#">LOC685158</a> | <a href="#">LOC685158.aSep08</a> | <a href="#">685158</a> | 520777 | 864  |    | 233  | similar to CG8138-PA (LOC685158) mRNA.                                                                                               |
| <a href="#">LOC685160</a> | <a href="#">LOC685160.aSep08</a> | <a href="#">685160</a> | 2067   | 409  |    | 47   | similar to spermatogenesis associated glutamate (E)-rich protein 4d (LOC685160) mRNA.                                                |
| <a href="#">LOC685172</a> | <a href="#">LOC685172.aSep08</a> | <a href="#">685172</a> | 66155  | 661  |    | 110  | hypothetical protein LOC685172 (LOC685172) mRNA.                                                                                     |
| <a href="#">LOC685179</a> | <a href="#">LOC685179.aSep08</a> | <a href="#">685179</a> | 24446  | 3167 | 26 | 987  | similar to SWI/SNF-related matrix-associated actin-dependent regulator of chromatin c2 (LOC685179) alternative variant aSep08, mRNA. |
| <a href="#">LOC685179</a> | <a href="#">LOC685179.bSep08</a> | <a href="#">685179</a> | 25795  | 1977 | 17 | 637  | similar to SWI/SNF-related matrix-associated actin-dependent regulator of chromatin c2 (LOC685179) alternative variant bSep08, mRNA. |
| <a href="#">LOC685179</a> | <a href="#">LOC685179.cSep08</a> | <a href="#">685179</a> | 13897  | 1460 | 13 | 486  | similar to SWI/SNF-related matrix-associated actin-dependent regulator of chromatin c2 (LOC685179) alternative variant cSep08, mRNA. |
| <a href="#">LOC685179</a> | <a href="#">LOC685179.dSep08</a> | <a href="#">685179</a> | 5336   | 2356 | 5  | 355  | similar to SWI/SNF-related matrix-associated actin-dependent regulator of chromatin c2 (LOC685179) alternative variant dSep08, mRNA. |
| <a href="#">LOC685179</a> | <a href="#">LOC685179.fSep08</a> | <a href="#">685179</a> | 7775   | 410  | 5  | 136  | similar to SWI/SNF-related matrix-associated actin-dependent regulator of chromatin c2 (LOC685179) alternative variant fSep08, mRNA. |
| <a href="#">LOC685179</a> | <a href="#">LOC685179.gSep08</a> | <a href="#">685179</a> | 1190   | 380  | 4  | 126  | similar to SWI/SNF-related matrix-associated actin-dependent regulator of chromatin c2 (LOC685179) alternative variant gSep08, mRNA. |
| <a href="#">LOC685179</a> | <a href="#">LOC685179.hSep08</a> | <a href="#">685179</a> | 1390   | 515  | 2  | 112  | similar to SWI/SNF-related matrix-associated actin-dependent regulator of chromatin c2 (LOC685179) alternative variant hSep08, mRNA. |

|                           |                                  |                        |       |      |   |     |                                                                                                                                                             |
|---------------------------|----------------------------------|------------------------|-------|------|---|-----|-------------------------------------------------------------------------------------------------------------------------------------------------------------|
| <a href="#">LOC685187</a> | <a href="#">LOC685187.aSep08</a> | <a href="#">685187</a> | 1280  | 758  |   | 252 | similar to ADAM 21 precursor (A disintegrin and metalloproteinase domain 21) (ADAM 31) (LOC685187) mRNA.                                                    |
| <a href="#">LOC685195</a> | <a href="#">LOC685195.aSep08</a> | <a href="#">685195</a> | 1534  | 931  | 3 | 137 | hypothetical protein LOC685195 (LOC685195) alternative variant aSep08, mRNA.                                                                                |
| <a href="#">LOC685210</a> | <a href="#">LOC685210.aSep08</a> | <a href="#">685210</a> | 3050  | 648  |   | 215 | similar to RAN binding protein 5 (LOC685210) mRNA.                                                                                                          |
| <a href="#">LOC685215</a> | <a href="#">LOC685215.aSep08</a> | <a href="#">685215</a> | 12829 | 738  |   | 245 | putative protein (LOC685215) mRNA.                                                                                                                          |
| <a href="#">LOC685227</a> | <a href="#">LOC685227.aSep08</a> | <a href="#">685227</a> | 2272  | 266  |   | 83  | similar to WAP four-disulfide core domain 11 precursor (LOC685227) mRNA.                                                                                    |
| <a href="#">LOC685233</a> | <a href="#">LOC685233.aSep08</a> | <a href="#">685233</a> | 39814 | 445  |   | 60  | hypothetical protein LOC685233 (LOC685233) mRNA.                                                                                                            |
| <a href="#">LOC685249</a> | <a href="#">LOC685249.aSep08</a> | <a href="#">685249</a> | 2105  | 704  | 2 | 110 | hypothetical protein LOC685249 (12.2 kD) (LOC685249) alternative variant aSep08, mRNA.                                                                      |
| <a href="#">LOC685249</a> | <a href="#">LOC685249.bSep08</a> | <a href="#">685249</a> | 6275  | 622  | 3 | 81  | hypothetical protein LOC685249 (LOC685249) alternative variant bSep08, mRNA.                                                                                |
| <a href="#">LOC685249</a> | <a href="#">LOC685249.cSep08</a> | <a href="#">685249</a> | 4332  | 382  | 2 | 63  | hypothetical protein LOC685249 (LOC685249) alternative variant cSep08, mRNA.                                                                                |
| <a href="#">LOC685253</a> | <a href="#">LOC685253.aSep08</a> | <a href="#">685253</a> | 2735  | 510  |   | 57  | hypothetical protein LOC685253 (LOC685253) mRNA.                                                                                                            |
| <a href="#">LOC685269</a> | <a href="#">LOC685269.aSep08</a> | <a href="#">685269</a> | 3894  | 958  |   | 314 | similar to Integrin alpha-IIb precursor (Platelet membrane glycoprotein IIb) (GPalpha IIb) (GPIIb) (CD41 antigen) (LOC685269) mRNA.                         |
| <a href="#">LOC685276</a> | <a href="#">LOC685276.aSep08</a> | <a href="#">685276</a> | 23203 | 265  |   | 77  | hypothetical protein LOC685276 (LOC685276) mRNA.                                                                                                            |
| <a href="#">LOC685293</a> | <a href="#">LOC685293.aSep08</a> | <a href="#">685293</a> | 2225  | 1025 |   | 161 | similar to RT1 class Ia, locus A2 (18.1 kD) (LOC685293) mRNA.                                                                                               |
| <a href="#">LOC685294</a> | <a href="#">LOC685294.aSep08</a> | <a href="#">685294</a> | 22558 | 743  |   | 132 | similar to RalA-binding protein 1 (RalBP1) (Ral-interacting protein 1) (Cytocentrin) (Dinitrophenyl S-glutathione ATPase) (DNP-SG ATPase) (LOC685294) mRNA. |
| <a href="#">LOC685297</a> | <a href="#">LOC685297.aSep08</a> | <a href="#">685297</a> | 13611 | 2121 |   | 483 | similar to BAI1-associated protein 3 (BAP3) (LOC685297) alternative variant aSep08, mRNA.                                                                   |
| <a href="#">LOC685297</a> | <a href="#">LOC685297.bSep08</a> | <a href="#">685297</a> | 3341  | 2358 |   | 448 | similar to BAI1-associated protein 3 (BAP3) (LOC685297) alternative variant bSep08, mRNA.                                                                   |
| <a href="#">LOC685317</a> | <a href="#">LOC685317.aSep08</a> | <a href="#">685317</a> | 78500 | 491  |   | 72  | hypothetical protein LOC685317 (8.1 kD) (LOC685317) mRNA.                                                                                                   |
| <a href="#">LOC685336</a> | <a href="#">LOC685336.aSep08</a> | <a href="#">685336</a> | 22610 | 616  |   | 72  | hypothetical protein LOC685336 (8.0 kD) (LOC685336) mRNA.                                                                                                   |
| <a href="#">LOC685385</a> | <a href="#">LOC685385.aSep08</a> | <a href="#">685385</a> | 1853  | 1096 |   | 199 | similar to S100 calcium binding protein A14 (LOC685385) alternative variant aSep08, mRNA.                                                                   |
| <a href="#">LOC685405</a> | <a href="#">LOC685405.aSep08</a> | <a href="#">685405</a> | 5125  | 3405 |   | 230 | similar to family 53, member C protein (LOC685405) mRNA.                                                                                                    |
| <a href="#">LOC685440</a> | <a href="#">LOC685440.aSep08</a> | <a href="#">685440</a> | 4181  | 470  |   | 95  | similar to NIMA (never in mitosis gene a)-related expressed kinase 5 (LOC685440) alternative variant aSep08, mRNA.                                          |
| <a href="#">LOC685444</a> | <a href="#">LOC685444.aSep08</a> | <a href="#">685444</a> | 9180  | 1567 |   | 77  | hypothetical protein LOC685444 (LOC685444) alternative variant aSep08, mRNA.                                                                                |
| <a href="#">LOC685454</a> | <a href="#">LOC685454.aSep08</a> | <a href="#">685454</a> | 16512 | 231  |   | 35  | hypothetical protein LOC685454 (LOC685454) mRNA.                                                                                                            |
| <a href="#">LOC685487</a> | <a href="#">LOC685487.aSep08</a> | <a href="#">685487</a> | 47890 | 355  |   | 115 | similar to ring finger protein 43 (LOC685487) mRNA.                                                                                                         |
| <a href="#">LOC685527</a> | <a href="#">LOC685527.aSep08</a> | <a href="#">685527</a> | 3832  | 395  | 1 | 59  | hypothetical protein LOC685527 (LOC685527) alternative variant aSep08, mRNA.                                                                                |



|                           |                                  |                        |       |      |   |     |                                                                                                                                 |
|---------------------------|----------------------------------|------------------------|-------|------|---|-----|---------------------------------------------------------------------------------------------------------------------------------|
| <a href="#">LOC685527</a> | <a href="#">LOC685527.bSep08</a> | <a href="#">685527</a> | 4064  | 548  |   | 47  | hypothetical protein LOC685527 (4.8 kD) (LOC685527) alternative variant bSep08, mRNA.                                           |
| <a href="#">LOC685569</a> | <a href="#">LOC685569.aSep08</a> | <a href="#">685569</a> | 2247  | 530  | 2 | 124 | hypothetical protein LOC685569 (LOC685569) alternative variant aSep08, mRNA.                                                    |
| <a href="#">LOC685574</a> | <a href="#">LOC685574.aSep08</a> | <a href="#">685574</a> | 7021  | 344  |   | 63  | similar to zinc finger protein 334 (LOC685574) mRNA.                                                                            |
| <a href="#">LOC685576</a> | <a href="#">LOC685576.aSep08</a> | <a href="#">685576</a> | 1324  | 567  |   | 58  | hypothetical protein LOC685576 (LOC685576) mRNA.                                                                                |
| <a href="#">LOC685580</a> | <a href="#">LOC685580.aSep08</a> | <a href="#">685580</a> | 4405  | 733  |   | 244 | hypothetical protein LOC685580 (LOC685580) mRNA.                                                                                |
| <a href="#">LOC685584</a> | <a href="#">LOC685584.aSep08</a> | <a href="#">685584</a> | 1151  | 392  |   | 109 | hypothetical protein LOC685584 (LOC685584) mRNA.                                                                                |
| <a href="#">LOC685601</a> | <a href="#">LOC685601.aSep08</a> | <a href="#">685601</a> | 22174 | 754  |   | 250 | similar to MICAL CG33208-PB, isoform B (LOC685601) mRNA.                                                                        |
| <a href="#">LOC685608</a> | <a href="#">LOC685608.aSep08</a> | <a href="#">685608</a> | 3600  | 603  | 4 | 137 | hypothetical protein LOC685608 (14.4 kD) (LOC685608) alternative variant aSep08, mRNA.                                          |
| <a href="#">LOC685609</a> | <a href="#">LOC685609.aSep08</a> | <a href="#">685609</a> | 1784  | 755  |   | 118 | hypothetical protein LOC685609 (14.0 kD) (LOC685609) mRNA.                                                                      |
| <a href="#">LOC685612</a> | <a href="#">LOC685612.aSep08</a> | <a href="#">685612</a> | 10194 | 1703 |   | 144 | similar to Emu2 (LOC685612) mRNA.                                                                                               |
| <a href="#">LOC685619</a> | <a href="#">LOC685619.aSep08</a> | <a href="#">685619</a> | 2260  | 901  | 2 | 246 | similar to TP53-regulating kinase (p53-related protein kinase) (Nori-2) (27.6 kD) (LOC685619) alternative variant aSep08, mRNA. |
| <a href="#">LOC685619</a> | <a href="#">LOC685619.bSep08</a> | <a href="#">685619</a> | 3035  | 1878 | 2 | 245 | similar to TP53-regulating kinase (p53-related protein kinase) (Nori-2) (27.0 kD) (LOC685619) alternative variant bSep08, mRNA. |
| <a href="#">LOC685632</a> | <a href="#">LOC685632.aSep08</a> | <a href="#">685632</a> | 1413  | 698  |   | 87  | similar to spermatogenesis associated glutamate (E)-rich protein 4d (LOC685632) mRNA.                                           |
| <a href="#">LOC685634</a> | <a href="#">LOC685634.aSep08</a> | <a href="#">685634</a> | 3811  | 981  | 2 | 89  | hypothetical protein LOC685634 (LOC685634) alternative variant aSep08, mRNA.                                                    |
| <a href="#">LOC685634</a> | <a href="#">LOC685634.bSep08</a> | <a href="#">685634</a> | 1751  | 486  | 2 | 83  | hypothetical protein LOC685634 (LOC685634) alternative variant bSep08, mRNA.                                                    |
| <a href="#">LOC685645</a> | <a href="#">LOC685645.aSep08</a> | <a href="#">685645</a> | 1978  | 635  |   | 143 | similar to carboxylesterase isoenzyme gene (LOC685645) mRNA.                                                                    |
| <a href="#">LOC685652</a> | <a href="#">LOC685652.aSep08</a> | <a href="#">685652</a> | 1345  | 678  |   | 90  | similar to keratin 6L (LOC685652) mRNA.                                                                                         |
| <a href="#">LOC685661</a> | <a href="#">LOC685661.aSep08</a> | <a href="#">685661</a> | 2495  | 437  |   | 145 | similar to Discs large homolog 5 (Placenta and prostate DLG) (Discs large protein P-dlg) (LOC685661) mRNA.                      |
| <a href="#">LOC685663</a> | <a href="#">LOC685663.aSep08</a> | <a href="#">685663</a> | 4500  | 599  |   | 188 | hypothetical protein LOC685663 (LOC685663) mRNA.                                                                                |
| <a href="#">LOC685671</a> | <a href="#">LOC685671.aSep08</a> | <a href="#">685671</a> | 7706  | 293  |   | 97  | similar to myocyte enhancer factor 2C (LOC685671) mRNA.                                                                         |
| <a href="#">LOC685694</a> | <a href="#">LOC685694.aSep08</a> | <a href="#">685694</a> | 5605  | 499  | 2 | 153 | similar to TruB pseudouridine (psi) synthase homolog 2 (LOC685694) alternative variant aSep08, mRNA.                            |
| <a href="#">LOC685694</a> | <a href="#">LOC685694.bSep08</a> | <a href="#">685694</a> | 4890  | 672  | 1 | 150 | similar to TruB pseudouridine (psi) synthase homolog 2 (LOC685694) alternative variant bSep08, mRNA.                            |
| <a href="#">LOC685700</a> | <a href="#">LOC685700.aSep08</a> | <a href="#">685700</a> | 5532  | 635  |   | 73  | hypothetical protein LOC685700 (LOC685700) mRNA.                                                                                |
| <a href="#">LOC685702</a> | <a href="#">LOC685702.cSep08</a> | <a href="#">685702</a> | 3587  | 648  | 2 | 61  | similar to C44B7.7 (LOC685702) alternative variant cSep08, mRNA.                                                                |
| <a href="#">LOC685707</a> | <a href="#">LOC685707.aSep08</a> | <a href="#">685707</a> | 49014 | 405  |   | 134 | similar to neuron navigator 1 (LOC685707) mRNA.                                                                                 |
| <a href="#">LOC685716</a> | <a href="#">LOC685716.aSep08</a> | <a href="#">685716</a> | 2541  | 384  |   | 127 | similar to OX-2 membrane glycoprotein precursor (MRC OX-2 antigen) (CD200 antigen) (LOC685716) mRNA.                            |

|                           |                                  |                        |       |      |   |     |                                                                                                                      |
|---------------------------|----------------------------------|------------------------|-------|------|---|-----|----------------------------------------------------------------------------------------------------------------------|
| <a href="#">LOC685729</a> | <a href="#">LOC685729.aSep08</a> | <a href="#">685729</a> | 13005 | 732  |   | 62  | similar to dimerization cofactor of hepatocyte nuclear factor 1 (HNF1) from muscle (LOC685729) mRNA.                 |
| <a href="#">LOC685734</a> | <a href="#">LOC685734.aSep08</a> | <a href="#">685734</a> | 13930 | 721  |   | 76  | similar to erythrocyte membrane protein band 4.1 like 4B isoform 2 (LOC685734) mRNA.                                 |
| <a href="#">LOC685742</a> | <a href="#">LOC685742.aSep08</a> | <a href="#">685742</a> | 3010  | 423  | 2 | 71  | hypothetical protein LOC685742 (8.2 kD) (LOC685742) alternative variant aSep08, mRNA.                                |
| <a href="#">LOC685746</a> | <a href="#">LOC685746.aSep08</a> | <a href="#">685746</a> | 2131  | 666  |   | 117 | similar to RIKEN cDNA 5031410I06 (LOC685746) mRNA.                                                                   |
| <a href="#">LOC685767</a> | <a href="#">LOC685767.aSep08</a> | <a href="#">685767</a> | 20004 | 731  |   | 178 | similar to OX-2 membrane glycoprotein precursor (MRC OX-2 antigen) (CD200 antigen) (LOC685767) mRNA.                 |
| <a href="#">LOC685779</a> | <a href="#">LOC685779.aSep08</a> | <a href="#">685779</a> | 40804 | 739  |   | 125 | hypothetical protein LOC685779 (LOC685779) mRNA.                                                                     |
| <a href="#">LOC685785</a> | <a href="#">LOC685785.aSep08</a> | <a href="#">685785</a> | 90757 | 775  |   | 172 | similar to solute carrier organic anion transporter family, member 6c1 (19.1 kD) (LOC685785) mRNA.                   |
| <a href="#">LOC685792</a> | <a href="#">LOC685792.aSep08</a> | <a href="#">685792</a> | 2490  | 437  |   | 145 | similar to Discs large homolog 5 (Placenta and prostate DLG) (Discs large protein P-dlg) (LOC685792) mRNA.           |
| <a href="#">LOC685808</a> | <a href="#">LOC685808.aSep08</a> | <a href="#">685808</a> | 2403  | 677  |   | 64  | similar to transmembrane NK cell receptor 2B4 (LOC685808) mRNA.                                                      |
| <a href="#">LOC685817</a> | <a href="#">LOC685817.aSep08</a> | <a href="#">685817</a> | 485   | 362  |   | 10  | similar to Myosin-9B (Myosin IXb) (Unconventional myosin-9b) (1.1 kD) (LOC685817) mRNA.                              |
| <a href="#">LOC685834</a> | <a href="#">LOC685834.aSep08</a> | <a href="#">685834</a> | 4426  | 871  | 2 | 90  | similar to zinc finger protein 740 (LOC685834) alternative variant aSep08, mRNA.                                     |
| <a href="#">LOC685834</a> | <a href="#">LOC685834.bSep08</a> | <a href="#">685834</a> | 4380  | 586  | 2 | 63  | similar to zinc finger protein 740 (LOC685834) alternative variant bSep08, mRNA.                                     |
| <a href="#">LOC685849</a> | <a href="#">LOC685849.aSep08</a> | <a href="#">685849</a> | 5536  | 1292 | 1 | 233 | hypothetical protein LOC685849 (25.7 kD) (LOC685849) alternative variant aSep08, mRNA.                               |
| <a href="#">LOC685849</a> | <a href="#">LOC685849.bSep08</a> | <a href="#">685849</a> | 4969  | 728  | 1 | 105 | hypothetical protein LOC685849 (LOC685849) alternative variant bSep08, mRNA.                                         |
| <a href="#">LOC685868</a> | <a href="#">LOC685868.aSep08</a> | <a href="#">685868</a> | 45777 | 688  |   | 229 | similar to otogelin (LOC685868) mRNA.                                                                                |
| <a href="#">LOC685888</a> | <a href="#">LOC685888.aSep08</a> | <a href="#">685888</a> | 8132  | 832  | 3 | 65  | hypothetical protein LOC685888 (LOC685888) alternative variant aSep08, mRNA.                                         |
| <a href="#">LOC685888</a> | <a href="#">LOC685888.bSep08</a> | <a href="#">685888</a> | 8162  | 695  | 3 | 32  | hypothetical protein LOC685888 (LOC685888) alternative variant bSep08, mRNA.                                         |
| <a href="#">LOC685888</a> | <a href="#">LOC685888.cSep08</a> | <a href="#">685888</a> | 2249  | 540  | 2 | 67  | hypothetical protein LOC685888 (LOC685888) alternative variant cSep08, mRNA.                                         |
| <a href="#">LOC685890</a> | <a href="#">LOC685890.aSep08</a> | <a href="#">685890</a> | 4396  | 688  |   | 140 | hypothetical protein LOC685890 (LOC685890) mRNA.                                                                     |
| <a href="#">LOC685906</a> | <a href="#">LOC685906.aSep08</a> | <a href="#">685906</a> | 56893 | 656  | 5 | 218 | similar to splicing coactivator subunit SRm300 (LOC685906) alternative variant aSep08, mRNA.                         |
| <a href="#">LOC685908</a> | <a href="#">LOC685908.aSep08</a> | <a href="#">685908</a> | 10257 | 588  |   | 125 | similar to Discs large homolog 5 (Placenta and prostate DLG) (Discs large protein P-dlg) (13.4 kD) (LOC685908) mRNA. |
| <a href="#">LOC685909</a> | <a href="#">LOC685909.bSep08</a> | <a href="#">685909</a> | 6076  | 623  | 3 | 107 | similar to H2A histone family, member V isoform 1 (11.6 kD) (LOC685909) alternative variant bSep08, mRNA.            |
| <a href="#">LOC685923</a> | <a href="#">LOC685923.bSep08</a> | <a href="#">685923</a> | 1744  | 653  | 1 | 148 | similar to cerebral cavernous malformation 2 homolog (LOC685923) alternative variant bSep08, mRNA.                   |
| <a href="#">LOC685925</a> | <a href="#">LOC685925.aSep08</a> | <a href="#">685925</a> | 20707 | 599  |   | 163 | similar to zinc finger protein 455 (LOC685925) mRNA.                                                                 |
| <a href="#">LOC685931</a> | <a href="#">LOC685931.aSep08</a> | <a href="#">685931</a> | 1975  | 880  |   | 87  | similar to serine/threonine kinase (LOC685931) mRNA.                                                                 |

|                           |                                  |                        |       |      |   |     |                                                                                                      |
|---------------------------|----------------------------------|------------------------|-------|------|---|-----|------------------------------------------------------------------------------------------------------|
| <a href="#">LOC685961</a> | <a href="#">LOC685961.aSep08</a> | <a href="#">685961</a> | 69433 | 756  |   | 140 | similar to SIRP beta 1 isoform 3 (15.6 kD) (LOC685961) mRNA.                                         |
| <a href="#">LOC685964</a> | <a href="#">LOC685964.bSep08</a> | <a href="#">685964</a> | 4470  | 423  | 1 | 110 | hypothetical protein LOC685964 (LOC685964) alternative variant bSep08, mRNA.                         |
| <a href="#">LOC685974</a> | <a href="#">LOC685974.aSep08</a> | <a href="#">685974</a> | 3611  | 730  |   | 243 | similar to spermatogenesis associated glutamate (E)-rich protein 4b (LOC685974) mRNA.                |
| <a href="#">LOC685988</a> | <a href="#">LOC685988.aSep08</a> | <a href="#">685988</a> | 3026  | 667  |   | 117 | hypothetical protein LOC685988 (LOC685988) mRNA.                                                     |
| <a href="#">LOC686006</a> | <a href="#">LOC686006.aSep08</a> | <a href="#">686006</a> | 1062  | 757  |   | 97  | hypothetical protein LOC686006 (10.9 kD) (LOC686006) mRNA.                                           |
| <a href="#">LOC686032</a> | <a href="#">LOC686032.aSep08</a> | <a href="#">686032</a> | 36728 | 562  |   | 68  | hypothetical protein LOC686032 (7.7 kD) (LOC686032) mRNA.                                            |
| <a href="#">LOC686059</a> | <a href="#">LOC686059.aSep08</a> | <a href="#">686059</a> | 8029  | 913  |   | 304 | similar to ryanodine receptor 1 (skeletal) (LOC686059) mRNA.                                         |
| <a href="#">LOC686083</a> | <a href="#">LOC686083.aSep08</a> | <a href="#">686083</a> | 11326 | 376  |   | 77  | similar to transducer of regulated CREB protein 3 (LOC686083) mRNA.                                  |
| <a href="#">LOC686084</a> | <a href="#">LOC686084.aSep08</a> | <a href="#">686084</a> | 15164 | 710  |   | 236 | similar to CG32580-PA (LOC686084) mRNA.                                                              |
| <a href="#">LOC686088</a> | <a href="#">LOC686088.aSep08</a> | <a href="#">686088</a> | 18269 | 623  | 2 | 207 | fshd region gene 1 (LOC686088) alternative variant aSep08, mRNA.                                     |
| <a href="#">LOC686088</a> | <a href="#">LOC686088.aSep08</a> | <a href="#">686103</a> | 18269 | 623  | 2 | 207 | fshd region gene 1 (LOC686088) alternative variant aSep08, mRNA.                                     |
| <a href="#">LOC686088</a> | <a href="#">LOC686088.bSep08</a> | <a href="#">686088</a> | 7341  | 600  | 1 | 191 | fshd region gene 1 (LOC686088) alternative variant bSep08, mRNA.                                     |
| <a href="#">LOC686088</a> | <a href="#">LOC686088.bSep08</a> | <a href="#">686103</a> | 7341  | 600  | 1 | 191 | fshd region gene 1 (LOC686088) alternative variant bSep08, mRNA.                                     |
| <a href="#">LOC686091</a> | <a href="#">LOC686091.aSep08</a> | <a href="#">686091</a> | 21354 | 1493 |   | 464 | putative protein, with 5 coiled coil domains, of eukaryotic origin (LOC686091) mRNA.                 |
| <a href="#">LOC686120</a> | <a href="#">LOC686120.aSep08</a> | <a href="#">686120</a> | 965   | 455  | 1 | 111 | hypothetical protein LOC686120 (13.0 kD) (LOC686120) alternative variant aSep08, mRNA.               |
| <a href="#">LOC686120</a> | <a href="#">LOC686120.bSep08</a> | <a href="#">686120</a> | 1005  | 378  |   | 104 | hypothetical protein LOC686120 (10.4 kD) (LOC686120) alternative variant bSep08, mRNA.               |
| <a href="#">LOC686123</a> | <a href="#">LOC686123.aSep08</a> | <a href="#">686123</a> | 2738  | 519  |   | 103 | putative protein of mammalian origin (LOC686123) mRNA.                                               |
| <a href="#">LOC686139</a> | <a href="#">LOC686139.aSep08</a> | <a href="#">686139</a> | 2729  | 1159 | 6 | 321 | PGAP1-like and alpha/beta hydrolase fold-1 (LOC686139) alternative variant aSep08, mRNA.             |
| <a href="#">LOC686139</a> | <a href="#">LOC686139.bSep08</a> | <a href="#">686139</a> | 1697  | 663  | 3 | 157 | putative protein of ancient origin (LOC686139) alternative variant bSep08, mRNA.                     |
| <a href="#">LOC686139</a> | <a href="#">LOC686139.dSep08</a> | <a href="#">686139</a> | 2784  | 994  | 5 | 127 | putative protein of ancient origin (13.5 kD) (LOC686139) alternative variant dSep08, mRNA.           |
| <a href="#">LOC686139</a> | <a href="#">LOC686139.eSep08</a> | <a href="#">686139</a> | 2003  | 1424 | 3 | 39  | putative protein (LOC686139) alternative variant eSep08, mRNA.                                       |
| <a href="#">LOC686141</a> | <a href="#">LOC686141.aSep08</a> | <a href="#">686141</a> | 5874  | 1115 |   | 204 | similar to Spetex-2C protein (23.9 kD) (LOC686141) mRNA.                                             |
| <a href="#">LOC686149</a> | <a href="#">LOC686149.aSep08</a> | <a href="#">686149</a> | 22960 | 801  |   | 190 | similar to Actin, aortic smooth muscle (Alpha-actin-2) (LOC686149) alternative variant aSep08, mRNA. |
| <a href="#">LOC686149</a> | <a href="#">LOC686149.bSep08</a> | <a href="#">686149</a> | 4727  | 462  |   | 85  | similar to Actin, aortic smooth muscle (Alpha-actin-2) (LOC686149) alternative variant bSep08, mRNA. |
| <a href="#">LOC686841</a> | <a href="#">LOC686841.bSep08</a> | <a href="#">686841</a> | 458   | 271  | 2 | 67  | similar to Protein EAN57 (LOC686841) alternative variant bSep08, mRNA.                               |

|                           |                                  |                        |        |      |   |     |                                                                                                                           |
|---------------------------|----------------------------------|------------------------|--------|------|---|-----|---------------------------------------------------------------------------------------------------------------------------|
| <a href="#">LOC686841</a> | <a href="#">LOC686841.cSep08</a> | <a href="#">686841</a> | 46159  | 1740 | 2 | 58  | similar to Protein EAN57 (LOC686841) alternative variant cSep08, mRNA.                                                    |
| <a href="#">LOC688400</a> | <a href="#">LOC688400.aSep08</a> | <a href="#">688400</a> | 272916 | 780  |   | 155 | similar to EGF-like repeats and discoidin I-like domains-containing protein 3 (LOC688400) mRNA.                           |
| <a href="#">LOC688433</a> | <a href="#">LOC688433.aSep08</a> | <a href="#">688433</a> | 4273   | 304  |   | 44  | putative protein of vertebrate origin (LOC688433) mRNA.                                                                   |
| <a href="#">LOC688435</a> | <a href="#">LOC688435.aSep08</a> | <a href="#">688435</a> | 30620  | 730  |   | 79  | similar to 40S ribosomal protein S2 (8.7 kD) (LOC688435) mRNA.                                                            |
| <a href="#">LOC688442</a> | <a href="#">LOC688442.aSep08</a> | <a href="#">688442</a> | 22561  | 688  |   | 228 | similar to limkain b1 (LOC688442) mRNA.                                                                                   |
| <a href="#">LOC688448</a> | <a href="#">LOC688448.aSep08</a> | <a href="#">688448</a> | 8191   | 848  |   | 203 | glycine n-acyltransferase-like protein 3 (LOC688448) mRNA.                                                                |
| <a href="#">LOC688452</a> | <a href="#">LOC688452.aSep08</a> | <a href="#">688452</a> | 9982   | 728  | 5 | 153 | hypothetical protein LOC688452 and hypothetical protein LOC690129 (LOC688452) alternative variant aSep08, mRNA.           |
| <a href="#">LOC688452</a> | <a href="#">LOC688452.aSep08</a> | <a href="#">690129</a> | 9982   | 728  | 5 | 153 | hypothetical protein LOC688452 and hypothetical protein LOC690129 (LOC688452) alternative variant aSep08, mRNA.           |
| <a href="#">LOC688452</a> | <a href="#">LOC688452.bSep08</a> | <a href="#">688452</a> | 8163   | 693  | 3 | 124 | hypothetical protein LOC688452 and hypothetical protein LOC690129 (LOC688452) alternative variant bSep08, mRNA.           |
| <a href="#">LOC688452</a> | <a href="#">LOC688452.bSep08</a> | <a href="#">690129</a> | 8163   | 693  | 3 | 124 | hypothetical protein LOC688452 and hypothetical protein LOC690129 (LOC688452) alternative variant bSep08, mRNA.           |
| <a href="#">LOC688452</a> | <a href="#">LOC688452.cSep08</a> | <a href="#">688452</a> | 8553   | 1890 | 5 | 96  | hypothetical protein LOC688452 and hypothetical protein LOC690129 (10.4 kD) (LOC688452) alternative variant cSep08, mRNA. |
| <a href="#">LOC688452</a> | <a href="#">LOC688452.cSep08</a> | <a href="#">690129</a> | 8553   | 1890 | 5 | 96  | hypothetical protein LOC688452 and hypothetical protein LOC690129 (10.4 kD) (LOC688452) alternative variant cSep08, mRNA. |
| <a href="#">LOC688452</a> | <a href="#">LOC688452.dSep08</a> | <a href="#">688452</a> | 17918  | 854  | 6 | 94  | hypothetical protein LOC688452 and hypothetical protein LOC690129 (LOC688452) alternative variant dSep08, mRNA.           |
| <a href="#">LOC688452</a> | <a href="#">LOC688452.dSep08</a> | <a href="#">690129</a> | 17918  | 854  | 6 | 94  | hypothetical protein LOC688452 and hypothetical protein LOC690129 (LOC688452) alternative variant dSep08, mRNA.           |
| <a href="#">LOC688452</a> | <a href="#">LOC688452.eSep08</a> | <a href="#">688452</a> | 1610   | 737  | 2 | 68  | hypothetical protein LOC688452 and hypothetical protein LOC690129 (LOC688452) alternative variant eSep08, mRNA.           |
| <a href="#">LOC688452</a> | <a href="#">LOC688452.eSep08</a> | <a href="#">690129</a> | 1610   | 737  | 2 | 68  | hypothetical protein LOC688452 and hypothetical protein LOC690129 (LOC688452) alternative variant eSep08, mRNA.           |
| <a href="#">LOC688463</a> | <a href="#">LOC688463.aSep08</a> | <a href="#">688463</a> | 7025   | 706  |   | 137 | hypothetical protein LOC688463 (LOC688463) mRNA.                                                                          |
| <a href="#">LOC688464</a> | <a href="#">LOC688464.aSep08</a> | <a href="#">688464</a> | 13195  | 764  | 1 | 130 | hypothetical protein LOC688464 (LOC688464) alternative variant aSep08, mRNA.                                              |
| <a href="#">LOC688464</a> | <a href="#">LOC688464.bSep08</a> | <a href="#">688464</a> | 12674  | 770  | 1 | 104 | hypothetical protein LOC688464 (11.5 kD) (LOC688464) alternative variant bSep08, mRNA.                                    |

|                           |                                  |                        |       |      |   |     |                                                                                                                                                                                                                   |
|---------------------------|----------------------------------|------------------------|-------|------|---|-----|-------------------------------------------------------------------------------------------------------------------------------------------------------------------------------------------------------------------|
| <a href="#">LOC688466</a> | <a href="#">LOC688466.aSep08</a> | <a href="#">688466</a> | 1740  | 949  | 2 | 249 | similar to Ubiquitin carboxyl-terminal hydrolase 21 (Ubiquitin thiolesterase 21) (Ubiquitin-specific processing protease 21) (Deubiquitinating enzyme 21) (LOC688466) alternative variant aSep08, mRNA.           |
| <a href="#">LOC688466</a> | <a href="#">LOC688466.bSep08</a> | <a href="#">688466</a> | 49851 | 558  | 3 | 185 | similar to Ubiquitin carboxyl-terminal hydrolase 21 (Ubiquitin thiolesterase 21) (Ubiquitin-specific processing protease 21) (Deubiquitinating enzyme 21) (LOC688466) alternative variant bSep08, mRNA.           |
| <a href="#">LOC688466</a> | <a href="#">LOC688466.dSep08</a> | <a href="#">688466</a> | 1145  | 846  | 3 | 111 | similar to Ubiquitin carboxyl-terminal hydrolase 21 (Ubiquitin thiolesterase 21) (Ubiquitin-specific processing protease 21) (Deubiquitinating enzyme 21) (12.5 kD) (LOC688466) alternative variant dSep08, mRNA. |
| <a href="#">LOC688479</a> | <a href="#">LOC688479.aSep08</a> | <a href="#">688479</a> | 5362  | 631  | 1 | 209 | region containing hypothetical protein LOC501396; similar to RIKEN cDNA 1700001E04 (LOC688479) alternative variant aSep08, mRNA.                                                                                  |
| <a href="#">LOC688479</a> | <a href="#">LOC688479.bSep08</a> | <a href="#">688479</a> | 21321 | 858  | 1 | 123 | region containing hypothetical protein LOC501396; similar to RIKEN cDNA 1700001E04 (LOC688479) alternative variant bSep08, mRNA.                                                                                  |
| <a href="#">LOC688488</a> | <a href="#">LOC688488.aSep08</a> | <a href="#">688488</a> | 2818  | 374  |   | 86  | hypothetical protein LOC688488 (LOC688488) mRNA.                                                                                                                                                                  |
| <a href="#">LOC688495</a> | <a href="#">LOC688495.aSep08</a> | <a href="#">688495</a> | 3991  | 1367 |   | 108 | hypothetical protein LOC688495 (LOC688495) mRNA.                                                                                                                                                                  |
| <a href="#">LOC688499</a> | <a href="#">LOC688499.aSep08</a> | <a href="#">688499</a> | 1397  | 390  |   | 129 | hypothetical protein LOC688499 (LOC688499) mRNA.                                                                                                                                                                  |
| <a href="#">LOC688502</a> | <a href="#">LOC688502.aSep08</a> | <a href="#">688502</a> | 14827 | 1297 |   | 360 | similar to Protein arginine N-methyltransferase 4 (Heterogeneous nuclear ribonucleoprotein methyltransferase-like protein 4) (LOC688502) mRNA.                                                                    |
| <a href="#">LOC688504</a> | <a href="#">LOC688504.aSep08</a> | <a href="#">688504</a> | 2126  | 586  |   | 84  | similar to 60S ribosomal protein L28 (9.3 kD) (LOC688504) mRNA.                                                                                                                                                   |
| <a href="#">LOC688514</a> | <a href="#">LOC688514.aSep08</a> | <a href="#">688514</a> | 1139  | 426  | 1 | 82  | similar to major urinary protein 4 (LOC688514) alternative variant aSep08, mRNA.                                                                                                                                  |
| <a href="#">LOC688514</a> | <a href="#">LOC688514.bSep08</a> | <a href="#">688514</a> | 1138  | 379  | 1 | 67  | similar to major urinary protein 4 (LOC688514) alternative variant bSep08, mRNA.                                                                                                                                  |
| <a href="#">LOC688534</a> | <a href="#">LOC688534.bSep08</a> | <a href="#">688534</a> | 371   | 284  | 2 | 11  | similar to Mitochondrial import inner membrane translocase subunit Tim9 B (TIMM10B) (Tim10b) (Fracture callus protein 1) (FxC1) (LOC688534) alternative variant bSep08, mRNA.                                     |
| <a href="#">LOC688535</a> | <a href="#">LOC688535.aSep08</a> | <a href="#">688535</a> | 4099  | 954  |   | 58  | hypothetical protein LOC688535 (LOC688535) mRNA.                                                                                                                                                                  |
| <a href="#">LOC688536</a> | <a href="#">LOC688536.aSep08</a> | <a href="#">688536</a> | 9110  | 848  |   | 203 | glycine n-acyltransferase-like protein 3 (LOC688536) mRNA.                                                                                                                                                        |
| <a href="#">LOC688542</a> | <a href="#">LOC688542.aSep08</a> | <a href="#">688542</a> | 1118  | 428  |   | 67  | similar to carboxylesterase 5 (8.0 kD) (LOC688542) mRNA.                                                                                                                                                          |
| <a href="#">LOC688548</a> | <a href="#">LOC688548.bSep08</a> | <a href="#">688548</a> | 10836 | 1206 | 2 | 181 | hypothetical protein LOC688548 (LOC688548) alternative variant bSep08, mRNA.                                                                                                                                      |
| <a href="#">LOC688553</a> | <a href="#">LOC688553.aSep08</a> | <a href="#">688553</a> | 19158 | 1503 | 6 | 292 | hypothetical protein LOC688553 (32.8 kD) (LOC688553) alternative variant aSep08, mRNA.                                                                                                                            |
| <a href="#">LOC688553</a> | <a href="#">LOC688553.bSep08</a> | <a href="#">688553</a> | 1574  | 326  | 1 | 49  | hypothetical protein LOC688553 (LOC688553) alternative variant bSep08, mRNA.                                                                                                                                      |
| <a href="#">LOC688568</a> | <a href="#">LOC688568.aSep08</a> | <a href="#">688568</a> | 16894 | 495  |   | 74  | similar to similar to RIKEN cDNA 1700001E04 (8.3 kD) (LOC688568) mRNA.                                                                                                                                            |

|                           |                                  |                        |        |      |    |     |                                                                                                                                                                                |
|---------------------------|----------------------------------|------------------------|--------|------|----|-----|--------------------------------------------------------------------------------------------------------------------------------------------------------------------------------|
| <a href="#">LOC688579</a> | <a href="#">LOC688579.aSep08</a> | <a href="#">688579</a> | 21543  | 737  | 2  | 111 | hypothetical protein LOC688579 (LOC688579) alternative variant aSep08, mRNA.                                                                                                   |
| <a href="#">LOC688579</a> | <a href="#">LOC688579.bSep08</a> | <a href="#">688579</a> | 127192 | 393  | 2  | 104 | hypothetical protein LOC688579 (LOC688579) alternative variant bSep08, mRNA.                                                                                                   |
| <a href="#">LOC688582</a> | <a href="#">LOC688582.aSep08</a> | <a href="#">688582</a> | 2418   | 344  |    | 114 | similar to hemicentin 1 (LOC688582) mRNA.                                                                                                                                      |
| <a href="#">LOC688585</a> | <a href="#">LOC688585.aSep08</a> | <a href="#">688585</a> | 139719 | 454  |    | 31  | hypothetical protein LOC688585 (3.7 kD) (LOC688585) mRNA.                                                                                                                      |
| <a href="#">LOC688587</a> | <a href="#">LOC688587.aSep08</a> | <a href="#">688587</a> | 1776   | 429  |    | 97  | similar to spermatogenesis associated glutamate (E)-rich protein 4d (LOC688587) mRNA.                                                                                          |
| <a href="#">LOC688588</a> | <a href="#">LOC688588.aSep08</a> | <a href="#">688588</a> | 17151  | 831  |    | 157 | similar to MIC2 like 1 (18.1 kD) (LOC688588) mRNA.                                                                                                                             |
| <a href="#">LOC688599</a> | <a href="#">LOC688599.aSep08</a> | <a href="#">688599</a> | 1772   | 403  |    | 133 | similar to hemicentin 1 (LOC688599) mRNA.                                                                                                                                      |
| <a href="#">LOC688603</a> | <a href="#">LOC688603.aSep08</a> | <a href="#">688603</a> | 1777   | 430  | 3  | 97  | similar to RIKEN cDNA 5031410I06 (LOC688603) alternative variant aSep08, mRNA.                                                                                                 |
| <a href="#">LOC688631</a> | <a href="#">LOC688631.aSep08</a> | <a href="#">688631</a> | 317776 | 773  |    | 257 | similar to DNA repair endonuclease XPF (DNA excision repair protein ERCC-4) (LOC688631) mRNA.                                                                                  |
| <a href="#">LOC688634</a> | <a href="#">LOC688634.aSep08</a> | <a href="#">688634</a> | 117077 | 1297 |    | 319 | similar to Histone acetyltransferase MYST4 (MYST protein 4) (MOZ, YBF2/SAS3, SAS2 and TIP60 protein 4) (Querkopf protein) and hypothetical protein LOC688653 (LOC688634) mRNA. |
| <a href="#">LOC688634</a> | <a href="#">LOC688634.aSep08</a> | <a href="#">688653</a> | 117077 | 1297 |    | 319 | similar to Histone acetyltransferase MYST4 (MYST protein 4) (MOZ, YBF2/SAS3, SAS2 and TIP60 protein 4) (Querkopf protein) and hypothetical protein LOC688653 (LOC688634) mRNA. |
| <a href="#">LOC688637</a> | <a href="#">LOC688637.aSep08</a> | <a href="#">688637</a> | 28092  | 3116 | 23 | 922 | similar to WD repeat domain 36 (LOC688637) alternative variant aSep08, mRNA.                                                                                                   |
| <a href="#">LOC688637</a> | <a href="#">LOC688637.bSep08</a> | <a href="#">688637</a> | 11679  | 716  | 8  | 238 | similar to WD repeat domain 36 (LOC688637) alternative variant bSep08, mRNA.                                                                                                   |
| <a href="#">LOC688662</a> | <a href="#">LOC688662.aSep08</a> | <a href="#">688662</a> | 17698  | 412  | 2  | 92  | similar to Reticulocalbin-1 precursor (LOC688662) alternative variant aSep08, mRNA.                                                                                            |
| <a href="#">LOC688662</a> | <a href="#">LOC688662.bSep08</a> | <a href="#">688662</a> | 10605  | 427  | 2  | 39  | similar to Reticulocalbin-1 precursor (LOC688662) alternative variant bSep08, mRNA.                                                                                            |
| <a href="#">LOC688673</a> | <a href="#">LOC688673.bSep08</a> | <a href="#">688673</a> | 5125   | 684  | 6  | 97  | similar to Protein O-mannosyl-transferase 2 (Dolichyl-phosphate-mannose--protein mannosyltransferase 2) (LOC688673) alternative variant bSep08, mRNA.                          |
| <a href="#">LOC688673</a> | <a href="#">LOC688673.cSep08</a> | <a href="#">688673</a> | 6838   | 342  | 3  | 18  | similar to Protein O-mannosyl-transferase 2 (Dolichyl-phosphate-mannose--protein mannosyltransferase 2) (LOC688673) alternative variant cSep08, mRNA.                          |
| <a href="#">LOC688676</a> | <a href="#">LOC688676.aSep08</a> | <a href="#">688676</a> | 593    | 371  |    | 30  | hypothetical protein LOC688676 (LOC688676) mRNA.                                                                                                                               |
| <a href="#">LOC688681</a> | <a href="#">LOC688681.aSep08</a> | <a href="#">688681</a> | 949    | 868  | 2  | 189 | similar to transforming growth factor, beta receptor III (betaglycan, 300kDa) (20.6 kD) (LOC688681) alternative variant aSep08, mRNA.                                          |
| <a href="#">LOC688681</a> | <a href="#">LOC688681.bSep08</a> | <a href="#">688681</a> | 1486   | 445  | 3  | 148 | similar to transforming growth factor, beta receptor III (betaglycan, 300kDa) (LOC688681) alternative variant bSep08, mRNA.                                                    |
| <a href="#">LOC688682</a> | <a href="#">LOC688682.bSep08</a> | <a href="#">688682</a> | 448    | 346  | 2  | 73  | similar to small nuclear ribonucleoparticle-associated protein (LOC688682) alternative variant bSep08, mRNA.                                                                   |

|                           |                                  |                        |       |      |   |     |                                                                                                                                             |
|---------------------------|----------------------------------|------------------------|-------|------|---|-----|---------------------------------------------------------------------------------------------------------------------------------------------|
| <a href="#">LOC688686</a> | <a href="#">LOC688686.aSep08</a> | <a href="#">688686</a> | 5120  | 621  |   | 77  | hypothetical protein LOC688686 (9.1 kD) (LOC688686) mRNA.                                                                                   |
| <a href="#">LOC688749</a> | <a href="#">LOC688749.aSep08</a> | <a href="#">688749</a> | 36414 | 690  |   | 229 | similar to Tubby-related protein 3 (Tubby-like protein 3) (LOC688749) mRNA.                                                                 |
| <a href="#">LOC688773</a> | <a href="#">LOC688773.bSep08</a> | <a href="#">688773</a> | 12834 | 1520 | 3 | 104 | similar to nidogen 2 (11.6 kD) (LOC688773) alternative variant bSep08, mRNA.                                                                |
| <a href="#">LOC688773</a> | <a href="#">LOC688773.cSep08</a> | <a href="#">688773</a> | 11898 | 773  | 3 | 94  | similar to nidogen 2 (LOC688773) alternative variant cSep08, mRNA.                                                                          |
| <a href="#">LOC688773</a> | <a href="#">LOC688773.dSep08</a> | <a href="#">688773</a> | 1479  | 750  | 2 | 93  | similar to nidogen 2 (10.4 kD) (LOC688773) alternative variant dSep08, mRNA.                                                                |
| <a href="#">LOC688778</a> | <a href="#">LOC688778.aSep08</a> | <a href="#">688778</a> | 1385  | 676  | 2 | 225 | similar to fatty aldehyde dehydrogenase-like (LOC688778) alternative variant aSep08, mRNA.                                                  |
| <a href="#">LOC688778</a> | <a href="#">LOC688778.bSep08</a> | <a href="#">688778</a> | 916   | 382  | 1 | 73  | similar to fatty aldehyde dehydrogenase-like (LOC688778) alternative variant bSep08, mRNA.                                                  |
| <a href="#">LOC688801</a> | <a href="#">LOC688801.aSep08</a> | <a href="#">688801</a> | 6849  | 636  |   | 89  | hypothetical protein LOC688801 (LOC688801) mRNA.                                                                                            |
| <a href="#">LOC688807</a> | <a href="#">LOC688807.aSep08</a> | <a href="#">688807</a> | 3707  | 701  |   | 137 | hypothetical protein LOC688807 (14.4 kD) (LOC688807) mRNA.                                                                                  |
| <a href="#">LOC688808</a> | <a href="#">LOC688808.aSep08</a> | <a href="#">688808</a> | 27464 | 532  | 3 | 19  | similar to RIKEN cDNA 5031410I06 (2.1 kD) (LOC688808) alternative variant aSep08, mRNA.                                                     |
| <a href="#">LOC688808</a> | <a href="#">LOC688808.bSep08</a> | <a href="#">688808</a> | 4423  | 380  | 2 | 70  | similar to RIKEN cDNA 5031410I06 (LOC688808) alternative variant bSep08, mRNA.                                                              |
| <a href="#">LOC688832</a> | <a href="#">LOC688832.aSep08</a> | <a href="#">688832</a> | 1699  | 590  |   | 71  | hypothetical protein LOC688832 (7.8 kD) (LOC688832) mRNA.                                                                                   |
| <a href="#">LOC688833</a> | <a href="#">LOC688833.aSep08</a> | <a href="#">688833</a> | 768   | 234  |   | 60  | hypothetical protein LOC688833 (LOC688833) mRNA.                                                                                            |
| <a href="#">LOC688864</a> | <a href="#">LOC688864.aSep08</a> | <a href="#">688864</a> | 9796  | 655  |   | 84  | similar to transmembrane protein 61 (9.4 kD) (LOC688864) mRNA.                                                                              |
| <a href="#">LOC688869</a> | <a href="#">LOC688869.bSep08</a> | <a href="#">688869</a> | 7300  | 437  | 3 | 86  | similar to cytochrome c oxidase, subunit VIb polypeptide 1 (10.1 kD) (LOC688869) alternative variant bSep08, complete mRNA.                 |
| <a href="#">LOC688872</a> | <a href="#">LOC688872.bSep08</a> | <a href="#">688872</a> | 14599 | 1390 | 6 | 296 | similar to fetal Alzheimer antigen isoform 2 (LOC688872) alternative variant bSep08, mRNA.                                                  |
| <a href="#">LOC688872</a> | <a href="#">LOC688872.cSep08</a> | <a href="#">688872</a> | 11511 | 1797 | 6 | 227 | similar to fetal Alzheimer antigen isoform 2 (LOC688872) alternative variant cSep08, mRNA.                                                  |
| <a href="#">LOC688872</a> | <a href="#">LOC688872.dSep08</a> | <a href="#">688872</a> | 1449  | 313  | 2 | 104 | similar to fetal Alzheimer antigen isoform 2 (LOC688872) alternative variant dSep08, mRNA.                                                  |
| <a href="#">LOC688877</a> | <a href="#">LOC688877.aSep08</a> | <a href="#">688877</a> | 12946 | 662  |   | 121 | similar to nidogen 2 (13.0 kD) (LOC688877) mRNA.                                                                                            |
| <a href="#">LOC688893</a> | <a href="#">LOC688893.aSep08</a> | <a href="#">688893</a> | 1373  | 388  |   | 54  | hypothetical protein LOC688893 (LOC688893) mRNA.                                                                                            |
| <a href="#">LOC688903</a> | <a href="#">LOC688903.aSep08</a> | <a href="#">688903</a> | 11020 | 767  | 2 | 113 | similar to Nucleoside diphosphate kinase homolog 5 (NDK-H 5) (NDP kinase homolog 5) (nm23-M5) (LOC688903) alternative variant aSep08, mRNA. |
| <a href="#">LOC688903</a> | <a href="#">LOC688903.bSep08</a> | <a href="#">688903</a> | 16761 | 833  | 1 | 46  | similar to Nucleoside diphosphate kinase homolog 5 (NDK-H 5) (NDP kinase homolog 5) (nm23-M5) (LOC688903) alternative variant bSep08, mRNA. |
| <a href="#">LOC688905</a> | <a href="#">LOC688905.aSep08</a> | <a href="#">688905</a> | 2655  | 527  |   | 75  | similar to metaxin 3 (LOC688905) mRNA.                                                                                                      |
| <a href="#">LOC688914</a> | <a href="#">LOC688914.aSep08</a> | <a href="#">688914</a> | 72487 | 402  |   | 122 | hypothetical protein LOC688914 (LOC688914) mRNA.                                                                                            |

|                           |                                  |                        |        |      |   |     |                                                                                                                                                                                                                                                                                              |
|---------------------------|----------------------------------|------------------------|--------|------|---|-----|----------------------------------------------------------------------------------------------------------------------------------------------------------------------------------------------------------------------------------------------------------------------------------------------|
| <a href="#">LOC688915</a> | <a href="#">LOC688915.aSep08</a> | <a href="#">688915</a> | 26587  | 1008 | 1 | 310 | similar to cardiomyopathy associated 5 (LOC688915) alternative variant aSep08, mRNA.                                                                                                                                                                                                         |
| <a href="#">LOC688915</a> | <a href="#">LOC688915.bSep08</a> | <a href="#">688915</a> | 25484  | 1529 | 1 | 221 | similar to cardiomyopathy associated 5 (24.6 kD) (LOC688915) alternative variant bSep08, mRNA.                                                                                                                                                                                               |
| <a href="#">LOC688916</a> | <a href="#">LOC688916.aSep08</a> | <a href="#">688916</a> | 69395  | 582  |   | 108 | hypothetical protein LOC688916 (LOC688916) mRNA.                                                                                                                                                                                                                                             |
| <a href="#">LOC688968</a> | <a href="#">LOC688968.aSep08</a> | <a href="#">688968</a> | 14748  | 1322 | 2 | 348 | similar to SGT1 protein homolog (Ecdysoneless homolog) (LOC688968) alternative variant aSep08, mRNA.                                                                                                                                                                                         |
| <a href="#">LOC688968</a> | <a href="#">LOC688968.bSep08</a> | <a href="#">688968</a> | 11167  | 737  | 1 | 154 | similar to SGT1 protein homolog (Ecdysoneless homolog) (LOC688968) alternative variant bSep08, mRNA.                                                                                                                                                                                         |
| <a href="#">LOC688972</a> | <a href="#">LOC688972.aSep08</a> | <a href="#">688972</a> | 17859  | 1257 | 7 | 132 | similar to Glycophorin (14.0 kD) (LOC688972) alternative variant aSep08, complete mRNA.                                                                                                                                                                                                      |
| <a href="#">LOC688990</a> | <a href="#">LOC688990.aSep08</a> | <a href="#">688990</a> | 1777   | 812  |   | 78  | hypothetical protein LOC688990 (LOC688990) mRNA.                                                                                                                                                                                                                                             |
| <a href="#">LOC689010</a> | <a href="#">LOC689010.aSep08</a> | <a href="#">689010</a> | 52114  | 574  |   | 45  | hypothetical protein LOC689010 (5.3 kD) (LOC689010) mRNA.                                                                                                                                                                                                                                    |
| <a href="#">LOC689012</a> | <a href="#">LOC689012.aSep08</a> | <a href="#">689012</a> | 12343  | 425  |   | 34  | hypothetical protein LOC689012 (LOC689012) mRNA.                                                                                                                                                                                                                                             |
| <a href="#">LOC689019</a> | <a href="#">LOC689019.aSep08</a> | <a href="#">689019</a> | 1842   | 407  |   | 99  | hypothetical protein LOC689019 (LOC689019) mRNA.                                                                                                                                                                                                                                             |
| <a href="#">LOC689027</a> | <a href="#">LOC689027.bSep08</a> | <a href="#">689027</a> | 15986  | 746  | 8 | 248 | similar to Probable polypeptide N-acetylgalactosaminyltransferase 8 (Protein-UDP acetylgalactosaminyltransferase 8) (UDP-GalNAc:polypeptide N-acetylgalactosaminyltransferase 8) (Polypeptide GalNAc transferase 8) (GalNAc-T8) (pp-GaNTase 8) (LOC689027) alternative variant bSep08, mRNA. |
| <a href="#">LOC689035</a> | <a href="#">LOC689035.aSep08</a> | <a href="#">689035</a> | 13730  | 858  |   | 285 | similar to CG5946-PB, isoform B (LOC689035) mRNA.                                                                                                                                                                                                                                            |
| <a href="#">LOC689043</a> | <a href="#">LOC689043.bSep08</a> | <a href="#">689043</a> | 244814 | 1781 | 1 | 67  | similar to TFAA4 protein (LOC689043) alternative variant bSep08, mRNA.                                                                                                                                                                                                                       |
| <a href="#">LOC689044</a> | <a href="#">LOC689044.bSep08</a> | <a href="#">689044</a> | 78187  | 388  | 1 | 76  | hypothetical protein LOC689044 (LOC689044) alternative variant bSep08, mRNA.                                                                                                                                                                                                                 |
| <a href="#">LOC689074</a> | <a href="#">LOC689074.aSep08</a> | <a href="#">689074</a> | 18430  | 1057 |   | 351 | similar to Protein KIAA1543 (LOC689074) mRNA.                                                                                                                                                                                                                                                |
| <a href="#">LOC689084</a> | <a href="#">LOC689084.aSep08</a> | <a href="#">689084</a> | 3140   | 701  |   | 144 | hypothetical protein LOC689084 (17.2 kD) (LOC689084) mRNA.                                                                                                                                                                                                                                   |
| <a href="#">LOC689088</a> | <a href="#">LOC689088.aSep08</a> | <a href="#">689088</a> | 5752   | 1510 |   | 158 | predicted gene (LOC689088) mRNA.                                                                                                                                                                                                                                                             |
| <a href="#">LOC689095</a> | <a href="#">LOC689095.aSep08</a> | <a href="#">689095</a> | 14266  | 290  | 2 | 96  | similar to stearoyl-Coenzyme A desaturase 1 (LOC689095) alternative variant aSep08, mRNA.                                                                                                                                                                                                    |
| <a href="#">LOC689103</a> | <a href="#">LOC689103.aSep08</a> | <a href="#">689103</a> | 553    | 441  |   | 120 | similar to vitelliform macular dystrophy 2-like 2 (LOC689103) mRNA.                                                                                                                                                                                                                          |
| <a href="#">LOC689116</a> | <a href="#">LOC689116.aSep08</a> | <a href="#">689116</a> | 3798   | 1023 | 3 | 254 | similar to nuclear cap binding protein subunit 2 (LOC689116) alternative variant aSep08, mRNA.                                                                                                                                                                                               |
| <a href="#">LOC689116</a> | <a href="#">LOC689116.bSep08</a> | <a href="#">689116</a> | 3591   | 819  | 3 | 226 | similar to nuclear cap binding protein subunit 2 (LOC689116) alternative variant bSep08, mRNA.                                                                                                                                                                                               |
| <a href="#">LOC689116</a> | <a href="#">LOC689116.cSep08</a> | <a href="#">689116</a> | 29057  | 647  | 5 | 181 | similar to nuclear cap binding protein subunit 2 (LOC689116) alternative variant cSep08, mRNA.                                                                                                                                                                                               |
| <a href="#">LOC689116</a> | <a href="#">LOC689116.eSep08</a> | <a href="#">689116</a> | 8137   | 805  | 5 | 156 | similar to nuclear cap binding protein subunit 2 (18.0 kD) (LOC689116) alternative variant eSep08, mRNA.                                                                                                                                                                                     |
| <a href="#">LOC689116</a> | <a href="#">LOC689116.fSep08</a> | <a href="#">689116</a> | 7830   | 425  | 3 | 110 | similar to nuclear cap binding protein subunit 2 (LOC689116) alternative variant fSep08, mRNA.                                                                                                                                                                                               |



|                           |                                  |                        |       |      |    |     |                                                                                                                          |
|---------------------------|----------------------------------|------------------------|-------|------|----|-----|--------------------------------------------------------------------------------------------------------------------------|
| <a href="#">LOC689116</a> | <a href="#">LOC689116.gSep08</a> | <a href="#">689116</a> | 838   | 738  | 2  | 40  | similar to nuclear cap binding protein subunit 2 (LOC689116) alternative variant gSep08, mRNA.                           |
| <a href="#">LOC689124</a> | <a href="#">LOC689124.aSep08</a> | <a href="#">689124</a> | 617   | 385  |    | 10  | similar to RIKEN cDNA 5031410I06 (1.1 kD) (LOC689124) mRNA.                                                              |
| <a href="#">LOC689133</a> | <a href="#">LOC689133.aSep08</a> | <a href="#">689133</a> | 1763  | 404  |    | 81  | similar to Extracellular peptidase inhibitor precursor (Protein WDNM1) (LOC689133) mRNA.                                 |
| <a href="#">LOC689134</a> | <a href="#">LOC689134.aSep08</a> | <a href="#">689134</a> | 6273  | 368  | 4  | 75  | similar to Protein transport protein SEC61 gamma subunit (LOC689134) alternative variant aSep08, mRNA.                   |
| <a href="#">LOC689134</a> | <a href="#">LOC689134.bSep08</a> | <a href="#">689134</a> | 6409  | 477  | 4  | 68  | similar to Protein transport protein SEC61 gamma subunit (7.7 kD) (LOC689134) alternative variant bSep08, complete mRNA. |
| <a href="#">LOC689147</a> | <a href="#">LOC689147.aSep08</a> | <a href="#">689147</a> | 25440 | 877  | 2  | 131 | hypothetical protein LOC689147 (14.9 kD) (LOC689147) alternative variant aSep08, mRNA.                                   |
| <a href="#">LOC689147</a> | <a href="#">LOC689147.bSep08</a> | <a href="#">689147</a> | 19501 | 713  | 1  | 108 | hypothetical protein LOC689147 (LOC689147) alternative variant bSep08, mRNA.                                             |
| <a href="#">LOC689168</a> | <a href="#">LOC689168.aSep08</a> | <a href="#">689168</a> | 5864  | 626  | 1  | 84  | similar to Cystatin S precursor (LM protein) (9.4 kD) (LOC689168) alternative variant aSep08, mRNA.                      |
| <a href="#">LOC689168</a> | <a href="#">LOC689168.bSep08</a> | <a href="#">689168</a> | 12181 | 648  | 1  | 82  | similar to Cystatin S precursor (LM protein) (LOC689168) alternative variant bSep08, mRNA.                               |
| <a href="#">LOC689176</a> | <a href="#">LOC689176.aSep08</a> | <a href="#">689176</a> | 16347 | 784  |    | 260 | similar to transmembrane protein 64 (LOC689176) mRNA.                                                                    |
| <a href="#">LOC689178</a> | <a href="#">LOC689178.aSep08</a> | <a href="#">689178</a> | 2767  | 473  |    | 98  | hypothetical protein LOC689178 (LOC689178) mRNA.                                                                         |
| <a href="#">LOC689212</a> | <a href="#">LOC689212.aSep08</a> | <a href="#">689212</a> | 1480  | 435  |    | 65  | similar to Cystatin S precursor (LM protein) (LOC689212) mRNA.                                                           |
| <a href="#">LOC689226</a> | <a href="#">LOC689226.aSep08</a> | <a href="#">689226</a> | 60141 | 1690 | 1  | 235 | similar to ubiquitin-conjugating enzyme E2R 2 (LOC689226) alternative variant aSep08, mRNA.                              |
| <a href="#">LOC689240</a> | <a href="#">LOC689240.aSep08</a> | <a href="#">689240</a> | 1070  | 646  |    | 90  | neurobeachin like 1 (LOC689240) mRNA.                                                                                    |
| <a href="#">LOC689252</a> | <a href="#">LOC689252.aSep08</a> | <a href="#">689252</a> | 86410 | 817  |    | 119 | hypothetical protein LOC689252 (12.8 kD) (LOC689252) mRNA.                                                               |
| <a href="#">LOC689275</a> | <a href="#">LOC689275.aSep08</a> | <a href="#">689275</a> | 91182 | 1943 |    | 69  | hypothetical protein LOC689275 (7.8 kD) (LOC689275) mRNA.                                                                |
| <a href="#">LOC689276</a> | <a href="#">LOC689276.aSep08</a> | <a href="#">689276</a> | 1982  | 388  |    | 45  | hypothetical protein LOC689276 (LOC689276) mRNA.                                                                         |
| <a href="#">LOC689288</a> | <a href="#">LOC689288.aSep08</a> | <a href="#">689288</a> | 5310  | 1784 | 2  | 419 | similar to copine II (LOC689288) alternative variant aSep08, mRNA.                                                       |
| <a href="#">LOC689288</a> | <a href="#">LOC689288.bSep08</a> | <a href="#">689288</a> | 8359  | 983  | 3  | 87  | similar to copine II (LOC689288) alternative variant bSep08, mRNA.                                                       |
| <a href="#">LOC689289</a> | <a href="#">LOC689289.bSep08</a> | <a href="#">689289</a> | 2289  | 570  | 3  | 143 | similar to Y73F8A.5 (LOC689289) alternative variant bSep08, mRNA.                                                        |
| <a href="#">LOC689294</a> | <a href="#">LOC689294.aSep08</a> | <a href="#">689294</a> | 28537 | 312  |    | 101 | similar to ADAM 22 precursor (A disintegrin and metalloproteinase domain 22) (LOC689294) mRNA.                           |
| <a href="#">LOC689303</a> | <a href="#">LOC689303.aSep08</a> | <a href="#">689303</a> | 14692 | 327  |    | 94  | similar to vitamin A-deficient testicular protein 11-like (LOC689303) mRNA.                                              |
| <a href="#">LOC689314</a> | <a href="#">LOC689314.aSep08</a> | <a href="#">689314</a> | 4146  | 2125 | 11 | 314 | similar to mitogen-activated protein kinase 11 (LOC689314) alternative variant aSep08, mRNA.                             |
| <a href="#">LOC689316</a> | <a href="#">LOC689316.aSep08</a> | <a href="#">689316</a> | 3076  | 884  |    | 196 | hypothetical protein LOC689316 (21.8 kD) (LOC689316) mRNA.                                                               |
| <a href="#">LOC689329</a> | <a href="#">LOC689329.aSep08</a> | <a href="#">689329</a> | 7278  | 651  |    | 103 | hypothetical protein LOC689329 (12.0 kD) (LOC689329) mRNA.                                                               |

|                           |                                  |                        |        |      |    |     |                                                                                                                                        |
|---------------------------|----------------------------------|------------------------|--------|------|----|-----|----------------------------------------------------------------------------------------------------------------------------------------|
| <a href="#">LOC689340</a> | <a href="#">LOC689340.aSep08</a> | <a href="#">689340</a> | 36467  | 582  |    | 39  | similar to 40S ribosomal protein S2 (4.3 kD) (LOC689340) mRNA.                                                                         |
| <a href="#">LOC689372</a> | <a href="#">LOC689372.aSep08</a> | <a href="#">689372</a> | 1308   | 465  |    | 68  | similar to spermatogenesis associated glutamate (E)-rich protein 4d (8.3 kD) (LOC689372) mRNA.                                         |
| <a href="#">LOC689396</a> | <a href="#">LOC689396.aSep08</a> | <a href="#">689396</a> | 8016   | 769  | 2  | 234 | similar to RNA polymerase II elongation factor ELL2 (LOC689396) alternative variant aSep08, mRNA.                                      |
| <a href="#">LOC689399</a> | <a href="#">LOC689399.aSep08</a> | <a href="#">689399</a> | 4938   | 1600 |    | 86  | hypothetical protein LOC689399 (9.8 kD) (LOC689399) mRNA.                                                                              |
| <a href="#">LOC689418</a> | <a href="#">LOC689418.aSep08</a> | <a href="#">689418</a> | 2932   | 400  |    | 133 | hypothetical protein LOC689418 (LOC689418) mRNA.                                                                                       |
| <a href="#">LOC689443</a> | <a href="#">LOC689443.aSep08</a> | <a href="#">689443</a> | 197243 | 2307 |    | 250 | similar to TBC1 domain family member 22A (LOC689443) mRNA.                                                                             |
| <a href="#">LOC689445</a> | <a href="#">LOC689445.aSep08</a> | <a href="#">689445</a> | 6483   | 341  | 1  | 113 | hypothetical protein LOC689445 (LOC689445) alternative variant aSep08, mRNA.                                                           |
| <a href="#">LOC689445</a> | <a href="#">LOC689445.bSep08</a> | <a href="#">689445</a> | 4247   | 499  | 2  | 61  | hypothetical protein LOC689445 (7.0 kD) (LOC689445) alternative variant bSep08, mRNA.                                                  |
| <a href="#">LOC689464</a> | <a href="#">LOC689464.aSep08</a> | <a href="#">689464</a> | 5442   | 1014 | 3  | 76  | similar to 40S ribosomal protein SA (p40) (34/67 kDa laminin receptor) (LOC689464) alternative variant aSep08, mRNA.                   |
| <a href="#">LOC689479</a> | <a href="#">LOC689479.aSep08</a> | <a href="#">689479</a> | 8359   | 802  | 3  | 206 | similar to Discs large homolog 5 (Placenta and prostate DLG) (Discs large protein P-dlg) (LOC689479) alternative variant aSep08, mRNA. |
| <a href="#">LOC689479</a> | <a href="#">LOC689479.bSep08</a> | <a href="#">689479</a> | 2760   | 732  | 1  | 122 | similar to Discs large homolog 5 (Placenta and prostate DLG) (Discs large protein P-dlg) (LOC689479) alternative variant bSep08, mRNA. |
| <a href="#">LOC689486</a> | <a href="#">LOC689486.aSep08</a> | <a href="#">689486</a> | 31248  | 377  |    | 93  | hypothetical protein LOC689486 (LOC689486) mRNA.                                                                                       |
| <a href="#">LOC689541</a> | <a href="#">LOC689541.aSep08</a> | <a href="#">689541</a> | 2007   | 533  |    | 93  | similar to spermatogenesis associated glutamate (E)-rich protein 4d (LOC689541) mRNA.                                                  |
| <a href="#">LOC689570</a> | <a href="#">LOC689570.bSep08</a> | <a href="#">689570</a> | 5536   | 448  | 2  | 72  | similar to Kazal type serine protease inhibitor 4 (LOC689570) alternative variant bSep08, mRNA.                                        |
| <a href="#">LOC689574</a> | <a href="#">LOC689574.aSep08</a> | <a href="#">689574</a> | 9955   | 854  | 3  | 115 | hypothetical protein LOC689574 (LOC689574) alternative variant aSep08, mRNA.                                                           |
| <a href="#">LOC689574</a> | <a href="#">LOC689574.bSep08</a> | <a href="#">689574</a> | 7152   | 289  | 3  | 96  | hypothetical protein LOC689574 (LOC689574) alternative variant bSep08, mRNA.                                                           |
| <a href="#">LOC689574</a> | <a href="#">LOC689574.dSep08</a> | <a href="#">689574</a> | 1201   | 547  | 2  | 50  | hypothetical protein LOC689574 (LOC689574) alternative variant dSep08, mRNA.                                                           |
| <a href="#">LOC689589</a> | <a href="#">LOC689589.aSep08</a> | <a href="#">689589</a> | 20840  | 883  |    | 87  | hypothetical protein LOC689589 (10.0 kD) (LOC689589) mRNA.                                                                             |
| <a href="#">LOC689593</a> | <a href="#">LOC689593.aSep08</a> | <a href="#">689593</a> | 7696   | 1795 | 3  | 499 | CRA g (LOC689593) alternative variant aSep08, mRNA.                                                                                    |
| <a href="#">LOC689593</a> | <a href="#">LOC689593.bSep08</a> | <a href="#">689593</a> | 7536   | 2793 | 8  | 335 | DnaJ homolog subfamily B member (LOC689593) alternative variant bSep08, mRNA.                                                          |
| <a href="#">LOC689593</a> | <a href="#">LOC689593.cSep08</a> | <a href="#">689593</a> | 8212   | 1879 | 10 | 277 | DnaJ homolog subfamily B member (30.7 kD) (LOC689593) alternative variant cSep08, mRNA.                                                |
| <a href="#">LOC689593</a> | <a href="#">LOC689593.eSep08</a> | <a href="#">689593</a> | 3673   | 864  | 5  | 223 | DnaJ homolog subfamily B member (LOC689593) alternative variant eSep08, mRNA.                                                          |
| <a href="#">LOC689593</a> | <a href="#">LOC689593.fSep08</a> | <a href="#">689593</a> | 4454   | 937  | 5  | 169 | DnaJ homolog subfamily B member (19.1 kD) (LOC689593) alternative variant fSep08, mRNA.                                                |

|                           |                                  |                        |        |      |   |     |                                                                                                                                            |
|---------------------------|----------------------------------|------------------------|--------|------|---|-----|--------------------------------------------------------------------------------------------------------------------------------------------|
| <a href="#">LOC689593</a> | <a href="#">LOC689593.gSep08</a> | <a href="#">689593</a> | 4569   | 562  | 7 | 156 | DnaJ homolog subfamily B member (LOC689593) alternative variant gSep08, mRNA.                                                              |
| <a href="#">LOC689593</a> | <a href="#">LOC689593.hSep08</a> | <a href="#">689593</a> | 1078   | 574  | 2 | 138 | CRA g (15.6 kD) (LOC689593) alternative variant hSep08, mRNA.                                                                              |
| <a href="#">LOC689593</a> | <a href="#">LOC689593.iSep08</a> | <a href="#">689593</a> | 930    | 733  | 2 | 86  | putative protein (LOC689593) alternative variant iSep08, mRNA.                                                                             |
| <a href="#">LOC689601</a> | <a href="#">LOC689601.aSep08</a> | <a href="#">689601</a> | 22476  | 1003 | 7 | 230 | similar to density-regulated protein (LOC689601) alternative variant aSep08, mRNA.                                                         |
| <a href="#">LOC689601</a> | <a href="#">LOC689601.cSep08</a> | <a href="#">689601</a> | 3004   | 619  | 3 | 102 | similar to density-regulated protein (LOC689601) alternative variant cSep08, mRNA.                                                         |
| <a href="#">LOC689601</a> | <a href="#">LOC689601.dSep08</a> | <a href="#">689601</a> | 773    | 662  | 2 |     |                                                                                                                                            |
| <a href="#">LOC689617</a> | <a href="#">LOC689617.aSep08</a> | <a href="#">689617</a> | 4614   | 424  |   | 141 | similar to GTPase activating protein testicular GAP1 (LOC689617) mRNA.                                                                     |
| <a href="#">LOC689619</a> | <a href="#">LOC689619.aSep08</a> | <a href="#">689619</a> | 16450  | 659  | 2 | 184 | similar to nuclear receptor interacting protein 2 (LOC689619) alternative variant aSep08, mRNA.                                            |
| <a href="#">LOC689619</a> | <a href="#">LOC689619.bSep08</a> | <a href="#">689619</a> | 7833   | 429  | 1 | 69  | similar to nuclear receptor interacting protein 2 (LOC689619) alternative variant bSep08, mRNA.                                            |
| <a href="#">LOC689636</a> | <a href="#">LOC689636.aSep08</a> | <a href="#">689636</a> | 35263  | 393  | 2 | 86  | hypothetical protein LOC689636 (LOC689636) alternative variant aSep08, mRNA.                                                               |
| <a href="#">LOC689636</a> | <a href="#">LOC689636.bSep08</a> | <a href="#">689636</a> | 43293  | 597  | 3 | 81  | hypothetical protein LOC689636 (LOC689636) alternative variant bSep08, mRNA.                                                               |
| <a href="#">LOC689663</a> | <a href="#">LOC689663.aSep08</a> | <a href="#">689663</a> | 1853   | 473  | 1 | 157 | hypothetical protein LOC689663 (LOC689663) alternative variant aSep08, mRNA.                                                               |
| <a href="#">LOC689663</a> | <a href="#">LOC689663.bSep08</a> | <a href="#">689663</a> | 6045   | 373  | 2 | 80  | hypothetical protein LOC689663 (LOC689663) alternative variant bSep08, mRNA.                                                               |
| <a href="#">LOC689696</a> | <a href="#">LOC689696.aSep08</a> | <a href="#">689696</a> | 214974 | 401  |   | 81  | similar to Receptor-type tyrosine-protein phosphatase delta precursor (Protein-tyrosine phosphatase delta) (R-PTP-delta) (LOC689696) mRNA. |
| <a href="#">LOC689717</a> | <a href="#">LOC689717.aSep08</a> | <a href="#">689717</a> | 66828  | 682  | 3 | 69  | similar to carboxypeptidase O (7.7 kD) (LOC689717) alternative variant aSep08, mRNA.                                                       |
| <a href="#">LOC689727</a> | <a href="#">LOC689727.aSep08</a> | <a href="#">689727</a> | 8878   | 556  |   | 61  | hypothetical protein LOC689727 (7.0 kD) (LOC689727) mRNA.                                                                                  |
| <a href="#">LOC689732</a> | <a href="#">LOC689732.aSep08</a> | <a href="#">689732</a> | 24564  | 229  |   | 76  | hypothetical protein LOC689732 (LOC689732) mRNA.                                                                                           |
| <a href="#">LOC689748</a> | <a href="#">LOC689748.aSep08</a> | <a href="#">689748</a> | 5896   | 497  |   | 127 | hypothetical protein LOC689748 (LOC689748) mRNA.                                                                                           |
| <a href="#">LOC689750</a> | <a href="#">LOC689750.aSep08</a> | <a href="#">689750</a> | 1308   | 465  |   | 68  | similar to spermatogenesis associated glutamate (E)-rich protein 4d (8.3 kD) (LOC689750) mRNA.                                             |
| <a href="#">LOC689755</a> | <a href="#">LOC689755.aSep08</a> | <a href="#">689755</a> | 20140  | 816  | 3 | 182 | hypothetical protein LOC689755 (LOC689755) alternative variant aSep08, mRNA.                                                               |
| <a href="#">LOC689755</a> | <a href="#">LOC689755.cSep08</a> | <a href="#">689755</a> | 14022  | 341  | 2 | 32  | hypothetical protein LOC689755 (LOC689755) alternative variant cSep08, mRNA.                                                               |
| <a href="#">LOC689770</a> | <a href="#">LOC689770.aSep08</a> | <a href="#">689770</a> | 12590  | 676  |   | 182 | similar to osteoclast inhibitory lectin (LOC689770) mRNA.                                                                                  |
| <a href="#">LOC689775</a> | <a href="#">LOC689775.aSep08</a> | <a href="#">689775</a> | 8325   | 418  |   | 83  | hypothetical protein LOC689775 (LOC689775) mRNA.                                                                                           |
| <a href="#">LOC689791</a> | <a href="#">LOC689791.aSep08</a> | <a href="#">689791</a> | 10263  | 334  | 1 | 92  | hypothetical protein LOC689791 (LOC689791) alternative variant aSep08, mRNA.                                                               |
| <a href="#">LOC689791</a> | <a href="#">LOC689791.bSep08</a> | <a href="#">689791</a> | 10771  | 702  |   | 52  | hypothetical protein LOC689791 (LOC689791) alternative variant bSep08, mRNA.                                                               |

|                           |                                  |                        |       |      |   |     |                                                                                                                                       |
|---------------------------|----------------------------------|------------------------|-------|------|---|-----|---------------------------------------------------------------------------------------------------------------------------------------|
| <a href="#">LOC689795</a> | <a href="#">LOC689795.aSep08</a> | <a href="#">689795</a> | 10180 | 463  |   | 76  | hypothetical protein LOC689795 (8.5 kD) (LOC689795) alternative variant aSep08, mRNA.                                                 |
| <a href="#">LOC689795</a> | <a href="#">LOC689795.bSep08</a> | <a href="#">689795</a> | 10426 | 708  |   | 76  | hypothetical protein LOC689795 (8.5 kD) (LOC689795) alternative variant bSep08, mRNA.                                                 |
| <a href="#">LOC689797</a> | <a href="#">LOC689797.aSep08</a> | <a href="#">689797</a> | 3352  | 655  |   | 83  | hypothetical protein LOC689797 (9.2 kD) (LOC689797) mRNA.                                                                             |
| <a href="#">LOC689799</a> | <a href="#">LOC689799.aSep08</a> | <a href="#">689799</a> | 21254 | 979  |   | 228 | similar to proteoglycan 4 (LOC689799) mRNA.                                                                                           |
| <a href="#">LOC689801</a> | <a href="#">LOC689801.aSep08</a> | <a href="#">689801</a> | 27642 | 1202 |   | 377 | similar to butyrophilin-like 8 (42.8 kD) (LOC689801) mRNA.                                                                            |
| <a href="#">LOC689820</a> | <a href="#">LOC689820.aSep08</a> | <a href="#">689820</a> | 19220 | 2780 | 1 | 384 | similar to SET domain-containing protein (LOC689820) alternative variant aSep08, mRNA.                                                |
| <a href="#">LOC689820</a> | <a href="#">LOC689820.bSep08</a> | <a href="#">689820</a> | 5779  | 519  | 1 | 101 | similar to SET domain-containing protein (LOC689820) alternative variant bSep08, mRNA.                                                |
| <a href="#">LOC689822</a> | <a href="#">LOC689822.aSep08</a> | <a href="#">689822</a> | 6487  | 1426 |   | 181 | similar to Nucleolar GTP-binding protein 1 (Chronic renal failure gene protein) (GTP-binding protein NGB) (LOC689822) mRNA.           |
| <a href="#">LOC689823</a> | <a href="#">LOC689823.aSep08</a> | <a href="#">689823</a> | 3360  | 433  |   | 144 | similar to RAD21 homolog (LOC689823) mRNA.                                                                                            |
| <a href="#">LOC689842</a> | <a href="#">LOC689842.aSep08</a> | <a href="#">689842</a> | 5759  | 1633 |   | 129 | similar to Nucleolar GTP-binding protein 1 (Chronic renal failure gene protein) (GTP-binding protein NGB) (14.8 kD) (LOC689842) mRNA. |
| <a href="#">LOC689852</a> | <a href="#">LOC689852.aSep08</a> | <a href="#">689852</a> | 13948 | 821  | 5 | 222 | similar to Proteasome inhibitor PI31 subunit (LOC689852) alternative variant aSep08, mRNA.                                            |
| <a href="#">LOC689852</a> | <a href="#">LOC689852.bSep08</a> | <a href="#">689852</a> | 12109 | 720  | 4 | 178 | similar to Proteasome inhibitor PI31 subunit (LOC689852) alternative variant bSep08, mRNA.                                            |
| <a href="#">LOC689852</a> | <a href="#">LOC689852.dSep08</a> | <a href="#">689852</a> | 22040 | 1010 | 7 | 178 | similar to Proteasome inhibitor PI31 subunit (LOC689852) alternative variant dSep08, mRNA.                                            |
| <a href="#">LOC689852</a> | <a href="#">LOC689852.eSep08</a> | <a href="#">689852</a> | 16311 | 224  | 3 | 52  | similar to Proteasome inhibitor PI31 subunit (LOC689852) alternative variant eSep08, mRNA.                                            |
| <a href="#">LOC689852</a> | <a href="#">LOC689852.fSep08</a> | <a href="#">689852</a> | 2085  | 305  | 2 | 30  | similar to Proteasome inhibitor PI31 subunit (LOC689852) alternative variant fSep08, mRNA.                                            |
| <a href="#">LOC689920</a> | <a href="#">LOC689920.aSep08</a> | <a href="#">689920</a> | 5149  | 1031 |   | 129 | similar to G protein-binding protein CRFG (14.9 kD) (LOC689920) mRNA.                                                                 |
| <a href="#">LOC689925</a> | <a href="#">LOC689925.aSep08</a> | <a href="#">689925</a> | 17066 | 724  |   | 76  | similar to xenotropic and polytropic retrovirus receptor 1 (8.7 kD) (LOC689925) mRNA.                                                 |
| <a href="#">LOC689926</a> | <a href="#">LOC689926.aSep08</a> | <a href="#">689926</a> | 5732  | 847  | 1 | 110 | hypothetical protein LOC689926 (LOC689926) alternative variant aSep08, mRNA.                                                          |
| <a href="#">LOC689926</a> | <a href="#">LOC689926.bSep08</a> | <a href="#">689926</a> | 4807  | 462  | 1 | 97  | hypothetical protein LOC689926 (LOC689926) alternative variant bSep08, mRNA.                                                          |
| <a href="#">LOC689933</a> | <a href="#">LOC689933.aSep08</a> | <a href="#">689933</a> | 26356 | 644  |   | 66  | hypothetical protein LOC689933 (LOC689933) mRNA.                                                                                      |
| <a href="#">LOC689953</a> | <a href="#">LOC689953.bSep08</a> | <a href="#">689953</a> | 15079 | 1261 | 2 | 79  | hypothetical protein LOC689953 (LOC689953) alternative variant bSep08, mRNA.                                                          |
| <a href="#">LOC689959</a> | <a href="#">LOC689959.bSep08</a> | <a href="#">689959</a> | 5901  | 227  | 1 | 75  | hypothetical protein LOC689959 (LOC689959) alternative variant bSep08, mRNA.                                                          |
| <a href="#">LOC689963</a> | <a href="#">LOC689963.bSep08</a> | <a href="#">689963</a> | 4825  | 777  | 2 | 142 | hypothetical protein LOC689963 (LOC689963) alternative variant bSep08, mRNA.                                                          |
| <a href="#">LOC689982</a> | <a href="#">LOC689982.aSep08</a> | <a href="#">689982</a> | 4184  | 919  |   | 219 | similar to CG18437-PA (LOC689982) mRNA.                                                                                               |
| <a href="#">LOC689985</a> | <a href="#">LOC689985.aSep08</a> | <a href="#">689985</a> | 4071  | 834  |   | 175 | hypothetical protein LOC689985 (19.8 kD) (LOC689985) mRNA.                                                                            |

|                           |                                  |                        |       |      |    |     |                                                                                                                                              |
|---------------------------|----------------------------------|------------------------|-------|------|----|-----|----------------------------------------------------------------------------------------------------------------------------------------------|
| <a href="#">LOC689991</a> | <a href="#">LOC689991.aSep08</a> | <a href="#">689991</a> | 28929 | 1766 | 10 | 588 | similar to CG18437-PA and similar to CG18437-PA (LOC689991) alternative variant aSep08, mRNA.                                                |
| <a href="#">LOC689991</a> | <a href="#">LOC689991.aSep08</a> | <a href="#">689998</a> | 28929 | 1766 | 10 | 588 | similar to CG18437-PA and similar to CG18437-PA (LOC689991) alternative variant aSep08, mRNA.                                                |
| <a href="#">LOC689991</a> | <a href="#">LOC689991.bSep08</a> | <a href="#">689991</a> | 9122  | 414  | 2  | 138 | similar to CG18437-PA and similar to CG18437-PA (LOC689991) alternative variant bSep08, mRNA.                                                |
| <a href="#">LOC689991</a> | <a href="#">LOC689991.bSep08</a> | <a href="#">689998</a> | 9122  | 414  | 2  | 138 | similar to CG18437-PA and similar to CG18437-PA (LOC689991) alternative variant bSep08, mRNA.                                                |
| <a href="#">LOC689996</a> | <a href="#">LOC689996.aSep08</a> | <a href="#">689996</a> | 4876  | 765  | 1  | 68  | similar to translocase of outer mitochondrial membrane 20 homolog (7.8 kD) (LOC689996) alternative variant aSep08, mRNA.                     |
| <a href="#">LOC689996</a> | <a href="#">LOC689996.bSep08</a> | <a href="#">689996</a> | 5377  | 279  | 2  | 66  | similar to translocase of outer mitochondrial membrane 20 homolog (LOC689996) alternative variant bSep08, mRNA.                              |
| <a href="#">LOC690000</a> | <a href="#">LOC690000.aSep08</a> | <a href="#">690000</a> | 13518 | 3189 | 2  | 141 | similar to CG3740-PA (15.1 kD) (LOC690000) alternative variant aSep08, mRNA.                                                                 |
| <a href="#">LOC690000</a> | <a href="#">LOC690000.bSep08</a> | <a href="#">690000</a> | 10921 | 455  | 2  | 130 | similar to CG3740-PA (LOC690000) alternative variant bSep08, mRNA.                                                                           |
| <a href="#">LOC690000</a> | <a href="#">LOC690000.cSep08</a> | <a href="#">690000</a> | 1714  | 441  | 1  | 48  | similar to CG3740-PA (LOC690000) alternative variant cSep08, mRNA.                                                                           |
| <a href="#">LOC690012</a> | <a href="#">LOC690012.aSep08</a> | <a href="#">690012</a> | 10918 | 798  | 6  | 118 | similar to High mobility group protein 2 (HMG-2) (13.0 kD) (LOC690012) alternative variant aSep08, mRNA.                                     |
| <a href="#">LOC690020</a> | <a href="#">LOC690020.aSep08</a> | <a href="#">690020</a> | 9857  | 601  |    | 57  | similar to killer cell lectin-like receptor, subfamily A, member 17 (LOC690020) mRNA.                                                        |
| <a href="#">LOC690032</a> | <a href="#">LOC690032.aSep08</a> | <a href="#">690032</a> | 16198 | 1916 | 9  | 428 | similar to WD repeat domain 4 (LOC690032) alternative variant aSep08, mRNA.                                                                  |
| <a href="#">LOC690032</a> | <a href="#">LOC690032.bSep08</a> | <a href="#">690032</a> | 18942 | 1112 | 3  | 105 | similar to WD repeat domain 4 (LOC690032) alternative variant bSep08, mRNA.                                                                  |
| <a href="#">LOC690035</a> | <a href="#">LOC690035.aSep08</a> | <a href="#">299123</a> | 82893 | 1783 | 12 | 593 | CRA a (LOC690035) alternative variant aSep08, mRNA.                                                                                          |
| <a href="#">LOC690035</a> | <a href="#">LOC690035.aSep08</a> | <a href="#">690035</a> | 82893 | 1783 | 12 | 593 | CRA a (LOC690035) alternative variant aSep08, mRNA.                                                                                          |
| <a href="#">LOC690035</a> | <a href="#">LOC690035.bSep08</a> | <a href="#">299123</a> | 58178 | 2006 | 12 | 343 | CRA a (37.2 kD) (LOC690035) alternative variant bSep08, mRNA.                                                                                |
| <a href="#">LOC690035</a> | <a href="#">LOC690035.bSep08</a> | <a href="#">690035</a> | 58178 | 2006 | 12 | 343 | CRA a (37.2 kD) (LOC690035) alternative variant bSep08, mRNA.                                                                                |
| <a href="#">LOC690035</a> | <a href="#">LOC690035.cSep08</a> | <a href="#">299123</a> | 41779 | 674  | 4  | 165 | CRA a like (LOC690035) alternative variant cSep08, mRNA.                                                                                     |
| <a href="#">LOC690035</a> | <a href="#">LOC690035.cSep08</a> | <a href="#">690035</a> | 41779 | 674  | 4  | 165 | CRA a like (LOC690035) alternative variant cSep08, mRNA.                                                                                     |
| <a href="#">LOC690035</a> | <a href="#">LOC690035.dSep08</a> | <a href="#">299123</a> | 2005  | 625  | 2  | 86  | CRA a (LOC690035) alternative variant dSep08, mRNA.                                                                                          |
| <a href="#">LOC690035</a> | <a href="#">LOC690035.dSep08</a> | <a href="#">690035</a> | 2005  | 625  | 2  | 86  | CRA a (LOC690035) alternative variant dSep08, mRNA.                                                                                          |
| <a href="#">LOC690035</a> | <a href="#">LOC690035.eSep08</a> | <a href="#">299123</a> | 63857 | 466  | 4  | 72  | CRA a like (LOC690035) alternative variant eSep08, mRNA.                                                                                     |
| <a href="#">LOC690035</a> | <a href="#">LOC690035.eSep08</a> | <a href="#">690035</a> | 63857 | 466  | 4  | 72  | CRA a like (LOC690035) alternative variant eSep08, mRNA.                                                                                     |
| <a href="#">LOC690040</a> | <a href="#">LOC690040.aSep08</a> | <a href="#">690040</a> | 18447 | 679  | 5  | 183 | similar to protein tyrosine phosphatase-like (proline instead of catalytic arginine), member b (LOC690040) alternative variant aSep08, mRNA. |

|                           |                                  |                        |        |      |   |     |                                                                                                    |
|---------------------------|----------------------------------|------------------------|--------|------|---|-----|----------------------------------------------------------------------------------------------------|
| <a href="#">LOC690042</a> | <a href="#">LOC690042.aSep08</a> | <a href="#">690042</a> | 10288  | 942  | 4 | 261 | hypothetical protein LOC690042 (LOC690042) alternative variant aSep08, mRNA.                       |
| <a href="#">LOC690042</a> | <a href="#">LOC690042.bSep08</a> | <a href="#">690042</a> | 10129  | 618  | 3 | 163 | hypothetical protein LOC690042 (LOC690042) alternative variant bSep08, mRNA.                       |
| <a href="#">LOC690042</a> | <a href="#">LOC690042.cSep08</a> | <a href="#">690042</a> | 5316   | 444  | 2 | 61  | hypothetical protein LOC690042 (7.0 kD) (LOC690042) alternative variant cSep08, mRNA.              |
| <a href="#">LOC690043</a> | <a href="#">LOC690043.bSep08</a> | <a href="#">690043</a> | 16329  | 2885 | 2 | 316 | similar to ring finger protein 168 (35.6 kD) (LOC690043) alternative variant bSep08, mRNA.         |
| <a href="#">LOC690045</a> | <a href="#">LOC690045.aSep08</a> | <a href="#">690045</a> | 21215  | 859  |   | 193 | similar to immunoreceptor Ly49si1 (LOC690045) mRNA.                                                |
| <a href="#">LOC690068</a> | <a href="#">LOC690068.aSep08</a> | <a href="#">690068</a> | 22317  | 1749 | 8 | 100 | putative protein of ancient origin (LOC690068) alternative variant aSep08, mRNA.                   |
| <a href="#">LOC690068</a> | <a href="#">LOC690068.bSep08</a> | <a href="#">690068</a> | 9671   | 519  | 3 | 92  | putative protein of eukaryotic origin (LOC690068) alternative variant bSep08, mRNA.                |
| <a href="#">LOC690068</a> | <a href="#">LOC690068.cSep08</a> | <a href="#">690068</a> | 3565   | 244  | 3 | 52  | putative protein (LOC690068) alternative variant cSep08, mRNA.                                     |
| <a href="#">LOC690068</a> | <a href="#">LOC690068.dSep08</a> | <a href="#">690068</a> | 5023   | 561  | 3 | 32  | putative protein (3.6 kD) (LOC690068) alternative variant dSep08, mRNA.                            |
| <a href="#">LOC690068</a> | <a href="#">LOC690068.eSep08</a> | <a href="#">690068</a> | 22330  | 411  | 5 | 43  | putative protein of eukaryotic origin (LOC690068) alternative variant eSep08, mRNA.                |
| <a href="#">LOC690073</a> | <a href="#">LOC690073.aSep08</a> | <a href="#">690073</a> | 102821 | 2023 | 9 | 561 | similar to neuroblastoma-amplified protein (LOC690073) alternative variant aSep08, mRNA.           |
| <a href="#">LOC690073</a> | <a href="#">LOC690073.bSep08</a> | <a href="#">690073</a> | 36428  | 932  | 5 | 241 | similar to neuroblastoma-amplified protein (27.2 kD) (LOC690073) alternative variant bSep08, mRNA. |
| <a href="#">LOC690073</a> | <a href="#">LOC690073.cSep08</a> | <a href="#">690073</a> | 31846  | 766  | 4 | 207 | similar to neuroblastoma-amplified protein (LOC690073) alternative variant cSep08, mRNA.           |
| <a href="#">LOC690073</a> | <a href="#">LOC690073.dSep08</a> | <a href="#">690073</a> | 25487  | 759  | 3 | 198 | similar to neuroblastoma-amplified protein (22.1 kD) (LOC690073) alternative variant dSep08, mRNA. |
| <a href="#">LOC690073</a> | <a href="#">LOC690073.eSep08</a> | <a href="#">690073</a> | 21019  | 753  | 3 | 103 | similar to neuroblastoma-amplified protein (LOC690073) alternative variant eSep08, mRNA.           |
| <a href="#">LOC690082</a> | <a href="#">LOC690082.aSep08</a> | <a href="#">690082</a> | 4326   | 1085 |   | 115 | similar to melanoma ubiquitous mutated protein (12.6 kD) (LOC690082) mRNA.                         |
| <a href="#">LOC690085</a> | <a href="#">LOC690085.aSep08</a> | <a href="#">690085</a> | 30186  | 1974 |   | 550 | similar to B-cell CLL/lymphoma 7A (LOC690085) alternative variant aSep08, mRNA.                    |
| <a href="#">LOC690097</a> | <a href="#">LOC690097.aSep08</a> | <a href="#">690097</a> | 11168  | 813  |   | 50  | similar to immunoreceptor Ly49si3 (LOC690097) mRNA.                                                |
| <a href="#">LOC690101</a> | <a href="#">LOC690101.aSep08</a> | <a href="#">690101</a> | 617    | 263  |   | 87  | hypothetical protein LOC690101 (LOC690101) mRNA.                                                   |
| <a href="#">LOC690116</a> | <a href="#">LOC690116.aSep08</a> | <a href="#">690116</a> | 22980  | 781  |   | 243 | similar to regulator of G-protein signalling like 2 (LOC690116) alternative variant aSep08, mRNA.  |
| <a href="#">LOC690116</a> | <a href="#">LOC690116.bSep08</a> | <a href="#">690116</a> | 8236   | 563  |   | 187 | similar to regulator of G-protein signalling like 2 (LOC690116) alternative variant bSep08, mRNA.  |
| <a href="#">LOC690135</a> | <a href="#">LOC690135.aSep08</a> | <a href="#">690135</a> | 53341  | 618  |   | 163 | hypothetical protein LOC690135 (LOC690135) mRNA.                                                   |
| <a href="#">LOC690139</a> | <a href="#">LOC690139.aSep08</a> | <a href="#">690139</a> | 9179   | 1073 | 2 | 180 | similar to RNA binding motif protein 24 (LOC690139) alternative variant aSep08, mRNA.              |
| <a href="#">LOC690139</a> | <a href="#">LOC690139.bSep08</a> | <a href="#">690139</a> | 9934   | 851  | 4 | 152 | similar to RNA binding motif protein 24 (LOC690139) alternative variant bSep08, mRNA.              |
| <a href="#">LOC690139</a> | <a href="#">LOC690139.cSep08</a> | <a href="#">690139</a> | 3165   | 694  | 2 | 146 | similar to RNA binding motif protein 24 (LOC690139) alternative variant cSep08, mRNA.              |

|                           |                                  |                        |       |      |   |     |                                                                                                                                                                |
|---------------------------|----------------------------------|------------------------|-------|------|---|-----|----------------------------------------------------------------------------------------------------------------------------------------------------------------|
| <a href="#">LOC690155</a> | <a href="#">LOC690155.aSep08</a> | <a href="#">690155</a> | 7830  | 1949 |   | 208 | similar to phosducin-like (23.8 kD) (LOC690155) mRNA.                                                                                                          |
| <a href="#">LOC690171</a> | <a href="#">LOC690171.bSep08</a> | <a href="#">690171</a> | 724   | 392  | 2 | 125 | similar to H3 histone, family 3B (LOC690171) alternative variant bSep08, mRNA.                                                                                 |
| <a href="#">LOC690188</a> | <a href="#">LOC690188.aSep08</a> | <a href="#">690188</a> | 15983 | 341  |   | 113 | similar to Protein KIAA0280 (LOC690188) mRNA.                                                                                                                  |
| <a href="#">LOC690190</a> | <a href="#">LOC690190.aSep08</a> | <a href="#">690190</a> | 1100  | 995  |   | 31  | hypothetical protein LOC690190 (12.7 kD) (LOC690190) mRNA.                                                                                                     |
| <a href="#">LOC690208</a> | <a href="#">LOC690208.aSep08</a> | <a href="#">690208</a> | 23560 | 1165 | 4 | 307 | hypothetical protein LOC690208 (LOC690208) alternative variant aSep08, mRNA.                                                                                   |
| <a href="#">LOC690208</a> | <a href="#">LOC690208.bSep08</a> | <a href="#">690208</a> | 9704  | 1254 | 1 | 201 | hypothetical protein LOC690208 (LOC690208) alternative variant bSep08, mRNA.                                                                                   |
| <a href="#">LOC690214</a> | <a href="#">LOC690214.aSep08</a> | <a href="#">690214</a> | 2326  | 1688 | 2 | 231 | similar to peptide deformylase-like protein (LOC690214) alternative variant aSep08, complete mRNA.                                                             |
| <a href="#">LOC690217</a> | <a href="#">LOC690217.aSep08</a> | <a href="#">690217</a> | 7002  | 1001 |   | 147 | similar to B0511.12 (LOC690217) mRNA.                                                                                                                          |
| <a href="#">LOC690226</a> | <a href="#">LOC690226.aSep08</a> | <a href="#">690226</a> | 10394 | 1617 | 5 | 318 | similar to dehydrogenase/reductase (SDR family) member 7 (LOC690226) alternative variant aSep08, mRNA.                                                         |
| <a href="#">LOC690226</a> | <a href="#">LOC690226.bSep08</a> | <a href="#">690226</a> | 1448  | 841  | 1 | 64  | similar to dehydrogenase/reductase (SDR family) member 7 (7.6 kD) (LOC690226) alternative variant bSep08, mRNA.                                                |
| <a href="#">LOC690236</a> | <a href="#">LOC690236.aSep08</a> | <a href="#">690236</a> | 52575 | 306  |   | 68  | hypothetical protein LOC690236 (LOC690236) mRNA.                                                                                                               |
| <a href="#">LOC690243</a> | <a href="#">LOC690243.aSep08</a> | <a href="#">690243</a> | 2282  | 748  | 8 | 57  | CRA a like (6.3 kD) (LOC690243) alternative variant aSep08, mRNA.                                                                                              |
| <a href="#">LOC690243</a> | <a href="#">LOC690243.bSep08</a> | <a href="#">690243</a> | 1897  | 1176 | 4 | 56  | CRA d like (6.4 kD) (LOC690243) alternative variant bSep08, mRNA.                                                                                              |
| <a href="#">LOC690243</a> | <a href="#">LOC690243.cSep08</a> | <a href="#">690243</a> | 1417  | 727  | 4 | 40  | CRA d like (LOC690243) alternative variant cSep08, mRNA.                                                                                                       |
| <a href="#">LOC690243</a> | <a href="#">LOC690243.dSep08</a> | <a href="#">690243</a> | 2459  | 1214 | 6 | 56  | CRA d like (6.4 kD) (LOC690243) alternative variant dSep08, mRNA.                                                                                              |
| <a href="#">LOC690243</a> | <a href="#">LOC690243.eSep08</a> | <a href="#">690243</a> | 2197  | 749  | 7 | 40  | CRA d like (LOC690243) alternative variant eSep08, complete mRNA.                                                                                              |
| <a href="#">LOC690274</a> | <a href="#">LOC690274.aSep08</a> | <a href="#">690274</a> | 2257  | 555  | 1 | 89  | hypothetical protein LOC690274 (LOC690274) alternative variant aSep08, mRNA.                                                                                   |
| <a href="#">LOC690274</a> | <a href="#">LOC690274.bSep08</a> | <a href="#">690274</a> | 965   | 525  | 1 | 71  | hypothetical protein LOC690274 (8.0 kD) (LOC690274) alternative variant bSep08, mRNA.                                                                          |
| <a href="#">LOC690276</a> | <a href="#">LOC690276.bSep08</a> | <a href="#">690276</a> | 3749  | 586  | 2 | 132 | hypothetical protein LOC690276 (LOC690276) alternative variant bSep08, mRNA.                                                                                   |
| <a href="#">LOC690280</a> | <a href="#">LOC690280.aSep08</a> | <a href="#">690280</a> | 2495  | 437  |   | 145 | similar to Discs large homolog 5 (Placenta and prostate DLG) (Discs large protein P-dlg) (LOC690280) mRNA.                                                     |
| <a href="#">LOC690286</a> | <a href="#">LOC690286.aSep08</a> | <a href="#">690286</a> | 4851  | 276  |   | 92  | similar to hepatic leukemia factor (LOC690286) mRNA.                                                                                                           |
| <a href="#">LOC690295</a> | <a href="#">LOC690295.aSep08</a> | <a href="#">690295</a> | 632   | 305  |   | 94  | similar to dynein, axonemal, heavy polypeptide 1 (LOC690295) mRNA.                                                                                             |
| <a href="#">LOC690298</a> | <a href="#">LOC690298.aSep08</a> | <a href="#">690298</a> | 20502 | 648  |   | 93  | similar to Discs large homolog 5 (Placenta and prostate DLG) (Discs large protein P-dlg) and similar to Reticulocalbin-1 precursor (10.9 kD) (LOC690298) mRNA. |
| <a href="#">LOC690298</a> | <a href="#">LOC690298.aSep08</a> | <a href="#">690306</a> | 20502 | 648  |   | 93  | similar to Discs large homolog 5 (Placenta and prostate DLG) (Discs large protein P-dlg) and similar to Reticulocalbin-1 precursor (10.9 kD) (LOC690298) mRNA. |

|                           |                                  |                        |       |      |    |     |                                                                                                                                                   |
|---------------------------|----------------------------------|------------------------|-------|------|----|-----|---------------------------------------------------------------------------------------------------------------------------------------------------|
| <a href="#">LOC690323</a> | <a href="#">LOC690323.aSep08</a> | <a href="#">690323</a> | 5826  | 2732 | 11 | 157 | similar to Myosin-15 (Myosin XV) (Unconventional myosin-15) (17.8 kD) (LOC690323) alternative variant aSep08, mRNA.                               |
| <a href="#">LOC690323</a> | <a href="#">LOC690323.bSep08</a> | <a href="#">690323</a> | 8779  | 375  | 4  | 66  | similar to Myosin-15 (Myosin XV) (Unconventional myosin-15) (LOC690323) alternative variant bSep08, mRNA.                                         |
| <a href="#">LOC690340</a> | <a href="#">LOC690340.aSep08</a> | <a href="#">690340</a> | 3732  | 593  |    | 142 | similar to spermatogenesis associated glutamate (E)-rich protein 4d (LOC690340) mRNA.                                                             |
| <a href="#">LOC690343</a> | <a href="#">LOC690343.aSep08</a> | <a href="#">690343</a> | 29999 | 658  |    | 112 | similar to zinc finger protein 420 (LOC690343) mRNA.                                                                                              |
| <a href="#">LOC690344</a> | <a href="#">LOC690344.aSep08</a> | <a href="#">690344</a> | 796   | 707  | 2  | 89  | similar to Protein UNQ655/PRO1286 homolog precursor (9.7 kD) (LOC690344) alternative variant aSep08, mRNA.                                        |
| <a href="#">LOC690347</a> | <a href="#">LOC690347.aSep08</a> | <a href="#">690347</a> | 870   | 287  | 1  | 86  | hypothetical protein LOC690347 (LOC690347) alternative variant aSep08, mRNA.                                                                      |
| <a href="#">LOC690347</a> | <a href="#">LOC690347.bSep08</a> | <a href="#">690347</a> | 9050  | 313  | 2  | 52  | hypothetical protein LOC690347 (LOC690347) alternative variant bSep08, mRNA.                                                                      |
| <a href="#">LOC690358</a> | <a href="#">LOC690358.aSep08</a> | <a href="#">690358</a> | 51824 | 749  |    | 185 | putative protein of metazoan origin (20.7 kD) (LOC690358) mRNA.                                                                                   |
| <a href="#">LOC690372</a> | <a href="#">LOC690372.aSep08</a> | <a href="#">690372</a> | 17569 | 1452 | 12 | 471 | similar to U2 (RNU2) small nuclear RNA auxiliary factor 2 isoform b (53.1 kD) (LOC690372) alternative variant aSep08, mRNA.                       |
| <a href="#">LOC690372</a> | <a href="#">LOC690372.bSep08</a> | <a href="#">690372</a> | 10185 | 759  | 7  | 252 | similar to U2 (RNU2) small nuclear RNA auxiliary factor 2 isoform b (LOC690372) alternative variant bSep08, mRNA.                                 |
| <a href="#">LOC690372</a> | <a href="#">LOC690372.cSep08</a> | <a href="#">690372</a> | 6808  | 848  | 6  | 223 | similar to U2 (RNU2) small nuclear RNA auxiliary factor 2 isoform b (LOC690372) alternative variant cSep08, mRNA.                                 |
| <a href="#">LOC690402</a> | <a href="#">LOC690402.bSep08</a> | <a href="#">690402</a> | 1171  | 333  | 2  | 14  | similar to Short palate, lung and nasal epithelium carcinoma-associated protein 3 homolog precursor (LOC690402) alternative variant bSep08, mRNA. |
| <a href="#">LOC690414</a> | <a href="#">LOC690414.aSep08</a> | <a href="#">690414</a> | 9785  | 1475 |    | 66  | hypothetical protein LOC690414 (6.8 kD) (LOC690414) mRNA.                                                                                         |
| <a href="#">LOC690419</a> | <a href="#">LOC690419.aSep08</a> | <a href="#">690419</a> | 16886 | 352  |    | 100 | similar to zinc finger protein 709 (LOC690419) mRNA.                                                                                              |
| <a href="#">LOC690422</a> | <a href="#">LOC690422.aSep08</a> | <a href="#">690422</a> | 1275  | 558  | 4  | 185 | hypothetical protein LOC690422 (LOC690422) alternative variant aSep08, mRNA.                                                                      |
| <a href="#">LOC690422</a> | <a href="#">LOC690422.bSep08</a> | <a href="#">690422</a> | 4665  | 740  | 6  | 183 | hypothetical protein LOC690422 (LOC690422) alternative variant bSep08, mRNA.                                                                      |
| <a href="#">LOC690422</a> | <a href="#">LOC690422.cSep08</a> | <a href="#">690422</a> | 4260  | 727  | 4  | 112 | hypothetical protein LOC690422 (LOC690422) alternative variant cSep08, mRNA.                                                                      |
| <a href="#">LOC690437</a> | <a href="#">LOC690437.aSep08</a> | <a href="#">690437</a> | 1014  | 581  | 1  | 110 | hypothetical protein LOC690437 (4.0 kD) (LOC690437) alternative variant aSep08, mRNA.                                                             |
| <a href="#">LOC690437</a> | <a href="#">LOC690437.bSep08</a> | <a href="#">690437</a> | 2219  | 432  | 3  | 84  | hypothetical protein LOC690437 (LOC690437) alternative variant bSep08, mRNA.                                                                      |
| <a href="#">LOC690470</a> | <a href="#">LOC690470.bSep08</a> | <a href="#">690470</a> | 28493 | 758  | 1  | 135 | similar to 1-aminocyclopropane-1-carboxylate synthase (LOC690470) alternative variant bSep08, mRNA.                                               |
| <a href="#">LOC690479</a> | <a href="#">LOC690479.aSep08</a> | <a href="#">690479</a> | 5252  | 335  |    | 35  | hypothetical protein LOC690479 (LOC690479) mRNA.                                                                                                  |
| <a href="#">LOC690482</a> | <a href="#">LOC690482.aSep08</a> | <a href="#">690482</a> | 2008  | 533  |    | 93  | hypothetical protein LOC690482 (LOC690482) mRNA.                                                                                                  |
| <a href="#">LOC690483</a> | <a href="#">LOC690483.aSep08</a> | <a href="#">690483</a> | 4087  | 659  |    | 209 | hypothetical protein LOC690483 (LOC690483) mRNA.                                                                                                  |
| <a href="#">LOC690492</a> | <a href="#">LOC690492.aSep08</a> | <a href="#">690492</a> | 6136  | 1773 | 1  | 502 | similar to CD33 antigen (LOC690492) alternative variant aSep08, mRNA.                                                                             |



|                           |                                  |                        |       |      |   |     |                                                                                                                                        |
|---------------------------|----------------------------------|------------------------|-------|------|---|-----|----------------------------------------------------------------------------------------------------------------------------------------|
| <a href="#">LOC690492</a> | <a href="#">LOC690492.bSep08</a> | <a href="#">690492</a> | 1961  | 804  | 3 | 65  | similar to CD33 antigen (LOC690492) alternative variant bSep08, mRNA.                                                                  |
| <a href="#">LOC690492</a> | <a href="#">LOC690492.dSep08</a> | <a href="#">690492</a> | 3794  | 675  | 3 | 8   | similar to CD33 antigen (0.9 kD) (LOC690492) alternative variant dSep08, mRNA.                                                         |
| <a href="#">LOC690492</a> | <a href="#">LOC690492.eSep08</a> | <a href="#">690492</a> | 550   | 293  |   |     |                                                                                                                                        |
| <a href="#">LOC690502</a> | <a href="#">LOC690502.aSep08</a> | <a href="#">690502</a> | 26229 | 820  | 2 | 153 | similar to zinc finger protein 420 (LOC690502) alternative variant aSep08, mRNA.                                                       |
| <a href="#">LOC690502</a> | <a href="#">LOC690502.bSep08</a> | <a href="#">690502</a> | 24163 | 536  | 1 | 114 | similar to zinc finger protein 420 (LOC690502) alternative variant bSep08, mRNA.                                                       |
| <a href="#">LOC690502</a> | <a href="#">LOC690502.cSep08</a> | <a href="#">690502</a> | 19065 | 462  | 2 | 65  | similar to zinc finger protein 420 (LOC690502) alternative variant cSep08, mRNA.                                                       |
| <a href="#">LOC690507</a> | <a href="#">LOC690507.aSep08</a> | <a href="#">690507</a> | 2641  | 295  |   | 98  | similar to Vomeromodulin (LOC690507) mRNA.                                                                                             |
| <a href="#">LOC690538</a> | <a href="#">LOC690538.aSep08</a> | <a href="#">690538</a> | 73203 | 725  |   | 150 | similar to Protein C9orf126 homolog (LOC690538) mRNA.                                                                                  |
| <a href="#">LOC690543</a> | <a href="#">LOC690543.aSep08</a> | <a href="#">690543</a> | 14324 | 1075 |   | 235 | similar to zinc finger protein 679 (LOC690543) mRNA.                                                                                   |
| <a href="#">LOC690559</a> | <a href="#">LOC690559.aSep08</a> | <a href="#">690559</a> | 45319 | 595  |   | 131 | similar to reduced expression 2 (LOC690559) mRNA.                                                                                      |
| <a href="#">LOC690576</a> | <a href="#">LOC690576.aSep08</a> | <a href="#">690576</a> | 18345 | 714  | 1 | 213 | similar to Discs large homolog 5 (Placenta and prostate DLG) (Discs large protein P-dlg) (LOC690576) alternative variant aSep08, mRNA. |
| <a href="#">LOC690576</a> | <a href="#">LOC690576.bSep08</a> | <a href="#">690576</a> | 18400 | 609  |   | 164 | similar to Discs large homolog 5 (Placenta and prostate DLG) (Discs large protein P-dlg) (LOC690576) alternative variant bSep08, mRNA. |
| <a href="#">LOC690629</a> | <a href="#">LOC690629.aSep08</a> | <a href="#">690629</a> | 5587  | 1784 |   | 515 | hypothetical protein LOC690629 (LOC690629) mRNA.                                                                                       |
| <a href="#">LOC690665</a> | <a href="#">LOC690665.aSep08</a> | <a href="#">690665</a> | 13782 | 997  |   | 156 | similar to Discs large homolog 5 (Placenta and prostate DLG) (Discs large protein P-dlg) (18.5 kD) (LOC690665) mRNA.                   |
| <a href="#">LOC690692</a> | <a href="#">LOC690692.aSep08</a> | <a href="#">690692</a> | 55275 | 528  |   | 56  | hypothetical protein LOC690692 (6.2 kD) (LOC690692) mRNA.                                                                              |
| <a href="#">LOC690693</a> | <a href="#">LOC690693.aSep08</a> | <a href="#">690693</a> | 18497 | 1128 | 1 | 334 | similar to DDX19 homolog (LOC690693) alternative variant aSep08, mRNA.                                                                 |
| <a href="#">LOC690693</a> | <a href="#">LOC690693.bSep08</a> | <a href="#">690693</a> | 20871 | 708  | 1 | 235 | similar to DDX19 homolog (LOC690693) alternative variant bSep08, mRNA.                                                                 |
| <a href="#">LOC690727</a> | <a href="#">LOC690727.aSep08</a> | <a href="#">690727</a> | 1045  | 924  |   | 235 | similar to nucleolar protein 1 (LOC690727) mRNA.                                                                                       |
| <a href="#">LOC690728</a> | <a href="#">LOC690728.bSep08</a> | <a href="#">690728</a> | 13993 | 2070 | 9 | 524 | similar to Protein C12orf11 (Sarcoma antigen NY-SAR-95) (LOC690728) alternative variant bSep08, mRNA.                                  |
| <a href="#">LOC690728</a> | <a href="#">LOC690728.cSep08</a> | <a href="#">690728</a> | 5253  | 990  | 5 | 218 | similar to Protein C12orf11 (Sarcoma antigen NY-SAR-95) (LOC690728) alternative variant cSep08, mRNA.                                  |
| <a href="#">LOC690728</a> | <a href="#">LOC690728.dSep08</a> | <a href="#">690728</a> | 1217  | 337  | 3 | 100 | similar to Protein C12orf11 (Sarcoma antigen NY-SAR-95) (LOC690728) alternative variant dSep08, mRNA.                                  |
| <a href="#">LOC690739</a> | <a href="#">LOC690739.aSep08</a> | <a href="#">690739</a> | 18424 | 711  | 3 | 147 | similar to Discs large homolog 5 (Placenta and prostate DLG) (Discs large protein P-dlg) (LOC690739) alternative variant aSep08, mRNA. |
| <a href="#">LOC690739</a> | <a href="#">LOC690739.bSep08</a> | <a href="#">690739</a> | 2482  | 437  | 2 | 145 | similar to Discs large homolog 5 (Placenta and prostate DLG) (Discs large protein P-dlg) (LOC690739) alternative variant bSep08, mRNA. |

|                           |                                  |                        |       |      |   |     |                                                                                                                                                            |
|---------------------------|----------------------------------|------------------------|-------|------|---|-----|------------------------------------------------------------------------------------------------------------------------------------------------------------|
| <a href="#">LOC690739</a> | <a href="#">LOC690739.cSep08</a> | <a href="#">690739</a> | 23750 | 1476 | 4 | 93  | similar to Discs large homolog 5 (Placenta and prostate DLG) (Discs large protein P-dlg) (10.8 kD) (LOC690739) alternative variant cSep08, mRNA.           |
| <a href="#">LOC690743</a> | <a href="#">LOC690743.aSep08</a> | <a href="#">690743</a> | 11416 | 717  |   | 239 | similar to mixed lineage kinase domain-like (LOC690743) mRNA.                                                                                              |
| <a href="#">LOC690745</a> | <a href="#">LOC690745.aSep08</a> | <a href="#">690745</a> | 54986 | 1571 |   | 204 | MOSC (LOC690745) mRNA.                                                                                                                                     |
| <a href="#">LOC690746</a> | <a href="#">LOC690746.aSep08</a> | <a href="#">690746</a> | 70670 | 385  |   | 128 | similar to projection protein PF6 (LOC690746) mRNA.                                                                                                        |
| <a href="#">LOC690751</a> | <a href="#">LOC690751.aSep08</a> | <a href="#">690751</a> | 26318 | 1489 | 2 | 496 | similar to WD repeat domain 59 (LOC690751) alternative variant aSep08, mRNA.                                                                               |
| <a href="#">LOC690751</a> | <a href="#">LOC690751.bSep08</a> | <a href="#">690751</a> | 1667  | 259  | 1 | 85  | similar to WD repeat domain 59 (LOC690751) alternative variant bSep08, mRNA.                                                                               |
| <a href="#">LOC690768</a> | <a href="#">LOC690768.aSep08</a> | <a href="#">690768</a> | 15329 | 690  |   | 53  | hypothetical protein LOC690768 (5.7 kD) (LOC690768) mRNA.                                                                                                  |
| <a href="#">LOC690769</a> | <a href="#">LOC690769.aSep08</a> | <a href="#">690769</a> | 85097 | 2418 | 5 | 326 | similar to zinc ring finger protein 1 (35.0 kD) (LOC690769) alternative variant aSep08, mRNA.                                                              |
| <a href="#">LOC690769</a> | <a href="#">LOC690769.bSep08</a> | <a href="#">690769</a> | 83683 | 682  | 5 | 120 | similar to zinc ring finger protein 1 (LOC690769) alternative variant bSep08, mRNA.                                                                        |
| <a href="#">LOC690769</a> | <a href="#">LOC690769.cSep08</a> | <a href="#">690769</a> | 32981 | 640  | 5 | 71  | similar to zinc ring finger protein 1 (8.1 kD) (LOC690769) alternative variant cSep08, mRNA.                                                               |
| <a href="#">LOC690771</a> | <a href="#">LOC690771.aSep08</a> | <a href="#">690771</a> | 594   | 302  |   | 100 | hypothetical protein LOC690771 (LOC690771) mRNA.                                                                                                           |
| <a href="#">LOC690774</a> | <a href="#">LOC690774.aSep08</a> | <a href="#">690774</a> | 426   | 231  |   | 45  | hypothetical protein LOC690774 (LOC690774) mRNA.                                                                                                           |
| <a href="#">LOC690776</a> | <a href="#">LOC690776.aSep08</a> | <a href="#">690776</a> | 30668 | 1211 |   | 97  | hypothetical protein LOC690776 (LOC690776) mRNA.                                                                                                           |
| <a href="#">LOC690777</a> | <a href="#">LOC690777.aSep08</a> | <a href="#">690777</a> | 12395 | 741  |   | 223 | similar to RUN and FYVE domain-containing 2 (LOC690777) mRNA.                                                                                              |
| <a href="#">LOC690785</a> | <a href="#">LOC690785.aSep08</a> | <a href="#">690785</a> | 7309  | 477  |   | 100 | hypothetical protein LOC690785 (11.5 kD) (LOC690785) alternative variant aSep08, mRNA.                                                                     |
| <a href="#">LOC690785</a> | <a href="#">LOC690785.bSep08</a> | <a href="#">690785</a> | 7431  | 688  | 1 | 100 | hypothetical protein LOC690785 (11.5 kD) (LOC690785) alternative variant bSep08, mRNA.                                                                     |
| <a href="#">LOC690789</a> | <a href="#">LOC690789.aSep08</a> | <a href="#">690789</a> | 3527  | 1594 |   | 173 | similar to Ornithine decarboxylase antizyme 2 (ODC-Az 2) (AZ2) (LOC690789) mRNA.                                                                           |
| <a href="#">LOC690806</a> | <a href="#">LOC690806.aSep08</a> | <a href="#">690806</a> | 14555 | 746  |   | 88  | hypothetical protein LOC690806 (10.0 kD) (LOC690806) mRNA.                                                                                                 |
| <a href="#">LOC690818</a> | <a href="#">LOC690818.aSep08</a> | <a href="#">690818</a> | 10415 | 759  | 1 | 79  | similar to nidogen 2 (8.6 kD) (LOC690818) alternative variant aSep08, mRNA.                                                                                |
| <a href="#">LOC690818</a> | <a href="#">LOC690818.bSep08</a> | <a href="#">690818</a> | 9622  | 691  | 1 | 79  | similar to nidogen 2 (8.6 kD) (LOC690818) alternative variant bSep08, mRNA.                                                                                |
| <a href="#">LOC690825</a> | <a href="#">LOC690825.aSep08</a> | <a href="#">690825</a> | 2643  | 595  | 2 | 86  | similar to guanine nucleotide binding protein (G protein), gamma transducing activity polypeptide 2 (LOC690825) alternative variant aSep08, mRNA.          |
| <a href="#">LOC690825</a> | <a href="#">LOC690825.bSep08</a> | <a href="#">690825</a> | 2083  | 501  | 1 | 69  | similar to guanine nucleotide binding protein (G protein), gamma transducing activity polypeptide 2 (7.8 kD) (LOC690825) alternative variant bSep08, mRNA. |
| <a href="#">LOC690825</a> | <a href="#">LOC690825.cSep08</a> | <a href="#">690825</a> | 3087  | 498  | 2 | 69  | similar to guanine nucleotide binding protein (G protein), gamma transducing activity polypeptide 2 (7.8 kD) (LOC690825) alternative variant cSep08, mRNA. |
| <a href="#">LOC690846</a> | <a href="#">LOC690846.bSep08</a> | <a href="#">690846</a> | 51868 | 808  | 1 | 268 | similar to resistance to inhibitors of cholinesterase 3 homolog (LOC690846) alternative variant bSep08, mRNA.                                              |

|                           |                                  |                        |       |      |   |     |                                                                                                                                                                           |
|---------------------------|----------------------------------|------------------------|-------|------|---|-----|---------------------------------------------------------------------------------------------------------------------------------------------------------------------------|
| <a href="#">LOC690851</a> | <a href="#">LOC690851.aSep08</a> | <a href="#">690851</a> | 7945  | 261  |   | 65  | hypothetical protein LOC690851 (LOC690851) mRNA.                                                                                                                          |
| <a href="#">LOC690871</a> | <a href="#">LOC690871.aSep08</a> | <a href="#">690871</a> | 2149  | 450  |   | 86  | hypothetical protein LOC690871 (LOC690871) mRNA.                                                                                                                          |
| <a href="#">LOC690883</a> | <a href="#">LOC690883.aSep08</a> | <a href="#">690883</a> | 6070  | 1196 |   | 74  | hypothetical protein LOC690883 (8.0 kD) (LOC690883) mRNA.                                                                                                                 |
| <a href="#">LOC690895</a> | <a href="#">LOC690895.bSep08</a> | <a href="#">690895</a> | 29886 | 764  | 8 | 133 | similar to zinc finger protein 426 (LOC690895) alternative variant bSep08, mRNA.                                                                                          |
| <a href="#">LOC690895</a> | <a href="#">LOC690895.cSep08</a> | <a href="#">690895</a> | 10892 | 365  | 4 | 67  | similar to zinc finger protein 426 (LOC690895) alternative variant cSep08, mRNA.                                                                                          |
| <a href="#">LOC690911</a> | <a href="#">LOC690911.aSep08</a> | <a href="#">690911</a> | 2490  | 1799 | 4 | 253 | similar to Msx2-interacting protein (SPEN homolog) (SMART/HDAC1-associated repressor protein) (LOC690911) alternative variant aSep08, mRNA.                               |
| <a href="#">LOC690930</a> | <a href="#">LOC690930.aSep08</a> | <a href="#">690930</a> | 5402  | 615  |   | 123 | similar to membrane-spanning 4-domains, subfamily A, member 6B (LOC690930) mRNA.                                                                                          |
| <a href="#">LOC690945</a> | <a href="#">LOC690945.aSep08</a> | <a href="#">690945</a> | 79695 | 1739 | 8 | 345 | similar to Putative deoxyribose-phosphate aldolase (Phosphodeoxyriboaldolase) (Deoxyriboaldolase) (DERA) (LOC690945) alternative variant aSep08, mRNA.                    |
| <a href="#">LOC690945</a> | <a href="#">LOC690945.bSep08</a> | <a href="#">690945</a> | 79170 | 1342 | 6 | 300 | similar to Putative deoxyribose-phosphate aldolase (Phosphodeoxyriboaldolase) (Deoxyriboaldolase) (DERA) (LOC690945) alternative variant bSep08, mRNA.                    |
| <a href="#">LOC690945</a> | <a href="#">LOC690945.cSep08</a> | <a href="#">690945</a> | 79255 | 694  | 3 | 116 | similar to Putative deoxyribose-phosphate aldolase (Phosphodeoxyriboaldolase) (Deoxyriboaldolase) (DERA) (12.9 kD) (LOC690945) alternative variant cSep08, complete mRNA. |
| <a href="#">LOC690945</a> | <a href="#">LOC690945.dSep08</a> | <a href="#">690945</a> | 11995 | 1278 | 3 | 38  | similar to Putative deoxyribose-phosphate aldolase (Phosphodeoxyriboaldolase) (Deoxyriboaldolase) (DERA) (LOC690945) alternative variant dSep08, mRNA.                    |
| <a href="#">LOC690948</a> | <a href="#">LOC690948.aSep08</a> | <a href="#">690948</a> | 4668  | 1299 | 9 | 388 | similar to paired-Ig-like receptor A11 and similar to paired-Ig-like receptor B (LOC690948) alternative variant aSep08, mRNA.                                             |
| <a href="#">LOC690948</a> | <a href="#">LOC690948.aSep08</a> | <a href="#">690955</a> | 4668  | 1299 | 9 | 388 | similar to paired-Ig-like receptor A11 and similar to paired-Ig-like receptor B (LOC690948) alternative variant aSep08, mRNA.                                             |
| <a href="#">LOC690948</a> | <a href="#">LOC690948.bSep08</a> | <a href="#">690948</a> | 44343 | 1083 | 5 | 361 | similar to paired-Ig-like receptor A11 and similar to paired-Ig-like receptor B (LOC690948) alternative variant bSep08, mRNA.                                             |
| <a href="#">LOC690948</a> | <a href="#">LOC690948.bSep08</a> | <a href="#">690955</a> | 44343 | 1083 | 5 | 361 | similar to paired-Ig-like receptor A11 and similar to paired-Ig-like receptor B (LOC690948) alternative variant bSep08, mRNA.                                             |
| <a href="#">LOC690948</a> | <a href="#">LOC690948.cSep08</a> | <a href="#">690948</a> | 3457  | 689  | 7 | 186 | similar to paired-Ig-like receptor A11 and similar to paired-Ig-like receptor B (LOC690948) alternative variant cSep08, mRNA.                                             |
| <a href="#">LOC690948</a> | <a href="#">LOC690948.cSep08</a> | <a href="#">690955</a> | 3457  | 689  | 7 | 186 | similar to paired-Ig-like receptor A11 and similar to paired-Ig-like receptor B (LOC690948) alternative variant cSep08, mRNA.                                             |
| <a href="#">LOC690948</a> | <a href="#">LOC690948.dSep08</a> | <a href="#">690948</a> | 1522  | 592  | 2 | 79  | similar to paired-Ig-like receptor A11 and similar to paired-Ig-like receptor B (8.4 kD) (LOC690948) alternative variant dSep08, mRNA.                                    |

|                           |                                  |                        |        |      |    |      |                                                                                                                                        |
|---------------------------|----------------------------------|------------------------|--------|------|----|------|----------------------------------------------------------------------------------------------------------------------------------------|
| <a href="#">LOC690948</a> | <a href="#">LOC690948.dSep08</a> | <a href="#">690955</a> | 1522   | 592  | 2  | 79   | similar to paired-Ig-like receptor A11 and similar to paired-Ig-like receptor B (8.4 kD) (LOC690948) alternative variant dSep08, mRNA. |
| <a href="#">LOC690965</a> | <a href="#">LOC690965.aSep08</a> | <a href="#">690965</a> | 4943   | 500  |    | 108  | similar to CG17265-PA (11.8 kD) (LOC690965) mRNA.                                                                                      |
| <a href="#">LOC690987</a> | <a href="#">LOC690987.bSep08</a> | <a href="#">690987</a> | 6923   | 752  | 1  | 181  | similar to glycogen synthase 1, muscle (LOC690987) alternative variant bSep08, mRNA.                                                   |
| <a href="#">LOC690989</a> | <a href="#">LOC690989.aSep08</a> | <a href="#">690989</a> | 4117   | 387  | 1  | 109  | similar to Docking protein 5 (Downstream of tyrosine kinase 5) (Protein dok-5) (LOC690989) alternative variant aSep08, mRNA.           |
| <a href="#">LOC690989</a> | <a href="#">LOC690989.bSep08</a> | <a href="#">690989</a> | 1243   | 298  | 1  | 79   | similar to Docking protein 5 (Downstream of tyrosine kinase 5) (Protein dok-5) (LOC690989) alternative variant bSep08, mRNA.           |
| <a href="#">LOC691000</a> | <a href="#">LOC691000.aSep08</a> | <a href="#">691000</a> | 5203   | 619  |    | 79   | hypothetical protein LOC691000 (8.7 kD) (LOC691000) mRNA.                                                                              |
| <a href="#">LOC691024</a> | <a href="#">LOC691024.bSep08</a> | <a href="#">691024</a> | 46292  | 424  | 3  | 54   | similar to Protein C9orf25 homolog (LOC691024) alternative variant bSep08, mRNA.                                                       |
| <a href="#">LOC691031</a> | <a href="#">LOC691031.aSep08</a> | <a href="#">691031</a> | 38616  | 2781 | 4  | 83   | hypothetical protein LOC691031 (9.1 kD) (LOC691031) alternative variant aSep08, mRNA.                                                  |
| <a href="#">LOC691031</a> | <a href="#">LOC691031.bSep08</a> | <a href="#">691031</a> | 65690  | 698  | 4  | 61   | hypothetical protein LOC691031 (LOC691031) alternative variant bSep08, mRNA.                                                           |
| <a href="#">LOC691031</a> | <a href="#">LOC691031.dSep08</a> | <a href="#">691031</a> | 47378  | 773  | 2  | 52   | hypothetical protein LOC691031 (5.8 kD) (LOC691031) alternative variant dSep08, mRNA.                                                  |
| <a href="#">LOC691031</a> | <a href="#">LOC691031.eSep08</a> | <a href="#">691031</a> | 36793  | 656  | 3  | 57   | hypothetical protein LOC691031 (5.9 kD) (LOC691031) alternative variant eSep08, mRNA.                                                  |
| <a href="#">LOC691036</a> | <a href="#">LOC691036.aSep08</a> | <a href="#">691036</a> | 380074 | 6933 | 34 | 1068 | similar to SET binding factor 2 and similar to SET binding factor 2 (LOC691036) alternative variant aSep08, mRNA.                      |
| <a href="#">LOC691036</a> | <a href="#">LOC691036.aSep08</a> | <a href="#">691042</a> | 380074 | 6933 | 34 | 1068 | similar to SET binding factor 2 and similar to SET binding factor 2 (LOC691036) alternative variant aSep08, mRNA.                      |
| <a href="#">LOC691036</a> | <a href="#">LOC691036.bSep08</a> | <a href="#">691036</a> | 26288  | 994  | 6  | 307  | similar to SET binding factor 2 and similar to SET binding factor 2 (LOC691036) alternative variant bSep08, mRNA.                      |
| <a href="#">LOC691036</a> | <a href="#">LOC691036.bSep08</a> | <a href="#">691042</a> | 26288  | 994  | 6  | 307  | similar to SET binding factor 2 and similar to SET binding factor 2 (LOC691036) alternative variant bSep08, mRNA.                      |
| <a href="#">LOC691036</a> | <a href="#">LOC691036.cSep08</a> | <a href="#">691036</a> | 4231   | 455  | 3  | 84   | similar to SET binding factor 2 and similar to SET binding factor 2 (LOC691036) alternative variant cSep08, mRNA.                      |
| <a href="#">LOC691036</a> | <a href="#">LOC691036.cSep08</a> | <a href="#">691042</a> | 4231   | 455  | 3  | 84   | similar to SET binding factor 2 and similar to SET binding factor 2 (LOC691036) alternative variant cSep08, mRNA.                      |
| <a href="#">LOC691056</a> | <a href="#">LOC691056.aSep08</a> | <a href="#">691056</a> | 9101   | 2669 | 5  | 812  | similar to 5E5 antigen (LOC691056) alternative variant aSep08, mRNA.                                                                   |
| <a href="#">LOC691056</a> | <a href="#">LOC691056.bSep08</a> | <a href="#">691056</a> | 5161   | 1041 | 4  | 347  | similar to 5E5 antigen (LOC691056) alternative variant bSep08, mRNA.                                                                   |
| <a href="#">LOC691059</a> | <a href="#">LOC691059.aSep08</a> | <a href="#">691059</a> | 10863  | 732  | 4  | 185  | similar to GTPase activating protein testicular GAP1 (LOC691059) alternative variant aSep08, mRNA.                                     |
| <a href="#">LOC691059</a> | <a href="#">LOC691059.bSep08</a> | <a href="#">691059</a> | 899    | 771  | 2  | 68   | similar to GTPase activating protein testicular GAP1 (LOC691059) alternative variant bSep08, mRNA.                                     |
| <a href="#">LOC691059</a> | <a href="#">LOC691059.cSep08</a> | <a href="#">691059</a> | 5770   | 705  | 4  | 98   | similar to GTPase activating protein testicular GAP1 (LOC691059) alternative variant cSep08, mRNA.                                     |

|                           |                                  |                        |        |      |   |     |                                                                                                                                         |
|---------------------------|----------------------------------|------------------------|--------|------|---|-----|-----------------------------------------------------------------------------------------------------------------------------------------|
| <a href="#">LOC691059</a> | <a href="#">LOC691059.dSep08</a> | <a href="#">691059</a> | 7038   | 693  | 4 | 77  | similar to GTPase activating protein testicular GAP1 (LOC691059) alternative variant dSep08, mRNA.                                      |
| <a href="#">LOC691083</a> | <a href="#">LOC691083.aSep08</a> | <a href="#">691083</a> | 89565  | 776  | 1 | 199 | hypothetical protein LOC691083 (22.4 kD) (LOC691083) alternative variant aSep08, mRNA.                                                  |
| <a href="#">LOC691083</a> | <a href="#">LOC691083.bSep08</a> | <a href="#">691083</a> | 89161  | 460  | 2 | 139 | hypothetical protein LOC691083 (LOC691083) alternative variant bSep08, mRNA.                                                            |
| <a href="#">LOC691083</a> | <a href="#">LOC691083.cSep08</a> | <a href="#">691083</a> | 159008 | 883  | 1 | 138 | hypothetical protein LOC691083 (15.8 kD) (LOC691083) alternative variant cSep08, mRNA.                                                  |
| <a href="#">LOC691092</a> | <a href="#">LOC691092.aSep08</a> | <a href="#">691092</a> | 1909   | 701  |   | 233 | similar to major histocompatibility complex class II integral membrane alpha chain gene (LOC691092) mRNA.                               |
| <a href="#">LOC691099</a> | <a href="#">LOC691099.bSep08</a> | <a href="#">691099</a> | 1099   | 769  | 1 | 70  | putative protein (LOC691099) alternative variant bSep08, mRNA.                                                                          |
| <a href="#">LOC691107</a> | <a href="#">LOC691107.aSep08</a> | <a href="#">691107</a> | 11534  | 794  | 3 | 87  | hypothetical protein LOC691107 (9.8 kD) (LOC691107) alternative variant aSep08, mRNA.                                                   |
| <a href="#">LOC691107</a> | <a href="#">LOC691107.bSep08</a> | <a href="#">691107</a> | 23954  | 758  | 4 | 33  | hypothetical protein LOC691107 (3.9 kD) (LOC691107) alternative variant bSep08, mRNA.                                                   |
| <a href="#">LOC691110</a> | <a href="#">LOC691110.aSep08</a> | <a href="#">691110</a> | 2017   | 792  |   | 82  | similar to taste receptor protein 1 (8.9 kD) (LOC691110) mRNA.                                                                          |
| <a href="#">LOC691124</a> | <a href="#">LOC691124.aSep08</a> | <a href="#">691124</a> | 84815  | 552  | 2 | 63  | hypothetical protein LOC691124 (LOC691124) alternative variant aSep08, mRNA.                                                            |
| <a href="#">LOC691124</a> | <a href="#">LOC691124.bSep08</a> | <a href="#">691124</a> | 119746 | 1800 | 2 | 35  | hypothetical protein LOC691124 (4.0 kD) (LOC691124) alternative variant bSep08, mRNA.                                                   |
| <a href="#">LOC691125</a> | <a href="#">LOC691125.aSep08</a> | <a href="#">691125</a> | 20151  | 1785 |   | 569 | similar to Probable phospholipid-transporting ATPase ID (ATPase class I type 8B member 2) (LOC691125) alternative variant aSep08, mRNA. |
| <a href="#">LOC691125</a> | <a href="#">LOC691125.bSep08</a> | <a href="#">691125</a> | 14740  | 398  |   | 132 | similar to Probable phospholipid-transporting ATPase ID (ATPase class I type 8B member 2) (LOC691125) alternative variant bSep08, mRNA. |
| <a href="#">LOC691135</a> | <a href="#">LOC691135.aSep08</a> | <a href="#">691135</a> | 9021   | 760  |   | 222 | similar to zinc finger protein 418 (LOC691135) mRNA.                                                                                    |
| <a href="#">LOC691141</a> | <a href="#">LOC691141.bSep08</a> | <a href="#">691141</a> | 18305  | 804  | 6 | 224 | hypothetical protein LOC691141 (LOC691141) alternative variant bSep08, mRNA.                                                            |
| <a href="#">LOC691142</a> | <a href="#">LOC691142.aSep08</a> | <a href="#">691142</a> | 7039   | 306  |   | 102 | hypothetical protein LOC691142 (LOC691142) mRNA.                                                                                        |
| <a href="#">LOC691143</a> | <a href="#">LOC691143.aSep08</a> | <a href="#">691143</a> | 17983  | 1836 | 9 | 474 | similar to Serum amyloid A-3 protein precursor (LOC691143) alternative variant aSep08, mRNA.                                            |
| <a href="#">LOC691143</a> | <a href="#">LOC691143.bSep08</a> | <a href="#">691143</a> | 8221   | 548  | 2 | 182 | similar to Serum amyloid A-3 protein precursor (LOC691143) alternative variant bSep08, mRNA.                                            |
| <a href="#">LOC691143</a> | <a href="#">LOC691143.cSep08</a> | <a href="#">691143</a> | 7647   | 715  | 3 | 168 | similar to Serum amyloid A-3 protein precursor (LOC691143) alternative variant cSep08, mRNA.                                            |
| <a href="#">LOC691149</a> | <a href="#">LOC691149.bSep08</a> | <a href="#">691149</a> | 1202   | 879  | 2 | 54  | putative protein (6.1 kD) (LOC691149) alternative variant bSep08, mRNA.                                                                 |
| <a href="#">LOC691149</a> | <a href="#">LOC691149.cSep08</a> | <a href="#">691149</a> | 25599  | 874  | 3 | 40  | protein actin (LOC691149) alternative variant cSep08, mRNA.                                                                             |
| <a href="#">LOC691161</a> | <a href="#">LOC691161.aSep08</a> | <a href="#">691161</a> | 4162   | 782  |   | 202 | hypothetical protein LOC691161 (22.4 kD) (LOC691161) mRNA.                                                                              |
| <a href="#">LOC691169</a> | <a href="#">LOC691169.aSep08</a> | <a href="#">691169</a> | 22194  | 1778 | 5 | 133 | hypothetical protein LOC691169 (LOC691169) alternative variant aSep08, mRNA.                                                            |

|                           |                                  |                        |       |      |    |     |                                                                                                             |
|---------------------------|----------------------------------|------------------------|-------|------|----|-----|-------------------------------------------------------------------------------------------------------------|
| <a href="#">LOC691169</a> | <a href="#">LOC691169.bSep08</a> | <a href="#">691169</a> | 9762  | 970  | 3  | 128 | hypothetical protein LOC691169 (LOC691169) alternative variant bSep08, mRNA.                                |
| <a href="#">LOC691169</a> | <a href="#">LOC691169.cSep08</a> | <a href="#">691169</a> | 24710 | 865  | 6  | 95  | hypothetical protein LOC691169 (10.5 kD) (LOC691169) alternative variant cSep08, mRNA.                      |
| <a href="#">LOC691169</a> | <a href="#">LOC691169.dSep08</a> | <a href="#">691169</a> | 8210  | 362  | 3  | 77  | hypothetical protein LOC691169 (8.3 kD) (LOC691169) alternative variant dSep08, mRNA.                       |
| <a href="#">LOC691178</a> | <a href="#">LOC691178.aSep08</a> | <a href="#">691178</a> | 59084 | 639  |    | 118 | similar to glutamate receptor, ionotropic, AMPA1 (alpha 1) (LOC691178) mRNA.                                |
| <a href="#">LOC691221</a> | <a href="#">LOC691221.aSep08</a> | <a href="#">691221</a> | 24036 | 1561 | 7  | 326 | similar to CG1998-PA (37.5 kD) (LOC691221) alternative variant aSep08, mRNA.                                |
| <a href="#">LOC691221</a> | <a href="#">LOC691221.bSep08</a> | <a href="#">691221</a> | 22331 | 1117 | 8  | 312 | similar to CG1998-PA (LOC691221) alternative variant bSep08, mRNA.                                          |
| <a href="#">LOC691221</a> | <a href="#">LOC691221.cSep08</a> | <a href="#">691221</a> | 24841 | 1974 | 6  | 256 | similar to CG1998-PA (LOC691221) alternative variant cSep08, mRNA.                                          |
| <a href="#">LOC691221</a> | <a href="#">LOC691221.dSep08</a> | <a href="#">691221</a> | 7312  | 667  | 5  | 222 | similar to CG1998-PA (LOC691221) alternative variant dSep08, mRNA.                                          |
| <a href="#">LOC691221</a> | <a href="#">LOC691221.eSep08</a> | <a href="#">691221</a> | 1808  | 373  | 2  | 123 | similar to CG1998-PA (LOC691221) alternative variant eSep08, mRNA.                                          |
| <a href="#">LOC691221</a> | <a href="#">LOC691221.fSep08</a> | <a href="#">691221</a> | 22297 | 521  | 4  | 122 | similar to CG1998-PA (LOC691221) alternative variant fSep08, mRNA.                                          |
| <a href="#">LOC691221</a> | <a href="#">LOC691221.hSep08</a> | <a href="#">691221</a> | 3083  | 736  | 2  | 93  | similar to CG1998-PA (9.8 kD) (LOC691221) alternative variant hSep08, mRNA.                                 |
| <a href="#">LOC691221</a> | <a href="#">LOC691221.iSep08</a> | <a href="#">691221</a> | 3103  | 611  | 3  | 42  | similar to CG1998-PA (LOC691221) alternative variant iSep08, mRNA.                                          |
| <a href="#">LOC691222</a> | <a href="#">LOC691222.aSep08</a> | <a href="#">691222</a> | 3463  | 1785 |    | 170 | similar to ubiquitin carboxyl-terminal hydrolase CYLD (LOC691222) mRNA.                                     |
| <a href="#">LOC691223</a> | <a href="#">LOC691223.aSep08</a> | <a href="#">691223</a> | 3447  | 298  |    | 38  | hypothetical protein LOC691223 (LOC691223) mRNA.                                                            |
| <a href="#">LOC691231</a> | <a href="#">LOC691231.aSep08</a> | <a href="#">691231</a> | 23557 | 1904 | 10 | 634 | similar to gem (nuclear organelle) associated protein 5 (LOC691231) alternative variant aSep08, mRNA.       |
| <a href="#">LOC691231</a> | <a href="#">LOC691231.bSep08</a> | <a href="#">691231</a> | 8497  | 827  | 7  | 275 | similar to gem (nuclear organelle) associated protein 5 (LOC691231) alternative variant bSep08, mRNA.       |
| <a href="#">LOC691231</a> | <a href="#">LOC691231.cSep08</a> | <a href="#">691231</a> | 4704  | 550  | 1  | 120 | similar to gem (nuclear organelle) associated protein 5 (LOC691231) alternative variant cSep08, mRNA.       |
| <a href="#">LOC691254</a> | <a href="#">LOC691254.aSep08</a> | <a href="#">691254</a> | 29546 | 549  |    | 118 | hypothetical protein LOC691254 (LOC691254) mRNA.                                                            |
| <a href="#">LOC691257</a> | <a href="#">LOC691257.aSep08</a> | <a href="#">691257</a> | 7193  | 456  | 1  | 142 | similar to Zinc finger protein 267 (Zinc finger protein HZF2) (LOC691257) alternative variant aSep08, mRNA. |
| <a href="#">LOC691257</a> | <a href="#">LOC691257.bSep08</a> | <a href="#">691257</a> | 17240 | 523  | 4  | 109 | similar to Zinc finger protein 267 (Zinc finger protein HZF2) (LOC691257) alternative variant bSep08, mRNA. |
| <a href="#">LOC691259</a> | <a href="#">LOC691259.aSep08</a> | <a href="#">691259</a> | 10835 | 1000 | 5  | 249 | hypothetical protein LOC691259 (26.6 kD) (LOC691259) alternative variant aSep08, mRNA.                      |
| <a href="#">LOC691259</a> | <a href="#">LOC691259.cSep08</a> | <a href="#">691259</a> | 8041  | 521  | 1  | 38  | hypothetical protein LOC691259 (LOC691259) alternative variant cSep08, mRNA.                                |
| <a href="#">LOC691289</a> | <a href="#">LOC691289.aSep08</a> | <a href="#">691289</a> | 3982  | 935  |    | 33  | similar to serine (or cysteine) proteinase inhibitor, clade B, member 1a (LOC691289) mRNA.                  |
| <a href="#">LOC691293</a> | <a href="#">LOC691293.aSep08</a> | <a href="#">691293</a> | 3035  | 304  |    | 68  | reproductive homeobox (LOC691293) mRNA.                                                                     |
| <a href="#">LOC691297</a> | <a href="#">LOC691297.aSep08</a> | <a href="#">691297</a> | 1508  | 641  |    | 125 | hypothetical protein LOC691297 (13.5 kD) (LOC691297) mRNA.                                                  |

|                           |                                  |                        |       |      |   |     |                                                                                                                                                |
|---------------------------|----------------------------------|------------------------|-------|------|---|-----|------------------------------------------------------------------------------------------------------------------------------------------------|
| <a href="#">LOC691300</a> | <a href="#">LOC691300.aSep08</a> | <a href="#">691300</a> | 53790 | 450  | 2 | 149 | hypothetical protein LOC691300 (LOC691300) alternative variant aSep08, mRNA.                                                                   |
| <a href="#">LOC691345</a> | <a href="#">LOC691345.aSep08</a> | <a href="#">691345</a> | 2232  | 1032 |   | 142 | hypothetical protein LOC691345 (15.7 kD) (LOC691345) mRNA.                                                                                     |
| <a href="#">LOC691354</a> | <a href="#">LOC691354.aSep08</a> | <a href="#">691354</a> | 8449  | 507  | 3 | 161 | hypothetical protein LOC691354 (LOC691354) alternative variant aSep08, mRNA.                                                                   |
| <a href="#">LOC691358</a> | <a href="#">LOC691358.aSep08</a> | <a href="#">691358</a> | 1096  | 399  |   | 74  | hypothetical protein LOC691358 (LOC691358) mRNA.                                                                                               |
| <a href="#">LOC691375</a> | <a href="#">LOC691375.aSep08</a> | <a href="#">691375</a> | 19481 | 644  |   | 168 | similar to serine (or cysteine) proteinase inhibitor, clade E (nexin, plasminogen activator inhibitor type 1), member 2 (LOC691375) mRNA.      |
| <a href="#">LOC691396</a> | <a href="#">LOC691396.aSep08</a> | <a href="#">691396</a> | 2456  | 980  | 1 | 171 | similar to Zinc finger protein 551 (Zinc finger protein KOX23) (LOC691396) alternative variant aSep08, mRNA.                                   |
| <a href="#">LOC691396</a> | <a href="#">LOC691396.bSep08</a> | <a href="#">691396</a> | 12343 | 542  | 1 | 33  | similar to Zinc finger protein 551 (Zinc finger protein KOX23) (LOC691396) alternative variant bSep08, mRNA.                                   |
| <a href="#">LOC691422</a> | <a href="#">LOC691422.aSep08</a> | <a href="#">691422</a> | 1314  | 1122 |   | 31  | similar to zinc finger protein 101 (LOC691422) mRNA.                                                                                           |
| <a href="#">LOC691426</a> | <a href="#">LOC691426.aSep08</a> | <a href="#">691426</a> | 3734  | 710  | 4 | 236 | similar to CG7744-PA (LOC691426) alternative variant aSep08, mRNA.                                                                             |
| <a href="#">LOC691427</a> | <a href="#">LOC691427.aSep08</a> | <a href="#">691427</a> | 5783  | 649  | 4 | 60  | similar to 6.8 kDa mitochondrial proteolipid (6.9 kD) (LOC691427) alternative variant aSep08, mRNA.                                            |
| <a href="#">LOC691431</a> | <a href="#">LOC691431.bSep08</a> | <a href="#">691431</a> | 6810  | 844  | 5 | 215 | similar to mitochondrial carrier protein MGC4399 (LOC691431) alternative variant bSep08, mRNA.                                                 |
| <a href="#">LOC691431</a> | <a href="#">LOC691431.cSep08</a> | <a href="#">691431</a> | 6592  | 666  | 5 | 212 | similar to mitochondrial carrier protein MGC4399 (LOC691431) alternative variant cSep08, mRNA.                                                 |
| <a href="#">LOC691431</a> | <a href="#">LOC691431.dSep08</a> | <a href="#">691431</a> | 2460  | 1103 | 3 | 168 | similar to mitochondrial carrier protein MGC4399 (LOC691431) alternative variant dSep08, mRNA.                                                 |
| <a href="#">LOC691452</a> | <a href="#">LOC691452.aSep08</a> | <a href="#">691452</a> | 64761 | 710  | 3 | 236 | hypothetical protein LOC691452 (LOC691452) alternative variant aSep08, mRNA.                                                                   |
| <a href="#">LOC691452</a> | <a href="#">LOC691452.bSep08</a> | <a href="#">691452</a> | 64741 | 681  | 3 | 226 | hypothetical protein LOC691452 (LOC691452) alternative variant bSep08, mRNA.                                                                   |
| <a href="#">LOC691452</a> | <a href="#">LOC691452.cSep08</a> | <a href="#">691452</a> | 30397 | 665  | 1 | 105 | hypothetical protein LOC691452 (LOC691452) alternative variant cSep08, mRNA.                                                                   |
| <a href="#">LOC691468</a> | <a href="#">LOC691468.aSep08</a> | <a href="#">691468</a> | 12592 | 710  |   | 236 | similar to Zinc finger protein 84 (Zinc finger protein HPF2) (LOC691468) mRNA.                                                                 |
| <a href="#">LOC691504</a> | <a href="#">LOC691504.aSep08</a> | <a href="#">691504</a> | 52310 | 579  |   | 182 | similar to Zinc finger protein ZFPM1 (Zinc finger protein multitype 1) (Friend of GATA protein 1) (Friend of GATA-1) (FOG-1) (LOC691504) mRNA. |
| <a href="#">LOC691509</a> | <a href="#">LOC691509.aSep08</a> | <a href="#">691509</a> | 22977 | 1206 |   | 142 | hypothetical protein LOC691509 (16.0 kD) (LOC691509) mRNA.                                                                                     |
| <a href="#">LOC691519</a> | <a href="#">LOC691519.aSep08</a> | <a href="#">691519</a> | 8276  | 451  |   | 70  | putative protein, with 2 coiled coil domains (LOC691519) mRNA.                                                                                 |
| <a href="#">LOC691521</a> | <a href="#">LOC691521.aSep08</a> | <a href="#">691521</a> | 10645 | 543  | 5 | 180 | similar to MEGF11 protein (LOC691521) alternative variant aSep08, mRNA.                                                                        |
| <a href="#">LOC691521</a> | <a href="#">LOC691521.bSep08</a> | <a href="#">691521</a> | 9441  | 935  | 5 | 163 | similar to MEGF11 protein (LOC691521) alternative variant bSep08, mRNA.                                                                        |
| <a href="#">LOC691551</a> | <a href="#">LOC691551.aSep08</a> | <a href="#">691551</a> | 1511  | 298  |   | 52  | similar to F28B3.5a (LOC691551) mRNA.                                                                                                          |
| <a href="#">LOC691556</a> | <a href="#">LOC691556.bSep08</a> | <a href="#">691556</a> | 2533  | 1928 | 1 | 385 | similar to zinc finger protein 238 (LOC691556) alternative variant bSep08, mRNA.                                                               |

|                           |                                  |                        |        |      |   |     |                                                                                                                                     |
|---------------------------|----------------------------------|------------------------|--------|------|---|-----|-------------------------------------------------------------------------------------------------------------------------------------|
| <a href="#">LOC691565</a> | <a href="#">LOC691565.aSep08</a> | <a href="#">691565</a> | 33750  | 388  |   | 84  | hypothetical protein LOC691565 (LOC691565) mRNA.                                                                                    |
| <a href="#">LOC691572</a> | <a href="#">LOC691572.aSep08</a> | <a href="#">691572</a> | 11621  | 818  | 4 | 177 | hypothetical protein LOC691572 and similar to ubiquitin-associated protein 1 (LOC691572) alternative variant aSep08, mRNA.          |
| <a href="#">LOC691572</a> | <a href="#">LOC691572.aSep08</a> | <a href="#">691574</a> | 11621  | 818  | 4 | 177 | hypothetical protein LOC691572 and similar to ubiquitin-associated protein 1 (LOC691572) alternative variant aSep08, mRNA.          |
| <a href="#">LOC691572</a> | <a href="#">LOC691572.bSep08</a> | <a href="#">691572</a> | 9942   | 650  | 3 | 162 | hypothetical protein LOC691572 and similar to ubiquitin-associated protein 1 (LOC691572) alternative variant bSep08, mRNA.          |
| <a href="#">LOC691572</a> | <a href="#">LOC691572.bSep08</a> | <a href="#">691574</a> | 9942   | 650  | 3 | 162 | hypothetical protein LOC691572 and similar to ubiquitin-associated protein 1 (LOC691572) alternative variant bSep08, mRNA.          |
| <a href="#">LOC691572</a> | <a href="#">LOC691572.cSep08</a> | <a href="#">691572</a> | 989    | 672  | 2 | 54  | hypothetical protein LOC691572 and similar to ubiquitin-associated protein 1 (6.4 kD) (LOC691572) alternative variant cSep08, mRNA. |
| <a href="#">LOC691572</a> | <a href="#">LOC691572.cSep08</a> | <a href="#">691574</a> | 989    | 672  | 2 | 54  | hypothetical protein LOC691572 and similar to ubiquitin-associated protein 1 (6.4 kD) (LOC691572) alternative variant cSep08, mRNA. |
| <a href="#">LOC691586</a> | <a href="#">LOC691586.aSep08</a> | <a href="#">691586</a> | 2111   | 635  |   | 105 | similar to Integrin alpha-6 precursor (VLA-6) (CD49f antigen) (LOC691586) mRNA.                                                     |
| <a href="#">LOC691595</a> | <a href="#">LOC691595.aSep08</a> | <a href="#">691595</a> | 2137   | 666  |   | 117 | hypothetical protein LOC691595 (LOC691595) mRNA.                                                                                    |
| <a href="#">LOC691600</a> | <a href="#">LOC691600.aSep08</a> | <a href="#">691600</a> | 940    | 271  |   | 89  | similar to Discs large homolog 5 (Placenta and prostate DLG) (Discs large protein P-dlg) (LOC691600) mRNA.                          |
| <a href="#">LOC691608</a> | <a href="#">LOC691608.aSep08</a> | <a href="#">691608</a> | 10981  | 407  | 4 | 72  | hypothetical protein LOC691608 (LOC691608) alternative variant aSep08, mRNA.                                                        |
| <a href="#">LOC691608</a> | <a href="#">LOC691608.bSep08</a> | <a href="#">691608</a> | 6543   | 512  | 2 | 70  | hypothetical protein LOC691608 (LOC691608) alternative variant bSep08, mRNA.                                                        |
| <a href="#">LOC691608</a> | <a href="#">LOC691608.cSep08</a> | <a href="#">691608</a> | 3369   | 384  | 1 | 66  | hypothetical protein LOC691608 (LOC691608) alternative variant cSep08, mRNA.                                                        |
| <a href="#">LOC691608</a> | <a href="#">LOC691608.dSep08</a> | <a href="#">691608</a> | 19555  | 670  | 5 | 69  | hypothetical protein LOC691608 (LOC691608) alternative variant dSep08, mRNA.                                                        |
| <a href="#">LOC691627</a> | <a href="#">LOC691627.aSep08</a> | <a href="#">691627</a> | 1281   | 565  |   | 38  | similar to spermatogenesis associated glutamate (E)-rich protein 4d (LOC691627) mRNA.                                               |
| <a href="#">LOC691631</a> | <a href="#">LOC691631.aSep08</a> | <a href="#">691631</a> | 47742  | 1866 | 2 | 545 | hypothetical protein LOC691631 (LOC691631) alternative variant aSep08, mRNA.                                                        |
| <a href="#">LOC691632</a> | <a href="#">LOC691632.aSep08</a> | <a href="#">691632</a> | 6999   | 402  |   | 92  | similar to MIC2 like 1 (LOC691632) mRNA.                                                                                            |
| <a href="#">LOC691636</a> | <a href="#">LOC691636.aSep08</a> | <a href="#">691636</a> | 13107  | 545  |   | 163 | putative protein of mammalian origin (LOC691636) mRNA.                                                                              |
| <a href="#">LOC691649</a> | <a href="#">LOC691649.aSep08</a> | <a href="#">691649</a> | 120105 | 2008 | 6 | 282 | hypothetical protein LOC691649 (31.2 kD) (LOC691649) alternative variant aSep08, mRNA.                                              |
| <a href="#">LOC691652</a> | <a href="#">LOC691652.aSep08</a> | <a href="#">691652</a> | 17914  | 624  |   | 74  | hypothetical protein LOC691652 (LOC691652) mRNA.                                                                                    |
| <a href="#">LOC691653</a> | <a href="#">LOC691653.aSep08</a> | <a href="#">691653</a> | 20150  | 941  | 4 | 101 | hypothetical protein LOC691653 and hypothetical protein LOC691659 (11.4 kD) (LOC691653) alternative variant aSep08, mRNA.           |
| <a href="#">LOC691653</a> | <a href="#">LOC691653.aSep08</a> | <a href="#">691659</a> | 20150  | 941  | 4 | 101 | hypothetical protein LOC691653 and hypothetical protein LOC691659 (11.4 kD) (LOC691653) alternative variant aSep08, mRNA.           |



|                           |                                  |                        |        |      |   |     |                                                                                                                                     |
|---------------------------|----------------------------------|------------------------|--------|------|---|-----|-------------------------------------------------------------------------------------------------------------------------------------|
| <a href="#">LOC691653</a> | <a href="#">LOC691653.bSep08</a> | <a href="#">691653</a> | 4329   | 308  | 1 | 50  | hypothetical protein LOC691653 and hypothetical protein LOC691659 (LOC691653) alternative variant bSep08, mRNA.                     |
| <a href="#">LOC691653</a> | <a href="#">LOC691653.bSep08</a> | <a href="#">691659</a> | 4329   | 308  | 1 | 50  | hypothetical protein LOC691653 and hypothetical protein LOC691659 (LOC691653) alternative variant bSep08, mRNA.                     |
| <a href="#">LOC691657</a> | <a href="#">LOC691657.aSep08</a> | <a href="#">691657</a> | 7872   | 463  | 2 | 115 | similar to Cysteine-rich protein 1 (Cysteine-rich intestinal protein) (CRIP) (LOC691657) alternative variant aSep08, mRNA.          |
| <a href="#">LOC691657</a> | <a href="#">LOC691657.bSep08</a> | <a href="#">691657</a> | 1933   | 539  | 1 | 77  | similar to Cysteine-rich protein 1 (Cysteine-rich intestinal protein) (CRIP) (8.5 kD) (LOC691657) alternative variant bSep08, mRNA. |
| <a href="#">LOC691658</a> | <a href="#">LOC691658.aSep08</a> | <a href="#">691658</a> | 17578  | 1013 |   | 300 | similar to anterior pharynx defective 1b homolog (LOC691658) alternative variant aSep08, mRNA.                                      |
| <a href="#">LOC691658</a> | <a href="#">LOC691658.bSep08</a> | <a href="#">691658</a> | 3788   | 1098 |   | 96  | similar to anterior pharynx defective 1b homolog (11.1 kD) (LOC691658) alternative variant bSep08, mRNA.                            |
| <a href="#">LOC691661</a> | <a href="#">LOC691661.aSep08</a> | <a href="#">691661</a> | 33362  | 768  |   | 42  | putative protein (LOC691661) mRNA.                                                                                                  |
| <a href="#">LOC691672</a> | <a href="#">LOC691672.aSep08</a> | <a href="#">691672</a> | 5838   | 1017 |   | 77  | similar to Discs large homolog 5 (Placenta and prostate DLG) (Discs large protein P-dlg) (LOC691672) mRNA.                          |
| <a href="#">LOC691673</a> | <a href="#">LOC691673.aSep08</a> | <a href="#">691673</a> | 18646  | 618  |   | 163 | hypothetical protein LOC691673 (LOC691673) mRNA.                                                                                    |
| <a href="#">LOC691687</a> | <a href="#">LOC691687.bSep08</a> | <a href="#">691687</a> | 15663  | 765  | 3 | 102 | hypothetical protein LOC691687 (10.3 kD) (LOC691687) alternative variant bSep08, mRNA.                                              |
| <a href="#">LOC691693</a> | <a href="#">LOC691693.aSep08</a> | <a href="#">691693</a> | 23114  | 250  |   | 54  | ankyrin (LOC691693) mRNA.                                                                                                           |
| <a href="#">LOC691722</a> | <a href="#">LOC691722.aSep08</a> | <a href="#">691722</a> | 32576  | 752  | 8 | 69  | hypothetical protein LOC691722 (LOC691722) alternative variant aSep08, mRNA.                                                        |
| <a href="#">LOC691742</a> | <a href="#">LOC691742.aSep08</a> | <a href="#">691742</a> | 18907  | 1091 |   | 52  | hypothetical protein LOC691742 (LOC691742) mRNA.                                                                                    |
| <a href="#">LOC691750</a> | <a href="#">LOC691750.aSep08</a> | <a href="#">691750</a> | 2106   | 789  | 5 | 145 | hypothetical protein LOC691750 (LOC691750) alternative variant aSep08, mRNA.                                                        |
| <a href="#">LOC691750</a> | <a href="#">LOC691750.cSep08</a> | <a href="#">691750</a> | 1425   | 417  | 2 | 61  | hypothetical protein LOC691750 (LOC691750) alternative variant cSep08, mRNA.                                                        |
| <a href="#">LOC691759</a> | <a href="#">LOC691759.aSep08</a> | <a href="#">691759</a> | 2150   | 420  | 3 | 77  | hypothetical protein LOC691759 (8.0 kD) (LOC691759) alternative variant aSep08, mRNA.                                               |
| <a href="#">LOC691759</a> | <a href="#">LOC691759.bSep08</a> | <a href="#">691759</a> | 2053   | 270  | 2 | 67  | hypothetical protein LOC691759 (LOC691759) alternative variant bSep08, mRNA.                                                        |
| <a href="#">LOC691762</a> | <a href="#">LOC691762.aSep08</a> | <a href="#">691762</a> | 398137 | 618  |   | 163 | hypothetical protein LOC691762 and hypothetical protein LOC691795 (LOC691762) mRNA.                                                 |
| <a href="#">LOC691762</a> | <a href="#">LOC691762.aSep08</a> | <a href="#">691795</a> | 398137 | 618  |   | 163 | hypothetical protein LOC691762 and hypothetical protein LOC691795 (LOC691762) mRNA.                                                 |
| <a href="#">LOC691773</a> | <a href="#">LOC691773.aSep08</a> | <a href="#">691773</a> | 2764   | 838  |   | 174 | hypothetical protein LOC691773 (LOC691773) mRNA.                                                                                    |
| <a href="#">LOC691777</a> | <a href="#">LOC691777.aSep08</a> | <a href="#">691777</a> | 13441  | 328  |   | 109 | hypothetical protein LOC691777 (LOC691777) mRNA.                                                                                    |
| <a href="#">LOC691809</a> | <a href="#">LOC691809.aSep08</a> | <a href="#">691809</a> | 63096  | 413  |   | 84  | hypothetical protein LOC691809 (LOC691809) mRNA.                                                                                    |
| <a href="#">LOC691813</a> | <a href="#">LOC691813.aSep08</a> | <a href="#">691813</a> | 5489   | 305  |   | 101 | similar to phospholipase A2, group IVC (cytosolic, calcium-independent) (LOC691813) mRNA.                                           |
| <a href="#">LOC691817</a> | <a href="#">LOC691817.aSep08</a> | <a href="#">691817</a> | 22984  | 782  |   | 88  | hypothetical protein LOC691817 (LOC691817) mRNA.                                                                                    |

|                           |                                  |                        |        |      |   |     |                                                                                                                                                           |
|---------------------------|----------------------------------|------------------------|--------|------|---|-----|-----------------------------------------------------------------------------------------------------------------------------------------------------------|
| <a href="#">LOC691842</a> | <a href="#">LOC691842.bSep08</a> | <a href="#">691842</a> | 3036   | 1437 | 5 | 267 | similar to Myc-associated zinc finger protein (MAZI) (Purine-binding transcription factor) (Pur-1) (LOC691842) alternative variant bSep08, mRNA.          |
| <a href="#">LOC691842</a> | <a href="#">LOC691842.cSep08</a> | <a href="#">691842</a> | 3542   | 789  | 4 | 140 | similar to Myc-associated zinc finger protein (MAZI) (Purine-binding transcription factor) (Pur-1) (LOC691842) alternative variant cSep08, mRNA.          |
| <a href="#">LOC691842</a> | <a href="#">LOC691842.eSep08</a> | <a href="#">691842</a> | 3550   | 2101 | 3 | 78  | similar to Myc-associated zinc finger protein (MAZI) (Purine-binding transcription factor) (Pur-1) (7.6 kD) (LOC691842) alternative variant eSep08, mRNA. |
| <a href="#">LOC691849</a> | <a href="#">LOC691849.aSep08</a> | <a href="#">691849</a> | 5328   | 1598 |   | 123 | hypothetical protein LOC691849 (13.8 kD) (LOC691849) mRNA.                                                                                                |
| <a href="#">LOC691853</a> | <a href="#">LOC691853.aSep08</a> | <a href="#">691853</a> | 28450  | 495  |   | 164 | similar to COX10 homolog, cytochrome c oxidase assembly protein, heme A: farnesyltransferase (LOC691853) mRNA.                                            |
| <a href="#">LOC691862</a> | <a href="#">LOC691862.aSep08</a> | <a href="#">691862</a> | 7110   | 1279 |   | 27  | hypothetical protein LOC691862 (LOC691862) mRNA.                                                                                                          |
| <a href="#">LOC691887</a> | <a href="#">LOC691887.aSep08</a> | <a href="#">691887</a> | 1152   | 493  |   | 164 | similar to zinc finger protein HIT-39 (LOC691887) mRNA.                                                                                                   |
| <a href="#">LOC691889</a> | <a href="#">LOC691889.aSep08</a> | <a href="#">691889</a> | 126868 | 692  |   | 230 | similar to ATPase, aminophospholipid transporter-like, class I, type 8A, member 2 (LOC691889) mRNA.                                                       |
| <a href="#">LOC691904</a> | <a href="#">LOC691904.bSep08</a> | <a href="#">691904</a> | 3799   | 400  |   | 99  | hypothetical protein LOC691904 (LOC691904) alternative variant bSep08, mRNA.                                                                              |
| <a href="#">LOC691911</a> | <a href="#">LOC691911.aSep08</a> | <a href="#">691911</a> | 7869   | 402  |   | 133 | similar to Ciliary dynein heavy chain 9 (Axonemal beta dynein heavy chain 9) (LOC691911) mRNA.                                                            |
| <a href="#">LOC691914</a> | <a href="#">LOC691914.aSep08</a> | <a href="#">691914</a> | 8289   | 652  |   | 216 | similar to Leo1, Paf1/RNA polymerase II complex component, homolog (LOC691914) mRNA.                                                                      |
| <a href="#">LOC691921</a> | <a href="#">LOC691921.aSep08</a> | <a href="#">691921</a> | 3085   | 337  | 3 | 85  | hypothetical protein LOC691921 (LOC691921) alternative variant aSep08, mRNA.                                                                              |
| <a href="#">LOC691921</a> | <a href="#">LOC691921.bSep08</a> | <a href="#">691921</a> | 2916   | 428  | 2 | 67  | hypothetical protein LOC691921 (7.6 kD) (LOC691921) alternative variant bSep08, mRNA.                                                                     |
| <a href="#">LOC691923</a> | <a href="#">LOC691923.aSep08</a> | <a href="#">691923</a> | 52312  | 653  |   | 65  | hypothetical protein LOC691923 (LOC691923) mRNA.                                                                                                          |
| <a href="#">LOC691926</a> | <a href="#">LOC691926.aSep08</a> | <a href="#">691926</a> | 9173   | 853  |   | 284 | similar to Stabilin-2 precursor (Hyaluronan receptor for endocytosis) (LOC691926) mRNA.                                                                   |
| <a href="#">LOC691928</a> | <a href="#">LOC691928.aSep08</a> | <a href="#">691928</a> | 39293  | 662  | 5 | 33  | hypothetical protein LOC691928 (3.8 kD) (LOC691928) alternative variant aSep08, mRNA.                                                                     |
| <a href="#">LOC691932</a> | <a href="#">LOC691932.aSep08</a> | <a href="#">691932</a> | 697    | 419  |   | 72  | similar to transglutaminase 7 (LOC691932) mRNA.                                                                                                           |
| <a href="#">LOC691933</a> | <a href="#">LOC691933.aSep08</a> | <a href="#">691933</a> | 30939  | 1452 | 3 | 484 | similar to Protein C6orf142 homolog (LOC691933) alternative variant aSep08, mRNA.                                                                         |
| <a href="#">LOC691933</a> | <a href="#">LOC691933.bSep08</a> | <a href="#">691933</a> | 101129 | 947  | 8 | 315 | similar to Protein C6orf142 homolog (LOC691933) alternative variant bSep08, mRNA.                                                                         |
| <a href="#">LOC691933</a> | <a href="#">LOC691933.cSep08</a> | <a href="#">691933</a> | 82319  | 666  | 4 | 221 | similar to Protein C6orf142 homolog (LOC691933) alternative variant cSep08, mRNA.                                                                         |
| <a href="#">LOC691933</a> | <a href="#">LOC691933.dSep08</a> | <a href="#">691933</a> | 74471  | 591  | 4 | 196 | similar to Protein C6orf142 homolog (LOC691933) alternative variant dSep08, mRNA.                                                                         |
| <a href="#">LOC691933</a> | <a href="#">LOC691933.eSep08</a> | <a href="#">691933</a> | 71900  | 586  | 5 | 195 | similar to Protein C6orf142 homolog (LOC691933) alternative variant eSep08, mRNA.                                                                         |
| <a href="#">LOC691933</a> | <a href="#">LOC691933.fSep08</a> | <a href="#">691933</a> | 101147 | 683  | 5 | 167 | similar to Protein C6orf142 homolog (LOC691933) alternative variant fSep08, mRNA.                                                                         |

|                              |                                     |                           |        |      |    |     |                                                                                                                 |
|------------------------------|-------------------------------------|---------------------------|--------|------|----|-----|-----------------------------------------------------------------------------------------------------------------|
| <a href="#">LOC691933</a>    | <a href="#">LOC691933.gSep08</a>    | <a href="#">691933</a>    | 27083  | 420  | 6  | 140 | similar to Protein C6orf142 homolog (LOC691933) alternative variant gSep08, mRNA.                               |
| <a href="#">LOC691951</a>    | <a href="#">LOC691951.aSep08</a>    | <a href="#">691951</a>    | 36290  | 404  | 1  | 70  | hypothetical protein LOC691951 (LOC691951) alternative variant aSep08, mRNA.                                    |
| <a href="#">LOC691951</a>    | <a href="#">LOC691951.bSep08</a>    | <a href="#">691951</a>    | 8607   | 557  | 1  | 47  | hypothetical protein LOC691951 (LOC691951) alternative variant bSep08, mRNA.                                    |
| <a href="#">LOC691960</a>    | <a href="#">LOC691960.aSep08</a>    | <a href="#">691960</a>    | 18664  | 1817 | 14 | 536 | similar to solute carrier family 28, member 2 (LOC691960) alternative variant aSep08, mRNA.                     |
| <a href="#">LOC691962</a>    | <a href="#">LOC691962.aSep08</a>    | <a href="#">691962</a>    | 72455  | 764  |    | 150 | hypothetical protein LOC691962 (17.2 kD) (LOC691962) mRNA.                                                      |
| <a href="#">LOC691966</a>    | <a href="#">LOC691966.aSep08</a>    | <a href="#">691966</a>    | 8977   | 1107 |    | 297 | similar to Sulfide:quinone oxidoreductase, mitochondrial precursor (LOC691966) mRNA.                            |
| <a href="#">LOC691969</a>    | <a href="#">LOC691969.aSep08</a>    | <a href="#">691969</a>    | 9592   | 1476 |    | 344 | similar to deleted in malignant brain tumors 1 isoform a precursor (38.7 kD) (LOC691969) mRNA.                  |
| <a href="#">LOC691979</a>    | <a href="#">LOC691979.aSep08</a>    | <a href="#">691979</a>    | 16224  | 2109 |    | 619 | similar to N-acetyltransferase ESCO2 (Establishment of cohesion 1 homolog 2) (ECO1 homolog 2) (LOC691979) mRNA. |
| <a href="#">LOC691984</a>    | <a href="#">LOC691984.aSep08</a>    | <a href="#">691984</a>    | 421847 | 697  | 3  | 232 | similar to Glypican-6 precursor (LOC691984) alternative variant aSep08, mRNA.                                   |
| <a href="#">LOC691988</a>    | <a href="#">LOC691988.aSep08</a>    | <a href="#">691988</a>    | 19875  | 446  |    | 116 | similar to a disintegrin and metalloproteinase domain 28 (LOC691988) mRNA.                                      |
| <a href="#">LOC692032</a>    | <a href="#">LOC692032.aSep08</a>    | <a href="#">692032</a>    | 10575  | 2576 | 1  | 78  | hypothetical protein LOC692032 (8.1 kD) (LOC692032) alternative variant aSep08, mRNA.                           |
| <a href="#">LOC692032</a>    | <a href="#">LOC692032.bSep08</a>    | <a href="#">692032</a>    | 6911   | 761  | 1  | 59  | hypothetical protein LOC692032 (LOC692032) alternative variant bSep08, mRNA.                                    |
| <a href="#">LOC692032</a>    | <a href="#">LOC692032.cSep08</a>    | <a href="#">692032</a>    | 8719   | 701  | 1  | 41  | hypothetical protein LOC692032 (4.4 kD) (LOC692032) alternative variant cSep08, mRNA.                           |
| <a href="#">LOC100125368</a> | <a href="#">LOC100125368.aSep08</a> | <a href="#">100125368</a> | 22365  | 1960 |    | 501 | zinc finger protein LOC100125368 (58.2 kD) (LOC100125368) mRNA.                                                 |
| <a href="#">LOC100125371</a> | <a href="#">LOC100125371.aSep08</a> | <a href="#">100125371</a> | 5349   | 2817 | 3  | 73  | hypothetical LOC100125371 (8.3 kD) (LOC100125371) alternative variant aSep08, mRNA.                             |
| <a href="#">LOC100125386</a> | <a href="#">LOC100125386.aSep08</a> | <a href="#">100125386</a> | 10099  | 1324 |    | 134 | hypothetical LOC100125386 (15.3 kD) (LOC100125386) mRNA.                                                        |
| <a href="#">LOC100151767</a> | <a href="#">LOC100151767.aSep08</a> | <a href="#">100151767</a> | 11143  | 3549 | 6  | 291 | hypothetical LOC100151767 (33.7 kD) (LOC100151767) alternative variant aSep08, complete mRNA.                   |
| <a href="#">LOC100151767</a> | <a href="#">LOC100151767.cSep08</a> | <a href="#">100151767</a> | 5977   | 398  | 3  | 98  | hypothetical LOC100151767 (LOC100151767) alternative variant cSep08, mRNA.                                      |
| <a href="#">LOC100158225</a> | <a href="#">LOC100158225.bSep08</a> | <a href="#">100158225</a> | 1820   | 1015 | 5  | 195 | hypothetical protein LOC100158225 (LOC100158225) alternative variant bSep08, mRNA.                              |
| <a href="#">LOC100174909</a> | <a href="#">LOC100174909.bSep08</a> | <a href="#">100174909</a> | 9841   | 490  | 3  | 98  | hypothetical LOC100174909 (LOC100174909) alternative variant bSep08, mRNA.                                      |
| <a href="#">LOC100174909</a> | <a href="#">LOC100174909.cSep08</a> | <a href="#">100174909</a> | 5698   | 521  | 2  | 91  | hypothetical LOC100174909 (LOC100174909) alternative variant cSep08, mRNA.                                      |
| <a href="#">LOC100174909</a> | <a href="#">LOC100174909.dSep08</a> | <a href="#">100174909</a> | 6845   | 1614 | 2  | 55  | hypothetical LOC100174909 (6.5 kD) (LOC100174909) alternative variant dSep08, mRNA.                             |

|                              |                                     |                           |       |      |    |     |                                                                                                                                     |
|------------------------------|-------------------------------------|---------------------------|-------|------|----|-----|-------------------------------------------------------------------------------------------------------------------------------------|
| <a href="#">LOC100188932</a> | <a href="#">LOC100188932.aSep08</a> | <a href="#">100188932</a> | 3506  | 1164 | 3  | 110 | dolichyl-diphosphooligosaccharide--protein glycosyltransferase subunit 4 (12.9 kD) (LOC100188932) alternative variant aSep08, mRNA. |
| <a href="#">LOC100188933</a> | <a href="#">LOC100188933.aSep08</a> | <a href="#">100188933</a> | 11687 | 449  | 1  | 80  | hypothetical protein LOC100188933 (8.8 kD) (LOC100188933) alternative variant aSep08, mRNA.                                         |
| <a href="#">LOC100188936</a> | <a href="#">LOC100188936.aSep08</a> | <a href="#">100188936</a> | 4992  | 697  | 3  | 214 | hypothetical protein LOC100188936 (LOC100188936) alternative variant aSep08, mRNA.                                                  |
| <a href="#">lochy</a>        | <a href="#">lochy.aSep08</a>        |                           | 13815 | 772  |    | 27  | putative protein (lochy) mRNA.                                                                                                      |
| <a href="#">lodar</a>        | <a href="#">lodar.aSep08</a>        |                           | 1518  | 450  |    | 42  | putative protein (lodar) mRNA.                                                                                                      |
| <a href="#">lofer</a>        | <a href="#">lofer.aSep08</a>        |                           | 3247  | 199  |    | 63  | gag protein like (lofer) mRNA.                                                                                                      |
| <a href="#">loflo</a>        | <a href="#">loflo.aSep08</a>        |                           | 38674 | 680  |    | 67  | putative protein (7.7 kD) (loflo) mRNA.                                                                                             |
| <a href="#">loflu</a>        | <a href="#">loflu.aSep08</a>        |                           | 8630  | 719  |    | 239 | neuron navigator 2 CRA c (loflu) mRNA.                                                                                              |
| <a href="#">Loh11cr2a</a>    | <a href="#">Loh11cr2a.bSep08</a>    | <a href="#">301097</a>    | 7104  | 2309 | 7  | 288 | loss of heterozygosity, 11, chromosomal region 2, gene A homolog (human) (Loh11cr2a) alternative variant bSep08, mRNA.              |
| <a href="#">Loh11cr2a</a>    | <a href="#">Loh11cr2a.cSep08</a>    | <a href="#">301097</a>    | 4393  | 525  | 5  | 116 | loss of heterozygosity, 11, chromosomal region 2, gene A homolog (human) (Loh11cr2a) alternative variant cSep08, mRNA.              |
| <a href="#">Loh11cr2a</a>    | <a href="#">Loh11cr2a.eSep08</a>    | <a href="#">301097</a>    | 1290  | 390  | 2  | 55  | loss of heterozygosity, 11, chromosomal region 2, gene A homolog (human) (Loh11cr2a) alternative variant eSep08, mRNA.              |
| <a href="#">Loh12cr1</a>     | <a href="#">Loh12cr1.cSep08</a>     | <a href="#">362452</a>    | 59837 | 1047 | 5  | 91  | loss of heterozygosity, 12, chromosomal region 1 homolog (human) (10.1 kD) (Loh12cr1) alternative variant cSep08, mRNA.             |
| <a href="#">lojey</a>        | <a href="#">lojey.aSep08</a>        |                           | 4663  | 628  |    | 36  | putative protein (4.1 kD) (lojey) mRNA.                                                                                             |
| <a href="#">lokee</a>        | <a href="#">lokee.aSep08</a>        |                           | 2798  | 400  |    | 133 | putative protein (lokee) mRNA.                                                                                                      |
| <a href="#">loloy</a>        | <a href="#">loloy.aSep08</a>        |                           | 2605  | 417  |    | 97  | putative protein (loloy) mRNA.                                                                                                      |
| <a href="#">lomee</a>        | <a href="#">lomee.aSep08</a>        |                           | 2516  | 708  |    | 41  | putative protein (4.3 kD) (lomee) mRNA.                                                                                             |
| <a href="#">lomer</a>        | <a href="#">lomer.aSep08</a>        |                           | 697   | 248  |    | 38  | ATP-binding cassette sub-family A member like (lomer) mRNA.                                                                         |
| <a href="#">lonoy</a>        | <a href="#">lonoy.aSep08</a>        |                           | 677   | 419  |    | 135 | putative protein of mammalian origin (lonoy) mRNA.                                                                                  |
| <a href="#">Lonp1</a>        | <a href="#">Lonp1.bSep08</a>        | <a href="#">170916</a>    | 2050  | 721  | 5  | 204 | lon peptidase 1, mitochondrial (Lonp1) alternative variant bSep08, mRNA.                                                            |
| <a href="#">Lonp1</a>        | <a href="#">Lonp1.cSep08</a>        | <a href="#">170916</a>    | 404   | 320  | 2  | 106 | lon peptidase 1, mitochondrial (Lonp1) alternative variant cSep08, mRNA.                                                            |
| <a href="#">Lonp2</a>        | <a href="#">Lonp2.aSep08</a>        | <a href="#">291922</a>    | 92901 | 2829 | 15 | 852 | peroxisomal lon (94.4 kD) (Lonp2) alternative variant aSep08, mRNA.                                                                 |
| <a href="#">Lonp2</a>        | <a href="#">Lonp2.cSep08</a>        | <a href="#">291922</a>    | 7575  | 757  | 4  | 211 | CRA c (Lonp2) alternative variant cSep08, mRNA.                                                                                     |
| <a href="#">Lonrf1</a>       | <a href="#">Lonrf1.aSep08</a>       | <a href="#">306505</a>    | 15971 | 444  | 2  | 147 | LON peptidase N-terminal domain and ring finger 1 (Lonrf1) alternative variant aSep08, mRNA.                                        |
| <a href="#">Lonrf1</a>       | <a href="#">Lonrf1.bSep08</a>       | <a href="#">306505</a>    | 5304  | 346  | 1  | 115 | LON peptidase N-terminal domain and ring finger 1 (Lonrf1) alternative variant bSep08, mRNA.                                        |
| <a href="#">Lonrf2</a>       | <a href="#">Lonrf2.aSep08</a>       | <a href="#">301361</a>    | 3746  | 432  |    | 110 | LON peptidase N-terminal domain and ring finger 2 (Lonrf2) mRNA.                                                                    |
| <a href="#">Lonrf3</a>       | <a href="#">Lonrf3.aSep08</a>       | <a href="#">298322</a>    | 15464 | 770  |    | 256 | LON peptidase N-terminal domain and ring finger 3 (Lonrf3) mRNA.                                                                    |

|                         |                                |                        |        |      |    |     |                                                                                       |
|-------------------------|--------------------------------|------------------------|--------|------|----|-----|---------------------------------------------------------------------------------------|
| <a href="#">lopor</a>   | <a href="#">lopor.aSep08</a>   |                        | 6829   | 698  |    | 142 | putative protein (15.5 kD) (lopor) mRNA.                                              |
| <a href="#">lorby</a>   | <a href="#">lorby.aSep08</a>   |                        | 9165   | 3243 |    | 253 | WWC family member 3 like (lorby) mRNA.                                                |
| <a href="#">lorchy</a>  | <a href="#">lorchy.aSep08</a>  |                        | 4514   | 278  |    | 92  | titin (lorchy) mRNA.                                                                  |
| <a href="#">lordar</a>  | <a href="#">lordar.aSep08</a>  |                        | 936    | 381  |    | 19  | putative protein (lordar) mRNA.                                                       |
| <a href="#">lorfer</a>  | <a href="#">lorfer.aSep08</a>  |                        | 24384  | 329  |    | 109 | nidogen (lorfer) mRNA.                                                                |
| <a href="#">lorflo</a>  | <a href="#">lorflo.aSep08</a>  |                        | 1179   | 694  |    | 55  | putative protein (6.1 kD) (lorflo) mRNA.                                              |
| <a href="#">lorflu</a>  | <a href="#">lorflu.aSep08</a>  |                        | 12599  | 464  |    | 89  | putative protein (lorflu) mRNA.                                                       |
| <a href="#">lorgar</a>  | <a href="#">lorgar.aSep08</a>  |                        | 72054  | 397  | 1  | 48  | putative protein (lorgar) alternative variant aSep08, mRNA.                           |
| <a href="#">lorgar</a>  | <a href="#">lorgar.bSep08</a>  |                        | 12493  | 327  | 1  | 42  | putative protein (4.4 kD) (lorgar) alternative variant bSep08, mRNA.                  |
| <a href="#">lorjey</a>  | <a href="#">lorjey.aSep08</a>  |                        | 12176  | 624  |    | 207 | polycystin (lorjey) mRNA.                                                             |
| <a href="#">lorkee</a>  | <a href="#">lorkee.aSep08</a>  |                        | 113831 | 442  |    | 99  | putative nuclear protein (11.3 kD) (lorkee) mRNA.                                     |
| <a href="#">lorloy</a>  | <a href="#">lorloy.aSep08</a>  |                        | 2774   | 1120 |    | 101 | ATPase 13a5 (11.8 kD) (lorloy) mRNA.                                                  |
| <a href="#">lormee</a>  | <a href="#">lormee.aSep08</a>  |                        | 1369   | 613  |    | 192 | putative protein, with a coiled coil domain, of mammalian origin (lormee) mRNA.       |
| <a href="#">lormer</a>  | <a href="#">lormer.aSep08</a>  |                        | 2013   | 556  |    | 36  | putative protein (4.0 kD) (lormer) mRNA.                                              |
| <a href="#">lornoy</a>  | <a href="#">lornoy.aSep08</a>  |                        | 37241  | 325  |    | 62  | putative protein (lornoy) mRNA.                                                       |
| <a href="#">lorpor</a>  | <a href="#">lorpor.aSep08</a>  |                        | 1946   | 309  |    | 63  | putative protein (lorpor) mRNA.                                                       |
| <a href="#">lorsa</a>   | <a href="#">lorsa.aSep08</a>   |                        | 33336  | 459  |    | 21  | putative protein (lorsa) mRNA.                                                        |
| <a href="#">lorshee</a> | <a href="#">lorshee.aSep08</a> |                        | 2260   | 660  |    | 38  | putative protein (lorshee) mRNA.                                                      |
| <a href="#">lortu</a>   | <a href="#">lortu.aSep08</a>   |                        | 962    | 339  |    | 87  | putative protein (lortu) mRNA.                                                        |
| <a href="#">lorvar</a>  | <a href="#">lorvar.aSep08</a>  |                        | 15435  | 1464 | 10 | 452 | polycystic kidney disease like (lorvar) alternative variant aSep08, mRNA.             |
| <a href="#">lorvar</a>  | <a href="#">lorvar.bSep08</a>  |                        | 2579   | 1318 | 3  | 156 | polycystic kidney disease 1-like (17.3 kD) (lorvar) alternative variant bSep08, mRNA. |
| <a href="#">lorvar</a>  | <a href="#">lorvar.cSep08</a>  |                        | 6105   | 888  | 4  | 109 | polycystic kidney disease like (lorvar) alternative variant cSep08, mRNA.             |
| <a href="#">lorvar</a>  | <a href="#">lorvar.dSep08</a>  |                        | 2767   | 438  | 4  | 95  | polycystic kidney disease 1-like (lorvar) alternative variant dSep08, mRNA.           |
| <a href="#">lorwey</a>  | <a href="#">lorwey.aSep08</a>  |                        | 57096  | 904  |    | 300 | inositol 1 receptor CRA a (lorwey) mRNA.                                              |
| <a href="#">losa</a>    | <a href="#">losa.aSep08</a>    |                        | 83806  | 1281 | 8  | 426 | trafficking protein particle complex 9 (losa) alternative variant aSep08, mRNA.       |
| <a href="#">losa</a>    | <a href="#">losa.bSep08</a>    |                        | 16798  | 555  | 5  | 184 | trafficking protein particle complex 9 (losa) alternative variant bSep08, mRNA.       |
| <a href="#">losa</a>    | <a href="#">losa.cSep08</a>    |                        | 16720  | 720  | 4  | 143 | trafficking protein particle complex 9 (losa) alternative variant cSep08, mRNA.       |
| <a href="#">loshee</a>  | <a href="#">loshee.aSep08</a>  |                        | 4042   | 494  |    | 164 | putative protein of metazoan origin (loshee) mRNA.                                    |
| <a href="#">lotu</a>    | <a href="#">lotu.aSep08</a>    |                        | 1046   | 452  |    | 32  | putative protein (3.5 kD) (lotu) mRNA.                                                |
| <a href="#">lovar</a>   | <a href="#">lovar.aSep08</a>   |                        | 665    | 377  |    | 61  | putative protein (lovar) mRNA.                                                        |
| <a href="#">lowey</a>   | <a href="#">lowey.aSep08</a>   |                        | 3946   | 385  |    | 23  | putative protein (lowey) mRNA.                                                        |
| <a href="#">Loxl1</a>   | <a href="#">Loxl1.bSep08</a>   | <a href="#">315714</a> | 7840   | 768  | 4  | 42  | lysyl oxidase-like 1 (4.8 kD) (Loxl1) alternative variant bSep08, mRNA.               |
| <a href="#">Loxl2</a>   | <a href="#">Loxl2.aSep08</a>   | <a href="#">290350</a> | 89019  | 4784 | 14 | 750 | lysyl oxidase-like 2 CRA b (Loxl2) alternative variant aSep08, mRNA.                  |

|                         |                                |                        |        |      |    |     |                                                                                 |
|-------------------------|--------------------------------|------------------------|--------|------|----|-----|---------------------------------------------------------------------------------|
| <a href="#">Loxl2</a>   | <a href="#">Loxl2.bSep08</a>   | <a href="#">290350</a> | 33906  | 1953 | 12 | 466 | lysyl oxidase-like 2 CRA b (Loxl2) alternative variant bSep08, mRNA.            |
| <a href="#">Loxl2</a>   | <a href="#">Loxl2.dSep08</a>   | <a href="#">290350</a> | 26486  | 393  | 2  | 70  | putative protein (Loxl2) alternative variant dSep08, mRNA.                      |
| <a href="#">Loxl2</a>   | <a href="#">Loxl2.eSep08</a>   | <a href="#">290350</a> | 1127   | 517  | 2  | 45  | lysyl oxidase-like 2 (5.4 kD) (Loxl2) alternative variant eSep08, mRNA.         |
| <a href="#">Loxl3</a>   | <a href="#">Loxl3.bSep08</a>   | <a href="#">312478</a> | 800    | 613  | 3  | 133 | lysyl oxidase-like 3 (Loxl3) alternative variant bSep08, mRNA.                  |
| <a href="#">Loxl3</a>   | <a href="#">Loxl3.cSep08</a>   | <a href="#">312478</a> | 1483   | 951  | 4  | 111 | lysyl oxidase-like 3 (12.9 kD) (Loxl3) alternative variant cSep08, mRNA.        |
| <a href="#">loyby</a>   | <a href="#">loyby.aSep08</a>   |                        | 489485 | 852  | 1  | 283 | rho GTPase activating protein 6 (loyby) alternative variant aSep08, mRNA.       |
| <a href="#">loyby</a>   | <a href="#">loyby.bSep08</a>   |                        | 216582 | 622  | 1  | 181 | rho GTPase activating protein 6 (loyby) alternative variant bSep08, mRNA.       |
| <a href="#">loychy</a>  | <a href="#">loychy.aSep08</a>  |                        | 888    | 246  |    | 82  | titin (loychy) mRNA.                                                            |
| <a href="#">loydar</a>  | <a href="#">loydar.aSep08</a>  |                        | 9076   | 558  |    | 40  | putative protein (4.4 kD) (loydar) mRNA.                                        |
| <a href="#">loyfer</a>  | <a href="#">loyfer.cSep08</a>  |                        | 1587   | 761  | 2  | 65  | putative protein (7.2 kD) (loyfer) alternative variant cSep08, mRNA.            |
| <a href="#">loyflo</a>  | <a href="#">loyflo.aSep08</a>  |                        | 2897   | 443  |    | 77  | putative protein (loyflo) mRNA.                                                 |
| <a href="#">loyflu</a>  | <a href="#">loyflu.aSep08</a>  |                        | 21287  | 559  |    | 105 | putative mitochondrial protein (11.4 kD) (loyflu) mRNA.                         |
| <a href="#">loygar</a>  | <a href="#">loygar.aSep08</a>  |                        | 5889   | 757  | 3  | 118 | putative protein (loygar) alternative variant aSep08, mRNA.                     |
| <a href="#">loyjey</a>  | <a href="#">loyjey.aSep08</a>  |                        | 670    | 401  | 1  | 118 | putative protein (loyjey) alternative variant aSep08, mRNA.                     |
| <a href="#">loyjey</a>  | <a href="#">loyjey.bSep08</a>  |                        | 11371  | 754  | 2  | 48  | putative protein (5.2 kD) (loyjey) alternative variant bSep08, mRNA.            |
| <a href="#">loykee</a>  | <a href="#">loykee.aSep08</a>  |                        | 14459  | 1314 |    | 42  | putative protein (4.8 kD) (loykee) alternative variant aSep08, mRNA.            |
| <a href="#">loyloy</a>  | <a href="#">loyloy.aSep08</a>  |                        | 1213   | 313  |    | 70  | putative protein (loyloy) mRNA.                                                 |
| <a href="#">loymee</a>  | <a href="#">loymee.aSep08</a>  |                        | 556    | 482  |    | 87  | putative protein of bilateral origin (loymee) mRNA.                             |
| <a href="#">loymer</a>  | <a href="#">loymer.aSep08</a>  |                        | 10956  | 827  |    | 41  | putative protein (loymer) mRNA.                                                 |
| <a href="#">loynoy</a>  | <a href="#">loynoy.aSep08</a>  |                        | 3892   | 798  |    | 24  | putative protein (loynoy) mRNA.                                                 |
| <a href="#">loypor</a>  | <a href="#">loypor.aSep08</a>  |                        | 10510  | 550  |    | 111 | putative protein (loypor) mRNA.                                                 |
| <a href="#">loysa</a>   | <a href="#">loysa.aSep08</a>   |                        | 2098   | 557  |    | 88  | CRA b like (9.8 kD) (loysa) alternative variant aSep08, mRNA.                   |
| <a href="#">loysa</a>   | <a href="#">loysa.bSep08</a>   |                        | 1862   | 500  | 1  | 60  | CRA a like (loysa) alternative variant bSep08, mRNA.                            |
| <a href="#">loyshee</a> | <a href="#">loyshee.aSep08</a> |                        | 50915  | 334  | 1  | 103 | putative protein (loyshee) alternative variant aSep08, mRNA.                    |
| <a href="#">loyshee</a> | <a href="#">loyshee.bSep08</a> |                        | 93397  | 343  | 1  | 96  | putative protein (10.2 kD) (loyshee) alternative variant bSep08, mRNA.          |
| <a href="#">loytu</a>   | <a href="#">loytu.aSep08</a>   |                        | 4993   | 467  |    | 109 | putative protein, with a coiled coil domain, of vertebrate origin (loytu) mRNA. |
| <a href="#">loyvar</a>  | <a href="#">loyvar.aSep08</a>  |                        | 412    | 306  |    | 51  | putative protein (loyvar) mRNA.                                                 |
| <a href="#">loywey</a>  | <a href="#">loywey.aSep08</a>  |                        | 16259  | 1008 | 6  | 268 | inositol 1 receptor CRA a (loywey) alternative variant aSep08, mRNA.            |
| <a href="#">loywey</a>  | <a href="#">loywey.bSep08</a>  |                        | 1517   | 329  | 2  | 69  | inositol 1 receptor CRA a (loywey) alternative variant bSep08, mRNA.            |

|                        |                               |                        |        |      |    |     |                                                                                      |
|------------------------|-------------------------------|------------------------|--------|------|----|-----|--------------------------------------------------------------------------------------|
| <a href="#">Lpar1</a>  | <a href="#">Lpar1.bSep08</a>  | <a href="#">116744</a> | 74908  | 620  | 2  | 158 | lysophosphatidic acid receptor 1 (Lpar1) alternative variant bSep08, mRNA.           |
| <a href="#">Lpar1</a>  | <a href="#">Lpar1.cSep08</a>  | <a href="#">116744</a> | 74792  | 441  | 2  | 60  | lysophosphatidic acid receptor 1 (Lpar1) alternative variant cSep08, mRNA.           |
| <a href="#">Lpar1</a>  | <a href="#">Lpar1.dSep08</a>  | <a href="#">116744</a> | 12954  | 411  | 1  | 65  | lysophosphatidic acid receptor 1 (Lpar1) alternative variant dSep08, mRNA.           |
| <a href="#">Lpar1</a>  | <a href="#">Lpar1.eSep08</a>  | <a href="#">116744</a> | 71872  | 351  | 2  | 54  | lysophosphatidic acid receptor 1 (Lpar1) alternative variant eSep08, mRNA.           |
| <a href="#">Lpcat1</a> | <a href="#">Lpcat1.aSep08</a> | <a href="#">361467</a> | 50893  | 3607 | 14 | 579 | lysophosphatidylcholine acyltransferase 1 (Lpcat1) alternative variant aSep08, mRNA. |
| <a href="#">Lphn1</a>  | <a href="#">Lphn1.bSep08</a>  | <a href="#">65096</a>  | 5032   | 1573 | 10 | 437 | latrophilin 1 (Lphn1) alternative variant bSep08, mRNA.                              |
| <a href="#">Lphn1</a>  | <a href="#">Lphn1.dSep08</a>  | <a href="#">65096</a>  | 1487   | 477  | 1  | 139 | latrophilin 1 (Lphn1) alternative variant dSep08, mRNA.                              |
| <a href="#">Lphn2</a>  | <a href="#">Lphn2.bSep08</a>  | <a href="#">171447</a> | 20836  | 2687 | 7  | 448 | latrophilin 2 (Lphn2) alternative variant bSep08, mRNA.                              |
| <a href="#">Lphn2</a>  | <a href="#">Lphn2.cSep08</a>  | <a href="#">171447</a> | 5176   | 403  | 4  | 63  | latrophilin 2 (Lphn2) alternative variant cSep08, mRNA.                              |
| <a href="#">Lphn2</a>  | <a href="#">Lphn2.dSep08</a>  | <a href="#">171447</a> | 5875   | 773  | 2  | 45  | latrophilin 2 (Lphn2) alternative variant dSep08, mRNA.                              |
| <a href="#">Lphn2</a>  | <a href="#">Lphn2.eSep08</a>  | <a href="#">171447</a> | 2603   | 382  | 3  | 45  | latrophilin 2 (Lphn2) alternative variant eSep08, mRNA.                              |
| <a href="#">Lphn3</a>  | <a href="#">Lphn3.bSep08</a>  | <a href="#">170641</a> | 69696  | 813  | 3  | 176 | latrophilin 3 (Lphn3) alternative variant bSep08, mRNA.                              |
| <a href="#">Lpin1</a>  | <a href="#">Lpin1.bSep08</a>  | <a href="#">313977</a> | 11943  | 755  | 5  | 251 | lipin 1 (Lpin1) alternative variant bSep08, mRNA.                                    |
| <a href="#">Lpin1</a>  | <a href="#">Lpin1.cSep08</a>  | <a href="#">313977</a> | 9965   | 916  | 7  | 251 | lipin 1 (Lpin1) alternative variant cSep08, mRNA.                                    |
| <a href="#">Lpin1</a>  | <a href="#">Lpin1.dSep08</a>  | <a href="#">313977</a> | 9571   | 850  | 5  | 245 | lipin 1 (Lpin1) alternative variant dSep08, mRNA.                                    |
| <a href="#">Lpin2</a>  | <a href="#">Lpin2.bSep08</a>  | <a href="#">316737</a> | 7119   | 675  | 3  | 187 | lipin 2 (Lpin2) alternative variant bSep08, mRNA.                                    |
| <a href="#">Lpin3</a>  | <a href="#">Lpin3.bSep08</a>  | <a href="#">362261</a> | 7507   | 815  | 5  | 185 | lipin 3 CRA b (20.2 kD) (Lpin3) alternative variant bSep08, mRNA.                    |
| <a href="#">Lpin3</a>  | <a href="#">Lpin3.cSep08</a>  | <a href="#">362261</a> | 2355   | 768  | 4  | 111 | lipin 3 (Lpin3) alternative variant cSep08, mRNA.                                    |
| <a href="#">Lpp</a>    | <a href="#">Lpp.bSep08</a>    | <a href="#">288010</a> | 196027 | 1362 | 6  | 263 | LIM, zinc-binding (Lpp) alternative variant bSep08, mRNA.                            |
| <a href="#">Lpp</a>    | <a href="#">Lpp.cSep08</a>    | <a href="#">288010</a> | 43720  | 757  | 3  | 217 | putative protein of vertebrate origin (Lpp) alternative variant cSep08, mRNA.        |
| <a href="#">Lpp</a>    | <a href="#">Lpp.eSep08</a>    | <a href="#">288010</a> | 1856   | 342  | 3  | 40  | putative protein (4.5 kD) (Lpp) alternative variant eSep08, mRNA.                    |
| <a href="#">Lpp</a>    | <a href="#">Lpp.fSep08</a>    | <a href="#">288010</a> | 1040   | 272  | 2  | 48  | putative protein (Lpp) alternative variant fSep08, mRNA.                             |
| <a href="#">Lpxn</a>   | <a href="#">Lpxn.aSep08</a>   | <a href="#">293783</a> | 36511  | 1799 | 6  | 483 | leupaxin (Lpxn) alternative variant aSep08, mRNA.                                    |
| <a href="#">Lpxn</a>   | <a href="#">Lpxn.cSep08</a>   | <a href="#">293783</a> | 29704  | 686  | 6  | 218 | leupaxin (Lpxn) alternative variant cSep08, mRNA.                                    |
| <a href="#">Lpxn</a>   | <a href="#">Lpxn.dSep08</a>   | <a href="#">293783</a> | 7337   | 757  | 5  | 173 | leupaxin (Lpxn) alternative variant dSep08, mRNA.                                    |
| <a href="#">Lpxn</a>   | <a href="#">Lpxn.eSep08</a>   | <a href="#">293783</a> | 29379  | 701  | 5  | 173 | leupaxin (Lpxn) alternative variant eSep08, mRNA.                                    |
| <a href="#">Lrba</a>   | <a href="#">Lrba.bSep08</a>   | <a href="#">361975</a> | 193242 | 2828 | 14 | 596 | LPS-responsive beige-like anchor (Lrba) alternative variant bSep08, mRNA.            |
| <a href="#">Lrba</a>   | <a href="#">Lrba.cSep08</a>   | <a href="#">361975</a> | 6637   | 985  | 4  | 311 | LPS-responsive beige-like anchor (Lrba) alternative variant cSep08, mRNA.            |
| <a href="#">Lrba</a>   | <a href="#">Lrba.dSep08</a>   | <a href="#">361975</a> | 13901  | 712  | 6  | 217 | LPS-responsive beige-like anchor (Lrba) alternative variant dSep08, mRNA.            |
| <a href="#">Lrba</a>   | <a href="#">Lrba.eSep08</a>   | <a href="#">361975</a> | 106615 | 557  | 5  | 185 | LPS-responsive beige-like anchor (Lrba) alternative variant eSep08, mRNA.            |
| <a href="#">Lrch1</a>  | <a href="#">Lrch1.bSep08</a>  | <a href="#">502020</a> | 30488  | 746  | 5  | 210 | calponin-like actin-binding (Lrch1) alternative variant bSep08, mRNA.                |

|                       |                              |                        |       |      |    |     |                                                                                                                            |
|-----------------------|------------------------------|------------------------|-------|------|----|-----|----------------------------------------------------------------------------------------------------------------------------|
| <a href="#">Lrch1</a> | <a href="#">Lrch1.cSep08</a> | <a href="#">502020</a> | 35718 | 779  | 7  | 199 | leucine-rich repeat calponin homology domain-containing protein 1 (22.5 kD) (Lrch1) alternative variant cSep08, mRNA.      |
| <a href="#">Lrch1</a> | <a href="#">Lrch1.dSep08</a> | <a href="#">502020</a> | 3480  | 525  | 2  | 154 | putative protein of bilateral origin (Lrch1) alternative variant dSep08, mRNA.                                             |
| <a href="#">Lrch2</a> | <a href="#">Lrch2.aSep08</a> | <a href="#">680591</a> | 3646  | 499  |    | 165 | putative protein of vertebrate origin (Lrch2) mRNA.                                                                        |
| <a href="#">Lrch4</a> | <a href="#">Lrch4.bSep08</a> | <a href="#">360779</a> | 14939 | 2007 | 18 | 542 | leucine-rich repeat containing protein and calponin-like actin-binding (59.1 kD) (Lrch4) alternative variant bSep08, mRNA. |
| <a href="#">Lrch4</a> | <a href="#">Lrch4.cSep08</a> | <a href="#">360779</a> | 3459  | 729  | 8  | 242 | leucine-rich repeat containing protein (Lrch4) alternative variant cSep08, mRNA.                                           |
| <a href="#">Lrch4</a> | <a href="#">Lrch4.dSep08</a> | <a href="#">360779</a> | 772   | 493  | 4  | 122 | putative protein of mammalian origin (Lrch4) alternative variant dSep08, mRNA.                                             |
| <a href="#">Lrch4</a> | <a href="#">Lrch4.eSep08</a> | <a href="#">360779</a> | 31612 | 393  | 2  | 87  | putative protein of vertebrate origin (Lrch4) alternative variant eSep08, mRNA.                                            |
| <a href="#">Lrch4</a> | <a href="#">Lrch4.fSep08</a> | <a href="#">360779</a> | 20028 | 596  | 2  | 43  | putative protein (5.0 kD) (Lrch4) alternative variant fSep08, mRNA.                                                        |
| <a href="#">Lrdd</a>  | <a href="#">Lrdd.aSep08</a>  | <a href="#">293625</a> | 1271  | 840  |    | 279 | putative protein (Lrdd) mRNA.                                                                                              |
| <a href="#">Lrig1</a> | <a href="#">Lrig1.aSep08</a> | <a href="#">312574</a> | 38293 | 492  | 5  | 163 | leucine-rich repeats and immunoglobulin-like domains 1 (Lrig1) alternative variant aSep08, mRNA.                           |
| <a href="#">Lrig3</a> | <a href="#">Lrig3.aSep08</a> | <a href="#">299830</a> | 12761 | 2268 | 8  | 649 | leucine-rich repeats immunoglobulin-like domains 3 (Lrig3) alternative variant aSep08, mRNA.                               |
| <a href="#">Lrig3</a> | <a href="#">Lrig3.bSep08</a> | <a href="#">299830</a> | 50597 | 5100 | 17 | 526 | leucine-rich repeats immunoglobulin-like domains 3 (Lrig3) alternative variant bSep08, mRNA.                               |
| <a href="#">Lrig3</a> | <a href="#">Lrig3.cSep08</a> | <a href="#">299830</a> | 19754 | 788  | 4  | 204 | leucine-rich repeats immunoglobulin-like domains 3 (Lrig3) alternative variant cSep08, mRNA.                               |
| <a href="#">Lrig3</a> | <a href="#">Lrig3.dSep08</a> | <a href="#">299830</a> | 2047  | 858  | 2  | 193 | leucine-rich repeats immunoglobulin-like domains 3 precursor (21.7 kD) (Lrig3) alternative variant dSep08, mRNA.           |
| <a href="#">Lrit3</a> | <a href="#">Lrit3.aSep08</a> | <a href="#">502596</a> | 3551  | 675  |    | 222 | leucine-rich repeat, immunoglobulin-like and transmembrane domains 3 (Lrit3) mRNA.                                         |
| <a href="#">Lrmp</a>  | <a href="#">Lrmp.aSep08</a>  | <a href="#">500361</a> | 22623 | 907  | 10 | 301 | lymphoid-restricted membrane protein (Lrmp) alternative variant aSep08, mRNA.                                              |
| <a href="#">Lrmp</a>  | <a href="#">Lrmp.bSep08</a>  | <a href="#">500361</a> | 11410 | 864  | 10 | 287 | lymphoid-restricted membrane protein (Lrmp) alternative variant bSep08, mRNA.                                              |
| <a href="#">Lrmp</a>  | <a href="#">Lrmp.cSep08</a>  | <a href="#">500361</a> | 2934  | 710  | 3  | 161 | lymphoid-restricted membrane protein (17.5 kD) (Lrmp) alternative variant cSep08, mRNA.                                    |
| <a href="#">Lrmp</a>  | <a href="#">Lrmp.eSep08</a>  | <a href="#">500361</a> | 1733  | 1174 | 2  | 126 | lymphoid-restricted membrane protein (13.9 kD) (Lrmp) alternative variant eSep08, mRNA.                                    |
| <a href="#">Lrmp</a>  | <a href="#">Lrmp.fSep08</a>  | <a href="#">500361</a> | 7764  | 715  | 8  | 118 | lymphoid-restricted membrane protein (Lrmp) alternative variant fSep08, mRNA.                                              |
| <a href="#">Lrmp</a>  | <a href="#">Lrmp.gSep08</a>  | <a href="#">500361</a> | 2711  | 667  | 4  | 88  | lymphoid-restricted membrane protein (Lrmp) alternative variant gSep08, mRNA.                                              |
| <a href="#">Lrp1</a>  | <a href="#">Lrp1.aSep08</a>  | <a href="#">299858</a> | 8026  | 3232 | 18 | 819 | low density lipoprotein receptor-related protein 1 (Lrp1) alternative variant aSep08, mRNA.                                |
| <a href="#">Lrp1</a>  | <a href="#">Lrp1.bSep08</a>  | <a href="#">299858</a> | 4306  | 783  | 7  | 260 | low density lipoprotein receptor-related protein 1 (Lrp1) alternative variant bSep08, mRNA.                                |



|                        |                               |                        |        |      |    |      |                                                                                                                |
|------------------------|-------------------------------|------------------------|--------|------|----|------|----------------------------------------------------------------------------------------------------------------|
| <a href="#">Lrp1</a>   | <a href="#">Lrp1.cSep08</a>   | <a href="#">299858</a> | 10807  | 631  | 3  | 209  | low density lipoprotein receptor-related protein 1 (Lrp1) alternative variant cSep08, mRNA.                    |
| <a href="#">Lrp1</a>   | <a href="#">Lrp1.dSep08</a>   | <a href="#">299858</a> | 68305  | 571  | 4  | 171  | low density lipoprotein receptor-related protein 1 (Lrp1) alternative variant dSep08, mRNA.                    |
| <a href="#">Lrp1</a>   | <a href="#">Lrp1.eSep08</a>   | <a href="#">299858</a> | 1631   | 1027 | 5  | 107  | low density lipoprotein receptor-related protein 1 (Lrp1) alternative variant eSep08, mRNA.                    |
| <a href="#">Lrp2</a>   | <a href="#">Lrp2.aSep08</a>   | <a href="#">29216</a>  | 28434  | 3791 |    | 817  | low density lipoprotein receptor-related protein 2 (Lrp2) alternative variant aSep08, mRNA.                    |
| <a href="#">Lrp2</a>   | <a href="#">Lrp2.bSep08</a>   | <a href="#">29216</a>  | 2077   | 605  | 1  | 126  | low density lipoprotein receptor-related protein 2 (Lrp2) alternative variant bSep08, mRNA.                    |
| <a href="#">Lrp3</a>   | <a href="#">Lrp3.bSep08</a>   | <a href="#">89787</a>  | 12125  | 704  | 7  | 179  | low density lipoprotein receptor-related protein 3 (Lrp3) alternative variant bSep08, mRNA.                    |
| <a href="#">Lrp6</a>   | <a href="#">Lrp6.bSep08</a>   | <a href="#">312781</a> | 8759   | 1067 | 5  | 276  | low density lipoprotein receptor-related protein 6 (Lrp6) alternative variant bSep08, mRNA.                    |
| <a href="#">Lrp8</a>   | <a href="#">Lrp8.aSep08</a>   | <a href="#">362558</a> | 15785  | 474  |    | 157  | low density lipoprotein receptor-related protein 8, apolipoprotein e receptor (Lrp8) mRNA.                     |
| <a href="#">Lrp10</a>  | <a href="#">Lrp10.bSep08</a>  | <a href="#">305880</a> | 4758   | 1920 | 5  | 499  | low-density lipoprotein receptor-related protein 10 (Lrp10) alternative variant bSep08, mRNA.                  |
| <a href="#">Lrp10</a>  | <a href="#">Lrp10.cSep08</a>  | <a href="#">305880</a> | 1479   | 383  | 3  | 62   | low-density lipoprotein receptor-related protein 10 (Lrp10) alternative variant cSep08, mRNA.                  |
| <a href="#">Lrp11</a>  | <a href="#">Lrp11.bSep08</a>  | <a href="#">292462</a> | 17560  | 1075 | 5  | 357  | low density lipoprotein receptor-related protein 11 (Lrp11) alternative variant bSep08, mRNA.                  |
| <a href="#">Lrp11</a>  | <a href="#">Lrp11.cSep08</a>  | <a href="#">292462</a> | 57909  | 1102 | 7  | 243  | low density lipoprotein receptor-related protein 11 (26.3 kD) (Lrp11) alternative variant cSep08, mRNA.        |
| <a href="#">Lrpap1</a> | <a href="#">Lrpap1.aSep08</a> | <a href="#">116565</a> | 14038  | 3442 | 8  | 367  | low density lipoprotein receptor-related protein associated 1 (Lrpap1) alternative variant aSep08, mRNA.       |
| <a href="#">Lrpap1</a> | <a href="#">Lrpap1.bSep08</a> | <a href="#">116565</a> | 3899   | 743  | 2  | 147  | low density lipoprotein receptor-related protein associated 1 (Lrpap1) alternative variant bSep08, mRNA.       |
| <a href="#">Lrpap1</a> | <a href="#">Lrpap1.cSep08</a> | <a href="#">116565</a> | 2478   | 525  | 3  | 99   | low density lipoprotein receptor-related protein associated 1 CRA c (Lrpap1) alternative variant cSep08, mRNA. |
| <a href="#">Lrpprc</a> | <a href="#">Lrpprc.bSep08</a> | <a href="#">313867</a> | 65216  | 3527 | 32 | 1131 | leucine-rich PPR-motif containing (Lrpprc) alternative variant bSep08, mRNA.                                   |
| <a href="#">Lrpprc</a> | <a href="#">Lrpprc.cSep08</a> | <a href="#">313867</a> | 14049  | 330  | 4  | 109  | leucine-rich PPR-motif containing (Lrpprc) alternative variant cSep08, mRNA.                                   |
| <a href="#">Lrpprc</a> | <a href="#">Lrpprc.dSep08</a> | <a href="#">313867</a> | 3280   | 665  | 4  | 70   | leucine-rich PPR-motif containing (8.0 kD) (Lrpprc) alternative variant dSep08, mRNA.                          |
| <a href="#">Lrrc1</a>  | <a href="#">Lrrc1.bSep08</a>  | <a href="#">367113</a> | 110560 | 683  | 6  | 227  | leucine rich repeat containing 1 (Lrrc1) alternative variant bSep08, mRNA.                                     |
| <a href="#">Lrrc1</a>  | <a href="#">Lrrc1.cSep08</a>  | <a href="#">367113</a> | 8192   | 1012 | 2  | 67   | leucine rich repeat containing 1 (10.2 kD) (Lrrc1) alternative variant cSep08, mRNA.                           |
| <a href="#">Lrrc2</a>  | <a href="#">Lrrc2.bSep08</a>  | <a href="#">301033</a> | 15892  | 769  | 5  | 209  | leucine rich repeat containing 2 (Lrrc2) alternative variant bSep08, mRNA.                                     |
| <a href="#">Lrrc2</a>  | <a href="#">Lrrc2.cSep08</a>  | <a href="#">301033</a> | 15729  | 803  | 5  | 183  | leucine rich repeat containing 2 (Lrrc2) alternative variant cSep08, mRNA.                                     |
| <a href="#">Lrrc2</a>  | <a href="#">Lrrc2.dSep08</a>  | <a href="#">301033</a> | 6003   | 661  | 4  | 159  | leucine rich repeat containing 2 (Lrrc2) alternative variant dSep08, mRNA.                                     |

|                         |                                |                        |        |      |    |     |                                                                                                       |
|-------------------------|--------------------------------|------------------------|--------|------|----|-----|-------------------------------------------------------------------------------------------------------|
| <a href="#">Lrrc3b</a>  | <a href="#">Lrrc3b.aSep08</a>  | <a href="#">305705</a> | 77833  | 1357 |    | 259 | leucine rich repeat containing 3B (29.3 kD) (Lrrc3b) complete mRNA.                                   |
| <a href="#">Lrrc4b</a>  | <a href="#">Lrrc4b.aSep08</a>  | <a href="#">308571</a> | 16709  | 1917 | 2  | 638 | leucine rich repeat containing 4B (Lrrc4b) alternative variant aSep08, mRNA.                          |
| <a href="#">Lrrc8a</a>  | <a href="#">Lrrc8a.cSep08</a>  | <a href="#">311846</a> | 18662  | 388  | 2  | 116 | leucine rich repeat containing 8A (Lrrc8a) alternative variant cSep08, mRNA.                          |
| <a href="#">Lrrc8a</a>  | <a href="#">Lrrc8a.dSep08</a>  | <a href="#">311846</a> | 3613   | 374  | 1  | 41  | leucine rich repeat containing 8A (Lrrc8a) alternative variant dSep08, mRNA.                          |
| <a href="#">Lrrc8c</a>  | <a href="#">Lrrc8c.bSep08</a>  | <a href="#">289443</a> | 59717  | 551  | 3  | 87  | leucine rich repeat containing 8 family, member C (9.7 kD) (Lrrc8c) alternative variant bSep08, mRNA. |
| <a href="#">Lrrc8c</a>  | <a href="#">Lrrc8c.cSep08</a>  | <a href="#">289443</a> | 22600  | 396  | 1  | 30  | leucine rich repeat containing 8 family, member C (3.6 kD) (Lrrc8c) alternative variant cSep08, mRNA. |
| <a href="#">Lrrc8d</a>  | <a href="#">Lrrc8d.bSep08</a>  | <a href="#">305131</a> | 106863 | 3802 | 3  | 858 | leucine rich repeat containing 8D (97.9 kD) (Lrrc8d) alternative variant bSep08, mRNA.                |
| <a href="#">Lrrc8d</a>  | <a href="#">Lrrc8d.cSep08</a>  | <a href="#">305131</a> | 74801  | 401  | 3  | 76  | leucine rich repeat containing 8D (Lrrc8d) alternative variant cSep08, mRNA.                          |
| <a href="#">Lrrc9</a>   | <a href="#">Lrrc9.aSep08</a>   | <a href="#">299129</a> | 25839  | 474  |    | 152 | leucine rich repeat containing 9 (Lrrc9) mRNA.                                                        |
| <a href="#">Lrrc14</a>  | <a href="#">Lrrc14.bSep08</a>  | <a href="#">500900</a> | 5742   | 1333 | 2  | 245 | leucine rich repeat containing 14 (Lrrc14) alternative variant bSep08, mRNA.                          |
| <a href="#">Lrrc16a</a> | <a href="#">Lrrc16a.aSep08</a> | <a href="#">306941</a> | 17742  | 1759 | 5  | 291 | leucine rich repeat containing 16A (Lrrc16a) alternative variant aSep08, mRNA.                        |
| <a href="#">Lrrc18</a>  | <a href="#">Lrrc18.bSep08</a>  | <a href="#">306278</a> | 18811  | 1647 | 3  | 255 | leucine rich repeat containing 18 (28.8 kD) (Lrrc18) alternative variant bSep08, mRNA.                |
| <a href="#">Lrrc18</a>  | <a href="#">Lrrc18.cSep08</a>  | <a href="#">306278</a> | 19515  | 764  | 3  | 12  | leucine rich repeat containing 18 (1.4 kD) (Lrrc18) alternative variant cSep08, mRNA.                 |
| <a href="#">Lrrc23</a>  | <a href="#">Lrrc23.aSep08</a>  | <a href="#">312707</a> | 4316   | 1782 | 4  | 444 | leucine rich repeat containing 23 (Lrrc23) alternative variant aSep08, mRNA.                          |
| <a href="#">Lrrc23</a>  | <a href="#">Lrrc23.bSep08</a>  | <a href="#">312707</a> | 10190  | 1598 | 8  | 345 | leucine rich repeat containing 23 (40.0 kD) (Lrrc23) alternative variant bSep08, mRNA.                |
| <a href="#">Lrrc23</a>  | <a href="#">Lrrc23.dSep08</a>  | <a href="#">312707</a> | 4294   | 1111 | 5  | 230 | leucine rich repeat containing 23 (25.9 kD) (Lrrc23) alternative variant dSep08, complete mRNA.       |
| <a href="#">Lrrc23</a>  | <a href="#">Lrrc23.eSep08</a>  | <a href="#">312707</a> | 847    | 765  | 2  | 57  | leucine rich repeat containing 23 (Lrrc23) alternative variant eSep08, mRNA.                          |
| <a href="#">Lrrc23</a>  | <a href="#">Lrrc23.fSep08</a>  | <a href="#">312707</a> | 2090   | 1651 | 2  | 88  | leucine rich repeat containing 23 (10.4 kD) (Lrrc23) alternative variant fSep08, mRNA.                |
| <a href="#">Lrrc25</a>  | <a href="#">Lrrc25.aSep08</a>  | <a href="#">498605</a> | 2931   | 1099 |    | 169 | leucine rich repeat containing 25 (Lrrc25) mRNA.                                                      |
| <a href="#">Lrrc27</a>  | <a href="#">Lrrc27.aSep08</a>  | <a href="#">499281</a> | 30292  | 1870 | 11 | 513 | leucine rich repeat containing 27 (59.1 kD) (Lrrc27) alternative variant aSep08, mRNA.                |
| <a href="#">Lrrc27</a>  | <a href="#">Lrrc27.cSep08</a>  | <a href="#">499281</a> | 13755  | 838  | 6  | 239 | leucine rich repeat containing 27 (Lrrc27) alternative variant cSep08, mRNA.                          |
| <a href="#">Lrrc27</a>  | <a href="#">Lrrc27.dSep08</a>  | <a href="#">499281</a> | 11535  | 723  | 5  | 182 | leucine rich repeat containing 27 (Lrrc27) alternative variant dSep08, mRNA.                          |
| <a href="#">Lrrc27</a>  | <a href="#">Lrrc27.eSep08</a>  | <a href="#">499281</a> | 13800  | 821  | 5  | 146 | leucine rich repeat containing 27 (17.1 kD) (Lrrc27) alternative variant eSep08, mRNA.                |
| <a href="#">Lrrc28</a>  | <a href="#">Lrrc28.bSep08</a>  | <a href="#">361588</a> | 77115  | 576  | 6  | 151 | leucine rich repeat containing 28 (17.0 kD) (Lrrc28) alternative variant bSep08, mRNA.                |

|                         |                                |                        |        |      |   |     |                                                                                                                 |
|-------------------------|--------------------------------|------------------------|--------|------|---|-----|-----------------------------------------------------------------------------------------------------------------|
| <a href="#">Lrrc28</a>  | <a href="#">Lrrc28.cSep08</a>  | <a href="#">361588</a> | 100085 | 805  | 8 | 151 | leucine rich repeat containing 28 (17.0 kD) (Lrrc28) alternative variant cSep08, mRNA.                          |
| <a href="#">Lrrc28</a>  | <a href="#">Lrrc28.dSep08</a>  | <a href="#">361588</a> | 90508  | 758  | 7 | 103 | leucine rich repeat containing 28 (Lrrc28) alternative variant dSep08, mRNA.                                    |
| <a href="#">Lrrc28</a>  | <a href="#">Lrrc28.eSep08</a>  | <a href="#">361588</a> | 30330  | 692  | 4 | 46  | leucine rich repeat containing 28 (5.3 kD) (Lrrc28) alternative variant eSep08, mRNA.                           |
| <a href="#">Lrrc33</a>  | <a href="#">Lrrc33.bSep08</a>  | <a href="#">303875</a> | 15639  | 764  | 2 | 254 | leucine rich repeat containing 33 (Lrrc33) alternative variant bSep08, mRNA.                                    |
| <a href="#">Lrrc33</a>  | <a href="#">Lrrc33.cSep08</a>  | <a href="#">303875</a> | 3901   | 871  | 1 | 245 | leucine rich repeat containing 33 (Lrrc33) alternative variant cSep08, mRNA.                                    |
| <a href="#">Lrrc36</a>  | <a href="#">Lrrc36.bSep08</a>  | <a href="#">361394</a> | 8310   | 1124 | 1 | 286 | leucine rich repeat containing 36 (31.6 kD) (Lrrc36) alternative variant bSep08, mRNA.                          |
| <a href="#">Lrrc37a</a> | <a href="#">Lrrc37a.aSep08</a> | <a href="#">303556</a> | 5711   | 751  |   | 189 | leucine rich repeat containing 37A (Lrrc37a) mRNA.                                                              |
| <a href="#">Lrrc39</a>  | <a href="#">Lrrc39.bSep08</a>  | <a href="#">691307</a> | 13641  | 510  | 5 | 170 | leucine rich repeat containing 39 (Lrrc39) alternative variant bSep08, mRNA.                                    |
| <a href="#">Lrrc39</a>  | <a href="#">Lrrc39.cSep08</a>  | <a href="#">691307</a> | 11308  | 1113 | 5 | 150 | leucine rich repeat containing 39 (17.2 kD) (Lrrc39) alternative variant cSep08, mRNA.                          |
| <a href="#">Lrrc39</a>  | <a href="#">Lrrc39.dSep08</a>  | <a href="#">691307</a> | 3735   | 405  | 3 | 51  | leucine rich repeat containing 39 (Lrrc39) alternative variant dSep08, mRNA.                                    |
| <a href="#">Lrrc40</a>  | <a href="#">Lrrc40.bSep08</a>  | <a href="#">310946</a> | 6655   | 2182 | 4 | 153 | leucine rich repeat containing 40 (17.2 kD) (Lrrc40) alternative variant bSep08, mRNA.                          |
| <a href="#">Lrrc40</a>  | <a href="#">Lrrc40.cSep08</a>  | <a href="#">310946</a> | 5000   | 521  | 3 | 132 | leucine rich repeat containing 40 (Lrrc40) alternative variant cSep08, mRNA.                                    |
| <a href="#">Lrrc41</a>  | <a href="#">Lrrc41.bSep08</a>  | <a href="#">362566</a> | 12337  | 748  | 1 | 133 | leucine rich repeat containing 41 (Lrrc41) alternative variant bSep08, mRNA.                                    |
| <a href="#">Lrrc42</a>  | <a href="#">Lrrc42.bSep08</a>  | <a href="#">298309</a> | 5515   | 401  | 1 | 75  | leucine rich repeat containing 42 and hypothetical protein LOC689122 (Lrrc42) alternative variant bSep08, mRNA. |
| <a href="#">Lrrc42</a>  | <a href="#">Lrrc42.bSep08</a>  | <a href="#">689122</a> | 5515   | 401  | 1 | 75  | leucine rich repeat containing 42 and hypothetical protein LOC689122 (Lrrc42) alternative variant bSep08, mRNA. |
| <a href="#">Lrrc43</a>  | <a href="#">Lrrc43.aSep08</a>  | <a href="#">288751</a> | 10535  | 756  |   | 251 | leucine rich repeat containing 43 (Lrrc43) mRNA.                                                                |
| <a href="#">Lrrc44</a>  | <a href="#">Lrrc44.bSep08</a>  | <a href="#">499732</a> | 8307   | 751  | 1 | 198 | leucine rich repeat containing 44 (Lrrc44) alternative variant bSep08, mRNA.                                    |
| <a href="#">Lrrc46</a>  | <a href="#">Lrrc46.bSep08</a>  | <a href="#">287653</a> | 11410  | 800  | 2 | 182 | leucine rich repeat containing 46 (Lrrc46) alternative variant bSep08, mRNA.                                    |
| <a href="#">Lrrc47</a>  | <a href="#">Lrrc47.aSep08</a>  | <a href="#">362672</a> | 9433   | 2888 | 7 | 579 | leucine rich repeat containing 47 (Lrrc47) alternative variant aSep08, mRNA.                                    |
| <a href="#">Lrrc47</a>  | <a href="#">Lrrc47.cSep08</a>  | <a href="#">362672</a> | 926    | 794  | 2 | 87  | leucine rich repeat containing 47 (9.4 kD) (Lrrc47) alternative variant cSep08, mRNA.                           |
| <a href="#">Lrrc48</a>  | <a href="#">Lrrc48.bSep08</a>  | <a href="#">287371</a> | 13841  | 709  | 6 | 117 | leucine rich repeat containing 48 (Lrrc48) alternative variant bSep08, mRNA.                                    |
| <a href="#">Lrrc48</a>  | <a href="#">Lrrc48.cSep08</a>  | <a href="#">287371</a> | 751    | 444  | 2 | 40  | leucine rich repeat containing 48 (Lrrc48) alternative variant cSep08, mRNA.                                    |
| <a href="#">Lrrc49</a>  | <a href="#">Lrrc49.bSep08</a>  | <a href="#">300763</a> | 7980   | 755  | 5 | 164 | leucine rich repeat containing 49 (Lrrc49) alternative variant bSep08, mRNA.                                    |
| <a href="#">Lrrc49</a>  | <a href="#">Lrrc49.cSep08</a>  | <a href="#">300763</a> | 38851  | 638  | 4 | 76  | leucine rich repeat containing 49 (Lrrc49) alternative variant cSep08, mRNA.                                    |

|                         |                                |                        |        |      |    |     |                                                                                                 |
|-------------------------|--------------------------------|------------------------|--------|------|----|-----|-------------------------------------------------------------------------------------------------|
| <a href="#">Lrrc50</a>  | <a href="#">Lrrc50.bSep08</a>  | <a href="#">361419</a> | 3623   | 633  | 1  | 163 | leucine rich repeat containing 50 (Lrrc50) alternative variant bSep08, mRNA.                    |
| <a href="#">Lrrc56</a>  | <a href="#">Lrrc56.bSep08</a>  | <a href="#">365389</a> | 3865   | 844  | 1  | 126 | leucine rich repeat containing 56 (13.9 kD) (Lrrc56) alternative variant bSep08, complete mRNA. |
| <a href="#">Lrrc57</a>  | <a href="#">Lrrc57.bSep08</a>  | <a href="#">311346</a> | 1945   | 1026 | 2  | 175 | leucine rich repeat containing 57 (19.5 kD) (Lrrc57) alternative variant bSep08, mRNA.          |
| <a href="#">Lrrc57</a>  | <a href="#">Lrrc57.cSep08</a>  | <a href="#">311346</a> | 1010   | 716  | 1  | 97  | leucine rich repeat containing 57 (10.7 kD) (Lrrc57) alternative variant cSep08, mRNA.          |
| <a href="#">Lrrc58</a>  | <a href="#">Lrrc58.aSep08</a>  | <a href="#">303919</a> | 9021   | 722  |    | 240 | leucine rich repeat containing 58 (Lrrc58) mRNA.                                                |
| <a href="#">Lrrcc1</a>  | <a href="#">Lrrcc1.aSep08</a>  | <a href="#">266808</a> | 11859  | 988  |    | 328 | putative protein, with 3 coiled coil domains, of eukaryotic origin (Lrrcc1) mRNA.               |
| <a href="#">LRRCT.0</a> | <a href="#">LRRCT.0.aSep08</a> |                        | 4667   | 347  |    | 115 | leucine-rich repeats immunoglobulin-like domains 1 (LRRCT.0) mRNA.                              |
| <a href="#">Lrrfip1</a> | <a href="#">Lrrfip1.bSep08</a> | <a href="#">367314</a> | 62502  | 1952 | 11 | 402 | leucine rich repeat (in FLII) interacting protein 1 (Lrrfip1) alternative variant bSep08, mRNA. |
| <a href="#">Lrrfip1</a> | <a href="#">Lrrfip1.cSep08</a> | <a href="#">367314</a> | 57892  | 783  | 6  | 199 | leucine rich repeat (in FLII) interacting protein 1 (Lrrfip1) alternative variant cSep08, mRNA. |
| <a href="#">Lrrfip1</a> | <a href="#">Lrrfip1.dSep08</a> | <a href="#">367314</a> | 95954  | 718  | 12 | 144 | leucine rich repeat (in FLII) interacting protein 1 (Lrrfip1) alternative variant dSep08, mRNA. |
| <a href="#">Lrrfip1</a> | <a href="#">Lrrfip1.eSep08</a> | <a href="#">367314</a> | 104866 | 735  | 12 | 143 | leucine rich repeat (in FLII) interacting protein 1 (Lrrfip1) alternative variant eSep08, mRNA. |
| <a href="#">Lrrfip2</a> | <a href="#">Lrrfip2.bSep08</a> | <a href="#">301035</a> | 101054 | 1453 | 13 | 342 | leucine rich repeat (in FLII) interacting protein 2 (Lrrfip2) alternative variant bSep08, mRNA. |
| <a href="#">Lrrfip2</a> | <a href="#">Lrrfip2.cSep08</a> | <a href="#">301035</a> | 41961  | 778  | 8  | 239 | leucine rich repeat (in FLII) interacting protein 2 (Lrrfip2) alternative variant cSep08, mRNA. |
| <a href="#">Lrrfip2</a> | <a href="#">Lrrfip2.dSep08</a> | <a href="#">301035</a> | 11564  | 1899 | 7  | 218 | leucine rich repeat (in FLII) interacting protein 2 (Lrrfip2) alternative variant dSep08, mRNA. |
| <a href="#">Lrriq1</a>  | <a href="#">Lrriq1.aSep08</a>  | <a href="#">299759</a> | 25733  | 675  |    | 224 | leucine-rich repeats and IQ motif containing 1 (Lrriq1) mRNA.                                   |
| <a href="#">Lrrk1</a>   | <a href="#">Lrrk1.aSep08</a>   | <a href="#">308703</a> | 10376  | 990  |    | 330 | leucine-rich repeat kinase 1 (Lrrk1) mRNA.                                                      |
| <a href="#">Lrrk2</a>   | <a href="#">Lrrk2.aSep08</a>   | <a href="#">300160</a> | 53473  | 2507 |    | 681 | leucine-rich repeat kinase 2 (Lrrk2) mRNA.                                                      |
| <a href="#">Lrrn2</a>   | <a href="#">Lrrn2.aSep08</a>   | <a href="#">289020</a> | 58028  | 630  |    | 113 | leucine rich repeat protein 2, neuronal (Lrrn2) mRNA.                                           |
| <a href="#">LRRNT.0</a> | <a href="#">LRRNT.0.aSep08</a> |                        | 10298  | 588  |    | 154 | slit homolog 2 (LRRNT.0) mRNA.                                                                  |
| <a href="#">LRRNT.1</a> | <a href="#">LRRNT.1.aSep08</a> |                        | 3057   | 389  |    | 129 | leucine-rich repeat, cysteine-rich flanking region, N-terminal (LRRNT.1) mRNA.                  |
| <a href="#">LRRNT.3</a> | <a href="#">LRRNT.3.aSep08</a> |                        | 1045   | 459  |    | 153 | CRA a (LRRNT.3) mRNA.                                                                           |
| <a href="#">LRR_1.1</a> | <a href="#">LRR_1.1.aSep08</a> |                        | 15257  | 1315 |    | 422 | extracellular matrix protein 2 (LRR_1.1) mRNA.                                                  |
| <a href="#">LRR_1.2</a> | <a href="#">LRR_1.2.aSep08</a> |                        | 45700  | 582  | 6  | 194 | G protein-coupled receptor 125 (LRR_1.2) alternative variant aSep08, mRNA.                      |
| <a href="#">LRR_1.2</a> | <a href="#">LRR_1.2.bSep08</a> |                        | 55583  | 957  | 8  | 169 | G protein-coupled receptor 125 (LRR_1.2) alternative variant bSep08, mRNA.                      |
| <a href="#">LRR_1.2</a> | <a href="#">LRR_1.2.eSep08</a> |                        | 3457   | 548  | 2  | 39  | putative protein (4.6 kD) (LRR_1.2) alternative variant eSep08, mRNA.                           |
| <a href="#">LRR_1.3</a> | <a href="#">LRR_1.3.aSep08</a> |                        | 7485   | 595  | 4  | 197 | leucine-rich repeat-containing protein homolog (LRR_1.3) alternative variant aSep08, mRNA.      |
| <a href="#">LRR_1.4</a> | <a href="#">LRR_1.4.aSep08</a> |                        | 808    | 378  |    | 125 | scribbled homolog CRA a (LRR_1.4) mRNA.                                                         |

|                          |                                 |                        |        |      |   |     |                                                                                                                  |
|--------------------------|---------------------------------|------------------------|--------|------|---|-----|------------------------------------------------------------------------------------------------------------------|
| <a href="#">LRR_1.5</a>  | <a href="#">LRR_1.5.aSep08</a>  |                        | 5668   | 399  |   | 132 | leucine-rich repeat kinase 2 (LRR_1.5) mRNA.                                                                     |
| <a href="#">LRR_1.6</a>  | <a href="#">LRR_1.6.aSep08</a>  |                        | 7761   | 2154 |   | 412 | podocan (LRR_1.6) mRNA.                                                                                          |
| <a href="#">LRR_1.7</a>  | <a href="#">LRR_1.7.aSep08</a>  |                        | 8292   | 788  |   | 109 | leucine-rich repeats immunoglobulin-like domains 1 (LRR_1.7) mRNA.                                               |
| <a href="#">LRR_1.8</a>  | <a href="#">LRR_1.8.aSep08</a>  |                        | 2128   | 589  |   | 162 | leucine rich neuronal (LRR_1.8) mRNA.                                                                            |
| <a href="#">LRR_1.9</a>  | <a href="#">LRR_1.9.aSep08</a>  |                        | 18640  | 593  |   | 181 | erbb2 interacting protein (LRR_1.9) mRNA.                                                                        |
| <a href="#">LRR_1.10</a> | <a href="#">LRR_1.10.aSep08</a> |                        | 3389   | 425  |   | 141 | leucine-rich repeat containing protein (LRR_1.10) mRNA.                                                          |
| <a href="#">LRR_1.11</a> | <a href="#">LRR_1.11.aSep08</a> |                        | 2846   | 1264 |   | 322 | leucine-rich repeats IQ motif containing 4 (LRR_1.11) mRNA.                                                      |
| <a href="#">LRR_1.12</a> | <a href="#">LRR_1.12.aSep08</a> |                        | 11015  | 785  |   | 261 | leucine-rich repeat kinase 1 (LRR_1.12) mRNA.                                                                    |
| <a href="#">Lrsam1</a>   | <a href="#">Lrsam1.bSep08</a>   | <a href="#">311866</a> | 4061   | 642  | 3 | 119 | leucine rich repeat and sterile alpha motif containing 1 (Lrsam1) alternative variant bSep08, mRNA.              |
| <a href="#">Lrsam1</a>   | <a href="#">Lrsam1.cSep08</a>   | <a href="#">311866</a> | 1727   | 405  | 2 | 50  | leucine rich repeat and sterile alpha motif containing 1 (Lrsam1) alternative variant cSep08, mRNA.              |
| <a href="#">Lrsam1</a>   | <a href="#">Lrsam1.dSep08</a>   | <a href="#">311866</a> | 4093   | 343  | 5 | 58  | leucine rich repeat and sterile alpha motif containing 1 (Lrsam1) alternative variant dSep08, mRNA.              |
| <a href="#">Lsamp</a>    | <a href="#">Lsamp.bSep08</a>    | <a href="#">29561</a>  | 257256 | 1188 | 7 | 194 | limbic system-associated membrane protein (Lsamp) alternative variant bSep08, mRNA.                              |
| <a href="#">Lsg1</a>     | <a href="#">Lsg1.bSep08</a>     | <a href="#">288029</a> | 5698   | 647  | 5 | 174 | large subunit GTPase 1 homolog (S. cerevisiae) (20.8 kD) (Lsg1) alternative variant bSep08, complete mRNA.       |
| <a href="#">Lsg1</a>     | <a href="#">Lsg1.dSep08</a>     | <a href="#">288029</a> | 2963   | 318  | 2 | 65  | large subunit GTPase 1 homolog (S. cerevisiae) (Lsg1) alternative variant dSep08, mRNA.                          |
| <a href="#">LSM.0</a>    | <a href="#">LSM.0.bSep08</a>    |                        | 2502   | 604  | 2 | 80  | like-Sm ribonucleoprotein, core (9.1 kD) (LSM.0) alternative variant bSep08, mRNA.                               |
| <a href="#">LSM.1</a>    | <a href="#">LSM.1.aSep08</a>    |                        | 6199   | 374  | 4 | 82  | small nuclear ribonucleoprotein E CRA a (LSM.1) alternative variant aSep08, mRNA.                                |
| <a href="#">LSM.1</a>    | <a href="#">LSM.1.bSep08</a>    |                        | 6238   | 417  | 4 | 67  | small nuclear ribonucleoprotein E CRA a (7.9 kD) (LSM.1) alternative variant bSep08, mRNA.                       |
| <a href="#">LSM.1</a>    | <a href="#">LSM.1.cSep08</a>    |                        | 6190   | 307  | 2 | 61  | small nuclear ribonucleoprotein e (LSM.1) alternative variant cSep08, mRNA.                                      |
| <a href="#">LSM.1</a>    | <a href="#">LSM.1.dSep08</a>    |                        | 3360   | 364  | 2 | 59  | small nuclear ribonucleoprotein e CRA a (LSM.1) alternative variant dSep08, mRNA.                                |
| <a href="#">LSM.1</a>    | <a href="#">LSM.1.eSep08</a>    |                        | 6292   | 898  | 3 | 52  | small nuclear ribonucleoprotein e (5.9 kD) (LSM.1) alternative variant eSep08, mRNA.                             |
| <a href="#">Lsm4</a>     | <a href="#">Lsm4.cSep08</a>     | <a href="#">290647</a> | 5301   | 812  | 5 | 103 | LSM4 homolog, U6 small nuclear RNA associated (S. cerevisiae) (11.3 kD) (Lsm4) alternative variant cSep08, mRNA. |
| <a href="#">Lsm4</a>     | <a href="#">Lsm4.dSep08</a>     | <a href="#">290647</a> | 4526   | 653  | 4 | 40  | LSM4 homolog, U6 small nuclear RNA associated (S. cerevisiae) (Lsm4) alternative variant dSep08, mRNA.           |
| <a href="#">Lsm5</a>     | <a href="#">Lsm5.aSep08</a>     | <a href="#">306222</a> | 3138   | 460  | 4 | 83  | LSM5 homolog, U6 small nuclear RNA associated (S. cerevisiae) (Lsm5) alternative variant aSep08, mRNA.           |
| <a href="#">Lsm5</a>     | <a href="#">Lsm5.bSep08</a>     | <a href="#">306222</a> | 1587   | 418  | 1 | 59  | LSM5 homolog, U6 small nuclear RNA associated (S. cerevisiae) (Lsm5) alternative variant bSep08, mRNA.           |
| <a href="#">Lsm6</a>     | <a href="#">Lsm6.bSep08</a>     | <a href="#">498934</a> | 2328   | 456  | 2 | 87  | LSM6 homolog, U6 small nuclear RNA associated (S. cerevisiae) (Lsm6) alternative variant bSep08, mRNA.           |

|                        |                               |                        |       |      |    |     |                                                                                                                                                                                                         |
|------------------------|-------------------------------|------------------------|-------|------|----|-----|---------------------------------------------------------------------------------------------------------------------------------------------------------------------------------------------------------|
| <a href="#">Lsm6</a>   | <a href="#">Lsm6.dSep08</a>   | <a href="#">498934</a> | 2346  | 448  | 2  | 63  | LSM6 homolog, U6 small nuclear RNA associated ( <i>S. cerevisiae</i> ) (Lsm6) alternative variant dSep08, mRNA.                                                                                         |
| <a href="#">Lsm7</a>   | <a href="#">Lsm7.bSep08</a>   | <a href="#">362829</a> | 2356  | 587  | 4  | 40  | LSM7 homolog, U6 small nuclear RNA associated ( <i>S. cerevisiae</i> ) (4.6 kD) (Lsm7) alternative variant bSep08, mRNA.                                                                                |
| <a href="#">Lsm8</a>   | <a href="#">Lsm8.bSep08</a>   | <a href="#">296913</a> | 5772  | 697  | 4  | 88  | LSM8 homolog, U6 small nuclear RNA associated ( <i>S. cerevisiae</i> ) (Lsm8) alternative variant bSep08, mRNA.                                                                                         |
| <a href="#">Lsm8</a>   | <a href="#">Lsm8.cSep08</a>   | <a href="#">296913</a> | 3931  | 769  | 3  | 67  | LSM8 homolog, U6 small nuclear RNA associated ( <i>S. cerevisiae</i> ) (7.4 kD) (Lsm8) alternative variant cSep08, mRNA.                                                                                |
| <a href="#">Lsm10</a>  | <a href="#">Lsm10.bSep08</a>  | <a href="#">366468</a> | 1910  | 819  | 2  | 122 | u7 snRNP-specific Sm-like protein LSM10 (13.9 kD) (Lsm10) alternative variant bSep08, complete mRNA.                                                                                                    |
| <a href="#">Lsm10</a>  | <a href="#">Lsm10.cSep08</a>  | <a href="#">366468</a> | 529   | 367  | 2  | 103 | u7 snRNP-specific Sm-like protein LSM10 (Lsm10) alternative variant cSep08, mRNA.                                                                                                                       |
| <a href="#">Lsm11</a>  | <a href="#">Lsm11.aSep08</a>  | <a href="#">501688</a> | 15613 | 2390 |    | 362 | u7 snRNP-specific Sm-like protein LSM11 (Lsm11) alternative variant aSep08, mRNA.                                                                                                                       |
| <a href="#">Lsm14a</a> | <a href="#">Lsm14a.bSep08</a> | <a href="#">361554</a> | 44259 | 2464 | 9  | 373 | LSM14 homolog A (SCD6, <i>S. cerevisiae</i> ) (Lsm14a) alternative variant bSep08, mRNA.                                                                                                                |
| <a href="#">Lsm14a</a> | <a href="#">Lsm14a.cSep08</a> | <a href="#">361554</a> | 13788 | 1580 | 7  | 283 | LSM14 homolog A (SCD6, <i>S. cerevisiae</i> ) (Lsm14a) alternative variant cSep08, mRNA.                                                                                                                |
| <a href="#">Lsm16</a>  | <a href="#">Lsm16.aSep08</a>  | <a href="#">315708</a> | 9459  | 1199 |    | 193 | LSM16 homolog (EDC3, <i>S. cerevisiae</i> ) (Lsm16) mRNA.                                                                                                                                               |
| <a href="#">Lsm1</a>   | <a href="#">Lsm1.bSep08</a>   | <a href="#">287429</a> | 541   | 382  | 2  | 73  | LSM domain-containing 1 (7.9 kD) (Lsm1) alternative variant bSep08, mRNA.                                                                                                                               |
| <a href="#">Lsm1</a>   | <a href="#">Lsm1.cSep08</a>   | <a href="#">287429</a> | 1182  | 528  | 3  | 73  | LSM domain-containing 1 (7.9 kD) (Lsm1) alternative variant cSep08, mRNA.                                                                                                                               |
| <a href="#">Lsp1</a>   | <a href="#">Lsp1.bSep08</a>   | <a href="#">361680</a> | 22445 | 1513 | 11 | 329 | lymphocyte specific 1 (36.4 kD) (Lsp1) alternative variant bSep08, mRNA.                                                                                                                                |
| <a href="#">Lsp1</a>   | <a href="#">Lsp1.cSep08</a>   | <a href="#">361680</a> | 8317  | 1057 | 9  | 224 | lymphocyte specific 1 (Lsp1) alternative variant cSep08, mRNA.                                                                                                                                          |
| <a href="#">Lsp1</a>   | <a href="#">Lsp1.dSep08</a>   | <a href="#">361680</a> | 13248 | 644  | 4  | 184 | lymphocyte specific 1 (Lsp1) alternative variant dSep08, mRNA.                                                                                                                                          |
| <a href="#">Lsr</a>    | <a href="#">Lsr.bSep08</a>    | <a href="#">64355</a>  | 15206 | 1799 | 8  | 528 | lipolysis stimulated lipoprotein receptor (Lsr) alternative variant bSep08, mRNA.                                                                                                                       |
| <a href="#">Lsr</a>    | <a href="#">Lsr.cSep08</a>    | <a href="#">64355</a>  | 13910 | 726  | 4  | 241 | lipolysis stimulated lipoprotein receptor (Lsr) alternative variant cSep08, mRNA.                                                                                                                       |
| <a href="#">Lsr</a>    | <a href="#">Lsr.dSep08</a>    | <a href="#">64355</a>  | 1008  | 888  | 2  | 102 | lipolysis stimulated lipoprotein receptor (Lsr) alternative variant dSep08, mRNA.                                                                                                                       |
| <a href="#">Lss</a>    | <a href="#">Lss.aSep08</a>    | <a href="#">81681</a>  | 19453 | 1726 |    | 575 | lanosterol synthase (Lss) mRNA.                                                                                                                                                                         |
| <a href="#">Lta4h</a>  | <a href="#">Lta4h.aSep08</a>  | <a href="#">299732</a> | 32861 | 2031 | 19 | 611 | leukotriene A4 hydrolase and similar to Proteasome subunit beta type 3 (Proteasome theta chain) (Proteasome chain 13) (Proteasome component C10-II) (69.1 kD) (Lta4h) alternative variant aSep08, mRNA. |
| <a href="#">Lta4h</a>  | <a href="#">Lta4h.aSep08</a>  | <a href="#">680680</a> | 32861 | 2031 | 19 | 611 | leukotriene A4 hydrolase and similar to Proteasome subunit beta type 3 (Proteasome theta chain) (Proteasome chain 13) (Proteasome component C10-II) (69.1 kD) (Lta4h) alternative variant aSep08, mRNA. |

|                        |                               |                        |       |      |    |     |                                                                                                                                                                                               |
|------------------------|-------------------------------|------------------------|-------|------|----|-----|-----------------------------------------------------------------------------------------------------------------------------------------------------------------------------------------------|
| <a href="#">Lta4h</a>  | <a href="#">Lta4h.bSep08</a>  | <a href="#">299732</a> | 9807  | 479  | 5  | 77  | leukotriene A4 hydrolase and similar to Proteasome subunit beta type 3 (Proteasome theta chain) (Proteasome chain 13) (Proteasome component C10-II) (Lta4h) alternative variant bSep08, mRNA. |
| <a href="#">Lta4h</a>  | <a href="#">Lta4h.bSep08</a>  | <a href="#">680680</a> | 9807  | 479  | 5  | 77  | leukotriene A4 hydrolase and similar to Proteasome subunit beta type 3 (Proteasome theta chain) (Proteasome chain 13) (Proteasome component C10-II) (Lta4h) alternative variant bSep08, mRNA. |
| <a href="#">Ltb</a>    | <a href="#">Ltb.bSep08</a>    | <a href="#">361795</a> | 968   | 644  | 1  | 183 | lymphotoxin B (Ltb) alternative variant bSep08, mRNA.                                                                                                                                         |
| <a href="#">Ltb4dh</a> | <a href="#">Ltb4dh.bSep08</a> | <a href="#">192227</a> | 4730  | 572  | 1  | 108 | leukotriene B4 12-hydroxydehydrogenase (Ltb4dh) alternative variant bSep08, mRNA.                                                                                                             |
| <a href="#">Ltbp1</a>  | <a href="#">Ltbp1.aSep08</a>  | <a href="#">59107</a>  | 42639 | 2179 | 10 | 463 | latent transforming growth factor beta binding protein 1 (Ltbp1) alternative variant aSep08, mRNA.                                                                                            |
| <a href="#">Ltbp2</a>  | <a href="#">Ltbp2.bSep08</a>  | <a href="#">59106</a>  | 3152  | 1945 | 6  | 303 | latent transforming growth factor beta binding protein 2 (Ltbp2) alternative variant bSep08, mRNA.                                                                                            |
| <a href="#">Ltbp4</a>  | <a href="#">Ltbp4.aSep08</a>  | <a href="#">292734</a> | 9186  | 2137 | 16 | 712 | latent transforming growth factor beta binding protein 4 (Ltbp4) alternative variant aSep08, mRNA.                                                                                            |
| <a href="#">Ltbp4</a>  | <a href="#">Ltbp4.bSep08</a>  | <a href="#">292734</a> | 16733 | 2421 | 13 | 674 | latent transforming growth factor beta binding protein 4 (Ltbp4) alternative variant bSep08, mRNA.                                                                                            |
| <a href="#">Ltbp4</a>  | <a href="#">Ltbp4.cSep08</a>  | <a href="#">292734</a> | 20818 | 1786 | 9  | 509 | latent transforming growth factor beta binding protein 4 (Ltbp4) alternative variant cSep08, mRNA.                                                                                            |
| <a href="#">Ltbp4</a>  | <a href="#">Ltbp4.dSep08</a>  | <a href="#">292734</a> | 2781  | 1084 | 4  | 273 | latent transforming growth factor beta binding protein 4 (Ltbp4) alternative variant dSep08, mRNA.                                                                                            |
| <a href="#">Ltbp4</a>  | <a href="#">Ltbp4.eSep08</a>  | <a href="#">292734</a> | 1859  | 990  | 3  | 243 | latent transforming growth factor beta binding protein 4 (Ltbp4) alternative variant eSep08, mRNA.                                                                                            |
| <a href="#">Ltbr</a>   | <a href="#">Ltbr.bSep08</a>   | <a href="#">297604</a> | 1375  | 702  | 4  | 159 | lymphotoxin B receptor (Ltbr) alternative variant bSep08, mRNA.                                                                                                                               |
| <a href="#">Ltc4s</a>  | <a href="#">Ltc4s.aSep08</a>  | <a href="#">114097</a> | 2012  | 724  | 4  | 240 | leukotriene C4 synthase (Ltc4s) alternative variant aSep08, mRNA.                                                                                                                             |
| <a href="#">Ltv1</a>   | <a href="#">Ltv1.bSep08</a>   | <a href="#">361452</a> | 2124  | 1602 | 1  | 74  | LTV1 homolog (S. cerevisiae) (8.8 kD) (Ltv1) alternative variant bSep08, mRNA.                                                                                                                |
| <a href="#">luby</a>   | <a href="#">luby.aSep08</a>   |                        | 3573  | 1220 | 4  | 406 | putative protein of eukaryotic origin (luby) mRNA.                                                                                                                                            |
| <a href="#">Luc7l</a>  | <a href="#">Luc7l.aSep08</a>  | <a href="#">360503</a> | 29743 | 1500 | 11 | 318 | CRA b (38.1 kD) (Luc7l) alternative variant aSep08, complete mRNA.                                                                                                                            |
| <a href="#">Luc7l</a>  | <a href="#">Luc7l.cSep08</a>  | <a href="#">360503</a> | 25951 | 801  | 7  | 238 | luc7 homolog -like (Luc7l) alternative variant cSep08, mRNA.                                                                                                                                  |
| <a href="#">Luc7l</a>  | <a href="#">Luc7l.dSep08</a>  | <a href="#">360503</a> | 1201  | 812  | 2  | 102 | putative nuclear protein (11.3 kD) (Luc7l) alternative variant dSep08, complete mRNA.                                                                                                         |
| <a href="#">Luc7l</a>  | <a href="#">Luc7l.fSep08</a>  | <a href="#">360503</a> | 6072  | 534  | 4  | 79  | putative protein (8.6 kD) (Luc7l) alternative variant fSep08, complete mRNA.                                                                                                                  |
| <a href="#">Luc7l</a>  | <a href="#">Luc7l.gSep08</a>  | <a href="#">360503</a> | 6786  | 422  | 2  | 70  | CRA a (Luc7l) alternative variant gSep08, mRNA.                                                                                                                                               |
| <a href="#">Luc7l2</a> | <a href="#">Luc7l2.bSep08</a> | <a href="#">312251</a> | 27773 | 1365 | 7  | 330 | LUC7-like 2 (S. cerevisiae) and hypothetical protein LOC689861 (Luc7l2) alternative variant bSep08, mRNA.                                                                                     |
| <a href="#">Luc7l2</a> | <a href="#">Luc7l2.bSep08</a> | <a href="#">689861</a> | 27773 | 1365 | 7  | 330 | LUC7-like 2 (S. cerevisiae) and hypothetical protein LOC689861 (Luc7l2) alternative variant bSep08, mRNA.                                                                                     |
| <a href="#">Luc7l2</a> | <a href="#">Luc7l2.cSep08</a> | <a href="#">312251</a> | 22739 | 1870 | 6  | 248 | LUC7-like 2 (S. cerevisiae) and hypothetical protein LOC689861 (Luc7l2) alternative variant cSep08, mRNA.                                                                                     |

|                               |                                      |                        |       |      |   |     |                                                                                                                          |
|-------------------------------|--------------------------------------|------------------------|-------|------|---|-----|--------------------------------------------------------------------------------------------------------------------------|
| <a href="#">Luc7l2</a>        | <a href="#">Luc7l2.cSep08</a>        | <a href="#">689861</a> | 22739 | 1870 | 6 | 248 | LUC7-like 2 ( <i>S. cerevisiae</i> ) and hypothetical protein LOC689861 (Luc7l2) alternative variant cSep08, mRNA.       |
| <a href="#">Luc7l2</a>        | <a href="#">Luc7l2.dSep08</a>        | <a href="#">312251</a> | 19929 | 884  | 4 | 214 | LUC7-like 2 ( <i>S. cerevisiae</i> ) and hypothetical protein LOC689861 (Luc7l2) alternative variant dSep08, mRNA.       |
| <a href="#">Luc7l2</a>        | <a href="#">Luc7l2.dSep08</a>        | <a href="#">689861</a> | 19929 | 884  | 4 | 214 | LUC7-like 2 ( <i>S. cerevisiae</i> ) and hypothetical protein LOC689861 (Luc7l2) alternative variant dSep08, mRNA.       |
| <a href="#">luchy</a>         | <a href="#">luchy.aSep08</a>         |                        | 1210  | 731  |   | 34  | putative protein (3.8 kD) (luchy) mRNA.                                                                                  |
| <a href="#">ludar</a>         | <a href="#">ludar.aSep08</a>         |                        | 1761  | 505  |   | 44  | putative protein (4.7 kD) (ludar) mRNA.                                                                                  |
| <a href="#">lufer</a>         | <a href="#">lufer.aSep08</a>         |                        | 6263  | 994  | 6 | 187 | wac mouse WW domain-containing adapter protein with coiled-coil like (20.1 kD) (lufer) alternative variant aSep08, mRNA. |
| <a href="#">lufer</a>         | <a href="#">lufer.bSep08</a>         |                        | 5686  | 767  | 5 | 142 | putative protein of vertebrate origin (lufer) alternative variant bSep08, mRNA.                                          |
| <a href="#">lufer</a>         | <a href="#">lufer.cSep08</a>         |                        | 2663  | 982  | 2 | 67  | CRA a (lufer) alternative variant cSep08, mRNA.                                                                          |
| <a href="#">luflo</a>         | <a href="#">luflo.aSep08</a>         |                        | 533   | 384  |   | 106 | tectonic family member 3 like (luflo) mRNA.                                                                              |
| <a href="#">lufly</a>         | <a href="#">lufly.aSep08</a>         |                        | 19536 | 431  |   | 66  | putative protein, with a coiled coil domain (7.3 kD) (lufly) mRNA.                                                       |
| <a href="#">luje</a>          | <a href="#">luje.aSep08</a>          |                        | 18980 | 932  | 4 | 173 | brdt mouse testis-specific protein like (luje) mRNA.                                                                     |
| <a href="#">lukee</a>         | <a href="#">lukee.aSep08</a>         |                        | 477   | 327  |   | 53  | putative protein (5.9 kD) (lukee) mRNA.                                                                                  |
| <a href="#">luloy</a>         | <a href="#">luloy.aSep08</a>         |                        | 18717 | 850  |   | 229 | ATPase type 13a3 (luloy) mRNA.                                                                                           |
| <a href="#">lumee</a>         | <a href="#">lumee.bSep08</a>         |                        | 441   | 206  | 2 | 37  | putative protein (lumee) alternative variant bSep08, mRNA.                                                               |
| <a href="#">lumer</a>         | <a href="#">lumer.aSep08</a>         |                        | 3046  | 401  |   | 133 | A member cassette sub-family 8 (lumer) mRNA.                                                                             |
| <a href="#">Lung_7-TM_R.0</a> | <a href="#">Lung_7-TM_R.0.aSep08</a> |                        | 18987 | 1127 |   | 352 | transmembrane protein 87B (Lung_7-TM_R.0) mRNA.                                                                          |
| <a href="#">lunoy</a>         | <a href="#">lunoy.aSep08</a>         |                        | 13606 | 1060 | 4 | 78  | putative protein of vertebrate origin (8.9 kD) (lunoy) alternative variant aSep08, mRNA.                                 |
| <a href="#">lunoy</a>         | <a href="#">lunoy.bSep08</a>         |                        | 3849  | 743  | 1 | 51  | putative protein of mammalian origin (5.8 kD) (lunoy) alternative variant bSep08, mRNA.                                  |
| <a href="#">lupor</a>         | <a href="#">lupor.aSep08</a>         |                        | 10218 | 469  |   | 54  | putative protein (lupor) mRNA.                                                                                           |
| <a href="#">lusa</a>          | <a href="#">lusa.aSep08</a>          |                        | 31137 | 388  |   | 128 | collagen type xxii alpha 1 (lusa) mRNA.                                                                                  |
| <a href="#">lushee</a>        | <a href="#">lushee.aSep08</a>        |                        | 11401 | 744  |   | 247 | putative protein of vertebrate origin (lushee) mRNA.                                                                     |
| <a href="#">lutu</a>          | <a href="#">lutu.aSep08</a>          |                        | 684   | 551  |   | 79  | putative protein (8.6 kD) (lutu) mRNA.                                                                                   |
| <a href="#">luvar</a>         | <a href="#">luvar.aSep08</a>         |                        | 1919  | 1303 |   | 36  | putative protein (3.8 kD) (luvar) mRNA.                                                                                  |
| <a href="#">luwey</a>         | <a href="#">luwey.aSep08</a>         |                        | 1185  | 449  |   | 40  | putative protein (4.4 kD) (luwey) mRNA.                                                                                  |
| <a href="#">Luzp5</a>         | <a href="#">Luzp5.aSep08</a>         | <a href="#">362798</a> | 8500  | 286  |   | 95  | leucine zipper protein 5 (Luzp5) mRNA.                                                                                   |
| <a href="#">Lxn</a>           | <a href="#">Lxn.bSep08</a>           | <a href="#">59073</a>  | 2749  | 616  | 3 | 146 | latexin (16.4 kD) (Lxn) alternative variant bSep08, mRNA.                                                                |
| <a href="#">Ly6b</a>          | <a href="#">Ly6b.cSep08</a>          | <a href="#">246138</a> | 2591  | 768  | 3 | 56  | lymphocyte antigen 6 complex, locus B (Ly6b) alternative variant cSep08, mRNA.                                           |
| <a href="#">Ly6e</a>          | <a href="#">Ly6e.aSep08</a>          | <a href="#">362934</a> | 2930  | 852  | 5 | 179 | lymphocyte antigen 6 complex, locus E (18.8 kD) (Ly6e) alternative variant aSep08, mRNA.                                 |
| <a href="#">Ly6e</a>          | <a href="#">Ly6e.bSep08</a>          | <a href="#">362934</a> | 3451  | 681  | 5 | 160 | lymphocyte antigen 6 complex, locus E (Ly6e) alternative variant bSep08, mRNA.                                           |
| <a href="#">Ly6e</a>          | <a href="#">Ly6e.cSep08</a>          | <a href="#">362934</a> | 3894  | 1083 | 4 | 136 | lymphocyte antigen 6 complex, locus E (14.3 kD) (Ly6e) alternative variant cSep08, mRNA.                                 |



|                        |                               |                        |        |      |   |     |                                                                                          |
|------------------------|-------------------------------|------------------------|--------|------|---|-----|------------------------------------------------------------------------------------------|
| <a href="#">Ly6e</a>   | <a href="#">Ly6e.dSep08</a>   | <a href="#">362934</a> | 3366   | 955  | 6 | 136 | lymphocyte antigen 6 complex, locus E (14.3 kD) (Ly6e) alternative variant dSep08, mRNA. |
| <a href="#">Ly6e</a>   | <a href="#">Ly6e.eSep08</a>   | <a href="#">362934</a> | 3366   | 599  | 5 | 136 | lymphocyte antigen 6 complex, locus E (14.3 kD) (Ly6e) alternative variant eSep08, mRNA. |
| <a href="#">Ly6e</a>   | <a href="#">Ly6e.fSep08</a>   | <a href="#">362934</a> | 3704   | 1270 | 4 | 136 | lymphocyte antigen 6 complex, locus E (14.3 kD) (Ly6e) alternative variant fSep08, mRNA. |
| <a href="#">Ly6e</a>   | <a href="#">Ly6e.hSep08</a>   | <a href="#">362934</a> | 2737   | 758  | 5 | 120 | lymphocyte antigen 6 complex, locus E (Ly6e) alternative variant hSep08, mRNA.           |
| <a href="#">Ly6e</a>   | <a href="#">Ly6e.iSep08</a>   | <a href="#">362934</a> | 3063   | 1107 | 4 | 110 | lymphocyte antigen 6 complex, locus E (11.7 kD) (Ly6e) alternative variant iSep08, mRNA. |
| <a href="#">Ly6g6f</a> | <a href="#">Ly6g6f.bSep08</a> | <a href="#">309609</a> | 718    | 417  | 2 | 72  | lymphocyte antigen 6 complex, locus G6F (Ly6g6f) alternative variant bSep08, mRNA.       |
| <a href="#">Ly6h</a>   | <a href="#">Ly6h.bSep08</a>   | <a href="#">300025</a> | 1918   | 910  | 2 | 181 | lymphocyte antigen 6 complex, locus H (Ly6h) alternative variant bSep08, mRNA.           |
| <a href="#">Ly6h</a>   | <a href="#">Ly6h.cSep08</a>   | <a href="#">300025</a> | 1722   | 543  | 2 | 149 | lymphocyte antigen 6 complex, locus H (Ly6h) alternative variant cSep08, mRNA.           |
| <a href="#">Ly6h</a>   | <a href="#">Ly6h.dSep08</a>   | <a href="#">300025</a> | 1602   | 401  | 2 | 78  | lymphocyte antigen 6 complex, locus H (Ly6h) alternative variant dSep08, mRNA.           |
| <a href="#">Ly9</a>    | <a href="#">Ly9.aSep08</a>    | <a href="#">289227</a> | 1766   | 575  | 2 | 191 | lymphocyte antigen 9 (Ly9) alternative variant aSep08, mRNA.                             |
| <a href="#">Ly49s6</a> | <a href="#">Ly49s6.aSep08</a> | <a href="#">494196</a> | 23583  | 684  |   | 64  | ly49 stimulatory receptor 6 (7.2 kD) (Ly49s6) mRNA.                                      |
| <a href="#">Ly75</a>   | <a href="#">Ly75.aSep08</a>   | <a href="#">499800</a> | 4955   | 327  |   | 108 | lymphocyte antigen 75 (Ly75) mRNA.                                                       |
| <a href="#">Lyar</a>   | <a href="#">Lyar.bSep08</a>   | <a href="#">289707</a> | 10010  | 935  | 6 | 253 | ly1 antibody reactive clone (Lyar) alternative variant bSep08, mRNA.                     |
| <a href="#">Lyar</a>   | <a href="#">Lyar.cSep08</a>   | <a href="#">289707</a> | 3346   | 450  | 3 | 59  | ly1 antibody reactive clone (Lyar) alternative variant cSep08, mRNA.                     |
| <a href="#">lyby</a>   | <a href="#">lyby.aSep08</a>   |                        | 2464   | 1526 | 4 | 366 | putative protein of vertebrate origin (lyby) alternative variant aSep08, mRNA.           |
| <a href="#">lyby</a>   | <a href="#">lyby.bSep08</a>   |                        | 2627   | 635  | 4 | 211 | putative protein of vertebrate origin (lyby) alternative variant bSep08, mRNA.           |
| <a href="#">Lycat</a>  | <a href="#">Lycat.aSep08</a>  | <a href="#">362702</a> | 154201 | 1190 | 2 | 346 | lysocardiolipin acyltransferase (Lycat) alternative variant aSep08, mRNA.                |
| <a href="#">lychy</a>  | <a href="#">lychy.aSep08</a>  |                        | 6536   | 779  |   | 67  | putative protein (lychy) mRNA.                                                           |
| <a href="#">lydar</a>  | <a href="#">lydar.aSep08</a>  |                        | 52616  | 439  |   | 55  | putative protein (lydar) mRNA.                                                           |
| <a href="#">lyfer</a>  | <a href="#">lyfer.aSep08</a>  |                        | 3959   | 199  | 2 | 63  | gag protein like (lyfer) alternative variant aSep08, mRNA.                               |
| <a href="#">lyflo</a>  | <a href="#">lyflo.aSep08</a>  |                        | 1607   | 273  |   | 26  | putative protein (lyflo) mRNA.                                                           |
| <a href="#">lyflu</a>  | <a href="#">lyflu.aSep08</a>  |                        | 6715   | 629  |   | 51  | putative protein (5.4 kD) (lyflu) mRNA.                                                  |
| <a href="#">lyjey</a>  | <a href="#">lyjey.aSep08</a>  |                        | 6106   | 1535 |   | 106 | bromodomain testis-specific CRA a (lyjey) mRNA.                                          |
| <a href="#">Lyk5</a>   | <a href="#">Lyk5.aSep08</a>   | <a href="#">303605</a> | 28120  | 1373 | 5 | 416 | protein kinase LYK5 (Lyk5) alternative variant aSep08, mRNA.                             |
| <a href="#">Lyk5</a>   | <a href="#">Lyk5.cSep08</a>   | <a href="#">303605</a> | 24584  | 830  | 1 | 248 | protein kinase LYK5 (Lyk5) alternative variant cSep08, mRNA.                             |
| <a href="#">Lyk5</a>   | <a href="#">Lyk5.dSep08</a>   | <a href="#">303605</a> | 28985  | 2129 | 4 | 235 | protein kinase LYK5 (26.1 kD) (Lyk5) alternative variant dSep08, complete mRNA.          |
| <a href="#">Lyk5</a>   | <a href="#">Lyk5.eSep08</a>   | <a href="#">303605</a> | 24091  | 848  | 2 | 192 | protein kinase LYK5 (Lyk5) alternative variant eSep08, mRNA.                             |

|                         |                                |                        |       |      |   |     |                                                                                                            |
|-------------------------|--------------------------------|------------------------|-------|------|---|-----|------------------------------------------------------------------------------------------------------------|
| <a href="#">lykee</a>   | <a href="#">lykee.aSep08</a>   |                        | 7602  | 338  |   | 44  | putative protein (lykee) mRNA.                                                                             |
| <a href="#">lyloy</a>   | <a href="#">lyloy.aSep08</a>   |                        | 3083  | 542  |   | 60  | putative protein (6.8 kD) (lyloy) mRNA.                                                                    |
| <a href="#">lymee</a>   | <a href="#">lymee.aSep08</a>   |                        | 821   | 369  |   | 122 | polycystic kidney disease 1 like (lymee) mRNA.                                                             |
| <a href="#">lymer</a>   | <a href="#">lymer.aSep08</a>   |                        | 5176  | 414  |   | 137 | member 8a (lymer) mRNA.                                                                                    |
| <a href="#">lynoy</a>   | <a href="#">lynoy.aSep08</a>   |                        | 7571  | 632  |   | 97  | putative mitochondrial protein (11.2 kD) (lynoy) mRNA.                                                     |
| <a href="#">Lypd2</a>   | <a href="#">Lypd2.bSep08</a>   | <a href="#">300017</a> | 1795  | 446  | 1 | 121 | CD59 antigen (Lypd2) alternative variant bSep08, mRNA.                                                     |
| <a href="#">Lypd3</a>   | <a href="#">Lypd3.bSep08</a>   | <a href="#">60378</a>  | 1689  | 749  | 1 | 249 | CD59 antigen (Lypd3) alternative variant bSep08, mRNA.                                                     |
| <a href="#">Lypla1</a>  | <a href="#">Lypla1.bSep08</a>  | <a href="#">25514</a>  | 27697 | 786  | 8 | 198 | lysophospholipase 1 (Lypla1) alternative variant bSep08, mRNA.                                             |
| <a href="#">Lypla1</a>  | <a href="#">Lypla1.cSep08</a>  | <a href="#">25514</a>  | 3758  | 762  | 3 | 80  | lysophospholipase 1 (Lypla1) alternative variant cSep08, mRNA.                                             |
| <a href="#">Lypla2</a>  | <a href="#">Lypla2.bSep08</a>  | <a href="#">83510</a>  | 3565  | 602  | 4 | 182 | lysophospholipase 2 (Lypla2) alternative variant bSep08, mRNA.                                             |
| <a href="#">Lypla2</a>  | <a href="#">Lypla2.cSep08</a>  | <a href="#">83510</a>  | 4463  | 1491 | 4 | 164 | lysophospholipase 2 (17.7 kD) (Lypla2) alternative variant cSep08, mRNA.                                   |
| <a href="#">Lypla2</a>  | <a href="#">Lypla2.dSep08</a>  | <a href="#">83510</a>  | 3535  | 578  | 4 | 163 | lysophospholipase 2 (Lypla2) alternative variant dSep08, mRNA.                                             |
| <a href="#">Lyplal1</a> | <a href="#">Lyplal1.cSep08</a> | <a href="#">289357</a> | 14748 | 281  | 2 | 29  | lysophospholipase-like 1 (3.1 kD) (Lyplal1) alternative variant cSep08, mRNA.                              |
| <a href="#">lypor</a>   | <a href="#">lypor.aSep08</a>   |                        | 3160  | 590  | 1 | 103 | putative protein (11.8 kD) (lypor) alternative variant aSep08, mRNA.                                       |
| <a href="#">lypor</a>   | <a href="#">lypor.bSep08</a>   |                        | 34686 | 523  | 1 | 19  | putative protein (11.8 kD) (lypor) alternative variant bSep08, mRNA.                                       |
| <a href="#">Lym1</a>    | <a href="#">Lym1.bSep08</a>    | <a href="#">365361</a> | 20007 | 1242 | 3 | 122 | LYR motif containing 1 (14.2 kD) (Lym1) alternative variant bSep08, mRNA.                                  |
| <a href="#">lysa</a>    | <a href="#">lysa.aSep08</a>    |                        | 1716  | 1108 |   | 83  | putative protein (9.4 kD) (lysa) mRNA.                                                                     |
| <a href="#">lyshee</a>  | <a href="#">lyshee.aSep08</a>  |                        | 1914  | 400  |   | 133 | putative protein of bilateral origin (lyshee) mRNA.                                                        |
| <a href="#">Lysmd2</a>  | <a href="#">Lysmd2.bSep08</a>  | <a href="#">300839</a> | 7076  | 1550 | 3 | 149 | putative protein of vertebrate origin (16.9 kD) (Lysmd2) alternative variant bSep08, mRNA.                 |
| <a href="#">Lysmd2</a>  | <a href="#">Lysmd2.cSep08</a>  | <a href="#">300839</a> | 12129 | 180  | 2 | 59  | putative protein (Lysmd2) alternative variant cSep08, mRNA.                                                |
| <a href="#">Lysmd3</a>  | <a href="#">Lysmd3.bSep08</a>  | <a href="#">315923</a> | 7728  | 2534 | 3 | 162 | putative protein of vertebrate origin (Lysmd3) alternative variant bSep08, mRNA.                           |
| <a href="#">Lyst</a>    | <a href="#">Lyst.aSep08</a>    | <a href="#">85419</a>  | 51554 | 2248 |   | 654 | lysosomal trafficking regulator (Lyst) alternative variant aSep08, mRNA.                                   |
| <a href="#">lytu</a>    | <a href="#">lytu.aSep08</a>    |                        | 1359  | 410  |   | 91  | putative protein (10.0 kD) (lytu) mRNA.                                                                    |
| <a href="#">lyvar</a>   | <a href="#">lyvar.aSep08</a>   |                        | 1162  | 773  |   | 51  | putative protein (lyvar) mRNA.                                                                             |
| <a href="#">lywey</a>   | <a href="#">lywey.aSep08</a>   |                        | 69890 | 219  |   | 30  | putative protein (lywey) mRNA.                                                                             |
| <a href="#">Lyz2</a>    | <a href="#">Lyz2.bSep08</a>    | <a href="#">25211</a>  | 1915  | 387  | 2 | 121 | lysozyme 2 (Lyz2) alternative variant bSep08, mRNA.                                                        |
| <a href="#">Lyzl4</a>   | <a href="#">Lyzl4.aSep08</a>   | <a href="#">363168</a> | 4352  | 505  |   | 108 | lysozyme-like 4 (Lyzl4) mRNA.                                                                              |
| <a href="#">Lyzl6</a>   | <a href="#">Lyzl6.aSep08</a>   | <a href="#">287751</a> | 5492  | 807  |   | 149 | lysozyme-like 6 (17.2 kD) (Lyzl6) mRNA.                                                                    |
| <a href="#">Lzic</a>    | <a href="#">Lzic.cSep08</a>    | <a href="#">366507</a> | 3235  | 296  | 4 | 98  | putative protein, with a coiled coil domain, of eukaryotic origin (Lzic) alternative variant cSep08, mRNA. |
| <a href="#">Lztf1</a>   | <a href="#">Lztf1.bSep08</a>   | <a href="#">316102</a> | 12394 | 776  | 9 | 134 | leucine zipper transcription factor-like 1 (15.5 kD) (Lztf1) alternative variant bSep08, mRNA.             |

|                         |                                |                        |        |      |    |     |                                                                                                               |
|-------------------------|--------------------------------|------------------------|--------|------|----|-----|---------------------------------------------------------------------------------------------------------------|
| <a href="#">Lztr1</a>   | <a href="#">Lztr1.bSep08</a>   | <a href="#">360745</a> | 4462   | 1524 | 11 | 508 | leucine-zipper-like transcription regulator 1 (Lztr1) alternative variant bSep08, mRNA.                       |
| <a href="#">Lztr1</a>   | <a href="#">Lztr1.cSep08</a>   | <a href="#">360745</a> | 3575   | 868  | 7  | 249 | leucine-zipper-like transcription regulator 1 (Lztr1) alternative variant cSep08, mRNA.                       |
| <a href="#">Lztr1</a>   | <a href="#">Lztr1.dSep08</a>   | <a href="#">360745</a> | 3435   | 2260 | 6  | 209 | leucine-zipper-like transcription regulator 1 (23.1 kD) (Lztr1) alternative variant dSep08, mRNA.             |
| <a href="#">Lztr1</a>   | <a href="#">Lztr1.fSep08</a>   | <a href="#">360745</a> | 1451   | 359  | 3  | 107 | leucine-zipper-like transcription regulator 1 (Lztr1) alternative variant fSep08, mRNA.                       |
| <a href="#">Lzts2</a>   | <a href="#">Lzts2.aSep08</a>   | <a href="#">365468</a> | 11764  | 3245 | 5  | 670 | leucine zipper, putative tumor suppressor 2 (72.6 kD) (Lzts2) alternative variant aSep08, mRNA.               |
| <a href="#">Lzts2</a>   | <a href="#">Lzts2.cSep08</a>   | <a href="#">365468</a> | 7739   | 539  | 3  | 154 | leucine zipper, putative tumor suppressor 2 (Lzts2) alternative variant cSep08, mRNA.                         |
| <a href="#">M-rip</a>   | <a href="#">M-rip.cSep08</a>   | <a href="#">116504</a> | 16672  | 3565 | 9  | 520 | myosin phosphatase-Rho interacting protein (M-rip) alternative variant cSep08, mRNA.                          |
| <a href="#">M-rip</a>   | <a href="#">M-rip.dSep08</a>   | <a href="#">116504</a> | 32823  | 1845 | 6  | 397 | myosin phosphatase-Rho interacting protein (M-rip) alternative variant dSep08, mRNA.                          |
| <a href="#">M-rip</a>   | <a href="#">M-rip.eSep08</a>   | <a href="#">116504</a> | 8949   | 874  | 6  | 158 | myosin phosphatase-Rho interacting protein (M-rip) alternative variant eSep08, mRNA.                          |
| <a href="#">M-rip</a>   | <a href="#">M-rip.fSep08</a>   | <a href="#">116504</a> | 51150  | 421  | 4  | 102 | myosin phosphatase-Rho interacting protein (11.8 kD) (M-rip) alternative variant fSep08, mRNA.                |
| <a href="#">M-rip</a>   | <a href="#">M-rip.gSep08</a>   | <a href="#">116504</a> | 5879   | 940  | 4  | 70  | myosin phosphatase-Rho interacting protein (M-rip) alternative variant gSep08, mRNA.                          |
| <a href="#">M6pr</a>    | <a href="#">M6pr.bSep08</a>    | <a href="#">312689</a> | 4647   | 708  | 3  | 107 | mannose-6-phosphate receptor, cation dependent (M6pr) alternative variant bSep08, mRNA.                       |
| <a href="#">M6pr</a>    | <a href="#">M6pr.eSep08</a>    | <a href="#">312689</a> | 3590   | 390  | 3  | 62  | mannose-6-phosphate receptor, cation dependent (M6pr) alternative variant eSep08, mRNA.                       |
| <a href="#">M6prbp1</a> | <a href="#">M6prbp1.aSep08</a> | <a href="#">316130</a> | 11870  | 1937 | 8  | 438 | mannose-6-phosphate receptor binding protein 1 (47.3 kD) (M6prbp1) alternative variant aSep08, complete mRNA. |
| <a href="#">M6prbp1</a> | <a href="#">M6prbp1.bSep08</a> | <a href="#">316130</a> | 5672   | 730  | 3  | 154 | mannose-6-phosphate receptor binding protein 1 (16.4 kD) (M6prbp1) alternative variant bSep08, complete mRNA. |
| <a href="#">maby</a>    | <a href="#">maby.aSep08</a>    |                        | 5959   | 498  |    | 70  | putative protein (maby) mRNA.                                                                                 |
| <a href="#">machy</a>   | <a href="#">machy.aSep08</a>   |                        | 6124   | 415  |    | 137 | CRA a (machy) mRNA.                                                                                           |
| <a href="#">Macrod1</a> | <a href="#">Macrod1.bSep08</a> | <a href="#">246233</a> | 132067 | 716  | 7  | 197 | putative protein of ancient origin (Macrod1) alternative variant bSep08, mRNA.                                |
| <a href="#">Macrod1</a> | <a href="#">Macrod1.cSep08</a> | <a href="#">246233</a> | 10907  | 664  | 3  | 186 | putative protein of fungal and metazoan origin (20.1 kD) (Macrod1) alternative variant cSep08, mRNA.          |
| <a href="#">Mad2l1</a>  | <a href="#">Mad2l1.bSep08</a>  | <a href="#">297176</a> | 5448   | 1556 | 1  | 172 | MAD2 (mitotic arrest deficient, homolog)-like 1 (yeast) (Mad2l1) alternative variant bSep08, mRNA.            |
| <a href="#">Mad2l1</a>  | <a href="#">Mad2l1.cSep08</a>  | <a href="#">297176</a> | 10507  | 707  | 1  | 162 | MAD2 (mitotic arrest deficient, homolog)-like 1 (yeast) (Mad2l1) alternative variant cSep08, mRNA.            |
| <a href="#">Mad2l2</a>  | <a href="#">Mad2l2.bSep08</a>  | <a href="#">313702</a> | 4614   | 1158 | 8  | 211 | MAD2 mitotic arrest deficient-like 2 (yeast) (24.4 kD) (Mad2l2) alternative variant bSep08, mRNA.             |
| <a href="#">Mad2l2</a>  | <a href="#">Mad2l2.cSep08</a>  | <a href="#">313702</a> | 2973   | 699  | 5  | 141 | MAD2 mitotic arrest deficient-like 2 (yeast) (Mad2l2) alternative variant cSep08, mRNA.                       |
| <a href="#">Mad2l2</a>  | <a href="#">Mad2l2.dSep08</a>  | <a href="#">313702</a> | 10515  | 717  | 6  | 83  | MAD2 mitotic arrest deficient-like 2 (yeast) (9.3 kD) (Mad2l2) alternative variant dSep08, mRNA.              |
| <a href="#">madar</a>   | <a href="#">madar.aSep08</a>   |                        | 4109   | 597  |    | 57  | putative protein (madar) mRNA.                                                                                |

|                        |                               |                        |        |      |   |     |                                                                                                                   |
|------------------------|-------------------------------|------------------------|--------|------|---|-----|-------------------------------------------------------------------------------------------------------------------|
| <a href="#">Madd</a>   | <a href="#">Madd.bSep08</a>   | <a href="#">94193</a>  | 6686   | 708  | 7 | 236 | MAP-kinase activating death domain (Madd) alternative variant bSep08, mRNA.                                       |
| <a href="#">Madd</a>   | <a href="#">Madd.dSep08</a>   | <a href="#">94193</a>  | 8920   | 1440 | 6 | 134 | MAP-kinase activating death domain (Madd) alternative variant dSep08, mRNA.                                       |
| <a href="#">Maea</a>   | <a href="#">Maea.bSep08</a>   | <a href="#">298982</a> | 19918  | 402  | 3 | 95  | macrophage erythroblast attacher (Maea) alternative variant bSep08, mRNA.                                         |
| <a href="#">Mael</a>   | <a href="#">Mael.bSep08</a>   | <a href="#">364039</a> | 36000  | 772  | 1 | 256 | maelstrom homolog (Drosophila) (Mael) alternative variant bSep08, mRNA.                                           |
| <a href="#">Maf</a>    | <a href="#">Maf.bSep08</a>    | <a href="#">54267</a>  | 3038   | 2236 | 2 | 206 | v-maf musculoaponeurotic fibrosarcoma oncogene homolog (avian) (Maf) alternative variant bSep08, mRNA.            |
| <a href="#">Maf</a>    | <a href="#">Maf.cSep08</a>    | <a href="#">54267</a>  | 368439 | 523  | 3 | 113 | v-maf musculoaponeurotic fibrosarcoma oncogene homolog (avian) (Maf) alternative variant cSep08, mRNA.            |
| <a href="#">Maf</a>    | <a href="#">Maf.dSep08</a>    | <a href="#">54267</a>  | 13127  | 402  | 2 | 62  | v-maf musculoaponeurotic fibrosarcoma oncogene homolog (avian) (Maf) alternative variant dSep08, mRNA.            |
| <a href="#">Maf1</a>   | <a href="#">Maf1.aSep08</a>   | <a href="#">315093</a> | 3052   | 1804 | 7 | 262 | MAF1 homolog (S. cerevisiae) (28.9 kD) (Maf1) alternative variant aSep08, complete mRNA.                          |
| <a href="#">Maf1</a>   | <a href="#">Maf1.cSep08</a>   | <a href="#">315093</a> | 1054   | 753  | 4 | 224 | MAF1 homolog (S. cerevisiae) (Maf1) alternative variant cSep08, mRNA.                                             |
| <a href="#">Maf1</a>   | <a href="#">Maf1.dSep08</a>   | <a href="#">315093</a> | 2879   | 1329 | 7 | 213 | MAF1 homolog (S. cerevisiae) (24.3 kD) (Maf1) alternative variant dSep08, mRNA.                                   |
| <a href="#">Maf1</a>   | <a href="#">Maf1.eSep08</a>   | <a href="#">315093</a> | 1249   | 661  | 2 | 81  | MAF1 homolog (S. cerevisiae) (Maf1) alternative variant eSep08, mRNA.                                             |
| <a href="#">Maf1</a>   | <a href="#">Maf1.gSep08</a>   | <a href="#">315093</a> | 1346   | 575  | 2 | 51  | MAF1 homolog (S. cerevisiae) (Maf1) alternative variant gSep08, mRNA.                                             |
| <a href="#">Maf1</a>   | <a href="#">Maf1.hSep08</a>   | <a href="#">315093</a> | 1412   | 335  | 3 | 55  | MAF1 homolog (S. cerevisiae) (Maf1) alternative variant hSep08, mRNA.                                             |
| <a href="#">mafer</a>  | <a href="#">mafer.aSep08</a>  |                        | 16623  | 752  |   | 54  | putative protein (5.7 kD) (mafer) mRNA.                                                                           |
| <a href="#">Mafg</a>   | <a href="#">Mafg.aSep08</a>   | <a href="#">64188</a>  | 2224   | 1543 | 3 | 233 | v-maf musculoaponeurotic fibrosarcoma oncogene family, protein G (avian) (Mafg) alternative variant aSep08, mRNA. |
| <a href="#">Mafg</a>   | <a href="#">Mafg.cSep08</a>   | <a href="#">64188</a>  | 763    | 682  | 2 | 52  | v-maf musculoaponeurotic fibrosarcoma oncogene family, protein G (avian) (Mafg) alternative variant cSep08, mRNA. |
| <a href="#">maflo</a>  | <a href="#">maflo.aSep08</a>  |                        | 2315   | 590  |   | 85  | putative protein (maflo) mRNA.                                                                                    |
| <a href="#">maflu</a>  | <a href="#">maflu.aSep08</a>  |                        | 11082  | 402  |   | 133 | pink-eyed dilution CRA a (maflu) mRNA.                                                                            |
| <a href="#">Mag</a>    | <a href="#">Mag.bSep08</a>    | <a href="#">29409</a>  | 9641   | 1826 | 2 | 339 | myelin-associated glycoprotein (37.2 kD) (Mag) alternative variant bSep08, mRNA.                                  |
| <a href="#">Mag</a>    | <a href="#">Mag.cSep08</a>    | <a href="#">29409</a>  | 2687   | 991  | 3 | 153 | myelin-associated glycoprotein (Mag) alternative variant cSep08, mRNA.                                            |
| <a href="#">magar</a>  | <a href="#">magar.aSep08</a>  |                        | 1196   | 727  |   | 33  | putative protein (magar) alternative variant aSep08, mRNA.                                                        |
| <a href="#">Maged1</a> | <a href="#">Maged1.bSep08</a> | <a href="#">84469</a>  | 3498   | 1875 | 8 | 207 | melanoma antigen family d 1 like (23.8 kD) (Maged1) alternative variant bSep08, mRNA.                             |
| <a href="#">Maged1</a> | <a href="#">Maged1.dSep08</a> | <a href="#">84469</a>  | 1044   | 516  | 3 | 43  | melanoma antigen family D 1 like (5.3 kD) (Maged1) alternative variant dSep08, mRNA.                              |
| <a href="#">Maged2</a> | <a href="#">Maged2.bSep08</a> | <a href="#">113947</a> | 2807   | 927  | 4 | 277 | melanoma antigen, family D, 2 (Maged2) alternative variant bSep08, mRNA.                                          |
| <a href="#">Maged2</a> | <a href="#">Maged2.cSep08</a> | <a href="#">113947</a> | 2797   | 829  | 5 | 229 | melanoma antigen, family D, 2 (Maged2) alternative variant cSep08, mRNA.                                          |

|                        |                               |                        |        |      |   |     |                                                                                                                                                                       |
|------------------------|-------------------------------|------------------------|--------|------|---|-----|-----------------------------------------------------------------------------------------------------------------------------------------------------------------------|
| <a href="#">Maged2</a> | <a href="#">Maged2.dSep08</a> | <a href="#">113947</a> | 2619   | 764  | 3 | 184 | melanoma antigen, family D, 2 (19.1 kD) (Maged2) alternative variant dSep08, mRNA.                                                                                    |
| <a href="#">Maged2</a> | <a href="#">Maged2.eSep08</a> | <a href="#">113947</a> | 1145   | 785  | 2 | 179 | melanoma antigen, family D, 2 (Maged2) alternative variant eSep08, mRNA.                                                                                              |
| <a href="#">Maged2</a> | <a href="#">Maged2.fSep08</a> | <a href="#">113947</a> | 5862   | 583  | 3 | 147 | melanoma antigen, family D, 2 (Maged2) alternative variant fSep08, mRNA.                                                                                              |
| <a href="#">Magel2</a> | <a href="#">Magel2.aSep08</a> | <a href="#">679875</a> | 4090   | 2964 |   | 359 | melanoma antigen, family L, 2 (35.8 kD) (Magel2) mRNA.                                                                                                                |
| <a href="#">Magi1</a>  | <a href="#">Magi1.bSep08</a>  | <a href="#">500261</a> | 13812  | 2366 | 5 | 223 | PDZ/DHR/GLGF (24.5 kD) (Magi1) alternative variant bSep08, mRNA.                                                                                                      |
| <a href="#">Magi1</a>  | <a href="#">Magi1.cSep08</a>  | <a href="#">500261</a> | 129388 | 1006 | 4 | 157 | putative protein of metazoan origin (17.2 kD) (Magi1) alternative variant cSep08, mRNA.                                                                               |
| <a href="#">Magi1</a>  | <a href="#">Magi1.dSep08</a>  | <a href="#">500261</a> | 12688  | 343  | 3 | 114 | putative protein of vertebrate origin (Magi1) alternative variant dSep08, mRNA.                                                                                       |
| <a href="#">Magi1</a>  | <a href="#">Magi1.eSep08</a>  | <a href="#">500261</a> | 12688  | 340  | 3 | 113 | putative protein of vertebrate origin (Magi1) alternative variant eSep08, mRNA.                                                                                       |
| <a href="#">Magi1</a>  | <a href="#">Magi1.gSep08</a>  | <a href="#">500261</a> | 9305   | 400  | 2 | 50  | putative protein (Magi1) alternative variant gSep08, mRNA.                                                                                                            |
| <a href="#">Magi2</a>  | <a href="#">Magi2.bSep08</a>  | <a href="#">113970</a> | 29160  | 757  | 6 | 240 | membrane associated guanylate kinase 2 (Magi2) alternative variant bSep08, mRNA.                                                                                      |
| <a href="#">Magi2</a>  | <a href="#">Magi2.cSep08</a>  | <a href="#">113970</a> | 29614  | 722  | 6 | 240 | membrane associated guanylate kinase 2 (Magi2) alternative variant cSep08, mRNA.                                                                                      |
| <a href="#">Magi2</a>  | <a href="#">Magi2.dSep08</a>  | <a href="#">113970</a> | 56285  | 410  | 3 | 135 | PDZ/DHR/GLGF (Magi2) alternative variant dSep08, mRNA.                                                                                                                |
| <a href="#">Magi3</a>  | <a href="#">Magi3.bSep08</a>  | <a href="#">245903</a> | 25292  | 1101 | 8 | 306 | PDZ/DHR/GLGF (Magi3) alternative variant bSep08, mRNA.                                                                                                                |
| <a href="#">Magi3</a>  | <a href="#">Magi3.cSep08</a>  | <a href="#">245903</a> | 8207   | 627  | 5 | 172 | PDZ/DHR/GLGF (Magi3) alternative variant cSep08, mRNA.                                                                                                                |
| <a href="#">Magmas</a> | <a href="#">Magmas.aSep08</a> | <a href="#">679907</a> | 8128   | 986  | 4 | 180 | mitochondria-associated protein involved in granulocyte-macrophage colony-stimulating factor signal transduction (19.4 kD) (Magmas) alternative variant aSep08, mRNA. |
| <a href="#">Magmas</a> | <a href="#">Magmas.bSep08</a> | <a href="#">679907</a> | 1583   | 531  | 4 | 160 | mitochondria-associated protein involved in granulocyte-macrophage colony-stimulating factor signal transduction (Magmas) alternative variant bSep08, mRNA.           |
| <a href="#">Magmas</a> | <a href="#">Magmas.dSep08</a> | <a href="#">679907</a> | 794    | 382  | 3 | 103 | mitochondria-associated protein involved in granulocyte-macrophage colony-stimulating factor signal transduction (Magmas) alternative variant dSep08, mRNA.           |
| <a href="#">Magoh</a>  | <a href="#">Magoh.aSep08</a>  | <a href="#">298385</a> | 7451   | 656  |   | 146 | mago-nashi homolog, proliferation-associated (Drosophila) (17.2 kD) (Magoh) complete mRNA.                                                                            |
| <a href="#">Magt1</a>  | <a href="#">Magt1.bSep08</a>  | <a href="#">116967</a> | 23514  | 797  | 1 | 156 | magnesium transporter 1 (Magt1) alternative variant bSep08, mRNA.                                                                                                     |
| <a href="#">majey</a>  | <a href="#">majey.aSep08</a>  |                        | 1655   | 262  |   | 25  | putative protein (majey) mRNA.                                                                                                                                        |
| <a href="#">Mak10</a>  | <a href="#">Mak10.bSep08</a>  | <a href="#">64472</a>  | 9370   | 843  | 8 | 280 | corneal wound healing-related protein (Mak10) alternative variant bSep08, mRNA.                                                                                       |
| <a href="#">Mak10</a>  | <a href="#">Mak10.cSep08</a>  | <a href="#">64472</a>  | 4550   | 521  | 4 | 172 | corneal wound healing-related protein (Mak10) alternative variant cSep08, mRNA.                                                                                       |
| <a href="#">Mak10</a>  | <a href="#">Mak10.dSep08</a>  | <a href="#">64472</a>  | 22072  | 561  | 7 | 161 | mak10 homolog amino-acid N-acetyltransferase CRA b (Mak10) alternative variant dSep08, mRNA.                                                                          |

|                        |                               |                        |       |      |    |     |                                                                                                           |
|------------------------|-------------------------------|------------------------|-------|------|----|-----|-----------------------------------------------------------------------------------------------------------|
| <a href="#">Mak10</a>  | <a href="#">Mak10.eSep08</a>  | <a href="#">64472</a>  | 12934 | 414  | 5  | 136 | mak10 homolog amino-acid N-acetyltransferase CRA b (Mak10) alternative variant eSep08, mRNA.              |
| <a href="#">Mak10</a>  | <a href="#">Mak10.fSep08</a>  | <a href="#">64472</a>  | 3819  | 546  | 4  | 133 | corneal wound healing-related protein (15.3 kD) (Mak10) alternative variant fSep08, mRNA.                 |
| <a href="#">Mak10</a>  | <a href="#">Mak10.gSep08</a>  | <a href="#">64472</a>  | 19624 | 791  | 7  | 63  | mak10 homolog amino-acid N-acetyltransferase CRA b (7.4 kD) (Mak10) alternative variant gSep08, mRNA.     |
| <a href="#">makee</a>  | <a href="#">makee.aSep08</a>  |                        | 5078  | 574  |    | 62  | putative protein (7.2 kD) (makee) mRNA.                                                                   |
| <a href="#">maloy</a>  | <a href="#">maloy.bSep08</a>  |                        | 1013  | 302  | 3  | 46  | putative protein (maloy) alternative variant bSep08, mRNA.                                                |
| <a href="#">Malt1</a>  | <a href="#">Malt1.aSep08</a>  | <a href="#">307366</a> | 16114 | 1474 | 4  | 380 | mucosa associated lymphoid tissue lymphoma translocation gene 1 (Malt1) alternative variant aSep08, mRNA. |
| <a href="#">Malt1</a>  | <a href="#">Malt1.bSep08</a>  | <a href="#">307366</a> | 20083 | 764  | 5  | 138 | mucosa associated lymphoid tissue lymphoma translocation gene 1 (Malt1) alternative variant bSep08, mRNA. |
| <a href="#">MAM.0</a>  | <a href="#">MAM.0.aSep08</a>  |                        | 96051 | 326  |    | 108 | protein tyrosine phosphatase Receptor (MAM.0) mRNA.                                                       |
| <a href="#">MAM.1</a>  | <a href="#">MAM.1.aSep08</a>  |                        | 85198 | 608  |    | 202 | anaplastic lymphoma kinase like (MAM.1) mRNA.                                                             |
| <a href="#">Mamdc2</a> | <a href="#">Mamdc2.aSep08</a> | <a href="#">309410</a> | 56222 | 2039 |    | 270 | MAM (Mamdc2) mRNA.                                                                                        |
| <a href="#">mamee</a>  | <a href="#">mamee.aSep08</a>  |                        | 1177  | 529  |    | 162 | putative protein of mammalian origin (mamee) mRNA.                                                        |
| <a href="#">mamer</a>  | <a href="#">mamer.aSep08</a>  |                        | 1934  | 385  |    | 76  | putative protein (mamer) mRNA.                                                                            |
| <a href="#">Maml1</a>  | <a href="#">Maml1.aSep08</a>  | <a href="#">303101</a> | 10857 | 3518 | 4  | 446 | mastermind like 1 (Drosophila) (Maml1) alternative variant aSep08, mRNA.                                  |
| <a href="#">Maml2</a>  | <a href="#">Maml2.aSep08</a>  | <a href="#">689844</a> | 8611  | 604  |    | 200 | mastermind like 2 (Drosophila) (Maml2) mRNA.                                                              |
| <a href="#">Man1a</a>  | <a href="#">Man1a.bSep08</a>  | <a href="#">294410</a> | 21951 | 3427 | 2  | 262 | mannosidase 1, alpha (Man1a) alternative variant bSep08, mRNA.                                            |
| <a href="#">Man1a2</a> | <a href="#">Man1a2.bSep08</a> | <a href="#">295319</a> | 83638 | 717  | 8  | 239 | mannosidase, alpha, class 1A, member 2 (Man1a2) alternative variant bSep08, mRNA.                         |
| <a href="#">Man1a2</a> | <a href="#">Man1a2.cSep08</a> | <a href="#">295319</a> | 16213 | 3706 | 3  | 125 | mannosidase, alpha, class 1A, member 2 (Man1a2) alternative variant cSep08, mRNA.                         |
| <a href="#">Man1b1</a> | <a href="#">Man1b1.aSep08</a> | <a href="#">499751</a> | 21112 | 3725 | 13 | 692 | mannosidase, alpha, class 1B, member 1 (Man1b1) alternative variant aSep08, mRNA.                         |
| <a href="#">Man1b1</a> | <a href="#">Man1b1.bSep08</a> | <a href="#">499751</a> | 6728  | 758  | 4  | 252 | mannosidase, alpha, class 1B, member 1 (Man1b1) alternative variant bSep08, mRNA.                         |
| <a href="#">Man1b1</a> | <a href="#">Man1b1.cSep08</a> | <a href="#">499751</a> | 2433  | 641  | 2  | 169 | mannosidase, alpha, class 1B, member 1 (Man1b1) alternative variant cSep08, mRNA.                         |
| <a href="#">Man1b1</a> | <a href="#">Man1b1.dSep08</a> | <a href="#">499751</a> | 5103  | 367  | 3  | 93  | mannosidase, alpha, class 1B, member 1 (Man1b1) alternative variant dSep08, mRNA.                         |
| <a href="#">Man2a1</a> | <a href="#">Man2a1.bSep08</a> | <a href="#">25478</a>  | 4372  | 923  | 1  | 145 | mannosidase 2, alpha 1 (Man2a1) alternative variant bSep08, mRNA.                                         |
| <a href="#">Man2a2</a> | <a href="#">Man2a2.bSep08</a> | <a href="#">308757</a> | 3975  | 2025 | 7  | 382 | mannosidase 2, alpha 2 (Man2a2) alternative variant bSep08, mRNA.                                         |
| <a href="#">Man2a2</a> | <a href="#">Man2a2.cSep08</a> | <a href="#">308757</a> | 2890  | 519  | 4  | 167 | mannosidase 2, alpha 2 (Man2a2) alternative variant cSep08, mRNA.                                         |
| <a href="#">Man2a2</a> | <a href="#">Man2a2.dSep08</a> | <a href="#">308757</a> | 4236  | 2956 | 3  | 149 | mannosidase 2, alpha 2 (Man2a2) alternative variant dSep08, mRNA.                                         |
| <a href="#">Man2a2</a> | <a href="#">Man2a2.eSep08</a> | <a href="#">308757</a> | 2870  | 397  | 3  | 132 | mannosidase 2, alpha 2 (Man2a2) alternative variant eSep08, mRNA.                                         |

|                          |                                 |                        |        |      |   |     |                                                                                                            |
|--------------------------|---------------------------------|------------------------|--------|------|---|-----|------------------------------------------------------------------------------------------------------------|
| <a href="#">Man2b1</a>   | <a href="#">Man2b1.bSep08</a>   | <a href="#">361378</a> | 2149   | 645  | 4 | 214 | mannosidase 2, alpha B1 (Man2b1) alternative variant bSep08, mRNA.                                         |
| <a href="#">Man2b1</a>   | <a href="#">Man2b1.cSep08</a>   | <a href="#">361378</a> | 2355   | 1385 | 6 | 189 | mannosidase 2, alpha B1 (Man2b1) alternative variant cSep08, mRNA.                                         |
| <a href="#">Man2b1</a>   | <a href="#">Man2b1.dSep08</a>   | <a href="#">361378</a> | 1817   | 724  | 4 | 155 | mannosidase 2, alpha B1 (Man2b1) alternative variant dSep08, mRNA.                                         |
| <a href="#">Man2b1</a>   | <a href="#">Man2b1.eSep08</a>   | <a href="#">361378</a> | 1213   | 888  | 3 | 121 | mannosidase 2, alpha B1 (Man2b1) alternative variant eSep08, mRNA.                                         |
| <a href="#">Man2c1</a>   | <a href="#">Man2c1.bSep08</a>   | <a href="#">246136</a> | 1017   | 693  | 4 | 202 | mannosidase alpha class 2C member 1 (Man2c1) alternative variant bSep08, mRNA.                             |
| <a href="#">Man2c1</a>   | <a href="#">Man2c1.cSep08</a>   | <a href="#">246136</a> | 3513   | 2441 | 7 | 199 | mannosidase alpha class 2C member 1 (Man2c1) alternative variant cSep08, mRNA.                             |
| <a href="#">Man2c1</a>   | <a href="#">Man2c1.dSep08</a>   | <a href="#">246136</a> | 1243   | 901  | 4 | 168 | alpha mannosidase 6A8B (Man2c1) alternative variant dSep08, mRNA.                                          |
| <a href="#">Man2c1</a>   | <a href="#">Man2c1.eSep08</a>   | <a href="#">246136</a> | 1048   | 778  | 4 | 139 | mannosidase alpha class 2C member 1 CRA c (15.4 kD) (Man2c1) alternative variant eSep08, mRNA.             |
| <a href="#">Man2c1</a>   | <a href="#">Man2c1.fSep08</a>   | <a href="#">246136</a> | 964    | 806  | 2 | 110 | mannosidase alpha class 2C member 1 (Man2c1) alternative variant fSep08, mRNA.                             |
| <a href="#">Manba</a>    | <a href="#">Manba.bSep08</a>    | <a href="#">310864</a> | 28335  | 1131 | 1 | 288 | mannosidase, beta A, lysosomal (33.6 kD) (Manba) alternative variant bSep08, mRNA.                         |
| <a href="#">Manbal</a>   | <a href="#">Manbal.aSep08</a>   | <a href="#">499934</a> | 17842  | 1062 |   | 85  | mannosidase, beta A, lysosomal-like (9.5 kD) (Manbal) mRNA.                                                |
| <a href="#">Manea</a>    | <a href="#">Manea.bSep08</a>    | <a href="#">140808</a> | 20283  | 2784 | 5 | 229 | mannosidase, endo-alpha (26.6 kD) (Manea) alternative variant bSep08, mRNA.                                |
| <a href="#">Manea</a>    | <a href="#">Manea.cSep08</a>    | <a href="#">140808</a> | 6726   | 276  | 2 | 91  | mannosidase, endo-alpha (Manea) alternative variant cSep08, mRNA.                                          |
| <a href="#">manoy</a>    | <a href="#">manoy.aSep08</a>    |                        | 876    | 666  |   | 73  | putative protein (manoy) mRNA.                                                                             |
| <a href="#">Maoa</a>     | <a href="#">Maoa.aSep08</a>     | <a href="#">29253</a>  | 68365  | 3499 |   | 537 | monoamine oxidase A (Maoa) mRNA.                                                                           |
| <a href="#">Maob</a>     | <a href="#">Maob.bSep08</a>     | <a href="#">25750</a>  | 77567  | 731  | 5 | 211 | monoamine oxidase B (23.8 kD) (Maob) alternative variant bSep08, mRNA.                                     |
| <a href="#">Maob</a>     | <a href="#">Maob.cSep08</a>     | <a href="#">25750</a>  | 66625  | 349  | 2 | 116 | monoamine oxidase B (Maob) alternative variant cSep08, mRNA.                                               |
| <a href="#">Map1lc3a</a> | <a href="#">Map1lc3a.aSep08</a> | <a href="#">362245</a> | 1083   | 714  | 3 | 121 | microtubule-associated protein 1 light chain 3 alpha (Map1lc3a) alternative variant aSep08, mRNA.          |
| <a href="#">Map1lc3a</a> | <a href="#">Map1lc3a.cSep08</a> | <a href="#">362245</a> | 451    | 291  | 2 | 75  | microtubule-associated protein 1 light chain 3 alpha (Map1lc3a) alternative variant cSep08, mRNA.          |
| <a href="#">Map1lc3b</a> | <a href="#">Map1lc3b.bSep08</a> | <a href="#">64862</a>  | 3678   | 408  | 1 | 100 | microtubule-associated protein 1 light chain 3 beta (11.0 kD) (Map1lc3b) alternative variant bSep08, mRNA. |
| <a href="#">Map1s</a>    | <a href="#">Map1s.bSep08</a>    | <a href="#">290640</a> | 4767   | 363  | 1 | 108 | microtubule-associated protein 1S (Map1s) alternative variant bSep08, mRNA.                                |
| <a href="#">Map2</a>     | <a href="#">Map2.bSep08</a>     | <a href="#">25595</a>  | 110348 | 813  | 7 | 217 | microtubule-associated protein 2 (Map2) alternative variant bSep08, mRNA.                                  |
| <a href="#">Map2</a>     | <a href="#">Map2.dSep08</a>     | <a href="#">25595</a>  | 723    | 518  | 2 | 55  | microtubule-associated protein 2 (6.5 kD) (Map2) alternative variant dSep08, mRNA.                         |
| <a href="#">Map2</a>     | <a href="#">Map2.eSep08</a>     | <a href="#">25595</a>  | 13791  | 410  | 3 | 56  | microtubule-associated protein 2 (Map2) alternative variant eSep08, mRNA.                                  |

|                           |                                  |                        |        |      |    |     |                                                                                                                                  |
|---------------------------|----------------------------------|------------------------|--------|------|----|-----|----------------------------------------------------------------------------------------------------------------------------------|
| <a href="#">Map2k1</a>    | <a href="#">Map2k1.bSep08</a>    | <a href="#">170851</a> | 8686   | 687  | 5  | 211 | mitogen activated protein kinase kinase 1 (Map2k1) alternative variant bSep08, mRNA.                                             |
| <a href="#">Map2k1</a>    | <a href="#">Map2k1.cSep08</a>    | <a href="#">170851</a> | 28533  | 630  | 5  | 208 | mitogen activated protein kinase kinase 1 (Map2k1) alternative variant cSep08, mRNA.                                             |
| <a href="#">Map2k1</a>    | <a href="#">Map2k1.dSep08</a>    | <a href="#">170851</a> | 2045   | 374  | 1  | 94  | mitogen activated protein kinase kinase 1 (Map2k1) alternative variant dSep08, mRNA.                                             |
| <a href="#">Map2k1ip1</a> | <a href="#">Map2k1ip1.aSep08</a> | <a href="#">362045</a> | 11969  | 934  | 6  | 124 | mitogen-activated protein kinase kinase 1 interacting protein 1 (13.6 kD) (Map2k1ip1) alternative variant aSep08, mRNA.          |
| <a href="#">Map2k1ip1</a> | <a href="#">Map2k1ip1.bSep08</a> | <a href="#">362045</a> | 11962  | 739  | 7  | 124 | mitogen-activated protein kinase kinase 1 interacting protein 1 (13.6 kD) (Map2k1ip1) alternative variant bSep08, mRNA.          |
| <a href="#">Map2k1ip1</a> | <a href="#">Map2k1ip1.dSep08</a> | <a href="#">362045</a> | 12529  | 1251 | 7  | 124 | mitogen-activated protein kinase kinase 1 interacting protein 1 (13.6 kD) (Map2k1ip1) alternative variant dSep08, complete mRNA. |
| <a href="#">Map2k2</a>    | <a href="#">Map2k2.bSep08</a>    | <a href="#">58960</a>  | 9572   | 1728 | 9  | 265 | mitogen activated protein kinase kinase 2 (Map2k2) alternative variant bSep08, mRNA.                                             |
| <a href="#">Map2k2</a>    | <a href="#">Map2k2.cSep08</a>    | <a href="#">58960</a>  | 3488   | 913  | 4  | 258 | mitogen activated protein kinase kinase 2 (Map2k2) alternative variant cSep08, mRNA.                                             |
| <a href="#">Map2k2</a>    | <a href="#">Map2k2.dSep08</a>    | <a href="#">58960</a>  | 1587   | 701  | 4  | 233 | mitogen activated protein kinase kinase 2 (Map2k2) alternative variant dSep08, mRNA.                                             |
| <a href="#">Map2k2</a>    | <a href="#">Map2k2.eSep08</a>    | <a href="#">58960</a>  | 2269   | 886  | 3  | 220 | mitogen activated protein kinase kinase 2 (Map2k2) alternative variant eSep08, mRNA.                                             |
| <a href="#">Map2k2</a>    | <a href="#">Map2k2.fSep08</a>    | <a href="#">58960</a>  | 2430   | 635  | 3  | 63  | mitogen activated protein kinase kinase 2 (Map2k2) alternative variant fSep08, mRNA.                                             |
| <a href="#">Map2k2</a>    | <a href="#">Map2k2.hSep08</a>    | <a href="#">58960</a>  | 2929   | 206  | 2  | 58  | mitogen activated protein kinase kinase 2 (Map2k2) alternative variant hSep08, mRNA.                                             |
| <a href="#">Map2k5</a>    | <a href="#">Map2k5.aSep08</a>    | <a href="#">29568</a>  | 227048 | 2111 | 22 | 592 | mitogen activated protein kinase kinase 5 (Map2k5) alternative variant aSep08, mRNA.                                             |
| <a href="#">Map2k5</a>    | <a href="#">Map2k5.bSep08</a>    | <a href="#">29568</a>  | 70499  | 619  | 5  | 95  | mitogen activated protein kinase kinase 5 (Map2k5) alternative variant bSep08, mRNA.                                             |
| <a href="#">Map2k5</a>    | <a href="#">Map2k5.cSep08</a>    | <a href="#">29568</a>  | 1196   | 884  | 2  | 37  | mitogen activated protein kinase kinase 5 (4.4 kD) (Map2k5) alternative variant cSep08, mRNA.                                    |
| <a href="#">Map2k7</a>    | <a href="#">Map2k7.bSep08</a>    | <a href="#">363855</a> | 5171   | 593  | 6  | 187 | mitogen activated protein kinase kinase 7 (Map2k7) alternative variant bSep08, mRNA.                                             |
| <a href="#">Map3k1</a>    | <a href="#">Map3k1.bSep08</a>    | <a href="#">116667</a> | 10677  | 2595 | 6  | 714 | mitogen activated protein kinase kinase kinase 1 (Map3k1) alternative variant bSep08, mRNA.                                      |
| <a href="#">Map3k1</a>    | <a href="#">Map3k1.cSep08</a>    | <a href="#">116667</a> | 40860  | 1794 | 5  | 525 | mitogen activated protein kinase kinase kinase 1 (Map3k1) alternative variant cSep08, mRNA.                                      |
| <a href="#">Map3k2</a>    | <a href="#">Map3k2.bSep08</a>    | <a href="#">171492</a> | 35760  | 320  |    | 71  | mitogen activated protein kinase kinase kinase 2 (Map3k2) alternative variant bSep08, mRNA.                                      |
| <a href="#">Map3k4</a>    | <a href="#">Map3k4.bSep08</a>    | <a href="#">308106</a> | 7005   | 573  | 6  | 191 | mitogen activated protein kinase kinase kinase 4 (Map3k4) alternative variant bSep08, mRNA.                                      |
| <a href="#">Map3k4</a>    | <a href="#">Map3k4.cSep08</a>    | <a href="#">308106</a> | 7035   | 539  | 6  | 179 | mitogen activated protein kinase kinase kinase 4 (Map3k4) alternative variant cSep08, mRNA.                                      |
| <a href="#">Map3k4</a>    | <a href="#">Map3k4.dSep08</a>    | <a href="#">308106</a> | 1684   | 577  | 2  | 157 | mitogen activated protein kinase kinase kinase 4 (Map3k4) alternative variant dSep08, mRNA.                                      |



|                           |                                  |                        |       |      |    |     |                                                                                                                      |
|---------------------------|----------------------------------|------------------------|-------|------|----|-----|----------------------------------------------------------------------------------------------------------------------|
| <a href="#">Map3k6</a>    | <a href="#">Map3k6.bSep08</a>    | <a href="#">313022</a> | 1298  | 853  | 4  | 187 | mitogen-activated protein kinase kinase kinase 6 (Map3k6) alternative variant bSep08, mRNA.                          |
| <a href="#">Map3k6</a>    | <a href="#">Map3k6.cSep08</a>    | <a href="#">313022</a> | 989   | 760  | 2  | 101 | mitogen-activated protein kinase kinase kinase 6 (Map3k6) alternative variant cSep08, mRNA.                          |
| <a href="#">Map3k7</a>    | <a href="#">Map3k7.bSep08</a>    | <a href="#">313121</a> | 18024 | 396  | 5  | 131 | mitogen activated protein kinase kinase kinase 7 (Map3k7) alternative variant bSep08, mRNA.                          |
| <a href="#">Map3k7</a>    | <a href="#">Map3k7.cSep08</a>    | <a href="#">313121</a> | 22319 | 392  | 5  | 130 | mitogen activated protein kinase kinase kinase 7 (Map3k7) alternative variant cSep08, mRNA.                          |
| <a href="#">Map3k7ip1</a> | <a href="#">Map3k7ip1.bSep08</a> | <a href="#">315139</a> | 2947  | 1775 | 1  | 44  | mitogen-activated protein kinase kinase kinase 7 interacting protein 1 (Map3k7ip1) alternative variant bSep08, mRNA. |
| <a href="#">Map3k7ip2</a> | <a href="#">Map3k7ip2.bSep08</a> | <a href="#">308267</a> | 14893 | 3651 | 5  | 614 | mitogen-activated protein kinase kinase kinase 7 interacting protein 2 (Map3k7ip2) alternative variant bSep08, mRNA. |
| <a href="#">Map3k7ip2</a> | <a href="#">Map3k7ip2.cSep08</a> | <a href="#">308267</a> | 853   | 761  | 2  | 70  | mitogen-activated protein kinase kinase kinase 7 interacting protein 2 (Map3k7ip2) alternative variant cSep08, mRNA. |
| <a href="#">Map3k8</a>    | <a href="#">Map3k8.bSep08</a>    | <a href="#">116596</a> | 3863  | 468  | 2  | 156 | mitogen-activated protein kinase kinase kinase 8 (Map3k8) alternative variant bSep08, mRNA.                          |
| <a href="#">Map3k9</a>    | <a href="#">Map3k9.aSep08</a>    | <a href="#">500690</a> | 6363  | 675  |    | 225 | mitogen-activated protein kinase kinase kinase 9 (Map3k9) mRNA.                                                      |
| <a href="#">Map3k10</a>   | <a href="#">Map3k10.aSep08</a>   | <a href="#">308463</a> | 6194  | 863  |    | 287 | mitogen activated protein kinase kinase kinase 10 (Map3k10) mRNA.                                                    |
| <a href="#">Map3k12</a>   | <a href="#">Map3k12.bSep08</a>   | <a href="#">25579</a>  | 2561  | 1982 | 2  | 113 | mitogen activated protein kinase kinase kinase 12 (13.1 kD) (Map3k12) alternative variant bSep08, mRNA.              |
| <a href="#">Map3k14</a>   | <a href="#">Map3k14.bSep08</a>   | <a href="#">360640</a> | 994   | 675  | 1  | 76  | mitogen-activated protein kinase kinase kinase 14 (Map3k14) alternative variant bSep08, mRNA.                        |
| <a href="#">Map4</a>      | <a href="#">Map4.bSep08</a>      | <a href="#">367171</a> | 29724 | 1797 | 5  | 587 | microtubule-associated protein 4 (Map4) alternative variant bSep08, mRNA.                                            |
| <a href="#">Map4</a>      | <a href="#">Map4.cSep08</a>      | <a href="#">367171</a> | 20809 | 3966 | 4  | 501 | microtubule-associated protein 4 (51.0 kD) (Map4) alternative variant cSep08, mRNA.                                  |
| <a href="#">Map4</a>      | <a href="#">Map4.dSep08</a>      | <a href="#">367171</a> | 9634  | 1162 | 3  | 161 | microtubule-associated protein 4 (Map4) alternative variant dSep08, mRNA.                                            |
| <a href="#">Map4</a>      | <a href="#">Map4.eSep08</a>      | <a href="#">367171</a> | 8964  | 395  |    | 131 | microtubule-associated protein 4 (Map4) alternative variant eSep08, mRNA.                                            |
| <a href="#">Map4</a>      | <a href="#">Map4.fSep08</a>      | <a href="#">367171</a> | 2601  | 768  | 2  | 111 | microtubule-associated protein 4 (12.1 kD) (Map4) alternative variant fSep08, mRNA.                                  |
| <a href="#">Map4k1</a>    | <a href="#">Map4k1.bSep08</a>    | <a href="#">292763</a> | 3021  | 704  | 7  | 197 | mitogen-activated protein kinase 1 (Map4k1) alternative variant bSep08, mRNA.                                        |
| <a href="#">Map4k1</a>    | <a href="#">Map4k1.cSep08</a>    | <a href="#">292763</a> | 9173  | 777  | 10 | 138 | mitogen activated protein kinase 1 CRA c (15.3 kD) (Map4k1) alternative variant cSep08, mRNA.                        |
| <a href="#">Map4k1</a>    | <a href="#">Map4k1.dSep08</a>    | <a href="#">292763</a> | 5448  | 418  | 5  | 114 | mitogen activated protein kinase 1 CRA c (13.3 kD) (Map4k1) alternative variant dSep08, mRNA.                        |
| <a href="#">Map4k1</a>    | <a href="#">Map4k1.eSep08</a>    | <a href="#">292763</a> | 809   | 724  | 2  | 113 | mitogen activated protein kinase 1 CRA a (Map4k1) alternative variant eSep08, mRNA.                                  |
| <a href="#">Map4k1</a>    | <a href="#">Map4k1.fSep08</a>    | <a href="#">292763</a> | 1867  | 485  | 6  | 102 | mitogen-activated protein kinase 1 CRA c (11.3 kD) (Map4k1) alternative variant fSep08, mRNA.                        |

|                        |                               |                        |        |      |    |     |                                                                                                              |
|------------------------|-------------------------------|------------------------|--------|------|----|-----|--------------------------------------------------------------------------------------------------------------|
| <a href="#">Map4k2</a> | <a href="#">Map4k2.bSep08</a> | <a href="#">293694</a> | 2165   | 631  | 9  | 203 | mitogen activated protein kinase kinase kinase kinase 2 (Map4k2) alternative variant bSep08, mRNA.           |
| <a href="#">Map4k3</a> | <a href="#">Map4k3.aSep08</a> | <a href="#">170920</a> | 139912 | 1558 | 20 | 474 | mitogen-activated protein kinase kinase kinase kinase 3 (Map4k3) alternative variant aSep08, mRNA.           |
| <a href="#">Map4k3</a> | <a href="#">Map4k3.bSep08</a> | <a href="#">170920</a> | 57337  | 3227 | 23 | 351 | mitogen-activated protein kinase kinase kinase kinase 3 (40.2 kD) (Map4k3) alternative variant bSep08, mRNA. |
| <a href="#">Map4k3</a> | <a href="#">Map4k3.cSep08</a> | <a href="#">170920</a> | 8205   | 477  | 5  | 156 | mitogen-activated protein kinase kinase kinase kinase 3 (Map4k3) alternative variant cSep08, mRNA.           |
| <a href="#">Map4k3</a> | <a href="#">Map4k3.dSep08</a> | <a href="#">170920</a> | 6442   | 576  | 3  | 112 | mitogen-activated protein kinase kinase kinase kinase 3 (Map4k3) alternative variant dSep08, mRNA.           |
| <a href="#">Map4k4</a> | <a href="#">Map4k4.bSep08</a> | <a href="#">301363</a> | 18685  | 1809 | 11 | 516 | mitogen-activated protein kinase kinase kinase kinase 4 (Map4k4) alternative variant bSep08, mRNA.           |
| <a href="#">Map4k4</a> | <a href="#">Map4k4.cSep08</a> | <a href="#">301363</a> | 32759  | 1785 | 10 | 508 | mitogen-activated protein kinase kinase kinase kinase 4 (Map4k4) alternative variant cSep08, mRNA.           |
| <a href="#">Map4k4</a> | <a href="#">Map4k4.dSep08</a> | <a href="#">301363</a> | 4912   | 669  | 5  | 222 | mitogen-activated protein kinase kinase kinase kinase 4 (Map4k4) alternative variant dSep08, mRNA.           |
| <a href="#">Map4k4</a> | <a href="#">Map4k4.eSep08</a> | <a href="#">301363</a> | 7680   | 557  | 4  | 185 | mitogen-activated protein kinase kinase kinase kinase 4 (Map4k4) alternative variant eSep08, mRNA.           |
| <a href="#">Map4k4</a> | <a href="#">Map4k4.fSep08</a> | <a href="#">301363</a> | 2223   | 793  | 4  | 155 | mitogen-activated protein kinase kinase kinase kinase 4 (Map4k4) alternative variant fSep08, mRNA.           |
| <a href="#">Map4k4</a> | <a href="#">Map4k4.hSep08</a> | <a href="#">301363</a> | 990    | 342  | 2  | 69  | mitogen-activated protein kinase kinase kinase kinase 4 (Map4k4) alternative variant hSep08, mRNA.           |
| <a href="#">Map4k5</a> | <a href="#">Map4k5.aSep08</a> | <a href="#">503027</a> | 23987  | 1280 | 12 | 426 | mitogen-activated protein kinase kinase kinase kinase 5 (Map4k5) alternative variant aSep08, mRNA.           |
| <a href="#">Map4k5</a> | <a href="#">Map4k5.bSep08</a> | <a href="#">503027</a> | 20606  | 1011 | 10 | 336 | mitogen-activated protein kinase kinase kinase kinase 5 (Map4k5) alternative variant bSep08, mRNA.           |
| <a href="#">Map4k5</a> | <a href="#">Map4k5.cSep08</a> | <a href="#">503027</a> | 17579  | 1596 | 9  | 276 | mitogen-activated protein kinase kinase kinase kinase 5 (Map4k5) alternative variant cSep08, mRNA.           |
| <a href="#">Map4k5</a> | <a href="#">Map4k5.dSep08</a> | <a href="#">503027</a> | 6079   | 633  | 4  | 210 | mitogen-activated protein kinase kinase kinase kinase 5 (Map4k5) alternative variant dSep08, mRNA.           |
| <a href="#">Map4k5</a> | <a href="#">Map4k5.fSep08</a> | <a href="#">503027</a> | 1543   | 376  | 2  | 80  | mitogen-activated protein kinase kinase kinase kinase 5 (Map4k5) alternative variant fSep08, mRNA.           |
| <a href="#">Map7</a>   | <a href="#">Map7.aSep08</a>   | <a href="#">293016</a> | 46010  | 2019 | 15 | 626 | microtubule-associated protein 7 (Map7) alternative variant aSep08, mRNA.                                    |
| <a href="#">Map7</a>   | <a href="#">Map7.cSep08</a>   | <a href="#">293016</a> | 23773  | 336  | 4  | 111 | microtubule-associated protein 7 (Map7) alternative variant cSep08, mRNA.                                    |
| <a href="#">Map7</a>   | <a href="#">Map7.eSep08</a>   | <a href="#">293016</a> | 4178   | 724  | 3  | 64  | microtubule-associated protein 7 (7.0 kD) (Map7) alternative variant eSep08, mRNA.                           |
| <a href="#">Map7d1</a> | <a href="#">Map7d1.aSep08</a> | <a href="#">681287</a> | 24077  | 2675 | 16 | 846 | arginine proline rich coiled-coil 1 (Map7d1) alternative variant aSep08, mRNA.                               |
| <a href="#">Map7d1</a> | <a href="#">Map7d1.bSep08</a> | <a href="#">681287</a> | 5167   | 841  | 5  | 280 | arginine proline rich coiled-coil 1 (Map7d1) alternative variant bSep08, mRNA.                               |
| <a href="#">Map7d1</a> | <a href="#">Map7d1.cSep08</a> | <a href="#">681287</a> | 1631   | 704  | 7  | 234 | arginine proline rich coiled-coil 1 CRA a (Map7d1) alternative variant cSep08, mRNA.                         |
| <a href="#">Map7d1</a> | <a href="#">Map7d1.dSep08</a> | <a href="#">681287</a> | 2062   | 1230 | 7  | 215 | arginine proline rich coiled-coil 1 (Map7d1) alternative variant dSep08, mRNA.                               |

|                           |                                  |                        |        |      |   |     |                                                                                                                                |
|---------------------------|----------------------------------|------------------------|--------|------|---|-----|--------------------------------------------------------------------------------------------------------------------------------|
| <a href="#">Map7d1</a>    | <a href="#">Map7d1.eSep08</a>    | <a href="#">681287</a> | 4849   | 591  | 5 | 197 | arginine proline rich coiled-coil 1 (Map7d1) alternative variant eSep08, mRNA.                                                 |
| <a href="#">Map7d1</a>    | <a href="#">Map7d1.gSep08</a>    | <a href="#">681287</a> | 2332   | 446  | 4 | 148 | arginine proline rich coiled-coil 1 (Map7d1) alternative variant gSep08, mRNA.                                                 |
| <a href="#">Map7d1</a>    | <a href="#">Map7d1.hSep08</a>    | <a href="#">681287</a> | 1017   | 383  | 3 | 127 | arginine proline rich coiled-coil 1 (Map7d1) alternative variant hSep08, mRNA.                                                 |
| <a href="#">Map7d1</a>    | <a href="#">Map7d1.iSep08</a>    | <a href="#">681287</a> | 1254   | 705  | 5 | 105 | arginine proline rich coiled-coil 1 CRA a (11.1 kD) (Map7d1) alternative variant iSep08, mRNA.                                 |
| <a href="#">Map7d2</a>    | <a href="#">Map7d2.aSep08</a>    | <a href="#">317508</a> | 115875 | 3970 | 6 | 763 | putative protein, with 2 coiled coil domains, of vertebrate origin (84.9 kD) (Map7d2) alternative variant aSep08, mRNA.        |
| <a href="#">Map7d2</a>    | <a href="#">Map7d2.bSep08</a>    | <a href="#">317508</a> | 28747  | 943  | 1 | 227 | putative protein of vertebrate origin (Map7d2) alternative variant bSep08, mRNA.                                               |
| <a href="#">Map7d2</a>    | <a href="#">Map7d2.cSep08</a>    | <a href="#">317508</a> | 10852  | 622  | 2 | 146 | putative protein of vertebrate origin (Map7d2) alternative variant cSep08, mRNA.                                               |
| <a href="#">Mapbpip</a>   | <a href="#">Mapbpip.aSep08</a>   | <a href="#">295234</a> | 4023   | 521  | 4 | 134 | mitogen-activated protein binding protein interacting protein (Mapbpip) alternative variant aSep08, mRNA.                      |
| <a href="#">Mapbpip</a>   | <a href="#">Mapbpip.cSep08</a>   | <a href="#">295234</a> | 3322   | 517  | 4 | 124 | mitogen-activated protein binding protein interacting protein (13.4 kD) (Mapbpip) alternative variant cSep08, complete mRNA.   |
| <a href="#">Mapbpip</a>   | <a href="#">Mapbpip.eSep08</a>   | <a href="#">295234</a> | 1339   | 635  | 2 | 65  | mitogen-activated protein binding protein interacting protein (6.6 kD) (Mapbpip) alternative variant eSep08, mRNA.             |
| <a href="#">Mapbpip</a>   | <a href="#">Mapbpip.fSep08</a>   | <a href="#">295234</a> | 2315   | 514  | 2 | 54  | mitogen-activated protein binding protein interacting protein (5.9 kD) (Mapbpip) alternative variant fSep08, mRNA.             |
| <a href="#">Mapk1</a>     | <a href="#">Mapk1.bSep08</a>     | <a href="#">116590</a> | 21281  | 1310 | 6 | 162 | mitogen activated protein kinase 1 (18.7 kD) (Mapk1) alternative variant bSep08, mRNA.                                         |
| <a href="#">Mapk1</a>     | <a href="#">Mapk1.cSep08</a>     | <a href="#">116590</a> | 18168  | 1577 | 5 | 136 | mitogen activated protein kinase 1 (Mapk1) alternative variant cSep08, mRNA.                                                   |
| <a href="#">Mapk1</a>     | <a href="#">Mapk1.eSep08</a>     | <a href="#">116590</a> | 4193   | 315  | 3 | 52  | mitogen activated protein kinase 1 (Mapk1) alternative variant eSep08, mRNA.                                                   |
| <a href="#">Mapk1ip1</a>  | <a href="#">Mapk1ip1.aSep08</a>  | <a href="#">499280</a> | 11057  | 1461 | 2 | 263 | putative protein (11.6 kD) (Mapk1ip1) alternative variant aSep08, complete mRNA.                                               |
| <a href="#">Mapk1ip1</a>  | <a href="#">Mapk1ip1.cSep08</a>  | <a href="#">499280</a> | 10289  | 755  | 3 | 110 | putative protein (11.7 kD) (Mapk1ip1) alternative variant cSep08, mRNA.                                                        |
| <a href="#">Mapk1ip1</a>  | <a href="#">Mapk1ip1.dSep08</a>  | <a href="#">499280</a> | 10242  | 767  | 3 | 110 | putative protein (11.7 kD) (Mapk1ip1) alternative variant dSep08, mRNA.                                                        |
| <a href="#">Mapk1ip1</a>  | <a href="#">Mapk1ip1.eSep08</a>  | <a href="#">499280</a> | 10105  | 753  | 4 | 29  | putative protein (3.2 kD) (Mapk1ip1) alternative variant eSep08, mRNA.                                                         |
| <a href="#">Mapk1ip1l</a> | <a href="#">Mapk1ip1l.aSep08</a> | <a href="#">361028</a> | 26562  | 3528 | 4 | 240 | mitogen-activated protein kinase 1 interacting protein 1-like (23.7 kD) (Mapk1ip1l) alternative variant aSep08, complete mRNA. |
| <a href="#">Mapk3</a>     | <a href="#">Mapk3.bSep08</a>     | <a href="#">50689</a>  | 5205   | 1778 | 7 | 370 | protein kinase 3 (42.3 kD) (Mapk3) alternative variant bSep08, mRNA.                                                           |
| <a href="#">Mapk3</a>     | <a href="#">Mapk3.cSep08</a>     | <a href="#">50689</a>  | 4196   | 753  | 5 | 233 | protein kinase 3 (Mapk3) alternative variant cSep08, mRNA.                                                                     |
| <a href="#">Mapk3</a>     | <a href="#">Mapk3.dSep08</a>     | <a href="#">50689</a>  | 1607   | 700  | 5 | 233 | protein kinase 3 (Mapk3) alternative variant dSep08, mRNA.                                                                     |

|                          |                                 |                        |        |      |    |     |                                                                                                                |
|--------------------------|---------------------------------|------------------------|--------|------|----|-----|----------------------------------------------------------------------------------------------------------------|
| <a href="#">Mapk3</a>    | <a href="#">Mapk3.fSep08</a>    | <a href="#">50689</a>  | 3020   | 753  | 6  | 123 | mitogen-activated protein kinase 3 (Mapk3) alternative variant fSep08, mRNA.                                   |
| <a href="#">Mapk3</a>    | <a href="#">Mapk3.gSep08</a>    | <a href="#">50689</a>  | 1262   | 345  | 2  | 93  | protein kinase 3 (Mapk3) alternative variant gSep08, mRNA.                                                     |
| <a href="#">Mapk4</a>    | <a href="#">Mapk4.aSep08</a>    | <a href="#">54268</a>  | 3945   | 1396 |    | 283 | mitogen-activated protein kinase 4 (Mapk4) mRNA.                                                               |
| <a href="#">Mapk8</a>    | <a href="#">Mapk8.aSep08</a>    | <a href="#">116554</a> | 58085  | 488  | 3  | 120 | mitogen-activated protein kinase 8 (Mapk8) alternative variant aSep08, mRNA.                                   |
| <a href="#">Mapk8</a>    | <a href="#">Mapk8.bSep08</a>    | <a href="#">116554</a> | 52585  | 448  | 1  | 87  | mitogen-activated protein kinase 8 (9.8 kD) (Mapk8) alternative variant bSep08, complete mRNA.                 |
| <a href="#">Mapk8ip1</a> | <a href="#">Mapk8ip1.bSep08</a> | <a href="#">116457</a> | 2375   | 821  | 3  | 219 | mitogen-activated protein kinase 8 interacting protein 1 (Mapk8ip1) alternative variant bSep08, mRNA.          |
| <a href="#">Mapk8ip1</a> | <a href="#">Mapk8ip1.dSep08</a> | <a href="#">116457</a> | 1287   | 546  | 4  | 75  | mitogen-activated protein kinase 8 interacting protein 1 (Mapk8ip1) alternative variant dSep08, mRNA.          |
| <a href="#">Mapk8ip2</a> | <a href="#">Mapk8ip2.aSep08</a> | <a href="#">315220</a> | 3746   | 1764 | 6  | 345 | mitogen-activated protein kinase 8 interacting protein 2 (Mapk8ip2) alternative variant aSep08, mRNA.          |
| <a href="#">Mapk8ip2</a> | <a href="#">Mapk8ip2.bSep08</a> | <a href="#">315220</a> | 1212   | 740  | 1  | 71  | mitogen-activated protein kinase 8 interacting protein 2 (8.3 kD) (Mapk8ip2) alternative variant bSep08, mRNA. |
| <a href="#">Mapk8ip3</a> | <a href="#">Mapk8ip3.aSep08</a> | <a href="#">302983</a> | 8823   | 3874 | 20 | 826 | mitogen-activated protein kinase 8 interacting protein 3 (Mapk8ip3) alternative variant aSep08, mRNA.          |
| <a href="#">Mapk8ip3</a> | <a href="#">Mapk8ip3.bSep08</a> | <a href="#">302983</a> | 927    | 571  | 5  | 147 | mitogen-activated protein kinase 8 interacting protein 3 (Mapk8ip3) alternative variant bSep08, mRNA.          |
| <a href="#">Mapk8ip3</a> | <a href="#">Mapk8ip3.cSep08</a> | <a href="#">302983</a> | 802    | 677  | 2  | 60  | mitogen-activated protein kinase 8 interacting protein 3 (Mapk8ip3) alternative variant cSep08, mRNA.          |
| <a href="#">Mapk8ip3</a> | <a href="#">Mapk8ip3.dSep08</a> | <a href="#">302983</a> | 490    | 404  | 2  | 56  | mitogen-activated protein kinase 8 interacting protein 3 (Mapk8ip3) alternative variant dSep08, mRNA.          |
| <a href="#">Mapk9</a>    | <a href="#">Mapk9.bSep08</a>    | <a href="#">50658</a>  | 6927   | 2662 | 5  | 175 | mitogen-activated protein kinase 9 (20.0 kD) (Mapk9) alternative variant bSep08, mRNA.                         |
| <a href="#">Mapk9</a>    | <a href="#">Mapk9.cSep08</a>    | <a href="#">50658</a>  | 28016  | 745  | 1  | 128 | mitogen-activated protein kinase 9 (Mapk9) alternative variant cSep08, mRNA.                                   |
| <a href="#">Mapk9</a>    | <a href="#">Mapk9.dSep08</a>    | <a href="#">50658</a>  | 4652   | 392  | 5  | 122 | mitogen-activated protein kinase 9 (Mapk9) alternative variant dSep08, mRNA.                                   |
| <a href="#">Mapk10</a>   | <a href="#">Mapk10.bSep08</a>   | <a href="#">25272</a>  | 125130 | 1281 | 11 | 426 | mitogen activated protein kinase 10 (Mapk10) alternative variant bSep08, mRNA.                                 |
| <a href="#">Mapk10</a>   | <a href="#">Mapk10.cSep08</a>   | <a href="#">25272</a>  | 52000  | 1289 | 5  | 106 | mitogen activated protein kinase 10 (Mapk10) alternative variant cSep08, mRNA.                                 |
| <a href="#">Mapk12</a>   | <a href="#">Mapk12.cSep08</a>   | <a href="#">60352</a>  | 2876   | 1158 | 4  | 106 | mitogen-activated protein kinase 12 (12.1 kD) (Mapk12) alternative variant cSep08, mRNA.                       |
| <a href="#">Mapk12</a>   | <a href="#">Mapk12.dSep08</a>   | <a href="#">60352</a>  | 2338   | 718  | 3  | 100 | mitogen-activated protein kinase 12 (Mapk12) alternative variant dSep08, mRNA.                                 |
| <a href="#">Mapk14</a>   | <a href="#">Mapk14.bSep08</a>   | <a href="#">81649</a>  | 18513  | 1254 | 1  | 155 | mitogen activated protein kinase 14 (Mapk14) alternative variant bSep08, mRNA.                                 |
| <a href="#">Mapkap1</a>  | <a href="#">Mapkap1.bSep08</a>  | <a href="#">296648</a> | 199289 | 1502 | 10 | 445 | mitogen-activated protein kinase associated protein 1 (Mapkap1) alternative variant bSep08, mRNA.              |
| <a href="#">Mapkap1</a>  | <a href="#">Mapkap1.cSep08</a>  | <a href="#">296648</a> | 86865  | 761  | 5  | 200 | mitogen-activated protein kinase associated protein 1 (Mapkap1) alternative variant cSep08, mRNA.              |
| <a href="#">Mapkap1</a>  | <a href="#">Mapkap1.dSep08</a>  | <a href="#">296648</a> | 103239 | 770  | 4  | 184 | mitogen-activated protein kinase associated protein 1 (Mapkap1) alternative variant dSep08, mRNA.              |

|                          |                                 |                        |       |      |    |     |                                                                                                             |
|--------------------------|---------------------------------|------------------------|-------|------|----|-----|-------------------------------------------------------------------------------------------------------------|
| <a href="#">Mapkap1</a>  | <a href="#">Mapkap1.eSep08</a>  | <a href="#">296648</a> | 5359  | 1932 | 2  | 118 | mitogen-activated protein kinase associated protein 1 (13.4 kD) (Mapkap1) alternative variant eSep08, mRNA. |
| <a href="#">Mapkap1</a>  | <a href="#">Mapkap1.fSep08</a>  | <a href="#">296648</a> | 37447 | 505  | 3  | 90  | mitogen-activated protein kinase associated protein 1 (Mapkap1) alternative variant fSep08, mRNA.           |
| <a href="#">Mapkapk2</a> | <a href="#">Mapkapk2.bSep08</a> | <a href="#">289014</a> | 1393  | 327  | 4  | 105 | MAP kinase-activated protein kinase 2 (Mapkapk2) alternative variant bSep08, mRNA.                          |
| <a href="#">Mapkapk3</a> | <a href="#">Mapkapk3.bSep08</a> | <a href="#">315994</a> | 27290 | 754  | 5  | 158 | mitogen-activated protein kinase-activated protein kinase 3 (Mapkapk3) alternative variant bSep08, mRNA.    |
| <a href="#">Mapkapk5</a> | <a href="#">Mapkapk5.bSep08</a> | <a href="#">498183</a> | 13095 | 905  | 9  | 301 | MAP kinase-activated protein kinase 5 (Mapkapk5) alternative variant bSep08, mRNA.                          |
| <a href="#">Mapkapk5</a> | <a href="#">Mapkapk5.cSep08</a> | <a href="#">498183</a> | 2938  | 658  | 5  | 187 | MAP kinase-activated protein kinase 5 (Mapkapk5) alternative variant cSep08, mRNA.                          |
| <a href="#">Mapkapk5</a> | <a href="#">Mapkapk5.dSep08</a> | <a href="#">498183</a> | 4141  | 440  | 4  | 146 | MAP kinase-activated protein kinase 5 (Mapkapk5) alternative variant dSep08, mRNA.                          |
| <a href="#">Mapkapk5</a> | <a href="#">Mapkapk5.eSep08</a> | <a href="#">498183</a> | 1075  | 732  | 2  | 80  | MAP kinase-activated protein kinase 5 (9.4 kD) (Mapkapk5) alternative variant eSep08, mRNA.                 |
| <a href="#">Mapkapk5</a> | <a href="#">Mapkapk5.hSep08</a> | <a href="#">498183</a> | 2828  | 423  | 4  | 55  | MAP kinase-activated protein kinase 5 (6.6 kD) (Mapkapk5) alternative variant hSep08, mRNA.                 |
| <a href="#">mapor</a>    | <a href="#">mapor.aSep08</a>    |                        | 3580  | 455  |    | 42  | putative protein (mapor) mRNA.                                                                              |
| <a href="#">Mapre1</a>   | <a href="#">Mapre1.bSep08</a>   | <a href="#">114764</a> | 24919 | 852  | 6  | 249 | microtubule-associated protein, RP/EB family, member 1 (Mapre1) alternative variant bSep08, mRNA.           |
| <a href="#">Mapre1</a>   | <a href="#">Mapre1.cSep08</a>   | <a href="#">114764</a> | 24602 | 745  | 6  | 248 | microtubule-associated protein, RP/EB family, member 1 (Mapre1) alternative variant cSep08, mRNA.           |
| <a href="#">Mapre3</a>   | <a href="#">Mapre3.bSep08</a>   | <a href="#">298848</a> | 44325 | 892  | 6  | 243 | microtubule-associated protein, RP/EB family, member 3 (Mapre3) alternative variant bSep08, mRNA.           |
| <a href="#">Mapre3</a>   | <a href="#">Mapre3.cSep08</a>   | <a href="#">298848</a> | 44636 | 1026 | 7  | 220 | microtubule-associated protein, RP/EB family, member 3 (24.8 kD) (Mapre3) alternative variant cSep08, mRNA. |
| <a href="#">Mapre3</a>   | <a href="#">Mapre3.dSep08</a>   | <a href="#">298848</a> | 1444  | 1195 | 3  | 157 | microtubule-associated protein, RP/EB family, member 3 (17.7 kD) (Mapre3) alternative variant dSep08, mRNA. |
| <a href="#">Mapre3</a>   | <a href="#">Mapre3.eSep08</a>   | <a href="#">298848</a> | 6675  | 394  | 3  | 48  | microtubule-associated protein, RP/EB family, member 3 (Mapre3) alternative variant eSep08, mRNA.           |
| <a href="#">Mapt</a>     | <a href="#">Mapt.aSep08</a>     | <a href="#">29477</a>  | 64085 | 1316 | 6  | 397 | microtubule-associated protein tau (Mapt) alternative variant aSep08, mRNA.                                 |
| <a href="#">Mapt</a>     | <a href="#">Mapt.bSep08</a>     | <a href="#">29477</a>  | 94002 | 1428 | 9  | 343 | microtubule-associated protein tau (35.9 kD) (Mapt) alternative variant bSep08, mRNA.                       |
| <a href="#">Mapt</a>     | <a href="#">Mapt.cSep08</a>     | <a href="#">29477</a>  | 42367 | 5250 | 10 | 330 | microtubule-associated protein tau (34.3 kD) (Mapt) alternative variant cSep08, mRNA.                       |
| <a href="#">Mapt</a>     | <a href="#">Mapt.dSep08</a>     | <a href="#">29477</a>  | 53219 | 551  | 3  | 138 | protein tau (14.6 kD) (Mapt) alternative variant dSep08, mRNA.                                              |
| <a href="#">marby</a>    | <a href="#">marby.aSep08</a>    |                        | 4439  | 550  |    | 49  | putative protein (marby) mRNA.                                                                              |
| <a href="#">1-Mar</a>    | <a href="#">March1.aSep08</a>   | <a href="#">361135</a> | 72108 | 993  |    | 277 | membrane-associated ring finger (C3HC4) 1 (March1) mRNA.                                                    |
| <a href="#">2-Mar</a>    | <a href="#">March2.bSep08</a>   | <a href="#">362849</a> | 25199 | 2515 | 4  | 232 | membrane-associated ring finger (C3HC4) 2 (25.1 kD) (March2) alternative variant bSep08, mRNA.              |
| <a href="#">2-Mar</a>    | <a href="#">March2.cSep08</a>   | <a href="#">362849</a> | 13236 | 737  | 1  | 60  | membrane-associated ring finger (C3HC4) 2 (6.2 kD) (March2) alternative variant cSep08, mRNA.               |

|                          |                                 |                        |        |      |   |     |                                                                                               |
|--------------------------|---------------------------------|------------------------|--------|------|---|-----|-----------------------------------------------------------------------------------------------|
| <a href="#">3-Mar</a>    | <a href="#">March3.bSep08</a>   | <a href="#">364878</a> | 164055 | 780  | 5 | 175 | glutaredoxin-like protein (19.0 kD) (March3) alternative variant bSep08, mRNA.                |
| <a href="#">3-Mar</a>    | <a href="#">March3.dSep08</a>   | <a href="#">364878</a> | 15991  | 1037 | 3 | 96  | glutaredoxin-like protein (11.2 kD) (March3) alternative variant dSep08, complete mRNA.       |
| <a href="#">3-Mar</a>    | <a href="#">March3.eSep08</a>   | <a href="#">364878</a> | 204313 | 2868 | 8 | 64  | glutaredoxin-like protein (7.1 kD) (March3) alternative variant eSep08, mRNA.                 |
| <a href="#">3-Mar</a>    | <a href="#">March3.gSep08</a>   | <a href="#">364878</a> | 151977 | 840  | 4 | 67  | putative protein (March3) alternative variant gSep08, mRNA.                                   |
| <a href="#">5-Mar</a>    | <a href="#">March5.bSep08</a>   | <a href="#">294079</a> | 602    | 456  | 2 | 65  | membrane-associated ring finger (C3HC4) 5 (March5) alternative variant bSep08, mRNA.          |
| <a href="#">6-Mar</a>    | <a href="#">March6.aSep08</a>   | <a href="#">294862</a> | 28949  | 4514 |   | 395 | membrane-associated ring finger (C3HC4) 6 (March6) mRNA.                                      |
| <a href="#">7-Mar</a>    | <a href="#">March7.aSep08</a>   | <a href="#">311059</a> | 38487  | 3538 | 9 | 745 | membrane-associated ring finger (C3HC4) 7 (March7) alternative variant aSep08, mRNA.          |
| <a href="#">7-Mar</a>    | <a href="#">March7.cSep08</a>   | <a href="#">311059</a> | 6878   | 839  | 3 | 134 | membrane-associated ring finger (C3HC4) 7 (March7) alternative variant cSep08, mRNA.          |
| <a href="#">7-Mar</a>    | <a href="#">March7.eSep08</a>   | <a href="#">311059</a> | 18621  | 603  | 2 | 100 | membrane-associated ring finger (C3HC4) 7 (March7) alternative variant eSep08, mRNA.          |
| <a href="#">7-Mar</a>    | <a href="#">March7.fSep08</a>   | <a href="#">311059</a> | 4768   | 706  | 3 | 48  | membrane-associated ring finger (C3HC4) 7 (March7) alternative variant fSep08, mRNA.          |
| <a href="#">marchy</a>   | <a href="#">marchy.aSep08</a>   |                        | 34268  | 345  |   | 30  | putative protein (3.3 kD) (marchy) mRNA.                                                      |
| <a href="#">Marcksl1</a> | <a href="#">Marcksl1.bSep08</a> | <a href="#">81520</a>  | 1109   | 850  | 1 | 194 | MARCKS-like 1 (Marcksl1) alternative variant bSep08, mRNA.                                    |
| <a href="#">mardar</a>   | <a href="#">mardar.aSep08</a>   |                        | 14654  | 673  |   | 55  | putative protein (6.4 kD) (mardar) alternative variant aSep08, mRNA.                          |
| <a href="#">mardar</a>   | <a href="#">mardar.bSep08</a>   |                        | 14257  | 491  | 1 | 88  | putative nuclear protein (9.7 kD) (mardar) alternative variant bSep08, mRNA.                  |
| <a href="#">Mare</a>     | <a href="#">Mare.bSep08</a>     | <a href="#">360505</a> | 10320  | 1374 | 7 | 352 | alpha globin regulatory element containing (Mare) alternative variant bSep08, mRNA.           |
| <a href="#">Mare</a>     | <a href="#">Mare.cSep08</a>     | <a href="#">360505</a> | 24350  | 961  | 8 | 272 | alpha globin regulatory element containing (Mare) alternative variant cSep08, mRNA.           |
| <a href="#">Mare</a>     | <a href="#">Mare.dSep08</a>     | <a href="#">360505</a> | 1819   | 715  | 3 | 114 | alpha globin regulatory element containing (13.0 kD) (Mare) alternative variant dSep08, mRNA. |
| <a href="#">Mare</a>     | <a href="#">Mare.eSep08</a>     | <a href="#">360505</a> | 4001   | 404  | 2 | 42  | putative protein (Mare) alternative variant eSep08, mRNA.                                     |
| <a href="#">marfer</a>   | <a href="#">marfer.aSep08</a>   |                        | 2052   | 527  |   | 97  | putative protein (marfer) mRNA.                                                               |
| <a href="#">marflo</a>   | <a href="#">marflo.aSep08</a>   |                        | 1783   | 458  |   | 32  | putative protein (3.7 kD) (marflo) mRNA.                                                      |
| <a href="#">marflu</a>   | <a href="#">marflu.aSep08</a>   |                        | 57401  | 1091 | 3 | 363 | ubiquitin protein ligase E3A (marflu) alternative variant aSep08, mRNA.                       |
| <a href="#">marflu</a>   | <a href="#">marflu.bSep08</a>   |                        | 53033  | 534  | 4 | 107 | ubiquitin protein ligase E3A (marflu) alternative variant bSep08, mRNA.                       |
| <a href="#">marflu</a>   | <a href="#">marflu.cSep08</a>   |                        | 19879  | 529  | 4 | 39  | putative protein (marflu) alternative variant cSep08, mRNA.                                   |
| <a href="#">margar</a>   | <a href="#">margar.aSep08</a>   |                        | 9362   | 803  |   | 54  | putative protein (6.3 kD) (margar) mRNA.                                                      |
| <a href="#">marjey</a>   | <a href="#">marjey.aSep08</a>   |                        | 29548  | 1170 | 7 | 187 | protein Tyrosine phosphatase non-receptor type 13 (marjey) mRNA.                              |
| <a href="#">Mark1</a>    | <a href="#">Mark1.bSep08</a>    | <a href="#">117016</a> | 16991  | 2365 | 8 | 637 | MAP/microtubule affinity-regulating kinase 1 (Mark1) alternative variant bSep08, mRNA.        |

|                         |                                |                        |       |      |    |     |                                                                                                  |
|-------------------------|--------------------------------|------------------------|-------|------|----|-----|--------------------------------------------------------------------------------------------------|
| <a href="#">Mark2</a>   | <a href="#">Mark2.bSep08</a>   | <a href="#">60328</a>  | 9402  | 3219 | 10 | 489 | MAP/microtubule affinity-regulating kinase 2 (Mark2) alternative variant bSep08, mRNA.           |
| <a href="#">Mark2</a>   | <a href="#">Mark2.cSep08</a>   | <a href="#">60328</a>  | 5626  | 1602 | 4  | 272 | MAP/microtubule affinity-regulating kinase 2 (29.8 kD) (Mark2) alternative variant cSep08, mRNA. |
| <a href="#">Mark2</a>   | <a href="#">Mark2.dSep08</a>   | <a href="#">60328</a>  | 1672  | 1078 | 2  | 167 | MAP/microtubule affinity-regulating kinase 2 (Mark2) alternative variant dSep08, mRNA.           |
| <a href="#">Mark3</a>   | <a href="#">Mark3.bSep08</a>   | <a href="#">170577</a> | 33069 | 1686 | 6  | 361 | MAP/microtubule affinity-regulating kinase 3 (Mark3) alternative variant bSep08, mRNA.           |
| <a href="#">Mark3</a>   | <a href="#">Mark3.cSep08</a>   | <a href="#">170577</a> | 56021 | 544  | 7  | 155 | MAP/microtubule affinity-regulating kinase 3 (Mark3) alternative variant cSep08, mRNA.           |
| <a href="#">Mark3</a>   | <a href="#">Mark3.dSep08</a>   | <a href="#">170577</a> | 2241  | 781  | 2  | 152 | MAP/microtubule affinity-regulating kinase 3 (17.7 kD) (Mark3) alternative variant dSep08, mRNA. |
| <a href="#">Mark4</a>   | <a href="#">Mark4.aSep08</a>   | <a href="#">680407</a> | 14477 | 1497 | 9  | 498 | MAP/microtubule affinity-regulating kinase 4 (Mark4) alternative variant aSep08, mRNA.           |
| <a href="#">Mark4</a>   | <a href="#">Mark4.bSep08</a>   | <a href="#">680407</a> | 7523  | 855  | 6  | 285 | MAP/microtubule affinity-regulating kinase 4 (Mark4) alternative variant bSep08, mRNA.           |
| <a href="#">Mark4</a>   | <a href="#">Mark4.cSep08</a>   | <a href="#">680407</a> | 2996  | 340  | 3  | 91  | MAP/microtubule affinity-regulating kinase 4 (Mark4) alternative variant cSep08, mRNA.           |
| <a href="#">Mark4</a>   | <a href="#">Mark4.dSep08</a>   | <a href="#">680407</a> | 2073  | 503  | 1  | 71  | MAP/microtubule affinity-regulating kinase 4 (Mark4) alternative variant dSep08, mRNA.           |
| <a href="#">Mark4</a>   | <a href="#">Mark4.eSep08</a>   | <a href="#">680407</a> | 2756  | 339  | 3  | 60  | MAP/microtubule affinity-regulating kinase 4 (Mark4) alternative variant eSep08, mRNA.           |
| <a href="#">markee</a>  | <a href="#">markee.aSep08</a>  |                        | 6728  | 695  |    | 155 | putative protein of eukaryotic origin (markee) mRNA.                                             |
| <a href="#">marloy</a>  | <a href="#">marloy.aSep08</a>  |                        | 21748 | 679  |    | 41  | putative protein (marloy) mRNA.                                                                  |
| <a href="#">marmee</a>  | <a href="#">marmee.aSep08</a>  |                        | 1708  | 780  |    | 259 | CRA b (marmee) mRNA.                                                                             |
| <a href="#">marmer</a>  | <a href="#">marmer.aSep08</a>  |                        | 757   | 603  |    | 104 | putative protein (11.9 kD) (marmer) mRNA.                                                        |
| <a href="#">marnoy</a>  | <a href="#">marnoy.aSep08</a>  |                        | 424   | 268  |    | 38  | putative protein (marnoy) mRNA.                                                                  |
| <a href="#">marpor</a>  | <a href="#">marpor.aSep08</a>  |                        | 2496  | 653  | 1  | 101 | putative protein (10.9 kD) (marpor) alternative variant aSep08, mRNA.                            |
| <a href="#">marpor</a>  | <a href="#">marpor.bSep08</a>  |                        | 2370  | 483  |    | 101 | putative protein (10.9 kD) (marpor) alternative variant bSep08, mRNA.                            |
| <a href="#">Mars</a>    | <a href="#">Mars.bSep08</a>    | <a href="#">299851</a> | 3621  | 1427 | 8  | 295 | methionine-tRNA synthetase (Mars) alternative variant bSep08, mRNA.                              |
| <a href="#">Mars</a>    | <a href="#">Mars.cSep08</a>    | <a href="#">299851</a> | 555   | 433  | 2  | 50  | methionine-tRNA synthetase (5.9 kD) (Mars) alternative variant cSep08, mRNA.                     |
| <a href="#">Mars</a>    | <a href="#">Mars.dSep08</a>    | <a href="#">299851</a> | 3274  | 303  | 2  | 33  | methionine-tRNA synthetase (Mars) alternative variant dSep08, mRNA.                              |
| <a href="#">marsa</a>   | <a href="#">marsa.aSep08</a>   |                        | 8069  | 766  |    | 72  | putative protein (8.4 kD) (marsa) mRNA.                                                          |
| <a href="#">marshee</a> | <a href="#">marshee.aSep08</a> |                        | 2042  | 717  |    | 46  | putative protein (marshee) mRNA.                                                                 |
| <a href="#">martu</a>   | <a href="#">martu.aSep08</a>   |                        | 2600  | 731  |    | 126 | putative protein (14.2 kD) (martu) mRNA.                                                         |
| <a href="#">marvar</a>  | <a href="#">marvar.aSep08</a>  |                        | 7800  | 548  |    | 77  | putative protein (marvar) mRNA.                                                                  |
| <a href="#">marwey</a>  | <a href="#">marwey.aSep08</a>  |                        | 19900 | 817  |    | 107 | putative protein (marwey) mRNA.                                                                  |
| <a href="#">masa</a>    | <a href="#">masa.aSep08</a>    |                        | 2863  | 426  |    | 142 | putative protein of mammalian origin (masa) mRNA.                                                |
| <a href="#">mashee</a>  | <a href="#">mashee.bSep08</a>  |                        | 5590  | 681  |    | 19  | putative protein (mashee) alternative variant bSep08, mRNA.                                      |

|                       |                              |                        |        |      |    |     |                                                                                               |
|-----------------------|------------------------------|------------------------|--------|------|----|-----|-----------------------------------------------------------------------------------------------|
| <a href="#">Masp1</a> | <a href="#">Masp1.bSep08</a> | <a href="#">64023</a>  | 4644   | 676  | 1  | 51  | mannan-binding lectin serine peptidase 1 (Masp1) alternative variant bSep08, mRNA.            |
| <a href="#">Masp2</a> | <a href="#">Masp2.bSep08</a> | <a href="#">64459</a>  | 1797   | 625  | 3  | 112 | mannan-binding lectin serine 2 like (Masp2) alternative variant bSep08, mRNA.                 |
| <a href="#">Masp2</a> | <a href="#">Masp2.cSep08</a> | <a href="#">64459</a>  | 1962   | 829  | 2  | 88  | putative protein (10.0 kD) (Masp2) alternative variant cSep08, mRNA.                          |
| <a href="#">MAST1</a> | <a href="#">MAST1.bSep08</a> | <a href="#">353118</a> | 1713   | 272  | 3  | 90  | microtubule associated serine/threonine kinase 1 (MAST1) alternative variant bSep08, mRNA.    |
| <a href="#">Mast2</a> | <a href="#">Mast2.bSep08</a> | <a href="#">313819</a> | 3366   | 2573 | 4  | 653 | microtubule associated serine/threonine kinase 2 (Mast2) alternative variant bSep08, mRNA.    |
| <a href="#">Mast2</a> | <a href="#">Mast2.cSep08</a> | <a href="#">313819</a> | 816    | 732  | 2  | 117 | microtubule associated serine/threonine kinase 2 (Mast2) alternative variant cSep08, mRNA.    |
| <a href="#">Mast3</a> | <a href="#">Mast3.bSep08</a> | <a href="#">688540</a> | 2230   | 1019 | 3  | 132 | microtubule associated serine/threonine kinase 3 (Mast3) alternative variant bSep08, mRNA.    |
| <a href="#">Mast4</a> | <a href="#">Mast4.aSep08</a> | <a href="#">310040</a> | 325007 | 701  |    | 180 | microtubule associated serine/threonine kinase family member 4 (Mast4) mRNA.                  |
| <a href="#">Mastl</a> | <a href="#">Mastl.bSep08</a> | <a href="#">307169</a> | 17400  | 1513 | 1  | 409 | microtubule associated serine/threonine kinase-like (Mastl) alternative variant bSep08, mRNA. |
| <a href="#">Mat1a</a> | <a href="#">Mat1a.bSep08</a> | <a href="#">25331</a>  | 2969   | 2393 | 1  | 65  | methionine adenosyltransferase I, alpha (Mat1a) alternative variant bSep08, mRNA.             |
| <a href="#">Mat2a</a> | <a href="#">Mat2a.bSep08</a> | <a href="#">171347</a> | 2870   | 2222 | 5  | 236 | methionine adenosyltransferase II, alpha (Mat2a) alternative variant bSep08, mRNA.            |
| <a href="#">Mat2a</a> | <a href="#">Mat2a.cSep08</a> | <a href="#">171347</a> | 2568   | 2235 | 3  | 199 | methionine adenosyltransferase II, alpha (22.0 kD) (Mat2a) alternative variant cSep08, mRNA.  |
| <a href="#">Mat2a</a> | <a href="#">Mat2a.eSep08</a> | <a href="#">171347</a> | 4885   | 369  | 3  | 95  | methionine adenosyltransferase II, alpha (Mat2a) alternative variant eSep08, mRNA.            |
| <a href="#">Mat2b</a> | <a href="#">Mat2b.bSep08</a> | <a href="#">689330</a> | 5233   | 1352 | 4  | 214 | methionine adenosyltransferase II, beta (Mat2b) alternative variant bSep08, mRNA.             |
| <a href="#">Matk</a>  | <a href="#">Matk.bSep08</a>  | <a href="#">60450</a>  | 2975   | 1080 | 6  | 217 | megakaryocyte-associated tyrosine kinase (24.3 kD) (Matk) alternative variant bSep08, mRNA.   |
| <a href="#">Matn1</a> | <a href="#">Matn1.bSep08</a> | <a href="#">297894</a> | 2475   | 723  | 4  | 240 | matrilin 1, cartilage matrix protein (Matn1) alternative variant bSep08, mRNA.                |
| <a href="#">Matn2</a> | <a href="#">Matn2.aSep08</a> | <a href="#">299996</a> | 54611  | 2250 | 13 | 562 | matrilin 2 (Matn2) alternative variant aSep08, mRNA.                                          |
| <a href="#">Matn2</a> | <a href="#">Matn2.bSep08</a> | <a href="#">299996</a> | 4129   | 1457 | 2  | 149 | matrilin 2 (Matn2) alternative variant bSep08, mRNA.                                          |
| <a href="#">Matn2</a> | <a href="#">Matn2.cSep08</a> | <a href="#">299996</a> | 3117   | 837  | 4  | 118 | matrilin 2 (Matn2) alternative variant cSep08, mRNA.                                          |
| <a href="#">Matn2</a> | <a href="#">Matn2.dSep08</a> | <a href="#">299996</a> | 19944  | 278  | 3  | 92  | matrilin 2 (Matn2) alternative variant dSep08, mRNA.                                          |
| <a href="#">Matn3</a> | <a href="#">Matn3.bSep08</a> | <a href="#">313954</a> | 7843   | 1317 | 3  | 302 | matrilin 3 (Matn3) alternative variant bSep08, mRNA.                                          |
| <a href="#">Matn3</a> | <a href="#">Matn3.cSep08</a> | <a href="#">313954</a> | 14178  | 1134 | 7  | 248 | matrilin 3 (Matn3) alternative variant cSep08, mRNA.                                          |
| <a href="#">Matn3</a> | <a href="#">Matn3.dSep08</a> | <a href="#">313954</a> | 8586   | 1204 | 5  | 248 | matrilin 3 (Matn3) alternative variant dSep08, mRNA.                                          |
| <a href="#">Matr3</a> | <a href="#">Matr3.bSep08</a> | <a href="#">29150</a>  | 19525  | 1680 | 9  | 481 | matrin 3 (Matr3) alternative variant bSep08, mRNA.                                            |
| <a href="#">Matr3</a> | <a href="#">Matr3.cSep08</a> | <a href="#">29150</a>  | 20022  | 870  | 9  | 290 | matrin 3 (Matr3) alternative variant cSep08, mRNA.                                            |
| <a href="#">Matr3</a> | <a href="#">Matr3.dSep08</a> | <a href="#">29150</a>  | 3579   | 758  | 2  | 165 | matrin 3 (Matr3) alternative variant dSep08, mRNA.                                            |
| <a href="#">Matr3</a> | <a href="#">Matr3.eSep08</a> | <a href="#">29150</a>  | 10187  | 707  | 2  | 148 | matrin 3 (Matr3) alternative variant eSep08, mRNA.                                            |
| <a href="#">Matr3</a> | <a href="#">Matr3.fSep08</a> | <a href="#">29150</a>  | 647    | 356  | 2  | 68  | matrin 3 (Matr3) alternative variant fSep08, mRNA.                                            |
| <a href="#">Matr3</a> | <a href="#">Matr3.gSep08</a> | <a href="#">29150</a>  | 1172   | 923  | 2  | 60  | matrin 3 like (Matr3) alternative variant gSep08, mRNA.                                       |



|                         |                                |                       |       |      |   |     |                                                                                                  |
|-------------------------|--------------------------------|-----------------------|-------|------|---|-----|--------------------------------------------------------------------------------------------------|
| <a href="#">Matr3</a>   | <a href="#">Matr3.hSep08</a>   | <a href="#">29150</a> | 15635 | 367  | 2 | 39  | matrin 3 (Matr3) alternative variant hSep08, mRNA.                                               |
| <a href="#">Matr3</a>   | <a href="#">Matr3.jSep08</a>   | <a href="#">29150</a> | 9718  | 519  | 2 | 88  | matrin 3 (Matr3) alternative variant jSep08, mRNA.                                               |
| <a href="#">matu</a>    | <a href="#">matu.aSep08</a>    |                       | 3290  | 269  |   | 77  | putative protein of vertebrate origin (matu) mRNA.                                               |
| <a href="#">mavar</a>   | <a href="#">mavar.aSep08</a>   |                       | 15396 | 304  |   | 40  | putative protein (mavar) alternative variant aSep08, mRNA.                                       |
| <a href="#">mavar</a>   | <a href="#">mavar.bSep08</a>   |                       | 15948 | 857  |   | 22  | putative protein (mavar) alternative variant bSep08, mRNA.                                       |
| <a href="#">mawby</a>   | <a href="#">mawby.aSep08</a>   |                       | 976   | 618  |   | 39  | putative protein (3.9 kD) (mawby) mRNA.                                                          |
| <a href="#">mawchy</a>  | <a href="#">mawchy.bSep08</a>  |                       | 880   | 471  | 2 | 46  | putative protein (5.5 kD) (mawchy) alternative variant bSep08, mRNA.                             |
| <a href="#">mawdar</a>  | <a href="#">mawdar.bSep08</a>  |                       | 815   | 251  | 2 | 59  | putative protein (mawdar) alternative variant bSep08, mRNA.                                      |
| <a href="#">mawey</a>   | <a href="#">mawey.aSep08</a>   |                       | 31167 | 1986 | 5 | 237 | inositol 1 receptor CRA a (mawey) alternative variant aSep08, mRNA.                              |
| <a href="#">mawey</a>   | <a href="#">mawey.bSep08</a>   |                       | 98936 | 1015 | 7 | 93  | putative protein (10.4 kD) (mawey) alternative variant bSep08, mRNA.                             |
| <a href="#">mawfer</a>  | <a href="#">mawfer.aSep08</a>  |                       | 9126  | 1989 | 2 | 439 | peripheral benzodiazepine receptor associated protein (mawfer) alternative variant aSep08, mRNA. |
| <a href="#">mawflo</a>  | <a href="#">mawflo.bSep08</a>  |                       | 3132  | 400  | 2 | 102 | putative protein (mawflo) alternative variant bSep08, mRNA.                                      |
| <a href="#">mawflu</a>  | <a href="#">mawflu.aSep08</a>  |                       | 11684 | 353  |   | 46  | putative protein (mawflu) mRNA.                                                                  |
| <a href="#">mawgar</a>  | <a href="#">mawgar.aSep08</a>  |                       | 24916 | 297  |   | 93  | putative protein (mawgar) mRNA.                                                                  |
| <a href="#">mawjey</a>  | <a href="#">mawjey.aSep08</a>  |                       | 6502  | 1901 |   | 38  | putative protein (mawjey) alternative variant aSep08, mRNA.                                      |
| <a href="#">mawkee</a>  | <a href="#">mawkee.aSep08</a>  |                       | 26257 | 566  |   | 72  | putative protein (8.4 kD) (mawkee) mRNA.                                                         |
| <a href="#">mawloy</a>  | <a href="#">mawloy.bSep08</a>  |                       | 2876  | 312  | 2 | 66  | putative protein (mawloy) alternative variant bSep08, mRNA.                                      |
| <a href="#">mawloy</a>  | <a href="#">mawloy.cSep08</a>  |                       | 1625  | 303  | 2 | 61  | putative protein (mawloy) alternative variant cSep08, mRNA.                                      |
| <a href="#">mawmee</a>  | <a href="#">mawmee.aSep08</a>  |                       | 2098  | 276  |   | 78  | putative protein (mawmee) mRNA.                                                                  |
| <a href="#">mawmer</a>  | <a href="#">mawmer.aSep08</a>  |                       | 1610  | 406  | 1 | 130 | putative protein (mawmer) alternative variant aSep08, mRNA.                                      |
| <a href="#">mawmer</a>  | <a href="#">mawmer.bSep08</a>  |                       | 1544  | 479  | 1 | 36  | putative protein (mawmer) alternative variant bSep08, mRNA.                                      |
| <a href="#">mawnoy</a>  | <a href="#">mawnoy.aSep08</a>  |                       | 27044 | 566  | 3 | 136 | putative protein (mawnoy) alternative variant aSep08, mRNA.                                      |
| <a href="#">mawnoy</a>  | <a href="#">mawnoy.bSep08</a>  |                       | 555   | 453  | 2 | 123 | putative protein (mawnoy) alternative variant bSep08, mRNA.                                      |
| <a href="#">mawnoy</a>  | <a href="#">mawnoy.cSep08</a>  |                       | 12334 | 916  | 3 | 117 | putative protein (13.0 kD) (mawnoy) alternative variant cSep08, mRNA.                            |
| <a href="#">mawpor</a>  | <a href="#">mawpor.aSep08</a>  |                       | 7819  | 2170 |   | 95  | coronin actin binding protein 2B like (mawpor) mRNA.                                             |
| <a href="#">mawsa</a>   | <a href="#">mawsa.aSep08</a>   |                       | 3237  | 227  |   | 62  | putative protein (7.0 kD) (mawsa) mRNA.                                                          |
| <a href="#">mawshee</a> | <a href="#">mawshee.aSep08</a> |                       | 12540 | 492  | 2 | 48  | CRA a like (mawshee) alternative variant aSep08, mRNA.                                           |
| <a href="#">mawshee</a> | <a href="#">mawshee.bSep08</a> |                       | 2283  | 383  | 1 | 48  | CRA a like (mawshee) alternative variant bSep08, mRNA.                                           |
| <a href="#">mawtu</a>   | <a href="#">mawtu.aSep08</a>   |                       | 33271 | 381  |   | 64  | putative protein (mawtu) mRNA.                                                                   |
| <a href="#">mawvar</a>  | <a href="#">mawvar.aSep08</a>  |                       | 10820 | 533  |   |     |                                                                                                  |
| <a href="#">mawwey</a>  | <a href="#">mawwey.aSep08</a>  |                       | 31028 | 457  |   | 57  | putative protein (mawwey) mRNA.                                                                  |

|                       |                              |                        |        |      |   |     |                                                                                         |
|-----------------------|------------------------------|------------------------|--------|------|---|-----|-----------------------------------------------------------------------------------------|
| <a href="#">Max</a>   | <a href="#">Max.cSep08</a>   | <a href="#">60661</a>  | 25392  | 1901 | 4 | 151 | max protein (17.2 kD) (Max) alternative variant cSep08, complete mRNA.                  |
| <a href="#">Max</a>   | <a href="#">Max.dSep08</a>   | <a href="#">60661</a>  | 25371  | 1992 | 6 | 103 | max protein (12.1 kD) (Max) alternative variant dSep08, complete mRNA.                  |
| <a href="#">Max</a>   | <a href="#">Max.eSep08</a>   | <a href="#">60661</a>  | 24133  | 727  | 5 | 94  | max protein (11.0 kD) (Max) alternative variant eSep08, mRNA.                           |
| <a href="#">Max</a>   | <a href="#">Max.fSep08</a>   | <a href="#">60661</a>  | 24116  | 726  | 5 | 94  | max protein (11.0 kD) (Max) alternative variant fSep08, complete mRNA.                  |
| <a href="#">Mbd1</a>  | <a href="#">Mbd1.bSep08</a>  | <a href="#">291439</a> | 1293   | 463  | 3 | 154 | methyl-CpG binding domain protein 1 (Mbd1) alternative variant bSep08, mRNA.            |
| <a href="#">Mbd1</a>  | <a href="#">Mbd1.cSep08</a>  | <a href="#">291439</a> | 1204   | 406  | 4 | 134 | methyl-CpG binding domain protein 1 (Mbd1) alternative variant cSep08, mRNA.            |
| <a href="#">Mbd1</a>  | <a href="#">Mbd1.dSep08</a>  | <a href="#">291439</a> | 4349   | 3119 | 2 | 124 | methyl-CpG binding domain protein 1 (Mbd1) alternative variant dSep08, mRNA.            |
| <a href="#">Mbd1</a>  | <a href="#">Mbd1.eSep08</a>  | <a href="#">291439</a> | 1391   | 313  | 2 | 93  | methyl-CpG binding domain protein 1 (Mbd1) alternative variant eSep08, mRNA.            |
| <a href="#">Mbd1</a>  | <a href="#">Mbd1.gSep08</a>  | <a href="#">291439</a> | 2741   | 1412 | 2 | 51  | methyl-CpG binding domain protein 1 (5.5 kD) (Mbd1) alternative variant gSep08, mRNA.   |
| <a href="#">Mbd2</a>  | <a href="#">Mbd2.bSep08</a>  | <a href="#">680172</a> | 54401  | 693  | 6 | 201 | methyl-CpG binding domain protein 2 (Mbd2) alternative variant bSep08, mRNA.            |
| <a href="#">MBD3</a>  | <a href="#">MBD3.bSep08</a>  | <a href="#">362834</a> | 7197   | 1566 | 5 | 352 | methyl-CpG binding domain protein 3 (MBD3) alternative variant bSep08, mRNA.            |
| <a href="#">MBD3</a>  | <a href="#">MBD3.cSep08</a>  | <a href="#">362834</a> | 6916   | 1405 | 6 | 345 | methyl-CpG binding domain protein 3 (MBD3) alternative variant cSep08, mRNA.            |
| <a href="#">MBD3</a>  | <a href="#">MBD3.dSep08</a>  | <a href="#">362834</a> | 5670   | 751  | 4 | 250 | methyl-CpG binding domain protein 3 (MBD3) alternative variant dSep08, mRNA.            |
| <a href="#">MBD3</a>  | <a href="#">MBD3.eSep08</a>  | <a href="#">362834</a> | 1181   | 416  | 1 | 138 | methyl-CpG binding domain protein 3 (MBD3) alternative variant eSep08, mRNA.            |
| <a href="#">Mbd4</a>  | <a href="#">Mbd4.aSep08</a>  | <a href="#">680915</a> | 3699   | 1404 |   | 178 | methyl-CpG binding domain protein 4 (Mbd4) alternative variant aSep08, mRNA.            |
| <a href="#">Mbd4</a>  | <a href="#">Mbd4.bSep08</a>  | <a href="#">680915</a> | 9898   | 1619 |   | 169 | methyl-CpG binding domain protein 4 (20.2 kD) (Mbd4) alternative variant bSep08, mRNA.  |
| <a href="#">Mbd6</a>  | <a href="#">Mbd6.aSep08</a>  | <a href="#">362892</a> | 3739   | 2643 | 1 | 730 | methyl-CpG binding domain protein 6 (Mbd6) alternative variant aSep08, mRNA.            |
| <a href="#">Mbd6</a>  | <a href="#">Mbd6.bSep08</a>  | <a href="#">362892</a> | 1825   | 1371 | 1 | 104 | methyl-CpG binding domain protein 6 (Mbd6) alternative variant bSep08, mRNA.            |
| <a href="#">Mbip</a>  | <a href="#">Mbip.bSep08</a>  | <a href="#">362740</a> | 7220   | 659  | 3 | 78  | MAP3K12 binding inhibitory protein 1 (Mbip) alternative variant bSep08, mRNA.           |
| <a href="#">Mbl2</a>  | <a href="#">Mbl2.aSep08</a>  | <a href="#">64668</a>  | 7127   | 1072 | 5 | 244 | mannose binding lectin 2 (protein C) (26.0 kD) (Mbl2) alternative variant aSep08, mRNA. |
| <a href="#">Mbl2</a>  | <a href="#">Mbl2.cSep08</a>  | <a href="#">64668</a>  | 6818   | 694  | 4 | 152 | mannose binding lectin 2 (protein C) (Mbl2) alternative variant cSep08, mRNA.           |
| <a href="#">Mbl2</a>  | <a href="#">Mbl2.dSep08</a>  | <a href="#">64668</a>  | 38634  | 498  | 2 | 37  | mannose binding lectin 2 (protein C) (Mbl2) alternative variant dSep08, mRNA.           |
| <a href="#">Mbnl1</a> | <a href="#">Mbnl1.aSep08</a> | <a href="#">282635</a> | 139746 | 1106 | 6 | 287 | muscleblind-like 1 (Drosophila) (Mbnl1) alternative variant aSep08, mRNA.               |

|                         |                                |                        |        |      |   |     |                                                                                                  |
|-------------------------|--------------------------------|------------------------|--------|------|---|-----|--------------------------------------------------------------------------------------------------|
| <a href="#">Mbnl1</a>   | <a href="#">Mbnl1.bSep08</a>   | <a href="#">282635</a> | 29244  | 863  | 3 | 271 | muscleblind-like 1 (Drosophila) (Mbnl1) alternative variant bSep08, mRNA.                        |
| <a href="#">Mbnl1</a>   | <a href="#">Mbnl1.cSep08</a>   | <a href="#">282635</a> | 19783  | 718  | 3 | 239 | muscleblind-like 1 (Drosophila) (Mbnl1) alternative variant cSep08, mRNA.                        |
| <a href="#">Mbnl1</a>   | <a href="#">Mbnl1.dSep08</a>   | <a href="#">282635</a> | 8068   | 380  | 1 | 126 | muscleblind-like 1 (Drosophila) (Mbnl1) alternative variant dSep08, mRNA.                        |
| <a href="#">Mbnl3</a>   | <a href="#">Mbnl3.bSep08</a>   | <a href="#">302492</a> | 80774  | 801  | 2 | 266 | muscleblind-like 3 (Drosophila) (Mbnl3) alternative variant bSep08, mRNA.                        |
| <a href="#">Mbnl3</a>   | <a href="#">Mbnl3.cSep08</a>   | <a href="#">302492</a> | 24058  | 738  | 3 | 245 | muscleblind-like 3 (Drosophila) (Mbnl3) alternative variant cSep08, mRNA.                        |
| <a href="#">Mbnl3</a>   | <a href="#">Mbnl3.dSep08</a>   | <a href="#">302492</a> | 19833  | 716  | 2 | 238 | muscleblind-like 3 (Drosophila) (Mbnl3) alternative variant dSep08, mRNA.                        |
| <a href="#">Mbnl3</a>   | <a href="#">Mbnl3.eSep08</a>   | <a href="#">302492</a> | 67436  | 605  | 1 | 171 | muscleblind-like 3 (Drosophila) (Mbnl3) alternative variant eSep08, mRNA.                        |
| <a href="#">MBOAT.0</a> | <a href="#">MBOAT.0.aSep08</a> |                        | 14335  | 2345 | 8 | 473 | leukocyte receptor cluster member 4 (53.4 kD) (MBOAT.0) alternative variant aSep08, mRNA.        |
| <a href="#">MBOAT.0</a> | <a href="#">MBOAT.0.bSep08</a> |                        | 9056   | 3031 | 3 | 203 | leukocyte receptor cluster member 4 (23.4 kD) (MBOAT.0) alternative variant bSep08, mRNA.        |
| <a href="#">Mboat2</a>  | <a href="#">Mboat2.bSep08</a>  | <a href="#">313997</a> | 109424 | 600  |   | 199 | putative protein of eukaryotic origin (Mboat2) alternative variant bSep08, mRNA.                 |
| <a href="#">Mboat4</a>  | <a href="#">Mboat4.aSep08</a>  | <a href="#">306515</a> | 8295   | 1308 | 3 | 435 | membrane bound O-acyl transferase, MBOAT (Mboat4) alternative variant aSep08, mRNA.              |
| <a href="#">Mbp</a>     | <a href="#">Mbp.gSep08</a>     | <a href="#">24547</a>  | 26309  | 1021 | 2 | 146 | putative protein (15.8 kD) (Mbp) alternative variant gSep08, mRNA.                               |
| <a href="#">Mbp</a>     | <a href="#">Mbp.hSep08</a>     | <a href="#">24547</a>  | 30613  | 798  | 4 | 140 | myelin basic protein (Mbp) alternative variant hSep08, mRNA.                                     |
| <a href="#">Mbp</a>     | <a href="#">Mbp.iSep08</a>     | <a href="#">24547</a>  | 21053  | 398  | 4 | 120 | myelin basic protein (Mbp) alternative variant iSep08, mRNA.                                     |
| <a href="#">Mbp</a>     | <a href="#">Mbp.jSep08</a>     | <a href="#">24547</a>  | 30604  | 780  | 3 | 114 | myelin basic protein (12.2 kD) (Mbp) alternative variant jSep08, mRNA.                           |
| <a href="#">Mbrl</a>    | <a href="#">Mbrl.aSep08</a>    | <a href="#">299608</a> | 6695   | 2156 | 6 | 588 | membralin (Mbrl) alternative variant aSep08, mRNA.                                               |
| <a href="#">Mbrl</a>    | <a href="#">Mbrl.bSep08</a>    | <a href="#">299608</a> | 2108   | 1295 | 6 | 431 | membralin (Mbrl) alternative variant bSep08, mRNA.                                               |
| <a href="#">Mbrl</a>    | <a href="#">Mbrl.cSep08</a>    | <a href="#">299608</a> | 970    | 462  | 2 | 154 | membralin (Mbrl) alternative variant cSep08, mRNA.                                               |
| <a href="#">Mbrl</a>    | <a href="#">Mbrl.dSep08</a>    | <a href="#">299608</a> | 2652   | 1988 | 2 | 86  | membralin (Mbrl) alternative variant dSep08, mRNA.                                               |
| <a href="#">Mbtps1</a>  | <a href="#">Mbtps1.bSep08</a>  | <a href="#">89842</a>  | 12159  | 887  | 5 | 211 | membrane-bound transcription factor peptidase, site 1 (Mbtps1) alternative variant bSep08, mRNA. |
| <a href="#">Mbtps1</a>  | <a href="#">Mbtps1.cSep08</a>  | <a href="#">89842</a>  | 2321   | 737  | 2 | 42  | membrane-bound transcription factor peptidase, site 1 (Mbtps1) alternative variant cSep08, mRNA. |
| <a href="#">Mbtps2</a>  | <a href="#">Mbtps2.bSep08</a>  | <a href="#">302705</a> | 7983   | 1803 | 1 | 164 | membrane-bound transcription factor peptidase, site 2 (Mbtps2) alternative variant bSep08, mRNA. |
| <a href="#">Mc2r</a>    | <a href="#">Mc2r.aSep08</a>    | <a href="#">282839</a> | 9784   | 435  | 1 | 62  | melanocortin 2 receptor (Mc2r) alternative variant aSep08, mRNA.                                 |
| <a href="#">Mc2r</a>    | <a href="#">Mc2r.bSep08</a>    | <a href="#">282839</a> | 9797   | 405  | 1 | 70  | melanocortin 2 receptor (Mc2r) alternative variant bSep08, mRNA.                                 |
| <a href="#">Mcam</a>    | <a href="#">Mcam.cSep08</a>    | <a href="#">78967</a>  | 519    | 407  | 2 | 97  | melanoma cell adhesion molecule (Mcam) alternative variant cSep08, mRNA.                         |



|                         |                                |                        |        |      |   |     |                                                                                                   |
|-------------------------|--------------------------------|------------------------|--------|------|---|-----|---------------------------------------------------------------------------------------------------|
| <a href="#">Mcm7</a>    | <a href="#">Mcm7.dSep08</a>    | <a href="#">288532</a> | 1494   | 491  | 3 | 96  | putative protein of eukaryotic origin (Mcm7) alternative variant dSep08, mRNA.                    |
| <a href="#">Mcm10</a>   | <a href="#">Mcm10.bSep08</a>   | <a href="#">307126</a> | 21664  | 1482 | 4 | 37  | putative protein (Mcm10) alternative variant bSep08, mRNA.                                        |
| <a href="#">Mcoln1</a>  | <a href="#">Mcoln1.bSep08</a>  | <a href="#">288371</a> | 3122   | 1288 | 6 | 265 | mucolin 1 (Mcoln1) alternative variant bSep08, mRNA.                                              |
| <a href="#">Mcoln1</a>  | <a href="#">Mcoln1.dSep08</a>  | <a href="#">288371</a> | 3917   | 441  | 3 | 93  | mucolin 1 (Mcoln1) alternative variant dSep08, mRNA.                                              |
| <a href="#">Mcoln3</a>  | <a href="#">Mcoln3.bSep08</a>  | <a href="#">308022</a> | 6160   | 2004 | 3 | 154 | mucolin 3 (Mcoln3) alternative variant bSep08, mRNA.                                              |
| <a href="#">Mcph1</a>   | <a href="#">Mcph1.aSep08</a>   | <a href="#">306594</a> | 20173  | 301  |   | 100 | microcephaly, primary autosomal recessive 1 (Mcph1) mRNA.                                         |
| <a href="#">Mcpt8l2</a> | <a href="#">Mcpt8l2.aSep08</a> | <a href="#">408240</a> | 1609   | 664  |   | 193 | mast cell protease 8-like 2 (Mcpt8l2) mRNA.                                                       |
| <a href="#">Mcpt9</a>   | <a href="#">Mcpt9.bSep08</a>   | <a href="#">54272</a>  | 2957   | 1375 | 1 | 74  | mast cell protease 9 (8.2 kD) (Mcpt9) alternative variant bSep08, mRNA.                           |
| <a href="#">Mcrcs1</a>  | <a href="#">Mcrcs1.cSep08</a>  | <a href="#">300222</a> | 3173   | 487  | 4 | 48  | microspherule protein 1 (5.3 kD) (Mcrcs1) alternative variant cSep08, mRNA.                       |
| <a href="#">Mcrcs1</a>  | <a href="#">Mcrcs1.dSep08</a>  | <a href="#">300222</a> | 1714   | 412  | 2 | 43  | microspherule protein 1 (4.7 kD) (Mcrcs1) alternative variant dSep08, mRNA.                       |
| <a href="#">Mctp1</a>   | <a href="#">Mctp1.aSep08</a>   | <a href="#">309928</a> | 233924 | 879  |   | 252 | multiple C2 domains, transmembrane 1 (29.0 kD) (Mctp1) mRNA.                                      |
| <a href="#">Mcts1</a>   | <a href="#">Mcts1.bSep08</a>   | <a href="#">302500</a> | 11532  | 789  | 6 | 181 | malignant T cell amplified sequence 1 (20.6 kD) (Mcts1) alternative variant bSep08, mRNA.         |
| <a href="#">Mcts1</a>   | <a href="#">Mcts1.cSep08</a>   | <a href="#">302500</a> | 9644   | 741  | 5 | 156 | malignant T cell amplified sequence 1 (17.5 kD) (Mcts1) alternative variant cSep08, mRNA.         |
| <a href="#">Mcts1</a>   | <a href="#">Mcts1.dSep08</a>   | <a href="#">302500</a> | 11294  | 673  | 6 | 138 | malignant T cell amplified sequence 1 (15.5 kD) (Mcts1) alternative variant dSep08, mRNA.         |
| <a href="#">Mcts1</a>   | <a href="#">Mcts1.eSep08</a>   | <a href="#">302500</a> | 1724   | 505  | 2 | 47  | malignant T cell amplified sequence 1 (5.3 kD) (Mcts1) alternative variant eSep08, mRNA.          |
| <a href="#">Mdc1</a>    | <a href="#">Mdc1.aSep08</a>    | <a href="#">309595</a> | 6520   | 3058 |   | 671 | mediator of DNA damage checkpoint 1 (71.9 kD) (Mdc1) mRNA.                                        |
| <a href="#">Mdfic</a>   | <a href="#">Mdfic.bSep08</a>   | <a href="#">362325</a> | 73357  | 708  | 3 | 184 | putative nuclear protein of vertebrate origin (19.9 kD) (Mdfic) alternative variant bSep08, mRNA. |
| <a href="#">Mdfic</a>   | <a href="#">Mdfic.cSep08</a>   | <a href="#">362325</a> | 49931  | 760  | 3 | 134 | putative protein of vertebrate origin (Mdfic) alternative variant cSep08, mRNA.                   |
| <a href="#">Mdga1</a>   | <a href="#">Mdga1.bSep08</a>   | <a href="#">309659</a> | 8919   | 982  | 4 | 194 | glycosylphosphatidylinositol anchor 1 (Mdga1) alternative variant bSep08, mRNA.                   |
| <a href="#">Mdga2</a>   | <a href="#">Mdga2.bSep08</a>   | <a href="#">314180</a> | 100806 | 780  | 2 | 259 | MAM (Mdga2) alternative variant bSep08, mRNA.                                                     |
| <a href="#">Mdh1</a>    | <a href="#">Mdh1.cSep08</a>    | <a href="#">24551</a>  | 1182   | 570  | 2 | 66  | malate dehydrogenase 1, NAD (soluble) (7.4 kD) (Mdh1) alternative variant cSep08, mRNA.           |
| <a href="#">Mdh2</a>    | <a href="#">Mdh2.bSep08</a>    | <a href="#">81829</a>  | 5849   | 742  | 5 | 247 | malate dehydrogenase 2, NAD (mitochondrial) (Mdh2) alternative variant bSep08, mRNA.              |
| <a href="#">Mdh2</a>    | <a href="#">Mdh2.cSep08</a>    | <a href="#">81829</a>  | 11872  | 746  | 6 | 215 | malate dehydrogenase 2, NAD (mitochondrial) (Mdh2) alternative variant cSep08, mRNA.              |
| <a href="#">Mdk</a>     | <a href="#">Mdk.aSep08</a>     | <a href="#">81517</a>  | 1779   | 658  | 5 | 142 | midkine (15.7 kD) (Mdk) alternative variant aSep08, mRNA.                                         |
| <a href="#">Mdk</a>     | <a href="#">Mdk.cSep08</a>     | <a href="#">81517</a>  | 1929   | 746  | 5 | 140 | midkine (Mdk) alternative variant cSep08, complete mRNA.                                          |
| <a href="#">Mdk</a>     | <a href="#">Mdk.dSep08</a>     | <a href="#">81517</a>  | 1923   | 732  | 5 | 140 | midkine (Mdk) alternative variant dSep08, complete mRNA.                                          |
| <a href="#">Mdk</a>     | <a href="#">Mdk.eSep08</a>     | <a href="#">81517</a>  | 851    | 732  | 2 | 117 | midkine (Mdk) alternative variant eSep08, mRNA.                                                   |

|                       |                              |                        |        |      |    |     |                                                                                                                 |
|-----------------------|------------------------------|------------------------|--------|------|----|-----|-----------------------------------------------------------------------------------------------------------------|
| <a href="#">Mdm1</a>  | <a href="#">Mdm1.bSep08</a>  | <a href="#">314859</a> | 1782   | 528  | 3  | 89  | transformed mouse 3T3 cell double minute 1 (Mdm1) alternative variant bSep08, mRNA.                             |
| <a href="#">Mdm1</a>  | <a href="#">Mdm1.dSep08</a>  | <a href="#">314859</a> | 11297  | 735  | 6  | 59  | transformed mouse 3T3 cell double minute 1 (6.8 kD) (Mdm1) alternative variant dSep08, mRNA.                    |
| <a href="#">Mdm2</a>  | <a href="#">Mdm2.bSep08</a>  | <a href="#">314856</a> | 16003  | 731  | 2  | 243 | transformed mouse 3T3 cell double minute 2 (Mdm2) alternative variant bSep08, mRNA.                             |
| <a href="#">Mdm2</a>  | <a href="#">Mdm2.cSep08</a>  | <a href="#">314856</a> | 16604  | 1177 | 2  | 211 | transformed mouse 3T3 cell double minute 2 (Mdm2) alternative variant cSep08, mRNA.                             |
| <a href="#">Mdm4</a>  | <a href="#">Mdm4.bSep08</a>  | <a href="#">304798</a> | 36739  | 2634 | 7  | 362 | mouse double minute 4 like (41.2 kD) (Mdm4) alternative variant bSep08, mRNA.                                   |
| <a href="#">Mdm4</a>  | <a href="#">Mdm4.cSep08</a>  | <a href="#">304798</a> | 35551  | 1695 | 10 | 212 | mouse double minute 4 like (Mdm4) alternative variant cSep08, mRNA.                                             |
| <a href="#">Mdm4</a>  | <a href="#">Mdm4.dSep08</a>  | <a href="#">304798</a> | 10309  | 1438 | 4  | 196 | mouse double minute 4 like (22.0 kD) (Mdm4) alternative variant dSep08, mRNA.                                   |
| <a href="#">Mdm4</a>  | <a href="#">Mdm4.eSep08</a>  | <a href="#">304798</a> | 29482  | 781  | 8  | 127 | mouse double minute 4 like (14.1 kD) (Mdm4) alternative variant eSep08, mRNA.                                   |
| <a href="#">Mdm4</a>  | <a href="#">Mdm4.fSep08</a>  | <a href="#">304798</a> | 19538  | 448  | 5  | 111 | mouse double minute 4 like (Mdm4) alternative variant fSep08, mRNA.                                             |
| <a href="#">Mdm4</a>  | <a href="#">Mdm4.gSep08</a>  | <a href="#">304798</a> | 1838   | 430  | 2  | 100 | mouse double minute 4 like (Mdm4) alternative variant gSep08, mRNA.                                             |
| <a href="#">Mdp-1</a> | <a href="#">Mdp-1.bSep08</a> | <a href="#">290230</a> | 1209   | 418  | 1  | 106 | magnesium-dependent phosphatase 1 (12.2 kD) (Mdp-1) alternative variant bSep08, mRNA.                           |
| <a href="#">Me1</a>   | <a href="#">Me1.bSep08</a>   | <a href="#">24552</a>  | 84821  | 822  | 8  | 182 | malic enzyme 1, NADP(+)-dependent, cytosolic (Me1) alternative variant bSep08, mRNA.                            |
| <a href="#">Me2</a>   | <a href="#">Me2.aSep08</a>   | <a href="#">307270</a> | 44256  | 1856 |    | 599 | malic enzyme 2, NAD(+)-dependent, mitochondrial (Me2) mRNA.                                                     |
| <a href="#">Me3</a>   | <a href="#">Me3.aSep08</a>   | <a href="#">361602</a> | 198042 | 1363 | 9  | 429 | malic enzyme 3, NADP(+)-dependent, mitochondrial (Me3) alternative variant aSep08, mRNA.                        |
| <a href="#">Mea1</a>  | <a href="#">Mea1.aSep08</a>  | <a href="#">685131</a> | 2126   | 1597 | 3  | 208 | male-enhanced antigen 1 (22.4 kD) (Mea1) alternative variant aSep08, mRNA.                                      |
| <a href="#">Mea1</a>  | <a href="#">Mea1.bSep08</a>  | <a href="#">685131</a> | 1602   | 667  | 4  | 189 | male-enhanced antigen 1 (Mea1) alternative variant bSep08, mRNA.                                                |
| <a href="#">Mea1</a>  | <a href="#">Mea1.dSep08</a>  | <a href="#">685131</a> | 9579   | 341  | 2  | 113 | male-enhanced antigen 1 (Mea1) alternative variant dSep08, mRNA.                                                |
| <a href="#">Mecr</a>  | <a href="#">Mecr.bSep08</a>  | <a href="#">29470</a>  | 5789   | 1119 | 4  | 92  | mitochondrial trans-2-enoyl-CoA reductase (10.5 kD) (Mecr) alternative variant bSep08, mRNA.                    |
| <a href="#">Mecr</a>  | <a href="#">Mecr.cSep08</a>  | <a href="#">29470</a>  | 7364   | 610  | 5  | 77  | mitochondrial trans-2-enoyl-CoA reductase (Mecr) alternative variant cSep08, mRNA.                              |
| <a href="#">Mecr</a>  | <a href="#">Mecr.dSep08</a>  | <a href="#">29470</a>  | 12148  | 557  | 4  | 88  | mitochondrial trans-2-enoyl-CoA reductase (Mecr) alternative variant dSep08, mRNA.                              |
| <a href="#">Med1</a>  | <a href="#">Med1.bSep08</a>  | <a href="#">497991</a> | 28784  | 2603 | 10 | 539 | mediator complex subunit 1 (Med1) alternative variant bSep08, mRNA.                                             |
| <a href="#">Med1</a>  | <a href="#">Med1.cSep08</a>  | <a href="#">497991</a> | 11626  | 848  | 5  | 152 | mediator complex subunit 1 (Med1) alternative variant cSep08, mRNA.                                             |
| <a href="#">Med6</a>  | <a href="#">Med6.bSep08</a>  | <a href="#">299180</a> | 12696  | 713  | 7  | 212 | mediator of RNA polymerase II transcription, subunit 6 homolog (yeast) (Med6) alternative variant bSep08, mRNA. |

|                               |                                      |                        |       |      |   |     |                                                                                                                                    |
|-------------------------------|--------------------------------------|------------------------|-------|------|---|-----|------------------------------------------------------------------------------------------------------------------------------------|
| <a href="#">MED7.0</a>        | <a href="#">MED7.0.aSep08</a>        |                        | 4161  | 1177 | 3 | 233 | mediator complex (27.2 kD) (MED7.0) alternative variant aSep08, mRNA.                                                              |
| <a href="#">MED7.0</a>        | <a href="#">MED7.0.cSep08</a>        |                        | 3574  | 770  | 3 | 128 | mediator complex (MED7.0) alternative variant cSep08, mRNA.                                                                        |
| <a href="#">MED7.0</a>        | <a href="#">MED7.0.dSep08</a>        |                        | 14182 | 699  | 4 | 66  | putative protein (7.6 kD) (MED7.0) alternative variant dSep08, mRNA.                                                               |
| <a href="#">Med8</a>          | <a href="#">Med8.aSep08</a>          | <a href="#">362575</a> | 6324  | 1945 | 7 | 276 | mediator of RNA polymerase II transcription, subunit 8 homolog (yeast) (Med8) alternative variant aSep08, mRNA.                    |
| <a href="#">Med10</a>         | <a href="#">Med10.aSep08</a>         | <a href="#">290939</a> | 5660  | 843  |   | 149 | mediator of RNA polymerase II transcription, subunit 10 homolog (NUT2, <i>S. cerevisiae</i> ) (Med10) mRNA.                        |
| <a href="#">Med11</a>         | <a href="#">Med11.bSep08</a>         | <a href="#">287456</a> | 1809  | 919  | 1 | 137 | mediator of RNA polymerase II transcription, subunit 11 homolog ( <i>S. cerevisiae</i> ) (Med11) alternative variant bSep08, mRNA. |
| <a href="#">Med13</a>         | <a href="#">Med13.bSep08</a>         | <a href="#">303403</a> | 8548  | 154  | 1 | 51  | mediator complex subunit 13 (Med13) alternative variant bSep08, mRNA.                                                              |
| <a href="#">Med13l</a>        | <a href="#">Med13l.bSep08</a>        | <a href="#">360817</a> | 13407 | 1963 | 7 | 474 | mediator complex subunit 13-like (Med13l) alternative variant bSep08, mRNA.                                                        |
| <a href="#">Med13l</a>        | <a href="#">Med13l.cSep08</a>        | <a href="#">360817</a> | 2415  | 910  | 4 | 215 | mediator complex subunit 13-like (Med13l) alternative variant cSep08, mRNA.                                                        |
| <a href="#">Med14</a>         | <a href="#">Med14.aSep08</a>         | <a href="#">317343</a> | 16861 | 945  |   | 315 | mediator complex subunit 14 (Med14) mRNA.                                                                                          |
| <a href="#">Med15</a>         | <a href="#">Med15.bSep08</a>         | <a href="#">360743</a> | 2730  | 1006 | 7 | 311 | mediator complex (Med15) alternative variant bSep08, mRNA.                                                                         |
| <a href="#">Med15</a>         | <a href="#">Med15.cSep08</a>         | <a href="#">360743</a> | 19323 | 759  | 5 | 252 | putative protein (Med15) alternative variant cSep08, mRNA.                                                                         |
| <a href="#">Med15</a>         | <a href="#">Med15.dSep08</a>         | <a href="#">360743</a> | 4431  | 2272 | 6 | 223 | mediator complex (25.0 kD) (Med15) alternative variant dSep08, mRNA.                                                               |
| <a href="#">Med15</a>         | <a href="#">Med15.eSep08</a>         | <a href="#">360743</a> | 13990 | 2000 | 5 | 211 | mediator complex (Med15) alternative variant eSep08, mRNA.                                                                         |
| <a href="#">Med15</a>         | <a href="#">Med15.fSep08</a>         | <a href="#">360743</a> | 829   | 382  | 2 | 93  | mediator complex (Med15) alternative variant fSep08, mRNA.                                                                         |
| <a href="#">Med15</a>         | <a href="#">Med15.gSep08</a>         | <a href="#">360743</a> | 41185 | 1355 | 4 | 84  | mediator complex (9.5 kD) (Med15) alternative variant gSep08, complete mRNA.                                                       |
| <a href="#">Med15</a>         | <a href="#">Med15.hSep08</a>         | <a href="#">360743</a> | 708   | 621  | 2 | 68  | putative protein (10.1 kD) (Med15) alternative variant hSep08, mRNA.                                                               |
| <a href="#">Med16</a>         | <a href="#">Med16.bSep08</a>         | <a href="#">299607</a> | 4379  | 822  | 6 | 273 | mediator complex subunit 16 (Med16) alternative variant bSep08, mRNA.                                                              |
| <a href="#">Med16</a>         | <a href="#">Med16.cSep08</a>         | <a href="#">299607</a> | 2474  | 880  | 5 | 256 | mediator complex subunit 16 (Med16) alternative variant cSep08, mRNA.                                                              |
| <a href="#">Med16</a>         | <a href="#">Med16.eSep08</a>         | <a href="#">299607</a> | 4432  | 739  | 5 | 141 | mediator complex subunit 16 (Med16) alternative variant eSep08, mRNA.                                                              |
| <a href="#">Med16</a>         | <a href="#">Med16.fSep08</a>         | <a href="#">299607</a> | 1456  | 397  | 4 | 106 | mediator complex subunit 16 (Med16) alternative variant fSep08, mRNA.                                                              |
| <a href="#">Med17</a>         | <a href="#">Med17.bSep08</a>         | <a href="#">300367</a> | 9955  | 1800 | 5 | 181 | mediator complex subunit 17 (Med17) alternative variant bSep08, mRNA.                                                              |
| <a href="#">Med20andUsp49</a> | <a href="#">Med20andUsp49.bSep08</a> | <a href="#">316209</a> | 11545 | 1582 | 2 | 123 | mediator complex (Med20andUsp49) alternative variant bSep08, mRNA.                                                                 |

|                               |                                      |                        |       |      |    |     |                                                                                                                        |
|-------------------------------|--------------------------------------|------------------------|-------|------|----|-----|------------------------------------------------------------------------------------------------------------------------|
| <a href="#">Med20andUsp49</a> | <a href="#">Med20andUsp49.bSep08</a> | <a href="#">316211</a> | 11545 | 1582 | 2  | 123 | mediator complex (Med20andUsp49) alternative variant bSep08, mRNA.                                                     |
| <a href="#">Med20andUsp49</a> | <a href="#">Med20andUsp49.cSep08</a> | <a href="#">316209</a> | 65485 | 327  | 2  | 63  | putative protein (Med20andUsp49) alternative variant cSep08, mRNA.                                                     |
| <a href="#">Med20andUsp49</a> | <a href="#">Med20andUsp49.cSep08</a> | <a href="#">316211</a> | 65485 | 327  | 2  | 63  | putative protein (Med20andUsp49) alternative variant cSep08, mRNA.                                                     |
| <a href="#">Med20andUsp49</a> | <a href="#">Med20andUsp49.dSep08</a> | <a href="#">316209</a> | 45961 | 593  | 3  | 48  | ubiquitin 49 (Med20andUsp49) alternative variant dSep08, mRNA.                                                         |
| <a href="#">Med20andUsp49</a> | <a href="#">Med20andUsp49.dSep08</a> | <a href="#">316211</a> | 45961 | 593  | 3  | 48  | ubiquitin 49 (Med20andUsp49) alternative variant dSep08, mRNA.                                                         |
| <a href="#">Med21</a>         | <a href="#">Med21.aSep08</a>         | <a href="#">312849</a> | 6959  | 771  | 3  | 144 | mediator complex subunit 21 (15.6 kD) (Med21) alternative variant aSep08, complete mRNA.                               |
| <a href="#">Med21</a>         | <a href="#">Med21.cSep08</a>         | <a href="#">312849</a> | 23188 | 494  | 4  | 86  | mediator complex subunit 21 (Med21) alternative variant cSep08, mRNA.                                                  |
| <a href="#">Med21</a>         | <a href="#">Med21.dSep08</a>         | <a href="#">312849</a> | 6933  | 529  | 1  | 72  | mediator complex subunit 21 (7.9 kD) (Med21) alternative variant dSep08, complete mRNA.                                |
| <a href="#">Med22</a>         | <a href="#">Med22.bSep08</a>         | <a href="#">499762</a> | 2570  | 858  | 3  | 140 | mediator complex subunit 22 (16.4 kD) (Med22) alternative variant bSep08, mRNA.                                        |
| <a href="#">Med23</a>         | <a href="#">Med23.aSep08</a>         | <a href="#">309565</a> | 20818 | 3416 | 14 | 960 | mediator complex subunit 23 (Med23) alternative variant aSep08, mRNA.                                                  |
| <a href="#">Med23</a>         | <a href="#">Med23.bSep08</a>         | <a href="#">309565</a> | 3413  | 544  | 1  | 181 | mediator complex subunit 23 (Med23) alternative variant bSep08, mRNA.                                                  |
| <a href="#">Med24</a>         | <a href="#">Med24.bSep08</a>         | <a href="#">619436</a> | 12530 | 879  | 6  | 206 | mediator complex subunit 24 (23.0 kD) (Med24) alternative variant bSep08, mRNA.                                        |
| <a href="#">Med24</a>         | <a href="#">Med24.cSep08</a>         | <a href="#">619436</a> | 2690  | 601  | 3  | 197 | mediator complex subunit 24 (Med24) alternative variant cSep08, mRNA.                                                  |
| <a href="#">Med25</a>         | <a href="#">Med25.aSep08</a>         | <a href="#">292889</a> | 15616 | 3785 | 18 | 802 | mediator of RNA polymerase II transcription homolog CRA b (85.3 kD) (Med25) alternative variant aSep08, complete mRNA. |
| <a href="#">Med25</a>         | <a href="#">Med25.bSep08</a>         | <a href="#">292889</a> | 12822 | 2180 | 17 | 426 | mediator of RNA polymerase II transcription homolog CRA b (44.5 kD) (Med25) alternative variant bSep08, mRNA.          |
| <a href="#">Med25</a>         | <a href="#">Med25.cSep08</a>         | <a href="#">292889</a> | 3684  | 881  | 6  | 281 | mediator of RNA polymerase II transcription homolog CRA b (Med25) alternative variant cSep08, mRNA.                    |
| <a href="#">Med25</a>         | <a href="#">Med25.dSep08</a>         | <a href="#">292889</a> | 1405  | 847  | 3  | 185 | mediator of RNA polymerase II transcription homolog CRA b (18.8 kD) (Med25) alternative variant dSep08, mRNA.          |
| <a href="#">Med25</a>         | <a href="#">Med25.eSep08</a>         | <a href="#">292889</a> | 6428  | 538  | 4  | 134 | mediator of RNA polymerase II transcription homolog CRA b (Med25) alternative variant eSep08, mRNA.                    |
| <a href="#">Med26</a>         | <a href="#">Med26.aSep08</a>         | <a href="#">306328</a> | 48055 | 506  |    | 79  | mediator complex subunit 26 (Med26) mRNA.                                                                              |
| <a href="#">Med30</a>         | <a href="#">Med30.aSep08</a>         | <a href="#">299905</a> | 21845 | 998  | 2  | 202 | mediator complex subunit 30 (Med30) alternative variant aSep08, mRNA.                                                  |
| <a href="#">Med31</a>         | <a href="#">Med31.aSep08</a>         | <a href="#">287475</a> | 3402  | 646  | 4  | 156 | mediator of RNA polymerase II transcription, subunit 31 homolog (yeast) (Med31) alternative variant aSep08, mRNA.      |
| <a href="#">Med31</a>         | <a href="#">Med31.bSep08</a>         | <a href="#">287475</a> | 2438  | 572  | 3  | 133 | mediator of RNA polymerase II transcription, subunit 31 homolog (yeast) (Med31) alternative variant bSep08, mRNA.      |



|                         |                                |                        |        |      |   |     |                                                                                                                   |
|-------------------------|--------------------------------|------------------------|--------|------|---|-----|-------------------------------------------------------------------------------------------------------------------|
| <a href="#">Med31</a>   | <a href="#">Med31.cSep08</a>   | <a href="#">287475</a> | 2030   | 867  | 3 | 100 | mediator of RNA polymerase II transcription, subunit 31 homolog (yeast) (Med31) alternative variant cSep08, mRNA. |
| <a href="#">meeby</a>   | <a href="#">meeby.aSep08</a>   |                        | 168904 | 1797 |   | 526 | cyclin-dependent kinase-like 5 (meeby) mRNA.                                                                      |
| <a href="#">meechy</a>  | <a href="#">meechy.aSep08</a>  |                        | 867    | 381  |   | 25  | putative protein (meechy) mRNA.                                                                                   |
| <a href="#">meedar</a>  | <a href="#">meedar.aSep08</a>  |                        | 545    | 415  |   | 97  | HEAT repeat containing 3 (meedar) mRNA.                                                                           |
| <a href="#">meefer</a>  | <a href="#">meefer.aSep08</a>  |                        | 16894  | 582  |   | 118 | putative cytoplasmic protein (13.1 kD) (meefer) mRNA.                                                             |
| <a href="#">meeflo</a>  | <a href="#">meeflo.aSep08</a>  |                        | 3621   | 792  |   | 38  | putative protein (meeflo) mRNA.                                                                                   |
| <a href="#">meeflu</a>  | <a href="#">meeflu.aSep08</a>  |                        | 11744  | 392  |   | 38  | putative protein (meeflu) mRNA.                                                                                   |
| <a href="#">meegar</a>  | <a href="#">meegar.aSep08</a>  |                        | 9460   | 907  |   | 300 | CRA a (meegar) mRNA.                                                                                              |
| <a href="#">meejey</a>  | <a href="#">meejey.aSep08</a>  |                        | 1625   | 656  |   | 28  | putative protein (3.4 kD) (meejey) mRNA.                                                                          |
| <a href="#">meekee</a>  | <a href="#">meekee.aSep08</a>  |                        | 486    | 348  |   | 41  | putative protein (4.7 kD) (meekee) mRNA.                                                                          |
| <a href="#">meeloy</a>  | <a href="#">meeloy.aSep08</a>  |                        | 12317  | 1062 |   | 76  | putative secreted or extracellular protein precursor (8.3 kD) (meeloy) mRNA.                                      |
| <a href="#">meemee</a>  | <a href="#">meemee.aSep08</a>  |                        | 2568   | 556  | 3 | 53  | putative protein (6.0 kD) (meemee) alternative variant aSep08, mRNA.                                              |
| <a href="#">meemer</a>  | <a href="#">meemer.aSep08</a>  |                        | 5528   | 730  |   | 80  | putative protein (8.7 kD) (meemer) mRNA.                                                                          |
| <a href="#">meenoy</a>  | <a href="#">meenoy.aSep08</a>  |                        | 19823  | 390  |   | 68  | putative protein (meenoy) mRNA.                                                                                   |
| <a href="#">meepor</a>  | <a href="#">meepor.aSep08</a>  |                        | 694    | 580  |   | 59  | putative protein (meepor) mRNA.                                                                                   |
| <a href="#">meesa</a>   | <a href="#">meesa.aSep08</a>   |                        | 3245   | 3108 |   | 118 | putative protein (13.0 kD) (meesa) mRNA.                                                                          |
| <a href="#">meeshee</a> | <a href="#">meeshee.aSep08</a> |                        | 4317   | 669  |   | 96  | ab2-143 like (10.7 kD) (meeshee) mRNA.                                                                            |
| <a href="#">meetu</a>   | <a href="#">meetu.aSep08</a>   |                        | 5269   | 282  |   | 93  | s1 rna binding domain 1 like (meetu) mRNA.                                                                        |
| <a href="#">meevar</a>  | <a href="#">meevar.aSep08</a>  |                        | 1913   | 331  |   | 24  | putative protein (meevar) mRNA.                                                                                   |
| <a href="#">meewey</a>  | <a href="#">meewey.aSep08</a>  |                        | 5652   | 1412 | 2 | 105 | putative protein (meewey) mRNA.                                                                                   |
| <a href="#">Mef2b</a>   | <a href="#">Mef2b.bSep08</a>   | <a href="#">498607</a> | 7113   | 899  | 6 | 171 | putative protein of eukaryotic origin (Mef2b) alternative variant bSep08, mRNA.                                   |
| <a href="#">Mef2b</a>   | <a href="#">Mef2b.bSep08</a>   | <a href="#">688966</a> | 7113   | 899  | 6 | 171 | putative protein of eukaryotic origin (Mef2b) alternative variant bSep08, mRNA.                                   |
| <a href="#">Mef2b</a>   | <a href="#">Mef2b.cSep08</a>   | <a href="#">498607</a> | 4663   | 513  | 5 | 142 | putative protein of eukaryotic origin (Mef2b) alternative variant cSep08, mRNA.                                   |
| <a href="#">Mef2b</a>   | <a href="#">Mef2b.cSep08</a>   | <a href="#">688966</a> | 4663   | 513  | 5 | 142 | putative protein of eukaryotic origin (Mef2b) alternative variant cSep08, mRNA.                                   |
| <a href="#">Mef2b</a>   | <a href="#">Mef2b.dSep08</a>   | <a href="#">498607</a> | 5209   | 427  | 5 | 134 | MADS box transcription enhancer factor 2 polypeptide B like (Mef2b) alternative variant dSep08, mRNA.             |
| <a href="#">Mef2b</a>   | <a href="#">Mef2b.dSep08</a>   | <a href="#">688966</a> | 5209   | 427  | 5 | 134 | MADS box transcription enhancer factor 2 polypeptide B like (Mef2b) alternative variant dSep08, mRNA.             |
| <a href="#">Mef2b</a>   | <a href="#">Mef2b.eSep08</a>   | <a href="#">498607</a> | 4899   | 808  | 4 | 103 | MADS box transcription enhancer factor 2 polypeptide B (Mef2b) alternative variant eSep08, mRNA.                  |
| <a href="#">Mef2b</a>   | <a href="#">Mef2b.eSep08</a>   | <a href="#">688966</a> | 4899   | 808  | 4 | 103 | MADS box transcription enhancer factor 2 polypeptide B (Mef2b) alternative variant eSep08, mRNA.                  |
| <a href="#">Mef2d</a>   | <a href="#">Mef2d.bSep08</a>   | <a href="#">81518</a>  | 8905   | 772  | 7 | 257 | myocyte enhancer factor 2D (Mef2d) alternative variant bSep08, mRNA.                                              |
| <a href="#">Mef2d</a>   | <a href="#">Mef2d.cSep08</a>   | <a href="#">81518</a>  | 1176   | 703  | 2 | 112 | myocyte enhancer factor 2D (13.0 kD) (Mef2d) alternative variant cSep08, mRNA.                                    |

|                        |                               |                        |        |      |    |     |                                                                                                                |
|------------------------|-------------------------------|------------------------|--------|------|----|-----|----------------------------------------------------------------------------------------------------------------|
| <a href="#">Megf10</a> | <a href="#">Megf10.aSep08</a> | <a href="#">291445</a> | 1872   | 852  |    | 83  | multiple EGF-like domains 10 (Megf10) mRNA.                                                                    |
| <a href="#">Megf11</a> | <a href="#">Megf11.aSep08</a> | <a href="#">691517</a> | 50874  | 1350 | 8  | 450 | multiple EGF-like-domains 11 (Megf11) alternative variant aSep08, mRNA.                                        |
| <a href="#">Megf11</a> | <a href="#">Megf11.bSep08</a> | <a href="#">691517</a> | 1304   | 980  | 1  | 253 | multiple EGF-like-domains 11 (Megf11) alternative variant bSep08, mRNA.                                        |
| <a href="#">Mei1</a>   | <a href="#">Mei1.bSep08</a>   | <a href="#">315162</a> | 20677  | 1789 | 1  | 485 | meiosis defective 1 (Mei1) alternative variant bSep08, mRNA.                                                   |
| <a href="#">Meis2</a>  | <a href="#">Meis2.bSep08</a>  | <a href="#">311311</a> | 195698 | 2146 | 8  | 320 | meis1, myeloid ecotropic viral integration site 1 homolog 2 (Meis2) alternative variant bSep08, mRNA.          |
| <a href="#">Meis2</a>  | <a href="#">Meis2.cSep08</a>  | <a href="#">311311</a> | 6701   | 826  | 5  | 165 | meis1, myeloid ecotropic viral integration site 1 homolog 2 (Meis2) alternative variant cSep08, mRNA.          |
| <a href="#">Meis2</a>  | <a href="#">Meis2.dSep08</a>  | <a href="#">311311</a> | 137452 | 853  | 6  | 126 | meis1, myeloid ecotropic viral integration site 1 homolog 2 (Meis2) alternative variant dSep08, mRNA.          |
| <a href="#">Meis2</a>  | <a href="#">Meis2.fSep08</a>  | <a href="#">311311</a> | 138478 | 1858 | 6  | 116 | meis1, myeloid ecotropic viral integration site 1 homolog 2 (Meis2) alternative variant fSep08, mRNA.          |
| <a href="#">Meis2</a>  | <a href="#">Meis2.gSep08</a>  | <a href="#">311311</a> | 47370  | 756  | 2  | 91  | meis1, myeloid ecotropic viral integration site 1 homolog 2 (9.9 kD) (Meis2) alternative variant gSep08, mRNA. |
| <a href="#">Meis2</a>  | <a href="#">Meis2.iSep08</a>  | <a href="#">311311</a> | 896    | 391  | 2  | 46  | meis1, myeloid ecotropic viral integration site 1 homolog 2 (Meis2) alternative variant iSep08, mRNA.          |
| <a href="#">Meis3</a>  | <a href="#">Meis3.aSep08</a>  | <a href="#">361514</a> | 9556   | 1488 | 11 | 490 | meis homeobox 3 (Meis3) alternative variant aSep08, mRNA.                                                      |
| <a href="#">Meis3</a>  | <a href="#">Meis3.cSep08</a>  | <a href="#">361514</a> | 7330   | 1413 | 9  | 440 | meis homeobox 3 (Meis3) alternative variant cSep08, mRNA.                                                      |
| <a href="#">Mel13</a>  | <a href="#">Mel13.bSep08</a>  | <a href="#">287661</a> | 2977   | 723  | 3  | 137 | melanoma nuclear protein 13 (15.6 kD) (Mel13) alternative variant bSep08, mRNA.                                |
| <a href="#">Mel13</a>  | <a href="#">Mel13.cSep08</a>  | <a href="#">287661</a> | 2990   | 1005 | 2  | 87  | melanoma nuclear protein 13 (9.8 kD) (Mel13) alternative variant cSep08, mRNA.                                 |
| <a href="#">Melk</a>   | <a href="#">Melk.bSep08</a>   | <a href="#">362510</a> | 34257  | 1014 | 1  | 337 | maternal embryonic leucine zipper kinase (Melk) alternative variant bSep08, mRNA.                              |
| <a href="#">Memo1</a>  | <a href="#">Memo1.bSep08</a>  | <a href="#">298787</a> | 88730  | 1811 | 8  | 271 | mediator of cell motility 1 (Memo1) alternative variant bSep08, mRNA.                                          |
| <a href="#">Memo1</a>  | <a href="#">Memo1.cSep08</a>  | <a href="#">298787</a> | 11641  | 1180 | 3  | 79  | mediator of cell motility 1 (8.8 kD) (Memo1) alternative variant cSep08, mRNA.                                 |
| <a href="#">Memo1</a>  | <a href="#">Memo1.dSep08</a>  | <a href="#">298787</a> | 3535   | 568  | 2  | 51  | mediator of cell motility 1 (Memo1) alternative variant dSep08, mRNA.                                          |
| <a href="#">Men1</a>   | <a href="#">Men1.aSep08</a>   | <a href="#">29417</a>  | 4788   | 1560 | 10 | 519 | multiple endocrine neoplasia 1 (Men1) alternative variant aSep08, mRNA.                                        |
| <a href="#">Men1</a>   | <a href="#">Men1.bSep08</a>   | <a href="#">29417</a>  | 2108   | 1564 | 3  | 270 | multiple endocrine neoplasia 1 (Men1) alternative variant bSep08, mRNA.                                        |
| <a href="#">Men1</a>   | <a href="#">Men1.dSep08</a>   | <a href="#">29417</a>  | 680    | 383  | 2  | 127 | multiple endocrine neoplasia 1 (Men1) alternative variant dSep08, mRNA.                                        |
| <a href="#">Mepce</a>  | <a href="#">Mepce.aSep08</a>  | <a href="#">304361</a> | 3694   | 2078 |    | 515 | methylphosphate capping enzyme (Mepce) mRNA.                                                                   |
| <a href="#">merby</a>  | <a href="#">merby.aSep08</a>  |                        | 12687  | 359  |    | 119 | cyclin-dependent kinase-like 5 (merby) mRNA.                                                                   |
| <a href="#">merchy</a> | <a href="#">merchy.aSep08</a> |                        | 4369   | 619  |    | 181 | tankyrase protein (merchy) mRNA.                                                                               |
| <a href="#">merdar</a> | <a href="#">merdar.aSep08</a> |                        | 4382   | 526  | 3  | 104 | putative mitochondrial protein (11.6 kD) (merdar) alternative variant aSep08, mRNA.                            |

|                         |                                |                        |       |      |   |     |                                                                                  |
|-------------------------|--------------------------------|------------------------|-------|------|---|-----|----------------------------------------------------------------------------------|
| <a href="#">merdar</a>  | <a href="#">merdar.bSep08</a>  |                        | 1315  | 401  | 2 | 74  | putative protein (merdar) alternative variant bSep08, mRNA.                      |
| <a href="#">merdar</a>  | <a href="#">merdar.cSep08</a>  |                        | 7856  | 787  | 4 | 42  | putative protein (merdar) alternative variant cSep08, mRNA.                      |
| <a href="#">merfer</a>  | <a href="#">merfer.aSep08</a>  |                        | 6358  | 493  | 2 | 31  | putative protein (merfer) alternative variant aSep08, mRNA.                      |
| <a href="#">merfer</a>  | <a href="#">merfer.bSep08</a>  |                        | 2147  | 262  | 1 | 33  | putative protein (merfer) alternative variant bSep08, mRNA.                      |
| <a href="#">merflo</a>  | <a href="#">merflo.aSep08</a>  |                        | 783   | 293  |   | 63  | putative protein (7.0 kD) (merflo) mRNA.                                         |
| <a href="#">merflu</a>  | <a href="#">merflu.aSep08</a>  |                        | 3536  | 1157 | 1 | 38  | putative protein (4.6 kD) (merflu) alternative variant aSep08, mRNA.             |
| <a href="#">merflu</a>  | <a href="#">merflu.bSep08</a>  |                        | 2408  | 341  | 1 | 16  | putative protein (merflu) alternative variant bSep08, mRNA.                      |
| <a href="#">mergar</a>  | <a href="#">mergar.aSep08</a>  |                        | 11781 | 717  |   | 239 | CRA b (mergar) mRNA.                                                             |
| <a href="#">merjey</a>  | <a href="#">merjey.aSep08</a>  |                        | 8505  | 555  |   | 35  | putative protein (4.0 kD) (merjey) mRNA.                                         |
| <a href="#">merkee</a>  | <a href="#">merkee.aSep08</a>  |                        | 26503 | 973  |   | 324 | glycoside hydrolase, family 47 (merkee) mRNA.                                    |
| <a href="#">merloy</a>  | <a href="#">merloy.aSep08</a>  |                        | 1946  | 941  |   | 77  | putative protein (merloy) mRNA.                                                  |
| <a href="#">mermee</a>  | <a href="#">mermee.aSep08</a>  |                        | 1243  | 348  |   | 24  | putative protein (2.8 kD) (mermee) mRNA.                                         |
| <a href="#">mermer</a>  | <a href="#">mermer.aSep08</a>  |                        | 894   | 778  |   | 51  | putative protein (mermer) mRNA.                                                  |
| <a href="#">merno</a>   | <a href="#">merno.aSep08</a>   |                        | 7732  | 289  |   | 90  | putative protein (merno) mRNA.                                                   |
| <a href="#">merpor</a>  | <a href="#">merpor.bSep08</a>  |                        | 1202  | 357  | 3 | 55  | putative protein (merpor) alternative variant bSep08, mRNA.                      |
| <a href="#">mersa</a>   | <a href="#">mersa.aSep08</a>   |                        | 5888  | 2303 | 2 | 107 | putative mitochondrial protein (11.9 kD) (mersa) mRNA.                           |
| <a href="#">mershee</a> | <a href="#">mershee.aSep08</a> |                        | 97385 | 818  |   | 39  | putative protein (4.6 kD) (mershee) mRNA.                                        |
| <a href="#">Mertk</a>   | <a href="#">Mertk.bSep08</a>   | <a href="#">65037</a>  | 25769 | 681  | 5 | 222 | c-mer proto-oncogene tyrosine kinase (Mertk) alternative variant bSep08, mRNA.   |
| <a href="#">mertu</a>   | <a href="#">mertu.aSep08</a>   |                        | 4594  | 775  |   | 85  | putative nuclear protein (9.0 kD) (mertu) mRNA.                                  |
| <a href="#">mervar</a>  | <a href="#">mervar.aSep08</a>  |                        | 2610  | 701  |   | 12  | putative protein (1.4 kD) (mervar) mRNA.                                         |
| <a href="#">merwey</a>  | <a href="#">merwey.aSep08</a>  |                        | 1747  | 664  |   | 116 | bromodomain PHD finger containing 1 CRA d (merwey) mRNA.                         |
| <a href="#">Mesdc2</a>  | <a href="#">Mesdc2.bSep08</a>  | <a href="#">308796</a> | 12572 | 533  | 3 | 153 | mesoderm development candidate 2 (Mesdc2) alternative variant bSep08, mRNA.      |
| <a href="#">Metap1</a>  | <a href="#">Metap1.bSep08</a>  | <a href="#">295500</a> | 18802 | 681  | 2 | 226 | methionyl aminopeptidase 1 (Metap1) alternative variant bSep08, mRNA.            |
| <a href="#">Metap1</a>  | <a href="#">Metap1.cSep08</a>  | <a href="#">295500</a> | 18979 | 677  | 2 | 225 | methionyl aminopeptidase 1 (Metap1) alternative variant cSep08, mRNA.            |
| <a href="#">Metap2</a>  | <a href="#">Metap2.bSep08</a>  | <a href="#">64370</a>  | 23418 | 1046 | 5 | 319 | methionine aminopeptidase 2 (Metap2) alternative variant bSep08, mRNA.           |
| <a href="#">Metap2</a>  | <a href="#">Metap2.cSep08</a>  | <a href="#">64370</a>  | 19368 | 897  | 4 | 263 | methionine aminopeptidase 2 (Metap2) alternative variant cSep08, mRNA.           |
| <a href="#">Metap2</a>  | <a href="#">Metap2.dSep08</a>  | <a href="#">64370</a>  | 18249 | 847  | 3 | 252 | methionine aminopeptidase 2 (Metap2) alternative variant dSep08, mRNA.           |
| <a href="#">Metap2</a>  | <a href="#">Metap2.eSep08</a>  | <a href="#">64370</a>  | 27955 | 2162 | 7 | 237 | methionine aminopeptidase 2 (26.1 kD) (Metap2) alternative variant eSep08, mRNA. |
| <a href="#">Metap2</a>  | <a href="#">Metap2.fSep08</a>  | <a href="#">64370</a>  | 18243 | 748  | 2 | 213 | methionine aminopeptidase 2 (Metap2) alternative variant fSep08, mRNA.           |

|                                    |                                           |                        |       |      |    |     |                                                                                                                 |
|------------------------------------|-------------------------------------------|------------------------|-------|------|----|-----|-----------------------------------------------------------------------------------------------------------------|
| <a href="#">Metap2</a>             | <a href="#">Metap2.gSep08</a>             | <a href="#">64370</a>  | 18219 | 729  | 2  | 123 | methionine aminopeptidase 2 (13.4 kD) (Metap2) alternative variant gSep08, mRNA.                                |
| <a href="#">Metap1</a>             | <a href="#">Metap1.bSep08</a>             | <a href="#">311748</a> | 71373 | 698  |    | 232 | methionine aminopeptidase-like 1 (Metap1) alternative variant bSep08, mRNA.                                     |
| <a href="#">Methyltransf_16.0</a>  | <a href="#">Methyltransf_16.0.aSep08</a>  |                        | 687   | 409  |    | 131 | CRA a (Methyltransf_16.0) mRNA.                                                                                 |
| <a href="#">MetrnandRGD1306126</a> | <a href="#">MetrnandRGD1306126.cSep08</a> | <a href="#">287150</a> | 809   | 595  | 2  | 164 | meteorin (MetrnandRGD1306126) alternative variant cSep08, mRNA.                                                 |
| <a href="#">MetrnandRGD1306126</a> | <a href="#">MetrnandRGD1306126.cSep08</a> | <a href="#">287151</a> | 809   | 595  | 2  | 164 | meteorin (MetrnandRGD1306126) alternative variant cSep08, mRNA.                                                 |
| <a href="#">MetrnandRGD1306126</a> | <a href="#">MetrnandRGD1306126.dSep08</a> | <a href="#">287150</a> | 1629  | 716  | 4  | 132 | putative cytoplasmic protein of ancient origin (14.2 kD) (MetrnandRGD1306126) alternative variant dSep08, mRNA. |
| <a href="#">MetrnandRGD1306126</a> | <a href="#">MetrnandRGD1306126.dSep08</a> | <a href="#">287151</a> | 1629  | 716  | 4  | 132 | putative cytoplasmic protein of ancient origin (14.2 kD) (MetrnandRGD1306126) alternative variant dSep08, mRNA. |
| <a href="#">MetrnandRGD1306126</a> | <a href="#">MetrnandRGD1306126.eSep08</a> | <a href="#">287150</a> | 5795  | 478  | 4  | 112 | meteorin (MetrnandRGD1306126) alternative variant eSep08, mRNA.                                                 |
| <a href="#">MetrnandRGD1306126</a> | <a href="#">MetrnandRGD1306126.eSep08</a> | <a href="#">287151</a> | 5795  | 478  | 4  | 112 | meteorin (MetrnandRGD1306126) alternative variant eSep08, mRNA.                                                 |
| <a href="#">Metrnl</a>             | <a href="#">Metrnl.bSep08</a>             | <a href="#">316842</a> | 13472 | 448  | 3  | 146 | meteorin, glial cell differentiation regulator-like (Metrnl) alternative variant bSep08, mRNA.                  |
| <a href="#">Metrnl</a>             | <a href="#">Metrnl.cSep08</a>             | <a href="#">316842</a> | 5330  | 432  | 2  | 143 | meteorin, glial cell differentiation regulator-like (Metrnl) alternative variant cSep08, mRNA.                  |
| <a href="#">Mett10d</a>            | <a href="#">Mett10d.aSep08</a>            | <a href="#">360568</a> | 44749 | 1120 | 8  | 339 | putative protein of ancient origin (Mett10d) alternative variant aSep08, mRNA.                                  |
| <a href="#">Mett10d</a>            | <a href="#">Mett10d.bSep08</a>            | <a href="#">360568</a> | 3713  | 689  | 1  | 127 | putative protein of ancient origin (Mett10d) alternative variant bSep08, mRNA.                                  |
| <a href="#">Mett11d1</a>           | <a href="#">Mett11d1.aSep08</a>           | <a href="#">305845</a> | 6618  | 1521 | 13 | 466 | methyltransferase type 11 (Mett11d1) alternative variant aSep08, mRNA.                                          |
| <a href="#">Mett11d1</a>           | <a href="#">Mett11d1.bSep08</a>           | <a href="#">305845</a> | 4563  | 826  | 7  | 77  | putative cytoplasmic protein of ancient origin (8.3 kD) (Mett11d1) alternative variant bSep08, mRNA.            |
| <a href="#">Mett11d1</a>           | <a href="#">Mett11d1.cSep08</a>           | <a href="#">305845</a> | 3109  | 1668 | 4  | 80  | putative protein of mammalian origin (9.1 kD) (Mett11d1) alternative variant cSep08, mRNA.                      |
| <a href="#">Mett11d1</a>           | <a href="#">Mett11d1.dSep08</a>           | <a href="#">305845</a> | 2580  | 1140 | 3  | 80  | putative protein of mammalian origin (9.1 kD) (Mett11d1) alternative variant dSep08, mRNA.                      |
| <a href="#">Mettl2</a>             | <a href="#">Mettl2.bSep08</a>             | <a href="#">363687</a> | 7679  | 752  | 4  | 117 | methyltransferase like 2 (Mettl2) alternative variant bSep08, mRNA.                                             |
| <a href="#">Mettl3</a>             | <a href="#">Mettl3.bSep08</a>             | <a href="#">361035</a> | 1482  | 728  | 3  | 59  | methyltransferase-like 3 (Mettl3) alternative variant bSep08, mRNA.                                             |
| <a href="#">Mettl4</a>             | <a href="#">Mettl4.aSep08</a>             | <a href="#">316731</a> | 22447 | 662  | 4  | 220 | methyltransferase like 4 (Mettl4) alternative variant aSep08, mRNA.                                             |
| <a href="#">Mettl6</a>             | <a href="#">Mettl6.bSep08</a>             | <a href="#">290564</a> | 2836  | 884  | 3  | 120 | methyltransferase like 6 (Mettl6) alternative variant bSep08, mRNA.                                             |
| <a href="#">meyby</a>              | <a href="#">meyby.aSep08</a>              |                        | 2848  | 466  |    | 31  | putative protein (3.6 kD) (meyby) mRNA.                                                                         |
| <a href="#">meychy</a>             | <a href="#">meychy.aSep08</a>             |                        | 1407  | 742  |    | 247 | tankyrase 1 binding protein like (meychy) mRNA.                                                                 |
| <a href="#">meydar</a>             | <a href="#">meydar.aSep08</a>             |                        | 1680  | 263  |    | 19  | putative protein (2.2 kD) (meydar) mRNA.                                                                        |

|                         |                                |                        |        |      |   |     |                                                                                                                |
|-------------------------|--------------------------------|------------------------|--------|------|---|-----|----------------------------------------------------------------------------------------------------------------|
| <a href="#">meyfer</a>  | <a href="#">meyfer.aSep08</a>  |                        | 139217 | 691  |   | 230 | transcription initiation factor tfiid (meyfer) mRNA.                                                           |
| <a href="#">meyflo</a>  | <a href="#">meyflo.aSep08</a>  |                        | 896    | 770  |   | 38  | putative protein (4.1 kD) (meyflo) mRNA.                                                                       |
| <a href="#">meyflu</a>  | <a href="#">meyflu.aSep08</a>  |                        | 104640 | 495  |   | 27  | putative protein (3.1 kD) (meyflu) mRNA.                                                                       |
| <a href="#">meygar</a>  | <a href="#">meygar.aSep08</a>  |                        | 3857   | 399  |   | 108 | heavy axonemal (meygar) mRNA.                                                                                  |
| <a href="#">meyjey</a>  | <a href="#">meyjey.aSep08</a>  |                        | 805    | 586  |   | 103 | putative protein (meyjey) mRNA.                                                                                |
| <a href="#">meykee</a>  | <a href="#">meykee.aSep08</a>  |                        | 6650   | 614  |   | 189 | 3 ER degradation mannosidase-like (meykee) mRNA.                                                               |
| <a href="#">meyloy</a>  | <a href="#">meyloy.aSep08</a>  |                        | 3229   | 333  |   | 56  | putative protein (meyloy) mRNA.                                                                                |
| <a href="#">meymee</a>  | <a href="#">meymee.aSep08</a>  |                        | 28668  | 452  |   | 40  | putative protein (meymee) mRNA.                                                                                |
| <a href="#">meymer</a>  | <a href="#">meymer.aSep08</a>  |                        | 14216  | 449  |   | 149 | tweety 2 (meymer) mRNA.                                                                                        |
| <a href="#">meynoy</a>  | <a href="#">meynoy.aSep08</a>  |                        | 5673   | 644  | 3 | 169 | phosphatidylinositol-3-phosphate phosphatidylinositol type III like (meynoy) alternative variant aSep08, mRNA. |
| <a href="#">meynoy</a>  | <a href="#">meynoy.bSep08</a>  |                        | 5516   | 542  | 3 | 135 | type III (meynoy) alternative variant bSep08, mRNA.                                                            |
| <a href="#">meypor</a>  | <a href="#">meypor.aSep08</a>  |                        | 937    | 455  |   | 85  | putative mitochondrial protein (9.2 kD) (meypor) mRNA.                                                         |
| <a href="#">meysa</a>   | <a href="#">meysa.aSep08</a>   |                        | 1191   | 515  |   | 171 | rhophilin Rho GTPase binding protein 1 CRA a like (meysa) mRNA.                                                |
| <a href="#">meyshee</a> | <a href="#">meyshee.aSep08</a> |                        | 166285 | 408  |   | 50  | putative protein (meyshee) mRNA.                                                                               |
| <a href="#">meytu</a>   | <a href="#">meytu.aSep08</a>   |                        | 1103   | 743  |   | 143 | putative protein (meytu) mRNA.                                                                                 |
| <a href="#">meyvar</a>  | <a href="#">meyvar.aSep08</a>  |                        | 5015   | 697  |   | 140 | putative protein (meyvar) mRNA.                                                                                |
| <a href="#">meywey</a>  | <a href="#">meywey.aSep08</a>  |                        | 2395   | 1018 |   | 111 | bromodomain PHD finger containing 1 CRA e (meywey) mRNA.                                                       |
| <a href="#">Mfap1a</a>  | <a href="#">Mfap1a.aSep08</a>  | <a href="#">499878</a> | 18346  | 3636 |   | 439 | microfibrillar-associated protein 1A (52.0 kD) (Mfap1a) mRNA.                                                  |
| <a href="#">Mfap4</a>   | <a href="#">Mfap4.aSep08</a>   | <a href="#">287382</a> | 3133   | 1750 | 4 | 281 | microfibrillar-associated protein 4 (31.4 kD) (Mfap4) alternative variant aSep08, complete mRNA.               |
| <a href="#">Mfap4</a>   | <a href="#">Mfap4.cSep08</a>   | <a href="#">287382</a> | 1756   | 742  | 3 | 241 | microfibrillar-associated protein 4 (26.5 kD) (Mfap4) alternative variant cSep08, mRNA.                        |
| <a href="#">Mfap4</a>   | <a href="#">Mfap4.dSep08</a>   | <a href="#">287382</a> | 1860   | 774  | 4 | 217 | microfibrillar-associated protein 4 (24.1 kD) (Mfap4) alternative variant dSep08, mRNA.                        |
| <a href="#">Mfap4</a>   | <a href="#">Mfap4.eSep08</a>   | <a href="#">287382</a> | 2771   | 1151 | 5 | 210 | microfibrillar-associated protein 4 (24.0 kD) (Mfap4) alternative variant eSep08, mRNA.                        |
| <a href="#">Mfap4</a>   | <a href="#">Mfap4.fSep08</a>   | <a href="#">287382</a> | 2350   | 1137 | 4 | 135 | microfibrillar-associated protein 4 (15.3 kD) (Mfap4) alternative variant fSep08, mRNA.                        |
| <a href="#">Mfap4</a>   | <a href="#">Mfap4.gSep08</a>   | <a href="#">287382</a> | 2241   | 778  | 5 | 125 | microfibrillar-associated protein 4 (13.9 kD) (Mfap4) alternative variant gSep08, mRNA.                        |
| <a href="#">Mfap5</a>   | <a href="#">Mfap5.bSep08</a>   | <a href="#">362429</a> | 3229   | 669  | 1 | 49  | microfibrillar associated protein 5 (5.2 kD) (Mfap5) alternative variant bSep08, mRNA.                         |
| <a href="#">Mfge8</a>   | <a href="#">Mfge8.bSep08</a>   | <a href="#">25277</a>  | 12004  | 1785 | 2 | 473 | milk fat globule-EGF factor 8 protein (Mfge8) alternative variant bSep08, mRNA.                                |
| <a href="#">Mfhas1</a>  | <a href="#">Mfhas1.bSep08</a>  | <a href="#">306508</a> | 84600  | 3294 | 3 | 990 | malignant fibrous histiocytoma amplified sequence 1 (Mfhas1) alternative variant bSep08, mRNA.                 |
| <a href="#">Mfhas1</a>  | <a href="#">Mfhas1.cSep08</a>  | <a href="#">306508</a> | 13447  | 470  | 3 | 57  | malignant fibrous histiocytoma amplified sequence 1 (Mfhas1) alternative variant cSep08, mRNA.                 |
| <a href="#">Mfhas1</a>  | <a href="#">Mfhas1.dSep08</a>  | <a href="#">306508</a> | 8594   | 457  | 2 | 37  | malignant fibrous histiocytoma amplified sequence 1 (Mfhas1) alternative variant dSep08, mRNA.                 |

|                        |                               |                        |       |      |    |     |                                                                                                                                |
|------------------------|-------------------------------|------------------------|-------|------|----|-----|--------------------------------------------------------------------------------------------------------------------------------|
| <a href="#">Mfi2</a>   | <a href="#">Mfi2.cSep08</a>   | <a href="#">288038</a> | 1535  | 736  | 2  | 84  | antigen p97 (melanoma associated) identified by monoclonal antibodies 133.2 and 96.5 (Mfi2) alternative variant cSep08, mRNA.  |
| <a href="#">Mfn1</a>   | <a href="#">Mfn1.aSep08</a>   | <a href="#">192647</a> | 16000 | 3271 | 2  | 416 | mitofusin 1 (Mfn1) alternative variant aSep08, mRNA.                                                                           |
| <a href="#">Mfn1</a>   | <a href="#">Mfn1.bSep08</a>   | <a href="#">192647</a> | 2536  | 1677 | 1  | 138 | mitofusin 1 (Mfn1) alternative variant bSep08, mRNA.                                                                           |
| <a href="#">Mfn2</a>   | <a href="#">Mfn2.bSep08</a>   | <a href="#">64476</a>  | 4894  | 2161 | 3  | 148 | mitofusin 2 (Mfn2) alternative variant bSep08, mRNA.                                                                           |
| <a href="#">Mfn2</a>   | <a href="#">Mfn2.dSep08</a>   | <a href="#">64476</a>  | 9621  | 514  | 4  | 72  | mitofusin 2 (Mfn2) alternative variant dSep08, mRNA.                                                                           |
| <a href="#">Mfsd1</a>  | <a href="#">Mfsd1.aSep08</a>  | <a href="#">361957</a> | 19280 | 1425 | 16 | 464 | major facilitator superfamily MFS 1 (51.3 kD) (Mfsd1) alternative variant aSep08, mRNA.                                        |
| <a href="#">Mfsd1</a>  | <a href="#">Mfsd1.bSep08</a>  | <a href="#">361957</a> | 11144 | 2415 | 10 | 258 | putative protein, with at least 6 transmembrane domains, of ancient origin (Mfsd1) alternative variant bSep08, mRNA.           |
| <a href="#">Mfsd1</a>  | <a href="#">Mfsd1.cSep08</a>  | <a href="#">361957</a> | 2742  | 514  | 3  | 43  | putative protein of metazoan origin (Mfsd1) alternative variant cSep08, mRNA.                                                  |
| <a href="#">Mfsd2</a>  | <a href="#">Mfsd2.bSep08</a>  | <a href="#">298504</a> | 10534 | 756  | 3  | 252 | putative protein of ancient origin (Mfsd2) alternative variant bSep08, mRNA.                                                   |
| <a href="#">Mfsd2</a>  | <a href="#">Mfsd2.cSep08</a>  | <a href="#">298504</a> | 5348  | 622  | 3  | 193 | putative protein, with at least 2 transmembrane domains, of ancient origin (Mfsd2) alternative variant cSep08, mRNA.           |
| <a href="#">Mfsd3</a>  | <a href="#">Mfsd3.bSep08</a>  | <a href="#">500899</a> | 559   | 477  | 2  | 114 | putative protein, with a transmembrane domain, of vertebrate origin (Mfsd3) alternative variant bSep08, mRNA.                  |
| <a href="#">Mfsd3</a>  | <a href="#">Mfsd3.cSep08</a>  | <a href="#">500899</a> | 1583  | 668  | 4  | 112 | putative protein of mammalian origin (Mfsd3) alternative variant cSep08, mRNA.                                                 |
| <a href="#">Mfsd3</a>  | <a href="#">Mfsd3.dSep08</a>  | <a href="#">500899</a> | 911   | 815  | 2  | 34  | putative protein (3.6 kD) (Mfsd3) alternative variant dSep08, mRNA.                                                            |
| <a href="#">Mfsd4</a>  | <a href="#">Mfsd4.bSep08</a>  | <a href="#">498228</a> | 14179 | 1493 | 1  | 159 | putative protein, with at least 3 transmembrane domains, of eukaryotic origin (Mfsd4) alternative variant bSep08, mRNA.        |
| <a href="#">Mfsd7</a>  | <a href="#">Mfsd7.bSep08</a>  | <a href="#">305625</a> | 4658  | 765  | 1  | 168 | putative protein, with at least 2 transmembrane domains, of ancient origin (Mfsd7) alternative variant bSep08, mRNA.           |
| <a href="#">Mfsd8</a>  | <a href="#">Mfsd8.bSep08</a>  | <a href="#">361939</a> | 9279  | 377  | 4  | 125 | putative protein, with a transmembrane domain, of ancient origin (Mfsd8) alternative variant bSep08, mRNA.                     |
| <a href="#">Mfsd10</a> | <a href="#">Mfsd10.aSep08</a> | <a href="#">305449</a> | 967   | 423  | 3  | 140 | putative protein of metazoan origin (Mfsd10) alternative variant aSep08, mRNA.                                                 |
| <a href="#">Mfsd10</a> | <a href="#">Mfsd10.bSep08</a> | <a href="#">305449</a> | 1374  | 738  | 3  | 113 | putative protein of metazoan origin (12.9 kD) (Mfsd10) alternative variant bSep08, mRNA.                                       |
| <a href="#">Mga</a>    | <a href="#">Mga.aSep08</a>    | <a href="#">499874</a> | 23794 | 1800 | 8  | 458 | MAX gene associated (Mga) alternative variant aSep08, mRNA.                                                                    |
| <a href="#">Mga</a>    | <a href="#">Mga.bSep08</a>    | <a href="#">499874</a> | 8587  | 585  | 5  | 194 | MAX gene associated (Mga) alternative variant bSep08, mRNA.                                                                    |
| <a href="#">Mgat1</a>  | <a href="#">Mgat1.bSep08</a>  | <a href="#">81519</a>  | 10586 | 790  | 2  | 199 | mannosyl (alpha-1,3-)-glycoprotein beta-1,2-N-acetylglucosaminyltransferase (Mgat1) alternative variant bSep08, mRNA.          |
| <a href="#">Mgat1</a>  | <a href="#">Mgat1.cSep08</a>  | <a href="#">81519</a>  | 13781 | 540  | 2  | 41  | mannosyl (alpha-1,3-)-glycoprotein beta-1,2-N-acetylglucosaminyltransferase (4.5 kD) (Mgat1) alternative variant cSep08, mRNA. |

|                          |                                 |                        |        |      |    |     |                                                                                                                                   |
|--------------------------|---------------------------------|------------------------|--------|------|----|-----|-----------------------------------------------------------------------------------------------------------------------------------|
| <a href="#">Mgat4a</a>   | <a href="#">Mgat4a.bSep08</a>   | <a href="#">367252</a> | 41678  | 969  | 3  | 230 | mannosyl (alpha-1,3-)-glycoprotein beta-1,4-N-acetylglucosaminyltransferase, isozyme A (Mgat4a) alternative variant bSep08, mRNA. |
| <a href="#">Mgat4a</a>   | <a href="#">Mgat4a.cSep08</a>   | <a href="#">367252</a> | 15507  | 728  | 3  | 166 | mannosyl (alpha-1,3-)-glycoprotein beta-1,4-N-acetylglucosaminyltransferase, isozyme A (Mgat4a) alternative variant cSep08, mRNA. |
| <a href="#">Mgat4b</a>   | <a href="#">Mgat4b.bSep08</a>   | <a href="#">303100</a> | 2807   | 1329 | 10 | 366 | mannosyl (alpha-1,3-)-glycoprotein beta-1,4-N-acetylglucosaminyltransferase, isozyme B (Mgat4b) alternative variant bSep08, mRNA. |
| <a href="#">Mgat4b</a>   | <a href="#">Mgat4b.cSep08</a>   | <a href="#">303100</a> | 1749   | 841  | 6  | 237 | mannosyl (alpha-1,3-)-glycoprotein beta-1,4-N-acetylglucosaminyltransferase, isozyme B (Mgat4b) alternative variant cSep08, mRNA. |
| <a href="#">Mgat4c</a>   | <a href="#">Mgat4c.aSep08</a>   | <a href="#">299756</a> | 205967 | 385  |    | 59  | mannosyl (alpha-1,3-)-glycoprotein beta-1,4-N-acetylglucosaminyltransferase, isozyme C (putative) (Mgat4c) mRNA.                  |
| <a href="#">Mgat5</a>    | <a href="#">Mgat5.bSep08</a>    | <a href="#">65271</a>  | 16296  | 895  | 2  | 111 | mannosyl (alpha-1,6-)-glycoprotein beta-1,6-N-acetylglucosaminyltransferase (Mgat5) alternative variant bSep08, mRNA.             |
| <a href="#">Mgat5</a>    | <a href="#">Mgat5.dSep08</a>    | <a href="#">65271</a>  | 20068  | 590  | 3  | 54  | mannosyl (alpha-1,6-)-glycoprotein beta-1,6-N-acetylglucosaminyltransferase (6.3 kD) (Mgat5) alternative variant dSep08, mRNA.    |
| <a href="#">MGC72612</a> | <a href="#">MGC72612.bSep08</a> | <a href="#">494340</a> | 4336   | 3220 | 2  | 386 | similar to expressed sequence AI449175 (45.4 kD) (MGC72612) alternative variant bSep08, mRNA.                                     |
| <a href="#">MGC72612</a> | <a href="#">MGC72612.cSep08</a> | <a href="#">494340</a> | 9359   | 1719 | 3  | 35  | similar to expressed sequence AI449175 (MGC72612) alternative variant cSep08, mRNA.                                               |
| <a href="#">MGC72612</a> | <a href="#">MGC72612.dSep08</a> | <a href="#">494340</a> | 12701  | 732  | 3  | 8   | similar to expressed sequence AI449175 (0.9 kD) (MGC72612) alternative variant dSep08, mRNA.                                      |
| <a href="#">MGC72614</a> | <a href="#">MGC72614.bSep08</a> | <a href="#">310540</a> | 3723   | 591  | 2  | 147 | hypothetical LOC310540 (MGC72614) alternative variant bSep08, mRNA.                                                               |
| <a href="#">MGC72973</a> | <a href="#">MGC72973.aSep08</a> | <a href="#">361619</a> | 2854   | 802  | 3  | 148 | beta-globin (MGC72973) alternative variant aSep08, mRNA.                                                                          |
| <a href="#">MGC72973</a> | <a href="#">MGC72973.aSep08</a> | <a href="#">689064</a> | 2854   | 802  | 3  | 148 | beta-globin (MGC72973) alternative variant aSep08, mRNA.                                                                          |
| <a href="#">MGC72973</a> | <a href="#">MGC72973.bSep08</a> | <a href="#">361619</a> | 8086   | 606  | 3  | 147 | beta-globin (16.0 kD) (MGC72973) alternative variant bSep08, mRNA.                                                                |
| <a href="#">MGC72973</a> | <a href="#">MGC72973.bSep08</a> | <a href="#">689064</a> | 8086   | 606  | 3  | 147 | beta-globin (16.0 kD) (MGC72973) alternative variant bSep08, mRNA.                                                                |
| <a href="#">MGC72973</a> | <a href="#">MGC72973.cSep08</a> | <a href="#">361619</a> | 13266  | 621  | 3  | 147 | beta-globin (16.0 kD) (MGC72973) alternative variant cSep08, mRNA.                                                                |
| <a href="#">MGC72973</a> | <a href="#">MGC72973.cSep08</a> | <a href="#">689064</a> | 13266  | 621  | 3  | 147 | beta-globin (16.0 kD) (MGC72973) alternative variant cSep08, mRNA.                                                                |
| <a href="#">MGC72973</a> | <a href="#">MGC72973.gSep08</a> | <a href="#">361619</a> | 894    | 779  | 2  | 133 | beta-globin (14.6 kD) (MGC72973) alternative variant gSep08, mRNA.                                                                |
| <a href="#">MGC72973</a> | <a href="#">MGC72973.gSep08</a> | <a href="#">689064</a> | 894    | 779  | 2  | 133 | beta-globin (14.6 kD) (MGC72973) alternative variant gSep08, mRNA.                                                                |
| <a href="#">MGC72973</a> | <a href="#">MGC72973.hSep08</a> | <a href="#">361619</a> | 8090   | 689  | 4  | 110 | beta-globin (12.0 kD) (MGC72973) alternative variant hSep08, mRNA.                                                                |

|                          |                                 |                        |       |      |   |     |                                                                                                  |
|--------------------------|---------------------------------|------------------------|-------|------|---|-----|--------------------------------------------------------------------------------------------------|
| <a href="#">MGC72973</a> | <a href="#">MGC72973.hSep08</a> | <a href="#">689064</a> | 8090  | 689  | 4 | 110 | beta-globin (12.0 kD) (MGC72973) alternative variant hSep08, mRNA.                               |
| <a href="#">MGC72973</a> | <a href="#">MGC72973.jSep08</a> | <a href="#">361619</a> | 7441  | 384  | 2 | 35  | beta-globin (3.7 kD) (MGC72973) alternative variant jSep08, mRNA.                                |
| <a href="#">MGC72973</a> | <a href="#">MGC72973.jSep08</a> | <a href="#">689064</a> | 7441  | 384  | 2 | 35  | beta-globin (3.7 kD) (MGC72973) alternative variant jSep08, mRNA.                                |
| <a href="#">MGC72974</a> | <a href="#">MGC72974.bSep08</a> | <a href="#">316976</a> | 9690  | 1443 | 4 | 255 | hypothetical LOC316976 (28.6 kD) (MGC72974) alternative variant bSep08, mRNA.                    |
| <a href="#">MGC72974</a> | <a href="#">MGC72974.dSep08</a> | <a href="#">316976</a> | 4192  | 1799 | 3 | 53  | hypothetical LOC316976 (MGC72974) alternative variant dSep08, mRNA.                              |
| <a href="#">MGC72974</a> | <a href="#">MGC72974.eSep08</a> | <a href="#">316976</a> | 3611  | 1349 | 3 | 104 | hypothetical LOC316976 (12.2 kD) (MGC72974) alternative variant eSep08, complete mRNA.           |
| <a href="#">MGC93975</a> | <a href="#">MGC93975.bSep08</a> | <a href="#">292878</a> | 5733  | 1126 | 8 | 264 | similar to 2310044H10Rik protein (27.6 kD) (MGC93975) alternative variant bSep08, mRNA.          |
| <a href="#">MGC93975</a> | <a href="#">MGC93975.cSep08</a> | <a href="#">292878</a> | 5644  | 1163 | 8 | 236 | similar to 2310044H10Rik protein (25.0 kD) (MGC93975) alternative variant cSep08, mRNA.          |
| <a href="#">MGC93975</a> | <a href="#">MGC93975.dSep08</a> | <a href="#">292878</a> | 5327  | 900  | 7 | 233 | similar to 2310044H10Rik protein (MGC93975) alternative variant dSep08, mRNA.                    |
| <a href="#">MGC93975</a> | <a href="#">MGC93975.eSep08</a> | <a href="#">292878</a> | 2790  | 1294 | 5 | 154 | similar to 2310044H10Rik protein (16.8 kD) (MGC93975) alternative variant eSep08, mRNA.          |
| <a href="#">MGC94190</a> | <a href="#">MGC94190.bSep08</a> | <a href="#">288616</a> | 15693 | 1001 | 5 | 245 | similar to 0610007L01Rik protein (MGC94190) alternative variant bSep08, mRNA.                    |
| <a href="#">MGC94190</a> | <a href="#">MGC94190.cSep08</a> | <a href="#">288616</a> | 18141 | 739  | 4 | 197 | similar to 0610007L01Rik protein (MGC94190) alternative variant cSep08, mRNA.                    |
| <a href="#">MGC94192</a> | <a href="#">MGC94192.bSep08</a> | <a href="#">360550</a> | 3705  | 1177 | 3 | 332 | similar to PHD zinc finger containing protein JUNE1 (MGC94192) alternative variant bSep08, mRNA. |
| <a href="#">MGC94192</a> | <a href="#">MGC94192.cSep08</a> | <a href="#">360550</a> | 2635  | 681  | 3 | 185 | similar to PHD zinc finger containing protein JUNE1 (MGC94192) alternative variant cSep08, mRNA. |
| <a href="#">MGC94192</a> | <a href="#">MGC94192.dSep08</a> | <a href="#">360550</a> | 1268  | 717  | 2 | 163 | similar to PHD zinc finger containing protein JUNE1 (MGC94192) alternative variant dSep08, mRNA. |
| <a href="#">MGC94199</a> | <a href="#">MGC94199.bSep08</a> | <a href="#">362483</a> | 13440 | 865  | 3 | 104 | similar to RIKEN cDNA 2610301B20; EST A1428449 (MGC94199) alternative variant bSep08, mRNA.      |
| <a href="#">MGC94199</a> | <a href="#">MGC94199.cSep08</a> | <a href="#">362483</a> | 13424 | 986  | 3 | 101 | similar to RIKEN cDNA 2610301B20; EST A1428449 (MGC94199) alternative variant cSep08, mRNA.      |
| <a href="#">MGC94207</a> | <a href="#">MGC94207.bSep08</a> | <a href="#">362946</a> | 550   | 379  | 1 | 119 | similar to RIKEN cDNA C030006K11 (MGC94207) alternative variant bSep08, mRNA.                    |
| <a href="#">MGC94282</a> | <a href="#">MGC94282.aSep08</a> | <a href="#">297627</a> | 5127  | 1245 | 3 | 235 | similar to 5930416119Rik protein (27.1 kD) (MGC94282) alternative variant aSep08, mRNA.          |
| <a href="#">MGC94542</a> | <a href="#">MGC94542.bSep08</a> | <a href="#">290631</a> | 5977  | 1765 | 8 | 195 | similar to RIKEN cDNA 5430437P03 (21.2 kD) (MGC94542) alternative variant bSep08, mRNA.          |
| <a href="#">MGC94542</a> | <a href="#">MGC94542.cSep08</a> | <a href="#">290631</a> | 1155  | 765  | 2 | 122 | similar to RIKEN cDNA 5430437P03 (13.0 kD) (MGC94542) alternative variant cSep08, mRNA.          |
| <a href="#">MGC94600</a> | <a href="#">MGC94600.aSep08</a> | <a href="#">301013</a> | 14276 | 1156 | 6 | 245 | scotin (26.4 kD) (MGC94600) alternative variant aSep08, mRNA.                                    |
| <a href="#">MGC94600</a> | <a href="#">MGC94600.bSep08</a> | <a href="#">301013</a> | 14278 | 1155 | 6 | 244 | scotin (26.4 kD) (MGC94600) alternative variant bSep08, mRNA.                                    |
| <a href="#">MGC94600</a> | <a href="#">MGC94600.cSep08</a> | <a href="#">301013</a> | 13945 | 737  | 6 | 217 | scotin (MGC94600) alternative variant cSep08, mRNA.                                              |



|                           |                                  |                        |       |      |   |     |                                                                                                                          |
|---------------------------|----------------------------------|------------------------|-------|------|---|-----|--------------------------------------------------------------------------------------------------------------------------|
| <a href="#">MGC94600</a>  | <a href="#">MGC94600.dSep08</a>  | <a href="#">301013</a> | 5846  | 1025 | 5 | 159 | scotin (MGC94600) alternative variant dSep08, mRNA.                                                                      |
| <a href="#">MGC94600</a>  | <a href="#">MGC94600.eSep08</a>  | <a href="#">301013</a> | 4896  | 410  | 3 | 136 | scotin (MGC94600) alternative variant eSep08, mRNA.                                                                      |
| <a href="#">MGC94600</a>  | <a href="#">MGC94600.gSep08</a>  | <a href="#">301013</a> | 8879  | 305  | 3 | 101 | scotin (MGC94600) alternative variant gSep08, mRNA.                                                                      |
| <a href="#">MGC94915</a>  | <a href="#">MGC94915.bSep08</a>  | <a href="#">362712</a> | 6204  | 677  | 5 | 225 | CRA a like (MGC94915) alternative variant bSep08, mRNA.                                                                  |
| <a href="#">MGC94915</a>  | <a href="#">MGC94915.cSep08</a>  | <a href="#">362712</a> | 3576  | 911  | 4 | 171 | putative protein, with a coiled coil domain, of eukaryotic origin (19.6 kD) (MGC94915) alternative variant cSep08, mRNA. |
| <a href="#">MGC94915</a>  | <a href="#">MGC94915.dSep08</a>  | <a href="#">362712</a> | 5801  | 582  | 4 | 145 | putative protein, with a coiled coil domain, of eukaryotic origin (MGC94915) alternative variant dSep08, mRNA.           |
| <a href="#">MGC94915</a>  | <a href="#">MGC94915.eSep08</a>  | <a href="#">362712</a> | 2297  | 405  | 2 | 134 | CRA a like (MGC94915) alternative variant eSep08, mRNA.                                                                  |
| <a href="#">MGC94915</a>  | <a href="#">MGC94915.fSep08</a>  | <a href="#">362712</a> | 2127  | 703  | 4 | 82  | upf0407 protein c2orf39 homolog like (MGC94915) alternative variant fSep08, mRNA.                                        |
| <a href="#">MGC94915</a>  | <a href="#">MGC94915.gSep08</a>  | <a href="#">362712</a> | 2670  | 533  | 3 | 74  | CRA a like (8.7 kD) (MGC94915) alternative variant gSep08, mRNA.                                                         |
| <a href="#">MGC94941</a>  | <a href="#">MGC94941.aSep08</a>  | <a href="#">296988</a> | 8007  | 2667 | 6 | 376 | similar to Mkrn1 protein (MGC94941) alternative variant aSep08, mRNA.                                                    |
| <a href="#">MGC94941</a>  | <a href="#">MGC94941.cSep08</a>  | <a href="#">296988</a> | 13619 | 736  | 3 | 194 | similar to Mkrn1 protein (MGC94941) alternative variant cSep08, mRNA.                                                    |
| <a href="#">MGC94941</a>  | <a href="#">MGC94941.dSep08</a>  | <a href="#">296988</a> | 1981  | 284  | 2 | 87  | similar to Mkrn1 protein (MGC94941) alternative variant dSep08, mRNA.                                                    |
| <a href="#">MGC95152</a>  | <a href="#">MGC95152.bSep08</a>  | <a href="#">297109</a> | 8550  | 638  | 1 | 120 | similar to B230212L03Rik protein (MGC95152) alternative variant bSep08, mRNA.                                            |
| <a href="#">MGC95208</a>  | <a href="#">MGC95208.bSep08</a>  | <a href="#">304176</a> | 4262  | 696  |   | 195 | similar to 4930453N24Rik protein (MGC95208) alternative variant bSep08, mRNA.                                            |
| <a href="#">MGC95210</a>  | <a href="#">MGC95210.bSep08</a>  | <a href="#">287798</a> | 10030 | 2019 | 4 | 530 | DNA segment Chr 11 Wayne State University 47 expressed (58.2 kD) (MGC95210) alternative variant bSep08, mRNA.            |
| <a href="#">MGC95210</a>  | <a href="#">MGC95210.cSep08</a>  | <a href="#">287798</a> | 1259  | 659  | 2 | 219 | DNA segment Chr 11 Wayne State University 47 expressed (MGC95210) alternative variant cSep08, mRNA.                      |
| <a href="#">MGC95210</a>  | <a href="#">MGC95210.dSep08</a>  | <a href="#">287798</a> | 5883  | 506  | 2 | 131 | CRA b (MGC95210) alternative variant dSep08, mRNA.                                                                       |
| <a href="#">MGC95210</a>  | <a href="#">MGC95210.eSep08</a>  | <a href="#">287798</a> | 1402  | 451  | 1 | 81  | putative mitochondrial protein (8.8 kD) (MGC95210) alternative variant eSep08, mRNA.                                     |
| <a href="#">MGC105560</a> | <a href="#">MGC105560.bSep08</a> | <a href="#">500941</a> | 1920  | 1255 | 2 | 321 | similar to Hypothetical protein BC014729 (38.1 kD) (MGC105560) alternative variant bSep08, mRNA.                         |
| <a href="#">MGC105649</a> | <a href="#">MGC105649.aSep08</a> | <a href="#">302884</a> | 2825  | 554  | 2 | 121 | hypothetical LOC302884 (MGC105649) alternative variant aSep08, mRNA.                                                     |
| <a href="#">MGC108747</a> | <a href="#">MGC108747.bSep08</a> | <a href="#">288001</a> | 13963 | 675  | 7 | 224 | similar to alpha-1 major acute phase protein prepeptide (MGC108747) alternative variant bSep08, mRNA.                    |
| <a href="#">MGC108747</a> | <a href="#">MGC108747.cSep08</a> | <a href="#">288001</a> | 11216 | 255  | 4 | 80  | similar to alpha-1 major acute phase protein prepeptide (MGC108747) alternative variant cSep08, mRNA.                    |
| <a href="#">MGC108747</a> | <a href="#">MGC108747.eSep08</a> | <a href="#">288001</a> | 1602  | 413  | 2 | 24  | similar to alpha-1 major acute phase protein prepeptide (MGC108747) alternative variant eSep08, mRNA.                    |
| <a href="#">MGC108785</a> | <a href="#">MGC108785.aSep08</a> | <a href="#">304277</a> | 12467 | 718  | 3 | 239 | similar to CPSF4 protein (MGC108785) alternative variant aSep08, mRNA.                                                   |
| <a href="#">MGC108785</a> | <a href="#">MGC108785.bSep08</a> | <a href="#">304277</a> | 15671 | 976  | 4 | 238 | similar to CPSF4 protein (MGC108785) alternative variant bSep08, mRNA.                                                   |

|                           |                                  |                        |       |      |   |     |                                                                                                    |
|---------------------------|----------------------------------|------------------------|-------|------|---|-----|----------------------------------------------------------------------------------------------------|
| <a href="#">MGC108785</a> | <a href="#">MGC108785.cSep08</a> | <a href="#">304277</a> | 9485  | 748  | 2 | 174 | similar to CPSF4 protein (MGC108785) alternative variant cSep08, mRNA.                             |
| <a href="#">MGC108896</a> | <a href="#">MGC108896.bSep08</a> | <a href="#">499689</a> | 4897  | 1349 | 6 | 114 | similar to glutathione transferase GSTM7-7 (13.4 kD) (MGC108896) alternative variant bSep08, mRNA. |
| <a href="#">MGC108896</a> | <a href="#">MGC108896.cSep08</a> | <a href="#">499689</a> | 2684  | 434  | 5 | 78  | similar to glutathione transferase GSTM7-7 (MGC108896) alternative variant cSep08, mRNA.           |
| <a href="#">MGC112682</a> | <a href="#">MGC112682.bSep08</a> | <a href="#">497900</a> | 7994  | 910  | 6 | 231 | similar to RIKEN cDNA 0610039K22 (MGC112682) alternative variant bSep08, mRNA.                     |
| <a href="#">MGC112682</a> | <a href="#">MGC112682.cSep08</a> | <a href="#">497900</a> | 7780  | 692  | 6 | 177 | similar to RIKEN cDNA 0610039K22 (MGC112682) alternative variant cSep08, mRNA.                     |
| <a href="#">MGC112682</a> | <a href="#">MGC112682.dSep08</a> | <a href="#">497900</a> | 1315  | 1236 | 2 | 66  | similar to RIKEN cDNA 0610039K22 (7.5 kD) (MGC112682) alternative variant dSep08, mRNA.            |
| <a href="#">MGC112727</a> | <a href="#">MGC112727.aSep08</a> | <a href="#">360762</a> | 1697  | 859  | 2 | 225 | similar to RNA polymerase 1-3 (MGC112727) alternative variant aSep08, mRNA.                        |
| <a href="#">MGC112727</a> | <a href="#">MGC112727.dSep08</a> | <a href="#">360762</a> | 10529 | 836  | 2 | 137 | similar to RNA polymerase 1-3 (MGC112727) alternative variant dSep08, mRNA.                        |
| <a href="#">MGC112727</a> | <a href="#">MGC112727.eSep08</a> | <a href="#">360762</a> | 33220 | 863  | 4 | 71  | similar to RNA polymerase 1-3 (MGC112727) alternative variant eSep08, mRNA.                        |
| <a href="#">MGC112727</a> | <a href="#">MGC112727.fSep08</a> | <a href="#">360762</a> | 467   | 351  | 2 | 48  | similar to RNA polymerase 1-3 (MGC112727) alternative variant fSep08, mRNA.                        |
| <a href="#">MGC112830</a> | <a href="#">MGC112830.bSep08</a> | <a href="#">361178</a> | 38029 | 1730 | 3 | 338 | similar to transcription factor (MGC112830) alternative variant bSep08, mRNA.                      |
| <a href="#">MGC112830</a> | <a href="#">MGC112830.cSep08</a> | <a href="#">361178</a> | 32644 | 854  | 4 | 262 | similar to transcription factor (MGC112830) alternative variant cSep08, mRNA.                      |
| <a href="#">MGC112830</a> | <a href="#">MGC112830.dSep08</a> | <a href="#">361178</a> | 14944 | 722  | 1 | 203 | similar to transcription factor (MGC112830) alternative variant dSep08, mRNA.                      |
| <a href="#">MGC112830</a> | <a href="#">MGC112830.eSep08</a> | <a href="#">361178</a> | 30840 | 624  | 3 | 106 | similar to transcription factor (11.2 kD) (MGC112830) alternative variant eSep08, mRNA.            |
| <a href="#">MGC112899</a> | <a href="#">MGC112899.bSep08</a> | <a href="#">500087</a> | 8251  | 491  | 2 | 97  | similar to RIKEN cDNA 1110001J03 (MGC112899) alternative variant bSep08, mRNA.                     |
| <a href="#">MGC112899</a> | <a href="#">MGC112899.cSep08</a> | <a href="#">500087</a> | 6814  | 383  | 2 | 89  | similar to RIKEN cDNA 1110001J03 (MGC112899) alternative variant cSep08, mRNA.                     |
| <a href="#">MGC114440</a> | <a href="#">MGC114440.bSep08</a> | <a href="#">500566</a> | 23319 | 582  | 1 | 32  | similar to RIKEN cDNA 4930555I21 (3.7 kD) (MGC114440) alternative variant bSep08, mRNA.            |
| <a href="#">MGC114529</a> | <a href="#">MGC114529.bSep08</a> | <a href="#">317590</a> | 7618  | 1045 | 1 | 279 | similar to melanoma antigen family A, 10 (MGC114529) alternative variant bSep08, mRNA.             |
| <a href="#">MGC116121</a> | <a href="#">MGC116121.bSep08</a> | <a href="#">498830</a> | 4825  | 267  | 3 | 88  | similar to RIKEN cDNA 2700062C07 (MGC116121) alternative variant bSep08, mRNA.                     |
| <a href="#">MGC116121</a> | <a href="#">MGC116121.cSep08</a> | <a href="#">498830</a> | 840   | 765  | 2 | 73  | similar to RIKEN cDNA 2700062C07 (MGC116121) alternative variant cSep08, mRNA.                     |
| <a href="#">MGC116202</a> | <a href="#">MGC116202.bSep08</a> | <a href="#">688736</a> | 3984  | 789  | 3 | 230 | hypothetical protein LOC688736 (MGC116202) alternative variant bSep08, mRNA.                       |
| <a href="#">MGC116202</a> | <a href="#">MGC116202.cSep08</a> | <a href="#">688736</a> | 4572  | 576  | 4 | 78  | hypothetical protein LOC688736 (MGC116202) alternative variant cSep08, mRNA.                       |
| <a href="#">MGC124740</a> | <a href="#">MGC124740.bSep08</a> | <a href="#">688590</a> | 31356 | 610  | 1 | 202 | similar to Rap2-binding protein 9 (MGC124740) alternative variant bSep08, mRNA.                    |

|                           |                                  |                        |        |      |   |     |                                                                                                                 |
|---------------------------|----------------------------------|------------------------|--------|------|---|-----|-----------------------------------------------------------------------------------------------------------------|
| <a href="#">MGC124740</a> | <a href="#">MGC124740.cSep08</a> | <a href="#">688590</a> | 31301  | 561  | 1 | 186 | similar to Rap2-binding protein 9 (MGC124740) alternative variant cSep08, mRNA.                                 |
| <a href="#">MGC124992</a> | <a href="#">MGC124992.bSep08</a> | <a href="#">499697</a> | 6061   | 763  | 7 | 246 | putative protein of eukaryotic origin (MGC124992) alternative variant bSep08, mRNA.                             |
| <a href="#">MGC124992</a> | <a href="#">MGC124992.cSep08</a> | <a href="#">499697</a> | 2252   | 1571 | 2 | 236 | putative cytoplasmic protein of eukaryotic origin (26.5 kD) (MGC124992) alternative variant cSep08, mRNA.       |
| <a href="#">MGC124992</a> | <a href="#">MGC124992.dSep08</a> | <a href="#">499697</a> | 1172   | 611  | 3 | 118 | putative protein of vertebrate origin (MGC124992) alternative variant dSep08, mRNA.                             |
| <a href="#">MGC125002</a> | <a href="#">MGC125002.bSep08</a> | <a href="#">500501</a> | 44147  | 1628 | 4 | 174 | similar to RIKEN cDNA 5830433M19 (18.2 kD) (MGC125002) alternative variant bSep08, mRNA.                        |
| <a href="#">MGC125002</a> | <a href="#">MGC125002.cSep08</a> | <a href="#">500501</a> | 102481 | 743  | 7 | 120 | similar to RIKEN cDNA 5830433M19 (13.4 kD) (MGC125002) alternative variant cSep08, mRNA.                        |
| <a href="#">MGC125086</a> | <a href="#">MGC125086.bSep08</a> | <a href="#">498695</a> | 6718   | 1041 | 4 | 84  | similar to RIKEN cDNA 5133401N09 (9.2 kD) (MGC125086) alternative variant bSep08, complete mRNA.                |
| <a href="#">MGC125201</a> | <a href="#">MGC125201.bSep08</a> | <a href="#">497878</a> | 58432  | 773  | 5 | 160 | HMP19 protein (17.8 kD) (MGC125201) alternative variant bSep08, mRNA.                                           |
| <a href="#">Mgea5</a>     | <a href="#">Mgea5.bSep08</a>     | <a href="#">154968</a> | 6159   | 619  | 4 | 205 | meningioma expressed antigen 5 (hyaluronidase) (Mgea5) alternative variant bSep08, mRNA.                        |
| <a href="#">Mgea5</a>     | <a href="#">Mgea5.dSep08</a>     | <a href="#">154968</a> | 13978  | 3343 | 6 | 182 | meningioma expressed antigen 5 (hyaluronidase) (20.3 kD) (Mgea5) alternative variant dSep08, mRNA.              |
| <a href="#">Mgea5</a>     | <a href="#">Mgea5.eSep08</a>     | <a href="#">154968</a> | 4511   | 1356 | 3 | 138 | meningioma expressed antigen 5 (hyaluronidase) (Mgea5) alternative variant eSep08, mRNA.                        |
| <a href="#">Mgea5</a>     | <a href="#">Mgea5.fSep08</a>     | <a href="#">154968</a> | 4981   | 633  | 3 | 136 | meningioma expressed antigen 5 (hyaluronidase) (Mgea5) alternative variant fSep08, mRNA.                        |
| <a href="#">Mgea5</a>     | <a href="#">Mgea5.gSep08</a>     | <a href="#">154968</a> | 3467   | 814  | 2 | 96  | meningioma expressed antigen 5 (hyaluronidase) (10.8 kD) (Mgea5) alternative variant gSep08, mRNA.              |
| <a href="#">Mgl1</a>      | <a href="#">Mgl1.bSep08</a>      | <a href="#">64195</a>  | 2647   | 613  | 3 | 113 | macrophage galactose N-acetyl-galactosamine specific lectin 1 (Mgl1) alternative variant bSep08, mRNA.          |
| <a href="#">Mgl1</a>      | <a href="#">Mgl1.cSep08</a>      | <a href="#">64195</a>  | 2068   | 563  | 1 | 84  | macrophage galactose N-acetyl-galactosamine specific lectin 1 (9.2 kD) (Mgl1) alternative variant cSep08, mRNA. |
| <a href="#">Mgll</a>      | <a href="#">Mgll.bSep08</a>      | <a href="#">29254</a>  | 82028  | 695  | 5 | 164 | monoglyceride lipase (Mgll) alternative variant bSep08, mRNA.                                                   |
| <a href="#">Mgll</a>      | <a href="#">Mgll.cSep08</a>      | <a href="#">29254</a>  | 71331  | 498  | 4 | 123 | monoglyceride lipase (13.8 kD) (Mgll) alternative variant cSep08, mRNA.                                         |
| <a href="#">Mgll</a>      | <a href="#">Mgll.dSep08</a>      | <a href="#">29254</a>  | 41720  | 774  | 4 | 112 | monoglyceride lipase (12.9 kD) (Mgll) alternative variant dSep08, mRNA.                                         |
| <a href="#">Mgll</a>      | <a href="#">Mgll.eSep08</a>      | <a href="#">29254</a>  | 967    | 488  | 2 | 58  | monoglyceride lipase (6.7 kD) (Mgll) alternative variant eSep08, mRNA.                                          |
| <a href="#">Mgp</a>       | <a href="#">Mgp.aSep08</a>       | <a href="#">25333</a>  | 3362   | 969  | 3 | 146 | matrix Gla protein (Mgp) alternative variant aSep08, mRNA.                                                      |
| <a href="#">Mgp</a>       | <a href="#">Mgp.cSep08</a>       | <a href="#">25333</a>  | 3440   | 2050 | 3 | 78  | matrix Gla protein (9.5 kD) (Mgp) alternative variant cSep08, mRNA.                                             |
| <a href="#">Mgrn1</a>     | <a href="#">Mgrn1.bSep08</a>     | <a href="#">302938</a> | 30198  | 766  | 6 | 209 | mahogunin, ring finger 1 (Mgrn1) alternative variant bSep08, mRNA.                                              |
| <a href="#">Mgrn1</a>     | <a href="#">Mgrn1.cSep08</a>     | <a href="#">302938</a> | 7411   | 447  | 5 | 149 | mahogunin, ring finger 1 (Mgrn1) alternative variant cSep08, mRNA.                                              |

|                             |                                    |                        |        |      |   |     |                                                                                                                        |
|-----------------------------|------------------------------------|------------------------|--------|------|---|-----|------------------------------------------------------------------------------------------------------------------------|
| <a href="#">Mgrn1</a>       | <a href="#">Mgrn1.dSep08</a>       | <a href="#">302938</a> | 6927   | 1821 | 4 | 94  | mahogunin, ring finger 1 (Mgrn1) alternative variant dSep08, mRNA.                                                     |
| <a href="#">Mgst2</a>       | <a href="#">Mgst2.bSep08</a>       | <a href="#">295037</a> | 12194  | 374  | 2 | 52  | microsomal glutathione S-transferase 2 (Mgst2) alternative variant bSep08, mRNA.                                       |
| <a href="#">Mgst3</a>       | <a href="#">Mgst3.aSep08</a>       | <a href="#">289197</a> | 20773  | 628  | 6 | 152 | microsomal glutathione S-transferase 3 (16.7 kD) (Mgst3) alternative variant aSep08, mRNA.                             |
| <a href="#">Mgst3</a>       | <a href="#">Mgst3.bSep08</a>       | <a href="#">289197</a> | 20780  | 628  | 6 | 114 | microsomal glutathione S-transferase 3 (12.9 kD) (Mgst3) alternative variant bSep08, mRNA.                             |
| <a href="#">MHC_I.0</a>     | <a href="#">MHC_I.0.aSep08</a>     |                        | 891    | 730  | 2 | 243 | MHC class I antigen like (MHC_I.0) alternative variant aSep08, mRNA.                                                   |
| <a href="#">MHC_I.1</a>     | <a href="#">MHC_I.1.aSep08</a>     |                        | 1530   | 1341 | 2 | 171 | MHC class I antigen like (19.5 kD) (MHC_I.1) alternative variant aSep08, mRNA.                                         |
| <a href="#">MHC_I.1</a>     | <a href="#">MHC_I.1.bSep08</a>     |                        | 1323   | 765  | 2 | 117 | MHC class I (13.4 kD) (MHC_I.1) alternative variant bSep08, mRNA.                                                      |
| <a href="#">MHC_I.1</a>     | <a href="#">MHC_I.1.cSep08</a>     |                        | 2861   | 1429 | 7 | 99  | putative protein (10.9 kD) (MHC_I.1) alternative variant cSep08, mRNA.                                                 |
| <a href="#">MHC_I.1</a>     | <a href="#">MHC_I.1.dSep08</a>     |                        | 948    | 767  | 2 | 61  | putative protein (6.8 kD) (MHC_I.1) alternative variant dSep08, mRNA.                                                  |
| <a href="#">MIB_HERC2.0</a> | <a href="#">MIB_HERC2.0.aSep08</a> |                        | 2513   | 1014 | 7 | 337 | mindbomb homolog 2 CRA b (MIB_HERC2.0) alternative variant aSep08, mRNA.                                               |
| <a href="#">MIB_HERC2.0</a> | <a href="#">MIB_HERC2.0.bSep08</a> |                        | 987    | 865  | 1 | 72  | mindbomb homolog 2 CRA c (MIB_HERC2.0) alternative variant bSep08, mRNA.                                               |
| <a href="#">Mical1</a>      | <a href="#">Mical1.cSep08</a>      | <a href="#">294520</a> | 716    | 433  | 2 | 66  | putative protein of vertebrate origin (8.1 kD) (Mical1) alternative variant cSep08, mRNA.                              |
| <a href="#">Mical2</a>      | <a href="#">Mical2.aSep08</a>      | <a href="#">365352</a> | 91566  | 1400 |   | 399 | putative protein of eukaryotic origin (Mical2) mRNA.                                                                   |
| <a href="#">Mical3</a>      | <a href="#">Mical3.aSep08</a>      | <a href="#">362427</a> | 46544  | 1656 | 6 | 331 | putative protein of eukaryotic origin (37.8 kD) (Mical3) alternative variant aSep08, complete mRNA.                    |
| <a href="#">Mical3</a>      | <a href="#">Mical3.bSep08</a>      | <a href="#">362427</a> | 42191  | 736  | 2 | 121 | putative protein of eukaryotic origin (Mical3) alternative variant bSep08, mRNA.                                       |
| <a href="#">Mical3</a>      | <a href="#">Mical3.cSep08</a>      | <a href="#">362427</a> | 42176  | 725  | 2 | 112 | putative protein of metazoan origin (Mical3) alternative variant cSep08, mRNA.                                         |
| <a href="#">Micalcl</a>     | <a href="#">Micalcl.bSep08</a>     | <a href="#">293180</a> | 32630  | 1779 | 1 | 554 | MICAL C-terminal like (Micalcl) alternative variant bSep08, mRNA.                                                      |
| <a href="#">Micall2</a>     | <a href="#">Micall2.aSep08</a>     | <a href="#">288515</a> | 6772   | 1328 | 9 | 395 | MICAL-like 2 (Micall2) alternative variant aSep08, mRNA.                                                               |
| <a href="#">Micall2</a>     | <a href="#">Micall2.bSep08</a>     | <a href="#">288515</a> | 2679   | 541  | 1 | 33  | MICAL-like 2 (3.8 kD) (Micall2) alternative variant bSep08, mRNA.                                                      |
| <a href="#">Mid1</a>        | <a href="#">Mid1.bSep08</a>        | <a href="#">54252</a>  | 263870 | 398  | 2 | 72  | midline 1 (Mid1) alternative variant bSep08, mRNA.                                                                     |
| <a href="#">Mid1ip1</a>     | <a href="#">Mid1ip1.bSep08</a>     | <a href="#">404280</a> | 835    | 350  | 2 | 34  | MID1 interacting protein 1 (gastrulation specific G12 homolog (zebrafish)) (Mid1ip1) alternative variant bSep08, mRNA. |
| <a href="#">Mid2</a>        | <a href="#">Mid2.aSep08</a>        | <a href="#">363502</a> | 13688  | 440  |   | 146 | midline 2 (Mid2) mRNA.                                                                                                 |
| <a href="#">Midn</a>        | <a href="#">Midn.aSep08</a>        | <a href="#">314623</a> | 1655   | 706  |   | 108 | midnolin (Midn) mRNA.                                                                                                  |
| <a href="#">Mier1</a>       | <a href="#">Mier1.bSep08</a>       | <a href="#">313418</a> | 25923  | 600  | 7 | 143 | mesoderm induction early response 1 homolog (Xenopus laevis) (Mier1) alternative variant bSep08, mRNA.                 |
| <a href="#">Mier1</a>       | <a href="#">Mier1.cSep08</a>       | <a href="#">313418</a> | 16763  | 338  | 6 | 112 | mesoderm induction early response 1 homolog (Xenopus laevis) (Mier1) alternative variant cSep08, mRNA.                 |

|                        |                               |                        |       |      |    |     |                                                                                                                                                  |
|------------------------|-------------------------------|------------------------|-------|------|----|-----|--------------------------------------------------------------------------------------------------------------------------------------------------|
| <a href="#">Mier1</a>  | <a href="#">Mier1.dSep08</a>  | <a href="#">313418</a> | 26656 | 717  | 8  | 98  | mesoderm induction early response 1 homolog ( <i>Xenopus laevis</i> ) ( <i>Mier1</i> ) alternative variant dSep08, mRNA.                         |
| <a href="#">Mier2</a>  | <a href="#">Mier2.aSep08</a>  | <a href="#">362841</a> | 9820  | 1617 | 12 | 471 | mesoderm induction early response 1 family member 2 CRA d ( <i>Mier2</i> ) alternative variant aSep08, mRNA.                                     |
| <a href="#">Mier2</a>  | <a href="#">Mier2.cSep08</a>  | <a href="#">362841</a> | 3727  | 972  | 4  | 192 | mesoderm induction early response 2 ( <i>Mier2</i> ) alternative variant cSep08, mRNA.                                                           |
| <a href="#">Mier2</a>  | <a href="#">Mier2.dSep08</a>  | <a href="#">362841</a> | 3415  | 712  | 6  | 188 | mesoderm induction early response 1 family member 2 CRA c ( <i>Mier2</i> ) alternative variant dSep08, mRNA.                                     |
| <a href="#">Mier3</a>  | <a href="#">Mier3.aSep08</a>  | <a href="#">310086</a> | 9336  | 384  |    | 127 | mesoderm induction early response 1, family member 3 ( <i>Mier3</i> ) mRNA.                                                                      |
| <a href="#">Mif</a>    | <a href="#">Mif.aSep08</a>    | <a href="#">81683</a>  | 716   | 594  | 1  | 122 | macrophage migration inhibitory factor (12.8 kD) ( <i>Mif</i> ) alternative variant aSep08, mRNA.                                                |
| <a href="#">Mif4gd</a> | <a href="#">Mif4gd.bSep08</a> | <a href="#">360659</a> | 4552  | 1339 | 5  | 151 | putative cytoplasmic protein of metazoan origin (17.2 kD) ( <i>Mif4gd</i> ) alternative variant bSep08, mRNA.                                    |
| <a href="#">Mif4gd</a> | <a href="#">Mif4gd.cSep08</a> | <a href="#">360659</a> | 3256  | 908  | 3  | 116 | putative protein ( <i>Mif4gd</i> ) alternative variant cSep08, mRNA.                                                                             |
| <a href="#">Mif4gd</a> | <a href="#">Mif4gd.dSep08</a> | <a href="#">360659</a> | 1567  | 1169 | 2  | 103 | putative cytoplasmic protein (11.9 kD) ( <i>Mif4gd</i> ) alternative variant dSep08, mRNA.                                                       |
| <a href="#">Mif4gd</a> | <a href="#">Mif4gd.eSep08</a> | <a href="#">360659</a> | 3505  | 398  | 4  | 68  | putative protein of vertebrate origin ( <i>Mif4gd</i> ) alternative variant eSep08, mRNA.                                                        |
| <a href="#">Mill2</a>  | <a href="#">Mill2.bSep08</a>  | <a href="#">365212</a> | 2151  | 791  | 1  | 154 | mill2 gene for MHC class I-like located near the LRC, 2, exon 3, partial cds, strain:LEW.1lm1 ( <i>Mill2</i> ) alternative variant bSep08, mRNA. |
| <a href="#">Minpp1</a> | <a href="#">Minpp1.bSep08</a> | <a href="#">29688</a>  | 44977 | 1091 | 2  | 90  | multiple inositol polyphosphate histidine phosphatase 1 ( <i>Minpp1</i> ) alternative variant bSep08, mRNA.                                      |
| <a href="#">Miox</a>   | <a href="#">Miox.bSep08</a>   | <a href="#">252899</a> | 821   | 550  | 4  | 131 | myo-inositol oxygenase ( <i>Miox</i> ) alternative variant bSep08, mRNA.                                                                         |
| <a href="#">Miox</a>   | <a href="#">Miox.cSep08</a>   | <a href="#">252899</a> | 1124  | 639  | 4  | 114 | myo-inositol oxygenase ( <i>Miox</i> ) alternative variant cSep08, mRNA.                                                                         |
| <a href="#">Miox</a>   | <a href="#">Miox.dSep08</a>   | <a href="#">252899</a> | 1388  | 569  | 5  | 90  | myo-inositol oxygenase ( <i>Miox</i> ) alternative variant dSep08, mRNA.                                                                         |
| <a href="#">Miox</a>   | <a href="#">Miox.eSep08</a>   | <a href="#">252899</a> | 916   | 776  | 2  | 73  | myo-inositol oxygenase (8.4 kD) ( <i>Miox</i> ) alternative variant eSep08, mRNA.                                                                |
| <a href="#">Mipep</a>  | <a href="#">Mipep.bSep08</a>  | <a href="#">81684</a>  | 77191 | 1141 |    | 330 | mitochondrial intermediate peptidase ( <i>Mipep</i> ) alternative variant bSep08, mRNA.                                                          |
| <a href="#">Mipep</a>  | <a href="#">Mipep.cSep08</a>  | <a href="#">81684</a>  | 25428 | 419  | 1  | 34  | mitochondrial intermediate peptidase ( <i>Mipep</i> ) alternative variant cSep08, mRNA.                                                          |
| <a href="#">Miro.1</a> | <a href="#">Miro.1.aSep08</a> |                        | 7304  | 844  |    | 265 | leucine-rich repeat kinase 2 ( <i>Miro.1</i> ) mRNA.                                                                                             |
| <a href="#">Mis12</a>  | <a href="#">Mis12.aSep08</a>  | <a href="#">501706</a> | 8967  | 3153 | 2  | 206 | MIS12, MIND kinetochore complex component, homolog (yeast) (24.2 kD) ( <i>Mis12</i> ) alternative variant aSep08, mRNA.                          |
| <a href="#">Mis12</a>  | <a href="#">Mis12.bSep08</a>  | <a href="#">501706</a> | 6731  | 501  | 1  | 42  | MIS12, MIND kinetochore complex component, homolog (yeast) ( <i>Mis12</i> ) alternative variant bSep08, mRNA.                                    |
| <a href="#">MIT.0</a>  | <a href="#">MIT.0.aSep08</a>  |                        | 8213  | 565  |    | 187 | MIT containing protein ( <i>MIT.0</i> ) mRNA.                                                                                                    |
| <a href="#">Mitd1</a>  | <a href="#">Mitd1.bSep08</a>  | <a href="#">363219</a> | 7577  | 395  | 3  | 88  | MIT containing protein (9.8 kD) ( <i>Mitd1</i> ) alternative variant bSep08, mRNA.                                                               |

|                             |                                    |                        |       |      |   |     |                                                                                                                                 |
|-----------------------------|------------------------------------|------------------------|-------|------|---|-----|---------------------------------------------------------------------------------------------------------------------------------|
| <a href="#">Mitf</a>        | <a href="#">Mitf.aSep08</a>        | <a href="#">25094</a>  | 75047 | 1010 | 4 | 336 | microphthalmia-associated transcription factor (Mitf) alternative variant aSep08, mRNA.                                         |
| <a href="#">Mitf</a>        | <a href="#">Mitf.bSep08</a>        | <a href="#">25094</a>  | 10201 | 923  | 1 | 147 | microphthalmia-associated transcription factor (Mitf) alternative variant bSep08, mRNA.                                         |
| <a href="#">Mito_carr.0</a> | <a href="#">Mito_carr.0.aSep08</a> |                        | 5743  | 264  |   | 84  | mitochondrial carrier protein (Mito_carr.0) mRNA.                                                                               |
| <a href="#">Mito_carr.1</a> | <a href="#">Mito_carr.1.bSep08</a> |                        | 1095  | 625  | 2 | 70  | mitochondrial carrier triple repeat (Mito_carr.1) alternative variant bSep08, mRNA.                                             |
| <a href="#">Mito_carr.3</a> | <a href="#">Mito_carr.3.aSep08</a> | <a href="#">311122</a> | 7260  | 1177 |   | 242 | solute carrier family 25 member 12 (Mito_carr.3) mRNA.                                                                          |
| <a href="#">Mizf</a>        | <a href="#">Mizf.aSep08</a>        | <a href="#">300665</a> | 2502  | 1449 |   | 322 | MBD2-interacting zinc finger (Mizf) mRNA.                                                                                       |
| <a href="#">Mki67</a>       | <a href="#">Mki67.aSep08</a>       | <a href="#">291234</a> | 6095  | 2812 | 3 | 845 | antigen identified by monoclonal antibody Ki-67 (Mki67) alternative variant aSep08, mRNA.                                       |
| <a href="#">Mki67ip</a>     | <a href="#">Mki67ip.aSep08</a>     | <a href="#">246042</a> | 10056 | 1720 | 4 | 272 | mki67 (FHA domain) interacting nucleolar phosphoprotein (31.5 kD) (Mki67ip) alternative variant aSep08, complete mRNA.          |
| <a href="#">Mki67ip</a>     | <a href="#">Mki67ip.cSep08</a>     | <a href="#">246042</a> | 5858  | 694  | 2 | 159 | mki67 (FHA domain) interacting nucleolar phosphoprotein (Mki67ip) alternative variant cSep08, mRNA.                             |
| <a href="#">Mkl1</a>        | <a href="#">Mkl1.aSep08</a>        | <a href="#">315151</a> | 4459  | 2220 |   | 401 | megakaryoblastic leukemia (translocation) 1 (Mkl1) mRNA.                                                                        |
| <a href="#">Mknk1</a>       | <a href="#">Mknk1.bSep08</a>       | <a href="#">500526</a> | 16354 | 554  | 6 | 170 | MAP kinase-interacting serine/threonine kinase 1 (Mknk1) alternative variant bSep08, mRNA.                                      |
| <a href="#">Mknk1</a>       | <a href="#">Mknk1.cSep08</a>       | <a href="#">500526</a> | 32845 | 748  | 9 | 168 | MAP kinase-interacting serine/threonine kinase 1 (Mknk1) alternative variant cSep08, mRNA.                                      |
| <a href="#">Mknk1</a>       | <a href="#">Mknk1.eSep08</a>       | <a href="#">500526</a> | 1915  | 483  | 2 | 35  | MAP kinase-interacting serine/threonine kinase 1 (Mknk1) alternative variant eSep08, mRNA.                                      |
| <a href="#">Mknk2</a>       | <a href="#">Mknk2.bSep08</a>       | <a href="#">299618</a> | 6881  | 737  | 8 | 176 | MAP kinase-interacting serine/threonine kinase 2 (Mknk2) alternative variant bSep08, mRNA.                                      |
| <a href="#">Mknk2</a>       | <a href="#">Mknk2.cSep08</a>       | <a href="#">299618</a> | 1185  | 747  | 2 | 98  | MAP kinase-interacting serine/threonine kinase 2 (Mknk2) alternative variant cSep08, mRNA.                                      |
| <a href="#">Mkrn2</a>       | <a href="#">Mkrn2.bSep08</a>       | <a href="#">297525</a> | 999   | 838  | 2 | 92  | makorin, ring finger protein, 2 (10.5 kD) (Mkrn2) alternative variant bSep08, mRNA.                                             |
| <a href="#">Mkx</a>         | <a href="#">Mkx.aSep08</a>         | <a href="#">291228</a> | 1989  | 295  |   | 98  | mohawk homeobox (Mkx) mRNA.                                                                                                     |
| <a href="#">Mlc1</a>        | <a href="#">Mlc1.bSep08</a>        | <a href="#">315215</a> | 6147  | 771  | 1 | 93  | megalencephalic leukoencephalopathy with subcortical cysts 1 homolog (human) (10.4 kD) (Mlc1) alternative variant bSep08, mRNA. |
| <a href="#">Mlf1</a>        | <a href="#">Mlf1.bSep08</a>        | <a href="#">310483</a> | 33022 | 1024 |   | 267 | myeloid leukemia factor 1 (30.6 kD) (Mlf1) alternative variant bSep08, complete mRNA.                                           |
| <a href="#">Mlf1ip</a>      | <a href="#">Mlf1ip.aSep08</a>      | <a href="#">306464</a> | 22706 | 1799 | 8 | 542 | myeloid leukemia factor 1 interacting protein (Mlf1ip) alternative variant aSep08, mRNA.                                        |
| <a href="#">Mlf1ip</a>      | <a href="#">Mlf1ip.cSep08</a>      | <a href="#">306464</a> | 15402 | 889  | 8 | 248 | myeloid leukemia factor 1 interacting protein (Mlf1ip) alternative variant cSep08, mRNA.                                        |
| <a href="#">Mlf2</a>        | <a href="#">Mlf2.aSep08</a>        | <a href="#">312709</a> | 4662  | 1534 | 9 | 247 | myeloid leukemia factor 2 (28.1 kD) (Mlf2) alternative variant aSep08, complete mRNA.                                           |
| <a href="#">Mlf2</a>        | <a href="#">Mlf2.cSep08</a>        | <a href="#">312709</a> | 3121  | 643  | 7 | 213 | myeloid leukemia factor 2 (Mlf2) alternative variant cSep08, mRNA.                                                              |
| <a href="#">Mlf2</a>        | <a href="#">Mlf2.dSep08</a>        | <a href="#">312709</a> | 2202  | 995  | 5 | 180 | myeloid leukemia factor 2 (Mlf2) alternative variant dSep08, mRNA.                                                              |
| <a href="#">Mlh1</a>        | <a href="#">Mlh1.bSep08</a>        | <a href="#">81685</a>  | 12055 | 1100 | 7 | 240 | mutL homolog 1 (E. coli) (27.7 kD) (Mlh1) alternative variant bSep08, mRNA.                                                     |

|                       |                              |                        |       |      |    |     |                                                                                                                                                    |
|-----------------------|------------------------------|------------------------|-------|------|----|-----|----------------------------------------------------------------------------------------------------------------------------------------------------|
| <a href="#">Mlh1</a>  | <a href="#">Mlh1.cSep08</a>  | <a href="#">81685</a>  | 683   | 304  | 2  | 83  | mutL homolog 1 (E. coli) (Mlh1) alternative variant cSep08, mRNA.                                                                                  |
| <a href="#">Mlh1</a>  | <a href="#">Mlh1.dSep08</a>  | <a href="#">81685</a>  | 5639  | 509  | 2  | 57  | mutL homolog 1 (E. coli) (Mlh1) alternative variant dSep08, mRNA.                                                                                  |
| <a href="#">Mlh1</a>  | <a href="#">Mlh1.eSep08</a>  | <a href="#">81685</a>  | 7881  | 357  | 4  | 45  | mutL homolog 1 (E. coli) (4.9 kD) (Mlh1) alternative variant eSep08, mRNA.                                                                         |
| <a href="#">Mll1</a>  | <a href="#">Mll1.cSep08</a>  | <a href="#">315606</a> | 1827  | 545  | 3  | 115 | myeloid/lymphoid or mixed-lineage leukemia 1 (Mll1) alternative variant cSep08, mRNA.                                                              |
| <a href="#">Mll1</a>  | <a href="#">Mll1.eSep08</a>  | <a href="#">315606</a> | 1159  | 463  | 2  | 79  | myeloid/lymphoid or mixed-lineage leukemia 1 (Mll1) alternative variant eSep08, mRNA.                                                              |
| <a href="#">Mll5</a>  | <a href="#">Mll5.aSep08</a>  | <a href="#">311968</a> | 14861 | 1517 | 8  | 481 | myeloid/lymphoid or mixed-lineage leukemia 5 (trithorax homolog, Drosophila) (Mll5) alternative variant aSep08, mRNA.                              |
| <a href="#">Mll5</a>  | <a href="#">Mll5.bSep08</a>  | <a href="#">311968</a> | 4093  | 698  | 3  | 232 | myeloid/lymphoid or mixed-lineage leukemia 5 (trithorax homolog, Drosophila) (Mll5) alternative variant bSep08, mRNA.                              |
| <a href="#">Mll5</a>  | <a href="#">Mll5.cSep08</a>  | <a href="#">311968</a> | 1933  | 1235 | 2  | 114 | myeloid/lymphoid or mixed-lineage leukemia 5 (trithorax homolog, Drosophila) (Mll5) alternative variant cSep08, mRNA.                              |
| <a href="#">Mllt1</a> | <a href="#">Mllt1.bSep08</a> | <a href="#">301119</a> | 37350 | 1094 | 5  | 316 | myeloid/lymphoid or mixed-lineage leukemia (trithorax homolog, Drosophila); translocated to, 1 (Mllt1) alternative variant bSep08, mRNA.           |
| <a href="#">Mllt3</a> | <a href="#">Mllt3.aSep08</a> | <a href="#">114510</a> | 19251 | 1940 |    | 195 | myeloid/lymphoid or mixed-lineage leukemia (trithorax homolog, Drosophila); translocated to, 3 (Mllt3) mRNA.                                       |
| <a href="#">Mllt4</a> | <a href="#">Mllt4.bSep08</a> | <a href="#">26955</a>  | 21880 | 3846 | 8  | 673 | myeloid/lymphoid or mixed-lineage leukemia (trithorax homolog, Drosophila); translocated to, 4 (Mllt4) alternative variant bSep08, mRNA.           |
| <a href="#">Mllt4</a> | <a href="#">Mllt4.cSep08</a> | <a href="#">26955</a>  | 5296  | 476  | 3  | 157 | myeloid/lymphoid or mixed-lineage leukemia (trithorax homolog, Drosophila); translocated to, 4 (Mllt4) alternative variant cSep08, mRNA.           |
| <a href="#">Mllt4</a> | <a href="#">Mllt4.dSep08</a> | <a href="#">26955</a>  | 5272  | 455  | 3  | 151 | myeloid/lymphoid or mixed-lineage leukemia (trithorax homolog, Drosophila); translocated to, 4 (Mllt4) alternative variant dSep08, mRNA.           |
| <a href="#">Mllt4</a> | <a href="#">Mllt4.eSep08</a> | <a href="#">26955</a>  | 3869  | 417  | 3  | 138 | myeloid/lymphoid or mixed-lineage leukemia (trithorax homolog, Drosophila); translocated to, 4 (Mllt4) alternative variant eSep08, mRNA.           |
| <a href="#">Mllt4</a> | <a href="#">Mllt4.fSep08</a> | <a href="#">26955</a>  | 5226  | 409  | 3  | 135 | myeloid/lymphoid or mixed-lineage leukemia (trithorax homolog, Drosophila); translocated to, 4 (Mllt4) alternative variant fSep08, mRNA.           |
| <a href="#">Mllt4</a> | <a href="#">Mllt4.gSep08</a> | <a href="#">26955</a>  | 5214  | 400  | 3  | 132 | myeloid/lymphoid or mixed-lineage leukemia (trithorax homolog, Drosophila); translocated to, 4 (Mllt4) alternative variant gSep08, mRNA.           |
| <a href="#">Mllt6</a> | <a href="#">Mllt6.aSep08</a> | <a href="#">303504</a> | 7723  | 2579 | 10 | 692 | myeloid/lymphoid or mixed-lineage leukemia (trithorax homolog, Drosophila); translocated to, 6 (69.5 kD) (Mllt6) alternative variant aSep08, mRNA. |

|                        |                               |                        |       |      |    |     |                                                                                                                                            |
|------------------------|-------------------------------|------------------------|-------|------|----|-----|--------------------------------------------------------------------------------------------------------------------------------------------|
| <a href="#">MlIt6</a>  | <a href="#">MlIt6.bSep08</a>  | <a href="#">303504</a> | 2082  | 746  | 3  | 248 | myeloid/lymphoid or mixed-lineage leukemia (trithorax homolog, Drosophila); translocated to, 6 (MlIt6) alternative variant bSep08, mRNA.   |
| <a href="#">MlIt6</a>  | <a href="#">MlIt6.cSep08</a>  | <a href="#">303504</a> | 4197  | 705  | 4  | 235 | myeloid/lymphoid or mixed-lineage leukemia (trithorax homolog, Drosophila); translocated to, 6 (MlIt6) alternative variant cSep08, mRNA.   |
| <a href="#">MlIt6</a>  | <a href="#">MlIt6.dSep08</a>  | <a href="#">303504</a> | 6409  | 4242 | 3  | 154 | myeloid/lymphoid or mixed-lineage leukemia (trithorax homolog, Drosophila); translocated to, 6 (MlIt6) alternative variant dSep08, mRNA.   |
| <a href="#">MlIt10</a> | <a href="#">MlIt10.bSep08</a> | <a href="#">361285</a> | 41162 | 3648 | 13 | 684 | myeloid lymphoid mixed-lineage leukemia translocated 10 like (MlIt10) alternative variant bSep08, mRNA.                                    |
| <a href="#">MlIt10</a> | <a href="#">MlIt10.cSep08</a> | <a href="#">361285</a> | 30036 | 777  | 7  | 233 | myeloid lymphoid mixed-lineage leukemia translocated 10 like (MlIt10) alternative variant cSep08, mRNA.                                    |
| <a href="#">MlIt10</a> | <a href="#">MlIt10.dSep08</a> | <a href="#">361285</a> | 2083  | 1584 | 3  | 200 | myeloid lymphoid mixed-lineage leukemia translocated 10 like (MlIt10) alternative variant dSep08, mRNA.                                    |
| <a href="#">MlIt10</a> | <a href="#">MlIt10.eSep08</a> | <a href="#">361285</a> | 51835 | 580  | 6  | 177 | myeloid lymphoid mixed-lineage leukemia like (MlIt10) alternative variant eSep08, mRNA.                                                    |
| <a href="#">MlIt10</a> | <a href="#">MlIt10.fSep08</a> | <a href="#">361285</a> | 31736 | 526  | 6  | 155 | myeloid lymphoid mixed-lineage leukemia like (MlIt10) alternative variant fSep08, mRNA.                                                    |
| <a href="#">MlIt10</a> | <a href="#">MlIt10.gSep08</a> | <a href="#">361285</a> | 52703 | 392  | 4  | 130 | myeloid lymphoid mixed-lineage leukemia like (MlIt10) alternative variant gSep08, mRNA.                                                    |
| <a href="#">MlIt10</a> | <a href="#">MlIt10.iSep08</a> | <a href="#">361285</a> | 48647 | 543  | 6  | 69  | myeloid lymphoid mixed-lineage leukemia like (MlIt10) alternative variant iSep08, mRNA.                                                    |
| <a href="#">MlIt11</a> | <a href="#">MlIt11.aSep08</a> | <a href="#">295264</a> | 9655  | 728  | 2  | 108 | myeloid/lymphoid or mixed-lineage leukemia (trithorax homolog, Drosophila); translocated to, 11 (MlIt11) alternative variant aSep08, mRNA. |
| <a href="#">MlIt11</a> | <a href="#">MlIt11.cSep08</a> | <a href="#">295264</a> | 9481  | 741  | 3  | 62  | myeloid/lymphoid or mixed-lineage leukemia (trithorax homolog, Drosophila); translocated to, 11 (MlIt11) alternative variant cSep08, mRNA. |
| <a href="#">Mlph</a>   | <a href="#">Mlph.bSep08</a>   | <a href="#">316620</a> | 4800  | 726  | 1  | 41  | melanophilin (Mlph) alternative variant bSep08, mRNA.                                                                                      |
| <a href="#">Mlstd2</a> | <a href="#">Mlstd2.bSep08</a> | <a href="#">293173</a> | 23914 | 4312 | 9  | 341 | fatty acyl CoA reductase 1 (Mlstd2) alternative variant bSep08, mRNA.                                                                      |
| <a href="#">Mlx</a>    | <a href="#">Mlx.bSep08</a>    | <a href="#">360631</a> | 4757  | 2823 | 7  | 264 | MAX-like protein X (Mlx) alternative variant bSep08, mRNA.                                                                                 |
| <a href="#">Mlx</a>    | <a href="#">Mlx.cSep08</a>    | <a href="#">360631</a> | 4403  | 1457 | 8  | 167 | MAX-like protein X (19.0 kD) (Mlx) alternative variant cSep08, mRNA.                                                                       |
| <a href="#">Mlx</a>    | <a href="#">Mlx.dSep08</a>    | <a href="#">360631</a> | 2441  | 417  | 6  | 138 | MAX-like protein X (Mlx) alternative variant dSep08, mRNA.                                                                                 |
| <a href="#">Mlxip</a>  | <a href="#">Mlxip.aSep08</a>  | <a href="#">304479</a> | 1680  | 770  |    | 256 | MLX interacting protein (Mlxip) mRNA.                                                                                                      |
| <a href="#">Mlycd</a>  | <a href="#">Mlycd.bSep08</a>  | <a href="#">85239</a>  | 2956  | 816  | 1  | 225 | malonyl-CoA decarboxylase (25.1 kD) (Mlycd) alternative variant bSep08, mRNA.                                                              |
| <a href="#">Mlze</a>   | <a href="#">Mlze.bSep08</a>   | <a href="#">299908</a> | 1218  | 745  | 2  | 102 | melanoma-derived leucine zipper, extra-nuclear factor (11.3 kD) (Mlze) alternative variant bSep08, mRNA.                                   |
| <a href="#">Mmaa</a>   | <a href="#">Mmaa.bSep08</a>   | <a href="#">291939</a> | 16865 | 733  | 4  | 158 | methylmalonic aciduria cblA type (18.1 kD) (Mmaa) alternative variant bSep08, mRNA.                                                        |
| <a href="#">Mmaa</a>   | <a href="#">Mmaa.cSep08</a>   | <a href="#">291939</a> | 1792  | 941  | 2  | 137 | methylmalonic aciduria cblA type (15.9 kD) (Mmaa) alternative variant cSep08, mRNA.                                                        |



|                        |                               |                        |       |      |    |     |                                                                                                                         |
|------------------------|-------------------------------|------------------------|-------|------|----|-----|-------------------------------------------------------------------------------------------------------------------------|
| <a href="#">Mmachc</a> | <a href="#">Mmachc.bSep08</a> | <a href="#">313520</a> | 6371  | 1836 | 2  | 144 | methylmalonic aciduria (cobalamin deficiency) cbIC type, with homocystinuria (Mmachc) alternative variant bSep08, mRNA. |
| <a href="#">Mmachc</a> | <a href="#">Mmachc.cSep08</a> | <a href="#">313520</a> | 3661  | 751  | 1  | 134 | methylmalonic aciduria (cobalamin deficiency) cbIC type, with homocystinuria (Mmachc) alternative variant cSep08, mRNA. |
| <a href="#">Mmd</a>    | <a href="#">Mmd.bSep08</a>    | <a href="#">303439</a> | 9813  | 390  | 1  | 77  | monocyte to macrophage differentiation-associated (Mmd) alternative variant bSep08, mRNA.                               |
| <a href="#">Mme</a>    | <a href="#">Mme.bSep08</a>    | <a href="#">24590</a>  | 29294 | 551  | 1  | 174 | membrane metallo endopeptidase (Mme) alternative variant bSep08, mRNA.                                                  |
| <a href="#">Mme</a>    | <a href="#">Mme.cSep08</a>    | <a href="#">24590</a>  | 29158 | 576  | 1  | 150 | membrane metallo endopeptidase (Mme) alternative variant cSep08, mRNA.                                                  |
| <a href="#">Mmel1</a>  | <a href="#">Mmel1.bSep08</a>  | <a href="#">313755</a> | 30370 | 2717 | 24 | 521 | membrane metallo-endopeptidase-like 1 (60.5 kD) (Mmel1) alternative variant bSep08, mRNA.                               |
| <a href="#">Mmel1</a>  | <a href="#">Mmel1.cSep08</a>  | <a href="#">313755</a> | 22958 | 3116 | 9  | 313 | membrane metallo-endopeptidase-like 1 (35.4 kD) (Mmel1) alternative variant cSep08, mRNA.                               |
| <a href="#">Mmel1</a>  | <a href="#">Mmel1.dSep08</a>  | <a href="#">313755</a> | 17845 | 572  | 5  | 190 | metallo-endopeptidase-like 1 (Mmel1) alternative variant dSep08, mRNA.                                                  |
| <a href="#">Mmel1</a>  | <a href="#">Mmel1.fSep08</a>  | <a href="#">313755</a> | 846   | 494  | 3  | 62  | metallo-endopeptidase-like 1 (Mmel1) alternative variant fSep08, mRNA.                                                  |
| <a href="#">Mmp1b</a>  | <a href="#">Mmp1b.aSep08</a>  | <a href="#">300338</a> | 52415 | 675  |    | 160 | matrix metalloproteinase 1b (interstitial collagenase) (Mmp1b) mRNA.                                                    |
| <a href="#">Mmp2</a>   | <a href="#">Mmp2.bSep08</a>   | <a href="#">81686</a>  | 25562 | 2947 | 2  | 586 | matrix metalloproteinase 2 (Mmp2) alternative variant bSep08, mRNA.                                                     |
| <a href="#">Mmp2</a>   | <a href="#">Mmp2.cSep08</a>   | <a href="#">81686</a>  | 21474 | 2042 | 3  | 527 | matrix metalloproteinase 2 (Mmp2) alternative variant cSep08, mRNA.                                                     |
| <a href="#">Mmp2</a>   | <a href="#">Mmp2.dSep08</a>   | <a href="#">81686</a>  | 3634  | 742  | 1  | 121 | matrix metalloproteinase 2 (Mmp2) alternative variant dSep08, mRNA.                                                     |
| <a href="#">Mmp11</a>  | <a href="#">Mmp11.bSep08</a>  | <a href="#">25481</a>  | 1717  | 1057 | 1  | 135 | matrix metalloproteinase 11 (Mmp11) alternative variant bSep08, mRNA.                                                   |
| <a href="#">Mmp13</a>  | <a href="#">Mmp13.aSep08</a>  | <a href="#">171052</a> | 2881  | 1519 |    | 114 | matrix metalloproteinase 13 (Mmp13) mRNA.                                                                               |
| <a href="#">Mmp15</a>  | <a href="#">Mmp15.bSep08</a>  | <a href="#">291848</a> | 1067  | 764  | 1  | 108 | matrix metalloproteinase 15 (Mmp15) alternative variant bSep08, mRNA.                                                   |
| <a href="#">Mmp16</a>  | <a href="#">Mmp16.bSep08</a>  | <a href="#">65205</a>  | 6886  | 1827 | 3  | 183 | matrix metalloproteinase 16 (Mmp16) alternative variant bSep08, mRNA.                                                   |
| <a href="#">Mmp16</a>  | <a href="#">Mmp16.cSep08</a>  | <a href="#">65205</a>  | 646   | 550  | 1  | 68  | matrix metalloproteinase 16 (Mmp16) alternative variant cSep08, mRNA.                                                   |
| <a href="#">Mmp17</a>  | <a href="#">Mmp17.aSep08</a>  | <a href="#">288626</a> | 4325  | 1785 | 1  | 592 | matrix metalloproteinase 17 (Mmp17) alternative variant aSep08, mRNA.                                                   |
| <a href="#">Mmp19</a>  | <a href="#">Mmp19.bSep08</a>  | <a href="#">304608</a> | 4123  | 384  | 1  | 128 | matrix metalloproteinase 19 (Mmp19) alternative variant bSep08, mRNA.                                                   |
| <a href="#">Mmp23</a>  | <a href="#">Mmp23.aSep08</a>  | <a href="#">94339</a>  | 2577  | 1259 | 7  | 262 | metalloproteinase (Mmp23) alternative variant aSep08, mRNA.                                                             |
| <a href="#">Mmp23</a>  | <a href="#">Mmp23.bSep08</a>  | <a href="#">94339</a>  | 1463  | 729  | 5  | 224 | metalloproteinase (Mmp23) alternative variant bSep08, mRNA.                                                             |
| <a href="#">Mmp23</a>  | <a href="#">Mmp23.cSep08</a>  | <a href="#">94339</a>  | 1031  | 644  | 4  | 214 | metalloproteinase (Mmp23) alternative variant cSep08, mRNA.                                                             |

|                         |                                |                        |        |      |   |     |                                                                                                                      |
|-------------------------|--------------------------------|------------------------|--------|------|---|-----|----------------------------------------------------------------------------------------------------------------------|
| <a href="#">Mmp23</a>   | <a href="#">Mmp23.dSep08</a>   | <a href="#">94339</a>  | 1097   | 790  | 4 | 171 | metalloprotease (20.1 kD) (Mmp23) alternative variant dSep08, mRNA.                                                  |
| <a href="#">Mmp23</a>   | <a href="#">Mmp23.eSep08</a>   | <a href="#">94339</a>  | 1350   | 733  | 3 | 161 | matrix metalloproteinase 23 (Mmp23) alternative variant eSep08, mRNA.                                                |
| <a href="#">Mmp28</a>   | <a href="#">Mmp28.bSep08</a>   | <a href="#">303384</a> | 16515  | 1783 | 4 | 546 | matrix metalloproteinase 28 (epilysin) (Mmp28) alternative variant bSep08, mRNA.                                     |
| <a href="#">Mmrn1</a>   | <a href="#">Mmrn1.aSep08</a>   | <a href="#">500152</a> | 21618  | 1461 |   | 236 | multimerin 1 (Mmrn1) mRNA.                                                                                           |
| <a href="#">Mnd1</a>    | <a href="#">Mnd1.aSep08</a>    | <a href="#">295160</a> | 48039  | 647  | 2 | 162 | meiotic nuclear divisions 1 homolog (S. cerevisiae) (Mnd1) alternative variant aSep08, mRNA.                         |
| <a href="#">Mnd1</a>    | <a href="#">Mnd1.bSep08</a>    | <a href="#">295160</a> | 12740  | 424  | 1 | 25  | meiotic nuclear divisions 1 homolog (S. cerevisiae) (Mnd1) alternative variant bSep08, mRNA.                         |
| <a href="#">Moap1</a>   | <a href="#">Moap1.bSep08</a>   | <a href="#">299261</a> | 1238   | 1152 | 2 | 285 | putative protein (Moap1) alternative variant bSep08, mRNA.                                                           |
| <a href="#">Moap1</a>   | <a href="#">Moap1.dSep08</a>   | <a href="#">299261</a> | 4527   | 920  | 2 | 97  | CRA b like (10.2 kD) (Moap1) alternative variant dSep08, complete mRNA.                                              |
| <a href="#">Moap1</a>   | <a href="#">Moap1.eSep08</a>   | <a href="#">299261</a> | 16127  | 1058 | 2 | 75  | CRA b like (7.9 kD) (Moap1) alternative variant eSep08, mRNA.                                                        |
| <a href="#">Moap1</a>   | <a href="#">Moap1.fSep08</a>   | <a href="#">299261</a> | 5688   | 339  | 2 | 69  | paraneoplastic antigen MA1 like (7.8 kD) (Moap1) alternative variant fSep08, mRNA.                                   |
| <a href="#">Mobkl2a</a> | <a href="#">Mobkl2a.aSep08</a> | <a href="#">362833</a> | 14464  | 1422 | 2 | 246 | MOB1, Mps One Binder kinase activator-like 2A (yeast) (28.6 kD) (Mobkl2a) alternative variant aSep08, complete mRNA. |
| <a href="#">Mobkl2b</a> | <a href="#">Mobkl2b.aSep08</a> | <a href="#">366352</a> | 111904 | 651  |   | 191 | MOB1, Mps One Binder kinase activator-like 2B (yeast) (Mobkl2b) mRNA.                                                |
| <a href="#">Mobkl2c</a> | <a href="#">Mobkl2c.bSep08</a> | <a href="#">313511</a> | 3100   | 766  | 2 | 216 | MOB1, Mps One Binder kinase activator-like 2C (yeast) (25.6 kD) (Mobkl2c) alternative variant bSep08, mRNA.          |
| <a href="#">Mobkl3</a>  | <a href="#">Mobkl3.bSep08</a>  | <a href="#">171050</a> | 22404  | 905  | 6 | 126 | MOB1, Mps One Binder kinase activator-like 3 (yeast) (14.6 kD) (Mobkl3) alternative variant bSep08, complete mRNA.   |
| <a href="#">Mobkl3</a>  | <a href="#">Mobkl3.cSep08</a>  | <a href="#">171050</a> | 3334   | 685  | 2 | 97  | MOB1, Mps One Binder kinase activator-like 3 (yeast) (11.3 kD) (Mobkl3) alternative variant cSep08, mRNA.            |
| <a href="#">Mobp</a>    | <a href="#">Mobp.aSep08</a>    | <a href="#">25037</a>  | 29681  | 2410 | 4 | 81  | myelin-associated oligodendrocytic basic protein (9.7 kD) (Mobp) alternative variant aSep08, complete mRNA.          |
| <a href="#">Mobp</a>    | <a href="#">Mobp.bSep08</a>    | <a href="#">25037</a>  | 28069  | 875  | 5 | 81  | myelin-associated oligodendrocytic basic protein (9.7 kD) (Mobp) alternative variant bSep08, complete mRNA.          |
| <a href="#">Mobp</a>    | <a href="#">Mobp.cSep08</a>    | <a href="#">25037</a>  | 17862  | 792  | 4 | 170 | myelin-associated oligodendrocytic basic protein (19.1 kD) (Mobp) alternative variant cSep08, complete mRNA.         |
| <a href="#">Mobp</a>    | <a href="#">Mobp.dSep08</a>    | <a href="#">25037</a>  | 17515  | 409  | 3 | 99  | myelin-associated oligodendrocytic basic protein (Mobp) alternative variant dSep08, mRNA.                            |
| <a href="#">Mobp</a>    | <a href="#">Mobp.eSep08</a>    | <a href="#">25037</a>  | 22153  | 344  | 2 |     |                                                                                                                      |
| <a href="#">moby</a>    | <a href="#">moby.aSep08</a>    |                        | 2695   | 1279 |   | 51  | putative protein (moby) mRNA.                                                                                        |
| <a href="#">mochy</a>   | <a href="#">mochy.aSep08</a>   |                        | 11695  | 803  | 3 | 247 | CRA b (mochy) alternative variant aSep08, mRNA.                                                                      |
| <a href="#">mochy</a>   | <a href="#">mochy.bSep08</a>   |                        | 6992   | 520  | 1 | 136 | putative protein of vertebrate origin (mochy) alternative variant bSep08, mRNA.                                      |
| <a href="#">Mocos</a>   | <a href="#">Mocos.bSep08</a>   | <a href="#">361300</a> | 18953  | 549  | 5 | 183 | molybdenum cofactor sulfurase (Mocos) alternative variant bSep08, mRNA.                                              |

|                        |                               |                        |        |      |   |     |                                                                                                    |
|------------------------|-------------------------------|------------------------|--------|------|---|-----|----------------------------------------------------------------------------------------------------|
| <a href="#">Mocos</a>  | <a href="#">Mocos.cSep08</a>  | <a href="#">361300</a> | 3357   | 760  | 2 | 154 | molybdenum cofactor sulfurase (Mocos) alternative variant cSep08, mRNA.                            |
| <a href="#">Mocos</a>  | <a href="#">Mocos.dSep08</a>  | <a href="#">361300</a> | 16193  | 496  | 4 | 103 | molybdenum cofactor sulfurase (Mocos) alternative variant dSep08, mRNA.                            |
| <a href="#">Mocos</a>  | <a href="#">Mocos.eSep08</a>  | <a href="#">361300</a> | 4665   | 582  | 3 | 62  | molybdenum cofactor sulfurase (6.8 kD) (Mocos) alternative variant eSep08, mRNA.                   |
| <a href="#">Mocos</a>  | <a href="#">Mocos.fSep08</a>  | <a href="#">361300</a> | 4874   | 424  | 4 | 54  | molybdenum cofactor sulfurase (Mocos) alternative variant fSep08, mRNA.                            |
| <a href="#">Mocs1</a>  | <a href="#">Mocs1.bSep08</a>  | <a href="#">301221</a> | 13099  | 754  | 6 | 230 | molybdenum cofactor synthesis 1 (Mocs1) alternative variant bSep08, mRNA.                          |
| <a href="#">Mocs1</a>  | <a href="#">Mocs1.cSep08</a>  | <a href="#">301221</a> | 10401  | 442  | 3 | 103 | molybdenum cofactor synthesis 1 (Mocs1) alternative variant cSep08, mRNA.                          |
| <a href="#">Mocs1</a>  | <a href="#">Mocs1.dSep08</a>  | <a href="#">301221</a> | 6485   | 1583 | 4 | 76  | molybdenum cofactor synthesis 1 (Mocs1) alternative variant dSep08, mRNA.                          |
| <a href="#">Mocs2</a>  | <a href="#">Mocs2.bSep08</a>  | <a href="#">294753</a> | 11011  | 830  | 7 | 189 | molybdenum cofactor synthesis 2 CRA a (21.0 kD) (Mocs2) alternative variant bSep08, complete mRNA. |
| <a href="#">Mocs2</a>  | <a href="#">Mocs2.cSep08</a>  | <a href="#">294753</a> | 7397   | 638  | 6 | 110 | molybdenum cofactor synthesis 2 CRA a (Mocs2) alternative variant cSep08, mRNA.                    |
| <a href="#">Mocs2</a>  | <a href="#">Mocs2.dSep08</a>  | <a href="#">294753</a> | 7420   | 612  | 5 | 88  | molybdopterin synthase Mocs2A (9.7 kD) (Mocs2) alternative variant dSep08, mRNA.                   |
| <a href="#">modar</a>  | <a href="#">modar.aSep08</a>  |                        | 4650   | 344  |   | 109 | ubiquitin carboxyl-terminal hydrolase cyld (modar) mRNA.                                           |
| <a href="#">mofer</a>  | <a href="#">mofer.aSep08</a>  |                        | 16756  | 804  | 4 | 100 | putative protein (mofer) alternative variant aSep08, mRNA.                                         |
| <a href="#">mofer</a>  | <a href="#">mofer.bSep08</a>  |                        | 8619   | 635  | 5 | 95  | putative protein (10.6 kD) (mofer) alternative variant bSep08, mRNA.                               |
| <a href="#">mofer</a>  | <a href="#">mofer.cSep08</a>  |                        | 3465   | 1137 | 2 | 45  | putative protein (5.0 kD) (mofer) alternative variant cSep08, mRNA.                                |
| <a href="#">mofer</a>  | <a href="#">mofer.dSep08</a>  |                        | 43600  | 717  | 5 | 70  | putative protein (8.0 kD) (mofer) alternative variant dSep08, mRNA.                                |
| <a href="#">moflo</a>  | <a href="#">moflo.aSep08</a>  |                        | 1092   | 309  |   | 60  | putative protein (moflo) mRNA.                                                                     |
| <a href="#">moflu</a>  | <a href="#">moflu.aSep08</a>  |                        | 129328 | 568  |   | 81  | putative protein (moflu) mRNA.                                                                     |
| <a href="#">mogar</a>  | <a href="#">mogar.aSep08</a>  |                        | 746    | 235  |   | 39  | putative protein (mogar) mRNA.                                                                     |
| <a href="#">Mogat1</a> | <a href="#">Mogat1.bSep08</a> | <a href="#">363261</a> | 9268   | 897  | 2 | 163 | monoacylglycerol O-acyltransferase 1 (18.4 kD) (Mogat1) alternative variant bSep08, mRNA.          |
| <a href="#">Mogat2</a> | <a href="#">Mogat2.aSep08</a> | <a href="#">681211</a> | 24369  | 1748 | 6 | 334 | monoacylglycerol O-acyltransferase 2 (Mogat2) alternative variant aSep08, complete mRNA.           |
| <a href="#">Mogat2</a> | <a href="#">Mogat2.cSep08</a> | <a href="#">681211</a> | 2779   | 702  | 2 | 46  | monoacylglycerol O-acyltransferase 2 (Mogat2) alternative variant cSep08, mRNA.                    |
| <a href="#">mojey</a>  | <a href="#">mojey.aSep08</a>  |                        | 2008   | 376  |   | 125 | protein Tyrosine phosphatase non-receptor type 13 (mojey) mRNA.                                    |
| <a href="#">mokee</a>  | <a href="#">mokee.aSep08</a>  |                        | 7119   | 403  |   | 134 | protein odr-4 homolog (mokee) mRNA.                                                                |
| <a href="#">moloy</a>  | <a href="#">moloy.aSep08</a>  |                        | 4188   | 616  |   | 126 | putative protein (13.9 kD) (moloy) alternative variant aSep08, mRNA.                               |
| <a href="#">moloy</a>  | <a href="#">moloy.bSep08</a>  |                        | 4233   | 808  | 1 | 91  | putative protein (moloy) alternative variant bSep08, mRNA.                                         |
| <a href="#">momee</a>  | <a href="#">momee.aSep08</a>  |                        | 962    | 362  | 3 | 46  | wd repeat-containing protein 90 like (momee) alternative variant aSep08, mRNA.                     |

|                           |                                  |                        |        |      |    |     |                                                                                  |
|---------------------------|----------------------------------|------------------------|--------|------|----|-----|----------------------------------------------------------------------------------|
| <a href="#">momer</a>     | <a href="#">momer.bSep08</a>     |                        | 1204   | 720  | 2  | 99  | putative protein (momer) alternative variant bSep08, mRNA.                       |
| <a href="#">Mon1a</a>     | <a href="#">Mon1a.aSep08</a>     | <a href="#">315999</a> | 20936  | 2044 |    | 555 | MON1 homolog A (yeast) (62.2 kD) (Mon1a) mRNA.                                   |
| <a href="#">Mon1b</a>     | <a href="#">Mon1b.bSep08</a>     | <a href="#">307868</a> | 2926   | 939  | 3  | 228 | MON1 homolog b (yeast) (Mon1b) alternative variant bSep08, mRNA.                 |
| <a href="#">Mon2</a>      | <a href="#">Mon2.aSep08</a>      | <a href="#">314894</a> | 26061  | 4065 | 13 | 771 | mon2 homolog CRA c (Mon2) alternative variant aSep08, mRNA.                      |
| <a href="#">Mon2</a>      | <a href="#">Mon2.bSep08</a>      | <a href="#">314894</a> | 57929  | 2593 | 13 | 674 | mon2 homolog CRA b (Mon2) alternative variant bSep08, mRNA.                      |
| <a href="#">Mon2</a>      | <a href="#">Mon2.cSep08</a>      | <a href="#">314894</a> | 5300   | 628  | 4  | 208 | mon2 homolog CRA d (Mon2) alternative variant cSep08, mRNA.                      |
| <a href="#">Mon2</a>      | <a href="#">Mon2.dSep08</a>      | <a href="#">314894</a> | 18920  | 672  | 4  | 152 | putative protein (Mon2) alternative variant dSep08, mRNA.                        |
| <a href="#">monoy</a>     | <a href="#">monoy.aSep08</a>     |                        | 18837  | 732  |    | 62  | putative protein (monoy) mRNA.                                                   |
| <a href="#">mopor</a>     | <a href="#">mopor.aSep08</a>     |                        | 10346  | 733  |    | 243 | D-glucuronyl (mopor) mRNA.                                                       |
| <a href="#">morby</a>     | <a href="#">morby.aSep08</a>     |                        | 251605 | 437  |    | 27  | putative protein (morby) mRNA.                                                   |
| <a href="#">Morc1</a>     | <a href="#">Morc1.aSep08</a>     | <a href="#">360712</a> | 32859  | 1784 |    | 435 | microrchidia 1 (Morc1) alternative variant aSep08, mRNA.                         |
| <a href="#">Morc1</a>     | <a href="#">Morc1.bSep08</a>     | <a href="#">360712</a> | 32346  | 765  |    | 180 | microrchidia 1 (Morc1) alternative variant bSep08, mRNA.                         |
| <a href="#">Morc3</a>     | <a href="#">Morc3.bSep08</a>     | <a href="#">304074</a> | 8225   | 965  | 5  | 321 | microrchidia 3 (Morc3) alternative variant bSep08, mRNA.                         |
| <a href="#">Morc3</a>     | <a href="#">Morc3.cSep08</a>     | <a href="#">304074</a> | 19739  | 1048 | 9  | 306 | zinc finger, CW-type (Morc3) alternative variant cSep08, mRNA.                   |
| <a href="#">Morc3</a>     | <a href="#">Morc3.dSep08</a>     | <a href="#">304074</a> | 1229   | 403  | 2  | 117 | putative protein of eukaryotic origin (Morc3) alternative variant dSep08, mRNA.  |
| <a href="#">Morc3</a>     | <a href="#">Morc3.fSep08</a>     | <a href="#">304074</a> | 2603   | 635  | 3  | 38  | putative protein of vertebrate origin (Morc3) alternative variant fSep08, mRNA.  |
| <a href="#">Morc4</a>     | <a href="#">Morc4.aSep08</a>     | <a href="#">315914</a> | 33317  | 3057 | 11 | 617 | microrchidia 4 (Morc4) alternative variant aSep08, mRNA.                         |
| <a href="#">Morc4</a>     | <a href="#">Morc4.bSep08</a>     | <a href="#">315914</a> | 1347   | 1045 | 2  | 114 | microrchidia 4 (Morc4) alternative variant bSep08, mRNA.                         |
| <a href="#">morchy</a>    | <a href="#">morchy.aSep08</a>    |                        | 18516  | 782  |    | 105 | putative protein (12.0 kD) (morchy) mRNA.                                        |
| <a href="#">mordar</a>    | <a href="#">mordar.aSep08</a>    |                        | 3356   | 661  | 4  | 74  | putative protein (mordar) alternative variant aSep08, mRNA.                      |
| <a href="#">Morf4I1.1</a> | <a href="#">Morf4I1.1.bSep08</a> | <a href="#">300891</a> | 18646  | 1041 | 11 | 296 | mortality factor 4 like 1 (Morf4I1.1) alternative variant bSep08, mRNA.          |
| <a href="#">Morf4I1.1</a> | <a href="#">Morf4I1.1.cSep08</a> | <a href="#">300891</a> | 2809   | 414  | 4  | 138 | mortality factor 4 like 1 (Morf4I1.1) alternative variant cSep08, mRNA.          |
| <a href="#">Morf4I1.1</a> | <a href="#">Morf4I1.1.dSep08</a> | <a href="#">300891</a> | 3207   | 1464 | 2  | 43  | mortality factor 4 like 1 (4.8 kD) (Morf4I1.1) alternative variant dSep08, mRNA. |
| <a href="#">Morf4I2</a>   | <a href="#">Morf4I2.aSep08</a>   | <a href="#">317413</a> | 7787   | 932  | 3  | 251 | mortality factor 4 like 2 (Morf4I2) alternative variant aSep08, mRNA.            |
| <a href="#">Morf4I2</a>   | <a href="#">Morf4I2.bSep08</a>   | <a href="#">317413</a> | 8601   | 1847 | 4  | 288 | mortality factor 4 like 2 (32.2 kD) (Morf4I2) alternative variant bSep08, mRNA.  |
| <a href="#">Morf4I2</a>   | <a href="#">Morf4I2.dSep08</a>   | <a href="#">317413</a> | 6726   | 1281 | 3  | 78  | mortality factor 4 like 2 (Morf4I2) alternative variant dSep08, mRNA.            |
| <a href="#">Morf4I2</a>   | <a href="#">Morf4I2.fSep08</a>   | <a href="#">317413</a> | 9154   | 718  | 4  | 136 | mortality factor 4 like 2 (Morf4I2) alternative variant fSep08, mRNA.            |
| <a href="#">Morf4I2</a>   | <a href="#">Morf4I2.gSep08</a>   | <a href="#">317413</a> | 3358   | 367  | 2  | 24  | mortality factor 4 like 2 (2.8 kD) (Morf4I2) alternative variant gSep08, mRNA.   |

|                         |                                |                        |       |      |   |     |                                                                                                                              |
|-------------------------|--------------------------------|------------------------|-------|------|---|-----|------------------------------------------------------------------------------------------------------------------------------|
| <a href="#">morfer</a>  | <a href="#">morfer.aSep08</a>  |                        | 5998  | 1777 |   | 54  | putative protein (morfer) alternative variant aSep08, mRNA.                                                                  |
| <a href="#">morfer</a>  | <a href="#">morfer.bSep08</a>  |                        | 5192  | 411  |   | 54  | putative protein (morfer) alternative variant bSep08, mRNA.                                                                  |
| <a href="#">morflo</a>  | <a href="#">morflo.aSep08</a>  |                        | 2153  | 2026 | 2 | 233 | sema 4G (morflo) alternative variant aSep08, mRNA.                                                                           |
| <a href="#">morflu</a>  | <a href="#">morflu.aSep08</a>  |                        | 37375 | 465  |   | 62  | putative protein (7.1 kD) (morflu) mRNA.                                                                                     |
| <a href="#">Morg1</a>   | <a href="#">Morg1.bSep08</a>   | <a href="#">288924</a> | 5032  | 747  | 3 | 173 | mitogen-activated protein kinase organizer 1 (Morg1) alternative variant bSep08, mRNA.                                       |
| <a href="#">Morg1</a>   | <a href="#">Morg1.cSep08</a>   | <a href="#">288924</a> | 3915  | 567  | 1 | 127 | mitogen-activated protein kinase organizer 1 (Morg1) alternative variant cSep08, mRNA.                                       |
| <a href="#">morgar</a>  | <a href="#">morgar.aSep08</a>  |                        | 21820 | 801  | 8 | 266 | adaptor protein phosphotyrosine interaction PH domain leucine zipper containing 1 (morgar) alternative variant aSep08, mRNA. |
| <a href="#">morgar</a>  | <a href="#">morgar.bSep08</a>  |                        | 1741  | 348  | 1 | 35  | putative protein (4.1 kD) (morgar) alternative variant bSep08, mRNA.                                                         |
| <a href="#">morja</a>   | <a href="#">morja.aSep08</a>   |                        | 34652 | 680  |   | 167 | putative protein (morja) mRNA.                                                                                               |
| <a href="#">morjey</a>  | <a href="#">morjey.aSep08</a>  |                        | 6672  | 412  |   | 136 | putative protein of vertebrate origin (morjey) mRNA.                                                                         |
| <a href="#">morkee</a>  | <a href="#">morkee.aSep08</a>  |                        | 661   | 398  |   | 94  | putative protein (morkee) mRNA.                                                                                              |
| <a href="#">morloy</a>  | <a href="#">morloy.aSep08</a>  |                        | 4146  | 768  |   | 79  | protease (morloy) mRNA.                                                                                                      |
| <a href="#">mormee</a>  | <a href="#">mormee.aSep08</a>  |                        | 17058 | 756  |   | 66  | putative protein (7.5 kD) (mormee) mRNA.                                                                                     |
| <a href="#">mormer</a>  | <a href="#">mormer.aSep08</a>  |                        | 1253  | 572  |   | 154 | kinesin family member 19A (mormer) mRNA.                                                                                     |
| <a href="#">Morn1</a>   | <a href="#">Morn1.bSep08</a>   | <a href="#">298676</a> | 42861 | 1081 | 2 | 233 | MORN repeat containing 1 (Morn1) alternative variant bSep08, mRNA.                                                           |
| <a href="#">Morn2</a>   | <a href="#">Morn2.aSep08</a>   | <a href="#">500606</a> | 6727  | 615  | 1 | 165 | MORN repeat containing 2 (Morn2) alternative variant aSep08, mRNA.                                                           |
| <a href="#">mornoy</a>  | <a href="#">mornoy.aSep08</a>  |                        | 12217 | 402  |   | 134 | type III (mornoy) mRNA.                                                                                                      |
| <a href="#">morpor</a>  | <a href="#">morpor.aSep08</a>  |                        | 5641  | 597  |   | 198 | zwilch (morpor) mRNA.                                                                                                        |
| <a href="#">morsa</a>   | <a href="#">morsa.aSep08</a>   |                        | 4409  | 597  |   | 97  | putative protein (morsa) mRNA.                                                                                               |
| <a href="#">morshee</a> | <a href="#">morshee.aSep08</a> |                        | 1874  | 576  |   | 82  | putative mitochondrial protein (9.0 kD) (morshee) mRNA.                                                                      |
| <a href="#">mortu</a>   | <a href="#">mortu.aSep08</a>   |                        | 30802 | 301  |   | 92  | uncharacterized protein c2orf61 homolog like (mortu) mRNA.                                                                   |
| <a href="#">morvar</a>  | <a href="#">morvar.aSep08</a>  |                        | 1557  | 299  |   | 94  | putative protein (morvar) mRNA.                                                                                              |
| <a href="#">morwey</a>  | <a href="#">morwey.aSep08</a>  |                        | 4985  | 543  |   | 66  | putative protein (morwey) mRNA.                                                                                              |
| <a href="#">mosa</a>    | <a href="#">mosa.aSep08</a>    |                        | 6244  | 685  |   | 76  | putative protein (mosa) mRNA.                                                                                                |
| <a href="#">Mosc2</a>   | <a href="#">Mosc2.bSep08</a>   | <a href="#">171451</a> | 39830 | 596  | 3 | 177 | MOSC, N-terminal beta barrel (Mosc2) alternative variant bSep08, mRNA.                                                       |
| <a href="#">Mosc2</a>   | <a href="#">Mosc2.cSep08</a>   | <a href="#">171451</a> | 7448  | 690  | 4 | 74  | putative mitochondrial protein of ancient origin (8.4 kD) (Mosc2) alternative variant cSep08, mRNA.                          |
| <a href="#">Mosc2</a>   | <a href="#">Mosc2.dSep08</a>   | <a href="#">171451</a> | 3468  | 689  | 2 | 60  | putative protein of metazoan origin (Mosc2) alternative variant dSep08, mRNA.                                                |
| <a href="#">moshee</a>  | <a href="#">moshee.aSep08</a>  |                        | 2070  | 558  |   | 83  | putative protein of metazoan origin (moshee) mRNA.                                                                           |
| <a href="#">Mospd1</a>  | <a href="#">Mospd1.bSep08</a>  | <a href="#">317312</a> | 24525 | 768  | 5 | 191 | major sperm protein (Mospd1) alternative variant bSep08, mRNA.                                                               |
| <a href="#">Mospd3</a>  | <a href="#">Mospd3.bSep08</a>  | <a href="#">288557</a> | 5045  | 935  | 5 | 173 | major sperm protein (18.8 kD) (Mospd3) alternative variant bSep08, mRNA.                                                     |

|                          |                                 |                        |       |      |   |      |                                                                                             |
|--------------------------|---------------------------------|------------------------|-------|------|---|------|---------------------------------------------------------------------------------------------|
| <a href="#">Mospd3</a>   | <a href="#">Mospd3.cSep08</a>   | <a href="#">288557</a> | 3462  | 970  | 3 | 129  | putative protein of mammalian origin (Mospd3) alternative variant cSep08, mRNA.             |
| <a href="#">motu</a>     | <a href="#">motu.aSep08</a>     |                        | 2775  | 656  |   | 66   | putative protein (motu) mRNA.                                                               |
| <a href="#">Mov10l1</a>  | <a href="#">Mov10l1.bSep08</a>  | <a href="#">300141</a> | 10483 | 603  | 1 | 185  | moloney leukemia virus 10-like 1 (Mov10l1) alternative variant bSep08, mRNA.                |
| <a href="#">movar</a>    | <a href="#">movar.aSep08</a>    |                        | 598   | 525  |   | 71   | putative protein (movar) mRNA.                                                              |
| <a href="#">mowey</a>    | <a href="#">mowey.aSep08</a>    |                        | 1101  | 461  |   | 40   | putative protein (4.6 kD) (mowey) mRNA.                                                     |
| <a href="#">Moxd1</a>    | <a href="#">Moxd1.aSep08</a>    | <a href="#">294119</a> | 59666 | 2486 |   | 501  | monooxygenase, DBH-like 1 (Moxd1) mRNA.                                                     |
| <a href="#">moyby</a>    | <a href="#">moyby.aSep08</a>    |                        | 2620  | 287  |   | 31   | putative protein (3.7 kD) (moyby) mRNA.                                                     |
| <a href="#">moychy</a>   | <a href="#">moychy.aSep08</a>   |                        | 700   | 400  |   | 52   | putative protein (moychy) mRNA.                                                             |
| <a href="#">moydar</a>   | <a href="#">moydar.aSep08</a>   |                        | 39774 | 385  |   | 127  | putative protein (moydar) mRNA.                                                             |
| <a href="#">moyfer</a>   | <a href="#">moyfer.aSep08</a>   |                        | 4931  | 737  |   | 69   | putative protein (moyfer) mRNA.                                                             |
| <a href="#">moyflo</a>   | <a href="#">moyflo.aSep08</a>   |                        | 559   | 383  |   | 95   | putative protein of mammalian origin (moyflo) mRNA.                                         |
| <a href="#">moyflu</a>   | <a href="#">moyflu.aSep08</a>   |                        | 21815 | 603  |   | 39   | putative protein (moyflu) mRNA.                                                             |
| <a href="#">moygar</a>   | <a href="#">moygar.bSep08</a>   |                        | 1758  | 428  | 3 | 49   | putative protein (moygar) alternative variant bSep08, mRNA.                                 |
| <a href="#">moyja</a>    | <a href="#">moyja.aSep08</a>    |                        | 10592 | 565  |   | 21   | putative protein (2.4 kD) (moyja) mRNA.                                                     |
| <a href="#">moyjey</a>   | <a href="#">moyjey.aSep08</a>   |                        | 4532  | 545  |   | 181  | putative protein of metazoan origin (moyjey) mRNA.                                          |
| <a href="#">moykee</a>   | <a href="#">moykee.aSep08</a>   |                        | 97831 | 776  |   | 43   | putative protein (4.8 kD) (moykee) mRNA.                                                    |
| <a href="#">moyloy</a>   | <a href="#">moyloy.aSep08</a>   |                        | 62478 | 1336 |   | 445  | vacuolar protein sorting 8 homolog (moyloy) mRNA.                                           |
| <a href="#">moymee</a>   | <a href="#">moymee.aSep08</a>   |                        | 1146  | 759  |   | 69   | putative protein (moymee) mRNA.                                                             |
| <a href="#">moymmer</a>  | <a href="#">moymmer.aSep08</a>  |                        | 1435  | 995  |   | 169  | kinesin family member 19A (moymmer) mRNA.                                                   |
| <a href="#">moynoy</a>   | <a href="#">moynoy.aSep08</a>   |                        | 4204  | 470  |   | 111  | type III (moynoy) mRNA.                                                                     |
| <a href="#">moypor</a>   | <a href="#">moypor.aSep08</a>   |                        | 6476  | 561  |   | 81   | 11-like domains precursor (8.8 kD) (moypor) mRNA.                                           |
| <a href="#">moysa</a>    | <a href="#">moysa.aSep08</a>    |                        | 1215  | 765  |   | 30   | putative protein (3.2 kD) (moysa) mRNA.                                                     |
| <a href="#">moyshee</a>  | <a href="#">moyshee.bSep08</a>  |                        | 75245 | 341  | 3 | 45   | putative protein (moyshee) alternative variant bSep08, mRNA.                                |
| <a href="#">moytu</a>    | <a href="#">moytu.aSep08</a>    |                        | 8525  | 755  |   | 109  | putative protein (moytu) mRNA.                                                              |
| <a href="#">moyvar</a>   | <a href="#">moyvar.aSep08</a>   |                        | 515   | 425  |   | 47   | putative protein (moyvar) mRNA.                                                             |
| <a href="#">moywey</a>   | <a href="#">moywey.aSep08</a>   |                        | 3346  | 465  |   | 50   | putative protein (moywey) mRNA.                                                             |
| <a href="#">Mpdu1</a>    | <a href="#">Mpdu1.bSep08</a>    | <a href="#">303244</a> | 4992  | 626  | 4 | 157  | mannose-P-dolichol utilization defect 1 (Mpdu1) alternative variant bSep08, mRNA.           |
| <a href="#">Mpdu1</a>    | <a href="#">Mpdu1.cSep08</a>    | <a href="#">303244</a> | 5125  | 694  | 5 | 121  | mannose-P-dolichol utilization defect 1 (13.4 kD) (Mpdu1) alternative variant cSep08, mRNA. |
| <a href="#">Mpdu1</a>    | <a href="#">Mpdu1.dSep08</a>    | <a href="#">303244</a> | 873   | 722  | 2 | 65   | mannose-P-dolichol utilization defect 1 (6.7 kD) (Mpdu1) alternative variant dSep08, mRNA.  |
| <a href="#">Mpeg1</a>    | <a href="#">Mpeg1.aSep08</a>    | <a href="#">64552</a>  | 880   | 598  |   | 156  | putative protein of metazoan origin (Mpeg1) mRNA.                                           |
| <a href="#">Mpg</a>      | <a href="#">Mpg.bSep08</a>      | <a href="#">24561</a>  | 3643  | 1452 | 2 | 162  | N-methylpurine-DNA glycosylase (18.0 kD) (Mpg) alternative variant bSep08, mRNA.            |
| <a href="#">Mphosph1</a> | <a href="#">Mphosph1.bSep08</a> | <a href="#">309523</a> | 30894 | 3018 | 8 | 1006 | M-phase phosphoprotein 1 (Mphosph1) alternative variant bSep08, mRNA.                       |
| <a href="#">Mphosph1</a> | <a href="#">Mphosph1.cSep08</a> | <a href="#">309523</a> | 15061 | 1024 | 2 | 341  | M-phase phosphoprotein 1 (Mphosph1) alternative variant cSep08, mRNA.                       |

|                           |                                  |                        |        |      |    |     |                                                                                                                     |
|---------------------------|----------------------------------|------------------------|--------|------|----|-----|---------------------------------------------------------------------------------------------------------------------|
| <a href="#">Mphosph8</a>  | <a href="#">Mphosph8.bSep08</a>  | <a href="#">290270</a> | 4184   | 894  | 4  | 92  | M-phase phosphoprotein 8 (10.2 kD) (Mphosph8) alternative variant bSep08, mRNA.                                     |
| <a href="#">Mphosph8</a>  | <a href="#">Mphosph8.cSep08</a>  | <a href="#">290270</a> | 3828   | 1267 | 2  | 81  | M-phase phosphoprotein 8 (Mphosph8) alternative variant cSep08, mRNA.                                               |
| <a href="#">Mphosph9</a>  | <a href="#">Mphosph9.aSep08</a>  | <a href="#">288654</a> | 17125  | 583  |    | 193 | M-phase phosphoprotein 9 (Mphosph9) mRNA.                                                                           |
| <a href="#">Mphosph10</a> | <a href="#">Mphosph10.bSep08</a> | <a href="#">293828</a> | 8555   | 1776 | 1  | 482 | M-phase phosphoprotein 10 (U3 small nucleolar ribonucleoprotein) (Mphosph10) alternative variant bSep08, mRNA.      |
| <a href="#">Mpi</a>       | <a href="#">Mpi.bSep08</a>       | <a href="#">300741</a> | 8133   | 1891 | 6  | 315 | mannose phosphate isomerase (mapped) (34.6 kD) (Mpi) alternative variant bSep08, mRNA.                              |
| <a href="#">Mpi</a>       | <a href="#">Mpi.cSep08</a>       | <a href="#">300741</a> | 7313   | 1075 | 7  | 233 | mannose phosphate isomerase (mapped) (Mpi) alternative variant cSep08, mRNA.                                        |
| <a href="#">Mpi</a>       | <a href="#">Mpi.eSep08</a>       | <a href="#">300741</a> | 6058   | 445  | 4  | 55  | mannose phosphate isomerase (mapped) (6.0 kD) (Mpi) alternative variant eSep08, mRNA.                               |
| <a href="#">Mpo</a>       | <a href="#">Mpo.bSep08</a>       | <a href="#">303413</a> | 6577   | 1176 | 3  | 391 | myeloperoxidase (Mpo) alternative variant bSep08, mRNA.                                                             |
| <a href="#">Mpp2</a>      | <a href="#">Mpp2.aSep08</a>      | <a href="#">85275</a>  | 25411  | 395  | 3  | 100 | membrane protein, palmitoylated 2 (MAGUK p55 subfamily member 2) (Mpp2) alternative variant aSep08, mRNA.           |
| <a href="#">Mpp2</a>      | <a href="#">Mpp2.bSep08</a>      | <a href="#">85275</a>  | 25153  | 415  | 3  | 83  | membrane protein, palmitoylated 2 (MAGUK p55 subfamily member 2) (Mpp2) alternative variant bSep08, mRNA.           |
| <a href="#">Mpp2</a>      | <a href="#">Mpp2.cSep08</a>      | <a href="#">85275</a>  | 4238   | 634  | 2  | 38  | membrane protein, palmitoylated 2 (MAGUK p55 subfamily member 2) (Mpp2) alternative variant cSep08, mRNA.           |
| <a href="#">Mpp3</a>      | <a href="#">Mpp3.aSep08</a>      | <a href="#">114202</a> | 28823  | 2197 | 10 | 568 | membrane protein, palmitoylated 3 (MAGUK p55 subfamily member 3) (Mpp3) alternative variant aSep08, mRNA.           |
| <a href="#">Mpp3</a>      | <a href="#">Mpp3.bSep08</a>      | <a href="#">114202</a> | 20804  | 1120 | 12 | 372 | membrane protein, palmitoylated 3 (MAGUK p55 subfamily member 3) (Mpp3) alternative variant bSep08, mRNA.           |
| <a href="#">Mpp3</a>      | <a href="#">Mpp3.cSep08</a>      | <a href="#">114202</a> | 11265  | 1829 | 8  | 274 | membrane protein, palmitoylated 3 (MAGUK p55 subfamily member 3) (31.2 kD) (Mpp3) alternative variant cSep08, mRNA. |
| <a href="#">Mpp4</a>      | <a href="#">Mpp4.bSep08</a>      | <a href="#">58808</a>  | 26593  | 847  | 7  | 101 | membrane protein palmitoylated 4 (Mpp4) alternative variant bSep08, mRNA.                                           |
| <a href="#">Mpp4</a>      | <a href="#">Mpp4.cSep08</a>      | <a href="#">58808</a>  | 9853   | 418  | 4  | 65  | putative protein (6.8 kD) (Mpp4) alternative variant cSep08, mRNA.                                                  |
| <a href="#">Mpp4</a>      | <a href="#">Mpp4.dSep08</a>      | <a href="#">58808</a>  | 26464  | 718  | 7  | 58  | membrane protein palmitoylated 4 (Mpp4) alternative variant dSep08, mRNA.                                           |
| <a href="#">Mpp6</a>      | <a href="#">Mpp6.aSep08</a>      | <a href="#">362359</a> | 80010  | 2634 | 7  | 504 | membrane protein, palmitoylated 6 (MAGUK p55 subfamily member 6) (Mpp6) alternative variant aSep08, mRNA.           |
| <a href="#">Mpp6</a>      | <a href="#">Mpp6.bSep08</a>      | <a href="#">362359</a> | 12749  | 467  | 1  | 155 | membrane protein, palmitoylated 6 (MAGUK p55 subfamily member 6) (Mpp6) alternative variant bSep08, mRNA.           |
| <a href="#">Mpp6</a>      | <a href="#">Mpp6.cSep08</a>      | <a href="#">362359</a> | 12732  | 501  | 3  | 58  | membrane protein, palmitoylated 6 (MAGUK p55 subfamily member 6) (6.6 kD) (Mpp6) alternative variant cSep08, mRNA.  |
| <a href="#">Mpp7</a>      | <a href="#">Mpp7.aSep08</a>      | <a href="#">307035</a> | 215144 | 734  | 1  | 179 | membrane protein, palmitoylated 7 (MAGUK p55 subfamily member 7) (Mpp7) alternative variant aSep08, mRNA.           |
| <a href="#">Mpp7</a>      | <a href="#">Mpp7.bSep08</a>      | <a href="#">307035</a> | 152314 | 608  | 1  | 157 | membrane protein, palmitoylated 7 (MAGUK p55 subfamily member 7) (Mpp7) alternative variant bSep08, mRNA.           |
| <a href="#">Mppe1</a>     | <a href="#">Mppe1.bSep08</a>     | <a href="#">361344</a> | 3110   | 299  | 2  | 84  | metallophosphoesterase 1 (Mppe1) alternative variant bSep08, mRNA.                                                  |

|                          |                                 |                        |        |      |    |     |                                                                                                                   |
|--------------------------|---------------------------------|------------------------|--------|------|----|-----|-------------------------------------------------------------------------------------------------------------------|
| <a href="#">Mpped2</a>   | <a href="#">Mpped2.aSep08</a>   | <a href="#">362185</a> | 176795 | 2674 | 5  | 294 | metallophosphoesterase (33.3 kD) (Mpped2) alternative variant aSep08, mRNA.                                       |
| <a href="#">Mpped2</a>   | <a href="#">Mpped2.bSep08</a>   | <a href="#">362185</a> | 3343   | 774  | 1  | 93  | putative protein (Mpped2) alternative variant bSep08, mRNA.                                                       |
| <a href="#">Mpst</a>     | <a href="#">Mpst.bSep08</a>     | <a href="#">192172</a> | 5155   | 1525 | 2  | 189 | mercaptopyruvate sulfurtransferase (21.1 kD) (Mpst) alternative variant bSep08, mRNA.                             |
| <a href="#">Mpv17l</a>   | <a href="#">Mpv17l.aSep08</a>   | <a href="#">360463</a> | 13427  | 450  |    | 111 | mpv17 transgene, kidney disease mutant-like (Mpv17l) mRNA.                                                        |
| <a href="#">Mpv17l.1</a> | <a href="#">Mpv17l.1.aSep08</a> | <a href="#">360463</a> | 9727   | 1038 | 7  | 154 | mpv17 transgene, kidney disease mutant-like (17.1 kD) (Mpv17l.1) alternative variant aSep08, mRNA.                |
| <a href="#">Mpv17l.1</a> | <a href="#">Mpv17l.1.cSep08</a> | <a href="#">360463</a> | 9242   | 801  | 5  | 150 | mpv17 transgene, kidney disease mutant-like (Mpv17l.1) alternative variant cSep08, mRNA.                          |
| <a href="#">Mpv17l.1</a> | <a href="#">Mpv17l.1.dSep08</a> | <a href="#">360463</a> | 9145   | 651  | 5  | 149 | mpv17 transgene, kidney disease mutant-like (16.2 kD) (Mpv17l.1) alternative variant dSep08, mRNA.                |
| <a href="#">Mpv17l.1</a> | <a href="#">Mpv17l.1.eSep08</a> | <a href="#">360463</a> | 9335   | 613  | 6  | 143 | mpv17 transgene, kidney disease mutant-like (15.8 kD) (Mpv17l.1) alternative variant eSep08, mRNA.                |
| <a href="#">Mpv17l.1</a> | <a href="#">Mpv17l.1.fSep08</a> | <a href="#">360463</a> | 9875   | 1118 | 6  | 136 | mpv17 transgene, kidney disease mutant-like (Mpv17l.1) alternative variant fSep08, mRNA.                          |
| <a href="#">Mpv17l.1</a> | <a href="#">Mpv17l.1.gSep08</a> | <a href="#">360463</a> | 9455   | 698  | 6  | 133 | mpv17 transgene, kidney disease mutant-like (14.4 kD) (Mpv17l.1) alternative variant gSep08, mRNA.                |
| <a href="#">Mpv17l.1</a> | <a href="#">Mpv17l.1.hSep08</a> | <a href="#">360463</a> | 1253   | 392  | 3  | 67  | mpv17 transgene, kidney disease mutant-like (7.4 kD) (Mpv17l.1) alternative variant hSep08, complete mRNA.        |
| <a href="#">Mpz</a>      | <a href="#">Mpz.bSep08</a>      | <a href="#">24564</a>  | 3626   | 577  | 3  | 170 | myelin protein zero (18.8 kD) (Mpz) alternative variant bSep08, mRNA.                                             |
| <a href="#">Mpzl1</a>    | <a href="#">Mpzl1.bSep08</a>    | <a href="#">360871</a> | 35886  | 1273 |    | 250 | myelin protein zero-like 1 (Mpzl1) alternative variant bSep08, mRNA.                                              |
| <a href="#">Mpzl3</a>    | <a href="#">Mpzl3.bSep08</a>    | <a href="#">363054</a> | 6446   | 375  | 1  | 124 | myelin protein zero-like 3 (Mpzl3) alternative variant bSep08, mRNA.                                              |
| <a href="#">Mrap</a>     | <a href="#">Mrap.aSep08</a>     | <a href="#">288271</a> | 10494  | 837  | 1  | 153 | melanocortin 2 receptor accessory protein (Mrap) alternative variant aSep08, mRNA.                                |
| <a href="#">Mrap</a>     | <a href="#">Mrap.bSep08</a>     | <a href="#">288271</a> | 10173  | 568  | 1  | 92  | melanocortin 2 receptor accessory protein (Mrap) alternative variant bSep08, mRNA.                                |
| <a href="#">Mras</a>     | <a href="#">Mras.bSep08</a>     | <a href="#">25482</a>  | 3311   | 407  | 1  | 124 | putative protein (Mras) alternative variant bSep08, mRNA.                                                         |
| <a href="#">Mrc2</a>     | <a href="#">Mrc2.bSep08</a>     | <a href="#">498011</a> | 11618  | 3158 | 13 | 615 | mannose receptor, C type 2 (Mrc2) alternative variant bSep08, mRNA.                                               |
| <a href="#">Mrc2</a>     | <a href="#">Mrc2.cSep08</a>     | <a href="#">498011</a> | 612    | 390  | 2  | 129 | mannose receptor, C type 2 (Mrc2) alternative variant cSep08, mRNA.                                               |
| <a href="#">Mreg</a>     | <a href="#">Mreg.aSep08</a>     | <a href="#">501162</a> | 34308  | 602  |    | 160 | melanoregulin (18.9 kD) (Mreg) mRNA.                                                                              |
| <a href="#">Mrlcb</a>    | <a href="#">Mrlcb.aSep08</a>    | <a href="#">50685</a>  | 14798  | 1167 | 4  | 172 | myosin light chain, regulatory B (19.8 kD) (Mrlcb) alternative variant aSep08, complete mRNA.                     |
| <a href="#">Mrm1</a>     | <a href="#">Mrm1.aSep08</a>     | <a href="#">363661</a> | 1447   | 1157 | 2  | 221 | mitochondrial rRNA methyltransferase 1 homolog (S. cerevisiae) (24.3 kD) (Mrm1) alternative variant aSep08, mRNA. |
| <a href="#">Mrm1</a>     | <a href="#">Mrm1.bSep08</a>     | <a href="#">363661</a> | 3351   | 542  | 3  | 141 | mitochondrial rRNA methyltransferase 1 homolog (S. cerevisiae) (Mrm1) alternative variant bSep08, mRNA.           |
| <a href="#">Mro</a>      | <a href="#">Mro.aSep08</a>      | <a href="#">361348</a> | 18456  | 716  | 5  | 238 | maestro (Mro) alternative variant aSep08, mRNA.                                                                   |
| <a href="#">Mro</a>      | <a href="#">Mro.aSep08</a>      | <a href="#">680524</a> | 18456  | 716  | 5  | 238 | maestro (Mro) alternative variant aSep08, mRNA.                                                                   |



|                        |                               |                        |       |      |   |     |                                                                                                   |
|------------------------|-------------------------------|------------------------|-------|------|---|-----|---------------------------------------------------------------------------------------------------|
| <a href="#">Mro</a>    | <a href="#">Mro.bSep08</a>    | <a href="#">361348</a> | 18542 | 961  | 5 | 169 | putative protein (Mro) alternative variant bSep08, mRNA.                                          |
| <a href="#">Mro</a>    | <a href="#">Mro.bSep08</a>    | <a href="#">680524</a> | 18542 | 961  | 5 | 169 | putative protein (Mro) alternative variant bSep08, mRNA.                                          |
| <a href="#">Mro</a>    | <a href="#">Mro.cSep08</a>    | <a href="#">361348</a> | 10282 | 474  | 4 | 132 | putative protein (Mro) alternative variant cSep08, mRNA.                                          |
| <a href="#">Mro</a>    | <a href="#">Mro.cSep08</a>    | <a href="#">680524</a> | 10282 | 474  | 4 | 132 | putative protein (Mro) alternative variant cSep08, mRNA.                                          |
| <a href="#">Mro</a>    | <a href="#">Mro.dSep08</a>    | <a href="#">361348</a> | 7988  | 523  | 3 | 116 | putative protein (Mro) alternative variant dSep08, mRNA.                                          |
| <a href="#">Mro</a>    | <a href="#">Mro.dSep08</a>    | <a href="#">680524</a> | 7988  | 523  | 3 | 116 | putative protein (Mro) alternative variant dSep08, mRNA.                                          |
| <a href="#">Mro</a>    | <a href="#">Mro.eSep08</a>    | <a href="#">361348</a> | 1971  | 1093 | 3 | 105 | maestro (Mro) alternative variant eSep08, mRNA.                                                   |
| <a href="#">Mro</a>    | <a href="#">Mro.eSep08</a>    | <a href="#">680524</a> | 1971  | 1093 | 3 | 105 | maestro (Mro) alternative variant eSep08, mRNA.                                                   |
| <a href="#">Mrpl1</a>  | <a href="#">Mrpl1.bSep08</a>  | <a href="#">289491</a> | 6401  | 334  | 1 | 51  | mitochondrial ribosomal protein L1 (Mrpl1) alternative variant bSep08, mRNA.                      |
| <a href="#">Mrpl2</a>  | <a href="#">Mrpl2.bSep08</a>  | <a href="#">301240</a> | 2542  | 733  | 1 | 140 | mitochondrial ribosomal protein L2 (15.5 kD) (Mrpl2) alternative variant bSep08, mRNA.            |
| <a href="#">Mrpl3</a>  | <a href="#">Mrpl3.bSep08</a>  | <a href="#">300974</a> | 3304  | 580  | 5 | 193 | mitochondrial ribosomal protein L3 (Mrpl3) alternative variant bSep08, mRNA.                      |
| <a href="#">Mrpl3</a>  | <a href="#">Mrpl3.cSep08</a>  | <a href="#">300974</a> | 3392  | 583  | 4 | 145 | mitochondrial ribosomal protein L3 (Mrpl3) alternative variant cSep08, mRNA.                      |
| <a href="#">Mrpl3</a>  | <a href="#">Mrpl3.dSep08</a>  | <a href="#">300974</a> | 5756  | 792  | 4 | 130 | mitochondrial ribosomal protein L3 (14.7 kD) (Mrpl3) alternative variant dSep08, mRNA.            |
| <a href="#">Mrpl3</a>  | <a href="#">Mrpl3.eSep08</a>  | <a href="#">300974</a> | 3783  | 358  | 3 | 106 | mitochondrial ribosomal protein L3 (Mrpl3) alternative variant eSep08, mRNA.                      |
| <a href="#">Mrpl3</a>  | <a href="#">Mrpl3.gSep08</a>  | <a href="#">300974</a> | 1333  | 337  | 2 | 44  | mitochondrial ribosomal protein L3 (Mrpl3) alternative variant gSep08, mRNA.                      |
| <a href="#">Mrpl4</a>  | <a href="#">Mrpl4.bSep08</a>  | <a href="#">363023</a> | 4620  | 800  | 3 | 159 | mitochondrial ribosomal protein L4 (Mrpl4) alternative variant bSep08, mRNA.                      |
| <a href="#">Mrpl4</a>  | <a href="#">Mrpl4.cSep08</a>  | <a href="#">363023</a> | 1417  | 877  | 2 | 129 | mitochondrial ribosomal protein L4 (Mrpl4) alternative variant cSep08, mRNA.                      |
| <a href="#">mrpl9</a>  | <a href="#">mrpl9.bSep08</a>  | <a href="#">310653</a> | 3271  | 783  | 5 | 178 | mitochondrial ribosomal protein L9 (20.4 kD) (mrpl9) alternative variant bSep08, mRNA.            |
| <a href="#">mrpl9</a>  | <a href="#">mrpl9.cSep08</a>  | <a href="#">310653</a> | 2923  | 416  | 4 | 131 | mitochondrial ribosomal protein L9 (mrpl9) alternative variant cSep08, mRNA.                      |
| <a href="#">mrpl11</a> | <a href="#">mrpl11.bSep08</a> | <a href="#">293666</a> | 3357  | 1211 | 2 | 160 | mitochondrial ribosomal protein L11 (17.0 kD) (mrpl11) alternative variant bSep08, complete mRNA. |
| <a href="#">mrpl11</a> | <a href="#">mrpl11.cSep08</a> | <a href="#">293666</a> | 2840  | 651  | 3 | 152 | mitochondrial ribosomal protein L11 (16.6 kD) (mrpl11) alternative variant cSep08, complete mRNA. |
| <a href="#">Mrpl13</a> | <a href="#">Mrpl13.aSep08</a> | <a href="#">299938</a> | 21902 | 847  | 6 | 237 | mitochondrial ribosomal protein L13 (Mrpl13) alternative variant aSep08, mRNA.                    |
| <a href="#">Mrpl13</a> | <a href="#">Mrpl13.cSep08</a> | <a href="#">299938</a> | 21608 | 969  | 7 | 162 | mitochondrial ribosomal protein L13 (18.7 kD) (Mrpl13) alternative variant cSep08, complete mRNA. |
| <a href="#">Mrpl14</a> | <a href="#">Mrpl14.aSep08</a> | <a href="#">301250</a> | 10801 | 621  | 1 | 175 | mitochondrial ribosomal protein L14 (Mrpl14) alternative variant aSep08, mRNA.                    |
| <a href="#">Mrpl15</a> | <a href="#">Mrpl15.aSep08</a> | <a href="#">297799</a> | 9495  | 2191 | 5 | 317 | mitochondrial ribosomal protein L15 (Mrpl15) alternative variant aSep08, mRNA.                    |
| <a href="#">Mrpl16</a> | <a href="#">Mrpl16.bSep08</a> | <a href="#">293754</a> | 886   | 611  | 2 | 65  | mitochondrial ribosomal protein L16 (7.4 kD) (Mrpl16) alternative variant bSep08, mRNA.           |
| <a href="#">Mrpl17</a> | <a href="#">Mrpl17.aSep08</a> | <a href="#">171061</a> | 1666  | 974  | 2 | 197 | mitochondrial ribosomal protein L17 (Mrpl17) alternative variant aSep08, mRNA.                    |

|                        |                               |                        |       |      |   |     |                                                                                                   |
|------------------------|-------------------------------|------------------------|-------|------|---|-----|---------------------------------------------------------------------------------------------------|
| <a href="#">Mrpl17</a> | <a href="#">Mrpl17.cSep08</a> | <a href="#">171061</a> | 1584  | 635  | 2 | 118 | mitochondrial ribosomal protein L17 (Mrpl17) alternative variant cSep08, mRNA.                    |
| <a href="#">Mrpl18</a> | <a href="#">Mrpl18.bSep08</a> | <a href="#">292244</a> | 4087  | 678  | 1 | 163 | mitochondrial ribosomal protein L18 (18.4 kD) (Mrpl18) alternative variant bSep08, complete mRNA. |
| <a href="#">Mrpl22</a> | <a href="#">Mrpl22.bSep08</a> | <a href="#">287302</a> | 10295 | 578  | 4 | 126 | mitochondrial ribosomal protein L22 (14.6 kD) (Mrpl22) alternative variant bSep08, complete mRNA. |
| <a href="#">Mrpl22</a> | <a href="#">Mrpl22.cSep08</a> | <a href="#">287302</a> | 3834  | 705  | 1 | 116 | mitochondrial ribosomal protein L22 (13.4 kD) (Mrpl22) alternative variant cSep08, mRNA.          |
| <a href="#">Mrpl23</a> | <a href="#">Mrpl23.aSep08</a> | <a href="#">64360</a>  | 7438  | 562  | 1 | 158 | mitochondrial ribosomal protein L23 (Mrpl23) alternative variant aSep08, mRNA.                    |
| <a href="#">Mrpl23</a> | <a href="#">Mrpl23.cSep08</a> | <a href="#">64360</a>  | 7734  | 1343 | 1 | 101 | mitochondrial ribosomal protein L23 (11.8 kD) (Mrpl23) alternative variant cSep08, mRNA.          |
| <a href="#">mrpl24</a> | <a href="#">mrpl24.aSep08</a> | <a href="#">295224</a> | 5127  | 821  | 6 | 216 | mitochondrial ribosomal protein L24 (25.0 kD) (mrpl24) alternative variant aSep08, complete mRNA. |
| <a href="#">mrpl24</a> | <a href="#">mrpl24.bSep08</a> | <a href="#">295224</a> | 5245  | 859  | 6 | 216 | mitochondrial ribosomal protein L24 (25.0 kD) (mrpl24) alternative variant bSep08, complete mRNA. |
| <a href="#">mrpl24</a> | <a href="#">mrpl24.dSep08</a> | <a href="#">295224</a> | 1447  | 851  | 4 | 189 | mitochondrial ribosomal protein L24 (21.9 kD) (mrpl24) alternative variant dSep08, mRNA.          |
| <a href="#">mrpl24</a> | <a href="#">mrpl24.eSep08</a> | <a href="#">295224</a> | 4746  | 604  | 5 | 146 | mitochondrial ribosomal protein L24 (mrpl24) alternative variant eSep08, mRNA.                    |
| <a href="#">Mrpl28</a> | <a href="#">Mrpl28.aSep08</a> | <a href="#">497876</a> | 2922  | 1084 | 5 | 283 | mitochondrial ribosomal protein L28 (Mrpl28) alternative variant aSep08, mRNA.                    |
| <a href="#">Mrpl28</a> | <a href="#">Mrpl28.bSep08</a> | <a href="#">497876</a> | 2028  | 636  | 4 | 152 | mitochondrial ribosomal protein L28 (18.0 kD) (Mrpl28) alternative variant bSep08, mRNA.          |
| <a href="#">Mrpl28</a> | <a href="#">Mrpl28.dSep08</a> | <a href="#">497876</a> | 1210  | 473  | 2 | 88  | mitochondrial ribosomal protein L28 (Mrpl28) alternative variant dSep08, mRNA.                    |
| <a href="#">Mrpl30</a> | <a href="#">Mrpl30.bSep08</a> | <a href="#">301352</a> | 11806 | 2076 | 1 | 160 | mitochondrial ribosomal protein L30 (18.4 kD) (Mrpl30) alternative variant bSep08, complete mRNA. |
| <a href="#">Mrpl35</a> | <a href="#">Mrpl35.bSep08</a> | <a href="#">297334</a> | 2720  | 563  | 2 | 132 | mitochondrial ribosomal protein L35 (Mrpl35) alternative variant bSep08, mRNA.                    |
| <a href="#">Mrpl35</a> | <a href="#">Mrpl35.cSep08</a> | <a href="#">297334</a> | 8655  | 781  | 2 | 78  | mitochondrial ribosomal protein L35 (8.6 kD) (Mrpl35) alternative variant cSep08, mRNA.           |
| <a href="#">Mrpl35</a> | <a href="#">Mrpl35.dSep08</a> | <a href="#">297334</a> | 6647  | 705  | 3 | 88  | mitochondrial ribosomal protein L35 (Mrpl35) alternative variant dSep08, mRNA.                    |
| <a href="#">Mrpl36</a> | <a href="#">Mrpl36.aSep08</a> | <a href="#">364656</a> | 1096  | 857  | 1 | 133 | mitochondrial ribosomal protein L36 (Mrpl36) alternative variant aSep08, mRNA.                    |
| <a href="#">Mrpl37</a> | <a href="#">Mrpl37.bSep08</a> | <a href="#">56281</a>  | 9118  | 1026 | 4 | 286 | mitochondrial ribosomal protein L37 (Mrpl37) alternative variant bSep08, mRNA.                    |
| <a href="#">Mrpl37</a> | <a href="#">Mrpl37.cSep08</a> | <a href="#">56281</a>  | 12800 | 2001 | 4 | 180 | mitochondrial ribosomal protein L37 (20.6 kD) (Mrpl37) alternative variant cSep08, mRNA.          |
| <a href="#">Mrpl37</a> | <a href="#">Mrpl37.dSep08</a> | <a href="#">56281</a>  | 5831  | 748  | 5 | 156 | mitochondrial ribosomal protein L37 (Mrpl37) alternative variant dSep08, mRNA.                    |
| <a href="#">Mrpl38</a> | <a href="#">Mrpl38.bSep08</a> | <a href="#">303685</a> | 3319  | 405  | 3 | 133 | mitochondrial ribosomal protein l38 CRA a (Mrpl38) alternative variant bSep08, mRNA.              |
| <a href="#">Mrpl38</a> | <a href="#">Mrpl38.cSep08</a> | <a href="#">303685</a> | 2679  | 553  | 4 | 126 | PEBP (Mrpl38) alternative variant cSep08, mRNA.                                                   |
| <a href="#">Mrpl38</a> | <a href="#">Mrpl38.dSep08</a> | <a href="#">303685</a> | 3480  | 705  | 4 | 99  | mitochondrial ribosomal protein L38 CRA a (11.5 kD) (Mrpl38) alternative variant dSep08, mRNA.    |

|                        |                               |                        |       |      |   |     |                                                                                                         |
|------------------------|-------------------------------|------------------------|-------|------|---|-----|---------------------------------------------------------------------------------------------------------|
| <a href="#">Mrpl38</a> | <a href="#">Mrpl38.eSep08</a> | <a href="#">303685</a> | 1266  | 1066 | 2 | 95  | putative protein of eukaryotic origin (Mrpl38) alternative variant eSep08, mRNA.                        |
| <a href="#">Mrpl42</a> | <a href="#">Mrpl42.aSep08</a> | <a href="#">299743</a> | 22293 | 568  | 1 | 147 | mitochondrial ribosomal protein L42 (Mrpl42) alternative variant aSep08, mRNA.                          |
| <a href="#">Mrpl42</a> | <a href="#">Mrpl42.cSep08</a> | <a href="#">299743</a> | 23733 | 663  | 3 | 141 | mitochondrial ribosomal protein L42 (16.6 kD) (Mrpl42) alternative variant cSep08, complete mRNA.       |
| <a href="#">Mrpl42</a> | <a href="#">Mrpl42.dSep08</a> | <a href="#">299743</a> | 23736 | 545  | 2 | 114 | mitochondrial ribosomal protein L42 (13.4 kD) (Mrpl42) alternative variant dSep08, complete mRNA.       |
| <a href="#">Mrpl43</a> | <a href="#">Mrpl43.aSep08</a> | <a href="#">309440</a> | 869   | 664  | 2 | 174 | mitochondrial ribosomal protein L43 (Mrpl43) alternative variant aSep08, mRNA.                          |
| <a href="#">Mrpl45</a> | <a href="#">Mrpl45.bSep08</a> | <a href="#">287656</a> | 8719  | 961  | 1 | 171 | mitochondrial ribosomal protein L45 (Mrpl45) alternative variant bSep08, mRNA.                          |
| <a href="#">Mrpl47</a> | <a href="#">Mrpl47.bSep08</a> | <a href="#">294963</a> | 10313 | 828  | 7 | 213 | mitochondrial ribosomal protein L47 (25.7 kD) (Mrpl47) alternative variant bSep08, mRNA.                |
| <a href="#">Mrpl47</a> | <a href="#">Mrpl47.dSep08</a> | <a href="#">294963</a> | 6281  | 336  | 4 | 53  | mitochondrial ribosomal protein L47 (Mrpl47) alternative variant dSep08, mRNA.                          |
| <a href="#">Mrpl48</a> | <a href="#">Mrpl48.aSep08</a> | <a href="#">293149</a> | 42230 | 930  | 8 | 246 | mitochondrial ribosomal protein L48 (Mrpl48) alternative variant aSep08, mRNA.                          |
| <a href="#">Mrpl48</a> | <a href="#">Mrpl48.bSep08</a> | <a href="#">293149</a> | 15956 | 776  | 4 | 53  | mitochondrial ribosomal protein L48 (5.7 kD) (Mrpl48) alternative variant bSep08, complete mRNA.        |
| <a href="#">Mrpl48</a> | <a href="#">Mrpl48.cSep08</a> | <a href="#">293149</a> | 4237  | 633  | 4 | 26  | mitochondrial ribosomal protein L48 (Mrpl48) alternative variant cSep08, mRNA.                          |
| <a href="#">Mrpl48</a> | <a href="#">Mrpl48.dSep08</a> | <a href="#">293149</a> | 1665  | 515  | 2 | 45  | mitochondrial ribosomal protein L48 (Mrpl48) alternative variant dSep08, mRNA.                          |
| <a href="#">Mrpl50</a> | <a href="#">Mrpl50.cSep08</a> | <a href="#">362517</a> | 448   | 239  | 2 | 58  | mitochondrial ribosomal protein L50 (Mrpl50) alternative variant cSep08, mRNA.                          |
| <a href="#">Mrpl51</a> | <a href="#">Mrpl51.bSep08</a> | <a href="#">297601</a> | 1079  | 740  | 2 | 51  | mitochondrial ribosomal protein L51 (5.9 kD) (Mrpl51) alternative variant bSep08, mRNA.                 |
| <a href="#">Mrpl52</a> | <a href="#">Mrpl52.aSep08</a> | <a href="#">361037</a> | 3813  | 1584 | 5 | 122 | mitochondrial ribosomal protein L52 CRA c (13.7 kD) (Mrpl52) alternative variant aSep08, complete mRNA. |
| <a href="#">Mrpl52</a> | <a href="#">Mrpl52.cSep08</a> | <a href="#">361037</a> | 2619  | 1750 | 3 | 63  | mitochondrial ribosomal protein L52 CRA a (7.5 kD) (Mrpl52) alternative variant cSep08, complete mRNA.  |
| <a href="#">Mrpl52</a> | <a href="#">Mrpl52.dSep08</a> | <a href="#">361037</a> | 2631  | 2486 | 3 | 55  | mitochondrial ribosomal protein L52 CRA e (5.8 kD) (Mrpl52) alternative variant dSep08, complete mRNA.  |
| <a href="#">Mrpl52</a> | <a href="#">Mrpl52.eSep08</a> | <a href="#">361037</a> | 2607  | 447  | 4 | 63  | mitochondrial ribosomal protein L52 CRA a (7.5 kD) (Mrpl52) alternative variant eSep08, complete mRNA.  |
| <a href="#">Mrpl55</a> | <a href="#">Mrpl55.aSep08</a> | <a href="#">287356</a> | 2798  | 816  | 4 | 138 | mitochondrial ribosomal protein L55 (15.8 kD) (Mrpl55) alternative variant aSep08, mRNA.                |
| <a href="#">Mrpl55</a> | <a href="#">Mrpl55.bSep08</a> | <a href="#">287356</a> | 2724  | 536  | 3 | 127 | mitochondrial ribosomal protein L55 (15.1 kD) (Mrpl55) alternative variant bSep08, mRNA.                |
| <a href="#">Mrpl55</a> | <a href="#">Mrpl55.cSep08</a> | <a href="#">287356</a> | 2803  | 602  | 3 | 127 | mitochondrial ribosomal protein L55 (15.1 kD) (Mrpl55) alternative variant cSep08, mRNA.                |
| <a href="#">Mrpl55</a> | <a href="#">Mrpl55.dSep08</a> | <a href="#">287356</a> | 2841  | 620  | 3 | 127 | mitochondrial ribosomal protein L55 (15.1 kD) (Mrpl55) alternative variant dSep08, mRNA.                |
| <a href="#">Mrpl55</a> | <a href="#">Mrpl55.fSep08</a> | <a href="#">287356</a> | 2785  | 594  | 3 | 125 | mitochondrial ribosomal protein L55 (Mrpl55) alternative variant fSep08, mRNA.                          |

|                         |                                |                        |       |      |    |     |                                                                                                   |
|-------------------------|--------------------------------|------------------------|-------|------|----|-----|---------------------------------------------------------------------------------------------------|
| <a href="#">Mrpl55</a>  | <a href="#">Mrpl55.gSep08</a>  | <a href="#">287356</a> | 1052  | 768  | 1  | 54  | mitochondrial ribosomal protein L55 (Mrpl55) alternative variant gSep08, mRNA.                    |
| <a href="#">Mrps2</a>   | <a href="#">Mrps2.aSep08</a>   | <a href="#">362094</a> | 3178  | 2263 | 3  | 300 | mitochondrial ribosomal protein S2 (33.5 kD) (Mrps2) alternative variant aSep08, complete mRNA.   |
| <a href="#">Mrps2</a>   | <a href="#">Mrps2.bSep08</a>   | <a href="#">362094</a> | 1826  | 784  | 3  | 260 | mitochondrial ribosomal protein S2 (Mrps2) alternative variant bSep08, mRNA.                      |
| <a href="#">Mrps2</a>   | <a href="#">Mrps2.cSep08</a>   | <a href="#">362094</a> | 1017  | 544  | 2  | 62  | mitochondrial ribosomal protein S2 (Mrps2) alternative variant cSep08, mRNA.                      |
| <a href="#">Mrps7</a>   | <a href="#">Mrps7.aSep08</a>   | <a href="#">113958</a> | 3835  | 1684 | 5  | 242 | mitochondrial ribosomal protein S7 (28.2 kD) (Mrps7) alternative variant aSep08, mRNA.            |
| <a href="#">Mrps9</a>   | <a href="#">Mrps9.bSep08</a>   | <a href="#">301371</a> | 25978 | 685  | 7  | 185 | mitochondrial ribosomal protein S9 (Mrps9) alternative variant bSep08, mRNA.                      |
| <a href="#">Mrps11</a>  | <a href="#">Mrps11.bSep08</a>  | <a href="#">499185</a> | 1323  | 694  | 2  | 87  | mitochondrial ribosomal protein S11 (9.8 kD) (Mrps11) alternative variant bSep08, mRNA.           |
| <a href="#">Mrps12</a>  | <a href="#">Mrps12.bSep08</a>  | <a href="#">292758</a> | 2895  | 723  | 3  | 139 | mitochondrial ribosomal protein S12 (15.4 kD) (Mrps12) alternative variant bSep08, complete mRNA. |
| <a href="#">Mrps14</a>  | <a href="#">Mrps14.aSep08</a>  | <a href="#">289143</a> | 5105  | 978  | 3  | 136 | mitochondrial ribosomal protein S14 (Mrps14) alternative variant aSep08, mRNA.                    |
| <a href="#">Mrps14</a>  | <a href="#">Mrps14.cSep08</a>  | <a href="#">289143</a> | 2154  | 401  | 2  | 97  | mitochondrial ribosomal protein S14 (11.2 kD) (Mrps14) alternative variant cSep08, mRNA.          |
| <a href="#">Mrps16</a>  | <a href="#">Mrps16.aSep08</a>  | <a href="#">688912</a> | 2781  | 999  | 2  | 147 | mitochondrial ribosomal protein S16 (Mrps16) alternative variant aSep08, mRNA.                    |
| <a href="#">Mrps17</a>  | <a href="#">Mrps17.aSep08</a>  | <a href="#">288621</a> | 2936  | 692  | 2  | 127 | mitochondrial ribosomal protein S17 (14.0 kD) (Mrps17) alternative variant aSep08, mRNA.          |
| <a href="#">Mrps18a</a> | <a href="#">Mrps18a.bSep08</a> | <a href="#">301249</a> | 13137 | 413  | 2  | 137 | mitochondrial ribosomal protein S18A (Mrps18a) alternative variant bSep08, mRNA.                  |
| <a href="#">Mrps18a</a> | <a href="#">Mrps18a.cSep08</a> | <a href="#">301249</a> | 16219 | 519  | 3  | 98  | mitochondrial ribosomal protein S18A (11.5 kD) (Mrps18a) alternative variant cSep08, mRNA.        |
| <a href="#">Mrps18b</a> | <a href="#">Mrps18b.bSep08</a> | <a href="#">294230</a> | 5519  | 454  | 1  | 150 | mitochondrial ribosomal protein S18B (Mrps18b) alternative variant bSep08, mRNA.                  |
| <a href="#">Mrps18b</a> | <a href="#">Mrps18b.cSep08</a> | <a href="#">294230</a> | 6017  | 885  |    | 87  | mitochondrial ribosomal protein S18B (Mrps18b) alternative variant cSep08, mRNA.                  |
| <a href="#">Mrps18c</a> | <a href="#">Mrps18c.bSep08</a> | <a href="#">289469</a> | 5863  | 395  | 2  | 87  | mitochondrial ribosomal protein S18C (Mrps18c) alternative variant bSep08, mRNA.                  |
| <a href="#">Mrps18c</a> | <a href="#">Mrps18c.cSep08</a> | <a href="#">289469</a> | 24183 | 382  | 1  | 57  | mitochondrial ribosomal protein S18C (Mrps18c) alternative variant cSep08, mRNA.                  |
| <a href="#">Mrps21</a>  | <a href="#">Mrps21.bSep08</a>  | <a href="#">689432</a> | 7739  | 469  | 3  | 87  | mitochondrial ribosomal protein S21 (10.6 kD) (Mrps21) alternative variant bSep08, mRNA.          |
| <a href="#">Mrps23</a>  | <a href="#">Mrps23.bSep08</a>  | <a href="#">360594</a> | 7209  | 726  | 5  | 172 | mitochondrial ribosomal protein S23 (Mrps23) alternative variant bSep08, mRNA.                    |
| <a href="#">Mrps23</a>  | <a href="#">Mrps23.cSep08</a>  | <a href="#">360594</a> | 8184  | 551  | 4  | 103 | mitochondrial ribosomal protein S23 (Mrps23) alternative variant cSep08, mRNA.                    |
| <a href="#">Mrps26</a>  | <a href="#">Mrps26.bSep08</a>  | <a href="#">362216</a> | 1503  | 660  |    | 108 | mitochondrial ribosomal protein S26 (12.7 kD) (Mrps26) alternative variant bSep08, mRNA.          |
| <a href="#">Mrps27</a>  | <a href="#">Mrps27.aSep08</a>  | <a href="#">361883</a> | 68605 | 1904 | 11 | 425 | mitochondrial ribosomal protein S27 CRA a (Mrps27) alternative variant aSep08, mRNA.              |

|                               |                                      |                        |       |      |   |     |                                                                                                                       |
|-------------------------------|--------------------------------------|------------------------|-------|------|---|-----|-----------------------------------------------------------------------------------------------------------------------|
| <a href="#">Mrps27</a>        | <a href="#">Mrps27.cSep08</a>        | <a href="#">361883</a> | 2363  | 375  | 2 | 94  | mitochondrial ribosomal protein S27 CRA g (Mrps27) alternative variant cSep08, mRNA.                                  |
| <a href="#">Mrps27</a>        | <a href="#">Mrps27.dSep08</a>        | <a href="#">361883</a> | 37456 | 691  | 4 | 75  | mitochondrial ribosomal protein S27 CRA c (Mrps27) alternative variant dSep08, mRNA.                                  |
| <a href="#">Mrps27</a>        | <a href="#">Mrps27.eSep08</a>        | <a href="#">361883</a> | 30168 | 597  | 2 | 56  | putative protein (6.5 kD) (Mrps27) alternative variant eSep08, mRNA.                                                  |
| <a href="#">Mrps27</a>        | <a href="#">Mrps27.gSep08</a>        | <a href="#">361883</a> | 30152 | 379  | 4 | 50  | mitochondrial ribosomal protein S27 CRA g (Mrps27) alternative variant gSep08, mRNA.                                  |
| <a href="#">Mrps28</a>        | <a href="#">Mrps28.bSep08</a>        | <a href="#">689025</a> | 35675 | 407  | 1 | 135 | mitochondrial ribosomal protein S28 (Mrps28) alternative variant bSep08, mRNA.                                        |
| <a href="#">Mrps28</a>        | <a href="#">Mrps28.cSep08</a>        | <a href="#">689025</a> | 37621 | 376  | 2 | 71  | mitochondrial ribosomal protein S28 (Mrps28) alternative variant cSep08, mRNA.                                        |
| <a href="#">Mrps30</a>        | <a href="#">Mrps30.bSep08</a>        | <a href="#">294767</a> | 6488  | 1148 | 6 | 351 | mitochondrial ribosomal protein S30 (Mrps30) alternative variant bSep08, mRNA.                                        |
| <a href="#">Mrps30</a>        | <a href="#">Mrps30.cSep08</a>        | <a href="#">294767</a> | 2636  | 729  | 2 | 209 | mitochondrial ribosomal protein S30 (22.9 kD) (Mrps30) alternative variant cSep08, mRNA.                              |
| <a href="#">Mrps30</a>        | <a href="#">Mrps30.eSep08</a>        | <a href="#">294767</a> | 3064  | 1042 | 2 | 108 | mitochondrial ribosomal protein S30 CRA b (12.5 kD) (Mrps30) alternative variant eSep08, mRNA.                        |
| <a href="#">Mrps31</a>        | <a href="#">Mrps31.bSep08</a>        | <a href="#">290850</a> | 1828  | 980  | 2 | 96  | mitochondrial ribosomal protein S31 (11.5 kD) (Mrps31) alternative variant bSep08, mRNA.                              |
| <a href="#">Mrps31</a>        | <a href="#">Mrps31.cSep08</a>        | <a href="#">290850</a> | 3550  | 526  | 2 | 75  | putative protein (Mrps31) alternative variant cSep08, mRNA.                                                           |
| <a href="#">Mrps31</a>        | <a href="#">Mrps31.dSep08</a>        | <a href="#">290850</a> | 3078  | 571  | 2 | 74  | mitochondrial ribosomal protein S31 like (Mrps31) alternative variant dSep08, mRNA.                                   |
| <a href="#">Mrps34andNme3</a> | <a href="#">Mrps34andNme3.cSep08</a> | <a href="#">85269</a>  | 1011  | 772  | 4 | 162 | non-metastatic cells like (18.2 kD) (Mrps34andNme3) alternative variant cSep08, mRNA.                                 |
| <a href="#">Mrps34andNme3</a> | <a href="#">Mrps34andNme3.cSep08</a> | <a href="#">287126</a> | 1011  | 772  | 4 | 162 | non-metastatic cells like (18.2 kD) (Mrps34andNme3) alternative variant cSep08, mRNA.                                 |
| <a href="#">Mrps34andNme3</a> | <a href="#">Mrps34andNme3.eSep08</a> | <a href="#">85269</a>  | 962   | 537  | 4 | 91  | nucleoside diphosphate (Mrps34andNme3) alternative variant eSep08, mRNA.                                              |
| <a href="#">Mrps34andNme3</a> | <a href="#">Mrps34andNme3.eSep08</a> | <a href="#">287126</a> | 962   | 537  | 4 | 91  | nucleoside diphosphate (Mrps34andNme3) alternative variant eSep08, mRNA.                                              |
| <a href="#">Mrps35</a>        | <a href="#">Mrps35.bSep08</a>        | <a href="#">297727</a> | 29425 | 813  | 5 | 266 | mitochondrial ribosomal protein S35 (Mrps35) alternative variant bSep08, mRNA.                                        |
| <a href="#">Mrps35</a>        | <a href="#">Mrps35.cSep08</a>        | <a href="#">297727</a> | 15281 | 464  | 2 | 97  | mitochondrial ribosomal protein S35 (Mrps35) alternative variant cSep08, mRNA.                                        |
| <a href="#">Mrps36</a>        | <a href="#">Mrps36.aSep08</a>        | <a href="#">294696</a> | 7755  | 892  | 2 | 117 | mitochondrial ribosomal protein S36 (Mrps36) alternative variant aSep08, mRNA.                                        |
| <a href="#">Mrps36</a>        | <a href="#">Mrps36.bSep08</a>        | <a href="#">294696</a> | 7480  | 429  | 1 | 58  | mitochondrial ribosomal protein S36 (6.2 kD) (Mrps36) alternative variant bSep08, complete mRNA.                      |
| <a href="#">Mrpf</a>          | <a href="#">Mrpf.aSep08</a>          | <a href="#">311903</a> | 16994 | 1798 | 5 | 535 | mitochondrial ribosome recycling factor (Mrpf) alternative variant aSep08, complete mRNA.                             |
| <a href="#">Mrs2</a>          | <a href="#">Mrs2.bSep08</a>          | <a href="#">79032</a>  | 17829 | 2312 | 2 | 450 | MRS2 magnesium homeostasis factor homolog (S. cerevisiae) (51.1 kD) (Mrs2) alternative variant bSep08, complete mRNA. |

|                        |                               |                        |       |      |   |     |                                                                                                                       |
|------------------------|-------------------------------|------------------------|-------|------|---|-----|-----------------------------------------------------------------------------------------------------------------------|
| <a href="#">Mrs2</a>   | <a href="#">Mrs2.cSep08</a>   | <a href="#">79032</a>  | 19207 | 3246 | 4 | 200 | MRS2 magnesium homeostasis factor homolog (S. cerevisiae) (22.8 kD) (Mrs2) alternative variant cSep08, complete mRNA. |
| <a href="#">Mrto4</a>  | <a href="#">Mrto4.aSep08</a>  | <a href="#">298586</a> | 6819  | 2518 | 2 | 240 | MRT4, mRNA turnover 4, homolog (S. cerevisiae) (27.6 kD) (Mrto4) alternative variant aSep08, mRNA.                    |
| <a href="#">Ms4a1</a>  | <a href="#">Ms4a1.bSep08</a>  | <a href="#">309217</a> | 9390  | 1084 | 5 | 251 | membrane-spanning 4-domains, subfamily A, member 1 (Ms4a1) alternative variant bSep08, mRNA.                          |
| <a href="#">Ms4a1</a>  | <a href="#">Ms4a1.cSep08</a>  | <a href="#">309217</a> | 5095  | 1159 | 4 | 199 | membrane-spanning 4-domains, subfamily A, member 1 (Ms4a1) alternative variant cSep08, mRNA.                          |
| <a href="#">Ms4a3</a>  | <a href="#">Ms4a3.aSep08</a>  | <a href="#">293753</a> | 15952 | 729  |   | 185 | membrane-spanning 4-domains, subfamily A, member 3 (Ms4a3) mRNA.                                                      |
| <a href="#">Ms4a4a</a> | <a href="#">Ms4a4a.aSep08</a> | <a href="#">361734</a> | 21951 | 1098 |   | 236 | membrane-spanning 4-domains, subfamily A, member 4A (25.3 kD) (Ms4a4a) alternative variant aSep08, mRNA.              |
| <a href="#">Ms4a6a</a> | <a href="#">Ms4a6a.aSep08</a> | <a href="#">293750</a> | 3089  | 534  |   | 60  | membrane-spanning 4-domains, subfamily A, member 6A (6.6 kD) (Ms4a6a) mRNA.                                           |
| <a href="#">Ms4a7</a>  | <a href="#">Ms4a7.bSep08</a>  | <a href="#">293744</a> | 16188 | 978  | 5 | 225 | membrane-spanning 4-domains, subfamily A, member 7 (24.5 kD) (Ms4a7) alternative variant bSep08, mRNA.                |
| <a href="#">Ms4a7</a>  | <a href="#">Ms4a7.cSep08</a>  | <a href="#">293744</a> | 3064  | 514  | 2 | 156 | membrane-spanning 4-domains, subfamily A, member 7 (Ms4a7) alternative variant cSep08, mRNA.                          |
| <a href="#">Ms4a8a</a> | <a href="#">Ms4a8a.bSep08</a> | <a href="#">361733</a> | 12124 | 823  | 4 | 148 | membrane-spanning 4-domains, subfamily A, member 8A (Ms4a8a) alternative variant bSep08, mRNA.                        |
| <a href="#">Ms4a10</a> | <a href="#">Ms4a10.aSep08</a> | <a href="#">293739</a> | 13130 | 886  | 8 | 259 | membrane-spanning 4-domains, subfamily A, member 10 (Ms4a10) alternative variant aSep08, mRNA.                        |
| <a href="#">Ms4a11</a> | <a href="#">Ms4a11.aSep08</a> | <a href="#">361735</a> | 12225 | 1374 | 5 | 245 | membrane-spanning 4-domains, subfamily A, member 11 (26.7 kD) (Ms4a11) alternative variant aSep08, mRNA.              |
| <a href="#">Ms4a11</a> | <a href="#">Ms4a11.bSep08</a> | <a href="#">361735</a> | 3152  | 607  | 1 | 113 | membrane-spanning 4-domains, subfamily A, member 11 (12.3 kD) (Ms4a11) alternative variant bSep08, mRNA.              |
| <a href="#">Msc</a>    | <a href="#">Msc.bSep08</a>    | <a href="#">312897</a> | 973   | 290  | 1 | 32  | musculin (Msc) alternative variant bSep08, mRNA.                                                                      |
| <a href="#">Msc</a>    | <a href="#">Msc.dSep08</a>    | <a href="#">312897</a> | 1458  | 483  | 2 | 79  | musculin (Msc) alternative variant dSep08, mRNA.                                                                      |
| <a href="#">Msh2</a>   | <a href="#">Msh2.bSep08</a>   | <a href="#">81709</a>  | 4347  | 944  | 1 | 39  | mutS homolog 2 (E. coli) (4.7 kD) (Msh2) alternative variant bSep08, mRNA.                                            |
| <a href="#">Msh3</a>   | <a href="#">Msh3.aSep08</a>   | <a href="#">499505</a> | 44703 | 1414 | 6 | 316 | mutS homolog 3 (E. coli) (Msh3) alternative variant aSep08, mRNA.                                                     |
| <a href="#">Msh3</a>   | <a href="#">Msh3.bSep08</a>   | <a href="#">499505</a> | 21730 | 784  | 4 | 209 | mutS homolog 3 (E. coli) (Msh3) alternative variant bSep08, mRNA.                                                     |
| <a href="#">Msh3</a>   | <a href="#">Msh3.cSep08</a>   | <a href="#">499505</a> | 16094 | 708  | 2 | 194 | mutS homolog 3 (E. coli) (Msh3) alternative variant cSep08, mRNA.                                                     |
| <a href="#">Msh5</a>   | <a href="#">Msh5.bSep08</a>   | <a href="#">294252</a> | 3614  | 1264 | 8 | 244 | mutS homolog 5 (E. coli) (Msh5) alternative variant bSep08, mRNA.                                                     |
| <a href="#">Msh5</a>   | <a href="#">Msh5.cSep08</a>   | <a href="#">294252</a> | 9662  | 688  | 9 | 229 | mutS homolog 5 (E. coli) (Msh5) alternative variant cSep08, mRNA.                                                     |
| <a href="#">Msh5</a>   | <a href="#">Msh5.dSep08</a>   | <a href="#">294252</a> | 2097  | 1197 | 4 | 95  | mutS homolog 5 (E. coli) (Msh5) alternative variant dSep08, mRNA.                                                     |
| <a href="#">Msi1</a>   | <a href="#">Msi1.bSep08</a>   | <a href="#">259272</a> | 22353 | 2656 | 2 | 264 | musashi homolog 1 (Drosophila) (Msi1) alternative variant bSep08, mRNA.                                               |
| <a href="#">Msi2</a>   | <a href="#">Msi2.aSep08</a>   | <a href="#">360596</a> | 72963 | 707  | 5 | 178 | musashi homolog 2 (Drosophila) (Msi2) alternative variant aSep08, mRNA.                                               |

|                              |                                     |                        |        |      |   |     |                                                                                                            |
|------------------------------|-------------------------------------|------------------------|--------|------|---|-----|------------------------------------------------------------------------------------------------------------|
| <a href="#">Msi2</a>         | <a href="#">Msi2.bSep08</a>         | <a href="#">360596</a> | 72961  | 751  | 6 | 177 | musashi homolog 2 (Drosophila) (Msi2) alternative variant bSep08, mRNA.                                    |
| <a href="#">Msi2</a>         | <a href="#">Msi2.cSep08</a>         | <a href="#">360596</a> | 39282  | 3280 | 5 | 129 | musashi homolog 2 (Drosophila) (Msi2) alternative variant cSep08, mRNA.                                    |
| <a href="#">Msi2</a>         | <a href="#">Msi2.dSep08</a>         | <a href="#">360596</a> | 36532  | 248  | 3 | 66  | musashi homolog 2 (Drosophila) (Msi2) alternative variant dSep08, mRNA.                                    |
| <a href="#">Msi2</a>         | <a href="#">Msi2.eSep08</a>         | <a href="#">360596</a> | 50287  | 380  | 3 | 33  | musashi homolog 2 (Drosophila) (Msi2) alternative variant eSep08, mRNA.                                    |
| <a href="#">Msl31</a>        | <a href="#">Msl31.bSep08</a>        | <a href="#">317464</a> | 17682  | 1196 | 9 | 291 | male-specific lethal-3 homolog 1 (Drosophila) (33.6 kD) (Msl31) alternative variant bSep08, complete mRNA. |
| <a href="#">Msl31</a>        | <a href="#">Msl31.cSep08</a>        | <a href="#">317464</a> | 3608   | 809  | 6 | 209 | male-specific lethal-3 homolog 1 (Drosophila) (Msl31) alternative variant cSep08, mRNA.                    |
| <a href="#">Msl31</a>        | <a href="#">Msl31.dSep08</a>        | <a href="#">317464</a> | 3382   | 449  | 5 | 149 | male-specific lethal-3 homolog 1 (Drosophila) (Msl31) alternative variant dSep08, mRNA.                    |
| <a href="#">Msl31</a>        | <a href="#">Msl31.eSep08</a>        | <a href="#">317464</a> | 1670   | 350  | 4 | 116 | male-specific lethal-3 homolog 1 (Drosophila) (Msl31) alternative variant eSep08, mRNA.                    |
| <a href="#">Msl31</a>        | <a href="#">Msl31.fSep08</a>        | <a href="#">317464</a> | 7902   | 743  | 6 | 114 | male-specific lethal-3 homolog 1 (Drosophila) (13.1 kD) (Msl31) alternative variant fSep08, mRNA.          |
| <a href="#">Msl31</a>        | <a href="#">Msl31.hSep08</a>        | <a href="#">317464</a> | 2116   | 327  | 3 | 108 | male-specific lethal-3 homolog 1 (Drosophila) (Msl31) alternative variant hSep08, mRNA.                    |
| <a href="#">Msln</a>         | <a href="#">Msln.bSep08</a>         | <a href="#">60333</a>  | 5695   | 405  | 2 | 117 | mesothelin (Msln) alternative variant bSep08, mRNA.                                                        |
| <a href="#">MsmbandNcoa4</a> | <a href="#">MsmbandNcoa4.cSep08</a> | <a href="#">29311</a>  | 38503  | 771  | 7 | 238 | nuclear receptor coactivator 4 (MsmbandNcoa4) alternative variant cSep08, mRNA.                            |
| <a href="#">MsmbandNcoa4</a> | <a href="#">MsmbandNcoa4.cSep08</a> | <a href="#">619385</a> | 38503  | 771  | 7 | 238 | nuclear receptor coactivator 4 (MsmbandNcoa4) alternative variant cSep08, mRNA.                            |
| <a href="#">MsmbandNcoa4</a> | <a href="#">MsmbandNcoa4.dSep08</a> | <a href="#">29311</a>  | 36908  | 673  | 7 | 223 | nuclear receptor coactivator 4 (MsmbandNcoa4) alternative variant dSep08, mRNA.                            |
| <a href="#">MsmbandNcoa4</a> | <a href="#">MsmbandNcoa4.dSep08</a> | <a href="#">619385</a> | 36908  | 673  | 7 | 223 | nuclear receptor coactivator 4 (MsmbandNcoa4) alternative variant dSep08, mRNA.                            |
| <a href="#">MsmbandNcoa4</a> | <a href="#">MsmbandNcoa4.eSep08</a> | <a href="#">29311</a>  | 7073   | 793  | 4 | 132 | nuclear receptor coactivator 4 (15.3 kD) (MsmbandNcoa4) alternative variant eSep08, mRNA.                  |
| <a href="#">MsmbandNcoa4</a> | <a href="#">MsmbandNcoa4.eSep08</a> | <a href="#">619385</a> | 7073   | 793  | 4 | 132 | nuclear receptor coactivator 4 (15.3 kD) (MsmbandNcoa4) alternative variant eSep08, mRNA.                  |
| <a href="#">MsmbandNcoa4</a> | <a href="#">MsmbandNcoa4.gSep08</a> | <a href="#">29311</a>  | 8355   | 742  | 3 | 84  | beta-microseminoprotein (MsmbandNcoa4) alternative variant gSep08, mRNA.                                   |
| <a href="#">MsmbandNcoa4</a> | <a href="#">MsmbandNcoa4.gSep08</a> | <a href="#">619385</a> | 8355   | 742  | 3 | 84  | beta-microseminoprotein (MsmbandNcoa4) alternative variant gSep08, mRNA.                                   |
| <a href="#">Msn</a>          | <a href="#">Msn.bSep08</a>          | <a href="#">81521</a>  | 7412   | 672  | 4 | 158 | moesin (Msn) alternative variant bSep08, mRNA.                                                             |
| <a href="#">Msr1</a>         | <a href="#">Msr1.aSep08</a>         | <a href="#">498638</a> | 10424  | 799  |   | 77  | macrophage scavenger receptor 1 (Msr1) mRNA.                                                               |
| <a href="#">Msra</a>         | <a href="#">Msra.bSep08</a>         | <a href="#">29447</a>  | 227945 | 581  | 2 | 193 | methionine sulfoxide reductase A (Msra) alternative variant bSep08, mRNA.                                  |
| <a href="#">Msra</a>         | <a href="#">Msra.cSep08</a>         | <a href="#">29447</a>  | 149822 | 432  | 1 | 144 | methionine sulfoxide reductase A (Msra) alternative variant cSep08, mRNA.                                  |
| <a href="#">Msrb2</a>        | <a href="#">Msrb2.bSep08</a>        | <a href="#">361286</a> | 25649  | 856  |   | 146 | methionine sulfoxide reductase B2 (Msrb2) alternative variant bSep08, mRNA.                                |
| <a href="#">Mst1</a>         | <a href="#">Mst1.bSep08</a>         | <a href="#">24566</a>  | 1908   | 736  | 4 | 135 | macrophage stimulating 1 (hepatocyte growth factor-like) (Mst1) alternative variant bSep08, mRNA.          |

|                       |                              |                        |        |      |    |     |                                                                                                                                                                                     |
|-----------------------|------------------------------|------------------------|--------|------|----|-----|-------------------------------------------------------------------------------------------------------------------------------------------------------------------------------------|
| <a href="#">Mst4</a>  | <a href="#">Mst4.aSep08</a>  | <a href="#">317589</a> | 44402  | 1002 |    | 334 | serine/threonine protein kinase MST4 (Mst4) mRNA.                                                                                                                                   |
| <a href="#">Msto1</a> | <a href="#">Msto1.bSep08</a> | <a href="#">295237</a> | 730    | 337  | 3  | 112 | misato homolog 1 (Drosophila) (Msto1) alternative variant bSep08, mRNA.                                                                                                             |
| <a href="#">Mt1a</a>  | <a href="#">Mt1a.bSep08</a>  | <a href="#">24567</a>  | 1148   | 982  | 2  | 85  | metallothionein 1a (8.5 kD) (Mt1a) alternative variant bSep08, mRNA.                                                                                                                |
| <a href="#">Mt1a</a>  | <a href="#">Mt1a.cSep08</a>  | <a href="#">24567</a>  | 1006   | 544  | 2  | 67  | metallothionein 1a (Mt1a) alternative variant cSep08, mRNA.                                                                                                                         |
| <a href="#">Mt2A</a>  | <a href="#">Mt2A.aSep08</a>  | <a href="#">689415</a> | 774    | 382  | 3  | 61  | metallothionein 2A (Mt2A) alternative variant aSep08, complete mRNA.                                                                                                                |
| <a href="#">Mta1</a>  | <a href="#">Mta1.bSep08</a>  | <a href="#">64520</a>  | 2989   | 1794 | 3  | 536 | metastasis associated 1 (Mta1) alternative variant bSep08, mRNA.                                                                                                                    |
| <a href="#">Mta1</a>  | <a href="#">Mta1.cSep08</a>  | <a href="#">64520</a>  | 17373  | 1783 | 14 | 361 | metastasis associated 1 (Mta1) alternative variant cSep08, mRNA.                                                                                                                    |
| <a href="#">Mta1</a>  | <a href="#">Mta1.dSep08</a>  | <a href="#">64520</a>  | 4391   | 1158 | 8  | 280 | metastasis associated 1 (Mta1) alternative variant dSep08, mRNA.                                                                                                                    |
| <a href="#">Mta1</a>  | <a href="#">Mta1.eSep08</a>  | <a href="#">64520</a>  | 11478  | 551  | 6  | 183 | metastasis associated 1 (Mta1) alternative variant eSep08, mRNA.                                                                                                                    |
| <a href="#">Mta1</a>  | <a href="#">Mta1.gSep08</a>  | <a href="#">64520</a>  | 3765   | 944  | 5  | 134 | metastasis associated 1 (Mta1) alternative variant gSep08, mRNA.                                                                                                                    |
| <a href="#">Mta1</a>  | <a href="#">Mta1.hSep08</a>  | <a href="#">64520</a>  | 1296   | 894  | 3  | 119 | metastasis associated 1 (Mta1) alternative variant hSep08, mRNA.                                                                                                                    |
| <a href="#">Mta3</a>  | <a href="#">Mta3.aSep08</a>  | <a href="#">298763</a> | 102173 | 1582 | 3  | 293 | metastasis associated 1 family, member 3 (Mta3) alternative variant aSep08, mRNA.                                                                                                   |
| <a href="#">Mta3</a>  | <a href="#">Mta3.bSep08</a>  | <a href="#">298763</a> | 45950  | 1195 | 2  | 276 | metastasis associated 1 family, member 3 (31.4 kD) (Mta3) alternative variant bSep08, mRNA.                                                                                         |
| <a href="#">Mtap</a>  | <a href="#">Mtap.bSep08</a>  | <a href="#">298227</a> | 7797   | 1236 | 1  | 167 | methylthioadenosine phosphorylase (Mtap) alternative variant bSep08, mRNA.                                                                                                          |
| <a href="#">Mtch1</a> | <a href="#">Mtch1.bSep08</a> | <a href="#">294313</a> | 22866  | 1444 | 12 | 260 | mitochondrial carrier homolog 1 (29.0 kD) (Mtch1) alternative variant bSep08, mRNA.                                                                                                 |
| <a href="#">Mtch1</a> | <a href="#">Mtch1.cSep08</a> | <a href="#">294313</a> | 15004  | 755  | 7  | 164 | mitochondrial carrier homolog 1 (Mtch1) alternative variant cSep08, mRNA.                                                                                                           |
| <a href="#">Mtch1</a> | <a href="#">Mtch1.dSep08</a> | <a href="#">294313</a> | 14980  | 646  | 7  | 129 | mitochondrial carrier homolog 1 (Mtch1) alternative variant dSep08, mRNA.                                                                                                           |
| <a href="#">Mtch2</a> | <a href="#">Mtch2.bSep08</a> | <a href="#">295922</a> | 15293  | 694  | 2  | 227 | mitochondrial carrier homolog 2 (Mtch2) alternative variant bSep08, mRNA.                                                                                                           |
| <a href="#">Mtch2</a> | <a href="#">Mtch2.cSep08</a> | <a href="#">295922</a> | 17187  | 738  | 2  | 225 | mitochondrial carrier homolog 2 (Mtch2) alternative variant cSep08, mRNA.                                                                                                           |
| <a href="#">Mtcp1</a> | <a href="#">Mtcp1.aSep08</a> | <a href="#">498814</a> | 3931   | 898  | 5  | 107 | mature T-cell proliferation 1 and similar to P8 MTCP-1 protein (Mature T-cell proliferation-1 type A) (MTCP-1 type A) (P8MTCP1) (12.9 kD) (Mtcp1) alternative variant aSep08, mRNA. |
| <a href="#">Mtcp1</a> | <a href="#">Mtcp1.aSep08</a> | <a href="#">679930</a> | 3931   | 898  | 5  | 107 | mature T-cell proliferation 1 and similar to P8 MTCP-1 protein (Mature T-cell proliferation-1 type A) (MTCP-1 type A) (P8MTCP1) (12.9 kD) (Mtcp1) alternative variant aSep08, mRNA. |



|                         |                                |                        |        |      |    |      |                                                                                                                                                                           |
|-------------------------|--------------------------------|------------------------|--------|------|----|------|---------------------------------------------------------------------------------------------------------------------------------------------------------------------------|
| <a href="#">Mtcp1</a>   | <a href="#">Mtcp1.bSep08</a>   | <a href="#">498814</a> | 632    | 426  | 2  | 69   | mature T-cell proliferation 1 and similar to P8 MTCP-1 protein (Mature T-cell proliferation-1 type A) (MTCP-1 type A) (P8MTCP1) (Mtcp1) alternative variant bSep08, mRNA. |
| <a href="#">Mtcp1</a>   | <a href="#">Mtcp1.bSep08</a>   | <a href="#">679930</a> | 632    | 426  | 2  | 69   | mature T-cell proliferation 1 and similar to P8 MTCP-1 protein (Mature T-cell proliferation-1 type A) (MTCP-1 type A) (P8MTCP1) (Mtcp1) alternative variant bSep08, mRNA. |
| <a href="#">Mtdh</a>    | <a href="#">Mtdh.bSep08</a>    | <a href="#">170910</a> | 30695  | 4048 | 9  | 393  | metadherin (Mtdh) alternative variant bSep08, mRNA.                                                                                                                       |
| <a href="#">Mtdh</a>    | <a href="#">Mtdh.cSep08</a>    | <a href="#">170910</a> | 20820  | 957  | 8  | 319  | metadherin (Mtdh) alternative variant cSep08, mRNA.                                                                                                                       |
| <a href="#">Mtdh</a>    | <a href="#">Mtdh.dSep08</a>    | <a href="#">170910</a> | 48403  | 950  | 6  | 199  | metadherin (Mtdh) alternative variant dSep08, mRNA.                                                                                                                       |
| <a href="#">Mtdh</a>    | <a href="#">Mtdh.eSep08</a>    | <a href="#">170910</a> | 16780  | 684  | 5  | 120  | metadherin (Mtdh) alternative variant eSep08, mRNA.                                                                                                                       |
| <a href="#">Mterf</a>   | <a href="#">Mterf.bSep08</a>   | <a href="#">85261</a>  | 6468   | 844  | 2  | 240  | mitochondrial transcription termination factor (Mterf) alternative variant bSep08, mRNA.                                                                                  |
| <a href="#">Mterf</a>   | <a href="#">Mterf.cSep08</a>   | <a href="#">85261</a>  | 6347   | 772  | 3  | 39   | putative protein (Mterf) alternative variant cSep08, mRNA.                                                                                                                |
| <a href="#">Mterf</a>   | <a href="#">Mterf.dSep08</a>   | <a href="#">85261</a>  | 6323   | 745  | 3  | 194  | mitochondrial transcription termination factor (Mterf) alternative variant dSep08, mRNA.                                                                                  |
| <a href="#">Mterfd1</a> | <a href="#">Mterfd1.bSep08</a> | <a href="#">299514</a> | 11031  | 760  | 5  | 161  | putative protein of mammalian origin (17.7 kD) (Mterfd1) alternative variant bSep08, mRNA.                                                                                |
| <a href="#">Mterfd1</a> | <a href="#">Mterfd1.cSep08</a> | <a href="#">299514</a> | 18255  | 1086 | 6  | 155  | putative protein of mammalian origin (17.1 kD) (Mterfd1) alternative variant cSep08, complete mRNA.                                                                       |
| <a href="#">Mterfd1</a> | <a href="#">Mterfd1.dSep08</a> | <a href="#">299514</a> | 2971   | 856  | 2  | 103  | putative cytoplasmic protein of metazoan origin (12.1 kD) (Mterfd1) alternative variant dSep08, mRNA.                                                                     |
| <a href="#">Mterfd1</a> | <a href="#">Mterfd1.eSep08</a> | <a href="#">299514</a> | 2691   | 734  | 2  | 99   | putative protein of mammalian origin (Mterfd1) alternative variant eSep08, mRNA.                                                                                          |
| <a href="#">Mterfd1</a> | <a href="#">Mterfd1.gSep08</a> | <a href="#">299514</a> | 13516  | 679  | 6  | 87   | putative protein of mammalian origin (9.5 kD) (Mterfd1) alternative variant gSep08, complete mRNA.                                                                        |
| <a href="#">Mterfd3</a> | <a href="#">Mterfd3.cSep08</a> | <a href="#">366856</a> | 5930   | 993  | 4  | 34   | putative protein (Mterfd3) alternative variant cSep08, mRNA.                                                                                                              |
| <a href="#">Mtf2</a>    | <a href="#">Mtf2.aSep08</a>    | <a href="#">360905</a> | 43300  | 2784 | 15 | 593  | metal response element binding transcription factor 2 (66.9 kD) (Mtf2) alternative variant aSep08, complete mRNA.                                                         |
| <a href="#">Mtf2</a>    | <a href="#">Mtf2.bSep08</a>    | <a href="#">360905</a> | 16126  | 968  | 9  | 280  | metal response element binding transcription factor 2 (Mtf2) alternative variant bSep08, mRNA.                                                                            |
| <a href="#">Mtf2</a>    | <a href="#">Mtf2.cSep08</a>    | <a href="#">360905</a> | 21066  | 863  | 6  | 129  | metal response element binding transcription factor 2 (Mtf2) alternative variant cSep08, mRNA.                                                                            |
| <a href="#">Mtf2</a>    | <a href="#">Mtf2.dSep08</a>    | <a href="#">360905</a> | 3794   | 1033 | 2  | 30   | metal response element binding transcription factor 2 (Mtf2) alternative variant dSep08, mRNA.                                                                            |
| <a href="#">Mtfmt</a>   | <a href="#">Mtfmt.bSep08</a>   | <a href="#">315763</a> | 3941   | 624  | 2  | 56   | mitochondrial methionyl-tRNA formyltransferase (6.5 kD) (Mtfmt) alternative variant bSep08, mRNA.                                                                         |
| <a href="#">Mtfr1</a>   | <a href="#">Mtfr1.bSep08</a>   | <a href="#">311403</a> | 11759  | 726  | 5  | 227  | mitochondrial fission regulator 1 (Mtfr1) alternative variant bSep08, mRNA.                                                                                               |
| <a href="#">Mthfd1l</a> | <a href="#">Mthfd1l.aSep08</a> | <a href="#">361472</a> | 193421 | 3568 | 23 | 1021 | methylenetetrahydrofolate dehydrogenase (NADP+ dependent) 1-like (Mthfd1l) alternative variant aSep08, mRNA.                                                              |
| <a href="#">Mthfd2l</a> | <a href="#">Mthfd2l.bSep08</a> | <a href="#">305248</a> | 53671  | 457  | 1  | 90   | methylenetetrahydrofolate dehydrogenase (NADP+ dependent) 2-like (Mthfd2l) alternative variant bSep08, mRNA.                                                              |
| <a href="#">Mthfr</a>   | <a href="#">Mthfr.aSep08</a>   | <a href="#">362657</a> | 10815  | 1594 | 7  | 530  | 5,10-methylenetetrahydrofolate reductase (NADPH) (Mthfr) alternative variant aSep08, mRNA.                                                                                |

|                       |                              |                        |       |      |    |     |                                                                                                             |
|-----------------------|------------------------------|------------------------|-------|------|----|-----|-------------------------------------------------------------------------------------------------------------|
| <a href="#">Mthfr</a> | <a href="#">Mthfr.bSep08</a> | <a href="#">362657</a> | 5172  | 1784 | 5  | 434 | 5,10-methylenetetrahydrofolate reductase (NADPH) (Mthfr) alternative variant bSep08, mRNA.                  |
| <a href="#">Mthfr</a> | <a href="#">Mthfr.cSep08</a> | <a href="#">362657</a> | 1469  | 384  | 1  | 66  | 5,10-methylenetetrahydrofolate reductase (NADPH) (Mthfr) alternative variant cSep08, mRNA.                  |
| <a href="#">Mtif2</a> | <a href="#">Mtif2.bSep08</a> | <a href="#">305606</a> | 12951 | 1268 | 9  | 341 | mitochondrial translational initiation factor 2 (37.8 kD) (Mtif2) alternative variant bSep08, mRNA.         |
| <a href="#">Mtl5</a>  | <a href="#">Mtl5.bSep08</a>  | <a href="#">309142</a> | 3244  | 298  | 1  | 87  | metallothionein-like 5, testis-specific (tesmin) (Mtl5) alternative variant bSep08, mRNA.                   |
| <a href="#">Mtm1</a>  | <a href="#">Mtm1.bSep08</a>  | <a href="#">288762</a> | 3971  | 1655 | 5  | 243 | X-linked myotubular myopathy gene 1 (Mtm1) alternative variant bSep08, mRNA.                                |
| <a href="#">Mtm1</a>  | <a href="#">Mtm1.cSep08</a>  | <a href="#">288762</a> | 3093  | 452  | 2  | 137 | X-linked myotubular myopathy gene 1 (Mtm1) alternative variant cSep08, mRNA.                                |
| <a href="#">Mtmr1</a> | <a href="#">Mtmr1.aSep08</a> | <a href="#">317296</a> | 18912 | 1792 | 5  | 565 | myotubularin related protein 1 (Mtmr1) alternative variant aSep08, mRNA.                                    |
| <a href="#">Mtmr1</a> | <a href="#">Mtmr1.bSep08</a> | <a href="#">317296</a> | 17594 | 2943 | 11 | 515 | myotubularin related protein 1 (Mtmr1) alternative variant bSep08, mRNA.                                    |
| <a href="#">Mtmr1</a> | <a href="#">Mtmr1.cSep08</a> | <a href="#">317296</a> | 3356  | 914  | 2  | 87  | myotubularin related protein 1 (8.9 kD) (Mtmr1) alternative variant cSep08, complete mRNA.                  |
| <a href="#">Mtmr1</a> | <a href="#">Mtmr1.dSep08</a> | <a href="#">317296</a> | 2998  | 579  | 2  | 80  | myotubularin related protein 1 (8.1 kD) (Mtmr1) alternative variant dSep08, complete mRNA.                  |
| <a href="#">Mtmr2</a> | <a href="#">Mtmr2.bSep08</a> | <a href="#">315422</a> | 4188  | 659  | 4  | 112 | myotubularin related protein 2 (Mtmr2) alternative variant bSep08, mRNA.                                    |
| <a href="#">Mtmr2</a> | <a href="#">Mtmr2.dSep08</a> | <a href="#">315422</a> | 3533  | 396  | 2  | 60  | myotubularin related protein 2 (Mtmr2) alternative variant dSep08, mRNA.                                    |
| <a href="#">Mtmr2</a> | <a href="#">Mtmr2.eSep08</a> | <a href="#">315422</a> | 2797  | 1284 | 2  | 57  | myotubularin related protein 2 (6.4 kD) (Mtmr2) alternative variant eSep08, mRNA.                           |
| <a href="#">Mtmr2</a> | <a href="#">Mtmr2.fSep08</a> | <a href="#">315422</a> | 27659 | 371  | 4  | 47  | myotubularin related protein 2 (Mtmr2) alternative variant fSep08, mRNA.                                    |
| <a href="#">Mtmr3</a> | <a href="#">Mtmr3.bSep08</a> | <a href="#">305482</a> | 6749  | 2688 | 4  | 261 | myotubularin related protein 3 (Mtmr3) alternative variant bSep08, mRNA.                                    |
| <a href="#">Mtmr3</a> | <a href="#">Mtmr3.dSep08</a> | <a href="#">305482</a> | 23719 | 477  | 6  | 97  | myotubularin-related protein 3 (Mtmr3) alternative variant dSep08, mRNA.                                    |
| <a href="#">Mtmr3</a> | <a href="#">Mtmr3.eSep08</a> | <a href="#">305482</a> | 49352 | 1536 | 3  | 84  | putative protein (Mtmr3) alternative variant eSep08, mRNA.                                                  |
| <a href="#">Mtmr3</a> | <a href="#">Mtmr3.gSep08</a> | <a href="#">305482</a> | 6292  | 1358 | 2  | 72  | ab2-143 like (8.0 kD) (Mtmr3) alternative variant gSep08, mRNA.                                             |
| <a href="#">Mtmr4</a> | <a href="#">Mtmr4.bSep08</a> | <a href="#">287607</a> | 2881  | 451  | 4  | 149 | myotubularin related protein 4 and hypothetical protein LOC689785 (Mtmr4) alternative variant bSep08, mRNA. |
| <a href="#">Mtmr4</a> | <a href="#">Mtmr4.bSep08</a> | <a href="#">689785</a> | 2881  | 451  | 4  | 149 | myotubularin related protein 4 and hypothetical protein LOC689785 (Mtmr4) alternative variant bSep08, mRNA. |
| <a href="#">Mtmr6</a> | <a href="#">Mtmr6.bSep08</a> | <a href="#">305935</a> | 9549  | 971  | 1  | 323 | myotubularin related protein 6 (Mtmr6) alternative variant bSep08, mRNA.                                    |
| <a href="#">Mtmr7</a> | <a href="#">Mtmr7.bSep08</a> | <a href="#">306490</a> | 12522 | 932  | 7  | 310 | myotubularin related protein 7 (Mtmr7) alternative variant bSep08, mRNA.                                    |
| <a href="#">Mtmr7</a> | <a href="#">Mtmr7.cSep08</a> | <a href="#">306490</a> | 49626 | 571  | 5  | 169 | myotubularin related protein 7 (Mtmr7) alternative variant cSep08, mRNA.                                    |
| <a href="#">Mtmr7</a> | <a href="#">Mtmr7.dSep08</a> | <a href="#">306490</a> | 3573  | 777  | 3  | 97  | myotubularin related protein 7 (Mtmr7) alternative variant dSep08, mRNA.                                    |

|                        |                               |                        |        |      |    |      |                                                                                                                      |
|------------------------|-------------------------------|------------------------|--------|------|----|------|----------------------------------------------------------------------------------------------------------------------|
| <a href="#">Mtmr10</a> | <a href="#">Mtmr10.aSep08</a> | <a href="#">309255</a> | 51444  | 4649 |    | 776  | myotubularin related protein 10 (Mtmr10) mRNA.                                                                       |
| <a href="#">Mtmr11</a> | <a href="#">Mtmr11.aSep08</a> | <a href="#">689613</a> | 5472   | 1268 | 12 | 387  | myotubularin related protein 11 (Mtmr11) alternative variant aSep08, mRNA.                                           |
| <a href="#">Mtmr11</a> | <a href="#">Mtmr11.bSep08</a> | <a href="#">689613</a> | 3417   | 1922 | 4  | 270  | myotubularin related protein 11 CRA f (30.7 kD) (Mtmr11) alternative variant bSep08, mRNA.                           |
| <a href="#">Mtmr11</a> | <a href="#">Mtmr11.cSep08</a> | <a href="#">689613</a> | 4914   | 1076 | 10 | 207  | myotubularin related protein 11 (Mtmr11) alternative variant cSep08, mRNA.                                           |
| <a href="#">Mtmr11</a> | <a href="#">Mtmr11.dSep08</a> | <a href="#">689613</a> | 5682   | 1500 | 8  | 119  | myotubularin related protein 11 CRA f (Mtmr11) alternative variant dSep08, mRNA.                                     |
| <a href="#">Mtmr12</a> | <a href="#">Mtmr12.bSep08</a> | <a href="#">310155</a> | 57580  | 2634 | 11 | 223  | myotubularin related protein 12 (25.8 kD) (Mtmr12) alternative variant bSep08, mRNA.                                 |
| <a href="#">Mtmr14</a> | <a href="#">Mtmr14.bSep08</a> | <a href="#">312634</a> | 11120  | 575  | 7  | 128  | myotubularin related protein 14 (Mtmr14) alternative variant bSep08, mRNA.                                           |
| <a href="#">Mtmr14</a> | <a href="#">Mtmr14.dSep08</a> | <a href="#">312634</a> | 1097   | 463  | 2  | 71   | myotubularin related protein 14 (Mtmr14) alternative variant dSep08, mRNA.                                           |
| <a href="#">Mtmr15</a> | <a href="#">Mtmr15.aSep08</a> | <a href="#">309256</a> | 4132   | 1179 |    | 155  | myotubularin related protein 15 (Mtmr15) mRNA.                                                                       |
| <a href="#">Mtp18</a>  | <a href="#">Mtp18.bSep08</a>  | <a href="#">289745</a> | 3233   | 789  | 2  | 157  | mitochondrial protein 18 kDa (17.0 kD) (Mtp18) alternative variant bSep08, mRNA.                                     |
| <a href="#">Mtrf1l</a> | <a href="#">Mtrf1l.bSep08</a> | <a href="#">361473</a> | 9441   | 894  | 6  | 143  | mitochondrial translational release factor 1-like (15.9 kD) (Mtrf1l) alternative variant bSep08, mRNA.               |
| <a href="#">Mtrf1l</a> | <a href="#">Mtrf1l.cSep08</a> | <a href="#">361473</a> | 3327   | 421  | 2  | 135  | mitochondrial translational release factor 1-like (Mtrf1l) alternative variant cSep08, mRNA.                         |
| <a href="#">Mtrf1l</a> | <a href="#">Mtrf1l.eSep08</a> | <a href="#">361473</a> | 1146   | 544  | 2  | 93   | mitochondrial translational release factor 1-like (11.1 kD) (Mtrf1l) alternative variant eSep08, mRNA.               |
| <a href="#">Mtrf1l</a> | <a href="#">Mtrf1l.fSep08</a> | <a href="#">361473</a> | 1841   | 395  | 2  | 87   | mitochondrial translational release factor 1-like (Mtrf1l) alternative variant fSep08, mRNA.                         |
| <a href="#">Mtrr</a>   | <a href="#">Mtrr.bSep08</a>   | <a href="#">290947</a> | 9815   | 971  | 7  | 323  | 5-methyltetrahydrofolate-homocysteine methyltransferase reductase (Mtrr) alternative variant bSep08, mRNA.           |
| <a href="#">Mtrr</a>   | <a href="#">Mtrr.cSep08</a>   | <a href="#">290947</a> | 17139  | 660  | 5  | 219  | 5-methyltetrahydrofolate-homocysteine methyltransferase reductase (Mtrr) alternative variant cSep08, mRNA.           |
| <a href="#">Mtrr</a>   | <a href="#">Mtrr.dSep08</a>   | <a href="#">290947</a> | 8595   | 837  | 5  | 95   | 5-methyltetrahydrofolate-homocysteine methyltransferase reductase (10.6 kD) (Mtrr) alternative variant dSep08, mRNA. |
| <a href="#">Mtss1</a>  | <a href="#">Mtss1.bSep08</a>  | <a href="#">362918</a> | 2005   | 867  | 2  | 263  | metastasis suppressor 1 (Mtss1) alternative variant bSep08, mRNA.                                                    |
| <a href="#">Mtus1</a>  | <a href="#">Mtus1.aSep08</a>  | <a href="#">306487</a> | 142806 | 4317 | 14 | 1210 | mitochondrial tumor suppressor 1 (134.2 kD) (Mtus1) alternative variant aSep08, mRNA.                                |
| <a href="#">Mtus1</a>  | <a href="#">Mtus1.cSep08</a>  | <a href="#">306487</a> | 17315  | 751  | 6  | 182  | mitochondrial tumor suppressor 1 (Mtus1) alternative variant cSep08, mRNA.                                           |
| <a href="#">Mtvr2</a>  | <a href="#">Mtvr2.cSep08</a>  | <a href="#">309170</a> | 1608   | 1253 | 2  | 118  | mammary tumor virus receptor 2 (11.8 kD) (Mtvr2) alternative variant cSep08, mRNA.                                   |
| <a href="#">Mtx2</a>   | <a href="#">Mtx2.bSep08</a>   | <a href="#">288150</a> | 32226  | 967  | 7  | 177  | metaxin 2 (Mtx2) alternative variant bSep08, mRNA.                                                                   |
| <a href="#">muby</a>   | <a href="#">muby.aSep08</a>   |                        | 1152   | 423  |    | 36   | putative protein (4.4 kD) (muby) mRNA.                                                                               |
| <a href="#">Muc4</a>   | <a href="#">Muc4.aSep08</a>   | <a href="#">303887</a> | 2322   | 1007 | 4  | 215  | mucin 4, cell surface associated (Muc4) alternative variant aSep08, mRNA.                                            |
| <a href="#">Muc13</a>  | <a href="#">Muc13.aSep08</a>  | <a href="#">207126</a> | 22252  | 2223 | 1  | 380  | mucin 13, cell surface associated (Muc13) alternative variant aSep08, mRNA.                                          |

|                        |                               |                        |       |      |    |     |                                                                                                     |
|------------------------|-------------------------------|------------------------|-------|------|----|-----|-----------------------------------------------------------------------------------------------------|
| <a href="#">Muc13</a>  | <a href="#">Muc13.bSep08</a>  | <a href="#">207126</a> | 2618  | 401  | 2  | 48  | mucin 13, cell surface associated (Muc13) alternative variant bSep08, mRNA.                         |
| <a href="#">Muc15</a>  | <a href="#">Muc15.bSep08</a>  | <a href="#">690914</a> | 6770  | 724  | 3  | 75  | mucin 15, cell surface associated (8.9 kD) (Muc15) alternative variant bSep08, mRNA.                |
| <a href="#">Muc16</a>  | <a href="#">Muc16.aSep08</a>  | <a href="#">315451</a> | 27077 | 1360 |    | 431 | mucin 16, cell surface associated (Muc16) mRNA.                                                     |
| <a href="#">Muc19</a>  | <a href="#">Muc19.aSep08</a>  | <a href="#">315239</a> | 6422  | 709  |    | 181 | mucin 19 (Muc19) mRNA.                                                                              |
| <a href="#">Mucdhl</a> | <a href="#">Mucdhl.bSep08</a> | <a href="#">171554</a> | 3654  | 981  | 5  | 304 | mucin and cadherin like (Mucdhl) alternative variant bSep08, mRNA.                                  |
| <a href="#">Mucdhl</a> | <a href="#">Mucdhl.cSep08</a> | <a href="#">171554</a> | 5022  | 300  | 3  | 99  | mucin and cadherin like (Mucdhl) alternative variant cSep08, mRNA.                                  |
| <a href="#">muchy</a>  | <a href="#">muchy.aSep08</a>  |                        | 1093  | 303  |    | 96  | putative protein (muchy) mRNA.                                                                      |
| <a href="#">mudar</a>  | <a href="#">mudar.aSep08</a>  |                        | 7173  | 676  |    | 77  | putative nuclear protein (8.3 kD) (mudar) mRNA.                                                     |
| <a href="#">mufer</a>  | <a href="#">mufer.aSep08</a>  |                        | 3031  | 270  |    | 45  | putative protein (mufer) mRNA.                                                                      |
| <a href="#">muflo</a>  | <a href="#">muflo.aSep08</a>  |                        | 4674  | 928  |    | 155 | hermansky-Pudlak syndrome protein like (muflo) mRNA.                                                |
| <a href="#">muflu</a>  | <a href="#">muflu.aSep08</a>  |                        | 1358  | 1213 |    | 230 | ATPase class V type 10A (24.7 kD) (muflu) mRNA.                                                     |
| <a href="#">Mug2</a>   | <a href="#">Mug2.aSep08</a>   | <a href="#">408236</a> | 14417 | 1169 |    | 389 | murinoglobulin 2 (Mug2) mRNA.                                                                       |
| <a href="#">mugar</a>  | <a href="#">mugar.aSep08</a>  |                        | 2660  | 216  |    | 52  | putative protein (5.8 kD) (mugar) mRNA.                                                             |
| <a href="#">mujej</a>  | <a href="#">mujej.aSep08</a>  |                        | 5087  | 393  | 2  | 131 | protein Tyrosine phosphatase non-receptor type 13 (mujej) alternative variant aSep08, mRNA.         |
| <a href="#">mukee</a>  | <a href="#">mukee.aSep08</a>  |                        | 3756  | 786  |    | 104 | CRA a like (mukee) mRNA.                                                                            |
| <a href="#">muloy</a>  | <a href="#">muloy.aSep08</a>  |                        | 59626 | 487  |    | 79  | putative protein (muloy) mRNA.                                                                      |
| <a href="#">Mum1</a>   | <a href="#">Mum1.aSep08</a>   | <a href="#">362838</a> | 16896 | 2572 | 14 | 698 | melanoma associated antigen (mutated) 1 (78.0 kD) (Mum1) alternative variant aSep08, complete mRNA. |
| <a href="#">Mum1</a>   | <a href="#">Mum1.cSep08</a>   | <a href="#">362838</a> | 5500  | 700  | 5  | 201 | melanoma associated antigen (mutated) 1 (Mum1) alternative variant cSep08, mRNA.                    |
| <a href="#">Mum1</a>   | <a href="#">Mum1.dSep08</a>   | <a href="#">362838</a> | 4534  | 795  | 5  | 192 | melanoma associated antigen (mutated) 1 (Mum1) alternative variant dSep08, mRNA.                    |
| <a href="#">Mum1</a>   | <a href="#">Mum1.eSep08</a>   | <a href="#">362838</a> | 959   | 604  | 2  | 118 | melanoma associated antigen (mutated) 1 (Mum1) alternative variant eSep08, mRNA.                    |
| <a href="#">Mum1</a>   | <a href="#">Mum1.gSep08</a>   | <a href="#">362838</a> | 5194  | 731  | 3  | 96  | melanoma associated antigen (mutated) 1 (Mum1) alternative variant gSep08, mRNA.                    |
| <a href="#">Mum1</a>   | <a href="#">Mum1.hSep08</a>   | <a href="#">362838</a> | 3030  | 806  | 3  | 57  | melanoma associated antigen (mutated) 1 (6.8 kD) (Mum1) alternative variant hSep08, mRNA.           |
| <a href="#">Mum111</a> | <a href="#">Mum111.aSep08</a> | <a href="#">501630</a> | 4227  | 3602 | 2  | 679 | melanoma associated antigen (mutated) 1-like 1 (77.2 kD) (Mum111) alternative variant aSep08, mRNA. |
| <a href="#">Mum111</a> | <a href="#">Mum111.cSep08</a> | <a href="#">501630</a> | 29092 | 554  | 4  | 74  | melanoma associated antigen (mutated) 1-like 1 (Mum111) alternative variant cSep08, mRNA.           |
| <a href="#">mumee</a>  | <a href="#">mumee.aSep08</a>  |                        | 20601 | 1689 | 4  | 226 | lipase maturation factor 1 (mumee) alternative variant aSep08, mRNA.                                |
| <a href="#">mumee</a>  | <a href="#">mumee.bSep08</a>  |                        | 6272  | 795  | 3  | 149 | lipase maturation factor 1 (mumee) alternative variant bSep08, mRNA.                                |
| <a href="#">mumer</a>  | <a href="#">mumer.aSep08</a>  |                        | 3482  | 728  |    | 36  | putative protein (4.3 kD) (mumer) mRNA.                                                             |
| <a href="#">munoy</a>  | <a href="#">munoy.aSep08</a>  |                        | 20189 | 632  |    | 78  | putative protein (munoy) mRNA.                                                                      |
| <a href="#">mupor</a>  | <a href="#">mupor.aSep08</a>  |                        | 11964 | 601  | 2  | 37  | CRA b like (4.0 kD) (mupor) alternative variant aSep08, mRNA.                                       |

|                           |                                  |                        |       |      |    |     |                                                                                       |
|---------------------------|----------------------------------|------------------------|-------|------|----|-----|---------------------------------------------------------------------------------------|
| <a href="#">mupor</a>     | <a href="#">mupor.bSep08</a>     |                        | 10241 | 575  | 1  | 28  | putative protein (3.0 kD) (mupor) alternative variant bSep08, mRNA.                   |
| <a href="#">Mus81</a>     | <a href="#">Mus81.bSep08</a>     | <a href="#">293678</a> | 1491  | 599  | 6  | 140 | mus81 endonuclease (Mus81) alternative variant bSep08, mRNA.                          |
| <a href="#">Mus81</a>     | <a href="#">Mus81.cSep08</a>     | <a href="#">293678</a> | 1003  | 516  | 3  | 72  | mus81 endonuclease (7.8 kD) (Mus81) alternative variant cSep08, mRNA.                 |
| <a href="#">Mus81</a>     | <a href="#">Mus81.dSep08</a>     | <a href="#">293678</a> | 1895  | 1096 | 6  | 83  | mus81 endonuclease (Mus81) alternative variant dSep08, mRNA.                          |
| <a href="#">musa</a>      | <a href="#">musa.aSep08</a>      |                        | 9398  | 918  |    | 305 | putative protein of eukaryotic origin (musa) mRNA.                                    |
| <a href="#">mushee</a>    | <a href="#">mushee.aSep08</a>    |                        | 10453 | 1025 |    | 144 | putative protein of metazoan origin (mushee) mRNA.                                    |
| <a href="#">Mut</a>       | <a href="#">Mut.aSep08</a>       | <a href="#">688517</a> | 13889 | 2187 |    | 288 | methylmalonyl-Coenzyme A mutase (Mut) mRNA.                                           |
| <a href="#">MutS_II.0</a> | <a href="#">MutS_II.0.aSep08</a> |                        | 81400 | 1362 |    | 451 | mutS homolog 3 (MutS_II.0) mRNA.                                                      |
| <a href="#">MutS_V.0</a>  | <a href="#">MutS_V.0.aSep08</a>  |                        | 4786  | 2188 | 7  | 603 | mutS homolog (MutS_V.0) alternative variant aSep08, mRNA.                             |
| <a href="#">mutu</a>      | <a href="#">mutu.aSep08</a>      |                        | 4024  | 733  |    | 53  | putative protein (mutu) mRNA.                                                         |
| <a href="#">Mutyh</a>     | <a href="#">Mutyh.bSep08</a>     | <a href="#">170841</a> | 9560  | 732  | 10 | 143 | mutY homolog (Mutyh) alternative variant bSep08, mRNA.                                |
| <a href="#">Mutyh</a>     | <a href="#">Mutyh.cSep08</a>     | <a href="#">170841</a> | 2444  | 853  | 6  | 119 | mutY homolog (Mutyh) alternative variant cSep08, mRNA.                                |
| <a href="#">Mutyh</a>     | <a href="#">Mutyh.dSep08</a>     | <a href="#">170841</a> | 9106  | 1043 | 3  | 111 | mutY homolog (12.9 kD) (Mutyh) alternative variant dSep08, complete mRNA.             |
| <a href="#">Mutyh</a>     | <a href="#">Mutyh.eSep08</a>     | <a href="#">170841</a> | 1620  | 649  | 3  | 92  | putative mitochondrial protein (9.3 kD) (Mutyh) alternative variant eSep08, mRNA.     |
| <a href="#">muvar</a>     | <a href="#">muvar.aSep08</a>     |                        | 1018  | 493  |    | 65  | putative protein (6.8 kD) (muvar) mRNA.                                               |
| <a href="#">muwey</a>     | <a href="#">muwey.aSep08</a>     |                        | 7993  | 1061 |    | 185 | ER degradation enhancer mannosidase alpha-like 1 (muwey) mRNA.                        |
| <a href="#">Mvd</a>       | <a href="#">Mvd.bSep08</a>       | <a href="#">81726</a>  | 491   | 381  | 2  | 44  | mevalonate (diphospho) decarboxylase (4.7 kD) (Mvd) alternative variant bSep08, mRNA. |
| <a href="#">Mvp</a>       | <a href="#">Mvp.bSep08</a>       | <a href="#">64681</a>  | 1643  | 658  | 1  | 148 | major vault protein (15.7 kD) (Mvp) alternative variant bSep08, mRNA.                 |
| <a href="#">Mx1</a>       | <a href="#">Mx1.bSep08</a>       | <a href="#">24575</a>  | 9191  | 386  | 3  | 69  | myxovirus (influenza virus) resistance 1 (Mx1) alternative variant bSep08, mRNA.      |
| <a href="#">Mx1</a>       | <a href="#">Mx1.cSep08</a>       | <a href="#">24575</a>  | 2178  | 288  | 2  | 26  | myxovirus (influenza virus) resistance 1 (Mx1) alternative variant cSep08, mRNA.      |
| <a href="#">Mxd1</a>      | <a href="#">Mxd1.aSep08</a>      | <a href="#">362391</a> | 18410 | 946  | 5  | 231 | max dimerization protein 1 (Mxd1) alternative variant aSep08, mRNA.                   |
| <a href="#">Mxd1</a>      | <a href="#">Mxd1.bSep08</a>      | <a href="#">362391</a> | 17914 | 494  | 5  | 164 | max dimerization protein 1 (Mxd1) alternative variant bSep08, mRNA.                   |
| <a href="#">Mxd4</a>      | <a href="#">Mxd4.aSep08</a>      | <a href="#">360961</a> | 14051 | 3930 | 6  | 273 | max dimerization protein 4 (Mxd4) alternative variant aSep08, mRNA.                   |
| <a href="#">Mxd4</a>      | <a href="#">Mxd4.bSep08</a>      | <a href="#">360961</a> | 9841  | 404  | 5  | 134 | max dimerization protein 4 (Mxd4) alternative variant bSep08, mRNA.                   |
| <a href="#">Mxd4</a>      | <a href="#">Mxd4.eSep08</a>      | <a href="#">360961</a> | 1529  | 475  | 2  | 32  | max dimerization protein 4 (3.7 kD) (Mxd4) alternative variant eSep08, mRNA.          |
| <a href="#">Mxi1</a>      | <a href="#">Mxi1.bSep08</a>      | <a href="#">25701</a>  | 27516 | 756  | 5  | 154 | max interacting protein 1 (17.6 kD) (Mxi1) alternative variant bSep08, mRNA.          |
| <a href="#">Mxi1</a>      | <a href="#">Mxi1.cSep08</a>      | <a href="#">25701</a>  | 55103 | 380  | 4  | 126 | max interacting protein 1 (Mxi1) alternative variant cSep08, mRNA.                    |

|                              |                                     |                        |       |      |    |     |                                                                                                     |
|------------------------------|-------------------------------------|------------------------|-------|------|----|-----|-----------------------------------------------------------------------------------------------------|
| <a href="#">Mxra7</a>        | <a href="#">Mxra7.aSep08</a>        | <a href="#">690599</a> | 2773  | 463  | 2  | 76  | matrix-remodelling associated 7 (Mxra7) alternative variant aSep08, mRNA.                           |
| <a href="#">Mxra7</a>        | <a href="#">Mxra7.bSep08</a>        | <a href="#">690599</a> | 23007 | 1782 | 4  |     |                                                                                                     |
| <a href="#">Mxra7</a>        | <a href="#">Mxra7.dSep08</a>        | <a href="#">690599</a> | 2603  | 373  | 3  | 61  | matrix-remodelling associated 7 (6.5 kD) (Mxra7) alternative variant dSep08, mRNA.                  |
| <a href="#">Mxra8andDvl1</a> | <a href="#">Mxra8andDvl1.aSep08</a> | <a href="#">83721</a>  | 11340 | 2706 | 14 | 785 | dishevelled 1 (Mxra8andDvl1) alternative variant aSep08, mRNA.                                      |
| <a href="#">Mxra8andDvl1</a> | <a href="#">Mxra8andDvl1.aSep08</a> | <a href="#">313770</a> | 11340 | 2706 | 14 | 785 | dishevelled 1 (Mxra8andDvl1) alternative variant aSep08, mRNA.                                      |
| <a href="#">Mxra8andDvl1</a> | <a href="#">Mxra8andDvl1.bSep08</a> | <a href="#">83721</a>  | 11902 | 2984 | 14 | 563 | dishevelled 1 (61.1 kD) (Mxra8andDvl1) alternative variant bSep08, mRNA.                            |
| <a href="#">Mxra8andDvl1</a> | <a href="#">Mxra8andDvl1.bSep08</a> | <a href="#">313770</a> | 11902 | 2984 | 14 | 563 | dishevelled 1 (61.1 kD) (Mxra8andDvl1) alternative variant bSep08, mRNA.                            |
| <a href="#">Mxra8andDvl1</a> | <a href="#">Mxra8andDvl1.cSep08</a> | <a href="#">83721</a>  | 14610 | 2533 | 15 | 447 | dishevelled 1 (49.2 kD) (Mxra8andDvl1) alternative variant cSep08, mRNA.                            |
| <a href="#">Mxra8andDvl1</a> | <a href="#">Mxra8andDvl1.cSep08</a> | <a href="#">313770</a> | 14610 | 2533 | 15 | 447 | dishevelled 1 (49.2 kD) (Mxra8andDvl1) alternative variant cSep08, mRNA.                            |
| <a href="#">Mxra8andDvl1</a> | <a href="#">Mxra8andDvl1.dSep08</a> | <a href="#">83721</a>  | 4356  | 2121 | 10 | 439 | matrix-remodelling associated 8 (49.5 kD) (Mxra8andDvl1) alternative variant dSep08, complete mRNA. |
| <a href="#">Mxra8andDvl1</a> | <a href="#">Mxra8andDvl1.dSep08</a> | <a href="#">313770</a> | 4356  | 2121 | 10 | 439 | matrix-remodelling associated 8 (49.5 kD) (Mxra8andDvl1) alternative variant dSep08, complete mRNA. |
| <a href="#">Mxra8andDvl1</a> | <a href="#">Mxra8andDvl1.fSep08</a> | <a href="#">83721</a>  | 1691  | 717  | 7  | 238 | dishevelled 1 (Mxra8andDvl1) alternative variant fSep08, mRNA.                                      |
| <a href="#">Mxra8andDvl1</a> | <a href="#">Mxra8andDvl1.fSep08</a> | <a href="#">313770</a> | 1691  | 717  | 7  | 238 | dishevelled 1 (Mxra8andDvl1) alternative variant fSep08, mRNA.                                      |
| <a href="#">Mxra8andDvl1</a> | <a href="#">Mxra8andDvl1.gSep08</a> | <a href="#">83721</a>  | 1941  | 703  | 5  | 190 | matrix-remodelling associated 8 (Mxra8andDvl1) alternative variant gSep08, mRNA.                    |
| <a href="#">Mxra8andDvl1</a> | <a href="#">Mxra8andDvl1.gSep08</a> | <a href="#">313770</a> | 1941  | 703  | 5  | 190 | matrix-remodelling associated 8 (Mxra8andDvl1) alternative variant gSep08, mRNA.                    |
| <a href="#">Mxra8andDvl1</a> | <a href="#">Mxra8andDvl1.hSep08</a> | <a href="#">83721</a>  | 1657  | 468  | 2  | 145 | dishevelled dsh homolog 1 CRA a like (Mxra8andDvl1) alternative variant hSep08, mRNA.               |
| <a href="#">Mxra8andDvl1</a> | <a href="#">Mxra8andDvl1.hSep08</a> | <a href="#">313770</a> | 1657  | 468  | 2  | 145 | dishevelled dsh homolog 1 CRA a like (Mxra8andDvl1) alternative variant hSep08, mRNA.               |
| <a href="#">Mxra8andDvl1</a> | <a href="#">Mxra8andDvl1.jSep08</a> | <a href="#">83721</a>  | 1203  | 763  | 2  | 129 | dishevelled dsh homolog 1 CRA b (13.3 kD) (Mxra8andDvl1) alternative variant jSep08, mRNA.          |
| <a href="#">Mxra8andDvl1</a> | <a href="#">Mxra8andDvl1.jSep08</a> | <a href="#">313770</a> | 1203  | 763  | 2  | 129 | dishevelled dsh homolog 1 CRA b (13.3 kD) (Mxra8andDvl1) alternative variant jSep08, mRNA.          |
| <a href="#">Mxra8andDvl1</a> | <a href="#">Mxra8andDvl1.kSep08</a> | <a href="#">83721</a>  | 2009  | 859  | 3  | 129 | dishevelled dsh homolog 1 CRA b (13.3 kD) (Mxra8andDvl1) alternative variant kSep08, mRNA.          |
| <a href="#">Mxra8andDvl1</a> | <a href="#">Mxra8andDvl1.kSep08</a> | <a href="#">313770</a> | 2009  | 859  | 3  | 129 | dishevelled dsh homolog 1 CRA b (13.3 kD) (Mxra8andDvl1) alternative variant kSep08, mRNA.          |
| <a href="#">Mxra8andDvl1</a> | <a href="#">Mxra8andDvl1.lSep08</a> | <a href="#">83721</a>  | 1410  | 522  | 2  | 77  | putative protein (Mxra8andDvl1) alternative variant lSep08, mRNA.                                   |
| <a href="#">Mxra8andDvl1</a> | <a href="#">Mxra8andDvl1.lSep08</a> | <a href="#">313770</a> | 1410  | 522  | 2  | 77  | putative protein (Mxra8andDvl1) alternative variant lSep08, mRNA.                                   |
| <a href="#">Myadm</a>        | <a href="#">Myadm.bSep08</a>        | <a href="#">369016</a> | 3793  | 761  | 2  | 187 | myeloid-associated differentiation marker (Myadm) alternative variant bSep08, mRNA.                 |

|                                   |                                          |                        |        |      |    |     |                                                                                              |
|-----------------------------------|------------------------------------------|------------------------|--------|------|----|-----|----------------------------------------------------------------------------------------------|
| <a href="#">Myadm</a>             | <a href="#">Myadm.cSep08</a>             | <a href="#">369016</a> | 9820   | 1210 | 4  | 86  | myeloid-associated differentiation marker (9.3 kD) (Myadm) alternative variant cSep08, mRNA. |
| <a href="#">Mybbp1a</a>           | <a href="#">Mybbp1a.bSep08</a>           | <a href="#">60571</a>  | 2242   | 797  | 6  | 265 | MYB binding protein (P160) 1a (Mybbp1a) alternative variant bSep08, mRNA.                    |
| <a href="#">Mybbp1a</a>           | <a href="#">Mybbp1a.cSep08</a>           | <a href="#">60571</a>  | 1171   | 646  | 5  | 214 | MYB binding protein (P160) 1a (Mybbp1a) alternative variant cSep08, mRNA.                    |
| <a href="#">Mybpc1</a>            | <a href="#">Mybpc1.aSep08</a>            | <a href="#">362867</a> | 37256  | 1896 | 10 | 493 | myosin binding protein C, slow type (Mybpc1) alternative variant aSep08, mRNA.               |
| <a href="#">Mybpc1</a>            | <a href="#">Mybpc1.bSep08</a>            | <a href="#">362867</a> | 16896  | 1325 | 8  | 381 | myosin binding protein C, slow type (Mybpc1) alternative variant bSep08, mRNA.               |
| <a href="#">Mybpc1</a>            | <a href="#">Mybpc1.cSep08</a>            | <a href="#">362867</a> | 13184  | 1038 | 7  | 242 | myosin binding protein C, slow type (Mybpc1) alternative variant cSep08, mRNA.               |
| <a href="#">Mybpc1</a>            | <a href="#">Mybpc1.dSep08</a>            | <a href="#">362867</a> | 8239   | 470  | 4  | 156 | myosin binding protein C, slow type (Mybpc1) alternative variant dSep08, mRNA.               |
| <a href="#">Mybpc1</a>            | <a href="#">Mybpc1.eSep08</a>            | <a href="#">362867</a> | 5251   | 439  | 4  | 42  | myosin binding protein C, slow type (Mybpc1) alternative variant eSep08, mRNA.               |
| <a href="#">Mybpc2</a>            | <a href="#">Mybpc2.bSep08</a>            | <a href="#">292879</a> | 8189   | 756  | 8  | 231 | myosin binding protein C, fast-type (Mybpc2) alternative variant bSep08, mRNA.               |
| <a href="#">Mybpc2</a>            | <a href="#">Mybpc2.cSep08</a>            | <a href="#">292879</a> | 1835   | 691  | 3  | 143 | myosin binding protein C, fast-type (Mybpc2) alternative variant cSep08, mRNA.               |
| <a href="#">Mybpc2</a>            | <a href="#">Mybpc2.dSep08</a>            | <a href="#">292879</a> | 1044   | 453  | 3  | 96  | myosin binding protein C, fast-type (Mybpc2) alternative variant dSep08, mRNA.               |
| <a href="#">Mybpc2</a>            | <a href="#">Mybpc2.eSep08</a>            | <a href="#">292879</a> | 465    | 288  | 2  | 92  | myosin binding protein C, fast-type (Mybpc2) alternative variant eSep08, mRNA.               |
| <a href="#">Mybpc3</a>            | <a href="#">Mybpc3.bSep08</a>            | <a href="#">295929</a> | 2816   | 741  | 9  | 216 | myosin binding protein C, cardiac (Mybpc3) alternative variant bSep08, mRNA.                 |
| <a href="#">Mybpc3</a>            | <a href="#">Mybpc3.cSep08</a>            | <a href="#">295929</a> | 1704   | 891  | 6  | 190 | myosin binding protein C, cardiac (Mybpc3) alternative variant cSep08, mRNA.                 |
| <a href="#">Mybph</a>             | <a href="#">Mybph.cSep08</a>             | <a href="#">83708</a>  | 825    | 325  | 2  | 96  | myosin binding protein H (Mybph) alternative variant cSep08, mRNA.                           |
| <a href="#">Mybphl</a>            | <a href="#">Mybphl.aSep08</a>            | <a href="#">310782</a> | 2169   | 1785 | 3  | 486 | myosin binding protein H-like (Mybphl) alternative variant aSep08, mRNA.                     |
| <a href="#">myby</a>              | <a href="#">myby.aSep08</a>              |                        | 159739 | 481  |    | 37  | putative protein (myby) mRNA.                                                                |
| <a href="#">Myb_DNA-binding.0</a> | <a href="#">Myb_DNA-binding.0.aSep08</a> |                        | 4806   | 395  |    | 131 | myb-like SWIRM MPN domains 1 (Myb_DNA-binding.0) mRNA.                                       |
| <a href="#">Myb_DNA-binding.1</a> | <a href="#">Myb_DNA-binding.1.aSep08</a> |                        | 2415   | 424  |    | 140 | myeloblastosis oncogene CRA b (Myb_DNA-binding.1) mRNA.                                      |
| <a href="#">Mycbp2</a>            | <a href="#">Mycbp2.cSep08</a>            | <a href="#">290447</a> | 15549  | 846  | 7  | 282 | MYC binding protein 2 (Mycbp2) alternative variant cSep08, mRNA.                             |
| <a href="#">Mycbp2</a>            | <a href="#">Mycbp2.dSep08</a>            | <a href="#">290447</a> | 29387  | 732  | 7  | 243 | MYC binding protein 2 (Mycbp2) alternative variant dSep08, mRNA.                             |
| <a href="#">Mycbp2</a>            | <a href="#">Mycbp2.eSep08</a>            | <a href="#">290447</a> | 5946   | 460  | 5  | 153 | MYC binding protein 2 (Mycbp2) alternative variant eSep08, mRNA.                             |
| <a href="#">Mycbp2</a>            | <a href="#">Mycbp2.fSep08</a>            | <a href="#">290447</a> | 5934   | 738  | 5  | 152 | MYC binding protein 2 (Mycbp2) alternative variant fSep08, mRNA.                             |
| <a href="#">Mycbp2</a>            | <a href="#">Mycbp2.gSep08</a>            | <a href="#">290447</a> | 2878   | 454  | 4  | 151 | MYC binding protein 2 (Mycbp2) alternative variant gSep08, mRNA.                             |

|                        |                               |                        |       |      |    |     |                                                                                                        |
|------------------------|-------------------------------|------------------------|-------|------|----|-----|--------------------------------------------------------------------------------------------------------|
| <a href="#">Mycbp2</a> | <a href="#">Mycbp2.hSep08</a> | <a href="#">290447</a> | 1406  | 314  | 2  | 104 | MYC binding protein 2 (Mycbp2) alternative variant hSep08, mRNA.                                       |
| <a href="#">Mycbp2</a> | <a href="#">Mycbp2.iSep08</a> | <a href="#">290447</a> | 15288 | 974  | 3  | 86  | MYC binding protein 2 (Mycbp2) alternative variant iSep08, mRNA.                                       |
| <a href="#">mychy</a>  | <a href="#">mychy.aSep08</a>  |                        | 39877 | 846  |    | 181 | CRA a (20.6 kD) (mychy) mRNA.                                                                          |
| <a href="#">mydar</a>  | <a href="#">mydar.aSep08</a>  |                        | 4115  | 596  |    | 105 | putative mitochondrial protein (11.4 kD) (mydar) mRNA.                                                 |
| <a href="#">Myef2</a>  | <a href="#">Myef2.bSep08</a>  | <a href="#">679712</a> | 18530 | 1008 | 10 | 336 | myelin basic protein expression factor 2 repressor CRA c (Myef2) alternative variant bSep08, mRNA.     |
| <a href="#">Myef2</a>  | <a href="#">Myef2.cSep08</a>  | <a href="#">679712</a> | 7971  | 1684 | 3  | 183 | myelin basic protein expression factor 2 repressor (20.1 kD) (Myef2) alternative variant cSep08, mRNA. |
| <a href="#">Myef2</a>  | <a href="#">Myef2.dSep08</a>  | <a href="#">679712</a> | 10991 | 1684 | 4  | 128 | myelin basic protein expression factor 2 repressor CRA c (Myef2) alternative variant dSep08, mRNA.     |
| <a href="#">Myef2</a>  | <a href="#">Myef2.eSep08</a>  | <a href="#">679712</a> | 1105  | 529  | 3  | 58  | myelin expression factor 2 (Myef2) alternative variant eSep08, mRNA.                                   |
| <a href="#">Myeov2</a> | <a href="#">Myeov2.aSep08</a> | <a href="#">681389</a> | 4619  | 258  | 1  | 77  | myeloma overexpressed 2 (Myeov2) alternative variant aSep08, mRNA.                                     |
| <a href="#">myfer</a>  | <a href="#">myfer.aSep08</a>  |                        | 6108  | 1675 |    | 181 | GTP binding protein 4 like (myfer) mRNA.                                                               |
| <a href="#">myflo</a>  | <a href="#">myflo.aSep08</a>  |                        | 12061 | 404  |    | 71  | putative protein (8.2 kD) (myflo) mRNA.                                                                |
| <a href="#">myflu</a>  | <a href="#">myflu.aSep08</a>  |                        | 6650  | 751  |    | 250 | e1-E2 ATPase (myflu) mRNA.                                                                             |
| <a href="#">mygar</a>  | <a href="#">mygar.aSep08</a>  |                        | 2823  | 1784 |    | 18  | putative protein (1.7 kD) (mygar) alternative variant aSep08, mRNA.                                    |
| <a href="#">Myh4</a>   | <a href="#">Myh4.bSep08</a>   | <a href="#">360543</a> | 582   | 487  | 1  | 132 | myosin, heavy polypeptide 4, skeletal muscle (14.7 kD) (Myh4) alternative variant bSep08, mRNA.        |
| <a href="#">Myh6</a>   | <a href="#">Myh6.bSep08</a>   | <a href="#">29556</a>  | 14236 | 1457 | 9  | 349 | myosin, heavy polypeptide 6, cardiac muscle, alpha (Myh6) alternative variant bSep08, mRNA.            |
| <a href="#">Myh6</a>   | <a href="#">Myh6.cSep08</a>   | <a href="#">29556</a>  | 5354  | 964  | 7  | 298 | myosin, heavy polypeptide 6, cardiac muscle, alpha (Myh6) alternative variant cSep08, mRNA.            |
| <a href="#">Myh6</a>   | <a href="#">Myh6.dSep08</a>   | <a href="#">29556</a>  | 1688  | 755  | 3  | 230 | myosin, heavy polypeptide 6, cardiac muscle, alpha (Myh6) alternative variant dSep08, mRNA.            |
| <a href="#">Myh6</a>   | <a href="#">Myh6.eSep08</a>   | <a href="#">29556</a>  | 1691  | 1374 | 2  | 100 | myosin, heavy polypeptide 6, cardiac muscle, alpha (Myh6) alternative variant eSep08, mRNA.            |
| <a href="#">Myh6</a>   | <a href="#">Myh6.fSep08</a>   | <a href="#">29556</a>  | 1452  | 1313 | 2  | 88  | myosin, heavy polypeptide 6, cardiac muscle, alpha (Myh6) alternative variant fSep08, mRNA.            |
| <a href="#">Myh8</a>   | <a href="#">Myh8.aSep08</a>   | <a href="#">252942</a> | 2916  | 686  |    | 179 | myosin, heavy polypeptide 8, skeletal muscle, perinatal (Myh8) mRNA.                                   |
| <a href="#">Myh9</a>   | <a href="#">Myh9.bSep08</a>   | <a href="#">25745</a>  | 2343  | 773  | 4  | 257 | myosin, heavy polypeptide 9, non-muscle (Myh9) alternative variant bSep08, mRNA.                       |
| <a href="#">Myh9</a>   | <a href="#">Myh9.cSep08</a>   | <a href="#">25745</a>  | 33258 | 695  | 3  | 159 | myosin, heavy polypeptide 9, non-muscle (Myh9) alternative variant cSep08, mRNA.                       |
| <a href="#">Myh10</a>  | <a href="#">Myh10.bSep08</a>  | <a href="#">79433</a>  | 1072  | 478  | 2  | 105 | myosin heavy chain (11.8 kD) (Myh10) alternative variant bSep08, mRNA.                                 |
| <a href="#">Myh10</a>  | <a href="#">Myh10.cSep08</a>  | <a href="#">79433</a>  | 1379  | 400  | 2  | 101 | myosin heavy chain non-muscle (Myh10) alternative variant cSep08, mRNA.                                |
| <a href="#">Myh11</a>  | <a href="#">Myh11.aSep08</a>  | <a href="#">24582</a>  | 70548 | 2982 | 23 | 960 | myosin, heavy polypeptide 11, smooth muscle (Myh11) alternative variant aSep08, mRNA.                  |



|                       |                              |                        |       |      |   |     |                                                                                                                         |
|-----------------------|------------------------------|------------------------|-------|------|---|-----|-------------------------------------------------------------------------------------------------------------------------|
| <a href="#">Myh11</a> | <a href="#">Myh11.bSep08</a> | <a href="#">24582</a>  | 5543  | 605  | 3 | 201 | myosin, heavy polypeptide 11, smooth muscle (Myh11) alternative variant bSep08, mRNA.                                   |
| <a href="#">Myh11</a> | <a href="#">Myh11.cSep08</a> | <a href="#">24582</a>  | 12422 | 395  | 3 | 62  | myosin, heavy polypeptide 11, smooth muscle (Myh11) alternative variant cSep08, mRNA.                                   |
| <a href="#">Myh13</a> | <a href="#">Myh13.aSep08</a> | <a href="#">29605</a>  | 2829  | 510  |   | 170 | myosin, heavy polypeptide 13, skeletal muscle (Myh13) mRNA.                                                             |
| <a href="#">Myh14</a> | <a href="#">Myh14.bSep08</a> | <a href="#">308572</a> | 2969  | 707  | 4 | 160 | myosin, heavy polypeptide 14 (Myh14) alternative variant bSep08, mRNA.                                                  |
| <a href="#">Myh14</a> | <a href="#">Myh14.cSep08</a> | <a href="#">308572</a> | 6979  | 307  | 3 | 102 | myosin, heavy polypeptide 14 (Myh14) alternative variant cSep08, mRNA.                                                  |
| <a href="#">myjey</a> | <a href="#">myjey.aSep08</a> |                        | 2984  | 669  |   | 69  | putative protein (7.5 kD) (myjey) mRNA.                                                                                 |
| <a href="#">mykee</a> | <a href="#">mykee.aSep08</a> |                        | 1238  | 543  |   | 36  | putative protein (4.0 kD) (mykee) mRNA.                                                                                 |
| <a href="#">Myl1</a>  | <a href="#">Myl1.aSep08</a>  | <a href="#">56781</a>  | 10154 | 1113 | 6 | 197 | myosin, light polypeptide 1 (21.9 kD) (Myl1) alternative variant aSep08, mRNA.                                          |
| <a href="#">Myl1</a>  | <a href="#">Myl1.cSep08</a>  | <a href="#">56781</a>  | 10348 | 792  | 6 | 162 | myosin, light polypeptide 1 (17.9 kD) (Myl1) alternative variant cSep08, mRNA.                                          |
| <a href="#">Myl1</a>  | <a href="#">Myl1.eSep08</a>  | <a href="#">56781</a>  | 7827  | 742  | 3 | 64  | myosin, light polypeptide 1 (7.1 kD) (Myl1) alternative variant eSep08, mRNA.                                           |
| <a href="#">Myl1</a>  | <a href="#">Myl1.fSep08</a>  | <a href="#">56781</a>  | 10509 | 978  | 7 | 92  | myosin, light polypeptide 1 (10.3 kD) (Myl1) alternative variant fSep08, mRNA.                                          |
| <a href="#">Myl3</a>  | <a href="#">Myl3.bSep08</a>  | <a href="#">24585</a>  | 28168 | 1394 | 3 | 200 | myosin, light polypeptide 3 (22.2 kD) (Myl3) alternative variant bSep08, mRNA.                                          |
| <a href="#">Myl6</a>  | <a href="#">Myl6.aSep08</a>  | <a href="#">685867</a> | 2996  | 675  | 7 | 151 | myosin, light chain 6, alkali, smooth muscle and non-muscle (16.9 kD) (Myl6) alternative variant aSep08, complete mRNA. |
| <a href="#">Myl6</a>  | <a href="#">Myl6.cSep08</a>  | <a href="#">685867</a> | 2982  | 1668 | 6 | 117 | myosin, light chain 6, alkali, smooth muscle and non-muscle (13.0 kD) (Myl6) alternative variant cSep08, complete mRNA. |
| <a href="#">Myl6</a>  | <a href="#">Myl6.dSep08</a>  | <a href="#">685867</a> | 2682  | 1007 | 7 | 116 | myosin, light chain 6, alkali, smooth muscle and non-muscle (12.9 kD) (Myl6) alternative variant dSep08, mRNA.          |
| <a href="#">Myl6</a>  | <a href="#">Myl6.eSep08</a>  | <a href="#">685867</a> | 1728  | 488  | 4 | 99  | myosin, light chain 6, alkali, smooth muscle and non-muscle (11.1 kD) (Myl6) alternative variant eSep08, mRNA.          |
| <a href="#">Myl6</a>  | <a href="#">Myl6.fSep08</a>  | <a href="#">685867</a> | 1621  | 1208 | 3 | 81  | myosin, light chain 6, alkali, smooth muscle and non-muscle (Myl6) alternative variant fSep08, mRNA.                    |
| <a href="#">Myl6</a>  | <a href="#">Myl6.gSep08</a>  | <a href="#">685867</a> | 1066  | 822  | 2 | 87  | myosin, light chain 6, alkali, smooth muscle and non-muscle (9.7 kD) (Myl6) alternative variant gSep08, mRNA.           |
| <a href="#">Myl6b</a> | <a href="#">Myl6b.aSep08</a> | <a href="#">685883</a> | 3071  | 907  | 6 | 215 | myosin, light chain 6B, alkali, smooth muscle and non-muscle (Myl6b) alternative variant aSep08, mRNA.                  |
| <a href="#">Myl6b</a> | <a href="#">Myl6b.bSep08</a> | <a href="#">685883</a> | 1559  | 387  | 3 | 56  | myosin, light chain 6B, alkali, smooth muscle and non-muscle (Myl6b) alternative variant bSep08, mRNA.                  |
| <a href="#">Myl7</a>  | <a href="#">Myl7.aSep08</a>  | <a href="#">289759</a> | 3116  | 1487 | 7 | 177 | myosin, light polypeptide 7, regulatory (Myl7) alternative variant aSep08, mRNA.                                        |
| <a href="#">Myl7</a>  | <a href="#">Myl7.cSep08</a>  | <a href="#">289759</a> | 1964  | 455  | 5 | 136 | myosin, light polypeptide 7, regulatory (Myl7) alternative variant cSep08, mRNA.                                        |
| <a href="#">Myl9</a>  | <a href="#">Myl9.bSep08</a>  | <a href="#">296313</a> | 5949  | 716  | 1 | 204 | myosin, light chain 9, regulatory (Myl9) alternative variant bSep08, mRNA.                                              |

|                       |                              |                        |       |      |    |     |                                                                                             |
|-----------------------|------------------------------|------------------------|-------|------|----|-----|---------------------------------------------------------------------------------------------|
| <a href="#">Mylip</a> | <a href="#">Mylip.bSep08</a> | <a href="#">306825</a> | 6392  | 1310 | 4  | 257 | myosin regulatory light chain interacting protein (Mylip) alternative variant bSep08, mRNA. |
| <a href="#">Mylip</a> | <a href="#">Mylip.cSep08</a> | <a href="#">306825</a> | 1491  | 384  | 2  | 79  | myosin regulatory light chain interacting protein (Mylip) alternative variant cSep08, mRNA. |
| <a href="#">Mylk</a>  | <a href="#">Mylk.bSep08</a>  | <a href="#">288057</a> | 5376  | 698  | 3  | 152 | myosin, light polypeptide kinase (Mylk) alternative variant bSep08, mRNA.                   |
| <a href="#">Mylk</a>  | <a href="#">Mylk.cSep08</a>  | <a href="#">288057</a> | 5382  | 701  | 3  | 150 | myosin, light polypeptide kinase (Mylk) alternative variant cSep08, mRNA.                   |
| <a href="#">Mylk</a>  | <a href="#">Mylk.dSep08</a>  | <a href="#">288057</a> | 16005 | 420  | 3  | 140 | myosin, light polypeptide kinase (Mylk) alternative variant dSep08, mRNA.                   |
| <a href="#">Mylk</a>  | <a href="#">Mylk.eSep08</a>  | <a href="#">288057</a> | 18568 | 464  | 5  | 127 | myosin, light polypeptide kinase (Mylk) alternative variant eSep08, mRNA.                   |
| <a href="#">Mylk</a>  | <a href="#">Mylk.fSep08</a>  | <a href="#">288057</a> | 26802 | 411  | 5  | 101 | myosin, light polypeptide kinase (Mylk) alternative variant fSep08, mRNA.                   |
| <a href="#">Mylk</a>  | <a href="#">Mylk.gSep08</a>  | <a href="#">288057</a> | 52369 | 312  | 3  | 77  | myosin, light polypeptide kinase (Mylk) alternative variant gSep08, mRNA.                   |
| <a href="#">Mylk3</a> | <a href="#">Mylk3.bSep08</a> | <a href="#">291926</a> | 9266  | 744  | 3  | 164 | myosin light chain kinase 3 (Mylk3) alternative variant bSep08, mRNA.                       |
| <a href="#">myloy</a> | <a href="#">myloy.aSep08</a> |                        | 5103  | 896  |    | 152 | putative protein (myloy) mRNA.                                                              |
| <a href="#">mymee</a> | <a href="#">mymee.aSep08</a> |                        | 862   | 718  |    | 88  | putative protein (mymee) mRNA.                                                              |
| <a href="#">mymer</a> | <a href="#">mymer.aSep08</a> |                        | 1495  | 907  |    | 84  | putative protein (mymer) mRNA.                                                              |
| <a href="#">Mynn</a>  | <a href="#">Mynn.aSep08</a>  | <a href="#">361924</a> | 16754 | 3661 | 4  | 610 | myoneurin (68.7 kD) (Mynn) alternative variant aSep08, complete mRNA.                       |
| <a href="#">Mynn</a>  | <a href="#">Mynn.cSep08</a>  | <a href="#">361924</a> | 10105 | 1329 | 2  | 153 | myoneurin (17.0 kD) (Mynn) alternative variant cSep08, mRNA.                                |
| <a href="#">mynoy</a> | <a href="#">mynoy.aSep08</a> |                        | 661   | 399  |    | 29  | putative protein (3.1 kD) (mynoy) mRNA.                                                     |
| <a href="#">Myo1a</a> | <a href="#">Myo1a.aSep08</a> | <a href="#">299509</a> | 1668  | 836  |    | 212 | myosin IA (Myo1a) mRNA.                                                                     |
| <a href="#">Myo1b</a> | <a href="#">Myo1b.aSep08</a> | <a href="#">117057</a> | 66983 | 511  |    | 117 | myosin Ib (Myo1b) mRNA.                                                                     |
| <a href="#">Myo1c</a> | <a href="#">Myo1c.aSep08</a> | <a href="#">65261</a>  | 21378 | 4479 | 32 | 954 | myosin-1c (109.4 kD) (Myo1c) alternative variant aSep08, mRNA.                              |
| <a href="#">Myo1c</a> | <a href="#">Myo1c.bSep08</a> | <a href="#">65261</a>  | 1605  | 575  | 5  | 148 | myosin 1C (Myo1c) alternative variant bSep08, mRNA.                                         |
| <a href="#">Myo1c</a> | <a href="#">Myo1c.cSep08</a> | <a href="#">65261</a>  | 4244  | 1134 | 6  | 139 | myosin 1C (16.3 kD) (Myo1c) alternative variant cSep08, mRNA.                               |
| <a href="#">Myo1c</a> | <a href="#">Myo1c.dSep08</a> | <a href="#">65261</a>  | 7450  | 376  | 4  | 120 | myosin 1C (Myo1c) alternative variant dSep08, mRNA.                                         |
| <a href="#">Myo1c</a> | <a href="#">Myo1c.eSep08</a> | <a href="#">65261</a>  | 634   | 531  | 2  | 107 | putative protein (Myo1c) alternative variant eSep08, mRNA.                                  |
| <a href="#">Myo1c</a> | <a href="#">Myo1c.fSep08</a> | <a href="#">65261</a>  | 2129  | 436  | 4  | 84  | myosin 1C (Myo1c) alternative variant fSep08, mRNA.                                         |
| <a href="#">Myo1d</a> | <a href="#">Myo1d.aSep08</a> | <a href="#">25485</a>  | 96780 | 1150 |    | 381 | myosin ID (Myo1d) mRNA.                                                                     |
| <a href="#">Myo1e</a> | <a href="#">Myo1e.bSep08</a> | <a href="#">25484</a>  | 28556 | 1034 | 9  | 344 | myosin IE (Myo1e) alternative variant bSep08, mRNA.                                         |
| <a href="#">Myo1e</a> | <a href="#">Myo1e.cSep08</a> | <a href="#">25484</a>  | 18328 | 1310 | 3  | 111 | myosin IE (Myo1e) alternative variant cSep08, mRNA.                                         |
| <a href="#">Myo1f</a> | <a href="#">Myo1f.bSep08</a> | <a href="#">314654</a> | 8582  | 1010 | 7  | 336 | myosin IF (Myo1f) alternative variant bSep08, mRNA.                                         |
| <a href="#">Myo1f</a> | <a href="#">Myo1f.cSep08</a> | <a href="#">314654</a> | 510   | 407  | 2  | 77  | myosin IF (Myo1f) alternative variant cSep08, mRNA.                                         |
| <a href="#">Myo1g</a> | <a href="#">Myo1g.bSep08</a> | <a href="#">289785</a> | 2609  | 641  | 2  | 213 | myosin IG (Myo1g) alternative variant bSep08, mRNA.                                         |
| <a href="#">Myo1g</a> | <a href="#">Myo1g.cSep08</a> | <a href="#">289785</a> | 4240  | 692  | 2  | 180 | myosin IG (Myo1g) alternative variant cSep08, mRNA.                                         |

|                                  |                                         |                        |       |      |    |     |                                                                                              |
|----------------------------------|-----------------------------------------|------------------------|-------|------|----|-----|----------------------------------------------------------------------------------------------|
| <a href="#">Myo5a</a>            | <a href="#">Myo5a.aSep08</a>            | <a href="#">25017</a>  | 33544 | 3892 | 9  | 440 | myosin Va (50.4 kD) (Myo5a) alternative variant aSep08, mRNA.                                |
| <a href="#">Myo5a</a>            | <a href="#">Myo5a.bSep08</a>            | <a href="#">25017</a>  | 2924  | 643  | 2  | 89  | myosin Va (Myo5a) alternative variant bSep08, mRNA.                                          |
| <a href="#">Myo5b</a>            | <a href="#">Myo5b.aSep08</a>            | <a href="#">25132</a>  | 31660 | 1993 |    | 664 | myosin Vb (Myo5b) mRNA.                                                                      |
| <a href="#">Myo5c</a>            | <a href="#">Myo5c.bSep08</a>            | <a href="#">315820</a> | 4242  | 735  | 2  | 128 | myosin VC (Myo5c) alternative variant bSep08, mRNA.                                          |
| <a href="#">Myo6</a>             | <a href="#">Myo6.aSep08</a>             | <a href="#">315840</a> | 92409 | 835  |    | 213 | myosin VI (Myo6) mRNA.                                                                       |
| <a href="#">Myo7a</a>            | <a href="#">Myo7a.bSep08</a>            | <a href="#">266714</a> | 2042  | 745  | 3  | 65  | myosin VIIA (7.1 kD) (Myo7a) alternative variant bSep08, mRNA.                               |
| <a href="#">Myo7b</a>            | <a href="#">Myo7b.aSep08</a>            | <a href="#">498834</a> | 8362  | 1038 |    | 197 | myosin VIIb (Myo7b) mRNA.                                                                    |
| <a href="#">Myo9b</a>            | <a href="#">Myo9b.bSep08</a>            | <a href="#">25486</a>  | 4042  | 883  | 7  | 294 | myosin IXb (Myo9b) alternative variant bSep08, mRNA.                                         |
| <a href="#">Myo9b</a>            | <a href="#">Myo9b.cSep08</a>            | <a href="#">25486</a>  | 2348  | 684  | 7  | 227 | myosin IXb (Myo9b) alternative variant cSep08, mRNA.                                         |
| <a href="#">Myo9b</a>            | <a href="#">Myo9b.dSep08</a>            | <a href="#">25486</a>  | 1772  | 1343 | 3  | 88  | myosin IXb (Myo9b) alternative variant dSep08, mRNA.                                         |
| <a href="#">Myo9b</a>            | <a href="#">Myo9b.fSep08</a>            | <a href="#">25486</a>  | 6083  | 1087 | 3  | 60  | myosin IXb (6.6 kD) (Myo9b) alternative variant fSep08, mRNA.                                |
| <a href="#">Myo15</a>            | <a href="#">Myo15.aSep08</a>            | <a href="#">501699</a> | 2051  | 409  |    | 136 | myosin XV (Myo15) mRNA.                                                                      |
| <a href="#">Myo16</a>            | <a href="#">Myo16.bSep08</a>            | <a href="#">192253</a> | 27082 | 834  | 3  | 73  | myosin XVI (Myo16) alternative variant bSep08, mRNA.                                         |
| <a href="#">Myocd</a>            | <a href="#">Myocd.bSep08</a>            | <a href="#">246297</a> | 47895 | 384  | 1  | 93  | transcription factor myocardin (Myocd) alternative variant bSep08, mRNA.                     |
| <a href="#">Myom1</a>            | <a href="#">Myom1.aSep08</a>            | <a href="#">316740</a> | 63552 | 3280 | 24 | 932 | myomesin 1 (Myom1) alternative variant aSep08, mRNA.                                         |
| <a href="#">Myom1</a>            | <a href="#">Myom1.bSep08</a>            | <a href="#">316740</a> | 582   | 280  | 2  | 55  | myomesin 1 (Myom1) alternative variant bSep08, mRNA.                                         |
| <a href="#">Myom2</a>            | <a href="#">Myom2.aSep08</a>            | <a href="#">306616</a> | 29212 | 2288 |    | 762 | myomesin 2 (Myom2) mRNA.                                                                     |
| <a href="#">Myosin_head.0</a>    | <a href="#">Myosin_head.0.aSep08</a>    |                        | 25413 | 1802 |    | 519 | myosin VC CRA d (Myosin_head.0) alternative variant aSep08, mRNA.                            |
| <a href="#">Myosin_head.0</a>    | <a href="#">Myosin_head.0.bSep08</a>    |                        | 18029 | 969  |    | 322 | myosin VC CRA b (Myosin_head.0) alternative variant bSep08, mRNA.                            |
| <a href="#">Myosin_head.0</a>    | <a href="#">Myosin_head.0.cSep08</a>    |                        | 5666  | 755  |    | 101 | myosin VC CRA b (Myosin_head.0) alternative variant cSep08, mRNA.                            |
| <a href="#">Myosin_N.0</a>       | <a href="#">Myosin_N.0.aSep08</a>       |                        | 2255  | 333  |    | 89  | myosin heavy chain (Myosin_N.0) mRNA.                                                        |
| <a href="#">Myosin_N.1</a>       | <a href="#">Myosin_N.1.aSep08</a>       |                        | 1814  | 330  |    | 85  | myosin heavy chain (Myosin_N.1) mRNA.                                                        |
| <a href="#">Myosin_tail_1.0</a>  | <a href="#">Myosin_tail_1.0.aSep08</a>  |                        | 21860 | 3286 | 17 | 932 | myosin tail (Myosin_tail_1.0) alternative variant aSep08, mRNA.                              |
| <a href="#">Myosin_tail_1.0</a>  | <a href="#">Myosin_tail_1.0.bSep08</a>  |                        | 3844  | 720  | 4  | 111 | myosin heavy chain (Myosin_tail_1.0) alternative variant bSep08, mRNA.                       |
| <a href="#">Myosin_tail_1.0</a>  | <a href="#">Myosin_tail_1.0.cSep08</a>  |                        | 6202  | 739  | 3  | 78  | putative protein human specific (8.9 kD) (Myosin_tail_1.0) alternative variant cSep08, mRNA. |
| <a href="#">Myosin_tail_1.1</a>  | <a href="#">Myosin_tail_1.1.aSep08</a>  |                        | 9405  | 2820 |    | 902 | myosin heavy chain skeletal muscle adult (Myosin_tail_1.1) mRNA.                             |
| <a href="#">Myot</a>             | <a href="#">Myot.bSep08</a>             | <a href="#">291605</a> | 7561  | 671  | 1  | 175 | myotilin (Myot) alternative variant bSep08, mRNA.                                            |
| <a href="#">Myotub-related.0</a> | <a href="#">Myotub-related.0.aSep08</a> |                        | 6785  | 1766 | 11 | 588 | CRA b (Myotub-related.0) alternative variant aSep08, mRNA.                                   |
| <a href="#">Myotub-related.0</a> | <a href="#">Myotub-related.0.bSep08</a> |                        | 4128  | 605  | 4  | 201 | CRA b (Myotub-related.0) alternative variant bSep08, mRNA.                                   |
| <a href="#">Myoz2</a>            | <a href="#">Myoz2.aSep08</a>            | <a href="#">295426</a> | 26705 | 1119 | 3  | 264 | myozenin 2 (29.8 kD) (Myoz2) alternative variant aSep08, mRNA.                               |
| <a href="#">Myoz2</a>            | <a href="#">Myoz2.cSep08</a>            | <a href="#">295426</a> | 18274 | 840  | 2  | 144 | myozenin 2 (Myoz2) alternative variant cSep08, mRNA.                                         |

|                         |                                |                        |        |      |    |     |                                                                                                              |
|-------------------------|--------------------------------|------------------------|--------|------|----|-----|--------------------------------------------------------------------------------------------------------------|
| <a href="#">mypor</a>   | <a href="#">mypor.aSep08</a>   |                        | 9754   | 795  |    | 54  | putative protein (5.8 kD) (mypor) mRNA.                                                                      |
| <a href="#">Myrip</a>   | <a href="#">Myrip.bSep08</a>   | <a href="#">360034</a> | 69397  | 1776 | 3  | 447 | myosin VIIA and Rab interacting protein (Myrip) alternative variant bSep08, mRNA.                            |
| <a href="#">Myrip</a>   | <a href="#">Myrip.cSep08</a>   | <a href="#">360034</a> | 28720  | 766  | 4  | 233 | myosin VIIA and Rab interacting protein (Myrip) alternative variant cSep08, mRNA.                            |
| <a href="#">mysa</a>    | <a href="#">mysa.aSep08</a>    |                        | 3655   | 328  |    | 30  | putative protein (mysa) mRNA.                                                                                |
| <a href="#">myshee</a>  | <a href="#">myshee.aSep08</a>  |                        | 2333   | 761  |    | 110 | repeat domain 50 (myshee) mRNA.                                                                              |
| <a href="#">Mysm1</a>   | <a href="#">Mysm1.aSep08</a>   | <a href="#">298247</a> | 6748   | 916  |    | 264 | myb-like, SWIRM and MPN domains 1 (Mysm1) mRNA.                                                              |
| <a href="#">Myst1</a>   | <a href="#">Myst1.bSep08</a>   | <a href="#">310194</a> | 5082   | 700  | 4  | 172 | myst histone acetyltransferase (Myst1) alternative variant bSep08, mRNA.                                     |
| <a href="#">Myst1</a>   | <a href="#">Myst1.cSep08</a>   | <a href="#">310194</a> | 1329   | 731  | 4  | 153 | myst histone acetyltransferase (17.5 kD) (Myst1) alternative variant cSep08, mRNA.                           |
| <a href="#">Myst1</a>   | <a href="#">Myst1.dSep08</a>   | <a href="#">310194</a> | 4942   | 2985 | 3  | 126 | histone acetyltransferase (Myst1) alternative variant dSep08, mRNA.                                          |
| <a href="#">Myst2</a>   | <a href="#">Myst2.bSep08</a>   | <a href="#">303470</a> | 34593  | 2447 | 12 | 516 | MYST histone acetyltransferase 2 (59.4 kD) (Myst2) alternative variant bSep08, mRNA.                         |
| <a href="#">Myst2</a>   | <a href="#">Myst2.cSep08</a>   | <a href="#">303470</a> | 2130   | 790  | 2  | 37  | MYST histone acetyltransferase 2 (Myst2) alternative variant cSep08, mRNA.                                   |
| <a href="#">Myst3</a>   | <a href="#">Myst3.aSep08</a>   | <a href="#">306571</a> | 20052  | 1255 | 1  | 418 | MYST histone acetyltransferase (monocytic leukemia) 3 (Myst3) alternative variant aSep08, mRNA.              |
| <a href="#">Myst3</a>   | <a href="#">Myst3.bSep08</a>   | <a href="#">306571</a> | 9778   | 419  | 1  | 139 | MYST histone acetyltransferase (monocytic leukemia) 3 (Myst3) alternative variant bSep08, mRNA.              |
| <a href="#">Myt11</a>   | <a href="#">Myt11.bSep08</a>   | <a href="#">116668</a> | 67935  | 1785 | 7  | 542 | myelin transcription factor 1-like (Myt11) alternative variant bSep08, mRNA.                                 |
| <a href="#">Myt11</a>   | <a href="#">Myt11.cSep08</a>   | <a href="#">116668</a> | 34628  | 1699 | 7  | 300 | myelin transcription factor 1-like (Myt11) alternative variant cSep08, mRNA.                                 |
| <a href="#">Myt11</a>   | <a href="#">Myt11.dSep08</a>   | <a href="#">116668</a> | 208597 | 473  | 4  | 32  | myelin transcription factor 1-like (3.2 kD) (Myt11) alternative variant dSep08, mRNA.                        |
| <a href="#">mytu</a>    | <a href="#">mytu.aSep08</a>    |                        | 8096   | 409  |    | 135 | putative protein of eukaryotic origin (mytu) mRNA.                                                           |
| <a href="#">myvar</a>   | <a href="#">myvar.aSep08</a>   |                        | 3571   | 437  |    | 145 | zinc finger protein 362 (myvar) mRNA.                                                                        |
| <a href="#">mywey</a>   | <a href="#">mywey.aSep08</a>   |                        | 5596   | 262  |    | 87  | ER degradation enhancer mannosidase alpha-like 1 (mywey) mRNA.                                               |
| <a href="#">Mzf1</a>    | <a href="#">Mzf1.cSep08</a>    | <a href="#">361508</a> | 2100   | 741  | 2  | 204 | zinc finger (Mzf1) alternative variant cSep08, mRNA.                                                         |
| <a href="#">Mzf1</a>    | <a href="#">Mzf1.dSep08</a>    | <a href="#">361508</a> | 11916  | 2263 | 3  | 136 | zinc finger (15.7 kD) (Mzf1) alternative variant dSep08, mRNA.                                               |
| <a href="#">Mzf1</a>    | <a href="#">Mzf1.eSep08</a>    | <a href="#">361508</a> | 7096   | 578  | 4  | 134 | CRA d (14.6 kD) (Mzf1) alternative variant eSep08, mRNA.                                                     |
| <a href="#">N4bp1</a>   | <a href="#">N4bp1.aSep08</a>   | <a href="#">291921</a> | 11721  | 736  |    | 244 | nedd4 binding protein 1 (N4bp1) mRNA.                                                                        |
| <a href="#">N4bp2</a>   | <a href="#">N4bp2.aSep08</a>   | <a href="#">305342</a> | 8390   | 293  |    | 97  | NEDD4 binding protein 2 (N4bp2) mRNA.                                                                        |
| <a href="#">N4bp2l2</a> | <a href="#">N4bp2l2.cSep08</a> | <a href="#">288416</a> | 2333   | 444  | 2  | 148 | NEDD4 binding protein 2-like 2 (N4bp2l2) alternative variant cSep08, mRNA.                                   |
| <a href="#">N4bp2l2</a> | <a href="#">N4bp2l2.dSep08</a> | <a href="#">288416</a> | 7307   | 292  | 3  | 37  | NEDD4 binding protein 2-like 2 (N4bp2l2) alternative variant dSep08, mRNA.                                   |
| <a href="#">N6amt1</a>  | <a href="#">N6amt1.aSep08</a>  | <a href="#">288309</a> | 12476  | 949  | 3  | 214 | N-6 adenine-specific DNA methyltransferase 1 (putative) (22.9 kD) (N6amt1) alternative variant aSep08, mRNA. |
| <a href="#">N6amt1</a>  | <a href="#">N6amt1.bSep08</a>  | <a href="#">288309</a> | 7934   | 711  | 1  | 150 | N-6 adenine-specific DNA methyltransferase 1 (putative) (N6amt1) alternative variant bSep08, complete mRNA.  |

|                                   |                                          |                           |       |      |    |     |                                                                                                      |
|-----------------------------------|------------------------------------------|---------------------------|-------|------|----|-----|------------------------------------------------------------------------------------------------------|
| <a href="#">N6amt2</a>            | <a href="#">N6amt2.aSep08</a>            | <a href="#">290279</a>    | 17043 | 883  | 4  | 246 | N-6 adenine-specific DNA methyltransferase 2 (N6amt2) alternative variant aSep08, mRNA.              |
| <a href="#">N6amt2</a>            | <a href="#">N6amt2.bSep08</a>            | <a href="#">290279</a>    | 13396 | 1277 | 4  | 244 | N-6 adenine-specific DNA methyltransferase 2 (27.8 kD) (N6amt2) alternative variant bSep08, mRNA.    |
| <a href="#">N6amt2</a>            | <a href="#">N6amt2.cSep08</a>            | <a href="#">290279</a>    | 11880 | 717  | 4  | 145 | N-6 adenine-specific DNA methyltransferase 2 (N6amt2) alternative variant cSep08, mRNA.              |
| <a href="#">N6amt2</a>            | <a href="#">N6amt2.dSep08</a>            | <a href="#">290279</a>    | 12098 | 727  | 2  | 130 | N-6 adenine-specific DNA methyltransferase 2 (15.2 kD) (N6amt2) alternative variant dSep08, mRNA.    |
| <a href="#">N6amt2</a>            | <a href="#">N6amt2.eSep08</a>            | <a href="#">290279</a>    | 2422  | 230  | 1  | 64  | CRA a like (N6amt2) alternative variant eSep08, mRNA.                                                |
| <a href="#">Naalad2</a>           | <a href="#">Naalad2.bSep08</a>           | <a href="#">300384</a>    | 73981 | 2998 | 15 | 346 | N-acetylated alpha-linked acidic dipeptidase 2 (39.3 kD) (Naalad2) alternative variant bSep08, mRNA. |
| <a href="#">Naalad2</a>           | <a href="#">Naalad2.cSep08</a>           | <a href="#">300384</a>    | 22662 | 692  | 1  | 186 | N-acetylated alpha-linked acidic dipeptidase 2 (Naalad2) alternative variant cSep08, mRNA.           |
| <a href="#">Naalad1</a>           | <a href="#">Naalad1.bSep08</a>           | <a href="#">83568</a>     | 1365  | 1023 | 4  | 152 | N-acetylated alpha-linked acidic dipeptidase-like 1 (Naalad1) alternative variant bSep08, mRNA.      |
| <a href="#">Nab2</a>              | <a href="#">Nab2.bSep08</a>              | <a href="#">314910</a>    | 3406  | 1243 | 5  | 361 | ngfi-A binding protein 2 (Nab2) alternative variant bSep08, mRNA.                                    |
| <a href="#">naby</a>              | <a href="#">naby.aSep08</a>              |                           | 16245 | 516  |    | 100 | ab2-143 like (naby) mRNA.                                                                            |
| <a href="#">Naca</a>              | <a href="#">Naca.aSep08</a>              | <a href="#">288770</a>    | 12278 | 872  | 1  | 245 | nascent-polypeptide-associated complex alpha polypeptide (Naca) alternative variant aSep08, mRNA.    |
| <a href="#">Nacad</a>             | <a href="#">Nacad.aSep08</a>             | <a href="#">289786</a>    | 3406  | 2656 | 5  | 696 | nacad protein (Nacad) alternative variant aSep08, mRNA.                                              |
| <a href="#">Nacad</a>             | <a href="#">Nacad.bSep08</a>             | <a href="#">289786</a>    | 804   | 469  | 1  | 156 | nascent polypeptide-associated complex NAC (Nacad) alternative variant bSep08, mRNA.                 |
| <a href="#">nachy</a>             | <a href="#">nachy.aSep08</a>             |                           | 5092  | 408  |    | 136 | protein tyrosine phosphatase receptor type J (nachy) mRNA.                                           |
| <a href="#">nadar</a>             | <a href="#">nadar.aSep08</a>             |                           | 3875  | 881  |    | 167 | nedd4 binding protein 1 like (nadar) mRNA.                                                           |
| <a href="#">NADH_oxidored.0</a>   | <a href="#">NADH_oxidored.0.aSep08</a>   |                           | 8559  | 549  | 3  | 57  | nadh dehydrogenase 1 beta subcomplex (7.0 kD) (NADH_oxidored.0) alternative variant aSep08, mRNA.    |
| <a href="#">NADH_oxidored.0</a>   | <a href="#">NADH_oxidored.0.bSep08</a>   |                           | 8455  | 448  | 3  | 57  | nadh dehydrogenase 1 beta subcomplex (7.0 kD) (NADH_oxidored.0) alternative variant bSep08, mRNA.    |
| <a href="#">NADH_ub_rd_NUML.0</a> | <a href="#">NADH_ub_rd_NUML.0.aSep08</a> |                           | 2123  | 938  | 3  | 86  | nadh dehydrogenase 1 alpha subcomplex 4-like 2 (NADH_ub_rd_NUML.0) alternative variant aSep08, mRNA. |
| <a href="#">NADH_ub_rd_NUML.0</a> | <a href="#">NADH_ub_rd_NUML.0.bSep08</a> |                           | 1126  | 772  | 1  | 39  | NADH dehydrogenase 1 alpha subcomplex 4-like 2 (NADH_ub_rd_NUML.0) alternative variant bSep08, mRNA. |
| <a href="#">Nadk</a>              | <a href="#">Nadk.aSep08</a>              | <a href="#">100125370</a> | 28517 | 1931 | 12 | 455 | NAD kinase (50.4 kD) (Nadk) alternative variant aSep08, mRNA.                                        |
| <a href="#">Nadk</a>              | <a href="#">Nadk.cSep08</a>              | <a href="#">100125370</a> | 713   | 515  | 2  | 43  | NAD kinase (4.9 kD) (Nadk) alternative variant cSep08, mRNA.                                         |
| <a href="#">Nadsyn1</a>           | <a href="#">Nadsyn1.bSep08</a>           | <a href="#">353255</a>    | 2148  | 446  | 2  | 111 | NAD synthetase 1 (Nadsyn1) alternative variant bSep08, mRNA.                                         |
| <a href="#">Nadsyn1</a>           | <a href="#">Nadsyn1.dSep08</a>           | <a href="#">353255</a>    | 2191  | 639  | 4  | 86  | NAD synthetase 1 (9.2 kD) (Nadsyn1) alternative variant dSep08, mRNA.                                |
| <a href="#">NAD_Gly3P_dh_C.0</a>  | <a href="#">NAD_Gly3P_dh_C.0.aSep08</a>  |                           | 1321  | 348  |    | 110 | dehydrogenase 1-like CRA d (NAD_Gly3P_dh_C.0) mRNA.                                                  |
| <a href="#">Nae1</a>              | <a href="#">Nae1.aSep08</a>              | <a href="#">84019</a>     | 15263 | 1311 |    | 392 | NEDD8 activating enzyme E1 subunit 1 (Nae1) mRNA.                                                    |

|                        |                               |                        |        |      |    |      |                                                                                                              |
|------------------------|-------------------------------|------------------------|--------|------|----|------|--------------------------------------------------------------------------------------------------------------|
| <a href="#">Naf1</a>   | <a href="#">Naf1.bSep08</a>   | <a href="#">306387</a> | 20223  | 2324 | 8  | 421  | nuclear assembly factor 1 homolog ( <i>S. cerevisiae</i> ) (Naf1) alternative variant bSep08, mRNA.          |
| <a href="#">nafer</a>  | <a href="#">nafer.aSep08</a>  |                        | 138869 | 739  |    | 72   | putative protein (nafer) mRNA.                                                                               |
| <a href="#">naflo</a>  | <a href="#">naflo.aSep08</a>  |                        | 68717  | 1219 |    | 60   | putative protein (7.1 kD) (naflo) mRNA.                                                                      |
| <a href="#">naflu</a>  | <a href="#">naflu.aSep08</a>  |                        | 14609  | 753  |    | 84   | putative mitochondrial protein (9.6 kD) (naflu) mRNA.                                                        |
| <a href="#">Naga</a>   | <a href="#">Naga.bSep08</a>   | <a href="#">315165</a> | 4117   | 850  | 7  | 283  | N-acetyl galactosaminidase, alpha (Naga) alternative variant bSep08, mRNA.                                   |
| <a href="#">Naga</a>   | <a href="#">Naga.cSep08</a>   | <a href="#">315165</a> | 2917   | 486  | 5  | 99   | N-acetyl galactosaminidase, alpha (Naga) alternative variant cSep08, mRNA.                                   |
| <a href="#">nagar</a>  | <a href="#">nagar.aSep08</a>  |                        | 2917   | 717  |    | 69   | putative protein (nagar) mRNA.                                                                               |
| <a href="#">Nagk</a>   | <a href="#">Nagk.bSep08</a>   | <a href="#">297393</a> | 6316   | 784  | 8  | 247  | N-acetylglucosamine kinase (Nagk) alternative variant bSep08, mRNA.                                          |
| <a href="#">Naglt1</a> | <a href="#">Naglt1.bSep08</a> | <a href="#">337920</a> | 8062   | 760  | 1  | 253  | na <sup>+</sup> dependent glucose transporter 1 (Naglt1) alternative variant bSep08, mRNA.                   |
| <a href="#">Nagpa</a>  | <a href="#">Nagpa.bSep08</a>  | <a href="#">360476</a> | 2299   | 725  | 3  | 234  | N-acetylglucosamine-1-phosphodiester alpha-N-acetylglucosaminidase (Nagpa) alternative variant bSep08, mRNA. |
| <a href="#">Nagpa</a>  | <a href="#">Nagpa.cSep08</a>  | <a href="#">360476</a> | 4438   | 722  | 5  | 139  | N-acetylglucosamine-1-phosphodiester alpha-N-acetylglucosaminidase (Nagpa) alternative variant cSep08, mRNA. |
| <a href="#">Nagpa</a>  | <a href="#">Nagpa.dSep08</a>  | <a href="#">360476</a> | 3948   | 374  | 4  | 124  | N-acetylglucosamine-1-phosphodiester alpha-N-acetylglucosaminidase (Nagpa) alternative variant dSep08, mRNA. |
| <a href="#">Nagpa</a>  | <a href="#">Nagpa.eSep08</a>  | <a href="#">360476</a> | 2063   | 586  | 2  | 42   | N-acetylglucosamine-1-phosphodiester alpha-N-acetylglucosaminidase (Nagpa) alternative variant eSep08, mRNA. |
| <a href="#">Nagpa</a>  | <a href="#">Nagpa.fSep08</a>  | <a href="#">360476</a> | 3660   | 721  | 5  | 103  | N-acetylglucosamine-1-phosphodiester alpha-N-acetylglucosaminidase (Nagpa) alternative variant fSep08, mRNA. |
| <a href="#">Naip2</a>  | <a href="#">Naip2.aSep08</a>  | <a href="#">191568</a> | 9718   | 726  |    | 241  | NLR family, apoptosis inhibitory protein 2 (Naip2) mRNA.                                                     |
| <a href="#">naja</a>   | <a href="#">naja.aSep08</a>   |                        | 5084   | 745  |    | 92   | putative secreted or extracellular protein precursor (9.4 kD) (naja) mRNA.                                   |
| <a href="#">najey</a>  | <a href="#">najey.aSep08</a>  |                        | 4552   | 345  |    | 114  | beige/BEACH (najey) mRNA.                                                                                    |
| <a href="#">nakee</a>  | <a href="#">nakee.aSep08</a>  |                        | 12245  | 402  |    | 134  | putative protein of ancient origin (nakee) mRNA.                                                             |
| <a href="#">Nalcn</a>  | <a href="#">Nalcn.aSep08</a>  | <a href="#">266760</a> | 242410 | 4501 | 36 | 1499 | sodium leak channel, non-selective (Nalcn) alternative variant aSep08, mRNA.                                 |
| <a href="#">Nalcn</a>  | <a href="#">Nalcn.cSep08</a>  | <a href="#">266760</a> | 7115   | 1934 | 3  | 132  | sodium leak channel, non-selective (Nalcn) alternative variant cSep08, mRNA.                                 |
| <a href="#">Nalcn</a>  | <a href="#">Nalcn.dSep08</a>  | <a href="#">266760</a> | 4343   | 333  | 3  | 111  | sodium leak channel, non-selective (Nalcn) alternative variant dSep08, mRNA.                                 |
| <a href="#">naloy</a>  | <a href="#">naloy.aSep08</a>  |                        | 5849   | 468  | 3  | 66   | vacuolar protein sorting 8 homolog (naloy) alternative variant aSep08, mRNA.                                 |
| <a href="#">namee</a>  | <a href="#">namee.aSep08</a>  |                        | 7744   | 423  |    | 62   | putative protein (6.8 kD) (namee) mRNA.                                                                      |
| <a href="#">namer</a>  | <a href="#">namer.aSep08</a>  |                        | 2393   | 596  |    | 71   | polymeric immunoglobulin receptor like (namer) mRNA.                                                         |
| <a href="#">Nampt</a>  | <a href="#">Nampt.bSep08</a>  | <a href="#">297508</a> | 3112   | 263  | 2  | 44   | nicotinamide phosphoribosyltransferase (5.0 kD) (Nampt) alternative variant bSep08, mRNA.                    |

|                        |                               |                        |       |      |    |     |                                                                                                                       |
|------------------------|-------------------------------|------------------------|-------|------|----|-----|-----------------------------------------------------------------------------------------------------------------------|
| <a href="#">Nanog</a>  | <a href="#">Nanog.bSep08</a>  | <a href="#">414065</a> | 5956  | 936  | 1  | 311 | nanog homeobox (Nanog) alternative variant bSep08, mRNA.                                                              |
| <a href="#">nanoy</a>  | <a href="#">nanoy.aSep08</a>  |                        | 1754  | 860  |    | 117 | type III (13.4 kD) (nanoy) mRNA.                                                                                      |
| <a href="#">Nans</a>   | <a href="#">Nans.bSep08</a>   | <a href="#">298071</a> | 2456  | 717  | 3  | 172 | N-acetylneuraminic acid synthase (sialic acid synthase) (Nans) alternative variant bSep08, mRNA.                      |
| <a href="#">Nans</a>   | <a href="#">Nans.cSep08</a>   | <a href="#">298071</a> | 17512 | 1127 | 3  | 147 | N-acetylneuraminic acid synthase (sialic acid synthase) (16.7 kD) (Nans) alternative variant cSep08, complete mRNA.   |
| <a href="#">Nap111</a> | <a href="#">Nap111.bSep08</a> | <a href="#">89825</a>  | 23282 | 1293 | 14 | 328 | nucleosome assembly protein 1-like 1 (38.2 kD) (Nap111) alternative variant bSep08, mRNA.                             |
| <a href="#">Nap111</a> | <a href="#">Nap111.cSep08</a> | <a href="#">89825</a>  | 4970  | 1170 | 9  | 290 | nucleosome assembly protein 1-like 1 (Nap111) alternative variant cSep08, mRNA.                                       |
| <a href="#">Nap111</a> | <a href="#">Nap111.dSep08</a> | <a href="#">89825</a>  | 5065  | 1590 | 8  | 231 | nucleosome assembly protein 1-like 1 (Nap111) alternative variant dSep08, mRNA.                                       |
| <a href="#">Nap111</a> | <a href="#">Nap111.eSep08</a> | <a href="#">89825</a>  | 18826 | 767  | 6  | 154 | nucleosome assembly protein 1-like 1 CRA e (18.2 kD) (Nap111) alternative variant eSep08, mRNA.                       |
| <a href="#">Nap111</a> | <a href="#">Nap111.fSep08</a> | <a href="#">89825</a>  | 1746  | 337  | 5  | 101 | nucleosome assembly protein 1-like 1 (Nap111) alternative variant fSep08, mRNA.                                       |
| <a href="#">Nap111</a> | <a href="#">Nap111.gSep08</a> | <a href="#">89825</a>  | 4654  | 2301 | 6  | 93  | nucleosome assembly protein 1-like 1 (Nap111) alternative variant gSep08, mRNA.                                       |
| <a href="#">Nap111</a> | <a href="#">Nap111.hSep08</a> | <a href="#">89825</a>  | 4191  | 2552 | 4  | 44  | putative protein (5.2 kD) (Nap111) alternative variant hSep08, mRNA.                                                  |
| <a href="#">Nap111</a> | <a href="#">Nap111.iSep08</a> | <a href="#">89825</a>  | 5997  | 387  | 5  | 50  | putative protein (6.1 kD) (Nap111) alternative variant iSep08, mRNA.                                                  |
| <a href="#">Nap114</a> | <a href="#">Nap114.bSep08</a> | <a href="#">361684</a> | 20887 | 816  | 9  | 247 | nucleosome assembly protein 1-like 4 (Nap114) alternative variant bSep08, mRNA.                                       |
| <a href="#">Nap114</a> | <a href="#">Nap114.cSep08</a> | <a href="#">361684</a> | 13310 | 1455 | 7  | 126 | nucleosome assembly protein 1-like 4 (Nap114) alternative variant cSep08, mRNA.                                       |
| <a href="#">Nap115</a> | <a href="#">Nap115.bSep08</a> | <a href="#">688843</a> | 1850  | 1445 | 2  | 189 | nucleosome assembly protein 1-like 5 (Nap115) alternative variant bSep08, mRNA.                                       |
| <a href="#">Napa</a>   | <a href="#">Napa.bSep08</a>   | <a href="#">140673</a> | 18014 | 906  | 11 | 265 | N-ethylmaleimide sensitive fusion protein attachment protein alpha (29.6 kD) (Napa) alternative variant bSep08, mRNA. |
| <a href="#">Napa</a>   | <a href="#">Napa.cSep08</a>   | <a href="#">140673</a> | 18000 | 789  | 10 | 247 | N-ethylmaleimide sensitive fusion protein attachment protein alpha (Napa) alternative variant cSep08, mRNA.           |
| <a href="#">Napa</a>   | <a href="#">Napa.dSep08</a>   | <a href="#">140673</a> | 15773 | 777  | 7  | 192 | N-ethylmaleimide sensitive fusion protein attachment protein alpha (Napa) alternative variant dSep08, mRNA.           |
| <a href="#">Napa</a>   | <a href="#">Napa.eSep08</a>   | <a href="#">140673</a> | 14538 | 391  | 4  | 109 | N-ethylmaleimide sensitive fusion protein attachment protein alpha (Napa) alternative variant eSep08, mRNA.           |
| <a href="#">Napa</a>   | <a href="#">Napa.fSep08</a>   | <a href="#">140673</a> | 5166  | 389  | 6  | 97  | N-ethylmaleimide sensitive fusion protein attachment protein alpha (Napa) alternative variant fSep08, mRNA.           |
| <a href="#">Napa</a>   | <a href="#">Napa.gSep08</a>   | <a href="#">140673</a> | 1407  | 775  | 3  | 60  | N-ethylmaleimide sensitive fusion protein attachment protein alpha (Napa) alternative variant gSep08, mRNA.           |
| <a href="#">Napg</a>   | <a href="#">Napg.aSep08</a>   | <a href="#">307382</a> | 14221 | 862  | 11 | 287 | N-ethylmaleimide sensitive fusion protein attachment protein gamma (Napg) alternative variant aSep08, mRNA.           |

|                         |                                |                        |       |      |   |     |                                                                                                                      |
|-------------------------|--------------------------------|------------------------|-------|------|---|-----|----------------------------------------------------------------------------------------------------------------------|
| <a href="#">Napg</a>    | <a href="#">Napg.cSep08</a>    | <a href="#">307382</a> | 2505  | 678  | 2 | 51  | N-ethylmaleimide sensitive fusion protein attachment protein gamma (5.1 kD) (Napg) alternative variant cSep08, mRNA. |
| <a href="#">napor</a>   | <a href="#">napor.aSep08</a>   |                        | 4414  | 1125 | 2 | 82  | ac1576 like (9.4 kD) (napor) alternative variant aSep08, mRNA.                                                       |
| <a href="#">napor</a>   | <a href="#">napor.bSep08</a>   |                        | 3225  | 765  | 1 | 81  | putative protein (napor) alternative variant bSep08, mRNA.                                                           |
| <a href="#">Naprt1</a>  | <a href="#">Naprt1.bSep08</a>  | <a href="#">315085</a> | 2030  | 1036 | 7 | 345 | putative protein of ancient origin (Naprt1) alternative variant bSep08, mRNA.                                        |
| <a href="#">Naprt1</a>  | <a href="#">Naprt1.cSep08</a>  | <a href="#">315085</a> | 1921  | 747  | 6 | 172 | putative protein of ancient origin (Naprt1) alternative variant cSep08, mRNA.                                        |
| <a href="#">Naprt1</a>  | <a href="#">Naprt1.dSep08</a>  | <a href="#">315085</a> | 839   | 663  | 3 | 168 | putative protein of ancient origin (Naprt1) alternative variant dSep08, mRNA.                                        |
| <a href="#">narby</a>   | <a href="#">narby.aSep08</a>   |                        | 6735  | 355  | 3 | 68  | putative protein (7.6 kD) (narby) alternative variant aSep08, mRNA.                                                  |
| <a href="#">narby</a>   | <a href="#">narby.bSep08</a>   |                        | 13952 | 1456 | 2 | 74  | putative protein (8.4 kD) (narby) alternative variant bSep08, mRNA.                                                  |
| <a href="#">narchy</a>  | <a href="#">narchy.aSep08</a>  |                        | 5732  | 693  |   | 207 | ATP GTP binding protein-like 2 (narchy) mRNA.                                                                        |
| <a href="#">nardar</a>  | <a href="#">nardar.aSep08</a>  |                        | 1175  | 589  | 1 | 110 | putative protein (nardar) alternative variant aSep08, mRNA.                                                          |
| <a href="#">nardar</a>  | <a href="#">nardar.bSep08</a>  |                        | 1003  | 422  | 1 | 80  | putative protein (nardar) alternative variant bSep08, mRNA.                                                          |
| <a href="#">narfer</a>  | <a href="#">narfer.aSep08</a>  |                        | 1202  | 791  |   | 83  | putative protein (9.4 kD) (narfer) mRNA.                                                                             |
| <a href="#">Narfl</a>   | <a href="#">Narfl.bSep08</a>   | <a href="#">360496</a> | 3494  | 406  | 4 | 73  | nuclear prelamin A recognition factor-like (8.0 kD) (Narfl) alternative variant bSep08, mRNA.                        |
| <a href="#">Narfl</a>   | <a href="#">Narfl.dSep08</a>   | <a href="#">360496</a> | 1560  | 702  | 3 | 54  | nuclear prelamin A recognition factor-like (Narfl) alternative variant dSep08, mRNA.                                 |
| <a href="#">narflo</a>  | <a href="#">narflo.aSep08</a>  |                        | 733   | 651  | 1 | 46  | putative protein (5.4 kD) (narflo) alternative variant aSep08, mRNA.                                                 |
| <a href="#">narflo</a>  | <a href="#">narflo.bSep08</a>  |                        | 1083  | 650  | 2 | 46  | putative protein (5.4 kD) (narflo) alternative variant bSep08, mRNA.                                                 |
| <a href="#">narflu</a>  | <a href="#">narflu.aSep08</a>  |                        | 438   | 257  |   | 78  | putative protein (narflu) mRNA.                                                                                      |
| <a href="#">Narg1</a>   | <a href="#">Narg1.bSep08</a>   | <a href="#">310399</a> | 5416  | 820  | 5 | 215 | NMDA receptor-regulated gene 1 (24.4 kD) (Narg1) alternative variant bSep08, mRNA.                                   |
| <a href="#">Narg1</a>   | <a href="#">Narg1.cSep08</a>   | <a href="#">310399</a> | 3539  | 381  | 3 | 126 | NMDA receptor-regulated gene 1 (Narg1) alternative variant cSep08, mRNA.                                             |
| <a href="#">Narg2</a>   | <a href="#">Narg2.aSep08</a>   | <a href="#">691379</a> | 3990  | 362  |   | 112 | NMDA receptor-regulated gene 2 (Narg2) mRNA.                                                                         |
| <a href="#">nargar</a>  | <a href="#">nargar.aSep08</a>  |                        | 9241  | 249  |   | 50  | putative protein (nargar) mRNA.                                                                                      |
| <a href="#">narja</a>   | <a href="#">narja.aSep08</a>   |                        | 666   | 375  |   | 65  | putative protein (narja) mRNA.                                                                                       |
| <a href="#">narjey</a>  | <a href="#">narjey.aSep08</a>  |                        | 2928  | 1723 |   | 309 | CRA b (34.3 kD) (narjey) mRNA.                                                                                       |
| <a href="#">narkee</a>  | <a href="#">narkee.aSep08</a>  |                        | 665   | 260  |   | 28  | putative protein (narkee) mRNA.                                                                                      |
| <a href="#">narkler</a> | <a href="#">narkler.aSep08</a> |                        | 2594  | 731  | 2 | 80  | endonuclease reverse transcriptase (9.3 kD) (narkler) alternative variant aSep08, mRNA.                              |
| <a href="#">narkler</a> | <a href="#">narkler.bSep08</a> |                        | 3584  | 687  | 2 | 35  | putative protein (narkler) alternative variant bSep08, mRNA.                                                         |
| <a href="#">narloy</a>  | <a href="#">narloy.aSep08</a>  |                        | 515   | 294  |   | 98  | chordin (narloy) mRNA.                                                                                               |
| <a href="#">narmee</a>  | <a href="#">narmee.aSep08</a>  |                        | 928   | 474  |   | 30  | putative protein (narmee) mRNA.                                                                                      |



|                         |                                |                        |       |      |    |     |                                                                                                                         |
|-------------------------|--------------------------------|------------------------|-------|------|----|-----|-------------------------------------------------------------------------------------------------------------------------|
| <a href="#">narmer</a>  | <a href="#">narmer.bSep08</a>  |                        | 1109  | 1000 |    |     |                                                                                                                         |
| <a href="#">naroy</a>   | <a href="#">naroy.aSep08</a>   |                        | 31289 | 563  |    | 37  | putative protein (naroy) mRNA.                                                                                          |
| <a href="#">narpor</a>  | <a href="#">narpor.aSep08</a>  |                        | 3654  | 246  |    | 32  | putative protein (3.5 kD) (narpor) mRNA.                                                                                |
| <a href="#">Nars</a>    | <a href="#">Nars.aSep08</a>    | <a href="#">291556</a> | 14962 | 1913 | 13 | 475 | asparaginyl-tRNA synthetase (54.3 kD) (Nars) alternative variant aSep08, mRNA.                                          |
| <a href="#">Nars</a>    | <a href="#">Nars.cSep08</a>    | <a href="#">291556</a> | 12005 | 1706 | 9  | 273 | asparaginyl-tRNA synthetase (Nars) alternative variant cSep08, mRNA.                                                    |
| <a href="#">Nars2</a>   | <a href="#">Nars2.bSep08</a>   | <a href="#">293128</a> | 68175 | 2165 | 9  | 277 | asparaginyl-tRNA synthetase 2 (mitochondrial)(putative) (Nars2) alternative variant bSep08, mRNA.                       |
| <a href="#">Nars2</a>   | <a href="#">Nars2.dSep08</a>   | <a href="#">293128</a> | 24720 | 434  | 2  | 45  | asparaginyl-tRNA synthetase 2 (mitochondrial)(putative) (Nars2) alternative variant dSep08, mRNA.                       |
| <a href="#">narsa</a>   | <a href="#">narsa.aSep08</a>   |                        | 18486 | 1571 | 13 | 523 | CRA b (narsa) alternative variant aSep08, mRNA.                                                                         |
| <a href="#">narsa</a>   | <a href="#">narsa.bSep08</a>   |                        | 2202  | 828  | 5  | 240 | CRA b like (narsa) alternative variant bSep08, mRNA.                                                                    |
| <a href="#">narsa</a>   | <a href="#">narsa.cSep08</a>   |                        | 3527  | 470  | 1  | 109 | CRA b (narsa) alternative variant cSep08, mRNA.                                                                         |
| <a href="#">narshee</a> | <a href="#">narshee.aSep08</a> |                        | 1511  | 363  |    | 37  | putative protein (narshee) mRNA.                                                                                        |
| <a href="#">nartu</a>   | <a href="#">nartu.aSep08</a>   |                        | 1748  | 744  |    | 67  | putative protein (7.8 kD) (nartu) mRNA.                                                                                 |
| <a href="#">narvar</a>  | <a href="#">narvar.aSep08</a>  |                        | 4707  | 753  |    | 34  | putative protein (narvar) mRNA.                                                                                         |
| <a href="#">narwey</a>  | <a href="#">narwey.aSep08</a>  |                        | 6663  | 867  |    | 289 | cullin-associated 2 (narwey) mRNA.                                                                                      |
| <a href="#">nasa</a>    | <a href="#">nasa.aSep08</a>    |                        | 3503  | 699  |    | 233 | putative protein of mammalian origin (nasa) mRNA.                                                                       |
| <a href="#">nashee</a>  | <a href="#">nashee.aSep08</a>  |                        | 1729  | 1109 |    | 332 | forkhead box O1A (nashee) mRNA.                                                                                         |
| <a href="#">Nasp</a>    | <a href="#">Nasp.bSep08</a>    | <a href="#">298441</a> | 25634 | 2132 | 7  | 492 | nuclear autoantigenic sperm protein (histone-binding) (Nasp) alternative variant bSep08, mRNA.                          |
| <a href="#">Nasp</a>    | <a href="#">Nasp.cSep08</a>    | <a href="#">298441</a> | 25636 | 2126 | 14 | 482 | nuclear autoantigenic sperm protein (histone-binding) (Nasp) alternative variant cSep08, mRNA.                          |
| <a href="#">Nasp</a>    | <a href="#">Nasp.dSep08</a>    | <a href="#">298441</a> | 8431  | 862  | 3  | 73  | nuclear autoantigenic sperm protein (histone-binding) (7.4 kD) (Nasp) alternative variant dSep08, mRNA.                 |
| <a href="#">Nat5</a>    | <a href="#">Nat5.bSep08</a>    | <a href="#">362228</a> | 16834 | 2690 | 4  | 178 | N-acetyltransferase 5 (ARD1 homolog, <i>S. cerevisiae</i> ) (20.4 kD) (Nat5) alternative variant bSep08, complete mRNA. |
| <a href="#">Nat5</a>    | <a href="#">Nat5.cSep08</a>    | <a href="#">362228</a> | 14353 | 462  | 3  | 143 | N-acetyltransferase 5 (ARD1 homolog, <i>S. cerevisiae</i> ) (Nat5) alternative variant cSep08, mRNA.                    |
| <a href="#">Nat5</a>    | <a href="#">Nat5.dSep08</a>    | <a href="#">362228</a> | 14448 | 585  | 3  | 106 | N-acetyltransferase 5 (ARD1 homolog, <i>S. cerevisiae</i> ) (12.2 kD) (Nat5) alternative variant dSep08, complete mRNA. |
| <a href="#">Nat8l</a>   | <a href="#">Nat8l.aSep08</a>   | <a href="#">289727</a> | 6370  | 3013 |    | 241 | N-acetyltransferase 8-like (Nat8l) mRNA.                                                                                |
| <a href="#">Nat9</a>    | <a href="#">Nat9.aSep08</a>    | <a href="#">303669</a> | 4836  | 1163 | 6  | 329 | NAT9 (Nat9) alternative variant aSep08, mRNA.                                                                           |
| <a href="#">Nat9</a>    | <a href="#">Nat9.cSep08</a>    | <a href="#">303669</a> | 1117  | 653  | 1  | 88  | NAT9 (10.2 kD) (Nat9) alternative variant cSep08, mRNA.                                                                 |
| <a href="#">Nat11</a>   | <a href="#">Nat11.bSep08</a>   | <a href="#">361718</a> | 15978 | 430  |    | 141 | N-acetyltransferase 11 (Nat11) alternative variant bSep08, mRNA.                                                        |
| <a href="#">Nat13</a>   | <a href="#">Nat13.aSep08</a>   | <a href="#">288108</a> | 19642 | 1833 | 2  | 169 | N-acetyltransferase 13 (19.4 kD) (Nat13) alternative variant aSep08, mRNA.                                              |
| <a href="#">Nat14</a>   | <a href="#">Nat14.bSep08</a>   | <a href="#">361500</a> | 1253  | 539  | 3  | 115 | N-acetyltransferase 14 (Nat14) alternative variant bSep08, mRNA.                                                        |
| <a href="#">natu</a>    | <a href="#">natu.bSep08</a>    |                        | 14841 | 1377 |    | 124 | putative protein, with a transmembrane domain (13.9 kD) (natu) alternative variant bSep08, mRNA.                        |
| <a href="#">Nav2</a>    | <a href="#">Nav2.aSep08</a>    | <a href="#">171563</a> | 8809  | 837  |    | 175 | neuron navigator 2 (Nav2) mRNA.                                                                                         |
| <a href="#">Nav3</a>    | <a href="#">Nav3.aSep08</a>    | <a href="#">314814</a> | 4933  | 569  |    | 46  | neuron navigator 3 (Nav3) mRNA.                                                                                         |

|                         |                                |  |       |      |   |     |                                                                               |
|-------------------------|--------------------------------|--|-------|------|---|-----|-------------------------------------------------------------------------------|
| <a href="#">navar</a>   | <a href="#">navar.aSep08</a>   |  | 1717  | 713  |   | 75  | putative secreted or extracellular protein precursor (8.5 kD) (navar) mRNA.   |
| <a href="#">nawby</a>   | <a href="#">nawby.aSep08</a>   |  | 1172  | 423  | 3 | 74  | arrestin 3 retinal (nawby) alternative variant aSep08, mRNA.                  |
| <a href="#">nawchy</a>  | <a href="#">nawchy.aSep08</a>  |  | 3322  | 305  |   | 69  | ATP GTP binding protein-like 2 (nawchy) mRNA.                                 |
| <a href="#">nawdar</a>  | <a href="#">nawdar.aSep08</a>  |  | 861   | 686  |   | 110 | hook homolog 2 (nawdar) mRNA.                                                 |
| <a href="#">nawey</a>   | <a href="#">nawey.aSep08</a>   |  | 2926  | 525  |   | 102 | putative protein (nawey) mRNA.                                                |
| <a href="#">nawfer</a>  | <a href="#">nawfer.bSep08</a>  |  | 2742  | 438  |   | 43  | putative protein (4.9 kD) (nawfer) alternative variant bSep08, mRNA.          |
| <a href="#">nawflo</a>  | <a href="#">nawflo.aSep08</a>  |  | 818   | 467  |   | 67  | putative protein (nawflo) mRNA.                                               |
| <a href="#">nawflu</a>  | <a href="#">nawflu.aSep08</a>  |  | 6738  | 747  |   | 66  | putative protein (7.8 kD) (nawflu) mRNA.                                      |
| <a href="#">nawgar</a>  | <a href="#">nawgar.aSep08</a>  |  | 4916  | 339  |   | 113 | leucine-rich repeats transmembrane domains 1 (nawgar) mRNA.                   |
| <a href="#">nawja</a>   | <a href="#">nawja.aSep08</a>   |  | 1136  | 699  |   | 43  | putative protein (nawja) mRNA.                                                |
| <a href="#">nawjey</a>  | <a href="#">nawjey.aSep08</a>  |  | 5391  | 586  | 4 | 87  | putative protein (10.0 kD) (nawjey) alternative variant aSep08, mRNA.         |
| <a href="#">nawjey</a>  | <a href="#">nawjey.bSep08</a>  |  | 14071 | 672  | 3 | 40  | putative protein (nawjey) alternative variant bSep08, mRNA.                   |
| <a href="#">nawkee</a>  | <a href="#">nawkee.aSep08</a>  |  | 2227  | 443  |   | 48  | putative protein (nawkee) mRNA.                                               |
| <a href="#">nawkler</a> | <a href="#">nawkler.aSep08</a> |  | 639   | 140  |   | 34  | putative protein (nawkler) mRNA.                                              |
| <a href="#">nawloy</a>  | <a href="#">nawloy.aSep08</a>  |  | 8629  | 2628 | 6 | 368 | CRA c (nawloy) alternative variant aSep08, mRNA.                              |
| <a href="#">nawloy</a>  | <a href="#">nawloy.bSep08</a>  |  | 5728  | 757  | 5 | 252 | CRA c (nawloy) alternative variant bSep08, mRNA.                              |
| <a href="#">nawloy</a>  | <a href="#">nawloy.cSep08</a>  |  | 5970  | 710  | 5 | 189 | CRA c (nawloy) alternative variant cSep08, mRNA.                              |
| <a href="#">nawloy</a>  | <a href="#">nawloy.dSep08</a>  |  | 7241  | 1057 | 6 | 150 | CRA c (16.1 kD) (nawloy) alternative variant dSep08, complete mRNA.           |
| <a href="#">nawloy</a>  | <a href="#">nawloy.eSep08</a>  |  | 6292  | 621  | 5 | 121 | putative protein (nawloy) alternative variant eSep08, mRNA.                   |
| <a href="#">nawloy</a>  | <a href="#">nawloy.fSep08</a>  |  | 1124  | 639  | 2 | 95  | CRA a like (nawloy) alternative variant fSep08, mRNA.                         |
| <a href="#">nawloy</a>  | <a href="#">nawloy.hSep08</a>  |  | 2670  | 569  | 3 | 76  | putative protein (nawloy) alternative variant hSep08, mRNA.                   |
| <a href="#">nawmee</a>  | <a href="#">nawmee.aSep08</a>  |  | 2132  | 603  | 3 | 29  | putative protein (nawmee) alternative variant aSep08, mRNA.                   |
| <a href="#">nawmee</a>  | <a href="#">nawmee.bSep08</a>  |  | 606   | 420  | 2 | 29  | putative protein (nawmee) alternative variant bSep08, mRNA.                   |
| <a href="#">nawmer</a>  | <a href="#">nawmer.aSep08</a>  |  | 1757  | 581  |   | 193 | CRA b (nawmer) mRNA.                                                          |
| <a href="#">nawnoy</a>  | <a href="#">nawnoy.bSep08</a>  |  | 33053 | 417  | 3 | 38  | putative protein (4.2 kD) (nawnoy) alternative variant bSep08, mRNA.          |
| <a href="#">nawpor</a>  | <a href="#">nawpor.aSep08</a>  |  | 3114  | 1259 |   | 71  | putative protein of bilateral origin (nawpor) mRNA.                           |
| <a href="#">nawsa</a>   | <a href="#">nawsa.aSep08</a>   |  | 9846  | 1839 | 4 | 318 | cysteine histidine rich 1 (33.8 kD) (nawsa) alternative variant aSep08, mRNA. |
| <a href="#">nawsa</a>   | <a href="#">nawsa.bSep08</a>   |  | 9705  | 1624 | 4 | 287 | cysteine histidine rich 1 (nawsa) alternative variant bSep08, mRNA.           |
| <a href="#">nawsa</a>   | <a href="#">nawsa.cSep08</a>   |  | 5502  | 3356 | 3 | 264 | histidine-rich 1 (nawsa) alternative variant cSep08, mRNA.                    |
| <a href="#">nawsa</a>   | <a href="#">nawsa.dSep08</a>   |  | 1806  | 1178 | 2 | 171 | cysteine histidine rich 1 (19.4 kD) (nawsa) alternative variant dSep08, mRNA. |

|                         |                                |                        |       |      |    |      |                                                                                              |
|-------------------------|--------------------------------|------------------------|-------|------|----|------|----------------------------------------------------------------------------------------------|
| <a href="#">nawshee</a> | <a href="#">nawshee.aSep08</a> |                        | 17116 | 221  |    | 28   | putative protein (nawshee) mRNA.                                                             |
| <a href="#">nawtu</a>   | <a href="#">nawtu.aSep08</a>   |                        | 3259  | 199  |    | 63   | gag protein like (nawtu) mRNA.                                                               |
| <a href="#">nawvar</a>  | <a href="#">nawvar.aSep08</a>  |                        | 3154  | 513  |    | 104  | putative protein (nawvar) mRNA.                                                              |
| <a href="#">nawwey</a>  | <a href="#">nawwey.aSep08</a>  |                        | 535   | 376  |    | 53   | putative protein (6.2 kD) (nawwey) complete mRNA.                                            |
| <a href="#">Nbeal1</a>  | <a href="#">Nbeal1.aSep08</a>  | <a href="#">689253</a> | 2582  | 627  |    | 52   | neurobeachin like 1 (Nbeal1) mRNA.                                                           |
| <a href="#">Nbeal2</a>  | <a href="#">Nbeal2.aSep08</a>  | <a href="#">316014</a> | 3540  | 1558 | 10 | 459  | neurobeachin-like 2 (Nbeal2) alternative variant aSep08, mRNA.                               |
| <a href="#">Nbeal2</a>  | <a href="#">Nbeal2.bSep08</a>  | <a href="#">316014</a> | 942   | 730  | 3  | 165  | neurobeachin-like 2 (Nbeal2) alternative variant bSep08, mRNA.                               |
| <a href="#">Nbeal2</a>  | <a href="#">Nbeal2.cSep08</a>  | <a href="#">316014</a> | 750   | 669  | 2  | 158  | neurobeachin-like 2 (Nbeal2) alternative variant cSep08, mRNA.                               |
| <a href="#">Nbl1</a>    | <a href="#">Nbl1.bSep08</a>    | <a href="#">50594</a>  | 10192 | 659  |    | 108  | neuroblastoma, suppression of tumorigenicity 1 (Nbl1) alternative variant bSep08, mRNA.      |
| <a href="#">Nbr1</a>    | <a href="#">Nbr1.aSep08</a>    | <a href="#">303554</a> | 10406 | 2513 | 5  | 436  | neighbor of Brca1 gene 1 (Nbr1) alternative variant aSep08, mRNA.                            |
| <a href="#">Nbr1</a>    | <a href="#">Nbr1.bSep08</a>    | <a href="#">303554</a> | 5995  | 818  | 4  | 184  | neighbor of Brca1 gene 1 (Nbr1) alternative variant bSep08, mRNA.                            |
| <a href="#">Ncald</a>   | <a href="#">Ncald.aSep08</a>   | <a href="#">553106</a> | 39719 | 806  |    | 156  | neurocalcin delta (16.5 kD) (Ncald) mRNA.                                                    |
| <a href="#">Ncam1</a>   | <a href="#">Ncam1.bSep08</a>   | <a href="#">24586</a>  | 18012 | 747  | 5  | 248  | neural cell adhesion molecule 1 (Ncam1) alternative variant bSep08, mRNA.                    |
| <a href="#">Ncam1</a>   | <a href="#">Ncam1.cSep08</a>   | <a href="#">24586</a>  | 25948 | 524  | 5  | 145  | neural cell adhesion molecule 1 (Ncam1) alternative variant cSep08, mRNA.                    |
| <a href="#">Ncapd2</a>  | <a href="#">Ncapd2.aSep08</a>  | <a href="#">362438</a> | 17668 | 4148 | 25 | 1305 | non-SMC condensin I complex, subunit D2 (Ncapd2) alternative variant aSep08, mRNA.           |
| <a href="#">Ncapd2</a>  | <a href="#">Ncapd2.bSep08</a>  | <a href="#">362438</a> | 2287  | 766  | 5  | 254  | non-SMC condensin I complex, subunit D2 (Ncapd2) alternative variant bSep08, mRNA.           |
| <a href="#">Ncapd2</a>  | <a href="#">Ncapd2.cSep08</a>  | <a href="#">362438</a> | 2588  | 1235 | 2  | 223  | non-SMC condensin I complex, subunit D2 (25.3 kD) (Ncapd2) alternative variant cSep08, mRNA. |
| <a href="#">Ncapd3</a>  | <a href="#">Ncapd3.bSep08</a>  | <a href="#">315508</a> | 4740  | 512  | 5  | 91   | non-SMC condensin II complex, subunit D3 (Ncapd3) alternative variant bSep08, mRNA.          |
| <a href="#">Ncapd3</a>  | <a href="#">Ncapd3.dSep08</a>  | <a href="#">315508</a> | 863   | 776  | 2  | 36   | non-SMC condensin II complex, subunit D3 (Ncapd3) alternative variant dSep08, mRNA.          |
| <a href="#">Ncaph</a>   | <a href="#">Ncaph.aSep08</a>   | <a href="#">680002</a> | 22717 | 2956 | 2  | 654  | condensin complex (Ncaph) alternative variant aSep08, mRNA.                                  |
| <a href="#">Ncaph</a>   | <a href="#">Ncaph.aSep08</a>   | <a href="#">680089</a> | 22717 | 2956 | 2  | 654  | condensin complex (Ncaph) alternative variant aSep08, mRNA.                                  |
| <a href="#">Ncaph</a>   | <a href="#">Ncaph.bSep08</a>   | <a href="#">680002</a> | 19759 | 1787 |    | 560  | condensin complex (Ncaph) alternative variant bSep08, mRNA.                                  |
| <a href="#">Ncaph</a>   | <a href="#">Ncaph.bSep08</a>   | <a href="#">680089</a> | 19759 | 1787 |    | 560  | condensin complex (Ncaph) alternative variant bSep08, mRNA.                                  |
| <a href="#">Ncaph</a>   | <a href="#">Ncaph.cSep08</a>   | <a href="#">680002</a> | 8161  | 951  | 2  | 178  | condensin complex (Ncaph) alternative variant cSep08, mRNA.                                  |
| <a href="#">Ncaph</a>   | <a href="#">Ncaph.cSep08</a>   | <a href="#">680089</a> | 8161  | 951  | 2  | 178  | condensin complex (Ncaph) alternative variant cSep08, mRNA.                                  |
| <a href="#">Ncaph</a>   | <a href="#">Ncaph.dSep08</a>   | <a href="#">680002</a> | 4216  | 773  | 1  | 124  | condensin complex (Ncaph) alternative variant dSep08, mRNA.                                  |

|                         |                                |                        |        |      |    |     |                                                                                                  |
|-------------------------|--------------------------------|------------------------|--------|------|----|-----|--------------------------------------------------------------------------------------------------|
| <a href="#">Ncaph</a>   | <a href="#">Ncaph.dSep08</a>   | <a href="#">680089</a> | 4216   | 773  | 1  | 124 | condensin complex (Ncaph) alternative variant dSep08, mRNA.                                      |
| <a href="#">Ncaph2</a>  | <a href="#">Ncaph2.bSep08</a>  | <a href="#">300149</a> | 8627   | 784  | 8  | 241 | non-SMC condensin II complex, subunit H2 (Ncaph2) alternative variant bSep08, mRNA.              |
| <a href="#">Ncaph2</a>  | <a href="#">Ncaph2.cSep08</a>  | <a href="#">300149</a> | 8074   | 670  | 7  | 206 | non-SMC condensin II complex, subunit H2 (Ncaph2) alternative variant cSep08, mRNA.              |
| <a href="#">Ncbp1</a>   | <a href="#">Ncbp1.bSep08</a>   | <a href="#">298075</a> | 8471   | 1911 | 9  | 280 | nuclear cap binding protein subunit 1, 80kDa (32.9 kD) (Ncbp1) alternative variant bSep08, mRNA. |
| <a href="#">Ncbp1</a>   | <a href="#">Ncbp1.cSep08</a>   | <a href="#">298075</a> | 1808   | 728  | 2  | 72  | nuclear cap binding protein subunit 1, 80kDa (8.5 kD) (Ncbp1) alternative variant cSep08, mRNA.  |
| <a href="#">Ncdn</a>    | <a href="#">Ncdn.bSep08</a>    | <a href="#">89791</a>  | 3032   | 688  | 3  | 228 | neurochondrin (Ncdn) alternative variant bSep08, mRNA.                                           |
| <a href="#">Ncdn</a>    | <a href="#">Ncdn.cSep08</a>    | <a href="#">89791</a>  | 2112   | 572  | 3  | 129 | neurochondrin (Ncdn) alternative variant cSep08, mRNA.                                           |
| <a href="#">Nckap1</a>  | <a href="#">Nckap1.bSep08</a>  | <a href="#">58823</a>  | 29115  | 855  | 8  | 285 | NCK-associated protein 1 (Nckap1) alternative variant bSep08, mRNA.                              |
| <a href="#">Nckap1</a>  | <a href="#">Nckap1.cSep08</a>  | <a href="#">58823</a>  | 1249   | 757  | 2  | 42  | NCK-associated protein 1 (Nckap1) alternative variant cSep08, mRNA.                              |
| <a href="#">Nckap1l</a> | <a href="#">Nckap1l.bSep08</a> | <a href="#">315348</a> | 34898  | 1782 | 14 | 514 | NCK associated protein 1 like (Nckap1l) alternative variant bSep08, mRNA.                        |
| <a href="#">Nckap1l</a> | <a href="#">Nckap1l.cSep08</a> | <a href="#">315348</a> | 9742   | 778  | 6  | 207 | NCK associated protein 1 like (Nckap1l) alternative variant cSep08, mRNA.                        |
| <a href="#">Nckap1l</a> | <a href="#">Nckap1l.dSep08</a> | <a href="#">315348</a> | 14922  | 282  | 3  | 71  | NCK associated protein 1 like (Nckap1l) alternative variant dSep08, mRNA.                        |
| <a href="#">Nckipsd</a> | <a href="#">Nckipsd.bSep08</a> | <a href="#">301009</a> | 1526   | 753  | 7  | 251 | NCK interacting protein with SH3 domain (Nckipsd) alternative variant bSep08, mRNA.              |
| <a href="#">Nckipsd</a> | <a href="#">Nckipsd.cSep08</a> | <a href="#">301009</a> | 2770   | 614  | 3  | 169 | NCK interacting protein with SH3 domain (Nckipsd) alternative variant cSep08, mRNA.              |
| <a href="#">Ncl</a>     | <a href="#">Ncl.bSep08</a>     | <a href="#">25135</a>  | 2849   | 821  | 6  | 273 | nucleolin (Ncl) alternative variant bSep08, mRNA.                                                |
| <a href="#">Ncln</a>    | <a href="#">Ncln.bSep08</a>    | <a href="#">314648</a> | 2671   | 1231 | 4  | 262 | nicalin (Ncln) alternative variant bSep08, mRNA.                                                 |
| <a href="#">Ncln</a>    | <a href="#">Ncln.cSep08</a>    | <a href="#">314648</a> | 2032   | 522  | 5  | 174 | nicalin (Ncln) alternative variant cSep08, mRNA.                                                 |
| <a href="#">Ncln</a>    | <a href="#">Ncln.dSep08</a>    | <a href="#">314648</a> | 1693   | 228  | 3  | 65  | nicalin (Ncln) alternative variant dSep08, mRNA.                                                 |
| <a href="#">Ncln</a>    | <a href="#">Ncln.eSep08</a>    | <a href="#">314648</a> | 1547   | 1096 | 4  | 65  | nicalin (Ncln) alternative variant eSep08, mRNA.                                                 |
| <a href="#">Ncln</a>    | <a href="#">Ncln.fSep08</a>    | <a href="#">314648</a> | 1842   | 1558 | 2  | 45  | nicalin (Ncln) alternative variant fSep08, mRNA.                                                 |
| <a href="#">Ncoa1</a>   | <a href="#">Ncoa1.bSep08</a>   | <a href="#">313929</a> | 54029  | 4550 | 11 | 803 | nuclear receptor coactivator 1 (Ncoa1) alternative variant bSep08, mRNA.                         |
| <a href="#">Ncoa1</a>   | <a href="#">Ncoa1.cSep08</a>   | <a href="#">313929</a> | 19784  | 1207 | 6  | 293 | nuclear receptor coactivator 1 (Ncoa1) alternative variant cSep08, mRNA.                         |
| <a href="#">Ncoa1</a>   | <a href="#">Ncoa1.dSep08</a>   | <a href="#">313929</a> | 13193  | 692  | 5  | 122 | nuclear receptor coactivator 1 (Ncoa1) alternative variant dSep08, mRNA.                         |
| <a href="#">Ncoa1</a>   | <a href="#">Ncoa1.fSep08</a>   | <a href="#">313929</a> | 155904 | 645  | 5  | 67  | nuclear receptor coactivator 1 (Ncoa1) alternative variant fSep08, mRNA.                         |
| <a href="#">Ncoa2</a>   | <a href="#">Ncoa2.aSep08</a>   | <a href="#">83724</a>  | 194058 | 824  | 7  | 222 | nuclear receptor coactivator 2 (Ncoa2) alternative variant aSep08, mRNA.                         |
| <a href="#">Ncoa2</a>   | <a href="#">Ncoa2.aSep08</a>   | <a href="#">680234</a> | 194058 | 824  | 7  | 222 | nuclear receptor coactivator 2 (Ncoa2) alternative variant aSep08, mRNA.                         |
| <a href="#">Ncoa2</a>   | <a href="#">Ncoa2.bSep08</a>   | <a href="#">83724</a>  | 154868 | 1002 | 3  | 44  | putative protein (Ncoa2) alternative variant bSep08, mRNA.                                       |

|                       |                              |                        |        |      |    |     |                                                                                                        |
|-----------------------|------------------------------|------------------------|--------|------|----|-----|--------------------------------------------------------------------------------------------------------|
| <a href="#">Ncoa2</a> | <a href="#">Ncoa2.bSep08</a> | <a href="#">680234</a> | 154868 | 1002 | 3  | 44  | putative protein (Ncoa2) alternative variant bSep08, mRNA.                                             |
| <a href="#">Ncoa2</a> | <a href="#">Ncoa2.dSep08</a> | <a href="#">83724</a>  | 89122  | 526  | 2  | 43  | putative protein (Ncoa2) alternative variant dSep08, mRNA.                                             |
| <a href="#">Ncoa2</a> | <a href="#">Ncoa2.dSep08</a> | <a href="#">680234</a> | 89122  | 526  | 2  | 43  | putative protein (Ncoa2) alternative variant dSep08, mRNA.                                             |
| <a href="#">Ncoa3</a> | <a href="#">Ncoa3.aSep08</a> | <a href="#">84584</a>  | 18270  | 4790 |    | 582 | nuclear receptor coactivator 3 (Ncoa3) mRNA.                                                           |
| <a href="#">Ncoa5</a> | <a href="#">Ncoa5.bSep08</a> | <a href="#">296372</a> | 3520   | 783  | 3  | 174 | nuclear receptor coactivator 5 (Ncoa5) alternative variant bSep08, mRNA.                               |
| <a href="#">Ncoa5</a> | <a href="#">Ncoa5.cSep08</a> | <a href="#">296372</a> | 2206   | 1136 | 2  | 148 | nuclear receptor coactivator 5 (Ncoa5) alternative variant cSep08, mRNA.                               |
| <a href="#">Ncoa5</a> | <a href="#">Ncoa5.dSep08</a> | <a href="#">296372</a> | 12095  | 1013 | 3  | 85  | nuclear receptor coactivator 5 (9.5 kD) (Ncoa5) alternative variant dSep08, mRNA.                      |
| <a href="#">Ncoa6</a> | <a href="#">Ncoa6.aSep08</a> | <a href="#">116464</a> | 16534  | 3494 | 5  | 989 | nuclear receptor coactivator 6 (Ncoa6) alternative variant aSep08, mRNA.                               |
| <a href="#">Ncoa6</a> | <a href="#">Ncoa6.bSep08</a> | <a href="#">116464</a> | 8257   | 1018 | 3  | 104 | nuclear receptor coactivator 6 (11.4 kD) (Ncoa6) alternative variant bSep08, mRNA.                     |
| <a href="#">Ncoa6</a> | <a href="#">Ncoa6.cSep08</a> | <a href="#">116464</a> | 7970   | 728  | 3  | 70  | nuclear receptor coactivator 6 (Ncoa6) alternative variant cSep08, mRNA.                               |
| <a href="#">Ncoa7</a> | <a href="#">Ncoa7.aSep08</a> | <a href="#">498995</a> | 38144  | 397  |    | 132 | nuclear receptor coactivator 7 (Ncoa7) mRNA.                                                           |
| <a href="#">Ncor1</a> | <a href="#">Ncor1.aSep08</a> | <a href="#">54299</a>  | 45305  | 1198 | 11 | 398 | nuclear receptor co-repressor 1 (Ncor1) alternative variant aSep08, mRNA.                              |
| <a href="#">Ncor1</a> | <a href="#">Ncor1.bSep08</a> | <a href="#">54299</a>  | 18778  | 378  | 6  | 126 | nuclear receptor co-repressor 1 (Ncor1) alternative variant bSep08, mRNA.                              |
| <a href="#">Ncor1</a> | <a href="#">Ncor1.cSep08</a> | <a href="#">54299</a>  | 27682  | 1577 | 4  | 108 | nuclear receptor co-repressor 1 (11.9 kD) (Ncor1) alternative variant cSep08, mRNA.                    |
| <a href="#">Ncor2</a> | <a href="#">Ncor2.bSep08</a> | <a href="#">360801</a> | 9051   | 2027 | 10 | 562 | nuclear receptor co-repressor 2 (Ncor2) alternative variant bSep08, mRNA.                              |
| <a href="#">Ncor2</a> | <a href="#">Ncor2.cSep08</a> | <a href="#">360801</a> | 9194   | 1816 | 8  | 484 | nuclear receptor co-repressor 2 (Ncor2) alternative variant cSep08, mRNA.                              |
| <a href="#">Ncor2</a> | <a href="#">Ncor2.dSep08</a> | <a href="#">360801</a> | 4836   | 707  | 6  | 224 | nuclear receptor co-repressor 2 (Ncor2) alternative variant dSep08, mRNA.                              |
| <a href="#">Ncor2</a> | <a href="#">Ncor2.eSep08</a> | <a href="#">360801</a> | 2007   | 418  | 3  | 139 | nuclear receptor co-repressor 2 (Ncor2) alternative variant eSep08, mRNA.                              |
| <a href="#">Ncor2</a> | <a href="#">Ncor2.iSep08</a> | <a href="#">360801</a> | 54029  | 572  | 3  | 61  | nuclear receptor co-repressor 2 (6.3 kD) (Ncor2) alternative variant iSep08, mRNA.                     |
| <a href="#">Ncstn</a> | <a href="#">Ncstn.bSep08</a> | <a href="#">289231</a> | 15991  | 2748 | 16 | 602 | nicastrin (67.2 kD) (Ncstn) alternative variant bSep08, mRNA.                                          |
| <a href="#">Ncstn</a> | <a href="#">Ncstn.cSep08</a> | <a href="#">289231</a> | 8698   | 936  | 7  | 150 | nicastrin (Ncstn) alternative variant cSep08, mRNA.                                                    |
| <a href="#">Ncstn</a> | <a href="#">Ncstn.dSep08</a> | <a href="#">289231</a> | 1549   | 703  | 3  | 140 | nicastrin (Ncstn) alternative variant dSep08, mRNA.                                                    |
| <a href="#">Ncstn</a> | <a href="#">Ncstn.eSep08</a> | <a href="#">289231</a> | 2188   | 989  | 5  | 83  | nicastrin (Ncstn) alternative variant eSep08, mRNA.                                                    |
| <a href="#">Ncstn</a> | <a href="#">Ncstn.fSep08</a> | <a href="#">289231</a> | 483    | 327  | 2  | 69  | nicastrin (Ncstn) alternative variant fSep08, mRNA.                                                    |
| <a href="#">Ndc80</a> | <a href="#">Ndc80.bSep08</a> | <a href="#">301701</a> | 16744  | 1783 | 1  | 384 | NDC80 homolog, kinetochore complex component (S. cerevisiae) (Ndc80) alternative variant bSep08, mRNA. |
| <a href="#">Ndel1</a> | <a href="#">Ndel1.aSep08</a> | <a href="#">170845</a> | 33779  | 2357 | 10 | 378 | nuclear distribution gene E-like homolog 1 (A. nidulans) (Ndel1) alternative variant aSep08, mRNA.     |

|                        |                               |                        |       |      |    |     |                                                                                                             |
|------------------------|-------------------------------|------------------------|-------|------|----|-----|-------------------------------------------------------------------------------------------------------------|
| <a href="#">Ndel1</a>  | <a href="#">Ndel1.cSep08</a>  | <a href="#">170845</a> | 53024 | 779  | 5  | 162 | nuclear distribution gene E-like homolog 1 ( <i>A. nidulans</i> ) (Ndel1) alternative variant cSep08, mRNA. |
| <a href="#">Ndel1</a>  | <a href="#">Ndel1.dSep08</a>  | <a href="#">170845</a> | 16701 | 733  | 5  | 147 | nuclear distribution gene E-like homolog 1 ( <i>A. nidulans</i> ) (Ndel1) alternative variant dSep08, mRNA. |
| <a href="#">Ndfip1</a> | <a href="#">Ndfip1.bSep08</a> | <a href="#">291609</a> | 50210 | 1756 | 8  | 263 | nedd4 family interacting protein 1 (Ndfip1) alternative variant bSep08, mRNA.                               |
| <a href="#">Ndfip1</a> | <a href="#">Ndfip1.cSep08</a> | <a href="#">291609</a> | 31102 | 412  | 3  | 137 | nedd4 family interacting protein 1 (Ndfip1) alternative variant cSep08, mRNA.                               |
| <a href="#">Ndfip1</a> | <a href="#">Ndfip1.dSep08</a> | <a href="#">291609</a> | 5421  | 1138 | 2  | 66  | nedd4 family interacting protein 1 (7.5 kD) (Ndfip1) alternative variant dSep08, mRNA.                      |
| <a href="#">Ndfip1</a> | <a href="#">Ndfip1.eSep08</a> | <a href="#">291609</a> | 7942  | 294  | 3  | 33  | nedd4 family interacting protein 1 (3.9 kD) (Ndfip1) alternative variant eSep08, mRNA.                      |
| <a href="#">Ndfip1</a> | <a href="#">Ndfip1.fSep08</a> | <a href="#">291609</a> | 6178  | 194  | 2  | 34  | nedd4 family interacting protein 1 (3.6 kD) (Ndfip1) alternative variant fSep08, mRNA.                      |
| <a href="#">Ndfip2</a> | <a href="#">Ndfip2.aSep08</a> | <a href="#">361089</a> | 59154 | 2108 | 1  | 337 | nedd4 family interacting protein 2 (36.3 kD) (Ndfip2) alternative variant aSep08, mRNA.                     |
| <a href="#">Ndg2</a>   | <a href="#">Ndg2.bSep08</a>   | <a href="#">361824</a> | 2321  | 1327 | 2  | 92  | nur77 downstream gene 2 (Ndg2) alternative variant bSep08, mRNA.                                            |
| <a href="#">Ndor1</a>  | <a href="#">Ndor1.bSep08</a>  | <a href="#">311799</a> | 954   | 744  | 3  | 159 | NADPH dependent diflavin oxidoreductase 1 (Ndor1) alternative variant bSep08, mRNA.                         |
| <a href="#">Ndor1</a>  | <a href="#">Ndor1.cSep08</a>  | <a href="#">311799</a> | 5133  | 700  | 3  | 58  | NADPH dependent diflavin oxidoreductase 1 (6.8 kD) (Ndor1) alternative variant cSep08, mRNA.                |
| <a href="#">Ndph</a>   | <a href="#">Ndph.bSep08</a>   | <a href="#">363443</a> | 24450 | 1547 |    | 89  | norrie disease homolog (9.5 kD) (Ndph) alternative variant bSep08, mRNA.                                    |
| <a href="#">Ndrg1</a>  | <a href="#">Ndrg1.aSep08</a>  | <a href="#">299923</a> | 35180 | 2882 | 1  | 441 | N-myc downstream regulated gene 1 (Ndrg1) alternative variant aSep08, mRNA.                                 |
| <a href="#">Ndrg1</a>  | <a href="#">Ndrg1.bSep08</a>  | <a href="#">299923</a> | 32902 | 1028 | 1  | 232 | N-myc downstream regulated gene 1 (Ndrg1) alternative variant bSep08, mRNA.                                 |
| <a href="#">Ndrg1</a>  | <a href="#">Ndrg1.cSep08</a>  | <a href="#">299923</a> | 29232 | 704  | 1  | 198 | N-myc downstream regulated gene 1 (Ndrg1) alternative variant cSep08, mRNA.                                 |
| <a href="#">Ndrg2</a>  | <a href="#">Ndrg2.bSep08</a>  | <a href="#">171114</a> | 8367  | 1718 | 15 | 359 | ndrg family member 2 (39.5 kD) (Ndrg2) alternative variant bSep08, mRNA.                                    |
| <a href="#">Ndrg2</a>  | <a href="#">Ndrg2.cSep08</a>  | <a href="#">171114</a> | 6890  | 2092 | 14 | 341 | ndrg family member 2 (37.5 kD) (Ndrg2) alternative variant cSep08, mRNA.                                    |
| <a href="#">Ndrg2</a>  | <a href="#">Ndrg2.dSep08</a>  | <a href="#">171114</a> | 6076  | 849  | 12 | 257 | ndrg 2 (Ndrg2) alternative variant dSep08, mRNA.                                                            |
| <a href="#">Ndrg2</a>  | <a href="#">Ndrg2.eSep08</a>  | <a href="#">171114</a> | 6094  | 825  | 11 | 257 | ndrg family member 2 (Ndrg2) alternative variant eSep08, mRNA.                                              |
| <a href="#">Ndrg2</a>  | <a href="#">Ndrg2.fSep08</a>  | <a href="#">171114</a> | 5020  | 599  | 8  | 184 | ndrg family member 2 (Ndrg2) alternative variant fSep08, mRNA.                                              |
| <a href="#">Ndrg2</a>  | <a href="#">Ndrg2.gSep08</a>  | <a href="#">171114</a> | 4307  | 682  | 9  | 151 | ndrg family member 2 CRA c (Ndrg2) alternative variant gSep08, mRNA.                                        |
| <a href="#">Ndrg2</a>  | <a href="#">Ndrg2.hSep08</a>  | <a href="#">171114</a> | 2721  | 403  | 2  | 105 | putative protein (Ndrg2) alternative variant hSep08, mRNA.                                                  |
| <a href="#">Ndrg2</a>  | <a href="#">Ndrg2.iSep08</a>  | <a href="#">171114</a> | 2597  | 429  | 4  | 100 | ndrg family member 2 (Ndrg2) alternative variant iSep08, mRNA.                                              |
| <a href="#">Ndrg2</a>  | <a href="#">Ndrg2.jSep08</a>  | <a href="#">171114</a> | 834   | 703  | 2  | 49  | ndrg family member 2 (Ndrg2) alternative variant jSep08, mRNA.                                              |
| <a href="#">Ndrg2</a>  | <a href="#">Ndrg2.lSep08</a>  | <a href="#">171114</a> | 1141  | 749  | 2  | 51  | putative protein (Ndrg2) alternative variant lSep08, mRNA.                                                  |

|                              |                                     |                        |       |      |    |     |                                                                                                                    |
|------------------------------|-------------------------------------|------------------------|-------|------|----|-----|--------------------------------------------------------------------------------------------------------------------|
| <a href="#">Ndrg2</a>        | <a href="#">Ndrg2.mSep08</a>        | <a href="#">171114</a> | 804   | 414  | 3  | 53  | putative protein (6.6 kD) (Ndrg2) alternative variant mSep08, mRNA.                                                |
| <a href="#">Ndrg3</a>        | <a href="#">Ndrg3.aSep08</a>        | <a href="#">296318</a> | 28593 | 1453 | 13 | 324 | N-myc downstream regulated gene 3 (Ndrg3) alternative variant aSep08, mRNA.                                        |
| <a href="#">Ndrg3</a>        | <a href="#">Ndrg3.bSep08</a>        | <a href="#">296318</a> | 20178 | 2138 | 8  | 190 | N-myc downstream regulated gene 3 (21.0 kD) (Ndrg3) alternative variant bSep08, mRNA.                              |
| <a href="#">Ndrg3</a>        | <a href="#">Ndrg3.cSep08</a>        | <a href="#">296318</a> | 18965 | 925  | 8  | 185 | N-myc downstream regulated gene 3 (Ndrg3) alternative variant cSep08, mRNA.                                        |
| <a href="#">Ndrg3</a>        | <a href="#">Ndrg3.dSep08</a>        | <a href="#">296318</a> | 13574 | 471  | 8  | 156 | N-myc downstream regulated gene 3 (Ndrg3) alternative variant dSep08, mRNA.                                        |
| <a href="#">Ndrg3</a>        | <a href="#">Ndrg3.eSep08</a>        | <a href="#">296318</a> | 15880 | 716  | 6  | 153 | N-myc downstream regulated gene 3 (16.7 kD) (Ndrg3) alternative variant eSep08, mRNA.                              |
| <a href="#">Ndrg3</a>        | <a href="#">Ndrg3.fSep08</a>        | <a href="#">296318</a> | 5477  | 729  | 3  | 85  | N-myc downstream regulated gene 3 (Ndrg3) alternative variant fSep08, mRNA.                                        |
| <a href="#">Ndrg4</a>        | <a href="#">Ndrg4.aSep08</a>        | <a href="#">64457</a>  | 11048 | 2810 | 15 | 352 | N-myc downstream regulated gene 4 (38.5 kD) (Ndrg4) alternative variant aSep08, mRNA.                              |
| <a href="#">Ndrg4</a>        | <a href="#">Ndrg4.bSep08</a>        | <a href="#">64457</a>  | 17253 | 691  | 9  | 229 | brain heart protein (Ndrg4) alternative variant bSep08, mRNA.                                                      |
| <a href="#">Ndrg4</a>        | <a href="#">Ndrg4.cSep08</a>        | <a href="#">64457</a>  | 4308  | 795  | 9  | 206 | brain heart protein (Ndrg4) alternative variant cSep08, mRNA.                                                      |
| <a href="#">Ndrg4</a>        | <a href="#">Ndrg4.eSep08</a>        | <a href="#">64457</a>  | 2235  | 739  | 8  | 184 | brain heart protein (Ndrg4) alternative variant eSep08, mRNA.                                                      |
| <a href="#">Ndrg4</a>        | <a href="#">Ndrg4.fSep08</a>        | <a href="#">64457</a>  | 1519  | 772  | 2  | 118 | N-myc downstream regulated gene 4 (12.5 kD) (Ndrg4) alternative variant fSep08, mRNA.                              |
| <a href="#">Ndrg4</a>        | <a href="#">Ndrg4.gSep08</a>        | <a href="#">64457</a>  | 2754  | 454  | 4  | 107 | N-myc downstream regulated gene 4 (Ndrg4) alternative variant gSep08, mRNA.                                        |
| <a href="#">Ndrg4</a>        | <a href="#">Ndrg4.iSep08</a>        | <a href="#">64457</a>  | 28341 | 367  | 5  | 88  | brain heart protein (Ndrg4) alternative variant iSep08, mRNA.                                                      |
| <a href="#">Ndrg4</a>        | <a href="#">Ndrg4.jSep08</a>        | <a href="#">64457</a>  | 1522  | 437  | 4  | 47  | N-myc downstream regulated gene 4 (Ndrg4) alternative variant jSep08, mRNA.                                        |
| <a href="#">Ndst2</a>        | <a href="#">Ndst2.bSep08</a>        | <a href="#">114002</a> | 2806  | 1467 | 5  | 165 | N-deacetylase N-sulfotransferase 2 (Ndst2) alternative variant bSep08, mRNA.                                       |
| <a href="#">Ndst2</a>        | <a href="#">Ndst2.cSep08</a>        | <a href="#">114002</a> | 914   | 789  | 2  | 71  | putative protein (7.6 kD) (Ndst2) alternative variant cSep08, mRNA.                                                |
| <a href="#">Ndst4</a>        | <a href="#">Ndst4.aSep08</a>        | <a href="#">362035</a> | 11856 | 632  |    | 145 | N-deacetylase/N-sulfotransferase (heparin glucosaminy) 4 (Ndst4) mRNA.                                             |
| <a href="#">NDT80_Phog.0</a> | <a href="#">NDT80_Phog.0.aSep08</a> |                        | 10386 | 735  | 2  | 206 | NDT80/Phog like DNA-binding (NDT80_Phog.0) alternative variant aSep08, mRNA.                                       |
| <a href="#">NDT80_Phog.0</a> | <a href="#">NDT80_Phog.0.bSep08</a> |                        | 9784  | 430  | 1  | 142 | CRA b (NDT80_Phog.0) alternative variant bSep08, mRNA.                                                             |
| <a href="#">Ndufa1</a>       | <a href="#">Ndufa1.bSep08</a>       | <a href="#">363441</a> | 3612  | 2541 | 1  | 66  | NADH dehydrogenase (ubiquinone) 1 alpha subcomplex, 1 (7.7 kD) (Ndufa1) alternative variant bSep08, complete mRNA. |
| <a href="#">Ndufa3</a>       | <a href="#">Ndufa3.bSep08</a>       | <a href="#">691001</a> | 2643  | 359  | 4  | 84  | NADH dehydrogenase (ubiquinone) 1 alpha subcomplex, 3 (9.4 kD) (Ndufa3) alternative variant bSep08, complete mRNA. |

|                            |                                   |                        |        |      |   |     |                                                                                                                                    |
|----------------------------|-----------------------------------|------------------------|--------|------|---|-----|------------------------------------------------------------------------------------------------------------------------------------|
| <a href="#">Ndufa3</a>     | <a href="#">Ndufa3.dSep08</a>     | <a href="#">691001</a> | 2602   | 527  | 3 | 53  | NADH dehydrogenase (ubiquinone) 1 alpha subcomplex, 3 (6.0 kD) (Ndufa3) alternative variant dSep08, complete mRNA.                 |
| <a href="#">Ndufa5</a>     | <a href="#">Ndufa5.bSep08</a>     | <a href="#">25488</a>  | 1875   | 1544 | 2 | 78  | NADH dehydrogenase (ubiquinone) 1 alpha subcomplex 5 (8.9 kD) (Ndufa5) alternative variant bSep08, mRNA.                           |
| <a href="#">Ndufa7</a>     | <a href="#">Ndufa7.aSep08</a>     | <a href="#">299643</a> | 13311  | 1007 | 2 | 120 | NADH dehydrogenase (ubiquinone) 1 alpha subcomplex, 7 (B14.5a) (Ndufa7) alternative variant aSep08, mRNA.                          |
| <a href="#">Ndufa8</a>     | <a href="#">Ndufa8.bSep08</a>     | <a href="#">296658</a> | 16452  | 1248 | 4 | 172 | NADH dehydrogenase (ubiquinone) 1 alpha subcomplex, 8 (20.0 kD) (Ndufa8) alternative variant bSep08, mRNA.                         |
| <a href="#">Ndufa8</a>     | <a href="#">Ndufa8.cSep08</a>     | <a href="#">296658</a> | 15901  | 693  | 4 | 117 | NADH dehydrogenase (ubiquinone) 1 alpha subcomplex, 8 (Ndufa8) alternative variant cSep08, mRNA.                                   |
| <a href="#">Ndufa10</a>    | <a href="#">Ndufa10.cSep08</a>    | <a href="#">678759</a> | 1758   | 318  | 2 | 46  | NADH dehydrogenase (ubiquinone) 1 alpha subcomplex 10 (Ndufa10) alternative variant cSep08, mRNA.                                  |
| <a href="#">Ndufa10I1</a>  | <a href="#">Ndufa10I1.bSep08</a>  | <a href="#">314071</a> | 1937   | 1803 | 2 | 273 | NADH dehydrogenase (ubiquinone) 1 alpha subcomplex 10-like 1 (31.8 kD) (Ndufa10I1) alternative variant bSep08, complete mRNA.      |
| <a href="#">Ndufa10I1</a>  | <a href="#">Ndufa10I1.bSep08</a>  | <a href="#">316632</a> | 1937   | 1803 | 2 | 273 | NADH dehydrogenase (ubiquinone) 1 alpha subcomplex 10-like 1 (31.8 kD) (Ndufa10I1) alternative variant bSep08, complete mRNA.      |
| <a href="#">Ndufa13-ps</a> | <a href="#">Ndufa13-ps.aSep08</a> | <a href="#">290671</a> | 6977   | 513  | 4 | 144 | NADH dehydrogenase (ubiquinone) 1 alpha subcomplex 13 pseudogene (16.8 kD) (Ndufa13-ps) alternative variant aSep08, complete mRNA. |
| <a href="#">Ndufa13-ps</a> | <a href="#">Ndufa13-ps.bSep08</a> | <a href="#">290671</a> | 1293   | 547  | 3 | 110 | NADH dehydrogenase (ubiquinone) 1 alpha subcomplex 13 pseudogene (13.1 kD) (Ndufa13-ps) alternative variant bSep08, mRNA.          |
| <a href="#">Ndufab1</a>    | <a href="#">Ndufab1.aSep08</a>    | <a href="#">293453</a> | 9733   | 642  | 5 | 165 | NADH dehydrogenase (ubiquinone) 1, alpha/beta subcomplex, 1 (Ndufab1) alternative variant aSep08, mRNA.                            |
| <a href="#">Ndufab1</a>    | <a href="#">Ndufab1.cSep08</a>    | <a href="#">293453</a> | 9283   | 849  | 4 | 132 | NADH dehydrogenase (ubiquinone) 1, alpha/beta subcomplex, 1 (Ndufab1) alternative variant cSep08, mRNA.                            |
| <a href="#">Ndufaf2</a>    | <a href="#">Ndufaf2.aSep08</a>    | <a href="#">361894</a> | 113420 | 602  |   | 166 | NADH dehydrogenase (ubiquinone) 1 alpha subcomplex, assembly factor 2 (19.6 kD) (Ndufaf2) mRNA.                                    |
| <a href="#">Ndufb2</a>     | <a href="#">Ndufb2.aSep08</a>     | <a href="#">362344</a> | 7079   | 456  | 4 | 105 | NADH dehydrogenase (ubiquinone) 1 beta subcomplex, 2 (Ndufb2) alternative variant aSep08, complete mRNA.                           |
| <a href="#">Ndufb3</a>     | <a href="#">Ndufb3.bSep08</a>     | <a href="#">301427</a> | 10177  | 533  |   | 58  | NADH dehydrogenase (ubiquinone) 1 beta subcomplex 3 (Ndufb3) alternative variant bSep08, mRNA.                                     |
| <a href="#">Ndufb8</a>     | <a href="#">Ndufb8.bSep08</a>     | <a href="#">293991</a> | 4669   | 435  | 5 | 144 | NADH dehydrogenase (ubiquinone) 1 beta subcomplex 8 (Ndufb8) alternative variant bSep08, mRNA.                                     |
| <a href="#">Ndufb8</a>     | <a href="#">Ndufb8.cSep08</a>     | <a href="#">293991</a> | 4384   | 1493 | 4 | 110 | NADH dehydrogenase (ubiquinone) 1 beta subcomplex 8 (13.3 kD) (Ndufb8) alternative variant cSep08, mRNA.                           |
| <a href="#">Ndufb8</a>     | <a href="#">Ndufb8.dSep08</a>     | <a href="#">293991</a> | 3730   | 840  | 3 | 110 | NADH dehydrogenase (ubiquinone) 1 beta subcomplex 8 (13.3 kD) (Ndufb8) alternative variant dSep08, mRNA.                           |
| <a href="#">Ndufb9</a>     | <a href="#">Ndufb9.bSep08</a>     | <a href="#">299954</a> | 6370   | 649  | 4 | 175 | NADH dehydrogenase (ubiquinone) 1 beta subcomplex, 9 (21.4 kD) (Ndufb9) alternative variant bSep08, complete mRNA.                 |



|                         |                                |                        |       |      |    |     |                                                                                                                        |
|-------------------------|--------------------------------|------------------------|-------|------|----|-----|------------------------------------------------------------------------------------------------------------------------|
| <a href="#">Ndufb9</a>  | <a href="#">Ndufb9.cSep08</a>  | <a href="#">299954</a> | 424   | 278  | 2  | 46  | NADH dehydrogenase (ubiquinone) 1 beta subcomplex, 9 (5.6 kD) (Ndufb9) alternative variant cSep08, mRNA.               |
| <a href="#">Ndufb11</a> | <a href="#">Ndufb11.bSep08</a> | <a href="#">299310</a> | 2258  | 1016 | 2  | 125 | NADH dehydrogenase (ubiquinone) 1 beta subcomplex, 11 (14.6 kD) (Ndufb11) alternative variant bSep08, complete mRNA.   |
| <a href="#">Ndufc1</a>  | <a href="#">Ndufc1.aSep08</a>  | <a href="#">689938</a> | 3787  | 528  | 4  | 82  | NADH dehydrogenase (ubiquinone) 1, subcomplex unknown, 1 (Ndufc1) alternative variant aSep08, mRNA.                    |
| <a href="#">Ndufc1</a>  | <a href="#">Ndufc1.bSep08</a>  | <a href="#">689938</a> | 3788  | 569  | 5  | 80  | NADH dehydrogenase (ubiquinone) 1, subcomplex unknown, 1 (Ndufc1) alternative variant bSep08, mRNA.                    |
| <a href="#">Ndufc2</a>  | <a href="#">Ndufc2.bSep08</a>  | <a href="#">293130</a> | 6230  | 623  | 3  | 94  | NADH dehydrogenase (ubiquinone) 1, subcomplex unknown, 2 (10.3 kD) (Ndufc2) alternative variant bSep08, complete mRNA. |
| <a href="#">Ndufs1</a>  | <a href="#">Ndufs1.bSep08</a>  | <a href="#">301458</a> | 34022 | 1788 | 12 | 431 | NADH dehydrogenase (ubiquinone) Fe-S protein 1 (Ndufs1) alternative variant bSep08, complete mRNA.                     |
| <a href="#">Ndufs1</a>  | <a href="#">Ndufs1.cSep08</a>  | <a href="#">301458</a> | 5178  | 524  | 4  | 152 | NADH dehydrogenase (ubiquinone) Fe-S protein 1 (Ndufs1) alternative variant cSep08, mRNA.                              |
| <a href="#">Ndufs2</a>  | <a href="#">Ndufs2.bSep08</a>  | <a href="#">289218</a> | 2804  | 753  | 5  | 185 | NADH dehydrogenase (ubiquinone) Fe-S protein 2 (Ndufs2) alternative variant bSep08, mRNA.                              |
| <a href="#">Ndufs2</a>  | <a href="#">Ndufs2.cSep08</a>  | <a href="#">289218</a> | 8610  | 531  | 4  | 109 | NADH dehydrogenase (ubiquinone) Fe-S protein 2 (Ndufs2) alternative variant cSep08, mRNA.                              |
| <a href="#">Ndufs2</a>  | <a href="#">Ndufs2.dSep08</a>  | <a href="#">289218</a> | 8644  | 578  | 4  | 46  | NADH dehydrogenase (ubiquinone) Fe-S protein 2 (Ndufs2) alternative variant dSep08, mRNA.                              |
| <a href="#">Ndufs3</a>  | <a href="#">Ndufs3.bSep08</a>  | <a href="#">295923</a> | 4639  | 574  | 6  | 191 | NADH dehydrogenase (ubiquinone) Fe-S protein 3 (Ndufs3) alternative variant bSep08, mRNA.                              |
| <a href="#">Ndufs3</a>  | <a href="#">Ndufs3.cSep08</a>  | <a href="#">295923</a> | 5538  | 1548 | 4  | 92  | NADH dehydrogenase (ubiquinone) Fe-S protein 3 (10.9 kD) (Ndufs3) alternative variant cSep08, mRNA.                    |
| <a href="#">Ndufs4</a>  | <a href="#">Ndufs4.bSep08</a>  | <a href="#">499529</a> | 8018  | 740  | 1  | 64  | NADH dehydrogenase (ubiquinone) Fe-S protein 4 (Ndufs4) alternative variant bSep08, mRNA.                              |
| <a href="#">Ndufs5</a>  | <a href="#">Ndufs5.aSep08</a>  | <a href="#">362588</a> | 5868  | 436  | 3  | 106 | NADH dehydrogenase (ubiquinone) Fe-S protein 5 (12.7 kD) (Ndufs5) alternative variant aSep08, mRNA.                    |
| <a href="#">Ndufs7</a>  | <a href="#">Ndufs7.bSep08</a>  | <a href="#">362837</a> | 9749  | 3723 | 8  | 228 | NADH dehydrogenase (ubiquinone) Fe-S protein 7 (25.1 kD) (Ndufs7) alternative variant bSep08, mRNA.                    |
| <a href="#">Ndufs7</a>  | <a href="#">Ndufs7.cSep08</a>  | <a href="#">362837</a> | 2217  | 707  | 3  | 142 | NADH dehydrogenase (ubiquinone) Fe-S protein 7 (Ndufs7) alternative variant cSep08, mRNA.                              |
| <a href="#">Ndufs8</a>  | <a href="#">Ndufs8.aSep08</a>  | <a href="#">293652</a> | 3771  | 880  | 3  | 212 | NADH dehydrogenase (ubiquinone) Fe-S protein 8 (24.0 kD) (Ndufs8) alternative variant aSep08, mRNA.                    |
| <a href="#">Ndufs8</a>  | <a href="#">Ndufs8.cSep08</a>  | <a href="#">293652</a> | 1848  | 556  | 1  | 119 | NADH dehydrogenase (ubiquinone) Fe-S protein 8 (Ndufs8) alternative variant cSep08, mRNA.                              |
| <a href="#">Ndufv1</a>  | <a href="#">Ndufv1.bSep08</a>  | <a href="#">293655</a> | 3885  | 1121 | 5  | 232 | nadh dehydrogenase flavoprotein 1 (25.6 kD) (Ndufv1) alternative variant bSep08, mRNA.                                 |
| <a href="#">Ndufv1</a>  | <a href="#">Ndufv1.cSep08</a>  | <a href="#">293655</a> | 871   | 655  | 3  | 73  | nadh dehydrogenase flavoprotein 1 CRA a (8.3 kD) (Ndufv1) alternative variant cSep08, mRNA.                            |
| <a href="#">Ndufv2</a>  | <a href="#">Ndufv2.bSep08</a>  | <a href="#">81728</a>  | 14820 | 778  | 5  | 184 | NADH dehydrogenase (ubiquinone) flavoprotein 2 (20.7 kD) (Ndufv2) alternative variant bSep08, complete mRNA.           |
| <a href="#">Ndufv2</a>  | <a href="#">Ndufv2.cSep08</a>  | <a href="#">81728</a>  | 1811  | 432  | 2  | 31  | NADH dehydrogenase (ubiquinone) flavoprotein 2 (Ndufv2) alternative variant cSep08, mRNA.                              |

|                           |                                  |                        |       |      |   |     |                                                                                                                  |
|---------------------------|----------------------------------|------------------------|-------|------|---|-----|------------------------------------------------------------------------------------------------------------------|
| <a href="#">Ndufv3l</a>   | <a href="#">Ndufv3l.cSep08</a>   | <a href="#">64539</a>  | 2103  | 725  | 1 | 73  | NADH dehydrogenase (ubiquinone) flavoprotein 3-like (7.8 kD) (Ndufv3l) alternative variant cSep08, mRNA.         |
| <a href="#">Neb</a>       | <a href="#">Neb.aSep08</a>       | <a href="#">311029</a> | 9110  | 1075 | 8 | 332 | nebulin (Neb) alternative variant aSep08, mRNA.                                                                  |
| <a href="#">Neb</a>       | <a href="#">Neb.bSep08</a>       | <a href="#">311029</a> | 8668  | 1036 | 8 | 319 | nebulin (Neb) alternative variant bSep08, mRNA.                                                                  |
| <a href="#">Neb</a>       | <a href="#">Neb.cSep08</a>       | <a href="#">311029</a> | 20318 | 1461 | 8 | 285 | nebulin (Neb) alternative variant cSep08, mRNA.                                                                  |
| <a href="#">Neb</a>       | <a href="#">Neb.dSep08</a>       | <a href="#">311029</a> | 13020 | 749  | 8 | 249 | nebulin (Neb) alternative variant dSep08, mRNA.                                                                  |
| <a href="#">Neb</a>       | <a href="#">Neb.eSep08</a>       | <a href="#">311029</a> | 784   | 454  | 2 | 56  | nebulin (Neb) alternative variant eSep08, mRNA.                                                                  |
| <a href="#">Neb1</a>      | <a href="#">Neb1.aSep08</a>      | <a href="#">307189</a> | 74373 | 557  | 4 | 85  | nebulette (Neb1) alternative variant aSep08, mRNA.                                                               |
| <a href="#">Nebulin.0</a> | <a href="#">Nebulin.0.aSep08</a> |                        | 10892 | 396  |   | 131 | nebulette (Nebulin.0) mRNA.                                                                                      |
| <a href="#">Nebulin.1</a> | <a href="#">Nebulin.1.aSep08</a> |                        | 9857  | 1779 |   | 592 | nebulin (Nebulin.1) alternative variant aSep08, mRNA.                                                            |
| <a href="#">Nebulin.1</a> | <a href="#">Nebulin.1.bSep08</a> |                        | 4409  | 603  |   | 201 | nebulin (Nebulin.1) alternative variant bSep08, mRNA.                                                            |
| <a href="#">Nebulin.1</a> | <a href="#">Nebulin.1.cSep08</a> |                        | 898   | 200  |   | 66  | putative protein of vertebrate origin (Nebulin.1) alternative variant cSep08, mRNA.                              |
| <a href="#">Nebulin.2</a> | <a href="#">Nebulin.2.aSep08</a> |                        | 1298  | 396  |   | 131 | nebulin (Nebulin.2) mRNA.                                                                                        |
| <a href="#">Nebulin.3</a> | <a href="#">Nebulin.3.aSep08</a> |                        | 2686  | 374  |   | 124 | nebulin (Nebulin.3) mRNA.                                                                                        |
| <a href="#">Nebulin.4</a> | <a href="#">Nebulin.4.aSep08</a> |                        | 1003  | 397  |   | 132 | nebulin (Nebulin.4) mRNA.                                                                                        |
| <a href="#">Nebulin.5</a> | <a href="#">Nebulin.5.aSep08</a> |                        | 9906  | 461  |   | 153 | nebulin (Nebulin.5) mRNA.                                                                                        |
| <a href="#">Necab1</a>    | <a href="#">Necab1.bSep08</a>    | <a href="#">64169</a>  | 3855  | 411  | 1 | 85  | N-terminal EF-hand calcium binding protein 1 (Necab1) alternative variant bSep08, mRNA.                          |
| <a href="#">Necab2</a>    | <a href="#">Necab2.aSep08</a>    | <a href="#">170928</a> | 6995  | 694  | 8 | 198 | N-terminal EF-hand calcium binding protein 2 (22.4 kD) (Necab2) alternative variant aSep08, mRNA.                |
| <a href="#">Necab2</a>    | <a href="#">Necab2.bSep08</a>    | <a href="#">170928</a> | 5559  | 628  | 6 | 150 | N-terminal EF-hand calcium binding protein 2 (16.8 kD) (Necab2) alternative variant bSep08, mRNA.                |
| <a href="#">Necab3</a>    | <a href="#">Necab3.bSep08</a>    | <a href="#">311562</a> | 3705  | 739  | 8 | 228 | antibiotic biosynthesis monooxygenase (Necab3) alternative variant bSep08, mRNA.                                 |
| <a href="#">Necab3</a>    | <a href="#">Necab3.cSep08</a>    | <a href="#">311562</a> | 2822  | 787  | 4 | 102 | putative protein of metazoan origin (Necab3) alternative variant cSep08, mRNA.                                   |
| <a href="#">Necab3</a>    | <a href="#">Necab3.dSep08</a>    | <a href="#">311562</a> | 11860 | 654  | 7 | 85  | calcium-binding EF-hand containing protein (9.3 kD) (Necab3) alternative variant dSep08, mRNA.                   |
| <a href="#">Necab3</a>    | <a href="#">Necab3.eSep08</a>    | <a href="#">311562</a> | 1159  | 711  | 3 | 65  | putative protein of vertebrate origin (Necab3) alternative variant eSep08, mRNA.                                 |
| <a href="#">Necap1</a>    | <a href="#">Necap1.bSep08</a>    | <a href="#">312694</a> | 14968 | 1193 | 3 | 218 | NECAP endocytosis associated 1 (23.0 kD) (Necap1) alternative variant bSep08, mRNA.                              |
| <a href="#">Necap2</a>    | <a href="#">Necap2.aSep08</a>    | <a href="#">298598</a> | 11287 | 1180 | 7 | 286 | NECAP endocytosis associated 2 (Necap2) alternative variant aSep08, mRNA.                                        |
| <a href="#">Necap2</a>    | <a href="#">Necap2.bSep08</a>    | <a href="#">298598</a> | 12386 | 1911 | 8 | 263 | NECAP endocytosis associated 2 (Necap2) alternative variant bSep08, complete mRNA.                               |
| <a href="#">Nedd1</a>     | <a href="#">Nedd1.bSep08</a>     | <a href="#">299730</a> | 8625  | 505  | 1 | 168 | neural precursor cell expressed, developmentally down-regulated gene 1 (Nedd1) alternative variant bSep08, mRNA. |
| <a href="#">Nedd4</a>     | <a href="#">Nedd4.bSep08</a>     | <a href="#">25489</a>  | 4111  | 864  | 3 | 111 | neural precursor cell expressed, developmentally down-regulated gene 4 (Nedd4) alternative variant bSep08, mRNA. |

|                         |                                |                        |        |      |    |     |                                                                                                                           |
|-------------------------|--------------------------------|------------------------|--------|------|----|-----|---------------------------------------------------------------------------------------------------------------------------|
| <a href="#">Nedd4</a>   | <a href="#">Nedd4.cSep08</a>   | <a href="#">25489</a>  | 1324   | 646  | 2  | 71  | neural precursor cell expressed, developmentally down-regulated gene 4 (8.2 kD) (Nedd4) alternative variant cSep08, mRNA. |
| <a href="#">Nedd4</a>   | <a href="#">Nedd4.dSep08</a>   | <a href="#">25489</a>  | 9243   | 425  | 7  | 51  | neural precursor cell expressed, developmentally down-regulated gene 4 (Nedd4) alternative variant dSep08, mRNA.          |
| <a href="#">Nedd4l</a>  | <a href="#">Nedd4l.bSep08</a>  | <a href="#">291553</a> | 157538 | 1129 | 13 | 355 | neural precursor cell expressed, developmentally down-regulated gene 4-like (Nedd4l) alternative variant bSep08, mRNA.    |
| <a href="#">Nedd4l</a>  | <a href="#">Nedd4l.cSep08</a>  | <a href="#">291553</a> | 14491  | 389  | 4  | 129 | neural precursor cell expressed, developmentally down-regulated gene 4-like (Nedd4l) alternative variant cSep08, mRNA.    |
| <a href="#">Nedd4l</a>  | <a href="#">Nedd4l.dSep08</a>  | <a href="#">291553</a> | 9871   | 375  | 5  | 125 | neural precursor cell expressed, developmentally down-regulated gene 4-like (Nedd4l) alternative variant dSep08, mRNA.    |
| <a href="#">Nedd9</a>   | <a href="#">Nedd9.bSep08</a>   | <a href="#">291044</a> | 147526 | 695  | 3  | 177 | neural precursor cell expressed, developmentally down-regulated gene 9 (Nedd9) alternative variant bSep08, mRNA.          |
| <a href="#">neeby</a>   | <a href="#">neeby.aSep08</a>   |                        | 494    | 377  |    | 62  | KIF4B (neeby) mRNA.                                                                                                       |
| <a href="#">neechy</a>  | <a href="#">neechy.aSep08</a>  |                        | 3640   | 870  |    | 83  | cytosolic carboxypeptidase 2 (neechy) mRNA.                                                                               |
| <a href="#">needar</a>  | <a href="#">needar.aSep08</a>  |                        | 3033   | 426  |    | 141 | hook homolog 2 CRA a (needar) mRNA.                                                                                       |
| <a href="#">neefer</a>  | <a href="#">neefer.aSep08</a>  |                        | 1065   | 720  |    | 70  | polyprotein (8.3 kD) (neefer) mRNA.                                                                                       |
| <a href="#">neeflo</a>  | <a href="#">neeflo.aSep08</a>  |                        | 378    | 239  |    | 41  | putative protein (neeflo) mRNA.                                                                                           |
| <a href="#">neeflu</a>  | <a href="#">neeflu.aSep08</a>  |                        | 340    | 97   |    | 24  | putative protein (neeflu) mRNA.                                                                                           |
| <a href="#">neegar</a>  | <a href="#">neegar.aSep08</a>  |                        | 16410  | 585  |    | 41  | putative protein (4.5 kD) (neegar) mRNA.                                                                                  |
| <a href="#">neeja</a>   | <a href="#">neeja.aSep08</a>   |                        | 16750  | 1634 |    | 97  | putative protein (neeja) mRNA.                                                                                            |
| <a href="#">neeje</a>   | <a href="#">neeje.aSep08</a>   |                        | 8427   | 1141 | 4  | 50  | putative protein (neeje) alternative variant aSep08, mRNA.                                                                |
| <a href="#">neeje</a>   | <a href="#">neeje.bSep08</a>   |                        | 7180   | 882  | 4  | 66  | putative protein (neeje) alternative variant bSep08, mRNA.                                                                |
| <a href="#">neeje</a>   | <a href="#">neeje.cSep08</a>   |                        | 6903   | 781  | 2  | 39  | putative protein (4.2 kD) (neeje) alternative variant cSep08, mRNA.                                                       |
| <a href="#">neekee</a>  | <a href="#">neekee.aSep08</a>  |                        | 12382  | 254  |    | 84  | putative protein of mammalian origin (neekee) mRNA.                                                                       |
| <a href="#">neekler</a> | <a href="#">neekler.aSep08</a> |                        | 1051   | 266  |    | 38  | putative protein (4.1 kD) (neekler) mRNA.                                                                                 |
| <a href="#">neeloy</a>  | <a href="#">neeloy.aSep08</a>  |                        | 1851   | 1188 |    | 159 | endothelin converting enzyme 2 (17.8 kD) (neeloy) mRNA.                                                                   |
| <a href="#">neemee</a>  | <a href="#">neemee.aSep08</a>  |                        | 4125   | 961  | 4  | 83  | putative mitochondrial protein (9.3 kD) (neemee) alternative variant aSep08, mRNA.                                        |
| <a href="#">neemer</a>  | <a href="#">neemer.aSep08</a>  |                        | 1270   | 595  |    | 197 | CRA b (neemer) mRNA.                                                                                                      |
| <a href="#">neenoy</a>  | <a href="#">neenoy.aSep08</a>  |                        | 3229   | 2278 |    | 112 | polyprotein (12.4 kD) (neenoy) mRNA.                                                                                      |
| <a href="#">neepor</a>  | <a href="#">neepor.aSep08</a>  |                        | 3492   | 247  |    | 57  | putative protein (neepor) mRNA.                                                                                           |
| <a href="#">neesa</a>   | <a href="#">neesa.aSep08</a>   |                        | 720    | 573  |    | 65  | putative protein of mammalian origin (6.7 kD) (neesa) mRNA.                                                               |
| <a href="#">neeshee</a> | <a href="#">neeshee.aSep08</a> |                        | 913    | 613  |    | 103 | putative protein (neeshee) mRNA.                                                                                          |
| <a href="#">neetu</a>   | <a href="#">neetu.bSep08</a>   |                        | 674    | 622  | 2  | 11  | putative protein (neetu) alternative variant bSep08, mRNA.                                                                |
| <a href="#">neever</a>  | <a href="#">neever.aSep08</a>  |                        | 925    | 307  |    | 66  | putative protein (neever) mRNA.                                                                                           |

|                        |                               |                        |       |      |    |     |                                                                                                              |
|------------------------|-------------------------------|------------------------|-------|------|----|-----|--------------------------------------------------------------------------------------------------------------|
| <a href="#">neewey</a> | <a href="#">neewey.aSep08</a> |                        | 9482  | 1597 | 7  | 389 | intraflagellar transport 122 homolog (43.9 kD) (neewey) alternative variant aSep08, mRNA.                    |
| <a href="#">neewey</a> | <a href="#">neewey.bSep08</a> |                        | 3523  | 1080 | 5  | 236 | intraflagellar transport 122 homolog CRA d (neewey) alternative variant bSep08, mRNA.                        |
| <a href="#">neewey</a> | <a href="#">neewey.cSep08</a> |                        | 3406  | 798  | 4  | 143 | intraflagellar transport 122 homolog CRA c (neewey) alternative variant cSep08, mRNA.                        |
| <a href="#">neewey</a> | <a href="#">neewey.dSep08</a> |                        | 935   | 495  | 1  | 94  | intraflagellar transport 122 homolog CRA c (neewey) alternative variant dSep08, mRNA.                        |
| <a href="#">Nefl</a>   | <a href="#">Nefl.cSep08</a>   | <a href="#">83613</a>  | 696   | 313  | 2  | 71  | neurofilament, light polypeptide (Nefl) alternative variant cSep08, mRNA.                                    |
| <a href="#">Nefm</a>   | <a href="#">Nefm.bSep08</a>   | <a href="#">24588</a>  | 1997  | 579  | 1  | 151 | neurofilament, medium polypeptide (Nefm) alternative variant bSep08, mRNA.                                   |
| <a href="#">Neil1</a>  | <a href="#">Neil1.bSep08</a>  | <a href="#">367090</a> | 2433  | 744  | 3  | 206 | nei endonuclease VIII-like 1 (E. coli) (Neil1) alternative variant bSep08, mRNA.                             |
| <a href="#">Neil1</a>  | <a href="#">Neil1.cSep08</a>  | <a href="#">367090</a> | 1566  | 741  | 4  | 94  | nei endonuclease VIII-like 1 (E. coli) (Neil1) alternative variant cSep08, mRNA.                             |
| <a href="#">Neil1</a>  | <a href="#">Neil1.dSep08</a>  | <a href="#">367090</a> | 1591  | 373  | 3  | 58  | nei endonuclease VIII-like 1 (E. coli) (Neil1) alternative variant dSep08, mRNA.                             |
| <a href="#">Neil1</a>  | <a href="#">Neil1.eSep08</a>  | <a href="#">367090</a> | 902   | 577  | 3  | 26  | nei endonuclease VIII-like 1 (E. coli) (2.9 kD) (Neil1) alternative variant eSep08, mRNA.                    |
| <a href="#">Neil3</a>  | <a href="#">Neil3.aSep08</a>  | <a href="#">290729</a> | 12624 | 1396 |    | 302 | nei like 3 (E. coli) (33.6 kD) (Neil3) mRNA.                                                                 |
| <a href="#">Nek1</a>   | <a href="#">Nek1.bSep08</a>   | <a href="#">290705</a> | 18816 | 501  | 4  | 166 | NIMA (never in mitosis gene a)-related expressed kinase 1 (Nek1) alternative variant bSep08, mRNA.           |
| <a href="#">Nek1</a>   | <a href="#">Nek1.cSep08</a>   | <a href="#">290705</a> | 78967 | 531  | 6  | 153 | NIMA (never in mitosis gene a)-related expressed kinase 1 (Nek1) alternative variant cSep08, mRNA.           |
| <a href="#">Nek3</a>   | <a href="#">Nek3.aSep08</a>   | <a href="#">306576</a> | 20740 | 1592 | 11 | 399 | NIMA (never in mitosis gene a)-related expressed kinase 3 (Nek3) alternative variant aSep08, mRNA.           |
| <a href="#">Nek4</a>   | <a href="#">Nek4.bSep08</a>   | <a href="#">306252</a> | 10246 | 977  | 6  | 325 | NIMA (never in mitosis gene a)-related expressed kinase 4 (Nek4) alternative variant bSep08, mRNA.           |
| <a href="#">Nek4</a>   | <a href="#">Nek4.cSep08</a>   | <a href="#">306252</a> | 14509 | 1183 | 8  | 226 | NIMA (never in mitosis gene a)-related expressed kinase 4 (25.7 kD) (Nek4) alternative variant cSep08, mRNA. |
| <a href="#">Nek6</a>   | <a href="#">Nek6.aSep08</a>   | <a href="#">360161</a> | 71775 | 2287 | 8  | 345 | NIMA (never in mitosis gene a)-related expressed kinase 6 (Nek6) alternative variant aSep08, mRNA.           |
| <a href="#">Nek6</a>   | <a href="#">Nek6.bSep08</a>   | <a href="#">360161</a> | 47004 | 809  | 2  | 147 | NIMA (never in mitosis gene a)-related expressed kinase 6 (Nek6) alternative variant bSep08, mRNA.           |
| <a href="#">Nek6</a>   | <a href="#">Nek6.cSep08</a>   | <a href="#">360161</a> | 36138 | 493  | 3  | 105 | NIMA (never in mitosis gene a)-related expressed kinase 6 (Nek6) alternative variant cSep08, mRNA.           |
| <a href="#">Nek7</a>   | <a href="#">Nek7.bSep08</a>   | <a href="#">360850</a> | 51119 | 646  | 7  | 215 | NIMA (never in mitosis gene a)-related expressed kinase 7 (Nek7) alternative variant bSep08, mRNA.           |
| <a href="#">Nek7</a>   | <a href="#">Nek7.cSep08</a>   | <a href="#">360850</a> | 14876 | 601  | 2  | 89  | NIMA (never in mitosis gene a)-related expressed kinase 7 (Nek7) alternative variant cSep08, mRNA.           |
| <a href="#">Nek9</a>   | <a href="#">Nek9.bSep08</a>   | <a href="#">299204</a> | 15873 | 1848 | 7  | 448 | NIMA (never in mitosis gene a)-related kinase 9 (Nek9) alternative variant bSep08, mRNA.                     |
| <a href="#">Nek11</a>  | <a href="#">Nek11.bSep08</a>  | <a href="#">315978</a> | 79318 | 772  |    | 187 | NIMA (never in mitosis gene a)-related expressed kinase 11 (Nek11) alternative variant bSep08, mRNA.         |
| <a href="#">Nelf</a>   | <a href="#">Nelf.aSep08</a>   | <a href="#">117536</a> | 5702  | 1093 | 7  | 310 | nasal embryonic LHRH factor (Nelf) alternative variant aSep08, mRNA.                                         |

|                         |                                |                        |        |      |    |     |                                                                                            |
|-------------------------|--------------------------------|------------------------|--------|------|----|-----|--------------------------------------------------------------------------------------------|
| <a href="#">Nelf</a>    | <a href="#">Nelf.bSep08</a>    | <a href="#">117536</a> | 4973   | 1974 | 11 | 292 | nasal embryonic LHRH factor (Nelf) alternative variant bSep08, mRNA.                       |
| <a href="#">Nelf</a>    | <a href="#">Nelf.cSep08</a>    | <a href="#">117536</a> | 5103   | 740  | 5  | 246 | nasal embryonic LHRH factor (Nelf) alternative variant cSep08, mRNA.                       |
| <a href="#">Nell2</a>   | <a href="#">Nell2.bSep08</a>   | <a href="#">81734</a>  | 44436  | 750  | 6  | 194 | NEL-like 2 (chicken) (Nell2) alternative variant bSep08, mRNA.                             |
| <a href="#">Nell2</a>   | <a href="#">Nell2.cSep08</a>   | <a href="#">81734</a>  | 101063 | 598  | 5  | 183 | NEL-like 2 (chicken) (Nell2) alternative variant cSep08, mRNA.                             |
| <a href="#">Nenf</a>    | <a href="#">Nenf.bSep08</a>    | <a href="#">289380</a> | 8903   | 546  | 4  | 136 | neuron derived neurotrophic factor (Nenf) alternative variant bSep08, mRNA.                |
| <a href="#">Neo1</a>    | <a href="#">Neo1.aSep08</a>    | <a href="#">81735</a>  | 19337  | 3370 |    | 332 | neogenin (Neo1) mRNA.                                                                      |
| <a href="#">nerby</a>   | <a href="#">nerby.aSep08</a>   |                        | 2023   | 380  |    | 126 | KIF4B (nerby) mRNA.                                                                        |
| <a href="#">nerchy</a>  | <a href="#">nerchy.aSep08</a>  |                        | 27878  | 681  | 1  | 104 | putative protein (nerchy) alternative variant aSep08, mRNA.                                |
| <a href="#">nerchy</a>  | <a href="#">nerchy.bSep08</a>  |                        | 27863  | 607  |    | 80  | putative protein (nerchy) alternative variant bSep08, mRNA.                                |
| <a href="#">nerdar</a>  | <a href="#">nerdar.aSep08</a>  |                        | 4096   | 688  |    | 112 | putative protein (12.5 kD) (nerdar) mRNA.                                                  |
| <a href="#">nerfer</a>  | <a href="#">nerfer.aSep08</a>  |                        | 76195  | 626  |    | 208 | putative protein of vertebrate origin (nerfer) mRNA.                                       |
| <a href="#">nerflo</a>  | <a href="#">nerflo.aSep08</a>  |                        | 8738   | 465  |    | 127 | putative nuclear protein (14.2 kD) (nerflo) mRNA.                                          |
| <a href="#">nerflu</a>  | <a href="#">nerflu.aSep08</a>  |                        | 3970   | 599  |    | 90  | putative nuclear protein (9.7 kD) (nerflu) mRNA.                                           |
| <a href="#">nergar</a>  | <a href="#">nergar.aSep08</a>  |                        | 934    | 726  |    | 59  | putative protein (7.0 kD) (nergar) mRNA.                                                   |
| <a href="#">nerja</a>   | <a href="#">nerja.aSep08</a>   |                        | 4890   | 959  |    | 80  | ab2-143 like (nerja) mRNA.                                                                 |
| <a href="#">nerjey</a>  | <a href="#">nerjey.aSep08</a>  |                        | 1095   | 247  |    | 50  | putative protein (nerjey) mRNA.                                                            |
| <a href="#">nerkee</a>  | <a href="#">nerkee.aSep08</a>  |                        | 4052   | 492  |    | 41  | putative protein (5.0 kD) (nerkee) mRNA.                                                   |
| <a href="#">nerkler</a> | <a href="#">nerkler.aSep08</a> |                        | 622    | 238  |    | 79  | putative protein (nerkler) mRNA.                                                           |
| <a href="#">nerloy</a>  | <a href="#">nerloy.aSep08</a>  |                        | 465    | 286  |    | 34  | putative protein (nerloy) mRNA.                                                            |
| <a href="#">nermee</a>  | <a href="#">nermee.aSep08</a>  |                        | 14016  | 733  |    | 64  | putative protein (7.4 kD) (nermee) mRNA.                                                   |
| <a href="#">nermer</a>  | <a href="#">nermer.aSep08</a>  |                        | 1181   | 373  |    | 124 | CRA b (nermer) mRNA.                                                                       |
| <a href="#">nernoy</a>  | <a href="#">nernoy.aSep08</a>  |                        | 9643   | 183  |    | 29  | putative protein (nernoy) mRNA.                                                            |
| <a href="#">nerpor</a>  | <a href="#">nerpor.aSep08</a>  |                        | 12812  | 408  | 1  | 135 | casein kinase 1 gamma CRA a (nerpor) alternative variant aSep08, mRNA.                     |
| <a href="#">nerpor</a>  | <a href="#">nerpor.bSep08</a>  |                        | 17381  | 576  | 1  | 87  | casein kinase 1 gamma CRA a (nerpor) alternative variant bSep08, mRNA.                     |
| <a href="#">nersa</a>   | <a href="#">nersa.aSep08</a>   |                        | 5127   | 308  |    | 28  | putative protein (nersa) mRNA.                                                             |
| <a href="#">nershee</a> | <a href="#">nershee.aSep08</a> |                        | 8549   | 970  |    | 51  | putative protein (nershee) mRNA.                                                           |
| <a href="#">nertu</a>   | <a href="#">nertu.aSep08</a>   |                        | 626    | 249  |    | 52  | putative protein (nertu) mRNA.                                                             |
| <a href="#">nervar</a>  | <a href="#">nervar.aSep08</a>  |                        | 743    | 443  |    | 107 | putative protein (nervar) mRNA.                                                            |
| <a href="#">nerwey</a>  | <a href="#">nerwey.aSep08</a>  |                        | 27583  | 708  | 1  | 157 | transmembrane coiled-coil domain family 1 CRA a (nerwey) alternative variant aSep08, mRNA. |
| <a href="#">nerwey</a>  | <a href="#">nerwey.bSep08</a>  |                        | 26484  | 336  | 1  | 111 | transmembrane coiled-coil domain family 1 CRA a (nerwey) alternative variant bSep08, mRNA. |
| <a href="#">Net1</a>    | <a href="#">Net1.bSep08</a>    | <a href="#">307098</a> | 24453  | 812  | 3  | 270 | neuroepithelial cell transforming gene 1 (Net1) alternative variant bSep08, mRNA.          |

|                              |                                     |                        |       |      |    |     |                                                                                              |
|------------------------------|-------------------------------------|------------------------|-------|------|----|-----|----------------------------------------------------------------------------------------------|
| <a href="#">Neto1</a>        | <a href="#">Neto1.bSep08</a>        | <a href="#">307206</a> | 7243  | 537  | 1  | 74  | neuropilin (NRP) and tolloid (TLL)-like 1 (8.4 kD) (Neto1) alternative variant bSep08, mRNA. |
| <a href="#">Neto2</a>        | <a href="#">Neto2.bSep08</a>        | <a href="#">307757</a> | 31099 | 932  | 3  | 310 | neuropilin (NRP) and tolloid (TLL)-like 2 (Neto2) alternative variant bSep08, mRNA.          |
| <a href="#">Neu1</a>         | <a href="#">Neu1.bSep08</a>         | <a href="#">24591</a>  | 2328  | 2232 | 2  | 320 | neuraminidase 1 (Neu1) alternative variant bSep08, mRNA.                                     |
| <a href="#">Neu1</a>         | <a href="#">Neu1.cSep08</a>         | <a href="#">24591</a>  | 2204  | 643  | 3  | 206 | neuraminidase 1 (Neu1) alternative variant cSep08, mRNA.                                     |
| <a href="#">Neu2</a>         | <a href="#">Neu2.bSep08</a>         | <a href="#">29204</a>  | 22025 | 785  | 1  | 222 | neuraminidase 2 (Neu2) alternative variant bSep08, mRNA.                                     |
| <a href="#">Neu3</a>         | <a href="#">Neu3.aSep08</a>         | <a href="#">117185</a> | 11528 | 2773 | 2  | 489 | neuraminidase 3 (Neu3) alternative variant aSep08, mRNA.                                     |
| <a href="#">Neuralized.0</a> | <a href="#">Neuralized.0.bSep08</a> |                        | 69226 | 489  | 2  | 162 | neuralized-like (Neuralized.0) alternative variant bSep08, mRNA.                             |
| <a href="#">Neurl</a>        | <a href="#">Neurl.aSep08</a>        | <a href="#">309459</a> | 6717  | 2403 |    | 218 | neuralized-like homolog (Drosophila) (Neurl) mRNA.                                           |
| <a href="#">Nexn</a>         | <a href="#">Nexn.cSep08</a>         | <a href="#">246172</a> | 31653 | 2023 | 10 | 622 | nexilin (Nexn) alternative variant cSep08, mRNA.                                             |
| <a href="#">Nexn</a>         | <a href="#">Nexn.eSep08</a>         | <a href="#">246172</a> | 1257  | 1171 | 2  | 91  | nexilin (10.4 kD) (Nexn) alternative variant eSep08, mRNA.                                   |
| <a href="#">Nexn</a>         | <a href="#">Nexn.fSep08</a>         | <a href="#">246172</a> | 12354 | 252  | 4  | 32  | nexilin CRA c (Nexn) alternative variant fSep08, mRNA.                                       |
| <a href="#">Nexn</a>         | <a href="#">Nexn.gSep08</a>         | <a href="#">246172</a> | 23100 | 395  | 5  |     |                                                                                              |
| <a href="#">Nexn</a>         | <a href="#">Nexn.hSep08</a>         | <a href="#">246172</a> | 437   | 361  | 2  | 37  | putative protein (Nexn) alternative variant hSep08, mRNA.                                    |
| <a href="#">neyby</a>        | <a href="#">neyby.aSep08</a>        |                        | 15395 | 499  |    | 45  | putative protein (5.0 kD) (neyby) mRNA.                                                      |
| <a href="#">neychy</a>       | <a href="#">neychy.aSep08</a>       |                        | 14112 | 373  |    | 107 | damage-specific DNA binding protein 2 like (neychy) mRNA.                                    |
| <a href="#">neydar</a>       | <a href="#">neydar.aSep08</a>       |                        | 5719  | 1783 | 4  | 513 | putative protein (neydar) alternative variant aSep08, mRNA.                                  |
| <a href="#">neydar</a>       | <a href="#">neydar.bSep08</a>       |                        | 4093  | 550  | 2  | 92  | putative protein (neydar) alternative variant bSep08, mRNA.                                  |
| <a href="#">neydar</a>       | <a href="#">neydar.cSep08</a>       |                        | 2656  | 840  | 4  | 60  | putative protein (6.9 kD) (neydar) alternative variant cSep08, mRNA.                         |
| <a href="#">neyfer</a>       | <a href="#">neyfer.aSep08</a>       |                        | 13069 | 741  |    | 45  | putative protein (neyfer) mRNA.                                                              |
| <a href="#">neyflo</a>       | <a href="#">neyflo.aSep08</a>       |                        | 14048 | 1153 | 1  | 53  | putative protein (5.8 kD) (neyflo) alternative variant aSep08, mRNA.                         |
| <a href="#">neyflo</a>       | <a href="#">neyflo.bSep08</a>       |                        | 12455 | 579  | 1  | 67  | putative protein (neyflo) alternative variant bSep08, mRNA.                                  |
| <a href="#">neyflu</a>       | <a href="#">neyflu.aSep08</a>       |                        | 15583 | 441  |    | 146 | putative protein of metazoan origin (neyflu) mRNA.                                           |
| <a href="#">neygar</a>       | <a href="#">neygar.aSep08</a>       |                        | 5127  | 675  | 2  | 64  | putative protein (6.8 kD) (neygar) alternative variant aSep08, mRNA.                         |
| <a href="#">neygar</a>       | <a href="#">neygar.bSep08</a>       |                        | 4350  | 717  | 2  | 51  | putative protein (5.7 kD) (neygar) alternative variant bSep08, mRNA.                         |
| <a href="#">neyja</a>        | <a href="#">neyja.aSep08</a>        |                        | 745   | 303  |    | 93  | putative protein, with a coiled coil domain, of vertebrate origin (neyja) mRNA.              |
| <a href="#">neyjey</a>       | <a href="#">neyjey.aSep08</a>       |                        | 621   | 334  |    | 70  | putative protein (neyjey) mRNA.                                                              |
| <a href="#">neykee</a>       | <a href="#">neykee.aSep08</a>       |                        | 96616 | 604  |    | 123 | putative protein (neykee) mRNA.                                                              |
| <a href="#">neykler</a>      | <a href="#">neykler.aSep08</a>      |                        | 11759 | 658  |    | 100 | putative protein (11.1 kD) (neykler) mRNA.                                                   |
| <a href="#">neyloy</a>       | <a href="#">neyloy.aSep08</a>       |                        | 6495  | 541  | 1  | 85  | putative protein (neyloy) alternative variant aSep08, mRNA.                                  |

|                          |                                 |                        |       |      |   |     |                                                                                                                                            |
|--------------------------|---------------------------------|------------------------|-------|------|---|-----|--------------------------------------------------------------------------------------------------------------------------------------------|
| <a href="#">neyloy</a>   | <a href="#">neyloy.bSep08</a>   |                        | 6548  | 588  | 1 | 73  | putative protein (neyloy) alternative variant bSep08, mRNA.                                                                                |
| <a href="#">neyloy</a>   | <a href="#">neyloy.cSep08</a>   |                        | 6824  | 764  | 2 | 50  | putative protein (5.4 kD) (neyloy) alternative variant cSep08, mRNA.                                                                       |
| <a href="#">neyloy</a>   | <a href="#">neyloy.dSep08</a>   |                        | 6800  | 734  | 2 | 48  | putative protein (5.2 kD) (neyloy) alternative variant dSep08, mRNA.                                                                       |
| <a href="#">neymee</a>   | <a href="#">neymee.aSep08</a>   |                        | 999   | 700  |   | 46  | putative protein (5.2 kD) (neymee) mRNA.                                                                                                   |
| <a href="#">neymer</a>   | <a href="#">neymer.aSep08</a>   |                        | 1877  | 463  |   | 73  | myosin-xvb like (neymer) mRNA.                                                                                                             |
| <a href="#">neynoy</a>   | <a href="#">neynoy.aSep08</a>   |                        | 8704  | 271  |   | 14  | putative protein (1.5 kD) (neynoy) mRNA.                                                                                                   |
| <a href="#">neypor</a>   | <a href="#">neypor.aSep08</a>   |                        | 867   | 419  |   | 42  | putative protein (neypor) mRNA.                                                                                                            |
| <a href="#">neysa</a>    | <a href="#">neysa.aSep08</a>    |                        | 613   | 489  |   | 45  | putative protein (neysa) mRNA.                                                                                                             |
| <a href="#">neyshee</a>  | <a href="#">neyshee.aSep08</a>  |                        | 4984  | 240  |   | 13  | putative protein (neyshee) mRNA.                                                                                                           |
| <a href="#">neytu</a>    | <a href="#">neytu.aSep08</a>    |                        | 10171 | 664  | 1 | 126 | SALF (neytu) alternative variant aSep08, mRNA.                                                                                             |
| <a href="#">neytu</a>    | <a href="#">neytu.bSep08</a>    |                        | 15687 | 384  | 1 | 65  | CRA b like (neytu) alternative variant bSep08, mRNA.                                                                                       |
| <a href="#">neyvar</a>   | <a href="#">neyvar.aSep08</a>   |                        | 680   | 510  |   | 66  | putative protein (neyvar) mRNA.                                                                                                            |
| <a href="#">neywey</a>   | <a href="#">neywey.aSep08</a>   |                        | 1939  | 988  |   | 127 | putative protein (15.2 kD) (neywey) mRNA.                                                                                                  |
| <a href="#">Nf1</a>      | <a href="#">Nf1.aSep08</a>      | <a href="#">24592</a>  | 18108 | 1456 |   | 485 | neurofibromatosis 1 (Nf1) mRNA.                                                                                                            |
| <a href="#">Nf2</a>      | <a href="#">Nf2.bSep08</a>      | <a href="#">25744</a>  | 14102 | 1784 | 4 | 465 | neurofibromatosis 2 (Nf2) alternative variant bSep08, mRNA.                                                                                |
| <a href="#">Nf2</a>      | <a href="#">Nf2.cSep08</a>      | <a href="#">25744</a>  | 14311 | 678  | 2 | 81  | neurofibromatosis 2 (8.5 kD) (Nf2) alternative variant cSep08, mRNA.                                                                       |
| <a href="#">Nfam1</a>    | <a href="#">Nfam1.aSep08</a>    | <a href="#">362966</a> | 18110 | 735  | 5 | 168 | nfat activating molecule with ITAM motif 1 (Nfam1) alternative variant aSep08, mRNA.                                                       |
| <a href="#">Nfam1</a>    | <a href="#">Nfam1.bSep08</a>    | <a href="#">362966</a> | 2408  | 758  | 3 | 88  | nfat activating molecule with ITAM motif 1 (Nfam1) alternative variant bSep08, mRNA.                                                       |
| <a href="#">Nfam1</a>    | <a href="#">Nfam1.cSep08</a>    | <a href="#">362966</a> | 5381  | 923  | 2 | 57  | nfat activating molecule with ITAM motif 1 (Nfam1) alternative variant cSep08, mRNA.                                                       |
| <a href="#">Nfasc</a>    | <a href="#">Nfasc.bSep08</a>    | <a href="#">116690</a> | 5064  | 569  | 5 | 189 | neurofascin (Nfasc) alternative variant bSep08, mRNA.                                                                                      |
| <a href="#">Nfatc2ip</a> | <a href="#">Nfatc2ip.aSep08</a> | <a href="#">308983</a> | 16534 | 1800 | 3 | 538 | nuclear factor of activated T-cells, cytoplasmic, calcineurin-dependent 2 interacting protein (Nfatc2ip) alternative variant aSep08, mRNA. |
| <a href="#">Nfatc3</a>   | <a href="#">Nfatc3.bSep08</a>   | <a href="#">361400</a> | 22568 | 1549 | 3 | 469 | nuclear factor of activated T-cells, cytoplasmic, calcineurin-dependent 3 (50.6 kD) (Nfatc3) alternative variant bSep08, mRNA.             |
| <a href="#">Nfatc3</a>   | <a href="#">Nfatc3.cSep08</a>   | <a href="#">361400</a> | 21076 | 1105 | 2 | 354 | nuclear factor of activated T-cells, cytoplasmic, calcineurin-dependent 3 (Nfatc3) alternative variant cSep08, mRNA.                       |
| <a href="#">Nfe2</a>     | <a href="#">Nfe2.bSep08</a>     | <a href="#">366998</a> | 5227  | 706  | 1 | 185 | nuclear factor, erythroid derived 2 (Nfe2) alternative variant bSep08, mRNA.                                                               |
| <a href="#">Nfe211</a>   | <a href="#">Nfe211.bSep08</a>   | <a href="#">360610</a> | 6121  | 3496 | 2 | 577 | nuclear factor, erythroid derived 2,-like 1 (Nfe211) alternative variant bSep08, mRNA.                                                     |
| <a href="#">Nfe211</a>   | <a href="#">Nfe211.cSep08</a>   | <a href="#">360610</a> | 6452  | 408  | 2 | 64  | nuclear factor, erythroid derived 2,-like 1 (Nfe211) alternative variant cSep08, mRNA.                                                     |
| <a href="#">Nfe212</a>   | <a href="#">Nfe212.bSep08</a>   | <a href="#">83619</a>  | 26470 | 1372 | 5 | 428 | nuclear factor, erythroid derived 2, like 2 (Nfe212) alternative variant bSep08, mRNA.                                                     |

|                        |                               |                        |        |      |    |     |                                                                                                                                                             |
|------------------------|-------------------------------|------------------------|--------|------|----|-----|-------------------------------------------------------------------------------------------------------------------------------------------------------------|
| <a href="#">Nfe2l2</a> | <a href="#">Nfe2l2.dSep08</a> | <a href="#">83619</a>  | 24073  | 689  | 4  | 111 | nuclear factor, erythroid derived 2, like 2 (Nfe2l2) alternative variant dSep08, mRNA.                                                                      |
| <a href="#">Nfe2l3</a> | <a href="#">Nfe2l3.aSep08</a> | <a href="#">312331</a> | 26456  | 1010 |    | 336 | nuclear factor, erythroid derived 2, like 3 (Nfe2l3) mRNA.                                                                                                  |
| <a href="#">Nfia</a>   | <a href="#">Nfia.bSep08</a>   | <a href="#">25492</a>  | 341814 | 1952 | 5  | 478 | nuclear factor I/A (Nfia) alternative variant bSep08, mRNA.                                                                                                 |
| <a href="#">Nfia</a>   | <a href="#">Nfia.cSep08</a>   | <a href="#">25492</a>  | 341466 | 1283 | 2  | 371 | nuclear factor I/A (Nfia) alternative variant cSep08, mRNA.                                                                                                 |
| <a href="#">Nfia</a>   | <a href="#">Nfia.dSep08</a>   | <a href="#">25492</a>  | 343738 | 3850 | 5  | 357 | nuclear factor I/A (Nfia) alternative variant dSep08, mRNA.                                                                                                 |
| <a href="#">Nfib</a>   | <a href="#">Nfib.bSep08</a>   | <a href="#">29227</a>  | 58054  | 1170 | 5  | 183 | nuclear factor I/B (Nfib) alternative variant bSep08, mRNA.                                                                                                 |
| <a href="#">Nfib</a>   | <a href="#">Nfib.cSep08</a>   | <a href="#">29227</a>  | 31010  | 2396 | 4  | 121 | nuclear factor I/B (13.2 kD) (Nfib) alternative variant cSep08, mRNA.                                                                                       |
| <a href="#">Nfil3</a>  | <a href="#">Nfil3.bSep08</a>  | <a href="#">114519</a> | 12107  | 697  | 2  | 126 | nuclear factor, interleukin 3 regulated (Nfil3) alternative variant bSep08, mRNA.                                                                           |
| <a href="#">Nfix</a>   | <a href="#">Nfix.bSep08</a>   | <a href="#">81524</a>  | 66129  | 1425 | 9  | 392 | nuclear factor I/X (43.7 kD) (Nfix) alternative variant bSep08, mRNA.                                                                                       |
| <a href="#">Nfix</a>   | <a href="#">Nfix.cSep08</a>   | <a href="#">81524</a>  | 19292  | 1004 | 6  | 156 | nuclear factor I/X (16.3 kD) (Nfix) alternative variant cSep08, mRNA.                                                                                       |
| <a href="#">Nfkb1</a>  | <a href="#">Nfkb1.aSep08</a>  | <a href="#">81736</a>  | 44673  | 2378 | 18 | 792 | nuclear factor of kappa light polypeptide gene enhancer in B-cells 1, p105 (Nfkb1) alternative variant aSep08, mRNA.                                        |
| <a href="#">Nfkb1</a>  | <a href="#">Nfkb1.bSep08</a>  | <a href="#">81736</a>  | 9178   | 1348 | 6  | 203 | nuclear factor of kappa light polypeptide gene enhancer in B-cells 1, p105 (Nfkb1) alternative variant bSep08, mRNA.                                        |
| <a href="#">Nfkb1</a>  | <a href="#">Nfkb1.cSep08</a>  | <a href="#">81736</a>  | 8545   | 1185 | 6  | 198 | nuclear factor of kappa light polypeptide gene enhancer in B-cells 1, p105 (21.7 kD) (Nfkb1) alternative variant cSep08, mRNA.                              |
| <a href="#">Nfkb2</a>  | <a href="#">Nfkb2.bSep08</a>  | <a href="#">309452</a> | 7252   | 1783 | 7  | 552 | nuclear factor of kappa light polypeptide gene enhancer in B-cells 2, p49/p100 and hypothetical protein LOC689848 (Nfkb2) alternative variant bSep08, mRNA. |
| <a href="#">Nfkb2</a>  | <a href="#">Nfkb2.bSep08</a>  | <a href="#">689848</a> | 7252   | 1783 | 7  | 552 | nuclear factor of kappa light polypeptide gene enhancer in B-cells 2, p49/p100 and hypothetical protein LOC689848 (Nfkb2) alternative variant bSep08, mRNA. |
| <a href="#">Nfkb2</a>  | <a href="#">Nfkb2.cSep08</a>  | <a href="#">309452</a> | 1647   | 749  | 6  | 181 | nuclear factor of kappa light polypeptide gene enhancer in B-cells 2, p49/p100 and hypothetical protein LOC689848 (Nfkb2) alternative variant cSep08, mRNA. |
| <a href="#">Nfkb2</a>  | <a href="#">Nfkb2.cSep08</a>  | <a href="#">689848</a> | 1647   | 749  | 6  | 181 | nuclear factor of kappa light polypeptide gene enhancer in B-cells 2, p49/p100 and hypothetical protein LOC689848 (Nfkb2) alternative variant cSep08, mRNA. |
| <a href="#">Nfkb2</a>  | <a href="#">Nfkb2.dSep08</a>  | <a href="#">309452</a> | 700    | 498  | 3  | 166 | nuclear factor of kappa light polypeptide gene enhancer in B-cells 2, p49/p100 and hypothetical protein LOC689848 (Nfkb2) alternative variant dSep08, mRNA. |
| <a href="#">Nfkb2</a>  | <a href="#">Nfkb2.dSep08</a>  | <a href="#">689848</a> | 700    | 498  | 3  | 166 | nuclear factor of kappa light polypeptide gene enhancer in B-cells 2, p49/p100 and hypothetical protein LOC689848 (Nfkb2) alternative variant dSep08, mRNA. |
| <a href="#">Nfkb2</a>  | <a href="#">Nfkb2.eSep08</a>  | <a href="#">309452</a> | 2662   | 625  | 7  | 155 | nuclear factor of kappa light polypeptide gene enhancer in B-cells 2, p49/p100 and hypothetical protein LOC689848 (Nfkb2) alternative variant eSep08, mRNA. |
| <a href="#">Nfkb2</a>  | <a href="#">Nfkb2.eSep08</a>  | <a href="#">689848</a> | 2662   | 625  | 7  | 155 | nuclear factor of kappa light polypeptide gene enhancer in B-cells 2, p49/p100 and hypothetical protein LOC689848 (Nfkb2) alternative variant eSep08, mRNA. |



|                         |                                |                        |       |      |   |     |                                                                                                                                                             |
|-------------------------|--------------------------------|------------------------|-------|------|---|-----|-------------------------------------------------------------------------------------------------------------------------------------------------------------|
| <a href="#">Nfkb2</a>   | <a href="#">Nfkb2.fSep08</a>   | <a href="#">309452</a> | 482   | 397  | 2 | 89  | nuclear factor of kappa light polypeptide gene enhancer in B-cells 2, p49/p100 and hypothetical protein LOC689848 (Nfkb2) alternative variant fSep08, mRNA. |
| <a href="#">Nfkb2</a>   | <a href="#">Nfkb2.fSep08</a>   | <a href="#">689848</a> | 482   | 397  | 2 | 89  | nuclear factor of kappa light polypeptide gene enhancer in B-cells 2, p49/p100 and hypothetical protein LOC689848 (Nfkb2) alternative variant fSep08, mRNA. |
| <a href="#">Nfkbia</a>  | <a href="#">Nfkbia.aSep08</a>  | <a href="#">25493</a>  | 3111  | 1963 | 5 | 327 | kappa alpha (Nfkbia) alternative variant aSep08, complete mRNA.                                                                                             |
| <a href="#">Nfkbia</a>  | <a href="#">Nfkbia.cSep08</a>  | <a href="#">25493</a>  | 1905  | 1120 | 3 | 211 | nuclear factor of kappa light gene enhancer in B-cells inhibitor alpha (23.4 kD) (Nfkbia) alternative variant cSep08, mRNA.                                 |
| <a href="#">Nfkbia</a>  | <a href="#">Nfkbia.dSep08</a>  | <a href="#">25493</a>  | 2118  | 1755 | 3 | 129 | kappa alpha (14.4 kD) (Nfkbia) alternative variant dSep08, mRNA.                                                                                            |
| <a href="#">Nfkbid</a>  | <a href="#">Nfkbid.aSep08</a>  | <a href="#">308496</a> | 2550  | 788  |   | 148 | nuclear factor of kappa light polypeptide gene enhancer in B-cells inhibitor, delta (Nfkbid) mRNA.                                                          |
| <a href="#">Nfkbie</a>  | <a href="#">Nfkbie.bSep08</a>  | <a href="#">316241</a> | 7636  | 2039 | 3 | 308 | nuclear factor of kappa light polypeptide gene enhancer in B-cells inhibitor, epsilon (Nfkbie) alternative variant bSep08, mRNA.                            |
| <a href="#">Nfkbil1</a> | <a href="#">Nfkbil1.bSep08</a> | <a href="#">361794</a> | 15795 | 996  | 5 | 270 | nuclear factor of kappa light polypeptide gene enhancer in B-cells inhibitor-like 1 (Nfkbil1) alternative variant bSep08, mRNA.                             |
| <a href="#">Nfkbil1</a> | <a href="#">Nfkbil1.dSep08</a> | <a href="#">361794</a> | 14751 | 553  | 4 | 164 | nuclear factor of kappa light polypeptide gene enhancer in B-cells inhibitor-like 1 (Nfkbil1) alternative variant dSep08, mRNA.                             |
| <a href="#">Nfrkb</a>   | <a href="#">Nfrkb.bSep08</a>   | <a href="#">315523</a> | 3110  | 694  | 5 | 169 | nuclear factor related to kappa B binding protein (Nfrkb) alternative variant bSep08, mRNA.                                                                 |
| <a href="#">Nfrkb</a>   | <a href="#">Nfrkb.dSep08</a>   | <a href="#">315523</a> | 1454  | 545  | 3 | 149 | nuclear factor related to kappa B binding protein (Nfrkb) alternative variant dSep08, mRNA.                                                                 |
| <a href="#">Nfrkb</a>   | <a href="#">Nfrkb.eSep08</a>   | <a href="#">315523</a> | 2506  | 404  | 5 | 134 | nuclear factor related to kappa B binding protein (Nfrkb) alternative variant eSep08, mRNA.                                                                 |
| <a href="#">Nfrkb</a>   | <a href="#">Nfrkb.fSep08</a>   | <a href="#">315523</a> | 1544  | 1447 | 2 | 98  | nuclear factor related to kappa B binding protein (Nfrkb) alternative variant fSep08, mRNA.                                                                 |
| <a href="#">Nfrkb</a>   | <a href="#">Nfrkb.gSep08</a>   | <a href="#">315523</a> | 945   | 221  | 2 | 35  | nuclear factor related to kappa B binding protein (3.9 kD) (Nfrkb) alternative variant gSep08, mRNA.                                                        |
| <a href="#">Nfs1</a>    | <a href="#">Nfs1.bSep08</a>    | <a href="#">84594</a>  | 15567 | 1358 | 7 | 292 | nitrogen fixation 1 (32.1 kD) (Nfs1) alternative variant bSep08, mRNA.                                                                                      |
| <a href="#">Nfs1</a>    | <a href="#">Nfs1.cSep08</a>    | <a href="#">84594</a>  | 3974  | 1646 | 4 | 102 | nfs1 nitrogen fixation 1 (Nfs1) alternative variant cSep08, mRNA.                                                                                           |
| <a href="#">Nfs1</a>    | <a href="#">Nfs1.dSep08</a>    | <a href="#">84594</a>  | 1663  | 798  | 2 | 44  | putative protein (Nfs1) alternative variant dSep08, mRNA.                                                                                                   |
| <a href="#">Nfu1</a>    | <a href="#">Nfu1.aSep08</a>    | <a href="#">297416</a> | 20782 | 909  | 8 | 254 | NFU1 iron-sulfur cluster scaffold homolog ( <i>S. cerevisiae</i> ) (Nfu1) alternative variant aSep08, mRNA.                                                 |
| <a href="#">Nfu1</a>    | <a href="#">Nfu1.bSep08</a>    | <a href="#">297416</a> | 21547 | 1538 | 7 | 114 | NFU1 iron-sulfur cluster scaffold homolog ( <i>S. cerevisiae</i> ) (12.5 kD) (Nfu1) alternative variant bSep08, mRNA.                                       |
| <a href="#">Nfu1</a>    | <a href="#">Nfu1.dSep08</a>    | <a href="#">297416</a> | 4673  | 1788 | 3 | 13  | NFU1 iron-sulfur cluster scaffold homolog ( <i>S. cerevisiae</i> ) (Nfu1) alternative variant dSep08, mRNA.                                                 |
| <a href="#">Nfx1</a>    | <a href="#">Nfx1.bSep08</a>    | <a href="#">313166</a> | 20733 | 1356 | 8 | 281 | nuclear transcription factor X-box binding 1 like (Nfx1) alternative variant bSep08, mRNA.                                                                  |

|                         |                                |                        |       |      |   |     |                                                                                                                             |
|-------------------------|--------------------------------|------------------------|-------|------|---|-----|-----------------------------------------------------------------------------------------------------------------------------|
| <a href="#">Nfx1</a>    | <a href="#">Nfx1.cSep08</a>    | <a href="#">313166</a> | 13526 | 744  | 7 | 247 | nuclear transcription factor X-box binding 1 like (Nfx1) alternative variant cSep08, mRNA.                                  |
| <a href="#">Nfx1</a>    | <a href="#">Nfx1.dSep08</a>    | <a href="#">313166</a> | 2643  | 807  | 2 | 93  | nuclear transcription factor X-box binding 1 like (10.2 kD) (Nfx1) alternative variant dSep08, mRNA.                        |
| <a href="#">Nfx1</a>    | <a href="#">Nfx1.eSep08</a>    | <a href="#">313166</a> | 4837  | 431  | 2 | 84  | nuclear transcription factor X-box binding 1 like (Nfx1) alternative variant eSep08, mRNA.                                  |
| <a href="#">Nfya</a>    | <a href="#">Nfya.aSep08</a>    | <a href="#">29508</a>  | 15550 | 1777 | 5 | 502 | nuclear transcription factor-Y alpha (Nfya) alternative variant aSep08, mRNA.                                               |
| <a href="#">Nfya</a>    | <a href="#">Nfya.dSep08</a>    | <a href="#">29508</a>  | 13762 | 364  | 4 | 69  | nuclear transcription factor-Y alpha (Nfya) alternative variant dSep08, mRNA.                                               |
| <a href="#">Nfyb</a>    | <a href="#">Nfyb.bSep08</a>    | <a href="#">25336</a>  | 3793  | 396  | 2 | 113 | nuclear transcription factor-Y beta (Nfyb) alternative variant bSep08, mRNA.                                                |
| <a href="#">Nfyb</a>    | <a href="#">Nfyb.cSep08</a>    | <a href="#">25336</a>  | 13452 | 1392 | 4 | 110 | nuclear transcription factor-Y beta (12.0 kD) (Nfyb) alternative variant cSep08, mRNA.                                      |
| <a href="#">Nfyc</a>    | <a href="#">Nfyc.bSep08</a>    | <a href="#">25337</a>  | 57883 | 767  | 7 | 244 | nuclear transcription factor Y (Nfyc) alternative variant bSep08, mRNA.                                                     |
| <a href="#">Nfyc</a>    | <a href="#">Nfyc.cSep08</a>    | <a href="#">25337</a>  | 8825  | 1823 | 4 | 177 | putative mitochondrial protein human specific (19.3 kD) (Nfyc) alternative variant cSep08, mRNA.                            |
| <a href="#">Nfyc</a>    | <a href="#">Nfyc.dSep08</a>    | <a href="#">25337</a>  | 3796  | 533  | 3 | 98  | putative secreted or extracellular protein precursor human specific (10.5 kD) (Nfyc) alternative variant dSep08, mRNA.      |
| <a href="#">Nfyc</a>    | <a href="#">Nfyc.eSep08</a>    | <a href="#">25337</a>  | 2015  | 1022 | 2 | 65  | nuclear transcription factor-Y gamma CRA a like (7.0 kD) (Nfyc) alternative variant eSep08, mRNA.                           |
| <a href="#">Ng23</a>    | <a href="#">Ng23.bSep08</a>    | <a href="#">406170</a> | 1795  | 863  | 1 | 142 | ng23 protein (Ng23) alternative variant bSep08, mRNA.                                                                       |
| <a href="#">Ngb</a>     | <a href="#">Ngb.aSep08</a>     | <a href="#">85382</a>  | 5277  | 1763 |   | 176 | neuroglobin (19.8 kD) (Ngb) mRNA.                                                                                           |
| <a href="#">Ngdn</a>    | <a href="#">Ngdn.bSep08</a>    | <a href="#">305887</a> | 2095  | 726  | 6 | 217 | neuroguidin, EIF4E binding protein (Ngdn) alternative variant bSep08, mRNA.                                                 |
| <a href="#">Ngdn</a>    | <a href="#">Ngdn.cSep08</a>    | <a href="#">305887</a> | 813   | 414  | 4 | 81  | neuroguidin, EIF4E binding protein (Ngdn) alternative variant cSep08, mRNA.                                                 |
| <a href="#">Ngdn</a>    | <a href="#">Ngdn.eSep08</a>    | <a href="#">305887</a> | 4249  | 428  | 4 | 48  | neuroguidin, EIF4E binding protein (Ngdn) alternative variant eSep08, mRNA.                                                 |
| <a href="#">Ngef</a>    | <a href="#">Ngef.aSep08</a>    | <a href="#">246217</a> | 10521 | 1816 | 8 | 361 | neuronal guanine nucleotide exchange factor (Ngef) alternative variant aSep08, mRNA.                                        |
| <a href="#">Ngef</a>    | <a href="#">Ngef.bSep08</a>    | <a href="#">246217</a> | 7392  | 1670 | 6 | 313 | neuronal guanine nucleotide exchange factor (Ngef) alternative variant bSep08, mRNA.                                        |
| <a href="#">Ngef</a>    | <a href="#">Ngef.cSep08</a>    | <a href="#">246217</a> | 882   | 502  | 1 | 95  | neuronal guanine nucleotide exchange factor (Ngef) alternative variant cSep08, mRNA.                                        |
| <a href="#">Ngfrap1</a> | <a href="#">Ngfrap1.aSep08</a> | <a href="#">117089</a> | 1547  | 835  | 2 | 130 | nerve growth factor receptor (TNFRSF16) associated protein 1 (15.3 kD) (Ngfrap1) alternative variant aSep08, complete mRNA. |
| <a href="#">Ngly1</a>   | <a href="#">Ngly1.bSep08</a>   | <a href="#">361014</a> | 17791 | 1268 | 5 | 260 | N-glycanase 1 (Ngly1) alternative variant bSep08, mRNA.                                                                     |
| <a href="#">Ngly1</a>   | <a href="#">Ngly1.cSep08</a>   | <a href="#">361014</a> | 9165  | 689  | 5 | 208 | N-glycanase 1 (Ngly1) alternative variant cSep08, mRNA.                                                                     |
| <a href="#">Ngly1</a>   | <a href="#">Ngly1.dSep08</a>   | <a href="#">361014</a> | 15458 | 1329 | 4 | 203 | N-glycanase 1 (Ngly1) alternative variant dSep08, mRNA.                                                                     |
| <a href="#">Ngly1</a>   | <a href="#">Ngly1.eSep08</a>   | <a href="#">361014</a> | 16913 | 545  | 4 | 65  | N-glycanase 1 (Ngly1) alternative variant eSep08, mRNA.                                                                     |
| <a href="#">Nhedc2</a>  | <a href="#">Nhedc2.aSep08</a>  | <a href="#">365946</a> | 26075 | 1250 | 8 | 356 | sodium/hydrogen exchanger (Nhedc2) mRNA.                                                                                    |

|                        |                               |                        |        |      |   |     |                                                                                                                      |
|------------------------|-------------------------------|------------------------|--------|------|---|-----|----------------------------------------------------------------------------------------------------------------------|
| <a href="#">Nhej1</a>  | <a href="#">Nhej1.bSep08</a>  | <a href="#">363251</a> | 5785   | 376  | 3 | 79  | nonhomologous end-joining factor 1 (Nhej1) alternative variant bSep08, mRNA.                                         |
| <a href="#">Nhej1</a>  | <a href="#">Nhej1.cSep08</a>  | <a href="#">363251</a> | 4936   | 668  | 3 | 60  | nonhomologous end-joining factor 1 (Nhej1) alternative variant cSep08, mRNA.                                         |
| <a href="#">Nhlh1</a>  | <a href="#">Nhlh1.bSep08</a>  | <a href="#">289230</a> | 3806   | 1159 | 1 | 133 | nescient helix loop helix 1 (14.8 kD) (Nhlh1) alternative variant bSep08, mRNA.                                      |
| <a href="#">Nhlh2</a>  | <a href="#">Nhlh2.bSep08</a>  | <a href="#">295327</a> | 3435   | 1440 | 2 | 117 | nescient helix loop helix 2 (12.1 kD) (Nhlh2) alternative variant bSep08, mRNA.                                      |
| <a href="#">Nhirc2</a> | <a href="#">Nhirc2.bSep08</a> | <a href="#">307986</a> | 4816   | 1674 | 3 | 189 | NHL repeat containing 2 (Nhirc2) alternative variant bSep08, mRNA.                                                   |
| <a href="#">Nhirc2</a> | <a href="#">Nhirc2.cSep08</a> | <a href="#">307986</a> | 932    | 531  | 2 | 105 | NHL repeat containing 2 (Nhirc2) alternative variant cSep08, mRNA.                                                   |
| <a href="#">Nibp</a>   | <a href="#">Nibp.aSep08</a>   | <a href="#">315059</a> | 346208 | 944  | 7 | 314 | trafficking protein particle complex 9 (Nibp) alternative variant aSep08, mRNA.                                      |
| <a href="#">Nibp</a>   | <a href="#">Nibp.bSep08</a>   | <a href="#">315059</a> | 73820  | 515  | 6 | 171 | trafficking protein particle complex 9 (Nibp) alternative variant bSep08, mRNA.                                      |
| <a href="#">Nibp</a>   | <a href="#">Nibp.cSep08</a>   | <a href="#">315059</a> | 96688  | 1268 | 3 | 150 | trafficking protein particle complex 9 (16.7 kD) (Nibp) alternative variant cSep08, mRNA.                            |
| <a href="#">Nid1</a>   | <a href="#">Nid1.aSep08</a>   | <a href="#">25494</a>  | 10594  | 2929 |   | 272 | nidogen 1 (Nid1) mRNA.                                                                                               |
| <a href="#">Nid2</a>   | <a href="#">Nid2.bSep08</a>   | <a href="#">302248</a> | 18020  | 1782 | 8 | 415 | nidogen 2 CRA b (Nid2) alternative variant bSep08, mRNA.                                                             |
| <a href="#">Nid2</a>   | <a href="#">Nid2.cSep08</a>   | <a href="#">302248</a> | 12255  | 1376 | 6 | 358 | nidogen 2 CRA a (38.8 kD) (Nid2) alternative variant cSep08, mRNA.                                                   |
| <a href="#">Nid2</a>   | <a href="#">Nid2.dSep08</a>   | <a href="#">302248</a> | 7152   | 1353 | 6 | 262 | nidogen 2 (Nid2) alternative variant dSep08, mRNA.                                                                   |
| <a href="#">Nid2</a>   | <a href="#">Nid2.eSep08</a>   | <a href="#">302248</a> | 4281   | 871  | 4 | 163 | nidogen 2 (Nid2) alternative variant eSep08, mRNA.                                                                   |
| <a href="#">Nid67</a>  | <a href="#">Nid67.aSep08</a>  | <a href="#">286910</a> | 26844  | 897  | 1 | 148 | putative small membrane protein NID67 (16.2 kD) (Nid67) alternative variant aSep08, mRNA.                            |
| <a href="#">NIDO.0</a> | <a href="#">NIDO.0.aSep08</a> |                        | 3369   | 357  |   | 118 | nidogen (NIDO.0) mRNA.                                                                                               |
| <a href="#">Nif311</a> | <a href="#">Nif311.aSep08</a> | <a href="#">301431</a> | 19925  | 1704 | 8 | 376 | ngg1 interacting factor 3-like 1 (S. pombe) (41.5 kD) (Nif311) alternative variant aSep08, mRNA.                     |
| <a href="#">Nif311</a> | <a href="#">Nif311.dSep08</a> | <a href="#">301431</a> | 2745   | 738  | 3 | 161 | ngg1 interacting factor 3-like 1 (S. pombe) (18.1 kD) (Nif311) alternative variant dSep08, mRNA.                     |
| <a href="#">Nin</a>    | <a href="#">Nin.bSep08</a>    | <a href="#">299117</a> | 10775  | 1179 | 1 | 243 | ninein (Nin) alternative variant bSep08, mRNA.                                                                       |
| <a href="#">Ninj1</a>  | <a href="#">Ninj1.cSep08</a>  | <a href="#">25338</a>  | 2501   | 530  | 2 | 71  | ninjurin 1 (Ninj1) alternative variant cSep08, mRNA.                                                                 |
| <a href="#">Ninj2</a>  | <a href="#">Ninj2.bSep08</a>  | <a href="#">59115</a>  | 1788   | 669  | 1 | 113 | ninjurin 2 (Ninj2) alternative variant bSep08, mRNA.                                                                 |
| <a href="#">Nip30</a>  | <a href="#">Nip30.bSep08</a>  | <a href="#">307652</a> | 21434  | 755  | 2 | 167 | NEFA-interacting nuclear protein NIP30 (20.1 kD) (Nip30) alternative variant bSep08, mRNA.                           |
| <a href="#">Nip30</a>  | <a href="#">Nip30.cSep08</a>  | <a href="#">307652</a> | 21431  | 748  | 2 | 158 | NEFA-interacting nuclear protein NIP30 (Nip30) alternative variant cSep08, mRNA.                                     |
| <a href="#">Nip30</a>  | <a href="#">Nip30.dSep08</a>  | <a href="#">307652</a> | 11773  | 754  | 2 | 89  | NEFA-interacting nuclear protein NIP30 (Nip30) alternative variant dSep08, mRNA.                                     |
| <a href="#">Nipa2</a>  | <a href="#">Nipa2.aSep08</a>  | <a href="#">308667</a> | 24129  | 2382 | 9 | 401 | non imprinted in Prader-Willi/Angelman syndrome 2 homolog (human) (Nipa2) alternative variant aSep08, mRNA.          |
| <a href="#">Nipa2</a>  | <a href="#">Nipa2.dSep08</a>  | <a href="#">308667</a> | 2433   | 830  | 2 | 40  | non imprinted in Prader-Willi/Angelman syndrome 2 homolog (human) (4.8 kD) (Nipa2) alternative variant dSep08, mRNA. |

|                           |                                  |                        |       |      |    |      |                                                                                                                                      |
|---------------------------|----------------------------------|------------------------|-------|------|----|------|--------------------------------------------------------------------------------------------------------------------------------------|
| <a href="#">Nipa2</a>     | <a href="#">Nipa2.eSep08</a>     | <a href="#">308667</a> | 12257 | 715  | 5  | 65   | non imprinted in Prader-Willi/Angelman syndrome 2 homolog (human) (Nipa2) alternative variant eSep08, mRNA.                          |
| <a href="#">NIPBL</a>     | <a href="#">NIPBL.bSep08</a>     | <a href="#">294787</a> | 6568  | 1776 | 4  | 276  | delangin (NIPBL) alternative variant bSep08, mRNA.                                                                                   |
| <a href="#">NIPBL</a>     | <a href="#">NIPBL.cSep08</a>     | <a href="#">294787</a> | 7957  | 750  | 7  | 250  | delangin (NIPBL) alternative variant cSep08, mRNA.                                                                                   |
| <a href="#">NIPBL</a>     | <a href="#">NIPBL.dSep08</a>     | <a href="#">294787</a> | 11221 | 1615 | 6  | 227  | delangin (25.5 kD) (NIPBL) alternative variant dSep08, mRNA.                                                                         |
| <a href="#">NIPBL</a>     | <a href="#">NIPBL.eSep08</a>     | <a href="#">294787</a> | 81763 | 710  | 6  | 150  | delangin (NIPBL) alternative variant eSep08, mRNA.                                                                                   |
| <a href="#">NIPBL</a>     | <a href="#">NIPBL.fSep08</a>     | <a href="#">294787</a> | 79590 | 562  | 4  | 105  | delangin (NIPBL) alternative variant fSep08, mRNA.                                                                                   |
| <a href="#">Nipsnap1</a>  | <a href="#">Nipsnap1.aSep08</a>  | <a href="#">360971</a> | 24116 | 1880 | 10 | 284  | 4-nitrophenylphosphatase domain non-neuronal protein homolog 1 CRA b (33.3 kD) (Nipsnap1) alternative variant aSep08, complete mRNA. |
| <a href="#">Nipsnap1</a>  | <a href="#">Nipsnap1.bSep08</a>  | <a href="#">360971</a> | 3838  | 474  | 4  | 88   | 4-nitrophenylphosphatase domain non-neuronal protein homolog 1 CRA c (10.6 kD) (Nipsnap1) alternative variant bSep08, mRNA.          |
| <a href="#">Nipsnap1</a>  | <a href="#">Nipsnap1.eSep08</a>  | <a href="#">360971</a> | 1761  | 350  | 2  | 37   | putative protein (Nipsnap1) alternative variant eSep08, mRNA.                                                                        |
| <a href="#">Nipsnap3a</a> | <a href="#">Nipsnap3a.bSep08</a> | <a href="#">313211</a> | 4969  | 695  |    | 120  | nipsnap homolog 3B (Nipsnap3a) alternative variant bSep08, mRNA.                                                                     |
| <a href="#">Nisch</a>     | <a href="#">Nisch.aSep08</a>     | <a href="#">306255</a> | 36212 | 5564 | 21 | 1653 | nischarin (Nisch) alternative variant aSep08, mRNA.                                                                                  |
| <a href="#">Nisch</a>     | <a href="#">Nisch.bSep08</a>     | <a href="#">306255</a> | 3174  | 2357 | 3  | 236  | nischarin (26.5 kD) (Nisch) alternative variant bSep08, mRNA.                                                                        |
| <a href="#">Nisch</a>     | <a href="#">Nisch.cSep08</a>     | <a href="#">306255</a> | 4851  | 1982 | 6  | 207  | nischarin (Nisch) alternative variant cSep08, mRNA.                                                                                  |
| <a href="#">Nisch</a>     | <a href="#">Nisch.dSep08</a>     | <a href="#">306255</a> | 3630  | 619  | 3  | 172  | nischarin (Nisch) alternative variant dSep08, mRNA.                                                                                  |
| <a href="#">Nisch</a>     | <a href="#">Nisch.eSep08</a>     | <a href="#">306255</a> | 2485  | 727  | 3  | 129  | nischarin (Nisch) alternative variant eSep08, mRNA.                                                                                  |
| <a href="#">Nisch</a>     | <a href="#">Nisch.fSep08</a>     | <a href="#">306255</a> | 6026  | 907  | 4  | 124  | nischarin (12.9 kD) (Nisch) alternative variant fSep08, mRNA.                                                                        |
| <a href="#">Nit1</a>      | <a href="#">Nit1.cSep08</a>      | <a href="#">289222</a> | 3373  | 1271 | 7  | 321  | nitrilase 1 (35.4 kD) (Nit1) alternative variant cSep08, complete mRNA.                                                              |
| <a href="#">Nit1</a>      | <a href="#">Nit1.dSep08</a>      | <a href="#">289222</a> | 2085  | 964  | 5  | 315  | nitrilase 1 (Nit1) alternative variant dSep08, mRNA.                                                                                 |
| <a href="#">Nit1</a>      | <a href="#">Nit1.eSep08</a>      | <a href="#">289222</a> | 2136  | 911  | 4  | 230  | nitrilase 1 (Nit1) alternative variant eSep08, mRNA.                                                                                 |
| <a href="#">Nit1</a>      | <a href="#">Nit1.fSep08</a>      | <a href="#">289222</a> | 2529  | 1500 | 6  | 226  | nitrilase 1 (24.8 kD) (Nit1) alternative variant fSep08, mRNA.                                                                       |
| <a href="#">Nit1</a>      | <a href="#">Nit1.gSep08</a>      | <a href="#">289222</a> | 2919  | 1706 | 6  | 224  | nitrilase 1 (Nit1) alternative variant gSep08, mRNA.                                                                                 |
| <a href="#">Nit1</a>      | <a href="#">Nit1.hSep08</a>      | <a href="#">289222</a> | 2995  | 1821 | 4  | 161  | nitrilase 1 (18.0 kD) (Nit1) alternative variant hSep08, mRNA.                                                                       |
| <a href="#">Nit2</a>      | <a href="#">Nit2.aSep08</a>      | <a href="#">288174</a> | 11027 | 1347 | 8  | 312  | nitrilase family, member 2 (Nit2) alternative variant aSep08, mRNA.                                                                  |
| <a href="#">Nit2</a>      | <a href="#">Nit2.cSep08</a>      | <a href="#">288174</a> | 10758 | 2048 | 7  | 191  | nitrilase family, member 2 (21.0 kD) (Nit2) alternative variant cSep08, complete mRNA.                                               |
| <a href="#">Nkain4</a>    | <a href="#">Nkain4.aSep08</a>    | <a href="#">296469</a> | 20503 | 838  | 7  | 194  | na <sup>+</sup> /K <sup>+</sup> transporting ATPase interacting 4 (Nkain4) alternative variant aSep08, mRNA.                         |
| <a href="#">Nkd1</a>      | <a href="#">Nkd1.bSep08</a>      | <a href="#">364952</a> | 64810 | 645  | 4  | 214  | naked cuticle 1 homolog (Drosophila) (Nkd1) alternative variant bSep08, mRNA.                                                        |
| <a href="#">Nkiras1</a>   | <a href="#">Nkiras1.bSep08</a>   | <a href="#">305751</a> | 8001  | 910  | 1  | 225  | NFKB inhibitor interacting Ras-like protein 1 (Nkiras1) alternative variant bSep08, mRNA.                                            |

|                         |                                |                        |       |      |    |     |                                                                                                                                 |
|-------------------------|--------------------------------|------------------------|-------|------|----|-----|---------------------------------------------------------------------------------------------------------------------------------|
| <a href="#">Nkiras2</a> | <a href="#">Nkiras2.bSep08</a> | <a href="#">287707</a> | 2931  | 869  | 3  | 191 | NFKB inhibitor interacting Ras-like protein 2 (21.5 kD) (Nkiras2) alternative variant bSep08, mRNA.                             |
| <a href="#">Nkiras2</a> | <a href="#">Nkiras2.cSep08</a> | <a href="#">287707</a> | 4112  | 1882 | 3  | 135 | NFKB inhibitor interacting Ras-like protein 2 (14.9 kD) (Nkiras2) alternative variant cSep08, mRNA.                             |
| <a href="#">Nkrf</a>    | <a href="#">Nkrf.aSep08</a>    | <a href="#">298316</a> | 13011 | 531  |    | 176 | NF-kappaB repressing factor (Nkrf) mRNA.                                                                                        |
| <a href="#">Nlgn2</a>   | <a href="#">Nlgn2.bSep08</a>   | <a href="#">117096</a> | 414   | 305  | 2  | 88  | neuroligin 2 (Nlgn2) alternative variant bSep08, mRNA.                                                                          |
| <a href="#">Nlgn2</a>   | <a href="#">Nlgn2.cSep08</a>   | <a href="#">117096</a> | 4055  | 628  | 2  | 63  | neuroligin 2 (Nlgn2) alternative variant cSep08, mRNA.                                                                          |
| <a href="#">Nlk</a>     | <a href="#">Nlk.aSep08</a>     | <a href="#">497961</a> | 15154 | 510  |    | 170 | nemo like kinase (Nlk) mRNA.                                                                                                    |
| <a href="#">Nln</a>     | <a href="#">Nln.bSep08</a>     | <a href="#">117041</a> | 81071 | 1783 | 7  | 386 | neurolysin (metallopeptidase M3 family) (Nln) alternative variant bSep08, mRNA.                                                 |
| <a href="#">Nln</a>     | <a href="#">Nln.cSep08</a>     | <a href="#">117041</a> | 12267 | 537  | 4  | 128 | neurolysin (metallopeptidase M3 family) (Nln) alternative variant cSep08, mRNA.                                                 |
| <a href="#">Nln</a>     | <a href="#">Nln.dSep08</a>     | <a href="#">117041</a> | 1340  | 438  | 2  | 91  | neurolysin (metallopeptidase M3 family) (Nln) alternative variant dSep08, mRNA.                                                 |
| <a href="#">Nln</a>     | <a href="#">Nln.eSep08</a>     | <a href="#">117041</a> | 5519  | 2068 | 2  | 42  | neurolysin (metallopeptidase M3 family) (4.8 kD) (Nln) alternative variant eSep08, mRNA.                                        |
| <a href="#">Nlp</a>     | <a href="#">Nlp.aSep08</a>     | <a href="#">311529</a> | 30516 | 659  |    | 181 | ninein-like (Nlp) mRNA.                                                                                                         |
| <a href="#">Nlrp1a</a>  | <a href="#">Nlrp1a.aSep08</a>  | <a href="#">360557</a> | 17506 | 354  |    | 117 | NACHT- LRR- PYD-containing protein 1 paralog b (Nlrp1a) mRNA.                                                                   |
| <a href="#">Nlrp3</a>   | <a href="#">Nlrp3.aSep08</a>   | <a href="#">287362</a> | 16063 | 844  | 6  | 281 | leucine-rich repeat containing protein (Nlrp3) alternative variant aSep08, mRNA.                                                |
| <a href="#">Nlrp3</a>   | <a href="#">Nlrp3.bSep08</a>   | <a href="#">287362</a> | 15066 | 928  | 6  | 158 | leucine-rich repeat containing protein (17.6 kD) (Nlrp3) alternative variant bSep08, mRNA.                                      |
| <a href="#">Nlrp3</a>   | <a href="#">Nlrp3.cSep08</a>   | <a href="#">287362</a> | 1178  | 1033 | 2  | 109 | putative protein of vertebrate origin (Nlrp3) alternative variant cSep08, mRNA.                                                 |
| <a href="#">Nlrp4e</a>  | <a href="#">Nlrp4e.aSep08</a>  | <a href="#">499069</a> | 5917  | 671  |    | 117 | containing NLR family pyrin domain 4 (Nlrp4e) mRNA.                                                                             |
| <a href="#">Nlrp6</a>   | <a href="#">Nlrp6.aSep08</a>   | <a href="#">171390</a> | 3883  | 1613 |    | 291 | vasopressin receptor (Nlrp6) mRNA.                                                                                              |
| <a href="#">Nmd3</a>    | <a href="#">Nmd3.bSep08</a>    | <a href="#">310512</a> | 25467 | 1848 | 14 | 383 | NMD3 homolog (S. cerevisiae) (43.6 kD) (Nmd3) alternative variant bSep08, mRNA.                                                 |
| <a href="#">Nmd3</a>    | <a href="#">Nmd3.cSep08</a>    | <a href="#">310512</a> | 3004  | 372  | 1  | 85  | NMD3 homolog (S. cerevisiae) (10.5 kD) (Nmd3) alternative variant cSep08, mRNA.                                                 |
| <a href="#">Nme1</a>    | <a href="#">Nme1.aSep08</a>    | <a href="#">191575</a> | 9696  | 1094 | 4  | 152 | non-metastatic cells 1, protein (NM23A) expressed in (17.2 kD) (Nme1) alternative variant aSep08, complete mRNA.                |
| <a href="#">Nme1</a>    | <a href="#">Nme1.cSep08</a>    | <a href="#">191575</a> | 2637  | 500  | 1  | 80  | non-metastatic cells 1, protein (NM23A) expressed in (Nme1) alternative variant cSep08, mRNA.                                   |
| <a href="#">Nme2</a>    | <a href="#">Nme2.aSep08</a>    | <a href="#">83782</a>  | 5167  | 610  | 4  | 164 | non-metastatic cells 2, protein (NM23B) expressed in (Nme2) alternative variant aSep08, mRNA.                                   |
| <a href="#">Nme2</a>    | <a href="#">Nme2.cSep08</a>    | <a href="#">83782</a>  | 5384  | 524  | 4  | 118 | non-metastatic cells 2, protein (NM23B) expressed in (13.4 kD) (Nme2) alternative variant cSep08, mRNA.                         |
| <a href="#">Nme6</a>    | <a href="#">Nme6.aSep08</a>    | <a href="#">58964</a>  | 6707  | 1407 | 3  | 141 | non-metastatic cells 6, protein expressed in (nucleoside-diphosphate kinase) (16.3 kD) (Nme6) alternative variant aSep08, mRNA. |
| <a href="#">Nme6</a>    | <a href="#">Nme6.bSep08</a>    | <a href="#">58964</a>  | 6308  | 1018 | 2  | 129 | non-metastatic cells 6, protein expressed in (nucleoside-diphosphate kinase) (Nme6) alternative variant bSep08, mRNA.           |

|                        |                               |                        |        |      |    |     |                                                                                                                       |
|------------------------|-------------------------------|------------------------|--------|------|----|-----|-----------------------------------------------------------------------------------------------------------------------|
| <a href="#">Nme7</a>   | <a href="#">Nme7.bSep08</a>   | <a href="#">171566</a> | 24171  | 377  | 3  | 100 | non-metastatic cells 7, protein expressed in (nucleoside-diphosphate kinase) (Nme7) alternative variant bSep08, mRNA. |
| <a href="#">Nme7</a>   | <a href="#">Nme7.cSep08</a>   | <a href="#">171566</a> | 3716   | 421  | 3  | 35  | non-metastatic cells 7, protein expressed in (nucleoside-diphosphate kinase) (Nme7) alternative variant cSep08, mRNA. |
| <a href="#">Nmi</a>    | <a href="#">Nmi.aSep08</a>    | <a href="#">311021</a> | 22719  | 801  | 5  | 242 | N-myc (and STAT) interactor (Nmi) alternative variant aSep08, mRNA.                                                   |
| <a href="#">Nmi</a>    | <a href="#">Nmi.cSep08</a>    | <a href="#">311021</a> | 10157  | 381  | 2  | 41  | N-myc (and STAT) interactor (Nmi) alternative variant cSep08, mRNA.                                                   |
| <a href="#">Nmnat1</a> | <a href="#">Nmnat1.bSep08</a> | <a href="#">298653</a> | 2374   | 2120 | 2  | 75  | nicotinamide nucleotide adenyllyltransferase 1 (Nmnat1) alternative variant bSep08, mRNA.                             |
| <a href="#">Nmnat2</a> | <a href="#">Nmnat2.bSep08</a> | <a href="#">289095</a> | 14643  | 307  | 1  | 97  | nicotinamide nucleotide adenyllyltransferase 2 (Nmnat2) alternative variant bSep08, mRNA.                             |
| <a href="#">Nmnat3</a> | <a href="#">Nmnat3.aSep08</a> | <a href="#">363118</a> | 111832 | 1855 | 5  | 245 | nicotinamide nucleotide adenyllyltransferase 3 (27.6 kD) (Nmnat3) alternative variant aSep08, mRNA.                   |
| <a href="#">Nmnat3</a> | <a href="#">Nmnat3.bSep08</a> | <a href="#">363118</a> | 7867   | 761  | 2  | 153 | nicotinamide nucleotide adenyllyltransferase 3 (17.0 kD) (Nmnat3) alternative variant bSep08, mRNA.                   |
| <a href="#">Nmnat3</a> | <a href="#">Nmnat3.dSep08</a> | <a href="#">363118</a> | 103617 | 743  | 4  | 117 | nicotinamide nucleotide adenyllyltransferase 3 (Nmnat3) alternative variant dSep08, mRNA.                             |
| <a href="#">Nmral1</a> | <a href="#">Nmral1.aSep08</a> | <a href="#">287063</a> | 8342   | 1150 | 2  | 299 | NmrA-like and TrkA-N (33.1 kD) (Nmral1) alternative variant aSep08, mRNA.                                             |
| <a href="#">Nmral1</a> | <a href="#">Nmral1.bSep08</a> | <a href="#">287063</a> | 8378   | 1754 | 1  | 197 | NmrA-like and TrkA-N (21.6 kD) (Nmral1) alternative variant bSep08, mRNA.                                             |
| <a href="#">Nmral1</a> | <a href="#">Nmral1.cSep08</a> | <a href="#">287063</a> | 8488   | 1105 | 1  | 179 | NmrA-like and TrkA-N (19.7 kD) (Nmral1) alternative variant cSep08, mRNA.                                             |
| <a href="#">Nmral1</a> | <a href="#">Nmral1.dSep08</a> | <a href="#">287063</a> | 5604   | 714  | 2  | 149 | NmrA-like (Nmral1) alternative variant dSep08, mRNA.                                                                  |
| <a href="#">Nmral1</a> | <a href="#">Nmral1.eSep08</a> | <a href="#">287063</a> | 8353   | 1776 | 1  | 27  | putative protein (2.8 kD) (Nmral1) alternative variant eSep08, mRNA.                                                  |
| <a href="#">Nmt1</a>   | <a href="#">Nmt1.bSep08</a>   | <a href="#">259274</a> | 12954  | 1684 | 10 | 395 | N-myristoyltransferase 1 (45.9 kD) (Nmt1) alternative variant bSep08, mRNA.                                           |
| <a href="#">Nmt1</a>   | <a href="#">Nmt1.cSep08</a>   | <a href="#">259274</a> | 11897  | 1792 | 7  | 216 | N-myristoyltransferase 1 (Nmt1) alternative variant cSep08, mRNA.                                                     |
| <a href="#">Nmu</a>    | <a href="#">Nmu.bSep08</a>    | <a href="#">63887</a>  | 28164  | 746  | 3  | 137 | neuromedin U (Nmu) alternative variant bSep08, mRNA.                                                                  |
| <a href="#">Nnat</a>   | <a href="#">Nnat.bSep08</a>   | <a href="#">94270</a>  | 1955   | 764  | 3  | 129 | neuronatin (Nnat) alternative variant bSep08, mRNA.                                                                   |
| <a href="#">Nnat</a>   | <a href="#">Nnat.eSep08</a>   | <a href="#">94270</a>  | 1825   | 715  | 4  | 79  | neuronatin (Nnat) alternative variant eSep08, mRNA.                                                                   |
| <a href="#">Nnt</a>    | <a href="#">Nnt.bSep08</a>    | <a href="#">310378</a> | 14667  | 790  | 4  | 262 | nicotinamide nucleotide transhydrogenase (Nnt) alternative variant bSep08, mRNA.                                      |
| <a href="#">Nnt</a>    | <a href="#">Nnt.cSep08</a>    | <a href="#">310378</a> | 13781  | 703  | 4  | 198 | nicotinamide nucleotide transhydrogenase (Nnt) alternative variant cSep08, mRNA.                                      |
| <a href="#">Nnt</a>    | <a href="#">Nnt.dSep08</a>    | <a href="#">310378</a> | 497    | 355  | 2  | 46  | nicotinamide nucleotide transhydrogenase (Nnt) alternative variant dSep08, mRNA.                                      |
| <a href="#">Nob1</a>   | <a href="#">Nob1.bSep08</a>   | <a href="#">291996</a> | 7972   | 906  | 7  | 295 | NIN one binding protein like (Nob1) alternative variant bSep08, mRNA.                                                 |
| <a href="#">Nob1</a>   | <a href="#">Nob1.cSep08</a>   | <a href="#">291996</a> | 8823   | 1075 | 7  | 273 | NIN one binding protein like (31.0 kD) (Nob1) alternative variant cSep08, mRNA.                                       |

|                        |                               |                        |       |      |   |     |                                                                                                                     |
|------------------------|-------------------------------|------------------------|-------|------|---|-----|---------------------------------------------------------------------------------------------------------------------|
| <a href="#">Nob1</a>   | <a href="#">Nob1.dSep08</a>   | <a href="#">291996</a> | 7267  | 810  | 7 | 234 | NIN one binding protein like (Nob1) alternative variant dSep08, mRNA.                                               |
| <a href="#">Nob1</a>   | <a href="#">Nob1.eSep08</a>   | <a href="#">291996</a> | 3865  | 810  | 2 | 59  | binding protein 1 like (Nob1) alternative variant eSep08, mRNA.                                                     |
| <a href="#">noby</a>   | <a href="#">noby.aSep08</a>   |                        | 9401  | 652  |   | 33  | putative protein (noby) mRNA.                                                                                       |
| <a href="#">Noc4l</a>  | <a href="#">Noc4l.aSep08</a>  | <a href="#">360828</a> | 1163  | 659  | 5 | 164 | nucleolar complex associated 4 homolog ( <i>S. cerevisiae</i> ) (Noc4l) alternative variant aSep08, mRNA.           |
| <a href="#">Noc4l</a>  | <a href="#">Noc4l.bSep08</a>  | <a href="#">360828</a> | 1806  | 732  | 6 | 132 | nucleolar complex associated 4 homolog ( <i>S. cerevisiae</i> ) (15.0 kD) (Noc4l) alternative variant bSep08, mRNA. |
| <a href="#">Noc4l</a>  | <a href="#">Noc4l.cSep08</a>  | <a href="#">360828</a> | 1600  | 892  | 5 | 125 | nucleolar complex associated 4 homolog ( <i>S. cerevisiae</i> ) (13.7 kD) (Noc4l) alternative variant cSep08, mRNA. |
| <a href="#">nochy</a>  | <a href="#">nochy.aSep08</a>  |                        | 3541  | 718  |   | 239 | ATP GTP binding protein-like 2 (nochy) mRNA.                                                                        |
| <a href="#">Nod1</a>   | <a href="#">Nod1.bSep08</a>   | <a href="#">500133</a> | 5735  | 1455 | 3 | 63  | putative protein of vertebrate origin (7.3 kD) (Nod1) alternative variant bSep08, mRNA.                             |
| <a href="#">nodar</a>  | <a href="#">nodar.aSep08</a>  |                        | 2723  | 1042 |   | 80  | putative protein (9.1 kD) (nodar) mRNA.                                                                             |
| <a href="#">NODP.0</a> | <a href="#">NODP.0.aSep08</a> |                        | 4002  | 391  |   | 130 | notch homolog 3 (NODP.0) mRNA.                                                                                      |
| <a href="#">nofer</a>  | <a href="#">nofer.bSep08</a>  |                        | 724   | 532  | 2 | 72  | putative protein (8.0 kD) (nofer) alternative variant bSep08, mRNA.                                                 |
| <a href="#">nofer</a>  | <a href="#">nofer.cSep08</a>  |                        | 689   | 488  | 3 | 59  | putative protein (nofer) alternative variant cSep08, mRNA.                                                          |
| <a href="#">noflo</a>  | <a href="#">noflo.aSep08</a>  |                        | 4125  | 1106 |   | 63  | gag protein like (noflo) mRNA.                                                                                      |
| <a href="#">noflu</a>  | <a href="#">noflu.aSep08</a>  |                        | 72407 | 488  |   | 43  | putative protein (5.2 kD) (noflu) mRNA.                                                                             |
| <a href="#">nogar</a>  | <a href="#">nogar.aSep08</a>  |                        | 7558  | 495  | 3 | 164 | putative protein of vertebrate origin (nogar) alternative variant aSep08, mRNA.                                     |
| <a href="#">nogar</a>  | <a href="#">nogar.bSep08</a>  |                        | 2062  | 398  | 2 | 92  | putative protein of vertebrate origin (nogar) alternative variant bSep08, mRNA.                                     |
| <a href="#">nogar</a>  | <a href="#">nogar.cSep08</a>  |                        | 8990  | 474  | 5 | 58  | putative protein of vertebrate origin (nogar) alternative variant cSep08, mRNA.                                     |
| <a href="#">nogar</a>  | <a href="#">nogar.dSep08</a>  |                        | 9024  | 355  | 4 | 49  | putative protein of vertebrate origin (nogar) alternative variant dSep08, mRNA.                                     |
| <a href="#">noja</a>   | <a href="#">noja.aSep08</a>   |                        | 4927  | 666  |   | 222 | repeat 18 (noja) mRNA.                                                                                              |
| <a href="#">nojey</a>  | <a href="#">nojey.aSep08</a>  |                        | 790   | 609  |   | 81  | putative protein (nojey) mRNA.                                                                                      |
| <a href="#">nokee</a>  | <a href="#">nokee.aSep08</a>  |                        | 893   | 342  |   | 113 | smg-7 homolog (nokee) mRNA.                                                                                         |
| <a href="#">nokler</a> | <a href="#">nokler.aSep08</a> |                        | 2584  | 249  |   | 43  | putative protein (4.9 kD) (nokler) mRNA.                                                                            |
| <a href="#">Nol1</a>   | <a href="#">Nol1.aSep08</a>   | <a href="#">314969</a> | 4452  | 1345 |   | 410 | nucleolar protein 1 (Nol1) mRNA.                                                                                    |
| <a href="#">Nol3</a>   | <a href="#">Nol3.bSep08</a>   | <a href="#">85383</a>  | 4161  | 1536 | 4 | 218 | nucleolar protein 3 (apoptosis repressor with CARD domain) (24.2 kD) (Nol3) alternative variant bSep08, mRNA.       |
| <a href="#">Nol5</a>   | <a href="#">Nol5.bSep08</a>   | <a href="#">60373</a>  | 8878  | 1908 | 6 | 187 | nucleolar protein 5 CRA a (Nol5) alternative variant bSep08, mRNA.                                                  |
| <a href="#">Nol5</a>   | <a href="#">Nol5.dSep08</a>   | <a href="#">60373</a>  | 5159  | 379  | 5 | 95  | nucleolar protein 5 CRA a (Nol5) alternative variant dSep08, mRNA.                                                  |
| <a href="#">Nol5</a>   | <a href="#">Nol5.eSep08</a>   | <a href="#">60373</a>  | 5688  | 350  | 3 | 49  | nucleolar protein (Nol5) alternative variant eSep08, mRNA.                                                          |
| <a href="#">Nol5a</a>  | <a href="#">Nol5a.bSep08</a>  | <a href="#">362214</a> | 3112  | 1991 | 7 | 252 | nucleolar protein 5A CRA d (27.9 kD) (Nol5a) alternative variant bSep08, mRNA.                                      |

|                       |                              |                        |       |      |    |     |                                                                                                                       |
|-----------------------|------------------------------|------------------------|-------|------|----|-----|-----------------------------------------------------------------------------------------------------------------------|
| <a href="#">Nol5a</a> | <a href="#">Nol5a.cSep08</a> | <a href="#">362214</a> | 2654  | 1633 | 5  | 197 | nucleolar protein 5A (Nol5a) alternative variant cSep08, mRNA.                                                        |
| <a href="#">Nol5a</a> | <a href="#">Nol5a.dSep08</a> | <a href="#">362214</a> | 1721  | 1107 | 2  | 188 | CRA d like (21.1 kD) (Nol5a) alternative variant dSep08, mRNA.                                                        |
| <a href="#">Nol5a</a> | <a href="#">Nol5a.eSep08</a> | <a href="#">362214</a> | 2179  | 638  | 6  | 160 | nucleolar protein 5A (Nol5a) alternative variant eSep08, mRNA.                                                        |
| <a href="#">Nol6</a>  | <a href="#">Nol6.aSep08</a>  | <a href="#">313167</a> | 6474  | 3738 | 15 | 622 | nucleolar protein family 6 (RNA-associated) (Nol6) alternative variant aSep08, mRNA.                                  |
| <a href="#">Nol6</a>  | <a href="#">Nol6.bSep08</a>  | <a href="#">313167</a> | 9566  | 1749 | 8  | 299 | nucleolar protein family 6 (RNA-associated) (34.0 kD) (Nol6) alternative variant bSep08, mRNA.                        |
| <a href="#">Nol6</a>  | <a href="#">Nol6.cSep08</a>  | <a href="#">313167</a> | 2137  | 817  | 6  | 272 | nucleolar protein family 6 (RNA-associated) (Nol6) alternative variant cSep08, mRNA.                                  |
| <a href="#">Nol6</a>  | <a href="#">Nol6.dSep08</a>  | <a href="#">313167</a> | 1924  | 678  | 5  | 225 | nucleolar protein family 6 (RNA-associated) (Nol6) alternative variant dSep08, mRNA.                                  |
| <a href="#">Nol7</a>  | <a href="#">Nol7.aSep08</a>  | <a href="#">498727</a> | 3202  | 1149 | 6  | 229 | nucleolar protein 7 (Nol7) alternative variant aSep08, mRNA.                                                          |
| <a href="#">Nol7</a>  | <a href="#">Nol7.bSep08</a>  | <a href="#">498727</a> | 799   | 723  | 2  | 130 | nucleolar protein 7 (14.4 kD) (Nol7) alternative variant bSep08, mRNA.                                                |
| <a href="#">Nol7</a>  | <a href="#">Nol7.cSep08</a>  | <a href="#">498727</a> | 2707  | 730  | 5  | 126 | nucleolar protein 7 (Nol7) alternative variant cSep08, mRNA.                                                          |
| <a href="#">Nol8</a>  | <a href="#">Nol8.bSep08</a>  | <a href="#">361221</a> | 7275  | 1273 | 6  | 423 | nucleolar protein 8 (Nol8) alternative variant bSep08, mRNA.                                                          |
| <a href="#">Nol8</a>  | <a href="#">Nol8.cSep08</a>  | <a href="#">361221</a> | 2614  | 554  | 4  | 144 | nucleolar protein 8 CRA b (Nol8) alternative variant cSep08, mRNA.                                                    |
| <a href="#">Nol8</a>  | <a href="#">Nol8.dSep08</a>  | <a href="#">361221</a> | 3730  | 930  | 4  | 124 | nucleolar protein 8 (14.4 kD) (Nol8) alternative variant dSep08, mRNA.                                                |
| <a href="#">Nol9</a>  | <a href="#">Nol9.aSep08</a>  | <a href="#">313744</a> | 8294  | 2419 |    | 308 | nucleolar protein 9 (Nol9) mRNA.                                                                                      |
| <a href="#">Nol10</a> | <a href="#">Nol10.bSep08</a> | <a href="#">313981</a> | 5134  | 366  | 1  | 28  | nucleolar protein 10 (Nol10) alternative variant bSep08, mRNA.                                                        |
| <a href="#">Nol11</a> | <a href="#">Nol11.aSep08</a> | <a href="#">688885</a> | 12786 | 1408 | 11 | 468 | nucleolar protein 11 (Nol11) alternative variant aSep08, mRNA.                                                        |
| <a href="#">Nol11</a> | <a href="#">Nol11.bSep08</a> | <a href="#">688885</a> | 2701  | 522  | 2  | 108 | nucleolar protein 11 (Nol11) alternative variant bSep08, mRNA.                                                        |
| <a href="#">Nol14</a> | <a href="#">Nol14.bSep08</a> | <a href="#">289724</a> | 5162  | 816  | 3  | 264 | nucleolar protein 14 (Nol14) alternative variant bSep08, mRNA.                                                        |
| <a href="#">Nol14</a> | <a href="#">Nol14.cSep08</a> | <a href="#">289724</a> | 2625  | 665  | 1  | 191 | nucleolar protein 14 precursor (22.3 kD) (Nol14) alternative variant cSep08, mRNA.                                    |
| <a href="#">Nol14</a> | <a href="#">Nol14.dSep08</a> | <a href="#">289724</a> | 5884  | 891  | 4  | 156 | nucleolar protein 14 (18.4 kD) (Nol14) alternative variant dSep08, mRNA.                                              |
| <a href="#">Nola1</a> | <a href="#">Nola1.bSep08</a> | <a href="#">499709</a> | 6890  | 1188 | 6  | 222 | nucleolar protein family A, member 1 (H/ACA small nucleolar RNPs) (22.7 kD) (Nola1) alternative variant bSep08, mRNA. |
| <a href="#">Nola2</a> | <a href="#">Nola2.aSep08</a> | <a href="#">287273</a> | 3359  | 746  | 1  | 153 | nucleolar protein family A, member 2 (17.3 kD) (Nola2) alternative variant aSep08, mRNA.                              |
| <a href="#">Nolc1</a> | <a href="#">Nolc1.bSep08</a> | <a href="#">64896</a>  | 7397  | 983  | 8  | 322 | nucleolar and coiled-body phosphoprotein 1 (Nolc1) alternative variant bSep08, mRNA.                                  |



|                         |                                |                        |        |      |   |     |                                                                                                       |
|-------------------------|--------------------------------|------------------------|--------|------|---|-----|-------------------------------------------------------------------------------------------------------|
| <a href="#">Nolc1</a>   | <a href="#">Nolc1.cSep08</a>   | <a href="#">64896</a>  | 2997   | 309  | 2 | 73  | nucleolar and coiled-body phosphoprotein 1 (Nolc1) alternative variant cSep08, mRNA.                  |
| <a href="#">Nolc1</a>   | <a href="#">Nolc1.dSep08</a>   | <a href="#">64896</a>  | 1405   | 415  | 2 | 37  | nucleolar and coiled-body phosphoprotein 1 (4.5 kD) (Nolc1) alternative variant dSep08, mRNA.         |
| <a href="#">noloy</a>   | <a href="#">noloy.aSep08</a>   |                        | 1450   | 415  |   | 137 | chordin (noloy) mRNA.                                                                                 |
| <a href="#">nomee</a>   | <a href="#">nomee.aSep08</a>   |                        | 1854   | 161  |   | 53  | putative protein of vertebrate origin (nomee) mRNA.                                                   |
| <a href="#">nomer</a>   | <a href="#">nomer.aSep08</a>   |                        | 5790   | 671  |   | 101 | putative protein (nomer) mRNA.                                                                        |
| <a href="#">Nomo1</a>   | <a href="#">Nomo1.bSep08</a>   | <a href="#">361578</a> | 11558  | 838  | 8 | 279 | nodal modulator 1 (Nomo1) alternative variant bSep08, mRNA.                                           |
| <a href="#">Nomo1</a>   | <a href="#">Nomo1.cSep08</a>   | <a href="#">361578</a> | 6874   | 636  | 6 | 212 | nodal modulator 1 (Nomo1) alternative variant cSep08, mRNA.                                           |
| <a href="#">Nomo1</a>   | <a href="#">Nomo1.dSep08</a>   | <a href="#">361578</a> | 5947   | 418  | 4 | 86  | nodal modulator 1 (Nomo1) alternative variant dSep08, mRNA.                                           |
| <a href="#">Nono</a>    | <a href="#">Nono.bSep08</a>    | <a href="#">317259</a> | 5051   | 1215 | 7 | 172 | non-POU-domain-containing, octamer-binding protein (21.3 kD) (Nono) alternative variant bSep08, mRNA. |
| <a href="#">Nono</a>    | <a href="#">Nono.cSep08</a>    | <a href="#">317259</a> | 1476   | 398  | 3 | 102 | non-POU-domain-containing, octamer-binding protein (Nono) alternative variant cSep08, mRNA.           |
| <a href="#">nonoy</a>   | <a href="#">nonoy.aSep08</a>   |                        | 100372 | 693  | 2 | 12  | putative protein (1.4 kD) (nonoy) alternative variant aSep08, mRNA.                                   |
| <a href="#">nonoy</a>   | <a href="#">nonoy.bSep08</a>   |                        | 100190 | 402  | 1 | 64  | putative protein (nonoy) alternative variant bSep08, mRNA.                                            |
| <a href="#">Nope</a>    | <a href="#">Nope.bSep08</a>    | <a href="#">363081</a> | 8088   | 1786 | 2 | 486 | neighbor of Punc E11 (Nope) alternative variant bSep08, mRNA.                                         |
| <a href="#">nopor</a>   | <a href="#">nopor.aSep08</a>   |                        | 2387   | 669  |   | 144 | solute carrier family 24 member 1 (nopor) mRNA.                                                       |
| <a href="#">norby</a>   | <a href="#">norby.aSep08</a>   |                        | 917    | 369  |   | 109 | interleukin 2 receptor (norby) mRNA.                                                                  |
| <a href="#">norchy</a>  | <a href="#">norchy.aSep08</a>  |                        | 1286   | 264  |   | 15  | putative protein (norchy) mRNA.                                                                       |
| <a href="#">nordar</a>  | <a href="#">nordar.aSep08</a>  |                        | 8894   | 1377 |   | 92  | putative protein (9.9 kD) (nordar) mRNA.                                                              |
| <a href="#">norfer</a>  | <a href="#">norfer.aSep08</a>  |                        | 7336   | 400  |   | 65  | putative protein (norfer) mRNA.                                                                       |
| <a href="#">norflo</a>  | <a href="#">norflo.aSep08</a>  |                        | 560    | 305  |   | 39  | putative protein (4.5 kD) (norflo) mRNA.                                                              |
| <a href="#">norflu</a>  | <a href="#">norflu.aSep08</a>  |                        | 3271   | 945  |   | 113 | CRA a (norflu) mRNA.                                                                                  |
| <a href="#">norgar</a>  | <a href="#">norgar.aSep08</a>  |                        | 7747   | 385  |   | 128 | putative protein, with a transmembrane domain, of eukaryotic origin (norgar) mRNA.                    |
| <a href="#">norja</a>   | <a href="#">norja.aSep08</a>   |                        | 12764  | 368  |   | 34  | putative protein (3.8 kD) (norja) mRNA.                                                               |
| <a href="#">norjey</a>  | <a href="#">norjey.aSep08</a>  |                        | 1885   | 243  |   | 17  | putative protein (norjey) mRNA.                                                                       |
| <a href="#">norkee</a>  | <a href="#">norkee.aSep08</a>  |                        | 1813   | 497  |   | 61  | CRA b like (6.6 kD) (norkee) mRNA.                                                                    |
| <a href="#">norkler</a> | <a href="#">norkler.aSep08</a> |                        | 4206   | 805  |   | 52  | sarcoma antigen like (norkler) mRNA.                                                                  |
| <a href="#">norloy</a>  | <a href="#">norloy.aSep08</a>  |                        | 8941   | 593  |   | 37  | putative protein (norloy) mRNA.                                                                       |
| <a href="#">normee</a>  | <a href="#">normee.aSep08</a>  |                        | 2082   | 457  |   | 152 | neuralized 2 (normee) mRNA.                                                                           |
| <a href="#">normer</a>  | <a href="#">normer.aSep08</a>  |                        | 683    | 332  |   | 110 | CRA b like (normer) mRNA.                                                                             |
| <a href="#">normoy</a>  | <a href="#">normoy.aSep08</a>  |                        | 52519  | 1388 |   | 34  | putative protein (3.7 kD) (normoy) mRNA.                                                              |
| <a href="#">norpor</a>  | <a href="#">norpor.aSep08</a>  |                        | 21987  | 297  |   | 48  | putative protein (norpor) mRNA.                                                                       |
| <a href="#">norsa</a>   | <a href="#">norsa.aSep08</a>   |                        | 3665   | 408  |   | 83  | putative protein (norsa) mRNA.                                                                        |
| <a href="#">norshee</a> | <a href="#">norshee.bSep08</a> |                        | 1270   | 702  | 2 | 77  | putative protein (norshee) alternative variant bSep08, mRNA.                                          |

|                         |                                |                        |       |      |   |     |                                                                                                        |
|-------------------------|--------------------------------|------------------------|-------|------|---|-----|--------------------------------------------------------------------------------------------------------|
| <a href="#">norshee</a> | <a href="#">norshee.cSep08</a> |                        | 754   | 523  | 2 | 75  | putative protein (norshee) alternative variant cSep08, mRNA.                                           |
| <a href="#">nortu</a>   | <a href="#">nortu.aSep08</a>   |                        | 10764 | 371  |   | 31  | putative protein (nortu) mRNA.                                                                         |
| <a href="#">norvar</a>  | <a href="#">norvar.aSep08</a>  |                        | 20129 | 413  |   | 137 | receptor protein tyrosine phosphatase hPTP-J (norvar) mRNA.                                            |
| <a href="#">norway</a>  | <a href="#">norway.aSep08</a>  |                        | 2165  | 245  |   | 46  | putative protein (norway) mRNA.                                                                        |
| <a href="#">Nos1</a>    | <a href="#">Nos1.bSep08</a>    | <a href="#">24598</a>  | 6689  | 589  | 1 | 195 | nitric oxide synthase 1, neuronal (Nos1) alternative variant bSep08, mRNA.                             |
| <a href="#">Nos1ap</a>  | <a href="#">Nos1ap.bSep08</a>  | <a href="#">192363</a> | 1861  | 407  | 2 | 87  | nitric oxide synthase 1 (neuronal) adaptor protein (Nos1ap) alternative variant bSep08, mRNA.          |
| <a href="#">Nos2</a>    | <a href="#">Nos2.bSep08</a>    | <a href="#">24599</a>  | 4503  | 299  | 3 | 99  | nitric oxide synthase 2, inducible, macrophage (Nos2) alternative variant bSep08, mRNA.                |
| <a href="#">Nos3</a>    | <a href="#">Nos3.bSep08</a>    | <a href="#">24600</a>  | 3500  | 625  | 1 | 143 | nitric oxide synthase 3, endothelial cell (Nos3) alternative variant bSep08, mRNA.                     |
| <a href="#">nosa</a>    | <a href="#">nosa.aSep08</a>    |                        | 1622  | 1006 |   | 77  | putative protein (7.9 kD) (nosa) mRNA.                                                                 |
| <a href="#">noshee</a>  | <a href="#">noshee.aSep08</a>  |                        | 2207  | 662  |   | 65  | putative protein (noshee) mRNA.                                                                        |
| <a href="#">Nosip</a>   | <a href="#">Nosip.aSep08</a>   | <a href="#">292894</a> | 16556 | 1078 | 9 | 301 | nitric oxide synthase interacting protein (33.3 kD) (Nosip) alternative variant aSep08, complete mRNA. |
| <a href="#">Nosip</a>   | <a href="#">Nosip.cSep08</a>   | <a href="#">292894</a> | 2540  | 820  | 6 | 260 | nitric oxide synthase interacting protein (Nosip) alternative variant cSep08, mRNA.                    |
| <a href="#">Nosip</a>   | <a href="#">Nosip.eSep08</a>   | <a href="#">292894</a> | 14008 | 779  | 3 | 59  | nitric oxide synthase interacting protein (6.5 kD) (Nosip) alternative variant eSep08, mRNA.           |
| <a href="#">Nosip</a>   | <a href="#">Nosip.fSep08</a>   | <a href="#">292894</a> | 3690  | 695  | 3 | 59  | nitric oxide synthase interacting protein (6.5 kD) (Nosip) alternative variant fSep08, mRNA.           |
| <a href="#">Nostrin</a> | <a href="#">Nostrin.bSep08</a> | <a href="#">311111</a> | 6115  | 472  | 3 | 111 | nitric oxide synthase trafficker (Nostrin) alternative variant bSep08, mRNA.                           |
| <a href="#">Nostrin</a> | <a href="#">Nostrin.cSep08</a> | <a href="#">311111</a> | 7055  | 378  | 4 | 80  | nitric oxide synthase trafficker (Nostrin) alternative variant cSep08, mRNA.                           |
| <a href="#">Notch1</a>  | <a href="#">Notch1.bSep08</a>  | <a href="#">25496</a>  | 7259  | 3885 | 6 | 725 | notch gene homolog 1 (Drosophila) (Notch1) alternative variant bSep08, mRNA.                           |
| <a href="#">Notch1</a>  | <a href="#">Notch1.cSep08</a>  | <a href="#">25496</a>  | 1420  | 632  | 2 | 210 | notch gene homolog 1 (Drosophila) (Notch1) alternative variant cSep08, mRNA.                           |
| <a href="#">Notch1</a>  | <a href="#">Notch1.dSep08</a>  | <a href="#">25496</a>  | 1752  | 445  | 4 | 148 | notch gene homolog 1 (Drosophila) (Notch1) alternative variant dSep08, mRNA.                           |
| <a href="#">Notch1</a>  | <a href="#">Notch1.eSep08</a>  | <a href="#">25496</a>  | 1609  | 409  | 3 | 136 | notch gene homolog 1 (Drosophila) (Notch1) alternative variant eSep08, mRNA.                           |
| <a href="#">Notch2</a>  | <a href="#">Notch2.bSep08</a>  | <a href="#">29492</a>  | 2982  | 468  | 3 | 84  | notch homolog 2 (Drosophila) (Notch2) alternative variant bSep08, mRNA.                                |
| <a href="#">Notch2</a>  | <a href="#">Notch2.cSep08</a>  | <a href="#">29492</a>  | 985   | 632  | 2 | 79  | notch homolog 2 (Drosophila) (8.5 kD) (Notch2) alternative variant cSep08, mRNA.                       |
| <a href="#">Notch3</a>  | <a href="#">Notch3.aSep08</a>  | <a href="#">56761</a>  | 3448  | 623  |   | 207 | notch homolog 3 (Drosophila) (Notch3) mRNA.                                                            |
| <a href="#">Notch4</a>  | <a href="#">Notch4.bSep08</a>  | <a href="#">406162</a> | 2849  | 2226 | 4 | 248 | notch homolog 4 (26.6 kD) (Notch4) alternative variant bSep08, mRNA.                                   |
| <a href="#">Notch4</a>  | <a href="#">Notch4.cSep08</a>  | <a href="#">406162</a> | 1588  | 779  | 5 | 228 | notch homolog 4 (Notch4) alternative variant cSep08, mRNA.                                             |

|                         |                                |                        |        |      |   |     |                                                                                                                    |
|-------------------------|--------------------------------|------------------------|--------|------|---|-----|--------------------------------------------------------------------------------------------------------------------|
| <a href="#">Notch4</a>  | <a href="#">Notch4.dSep08</a>  | <a href="#">406162</a> | 737    | 551  | 2 | 130 | notch homolog 4 (Notch4) alternative variant dSep08, mRNA.                                                         |
| <a href="#">Notch4</a>  | <a href="#">Notch4.fSep08</a>  | <a href="#">406162</a> | 1908   | 780  | 3 | 88  | notch homolog 4 CRA f precursor (9.7 kD) (Notch4) alternative variant fSep08, mRNA.                                |
| <a href="#">notu</a>    | <a href="#">notu.aSep08</a>    |                        | 1841   | 1007 |   | 181 | mutS homolog 6 like (notu) alternative variant aSep08, mRNA.                                                       |
| <a href="#">notu</a>    | <a href="#">notu.bSep08</a>    |                        | 1291   | 456  |   | 151 | dna mismatch repair protein msh6 like (notu) alternative variant bSep08, mRNA.                                     |
| <a href="#">Nova1</a>   | <a href="#">Nova1.aSep08</a>   | <a href="#">298992</a> | 120702 | 1115 | 1 | 371 | neuro-oncological ventral antigen 1 (Nova1) alternative variant aSep08, mRNA.                                      |
| <a href="#">Nova1</a>   | <a href="#">Nova1.bSep08</a>   | <a href="#">298992</a> | 118630 | 523  | 2 | 72  | neuro-oncological ventral antigen 1 (Nova1) alternative variant bSep08, mRNA.                                      |
| <a href="#">novar</a>   | <a href="#">novar.aSep08</a>   |                        | 9603   | 730  |   | 148 | putative nuclear protein (16.5 kD) (novar) mRNA.                                                                   |
| <a href="#">nowey</a>   | <a href="#">nowey.aSep08</a>   |                        | 2257   | 284  |   | 42  | putative protein (nowey) mRNA.                                                                                     |
| <a href="#">Noxo1</a>   | <a href="#">Noxo1.aSep08</a>   | <a href="#">302976</a> | 2202   | 1785 | 4 | 547 | NADPH oxidase organizer 1 (Noxo1) alternative variant aSep08, mRNA.                                                |
| <a href="#">Noxo1</a>   | <a href="#">Noxo1.cSep08</a>   | <a href="#">302976</a> | 860    | 419  | 2 | 92  | NADPH oxidase organizer 1 (Noxo1) alternative variant cSep08, mRNA.                                                |
| <a href="#">noyby</a>   | <a href="#">noyby.aSep08</a>   |                        | 1103   | 390  |   | 130 | mediator of RNA polymerase II transcription homolog (noyby) mRNA.                                                  |
| <a href="#">noychy</a>  | <a href="#">noychy.aSep08</a>  |                        | 5819   | 323  |   | 107 | cytoskeleton associated protein 5 (noychy) mRNA.                                                                   |
| <a href="#">noydar</a>  | <a href="#">noydar.bSep08</a>  |                        | 3084   | 465  | 2 | 86  | putative protein (noydar) alternative variant bSep08, mRNA.                                                        |
| <a href="#">noyfer</a>  | <a href="#">noyfer.aSep08</a>  |                        | 562    | 277  | 1 | 49  | putative protein (noyfer) alternative variant aSep08, mRNA.                                                        |
| <a href="#">noyfer</a>  | <a href="#">noyfer.bSep08</a>  |                        | 493    | 271  | 1 | 19  | putative protein (noyfer) alternative variant bSep08, mRNA.                                                        |
| <a href="#">noyflo</a>  | <a href="#">noyflo.aSep08</a>  |                        | 491    | 400  |   | 47  | putative protein (noyflo) mRNA.                                                                                    |
| <a href="#">noyflu</a>  | <a href="#">noyflu.aSep08</a>  |                        | 1778   | 708  |   | 45  | putative protein (5.4 kD) (noyflu) mRNA.                                                                           |
| <a href="#">noygar</a>  | <a href="#">noygar.aSep08</a>  |                        | 1589   | 706  | 2 | 31  | putative protein (noygar) alternative variant aSep08, mRNA.                                                        |
| <a href="#">noyja</a>   | <a href="#">noyja.aSep08</a>   |                        | 20867  | 851  |   | 41  | putative protein (noyja) mRNA.                                                                                     |
| <a href="#">noyjey</a>  | <a href="#">noyjey.aSep08</a>  |                        | 1383   | 421  |   | 40  | putative protein (4.3 kD) (noyjey) mRNA.                                                                           |
| <a href="#">noykee</a>  | <a href="#">noykee.aSep08</a>  |                        | 3344   | 295  |   | 66  | putative protein (noykee) mRNA.                                                                                    |
| <a href="#">noykler</a> | <a href="#">noykler.aSep08</a> |                        | 1602   | 263  |   | 69  | putative protein (noykler) mRNA.                                                                                   |
| <a href="#">noyloy</a>  | <a href="#">noyloy.aSep08</a>  |                        | 7861   | 709  |   | 34  | putative protein (3.9 kD) (noyloy) mRNA.                                                                           |
| <a href="#">noymee</a>  | <a href="#">noymee.aSep08</a>  |                        | 850    | 402  |   | 100 | putative protein (noymee) mRNA.                                                                                    |
| <a href="#">noymer</a>  | <a href="#">noymer.aSep08</a>  |                        | 389    | 306  |   | 101 | putative protein of vertebrate origin (noymer) mRNA.                                                               |
| <a href="#">noynoy</a>  | <a href="#">noynoy.aSep08</a>  |                        | 2619   | 392  |   | 130 | tensin (noynoy) mRNA.                                                                                              |
| <a href="#">noypor</a>  | <a href="#">noypor.aSep08</a>  |                        | 23447  | 349  |   | 95  | probable E3 ubiquitin-protein ligase Herc1 like (noypor) mRNA.                                                     |
| <a href="#">noysa</a>   | <a href="#">noysa.aSep08</a>   |                        | 8579   | 671  |   | 95  | putative cytoplasmic protein (10.8 kD) (noysa) mRNA.                                                               |
| <a href="#">noyshee</a> | <a href="#">noyshee.aSep08</a> |                        | 96147  | 473  | 4 | 154 | double cortin calcium calmodulin-dependent protein kinase-like 1 CRA a (noyshee) alternative variant aSep08, mRNA. |
| <a href="#">noyshee</a> | <a href="#">noyshee.bSep08</a> |                        | 17659  | 451  | 3 | 101 | double kinase-like 1 (noyshee) alternative variant bSep08, mRNA.                                                   |

|                         |                                |                        |       |      |    |     |                                                                                                                                  |
|-------------------------|--------------------------------|------------------------|-------|------|----|-----|----------------------------------------------------------------------------------------------------------------------------------|
| <a href="#">noyshee</a> | <a href="#">noyshee.cSep08</a> |                        | 4718  | 398  | 2  | 76  | activity neurotransmitter-induced early gene protein 4 like (noyshee) alternative variant cSep08, mRNA.                          |
| <a href="#">noytu</a>   | <a href="#">noytu.aSep08</a>   |                        | 1881  | 409  |    | 66  | putative protein (7.6 kD) (noytu) mRNA.                                                                                          |
| <a href="#">noyvar</a>  | <a href="#">noyvar.aSep08</a>  |                        | 1222  | 415  |    | 138 | receptor protein tyrosine phosphatase hPTP-J (noyvar) mRNA.                                                                      |
| <a href="#">noywey</a>  | <a href="#">noywey.aSep08</a>  |                        | 3575  | 368  |    | 67  | putative protein (7.3 kD) (noywey) mRNA.                                                                                         |
| <a href="#">Np</a>      | <a href="#">Np.aSep08</a>      | <a href="#">290029</a> | 7664  | 1361 | 6  | 289 | nucleoside phosphorylase (32.3 kD) (Np) alternative variant aSep08, complete mRNA.                                               |
| <a href="#">Np</a>      | <a href="#">Np.bSep08</a>      | <a href="#">290029</a> | 7648  | 1726 | 5  | 248 | nucleoside phosphorylase (27.6 kD) (Np) alternative variant bSep08, complete mRNA.                                               |
| <a href="#">Np</a>      | <a href="#">Np.dSep08</a>      | <a href="#">290029</a> | 2429  | 962  | 5  | 158 | nucleoside phosphorylase (17.6 kD) (Np) alternative variant dSep08, mRNA.                                                        |
| <a href="#">Np</a>      | <a href="#">Np.eSep08</a>      | <a href="#">290029</a> | 3759  | 264  | 2  | 67  | nucleoside phosphorylase (Np) alternative variant eSep08, mRNA.                                                                  |
| <a href="#">Npal2</a>   | <a href="#">Npal2.bSep08</a>   | <a href="#">362899</a> | 13967 | 309  | 3  | 103 | putative protein, with at least 2 transmembrane domains, of fungal and metazoan origin (Npal2) alternative variant bSep08, mRNA. |
| <a href="#">Npal2</a>   | <a href="#">Npal2.cSep08</a>   | <a href="#">362899</a> | 10307 | 368  | 1  | 25  | putative protein (2.8 kD) (Npal2) alternative variant cSep08, mRNA.                                                              |
| <a href="#">Npal3</a>   | <a href="#">Npal3.aSep08</a>   | <a href="#">502990</a> | 14436 | 585  | 3  | 80  | putative protein of metazoan origin (Npal3) alternative variant aSep08, mRNA.                                                    |
| <a href="#">Npal3</a>   | <a href="#">Npal3.bSep08</a>   | <a href="#">502990</a> | 4050  | 285  | 1  | 34  | putative protein (Npal3) alternative variant bSep08, mRNA.                                                                       |
| <a href="#">Npap60</a>  | <a href="#">Npap60.bSep08</a>  | <a href="#">25497</a>  | 11505 | 1035 | 5  | 344 | nuclear pore associated protein (Npap60) alternative variant bSep08, mRNA.                                                       |
| <a href="#">Npap60</a>  | <a href="#">Npap60.cSep08</a>  | <a href="#">25497</a>  | 2265  | 671  | 3  | 189 | nuclear pore associated protein (Npap60) alternative variant cSep08, mRNA.                                                       |
| <a href="#">Npas1</a>   | <a href="#">Npas1.cSep08</a>   | <a href="#">308387</a> | 4203  | 392  | 3  | 130 | neuronal PAS domain protein 1 (Npas1) alternative variant cSep08, mRNA.                                                          |
| <a href="#">Npas2</a>   | <a href="#">Npas2.aSep08</a>   | <a href="#">316351</a> | 39500 | 3079 | 13 | 599 | neuronal PAS domain protein 2 (Npas2) alternative variant aSep08, mRNA.                                                          |
| <a href="#">Npas2</a>   | <a href="#">Npas2.cSep08</a>   | <a href="#">316351</a> | 2738  | 531  | 2  | 169 | neuronal PAS domain protein 2 (Npas2) alternative variant cSep08, mRNA.                                                          |
| <a href="#">Npas4</a>   | <a href="#">Npas4.bSep08</a>   | <a href="#">266734</a> | 535   | 415  | 1  | 138 | neuronal PAS domain protein 4 (Npas4) alternative variant bSep08, mRNA.                                                          |
| <a href="#">Npdc1</a>   | <a href="#">Npdc1.aSep08</a>   | <a href="#">296562</a> | 5658  | 1530 | 7  | 391 | neural proliferation differentiation control 1 CRA d (Npdc1) alternative variant aSep08, complete mRNA.                          |
| <a href="#">Npdc1</a>   | <a href="#">Npdc1.cSep08</a>   | <a href="#">296562</a> | 4654  | 751  | 6  | 230 | neural proliferation differentiation control 1 (Npdc1) alternative variant cSep08, mRNA.                                         |
| <a href="#">Npdc1</a>   | <a href="#">Npdc1.dSep08</a>   | <a href="#">296562</a> | 4556  | 760  | 5  | 220 | neural proliferation differentiation control 1 (Npdc1) alternative variant dSep08, mRNA.                                         |
| <a href="#">Npdc1</a>   | <a href="#">Npdc1.eSep08</a>   | <a href="#">296562</a> | 3189  | 2039 | 3  | 163 | neural proliferation differentiation control 1 (Npdc1) alternative variant eSep08, mRNA.                                         |
| <a href="#">Npdc1</a>   | <a href="#">Npdc1.fSep08</a>   | <a href="#">296562</a> | 4333  | 472  | 3  | 106 | neural proliferation differentiation control 1 CRA d (Npdc1) alternative variant fSep08, mRNA.                                   |
| <a href="#">Npdc1</a>   | <a href="#">Npdc1.gSep08</a>   | <a href="#">296562</a> | 1344  | 1241 | 2  | 104 | neural proliferation differentiation control 1 CRA d (Npdc1) alternative variant gSep08, mRNA.                                   |

|                        |                               |                        |       |      |    |     |                                                                                                          |
|------------------------|-------------------------------|------------------------|-------|------|----|-----|----------------------------------------------------------------------------------------------------------|
| <a href="#">Npdc1</a>  | <a href="#">Npdc1.hSep08</a>  | <a href="#">296562</a> | 2996  | 435  | 2  | 98  | neural proliferation differentiation control 1 CRA e (10.5 kD) (Npdc1) alternative variant hSep08, mRNA. |
| <a href="#">Npepl1</a> | <a href="#">Npepl1.aSep08</a> | <a href="#">311671</a> | 12559 | 2131 | 5  | 556 | aminopeptidase-like 1 CRA a (Npepl1) alternative variant aSep08, mRNA.                                   |
| <a href="#">Npepl1</a> | <a href="#">Npepl1.bSep08</a> | <a href="#">311671</a> | 10704 | 1106 | 3  | 368 | aminopeptidase-like 1 CRA a (Npepl1) alternative variant bSep08, mRNA.                                   |
| <a href="#">Npepl1</a> | <a href="#">Npepl1.cSep08</a> | <a href="#">311671</a> | 11400 | 1359 | 2  | 292 | aminopeptidase-like 1 CRA a (Npepl1) alternative variant cSep08, mRNA.                                   |
| <a href="#">Npepl1</a> | <a href="#">Npepl1.dSep08</a> | <a href="#">311671</a> | 2387  | 760  | 1  | 102 | aminopeptidase-like 1 CRA a (Npepl1) alternative variant dSep08, mRNA.                                   |
| <a href="#">Npepps</a> | <a href="#">Npepps.fSep08</a> | <a href="#">50558</a>  | 3709  | 378  | 5  | 20  | aminopeptidase puromycin sensitive (2.2 kD) (Npepps) alternative variant fSep08, mRNA.                   |
| <a href="#">Nphp1</a>  | <a href="#">Nphp1.aSep08</a>  | <a href="#">296136</a> | 50171 | 2100 | 18 | 636 | nephronophthisis 1 (Nphp1) alternative variant aSep08, mRNA.                                             |
| <a href="#">Nphp1</a>  | <a href="#">Nphp1.aSep08</a>  | <a href="#">680233</a> | 50171 | 2100 | 18 | 636 | nephronophthisis 1 (Nphp1) alternative variant aSep08, mRNA.                                             |
| <a href="#">Nphp1</a>  | <a href="#">Nphp1.cSep08</a>  | <a href="#">296136</a> | 19878 | 828  | 10 | 275 | nephronophthisis 1 homolog CRA b (Nphp1) alternative variant cSep08, mRNA.                               |
| <a href="#">Nphp1</a>  | <a href="#">Nphp1.cSep08</a>  | <a href="#">680233</a> | 19878 | 828  | 10 | 275 | nephronophthisis 1 homolog CRA b (Nphp1) alternative variant cSep08, mRNA.                               |
| <a href="#">Nphp1</a>  | <a href="#">Nphp1.dSep08</a>  | <a href="#">296136</a> | 16144 | 735  | 8  | 244 | nephronophthisis 1 (Nphp1) alternative variant dSep08, mRNA.                                             |
| <a href="#">Nphp1</a>  | <a href="#">Nphp1.dSep08</a>  | <a href="#">680233</a> | 16144 | 735  | 8  | 244 | nephronophthisis 1 (Nphp1) alternative variant dSep08, mRNA.                                             |
| <a href="#">Nphp1</a>  | <a href="#">Nphp1.eSep08</a>  | <a href="#">296136</a> | 13083 | 560  | 6  | 186 | nephronophthisis 1 (Nphp1) alternative variant eSep08, mRNA.                                             |
| <a href="#">Nphp1</a>  | <a href="#">Nphp1.eSep08</a>  | <a href="#">680233</a> | 13083 | 560  | 6  | 186 | nephronophthisis 1 (Nphp1) alternative variant eSep08, mRNA.                                             |
| <a href="#">Nphp1</a>  | <a href="#">Nphp1.fSep08</a>  | <a href="#">296136</a> | 7137  | 733  | 4  | 180 | nephronophthisis 1 (Nphp1) alternative variant fSep08, mRNA.                                             |
| <a href="#">Nphp1</a>  | <a href="#">Nphp1.fSep08</a>  | <a href="#">680233</a> | 7137  | 733  | 4  | 180 | nephronophthisis 1 (Nphp1) alternative variant fSep08, mRNA.                                             |
| <a href="#">Nphp1</a>  | <a href="#">Nphp1.gSep08</a>  | <a href="#">296136</a> | 857   | 443  | 2  | 81  | putative protein (8.5 kD) (Nphp1) alternative variant gSep08, complete mRNA.                             |
| <a href="#">Nphp1</a>  | <a href="#">Nphp1.gSep08</a>  | <a href="#">680233</a> | 857   | 443  | 2  | 81  | putative protein (8.5 kD) (Nphp1) alternative variant gSep08, complete mRNA.                             |
| <a href="#">Nphp3</a>  | <a href="#">Nphp3.aSep08</a>  | <a href="#">363126</a> | 3297  | 1790 |    | 142 | nephronophthisis 3 (adolescent) (Nphp3) mRNA.                                                            |
| <a href="#">Nphp4</a>  | <a href="#">Nphp4.bSep08</a>  | <a href="#">313749</a> | 7865  | 2120 | 10 | 530 | nephronophthisis 4 (59.7 kD) (Nphp4) alternative variant bSep08, mRNA.                                   |
| <a href="#">Nphp4</a>  | <a href="#">Nphp4.cSep08</a>  | <a href="#">313749</a> | 9496  | 572  | 4  | 190 | nephronophthisis 4 (Nphp4) alternative variant cSep08, mRNA.                                             |
| <a href="#">Nphp4</a>  | <a href="#">Nphp4.dSep08</a>  | <a href="#">313749</a> | 11130 | 841  | 3  | 114 | nephronophthisis 4 (Nphp4) alternative variant dSep08, mRNA.                                             |
| <a href="#">Nphs1</a>  | <a href="#">Nphs1.bSep08</a>  | <a href="#">64563</a>  | 10054 | 1908 |    | 88  | nephrosis 1 homolog, nephrin (human) (Nphs1) alternative variant bSep08, mRNA.                           |
| <a href="#">Npl</a>    | <a href="#">Npl.bSep08</a>    | <a href="#">304860</a> | 30536 | 690  | 7  | 160 | N-acetylneuraminase pyruvate lyase (Npl) alternative variant bSep08, mRNA.                               |

|                       |                              |                        |       |      |   |     |                                                                                                     |
|-----------------------|------------------------------|------------------------|-------|------|---|-----|-----------------------------------------------------------------------------------------------------|
| <a href="#">Npl</a>   | <a href="#">Npl.cSep08</a>   | <a href="#">304860</a> | 23866 | 662  | 4 | 106 | N-acetylneuraminatase pyruvate lyase (Npl) alternative variant cSep08, mRNA.                        |
| <a href="#">Npl</a>   | <a href="#">Npl.dSep08</a>   | <a href="#">304860</a> | 43110 | 1785 | 6 | 46  | N-acetylneuraminatase pyruvate lyase (5.0 kD) (Npl) alternative variant dSep08, complete mRNA.      |
| <a href="#">Npm1</a>  | <a href="#">Npm1.bSep08</a>  | <a href="#">25498</a>  | 7999  | 1155 | 6 | 257 | nucleophosmin 1 (28.4 kD) (Npm1) alternative variant bSep08, complete mRNA.                         |
| <a href="#">Npm1</a>  | <a href="#">Npm1.cSep08</a>  | <a href="#">25498</a>  | 10634 | 1169 | 7 | 200 | nucleophosmin 1 (Npm1) alternative variant cSep08, mRNA.                                            |
| <a href="#">Npm3</a>  | <a href="#">Npm3.aSep08</a>  | <a href="#">502389</a> | 524   | 394  |   | 71  | nucleoplasmin 3 (Npm3) mRNA.                                                                        |
| <a href="#">Npr1</a>  | <a href="#">Npr1.bSep08</a>  | <a href="#">24603</a>  | 3315  | 1259 | 1 | 297 | natriuretic peptide receptor 1 (Npr1) alternative variant bSep08, mRNA.                             |
| <a href="#">Npr1</a>  | <a href="#">Npr1.cSep08</a>  | <a href="#">24603</a>  | 5044  | 694  | 2 | 212 | natriuretic peptide receptor 1 (Npr1) alternative variant cSep08, mRNA.                             |
| <a href="#">Npr2</a>  | <a href="#">Npr2.bSep08</a>  | <a href="#">116564</a> | 5405  | 717  | 7 | 238 | natriuretic peptide receptor B (Npr2) alternative variant bSep08, mRNA.                             |
| <a href="#">Npr2</a>  | <a href="#">Npr2.cSep08</a>  | <a href="#">116564</a> | 1664  | 1216 | 4 | 135 | natriuretic peptide receptor 2 (14.8 kD) (Npr2) alternative variant cSep08, mRNA.                   |
| <a href="#">Npr2</a>  | <a href="#">Npr2.dSep08</a>  | <a href="#">116564</a> | 983   | 761  | 2 | 89  | natriuretic peptide receptor B (Npr2) alternative variant dSep08, mRNA.                             |
| <a href="#">Npr3</a>  | <a href="#">Npr3.bSep08</a>  | <a href="#">25339</a>  | 6073  | 1218 | 3 | 281 | natriuretic peptide receptor 3 (Npr3) alternative variant bSep08, mRNA.                             |
| <a href="#">Npr3</a>  | <a href="#">Npr3.cSep08</a>  | <a href="#">25339</a>  | 47146 | 768  | 4 | 255 | natriuretic peptide receptor 3 (Npr3) alternative variant cSep08, mRNA.                             |
| <a href="#">Nptn</a>  | <a href="#">Nptn.bSep08</a>  | <a href="#">56064</a>  | 75697 | 1470 | 8 | 281 | neuroplastin (31.3 kD) (Nptn) alternative variant bSep08, mRNA.                                     |
| <a href="#">Nptn</a>  | <a href="#">Nptn.cSep08</a>  | <a href="#">56064</a>  | 77301 | 3061 | 9 | 277 | neuroplastin (30.8 kD) (Nptn) alternative variant cSep08, complete mRNA.                            |
| <a href="#">Nptn</a>  | <a href="#">Nptn.eSep08</a>  | <a href="#">56064</a>  | 8173  | 643  | 4 | 45  | neuroplastin (Nptn) alternative variant eSep08, mRNA.                                               |
| <a href="#">Nptx1</a> | <a href="#">Nptx1.aSep08</a> | <a href="#">266777</a> | 4929  | 921  |   | 295 | neuronal pentraxin 1 (Nptx1) mRNA.                                                                  |
| <a href="#">Nptx2</a> | <a href="#">Nptx2.bSep08</a> | <a href="#">288475</a> | 2729  | 1951 | 2 | 110 | neuronal pentraxin 2 (12.2 kD) (Nptx2) alternative variant bSep08, mRNA.                            |
| <a href="#">Npw</a>   | <a href="#">Npw.bSep08</a>   | <a href="#">259224</a> | 1249  | 397  | 2 | 107 | neuropeptide W (Npw) alternative variant bSep08, mRNA.                                              |
| <a href="#">Npy1r</a> | <a href="#">Npy1r.bSep08</a> | <a href="#">29358</a>  | 8302  | 752  |   | 140 | neuropeptide Y receptor Y1 (16.4 kD) (Npy1r) alternative variant bSep08, mRNA.                      |
| <a href="#">Nqo2</a>  | <a href="#">Nqo2.aSep08</a>  | <a href="#">291084</a> | 27882 | 830  | 2 | 235 | NAD(P)H dehydrogenase, quinone 2 (Nqo2) alternative variant aSep08, mRNA.                           |
| <a href="#">Nqo2</a>  | <a href="#">Nqo2.cSep08</a>  | <a href="#">291084</a> | 28301 | 1352 | 3 | 221 | NAD(P)H dehydrogenase, quinone 2 (25.1 kD) (Nqo2) alternative variant cSep08, mRNA.                 |
| <a href="#">Nr1d1</a> | <a href="#">Nr1d1.bSep08</a> | <a href="#">252917</a> | 4498  | 3366 | 4 | 613 | nuclear receptor subfamily 1, group D, member 1 (67.7 kD) (Nr1d1) alternative variant bSep08, mRNA. |
| <a href="#">Nr1h2</a> | <a href="#">Nr1h2.bSep08</a> | <a href="#">58851</a>  | 4628  | 1364 | 9 | 360 | nuclear receptor subfamily 1, group H, member 2 (Nr1h2) alternative variant bSep08, mRNA.           |
| <a href="#">Nr1h2</a> | <a href="#">Nr1h2.cSep08</a> | <a href="#">58851</a>  | 2002  | 711  | 5 | 186 | nuclear receptor subfamily 1, group H, member 2 (Nr1h2) alternative variant cSep08, mRNA.           |
| <a href="#">Nr1h2</a> | <a href="#">Nr1h2.dSep08</a> | <a href="#">58851</a>  | 2126  | 745  | 6 | 159 | nuclear receptor subfamily 1, group H, member 2 (Nr1h2) alternative variant dSep08, mRNA.           |

|                       |                              |                        |       |      |   |     |                                                                                                                              |
|-----------------------|------------------------------|------------------------|-------|------|---|-----|------------------------------------------------------------------------------------------------------------------------------|
| <a href="#">Nr1h2</a> | <a href="#">Nr1h2.fSep08</a> | <a href="#">58851</a>  | 1998  | 832  | 5 | 93  | nuclear receptor subfamily 1, group H, member 2 (9.3 kD) (Nr1h2) alternative variant fSep08, mRNA.                           |
| <a href="#">Nr1h2</a> | <a href="#">Nr1h2.gSep08</a> | <a href="#">58851</a>  | 2040  | 754  | 6 | 88  | nuclear receptor subfamily 1, group H, member 2 (Nr1h2) alternative variant gSep08, mRNA.                                    |
| <a href="#">Nr1h2</a> | <a href="#">Nr1h2.hSep08</a> | <a href="#">58851</a>  | 1006  | 669  | 3 | 64  | nuclear receptor subfamily 1, group H, member 2 (Nr1h2) alternative variant hSep08, mRNA.                                    |
| <a href="#">Nr1h2</a> | <a href="#">Nr1h2.iSep08</a> | <a href="#">58851</a>  | 1802  | 775  | 4 | 38  | nuclear receptor subfamily 1, group H, member 2 (Nr1h2) alternative variant iSep08, mRNA.                                    |
| <a href="#">Nr1h2</a> | <a href="#">Nr1h2.jSep08</a> | <a href="#">58851</a>  | 3329  | 1765 | 6 | 283 | nuclear receptor subfamily 1, group H, member 2 (31.0 kD) (Nr1h2) alternative variant jSep08, mRNA.                          |
| <a href="#">Nr1h3</a> | <a href="#">Nr1h3.bSep08</a> | <a href="#">58852</a>  | 3704  | 703  | 1 | 210 | nuclear receptor subfamily 1, group H, member 3 (Nr1h3) alternative variant bSep08, mRNA.                                    |
| <a href="#">Nr1h3</a> | <a href="#">Nr1h3.cSep08</a> | <a href="#">58852</a>  | 3724  | 1100 | 1 | 200 | nuclear receptor subfamily 1, group H, member 3 (Nr1h3) alternative variant cSep08, mRNA.                                    |
| <a href="#">Nr1h4</a> | <a href="#">Nr1h4.bSep08</a> | <a href="#">60351</a>  | 36909 | 1460 | 6 | 300 | nuclear receptor subfamily 1, group H, member 4 (34.2 kD) (Nr1h4) alternative variant bSep08, complete mRNA.                 |
| <a href="#">Nr1h4</a> | <a href="#">Nr1h4.cSep08</a> | <a href="#">60351</a>  | 29958 | 757  | 4 | 247 | nuclear receptor subfamily 1, group H, member 4 (Nr1h4) alternative variant cSep08, mRNA.                                    |
| <a href="#">Nr1h4</a> | <a href="#">Nr1h4.dSep08</a> | <a href="#">60351</a>  | 4710  | 286  | 4 | 95  | nuclear receptor subfamily 1, group H, member 4 (Nr1h4) alternative variant dSep08, mRNA.                                    |
| <a href="#">Nr2c1</a> | <a href="#">Nr2c1.bSep08</a> | <a href="#">252924</a> | 16767 | 930  | 6 | 180 | nuclear receptor subfamily 2 group C member 1 (20.1 kD) (Nr2c1) alternative variant bSep08, mRNA.                            |
| <a href="#">Nr2c1</a> | <a href="#">Nr2c1.cSep08</a> | <a href="#">252924</a> | 15769 | 1774 | 5 | 178 | nuclear receptor subfamily 2 group C member 1 (18.9 kD) (Nr2c1) alternative variant cSep08, mRNA.                            |
| <a href="#">Nr2f2</a> | <a href="#">Nr2f2.bSep08</a> | <a href="#">113984</a> | 13810 | 2720 | 3 | 281 | nuclear receptor subfamily 2, group F, member 2 (31.5 kD) (Nr2f2) alternative variant bSep08, mRNA.                          |
| <a href="#">Nr2f6</a> | <a href="#">Nr2f6.dSep08</a> | <a href="#">245980</a> | 2694  | 583  | 2 | 52  | nuclear receptor subfamily 2, group F, member 6 and hypothetical protein LOC688751 (Nr2f6) alternative variant dSep08, mRNA. |
| <a href="#">Nr2f6</a> | <a href="#">Nr2f6.dSep08</a> | <a href="#">688751</a> | 2694  | 583  | 2 | 52  | nuclear receptor subfamily 2, group F, member 6 and hypothetical protein LOC688751 (Nr2f6) alternative variant dSep08, mRNA. |
| <a href="#">Nr3c2</a> | <a href="#">Nr3c2.bSep08</a> | <a href="#">25672</a>  | 47132 | 780  | 5 | 175 | mineralocorticoid receptor (Nr3c2) alternative variant bSep08, mRNA.                                                         |
| <a href="#">Nr3c2</a> | <a href="#">Nr3c2.dSep08</a> | <a href="#">25672</a>  | 5854  | 337  | 2 | 76  | putative protein (Nr3c2) alternative variant dSep08, mRNA.                                                                   |
| <a href="#">Nr4a1</a> | <a href="#">Nr4a1.bSep08</a> | <a href="#">79240</a>  | 10008 | 580  | 1 | 163 | nuclear receptor subfamily 4, group A, member 1 (Nr4a1) alternative variant bSep08, mRNA.                                    |
| <a href="#">Nr5a2</a> | <a href="#">Nr5a2.bSep08</a> | <a href="#">60349</a>  | 4175  | 553  | 2 | 66  | nuclear receptor subfamily 5, group A, member 2 (Nr5a2) alternative variant bSep08, mRNA.                                    |
| <a href="#">Nr6a1</a> | <a href="#">Nr6a1.aSep08</a> | <a href="#">362125</a> | 21523 | 974  | 5 | 324 | nuclear receptor subfamily 6, group A, member 1 (Nr6a1) alternative variant aSep08, mRNA.                                    |
| <a href="#">Nr6a1</a> | <a href="#">Nr6a1.bSep08</a> | <a href="#">362125</a> | 13306 | 614  | 3 | 204 | nuclear receptor subfamily 6, group A, member 1 (Nr6a1) alternative variant bSep08, mRNA.                                    |
| <a href="#">Nradd</a> | <a href="#">Nradd.bSep08</a> | <a href="#">246143</a> | 2161  | 1090 | 1 | 81  | neurotrophin receptor associated death domain (Nradd) alternative variant bSep08, mRNA.                                      |
| <a href="#">Nradd</a> | <a href="#">Nradd.cSep08</a> | <a href="#">246143</a> | 2852  | 559  | 3 | 67  | neurotrophin receptor associated death domain (Nradd) alternative variant cSep08, mRNA.                                      |

|                       |                              |                        |        |      |    |     |                                                                                          |
|-----------------------|------------------------------|------------------------|--------|------|----|-----|------------------------------------------------------------------------------------------|
| <a href="#">Nrap</a>  | <a href="#">Nrap.cSep08</a>  | <a href="#">307982</a> | 7063   | 414  | 3  | 138 | nebulin-related anchoring protein (Nrap) alternative variant cSep08, mRNA.               |
| <a href="#">Nrcam</a> | <a href="#">Nrcam.bSep08</a> | <a href="#">497815</a> | 245625 | 1530 | 11 | 321 | neuron-glia-CAM-related cell adhesion molecule (Nrcam) alternative variant bSep08, mRNA. |
| <a href="#">Nrcam</a> | <a href="#">Nrcam.cSep08</a> | <a href="#">497815</a> | 26298  | 1142 | 6  | 273 | neuron-glia-CAM-related cell adhesion molecule (Nrcam) alternative variant cSep08, mRNA. |
| <a href="#">Nrcam</a> | <a href="#">Nrcam.dSep08</a> | <a href="#">497815</a> | 25854  | 734  | 7  | 244 | neuron-glia-CAM-related cell adhesion molecule (Nrcam) alternative variant dSep08, mRNA. |
| <a href="#">Nrcam</a> | <a href="#">Nrcam.eSep08</a> | <a href="#">497815</a> | 15923  | 384  | 3  | 127 | neuron-glia-CAM-related cell adhesion molecule (Nrcam) alternative variant eSep08, mRNA. |
| <a href="#">Nrcam</a> | <a href="#">Nrcam.fSep08</a> | <a href="#">497815</a> | 81545  | 241  | 2  | 36  | neuron-glia-CAM-related cell adhesion molecule (Nrcam) alternative variant fSep08, mRNA. |
| <a href="#">Nrd1</a>  | <a href="#">Nrd1.bSep08</a>  | <a href="#">25499</a>  | 6856   | 1352 | 5  | 202 | nardilysin (Nrd1) alternative variant bSep08, mRNA.                                      |
| <a href="#">Nrd1</a>  | <a href="#">Nrd1.cSep08</a>  | <a href="#">25499</a>  | 4050   | 356  | 4  | 106 | nardilysin CRA a (Nrd1) alternative variant cSep08, mRNA.                                |
| <a href="#">Nrd1</a>  | <a href="#">Nrd1.eSep08</a>  | <a href="#">25499</a>  | 2491   | 663  | 3  | 56  | nardilysin (Nrd1) alternative variant eSep08, mRNA.                                      |
| <a href="#">Nrep</a>  | <a href="#">Nrep.aSep08</a>  | <a href="#">338475</a> | 22686  | 358  | 3  | 114 | neuronal regeneration related protein (Nrep) alternative variant aSep08, mRNA.           |
| <a href="#">Nrep</a>  | <a href="#">Nrep.cSep08</a>  | <a href="#">338475</a> | 4526   | 290  | 2  | 43  | neuronal regeneration related protein (5.3 kD) (Nrep) alternative variant cSep08, mRNA.  |
| <a href="#">Nrf1</a>  | <a href="#">Nrf1.bSep08</a>  | <a href="#">312195</a> | 66225  | 3279 | 4  | 515 | nuclear respiratory factor 1 (54.9 kD) (Nrf1) alternative variant bSep08, mRNA.          |
| <a href="#">Nrf1</a>  | <a href="#">Nrf1.cSep08</a>  | <a href="#">312195</a> | 25109  | 844  | 2  | 105 | nuclear respiratory factor 1 (10.4 kD) (Nrf1) alternative variant cSep08, mRNA.          |
| <a href="#">Nrg1</a>  | <a href="#">Nrg1.bSep08</a>  | <a href="#">112400</a> | 19576  | 728  | 3  | 242 | neuregulin 1 (Nrg1) alternative variant bSep08, mRNA.                                    |
| <a href="#">Nrg1</a>  | <a href="#">Nrg1.cSep08</a>  | <a href="#">112400</a> | 27792  | 554  | 4  | 184 | neuregulin 1 (Nrg1) alternative variant cSep08, mRNA.                                    |
| <a href="#">Nrg2</a>  | <a href="#">Nrg2.aSep08</a>  | <a href="#">432361</a> | 6322   | 1770 |    | 590 | neuregulin 2 (Nrg2) alternative variant aSep08, mRNA.                                    |
| <a href="#">Nrg2</a>  | <a href="#">Nrg2.bSep08</a>  | <a href="#">432361</a> | 3064   | 434  |    | 144 | neuregulin 2 (Nrg2) alternative variant bSep08, mRNA.                                    |
| <a href="#">Nrg3</a>  | <a href="#">Nrg3.aSep08</a>  | <a href="#">498596</a> | 27344  | 1913 |    | 311 | neuregulin 3 (Nrg3) mRNA.                                                                |
| <a href="#">Nrg4</a>  | <a href="#">Nrg4.aSep08</a>  | <a href="#">690919</a> | 36328  | 800  |    | 70  | neuregulin 4 (Nrg4) mRNA.                                                                |
| <a href="#">Nrk</a>   | <a href="#">Nrk.aSep08</a>   | <a href="#">315907</a> | 8748   | 796  |    | 264 | nik related kinase (Nrk) mRNA.                                                           |
| <a href="#">Nrm</a>   | <a href="#">Nrm.bSep08</a>   | <a href="#">361791</a> | 2150   | 741  | 2  | 189 | nurim (nuclear envelope membrane protein) (Nrm) alternative variant bSep08, mRNA.        |
| <a href="#">Nrm</a>   | <a href="#">Nrm.cSep08</a>   | <a href="#">361791</a> | 2589   | 737  | 3  | 188 | nurim (nuclear envelope membrane protein) (Nrm) alternative variant cSep08, mRNA.        |
| <a href="#">Nrm</a>   | <a href="#">Nrm.dSep08</a>   | <a href="#">361791</a> | 2630   | 410  | 2  | 136 | nurim (nuclear envelope membrane protein) (Nrm) alternative variant dSep08, mRNA.        |
| <a href="#">Nrp1</a>  | <a href="#">Nrp1.bSep08</a>  | <a href="#">246331</a> | 7507   | 3050 | 1  | 154 | neuropilin 1 (Nrp1) alternative variant bSep08, mRNA.                                    |
| <a href="#">Nrp2</a>  | <a href="#">Nrp2.bSep08</a>  | <a href="#">81527</a>  | 10638  | 414  | 3  | 116 | neuropilin 2 (Nrp2) alternative variant bSep08, mRNA.                                    |
| <a href="#">Nrsn1</a> | <a href="#">Nrsn1.aSep08</a> | <a href="#">291129</a> | 17808  | 2096 | 2  | 196 | neurensin 1 (21.7 kD) (Nrsn1) alternative variant aSep08, mRNA.                          |
| <a href="#">Nrxn1</a> | <a href="#">Nrxn1.aSep08</a> | <a href="#">60391</a>  | 85429  | 960  |    | 319 | neurexin 1 (Nrxn1) mRNA.                                                                 |
| <a href="#">Nrxn2</a> | <a href="#">Nrxn2.bSep08</a> | <a href="#">116595</a> | 44661  | 1449 | 7  | 395 | neurexin II-alpha-b (Nrxn2) alternative variant bSep08, mRNA.                            |
| <a href="#">Nrxn2</a> | <a href="#">Nrxn2.cSep08</a> | <a href="#">116595</a> | 19480  | 753  | 4  | 250 | neurexin 2 (Nrxn2) alternative variant cSep08, mRNA.                                     |



|                         |                                |                        |        |      |    |     |                                                                                                 |
|-------------------------|--------------------------------|------------------------|--------|------|----|-----|-------------------------------------------------------------------------------------------------|
| <a href="#">Nrnx2</a>   | <a href="#">Nrnx2.dSep08</a>   | <a href="#">116595</a> | 1311   | 791  | 2  | 207 | neurexin II-alpha-b (Nrnx2) alternative variant dSep08, mRNA.                                   |
| <a href="#">Nrnx3</a>   | <a href="#">Nrnx3.cSep08</a>   | <a href="#">116508</a> | 26962  | 727  | 2  | 33  | neurexin 3 (4.0 kD) (Nrnx3) alternative variant cSep08, mRNA.                                   |
| <a href="#">Ns5atp9</a> | <a href="#">Ns5atp9.bSep08</a> | <a href="#">300795</a> | 12633  | 395  | 2  | 115 | NS5A (hepatitis C virus) transactivated protein 9 (Ns5atp9) alternative variant bSep08, mRNA.   |
| <a href="#">Nsdhl</a>   | <a href="#">Nsdhl.aSep08</a>   | <a href="#">309262</a> | 23355  | 2941 | 6  | 388 | NAD(P) dependent steroid dehydrogenase-like (43.5 kD) (Nsdhl) alternative variant aSep08, mRNA. |
| <a href="#">Nsf</a>     | <a href="#">Nsf.bSep08</a>     | <a href="#">60355</a>  | 9586   | 308  | 2  | 57  | N-ethylmaleimide sensitive fusion protein (Nsf) alternative variant bSep08, mRNA.               |
| <a href="#">Nsf1c</a>   | <a href="#">Nsf1c.bSep08</a>   | <a href="#">83809</a>  | 13627  | 997  | 6  | 287 | NSFL1 (p97) cofactor (p47) (Nsf1c) alternative variant bSep08, mRNA.                            |
| <a href="#">Nsf1c</a>   | <a href="#">Nsf1c.cSep08</a>   | <a href="#">83809</a>  | 11948  | 643  | 3  | 127 | NSFL1 (p97) cofactor (p47) (Nsf1c) alternative variant cSep08, mRNA.                            |
| <a href="#">Nsmce1</a>  | <a href="#">Nsmce1.bSep08</a>  | <a href="#">361645</a> | 24859  | 644  | 5  | 200 | non-SMC element 1 homolog (S. cerevisiae) (Nsmce1) alternative variant bSep08, mRNA.            |
| <a href="#">Nsmce1</a>  | <a href="#">Nsmce1.cSep08</a>  | <a href="#">361645</a> | 12553  | 711  | 5  | 142 | non-SMC element 1 homolog (S. cerevisiae) (Nsmce1) alternative variant cSep08, mRNA.            |
| <a href="#">Nsmce1</a>  | <a href="#">Nsmce1.dSep08</a>  | <a href="#">361645</a> | 19957  | 782  | 2  | 86  | non-SMC element 1 homolog (S. cerevisiae) (Nsmce1) alternative variant dSep08, mRNA.            |
| <a href="#">Nsmce2</a>  | <a href="#">Nsmce2.bSep08</a>  | <a href="#">299957</a> | 225905 | 783  | 5  | 158 | non-SMC element 2, MMS21 homolog (S. cerevisiae) (Nsmce2) alternative variant bSep08, mRNA.     |
| <a href="#">Nsmce2</a>  | <a href="#">Nsmce2.dSep08</a>  | <a href="#">299957</a> | 9421   | 483  | 3  | 23  | non-SMC element 2, MMS21 homolog (S. cerevisiae) (Nsmce2) alternative variant dSep08, mRNA.     |
| <a href="#">Nsmce4a</a> | <a href="#">Nsmce4a.aSep08</a> | <a href="#">293528</a> | 14737  | 1363 | 10 | 393 | non-smc element 4 homolog a (Nsmce4a) alternative variant aSep08, mRNA.                         |
| <a href="#">Nsmce4a</a> | <a href="#">Nsmce4a.cSep08</a> | <a href="#">293528</a> | 5821   | 1471 | 6  | 151 | non-SMC element 4 homolog a (Nsmce4a) alternative variant cSep08, mRNA.                         |
| <a href="#">Nsmce4a</a> | <a href="#">Nsmce4a.dSep08</a> | <a href="#">293528</a> | 5891   | 706  | 7  | 144 | non-SMC element 4 homolog a (16.8 kD) (Nsmce4a) alternative variant dSep08, mRNA.               |
| <a href="#">Nsun2</a>   | <a href="#">Nsun2.bSep08</a>   | <a href="#">361191</a> | 2142   | 306  | 2  | 87  | NOL1/NOP2/Sun domain family, member 2 (Nsun2) alternative variant bSep08, mRNA.                 |
| <a href="#">Nsun2</a>   | <a href="#">Nsun2.cSep08</a>   | <a href="#">361191</a> | 2260   | 742  | 3  | 63  | NOL1/NOP2/Sun domain family, member 2 (Nsun2) alternative variant cSep08, mRNA.                 |
| <a href="#">Nsun4</a>   | <a href="#">Nsun4.bSep08</a>   | <a href="#">298426</a> | 7481   | 655  | 1  | 74  | NOL1/NOP2/Sun domain family, member 4 (Nsun4) alternative variant bSep08, mRNA.                 |
| <a href="#">Nsun5</a>   | <a href="#">Nsun5.aSep08</a>   | <a href="#">288595</a> | 5615   | 2196 | 8  | 450 | NOL1/NOP2/Sun domain family, member 5 (Nsun5) alternative variant aSep08, mRNA.                 |
| <a href="#">Nsun5</a>   | <a href="#">Nsun5.bSep08</a>   | <a href="#">288595</a> | 1148   | 714  | 1  | 148 | NOL1/NOP2/Sun domain family, member 5 (16.4 kD) (Nsun5) alternative variant bSep08, mRNA.       |
| <a href="#">Nsun6</a>   | <a href="#">Nsun6.bSep08</a>   | <a href="#">307148</a> | 20600  | 499  | 6  | 166 | NOL1/NOP2/Sun domain family, member 6 (Nsun6) alternative variant bSep08, mRNA.                 |
| <a href="#">Nt5c3</a>   | <a href="#">Nt5c3.aSep08</a>   | <a href="#">312373</a> | 42616  | 1243 | 9  | 331 | 5'-nucleotidase, cytosolic III (37.3 kD) (Nt5c3) alternative variant aSep08, mRNA.              |
| <a href="#">Nt5c3l</a>  | <a href="#">Nt5c3l.bSep08</a>  | <a href="#">360629</a> | 12894  | 920  | 7  | 266 | 5'-nucleotidase, cytosolic III-like (Nt5c3l) alternative variant bSep08, mRNA.                  |

|                        |                               |                        |       |      |   |     |                                                                                               |
|------------------------|-------------------------------|------------------------|-------|------|---|-----|-----------------------------------------------------------------------------------------------|
| <a href="#">Nt5c3l</a> | <a href="#">Nt5c3l.cSep08</a> | <a href="#">360629</a> | 11258 | 731  | 6 | 243 | 5'-nucleotidase, cytosolic III-like (Nt5c3l) alternative variant cSep08, mRNA.                |
| <a href="#">Nt5c3l</a> | <a href="#">Nt5c3l.dSep08</a> | <a href="#">360629</a> | 9623  | 816  | 7 | 189 | 5'-nucleotidase, cytosolic III-like (Nt5c3l) alternative variant dSep08, mRNA.                |
| <a href="#">Nt5c3l</a> | <a href="#">Nt5c3l.eSep08</a> | <a href="#">360629</a> | 8479  | 939  | 3 | 156 | 5'-nucleotidase, cytosolic III-like (Nt5c3l) alternative variant eSep08, mRNA.                |
| <a href="#">Nt5c3l</a> | <a href="#">Nt5c3l.fSep08</a> | <a href="#">360629</a> | 8694  | 416  | 5 | 88  | 5'-nucleotidase, cytosolic III-like (Nt5c3l) alternative variant fSep08, mRNA.                |
| <a href="#">Nt5dc1</a> | <a href="#">Nt5dc1.bSep08</a> | <a href="#">294456</a> | 44452 | 739  | 3 | 246 | putative protein of ancient origin (Nt5dc1) alternative variant bSep08, mRNA.                 |
| <a href="#">Nt5dc1</a> | <a href="#">Nt5dc1.cSep08</a> | <a href="#">294456</a> | 18025 | 616  | 1 | 205 | putative protein of ancient origin (Nt5dc1) alternative variant cSep08, mRNA.                 |
| <a href="#">Nt5dc1</a> | <a href="#">Nt5dc1.dSep08</a> | <a href="#">294456</a> | 44564 | 689  | 1 | 179 | putative protein of ancient origin (Nt5dc1) alternative variant dSep08, mRNA.                 |
| <a href="#">Nt5dc2</a> | <a href="#">Nt5dc2.cSep08</a> | <a href="#">290558</a> | 4267  | 392  | 3 | 90  | putative protein of eukaryotic origin (Nt5dc2) alternative variant cSep08, mRNA.              |
| <a href="#">Nt5m</a>   | <a href="#">Nt5m.aSep08</a>   | <a href="#">287368</a> | 27576 | 2254 | 5 | 220 | 5',3'-nucleotidase, mitochondrial (25.5 kD) (Nt5m) alternative variant aSep08, complete mRNA. |
| <a href="#">Nt5m</a>   | <a href="#">Nt5m.cSep08</a>   | <a href="#">287368</a> | 2210  | 932  | 3 | 152 | 5',3'-nucleotidase, mitochondrial (15.9 kD) (Nt5m) alternative variant cSep08, mRNA.          |
| <a href="#">Nt5m</a>   | <a href="#">Nt5m.dSep08</a>   | <a href="#">287368</a> | 37808 | 669  | 5 | 54  | 5',3'-nucleotidase, mitochondrial (Nt5m) alternative variant dSep08, mRNA.                    |
| <a href="#">Ntan1</a>  | <a href="#">Ntan1.bSep08</a>  | <a href="#">360462</a> | 14993 | 853  | 7 | 238 | N-terminal asparagine amidase (Ntan1) alternative variant bSep08, mRNA.                       |
| <a href="#">Ntan1</a>  | <a href="#">Ntan1.cSep08</a>  | <a href="#">360462</a> | 6270  | 917  | 6 | 205 | N-terminal asparagine amidase (23.5 kD) (Ntan1) alternative variant cSep08, mRNA.             |
| <a href="#">Ntan1</a>  | <a href="#">Ntan1.dSep08</a>  | <a href="#">360462</a> | 6249  | 682  | 6 | 181 | N-terminal asparagine amidase (Ntan1) alternative variant dSep08, mRNA.                       |
| <a href="#">Ntan1</a>  | <a href="#">Ntan1.eSep08</a>  | <a href="#">360462</a> | 7832  | 516  | 5 | 132 | N-terminal asparagine amidase (14.9 kD) (Ntan1) alternative variant eSep08, mRNA.             |
| <a href="#">Ntan1</a>  | <a href="#">Ntan1.gSep08</a>  | <a href="#">360462</a> | 1193  | 411  | 2 | 102 | N-terminal asparagine amidase (Ntan1) alternative variant gSep08, mRNA.                       |
| <a href="#">Ntan1</a>  | <a href="#">Ntan1.hSep08</a>  | <a href="#">360462</a> | 923   | 582  | 2 | 96  | N-terminal asparagine amidase (11.1 kD) (Ntan1) alternative variant hSep08, mRNA.             |
| <a href="#">Ntf3</a>   | <a href="#">Ntf3.bSep08</a>   | <a href="#">81737</a>  | 70698 | 820  | 2 | 203 | neurotrophin 3 (Ntf3) alternative variant bSep08, mRNA.                                       |
| <a href="#">Nthl1</a>  | <a href="#">Nthl1.bSep08</a>  | <a href="#">29541</a>  | 6481  | 935  | 6 | 272 | nth (endonuclease III)-like 1 (E.coli) (Nthl1) alternative variant bSep08, mRNA.              |
| <a href="#">Nthl1</a>  | <a href="#">Nthl1.cSep08</a>  | <a href="#">29541</a>  | 817   | 741  | 2 | 208 | nth (endonuclease III)-like 1 (E.coli) (Nthl1) alternative variant cSep08, mRNA.              |
| <a href="#">Nthl1</a>  | <a href="#">Nthl1.dSep08</a>  | <a href="#">29541</a>  | 5103  | 697  | 5 | 193 | nth (endonuclease III)-like 1 (E.coli) (Nthl1) alternative variant dSep08, mRNA.              |
| <a href="#">Nthl1</a>  | <a href="#">Nthl1.eSep08</a>  | <a href="#">29541</a>  | 5104  | 713  | 5 | 157 | nth (endonuclease III)-like 1 (E.coli) (Nthl1) alternative variant eSep08, mRNA.              |
| <a href="#">Ntn2l</a>  | <a href="#">Ntn2l.aSep08</a>  | <a href="#">114524</a> | 2037  | 1368 | 5 | 455 | netrin 2-like (chicken) (Ntn2l) alternative variant aSep08, mRNA.                             |
| <a href="#">Ntn2l</a>  | <a href="#">Ntn2l.bSep08</a>  | <a href="#">114524</a> | 943   | 656  | 3 | 218 | netrin 2-like (chicken) (Ntn2l) alternative variant bSep08, mRNA.                             |

|                       |                              |                        |        |      |    |     |                                                                                                |
|-----------------------|------------------------------|------------------------|--------|------|----|-----|------------------------------------------------------------------------------------------------|
| <a href="#">Ntn2l</a> | <a href="#">Ntn2l.cSep08</a> | <a href="#">114524</a> | 885    | 793  | 1  | 75  | netrin 2-like (chicken) (Ntn2l) alternative variant cSep08, mRNA.                              |
| <a href="#">Ntng1</a> | <a href="#">Ntng1.bSep08</a> | <a href="#">295382</a> | 153972 | 568  | 4  | 189 | netrin G1 (Ntng1) alternative variant bSep08, mRNA.                                            |
| <a href="#">Ntrk2</a> | <a href="#">Ntrk2.bSep08</a> | <a href="#">25054</a>  | 78882  | 5745 | 6  | 208 | tyrosine kinase receptor (Ntrk2) alternative variant bSep08, mRNA.                             |
| <a href="#">Ntrk2</a> | <a href="#">Ntrk2.cSep08</a> | <a href="#">25054</a>  | 9816   | 334  | 4  | 83  | tyrosine kinase receptor (Ntrk2) alternative variant cSep08, mRNA.                             |
| <a href="#">Ntrk2</a> | <a href="#">Ntrk2.dSep08</a> | <a href="#">25054</a>  | 2150   | 404  | 2  | 66  | putative protein (Ntrk2) alternative variant dSep08, mRNA.                                     |
| <a href="#">Ntrk3</a> | <a href="#">Ntrk3.bSep08</a> | <a href="#">29613</a>  | 53082  | 783  | 2  | 195 | neurotrophic tyrosine kinase, receptor, type 3 (Ntrk3) alternative variant bSep08, mRNA.       |
| <a href="#">Ntrk3</a> | <a href="#">Ntrk3.cSep08</a> | <a href="#">29613</a>  | 52997  | 623  | 1  | 147 | neurotrophic tyrosine kinase, receptor, type 3 (Ntrk3) alternative variant cSep08, mRNA.       |
| <a href="#">Nub1</a>  | <a href="#">Nub1.bSep08</a>  | <a href="#">296731</a> | 18432  | 1174 | 9  | 300 | negative regulator of ubiquitin-like proteins 1 (Nub1) alternative variant bSep08, mRNA.       |
| <a href="#">Nubp1</a> | <a href="#">Nubp1.aSep08</a> | <a href="#">287042</a> | 11582  | 2308 | 10 | 334 | nucleotide binding protein 1 like (35.8 kD) (Nubp1) alternative variant aSep08, complete mRNA. |
| <a href="#">Nubp1</a> | <a href="#">Nubp1.bSep08</a> | <a href="#">287042</a> | 10056  | 961  | 10 | 292 | nucleotide binding protein 1 like (Nubp1) alternative variant bSep08, mRNA.                    |
| <a href="#">Nubp1</a> | <a href="#">Nubp1.cSep08</a> | <a href="#">287042</a> | 8343   | 736  | 8  | 164 | nucleotide binding protein 1 like (16.8 kD) (Nubp1) alternative variant cSep08, mRNA.          |
| <a href="#">Nubp1</a> | <a href="#">Nubp1.dSep08</a> | <a href="#">287042</a> | 3328   | 2171 | 2  | 59  | nucleotide binding protein 1 like (6.5 kD) (Nubp1) alternative variant dSep08, mRNA.           |
| <a href="#">Nubp2</a> | <a href="#">Nubp2.bSep08</a> | <a href="#">287125</a> | 2547   | 687  | 3  | 163 | nucleotide binding protein 2 (Nubp2) alternative variant bSep08, mRNA.                         |
| <a href="#">Nubp2</a> | <a href="#">Nubp2.cSep08</a> | <a href="#">287125</a> | 3035   | 475  | 2  | 151 | nucleotide binding protein 2 (16.0 kD) (Nubp2) alternative variant cSep08, mRNA.               |
| <a href="#">Nubpl</a> | <a href="#">Nubpl.aSep08</a> | <a href="#">299008</a> | 211770 | 1163 | 3  | 319 | nucleotide binding protein-like (34.1 kD) (Nubpl) alternative variant aSep08, mRNA.            |
| <a href="#">Nubpl</a> | <a href="#">Nubpl.bSep08</a> | <a href="#">299008</a> | 14488  | 254  | 1  | 63  | nucleotide binding protein-like (Nubpl) alternative variant bSep08, mRNA.                      |
| <a href="#">nuby</a>  | <a href="#">nuby.aSep08</a>  |                        | 9217   | 792  |    | 68  | putative protein (8.0 kD) (nuby) mRNA.                                                         |
| <a href="#">Nucb1</a> | <a href="#">Nucb1.bSep08</a> | <a href="#">84595</a>  | 14844  | 1415 | 7  | 264 | nucleobindin 1 CRA a precursor (30.9 kD) (Nucb1) alternative variant bSep08, complete mRNA.    |
| <a href="#">Nucb1</a> | <a href="#">Nucb1.cSep08</a> | <a href="#">84595</a>  | 14275  | 843  | 7  | 251 | nucleobindin 1 CRA a (Nucb1) alternative variant cSep08, mRNA.                                 |
| <a href="#">Nucb1</a> | <a href="#">Nucb1.dSep08</a> | <a href="#">84595</a>  | 1851   | 767  | 6  | 175 | nucleobindin 1 CRA a (20.2 kD) (Nucb1) alternative variant dSep08, mRNA.                       |
| <a href="#">Nucb1</a> | <a href="#">Nucb1.eSep08</a> | <a href="#">84595</a>  | 1645   | 1153 | 4  | 131 | nucleobindin 1 CRA a (Nucb1) alternative variant eSep08, mRNA.                                 |
| <a href="#">Nucb1</a> | <a href="#">Nucb1.fSep08</a> | <a href="#">84595</a>  | 10698  | 697  | 4  | 128 | nucleobindin 1 CRA c precursor (14.4 kD) (Nucb1) alternative variant fSep08, mRNA.             |
| <a href="#">Nucb1</a> | <a href="#">Nucb1.gSep08</a> | <a href="#">84595</a>  | 3737   | 527  | 3  | 121 | nucleobindin 1 CRA a (14.8 kD) (Nucb1) alternative variant gSep08, mRNA.                       |
| <a href="#">Nucb1</a> | <a href="#">Nucb1.iSep08</a> | <a href="#">84595</a>  | 9034   | 311  | 3  | 65  | putative protein (Nucb1) alternative variant iSep08, mRNA.                                     |
| <a href="#">Nucb2</a> | <a href="#">Nucb2.bSep08</a> | <a href="#">59295</a>  | 24232  | 794  | 6  | 264 | nucleobindin 2 (Nucb2) alternative variant bSep08, mRNA.                                       |
| <a href="#">nuchy</a> | <a href="#">nuchy.aSep08</a> |                        | 2114   | 437  |    | 57  | putative protein (nuchy) mRNA.                                                                 |

|                                  |                                         |                        |       |      |   |     |                                                                                                                            |
|----------------------------------|-----------------------------------------|------------------------|-------|------|---|-----|----------------------------------------------------------------------------------------------------------------------------|
| <a href="#">Nucleoporin2.0</a>   | <a href="#">Nucleoporin2.0.aSep08</a>   |                        | 26405 | 1183 | 6 | 394 | nucleoporin 98kDa (Nucleoporin2.0) alternative variant aSep08, mRNA.                                                       |
| <a href="#">Nucleoporin2.0</a>   | <a href="#">Nucleoporin2.0.bSep08</a>   |                        | 9356  | 415  | 1 | 138 | nucleoporin 98kDa (Nucleoporin2.0) alternative variant bSep08, mRNA.                                                       |
| <a href="#">Nuc_sug_transp.0</a> | <a href="#">Nuc_sug_transp.0.aSep08</a> |                        | 6260  | 435  |   | 145 | solute carrier family 35 member A5 (Nuc_sug_transp.0) mRNA.                                                                |
| <a href="#">nudar</a>            | <a href="#">nudar.aSep08</a>            |                        | 2659  | 631  |   | 79  | putative protein (9.1 kD) (nudar) mRNA.                                                                                    |
| <a href="#">Nudcd2</a>           | <a href="#">Nudcd2.bSep08</a>           | <a href="#">287199</a> | 4858  | 690  | 2 | 53  | putative protein (Nudcd2) alternative variant bSep08, mRNA.                                                                |
| <a href="#">Nudt1</a>            | <a href="#">Nudt1.bSep08</a>            | <a href="#">117260</a> | 6787  | 508  | 2 | 114 | nudix (nucleoside diphosphate linked moiety X)-type motif 1 (Nudt1) alternative variant bSep08, mRNA.                      |
| <a href="#">Nudt3</a>            | <a href="#">Nudt3.bSep08</a>            | <a href="#">294292</a> | 51322 | 670  | 1 | 131 | nudix (nucleotide diphosphate linked moiety X)-type motif 3 (15.1 kD) (Nudt3) alternative variant bSep08, mRNA.            |
| <a href="#">Nudt4</a>            | <a href="#">Nudt4.aSep08</a>            | <a href="#">94267</a>  | 14197 | 900  | 5 | 234 | nudix (nucleoside diphosphate linked moiety X)-type motif 4 (Nudt4) alternative variant aSep08, mRNA.                      |
| <a href="#">Nudt4</a>            | <a href="#">Nudt4.cSep08</a>            | <a href="#">94267</a>  | 2571  | 640  | 4 | 151 | nudix (nucleoside diphosphate linked moiety X)-type motif 4 (Nudt4) alternative variant cSep08, mRNA.                      |
| <a href="#">Nudt4</a>            | <a href="#">Nudt4.dSep08</a>            | <a href="#">94267</a>  | 1205  | 963  | 2 | 116 | nudix (nucleoside diphosphate linked moiety X)-type motif 4 (13.2 kD) (Nudt4) alternative variant dSep08, complete mRNA.   |
| <a href="#">Nudt4</a>            | <a href="#">Nudt4.eSep08</a>            | <a href="#">94267</a>  | 1814  | 260  | 3 | 29  | nudix (nucleoside diphosphate linked moiety X)-type motif 4 (Nudt4) alternative variant eSep08, mRNA.                      |
| <a href="#">Nudt7</a>            | <a href="#">Nudt7.bSep08</a>            | <a href="#">361413</a> | 26563 | 431  | 4 | 143 | nudix (nucleoside diphosphate linked moiety X)-type motif 7 (Nudt7) alternative variant bSep08, mRNA.                      |
| <a href="#">Nudt7</a>            | <a href="#">Nudt7.cSep08</a>            | <a href="#">361413</a> | 15077 | 1043 | 5 | 75  | nudix (nucleoside diphosphate linked moiety X)-type motif 7 (Nudt7) alternative variant cSep08, mRNA.                      |
| <a href="#">Nudt8</a>            | <a href="#">Nudt8.aSep08</a>            | <a href="#">361692</a> | 1712  | 989  |   | 301 | nudix (nucleoside diphosphate linked moiety X)-type motif 8 (Nudt8) mRNA.                                                  |
| <a href="#">Nudt9</a>            | <a href="#">Nudt9.bSep08</a>            | <a href="#">305149</a> | 31311 | 862  | 8 | 287 | nudix (nucleoside diphosphate linked moiety X)-type motif 9 (Nudt9) alternative variant bSep08, mRNA.                      |
| <a href="#">Nudt9</a>            | <a href="#">Nudt9.cSep08</a>            | <a href="#">305149</a> | 23604 | 619  | 6 | 172 | nudix (nucleoside diphosphate linked moiety X)-type motif 9 (Nudt9) alternative variant cSep08, mRNA.                      |
| <a href="#">Nudt11</a>           | <a href="#">Nudt11.aSep08</a>           | <a href="#">680248</a> | 3565  | 915  |   | 200 | nudix (nucleoside diphosphate linked moiety X)-type motif 11 (Nudt11) mRNA.                                                |
| <a href="#">Nudt15</a>           | <a href="#">Nudt15.aSep08</a>           | <a href="#">290365</a> | 4149  | 642  | 1 | 170 | nudix (nucleoside diphosphate linked moiety X)-type motif 15 (19.7 kD) (Nudt15) alternative variant aSep08, mRNA.          |
| <a href="#">Nudt15</a>           | <a href="#">Nudt15.bSep08</a>           | <a href="#">290365</a> | 3674  | 471  | 1 | 137 | nudix (nucleoside diphosphate linked moiety X)-type motif 15 (Nudt15) alternative variant bSep08, mRNA.                    |
| <a href="#">Nudt16</a>           | <a href="#">Nudt16.bSep08</a>           | <a href="#">363129</a> | 2355  | 1641 | 2 | 171 | nudix (nucleoside diphosphate linked moiety X)-type motif 16 (18.8 kD) (Nudt16) alternative variant bSep08, complete mRNA. |
| <a href="#">Nudt16l1</a>         | <a href="#">Nudt16l1.bSep08</a>         | <a href="#">497867</a> | 979   | 898  | 1 | 151 | nudix (nucleoside diphosphate linked moiety X)-type motif 16-like 1 (Nudt16l1) alternative variant bSep08, mRNA.           |
| <a href="#">Nudt18</a>           | <a href="#">Nudt18.bSep08</a>           | <a href="#">361068</a> | 2521  | 478  | 2 | 65  | nudix (nucleoside diphosphate linked moiety X)-type motif 18 (6.9 kD) (Nudt18) alternative variant bSep08, mRNA.           |

|                        |                               |                        |        |      |   |      |                                                                                                                            |
|------------------------|-------------------------------|------------------------|--------|------|---|------|----------------------------------------------------------------------------------------------------------------------------|
| <a href="#">Nudt19</a> | <a href="#">Nudt19.aSep08</a> | <a href="#">308518</a> | 11691  | 941  | 1 | 201  | nudix (nucleoside diphosphate linked moiety X)-type motif 19 (22.6 kD) (Nudt19) alternative variant aSep08, complete mRNA. |
| <a href="#">Nudt22</a> | <a href="#">Nudt22.bSep08</a> | <a href="#">293703</a> | 946    | 682  | 2 | 226  | nudix (nucleoside diphosphate linked moiety X)-type motif 22 (Nudt22) alternative variant bSep08, mRNA.                    |
| <a href="#">Nudt22</a> | <a href="#">Nudt22.cSep08</a> | <a href="#">293703</a> | 2340   | 652  | 4 | 156  | nudix (nucleoside diphosphate linked moiety X)-type motif 22 (17.0 kD) (Nudt22) alternative variant cSep08, mRNA.          |
| <a href="#">Nudt22</a> | <a href="#">Nudt22.dSep08</a> | <a href="#">293703</a> | 927    | 569  | 3 | 114  | nudix (nucleoside diphosphate linked moiety X)-type motif 22 (12.4 kD) (Nudt22) alternative variant dSep08, mRNA.          |
| <a href="#">Nudt22</a> | <a href="#">Nudt22.eSep08</a> | <a href="#">293703</a> | 2687   | 350  | 3 | 107  | nudix (nucleoside diphosphate linked moiety X)-type motif 22 (Nudt22) alternative variant eSep08, mRNA.                    |
| <a href="#">Nuf2</a>   | <a href="#">Nuf2.bSep08</a>   | <a href="#">304951</a> | 5359   | 814  | 1 | 139  | NUF2, NDC80 kinetochore complex component, homolog ( <i>S. cerevisiae</i> ) (Nuf2) alternative variant bSep08, mRNA.       |
| <a href="#">nufer</a>  | <a href="#">nufer.aSep08</a>  |                        | 445    | 396  |   | 71   | putative protein (nufer) mRNA.                                                                                             |
| <a href="#">Nufip1</a> | <a href="#">Nufip1.bSep08</a> | <a href="#">364430</a> | 8278   | 1228 | 3 | 129  | nuclear fragile X mental retardation protein interacting protein 1 (14.6 kD) (Nufip1) alternative variant bSep08, mRNA.    |
| <a href="#">Nufip1</a> | <a href="#">Nufip1.cSep08</a> | <a href="#">364430</a> | 10790  | 849  | 3 | 117  | nuclear fragile X mental retardation protein interacting protein 1 (Nufip1) alternative variant cSep08, mRNA.              |
| <a href="#">nuflo</a>  | <a href="#">nuflo.aSep08</a>  |                        | 1095   | 723  |   | 78   | putative protein (nuflo) mRNA.                                                                                             |
| <a href="#">nuflu</a>  | <a href="#">nuflu.aSep08</a>  |                        | 3364   | 198  |   | 15   | putative protein (nuflu) mRNA.                                                                                             |
| <a href="#">nugar</a>  | <a href="#">nugar.aSep08</a>  |                        | 2958   | 634  |   | 211  | putative protein of vertebrate origin (nugar) mRNA.                                                                        |
| <a href="#">nuja</a>   | <a href="#">nuja.aSep08</a>   |                        | 4531   | 642  |   | 89   | putative secreted or extracellular protein precursor (10.0 kD) (nuja) mRNA.                                                |
| <a href="#">nujey</a>  | <a href="#">nujey.aSep08</a>  |                        | 878    | 412  |   | 46   | putative protein (5.4 kD) (nujey) mRNA.                                                                                    |
| <a href="#">nukee</a>  | <a href="#">nukee.aSep08</a>  |                        | 35358  | 374  |   | 124  | RalGDS-like (nukee) alternative variant aSep08, mRNA.                                                                      |
| <a href="#">nuloy</a>  | <a href="#">nuloy.aSep08</a>  |                        | 459    | 295  |   | 93   | putative protein (nuloy) mRNA.                                                                                             |
| <a href="#">Numa1</a>  | <a href="#">Numa1.aSep08</a>  | <a href="#">308870</a> | 19390  | 3765 | 4 | 1014 | nuclear mitotic apparatus protein 1 (Numa1) alternative variant aSep08, mRNA.                                              |
| <a href="#">Numa1</a>  | <a href="#">Numa1.bSep08</a>  | <a href="#">308870</a> | 2517   | 1267 | 3 | 266  | nuclear mitotic apparatus protein 1 (Numa1) alternative variant bSep08, mRNA.                                              |
| <a href="#">Numb</a>   | <a href="#">Numb.aSep08</a>   | <a href="#">29419</a>  | 9161   | 964  | 4 | 207  | numb gene homolog ( <i>Drosophila</i> ) (Numb) alternative variant aSep08, mRNA.                                           |
| <a href="#">Numb</a>   | <a href="#">Numb.bSep08</a>   | <a href="#">29419</a>  | 111574 | 736  | 8 | 145  | numb gene homolog ( <i>Drosophila</i> ) (Numb) alternative variant bSep08, mRNA.                                           |
| <a href="#">Numb</a>   | <a href="#">Numb.cSep08</a>   | <a href="#">29419</a>  | 69310  | 389  | 4 | 82   | numb gene homolog ( <i>Drosophila</i> ) (Numb) alternative variant cSep08, mRNA.                                           |
| <a href="#">Numbl</a>  | <a href="#">Numbl.cSep08</a>  | <a href="#">292732</a> | 3101   | 431  | 2 | 78   | numb-like (Numbl) alternative variant cSep08, mRNA.                                                                        |
| <a href="#">numee</a>  | <a href="#">numee.aSep08</a>  |                        | 4427   | 362  |   | 86   | putative protein (numee) mRNA.                                                                                             |
| <a href="#">numer</a>  | <a href="#">numer.aSep08</a>  |                        | 5172   | 434  |   | 48   | putative protein (5.4 kD) (numer) mRNA.                                                                                    |
| <a href="#">nunoy</a>  | <a href="#">nunoy.aSep08</a>  |                        | 2914   | 2104 |   | 94   | putative protein of mammalian origin (nunoy) mRNA.                                                                         |
| <a href="#">Nup37</a>  | <a href="#">Nup37.bSep08</a>  | <a href="#">299706</a> | 28690  | 2754 | 2 | 293  | nucleoporin 37 (33.3 kD) (Nup37) alternative variant bSep08, mRNA.                                                         |
| <a href="#">Nup54</a>  | <a href="#">Nup54.bSep08</a>  | <a href="#">53372</a>  | 6473   | 609  | 5 | 203  | nucleoporin 54 (Nup54) alternative variant bSep08, mRNA.                                                                   |

|                          |                                 |                        |       |      |    |      |                                                                                           |
|--------------------------|---------------------------------|------------------------|-------|------|----|------|-------------------------------------------------------------------------------------------|
| <a href="#">Nup54</a>    | <a href="#">Nup54.cSep08</a>    | <a href="#">53372</a>  | 3608  | 895  | 4  | 132  | nucleoporin 54 (15.2 kD) (Nup54) alternative variant cSep08, mRNA.                        |
| <a href="#">Nup54</a>    | <a href="#">Nup54.dSep08</a>    | <a href="#">53372</a>  | 2052  | 719  | 2  | 73   | nucleoporin 54 (8.5 kD) (Nup54) alternative variant dSep08, mRNA.                         |
| <a href="#">Nup62</a>    | <a href="#">Nup62.aSep08</a>    | <a href="#">65274</a>  | 16330 | 2758 | 2  | 525  | nuclear pore complex glycoprotein p62 (53.4 kD) (Nup62) alternative variant aSep08, mRNA. |
| <a href="#">Nup62</a>    | <a href="#">Nup62.cSep08</a>    | <a href="#">65274</a>  | 22495 | 785  | 6  | 178  | interleukin 4 induced 1 like (Nup62) alternative variant cSep08, mRNA.                    |
| <a href="#">Nup62cl</a>  | <a href="#">Nup62cl.aSep08</a>  | <a href="#">300923</a> | 60535 | 2033 | 9  | 350  | nucleoporin 62 C-terminal like (Nup62cl) alternative variant aSep08, mRNA.                |
| <a href="#">Nup62cl</a>  | <a href="#">Nup62cl.bSep08</a>  | <a href="#">300923</a> | 40434 | 855  | 8  | 225  | nucleoporin 62 C-terminal like (Nup62cl) alternative variant bSep08, mRNA.                |
| <a href="#">Nup85</a>    | <a href="#">Nup85.bSep08</a>    | <a href="#">287830</a> | 12625 | 1433 | 13 | 201  | nucleoporin 85kDa (Nup85) alternative variant bSep08, mRNA.                               |
| <a href="#">Nup85</a>    | <a href="#">Nup85.fSep08</a>    | <a href="#">287830</a> | 3130  | 1795 | 3  | 56   | nucleoporin 85kDa (6.3 kD) (Nup85) alternative variant fSep08, mRNA.                      |
| <a href="#">Nup88</a>    | <a href="#">Nup88.bSep08</a>    | <a href="#">113929</a> | 7677  | 2082 | 2  | 202  | nucleoporin 88 (22.9 kD) (Nup88) alternative variant bSep08, mRNA.                        |
| <a href="#">Nup93</a>    | <a href="#">Nup93.bSep08</a>    | <a href="#">291874</a> | 23229 | 2098 | 17 | 645  | nucleoporin 93 (Nup93) alternative variant bSep08, mRNA.                                  |
| <a href="#">Nup93</a>    | <a href="#">Nup93.cSep08</a>    | <a href="#">291874</a> | 78118 | 696  | 5  | 206  | nucleoporin 93 (Nup93) alternative variant cSep08, mRNA.                                  |
| <a href="#">Nup107</a>   | <a href="#">Nup107.bSep08</a>   | <a href="#">116555</a> | 8229  | 563  | 1  | 187  | nucleoporin 107 (Nup107) alternative variant bSep08, mRNA.                                |
| <a href="#">Nup133.0</a> | <a href="#">Nup133.0.aSep08</a> |                        | 48064 | 3290 | 25 | 1066 | nucleoporin 133kDa (Nup133.0) alternative variant aSep08, mRNA.                           |
| <a href="#">Nup133.0</a> | <a href="#">Nup133.0.bSep08</a> |                        | 8780  | 727  | 5  | 242  | nucleoporin 133kDa (Nup133.0) alternative variant bSep08, mRNA.                           |
| <a href="#">Nup133.0</a> | <a href="#">Nup133.0.cSep08</a> |                        | 7383  | 707  | 5  | 169  | nucleoporin 133kDa (Nup133.0) alternative variant cSep08, mRNA.                           |
| <a href="#">Nup133.0</a> | <a href="#">Nup133.0.dSep08</a> |                        | 5300  | 558  | 3  | 159  | CRA b like (Nup133.0) alternative variant dSep08, mRNA.                                   |
| <a href="#">Nup153</a>   | <a href="#">Nup153.bSep08</a>   | <a href="#">25281</a>  | 4246  | 732  | 3  | 243  | nucleoporin 153 (Nup153) alternative variant bSep08, mRNA.                                |
| <a href="#">Nup153</a>   | <a href="#">Nup153.cSep08</a>   | <a href="#">25281</a>  | 1010  | 727  | 2  | 96   | nucleoporin 153 (Nup153) alternative variant cSep08, mRNA.                                |
| <a href="#">Nup155</a>   | <a href="#">Nup155.bSep08</a>   | <a href="#">117021</a> | 14161 | 1792 | 3  | 461  | nucleoporin 155 (Nup155) alternative variant bSep08, mRNA.                                |
| <a href="#">Nup155</a>   | <a href="#">Nup155.cSep08</a>   | <a href="#">117021</a> | 5632  | 829  | 3  | 226  | nucleoporin 155 (25.9 kD) (Nup155) alternative variant cSep08, mRNA.                      |
| <a href="#">Nup160</a>   | <a href="#">Nup160.bSep08</a>   | <a href="#">311182</a> | 23439 | 1698 | 11 | 565  | nucleoporin 160 (Nup160) alternative variant bSep08, mRNA.                                |
| <a href="#">Nup160</a>   | <a href="#">Nup160.cSep08</a>   | <a href="#">311182</a> | 7736  | 1006 | 1  | 118  | nucleoporin 160 (Nup160) alternative variant cSep08, mRNA.                                |
| <a href="#">Nup160</a>   | <a href="#">Nup160.dSep08</a>   | <a href="#">311182</a> | 11919 | 1776 | 4  |      |                                                                                           |
| <a href="#">Nup188</a>   | <a href="#">Nup188.aSep08</a>   | <a href="#">366016</a> | 11306 | 3088 | 16 | 709  | nucleoporin 188 (Nup188) alternative variant aSep08, mRNA.                                |
| <a href="#">Nup205</a>   | <a href="#">Nup205.bSep08</a>   | <a href="#">362335</a> | 4962  | 752  | 2  | 206  | nucleoporin 205 (Nup205) alternative variant bSep08, mRNA.                                |

|                        |                               |                        |       |      |    |     |                                                                                                 |
|------------------------|-------------------------------|------------------------|-------|------|----|-----|-------------------------------------------------------------------------------------------------|
| <a href="#">Nup214</a> | <a href="#">Nup214.aSep08</a> | <a href="#">296634</a> | 9807  | 1798 |    | 599 | nucleoporin 214 (Nup214) mRNA.                                                                  |
| <a href="#">Nupl1</a>  | <a href="#">Nupl1.bSep08</a>  | <a href="#">245922</a> | 10115 | 580  | 5  | 160 | nucleoporin like 1 (Nupl1) alternative variant bSep08, mRNA.                                    |
| <a href="#">Nupl1</a>  | <a href="#">Nupl1.cSep08</a>  | <a href="#">245922</a> | 6563  | 271  | 4  | 90  | nucleoporin like 1 (Nupl1) alternative variant cSep08, mRNA.                                    |
| <a href="#">Nupl2</a>  | <a href="#">Nupl2.cSep08</a>  | <a href="#">499974</a> | 7153  | 396  | 3  | 17  | nucleoporin like 2 (Nupl2) alternative variant cSep08, mRNA.                                    |
| <a href="#">nupor</a>  | <a href="#">nupor.aSep08</a>  |                        | 1026  | 347  |    | 96  | promoter-binding protein like (nupor) mRNA.                                                     |
| <a href="#">Nupr1</a>  | <a href="#">Nupr1.bSep08</a>  | <a href="#">113900</a> | 1986  | 458  | 1  | 53  | nuclear protein 1 (Nupr1) alternative variant bSep08, mRNA.                                     |
| <a href="#">Nus1</a>   | <a href="#">Nus1.aSep08</a>   | <a href="#">294400</a> | 26850 | 3712 |    | 345 | nuclear undecaprenyl pyrophosphate synthase 1 homolog ( <i>S. cerevisiae</i> ) (Nus1) mRNA.     |
| <a href="#">nusa</a>   | <a href="#">nusa.aSep08</a>   |                        | 483   | 400  |    | 132 | putative protein of mammalian origin (nusa) mRNA.                                               |
| <a href="#">Nusap1</a> | <a href="#">Nusap1.aSep08</a> | <a href="#">311336</a> | 30559 | 2091 | 11 | 416 | nucleolar and spindle associated protein 1 (47.4 kD) (Nusap1) alternative variant aSep08, mRNA. |
| <a href="#">Nusap1</a> | <a href="#">Nusap1.cSep08</a> | <a href="#">311336</a> | 13557 | 1389 | 6  | 220 | nucleolar and spindle associated protein 1 (Nusap1) alternative variant cSep08, mRNA.           |
| <a href="#">Nusap1</a> | <a href="#">Nusap1.dSep08</a> | <a href="#">311336</a> | 12103 | 698  | 3  | 106 | nucleolar and spindle associated protein 1 (12.1 kD) (Nusap1) alternative variant dSep08, mRNA. |
| <a href="#">nushee</a> | <a href="#">nushee.aSep08</a> |                        | 4730  | 631  |    | 147 | CRA b (16.6 kD) (nushee) mRNA.                                                                  |
| <a href="#">nutu</a>   | <a href="#">nutu.aSep08</a>   |                        | 13370 | 401  |    | 72  | putative protein (nutu) mRNA.                                                                   |
| <a href="#">nuvar</a>  | <a href="#">nuvar.aSep08</a>  |                        | 1187  | 470  |    | 65  | putative protein (7.5 kD) (nuvar) mRNA.                                                         |
| <a href="#">nuwey</a>  | <a href="#">nuwey.aSep08</a>  |                        | 2277  | 656  |    |     |                                                                                                 |
| <a href="#">Nvl</a>    | <a href="#">Nvl.bSep08</a>    | <a href="#">289323</a> | 12947 | 763  | 6  | 191 | nuclear VCP-like CRA b (Nvl) alternative variant bSep08, mRNA.                                  |
| <a href="#">Nvl</a>    | <a href="#">Nvl.cSep08</a>    | <a href="#">289323</a> | 12649 | 554  | 5  | 137 | nuclear VCP-like CRA b (Nvl) alternative variant cSep08, mRNA.                                  |
| <a href="#">Nvl</a>    | <a href="#">Nvl.dSep08</a>    | <a href="#">289323</a> | 5193  | 431  | 3  | 77  | nuclear VCP-like (Nvl) alternative variant dSep08, mRNA.                                        |
| <a href="#">Nvl</a>    | <a href="#">Nvl.eSep08</a>    | <a href="#">289323</a> | 1649  | 384  | 2  | 51  | nuclear VCP-like (Nvl) alternative variant eSep08, mRNA.                                        |
| <a href="#">Nvl</a>    | <a href="#">Nvl.fSep08</a>    | <a href="#">289323</a> | 2024  | 739  | 2  | 44  | nuclear VCP-like (5.1 kD) (Nvl) alternative variant fSep08, mRNA.                               |
| <a href="#">Nxf1</a>   | <a href="#">Nxf1.bSep08</a>   | <a href="#">59087</a>  | 5554  | 1783 | 4  | 310 | nuclear export factor (Nxf1) alternative variant bSep08, mRNA.                                  |
| <a href="#">Nxf1</a>   | <a href="#">Nxf1.bSep08</a>   | <a href="#">690285</a> | 5554  | 1783 | 4  | 310 | nuclear export factor (Nxf1) alternative variant bSep08, mRNA.                                  |
| <a href="#">Nxf1</a>   | <a href="#">Nxf1.cSep08</a>   | <a href="#">59087</a>  | 14634 | 3060 | 6  | 251 | nuclear RNA export factor 1 (28.2 kD) (Nxf1) alternative variant cSep08, mRNA.                  |
| <a href="#">Nxf1</a>   | <a href="#">Nxf1.cSep08</a>   | <a href="#">690285</a> | 14634 | 3060 | 6  | 251 | nuclear RNA export factor 1 (28.2 kD) (Nxf1) alternative variant cSep08, mRNA.                  |
| <a href="#">Nxf1</a>   | <a href="#">Nxf1.dSep08</a>   | <a href="#">59087</a>  | 2542  | 723  | 2  | 170 | nuclear RNA export factor 1 (Nxf1) alternative variant dSep08, mRNA.                            |
| <a href="#">Nxf1</a>   | <a href="#">Nxf1.dSep08</a>   | <a href="#">690285</a> | 2542  | 723  | 2  | 170 | nuclear RNA export factor 1 (Nxf1) alternative variant dSep08, mRNA.                            |
| <a href="#">Nxf1</a>   | <a href="#">Nxf1.eSep08</a>   | <a href="#">59087</a>  | 1966  | 1629 | 2  | 77  | nuclear RNA export factor 1 (Nxf1) alternative variant eSep08, mRNA.                            |

|                           |                                  |                        |        |      |   |     |                                                                                                    |
|---------------------------|----------------------------------|------------------------|--------|------|---|-----|----------------------------------------------------------------------------------------------------|
| <a href="#">Nxf1</a>      | <a href="#">Nxf1.eSep08</a>      | <a href="#">690285</a> | 1966   | 1629 | 2 | 77  | nuclear RNA export factor 1 (Nxf1) alternative variant eSep08, mRNA.                               |
| <a href="#">Nxf3</a>      | <a href="#">Nxf3.aSep08</a>      | <a href="#">302591</a> | 3786   | 1274 |   | 231 | nuclear RNA export factor 3 (Nxf3) mRNA.                                                           |
| <a href="#">Nxf7</a>      | <a href="#">Nxf7.bSep08</a>      | <a href="#">501621</a> | 5549   | 1151 | 1 | 184 | nuclear RNA export factor 7 (21.3 kD) (Nxf7) alternative variant bSep08, mRNA.                     |
| <a href="#">Nxn</a>       | <a href="#">Nxn.aSep08</a>       | <a href="#">360577</a> | 138185 | 2649 | 8 | 451 | nucleoredoxin (Nxn) alternative variant aSep08, mRNA.                                              |
| <a href="#">Nxn</a>       | <a href="#">Nxn.cSep08</a>       | <a href="#">360577</a> | 10721  | 958  | 3 | 147 | nucleoredoxin (Nxn) alternative variant cSep08, mRNA.                                              |
| <a href="#">Nxn</a>       | <a href="#">Nxn.dSep08</a>       | <a href="#">360577</a> | 926    | 529  | 2 | 89  | nucleoredoxin (Nxn) alternative variant dSep08, mRNA.                                              |
| <a href="#">Nxn1</a>      | <a href="#">Nxn1.bSep08</a>      | <a href="#">306342</a> | 21617  | 422  | 3 | 112 | nucleoredoxin-like 1 (12.9 kD) (Nxn1) alternative variant bSep08, mRNA.                            |
| <a href="#">Nxn1</a>      | <a href="#">Nxn1.cSep08</a>      | <a href="#">306342</a> | 18769  | 332  | 2 | 110 | nucleoredoxin-like 1 (Nxn1) alternative variant cSep08, mRNA.                                      |
| <a href="#">Nxph1</a>     | <a href="#">Nxph1.bSep08</a>     | <a href="#">25501</a>  | 95673  | 449  | 2 | 92  | neurexophilin 1 (Nxph1) alternative variant bSep08, mRNA.                                          |
| <a href="#">Nxph3</a>     | <a href="#">Nxph3.bSep08</a>     | <a href="#">59315</a>  | 3071   | 548  | 2 | 34  | neurexophilin 3 (3.7 kD) (Nxph3) alternative variant bSep08, mRNA.                                 |
| <a href="#">Nxph4</a>     | <a href="#">Nxph4.aSep08</a>     | <a href="#">59316</a>  | 12739  | 763  |   | 254 | neurexophilin 4 (Nxph4) mRNA.                                                                      |
| <a href="#">Nxt2</a>      | <a href="#">Nxt2.bSep08</a>      | <a href="#">315352</a> | 4389   | 966  | 1 | 134 | nuclear transport factor 2-like export factor 2 (15.5 kD) (Nxt2) alternative variant bSep08, mRNA. |
| <a href="#">Ny-sar-48</a> | <a href="#">Ny-sar-48.aSep08</a> | <a href="#">290626</a> | 15420  | 1481 | 8 | 462 | sarcoma antigen NY-SAR-48 (Ny-sar-48) alternative variant aSep08, mRNA.                            |
| <a href="#">Ny-sar-48</a> | <a href="#">Ny-sar-48.cSep08</a> | <a href="#">290626</a> | 9917   | 1257 | 8 | 201 | sarcoma antigen NY-SAR-48 (22.7 kD) (Ny-sar-48) alternative variant cSep08, mRNA.                  |
| <a href="#">Ny-sar-48</a> | <a href="#">Ny-sar-48.dSep08</a> | <a href="#">290626</a> | 4343   | 700  | 4 | 201 | sarcoma antigen NY-SAR-48 (Ny-sar-48) alternative variant dSep08, mRNA.                            |
| <a href="#">Ny-sar-48</a> | <a href="#">Ny-sar-48.eSep08</a> | <a href="#">290626</a> | 4330   | 545  | 3 | 149 | sarcoma antigen NY-SAR-48 (Ny-sar-48) alternative variant eSep08, mRNA.                            |
| <a href="#">Ny-sar-48</a> | <a href="#">Ny-sar-48.fSep08</a> | <a href="#">290626</a> | 9000   | 419  | 5 | 83  | sarcoma antigen NY-SAR-48 (Ny-sar-48) alternative variant fSep08, mRNA.                            |
| <a href="#">Ny-sar-48</a> | <a href="#">Ny-sar-48.hSep08</a> | <a href="#">290626</a> | 2025   | 313  | 2 | 47  | sarcoma antigen NY-SAR-48 (5.0 kD) (Ny-sar-48) alternative variant hSep08, mRNA.                   |
| <a href="#">nyby</a>      | <a href="#">nyby.aSep08</a>      |                        | 8230   | 682  |   | 226 | polymerase alpha (nyby) mRNA.                                                                      |
| <a href="#">nychy</a>     | <a href="#">nychy.aSep08</a>     |                        | 2881   | 385  |   | 128 | protein tyrosine phosphatase receptor type J (nychy) mRNA.                                         |
| <a href="#">nydar</a>     | <a href="#">nydar.aSep08</a>     |                        | 6127   | 511  |   | 36  | putative protein (nydar) mRNA.                                                                     |
| <a href="#">nyfer</a>     | <a href="#">nyfer.aSep08</a>     |                        | 13809  | 370  |   | 33  | putative protein (nyfer) mRNA.                                                                     |
| <a href="#">nyflo</a>     | <a href="#">nyflo.aSep08</a>     |                        | 3647   | 698  |   | 90  | putative mitochondrial protein (9.8 kD) (nyflo) mRNA.                                              |
| <a href="#">nyflu</a>     | <a href="#">nyflu.aSep08</a>     |                        | 34660  | 606  | 3 | 140 | putative mitochondrial protein (13.8 kD) (nyflu) mRNA.                                             |
| <a href="#">nygar</a>     | <a href="#">nygar.aSep08</a>     |                        | 13976  | 583  |   | 194 | putative protein of vertebrate origin (nygar) mRNA.                                                |
| <a href="#">nyja</a>      | <a href="#">nyja.aSep08</a>      |                        | 6973   | 695  |   | 58  | putative protein (nyja) mRNA.                                                                      |
| <a href="#">nyjey</a>     | <a href="#">nyjey.aSep08</a>     |                        | 451    | 267  |   | 74  | putative protein (nyjey) mRNA.                                                                     |
| <a href="#">nykee</a>     | <a href="#">nykee.aSep08</a>     |                        | 8946   | 1785 | 1 | 20  | putative protein (nykee) alternative variant aSep08, mRNA.                                         |
| <a href="#">nykee</a>     | <a href="#">nykee.bSep08</a>     |                        | 8634   | 551  | 2 | 15  | putative protein (nykee) alternative variant bSep08, mRNA.                                         |
| <a href="#">nyloy</a>     | <a href="#">nyloy.aSep08</a>     |                        | 2210   | 257  |   | 60  | vacuolar protein sorting 8 homolog (nyloy) mRNA.                                                   |
| <a href="#">nymee</a>     | <a href="#">nymee.aSep08</a>     |                        | 19233  | 1527 |   | 91  | putative protein (nymee) mRNA.                                                                     |



|                        |                               |                        |       |      |   |     |                                                                                                |
|------------------------|-------------------------------|------------------------|-------|------|---|-----|------------------------------------------------------------------------------------------------|
| <a href="#">nymer</a>  | <a href="#">nymer.aSep08</a>  |                        | 2574  | 723  |   | 40  | putative protein (nymer) mRNA.                                                                 |
| <a href="#">nynoy</a>  | <a href="#">nynoy.aSep08</a>  |                        | 859   | 281  |   | 85  | putative protein of vertebrate origin (nynoy) mRNA.                                            |
| <a href="#">nypor</a>  | <a href="#">nypor.aSep08</a>  |                        | 1581  | 512  |   | 109 | promoter-binding protein like (nypor) mRNA.                                                    |
| <a href="#">nysa</a>   | <a href="#">nysa.aSep08</a>   |                        | 4249  | 507  |   | 108 | putative protein (nysa) mRNA.                                                                  |
| <a href="#">nyshee</a> | <a href="#">nyshee.aSep08</a> |                        | 4727  | 385  |   | 66  | putative protein (nyshee) mRNA.                                                                |
| <a href="#">nytu</a>   | <a href="#">nytu.aSep08</a>   |                        | 1235  | 246  |   | 29  | putative protein (nytu) mRNA.                                                                  |
| <a href="#">nyvar</a>  | <a href="#">nyvar.aSep08</a>  |                        | 1440  | 859  |   | 84  | putative protein (nyvar) mRNA.                                                                 |
| <a href="#">Nyw1</a>   | <a href="#">Nyw1.bSep08</a>   | <a href="#">59319</a>  | 17537 | 1945 | 4 | 307 | ischemia related factor NYW-1 (Nyw1) alternative variant bSep08, mRNA.                         |
| <a href="#">Nyw1</a>   | <a href="#">Nyw1.cSep08</a>   | <a href="#">59319</a>  | 14632 | 745  | 5 | 197 | ischemia related factor NYW-1 (Nyw1) alternative variant cSep08, mRNA.                         |
| <a href="#">Nyw1</a>   | <a href="#">Nyw1.dSep08</a>   | <a href="#">59319</a>  | 7502  | 756  | 3 | 134 | ischemia related factor NYW-1 (Nyw1) alternative variant dSep08, mRNA.                         |
| <a href="#">Nyw1</a>   | <a href="#">Nyw1.eSep08</a>   | <a href="#">59319</a>  | 18821 | 331  | 3 | 110 | ischemia related factor NYW-1 (Nyw1) alternative variant eSep08, mRNA.                         |
| <a href="#">nywey</a>  | <a href="#">nywey.aSep08</a>  |                        | 1804  | 779  |   | 151 | envelope protein (nywey) mRNA.                                                                 |
| <a href="#">Oaf</a>    | <a href="#">Oaf.bSep08</a>    | <a href="#">315594</a> | 3484  | 1476 | 1 | 154 | OAF homolog (Drosophila) (17.9 kD) (Oaf) alternative variant bSep08, mRNA.                     |
| <a href="#">Oas1a</a>  | <a href="#">Oas1a.aSep08</a>  | <a href="#">192281</a> | 10657 | 1422 | 7 | 379 | 2'-5' oligoadenylate synthetase 1A (Oas1a) alternative variant aSep08, mRNA.                   |
| <a href="#">Oas1a</a>  | <a href="#">Oas1a.cSep08</a>  | <a href="#">192281</a> | 1392  | 766  | 2 | 169 | 2'-5' oligoadenylate synthetase 1A (Oas1a) alternative variant cSep08, mRNA.                   |
| <a href="#">Oas1k</a>  | <a href="#">Oas1k.bSep08</a>  | <a href="#">494198</a> | 5954  | 724  | 3 | 241 | 2'-5' oligoadenylate synthetase 1K (Oas1k) alternative variant bSep08, mRNA.                   |
| <a href="#">Oasl2</a>  | <a href="#">Oasl2.bSep08</a>  | <a href="#">304549</a> | 5282  | 722  | 3 | 240 | 2'-5' oligoadenylate synthetase-like 2 (Oasl2) alternative variant bSep08, mRNA.               |
| <a href="#">Oasl2</a>  | <a href="#">Oasl2.cSep08</a>  | <a href="#">304549</a> | 3034  | 677  | 2 | 174 | 2'-5' oligoadenylate synthetase-like 2 (19.9 kD) (Oasl2) alternative variant cSep08, mRNA.     |
| <a href="#">Oasl2</a>  | <a href="#">Oasl2.dSep08</a>  | <a href="#">304549</a> | 882   | 338  | 2 | 106 | 2'-5' oligoadenylate synthetase-like 2 (Oasl2) alternative variant dSep08, mRNA.               |
| <a href="#">Oat</a>    | <a href="#">Oat.bSep08</a>    | <a href="#">64313</a>  | 3175  | 532  | 3 | 143 | ornithine aminotransferase (Oat) alternative variant bSep08, mRNA.                             |
| <a href="#">Oat</a>    | <a href="#">Oat.cSep08</a>    | <a href="#">64313</a>  | 2723  | 771  | 2 | 87  | ornithine aminotransferase (Oat) alternative variant cSep08, mRNA.                             |
| <a href="#">Oaz1</a>   | <a href="#">Oaz1.bSep08</a>   | <a href="#">25502</a>  | 2266  | 848  | 5 | 207 | ornithine decarboxylase antizyme 1 (22.6 kD) (Oaz1) alternative variant bSep08, mRNA.          |
| <a href="#">Oaz1</a>   | <a href="#">Oaz1.cSep08</a>   | <a href="#">25502</a>  | 2466  | 1032 | 5 | 172 | ornithine decarboxylase antizyme 1 (18.6 kD) (Oaz1) alternative variant cSep08, complete mRNA. |
| <a href="#">Oaz1</a>   | <a href="#">Oaz1.dSep08</a>   | <a href="#">25502</a>  | 876   | 728  | 3 | 140 | ornithine decarboxylase antizyme 1 (15.8 kD) (Oaz1) alternative variant dSep08, mRNA.          |
| <a href="#">Oaz1</a>   | <a href="#">Oaz1.eSep08</a>   | <a href="#">25502</a>  | 2219  | 661  | 4 | 125 | ornithine decarboxylase antizyme 1 (14.1 kD) (Oaz1) alternative variant eSep08, mRNA.          |
| <a href="#">Oaz1</a>   | <a href="#">Oaz1.fSep08</a>   | <a href="#">25502</a>  | 1196  | 1118 | 2 | 69  | ornithine decarboxylase antizyme 1 (7.9 kD) (Oaz1) alternative variant fSep08, mRNA.           |
| <a href="#">Oaz1</a>   | <a href="#">Oaz1.gSep08</a>   | <a href="#">25502</a>  | 637   | 533  | 2 | 33  | ornithine decarboxylase antizyme 1 (3.6 kD) (Oaz1) alternative variant gSep08, mRNA.           |

|                        |                               |                        |       |      |    |     |                                                                                                                             |
|------------------------|-------------------------------|------------------------|-------|------|----|-----|-----------------------------------------------------------------------------------------------------------------------------|
| <a href="#">Oaz2</a>   | <a href="#">Oaz2.aSep08</a>   | <a href="#">501454</a> | 12882 | 862  | 2  | 166 | ornithine decarboxylase antizyme 2 (18.4 kD) (Oaz2) alternative variant aSep08, mRNA.                                       |
| <a href="#">Obfc1</a>  | <a href="#">Obfc1.bSep08</a>  | <a href="#">294025</a> | 33817 | 1337 | 10 | 377 | oligonucleotide oligosaccharide-binding fold containing 1 like (43.4 kD) (Obfc1) alternative variant bSep08, complete mRNA. |
| <a href="#">Obfc1</a>  | <a href="#">Obfc1.cSep08</a>  | <a href="#">294025</a> | 33810 | 1465 | 10 | 376 | oligonucleotide oligosaccharide-binding fold containing 1 like (43.3 kD) (Obfc1) alternative variant cSep08, complete mRNA. |
| <a href="#">Obfc1</a>  | <a href="#">Obfc1.dSep08</a>  | <a href="#">294025</a> | 14851 | 1251 | 6  | 312 | oligonucleotide oligosaccharide-binding fold containing 1 like (35.5 kD) (Obfc1) alternative variant dSep08, mRNA.          |
| <a href="#">Obfc1</a>  | <a href="#">Obfc1.eSep08</a>  | <a href="#">294025</a> | 12023 | 1096 | 4  | 137 | oligonucleotide oligosaccharide-binding fold containing 1 like (15.7 kD) (Obfc1) alternative variant eSep08, mRNA.          |
| <a href="#">Obfc1</a>  | <a href="#">Obfc1.fSep08</a>  | <a href="#">294025</a> | 13285 | 760  | 5  | 108 | oligonucleotide oligosaccharide-binding fold containing 1 like (12.3 kD) (Obfc1) alternative variant fSep08, mRNA.          |
| <a href="#">Obfc1</a>  | <a href="#">Obfc1.gSep08</a>  | <a href="#">294025</a> | 7422  | 593  | 3  | 89  | oligonucleotide oligosaccharide-binding fold containing 1 like (10.2 kD) (Obfc1) alternative variant gSep08, mRNA.          |
| <a href="#">Obfc1</a>  | <a href="#">Obfc1.iSep08</a>  | <a href="#">294025</a> | 5677  | 392  | 2  | 59  | putative protein (Obfc1) alternative variant iSep08, mRNA.                                                                  |
| <a href="#">Obfc2a</a> | <a href="#">Obfc2a.bSep08</a> | <a href="#">363227</a> | 5947  | 798  | 6  | 118 | oligonucleotide/oligosaccharide-binding fold containing 2A (13.1 kD) (Obfc2a) alternative variant bSep08, mRNA.             |
| <a href="#">Obfc2a</a> | <a href="#">Obfc2a.cSep08</a> | <a href="#">363227</a> | 5871  | 1382 | 5  | 118 | oligonucleotide/oligosaccharide-binding fold containing 2A (13.1 kD) (Obfc2a) alternative variant cSep08, mRNA.             |
| <a href="#">Obfc2b</a> | <a href="#">Obfc2b.aSep08</a> | <a href="#">362813</a> | 5711  | 1082 | 5  | 251 | oligonucleotide/oligosaccharide-binding fold containing 2B (Obfc2b) alternative variant aSep08, mRNA.                       |
| <a href="#">Obfc2b</a> | <a href="#">Obfc2b.cSep08</a> | <a href="#">362813</a> | 5486  | 942  | 5  | 211 | oligonucleotide/oligosaccharide-binding fold containing 2B (22.4 kD) (Obfc2b) alternative variant cSep08, mRNA.             |
| <a href="#">Obfc2b</a> | <a href="#">Obfc2b.dSep08</a> | <a href="#">362813</a> | 1210  | 539  | 2  | 80  | oligonucleotide/oligosaccharide-binding fold containing 2B (Obfc2b) alternative variant dSep08, mRNA.                       |
| <a href="#">Obp3</a>   | <a href="#">Obp3.aSep08</a>   | <a href="#">259247</a> | 3466  | 885  | 1  | 206 | alpha-2u globulin PGCL4 (Obp3) alternative variant aSep08, mRNA.                                                            |
| <a href="#">Obp3</a>   | <a href="#">Obp3.dSep08</a>   | <a href="#">259247</a> | 3341  | 772  | 1  | 195 | alpha-2u globulin PGCL4 (Obp3) alternative variant dSep08, mRNA.                                                            |
| <a href="#">Obscn</a>  | <a href="#">Obscn.aSep08</a>  | <a href="#">338458</a> | 19448 | 376  | 4  | 104 | obscurin, cytoskeletal calmodulin and titin-interacting RhoGEF (Obscn) alternative variant aSep08, mRNA.                    |
| <a href="#">Obscnl</a> | <a href="#">Obscnl.aSep08</a> | <a href="#">287353</a> | 3005  | 773  |    | 257 | obscurin, cytoskeletal calmodulin and titin-interacting RhoGEF-like (Obscnl) mRNA.                                          |
| <a href="#">Obsl1</a>  | <a href="#">Obsl1.aSep08</a>  | <a href="#">363259</a> | 8378  | 2732 | 8  | 821 | obscurin-like 1 (Obsl1) alternative variant aSep08, mRNA.                                                                   |
| <a href="#">OCIA.0</a> | <a href="#">OCIA.0.aSep08</a> |                        | 18876 | 1980 | 3  | 283 | ovarian carcinoma immunoreactive antigen (31.1 kD) (OCIA.0) alternative variant aSep08, mRNA.                               |
| <a href="#">OCIA.0</a> | <a href="#">OCIA.0.bSep08</a> |                        | 16313 | 1667 | 1  | 194 | ovarian carcinoma immunoreactive antigen (OCIA.0) alternative variant bSep08, mRNA.                                         |
| <a href="#">OCIA.0</a> | <a href="#">OCIA.0.cSep08</a> |                        | 27011 | 752  | 1  | 119 | ovarian carcinoma immunoreactive antigen (OCIA.0) alternative variant cSep08, mRNA.                                         |
| <a href="#">Ociad1</a> | <a href="#">Ociad1.bSep08</a> | <a href="#">289590</a> | 13858 | 685  | 6  | 179 | ovarian carcinoma immunoreactive antigen (Ociad1) alternative variant bSep08, mRNA.                                         |
| <a href="#">Ociad1</a> | <a href="#">Ociad1.cSep08</a> | <a href="#">289590</a> | 13855 | 772  | 7  | 163 | ovarian carcinoma immunoreactive antigen (Ociad1) alternative variant cSep08, mRNA.                                         |

|                        |                               |                        |       |      |    |     |                                                                                       |
|------------------------|-------------------------------|------------------------|-------|------|----|-----|---------------------------------------------------------------------------------------|
| <a href="#">Ociad1</a> | <a href="#">Ociad1.dSep08</a> | <a href="#">289590</a> | 7143  | 557  | 2  | 36  | putative protein of mammalian origin (Ociad1) alternative variant dSep08, mRNA.       |
| <a href="#">Ociad1</a> | <a href="#">Ociad1.fSep08</a> | <a href="#">289590</a> | 7197  | 655  | 2  | 63  | putative protein of mammalian origin (Ociad1) alternative variant fSep08, mRNA.       |
| <a href="#">Ocln</a>   | <a href="#">Ocln.aSep08</a>   | <a href="#">83497</a>  | 49323 | 3080 | 9  | 523 | occludin (59.2 kD) (Ocln) alternative variant aSep08, mRNA.                           |
| <a href="#">Ocln</a>   | <a href="#">Ocln.bSep08</a>   | <a href="#">83497</a>  | 12545 | 776  | 3  | 229 | occludin (Ocln) alternative variant bSep08, mRNA.                                     |
| <a href="#">Ocln</a>   | <a href="#">Ocln.cSep08</a>   | <a href="#">83497</a>  | 12457 | 732  | 3  | 195 | occludin (Ocln) alternative variant cSep08, mRNA.                                     |
| <a href="#">Ocln</a>   | <a href="#">Ocln.dSep08</a>   | <a href="#">83497</a>  | 7976  | 702  | 5  | 188 | occludin (Ocln) alternative variant dSep08, mRNA.                                     |
| <a href="#">Ocm</a>    | <a href="#">Ocm.aSep08</a>    | <a href="#">25503</a>  | 6856  | 637  | 1  | 127 | oncomodulin (Ocm) alternative variant aSep08, mRNA.                                   |
| <a href="#">Ocri</a>   | <a href="#">Ocri.bSep08</a>   | <a href="#">317576</a> | 13606 | 743  | 7  | 210 | oculocerebrorrenal syndrome of Lowe (Ocri) alternative variant bSep08, mRNA.          |
| <a href="#">Odc1</a>   | <a href="#">Odc1.bSep08</a>   | <a href="#">24609</a>  | 3304  | 746  | 3  | 248 | ornithine decarboxylase 1 (Odc1) alternative variant bSep08, mRNA.                    |
| <a href="#">Odc1</a>   | <a href="#">Odc1.cSep08</a>   | <a href="#">24609</a>  | 3477  | 807  | 4  | 205 | ornithine decarboxylase 1 (Odc1) alternative variant cSep08, mRNA.                    |
| <a href="#">Odc1</a>   | <a href="#">Odc1.dSep08</a>   | <a href="#">24609</a>  | 3360  | 886  | 4  | 194 | ornithine decarboxylase 1 (Odc1) alternative variant dSep08, mRNA.                    |
| <a href="#">Odc1</a>   | <a href="#">Odc1.eSep08</a>   | <a href="#">24609</a>  | 3666  | 1363 | 3  | 150 | ornithine decarboxylase 1 (16.6 kD) (Odc1) alternative variant eSep08, mRNA.          |
| <a href="#">Odc1</a>   | <a href="#">Odc1.fSep08</a>   | <a href="#">24609</a>  | 2601  | 406  | 2  | 45  | ornithine decarboxylase 1 (Odc1) alternative variant fSep08, mRNA.                    |
| <a href="#">Odf1</a>   | <a href="#">Odf1.aSep08</a>   | <a href="#">24610</a>  | 6121  | 636  | 1  | 171 | outer dense fiber of sperm tails 1 (Odf1) alternative variant aSep08, mRNA.           |
| <a href="#">Odf1</a>   | <a href="#">Odf1.bSep08</a>   | <a href="#">24610</a>  | 12186 | 727  | 1  | 169 | outer dense fiber of sperm tails 1 (18.3 kD) (Odf1) alternative variant bSep08, mRNA. |
| <a href="#">Odf2</a>   | <a href="#">Odf2.bSep08</a>   | <a href="#">29479</a>  | 18109 | 1441 | 13 | 449 | outer dense fiber 2 (Odf2) alternative variant bSep08, mRNA.                          |
| <a href="#">Odf2</a>   | <a href="#">Odf2.cSep08</a>   | <a href="#">29479</a>  | 17076 | 901  | 7  | 300 | outer dense fiber of sperm tails 2 CRA e (Odf2) alternative variant cSep08, mRNA.     |
| <a href="#">Odf2</a>   | <a href="#">Odf2.dSep08</a>   | <a href="#">29479</a>  | 13802 | 867  | 6  | 276 | outer dense fiber of sperm tails 2 CRA a (Odf2) alternative variant dSep08, mRNA.     |
| <a href="#">Odf2</a>   | <a href="#">Odf2.eSep08</a>   | <a href="#">29479</a>  | 10085 | 778  | 7  | 225 | outer dense fiber 2 (Odf2) alternative variant eSep08, mRNA.                          |
| <a href="#">Odf2</a>   | <a href="#">Odf2.fSep08</a>   | <a href="#">29479</a>  | 10061 | 764  | 7  | 224 | outer dense fiber 2 (Odf2) alternative variant fSep08, mRNA.                          |
| <a href="#">Odf2</a>   | <a href="#">Odf2.gSep08</a>   | <a href="#">29479</a>  | 11120 | 2074 | 4  | 186 | outer dense fiber 2 (21.6 kD) (Odf2) alternative variant gSep08, mRNA.                |
| <a href="#">Odf2</a>   | <a href="#">Odf2.hSep08</a>   | <a href="#">29479</a>  | 7397  | 496  | 3  | 150 | outer dense fiber 2 (Odf2) alternative variant hSep08, mRNA.                          |
| <a href="#">Odf2</a>   | <a href="#">Odf2.iSep08</a>   | <a href="#">29479</a>  | 15000 | 764  | 6  | 148 | outer dense fiber 2 (Odf2) alternative variant iSep08, mRNA.                          |
| <a href="#">Odf2</a>   | <a href="#">Odf2.jSep08</a>   | <a href="#">29479</a>  | 40987 | 483  | 4  | 142 | outer dense fiber of sperm tails 2 CRA a (Odf2) alternative variant jSep08, mRNA.     |
| <a href="#">Odf2</a>   | <a href="#">Odf2.kSep08</a>   | <a href="#">29479</a>  | 9480  | 777  | 5  | 136 | outer dense fiber 2 (Odf2) alternative variant kSep08, mRNA.                          |

|                                  |                                         |                        |       |      |    |     |                                                                                                           |
|----------------------------------|-----------------------------------------|------------------------|-------|------|----|-----|-----------------------------------------------------------------------------------------------------------|
| <a href="#">Odf2</a>             | <a href="#">Odf2.lSep08</a>             | <a href="#">29479</a>  | 2128  | 718  | 3  | 82  | outer dense fiber 2 (Odf2) alternative variant lSep08, mRNA.                                              |
| <a href="#">Odf2</a>             | <a href="#">Odf2.mSep08</a>             | <a href="#">29479</a>  | 7501  | 638  | 3  | 82  | outer dense fiber of sperm tails 2 CRA a (Odf2) alternative variant mSep08, mRNA.                         |
| <a href="#">Odf2l</a>            | <a href="#">Odf2l.bSep08</a>            | <a href="#">685425</a> | 36713 | 2516 | 15 | 379 | outer dense fiber of sperm tails 2-like (Odf2l) alternative variant bSep08, mRNA.                         |
| <a href="#">Odf2l</a>            | <a href="#">Odf2l.cSep08</a>            | <a href="#">685425</a> | 7310  | 367  | 4  | 122 | outer dense fiber of sperm tails 2-like (Odf2l) alternative variant cSep08, mRNA.                         |
| <a href="#">Odf2l</a>            | <a href="#">Odf2l.dSep08</a>            | <a href="#">685425</a> | 1375  | 406  | 2  | 68  | outer dense fiber of sperm tails 2-like (8.2 kD) (Odf2l) alternative variant dSep08, mRNA.                |
| <a href="#">Odf3</a>             | <a href="#">Odf3.bSep08</a>             | <a href="#">365387</a> | 1125  | 717  | 1  | 101 | outer dense fiber of sperm tails 3 (11.0 kD) (Odf3) alternative variant bSep08, mRNA.                     |
| <a href="#">Odf4</a>             | <a href="#">Odf4.aSep08</a>             | <a href="#">303236</a> | 5461  | 1345 | 5  | 326 | outer dense fiber of sperm tails 4 (Odf4) alternative variant aSep08, mRNA.                               |
| <a href="#">Odf4</a>             | <a href="#">Odf4.cSep08</a>             | <a href="#">303236</a> | 4521  | 791  | 4  | 211 | outer dense fiber of sperm tails 4 (Odf4) alternative variant cSep08, mRNA.                               |
| <a href="#">Odf4</a>             | <a href="#">Odf4.dSep08</a>             | <a href="#">303236</a> | 1270  | 940  | 2  | 57  | outer dense fiber of sperm tails 4 (6.0 kD) (Odf4) alternative variant dSep08, mRNA.                      |
| <a href="#">Odz2</a>             | <a href="#">Odz2.aSep08</a>             | <a href="#">117242</a> | 13443 | 993  |    | 330 | odd Oz/ten-m homolog 2 (Drosophila) (Odz2) mRNA.                                                          |
| <a href="#">Odz3</a>             | <a href="#">Odz3.aSep08</a>             | <a href="#">306451</a> | 15494 | 742  |    | 247 | odd Oz/ten-m homolog 3 (Drosophila) (Odz3) mRNA.                                                          |
| <a href="#">Odz4</a>             | <a href="#">Odz4.aSep08</a>             | <a href="#">308831</a> | 26080 | 395  |    | 131 | odd Oz/ten-m homolog 4 (Drosophila) (Odz4) mRNA.                                                          |
| <a href="#">Ofd1</a>             | <a href="#">Ofd1.bSep08</a>             | <a href="#">302661</a> | 8409  | 431  | 4  | 143 | oral-facial-digital syndrome 1 gene homolog (human) (Ofd1) alternative variant bSep08, mRNA.              |
| <a href="#">Ogdh</a>             | <a href="#">Ogdh.bSep08</a>             | <a href="#">360975</a> | 44485 | 764  | 6  | 254 | oxoglutarate dehydrogenase (lipoamide) (Ogdh) alternative variant bSep08, mRNA.                           |
| <a href="#">Ogdh</a>             | <a href="#">Ogdh.cSep08</a>             | <a href="#">360975</a> | 19068 | 574  | 3  | 190 | oxoglutarate dehydrogenase (lipoamide) (Ogdh) alternative variant cSep08, mRNA.                           |
| <a href="#">Ogdh</a>             | <a href="#">Ogdh.dSep08</a>             | <a href="#">360975</a> | 1373  | 833  | 2  | 186 | oxoglutarate dehydrogenase (lipoamide) (20.6 kD) (Ogdh) alternative variant dSep08, mRNA.                 |
| <a href="#">Ogdh</a>             | <a href="#">Ogdh.eSep08</a>             | <a href="#">360975</a> | 4903  | 701  | 3  | 160 | oxoglutarate dehydrogenase (lipoamide) (Ogdh) alternative variant eSep08, mRNA.                           |
| <a href="#">Ogdh</a>             | <a href="#">Ogdh.fSep08</a>             | <a href="#">360975</a> | 20165 | 495  | 3  | 119 | oxoglutarate dehydrogenase (lipoamide) (Ogdh) alternative variant fSep08, mRNA.                           |
| <a href="#">Ogdhl</a>            | <a href="#">Ogdhl.bSep08</a>            | <a href="#">290566</a> | 10035 | 930  | 6  | 297 | oxoglutarate dehydrogenase-like (Ogdhl) alternative variant bSep08, mRNA.                                 |
| <a href="#">Ogfod2andArl6ip4</a> | <a href="#">Ogfod2andArl6ip4.cSep08</a> | <a href="#">288656</a> | 5008  | 3293 | 5  | 229 | putative protein of ancient origin (25.4 kD) (Ogfod2andArl6ip4) alternative variant cSep08, mRNA.         |
| <a href="#">Ogfod2andArl6ip4</a> | <a href="#">Ogfod2andArl6ip4.cSep08</a> | <a href="#">288657</a> | 5008  | 3293 | 5  | 229 | putative protein of ancient origin (25.4 kD) (Ogfod2andArl6ip4) alternative variant cSep08, mRNA.         |
| <a href="#">Ogfod2andArl6ip4</a> | <a href="#">Ogfod2andArl6ip4.dSep08</a> | <a href="#">288656</a> | 966   | 529  | 3  | 175 | ADP-ribosylation factor-like 6 interacting protein 4 (Ogfod2andArl6ip4) alternative variant dSep08, mRNA. |
| <a href="#">Ogfod2andArl6ip4</a> | <a href="#">Ogfod2andArl6ip4.dSep08</a> | <a href="#">288657</a> | 966   | 529  | 3  | 175 | ADP-ribosylation factor-like 6 interacting protein 4 (Ogfod2andArl6ip4) alternative variant dSep08, mRNA. |
| <a href="#">Ogfod2andArl6ip4</a> | <a href="#">Ogfod2andArl6ip4.eSep08</a> | <a href="#">288656</a> | 1043  | 532  | 3  | 93  | ADP-ribosylation-like factor 6 interacting protein 4 (Ogfod2andArl6ip4) alternative variant eSep08, mRNA. |
| <a href="#">Ogfod2andArl6ip4</a> | <a href="#">Ogfod2andArl6ip4.eSep08</a> | <a href="#">288657</a> | 1043  | 532  | 3  | 93  | ADP-ribosylation-like factor 6 interacting protein 4 (Ogfod2andArl6ip4) alternative variant eSep08, mRNA. |

|                           |                                  |                        |       |      |   |     |                                                                                                                                                                  |
|---------------------------|----------------------------------|------------------------|-------|------|---|-----|------------------------------------------------------------------------------------------------------------------------------------------------------------------|
| <a href="#">Ogfr</a>      | <a href="#">Ogfr.aSep08</a>      | <a href="#">83525</a>  | 6291  | 2061 | 7 | 571 | opioid growth factor receptor (63.8 kD) (Ogfr) alternative variant aSep08, complete mRNA.                                                                        |
| <a href="#">Ogfr1</a>     | <a href="#">Ogfr1.cSep08</a>     | <a href="#">316290</a> | 4558  | 534  | 3 | 154 | opioid growth factor receptor-like 1 (Ogfr1) alternative variant cSep08, mRNA.                                                                                   |
| <a href="#">Ogg1</a>      | <a href="#">Ogg1.bSep08</a>      | <a href="#">81528</a>  | 1742  | 446  | 1 | 55  | 8-oxoguanine DNA-glycosylase 1 (6.1 kD) (Ogg1) alternative variant bSep08, mRNA.                                                                                 |
| <a href="#">Ogg1</a>      | <a href="#">Ogg1.cSep08</a>      | <a href="#">81528</a>  | 9516  | 1189 | 6 | 137 | 8-oxoguanine DNA-glycosylase 1 (15.6 kD) (Ogg1) alternative variant cSep08, mRNA.                                                                                |
| <a href="#">Ogn</a>       | <a href="#">Ogn.bSep08</a>       | <a href="#">291015</a> | 20474 | 1367 | 9 | 298 | osteoglycin (34.1 kD) (Ogn) alternative variant bSep08, mRNA.                                                                                                    |
| <a href="#">Ogn</a>       | <a href="#">Ogn.cSep08</a>       | <a href="#">291015</a> | 13018 | 703  | 4 | 234 | osteoglycin (Ogn) alternative variant cSep08, mRNA.                                                                                                              |
| <a href="#">Ogn</a>       | <a href="#">Ogn.dSep08</a>       | <a href="#">291015</a> | 2402  | 325  | 2 | 30  | osteoglycin (3.7 kD) (Ogn) alternative variant dSep08, complete mRNA.                                                                                            |
| <a href="#">Ogt</a>       | <a href="#">Ogt.bSep08</a>       | <a href="#">26295</a>  | 12197 | 1806 | 4 | 405 | O-linked N-acetylglucosamine (GlcNAc) transferase (UDP-N-acetylglucosamine:polypeptide-N-acetylglucosaminyl transferase) (Ogt) alternative variant bSep08, mRNA. |
| <a href="#">Ogt</a>       | <a href="#">Ogt.cSep08</a>       | <a href="#">26295</a>  | 27203 | 736  | 6 | 194 | O-linked N-acetylglucosamine (GlcNAc) transferase (UDP-N-acetylglucosamine:polypeptide-N-acetylglucosaminyl transferase) (Ogt) alternative variant cSep08, mRNA. |
| <a href="#">Ogt</a>       | <a href="#">Ogt.eSep08</a>       | <a href="#">26295</a>  | 3879  | 388  | 3 | 69  | O-linked N-acetylglucosamine (GlcNAc) transferase (UDP-N-acetylglucosamine:polypeptide-N-acetylglucosaminyl transferase) (Ogt) alternative variant eSep08, mRNA. |
| <a href="#">Oit1</a>      | <a href="#">Oit1.aSep08</a>      | <a href="#">289949</a> | 33667 | 1785 | 8 | 543 | oncoprotein induced transcript 1 (Oit1) alternative variant aSep08, mRNA.                                                                                        |
| <a href="#">Oit1</a>      | <a href="#">Oit1.cSep08</a>      | <a href="#">289949</a> | 31160 | 769  | 9 | 170 | oncoprotein induced transcript 1 (Oit1) alternative variant cSep08, mRNA.                                                                                        |
| <a href="#">Oit1</a>      | <a href="#">Oit1.dSep08</a>      | <a href="#">289949</a> | 6295  | 703  | 4 | 119 | oncoprotein induced transcript 1 (Oit1) alternative variant dSep08, mRNA.                                                                                        |
| <a href="#">Olfm1</a>     | <a href="#">Olfm1.bSep08</a>     | <a href="#">93667</a>  | 22002 | 980  | 4 | 184 | olfactomedin 1 (Olfm1) alternative variant bSep08, mRNA.                                                                                                         |
| <a href="#">Olfm1</a>     | <a href="#">Olfm1.cSep08</a>     | <a href="#">93667</a>  | 21230 | 720  | 4 | 130 | olfactomedin 1 (Olfm1) alternative variant cSep08, mRNA.                                                                                                         |
| <a href="#">Olfm1</a>     | <a href="#">Olfm1.dSep08</a>     | <a href="#">93667</a>  | 977   | 887  | 2 | 75  | olfactomedin 1 (Olfm1) alternative variant dSep08, mRNA.                                                                                                         |
| <a href="#">Olfm2</a>     | <a href="#">Olfm2.bSep08</a>     | <a href="#">313783</a> | 3768  | 749  | 2 | 249 | olfactomedin 2 (Olfm2) alternative variant bSep08, mRNA.                                                                                                         |
| <a href="#">Olfm2</a>     | <a href="#">Olfm2.cSep08</a>     | <a href="#">313783</a> | 75453 | 391  | 4 | 130 | olfactomedin 2 (Olfm2) alternative variant cSep08, mRNA.                                                                                                         |
| <a href="#">Olfml2b</a>   | <a href="#">Olfml2b.bSep08</a>   | <a href="#">304960</a> | 4465  | 487  | 1 | 124 | olfactomedin-like 2B (Olfml2b) alternative variant bSep08, mRNA.                                                                                                 |
| <a href="#">Olfml3</a>    | <a href="#">Olfml3.cSep08</a>    | <a href="#">310743</a> | 910   | 398  | 2 | 74  | olfactomedin-like 3 (Olfml3) alternative variant cSep08, mRNA.                                                                                                   |
| <a href="#">Olr35</a>     | <a href="#">Olr35.bSep08</a>     | <a href="#">293140</a> | 1404  | 746  | 3 | 79  | olfactory receptor 35 (8.7 kD) (Olr35) alternative variant bSep08, mRNA.                                                                                         |
| <a href="#">Olr738-ps</a> | <a href="#">Olr738-ps.aSep08</a> | <a href="#">405500</a> | 9290  | 289  |   | 84  | olfactory receptor pseudogene 738 (Olr738-ps) mRNA.                                                                                                              |
| <a href="#">Olr1366</a>   | <a href="#">Olr1366.bSep08</a>   | <a href="#">405335</a> | 9397  | 777  | 5 | 105 | olfactory receptor 1366 (11.5 kD) (Olr1366) alternative variant bSep08, mRNA.                                                                                    |
| <a href="#">Olr1366</a>   | <a href="#">Olr1366.cSep08</a>   | <a href="#">405335</a> | 4248  | 341  | 3 | 79  | olfactory receptor 1366 (Olr1366) alternative variant cSep08, mRNA.                                                                                              |
| <a href="#">Olr1705</a>   | <a href="#">Olr1705.bSep08</a>   | <a href="#">405188</a> | 10030 | 444  | 4 | 116 | olfactory receptor 1705 (Olr1705) alternative variant bSep08, mRNA.                                                                                              |

|                        |                               |                        |       |      |    |     |                                                                                                                       |
|------------------------|-------------------------------|------------------------|-------|------|----|-----|-----------------------------------------------------------------------------------------------------------------------|
| <a href="#">Omg</a>    | <a href="#">Omg.bSep08</a>    | <a href="#">450224</a> | 2718  | 1485 | 2  | 331 | oligodendrocyte-myelin glycoprotein (36.6 kD) (Omg) alternative variant bSep08, mRNA.                                 |
| <a href="#">Oosp1</a>  | <a href="#">Oosp1.aSep08</a>  | <a href="#">690893</a> | 15213 | 308  |    | 64  | oocyte secreted protein 1 (Oosp1) mRNA.                                                                               |
| <a href="#">Opa1</a>   | <a href="#">Opa1.bSep08</a>   | <a href="#">171116</a> | 1614  | 780  | 2  | 52  | optic atrophy 1 homolog (human) (Opa1) alternative variant bSep08, mRNA.                                              |
| <a href="#">Opa1</a>   | <a href="#">Opa1.cSep08</a>   | <a href="#">171116</a> | 1398  | 237  | 3  | 43  | optic atrophy 1 homolog (human) (Opa1) alternative variant cSep08, mRNA.                                              |
| <a href="#">Opalin</a> | <a href="#">Opalin.bSep08</a> | <a href="#">361757</a> | 8182  | 460  | 1  | 41  | oligodendrocytic myelin paranodal and inner loop protein (4.3 kD) (Opalin) alternative variant bSep08, complete mRNA. |
| <a href="#">Opalin</a> | <a href="#">Opalin.cSep08</a> | <a href="#">361757</a> | 15321 | 584  | 5  | 80  | oligodendrocytic myelin paranodal and inner loop protein (Opalin) alternative variant cSep08, mRNA.                   |
| <a href="#">Ophn1</a>  | <a href="#">Ophn1.bSep08</a>  | <a href="#">312108</a> | 8149  | 525  | 1  | 105 | oligophrenin 1 (Ophn1) alternative variant bSep08, mRNA.                                                              |
| <a href="#">Oplah</a>  | <a href="#">Oplah.bSep08</a>  | <a href="#">116684</a> | 3997  | 1349 | 4  | 239 | 5-oxoprolinase (ATP-hydrolysing) (Oplah) alternative variant bSep08, mRNA.                                            |
| <a href="#">Oplah</a>  | <a href="#">Oplah.cSep08</a>  | <a href="#">116684</a> | 1800  | 902  | 5  | 189 | 5-oxoprolinase (ATP-hydrolysing) (Oplah) alternative variant cSep08, mRNA.                                            |
| <a href="#">Oplah</a>  | <a href="#">Oplah.dSep08</a>  | <a href="#">116684</a> | 2076  | 717  | 5  | 164 | 5-oxoprolinase (ATP-hydrolysing) (Oplah) alternative variant dSep08, mRNA.                                            |
| <a href="#">Oplah</a>  | <a href="#">Oplah.eSep08</a>  | <a href="#">116684</a> | 489   | 371  | 2  | 115 | 5-oxoprolinase (ATP-hydrolysing) (Oplah) alternative variant eSep08, mRNA.                                            |
| <a href="#">Oplah</a>  | <a href="#">Oplah.fSep08</a>  | <a href="#">116684</a> | 42099 | 410  | 3  | 86  | 5-oxoprolinase (ATP-hydrolysing) (Oplah) alternative variant fSep08, mRNA.                                            |
| <a href="#">Opn3</a>   | <a href="#">Opn3.aSep08</a>   | <a href="#">498289</a> | 27717 | 604  | 1  | 201 | opsin 3 (Opn3) alternative variant aSep08, mRNA.                                                                      |
| <a href="#">Opn3</a>   | <a href="#">Opn3.bSep08</a>   | <a href="#">498289</a> | 628   | 269  | 1  | 69  | opsin 3 (Opn3) alternative variant bSep08, mRNA.                                                                      |
| <a href="#">Opn4</a>   | <a href="#">Opn4.bSep08</a>   | <a href="#">192223</a> | 5475  | 1750 | 1  | 473 | opsin 4 (melanopsin) (Opn4) alternative variant bSep08, mRNA.                                                         |
| <a href="#">Opn5</a>   | <a href="#">Opn5.bSep08</a>   | <a href="#">316259</a> | 13724 | 745  | 3  | 188 | opsin 5 (20.6 kD) (Opn5) alternative variant bSep08, mRNA.                                                            |
| <a href="#">Opn5</a>   | <a href="#">Opn5.cSep08</a>   | <a href="#">316259</a> | 10910 | 360  | 3  | 38  | opsin 5 (Opn5) alternative variant cSep08, mRNA.                                                                      |
| <a href="#">Opr1</a>   | <a href="#">Opr1.bSep08</a>   | <a href="#">29256</a>  | 3895  | 719  | 2  | 171 | opioid receptor-like 1 (Opr1) alternative variant bSep08, mRNA.                                                       |
| <a href="#">Oprs1</a>  | <a href="#">Oprs1.bSep08</a>  | <a href="#">29336</a>  | 1996  | 905  | 1  | 151 | opioid receptor, sigma 1 (17.1 kD) (Oprs1) alternative variant bSep08, mRNA.                                          |
| <a href="#">Oprs1</a>  | <a href="#">Oprs1.cSep08</a>  | <a href="#">29336</a>  | 2233  | 962  | 2  | 106 | opioid receptor, sigma 1 (Oprs1) alternative variant cSep08, mRNA.                                                    |
| <a href="#">Optn</a>   | <a href="#">Optn.aSep08</a>   | <a href="#">246294</a> | 50649 | 4047 | 13 | 585 | optineurin (67.0 kD) (Optn) alternative variant aSep08, mRNA.                                                         |
| <a href="#">Optn</a>   | <a href="#">Optn.bSep08</a>   | <a href="#">246294</a> | 19019 | 746  | 5  | 232 | optineurin (Optn) alternative variant bSep08, mRNA.                                                                   |
| <a href="#">Optn</a>   | <a href="#">Optn.cSep08</a>   | <a href="#">246294</a> | 7194  | 360  | 1  | 96  | optineurin (Optn) alternative variant cSep08, mRNA.                                                                   |
| <a href="#">Orai2</a>  | <a href="#">Orai2.aSep08</a>  | <a href="#">304592</a> | 17741 | 1668 |    | 313 | ORAI calcium release-activated calcium modulator 2 (34.5 kD) (Orai2) mRNA.                                            |
| <a href="#">Oraov1</a> | <a href="#">Oraov1.bSep08</a> | <a href="#">309136</a> | 4875  | 622  | 2  | 173 | oral cancer overexpressed 1 (Oraov1) alternative variant bSep08, mRNA.                                                |
| <a href="#">Oraov1</a> | <a href="#">Oraov1.cSep08</a> | <a href="#">309136</a> | 4873  | 617  | 2  | 172 | oral cancer overexpressed 1 (Oraov1) alternative variant cSep08, mRNA.                                                |

|                        |                               |                        |       |      |   |     |                                                                                                                        |
|------------------------|-------------------------------|------------------------|-------|------|---|-----|------------------------------------------------------------------------------------------------------------------------|
| <a href="#">Orc2l</a>  | <a href="#">Orc2l.bSep08</a>  | <a href="#">301430</a> | 9742  | 2247 | 7 | 274 | origin recognition complex, subunit 2-like ( <i>S. cerevisiae</i> ) (Orc2l) alternative variant bSep08, mRNA.          |
| <a href="#">Orc2l</a>  | <a href="#">Orc2l.cSep08</a>  | <a href="#">301430</a> | 20615 | 703  | 7 | 169 | origin recognition complex, subunit 2-like ( <i>S. cerevisiae</i> ) (Orc2l) alternative variant cSep08, mRNA.          |
| <a href="#">Orc2l</a>  | <a href="#">Orc2l.dSep08</a>  | <a href="#">301430</a> | 14142 | 585  | 6 | 137 | origin recognition complex, subunit 2-like ( <i>S. cerevisiae</i> ) (Orc2l) alternative variant dSep08, mRNA.          |
| <a href="#">Orc3l</a>  | <a href="#">Orc3l.bSep08</a>  | <a href="#">313138</a> | 2414  | 935  | 1 | 91  | origin recognition complex, subunit 3-like ( <i>S. cerevisiae</i> ) (Orc3l) alternative variant bSep08, mRNA.          |
| <a href="#">Orc4l</a>  | <a href="#">Orc4l.bSep08</a>  | <a href="#">295596</a> | 10479 | 846  | 3 | 139 | origin recognition complex, subunit 4-like ( <i>S. cerevisiae</i> ) (Orc4l) alternative variant bSep08, mRNA.          |
| <a href="#">Orc4l</a>  | <a href="#">Orc4l.cSep08</a>  | <a href="#">295596</a> | 10808 | 637  | 5 | 130 | origin recognition complex, subunit 4-like ( <i>S. cerevisiae</i> ) (Orc4l) alternative variant cSep08, mRNA.          |
| <a href="#">Orc4l</a>  | <a href="#">Orc4l.dSep08</a>  | <a href="#">295596</a> | 76271 | 437  | 1 | 69  | origin recognition complex, subunit 4-like ( <i>S. cerevisiae</i> ) (Orc4l) alternative variant dSep08, mRNA.          |
| <a href="#">Orc5l</a>  | <a href="#">Orc5l.bSep08</a>  | <a href="#">362304</a> | 29059 | 698  | 6 | 221 | origin recognition complex (Orc5l) alternative variant bSep08, mRNA.                                                   |
| <a href="#">Orc5l</a>  | <a href="#">Orc5l.cSep08</a>  | <a href="#">362304</a> | 39718 | 1313 | 7 | 171 | origin recognition complex (19.7 kD) (Orc5l) alternative variant cSep08, mRNA.                                         |
| <a href="#">Orc5l</a>  | <a href="#">Orc5l.dSep08</a>  | <a href="#">362304</a> | 9603  | 625  | 6 | 152 | origin recognition complex (Orc5l) alternative variant dSep08, mRNA.                                                   |
| <a href="#">Orc5l</a>  | <a href="#">Orc5l.eSep08</a>  | <a href="#">362304</a> | 12970 | 429  | 5 | 143 | origin recognition complex (Orc5l) alternative variant eSep08, mRNA.                                                   |
| <a href="#">Orc6l</a>  | <a href="#">Orc6l.aSep08</a>  | <a href="#">291927</a> | 7484  | 1777 | 5 | 545 | origin recognition complex, subunit 6-like ( <i>S. cerevisiae</i> ) (Orc6l) alternative variant aSep08, mRNA.          |
| <a href="#">Orc6l</a>  | <a href="#">Orc6l.cSep08</a>  | <a href="#">291927</a> | 2854  | 462  | 4 | 139 | origin recognition complex, subunit 6-like ( <i>S. cerevisiae</i> ) (Orc6l) alternative variant cSep08, mRNA.          |
| <a href="#">Orc6l</a>  | <a href="#">Orc6l.fSep08</a>  | <a href="#">291927</a> | 2236  | 186  | 3 | 31  | origin recognition complex, subunit 6-like ( <i>S. cerevisiae</i> ) (3.7 kD) (Orc6l) alternative variant fSep08, mRNA. |
| <a href="#">ORF19</a>  | <a href="#">ORF19.bSep08</a>  | <a href="#">367328</a> | 7048  | 647  | 6 | 215 | protein family homolog (ORF19) alternative variant bSep08, mRNA.                                                       |
| <a href="#">ORF19</a>  | <a href="#">ORF19.cSep08</a>  | <a href="#">367328</a> | 1083  | 431  | 2 | 143 | putative protein of vertebrate origin (ORF19) alternative variant cSep08, mRNA.                                        |
| <a href="#">ORF19</a>  | <a href="#">ORF19.dSep08</a>  | <a href="#">367328</a> | 1183  | 474  | 2 | 52  | putative protein (ORF19) alternative variant dSep08, mRNA.                                                             |
| <a href="#">ORF19</a>  | <a href="#">ORF19.fSep08</a>  | <a href="#">367328</a> | 4239  | 366  | 2 | 40  | putative protein human specific (4.4 kD) (ORF19) alternative variant fSep08, mRNA.                                     |
| <a href="#">Ormdl2</a> | <a href="#">Ormdl2.aSep08</a> | <a href="#">288783</a> | 3134  | 986  | 4 | 162 | ORM1-like 2 ( <i>S. cerevisiae</i> ) (Ormdl2) alternative variant aSep08, mRNA.                                        |
| <a href="#">Ormdl2</a> | <a href="#">Ormdl2.bSep08</a> | <a href="#">288783</a> | 1411  | 475  | 3 | 158 | ORM1-like 2 ( <i>S. cerevisiae</i> ) (Ormdl2) alternative variant bSep08, mRNA.                                        |
| <a href="#">Ormdl2</a> | <a href="#">Ormdl2.dSep08</a> | <a href="#">288783</a> | 1763  | 552  | 3 | 109 | ORM1-like 2 ( <i>S. cerevisiae</i> ) (12.3 kD) (Ormdl2) alternative variant dSep08, mRNA.                              |
| <a href="#">Ormdl3</a> | <a href="#">Ormdl3.aSep08</a> | <a href="#">360618</a> | 4881  | 1232 | 3 | 347 | ORM1-like 3 ( <i>S. cerevisiae</i> ) (Ormdl3) alternative variant aSep08, mRNA.                                        |
| <a href="#">Ormdl3</a> | <a href="#">Ormdl3.cSep08</a> | <a href="#">360618</a> | 5923  | 1974 | 3 | 180 | ORM1-like 3 ( <i>S. cerevisiae</i> ) (Ormdl3) alternative variant cSep08, mRNA.                                        |

|                        |                               |                        |        |      |    |     |                                                                                                                |
|------------------------|-------------------------------|------------------------|--------|------|----|-----|----------------------------------------------------------------------------------------------------------------|
| <a href="#">Os9</a>    | <a href="#">Os9.aSep08</a>    | <a href="#">362891</a> | 27017  | 3080 | 15 | 684 | amplified in osteosarcoma (Os9) alternative variant aSep08, mRNA.                                              |
| <a href="#">Os9</a>    | <a href="#">Os9.bSep08</a>    | <a href="#">362891</a> | 3818   | 1436 | 6  | 281 | amplified in osteosarcoma (Os9) alternative variant bSep08, mRNA.                                              |
| <a href="#">Os9</a>    | <a href="#">Os9.cSep08</a>    | <a href="#">362891</a> | 1891   | 780  | 5  | 260 | amplified in osteosarcoma (Os9) alternative variant cSep08, mRNA.                                              |
| <a href="#">Osbp</a>   | <a href="#">Osbp.bSep08</a>   | <a href="#">365410</a> | 2137   | 687  | 5  | 167 | oxysterol binding protein (Osbp) alternative variant bSep08, mRNA.                                             |
| <a href="#">Osbp</a>   | <a href="#">Osbp.cSep08</a>   | <a href="#">365410</a> | 1607   | 756  | 4  | 146 | oxysterol binding protein (Osbp) alternative variant cSep08, mRNA.                                             |
| <a href="#">Osbp</a>   | <a href="#">Osbp.dSep08</a>   | <a href="#">365410</a> | 1657   | 718  | 3  | 126 | oxysterol binding protein (15.0 kD) (Osbp) alternative variant dSep08, mRNA.                                   |
| <a href="#">Osbp2</a>  | <a href="#">Osbp2.bSep08</a>  | <a href="#">305475</a> | 3779   | 660  | 6  | 199 | oxysterol binding protein 2 (Osbp2) alternative variant bSep08, mRNA.                                          |
| <a href="#">Osbp2</a>  | <a href="#">Osbp2.dSep08</a>  | <a href="#">305475</a> | 446    | 215  | 2  | 58  | oxysterol binding protein 2 (Osbp2) alternative variant dSep08, mRNA.                                          |
| <a href="#">Osbpl2</a> | <a href="#">Osbpl2.bSep08</a> | <a href="#">296461</a> | 9517   | 777  | 7  | 258 | oxysterol-binding protein-like protein 2 (Osbpl2) alternative variant bSep08, mRNA.                            |
| <a href="#">Osbpl2</a> | <a href="#">Osbpl2.cSep08</a> | <a href="#">296461</a> | 3736   | 681  | 3  | 125 | oxysterol binding protein-like 2 (Osbpl2) alternative variant cSep08, mRNA.                                    |
| <a href="#">Osbpl2</a> | <a href="#">Osbpl2.dSep08</a> | <a href="#">296461</a> | 1713   | 762  | 2  | 100 | putative mitochondrial protein (11.2 kD) (Osbpl2) alternative variant dSep08, mRNA.                            |
| <a href="#">Osbpl2</a> | <a href="#">Osbpl2.eSep08</a> | <a href="#">296461</a> | 12764  | 400  | 4  | 46  | oxysterol-binding protein-like protein 2 (Osbpl2) alternative variant eSep08, mRNA.                            |
| <a href="#">Osbpl2</a> | <a href="#">Osbpl2.gSep08</a> | <a href="#">296461</a> | 895    | 760  | 2  | 61  | putative protein (7.5 kD) (Osbpl2) alternative variant gSep08, mRNA.                                           |
| <a href="#">Osbpl3</a> | <a href="#">Osbpl3.aSep08</a> | <a href="#">362360</a> | 15077  | 676  | 5  | 225 | oxysterol binding protein-like 3 (Osbpl3) alternative variant aSep08, mRNA.                                    |
| <a href="#">Osbpl5</a> | <a href="#">Osbpl5.bSep08</a> | <a href="#">361686</a> | 2653   | 720  | 4  | 195 | oxysterol binding protein-like 5 (Osbpl5) alternative variant bSep08, mRNA.                                    |
| <a href="#">Osbpl6</a> | <a href="#">Osbpl6.bSep08</a> | <a href="#">311129</a> | 11908  | 499  | 5  | 165 | oxysterol binding protein-like 6 and hypothetical protein LOC679513 (Osbpl6) alternative variant bSep08, mRNA. |
| <a href="#">Osbpl6</a> | <a href="#">Osbpl6.bSep08</a> | <a href="#">679513</a> | 11908  | 499  | 5  | 165 | oxysterol binding protein-like 6 and hypothetical protein LOC679513 (Osbpl6) alternative variant bSep08, mRNA. |
| <a href="#">Osbpl6</a> | <a href="#">Osbpl6.cSep08</a> | <a href="#">311129</a> | 121551 | 546  | 3  | 127 | oxysterol binding protein-like 6 and hypothetical protein LOC679513 (Osbpl6) alternative variant cSep08, mRNA. |
| <a href="#">Osbpl6</a> | <a href="#">Osbpl6.cSep08</a> | <a href="#">679513</a> | 121551 | 546  | 3  | 127 | oxysterol binding protein-like 6 and hypothetical protein LOC679513 (Osbpl6) alternative variant cSep08, mRNA. |
| <a href="#">Osbpl6</a> | <a href="#">Osbpl6.dSep08</a> | <a href="#">311129</a> | 2751   | 430  | 3  | 83  | oxysterol binding protein-like 6 and hypothetical protein LOC679513 (Osbpl6) alternative variant dSep08, mRNA. |
| <a href="#">Osbpl6</a> | <a href="#">Osbpl6.dSep08</a> | <a href="#">679513</a> | 2751   | 430  | 3  | 83  | oxysterol binding protein-like 6 and hypothetical protein LOC679513 (Osbpl6) alternative variant dSep08, mRNA. |
| <a href="#">Osbpl7</a> | <a href="#">Osbpl7.bSep08</a> | <a href="#">303497</a> | 3638   | 680  | 7  | 174 | oxysterol binding protein-like 7 (Osbpl7) alternative variant bSep08, mRNA.                                    |
| <a href="#">Osbpl9</a> | <a href="#">Osbpl9.aSep08</a> | <a href="#">298369</a> | 36427  | 2312 | 17 | 572 | oxysterol binding protein-like 9 (Osbpl9) alternative variant aSep08, mRNA.                                    |



|                         |                                |                        |        |      |   |     |                                                                                                         |
|-------------------------|--------------------------------|------------------------|--------|------|---|-----|---------------------------------------------------------------------------------------------------------|
| <a href="#">Osbp19</a>  | <a href="#">Osbp19.bSep08</a>  | <a href="#">298369</a> | 2943   | 1161 | 4 | 108 | oxysterol binding protein-like 9 (13.1 kD) (Osbp19) alternative variant bSep08, mRNA.                   |
| <a href="#">Osbp19</a>  | <a href="#">Osbp19.cSep08</a>  | <a href="#">298369</a> | 2637   | 470  | 4 | 75  | oxysterol binding protein-like 9 (Osbp19) alternative variant cSep08, mRNA.                             |
| <a href="#">Osbp10</a>  | <a href="#">Osbp10.aSep08</a>  | <a href="#">316039</a> | 155756 | 1722 | 4 | 477 | OSBP related protein 10 (Osbp10) alternative variant aSep08, mRNA.                                      |
| <a href="#">Osbp10</a>  | <a href="#">Osbp10.bSep08</a>  | <a href="#">316039</a> | 140442 | 966  | 6 | 300 | oxysterol binding protein-like 10 CRA b (Osbp10) alternative variant bSep08, mRNA.                      |
| <a href="#">Osbp10</a>  | <a href="#">Osbp10.cSep08</a>  | <a href="#">316039</a> | 93331  | 705  | 5 | 235 | oxysterol-binding protein-like protein 10 (Osbp10) alternative variant cSep08, mRNA.                    |
| <a href="#">Osbp10</a>  | <a href="#">Osbp10.dSep08</a>  | <a href="#">316039</a> | 14576  | 770  | 3 | 212 | oxysterol-binding protein-like protein 10 (Osbp10) alternative variant dSep08, mRNA.                    |
| <a href="#">Osbp10</a>  | <a href="#">Osbp10.eSep08</a>  | <a href="#">316039</a> | 28271  | 749  | 3 | 138 | oxysterol-binding protein-like protein 10 (Osbp10) alternative variant eSep08, mRNA.                    |
| <a href="#">Oscar</a>   | <a href="#">Oscar.aSep08</a>   | <a href="#">292537</a> | 671    | 521  |   | 146 | osteoclast associated receptor (Oscar) mRNA.                                                            |
| <a href="#">Osgep</a>   | <a href="#">Osgep.bSep08</a>   | <a href="#">290028</a> | 6500   | 1036 | 4 | 186 | O-sialoglycoprotein endopeptidase (19.8 kD) (Osgep) alternative variant bSep08, mRNA.                   |
| <a href="#">Osgep</a>   | <a href="#">Osgep.cSep08</a>   | <a href="#">290028</a> | 5816   | 689  | 3 | 122 | O-sialoglycoprotein endopeptidase (Osgep) alternative variant cSep08, mRNA.                             |
| <a href="#">Osgepl1</a> | <a href="#">Osgepl1.bSep08</a> | <a href="#">314548</a> | 10961  | 1084 | 1 | 196 | O-sialoglycoprotein endopeptidase-like 1 (21.4 kD) (Osgepl1) alternative variant bSep08, complete mRNA. |
| <a href="#">Osgin1</a>  | <a href="#">Osgin1.bSep08</a>  | <a href="#">171493</a> | 7254   | 901  | 4 | 245 | oxidative stress induced growth inhibitor 1 (Osgin1) alternative variant bSep08, mRNA.                  |
| <a href="#">Osgin1</a>  | <a href="#">Osgin1.cSep08</a>  | <a href="#">171493</a> | 23474  | 757  | 5 | 105 | oxidative stress induced growth inhibitor 1 (Osgin1) alternative variant cSep08, mRNA.                  |
| <a href="#">Osgin1</a>  | <a href="#">Osgin1.dSep08</a>  | <a href="#">171493</a> | 24484  | 750  | 5 | 86  | oxidative stress induced growth inhibitor 1 (Osgin1) alternative variant dSep08, mRNA.                  |
| <a href="#">Osgin2</a>  | <a href="#">Osgin2.aSep08</a>  | <a href="#">313085</a> | 18853  | 1797 | 3 | 417 | oxidative stress induced growth inhibitor family member 2 (Osgin2) alternative variant aSep08, mRNA.    |
| <a href="#">Osgin2</a>  | <a href="#">Osgin2.bSep08</a>  | <a href="#">313085</a> | 4594   | 1795 | 2 | 347 | oxidative stress induced growth inhibitor family member 2 (Osgin2) alternative variant bSep08, mRNA.    |
| <a href="#">Osgin2</a>  | <a href="#">Osgin2.cSep08</a>  | <a href="#">313085</a> | 10051  | 426  | 1 | 141 | oxidative stress induced growth inhibitor family member 2 (Osgin2) alternative variant cSep08, mRNA.    |
| <a href="#">Osr2</a>    | <a href="#">Osr2.aSep08</a>    | <a href="#">315039</a> | 3573   | 1924 | 2 | 312 | odd-skipped related 2 (Drosophila) (35.5 kD) (Osr2) alternative variant aSep08, mRNA.                   |
| <a href="#">Ostb</a>    | <a href="#">Ostb.aSep08</a>    | <a href="#">300790</a> | 8114   | 711  |   | 104 | organic solute transporter beta (11.3 kD) (Ostb) mRNA.                                                  |
| <a href="#">Ostf1</a>   | <a href="#">Ostf1.bSep08</a>   | <a href="#">259275</a> | 8772   | 1502 | 5 | 137 | osteoclast stimulating factor 1 (14.9 kD) (Ostf1) alternative variant bSep08, mRNA.                     |
| <a href="#">Ostf1</a>   | <a href="#">Ostf1.cSep08</a>   | <a href="#">259275</a> | 3095   | 694  | 2 | 36  | osteoclast stimulating factor 1 (3.8 kD) (Ostf1) alternative variant cSep08, mRNA.                      |
| <a href="#">Otc</a>     | <a href="#">Otc.bSep08</a>     | <a href="#">25611</a>  | 9819   | 398  | 1 | 132 | ornithine transcarbamylase (Otc) alternative variant bSep08, mRNA.                                      |
| <a href="#">Otoa</a>    | <a href="#">Otoa.aSep08</a>    | <a href="#">499260</a> | 15746  | 782  |   | 260 | otoancorin (Otoa) mRNA.                                                                                 |
| <a href="#">Otof</a>    | <a href="#">Otof.aSep08</a>    | <a href="#">84573</a>  | 43478  | 385  |   | 92  | otoferlin (Otof) mRNA.                                                                                  |
| <a href="#">Otos</a>    | <a href="#">Otos.aSep08</a>    | <a href="#">246044</a> | 1155   | 338  |   | 89  | otospiralin (10.1 kD) (Otos) mRNA.                                                                      |

|                        |                               |                        |       |      |    |     |                                                                                                                |
|------------------------|-------------------------------|------------------------|-------|------|----|-----|----------------------------------------------------------------------------------------------------------------|
| <a href="#">Otp</a>    | <a href="#">Otp.aSep08</a>    | <a href="#">294640</a> | 1878  | 624  | 2  | 159 | orthopedia homolog (Drosophila) (Otp) alternative variant aSep08, mRNA.                                        |
| <a href="#">Otp</a>    | <a href="#">Otp.bSep08</a>    | <a href="#">294640</a> | 6033  | 477  | 2  | 158 | orthopedia homolog (Drosophila) (Otp) alternative variant bSep08, mRNA.                                        |
| <a href="#">OTU.0</a>  | <a href="#">OTU.0.aSep08</a>  |                        | 11111 | 2233 |    | 278 | ovarian tumour, otubain (OTU.0) mRNA.                                                                          |
| <a href="#">Otub2</a>  | <a href="#">Otub2.bSep08</a>  | <a href="#">314405</a> | 18488 | 2695 | 5  | 219 | OTU domain, ubiquitin aldehyde binding 2 (25.0 kD) (Otub2) alternative variant bSep08, mRNA.                   |
| <a href="#">Otub2</a>  | <a href="#">Otub2.cSep08</a>  | <a href="#">314405</a> | 1186  | 854  | 1  | 75  | OTU domain, ubiquitin aldehyde binding 2 (Otub2) alternative variant cSep08, mRNA.                             |
| <a href="#">Otud3</a>  | <a href="#">Otud3.aSep08</a>  | <a href="#">500572</a> | 19457 | 616  | 3  | 204 | ovarian tumour, otubain (Otud3) alternative variant aSep08, mRNA.                                              |
| <a href="#">Otud3</a>  | <a href="#">Otud3.bSep08</a>  | <a href="#">500572</a> | 19426 | 472  | 2  | 128 | CRA a like (Otud3) alternative variant bSep08, mRNA.                                                           |
| <a href="#">Otud3</a>  | <a href="#">Otud3.cSep08</a>  | <a href="#">500572</a> | 19446 | 430  | 2  | 109 | putative protein of eukaryotic origin (Otud3) alternative variant cSep08, mRNA.                                |
| <a href="#">Otud3</a>  | <a href="#">Otud3.dSep08</a>  | <a href="#">500572</a> | 14217 | 516  | 2  | 89  | putative protein of eukaryotic origin (Otud3) alternative variant dSep08, mRNA.                                |
| <a href="#">Otud4</a>  | <a href="#">Otud4.aSep08</a>  | <a href="#">307774</a> | 35158 | 1776 |    | 515 | protein hin-1 (Otud4) alternative variant aSep08, mRNA.                                                        |
| <a href="#">Otud4</a>  | <a href="#">Otud4.bSep08</a>  | <a href="#">307774</a> | 8901  | 772  |    | 138 | protein hin-1 (Otud4) alternative variant bSep08, mRNA.                                                        |
| <a href="#">Otud5</a>  | <a href="#">Otud5.bSep08</a>  | <a href="#">363452</a> | 25261 | 1110 | 5  | 364 | ovarian tumour, otubain (Otud5) alternative variant bSep08, mRNA.                                              |
| <a href="#">Otud5</a>  | <a href="#">Otud5.dSep08</a>  | <a href="#">363452</a> | 1029  | 750  | 2  | 67  | putative protein (Otud5) alternative variant dSep08, mRNA.                                                     |
| <a href="#">Otud6b</a> | <a href="#">Otud6b.bSep08</a> | <a href="#">297911</a> | 11109 | 844  | 6  | 108 | CRA c (Otud6b) alternative variant bSep08, mRNA.                                                               |
| <a href="#">Otud7a</a> | <a href="#">Otud7a.aSep08</a> | <a href="#">309252</a> | 75920 | 683  |    | 150 | putative protein of vertebrate origin (Otud7a) mRNA.                                                           |
| <a href="#">Oxa1l</a>  | <a href="#">Oxa1l.aSep08</a>  | <a href="#">691393</a> | 7628  | 1531 | 10 | 433 | oxidase assembly 1-like (48.0 kD) (Oxa1l) alternative variant aSep08, complete mRNA.                           |
| <a href="#">Oxa1l</a>  | <a href="#">Oxa1l.bSep08</a>  | <a href="#">691393</a> | 6222  | 741  | 6  | 247 | oxidase assembly 1-like (Oxa1l) alternative variant bSep08, mRNA.                                              |
| <a href="#">Oxa1l</a>  | <a href="#">Oxa1l.cSep08</a>  | <a href="#">691393</a> | 1219  | 852  | 3  | 156 | oxidase assembly 1-like (17.9 kD) (Oxa1l) alternative variant cSep08, mRNA.                                    |
| <a href="#">Oxa1l</a>  | <a href="#">Oxa1l.dSep08</a>  | <a href="#">691393</a> | 2852  | 935  | 3  | 146 | oxidase assembly 1-like (15.2 kD) (Oxa1l) alternative variant dSep08, complete mRNA.                           |
| <a href="#">Oxa1l</a>  | <a href="#">Oxa1l.eSep08</a>  | <a href="#">691393</a> | 930   | 736  | 2  | 111 | oxidase assembly 1-like (12.8 kD) (Oxa1l) alternative variant eSep08, mRNA.                                    |
| <a href="#">Oxct1</a>  | <a href="#">Oxct1.aSep08</a>  | <a href="#">690163</a> | 94860 | 1501 |    | 500 | 3-oxoacid CoA transferase 1 (Oxct1) mRNA.                                                                      |
| <a href="#">Oxnad1</a> | <a href="#">Oxnad1.bSep08</a> | <a href="#">306270</a> | 25868 | 977  | 7  | 241 | putative protein of ancient origin (Oxnad1) alternative variant bSep08, mRNA.                                  |
| <a href="#">Oxnad1</a> | <a href="#">Oxnad1.cSep08</a> | <a href="#">306270</a> | 11121 | 1057 | 7  | 229 | putative mitochondrial protein of ancient origin (25.6 kD) (Oxnad1) alternative variant cSep08, complete mRNA. |
| <a href="#">Oxnad1</a> | <a href="#">Oxnad1.dSep08</a> | <a href="#">306270</a> | 18521 | 1447 | 4  | 220 | ferric reductase, NAD binding and oxidoreductase FAD/NAD(P)-binding (Oxnad1) alternative variant dSep08, mRNA. |
| <a href="#">Oxnad1</a> | <a href="#">Oxnad1.eSep08</a> | <a href="#">306270</a> | 24018 | 887  | 6  | 216 | putative protein of ancient origin (Oxnad1) alternative variant eSep08, mRNA.                                  |
| <a href="#">Oxnad1</a> | <a href="#">Oxnad1.fSep08</a> | <a href="#">306270</a> | 23929 | 905  | 7  | 181 | putative protein of ancient origin (Oxnad1) alternative variant fSep08, mRNA.                                  |

|                        |                               |                        |       |      |   |     |                                                                                                          |
|------------------------|-------------------------------|------------------------|-------|------|---|-----|----------------------------------------------------------------------------------------------------------|
| <a href="#">Oxnad1</a> | <a href="#">Oxnad1.gSep08</a> | <a href="#">306270</a> | 8282  | 757  | 5 | 78  | putative mitochondrial protein of mammalian origin (8.7 kD) (Oxnad1) alternative variant gSep08, mRNA.   |
| <a href="#">Oxr1</a>   | <a href="#">Oxr1.bSep08</a>   | <a href="#">117520</a> | 35253 | 743  | 7 | 228 | oxidation resistance 1 (Oxr1) alternative variant bSep08, mRNA.                                          |
| <a href="#">Oxr1</a>   | <a href="#">Oxr1.cSep08</a>   | <a href="#">117520</a> | 37110 | 2519 | 6 | 216 | oxidation resistance 1 (24.4 kD) (Oxr1) alternative variant cSep08, mRNA.                                |
| <a href="#">Oxr1</a>   | <a href="#">Oxr1.dSep08</a>   | <a href="#">117520</a> | 36738 | 591  | 6 | 197 | oxidation resistance 1 (Oxr1) alternative variant dSep08, mRNA.                                          |
| <a href="#">Oxr1</a>   | <a href="#">Oxr1.eSep08</a>   | <a href="#">117520</a> | 8809  | 790  | 5 | 189 | oxidation resistance 1 (Oxr1) alternative variant eSep08, mRNA.                                          |
| <a href="#">Oxr1</a>   | <a href="#">Oxr1.fSep08</a>   | <a href="#">117520</a> | 7797  | 285  | 4 | 94  | oxidation resistance 1 (Oxr1) alternative variant fSep08, mRNA.                                          |
| <a href="#">Oxsm</a>   | <a href="#">Oxsm.aSep08</a>   | <a href="#">289934</a> | 3074  | 2071 | 2 | 316 | 3-oxoacyl-ACP synthase, mitochondrial (Oxsm) alternative variant aSep08, mRNA.                           |
| <a href="#">Oxsr1</a>  | <a href="#">Oxsr1.bSep08</a>  | <a href="#">316064</a> | 25552 | 757  | 1 | 211 | oxidative-stress responsive 1 (Oxsr1) alternative variant bSep08, mRNA.                                  |
| <a href="#">Oxt</a>    | <a href="#">Oxt.aSep08</a>    | <a href="#">25504</a>  | 829   | 522  |   | 134 | oxytocin (Oxt) mRNA.                                                                                     |
| <a href="#">P2rx1</a>  | <a href="#">P2rx1.bSep08</a>  | <a href="#">25505</a>  | 4418  | 825  | 6 | 186 | purinergic receptor P2X, ligand-gated ion channel, 1 (21.2 kD) (P2rx1) alternative variant bSep08, mRNA. |
| <a href="#">P2rx2</a>  | <a href="#">P2rx2.aSep08</a>  | <a href="#">114115</a> | 3172  | 1783 | 2 | 547 | purinergic receptor P2X, ligand-gated ion channel, 2 (P2rx2) alternative variant aSep08, mRNA.           |
| <a href="#">P2rx2</a>  | <a href="#">P2rx2.cSep08</a>  | <a href="#">114115</a> | 726   | 519  | 2 | 66  | purinergic receptor P2X, ligand-gated ion channel, 2 (P2rx2) alternative variant cSep08, mRNA.           |
| <a href="#">P2rx3</a>  | <a href="#">P2rx3.bSep08</a>  | <a href="#">81739</a>  | 25898 | 1928 | 6 | 172 | purinergic receptor P2X, ligand-gated ion channel, 3 (P2rx3) alternative variant bSep08, mRNA.           |
| <a href="#">P2rx3</a>  | <a href="#">P2rx3.cSep08</a>  | <a href="#">81739</a>  | 15226 | 594  | 2 | 165 | purinergic receptor P2X, ligand-gated ion channel, 3 (P2rx3) alternative variant cSep08, mRNA.           |
| <a href="#">P2rx4</a>  | <a href="#">P2rx4.bSep08</a>  | <a href="#">29659</a>  | 3033  | 761  | 5 | 226 | purinergic receptor P2X, ligand-gated ion channel 4 (P2rx4) alternative variant bSep08, mRNA.            |
| <a href="#">P2rx4</a>  | <a href="#">P2rx4.cSep08</a>  | <a href="#">29659</a>  | 8935  | 824  | 5 | 73  | purinergic receptor P2X, ligand-gated ion channel 4 (P2rx4) alternative variant cSep08, mRNA.            |
| <a href="#">P2rx6</a>  | <a href="#">P2rx6.bSep08</a>  | <a href="#">25041</a>  | 6378  | 691  | 6 | 230 | purinergic receptor P2X, ligand-gated ion channel, 6 (P2rx6) alternative variant bSep08, mRNA.           |
| <a href="#">P2rx7</a>  | <a href="#">P2rx7.cSep08</a>  | <a href="#">29665</a>  | 17981 | 579  | 3 | 187 | purinergic receptor P2X, ligand-gated ion channel, 7 (P2rx7) alternative variant cSep08, mRNA.           |
| <a href="#">P2ry1</a>  | <a href="#">P2ry1.bSep08</a>  | <a href="#">25265</a>  | 5584  | 1637 | 1 | 58  | purinergic receptor P2Y, G-protein coupled 1 (6.6 kD) (P2ry1) alternative variant bSep08, mRNA.          |
| <a href="#">P2ry2</a>  | <a href="#">P2ry2.aSep08</a>  | <a href="#">29597</a>  | 13635 | 1443 |   | 318 | purinergic receptor P2Y, G-protein coupled 2 (P2ry2) mRNA.                                               |
| <a href="#">P2ry6</a>  | <a href="#">P2ry6.bSep08</a>  | <a href="#">117264</a> | 23520 | 429  | 3 | 17  | pyrimidinergic receptor P2Y, G-protein coupled, 6 (P2ry6) alternative variant bSep08, mRNA.              |
| <a href="#">P2ry6</a>  | <a href="#">P2ry6.cSep08</a>  | <a href="#">117264</a> | 2972  | 363  | 3 | 40  | pyrimidinergic receptor P2Y, G-protein coupled, 6 (P2ry6) alternative variant cSep08, mRNA.              |
| <a href="#">P2ry10</a> | <a href="#">P2ry10.aSep08</a> | <a href="#">317219</a> | 14113 | 2923 |   | 328 | purinergic receptor P2Y, G-protein coupled 10 (37.3 kD) (P2ry10) mRNA.                                   |
| <a href="#">P2ry13</a> | <a href="#">P2ry13.aSep08</a> | <a href="#">310444</a> | 2445  | 1793 | 3 | 536 | purinergic receptor P2Y, G-protein coupled, 13 (P2ry13) alternative variant aSep08, mRNA.                |

|                        |                               |                        |       |      |    |     |                                                                                                                                                     |
|------------------------|-------------------------------|------------------------|-------|------|----|-----|-----------------------------------------------------------------------------------------------------------------------------------------------------|
| <a href="#">P4ha1</a>  | <a href="#">P4ha1.bSep08</a>  | <a href="#">64475</a>  | 10726 | 1866 | 6  | 136 | procollagen-proline, 2-oxoglutarate 4-dioxygenase (proline 4-hydroxylase), alpha 1 polypeptide (15.2 kD) (P4ha1) alternative variant bSep08, mRNA.  |
| <a href="#">P4ha1</a>  | <a href="#">P4ha1.cSep08</a>  | <a href="#">64475</a>  | 2426  | 850  | 3  | 78  | procollagen-proline, 2-oxoglutarate 4-dioxygenase (proline 4-hydroxylase), alpha 1 polypeptide (8.6 kD) (P4ha1) alternative variant cSep08, mRNA.   |
| <a href="#">P4ha2</a>  | <a href="#">P4ha2.aSep08</a>  | <a href="#">360526</a> | 28825 | 2230 | 16 | 597 | procollagen-proline, 2-oxoglutarate 4-dioxygenase (proline 4-hydroxylase), alpha II polypeptide (P4ha2) alternative variant aSep08, mRNA.           |
| <a href="#">P4ha2</a>  | <a href="#">P4ha2.cSep08</a>  | <a href="#">360526</a> | 8707  | 752  | 5  | 250 | procollagen-proline, 2-oxoglutarate 4-dioxygenase (proline 4-hydroxylase), alpha II polypeptide (P4ha2) alternative variant cSep08, mRNA.           |
| <a href="#">P4ha2</a>  | <a href="#">P4ha2.eSep08</a>  | <a href="#">360526</a> | 2821  | 953  | 3  | 100 | procollagen-proline, 2-oxoglutarate 4-dioxygenase (proline 4-hydroxylase), alpha II polypeptide (10.9 kD) (P4ha2) alternative variant eSep08, mRNA. |
| <a href="#">P4ha3</a>  | <a href="#">P4ha3.bSep08</a>  | <a href="#">361612</a> | 1897  | 829  | 2  | 112 | procollagen-proline, 2-oxoglutarate 4-dioxygenase (proline 4-hydroxylase), alpha polypeptide III (P4ha3) alternative variant bSep08, mRNA.          |
| <a href="#">P4ha3</a>  | <a href="#">P4ha3.cSep08</a>  | <a href="#">361612</a> | 4398  | 351  | 3  | 108 | procollagen-proline, 2-oxoglutarate 4-dioxygenase (proline 4-hydroxylase), alpha polypeptide III (P4ha3) alternative variant cSep08, mRNA.          |
| <a href="#">P4hb</a>   | <a href="#">P4hb.bSep08</a>   | <a href="#">25506</a>  | 2603  | 771  | 6  | 230 | prolyl 4-hydroxylase, beta polypeptide (P4hb) alternative variant bSep08, mRNA.                                                                     |
| <a href="#">P4hb</a>   | <a href="#">P4hb.cSep08</a>   | <a href="#">25506</a>  | 823   | 714  | 2  | 104 | prolyl 4-hydroxylase, beta polypeptide (11.4 kD) (P4hb) alternative variant cSep08, mRNA.                                                           |
| <a href="#">P15rs</a>  | <a href="#">P15rs.aSep08</a>  | <a href="#">291736</a> | 44867 | 1290 | 6  | 364 | cyclin-dependent kinase 2B-inhibitor-related protein (P15rs) alternative variant aSep08, mRNA.                                                      |
| <a href="#">P15rs</a>  | <a href="#">P15rs.bSep08</a>  | <a href="#">291736</a> | 2697  | 496  | 4  | 155 | cyclin-dependent kinase 2B-inhibitor-related protein (P15rs) alternative variant bSep08, mRNA.                                                      |
| <a href="#">P15rs</a>  | <a href="#">P15rs.cSep08</a>  | <a href="#">291736</a> | 1649  | 1546 | 1  | 103 | cyclin-dependent kinase 2B-inhibitor-related protein (P15rs) alternative variant cSep08, mRNA.                                                      |
| <a href="#">P22k15</a> | <a href="#">P22k15.bSep08</a> | <a href="#">296229</a> | 2554  | 308  | 2  | 43  | cystatin related protein 2 (P22k15) alternative variant bSep08, mRNA.                                                                               |
| <a href="#">P76</a>    | <a href="#">P76.bSep08</a>    | <a href="#">246120</a> | 2346  | 1724 | 2  | 115 | mannose-6-phosphate protein p76 (12.9 kD) (P76) alternative variant bSep08, mRNA.                                                                   |
| <a href="#">p450.0</a> | <a href="#">p450.0.aSep08</a> | <a href="#">690021</a> | 7350  | 1378 | 11 | 449 | cytochrome P450 family 4 subfamily a polypeptide (51.7 kD) (p450.0) alternative variant aSep08, mRNA.                                               |
| <a href="#">p450.0</a> | <a href="#">p450.0.bSep08</a> | <a href="#">690021</a> | 2925  | 774  | 4  | 104 | putative mitochondrial protein (12.3 kD) (p450.0) alternative variant bSep08, mRNA.                                                                 |
| <a href="#">p450.1</a> | <a href="#">p450.1.aSep08</a> |                        | 50280 | 1003 | 5  | 331 | p450 2c2 (p450.1) alternative variant aSep08, mRNA.                                                                                                 |
| <a href="#">p450.1</a> | <a href="#">p450.1.bSep08</a> |                        | 6007  | 780  | 4  | 152 | cytochrome (17.4 kD) (p450.1) alternative variant bSep08, mRNA.                                                                                     |
| <a href="#">p450.1</a> | <a href="#">p450.1.cSep08</a> |                        | 4824  | 675  | 3  | 123 | cytochrome P450f (13.9 kD) (p450.1) alternative variant cSep08, complete mRNA.                                                                      |
| <a href="#">p450.1</a> | <a href="#">p450.1.dSep08</a> |                        | 1948  | 931  | 2  | 85  | cytochrome (9.6 kD) (p450.1) alternative variant dSep08, mRNA.                                                                                      |
| <a href="#">p450.1</a> | <a href="#">p450.1.eSep08</a> |                        | 3464  | 419  | 2  | 83  | cytochrome (p450.1) alternative variant eSep08, mRNA.                                                                                               |

|                              |                                     |                        |       |      |    |     |                                                                                                      |
|------------------------------|-------------------------------------|------------------------|-------|------|----|-----|------------------------------------------------------------------------------------------------------|
| <a href="#">p450.2</a>       | <a href="#">p450.2.aSep08</a>       |                        | 6815  | 856  | 2  | 274 | cytochrome P-450 IIC13 (p450.2) alternative variant aSep08, mRNA.                                    |
| <a href="#">p450.2</a>       | <a href="#">p450.2.bSep08</a>       |                        | 6568  | 296  |    | 98  | cytochrome P-450 IIC13 (p450.2) alternative variant bSep08, mRNA.                                    |
| <a href="#">p450.3</a>       | <a href="#">p450.3.aSep08</a>       |                        | 47628 | 1802 | 6  | 505 | cytochrome p450 family 2 subfamily c polypeptide (p450.3) alternative variant aSep08, complete mRNA. |
| <a href="#">p450.3</a>       | <a href="#">p450.3.bSep08</a>       |                        | 47459 | 1210 | 7  | 377 | cytochrome p450 family 2 subfamily c polypeptide (p450.3) alternative variant bSep08, mRNA.          |
| <a href="#">p450.3</a>       | <a href="#">p450.3.cSep08</a>       |                        | 2525  | 288  | 2  | 95  | cytochrome P450f (p450.3) alternative variant cSep08, mRNA.                                          |
| <a href="#">p450.3</a>       | <a href="#">p450.3.dSep08</a>       |                        | 16214 | 308  | 3  | 92  | p450 2c2 (p450.3) alternative variant dSep08, mRNA.                                                  |
| <a href="#">p450.3</a>       | <a href="#">p450.3.eSep08</a>       |                        | 1166  | 261  | 2  | 61  | putative protein (6.9 kD) (p450.3) alternative variant eSep08, complete mRNA.                        |
| <a href="#">Pa2g4</a>        | <a href="#">Pa2g4.bSep08</a>        | <a href="#">288778</a> | 958   | 429  | 1  | 142 | proliferation-associated 2G4 (Pa2g4) alternative variant bSep08, mRNA.                               |
| <a href="#">PAAD_DAPIN.0</a> | <a href="#">PAAD_DAPIN.0.aSep08</a> |                        | 1499  | 474  | 3  | 118 | pyrin (PAAD_DAPIN.0) alternative variant aSep08, mRNA.                                               |
| <a href="#">PAAD_DAPIN.0</a> | <a href="#">PAAD_DAPIN.0.bSep08</a> |                        | 643   | 433  | 1  | 83  | putative protein of mammalian origin (PAAD_DAPIN.0) alternative variant bSep08, mRNA.                |
| <a href="#">Pabpc1</a>       | <a href="#">Pabpc1.bSep08</a>       | <a href="#">171350</a> | 9527  | 1942 | 11 | 499 | poly binding protein cytoplasmic 1 like (Pabpc1) alternative variant bSep08, mRNA.                   |
| <a href="#">Pabpc1</a>       | <a href="#">Pabpc1.cSep08</a>       | <a href="#">171350</a> | 8196  | 2306 | 6  | 486 | poly binding protein cytoplasmic 1 like (Pabpc1) alternative variant cSep08, mRNA.                   |
| <a href="#">Pabpc1</a>       | <a href="#">Pabpc1.dSep08</a>       | <a href="#">171350</a> | 5136  | 881  | 4  | 225 | poly binding protein cytoplasmic 1 like (Pabpc1) alternative variant dSep08, mRNA.                   |
| <a href="#">Pabpc1</a>       | <a href="#">Pabpc1.eSep08</a>       | <a href="#">171350</a> | 2767  | 874  | 2  | 122 | poly binding protein cytoplasmic 1 like (Pabpc1) alternative variant eSep08, mRNA.                   |
| <a href="#">Pabpc1</a>       | <a href="#">Pabpc1.fSep08</a>       | <a href="#">171350</a> | 2302  | 739  | 5  | 117 | poly binding protein cytoplasmic 1 like (Pabpc1) alternative variant fSep08, mRNA.                   |
| <a href="#">Pabpc1</a>       | <a href="#">Pabpc1.gSep08</a>       | <a href="#">171350</a> | 1854  | 593  | 5  | 88  | poly binding protein cytoplasmic 1 like (9.4 kD) (Pabpc1) alternative variant gSep08, mRNA.          |
| <a href="#">Pabpc1</a>       | <a href="#">Pabpc1.hSep08</a>       | <a href="#">171350</a> | 1331  | 546  | 3  | 64  | poly Binding Protein like (6.8 kD) (Pabpc1) alternative variant hSep08, mRNA.                        |
| <a href="#">Pabpc4</a>       | <a href="#">Pabpc4.bSep08</a>       | <a href="#">298510</a> | 7733  | 1644 | 12 | 444 | poly A binding protein, cytoplasmic 4 (Pabpc4) alternative variant bSep08, mRNA.                     |
| <a href="#">Pabpc4</a>       | <a href="#">Pabpc4.cSep08</a>       | <a href="#">298510</a> | 3900  | 862  | 6  | 184 | poly A binding protein, cytoplasmic 4 (Pabpc4) alternative variant cSep08, mRNA.                     |
| <a href="#">Pabpc4</a>       | <a href="#">Pabpc4.dSep08</a>       | <a href="#">298510</a> | 3150  | 685  | 5  | 133 | poly A binding protein, cytoplasmic 4 (Pabpc4) alternative variant dSep08, mRNA.                     |
| <a href="#">Pabpn1</a>       | <a href="#">Pabpn1.aSep08</a>       | <a href="#">116697</a> | 4600  | 1776 | 7  | 302 | poly(A) binding protein, nuclear 1 (Pabpn1) alternative variant aSep08, mRNA.                        |
| <a href="#">Pabpn1</a>       | <a href="#">Pabpn1.bSep08</a>       | <a href="#">116697</a> | 4336  | 2238 | 6  | 236 | poly(A) binding protein, nuclear 1 (Pabpn1) alternative variant bSep08, mRNA.                        |
| <a href="#">Pabpn1</a>       | <a href="#">Pabpn1.cSep08</a>       | <a href="#">116697</a> | 3385  | 736  | 7  | 209 | poly(A) binding protein, nuclear 1 (Pabpn1) alternative variant cSep08, mRNA.                        |
| <a href="#">Pabpn1</a>       | <a href="#">Pabpn1.dSep08</a>       | <a href="#">116697</a> | 2697  | 774  | 6  | 201 | poly(A) binding protein, nuclear 1 (Pabpn1) alternative variant dSep08, mRNA.                        |

|                          |                                 |                        |        |      |   |     |                                                                                                                                    |
|--------------------------|---------------------------------|------------------------|--------|------|---|-----|------------------------------------------------------------------------------------------------------------------------------------|
| <a href="#">paby</a>     | <a href="#">paby.aSep08</a>     |                        | 1093   | 399  |   | 133 | mediator of RNA polymerase II transcription homolog (paby) mRNA.                                                                   |
| <a href="#">pachy</a>    | <a href="#">pachy.aSep08</a>    |                        | 6329   | 350  |   | 116 | cytoskeleton associated protein 5 CRA a (pachy) mRNA.                                                                              |
| <a href="#">Pacrg</a>    | <a href="#">Pacrg.bSep08</a>    | <a href="#">499021</a> | 274968 | 845  | 4 | 139 | park2 co-regulated (15.9 kD) (Pacrg) alternative variant bSep08, mRNA.                                                             |
| <a href="#">Pacrg</a>    | <a href="#">Pacrg.cSep08</a>    | <a href="#">499021</a> | 74797  | 658  | 2 | 90  | park2 co-regulated (10.0 kD) (Pacrg) alternative variant cSep08, mRNA.                                                             |
| <a href="#">Pacs-1.0</a> | <a href="#">Pacs-1.0.aSep08</a> |                        | 6515   | 559  |   | 186 | phosphofurin acidic cluster sorting protein 2 (Pacs-1.0) mRNA.                                                                     |
| <a href="#">Pacs-1.1</a> | <a href="#">Pacs-1.1.aSep08</a> |                        | 3049   | 1363 |   | 167 | phosphofurin acidic cluster sorting protein 2 (Pacs-1.1) mRNA.                                                                     |
| <a href="#">Pacsin2</a>  | <a href="#">Pacsin2.bSep08</a>  | <a href="#">124461</a> | 83820  | 1229 | 7 | 314 | protein kinase C and casein kinase substrate in neurons 2 (36.8 kD) (Pacsin2) alternative variant bSep08, mRNA.                    |
| <a href="#">Pacsin2</a>  | <a href="#">Pacsin2.cSep08</a>  | <a href="#">124461</a> | 92212  | 1573 | 9 | 223 | protein kinase C and casein kinase substrate in neurons 2 (25.5 kD) (Pacsin2) alternative variant cSep08, mRNA.                    |
| <a href="#">Pacsin2</a>  | <a href="#">Pacsin2.dSep08</a>  | <a href="#">124461</a> | 79170  | 710  | 5 | 188 | protein kinase C and casein kinase substrate in neurons 2 (Pacsin2) alternative variant dSep08, mRNA.                              |
| <a href="#">Pacsin2</a>  | <a href="#">Pacsin2.eSep08</a>  | <a href="#">124461</a> | 4707   | 782  | 3 | 70  | protein kinase C and casein kinase substrate in neurons 2 (Pacsin2) alternative variant eSep08, mRNA.                              |
| <a href="#">Pacsin2</a>  | <a href="#">Pacsin2.fSep08</a>  | <a href="#">124461</a> | 4480   | 1145 | 3 | 151 | protein kinase C and casein kinase substrate in neurons 2 (Pacsin2) alternative variant fSep08, mRNA.                              |
| <a href="#">Pacsin3</a>  | <a href="#">Pacsin3.bSep08</a>  | <a href="#">311187</a> | 3058   | 848  | 4 | 282 | protein kinase C and casein kinase substrate in neurons 3 (Pacsin3) alternative variant bSep08, mRNA.                              |
| <a href="#">Pacsin3</a>  | <a href="#">Pacsin3.cSep08</a>  | <a href="#">311187</a> | 7539   | 1528 | 7 | 266 | protein kinase C and casein kinase substrate in neurons 3 (30.9 kD) (Pacsin3) alternative variant cSep08, mRNA.                    |
| <a href="#">Pacsin3</a>  | <a href="#">Pacsin3.dSep08</a>  | <a href="#">311187</a> | 7009   | 795  | 3 | 190 | protein kinase C and casein kinase substrate in neurons 3 (22.4 kD) (Pacsin3) alternative variant dSep08, mRNA.                    |
| <a href="#">Pacsin3</a>  | <a href="#">Pacsin3.eSep08</a>  | <a href="#">311187</a> | 4419   | 579  | 3 | 106 | protein kinase C and casein kinase substrate in neurons 3 (Pacsin3) alternative variant eSep08, mRNA.                              |
| <a href="#">padar</a>    | <a href="#">padar.bSep08</a>    |                        | 857    | 533  | 2 | 107 | putative mitochondrial protein (11.2 kD) (padar) alternative variant bSep08, mRNA.                                                 |
| <a href="#">Padi2</a>    | <a href="#">Padi2.aSep08</a>    | <a href="#">29511</a>  | 18865  | 1160 |   | 260 | peptidyl arginine deiminase, type II (Padi2) mRNA.                                                                                 |
| <a href="#">PAD_N.0</a>  | <a href="#">PAD_N.0.aSep08</a>  |                        | 10796  | 428  |   | 114 | peptidyl arginine deiminase type II (PAD_N.0) mRNA.                                                                                |
| <a href="#">Paf1</a>     | <a href="#">Paf1.bSep08</a>     | <a href="#">361531</a> | 778    | 677  | 2 | 98  | paf1, RNA polymerase II associated factor, homolog (S. cerevisiae) (Paf1) alternative variant bSep08, mRNA.                        |
| <a href="#">Paf1</a>     | <a href="#">Paf1.cSep08</a>     | <a href="#">361531</a> | 536    | 389  | 3 | 69  | paf1, RNA polymerase II associated factor, homolog (S. cerevisiae) (Paf1) alternative variant cSep08, mRNA.                        |
| <a href="#">Paf1</a>     | <a href="#">Paf1.dSep08</a>     | <a href="#">361531</a> | 930    | 836  | 2 | 39  | paf1, RNA polymerase II associated factor, homolog (S. cerevisiae) (Paf1) alternative variant dSep08, mRNA.                        |
| <a href="#">Pafah1b1</a> | <a href="#">Pafah1b1.bSep08</a> | <a href="#">83572</a>  | 10863  | 3476 | 6 | 239 | platelet-activating factor acetylhydrolase, isoform 1b, alpha subunit 45kDa (27.1 kD) (Pafah1b1) alternative variant bSep08, mRNA. |
| <a href="#">Pafah1b2</a> | <a href="#">Pafah1b2.aSep08</a> | <a href="#">64189</a>  | 17698  | 1782 | 3 | 423 | platelet-activating factor acetylhydrolase, isoform 1b, alpha2 subunit (Pafah1b2) alternative variant aSep08, complete mRNA.       |

|                          |                                 |                        |       |      |    |     |                                                                                                                                                |
|--------------------------|---------------------------------|------------------------|-------|------|----|-----|------------------------------------------------------------------------------------------------------------------------------------------------|
| <a href="#">Pafah1b3</a> | <a href="#">Pafah1b3.cSep08</a> | <a href="#">114113</a> | 2511  | 1375 | 5  | 103 | platelet-activating factor acetylhydrolase, isoform 1b, alpha1 subunit (Pafah1b3) alternative variant cSep08, mRNA.                            |
| <a href="#">pafer</a>    | <a href="#">pafer.aSep08</a>    |                        | 1220  | 568  |    | 26  | putative protein (2.9 kD) (pafer) mRNA.                                                                                                        |
| <a href="#">paflo</a>    | <a href="#">paflo.aSep08</a>    |                        | 7116  | 251  |    | 83  | CRA a like (paflo) mRNA.                                                                                                                       |
| <a href="#">paflu</a>    | <a href="#">paflu.aSep08</a>    |                        | 847   | 712  |    | 31  | putative protein (paflu) mRNA.                                                                                                                 |
| <a href="#">pagar</a>    | <a href="#">pagar.aSep08</a>    |                        | 5418  | 532  |    | 176 | polybromo 1 CRA c (pagar) mRNA.                                                                                                                |
| <a href="#">Pah</a>      | <a href="#">Pah.bSep08</a>      | <a href="#">24616</a>  | 49476 | 815  | 1  | 217 | phenylalanine hydroxylase (Pah) alternative variant bSep08, mRNA.                                                                              |
| <a href="#">Paics</a>    | <a href="#">Paics.bSep08</a>    | <a href="#">140946</a> | 11181 | 866  | 2  | 288 | phosphoribosylaminoimidazole carboxylase, phosphoribosylaminoimidazole succinocarboxamide synthetase (Paics) alternative variant bSep08, mRNA. |
| <a href="#">Paics</a>    | <a href="#">Paics.cSep08</a>    | <a href="#">140946</a> | 11174 | 793  | 2  | 264 | phosphoribosylaminoimidazole carboxylase, phosphoribosylaminoimidazole succinocarboxamide synthetase (Paics) alternative variant cSep08, mRNA. |
| <a href="#">Paip1</a>    | <a href="#">Paip1.aSep08</a>    | <a href="#">365684</a> | 28145 | 2829 | 11 | 460 | polyadenylate binding protein-interacting protein 1 and hypothetical protein LOC689651 (Paip1) alternative variant aSep08, mRNA.               |
| <a href="#">Paip1</a>    | <a href="#">Paip1.aSep08</a>    | <a href="#">689651</a> | 28145 | 2829 | 11 | 460 | polyadenylate binding protein-interacting protein 1 and hypothetical protein LOC689651 (Paip1) alternative variant aSep08, mRNA.               |
| <a href="#">Paip1</a>    | <a href="#">Paip1.bSep08</a>    | <a href="#">365684</a> | 18715 | 983  | 7  | 327 | polyadenylate binding protein-interacting protein 1 and hypothetical protein LOC689651 (Paip1) alternative variant bSep08, mRNA.               |
| <a href="#">Paip1</a>    | <a href="#">Paip1.bSep08</a>    | <a href="#">689651</a> | 18715 | 983  | 7  | 327 | polyadenylate binding protein-interacting protein 1 and hypothetical protein LOC689651 (Paip1) alternative variant bSep08, mRNA.               |
| <a href="#">Paip1</a>    | <a href="#">Paip1.cSep08</a>    | <a href="#">365684</a> | 7749  | 465  | 4  | 143 | polyadenylate binding protein-interacting protein 1 and hypothetical protein LOC689651 (Paip1) alternative variant cSep08, mRNA.               |
| <a href="#">Paip1</a>    | <a href="#">Paip1.cSep08</a>    | <a href="#">689651</a> | 7749  | 465  | 4  | 143 | polyadenylate binding protein-interacting protein 1 and hypothetical protein LOC689651 (Paip1) alternative variant cSep08, mRNA.               |
| <a href="#">Paip1</a>    | <a href="#">Paip1.dSep08</a>    | <a href="#">365684</a> | 6447  | 949  | 4  | 102 | polyadenylate binding protein-interacting protein 1 and hypothetical protein LOC689651 (12.5 kD) (Paip1) alternative variant dSep08, mRNA.     |
| <a href="#">Paip1</a>    | <a href="#">Paip1.dSep08</a>    | <a href="#">689651</a> | 6447  | 949  | 4  | 102 | polyadenylate binding protein-interacting protein 1 and hypothetical protein LOC689651 (12.5 kD) (Paip1) alternative variant dSep08, mRNA.     |
| <a href="#">Paip2</a>    | <a href="#">Paip2.aSep08</a>    | <a href="#">361309</a> | 17723 | 775  | 4  | 147 | polyadenylate-binding protein interacting protein 2 (17.2 kD) (Paip2) alternative variant aSep08, mRNA.                                        |
| <a href="#">Paip2</a>    | <a href="#">Paip2.bSep08</a>    | <a href="#">361309</a> | 17856 | 836  | 4  | 124 | polyadenylate-binding protein interacting protein 2 (14.7 kD) (Paip2) alternative variant bSep08, complete mRNA.                               |
| <a href="#">Paip2</a>    | <a href="#">Paip2.dSep08</a>    | <a href="#">361309</a> | 18511 | 1418 | 3  | 124 | polyadenylate-binding protein interacting protein 2 (14.7 kD) (Paip2) alternative variant dSep08, mRNA.                                        |
| <a href="#">Paip2</a>    | <a href="#">Paip2.eSep08</a>    | <a href="#">361309</a> | 17587 | 625  | 4  | 114 | polyadenylate-binding protein interacting protein 2 (Paip2) alternative variant eSep08, mRNA.                                                  |

|                         |                                |                        |       |      |    |     |                                                                                                         |
|-------------------------|--------------------------------|------------------------|-------|------|----|-----|---------------------------------------------------------------------------------------------------------|
| <a href="#">Paip2</a>   | <a href="#">Paip2.fSep08</a>   | <a href="#">361309</a> | 18200 | 1111 | 3  | 101 | polyadenylate-binding protein interacting protein 2 (12.0 kD) (Paip2) alternative variant fSep08, mRNA. |
| <a href="#">Paip2</a>   | <a href="#">Paip2.gSep08</a>   | <a href="#">361309</a> | 14817 | 525  | 3  | 101 | polyadenylate-binding protein interacting protein 2 (Paip2) alternative variant gSep08, mRNA.           |
| <a href="#">Paip2b</a>  | <a href="#">Paip2b.aSep08</a>  | <a href="#">312490</a> | 27463 | 587  | 1  | 195 | poly(A) binding protein interacting protein 2B (Paip2b) alternative variant aSep08, mRNA.               |
| <a href="#">Paip2b</a>  | <a href="#">Paip2b.bSep08</a>  | <a href="#">312490</a> | 29060 | 575  | 3  | 167 | poly(A) binding protein interacting protein 2B (Paip2b) alternative variant bSep08, mRNA.               |
| <a href="#">paja</a>    | <a href="#">paja.aSep08</a>    |                        | 823   | 369  |    | 30  | putative protein (paja) mRNA.                                                                           |
| <a href="#">pajey</a>   | <a href="#">pajey.aSep08</a>   |                        | 1115  | 500  |    | 51  | putative protein (pajey) mRNA.                                                                          |
| <a href="#">Pak1</a>    | <a href="#">Pak1.bSep08</a>    | <a href="#">29431</a>  | 4747  | 758  | 2  | 60  | p21 (CDKN1A)-activated kinase 1 (6.8 kD) (Pak1) alternative variant bSep08, mRNA.                       |
| <a href="#">Pak1ip1</a> | <a href="#">Pak1ip1.bSep08</a> | <a href="#">361232</a> | 7874  | 943  | 7  | 129 | PAK1 interacting protein 1 (Pak1ip1) alternative variant bSep08, mRNA.                                  |
| <a href="#">Pak2</a>    | <a href="#">Pak2.cSep08</a>    | <a href="#">29432</a>  | 6287  | 708  | 3  |     |                                                                                                         |
| <a href="#">Pak3</a>    | <a href="#">Pak3.bSep08</a>    | <a href="#">29433</a>  | 26785 | 383  | 3  | 106 | putative protein human specific (Pak3) alternative variant bSep08, mRNA.                                |
| <a href="#">Pak3</a>    | <a href="#">Pak3.dSep08</a>    | <a href="#">29433</a>  | 26647 | 254  | 3  | 59  | putative protein human specific (Pak3) alternative variant dSep08, mRNA.                                |
| <a href="#">pakee</a>   | <a href="#">pakee.aSep08</a>   |                        | 2881  | 292  |    | 82  | uncharacterized protein like (pakee) mRNA.                                                              |
| <a href="#">pakler</a>  | <a href="#">pakler.aSep08</a>  | <a href="#">363309</a> | 40614 | 2075 | 21 | 613 | tubulin-specific chaperone d CRA c (pakler) alternative variant aSep08, mRNA.                           |
| <a href="#">Palb2</a>   | <a href="#">Palb2.aSep08</a>   | <a href="#">293452</a> | 3164  | 863  | 1  | 181 | partner and localizer of BRCA2 (19.3 kD) (Palb2) alternative variant aSep08, mRNA.                      |
| <a href="#">Palb2</a>   | <a href="#">Palb2.bSep08</a>   | <a href="#">293452</a> | 3998  | 652  | 2  | 137 | partner and localizer of BRCA2 (Palb2) alternative variant bSep08, mRNA.                                |
| <a href="#">Pald</a>    | <a href="#">Pald.bSep08</a>    | <a href="#">294508</a> | 7444  | 872  | 2  | 104 | paladin (12.5 kD) (Pald) alternative variant bSep08, mRNA.                                              |
| <a href="#">Palm</a>    | <a href="#">Palm.aSep08</a>    | <a href="#">170673</a> | 26559 | 2652 | 1  | 383 | paralemmin (41.9 kD) (Palm) alternative variant aSep08, mRNA.                                           |
| <a href="#">Palm</a>    | <a href="#">Palm.bSep08</a>    | <a href="#">170673</a> | 25289 | 1250 |    | 339 | paralemmin (37.0 kD) (Palm) alternative variant bSep08, mRNA.                                           |
| <a href="#">paloy</a>   | <a href="#">paloy.aSep08</a>   |                        | 2112  | 613  |    | 87  | putative protein (9.7 kD) (paloy) mRNA.                                                                 |
| <a href="#">Pam</a>     | <a href="#">Pam.bSep08</a>     | <a href="#">25508</a>  | 22641 | 1375 | 6  | 233 | peptidylglycine alpha-amidating monooxygenase (Pam) alternative variant bSep08, mRNA.                   |
| <a href="#">Pam</a>     | <a href="#">Pam.cSep08</a>     | <a href="#">25508</a>  | 22035 | 565  | 5  | 188 | peptidylglycine alpha-amidating monooxygenase (Pam) alternative variant cSep08, mRNA.                   |
| <a href="#">Pam</a>     | <a href="#">Pam.dSep08</a>     | <a href="#">25508</a>  | 35700 | 479  | 5  | 159 | peptidylglycine alpha-amidating monooxygenase (Pam) alternative variant dSep08, mRNA.                   |
| <a href="#">Pam</a>     | <a href="#">Pam.eSep08</a>     | <a href="#">25508</a>  | 18455 | 454  | 5  | 151 | peptidylglycine alpha-amidating monooxygenase (Pam) alternative variant eSep08, mRNA.                   |
| <a href="#">Pam</a>     | <a href="#">Pam.fSep08</a>     | <a href="#">25508</a>  | 16075 | 682  | 4  | 144 | peptidylglycine alpha-amidating monooxygenase (Pam) alternative variant fSep08, mRNA.                   |
| <a href="#">pamee</a>   | <a href="#">pamee.aSep08</a>   |                        | 978   | 555  |    | 119 | serine threonine kinase 10 (13.2 kD) (pamee) mRNA.                                                      |
| <a href="#">pamer</a>   | <a href="#">pamer.aSep08</a>   |                        | 15627 | 538  | 4  | 179 | acyl-Coenzyme A Oxidase 1 palmitoyl (pamer) alternative variant aSep08, mRNA.                           |



|                       |                              |                        |       |      |    |     |                                                                                                                              |
|-----------------------|------------------------------|------------------------|-------|------|----|-----|------------------------------------------------------------------------------------------------------------------------------|
| <a href="#">Pan3</a>  | <a href="#">Pan3.aSep08</a>  | <a href="#">360760</a> | 10641 | 2581 | 6  | 177 | PAN3 polyA specific ribonuclease subunit homolog ( <i>S. cerevisiae</i> ) (Pan3) alternative variant aSep08, mRNA.           |
| <a href="#">Pan3</a>  | <a href="#">Pan3.bSep08</a>  | <a href="#">360760</a> | 5375  | 655  | 4  | 149 | PAN3 polyA specific ribonuclease subunit homolog ( <i>S. cerevisiae</i> ) (17.0 kD) (Pan3) alternative variant bSep08, mRNA. |
| <a href="#">Pank1</a> | <a href="#">Pank1.aSep08</a> | <a href="#">294088</a> | 50172 | 937  | 5  | 283 | pantothenate kinase 1 (Pank1) alternative variant aSep08, mRNA.                                                              |
| <a href="#">Pank2</a> | <a href="#">Pank2.aSep08</a> | <a href="#">296167</a> | 21695 | 1320 | 6  | 262 | pantothenate kinase 2 (Pank2) alternative variant aSep08, mRNA.                                                              |
| <a href="#">Pank2</a> | <a href="#">Pank2.cSep08</a> | <a href="#">296167</a> | 13371 | 511  | 3  | 106 | CRA b (Pank2) alternative variant cSep08, mRNA.                                                                              |
| <a href="#">Pank2</a> | <a href="#">Pank2.dSep08</a> | <a href="#">296167</a> | 9706  | 551  | 3  | 106 | pantothenate kinase 2 (Pank2) alternative variant dSep08, mRNA.                                                              |
| <a href="#">Pank2</a> | <a href="#">Pank2.eSep08</a> | <a href="#">296167</a> | 3353  | 827  | 2  | 40  | pantothenate kinase 2 (4.5 kD) (Pank2) alternative variant eSep08, mRNA.                                                     |
| <a href="#">Pank4</a> | <a href="#">Pank4.bSep08</a> | <a href="#">171053</a> | 9507  | 1649 | 14 | 257 | pantothenate kinase 4 (28.4 kD) (Pank4) alternative variant bSep08, mRNA.                                                    |
| <a href="#">Pank4</a> | <a href="#">Pank4.cSep08</a> | <a href="#">171053</a> | 8439  | 1426 | 13 | 236 | pantothenate kinase 4 (Pank4) alternative variant cSep08, mRNA.                                                              |
| <a href="#">Pank4</a> | <a href="#">Pank4.dSep08</a> | <a href="#">171053</a> | 3388  | 745  | 7  | 115 | pantothenate kinase 4 (13.3 kD) (Pank4) alternative variant dSep08, mRNA.                                                    |
| <a href="#">Pank4</a> | <a href="#">Pank4.eSep08</a> | <a href="#">171053</a> | 3737  | 754  | 4  | 104 | pantothenate kinase 4 (Pank4) alternative variant eSep08, mRNA.                                                              |
| <a href="#">panoy</a> | <a href="#">panoy.aSep08</a> |                        | 15007 | 682  |    | 227 | tensin (panoy) mRNA.                                                                                                         |
| <a href="#">Panx2</a> | <a href="#">Panx2.bSep08</a> | <a href="#">362979</a> | 8399  | 1893 | 3  | 369 | pannexin 2 (Panx2) alternative variant bSep08, mRNA.                                                                         |
| <a href="#">Panx2</a> | <a href="#">Panx2.cSep08</a> | <a href="#">362979</a> | 3723  | 331  | 2  | 79  | pannexin 2 (Panx2) alternative variant cSep08, mRNA.                                                                         |
| <a href="#">Panx3</a> | <a href="#">Panx3.bSep08</a> | <a href="#">315567</a> | 4787  | 834  | 1  | 119 | pannexin 3 (Panx3) alternative variant bSep08, mRNA.                                                                         |
| <a href="#">Pap2d</a> | <a href="#">Pap2d.bSep08</a> | <a href="#">310812</a> | 4202  | 892  | 2  | 139 | phosphatidic acid phosphatase type 2 (15.4 kD) (Pap2d) alternative variant bSep08, mRNA.                                     |
| <a href="#">Pap2d</a> | <a href="#">Pap2d.cSep08</a> | <a href="#">310812</a> | 13021 | 425  | 2  | 76  | phosphatidic acid phosphatase type 2 (Pap2d) alternative variant cSep08, mRNA.                                               |
| <a href="#">Papd1</a> | <a href="#">Papd1.bSep08</a> | <a href="#">307050</a> | 9452  | 1011 | 5  | 332 | putative protein of metazoan origin (Papd1) alternative variant bSep08, mRNA.                                                |
| <a href="#">Papd1</a> | <a href="#">Papd1.cSep08</a> | <a href="#">307050</a> | 6686  | 828  | 4  | 246 | putative mitochondrial protein of vertebrate origin (27.6 kD) (Papd1) alternative variant cSep08, mRNA.                      |
| <a href="#">Papd1</a> | <a href="#">Papd1.dSep08</a> | <a href="#">307050</a> | 6615  | 699  | 4  | 232 | putative protein of metazoan origin (Papd1) alternative variant dSep08, mRNA.                                                |
| <a href="#">Papd1</a> | <a href="#">Papd1.eSep08</a> | <a href="#">307050</a> | 12021 | 2806 | 4  | 200 | PAP/25A-associated (22.4 kD) (Papd1) alternative variant eSep08, mRNA.                                                       |
| <a href="#">Papd1</a> | <a href="#">Papd1.fSep08</a> | <a href="#">307050</a> | 6505  | 766  | 5  | 181 | putative protein of bilateral origin (Papd1) alternative variant fSep08, mRNA.                                               |
| <a href="#">Papd4</a> | <a href="#">Papd4.bSep08</a> | <a href="#">361878</a> | 51942 | 2534 | 6  | 480 | PAP/25A-associated (55.5 kD) (Papd4) alternative variant bSep08, mRNA.                                                       |
| <a href="#">Papd4</a> | <a href="#">Papd4.cSep08</a> | <a href="#">361878</a> | 44723 | 1784 | 2  | 214 | putative protein of ancient origin (Papd4) alternative variant cSep08, mRNA.                                                 |
| <a href="#">Papd4</a> | <a href="#">Papd4.dSep08</a> | <a href="#">361878</a> | 3709  | 2490 | 2  | 32  | putative protein of mammalian origin (3.9 kD) (Papd4) alternative variant dSep08, mRNA.                                      |

|                        |                               |                        |       |      |    |     |                                                                                                              |
|------------------------|-------------------------------|------------------------|-------|------|----|-----|--------------------------------------------------------------------------------------------------------------|
| <a href="#">Papd5</a>  | <a href="#">Papd5.aSep08</a>  | <a href="#">307745</a> | 50702 | 1623 | 10 | 540 | DNA polymerase, beta-like region and PAP/25A-associated (Papd5) alternative variant aSep08, mRNA.            |
| <a href="#">Papln</a>  | <a href="#">Papln.bSep08</a>  | <a href="#">314297</a> | 4641  | 608  | 1  | 59  | papilin (6.6 kD) (Papln) alternative variant bSep08, mRNA.                                                   |
| <a href="#">Papola</a> | <a href="#">Papola.bSep08</a> | <a href="#">314417</a> | 25244 | 1369 | 10 | 317 | poly (A) polymerase alpha (36.3 kD) (Papola) alternative variant bSep08, complete mRNA.                      |
| <a href="#">Papola</a> | <a href="#">Papola.cSep08</a> | <a href="#">314417</a> | 10450 | 719  | 5  | 230 | poly (A) polymerase alpha (Papola) alternative variant cSep08, mRNA.                                         |
| <a href="#">Papola</a> | <a href="#">Papola.dSep08</a> | <a href="#">314417</a> | 9675  | 683  | 7  | 227 | poly (A) polymerase alpha (Papola) alternative variant dSep08, mRNA.                                         |
| <a href="#">Papola</a> | <a href="#">Papola.eSep08</a> | <a href="#">314417</a> | 13022 | 731  | 6  | 216 | poly (A) polymerase alpha (Papola) alternative variant eSep08, mRNA.                                         |
| <a href="#">Papolg</a> | <a href="#">Papolg.bSep08</a> | <a href="#">305586</a> | 2237  | 393  | 2  | 60  | poly(A) polymerase gamma (Papolg) alternative variant bSep08, mRNA.                                          |
| <a href="#">papor</a>  | <a href="#">papor.aSep08</a>  |                        | 6593  | 449  | 3  | 149 | probable E3 ubiquitin-protein ligase herc1 (papor) alternative variant aSep08, mRNA.                         |
| <a href="#">papor</a>  | <a href="#">papor.bSep08</a>  |                        | 634   | 132  | 1  | 43  | guanine nucleotide exchange factor p532 like (papor) alternative variant bSep08, mRNA.                       |
| <a href="#">Papss1</a> | <a href="#">Papss1.bSep08</a> | <a href="#">295443</a> | 19235 | 1019 | 1  | 237 | 3'-phosphoadenosine 5'-phosphosulfate synthase 1 (Papss1) alternative variant bSep08, mRNA.                  |
| <a href="#">Papss2</a> | <a href="#">Papss2.bSep08</a> | <a href="#">294103</a> | 84984 | 3509 | 7  | 614 | 3'-phosphoadenosine 5'-phosphosulfate synthase 2 (Papss2) alternative variant bSep08, complete mRNA.         |
| <a href="#">Papss2</a> | <a href="#">Papss2.cSep08</a> | <a href="#">294103</a> | 69657 | 783  | 1  | 241 | 3'-phosphoadenosine 5'-phosphosulfate synthase 2 (Papss2) alternative variant cSep08, mRNA.                  |
| <a href="#">Paqr4</a>  | <a href="#">Paqr4.bSep08</a>  | <a href="#">302967</a> | 1627  | 415  | 2  | 76  | progesterin and adipoQ receptor family member IV (Paqr4) alternative variant bSep08, mRNA.                   |
| <a href="#">Paqr5</a>  | <a href="#">Paqr5.bSep08</a>  | <a href="#">315741</a> | 37168 | 712  | 3  | 155 | progesterin and adipoQ receptor family member V (Paqr5) alternative variant bSep08, mRNA.                    |
| <a href="#">Paqr6</a>  | <a href="#">Paqr6.aSep08</a>  | <a href="#">681021</a> | 3263  | 1034 | 7  | 344 | progesterin and adipoQ receptor family member VI (Paqr6) alternative variant aSep08, mRNA.                   |
| <a href="#">Paqr6</a>  | <a href="#">Paqr6.bSep08</a>  | <a href="#">681021</a> | 3199  | 713  | 7  | 237 | progesterin and adipoQ receptor family member VI (Paqr6) alternative variant bSep08, mRNA.                   |
| <a href="#">Paqr6</a>  | <a href="#">Paqr6.cSep08</a>  | <a href="#">681021</a> | 2414  | 1237 | 5  | 169 | progesterin and adipoQ receptor family member VI (Paqr6) alternative variant cSep08, mRNA.                   |
| <a href="#">Paqr6</a>  | <a href="#">Paqr6.dSep08</a>  | <a href="#">681021</a> | 1603  | 610  | 5  | 144 | progesterin and adipoQ receptor family member VI (Paqr6) alternative variant dSep08, mRNA.                   |
| <a href="#">Paqr6</a>  | <a href="#">Paqr6.eSep08</a>  | <a href="#">681021</a> | 2427  | 316  | 4  | 87  | progesterin and adipoQ receptor family member VI (Paqr6) alternative variant eSep08, mRNA.                   |
| <a href="#">Paqr6</a>  | <a href="#">Paqr6.fSep08</a>  | <a href="#">681021</a> | 3907  | 1176 | 5  | 75  | progesterin and adipoQ receptor family member VI (8.2 kD) (Paqr6) alternative variant fSep08, complete mRNA. |
| <a href="#">Paqr6</a>  | <a href="#">Paqr6.gSep08</a>  | <a href="#">681021</a> | 1165  | 669  | 2  | 64  | progesterin and adipoQ receptor family member VI (Paqr6) alternative variant gSep08, mRNA.                   |
| <a href="#">Paqr8</a>  | <a href="#">Paqr8.aSep08</a>  | <a href="#">316275</a> | 50537 | 5027 | 3  | 354 | progesterin adipoQ receptor family member VIII (40.6 kD) (Paqr8) alternative variant aSep08, mRNA.           |
| <a href="#">Paqr8</a>  | <a href="#">Paqr8.cSep08</a>  | <a href="#">316275</a> | 43587 | 317  | 3  | 97  | putative protein (Paqr8) alternative variant cSep08, mRNA.                                                   |
| <a href="#">Paqr8</a>  | <a href="#">Paqr8.dSep08</a>  | <a href="#">316275</a> | 2623  | 393  | 3  | 50  | putative protein (Paqr8) alternative variant dSep08, mRNA.                                                   |
| <a href="#">Paqr8</a>  | <a href="#">Paqr8.eSep08</a>  | <a href="#">316275</a> | 44618 | 649  | 3  | 24  | putative protein (Paqr8) alternative variant eSep08, mRNA.                                                   |

|                              |                                     |                        |        |      |    |     |                                                                                                                     |
|------------------------------|-------------------------------------|------------------------|--------|------|----|-----|---------------------------------------------------------------------------------------------------------------------|
| <a href="#">Paqr8</a>        | <a href="#">Paqr8.fSep08</a>        | <a href="#">316275</a> | 2087   | 296  | 2  | 53  | putative protein (Paqr8) alternative variant fSep08, mRNA.                                                          |
| <a href="#">Paralemmin.0</a> | <a href="#">Paralemmin.0.aSep08</a> |                        | 136929 | 1102 | 4  | 298 | paralemmin 2 (Paralemmin.0) alternative variant aSep08, mRNA.                                                       |
| <a href="#">Paralemmin.0</a> | <a href="#">Paralemmin.0.bSep08</a> |                        | 72126  | 387  | 2  | 24  | putative protein (Paralemmin.0) alternative variant bSep08, mRNA.                                                   |
| <a href="#">parby</a>        | <a href="#">parby.aSep08</a>        |                        | 551    | 280  |    | 30  | putative protein (parby) mRNA.                                                                                      |
| <a href="#">Parc</a>         | <a href="#">Parc.aSep08</a>         | <a href="#">316228</a> | 38798  | 1790 | 10 | 596 | p53-associated parkin-like cytoplasmic protein (Parc) alternative variant aSep08, mRNA.                             |
| <a href="#">Parc</a>         | <a href="#">Parc.bSep08</a>         | <a href="#">316228</a> | 9354   | 1813 | 12 | 562 | p53-associated parkin-like cytoplasmic protein (Parc) alternative variant bSep08, mRNA.                             |
| <a href="#">Parc</a>         | <a href="#">Parc.cSep08</a>         | <a href="#">316228</a> | 2601   | 1790 | 4  | 555 | p53-associated parkin-like cytoplasmic protein (Parc) alternative variant cSep08, mRNA.                             |
| <a href="#">Parc</a>         | <a href="#">Parc.dSep08</a>         | <a href="#">316228</a> | 3556   | 1681 | 5  | 372 | p53-associated parkin-like cytoplasmic protein (41.1 kD) (Parc) alternative variant dSep08, mRNA.                   |
| <a href="#">Parc</a>         | <a href="#">Parc.eSep08</a>         | <a href="#">316228</a> | 29006  | 1122 | 5  | 128 | p53-associated parkin-like cytoplasmic protein (Parc) alternative variant eSep08, mRNA.                             |
| <a href="#">Parc</a>         | <a href="#">Parc.fSep08</a>         | <a href="#">316228</a> | 537    | 463  | 2  | 111 | p53-associated parkin-like cytoplasmic protein (Parc) alternative variant fSep08, mRNA.                             |
| <a href="#">parchy</a>       | <a href="#">parchy.aSep08</a>       |                        | 5946   | 233  |    | 21  | putative protein (2.4 kD) (parchy) mRNA.                                                                            |
| <a href="#">Pard3</a>        | <a href="#">Pard3.bSep08</a>        | <a href="#">81918</a>  | 147854 | 2222 | 4  | 219 | partitioning-defective protein 3 (Pard3) alternative variant bSep08, mRNA.                                          |
| <a href="#">Pard3</a>        | <a href="#">Pard3.cSep08</a>        | <a href="#">81918</a>  | 13225  | 579  | 2  | 158 | partitioning-defective 3 homolog (17.7 kD) (Pard3) alternative variant cSep08, mRNA.                                |
| <a href="#">Pard3</a>        | <a href="#">Pard3.dSep08</a>        | <a href="#">81918</a>  | 19327  | 735  | 3  | 136 | partitioning-defective 3 homolog (Pard3) alternative variant dSep08, mRNA.                                          |
| <a href="#">Pard6a</a>       | <a href="#">Pard6a.aSep08</a>       | <a href="#">307799</a> | 1779   | 1192 | 2  | 357 | par-6 homolog alpha (Pard6a) alternative variant aSep08, mRNA.                                                      |
| <a href="#">Pard6g</a>       | <a href="#">Pard6g.bSep08</a>       | <a href="#">307237</a> | 15481  | 1718 | 3  | 119 | putative protein (12.9 kD) (Pard6g) alternative variant bSep08, mRNA.                                               |
| <a href="#">pardar</a>       | <a href="#">pardar.aSep08</a>       |                        | 6279   | 1018 |    | 46  | putative protein (pardar) mRNA.                                                                                     |
| <a href="#">parfer</a>       | <a href="#">parfer.aSep08</a>       |                        | 56558  | 546  |    | 133 | putative protein of metazoan origin (parfer) mRNA.                                                                  |
| <a href="#">parflo</a>       | <a href="#">parflo.aSep08</a>       |                        | 13669  | 422  |    | 113 | putative protein (parflo) mRNA.                                                                                     |
| <a href="#">parflu</a>       | <a href="#">parflu.aSep08</a>       |                        | 55082  | 410  |    | 23  | putative protein (parflu) mRNA.                                                                                     |
| <a href="#">Parg</a>         | <a href="#">Parg.bSep08</a>         | <a href="#">83507</a>  | 61059  | 699  | 8  | 232 | poly (ADP-ribose) glycohydrolase (Parg) alternative variant bSep08, mRNA.                                           |
| <a href="#">Parg</a>         | <a href="#">Parg.cSep08</a>         | <a href="#">83507</a>  | 13172  | 715  | 3  | 137 | poly (ADP-ribose) glycohydrolase (Parg) alternative variant cSep08, mRNA.                                           |
| <a href="#">Parg</a>         | <a href="#">Parg.dSep08</a>         | <a href="#">83507</a>  | 21732  | 733  | 5  | 69  | poly (ADP-ribose) glycohydrolase (8.1 kD) (Parg) alternative variant dSep08, mRNA.                                  |
| <a href="#">pargar</a>       | <a href="#">pargar.aSep08</a>       |                        | 3872   | 460  |    | 53  | CRA a like (6.1 kD) (pargar) mRNA.                                                                                  |
| <a href="#">parja</a>        | <a href="#">parja.aSep08</a>        |                        | 1022   | 488  | 2  | 118 | putative protein (parja) alternative variant aSep08, mRNA.                                                          |
| <a href="#">parjey</a>       | <a href="#">parjey.aSep08</a>       |                        | 7843   | 432  |    | 143 | extracellular matrix protein Fras1 (parjey) mRNA.                                                                   |
| <a href="#">Park2</a>        | <a href="#">Park2.aSep08</a>        | <a href="#">56816</a>  | 27620  | 742  |    | 88  | parkin (9.9 kD) (Park2) mRNA.                                                                                       |
| <a href="#">Park7</a>        | <a href="#">Park7.aSep08</a>        | <a href="#">117287</a> | 18467  | 1391 | 7  | 214 | parkinson disease (autosomal recessive, early onset) 7 (22.5 kD) (Park7) alternative variant aSep08, complete mRNA. |

|                         |                                |                        |        |      |   |     |                                                                                                                     |
|-------------------------|--------------------------------|------------------------|--------|------|---|-----|---------------------------------------------------------------------------------------------------------------------|
| <a href="#">Park7</a>   | <a href="#">Park7.bSep08</a>   | <a href="#">117287</a> | 11684  | 797  | 7 | 189 | parkinson disease (autosomal recessive, early onset) 7 (20.0 kD) (Park7) alternative variant bSep08, complete mRNA. |
| <a href="#">Park7</a>   | <a href="#">Park7.cSep08</a>   | <a href="#">117287</a> | 11695  | 868  | 7 | 189 | parkinson disease (autosomal recessive, early onset) 7 (20.0 kD) (Park7) alternative variant cSep08, complete mRNA. |
| <a href="#">Park7</a>   | <a href="#">Park7.eSep08</a>   | <a href="#">117287</a> | 6340   | 731  | 5 | 175 | parkinson disease (autosomal recessive, early onset) 7 (Park7) alternative variant eSep08, mRNA.                    |
| <a href="#">Park7</a>   | <a href="#">Park7.fSep08</a>   | <a href="#">117287</a> | 15949  | 533  | 7 | 140 | parkinson disease (autosomal recessive, early onset) 7 (Park7) alternative variant fSep08, mRNA.                    |
| <a href="#">Park7</a>   | <a href="#">Park7.iSep08</a>   | <a href="#">117287</a> | 2017   | 638  | 2 | 64  | parkinson disease (autosomal recessive, early onset) 7 (Park7) alternative variant iSep08, mRNA.                    |
| <a href="#">parkee</a>  | <a href="#">parkee.aSep08</a>  |                        | 23801  | 588  |   | 128 | putative protein (parkee) mRNA.                                                                                     |
| <a href="#">parkler</a> | <a href="#">parkler.aSep08</a> |                        | 3198   | 199  | 2 | 63  | gag protein like (parkler) alternative variant aSep08, mRNA.                                                        |
| <a href="#">Parl</a>    | <a href="#">Parl.bSep08</a>    | <a href="#">287979</a> | 19516  | 783  | 6 | 249 | presenilin associated, rhomboid-like (Parl) alternative variant bSep08, mRNA.                                       |
| <a href="#">Parl</a>    | <a href="#">Parl.cSep08</a>    | <a href="#">287979</a> | 9868   | 687  | 5 | 177 | presenilin associated, rhomboid-like (Parl) alternative variant cSep08, mRNA.                                       |
| <a href="#">Parl</a>    | <a href="#">Parl.dSep08</a>    | <a href="#">287979</a> | 10508  | 598  | 4 | 171 | presenilin associated, rhomboid-like (19.5 kD) (Parl) alternative variant dSep08, complete mRNA.                    |
| <a href="#">Parl</a>    | <a href="#">Parl.eSep08</a>    | <a href="#">287979</a> | 5011   | 595  | 3 | 131 | presenilin associated, rhomboid-like (Parl) alternative variant eSep08, mRNA.                                       |
| <a href="#">parloy</a>  | <a href="#">parloy.aSep08</a>  |                        | 7904   | 1082 |   | 106 | apoptosis-inducing factor like (11.1 kD) (parloy) mRNA.                                                             |
| <a href="#">parmee</a>  | <a href="#">parmee.aSep08</a>  |                        | 36952  | 386  |   | 29  | putative protein (3.4 kD) (parmee) mRNA.                                                                            |
| <a href="#">parmer</a>  | <a href="#">parmer.aSep08</a>  |                        | 4773   | 710  | 6 | 118 | putative protein (12.8 kD) (parmer) alternative variant aSep08, mRNA.                                               |
| <a href="#">parmer</a>  | <a href="#">parmer.cSep08</a>  |                        | 943    | 712  | 2 | 23  | putative protein (2.7 kD) (parmer) alternative variant cSep08, mRNA.                                                |
| <a href="#">Parn</a>    | <a href="#">Parn.aSep08</a>    | <a href="#">360464</a> | 103883 | 1924 |   | 338 | poly(A)-specific ribonuclease (deadenylation nuclease) (Parn) mRNA.                                                 |
| <a href="#">parnoy</a>  | <a href="#">parnoy.aSep08</a>  |                        | 2564   | 345  |   | 66  | putative protein (parnoy) mRNA.                                                                                     |
| <a href="#">PARP.0</a>  | <a href="#">PARP.0.aSep08</a>  |                        | 10119  | 391  |   | 129 | poly polymerase 4 (PARP.0) mRNA.                                                                                    |
| <a href="#">PARP.1</a>  | <a href="#">PARP.1.aSep08</a>  |                        | 6478   | 1282 | 2 | 330 | poly polymerase family member 10 (PARP.1) alternative variant aSep08, mRNA.                                         |
| <a href="#">PARP.1</a>  | <a href="#">PARP.1.bSep08</a>  |                        | 1035   | 698  | 1 | 54  | poly polymerase family member 10 (PARP.1) alternative variant bSep08, mRNA.                                         |
| <a href="#">Parp1</a>   | <a href="#">Parp1.bSep08</a>   | <a href="#">25591</a>  | 6619   | 721  | 4 | 177 | poly (ADP-ribose) polymerase family, member 1 (Parp1) alternative variant bSep08, mRNA.                             |
| <a href="#">Parp1</a>   | <a href="#">Parp1.cSep08</a>   | <a href="#">25591</a>  | 2613   | 887  | 4 | 74  | poly (ADP-ribose) polymerase family, member 1 (Parp1) alternative variant cSep08, mRNA.                             |
| <a href="#">Parp1</a>   | <a href="#">Parp1.dSep08</a>   | <a href="#">25591</a>  | 1953   | 1704 | 2 | 122 | poly (ADP-ribose) polymerase family, member 1 (13.2 kD) (Parp1) alternative variant dSep08, mRNA.                   |
| <a href="#">Parp1</a>   | <a href="#">Parp1.gSep08</a>   | <a href="#">25591</a>  | 1141   | 413  | 2 | 40  | poly (ADP-ribose) polymerase family, member 1 (4.2 kD) (Parp1) alternative variant gSep08, mRNA.                    |
| <a href="#">Parp2</a>   | <a href="#">Parp2.bSep08</a>   | <a href="#">290027</a> | 1580   | 692  | 4 | 160 | poly polymerase family member 2 (17.6 kD) (Parp2) alternative variant bSep08, mRNA.                                 |

|                         |                                |                        |       |      |    |     |                                                                                                     |
|-------------------------|--------------------------------|------------------------|-------|------|----|-----|-----------------------------------------------------------------------------------------------------|
| <a href="#">Parp2</a>   | <a href="#">Parp2.cSep08</a>   | <a href="#">290027</a> | 923   | 580  | 3  | 157 | poly polymerase family member 2 (Parp2) alternative variant cSep08, mRNA.                           |
| <a href="#">Parp2</a>   | <a href="#">Parp2.dSep08</a>   | <a href="#">290027</a> | 8870  | 3745 | 6  | 139 | poly polymerase family member 2 (15.7 kD) (Parp2) alternative variant dSep08, mRNA.                 |
| <a href="#">Parp2</a>   | <a href="#">Parp2.eSep08</a>   | <a href="#">290027</a> | 5428  | 374  | 5  | 113 | poly polymerase family member 2 (Parp2) alternative variant eSep08, mRNA.                           |
| <a href="#">Parp3</a>   | <a href="#">Parp3.bSep08</a>   | <a href="#">300985</a> | 1801  | 796  | 2  | 254 | poly (ADP-ribose) polymerase family, member 3 (Parp3) alternative variant bSep08, mRNA.             |
| <a href="#">Parp4</a>   | <a href="#">Parp4.aSep08</a>   | <a href="#">361046</a> | 12684 | 1097 | 4  | 365 | poly (ADP-ribose) polymerase family, member 4 (Parp4) alternative variant aSep08, mRNA.             |
| <a href="#">Parp4</a>   | <a href="#">Parp4.bSep08</a>   | <a href="#">361046</a> | 12818 | 1192 | 4  | 279 | poly (ADP-ribose) polymerase family, member 4 (Parp4) alternative variant bSep08, mRNA.             |
| <a href="#">Parp4</a>   | <a href="#">Parp4.cSep08</a>   | <a href="#">361046</a> | 48591 | 613  | 6  | 157 | poly (ADP-ribose) polymerase family, member 4 (Parp4) alternative variant cSep08, mRNA.             |
| <a href="#">Parp6</a>   | <a href="#">Parp6.bSep08</a>   | <a href="#">300759</a> | 16884 | 1580 | 16 | 479 | poly (ADP-ribose) polymerase family, member 6 (Parp6) alternative variant bSep08, mRNA.             |
| <a href="#">Parp6</a>   | <a href="#">Parp6.cSep08</a>   | <a href="#">300759</a> | 14350 | 849  | 8  | 144 | poly (ADP-ribose) polymerase family, member 6 (Parp6) alternative variant cSep08, mRNA.             |
| <a href="#">Parp6</a>   | <a href="#">Parp6.dSep08</a>   | <a href="#">300759</a> | 4810  | 548  | 5  | 134 | poly (ADP-ribose) polymerase family, member 6 (Parp6) alternative variant dSep08, mRNA.             |
| <a href="#">Parp6</a>   | <a href="#">Parp6.eSep08</a>   | <a href="#">300759</a> | 1003  | 540  | 3  | 101 | poly (ADP-ribose) polymerase family, member 6 (Parp6) alternative variant eSep08, mRNA.             |
| <a href="#">Parp8</a>   | <a href="#">Parp8.aSep08</a>   | <a href="#">294762</a> | 83039 | 2688 | 24 | 804 | poly (ADP-ribose) polymerase family, member 8 (Parp8) alternative variant aSep08, mRNA.             |
| <a href="#">Parp8</a>   | <a href="#">Parp8.bSep08</a>   | <a href="#">294762</a> | 10469 | 397  | 3  | 131 | poly (ADP-ribose) polymerase family, member 8 (Parp8) alternative variant bSep08, mRNA.             |
| <a href="#">Parp8</a>   | <a href="#">Parp8.dSep08</a>   | <a href="#">294762</a> | 1647  | 537  | 2  | 60  | poly (ADP-ribose) polymerase family, member 8 (6.4 kD) (Parp8) alternative variant dSep08, mRNA.    |
| <a href="#">Parp11</a>  | <a href="#">Parp11.aSep08</a>  | <a href="#">500323</a> | 71530 | 1785 | 8  | 473 | poly (ADP-ribose) polymerase family, member 11 (Parp11) alternative variant aSep08, mRNA.           |
| <a href="#">Parp11</a>  | <a href="#">Parp11.bSep08</a>  | <a href="#">500323</a> | 59046 | 1061 | 8  | 196 | poly (ADP-ribose) polymerase family, member 11 (23.2 kD) (Parp11) alternative variant bSep08, mRNA. |
| <a href="#">Parp12</a>  | <a href="#">Parp12.aSep08</a>  | <a href="#">362343</a> | 30033 | 809  |    | 269 | poly (ADP-ribose) polymerase family, member 12 (Parp12) mRNA.                                       |
| <a href="#">Parp14</a>  | <a href="#">Parp14.aSep08</a>  | <a href="#">303903</a> | 6927  | 2579 |    | 284 | poly (ADP-ribose) polymerase family, member 14 (Parp14) mRNA.                                       |
| <a href="#">Parp16</a>  | <a href="#">Parp16.bSep08</a>  | <a href="#">315760</a> | 9781  | 871  | 1  | 168 | poly (ADP-ribose) polymerase family, member 16 (Parp16) alternative variant bSep08, mRNA.           |
| <a href="#">parpor</a>  | <a href="#">parpor.aSep08</a>  |                        | 2406  | 278  |    | 92  | guanine nucleotide exchange factor p532 (parpor) mRNA.                                              |
| <a href="#">parsa</a>   | <a href="#">parsa.aSep08</a>   |                        | 3673  | 694  |    | 122 | putative protein (13.8 kD) (parsa) mRNA.                                                            |
| <a href="#">parshee</a> | <a href="#">parshee.aSep08</a> |                        | 22334 | 599  |    | 199 | neurobeachin CRA a (parshee) mRNA.                                                                  |
| <a href="#">partu</a>   | <a href="#">partu.aSep08</a>   |                        | 9979  | 622  |    | 176 | baculoviral IAP repeat-containing 6 (partu) mRNA.                                                   |
| <a href="#">Parva</a>   | <a href="#">Parva.aSep08</a>   | <a href="#">57341</a>  | 39806 | 1788 | 4  | 519 | parvin, alpha (Parva) alternative variant aSep08, mRNA.                                             |
| <a href="#">Parva</a>   | <a href="#">Parva.cSep08</a>   | <a href="#">57341</a>  | 1279  | 539  | 2  | 35  | parvin, alpha (Parva) alternative variant cSep08, mRNA.                                             |
| <a href="#">parvar</a>  | <a href="#">parvar.aSep08</a>  |                        | 542   | 441  |    | 65  | putative protein (parvar) mRNA.                                                                     |
| <a href="#">Parvb</a>   | <a href="#">Parvb.bSep08</a>   | <a href="#">362973</a> | 13670 | 435  | 5  | 138 | parvin, beta (Parvb) alternative variant bSep08, mRNA.                                              |

|                           |                                  |                        |       |      |    |     |                                                                                                              |
|---------------------------|----------------------------------|------------------------|-------|------|----|-----|--------------------------------------------------------------------------------------------------------------|
| <a href="#">Parvb</a>     | <a href="#">Parvb.cSep08</a>     | <a href="#">362973</a> | 9178  | 397  | 3  | 77  | parvin, beta (Parvb) alternative variant cSep08, mRNA.                                                       |
| <a href="#">Parvb</a>     | <a href="#">Parvb.dSep08</a>     | <a href="#">362973</a> | 62325 | 418  | 5  | 39  | parvin, beta (Parvb) alternative variant dSep08, mRNA.                                                       |
| <a href="#">Parvg</a>     | <a href="#">Parvg.bSep08</a>     | <a href="#">689069</a> | 8506  | 464  | 2  | 75  | parvin, gamma (Parvg) alternative variant bSep08, mRNA.                                                      |
| <a href="#">parwey</a>    | <a href="#">parwey.aSep08</a>    |                        | 3699  | 2095 |    | 137 | putative protein of vertebrate origin (parwey) mRNA.                                                         |
| <a href="#">pasa</a>      | <a href="#">pasa.aSep08</a>      |                        | 38284 | 851  | 1  | 125 | putative protein (pasa) alternative variant aSep08, mRNA.                                                    |
| <a href="#">pasa</a>      | <a href="#">pasa.bSep08</a>      |                        | 38310 | 1783 | 1  | 44  | putative protein (pasa) alternative variant bSep08, mRNA.                                                    |
| <a href="#">pashee</a>    | <a href="#">pashee.aSep08</a>    |                        | 7186  | 2241 |    | 179 | neurobeachin (pashee) mRNA.                                                                                  |
| <a href="#">Pask</a>      | <a href="#">Pask.bSep08</a>      | <a href="#">301617</a> | 3837  | 535  | 1  | 140 | pask protein (Pask) alternative variant bSep08, mRNA.                                                        |
| <a href="#">Patatin.0</a> | <a href="#">Patatin.0.aSep08</a> |                        | 5479  | 733  |    | 244 | patatin (Patatin.0) mRNA.                                                                                    |
| <a href="#">Pat1</a>      | <a href="#">Pat1.bSep08</a>      | <a href="#">361736</a> | 19582 | 3067 | 12 | 500 | protein associated with topoisomerase II homolog 1 (yeast) (Pat1) alternative variant bSep08, mRNA.          |
| <a href="#">Pat1</a>      | <a href="#">Pat1.cSep08</a>      | <a href="#">361736</a> | 5752  | 2961 | 3  | 116 | protein associated with topoisomerase II homolog 1 (yeast) (Pat1) alternative variant cSep08, mRNA.          |
| <a href="#">Pat1</a>      | <a href="#">Pat1.eSep08</a>      | <a href="#">361736</a> | 7966  | 579  | 6  | 61  | protein associated with topoisomerase II homolog 1 (yeast) (7.0 kD) (Pat1) alternative variant eSep08, mRNA. |
| <a href="#">patu</a>      | <a href="#">patu.aSep08</a>      |                        | 5623  | 1368 |    | 286 | neurexin 1 CRA c (patu) alternative variant aSep08, mRNA.                                                    |
| <a href="#">pavar</a>     | <a href="#">pavar.aSep08</a>     |                        | 17355 | 394  |    | 130 | protein tyrosine phosphatase receptor type U CRA a (pavar) mRNA.                                             |
| <a href="#">pawby</a>     | <a href="#">pawby.aSep08</a>     |                        | 6463  | 601  |    | 200 | taf1 RNA polymerase II TATA box binding protein - associated factor 250kDa CRA a like (pawby) mRNA.          |
| <a href="#">pawchy</a>    | <a href="#">pawchy.aSep08</a>    |                        | 6573  | 430  |    | 43  | putative protein (4.9 kD) (pawchy) mRNA.                                                                     |
| <a href="#">pawdar</a>    | <a href="#">pawdar.aSep08</a>    |                        | 1465  | 425  |    | 32  | putative protein (3.7 kD) (pawdar) mRNA.                                                                     |
| <a href="#">pawey</a>     | <a href="#">pawey.aSep08</a>     |                        | 2675  | 728  | 1  | 45  | putative protein (pawey) alternative variant aSep08, mRNA.                                                   |
| <a href="#">pawey</a>     | <a href="#">pawey.bSep08</a>     |                        | 2148  | 785  | 1  | 14  | putative protein (1.4 kD) (pawey) alternative variant bSep08, mRNA.                                          |
| <a href="#">pawfer</a>    | <a href="#">pawfer.aSep08</a>    |                        | 37526 | 362  |    | 120 | putative protein of mammalian origin (pawfer) mRNA.                                                          |
| <a href="#">pawflo</a>    | <a href="#">pawflo.bSep08</a>    |                        | 3886  | 1225 | 3  | 85  | putative cytoplasmic protein (9.8 kD) (pawflo) alternative variant bSep08, mRNA.                             |
| <a href="#">pawflo</a>    | <a href="#">pawflo.cSep08</a>    |                        | 2937  | 993  | 2  | 71  | putative protein (7.9 kD) (pawflo) alternative variant cSep08, mRNA.                                         |
| <a href="#">pawflo</a>    | <a href="#">pawflo.dSep08</a>    |                        | 2595  | 907  | 2  | 101 | putative protein (pawflo) alternative variant dSep08, mRNA.                                                  |
| <a href="#">pawflo</a>    | <a href="#">pawflo.eSep08</a>    |                        | 2142  | 793  | 2  | 118 | putative nuclear protein (12.5 kD) (pawflo) alternative variant eSep08, mRNA.                                |
| <a href="#">pawflo</a>    | <a href="#">pawflo.fSep08</a>    |                        | 3986  | 730  | 3  | 85  | putative cytoplasmic protein (9.8 kD) (pawflo) alternative variant fSep08, mRNA.                             |
| <a href="#">pawflo</a>    | <a href="#">pawflo.gSep08</a>    |                        | 2249  | 644  | 2  | 111 | putative protein (pawflo) alternative variant gSep08, mRNA.                                                  |
| <a href="#">pawflo</a>    | <a href="#">pawflo.jSep08</a>    |                        | 1312  | 555  | 2  | 49  | putative protein (5.0 kD) (pawflo) alternative variant jSep08, mRNA.                                         |
| <a href="#">pawflo</a>    | <a href="#">pawflo.kSep08</a>    |                        | 3682  | 467  | 3  | 40  | putative protein (pawflo) alternative variant kSep08, mRNA.                                                  |
| <a href="#">pawflu</a>    | <a href="#">pawflu.aSep08</a>    |                        | 2544  | 938  | 1  | 47  | putative protein (5.3 kD) (pawflu) alternative variant aSep08, mRNA.                                         |

|                         |                                |                        |       |      |   |     |                                                                                                             |
|-------------------------|--------------------------------|------------------------|-------|------|---|-----|-------------------------------------------------------------------------------------------------------------|
| <a href="#">pawflu</a>  | <a href="#">pawflu.bSep08</a>  |                        | 6316  | 686  | 2 | 79  | putative protein (pawflu) alternative variant bSep08, mRNA.                                                 |
| <a href="#">pawgar</a>  | <a href="#">pawgar.aSep08</a>  |                        | 18864 | 539  |   | 69  | putative protein (7.5 kD) (pawgar) mRNA.                                                                    |
| <a href="#">pawja</a>   | <a href="#">pawja.aSep08</a>   |                        | 4934  | 715  |   | 74  | putative protein (8.6 kD) (pawja) mRNA.                                                                     |
| <a href="#">pawjey</a>  | <a href="#">pawjey.aSep08</a>  |                        | 7321  | 1780 |   | 14  | putative protein (1.7 kD) (pawjey) mRNA.                                                                    |
| <a href="#">pawkler</a> | <a href="#">pawkler.aSep08</a> |                        | 8560  | 703  | 1 | 234 | carboxylesterase (pawkler) alternative variant aSep08, mRNA.                                                |
| <a href="#">pawkler</a> | <a href="#">pawkler.bSep08</a> |                        | 8240  | 703  | 1 | 201 | carboxylesterase (pawkler) alternative variant bSep08, mRNA.                                                |
| <a href="#">pawloy</a>  | <a href="#">pawloy.aSep08</a>  |                        | 512   | 344  |   | 90  | putative protein (pawloy) mRNA.                                                                             |
| <a href="#">pawmee</a>  | <a href="#">pawmee.aSep08</a>  |                        | 10919 | 437  |   | 78  | putative protein (9.0 kD) (pawmee) mRNA.                                                                    |
| <a href="#">pawmer</a>  | <a href="#">pawmer.aSep08</a>  |                        | 1538  | 920  |   | 68  | putative protein (7.4 kD) (pawmer) mRNA.                                                                    |
| <a href="#">pawnoy</a>  | <a href="#">pawnoy.aSep08</a>  |                        | 8416  | 528  |   | 175 | ubiquitin specific peptidase 37 (pawnoy) mRNA.                                                              |
| <a href="#">pawpor</a>  | <a href="#">pawpor.aSep08</a>  |                        | 4087  | 541  |   | 179 | guanine nucleotide exchange factor p532 (pawpor) mRNA.                                                      |
| <a href="#">pawsa</a>   | <a href="#">pawsa.aSep08</a>   |                        | 6132  | 480  |   | 94  | putative protein (pawsa) mRNA.                                                                              |
| <a href="#">pawshee</a> | <a href="#">pawshee.aSep08</a> |                        | 20272 | 421  |   | 140 | neurobeachin (pawshee) mRNA.                                                                                |
| <a href="#">pawtu</a>   | <a href="#">pawtu.aSep08</a>   |                        | 6314  | 425  |   | 141 | baculoviral IAP repeat-containing 6 (pawtu) mRNA.                                                           |
| <a href="#">pawvar</a>  | <a href="#">pawvar.aSep08</a>  |                        | 36624 | 314  |   | 104 | putative protein (pawvar) mRNA.                                                                             |
| <a href="#">pawwey</a>  | <a href="#">pawwey.aSep08</a>  |                        | 2235  | 283  |   | 93  | putative protein, with a coiled coil domain, of mammalian origin (pawwey) mRNA.                             |
| <a href="#">Pax3</a>    | <a href="#">Pax3.aSep08</a>    | <a href="#">114502</a> | 32750 | 1730 | 6 | 230 | paired box gene 3 (Pax3) alternative variant aSep08, mRNA.                                                  |
| <a href="#">Pax4</a>    | <a href="#">Pax4.bSep08</a>    | <a href="#">83630</a>  | 3965  | 462  | 1 | 139 | paired box gene 4 (Pax4) alternative variant bSep08, mRNA.                                                  |
| <a href="#">Pax7</a>    | <a href="#">Pax7.aSep08</a>    | <a href="#">500574</a> | 55984 | 314  |   | 104 | paired box gene 7 (Pax7) mRNA.                                                                              |
| <a href="#">Pax8</a>    | <a href="#">Pax8.bSep08</a>    | <a href="#">81819</a>  | 2009  | 689  | 1 | 78  | paired box gene 8 (Pax8) alternative variant bSep08, mRNA.                                                  |
| <a href="#">Paxip1</a>  | <a href="#">Paxip1.bSep08</a>  | <a href="#">311944</a> | 9047  | 717  | 7 | 239 | PAX interacting (with transcription-activation domain) protein 1 (Paxip1) alternative variant bSep08, mRNA. |
| <a href="#">Paxip1</a>  | <a href="#">Paxip1.cSep08</a>  | <a href="#">311944</a> | 9656  | 902  | 5 | 205 | PAX interacting (with transcription-activation domain) protein 1 (Paxip1) alternative variant cSep08, mRNA. |
| <a href="#">PB1.0</a>   | <a href="#">PB1.0.aSep08</a>   |                        | 17645 | 1795 | 3 | 540 | neighbor of Brca1 gene 1 (PB1.0) alternative variant aSep08, mRNA.                                          |
| <a href="#">PB1.0</a>   | <a href="#">PB1.0.bSep08</a>   |                        | 3161  | 706  |   | 234 | neighbor of Brca1 gene 1 CRA a (PB1.0) alternative variant bSep08, mRNA.                                    |
| <a href="#">PB1.0</a>   | <a href="#">PB1.0.cSep08</a>   |                        | 13107 | 753  | 2 | 191 | neighbor of Brca1 gene 1 (PB1.0) alternative variant cSep08, mRNA.                                          |
| <a href="#">PB1.0</a>   | <a href="#">PB1.0.dSep08</a>   |                        | 13488 | 700  | 2 | 185 | neighbor of Brca1 gene 1 (PB1.0) alternative variant dSep08, mRNA.                                          |
| <a href="#">PBD.0</a>   | <a href="#">PBD.0.aSep08</a>   |                        | 5090  | 391  |   | 130 | CRA a (PBD.0) mRNA.                                                                                         |
| <a href="#">Pbld</a>    | <a href="#">Pbld.bSep08</a>    | <a href="#">171564</a> | 13556 | 1206 | 6 | 278 | MAWD binding protein like (30.5 kD) (Pbld) alternative variant bSep08, complete mRNA.                       |
| <a href="#">Pbld</a>    | <a href="#">Pbld.cSep08</a>    | <a href="#">171564</a> | 6824  | 678  | 4 | 189 | MAWD binding protein like (Pbld) alternative variant cSep08, mRNA.                                          |

|                        |                               |                        |        |      |    |     |                                                                                                                                                        |
|------------------------|-------------------------------|------------------------|--------|------|----|-----|--------------------------------------------------------------------------------------------------------------------------------------------------------|
| <a href="#">Pbld</a>   | <a href="#">Pbld.dSep08</a>   | <a href="#">171564</a> | 840    | 218  | 1  | 72  | MAWD binding protein like (Pbld) alternative variant dSep08, mRNA.                                                                                     |
| <a href="#">Pbrm1</a>  | <a href="#">Pbrm1.aSep08</a>  | <a href="#">306254</a> | 16170  | 3821 | 5  | 361 | polybromo 1 (Pbrm1) alternative variant aSep08, mRNA.                                                                                                  |
| <a href="#">Pbrm1</a>  | <a href="#">Pbrm1.bSep08</a>  | <a href="#">306254</a> | 13066  | 1091 | 3  | 228 | polybromo 1 (Pbrm1) alternative variant bSep08, mRNA.                                                                                                  |
| <a href="#">Pbrm1</a>  | <a href="#">Pbrm1.cSep08</a>  | <a href="#">306254</a> | 9680   | 417  | 2  | 139 | polybromo 1 (Pbrm1) alternative variant cSep08, mRNA.                                                                                                  |
| <a href="#">Pbsn</a>   | <a href="#">Pbsn.aSep08</a>   | <a href="#">54193</a>  | 38654  | 755  | 1  | 181 | probasin (21.2 kD) (Pbsn) alternative variant aSep08, mRNA.                                                                                            |
| <a href="#">Pbx1</a>   | <a href="#">Pbx1.bSep08</a>   | <a href="#">304947</a> | 275632 | 2154 | 7  | 347 | pre-B-cell leukemia transcription factor 1 (38.4 kD) (Pbx1) alternative variant bSep08, mRNA.                                                          |
| <a href="#">Pbx1</a>   | <a href="#">Pbx1.cSep08</a>   | <a href="#">304947</a> | 5378   | 1936 | 2  | 108 | pre-B-cell leukemia transcription factor 1 (Pbx1) alternative variant cSep08, mRNA.                                                                    |
| <a href="#">Pbx2</a>   | <a href="#">Pbx2.bSep08</a>   | <a href="#">406164</a> | 432    | 348  | 1  | 115 | pre-B-cell leukemia transcription factor 2 (Pbx2) alternative variant bSep08, mRNA.                                                                    |
| <a href="#">Pbx3</a>   | <a href="#">Pbx3.bSep08</a>   | <a href="#">311876</a> | 29134  | 1814 | 4  | 84  | pre B-cell leukemia transcription factor 3 (Pbx3) alternative variant bSep08, mRNA.                                                                    |
| <a href="#">Pbx3</a>   | <a href="#">Pbx3.cSep08</a>   | <a href="#">311876</a> | 170000 | 1763 | 3  |     |                                                                                                                                                        |
| <a href="#">Pbx4</a>   | <a href="#">Pbx4.bSep08</a>   | <a href="#">361131</a> | 5171   | 746  | 1  | 169 | pre-B-cell leukemia homeobox 4 (18.4 kD) (Pbx4) alternative variant bSep08, mRNA.                                                                      |
| <a href="#">Pbxip1</a> | <a href="#">Pbxip1.bSep08</a> | <a href="#">310644</a> | 6679   | 1130 | 1  | 234 | pre-B-cell leukemia transcription factor interacting protein 1 (24.7 kD) (Pbxip1) alternative variant bSep08, mRNA.                                    |
| <a href="#">Pcaf</a>   | <a href="#">Pcaf.aSep08</a>   | <a href="#">301164</a> | 36744  | 1689 | 13 | 548 | p300/CBP-associated factor (Pcaf) alternative variant aSep08, mRNA.                                                                                    |
| <a href="#">Pcaf</a>   | <a href="#">Pcaf.bSep08</a>   | <a href="#">301164</a> | 12642  | 772  | 5  | 183 | p300/CBP-associated factor (Pcaf) alternative variant bSep08, mRNA.                                                                                    |
| <a href="#">Pcbd1</a>  | <a href="#">Pcbd1.bSep08</a>  | <a href="#">29700</a>  | 1464   | 925  | 1  | 87  | pterin 4 alpha carbinolamine dehydratase/dimerization cofactor of hepatocyte nuclear factor 1 alpha (TCF1) 1 (Pcbd1) alternative variant bSep08, mRNA. |
| <a href="#">Pcbp2</a>  | <a href="#">Pcbp2.aSep08</a>  | <a href="#">363005</a> | 13611  | 1110 | 11 | 324 | poly(rC) binding protein 2 (Pcbp2) alternative variant aSep08, mRNA.                                                                                   |
| <a href="#">Pcbp2</a>  | <a href="#">Pcbp2.bSep08</a>  | <a href="#">363005</a> | 14260  | 1018 | 9  | 218 | poly(rC) binding protein 2 (Pcbp2) alternative variant bSep08, mRNA.                                                                                   |
| <a href="#">Pcbp2</a>  | <a href="#">Pcbp2.cSep08</a>  | <a href="#">363005</a> | 14286  | 951  | 8  | 206 | poly(rC) binding protein 2 (Pcbp2) alternative variant cSep08, mRNA.                                                                                   |
| <a href="#">Pcbp2</a>  | <a href="#">Pcbp2.dSep08</a>  | <a href="#">363005</a> | 12081  | 1381 | 7  | 151 | poly(rC) binding protein 2 (Pcbp2) alternative variant dSep08, mRNA.                                                                                   |
| <a href="#">Pcbp2</a>  | <a href="#">Pcbp2.eSep08</a>  | <a href="#">363005</a> | 11517  | 778  | 6  | 142 | poly(rC) binding protein 2 (Pcbp2) alternative variant eSep08, mRNA.                                                                                   |
| <a href="#">Pcbp2</a>  | <a href="#">Pcbp2.fSep08</a>  | <a href="#">363005</a> | 3066   | 524  | 3  | 128 | poly(rC) binding protein 2 (Pcbp2) alternative variant fSep08, mRNA.                                                                                   |
| <a href="#">Pcbp2</a>  | <a href="#">Pcbp2.gSep08</a>  | <a href="#">363005</a> | 8597   | 2119 | 2  | 21  | poly(rC) binding protein 2 (2.4 kD) (Pcbp2) alternative variant gSep08, mRNA.                                                                          |
| <a href="#">Pcbp2</a>  | <a href="#">Pcbp2.hSep08</a>  | <a href="#">363005</a> | 8590   | 1478 | 3  | 60  | poly(rC) binding protein 2 (6.7 kD) (Pcbp2) alternative variant hSep08, mRNA.                                                                          |
| <a href="#">Pcbp2</a>  | <a href="#">Pcbp2.iSep08</a>  | <a href="#">363005</a> | 4094   | 730  | 3  | 60  | poly(rC) binding protein 2 (6.7 kD) (Pcbp2) alternative variant iSep08, mRNA.                                                                          |
| <a href="#">Pcbp2</a>  | <a href="#">Pcbp2.jSep08</a>  | <a href="#">363005</a> | 3409   | 565  | 5  | 24  | poly(rC) binding protein 2 (Pcbp2) alternative variant jSep08, mRNA.                                                                                   |



|                        |                               |                        |        |      |    |      |                                                                                                                         |
|------------------------|-------------------------------|------------------------|--------|------|----|------|-------------------------------------------------------------------------------------------------------------------------|
| <a href="#">Pcbp2</a>  | <a href="#">Pcbp2.kSep08</a>  | <a href="#">363005</a> | 491    | 400  | 2  | 27   | poly(rC) binding protein 2 (Pcbp2) alternative variant kSep08, mRNA.                                                    |
| <a href="#">Pcbp3</a>  | <a href="#">Pcbp3.aSep08</a>  | <a href="#">294336</a> | 201107 | 2118 | 4  | 371  | poly(rC) binding protein 3 (39.3 kD) (Pcbp3) alternative variant aSep08, complete mRNA.                                 |
| <a href="#">Pcbp3</a>  | <a href="#">Pcbp3.bSep08</a>  | <a href="#">294336</a> | 48734  | 1100 | 4  | 245  | poly(rC) binding protein 3 (Pcbp3) alternative variant bSep08, mRNA.                                                    |
| <a href="#">Pcbp4</a>  | <a href="#">Pcbp4.aSep08</a>  | <a href="#">363133</a> | 10166  | 1951 | 3  | 403  | poly(rC) binding protein 4 (41.5 kD) (Pcbp4) alternative variant aSep08, complete mRNA.                                 |
| <a href="#">Pcbp4</a>  | <a href="#">Pcbp4.bSep08</a>  | <a href="#">363133</a> | 1524   | 1418 | 1  | 220  | poly(rC) binding protein 4 (23.2 kD) (Pcbp4) alternative variant bSep08, mRNA.                                          |
| <a href="#">Pcbp4</a>  | <a href="#">Pcbp4.cSep08</a>  | <a href="#">363133</a> | 1647   | 564  | 1  | 187  | poly(rC) binding protein 4 (Pcbp4) alternative variant cSep08, mRNA.                                                    |
| <a href="#">Pcbp4</a>  | <a href="#">Pcbp4.dSep08</a>  | <a href="#">363133</a> | 1537   | 840  | 1  | 73   | poly(rC) binding protein 4 (Pcbp4) alternative variant dSep08, mRNA.                                                    |
| <a href="#">Pcca</a>   | <a href="#">Pcca.bSep08</a>   | <a href="#">687008</a> | 193510 | 1401 | 12 | 374  | propionyl-coenzyme A carboxylase, alpha polypeptide (Pcca) alternative variant bSep08, mRNA.                            |
| <a href="#">Pcca</a>   | <a href="#">Pcca.cSep08</a>   | <a href="#">687008</a> | 13140  | 599  | 4  | 68   | propionyl-coenzyme A carboxylase, alpha polypeptide (Pcca) alternative variant cSep08, mRNA.                            |
| <a href="#">Pcca</a>   | <a href="#">Pcca.dSep08</a>   | <a href="#">687008</a> | 17157  | 516  | 2  | 63   | propionyl-coenzyme A carboxylase, alpha polypeptide (Pcca) alternative variant dSep08, mRNA.                            |
| <a href="#">Pcca</a>   | <a href="#">Pcca.eSep08</a>   | <a href="#">687008</a> | 34677  | 1298 | 6  | 71   | propionyl-coenzyme A carboxylase, alpha polypeptide (Pcca) alternative variant eSep08, complete mRNA.                   |
| <a href="#">Pcdh1</a>  | <a href="#">Pcdh1.aSep08</a>  | <a href="#">307481</a> | 9195   | 1995 | 3  | 664  | protocadherin 1 (Pcdh1) alternative variant aSep08, mRNA.                                                               |
| <a href="#">Pcdh8</a>  | <a href="#">Pcdh8.bSep08</a>  | <a href="#">64865</a>  | 3036   | 1293 | 2  | 303  | protocadherin 8 (Pcdh8) alternative variant bSep08, mRNA.                                                               |
| <a href="#">Pcdh9</a>  | <a href="#">Pcdh9.aSep08</a>  | <a href="#">306091</a> | 55526  | 364  |    | 69   | protocadherin 9 (Pcdh9) mRNA.                                                                                           |
| <a href="#">Pcdh10</a> | <a href="#">Pcdh10.aSep08</a> | <a href="#">361943</a> | 19448  | 1253 | 5  | 339  | protocadherin 10 (Pcdh10) alternative variant aSep08, mRNA.                                                             |
| <a href="#">Pcdh10</a> | <a href="#">Pcdh10.bSep08</a> | <a href="#">361943</a> | 28577  | 754  | 2  | 105  | protocadherin 10 (Pcdh10) alternative variant bSep08, mRNA.                                                             |
| <a href="#">Pcdh12</a> | <a href="#">Pcdh12.aSep08</a> | <a href="#">116808</a> | 9139   | 891  | 3  | 192  | protocadherin 12 (Pcdh12) alternative variant aSep08, mRNA.                                                             |
| <a href="#">Pcdh15</a> | <a href="#">Pcdh15.aSep08</a> | <a href="#">690865</a> | 19880  | 362  |    | 120  | protocadherin 15 (Pcdh15) mRNA.                                                                                         |
| <a href="#">Pcdh17</a> | <a href="#">Pcdh17.bSep08</a> | <a href="#">306055</a> | 30703  | 390  | 3  | 129  | protocadherin 17 (Pcdh17) alternative variant bSep08, mRNA.                                                             |
| <a href="#">Pcdh18</a> | <a href="#">Pcdh18.aSep08</a> | <a href="#">295027</a> | 13894  | 5098 |    | 1135 | protocadherin 18 (125.6 kD) (Pcdh18) mRNA.                                                                              |
| <a href="#">Pcdh19</a> | <a href="#">Pcdh19.aSep08</a> | <a href="#">317183</a> | 98770  | 2595 |    | 633  | protocadherin 19 (Pcdh19) mRNA.                                                                                         |
| <a href="#">Pcdh24</a> | <a href="#">Pcdh24.aSep08</a> | <a href="#">291002</a> | 8406   | 1685 | 13 | 530  | protocadherin 24 (Pcdh24) alternative variant aSep08, mRNA.                                                             |
| <a href="#">Pcdh24</a> | <a href="#">Pcdh24.bSep08</a> | <a href="#">291002</a> | 6835   | 1092 | 5  | 364  | protocadherin 24 (Pcdh24) alternative variant bSep08, mRNA.                                                             |
| <a href="#">Pcf11</a>  | <a href="#">Pcf11.aSep08</a>  | <a href="#">361605</a> | 20200  | 5162 | 13 | 1356 | cleavage and polyadenylation factor subunit homolog (S. cerevisiae) (Pcf11) alternative variant aSep08, mRNA.           |
| <a href="#">Pcf11</a>  | <a href="#">Pcf11.bSep08</a>  | <a href="#">361605</a> | 2824   | 968  | 3  | 112  | cleavage and polyadenylation factor subunit homolog (S. cerevisiae) (13.3 kD) (Pcf11) alternative variant bSep08, mRNA. |

|                       |                              |                        |       |      |    |     |                                                                                                                        |
|-----------------------|------------------------------|------------------------|-------|------|----|-----|------------------------------------------------------------------------------------------------------------------------|
| <a href="#">Pcf11</a> | <a href="#">Pcf11.cSep08</a> | <a href="#">361605</a> | 1317  | 504  | 2  | 72  | cleavage and polyadenylation factor subunit homolog ( <i>S. cerevisiae</i> ) (Pcf11) alternative variant cSep08, mRNA. |
| <a href="#">Pcf11</a> | <a href="#">Pcf11.dSep08</a> | <a href="#">361605</a> | 618   | 179  | 2  | 38  | cleavage and polyadenylation factor subunit homolog ( <i>S. cerevisiae</i> ) (Pcf11) alternative variant dSep08, mRNA. |
| <a href="#">Pcgf1</a> | <a href="#">Pcgf1.aSep08</a> | <a href="#">312480</a> | 2660  | 834  | 9  | 224 | polycomb group ring finger 1 (Pcgf1) alternative variant aSep08, mRNA.                                                 |
| <a href="#">Pcgf1</a> | <a href="#">Pcgf1.bSep08</a> | <a href="#">312480</a> | 2595  | 1076 | 9  | 176 | polycomb group ring finger 1 (20.9 kD) (Pcgf1) alternative variant bSep08, mRNA.                                       |
| <a href="#">Pcgf1</a> | <a href="#">Pcgf1.dSep08</a> | <a href="#">312480</a> | 705   | 619  | 2  | 73  | polycomb group ring finger 1 (8.2 kD) (Pcgf1) alternative variant dSep08, mRNA.                                        |
| <a href="#">Pcgf3</a> | <a href="#">Pcgf3.aSep08</a> | <a href="#">305624</a> | 55159 | 1779 | 11 | 241 | ring finger 3 (28.0 kD) (Pcgf3) alternative variant aSep08, mRNA.                                                      |
| <a href="#">Pcgf3</a> | <a href="#">Pcgf3.bSep08</a> | <a href="#">305624</a> | 39124 | 763  | 6  | 192 | ring finger 3 (Pcgf3) alternative variant bSep08, mRNA.                                                                |
| <a href="#">Pcgf5</a> | <a href="#">Pcgf5.aSep08</a> | <a href="#">681178</a> | 40197 | 824  | 1  | 174 | polycomb group ring finger 5 (Pcgf5) alternative variant aSep08, mRNA.                                                 |
| <a href="#">Pcgf5</a> | <a href="#">Pcgf5.bSep08</a> | <a href="#">681178</a> | 88426 | 760  | 2  | 155 | polycomb group ring finger 5 (Pcgf5) alternative variant bSep08, mRNA.                                                 |
| <a href="#">Pcgf6</a> | <a href="#">Pcgf6.aSep08</a> | <a href="#">309457</a> | 4969  | 838  | 4  | 278 | polycomb group ring finger 6 (Pcgf6) alternative variant aSep08, mRNA.                                                 |
| <a href="#">Pcgf6</a> | <a href="#">Pcgf6.bSep08</a> | <a href="#">309457</a> | 1901  | 780  | 1  | 200 | polycomb group ring finger 6 (Pcgf6) alternative variant bSep08, mRNA.                                                 |
| <a href="#">Pcif1</a> | <a href="#">Pcif1.bSep08</a> | <a href="#">362269</a> | 5452  | 2423 | 3  | 126 | PDX1 C-terminal inhibiting factor 1 (14.2 kD) (Pcif1) alternative variant bSep08, mRNA.                                |
| <a href="#">Pck1</a>  | <a href="#">Pck1.bSep08</a>  | <a href="#">362282</a> | 2952  | 2253 | 3  | 181 | phosphoenolpyruvate carboxykinase 1, cytosolic (Pck1) alternative variant bSep08, mRNA.                                |
| <a href="#">Pck1</a>  | <a href="#">Pck1.cSep08</a>  | <a href="#">362282</a> | 1308  | 764  | 3  | 137 | phosphoenolpyruvate carboxykinase 1, cytosolic (15.6 kD) (Pck1) alternative variant cSep08, mRNA.                      |
| <a href="#">Pck2</a>  | <a href="#">Pck2.bSep08</a>  | <a href="#">361042</a> | 2773  | 1346 | 5  | 349 | phosphoenolpyruvate carboxykinase 2 (mitochondrial) (38.2 kD) (Pck2) alternative variant bSep08, mRNA.                 |
| <a href="#">Pcm1</a>  | <a href="#">Pcm1.aSep08</a>  | <a href="#">81740</a>  | 39776 | 2668 | 17 | 781 | pericentriolar material 1 (Pcm1) alternative variant aSep08, mRNA.                                                     |
| <a href="#">Pcm1</a>  | <a href="#">Pcm1.bSep08</a>  | <a href="#">81740</a>  | 35706 | 1930 | 11 | 467 | pericentriolar material 1 (Pcm1) alternative variant bSep08, mRNA.                                                     |
| <a href="#">Pcm1</a>  | <a href="#">Pcm1.cSep08</a>  | <a href="#">81740</a>  | 1163  | 413  | 2  | 122 | pericentriolar material 1 (Pcm1) alternative variant cSep08, mRNA.                                                     |
| <a href="#">Pcm1</a>  | <a href="#">Pcm1.dSep08</a>  | <a href="#">81740</a>  | 2811  | 703  | 3  | 79  | pericentriolar material 1 (Pcm1) alternative variant dSep08, mRNA.                                                     |
| <a href="#">Pcmt1</a> | <a href="#">Pcmt1.bSep08</a> | <a href="#">25604</a>  | 14259 | 963  | 6  | 170 | protein-L-isoaspartate (D-aspartate) O-methyltransferase 1 (Pcmt1) alternative variant bSep08, mRNA.                   |
| <a href="#">Pcmt1</a> | <a href="#">Pcmt1.cSep08</a> | <a href="#">25604</a>  | 6770  | 643  | 4  | 163 | protein-L-isoaspartate (D-aspartate) O-methyltransferase 1 (Pcmt1) alternative variant cSep08, mRNA.                   |
| <a href="#">Pcnp</a>  | <a href="#">Pcnp.bSep08</a>  | <a href="#">288165</a> | 14520 | 2215 | 5  | 178 | PEST proteolytic signal containing nuclear protein (19.0 kD) (Pcnp) alternative variant bSep08, complete mRNA.         |
| <a href="#">Pcnp</a>  | <a href="#">Pcnp.cSep08</a>  | <a href="#">288165</a> | 13100 | 743  | 5  | 162 | PEST proteolytic signal containing nuclear protein (Pcnp) alternative variant cSep08, mRNA.                            |
| <a href="#">Pcnp</a>  | <a href="#">Pcnp.dSep08</a>  | <a href="#">288165</a> | 13119 | 1014 | 5  | 111 | PEST proteolytic signal containing nuclear protein (12.1 kD) (Pcnp) alternative variant dSep08, complete mRNA.         |

|                        |                               |                        |        |      |    |     |                                                                                                       |
|------------------------|-------------------------------|------------------------|--------|------|----|-----|-------------------------------------------------------------------------------------------------------|
| <a href="#">Pcnp</a>   | <a href="#">Pcnp.eSep08</a>   | <a href="#">288165</a> | 8495   | 1897 | 4  | 110 | PEST proteolytic signal containing nuclear protein (12.0 kD) (Pcnp) alternative variant eSep08, mRNA. |
| <a href="#">Pcnp</a>   | <a href="#">Pcnp.fSep08</a>   | <a href="#">288165</a> | 13192  | 672  | 4  | 105 | PEST proteolytic signal containing nuclear protein (Pcnp) alternative variant fSep08, mRNA.           |
| <a href="#">Pcnp</a>   | <a href="#">Pcnp.hSep08</a>   | <a href="#">288165</a> | 5729   | 1379 | 3  | 90  | PEST proteolytic signal containing nuclear protein (10.1 kD) (Pcnp) alternative variant hSep08, mRNA. |
| <a href="#">Pcnp</a>   | <a href="#">Pcnp.iSep08</a>   | <a href="#">288165</a> | 2065   | 869  | 2  | 55  | PEST proteolytic signal containing nuclear protein (6.2 kD) (Pcnp) alternative variant iSep08, mRNA.  |
| <a href="#">Pcnx</a>   | <a href="#">Pcnx.aSep08</a>   | <a href="#">314288</a> | 14760  | 3352 |    | 764 | pecanex homolog (Drosophila) (Pcnx) mRNA.                                                             |
| <a href="#">Pcnxl2</a> | <a href="#">Pcnxl2.aSep08</a> | <a href="#">307949</a> | 19126  | 356  |    | 118 | pecanex-like 2 (Drosophila) (Pcnxl2) mRNA.                                                            |
| <a href="#">Pcnxl3</a> | <a href="#">Pcnxl3.aSep08</a> | <a href="#">309167</a> | 12418  | 3309 | 4  | 965 | pecanex-like 3 (Drosophila) (Pcnxl3) alternative variant aSep08, mRNA.                                |
| <a href="#">Pcnxl3</a> | <a href="#">Pcnxl3.bSep08</a> | <a href="#">309167</a> | 2329   | 1391 | 5  | 463 | pecanex-like 3 (Drosophila) (Pcnxl3) alternative variant bSep08, mRNA.                                |
| <a href="#">Pcnxl3</a> | <a href="#">Pcnxl3.cSep08</a> | <a href="#">309167</a> | 850    | 754  | 2  | 251 | pecanex-like 3 (Drosophila) (Pcnxl3) alternative variant cSep08, mRNA.                                |
| <a href="#">Pcnxl3</a> | <a href="#">Pcnxl3.dSep08</a> | <a href="#">309167</a> | 1154   | 745  | 3  | 148 | pecanex-like 3 (Drosophila) (Pcnxl3) alternative variant dSep08, mRNA.                                |
| <a href="#">Pcolce</a> | <a href="#">Pcolce.bSep08</a> | <a href="#">29569</a>  | 4227   | 279  | 2  | 56  | procollagen C-endopeptidase enhancer protein (Pcolce) alternative variant bSep08, mRNA.               |
| <a href="#">Pcolce</a> | <a href="#">Pcolce.dSep08</a> | <a href="#">29569</a>  | 891    | 795  | 2  | 47  | procollagen C-endopeptidase enhancer protein (Pcolce) alternative variant dSep08, mRNA.               |
| <a href="#">Pcp2</a>   | <a href="#">Pcp2.bSep08</a>   | <a href="#">304195</a> | 1749   | 452  | 1  | 129 | purkinje cell protein 2 (L7) (Pcp2) alternative variant bSep08, mRNA.                                 |
| <a href="#">Pcp2</a>   | <a href="#">Pcp2.cSep08</a>   | <a href="#">304195</a> | 1733   | 460  | 1  | 78  | purkinje cell protein 2 (L7) (Pcp2) alternative variant cSep08, mRNA.                                 |
| <a href="#">Pcp4l1</a> | <a href="#">Pcp4l1.aSep08</a> | <a href="#">685448</a> | 22721  | 618  | 1  | 85  | purkinje cell protein 4-like 1 (9.9 kD) (Pcp4l1) alternative variant aSep08, mRNA.                    |
| <a href="#">Pcsk2</a>  | <a href="#">Pcsk2.bSep08</a>  | <a href="#">25121</a>  | 240841 | 1555 | 2  | 237 | proprotein convertase subtilisin/kexin type 2 (Pcsk2) alternative variant bSep08, mRNA.               |
| <a href="#">Pcsk4</a>  | <a href="#">Pcsk4.bSep08</a>  | <a href="#">171085</a> | 858    | 677  | 2  | 105 | proprotein convertase subtilisin/kexin type 4 (Pcsk4) alternative variant bSep08, mRNA.               |
| <a href="#">Pcsk4</a>  | <a href="#">Pcsk4.cSep08</a>  | <a href="#">171085</a> | 814    | 742  | 2  | 66  | proprotein convertase subtilisin/kexin type 4 (Pcsk4) alternative variant cSep08, mRNA.               |
| <a href="#">Pcsk5</a>  | <a href="#">Pcsk5.aSep08</a>  | <a href="#">116548</a> | 99514  | 771  |    | 257 | proprotein convertase subtilisin/kexin type 5 (Pcsk5) mRNA.                                           |
| <a href="#">Pcsk6</a>  | <a href="#">Pcsk6.bSep08</a>  | <a href="#">25507</a>  | 125527 | 2332 | 18 | 776 | proprotein convertase subtilisin/kexin type 6 (Pcsk6) alternative variant bSep08, mRNA.               |
| <a href="#">Pcsk6</a>  | <a href="#">Pcsk6.cSep08</a>  | <a href="#">25507</a>  | 25085  | 2396 | 9  | 350 | proprotein convertase subtilisin/kexin type 6 (Pcsk6) alternative variant cSep08, mRNA.               |
| <a href="#">Pcsk6</a>  | <a href="#">Pcsk6.dSep08</a>  | <a href="#">25507</a>  | 56741  | 880  | 5  | 293 | proprotein convertase subtilisin/kexin type 6 (Pcsk6) alternative variant dSep08, mRNA.               |
| <a href="#">Pcsk6</a>  | <a href="#">Pcsk6.eSep08</a>  | <a href="#">25507</a>  | 25574  | 791  | 6  | 212 | proprotein convertase subtilisin/kexin type 6 (Pcsk6) alternative variant eSep08, mRNA.               |
| <a href="#">Pcsk7</a>  | <a href="#">Pcsk7.bSep08</a>  | <a href="#">29606</a>  | 917    | 409  | 3  | 136 | proprotein convertase subtilisin/kexin type 7 (Pcsk7) alternative variant bSep08, mRNA.               |

|                         |                                |                        |       |      |    |      |                                                                                                            |
|-------------------------|--------------------------------|------------------------|-------|------|----|------|------------------------------------------------------------------------------------------------------------|
| <a href="#">Pctk1</a>   | <a href="#">Pctk1.aSep08</a>   | <a href="#">81741</a>  | 6304  | 1291 | 5  | 298  | pctaire protein kinase 1 (31.8 kD) (Pctk1) alternative variant aSep08, mRNA.                               |
| <a href="#">Pctk1</a>   | <a href="#">Pctk1.bSep08</a>   | <a href="#">81741</a>  | 2014  | 815  | 6  | 271  | pctaire protein kinase 1 (Pctk1) alternative variant bSep08, mRNA.                                         |
| <a href="#">Pctk1</a>   | <a href="#">Pctk1.cSep08</a>   | <a href="#">81741</a>  | 1447  | 712  | 4  | 237  | pctaire protein kinase 1 (Pctk1) alternative variant cSep08, mRNA.                                         |
| <a href="#">Pctk1</a>   | <a href="#">Pctk1.fSep08</a>   | <a href="#">81741</a>  | 2294  | 742  | 5  | 56   | pctaire protein kinase 1 (6.4 kD) (Pctk1) alternative variant fSep08, mRNA.                                |
| <a href="#">Pctk1</a>   | <a href="#">Pctk1.gSep08</a>   | <a href="#">81741</a>  | 1909  | 522  | 3  | 39   | putative protein (Pctk1) alternative variant gSep08, mRNA.                                                 |
| <a href="#">Pctk2</a>   | <a href="#">Pctk2.bSep08</a>   | <a href="#">314743</a> | 6402  | 707  | 6  | 178  | PCTAIRE-motif protein kinase 2 (Pctk2) alternative variant bSep08, mRNA.                                   |
| <a href="#">Pctk2</a>   | <a href="#">Pctk2.dSep08</a>   | <a href="#">314743</a> | 5016  | 412  | 3  | 103  | PCTAIRE-motif protein kinase 2 (Pctk2) alternative variant dSep08, mRNA.                                   |
| <a href="#">Pctk3</a>   | <a href="#">Pctk3.bSep08</a>   | <a href="#">289019</a> | 2307  | 400  | 4  | 98   | PCTAIRE-motif protein kinase 3 (Pctk3) alternative variant bSep08, mRNA.                                   |
| <a href="#">Pcx</a>     | <a href="#">Pcx.aSep08</a>     | <a href="#">25104</a>  | 99912 | 4036 | 21 | 1179 | pyruvate carboxylase (129.9 kD) (Pcx) alternative variant aSep08, mRNA.                                    |
| <a href="#">Pcx</a>     | <a href="#">Pcx.cSep08</a>     | <a href="#">25104</a>  | 1636  | 858  | 4  | 286  | pyruvate carboxylase (Pcx) alternative variant cSep08, mRNA.                                               |
| <a href="#">Pcx</a>     | <a href="#">Pcx.dSep08</a>     | <a href="#">25104</a>  | 4667  | 388  | 3  | 129  | pyruvate carboxylase (Pcx) alternative variant dSep08, mRNA.                                               |
| <a href="#">Pcyox1l</a> | <a href="#">Pcyox1l.bSep08</a> | <a href="#">307396</a> | 8369  | 621  | 1  | 80   | prenylcysteine oxidase 1 like (Pcyox1l) alternative variant bSep08, mRNA.                                  |
| <a href="#">Pcyt1a</a>  | <a href="#">Pcyt1a.bSep08</a>  | <a href="#">140544</a> | 31741 | 524  | 5  | 162  | phosphate cytidyltransferase 1, choline, alpha isoform (Pcyt1a) alternative variant bSep08, mRNA.          |
| <a href="#">Pcyt1a</a>  | <a href="#">Pcyt1a.cSep08</a>  | <a href="#">140544</a> | 3361  | 356  | 2  | 103  | phosphate cytidyltransferase 1, choline, alpha isoform (Pcyt1a) alternative variant cSep08, mRNA.          |
| <a href="#">Pcyt1a</a>  | <a href="#">Pcyt1a.fSep08</a>  | <a href="#">140544</a> | 1291  | 385  | 2  | 45   | phosphate cytidyltransferase 1, choline, alpha isoform (4.9 kD) (Pcyt1a) alternative variant fSep08, mRNA. |
| <a href="#">Pcyt2</a>   | <a href="#">Pcyt2.bSep08</a>   | <a href="#">89841</a>  | 6681  | 1158 | 13 | 385  | phosphate cytidyltransferase 2 ethanolamine CRA b (Pcyt2) alternative variant bSep08, mRNA.                |
| <a href="#">Pcyt2</a>   | <a href="#">Pcyt2.cSep08</a>   | <a href="#">89841</a>  | 2483  | 807  | 8  | 236  | phosphate cytidyltransferase 2 ethanolamine (Pcyt2) alternative variant cSep08, mRNA.                      |
| <a href="#">Pcyt2</a>   | <a href="#">Pcyt2.dSep08</a>   | <a href="#">89841</a>  | 4531  | 771  | 7  | 233  | phosphate cytidyltransferase 2 ethanolamine (25.8 kD) (Pcyt2) alternative variant dSep08, mRNA.            |
| <a href="#">Pcyt2</a>   | <a href="#">Pcyt2.eSep08</a>   | <a href="#">89841</a>  | 4904  | 617  | 7  | 180  | phosphate cytidyltransferase 2 ethanolamine (Pcyt2) alternative variant eSep08, mRNA.                      |
| <a href="#">Pcyt2</a>   | <a href="#">Pcyt2.fSep08</a>   | <a href="#">89841</a>  | 1469  | 910  | 5  | 121  | phosphate cytidyltransferase 2 ethanolamine (13.8 kD) (Pcyt2) alternative variant fSep08, mRNA.            |
| <a href="#">Pcyt2</a>   | <a href="#">Pcyt2.gSep08</a>   | <a href="#">89841</a>  | 1488  | 627  | 6  | 103  | phosphate cytidyltransferase 2 ethanolamine CRA c (Pcyt2) alternative variant gSep08, mRNA.                |
| <a href="#">Pdcd2</a>   | <a href="#">Pdcd2.aSep08</a>   | <a href="#">58934</a>  | 5760  | 1403 |    | 359  | programmed cell death 2 (Pdcd2) mRNA.                                                                      |
| <a href="#">Pdcd2l</a>  | <a href="#">Pdcd2l.bSep08</a>  | <a href="#">689637</a> | 10708 | 1781 | 6  | 222  | programmed cell death 2-like (Pdcd2l) alternative variant bSep08, mRNA.                                    |
| <a href="#">Pdcd2l</a>  | <a href="#">Pdcd2l.cSep08</a>  | <a href="#">689637</a> | 4501  | 396  | 2  | 131  | programmed cell death 2-like (Pdcd2l) alternative variant cSep08, mRNA.                                    |

|                         |                                |                        |        |      |   |     |                                                                                                                                |
|-------------------------|--------------------------------|------------------------|--------|------|---|-----|--------------------------------------------------------------------------------------------------------------------------------|
| <a href="#">Pdcd4</a>   | <a href="#">Pdcd4.bSep08</a>   | <a href="#">64031</a>  | 3907   | 522  | 5 | 110 | programmed cell death 4 (Pdcd4) alternative variant bSep08, mRNA.                                                              |
| <a href="#">Pdcd5</a>   | <a href="#">Pdcd5.cSep08</a>   | <a href="#">292814</a> | 4143   | 711  | 4 | 101 | programmed cell death 5 (Pdcd5) alternative variant cSep08, mRNA.                                                              |
| <a href="#">Pdcd5</a>   | <a href="#">Pdcd5.dSep08</a>   | <a href="#">292814</a> | 5278   | 584  | 6 | 84  | programmed cell death 5 (9.4 kD) (Pdcd5) alternative variant dSep08, complete mRNA.                                            |
| <a href="#">Pdcd6</a>   | <a href="#">Pdcd6.bSep08</a>   | <a href="#">308061</a> | 15248  | 1106 | 3 | 189 | programmed cell death 6 (21.7 kD) (Pdcd6) alternative variant bSep08, mRNA.                                                    |
| <a href="#">Pdcd6</a>   | <a href="#">Pdcd6.cSep08</a>   | <a href="#">308061</a> | 14846  | 648  | 2 | 183 | programmed cell death 6 (Pdcd6) alternative variant cSep08, mRNA.                                                              |
| <a href="#">Pdcd6</a>   | <a href="#">Pdcd6.dSep08</a>   | <a href="#">308061</a> | 15022  | 778  | 3 | 155 | programmed cell death 6 (17.6 kD) (Pdcd6) alternative variant dSep08, complete mRNA.                                           |
| <a href="#">Pdcd6ip</a> | <a href="#">Pdcd6ip.bSep08</a> | <a href="#">501083</a> | 1806   | 633  |   |     |                                                                                                                                |
| <a href="#">Pdcd7</a>   | <a href="#">Pdcd7.aSep08</a>   | <a href="#">363082</a> | 15079  | 2271 |   | 454 | programmed cell death protein 7 (Pdcd7) mRNA.                                                                                  |
| <a href="#">Pdcd10</a>  | <a href="#">Pdcd10.aSep08</a>  | <a href="#">494345</a> | 43120  | 1907 | 2 | 133 | programmed cell death 10 (15.2 kD) (Pdcd10) alternative variant aSep08, complete mRNA.                                         |
| <a href="#">Pdcd11</a>  | <a href="#">Pdcd11.bSep08</a>  | <a href="#">309458</a> | 6355   | 760  | 4 | 188 | programmed cell death 11 (Pdcd11) alternative variant bSep08, mRNA.                                                            |
| <a href="#">Pdcd11</a>  | <a href="#">Pdcd11.cSep08</a>  | <a href="#">309458</a> | 6575   | 727  | 6 | 159 | programmed cell death 11 (Pdcd11) alternative variant cSep08, mRNA.                                                            |
| <a href="#">Pdcd11</a>  | <a href="#">Pdcd11.eSep08</a>  | <a href="#">309458</a> | 633    | 474  | 2 | 94  | programmed cell death 11 (Pdcd11) alternative variant eSep08, mRNA.                                                            |
| <a href="#">Pdcl</a>    | <a href="#">Pdcl.bSep08</a>    | <a href="#">64013</a>  | 11449  | 558  | 4 | 119 | phosducin-like (13.7 kD) (Pdcl) alternative variant bSep08, mRNA.                                                              |
| <a href="#">Pdcl2</a>   | <a href="#">Pdcl2.aSep08</a>   | <a href="#">498352</a> | 14889  | 749  |   | 238 | phosducin-like 2 (Pdcl2) mRNA.                                                                                                 |
| <a href="#">Pdcd1</a>   | <a href="#">Pdcd1.bSep08</a>   | <a href="#">309110</a> | 655    | 531  | 1 | 86  | putative protein (9.3 kD) (Pdcd1) alternative variant bSep08, mRNA.                                                            |
| <a href="#">Pde1a</a>   | <a href="#">Pde1a.bSep08</a>   | <a href="#">81529</a>  | 21020  | 772  | 5 | 191 | phosphodiesterase 1A, calmodulin-dependent (Pde1a) alternative variant bSep08, mRNA.                                           |
| <a href="#">Pde1a</a>   | <a href="#">Pde1a.cSep08</a>   | <a href="#">81529</a>  | 134125 | 874  | 5 | 174 | phosphodiesterase 1A, calmodulin-dependent (Pde1a) alternative variant cSep08, mRNA.                                           |
| <a href="#">Pde1a</a>   | <a href="#">Pde1a.dSep08</a>   | <a href="#">81529</a>  | 7828   | 593  | 4 | 130 | phosphodiesterase 1A, calmodulin-dependent (Pde1a) alternative variant dSep08, mRNA.                                           |
| <a href="#">Pde2a</a>   | <a href="#">Pde2a.bSep08</a>   | <a href="#">81743</a>  | 33834  | 326  | 4 | 108 | phosphodiesterase 2A, cGMP-stimulated (Pde2a) alternative variant bSep08, mRNA.                                                |
| <a href="#">Pde2a</a>   | <a href="#">Pde2a.cSep08</a>   | <a href="#">81743</a>  | 63997  | 451  | 4 | 86  | phosphodiesterase 2A, cGMP-stimulated (Pde2a) alternative variant cSep08, mRNA.                                                |
| <a href="#">Pde2a</a>   | <a href="#">Pde2a.dSep08</a>   | <a href="#">81743</a>  | 2259   | 675  | 4 | 84  | phosphodiesterase 2A, cGMP-stimulated (9.9 kD) (Pde2a) alternative variant dSep08, mRNA.                                       |
| <a href="#">Pde2a</a>   | <a href="#">Pde2a.eSep08</a>   | <a href="#">81743</a>  | 1046   | 545  | 2 | 44  | phosphodiesterase 2A, cGMP-stimulated (Pde2a) alternative variant eSep08, mRNA.                                                |
| <a href="#">Pde4a</a>   | <a href="#">Pde4a.bSep08</a>   | <a href="#">25638</a>  | 2809   | 760  | 4 | 253 | phosphodiesterase 4A, cAMP-specific (phosphodiesterase E2 dunce homolog, Drosophila) (Pde4a) alternative variant bSep08, mRNA. |
| <a href="#">Pde4a</a>   | <a href="#">Pde4a.cSep08</a>   | <a href="#">25638</a>  | 2684   | 681  | 4 | 222 | phosphodiesterase 4A, cAMP-specific (phosphodiesterase E2 dunce homolog, Drosophila) (Pde4a) alternative variant cSep08, mRNA. |

|                         |                                |                        |        |      |    |     |                                                                                                                                |
|-------------------------|--------------------------------|------------------------|--------|------|----|-----|--------------------------------------------------------------------------------------------------------------------------------|
| <a href="#">Pde4b</a>   | <a href="#">Pde4b.bSep08</a>   | <a href="#">24626</a>  | 28218  | 755  | 5  | 251 | phosphodiesterase 4B, cAMP specific (Pde4b) alternative variant bSep08, mRNA.                                                  |
| <a href="#">Pde4b</a>   | <a href="#">Pde4b.cSep08</a>   | <a href="#">24626</a>  | 29483  | 521  | 5  | 173 | phosphodiesterase 4B, cAMP specific (Pde4b) alternative variant cSep08, mRNA.                                                  |
| <a href="#">Pde4b</a>   | <a href="#">Pde4b.eSep08</a>   | <a href="#">24626</a>  | 1320   | 593  | 2  | 75  | phosphodiesterase 4B, cAMP specific (8.6 kD) (Pde4b) alternative variant eSep08, mRNA.                                         |
| <a href="#">Pde4c</a>   | <a href="#">Pde4c.aSep08</a>   | <a href="#">290646</a> | 3751   | 1311 | 4  | 235 | phosphodiesterase 4C, cAMP-specific (phosphodiesterase E1 dunce homolog, Drosophila) (24.5 kD) (Pde4c) mRNA.                   |
| <a href="#">Pde4d</a>   | <a href="#">Pde4d.dSep08</a>   | <a href="#">24627</a>  | 170847 | 521  | 1  | 84  | phosphodiesterase 4D, cAMP-specific (phosphodiesterase E3 dunce homolog, Drosophila) (Pde4d) alternative variant dSep08, mRNA. |
| <a href="#">Pde4dip</a> | <a href="#">Pde4dip.bSep08</a> | <a href="#">64183</a>  | 7915   | 2163 | 7  | 344 | phosphodiesterase 4D interacting protein precursor (37.4 kD) (Pde4dip) alternative variant bSep08, mRNA.                       |
| <a href="#">Pde4dip</a> | <a href="#">Pde4dip.cSep08</a> | <a href="#">64183</a>  | 8917   | 3401 | 6  | 232 | phosphodiesterase 4D interacting protein (Pde4dip) alternative variant cSep08, mRNA.                                           |
| <a href="#">Pde4dip</a> | <a href="#">Pde4dip.dSep08</a> | <a href="#">64183</a>  | 8876   | 551  | 5  | 183 | phosphodiesterase 4D interacting protein (Pde4dip) alternative variant dSep08, mRNA.                                           |
| <a href="#">Pde4dip</a> | <a href="#">Pde4dip.eSep08</a> | <a href="#">64183</a>  | 22221  | 366  | 3  | 70  | phosphodiesterase 4D interacting protein (Pde4dip) alternative variant eSep08, mRNA.                                           |
| <a href="#">Pde4dip</a> | <a href="#">Pde4dip.fSep08</a> | <a href="#">64183</a>  | 11233  | 978  | 3  | 63  | phosphodiesterase 4D interacting protein (Pde4dip) alternative variant fSep08, mRNA.                                           |
| <a href="#">Pde4dip</a> | <a href="#">Pde4dip.gSep08</a> | <a href="#">64183</a>  | 1657   | 955  | 2  | 46  | phosphodiesterase 4D interacting protein (Pde4dip) alternative variant gSep08, mRNA.                                           |
| <a href="#">Pde5a</a>   | <a href="#">Pde5a.bSep08</a>   | <a href="#">171115</a> | 23180  | 785  | 6  | 221 | phosphodiesterase 5A, cGMP-specific (Pde5a) alternative variant bSep08, mRNA.                                                  |
| <a href="#">Pde5a</a>   | <a href="#">Pde5a.cSep08</a>   | <a href="#">171115</a> | 9084   | 613  | 4  | 119 | phosphodiesterase 5A, cGMP-specific (Pde5a) alternative variant cSep08, mRNA.                                                  |
| <a href="#">Pde6a</a>   | <a href="#">Pde6a.bSep08</a>   | <a href="#">307401</a> | 4961   | 998  | 2  | 60  | phosphodiesterase 6A, cGMP-specific, rod, alpha (7.0 kD) (Pde6a) alternative variant bSep08, mRNA.                             |
| <a href="#">Pde6b</a>   | <a href="#">Pde6b.bSep08</a>   | <a href="#">289878</a> | 3687   | 555  |    | 148 | phosphodiesterase 6B, cGMP-specific, rod, beta (Pde6b) alternative variant bSep08, mRNA.                                       |
| <a href="#">Pde6h</a>   | <a href="#">Pde6h.aSep08</a>   | <a href="#">114248</a> | 10853  | 577  | 2  | 83  | phosphodiesterase 6H, cGMP-specific, cone, gamma (9.0 kD) (Pde6h) alternative variant aSep08, mRNA.                            |
| <a href="#">Pde8a</a>   | <a href="#">Pde8a.aSep08</a>   | <a href="#">308776</a> | 84380  | 769  |    | 202 | phosphodiesterase 8A (Pde8a) mRNA.                                                                                             |
| <a href="#">Pde8b</a>   | <a href="#">Pde8b.bSep08</a>   | <a href="#">309962</a> | 9400   | 378  | 3  | 95  | phosphodiesterase 8B (Pde8b) alternative variant bSep08, mRNA.                                                                 |
| <a href="#">Pde9a</a>   | <a href="#">Pde9a.bSep08</a>   | <a href="#">191569</a> | 33694  | 853  | 10 | 212 | phosphodiesterase 9A (Pde9a) alternative variant bSep08, mRNA.                                                                 |
| <a href="#">Pde9a</a>   | <a href="#">Pde9a.cSep08</a>   | <a href="#">191569</a> | 69510  | 670  | 10 | 200 | phosphodiesterase 9A (Pde9a) alternative variant cSep08, mRNA.                                                                 |
| <a href="#">Pde9a</a>   | <a href="#">Pde9a.dSep08</a>   | <a href="#">191569</a> | 15246  | 786  | 5  | 144 | phosphodiesterase 9A (Pde9a) alternative variant dSep08, mRNA.                                                                 |
| <a href="#">Pde9a</a>   | <a href="#">Pde9a.eSep08</a>   | <a href="#">191569</a> | 5906   | 585  | 5  | 114 | phosphodiesterase 9A (Pde9a) alternative variant eSep08, mRNA.                                                                 |
| <a href="#">Pde9a</a>   | <a href="#">Pde9a.gSep08</a>   | <a href="#">191569</a> | 2167   | 484  | 2  | 28  | phosphodiesterase 9A (3.3 kD) (Pde9a) alternative variant gSep08, mRNA.                                                        |

|                            |                                   |                        |        |      |    |     |                                                                                                                |
|----------------------------|-----------------------------------|------------------------|--------|------|----|-----|----------------------------------------------------------------------------------------------------------------|
| <a href="#">Pde10a</a>     | <a href="#">Pde10a.aSep08</a>     | <a href="#">63885</a>  | 196134 | 2142 |    | 703 | phosphodiesterase 10A (Pde10a) alternative variant aSep08, mRNA.                                               |
| <a href="#">Pde12</a>      | <a href="#">Pde12.bSep08</a>      | <a href="#">306231</a> | 6168   | 4076 | 1  | 608 | phosphodiesterase 12 (67.2 kD) (Pde12) alternative variant bSep08, mRNA.                                       |
| <a href="#">PDEase_I.0</a> | <a href="#">PDEase_I.0.aSep08</a> |                        | 32494  | 1419 | 9  | 473 | phosphodiesterase 10A CRA a (PDEase_I.0) alternative variant aSep08, mRNA.                                     |
| <a href="#">PDEase_I.0</a> | <a href="#">PDEase_I.0.bSep08</a> |                        | 2487   | 432  | 1  | 95  | phosphodiesterase 10A CRA c (PDEase_I.0) alternative variant bSep08, mRNA.                                     |
| <a href="#">PDEase_I.1</a> | <a href="#">PDEase_I.1.aSep08</a> |                        | 25781  | 2442 | 11 | 484 | phosphodiesterase 8A CRA b (PDEase_I.1) alternative variant aSep08, mRNA.                                      |
| <a href="#">PDEase_I.1</a> | <a href="#">PDEase_I.1.bSep08</a> |                        | 6540   | 809  | 4  | 136 | phosphodiesterase 8A CRA b (PDEase_I.1) alternative variant bSep08, mRNA.                                      |
| <a href="#">PDEase_I.1</a> | <a href="#">PDEase_I.1.cSep08</a> |                        | 361    | 240  | 2  | 28  | putative protein (PDEase_I.1) alternative variant cSep08, mRNA.                                                |
| <a href="#">Pdgfa</a>      | <a href="#">Pdgfa.bSep08</a>      | <a href="#">25266</a>  | 17869  | 1791 | 6  | 190 | platelet-derived growth factor alpha polypeptide (Pdgfa) alternative variant bSep08, mRNA.                     |
| <a href="#">Pdgfa</a>      | <a href="#">Pdgfa.cSep08</a>      | <a href="#">25266</a>  | 17507  | 1359 | 5  | 175 | platelet-derived growth factor alpha polypeptide (Pdgfa) alternative variant cSep08, mRNA.                     |
| <a href="#">Pdgfa</a>      | <a href="#">Pdgfa.dSep08</a>      | <a href="#">25266</a>  | 16779  | 627  | 5  | 174 | platelet-derived growth factor alpha polypeptide (Pdgfa) alternative variant dSep08, mRNA.                     |
| <a href="#">Pdgfa</a>      | <a href="#">Pdgfa.eSep08</a>      | <a href="#">25266</a>  | 2559   | 404  | 2  | 105 | platelet-derived growth factor alpha polypeptide (Pdgfa) alternative variant eSep08, mRNA.                     |
| <a href="#">Pdgfc</a>      | <a href="#">Pdgfc.bSep08</a>      | <a href="#">79429</a>  | 117704 | 755  | 4  | 251 | platelet derived growth factor C (Pdgfc) alternative variant bSep08, mRNA.                                     |
| <a href="#">Pdgfc</a>      | <a href="#">Pdgfc.cSep08</a>      | <a href="#">79429</a>  | 93744  | 432  | 2  | 57  | platelet derived growth factor C (6.5 kD) (Pdgfc) alternative variant cSep08, mRNA.                            |
| <a href="#">Pdgfra</a>     | <a href="#">Pdgfra.aSep08</a>     | <a href="#">25267</a>  | 22111  | 4803 | 13 | 562 | platelet derived growth factor receptor, alpha polypeptide (Pdgfra) alternative variant aSep08, mRNA.          |
| <a href="#">Pdgfrb</a>     | <a href="#">Pdgfrb.aSep08</a>     | <a href="#">24629</a>  | 17648  | 4110 | 17 | 798 | platelet derived growth factor receptor, beta polypeptide (Pdgfrb) alternative variant aSep08, mRNA.           |
| <a href="#">Pdgfrb</a>     | <a href="#">Pdgfrb.bSep08</a>     | <a href="#">24629</a>  | 5683   | 907  | 6  | 302 | platelet derived growth factor receptor, beta polypeptide (Pdgfrb) alternative variant bSep08, mRNA.           |
| <a href="#">Pdgfrb</a>     | <a href="#">Pdgfrb.cSep08</a>     | <a href="#">24629</a>  | 1996   | 859  | 2  | 132 | platelet derived growth factor receptor, beta polypeptide (14.3 kD) (Pdgfrb) alternative variant cSep08, mRNA. |
| <a href="#">Pdgfrl</a>     | <a href="#">Pdgfrl.bSep08</a>     | <a href="#">290771</a> | 16658  | 721  | 2  | 117 | platelet-derived growth factor receptor-like (Pdgfrl) alternative variant bSep08, mRNA.                        |
| <a href="#">Pdgfrl</a>     | <a href="#">Pdgfrl.cSep08</a>     | <a href="#">290771</a> | 2193   | 808  | 2  | 99  | platelet-derived growth factor receptor-like (11.1 kD) (Pdgfrl) alternative variant cSep08, mRNA.              |
| <a href="#">Pdha1</a>      | <a href="#">Pdha1.aSep08</a>      | <a href="#">29554</a>  | 14376  | 3361 | 3  | 390 | pyruvate dehydrogenase E1 alpha 1 (43.2 kD) (Pdha1) alternative variant aSep08, mRNA.                          |
| <a href="#">Pdha1</a>      | <a href="#">Pdha1.bSep08</a>      | <a href="#">29554</a>  | 8340   | 758  | 3  | 252 | pyruvate dehydrogenase E1 alpha 1 (Pdha1) alternative variant bSep08, mRNA.                                    |
| <a href="#">Pdha1</a>      | <a href="#">Pdha1.cSep08</a>      | <a href="#">29554</a>  | 1818   | 784  | 1  | 101 | pyruvate dehydrogenase E1 alpha 1 (Pdha1) alternative variant cSep08, mRNA.                                    |
| <a href="#">Pdhb</a>       | <a href="#">Pdhb.bSep08</a>       | <a href="#">289950</a> | 2811   | 1051 | 6  | 114 | pyruvate dehydrogenase E1-beta (12.7 kD) (Pdhb) alternative variant bSep08, mRNA.                              |

|                        |                               |                        |       |      |    |     |                                                                                                    |
|------------------------|-------------------------------|------------------------|-------|------|----|-----|----------------------------------------------------------------------------------------------------|
| <a href="#">Pdhb</a>   | <a href="#">Pdhb.cSep08</a>   | <a href="#">289950</a> | 1043  | 804  | 2  | 86  | pyruvate dehydrogenase (9.3 kD) (Pdhb) alternative variant cSep08, mRNA.                           |
| <a href="#">Pdhx</a>   | <a href="#">Pdhx.bSep08</a>   | <a href="#">311254</a> | 65897 | 1757 | 11 | 510 | pyruvate dehydrogenase complex, component X (Pdhx) alternative variant bSep08, mRNA.               |
| <a href="#">Pdhx</a>   | <a href="#">Pdhx.cSep08</a>   | <a href="#">311254</a> | 11540 | 1491 | 3  | 128 | pyruvate dehydrogenase complex, component X (Pdhx) alternative variant cSep08, mRNA.               |
| <a href="#">Pdia3</a>  | <a href="#">Pdia3.bSep08</a>  | <a href="#">29468</a>  | 13597 | 553  | 4  | 91  | protein disulfide isomerase associated 3 (Pdia3) alternative variant bSep08, mRNA.                 |
| <a href="#">Pdia4</a>  | <a href="#">Pdia4.bSep08</a>  | <a href="#">116598</a> | 5353  | 732  | 4  | 243 | protein disulfide isomerase associated 4 (Pdia4) alternative variant bSep08, mRNA.                 |
| <a href="#">Pdia5</a>  | <a href="#">Pdia5.bSep08</a>  | <a href="#">360722</a> | 80806 | 1119 | 12 | 180 | protein disulfide isomerase-associated 5 (Pdia5) alternative variant bSep08, mRNA.                 |
| <a href="#">Pdia5</a>  | <a href="#">Pdia5.cSep08</a>  | <a href="#">360722</a> | 1105  | 383  | 2  | 24  | protein disulfide isomerase-associated 5 (2.7 kD) (Pdia5) alternative variant cSep08, mRNA.        |
| <a href="#">Pdia6</a>  | <a href="#">Pdia6.bSep08</a>  | <a href="#">286906</a> | 5658  | 1099 | 4  | 94  | protein disulfide isomerase associated 6 CRA a (10.3 kD) (Pdia6) alternative variant bSep08, mRNA. |
| <a href="#">Pdia6</a>  | <a href="#">Pdia6.cSep08</a>  | <a href="#">286906</a> | 1079  | 327  | 3  | 92  | protein disulfide isomerase associated 6 CRA b (Pdia6) alternative variant cSep08, mRNA.           |
| <a href="#">Pdia6</a>  | <a href="#">Pdia6.dSep08</a>  | <a href="#">286906</a> | 3516  | 1250 | 3  | 82  | protein disulfide isomerase (9.0 kD) (Pdia6) alternative variant dSep08, mRNA.                     |
| <a href="#">Pdk1</a>   | <a href="#">Pdk1.bSep08</a>   | <a href="#">116551</a> | 836   | 393  | 3  | 68  | pyruvate dehydrogenase kinase, isoenzyme 1 (Pdk1) alternative variant bSep08, mRNA.                |
| <a href="#">Pdk2</a>   | <a href="#">Pdk2.bSep08</a>   | <a href="#">81530</a>  | 12617 | 1533 | 9  | 268 | pyruvate dehydrogenase kinase, isoenzyme 2 (30.7 kD) (Pdk2) alternative variant bSep08, mRNA.      |
| <a href="#">Pdk2</a>   | <a href="#">Pdk2.cSep08</a>   | <a href="#">81530</a>  | 11082 | 656  | 5  | 192 | pyruvate dehydrogenase kinase, isoenzyme 2 (Pdk2) alternative variant cSep08, mRNA.                |
| <a href="#">Pdk2</a>   | <a href="#">Pdk2.dSep08</a>   | <a href="#">81530</a>  | 1623  | 936  | 4  | 117 | pyruvate dehydrogenase kinase, isoenzyme 2 (12.7 kD) (Pdk2) alternative variant dSep08, mRNA.      |
| <a href="#">Pdk3</a>   | <a href="#">Pdk3.aSep08</a>   | <a href="#">296849</a> | 66701 | 2078 | 6  | 415 | pyruvate dehydrogenase kinase, isoenzyme 3 (47.9 kD) (Pdk3) alternative variant aSep08, mRNA.      |
| <a href="#">Pdk3</a>   | <a href="#">Pdk3.bSep08</a>   | <a href="#">296849</a> | 24339 | 557  | 1  | 185 | pyruvate dehydrogenase kinase, isoenzyme 3 (Pdk3) alternative variant bSep08, mRNA.                |
| <a href="#">Pdlim1</a> | <a href="#">Pdlim1.bSep08</a> | <a href="#">54133</a>  | 20918 | 640  | 4  | 213 | PDZ and LIM domain 1 (elfin) (Pdlim1) alternative variant bSep08, mRNA.                            |
| <a href="#">Pdlim1</a> | <a href="#">Pdlim1.cSep08</a> | <a href="#">54133</a>  | 27039 | 808  | 5  | 176 | PDZ and LIM domain 1 (elfin) (Pdlim1) alternative variant cSep08, mRNA.                            |
| <a href="#">Pdlim1</a> | <a href="#">Pdlim1.dSep08</a> | <a href="#">54133</a>  | 6929  | 753  | 3  | 95  | PDZ and LIM domain 1 (elfin) (Pdlim1) alternative variant dSep08, mRNA.                            |
| <a href="#">Pdlim2</a> | <a href="#">Pdlim2.bSep08</a> | <a href="#">290354</a> | 4115  | 705  | 5  | 156 | PDZ and LIM domain 2 (16.5 kD) (Pdlim2) alternative variant bSep08, mRNA.                          |
| <a href="#">Pdlim2</a> | <a href="#">Pdlim2.cSep08</a> | <a href="#">290354</a> | 4055  | 420  | 4  | 104 | PDZ and LIM domain 2 (Pdlim2) alternative variant cSep08, mRNA.                                    |
| <a href="#">Pdlim3</a> | <a href="#">Pdlim3.bSep08</a> | <a href="#">114108</a> | 31721 | 1417 | 7  | 316 | LIM protein (34.4 kD) (Pdlim3) alternative variant bSep08, complete mRNA.                          |
| <a href="#">Pdlim3</a> | <a href="#">Pdlim3.cSep08</a> | <a href="#">114108</a> | 30128 | 997  | 6  | 292 | LIM protein (31.5 kD) (Pdlim3) alternative variant cSep08, complete mRNA.                          |
| <a href="#">Pdlim3</a> | <a href="#">Pdlim3.dSep08</a> | <a href="#">114108</a> | 29961 | 710  | 6  | 213 | LIM protein (Pdlim3) alternative variant dSep08, mRNA.                                             |



|                        |                               |                        |        |      |    |     |                                                                                                                       |
|------------------------|-------------------------------|------------------------|--------|------|----|-----|-----------------------------------------------------------------------------------------------------------------------|
| <a href="#">Pdlim3</a> | <a href="#">Pdlim3.eSep08</a> | <a href="#">114108</a> | 3219   | 896  | 2  | 75  | lim protein (Pdlim3) alternative variant eSep08, mRNA.                                                                |
| <a href="#">Pdlim3</a> | <a href="#">Pdlim3.fSep08</a> | <a href="#">114108</a> | 1642   | 517  | 2  | 54  | LIM protein (Pdlim3) alternative variant fSep08, mRNA.                                                                |
| <a href="#">Pdlim5</a> | <a href="#">Pdlim5.bSep08</a> | <a href="#">64353</a>  | 54244  | 1621 | 8  | 207 | PDZ LIM domain 5 (Pdlim5) alternative variant bSep08, mRNA.                                                           |
| <a href="#">Pdlim5</a> | <a href="#">Pdlim5.cSep08</a> | <a href="#">64353</a>  | 53562  | 924  | 7  | 202 | PDZ LIM domain 5 (Pdlim5) alternative variant cSep08, mRNA.                                                           |
| <a href="#">Pdlim5</a> | <a href="#">Pdlim5.dSep08</a> | <a href="#">64353</a>  | 34815  | 596  | 5  | 151 | PDZ LIM domain 5 (Pdlim5) alternative variant dSep08, mRNA.                                                           |
| <a href="#">Pdlim5</a> | <a href="#">Pdlim5.eSep08</a> | <a href="#">64353</a>  | 12485  | 908  | 7  | 124 | PDZ LIM domain 5 (Pdlim5) alternative variant eSep08, mRNA.                                                           |
| <a href="#">Pdlim7</a> | <a href="#">Pdlim7.bSep08</a> | <a href="#">286908</a> | 7537   | 768  | 9  | 232 | PDZ and LIM domain 7 (Pdlim7) alternative variant bSep08, mRNA.                                                       |
| <a href="#">Pdlim7</a> | <a href="#">Pdlim7.cSep08</a> | <a href="#">286908</a> | 6758   | 1000 | 8  | 222 | PDZ and LIM domain 7 (24.5 kD) (Pdlim7) alternative variant cSep08, complete mRNA.                                    |
| <a href="#">Pdlim7</a> | <a href="#">Pdlim7.dSep08</a> | <a href="#">286908</a> | 10664  | 1522 | 11 | 213 | PDZ and LIM domain 7 (23.1 kD) (Pdlim7) alternative variant dSep08, mRNA.                                             |
| <a href="#">Pdlim7</a> | <a href="#">Pdlim7.eSep08</a> | <a href="#">286908</a> | 2217   | 661  | 6  | 134 | PDZ and LIM domain 7 (Pdlim7) alternative variant eSep08, mRNA.                                                       |
| <a href="#">Pdlim7</a> | <a href="#">Pdlim7.gSep08</a> | <a href="#">286908</a> | 9842   | 763  | 7  | 103 | PDZ and LIM domain 7 (Pdlim7) alternative variant gSep08, mRNA.                                                       |
| <a href="#">Pdlim7</a> | <a href="#">Pdlim7.hSep08</a> | <a href="#">286908</a> | 3522   | 675  | 7  | 90  | PDZ and LIM domain 7 (10.2 kD) (Pdlim7) alternative variant hSep08, mRNA.                                             |
| <a href="#">Pdpk1</a>  | <a href="#">Pdpk1.bSep08</a>  | <a href="#">81745</a>  | 50395  | 714  | 6  | 212 | 3-phosphoinositide dependent protein kinase-1 (Pdpk1) alternative variant bSep08, mRNA.                               |
| <a href="#">Pdpk1</a>  | <a href="#">Pdpk1.cSep08</a>  | <a href="#">81745</a>  | 49654  | 719  | 5  | 179 | 3-phosphoinositide dependent protein kinase-1 (Pdpk1) alternative variant cSep08, mRNA.                               |
| <a href="#">Pdpk1</a>  | <a href="#">Pdpk1.dSep08</a>  | <a href="#">81745</a>  | 10666  | 1114 | 4  | 171 | 3-phosphoinositide dependent protein kinase-1 (19.8 kD) (Pdpk1) alternative variant dSep08, mRNA.                     |
| <a href="#">Pdpr</a>   | <a href="#">Pdpr.bSep08</a>   | <a href="#">307852</a> | 8495   | 1784 | 5  | 231 | pyruvate dehydrogenase phosphatase regulatory subunit (Pdpr) alternative variant bSep08, mRNA.                        |
| <a href="#">Pds5a</a>  | <a href="#">Pds5a.bSep08</a>  | <a href="#">305343</a> | 4612   | 412  | 3  | 137 | PDS5, regulator of cohesion maintenance, homolog A (S. cerevisiae) (Pds5a) alternative variant bSep08, mRNA.          |
| <a href="#">Pds5b</a>  | <a href="#">Pds5b.cSep08</a>  | <a href="#">304218</a> | 7833   | 678  | 3  | 225 | PDS5, regulator of cohesion maintenance, homolog B (S. cerevisiae) (Pds5b) alternative variant cSep08, mRNA.          |
| <a href="#">Pds5b</a>  | <a href="#">Pds5b.dSep08</a>  | <a href="#">304218</a> | 2527   | 1088 | 2  | 39  | PDS5, regulator of cohesion maintenance, homolog B (S. cerevisiae) (4.4 kD) (Pds5b) alternative variant dSep08, mRNA. |
| <a href="#">Pdss2</a>  | <a href="#">Pdss2.aSep08</a>  | <a href="#">365592</a> | 901900 | 1793 | 3  | 597 | prenyl (solanesyl) diphosphate synthase, subunit 2 (Pdss2) alternative variant aSep08, mRNA.                          |
| <a href="#">Pdss2</a>  | <a href="#">Pdss2.bSep08</a>  | <a href="#">365592</a> | 34998  | 813  | 1  | 150 | prenyl (solanesyl) diphosphate synthase, subunit 2 (17.4 kD) (Pdss2) alternative variant bSep08, mRNA.                |
| <a href="#">Pdss2</a>  | <a href="#">Pdss2.dSep08</a>  | <a href="#">365592</a> | 36717  | 834  | 2  | 63  | prenyl (solanesyl) diphosphate synthase, subunit 2 (Pdss2) alternative variant dSep08, mRNA.                          |
| <a href="#">Pdxdc1</a> | <a href="#">Pdxdc1.aSep08</a> | <a href="#">304721</a> | 84638  | 2699 | 23 | 807 | putative protein, with a coiled coil domain, of ancient origin (Pdxdc1) alternative variant aSep08, mRNA.             |
| <a href="#">Pdxdc1</a> | <a href="#">Pdxdc1.bSep08</a> | <a href="#">304721</a> | 9202   | 793  | 3  | 109 | putative protein of mammalian origin (Pdxdc1) alternative variant bSep08, mRNA.                                       |

|                          |                                 |                        |       |      |    |     |                                                                                           |
|--------------------------|---------------------------------|------------------------|-------|------|----|-----|-------------------------------------------------------------------------------------------|
| <a href="#">PDZ.0</a>    | <a href="#">PDZ.0.bSep08</a>    |                        | 25938 | 966  | 10 | 312 | LIM domain binding 3 like (PDZ.0) alternative variant bSep08, mRNA.                       |
| <a href="#">PDZ.0</a>    | <a href="#">PDZ.0.cSep08</a>    |                        | 11773 | 740  | 5  | 246 | LIM domain binding 3 like (PDZ.0) alternative variant cSep08, mRNA.                       |
| <a href="#">PDZ.1</a>    | <a href="#">PDZ.1.aSep08</a>    |                        | 14631 | 1230 | 7  | 400 | post-synaptic density 95 (PDZ.1) alternative variant aSep08, mRNA.                        |
| <a href="#">PDZ.1</a>    | <a href="#">PDZ.1.bSep08</a>    |                        | 564   | 444  | 2  | 105 | discs large homolog 4 (PDZ.1) alternative variant bSep08, mRNA.                           |
| <a href="#">PDZ.1</a>    | <a href="#">PDZ.1.cSep08</a>    |                        | 578   | 224  | 3  | 74  | discs large homolog 4 (PDZ.1) alternative variant cSep08, mRNA.                           |
| <a href="#">PDZ.2</a>    | <a href="#">PDZ.2.aSep08</a>    |                        | 9482  | 639  | 6  | 212 | rho guanine nucleotide exchange factor 12 (PDZ.2) alternative variant aSep08, mRNA.       |
| <a href="#">PDZ.2</a>    | <a href="#">PDZ.2.bSep08</a>    |                        | 6766  | 473  | 4  | 138 | rho guanine nucleotide exchange factor 12 (PDZ.2) alternative variant bSep08, mRNA.       |
| <a href="#">PDZ.3</a>    | <a href="#">PDZ.3.aSep08</a>    |                        | 15513 | 2462 | 12 | 435 | multiple PDZ domain protein (PDZ.3) alternative variant aSep08, mRNA.                     |
| <a href="#">PDZ.3</a>    | <a href="#">PDZ.3.bSep08</a>    |                        | 3464  | 508  | 3  | 91  | multiple PDZ domain protein (PDZ.3) alternative variant bSep08, mRNA.                     |
| <a href="#">PDZ.3</a>    | <a href="#">PDZ.3.dSep08</a>    |                        | 3542  | 617  | 3  | 45  | putative protein (5.0 kD) (PDZ.3) alternative variant dSep08, mRNA.                       |
| <a href="#">PDZ.4</a>    | <a href="#">PDZ.4.aSep08</a>    |                        | 3283  | 383  |    | 127 | multiple PDZ domain protein (PDZ.4) mRNA.                                                 |
| <a href="#">PDZ.5</a>    | <a href="#">PDZ.5.aSep08</a>    |                        | 27041 | 891  |    | 256 | InaD-like (PDZ.5) mRNA.                                                                   |
| <a href="#">PDZ.6</a>    | <a href="#">PDZ.6.aSep08</a>    |                        | 63356 | 631  | 4  | 128 | InaD-like (PDZ.6) alternative variant aSep08, mRNA.                                       |
| <a href="#">PDZ.7</a>    | <a href="#">PDZ.7.aSep08</a>    |                        | 12869 | 1172 |    | 390 | signal-induced proliferation-associated 1 like 3 (PDZ.7) mRNA.                            |
| <a href="#">Pdzd3</a>    | <a href="#">Pdzd3.aSep08</a>    | <a href="#">500986</a> | 1500  | 660  | 5  | 211 | PDZ protein (Pdzd3) alternative variant aSep08, mRNA.                                     |
| <a href="#">Pdzd3</a>    | <a href="#">Pdzd3.bSep08</a>    | <a href="#">500986</a> | 846   | 714  | 2  | 71  | PDZ protein like (Pdzd3) alternative variant bSep08, mRNA.                                |
| <a href="#">Pdzd7</a>    | <a href="#">Pdzd7.aSep08</a>    | <a href="#">293996</a> | 2009  | 1653 |    | 155 | putative protein of metazoan origin (Pdzd7) mRNA.                                         |
| <a href="#">Pdzd11</a>   | <a href="#">Pdzd11.bSep08</a>   | <a href="#">302422</a> | 2988  | 1023 | 6  | 140 | PDZ/DHR/GLGF (16.2 kD) (Pdzd11) alternative variant bSep08, mRNA.                         |
| <a href="#">Pdzd11</a>   | <a href="#">Pdzd11.cSep08</a>   | <a href="#">302422</a> | 3033  | 984  | 5  | 112 | PDZ/DHR/GLGF (12.9 kD) (Pdzd11) alternative variant cSep08, mRNA.                         |
| <a href="#">Pdzd11</a>   | <a href="#">Pdzd11.dSep08</a>   | <a href="#">302422</a> | 2425  | 1181 | 3  | 89  | PDZ/DHR/GLGF (9.8 kD) (Pdzd11) alternative variant dSep08, mRNA.                          |
| <a href="#">Pdzd11</a>   | <a href="#">Pdzd11.eSep08</a>   | <a href="#">302422</a> | 1885  | 416  | 4  | 50  | putative protein of vertebrate origin (5.9 kD) (Pdzd11) alternative variant eSep08, mRNA. |
| <a href="#">Pdzk1</a>    | <a href="#">Pdzk1.bSep08</a>    | <a href="#">65144</a>  | 7242  | 1401 | 4  | 201 | PDZ/DHR/GLGF (Pdzk1) alternative variant bSep08, mRNA.                                    |
| <a href="#">Pdzk1ip1</a> | <a href="#">Pdzk1ip1.bSep08</a> | <a href="#">81916</a>  | 3705  | 399  | 1  | 132 | PDZK1 interacting protein 1 (Pdzk1ip1) alternative variant bSep08, mRNA.                  |
| <a href="#">Pdzk1ip1</a> | <a href="#">Pdzk1ip1.cSep08</a> | <a href="#">81916</a>  | 3021  | 694  | 2  | 84  | PDZK1 interacting protein 1 (9.2 kD) (Pdzk1ip1) alternative variant cSep08, mRNA.         |
| <a href="#">Pdzm3</a>    | <a href="#">Pdzm3.aSep08</a>    | <a href="#">312607</a> | 19172 | 1820 |    | 606 | domain-containing ring finger protein 3 (Pdzm3) alternative variant aSep08, mRNA.         |

|                                    |                                           |                        |       |      |    |      |                                                                                                               |
|------------------------------------|-------------------------------------------|------------------------|-------|------|----|------|---------------------------------------------------------------------------------------------------------------|
| <a href="#">Pdzn3</a>              | <a href="#">Pdzn3.bSep08</a>              | <a href="#">312607</a> | 20540 | 1685 |    | 330  | PDZ/DHR/GLGF (Pdzn3) alternative variant bSep08, mRNA.                                                        |
| <a href="#">Pear1andRGD1309453</a> | <a href="#">Pear1andRGD1309453.aSep08</a> | <a href="#">295293</a> | 21044 | 5738 | 25 | 1033 | platelet endothelial aggregation receptor 1 (110.4 kD) (Pear1andRGD1309453) alternative variant aSep08, mRNA. |
| <a href="#">Pear1andRGD1309453</a> | <a href="#">Pear1andRGD1309453.aSep08</a> | <a href="#">310689</a> | 21044 | 5738 | 25 | 1033 | platelet endothelial aggregation receptor 1 (110.4 kD) (Pear1andRGD1309453) alternative variant aSep08, mRNA. |
| <a href="#">Pear1andRGD1309453</a> | <a href="#">Pear1andRGD1309453.cSep08</a> | <a href="#">295293</a> | 3924  | 1086 | 6  | 206  | CRA c (22.7 kD) (Pear1andRGD1309453) alternative variant cSep08, mRNA.                                        |
| <a href="#">Pear1andRGD1309453</a> | <a href="#">Pear1andRGD1309453.cSep08</a> | <a href="#">310689</a> | 3924  | 1086 | 6  | 206  | CRA c (22.7 kD) (Pear1andRGD1309453) alternative variant cSep08, mRNA.                                        |
| <a href="#">Peci</a>               | <a href="#">Peci.aSep08</a>               | <a href="#">291075</a> | 36316 | 1766 | 5  | 445  | peroxisomal isomerase CRA c (Peci) alternative variant aSep08, mRNA.                                          |
| <a href="#">Peci</a>               | <a href="#">Peci.cSep08</a>               | <a href="#">291075</a> | 27723 | 762  | 7  | 254  | peroxisomal isomerase CRA e (Peci) alternative variant cSep08, mRNA.                                          |
| <a href="#">Peci</a>               | <a href="#">Peci.dSep08</a>               | <a href="#">291075</a> | 7961  | 821  | 7  | 229  | peroxisomal isomerase CRA e (Peci) alternative variant dSep08, mRNA.                                          |
| <a href="#">Peci</a>               | <a href="#">Peci.eSep08</a>               | <a href="#">291075</a> | 6488  | 683  | 6  | 221  | peroxisomal isomerase CRA e (Peci) alternative variant eSep08, mRNA.                                          |
| <a href="#">Peci</a>               | <a href="#">Peci.fSep08</a>               | <a href="#">291075</a> | 6444  | 826  | 6  | 178  | peroxisomal isomerase CRA e (Peci) alternative variant fSep08, mRNA.                                          |
| <a href="#">Peci</a>               | <a href="#">Peci.gSep08</a>               | <a href="#">291075</a> | 1380  | 762  | 2  | 96   | peroxisomal delta3 delta2-enoyl-Coenzyme a isomerase (11.2 kD) (Peci) alternative variant gSep08, mRNA.       |
| <a href="#">Pecr</a>               | <a href="#">Pecr.bSep08</a>               | <a href="#">113956</a> | 10188 | 877  | 4  | 132  | peroxisomal trans-2-enoyl-CoA reductase (Pecr) alternative variant bSep08, mRNA.                              |
| <a href="#">Pecr</a>               | <a href="#">Pecr.cSep08</a>               | <a href="#">113956</a> | 12059 | 519  | 2  | 121  | peroxisomal trans-2-enoyl-CoA reductase (Pecr) alternative variant cSep08, mRNA.                              |
| <a href="#">Pecr</a>               | <a href="#">Pecr.dSep08</a>               | <a href="#">113956</a> | 2971  | 424  | 2  | 33   | peroxisomal trans-2-enoyl-CoA reductase (3.9 kD) (Pecr) alternative variant dSep08, mRNA.                     |
| <a href="#">peeby</a>              | <a href="#">peeby.aSep08</a>              |                        | 1411  | 454  |    | 151  | taf1 RNA polymerase II TATA box binding protein - associated factor 250kDa like (peeby) mRNA.                 |
| <a href="#">peedar</a>             | <a href="#">peedar.aSep08</a>             |                        | 4080  | 1926 |    | 132  | ATP-binding cassette sub-family e member 1 like (peedar) mRNA.                                                |
| <a href="#">peefer</a>             | <a href="#">peefer.aSep08</a>             |                        | 24654 | 538  |    | 179  | putative protein of metazoan origin (peefer) mRNA.                                                            |
| <a href="#">peeflo</a>             | <a href="#">peeflo.aSep08</a>             |                        | 1308  | 791  | 2  | 48   | putative protein (5.3 kD) (peeflo) alternative variant aSep08, mRNA.                                          |
| <a href="#">peeflu</a>             | <a href="#">peeflu.aSep08</a>             |                        | 5226  | 531  |    | 102  | putative protein (10.9 kD) (peeflu) mRNA.                                                                     |
| <a href="#">peegar</a>             | <a href="#">peegar.bSep08</a>             |                        | 1065  | 189  | 2  | 62   | putative protein (peegar) alternative variant bSep08, mRNA.                                                   |
| <a href="#">peeja</a>              | <a href="#">peeja.aSep08</a>              |                        | 11660 | 288  |    | 60   | putative protein (peeja) mRNA.                                                                                |
| <a href="#">peeje</a>              | <a href="#">peeje.aSep08</a>              |                        | 3848  | 295  |    | 24   | putative protein (3.0 kD) (peeje) mRNA.                                                                       |
| <a href="#">peekee</a>             | <a href="#">peekee.aSep08</a>             |                        | 3465  | 526  | 2  | 46   | CRA b like (peekee) alternative variant aSep08, mRNA.                                                         |
| <a href="#">peekee</a>             | <a href="#">peekee.cSep08</a>             |                        | 9186  | 465  | 4  | 45   | CRA b like (peekee) alternative variant cSep08, mRNA.                                                         |
| <a href="#">peekee</a>             | <a href="#">peekee.dSep08</a>             |                        | 13631 | 403  | 3  | 44   | putative protein (peekee) alternative variant dSep08, mRNA.                                                   |

|                                 |                                        |                        |       |      |   |     |                                                                                      |
|---------------------------------|----------------------------------------|------------------------|-------|------|---|-----|--------------------------------------------------------------------------------------|
| <a href="#">peekler</a>         | <a href="#">peekler.aSep08</a>         |                        | 23069 | 553  | 3 | 93  | putative protein (peekler) alternative variant aSep08, mRNA.                         |
| <a href="#">peekler</a>         | <a href="#">peekler.bSep08</a>         |                        | 75080 | 597  | 4 | 81  | putative protein (peekler) alternative variant bSep08, mRNA.                         |
| <a href="#">peeloy</a>          | <a href="#">peeloy.aSep08</a>          |                        | 8030  | 1545 | 8 | 478 | putative protein of ancient origin (peeloy) alternative variant aSep08, mRNA.        |
| <a href="#">peeloy</a>          | <a href="#">peeloy.bSep08</a>          |                        | 1058  | 383  | 3 | 111 | putative protein of ancient origin (peeloy) alternative variant bSep08, mRNA.        |
| <a href="#">peeloy</a>          | <a href="#">peeloy.cSep08</a>          |                        | 950   | 405  | 1 | 71  | putative protein of eukaryotic origin (peeloy) alternative variant cSep08, mRNA.     |
| <a href="#">peemee</a>          | <a href="#">peemee.aSep08</a>          |                        | 62579 | 382  |   | 127 | dedicator of 2 (peemee) mRNA.                                                        |
| <a href="#">peemer</a>          | <a href="#">peemer.aSep08</a>          |                        | 2149  | 549  |   | 44  | putative protein (5.1 kD) (peemer) mRNA.                                             |
| <a href="#">peenoy</a>          | <a href="#">peenoy.aSep08</a>          |                        | 4923  | 698  |   | 232 | ubiquitin specific peptidase 37 (peenoy) mRNA.                                       |
| <a href="#">peepor</a>          | <a href="#">peepor.aSep08</a>          |                        | 2029  | 481  |   | 68  | putative protein (7.8 kD) (peepor) alternative variant aSep08, mRNA.                 |
| <a href="#">peepor</a>          | <a href="#">peepor.bSep08</a>          |                        | 3233  | 718  |   | 54  | putative protein (peepor) alternative variant bSep08, mRNA.                          |
| <a href="#">peesaa</a>          | <a href="#">peesaa.aSep08</a>          |                        | 5775  | 701  |   | 82  | putative protein (9.3 kD) (peesaa) mRNA.                                             |
| <a href="#">peeshee</a>         | <a href="#">peeshee.aSep08</a>         |                        | 9406  | 641  |   | 38  | putative protein (4.4 kD) (peeshee) mRNA.                                            |
| <a href="#">peetu</a>           | <a href="#">peetu.aSep08</a>           |                        | 8358  | 983  |   | 327 | baculoviral IAP repeat-containing 6 (peetu) mRNA.                                    |
| <a href="#">peevar</a>          | <a href="#">peevar.aSep08</a>          |                        | 3936  | 426  | 2 | 103 | zinc finger DHHC-type containing 18 CRA b (peevar) alternative variant aSep08, mRNA. |
| <a href="#">peevar</a>          | <a href="#">peevar.bSep08</a>          |                        | 4679  | 895  | 2 | 98  | containing 18 (peevar) alternative variant bSep08, mRNA.                             |
| <a href="#">peevar</a>          | <a href="#">peevar.cSep08</a>          |                        | 3008  | 474  | 2 | 84  | containing Zinc finger DHHC domain 1 (peevar) alternative variant cSep08, mRNA.      |
| <a href="#">peewey</a>          | <a href="#">peewey.aSep08</a>          |                        | 4473  | 411  |   | 85  | calcium channel voltage-dependent (peewey) mRNA.                                     |
| <a href="#">Pef1</a>            | <a href="#">Pef1.bSep08</a>            | <a href="#">297900</a> | 6648  | 1336 | 4 | 229 | calcium-binding EF-hand containing protein (Pef1) alternative variant bSep08, mRNA.  |
| <a href="#">Peli1</a>           | <a href="#">Peli1.bSep08</a>           | <a href="#">305549</a> | 7970  | 403  | 4 | 106 | pellino homolog 1 (Drosophila) (Peli1) alternative variant bSep08, mRNA.             |
| <a href="#">Peli1</a>           | <a href="#">Peli1.cSep08</a>           | <a href="#">305549</a> | 17523 | 410  | 4 | 87  | pellino homolog 1 (Drosophila) (Peli1) alternative variant cSep08, mRNA.             |
| <a href="#">Penk1</a>           | <a href="#">Penk1.bSep08</a>           | <a href="#">29237</a>  | 5336  | 1294 | 2 | 269 | proenkephalin 1 (30.9 kD) (Penk1) alternative variant bSep08, complete mRNA.         |
| <a href="#">Peo1</a>            | <a href="#">Peo1.bSep08</a>            | <a href="#">309441</a> | 7228  | 1472 | 6 | 231 | twinkle (26.1 kD) (Peo1) alternative variant bSep08, mRNA.                           |
| <a href="#">Peo1</a>            | <a href="#">Peo1.cSep08</a>            | <a href="#">309441</a> | 3336  | 350  | 2 | 116 | twinkle (Peo1) alternative variant cSep08, mRNA.                                     |
| <a href="#">Peo1</a>            | <a href="#">Peo1.dSep08</a>            | <a href="#">309441</a> | 3271  | 272  | 2 | 61  | putative protein (Peo1) alternative variant dSep08, mRNA.                            |
| <a href="#">Pepd</a>            | <a href="#">Pepd.bSep08</a>            | <a href="#">292808</a> | 66436 | 1312 |   | 330 | peptidase D (Pepd) alternative variant bSep08, mRNA.                                 |
| <a href="#">Peptidase_C1.0</a>  | <a href="#">Peptidase_C1.0.aSep08</a>  |                        | 1170  | 393  |   | 130 | cathepsin M (Peptidase_C1.0) mRNA.                                                   |
| <a href="#">Peptidase_C48.0</a> | <a href="#">Peptidase_C48.0.aSep08</a> |                        | 10038 | 2293 |   | 225 | specific 7 (Peptidase_C48.0) mRNA.                                                   |
| <a href="#">Peptidase_M43.0</a> | <a href="#">Peptidase_M43.0.aSep08</a> |                        | 9713  | 690  |   | 230 | pappalysin 2 (Peptidase_M43.0) mRNA.                                                 |

|                                 |                                        |                        |       |      |    |     |                                                                                               |
|---------------------------------|----------------------------------------|------------------------|-------|------|----|-----|-----------------------------------------------------------------------------------------------|
| <a href="#">Peptidase_M49.0</a> | <a href="#">Peptidase_M49.0.aSep08</a> |                        | 12777 | 1936 | 12 | 516 | dipeptidyl peptidase III (Peptidase_M49.0) alternative variant aSep08, mRNA.                  |
| <a href="#">Peptidase_M49.0</a> | <a href="#">Peptidase_M49.0.bSep08</a> |                        | 3044  | 709  | 2  | 105 | dipeptidylpeptidase 3 (11.7 kD) (Peptidase_M49.0) alternative variant bSep08, mRNA.           |
| <a href="#">Peptidase_S9.0</a>  | <a href="#">Peptidase_S9.0.aSep08</a>  |                        | 5013  | 1521 |    | 307 | dipeptidylpeptidase 9 (Peptidase_S9.0) mRNA.                                                  |
| <a href="#">Per1</a>            | <a href="#">Per1.bSep08</a>            | <a href="#">287422</a> | 3101  | 1859 | 2  | 270 | period homolog 1 (Drosophila) (27.5 kD) (Per1) alternative variant bSep08, mRNA.              |
| <a href="#">Per2</a>            | <a href="#">Per2.bSep08</a>            | <a href="#">63840</a>  | 14482 | 1099 | 1  | 297 | period homolog 2 (Drosophila) (32.4 kD) (Per2) alternative variant bSep08, mRNA.              |
| <a href="#">Per3</a>            | <a href="#">Per3.bSep08</a>            | <a href="#">78962</a>  | 7295  | 822  | 4  | 187 | period homolog 3 (Per3) alternative variant bSep08, mRNA.                                     |
| <a href="#">Per3</a>            | <a href="#">Per3.cSep08</a>            | <a href="#">78962</a>  | 1706  | 491  | 3  | 149 | period homolog 3 (Per3) alternative variant cSep08, mRNA.                                     |
| <a href="#">Per3</a>            | <a href="#">Per3.dSep08</a>            | <a href="#">78962</a>  | 7733  | 559  | 4  | 125 | period homolog 3 (Per3) alternative variant dSep08, mRNA.                                     |
| <a href="#">Per3</a>            | <a href="#">Per3.fSep08</a>            | <a href="#">78962</a>  | 627   | 396  | 2  | 40  | period homolog 3 (Per3) alternative variant fSep08, mRNA.                                     |
| <a href="#">perby</a>           | <a href="#">perby.aSep08</a>           |                        | 5424  | 731  |    | 243 | taf1 RNA polymerase II TATA box binding protein - associated factor 250kDa like (perby) mRNA. |
| <a href="#">perchy</a>          | <a href="#">perchy.aSep08</a>          |                        | 4305  | 716  |    | 56  | putative protein (5.9 kD) (perchy) mRNA.                                                      |
| <a href="#">perdar</a>          | <a href="#">perdar.aSep08</a>          |                        | 5416  | 1145 |    | 381 | protein hin-1 (perdar) mRNA.                                                                  |
| <a href="#">perfer</a>          | <a href="#">perfer.aSep08</a>          |                        | 11326 | 578  |    | 73  | CRA a like (perfer) mRNA.                                                                     |
| <a href="#">perflo</a>          | <a href="#">perflo.aSep08</a>          |                        | 1971  | 623  |    | 110 | putative protein of mammalian origin (perflo) alternative variant aSep08, mRNA.               |
| <a href="#">perflu</a>          | <a href="#">perflu.aSep08</a>          |                        | 2314  | 427  |    | 35  | putative protein (perflu) mRNA.                                                               |
| <a href="#">pergar</a>          | <a href="#">pergar.aSep08</a>          |                        | 1689  | 661  |    | 80  | putative protein (9.1 kD) (pergar) mRNA.                                                      |
| <a href="#">perja</a>           | <a href="#">perja.aSep08</a>           |                        | 1301  | 1199 | 2  | 88  | putative endoplasmic reticulum protein (9.9 kD) (perja) alternative variant aSep08, mRNA.     |
| <a href="#">perjey</a>          | <a href="#">perjey.aSep08</a>          |                        | 892   | 692  |    | 43  | putative protein (5.1 kD) (perjey) mRNA.                                                      |
| <a href="#">perkee</a>          | <a href="#">perkee.aSep08</a>          |                        | 53967 | 755  |    | 25  | putative protein (2.8 kD) (perkee) mRNA.                                                      |
| <a href="#">perkler</a>         | <a href="#">perkler.aSep08</a>         |                        | 1351  | 522  |    | 69  | putative protein (perkler) mRNA.                                                              |
| <a href="#">perloy</a>          | <a href="#">perloy.aSep08</a>          |                        | 302   | 195  |    | 64  | putative protein (perloy) mRNA.                                                               |
| <a href="#">permee</a>          | <a href="#">permee.aSep08</a>          |                        | 3681  | 529  | 1  | 62  | putative protein (permee) alternative variant aSep08, mRNA.                                   |
| <a href="#">permee</a>          | <a href="#">permee.bSep08</a>          |                        | 10947 | 364  | 1  | 51  | putative protein (permee) alternative variant bSep08, mRNA.                                   |
| <a href="#">permer</a>          | <a href="#">permer.aSep08</a>          |                        | 8249  | 904  |    | 217 | putative protein (permer) mRNA.                                                               |
| <a href="#">pernoy</a>          | <a href="#">pernoy.aSep08</a>          |                        | 4585  | 308  |    | 19  | putative protein (pernoy) mRNA.                                                               |
| <a href="#">perpor</a>          | <a href="#">perpor.aSep08</a>          |                        | 1783  | 294  |    | 35  | putative protein (perpor) mRNA.                                                               |
| <a href="#">persa</a>           | <a href="#">persa.aSep08</a>           |                        | 1457  | 388  |    | 36  | putative protein (persa) mRNA.                                                                |
| <a href="#">pershee</a>         | <a href="#">pershee.aSep08</a>         |                        | 28637 | 743  |    | 37  | putative protein (3.9 kD) (pershee) mRNA.                                                     |
| <a href="#">pertu</a>           | <a href="#">pertu.aSep08</a>           |                        | 567   | 416  |    | 132 | baculoviral IAP repeat-containing 6 CRA c (pertu) mRNA.                                       |
| <a href="#">pervar</a>          | <a href="#">pervar.aSep08</a>          | <a href="#">362616</a> | 3826  | 528  | 3  | 128 | CD164 sialomucin-like 2 (pervar) alternative variant aSep08, mRNA.                            |

|                         |                                |                        |        |      |    |     |                                                                                        |
|-------------------------|--------------------------------|------------------------|--------|------|----|-----|----------------------------------------------------------------------------------------|
| <a href="#">pervar</a>  | <a href="#">pervar.bSep08</a>  | <a href="#">362616</a> | 3298   | 679  | 5  | 108 | cd164 sialomucin-like 2 (11.8 kD) (pervar) alternative variant bSep08, mRNA.           |
| <a href="#">perwey</a>  | <a href="#">perwey.aSep08</a>  |                        | 410    | 340  |    | 45  | putative protein (5.1 kD) (perwey) mRNA.                                               |
| <a href="#">PET.0</a>   | <a href="#">PET.0.aSep08</a>   |                        | 91206  | 991  | 7  | 305 | prickle 1 (PET.0) alternative variant aSep08, mRNA.                                    |
| <a href="#">PET.0</a>   | <a href="#">PET.0.cSep08</a>   |                        | 48043  | 550  | 4  | 82  | putative protein (9.4 kD) (PET.0) alternative variant cSep08, mRNA.                    |
| <a href="#">PET.0</a>   | <a href="#">PET.0.dSep08</a>   |                        | 946    | 445  | 2  | 49  | putative protein (PET.0) alternative variant dSep08, mRNA.                             |
| <a href="#">Pet112l</a> | <a href="#">Pet112l.aSep08</a> | <a href="#">361974</a> | 25697  | 609  |    | 116 | PET112-like (yeast) (Pet112l) mRNA.                                                    |
| <a href="#">Pex1</a>    | <a href="#">Pex1.bSep08</a>    | <a href="#">500006</a> | 8815   | 1343 | 7  | 394 | biogenesis factor 1 (Pex1) alternative variant bSep08, mRNA.                           |
| <a href="#">Pex1</a>    | <a href="#">Pex1.cSep08</a>    | <a href="#">500006</a> | 3638   | 583  | 3  | 137 | peroxisome biogenesis factor 1 (Pex1) alternative variant cSep08, mRNA.                |
| <a href="#">Pex3</a>    | <a href="#">Pex3.bSep08</a>    | <a href="#">83519</a>  | 18554  | 743  | 6  | 117 | peroxisomal biogenesis factor 3 (13.7 kD) (Pex3) alternative variant bSep08, mRNA.     |
| <a href="#">Pex3</a>    | <a href="#">Pex3.cSep08</a>    | <a href="#">83519</a>  | 18506  | 504  | 6  | 97  | peroxisomal biogenesis factor 3 (Pex3) alternative variant cSep08, mRNA.               |
| <a href="#">Pex3</a>    | <a href="#">Pex3.fSep08</a>    | <a href="#">83519</a>  | 6680   | 354  | 2  | 40  | peroxisomal biogenesis factor 3 (Pex3) alternative variant fSep08, mRNA.               |
| <a href="#">Pex5</a>    | <a href="#">Pex5.aSep08</a>    | <a href="#">312703</a> | 28709  | 3153 | 15 | 521 | peroxisome biogenesis factor 5 (58.1 kD) (Pex5) alternative variant aSep08, mRNA.      |
| <a href="#">Pex5</a>    | <a href="#">Pex5.bSep08</a>    | <a href="#">312703</a> | 754    | 364  | 2  | 93  | peroxisome biogenesis factor 5 (Pex5) alternative variant bSep08, mRNA.                |
| <a href="#">Pex5</a>    | <a href="#">Pex5.dSep08</a>    | <a href="#">312703</a> | 1603   | 391  | 2  | 64  | peroxisome biogenesis factor 5 (Pex5) alternative variant dSep08, mRNA.                |
| <a href="#">Pex5l</a>   | <a href="#">Pex5l.bSep08</a>   | <a href="#">286937</a> | 56063  | 984  | 7  | 327 | peroxisomal biogenesis factor 5-like (Pex5l) alternative variant bSep08, mRNA.         |
| <a href="#">Pex5l</a>   | <a href="#">Pex5l.cSep08</a>   | <a href="#">286937</a> | 69148  | 1398 | 9  | 308 | peroxisomal biogenesis factor 5-like (Pex5l) alternative variant cSep08, mRNA.         |
| <a href="#">Pex6</a>    | <a href="#">Pex6.aSep08</a>    | <a href="#">117265</a> | 6897   | 1214 |    | 404 | peroxisomal biogenesis factor 6 (Pex6) mRNA.                                           |
| <a href="#">Pex11b</a>  | <a href="#">Pex11b.aSep08</a>  | <a href="#">310682</a> | 9226   | 1742 | 2  | 450 | peroxisomal biogenesis factor 11b (Pex11b) alternative variant aSep08, mRNA.           |
| <a href="#">Pex11b</a>  | <a href="#">Pex11b.cSep08</a>  | <a href="#">310682</a> | 8550   | 895  | 1  | 201 | peroxisomal biogenesis factor 11b (22.2 kD) (Pex11b) alternative variant cSep08, mRNA. |
| <a href="#">Pex11c</a>  | <a href="#">Pex11c.bSep08</a>  | <a href="#">288369</a> | 3970   | 711  | 1  | 71  | peroxisomal biogenesis factor 11c (Pex11c) alternative variant bSep08, mRNA.           |
| <a href="#">Pex14</a>   | <a href="#">Pex14.bSep08</a>   | <a href="#">64460</a>  | 111744 | 721  | 7  | 216 | peroxisomal biogenesis factor 14 (Pex14) alternative variant bSep08, mRNA.             |
| <a href="#">Pex14</a>   | <a href="#">Pex14.cSep08</a>   | <a href="#">64460</a>  | 85312  | 563  | 5  | 151 | peroxisomal biogenesis factor 14 (Pex14) alternative variant cSep08, mRNA.             |
| <a href="#">Pex14</a>   | <a href="#">Pex14.dSep08</a>   | <a href="#">64460</a>  | 21146  | 699  | 6  | 151 | peroxisomal biogenesis factor 14 (Pex14) alternative variant dSep08, mRNA.             |
| <a href="#">Pex14</a>   | <a href="#">Pex14.eSep08</a>   | <a href="#">64460</a>  | 87184  | 404  | 3  | 41  | peroxisomal biogenesis factor 14 (Pex14) alternative variant eSep08, mRNA.             |
| <a href="#">Pex16</a>   | <a href="#">Pex16.aSep08</a>   | <a href="#">311203</a> | 3422   | 913  | 9  | 304 | peroxisome biogenesis factor 16 (Pex16) alternative variant aSep08, mRNA.              |

|                              |                                     |                        |       |      |   |     |                                                                                                           |
|------------------------------|-------------------------------------|------------------------|-------|------|---|-----|-----------------------------------------------------------------------------------------------------------|
| <a href="#">Pex19</a>        | <a href="#">Pex19.cSep08</a>        | <a href="#">289233</a> | 16332 | 1970 | 9 | 293 | peroxisome biogenesis factor 19 (Pex19) alternative variant cSep08, mRNA.                                 |
| <a href="#">Pex19</a>        | <a href="#">Pex19.dSep08</a>        | <a href="#">289233</a> | 2177  | 1332 | 3 | 116 | peroxisome biogenesis factor 19 (13.2 kD) (Pex19) alternative variant dSep08, mRNA.                       |
| <a href="#">peyby</a>        | <a href="#">peyby.aSep08</a>        |                        | 3755  | 370  |   | 123 | taf1 RNA polymerase II TATA box binding protein - associated factor 250kDa CRA c like (peyby) mRNA.       |
| <a href="#">peychy</a>       | <a href="#">peychy.aSep08</a>       |                        | 1676  | 433  |   | 77  | putative protein (peychy) mRNA.                                                                           |
| <a href="#">peydar</a>       | <a href="#">peydar.aSep08</a>       |                        | 68416 | 412  |   | 137 | solute carrier family 10 member 7 (peydar) mRNA.                                                          |
| <a href="#">peyfer</a>       | <a href="#">peyfer.aSep08</a>       |                        | 651   | 334  |   | 49  | putative protein (peyfer) mRNA.                                                                           |
| <a href="#">peyflo</a>       | <a href="#">peyflo.aSep08</a>       |                        | 1468  | 433  |   | 53  | putative protein (peyflo) mRNA.                                                                           |
| <a href="#">peyflu</a>       | <a href="#">peyflu.bSep08</a>       |                        | 2424  | 790  | 2 | 49  | putative protein (peyflu) alternative variant bSep08, mRNA.                                               |
| <a href="#">peygar</a>       | <a href="#">peygar.aSep08</a>       |                        | 18855 | 433  |   | 40  | putative protein (peygar) mRNA.                                                                           |
| <a href="#">peyja</a>        | <a href="#">peyja.aSep08</a>        |                        | 8429  | 255  |   | 39  | putative protein (peyja) mRNA.                                                                            |
| <a href="#">peyjey</a>       | <a href="#">peyjey.aSep08</a>       |                        | 3379  | 227  |   | 62  | putative protein (7.0 kD) (peyjey) mRNA.                                                                  |
| <a href="#">peykee</a>       | <a href="#">peykee.aSep08</a>       |                        | 13085 | 520  |   | 172 | astrotactin (peykee) mRNA.                                                                                |
| <a href="#">peykler</a>      | <a href="#">peykler.bSep08</a>      |                        | 5759  | 878  | 2 | 72  | ab2-143 like (8.0 kD) (peykler) alternative variant bSep08, mRNA.                                         |
| <a href="#">peylo</a>        | <a href="#">peylo.aSep08</a>        |                        | 977   | 710  |   | 34  | putative protein (3.8 kD) (peylo) mRNA.                                                                   |
| <a href="#">peyloy</a>       | <a href="#">peyloy.bSep08</a>       |                        | 6819  | 1859 | 2 | 72  | ab2-143 like (8.0 kD) (peyloy) alternative variant bSep08, mRNA.                                          |
| <a href="#">peymee</a>       | <a href="#">peymee.aSep08</a>       |                        | 6270  | 183  |   | 50  | putative protein (peymee) mRNA.                                                                           |
| <a href="#">peymer</a>       | <a href="#">peymer.aSep08</a>       |                        | 554   | 354  |   | 51  | putative protein (5.5 kD) (peymer) mRNA.                                                                  |
| <a href="#">peynoy</a>       | <a href="#">peynoy.aSep08</a>       |                        | 4280  | 320  |   | 62  | putative protein (peynoy) mRNA.                                                                           |
| <a href="#">peypor</a>       | <a href="#">peypor.aSep08</a>       |                        | 8741  | 634  |   | 32  | putative protein (peypor) mRNA.                                                                           |
| <a href="#">peysa</a>        | <a href="#">peysa.aSep08</a>        |                        | 16483 | 723  | 2 | 124 | putative protein (peysa) alternative variant aSep08, mRNA.                                                |
| <a href="#">peysa</a>        | <a href="#">peysa.bSep08</a>        |                        | 7019  | 611  | 2 | 73  | putative protein (peysa) alternative variant bSep08, mRNA.                                                |
| <a href="#">peyshee</a>      | <a href="#">peyshee.aSep08</a>      |                        | 44904 | 465  |   | 94  | mediator of RNA polymerase II transcription (peyshee) mRNA.                                               |
| <a href="#">peytu</a>        | <a href="#">peytu.aSep08</a>        |                        | 18408 | 479  |   | 53  | putative protein (6.1 kD) (peytu) mRNA.                                                                   |
| <a href="#">peyvar</a>       | <a href="#">peyvar.aSep08</a>       |                        | 15921 | 394  |   | 75  | putative protein (8.2 kD) (peyvar) mRNA.                                                                  |
| <a href="#">peywey</a>       | <a href="#">peywey.aSep08</a>       |                        | 3506  | 1211 |   | 114 | calcium channel voltage-dependent (peywey) mRNA.                                                          |
| <a href="#">Pfas</a>         | <a href="#">Pfas.bSep08</a>         | <a href="#">287420</a> | 9528  | 401  | 4 | 133 | phosphoribosylformylglycinamide synthase (FGAR amidotransferase) (Pfas) alternative variant bSep08, mRNA. |
| <a href="#">Pfas</a>         | <a href="#">Pfas.cSep08</a>         | <a href="#">287420</a> | 788   | 392  | 3 | 130 | phosphoribosylformylglycinamide synthase (FGAR amidotransferase) (Pfas) alternative variant cSep08, mRNA. |
| <a href="#">Pfas</a>         | <a href="#">Pfas.dSep08</a>         | <a href="#">287420</a> | 547   | 422  | 2 | 95  | phosphoribosylformylglycinamide synthase (FGAR amidotransferase) (Pfas) alternative variant dSep08, mRNA. |
| <a href="#">Pfdn5andMyg1</a> | <a href="#">Pfdn5andMyg1.cSep08</a> | <a href="#">300257</a> | 4019  | 752  | 3 | 140 | melanocyte proliferating gene 1 CRA a like (Pfdn5andMyg1) alternative variant cSep08, mRNA.               |
| <a href="#">Pfdn5andMyg1</a> | <a href="#">Pfdn5andMyg1.cSep08</a> | <a href="#">300258</a> | 4019  | 752  | 3 | 140 | melanocyte proliferating gene 1 CRA a like (Pfdn5andMyg1) alternative variant cSep08, mRNA.               |

|                              |                                     |                        |       |      |    |     |                                                                                                            |
|------------------------------|-------------------------------------|------------------------|-------|------|----|-----|------------------------------------------------------------------------------------------------------------|
| <a href="#">Pfdn5andMyg1</a> | <a href="#">Pfdn5andMyg1.dSep08</a> | <a href="#">300257</a> | 888   | 751  | 2  | 110 | melanocyte proliferating gene 1 like (12.6 kD) (Pfdn5andMyg1) alternative variant dSep08, complete mRNA.   |
| <a href="#">Pfdn5andMyg1</a> | <a href="#">Pfdn5andMyg1.dSep08</a> | <a href="#">300258</a> | 888   | 751  | 2  | 110 | melanocyte proliferating gene 1 like (12.6 kD) (Pfdn5andMyg1) alternative variant dSep08, complete mRNA.   |
| <a href="#">Pfdn5andMyg1</a> | <a href="#">Pfdn5andMyg1.eSep08</a> | <a href="#">300257</a> | 6254  | 2445 | 5  | 85  | prefoldin (9.6 kD) (Pfdn5andMyg1) alternative variant eSep08, complete mRNA.                               |
| <a href="#">Pfdn5andMyg1</a> | <a href="#">Pfdn5andMyg1.eSep08</a> | <a href="#">300258</a> | 6254  | 2445 | 5  | 85  | prefoldin (9.6 kD) (Pfdn5andMyg1) alternative variant eSep08, complete mRNA.                               |
| <a href="#">Pfkfb1</a>       | <a href="#">Pfkfb1.bSep08</a>       | <a href="#">24638</a>  | 32055 | 887  | 9  | 264 | 6-phosphofructo-2-kinase/fructose-2,6-biphosphatase 1 (Pfkfb1) alternative variant bSep08, mRNA.           |
| <a href="#">Pfkfb1</a>       | <a href="#">Pfkfb1.cSep08</a>       | <a href="#">24638</a>  | 34832 | 858  | 9  | 207 | 6-phosphofructo-2-kinase/fructose-2,6-biphosphatase 1 (Pfkfb1) alternative variant cSep08, mRNA.           |
| <a href="#">Pfkfb1</a>       | <a href="#">Pfkfb1.dSep08</a>       | <a href="#">24638</a>  | 1598  | 244  | 3  | 28  | 6-phosphofructo-2-kinase/fructose-2,6-biphosphatase 1 (Pfkfb1) alternative variant dSep08, mRNA.           |
| <a href="#">Pfkfb2</a>       | <a href="#">Pfkfb2.dSep08</a>       | <a href="#">24640</a>  | 1390  | 383  | 3  | 104 | 6-phosphofructo-2-kinase/fructose-2,6-biphosphatase 2 (Pfkfb2) alternative variant dSep08, mRNA.           |
| <a href="#">Pfkfb3</a>       | <a href="#">Pfkfb3.bSep08</a>       | <a href="#">117276</a> | 26992 | 1712 | 14 | 462 | 6-phosphofructo-2-kinase/fructose-2,6-biphosphatase 3 (53.6 kD) (Pfkfb3) alternative variant bSep08, mRNA. |
| <a href="#">Pfkfb3</a>       | <a href="#">Pfkfb3.cSep08</a>       | <a href="#">117276</a> | 22309 | 1802 | 7  | 376 | 6-phosphofructo-2-kinase/fructose-2,6-biphosphatase 3 (Pfkfb3) alternative variant cSep08, mRNA.           |
| <a href="#">Pfkfb3</a>       | <a href="#">Pfkfb3.eSep08</a>       | <a href="#">117276</a> | 65894 | 418  | 5  | 138 | 6-phosphofructo-2-kinase/fructose-2,6-biphosphatase 3 (Pfkfb3) alternative variant eSep08, mRNA.           |
| <a href="#">Pfkfb3</a>       | <a href="#">Pfkfb3.gSep08</a>       | <a href="#">117276</a> | 2142  | 476  | 3  | 103 | 6-phosphofructo-2-kinase/fructose-2,6-biphosphatase 3 (Pfkfb3) alternative variant gSep08, mRNA.           |
| <a href="#">Pfkfb3</a>       | <a href="#">Pfkfb3.iSep08</a>       | <a href="#">117276</a> | 6210  | 385  | 2  | 28  | 6-phosphofructo-2-kinase/fructose-2,6-biphosphatase 3 (Pfkfb3) alternative variant iSep08, mRNA.           |
| <a href="#">Pfkfb4</a>       | <a href="#">Pfkfb4.bSep08</a>       | <a href="#">54283</a>  | 38525 | 2685 | 13 | 419 | 6-phosphofructo-2-kinase fructose-2 (48.3 kD) (Pfkfb4) alternative variant bSep08, mRNA.                   |
| <a href="#">Pfkfb4</a>       | <a href="#">Pfkfb4.cSep08</a>       | <a href="#">54283</a>  | 37713 | 1757 | 14 | 379 | 6-phosphofructo-2-kinase fructose-2 4 (44.0 kD) (Pfkfb4) alternative variant cSep08, mRNA.                 |
| <a href="#">Pfkfb4</a>       | <a href="#">Pfkfb4.dSep08</a>       | <a href="#">54283</a>  | 37540 | 1413 | 12 | 372 | 6-phosphofructo-2-kinase fructose-2 4 (43.2 kD) (Pfkfb4) alternative variant dSep08, mRNA.                 |
| <a href="#">Pfkfb4</a>       | <a href="#">Pfkfb4.eSep08</a>       | <a href="#">54283</a>  | 19224 | 1339 | 8  | 151 | 6-phosphofructo-2-kinase fructose-2 transcript (Pfkfb4) alternative variant eSep08, mRNA.                  |
| <a href="#">Pfkfb4</a>       | <a href="#">Pfkfb4.fSep08</a>       | <a href="#">54283</a>  | 14672 | 1204 | 3  | 132 | 6-phosphofructo-2-kinase fructose-2 6 (Pfkfb4) alternative variant fSep08, mRNA.                           |
| <a href="#">Pfkl</a>         | <a href="#">Pfkl.bSep08</a>         | <a href="#">25741</a>  | 7156  | 888  | 9  | 235 | phosphofructokinase, liver, B-type (Pfkl) alternative variant bSep08, mRNA.                                |
| <a href="#">Pfkm</a>         | <a href="#">Pfkm.bSep08</a>         | <a href="#">65152</a>  | 3231  | 562  | 5  | 171 | phosphofructokinase, muscle (Pfkm) alternative variant bSep08, mRNA.                                       |
| <a href="#">Pfkm</a>         | <a href="#">Pfkm.cSep08</a>         | <a href="#">65152</a>  | 7609  | 417  | 4  | 115 | phosphofructokinase, muscle (Pfkm) alternative variant cSep08, mRNA.                                       |
| <a href="#">Pfkm</a>         | <a href="#">Pfkm.eSep08</a>         | <a href="#">65152</a>  | 826   | 731  | 2  | 48  | phosphofructokinase, muscle (5.6 kD) (Pfkm) alternative variant eSep08, mRNA.                              |



|                         |                                |                        |        |      |    |     |                                                                                               |
|-------------------------|--------------------------------|------------------------|--------|------|----|-----|-----------------------------------------------------------------------------------------------|
| <a href="#">Pfkp</a>    | <a href="#">Pfkp.aSep08</a>    | <a href="#">60416</a>  | 62766  | 3346 | 21 | 465 | phosphofructokinase, platelet (Pfkp) alternative variant aSep08, mRNA.                        |
| <a href="#">Pfkp</a>    | <a href="#">Pfkp.bSep08</a>    | <a href="#">60416</a>  | 24674  | 1168 | 12 | 254 | phosphofructokinase, platelet (Pfkp) alternative variant bSep08, mRNA.                        |
| <a href="#">Pfkp</a>    | <a href="#">Pfkp.cSep08</a>    | <a href="#">60416</a>  | 2000   | 778  | 1  | 54  | phosphofructokinase, platelet (Pfkp) alternative variant cSep08, mRNA.                        |
| <a href="#">Pfn1</a>    | <a href="#">Pfn1.cSep08</a>    | <a href="#">64303</a>  | 1335   | 814  | 2  | 59  | profilin 1 (6.8 kD) (Pfn1) alternative variant cSep08, mRNA.                                  |
| <a href="#">Pfn1</a>    | <a href="#">Pfn1.dSep08</a>    | <a href="#">64303</a>  | 2519   | 627  | 3  | 59  | profilin 1 (6.8 kD) (Pfn1) alternative variant dSep08, mRNA.                                  |
| <a href="#">Pftk1</a>   | <a href="#">Pftk1.bSep08</a>   | <a href="#">362316</a> | 226422 | 923  | 6  | 123 | kinase (13.9 kD) (Pftk1) alternative variant bSep08, mRNA.                                    |
| <a href="#">Pftk1</a>   | <a href="#">Pftk1.cSep08</a>   | <a href="#">362316</a> | 32515  | 665  | 3  | 109 | kinase (Pftk1) alternative variant cSep08, mRNA.                                              |
| <a href="#">Pftk1</a>   | <a href="#">Pftk1.dSep08</a>   | <a href="#">362316</a> | 7112   | 482  | 2  | 43  | kinase (4.9 kD) (Pftk1) alternative variant dSep08, complete mRNA.                            |
| <a href="#">Pgam5</a>   | <a href="#">Pgam5.bSep08</a>   | <a href="#">288731</a> | 6593   | 1520 | 4  | 296 | phosphoglycerate mutase family member 5 (Pgam5) alternative variant bSep08, mRNA.             |
| <a href="#">Pgam5</a>   | <a href="#">Pgam5.cSep08</a>   | <a href="#">288731</a> | 3382   | 802  | 3  | 200 | phosphoglycerate mutase family member 5 (Pgam5) alternative variant cSep08, mRNA.             |
| <a href="#">Pgam5</a>   | <a href="#">Pgam5.dSep08</a>   | <a href="#">288731</a> | 3199   | 713  | 2  | 138 | phosphoglycerate mutase family member 5 (Pgam5) alternative variant dSep08, mRNA.             |
| <a href="#">Pgcp</a>    | <a href="#">Pgcp.bSep08</a>    | <a href="#">58952</a>  | 277055 | 1374 | 5  | 327 | plasma glutamate carboxypeptidase (35.9 kD) (Pgcp) alternative variant bSep08, mRNA.          |
| <a href="#">Pgcp</a>    | <a href="#">Pgcp.cSep08</a>    | <a href="#">58952</a>  | 176184 | 1165 | 5  | 324 | plasma glutamate carboxypeptidase (35.6 kD) (Pgcp) alternative variant cSep08, mRNA.          |
| <a href="#">Pggt1b</a>  | <a href="#">Pggt1b.bSep08</a>  | <a href="#">81746</a>  | 29802  | 726  | 6  | 241 | geranylgeranyltransferase type I (Pggt1b) alternative variant bSep08, mRNA.                   |
| <a href="#">Pggt1b</a>  | <a href="#">Pggt1b.cSep08</a>  | <a href="#">81746</a>  | 27119  | 2815 | 5  | 230 | protein geranylgeranyltransferase type I (26.1 kD) (Pggt1b) alternative variant cSep08, mRNA. |
| <a href="#">Pggt1b</a>  | <a href="#">Pggt1b.dSep08</a>  | <a href="#">81746</a>  | 16293  | 437  | 4  | 118 | geranylgeranyltransferase type I (13.6 kD) (Pggt1b) alternative variant dSep08, mRNA.         |
| <a href="#">Pgk1</a>    | <a href="#">Pgk1.bSep08</a>    | <a href="#">24644</a>  | 4634   | 870  | 4  | 213 | phosphoglycerate kinase 1 (Pgk1) alternative variant bSep08, mRNA.                            |
| <a href="#">Pgk1</a>    | <a href="#">Pgk1.cSep08</a>    | <a href="#">24644</a>  | 1125   | 564  | 2  | 56  | phosphoglycerate kinase 1 (Pgk1) alternative variant cSep08, mRNA.                            |
| <a href="#">Pgls</a>    | <a href="#">Pgls.bSep08</a>    | <a href="#">290636</a> | 3408   | 571  | 5  | 132 | 6-phosphogluconolactonase (Pgls) alternative variant bSep08, mRNA.                            |
| <a href="#">Pglyrp1</a> | <a href="#">Pglyrp1.bSep08</a> | <a href="#">84387</a>  | 13745  | 611  | 2  | 105 | peptidoglycan recognition protein 1 (11.8 kD) (Pglyrp1) alternative variant bSep08, mRNA.     |
| <a href="#">Pglyrp3</a> | <a href="#">Pglyrp3.aSep08</a> | <a href="#">499658</a> | 5076   | 487  |    | 162 | peptidoglycan recognition protein 3 (Pglyrp3) mRNA.                                           |
| <a href="#">Pgm2</a>    | <a href="#">Pgm2.aSep08</a>    | <a href="#">289632</a> | 35142  | 2109 | 14 | 636 | phosphoglucomutase 2 (Pgm2) alternative variant aSep08, mRNA.                                 |
| <a href="#">Pgm2</a>    | <a href="#">Pgm2.dSep08</a>    | <a href="#">289632</a> | 23001  | 594  | 4  | 60  | phosphoglucomutase 2 (Pgm2) alternative variant dSep08, mRNA.                                 |
| <a href="#">Pgm2l1</a>  | <a href="#">Pgm2l1.bSep08</a>  | <a href="#">685076</a> | 4988   | 1319 | 3  | 87  | phosphoglucomutase 2-like 1 (Pgm2l1) alternative variant bSep08, mRNA.                        |
| <a href="#">Pgm3</a>    | <a href="#">Pgm3.aSep08</a>    | <a href="#">363109</a> | 18242  | 2587 | 13 | 555 | phosphoglucomutase 3 (Pgm3) alternative variant aSep08, mRNA.                                 |

|                                |                                       |                        |        |      |    |     |                                                                                                           |
|--------------------------------|---------------------------------------|------------------------|--------|------|----|-----|-----------------------------------------------------------------------------------------------------------|
| <a href="#">Pgm5</a>           | <a href="#">Pgm5.aSep08</a>           | <a href="#">679990</a> | 68481  | 1815 | 3  | 222 | phosphoglucomutase 5 (Pgm5) alternative variant aSep08, mRNA.                                             |
| <a href="#">Pgm5</a>           | <a href="#">Pgm5.bSep08</a>           | <a href="#">679990</a> | 45549  | 297  | 1  | 78  | phosphoglucomutase 5 (Pgm5) alternative variant bSep08, mRNA.                                             |
| <a href="#">PGM_PMM_I.0</a>    | <a href="#">PGM_PMM_I.0.aSep08</a>    |                        | 41887  | 610  |    | 203 | phosphoglucomutase (PGM_PMM_I.0) mRNA.                                                                    |
| <a href="#">Pgrmc1</a>         | <a href="#">Pgrmc1.bSep08</a>         | <a href="#">291948</a> | 6859   | 419  | 1  | 119 | progesterone receptor membrane component 1 (Pgrmc1) alternative variant bSep08, mRNA.                     |
| <a href="#">Pgs1</a>           | <a href="#">Pgs1.aSep08</a>           | <a href="#">303698</a> | 35625  | 2265 | 10 | 556 | phosphatidylglycerophosphate synthase 1 (Pgs1) alternative variant aSep08, mRNA.                          |
| <a href="#">Pgs1</a>           | <a href="#">Pgs1.cSep08</a>           | <a href="#">303698</a> | 4284   | 621  | 2  | 93  | phosphatidylglycerophosphate synthase 1 (9.8 kD) (Pgs1) alternative variant cSep08, mRNA.                 |
| <a href="#">Pgs1</a>           | <a href="#">Pgs1.eSep08</a>           | <a href="#">303698</a> | 4366   | 440  | 2  | 64  | phosphatidylglycerophosphate synthase 1 (Pgs1) alternative variant eSep08, mRNA.                          |
| <a href="#">Pgs1</a>           | <a href="#">Pgs1.fSep08</a>           | <a href="#">303698</a> | 4431   | 543  | 2  | 48  | phosphatidylglycerophosphate synthase 1 (5.2 kD) (Pgs1) alternative variant fSep08, mRNA.                 |
| <a href="#">Pgs1</a>           | <a href="#">Pgs1.gSep08</a>           | <a href="#">303698</a> | 6369   | 370  | 3  | 55  | phosphatidylglycerophosphate synthase 1 (Pgs1) alternative variant gSep08, mRNA.                          |
| <a href="#">PG_binding_1.0</a> | <a href="#">PG_binding_1.0.aSep08</a> |                        | 1519   | 524  |    | 174 | matrix 13 (PG_binding_1.0) mRNA.                                                                          |
| <a href="#">Ph-4</a>           | <a href="#">Ph-4.aSep08</a>           | <a href="#">301008</a> | 17839  | 1736 | 8  | 507 | hypoxia-inducible factor prolyl 4-hydroxylase (Ph-4) alternative variant aSep08, mRNA.                    |
| <a href="#">Ph-4</a>           | <a href="#">Ph-4.bSep08</a>           | <a href="#">301008</a> | 2174   | 428  | 1  | 118 | hypoxia-inducible factor prolyl 4-hydroxylase (Ph-4) alternative variant bSep08, mRNA.                    |
| <a href="#">Ph-4</a>           | <a href="#">Ph-4.cSep08</a>           | <a href="#">301008</a> | 11632  | 382  | 2  | 30  | hypoxia-inducible factor prolyl 4-hydroxylase (3.1 kD) (Ph-4) alternative variant cSep08, mRNA.           |
| <a href="#">PH.0</a>           | <a href="#">PH.0.aSep08</a>           |                        | 53054  | 383  |    | 109 | rho GTPase activating protein 2 (PH.0) mRNA.                                                              |
| <a href="#">PH.1</a>           | <a href="#">PH.1.aSep08</a>           |                        | 5813   | 488  |    | 162 | intersectin 1 CRA a (PH.1) mRNA.                                                                          |
| <a href="#">PH.2</a>           | <a href="#">PH.2.aSep08</a>           |                        | 3847   | 1253 |    | 143 | pleckstrin homology-like domain family B member 2 (PH.2) mRNA.                                            |
| <a href="#">PH.3</a>           | <a href="#">PH.3.bSep08</a>           |                        | 47676  | 830  | 4  | 233 | 1 -specific guanine nucleotide-releasing factor (PH.3) alternative variant bSep08, mRNA.                  |
| <a href="#">PH.4</a>           | <a href="#">PH.4.aSep08</a>           |                        | 13641  | 657  | 6  | 218 | oxysterol-binding protein-like protein 8 (PH.4) alternative variant aSep08, mRNA.                         |
| <a href="#">PH.5</a>           | <a href="#">PH.5.aSep08</a>           |                        | 4504   | 514  | 2  | 150 | spectrin beta (PH.5) alternative variant aSep08, mRNA.                                                    |
| <a href="#">PH.5</a>           | <a href="#">PH.5.bSep08</a>           |                        | 801    | 349  | 1  | 79  | spectrin beta (PH.5) alternative variant bSep08, mRNA.                                                    |
| <a href="#">PH.6</a>           | <a href="#">PH.6.aSep08</a>           |                        | 160202 | 1072 | 8  | 357 | activator protein for secretion 2 CRA b (PH.6) alternative variant aSep08, mRNA.                          |
| <a href="#">PH.6</a>           | <a href="#">PH.6.bSep08</a>           |                        | 1757   | 374  | 1  | 109 | activator protein for secretion 2 (PH.6) alternative variant bSep08, mRNA.                                |
| <a href="#">PH.7</a>           | <a href="#">PH.7.aSep08</a>           |                        | 8872   | 1137 | 8  | 273 | pleckstrin homology-like domain family B member 3 (PH.7) alternative variant aSep08, mRNA.                |
| <a href="#">PH.7</a>           | <a href="#">PH.7.bSep08</a>           |                        | 1206   | 738  | 2  | 89  | pleckstrin homology-like domain family B member 3 CRA c (9.8 kD) (PH.7) alternative variant bSep08, mRNA. |
| <a href="#">PH.8</a>           | <a href="#">PH.8.aSep08</a>           |                        | 8561   | 487  | 1  | 161 | homology domain-containing family A member 7 (PH.8) alternative variant aSep08, mRNA.                     |

|                         |                                |                        |        |      |   |     |                                                                                                          |
|-------------------------|--------------------------------|------------------------|--------|------|---|-----|----------------------------------------------------------------------------------------------------------|
| <a href="#">PH.8</a>    | <a href="#">PH.8.bSep08</a>    |                        | 15559  | 504  | 4 | 158 | CRA b (PH.8) alternative variant bSep08, mRNA.                                                           |
| <a href="#">Phactr1</a> | <a href="#">Phactr1.bSep08</a> | <a href="#">306844</a> | 162743 | 818  | 5 | 272 | phosphatase and actin regulator 1 (Phactr1) alternative variant bSep08, mRNA.                            |
| <a href="#">Phactr3</a> | <a href="#">Phactr3.bSep08</a> | <a href="#">362284</a> | 9346   | 1459 | 5 | 128 | phosphatase and actin regulator 3 (15.6 kD) (Phactr3) alternative variant bSep08, mRNA.                  |
| <a href="#">Phb2</a>    | <a href="#">Phb2.bSep08</a>    | <a href="#">114766</a> | 3600   | 2152 | 6 | 206 | prohibitin 2 (22.9 kD) (Phb2) alternative variant bSep08, mRNA.                                          |
| <a href="#">Phb2</a>    | <a href="#">Phb2.cSep08</a>    | <a href="#">114766</a> | 2702   | 844  | 6 | 183 | prohibitin 2 (Phb2) alternative variant cSep08, mRNA.                                                    |
| <a href="#">Phc1</a>    | <a href="#">Phc1.bSep08</a>    | <a href="#">312690</a> | 14184  | 1644 | 4 | 547 | polyhomeotic-like 1 (Phc1) alternative variant bSep08, mRNA.                                             |
| <a href="#">Phc1</a>    | <a href="#">Phc1.cSep08</a>    | <a href="#">312690</a> | 13894  | 2438 | 4 | 497 | polyhomeotic-like 1 CRA c (Phc1) alternative variant cSep08, mRNA.                                       |
| <a href="#">Phc1</a>    | <a href="#">Phc1.eSep08</a>    | <a href="#">312690</a> | 967    | 796  | 2 | 100 | polyhomeotic-like 1 CRA a (Phc1) alternative variant eSep08, mRNA.                                       |
| <a href="#">Phc2</a>    | <a href="#">Phc2.bSep08</a>    | <a href="#">313038</a> | 24230  | 2446 | 7 | 425 | polyhomeotic-like 2 (Drosophila) (Phc2) alternative variant bSep08, mRNA.                                |
| <a href="#">Phc2</a>    | <a href="#">Phc2.cSep08</a>    | <a href="#">313038</a> | 20369  | 1565 | 6 | 232 | polyhomeotic-like 2 (Drosophila) (26.0 kD) (Phc2) alternative variant cSep08, mRNA.                      |
| <a href="#">Phc2</a>    | <a href="#">Phc2.dSep08</a>    | <a href="#">313038</a> | 5830   | 784  | 4 | 178 | polyhomeotic-like 2 (Drosophila) (19.8 kD) (Phc2) alternative variant dSep08, mRNA.                      |
| <a href="#">Phca</a>    | <a href="#">Phca.aSep08</a>    | <a href="#">499210</a> | 6580   | 1216 | 4 | 82  | phytoceramidase, alkaline (Phca) alternative variant aSep08, mRNA.                                       |
| <a href="#">Phca</a>    | <a href="#">Phca.bSep08</a>    | <a href="#">499210</a> | 5720   | 1034 | 3 | 72  | phytoceramidase, alkaline (Phca) alternative variant bSep08, mRNA.                                       |
| <a href="#">PHD.0</a>   | <a href="#">PHD.0.aSep08</a>   |                        | 1611   | 934  |   | 311 | jumonji AT rich interactive domain 1C (PHD.0) mRNA.                                                      |
| <a href="#">PHD.1</a>   | <a href="#">PHD.1.aSep08</a>   |                        | 36167  | 3818 |   | 645 | taf3 RNA polymerase II tata box binding protein -associated factor like (PHD.1) mRNA.                    |
| <a href="#">PHD.2</a>   | <a href="#">PHD.2.aSep08</a>   |                        | 8636   | 370  |   | 123 | myst histone acetyltransferase 3 (PHD.2) mRNA.                                                           |
| <a href="#">PHD.3</a>   | <a href="#">PHD.3.aSep08</a>   |                        | 3020   | 376  | 3 | 125 | PHD finger protein 20 (PHD.3) alternative variant aSep08, mRNA.                                          |
| <a href="#">PHD.4</a>   | <a href="#">PHD.4.aSep08</a>   |                        | 12177  | 717  | 5 | 238 | bromodomain adjacent zinc finger domain 1A (PHD.4) alternative variant aSep08, mRNA.                     |
| <a href="#">PHD.5</a>   | <a href="#">PHD.5.aSep08</a>   |                        | 44943  | 1549 | 9 | 351 | myeloid lymphoid mixed-lineage leukemia 5 CRA a like (38.9 kD) (PHD.5) alternative variant aSep08, mRNA. |
| <a href="#">PHD.5</a>   | <a href="#">PHD.5.bSep08</a>   |                        | 16197  | 433  | 3 | 85  | putative protein (PHD.5) alternative variant bSep08, mRNA.                                               |
| <a href="#">PHD.5</a>   | <a href="#">PHD.5.cSep08</a>   |                        | 16653  | 816  | 2 | 75  | putative protein (PHD.5) alternative variant cSep08, mRNA.                                               |
| <a href="#">PHD.6</a>   | <a href="#">PHD.6.aSep08</a>   |                        | 1762   | 561  |   | 186 | myeloid lymphoid mixed-lineage leukemia like (PHD.6) mRNA.                                               |
| <a href="#">PHD.7</a>   | <a href="#">PHD.7.aSep08</a>   |                        | 14907  | 1046 | 7 | 258 | spacing factor 1 (PHD.7) alternative variant aSep08, mRNA.                                               |
| <a href="#">Phf1</a>    | <a href="#">Phf1.bSep08</a>    | <a href="#">294287</a> | 2310   | 742  | 6 | 247 | PHD finger protein 1 (Phf1) alternative variant bSep08, mRNA.                                            |
| <a href="#">Phf1</a>    | <a href="#">Phf1.cSep08</a>    | <a href="#">294287</a> | 1219   | 375  | 4 | 125 | PHD finger protein 1 (Phf1) alternative variant cSep08, mRNA.                                            |

|                       |                              |                        |        |      |    |     |                                                                                    |
|-----------------------|------------------------------|------------------------|--------|------|----|-----|------------------------------------------------------------------------------------|
| <a href="#">Phf1</a>  | <a href="#">Phf1.dSep08</a>  | <a href="#">294287</a> | 1471   | 732  | 6  | 115 | PHD finger protein 1 (Phf1) alternative variant dSep08, mRNA.                      |
| <a href="#">Phf2</a>  | <a href="#">Phf2.aSep08</a>  | <a href="#">306814</a> | 11441  | 1120 | 6  | 373 | PHD finger protein 2 (Phf2) alternative variant aSep08, mRNA.                      |
| <a href="#">Phf3</a>  | <a href="#">Phf3.bSep08</a>  | <a href="#">363210</a> | 10126  | 1799 | 1  | 469 | PHD finger protein 3 (Phf3) alternative variant bSep08, mRNA.                      |
| <a href="#">Phf5a</a> | <a href="#">Phf5a.bSep08</a> | <a href="#">192246</a> | 6045   | 838  | 1  | 88  | PHD finger protein 5A (Phf5a) alternative variant bSep08, mRNA.                    |
| <a href="#">Phf7</a>  | <a href="#">Phf7.bSep08</a>  | <a href="#">364510</a> | 12788  | 1387 | 9  | 221 | PHD finger protein 7 (25.1 kD) (Phf7) alternative variant bSep08, mRNA.            |
| <a href="#">Phf7</a>  | <a href="#">Phf7.cSep08</a>  | <a href="#">364510</a> | 5510   | 811  | 5  | 72  | PHD finger protein 7 (8.3 kD) (Phf7) alternative variant cSep08, mRNA.             |
| <a href="#">Phf10</a> | <a href="#">Phf10.bSep08</a> | <a href="#">292404</a> | 6740   | 737  | 7  | 245 | PHD finger protein 10 (Phf10) alternative variant bSep08, mRNA.                    |
| <a href="#">Phf10</a> | <a href="#">Phf10.cSep08</a> | <a href="#">292404</a> | 2202   | 532  | 4  | 148 | PHD finger protein 10 (Phf10) alternative variant cSep08, mRNA.                    |
| <a href="#">Phf10</a> | <a href="#">Phf10.dSep08</a> | <a href="#">292404</a> | 4914   | 1750 | 3  | 136 | PHD finger protein 10 (14.9 kD) (Phf10) alternative variant dSep08, mRNA.          |
| <a href="#">Phf10</a> | <a href="#">Phf10.gSep08</a> | <a href="#">292404</a> | 1563   | 1301 | 2  | 81  | PHD finger protein 10 (9.2 kD) (Phf10) alternative variant gSep08, mRNA.           |
| <a href="#">Phf11</a> | <a href="#">Phf11.aSep08</a> | <a href="#">361051</a> | 31502  | 719  | 7  | 239 | PHD finger protein 11 (Phf11) alternative variant aSep08, mRNA.                    |
| <a href="#">Phf11</a> | <a href="#">Phf11.bSep08</a> | <a href="#">361051</a> | 56899  | 736  | 2  | 110 | PHD finger protein 11 (12.4 kD) (Phf11) alternative variant bSep08, mRNA.          |
| <a href="#">Phf12</a> | <a href="#">Phf12.bSep08</a> | <a href="#">303274</a> | 13931  | 3075 | 10 | 725 | PHD finger protein 12 (Phf12) alternative variant bSep08, mRNA.                    |
| <a href="#">Phf12</a> | <a href="#">Phf12.cSep08</a> | <a href="#">303274</a> | 5925   | 1844 | 6  | 236 | PHD finger protein 12 (25.4 kD) (Phf12) alternative variant cSep08, mRNA.          |
| <a href="#">Phf12</a> | <a href="#">Phf12.dSep08</a> | <a href="#">303274</a> | 3664   | 404  | 6  | 134 | PHD finger protein 12 (Phf12) alternative variant dSep08, mRNA.                    |
| <a href="#">Phf12</a> | <a href="#">Phf12.eSep08</a> | <a href="#">303274</a> | 8626   | 673  | 5  | 127 | PHD finger protein 12 (Phf12) alternative variant eSep08, mRNA.                    |
| <a href="#">Phf12</a> | <a href="#">Phf12.fSep08</a> | <a href="#">303274</a> | 3007   | 370  | 4  | 123 | PHD finger protein 12 (Phf12) alternative variant fSep08, mRNA.                    |
| <a href="#">Phf12</a> | <a href="#">Phf12.iSep08</a> | <a href="#">303274</a> | 1490   | 338  | 3  | 28  | putative protein (Phf12) alternative variant iSep08, mRNA.                         |
| <a href="#">Phf14</a> | <a href="#">Phf14.bSep08</a> | <a href="#">500030</a> | 104699 | 3511 | 16 | 877 | PHD finger protein 14 (98.7 kD) (Phf14) alternative variant bSep08, complete mRNA. |
| <a href="#">Phf14</a> | <a href="#">Phf14.cSep08</a> | <a href="#">500030</a> | 120222 | 788  | 6  | 218 | PHD finger protein 14 (Phf14) alternative variant cSep08, mRNA.                    |
| <a href="#">Phf14</a> | <a href="#">Phf14.dSep08</a> | <a href="#">500030</a> | 22191  | 435  | 3  | 100 | PHD finger protein 14 (Phf14) alternative variant dSep08, mRNA.                    |
| <a href="#">Phf14</a> | <a href="#">Phf14.eSep08</a> | <a href="#">500030</a> | 29495  | 689  | 4  | 97  | PHD finger protein 14 (Phf14) alternative variant eSep08, mRNA.                    |
| <a href="#">Phf14</a> | <a href="#">Phf14.fSep08</a> | <a href="#">500030</a> | 92148  | 500  | 4  | 83  | PHD finger protein 14 (Phf14) alternative variant fSep08, mRNA.                    |
| <a href="#">Phf15</a> | <a href="#">Phf15.bSep08</a> | <a href="#">303113</a> | 43462  | 2297 | 2  | 671 | PHD finger protein 15 (Phf15) alternative variant bSep08, mRNA.                    |

|                        |                               |                        |        |      |    |     |                                                                                                                               |
|------------------------|-------------------------------|------------------------|--------|------|----|-----|-------------------------------------------------------------------------------------------------------------------------------|
| <a href="#">Phf17</a>  | <a href="#">Phf17.bSep08</a>  | <a href="#">310352</a> | 8083   | 845  | 4  | 281 | PHD finger protein 17 (Phf17) alternative variant bSep08, mRNA.                                                               |
| <a href="#">Phf17</a>  | <a href="#">Phf17.cSep08</a>  | <a href="#">310352</a> | 27909  | 492  | 5  | 163 | PHD finger protein 17 (Phf17) alternative variant cSep08, mRNA.                                                               |
| <a href="#">Phf19</a>  | <a href="#">Phf19.bSep08</a>  | <a href="#">296653</a> | 3537   | 2400 |    | 132 | PHD finger protein 19 (Phf19) alternative variant bSep08, mRNA.                                                               |
| <a href="#">Phf201</a> | <a href="#">Phf201.aSep08</a> | <a href="#">314964</a> | 32824  | 1045 | 4  | 327 | PHD finger protein 20-like 1 and hypothetical protein LOC690663 (Phf201) alternative variant aSep08, mRNA.                    |
| <a href="#">Phf201</a> | <a href="#">Phf201.aSep08</a> | <a href="#">690663</a> | 32824  | 1045 | 4  | 327 | PHD finger protein 20-like 1 and hypothetical protein LOC690663 (Phf201) alternative variant aSep08, mRNA.                    |
| <a href="#">Phf201</a> | <a href="#">Phf201.bSep08</a> | <a href="#">314964</a> | 30611  | 2521 | 4  | 316 | PHD finger protein 20-like 1 and hypothetical protein LOC690663 (35.8 kD) (Phf201) alternative variant bSep08, complete mRNA. |
| <a href="#">Phf201</a> | <a href="#">Phf201.bSep08</a> | <a href="#">690663</a> | 30611  | 2521 | 4  | 316 | PHD finger protein 20-like 1 and hypothetical protein LOC690663 (35.8 kD) (Phf201) alternative variant bSep08, complete mRNA. |
| <a href="#">Phf201</a> | <a href="#">Phf201.cSep08</a> | <a href="#">314964</a> | 14673  | 1324 | 3  | 285 | PHD finger protein 20-like 1 and hypothetical protein LOC690663 (Phf201) alternative variant cSep08, mRNA.                    |
| <a href="#">Phf201</a> | <a href="#">Phf201.cSep08</a> | <a href="#">690663</a> | 14673  | 1324 | 3  | 285 | PHD finger protein 20-like 1 and hypothetical protein LOC690663 (Phf201) alternative variant cSep08, mRNA.                    |
| <a href="#">Phf21b</a> | <a href="#">Phf21b.bSep08</a> | <a href="#">300117</a> | 62783  | 1802 | 5  | 400 | PHD finger protein 21B (Phf21b) alternative variant bSep08, mRNA.                                                             |
| <a href="#">Phf21b</a> | <a href="#">Phf21b.cSep08</a> | <a href="#">300117</a> | 2513   | 407  | 2  | 113 | PHD finger protein 21B (Phf21b) alternative variant cSep08, mRNA.                                                             |
| <a href="#">Phgdh</a>  | <a href="#">Phgdh.aSep08</a>  | <a href="#">58835</a>  | 29018  | 1832 | 12 | 533 | 3-phosphoglycerate dehydrogenase (56.5 kD) (Phgdh) alternative variant aSep08, mRNA.                                          |
| <a href="#">Phgdh</a>  | <a href="#">Phgdh.bSep08</a>  | <a href="#">58835</a>  | 3248   | 1382 | 5  | 429 | 3-phosphoglycerate dehydrogenase (Phgdh) alternative variant bSep08, mRNA.                                                    |
| <a href="#">Phgdh</a>  | <a href="#">Phgdh.cSep08</a>  | <a href="#">58835</a>  | 12211  | 767  | 4  | 92  | 3-phosphoglycerate dehydrogenase (10.1 kD) (Phgdh) alternative variant cSep08, mRNA.                                          |
| <a href="#">Phgdh1</a> | <a href="#">Phgdh1.aSep08</a> | <a href="#">361094</a> | 146141 | 1342 | 7  | 345 | phosphoglycerate dehydrogenase like 1 (39.1 kD) (Phgdh1) alternative variant aSep08, mRNA.                                    |
| <a href="#">Phgdh1</a> | <a href="#">Phgdh1.bSep08</a> | <a href="#">361094</a> | 107051 | 820  | 4  | 187 | phosphoglycerate dehydrogenase like 1 (21.4 kD) (Phgdh1) alternative variant bSep08, mRNA.                                    |
| <a href="#">Phka1</a>  | <a href="#">Phka1.aSep08</a>  | <a href="#">64561</a>  | 25323  | 706  | 3  | 235 | phosphorylase kinase alpha 1 (Phka1) alternative variant aSep08, mRNA.                                                        |
| <a href="#">Phka1</a>  | <a href="#">Phka1.bSep08</a>  | <a href="#">64561</a>  | 16874  | 403  | 1  | 134 | phosphorylase kinase alpha 1 (Phka1) alternative variant bSep08, mRNA.                                                        |
| <a href="#">Phka2</a>  | <a href="#">Phka2.aSep08</a>  | <a href="#">678739</a> | 3603   | 636  |    | 201 | phosphorylase kinase alpha 2 (Phka2) mRNA.                                                                                    |
| <a href="#">Phkb</a>   | <a href="#">Phkb.bSep08</a>   | <a href="#">361377</a> | 190210 | 1825 | 8  | 384 | phosphorylase kinase, beta (Phkb) alternative variant bSep08, complete mRNA.                                                  |
| <a href="#">Phkb</a>   | <a href="#">Phkb.cSep08</a>   | <a href="#">361377</a> | 27585  | 784  | 7  | 260 | phosphorylase kinase, beta (Phkb) alternative variant cSep08, mRNA.                                                           |
| <a href="#">Phkb</a>   | <a href="#">Phkb.dSep08</a>   | <a href="#">361377</a> | 30232  | 2680 | 6  | 223 | phosphorylase kinase, beta (25.7 kD) (Phkb) alternative variant dSep08, mRNA.                                                 |
| <a href="#">Phkg2</a>  | <a href="#">Phkg2.bSep08</a>  | <a href="#">140671</a> | 12053  | 1230 | 8  | 286 | phosphorylase kinase gamma (32.9 kD) (Phkg2) alternative variant bSep08, mRNA.                                                |

|                        |                               |                        |       |      |    |     |                                                                                                                                                      |
|------------------------|-------------------------------|------------------------|-------|------|----|-----|------------------------------------------------------------------------------------------------------------------------------------------------------|
| <a href="#">Phkg2</a>  | <a href="#">Phkg2.cSep08</a>  | <a href="#">140671</a> | 11629 | 778  | 7  | 207 | phosphorylase kinase gamma (Phkg2) alternative variant cSep08, mRNA.                                                                                 |
| <a href="#">Phkg2</a>  | <a href="#">Phkg2.dSep08</a>  | <a href="#">140671</a> | 3850  | 1433 | 3  | 133 | phosphorylase kinase gamma 2 (Phkg2) alternative variant dSep08, mRNA.                                                                               |
| <a href="#">Phkg2</a>  | <a href="#">Phkg2.eSep08</a>  | <a href="#">140671</a> | 8888  | 702  | 4  | 118 | phosphorylase kinase gamma 2 (Phkg2) alternative variant eSep08, mRNA.                                                                               |
| <a href="#">Phkg2</a>  | <a href="#">Phkg2.fSep08</a>  | <a href="#">140671</a> | 11320 | 795  | 6  | 96  | phosphorylase kinase gamma 2 (Phkg2) alternative variant fSep08, mRNA.                                                                               |
| <a href="#">Phkg2</a>  | <a href="#">Phkg2.hSep08</a>  | <a href="#">140671</a> | 564   | 483  | 2  | 63  | phosphorylase kinase gamma 2 (Phkg2) alternative variant hSep08, mRNA.                                                                               |
| <a href="#">Phlda1</a> | <a href="#">Phlda1.bSep08</a> | <a href="#">29380</a>  | 1887  | 1479 | 2  | 114 | pleckstrin homology-like domain, family A, member 1 and hypothetical protein LOC688472 (11.0 kD) (Phlda1) alternative variant bSep08, complete mRNA. |
| <a href="#">Phlda1</a> | <a href="#">Phlda1.bSep08</a> | <a href="#">688472</a> | 1887  | 1479 | 2  | 114 | pleckstrin homology-like domain, family A, member 1 and hypothetical protein LOC688472 (11.0 kD) (Phlda1) alternative variant bSep08, complete mRNA. |
| <a href="#">Phlda2</a> | <a href="#">Phlda2.aSep08</a> | <a href="#">293637</a> | 949   | 651  |    | 129 | pleckstrin homology-like domain, family A, member 2 (Phlda2) mRNA.                                                                                   |
| <a href="#">Phldb1</a> | <a href="#">Phldb1.aSep08</a> | <a href="#">171434</a> | 9547  | 1865 | 6  | 203 | pleckstrin homology-like domain, family B, member 1 (Phldb1) alternative variant aSep08, mRNA.                                                       |
| <a href="#">Phldb1</a> | <a href="#">Phldb1.bSep08</a> | <a href="#">171434</a> | 1787  | 872  | 2  | 72  | pleckstrin homology-like domain, family B, member 1 (Phldb1) alternative variant bSep08, mRNA.                                                       |
| <a href="#">Phldb2</a> | <a href="#">Phldb2.aSep08</a> | <a href="#">685611</a> | 15345 | 665  | 5  | 221 | pleckstrin homology-like domain, family B, member 2 (Phldb2) alternative variant aSep08, mRNA.                                                       |
| <a href="#">Phldb3</a> | <a href="#">Phldb3.aSep08</a> | <a href="#">308431</a> | 5983  | 961  |    | 225 | pleckstrin homology-like domain, family B, member 3 (Phldb3) mRNA.                                                                                   |
| <a href="#">Phlpb</a>  | <a href="#">Phlpb.bSep08</a>  | <a href="#">192259</a> | 20916 | 1096 | 10 | 232 | phospholipase B CRA c (26.7 kD) (Phlpb) alternative variant bSep08, mRNA.                                                                            |
| <a href="#">Phlpb</a>  | <a href="#">Phlpb.cSep08</a>  | <a href="#">192259</a> | 4277  | 753  | 5  | 102 | phospholipase B CRA b (Phlpb) alternative variant cSep08, mRNA.                                                                                      |
| <a href="#">Phlpb</a>  | <a href="#">Phlpb.dSep08</a>  | <a href="#">192259</a> | 3380  | 605  | 3  | 93  | putative protein (Phlpb) alternative variant dSep08, mRNA.                                                                                           |
| <a href="#">Phlpb</a>  | <a href="#">Phlpb.eSep08</a>  | <a href="#">192259</a> | 2110  | 465  | 3  | 62  | phospholipase B CRA b (Phlpb) alternative variant eSep08, mRNA.                                                                                      |
| <a href="#">Phlpb</a>  | <a href="#">Phlpb.fSep08</a>  | <a href="#">192259</a> | 1885  | 320  | 3  | 54  | phospholipase B CRA b (Phlpb) alternative variant fSep08, mRNA.                                                                                      |
| <a href="#">Phlppi</a> | <a href="#">Phlppi.bSep08</a> | <a href="#">498949</a> | 1648  | 506  | 1  | 89  | PH domain and leucine rich repeat protein phosphatase-like (Phlppi) alternative variant bSep08, mRNA.                                                |
| <a href="#">Phpt1</a>  | <a href="#">Phpt1.bSep08</a>  | <a href="#">296571</a> | 1374  | 672  | 3  | 115 | phosphohistidine phosphatase 1 (13.0 kD) (Phpt1) alternative variant bSep08, complete mRNA.                                                          |
| <a href="#">Phtf1</a>  | <a href="#">Phtf1.aSep08</a>  | <a href="#">252962</a> | 14010 | 1778 | 10 | 487 | putative homeodomain transcription factor 1 (Phtf1) alternative variant aSep08, mRNA.                                                                |
| <a href="#">Phtf1</a>  | <a href="#">Phtf1.bSep08</a>  | <a href="#">252962</a> | 7506  | 919  | 5  | 145 | putative homeodomain transcription factor 1 (Phtf1) alternative variant bSep08, mRNA.                                                                |
| <a href="#">Phtf1</a>  | <a href="#">Phtf1.cSep08</a>  | <a href="#">252962</a> | 1599  | 755  | 2  | 73  | putative homeodomain transcription factor 1 (Phtf1) alternative variant cSep08, mRNA.                                                                |
| <a href="#">Phtf2</a>  | <a href="#">Phtf2.aSep08</a>  | <a href="#">296762</a> | 25988 | 943  |    | 314 | putative homeodomain transcription factor 2 (Phtf2) mRNA.                                                                                            |

|                         |                                |                        |       |      |   |     |                                                                                                          |
|-------------------------|--------------------------------|------------------------|-------|------|---|-----|----------------------------------------------------------------------------------------------------------|
| <a href="#">Phyh</a>    | <a href="#">Phyh.bSep08</a>    | <a href="#">114209</a> | 9980  | 1493 | 6 | 241 | phytanoyl-CoA (27.6 kD) (Phyh) alternative variant bSep08, mRNA.                                         |
| <a href="#">Phyh</a>    | <a href="#">Phyh.cSep08</a>    | <a href="#">114209</a> | 6404  | 520  | 3 | 115 | phytanoyl-CoA (Phyh) alternative variant cSep08, mRNA.                                                   |
| <a href="#">Phyh</a>    | <a href="#">Phyh.dSep08</a>    | <a href="#">114209</a> | 6431  | 959  | 3 | 104 | phytanoyl-CoA hydroxylase (11.8 kD) (Phyh) alternative variant dSep08, mRNA.                             |
| <a href="#">Phyhd1</a>  | <a href="#">Phyhd1.bSep08</a>  | <a href="#">296621</a> | 9292  | 415  | 6 | 138 | putative protein of ancient origin (Phyhd1) alternative variant bSep08, mRNA.                            |
| <a href="#">Phyhipl</a> | <a href="#">Phyhipl.aSep08</a> | <a href="#">309901</a> | 41741 | 2680 | 5 | 375 | phytanoyl-CoA hydroxylase interacting protein-like (42.4 kD) (Phyhipl) alternative variant aSep08, mRNA. |
| <a href="#">Pi4k2a</a>  | <a href="#">Pi4k2a.bSep08</a>  | <a href="#">114554</a> | 16556 | 1700 | 8 | 309 | phosphatidylinositol 4-kinase type 2 alpha (Pi4k2a) alternative variant bSep08, mRNA.                    |
| <a href="#">Pi4k2a</a>  | <a href="#">Pi4k2a.cSep08</a>  | <a href="#">114554</a> | 5560  | 2016 | 3 | 126 | phosphatidylinositol 4-kinase type 2 alpha (Pi4k2a) alternative variant cSep08, mRNA.                    |
| <a href="#">Pi4k2a</a>  | <a href="#">Pi4k2a.dSep08</a>  | <a href="#">114554</a> | 7851  | 465  | 5 | 122 | phosphatidylinositol 4-kinase type 2 alpha (Pi4k2a) alternative variant dSep08, mRNA.                    |
| <a href="#">Pi4k2a</a>  | <a href="#">Pi4k2a.eSep08</a>  | <a href="#">114554</a> | 2857  | 355  | 3 | 118 | phosphatidylinositol 4-kinase type 2 alpha (Pi4k2a) alternative variant eSep08, mRNA.                    |
| <a href="#">Pi4ka</a>   | <a href="#">Pi4ka.bSep08</a>   | <a href="#">64161</a>  | 2030  | 408  | 4 | 135 | phosphatidylinositol 4-kinase, catalytic, alpha (Pi4ka) alternative variant bSep08, mRNA.                |
| <a href="#">Pi4kb</a>   | <a href="#">Pi4kb.bSep08</a>   | <a href="#">81747</a>  | 8198  | 1332 | 5 | 217 | phosphatidylinositol 4-kinase, catalytic, beta polypeptide (Pi4kb) alternative variant bSep08, mRNA.     |
| <a href="#">Pi4kb</a>   | <a href="#">Pi4kb.cSep08</a>   | <a href="#">81747</a>  | 1391  | 683  | 2 | 84  | phosphatidylinositol 4-kinase, catalytic, beta polypeptide (Pi4kb) alternative variant cSep08, mRNA.     |
| <a href="#">Pi16</a>    | <a href="#">Pi16.aSep08</a>    | <a href="#">294312</a> | 8231  | 1699 | 5 | 535 | peptidase inhibitor 16 (Pi16) alternative variant aSep08, mRNA.                                          |
| <a href="#">Pi16</a>    | <a href="#">Pi16.bSep08</a>    | <a href="#">294312</a> | 8574  | 858  | 7 | 264 | peptidase inhibitor 16 (29.3 kD) (Pi16) alternative variant bSep08, mRNA.                                |
| <a href="#">Pi16</a>    | <a href="#">Pi16.cSep08</a>    | <a href="#">294312</a> | 1180  | 653  | 3 | 183 | peptidase inhibitor 16 (Pi16) alternative variant cSep08, mRNA.                                          |
| <a href="#">Pi16</a>    | <a href="#">Pi16.dSep08</a>    | <a href="#">294312</a> | 7388  | 852  | 5 | 175 | peptidase inhibitor 16 (19.7 kD) (Pi16) alternative variant dSep08, mRNA.                                |
| <a href="#">Pias1</a>   | <a href="#">Pias1.bSep08</a>   | <a href="#">300772</a> | 59072 | 728  | 5 | 242 | protein inhibitor of activated STAT 1 (Pias1) alternative variant bSep08, mRNA.                          |
| <a href="#">Pias1</a>   | <a href="#">Pias1.cSep08</a>   | <a href="#">300772</a> | 11137 | 881  | 4 | 140 | protein inhibitor of activated STAT 1 (Pias1) alternative variant cSep08, mRNA.                          |
| <a href="#">Pias2</a>   | <a href="#">Pias2.bSep08</a>   | <a href="#">83422</a>  | 18187 | 924  | 7 | 231 | protein inhibitor of activated STAT 2 (Pias2) alternative variant bSep08, mRNA.                          |
| <a href="#">Pias3</a>   | <a href="#">Pias3.bSep08</a>   | <a href="#">83614</a>  | 4890  | 1089 | 7 | 328 | protein inhibitor of activated STAT 3 (Pias3) alternative variant bSep08, mRNA.                          |
| <a href="#">Pias3</a>   | <a href="#">Pias3.cSep08</a>   | <a href="#">83614</a>  | 2626  | 580  | 2 | 190 | protein inhibitor of activated STAT 3 (Pias3) alternative variant cSep08, mRNA.                          |
| <a href="#">Pias4</a>   | <a href="#">Pias4.bSep08</a>   | <a href="#">362827</a> | 1098  | 992  | 2 | 108 | protein inhibitor of activated STAT, 4 (Pias4) alternative variant bSep08, mRNA.                         |
| <a href="#">Pib5pa</a>  | <a href="#">Pib5pa.bSep08</a>  | <a href="#">171088</a> | 1247  | 1135 | 1 | 319 | phosphatidylinositol (4,5) bisphosphate 5-phosphatase, A (Pib5pa) alternative variant bSep08, mRNA.      |
| <a href="#">Pibf1</a>   | <a href="#">Pibf1.aSep08</a>   | <a href="#">306104</a> | 56949 | 867  |   | 181 | progesterone immunomodulatory binding factor 1 (Pibf1) mRNA.                                             |

|                        |                               |                        |        |      |    |     |                                                                                                             |
|------------------------|-------------------------------|------------------------|--------|------|----|-----|-------------------------------------------------------------------------------------------------------------|
| <a href="#">Picalm</a> | <a href="#">Picalm.bSep08</a> | <a href="#">89816</a>  | 23617  | 1684 | 10 | 306 | phosphatidylinositol binding clathrin assembly protein (Picalm) alternative variant bSep08, mRNA.           |
| <a href="#">Picalm</a> | <a href="#">Picalm.cSep08</a> | <a href="#">89816</a>  | 33189  | 1265 | 11 | 288 | phosphatidylinositol binding clathrin assembly protein (Picalm) alternative variant cSep08, mRNA.           |
| <a href="#">Picalm</a> | <a href="#">Picalm.dSep08</a> | <a href="#">89816</a>  | 32417  | 711  | 9  | 224 | phosphatidylinositol binding clathrin assembly protein (Picalm) alternative variant dSep08, mRNA.           |
| <a href="#">Pick1</a>  | <a href="#">Pick1.aSep08</a>  | <a href="#">84591</a>  | 19699  | 1791 | 6  | 452 | protein -binding like (Pick1) alternative variant aSep08, mRNA.                                             |
| <a href="#">Pick1</a>  | <a href="#">Pick1.cSep08</a>  | <a href="#">84591</a>  | 19640  | 1840 | 12 | 288 | arfaptin-like (32.9 kD) (Pick1) alternative variant cSep08, mRNA.                                           |
| <a href="#">Pick1</a>  | <a href="#">Pick1.dSep08</a>  | <a href="#">84591</a>  | 16323  | 779  | 9  | 259 | protein -binding like (Pick1) alternative variant dSep08, mRNA.                                             |
| <a href="#">Pick1</a>  | <a href="#">Pick1.eSep08</a>  | <a href="#">84591</a>  | 16597  | 1000 | 9  | 228 | protein interacting with 1 (Pick1) alternative variant eSep08, mRNA.                                        |
| <a href="#">Pick1</a>  | <a href="#">Pick1.fSep08</a>  | <a href="#">84591</a>  | 13472  | 628  | 6  | 135 | protein -binding like (Pick1) alternative variant fSep08, mRNA.                                             |
| <a href="#">Pick1</a>  | <a href="#">Pick1.gSep08</a>  | <a href="#">84591</a>  | 1105   | 751  | 2  | 96  | putative cytoplasmic protein (10.4 kD) (Pick1) alternative variant gSep08, mRNA.                            |
| <a href="#">Pick1</a>  | <a href="#">Pick1.hSep08</a>  | <a href="#">84591</a>  | 2610   | 742  | 4  | 88  | protein -binding like (Pick1) alternative variant hSep08, mRNA.                                             |
| <a href="#">PID.0</a>  | <a href="#">PID.0.aSep08</a>  |                        | 24686  | 4766 | 2  | 382 | adaptor protein containing pH domain leucine zipper 1 (PID.0) alternative variant aSep08, mRNA.             |
| <a href="#">PID.0</a>  | <a href="#">PID.0.bSep08</a>  |                        | 14594  | 741  | 1  | 247 | adaptor protein containing pH domain leucine zipper 1 (PID.0) alternative variant bSep08, mRNA.             |
| <a href="#">Pid1</a>   | <a href="#">Pid1.aSep08</a>   | <a href="#">501174</a> | 219026 | 2627 | 3  | 293 | putative protein of bilateral origin (Pid1) alternative variant aSep08, mRNA.                               |
| <a href="#">Piga</a>   | <a href="#">Piga.bSep08</a>   | <a href="#">363464</a> | 5741   | 744  | 2  | 41  | phosphatidylinositol glycan anchor biosynthesis, class A (Piga) alternative variant bSep08, mRNA.           |
| <a href="#">Pigc</a>   | <a href="#">Pigc.aSep08</a>   | <a href="#">364032</a> | 2473   | 1558 | 1  | 297 | phosphatidylinositol glycan anchor biosynthesis, class C (33.7 kD) (Pigc) alternative variant aSep08, mRNA. |
| <a href="#">Pigg</a>   | <a href="#">Pigg.aSep08</a>   | <a href="#">305626</a> | 5737   | 508  |    | 169 | phosphatidylinositol glycan anchor biosynthesis, class G (Pigg) mRNA.                                       |
| <a href="#">Pigh</a>   | <a href="#">Pigh.bSep08</a>   | <a href="#">362756</a> | 2165   | 362  | 2  | 114 | phosphatidylinositol glycan anchor biosynthesis, class H (Pigh) alternative variant bSep08, mRNA.           |
| <a href="#">Pigh</a>   | <a href="#">Pigh.cSep08</a>   | <a href="#">362756</a> | 2041   | 399  | 3  | 81  | phosphatidylinositol glycan anchor biosynthesis, class H (Pigh) alternative variant cSep08, mRNA.           |
| <a href="#">Pigl</a>   | <a href="#">Pigl.bSep08</a>   | <a href="#">192263</a> | 1866   | 1307 | 2  | 83  | phosphatidylinositol glycan anchor biosynthesis, class L (Pigl) alternative variant bSep08, mRNA.           |
| <a href="#">Pigo</a>   | <a href="#">Pigo.aSep08</a>   | <a href="#">313341</a> | 3331   | 1793 | 4  | 547 | phosphatidylinositol glycan anchor biosynthesis, class O (Pigo) alternative variant aSep08, mRNA.           |
| <a href="#">Pigo</a>   | <a href="#">Pigo.bSep08</a>   | <a href="#">313341</a> | 1338   | 893  | 2  | 297 | phosphatidylinositol glycan anchor biosynthesis, class O (Pigo) alternative variant bSep08, mRNA.           |
| <a href="#">Pigo</a>   | <a href="#">Pigo.cSep08</a>   | <a href="#">313341</a> | 566    | 448  | 2  | 61  | phosphatidylinositol glycan anchor biosynthesis, class O (Pigo) alternative variant cSep08, mRNA.           |
| <a href="#">Pigp</a>   | <a href="#">Pigp.bSep08</a>   | <a href="#">288238</a> | 5978   | 633  | 5  | 132 | phosphatidylinositol glycan anchor biosynthesis, class P (15.2 kD) (Pigp) alternative variant bSep08, mRNA. |



|                         |                                |                        |       |      |    |     |                                                                                                                      |
|-------------------------|--------------------------------|------------------------|-------|------|----|-----|----------------------------------------------------------------------------------------------------------------------|
| <a href="#">Pigp</a>    | <a href="#">Pigp.dSep08</a>    | <a href="#">288238</a> | 4265  | 392  | 4  | 55  | phosphatidylinositol glycan anchor biosynthesis, class P (6.4 kD) (Pigp) alternative variant dSep08, mRNA.           |
| <a href="#">Pigq</a>    | <a href="#">Pigq.bSep08</a>    | <a href="#">287159</a> | 7364  | 819  | 8  | 259 | phosphatidylinositol glycan anchor biosynthesis, class Q (Pigq) alternative variant bSep08, mRNA.                    |
| <a href="#">Pigq</a>    | <a href="#">Pigq.cSep08</a>    | <a href="#">287159</a> | 4913  | 760  | 2  | 253 | phosphatidylinositol glycan anchor biosynthesis, class Q (Pigq) alternative variant cSep08, mRNA.                    |
| <a href="#">Pigs</a>    | <a href="#">Pigs.bSep08</a>    | <a href="#">303277</a> | 8823  | 556  | 5  | 185 | phosphatidylinositol glycan anchor biosynthesis, class S (Pigs) alternative variant bSep08, mRNA.                    |
| <a href="#">Pigt</a>    | <a href="#">Pigt.bSep08</a>    | <a href="#">296360</a> | 8443  | 2015 | 2  | 233 | phosphatidylinositol glycan anchor biosynthesis, class T (Pigt) alternative variant bSep08, mRNA.                    |
| <a href="#">Pigv</a>    | <a href="#">Pigv.bSep08</a>    | <a href="#">366478</a> | 8359  | 2075 | 4  | 399 | phosphatidylinositol glycan anchor biosynthesis, class V (43.7 kD) (Pigv) alternative variant bSep08, complete mRNA. |
| <a href="#">Pigv</a>    | <a href="#">Pigv.cSep08</a>    | <a href="#">366478</a> | 7322  | 873  | 2  | 250 | phosphatidylinositol glycan anchor biosynthesis, class V (Pigv) alternative variant cSep08, mRNA.                    |
| <a href="#">Pigv</a>    | <a href="#">Pigv.dSep08</a>    | <a href="#">366478</a> | 11841 | 1680 | 2  | 118 | phosphatidylinositol glycan anchor biosynthesis, class V (13.6 kD) (Pigv) alternative variant dSep08, mRNA.          |
| <a href="#">Pigx</a>    | <a href="#">Pigx.aSep08</a>    | <a href="#">288041</a> | 17906 | 1496 | 7  | 315 | phosphatidylinositol glycan anchor biosynthesis, class X (Pigx) alternative variant aSep08, mRNA.                    |
| <a href="#">Pigx</a>    | <a href="#">Pigx.cSep08</a>    | <a href="#">288041</a> | 1470  | 847  | 2  | 52  | phosphatidylinositol glycan anchor biosynthesis, class X (5.7 kD) (Pigx) alternative variant cSep08, mRNA.           |
| <a href="#">Pih1d1</a>  | <a href="#">Pih1d1.aSep08</a>  | <a href="#">292898</a> | 4208  | 1785 | 6  | 568 | putative protein of eukaryotic origin (Pih1d1) alternative variant aSep08, mRNA.                                     |
| <a href="#">Pih1d1</a>  | <a href="#">Pih1d1.cSep08</a>  | <a href="#">292898</a> | 3035  | 813  | 4  | 87  | putative protein of eukaryotic origin (Pih1d1) alternative variant cSep08, mRNA.                                     |
| <a href="#">Pih1d2</a>  | <a href="#">Pih1d2.aSep08</a>  | <a href="#">315645</a> | 4877  | 1061 | 6  | 235 | putative protein of eukaryotic origin (Pih1d2) alternative variant aSep08, mRNA.                                     |
| <a href="#">Pih1d2</a>  | <a href="#">Pih1d2.bSep08</a>  | <a href="#">315645</a> | 6004  | 1119 | 4  | 185 | putative protein of eukaryotic origin (Pih1d2) alternative variant bSep08, mRNA.                                     |
| <a href="#">Pih1d2</a>  | <a href="#">Pih1d2.cSep08</a>  | <a href="#">315645</a> | 1989  | 1070 | 2  | 82  | putative protein (4.9 kD) (Pih1d2) alternative variant cSep08, mRNA.                                                 |
| <a href="#">Pik3ap1</a> | <a href="#">Pik3ap1.aSep08</a> | <a href="#">294048</a> | 60447 | 4114 | 15 | 668 | phosphoinositide-3-kinase adaptor protein 1 (Pik3ap1) alternative variant aSep08, mRNA.                              |
| <a href="#">Pik3ap1</a> | <a href="#">Pik3ap1.cSep08</a> | <a href="#">294048</a> | 8740  | 445  | 3  | 90  | phosphoinositide-3-kinase adaptor protein 1 (Pik3ap1) alternative variant cSep08, mRNA.                              |
| <a href="#">Pik3c2g</a> | <a href="#">Pik3c2g.bSep08</a> | <a href="#">116720</a> | 19587 | 672  | 4  | 206 | phox-like (Pik3c2g) alternative variant bSep08, mRNA.                                                                |
| <a href="#">Pik3ca</a>  | <a href="#">Pik3ca.aSep08</a>  | <a href="#">170911</a> | 16328 | 4699 | 11 | 495 | phosphatidylinositol 3-kinase, catalytic, alpha polypeptide (Pik3ca) alternative variant aSep08, mRNA.               |
| <a href="#">Pik3ca</a>  | <a href="#">Pik3ca.bSep08</a>  | <a href="#">170911</a> | 1930  | 1168 | 3  | 188 | phosphatidylinositol 3-kinase, catalytic, alpha polypeptide (22.0 kD) (Pik3ca) alternative variant bSep08, mRNA.     |
| <a href="#">Pik3ca</a>  | <a href="#">Pik3ca.cSep08</a>  | <a href="#">170911</a> | 606   | 506  | 2  | 66  | phosphatidylinositol 3-kinase, catalytic, alpha polypeptide (Pik3ca) alternative variant cSep08, mRNA.               |
| <a href="#">Pik3cb</a>  | <a href="#">Pik3cb.bSep08</a>  | <a href="#">85243</a>  | 24611 | 2448 | 9  | 377 | phosphatidylinositol 3-kinase, catalytic, beta polypeptide (Pik3cb) alternative variant bSep08, mRNA.                |
| <a href="#">Pik3cb</a>  | <a href="#">Pik3cb.cSep08</a>  | <a href="#">85243</a>  | 1788  | 738  | 2  | 106 | phosphatidylinositol 3-kinase, catalytic, beta polypeptide (Pik3cb) alternative variant cSep08, mRNA.                |

|                         |                                |                        |       |      |    |      |                                                                                                                                   |
|-------------------------|--------------------------------|------------------------|-------|------|----|------|-----------------------------------------------------------------------------------------------------------------------------------|
| <a href="#">Pik3cd</a>  | <a href="#">Pik3cd.bSep08</a>  | <a href="#">366508</a> | 3270  | 1113 | 5  | 197  | phosphatidylinositol 3-kinase catalytic delta polypeptide (Pik3cd) alternative variant bSep08, mRNA.                              |
| <a href="#">Pik3cg</a>  | <a href="#">Pik3cg.aSep08</a>  | <a href="#">298947</a> | 21170 | 1414 |    | 264  | phosphoinositide-3-kinase, catalytic, gamma polypeptide (Pik3cg) mRNA.                                                            |
| <a href="#">Pik3ip1</a> | <a href="#">Pik3ip1.aSep08</a> | <a href="#">305472</a> | 11981 | 2336 | 6  | 267  | interacting protein 1 (29.1 kD) (Pik3ip1) alternative variant aSep08, mRNA.                                                       |
| <a href="#">Pik3ip1</a> | <a href="#">Pik3ip1.bSep08</a> | <a href="#">305472</a> | 5271  | 773  | 2  | 112  | putative mitochondrial protein (12.0 kD) (Pik3ip1) alternative variant bSep08, mRNA.                                              |
| <a href="#">Pik3ip1</a> | <a href="#">Pik3ip1.cSep08</a> | <a href="#">305472</a> | 8202  | 735  | 2  | 112  | putative mitochondrial protein (12.0 kD) (Pik3ip1) alternative variant cSep08, mRNA.                                              |
| <a href="#">Pik3ip1</a> | <a href="#">Pik3ip1.eSep08</a> | <a href="#">305472</a> | 1686  | 757  | 4  | 88   | putative protein (Pik3ip1) alternative variant eSep08, mRNA.                                                                      |
| <a href="#">Pik3ip1</a> | <a href="#">Pik3ip1.gSep08</a> | <a href="#">305472</a> | 1272  | 278  | 2  | 25   | putative protein (Pik3ip1) alternative variant gSep08, mRNA.                                                                      |
| <a href="#">Pik3r1</a>  | <a href="#">Pik3r1.bSep08</a>  | <a href="#">25513</a>  | 5860  | 2545 | 8  | 465  | phosphatidylinositol 3-kinase, regulatory subunit, polypeptide 1 (p85 alpha) (Pik3r1) alternative variant bSep08, mRNA.           |
| <a href="#">Pik3r1</a>  | <a href="#">Pik3r1.cSep08</a>  | <a href="#">25513</a>  | 19005 | 1559 | 3  | 126  | phosphatidylinositol 3-kinase, regulatory subunit, polypeptide 1 (p85 alpha) (13.9 kD) (Pik3r1) alternative variant cSep08, mRNA. |
| <a href="#">Pik3r1</a>  | <a href="#">Pik3r1.dSep08</a>  | <a href="#">25513</a>  | 1505  | 351  | 2  | 116  | phosphatidylinositol 3-kinase, regulatory subunit, polypeptide 1 (p85 alpha) (Pik3r1) alternative variant dSep08, mRNA.           |
| <a href="#">Pik3r2</a>  | <a href="#">Pik3r2.bSep08</a>  | <a href="#">29741</a>  | 2798  | 1566 | 7  | 322  | regulatory (37.3 kD) (Pik3r2) alternative variant bSep08, mRNA.                                                                   |
| <a href="#">Pik3r2</a>  | <a href="#">Pik3r2.cSep08</a>  | <a href="#">29741</a>  | 2226  | 1257 | 7  | 200  | regulatory (23.8 kD) (Pik3r2) alternative variant cSep08, mRNA.                                                                   |
| <a href="#">Pik3r2</a>  | <a href="#">Pik3r2.dSep08</a>  | <a href="#">29741</a>  | 1159  | 732  | 4  | 192  | regulatory (Pik3r2) alternative variant dSep08, mRNA.                                                                             |
| <a href="#">Pik3r2</a>  | <a href="#">Pik3r2.eSep08</a>  | <a href="#">29741</a>  | 6899  | 484  | 4  | 157  | regulatory (Pik3r2) alternative variant eSep08, mRNA.                                                                             |
| <a href="#">Pik3r2</a>  | <a href="#">Pik3r2.fSep08</a>  | <a href="#">29741</a>  | 1125  | 737  | 4  | 131  | regulatory (Pik3r2) alternative variant fSep08, mRNA.                                                                             |
| <a href="#">Pik3r3</a>  | <a href="#">Pik3r3.bSep08</a>  | <a href="#">60664</a>  | 12601 | 1782 | 5  | 184  | phosphatidylinositol 3 kinase, regulatory subunit, polypeptide 3 (p55) (Pik3r3) alternative variant bSep08, mRNA.                 |
| <a href="#">Pik3r3</a>  | <a href="#">Pik3r3.cSep08</a>  | <a href="#">60664</a>  | 45400 | 512  | 4  | 106  | phosphatidylinositol 3 kinase, regulatory subunit, polypeptide 3 (p55) (Pik3r3) alternative variant cSep08, mRNA.                 |
| <a href="#">Pik3r4</a>  | <a href="#">Pik3r4.aSep08</a>  | <a href="#">363131</a> | 49015 | 4998 | 20 | 1358 | phosphoinositide-3-kinase, regulatory subunit 4, p150 (152.4 kD) (Pik3r4) alternative variant aSep08, mRNA.                       |
| <a href="#">Pik3r5</a>  | <a href="#">Pik3r5.aSep08</a>  | <a href="#">497931</a> | 2332  | 668  |    | 222  | phosphoinositide-3-kinase, regulatory subunit 5, p101 (Pik3r5) mRNA.                                                              |
| <a href="#">Pik3r6</a>  | <a href="#">Pik3r6.bSep08</a>  | <a href="#">497932</a> | 19790 | 1419 | 8  | 259  | phosphoinositide-3-kinase, regulatory subunit 6 (Pik3r6) alternative variant bSep08, mRNA.                                        |
| <a href="#">Pik3r6</a>  | <a href="#">Pik3r6.cSep08</a>  | <a href="#">497932</a> | 49400 | 825  | 8  | 228  | phosphoinositide-3-kinase, regulatory subunit 6 (Pik3r6) alternative variant cSep08, mRNA.                                        |
| <a href="#">Pik3r6</a>  | <a href="#">Pik3r6.dSep08</a>  | <a href="#">497932</a> | 1840  | 338  | 3  | 73   | phosphoinositide-3-kinase, regulatory subunit 6 (Pik3r6) alternative variant dSep08, mRNA.                                        |

|                         |                                |                        |       |      |    |     |                                                                                                                        |
|-------------------------|--------------------------------|------------------------|-------|------|----|-----|------------------------------------------------------------------------------------------------------------------------|
| <a href="#">Pilra</a>   | <a href="#">Pilra.aSep08</a>   | <a href="#">288568</a> | 11477 | 1458 | 3  | 199 | paired immunoglobulin-like type 2 receptor alpha (Pilra) alternative variant aSep08, mRNA.                             |
| <a href="#">Pilra</a>   | <a href="#">Pilra.bSep08</a>   | <a href="#">288568</a> | 5658  | 446  | 1  | 109 | paired immunoglobulin-like type 2 receptor alpha (Pilra) alternative variant bSep08, mRNA.                             |
| <a href="#">Pim1</a>    | <a href="#">Pim1.cSep08</a>    | <a href="#">24649</a>  | 4545  | 241  | 3  | 45  | proviral integration site 1 (Pim1) alternative variant cSep08, mRNA.                                                   |
| <a href="#">Pim3</a>    | <a href="#">Pim3.aSep08</a>    | <a href="#">64534</a>  | 1412  | 1337 |    | 121 | proviral integration site 3 (Pim3) mRNA.                                                                               |
| <a href="#">Pin1</a>    | <a href="#">Pin1.bSep08</a>    | <a href="#">298696</a> | 12603 | 1104 | 3  | 89  | protein (peptidyl-prolyl cis/trans isomerase) NIMA-interacting 1 (Pin1) alternative variant bSep08, mRNA.              |
| <a href="#">Pin1</a>    | <a href="#">Pin1.cSep08</a>    | <a href="#">298696</a> | 8015  | 388  | 2  | 73  | protein (peptidyl-prolyl cis/trans isomerase) NIMA-interacting 1 (Pin1) alternative variant cSep08, mRNA.              |
| <a href="#">Pink1</a>   | <a href="#">Pink1.aSep08</a>   | <a href="#">298575</a> | 12641 | 2837 | 8  | 580 | PTEN induced putative kinase 1 (Pink1) alternative variant aSep08, complete mRNA.                                      |
| <a href="#">Pinx1</a>   | <a href="#">Pinx1.bSep08</a>   | <a href="#">305963</a> | 37717 | 764  | 3  | 79  | PIN2-interacting protein 1 (9.2 kD) (Pinx1) alternative variant bSep08, mRNA.                                          |
| <a href="#">Pip4k2a</a> | <a href="#">Pip4k2a.bSep08</a> | <a href="#">116723</a> | 25468 | 2757 |    | 193 | phosphatidylinositol-5-phosphate 4-kinase, type II, alpha (Pip4k2a) alternative variant bSep08, mRNA.                  |
| <a href="#">Pip4k2c</a> | <a href="#">Pip4k2c.cSep08</a> | <a href="#">140607</a> | 1128  | 1079 | 2  | 38  | phosphatidylinositol-5-phosphate 4-kinase, type II, gamma (4.1 kD) (Pip4k2c) alternative variant cSep08, mRNA.         |
| <a href="#">Pip5k1a</a> | <a href="#">Pip5k1a.bSep08</a> | <a href="#">365865</a> | 27619 | 778  | 1  | 105 | phosphatidylinositol-4-phosphate 5-kinase, type 1, alpha (Pip5k1a) alternative variant bSep08, mRNA.                   |
| <a href="#">Pip5k1b</a> | <a href="#">Pip5k1b.bSep08</a> | <a href="#">309419</a> | 9520  | 858  | 1  | 11  | phosphatidylinositol-4-phosphate 5-kinase, type 1, beta (8.2 kD) (Pip5k1b) alternative variant bSep08, mRNA.           |
| <a href="#">Pip5k1c</a> | <a href="#">Pip5k1c.aSep08</a> | <a href="#">314641</a> | 27892 | 4184 | 17 | 636 | phosphatidylinositol-4-phosphate 5-kinase, type 1 gamma (69.7 kD) (Pip5k1c) alternative variant aSep08, complete mRNA. |
| <a href="#">Pip5k1c</a> | <a href="#">Pip5k1c.bSep08</a> | <a href="#">314641</a> | 5091  | 972  | 7  | 192 | phosphatidylinositol-4-phosphate 5-kinase, type 1 gamma (Pip5k1c) alternative variant bSep08, mRNA.                    |
| <a href="#">Pip5k1c</a> | <a href="#">Pip5k1c.cSep08</a> | <a href="#">314641</a> | 14747 | 676  | 5  | 176 | phosphatidylinositol-4-phosphate 5-kinase, type 1 gamma (18.9 kD) (Pip5k1c) alternative variant cSep08, mRNA.          |
| <a href="#">Pip5k1c</a> | <a href="#">Pip5k1c.dSep08</a> | <a href="#">314641</a> | 2182  | 399  | 2  | 122 | phosphatidylinositol-4-phosphate 5-kinase, type 1 gamma (Pip5k1c) alternative variant dSep08, mRNA.                    |
| <a href="#">Pip5k3</a>  | <a href="#">Pip5k3.aSep08</a>  | <a href="#">316457</a> | 8707  | 631  |    | 210 | phosphatidylinositol-3-phosphate/phosphatidylinositol 5-kinase, type III (Pip5k3) mRNA.                                |
| <a href="#">Pirb</a>    | <a href="#">Pirb.bSep08</a>    | <a href="#">65146</a>  | 3078  | 741  | 2  | 136 | paired-Ig-like receptor B (Pirb) alternative variant bSep08, mRNA.                                                     |
| <a href="#">Pisd</a>    | <a href="#">Pisd.aSep08</a>    | <a href="#">681361</a> | 49017 | 2179 | 8  | 406 | phosphatidylserine decarboxylase (Pisd) alternative variant aSep08, mRNA.                                              |
| <a href="#">Pisd</a>    | <a href="#">Pisd.bSep08</a>    | <a href="#">681361</a> | 46862 | 717  | 6  | 238 | phosphatidylserine decarboxylase (Pisd) alternative variant bSep08, mRNA.                                              |
| <a href="#">Pisd</a>    | <a href="#">Pisd.cSep08</a>    | <a href="#">681361</a> | 7619  | 992  | 6  | 227 | phosphatidylserine decarboxylase (Pisd) alternative variant cSep08, mRNA.                                              |
| <a href="#">Pisd</a>    | <a href="#">Pisd.dSep08</a>    | <a href="#">681361</a> | 8014  | 738  | 5  | 168 | phosphatidylserine decarboxylase (Pisd) alternative variant dSep08, mRNA.                                              |
| <a href="#">Pisd</a>    | <a href="#">Pisd.eSep08</a>    | <a href="#">681361</a> | 22723 | 377  | 3  | 117 | CRA a (Pisd) alternative variant eSep08, mRNA.                                                                         |
| <a href="#">Pisd</a>    | <a href="#">Pisd.fSep08</a>    | <a href="#">681361</a> | 6878  | 394  | 3  | 79  | phosphatidylserine decarboxylase (Pisd) alternative variant fSep08, mRNA.                                              |

|                               |                                      |                        |       |      |   |     |                                                                                                          |
|-------------------------------|--------------------------------------|------------------------|-------|------|---|-----|----------------------------------------------------------------------------------------------------------|
| <a href="#">Pisd</a>          | <a href="#">Pisd.gSep08</a>          | <a href="#">681361</a> | 5367  | 417  | 3 | 44  | phosphatidylserine decarboxylase (Pisd) alternative variant gSep08, mRNA.                                |
| <a href="#">Pitpna</a>        | <a href="#">Pitpna.bSep08</a>        | <a href="#">29525</a>  | 10181 | 389  | 3 | 129 | phosphatidylinositol transfer protein, alpha (Pitpna) alternative variant bSep08, mRNA.                  |
| <a href="#">Pitpnb</a>        | <a href="#">Pitpnb.aSep08</a>        | <a href="#">114561</a> | 33190 | 2348 | 7 | 170 | phosphatidylinositol transfer protein, beta (Pitpnb) alternative variant aSep08, mRNA.                   |
| <a href="#">Pitpnb</a>        | <a href="#">Pitpnb.bSep08</a>        | <a href="#">114561</a> | 31640 | 714  | 6 | 154 | phosphatidylinositol transfer protein, beta (Pitpnb) alternative variant bSep08, mRNA.                   |
| <a href="#">Pitpnb</a>        | <a href="#">Pitpnb.cSep08</a>        | <a href="#">114561</a> | 30907 | 1543 | 5 | 83  | phosphatidylinositol transfer protein, beta (10.1 kD) (Pitpnb) alternative variant cSep08, mRNA.         |
| <a href="#">Pitpnb</a>        | <a href="#">Pitpnb.dSep08</a>        | <a href="#">114561</a> | 7991  | 1182 | 5 | 82  | phosphatidylinositol transfer protein, beta (9.9 kD) (Pitpnb) alternative variant dSep08, mRNA.          |
| <a href="#">Pitpnm1</a>       | <a href="#">Pitpnm1.bSep08</a>       | <a href="#">361694</a> | 1811  | 411  | 2 | 136 | phosphatidylinositol transfer protein, membrane-associated 1 (Pitpnm1) alternative variant bSep08, mRNA. |
| <a href="#">Pitpnm1</a>       | <a href="#">Pitpnm1.dSep08</a>       | <a href="#">361694</a> | 1718  | 386  | 2 | 51  | phosphatidylinositol transfer protein, membrane-associated 1 (Pitpnm1) alternative variant dSep08, mRNA. |
| <a href="#">Pitpnm2</a>       | <a href="#">Pitpnm2.aSep08</a>       | <a href="#">304474</a> | 10723 | 1307 |   | 411 | phosphatidylinositol transfer protein, membrane-associated 2 (Pitpnm2) mRNA.                             |
| <a href="#">Pitpnm3</a>       | <a href="#">Pitpnm3.aSep08</a>       | <a href="#">287467</a> | 3544  | 422  |   | 140 | PITPNM family member 3 (Pitpnm3) mRNA.                                                                   |
| <a href="#">Pitrm1</a>        | <a href="#">Pitrm1.bSep08</a>        | <a href="#">307081</a> | 7152  | 831  | 8 | 276 | pitriysin 1 (Pitrm1) alternative variant bSep08, mRNA.                                                   |
| <a href="#">Pitrm1</a>        | <a href="#">Pitrm1.cSep08</a>        | <a href="#">307081</a> | 6627  | 704  | 7 | 132 | pitriysin 1 (Pitrm1) alternative variant cSep08, mRNA.                                                   |
| <a href="#">Pitrm1</a>        | <a href="#">Pitrm1.dSep08</a>        | <a href="#">307081</a> | 1965  | 779  | 2 | 87  | pitriysin 1 (Pitrm1) alternative variant dSep08, mRNA.                                                   |
| <a href="#">Pitx1</a>         | <a href="#">Pitx1.bSep08</a>         | <a href="#">113983</a> | 5390  | 606  | 1 | 198 | paired-like homeodomain transcription factor 1 (Pitx1) alternative variant bSep08, mRNA.                 |
| <a href="#">Pitx3</a>         | <a href="#">Pitx3.bSep08</a>         | <a href="#">29609</a>  | 991   | 597  | 2 | 115 | paired-like homeodomain transcription factor 3 (Pitx3) alternative variant bSep08, mRNA.                 |
| <a href="#">Pitx3</a>         | <a href="#">Pitx3.cSep08</a>         | <a href="#">29609</a>  | 4205  | 334  | 3 | 111 | paired-like homeodomain transcription factor 3 (Pitx3) alternative variant cSep08, mRNA.                 |
| <a href="#">Piwil4</a>        | <a href="#">Piwil4.aSep08</a>        | <a href="#">689972</a> | 16446 | 2015 |   | 245 | piwi-like 4 (Drosophila) (Piwil4) mRNA.                                                                  |
| <a href="#">Pja2</a>          | <a href="#">Pja2.bSep08</a>          | <a href="#">192256</a> | 19455 | 600  | 4 | 199 | pja2, RING-H2 motif containing (Pja2) alternative variant bSep08, mRNA.                                  |
| <a href="#">Pja2</a>          | <a href="#">Pja2.cSep08</a>          | <a href="#">192256</a> | 24214 | 700  | 5 | 135 | pja2, RING-H2 motif containing (Pja2) alternative variant cSep08, mRNA.                                  |
| <a href="#">PKD.0</a>         | <a href="#">PKD.0.aSep08</a>         |                        | 608   | 399  |   | 93  | polycystic kidney disease 1 like (PKD.0) mRNA.                                                           |
| <a href="#">PKD2</a>          | <a href="#">PKD2.aSep08</a>          | <a href="#">498328</a> | 9103  | 1818 | 6 | 295 | polycystic kidney disease 2 (PKD2) alternative variant aSep08, mRNA.                                     |
| <a href="#">PKD2</a>          | <a href="#">PKD2.bSep08</a>          | <a href="#">498328</a> | 2721  | 1788 | 3 | 93  | polycystic kidney disease 2 (PKD2) alternative variant bSep08, mRNA.                                     |
| <a href="#">Pkd2l1</a>        | <a href="#">Pkd2l1.bSep08</a>        | <a href="#">293937</a> | 8547  | 726  | 2 | 198 | polycystic kidney disease 2-like 1 (Pkd2l1) alternative variant bSep08, mRNA.                            |
| <a href="#">PKD_channel.0</a> | <a href="#">PKD_channel.0.aSep08</a> |                        | 3253  | 2588 | 3 | 550 | polycystin 1 (PKD_channel.0) alternative variant aSep08, mRNA.                                           |
| <a href="#">PKD_channel.0</a> | <a href="#">PKD_channel.0.bSep08</a> |                        | 1114  | 1028 | 1 | 215 | polycystic kidney disease 1 protein like (PKD_channel.0) alternative variant bSep08, mRNA.               |
| <a href="#">Pkia</a>          | <a href="#">Pkia.aSep08</a>          | <a href="#">114906</a> | 15017 | 3678 | 3 | 136 | protein kinase inhibitor, alpha (Pkia) alternative variant aSep08, mRNA.                                 |

|                               |                                      |                        |        |      |    |     |                                                                                                                             |
|-------------------------------|--------------------------------------|------------------------|--------|------|----|-----|-----------------------------------------------------------------------------------------------------------------------------|
| <a href="#">Pkia</a>          | <a href="#">Pkia.cSep08</a>          | <a href="#">114906</a> | 68155  | 498  | 3  | 82  | protein kinase inhibitor, alpha (Pkia) alternative variant cSep08, mRNA.                                                    |
| <a href="#">Pkia</a>          | <a href="#">Pkia.dSep08</a>          | <a href="#">114906</a> | 72013  | 422  | 3  | 42  | protein kinase inhibitor, alpha (Pkia) alternative variant dSep08, mRNA.                                                    |
| <a href="#">Pkib</a>          | <a href="#">Pkib.bSep08</a>          | <a href="#">24678</a>  | 79161  | 352  | 5  | 80  | protein kinase inhibitor beta, (cAMP-dependent, catalytic) inhibitor beta (Pkib) alternative variant bSep08, mRNA.          |
| <a href="#">Pkib</a>          | <a href="#">Pkib.cSep08</a>          | <a href="#">24678</a>  | 5890   | 282  | 3  | 72  | protein kinase inhibitor beta, (cAMP-dependent, catalytic) inhibitor beta (Pkib) alternative variant cSep08, mRNA.          |
| <a href="#">Pkib</a>          | <a href="#">Pkib.eSep08</a>          | <a href="#">24678</a>  | 94480  | 1132 | 5  | 78  | protein kinase inhibitor beta, (cAMP-dependent, catalytic) inhibitor beta (8.4 kD) (Pkib) alternative variant eSep08, mRNA. |
| <a href="#">Pkib</a>          | <a href="#">Pkib.fSep08</a>          | <a href="#">24678</a>  | 119855 | 656  | 6  | 100 | protein kinase inhibitor beta, (cAMP-dependent, catalytic) inhibitor beta (Pkib) alternative variant fSep08, mRNA.          |
| <a href="#">Pkig</a>          | <a href="#">Pkig.aSep08</a>          | <a href="#">266709</a> | 30759  | 536  | 3  | 120 | protein kinase inhibitor, gamma (Pkig) alternative variant aSep08, mRNA.                                                    |
| <a href="#">Pkig</a>          | <a href="#">Pkig.dSep08</a>          | <a href="#">266709</a> | 30736  | 582  | 4  | 76  | protein kinase inhibitor, gamma (7.9 kD) (Pkig) alternative variant dSep08, mRNA.                                           |
| <a href="#">Pkig</a>          | <a href="#">Pkig.eSep08</a>          | <a href="#">266709</a> | 66730  | 536  | 5  | 76  | protein kinase inhibitor, gamma (7.9 kD) (Pkig) alternative variant eSep08, mRNA.                                           |
| <a href="#">Pkinase.0</a>     | <a href="#">Pkinase.0.aSep08</a>     |                        | 3960   | 813  | 4  | 270 | protein-serine threonine kinase (Pkinase.0) alternative variant aSep08, mRNA.                                               |
| <a href="#">Pkinase.0</a>     | <a href="#">Pkinase.0.bSep08</a>     |                        | 1544   | 888  | 2  | 244 | protein-serine threonine kinase (Pkinase.0) alternative variant bSep08, mRNA.                                               |
| <a href="#">Pkinase.1</a>     | <a href="#">Pkinase.1.aSep08</a>     |                        | 4424   | 1020 | 7  | 224 | CDC-like kinase 4 (Pkinase.1) alternative variant aSep08, mRNA.                                                             |
| <a href="#">Pkinase.1</a>     | <a href="#">Pkinase.1.bSep08</a>     |                        | 2773   | 852  | 4  | 72  | CDC like kinase 4 CRA a (Pkinase.1) alternative variant bSep08, mRNA.                                                       |
| <a href="#">Pkinase.1</a>     | <a href="#">Pkinase.1.dSep08</a>     |                        | 693    | 447  | 2  | 60  | putative protein (7.0 kD) (Pkinase.1) alternative variant dSep08, mRNA.                                                     |
| <a href="#">Pkinase.2</a>     | <a href="#">Pkinase.2.aSep08</a>     |                        | 5049   | 2673 |    | 790 | protein kinase 7 (Pkinase.2) mRNA.                                                                                          |
| <a href="#">Pkinase.4</a>     | <a href="#">Pkinase.4.aSep08</a>     |                        | 3230   | 2796 |    | 931 | titin CRA a (Pkinase.4) mRNA.                                                                                               |
| <a href="#">Pkinase.5</a>     | <a href="#">Pkinase.5.aSep08</a>     |                        | 26460  | 2634 | 10 | 409 | protein kinase, C-terminal and tyrosine protein kinase (Pkinase.5) alternative variant aSep08, mRNA.                        |
| <a href="#">Pkinase.5</a>     | <a href="#">Pkinase.5.cSep08</a>     |                        | 1896   | 552  | 2  | 68  | putative protein (8.0 kD) (Pkinase.5) alternative variant cSep08, mRNA.                                                     |
| <a href="#">Pkinase_Tyr.0</a> | <a href="#">Pkinase_Tyr.0.aSep08</a> |                        | 5942   | 474  | 4  | 158 | eph receptor A4 (Pkinase_Tyr.0) alternative variant aSep08, mRNA.                                                           |
| <a href="#">Pkinase_Tyr.1</a> | <a href="#">Pkinase_Tyr.1.aSep08</a> |                        | 10806  | 2017 | 10 | 497 | tyrosine kinase 2 (Pkinase_Tyr.1) alternative variant aSep08, mRNA.                                                         |
| <a href="#">Pkinase_Tyr.1</a> | <a href="#">Pkinase_Tyr.1.bSep08</a> |                        | 3812   | 991  | 8  | 303 | tyrosine kinase (Pkinase_Tyr.1) alternative variant bSep08, mRNA.                                                           |
| <a href="#">Pkinase_Tyr.1</a> | <a href="#">Pkinase_Tyr.1.cSep08</a> |                        | 4539   | 1606 | 4  | 209 | tyrosine kinase 2 CRA a (Pkinase_Tyr.1) alternative variant cSep08, mRNA.                                                   |
| <a href="#">Pkinase_Tyr.1</a> | <a href="#">Pkinase_Tyr.1.dSep08</a> |                        | 1272   | 422  | 3  | 131 | tyrosine kinase 2 (Pkinase_Tyr.1) alternative variant dSep08, mRNA.                                                         |
| <a href="#">Pkinase_Tyr.1</a> | <a href="#">Pkinase_Tyr.1.fSep08</a> |                        | 464    | 388  | 2  | 69  | tyrosine kinase 2 CRA a (8.1 kD) (Pkinase_Tyr.1) alternative variant fSep08, mRNA.                                          |

|                               |                                      |                        |       |      |    |     |                                                                                                               |
|-------------------------------|--------------------------------------|------------------------|-------|------|----|-----|---------------------------------------------------------------------------------------------------------------|
| <a href="#">Pkinase_Tyr.1</a> | <a href="#">Pkinase_Tyr.1.gSep08</a> |                        | 3097  | 457  | 3  | 13  | putative protein (Pkinase_Tyr.1) alternative variant gSep08, mRNA.                                            |
| <a href="#">Pklr</a>          | <a href="#">Pklr.bSep08</a>          | <a href="#">24651</a>  | 3893  | 696  | 5  | 231 | pyruvate kinase, liver and red blood cell (Pklr) alternative variant bSep08, mRNA.                            |
| <a href="#">Pklr</a>          | <a href="#">Pklr.cSep08</a>          | <a href="#">24651</a>  | 3794  | 1415 | 5  | 202 | pyruvate kinase, liver and red blood cell (22.0 kD) (Pklr) alternative variant cSep08, mRNA.                  |
| <a href="#">Pkm2</a>          | <a href="#">Pkm2.bSep08</a>          | <a href="#">25630</a>  | 19849 | 2331 | 12 | 600 | pyruvate kinase, muscle (Pkm2) alternative variant bSep08, mRNA.                                              |
| <a href="#">Pkm2</a>          | <a href="#">Pkm2.cSep08</a>          | <a href="#">25630</a>  | 7455  | 632  | 5  | 181 | pyruvate kinase, muscle (Pkm2) alternative variant cSep08, mRNA.                                              |
| <a href="#">Pkm2</a>          | <a href="#">Pkm2.dSep08</a>          | <a href="#">25630</a>  | 2529  | 1975 | 2  | 38  | pyruvate kinase, muscle (4.1 kD) (Pkm2) alternative variant dSep08, mRNA.                                     |
| <a href="#">Pkmyt1</a>        | <a href="#">Pkmyt1.bSep08</a>        | <a href="#">287101</a> | 11956 | 2719 | 7  | 401 | protein kinase, membrane associated tyrosine/threonine 1 (44.5 kD) (Pkmyt1) alternative variant bSep08, mRNA. |
| <a href="#">Pkmyt1</a>        | <a href="#">Pkmyt1.cSep08</a>        | <a href="#">287101</a> | 9558  | 755  | 4  | 251 | protein kinase, membrane associated tyrosine/threonine 1 (Pkmyt1) alternative variant cSep08, mRNA.           |
| <a href="#">Pkn1</a>          | <a href="#">Pkn1.bSep08</a>          | <a href="#">29355</a>  | 5992  | 752  | 8  | 250 | tyrosine protein kinase (Pkn1) alternative variant bSep08, mRNA.                                              |
| <a href="#">Pkn1</a>          | <a href="#">Pkn1.cSep08</a>          | <a href="#">29355</a>  | 2235  | 1373 | 6  | 190 | protein kinase and tyrosine protein kinase (Pkn1) alternative variant cSep08, mRNA.                           |
| <a href="#">Pkn1</a>          | <a href="#">Pkn1.dSep08</a>          | <a href="#">29355</a>  | 7575  | 2635 | 9  | 177 | protein kinase, C-terminal (20.0 kD) (Pkn1) alternative variant dSep08, mRNA.                                 |
| <a href="#">Pkn1</a>          | <a href="#">Pkn1.eSep08</a>          | <a href="#">29355</a>  | 1258  | 882  | 3  | 117 | putative protein of eukaryotic origin (Pkn1) alternative variant eSep08, mRNA.                                |
| <a href="#">Pkn3</a>          | <a href="#">Pkn3.bSep08</a>          | <a href="#">296619</a> | 10473 | 2040 | 18 | 679 | PKN/rhopilin/rhotekin rho-binding repeat containing protein (Pkn3) alternative variant bSep08, mRNA.          |
| <a href="#">Pkn3</a>          | <a href="#">Pkn3.cSep08</a>          | <a href="#">296619</a> | 2866  | 753  | 3  | 186 | putative protein (Pkn3) alternative variant cSep08, mRNA.                                                     |
| <a href="#">Pkn3</a>          | <a href="#">Pkn3.dSep08</a>          | <a href="#">296619</a> | 8289  | 1181 | 5  | 181 | set translocation (20.9 kD) (Pkn3) alternative variant dSep08, mRNA.                                          |
| <a href="#">Pkn3</a>          | <a href="#">Pkn3.eSep08</a>          | <a href="#">296619</a> | 8176  | 736  | 6  | 175 | set translocation (Pkn3) alternative variant eSep08, mRNA.                                                    |
| <a href="#">Pkn3</a>          | <a href="#">Pkn3.fSep08</a>          | <a href="#">296619</a> | 3022  | 838  | 5  | 164 | set translocation (Pkn3) alternative variant fSep08, mRNA.                                                    |
| <a href="#">Pkn3</a>          | <a href="#">Pkn3.gSep08</a>          | <a href="#">296619</a> | 3730  | 1066 | 8  | 150 | protein kinase N2 CRA d (16.8 kD) (Pkn3) alternative variant gSep08, mRNA.                                    |
| <a href="#">Pkn3</a>          | <a href="#">Pkn3.hSep08</a>          | <a href="#">296619</a> | 6204  | 527  | 5  | 147 | SET translocation (Pkn3) alternative variant hSep08, mRNA.                                                    |
| <a href="#">Pkn3</a>          | <a href="#">Pkn3.iSep08</a>          | <a href="#">296619</a> | 2040  | 359  | 4  | 119 | SET translocation (Pkn3) alternative variant iSep08, mRNA.                                                    |
| <a href="#">Pknox1</a>        | <a href="#">Pknox1.bSep08</a>        | <a href="#">294322</a> | 11114 | 787  | 6  | 188 | pbx/knotted 1 homeobox (Pknox1) alternative variant bSep08, mRNA.                                             |
| <a href="#">Pkp1</a>          | <a href="#">Pkp1.bSep08</a>          | <a href="#">304822</a> | 4016  | 603  | 1  | 200 | plakophilin 1 (Pkp1) alternative variant bSep08, mRNA.                                                        |
| <a href="#">Pkp2</a>          | <a href="#">Pkp2.aSep08</a>          | <a href="#">287925</a> | 31618 | 2257 |    | 378 | plakophilin 2 (Pkp2) mRNA.                                                                                    |
| <a href="#">Pkp3</a>          | <a href="#">Pkp3.bSep08</a>          | <a href="#">293619</a> | 3359  | 1019 | 1  | 339 | plakophilin 3 (Pkp3) alternative variant bSep08, mRNA.                                                        |
| <a href="#">Pkp4</a>          | <a href="#">Pkp4.bSep08</a>          | <a href="#">295625</a> | 15884 | 1631 | 8  | 411 | plakophilin 4 (Pkp4) alternative variant bSep08, mRNA.                                                        |
| <a href="#">Pkp4</a>          | <a href="#">Pkp4.cSep08</a>          | <a href="#">295625</a> | 9393  | 1051 | 5  | 256 | plakophilin 4 CRA a (Pkp4) alternative variant cSep08, mRNA.                                                  |

|                          |                                 |                        |       |      |    |     |                                                                                                        |
|--------------------------|---------------------------------|------------------------|-------|------|----|-----|--------------------------------------------------------------------------------------------------------|
| <a href="#">Pkp4</a>     | <a href="#">Pkp4.dSep08</a>     | <a href="#">295625</a> | 10174 | 513  | 4  | 170 | plakophilin 4 CRA b (Pkp4) alternative variant dSep08, mRNA.                                           |
| <a href="#">Pkp4</a>     | <a href="#">Pkp4.eSep08</a>     | <a href="#">295625</a> | 7888  | 377  | 4  | 125 | plakophilin 4 CRA a (Pkp4) alternative variant eSep08, mRNA.                                           |
| <a href="#">Pkp4</a>     | <a href="#">Pkp4.fSep08</a>     | <a href="#">295625</a> | 89035 | 611  | 6  | 115 | plakophilin 4 (Pkp4) alternative variant fSep08, mRNA.                                                 |
| <a href="#">Pkp4</a>     | <a href="#">Pkp4.gSep08</a>     | <a href="#">295625</a> | 4665  | 659  | 3  | 97  | plakophilin 4 CRA i (Pkp4) alternative variant gSep08, mRNA.                                           |
| <a href="#">Pkp4</a>     | <a href="#">Pkp4.hSep08</a>     | <a href="#">295625</a> | 83783 | 499  | 4  | 96  | plakophilin 4 CRA a (Pkp4) alternative variant hSep08, mRNA.                                           |
| <a href="#">Pkp4</a>     | <a href="#">Pkp4.iSep08</a>     | <a href="#">295625</a> | 33933 | 522  | 4  | 36  | plakophilin 4 CRA i (Pkp4) alternative variant iSep08, mRNA.                                           |
| <a href="#">Pla2g2a</a>  | <a href="#">Pla2g2a.aSep08</a>  | <a href="#">29692</a>  | 1951  | 739  | 3  | 156 | phospholipase A2, group IIA (platelets, synovial fluid) (Pla2g2a) alternative variant aSep08, mRNA.    |
| <a href="#">Pla2g2a</a>  | <a href="#">Pla2g2a.cSep08</a>  | <a href="#">29692</a>  | 2563  | 606  | 2  | 31  | phospholipase A2, group IIA (platelets, synovial fluid) (Pla2g2a) alternative variant cSep08, mRNA.    |
| <a href="#">Pla2g2a</a>  | <a href="#">Pla2g2a.dSep08</a>  | <a href="#">29692</a>  | 2560  | 1357 | 3  | 32  | phospholipase A2, group IIA (platelets, synovial fluid) (Pla2g2a) alternative variant dSep08, mRNA.    |
| <a href="#">Pla2g2c</a>  | <a href="#">Pla2g2c.bSep08</a>  | <a href="#">29387</a>  | 975   | 323  | 2  | 64  | phospholipase A2, group IIC (Pla2g2c) alternative variant bSep08, mRNA.                                |
| <a href="#">Pla2g2e</a>  | <a href="#">Pla2g2e.bSep08</a>  | <a href="#">298581</a> | 5237  | 750  | 1  | 137 | phospholipase A2, group IIE (Pla2g2e) alternative variant bSep08, mRNA.                                |
| <a href="#">Pla2g4a</a>  | <a href="#">Pla2g4a.bSep08</a>  | <a href="#">24653</a>  | 81055 | 542  |    | 127 | phospholipase A2, group IVA (cytosolic, calcium-dependent) (Pla2g4a) alternative variant bSep08, mRNA. |
| <a href="#">Pla2g4b</a>  | <a href="#">Pla2g4b.bSep08</a>  | <a href="#">311341</a> | 2903  | 739  | 1  | 212 | phospholipase A2, group IVB (cytosolic) (Pla2g4b) alternative variant bSep08, mRNA.                    |
| <a href="#">Pla2g4d</a>  | <a href="#">Pla2g4d.aSep08</a>  | <a href="#">691905</a> | 4869  | 746  |    | 248 | phospholipase A2, group IVD (Pla2g4d) mRNA.                                                            |
| <a href="#">Pla2g4e</a>  | <a href="#">Pla2g4e.aSep08</a>  | <a href="#">296091</a> | 3399  | 180  |    | 59  | phospholipase A2, group IVE (Pla2g4e) mRNA.                                                            |
| <a href="#">Pla2g5</a>   | <a href="#">Pla2g5.aSep08</a>   | <a href="#">29354</a>  | 20257 | 808  | 5  | 137 | phospholipase A2, group V (16.0 kD) (Pla2g5) alternative variant aSep08, mRNA.                         |
| <a href="#">Pla2g5</a>   | <a href="#">Pla2g5.bSep08</a>   | <a href="#">29354</a>  | 64821 | 749  | 7  | 112 | phospholipase A2, group V (Pla2g5) alternative variant bSep08, mRNA.                                   |
| <a href="#">Pla2g5</a>   | <a href="#">Pla2g5.cSep08</a>   | <a href="#">29354</a>  | 7239  | 464  | 2  | 37  | phospholipase A2, group V (Pla2g5) alternative variant cSep08, mRNA.                                   |
| <a href="#">Pla2g6</a>   | <a href="#">Pla2g6.aSep08</a>   | <a href="#">360426</a> | 40362 | 3314 | 19 | 831 | phospholipase A2, group VI (92.1 kD) (Pla2g6) alternative variant aSep08, mRNA.                        |
| <a href="#">Pla2g6</a>   | <a href="#">Pla2g6.bSep08</a>   | <a href="#">360426</a> | 30645 | 1838 | 10 | 457 | phospholipase A2, group VI (Pla2g6) alternative variant bSep08, mRNA.                                  |
| <a href="#">Pla2g6</a>   | <a href="#">Pla2g6.cSep08</a>   | <a href="#">360426</a> | 1126  | 413  | 2  | 77  | phospholipase A2, group VI (Pla2g6) alternative variant cSep08, mRNA.                                  |
| <a href="#">Pla2g6</a>   | <a href="#">Pla2g6.eSep08</a>   | <a href="#">360426</a> | 10096 | 265  | 2  | 69  | phospholipase A2, group VI (Pla2g6) alternative variant eSep08, mRNA.                                  |
| <a href="#">Pla2g12a</a> | <a href="#">Pla2g12a.aSep08</a> | <a href="#">362039</a> | 17027 | 1513 | 2  | 192 | phospholipase A2, group XIIA (20.9 kD) (Pla2g12a) alternative variant aSep08, complete mRNA.           |
| <a href="#">Pla2g12a</a> | <a href="#">Pla2g12a.bSep08</a> | <a href="#">362039</a> | 6755  | 737  | 2  | 119 | phospholipase A2, group XIIA (Pla2g12a) alternative variant bSep08, mRNA.                              |
| <a href="#">Pla2g12a</a> | <a href="#">Pla2g12a.cSep08</a> | <a href="#">362039</a> | 6711  | 656  | 2  | 105 | phospholipase A2, group XIIA (Pla2g12a) alternative variant cSep08, mRNA.                              |

|                          |                                 |                        |        |      |   |     |                                                                                                                                               |
|--------------------------|---------------------------------|------------------------|--------|------|---|-----|-----------------------------------------------------------------------------------------------------------------------------------------------|
| <a href="#">Pla2g12b</a> | <a href="#">Pla2g12b.aSep08</a> | <a href="#">367415</a> | 18461  | 1094 | 4 | 224 | phospholipase A2, group XIIB (Pla2g12b) alternative variant aSep08, mRNA.                                                                     |
| <a href="#">Pla2g12b</a> | <a href="#">Pla2g12b.bSep08</a> | <a href="#">367415</a> | 2006   | 216  | 2 | 49  | phospholipase A2, group XIIB (Pla2g12b) alternative variant bSep08, mRNA.                                                                     |
| <a href="#">Pla2r1</a>   | <a href="#">Pla2r1.aSep08</a>   | <a href="#">295631</a> | 11863  | 730  |   | 182 | phospholipase A2 receptor 1 (Pla2r1) mRNA.                                                                                                    |
| <a href="#">Plaa</a>     | <a href="#">Plaa.bSep08</a>     | <a href="#">116645</a> | 3209   | 1241 | 2 | 251 | phospholipase A2, activating protein (28.0 kD) (Plaa) alternative variant bSep08, mRNA.                                                       |
| <a href="#">plabor</a>   | <a href="#">plabor.aSep08</a>   |                        | 982    | 334  |   | 46  | putative protein (5.0 kD) (plabor) mRNA.                                                                                                      |
| <a href="#">PLAC.0</a>   | <a href="#">PLAC.0.aSep08</a>   |                        | 20501  | 1136 | 8 | 315 | proprotein convertase subtilisin kexin type 5 (PLAC.0) alternative variant aSep08, mRNA.                                                      |
| <a href="#">Plac1</a>    | <a href="#">Plac1.bSep08</a>    | <a href="#">317316</a> | 138704 | 539  | 3 | 56  | placenta-specific 1 (6.3 kD) (Plac1) alternative variant bSep08, mRNA.                                                                        |
| <a href="#">Plac8</a>    | <a href="#">Plac8.bSep08</a>    | <a href="#">360914</a> | 8224   | 482  | 3 | 69  | placenta-specific 8 (Plac8) alternative variant bSep08, mRNA.                                                                                 |
| <a href="#">plachy</a>   | <a href="#">plachy.aSep08</a>   |                        | 2539   | 488  |   | 51  | putative protein (plachy) mRNA.                                                                                                               |
| <a href="#">pladoy</a>   | <a href="#">pladoy.aSep08</a>   |                        | 2409   | 400  |   | 37  | putative protein (pladoy) mRNA.                                                                                                               |
| <a href="#">plafee</a>   | <a href="#">plafee.aSep08</a>   |                        | 1196   | 184  |   | 42  | cathepsin Q2 (plafee) mRNA.                                                                                                                   |
| <a href="#">plaflu</a>   | <a href="#">plaflu.aSep08</a>   |                        | 3897   | 1163 | 3 | 113 | putative endoplasmic reticulum protein, with a transmembrane domain, of mammalian origin (12.4 kD) (plaflu) alternative variant aSep08, mRNA. |
| <a href="#">plafly</a>   | <a href="#">plafly.aSep08</a>   |                        | 2895   | 754  |   | 95  | putative protein (10.7 kD) (plafly) mRNA.                                                                                                     |
| <a href="#">plagar</a>   | <a href="#">plagar.aSep08</a>   |                        | 1765   | 1673 | 2 | 124 | putative protein (14.5 kD) (plagar) alternative variant aSep08, mRNA.                                                                         |
| <a href="#">Plagl1</a>   | <a href="#">Plagl1.aSep08</a>   | <a href="#">25157</a>  | 32704  | 409  |   | 41  | pleiomorphic adenoma gene-like 1 (Plagl1) mRNA.                                                                                               |
| <a href="#">Plagl2</a>   | <a href="#">Plagl2.aSep08</a>   | <a href="#">296281</a> | 3016   | 327  | 2 | 109 | pleiomorphic adenoma gene-like 2 (Plagl2) alternative variant aSep08, mRNA.                                                                   |
| <a href="#">plaja</a>    | <a href="#">plaja.aSep08</a>    |                        | 68475  | 434  |   | 123 | diaphanous homolog 3 (plaja) mRNA.                                                                                                            |
| <a href="#">plajey</a>   | <a href="#">plajey.aSep08</a>   |                        | 1091   | 420  |   | 43  | putative protein (5.1 kD) (plajey) mRNA.                                                                                                      |
| <a href="#">plalo</a>    | <a href="#">plalo.aSep08</a>    |                        | 7299   | 625  | 2 | 100 | putative protein (plalo) alternative variant aSep08, mRNA.                                                                                    |
| <a href="#">plalo</a>    | <a href="#">plalo.bSep08</a>    |                        | 4823   | 411  |   | 46  | putative protein (4.8 kD) (plalo) alternative variant bSep08, mRNA.                                                                           |
| <a href="#">plamee</a>   | <a href="#">plamee.aSep08</a>   |                        | 18503  | 875  | 7 | 274 | myosin XVIIIa (plamee) alternative variant aSep08, mRNA.                                                                                      |
| <a href="#">plamee</a>   | <a href="#">plamee.bSep08</a>   |                        | 40419  | 731  | 6 | 243 | myosin XVIIIa (plamee) alternative variant bSep08, mRNA.                                                                                      |
| <a href="#">plamee</a>   | <a href="#">plamee.cSep08</a>   |                        | 11104  | 746  | 4 | 200 | putative protein (plamee) alternative variant cSep08, mRNA.                                                                                   |
| <a href="#">plapey</a>   | <a href="#">plapey.aSep08</a>   |                        | 3229   | 296  |   | 28  | putative protein (plapey) mRNA.                                                                                                               |
| <a href="#">plapor</a>   | <a href="#">plapor.aSep08</a>   |                        | 671    | 571  |   | 78  | putative protein (plapor) mRNA.                                                                                                               |
| <a href="#">plarbor</a>  | <a href="#">plarbor.aSep08</a>  |                        | 987    | 392  |   | 35  | putative protein (4.3 kD) (plarbor) mRNA.                                                                                                     |
| <a href="#">plarchy</a>  | <a href="#">plarchy.aSep08</a>  |                        | 6188   | 371  |   | 123 | retinoblastoma-like 1 (plarchy) mRNA.                                                                                                         |
| <a href="#">plardoy</a>  | <a href="#">plardoy.aSep08</a>  |                        | 4062   | 740  |   | 44  | putative protein (4.9 kD) (plardoy) mRNA.                                                                                                     |
| <a href="#">plarfee</a>  | <a href="#">plarfee.aSep08</a>  |                        | 15727  | 619  | 7 | 206 | putative protein of eukaryotic origin (plarfee) alternative variant aSep08, mRNA.                                                             |
| <a href="#">plarflu</a>  | <a href="#">plarflu.aSep08</a>  |                        | 11279  | 295  |   | 46  | putative protein (5.0 kD) (plarflu) mRNA.                                                                                                     |
| <a href="#">plarfly</a>  | <a href="#">plarfly.aSep08</a>  |                        | 5954   | 519  |   | 173 | thrombospondin 2 (plarfly) mRNA.                                                                                                              |



|                          |                                 |                       |       |      |   |     |                                                                           |
|--------------------------|---------------------------------|-----------------------|-------|------|---|-----|---------------------------------------------------------------------------|
| <a href="#">plarja</a>   | <a href="#">plarja.aSep08</a>   |                       | 12627 | 725  |   | 241 | progesterone-induced blocking factor 1 like (plarja) mRNA.                |
| <a href="#">plarjey</a>  | <a href="#">plarjey.aSep08</a>  |                       | 24691 | 922  |   | 306 | ubiquitin 34 (plarjey) mRNA.                                              |
| <a href="#">parlo</a>    | <a href="#">parlo.aSep08</a>    |                       | 10920 | 299  |   | 37  | putative protein (parlo) mRNA.                                            |
| <a href="#">plarmee</a>  | <a href="#">plarmee.aSep08</a>  |                       | 547   | 407  | 2 | 76  | putative protein (8.3 kD) (plarmee) alternative variant aSep08, mRNA.     |
| <a href="#">plarmee</a>  | <a href="#">plarmee.bSep08</a>  |                       | 11213 | 537  | 3 | 76  | putative protein (8.7 kD) (plarmee) alternative variant bSep08, mRNA.     |
| <a href="#">plarmee</a>  | <a href="#">plarmee.cSep08</a>  |                       | 16035 | 784  | 6 | 76  | putative protein (8.7 kD) (plarmee) alternative variant cSep08, mRNA.     |
| <a href="#">plaroy</a>   | <a href="#">plaroy.aSep08</a>   |                       | 26802 | 884  |   | 43  | protein CRA a like (plaroy) alternative variant aSep08, mRNA.             |
| <a href="#">plarpey</a>  | <a href="#">plarpey.aSep08</a>  |                       | 839   | 425  |   | 34  | putative protein (3.8 kD) (plarpey) mRNA.                                 |
| <a href="#">plarpor</a>  | <a href="#">plarpor.aSep08</a>  |                       | 3441  | 468  |   | 156 | golgi autoantigen golgin subfamily a 4 CRA a like (plarpor) mRNA.         |
| <a href="#">plarroy</a>  | <a href="#">plarroy.aSep08</a>  |                       | 2843  | 1655 | 2 | 184 | uncharacterized protein like (plarroy) alternative variant aSep08, mRNA.  |
| <a href="#">plarroy</a>  | <a href="#">plarroy.bSep08</a>  |                       | 8438  | 185  | 2 | 61  | putative protein (plarroy) alternative variant bSep08, mRNA.              |
| <a href="#">plarshaw</a> | <a href="#">plarshaw.aSep08</a> |                       | 6499  | 564  | 1 | 136 | putative protein (plarshaw) alternative variant aSep08, mRNA.             |
| <a href="#">plarshaw</a> | <a href="#">plarshaw.bSep08</a> |                       | 71338 | 333  | 2 | 63  | putative protein (plarshaw) alternative variant bSep08, mRNA.             |
| <a href="#">plarshee</a> | <a href="#">plarshee.aSep08</a> |                       | 9386  | 361  |   | 97  | CRA a like (plarshee) mRNA.                                               |
| <a href="#">plartu</a>   | <a href="#">plartu.aSep08</a>   |                       | 34310 | 383  |   | 50  | putative protein (plartu) mRNA.                                           |
| <a href="#">plarvo</a>   | <a href="#">plarvo.aSep08</a>   |                       | 7955  | 2862 |   | 230 | putative protein of eukaryotic origin (plarvo) mRNA.                      |
| <a href="#">plarwer</a>  | <a href="#">plarwer.aSep08</a>  |                       | 9355  | 766  |   | 122 | putative protein (12.8 kD) (plarwer) mRNA.                                |
| <a href="#">plashaw</a>  | <a href="#">plashaw.aSep08</a>  |                       | 4653  | 855  |   | 58  | putative protein (6.6 kD) (plashaw) mRNA.                                 |
| <a href="#">plashee</a>  | <a href="#">plashee.aSep08</a>  |                       | 1768  | 719  |   | 54  | putative protein (plashee) mRNA.                                          |
| <a href="#">Plat</a>     | <a href="#">Plat.bSep08</a>     | <a href="#">25692</a> | 12431 | 446  | 6 | 148 | plasminogen activator, tissue (Plat) alternative variant bSep08, mRNA.    |
| <a href="#">Plat</a>     | <a href="#">Plat.cSep08</a>     | <a href="#">25692</a> | 4424  | 346  | 4 | 115 | plasminogen activator, tissue (Plat) alternative variant cSep08, mRNA.    |
| <a href="#">platu</a>    | <a href="#">platu.aSep08</a>    |                       | 5847  | 937  |   | 82  | putative nuclear protein (9.3 kD) (platu) mRNA.                           |
| <a href="#">Plau</a>     | <a href="#">Plau.bSep08</a>     | <a href="#">25619</a> | 2377  | 800  | 5 | 152 | plasminogen activator, urokinase (Plau) alternative variant bSep08, mRNA. |
| <a href="#">Plau</a>     | <a href="#">Plau.cSep08</a>     | <a href="#">25619</a> | 1706  | 381  | 5 | 66  | plasminogen activator, urokinase (Plau) alternative variant cSep08, mRNA. |
| <a href="#">Plaur</a>    | <a href="#">Plaur.aSep08</a>    | <a href="#">50692</a> | 4237  | 288  |   | 84  | plasminogen activator, urokinase receptor (Plaur) mRNA.                   |
| <a href="#">plavo</a>    | <a href="#">plavo.aSep08</a>    |                       | 4964  | 434  |   | 54  | putative protein (5.7 kD) (plavo) mRNA.                                   |
| <a href="#">plawchy</a>  | <a href="#">plawchy.aSep08</a>  |                       | 3531  | 327  |   | 40  | putative protein (plawchy) mRNA.                                          |
| <a href="#">plawdoy</a>  | <a href="#">plawdoy.aSep08</a>  |                       | 840   | 751  |   | 59  | putative protein (6.9 kD) (plawdoy) mRNA.                                 |
| <a href="#">plawer</a>   | <a href="#">plawer.aSep08</a>   |                       | 2294  | 338  |   | 34  | putative protein (plawer) mRNA.                                           |
| <a href="#">plawfee</a>  | <a href="#">plawfee.aSep08</a>  |                       | 1808  | 426  |   | 56  | CRA a like (6.2 kD) (plawfee) mRNA.                                       |
| <a href="#">plawflu</a>  | <a href="#">plawflu.aSep08</a>  |                       | 563   | 426  |   | 54  | putative protein (plawflu) mRNA.                                          |

|                          |                                 |                        |        |      |    |     |                                                                              |
|--------------------------|---------------------------------|------------------------|--------|------|----|-----|------------------------------------------------------------------------------|
| <a href="#">plawfly</a>  | <a href="#">plawfly.aSep08</a>  |                        | 4046   | 580  |    | 118 | thrombospondin 2 (plawfly) mRNA.                                             |
| <a href="#">plawja</a>   | <a href="#">plawja.aSep08</a>   |                        | 61817  | 820  |    | 244 | progesterone-induced blocking factor 1 like (29.2 kD) (plawja) mRNA.         |
| <a href="#">plawjey</a>  | <a href="#">plawjey.aSep08</a>  |                        | 8754   | 997  |    | 318 | ubiquitin 34 (plawjey) mRNA.                                                 |
| <a href="#">plawlo</a>   | <a href="#">plawlo.aSep08</a>   |                        | 1489   | 387  |    | 128 | gcn1 general control of amino-acid synthesis 1-like 1 (plawlo) mRNA.         |
| <a href="#">plawmee</a>  | <a href="#">plawmee.aSep08</a>  |                        | 1761   | 282  |    | 93  | CRA a like (plawmee) mRNA.                                                   |
| <a href="#">plawpey</a>  | <a href="#">plawpey.aSep08</a>  |                        | 1005   | 409  |    | 48  | putative protein (plawpey) mRNA.                                             |
| <a href="#">plawpor</a>  | <a href="#">plawpor.aSep08</a>  |                        | 137959 | 734  |    | 244 | integrin alpha 9 (plawpor) mRNA.                                             |
| <a href="#">plawroy</a>  | <a href="#">plawroy.aSep08</a>  |                        | 1296   | 263  |    | 53  | putative protein (5.5 kD) (plawroy) mRNA.                                    |
| <a href="#">plawshaw</a> | <a href="#">plawshaw.aSep08</a> |                        | 1191   | 770  |    | 13  | putative protein (plawshaw) mRNA.                                            |
| <a href="#">plawshee</a> | <a href="#">plawshee.aSep08</a> |                        | 11819  | 376  |    | 78  | putative protein (plawshee) mRNA.                                            |
| <a href="#">plawtu</a>   | <a href="#">plawtu.aSep08</a>   |                        | 919    | 221  |    | 46  | putative protein (plawtu) mRNA.                                              |
| <a href="#">plawvo</a>   | <a href="#">plawvo.aSep08</a>   |                        | 6537   | 532  |    | 176 | F-box protein 10 (plawvo) mRNA.                                              |
| <a href="#">plawwer</a>  | <a href="#">plawwer.aSep08</a>  |                        | 753    | 293  |    | 80  | putative protein (plawwer) mRNA.                                             |
| <a href="#">Plcb2</a>    | <a href="#">Plcb2.aSep08</a>    | <a href="#">85240</a>  | 930    | 393  |    | 87  | phospholipase C, beta 2 (Plcb2) mRNA.                                        |
| <a href="#">Plcb3</a>    | <a href="#">Plcb3.bSep08</a>    | <a href="#">29322</a>  | 4044   | 1771 | 1  | 491 | phospholipase C, beta 3 (Plcb3) alternative variant bSep08, mRNA.            |
| <a href="#">Plcb4</a>    | <a href="#">Plcb4.bSep08</a>    | <a href="#">25031</a>  | 20919  | 1338 | 8  | 242 | phospholipase C, beta 4 (Plcb4) alternative variant bSep08, mRNA.            |
| <a href="#">Plcb4</a>    | <a href="#">Plcb4.cSep08</a>    | <a href="#">25031</a>  | 149554 | 440  | 5  | 74  | phospholipase C, beta 4 (Plcb4) alternative variant cSep08, mRNA.            |
| <a href="#">Plcd1</a>    | <a href="#">Plcd1.bSep08</a>    | <a href="#">24655</a>  | 28609  | 2352 | 1  | 783 | phospholipase C, delta 1 (88.4 kD) (Plcd1) alternative variant bSep08, mRNA. |
| <a href="#">Plcd3</a>    | <a href="#">Plcd3.bSep08</a>    | <a href="#">287745</a> | 571    | 482  | 2  | 137 | phospholipase C, delta 3 (Plcd3) alternative variant bSep08, mRNA.           |
| <a href="#">Plcd3</a>    | <a href="#">Plcd3.cSep08</a>    | <a href="#">287745</a> | 30448  | 502  | 3  | 100 | phospholipase C, delta 3 (Plcd3) alternative variant cSep08, mRNA.           |
| <a href="#">Plcd4</a>    | <a href="#">Plcd4.bSep08</a>    | <a href="#">140693</a> | 7883   | 790  | 6  | 262 | phospholipase C, delta 4 (Plcd4) alternative variant bSep08, mRNA.           |
| <a href="#">Plcd4</a>    | <a href="#">Plcd4.cSep08</a>    | <a href="#">140693</a> | 7920   | 624  | 5  | 141 | phospholipase C, delta 4 (16.7 kD) (Plcd4) alternative variant cSep08, mRNA. |
| <a href="#">Plcg1</a>    | <a href="#">Plcg1.bSep08</a>    | <a href="#">25738</a>  | 19202  | 692  | 7  | 230 | phospholipase C, gamma 1 (Plcg1) alternative variant bSep08, mRNA.           |
| <a href="#">Plcg1</a>    | <a href="#">Plcg1.cSep08</a>    | <a href="#">25738</a>  | 1369   | 396  | 3  | 131 | phospholipase C, gamma 1 (Plcg1) alternative variant cSep08, mRNA.           |
| <a href="#">Plcg1</a>    | <a href="#">Plcg1.dSep08</a>    | <a href="#">25738</a>  | 891    | 386  | 3  | 128 | phospholipase C, gamma 1 (Plcg1) alternative variant dSep08, mRNA.           |
| <a href="#">Plcg1</a>    | <a href="#">Plcg1.eSep08</a>    | <a href="#">25738</a>  | 890    | 797  | 2  | 91  | phospholipase C, gamma 1 (Plcg1) alternative variant eSep08, mRNA.           |
| <a href="#">Plcg2</a>    | <a href="#">Plcg2.bSep08</a>    | <a href="#">29337</a>  | 30914  | 1617 | 10 | 436 | phospholipase C, gamma 2 (Plcg2) alternative variant bSep08, mRNA.           |
| <a href="#">Plcg2</a>    | <a href="#">Plcg2.cSep08</a>    | <a href="#">29337</a>  | 1630   | 776  | 1  | 50  | phospholipase C, gamma 2 (5.5 kD) (Plcg2) alternative variant cSep08, mRNA.  |
| <a href="#">Plch1</a>    | <a href="#">Plch1.aSep08</a>    | <a href="#">310463</a> | 2718   | 356  |    | 118 | phospholipase C, eta 1 (Plch1) mRNA.                                         |

|                           |                                  |                        |        |      |   |     |                                                                               |
|---------------------------|----------------------------------|------------------------|--------|------|---|-----|-------------------------------------------------------------------------------|
| <a href="#">Plch2</a>     | <a href="#">Plch2.aSep08</a>     | <a href="#">313756</a> | 1174   | 774  |   | 206 | phospholipase C, eta 2 (Plch2) mRNA.                                          |
| <a href="#">Plcz1</a>     | <a href="#">Plcz1.bSep08</a>     | <a href="#">497197</a> | 30832  | 1058 | 5 | 307 | phospholipase C, zeta 1 (Plcz1) alternative variant bSep08, mRNA.             |
| <a href="#">Plcz1</a>     | <a href="#">Plcz1.cSep08</a>     | <a href="#">497197</a> | 13513  | 693  | 4 | 231 | phospholipase C, zeta 1 (Plcz1) alternative variant cSep08, mRNA.             |
| <a href="#">Plcz1</a>     | <a href="#">Plcz1.dSep08</a>     | <a href="#">497197</a> | 17245  | 750  | 5 | 188 | phospholipase C, zeta 1 (Plcz1) alternative variant dSep08, mRNA.             |
| <a href="#">Pld1</a>      | <a href="#">Pld1.aSep08</a>      | <a href="#">25096</a>  | 57940  | 2555 |   | 355 | phospholipase D1 (Pld1) mRNA.                                                 |
| <a href="#">Pld3</a>      | <a href="#">Pld3.bSep08</a>      | <a href="#">361527</a> | 14688  | 1143 | 8 | 307 | phospholipase D family, member 3 (Pld3) alternative variant bSep08, mRNA.     |
| <a href="#">Pld3</a>      | <a href="#">Pld3.cSep08</a>      | <a href="#">361527</a> | 12135  | 785  | 7 | 224 | phospholipase D family, member 3 (Pld3) alternative variant cSep08, mRNA.     |
| <a href="#">Pld3</a>      | <a href="#">Pld3.dSep08</a>      | <a href="#">361527</a> | 3729   | 605  | 6 | 169 | phospholipase D family, member 3 (Pld3) alternative variant dSep08, mRNA.     |
| <a href="#">Pld5</a>      | <a href="#">Pld5.aSep08</a>      | <a href="#">289270</a> | 111943 | 658  |   | 219 | phospholipase D family, member 5 (Pld5) mRNA.                                 |
| <a href="#">PLDc.0</a>    | <a href="#">PLDc.0.aSep08</a>    |                        | 27520  | 1253 |   | 397 | phospholipase D1 (PLDc.0) mRNA.                                               |
| <a href="#">Pldn</a>      | <a href="#">Pldn.bSep08</a>      | <a href="#">317630</a> | 8552   | 659  | 5 | 158 | pallidin (Pldn) alternative variant bSep08, mRNA.                             |
| <a href="#">Plec1</a>     | <a href="#">Plec1.bSep08</a>     | <a href="#">64204</a>  | 5274   | 410  | 2 | 58  | plectin 1 (Plec1) alternative variant bSep08, mRNA.                           |
| <a href="#">Plectin.0</a> | <a href="#">Plectin.0.aSep08</a> |                        | 2375   | 1310 | 1 | 436 | desmoplakin CRA b (Plectin.0) alternative variant aSep08, mRNA.               |
| <a href="#">Plectin.0</a> | <a href="#">Plectin.0.bSep08</a> |                        | 3431   | 569  | 1 | 189 | desmoplakin II (Plectin.0) alternative variant bSep08, mRNA.                  |
| <a href="#">pleebor</a>   | <a href="#">pleebor.aSep08</a>   |                        | 115700 | 1671 |   | 184 | catenin Alpha-3 (pleebor) mRNA.                                               |
| <a href="#">pleechy</a>   | <a href="#">pleechy.aSep08</a>   |                        | 7183   | 836  |   | 278 | putative protein (pleechy) mRNA.                                              |
| <a href="#">pleedoy</a>   | <a href="#">pleedoy.aSep08</a>   |                        | 11672  | 357  |   | 83  | putative protein (pleedoy) mRNA.                                              |
| <a href="#">pleeflu</a>   | <a href="#">pleeflu.aSep08</a>   |                        | 1757   | 276  |   | 46  | putative protein (pleeflu) mRNA.                                              |
| <a href="#">pleefly</a>   | <a href="#">pleefly.aSep08</a>   |                        | 3088   | 763  |   | 84  | putative secreted or extracellular protein precursor (9.0 kD) (pleefly) mRNA. |
| <a href="#">pleeja</a>    | <a href="#">pleeja.aSep08</a>    |                        | 1285   | 858  |   | 52  | putative protein (pleeja) mRNA.                                               |
| <a href="#">pleejey</a>   | <a href="#">pleejey.aSep08</a>   |                        | 8721   | 394  |   | 119 | ubiquitin 34 (pleejey) mRNA.                                                  |
| <a href="#">pleelo</a>    | <a href="#">pleelo.aSep08</a>    |                        | 7214   | 622  |   | 207 | gcn1 1 (pleelo) mRNA.                                                         |
| <a href="#">pleemee</a>   | <a href="#">pleemee.aSep08</a>   |                        | 342    | 191  |   | 63  | CRA a like (pleemee) mRNA.                                                    |
| <a href="#">pleepey</a>   | <a href="#">pleepey.aSep08</a>   |                        | 1915   | 735  |   | 72  | putative protein (7.8 kD) (pleepey) mRNA.                                     |
| <a href="#">pleepor</a>   | <a href="#">pleepor.aSep08</a>   |                        | 1358   | 633  |   | 31  | putative protein (pleepor) mRNA.                                              |
| <a href="#">pleeroy</a>   | <a href="#">pleeroy.aSep08</a>   |                        | 6252   | 893  |   | 92  | putative protein (10.2 kD) (pleeroy) mRNA.                                    |
| <a href="#">pleeshaw</a>  | <a href="#">pleeshaw.aSep08</a>  |                        | 7688   | 468  |   | 34  | putative protein (pleeshaw) mRNA.                                             |
| <a href="#">pleeshee</a>  | <a href="#">pleeshee.aSep08</a>  |                        | 1602   | 196  |   | 65  | centromere protein E CRA b (pleeshee) mRNA.                                   |
| <a href="#">pleetu</a>    | <a href="#">pleetu.aSep08</a>    |                        | 685    | 384  |   | 53  | putative protein (pleetu) mRNA.                                               |
| <a href="#">pleevo</a>    | <a href="#">pleevo.aSep08</a>    |                        | 5150   | 643  |   | 189 | putative protein of metazoan origin (pleevo) mRNA.                            |
| <a href="#">pleewer</a>   | <a href="#">pleewer.aSep08</a>   |                        | 687    | 262  |   | 39  | putative protein (pleewer) mRNA.                                              |
| <a href="#">Plek2</a>     | <a href="#">Plek2.bSep08</a>     | <a href="#">314260</a> | 1744   | 406  | 2 | 83  | pleckstrin 2 (Plek2) alternative variant bSep08, mRNA.                        |
| <a href="#">Plek2</a>     | <a href="#">Plek2.cSep08</a>     | <a href="#">314260</a> | 1280   | 656  | 1 | 36  | pleckstrin 2 (3.9 kD) (Plek2) alternative variant cSep08, mRNA.               |

|                         |                                |                        |        |      |    |      |                                                                                                                                                   |
|-------------------------|--------------------------------|------------------------|--------|------|----|------|---------------------------------------------------------------------------------------------------------------------------------------------------|
| <a href="#">Plekha1</a> | <a href="#">Plekha1.bSep08</a> | <a href="#">361659</a> | 33180  | 730  | 6  | 203  | pleckstrin-like (23.2 kD) (Plekha1) alternative variant bSep08, complete mRNA.                                                                    |
| <a href="#">Plekha3</a> | <a href="#">Plekha3.cSep08</a> | <a href="#">295674</a> | 6776   | 622  | 2  | 45   | pleckstrin homology domain-containing, family A (phosphoinositide binding specific) member 3 (5.2 kD) (Plekha3) alternative variant cSep08, mRNA. |
| <a href="#">Plekha4</a> | <a href="#">Plekha4.aSep08</a> | <a href="#">308584</a> | 18967  | 2348 | 17 | 715  | pleckstrin-like (Plekha4) alternative variant aSep08, mRNA.                                                                                       |
| <a href="#">Plekha4</a> | <a href="#">Plekha4.cSep08</a> | <a href="#">308584</a> | 5218   | 650  | 5  | 216  | pleckstrin-like (Plekha4) alternative variant cSep08, mRNA.                                                                                       |
| <a href="#">Plekha4</a> | <a href="#">Plekha4.dSep08</a> | <a href="#">308584</a> | 4969   | 777  | 4  | 126  | putative protein of mammalian origin (Plekha4) alternative variant dSep08, mRNA.                                                                  |
| <a href="#">Plekha5</a> | <a href="#">Plekha5.aSep08</a> | <a href="#">246237</a> | 168773 | 4046 | 26 | 1077 | WW/Rsp5/WWP and pleckstrin-like (Plekha5) alternative variant aSep08, mRNA.                                                                       |
| <a href="#">Plekha5</a> | <a href="#">Plekha5.bSep08</a> | <a href="#">246237</a> | 18881  | 1348 | 5  | 378  | putative protein of vertebrate origin (42.8 kD) (Plekha5) alternative variant bSep08, mRNA.                                                       |
| <a href="#">Plekha5</a> | <a href="#">Plekha5.cSep08</a> | <a href="#">246237</a> | 112574 | 851  | 8  | 283  | pleckstrin-like (Plekha5) alternative variant cSep08, mRNA.                                                                                       |
| <a href="#">Plekha5</a> | <a href="#">Plekha5.dSep08</a> | <a href="#">246237</a> | 28261  | 739  | 8  | 246  | pleckstrin-like (Plekha5) alternative variant dSep08, mRNA.                                                                                       |
| <a href="#">Plekha5</a> | <a href="#">Plekha5.eSep08</a> | <a href="#">246237</a> | 10178  | 919  | 6  | 237  | putative protein of vertebrate origin (Plekha5) alternative variant eSep08, mRNA.                                                                 |
| <a href="#">Plekha5</a> | <a href="#">Plekha5.fSep08</a> | <a href="#">246237</a> | 99646  | 700  | 7  | 232  | pleckstrin-like (Plekha5) alternative variant fSep08, mRNA.                                                                                       |
| <a href="#">Plekha5</a> | <a href="#">Plekha5.gSep08</a> | <a href="#">246237</a> | 18458  | 876  | 6  | 215  | pleckstrin-like (Plekha5) alternative variant gSep08, mRNA.                                                                                       |
| <a href="#">Plekha5</a> | <a href="#">Plekha5.hSep08</a> | <a href="#">246237</a> | 105784 | 795  | 8  | 212  | pleckstrin-like (Plekha5) alternative variant hSep08, mRNA.                                                                                       |
| <a href="#">Plekha5</a> | <a href="#">Plekha5.iSep08</a> | <a href="#">246237</a> | 68273  | 727  | 8  | 184  | pleckstrin-like (Plekha5) alternative variant iSep08, mRNA.                                                                                       |
| <a href="#">Plekha5</a> | <a href="#">Plekha5.jSep08</a> | <a href="#">246237</a> | 11401  | 866  | 5  | 134  | putative protein, with a coiled coil domain, of vertebrate origin (Plekha5) alternative variant jSep08, mRNA.                                     |
| <a href="#">Plekha5</a> | <a href="#">Plekha5.kSep08</a> | <a href="#">246237</a> | 15240  | 379  | 6  | 126  | phosphoinositol 3-phosphate-binding like (Plekha5) alternative variant kSep08, mRNA.                                                              |
| <a href="#">Plekha5</a> | <a href="#">Plekha5.lSep08</a> | <a href="#">246237</a> | 7847   | 427  | 5  | 90   | putative protein, with a coiled coil domain, of vertebrate origin (Plekha5) alternative variant lSep08, mRNA.                                     |
| <a href="#">Plekha5</a> | <a href="#">Plekha5.mSep08</a> | <a href="#">246237</a> | 2703   | 737  | 2  | 118  | putative protein (13.2 kD) (Plekha5) alternative variant mSep08, mRNA.                                                                            |
| <a href="#">Plekha6</a> | <a href="#">Plekha6.aSep08</a> | <a href="#">360842</a> | 109725 | 1746 | 10 | 434  | WW/Rsp5/WWP and pleckstrin-like (Plekha6) alternative variant aSep08, mRNA.                                                                       |
| <a href="#">Plekha6</a> | <a href="#">Plekha6.bSep08</a> | <a href="#">360842</a> | 92627  | 943  | 8  | 195  | pleckstrin-like (Plekha6) alternative variant bSep08, mRNA.                                                                                       |
| <a href="#">Plekha6</a> | <a href="#">Plekha6.cSep08</a> | <a href="#">360842</a> | 86096  | 299  | 3  | 45   | putative protein (Plekha6) alternative variant cSep08, mRNA.                                                                                      |
| <a href="#">Plekhb1</a> | <a href="#">Plekhb1.bSep08</a> | <a href="#">64471</a>  | 11839  | 824  | 6  | 188  | pleckstrin-like (21.3 kD) (Plekhb1) alternative variant bSep08, mRNA.                                                                             |
| <a href="#">Plekhb1</a> | <a href="#">Plekhb1.cSep08</a> | <a href="#">64471</a>  | 13777  | 1307 | 7  | 188  | pleckstrin-like (21.3 kD) (Plekhb1) alternative variant cSep08, mRNA.                                                                             |
| <a href="#">Plekhb1</a> | <a href="#">Plekhb1.dSep08</a> | <a href="#">64471</a>  | 7487   | 454  | 5  | 111  | putative protein (Plekhb1) alternative variant dSep08, mRNA.                                                                                      |
| <a href="#">Plekhb1</a> | <a href="#">Plekhb1.fSep08</a> | <a href="#">64471</a>  | 5154   | 411  | 3  | 77   | putative nuclear protein (8.3 kD) (Plekhb1) alternative variant fSep08, mRNA.                                                                     |
| <a href="#">Plekhb2</a> | <a href="#">Plekhb2.bSep08</a> | <a href="#">301337</a> | 21108  | 484  | 1  | 136  | putative protein of metazoan origin (Plekhb2) alternative variant bSep08, mRNA.                                                                   |
| <a href="#">Plekhg2</a> | <a href="#">Plekhg2.aSep08</a> | <a href="#">292750</a> | 9993   | 3612 | 13 | 492  | DH and pleckstrin-like (54.3 kD) (Plekhg2) alternative variant aSep08, mRNA.                                                                      |

|                         |                                |                        |       |      |    |     |                                                                                                                               |
|-------------------------|--------------------------------|------------------------|-------|------|----|-----|-------------------------------------------------------------------------------------------------------------------------------|
| <a href="#">Plekhg2</a> | <a href="#">Plekhg2.bSep08</a> | <a href="#">292750</a> | 2446  | 867  | 3  | 289 | putative protein of ancient origin (Plekhg2) alternative variant bSep08, mRNA.                                                |
| <a href="#">Plekhg3</a> | <a href="#">Plekhg3.aSep08</a> | <a href="#">314249</a> | 24948 | 396  |    | 131 | putative protein of mammalian origin (Plekhg3) mRNA.                                                                          |
| <a href="#">Plekhg4</a> | <a href="#">Plekhg4.aSep08</a> | <a href="#">307796</a> | 1080  | 894  |    | 12  | putative protein (Plekhg4) mRNA.                                                                                              |
| <a href="#">Plekhh1</a> | <a href="#">Plekhh1.bSep08</a> | <a href="#">314262</a> | 4765  | 982  | 3  | 280 | putative protein of bilaterial origin (Plekhh1) alternative variant bSep08, mRNA.                                             |
| <a href="#">Plekhh1</a> | <a href="#">Plekhh1.cSep08</a> | <a href="#">314262</a> | 6280  | 1476 | 7  | 280 | putative protein of eukaryotic origin (Plekhh1) alternative variant cSep08, mRNA.                                             |
| <a href="#">Plekhh1</a> | <a href="#">Plekhh1.dSep08</a> | <a href="#">314262</a> | 2162  | 344  | 3  | 114 | putative protein of eukaryotic origin (Plekhh1) alternative variant dSep08, mRNA.                                             |
| <a href="#">Plekhh2</a> | <a href="#">Plekhh2.aSep08</a> | <a href="#">313866</a> | 20637 | 1219 |    | 406 | pleckstrin-like and unconventional myosin/plant kinesin-like protein/non-motor protein conserved region MyTH4 (Plekhh2) mRNA. |
| <a href="#">Plekhh3</a> | <a href="#">Plekhh3.bSep08</a> | <a href="#">360634</a> | 1230  | 712  | 4  | 130 | putative protein of eukaryotic origin (Plekhh3) alternative variant bSep08, mRNA.                                             |
| <a href="#">Plekhh3</a> | <a href="#">Plekhh3.cSep08</a> | <a href="#">360634</a> | 1477  | 407  | 3  | 104 | putative protein of mammalian origin (Plekhh3) alternative variant cSep08, mRNA.                                              |
| <a href="#">Plekhj1</a> | <a href="#">Plekhj1.bSep08</a> | <a href="#">314634</a> | 746   | 644  | 2  | 125 | putative protein of vertebrate origin (Plekhj1) alternative variant bSep08, mRNA.                                             |
| <a href="#">Plekhj1</a> | <a href="#">Plekhj1.cSep08</a> | <a href="#">314634</a> | 2139  | 1043 | 3  | 111 | putative cytoplasmic protein of vertebrate origin (12.2 kD) (Plekhj1) alternative variant cSep08, complete mRNA.              |
| <a href="#">Plekhj1</a> | <a href="#">Plekhj1.dSep08</a> | <a href="#">314634</a> | 3499  | 1286 | 2  | 31  | putative protein (3.6 kD) (Plekhj1) alternative variant dSep08, mRNA.                                                         |
| <a href="#">Plekhm2</a> | <a href="#">Plekhm2.aSep08</a> | <a href="#">313667</a> | 5944  | 2478 | 12 | 571 | pleckstrin-like (Plekhm2) alternative variant aSep08, mRNA.                                                                   |
| <a href="#">Plekhm2</a> | <a href="#">Plekhm2.cSep08</a> | <a href="#">313667</a> | 849   | 772  | 2  | 93  | putative protein of vertebrate origin (Plekhm2) alternative variant cSep08, mRNA.                                             |
| <a href="#">Plekhm2</a> | <a href="#">Plekhm2.dSep08</a> | <a href="#">313667</a> | 995   | 376  | 3  | 77  | putative protein of vertebrate origin (Plekhm2) alternative variant dSep08, mRNA.                                             |
| <a href="#">Plekhm3</a> | <a href="#">Plekhm3.aSep08</a> | <a href="#">316455</a> | 30689 | 1628 |    | 115 | putative protein of eukaryotic origin (13.1 kD) (Plekhm3) alternative variant aSep08, mRNA.                                   |
| <a href="#">Plekho1</a> | <a href="#">Plekho1.cSep08</a> | <a href="#">310674</a> | 5891  | 653  | 4  | 160 | pleckstrin-like (Plekho1) alternative variant cSep08, mRNA.                                                                   |
| <a href="#">plerbor</a> | <a href="#">plerbor.aSep08</a> |                        | 14296 | 1226 | 4  | 154 | CRA b (plerbor) alternative variant aSep08, mRNA.                                                                             |
| <a href="#">plerchy</a> | <a href="#">plerchy.aSep08</a> |                        | 13110 | 479  |    | 159 | putative protein of vertebrate origin (plerchy) mRNA.                                                                         |
| <a href="#">plerdoy</a> | <a href="#">plerdoy.aSep08</a> |                        | 3537  | 1137 | 3  | 110 | CRA b like (12.4 kD) (plerdoy) mRNA.                                                                                          |
| <a href="#">plerfee</a> | <a href="#">plerfee.aSep08</a> |                        | 3545  | 425  |    | 39  | putative protein (4.6 kD) (plerfee) mRNA.                                                                                     |
| <a href="#">plerflu</a> | <a href="#">plerflu.aSep08</a> |                        | 5081  | 616  |    | 205 | putative protein of eukaryotic origin (plerflu) mRNA.                                                                         |
| <a href="#">plerfly</a> | <a href="#">plerfly.bSep08</a> |                        | 61321 | 766  | 5  | 110 | putative protein (plerfly) alternative variant bSep08, mRNA.                                                                  |
| <a href="#">plerfly</a> | <a href="#">plerfly.cSep08</a> |                        | 61289 | 330  | 2  | 39  | wd repeat domain 27 CRA c (plerfly) alternative variant cSep08, mRNA.                                                         |
| <a href="#">plerja</a>  | <a href="#">plerja.aSep08</a>  |                        | 4611  | 632  |    | 57  | putative protein (6.6 kD) (plerja) mRNA.                                                                                      |
| <a href="#">plerjey</a> | <a href="#">plerjey.aSep08</a> |                        | 16500 | 641  |    | 213 | ubiquitin 34 (plerjey) mRNA.                                                                                                  |
| <a href="#">plerlo</a>  | <a href="#">plerlo.aSep08</a>  |                        | 1058  | 387  |    | 19  | putative protein (2.1 kD) (plerlo) mRNA.                                                                                      |
| <a href="#">plermee</a> | <a href="#">plermee.aSep08</a> |                        | 1050  | 322  |    | 107 | CRA a like (plermee) mRNA.                                                                                                    |
| <a href="#">plerpey</a> | <a href="#">plerpey.aSep08</a> |                        | 1458  | 336  |    | 32  | putative protein (3.4 kD) (plerpey) mRNA.                                                                                     |

|                                 |                                        |                       |       |      |   |     |                                                                                                                  |
|---------------------------------|----------------------------------------|-----------------------|-------|------|---|-----|------------------------------------------------------------------------------------------------------------------|
| <a href="#">plerpor</a>         | <a href="#">plerpor.aSep08</a>         |                       | 3462  | 741  |   | 98  | deleted in lung esophageal cancer 1 like (plerpor) mRNA.                                                         |
| <a href="#">plerroy</a>         | <a href="#">plerroy.aSep08</a>         |                       | 3316  | 416  |   | 36  | putative protein (plerroy) mRNA.                                                                                 |
| <a href="#">plershaw</a>        | <a href="#">plershaw.aSep08</a>        |                       | 6140  | 750  |   | 126 | putative protein (plershaw) mRNA.                                                                                |
| <a href="#">plershee</a>        | <a href="#">plershee.aSep08</a>        |                       | 1497  | 370  |   | 122 | centromere protein E CRA a (plershee) mRNA.                                                                      |
| <a href="#">plertu</a>          | <a href="#">plertu.aSep08</a>          |                       | 39272 | 726  | 3 | 63  | putative protein (6.7 kD) (plertu) alternative variant aSep08, mRNA.                                             |
| <a href="#">plertu</a>          | <a href="#">plertu.bSep08</a>          |                       | 29597 | 487  | 2 | 49  | putative protein (5.7 kD) (plertu) alternative variant bSep08, mRNA.                                             |
| <a href="#">plervo</a>          | <a href="#">plervo.aSep08</a>          |                       | 4272  | 737  |   | 177 | putative protein, with at least 2 transmembrane domains (plervo) mRNA.                                           |
| <a href="#">plerwer</a>         | <a href="#">plerwer.aSep08</a>         |                       | 2849  | 906  |   | 77  | putative protein (9.1 kD) (plerwer) mRNA.                                                                        |
| <a href="#">Plexin_cytopl.0</a> | <a href="#">Plexin_cytopl.0.aSep08</a> |                       | 2295  | 587  | 4 | 195 | plexin A1 CRA c (Plexin_cytopl.0) alternative variant aSep08, mRNA.                                              |
| <a href="#">pleybor</a>         | <a href="#">pleybor.aSep08</a>         |                       | 4383  | 920  |   | 55  | putative protein (pleybor) mRNA.                                                                                 |
| <a href="#">pleychy</a>         | <a href="#">pleychy.aSep08</a>         |                       | 2764  | 573  |   | 35  | putative protein (pleychy) mRNA.                                                                                 |
| <a href="#">pleydoy</a>         | <a href="#">pleydoy.aSep08</a>         |                       | 4145  | 499  |   | 52  | putative protein (pleydoy) mRNA.                                                                                 |
| <a href="#">pleyfee</a>         | <a href="#">pleyfee.aSep08</a>         |                       | 823   | 285  |   | 33  | putative protein (pleyfee) mRNA.                                                                                 |
| <a href="#">pleyflu</a>         | <a href="#">pleyflu.aSep08</a>         |                       | 4089  | 1555 |   | 54  | putative protein (5.9 kD) (pleyflu) mRNA.                                                                        |
| <a href="#">pleyfly</a>         | <a href="#">pleyfly.aSep08</a>         |                       | 7295  | 2150 | 2 | 288 | putative cytoplasmic protein of eukaryotic origin (32.1 kD) (pleyfly) alternative variant aSep08, complete mRNA. |
| <a href="#">pleyfly</a>         | <a href="#">pleyfly.bSep08</a>         |                       | 5364  | 785  | 1 | 202 | putative cytoplasmic protein of eukaryotic origin (22.4 kD) (pleyfly) alternative variant bSep08, mRNA.          |
| <a href="#">pleyja</a>          | <a href="#">pleyja.aSep08</a>          |                       | 16267 | 604  |   | 201 | tbc1 domain family member 4 (pleyja) mRNA.                                                                       |
| <a href="#">pleyjej</a>         | <a href="#">pleyjej.aSep08</a>         |                       | 5603  | 670  | 6 | 223 | ubiquitin 34 (pleyjej) alternative variant aSep08, mRNA.                                                         |
| <a href="#">pleylo</a>          | <a href="#">pleylo.aSep08</a>          |                       | 1823  | 327  | 3 | 63  | putative protein (6.7 kD) (pleylo) alternative variant aSep08, mRNA.                                             |
| <a href="#">pleymee</a>         | <a href="#">pleymee.aSep08</a>         |                       | 12006 | 435  |   | 115 | putative protein (pleymee) mRNA.                                                                                 |
| <a href="#">pleypey</a>         | <a href="#">pleypey.bSep08</a>         |                       | 2923  | 713  | 3 | 68  | CRA a like (pleypey) alternative variant bSep08, mRNA.                                                           |
| <a href="#">pleypey</a>         | <a href="#">pleypey.cSep08</a>         |                       | 2876  | 631  | 3 | 76  | putative protein (pleypey) alternative variant cSep08, mRNA.                                                     |
| <a href="#">pleypor</a>         | <a href="#">pleypor.aSep08</a>         |                       | 2257  | 1940 |   | 73  | deleted in lung esophageal cancer 1 like (8.3 kD) (pleypor) mRNA.                                                |
| <a href="#">pleyro</a>          | <a href="#">pleyro.aSep08</a>          |                       | 7968  | 658  |   | 151 | stabilin 2 (pleyro) mRNA.                                                                                        |
| <a href="#">pleyshaw</a>        | <a href="#">pleyshaw.aSep08</a>        |                       | 3384  | 571  |   | 66  | putative protein (pleyshaw) mRNA.                                                                                |
| <a href="#">pleyshee</a>        | <a href="#">pleyshee.aSep08</a>        |                       | 7634  | 1559 | 6 | 519 | centromere protein E (pleyshee) alternative variant aSep08, mRNA.                                                |
| <a href="#">pleyshee</a>        | <a href="#">pleyshee.bSep08</a>        |                       | 629   | 397  | 1 | 132 | centromere protein e (pleyshee) alternative variant bSep08, mRNA.                                                |
| <a href="#">pleytu</a>          | <a href="#">pleytu.aSep08</a>          |                       | 1137  | 647  |   | 59  | putative protein (6.4 kD) (pleytu) mRNA.                                                                         |
| <a href="#">pleyvo</a>          | <a href="#">pleyvo.aSep08</a>          |                       | 1046  | 789  |   | 53  | putative protein (5.6 kD) (pleyvo) mRNA.                                                                         |
| <a href="#">pleywer</a>         | <a href="#">pleywer.aSep08</a>         |                       | 3125  | 446  |   | 49  | putative protein (5.7 kD) (pleywer) mRNA.                                                                        |
| <a href="#">Plg</a>             | <a href="#">Plg.aSep08</a>             | <a href="#">85253</a> | 42718 | 2749 |   | 812 | plasminogen (90.5 kD) (Plg) mRNA.                                                                                |
| <a href="#">Plk1</a>            | <a href="#">Plk1.bSep08</a>            | <a href="#">25515</a> | 1928  | 684  | 3 | 227 | polo-like kinase 1 (Drosophila) (Plk1) alternative variant bSep08, mRNA.                                         |

|                         |                                |                        |       |      |    |     |                                                                                                        |
|-------------------------|--------------------------------|------------------------|-------|------|----|-----|--------------------------------------------------------------------------------------------------------|
| <a href="#">Plk1</a>    | <a href="#">Plk1.cSep08</a>    | <a href="#">25515</a>  | 1726  | 743  | 1  | 169 | polo-like kinase 1 (Drosophila) (Plk1) alternative variant cSep08, mRNA.                               |
| <a href="#">Plk3</a>    | <a href="#">Plk3.aSep08</a>    | <a href="#">58936</a>  | 2667  | 1339 |    | 334 | polo-like kinase 3 (Drosophila) (Plk3) mRNA.                                                           |
| <a href="#">Plk4</a>    | <a href="#">Plk4.aSep08</a>    | <a href="#">310344</a> | 19088 | 3419 | 16 | 924 | polo-like kinase 4 (Drosophila) (103.8 kD) (Plk4) alternative variant aSep08, complete mRNA.           |
| <a href="#">Plk4</a>    | <a href="#">Plk4.bSep08</a>    | <a href="#">310344</a> | 3089  | 557  | 3  | 119 | polo-like kinase 4 (Drosophila) (Plk4) alternative variant bSep08, mRNA.                               |
| <a href="#">Plip</a>    | <a href="#">Plip.bSep08</a>    | <a href="#">64364</a>  | 6442  | 380  | 1  | 49  | plasma membrane proteolipid (Plip) alternative variant bSep08, mRNA.                                   |
| <a href="#">Pln</a>     | <a href="#">Pln.bSep08</a>     | <a href="#">64672</a>  | 2986  | 281  | 1  | 22  | phospholamban (Pln) alternative variant bSep08, mRNA.                                                  |
| <a href="#">plobor</a>  | <a href="#">plobor.aSep08</a>  |                        | 3344  | 634  |    | 113 | putative protein, with a coiled coil domain, of metazoan origin (plobor) mRNA.                         |
| <a href="#">plochy</a>  | <a href="#">plochy.bSep08</a>  |                        | 4164  | 371  | 3  | 63  | putative protein (7.1 kD) (plochy) alternative variant bSep08, mRNA.                                   |
| <a href="#">Plod1</a>   | <a href="#">Plod1.aSep08</a>   | <a href="#">116552</a> | 19985 | 3257 |    | 574 | procollagen-lysine, 2-oxoglutarate 5-dioxygenase 1 (Plod1) mRNA.                                       |
| <a href="#">Plod2</a>   | <a href="#">Plod2.bSep08</a>   | <a href="#">300901</a> | 33767 | 1782 | 2  | 184 | procollagen lysine, 2-oxoglutarate 5-dioxygenase 2 (21.5 kD) (Plod2) alternative variant bSep08, mRNA. |
| <a href="#">Plod3</a>   | <a href="#">Plod3.bSep08</a>   | <a href="#">288583</a> | 1517  | 744  | 6  | 248 | procollagen-lysine, 2-oxoglutarate 5-dioxygenase 3 (Plod3) alternative variant bSep08, mRNA.           |
| <a href="#">Plod3</a>   | <a href="#">Plod3.cSep08</a>   | <a href="#">288583</a> | 1145  | 652  | 5  | 114 | procollagen-lysine, 2-oxoglutarate 5-dioxygenase 3 (Plod3) alternative variant cSep08, mRNA.           |
| <a href="#">Plod3</a>   | <a href="#">Plod3.dSep08</a>   | <a href="#">288583</a> | 527   | 386  | 2  | 98  | procollagen-lysine, 2-oxoglutarate 5-dioxygenase 3 (Plod3) alternative variant dSep08, mRNA.           |
| <a href="#">plodoy</a>  | <a href="#">plodoy.aSep08</a>  |                        | 21188 | 697  |    | 61  | putative protein (plodoy) mRNA.                                                                        |
| <a href="#">plofee</a>  | <a href="#">plofee.aSep08</a>  |                        | 7137  | 844  |    | 242 | putative protein of vertebrate origin (plofee) mRNA.                                                   |
| <a href="#">ploflu</a>  | <a href="#">ploflu.aSep08</a>  |                        | 4273  | 430  |    | 47  | putative protein (5.2 kD) (ploflu) mRNA.                                                               |
| <a href="#">plofly</a>  | <a href="#">plofly.aSep08</a>  |                        | 14228 | 818  |    | 102 | putative protein of mammalian origin (11.4 kD) (plofly) mRNA.                                          |
| <a href="#">ploja</a>   | <a href="#">ploja.bSep08</a>   |                        | 745   | 222  |    | 28  | putative protein (3.3 kD) (ploja) alternative variant bSep08, mRNA.                                    |
| <a href="#">plojey</a>  | <a href="#">plojey.aSep08</a>  |                        | 1586  | 1051 |    | 37  | putative protein (4.2 kD) (plojey) mRNA.                                                               |
| <a href="#">plolo</a>   | <a href="#">plolo.aSep08</a>   |                        | 474   | 367  |    | 116 | putative protein (plolo) mRNA.                                                                         |
| <a href="#">plomee</a>  | <a href="#">plomee.aSep08</a>  |                        | 24043 | 529  |    | 175 | seizure related 6 (plomee) mRNA.                                                                       |
| <a href="#">plopey</a>  | <a href="#">plopey.aSep08</a>  |                        | 27392 | 248  |    | 36  | putative protein (plopey) mRNA.                                                                        |
| <a href="#">plopor</a>  | <a href="#">plopor.aSep08</a>  |                        | 3728  | 356  |    | 118 | golgi autoantigen golgin subfamily a 4 CRA a like (plopor) mRNA.                                       |
| <a href="#">plorbor</a> | <a href="#">plorbor.bSep08</a> |                        | 2392  | 355  | 3  | 70  | putative protein (plorbor) alternative variant bSep08, mRNA.                                           |
| <a href="#">plorchy</a> | <a href="#">plorchy.aSep08</a> |                        | 756   | 662  |    | 71  | putative secreted or extracellular protein precursor (7.9 kD) (plorchy) mRNA.                          |
| <a href="#">plordoy</a> | <a href="#">plordoy.aSep08</a> |                        | 8069  | 2195 |    | 114 | guanine nucleotide binding protein alpha olfactory type like (plordoy) mRNA.                           |
| <a href="#">plorfee</a> | <a href="#">plorfee.aSep08</a> |                        | 6350  | 858  |    | 39  | putative protein (plorfee) mRNA.                                                                       |
| <a href="#">plorflu</a> | <a href="#">plorflu.aSep08</a> |                        | 30634 | 856  | 2  | 77  | putative protein (8.3 kD) (plorflu) alternative variant aSep08, mRNA.                                  |

|                          |                                 |  |       |      |    |     |                                                                                                                    |
|--------------------------|---------------------------------|--|-------|------|----|-----|--------------------------------------------------------------------------------------------------------------------|
| <a href="#">plorfly</a>  | <a href="#">plorfly.aSep08</a>  |  | 16941 | 376  |    | 46  | putative protein (plorfly) mRNA.                                                                                   |
| <a href="#">plorja</a>   | <a href="#">plorja.aSep08</a>   |  | 2237  | 212  |    | 70  | tbc1 domain family member 4 (plorja) mRNA.                                                                         |
| <a href="#">plorjey</a>  | <a href="#">plorjey.aSep08</a>  |  | 10902 | 1261 | 10 | 339 | ubiquitin 34 (plorjey) alternative variant aSep08, mRNA.                                                           |
| <a href="#">plorjey</a>  | <a href="#">plorjey.bSep08</a>  |  | 7599  | 1092 | 8  | 236 | ubiquitin 34 (plorjey) alternative variant bSep08, mRNA.                                                           |
| <a href="#">plorlo</a>   | <a href="#">plorlo.aSep08</a>   |  | 3031  | 473  |    | 157 | trichoplein keratin filament binding CRA b like (plorlo) mRNA.                                                     |
| <a href="#">plormee</a>  | <a href="#">plormee.aSep08</a>  |  | 2502  | 1108 |    | 368 | suppressor of Ty 6 homolog (plormee) mRNA.                                                                         |
| <a href="#">ploroy</a>   | <a href="#">ploroy.aSep08</a>   |  | 13093 | 403  | 3  | 133 | aldehyde dehydrogenase 1 family member L2 CRA a (ploroy) alternative variant aSep08, mRNA.                         |
| <a href="#">plorpey</a>  | <a href="#">plorpey.aSep08</a>  |  | 17906 | 497  |    | 84  | putative protein (9.0 kD) (plorpey) mRNA.                                                                          |
| <a href="#">plorpor</a>  | <a href="#">plorpor.aSep08</a>  |  | 1722  | 665  |    | 153 | putative protein (plorpor) mRNA.                                                                                   |
| <a href="#">plorroy</a>  | <a href="#">plorroy.aSep08</a>  |  | 1860  | 772  |    | 48  | putative protein (plorroy) mRNA.                                                                                   |
| <a href="#">plorshaw</a> | <a href="#">plorshaw.aSep08</a> |  | 15184 | 270  |    | 47  | putative protein (plorshaw) mRNA.                                                                                  |
| <a href="#">plorshee</a> | <a href="#">plorshee.aSep08</a> |  | 5786  | 552  |    | 49  | putative protein (plorshee) mRNA.                                                                                  |
| <a href="#">plortu</a>   | <a href="#">plortu.aSep08</a>   |  | 12043 | 577  |    | 79  | vesicle transport through interaction with t-snares homolog 1b (9.0 kD) (plortu) alternative variant aSep08, mRNA. |
| <a href="#">plortu</a>   | <a href="#">plortu.bSep08</a>   |  | 12055 | 672  | 1  | 62  | vesicle transport through interaction with t-snares 1b (plortu) alternative variant bSep08, mRNA.                  |
| <a href="#">plorvo</a>   | <a href="#">plorvo.aSep08</a>   |  | 1977  | 554  |    | 46  | putative protein (plorvo) mRNA.                                                                                    |
| <a href="#">plorwer</a>  | <a href="#">plorwer.aSep08</a>  |  | 630   | 263  |    | 87  | CRA a (plorwer) mRNA.                                                                                              |
| <a href="#">ploshaw</a>  | <a href="#">ploshaw.aSep08</a>  |  | 44137 | 318  |    | 26  | putative protein (2.9 kD) (ploshaw) mRNA.                                                                          |
| <a href="#">ploshee</a>  | <a href="#">ploshee.aSep08</a>  |  | 3544  | 826  |    | 133 | putative protein of eukaryotic origin (14.8 kD) (ploshee) mRNA.                                                    |
| <a href="#">plotu</a>    | <a href="#">plotu.aSep08</a>    |  | 2955  | 767  |    | 38  | putative protein (4.4 kD) (plotu) mRNA.                                                                            |
| <a href="#">plovo</a>    | <a href="#">plovo.aSep08</a>    |  | 1530  | 383  | 2  | 92  | putative protein (plovo) alternative variant aSep08, mRNA.                                                         |
| <a href="#">plower</a>   | <a href="#">plower.aSep08</a>   |  | 1175  | 723  |    | 67  | putative protein (8.1 kD) (plower) mRNA.                                                                           |
| <a href="#">ploybor</a>  | <a href="#">ploybor.aSep08</a>  |  | 12612 | 815  |    | 65  | alpha 1 type XIII collagen (6.4 kD) (ploybor) mRNA.                                                                |
| <a href="#">ploychy</a>  | <a href="#">ploychy.aSep08</a>  |  | 7678  | 564  |    | 188 | uncharacterized protein homolog (ploychy) mRNA.                                                                    |
| <a href="#">ploydoy</a>  | <a href="#">ploydoy.aSep08</a>  |  | 5051  | 1419 | 2  | 150 | centrosomal protein 76 (ploydoy) alternative variant aSep08, mRNA.                                                 |
| <a href="#">ploydoy</a>  | <a href="#">ploydoy.bSep08</a>  |  | 6516  | 360  | 2  | 57  | centrosomal protein 76 (ploydoy) alternative variant bSep08, mRNA.                                                 |
| <a href="#">ployfee</a>  | <a href="#">ployfee.aSep08</a>  |  | 8281  | 354  |    | 117 | putative protein (ployfee) mRNA.                                                                                   |
| <a href="#">ployflu</a>  | <a href="#">ployflu.aSep08</a>  |  | 3000  | 332  |    | 87  | putative protein (ployflu) mRNA.                                                                                   |
| <a href="#">ployfly</a>  | <a href="#">ployfly.aSep08</a>  |  | 33639 | 701  | 2  | 54  | putative protein (ployfly) alternative variant aSep08, mRNA.                                                       |
| <a href="#">ployfly</a>  | <a href="#">ployfly.bSep08</a>  |  | 10244 | 637  | 1  | 72  | putative protein (ployfly) alternative variant bSep08, mRNA.                                                       |
| <a href="#">ployja</a>   | <a href="#">ployja.aSep08</a>   |  | 28856 | 663  |    | 48  | putative protein (ployja) mRNA.                                                                                    |
| <a href="#">ployjey</a>  | <a href="#">ployjey.aSep08</a>  |  | 14371 | 2133 | 7  | 152 | putative protein (ployjey) alternative variant aSep08, mRNA.                                                       |
| <a href="#">ployjey</a>  | <a href="#">ployjey.bSep08</a>  |  | 5547  | 267  | 3  | 68  | putative protein (ployjey) alternative variant bSep08, mRNA.                                                       |
| <a href="#">ploylo</a>   | <a href="#">ploylo.aSep08</a>   |  | 7339  | 1024 | 2  | 341 | trichoplein keratin filament binding like (ploylo) alternative variant aSep08, mRNA.                               |



|                          |                                 |                        |       |      |    |     |                                                                                               |
|--------------------------|---------------------------------|------------------------|-------|------|----|-----|-----------------------------------------------------------------------------------------------|
| <a href="#">poylo</a>    | <a href="#">poylo.bSep08</a>    |                        | 6392  | 581  | 1  | 193 | trichoplein keratin filament binding CRA a like (poylo) alternative variant bSep08, mRNA.     |
| <a href="#">ploymee</a>  | <a href="#">ploymee.aSep08</a>  |                        | 2945  | 727  | 3  | 92  | putative protein (ploymee) alternative variant aSep08, mRNA.                                  |
| <a href="#">ploypey</a>  | <a href="#">ploypey.aSep08</a>  |                        | 699   | 423  |    | 85  | putative protein (ploypey) mRNA.                                                              |
| <a href="#">ploypor</a>  | <a href="#">ploypor.aSep08</a>  |                        | 3199  | 701  | 3  | 190 | putative protein (ploypor) alternative variant aSep08, mRNA.                                  |
| <a href="#">poyroy</a>   | <a href="#">poyroy.aSep08</a>   |                        | 31274 | 642  |    | 214 | CRA b (poyroy) mRNA.                                                                          |
| <a href="#">poyshaw</a>  | <a href="#">poyshaw.aSep08</a>  |                        | 9427  | 845  |    | 47  | single-stranded DNA binding protein 2 like (poyshaw) mRNA.                                    |
| <a href="#">ployshee</a> | <a href="#">ployshee.aSep08</a> |                        | 4437  | 549  |    | 94  | putative protein (10.4 kD) (ployshee) mRNA.                                                   |
| <a href="#">poytu</a>    | <a href="#">poytu.aSep08</a>    |                        | 3341  | 738  |    | 69  | putative protein (poytu) mRNA.                                                                |
| <a href="#">poyvo</a>    | <a href="#">poyvo.aSep08</a>    |                        | 7589  | 565  |    | 154 | putative protein (poyvo) mRNA.                                                                |
| <a href="#">poywer</a>   | <a href="#">poywer.aSep08</a>   |                        | 17888 | 738  |    | 80  | putative cytoplasmic protein (8.8 kD) (poywer) mRNA.                                          |
| <a href="#">Plp1</a>     | <a href="#">Plp1.aSep08</a>     | <a href="#">24943</a>  | 8202  | 2929 | 7  | 286 | proteolipid protein Dm-20 (Plp1) alternative variant aSep08, mRNA.                            |
| <a href="#">Plp1</a>     | <a href="#">Plp1.cSep08</a>     | <a href="#">24943</a>  | 12041 | 828  | 6  | 219 | proteolipid protein Dm-20 (Plp1) alternative variant cSep08, mRNA.                            |
| <a href="#">Plp1</a>     | <a href="#">Plp1.dSep08</a>     | <a href="#">24943</a>  | 12121 | 719  | 6  | 131 | proteolipid protein Dm-20 (Plp1) alternative variant dSep08, mRNA.                            |
| <a href="#">Plp1</a>     | <a href="#">Plp1.fSep08</a>     | <a href="#">24943</a>  | 3327  | 1083 | 4  | 72  | proteolipid protein Dm-20 (7.8 kD) (Plp1) alternative variant fSep08, mRNA.                   |
| <a href="#">Plp1</a>     | <a href="#">Plp1.gSep08</a>     | <a href="#">24943</a>  | 8379  | 376  | 2  | 64  | proteolipid protein Dm-20 (7.0 kD) (Plp1) alternative variant gSep08, mRNA.                   |
| <a href="#">Plp2</a>     | <a href="#">Plp2.bSep08</a>     | <a href="#">302562</a> | 1957  | 821  | 4  | 95  | proteolipid protein 2 (10.6 kD) (Plp2) alternative variant bSep08, mRNA.                      |
| <a href="#">Plp2</a>     | <a href="#">Plp2.cSep08</a>     | <a href="#">302562</a> | 3423  | 1033 | 5  | 95  | proteolipid protein 2 (10.6 kD) (Plp2) alternative variant cSep08, complete mRNA.             |
| <a href="#">Plrg1</a>    | <a href="#">Plrg1.bSep08</a>    | <a href="#">60376</a>  | 4832  | 610  | 1  | 171 | pleiotropic regulator 1, PRL1 homolog (Arabidopsis) (Plrg1) alternative variant bSep08, mRNA. |
| <a href="#">Pls1</a>     | <a href="#">Pls1.bSep08</a>     | <a href="#">315926</a> | 70005 | 3711 | 2  | 630 | plastin 1 (I isoform) (70.4 kD) (Pls1) alternative variant bSep08, mRNA.                      |
| <a href="#">Pls3</a>     | <a href="#">Pls3.aSep08</a>     | <a href="#">81748</a>  | 95350 | 2246 | 13 | 630 | plastin 3 (T-isoform) (70.7 kD) (Pls3) alternative variant aSep08, mRNA.                      |
| <a href="#">Pls3</a>     | <a href="#">Pls3.bSep08</a>     | <a href="#">81748</a>  | 7562  | 881  | 8  | 293 | plastin 3 (T-isoform) (Pls3) alternative variant bSep08, mRNA.                                |
| <a href="#">Pls3</a>     | <a href="#">Pls3.cSep08</a>     | <a href="#">81748</a>  | 42462 | 383  | 1  | 127 | plastin 3 (T-isoform) (Pls3) alternative variant cSep08, mRNA.                                |
| <a href="#">Plscr1</a>   | <a href="#">Plscr1.bSep08</a>   | <a href="#">117540</a> | 15901 | 1399 | 3  | 294 | phospholipid scramblase 1 (31.9 kD) (Plscr1) alternative variant bSep08, complete mRNA.       |
| <a href="#">Plscr1</a>   | <a href="#">Plscr1.cSep08</a>   | <a href="#">117540</a> | 15254 | 801  | 1  | 207 | phospholipid scramblase 1 (Plscr1) alternative variant cSep08, mRNA.                          |
| <a href="#">Plscr2</a>   | <a href="#">Plscr2.bSep08</a>   | <a href="#">315883</a> | 11915 | 1292 |    | 265 | phospholipid scramblase 2 (Plscr2) alternative variant bSep08, mRNA.                          |
| <a href="#">Plscr3</a>   | <a href="#">Plscr3.bSep08</a>   | <a href="#">360549</a> | 601   | 416  | 1  | 138 | phospholipid scramblase 3 (Plscr3) alternative variant bSep08, mRNA.                          |

|                         |                                |                        |        |      |    |     |                                                                                  |
|-------------------------|--------------------------------|------------------------|--------|------|----|-----|----------------------------------------------------------------------------------|
| <a href="#">Pltp</a>    | <a href="#">Pltp.aSep08</a>    | <a href="#">296371</a> | 18118  | 2025 | 16 | 580 | phospholipid transfer protein (Pltp) alternative variant aSep08, mRNA.           |
| <a href="#">Pltp</a>    | <a href="#">Pltp.bSep08</a>    | <a href="#">296371</a> | 22131  | 1520 | 13 | 292 | phospholipid transfer protein (Pltp) alternative variant bSep08, mRNA.           |
| <a href="#">Pltp</a>    | <a href="#">Pltp.cSep08</a>    | <a href="#">296371</a> | 12768  | 897  | 3  | 62  | phospholipid transfer protein (Pltp) alternative variant cSep08, mRNA.           |
| <a href="#">plubor</a>  | <a href="#">plubor.aSep08</a>  | <a href="#">309745</a> | 276442 | 630  |    | 210 | catenin Alpha-3 (plubor) mRNA.                                                   |
| <a href="#">pluchy</a>  | <a href="#">pluchy.aSep08</a>  |                        | 7846   | 240  |    | 33  | putative protein (pluchy) mRNA.                                                  |
| <a href="#">pludoy</a>  | <a href="#">pludoy.aSep08</a>  |                        | 22603  | 278  |    | 34  | putative protein (4.1 kD) (pludoy) mRNA.                                         |
| <a href="#">plufee</a>  | <a href="#">plufee.aSep08</a>  |                        | 7661   | 376  |    | 89  | putative protein (10.1 kD) (plufee) mRNA.                                        |
| <a href="#">plufu</a>   | <a href="#">plufu.aSep08</a>   |                        | 961    | 639  | 3  | 148 | protease serine 36 (plufu) alternative variant aSep08, mRNA.                     |
| <a href="#">plufly</a>  | <a href="#">plufly.aSep08</a>  |                        | 28066  | 783  |    | 86  | putative protein of metazoan origin (9.2 kD) (plufly) mRNA.                      |
| <a href="#">plugar</a>  | <a href="#">plugar.aSep08</a>  |                        | 6497   | 244  |    | 81  | F-box protein 25 (plugar) mRNA.                                                  |
| <a href="#">pluja</a>   | <a href="#">pluja.aSep08</a>   |                        | 592    | 318  | 2  | 13  | putative protein (pluja) mRNA.                                                   |
| <a href="#">plujey</a>  | <a href="#">plujey.aSep08</a>  |                        | 38789  | 1820 |    | 33  | putative protein (plujey) mRNA.                                                  |
| <a href="#">plulo</a>   | <a href="#">plulo.aSep08</a>   |                        | 662    | 435  | 2  | 30  | putative protein (3.4 kD) (plulo) alternative variant aSep08, mRNA.              |
| <a href="#">plumee</a>  | <a href="#">plumee.aSep08</a>  |                        | 4576   | 422  |    | 44  | putative protein (4.7 kD) (plumee) mRNA.                                         |
| <a href="#">plupey</a>  | <a href="#">plupey.aSep08</a>  |                        | 39640  | 604  | 1  | 129 | putative protein (14.4 kD) (plupey) alternative variant aSep08, mRNA.            |
| <a href="#">plupey</a>  | <a href="#">plupey.cSep08</a>  |                        | 40342  | 1327 | 2  | 86  | putative protein (plupey) alternative variant cSep08, mRNA.                      |
| <a href="#">plupor</a>  | <a href="#">plupor.aSep08</a>  |                        | 28645  | 484  |    | 160 | golgi autoantigen golgin subfamily a 4 CRA a like (plupor) mRNA.                 |
| <a href="#">pluroy</a>  | <a href="#">pluroy.aSep08</a>  |                        | 12453  | 647  |    | 192 | CRA b (pluroy) mRNA.                                                             |
| <a href="#">plushaw</a> | <a href="#">plushaw.aSep08</a> |                        | 624    | 368  |    | 113 | putative protein (plushaw) mRNA.                                                 |
| <a href="#">plushee</a> | <a href="#">plushee.aSep08</a> |                        | 3897   | 707  |    | 108 | polyprotein (plushee) mRNA.                                                      |
| <a href="#">plutu</a>   | <a href="#">plutu.aSep08</a>   |                        | 2803   | 2463 |    | 534 | putative protein of vertebrate origin (plutu) alternative variant aSep08, mRNA.  |
| <a href="#">plutu</a>   | <a href="#">plutu.bSep08</a>   |                        | 5814   | 1784 |    | 399 | putative protein of mammalian origin (plutu) alternative variant bSep08, mRNA.   |
| <a href="#">pluvo</a>   | <a href="#">pluvo.bSep08</a>   |                        | 4304   | 574  | 2  | 18  | putative protein (2.2 kD) (pluvo) alternative variant bSep08, mRNA.              |
| <a href="#">pluwer</a>  | <a href="#">pluwer.aSep08</a>  |                        | 25680  | 341  |    | 113 | activator for secretion protein 2 (pluwer) mRNA.                                 |
| <a href="#">Plvap</a>   | <a href="#">Plvap.bSep08</a>   | <a href="#">56765</a>  | 1459   | 828  | 3  | 274 | plasmalemma vesicle associated protein (Plvap) alternative variant bSep08, mRNA. |
| <a href="#">Plxna3</a>  | <a href="#">Plxna3.bSep08</a>  | <a href="#">309280</a> | 992    | 733  | 4  | 148 | plexin A3 (Plxna3) alternative variant bSep08, mRNA.                             |
| <a href="#">Plxna3</a>  | <a href="#">Plxna3.cSep08</a>  | <a href="#">309280</a> | 1607   | 547  | 2  | 74  | plexin A3 (8.6 kD) (Plxna3) alternative variant cSep08, mRNA.                    |
| <a href="#">Plxna4</a>  | <a href="#">Plxna4.bSep08</a>  | <a href="#">312213</a> | 17275  | 734  | 1  | 112 | plexin A4 CRA b (Plxna4) alternative variant bSep08, mRNA.                       |
| <a href="#">Plxnb1</a>  | <a href="#">Plxnb1.bSep08</a>  | <a href="#">316009</a> | 9675   | 431  | 4  | 137 | plexin B1 (Plxnb1) alternative variant bSep08, mRNA.                             |
| <a href="#">Plxnb1</a>  | <a href="#">Plxnb1.cSep08</a>  | <a href="#">316009</a> | 972    | 401  | 3  | 133 | plexin B1 (Plxnb1) alternative variant cSep08, mRNA.                             |
| <a href="#">Plxnb1</a>  | <a href="#">Plxnb1.dSep08</a>  | <a href="#">316009</a> | 1253   | 414  | 5  | 107 | plexin B1 (Plxnb1) alternative variant dSep08, mRNA.                             |

|                         |                                |                        |       |      |    |     |                                                                        |
|-------------------------|--------------------------------|------------------------|-------|------|----|-----|------------------------------------------------------------------------|
| <a href="#">Plxnb2</a>  | <a href="#">Plxnb2.bSep08</a>  | <a href="#">315217</a> | 3072  | 1101 | 2  | 335 | plexin B2 (Plxnb2) alternative variant bSep08, mRNA.                   |
| <a href="#">Plxnb2</a>  | <a href="#">Plxnb2.cSep08</a>  | <a href="#">315217</a> | 2201  | 749  | 2  | 233 | plexin B2 (Plxnb2) alternative variant cSep08, mRNA.                   |
| <a href="#">Plxnb2</a>  | <a href="#">Plxnb2.dSep08</a>  | <a href="#">315217</a> | 2834  | 1308 | 8  | 217 | plexin B2 (Plxnb2) alternative variant dSep08, mRNA.                   |
| <a href="#">Plxnb2</a>  | <a href="#">Plxnb2.eSep08</a>  | <a href="#">315217</a> | 2689  | 1253 | 7  | 201 | plexin B2 (Plxnb2) alternative variant eSep08, mRNA.                   |
| <a href="#">Plxnb2</a>  | <a href="#">Plxnb2.fSep08</a>  | <a href="#">315217</a> | 1391  | 607  | 5  | 181 | plexin B2 (Plxnb2) alternative variant fSep08, mRNA.                   |
| <a href="#">Plxnb2</a>  | <a href="#">Plxnb2.gSep08</a>  | <a href="#">315217</a> | 756   | 435  | 2  | 123 | plexin B2 (Plxnb2) alternative variant gSep08, mRNA.                   |
| <a href="#">Plxnb2</a>  | <a href="#">Plxnb2.hSep08</a>  | <a href="#">315217</a> | 642   | 542  | 2  | 65  | putative protein (Plxnb2) alternative variant hSep08, mRNA.            |
| <a href="#">Plxnb3</a>  | <a href="#">Plxnb3.aSep08</a>  | <a href="#">363517</a> | 1840  | 791  | 5  | 182 | plexin B3 (Plxnb3) alternative variant aSep08, mRNA.                   |
| <a href="#">Plxnb3</a>  | <a href="#">Plxnb3.bSep08</a>  | <a href="#">363517</a> | 385   | 318  | 1  | 58  | plexin B3 (Plxnb3) alternative variant bSep08, mRNA.                   |
| <a href="#">Plxnc1</a>  | <a href="#">Plxnc1.bSep08</a>  | <a href="#">362873</a> | 7145  | 2806 | 5  | 162 | plexin C1 (Plxnc1) alternative variant bSep08, mRNA.                   |
| <a href="#">Plxnc1</a>  | <a href="#">Plxnc1.cSep08</a>  | <a href="#">362873</a> | 19404 | 256  | 3  | 84  | plexin C1 (Plxnc1) alternative variant cSep08, mRNA.                   |
| <a href="#">Plxnd1</a>  | <a href="#">Plxnd1.bSep08</a>  | <a href="#">312652</a> | 9040  | 3060 | 14 | 274 | plexin D1 (32.2 kD) (Plxnd1) alternative variant bSep08, mRNA.         |
| <a href="#">Plxnd1</a>  | <a href="#">Plxnd1.cSep08</a>  | <a href="#">312652</a> | 1525  | 881  | 3  | 81  | plexin D1 (9.6 kD) (Plxnd1) alternative variant cSep08, mRNA.          |
| <a href="#">plybor</a>  | <a href="#">plybor.aSep08</a>  |                        | 21054 | 613  |    | 76  | putative protein (plybor) mRNA.                                        |
| <a href="#">plychy</a>  | <a href="#">plychy.aSep08</a>  |                        | 11255 | 290  |    | 56  | putative protein (plychy) mRNA.                                        |
| <a href="#">plydoy</a>  | <a href="#">plydoy.aSep08</a>  |                        | 72826 | 661  |    | 78  | putative protein (plydoy) mRNA.                                        |
| <a href="#">plyfee</a>  | <a href="#">plyfee.aSep08</a>  |                        | 66682 | 516  | 1  | 96  | CRA a like (11.2 kD) (plyfee) alternative variant aSep08, mRNA.        |
| <a href="#">plyfee</a>  | <a href="#">plyfee.bSep08</a>  |                        | 84286 | 249  | 2  | 31  | putative protein (plyfee) alternative variant bSep08, mRNA.            |
| <a href="#">plyflu</a>  | <a href="#">plyflu.aSep08</a>  |                        | 626   | 271  |    | 90  | putative protein (plyflu) mRNA.                                        |
| <a href="#">plyfly</a>  | <a href="#">plyfly.aSep08</a>  |                        | 2895  | 754  |    | 95  | putative protein (10.7 kD) (plyfly) mRNA.                              |
| <a href="#">plygar</a>  | <a href="#">plygar.aSep08</a>  |                        | 707   | 347  |    | 115 | mcf.2 transforming sequence-like CRA a (plygar) mRNA.                  |
| <a href="#">plyja</a>   | <a href="#">plyja.aSep08</a>   |                        | 751   | 542  |    | 11  | putative protein (1.2 kD) (plyja) mRNA.                                |
| <a href="#">plyjey</a>  | <a href="#">plyjey.aSep08</a>  |                        | 744   | 488  |    | 67  | putative protein (plyjey) mRNA.                                        |
| <a href="#">plylo</a>   | <a href="#">plylo.aSep08</a>   |                        | 16378 | 731  |    | 52  | putative protein (plylo) mRNA.                                         |
| <a href="#">plymee</a>  | <a href="#">plymee.aSep08</a>  |                        | 3068  | 449  |    | 54  | putative protein (plymee) mRNA.                                        |
| <a href="#">plypey</a>  | <a href="#">plypey.aSep08</a>  |                        | 5877  | 725  |    | 50  | putative protein (5.8 kD) (plypey) mRNA.                               |
| <a href="#">plypor</a>  | <a href="#">plypor.aSep08</a>  |                        | 11870 | 350  |    | 116 | putative protein of mammalian origin (plypor) mRNA.                    |
| <a href="#">plyroy</a>  | <a href="#">plyroy.aSep08</a>  |                        | 13432 | 1534 |    | 421 | CRA a (plyroy) mRNA.                                                   |
| <a href="#">plyshaw</a> | <a href="#">plyshaw.aSep08</a> |                        | 4155  | 1732 | 2  | 139 | catalytic beta polypeptide (plyshaw) alternative variant aSep08, mRNA. |
| <a href="#">plyshaw</a> | <a href="#">plyshaw.bSep08</a> |                        | 1788  | 738  | 1  | 106 | catalytic beta polypeptide (plyshaw) alternative variant bSep08, mRNA. |
| <a href="#">plyshee</a> | <a href="#">plyshee.aSep08</a> |                        | 714   | 554  |    | 41  | putative protein (4.8 kD) (plyshee) mRNA.                              |
| <a href="#">plytu</a>   | <a href="#">plytu.aSep08</a>   |                        | 1317  | 567  |    | 188 | putative protein of eukaryotic origin (plytu) mRNA.                    |
| <a href="#">plyvo</a>   | <a href="#">plyvo.aSep08</a>   |                        | 945   | 411  |    | 104 | microprotein (plyvo) mRNA.                                             |
| <a href="#">plywer</a>  | <a href="#">plywer.aSep08</a>  |                        | 1176  | 314  |    | 58  | putative protein (plywer) mRNA.                                        |
| <a href="#">Pm20d2</a>  | <a href="#">Pm20d2.aSep08</a>  | <a href="#">313130</a> | 14148 | 1331 | 6  | 342 | aminoacylase 1-like 2 (Pm20d2) alternative variant aSep08, mRNA.       |

|                        |                               |                        |       |      |   |     |                                                                                           |
|------------------------|-------------------------------|------------------------|-------|------|---|-----|-------------------------------------------------------------------------------------------|
| <a href="#">Pmepa1</a> | <a href="#">Pmepa1.aSep08</a> | <a href="#">311676</a> | 7634  | 1498 |   | 230 | prostate transmembrane protein, androgen induced 1 (Pmepa1) mRNA.                         |
| <a href="#">Pmf1</a>   | <a href="#">Pmf1.aSep08</a>   | <a href="#">681050</a> | 19736 | 788  |   | 198 | polyamine-modulated factor 1 (Pmf1) mRNA.                                                 |
| <a href="#">Pmfbp1</a> | <a href="#">Pmfbp1.bSep08</a> | <a href="#">171414</a> | 28572 | 980  | 7 | 303 | polyamine modulated factor 1 binding protein 1 (Pmfbp1) alternative variant bSep08, mRNA. |
| <a href="#">Pmfbp1</a> | <a href="#">Pmfbp1.cSep08</a> | <a href="#">171414</a> | 5244  | 606  | 5 | 202 | polyamine modulated factor 1 binding protein 1 (Pmfbp1) alternative variant cSep08, mRNA. |
| <a href="#">Pmfbp1</a> | <a href="#">Pmfbp1.dSep08</a> | <a href="#">171414</a> | 2619  | 576  | 4 | 192 | polyamine modulated factor 1 binding protein 1 (Pmfbp1) alternative variant dSep08, mRNA. |
| <a href="#">Pmfbp1</a> | <a href="#">Pmfbp1.eSep08</a> | <a href="#">171414</a> | 1014  | 503  | 2 | 92  | polyamine modulated factor 1 binding protein 1 (Pmfbp1) alternative variant eSep08, mRNA. |
| <a href="#">Pml</a>    | <a href="#">Pml.aSep08</a>    | <a href="#">315713</a> | 11719 | 604  |   | 201 | promyelocytic leukemia (Pml) mRNA.                                                        |
| <a href="#">Pmm1</a>   | <a href="#">Pmm1.bSep08</a>   | <a href="#">300089</a> | 9756  | 756  | 8 | 170 | phosphomannomutase 1 CRA b (Pmm1) alternative variant bSep08, mRNA.                       |
| <a href="#">Pmm1</a>   | <a href="#">Pmm1.cSep08</a>   | <a href="#">300089</a> | 5742  | 763  | 4 | 125 | phosphomannomutase 1 CRA b (14.1 kD) (Pmm1) alternative variant cSep08, mRNA.             |
| <a href="#">Pmm1</a>   | <a href="#">Pmm1.dSep08</a>   | <a href="#">300089</a> | 3584  | 374  | 3 | 65  | phosphomannomutase (Pmm1) alternative variant dSep08, mRNA.                               |
| <a href="#">Pmm2</a>   | <a href="#">Pmm2.bSep08</a>   | <a href="#">302915</a> | 11087 | 693  | 5 | 126 | phosphomannomutase 2 CRA b (14.3 kD) (Pmm2) alternative variant bSep08, complete mRNA.    |
| <a href="#">Pmm2</a>   | <a href="#">Pmm2.cSep08</a>   | <a href="#">302915</a> | 2027  | 712  | 2 | 101 | putative protein (10.9 kD) (Pmm2) alternative variant cSep08, mRNA.                       |
| <a href="#">Pmm2</a>   | <a href="#">Pmm2.dSep08</a>   | <a href="#">302915</a> | 9365  | 747  | 5 | 97  | phosphomannomutase 2 CRA b (Pmm2) alternative variant dSep08, mRNA.                       |
| <a href="#">Pmm2</a>   | <a href="#">Pmm2.eSep08</a>   | <a href="#">302915</a> | 15420 | 849  | 3 | 63  | phosphomannomutase 2 CRA b (Pmm2) alternative variant eSep08, mRNA.                       |
| <a href="#">Pmm2</a>   | <a href="#">Pmm2.fSep08</a>   | <a href="#">302915</a> | 6649  | 1156 | 3 | 35  | phosphomannomutase 2 (4.0 kD) (Pmm2) alternative variant fSep08, mRNA.                    |
| <a href="#">Pmp2</a>   | <a href="#">Pmp2.bSep08</a>   | <a href="#">688790</a> | 3257  | 682  | 4 | 110 | peripheral myelin protein 2 (12.4 kD) (Pmp2) alternative variant bSep08, complete mRNA.   |
| <a href="#">Pmp22</a>  | <a href="#">Pmp22.bSep08</a>  | <a href="#">24660</a>  | 19202 | 354  | 3 | 117 | peripheral myelin protein 22 (Pmp22) alternative variant bSep08, mRNA.                    |
| <a href="#">Pmp22</a>  | <a href="#">Pmp22.cSep08</a>  | <a href="#">24660</a>  | 19622 | 617  | 4 | 97  | peripheral myelin protein 22 (Pmp22) alternative variant cSep08, mRNA.                    |
| <a href="#">Pmp22</a>  | <a href="#">Pmp22.dSep08</a>  | <a href="#">24660</a>  | 20825 | 492  | 4 | 97  | peripheral myelin protein 22 (Pmp22) alternative variant dSep08, mRNA.                    |
| <a href="#">Pmpca</a>  | <a href="#">Pmpca.bSep08</a>  | <a href="#">296588</a> | 866   | 774  | 2 | 247 | peptidase (mitochondrial processing) alpha (Pmpca) alternative variant bSep08, mRNA.      |
| <a href="#">Pmpca</a>  | <a href="#">Pmpca.cSep08</a>  | <a href="#">296588</a> | 4804  | 761  | 7 | 219 | peptidase (mitochondrial processing) alpha (Pmpca) alternative variant cSep08, mRNA.      |
| <a href="#">Pmpca</a>  | <a href="#">Pmpca.dSep08</a>  | <a href="#">296588</a> | 1826  | 531  | 5 | 177 | peptidase (mitochondrial processing) alpha (Pmpca) alternative variant dSep08, mRNA.      |
| <a href="#">Pmpcb</a>  | <a href="#">Pmpcb.bSep08</a>  | <a href="#">64198</a>  | 6106  | 827  | 6 | 259 | peptidase (mitochondrial processing) beta (Pmpcb) alternative variant bSep08, mRNA.       |
| <a href="#">Pmpcb</a>  | <a href="#">Pmpcb.dSep08</a>  | <a href="#">64198</a>  | 561   | 341  | 3 | 84  | peptidase (mitochondrial processing) beta (Pmpcb) alternative variant dSep08, mRNA.       |

|                         |                                |                           |       |      |    |     |                                                                                                        |
|-------------------------|--------------------------------|---------------------------|-------|------|----|-----|--------------------------------------------------------------------------------------------------------|
| <a href="#">Pmpcb</a>   | <a href="#">Pmpcb.eSep08</a>   | <a href="#">64198</a>     | 1721  | 780  | 3  | 84  | peptidase (mitochondrial processing) beta (Pmpcb) alternative variant eSep08, mRNA.                    |
| <a href="#">Pms2</a>    | <a href="#">Pms2.aSep08</a>    | <a href="#">288479</a>    | 24197 | 2875 | 15 | 853 | postmeiotic segregation increased 2 (S. cerevisiae) (94.5 kD) (Pms2) alternative variant aSep08, mRNA. |
| <a href="#">Pms2</a>    | <a href="#">Pms2.cSep08</a>    | <a href="#">288479</a>    | 4913  | 762  | 3  | 165 | postmeiotic segregation increased 2 (S. cerevisiae) (Pms2) alternative variant cSep08, mRNA.           |
| <a href="#">Pms2</a>    | <a href="#">Pms2.dSep08</a>    | <a href="#">288479</a>    | 4804  | 687  | 3  | 74  | postmeiotic segregation increased 2 (S. cerevisiae) (8.3 kD) (Pms2) alternative variant dSep08, mRNA.  |
| <a href="#">Pmvk</a>    | <a href="#">Pmvk.bSep08</a>    | <a href="#">310645</a>    | 9550  | 751  | 3  | 83  | phosphomevalonate kinase (9.6 kD) (Pmvk) alternative variant bSep08, mRNA.                             |
| <a href="#">Pnkd</a>    | <a href="#">Pnkd.bSep08</a>    | <a href="#">100188944</a> | 86084 | 3065 | 9  | 369 | paroxysmal nonkinesinogenic dyskinesia (41.0 kD) (Pnkd) alternative variant bSep08, complete mRNA.     |
| <a href="#">Pnkd</a>    | <a href="#">Pnkd.fSep08</a>    | <a href="#">100188944</a> | 20834 | 1073 | 3  | 79  | paroxysmal nonkinesinogenic dyskinesia (8.4 kD) (Pnkd) alternative variant fSep08, complete mRNA.      |
| <a href="#">Pnkp</a>    | <a href="#">Pnkp.bSep08</a>    | <a href="#">308576</a>    | 3676  | 1105 | 12 | 255 | polynucleotide kinase 3'-phosphatase (Pnkp) alternative variant bSep08, mRNA.                          |
| <a href="#">Pnkp</a>    | <a href="#">Pnkp.cSep08</a>    | <a href="#">308576</a>    | 3347  | 987  | 6  | 203 | polynucleotide kinase 3'-phosphatase (Pnkp) alternative variant cSep08, mRNA.                          |
| <a href="#">Pnkp</a>    | <a href="#">Pnkp.dSep08</a>    | <a href="#">308576</a>    | 792   | 716  | 2  | 80  | polynucleotide kinase 3'-phosphatase (Pnkp) alternative variant dSep08, mRNA.                          |
| <a href="#">Pnlhc1</a>  | <a href="#">Pnlhc1.bSep08</a>  | <a href="#">361478</a>    | 9714  | 877  | 6  | 292 | ribonuclease CAF1 (Pnlhc1) alternative variant bSep08, mRNA.                                           |
| <a href="#">Pnlhc1</a>  | <a href="#">Pnlhc1.cSep08</a>  | <a href="#">361478</a>    | 7573  | 759  | 3  | 252 | putative protein of eukaryotic origin (Pnlhc1) alternative variant cSep08, mRNA.                       |
| <a href="#">Pnlhc1</a>  | <a href="#">Pnlhc1.dSep08</a>  | <a href="#">361478</a>    | 11091 | 761  | 7  | 158 | putative protein of eukaryotic origin (Pnlhc1) alternative variant dSep08, mRNA.                       |
| <a href="#">Pnlipr2</a> | <a href="#">Pnlipr2.bSep08</a> | <a href="#">117554</a>    | 6312  | 444  | 4  | 129 | pancreatic lipase-related protein 2 (Pnlipr2) alternative variant bSep08, mRNA.                        |
| <a href="#">Pnmal1</a>  | <a href="#">Pnmal1.bSep08</a>  | <a href="#">361515</a>    | 743   | 582  | 2  | 90  | PNMA-like 1 (Pnmal1) alternative variant bSep08, mRNA.                                                 |
| <a href="#">Pnmal2</a>  | <a href="#">Pnmal2.bSep08</a>  | <a href="#">308393</a>    | 2705  | 1835 | 2  | 375 | PNMA-like 2 (Pnmal2) alternative variant bSep08, mRNA.                                                 |
| <a href="#">Pno1</a>    | <a href="#">Pno1.bSep08</a>    | <a href="#">289809</a>    | 7551  | 614  | 2  | 202 | partner of NOB1 homolog (S. cerevisiae) (Pno1) alternative variant bSep08, mRNA.                       |
| <a href="#">Pnpla1</a>  | <a href="#">Pnpla1.aSep08</a>  | <a href="#">361812</a>    | 8469  | 1781 |    | 465 | putative protein (Pnpla1) alternative variant aSep08, mRNA.                                            |
| <a href="#">Pnpla3</a>  | <a href="#">Pnpla3.aSep08</a>  | <a href="#">362972</a>    | 21685 | 3431 | 9  | 383 | adiponutrin (42.4 kD) (Pnpla3) alternative variant aSep08, complete mRNA.                              |
| <a href="#">Pnpla3</a>  | <a href="#">Pnpla3.bSep08</a>  | <a href="#">362972</a>    | 10745 | 879  | 6  | 280 | patatin (Pnpla3) alternative variant bSep08, mRNA.                                                     |
| <a href="#">Pnpla3</a>  | <a href="#">Pnpla3.cSep08</a>  | <a href="#">362972</a>    | 3430  | 638  | 2  | 132 | putative protein of eukaryotic origin (Pnpla3) alternative variant cSep08, mRNA.                       |
| <a href="#">Pnpla6</a>  | <a href="#">Pnpla6.aSep08</a>  | <a href="#">360753</a>    | 1698  | 632  | 4  | 128 | putative protein of vertebrate origin (Pnpla6) alternative variant aSep08, mRNA.                       |
| <a href="#">Pnpla6</a>  | <a href="#">Pnpla6.bSep08</a>  | <a href="#">360753</a>    | 29337 | 873  | 5  | 39  | putative protein (Pnpla6) alternative variant bSep08, mRNA.                                            |
| <a href="#">Pnpla6</a>  | <a href="#">Pnpla6.cSep08</a>  | <a href="#">360753</a>    | 880   | 750  | 2  | 59  | putative protein (Pnpla6) alternative variant cSep08, mRNA.                                            |
| <a href="#">Pnpla7</a>  | <a href="#">Pnpla7.bSep08</a>  | <a href="#">246246</a>    | 70095 | 4446 | 26 | 957 | cyclic nucleotide-binding (106.3 kD) (Pnpla7) alternative variant bSep08, mRNA.                        |

|                        |                               |                        |       |      |    |     |                                                                                                                               |
|------------------------|-------------------------------|------------------------|-------|------|----|-----|-------------------------------------------------------------------------------------------------------------------------------|
| <a href="#">Pnpla7</a> | <a href="#">Pnpla7.cSep08</a> | <a href="#">246246</a> | 37352 | 2373 | 18 | 682 | patatin (75.8 kD) (Pnpla7) alternative variant cSep08, mRNA.                                                                  |
| <a href="#">Pnpla7</a> | <a href="#">Pnpla7.dSep08</a> | <a href="#">246246</a> | 4382  | 1262 | 4  | 225 | putative protein of ancient origin (Pnpla7) alternative variant dSep08, mRNA.                                                 |
| <a href="#">Pnpla7</a> | <a href="#">Pnpla7.fSep08</a> | <a href="#">246246</a> | 1425  | 388  | 2  | 70  | neuropathy target esterase-related esterase splice like (7.7 kD) (Pnpla7) alternative variant fSep08, mRNA.                   |
| <a href="#">Pnpla8</a> | <a href="#">Pnpla8.aSep08</a> | <a href="#">314075</a> | 34741 | 4414 | 8  | 776 | membrane-associated calcium-independent phospholipase A2 gamma (88.0 kD) (Pnpla8) alternative variant aSep08, mRNA.           |
| <a href="#">Pnpla8</a> | <a href="#">Pnpla8.bSep08</a> | <a href="#">314075</a> | 59690 | 1786 | 5  | 595 | putative protein of eukaryotic origin (Pnpla8) alternative variant bSep08, mRNA.                                              |
| <a href="#">Pnpla8</a> | <a href="#">Pnpla8.dSep08</a> | <a href="#">314075</a> | 3284  | 409  | 2  | 19  | putative protein (2.3 kD) (Pnpla8) alternative variant dSep08, mRNA.                                                          |
| <a href="#">Pnpt1</a>  | <a href="#">Pnpt1.aSep08</a>  | <a href="#">360992</a> | 23454 | 1801 | 20 | 532 | polyribonucleotide nucleotidyltransferase 1 (Pnpt1) alternative variant aSep08, mRNA.                                         |
| <a href="#">Pnpt1</a>  | <a href="#">Pnpt1.bSep08</a>  | <a href="#">360992</a> | 1372  | 330  | 3  | 63  | polyribonucleotide nucleotidyltransferase 1 (Pnpt1) alternative variant bSep08, mRNA.                                         |
| <a href="#">Pnpt1</a>  | <a href="#">Pnpt1.cSep08</a>  | <a href="#">360992</a> | 629   | 543  | 2  | 34  | polyribonucleotide nucleotidyltransferase 1 (4.0 kD) (Pnpt1) alternative variant cSep08, mRNA.                                |
| <a href="#">Pnpt1</a>  | <a href="#">Pnpt1.dSep08</a>  | <a href="#">360992</a> | 3898  | 917  | 2  | 40  | polyribonucleotide nucleotidyltransferase 1 (4.3 kD) (Pnpt1) alternative variant dSep08, mRNA.                                |
| <a href="#">Pnrc1</a>  | <a href="#">Pnrc1.bSep08</a>  | <a href="#">286988</a> | 45654 | 829  | 2  | 142 | proline-rich nuclear receptor coactivator 1 (16.0 kD) (Pnrc1) alternative variant bSep08, mRNA.                               |
| <a href="#">poby</a>   | <a href="#">poby.aSep08</a>   |                        | 4048  | 384  |    | 23  | putative protein (2.4 kD) (poby) mRNA.                                                                                        |
| <a href="#">pochy</a>  | <a href="#">pochy.aSep08</a>  |                        | 13305 | 926  |    | 138 | putative protein (pochy) alternative variant aSep08, mRNA.                                                                    |
| <a href="#">podar</a>  | <a href="#">podar.aSep08</a>  |                        | 9351  | 393  |    | 61  | putative protein (podar) mRNA.                                                                                                |
| <a href="#">Podnl1</a> | <a href="#">Podnl1.bSep08</a> | <a href="#">288907</a> | 2170  | 1396 | 3  | 218 | podocan-like 1 (Podnl1) alternative variant bSep08, mRNA.                                                                     |
| <a href="#">Podnl1</a> | <a href="#">Podnl1.cSep08</a> | <a href="#">288907</a> | 730   | 658  | 2  | 132 | podocan-like 1 (Podnl1) alternative variant cSep08, mRNA.                                                                     |
| <a href="#">Podxl2</a> | <a href="#">Podxl2.cSep08</a> | <a href="#">297433</a> | 2930  | 401  | 2  | 69  | podocalyxin-like 2 (Podxl2) alternative variant cSep08, mRNA.                                                                 |
| <a href="#">Pof1b</a>  | <a href="#">Pof1b.bSep08</a>  | <a href="#">302328</a> | 34368 | 605  | 1  | 201 | premature ovarian failure 1B (Pof1b) alternative variant bSep08, mRNA.                                                        |
| <a href="#">pofer</a>  | <a href="#">pofer.aSep08</a>  |                        | 7994  | 1732 |    | 78  | putative cytoplasmic protein of eukaryotic origin (9.2 kD) (pofer) mRNA.                                                      |
| <a href="#">poflo</a>  | <a href="#">poflo.aSep08</a>  |                        | 88052 | 418  | 1  | 88  | putative protein (poflo) alternative variant aSep08, mRNA.                                                                    |
| <a href="#">poflo</a>  | <a href="#">poflo.bSep08</a>  |                        | 62176 | 537  | 1  | 71  | golgi-specific brefeldin A-resistance guanine nucleotide exchange factor 1 (7.9 kD) (poflo) alternative variant bSep08, mRNA. |
| <a href="#">poflu</a>  | <a href="#">poflu.aSep08</a>  |                        | 3099  | 400  |    | 133 | leucine-rich repeat kinase 1 CRA b (poflu) mRNA.                                                                              |
| <a href="#">Pofut2</a> | <a href="#">Pofut2.bSep08</a> | <a href="#">309686</a> | 1033  | 901  | 2  | 94  | protein O-fucosyltransferase 2 (Pofut2) alternative variant bSep08, mRNA.                                                     |
| <a href="#">pogar</a>  | <a href="#">pogar.aSep08</a>  |                        | 2891  | 744  |    | 100 | putative protein (pogar) mRNA.                                                                                                |
| <a href="#">poja</a>   | <a href="#">poja.aSep08</a>   |                        | 1766  | 971  | 2  | 82  | putative protein (9.8 kD) (poja) alternative variant aSep08, mRNA.                                                            |
| <a href="#">poja</a>   | <a href="#">poja.bSep08</a>   |                        | 1784  | 802  | 3  | 45  | putative protein (5.3 kD) (poja) alternative variant bSep08, mRNA.                                                            |

|                         |                                |                        |        |      |   |     |                                                                                                                 |
|-------------------------|--------------------------------|------------------------|--------|------|---|-----|-----------------------------------------------------------------------------------------------------------------|
| <a href="#">pojey</a>   | <a href="#">pojey.aSep08</a>   |                        | 2646   | 497  |   | 60  | putative protein (pojey) mRNA.                                                                                  |
| <a href="#">pokee</a>   | <a href="#">pokee.bSep08</a>   |                        | 15951  | 434  |   | 94  | putative nuclear protein (9.7 kD) (pokee) alternative variant bSep08, mRNA.                                     |
| <a href="#">pokler</a>  | <a href="#">pokler.aSep08</a>  |                        | 2318   | 356  |   | 26  | putative protein (pokler) mRNA.                                                                                 |
| <a href="#">Pola1</a>   | <a href="#">Pola1.aSep08</a>   | <a href="#">85241</a>  | 189946 | 2297 |   | 468 | polymerase (DNA directed), alpha 1 (Pola1) mRNA.                                                                |
| <a href="#">Pola2</a>   | <a href="#">Pola2.bSep08</a>   | <a href="#">85242</a>  | 10608  | 714  | 5 | 219 | polymerase (DNA directed), alpha 2 (Pola2) alternative variant bSep08, mRNA.                                    |
| <a href="#">Pola2</a>   | <a href="#">Pola2.cSep08</a>   | <a href="#">85242</a>  | 9029   | 760  | 7 | 148 | polymerase (DNA directed), alpha 2 (Pola2) alternative variant cSep08, mRNA.                                    |
| <a href="#">Pola2</a>   | <a href="#">Pola2.dSep08</a>   | <a href="#">85242</a>  | 1432   | 719  | 2 | 139 | polymerase (DNA directed), alpha 2 (Pola2) alternative variant dSep08, mRNA.                                    |
| <a href="#">Pola2</a>   | <a href="#">Pola2.fSep08</a>   | <a href="#">85242</a>  | 2174   | 1004 | 3 | 35  | polymerase (DNA directed), alpha 2 (3.9 kD) (Pola2) alternative variant fSep08, mRNA.                           |
| <a href="#">Polb</a>    | <a href="#">Polb.bSep08</a>    | <a href="#">29240</a>  | 5634   | 671  | 5 | 92  | polymerase (DNA directed), beta (Polb) alternative variant bSep08, mRNA.                                        |
| <a href="#">Polb</a>    | <a href="#">Polb.cSep08</a>    | <a href="#">29240</a>  | 3024   | 300  | 3 | 91  | polymerase (DNA directed), beta (10.1 kD) (Polb) alternative variant cSep08, mRNA.                              |
| <a href="#">Pold2</a>   | <a href="#">Pold2.bSep08</a>   | <a href="#">289758</a> | 4792   | 799  | 5 | 265 | polymerase (DNA directed), delta 2, regulatory subunit (Pold2) alternative variant bSep08, mRNA.                |
| <a href="#">Pold2</a>   | <a href="#">Pold2.dSep08</a>   | <a href="#">289758</a> | 560    | 316  | 2 | 94  | polymerase (DNA directed), delta 2, regulatory subunit (Pold2) alternative variant dSep08, mRNA.                |
| <a href="#">Pold2</a>   | <a href="#">Pold2.eSep08</a>   | <a href="#">289758</a> | 823    | 494  | 2 | 68  | polymerase (DNA directed), delta 2, regulatory subunit (Pold2) alternative variant eSep08, mRNA.                |
| <a href="#">Pold4</a>   | <a href="#">Pold4.bSep08</a>   | <a href="#">361698</a> | 1555   | 543  | 4 | 110 | polymerase (DNA-directed), delta 4 (Pold4) alternative variant bSep08, mRNA.                                    |
| <a href="#">Pold4</a>   | <a href="#">Pold4.dSep08</a>   | <a href="#">361698</a> | 1320   | 767  | 3 | 32  | polymerase (DNA-directed), delta 4 (3.8 kD) (Pold4) alternative variant dSep08, mRNA.                           |
| <a href="#">Pold4</a>   | <a href="#">Pold4.eSep08</a>   | <a href="#">361698</a> | 1331   | 594  | 3 | 32  | polymerase (DNA-directed), delta 4 (3.7 kD) (Pold4) alternative variant eSep08, mRNA.                           |
| <a href="#">Poldip2</a> | <a href="#">Poldip2.bSep08</a> | <a href="#">287544</a> | 6505   | 858  | 8 | 286 | polymerase (DNA-directed), delta interacting protein 2 (Poldip2) alternative variant bSep08, mRNA.              |
| <a href="#">Poldip2</a> | <a href="#">Poldip2.cSep08</a> | <a href="#">287544</a> | 3353   | 897  | 3 | 229 | polymerase (DNA-directed), delta interacting protein 2 (26.2 kD) (Poldip2) alternative variant cSep08, mRNA.    |
| <a href="#">Poldip2</a> | <a href="#">Poldip2.dSep08</a> | <a href="#">287544</a> | 1518   | 922  | 2 | 109 | polymerase (DNA-directed), delta interacting protein 2 (Poldip2) alternative variant dSep08, mRNA.              |
| <a href="#">Pole</a>    | <a href="#">Pole.bSep08</a>    | <a href="#">304573</a> | 7713   | 1010 | 4 | 336 | polymerase (DNA directed), epsilon (Pole) alternative variant bSep08, mRNA.                                     |
| <a href="#">Pole</a>    | <a href="#">Pole.cSep08</a>    | <a href="#">304573</a> | 5952   | 849  | 2 | 278 | polymerase (DNA directed), epsilon (Pole) alternative variant cSep08, mRNA.                                     |
| <a href="#">Pole2</a>   | <a href="#">Pole2.aSep08</a>   | <a href="#">299112</a> | 17587  | 1011 | 6 | 336 | polymerase (DNA directed), epsilon 2 (p59 subunit) (Pole2) alternative variant aSep08, mRNA.                    |
| <a href="#">Pole2</a>   | <a href="#">Pole2.bSep08</a>   | <a href="#">299112</a> | 12768  | 677  | 2 | 180 | polymerase (DNA directed), epsilon 2 (p59 subunit) (Pole2) alternative variant bSep08, mRNA.                    |
| <a href="#">Pole4</a>   | <a href="#">Pole4.bSep08</a>   | <a href="#">362385</a> | 5189   | 1980 | 2 | 107 | polymerase (DNA-directed), epsilon 4 (p12 subunit) (10.9 kD) (Pole4) alternative variant bSep08, complete mRNA. |
| <a href="#">Pole4</a>   | <a href="#">Pole4.dSep08</a>   | <a href="#">362385</a> | 4210   | 559  | 3 | 88  | polymerase (DNA-directed), epsilon 4 (p12 subunit) (9.8 kD) (Pole4) alternative variant dSep08, mRNA.           |

|                        |                               |                        |       |      |   |     |                                                                                                       |
|------------------------|-------------------------------|------------------------|-------|------|---|-----|-------------------------------------------------------------------------------------------------------|
| <a href="#">Polg</a>   | <a href="#">Polg.bSep08</a>   | <a href="#">85472</a>  | 9090  | 2176 | 1 | 522 | polymerase (DNA directed), gamma (Polg) alternative variant bSep08, mRNA.                             |
| <a href="#">Polg2</a>  | <a href="#">Polg2.bSep08</a>  | <a href="#">303612</a> | 6088  | 849  | 5 | 174 | polymerase (DNA directed), gamma 2, accessory subunit (Polg2) alternative variant bSep08, mRNA.       |
| <a href="#">Poli</a>   | <a href="#">Poli.bSep08</a>   | <a href="#">291526</a> | 8556  | 767  | 2 | 255 | polymerase (DNA directed), iota (Poli) alternative variant bSep08, mRNA.                              |
| <a href="#">Poll</a>   | <a href="#">Poll.bSep08</a>   | <a href="#">361767</a> | 3995  | 1321 | 4 | 261 | polymerase (DNA directed), lambda (Poll) alternative variant bSep08, mRNA.                            |
| <a href="#">Poll</a>   | <a href="#">Poll.cSep08</a>   | <a href="#">361767</a> | 920   | 632  | 2 | 172 | polymerase (DNA directed), lambda (Poll) alternative variant cSep08, mRNA.                            |
| <a href="#">Poll</a>   | <a href="#">Poll.dSep08</a>   | <a href="#">361767</a> | 2946  | 625  | 3 | 164 | polymerase (DNA directed), lambda (Poll) alternative variant dSep08, mRNA.                            |
| <a href="#">Poll</a>   | <a href="#">Poll.fSep08</a>   | <a href="#">361767</a> | 2050  | 549  | 2 | 113 | polymerase (DNA directed), lambda (Poll) alternative variant fSep08, mRNA.                            |
| <a href="#">Poll</a>   | <a href="#">Poll.gSep08</a>   | <a href="#">361767</a> | 1959  | 298  | 2 | 83  | polymerase (DNA directed), lambda (Poll) alternative variant gSep08, mRNA.                            |
| <a href="#">Poln</a>   | <a href="#">Poln.aSep08</a>   | <a href="#">498396</a> | 2431  | 441  |   | 62  | polymerase (DNA directed) nu (Poln) mRNA.                                                             |
| <a href="#">poloy</a>  | <a href="#">poloy.aSep08</a>  |                        | 9611  | 2987 |   | 282 | DiGeorge syndrome critical region gene 2 like (poloy) mRNA.                                           |
| <a href="#">Polr1e</a> | <a href="#">Polr1e.bSep08</a> | <a href="#">313245</a> | 8919  | 711  | 3 | 204 | polymerase (RNA) I polypeptide E (22.6 kD) (Polr1e) alternative variant bSep08, mRNA.                 |
| <a href="#">Polr1e</a> | <a href="#">Polr1e.cSep08</a> | <a href="#">313245</a> | 10241 | 1569 | 4 | 171 | polymerase (RNA) I polypeptide E (Polr1e) alternative variant cSep08, mRNA.                           |
| <a href="#">Polr1e</a> | <a href="#">Polr1e.dSep08</a> | <a href="#">313245</a> | 9326  | 769  | 5 | 162 | polymerase (RNA) I polypeptide E (18.2 kD) (Polr1e) alternative variant dSep08, mRNA.                 |
| <a href="#">Polr2a</a> | <a href="#">Polr2a.aSep08</a> | <a href="#">363633</a> | 2842  | 2040 |   | 542 | polymerase (RNA) II (DNA directed) polypeptide A (Polr2a) alternative variant aSep08, mRNA.           |
| <a href="#">Polr2a</a> | <a href="#">Polr2a.bSep08</a> | <a href="#">363633</a> | 6692  | 1670 |   | 429 | polymerase (RNA) II (DNA directed) polypeptide A (Polr2a) alternative variant bSep08, mRNA.           |
| <a href="#">Polr2a</a> | <a href="#">Polr2a.cSep08</a> | <a href="#">363633</a> | 3046  | 501  |   | 166 | polymerase (RNA) II (DNA directed) polypeptide A (Polr2a) alternative variant cSep08, mRNA.           |
| <a href="#">Polr2c</a> | <a href="#">Polr2c.bSep08</a> | <a href="#">361365</a> | 1572  | 1003 | 2 | 87  | polymerase (RNA) II (DNA directed) polypeptide C (Polr2c) alternative variant bSep08, mRNA.           |
| <a href="#">Polr2d</a> | <a href="#">Polr2d.bSep08</a> | <a href="#">364834</a> | 2277  | 749  | 1 | 29  | polymerase (RNA) II (DNA directed) polypeptide D (3.3 kD) (Polr2d) alternative variant bSep08, mRNA.  |
| <a href="#">Polr2e</a> | <a href="#">Polr2e.bSep08</a> | <a href="#">690966</a> | 3331  | 828  | 6 | 202 | polymerase (RNA) II (DNA directed) polypeptide E (23.1 kD) (Polr2e) alternative variant bSep08, mRNA. |
| <a href="#">Polr2e</a> | <a href="#">Polr2e.cSep08</a> | <a href="#">690966</a> | 2785  | 700  | 6 | 166 | polymerase (RNA) II (DNA directed) polypeptide E (Polr2e) alternative variant cSep08, mRNA.           |
| <a href="#">Polr2e</a> | <a href="#">Polr2e.dSep08</a> | <a href="#">690966</a> | 1736  | 655  | 6 | 132 | polymerase (RNA) II (DNA directed) polypeptide E (Polr2e) alternative variant dSep08, mRNA.           |
| <a href="#">Polr2e</a> | <a href="#">Polr2e.eSep08</a> | <a href="#">690966</a> | 879   | 538  | 2 | 96  | polymerase (RNA) II (DNA directed) polypeptide E (Polr2e) alternative variant eSep08, mRNA.           |
| <a href="#">Polr2e</a> | <a href="#">Polr2e.fSep08</a> | <a href="#">690966</a> | 1554  | 550  | 4 | 60  | polymerase (RNA) II (DNA directed) polypeptide E (Polr2e) alternative variant fSep08, mRNA.           |
| <a href="#">Polr2g</a> | <a href="#">Polr2g.aSep08</a> | <a href="#">117017</a> | 6546  | 1187 | 8 | 174 | polymerase (RNA) II (DNA directed) polypeptide G (19.5 kD) (Polr2g) alternative variant aSep08, mRNA. |



|                         |                                |                        |       |      |    |     |                                                                                                                                                                                                |
|-------------------------|--------------------------------|------------------------|-------|------|----|-----|------------------------------------------------------------------------------------------------------------------------------------------------------------------------------------------------|
| <a href="#">Polr2g</a>  | <a href="#">Polr2g.cSep08</a>  | <a href="#">117017</a> | 2622  | 616  | 7  | 153 | polymerase (RNA) II (DNA directed) polypeptide G (17.1 kD) (Polr2g) alternative variant cSep08, mRNA.                                                                                          |
| <a href="#">Polr2g</a>  | <a href="#">Polr2g.dSep08</a>  | <a href="#">117017</a> | 2135  | 416  | 4  | 138 | polymerase (RNA) II (DNA directed) polypeptide G (Polr2g) alternative variant dSep08, mRNA.                                                                                                    |
| <a href="#">Polr2h</a>  | <a href="#">Polr2h.bSep08</a>  | <a href="#">498109</a> | 2702  | 451  | 4  | 112 | polymerase (RNA) II (DNA directed) polypeptide H (12.9 kD) (Polr2h) alternative variant bSep08, mRNA.                                                                                          |
| <a href="#">Polr2i</a>  | <a href="#">Polr2i.bSep08</a>  | <a href="#">292778</a> | 1055  | 493  | 5  | 103 | polymerase (RNA) II (DNA directed) polypeptide I (12.0 kD) (Polr2i) alternative variant bSep08, mRNA.                                                                                          |
| <a href="#">Polr2i</a>  | <a href="#">Polr2i.dSep08</a>  | <a href="#">292778</a> | 920   | 444  | 4  | 67  | polymerase (RNA) II (DNA directed) polypeptide I (Polr2i) alternative variant dSep08, mRNA.                                                                                                    |
| <a href="#">Polr3a</a>  | <a href="#">Polr3a.aSep08</a>  | <a href="#">361102</a> | 14897 | 1498 |    | 499 | polymerase (RNA) III (DNA directed) polypeptide A (Polr3a) mRNA.                                                                                                                               |
| <a href="#">Polr3b</a>  | <a href="#">Polr3b.aSep08</a>  | <a href="#">362858</a> | 54465 | 2412 | 12 | 560 | polymerase (RNA) III (DNA directed) polypeptide B (Polr3b) mRNA.                                                                                                                               |
| <a href="#">Polr3c</a>  | <a href="#">Polr3c.bSep08</a>  | <a href="#">310685</a> | 3925  | 531  | 3  | 103 | polymerase (RNA) III (DNA directed) polypeptide C (Polr3c) alternative variant bSep08, mRNA.                                                                                                   |
| <a href="#">Polr3c</a>  | <a href="#">Polr3c.cSep08</a>  | <a href="#">310685</a> | 1160  | 343  | 2  | 84  | polymerase (RNA) III (DNA directed) polypeptide C (Polr3c) alternative variant cSep08, mRNA.                                                                                                   |
| <a href="#">Polr3d</a>  | <a href="#">Polr3d.bSep08</a>  | <a href="#">306012</a> | 2535  | 631  | 1  | 209 | polymerase (RNA) III (DNA directed) polypeptide D (Polr3d) alternative variant bSep08, mRNA.                                                                                                   |
| <a href="#">Polr3e</a>  | <a href="#">Polr3e.bSep08</a>  | <a href="#">361640</a> | 760   | 258  | 3  | 85  | polymerase (RNA) III (DNA directed) polypeptide E (Polr3e) alternative variant bSep08, mRNA.                                                                                                   |
| <a href="#">Polr3gl</a> | <a href="#">Polr3gl.bSep08</a> | <a href="#">690254</a> | 1076  | 326  | 2  | 100 | putative protein (Polr3gl) alternative variant bSep08, mRNA.                                                                                                                                   |
| <a href="#">Polr3gl</a> | <a href="#">Polr3gl.cSep08</a> | <a href="#">690254</a> | 1370  | 733  | 3  | 71  | putative protein (8.0 kD) (Polr3gl) alternative variant cSep08, mRNA.                                                                                                                          |
| <a href="#">Polr3gl</a> | <a href="#">Polr3gl.dSep08</a> | <a href="#">690254</a> | 649   | 543  | 2  | 58  | putative protein, with a coiled coil domain (Polr3gl) alternative variant dSep08, mRNA.                                                                                                        |
| <a href="#">Polr3gl</a> | <a href="#">Polr3gl.eSep08</a> | <a href="#">690254</a> | 1230  | 550  | 2  | 25  | putative protein (Polr3gl) alternative variant eSep08, mRNA.                                                                                                                                   |
| <a href="#">Polr3h</a>  | <a href="#">Polr3h.aSep08</a>  | <a href="#">300088</a> | 10478 | 1797 | 7  | 476 | polymerase (RNA) III (DNA directed) polypeptide H (Polr3h) alternative variant aSep08, complete mRNA.                                                                                          |
| <a href="#">Polr3h</a>  | <a href="#">Polr3h.cSep08</a>  | <a href="#">300088</a> | 21236 | 632  | 7  | 128 | polymerase (RNA) III (DNA directed) polypeptide H (Polr3h) alternative variant cSep08, mRNA.                                                                                                   |
| <a href="#">Polrmt</a>  | <a href="#">Polrmt.bSep08</a>  | <a href="#">299604</a> | 2623  | 1706 | 9  | 538 | polymerase mitochondrial CRA a (Polrmt) alternative variant bSep08, mRNA.                                                                                                                      |
| <a href="#">Polrmt</a>  | <a href="#">Polrmt.cSep08</a>  | <a href="#">299604</a> | 3442  | 2523 | 7  | 262 | polymerase mitochondrial CRA b (29.3 kD) (Polrmt) alternative variant cSep08, mRNA.                                                                                                            |
| <a href="#">Polrmt</a>  | <a href="#">Polrmt.dSep08</a>  | <a href="#">299604</a> | 530   | 431  | 2  | 84  | polymerase mitochondrial CRA b (Polrmt) alternative variant dSep08, mRNA.                                                                                                                      |
| <a href="#">Pomc</a>    | <a href="#">Pomc.bSep08</a>    | <a href="#">24664</a>  | 5529  | 702  | 2  | 173 | proopiomelanocortin (adrenocorticotropin/ beta-lipotropin/ alpha-melanocyte stimulating hormone/ beta-melanocyte stimulating hormone/ beta-endorphin) (Pomc) alternative variant bSep08, mRNA. |

|                         |                                |                        |       |      |    |     |                                                                                                                                                                                                |
|-------------------------|--------------------------------|------------------------|-------|------|----|-----|------------------------------------------------------------------------------------------------------------------------------------------------------------------------------------------------|
| <a href="#">Pomc</a>    | <a href="#">Pomc.cSep08</a>    | <a href="#">24664</a>  | 5246  | 387  | 1  | 84  | proopiomelanocortin (adrenocorticotropin/ beta-lipotropin/ alpha-melanocyte stimulating hormone/ beta-melanocyte stimulating hormone/ beta-endorphin) (Pomc) alternative variant cSep08, mRNA. |
| <a href="#">pomee</a>   | <a href="#">pomee.aSep08</a>   |                        | 9213  | 745  |    | 52  | putative protein (6.1 kD) (pomee) mRNA.                                                                                                                                                        |
| <a href="#">pomer</a>   | <a href="#">pomer.aSep08</a>   |                        | 11456 | 647  |    | 175 | CRA b like (pomer) alternative variant aSep08, mRNA.                                                                                                                                           |
| <a href="#">pomer</a>   | <a href="#">pomer.bSep08</a>   |                        | 9030  | 456  |    | 132 | CRA b like (pomer) alternative variant bSep08, mRNA.                                                                                                                                           |
| <a href="#">Pomgnt1</a> | <a href="#">Pomgnt1.bSep08</a> | <a href="#">362567</a> | 3342  | 618  | 4  | 189 | protein O-linked mannose beta1,2-N-acetylglucosaminyltransferase (Pomgnt1) alternative variant bSep08, mRNA.                                                                                   |
| <a href="#">Pomgnt1</a> | <a href="#">Pomgnt1.cSep08</a> | <a href="#">362567</a> | 1401  | 773  | 2  | 120 | protein O-linked mannose beta1,2-N-acetylglucosaminyltransferase (Pomgnt1) alternative variant cSep08, mRNA.                                                                                   |
| <a href="#">Pomgnt1</a> | <a href="#">Pomgnt1.dSep08</a> | <a href="#">362567</a> | 2066  | 1351 | 3  | 92  | protein O-linked mannose beta1,2-N-acetylglucosaminyltransferase (10.5 kD) (Pomgnt1) alternative variant dSep08, mRNA.                                                                         |
| <a href="#">Pomp</a>    | <a href="#">Pomp.bSep08</a>    | <a href="#">288455</a> | 11041 | 429  | 1  | 120 | proteasome maturation protein (Pomp) alternative variant bSep08, mRNA.                                                                                                                         |
| <a href="#">Pomt1</a>   | <a href="#">Pomt1.aSep08</a>   | <a href="#">84430</a>  | 15667 | 1956 | 18 | 651 | protein-O-mannosyltransferase 1 (Pomt1) alternative variant aSep08, mRNA.                                                                                                                      |
| <a href="#">Pomt1</a>   | <a href="#">Pomt1.bSep08</a>   | <a href="#">84430</a>  | 6520  | 604  | 7  | 200 | protein-O-mannosyltransferase 1 (Pomt1) alternative variant bSep08, mRNA.                                                                                                                      |
| <a href="#">Pomt1</a>   | <a href="#">Pomt1.cSep08</a>   | <a href="#">84430</a>  | 2676  | 303  | 4  | 100 | protein-O-mannosyltransferase 1 (Pomt1) alternative variant cSep08, mRNA.                                                                                                                      |
| <a href="#">Pomt2</a>   | <a href="#">Pomt2.aSep08</a>   | <a href="#">366697</a> | 76922 | 1663 | 11 | 554 | protein-O-mannosyltransferase 2 (Pomt2) alternative variant aSep08, mRNA.                                                                                                                      |
| <a href="#">Pomt2</a>   | <a href="#">Pomt2.bSep08</a>   | <a href="#">366697</a> | 22957 | 1518 | 3  | 142 | protein-O-mannosyltransferase 2 (Pomt2) alternative variant bSep08, mRNA.                                                                                                                      |
| <a href="#">Pomt2</a>   | <a href="#">Pomt2.cSep08</a>   | <a href="#">366697</a> | 40516 | 362  | 3  | 120 | protein-O-mannosyltransferase 2 (Pomt2) alternative variant cSep08, mRNA.                                                                                                                      |
| <a href="#">Pon2</a>    | <a href="#">Pon2.bSep08</a>    | <a href="#">296851</a> | 4269  | 771  | 4  | 196 | paraoxonase 2 (22.0 kD) (Pon2) alternative variant bSep08, mRNA.                                                                                                                               |
| <a href="#">Pon2</a>    | <a href="#">Pon2.cSep08</a>    | <a href="#">296851</a> | 30920 | 939  | 7  | 158 | paraoxonase 2 (18.3 kD) (Pon2) alternative variant cSep08, complete mRNA.                                                                                                                      |
| <a href="#">Pon3</a>    | <a href="#">Pon3.bSep08</a>    | <a href="#">312086</a> | 4749  | 989  | 2  | 67  | paraoxonase 3 (7.5 kD) (Pon3) alternative variant bSep08, mRNA.                                                                                                                                |
| <a href="#">ponoy</a>   | <a href="#">ponoy.aSep08</a>   |                        | 1713  | 378  |    | 126 | putative protein (ponoy) mRNA.                                                                                                                                                                 |
| <a href="#">Pop4</a>    | <a href="#">Pop4.bSep08</a>    | <a href="#">292831</a> | 4867  | 1076 | 5  | 219 | processing of precursor 4, ribonuclease P/MRP family, (S. cerevisiae) (25.2 kD) (Pop4) alternative variant bSep08, mRNA.                                                                       |
| <a href="#">Pop4</a>    | <a href="#">Pop4.cSep08</a>    | <a href="#">292831</a> | 5713  | 1048 | 5  | 159 | processing of precursor 4, ribonuclease P/MRP family, (S. cerevisiae) (18.7 kD) (Pop4) alternative variant cSep08, mRNA.                                                                       |
| <a href="#">Pop4</a>    | <a href="#">Pop4.dSep08</a>    | <a href="#">292831</a> | 2257  | 1239 | 2  | 169 | processing of precursor 4, ribonuclease P/MRP family, (S. cerevisiae) (18.8 kD) (Pop4) alternative variant dSep08, mRNA.                                                                       |

|                         |                                |                        |       |      |    |     |                                                                                                               |
|-------------------------|--------------------------------|------------------------|-------|------|----|-----|---------------------------------------------------------------------------------------------------------------|
| <a href="#">Pop5</a>    | <a href="#">Pop5.aSep08</a>    | <a href="#">117241</a> | 3420  | 2095 | 2  | 174 | processing of precursor 5, ribonuclease P/MRP family (S. cerevisiae) (Pop5) alternative variant aSep08, mRNA. |
| <a href="#">popor</a>   | <a href="#">popor.aSep08</a>   |                        | 558   | 465  |    | 155 | probable E3 ubiquitin-protein ligase herc1 (popor) mRNA.                                                      |
| <a href="#">Por</a>     | <a href="#">Por.bSep08</a>     | <a href="#">29441</a>  | 70870 | 642  | 6  | 169 | p450 (cytochrome) oxidoreductase (Por) alternative variant bSep08, mRNA.                                      |
| <a href="#">Por</a>     | <a href="#">Por.cSep08</a>     | <a href="#">29441</a>  | 5283  | 381  | 3  | 54  | p450 (cytochrome) oxidoreductase (Por) alternative variant cSep08, mRNA.                                      |
| <a href="#">porby</a>   | <a href="#">porby.aSep08</a>   |                        | 7030  | 630  |    | 209 | taf1 RNA polymerase ii TATA box binding protein - associated factor like (porby) mRNA.                        |
| <a href="#">porchy</a>  | <a href="#">porchy.aSep08</a>  |                        | 4825  | 414  | 4  | 138 | cd44 (porchy) alternative variant aSep08, mRNA.                                                               |
| <a href="#">Porcn</a>   | <a href="#">Porcn.aSep08</a>   | <a href="#">317368</a> | 12771 | 1410 | 11 | 360 | porcupine homolog (Drosophila) (Porcn) alternative variant aSep08, mRNA.                                      |
| <a href="#">Porcn</a>   | <a href="#">Porcn.bSep08</a>   | <a href="#">317368</a> | 5474  | 811  | 8  | 269 | porcupine homolog (Drosophila) (Porcn) alternative variant bSep08, mRNA.                                      |
| <a href="#">Porcn</a>   | <a href="#">Porcn.cSep08</a>   | <a href="#">317368</a> | 2707  | 536  | 4  | 168 | porcupine homolog (Drosophila) (Porcn) alternative variant cSep08, mRNA.                                      |
| <a href="#">Porcn</a>   | <a href="#">Porcn.eSep08</a>   | <a href="#">317368</a> | 747   | 652  | 2  | 95  | porcupine homolog (Drosophila) (Porcn) alternative variant eSep08, mRNA.                                      |
| <a href="#">Porcn</a>   | <a href="#">Porcn.fSep08</a>   | <a href="#">317368</a> | 2286  | 326  | 3  | 85  | porcupine homolog (Drosophila) (Porcn) alternative variant fSep08, mRNA.                                      |
| <a href="#">pordar</a>  | <a href="#">pordar.aSep08</a>  |                        | 7414  | 481  |    | 50  | putative protein (5.6 kD) (pordar) mRNA.                                                                      |
| <a href="#">porfer</a>  | <a href="#">porfer.aSep08</a>  |                        | 3225  | 903  |    | 55  | putative protein (6.1 kD) (porfer) mRNA.                                                                      |
| <a href="#">porflo</a>  | <a href="#">porflo.aSep08</a>  |                        | 2694  | 736  |    | 38  | putative protein (4.2 kD) (porflo) mRNA.                                                                      |
| <a href="#">porflu</a>  | <a href="#">porflu.aSep08</a>  |                        | 23702 | 493  | 4  | 70  | putative protein (8.0 kD) (porflu) alternative variant aSep08, mRNA.                                          |
| <a href="#">porflu</a>  | <a href="#">porflu.bSep08</a>  |                        | 67215 | 1793 | 6  | 53  | putative protein (porflu) alternative variant bSep08, mRNA.                                                   |
| <a href="#">porflu</a>  | <a href="#">porflu.dSep08</a>  |                        | 1459  | 371  | 3  | 59  | CRA a like (porflu) alternative variant dSep08, mRNA.                                                         |
| <a href="#">porgar</a>  | <a href="#">porgar.aSep08</a>  |                        | 2033  | 908  |    | 302 | family with sequence similarity 170 member B like (porgar) mRNA.                                              |
| <a href="#">porja</a>   | <a href="#">porja.aSep08</a>   |                        | 596   | 414  |    | 35  | putative protein (porja) mRNA.                                                                                |
| <a href="#">porjey</a>  | <a href="#">porjey.aSep08</a>  |                        | 1024  | 566  |    | 64  | cc2-5 like (7.2 kD) (porjey) mRNA.                                                                            |
| <a href="#">porkee</a>  | <a href="#">porkee.aSep08</a>  |                        | 9433  | 396  |    | 69  | pappalysin 2 (porkee) mRNA.                                                                                   |
| <a href="#">porkler</a> | <a href="#">porkler.aSep08</a> |                        | 20132 | 573  | 1  | 141 | protection of telomeres 1 (porkler) alternative variant aSep08, mRNA.                                         |
| <a href="#">porkler</a> | <a href="#">porkler.bSep08</a> |                        | 20251 | 678  | 1  | 91  | protection of telomeres 1 (10.4 kD) (porkler) alternative variant bSep08, mRNA.                               |
| <a href="#">porlo</a>   | <a href="#">porlo.aSep08</a>   |                        | 5769  | 351  |    | 43  | putative protein (porlo) mRNA.                                                                                |
| <a href="#">porloy</a>  | <a href="#">porloy.aSep08</a>  |                        | 4008  | 403  | 2  | 56  | apolipoprotein D CRA a (porloy) alternative variant aSep08, mRNA.                                             |
| <a href="#">porloy</a>  | <a href="#">porloy.bSep08</a>  |                        | 4037  | 333  | 1  | 81  | putative protein (9.6 kD) (porloy) alternative variant bSep08, mRNA.                                          |
| <a href="#">porloy</a>  | <a href="#">porloy.cSep08</a>  |                        | 4037  | 179  | 1  | 59  | putative protein (porloy) alternative variant cSep08, mRNA.                                                   |
| <a href="#">pormee</a>  | <a href="#">pormee.aSep08</a>  |                        | 16026 | 1099 |    | 366 | putative protein of metazoan origin (pormee) mRNA.                                                            |
| <a href="#">pormer</a>  | <a href="#">pormer.aSep08</a>  |                        | 36077 | 377  |    | 110 | putative protein (pormer) mRNA.                                                                               |
| <a href="#">pornoy</a>  | <a href="#">pornoy.aSep08</a>  |                        | 1735  | 380  |    | 44  | serine threonine kinase 36 (pornoy) mRNA.                                                                     |

|                         |                                |                        |        |      |    |     |                                                                                                 |
|-------------------------|--------------------------------|------------------------|--------|------|----|-----|-------------------------------------------------------------------------------------------------|
| <a href="#">porpor</a>  | <a href="#">porpor.aSep08</a>  |                        | 7312   | 453  |    | 150 | talin 2 (porpor) mRNA.                                                                          |
| <a href="#">porsa</a>   | <a href="#">porsa.aSep08</a>   |                        | 1381   | 1083 |    | 90  | binding protein 1 like (porsa) mRNA.                                                            |
| <a href="#">porshee</a> | <a href="#">porshee.aSep08</a> |                        | 9706   | 725  |    | 207 | mediator of rna polymerase ii transcription homolog (porshee) mRNA.                             |
| <a href="#">portu</a>   | <a href="#">portu.aSep08</a>   |                        | 946    | 477  | 2  | 79  | putative protein (9.0 kD) (portu) alternative variant aSep08, mRNA.                             |
| <a href="#">porvar</a>  | <a href="#">porvar.aSep08</a>  |                        | 15308  | 629  |    | 71  | putative protein (7.8 kD) (porvar) mRNA.                                                        |
| <a href="#">porwey</a>  | <a href="#">porwey.aSep08</a>  |                        | 1578   | 516  |    | 57  | putative protein (porwey) mRNA.                                                                 |
| <a href="#">posa</a>    | <a href="#">posa.aSep08</a>    |                        | 1745   | 525  |    | 88  | putative protein (9.9 kD) (posa) mRNA.                                                          |
| <a href="#">poshee</a>  | <a href="#">poshee.bSep08</a>  |                        | 104360 | 393  | 2  | 31  | putative protein (3.8 kD) (poshee) alternative variant bSep08, mRNA.                            |
| <a href="#">Postn</a>   | <a href="#">Postn.bSep08</a>   | <a href="#">361945</a> | 16177  | 1452 | 11 | 300 | periostin, osteoblast specific factor (Postn) alternative variant bSep08, mRNA.                 |
| <a href="#">Postn</a>   | <a href="#">Postn.cSep08</a>   | <a href="#">361945</a> | 13013  | 810  | 8  | 177 | periostin, osteoblast specific factor (Postn) alternative variant cSep08, mRNA.                 |
| <a href="#">Postn</a>   | <a href="#">Postn.dSep08</a>   | <a href="#">361945</a> | 13266  | 982  | 7  | 151 | periostin, osteoblast specific factor (Postn) alternative variant dSep08, mRNA.                 |
| <a href="#">Postn</a>   | <a href="#">Postn.eSep08</a>   | <a href="#">361945</a> | 7787   | 412  | 6  | 137 | periostin, osteoblast specific factor (Postn) alternative variant eSep08, mRNA.                 |
| <a href="#">Postn</a>   | <a href="#">Postn.fSep08</a>   | <a href="#">361945</a> | 4967   | 540  | 5  | 125 | periostin, osteoblast specific factor (Postn) alternative variant fSep08, mRNA.                 |
| <a href="#">Pot1b</a>   | <a href="#">Pot1b.aSep08</a>   | <a href="#">690237</a> | 22441  | 923  | 2  | 307 | protection of telomeres 1B (Pot1b) alternative variant aSep08, mRNA.                            |
| <a href="#">Pot1b</a>   | <a href="#">Pot1b.bSep08</a>   | <a href="#">690237</a> | 35776  | 689  | 1  | 227 | protection of telomeres 1B (Pot1b) alternative variant bSep08, mRNA.                            |
| <a href="#">potu</a>    | <a href="#">potu.aSep08</a>    |                        | 10760  | 781  |    | 46  | putative protein (potu) mRNA.                                                                   |
| <a href="#">Pou.0</a>   | <a href="#">Pou.0.aSep08</a>   |                        | 24431  | 780  |    | 260 | pou domain transcription factor Oct-1B (Pou.0) mRNA.                                            |
| <a href="#">Pou1f1</a>  | <a href="#">Pou1f1.aSep08</a>  | <a href="#">25517</a>  | 21153  | 2426 | 1  | 317 | POU class 1 homeobox 1 (35.8 kD) (Pou1f1) alternative variant aSep08, mRNA.                     |
| <a href="#">Pou2f1</a>  | <a href="#">Pou2f1.aSep08</a>  | <a href="#">171068</a> | 95289  | 643  | 6  | 213 | POU domain, class 2, transcription factor 1 (Pou2f1) alternative variant aSep08, mRNA.          |
| <a href="#">Pou2f1</a>  | <a href="#">Pou2f1.bSep08</a>  | <a href="#">171068</a> | 9763   | 459  | 2  | 44  | POU domain, class 2, transcription factor 1 (4.7 kD) (Pou2f1) alternative variant bSep08, mRNA. |
| <a href="#">Pou4f1</a>  | <a href="#">Pou4f1.aSep08</a>  | <a href="#">114503</a> | 1674   | 478  |    | 110 | POU domain, class 4, transcription factor 1 (Pou4f1) alternative variant aSep08, mRNA.          |
| <a href="#">povar</a>   | <a href="#">povar.aSep08</a>   |                        | 1665   | 306  |    | 101 | putative protein (povar) mRNA.                                                                  |
| <a href="#">powey</a>   | <a href="#">powey.aSep08</a>   |                        | 4353   | 377  |    | 88  | ribosome assembly protein CRA b (powey) mRNA.                                                   |
| <a href="#">poyby</a>   | <a href="#">poyby.aSep08</a>   |                        | 488    | 407  |    | 129 | putative protein (poyby) mRNA.                                                                  |
| <a href="#">poychy</a>  | <a href="#">poychy.aSep08</a>  |                        | 17818  | 736  |    | 245 | CRA a (poychy) mRNA.                                                                            |
| <a href="#">poydar</a>  | <a href="#">poydar.aSep08</a>  |                        | 843    | 422  |    | 33  | putative protein (poydar) mRNA.                                                                 |
| <a href="#">poyfer</a>  | <a href="#">poyfer.aSep08</a>  |                        | 22797  | 425  |    | 89  | putative protein (9.8 kD) (poyfer) mRNA.                                                        |
| <a href="#">poyflo</a>  | <a href="#">poyflo.aSep08</a>  |                        | 16529  | 270  |    | 52  | putative protein (poyflo) mRNA.                                                                 |
| <a href="#">poyflu</a>  | <a href="#">poyflu.aSep08</a>  |                        | 26473  | 501  | 2  | 101 | CRA a like (poyflu) alternative variant aSep08, mRNA.                                           |
| <a href="#">poyflu</a>  | <a href="#">poyflu.bSep08</a>  |                        | 5538   | 786  | 2  | 93  | putative protein (10.3 kD) (poyflu) alternative variant bSep08, mRNA.                           |

|                         |                                |                        |       |      |    |     |                                                                                           |
|-------------------------|--------------------------------|------------------------|-------|------|----|-----|-------------------------------------------------------------------------------------------|
| <a href="#">poygar</a>  | <a href="#">poygar.aSep08</a>  |                        | 32831 | 704  |    | 234 | putative protein, with a transmembrane domain, of vertebrate origin (poygar) mRNA.        |
| <a href="#">poyja</a>   | <a href="#">poyja.aSep08</a>   |                        | 3475  | 1507 |    | 62  | putative protein (6.9 kD) (poyja) mRNA.                                                   |
| <a href="#">poyjey</a>  | <a href="#">poyjey.aSep08</a>  |                        | 2319  | 530  |    | 44  | putative protein (poyjey) mRNA.                                                           |
| <a href="#">poykee</a>  | <a href="#">poykee.aSep08</a>  |                        | 30824 | 406  |    | 135 | pappalysin 2 (poykee) mRNA.                                                               |
| <a href="#">poykler</a> | <a href="#">poykler.aSep08</a> |                        | 1063  | 189  |    | 62  | putative protein (poykler) mRNA.                                                          |
| <a href="#">poylo</a>   | <a href="#">poylo.aSep08</a>   |                        | 971   | 349  |    | 68  | putative protein (poylo) mRNA.                                                            |
| <a href="#">poymee</a>  | <a href="#">poymee.aSep08</a>  |                        | 12527 | 651  |    | 216 | putative protein, with 2 coiled coil domains, of bilateral origin (poymee) mRNA.          |
| <a href="#">poymer</a>  | <a href="#">poymer.aSep08</a>  |                        | 10385 | 463  |    | 45  | putative protein (4.8 kD) (poymer) mRNA.                                                  |
| <a href="#">poynoy</a>  | <a href="#">poynoy.aSep08</a>  |                        | 4085  | 417  |    | 139 | putative protein of mammalian origin (poynoy) mRNA.                                       |
| <a href="#">poypor</a>  | <a href="#">poypor.aSep08</a>  |                        | 11353 | 372  |    | 104 | talin 2 (poypor) mRNA.                                                                    |
| <a href="#">poysa</a>   | <a href="#">poysa.aSep08</a>   |                        | 610   | 499  |    | 64  | putative protein (poysa) mRNA.                                                            |
| <a href="#">poyshee</a> | <a href="#">poyshee.aSep08</a> |                        | 1073  | 422  |    | 140 | mediator of rna polymerase ii transcription (poyshee) mRNA.                               |
| <a href="#">poytu</a>   | <a href="#">poytu.aSep08</a>   |                        | 34196 | 519  |    | 114 | putative protein (poytu) mRNA.                                                            |
| <a href="#">poyvar</a>  | <a href="#">poyvar.aSep08</a>  |                        | 2900  | 665  | 5  | 189 | absent in melanoma 1-like (poyvar) alternative variant aSep08, mRNA.                      |
| <a href="#">poywey</a>  | <a href="#">poywey.aSep08</a>  |                        | 6915  | 566  | 2  | 75  | putative nuclear protein (8.6 kD) (poywey) alternative variant aSep08, mRNA.              |
| <a href="#">Pp11r</a>   | <a href="#">Pp11r.aSep08</a>   | <a href="#">680317</a> | 12998 | 1777 |    | 495 | placental protein 11 related (Pp11r) alternative variant aSep08, mRNA.                    |
| <a href="#">Ppa1</a>    | <a href="#">Ppa1.aSep08</a>    | <a href="#">294504</a> | 26758 | 1318 | 11 | 333 | pyrophosphatase (inorganic) 1 (Ppa1) alternative variant aSep08, mRNA.                    |
| <a href="#">Ppa1</a>    | <a href="#">Ppa1.bSep08</a>    | <a href="#">294504</a> | 19139 | 881  | 8  | 198 | pyrophosphatase (inorganic) 1 (22.6 kD) (Ppa1) alternative variant bSep08, mRNA.          |
| <a href="#">Ppa2</a>    | <a href="#">Ppa2.aSep08</a>    | <a href="#">310856</a> | 78357 | 1158 | 12 | 330 | pyrophosphatase (inorganic) 2 (37.8 kD) (Ppa2) alternative variant aSep08, complete mRNA. |
| <a href="#">Ppa2</a>    | <a href="#">Ppa2.bSep08</a>    | <a href="#">310856</a> | 73939 | 738  | 8  | 219 | pyrophosphatase (inorganic) 2 (Ppa2) alternative variant bSep08, mRNA.                    |
| <a href="#">Ppa2</a>    | <a href="#">Ppa2.cSep08</a>    | <a href="#">310856</a> | 1950  | 664  | 2  | 55  | pyrophosphatase (inorganic) 2 (5.9 kD) (Ppa2) alternative variant cSep08, mRNA.           |
| <a href="#">Ppa2</a>    | <a href="#">Ppa2.dSep08</a>    | <a href="#">310856</a> | 9477  | 421  | 2  | 29  | pyrophosphatase (inorganic) 2 (3.5 kD) (Ppa2) alternative variant dSep08, mRNA.           |
| <a href="#">PPAK.0</a>  | <a href="#">PPAK.0.aSep08</a>  |                        | 2599  | 595  |    | 198 | titin (PPAK.0) mRNA.                                                                      |
| <a href="#">Ppan</a>    | <a href="#">Ppan.aSep08</a>    | <a href="#">298699</a> | 3963  | 1797 | 4  | 553 | peter pan homolog (Drosophila) (Ppan) alternative variant aSep08, mRNA.                   |
| <a href="#">Ppan</a>    | <a href="#">Ppan.cSep08</a>    | <a href="#">298699</a> | 2490  | 834  | 4  | 277 | peter pan homolog (Drosophila) (Ppan) alternative variant cSep08, mRNA.                   |
| <a href="#">Ppan</a>    | <a href="#">Ppan.dSep08</a>    | <a href="#">298699</a> | 2446  | 730  | 2  | 243 | peter pan homolog (Drosophila) (Ppan) alternative variant dSep08, mRNA.                   |
| <a href="#">Ppan</a>    | <a href="#">Ppan.eSep08</a>    | <a href="#">298699</a> | 935   | 682  | 4  | 178 | peter pan homolog (Drosophila) (Ppan) alternative variant eSep08, mRNA.                   |
| <a href="#">Ppap2a</a>  | <a href="#">Ppap2a.bSep08</a>  | <a href="#">64369</a>  | 64445 | 1225 | 6  | 326 | phosphatidic acid phosphatase 2a (Ppap2a) alternative variant bSep08, mRNA.               |

|                          |                                 |                        |       |      |   |     |                                                                                                                               |
|--------------------------|---------------------------------|------------------------|-------|------|---|-----|-------------------------------------------------------------------------------------------------------------------------------|
| <a href="#">Ppap2a</a>   | <a href="#">Ppap2a.cSep08</a>   | <a href="#">64369</a>  | 63588 | 764  | 4 | 136 | phosphatidic acid phosphatase 2a (Ppap2a) alternative variant cSep08, mRNA.                                                   |
| <a href="#">Ppap2c</a>   | <a href="#">Ppap2c.aSep08</a>   | <a href="#">246115</a> | 7654  | 1138 | 1 | 279 | phosphatidic acid phosphatase type 2c (Ppap2c) alternative variant aSep08, mRNA.                                              |
| <a href="#">Ppapdc1a</a> | <a href="#">Ppapdc1a.aSep08</a> | <a href="#">309014</a> | 62715 | 527  |   | 175 | putative protein, with at least 2 transmembrane domains, of eukaryotic origin (Ppapdc1a) mRNA.                                |
| <a href="#">Ppapdc1b</a> | <a href="#">Ppapdc1b.bSep08</a> | <a href="#">680466</a> | 3523  | 826  | 6 | 251 | phosphoesterase, PA-phosphatase related (Ppapdc1b) alternative variant bSep08, mRNA.                                          |
| <a href="#">Ppapdc1b</a> | <a href="#">Ppapdc1b.cSep08</a> | <a href="#">680466</a> | 3662  | 1777 | 4 | 212 | putative protein, with a transmembrane domain, of eukaryotic origin (Ppapdc1b) alternative variant cSep08, mRNA.              |
| <a href="#">Ppapdc1b</a> | <a href="#">Ppapdc1b.dSep08</a> | <a href="#">680466</a> | 1734  | 753  | 4 | 161 | putative protein, with at least 2 transmembrane domains, of eukaryotic origin (Ppapdc1b) alternative variant dSep08, mRNA.    |
| <a href="#">Ppapdc1b</a> | <a href="#">Ppapdc1b.eSep08</a> | <a href="#">680466</a> | 4097  | 1801 | 5 | 160 | putative protein, with at least 2 transmembrane domains, of eukaryotic origin (Ppapdc1b) alternative variant eSep08, mRNA.    |
| <a href="#">Ppapdc1b</a> | <a href="#">Ppapdc1b.fSep08</a> | <a href="#">680466</a> | 1308  | 439  | 3 | 146 | putative protein, with a transmembrane domain, of eukaryotic origin (Ppapdc1b) alternative variant fSep08, mRNA.              |
| <a href="#">Ppard</a>    | <a href="#">Ppard.bSep08</a>    | <a href="#">25682</a>  | 15737 | 328  | 2 | 48  | peroxisome proliferator-activated receptor delta (5.0 kD) (Ppard) alternative variant bSep08, mRNA.                           |
| <a href="#">Pparg</a>    | <a href="#">Pparg.bSep08</a>    | <a href="#">25664</a>  | 96675 | 778  | 6 | 215 | peroxisome proliferator activated receptor gamma (Pparg) alternative variant bSep08, mRNA.                                    |
| <a href="#">Pparg</a>    | <a href="#">Pparg.cSep08</a>    | <a href="#">25664</a>  | 97958 | 1012 | 6 | 205 | peroxisome proliferator activated receptor gamma (Pparg) alternative variant cSep08, mRNA.                                    |
| <a href="#">Pparg</a>    | <a href="#">Pparg.dSep08</a>    | <a href="#">25664</a>  | 47520 | 619  | 4 | 100 | peroxisome proliferator activated receptor gamma (Pparg) alternative variant dSep08, mRNA.                                    |
| <a href="#">Ppargc1a</a> | <a href="#">Ppargc1a.bSep08</a> | <a href="#">83516</a>  | 24686 | 504  | 3 | 85  | peroxisome proliferative activated receptor, gamma, coactivator 1 alpha (9.5 kD) (Ppargc1a) alternative variant bSep08, mRNA. |
| <a href="#">Ppargc1a</a> | <a href="#">Ppargc1a.dSep08</a> | <a href="#">83516</a>  | 23694 | 525  | 3 | 70  | peroxisome proliferative activated receptor, gamma, coactivator 1 alpha (7.7 kD) (Ppargc1a) alternative variant dSep08, mRNA. |
| <a href="#">Ppat</a>     | <a href="#">Ppat.aSep08</a>     | <a href="#">117544</a> | 34397 | 4053 | 8 | 517 | phosphoribosyl pyrophosphate amidotransferase (57.4 kD) (Ppat) alternative variant aSep08, mRNA.                              |
| <a href="#">Ppat</a>     | <a href="#">Ppat.bSep08</a>     | <a href="#">117544</a> | 25226 | 857  | 4 | 285 | phosphoribosyl pyrophosphate amidotransferase (Ppat) alternative variant bSep08, mRNA.                                        |
| <a href="#">Ppat</a>     | <a href="#">Ppat.cSep08</a>     | <a href="#">117544</a> | 7212  | 880  | 5 | 268 | phosphoribosyl pyrophosphate amidotransferase (Ppat) alternative variant cSep08, mRNA.                                        |
| <a href="#">Ppcdc</a>    | <a href="#">Ppcdc.bSep08</a>    | <a href="#">363069</a> | 20690 | 807  | 5 | 216 | phosphopantothenoylcysteine decarboxylase (Ppcdc) alternative variant bSep08, mRNA.                                           |
| <a href="#">Ppcdc</a>    | <a href="#">Ppcdc.cSep08</a>    | <a href="#">363069</a> | 5716  | 681  | 3 | 144 | phosphopantothenoylcysteine decarboxylase (Ppcdc) alternative variant cSep08, mRNA.                                           |
| <a href="#">Ppef1</a>    | <a href="#">Ppef1.bSep08</a>    | <a href="#">317498</a> | 13207 | 548  | 3 | 182 | protein phosphatase with EF hand calcium-binding domain 1 (Ppef1) alternative variant bSep08, mRNA.                           |

|                        |                               |                        |       |      |    |     |                                                                                                                                                                                         |
|------------------------|-------------------------------|------------------------|-------|------|----|-----|-----------------------------------------------------------------------------------------------------------------------------------------------------------------------------------------|
| <a href="#">Ppfia1</a> | <a href="#">Ppfia1.bSep08</a> | <a href="#">293645</a> | 24351 | 1744 | 12 | 310 | protein interacting alpha 1 (35.3 kD) (Ppfia1) alternative variant bSep08, mRNA.                                                                                                        |
| <a href="#">Ppfia1</a> | <a href="#">Ppfia1.cSep08</a> | <a href="#">293645</a> | 4908  | 763  | 4  | 149 | putative protein (Ppfia1) alternative variant cSep08, mRNA.                                                                                                                             |
| <a href="#">Ppfia1</a> | <a href="#">Ppfia1.eSep08</a> | <a href="#">293645</a> | 6571  | 379  | 4  | 126 | protein tyrosine phosphatase receptor type f polypeptide interacting alpha (Ppfia1) alternative variant eSep08, mRNA.                                                                   |
| <a href="#">Ppfia1</a> | <a href="#">Ppfia1.fSep08</a> | <a href="#">293645</a> | 3836  | 373  | 3  | 123 | protein tyrosine phosphatase receptor type f polypeptide interacting alpha 1 (Ppfia1) alternative variant fSep08, mRNA.                                                                 |
| <a href="#">Ppfia1</a> | <a href="#">Ppfia1.gSep08</a> | <a href="#">293645</a> | 558   | 391  | 2  | 122 | protein interacting alpha 1 (Ppfia1) alternative variant gSep08, mRNA.                                                                                                                  |
| <a href="#">Ppfia2</a> | <a href="#">Ppfia2.bSep08</a> | <a href="#">362876</a> | 21344 | 456  | 2  | 74  | protein tyrosine phosphatase, receptor type, f polypeptide (PTPRF), interacting protein (liprin), alpha 2 (8.2 kD) (Ppfia2) alternative variant bSep08, mRNA.                           |
| <a href="#">Ppfia3</a> | <a href="#">Ppfia3.aSep08</a> | <a href="#">140591</a> | 1344  | 744  |    | 156 | protein tyrosine phosphatase, receptor type, f polypeptide (PTPRF), interacting protein (liprin), alpha 3 (17.1 kD) (Ppfia3) mRNA.                                                      |
| <a href="#">Ppfia4</a> | <a href="#">Ppfia4.aSep08</a> | <a href="#">140592</a> | 5041  | 1330 | 7  | 443 | protein tyrosine phosphatase, receptor type, f polypeptide (PTPRF), interacting protein (liprin), alpha 4 and hypothetical protein LOC685423 (Ppfia4) alternative variant aSep08, mRNA. |
| <a href="#">Ppfia4</a> | <a href="#">Ppfia4.aSep08</a> | <a href="#">685423</a> | 5041  | 1330 | 7  | 443 | protein tyrosine phosphatase, receptor type, f polypeptide (PTPRF), interacting protein (liprin), alpha 4 and hypothetical protein LOC685423 (Ppfia4) alternative variant aSep08, mRNA. |
| <a href="#">Ppfia4</a> | <a href="#">Ppfia4.bSep08</a> | <a href="#">140592</a> | 17666 | 2732 | 11 | 367 | protein tyrosine phosphatase, receptor type, f polypeptide (PTPRF), interacting protein (liprin), alpha 4 and hypothetical protein LOC685423 (Ppfia4) alternative variant bSep08, mRNA. |
| <a href="#">Ppfia4</a> | <a href="#">Ppfia4.bSep08</a> | <a href="#">685423</a> | 17666 | 2732 | 11 | 367 | protein tyrosine phosphatase, receptor type, f polypeptide (PTPRF), interacting protein (liprin), alpha 4 and hypothetical protein LOC685423 (Ppfia4) alternative variant bSep08, mRNA. |
| <a href="#">Ppfia4</a> | <a href="#">Ppfia4.cSep08</a> | <a href="#">140592</a> | 4057  | 594  | 5  | 197 | protein tyrosine phosphatase, receptor type, f polypeptide (PTPRF), interacting protein (liprin), alpha 4 and hypothetical protein LOC685423 (Ppfia4) alternative variant cSep08, mRNA. |
| <a href="#">Ppfia4</a> | <a href="#">Ppfia4.cSep08</a> | <a href="#">685423</a> | 4057  | 594  | 5  | 197 | protein tyrosine phosphatase, receptor type, f polypeptide (PTPRF), interacting protein (liprin), alpha 4 and hypothetical protein LOC685423 (Ppfia4) alternative variant cSep08, mRNA. |
| <a href="#">Ppfia4</a> | <a href="#">Ppfia4.dSep08</a> | <a href="#">140592</a> | 1100  | 640  | 2  | 167 | protein tyrosine phosphatase, receptor type, f polypeptide (PTPRF), interacting protein (liprin), alpha 4 and hypothetical protein LOC685423 (Ppfia4) alternative variant dSep08, mRNA. |

|                         |                                |                        |        |      |    |     |                                                                                                                                                                                         |
|-------------------------|--------------------------------|------------------------|--------|------|----|-----|-----------------------------------------------------------------------------------------------------------------------------------------------------------------------------------------|
| <a href="#">Ppfia4</a>  | <a href="#">Ppfia4.dSep08</a>  | <a href="#">685423</a> | 1100   | 640  | 2  | 167 | protein tyrosine phosphatase, receptor type, f polypeptide (PTPRF), interacting protein (liprin), alpha 4 and hypothetical protein LOC685423 (Ppfia4) alternative variant dSep08, mRNA. |
| <a href="#">Ppfia4</a>  | <a href="#">Ppfia4.eSep08</a>  | <a href="#">140592</a> | 47724  | 1416 | 3  | 127 | protein tyrosine phosphatase, receptor type, f polypeptide (PTPRF), interacting protein (liprin), alpha 4 and hypothetical protein LOC685423 (Ppfia4) alternative variant eSep08, mRNA. |
| <a href="#">Ppfia4</a>  | <a href="#">Ppfia4.eSep08</a>  | <a href="#">685423</a> | 47724  | 1416 | 3  | 127 | protein tyrosine phosphatase, receptor type, f polypeptide (PTPRF), interacting protein (liprin), alpha 4 and hypothetical protein LOC685423 (Ppfia4) alternative variant eSep08, mRNA. |
| <a href="#">Ppfibp1</a> | <a href="#">Ppfibp1.aSep08</a> | <a href="#">312855</a> | 103251 | 684  |    | 157 | PTPRF interacting protein, binding protein 1 (liprin beta 1) (Ppfibp1) mRNA.                                                                                                            |
| <a href="#">Ppfibp2</a> | <a href="#">Ppfibp2.aSep08</a> | <a href="#">308918</a> | 76852  | 2980 | 22 | 799 | protein tyrosine phosphatase receptor-type F interacting binding 2 CRA b like (90.3 kD) (Ppfibp2) alternative variant aSep08, mRNA.                                                     |
| <a href="#">Ppfibp2</a> | <a href="#">Ppfibp2.bSep08</a> | <a href="#">308918</a> | 100296 | 891  | 6  | 197 | protein interacting binding 2 like (Ppfibp2) alternative variant bSep08, mRNA.                                                                                                          |
| <a href="#">Ppfibp2</a> | <a href="#">Ppfibp2.cSep08</a> | <a href="#">308918</a> | 2755   | 466  | 3  | 155 | protein tyrosine phosphatase receptor-type F interacting binding 2 like (Ppfibp2) alternative variant cSep08, mRNA.                                                                     |
| <a href="#">Ppfibp2</a> | <a href="#">Ppfibp2.dSep08</a> | <a href="#">308918</a> | 8189   | 925  | 4  | 148 | protein tyrosine phosphatase receptor-type F interacting binding 2 like (Ppfibp2) alternative variant dSep08, mRNA.                                                                     |
| <a href="#">Ppfibp2</a> | <a href="#">Ppfibp2.eSep08</a> | <a href="#">308918</a> | 17532  | 406  | 5  | 90  | protein tyrosine phosphatase receptor-type F interacting binding 2 CRA a like (10.6 kD) (Ppfibp2) alternative variant eSep08, mRNA.                                                     |
| <a href="#">Ppfibp2</a> | <a href="#">Ppfibp2.fSep08</a> | <a href="#">308918</a> | 6234   | 796  | 3  | 71  | putative secreted or extracellular protein precursor (8.0 kD) (Ppfibp2) alternative variant fSep08, mRNA.                                                                               |
| <a href="#">Ppgeb</a>   | <a href="#">Ppgeb.bSep08</a>   | <a href="#">296370</a> | 6106   | 2216 | 15 | 493 | protective protein for beta-galactosidase (55.8 kD) (Ppgeb) alternative variant bSep08, mRNA.                                                                                           |
| <a href="#">Ppgeb</a>   | <a href="#">Ppgeb.cSep08</a>   | <a href="#">296370</a> | 3341   | 1059 | 9  | 253 | protective protein for beta-galactosidase (Ppgeb) alternative variant cSep08, mRNA.                                                                                                     |
| <a href="#">Ppgeb</a>   | <a href="#">Ppgeb.dSep08</a>   | <a href="#">296370</a> | 3127   | 743  | 8  | 210 | protective protein for beta-galactosidase (23.6 kD) (Ppgeb) alternative variant dSep08, mRNA.                                                                                           |
| <a href="#">Ppgeb</a>   | <a href="#">Ppgeb.eSep08</a>   | <a href="#">296370</a> | 2222   | 703  | 4  | 116 | protective protein for beta-galactosidase (Ppgeb) alternative variant eSep08, mRNA.                                                                                                     |
| <a href="#">Pphln1</a>  | <a href="#">Pphln1.bSep08</a>  | <a href="#">366975</a> | 82925  | 1787 | 1  | 359 | periphilin 1 (Pphln1) alternative variant bSep08, complete mRNA.                                                                                                                        |
| <a href="#">Pphln1</a>  | <a href="#">Pphln1.cSep08</a>  | <a href="#">366975</a> | 82925  | 3596 | 2  | 312 | periphilin 1 (36.0 kD) (Pphln1) alternative variant cSep08, complete mRNA.                                                                                                              |
| <a href="#">Ppia</a>    | <a href="#">Ppia.bSep08</a>    | <a href="#">25518</a>  | 3967   | 2640 | 4  | 104 | peptidylprolyl isomerase A (11.3 kD) (Ppia) alternative variant bSep08, complete mRNA.                                                                                                  |
| <a href="#">Ppib</a>    | <a href="#">Ppib.bSep08</a>    | <a href="#">64367</a>  | 3331   | 738  | 3  | 116 | peptidylprolyl isomerase B (12.8 kD) (Ppib) alternative variant bSep08, mRNA.                                                                                                           |
| <a href="#">Ppib</a>    | <a href="#">Ppib.cSep08</a>    | <a href="#">64367</a>  | 1396   | 730  | 2  | 77  | peptidylprolyl isomerase B (8.5 kD) (Ppib) alternative variant cSep08, mRNA.                                                                                                            |



|                       |                              |                        |       |      |    |     |                                                                                                            |
|-----------------------|------------------------------|------------------------|-------|------|----|-----|------------------------------------------------------------------------------------------------------------|
| <a href="#">Ppic</a>  | <a href="#">Ppic.bSep08</a>  | <a href="#">291463</a> | 6100  | 840  | 2  | 118 | peptidylprolyl isomerase C (12.9 kD) (Ppic) alternative variant bSep08, mRNA.                              |
| <a href="#">Ppic</a>  | <a href="#">Ppic.cSep08</a>  | <a href="#">291463</a> | 12134 | 878  | 4  | 118 | peptidylprolyl isomerase C (12.9 kD) (Ppic) alternative variant cSep08, mRNA.                              |
| <a href="#">Ppid</a>  | <a href="#">Ppid.bSep08</a>  | <a href="#">361967</a> | 2937  | 1889 | 3  | 132 | peptidylprolyl isomerase D (14.5 kD) (Ppid) alternative variant bSep08, mRNA.                              |
| <a href="#">Ppid</a>  | <a href="#">Ppid.cSep08</a>  | <a href="#">361967</a> | 4479  | 785  | 3  | 116 | peptidylprolyl isomerase D (12.8 kD) (Ppid) alternative variant cSep08, mRNA.                              |
| <a href="#">Ppie</a>  | <a href="#">Ppie.aSep08</a>  | <a href="#">298508</a> | 13288 | 1184 | 10 | 301 | peptidylprolyl isomerase E (cyclophilin E) (33.4 kD) (Ppie) alternative variant aSep08, complete mRNA.     |
| <a href="#">Ppie</a>  | <a href="#">Ppie.cSep08</a>  | <a href="#">298508</a> | 3297  | 752  | 4  | 100 | peptidylprolyl isomerase E (cyclophilin E) (Ppie) alternative variant cSep08, mRNA.                        |
| <a href="#">Ppig</a>  | <a href="#">Ppig.bSep08</a>  | <a href="#">83624</a>  | 26533 | 1441 | 14 | 418 | peptidylprolyl isomerase G (Ppig) alternative variant bSep08, mRNA.                                        |
| <a href="#">Ppig</a>  | <a href="#">Ppig.cSep08</a>  | <a href="#">83624</a>  | 6353  | 401  | 3  | 133 | peptidylprolyl isomerase G (Ppig) alternative variant cSep08, mRNA.                                        |
| <a href="#">Ppig</a>  | <a href="#">Ppig.dSep08</a>  | <a href="#">83624</a>  | 11060 | 745  | 7  | 119 | peptidylprolyl isomerase G (Ppig) alternative variant dSep08, mRNA.                                        |
| <a href="#">Ppig</a>  | <a href="#">Ppig.fSep08</a>  | <a href="#">83624</a>  | 810   | 360  | 2  | 33  | peptidylprolyl isomerase G (Ppig) alternative variant fSep08, mRNA.                                        |
| <a href="#">Ppil1</a> | <a href="#">Ppil1.bSep08</a> | <a href="#">309651</a> | 9051  | 805  | 1  | 121 | peptidylprolyl isomerase (cyclophilin)-like 1 (13.1 kD) (Ppil1) alternative variant bSep08, mRNA.          |
| <a href="#">Ppil1</a> | <a href="#">Ppil1.cSep08</a> | <a href="#">309651</a> | 11820 | 934  | 1  | 67  | peptidylprolyl isomerase (cyclophilin)-like 1 (7.2 kD) (Ppil1) alternative variant cSep08, mRNA.           |
| <a href="#">Ppil1</a> | <a href="#">Ppil1.dSep08</a> | <a href="#">309651</a> | 7944  | 620  | 1  | 67  | peptidylprolyl isomerase (cyclophilin)-like 1 (7.2 kD) (Ppil1) alternative variant dSep08, mRNA.           |
| <a href="#">Ppil2</a> | <a href="#">Ppil2.aSep08</a> | <a href="#">360746</a> | 22579 | 1778 | 20 | 526 | peptidylprolyl isomerase (cyclophilin)-like 2 (59.5 kD) (Ppil2) alternative variant aSep08, complete mRNA. |
| <a href="#">Ppil2</a> | <a href="#">Ppil2.bSep08</a> | <a href="#">360746</a> | 18360 | 858  | 12 | 267 | peptidylprolyl isomerase (cyclophilin)-like 2 (Ppil2) alternative variant bSep08, mRNA.                    |
| <a href="#">Ppil2</a> | <a href="#">Ppil2.cSep08</a> | <a href="#">360746</a> | 2841  | 529  | 6  | 175 | peptidylprolyl isomerase (cyclophilin)-like 2 (Ppil2) alternative variant cSep08, mRNA.                    |
| <a href="#">Ppil2</a> | <a href="#">Ppil2.dSep08</a> | <a href="#">360746</a> | 7840  | 502  | 5  | 161 | peptidylprolyl isomerase (cyclophilin)-like 2 (Ppil2) alternative variant dSep08, mRNA.                    |
| <a href="#">Ppil2</a> | <a href="#">Ppil2.eSep08</a> | <a href="#">360746</a> | 16716 | 775  | 11 | 118 | peptidylprolyl isomerase (cyclophilin)-like 2 (13.5 kD) (Ppil2) alternative variant eSep08, mRNA.          |
| <a href="#">Ppil2</a> | <a href="#">Ppil2.fSep08</a> | <a href="#">360746</a> | 1308  | 736  | 2  | 42  | peptidylprolyl isomerase (cyclophilin)-like 2 (Ppil2) alternative variant fSep08, mRNA.                    |
| <a href="#">Ppil3</a> | <a href="#">Ppil3.bSep08</a> | <a href="#">301432</a> | 9868  | 439  | 1  | 121 | peptidylprolyl isomerase (cyclophilin)-like 3 (Ppil3) alternative variant bSep08, mRNA.                    |
| <a href="#">Ppil4</a> | <a href="#">Ppil4.aSep08</a> | <a href="#">361449</a> | 26366 | 1136 | 2  | 378 | peptidylprolyl isomerase (cyclophilin)-like 4 (Ppil4) alternative variant aSep08, mRNA.                    |
| <a href="#">Ppil6</a> | <a href="#">Ppil6.aSep08</a> | <a href="#">685567</a> | 19810 | 740  |    | 230 | peptidylprolyl isomerase (cyclophilin)-like 6 (Ppil6) mRNA.                                                |
| <a href="#">Ppm1a</a> | <a href="#">Ppm1a.bSep08</a> | <a href="#">24666</a>  | 5771  | 3456 | 2  | 280 | protein phosphatase 1A, magnesium dependent, alpha isoform (Ppm1a) alternative variant bSep08, mRNA.       |

|                        |                               |                        |        |      |   |     |                                                                                                                |
|------------------------|-------------------------------|------------------------|--------|------|---|-----|----------------------------------------------------------------------------------------------------------------|
| <a href="#">Ppm1a</a>  | <a href="#">Ppm1a.cSep08</a>  | <a href="#">24666</a>  | 41510  | 1496 | 6 | 99  | protein phosphatase 1A, magnesium dependent, alpha isoform (11.0 kD) (Ppm1a) alternative variant cSep08, mRNA. |
| <a href="#">Ppm1a</a>  | <a href="#">Ppm1a.dSep08</a>  | <a href="#">24666</a>  | 2662   | 1791 | 2 | 87  | protein phosphatase 1A, magnesium dependent, alpha isoform (9.5 kD) (Ppm1a) alternative variant dSep08, mRNA.  |
| <a href="#">Ppm1b</a>  | <a href="#">Ppm1b.bSep08</a>  | <a href="#">24667</a>  | 21921  | 1897 | 5 | 375 | protein phosphatase 1B, magnesium dependent, beta isoform (Ppm1b) alternative variant bSep08, mRNA.            |
| <a href="#">Ppm1b</a>  | <a href="#">Ppm1b.cSep08</a>  | <a href="#">24667</a>  | 1125   | 756  | 2 | 71  | protein phosphatase 1B, magnesium dependent, beta isoform (Ppm1b) alternative variant cSep08, mRNA.            |
| <a href="#">Ppm1b</a>  | <a href="#">Ppm1b.dSep08</a>  | <a href="#">24667</a>  | 19689  | 443  | 3 | 63  | protein phosphatase 1B, magnesium dependent, beta isoform (Ppm1b) alternative variant dSep08, mRNA.            |
| <a href="#">Ppm1b</a>  | <a href="#">Ppm1b.eSep08</a>  | <a href="#">24667</a>  | 19670  | 472  | 4 | 59  | protein phosphatase 1B, magnesium dependent, beta isoform (Ppm1b) alternative variant eSep08, mRNA.            |
| <a href="#">Ppm1d</a>  | <a href="#">Ppm1d.bSep08</a>  | <a href="#">287585</a> | 28849  | 808  | 1 | 256 | protein phosphatase 1D magnesium-dependent, delta isoform (Ppm1d) alternative variant bSep08, mRNA.            |
| <a href="#">Ppm1f</a>  | <a href="#">Ppm1f.bSep08</a>  | <a href="#">287931</a> | 18873  | 811  | 5 | 206 | protein phosphatase 1F (Ppm1f) alternative variant bSep08, mRNA.                                               |
| <a href="#">Ppm1g</a>  | <a href="#">Ppm1g.aSep08</a>  | <a href="#">259229</a> | 1658   | 1235 |   | 99  | protein phosphatase 1G (formerly 2C), magnesium-dependent, gamma isoform (10.9 kD) (Ppm1g) mRNA.               |
| <a href="#">Ppm1h</a>  | <a href="#">Ppm1h.aSep08</a>  | <a href="#">314897</a> | 127516 | 806  | 7 | 249 | protein phosphatase 1h (Ppm1h) alternative variant aSep08, mRNA.                                               |
| <a href="#">Ppm1h</a>  | <a href="#">Ppm1h.bSep08</a>  | <a href="#">314897</a> | 63616  | 1862 | 5 | 194 | protein phosphatase 1H (21.8 kD) (Ppm1h) alternative variant bSep08, mRNA.                                     |
| <a href="#">Ppm1k</a>  | <a href="#">Ppm1k.bSep08</a>  | <a href="#">312381</a> | 24626  | 1800 | 3 | 268 | protein phosphatase 1K CRA b (Ppm1k) alternative variant bSep08, mRNA.                                         |
| <a href="#">Ppm1k</a>  | <a href="#">Ppm1k.cSep08</a>  | <a href="#">312381</a> | 9287   | 765  | 1 | 142 | protein phosphatase 1K CRA a (Ppm1k) alternative variant cSep08, mRNA.                                         |
| <a href="#">Ppm2c</a>  | <a href="#">Ppm2c.bSep08</a>  | <a href="#">54705</a>  | 6778   | 2496 | 3 | 579 | protein phosphatase 2C, magnesium dependent, catalytic subunit (Ppm2c) alternative variant bSep08, mRNA.       |
| <a href="#">Ppm2c</a>  | <a href="#">Ppm2c.cSep08</a>  | <a href="#">54705</a>  | 4168   | 446  | 3 | 124 | protein phosphatase 2C, magnesium dependent, catalytic subunit (Ppm2c) alternative variant cSep08, mRNA.       |
| <a href="#">Ppme1</a>  | <a href="#">Ppme1.aSep08</a>  | <a href="#">361613</a> | 48316  | 2461 |   | 386 | protein phosphatase methylesterase 1 (42.3 kD) (Ppme1) mRNA.                                                   |
| <a href="#">Ppox</a>   | <a href="#">Ppox.bSep08</a>   | <a href="#">289219</a> | 4133   | 2374 | 8 | 339 | protoporphyrinogen oxidase (36.4 kD) (Ppox) alternative variant bSep08, mRNA.                                  |
| <a href="#">Ppox</a>   | <a href="#">Ppox.cSep08</a>   | <a href="#">289219</a> | 2155   | 1612 | 5 | 172 | protoporphyrinogen oxidase (18.3 kD) (Ppox) alternative variant cSep08, mRNA.                                  |
| <a href="#">Ppox</a>   | <a href="#">Ppox.dSep08</a>   | <a href="#">289219</a> | 1600   | 710  | 6 | 148 | protoporphyrinogen oxidase (Ppox) alternative variant dSep08, mRNA.                                            |
| <a href="#">Ppox</a>   | <a href="#">Ppox.eSep08</a>   | <a href="#">289219</a> | 446    | 291  | 2 | 61  | protoporphyrinogen oxidase (Ppox) alternative variant eSep08, mRNA.                                            |
| <a href="#">Ppp1cb</a> | <a href="#">Ppp1cb.bSep08</a> | <a href="#">25594</a>  | 24612  | 909  | 7 | 243 | protein phosphatase 1, catalytic subunit, beta isoform (Ppp1cb) alternative variant bSep08, mRNA.              |
| <a href="#">Ppp1cb</a> | <a href="#">Ppp1cb.cSep08</a> | <a href="#">25594</a>  | 30191  | 966  | 4 |     |                                                                                                                |
| <a href="#">Ppp1cc</a> | <a href="#">Ppp1cc.aSep08</a> | <a href="#">24669</a>  | 18169  | 1410 | 8 | 337 | protein phosphatase 1 catalytic (38.5 kD) (Ppp1cc) alternative variant aSep08, complete mRNA.                  |

|                                   |                                          |                        |       |      |    |     |                                                                                                                  |
|-----------------------------------|------------------------------------------|------------------------|-------|------|----|-----|------------------------------------------------------------------------------------------------------------------|
| <a href="#">Ppp1cc</a>            | <a href="#">Ppp1cc.cSep08</a>            | <a href="#">24669</a>  | 15819 | 879  | 5  | 263 | protein phosphatase 1 (Ppp1cc) alternative variant cSep08, mRNA.                                                 |
| <a href="#">Ppp1cc</a>            | <a href="#">Ppp1cc.dSep08</a>            | <a href="#">24669</a>  | 15660 | 725  | 5  | 147 | protein phosphatase 1 (17.0 kD) (Ppp1cc) alternative variant dSep08, mRNA.                                       |
| <a href="#">Ppp1cc</a>            | <a href="#">Ppp1cc.eSep08</a>            | <a href="#">24669</a>  | 1480  | 737  | 2  | 118 | protein phosphatase 1 catalytic (Ppp1cc) alternative variant eSep08, mRNA.                                       |
| <a href="#">Ppp1r1a</a>           | <a href="#">Ppp1r1a.bSep08</a>           | <a href="#">58977</a>  | 3427  | 481  | 6  | 160 | protein phosphatase 1, regulatory (inhibitor) subunit 1A (Ppp1r1a) alternative variant bSep08, mRNA.             |
| <a href="#">Ppp1r1a</a>           | <a href="#">Ppp1r1a.cSep08</a>           | <a href="#">58977</a>  | 1839  | 641  | 3  | 97  | protein phosphatase 1, regulatory (inhibitor) subunit 1A (10.3 kD) (Ppp1r1a) alternative variant cSep08, mRNA.   |
| <a href="#">Ppp1r1a</a>           | <a href="#">Ppp1r1a.dSep08</a>           | <a href="#">58977</a>  | 998   | 601  | 2  | 96  | protein phosphatase 1, regulatory (inhibitor) subunit 1A (Ppp1r1a) alternative variant dSep08, mRNA.             |
| <a href="#">Ppp1r1b</a>           | <a href="#">Ppp1r1b.aSep08</a>           | <a href="#">360616</a> | 9715  | 1761 |    | 205 | protein phosphatase 1, regulatory (inhibitor) subunit 1B (22.9 kD) (Ppp1r1b) mRNA.                               |
| <a href="#">Ppp1r2</a>            | <a href="#">Ppp1r2.bSep08</a>            | <a href="#">192361</a> | 4017  | 617  | 3  | 105 | protein phosphatase 1, regulatory (inhibitor) subunit 2 (Ppp1r2) alternative variant bSep08, mRNA.               |
| <a href="#">Ppp1r3b</a>           | <a href="#">Ppp1r3b.bSep08</a>           | <a href="#">192280</a> | 7584  | 344  | 2  | 62  | protein phosphatase 1, regulatory (inhibitor) subunit 3B (Ppp1r3b) alternative variant bSep08, mRNA.             |
| <a href="#">Ppp1r3f_predicted</a> | <a href="#">Ppp1r3f_predicted.aSep08</a> | <a href="#">363453</a> | 14239 | 316  |    | 105 | protein phosphatase 1, regulatory (inhibitor) subunit 3F (predicted) (Ppp1r3f_predicted) mRNA.                   |
| <a href="#">Ppp1r8</a>            | <a href="#">Ppp1r8.bSep08</a>            | <a href="#">313030</a> | 12384 | 668  | 5  | 218 | protein phosphatase 1, regulatory (inhibitor) subunit 8 (Ppp1r8) alternative variant bSep08, mRNA.               |
| <a href="#">Ppp1r9a</a>           | <a href="#">Ppp1r9a.bSep08</a>           | <a href="#">84685</a>  | 4312  | 1199 | 2  | 141 | protein phosphatase 1, regulatory (inhibitor) subunit 9A (16.1 kD) (Ppp1r9a) alternative variant bSep08, mRNA.   |
| <a href="#">Ppp1r9b</a>           | <a href="#">Ppp1r9b.aSep08</a>           | <a href="#">84686</a>  | 12613 | 1489 | 3  | 496 | protein phosphatase 1, regulatory subunit 9B (Ppp1r9b) alternative variant aSep08, mRNA.                         |
| <a href="#">Ppp1r9b</a>           | <a href="#">Ppp1r9b.bSep08</a>           | <a href="#">84686</a>  | 4790  | 1783 | 1  | 433 | protein phosphatase 1, regulatory subunit 9B (Ppp1r9b) alternative variant bSep08, mRNA.                         |
| <a href="#">Ppp1r9b</a>           | <a href="#">Ppp1r9b.cSep08</a>           | <a href="#">84686</a>  | 7146  | 1170 | 1  | 389 | protein phosphatase 1, regulatory subunit 9B (Ppp1r9b) alternative variant cSep08, mRNA.                         |
| <a href="#">Ppp1r10</a>           | <a href="#">Ppp1r10.bSep08</a>           | <a href="#">65045</a>  | 12255 | 2683 | 17 | 654 | protein phosphatase 1 regulatory (71.1 kD) (Ppp1r10) alternative variant bSep08, mRNA.                           |
| <a href="#">Ppp1r10</a>           | <a href="#">Ppp1r10.cSep08</a>           | <a href="#">65045</a>  | 1462  | 1202 | 2  | 128 | protein phosphatase 1 regulatory (13.3 kD) (Ppp1r10) alternative variant cSep08, mRNA.                           |
| <a href="#">Ppp1r11</a>           | <a href="#">Ppp1r11.bSep08</a>           | <a href="#">294207</a> | 2459  | 804  | 3  | 114 | protein phosphatase 1, regulatory (inhibitor) subunit 11 (12.5 kD) (Ppp1r11) alternative variant bSep08, mRNA.   |
| <a href="#">Ppp1r11</a>           | <a href="#">Ppp1r11.cSep08</a>           | <a href="#">294207</a> | 1127  | 757  | 2  | 114 | protein phosphatase 1, regulatory (inhibitor) subunit 11 (12.5 kD) (Ppp1r11) alternative variant cSep08, mRNA.   |
| <a href="#">Ppp1r11</a>           | <a href="#">Ppp1r11.dSep08</a>           | <a href="#">294207</a> | 2298  | 749  | 3  | 106 | protein phosphatase 1, regulatory (inhibitor) subunit 11 (12.0 kD) (Ppp1r11) alternative variant dSep08, mRNA.   |
| <a href="#">Ppp1r12a</a>          | <a href="#">Ppp1r12a.bSep08</a>          | <a href="#">116670</a> | 12498 | 1711 | 8  | 413 | protein phosphatase 1, regulatory (inhibitor) subunit 12A (Ppp1r12a) alternative variant bSep08, mRNA.           |
| <a href="#">Ppp1r12a</a>          | <a href="#">Ppp1r12a.cSep08</a>          | <a href="#">116670</a> | 16782 | 3150 | 7  | 152 | protein phosphatase 1, regulatory (inhibitor) subunit 12A (17.9 kD) (Ppp1r12a) alternative variant cSep08, mRNA. |
| <a href="#">Ppp1r12a</a>          | <a href="#">Ppp1r12a.dSep08</a>          | <a href="#">116670</a> | 17326 | 887  | 10 | 127 | protein phosphatase 1, regulatory (inhibitor) subunit 12A (14.7 kD) (Ppp1r12a) alternative variant dSep08, mRNA. |

|                          |                                 |                        |       |      |    |     |                                                                                                                                        |
|--------------------------|---------------------------------|------------------------|-------|------|----|-----|----------------------------------------------------------------------------------------------------------------------------------------|
| <a href="#">Ppp1r12a</a> | <a href="#">Ppp1r12a.fSep08</a> | <a href="#">116670</a> | 1470  | 436  | 2  | 51  | protein phosphatase 1, regulatory (inhibitor) subunit 12A (Ppp1r12a) alternative variant fSep08, mRNA.                                 |
| <a href="#">Ppp1r12b</a> | <a href="#">Ppp1r12b.aSep08</a> | <a href="#">304813</a> | 31528 | 1104 |    | 367 | protein phosphatase 1, regulatory (inhibitor) subunit 12B (Ppp1r12b) mRNA.                                                             |
| <a href="#">Ppp1r12c</a> | <a href="#">Ppp1r12c.aSep08</a> | <a href="#">499076</a> | 23794 | 3857 | 22 | 318 | protein phosphatase 1, regulatory (inhibitor) subunit 12C (35.8 kD) (Ppp1r12c) alternative variant aSep08, complete mRNA.              |
| <a href="#">Ppp1r12c</a> | <a href="#">Ppp1r12c.bSep08</a> | <a href="#">499076</a> | 1144  | 464  | 7  | 154 | protein phosphatase 1, regulatory (inhibitor) subunit 12C (Ppp1r12c) alternative variant bSep08, mRNA.                                 |
| <a href="#">Ppp1r12c</a> | <a href="#">Ppp1r12c.cSep08</a> | <a href="#">499076</a> | 1452  | 734  | 8  | 143 | protein phosphatase 1, regulatory (inhibitor) subunit 12C (Ppp1r12c) alternative variant cSep08, mRNA.                                 |
| <a href="#">Ppp1r12c</a> | <a href="#">Ppp1r12c.dSep08</a> | <a href="#">499076</a> | 1209  | 1120 | 2  | 50  | protein phosphatase 1, regulatory (inhibitor) subunit 12C (Ppp1r12c) alternative variant dSep08, mRNA.                                 |
| <a href="#">Ppp1r14a</a> | <a href="#">Ppp1r14a.aSep08</a> | <a href="#">114004</a> | 5743  | 676  | 5  | 192 | protein phosphatase 1, regulatory (inhibitor) subunit 14A (Ppp1r14a) alternative variant aSep08, mRNA.                                 |
| <a href="#">Ppp1r15b</a> | <a href="#">Ppp1r15b.bSep08</a> | <a href="#">304799</a> | 6129  | 2028 | 2  | 178 | protein phosphatase 1, regulatory (inhibitor) subunit 15b (Ppp1r15b) alternative variant bSep08, mRNA.                                 |
| <a href="#">Ppp1r16a</a> | <a href="#">Ppp1r16a.bSep08</a> | <a href="#">362944</a> | 1084  | 781  | 4  | 171 | protein phosphatase 1, regulatory (inhibitor) subunit 16A (Ppp1r16a) alternative variant bSep08, mRNA.                                 |
| <a href="#">Ppp1r16a</a> | <a href="#">Ppp1r16a.bSep08</a> | <a href="#">681165</a> | 1084  | 781  | 4  | 171 | protein phosphatase 1, regulatory (inhibitor) subunit 16A (Ppp1r16a) alternative variant bSep08, mRNA.                                 |
| <a href="#">Ppp1r16a</a> | <a href="#">Ppp1r16a.dSep08</a> | <a href="#">362944</a> | 6100  | 498  | 3  | 32  | protein phosphatase 1, regulatory (inhibitor) subunit 16A (3.5 kD) (Ppp1r16a) alternative variant dSep08, complete mRNA.               |
| <a href="#">Ppp1r16a</a> | <a href="#">Ppp1r16a.dSep08</a> | <a href="#">681165</a> | 6100  | 498  | 3  | 32  | protein phosphatase 1, regulatory (inhibitor) subunit 16A (3.5 kD) (Ppp1r16a) alternative variant dSep08, complete mRNA.               |
| <a href="#">Ppp1r16b</a> | <a href="#">Ppp1r16b.aSep08</a> | <a href="#">680616</a> | 80828 | 750  |    | 190 | protein phosphatase 1, regulatory (inhibitor) subunit 16B (Ppp1r16b) mRNA.                                                             |
| <a href="#">Ppp2cb</a>   | <a href="#">Ppp2cb.bSep08</a>   | <a href="#">24673</a>  | 5161  | 1574 | 2  | 115 | protein phosphatase 2 (formerly 2A), catalytic subunit, beta isoform (13.1 kD) (Ppp2cb) alternative variant bSep08, mRNA.              |
| <a href="#">Ppp2r1a</a>  | <a href="#">Ppp2r1a.bSep08</a>  | <a href="#">117281</a> | 7874  | 752  | 1  | 98  | protein phosphatase 2 (formerly 2A), regulatory subunit A (PR 65), alpha isoform (10.7 kD) (Ppp2r1a) alternative variant bSep08, mRNA. |
| <a href="#">Ppp2r1b</a>  | <a href="#">Ppp2r1b.bSep08</a>  | <a href="#">315648</a> | 4037  | 345  | 3  | 115 | protein phosphatase 2 (formerly 2A), regulatory subunit A (PR 65), beta isoform (Ppp2r1b) alternative variant bSep08, mRNA.            |
| <a href="#">Ppp2r1b</a>  | <a href="#">Ppp2r1b.dSep08</a>  | <a href="#">315648</a> | 466   | 337  | 2  | 35  | protein phosphatase 2 (formerly 2A), regulatory subunit A (PR 65), beta isoform (4.3 kD) (Ppp2r1b) alternative variant dSep08, mRNA.   |
| <a href="#">Ppp2r2a</a>  | <a href="#">Ppp2r2a.bSep08</a>  | <a href="#">117104</a> | 8047  | 2112 | 4  | 240 | protein phosphatase 2 (formerly 2A), regulatory subunit B (PR 52), alpha isoform (27.9 kD) (Ppp2r2a) alternative variant bSep08, mRNA. |
| <a href="#">Ppp2r2a</a>  | <a href="#">Ppp2r2a.cSep08</a>  | <a href="#">117104</a> | 50591 | 789  | 6  | 113 | protein phosphatase 2 (formerly 2A), regulatory subunit B (PR 52), alpha isoform (Ppp2r2a) alternative variant cSep08, mRNA.           |

|                         |                                |                        |        |      |    |     |                                                                                                                              |
|-------------------------|--------------------------------|------------------------|--------|------|----|-----|------------------------------------------------------------------------------------------------------------------------------|
| <a href="#">Ppp2r2a</a> | <a href="#">Ppp2r2a.dSep08</a> | <a href="#">117104</a> | 48503  | 339  | 4  | 112 | protein phosphatase 2 (formerly 2A), regulatory subunit B (PR 52), alpha isoform (Ppp2r2a) alternative variant dSep08, mRNA. |
| <a href="#">Ppp2r2b</a> | <a href="#">Ppp2r2b.bSep08</a> | <a href="#">60660</a>  | 256027 | 754  | 6  | 166 | protein phosphatase 2 (formerly 2A), regulatory subunit B (PR 52), beta isoform (Ppp2r2b) alternative variant bSep08, mRNA.  |
| <a href="#">Ppp2r2b</a> | <a href="#">Ppp2r2b.cSep08</a> | <a href="#">60660</a>  | 256110 | 763  | 5  | 161 | protein phosphatase 2 (formerly 2A), regulatory subunit B (PR 52), beta isoform (Ppp2r2b) alternative variant cSep08, mRNA.  |
| <a href="#">Ppp2r2b</a> | <a href="#">Ppp2r2b.dSep08</a> | <a href="#">60660</a>  | 256120 | 883  | 6  | 153 | protein phosphatase 2 (formerly 2A), regulatory subunit B (PR 52), beta isoform (Ppp2r2b) alternative variant dSep08, mRNA.  |
| <a href="#">Ppp2r2b</a> | <a href="#">Ppp2r2b.eSep08</a> | <a href="#">60660</a>  | 217955 | 775  | 5  | 151 | protein phosphatase 2 (formerly 2A), regulatory subunit B (PR 52), beta isoform (Ppp2r2b) alternative variant eSep08, mRNA.  |
| <a href="#">Ppp2r2b</a> | <a href="#">Ppp2r2b.fSep08</a> | <a href="#">60660</a>  | 217968 | 745  | 5  | 149 | protein phosphatase 2 (formerly 2A), regulatory subunit B (PR 52), beta isoform (Ppp2r2b) alternative variant fSep08, mRNA.  |
| <a href="#">Ppp2r2b</a> | <a href="#">Ppp2r2b.gSep08</a> | <a href="#">60660</a>  | 179008 | 1081 | 2  | 135 | protein phosphatase 2 (formerly 2A), regulatory subunit B (PR 52), beta isoform (Ppp2r2b) alternative variant gSep08, mRNA.  |
| <a href="#">Ppp2r2b</a> | <a href="#">Ppp2r2b.hSep08</a> | <a href="#">60660</a>  | 25564  | 723  | 2  | 128 | protein phosphatase 2 (formerly 2A), regulatory subunit B (PR 52), beta isoform (Ppp2r2b) alternative variant hSep08, mRNA.  |
| <a href="#">Ppp2r2b</a> | <a href="#">Ppp2r2b.iSep08</a> | <a href="#">60660</a>  | 172289 | 629  | 2  | 111 | protein phosphatase 2 (formerly 2A), regulatory subunit B (PR 52), beta isoform (Ppp2r2b) alternative variant iSep08, mRNA.  |
| <a href="#">Ppp2r2b</a> | <a href="#">Ppp2r2b.jSep08</a> | <a href="#">60660</a>  | 211192 | 752  | 4  | 110 | protein phosphatase 2 (formerly 2A), regulatory subunit B (PR 52), beta isoform (Ppp2r2b) alternative variant jSep08, mRNA.  |
| <a href="#">Ppp2r2c</a> | <a href="#">Ppp2r2c.bSep08</a> | <a href="#">117256</a> | 2939   | 413  | 1  | 122 | protein phosphatase 2 (formerly 2A), regulatory subunit B (PR 52), gamma isoform (Ppp2r2c) alternative variant bSep08, mRNA. |
| <a href="#">Ppp2r2d</a> | <a href="#">Ppp2r2d.bSep08</a> | <a href="#">246255</a> | 24598  | 761  | 6  | 253 | protein phosphatase 2, regulatory subunit B, delta isoform (Ppp2r2d) alternative variant bSep08, mRNA.                       |
| <a href="#">Ppp2r2d</a> | <a href="#">Ppp2r2d.cSep08</a> | <a href="#">246255</a> | 24526  | 562  | 6  | 154 | protein phosphatase 2, regulatory subunit B, delta isoform (Ppp2r2d) alternative variant cSep08, mRNA.                       |
| <a href="#">Ppp2r3a</a> | <a href="#">Ppp2r3a.aSep08</a> | <a href="#">363122</a> | 74265  | 1677 | 10 | 558 | protein phosphatase 2 (formerly 2A), regulatory subunit B", alpha (Ppp2r3a) alternative variant aSep08, mRNA.                |
| <a href="#">Ppp2r3a</a> | <a href="#">Ppp2r3a.bSep08</a> | <a href="#">363122</a> | 12914  | 739  | 3  | 167 | protein phosphatase 2 (formerly 2A), regulatory subunit B", alpha (Ppp2r3a) alternative variant bSep08, mRNA.                |
| <a href="#">Ppp2r3a</a> | <a href="#">Ppp2r3a.cSep08</a> | <a href="#">363122</a> | 5021   | 807  | 1  | 94  | protein phosphatase 2 (formerly 2A), regulatory subunit B", alpha (Ppp2r3a) alternative variant cSep08, mRNA.                |
| <a href="#">Ppp2r3c</a> | <a href="#">Ppp2r3c.bSep08</a> | <a href="#">362739</a> | 4496   | 377  | 1  | 120 | protein phosphatase 2, regulatory subunit B", gamma (Ppp2r3c) alternative variant bSep08, mRNA.                              |
| <a href="#">Ppp2r4</a>  | <a href="#">Ppp2r4.bSep08</a>  | <a href="#">362102</a> | 5212   | 580  | 4  | 95  | protein phosphatase 2A, regulatory subunit B (PR 53) (Ppp2r4) alternative variant bSep08, mRNA.                              |

|                         |                                |                        |        |      |    |     |                                                                                                                                                          |
|-------------------------|--------------------------------|------------------------|--------|------|----|-----|----------------------------------------------------------------------------------------------------------------------------------------------------------|
| <a href="#">Ppp2r4</a>  | <a href="#">Ppp2r4.cSep08</a>  | <a href="#">362102</a> | 5724   | 852  | 3  | 72  | protein phosphatase 2A, regulatory subunit B (PR 53) (Ppp2r4) alternative variant cSep08, mRNA.                                                          |
| <a href="#">Ppp2r5a</a> | <a href="#">Ppp2r5a.bSep08</a> | <a href="#">312754</a> | 16010  | 688  | 8  | 228 | protein phosphatase 2, regulatory subunit B (B56), alpha isoform and hypothetical protein LOC679797 (Ppp2r5a) alternative variant bSep08, mRNA.          |
| <a href="#">Ppp2r5a</a> | <a href="#">Ppp2r5a.bSep08</a> | <a href="#">679797</a> | 16010  | 688  | 8  | 228 | protein phosphatase 2, regulatory subunit B (B56), alpha isoform and hypothetical protein LOC679797 (Ppp2r5a) alternative variant bSep08, mRNA.          |
| <a href="#">Ppp2r5a</a> | <a href="#">Ppp2r5a.cSep08</a> | <a href="#">312754</a> | 2348   | 1520 | 3  | 64  | protein phosphatase 2, regulatory subunit B (B56), alpha isoform and hypothetical protein LOC679797 (7.7 kD) (Ppp2r5a) alternative variant cSep08, mRNA. |
| <a href="#">Ppp2r5a</a> | <a href="#">Ppp2r5a.cSep08</a> | <a href="#">679797</a> | 2348   | 1520 | 3  | 64  | protein phosphatase 2, regulatory subunit B (B56), alpha isoform and hypothetical protein LOC679797 (7.7 kD) (Ppp2r5a) alternative variant cSep08, mRNA. |
| <a href="#">Ppp2r5b</a> | <a href="#">Ppp2r5b.cSep08</a> | <a href="#">309179</a> | 1751   | 1056 | 4  | 190 | protein phosphatase 2, regulatory subunit B (B56), beta isoform (Ppp2r5b) alternative variant cSep08, mRNA.                                              |
| <a href="#">Ppp2r5b</a> | <a href="#">Ppp2r5b.dSep08</a> | <a href="#">309179</a> | 3816   | 1195 | 7  | 130 | protein phosphatase 2, regulatory subunit B (B56), beta isoform (Ppp2r5b) alternative variant dSep08, mRNA.                                              |
| <a href="#">Ppp2r5b</a> | <a href="#">Ppp2r5b.fSep08</a> | <a href="#">309179</a> | 3649   | 1091 | 8  | 74  | protein phosphatase 2, regulatory subunit B (B56), beta isoform (Ppp2r5b) alternative variant fSep08, mRNA.                                              |
| <a href="#">Ppp2r5c</a> | <a href="#">Ppp2r5c.aSep08</a> | <a href="#">691318</a> | 128772 | 1729 | 14 | 554 | protein phosphatase 2, regulatory subunit B' gamma isoform (Ppp2r5c) alternative variant aSep08, mRNA.                                                   |
| <a href="#">Ppp2r5c</a> | <a href="#">Ppp2r5c.bSep08</a> | <a href="#">691318</a> | 85186  | 2432 | 12 | 452 | protein phosphatase 2, regulatory subunit B' gamma isoform (52.8 kD) (Ppp2r5c) alternative variant bSep08, mRNA.                                         |
| <a href="#">Ppp2r5c</a> | <a href="#">Ppp2r5c.cSep08</a> | <a href="#">691318</a> | 15984  | 2929 | 4  | 122 | protein phosphatase 2, regulatory subunit B' gamma isoform (Ppp2r5c) alternative variant cSep08, mRNA.                                                   |
| <a href="#">Ppp2r5c</a> | <a href="#">Ppp2r5c.dSep08</a> | <a href="#">691318</a> | 3547   | 471  | 3  | 116 | protein phosphatase 2, regulatory subunit B' gamma isoform (Ppp2r5c) alternative variant dSep08, mRNA.                                                   |
| <a href="#">Ppp2r5c</a> | <a href="#">Ppp2r5c.eSep08</a> | <a href="#">691318</a> | 7157   | 403  | 4  | 81  | protein phosphatase 2, regulatory subunit B' gamma isoform (Ppp2r5c) alternative variant eSep08, mRNA.                                                   |
| <a href="#">Ppp2r5c</a> | <a href="#">Ppp2r5c.fSep08</a> | <a href="#">691318</a> | 5868   | 1264 | 2  | 80  | protein phosphatase 2, regulatory subunit B' gamma isoform (Ppp2r5c) alternative variant fSep08, mRNA.                                                   |
| <a href="#">Ppp2r5d</a> | <a href="#">Ppp2r5d.aSep08</a> | <a href="#">363193</a> | 24517  | 2912 | 16 | 637 | protein phosphatase 2, regulatory subunit B (B56), delta isoform (Ppp2r5d) alternative variant aSep08, mRNA.                                             |
| <a href="#">Ppp2r5e</a> | <a href="#">Ppp2r5e.bSep08</a> | <a href="#">299147</a> | 41967  | 2417 | 11 | 230 | protein phosphatase 2, regulatory subunit B (B56), epsilon isoform (26.9 kD) (Ppp2r5e) alternative variant bSep08, mRNA.                                 |
| <a href="#">Ppp3ca</a>  | <a href="#">Ppp3ca.bSep08</a>  | <a href="#">24674</a>  | 76579  | 1531 | 12 | 428 | protein phosphatase 3, catalytic subunit, alpha isoform (Ppp3ca) alternative variant bSep08, mRNA.                                                       |
| <a href="#">Ppp3ca</a>  | <a href="#">Ppp3ca.cSep08</a>  | <a href="#">24674</a>  | 202492 | 441  | 3  | 68  | protein phosphatase 3, catalytic subunit, alpha isoform (Ppp3ca) alternative variant cSep08, mRNA.                                                       |
| <a href="#">Ppp3cb</a>  | <a href="#">Ppp3cb.bSep08</a>  | <a href="#">24675</a>  | 14494  | 1432 | 6  | 211 | protein phosphatase 3, catalytic subunit, beta isoform (Ppp3cb) alternative variant bSep08, mRNA.                                                        |
| <a href="#">Ppp3cb</a>  | <a href="#">Ppp3cb.cSep08</a>  | <a href="#">24675</a>  | 18819  | 2004 | 6  | 195 | protein phosphatase 3, catalytic subunit, beta isoform (Ppp3cb) alternative variant cSep08, mRNA.                                                        |

|                         |                                |                        |       |      |    |      |                                                                                                                                |
|-------------------------|--------------------------------|------------------------|-------|------|----|------|--------------------------------------------------------------------------------------------------------------------------------|
| <a href="#">Ppp3cb</a>  | <a href="#">Ppp3cb.dSep08</a>  | <a href="#">24675</a>  | 2492  | 862  | 2  | 59   | protein phosphatase 3, catalytic subunit, beta isoform (6.9 kD) (Ppp3cb) alternative variant dSep08, mRNA.                     |
| <a href="#">Ppp3cc</a>  | <a href="#">Ppp3cc.aSep08</a>  | <a href="#">171378</a> | 49339 | 1583 | 11 | 332  | protein phosphatase 3, catalytic subunit, gamma isoform (37.7 kD) (Ppp3cc) alternative variant aSep08, mRNA.                   |
| <a href="#">Ppp3cc</a>  | <a href="#">Ppp3cc.bSep08</a>  | <a href="#">171378</a> | 24445 | 658  | 5  | 189  | protein phosphatase 3, catalytic subunit, gamma isoform (Ppp3cc) alternative variant bSep08, mRNA.                             |
| <a href="#">Ppp3cc</a>  | <a href="#">Ppp3cc.cSep08</a>  | <a href="#">171378</a> | 8424  | 2009 | 3  | 108  | protein phosphatase 3, catalytic subunit, gamma isoform (12.0 kD) (Ppp3cc) alternative variant cSep08, mRNA.                   |
| <a href="#">Ppp4c</a>   | <a href="#">Ppp4c.bSep08</a>   | <a href="#">171366</a> | 6769  | 1423 | 2  | 307  | protein phosphatase 4, catalytic subunit (35.1 kD) (Ppp4c) alternative variant bSep08, mRNA.                                   |
| <a href="#">Ppp4r1</a>  | <a href="#">Ppp4r1.bSep08</a>  | <a href="#">140943</a> | 15838 | 901  | 4  | 300  | protein phosphatase 4, regulatory subunit 1 (Ppp4r1) alternative variant bSep08, mRNA.                                         |
| <a href="#">Ppp4r1</a>  | <a href="#">Ppp4r1.cSep08</a>  | <a href="#">140943</a> | 13865 | 1100 | 8  | 252  | protein phosphatase 4, regulatory subunit 1 (28.6 kD) (Ppp4r1) alternative variant cSep08, mRNA.                               |
| <a href="#">Ppp4r1</a>  | <a href="#">Ppp4r1.dSep08</a>  | <a href="#">140943</a> | 12885 | 1352 | 6  | 198  | protein phosphatase 4, regulatory subunit 1 (Ppp4r1) alternative variant dSep08, mRNA.                                         |
| <a href="#">Ppp4r1</a>  | <a href="#">Ppp4r1.eSep08</a>  | <a href="#">140943</a> | 2691  | 849  | 2  | 123  | protein phosphatase 4, regulatory subunit 1 (Ppp4r1) alternative variant eSep08, mRNA.                                         |
| <a href="#">Ppp4r1l</a> | <a href="#">Ppp4r1l.bSep08</a> | <a href="#">315549</a> | 12680 | 482  | 4  | 160  | protein phosphatase 4, regulatory subunit 1-like (Ppp4r1l) alternative variant bSep08, mRNA.                                   |
| <a href="#">Ppp4r2</a>  | <a href="#">Ppp4r2.bSep08</a>  | <a href="#">297486</a> | 37117 | 1517 | 2  | 375  | protein phosphatase 4, regulatory subunit 2 (41.6 kD) (Ppp4r2) alternative variant bSep08, mRNA.                               |
| <a href="#">Ppp5c</a>   | <a href="#">Ppp5c.bSep08</a>   | <a href="#">65179</a>  | 4992  | 1113 | 4  | 314  | protein phosphatase 5, catalytic subunit (Ppp5c) alternative variant bSep08, mRNA.                                             |
| <a href="#">Ppp5c</a>   | <a href="#">Ppp5c.cSep08</a>   | <a href="#">65179</a>  | 2432  | 1317 | 3  | 220  | protein phosphatase 5, catalytic subunit (Ppp5c) alternative variant cSep08, mRNA.                                             |
| <a href="#">Pprc1</a>   | <a href="#">Pprc1.bSep08</a>   | <a href="#">294007</a> | 10263 | 3800 | 9  | 1196 | peroxisome proliferative activated receptor, gamma, coactivator-related 1 (127.3 kD) (Pprc1) alternative variant bSep08, mRNA. |
| <a href="#">Pprc1</a>   | <a href="#">Pprc1.dSep08</a>   | <a href="#">294007</a> | 5810  | 414  | 3  | 138  | peroxisome proliferative activated receptor, gamma, coactivator-related 1 (Pprc1) alternative variant dSep08, mRNA.            |
| <a href="#">Pprc1</a>   | <a href="#">Pprc1.eSep08</a>   | <a href="#">294007</a> | 3712  | 1264 | 5  | 111  | peroxisome proliferative activated receptor, gamma, coactivator-related 1 (13.0 kD) (Pprc1) alternative variant eSep08, mRNA.  |
| <a href="#">Pprc1</a>   | <a href="#">Pprc1.fSep08</a>   | <a href="#">294007</a> | 672   | 457  | 2  | 104  | peroxisome proliferative activated receptor, gamma, coactivator-related 1 (Pprc1) alternative variant fSep08, mRNA.            |
| <a href="#">Ppt2</a>    | <a href="#">Ppt2.bSep08</a>    | <a href="#">54398</a>  | 3693  | 984  | 4  | 241  | palmitoyl-protein thioesterase 2 (Ppt2) alternative variant bSep08, mRNA.                                                      |
| <a href="#">Ppt2</a>    | <a href="#">Ppt2.cSep08</a>    | <a href="#">54398</a>  | 4370  | 1082 | 6  | 232  | palmitoyl-protein thioesterase 2 (Ppt2) alternative variant cSep08, mRNA.                                                      |
| <a href="#">Ppt2</a>    | <a href="#">Ppt2.dSep08</a>    | <a href="#">54398</a>  | 4444  | 1211 | 5  | 208  | palmitoyl-protein thioesterase 2 (Ppt2) alternative variant dSep08, mRNA.                                                      |
| <a href="#">Ppt2</a>    | <a href="#">Ppt2.eSep08</a>    | <a href="#">54398</a>  | 1745  | 1119 | 3  | 180  | palmitoyl-protein thioesterase 2 (Ppt2) alternative variant eSep08, mRNA.                                                      |

|                          |                                 |                        |       |      |   |     |                                                                                                      |
|--------------------------|---------------------------------|------------------------|-------|------|---|-----|------------------------------------------------------------------------------------------------------|
| <a href="#">Ppt2</a>     | <a href="#">Ppt2.fSep08</a>     | <a href="#">54398</a>  | 867   | 451  | 1 | 70  | palmitoyl-protein thioesterase 2 (Ppt2) alternative variant fSep08, mRNA.                            |
| <a href="#">Ppwd1</a>    | <a href="#">Ppwd1.bSep08</a>    | <a href="#">294711</a> | 8452  | 1077 | 4 | 254 | peptidylprolyl isomerase domain and WD repeat containing 1 (Ppwd1) alternative variant bSep08, mRNA. |
| <a href="#">Ppwd1</a>    | <a href="#">Ppwd1.cSep08</a>    | <a href="#">294711</a> | 2960  | 858  | 1 | 79  | peptidylprolyl isomerase domain and WD repeat containing 1 (Ppwd1) alternative variant cSep08, mRNA. |
| <a href="#">Pqbp1</a>    | <a href="#">Pqbp1.bSep08</a>    | <a href="#">302557</a> | 4077  | 1034 | 6 | 263 | polyglutamine binding protein 1 (30.5 kD) (Pqbp1) alternative variant bSep08, mRNA.                  |
| <a href="#">Pqbp1</a>    | <a href="#">Pqbp1.cSep08</a>    | <a href="#">302557</a> | 4418  | 994  | 6 | 263 | polyglutamine binding protein 1 (30.5 kD) (Pqbp1) alternative variant cSep08, mRNA.                  |
| <a href="#">Pqbp1</a>    | <a href="#">Pqbp1.dSep08</a>    | <a href="#">302557</a> | 3578  | 463  | 4 | 128 | polyglutamine binding protein 1 (Pqbp1) alternative variant dSep08, mRNA.                            |
| <a href="#">Pqbp1</a>    | <a href="#">Pqbp1.eSep08</a>    | <a href="#">302557</a> | 2737  | 299  | 2 | 74  | polyglutamine binding protein 1 (Pqbp1) alternative variant eSep08, mRNA.                            |
| <a href="#">Pqlc1</a>    | <a href="#">Pqlc1.aSep08</a>    | <a href="#">361352</a> | 36464 | 1459 | 4 | 271 | PQ loop repeat containing 1 (30.6 kD) (Pqlc1) alternative variant aSep08, mRNA.                      |
| <a href="#">Pqlc1</a>    | <a href="#">Pqlc1.bSep08</a>    | <a href="#">361352</a> | 36209 | 1602 | 2 | 253 | PQ loop repeat containing 1 (28.4 kD) (Pqlc1) alternative variant bSep08, mRNA.                      |
| <a href="#">Pqlc1</a>    | <a href="#">Pqlc1.dSep08</a>    | <a href="#">361352</a> | 27013 | 772  | 3 | 184 | PQ loop repeat containing 1 (Pqlc1) alternative variant dSep08, mRNA.                                |
| <a href="#">Pqlc2</a>    | <a href="#">Pqlc2.aSep08</a>    | <a href="#">362642</a> | 9905  | 1388 | 6 | 293 | PQ loop repeat containing 2 (32.2 kD) (Pqlc2) alternative variant aSep08, mRNA.                      |
| <a href="#">Pqlc2</a>    | <a href="#">Pqlc2.bSep08</a>    | <a href="#">362642</a> | 6163  | 1057 | 2 | 146 | PQ loop repeat containing 2 (15.9 kD) (Pqlc2) alternative variant bSep08, mRNA.                      |
| <a href="#">Pqlc3</a>    | <a href="#">Pqlc3.bSep08</a>    | <a href="#">298906</a> | 7105  | 626  | 1 | 153 | PQ loop repeat containing 3 (17.2 kD) (Pqlc3) alternative variant bSep08, mRNA.                      |
| <a href="#">Praf2</a>    | <a href="#">Praf2.cSep08</a>    | <a href="#">367743</a> | 1351  | 522  | 2 | 29  | PRA1 domain family 2 (3.2 kD) (Praf2) alternative variant cSep08, mRNA.                              |
| <a href="#">Pram1</a>    | <a href="#">Pram1.aSep08</a>    | <a href="#">362848</a> | 4272  | 1781 | 4 | 556 | PML-RAR alpha-regulated adaptor molecule 1 (Pram1) alternative variant aSep08, mRNA.                 |
| <a href="#">Pram1</a>    | <a href="#">Pram1.bSep08</a>    | <a href="#">362848</a> | 601   | 354  | 3 | 80  | PML-RAR alpha-regulated adaptor molecule 1 (Pram1) alternative variant bSep08, mRNA.                 |
| <a href="#">Pram1</a>    | <a href="#">Pram1.cSep08</a>    | <a href="#">362848</a> | 499   | 415  | 1 | 63  | PML-RAR alpha-regulated adaptor molecule 1 (7.3 kD) (Pram1) alternative variant cSep08, mRNA.        |
| <a href="#">Pramef12</a> | <a href="#">Pramef12.aSep08</a> | <a href="#">691157</a> | 7779  | 678  | 3 | 189 | PRAME family member 12 (Pramef12) alternative variant aSep08, mRNA.                                  |
| <a href="#">Prc1</a>     | <a href="#">Prc1.bSep08</a>     | <a href="#">308761</a> | 6108  | 1707 | 7 | 239 | protein regulator of cytokinesis 1 (Prc1) alternative variant bSep08, mRNA.                          |
| <a href="#">Prc1</a>     | <a href="#">Prc1.cSep08</a>     | <a href="#">308761</a> | 4177  | 1063 | 4 | 116 | protein regulator of cytokinesis 1 (Prc1) alternative variant cSep08, mRNA.                          |
| <a href="#">Prpcp</a>    | <a href="#">Prpcp.bSep08</a>    | <a href="#">293118</a> | 3543  | 679  | 2 | 187 | prolylcarboxypeptidase (angiotensinase C) (Prpcp) alternative variant bSep08, mRNA.                  |
| <a href="#">Prpcp</a>    | <a href="#">Prpcp.dSep08</a>    | <a href="#">293118</a> | 2656  | 518  | 1 | 125 | prolylcarboxypeptidase (angiotensinase C) (14.2 kD) (Prpcp) alternative variant dSep08, mRNA.        |
| <a href="#">Prdm2</a>    | <a href="#">Prdm2.bSep08</a>    | <a href="#">313678</a> | 75830 | 512  | 5 | 124 | putative protein of metazoan origin (Prdm2) alternative variant bSep08, mRNA.                        |



|                               |                                      |                        |        |      |    |      |                                                                                                           |
|-------------------------------|--------------------------------------|------------------------|--------|------|----|------|-----------------------------------------------------------------------------------------------------------|
| <a href="#">Prdm4</a>         | <a href="#">Prdm4.bSep08</a>         | <a href="#">170820</a> | 1288   | 737  | 1  | 141  | zinc finger, C2H2-type (Prdm4) alternative variant bSep08, mRNA.                                          |
| <a href="#">Prdm5</a>         | <a href="#">Prdm5.aSep08</a>         | <a href="#">689788</a> | 102863 | 1130 |    | 376  | domain 5 (Prdm5) mRNA.                                                                                    |
| <a href="#">Prdm6</a>         | <a href="#">Prdm6.aSep08</a>         | <a href="#">307305</a> | 19715  | 426  |    | 77   | PR domain 6 (Prdm6) mRNA.                                                                                 |
| <a href="#">Prdm8</a>         | <a href="#">Prdm8.aSep08</a>         | <a href="#">305198</a> | 2172   | 840  | 1  | 279  | pr domain 8 (Prdm8) alternative variant aSep08, mRNA.                                                     |
| <a href="#">Prdm10</a>        | <a href="#">Prdm10.aSep08</a>        | <a href="#">500964</a> | 28329  | 2190 |    | 700  | zinc finger, C2H2-type (Prdm10) mRNA.                                                                     |
| <a href="#">Prdm12</a>        | <a href="#">Prdm12.aSep08</a>        | <a href="#">688699</a> | 2839   | 486  |    | 161  | zinc finger, C2H2-type (Prdm12) mRNA.                                                                     |
| <a href="#">Prdx2</a>         | <a href="#">Prdx2.bSep08</a>         | <a href="#">29338</a>  | 5034   | 813  | 6  | 192  | peroxiredoxin 2 (Prdx2) alternative variant bSep08, mRNA.                                                 |
| <a href="#">Prdx2</a>         | <a href="#">Prdx2.cSep08</a>         | <a href="#">29338</a>  | 5760   | 1286 | 5  | 181  | peroxiredoxin 2 (19.8 kD) (Prdx2) alternative variant cSep08, mRNA.                                       |
| <a href="#">Prdx2</a>         | <a href="#">Prdx2.eSep08</a>         | <a href="#">29338</a>  | 1756   | 419  | 3  | 88   | peroxiredoxin 2 (Prdx2) alternative variant eSep08, mRNA.                                                 |
| <a href="#">Prdx2</a>         | <a href="#">Prdx2.fSep08</a>         | <a href="#">29338</a>  | 505    | 416  | 2  | 47   | peroxiredoxin 2 (Prdx2) alternative variant fSep08, mRNA.                                                 |
| <a href="#">Prdx3</a>         | <a href="#">Prdx3.bSep08</a>         | <a href="#">64371</a>  | 1831   | 1369 | 2  | 55   | peroxiredoxin 3 (6.2 kD) (Prdx3) alternative variant bSep08, mRNA.                                        |
| <a href="#">Prdx5</a>         | <a href="#">Prdx5.bSep08</a>         | <a href="#">113898</a> | 2947   | 789  | 4  | 217  | peroxiredoxin 5 (Prdx5) alternative variant bSep08, complete mRNA.                                        |
| <a href="#">Prdx5</a>         | <a href="#">Prdx5.cSep08</a>         | <a href="#">113898</a> | 3344   | 687  | 6  | 158  | peroxiredoxin 5 (16.7 kD) (Prdx5) alternative variant cSep08, mRNA.                                       |
| <a href="#">Prdx5</a>         | <a href="#">Prdx5.dSep08</a>         | <a href="#">113898</a> | 3454   | 430  | 6  | 142  | peroxiredoxin 5 (Prdx5) alternative variant dSep08, mRNA.                                                 |
| <a href="#">Prdx5</a>         | <a href="#">Prdx5.gSep08</a>         | <a href="#">113898</a> | 1113   | 777  | 2  | 78   | peroxiredoxin 5 (9.6 kD) (Prdx5) alternative variant gSep08, mRNA.                                        |
| <a href="#">Prdx5</a>         | <a href="#">Prdx5.hSep08</a>         | <a href="#">113898</a> | 439    | 347  | 2  | 42   | peroxiredoxin 5 (Prdx5) alternative variant hSep08, mRNA.                                                 |
| <a href="#">Pre-SET.0</a>     | <a href="#">Pre-SET.0.aSep08</a>     |                        | 20762  | 4460 | 16 | 1113 | SET domain bifurcated 1 (Pre-SET.0) alternative variant aSep08, mRNA.                                     |
| <a href="#">Pre-SET.0</a>     | <a href="#">Pre-SET.0.bSep08</a>     |                        | 8758   | 1011 | 2  | 197  | CRA a (Pre-SET.0) alternative variant bSep08, mRNA.                                                       |
| <a href="#">Pre-SET.0</a>     | <a href="#">Pre-SET.0.cSep08</a>     |                        | 1253   | 1136 | 2  | 70   | CRA b like (7.6 kD) (Pre-SET.0) alternative variant cSep08, mRNA.                                         |
| <a href="#">Pre-SET.0</a>     | <a href="#">Pre-SET.0.dSep08</a>     |                        | 499    | 384  | 2  | 55   | SET domain bifurcated 1 (Pre-SET.0) alternative variant dSep08, mRNA.                                     |
| <a href="#">Prelid1</a>       | <a href="#">Prelid1.bSep08</a>       | <a href="#">290995</a> | 2359   | 675  | 1  | 174  | preli (Prelid1) alternative variant bSep08, mRNA.                                                         |
| <a href="#">Prelid2</a>       | <a href="#">Prelid2.aSep08</a>       | <a href="#">681037</a> | 74752  | 598  | 2  | 108  | putative protein (Prelid2) alternative variant aSep08, mRNA.                                              |
| <a href="#">Prelid2</a>       | <a href="#">Prelid2.bSep08</a>       | <a href="#">681037</a> | 94115  | 397  | 1  | 44   | putative protein of mammalian origin (Prelid2) alternative variant bSep08, mRNA.                          |
| <a href="#">Prelp</a>         | <a href="#">Prelp.bSep08</a>         | <a href="#">84400</a>  | 12951  | 3581 | 2  | 377  | proline arginine-rich end leucine-rich repeat protein (43.2 kD) (Prelp) alternative variant bSep08, mRNA. |
| <a href="#">Prenyltrans.0</a> | <a href="#">Prenyltrans.0.aSep08</a> |                        | 9219   | 2761 | 4  | 170  | lanosterol synthase (Prenyltrans.0) alternative variant aSep08, mRNA.                                     |
| <a href="#">Prenyltrans.0</a> | <a href="#">Prenyltrans.0.bSep08</a> |                        | 746    | 211  | 1  | 45   | putative protein (Prenyltrans.0) alternative variant bSep08, mRNA.                                        |
| <a href="#">Prep</a>          | <a href="#">Prep.bSep08</a>          | <a href="#">83471</a>  | 32885  | 2847 | 6  | 259  | prolyl endopeptidase (28.7 kD) (Prep) alternative variant bSep08, mRNA.                                   |
| <a href="#">Prep</a>          | <a href="#">Prep.cSep08</a>          | <a href="#">83471</a>  | 1888   | 458  | 2  | 99   | prolyl endopeptidase (Prep) alternative variant cSep08, mRNA.                                             |

|                          |                                 |                        |       |      |    |     |                                                                                                                                                                                               |
|--------------------------|---------------------------------|------------------------|-------|------|----|-----|-----------------------------------------------------------------------------------------------------------------------------------------------------------------------------------------------|
| <a href="#">Prepl</a>    | <a href="#">Prepl.aSep08</a>    | <a href="#">298771</a> | 29761 | 2387 | 8  | 640 | prolyl endopeptidase-like (Prepl) alternative variant aSep08, mRNA.                                                                                                                           |
| <a href="#">Prepl</a>    | <a href="#">Prepl.cSep08</a>    | <a href="#">298771</a> | 14124 | 679  | 5  | 140 | prolyl endopeptidase-like (Prepl) alternative variant cSep08, mRNA.                                                                                                                           |
| <a href="#">Prepl</a>    | <a href="#">Prepl.dSep08</a>    | <a href="#">298771</a> | 10181 | 734  | 2  | 121 | prolyl endopeptidase-like (Prepl) alternative variant dSep08, mRNA.                                                                                                                           |
| <a href="#">Prg-2</a>    | <a href="#">Prg-2.bSep08</a>    | <a href="#">314614</a> | 9633  | 1247 | 4  | 136 | plasticity-related gene 2 (15.1 kD) (Prg-2) alternative variant bSep08, mRNA.                                                                                                                 |
| <a href="#">Prg-2</a>    | <a href="#">Prg-2.cSep08</a>    | <a href="#">314614</a> | 11006 | 247  | 1  | 55  | plasticity-related gene 2 (Prg-2) alternative variant cSep08, mRNA.                                                                                                                           |
| <a href="#">Prg-4</a>    | <a href="#">Prg-4.aSep08</a>    | <a href="#">300443</a> | 11881 | 2364 | 10 | 452 | plasticity-related gene 4 (48.4 kD) (Prg-4) alternative variant aSep08, mRNA.                                                                                                                 |
| <a href="#">Prg-4</a>    | <a href="#">Prg-4.bSep08</a>    | <a href="#">300443</a> | 5447  | 1881 | 5  | 206 | plasticity-related gene 4 (Prg-4) alternative variant bSep08, mRNA.                                                                                                                           |
| <a href="#">Prg-4</a>    | <a href="#">Prg-4.cSep08</a>    | <a href="#">300443</a> | 797   | 407  | 2  | 62  | plasticity-related gene 4 (Prg-4) alternative variant cSep08, mRNA.                                                                                                                           |
| <a href="#">Prg-4</a>    | <a href="#">Prg-4.dSep08</a>    | <a href="#">300443</a> | 2769  | 343  | 3  | 53  | plasticity-related gene 4 (Prg-4) alternative variant dSep08, mRNA.                                                                                                                           |
| <a href="#">Prg4</a>     | <a href="#">Prg4.bSep08</a>     | <a href="#">289104</a> | 4776  | 536  | 4  | 172 | proteoglycan 4, (megakaryocyte stimulating factor, articular superficial zone protein, camptodactyly, arthropathy, coxa vara, pericarditis syndrome) (Prg4) alternative variant bSep08, mRNA. |
| <a href="#">Pric285</a>  | <a href="#">Pric285.aSep08</a>  | <a href="#">296474</a> | 3010  | 2064 | 5  | 555 | peroxisomal proliferator-activated receptor A interacting complex 285 (Pric285) alternative variant aSep08, mRNA.                                                                             |
| <a href="#">Pric285</a>  | <a href="#">Pric285.bSep08</a>  | <a href="#">296474</a> | 1818  | 1529 | 4  | 266 | peroxisomal proliferator-activated receptor A interacting complex 285 (29.9 kD) (Pric285) alternative variant bSep08, mRNA.                                                                   |
| <a href="#">Prickle3</a> | <a href="#">Prickle3.bSep08</a> | <a href="#">317380</a> | 3469  | 1158 | 5  | 315 | prickle homolog 3 (Drosophila) (Prickle3) alternative variant bSep08, mRNA.                                                                                                                   |
| <a href="#">Prickle4</a> | <a href="#">Prickle4.aSep08</a> | <a href="#">681123</a> | 1534  | 677  | 3  | 135 | prickle homolog 4 (Drosophila) (Prickle4) alternative variant aSep08, mRNA.                                                                                                                   |
| <a href="#">Prim1</a>    | <a href="#">Prim1.aSep08</a>    | <a href="#">246327</a> | 29441 | 1560 | 11 | 417 | DNA primase, p49 subunit (Prim1) alternative variant aSep08, mRNA.                                                                                                                            |
| <a href="#">Prim1</a>    | <a href="#">Prim1.bSep08</a>    | <a href="#">246327</a> | 29903 | 1451 | 12 | 333 | DNA primase, p49 subunit (38.9 kD) (Prim1) alternative variant bSep08, complete mRNA.                                                                                                         |
| <a href="#">Prim1</a>    | <a href="#">Prim1.cSep08</a>    | <a href="#">246327</a> | 23720 | 877  | 5  | 277 | DNA primase, p49 subunit (Prim1) alternative variant cSep08, mRNA.                                                                                                                            |
| <a href="#">Prim1</a>    | <a href="#">Prim1.dSep08</a>    | <a href="#">246327</a> | 9692  | 727  | 8  | 242 | DNA primase, p49 subunit (Prim1) alternative variant dSep08, mRNA.                                                                                                                            |
| <a href="#">Prim1</a>    | <a href="#">Prim1.eSep08</a>    | <a href="#">246327</a> | 9281  | 726  | 8  | 219 | DNA primase, p49 subunit (Prim1) alternative variant eSep08, mRNA.                                                                                                                            |
| <a href="#">Prim1</a>    | <a href="#">Prim1.fSep08</a>    | <a href="#">246327</a> | 7863  | 1110 | 6  | 178 | DNA primase, p49 subunit (Prim1) alternative variant fSep08, mRNA.                                                                                                                            |
| <a href="#">Prim2</a>    | <a href="#">Prim2.bSep08</a>    | <a href="#">301323</a> | 40275 | 826  | 7  | 275 | DNA primase, p58 subunit (Prim2) alternative variant bSep08, mRNA.                                                                                                                            |
| <a href="#">Prim2</a>    | <a href="#">Prim2.cSep08</a>    | <a href="#">301323</a> | 50188 | 732  | 7  | 244 | DNA primase, p58 subunit (Prim2) alternative variant cSep08, mRNA.                                                                                                                            |

|                         |                                |                        |        |      |    |     |                                                                                                                               |
|-------------------------|--------------------------------|------------------------|--------|------|----|-----|-------------------------------------------------------------------------------------------------------------------------------|
| <a href="#">Prim2</a>   | <a href="#">Prim2.dSep08</a>   | <a href="#">301323</a> | 167897 | 1269 | 8  | 220 | DNA primase, p58 subunit (25.3 kD) (Prim2) alternative variant dSep08, mRNA.                                                  |
| <a href="#">Prima1</a>  | <a href="#">Prima1.aSep08</a>  | <a href="#">690195</a> | 43598  | 441  | 4  | 146 | proline rich membrane anchor 1 (Prima1) alternative variant aSep08, mRNA.                                                     |
| <a href="#">Prkaa1</a>  | <a href="#">Prkaa1.aSep08</a>  | <a href="#">65248</a>  | 4895   | 1783 | 4  | 558 | protein kinase, AMP-activated, alpha 1 catalytic subunit (Prkaa1) alternative variant aSep08, mRNA.                           |
| <a href="#">Prkab1</a>  | <a href="#">Prkab1.bSep08</a>  | <a href="#">83803</a>  | 9101   | 806  | 7  | 241 | 5-AMP-activated protein kinase, beta subunit, complex-interacting region (Prkab1) alternative variant bSep08, mRNA.           |
| <a href="#">Prkab1</a>  | <a href="#">Prkab1.cSep08</a>  | <a href="#">83803</a>  | 5153   | 2021 | 3  | 116 | 5-AMP-activated protein kinase, beta subunit, complex-interacting region (13.1 kD) (Prkab1) alternative variant cSep08, mRNA. |
| <a href="#">Prkab1</a>  | <a href="#">Prkab1.dSep08</a>  | <a href="#">83803</a>  | 7225   | 928  | 5  | 87  | putative protein of ancient origin (Prkab1) alternative variant dSep08, mRNA.                                                 |
| <a href="#">Prkab1</a>  | <a href="#">Prkab1.fSep08</a>  | <a href="#">83803</a>  | 1122   | 917  | 2  | 61  | AMP-activated protein kinase (Prkab1) alternative variant fSep08, mRNA.                                                       |
| <a href="#">Prkab1</a>  | <a href="#">Prkab1.gSep08</a>  | <a href="#">83803</a>  | 1296   | 348  | 2  | 52  | putative protein of eukaryotic origin (Prkab1) alternative variant gSep08, mRNA.                                              |
| <a href="#">Prkacb</a>  | <a href="#">Prkacb.bSep08</a>  | <a href="#">293508</a> | 24329  | 1345 | 6  | 216 | protein kinase, cAMP dependent, catalytic, beta (25.3 kD) (Prkacb) alternative variant bSep08, mRNA.                          |
| <a href="#">Prkacb</a>  | <a href="#">Prkacb.cSep08</a>  | <a href="#">293508</a> | 25402  | 634  | 7  | 187 | protein kinase, cAMP dependent, catalytic, beta (Prkacb) alternative variant cSep08, mRNA.                                    |
| <a href="#">Prkag1</a>  | <a href="#">Prkag1.bSep08</a>  | <a href="#">25520</a>  | 15915  | 701  | 7  | 189 | protein kinase, AMP-activated, gamma 1 non-catalytic subunit (21.6 kD) (Prkag1) alternative variant bSep08, mRNA.             |
| <a href="#">Prkag1</a>  | <a href="#">Prkag1.cSep08</a>  | <a href="#">25520</a>  | 12250  | 1786 | 8  | 177 | protein kinase, AMP-activated, gamma 1 non-catalytic subunit (Prkag1) alternative variant cSep08, mRNA.                       |
| <a href="#">Prkag1</a>  | <a href="#">Prkag1.dSep08</a>  | <a href="#">25520</a>  | 14846  | 402  | 2  | 68  | protein kinase, AMP-activated, gamma 1 non-catalytic subunit (7.6 kD) (Prkag1) alternative variant dSep08, mRNA.              |
| <a href="#">Prkag2</a>  | <a href="#">Prkag2.aSep08</a>  | <a href="#">373545</a> | 233803 | 1657 | 11 | 407 | protein kinase AMP-activated (Prkag2) alternative variant aSep08, mRNA.                                                       |
| <a href="#">Prkag2</a>  | <a href="#">Prkag2.dSep08</a>  | <a href="#">373545</a> | 80879  | 1120 | 9  | 154 | kinase -activated protein (Prkag2) alternative variant dSep08, mRNA.                                                          |
| <a href="#">Prkag2</a>  | <a href="#">Prkag2.eSep08</a>  | <a href="#">373545</a> | 3571   | 498  | 2  | 102 | protein kinase AMP-activated (11.4 kD) (Prkag2) alternative variant eSep08, mRNA.                                             |
| <a href="#">Prkar1b</a> | <a href="#">Prkar1b.bSep08</a> | <a href="#">25521</a>  | 76062  | 729  | 6  | 243 | protein kinase, cAMP dependent regulatory, type I, beta (Prkar1b) alternative variant bSep08, mRNA.                           |
| <a href="#">Prkar1b</a> | <a href="#">Prkar1b.cSep08</a> | <a href="#">25521</a>  | 40099  | 532  | 3  | 138 | protein kinase, cAMP dependent regulatory, type I, beta (Prkar1b) alternative variant cSep08, mRNA.                           |
| <a href="#">Prkar1b</a> | <a href="#">Prkar1b.dSep08</a> | <a href="#">25521</a>  | 26919  | 1677 | 3  | 111 | protein kinase, cAMP dependent regulatory, type I, beta (12.5 kD) (Prkar1b) alternative variant dSep08, mRNA.                 |
| <a href="#">Prkar2a</a> | <a href="#">Prkar2a.bSep08</a> | <a href="#">29699</a>  | 12888  | 4090 | 2  | 154 | protein kinase, cAMP dependent regulatory, type II alpha (17.3 kD) (Prkar2a) alternative variant bSep08, mRNA.                |
| <a href="#">Prkar2b</a> | <a href="#">Prkar2b.bSep08</a> | <a href="#">24679</a>  | 46358  | 675  | 8  | 203 | protein kinase, cAMP dependent regulatory, type II beta (Prkar2b) alternative variant bSep08, mRNA.                           |

|                         |                                |                        |        |      |    |     |                                                                                |
|-------------------------|--------------------------------|------------------------|--------|------|----|-----|--------------------------------------------------------------------------------|
| <a href="#">Prkca</a>   | <a href="#">Prkca.aSep08</a>   | <a href="#">24680</a>  | 114646 | 3677 | 2  | 576 | protein kinase C, alpha (Prkca) alternative variant aSep08, mRNA.              |
| <a href="#">Prkcb1</a>  | <a href="#">Prkcb1.bSep08</a>  | <a href="#">25023</a>  | 109621 | 1887 | 12 | 459 | protein kinase C, beta 1 (Prkcb1) alternative variant bSep08, mRNA.            |
| <a href="#">Prkcb1</a>  | <a href="#">Prkcb1.cSep08</a>  | <a href="#">25023</a>  | 30175  | 1119 | 2  | 90  | protein kinase C, beta 1 (Prkcb1) alternative variant cSep08, mRNA.            |
| <a href="#">Prkcb1</a>  | <a href="#">Prkcb1.eSep08</a>  | <a href="#">25023</a>  | 6622   | 688  | 2  | 61  | protein kinase C, beta 1 (Prkcb1) alternative variant eSep08, mRNA.            |
| <a href="#">Prkcb1</a>  | <a href="#">Prkcb1.fSep08</a>  | <a href="#">25023</a>  | 176794 | 1406 | 4  | 51  | protein kinase C, beta 1 (6.0 kD) (Prkcb1) alternative variant fSep08, mRNA.   |
| <a href="#">Prkcbp1</a> | <a href="#">Prkcbp1.bSep08</a> | <a href="#">296374</a> | 12741  | 1773 | 6  | 334 | protein kinase C binding protein 1 (Prkcbp1) alternative variant bSep08, mRNA. |
| <a href="#">Prkcbp1</a> | <a href="#">Prkcbp1.cSep08</a> | <a href="#">296374</a> | 40934  | 669  | 7  | 222 | protein kinase C binding protein 1 (Prkcbp1) alternative variant cSep08, mRNA. |
| <a href="#">Prkcbp1</a> | <a href="#">Prkcbp1.dSep08</a> | <a href="#">296374</a> | 44536  | 1010 | 5  | 220 | protein kinase C binding protein 1 (Prkcbp1) alternative variant dSep08, mRNA. |
| <a href="#">Prkcbp1</a> | <a href="#">Prkcbp1.eSep08</a> | <a href="#">296374</a> | 10644  | 2036 | 5  | 219 | protein kinase C binding protein 1 (Prkcbp1) alternative variant eSep08, mRNA. |
| <a href="#">Prkcbp1</a> | <a href="#">Prkcbp1.gSep08</a> | <a href="#">296374</a> | 10201  | 870  | 6  | 167 | protein kinase C binding protein 1 (Prkcbp1) alternative variant gSep08, mRNA. |
| <a href="#">Prkcbp1</a> | <a href="#">Prkcbp1.hSep08</a> | <a href="#">296374</a> | 15104  | 757  | 6  | 161 | protein kinase C binding protein 1 (Prkcbp1) alternative variant hSep08, mRNA. |
| <a href="#">Prkcbp1</a> | <a href="#">Prkcbp1.iSep08</a> | <a href="#">296374</a> | 40807  | 398  | 4  | 132 | protein kinase C binding protein 1 (Prkcbp1) alternative variant iSep08, mRNA. |
| <a href="#">Prkcbp1</a> | <a href="#">Prkcbp1.jSep08</a> | <a href="#">296374</a> | 40770  | 373  | 5  | 105 | protein kinase C binding protein 1 (Prkcbp1) alternative variant jSep08, mRNA. |
| <a href="#">Prkcbp1</a> | <a href="#">Prkcbp1.kSep08</a> | <a href="#">296374</a> | 7965   | 445  | 2  | 51  | protein kinase C binding protein 1 (Prkcbp1) alternative variant kSep08, mRNA. |
| <a href="#">Prkcc</a>   | <a href="#">Prkcc.bSep08</a>   | <a href="#">24681</a>  | 1713   | 853  | 3  | 130 | kinase C gamma (14.6 kD) (Prkcc) alternative variant bSep08, mRNA.             |
| <a href="#">Prkcc</a>   | <a href="#">Prkcc.cSep08</a>   | <a href="#">24681</a>  | 2062   | 668  | 4  | 95  | kinase C gamma (Prkcc) alternative variant cSep08, mRNA.                       |
| <a href="#">Prkcc</a>   | <a href="#">Prkcc.dSep08</a>   | <a href="#">24681</a>  | 1589   | 495  | 2  | 74  | protein kinase C gamma (Prkcc) alternative variant dSep08, mRNA.               |
| <a href="#">Prkcd</a>   | <a href="#">Prkcd.bSep08</a>   | <a href="#">170538</a> | 4178   | 743  | 7  | 206 | protein kinase C delta CRA a (Prkcd) alternative variant bSep08, mRNA.         |
| <a href="#">Prkcd</a>   | <a href="#">Prkcd.cSep08</a>   | <a href="#">170538</a> | 2115   | 726  | 3  | 116 | protein kinase C delta CRA b (Prkcd) alternative variant cSep08, mRNA.         |
| <a href="#">Prkcd</a>   | <a href="#">Prkcd.dSep08</a>   | <a href="#">170538</a> | 2454   | 526  | 2  | 61  | putative protein (6.5 kD) (Prkcd) alternative variant dSep08, mRNA.            |
| <a href="#">Prkce</a>   | <a href="#">Prkce.bSep08</a>   | <a href="#">29340</a>  | 68109  | 484  | 4  | 161 | protein kinase C, epsilon (Prkce) alternative variant bSep08, mRNA.            |
| <a href="#">Prkce</a>   | <a href="#">Prkce.cSep08</a>   | <a href="#">29340</a>  | 9114   | 637  | 3  | 129 | protein kinase C, epsilon (Prkce) alternative variant cSep08, mRNA.            |
| <a href="#">Prkce</a>   | <a href="#">Prkce.eSep08</a>   | <a href="#">29340</a>  | 9017   | 300  | 3  | 74  | protein kinase C, epsilon (8.8 kD) (Prkce) alternative variant eSep08, mRNA.   |
| <a href="#">Prkcq</a>   | <a href="#">Prkcq.aSep08</a>   | <a href="#">85420</a>  | 58808  | 2727 |    | 464 | protein kinase C, theta (53.9 kD) (Prkcq) mRNA.                                |

|                        |                               |                        |        |      |    |     |                                                                                                                           |
|------------------------|-------------------------------|------------------------|--------|------|----|-----|---------------------------------------------------------------------------------------------------------------------------|
| <a href="#">Prkcsh</a> | <a href="#">Prkcsh.bSep08</a> | <a href="#">300445</a> | 10178  | 1601 | 17 | 497 | protein kinase C substrate 80K-H (Prkcsh) alternative variant bSep08, mRNA.                                               |
| <a href="#">Prkcsh</a> | <a href="#">Prkcsh.cSep08</a> | <a href="#">300445</a> | 733    | 561  | 3  | 130 | protein kinase C substrate 80K-H (14.2 kD) (Prkcsh) alternative variant cSep08, mRNA.                                     |
| <a href="#">Prkcsh</a> | <a href="#">Prkcsh.dSep08</a> | <a href="#">300445</a> | 4093   | 664  | 3  | 119 | protein kinase C substrate 80K-H (Prkcsh) alternative variant dSep08, mRNA.                                               |
| <a href="#">Prkcz</a>  | <a href="#">Prkcz.bSep08</a>  | <a href="#">25522</a>  | 109433 | 2188 | 13 | 546 | protein kinase C, zeta (62.5 kD) (Prkcz) alternative variant bSep08, mRNA.                                                |
| <a href="#">Prkcz</a>  | <a href="#">Prkcz.cSep08</a>  | <a href="#">25522</a>  | 63277  | 1062 | 1  | 96  | protein kinase C, zeta (Prkcz) alternative variant cSep08, mRNA.                                                          |
| <a href="#">Prkd1</a>  | <a href="#">Prkd1.aSep08</a>  | <a href="#">85421</a>  | 229432 | 456  |    | 152 | protein kinase D1 (Prkd1) mRNA.                                                                                           |
| <a href="#">Prkd2</a>  | <a href="#">Prkd2.bSep08</a>  | <a href="#">292658</a> | 8062   | 1556 | 7  | 231 | protein kinase D2 (24.6 kD) (Prkd2) alternative variant bSep08, mRNA.                                                     |
| <a href="#">Prkd2</a>  | <a href="#">Prkd2.cSep08</a>  | <a href="#">292658</a> | 1814   | 266  | 2  | 68  | protein kinase D2 (Prkd2) alternative variant cSep08, mRNA.                                                               |
| <a href="#">Prkd3</a>  | <a href="#">Prkd3.bSep08</a>  | <a href="#">313834</a> | 13211  | 1745 | 2  | 297 | protein kinase D3 (33.6 kD) (Prkd3) alternative variant bSep08, mRNA.                                                     |
| <a href="#">Prkdc</a>  | <a href="#">Prkdc.bSep08</a>  | <a href="#">360748</a> | 24474  | 3090 | 10 | 404 | protein kinase catalytic (46.5 kD) (Prkdc) alternative variant bSep08, mRNA.                                              |
| <a href="#">Prkdc</a>  | <a href="#">Prkdc.cSep08</a>  | <a href="#">360748</a> | 8571   | 1161 | 9  | 289 | protein kinase DNA-activated catalytic polypeptide CRA d (Prkdc) alternative variant cSep08, mRNA.                        |
| <a href="#">Prkdc</a>  | <a href="#">Prkdc.dSep08</a>  | <a href="#">360748</a> | 8541   | 423  | 3  | 140 | protein kinase catalytic (Prkdc) alternative variant dSep08, mRNA.                                                        |
| <a href="#">Prkdc</a>  | <a href="#">Prkdc.eSep08</a>  | <a href="#">360748</a> | 2739   | 922  | 2  | 80  | putative protein of eukaryotic origin (Prkdc) alternative variant eSep08, mRNA.                                           |
| <a href="#">Prkg1</a>  | <a href="#">Prkg1.aSep08</a>  | <a href="#">54286</a>  | 5888   | 785  |    | 104 | protein kinase, cGMP-dependent, type 1 (Prkg1) mRNA.                                                                      |
| <a href="#">Prkg2</a>  | <a href="#">Prkg2.bSep08</a>  | <a href="#">25523</a>  | 12169  | 417  | 1  | 138 | protein kinase, cGMP-dependent, type II (Prkg2) alternative variant bSep08, mRNA.                                         |
| <a href="#">Prkra</a>  | <a href="#">Prkra.bSep08</a>  | <a href="#">311130</a> | 5242   | 720  | 4  | 90  | protein kinase, interferon inducible double stranded RNA dependent activator (Prkra) alternative variant bSep08, mRNA.    |
| <a href="#">Prkrir</a> | <a href="#">Prkrir.aSep08</a> | <a href="#">308845</a> | 13049  | 618  |    | 185 | protein-kinase, interferon-inducible double stranded RNA dependent inhibitor, repressor of (P58 repressor) (Prkrir) mRNA. |
| <a href="#">Prkx</a>   | <a href="#">Prkx.bSep08</a>   | <a href="#">501563</a> | 994    | 784  | 2  | 153 | protein kinase, X-linked (Prkx) alternative variant bSep08, mRNA.                                                         |
| <a href="#">Prl</a>    | <a href="#">Prl.bSep08</a>    | <a href="#">24683</a>  | 10408  | 1345 | 5  | 225 | prolactin (25.7 kD) (Prl) alternative variant bSep08, mRNA.                                                               |
| <a href="#">Prl</a>    | <a href="#">Prl.cSep08</a>    | <a href="#">24683</a>  | 9945   | 876  | 5  | 223 | prolactin (25.4 kD) (Prl) alternative variant cSep08, complete mRNA.                                                      |
| <a href="#">Prl</a>    | <a href="#">Prl.dSep08</a>    | <a href="#">24683</a>  | 9776   | 704  | 5  | 216 | prolactin (Prl) alternative variant dSep08, mRNA.                                                                         |
| <a href="#">Prl</a>    | <a href="#">Prl.eSep08</a>    | <a href="#">24683</a>  | 9709   | 654  | 5  | 200 | prolactin (Prl) alternative variant eSep08, mRNA.                                                                         |
| <a href="#">Prl</a>    | <a href="#">Prl.fSep08</a>    | <a href="#">24683</a>  | 9935   | 767  | 4  | 190 | prolactin (21.7 kD) (Prl) alternative variant fSep08, complete mRNA.                                                      |
| <a href="#">Prl</a>    | <a href="#">Prl.gSep08</a>    | <a href="#">24683</a>  | 9881   | 710  | 4  | 189 | prolactin (21.6 kD) (Prl) alternative variant gSep08, mRNA.                                                               |
| <a href="#">Prl</a>    | <a href="#">Prl.hSep08</a>    | <a href="#">24683</a>  | 16150  | 739  | 5  | 174 | prolactin (19.7 kD) (Prl) alternative variant hSep08, mRNA.                                                               |
| <a href="#">Prl</a>    | <a href="#">Prl.iSep08</a>    | <a href="#">24683</a>  | 9854   | 715  | 5  | 133 | prolactin (15.2 kD) (Prl) alternative variant iSep08, mRNA.                                                               |

|                        |                               |                        |        |      |   |     |                                                                                                         |
|------------------------|-------------------------------|------------------------|--------|------|---|-----|---------------------------------------------------------------------------------------------------------|
| <a href="#">Prl</a>    | <a href="#">Prl.jSep08</a>    | <a href="#">24683</a>  | 3700   | 361  | 3 | 119 | prolactin (Prl) alternative variant jSep08, mRNA.                                                       |
| <a href="#">Prl</a>    | <a href="#">Prl.kSep08</a>    | <a href="#">24683</a>  | 4356   | 1020 | 3 | 114 | prolactin (12.8 kD) (Prl) alternative variant kSep08, complete mRNA.                                    |
| <a href="#">Prl3b1</a> | <a href="#">Prl3b1.cSep08</a> | <a href="#">24283</a>  | 25739  | 217  | 3 | 38  | prolactin family 3, subfamily b, member 1 (Prl3b1) alternative variant cSep08, mRNA.                    |
| <a href="#">Prl3d4</a> | <a href="#">Prl3d4.aSep08</a> | <a href="#">24282</a>  | 6753   | 734  | 4 | 224 | prolactin family 3, subfamily d, member 4 (25.9 kD) (Prl3d4) alternative variant aSep08, mRNA.          |
| <a href="#">Prl3d4</a> | <a href="#">Prl3d4.cSep08</a> | <a href="#">24282</a>  | 3965   | 440  | 2 | 117 | prolactin family 3, subfamily d, member 4 (13.7 kD) (Prl3d4) alternative variant cSep08, mRNA.          |
| <a href="#">Prl3d4</a> | <a href="#">Prl3d4.dSep08</a> | <a href="#">24282</a>  | 1944   | 767  | 1 | 78  | prolactin family 3, subfamily d, member 4 (8.9 kD) (Prl3d4) alternative variant dSep08, mRNA.           |
| <a href="#">Prl4a1</a> | <a href="#">Prl4a1.cSep08</a> | <a href="#">24656</a>  | 2147   | 487  | 2 |     |                                                                                                         |
| <a href="#">Prl6a1</a> | <a href="#">Prl6a1.bSep08</a> | <a href="#">24657</a>  | 7367   | 888  | 2 | 216 | prolactin family 6, subfamily a, member 1 (25.1 kD) (Prl6a1) alternative variant bSep08, mRNA.          |
| <a href="#">Prl7d1</a> | <a href="#">Prl7d1.bSep08</a> | <a href="#">84377</a>  | 6464   | 1056 | 2 | 217 | prolactin family 7, subfamily d, member 1 (24.3 kD) (Prl7d1) alternative variant bSep08, mRNA.          |
| <a href="#">Prl8a2</a> | <a href="#">Prl8a2.aSep08</a> | <a href="#">24315</a>  | 10175  | 928  | 1 | 240 | prolactin family 8, subfamily a, member 2 (27.9 kD) (Prl8a2) alternative variant aSep08, mRNA.          |
| <a href="#">Prl8a4</a> | <a href="#">Prl8a4.bSep08</a> | <a href="#">59088</a>  | 6339   | 1125 | 1 | 226 | prolactin family 8, subfamily a, member 4 (25.8 kD) (Prl8a4) alternative variant bSep08, complete mRNA. |
| <a href="#">Prl8a7</a> | <a href="#">Prl8a7.aSep08</a> | <a href="#">64368</a>  | 6409   | 1577 | 2 | 241 | prolactin family 8, subfamily a, member 7 (27.4 kD) (Prl8a7) alternative variant aSep08, complete mRNA. |
| <a href="#">Prl8a9</a> | <a href="#">Prl8a9.bSep08</a> | <a href="#">171406</a> | 4481   | 731  | 4 | 184 | prolactin family 8, subfamily a, member 9 (20.9 kD) (Prl8a9) alternative variant bSep08, complete mRNA. |
| <a href="#">Prl8a9</a> | <a href="#">Prl8a9.cSep08</a> | <a href="#">171406</a> | 4216   | 427  | 3 | 142 | prolactin family 8, subfamily a, member 9 (Prl8a9) alternative variant cSep08, mRNA.                    |
| <a href="#">Prl8a9</a> | <a href="#">Prl8a9.dSep08</a> | <a href="#">171406</a> | 4198   | 445  | 4 | 139 | prolactin family 8, subfamily a, member 9 (Prl8a9) alternative variant dSep08, mRNA.                    |
| <a href="#">Prl8a9</a> | <a href="#">Prl8a9.eSep08</a> | <a href="#">171406</a> | 2737   | 751  | 2 | 92  | prolactin family 8, subfamily a, member 9 (Prl8a9) alternative variant eSep08, mRNA.                    |
| <a href="#">Prlr</a>   | <a href="#">Prlr.cSep08</a>   | <a href="#">24684</a>  | 23329  | 555  | 4 | 134 | prolactin receptor (Prlr) alternative variant cSep08, mRNA.                                             |
| <a href="#">Prlr</a>   | <a href="#">Prlr.dSep08</a>   | <a href="#">24684</a>  | 158504 | 548  | 3 | 84  | putative protein (Prlr) alternative variant dSep08, mRNA.                                               |
| <a href="#">Prlr</a>   | <a href="#">Prlr.eSep08</a>   | <a href="#">24684</a>  | 34265  | 627  | 5 | 17  | putative protein (2.2 kD) (Prlr) alternative variant eSep08, mRNA.                                      |
| <a href="#">Prlr</a>   | <a href="#">Prlr.fSep08</a>   | <a href="#">24684</a>  | 120132 | 567  | 3 | 35  | putative protein (Prlr) alternative variant fSep08, mRNA.                                               |
| <a href="#">Prlr</a>   | <a href="#">Prlr.gSep08</a>   | <a href="#">24684</a>  | 58263  | 484  | 2 | 34  | putative protein (3.7 kD) (Prlr) alternative variant gSep08, mRNA.                                      |
| <a href="#">Prmt1</a>  | <a href="#">Prmt1.bSep08</a>  | <a href="#">60421</a>  | 6945   | 784  | 8 | 253 | protein arginine N-methyltransferase 1 (Prmt1) alternative variant bSep08, mRNA.                        |
| <a href="#">Prmt1</a>  | <a href="#">Prmt1.cSep08</a>  | <a href="#">60421</a>  | 4232   | 661  | 5 | 200 | protein arginine N-methyltransferase 1 (Prmt1) alternative variant cSep08, mRNA.                        |
| <a href="#">Prmt2</a>  | <a href="#">Prmt2.bSep08</a>  | <a href="#">499420</a> | 7373   | 562  | 1 | 187 | protein arginine N-methyltransferase 2 (Prmt2) alternative variant bSep08, mRNA.                        |
| <a href="#">Prmt5</a>  | <a href="#">Prmt5.bSep08</a>  | <a href="#">364382</a> | 1102   | 428  | 2 | 64  | protein arginine N-methyltransferase 5 (Prmt5) alternative variant bSep08, mRNA.                        |

|                                 |                                        |                        |       |      |    |      |                                                                                             |
|---------------------------------|----------------------------------------|------------------------|-------|------|----|------|---------------------------------------------------------------------------------------------|
| <a href="#">Prmt7</a>           | <a href="#">Prmt7.bSep08</a>           | <a href="#">361402</a> | 35122 | 865  | 7  | 284  | protein arginine N-methyltransferase 7 (Prmt7) alternative variant bSep08, mRNA.            |
| <a href="#">Prmt7</a>           | <a href="#">Prmt7.cSep08</a>           | <a href="#">361402</a> | 2273  | 389  | 3  | 114  | protein arginine N-methyltransferase 7 (Prmt7) alternative variant cSep08, mRNA.            |
| <a href="#">Prnd</a>            | <a href="#">Prnd.bSep08</a>            | <a href="#">113910</a> | 3193  | 2329 | 2  | 181  | prion protein dublet (Prnd) alternative variant bSep08, mRNA.                               |
| <a href="#">Prnp</a>            | <a href="#">Prnp.bSep08</a>            | <a href="#">24686</a>  | 13954 | 821  | 1  | 194  | prion protein (Prnp) alternative variant bSep08, mRNA.                                      |
| <a href="#">Prnpip1</a>         | <a href="#">Prnpip1.aSep08</a>         | <a href="#">313535</a> | 42599 | 986  | 6  | 328  | prion protein interacting protein 1 (Prnpip1) alternative variant aSep08, mRNA.             |
| <a href="#">Prnpip1</a>         | <a href="#">Prnpip1.bSep08</a>         | <a href="#">313535</a> | 38986 | 807  | 5  | 268  | prion protein interacting protein 1 (Prnpip1) alternative variant bSep08, mRNA.             |
| <a href="#">Prnpip1</a>         | <a href="#">Prnpip1.cSep08</a>         | <a href="#">313535</a> | 24300 | 793  | 3  | 144  | prion protein interacting protein 1 (Prnpip1) alternative variant cSep08, mRNA.             |
| <a href="#">Prnpip1</a>         | <a href="#">Prnpip1.eSep08</a>         | <a href="#">313535</a> | 40180 | 346  | 4  | 76   | prion protein interacting protein 1 (Prnpip1) alternative variant eSep08, mRNA.             |
| <a href="#">PRO8NT.0</a>        | <a href="#">PRO8NT.0.aSep08</a>        |                        | 4934  | 1869 |    | 533  | pre-mRNA processing factor 8 (PRO8NT.0) mRNA.                                               |
| <a href="#">Proc</a>            | <a href="#">Proc.bSep08</a>            | <a href="#">25268</a>  | 8064  | 836  | 8  | 259  | protein C (Proc) alternative variant bSep08, mRNA.                                          |
| <a href="#">PROCN.0</a>         | <a href="#">PROCN.0.aSep08</a>         |                        | 2713  | 1177 |    | 391  | pre-mRNA processing factor 8 (PROCN.0) mRNA.                                                |
| <a href="#">Prodh2</a>          | <a href="#">Prodh2.bSep08</a>          | <a href="#">361538</a> | 5998  | 750  | 4  | 109  | proline dehydrogenase 2 CRA a (11.4 kD) (Prodh2) alternative variant bSep08, mRNA.          |
| <a href="#">Prodh2</a>          | <a href="#">Prodh2.cSep08</a>          | <a href="#">361538</a> | 3796  | 425  | 3  | 85   | proline dehydrogenase 2 CRA a (9.6 kD) (Prodh2) alternative variant cSep08, mRNA.           |
| <a href="#">Prok2</a>           | <a href="#">Prok2.cSep08</a>           | <a href="#">192206</a> | 4185  | 832  | 2  | 90   | prokineticin 2 (Prok2) alternative variant cSep08, mRNA.                                    |
| <a href="#">Prom1</a>           | <a href="#">Prom1.cSep08</a>           | <a href="#">60357</a>  | 7932  | 521  | 4  | 129  | prominin 1 (Prom1) alternative variant cSep08, mRNA.                                        |
| <a href="#">Prom1</a>           | <a href="#">Prom1.dSep08</a>           | <a href="#">60357</a>  | 38223 | 1374 | 3  | 85   | prominin 1 (9.3 kD) (Prom1) alternative variant dSep08, mRNA.                               |
| <a href="#">Prom2</a>           | <a href="#">Prom2.bSep08</a>           | <a href="#">192211</a> | 1645  | 459  | 5  | 90   | prominin 2 (Prom2) alternative variant bSep08, mRNA.                                        |
| <a href="#">Prom2</a>           | <a href="#">Prom2.cSep08</a>           | <a href="#">192211</a> | 528   | 416  | 2  | 70   | prominin 2 (Prom2) alternative variant cSep08, mRNA.                                        |
| <a href="#">Prosc</a>           | <a href="#">Prosc.bSep08</a>           | <a href="#">306544</a> | 8033  | 852  | 3  | 108  | proline synthetase co-transcribed (Prosc) alternative variant bSep08, mRNA.                 |
| <a href="#">Prosc</a>           | <a href="#">Prosc.cSep08</a>           | <a href="#">306544</a> | 4018  | 466  | 5  | 85   | proline synthetase co-transcribed (9.4 kD) (Prosc) alternative variant cSep08, mRNA.        |
| <a href="#">Proz</a>            | <a href="#">Proz.aSep08</a>            | <a href="#">306608</a> | 13125 | 3221 | 1  | 410  | protein Z, vitamin K-dependent plasma glycoprotein (Proz) alternative variant aSep08, mRNA. |
| <a href="#">Pro_isomerase.0</a> | <a href="#">Pro_isomerase.0.cSep08</a> |                        | 10090 | 718  | 2  | 162  | fusion protein (Pro_isomerase.0) alternative variant cSep08, mRNA.                          |
| <a href="#">PRP-2</a>           | <a href="#">PRP-2.aSep08</a>           | <a href="#">287750</a> | 54922 | 3592 | 14 | 1153 | leucine-rich repeat containing protein (PRP-2) alternative variant aSep08, mRNA.            |
| <a href="#">PRP-2</a>           | <a href="#">PRP-2.bSep08</a>           | <a href="#">287750</a> | 25279 | 759  | 4  | 252  | putative protein of mammalian origin (PRP-2) alternative variant bSep08, mRNA.              |
| <a href="#">PRP-2</a>           | <a href="#">PRP-2.cSep08</a>           | <a href="#">287750</a> | 5680  | 2441 | 4  | 238  | CRA a (PRP-2) alternative variant cSep08, mRNA.                                             |
| <a href="#">PRP-2</a>           | <a href="#">PRP-2.dSep08</a>           | <a href="#">287750</a> | 1208  | 1056 | 3  | 124  | CRA a like (14.5 kD) (PRP-2) alternative variant dSep08, mRNA.                              |
| <a href="#">Prpf3</a>           | <a href="#">Prpf3.bSep08</a>           | <a href="#">361995</a> | 6267  | 693  | 5  | 207  | prp3 pre-mRNA processing factor 3 homolog (Prpf3) alternative variant bSep08, mRNA.         |

|                         |                                |                        |       |      |    |      |                                                                                                                                |
|-------------------------|--------------------------------|------------------------|-------|------|----|------|--------------------------------------------------------------------------------------------------------------------------------|
| <a href="#">Prpf3</a>   | <a href="#">Prpf3.cSep08</a>   | <a href="#">361995</a> | 6327  | 1078 | 7  | 202  | prp3 Pre-mRNA processing factor 3 homolog (23.0 kD) (Prpf3) alternative variant cSep08, mRNA.                                  |
| <a href="#">Prpf3</a>   | <a href="#">Prpf3.dSep08</a>   | <a href="#">361995</a> | 9491  | 1069 | 7  | 177  | prp3 pre-mRNA processing factor 3 homolog (Prpf3) alternative variant dSep08, mRNA.                                            |
| <a href="#">Prpf3</a>   | <a href="#">Prpf3.eSep08</a>   | <a href="#">361995</a> | 3331  | 459  | 4  | 93   | prp3 pre-mRNA processing factor 3 homolog (Prpf3) alternative variant eSep08, mRNA.                                            |
| <a href="#">Prpf3</a>   | <a href="#">Prpf3.fSep08</a>   | <a href="#">361995</a> | 2850  | 1252 | 2  | 38   | prp3 pre-mRNA processing factor 3 homolog (4.5 kD) (Prpf3) alternative variant fSep08, mRNA.                                   |
| <a href="#">Prpf3</a>   | <a href="#">Prpf3.gSep08</a>   | <a href="#">361995</a> | 8162  | 664  | 6  | 99   | prp3 pre-mRNA processing factor 3 homolog (11.3 kD) (Prpf3) alternative variant gSep08, mRNA.                                  |
| <a href="#">Prpf4b</a>  | <a href="#">Prpf4b.bSep08</a>  | <a href="#">291078</a> | 2186  | 686  | 3  | 136  | PRP4 pre-mRNA processing factor 4 homolog B (yeast) (15.8 kD) (Prpf4b) alternative variant bSep08, mRNA.                       |
| <a href="#">Prpf4b</a>  | <a href="#">Prpf4b.dSep08</a>  | <a href="#">291078</a> | 5089  | 1369 | 8  | 136  | PRP4 pre-mRNA processing factor 4 homolog B (yeast) (15.8 kD) (Prpf4b) alternative variant dSep08, mRNA.                       |
| <a href="#">Prpf6</a>   | <a href="#">Prpf6.bSep08</a>   | <a href="#">366276</a> | 8292  | 1778 | 7  | 558  | PRP6 pre-mRNA splicing factor 6 homolog ( <i>S. cerevisiae</i> ) (Prpf6) alternative variant bSep08, mRNA.                     |
| <a href="#">Prpf8</a>   | <a href="#">Prpf8.aSep08</a>   | <a href="#">287530</a> | 14514 | 3986 | 23 | 1275 | pre-mrna processing factor 8 (Prpf8) alternative variant aSep08, mRNA.                                                         |
| <a href="#">Prpf8</a>   | <a href="#">Prpf8.bSep08</a>   | <a href="#">287530</a> | 2418  | 769  | 5  | 197  | pre-mRNA processing factor 8 (Prpf8) alternative variant bSep08, mRNA.                                                         |
| <a href="#">Prpf8</a>   | <a href="#">Prpf8.cSep08</a>   | <a href="#">287530</a> | 577   | 398  | 2  | 107  | pre-mRNA processing factor 8 (Prpf8) alternative variant cSep08, mRNA.                                                         |
| <a href="#">Prpf8</a>   | <a href="#">Prpf8.dSep08</a>   | <a href="#">287530</a> | 2523  | 761  | 4  | 87   | splicing factor Prp8 (Prpf8) alternative variant dSep08, mRNA.                                                                 |
| <a href="#">Prpf8</a>   | <a href="#">Prpf8.eSep08</a>   | <a href="#">287530</a> | 558   | 428  | 2  | 67   | pre-mRNA processing factor 8 (Prpf8) alternative variant eSep08, mRNA.                                                         |
| <a href="#">Prpf18</a>  | <a href="#">Prpf18.bSep08</a>  | <a href="#">171552</a> | 13589 | 1789 | 4  | 506  | PRP18 pre-mRNA processing factor 18 homolog (Prpf18) alternative variant bSep08, mRNA.                                         |
| <a href="#">Prpf18</a>  | <a href="#">Prpf18.cSep08</a>  | <a href="#">171552</a> | 12840 | 663  | 3  | 78   | PRP18 pre-mRNA processing factor 18 homolog (Prpf18) alternative variant cSep08, mRNA.                                         |
| <a href="#">Prpf18</a>  | <a href="#">Prpf18.eSep08</a>  | <a href="#">171552</a> | 9733  | 468  | 2  | 72   | PRP18 pre-mRNA processing factor 18 homolog (Prpf18) alternative variant eSep08, mRNA.                                         |
| <a href="#">Prpf18</a>  | <a href="#">Prpf18.fSep08</a>  | <a href="#">171552</a> | 4034  | 469  | 3  | 51   | PRP18 pre-mRNA processing factor 18 homolog (6.2 kD) (Prpf18) alternative variant fSep08, mRNA.                                |
| <a href="#">Prpf18</a>  | <a href="#">Prpf18.gSep08</a>  | <a href="#">171552</a> | 11232 | 360  | 3  |      |                                                                                                                                |
| <a href="#">Prpf19</a>  | <a href="#">Prpf19.bSep08</a>  | <a href="#">246216</a> | 4266  | 782  | 5  | 194  | PRP19/PSO4 pre-mRNA processing factor 19 homolog ( <i>S. cerevisiae</i> ) (Prpf19) alternative variant bSep08, mRNA.           |
| <a href="#">Prpf19</a>  | <a href="#">Prpf19.cSep08</a>  | <a href="#">246216</a> | 5085  | 912  | 5  | 154  | PRP19/PSO4 pre-mRNA processing factor 19 homolog ( <i>S. cerevisiae</i> ) (17.5 kD) (Prpf19) alternative variant cSep08, mRNA. |
| <a href="#">Prpf19</a>  | <a href="#">Prpf19.dSep08</a>  | <a href="#">246216</a> | 8823  | 249  | 2  | 69   | PRP19/PSO4 pre-mRNA processing factor 19 homolog ( <i>S. cerevisiae</i> ) (Prpf19) alternative variant dSep08, mRNA.           |
| <a href="#">Prpf38a</a> | <a href="#">Prpf38a.aSep08</a> | <a href="#">298374</a> | 11539 | 1495 | 9  | 312  | PRP38 (37.4 kD) (Prpf38a) alternative variant aSep08, mRNA.                                                                    |
| <a href="#">Prpf38a</a> | <a href="#">Prpf38a.bSep08</a> | <a href="#">298374</a> | 1404  | 423  | 1  | 33   | putative protein of eukaryotic origin (Prpf38a) alternative variant bSep08, mRNA.                                              |



|                         |                                |                        |       |      |    |     |                                                                                                                    |
|-------------------------|--------------------------------|------------------------|-------|------|----|-----|--------------------------------------------------------------------------------------------------------------------|
| <a href="#">Prpf38b</a> | <a href="#">Prpf38b.bSep08</a> | <a href="#">499691</a> | 3970  | 750  | 3  | 168 | putative protein of eukaryotic origin (Prpf38b) alternative variant bSep08, mRNA.                                  |
| <a href="#">Prpf38b</a> | <a href="#">Prpf38b.cSep08</a> | <a href="#">499691</a> | 8599  | 2139 | 8  | 139 | PRP38 pre-mRNA processing factor 38 domain (Prpf38b) alternative variant cSep08, mRNA.                             |
| <a href="#">Prpf38b</a> | <a href="#">Prpf38b.dSep08</a> | <a href="#">499691</a> | 3539  | 372  | 4  | 52  | putative protein (Prpf38b) alternative variant dSep08, mRNA.                                                       |
| <a href="#">Prpf38b</a> | <a href="#">Prpf38b.fSep08</a> | <a href="#">499691</a> | 1104  | 522  | 2  | 37  | putative protein of metazoan origin (Prpf38b) alternative variant fSep08, mRNA.                                    |
| <a href="#">Prpf39</a>  | <a href="#">Prpf39.bSep08</a>  | <a href="#">314171</a> | 6064  | 2588 | 6  | 278 | prp39 pre-mRNA processing factor 39 homolog CRA b (33.2 kD) (Prpf39) alternative variant bSep08, mRNA.             |
| <a href="#">Prpf39</a>  | <a href="#">Prpf39.cSep08</a>  | <a href="#">314171</a> | 24854 | 3645 | 14 | 271 | prp39 pre-mRNA processing factor 39 homolog CRA a (31.6 kD) (Prpf39) alternative variant cSep08, complete mRNA.    |
| <a href="#">Prpf39</a>  | <a href="#">Prpf39.dSep08</a>  | <a href="#">314171</a> | 8412  | 742  | 6  | 247 | prp39 pre-mRNA processing factor 39 homolog CRA b (Prpf39) alternative variant dSep08, mRNA.                       |
| <a href="#">Prpf39</a>  | <a href="#">Prpf39.eSep08</a>  | <a href="#">314171</a> | 2587  | 876  | 3  | 111 | prp39 pre-mRNA processing factor 39 homolog CRA a (Prpf39) alternative variant eSep08, mRNA.                       |
| <a href="#">Prpf39</a>  | <a href="#">Prpf39.fSep08</a>  | <a href="#">314171</a> | 7739  | 698  | 3  | 53  | prp39 pre-mRNA processing factor 39 homolog (6.6 kD) (Prpf39) alternative variant fSep08, complete mRNA.           |
| <a href="#">Prpf39</a>  | <a href="#">Prpf39.iSep08</a>  | <a href="#">314171</a> | 1583  | 412  | 3  | 9   | putative protein (1.2 kD) (Prpf39) alternative variant iSep08, mRNA.                                               |
| <a href="#">Prpf40a</a> | <a href="#">Prpf40a.bSep08</a> | <a href="#">295607</a> | 5262  | 684  | 7  | 146 | PRP40 pre-mRNA processing factor 40 homolog A ( <i>S. cerevisiae</i> ) (Prpf40a) alternative variant bSep08, mRNA. |
| <a href="#">Prph</a>    | <a href="#">Prph.bSep08</a>    | <a href="#">24688</a>  | 3196  | 1517 | 7  | 311 | peripherin (35.8 kD) (Prph) alternative variant bSep08, mRNA.                                                      |
| <a href="#">Prph</a>    | <a href="#">Prph.cSep08</a>    | <a href="#">24688</a>  | 2149  | 995  | 4  | 88  | peripherin (10.3 kD) (Prph) alternative variant cSep08, mRNA.                                                      |
| <a href="#">Prph</a>    | <a href="#">Prph.dSep08</a>    | <a href="#">24688</a>  | 793   | 527  | 2  | 53  | peripherin (Prph) alternative variant dSep08, mRNA.                                                                |
| <a href="#">Prps1</a>   | <a href="#">Prps1.bSep08</a>   | <a href="#">29562</a>  | 21112 | 540  | 1  | 152 | phosphoribosyl pyrophosphate synthetase 1 (16.8 kD) (Prps1) alternative variant bSep08, mRNA.                      |
| <a href="#">Prps2</a>   | <a href="#">Prps2.bSep08</a>   | <a href="#">24689</a>  | 6692  | 322  | 2  | 64  | phosphoribosyl pyrophosphate synthetase 2 (Prps2) alternative variant bSep08, mRNA.                                |
| <a href="#">Prpsap1</a> | <a href="#">Prpsap1.bSep08</a> | <a href="#">64390</a>  | 14558 | 1486 | 4  | 210 | synthetase-associated protein (Prpsap1) alternative variant bSep08, mRNA.                                          |
| <a href="#">Prpsap1</a> | <a href="#">Prpsap1.cSep08</a> | <a href="#">64390</a>  | 49745 | 1041 | 9  | 150 | synthetase-associated protein (16.5 kD) (Prpsap1) alternative variant cSep08, mRNA.                                |
| <a href="#">Prpsap1</a> | <a href="#">Prpsap1.dSep08</a> | <a href="#">64390</a>  | 6778  | 1265 | 5  | 148 | synthetase-associated protein (16.3 kD) (Prpsap1) alternative variant dSep08, mRNA.                                |
| <a href="#">Prpsap1</a> | <a href="#">Prpsap1.gSep08</a> | <a href="#">64390</a>  | 2121  | 1553 | 2  | 74  | synthetase-associated protein (8.3 kD) (Prpsap1) alternative variant gSep08, mRNA.                                 |
| <a href="#">Prpsap1</a> | <a href="#">Prpsap1.hSep08</a> | <a href="#">64390</a>  | 23652 | 1535 | 4  | 34  | putative protein (3.8 kD) (Prpsap1) alternative variant hSep08, mRNA.                                              |
| <a href="#">Prpsap1</a> | <a href="#">Prpsap1.iSep08</a> | <a href="#">64390</a>  | 22834 | 671  | 3  | 54  | putative protein (6.0 kD) (Prpsap1) alternative variant iSep08, mRNA.                                              |
| <a href="#">Prpsap2</a> | <a href="#">Prpsap2.bSep08</a> | <a href="#">117272</a> | 33102 | 1790 | 12 | 369 | phosphoribosyl pyrophosphate synthetase-associated protein 2 (40.9 kD) (Prpsap2) alternative variant bSep08, mRNA. |

|                         |                                |                        |        |      |    |     |                                                                                                                             |
|-------------------------|--------------------------------|------------------------|--------|------|----|-----|-----------------------------------------------------------------------------------------------------------------------------|
| <a href="#">Prpsap2</a> | <a href="#">Prpsap2.cSep08</a> | <a href="#">117272</a> | 35045  | 1634 | 11 | 320 | phosphoribosyl pyrophosphate synthetase-associated protein 2 (35.5 kD) (Prpsap2) alternative variant cSep08, complete mRNA. |
| <a href="#">Prpsap2</a> | <a href="#">Prpsap2.dSep08</a> | <a href="#">117272</a> | 33166  | 915  | 9  | 208 | phosphoribosyl pyrophosphate synthetase-associated protein 2 (Prpsap2) alternative variant dSep08, mRNA.                    |
| <a href="#">Prpsap2</a> | <a href="#">Prpsap2.eSep08</a> | <a href="#">117272</a> | 16756  | 786  | 8  | 172 | phosphoribosyl pyrophosphate synthetase-associated protein 2 (Prpsap2) alternative variant eSep08, mRNA.                    |
| <a href="#">Prpsap2</a> | <a href="#">Prpsap2.fSep08</a> | <a href="#">117272</a> | 28297  | 887  | 8  | 152 | phosphoribosyl pyrophosphate synthetase-associated protein 2 (Prpsap2) alternative variant fSep08, mRNA.                    |
| <a href="#">Prpsap2</a> | <a href="#">Prpsap2.gSep08</a> | <a href="#">117272</a> | 12903  | 741  | 7  | 126 | phosphoribosyl pyrophosphate synthetase-associated protein 2 (Prpsap2) alternative variant gSep08, mRNA.                    |
| <a href="#">Prr3</a>    | <a href="#">Prr3.bSep08</a>    | <a href="#">361788</a> | 4725   | 2121 | 4  | 143 | proline-rich polypeptide 3 (15.8 kD) (Prr3) alternative variant bSep08, mRNA.                                               |
| <a href="#">Prr3</a>    | <a href="#">Prr3.cSep08</a>    | <a href="#">361788</a> | 4246   | 1140 | 5  | 116 | proline-rich polypeptide 3 (Prr3) alternative variant cSep08, mRNA.                                                         |
| <a href="#">Prr3</a>    | <a href="#">Prr3.dSep08</a>    | <a href="#">361788</a> | 3679   | 744  | 5  | 101 | proline-rich polypeptide 3 (Prr3) alternative variant dSep08, mRNA.                                                         |
| <a href="#">Prr5</a>    | <a href="#">Prr5.bSep08</a>    | <a href="#">315189</a> | 30638  | 761  | 8  | 253 | proline rich 5 (renal) (Prr5) alternative variant bSep08, mRNA.                                                             |
| <a href="#">Prr5</a>    | <a href="#">Prr5.cSep08</a>    | <a href="#">315189</a> | 30677  | 680  | 7  | 213 | proline rich 5 (renal) (Prr5) alternative variant cSep08, mRNA.                                                             |
| <a href="#">Prr6</a>    | <a href="#">Prr6.aSep08</a>    | <a href="#">501702</a> | 8522   | 1780 | 3  | 513 | proline-rich polypeptide 6 (Prr6) alternative variant aSep08, mRNA.                                                         |
| <a href="#">Prr6</a>    | <a href="#">Prr6.bSep08</a>    | <a href="#">501702</a> | 13347  | 773  | 5  | 185 | proline-rich polypeptide 6 (Prr6) alternative variant bSep08, mRNA.                                                         |
| <a href="#">Prr6</a>    | <a href="#">Prr6.cSep08</a>    | <a href="#">501702</a> | 13341  | 652  | 4  | 133 | proline-rich polypeptide 6 (Prr6) alternative variant cSep08, mRNA.                                                         |
| <a href="#">Prr11</a>   | <a href="#">Prr11.bSep08</a>   | <a href="#">360591</a> | 10548  | 1782 | 1  | 139 | proline rich 11 (Prr11) alternative variant bSep08, mRNA.                                                                   |
| <a href="#">Prr12</a>   | <a href="#">Prr12.aSep08</a>   | <a href="#">361569</a> | 16415  | 2875 |    | 651 | proline rich 12 (Prr12) mRNA.                                                                                               |
| <a href="#">Prr13</a>   | <a href="#">Prr13.aSep08</a>   | <a href="#">363004</a> | 1323   | 983  | 2  | 177 | proline rich 13 (18.6 kD) (Prr13) alternative variant aSep08, mRNA.                                                         |
| <a href="#">Prr14</a>   | <a href="#">Prr14.aSep08</a>   | <a href="#">691898</a> | 5422   | 2740 | 11 | 649 | proline rich 14 (Prr14) alternative variant aSep08, mRNA.                                                                   |
| <a href="#">Prr14</a>   | <a href="#">Prr14.bSep08</a>   | <a href="#">691898</a> | 2626   | 1323 | 7  | 359 | proline rich 14 (Prr14) alternative variant bSep08, mRNA.                                                                   |
| <a href="#">Prr14</a>   | <a href="#">Prr14.cSep08</a>   | <a href="#">691898</a> | 2921   | 856  | 5  | 169 | proline rich 14 (Prr14) alternative variant cSep08, mRNA.                                                                   |
| <a href="#">Prr14</a>   | <a href="#">Prr14.dSep08</a>   | <a href="#">691898</a> | 3339   | 692  | 6  | 159 | proline rich 14 (Prr14) alternative variant dSep08, mRNA.                                                                   |
| <a href="#">Prr19</a>   | <a href="#">Prr19.aSep08</a>   | <a href="#">681408</a> | 3017   | 1286 |    | 363 | proline rich 19 (39.9 kD) (Prr19) mRNA.                                                                                     |
| <a href="#">Prrg1</a>   | <a href="#">Prrg1.aSep08</a>   | <a href="#">363472</a> | 113616 | 1310 |    | 217 | proline rich Gla (G-carboxyglutamic acid) 1 (Prrg1) mRNA.                                                                   |
| <a href="#">Prrg2</a>   | <a href="#">Prrg2.aSep08</a>   | <a href="#">361570</a> | 8236   | 1364 | 2  | 198 | proline-rich Gla (G-carboxyglutamic acid) polypeptide 2 (22.3 kD) (Prrg2) alternative variant aSep08, complete mRNA.        |
| <a href="#">Prrg4</a>   | <a href="#">Prrg4.bSep08</a>   | <a href="#">499847</a> | 14554  | 1788 | 2  | 112 | proline rich Gla (G-carboxyglutamic acid) 4 (transmembrane) (12.2 kD) (Prrg4) alternative variant bSep08, mRNA.             |
| <a href="#">Prrg4</a>   | <a href="#">Prrg4.cSep08</a>   | <a href="#">499847</a> | 12959  | 390  | 2  | 97  | proline rich Gla (G-carboxyglutamic acid) 4 (transmembrane) (Prrg4) alternative variant cSep08, mRNA.                       |

|                         |                                |                        |        |      |    |     |                                                                                                               |
|-------------------------|--------------------------------|------------------------|--------|------|----|-----|---------------------------------------------------------------------------------------------------------------|
| <a href="#">Prrt1</a>   | <a href="#">Prrt1.aSep08</a>   | <a href="#">406167</a> | 3642   | 2544 | 1  | 357 | proline-rich transmembrane protein 1 (Prrt1) alternative variant aSep08, mRNA.                                |
| <a href="#">Prrt1</a>   | <a href="#">Prrt1.bSep08</a>   | <a href="#">406167</a> | 1489   | 753  | 2  | 179 | proline-rich transmembrane protein 1 (Prrt1) alternative variant bSep08, mRNA.                                |
| <a href="#">Prrt3</a>   | <a href="#">Prrt3.bSep08</a>   | <a href="#">502873</a> | 5875   | 1726 | 3  | 386 | proline-rich transmembrane protein 3 (40.1 kD) (Prrt3) alternative variant bSep08, mRNA.                      |
| <a href="#">Prrx2</a>   | <a href="#">Prrx2.bSep08</a>   | <a href="#">113931</a> | 35219  | 511  | 3  | 169 | paired related homeobox 2 (Prrx2) alternative variant bSep08, mRNA.                                           |
| <a href="#">Prrx2</a>   | <a href="#">Prrx2.cSep08</a>   | <a href="#">113931</a> | 3422   | 695  | 3  | 123 | paired related homeobox 2 (Prrx2) alternative variant cSep08, mRNA.                                           |
| <a href="#">Prss7</a>   | <a href="#">Prss7.bSep08</a>   | <a href="#">288291</a> | 3050   | 366  | 1  | 70  | protease, serine, 7 (enterokinase) (Prss7) alternative variant bSep08, mRNA.                                  |
| <a href="#">Prss12</a>  | <a href="#">Prss12.bSep08</a>  | <a href="#">85266</a>  | 8588   | 783  | 1  | 207 | protease, serine, 12 neurotrypsin (motopsin) (Prss12) alternative variant bSep08, mRNA.                       |
| <a href="#">Prss16</a>  | <a href="#">Prss16.bSep08</a>  | <a href="#">364719</a> | 1457   | 656  | 2  | 166 | protease, serine, 16 (thymus) (18.2 kD) (Prss16) alternative variant bSep08, mRNA.                            |
| <a href="#">Prss36</a>  | <a href="#">Prss36.aSep08</a>  | <a href="#">497040</a> | 1015   | 599  |    | 199 | protease, serine, 36 (Prss36) mRNA.                                                                           |
| <a href="#">Prtfdc1</a> | <a href="#">Prtfdc1.bSep08</a> | <a href="#">291355</a> | 119563 | 1965 | 10 | 215 | phosphoribosyltransferase (24.6 kD) (Prtfdc1) alternative variant bSep08, complete mRNA.                      |
| <a href="#">Prtfdc1</a> | <a href="#">Prtfdc1.cSep08</a> | <a href="#">291355</a> | 102906 | 647  | 6  | 136 | phosphoribosyl transferase 1 (Prtfdc1) alternative variant cSep08, mRNA.                                      |
| <a href="#">Prtfdc1</a> | <a href="#">Prtfdc1.dSep08</a> | <a href="#">291355</a> | 15783  | 338  | 3  | 96  | putative protein of ancient origin (Prtfdc1) alternative variant dSep08, mRNA.                                |
| <a href="#">Prtfdc1</a> | <a href="#">Prtfdc1.eSep08</a> | <a href="#">291355</a> | 35563  | 408  | 2  | 34  | putative protein (Prtfdc1) alternative variant eSep08, mRNA.                                                  |
| <a href="#">Prune</a>   | <a href="#">Prune.bSep08</a>   | <a href="#">310664</a> | 16016  | 421  | 3  | 55  | prune homolog (Drosophila) (Prune) alternative variant bSep08, mRNA.                                          |
| <a href="#">Psap</a>    | <a href="#">Psap.bSep08</a>    | <a href="#">25524</a>  | 26906  | 2554 | 14 | 553 | prosaposin (61.0 kD) (Psap) alternative variant bSep08, mRNA.                                                 |
| <a href="#">Psap</a>    | <a href="#">Psap.cSep08</a>    | <a href="#">25524</a>  | 1484   | 738  | 2  | 71  | prosaposin (7.6 kD) (Psap) alternative variant cSep08, mRNA.                                                  |
| <a href="#">Psbpc1</a>  | <a href="#">Psbpc1.bSep08</a>  | <a href="#">309203</a> | 3004   | 461  | 2  | 73  | prostatic steroid binding protein C1 (8.6 kD) (Psbpc1) alternative variant bSep08, complete mRNA.             |
| <a href="#">Pscd1</a>   | <a href="#">Pscd1.bSep08</a>   | <a href="#">116691</a> | 16801  | 797  | 7  | 161 | pleckstrin homology, Sec7 and coiled-coil domains 1 (Pscd1) alternative variant bSep08, mRNA.                 |
| <a href="#">Pscd2</a>   | <a href="#">Pscd2.bSep08</a>   | <a href="#">116692</a> | 2748   | 688  | 4  | 145 | pleckstrin homology, Sec7 and coiled-coil domains 2 (Pscd2) alternative variant bSep08, mRNA.                 |
| <a href="#">Pscdbp</a>  | <a href="#">Pscdbp.bSep08</a>  | <a href="#">311047</a> | 27878  | 2521 | 7  | 152 | pleckstrin homology, Sec7 and coiled-coil domains, binding protein (Pscdbp) alternative variant bSep08, mRNA. |
| <a href="#">Psd</a>     | <a href="#">Psd.aSep08</a>     | <a href="#">171381</a> | 2571   | 1118 | 2  | 294 | pleckstrin-like (Psd) alternative variant aSep08, mRNA.                                                       |
| <a href="#">Psd3</a>    | <a href="#">Psd3.aSep08</a>    | <a href="#">306380</a> | 28868  | 623  |    | 166 | putative protein, with a coiled coil domain, of bilateral origin (Psd3) mRNA.                                 |
| <a href="#">Psd4</a>    | <a href="#">Psd4.bSep08</a>    | <a href="#">311785</a> | 22582  | 773  | 2  | 89  | putative protein (Psd4) alternative variant bSep08, mRNA.                                                     |
| <a href="#">Psen1</a>   | <a href="#">Psen1.bSep08</a>   | <a href="#">29192</a>  | 39325  | 730  | 6  | 183 | presenilin 1 CRA a (21.1 kD) (Psen1) alternative variant bSep08, mRNA.                                        |
| <a href="#">Psen1</a>   | <a href="#">Psen1.cSep08</a>   | <a href="#">29192</a>  | 2332   | 798  | 2  | 100 | presenilin 1 I-467 precursor (11.0 kD) (Psen1) alternative variant cSep08, mRNA.                              |

|                                   |                                          |                        |       |      |   |     |                                                                                                          |
|-----------------------------------|------------------------------------------|------------------------|-------|------|---|-----|----------------------------------------------------------------------------------------------------------|
| <a href="#">Psen2</a>             | <a href="#">Psen2.bSep08</a>             | <a href="#">81751</a>  | 2807  | 1317 | 3 | 107 | presenilin 2 (11.8 kD) (Psen2) alternative variant bSep08, mRNA.                                         |
| <a href="#">Psen2</a>             | <a href="#">Psen2.cSep08</a>             | <a href="#">81751</a>  | 2083  | 512  | 2 | 67  | presenilin 2 (11.4 kD) (Psen2) alternative variant cSep08, mRNA.                                         |
| <a href="#">PseudoU_synth_2.0</a> | <a href="#">PseudoU_synth_2.0.aSep08</a> |                        | 1260  | 398  |   | 132 | pseudouridine synthase (PseudoU_synth_2.0) mRNA.                                                         |
| <a href="#">Psg-ps1_predicted</a> | <a href="#">Psg-ps1_predicted.aSep08</a> | <a href="#">308396</a> | 6289  | 1203 |   | 400 | pregnancy specific glycoprotein pseudogene 1 (predicted) (Psg-ps1_predicted) mRNA.                       |
| <a href="#">Psg19</a>             | <a href="#">Psg19.bSep08</a>             | <a href="#">24256</a>  | 10322 | 2470 | 4 | 355 | pregnancy specific glycoprotein 19 (39.9 kD) (Psg19) alternative variant bSep08, complete mRNA.          |
| <a href="#">Psg19</a>             | <a href="#">Psg19.cSep08</a>             | <a href="#">24256</a>  | 971   | 350  | 2 | 116 | pregnancy specific glycoprotein 19 (Psg19) alternative variant cSep08, mRNA.                             |
| <a href="#">Psg19</a>             | <a href="#">Psg19.dSep08</a>             | <a href="#">24256</a>  | 1150  | 378  | 2 | 114 | pregnancy specific glycoprotein 19 (Psg19) alternative variant dSep08, mRNA.                             |
| <a href="#">Psgb1</a>             | <a href="#">Psgb1.bSep08</a>             | <a href="#">59313</a>  | 2191  | 542  | 2 | 125 | pregnancy-specific beta 1-glycoprotein (Psgb1) alternative variant bSep08, mRNA.                         |
| <a href="#">Psgb1</a>             | <a href="#">Psgb1.cSep08</a>             | <a href="#">59313</a>  | 5157  | 378  | 2 | 104 | pregnancy-specific beta 1-glycoprotein (Psgb1) alternative variant cSep08, mRNA.                         |
| <a href="#">PSI.0</a>             | <a href="#">PSI.0.aSep08</a>             |                        | 1756  | 495  |   | 164 | plexin A1 CRA c (PSI.0) mRNA.                                                                            |
| <a href="#">PSI.1</a>             | <a href="#">PSI.1.aSep08</a>             |                        | 2665  | 181  |   | 60  | sema 4G (PSI.1) mRNA.                                                                                    |
| <a href="#">PSI.2</a>             | <a href="#">PSI.2.aSep08</a>             |                        | 51047 | 941  |   | 313 | attractin-like 1 CRA a (PSI.2) mRNA.                                                                     |
| <a href="#">Psp1</a>              | <a href="#">Psp1.bSep08</a>              | <a href="#">313323</a> | 28512 | 1783 | 9 | 357 | PC4 and SFRS1 interacting protein 1 (Psp1) alternative variant bSep08, mRNA.                             |
| <a href="#">Psp1</a>              | <a href="#">Psp1.cSep08</a>              | <a href="#">313323</a> | 22493 | 1521 | 9 | 285 | PC4 and SFRS1 interacting protein 1 (Psp1) alternative variant cSep08, mRNA.                             |
| <a href="#">Psp1</a>              | <a href="#">Psp1.dSep08</a>              | <a href="#">313323</a> | 11908 | 1101 | 6 | 205 | PC4 and SFRS1 interacting protein 1 (Psp1) alternative variant dSep08, mRNA.                             |
| <a href="#">Psp1</a>              | <a href="#">Psp1.eSep08</a>              | <a href="#">313323</a> | 6430  | 1494 | 5 | 141 | PC4 and SFRS1 interacting protein 1 (16.5 kD) (Psp1) alternative variant eSep08, mRNA.                   |
| <a href="#">Pskh1</a>             | <a href="#">Pskh1.aSep08</a>             | <a href="#">364993</a> | 12510 | 1065 | 2 | 294 | protein serine kinase H1 (Pskh1) alternative variant aSep08, mRNA.                                       |
| <a href="#">Psm2</a>              | <a href="#">Psm2.bSep08</a>              | <a href="#">29669</a>  | 4238  | 495  |   | 111 | proteasome (prosome, macropain) subunit, alpha type 2 (Psm2) alternative variant bSep08, mRNA.           |
| <a href="#">Psm3l</a>             | <a href="#">Psm3l.bSep08</a>             | <a href="#">29670</a>  | 11917 | 526  | 7 | 174 | proteasome alpha (Psm3l) alternative variant bSep08, mRNA.                                               |
| <a href="#">Psm3l</a>             | <a href="#">Psm3l.bSep08</a>             | <a href="#">408248</a> | 11917 | 526  | 7 | 174 | proteasome alpha (Psm3l) alternative variant bSep08, mRNA.                                               |
| <a href="#">Psm3l</a>             | <a href="#">Psm3l.cSep08</a>             | <a href="#">29670</a>  | 4491  | 620  | 3 | 56  | proteasome alpha type 3 (6.7 kD) (Psm3l) alternative variant cSep08, mRNA.                               |
| <a href="#">Psm3l</a>             | <a href="#">Psm3l.cSep08</a>             | <a href="#">408248</a> | 4491  | 620  | 3 | 56  | proteasome alpha type 3 (6.7 kD) (Psm3l) alternative variant cSep08, mRNA.                               |
| <a href="#">Psm3l</a>             | <a href="#">Psm3l.dSep08</a>             | <a href="#">29670</a>  | 1151  | 375  | 2 | 22  | putative protein (Psm3l) alternative variant dSep08, mRNA.                                               |
| <a href="#">Psm3l</a>             | <a href="#">Psm3l.dSep08</a>             | <a href="#">408248</a> | 1151  | 375  | 2 | 22  | putative protein (Psm3l) alternative variant dSep08, mRNA.                                               |
| <a href="#">Psm4</a>              | <a href="#">Psm4.bSep08</a>              | <a href="#">29671</a>  | 6474  | 818  | 8 | 219 | proteasome (prosome, macropain) subunit, alpha type 4 (24.3 kD) (Psm4) alternative variant bSep08, mRNA. |

|                        |                               |                        |       |      |   |     |                                                                                                                                                      |
|------------------------|-------------------------------|------------------------|-------|------|---|-----|------------------------------------------------------------------------------------------------------------------------------------------------------|
| <a href="#">Psm4</a>   | <a href="#">Psm4.cSep08</a>   | <a href="#">29671</a>  | 4999  | 658  | 7 | 208 | proteasome (prosome, macropain) subunit, alpha type 4 (Psm4) alternative variant cSep08, mRNA.                                                       |
| <a href="#">Psm4</a>   | <a href="#">Psm4.eSep08</a>   | <a href="#">29671</a>  | 1796  | 481  | 2 | 57  | proteasome (prosome, macropain) subunit, alpha type 4 (Psm4) alternative variant eSep08, mRNA.                                                       |
| <a href="#">Psm5</a>   | <a href="#">Psm5.aSep08</a>   | <a href="#">29672</a>  | 22984 | 976  | 9 | 244 | proteasome (prosome, macropain) subunit, alpha type 5 (26.5 kD) (Psm5) alternative variant aSep08, mRNA.                                             |
| <a href="#">Psm6</a>   | <a href="#">Psm6.bSep08</a>   | <a href="#">29673</a>  | 30996 | 794  | 1 | 243 | proteasome (prosome, macropain) subunit, alpha type 6 (Psm6) alternative variant bSep08, mRNA.                                                       |
| <a href="#">Psm7</a>   | <a href="#">Psm7.bSep08</a>   | <a href="#">29674</a>  | 6370  | 1717 | 5 | 174 | proteasome (prosome, macropain) subunit, alpha type 7 (19.5 kD) (Psm7) alternative variant bSep08, mRNA.                                             |
| <a href="#">Psm7</a>   | <a href="#">Psm7.cSep08</a>   | <a href="#">29674</a>  | 4631  | 406  | 4 | 130 | proteasome (prosome, macropain) subunit, alpha type 7 (Psm7) alternative variant cSep08, mRNA.                                                       |
| <a href="#">Psm7</a>   | <a href="#">Psm7.eSep08</a>   | <a href="#">29674</a>  | 2353  | 813  | 3 | 45  | proteasome (prosome, macropain) subunit, alpha type 7 (Psm7) alternative variant eSep08, mRNA.                                                       |
| <a href="#">Psm7</a>   | <a href="#">Psm7.fSep08</a>   | <a href="#">29674</a>  | 615   | 499  | 2 | 55  | proteasome (prosome, macropain) subunit, alpha type 7 (Psm7) alternative variant fSep08, mRNA.                                                       |
| <a href="#">Psm1</a>   | <a href="#">Psm1.bSep08</a>   | <a href="#">94198</a>  | 17200 | 783  | 6 | 201 | proteasome (prosome, macropain) subunit, beta type 1 (22.3 kD) (Psm1) alternative variant bSep08, mRNA.                                              |
| <a href="#">Psm1</a>   | <a href="#">Psm1.cSep08</a>   | <a href="#">94198</a>  | 19306 | 995  | 6 | 201 | proteasome (prosome, macropain) subunit, beta type 1 (22.3 kD) (Psm1) alternative variant cSep08, complete mRNA.                                     |
| <a href="#">Psm3</a>   | <a href="#">Psm3.aSep08</a>   | <a href="#">29676</a>  | 4596  | 794  | 3 | 197 | proteasome (prosome, macropain) subunit, beta type 3 (22.0 kD) (Psm3) alternative variant aSep08, mRNA.                                              |
| <a href="#">Psm3</a>   | <a href="#">Psm3.bSep08</a>   | <a href="#">29676</a>  | 7012  | 744  | 6 | 173 | proteasome (prosome, macropain) subunit, beta type 3 (19.4 kD) (Psm3) alternative variant bSep08, complete mRNA.                                     |
| <a href="#">Psm7</a>   | <a href="#">Psm7.bSep08</a>   | <a href="#">85492</a>  | 22537 | 742  | 1 | 86  | proteasome (prosome, macropain) subunit, beta type 7 (Psm7) alternative variant bSep08, mRNA.                                                        |
| <a href="#">Psm8</a>   | <a href="#">Psm8.bSep08</a>   | <a href="#">24968</a>  | 2916  | 1457 | 5 | 189 | proteasome (prosome, macropain) subunit, beta type 8 (large multifunctional peptidase 7) (20.6 kD) (Psm8) alternative variant bSep08, complete mRNA. |
| <a href="#">Psm8</a>   | <a href="#">Psm8.cSep08</a>   | <a href="#">24968</a>  | 3157  | 2066 | 4 | 160 | proteasome (prosome, macropain) subunit, beta type 8 (large multifunctional peptidase 7) (17.5 kD) (Psm8) alternative variant cSep08, mRNA.          |
| <a href="#">Psm8</a>   | <a href="#">Psm8.dSep08</a>   | <a href="#">24968</a>  | 463   | 276  | 2 | 83  | proteasome (prosome, macropain) subunit, beta type 8 (large multifunctional peptidase 7) (Psm8) alternative variant dSep08, mRNA.                    |
| <a href="#">Psm1</a>   | <a href="#">Psm1.bSep08</a>   | <a href="#">117263</a> | 6687  | 758  | 1 | 252 | protease (prosome, macropain) 26S subunit, ATPase 1 (Psm1) alternative variant bSep08, mRNA.                                                         |
| <a href="#">Psm3</a>   | <a href="#">Psm3.bSep08</a>   | <a href="#">29677</a>  | 854   | 748  | 1 | 63  | proteasome (prosome, macropain) 26S subunit, ATPase 3 (Psm3) alternative variant bSep08, mRNA.                                                       |
| <a href="#">Psm3ip</a> | <a href="#">Psm3ip.bSep08</a> | <a href="#">140938</a> | 774   | 551  | 3 | 103 | psmc3 interacting protein (Psm3ip) alternative variant bSep08, mRNA.                                                                                 |
| <a href="#">Psm3ip</a> | <a href="#">Psm3ip.cSep08</a> | <a href="#">140938</a> | 858   | 777  | 2 | 86  | psmc3 interacting protein CRA c (9.9 kD) (Psm3ip) alternative variant cSep08, mRNA.                                                                  |
| <a href="#">Psm3ip</a> | <a href="#">Psm3ip.dSep08</a> | <a href="#">140938</a> | 438   | 355  | 2 | 71  | proteasome ATPase 3 interacting protein CRA b (Psm3ip) alternative variant dSep08, mRNA.                                                             |

|                       |                              |                        |       |      |    |     |                                                                                                                         |
|-----------------------|------------------------------|------------------------|-------|------|----|-----|-------------------------------------------------------------------------------------------------------------------------|
| <a href="#">Psmc4</a> | <a href="#">Psmc4.bSep08</a> | <a href="#">117262</a> | 1102  | 670  | 4  | 110 | proteasome (prosome, macropain) 26S subunit, ATPase, 4 (12.8 kD) (Psmc4) alternative variant bSep08, mRNA.              |
| <a href="#">Psmc5</a> | <a href="#">Psmc5.bSep08</a> | <a href="#">81827</a>  | 5860  | 794  | 9  | 139 | protease (prosome, macropain) 26S subunit, ATPase 5 (15.9 kD) (Psmc5) alternative variant bSep08, mRNA.                 |
| <a href="#">Psmc5</a> | <a href="#">Psmc5.cSep08</a> | <a href="#">81827</a>  | 4303  | 409  | 5  | 126 | protease (prosome, macropain) 26S subunit, ATPase 5 (Psmc5) alternative variant cSep08, mRNA.                           |
| <a href="#">Psmc5</a> | <a href="#">Psmc5.dSep08</a> | <a href="#">81827</a>  | 967   | 664  | 4  | 71  | protease (prosome, macropain) 26S subunit, ATPase 5 (8.0 kD) (Psmc5) alternative variant dSep08, mRNA.                  |
| <a href="#">Psmc6</a> | <a href="#">Psmc6.aSep08</a> | <a href="#">289990</a> | 21299 | 1726 | 14 | 407 | proteasome (prosome, macropain) 26S subunit, ATPase, 6 (Psmc6) alternative variant aSep08, mRNA.                        |
| <a href="#">Psmc6</a> | <a href="#">Psmc6.bSep08</a> | <a href="#">289990</a> | 11353 | 812  | 9  | 200 | proteasome (prosome, macropain) 26S subunit, ATPase, 6 (Psmc6) alternative variant bSep08, mRNA.                        |
| <a href="#">Psmc1</a> | <a href="#">Psmc1.bSep08</a> | <a href="#">83806</a>  | 16391 | 825  | 7  | 275 | proteasome (prosome, macropain) 26S subunit, non-ATPase, 1 (Psmc1) alternative variant bSep08, mRNA.                    |
| <a href="#">Psmc1</a> | <a href="#">Psmc1.cSep08</a> | <a href="#">83806</a>  | 38475 | 727  | 6  | 183 | proteasome (prosome, macropain) 26S subunit, non-ATPase, 1 (Psmc1) alternative variant cSep08, mRNA.                    |
| <a href="#">Psmc1</a> | <a href="#">Psmc1.dSep08</a> | <a href="#">83806</a>  | 19460 | 653  | 5  | 142 | proteasome (prosome, macropain) 26S subunit, non-ATPase, 1 (Psmc1) alternative variant dSep08, mRNA.                    |
| <a href="#">Psmc1</a> | <a href="#">Psmc1.fSep08</a> | <a href="#">83806</a>  | 2166  | 614  | 2  | 48  | proteasome (prosome, macropain) 26S subunit, non-ATPase, 1 (Psmc1) alternative variant fSep08, mRNA.                    |
| <a href="#">Psmc1</a> | <a href="#">Psmc1.gSep08</a> | <a href="#">83806</a>  | 552   | 367  | 2  | 34  | proteasome (prosome, macropain) 26S subunit, non-ATPase, 1 (Psmc1) alternative variant gSep08, mRNA.                    |
| <a href="#">Psmc2</a> | <a href="#">Psmc2.bSep08</a> | <a href="#">287984</a> | 2480  | 735  | 1  | 220 | proteasome (prosome, macropain) 26S subunit, non-ATPase, 2 (Psmc2) alternative variant bSep08, mRNA.                    |
| <a href="#">Psmc3</a> | <a href="#">Psmc3.bSep08</a> | <a href="#">287670</a> | 2216  | 750  | 1  | 121 | proteasome (prosome, macropain) 26S subunit, non-ATPase, 3 (Psmc3) alternative variant bSep08, mRNA.                    |
| <a href="#">Psmc4</a> | <a href="#">Psmc4.bSep08</a> | <a href="#">83499</a>  | 9217  | 1281 | 9  | 377 | proteasome (prosome, macropain) 26S subunit, non-ATPase, 4 (40.7 kD) (Psmc4) alternative variant bSep08, complete mRNA. |
| <a href="#">Psmc4</a> | <a href="#">Psmc4.cSep08</a> | <a href="#">83499</a>  | 9179  | 1397 | 8  | 273 | proteasome (prosome, macropain) 26S subunit, non-ATPase, 4 (29.2 kD) (Psmc4) alternative variant cSep08, complete mRNA. |
| <a href="#">Psmc5</a> | <a href="#">Psmc5.bSep08</a> | <a href="#">296651</a> | 10739 | 768  | 6  | 191 | proteasome (prosome, macropain) 26S subunit, non-ATPase, 5 (Psmc5) alternative variant bSep08, mRNA.                    |
| <a href="#">Psmc5</a> | <a href="#">Psmc5.cSep08</a> | <a href="#">296651</a> | 3828  | 354  | 2  | 110 | proteasome (prosome, macropain) 26S subunit, non-ATPase, 5 (Psmc5) alternative variant cSep08, mRNA.                    |
| <a href="#">Psmc6</a> | <a href="#">Psmc6.bSep08</a> | <a href="#">289924</a> | 6975  | 264  | 3  | 88  | proteasome (prosome, macropain) 26S subunit, non-ATPase, 6 (Psmc6) alternative variant bSep08, mRNA.                    |
| <a href="#">Psmc7</a> | <a href="#">Psmc7.bSep08</a> | <a href="#">307821</a> | 6357  | 746  | 3  | 158 | proteasome (prosome, macropain) 26S subunit, non-ATPase, 7 (Psmc7) alternative variant bSep08, mRNA.                    |
| <a href="#">Psmc8</a> | <a href="#">Psmc8.aSep08</a> | <a href="#">292766</a> | 6833  | 1520 | 7  | 353 | proteasome (prosome, macropain) 26S subunit, non-ATPase, 8 (39.9 kD) (Psmc8) alternative variant aSep08, mRNA.          |
| <a href="#">Psmc8</a> | <a href="#">Psmc8.bSep08</a> | <a href="#">292766</a> | 5389  | 709  | 6  | 215 | proteasome (prosome, macropain) 26S subunit, non-ATPase, 8 (Psmc8) alternative variant bSep08, mRNA.                    |
| <a href="#">Psmc8</a> | <a href="#">Psmc8.cSep08</a> | <a href="#">292766</a> | 5410  | 686  | 6  | 136 | proteasome (prosome, macropain) 26S subunit, non-ATPase, 8 (Psmc8) alternative variant cSep08, mRNA.                    |

|                         |                                |                        |       |      |    |     |                                                                                                                          |
|-------------------------|--------------------------------|------------------------|-------|------|----|-----|--------------------------------------------------------------------------------------------------------------------------|
| <a href="#">Psm8</a>    | <a href="#">Psm8.dSep08</a>    | <a href="#">292766</a> | 1508  | 875  | 2  | 90  | proteasome (prosome, macropain) 26S subunit, non-ATPase, 8 (10.5 kD) (Psm8) alternative variant dSep08, mRNA.            |
| <a href="#">Psm9</a>    | <a href="#">Psm9.bSep08</a>    | <a href="#">161475</a> | 20047 | 747  | 3  | 167 | proteasome (prosome, macropain) 26S subunit, non-ATPase, 9 (Psm9) alternative variant bSep08, mRNA.                      |
| <a href="#">Psm9</a>    | <a href="#">Psm9.cSep08</a>    | <a href="#">161475</a> | 10474 | 775  | 5  | 120 | proteasome (prosome, macropain) 26S subunit, non-ATPase, 9 (Psm9) alternative variant cSep08, mRNA.                      |
| <a href="#">Psm9</a>    | <a href="#">Psm9.eSep08</a>    | <a href="#">161475</a> | 8803  | 699  | 5  | 91  | proteasome (prosome, macropain) 26S subunit, non-ATPase, 9 (Psm9) alternative variant eSep08, mRNA.                      |
| <a href="#">Psm11</a>   | <a href="#">Psm11.bSep08</a>   | <a href="#">303353</a> | 45221 | 2737 | 12 | 343 | proteasome (prosome, macropain) 26S subunit, non-ATPase, 11 (39.2 kD) (Psm11) alternative variant bSep08, complete mRNA. |
| <a href="#">Psm11</a>   | <a href="#">Psm11.cSep08</a>   | <a href="#">303353</a> | 13378 | 888  | 8  | 207 | proteasome (prosome, macropain) 26S subunit, non-ATPase, 11 (Psm11) alternative variant cSep08, mRNA.                    |
| <a href="#">Psm11</a>   | <a href="#">Psm11.dSep08</a>   | <a href="#">303353</a> | 12376 | 637  | 7  | 159 | proteasome (prosome, macropain) 26S subunit, non-ATPase, 11 (Psm11) alternative variant dSep08, mRNA.                    |
| <a href="#">Psm12</a>   | <a href="#">Psm12.bSep08</a>   | <a href="#">287772</a> | 12629 | 758  | 6  | 235 | proteasome (prosome, macropain) 26S subunit, non-ATPase, 12 (Psm12) alternative variant bSep08, mRNA.                    |
| <a href="#">Psm13</a>   | <a href="#">Psm13.bSep08</a>   | <a href="#">365388</a> | 6218  | 771  | 7  | 204 | proteasome non-ATPase (23.0 kD) (Psm13) alternative variant bSep08, mRNA.                                                |
| <a href="#">Psm13</a>   | <a href="#">Psm13.cSep08</a>   | <a href="#">365388</a> | 3480  | 698  | 5  | 117 | proteasome non-ATPase (Psm13) alternative variant cSep08, mRNA.                                                          |
| <a href="#">Psm13</a>   | <a href="#">Psm13.dSep08</a>   | <a href="#">365388</a> | 1722  | 1612 | 2  | 92  | proteasome non-ATPase (10.6 kD) (Psm13) alternative variant dSep08, mRNA.                                                |
| <a href="#">Psme1</a>   | <a href="#">Psme1.aSep08</a>   | <a href="#">29630</a>  | 2883  | 1005 | 10 | 286 | proteasome (prosome, macropain) 28 subunit, alpha (Psme1) alternative variant aSep08, mRNA.                              |
| <a href="#">Psme1</a>   | <a href="#">Psme1.bSep08</a>   | <a href="#">29630</a>  | 2830  | 1356 | 8  | 178 | proteasome (prosome, macropain) 28 subunit, alpha (19.6 kD) (Psme1) alternative variant bSep08, complete mRNA.           |
| <a href="#">Psme1</a>   | <a href="#">Psme1.cSep08</a>   | <a href="#">29630</a>  | 1830  | 712  | 5  | 155 | proteasome (prosome, macropain) 28 subunit, alpha (17.0 kD) (Psme1) alternative variant cSep08, mRNA.                    |
| <a href="#">Psme1</a>   | <a href="#">Psme1.dSep08</a>   | <a href="#">29630</a>  | 1146  | 461  | 1  | 18  | proteasome (prosome, macropain) 28 subunit, alpha (2.1 kD) (Psme1) alternative variant dSep08, mRNA.                     |
| <a href="#">Psme2.1</a> | <a href="#">Psme2.1.aSep08</a> | <a href="#">29614</a>  | 4302  | 1345 | 11 | 250 | proteasome (prosome, macropain) 28 subunit, beta (Psme2.1) alternative variant aSep08, mRNA.                             |
| <a href="#">Psme2.1</a> | <a href="#">Psme2.1.cSep08</a> | <a href="#">29614</a>  | 629   | 539  | 2  | 55  | proteasome (prosome, macropain) 28 subunit, beta (6.4 kD) (Psme2.1) alternative variant cSep08, mRNA.                    |
| <a href="#">Psme3</a>   | <a href="#">Psme3.aSep08</a>   | <a href="#">287716</a> | 9046  | 3820 |    | 325 | proteasome (prosome, macropain) 28 subunit, 3 (Psme3) mRNA.                                                              |
| <a href="#">Psme4</a>   | <a href="#">Psme4.aSep08</a>   | <a href="#">498433</a> | 44846 | 4305 | 23 | 929 | proteasome (prosome, macropain) activator subunit 4 (Psme4) alternative variant aSep08, mRNA.                            |
| <a href="#">Psme4</a>   | <a href="#">Psme4.bSep08</a>   | <a href="#">498433</a> | 24979 | 1475 | 16 | 491 | proteasome (prosome, macropain) activator subunit 4 (Psme4) alternative variant bSep08, mRNA.                            |
| <a href="#">Psme4</a>   | <a href="#">Psme4.cSep08</a>   | <a href="#">498433</a> | 5088  | 635  | 7  | 156 | proteasome (prosome, macropain) activator subunit 4 (Psme4) alternative variant cSep08, mRNA.                            |
| <a href="#">Psme4</a>   | <a href="#">Psme4.dSep08</a>   | <a href="#">498433</a> | 5566  | 794  | 4  | 140 | proteasome (prosome, macropain) activator subunit 4 (15.8 kD) (Psme4) alternative variant dSep08, mRNA.                  |

|                         |                                |                        |       |      |    |     |                                                                                                                 |
|-------------------------|--------------------------------|------------------------|-------|------|----|-----|-----------------------------------------------------------------------------------------------------------------|
| <a href="#">Psmg1</a>   | <a href="#">Psmg1.bSep08</a>   | <a href="#">288236</a> | 9455  | 1002 | 4  | 289 | proteasome (prosome, macropain) assembly chaperone 1 (33.2 kD) (Psmg1) alternative variant bSep08, mRNA.        |
| <a href="#">Psmg1</a>   | <a href="#">Psmg1.cSep08</a>   | <a href="#">288236</a> | 6922  | 589  | 3  | 165 | proteasome (prosome, macropain) assembly chaperone 1 (Psmg1) alternative variant cSep08, mRNA.                  |
| <a href="#">Psp</a>     | <a href="#">Psp.bSep08</a>     | <a href="#">50585</a>  | 2411  | 361  | 1  | 51  | parotid secretory protein (Psp) alternative variant bSep08, mRNA.                                               |
| <a href="#">Pspc1</a>   | <a href="#">Pspc1.bSep08</a>   | <a href="#">305910</a> | 6844  | 1422 | 3  | 133 | paraspeckle protein 1 (13.4 kD) (Pspc1) alternative variant bSep08, mRNA.                                       |
| <a href="#">Pspc1</a>   | <a href="#">Pspc1.cSep08</a>   | <a href="#">305910</a> | 29365 | 876  | 5  | 77  | paraspeckle protein 1 (Pspc1) alternative variant cSep08, mRNA.                                                 |
| <a href="#">Psph</a>    | <a href="#">Psph.bSep08</a>    | <a href="#">304429</a> | 16403 | 584  | 3  | 102 | phosphoserine phosphatase (11.5 kD) (Psph) alternative variant bSep08, mRNA.                                    |
| <a href="#">Psph</a>    | <a href="#">Psph.cSep08</a>    | <a href="#">304429</a> | 17352 | 785  | 3  | 102 | phosphoserine phosphatase (11.5 kD) (Psph) alternative variant cSep08, mRNA.                                    |
| <a href="#">Psrc1</a>   | <a href="#">Psrc1.bSep08</a>   | <a href="#">691380</a> | 2955  | 956  | 1  | 282 | proline/serine-rich coiled-coil 1 (Psrc1) alternative variant bSep08, mRNA.                                     |
| <a href="#">Psrc2</a>   | <a href="#">Psrc2.aSep08</a>   | <a href="#">314836</a> | 24498 | 3400 | 20 | 859 | proline serine-rich coiled-coil 2 (Psrc2) alternative variant aSep08, mRNA.                                     |
| <a href="#">Psrc2</a>   | <a href="#">Psrc2.bSep08</a>   | <a href="#">314836</a> | 5866  | 862  | 5  | 287 | proline serine-rich coiled-coil 2 CRA b (Psrc2) alternative variant bSep08, mRNA.                               |
| <a href="#">Psrc2</a>   | <a href="#">Psrc2.cSep08</a>   | <a href="#">314836</a> | 5594  | 713  | 4  | 165 | proline serine-rich coiled-coil 2 CRA b (Psrc2) alternative variant cSep08, mRNA.                               |
| <a href="#">Psrc2</a>   | <a href="#">Psrc2.dSep08</a>   | <a href="#">314836</a> | 2352  | 839  | 2  | 44  | proline serine-rich coiled-coil 2 CRA d (5.2 kD) (Psrc2) alternative variant dSep08, mRNA.                      |
| <a href="#">Pstpip1</a> | <a href="#">Pstpip1.aSep08</a> | <a href="#">300732</a> | 14824 | 1802 | 10 | 525 | proline-serine-threonine phosphatase-interacting protein 1 (Pstpip1) alternative variant aSep08, mRNA.          |
| <a href="#">Pstpip1</a> | <a href="#">Pstpip1.cSep08</a> | <a href="#">300732</a> | 3088  | 586  | 2  | 65  | proline-serine-threonine phosphatase-interacting protein 1 (Pstpip1) alternative variant cSep08, mRNA.          |
| <a href="#">Pstpip2</a> | <a href="#">Pstpip2.aSep08</a> | <a href="#">307248</a> | 20444 | 2745 | 10 | 216 | proline-serine-threonine phosphatase-interacting protein 2 (Pstpip2) alternative variant aSep08, mRNA.          |
| <a href="#">Ptar1</a>   | <a href="#">Ptar1.bSep08</a>   | <a href="#">286972</a> | 9275  | 524  | 2  | 151 | protein prenyltransferase alpha subunit repeat containing 1 (17.0 kD) (Ptar1) alternative variant bSep08, mRNA. |
| <a href="#">PTB.0</a>   | <a href="#">PTB.0.aSep08</a>   | <a href="#">498410</a> | 13842 | 3335 | 5  | 218 | tensin (PTB.0) alternative variant aSep08, mRNA.                                                                |
| <a href="#">PTB.0</a>   | <a href="#">PTB.0.bSep08</a>   | <a href="#">498410</a> | 2024  | 740  | 1  | 111 | tensin (PTB.0) alternative variant bSep08, mRNA.                                                                |
| <a href="#">PTB.1</a>   | <a href="#">PTB.1.aSep08</a>   |                        | 9338  | 915  |    | 305 | tensin (PTB.1) mRNA.                                                                                            |
| <a href="#">Ptbp1</a>   | <a href="#">Ptbp1.bSep08</a>   | <a href="#">29497</a>  | 8286  | 3285 | 11 | 518 | polypyrimidine tract binding protein 1 (55.2 kD) (Ptbp1) alternative variant bSep08, mRNA.                      |
| <a href="#">Ptbp1</a>   | <a href="#">Ptbp1.cSep08</a>   | <a href="#">29497</a>  | 3276  | 868  | 6  | 151 | polypyrimidine tract binding protein 1 (16.7 kD) (Ptbp1) alternative variant cSep08, mRNA.                      |
| <a href="#">Ptbp1</a>   | <a href="#">Ptbp1.dSep08</a>   | <a href="#">29497</a>  | 2947  | 1049 | 5  | 148 | polypyrimidine tract binding protein 1 (Ptbp1) alternative variant dSep08, mRNA.                                |
| <a href="#">Ptbp1</a>   | <a href="#">Ptbp1.eSep08</a>   | <a href="#">29497</a>  | 3571  | 856  | 7  | 140 | polypyrimidine tract binding protein 1 (Ptbp1) alternative variant eSep08, mRNA.                                |
| <a href="#">Ptbp2</a>   | <a href="#">Ptbp2.bSep08</a>   | <a href="#">310820</a> | 24101 | 2386 | 7  | 265 | polypyrimidine tract binding protein 2 like (Ptbp2) alternative variant bSep08, mRNA.                           |
| <a href="#">Ptbp2</a>   | <a href="#">Ptbp2.cSep08</a>   | <a href="#">310820</a> | 6277  | 1138 | 6  | 197 | polypyrimidine tract binding protein 2 CRA b like (Ptbp2) alternative variant cSep08, mRNA.                     |



|                        |                               |                        |       |      |    |     |                                                                                                              |
|------------------------|-------------------------------|------------------------|-------|------|----|-----|--------------------------------------------------------------------------------------------------------------|
| <a href="#">Ptbp2</a>  | <a href="#">Ptbp2.dSep08</a>  | <a href="#">310820</a> | 22475 | 726  | 6  | 150 | polypyrimidine tract binding protein 2 like (16.8 kD) (Ptbp2) alternative variant dSep08, mRNA.              |
| <a href="#">Ptbp2</a>  | <a href="#">Ptbp2.eSep08</a>  | <a href="#">310820</a> | 22547 | 933  | 5  | 147 | polypyrimidine tract binding protein 2 CRA e like (15.4 kD) (Ptbp2) alternative variant eSep08, mRNA.        |
| <a href="#">Ptbp2</a>  | <a href="#">Ptbp2.fSep08</a>  | <a href="#">310820</a> | 3676  | 628  | 2  | 139 | polypyrimidine tract binding protein 2 CRA a like (Ptbp2) alternative variant fSep08, mRNA.                  |
| <a href="#">Ptcd1</a>  | <a href="#">Ptcd1.aSep08</a>  | <a href="#">304278</a> | 17676 | 2946 | 9  | 686 | pentatricopeptide repeat domain 1 (77.1 kD) (Ptcd1) alternative variant aSep08, complete mRNA.               |
| <a href="#">Ptcd3</a>  | <a href="#">Ptcd3.bSep08</a>  | <a href="#">500199</a> | 14610 | 1965 | 14 | 230 | pentatricopeptide repeat domain 3 (26.4 kD) (Ptcd3) alternative variant bSep08, mRNA.                        |
| <a href="#">Ptch1</a>  | <a href="#">Ptch1.bSep08</a>  | <a href="#">89830</a>  | 29287 | 857  | 3  | 183 | patched homolog 1 (Drosophila) (20.8 kD) (Ptch1) alternative variant bSep08, mRNA.                           |
| <a href="#">Ptch1</a>  | <a href="#">Ptch1.cSep08</a>  | <a href="#">89830</a>  | 18439 | 475  | 2  | 140 | patched homolog 1 (Drosophila) (Ptch1) alternative variant cSep08, mRNA.                                     |
| <a href="#">Ptch2</a>  | <a href="#">Ptch2.bSep08</a>  | <a href="#">366452</a> | 5155  | 1433 |    | 41  | patched homolog 2 (Ptch2) alternative variant bSep08, mRNA.                                                  |
| <a href="#">Ptchd2</a> | <a href="#">Ptchd2.bSep08</a> | <a href="#">313705</a> | 12757 | 1802 | 6  | 600 | putative protein of metazoan origin (Ptchd2) alternative variant bSep08, mRNA.                               |
| <a href="#">Ptchd2</a> | <a href="#">Ptchd2.cSep08</a> | <a href="#">313705</a> | 1930  | 584  | 3  | 154 | putative protein of metazoan origin (Ptchd2) alternative variant cSep08, mRNA.                               |
| <a href="#">Ptchd2</a> | <a href="#">Ptchd2.dSep08</a> | <a href="#">313705</a> | 2403  | 418  | 4  | 139 | putative protein, with a transmembrane domain, of metazoan origin (Ptchd2) alternative variant dSep08, mRNA. |
| <a href="#">Ptcrs</a>  | <a href="#">Ptcrs.aSep08</a>  | <a href="#">116462</a> | 1240  | 602  |    | 93  | pre T-cell antigen receptor alpha (Ptcrs) mRNA.                                                              |
| <a href="#">Ptdss1</a> | <a href="#">Ptdss1.bSep08</a> | <a href="#">314553</a> | 22904 | 591  | 5  | 197 | phosphatidylserine synthase 1 (Ptdss1) alternative variant bSep08, mRNA.                                     |
| <a href="#">Ptdss2</a> | <a href="#">Ptdss2.bSep08</a> | <a href="#">293620</a> | 22633 | 2006 | 1  | 168 | phosphatidylserine synthase 2 (20.1 kD) (Ptdss2) alternative variant bSep08, complete mRNA.                  |
| <a href="#">Pten</a>   | <a href="#">Pten.bSep08</a>   | <a href="#">50557</a>  | 18749 | 423  | 2  | 61  | phosphatase and tensin homolog (Pten) alternative variant bSep08, mRNA.                                      |
| <a href="#">Pter</a>   | <a href="#">Pter.bSep08</a>   | <a href="#">63852</a>  | 41368 | 750  | 1  | 250 | phosphotriesterase related (Pter) alternative variant bSep08, mRNA.                                          |
| <a href="#">Pter</a>   | <a href="#">Pter.cSep08</a>   | <a href="#">63852</a>  | 41341 | 752  | 1  | 250 | phosphotriesterase related (Pter) alternative variant cSep08, mRNA.                                          |
| <a href="#">Ptgds</a>  | <a href="#">Ptgds.bSep08</a>  | <a href="#">25526</a>  | 2853  | 633  | 7  | 195 | prostaglandin D2 synthase (brain) (Ptgds) alternative variant bSep08, mRNA.                                  |
| <a href="#">Ptgds</a>  | <a href="#">Ptgds.cSep08</a>  | <a href="#">25526</a>  | 2530  | 758  | 6  | 126 | prostaglandin D2 synthase (brain) (14.2 kD) (Ptgds) alternative variant cSep08, mRNA.                        |
| <a href="#">Ptgds2</a> | <a href="#">Ptgds2.bSep08</a> | <a href="#">58962</a>  | 11201 | 609  | 1  | 103 | prostaglandin D2 synthase 2, hematopoietic (Ptgds2) alternative variant bSep08, mRNA.                        |
| <a href="#">Ptger1</a> | <a href="#">Ptger1.cSep08</a> | <a href="#">25637</a>  | 1716  | 763  | 2  | 219 | prostaglandin E receptor 1 (subtype EP1) (Ptger1) alternative variant cSep08, mRNA.                          |
| <a href="#">Ptger3</a> | <a href="#">Ptger3.aSep08</a> | <a href="#">24929</a>  | 79248 | 2078 | 3  | 366 | prostaglandin E receptor 3 (subtype EP3) (40.1 kD) (Ptger3) alternative variant aSep08, mRNA.                |
| <a href="#">Ptger3</a> | <a href="#">Ptger3.bSep08</a> | <a href="#">24929</a>  | 39240 | 1188 | 1  | 365 | prostaglandin E receptor 3 (subtype EP3) (39.6 kD) (Ptger3) alternative variant bSep08, mRNA.                |

|                        |                               |                        |        |      |    |     |                                                                                     |
|------------------------|-------------------------------|------------------------|--------|------|----|-----|-------------------------------------------------------------------------------------|
| <a href="#">Ptger4</a> | <a href="#">Ptger4.bSep08</a> | <a href="#">84023</a>  | 2373   | 755  | 4  | 122 | putative mitochondrial protein (13.9 kD) (Ptger4) alternative variant bSep08, mRNA. |
| <a href="#">Ptges</a>  | <a href="#">Ptges.bSep08</a>  | <a href="#">59103</a>  | 895    | 493  | 2  | 38  | prostaglandin E synthase (4.2 kD) (Ptges) alternative variant bSep08, mRNA.         |
| <a href="#">Ptges2</a> | <a href="#">Ptges2.bSep08</a> | <a href="#">311865</a> | 5200   | 1311 | 4  | 189 | prostaglandin E synthase 2 (20.8 kD) (Ptges2) alternative variant bSep08, mRNA.     |
| <a href="#">Ptgir</a>  | <a href="#">Ptgir.bSep08</a>  | <a href="#">292661</a> | 2226   | 593  | 2  | 197 | prostaglandin I receptor (IP) (Ptgir) alternative variant bSep08, mRNA.             |
| <a href="#">Ptgs1</a>  | <a href="#">Ptgs1.bSep08</a>  | <a href="#">24693</a>  | 6223   | 324  | 3  | 92  | prostaglandin-endoperoxide synthase 1 (Ptgs1) alternative variant bSep08, mRNA.     |
| <a href="#">Pthr1</a>  | <a href="#">Pthr1.bSep08</a>  | <a href="#">56813</a>  | 23300  | 2250 | 12 | 363 | parathyroid hormone receptor (40.3 kD) (Pthr1) alternative variant bSep08, mRNA.    |
| <a href="#">Pthr1</a>  | <a href="#">Pthr1.cSep08</a>  | <a href="#">56813</a>  | 4107   | 2604 | 5  | 269 | parathyroid hormone receptor (29.9 kD) (Pthr1) alternative variant cSep08, mRNA.    |
| <a href="#">Pthr1</a>  | <a href="#">Pthr1.dSep08</a>  | <a href="#">56813</a>  | 17113  | 736  | 7  | 212 | parathyroid hormone receptor (Pthr1) alternative variant dSep08, mRNA.              |
| <a href="#">Pthr1</a>  | <a href="#">Pthr1.eSep08</a>  | <a href="#">56813</a>  | 19479  | 655  | 7  | 198 | parathyroid hormone receptor (Pthr1) alternative variant eSep08, mRNA.              |
| <a href="#">Pthr1</a>  | <a href="#">Pthr1.fSep08</a>  | <a href="#">56813</a>  | 1954   | 713  | 4  | 194 | parathyroid hormone receptor (Pthr1) alternative variant fSep08, mRNA.              |
| <a href="#">Pthr1</a>  | <a href="#">Pthr1.gSep08</a>  | <a href="#">56813</a>  | 12664  | 458  | 3  | 152 | putative protein (Pthr1) alternative variant gSep08, mRNA.                          |
| <a href="#">Pthr1</a>  | <a href="#">Pthr1.iSep08</a>  | <a href="#">56813</a>  | 1994   | 617  | 3  | 75  | parathyroid hormone receptor (Pthr1) alternative variant iSep08, mRNA.              |
| <a href="#">Ptk2</a>   | <a href="#">Ptk2.bSep08</a>   | <a href="#">25614</a>  | 22578  | 1784 | 5  | 449 | PTK2 protein tyrosine kinase 2 (Ptk2) alternative variant bSep08, mRNA.             |
| <a href="#">Ptk2</a>   | <a href="#">Ptk2.cSep08</a>   | <a href="#">25614</a>  | 119169 | 1907 | 21 | 248 | PTK2 protein tyrosine kinase 2 (Ptk2) alternative variant cSep08, mRNA.             |
| <a href="#">Ptk2</a>   | <a href="#">Ptk2.dSep08</a>   | <a href="#">25614</a>  | 10824  | 398  | 5  | 113 | PTK2 protein tyrosine kinase 2 (Ptk2) alternative variant dSep08, mRNA.             |
| <a href="#">Ptk2</a>   | <a href="#">Ptk2.fSep08</a>   | <a href="#">25614</a>  | 8443   | 436  | 3  | 38  | PTK2 protein tyrosine kinase 2 (Ptk2) alternative variant fSep08, mRNA.             |
| <a href="#">Ptk7</a>   | <a href="#">Ptk7.bSep08</a>   | <a href="#">301242</a> | 11957  | 1105 | 5  | 214 | PTK7 protein tyrosine kinase 7 (Ptk7) alternative variant bSep08, mRNA.             |
| <a href="#">Ptk7</a>   | <a href="#">Ptk7.cSep08</a>   | <a href="#">301242</a> | 3601   | 459  | 4  | 152 | PTK7 protein tyrosine kinase 7 (Ptk7) alternative variant cSep08, mRNA.             |
| <a href="#">Ptma</a>   | <a href="#">Ptma.bSep08</a>   | <a href="#">29222</a>  | 3656   | 975  | 4  | 107 | prothymosin alpha (11.7 kD) (Ptma) alternative variant bSep08, mRNA.                |
| <a href="#">Ptma</a>   | <a href="#">Ptma.cSep08</a>   | <a href="#">29222</a>  | 3966   | 1041 | 5  | 96  | prothymosin alpha (10.6 kD) (Ptma) alternative variant cSep08, mRNA.                |
| <a href="#">Ptma</a>   | <a href="#">Ptma.dSep08</a>   | <a href="#">29222</a>  | 3835   | 1179 | 4  | 73  | prothymosin alpha (8.0 kD) (Ptma) alternative variant dSep08, complete mRNA.        |
| <a href="#">Ptma</a>   | <a href="#">Ptma.eSep08</a>   | <a href="#">29222</a>  | 3500   | 401  | 3  | 38  | prothymosin alpha (4.3 kD) (Ptma) alternative variant eSep08, mRNA.                 |
| <a href="#">Ptn</a>    | <a href="#">Ptn.aSep08</a>    | <a href="#">24924</a>  | 50563  | 1294 | 5  | 180 | pleiotrophin (Ptn) alternative variant aSep08, mRNA.                                |
| <a href="#">Ptn</a>    | <a href="#">Ptn.bSep08</a>    | <a href="#">24924</a>  | 80888  | 916  | 6  | 168 | pleiotrophin (18.9 kD) (Ptn) alternative variant bSep08, complete mRNA.             |

|                        |                               |                        |       |      |   |     |                                                                                                                                                  |
|------------------------|-------------------------------|------------------------|-------|------|---|-----|--------------------------------------------------------------------------------------------------------------------------------------------------|
| <a href="#">Ptn</a>    | <a href="#">Ptn.dSep08</a>    | <a href="#">24924</a>  | 65113 | 1094 | 4 | 156 | pleiotrophin (17.4 kD) (Ptn) alternative variant dSep08, mRNA.                                                                                   |
| <a href="#">Ptn</a>    | <a href="#">Ptn.eSep08</a>    | <a href="#">24924</a>  | 64607 | 621  | 4 | 152 | pleiotrophin (Ptn) alternative variant eSep08, mRNA.                                                                                             |
| <a href="#">Ptn</a>    | <a href="#">Ptn.fSep08</a>    | <a href="#">24924</a>  | 40805 | 539  | 4 | 146 | pleiotrophin (Ptn) alternative variant fSep08, mRNA.                                                                                             |
| <a href="#">Ptov1</a>  | <a href="#">Ptov1.bSep08</a>  | <a href="#">292888</a> | 2745  | 1054 | 8 | 227 | prostate tumor overexpressed 1 like (26.2 kD) (Ptov1) alternative variant bSep08, mRNA.                                                          |
| <a href="#">Ptov1</a>  | <a href="#">Ptov1.cSep08</a>  | <a href="#">292888</a> | 4625  | 1296 | 9 | 224 | prostate tumor overexpressed 1 like (Ptov1) alternative variant cSep08, mRNA.                                                                    |
| <a href="#">Ptp4a1</a> | <a href="#">Ptp4a1.cSep08</a> | <a href="#">29463</a>  | 3232  | 581  | 2 | 46  | putative protein (Ptp4a1) alternative variant cSep08, mRNA.                                                                                      |
| <a href="#">Ptp4a3</a> | <a href="#">Ptp4a3.bSep08</a> | <a href="#">362930</a> | 2980  | 365  | 3 | 37  | putative protein (Ptp4a3) alternative variant bSep08, mRNA.                                                                                      |
| <a href="#">Ptp4a3</a> | <a href="#">Ptp4a3.dSep08</a> | <a href="#">362930</a> | 3109  | 416  | 2 | 39  | putative protein (Ptp4a3) alternative variant dSep08, mRNA.                                                                                      |
| <a href="#">Ptpdc1</a> | <a href="#">Ptpdc1.bSep08</a> | <a href="#">291022</a> | 7372  | 1521 | 4 | 129 | protein tyrosine phosphatase (Ptpdc1) alternative variant bSep08, mRNA.                                                                          |
| <a href="#">Ptpdc1</a> | <a href="#">Ptpdc1.cSep08</a> | <a href="#">291022</a> | 777   | 368  | 2 | 122 | putative protein of vertebrate origin (Ptpdc1) alternative variant cSep08, mRNA.                                                                 |
| <a href="#">Ptpdc1</a> | <a href="#">Ptpdc1.dSep08</a> | <a href="#">291022</a> | 34699 | 422  | 3 | 52  | putative protein of vertebrate origin (Ptpdc1) alternative variant dSep08, mRNA.                                                                 |
| <a href="#">Ptpla</a>  | <a href="#">Ptpla.bSep08</a>  | <a href="#">680115</a> | 14016 | 683  | 5 | 196 | protein tyrosine phosphatase-like (proline instead of catalytic arginine), member a (Ptpla) alternative variant bSep08, mRNA.                    |
| <a href="#">Ptpla</a>  | <a href="#">Ptpla.cSep08</a>  | <a href="#">680115</a> | 13952 | 896  | 3 | 175 | protein tyrosine phosphatase-like (proline instead of catalytic arginine), member a (20.3 kD) (Ptpla) alternative variant cSep08, mRNA.          |
| <a href="#">Ptpla</a>  | <a href="#">Ptpla.dSep08</a>  | <a href="#">680115</a> | 2242  | 373  | 1 | 51  | protein tyrosine phosphatase-like (proline instead of catalytic arginine), member a (Ptpla) alternative variant dSep08, mRNA.                    |
| <a href="#">Ptplb</a>  | <a href="#">Ptplb.aSep08</a>  | <a href="#">288058</a> | 91751 | 994  | 7 | 254 | protein tyrosine phosphatase-like (proline instead of catalytic arginine), member b (28.4 kD) (Ptplb) alternative variant aSep08, complete mRNA. |
| <a href="#">Ptplb</a>  | <a href="#">Ptplb.bSep08</a>  | <a href="#">288058</a> | 18246 | 679  | 5 | 183 | protein tyrosine phosphatase-like (proline instead of catalytic arginine), member b (Ptplb) alternative variant bSep08, mRNA.                    |
| <a href="#">Ptpmt1</a> | <a href="#">Ptpmt1.bSep08</a> | <a href="#">29390</a>  | 9074  | 580  | 3 | 123 | protein tyrosine phosphatase, mitochondrial 1 (14.0 kD) (Ptpmt1) alternative variant bSep08, mRNA.                                               |
| <a href="#">Ptpmt1</a> | <a href="#">Ptpmt1.cSep08</a> | <a href="#">29390</a>  | 9715  | 915  | 5 | 46  | protein tyrosine phosphatase, mitochondrial 1 (Ptpmt1) alternative variant cSep08, mRNA.                                                         |
| <a href="#">Ptpn1</a>  | <a href="#">Ptpn1.bSep08</a>  | <a href="#">24697</a>  | 31509 | 581  | 2 | 67  | protein tyrosine phosphatase, non-receptor type 1 (8.0 kD) (Ptpn1) alternative variant bSep08, mRNA.                                             |
| <a href="#">Ptpn2</a>  | <a href="#">Ptpn2.bSep08</a>  | <a href="#">117063</a> | 24843 | 1210 | 7 | 289 | protein tyrosine phosphatase, non-receptor type 2 (Ptpn2) alternative variant bSep08, mRNA.                                                      |
| <a href="#">Ptpn3</a>  | <a href="#">Ptpn3.aSep08</a>  | <a href="#">362524</a> | 29759 | 1157 |   | 384 | protein tyrosine phosphatase, non-receptor type 3 (Ptpn3) mRNA.                                                                                  |

|                        |                               |                        |        |      |    |     |                                                                                                                                |
|------------------------|-------------------------------|------------------------|--------|------|----|-----|--------------------------------------------------------------------------------------------------------------------------------|
| <a href="#">Ptpn4</a>  | <a href="#">Ptpn4.aSep08</a>  | <a href="#">246116</a> | 144629 | 1757 | 6  | 525 | protein tyrosine phosphatase, non-receptor type 4 and hypothetical protein LOC680095 (Ptpn4) alternative variant aSep08, mRNA. |
| <a href="#">Ptpn4</a>  | <a href="#">Ptpn4.aSep08</a>  | <a href="#">680095</a> | 144629 | 1757 | 6  | 525 | protein tyrosine phosphatase, non-receptor type 4 and hypothetical protein LOC680095 (Ptpn4) alternative variant aSep08, mRNA. |
| <a href="#">Ptpn4</a>  | <a href="#">Ptpn4.bSep08</a>  | <a href="#">246116</a> | 69125  | 494  | 2  | 104 | protein tyrosine phosphatase, non-receptor type 4 and hypothetical protein LOC680095 (Ptpn4) alternative variant bSep08, mRNA. |
| <a href="#">Ptpn4</a>  | <a href="#">Ptpn4.bSep08</a>  | <a href="#">680095</a> | 69125  | 494  | 2  | 104 | protein tyrosine phosphatase, non-receptor type 4 and hypothetical protein LOC680095 (Ptpn4) alternative variant bSep08, mRNA. |
| <a href="#">Ptpn5</a>  | <a href="#">Ptpn5.bSep08</a>  | <a href="#">29644</a>  | 3408   | 700  | 1  | 140 | protein tyrosine phosphatase, non-receptor type 5 (16.1 kD) (Ptpn5) alternative variant bSep08, mRNA.                          |
| <a href="#">Ptpn6</a>  | <a href="#">Ptpn6.bSep08</a>  | <a href="#">116689</a> | 5139   | 846  | 6  | 231 | protein tyrosine phosphatase, non-receptor type 6 (Ptpn6) alternative variant bSep08, mRNA.                                    |
| <a href="#">Ptpn6</a>  | <a href="#">Ptpn6.cSep08</a>  | <a href="#">116689</a> | 5197   | 739  | 6  | 176 | protein tyrosine phosphatase, non-receptor type 6 (Ptpn6) alternative variant cSep08, mRNA.                                    |
| <a href="#">Ptpn6</a>  | <a href="#">Ptpn6.dSep08</a>  | <a href="#">116689</a> | 1351   | 808  | 4  | 141 | protein tyrosine phosphatase, non-receptor type 6 (Ptpn6) alternative variant dSep08, mRNA.                                    |
| <a href="#">Ptpn9</a>  | <a href="#">Ptpn9.bSep08</a>  | <a href="#">266611</a> | 29990  | 1582 | 8  | 367 | protein tyrosine phosphatase, non-receptor type 9 (42.1 kD) (Ptpn9) alternative variant bSep08, mRNA.                          |
| <a href="#">Ptpn9</a>  | <a href="#">Ptpn9.cSep08</a>  | <a href="#">266611</a> | 12680  | 621  | 6  | 144 | protein tyrosine phosphatase, non-receptor type 9 (Ptpn9) alternative variant cSep08, mRNA.                                    |
| <a href="#">Ptpn9</a>  | <a href="#">Ptpn9.dSep08</a>  | <a href="#">266611</a> | 14031  | 414  | 5  | 104 | protein tyrosine phosphatase, non-receptor type 9 (Ptpn9) alternative variant dSep08, mRNA.                                    |
| <a href="#">Ptpn13</a> | <a href="#">Ptpn13.aSep08</a> | <a href="#">498331</a> | 44073  | 1897 | 7  | 570 | tyrosine phosphatase (Ptpn13) alternative variant aSep08, mRNA.                                                                |
| <a href="#">Ptpn13</a> | <a href="#">Ptpn13.bSep08</a> | <a href="#">498331</a> | 20412  | 1822 | 10 | 413 | protein Tyrosine phosphatase (Ptpn13) alternative variant bSep08, mRNA.                                                        |
| <a href="#">Ptpn13</a> | <a href="#">Ptpn13.cSep08</a> | <a href="#">498331</a> | 35649  | 1788 | 8  | 404 | protein Tyrosine phosphatase (Ptpn13) alternative variant cSep08, mRNA.                                                        |
| <a href="#">Ptpn13</a> | <a href="#">Ptpn13.dSep08</a> | <a href="#">498331</a> | 5992   | 924  | 6  | 307 | protein Tyrosine phosphatase (Ptpn13) alternative variant dSep08, mRNA.                                                        |
| <a href="#">Ptpn13</a> | <a href="#">Ptpn13.eSep08</a> | <a href="#">498331</a> | 9945   | 734  | 6  | 244 | protein Tyrosine phosphatase (Ptpn13) alternative variant eSep08, mRNA.                                                        |
| <a href="#">Ptpn13</a> | <a href="#">Ptpn13.fSep08</a> | <a href="#">498331</a> | 6730   | 318  | 3  | 83  | protein Tyrosine phosphatase (Ptpn13) alternative variant fSep08, mRNA.                                                        |
| <a href="#">Ptpn13</a> | <a href="#">Ptpn13.gSep08</a> | <a href="#">498331</a> | 1587   | 529  | 2  | 67  | protein Tyrosine phosphatase (Ptpn13) alternative variant gSep08, mRNA.                                                        |
| <a href="#">Ptpn18</a> | <a href="#">Ptpn18.bSep08</a> | <a href="#">301333</a> | 6156   | 1866 | 10 | 333 | protein tyrosine phosphatase, non-receptor type 18 (36.5 kD) (Ptpn18) alternative variant bSep08, mRNA.                        |
| <a href="#">Ptpn18</a> | <a href="#">Ptpn18.cSep08</a> | <a href="#">301333</a> | 2187   | 1184 | 5  | 133 | protein tyrosine phosphatase, non-receptor type 18 (Ptpn18) alternative variant cSep08, mRNA.                                  |
| <a href="#">Ptpn18</a> | <a href="#">Ptpn18.dSep08</a> | <a href="#">301333</a> | 13535  | 697  | 7  | 71  | protein tyrosine phosphatase, non-receptor type 18 (Ptpn18) alternative variant dSep08, mRNA.                                  |

|                        |                               |                        |        |      |   |     |                                                                                                             |
|------------------------|-------------------------------|------------------------|--------|------|---|-----|-------------------------------------------------------------------------------------------------------------|
| <a href="#">Ptpn21</a> | <a href="#">Ptpn21.bSep08</a> | <a href="#">171070</a> | 12605  | 3818 | 6 | 687 | protein tyrosine phosphatase, non-receptor type 21 (Ptpn21) alternative variant bSep08, mRNA.               |
| <a href="#">Ptpn21</a> | <a href="#">Ptpn21.cSep08</a> | <a href="#">171070</a> | 2567   | 539  | 1 | 84  | protein tyrosine phosphatase, non-receptor type 21 (Ptpn21) alternative variant cSep08, mRNA.               |
| <a href="#">Ptpn23</a> | <a href="#">Ptpn23.bSep08</a> | <a href="#">117552</a> | 754    | 388  | 1 | 57  | protein tyrosine phosphatase, non-receptor type 23 (Ptpn23) alternative variant bSep08, mRNA.               |
| <a href="#">Ptpra</a>  | <a href="#">Ptpra.bSep08</a>  | <a href="#">25167</a>  | 109886 | 1481 | 7 | 327 | protein tyrosine phosphatase, receptor type, A (35.1 kD) (Ptpra) alternative variant bSep08, complete mRNA. |
| <a href="#">Ptpra</a>  | <a href="#">Ptpra.cSep08</a>  | <a href="#">25167</a>  | 27313  | 528  | 6 | 175 | protein tyrosine phosphatase, receptor type, A (Ptpra) alternative variant cSep08, mRNA.                    |
| <a href="#">Ptpra</a>  | <a href="#">Ptpra.dSep08</a>  | <a href="#">25167</a>  | 19644  | 738  | 7 | 167 | protein tyrosine phosphatase, receptor type, A (Ptpra) alternative variant dSep08, mRNA.                    |
| <a href="#">Ptprb</a>  | <a href="#">Ptprb.bSep08</a>  | <a href="#">314843</a> | 8882   | 501  | 3 | 166 | protein tyrosine phosphatase receptor type B CRA b (Ptprb) alternative variant bSep08, mRNA.                |
| <a href="#">Ptprb</a>  | <a href="#">Ptprb.bSep08</a>  | <a href="#">688895</a> | 8882   | 501  | 3 | 166 | protein tyrosine phosphatase receptor type B CRA b (Ptprb) alternative variant bSep08, mRNA.                |
| <a href="#">Ptprb</a>  | <a href="#">Ptprb.cSep08</a>  | <a href="#">314843</a> | 791    | 377  | 2 | 77  | protein tyrosine phosphatase receptor type B (Ptprb) alternative variant cSep08, mRNA.                      |
| <a href="#">Ptprb</a>  | <a href="#">Ptprb.cSep08</a>  | <a href="#">688895</a> | 791    | 377  | 2 | 77  | protein tyrosine phosphatase receptor type B (Ptprb) alternative variant cSep08, mRNA.                      |
| <a href="#">Ptprc</a>  | <a href="#">Ptprc.fSep08</a>  | <a href="#">24699</a>  | 58176  | 443  | 5 | 108 | protein tyrosine phosphatase, receptor type, C (Ptprc) alternative variant fSep08, mRNA.                    |
| <a href="#">Ptprc</a>  | <a href="#">Ptprc.gSep08</a>  | <a href="#">24699</a>  | 7596   | 755  | 4 | 101 | protein tyrosine phosphatase, receptor type, C (Ptprc) alternative variant gSep08, mRNA.                    |
| <a href="#">Ptprd</a>  | <a href="#">Ptprd.bSep08</a>  | <a href="#">25529</a>  | 32824  | 2145 | 8 | 559 | protein tyrosine phosphatase, receptor type, D (Ptprd) alternative variant bSep08, mRNA.                    |
| <a href="#">Ptprd</a>  | <a href="#">Ptprd.dSep08</a>  | <a href="#">25529</a>  | 3633   | 851  | 5 | 283 | protein tyrosine phosphatase, receptor type, D (Ptprd) alternative variant dSep08, mRNA.                    |
| <a href="#">Ptprd</a>  | <a href="#">Ptprd.eSep08</a>  | <a href="#">25529</a>  | 15535  | 1171 | 7 | 248 | protein tyrosine phosphatase, receptor type, D (Ptprd) alternative variant eSep08, mRNA.                    |
| <a href="#">Ptprd</a>  | <a href="#">Ptprd.fSep08</a>  | <a href="#">25529</a>  | 1705   | 618  | 3 | 198 | protein tyrosine phosphatase, receptor type, D (Ptprd) alternative variant fSep08, mRNA.                    |
| <a href="#">Ptprd</a>  | <a href="#">Ptprd.gSep08</a>  | <a href="#">25529</a>  | 9390   | 716  | 5 | 172 | protein tyrosine phosphatase, receptor type, D (Ptprd) alternative variant gSep08, mRNA.                    |
| <a href="#">Ptprd</a>  | <a href="#">Ptprd.hSep08</a>  | <a href="#">25529</a>  | 1580   | 881  | 3 | 124 | protein tyrosine phosphatase, receptor type, D (Ptprd) alternative variant hSep08, mRNA.                    |
| <a href="#">Ptpre</a>  | <a href="#">Ptpre.bSep08</a>  | <a href="#">114767</a> | 53644  | 678  | 6 | 95  | protein tyrosine phosphatase, receptor type, E (10.5 kD) (Ptpre) alternative variant bSep08, mRNA.          |
| <a href="#">Ptprf</a>  | <a href="#">Ptprf.bSep08</a>  | <a href="#">360406</a> | 6443   | 711  | 6 | 236 | protein tyrosine phosphatase, receptor type, F (Ptprf) alternative variant bSep08, mRNA.                    |
| <a href="#">Ptprf</a>  | <a href="#">Ptprf.cSep08</a>  | <a href="#">360406</a> | 9315   | 563  | 5 | 187 | protein tyrosine phosphatase, receptor type, F (Ptprf) alternative variant cSep08, mRNA.                    |
| <a href="#">Ptprf</a>  | <a href="#">Ptprf.eSep08</a>  | <a href="#">360406</a> | 618    | 389  | 2 | 92  | protein tyrosine phosphatase, receptor type, F (Ptprf) alternative variant eSep08, mRNA.                    |
| <a href="#">Ptprf</a>  | <a href="#">Ptprf.fSep08</a>  | <a href="#">360406</a> | 4304   | 274  | 3 | 90  | protein tyrosine phosphatase, receptor type, F (Ptprf) alternative variant fSep08, mRNA.                    |

|                        |                               |                        |        |      |    |      |                                                                                                                |
|------------------------|-------------------------------|------------------------|--------|------|----|------|----------------------------------------------------------------------------------------------------------------|
| <a href="#">Ptprg</a>  | <a href="#">Ptprg.bSep08</a>  | <a href="#">171357</a> | 55964  | 3014 | 17 | 668  | protein tyrosine phosphatase, receptor type, G (Ptprg) alternative variant bSep08, mRNA.                       |
| <a href="#">Ptprg</a>  | <a href="#">Ptprg.cSep08</a>  | <a href="#">171357</a> | 39170  | 417  | 3  | 138  | protein tyrosine phosphatase, receptor type, G (Ptprg) alternative variant cSep08, mRNA.                       |
| <a href="#">Ptprh</a>  | <a href="#">Ptprh.aSep08</a>  | <a href="#">171125</a> | 29203  | 1714 | 7  | 571  | protein tyrosine phosphatase, receptor type, H (Ptprh) alternative variant aSep08, mRNA.                       |
| <a href="#">Ptprh</a>  | <a href="#">Ptprh.bSep08</a>  | <a href="#">171125</a> | 10708  | 391  | 3  | 130  | protein tyrosine phosphatase, receptor type, H (Ptprh) alternative variant bSep08, mRNA.                       |
| <a href="#">Ptprh</a>  | <a href="#">Ptprh.cSep08</a>  | <a href="#">171125</a> | 2392   | 291  | 2  | 96   | protein tyrosine phosphatase, receptor type, H (Ptprh) alternative variant cSep08, mRNA.                       |
| <a href="#">Ptprj</a>  | <a href="#">Ptprj.aSep08</a>  | <a href="#">29645</a>  | 111816 | 1795 |    | 598  | protein tyrosine phosphatase, receptor type, J (Ptprj) alternative variant aSep08, mRNA.                       |
| <a href="#">Ptprj</a>  | <a href="#">Ptprj.bSep08</a>  | <a href="#">29645</a>  | 3240   | 346  |    | 115  | protein tyrosine phosphatase, receptor type, J (Ptprj) alternative variant bSep08, mRNA.                       |
| <a href="#">Ptprk</a>  | <a href="#">Ptprk.bSep08</a>  | <a href="#">360302</a> | 299803 | 1795 | 1  | 597  | protein tyrosine phosphatase, receptor type, K, extracellular region (Ptprk) alternative variant bSep08, mRNA. |
| <a href="#">Ptprm</a>  | <a href="#">Ptprm.aSep08</a>  | <a href="#">29616</a>  | 307975 | 3967 | 24 | 1059 | protein tyrosine phosphatase, receptor type, M (Ptprm) alternative variant aSep08, mRNA.                       |
| <a href="#">Ptprm</a>  | <a href="#">Ptprm.bSep08</a>  | <a href="#">29616</a>  | 20555  | 792  | 6  | 227  | protein tyrosine phosphatase, receptor type, M (Ptprm) alternative variant bSep08, mRNA.                       |
| <a href="#">Ptprm</a>  | <a href="#">Ptprm.cSep08</a>  | <a href="#">29616</a>  | 142898 | 704  | 7  | 187  | protein tyrosine phosphatase, receptor type, M (Ptprm) alternative variant cSep08, mRNA.                       |
| <a href="#">Ptprm</a>  | <a href="#">Ptprm.dSep08</a>  | <a href="#">29616</a>  | 8831   | 350  | 4  | 116  | protein tyrosine phosphatase, receptor type, M (Ptprm) alternative variant dSep08, mRNA.                       |
| <a href="#">Ptprm</a>  | <a href="#">Ptprm.gSep08</a>  | <a href="#">29616</a>  | 1428   | 309  | 2  | 56   | protein tyrosine phosphatase, receptor type, M (Ptprm) alternative variant gSep08, mRNA.                       |
| <a href="#">Ptprn</a>  | <a href="#">Ptprn.aSep08</a>  | <a href="#">116660</a> | 15082  | 3372 | 23 | 952  | protein tyrosine phosphatase, receptor type, N (Ptprn) alternative variant aSep08, mRNA.                       |
| <a href="#">Ptprn</a>  | <a href="#">Ptprn.bSep08</a>  | <a href="#">116660</a> | 2262   | 587  | 6  | 180  | protein tyrosine phosphatase, receptor type, N (Ptprn) alternative variant bSep08, mRNA.                       |
| <a href="#">Ptprn</a>  | <a href="#">Ptprn.cSep08</a>  | <a href="#">116660</a> | 9093   | 1831 | 7  | 172  | protein tyrosine phosphatase, receptor type, N (Ptprn) alternative variant cSep08, mRNA.                       |
| <a href="#">Ptprn</a>  | <a href="#">Ptprn.dSep08</a>  | <a href="#">116660</a> | 465    | 383  | 2  | 127  | protein tyrosine phosphatase, receptor type, N (Ptprn) alternative variant dSep08, mRNA.                       |
| <a href="#">Ptprn</a>  | <a href="#">Ptprn.eSep08</a>  | <a href="#">116660</a> | 1141   | 428  | 5  | 60   | protein tyrosine phosphatase, receptor type, N (Ptprn) alternative variant eSep08, mRNA.                       |
| <a href="#">Ptpro</a>  | <a href="#">Ptpro.bSep08</a>  | <a href="#">50677</a>  | 34514  | 809  | 1  | 217  | protein tyrosine phosphatase, receptor type, O (Ptpro) alternative variant bSep08, mRNA.                       |
| <a href="#">Ptpru</a>  | <a href="#">Ptpru.aSep08</a>  | <a href="#">116680</a> | 8623   | 1113 | 8  | 370  | protein tyrosine phosphatase, receptor type, U (Ptpru) alternative variant aSep08, mRNA.                       |
| <a href="#">Ptpru</a>  | <a href="#">Ptpru.bSep08</a>  | <a href="#">116680</a> | 3609   | 2339 | 3  | 175  | protein tyrosine phosphatase, receptor type, U (20.0 kD) (Ptpru) alternative variant bSep08, mRNA.             |
| <a href="#">Ptprv</a>  | <a href="#">Ptprv.aSep08</a>  | <a href="#">64576</a>  | 2595   | 786  |    | 261  | protein tyrosine phosphatase, receptor type, V (Ptprv) mRNA.                                                   |
| <a href="#">Ptprz1</a> | <a href="#">Ptprz1.cSep08</a> | <a href="#">25613</a>  | 11078  | 625  | 6  | 207  | protein tyrosine phosphatase, receptor-type, Z polypeptide 1 (Ptprz1) alternative variant cSep08, mRNA.        |

|                         |                                |                        |       |      |    |     |                                                                                                |
|-------------------------|--------------------------------|------------------------|-------|------|----|-----|------------------------------------------------------------------------------------------------|
| <a href="#">Pts</a>     | <a href="#">Pts.bSep08</a>     | <a href="#">29498</a>  | 6581  | 724  |    | 91  | 6-pyruvoyl-tetrahydropterin synthase (10.4 kD) (Pts) alternative variant bSep08, mRNA.         |
| <a href="#">Pttg1</a>   | <a href="#">Pttg1.bSep08</a>   | <a href="#">64193</a>  | 5671  | 1072 | 2  | 199 | pituitary tumor-transforming 1 (21.6 kD) (Pttg1) alternative variant bSep08, mRNA.             |
| <a href="#">Pttg1</a>   | <a href="#">Pttg1.cSep08</a>   | <a href="#">64193</a>  | 5147  | 715  | 2  | 108 | pituitary tumor-transforming 1 (Pttg1) alternative variant cSep08, mRNA.                       |
| <a href="#">Pttg1ip</a> | <a href="#">Pttg1ip.bSep08</a> | <a href="#">365548</a> | 12542 | 746  | 6  | 162 | pituitary tumor-transforming 1 interacting protein (Pttg1ip) alternative variant bSep08, mRNA. |
| <a href="#">puby</a>    | <a href="#">puby.aSep08</a>    |                        | 2858  | 1967 |    | 160 | mediator of RNA polymerase II transcription homolog (19.1 kD) (puby) mRNA.                     |
| <a href="#">puchy</a>   | <a href="#">puchy.aSep08</a>   |                        | 2132  | 881  |    | 83  | putative protein (9.1 kD) (puchy) mRNA.                                                        |
| <a href="#">pudar</a>   | <a href="#">pudar.aSep08</a>   |                        | 2288  | 757  |    | 77  | putative mitochondrial protein (9.2 kD) (pudar) mRNA.                                          |
| <a href="#">pufer</a>   | <a href="#">pufer.aSep08</a>   |                        | 1075  | 307  |    | 85  | putative protein (pufer) mRNA.                                                                 |
| <a href="#">puflo</a>   | <a href="#">puflo.aSep08</a>   |                        | 34318 | 842  | 9  | 238 | CRA a (puflo) alternative variant aSep08, mRNA.                                                |
| <a href="#">puflo</a>   | <a href="#">puflo.cSep08</a>   |                        | 16453 | 282  | 2  | 74  | CRA a like (puflo) alternative variant cSep08, mRNA.                                           |
| <a href="#">puflu</a>   | <a href="#">puflu.aSep08</a>   |                        | 3083  | 400  |    | 42  | putative protein (4.7 kD) (puflu) mRNA.                                                        |
| <a href="#">pugar</a>   | <a href="#">pugar.aSep08</a>   |                        | 2021  | 384  |    | 127 | stabilin 1 (pugar) mRNA.                                                                       |
| <a href="#">puja</a>    | <a href="#">puja.aSep08</a>    |                        | 7631  | 696  |    | 105 | putative protein (12.0 kD) (puja) mRNA.                                                        |
| <a href="#">pujey</a>   | <a href="#">pujey.aSep08</a>   |                        | 764   | 509  |    | 35  | putative protein (3.9 kD) (pujey) mRNA.                                                        |
| <a href="#">pukee</a>   | <a href="#">pukee.bSep08</a>   |                        | 1225  | 440  |    | 146 | centrosomal protein 350kDa CRA a (pukee) alternative variant bSep08, mRNA.                     |
| <a href="#">pukler</a>  | <a href="#">pukler.aSep08</a>  |                        | 2315  | 739  |    | 45  | putative protein (5.2 kD) (pukler) mRNA.                                                       |
| <a href="#">puloy</a>   | <a href="#">puloy.aSep08</a>   |                        | 1594  | 1421 | 2  | 80  | putative mitochondrial protein (9.0 kD) (puloy) alternative variant aSep08, mRNA.              |
| <a href="#">Pum2</a>    | <a href="#">Pum2.bSep08</a>    | <a href="#">298874</a> | 38452 | 1972 | 13 | 656 | pumilio 2 (Drosophila) (Pum2) alternative variant bSep08, mRNA.                                |
| <a href="#">Pum2</a>    | <a href="#">Pum2.cSep08</a>    | <a href="#">298874</a> | 35808 | 684  | 5  | 165 | pumilio 2 (Drosophila) (Pum2) alternative variant cSep08, mRNA.                                |
| <a href="#">Pum2</a>    | <a href="#">Pum2.dSep08</a>    | <a href="#">298874</a> | 11361 | 310  | 2  | 103 | pumilio 2 (Drosophila) (Pum2) alternative variant dSep08, mRNA.                                |
| <a href="#">pumee</a>   | <a href="#">pumee.aSep08</a>   |                        | 8755  | 811  |    | 97  | putative protein (10.6 kD) (pumee) mRNA.                                                       |
| <a href="#">pumer</a>   | <a href="#">pumer.aSep08</a>   |                        | 3895  | 1346 | 4  | 448 | ubiquitin-conjugating enzyme E2O CRA d (pumer) alternative variant aSep08, mRNA.               |
| <a href="#">Punc</a>    | <a href="#">Punc.aSep08</a>    | <a href="#">315759</a> | 47801 | 4756 | 12 | 923 | putative neuronal cell adhesion molecule (Punc) alternative variant aSep08, mRNA.              |
| <a href="#">Punc</a>    | <a href="#">Punc.bSep08</a>    | <a href="#">315759</a> | 8239  | 2127 | 10 | 528 | putative neuronal cell adhesion molecule (Punc) alternative variant bSep08, mRNA.              |
| <a href="#">Punc</a>    | <a href="#">Punc.dSep08</a>    | <a href="#">315759</a> | 2823  | 2093 | 2  | 108 | putative neuronal cell adhesion molecule (Punc) alternative variant dSep08, mRNA.              |
| <a href="#">punoy</a>   | <a href="#">punoy.aSep08</a>   |                        | 3311  | 555  |    | 37  | putative protein (punoy) mRNA.                                                                 |
| <a href="#">pupor</a>   | <a href="#">pupor.aSep08</a>   |                        | 3132  | 906  | 1  | 302 | probable E3 ubiquitin-protein ligase herc1 (pupor) alternative variant aSep08, mRNA.           |
| <a href="#">pupor</a>   | <a href="#">pupor.bSep08</a>   |                        | 2850  | 289  | 1  | 96  | probable E3 ubiquitin-protein ligase herc1 like (pupor) alternative variant bSep08, mRNA.      |
| <a href="#">Purg</a>    | <a href="#">Purg.aSep08</a>    | <a href="#">361162</a> | 29855 | 1287 |    | 162 | purine-rich element binding protein G (Purg) mRNA.                                             |

|                        |                               |                        |       |      |    |     |                                                                                              |
|------------------------|-------------------------------|------------------------|-------|------|----|-----|----------------------------------------------------------------------------------------------|
| <a href="#">Pus1</a>   | <a href="#">Pus1.bSep08</a>   | <a href="#">304567</a> | 7910  | 1032 | 5  | 336 | pseudouridine synthase 1 (Pus1) alternative variant bSep08, mRNA.                            |
| <a href="#">Pus1</a>   | <a href="#">Pus1.cSep08</a>   | <a href="#">304567</a> | 7586  | 807  | 4  | 268 | pseudouridine synthase 1 (Pus1) alternative variant cSep08, mRNA.                            |
| <a href="#">Pus1</a>   | <a href="#">Pus1.dSep08</a>   | <a href="#">304567</a> | 6975  | 742  | 4  | 247 | pseudouridine synthase 1 (Pus1) alternative variant dSep08, mRNA.                            |
| <a href="#">Pus3</a>   | <a href="#">Pus3.bSep08</a>   | <a href="#">315554</a> | 709   | 624  | 1  | 115 | pseudouridine synthase 3 (Pus3) alternative variant bSep08, mRNA.                            |
| <a href="#">Pus7</a>   | <a href="#">Pus7.aSep08</a>   | <a href="#">296751</a> | 14182 | 2401 | 9  | 341 | pseudouridylate synthase 7 homolog CRA a (38.9 kD) (Pus7) alternative variant aSep08, mRNA.  |
| <a href="#">Pus7</a>   | <a href="#">Pus7.bSep08</a>   | <a href="#">296751</a> | 8154  | 650  | 3  | 200 | putative protein (Pus7) alternative variant bSep08, mRNA.                                    |
| <a href="#">Pus7</a>   | <a href="#">Pus7.cSep08</a>   | <a href="#">296751</a> | 15774 | 757  | 8  | 182 | pseudouridylate synthase 7 homolog CRA a (Pus7) alternative variant cSep08, mRNA.            |
| <a href="#">Pus7</a>   | <a href="#">Pus7.dSep08</a>   | <a href="#">296751</a> | 934   | 557  | 2  | 44  | putative protein (Pus7) alternative variant dSep08, mRNA.                                    |
| <a href="#">pusa</a>   | <a href="#">pusa.aSep08</a>   |                        | 1203  | 1045 |    |     |                                                                                              |
| <a href="#">pushee</a> | <a href="#">pushee.aSep08</a> |                        | 31039 | 834  |    | 277 | neurobeachin (pushee) mRNA.                                                                  |
| <a href="#">Pusl1</a>  | <a href="#">Pusl1.aSep08</a>  | <a href="#">362681</a> | 5102  | 3340 | 8  | 291 | pseudouridylate synthase-like 1 (32.1 kD) (Pusl1) alternative variant aSep08, complete mRNA. |
| <a href="#">Pusl1</a>  | <a href="#">Pusl1.bSep08</a>  | <a href="#">362681</a> | 1357  | 760  | 5  | 211 | pseudouridylate synthase-like 1 (Pusl1) alternative variant bSep08, mRNA.                    |
| <a href="#">Pusl1</a>  | <a href="#">Pusl1.cSep08</a>  | <a href="#">362681</a> | 2223  | 806  | 6  | 167 | pseudouridylate synthase-like 1 (18.4 kD) (Pusl1) alternative variant cSep08, mRNA.          |
| <a href="#">Pusl1</a>  | <a href="#">Pusl1.dSep08</a>  | <a href="#">362681</a> | 1876  | 1316 | 5  | 129 | pseudouridylate synthase-like 1 (13.9 kD) (Pusl1) alternative variant dSep08, mRNA.          |
| <a href="#">Pusl1</a>  | <a href="#">Pusl1.eSep08</a>  | <a href="#">362681</a> | 977   | 748  | 2  | 114 | pseudouridylate synthase-like 1 (Pusl1) alternative variant eSep08, mRNA.                    |
| <a href="#">putu</a>   | <a href="#">putu.aSep08</a>   |                        | 2234  | 430  |    | 43  | putative protein (5.0 kD) (putu) mRNA.                                                       |
| <a href="#">puvar</a>  | <a href="#">puvar.aSep08</a>  |                        | 1464  | 811  |    | 27  | putative protein (2.9 kD) (puvar) mRNA.                                                      |
| <a href="#">puwey</a>  | <a href="#">puwey.aSep08</a>  |                        | 1691  | 813  |    | 44  | putative protein (puwey) mRNA.                                                               |
| <a href="#">Pvalb</a>  | <a href="#">Pvalb.aSep08</a>  | <a href="#">25269</a>  | 14998 | 965  | 3  | 110 | parvalbumin (11.9 kD) (Pvalb) alternative variant aSep08, complete mRNA.                     |
| <a href="#">Pvrl1</a>  | <a href="#">Pvrl1.aSep08</a>  | <a href="#">192183</a> | 1345  | 571  |    | 190 | poliovirus receptor-related 1 (Pvrl1) mRNA.                                                  |
| <a href="#">Pvrl3</a>  | <a href="#">Pvrl3.bSep08</a>  | <a href="#">288124</a> | 55420 | 1364 | 7  | 377 | poliovirus receptor-related 3 (41.6 kD) (Pvrl3) alternative variant bSep08, mRNA.            |
| <a href="#">Pvrl3</a>  | <a href="#">Pvrl3.cSep08</a>  | <a href="#">288124</a> | 8890  | 3308 | 2  | 216 | poliovirus receptor-related 3 (Pvrl3) alternative variant cSep08, mRNA.                      |
| <a href="#">Pvrl3</a>  | <a href="#">Pvrl3.dSep08</a>  | <a href="#">288124</a> | 27679 | 761  | 2  | 105 | poliovirus receptor-related 3 (Pvrl3) alternative variant dSep08, mRNA.                      |
| <a href="#">Pvrl3</a>  | <a href="#">Pvrl3.eSep08</a>  | <a href="#">288124</a> | 11904 | 678  | 3  | 93  | poliovirus receptor-related 3 (10.3 kD) (Pvrl3) alternative variant eSep08, mRNA.            |
| <a href="#">Pvrl4</a>  | <a href="#">Pvrl4.aSep08</a>  | <a href="#">498281</a> | 3404  | 1787 | 2  | 517 | poliovirus receptor-related 4 (Pvrl4) alternative variant aSep08, mRNA.                      |
| <a href="#">Pvrl4</a>  | <a href="#">Pvrl4.cSep08</a>  | <a href="#">498281</a> | 3227  | 779  | 2  | 208 | poliovirus receptor-related 4 (Pvrl4) alternative variant cSep08, mRNA.                      |
| <a href="#">Pwp1</a>   | <a href="#">Pwp1.aSep08</a>   | <a href="#">362856</a> | 14648 | 1427 | 13 | 456 | PWP1 homolog ( <i>S. cerevisiae</i> ) (Pwp1) alternative variant aSep08, mRNA.               |



|                        |                               |                        |       |      |    |     |                                                                                                                       |
|------------------------|-------------------------------|------------------------|-------|------|----|-----|-----------------------------------------------------------------------------------------------------------------------|
| <a href="#">Pwp1</a>   | <a href="#">Pwp1.bSep08</a>   | <a href="#">362856</a> | 4045  | 1325 | 5  | 184 | PWP1 homolog ( <i>S. cerevisiae</i> ) (20.5 kD) (Pwp1) alternative variant bSep08, mRNA.                              |
| <a href="#">Pwp2</a>   | <a href="#">Pwp2.aSep08</a>   | <a href="#">690297</a> | 6771  | 1767 | 10 | 470 | PWP2 periodic tryptophan protein homolog (yeast) (Pwp2) alternative variant aSep08, mRNA.                             |
| <a href="#">Pwp2</a>   | <a href="#">Pwp2.cSep08</a>   | <a href="#">690297</a> | 1117  | 1001 | 2  | 76  | PWP2 periodic tryptophan protein homolog (yeast) (Pwp2) alternative variant cSep08, mRNA.                             |
| <a href="#">Pwwp2a</a> | <a href="#">Pwwp2a.bSep08</a> | <a href="#">303060</a> | 14230 | 817  | 2  | 97  | putative protein of vertebrate origin (Pwwp2a) alternative variant bSep08, mRNA.                                      |
| <a href="#">Pwwp2b</a> | <a href="#">Pwwp2b.bSep08</a> | <a href="#">361671</a> | 11056 | 1177 | 2  | 147 | PWWP (Pwwp2b) alternative variant bSep08, mRNA.                                                                       |
| <a href="#">PX.0</a>   | <a href="#">PX.0.aSep08</a>   |                        | 42870 | 986  | 1  | 303 | phox-like and MIT containing protein (33.8 kD) (PX.0) alternative variant aSep08, mRNA.                               |
| <a href="#">PX.0</a>   | <a href="#">PX.0.bSep08</a>   |                        | 26609 | 658  | 1  | 98  | putative protein of metazoan origin (PX.0) alternative variant bSep08, mRNA.                                          |
| <a href="#">PX.1</a>   | <a href="#">PX.1.aSep08</a>   |                        | 7816  | 415  |    | 138 | protein 3 CRA d (PX.1) mRNA.                                                                                          |
| <a href="#">PX.2</a>   | <a href="#">PX.2.aSep08</a>   |                        | 9200  | 2230 | 1  | 278 | sorting nexin 21 (PX.2) alternative variant aSep08, mRNA.                                                             |
| <a href="#">PX.2</a>   | <a href="#">PX.2.bSep08</a>   |                        | 518   | 351  | 1  | 116 | sorting nexin 21 (PX.2) alternative variant bSep08, mRNA.                                                             |
| <a href="#">PX.3</a>   | <a href="#">PX.3.aSep08</a>   |                        | 21888 | 820  |    | 273 | phospholipase D1 (PX.3) mRNA.                                                                                         |
| <a href="#">Pxdn</a>   | <a href="#">Pxdn.aSep08</a>   | <a href="#">554172</a> | 15295 | 4278 |    | 192 | peroxidasin homolog ( <i>Drosophila</i> ) (21.6 kD) (Pxdn) mRNA.                                                      |
| <a href="#">Pxm</a>    | <a href="#">Pxm.dSep08</a>    | <a href="#">306203</a> | 3208  | 646  | 2  | 46  | putative protein of metazoan origin (Pxm) alternative variant dSep08, mRNA.                                           |
| <a href="#">Pxmp2</a>  | <a href="#">Pxmp2.bSep08</a>  | <a href="#">29533</a>  | 2615  | 624  | 2  | 74  | peroxisomal membrane protein 2 (Pxmp2) alternative variant bSep08, mRNA.                                              |
| <a href="#">Pxmp3</a>  | <a href="#">Pxmp3.aSep08</a>  | <a href="#">29534</a>  | 15954 | 931  | 2  | 310 | peroxisomal membrane protein 3 (Pxmp3) alternative variant aSep08, mRNA.                                              |
| <a href="#">Pxmp3</a>  | <a href="#">Pxmp3.cSep08</a>  | <a href="#">29534</a>  | 16663 | 1750 | 3  | 305 | peroxisomal membrane protein 3 (34.8 kD) (Pxmp3) alternative variant cSep08, complete mRNA.                           |
| <a href="#">Pxmp3</a>  | <a href="#">Pxmp3.dSep08</a>  | <a href="#">29534</a>  | 15956 | 750  | 3  | 209 | peroxisomal membrane protein 3 (Pxmp3) alternative variant dSep08, mRNA.                                              |
| <a href="#">Pxn</a>    | <a href="#">Pxn.bSep08</a>    | <a href="#">360820</a> | 38036 | 767  | 2  | 207 | paxillin (Pxn) alternative variant bSep08, mRNA.                                                                      |
| <a href="#">pyby</a>   | <a href="#">pyby.aSep08</a>   |                        | 2675  | 622  | 5  | 207 | mediator of RNA polymerase II transcription homolog (pyby) alternative variant aSep08, mRNA.                          |
| <a href="#">pychy</a>  | <a href="#">pychy.aSep08</a>  |                        | 68454 | 367  | 1  | 64  | putative protein (pychy) alternative variant aSep08, mRNA.                                                            |
| <a href="#">pychy</a>  | <a href="#">pychy.bSep08</a>  |                        | 858   | 395  | 1  | 49  | putative protein (pychy) alternative variant bSep08, mRNA.                                                            |
| <a href="#">Pycr1</a>  | <a href="#">Pycr1.bSep08</a>  | <a href="#">287877</a> | 948   | 337  | 1  | 93  | pyrroline-5-carboxylate reductase 1 (Pycr1) alternative variant bSep08, mRNA.                                         |
| <a href="#">Pycr2</a>  | <a href="#">Pycr2.bSep08</a>  | <a href="#">364064</a> | 2284  | 386  | 3  | 84  | pyrroline-5-carboxylate reductase family, member 2 (8.7 kD) (Pycr2) alternative variant bSep08, mRNA.                 |
| <a href="#">Pycr2</a>  | <a href="#">Pycr2.cSep08</a>  | <a href="#">364064</a> | 1682  | 373  | 2  | 75  | pyrroline-5-carboxylate reductase family, member 2 (Pycr2) alternative variant cSep08, mRNA.                          |
| <a href="#">Pycl</a>   | <a href="#">Pycl.bSep08</a>   | <a href="#">300035</a> | 4547  | 789  | 1  | 260 | pyrroline-5-carboxylate reductase-like (Pycl) alternative variant bSep08, mRNA.                                       |
| <a href="#">Pycs</a>   | <a href="#">Pycs.bSep08</a>   | <a href="#">361755</a> | 20258 | 1357 | 11 | 413 | pyrroline-5-carboxylate synthetase (glutamate gamma-semialdehyde synthetase) (Pycs) alternative variant bSep08, mRNA. |

|                         |                                |                        |       |      |    |     |                                                                                                                                |
|-------------------------|--------------------------------|------------------------|-------|------|----|-----|--------------------------------------------------------------------------------------------------------------------------------|
| <a href="#">Pycs</a>    | <a href="#">Pycs.dSep08</a>    | <a href="#">361755</a> | 1946  | 677  | 3  | 52  | pyrroline-5-carboxylate synthetase (glutamate gamma-semialdehyde synthetase) (5.6 kD) (Pycs) alternative variant dSep08, mRNA. |
| <a href="#">pydar</a>   | <a href="#">pydar.aSep08</a>   |                        | 5910  | 735  |    | 25  | putative protein (2.9 kD) (pydar) mRNA.                                                                                        |
| <a href="#">pyfer</a>   | <a href="#">pyfer.aSep08</a>   |                        | 607   | 375  |    | 64  | putative protein (pyfer) mRNA.                                                                                                 |
| <a href="#">pyflo</a>   | <a href="#">pyflo.aSep08</a>   |                        | 6349  | 382  |    | 101 | CRA b like (pyflo) mRNA.                                                                                                       |
| <a href="#">pyflu</a>   | <a href="#">pyflu.aSep08</a>   |                        | 13054 | 1029 | 9  | 255 | small nuclear ribonucleoprotein polypeptide a' (28.3 kD) (pyflu) alternative variant aSep08, mRNA.                             |
| <a href="#">pyflu</a>   | <a href="#">pyflu.bSep08</a>   |                        | 602   | 388  | 2  | 74  | CRA c (pyflu) alternative variant bSep08, mRNA.                                                                                |
| <a href="#">pyflu</a>   | <a href="#">pyflu.cSep08</a>   |                        | 9595  | 611  | 6  | 62  | small nuclear ribonucleoprotein polypeptide A' (pyflu) alternative variant cSep08, mRNA.                                       |
| <a href="#">pyflu</a>   | <a href="#">pyflu.dSep08</a>   |                        | 2905  | 532  | 2  | 31  | putative protein (pyflu) alternative variant dSep08, mRNA.                                                                     |
| <a href="#">pygar</a>   | <a href="#">pygar.aSep08</a>   |                        | 2370  | 753  |    | 250 | stabilin 1 (pygar) mRNA.                                                                                                       |
| <a href="#">Pygb</a>    | <a href="#">Pygb.aSep08</a>    | <a href="#">25739</a>  | 51705 | 4191 | 21 | 846 | brain glycogen phosphorylase (96.8 kD) (Pygb) alternative variant aSep08, mRNA.                                                |
| <a href="#">Pygl</a>    | <a href="#">Pygl.aSep08</a>    | <a href="#">64035</a>  | 43713 | 3416 |    | 910 | liver glycogen phosphorylase (Pygl) mRNA.                                                                                      |
| <a href="#">Pygm</a>    | <a href="#">Pygm.bSep08</a>    | <a href="#">24701</a>  | 949   | 378  | 4  | 103 | muscle glycogen phosphorylase (Pygm) alternative variant bSep08, mRNA.                                                         |
| <a href="#">Pygo2</a>   | <a href="#">Pygo2.bSep08</a>   | <a href="#">295251</a> | 2865  | 757  | 2  | 252 | pygopus 2 (Pygo2) alternative variant bSep08, mRNA.                                                                            |
| <a href="#">Pygo2</a>   | <a href="#">Pygo2.cSep08</a>   | <a href="#">295251</a> | 2853  | 1418 | 1  | 245 | pygopus 2 (Pygo2) alternative variant cSep08, mRNA.                                                                            |
| <a href="#">pyja</a>    | <a href="#">pyja.aSep08</a>    |                        | 5667  | 509  |    | 64  | putative protein (7.2 kD) (pyja) mRNA.                                                                                         |
| <a href="#">pyjey</a>   | <a href="#">pyjey.aSep08</a>   |                        | 1174  | 670  |    | 70  | putative protein (7.9 kD) (pyjey) mRNA.                                                                                        |
| <a href="#">pykee</a>   | <a href="#">pykee.aSep08</a>   |                        | 10720 | 865  |    | 150 | centrosomal protein 350kDa CRA a (pykee) mRNA.                                                                                 |
| <a href="#">pykler</a>  | <a href="#">pykler.aSep08</a>  |                        | 25794 | 800  |    | 51  | putative protein (5.6 kD) (pykler) mRNA.                                                                                       |
| <a href="#">pyloy</a>   | <a href="#">pyloy.aSep08</a>   |                        | 1799  | 226  |    | 60  | putative protein (pyloy) mRNA.                                                                                                 |
| <a href="#">pymee</a>   | <a href="#">pymee.aSep08</a>   |                        | 7947  | 592  |    | 196 | serine threonine kinase 10 (pymee) mRNA.                                                                                       |
| <a href="#">pymer</a>   | <a href="#">pymer.aSep08</a>   |                        | 826   | 687  |    | 133 | ubiquitin-conjugating enzyme E2O CRA c (pymer) mRNA.                                                                           |
| <a href="#">pynoy</a>   | <a href="#">pynoy.aSep08</a>   |                        | 25017 | 303  |    | 100 | tensin (pynoy) mRNA.                                                                                                           |
| <a href="#">pypor</a>   | <a href="#">pypor.aSep08</a>   |                        | 8115  | 640  |    | 213 | probable e3 ubiquitin-protein ligase herc1 (pypor) mRNA.                                                                       |
| <a href="#">Pyroxd1</a> | <a href="#">Pyroxd1.bSep08</a> | <a href="#">297708</a> | 1454  | 817  | 2  | 140 | pyridine nucleotide-disulphide oxidoreductase domain 1 (Pyroxd1) alternative variant bSep08, mRNA.                             |
| <a href="#">Pyroxd1</a> | <a href="#">Pyroxd1.cSep08</a> | <a href="#">297708</a> | 1676  | 919  | 2  | 117 | pyridine nucleotide-disulphide oxidoreductase domain 1 (13.2 kD) (Pyroxd1) alternative variant cSep08, mRNA.                   |
| <a href="#">Pyroxd1</a> | <a href="#">Pyroxd1.dSep08</a> | <a href="#">297708</a> | 1811  | 343  | 2  | 49  | pyridine nucleotide-disulphide oxidoreductase domain 1 (Pyroxd1) alternative variant dSep08, mRNA.                             |
| <a href="#">pysa</a>    | <a href="#">pysa.aSep08</a>    |                        | 21599 | 505  |    | 74  | putative protein (pysa) mRNA.                                                                                                  |
| <a href="#">pyshee</a>  | <a href="#">pyshee.aSep08</a>  |                        | 21705 | 605  |    | 201 | neurobeachin CRA e (pyshee) mRNA.                                                                                              |
| <a href="#">pytu</a>    | <a href="#">pytu.aSep08</a>    |                        | 2123  | 732  |    | 100 | putative protein (pytu) mRNA.                                                                                                  |
| <a href="#">pyvar</a>   | <a href="#">pyvar.aSep08</a>   |                        | 3126  | 858  |    | 63  | putative protein (pyvar) mRNA.                                                                                                 |
| <a href="#">pywey</a>   | <a href="#">pywey.bSep08</a>   |                        | 626   | 446  | 2  | 59  | putative protein (pywey) alternative variant bSep08, mRNA.                                                                     |
| <a href="#">Pzp</a>     | <a href="#">Pzp.bSep08</a>     | <a href="#">252922</a> | 4832  | 1204 | 8  | 265 | zone protein (Pzp) alternative variant bSep08, mRNA.                                                                           |
| <a href="#">Pzp</a>     | <a href="#">Pzp.cSep08</a>     | <a href="#">252922</a> | 2137  | 771  | 4  | 221 | zone protein (Pzp) alternative variant cSep08, mRNA.                                                                           |

|                        |                               |                        |       |      |   |     |                                                                                                                     |
|------------------------|-------------------------------|------------------------|-------|------|---|-----|---------------------------------------------------------------------------------------------------------------------|
| <a href="#">Pzp</a>    | <a href="#">Pzp.eSep08</a>    | <a href="#">252922</a> | 4595  | 253  | 3 | 84  | pregnancy-zone protein like (Pzp) alternative variant eSep08, mRNA.                                                 |
| <a href="#">Pzp</a>    | <a href="#">Pzp.fSep08</a>    | <a href="#">252922</a> | 2087  | 1283 | 2 | 64  | zone protein (7.2 kD) (Pzp) alternative variant fSep08, mRNA.                                                       |
| <a href="#">Qars</a>   | <a href="#">Qars.bSep08</a>   | <a href="#">290868</a> | 2249  | 639  | 7 | 212 | glutaminyl-tRNA synthetase (Qars) alternative variant bSep08, mRNA.                                                 |
| <a href="#">Qars</a>   | <a href="#">Qars.cSep08</a>   | <a href="#">290868</a> | 1756  | 691  | 6 | 175 | glutaminyl-tRNA synthetase (19.7 kD) (Qars) alternative variant cSep08, mRNA.                                       |
| <a href="#">Qars</a>   | <a href="#">Qars.dSep08</a>   | <a href="#">290868</a> | 761   | 396  | 3 | 131 | glutaminyl-tRNA synthetase (Qars) alternative variant dSep08, mRNA.                                                 |
| <a href="#">Qars</a>   | <a href="#">Qars.eSep08</a>   | <a href="#">290868</a> | 1847  | 672  | 7 | 117 | glutaminyl-tRNA synthetase (Qars) alternative variant eSep08, mRNA.                                                 |
| <a href="#">Qki</a>    | <a href="#">Qki.bSep08</a>    | <a href="#">499022</a> | 61970 | 3747 | 6 | 229 | quaking homolog, KH domain RNA binding (mouse) (Qki) alternative variant bSep08, mRNA.                              |
| <a href="#">Qki</a>    | <a href="#">Qki.cSep08</a>    | <a href="#">499022</a> | 59043 | 796  | 6 | 214 | quaking homolog, KH domain RNA binding (mouse) (Qki) alternative variant cSep08, mRNA.                              |
| <a href="#">QLQ.0</a>  | <a href="#">QLQ.0.aSep08</a>  |                        | 25426 | 714  |   | 214 | SWI snf-related matrix-associated actin-dependent regulator of chromatin a2 (QLQ.0) mRNA.                           |
| <a href="#">Qpctl</a>  | <a href="#">Qpctl.bSep08</a>  | <a href="#">292687</a> | 8335  | 1349 | 6 | 221 | glutaminyl-peptide cyclotransferase-like (24.2 kD) (Qpctl) alternative variant bSep08, complete mRNA.               |
| <a href="#">Qpctl</a>  | <a href="#">Qpctl.cSep08</a>  | <a href="#">292687</a> | 2537  | 661  | 2 | 127 | glutaminyl-peptide cyclotransferase-like (Qpctl) alternative variant cSep08, mRNA.                                  |
| <a href="#">Qprt</a>   | <a href="#">Qprt.aSep08</a>   | <a href="#">293504</a> | 15504 | 1218 | 3 | 305 | quinolinate phosphoribosyltransferase (Qprt) alternative variant aSep08, mRNA.                                      |
| <a href="#">Qprt</a>   | <a href="#">Qprt.cSep08</a>   | <a href="#">293504</a> | 14414 | 635  | 3 | 131 | quinolinate phosphoribosyltransferase (Qprt) alternative variant cSep08, mRNA.                                      |
| <a href="#">Qprt</a>   | <a href="#">Qprt.dSep08</a>   | <a href="#">293504</a> | 4943  | 607  | 3 | 27  | quinolinate phosphoribosyltransferase (3.0 kD) (Qprt) alternative variant dSep08, complete mRNA.                    |
| <a href="#">Qrich2</a> | <a href="#">Qrich2.aSep08</a> | <a href="#">501747</a> | 1816  | 573  | 4 | 157 | glutamine rich 2 (Qrich2) alternative variant aSep08, mRNA.                                                         |
| <a href="#">Qrich2</a> | <a href="#">Qrich2.bSep08</a> | <a href="#">501747</a> | 4588  | 716  | 6 | 156 | glutamine rich 2 (17.2 kD) (Qrich2) alternative variant bSep08, mRNA.                                               |
| <a href="#">Qrs1</a>   | <a href="#">Qrs1.bSep08</a>   | <a href="#">309911</a> | 14359 | 1040 | 6 | 183 | glutaminyl-tRNA synthase (glutamine-hydrolyzing)-like 1 (19.8 kD) (Qrs1) alternative variant bSep08, complete mRNA. |
| <a href="#">Qrs1</a>   | <a href="#">Qrs1.cSep08</a>   | <a href="#">309911</a> | 2738  | 448  | 3 | 142 | glutaminyl-tRNA synthase (glutamine-hydrolyzing)-like 1 (Qrs1) alternative variant cSep08, mRNA.                    |
| <a href="#">Qser1</a>  | <a href="#">Qser1.aSep08</a>  | <a href="#">311266</a> | 9001  | 708  |   | 200 | glutamine and serine rich 1 (Qser1) mRNA.                                                                           |
| <a href="#">Qtrt1</a>  | <a href="#">Qtrt1.bSep08</a>  | <a href="#">64016</a>  | 2367  | 750  | 5 | 141 | queuine tRNA-ribosyltransferase 1 (Qtrt1) alternative variant bSep08, mRNA.                                         |
| <a href="#">Qtrt1</a>  | <a href="#">Qtrt1.cSep08</a>  | <a href="#">64016</a>  | 801   | 360  | 1 | 97  | queuine tRNA-ribosyltransferase 1 (10.9 kD) (Qtrt1) alternative variant cSep08, mRNA.                               |
| <a href="#">Qtrtd1</a> | <a href="#">Qtrtd1.aSep08</a> | <a href="#">288364</a> | 6360  | 909  |   | 230 | queuine/other tRNA-ribosyltransferase (Qtrtd1) mRNA.                                                                |
| <a href="#">R3hcc1</a> | <a href="#">R3hcc1.aSep08</a> | <a href="#">361064</a> | 7395  | 1714 | 8 | 515 | R3H domain and coiled-coil containing 1 (R3hcc1) alternative variant aSep08, mRNA.                                  |
| <a href="#">R3hcc1</a> | <a href="#">R3hcc1.bSep08</a> | <a href="#">361064</a> | 2147  | 825  | 4 | 247 | R3H domain and coiled-coil containing 1 (R3hcc1) alternative variant bSep08, mRNA.                                  |

|                        |                               |                        |       |      |    |     |                                                                                       |
|------------------------|-------------------------------|------------------------|-------|------|----|-----|---------------------------------------------------------------------------------------|
| <a href="#">R3hcc1</a> | <a href="#">R3hcc1.cSep08</a> | <a href="#">361064</a> | 10681 | 745  | 4  | 247 | R3H domain and coiled-coil containing 1 (R3hcc1) alternative variant cSep08, mRNA.    |
| <a href="#">R3hdm1</a> | <a href="#">R3hdm1.bSep08</a> | <a href="#">304763</a> | 29853 | 1775 | 13 | 455 | R3H domain 1 (52.3 kD) (R3hdm1) alternative variant bSep08, mRNA.                     |
| <a href="#">R3hdm1</a> | <a href="#">R3hdm1.cSep08</a> | <a href="#">304763</a> | 16083 | 463  | 3  | 81  | R3H domain 1 (R3hdm1) alternative variant cSep08, mRNA.                               |
| <a href="#">R3hdm1</a> | <a href="#">R3hdm1.dSep08</a> | <a href="#">304763</a> | 5422  | 770  | 4  | 79  | putative protein (9.1 kD) (R3hdm1) alternative variant dSep08, mRNA.                  |
| <a href="#">R3hdm1</a> | <a href="#">R3hdm1.eSep08</a> | <a href="#">304763</a> | 827   | 727  | 2  | 43  | putative protein (R3hdm1) alternative variant eSep08, mRNA.                           |
| <a href="#">R3hdm2</a> | <a href="#">R3hdm2.bSep08</a> | <a href="#">362894</a> | 14877 | 1793 | 8  | 421 | putative protein of vertebrate origin (R3hdm2) alternative variant bSep08, mRNA.      |
| <a href="#">R3hdm2</a> | <a href="#">R3hdm2.cSep08</a> | <a href="#">362894</a> | 5856  | 1585 | 5  | 312 | putative protein of vertebrate origin (R3hdm2) alternative variant cSep08, mRNA.      |
| <a href="#">R3hdm2</a> | <a href="#">R3hdm2.dSep08</a> | <a href="#">362894</a> | 11089 | 675  | 5  | 225 | putative protein of vertebrate origin (R3hdm2) alternative variant dSep08, mRNA.      |
| <a href="#">RA.0</a>   | <a href="#">RA.0.aSep08</a>   |                        | 7636  | 539  | 3  | 179 | guanine nucleotide exchange factor (RA.0) alternative variant aSep08, mRNA.           |
| <a href="#">RA.0</a>   | <a href="#">RA.0.bSep08</a>   |                        | 5379  | 418  | 1  | 123 | guanine nucleotide exchange factor (RA.0) alternative variant bSep08, mRNA.           |
| <a href="#">Rab1</a>   | <a href="#">Rab1.bSep08</a>   | <a href="#">81754</a>  | 47195 | 331  | 4  | 58  | RAB1, member RAS oncogene family (Rab1) alternative variant bSep08, mRNA.             |
| <a href="#">Rab2b</a>  | <a href="#">Rab2b.bSep08</a>  | <a href="#">305853</a> | 17926 | 1116 | 6  | 169 | RAB2B, member RAS oncogene family (19.3 kD) (Rab2b) alternative variant bSep08, mRNA. |
| <a href="#">Rab2b</a>  | <a href="#">Rab2b.cSep08</a>  | <a href="#">305853</a> | 17455 | 675  | 7  | 168 | RAB2B, member RAS oncogene family (Rab2b) alternative variant cSep08, mRNA.           |
| <a href="#">Rab2b</a>  | <a href="#">Rab2b.dSep08</a>  | <a href="#">305853</a> | 21556 | 2601 | 7  | 146 | RAB2B, member RAS oncogene family (16.6 kD) (Rab2b) alternative variant dSep08, mRNA. |
| <a href="#">Rab2b</a>  | <a href="#">Rab2b.eSep08</a>  | <a href="#">305853</a> | 12778 | 534  | 6  | 142 | RAB2B, member RAS oncogene family (Rab2b) alternative variant eSep08, mRNA.           |
| <a href="#">Rab2b</a>  | <a href="#">Rab2b.fSep08</a>  | <a href="#">305853</a> | 4853  | 524  | 2  | 76  | RAB2B, member RAS oncogene family (Rab2b) alternative variant fSep08, mRNA.           |
| <a href="#">Rab2l</a>  | <a href="#">Rab2l.bSep08</a>  | <a href="#">294283</a> | 1144  | 705  | 5  | 201 | RAB2, member RAS oncogene family-like (Rab2l) alternative variant bSep08, mRNA.       |
| <a href="#">Rab2l</a>  | <a href="#">Rab2l.cSep08</a>  | <a href="#">294283</a> | 934   | 740  | 3  | 159 | RAB2, member RAS oncogene family-like (Rab2l) alternative variant cSep08, mRNA.       |
| <a href="#">Rab2l</a>  | <a href="#">Rab2l.dSep08</a>  | <a href="#">294283</a> | 1214  | 872  | 3  | 119 | RAB2, member RAS oncogene family-like (Rab2l) alternative variant dSep08, mRNA.       |
| <a href="#">Rab2l</a>  | <a href="#">Rab2l.eSep08</a>  | <a href="#">294283</a> | 775   | 688  | 2  | 115 | RAB2, member RAS oncogene family-like (Rab2l) alternative variant eSep08, mRNA.       |
| <a href="#">Rab3b</a>  | <a href="#">Rab3b.aSep08</a>  | <a href="#">81755</a>  | 98895 | 1153 | 5  | 259 | RAB3B, member RAS oncogene family (Rab3b) alternative variant aSep08, mRNA.           |
| <a href="#">Rab3b</a>  | <a href="#">Rab3b.bSep08</a>  | <a href="#">81755</a>  | 98325 | 610  | 5  | 202 | RAB3B, member RAS oncogene family (Rab3b) alternative variant bSep08, mRNA.           |
| <a href="#">Rab3b</a>  | <a href="#">Rab3b.cSep08</a>  | <a href="#">81755</a>  | 17764 | 588  | 3  | 121 | RAB3B, member RAS oncogene family (Rab3b) alternative variant cSep08, mRNA.           |

|                               |                                      |                        |       |      |    |     |                                                                                                |
|-------------------------------|--------------------------------------|------------------------|-------|------|----|-----|------------------------------------------------------------------------------------------------|
| <a href="#">Rab3b</a>         | <a href="#">Rab3b.dSep08</a>         | <a href="#">81755</a>  | 8808  | 267  | 2  | 89  | RAB3B, member RAS oncogene family (Rab3b) alternative variant dSep08, mRNA.                    |
| <a href="#">Rab3c</a>         | <a href="#">Rab3c.bSep08</a>         | <a href="#">171058</a> | 19396 | 315  | 2  | 34  | RAB3C, member RAS oncogene family (Rab3c) alternative variant bSep08, mRNA.                    |
| <a href="#">Rab3c</a>         | <a href="#">Rab3c.cSep08</a>         | <a href="#">171058</a> | 1419  | 299  | 2  | 33  | RAB3C, member RAS oncogene family (3.5 kD) (Rab3c) alternative variant cSep08, mRNA.           |
| <a href="#">Rab3gap2</a>      | <a href="#">Rab3gap2.aSep08</a>      | <a href="#">289350</a> | 14034 | 1655 | 10 | 551 | RAB3 GTPase activating protein subunit 2 (Rab3gap2) alternative variant aSep08, mRNA.          |
| <a href="#">Rab3gap2</a>      | <a href="#">Rab3gap2.bSep08</a>      | <a href="#">289350</a> | 6143  | 731  | 3  | 208 | RAB3 GTPase activating protein subunit 2 (Rab3gap2) alternative variant bSep08, mRNA.          |
| <a href="#">Rab3il1</a>       | <a href="#">Rab3il1.bSep08</a>       | <a href="#">171452</a> | 25971 | 707  | 4  | 40  | RAB3A interacting protein (rabin3)-like 1 (4.1 kD) (Rab3il1) alternative variant bSep08, mRNA. |
| <a href="#">Rab3il1</a>       | <a href="#">Rab3il1.cSep08</a>       | <a href="#">171452</a> | 13551 | 855  | 4  | 50  | RAB3A interacting protein (rabin3)-like 1 (Rab3il1) alternative variant cSep08, mRNA.          |
| <a href="#">Rab3il1</a>       | <a href="#">Rab3il1.dSep08</a>       | <a href="#">171452</a> | 13218 | 634  | 5  | 93  | RAB3A interacting protein (rabin3)-like 1 (Rab3il1) alternative variant dSep08, mRNA.          |
| <a href="#">Rab3ip</a>        | <a href="#">Rab3ip.bSep08</a>        | <a href="#">29885</a>  | 3061  | 548  | 3  | 104 | RAB3A interacting protein (Rab3ip) alternative variant bSep08, mRNA.                           |
| <a href="#">Rab4a</a>         | <a href="#">Rab4a.bSep08</a>         | <a href="#">25532</a>  | 26747 | 752  | 7  | 164 | RAB4A, member RAS oncogene family (Rab4a) alternative variant bSep08, mRNA.                    |
| <a href="#">Rab4bandEgln2</a> | <a href="#">Rab4bandEgln2.bSep08</a> | <a href="#">50866</a>  | 5267  | 753  | 4  | 250 | EGL nine homolog 2 (Rab4bandEgln2) alternative variant bSep08, mRNA.                           |
| <a href="#">Rab4bandEgln2</a> | <a href="#">Rab4bandEgln2.bSep08</a> | <a href="#">308457</a> | 5267  | 753  | 4  | 250 | EGL nine homolog 2 (Rab4bandEgln2) alternative variant bSep08, mRNA.                           |
| <a href="#">Rab4bandEgln2</a> | <a href="#">Rab4bandEgln2.dSep08</a> | <a href="#">50866</a>  | 14616 | 1178 | 7  | 186 | GTP-binding protein like (20.6 kD) (Rab4bandEgln2) alternative variant dSep08, mRNA.           |
| <a href="#">Rab4bandEgln2</a> | <a href="#">Rab4bandEgln2.dSep08</a> | <a href="#">308457</a> | 14616 | 1178 | 7  | 186 | GTP-binding protein like (20.6 kD) (Rab4bandEgln2) alternative variant dSep08, mRNA.           |
| <a href="#">Rab4bandEgln2</a> | <a href="#">Rab4bandEgln2.eSep08</a> | <a href="#">50866</a>  | 7436  | 518  | 5  | 154 | member ras oncogene family (Rab4bandEgln2) alternative variant eSep08, mRNA.                   |
| <a href="#">Rab4bandEgln2</a> | <a href="#">Rab4bandEgln2.eSep08</a> | <a href="#">308457</a> | 7436  | 518  | 5  | 154 | member ras oncogene family (Rab4bandEgln2) alternative variant eSep08, mRNA.                   |
| <a href="#">Rab4bandEgln2</a> | <a href="#">Rab4bandEgln2.fSep08</a> | <a href="#">50866</a>  | 2399  | 740  | 4  | 138 | protein rab-4a (Rab4bandEgln2) alternative variant fSep08, mRNA.                               |
| <a href="#">Rab4bandEgln2</a> | <a href="#">Rab4bandEgln2.fSep08</a> | <a href="#">308457</a> | 2399  | 740  | 4  | 138 | protein rab-4a (Rab4bandEgln2) alternative variant fSep08, mRNA.                               |
| <a href="#">Rab4bandEgln2</a> | <a href="#">Rab4bandEgln2.gSep08</a> | <a href="#">50866</a>  | 3004  | 2156 | 4  | 124 | EGL nine homolog 2 (Rab4bandEgln2) alternative variant gSep08, mRNA.                           |
| <a href="#">Rab4bandEgln2</a> | <a href="#">Rab4bandEgln2.gSep08</a> | <a href="#">308457</a> | 3004  | 2156 | 4  | 124 | EGL nine homolog 2 (Rab4bandEgln2) alternative variant gSep08, mRNA.                           |
| <a href="#">Rab4bandEgln2</a> | <a href="#">Rab4bandEgln2.hSep08</a> | <a href="#">50866</a>  | 1128  | 769  | 2  | 115 | EGL nine homolog 2 (13.3 kD) (Rab4bandEgln2) alternative variant hSep08, mRNA.                 |
| <a href="#">Rab4bandEgln2</a> | <a href="#">Rab4bandEgln2.hSep08</a> | <a href="#">308457</a> | 1128  | 769  | 2  | 115 | EGL nine homolog 2 (13.3 kD) (Rab4bandEgln2) alternative variant hSep08, mRNA.                 |
| <a href="#">Rab5a</a>         | <a href="#">Rab5a.bSep08</a>         | <a href="#">64633</a>  | 491   | 396  | 2  | 111 | putative protein (Rab5a) alternative variant bSep08, mRNA.                                     |

|                           |                                  |                        |       |      |    |     |                                                                                                  |
|---------------------------|----------------------------------|------------------------|-------|------|----|-----|--------------------------------------------------------------------------------------------------|
| <a href="#">Rab5a</a>     | <a href="#">Rab5a.cSep08</a>     | <a href="#">64633</a>  | 3317  | 291  | 2  | 94  | putative protein (Rab5a) alternative variant cSep08, mRNA.                                       |
| <a href="#">Rab5a</a>     | <a href="#">Rab5a.dSep08</a>     | <a href="#">64633</a>  | 28645 | 1674 | 4  | 78  | RAB5C member RAS oncogene family (8.5 kD) (Rab5a) alternative variant dSep08, complete mRNA.     |
| <a href="#">Rab5b</a>     | <a href="#">Rab5b.bSep08</a>     | <a href="#">288779</a> | 13639 | 675  | 4  | 205 | RAB5B, member RAS oncogene family (Rab5b) alternative variant bSep08, mRNA.                      |
| <a href="#">Rab5b</a>     | <a href="#">Rab5b.cSep08</a>     | <a href="#">288779</a> | 10067 | 919  | 3  | 113 | RAB5B, member RAS oncogene family (Rab5b) alternative variant cSep08, mRNA.                      |
| <a href="#">Rab6a</a>     | <a href="#">Rab6a.aSep08</a>     | <a href="#">84379</a>  | 38986 | 3231 | 8  | 208 | RAB6A, member RAS oncogene family (23.6 kD) (Rab6a) alternative variant aSep08, mRNA.            |
| <a href="#">Rab6a</a>     | <a href="#">Rab6a.bSep08</a>     | <a href="#">84379</a>  | 13403 | 1069 | 5  | 132 | RAB6A, member RAS oncogene family (Rab6a) alternative variant bSep08, mRNA.                      |
| <a href="#">Rab6a</a>     | <a href="#">Rab6a.cSep08</a>     | <a href="#">84379</a>  | 24252 | 831  | 4  | 103 | RAB6A, member RAS oncogene family (11.7 kD) (Rab6a) alternative variant cSep08, mRNA.            |
| <a href="#">Rab6ip1.1</a> | <a href="#">Rab6ip1.1.aSep08</a> | <a href="#">308942</a> | 26919 | 3131 | 15 | 708 | rab6 interacting protein 1 (81.2 kD) (Rab6ip1.1) alternative variant aSep08, mRNA.               |
| <a href="#">Rab6ip1.1</a> | <a href="#">Rab6ip1.1.bSep08</a> | <a href="#">308942</a> | 3404  | 516  | 3  | 148 | rab6 interacting protein 1 (Rab6ip1.1) alternative variant bSep08, mRNA.                         |
| <a href="#">Rab7</a>      | <a href="#">Rab7.bSep08</a>      | <a href="#">29448</a>  | 11609 | 633  | 4  | 183 | RAB7, member RAS oncogene family (Rab7) alternative variant bSep08, mRNA.                        |
| <a href="#">Rab7</a>      | <a href="#">Rab7.cSep08</a>      | <a href="#">29448</a>  | 6214  | 459  | 4  | 82  | RAB7, member RAS oncogene family (Rab7) alternative variant cSep08, mRNA.                        |
| <a href="#">Rab8a</a>     | <a href="#">Rab8a.bSep08</a>     | <a href="#">117103</a> | 14904 | 685  | 1  | 134 | RAB8A, member RAS oncogene family (Rab8a) alternative variant bSep08, mRNA.                      |
| <a href="#">Rab11a</a>    | <a href="#">Rab11a.bSep08</a>    | <a href="#">81830</a>  | 35539 | 784  | 2  | 101 | RAB11a, member RAS oncogene family (11.7 kD) (Rab11a) alternative variant bSep08, mRNA.          |
| <a href="#">Rab11b</a>    | <a href="#">Rab11b.bSep08</a>    | <a href="#">79434</a>  | 11939 | 959  | 1  | 178 | RAB11B, member RAS oncogene family (19.9 kD) (Rab11b) alternative variant bSep08, mRNA.          |
| <a href="#">Rab11fip2</a> | <a href="#">Rab11fip2.bSep08</a> | <a href="#">308003</a> | 6396  | 1100 | 2  | 135 | RAB11 family interacting protein 2 (class I) (Rab11fip2) alternative variant bSep08, mRNA.       |
| <a href="#">Rab11fip2</a> | <a href="#">Rab11fip2.cSep08</a> | <a href="#">308003</a> | 28526 | 429  | 2  | 84  | RAB11 family interacting protein 2 (class I) (Rab11fip2) alternative variant cSep08, mRNA.       |
| <a href="#">Rab11fip4</a> | <a href="#">Rab11fip4.cSep08</a> | <a href="#">303337</a> | 28304 | 380  | 3  | 95  | RAB11 family interacting protein 4 (class II) (Rab11fip4) alternative variant cSep08, mRNA.      |
| <a href="#">Rab12</a>     | <a href="#">Rab12.aSep08</a>     | <a href="#">25530</a>  | 19693 | 566  |    | 188 | RAB12, member RAS oncogene family (Rab12) mRNA.                                                  |
| <a href="#">Rab13</a>     | <a href="#">Rab13.bSep08</a>     | <a href="#">81756</a>  | 2036  | 806  | 6  | 96  | RAB13, member RAS oncogene family (Rab13) alternative variant bSep08, mRNA.                      |
| <a href="#">Rab13</a>     | <a href="#">Rab13.cSep08</a>     | <a href="#">81756</a>  | 1260  | 746  | 3  | 86  | RAB13, member RAS oncogene family (9.3 kD) (Rab13) alternative variant cSep08, mRNA.             |
| <a href="#">Rab14</a>     | <a href="#">Rab14.bSep08</a>     | <a href="#">94197</a>  | 1758  | 534  | 3  | 88  | RAB14, member RAS oncogene family (9.5 kD) (Rab14) alternative variant bSep08, mRNA.             |
| <a href="#">Rab18</a>     | <a href="#">Rab18.bSep08</a>     | <a href="#">307039</a> | 31799 | 2116 | 1  | 89  | RAB18, member RAS oncogene family (9.7 kD) (Rab18) alternative variant bSep08, complete mRNA.    |
| <a href="#">Rab21</a>     | <a href="#">Rab21.bSep08</a>     | <a href="#">299799</a> | 8006  | 410  | 5  | 89  | RAB21, member RAS oncogene family (Rab21) alternative variant bSep08, mRNA.                      |
| <a href="#">Rab22a</a>    | <a href="#">Rab22a.aSep08</a>    | <a href="#">366265</a> | 41865 | 1726 | 5  | 194 | RAB22A, member RAS oncogene family (21.8 kD) (Rab22a) alternative variant aSep08, complete mRNA. |

|                        |                               |                        |       |      |   |     |                                                                                         |
|------------------------|-------------------------------|------------------------|-------|------|---|-----|-----------------------------------------------------------------------------------------|
| <a href="#">Rab22a</a> | <a href="#">Rab22a.cSep08</a> | <a href="#">366265</a> | 36674 | 682  | 3 | 186 | RAB22A, member RAS oncogene family (Rab22a) alternative variant cSep08, mRNA.           |
| <a href="#">Rab24</a>  | <a href="#">Rab24.aSep08</a>  | <a href="#">361208</a> | 2307  | 1418 | 8 | 203 | RAB24, member RAS oncogene family (23.1 kD) (Rab24) alternative variant aSep08, mRNA.   |
| <a href="#">Rab24</a>  | <a href="#">Rab24.cSep08</a>  | <a href="#">361208</a> | 1182  | 887  | 3 | 107 | RAB24, member RAS oncogene family (11.9 kD) (Rab24) alternative variant cSep08, mRNA.   |
| <a href="#">Rab24</a>  | <a href="#">Rab24.dSep08</a>  | <a href="#">361208</a> | 2076  | 1889 | 3 | 76  | RAB24, member RAS oncogene family (9.0 kD) (Rab24) alternative variant dSep08, mRNA.    |
| <a href="#">Rab24</a>  | <a href="#">Rab24.eSep08</a>  | <a href="#">361208</a> | 770   | 396  | 4 | 60  | RAB24, member RAS oncogene family (Rab24) alternative variant eSep08, mRNA.             |
| <a href="#">Rab26</a>  | <a href="#">Rab26.bSep08</a>  | <a href="#">171111</a> | 3576  | 847  | 5 | 212 | RAB26, member RAS oncogene family (Rab26) alternative variant bSep08, mRNA.             |
| <a href="#">Rab26</a>  | <a href="#">Rab26.cSep08</a>  | <a href="#">171111</a> | 814   | 715  | 2 | 78  | RAB26, member RAS oncogene family (Rab26) alternative variant cSep08, mRNA.             |
| <a href="#">Rab28</a>  | <a href="#">Rab28.bSep08</a>  | <a href="#">117049</a> | 79248 | 884  | 7 | 220 | RAB28, member RAS oncogene family (24.7 kD) (Rab28) alternative variant bSep08, mRNA.   |
| <a href="#">Rab28</a>  | <a href="#">Rab28.cSep08</a>  | <a href="#">117049</a> | 79890 | 662  | 6 | 184 | RAB28, member RAS oncogene family (Rab28) alternative variant cSep08, mRNA.             |
| <a href="#">Rab28</a>  | <a href="#">Rab28.dSep08</a>  | <a href="#">117049</a> | 79408 | 897  | 6 | 83  | RAB28, member RAS oncogene family (9.4 kD) (Rab28) alternative variant dSep08, mRNA.    |
| <a href="#">Rab28</a>  | <a href="#">Rab28.eSep08</a>  | <a href="#">117049</a> | 5613  | 233  | 2 | 77  | RAB28, member RAS oncogene family (Rab28) alternative variant eSep08, mRNA.             |
| <a href="#">Rab28</a>  | <a href="#">Rab28.fSep08</a>  | <a href="#">117049</a> | 79403 | 855  | 5 | 86  | RAB28, member RAS oncogene family (9.7 kD) (Rab28) alternative variant fSep08, mRNA.    |
| <a href="#">Rab28</a>  | <a href="#">Rab28.gSep08</a>  | <a href="#">117049</a> | 75573 | 469  | 4 | 58  | RAB28, member RAS oncogene family (6.5 kD) (Rab28) alternative variant gSep08, mRNA.    |
| <a href="#">Rab30</a>  | <a href="#">Rab30.bSep08</a>  | <a href="#">308821</a> | 85854 | 735  | 4 | 173 | RAB30, member RAS oncogene family (Rab30) alternative variant bSep08, mRNA.             |
| <a href="#">Rab30</a>  | <a href="#">Rab30.cSep08</a>  | <a href="#">308821</a> | 81417 | 410  | 3 | 53  | RAB30, member RAS oncogene family (Rab30) alternative variant cSep08, mRNA.             |
| <a href="#">Rab31</a>  | <a href="#">Rab31.bSep08</a>  | <a href="#">246324</a> | 23344 | 714  | 1 | 91  | RAB31, member RAS oncogene family (9.7 kD) (Rab31) alternative variant bSep08, mRNA.    |
| <a href="#">Rab32</a>  | <a href="#">Rab32.bSep08</a>  | <a href="#">365042</a> | 15628 | 2910 | 1 | 163 | RAB32, member RAS oncogene family (Rab32) alternative variant bSep08, mRNA.             |
| <a href="#">Rab34</a>  | <a href="#">Rab34.bSep08</a>  | <a href="#">360571</a> | 3699  | 1498 | 8 | 215 | RAB34, member of RAS oncogene family (Rab34) alternative variant bSep08, mRNA.          |
| <a href="#">Rab34</a>  | <a href="#">Rab34.cSep08</a>  | <a href="#">360571</a> | 965   | 799  | 3 | 146 | RAB34, member of RAS oncogene family (Rab34) alternative variant cSep08, mRNA.          |
| <a href="#">Rab34</a>  | <a href="#">Rab34.dSep08</a>  | <a href="#">360571</a> | 911   | 699  | 3 | 81  | RAB34, member of RAS oncogene family (9.1 kD) (Rab34) alternative variant dSep08, mRNA. |
| <a href="#">Rab35</a>  | <a href="#">Rab35.bSep08</a>  | <a href="#">288700</a> | 15232 | 3235 | 3 | 235 | RAB35, member RAS oncogene family (Rab35) alternative variant bSep08, mRNA.             |
| <a href="#">Rab35</a>  | <a href="#">Rab35.cSep08</a>  | <a href="#">288700</a> | 13915 | 755  | 3 | 183 | RAB35, member RAS oncogene family (21.0 kD) (Rab35) alternative variant cSep08, mRNA.   |
| <a href="#">Rab36</a>  | <a href="#">Rab36.bSep08</a>  | <a href="#">690407</a> | 11890 | 750  | 6 | 236 | RAB36, member RAS oncogene family (Rab36) alternative variant bSep08, mRNA.             |

|                          |                                 |                        |       |      |   |     |                                                                                                      |
|--------------------------|---------------------------------|------------------------|-------|------|---|-----|------------------------------------------------------------------------------------------------------|
| <a href="#">Rab40b</a>   | <a href="#">Rab40b.bSep08</a>   | <a href="#">303754</a> | 25611 | 685  | 6 | 106 | rab40b, member RAS oncogene family (Rab40b) alternative variant bSep08, mRNA.                        |
| <a href="#">Rab43</a>    | <a href="#">Rab43.bSep08</a>    | <a href="#">500249</a> | 17504 | 887  | 2 | 122 | RAB43, member RAS oncogene family (13.5 kD) (Rab43) alternative variant bSep08, mRNA.                |
| <a href="#">Rabac1</a>   | <a href="#">Rabac1.bSep08</a>   | <a href="#">83583</a>  | 1622  | 1377 | 2 | 161 | rab acceptor 1 (18.4 kD) (Rabac1) alternative variant bSep08, mRNA.                                  |
| <a href="#">Rabac1</a>   | <a href="#">Rabac1.cSep08</a>   | <a href="#">83583</a>  | 3020  | 705  | 5 | 91  | putative protein (Rabac1) alternative variant cSep08, mRNA.                                          |
| <a href="#">Rabac1</a>   | <a href="#">Rabac1.dSep08</a>   | <a href="#">83583</a>  | 922   | 679  | 2 | 90  | rab acceptor 1 (Rabac1) alternative variant dSep08, mRNA.                                            |
| <a href="#">Rabac1</a>   | <a href="#">Rabac1.eSep08</a>   | <a href="#">83583</a>  | 682   | 598  | 2 | 75  | putative protein (Rabac1) alternative variant eSep08, mRNA.                                          |
| <a href="#">Rabep1</a>   | <a href="#">Rabep1.bSep08</a>   | <a href="#">54190</a>  | 5900  | 407  | 4 | 109 | rabaptin, RAB GTPase binding effector protein 1 (Rabep1) alternative variant bSep08, mRNA.           |
| <a href="#">Rabep2</a>   | <a href="#">Rabep2.aSep08</a>   | <a href="#">80754</a>  | 10482 | 1089 | 5 | 348 | rabaptin, RAB GTPase binding effector protein 2 (Rabep2) alternative variant aSep08, mRNA.           |
| <a href="#">Rabep2</a>   | <a href="#">Rabep2.bSep08</a>   | <a href="#">80754</a>  | 6297  | 541  | 1 | 151 | rabaptin, RAB GTPase binding effector protein 2 (16.5 kD) (Rabep2) alternative variant bSep08, mRNA. |
| <a href="#">Rabepk</a>   | <a href="#">Rabepk.bSep08</a>   | <a href="#">296649</a> | 19237 | 1019 | 7 | 331 | rab9 effector protein with kelch motifs (Rabepk) alternative variant bSep08, mRNA.                   |
| <a href="#">Rabepk</a>   | <a href="#">Rabepk.cSep08</a>   | <a href="#">296649</a> | 17384 | 987  | 6 | 175 | rab9 effector protein with kelch motifs (Rabepk) alternative variant cSep08, mRNA.                   |
| <a href="#">Rabepk</a>   | <a href="#">Rabepk.dSep08</a>   | <a href="#">296649</a> | 11072 | 410  | 4 | 136 | rab9 effector protein with kelch motifs (Rabepk) alternative variant dSep08, mRNA.                   |
| <a href="#">Rabgap1</a>  | <a href="#">Rabgap1.bSep08</a>  | <a href="#">311911</a> | 8205  | 882  | 6 | 213 | RAB GTPase activating protein 1 (Rabgap1) alternative variant bSep08, mRNA.                          |
| <a href="#">Rabgap1</a>  | <a href="#">Rabgap1.cSep08</a>  | <a href="#">311911</a> | 18675 | 457  | 3 | 121 | RAB GTPase activating protein 1 (Rabgap1) alternative variant cSep08, mRNA.                          |
| <a href="#">Rabgap1l</a> | <a href="#">Rabgap1l.bSep08</a> | <a href="#">304914</a> | 51722 | 940  | 2 | 72  | RAB GTPase activating protein 1-like (8.7 kD) (Rabgap1l) alternative variant bSep08, mRNA.           |
| <a href="#">Rabgef1</a>  | <a href="#">Rabgef1.bSep08</a>  | <a href="#">360797</a> | 40931 | 759  | 2 | 252 | RAB guanine nucleotide exchange factor (GEF) 1 (Rabgef1) alternative variant bSep08, mRNA.           |
| <a href="#">Rabggta</a>  | <a href="#">Rabggta.bSep08</a>  | <a href="#">58983</a>  | 4023  | 1668 | 6 | 252 | rab geranylgeranyl transferase, a subunit (Rabggta) alternative variant bSep08, mRNA.                |
| <a href="#">Rabggta</a>  | <a href="#">Rabggta.cSep08</a>  | <a href="#">58983</a>  | 1511  | 691  | 6 | 230 | rab geranylgeranyl transferase, a subunit (Rabggta) alternative variant cSep08, mRNA.                |
| <a href="#">Rabggta</a>  | <a href="#">Rabggta.dSep08</a>  | <a href="#">58983</a>  | 1847  | 815  | 6 | 210 | rab geranylgeranyl transferase, a subunit (Rabggta) alternative variant dSep08, mRNA.                |
| <a href="#">Rabggta</a>  | <a href="#">Rabggta.eSep08</a>  | <a href="#">58983</a>  | 1718  | 632  | 2 | 96  | rab geranylgeranyl transferase, a subunit (10.4 kD) (Rabggta) alternative variant eSep08, mRNA.      |
| <a href="#">Rabggta</a>  | <a href="#">Rabggta.iSep08</a>  | <a href="#">58983</a>  | 488   | 293  | 3 | 49  | rab geranylgeranyl transferase, a subunit (Rabggta) alternative variant iSep08, mRNA.                |
| <a href="#">Rabggtb</a>  | <a href="#">Rabggtb.bSep08</a>  | <a href="#">25533</a>  | 6193  | 1235 | 8 | 208 | RAB geranylgeranyl transferase CRA b (22.8 kD) (Rabggtb) alternative variant bSep08, complete mRNA.  |
| <a href="#">Rabggtb</a>  | <a href="#">Rabggtb.cSep08</a>  | <a href="#">25533</a>  | 4887  | 929  | 8 | 116 | rab geranylgeranyl transferase CRA b (12.4 kD) (Rabggtb) alternative variant cSep08, mRNA.           |



|                         |                                |                        |       |      |   |     |                                                                                                        |
|-------------------------|--------------------------------|------------------------|-------|------|---|-----|--------------------------------------------------------------------------------------------------------|
| <a href="#">Rabggtb</a> | <a href="#">Rabggtb.dSep08</a> | <a href="#">25533</a>  | 5240  | 947  | 9 | 113 | rabggtb protein (12.8 kD) (Rabggtb) alternative variant dSep08, mRNA.                                  |
| <a href="#">Rabggtb</a> | <a href="#">Rabggtb.eSep08</a> | <a href="#">25533</a>  | 4075  | 638  | 3 | 87  | RAB geranylgeranyl transferase (Rabggtb) alternative variant eSep08, mRNA.                             |
| <a href="#">Rabggtb</a> | <a href="#">Rabggtb.fSep08</a> | <a href="#">25533</a>  | 3305  | 1343 | 5 | 70  | rab geranylgeranyl transferase (7.5 kD) (Rabggtb) alternative variant fSep08, mRNA.                    |
| <a href="#">Rabggtb</a> | <a href="#">Rabggtb.gSep08</a> | <a href="#">25533</a>  | 1629  | 1092 | 3 | 60  | rab geranylgeranyl transferase (Rabggtb) alternative variant gSep08, mRNA.                             |
| <a href="#">Rabggtb</a> | <a href="#">Rabggtb.iSep08</a> | <a href="#">25533</a>  | 3353  | 1412 | 4 | 73  | rabggtb protein (8.3 kD) (Rabggtb) alternative variant iSep08, mRNA.                                   |
| <a href="#">Rabggtb</a> | <a href="#">Rabggtb.jSep08</a> | <a href="#">25533</a>  | 2850  | 1340 | 4 | 88  | rab geranylgeranyl transferase (Rabggtb) alternative variant jSep08, mRNA.                             |
| <a href="#">Rabggtb</a> | <a href="#">Rabggtb.kSep08</a> | <a href="#">25533</a>  | 4140  | 986  | 9 | 73  | rabggtb protein (8.3 kD) (Rabggtb) alternative variant kSep08, mRNA.                                   |
| <a href="#">Rabl2a</a>  | <a href="#">Rabl2a.aSep08</a>  | <a href="#">362987</a> | 8191  | 1388 | 8 | 250 | RAB, member of RAS oncogene family-like 2A (28.6 kD) (Rabl2a) alternative variant aSep08, mRNA.        |
| <a href="#">Rabl2a</a>  | <a href="#">Rabl2a.cSep08</a>  | <a href="#">362987</a> | 2805  | 601  | 2 | 144 | RAB, member of RAS oncogene family-like 2A (Rabl2a) alternative variant cSep08, mRNA.                  |
| <a href="#">Rabl2a</a>  | <a href="#">Rabl2a.dSep08</a>  | <a href="#">362987</a> | 6871  | 366  | 3 | 97  | RAB, member of RAS oncogene family-like 2A (Rabl2a) alternative variant dSep08, mRNA.                  |
| <a href="#">Rabl3</a>   | <a href="#">Rabl3.bSep08</a>   | <a href="#">360720</a> | 6752  | 1757 | 4 | 80  | RAB, member of RAS oncogene family-like 3 (Rabl3) alternative variant bSep08, mRNA.                    |
| <a href="#">Rabl4</a>   | <a href="#">Rabl4.aSep08</a>   | <a href="#">300062</a> | 7615  | 545  |   | 128 | RAB, member of RAS oncogene family-like 4 (Rabl4) alternative variant aSep08, mRNA.                    |
| <a href="#">Rabl5</a>   | <a href="#">Rabl5.bSep08</a>   | <a href="#">288585</a> | 7015  | 1270 | 2 | 100 | RAB, member RAS oncogene family-like 5 (11.0 kD) (Rabl5) alternative variant bSep08, mRNA.             |
| <a href="#">raby</a>    | <a href="#">raby.aSep08</a>    |                        | 5002  | 390  |   | 124 | putative protein (raby) mRNA.                                                                          |
| <a href="#">Rac1</a>    | <a href="#">Rac1.aSep08</a>    | <a href="#">363875</a> | 21681 | 2312 | 7 | 211 | ras-related C3 botulinum toxin substrate 1 (23.4 kD) (Rac1) alternative variant aSep08, complete mRNA. |
| <a href="#">Rac2</a>    | <a href="#">Rac2.aSep08</a>    | <a href="#">366957</a> | 12381 | 1846 | 6 | 230 | RAS-related C3 botulinum substrate 2 (25.9 kD) (Rac2) alternative variant aSep08, mRNA.                |
| <a href="#">Rac2</a>    | <a href="#">Rac2.cSep08</a>    | <a href="#">366957</a> | 11805 | 670  | 7 | 185 | RAS-related C3 botulinum substrate 2 (20.8 kD) (Rac2) alternative variant cSep08, mRNA.                |
| <a href="#">Rac2</a>    | <a href="#">Rac2.dSep08</a>    | <a href="#">366957</a> | 11894 | 717  | 6 | 171 | RAS-related C3 botulinum substrate 2 (19.1 kD) (Rac2) alternative variant dSep08, mRNA.                |
| <a href="#">Racgap1</a> | <a href="#">Racgap1.bSep08</a> | <a href="#">315298</a> | 29804 | 2913 | 2 | 626 | rac GTPase-activating protein 1 (69.9 kD) (Racgap1) alternative variant bSep08, mRNA.                  |
| <a href="#">rachy</a>   | <a href="#">rachy.aSep08</a>   |                        | 1103  | 513  |   | 61  | putative protein (6.9 kD) (rachy) mRNA.                                                                |
| <a href="#">Rad1</a>    | <a href="#">Rad1.bSep08</a>    | <a href="#">294800</a> | 3464  | 676  | 3 | 98  | RAD1 homolog (S. pombe) (11.2 kD) (Rad1) alternative variant bSep08, mRNA.                             |
| <a href="#">Rad9.0</a>  | <a href="#">Rad9.0.aSep08</a>  |                        | 2746  | 1775 | 5 | 205 | CRA a (Rad9.0) alternative variant aSep08, mRNA.                                                       |
| <a href="#">Rad9.0</a>  | <a href="#">Rad9.0.bSep08</a>  |                        | 5091  | 811  | 6 | 171 | CRA a (19.0 kD) (Rad9.0) alternative variant bSep08, mRNA.                                             |
| <a href="#">Rad9b</a>   | <a href="#">Rad9b.bSep08</a>   | <a href="#">363924</a> | 2751  | 388  | 3 | 116 | RAD9 homolog B (S. cerevisiae) (Rad9b) alternative variant bSep08, mRNA.                               |
| <a href="#">Rad18</a>   | <a href="#">Rad18.bSep08</a>   | <a href="#">362412</a> | 66980 | 712  | 5 | 175 | RAD18 homolog (S. cerevisiae) (Rad18) alternative variant bSep08, mRNA.                                |

|                               |                                      |                        |       |      |    |     |                                                                                      |
|-------------------------------|--------------------------------------|------------------------|-------|------|----|-----|--------------------------------------------------------------------------------------|
| <a href="#">Rad18</a>         | <a href="#">Rad18.cSep08</a>         | <a href="#">362412</a> | 59855 | 440  | 3  | 63  | RAD18 homolog (S. cerevisiae) (Rad18) alternative variant cSep08, mRNA.              |
| <a href="#">Rad18</a>         | <a href="#">Rad18.dSep08</a>         | <a href="#">362412</a> | 7074  | 381  | 3  | 23  | RAD18 homolog (S. cerevisiae) (2.5 kD) (Rad18) alternative variant dSep08, mRNA.     |
| <a href="#">Rad18</a>         | <a href="#">Rad18.eSep08</a>         | <a href="#">362412</a> | 21234 | 330  | 2  | 46  | RAD18 homolog (S. cerevisiae) (Rad18) alternative variant eSep08, mRNA.              |
| <a href="#">Rad21</a>         | <a href="#">Rad21.bSep08</a>         | <a href="#">314949</a> | 763   | 382  | 2  | 117 | RAD21 homolog (S. pombe) (Rad21) alternative variant bSep08, mRNA.                   |
| <a href="#">Rad23a</a>        | <a href="#">Rad23a.bSep08</a>        | <a href="#">361381</a> | 3993  | 1668 | 7  | 255 | RAD23a homolog (S. cerevisiae) (Rad23a) alternative variant bSep08, mRNA.            |
| <a href="#">Rad23a</a>        | <a href="#">Rad23a.cSep08</a>        | <a href="#">361381</a> | 2767  | 776  | 5  | 244 | RAD23a homolog (S. cerevisiae) (Rad23a) alternative variant cSep08, mRNA.            |
| <a href="#">Rad23a</a>        | <a href="#">Rad23a.dSep08</a>        | <a href="#">361381</a> | 2966  | 723  | 6  | 241 | RAD23a homolog (S. cerevisiae) (Rad23a) alternative variant dSep08, mRNA.            |
| <a href="#">Rad23b</a>        | <a href="#">Rad23b.bSep08</a>        | <a href="#">298012</a> | 16672 | 421  | 3  | 94  | RAD23b homolog (S. cerevisiae) (Rad23b) alternative variant bSep08, mRNA.            |
| <a href="#">Rad23b</a>        | <a href="#">Rad23b.cSep08</a>        | <a href="#">298012</a> | 16407 | 891  | 2  | 74  | RAD23b homolog (S. cerevisiae) (8.3 kD) (Rad23b) alternative variant cSep08, mRNA.   |
| <a href="#">Rad51ap1</a>      | <a href="#">Rad51ap1.aSep08</a>      | <a href="#">689055</a> | 12309 | 1225 | 9  | 349 | RAD51 associated protein 1 (Rad51ap1) alternative variant aSep08, mRNA.              |
| <a href="#">Rad51ap1</a>      | <a href="#">Rad51ap1.cSep08</a>      | <a href="#">689055</a> | 4318  | 856  | 5  | 202 | RAD51 associated protein 1 (Rad51ap1) alternative variant cSep08, mRNA.              |
| <a href="#">Rad51c</a>        | <a href="#">Rad51c.aSep08</a>        | <a href="#">497976</a> | 26070 | 1832 |    | 345 | rad51 homolog c (S. cerevisiae) (Rad51c) mRNA.                                       |
| <a href="#">Rad5111</a>       | <a href="#">Rad5111.aSep08</a>       | <a href="#">500679</a> | 41992 | 768  |    | 237 | RAD51-like 1 (S. cerevisiae) (Rad5111) alternative variant aSep08, mRNA.             |
| <a href="#">Rad5111</a>       | <a href="#">Rad5111.bSep08</a>       | <a href="#">500679</a> | 41960 | 839  | 1  | 223 | RAD51-like 1 (S. cerevisiae) (Rad5111) alternative variant bSep08, mRNA.             |
| <a href="#">Rad52</a>         | <a href="#">Rad52.bSep08</a>         | <a href="#">297561</a> | 2366  | 735  | 3  | 133 | RAD52 homolog (S. cerevisiae) (Rad52) alternative variant bSep08, mRNA.              |
| <a href="#">Rad52</a>         | <a href="#">Rad52.cSep08</a>         | <a href="#">297561</a> | 2512  | 1464 | 2  | 111 | RAD52 homolog (S. cerevisiae) (12.6 kD) (Rad52) alternative variant cSep08, mRNA.    |
| <a href="#">Rad52</a>         | <a href="#">Rad52.dSep08</a>         | <a href="#">297561</a> | 1484  | 427  | 2  | 39  | RAD52 homolog (S. cerevisiae) (Rad52) alternative variant dSep08, mRNA.              |
| <a href="#">radar</a>         | <a href="#">radar.aSep08</a>         |                        | 67291 | 1429 | 1  | 46  | putative protein (4.8 kD) (radar) alternative variant aSep08, mRNA.                  |
| <a href="#">radar</a>         | <a href="#">radar.bSep08</a>         |                        | 40118 | 313  | 1  | 43  | putative protein (radar) alternative variant bSep08, mRNA.                           |
| <a href="#">Radical_SAM.0</a> | <a href="#">Radical_SAM.0.aSep08</a> |                        | 62107 | 2812 | 15 | 591 | elongation protein 3 homolog (Radical_SAM.0) alternative variant aSep08, mRNA.       |
| <a href="#">Radical_SAM.0</a> | <a href="#">Radical_SAM.0.bSep08</a> |                        | 27137 | 784  | 8  | 261 | elongation protein 3 homolog CRA c (Radical_SAM.0) alternative variant bSep08, mRNA. |
| <a href="#">Radical_SAM.0</a> | <a href="#">Radical_SAM.0.cSep08</a> |                        | 16959 | 674  | 7  | 212 | elongation protein 3 homolog (Radical_SAM.0) alternative variant cSep08, mRNA.       |
| <a href="#">Radil</a>         | <a href="#">Radil.bSep08</a>         | <a href="#">304299</a> | 1855  | 740  | 3  | 203 | rap GTPase interactor (Radil) alternative variant bSep08, mRNA.                      |
| <a href="#">Radil</a>         | <a href="#">Radil.cSep08</a>         | <a href="#">304299</a> | 2664  | 538  | 3  | 179 | rap GTPase interactor (Radil) alternative variant cSep08, mRNA.                      |

|                         |                                |                        |       |      |    |     |                                                                                                  |
|-------------------------|--------------------------------|------------------------|-------|------|----|-----|--------------------------------------------------------------------------------------------------|
| <a href="#">Rae1</a>    | <a href="#">Rae1.aSep08</a>    | <a href="#">362281</a> | 9210  | 1791 | 7  | 500 | RAE1 RNA export 1 homolog (S. pombe) (Rae1) alternative variant aSep08, mRNA.                    |
| <a href="#">Rae1</a>    | <a href="#">Rae1.cSep08</a>    | <a href="#">362281</a> | 696   | 621  | 2  | 116 | RAE1 RNA export 1 homolog (S. pombe) (Rae1) alternative variant cSep08, mRNA.                    |
| <a href="#">Rae1</a>    | <a href="#">Rae1.dSep08</a>    | <a href="#">362281</a> | 3168  | 400  | 3  | 103 | RAE1 RNA export 1 homolog (S. pombe) (Rae1) alternative variant dSep08, mRNA.                    |
| <a href="#">Raf1</a>    | <a href="#">Raf1.bSep08</a>    | <a href="#">24703</a>  | 13099 | 1133 | 11 | 377 | v-raf-leukemia viral oncogene 1 (Raf1) alternative variant bSep08, mRNA.                         |
| <a href="#">Raf1</a>    | <a href="#">Raf1.cSep08</a>    | <a href="#">24703</a>  | 5262  | 2121 | 6  | 257 | v-raf-leukemia viral oncogene 1 (Raf1) alternative variant cSep08, mRNA.                         |
| <a href="#">Raf1</a>    | <a href="#">Raf1.dSep08</a>    | <a href="#">24703</a>  | 2783  | 719  | 5  | 164 | v-raf-leukemia viral oncogene 1 (Raf1) alternative variant dSep08, mRNA.                         |
| <a href="#">Raf1</a>    | <a href="#">Raf1.eSep08</a>    | <a href="#">24703</a>  | 1237  | 737  | 4  | 122 | v-raf-leukemia viral oncogene 1 (Raf1) alternative variant eSep08, mRNA.                         |
| <a href="#">Raf1</a>    | <a href="#">Raf1.fSep08</a>    | <a href="#">24703</a>  | 1309  | 1152 | 2  | 89  | v-raf-leukemia viral oncogene 1 (10.0 kD) (Raf1) alternative variant fSep08, mRNA.               |
| <a href="#">rafer</a>   | <a href="#">rafer.aSep08</a>   |                        | 7786  | 988  |    | 47  | putative protein (rafer) mRNA.                                                                   |
| <a href="#">raflo</a>   | <a href="#">raflo.aSep08</a>   |                        | 738   | 236  | 2  | 64  | putative protein (raflo) alternative variant aSep08, mRNA.                                       |
| <a href="#">raflu</a>   | <a href="#">raflu.aSep08</a>   |                        | 50513 | 706  | 2  | 58  | putative protein (raflu) alternative variant aSep08, mRNA.                                       |
| <a href="#">raflu</a>   | <a href="#">raflu.bSep08</a>   |                        | 1520  | 593  | 1  | 99  | CRA a like (11.1 kD) (raflu) alternative variant bSep08, mRNA.                                   |
| <a href="#">Rag1ap1</a> | <a href="#">Rag1ap1.bSep08</a> | <a href="#">295245</a> | 1577  | 755  | 1  | 116 | recombination activating gene 1 activating protein 1 (Rag1ap1) alternative variant bSep08, mRNA. |
| <a href="#">ragar</a>   | <a href="#">ragar.aSep08</a>   |                        | 5116  | 593  |    | 87  | CRA b like (ragar) mRNA.                                                                         |
| <a href="#">Rage</a>    | <a href="#">Rage.aSep08</a>    | <a href="#">362787</a> | 20734 | 1485 | 7  | 301 | renal tumor antigen (Rage) alternative variant aSep08, mRNA.                                     |
| <a href="#">Rage</a>    | <a href="#">Rage.cSep08</a>    | <a href="#">362787</a> | 5719  | 743  | 2  | 75  | renal tumor antigen (Rage) alternative variant cSep08, mRNA.                                     |
| <a href="#">Rai1</a>    | <a href="#">Rai1.aSep08</a>    | <a href="#">303188</a> | 10480 | 2870 | 3  | 415 | retinoic acid induced 1 (Rai1) alternative variant aSep08, mRNA.                                 |
| <a href="#">Rai1</a>    | <a href="#">Rai1.bSep08</a>    | <a href="#">303188</a> | 2069  | 1870 | 1  | 51  | retinoic acid induced 1 (6.1 kD) (Rai1) alternative variant bSep08, mRNA.                        |
| <a href="#">Rai12</a>   | <a href="#">Rai12.aSep08</a>   | <a href="#">287446</a> | 11626 | 1457 | 8  | 320 | retinoic acid induced 12 like (35.6 kD) (Rai12) alternative variant aSep08, mRNA.                |
| <a href="#">Rai12</a>   | <a href="#">Rai12.cSep08</a>   | <a href="#">287446</a> | 6399  | 1530 | 4  | 183 | retinoic acid induced 12 like (20.2 kD) (Rai12) alternative variant cSep08, mRNA.                |
| <a href="#">Rai12</a>   | <a href="#">Rai12.dSep08</a>   | <a href="#">287446</a> | 3714  | 1276 | 4  | 173 | retinoic acid induced 12 CRA b like (19.5 kD) (Rai12) alternative variant dSep08, mRNA.          |
| <a href="#">Rai12</a>   | <a href="#">Rai12.eSep08</a>   | <a href="#">287446</a> | 6008  | 612  | 4  | 153 | retinoic acid induced 12 CRA e like (Rai12) alternative variant eSep08, mRNA.                    |
| <a href="#">Rai12</a>   | <a href="#">Rai12.fSep08</a>   | <a href="#">287446</a> | 1415  | 684  | 2  | 98  | S-phase 2 protein (Rai12) alternative variant fSep08, mRNA.                                      |
| <a href="#">Rai12</a>   | <a href="#">Rai12.gSep08</a>   | <a href="#">287446</a> | 3023  | 484  | 3  | 88  | dermal papilla derived protein 6 CRA a like (Rai12) alternative variant gSep08, mRNA.            |
| <a href="#">Rai14</a>   | <a href="#">Rai14.bSep08</a>   | <a href="#">294804</a> | 10806 | 772  | 5  | 257 | retinoic acid induced 14 (Rai14) alternative variant bSep08, mRNA.                               |

|                         |                                |                        |        |      |    |     |                                                                                                       |
|-------------------------|--------------------------------|------------------------|--------|------|----|-----|-------------------------------------------------------------------------------------------------------|
| <a href="#">Rai14</a>   | <a href="#">Rai14.cSep08</a>   | <a href="#">294804</a> | 117597 | 698  | 8  | 176 | retinoic acid induced 14 (Rai14) alternative variant cSep08, mRNA.                                    |
| <a href="#">Rai16</a>   | <a href="#">Rai16.aSep08</a>   | <a href="#">306015</a> | 17467  | 3814 | 17 | 756 | retinoic acid induced 16 (Rai16) alternative variant aSep08, mRNA.                                    |
| <a href="#">raja</a>    | <a href="#">raja.aSep08</a>    |                        | 60013  | 330  |    | 36  | putative protein (raja) mRNA.                                                                         |
| <a href="#">rajey</a>   | <a href="#">rajey.aSep08</a>   |                        | 11565  | 1331 | 4  | 443 | shroom (rajey) alternative variant aSep08, mRNA.                                                      |
| <a href="#">rakee</a>   | <a href="#">rakee.aSep08</a>   |                        | 2564   | 687  | 2  | 63  | putative protein (7.5 kD) (rakee) alternative variant aSep08, mRNA.                                   |
| <a href="#">rakler</a>  | <a href="#">rakler.aSep08</a>  |                        | 16211  | 537  | 2  | 143 | putative protein of mammalian origin (15.7 kD) (rakler) alternative variant aSep08, mRNA.             |
| <a href="#">rakler</a>  | <a href="#">rakler.bSep08</a>  |                        | 14571  | 824  | 1  | 101 | putative protein of mammalian origin (rakler) alternative variant bSep08, mRNA.                       |
| <a href="#">Rala</a>    | <a href="#">Rala.bSep08</a>    | <a href="#">81757</a>  | 6211   | 584  | 1  | 120 | v-ral simian leukemia viral oncogene homolog A (ras related) (Rala) alternative variant bSep08, mRNA. |
| <a href="#">Ralbp1</a>  | <a href="#">Ralbp1.bSep08</a>  | <a href="#">84014</a>  | 20670  | 625  | 3  | 156 | ralA binding protein 1 (Ralbp1) alternative variant bSep08, mRNA.                                     |
| <a href="#">Ralbp1</a>  | <a href="#">Ralbp1.cSep08</a>  | <a href="#">84014</a>  | 20520  | 378  | 2  | 125 | ralA binding protein 1 (Ralbp1) alternative variant cSep08, mRNA.                                     |
| <a href="#">Ralgds</a>  | <a href="#">Ralgds.aSep08</a>  | <a href="#">29622</a>  | 33574  | 1664 | 4  | 422 | ral guanine nucleotide dissociation stimulator (Ralgds) alternative variant aSep08, mRNA.             |
| <a href="#">Ralgds</a>  | <a href="#">Ralgds.bSep08</a>  | <a href="#">29622</a>  | 12145  | 1697 | 3  | 407 | ral guanine nucleotide dissociation stimulator (Ralgds) alternative variant bSep08, mRNA.             |
| <a href="#">Ralgds</a>  | <a href="#">Ralgds.cSep08</a>  | <a href="#">29622</a>  | 7149   | 1719 | 10 | 370 | ral guanine nucleotide dissociation stimulator (41.0 kD) (Ralgds) alternative variant cSep08, mRNA.   |
| <a href="#">Ralgds</a>  | <a href="#">Ralgds.dSep08</a>  | <a href="#">29622</a>  | 2405   | 570  | 2  | 189 | ral guanine nucleotide dissociation stimulator (Ralgds) alternative variant dSep08, mRNA.             |
| <a href="#">Ralgps2</a> | <a href="#">Ralgps2.aSep08</a> | <a href="#">304887</a> | 68984  | 2424 | 14 | 454 | GEF with PH domain motif 2 (Ralgps2) alternative variant aSep08, mRNA.                                |
| <a href="#">Ralgps2</a> | <a href="#">Ralgps2.cSep08</a> | <a href="#">304887</a> | 14826  | 886  | 6  | 172 | GEF with PH domain motif 2 (19.6 kD) (Ralgps2) alternative variant cSep08, mRNA.                      |
| <a href="#">ralo</a>    | <a href="#">ralo.aSep08</a>    |                        | 18387  | 535  |    | 107 | ecotropic viral integration site 5-like (ralo) mRNA.                                                  |
| <a href="#">Raly</a>    | <a href="#">Raly.bSep08</a>    | <a href="#">296301</a> | 61273  | 1359 | 6  | 244 | hnRNP-associated with lethal yellow (26.5 kD) (Raly) alternative variant bSep08, mRNA.                |
| <a href="#">Raly</a>    | <a href="#">Raly.cSep08</a>    | <a href="#">296301</a> | 61572  | 692  | 5  | 230 | hnRNP-associated with lethal yellow (Raly) alternative variant cSep08, mRNA.                          |
| <a href="#">Raly</a>    | <a href="#">Raly.dSep08</a>    | <a href="#">296301</a> | 60051  | 842  | 6  | 165 | hnRNP-associated with lethal yellow (Raly) alternative variant dSep08, mRNA.                          |
| <a href="#">Raly</a>    | <a href="#">Raly.eSep08</a>    | <a href="#">296301</a> | 58004  | 652  | 5  | 126 | hnRNP-associated with lethal yellow (Raly) alternative variant eSep08, mRNA.                          |
| <a href="#">Raly</a>    | <a href="#">Raly.fSep08</a>    | <a href="#">296301</a> | 55785  | 441  | 3  | 68  | hnRNP-associated with lethal yellow (Raly) alternative variant fSep08, mRNA.                          |
| <a href="#">Raly</a>    | <a href="#">Raly.gSep08</a>    | <a href="#">296301</a> | 33389  | 294  | 3  | 43  | hnRNP-associated with lethal yellow (Raly) alternative variant gSep08, mRNA.                          |
| <a href="#">ramee</a>   | <a href="#">ramee.aSep08</a>   |                        | 4061   | 345  |    | 114 | odd Oz ten-m homolog 2 (ramee) mRNA.                                                                  |
| <a href="#">ramer</a>   | <a href="#">ramer.aSep08</a>   |                        | 879    | 671  |    | 55  | putative protein (ramer) mRNA.                                                                        |

|                         |                                |                        |       |      |    |      |                                                                                                        |
|-------------------------|--------------------------------|------------------------|-------|------|----|------|--------------------------------------------------------------------------------------------------------|
| <a href="#">Ramp2</a>   | <a href="#">Ramp2.bSep08</a>   | <a href="#">58966</a>  | 1746  | 503  | 4  | 105  | receptor (calcitonin) activity modifying protein 2 (Ramp2) alternative variant bSep08, mRNA.           |
| <a href="#">Ramp2</a>   | <a href="#">Ramp2.cSep08</a>   | <a href="#">58966</a>  | 996   | 866  | 2  | 76   | receptor (calcitonin) activity modifying protein 2 (Ramp2) alternative variant cSep08, mRNA.           |
| <a href="#">Ramp3</a>   | <a href="#">Ramp3.bSep08</a>   | <a href="#">56820</a>  | 14325 | 558  | 3  | 116  | receptor (calcitonin) activity modifying protein 3 (13.5 kD) (Ramp3) alternative variant bSep08, mRNA. |
| <a href="#">Ramp3</a>   | <a href="#">Ramp3.cSep08</a>   | <a href="#">56820</a>  | 15299 | 608  | 2  | 63   | receptor (calcitonin) activity modifying protein 3 (7.1 kD) (Ramp3) alternative variant cSep08, mRNA.  |
| <a href="#">Ran</a>     | <a href="#">Ran.aSep08</a>     | <a href="#">84509</a>  | 2343  | 777  | 6  | 259  | RAN, member RAS oncogene family (Ran) alternative variant aSep08, mRNA.                                |
| <a href="#">Ran</a>     | <a href="#">Ran.bSep08</a>     | <a href="#">84509</a>  | 2954  | 1104 | 6  | 216  | RAN, member RAS oncogene family (24.4 kD) (Ran) alternative variant bSep08, mRNA.                      |
| <a href="#">Ran</a>     | <a href="#">Ran.cSep08</a>     | <a href="#">84509</a>  | 3184  | 1101 | 7  | 216  | RAN, member RAS oncogene family (24.4 kD) (Ran) alternative variant cSep08, mRNA.                      |
| <a href="#">Ran</a>     | <a href="#">Ran.dSep08</a>     | <a href="#">84509</a>  | 4555  | 2488 | 7  | 216  | RAN, member RAS oncogene family (24.4 kD) (Ran) alternative variant dSep08, mRNA.                      |
| <a href="#">Ran</a>     | <a href="#">Ran.eSep08</a>     | <a href="#">84509</a>  | 1934  | 775  | 3  | 115  | RAN, member RAS oncogene family (Ran) alternative variant eSep08, mRNA.                                |
| <a href="#">Ranbp1</a>  | <a href="#">Ranbp1.aSep08</a>  | <a href="#">360739</a> | 6968  | 952  | 1  | 216  | RAN binding protein 1 (Ranbp1) alternative variant aSep08, mRNA.                                       |
| <a href="#">Ranbp2</a>  | <a href="#">Ranbp2.aSep08</a>  | <a href="#">294429</a> | 18805 | 5654 | 10 | 1529 | RAN binding protein 2 (Ranbp2) alternative variant aSep08, mRNA.                                       |
| <a href="#">Ranbp3</a>  | <a href="#">Ranbp3.aSep08</a>  | <a href="#">501281</a> | 37125 | 2532 | 17 | 558  | RAN binding protein 3 like (59.2 kD) (Ranbp3) alternative variant aSep08, mRNA.                        |
| <a href="#">Ranbp3</a>  | <a href="#">Ranbp3.bSep08</a>  | <a href="#">501281</a> | 36104 | 1392 | 12 | 369  | RAN binding protein 3 like (Ranbp3) alternative variant bSep08, mRNA.                                  |
| <a href="#">Ranbp3</a>  | <a href="#">Ranbp3.cSep08</a>  | <a href="#">501281</a> | 32630 | 779  | 10 | 255  | RAN binding protein 3 like (Ranbp3) alternative variant cSep08, mRNA.                                  |
| <a href="#">Ranbp3</a>  | <a href="#">Ranbp3.dSep08</a>  | <a href="#">501281</a> | 2915  | 664  | 5  | 220  | RAN binding protein 3 like (Ranbp3) alternative variant dSep08, mRNA.                                  |
| <a href="#">Ranbp3</a>  | <a href="#">Ranbp3.eSep08</a>  | <a href="#">501281</a> | 28176 | 803  | 9  | 211  | RAN binding protein 3 like (Ranbp3) alternative variant eSep08, mRNA.                                  |
| <a href="#">Ranbp3</a>  | <a href="#">Ranbp3.fSep08</a>  | <a href="#">501281</a> | 2749  | 862  | 3  | 177  | RAN binding protein 3 like (19.5 kD) (Ranbp3) alternative variant fSep08, mRNA.                        |
| <a href="#">Ranbp3</a>  | <a href="#">Ranbp3.gSep08</a>  | <a href="#">501281</a> | 28174 | 489  | 8  | 162  | RAN binding protein 3 like (Ranbp3) alternative variant gSep08, mRNA.                                  |
| <a href="#">Ranbp3</a>  | <a href="#">Ranbp3.hSep08</a>  | <a href="#">501281</a> | 902   | 810  | 2  | 95   | putative protein (Ranbp3) alternative variant hSep08, mRNA.                                            |
| <a href="#">Ranbp3</a>  | <a href="#">Ranbp3.iSep08</a>  | <a href="#">501281</a> | 26086 | 722  | 8  | 87   | RAN binding protein 3 like (Ranbp3) alternative variant iSep08, mRNA.                                  |
| <a href="#">Ranbp3l</a> | <a href="#">Ranbp3l.aSep08</a> | <a href="#">294789</a> | 9131  | 1762 | 6  | 425  | RAN binding protein 3-like (Ranbp3l) alternative variant aSep08, mRNA.                                 |
| <a href="#">Ranbp3l</a> | <a href="#">Ranbp3l.bSep08</a> | <a href="#">294789</a> | 9205  | 1683 | 6  | 226  | RAN binding protein 3-like (24.9 kD) (Ranbp3l) alternative variant bSep08, mRNA.                       |
| <a href="#">Ranbp3l</a> | <a href="#">Ranbp3l.cSep08</a> | <a href="#">294789</a> | 6657  | 1458 | 4  | 181  | RAN binding protein 3-like (Ranbp3l) alternative variant cSep08, mRNA.                                 |

|                              |                                     |                        |       |      |    |     |                                                                                           |
|------------------------------|-------------------------------------|------------------------|-------|------|----|-----|-------------------------------------------------------------------------------------------|
| <a href="#">Ranbp3l</a>      | <a href="#">Ranbp3l.dSep08</a>      | <a href="#">294789</a> | 6277  | 527  | 5  | 175 | RAN binding protein 3-like (Ranbp3l) alternative variant dSep08, mRNA.                    |
| <a href="#">Ranbp10</a>      | <a href="#">Ranbp10.aSep08</a>      | <a href="#">361396</a> | 54755 | 1782 | 8  | 594 | ran binding protein 10 like (Ranbp10) alternative variant aSep08, mRNA.                   |
| <a href="#">Ranbp10</a>      | <a href="#">Ranbp10.bSep08</a>      | <a href="#">361396</a> | 20794 | 773  | 7  | 225 | ran binding protein like (Ranbp10) alternative variant bSep08, mRNA.                      |
| <a href="#">Ranbp10</a>      | <a href="#">Ranbp10.cSep08</a>      | <a href="#">361396</a> | 48420 | 597  | 6  | 198 | ran binding protein like (Ranbp10) alternative variant cSep08, mRNA.                      |
| <a href="#">Ranbp10</a>      | <a href="#">Ranbp10.dSep08</a>      | <a href="#">361396</a> | 25445 | 759  | 6  | 172 | ran binding protein like (Ranbp10) alternative variant dSep08, mRNA.                      |
| <a href="#">Ranbp10</a>      | <a href="#">Ranbp10.eSep08</a>      | <a href="#">361396</a> | 495   | 398  | 2  | 76  | ran binding protein 10 like (Ranbp10) alternative variant eSep08, mRNA.                   |
| <a href="#">Ranbp10</a>      | <a href="#">Ranbp10.fSep08</a>      | <a href="#">361396</a> | 20377 | 523  | 2  | 68  | protein RAN binding like (Ranbp10) alternative variant fSep08, mRNA.                      |
| <a href="#">Ranbp17</a>      | <a href="#">Ranbp17.bSep08</a>      | <a href="#">303029</a> | 49554 | 1801 | 4  | 530 | RAN binding protein 17 (Ranbp17) alternative variant bSep08, mRNA.                        |
| <a href="#">RanBPM_CRA.0</a> | <a href="#">RanBPM_CRA.0.aSep08</a> |                        | 2005  | 571  |    | 190 | ran binding protein 10 like (RanBPM_CRA.0) mRNA.                                          |
| <a href="#">Rangap1</a>      | <a href="#">Rangap1.bSep08</a>      | <a href="#">362965</a> | 29421 | 3982 | 17 | 418 | RAN GTPase activating protein 1 (45.5 kD) (Rangap1) alternative variant bSep08, mRNA.     |
| <a href="#">Rangap1</a>      | <a href="#">Rangap1.cSep08</a>      | <a href="#">362965</a> | 1115  | 845  | 3  | 156 | RAN GTPase activating protein 1 (17.6 kD) (Rangap1) alternative variant cSep08, mRNA.     |
| <a href="#">Rangap1</a>      | <a href="#">Rangap1.dSep08</a>      | <a href="#">362965</a> | 719   | 537  | 2  | 71  | RAN GTPase activating protein 1 (Rangap1) alternative variant dSep08, mRNA.               |
| <a href="#">Rangap1</a>      | <a href="#">Rangap1.eSep08</a>      | <a href="#">362965</a> | 7971  | 707  | 3  | 42  | RAN GTPase activating protein 1 (Rangap1) alternative variant eSep08, mRNA.               |
| <a href="#">Rangap1</a>      | <a href="#">Rangap1.gSep08</a>      | <a href="#">362965</a> | 9692  | 346  | 3  | 32  | putative protein (Rangap1) alternative variant gSep08, mRNA.                              |
| <a href="#">Rangrf</a>       | <a href="#">Rangrf.bSep08</a>       | <a href="#">287419</a> | 1256  | 468  | 2  | 110 | RAN guanine nucleotide release factor (Rangrf) alternative variant bSep08, mRNA.          |
| <a href="#">Rangrf</a>       | <a href="#">Rangrf.cSep08</a>       | <a href="#">287419</a> | 884   | 801  | 1  | 65  | RAN guanine nucleotide release factor (7.0 kD) (Rangrf) alternative variant cSep08, mRNA. |
| <a href="#">ranoy</a>        | <a href="#">ranoy.aSep08</a>        |                        | 2675  | 739  |    | 63  | putative protein (ranoy) mRNA.                                                            |
| <a href="#">RAP.0</a>        | <a href="#">RAP.0.aSep08</a>        |                        | 7885  | 540  |    | 150 | protein CRA a (17.2 kD) (RAP.0) mRNA.                                                     |
| <a href="#">Rap1a</a>        | <a href="#">Rap1a.aSep08</a>        | <a href="#">295347</a> | 76317 | 681  | 1  | 193 | RAS-related protein 1a (21.8 kD) (Rap1a) alternative variant aSep08, mRNA.                |
| <a href="#">Rap1a</a>        | <a href="#">Rap1a.cSep08</a>        | <a href="#">295347</a> | 76280 | 760  | 2  | 161 | RAS-related protein 1a (18.2 kD) (Rap1a) alternative variant cSep08, mRNA.                |
| <a href="#">Rap1b</a>        | <a href="#">Rap1b.bSep08</a>        | <a href="#">171337</a> | 27312 | 2599 | 6  | 184 | RAS related protein 1b (20.8 kD) (Rap1b) alternative variant bSep08, mRNA.                |
| <a href="#">Rap1b</a>        | <a href="#">Rap1b.cSep08</a>        | <a href="#">171337</a> | 33046 | 2685 | 6  | 184 | RAS related protein 1b (20.8 kD) (Rap1b) alternative variant cSep08, mRNA.                |
| <a href="#">Rap1b</a>        | <a href="#">Rap1b.dSep08</a>        | <a href="#">171337</a> | 5688  | 713  | 3  | 133 | RAS related protein 1b (Rap1b) alternative variant dSep08, mRNA.                          |
| <a href="#">Rap1b</a>        | <a href="#">Rap1b.eSep08</a>        | <a href="#">171337</a> | 4335  | 725  | 2  | 130 | RAS related protein 1b (Rap1b) alternative variant eSep08, mRNA.                          |

|                          |                                 |                        |        |      |    |     |                                                                                            |
|--------------------------|---------------------------------|------------------------|--------|------|----|-----|--------------------------------------------------------------------------------------------|
| <a href="#">Rap1GAP</a>  | <a href="#">Rap1GAP.aSep08</a>  | <a href="#">313644</a> | 47130  | 3296 | 26 | 761 | rap1 GTPase-activating protein (Rap1GAP) alternative variant aSep08, mRNA.                 |
| <a href="#">Rap1GAP</a>  | <a href="#">Rap1GAP.bSep08</a>  | <a href="#">313644</a> | 9056   | 745  | 9  | 248 | rap1 GTPase-activating protein (Rap1GAP) alternative variant bSep08, mRNA.                 |
| <a href="#">Rap1GAP</a>  | <a href="#">Rap1GAP.cSep08</a>  | <a href="#">313644</a> | 51680  | 644  | 8  | 214 | rap1 GTPase-activating protein (Rap1GAP) alternative variant cSep08, mRNA.                 |
| <a href="#">Rap1GAP</a>  | <a href="#">Rap1GAP.dSep08</a>  | <a href="#">313644</a> | 7433   | 604  | 3  | 201 | rap1 GTPase-activating protein (Rap1GAP) alternative variant dSep08, mRNA.                 |
| <a href="#">Rap1GAP</a>  | <a href="#">Rap1GAP.fSep08</a>  | <a href="#">313644</a> | 882    | 562  | 2  | 87  | rap1 GTPase-activating protein (10.1 kD) (Rap1GAP) alternative variant fSep08, mRNA.       |
| <a href="#">Rap1GAP</a>  | <a href="#">Rap1GAP.gSep08</a>  | <a href="#">313644</a> | 1217   | 531  | 2  | 103 | rap1 GTPase-activating protein (Rap1GAP) alternative variant gSep08, mRNA.                 |
| <a href="#">Rap1gds1</a> | <a href="#">Rap1gds1.bSep08</a> | <a href="#">310909</a> | 119516 | 528  | 2  | 176 | RAP1, GTP-GDP dissociation stimulator 1 (Rap1gds1) alternative variant bSep08, mRNA.       |
| <a href="#">Rap2a</a>    | <a href="#">Rap2a.aSep08</a>    | <a href="#">114560</a> | 24401  | 1553 | 2  | 250 | RAS related protein 2a? (26.9 kD) (Rap2a) alternative variant aSep08, mRNA.                |
| <a href="#">Rap2ip</a>   | <a href="#">Rap2ip.bSep08</a>   | <a href="#">303569</a> | 9056   | 1935 | 11 | 441 | rap2 interacting protein (49.5 kD) (Rap2ip) alternative variant bSep08, mRNA.              |
| <a href="#">Rap2ip</a>   | <a href="#">Rap2ip.cSep08</a>   | <a href="#">303569</a> | 1571   | 404  | 3  | 104 | rap2 interacting protein (Rap2ip) alternative variant cSep08, mRNA.                        |
| <a href="#">Rap2ip</a>   | <a href="#">Rap2ip.eSep08</a>   | <a href="#">303569</a> | 892    | 393  | 3  | 72  | rap2 interacting protein (Rap2ip) alternative variant eSep08, mRNA.                        |
| <a href="#">Rapgef1</a>  | <a href="#">Rapgef1.aSep08</a>  | <a href="#">63881</a>  | 6246   | 981  | 6  | 249 | rap guanine nucleotide exchange factor (GEF) 1 (Rapgef1) alternative variant aSep08, mRNA. |
| <a href="#">Rapgef1</a>  | <a href="#">Rapgef1.bSep08</a>  | <a href="#">63881</a>  | 10884  | 396  | 4  | 131 | rap guanine nucleotide exchange factor (GEF) 1 (Rapgef1) alternative variant bSep08, mRNA. |
| <a href="#">Rapgef2</a>  | <a href="#">Rapgef2.bSep08</a>  | <a href="#">310533</a> | 10516  | 1147 | 9  | 381 | rap guanine nucleotide exchange factor (GEF) 2 (Rapgef2) alternative variant bSep08, mRNA. |
| <a href="#">Rapgef2</a>  | <a href="#">Rapgef2.cSep08</a>  | <a href="#">310533</a> | 8759   | 645  | 5  | 214 | rap guanine nucleotide exchange factor (GEF) 2 (Rapgef2) alternative variant cSep08, mRNA. |
| <a href="#">Rapgef3</a>  | <a href="#">Rapgef3.bSep08</a>  | <a href="#">59326</a>  | 6268   | 518  | 4  | 118 | rap guanine nucleotide exchange factor (GEF) 3 (Rapgef3) alternative variant bSep08, mRNA. |
| <a href="#">Rapgef4</a>  | <a href="#">Rapgef4.aSep08</a>  | <a href="#">252857</a> | 60892  | 705  | 7  | 234 | rap guanine nucleotide exchange factor (GEF) 4 (Rapgef4) alternative variant aSep08, mRNA. |
| <a href="#">Rapgef4</a>  | <a href="#">Rapgef4.bSep08</a>  | <a href="#">252857</a> | 203167 | 671  | 5  | 223 | rap guanine nucleotide exchange factor (GEF) 4 (Rapgef4) alternative variant bSep08, mRNA. |
| <a href="#">Rapgef4</a>  | <a href="#">Rapgef4.cSep08</a>  | <a href="#">252857</a> | 88229  | 538  | 5  | 132 | rap guanine nucleotide exchange factor (GEF) 4 (Rapgef4) alternative variant cSep08, mRNA. |
| <a href="#">Rapgef5</a>  | <a href="#">Rapgef5.bSep08</a>  | <a href="#">362799</a> | 13481  | 527  | 3  | 153 | rap guanine nucleotide exchange factor 5 (Rapgef5) alternative variant bSep08, mRNA.       |
| <a href="#">Rapgef5</a>  | <a href="#">Rapgef5.cSep08</a>  | <a href="#">362799</a> | 16269  | 441  | 4  | 147 | rap guanine nucleotide exchange factor 5 (Rapgef5) alternative variant cSep08, mRNA.       |
| <a href="#">Rapgef5</a>  | <a href="#">Rapgef5.eSep08</a>  | <a href="#">362799</a> | 3044   | 1193 | 2  | 96  | putative nuclear protein (10.8 kD) (Rapgef5) alternative variant eSep08, mRNA.             |
| <a href="#">Rapgef5</a>  | <a href="#">Rapgef5.fSep08</a>  | <a href="#">362799</a> | 7978   | 393  | 5  | 85  | rap guanine nucleotide exchange factor 5 (Rapgef5) alternative variant fSep08, mRNA.       |

|                         |                                |                        |       |      |   |     |                                                                                                                    |
|-------------------------|--------------------------------|------------------------|-------|------|---|-----|--------------------------------------------------------------------------------------------------------------------|
| <a href="#">Rapgef6</a> | <a href="#">Rapgef6.bSep08</a> | <a href="#">303141</a> | 10362 | 345  | 1 | 114 | rap guanine nucleotide exchange factor (GEF) 6 (Rapgef6) alternative variant bSep08, mRNA.                         |
| <a href="#">Rapgef1</a> | <a href="#">Rapgef1.aSep08</a> | <a href="#">303515</a> | 2399  | 916  | 7 | 217 | rap guanine nucleotide exchange factor -like 1 (Rapgef1) alternative variant aSep08, mRNA.                         |
| <a href="#">Rapgef1</a> | <a href="#">Rapgef1.bSep08</a> | <a href="#">303515</a> | 2563  | 2312 | 2 | 124 | putative secreted or extracellular protein precursor (13.2 kD) (Rapgef1) alternative variant bSep08, mRNA.         |
| <a href="#">Raph1</a>   | <a href="#">Raph1.bSep08</a>   | <a href="#">363239</a> | 5072  | 468  | 2 | 75  | ras association (RalGDS/AF-6) and pleckstrin homology domains 1 (8.4 kD) (Raph1) alternative variant bSep08, mRNA. |
| <a href="#">rapor</a>   | <a href="#">rapor.aSep08</a>   |                        | 24333 | 2096 | 9 | 698 | talin 2 (rapor) alternative variant aSep08, mRNA.                                                                  |
| <a href="#">rapor</a>   | <a href="#">rapor.bSep08</a>   |                        | 10535 | 560  | 4 | 186 | talin 2 (rapor) alternative variant bSep08, mRNA.                                                                  |
| <a href="#">rapor</a>   | <a href="#">rapor.cSep08</a>   |                        | 11630 | 581  | 5 | 119 | talin 2 (rapor) alternative variant cSep08, mRNA.                                                                  |
| <a href="#">rapor</a>   | <a href="#">rapor.dSep08</a>   |                        | 1495  | 407  | 2 | 104 | talin 2 (rapor) alternative variant dSep08, mRNA.                                                                  |
| <a href="#">Rapsn</a>   | <a href="#">Rapsn.bSep08</a>   | <a href="#">362161</a> | 1258  | 711  | 2 | 208 | receptor-associated protein of the synapse (23.1 kD) (Rapsn) alternative variant bSep08, mRNA.                     |
| <a href="#">Rapsn</a>   | <a href="#">Rapsn.cSep08</a>   | <a href="#">362161</a> | 710   | 398  | 2 | 69  | receptor-associated protein of the synapse (Rapsn) alternative variant cSep08, mRNA.                               |
| <a href="#">Rara</a>    | <a href="#">Rara.bSep08</a>    | <a href="#">24705</a>  | 3471  | 1784 | 2 | 165 | retinoic acid receptor, alpha (Rara) alternative variant bSep08, mRNA.                                             |
| <a href="#">Rarb</a>    | <a href="#">Rarb.aSep08</a>    | <a href="#">24706</a>  | 15876 | 1728 |   | 83  | retinoic acid receptor, beta (8.9 kD) (Rarb) mRNA.                                                                 |
| <a href="#">rarby</a>   | <a href="#">rarby.aSep08</a>   |                        | 34681 | 1245 | 4 | 48  | putative protein (5.7 kD) (rarby) alternative variant aSep08, mRNA.                                                |
| <a href="#">rarby</a>   | <a href="#">rarby.bSep08</a>   |                        | 51399 | 669  | 5 | 36  | putative protein (4.1 kD) (rarby) alternative variant bSep08, mRNA.                                                |
| <a href="#">rarchy</a>  | <a href="#">rarchy.aSep08</a>  |                        | 1219  | 244  |   | 81  | glutamine serine rich 1 (rarchy) mRNA.                                                                             |
| <a href="#">rardar</a>  | <a href="#">rardar.bSep08</a>  |                        | 21364 | 464  | 2 | 31  | CRA b like (3.7 kD) (rardar) alternative variant bSep08, mRNA.                                                     |
| <a href="#">rarfer</a>  | <a href="#">rarfer.aSep08</a>  |                        | 14302 | 263  |   | 87  | armadillo repeat containing 3 (rarfer) mRNA.                                                                       |
| <a href="#">rarflo</a>  | <a href="#">rarflo.aSep08</a>  |                        | 6432  | 686  |   | 43  | putative protein (4.6 kD) (rarflo) mRNA.                                                                           |
| <a href="#">rarflu</a>  | <a href="#">rarflu.aSep08</a>  |                        | 10723 | 745  |   | 63  | putative protein (rarflu) mRNA.                                                                                    |
| <a href="#">rargar</a>  | <a href="#">rargar.aSep08</a>  |                        | 2727  | 663  |   | 139 | putative protein (rargar) mRNA.                                                                                    |
| <a href="#">rarja</a>   | <a href="#">rarja.aSep08</a>   |                        | 512   | 312  |   | 51  | putative protein (rarja) mRNA.                                                                                     |
| <a href="#">rarjey</a>  | <a href="#">rarjey.aSep08</a>  |                        | 4428  | 439  | 2 | 62  | putative protein (7.0 kD) (rarjey) alternative variant aSep08, mRNA.                                               |
| <a href="#">rarjey</a>  | <a href="#">rarjey.bSep08</a>  |                        | 1475  | 261  | 2 | 49  | putative protein (rarjey) alternative variant bSep08, mRNA.                                                        |
| <a href="#">rarkee</a>  | <a href="#">rarkee.aSep08</a>  |                        | 8178  | 987  |   | 130 | RAB GTPase activating protein 1-like (rarkee) mRNA.                                                                |
| <a href="#">rarkler</a> | <a href="#">rarkler.aSep08</a> |                        | 4775  | 331  |   | 30  | putative protein (3.6 kD) (rarkler) mRNA.                                                                          |
| <a href="#">rarlo</a>   | <a href="#">rarlo.aSep08</a>   |                        | 4333  | 1681 |   | 560 | CRA b (rarlo) mRNA.                                                                                                |
| <a href="#">rarmee</a>  | <a href="#">rarmee.aSep08</a>  |                        | 61252 | 284  |   | 31  | putative protein (rarmee) mRNA.                                                                                    |
| <a href="#">rarmer</a>  | <a href="#">rarmer.aSep08</a>  |                        | 1954  | 755  |   | 145 | ring finger protein 213 (rarmer) mRNA.                                                                             |
| <a href="#">rarnoy</a>  | <a href="#">rarnoy.aSep08</a>  |                        | 885   | 454  |   | 130 | putative protein of metazoan origin (rarnoy) mRNA.                                                                 |
| <a href="#">rarpor</a>  | <a href="#">rarpor.aSep08</a>  |                        | 3099  | 646  |   | 215 | vacuolar protein sorting 13C (rarpor) mRNA.                                                                        |
| <a href="#">Rarres2</a> | <a href="#">Rarres2.bSep08</a> | <a href="#">297073</a> | 3048  | 1046 | 5 | 162 | retinoic acid receptor responder (tazarotene induced) 2 (18.4 kD) (Rarres2) alternative variant bSep08, mRNA.      |



|                            |                                   |                        |       |      |    |     |                                                                                                               |
|----------------------------|-----------------------------------|------------------------|-------|------|----|-----|---------------------------------------------------------------------------------------------------------------|
| <a href="#">Rarres2</a>    | <a href="#">Rarres2.cSep08</a>    | <a href="#">297073</a> | 2998  | 717  | 6  | 162 | retinoic acid receptor responder (tazarotene induced) 2 (18.4 kD) (Rarres2) alternative variant cSep08, mRNA. |
| <a href="#">Rarres2</a>    | <a href="#">Rarres2.eSep08</a>    | <a href="#">297073</a> | 2228  | 745  | 2  | 72  | retinoic acid receptor responder (tazarotene induced) 2 (Rarres2) alternative variant eSep08, mRNA.           |
| <a href="#">Rars</a>       | <a href="#">Rars.bSep08</a>       | <a href="#">287191</a> | 6063  | 605  | 3  | 153 | arginyl-tRNA synthetase (17.6 kD) (Rars) alternative variant bSep08, complete mRNA.                           |
| <a href="#">Rars2</a>      | <a href="#">Rars2.bSep08</a>      | <a href="#">297969</a> | 22369 | 743  | 9  | 160 | arginyl-tRNA synthetase 2 mitochondrial (Rars2) alternative variant bSep08, mRNA.                             |
| <a href="#">Rars2</a>      | <a href="#">Rars2.cSep08</a>      | <a href="#">297969</a> | 8971  | 1147 | 4  | 126 | arginyl-tRNA synthetase-like (14.6 kD) (Rars2) alternative variant cSep08, mRNA.                              |
| <a href="#">Rars2</a>      | <a href="#">Rars2.dSep08</a>      | <a href="#">297969</a> | 703   | 368  | 2  | 74  | arginyl-tRNA synthetase-like (Rars2) alternative variant dSep08, mRNA.                                        |
| <a href="#">rarsa</a>      | <a href="#">rarsa.aSep08</a>      |                        | 5298  | 705  |    | 48  | putative protein (5.7 kD) (rarsa) mRNA.                                                                       |
| <a href="#">rarshee</a>    | <a href="#">rarshee.aSep08</a>    |                        | 14873 | 470  |    | 32  | putative protein (rarshee) mRNA.                                                                              |
| <a href="#">rartu</a>      | <a href="#">rartu.aSep08</a>      |                        | 3365  | 747  |    | 81  | putative protein (9.1 kD) (rartu) mRNA.                                                                       |
| <a href="#">rarvar</a>     | <a href="#">rarvar.aSep08</a>     |                        | 944   | 282  |    | 20  | putative protein (rarvar) mRNA.                                                                               |
| <a href="#">rarwey</a>     | <a href="#">rarwey.aSep08</a>     |                        | 3579  | 1225 |    | 408 | uncharacterized protein (rarwey) mRNA.                                                                        |
| <a href="#">Ras.1</a>      | <a href="#">Ras.1.aSep08</a>      |                        | 2975  | 845  |    | 162 | GTPase Rab37 (Ras.1) mRNA.                                                                                    |
| <a href="#">rasa</a>       | <a href="#">rasa.aSep08</a>       |                        | 838   | 732  |    | 69  | putative protein (7.0 kD) (rasa) mRNA.                                                                        |
| <a href="#">Rasa1</a>      | <a href="#">Rasa1.bSep08</a>      | <a href="#">25676</a>  | 675   | 419  | 2  | 127 | RAS p21 protein activator 1 like (Rasa1) alternative variant bSep08, mRNA.                                    |
| <a href="#">Rasa1</a>      | <a href="#">Rasa1.cSep08</a>      | <a href="#">25676</a>  | 4185  | 894  | 4  | 95  | ras p21 protein activator 1 CRA b (10.9 kD) (Rasa1) alternative variant cSep08, mRNA.                         |
| <a href="#">Rasa2</a>      | <a href="#">Rasa2.bSep08</a>      | <a href="#">25597</a>  | 65170 | 1802 | 7  | 570 | RAS p21 protein activator 2 (Rasa2) alternative variant bSep08, mRNA.                                         |
| <a href="#">Rasa2</a>      | <a href="#">Rasa2.cSep08</a>      | <a href="#">25597</a>  | 11794 | 316  | 4  | 56  | RAS p21 protein activator 2 (Rasa2) alternative variant cSep08, mRNA.                                         |
| <a href="#">Rasa3</a>      | <a href="#">Rasa3.bSep08</a>      | <a href="#">29372</a>  | 26753 | 3458 | 17 | 624 | RAS p21 protein activator 3 (71.6 kD) (Rasa3) alternative variant bSep08, mRNA.                               |
| <a href="#">Rasa3</a>      | <a href="#">Rasa3.cSep08</a>      | <a href="#">29372</a>  | 8980  | 1802 | 8  | 564 | RAS p21 protein activator 3 (Rasa3) alternative variant cSep08, mRNA.                                         |
| <a href="#">Rasa3</a>      | <a href="#">Rasa3.dSep08</a>      | <a href="#">29372</a>  | 21682 | 1776 | 9  | 331 | RAS p21 protein activator 3 (Rasa3) alternative variant dSep08, mRNA.                                         |
| <a href="#">Rasal1</a>     | <a href="#">Rasal1.cSep08</a>     | <a href="#">360814</a> | 6514  | 441  |    |     |                                                                                                               |
| <a href="#">Rasal2</a>     | <a href="#">Rasal2.bSep08</a>     | <a href="#">304893</a> | 7827  | 1799 | 4  | 599 | RAS protein activator like 2 (Rasal2) alternative variant bSep08, mRNA.                                       |
| <a href="#">Rasal2</a>     | <a href="#">Rasal2.cSep08</a>     | <a href="#">304893</a> | 76176 | 828  | 6  | 275 | RAS protein activator like 2 (Rasal2) alternative variant cSep08, mRNA.                                       |
| <a href="#">Rasd1</a>      | <a href="#">Rasd1.aSep08</a>      | <a href="#">64455</a>  | 1771  | 1634 |    | 280 | RAS, dexamethasone-induced 1 (31.7 kD) (Rasd1) mRNA.                                                          |
| <a href="#">RasGAP_C.0</a> | <a href="#">RasGAP_C.0.aSep08</a> |                        | 2284  | 728  | 2  | 186 | IQ motif containing GTPase activating protein 3 (RasGAP_C.0) alternative variant aSep08, mRNA.                |
| <a href="#">RasGAP_C.0</a> | <a href="#">RasGAP_C.0.bSep08</a> |                        | 2652  | 502  | 2  | 166 | IQ motif containing GTPase activating protein 3 (RasGAP_C.0) alternative variant bSep08, mRNA.                |
| <a href="#">RasGEF.0</a>   | <a href="#">RasGEF.0.aSep08</a>   |                        | 20365 | 762  |    | 253 | ral guanine nucleotide dissociation stimulator-like 1 CRA d (RasGEF.0) mRNA.                                  |

|                            |                                   |                        |       |      |    |     |                                                                                                        |
|----------------------------|-----------------------------------|------------------------|-------|------|----|-----|--------------------------------------------------------------------------------------------------------|
| <a href="#">RasGEF.1</a>   | <a href="#">RasGEF.1.aSep08</a>   |                        | 4053  | 897  |    | 243 | domain-containing family member ras-gef 1 (RasGEF.1) mRNA.                                             |
| <a href="#">Rasgef1a</a>   | <a href="#">Rasgef1a.aSep08</a>   | <a href="#">312664</a> | 16502 | 388  |    | 129 | RasGEF domain family, member 1A (Rasgef1a) mRNA.                                                       |
| <a href="#">Rasgef1c</a>   | <a href="#">Rasgef1c.bSep08</a>   | <a href="#">360519</a> | 1520  | 763  | 1  | 39  | RasGEF domain family, member 1C (Rasgef1c) alternative variant bSep08, mRNA.                           |
| <a href="#">RasGEF_N.0</a> | <a href="#">RasGEF_N.0.aSep08</a> |                        | 10844 | 425  |    | 100 | RasGEF domain family member 1B (RasGEF_N.0) mRNA.                                                      |
| <a href="#">Rasgrf1</a>    | <a href="#">Rasgrf1.aSep08</a>    | <a href="#">192213</a> | 35033 | 1581 | 12 | 418 | RAS protein-specific guanine nucleotide-releasing factor 1 (Rasgrf1) alternative variant aSep08, mRNA. |
| <a href="#">Rasgrf2</a>    | <a href="#">Rasgrf2.bSep08</a>    | <a href="#">114513</a> | 1000  | 426  | 2  | 141 | RAS protein-specific guanine nucleotide-releasing factor 2 (Rasgrf2) alternative variant bSep08, mRNA. |
| <a href="#">Rasgrf2</a>    | <a href="#">Rasgrf2.cSep08</a>    | <a href="#">114513</a> | 13304 | 642  | 2  | 127 | RAS protein-specific guanine nucleotide-releasing factor 2 (Rasgrf2) alternative variant cSep08, mRNA. |
| <a href="#">Rasgrf2</a>    | <a href="#">Rasgrf2.dSep08</a>    | <a href="#">114513</a> | 4782  | 1366 | 3  | 95  | RAS protein-specific guanine nucleotide-releasing factor 2 (Rasgrf2) alternative variant dSep08, mRNA. |
| <a href="#">Rasgrp2</a>    | <a href="#">Rasgrp2.bSep08</a>    | <a href="#">361714</a> | 9955  | 1223 | 8  | 273 | RAS guanyl releasing protein 2 (Rasgrp2) alternative variant bSep08, mRNA.                             |
| <a href="#">Rasgrp2</a>    | <a href="#">Rasgrp2.cSep08</a>    | <a href="#">361714</a> | 2554  | 888  | 4  | 145 | RAS guanyl releasing protein 2 (Rasgrp2) alternative variant cSep08, mRNA.                             |
| <a href="#">Rasgrp2</a>    | <a href="#">Rasgrp2.dSep08</a>    | <a href="#">361714</a> | 3799  | 587  | 5  | 141 | RAS guanyl releasing protein 2 (16.1 kD) (Rasgrp2) alternative variant dSep08, mRNA.                   |
| <a href="#">Rasgrp2</a>    | <a href="#">Rasgrp2.eSep08</a>    | <a href="#">361714</a> | 4705  | 623  | 5  | 141 | RAS guanyl releasing protein 2 (16.1 kD) (Rasgrp2) alternative variant eSep08, mRNA.                   |
| <a href="#">Rasgrp2</a>    | <a href="#">Rasgrp2.fSep08</a>    | <a href="#">361714</a> | 2010  | 572  | 4  | 141 | RAS guanyl releasing protein 2 (16.1 kD) (Rasgrp2) alternative variant fSep08, mRNA.                   |
| <a href="#">Rasgrp2</a>    | <a href="#">Rasgrp2.gSep08</a>    | <a href="#">361714</a> | 1543  | 510  | 4  | 110 | RAS guanyl releasing protein 2 (Rasgrp2) alternative variant gSep08, mRNA.                             |
| <a href="#">Rasgrp2</a>    | <a href="#">Rasgrp2.hSep08</a>    | <a href="#">361714</a> | 953   | 748  | 2  | 99  | putative protein (Rasgrp2) alternative variant hSep08, mRNA.                                           |
| <a href="#">Rasgrp3</a>    | <a href="#">Rasgrp3.bSep08</a>    | <a href="#">313874</a> | 12348 | 707  | 5  | 192 | RAS, guanyl releasing protein 3 (Rasgrp3) alternative variant bSep08, mRNA.                            |
| <a href="#">Rasgrp3</a>    | <a href="#">Rasgrp3.cSep08</a>    | <a href="#">313874</a> | 10409 | 407  | 4  | 135 | RAS, guanyl releasing protein 3 (Rasgrp3) alternative variant cSep08, mRNA.                            |
| <a href="#">Rasgrp3</a>    | <a href="#">Rasgrp3.dSep08</a>    | <a href="#">313874</a> | 65923 | 729  | 5  | 120 | RAS, guanyl releasing protein 3 (Rasgrp3) alternative variant dSep08, mRNA.                            |
| <a href="#">Rasgrp4</a>    | <a href="#">Rasgrp4.cSep08</a>    | <a href="#">170668</a> | 420   | 348  | 2  | 58  | RAS guanyl releasing protein 4 (6.2 kD) (Rasgrp4) alternative variant cSep08, mRNA.                    |
| <a href="#">rashee</a>     | <a href="#">rashee.aSep08</a>     |                        | 3552  | 324  |    | 108 | mediator of rna polymerase ii transcription (rashee) mRNA.                                             |
| <a href="#">Rasip1</a>     | <a href="#">Rasip1.bSep08</a>     | <a href="#">292912</a> | 904   | 739  | 2  | 132 | ras interacting protein 1 (Rasip1) alternative variant bSep08, mRNA.                                   |
| <a href="#">Rasl10b</a>    | <a href="#">Rasl10b.aSep08</a>    | <a href="#">303382</a> | 9931  | 1251 |    | 266 | RAS-like, family 10, member B (Rasl10b) mRNA.                                                          |
| <a href="#">Rasl11a</a>    | <a href="#">Rasl11a.bSep08</a>    | <a href="#">304268</a> | 2315  | 740  | 1  | 246 | RAS-like family 11 member A (Rasl11a) alternative variant bSep08, mRNA.                                |
| <a href="#">Rasl12</a>     | <a href="#">Rasl12.bSep08</a>     | <a href="#">315762</a> | 662   | 402  | 1  | 87  | RAS-like, family 12 (Rasl12) alternative variant bSep08, mRNA.                                         |
| <a href="#">Rasl12</a>     | <a href="#">Rasl12.cSep08</a>     | <a href="#">315762</a> | 3130  | 313  | 2  | 86  | RAS-like, family 12 (Rasl12) alternative variant cSep08, mRNA.                                         |

|                           |                                  |                        |        |      |   |     |                                                                                                              |
|---------------------------|----------------------------------|------------------------|--------|------|---|-----|--------------------------------------------------------------------------------------------------------------|
| <a href="#">Rassf1</a>    | <a href="#">Rassf1.cSep08</a>    | <a href="#">363140</a> | 6470   | 966  | 3 | 193 | ras association (RalGDS/AF-6) domain family member 1 (22.1 kD) (Rassf1) alternative variant cSep08, mRNA.    |
| <a href="#">Rassf5</a>    | <a href="#">Rassf5.bSep08</a>    | <a href="#">54355</a>  | 18842  | 709  | 3 | 167 | ras association (RalGDS/AF-6) domain family member 5 (Rassf5) alternative variant bSep08, mRNA.              |
| <a href="#">Rassf7</a>    | <a href="#">Rassf7.bSep08</a>    | <a href="#">293623</a> | 1753   | 1116 | 3 | 279 | ras association (RalGDS/AF-6) domain family (N-terminal) member 7 (Rassf7) alternative variant bSep08, mRNA. |
| <a href="#">Rassf8</a>    | <a href="#">Rassf8.aSep08</a>    | <a href="#">312846</a> | 26682  | 940  | 5 | 199 | CRA b like (Rassf8) alternative variant aSep08, mRNA.                                                        |
| <a href="#">Rassf8</a>    | <a href="#">Rassf8.bSep08</a>    | <a href="#">312846</a> | 73704  | 673  | 3 | 132 | CRA a (Rassf8) alternative variant bSep08, mRNA.                                                             |
| <a href="#">Rassf8</a>    | <a href="#">Rassf8.cSep08</a>    | <a href="#">312846</a> | 69822  | 432  | 3 | 94  | RA (Rassf8) alternative variant cSep08, mRNA.                                                                |
| <a href="#">ratu</a>      | <a href="#">ratu.aSep08</a>      |                        | 98638  | 720  |   | 122 | putative nuclear protein (14.0 kD) (ratu) mRNA.                                                              |
| <a href="#">ravar</a>     | <a href="#">ravar.aSep08</a>     |                        | 5942   | 1759 |   | 408 | uromodulin-like (ravar) mRNA.                                                                                |
| <a href="#">Raver1</a>    | <a href="#">Raver1.bSep08</a>    | <a href="#">298705</a> | 1948   | 748  | 6 | 249 | ribonucleoprotein, PTB-binding 1 (Raver1) alternative variant bSep08, mRNA.                                  |
| <a href="#">Raver1</a>    | <a href="#">Raver1.dSep08</a>    | <a href="#">298705</a> | 1913   | 732  | 2 | 91  | ribonucleoprotein, PTB-binding 1 (9.8 kD) (Raver1) alternative variant dSep08, mRNA.                         |
| <a href="#">Raver2</a>    | <a href="#">Raver2.aSep08</a>    | <a href="#">362551</a> | 23418  | 1385 | 6 | 420 | ribonucleoprotein, PTB-binding 2 (Raver2) alternative variant aSep08, mRNA.                                  |
| <a href="#">Raver2</a>    | <a href="#">Raver2.bSep08</a>    | <a href="#">362551</a> | 18494  | 1303 | 7 | 315 | ribonucleoprotein, PTB-binding 2 (Raver2) alternative variant bSep08, mRNA.                                  |
| <a href="#">rawby</a>     | <a href="#">rawby.aSep08</a>     |                        | 108128 | 386  |   | 79  | putative protein (rawby) alternative variant aSep08, mRNA.                                                   |
| <a href="#">rawchy</a>    | <a href="#">rawchy.aSep08</a>    |                        | 5544   | 383  |   | 76  | putative protein (8.8 kD) (rawchy) mRNA.                                                                     |
| <a href="#">rawdardar</a> | <a href="#">rawdardar.aSep08</a> |                        | 1426   | 639  |   | 198 | repeat-containing protein 16c (rawdardar) mRNA.                                                              |
| <a href="#">rawey</a>     | <a href="#">rawey.aSep08</a>     |                        | 1180   | 863  | 2 | 45  | putative protein (5.2 kD) (rawey) alternative variant aSep08, mRNA.                                          |
| <a href="#">rawfer</a>    | <a href="#">rawfer.aSep08</a>    |                        | 13842  | 826  |   | 227 | armadillo repeat containing 3 CRA b (rawfer) alternative variant aSep08, mRNA.                               |
| <a href="#">rawfer</a>    | <a href="#">rawfer.bSep08</a>    |                        | 6768   | 494  |   | 124 | armadillo repeat containing 3 CRA b (rawfer) alternative variant bSep08, mRNA.                               |
| <a href="#">rawflo</a>    | <a href="#">rawflo.aSep08</a>    |                        | 450    | 332  |   | 51  | putative protein (rawflo) mRNA.                                                                              |
| <a href="#">rawflu</a>    | <a href="#">rawflu.aSep08</a>    |                        | 24567  | 729  | 7 | 242 | protein kinase A anchoring Rt31 (rawflu) alternative variant aSep08, mRNA.                                   |
| <a href="#">rawflu</a>    | <a href="#">rawflu.bSep08</a>    |                        | 17661  | 688  | 6 | 229 | protein kinase A anchoring Rt31 (rawflu) alternative variant bSep08, mRNA.                                   |
| <a href="#">rawflu</a>    | <a href="#">rawflu.cSep08</a>    |                        | 17576  | 669  | 7 | 223 | protein kinase A anchoring Rt31 (rawflu) alternative variant cSep08, mRNA.                                   |
| <a href="#">rawflu</a>    | <a href="#">rawflu.dSep08</a>    |                        | 11338  | 645  | 2 | 177 | protein kinase A anchoring Rt31 (rawflu) alternative variant dSep08, mRNA.                                   |
| <a href="#">rawflu</a>    | <a href="#">rawflu.eSep08</a>    |                        | 9180   | 864  | 1 | 155 | protein kinase A anchoring Rt31 (rawflu) alternative variant eSep08, mRNA.                                   |
| <a href="#">rawflu</a>    | <a href="#">rawflu.fSep08</a>    |                        | 32096  | 789  | 1 | 110 | protein kinase A anchoring Rt31 (rawflu) alternative variant fSep08, mRNA.                                   |
| <a href="#">rawgar</a>    | <a href="#">rawgar.aSep08</a>    |                        | 3004   | 794  |   | 210 | putative protein (rawgar) mRNA.                                                                              |
| <a href="#">rawja</a>     | <a href="#">rawja.aSep08</a>     |                        | 13563  | 506  |   | 50  | putative protein (5.7 kD) (rawja) mRNA.                                                                      |
| <a href="#">rawjey</a>    | <a href="#">rawjey.aSep08</a>    |                        | 83063  | 246  |   | 55  | putative protein (rawjey) mRNA.                                                                              |
| <a href="#">rawkee</a>    | <a href="#">rawkee.aSep08</a>    |                        | 2325   | 727  |   | 31  | putative protein (3.5 kD) (rawkee) mRNA.                                                                     |

|                         |                                |                        |        |      |    |     |                                                                                                               |
|-------------------------|--------------------------------|------------------------|--------|------|----|-----|---------------------------------------------------------------------------------------------------------------|
| <a href="#">rawkler</a> | <a href="#">rawkler.aSep08</a> |                        | 3659   | 404  |    | 62  | putative protein (rawkler) mRNA.                                                                              |
| <a href="#">rawlo</a>   | <a href="#">rawlo.aSep08</a>   |                        | 1999   | 507  |    | 168 | putative protein of ancient origin (rawlo) mRNA.                                                              |
| <a href="#">rawmee</a>  | <a href="#">rawmee.aSep08</a>  |                        | 9552   | 995  | 5  | 77  | putative mitochondrial protein (8.7 kD) (rawmee) alternative variant aSep08, mRNA.                            |
| <a href="#">rawmer</a>  | <a href="#">rawmer.aSep08</a>  |                        | 10311  | 1283 |    | 427 | ring finger protein 213 (rawmer) mRNA.                                                                        |
| <a href="#">rawnoy</a>  | <a href="#">rawnoy.aSep08</a>  |                        | 1622   | 397  |    | 67  | putative protein (rawnoy) mRNA.                                                                               |
| <a href="#">rawpor</a>  | <a href="#">rawpor.aSep08</a>  |                        | 12884  | 687  |    | 139 | vacuolar protein sorting 13C CRA a (rawpor) mRNA.                                                             |
| <a href="#">rawsa</a>   | <a href="#">rawsa.aSep08</a>   |                        | 670    | 393  |    |     |                                                                                                               |
| <a href="#">rawshee</a> | <a href="#">rawshee.aSep08</a> |                        | 2847   | 232  |    | 44  | putative protein (5.2 kD) (rawshee) mRNA.                                                                     |
| <a href="#">rawtu</a>   | <a href="#">rawtu.aSep08</a>   |                        | 1303   | 875  | 1  | 95  | phosphatase 1G (rawtu) alternative variant aSep08, mRNA.                                                      |
| <a href="#">rawtu</a>   | <a href="#">rawtu.bSep08</a>   |                        | 1340   | 475  | 2  | 90  | phosphatase 1G (rawtu) alternative variant bSep08, mRNA.                                                      |
| <a href="#">rawvar</a>  | <a href="#">rawvar.aSep08</a>  |                        | 1479   | 709  |    | 118 | putative protein (rawvar) mRNA.                                                                               |
| <a href="#">rawwey</a>  | <a href="#">rawwey.aSep08</a>  |                        | 2138   | 355  | 3  | 61  | putative protein of vertebrate origin (rawwey) mRNA.                                                          |
| <a href="#">Rax</a>     | <a href="#">Rax.aSep08</a>     | <a href="#">114213</a> | 2929   | 504  |    | 167 | retina and anterior neural fold homeobox (Rax) mRNA.                                                          |
| <a href="#">Rb1</a>     | <a href="#">Rb1.aSep08</a>     | <a href="#">24708</a>  | 133015 | 4490 | 27 | 910 | retinoblastoma 1 (Rb1) alternative variant aSep08, mRNA.                                                      |
| <a href="#">Rb1</a>     | <a href="#">Rb1.bSep08</a>     | <a href="#">24708</a>  | 27260  | 512  | 5  | 170 | retinoblastoma-associated protein (Rb1) alternative variant bSep08, mRNA.                                     |
| <a href="#">Rb1</a>     | <a href="#">Rb1.cSep08</a>     | <a href="#">24708</a>  | 24207  | 494  | 4  | 106 | retinoblastoma-associated protein (Rb1) alternative variant cSep08, mRNA.                                     |
| <a href="#">Rb1</a>     | <a href="#">Rb1.dSep08</a>     | <a href="#">24708</a>  | 4124   | 735  | 3  | 92  | retinoblastoma 1 (Rb1) alternative variant dSep08, mRNA.                                                      |
| <a href="#">Rb1cc1</a>  | <a href="#">Rb1cc1.cSep08</a>  | <a href="#">312927</a> | 3087   | 427  | 3  | 80  | RB1-inducible coiled-coil 1 (Rb1cc1) alternative variant cSep08, mRNA.                                        |
| <a href="#">Rbaf600</a> | <a href="#">Rbaf600.bSep08</a> | <a href="#">313658</a> | 15502  | 1785 | 4  | 522 | ZUBR1 (Rbaf600) alternative variant bSep08, mRNA.                                                             |
| <a href="#">Rbaf600</a> | <a href="#">Rbaf600.cSep08</a> | <a href="#">313658</a> | 21377  | 1791 | 12 | 478 | ZUBR1 (Rbaf600) alternative variant cSep08, mRNA.                                                             |
| <a href="#">Rbaf600</a> | <a href="#">Rbaf600.dSep08</a> | <a href="#">313658</a> | 3156   | 676  | 5  | 225 | ZUBR1 (Rbaf600) alternative variant dSep08, mRNA.                                                             |
| <a href="#">Rbaf600</a> | <a href="#">Rbaf600.eSep08</a> | <a href="#">313658</a> | 5048   | 617  | 5  | 205 | ZUBR1 (Rbaf600) alternative variant eSep08, mRNA.                                                             |
| <a href="#">Rbaf600</a> | <a href="#">Rbaf600.fSep08</a> | <a href="#">313658</a> | 3523   | 772  | 2  | 135 | ZUBR1 (Rbaf600) alternative variant fSep08, mRNA.                                                             |
| <a href="#">Rbaf600</a> | <a href="#">Rbaf600.gSep08</a> | <a href="#">313658</a> | 1053   | 423  | 3  | 123 | ZUBR1 (Rbaf600) alternative variant gSep08, mRNA.                                                             |
| <a href="#">Rbaf600</a> | <a href="#">Rbaf600.hSep08</a> | <a href="#">313658</a> | 1357   | 543  | 2  | 81  | ZUBR1 (Rbaf600) alternative variant hSep08, mRNA.                                                             |
| <a href="#">Rbak</a>    | <a href="#">Rbak.aSep08</a>    | <a href="#">288489</a> | 11419  | 1026 |    | 341 | RB-associated KRAB repressor (Rbak) mRNA.                                                                     |
| <a href="#">Rbbp5</a>   | <a href="#">Rbbp5.bSep08</a>   | <a href="#">304794</a> | 8871   | 703  | 5  | 174 | retinoblastoma binding protein 5 (Rbbp5) alternative variant bSep08, mRNA.                                    |
| <a href="#">Rbbp5</a>   | <a href="#">Rbbp5.cSep08</a>   | <a href="#">304794</a> | 500    | 414  | 2  | 71  | retinoblastoma binding protein 5 (Rbbp5) alternative variant cSep08, mRNA.                                    |
| <a href="#">Rbbp5</a>   | <a href="#">Rbbp5.dSep08</a>   | <a href="#">304794</a> | 7545   | 416  | 2  | 49  | retinoblastoma binding protein 5 (Rbbp5) alternative variant dSep08, mRNA.                                    |
| <a href="#">Rbbp6</a>   | <a href="#">Rbbp6.aSep08</a>   | <a href="#">308968</a> | 3685   | 3357 |    | 977 | retinoblastoma binding protein 6 (Rbbp6) mRNA.                                                                |
| <a href="#">Rbbp7</a>   | <a href="#">Rbbp7.bSep08</a>   | <a href="#">83712</a>  | 13124  | 965  | 6  | 208 | retinoblastoma binding protein 7 and hypothetical protein LOC688840 (Rbbp7) alternative variant bSep08, mRNA. |
| <a href="#">Rbbp7</a>   | <a href="#">Rbbp7.bSep08</a>   | <a href="#">688840</a> | 13124  | 965  | 6  | 208 | retinoblastoma binding protein 7 and hypothetical protein LOC688840 (Rbbp7) alternative variant bSep08, mRNA. |

|                           |                                  |                        |       |      |   |     |                                                                                                                         |
|---------------------------|----------------------------------|------------------------|-------|------|---|-----|-------------------------------------------------------------------------------------------------------------------------|
| <a href="#">Rbbp7</a>     | <a href="#">Rbbp7.cSep08</a>     | <a href="#">83712</a>  | 2853  | 694  | 3 | 89  | retinoblastoma binding protein 7 and hypothetical protein LOC688840 (10.4 kD) (Rbbp7) alternative variant cSep08, mRNA. |
| <a href="#">Rbbp7</a>     | <a href="#">Rbbp7.cSep08</a>     | <a href="#">688840</a> | 2853  | 694  | 3 | 89  | retinoblastoma binding protein 7 and hypothetical protein LOC688840 (10.4 kD) (Rbbp7) alternative variant cSep08, mRNA. |
| <a href="#">Rbbp7</a>     | <a href="#">Rbbp7.dSep08</a>     | <a href="#">83712</a>  | 3073  | 861  | 3 | 71  | retinoblastoma binding protein 7 and hypothetical protein LOC688840 (Rbbp7) alternative variant dSep08, mRNA.           |
| <a href="#">Rbbp7</a>     | <a href="#">Rbbp7.dSep08</a>     | <a href="#">688840</a> | 3073  | 861  | 3 | 71  | retinoblastoma binding protein 7 and hypothetical protein LOC688840 (Rbbp7) alternative variant dSep08, mRNA.           |
| <a href="#">Rbbp9</a>     | <a href="#">Rbbp9.cSep08</a>     | <a href="#">29459</a>  | 1380  | 1029 | 2 | 90  | retinoblastoma binding protein 9 (10.3 kD) (Rbbp9) alternative variant cSep08, mRNA.                                    |
| <a href="#">Rbck1</a>     | <a href="#">Rbck1.bSep08</a>     | <a href="#">60383</a>  | 13961 | 1151 | 9 | 329 | zinc finger, RanBP2-type (Rbck1) alternative variant bSep08, mRNA.                                                      |
| <a href="#">Rbck1</a>     | <a href="#">Rbck1.cSep08</a>     | <a href="#">60383</a>  | 3357  | 1334 | 4 | 236 | putative protein of eukaryotic origin (26.4 kD) (Rbck1) alternative variant cSep08, mRNA.                               |
| <a href="#">Rbck1</a>     | <a href="#">Rbck1.dSep08</a>     | <a href="#">60383</a>  | 7306  | 633  | 4 | 181 | putative protein of metazoan origin (Rbck1) alternative variant dSep08, mRNA.                                           |
| <a href="#">RBD-FIP.0</a> | <a href="#">RBD-FIP.0.aSep08</a> |                        | 6182  | 3141 |   | 376 | rab11 family interacting protein 5 (RBD-FIP.0) mRNA.                                                                    |
| <a href="#">RBD.0</a>     | <a href="#">RBD.0.aSep08</a>     |                        | 22344 | 646  |   | 215 | T-cell lymphoma invasion metastasis 1 like (RBD.0) alternative variant aSep08, mRNA.                                    |
| <a href="#">RBD.0</a>     | <a href="#">RBD.0.bSep08</a>     |                        | 15975 | 513  |   | 115 | T-cell lymphoma invasion metastasis 1 like (RBD.0) alternative variant bSep08, mRNA.                                    |
| <a href="#">Rbed1</a>     | <a href="#">Rbed1.aSep08</a>     | <a href="#">297342</a> | 25762 | 1037 | 9 | 246 | RNA binding motif and ELMO domain 1 (Rbed1) alternative variant aSep08, mRNA.                                           |
| <a href="#">Rbed1</a>     | <a href="#">Rbed1.bSep08</a>     | <a href="#">297342</a> | 22639 | 762  | 7 | 137 | RNA binding motif and ELMO domain 1 (Rbed1) alternative variant bSep08, mRNA.                                           |
| <a href="#">Rbed1</a>     | <a href="#">Rbed1.cSep08</a>     | <a href="#">297342</a> | 19848 | 578  | 6 | 74  | RNA binding motif and ELMO domain 1 (8.0 kD) (Rbed1) alternative variant cSep08, mRNA.                                  |
| <a href="#">Rbj</a>       | <a href="#">Rbj.bSep08</a>       | <a href="#">298859</a> | 16241 | 684  | 5 | 169 | dnaj homolog subfamily C member 27 (Rbj) alternative variant bSep08, mRNA.                                              |
| <a href="#">Rbks</a>      | <a href="#">Rbks.bSep08</a>      | <a href="#">362706</a> | 31207 | 469  | 4 | 134 | ribokinase (Rbks) alternative variant bSep08, mRNA.                                                                     |
| <a href="#">Rbks</a>      | <a href="#">Rbks.cSep08</a>      | <a href="#">362706</a> | 23499 | 818  | 2 | 121 | ribokinase (Rbks) alternative variant cSep08, mRNA.                                                                     |
| <a href="#">Rbks</a>      | <a href="#">Rbks.dSep08</a>      | <a href="#">362706</a> | 8411  | 290  | 2 | 74  | ribokinase (Rbks) alternative variant dSep08, mRNA.                                                                     |
| <a href="#">Rbl1</a>      | <a href="#">Rbl1.aSep08</a>      | <a href="#">680111</a> | 23492 | 1174 |   | 338 | retinoblastoma-like 1 (p107) (Rbl1) mRNA.                                                                               |
| <a href="#">Rbl2</a>      | <a href="#">Rbl2.bSep08</a>      | <a href="#">81758</a>  | 14922 | 2787 | 8 | 401 | retinoblastoma-like 2 (Rbl2) alternative variant bSep08, mRNA.                                                          |
| <a href="#">Rbl2</a>      | <a href="#">Rbl2.cSep08</a>      | <a href="#">81758</a>  | 6849  | 719  | 5 | 239 | retinoblastoma-like 2 (Rbl2) alternative variant cSep08, mRNA.                                                          |
| <a href="#">Rbl2</a>      | <a href="#">Rbl2.dSep08</a>      | <a href="#">81758</a>  | 8206  | 627  | 4 | 172 | retinoblastoma-like 2 (Rbl2) alternative variant dSep08, mRNA.                                                          |
| <a href="#">Rbl2</a>      | <a href="#">Rbl2.eSep08</a>      | <a href="#">81758</a>  | 1173  | 727  | 2 | 117 | retinoblastoma-like 2 (Rbl2) alternative variant eSep08, mRNA.                                                          |
| <a href="#">Rbm3</a>      | <a href="#">Rbm3.aSep08</a>      | <a href="#">114488</a> | 6521  | 1799 | 7 | 456 | RNA binding motif protein 3 (Rbm3) alternative variant aSep08, complete mRNA.                                           |
| <a href="#">Rbm3</a>      | <a href="#">Rbm3.bSep08</a>      | <a href="#">114488</a> | 3983  | 1735 | 7 | 189 | RNA binding motif protein 3 (Rbm3) alternative variant bSep08, mRNA.                                                    |

|                       |                              |                        |       |      |    |     |                                                                                         |
|-----------------------|------------------------------|------------------------|-------|------|----|-----|-----------------------------------------------------------------------------------------|
| <a href="#">Rbm3</a>  | <a href="#">Rbm3.dSep08</a>  | <a href="#">114488</a> | 3102  | 847  | 7  | 185 | RNA binding motif protein 3 (Rbm3) alternative variant dSep08, mRNA.                    |
| <a href="#">Rbm3</a>  | <a href="#">Rbm3.eSep08</a>  | <a href="#">114488</a> | 3023  | 772  | 7  | 155 | RNA binding motif protein 3 (16.8 kD) (Rbm3) alternative variant eSep08, mRNA.          |
| <a href="#">Rbm3</a>  | <a href="#">Rbm3.fSep08</a>  | <a href="#">114488</a> | 3278  | 1292 | 8  | 118 | RNA binding motif protein 3 (12.8 kD) (Rbm3) alternative variant fSep08, complete mRNA. |
| <a href="#">Rbm3</a>  | <a href="#">Rbm3.gSep08</a>  | <a href="#">114488</a> | 1324  | 561  | 4  | 111 | RNA binding motif protein 3 (11.9 kD) (Rbm3) alternative variant gSep08, mRNA.          |
| <a href="#">Rbm3</a>  | <a href="#">Rbm3.hSep08</a>  | <a href="#">114488</a> | 3431  | 1815 | 6  | 94  | RNA binding motif protein 3 (10.0 kD) (Rbm3) alternative variant hSep08, complete mRNA. |
| <a href="#">Rbm3</a>  | <a href="#">Rbm3.iSep08</a>  | <a href="#">114488</a> | 1375  | 783  | 4  | 88  | RNA binding motif protein 3 (Rbm3) alternative variant iSep08, mRNA.                    |
| <a href="#">Rbm3</a>  | <a href="#">Rbm3.kSep08</a>  | <a href="#">114488</a> | 1356  | 787  | 2  | 94  | RNA binding motif protein 3 (10.6 kD) (Rbm3) alternative variant kSep08, mRNA.          |
| <a href="#">Rbm4</a>  | <a href="#">Rbm4.aSep08</a>  | <a href="#">293663</a> | 27506 | 2049 | 5  | 365 | RNA binding motif protein 4B like (40.4 kD) (Rbm4) alternative variant aSep08, mRNA.    |
| <a href="#">Rbm4</a>  | <a href="#">Rbm4.bSep08</a>  | <a href="#">293663</a> | 6458  | 908  | 3  | 228 | CRA b (Rbm4) alternative variant bSep08, mRNA.                                          |
| <a href="#">Rbm4</a>  | <a href="#">Rbm4.cSep08</a>  | <a href="#">293663</a> | 3842  | 3075 | 2  | 213 | RNA binding motif protein 14 like (22.7 kD) (Rbm4) alternative variant cSep08, mRNA.    |
| <a href="#">Rbm4</a>  | <a href="#">Rbm4.eSep08</a>  | <a href="#">293663</a> | 9043  | 872  | 3  | 143 | RNA binding motif protein 4B like (16.1 kD) (Rbm4) alternative variant eSep08, mRNA.    |
| <a href="#">Rbm4</a>  | <a href="#">Rbm4.fSep08</a>  | <a href="#">293663</a> | 27346 | 578  | 2  | 112 | RNA binding motif protein 14 like (Rbm4) alternative variant fSep08, mRNA.              |
| <a href="#">Rbm4</a>  | <a href="#">Rbm4.gSep08</a>  | <a href="#">293663</a> | 58655 | 893  | 3  | 109 | RNA binding motif protein 14 like (Rbm4) alternative variant gSep08, mRNA.              |
| <a href="#">Rbm4</a>  | <a href="#">Rbm4.hSep08</a>  | <a href="#">293663</a> | 18579 | 1306 | 4  | 100 | putative membrane protein (10.7 kD) (Rbm4) alternative variant hSep08, mRNA.            |
| <a href="#">Rbm4</a>  | <a href="#">Rbm4.jSep08</a>  | <a href="#">293663</a> | 1400  | 915  | 2  | 28  | putative protein (Rbm4) alternative variant jSep08, mRNA.                               |
| <a href="#">Rbm4b</a> | <a href="#">Rbm4b.bSep08</a> | <a href="#">474154</a> | 1486  | 871  | 2  | 172 | RNA binding motif protein 4B (19.7 kD) (Rbm4b) alternative variant bSep08, mRNA.        |
| <a href="#">Rbm4b</a> | <a href="#">Rbm4b.cSep08</a> | <a href="#">474154</a> | 2601  | 1833 | 3  | 7   | RNA binding motif protein 4B (0.8 kD) (Rbm4b) alternative variant cSep08, mRNA.         |
| <a href="#">Rbm5</a>  | <a href="#">Rbm5.bSep08</a>  | <a href="#">300996</a> | 23193 | 1752 | 18 | 537 | RNA binding motif protein 5 like (Rbm5) alternative variant bSep08, mRNA.               |
| <a href="#">Rbm5</a>  | <a href="#">Rbm5.cSep08</a>  | <a href="#">300996</a> | 10004 | 1692 | 5  | 146 | RNA binding motif protein 5 like (17.4 kD) (Rbm5) alternative variant cSep08, mRNA.     |
| <a href="#">Rbm5</a>  | <a href="#">Rbm5.dSep08</a>  | <a href="#">300996</a> | 3001  | 374  | 4  | 124 | RNA binding motif protein 5 like (Rbm5) alternative variant dSep08, mRNA.               |
| <a href="#">Rbm5</a>  | <a href="#">Rbm5.eSep08</a>  | <a href="#">300996</a> | 5047  | 846  | 4  | 122 | RNA binding motif protein 5 like (14.6 kD) (Rbm5) alternative variant eSep08, mRNA.     |
| <a href="#">Rbm5</a>  | <a href="#">Rbm5.fSep08</a>  | <a href="#">300996</a> | 5620  | 1417 | 4  | 100 | RNA binding motif protein 5 like (11.4 kD) (Rbm5) alternative variant fSep08, mRNA.     |
| <a href="#">Rbm5</a>  | <a href="#">Rbm5.hSep08</a>  | <a href="#">300996</a> | 3055  | 439  | 3  | 59  | RNA binding motif protein 5 like (Rbm5) alternative variant hSep08, mRNA.               |
| <a href="#">Rbm6</a>  | <a href="#">Rbm6.bSep08</a>  | <a href="#">315997</a> | 82144 | 724  | 6  | 185 | RNA binding motif protein 6 (Rbm6) alternative variant bSep08, mRNA.                    |

|                       |                              |                        |        |      |    |     |                                                                                         |
|-----------------------|------------------------------|------------------------|--------|------|----|-----|-----------------------------------------------------------------------------------------|
| <a href="#">Rbm6</a>  | <a href="#">Rbm6.eSep08</a>  | <a href="#">315997</a> | 19671  | 460  | 4  | 79  | RNA binding motif protein 6 (Rbm6) alternative variant eSep08, mRNA.                    |
| <a href="#">Rbm7</a>  | <a href="#">Rbm7.aSep08</a>  | <a href="#">315634</a> | 6350   | 1736 | 3  | 264 | RNA binding motif protein 7 like (Rbm7) alternative variant aSep08, mRNA.               |
| <a href="#">Rbm7</a>  | <a href="#">Rbm7.cSep08</a>  | <a href="#">315634</a> | 1822   | 414  | 2  | 79  | RNA binding motif protein 7 like (8.8 kD) (Rbm7) alternative variant cSep08, mRNA.      |
| <a href="#">Rbm8</a>  | <a href="#">Rbm8.aSep08</a>  | <a href="#">295284</a> | 2749   | 1468 | 3  | 174 | RNA binding motif protein 8 (19.9 kD) (Rbm8) alternative variant aSep08, complete mRNA. |
| <a href="#">Rbm8</a>  | <a href="#">Rbm8.bSep08</a>  | <a href="#">295284</a> | 2177   | 893  | 3  | 173 | RNA binding motif protein 8 (19.8 kD) (Rbm8) alternative variant bSep08, mRNA.          |
| <a href="#">Rbm8</a>  | <a href="#">Rbm8.cSep08</a>  | <a href="#">295284</a> | 1985   | 567  | 2  | 142 | RNA binding motif protein 8 (16.4 kD) (Rbm8) alternative variant cSep08, complete mRNA. |
| <a href="#">Rbm9</a>  | <a href="#">Rbm9.aSep08</a>  | <a href="#">362950</a> | 241334 | 2498 | 14 | 506 | RNA binding motif protein 9 (53.3 kD) (Rbm9) alternative variant aSep08, complete mRNA. |
| <a href="#">Rbm9</a>  | <a href="#">Rbm9.cSep08</a>  | <a href="#">362950</a> | 70427  | 1143 | 10 | 380 | RNA binding motif protein 9 (Rbm9) alternative variant cSep08, mRNA.                    |
| <a href="#">Rbm9</a>  | <a href="#">Rbm9.dSep08</a>  | <a href="#">362950</a> | 103955 | 729  | 5  | 178 | RNA binding motif protein 9 (Rbm9) alternative variant dSep08, mRNA.                    |
| <a href="#">Rbm9</a>  | <a href="#">Rbm9.eSep08</a>  | <a href="#">362950</a> | 142985 | 570  | 4  | 169 | RNA binding motif protein 9 (18.6 kD) (Rbm9) alternative variant eSep08, mRNA.          |
| <a href="#">Rbm9</a>  | <a href="#">Rbm9.fSep08</a>  | <a href="#">362950</a> | 48627  | 499  | 3  | 165 | RNA binding motif protein 9 (Rbm9) alternative variant fSep08, mRNA.                    |
| <a href="#">Rbm9</a>  | <a href="#">Rbm9.gSep08</a>  | <a href="#">362950</a> | 154741 | 714  | 7  | 162 | RNA binding motif protein 9 (Rbm9) alternative variant gSep08, mRNA.                    |
| <a href="#">Rbm10</a> | <a href="#">Rbm10.aSep08</a> | <a href="#">64510</a>  | 4866   | 1957 | 14 | 541 | RNA binding motif protein 10 like (59.5 kD) (Rbm10) alternative variant aSep08, mRNA.   |
| <a href="#">Rbm10</a> | <a href="#">Rbm10.cSep08</a> | <a href="#">64510</a>  | 26973  | 1468 | 10 | 263 | RNA binding motif protein 10 like (Rbm10) alternative variant cSep08, mRNA.             |
| <a href="#">Rbm10</a> | <a href="#">Rbm10.dSep08</a> | <a href="#">64510</a>  | 380    | 265  | 2  | 86  | putative protein (Rbm10) alternative variant dSep08, mRNA.                              |
| <a href="#">Rbm11</a> | <a href="#">Rbm11.aSep08</a> | <a href="#">288321</a> | 8089   | 711  | 1  | 214 | RNA binding motif protein 11 (Rbm11) alternative variant aSep08, mRNA.                  |
| <a href="#">Rbm12</a> | <a href="#">Rbm12.bSep08</a> | <a href="#">652928</a> | 33705  | 591  | 5  | 196 | RNA binding motif protein 12 (Rbm12) alternative variant bSep08, mRNA.                  |
| <a href="#">Rbm12</a> | <a href="#">Rbm12.cSep08</a> | <a href="#">652928</a> | 33226  | 385  | 4  | 61  | RNA binding motif protein 12 (Rbm12) alternative variant cSep08, mRNA.                  |
| <a href="#">Rbm13</a> | <a href="#">Rbm13.bSep08</a> | <a href="#">306526</a> | 5772   | 1251 | 6  | 229 | RNA binding motif protein 13 (27.5 kD) (Rbm13) alternative variant bSep08, mRNA.        |
| <a href="#">Rbm13</a> | <a href="#">Rbm13.cSep08</a> | <a href="#">306526</a> | 1611   | 359  | 3  | 14  | RNA binding motif protein 13 (1.5 kD) (Rbm13) alternative variant cSep08, mRNA.         |
| <a href="#">Rbm16</a> | <a href="#">Rbm16.bSep08</a> | <a href="#">245926</a> | 53178  | 2546 | 2  | 479 | RNA binding motif protein 16 (Rbm16) alternative variant bSep08, mRNA.                  |
| <a href="#">Rbm17</a> | <a href="#">Rbm17.bSep08</a> | <a href="#">291295</a> | 1900   | 363  | 2  | 120 | RNA binding motif protein 17 like (Rbm17) alternative variant bSep08, mRNA.             |
| <a href="#">Rbm17</a> | <a href="#">Rbm17.cSep08</a> | <a href="#">291295</a> | 4957   | 461  | 4  | 97  | RNA binding motif protein 17 like (Rbm17) alternative variant cSep08, mRNA.             |

|                        |                               |                        |       |      |    |     |                                                                                                |
|------------------------|-------------------------------|------------------------|-------|------|----|-----|------------------------------------------------------------------------------------------------|
| <a href="#">Rbm17</a>  | <a href="#">Rbm17.dSep08</a>  | <a href="#">291295</a> | 2421  | 365  | 2  | 80  | RNA binding motif protein 17 like (Rbm17) alternative variant dSep08, mRNA.                    |
| <a href="#">Rbm17</a>  | <a href="#">Rbm17.eSep08</a>  | <a href="#">291295</a> | 2147  | 996  | 3  | 69  | RNA binding motif protein 17 like (Rbm17) alternative variant eSep08, mRNA.                    |
| <a href="#">Rbm18</a>  | <a href="#">Rbm18.bSep08</a>  | <a href="#">311902</a> | 18243 | 747  | 5  | 180 | RNA binding motif protein 18 (Rbm18) alternative variant bSep08, mRNA.                         |
| <a href="#">Rbm18</a>  | <a href="#">Rbm18.cSep08</a>  | <a href="#">311902</a> | 10666 | 726  | 3  | 100 | RNA binding motif protein 18 (11.6 kD) (Rbm18) alternative variant cSep08, mRNA.               |
| <a href="#">Rbm18</a>  | <a href="#">Rbm18.dSep08</a>  | <a href="#">311902</a> | 4863  | 540  | 3  | 62  | RNA binding motif protein 18 (6.7 kD) (Rbm18) alternative variant dSep08, mRNA.                |
| <a href="#">Rbm19</a>  | <a href="#">Rbm19.bSep08</a>  | <a href="#">304512</a> | 4936  | 531  | 3  | 177 | RNA binding motif protein 19 (Rbm19) alternative variant bSep08, mRNA.                         |
| <a href="#">Rbm20</a>  | <a href="#">Rbm20.bSep08</a>  | <a href="#">309544</a> | 14470 | 816  | 2  | 171 | RNA binding motif protein 20 (Rbm20) alternative variant bSep08, mRNA.                         |
| <a href="#">Rbm20</a>  | <a href="#">Rbm20.cSep08</a>  | <a href="#">309544</a> | 36545 | 425  | 1  | 86  | RNA binding motif protein 20 (Rbm20) alternative variant cSep08, mRNA.                         |
| <a href="#">Rbm22</a>  | <a href="#">Rbm22.bSep08</a>  | <a href="#">307410</a> | 423   | 283  | 2  | 94  | RNA binding motif protein 22 (Rbm22) alternative variant bSep08, mRNA.                         |
| <a href="#">Rbm25</a>  | <a href="#">Rbm25.bSep08</a>  | <a href="#">366693</a> | 6795  | 1383 | 5  | 273 | RNA binding motif protein 25 (Rbm25) alternative variant bSep08, mRNA.                         |
| <a href="#">Rbm25</a>  | <a href="#">Rbm25.cSep08</a>  | <a href="#">366693</a> | 6170  | 1136 | 4  | 178 | RNA binding motif protein 25 (20.4 kD) (Rbm25) alternative variant cSep08, mRNA.               |
| <a href="#">Rbm25</a>  | <a href="#">Rbm25.fSep08</a>  | <a href="#">366693</a> | 3479  | 584  | 4  | 45  | RNA binding motif protein 25 (Rbm25) alternative variant fSep08, mRNA.                         |
| <a href="#">Rbm27</a>  | <a href="#">Rbm27.bSep08</a>  | <a href="#">361317</a> | 25916 | 1126 | 7  | 323 | RNA binding motif protein 27 (Rbm27) alternative variant bSep08, mRNA.                         |
| <a href="#">Rbm28</a>  | <a href="#">Rbm28.bSep08</a>  | <a href="#">312182</a> | 22730 | 1020 | 9  | 325 | RNA binding motif protein 28 (Rbm28) alternative variant bSep08, mRNA.                         |
| <a href="#">Rbm34</a>  | <a href="#">Rbm34.bSep08</a>  | <a href="#">307956</a> | 14130 | 786  | 9  | 193 | RNA binding motif protein 34 (Rbm34) alternative variant bSep08, mRNA.                         |
| <a href="#">Rbm35b</a> | <a href="#">Rbm35b.aSep08</a> | <a href="#">307810</a> | 6662  | 3467 | 15 | 746 | RNA binding motif protein 35b (Rbm35b) alternative variant aSep08, mRNA.                       |
| <a href="#">Rbm38</a>  | <a href="#">Rbm38.aSep08</a>  | <a href="#">366262</a> | 12250 | 1193 | 2  | 271 | RNA binding motif protein 38 (Rbm38) alternative variant aSep08, mRNA.                         |
| <a href="#">Rbm38</a>  | <a href="#">Rbm38.cSep08</a>  | <a href="#">366262</a> | 12072 | 992  | 2  | 158 | RNA binding motif protein 38 (16.9 kD) (Rbm38) alternative variant cSep08, mRNA.               |
| <a href="#">Rbm39</a>  | <a href="#">Rbm39.aSep08</a>  | <a href="#">362251</a> | 33169 | 2738 | 17 | 530 | RNA binding motif protein 39 like (59.4 kD) (Rbm39) alternative variant aSep08, complete mRNA. |
| <a href="#">Rbm39</a>  | <a href="#">Rbm39.cSep08</a>  | <a href="#">362251</a> | 15397 | 869  | 7  | 255 | RNA binding motif protein 39 like (Rbm39) alternative variant cSep08, mRNA.                    |
| <a href="#">Rbm39</a>  | <a href="#">Rbm39.dSep08</a>  | <a href="#">362251</a> | 18000 | 1144 | 10 | 235 | RNA binding motif protein 39 like (Rbm39) alternative variant dSep08, mRNA.                    |
| <a href="#">Rbm39</a>  | <a href="#">Rbm39.eSep08</a>  | <a href="#">362251</a> | 16579 | 1054 | 9  | 205 | RNA binding motif protein 39 like (Rbm39) alternative variant eSep08, mRNA.                    |
| <a href="#">Rbm39</a>  | <a href="#">Rbm39.fSep08</a>  | <a href="#">362251</a> | 7151  | 587  | 6  | 195 | RNA binding motif protein 39 like (Rbm39) alternative variant fSep08, mRNA.                    |



|                         |                                |                        |        |      |    |     |                                                                                                      |
|-------------------------|--------------------------------|------------------------|--------|------|----|-----|------------------------------------------------------------------------------------------------------|
| <a href="#">Rbm39</a>   | <a href="#">Rbm39.gSep08</a>   | <a href="#">362251</a> | 14796  | 1688 | 7  | 169 | RNA binding motif protein 39 like (Rbm39) alternative variant gSep08, mRNA.                          |
| <a href="#">Rbm39</a>   | <a href="#">Rbm39.hSep08</a>   | <a href="#">362251</a> | 12414  | 795  | 7  | 152 | RNA binding motif protein 39 like (Rbm39) alternative variant hSep08, mRNA.                          |
| <a href="#">Rbm39</a>   | <a href="#">Rbm39.iSep08</a>   | <a href="#">362251</a> | 1373   | 763  | 2  | 49  | binding CRA a like (Rbm39) alternative variant iSep08, mRNA.                                         |
| <a href="#">Rbm39</a>   | <a href="#">Rbm39.jSep08</a>   | <a href="#">362251</a> | 2316   | 1242 | 2  | 60  | putative protein (6.9 kD) (Rbm39) alternative variant jSep08, mRNA.                                  |
| <a href="#">Rbm39</a>   | <a href="#">Rbm39.lSep08</a>   | <a href="#">362251</a> | 1409   | 778  | 2  | 46  | putative protein (Rbm39) alternative variant lSep08, mRNA.                                           |
| <a href="#">Rbm39</a>   | <a href="#">Rbm39.mSep08</a>   | <a href="#">362251</a> | 1608   | 753  | 3  | 40  | putative protein of mammalian origin (4.6 kD) (Rbm39) alternative variant mSep08, complete mRNA.     |
| <a href="#">Rbm41</a>   | <a href="#">Rbm41.bSep08</a>   | <a href="#">680581</a> | 8357   | 612  | 1  | 156 | RNA binding motif protein 41 (Rbm41) alternative variant bSep08, mRNA.                               |
| <a href="#">Rbm42</a>   | <a href="#">Rbm42.bSep08</a>   | <a href="#">361545</a> | 9548   | 1275 | 4  | 391 | RNA binding motif protein 42 (Rbm42) alternative variant bSep08, mRNA.                               |
| <a href="#">Rbm43</a>   | <a href="#">Rbm43.aSep08</a>   | <a href="#">311020</a> | 2819   | 2114 | 2  | 276 | RNA binding motif protein 43 (Rbm43) alternative variant aSep08, mRNA.                               |
| <a href="#">Rbm43</a>   | <a href="#">Rbm43.bSep08</a>   | <a href="#">311020</a> | 19421  | 737  | 4  | 206 | RNA binding motif protein 43 (Rbm43) alternative variant bSep08, mRNA.                               |
| <a href="#">Rbm44</a>   | <a href="#">Rbm44.aSep08</a>   | <a href="#">501183</a> | 3481   | 735  |    | 163 | RNA binding motif protein 44 (Rbm44) mRNA.                                                           |
| <a href="#">Rbm45</a>   | <a href="#">Rbm45.bSep08</a>   | <a href="#">266631</a> | 5377   | 1422 | 3  | 263 | RNA binding motif protein 45 (Rbm45) alternative variant bSep08, mRNA.                               |
| <a href="#">Rbm45</a>   | <a href="#">Rbm45.cSep08</a>   | <a href="#">266631</a> | 9490   | 746  | 4  | 223 | RNA binding motif protein 45 (Rbm45) alternative variant cSep08, mRNA.                               |
| <a href="#">Rbms1</a>   | <a href="#">Rbms1.bSep08</a>   | <a href="#">362138</a> | 134369 | 2513 | 15 | 498 | RNA binding motif, single stranded interacting protein 1 (Rbms1) alternative variant bSep08, mRNA.   |
| <a href="#">Rbms1</a>   | <a href="#">Rbms1.cSep08</a>   | <a href="#">362138</a> | 113308 | 698  | 7  | 170 | RNA binding motif, single stranded interacting protein 1 (Rbms1) alternative variant cSep08, mRNA.   |
| <a href="#">Rbms1</a>   | <a href="#">Rbms1.dSep08</a>   | <a href="#">362138</a> | 113296 | 693  | 7  | 169 | RNA binding motif, single stranded interacting protein 1 (Rbms1) alternative variant dSep08, mRNA.   |
| <a href="#">Rbms1</a>   | <a href="#">Rbms1.eSep08</a>   | <a href="#">362138</a> | 7149   | 524  | 5  | 89  | RNA binding motif, single stranded interacting protein 1 (Rbms1) alternative variant eSep08, mRNA.   |
| <a href="#">Rbms2</a>   | <a href="#">Rbms2.aSep08</a>   | <a href="#">288771</a> | 36090  | 1798 | 9  | 495 | RNA binding motif, single stranded interacting protein 2 (Rbms2) alternative variant aSep08, mRNA.   |
| <a href="#">Rbms2</a>   | <a href="#">Rbms2.cSep08</a>   | <a href="#">288771</a> | 696    | 436  | 2  | 66  | RNA binding motif, single stranded interacting protein 2 (Rbms2) alternative variant cSep08, mRNA.   |
| <a href="#">Rbmx</a>    | <a href="#">Rbmx.bSep08</a>    | <a href="#">302855</a> | 9089   | 2127 | 10 | 306 | RBM1 (Rbmx) alternative variant bSep08, mRNA.                                                        |
| <a href="#">Rbmx</a>    | <a href="#">Rbmx.cSep08</a>    | <a href="#">302855</a> | 3665   | 669  | 6  | 187 | RBM1 (Rbmx) alternative variant cSep08, mRNA.                                                        |
| <a href="#">Rbmx</a>    | <a href="#">Rbmx.dSep08</a>    | <a href="#">302855</a> | 3882   | 2282 | 3  | 126 | putative cytoplasmic protein of vertebrate origin (13.9 kD) (Rbmx) alternative variant dSep08, mRNA. |
| <a href="#">Rbmx2</a>   | <a href="#">Rbmx2.bSep08</a>   | <a href="#">367930</a> | 6525   | 450  | 1  | 91  | RNA binding motif protein, X-linked 2 (Rbmx2) alternative variant bSep08, mRNA.                      |
| <a href="#">Rbmxrtl</a> | <a href="#">Rbmxrtl.aSep08</a> | <a href="#">307779</a> | 3571   | 1676 | 1  | 388 | RBM1 (42.2 kD) (Rbmxrtl) alternative variant aSep08, complete mRNA.                                  |
| <a href="#">Rbp3</a>    | <a href="#">Rbp3.aSep08</a>    | <a href="#">24711</a>  | 3727   | 343  |    | 114 | retinol binding protein 3, interstitial (Rbp3) mRNA.                                                 |

|                        |                               |                        |       |      |   |     |                                                                                                                       |
|------------------------|-------------------------------|------------------------|-------|------|---|-----|-----------------------------------------------------------------------------------------------------------------------|
| <a href="#">Rbpjl</a>  | <a href="#">Rbpjl.bSep08</a>  | <a href="#">362268</a> | 6266  | 767  | 1 | 255 | recombination signal binding protein for immunoglobulin kappa J region-like (Rbpjl) alternative variant bSep08, mRNA. |
| <a href="#">Rbpms2</a> | <a href="#">Rbpms2.aSep08</a> | <a href="#">503214</a> | 11824 | 1643 |   | 181 | RNA binding protein with multiple splicing 2 (Rbpms2) alternative variant aSep08, mRNA.                               |
| <a href="#">Rbpms2</a> | <a href="#">Rbpms2.bSep08</a> | <a href="#">503214</a> | 32428 | 1874 |   | 178 | RNA binding protein with multiple splicing 2 (19.5 kD) (Rbpms2) alternative variant bSep08, mRNA.                     |
| <a href="#">Rbpms2</a> | <a href="#">Rbpms2.cSep08</a> | <a href="#">503214</a> | 22937 | 687  |   | 89  | RNA binding protein with multiple splicing 2 (Rbpms2) alternative variant cSep08, mRNA.                               |
| <a href="#">Rbx1</a>   | <a href="#">Rbx1.bSep08</a>   | <a href="#">300084</a> | 10114 | 2248 | 4 | 86  | ring-box 1 (9.4 kD) (Rbx1) alternative variant bSep08, complete mRNA.                                                 |
| <a href="#">Rbx1</a>   | <a href="#">Rbx1.cSep08</a>   | <a href="#">300084</a> | 2393  | 1217 | 2 | 80  | ring-box 1 (8.2 kD) (Rbx1) alternative variant cSep08, mRNA.                                                          |
| <a href="#">Rc3h2</a>  | <a href="#">Rc3h2.bSep08</a>  | <a href="#">311909</a> | 2791  | 1742 | 6 | 454 | ring finger CCCH-type zinc domains 2 (Rc3h2) alternative variant bSep08, mRNA.                                        |
| <a href="#">Rc3h2</a>  | <a href="#">Rc3h2.cSep08</a>  | <a href="#">311909</a> | 727   | 628  | 2 | 86  | ring finger CCCH-type zinc domains 2 (Rc3h2) alternative variant cSep08, mRNA.                                        |
| <a href="#">Rcan1</a>  | <a href="#">Rcan1.aSep08</a>  | <a href="#">266766</a> | 92185 | 710  | 3 | 208 | regulator of calcineurin 1 (Rcan1) alternative variant aSep08, mRNA.                                                  |
| <a href="#">Rcan1</a>  | <a href="#">Rcan1.cSep08</a>  | <a href="#">266766</a> | 4753  | 685  | 2 | 119 | regulator of calcineurin 1 (13.5 kD) (Rcan1) alternative variant cSep08, mRNA.                                        |
| <a href="#">Rcan2</a>  | <a href="#">Rcan2.bSep08</a>  | <a href="#">140666</a> | 72660 | 425  | 2 | 80  | regulator of calcineurin 2 (Rcan2) alternative variant bSep08, mRNA.                                                  |
| <a href="#">Rcan2</a>  | <a href="#">Rcan2.cSep08</a>  | <a href="#">140666</a> | 11959 | 537  | 2 | 83  | regulator of calcineurin 2 (9.5 kD) (Rcan2) alternative variant cSep08, mRNA.                                         |
| <a href="#">Rcbtb1</a> | <a href="#">Rcbtb1.bSep08</a> | <a href="#">361050</a> | 66906 | 1359 | 9 | 159 | regulator of chromosome condensation, RCC1 (16.9 kD) (Rcbtb1) alternative variant bSep08, mRNA.                       |
| <a href="#">Rcbtb1</a> | <a href="#">Rcbtb1.cSep08</a> | <a href="#">361050</a> | 2458  | 610  | 3 | 110 | putative protein of eukaryotic origin (Rcbtb1) alternative variant cSep08, mRNA.                                      |
| <a href="#">Rcbtb2</a> | <a href="#">Rcbtb2.bSep08</a> | <a href="#">290363</a> | 15441 | 1028 | 6 | 303 | regulator of chromosome condensation, RCC1 (Rcbtb2) alternative variant bSep08, mRNA.                                 |
| <a href="#">Rcbtb2</a> | <a href="#">Rcbtb2.cSep08</a> | <a href="#">290363</a> | 14994 | 747  | 6 | 192 | regulator of chromosome condensation, RCC1 (Rcbtb2) alternative variant cSep08, mRNA.                                 |
| <a href="#">Rcbtb2</a> | <a href="#">Rcbtb2.dSep08</a> | <a href="#">290363</a> | 3716  | 825  | 4 | 154 | regulator of chromosome condensation, RCC1 (Rcbtb2) alternative variant dSep08, mRNA.                                 |
| <a href="#">Rcbtb2</a> | <a href="#">Rcbtb2.eSep08</a> | <a href="#">290363</a> | 13242 | 492  | 5 | 128 | putative protein of eukaryotic origin (Rcbtb2) alternative variant eSep08, mRNA.                                      |
| <a href="#">Rcbtb2</a> | <a href="#">Rcbtb2.fSep08</a> | <a href="#">290363</a> | 11614 | 1337 | 5 | 63  | putative protein (Rcbtb2) alternative variant fSep08, mRNA.                                                           |
| <a href="#">Rcbtb2</a> | <a href="#">Rcbtb2.gSep08</a> | <a href="#">290363</a> | 20875 | 758  | 8 | 126 | putative protein of ancient origin (Rcbtb2) alternative variant gSep08, mRNA.                                         |
| <a href="#">Rcbtb2</a> | <a href="#">Rcbtb2.hSep08</a> | <a href="#">290363</a> | 20824 | 752  | 8 | 120 | putative protein of ancient origin (Rcbtb2) alternative variant hSep08, mRNA.                                         |
| <a href="#">Rcbtb2</a> | <a href="#">Rcbtb2.iSep08</a> | <a href="#">290363</a> | 20072 | 700  | 7 | 94  | putative protein (Rcbtb2) alternative variant iSep08, mRNA.                                                           |
| <a href="#">RCC1.0</a> | <a href="#">RCC1.0.aSep08</a> |                        | 11325 | 890  |   | 296 | retinitis pigmentosa GTPase regulator (RCC1.0) mRNA.                                                                  |
| <a href="#">RCC1.1</a> | <a href="#">RCC1.1.aSep08</a> |                        | 5734  | 706  |   | 235 | hect domain RLD 6 CRA b (RCC1.1) mRNA.                                                                                |

|                           |                                  |                           |       |      |   |     |                                                                                                                                |
|---------------------------|----------------------------------|---------------------------|-------|------|---|-----|--------------------------------------------------------------------------------------------------------------------------------|
| <a href="#">Rcc2</a>      | <a href="#">Rcc2.aSep08</a>      | <a href="#">298594</a>    | 15336 | 3278 |   | 427 | regulator of chromosome condensation, RCC1 (Rcc2) mRNA.                                                                        |
| <a href="#">Rce1</a>      | <a href="#">Rce1.bSep08</a>      | <a href="#">309153</a>    | 3051  | 1361 | 8 | 314 | RCE1 homolog, prenyl protein peptidase ( <i>S. cerevisiae</i> ) (Rce1) alternative variant bSep08, mRNA.                       |
| <a href="#">Rce1</a>      | <a href="#">Rce1.cSep08</a>      | <a href="#">309153</a>    | 3100  | 1351 | 7 | 308 | RCE1 homolog, prenyl protein peptidase ( <i>S. cerevisiae</i> ) (Rce1) alternative variant cSep08, complete mRNA.              |
| <a href="#">Rce1</a>      | <a href="#">Rce1.dSep08</a>      | <a href="#">309153</a>    | 3075  | 1742 | 4 | 214 | RCE1 homolog, prenyl protein peptidase ( <i>S. cerevisiae</i> ) (Rce1) alternative variant dSep08, mRNA.                       |
| <a href="#">Rce1</a>      | <a href="#">Rce1.eSep08</a>      | <a href="#">309153</a>    | 2451  | 723  | 7 | 211 | RCE1 homolog, prenyl protein peptidase ( <i>S. cerevisiae</i> ) (Rce1) alternative variant eSep08, mRNA.                       |
| <a href="#">Rce1</a>      | <a href="#">Rce1.fSep08</a>      | <a href="#">309153</a>    | 1552  | 664  | 4 | 150 | RCE1 homolog, prenyl protein peptidase ( <i>S. cerevisiae</i> ) (Rce1) alternative variant fSep08, mRNA.                       |
| <a href="#">rCG_22919</a> | <a href="#">rCG_22919.cSep08</a> | <a href="#">100125364</a> | 880   | 628  | 2 | 209 | hypothetical protein LOC100125364 (rCG_22919) alternative variant cSep08, mRNA.                                                |
| <a href="#">rCG_22919</a> | <a href="#">rCG_22919.dSep08</a> | <a href="#">100125364</a> | 905   | 658  | 2 | 185 | hypothetical protein LOC100125364 (20.9 kD) (rCG_22919) alternative variant dSep08, mRNA.                                      |
| <a href="#">rCG_22919</a> | <a href="#">rCG_22919.eSep08</a> | <a href="#">100125364</a> | 9601  | 378  | 2 | 48  | hypothetical protein LOC100125364 (5.2 kD) (rCG_22919) alternative variant eSep08, mRNA.                                       |
| <a href="#">rCG_28701</a> | <a href="#">rCG_28701.aSep08</a> | <a href="#">691807</a>    | 1765  | 1085 |   | 65  | hypothetical protein LOC691807 (7.4 kD) (rCG_28701) complete mRNA.                                                             |
| <a href="#">rCG_34148</a> | <a href="#">rCG_34148.bSep08</a> | <a href="#">100169747</a> | 7514  | 574  | 5 | 113 | alanine-glyoxylate aminotransferase 2-like 2 (rCG_34148) alternative variant bSep08, mRNA.                                     |
| <a href="#">rCG_34148</a> | <a href="#">rCG_34148.cSep08</a> | <a href="#">100169747</a> | 1045  | 387  | 2 | 77  | alanine-glyoxylate aminotransferase 2-like 2 (9.0 kD) (rCG_34148) alternative variant cSep08, mRNA.                            |
| <a href="#">rCG_34148</a> | <a href="#">rCG_34148.dSep08</a> | <a href="#">100169747</a> | 3820  | 772  | 3 | 67  | alanine-glyoxylate aminotransferase 2-like 2 (rCG_34148) alternative variant dSep08, mRNA.                                     |
| <a href="#">rCG_43687</a> | <a href="#">rCG_43687.bSep08</a> | <a href="#">688459</a>    | 10855 | 1206 | 2 | 181 | hypothetical protein LOC688459 (rCG_43687) alternative variant bSep08, mRNA.                                                   |
| <a href="#">rCG_48149</a> | <a href="#">rCG_48149.bSep08</a> | <a href="#">100126191</a> | 1063  | 467  | 1 | 127 | RAB1B, member RAS oncogene family (rCG_48149) alternative variant bSep08, mRNA.                                                |
| <a href="#">rCG_48647</a> | <a href="#">rCG_48647.aSep08</a> | <a href="#">688047</a>    | 5064  | 915  |   | 151 | similar to Lysozyme C type 2 precursor (1,4-beta-N-acetylmuramidase C) (16.8 kD) (rCG_48647) alternative variant aSep08, mRNA. |
| <a href="#">rCG_49031</a> | <a href="#">rCG_49031.aSep08</a> | <a href="#">362863</a>    | 21741 | 1900 |   | 399 | grp94 neighboring nucleotidase (46.2 kD) (rCG_49031) mRNA.                                                                     |
| <a href="#">rCG_54677</a> | <a href="#">rCG_54677.bSep08</a> | <a href="#">678728</a>    | 16591 | 760  | 3 | 152 | bone morphogenetic protein 1 (rCG_54677) alternative variant bSep08, mRNA.                                                     |
| <a href="#">rCG_54677</a> | <a href="#">rCG_54677.bSep08</a> | <a href="#">678743</a>    | 16591 | 760  | 3 | 152 | bone morphogenetic protein 1 (rCG_54677) alternative variant bSep08, mRNA.                                                     |
| <a href="#">rCG_54677</a> | <a href="#">rCG_54677.cSep08</a> | <a href="#">678728</a>    | 12576 | 683  | 1 | 104 | tolloid-like (rCG_54677) alternative variant cSep08, mRNA.                                                                     |
| <a href="#">rCG_54677</a> | <a href="#">rCG_54677.cSep08</a> | <a href="#">678743</a>    | 12576 | 683  | 1 | 104 | tolloid-like (rCG_54677) alternative variant cSep08, mRNA.                                                                     |
| <a href="#">rCG_59505</a> | <a href="#">rCG_59505.bSep08</a> | <a href="#">100125385</a> | 10808 | 500  | 2 | 121 | hypothetical protein LOC100125385 (rCG_59505) alternative variant bSep08, mRNA.                                                |
| <a href="#">rCG_60321</a> | <a href="#">rCG_60321.bSep08</a> | <a href="#">688613</a>    | 4160  | 735  | 2 | 55  | hypothetical protein LOC688613 (5.7 kD) (rCG_60321) alternative variant bSep08, mRNA.                                          |
| <a href="#">Rchy1</a>     | <a href="#">Rchy1.bSep08</a>     | <a href="#">289508</a>    | 10209 | 1127 | 8 | 204 | zinc finger, RING-type (23.5 kD) (Rchy1) alternative variant bSep08, mRNA.                                                     |

|                       |                              |                        |       |      |   |     |                                                                                                     |
|-----------------------|------------------------------|------------------------|-------|------|---|-----|-----------------------------------------------------------------------------------------------------|
| <a href="#">Rchy1</a> | <a href="#">Rchy1.cSep08</a> | <a href="#">289508</a> | 1901  | 1100 | 2 | 75  | putative protein of eukaryotic origin (8.5 kD) (Rchy1) alternative variant cSep08, mRNA.            |
| <a href="#">Rcl1</a>  | <a href="#">Rcl1.aSep08</a>  | <a href="#">309301</a> | 45305 | 1827 | 9 | 398 | RNA terminal phosphate cyclase-like 1 (Rcl1) alternative variant aSep08, mRNA.                      |
| <a href="#">Rcl1</a>  | <a href="#">Rcl1.cSep08</a>  | <a href="#">309301</a> | 16308 | 860  | 5 | 170 | RNA terminal phosphate cyclase-like 1 (18.4 kD) (Rcl1) alternative variant cSep08, mRNA.            |
| <a href="#">Rcn1</a>  | <a href="#">Rcn1.bSep08</a>  | <a href="#">362182</a> | 5051  | 983  | 1 | 85  | reticulocalbin 1 (9.6 kD) (Rcn1) alternative variant bSep08, complete mRNA.                         |
| <a href="#">Rcn2</a>  | <a href="#">Rcn2.bSep08</a>  | <a href="#">29218</a>  | 5280  | 741  | 2 | 120 | reticulocalbin 2 (Rcn2) alternative variant bSep08, mRNA.                                           |
| <a href="#">Rcor1</a> | <a href="#">Rcor1.aSep08</a> | <a href="#">314458</a> | 29977 | 772  |   | 240 | REST corepressor 1 (Rcor1) mRNA.                                                                    |
| <a href="#">Rcor2</a> | <a href="#">Rcor2.bSep08</a> | <a href="#">305811</a> | 2812  | 783  | 7 | 260 | REST corepressor 2 (Rcor2) alternative variant bSep08, mRNA.                                        |
| <a href="#">Rcor2</a> | <a href="#">Rcor2.cSep08</a> | <a href="#">305811</a> | 2309  | 1472 | 4 | 223 | REST corepressor 2 (24.2 kD) (Rcor2) alternative variant cSep08, mRNA.                              |
| <a href="#">Rcsd1</a> | <a href="#">Rcsd1.bSep08</a> | <a href="#">360872</a> | 7953  | 384  | 4 | 127 | putative protein of vertebrate origin (Rcsd1) alternative variant bSep08, mRNA.                     |
| <a href="#">Rcsd1</a> | <a href="#">Rcsd1.cSep08</a> | <a href="#">360872</a> | 3491  | 753  | 3 | 106 | putative protein of vertebrate origin (Rcsd1) alternative variant cSep08, mRNA.                     |
| <a href="#">Rcsd1</a> | <a href="#">Rcsd1.dSep08</a> | <a href="#">360872</a> | 5846  | 486  | 4 | 86  | putative protein of vertebrate origin (Rcsd1) alternative variant dSep08, mRNA.                     |
| <a href="#">Rdbp</a>  | <a href="#">Rdbp.bSep08</a>  | <a href="#">294258</a> | 2844  | 1357 | 5 | 255 | RD RNA-binding protein (29.2 kD) (Rdbp) alternative variant bSep08, mRNA.                           |
| <a href="#">Rdh2</a>  | <a href="#">Rdh2.bSep08</a>  | <a href="#">299511</a> | 16938 | 3800 | 2 | 317 | retinol dehydrogenase 2 (35.7 kD) (Rdh2) alternative variant bSep08, mRNA.                          |
| <a href="#">Rdh5</a>  | <a href="#">Rdh5.aSep08</a>  | <a href="#">366791</a> | 1111  | 430  |   | 75  | retinol dehydrogenase 5 (Rdh5) alternative variant aSep08, mRNA.                                    |
| <a href="#">Rdh5</a>  | <a href="#">Rdh5.bSep08</a>  | <a href="#">366791</a> | 1622  | 940  |   | 64  | retinol dehydrogenase 5 (Rdh5) alternative variant bSep08, mRNA.                                    |
| <a href="#">Rdh12</a> | <a href="#">Rdh12.bSep08</a> | <a href="#">314264</a> | 5325  | 492  | 2 | 121 | retinol dehydrogenase 12 (Rdh12) alternative variant bSep08, mRNA.                                  |
| <a href="#">Rdh14</a> | <a href="#">Rdh14.bSep08</a> | <a href="#">298881</a> | 4484  | 782  | 1 | 229 | retinol dehydrogenase 14 (all-trans and 9-cis) (Rdh14) alternative variant bSep08, mRNA.            |
| <a href="#">Rdm1</a>  | <a href="#">Rdm1.bSep08</a>  | <a href="#">287726</a> | 3073  | 767  | 4 | 143 | RAD52 motif 1 (Rdm1) alternative variant bSep08, mRNA.                                              |
| <a href="#">Rdm1</a>  | <a href="#">Rdm1.cSep08</a>  | <a href="#">287726</a> | 5495  | 668  | 3 | 88  | RAD52 motif 1 (9.9 kD) (Rdm1) alternative variant cSep08, mRNA.                                     |
| <a href="#">Rdx</a>   | <a href="#">Rdx.aSep08</a>   | <a href="#">315655</a> | 20542 | 3201 | 6 | 318 | radixin (Rdx) alternative variant aSep08, mRNA.                                                     |
| <a href="#">Rdx</a>   | <a href="#">Rdx.cSep08</a>   | <a href="#">315655</a> | 15469 | 403  | 3 | 75  | radixin (Rdx) alternative variant cSep08, mRNA.                                                     |
| <a href="#">Rdx</a>   | <a href="#">Rdx.dSep08</a>   | <a href="#">315655</a> | 8868  | 753  | 5 | 58  | radixin (Rdx) alternative variant dSep08, mRNA.                                                     |
| <a href="#">Rdx</a>   | <a href="#">Rdx.eSep08</a>   | <a href="#">315655</a> | 17863 | 732  | 3 | 89  | radixin (9.6 kD) (Rdx) alternative variant eSep08, mRNA.                                            |
| <a href="#">Rdx</a>   | <a href="#">Rdx.gSep08</a>   | <a href="#">315655</a> | 15580 | 620  | 2 | 30  | radixin (Rdx) alternative variant gSep08, mRNA.                                                     |
| <a href="#">Reck</a>  | <a href="#">Reck.bSep08</a>  | <a href="#">313488</a> | 12925 | 2608 | 2 | 430 | reversion-inducing-cysteine-rich protein with kazal motifs (Reck) alternative variant bSep08, mRNA. |
| <a href="#">Recql</a> | <a href="#">Recql.bSep08</a> | <a href="#">312824</a> | 18390 | 1027 | 8 | 342 | RecQ protein-like (Recql) alternative variant bSep08, mRNA.                                         |
| <a href="#">Recql</a> | <a href="#">Recql.cSep08</a> | <a href="#">312824</a> | 13895 | 816  | 6 | 271 | RecQ protein-like (Recql) alternative variant cSep08, mRNA.                                         |

|                         |                                |                        |       |      |   |     |                                                                                                                            |
|-------------------------|--------------------------------|------------------------|-------|------|---|-----|----------------------------------------------------------------------------------------------------------------------------|
| <a href="#">Recql</a>   | <a href="#">Recql.dSep08</a>   | <a href="#">312824</a> | 13940 | 763  | 6 | 209 | RecQ protein-like (Recql) alternative variant dSep08, mRNA.                                                                |
| <a href="#">Recql</a>   | <a href="#">Recql.eSep08</a>   | <a href="#">312824</a> | 2729  | 1745 | 3 | 168 | RecQ protein-like (18.4 kD) (Recql) alternative variant eSep08, mRNA.                                                      |
| <a href="#">Recql</a>   | <a href="#">Recql.fSep08</a>   | <a href="#">312824</a> | 1857  | 419  | 4 | 87  | RecQ protein-like (Recql) alternative variant fSep08, mRNA.                                                                |
| <a href="#">Recql</a>   | <a href="#">Recql.gSep08</a>   | <a href="#">312824</a> | 488   | 401  | 2 | 62  | putative protein (7.3 kD) (Recql) alternative variant gSep08, mRNA.                                                        |
| <a href="#">Recql4</a>  | <a href="#">Recql4.bSep08</a>  | <a href="#">300057</a> | 5349  | 892  | 4 | 286 | RecQ protein-like 4 (Recql4) alternative variant bSep08, mRNA.                                                             |
| <a href="#">Recql4</a>  | <a href="#">Recql4.cSep08</a>  | <a href="#">300057</a> | 5541  | 1084 | 4 | 272 | RecQ protein-like 4 (Recql4) alternative variant cSep08, mRNA.                                                             |
| <a href="#">Recql5</a>  | <a href="#">Recql5.bSep08</a>  | <a href="#">287834</a> | 11288 | 738  | 1 | 246 | RecQ protein-like 5 (Recql5) alternative variant bSep08, mRNA.                                                             |
| <a href="#">reeby</a>   | <a href="#">reeby.aSep08</a>   |                        | 9583  | 1029 | 2 | 109 | putative secreted or extracellular protein precursor (12.0 kD) (reeby) alternative variant aSep08, mRNA.                   |
| <a href="#">reechy</a>  | <a href="#">reechy.aSep08</a>  |                        | 996   | 645  | 1 | 52  | putative protein of mammalian origin (5.8 kD) (reechy) alternative variant aSep08, mRNA.                                   |
| <a href="#">reechy</a>  | <a href="#">reechy.bSep08</a>  |                        | 10141 | 519  | 2 | 52  | putative protein of mammalian origin (5.8 kD) (reechy) alternative variant bSep08, mRNA.                                   |
| <a href="#">reedar</a>  | <a href="#">reedar.aSep08</a>  |                        | 875   | 414  | 2 | 120 | RGD motif leucine rich repeats tropomodulin domain proline-rich containing like (reedar) alternative variant aSep08, mRNA. |
| <a href="#">reedar</a>  | <a href="#">reedar.bSep08</a>  |                        | 797   | 600  | 1 | 81  | RGD motif leucine rich repeats tropomodulin domain proline-rich containing like (reedar) alternative variant bSep08, mRNA. |
| <a href="#">reefer</a>  | <a href="#">reefer.aSep08</a>  |                        | 833   | 743  |   | 37  | putative protein (reefer) mRNA.                                                                                            |
| <a href="#">reeflo</a>  | <a href="#">reeflo.aSep08</a>  |                        | 6808  | 711  |   | 147 | putative nuclear protein, with 2 coiled coil domains, of eukaryotic origin (16.8 kD) (reeflo) mRNA.                        |
| <a href="#">reeflu</a>  | <a href="#">reeflu.aSep08</a>  |                        | 18052 | 795  |   | 82  | putative protein (9.2 kD) (reeflu) mRNA.                                                                                   |
| <a href="#">reegar</a>  | <a href="#">reegar.aSep08</a>  |                        | 13062 | 1735 |   | 202 | putative protein of metazoan origin (reegar) mRNA.                                                                         |
| <a href="#">reeja</a>   | <a href="#">reeja.aSep08</a>   |                        | 3449  | 1310 |   | 55  | putative protein (reeja) mRNA.                                                                                             |
| <a href="#">reejey</a>  | <a href="#">reejey.aSep08</a>  |                        | 12083 | 625  |   | 41  | putative protein (4.8 kD) (reejey) mRNA.                                                                                   |
| <a href="#">reekee</a>  | <a href="#">reekee.aSep08</a>  |                        | 9952  | 1055 |   | 351 | roquin (reekee) mRNA.                                                                                                      |
| <a href="#">reekler</a> | <a href="#">reekler.aSep08</a> |                        | 1638  | 465  | 2 | 126 | putative protein (reekler) alternative variant aSep08, mRNA.                                                               |
| <a href="#">reelo</a>   | <a href="#">reelo.aSep08</a>   |                        | 5650  | 737  | 3 | 82  | putative protein (reelo) alternative variant aSep08, mRNA.                                                                 |
| <a href="#">reemee</a>  | <a href="#">reemee.aSep08</a>  |                        | 8560  | 757  |   | 43  | putative protein (reemee) mRNA.                                                                                            |
| <a href="#">reemer</a>  | <a href="#">reemer.aSep08</a>  |                        | 4907  | 2303 |   | 205 | CRA a (reemer) mRNA.                                                                                                       |
| <a href="#">reenoy</a>  | <a href="#">reenoy.aSep08</a>  |                        | 13718 | 575  |   | 34  | putative protein (3.7 kD) (reenoy) mRNA.                                                                                   |
| <a href="#">Reep1</a>   | <a href="#">Reep1.bSep08</a>   | <a href="#">362384</a> | 2986  | 629  | 2 | 81  | receptor accessory protein 1 (Reep1) alternative variant bSep08, mRNA.                                                     |
| <a href="#">Reep5</a>   | <a href="#">Reep5.aSep08</a>   | <a href="#">364838</a> | 30868 | 2480 | 5 | 220 | receptor accessory protein 5 (Reep5) alternative variant aSep08, mRNA.                                                     |
| <a href="#">Reep6</a>   | <a href="#">Reep6.bSep08</a>   | <a href="#">362835</a> | 2339  | 995  |   | 331 | receptor accessory protein 6 (Reep6) alternative variant bSep08, mRNA.                                                     |

|                         |                                |                        |        |      |    |     |                                                                                                       |
|-------------------------|--------------------------------|------------------------|--------|------|----|-----|-------------------------------------------------------------------------------------------------------|
| <a href="#">reepor</a>  | <a href="#">reepor.aSep08</a>  |                        | 350    | 264  |    | 68  | putative protein (reepor) mRNA.                                                                       |
| <a href="#">reesa</a>   | <a href="#">reesa.aSep08</a>   |                        | 9248   | 404  |    | 134 | E1A binding protein p300 like (reesa) mRNA.                                                           |
| <a href="#">reeshee</a> | <a href="#">reeshee.aSep08</a> |                        | 8737   | 1725 | 5  | 268 | acetyl-CoA transporter (reeshee) alternative variant aSep08, mRNA.                                    |
| <a href="#">reeshee</a> | <a href="#">reeshee.bSep08</a> |                        | 2076   | 931  | 2  | 122 | acetyl-CoA transporter (13.4 kD) (reeshee) alternative variant bSep08, mRNA.                          |
| <a href="#">reeshee</a> | <a href="#">reeshee.cSep08</a> |                        | 2178   | 345  | 3  | 90  | putative protein (reeshee) alternative variant cSep08, mRNA.                                          |
| <a href="#">reetu</a>   | <a href="#">reetu.aSep08</a>   |                        | 1357   | 600  | 2  | 138 | zinc finger protein 513 (reetu) alternative variant aSep08, mRNA.                                     |
| <a href="#">reetu</a>   | <a href="#">reetu.bSep08</a>   |                        | 1613   | 608  | 3  | 133 | zinc finger protein 513 (reetu) alternative variant bSep08, mRNA.                                     |
| <a href="#">reetu</a>   | <a href="#">reetu.cSep08</a>   |                        | 844    | 596  | 2  | 77  | putative protein (reetu) alternative variant cSep08, mRNA.                                            |
| <a href="#">reevar</a>  | <a href="#">reevar.aSep08</a>  |                        | 7958   | 716  |    | 132 | CRA b like (reevar) alternative variant aSep08, mRNA.                                                 |
| <a href="#">reevar</a>  | <a href="#">reevar.bSep08</a>  |                        | 6289   | 494  |    | 126 | CRA b like (reevar) alternative variant bSep08, mRNA.                                                 |
| <a href="#">reewey</a>  | <a href="#">reewey.aSep08</a>  |                        | 3486   | 368  |    | 122 | putative protein of eukaryotic origin (reewey) mRNA.                                                  |
| <a href="#">Reg3a</a>   | <a href="#">Reg3a.aSep08</a>   | <a href="#">171162</a> | 2769   | 790  | 1  | 192 | regenerating islet-derived 3 alpha (Reg3a) alternative variant aSep08, mRNA.                          |
| <a href="#">Reg3b</a>   | <a href="#">Reg3b.cSep08</a>   | <a href="#">24618</a>  | 1592   | 669  | 2  | 48  | regenerating islet-derived 3 beta (5.5 kD) (Reg3b) alternative variant cSep08, mRNA.                  |
| <a href="#">Rela</a>    | <a href="#">Rela.bSep08</a>    | <a href="#">309165</a> | 4506   | 467  | 3  | 65  | v-rel reticuloendotheliosis viral oncogene homolog A (avian) (Rela) alternative variant bSep08, mRNA. |
| <a href="#">Rell1</a>   | <a href="#">Rell1.bSep08</a>   | <a href="#">289635</a> | 30683  | 2762 | 1  | 229 | RELT-like 1 (Rell1) alternative variant bSep08, mRNA.                                                 |
| <a href="#">Rell2</a>   | <a href="#">Rell2.bSep08</a>   | <a href="#">361313</a> | 2537   | 763  | 5  | 253 | RELT-like 2 (Rell2) alternative variant bSep08, mRNA.                                                 |
| <a href="#">Reln</a>    | <a href="#">Reln.bSep08</a>    | <a href="#">24718</a>  | 7735   | 622  | 5  | 206 | reelin (Reln) alternative variant bSep08, mRNA.                                                       |
| <a href="#">Reln</a>    | <a href="#">Reln.cSep08</a>    | <a href="#">24718</a>  | 2880   | 518  | 2  | 106 | reelin (Reln) alternative variant cSep08, mRNA.                                                       |
| <a href="#">Reln</a>    | <a href="#">Reln.dSep08</a>    | <a href="#">24718</a>  | 6396   | 1470 | 2  | 64  | reelin (7.2 kD) (Reln) alternative variant dSep08, mRNA.                                              |
| <a href="#">Rem1</a>    | <a href="#">Rem1.bSep08</a>    | <a href="#">366232</a> | 7335   | 1384 | 4  | 213 | rad and gem related GTP binding protein 1 (23.2 kD) (Rem1) alternative variant bSep08, mRNA.          |
| <a href="#">Ren1</a>    | <a href="#">Ren1.bSep08</a>    | <a href="#">24715</a>  | 6240   | 692  | 1  | 207 | renin 1 structural (Ren1) alternative variant bSep08, mRNA.                                           |
| <a href="#">Renbp</a>   | <a href="#">Renbp.bSep08</a>   | <a href="#">81759</a>  | 3520   | 549  | 5  | 150 | renin binding protein (Renbp) alternative variant bSep08, mRNA.                                       |
| <a href="#">Reps1</a>   | <a href="#">Reps1.bSep08</a>   | <a href="#">292944</a> | 33312  | 1808 | 15 | 537 | calcium-binding EF-hand containing protein (Reps1) alternative variant bSep08, mRNA.                  |
| <a href="#">Reps1</a>   | <a href="#">Reps1.cSep08</a>   | <a href="#">292944</a> | 28049  | 816  | 9  | 272 | calcium-binding EF-hand containing protein (Reps1) alternative variant cSep08, mRNA.                  |
| <a href="#">Reps1</a>   | <a href="#">Reps1.dSep08</a>   | <a href="#">292944</a> | 27871  | 811  | 8  | 270 | putative protein of vertebrate origin (Reps1) alternative variant dSep08, mRNA.                       |
| <a href="#">Reps1</a>   | <a href="#">Reps1.eSep08</a>   | <a href="#">292944</a> | 11095  | 535  | 2  | 127 | putative protein of vertebrate origin (Reps1) alternative variant eSep08, mRNA.                       |
| <a href="#">Reps1</a>   | <a href="#">Reps1.fSep08</a>   | <a href="#">292944</a> | 2724   | 463  | 4  | 80  | putative protein of vertebrate origin (Reps1) alternative variant fSep08, mRNA.                       |
| <a href="#">Reps2</a>   | <a href="#">Reps2.aSep08</a>   | <a href="#">363466</a> | 113951 | 483  |    | 160 | putative protein of eukaryotic origin (Reps2) mRNA.                                                   |

|                        |                               |                        |        |      |   |     |                                                                                                                           |
|------------------------|-------------------------------|------------------------|--------|------|---|-----|---------------------------------------------------------------------------------------------------------------------------|
| <a href="#">Rer1</a>   | <a href="#">Rer1.aSep08</a>   | <a href="#">298675</a> | 12393  | 1797 | 6 | 327 | RER1 retention in endoplasmic reticulum 1 homolog (S. cerevisiae) (Rer1) alternative variant aSep08, mRNA.                |
| <a href="#">Rer1</a>   | <a href="#">Rer1.cSep08</a>   | <a href="#">298675</a> | 4712   | 1085 | 2 | 68  | RER1 retention in endoplasmic reticulum 1 homolog (S. cerevisiae) (8.1 kD) (Rer1) alternative variant cSep08, mRNA.       |
| <a href="#">rerby</a>  | <a href="#">rerby.aSep08</a>  |                        | 23846  | 582  |   | 42  | CRA b like (rerby) mRNA.                                                                                                  |
| <a href="#">rerchy</a> | <a href="#">rerchy.aSep08</a> |                        | 1095   | 323  |   | 59  | putative protein (6.6 kD) (rerchy) mRNA.                                                                                  |
| <a href="#">rerdar</a> | <a href="#">rerdar.aSep08</a> |                        | 17453  | 427  |   | 66  | putative protein (rerdar) mRNA.                                                                                           |
| <a href="#">Rere</a>   | <a href="#">Rere.bSep08</a>   | <a href="#">116665</a> | 2975   | 2206 | 3 | 685 | arginine-glutamic acid dipeptide (RE) repeats and hypothetical protein LOC691475 (Rere) alternative variant bSep08, mRNA. |
| <a href="#">Rere</a>   | <a href="#">Rere.bSep08</a>   | <a href="#">691475</a> | 2975   | 2206 | 3 | 685 | arginine-glutamic acid dipeptide (RE) repeats and hypothetical protein LOC691475 (Rere) alternative variant bSep08, mRNA. |
| <a href="#">Rere</a>   | <a href="#">Rere.dSep08</a>   | <a href="#">116665</a> | 39886  | 575  | 3 | 107 | arginine-glutamic acid dipeptide (RE) repeats and hypothetical protein LOC691475 (Rere) alternative variant dSep08, mRNA. |
| <a href="#">Rere</a>   | <a href="#">Rere.dSep08</a>   | <a href="#">691475</a> | 39886  | 575  | 3 | 107 | arginine-glutamic acid dipeptide (RE) repeats and hypothetical protein LOC691475 (Rere) alternative variant dSep08, mRNA. |
| <a href="#">Rere</a>   | <a href="#">Rere.eSep08</a>   | <a href="#">116665</a> | 21459  | 331  | 4 | 69  | arginine-glutamic acid dipeptide (RE) repeats and hypothetical protein LOC691475 (Rere) alternative variant eSep08, mRNA. |
| <a href="#">Rere</a>   | <a href="#">Rere.eSep08</a>   | <a href="#">691475</a> | 21459  | 331  | 4 | 69  | arginine-glutamic acid dipeptide (RE) repeats and hypothetical protein LOC691475 (Rere) alternative variant eSep08, mRNA. |
| <a href="#">Rere</a>   | <a href="#">Rere.fSep08</a>   | <a href="#">116665</a> | 35669  | 233  | 3 | 52  | arginine-glutamic acid dipeptide (RE) repeats and hypothetical protein LOC691475 (Rere) alternative variant fSep08, mRNA. |
| <a href="#">Rere</a>   | <a href="#">Rere.fSep08</a>   | <a href="#">691475</a> | 35669  | 233  | 3 | 52  | arginine-glutamic acid dipeptide (RE) repeats and hypothetical protein LOC691475 (Rere) alternative variant fSep08, mRNA. |
| <a href="#">rerfer</a> | <a href="#">rerfer.aSep08</a> |                        | 4603   | 392  |   | 102 | putative protein (rerfer) mRNA.                                                                                           |
| <a href="#">rerflo</a> | <a href="#">rerflo.aSep08</a> |                        | 8932   | 756  |   | 84  | putative protein (rerflo) mRNA.                                                                                           |
| <a href="#">rerflu</a> | <a href="#">rerflu.aSep08</a> |                        | 418224 | 1728 |   | 541 | protein CRA b (rerflu) alternative variant aSep08, mRNA.                                                                  |
| <a href="#">Rerg</a>   | <a href="#">Rerg.aSep08</a>   | <a href="#">502916</a> | 112501 | 1801 |   |     |                                                                                                                           |
| <a href="#">Rerg</a>   | <a href="#">Rerg.cSep08</a>   | <a href="#">502916</a> | 98795  | 416  |   | 76  | RAS-like, estrogen-regulated, growth-inhibitor (Rerg) alternative variant cSep08, mRNA.                                   |
| <a href="#">rergar</a> | <a href="#">rergar.aSep08</a> |                        | 1088   | 417  |   | 100 | putative protein (rergar) mRNA.                                                                                           |
| <a href="#">Rergl</a>  | <a href="#">Rergl.aSep08</a>  | <a href="#">500356</a> | 8835   | 723  |   | 214 | RERG/RAS-like (Rergl) mRNA.                                                                                               |
| <a href="#">rerja</a>  | <a href="#">rerja.aSep08</a>  |                        | 15422  | 747  | 2 | 99  | putative nuclear protein (11.1 kD) (rerja) alternative variant aSep08, mRNA.                                              |
| <a href="#">rerja</a>  | <a href="#">rerja.bSep08</a>  |                        | 5781   | 737  | 1 | 44  | putative protein, with a coiled coil domain (5.1 kD) (rerja) alternative variant bSep08, mRNA.                            |
| <a href="#">rerjey</a> | <a href="#">rerjey.aSep08</a> |                        | 4405   | 404  |   | 71  | putative protein (8.3 kD) (rerjey) mRNA.                                                                                  |

|                         |                                |                        |       |      |   |     |                                                                                                                          |
|-------------------------|--------------------------------|------------------------|-------|------|---|-----|--------------------------------------------------------------------------------------------------------------------------|
| <a href="#">rerkee</a>  | <a href="#">rerkee.aSep08</a>  |                        | 3186  | 589  | 2 | 111 | ring CCCH domains 1 (rerkee) alternative variant aSep08, mRNA.                                                           |
| <a href="#">rerkee</a>  | <a href="#">rerkee.bSep08</a>  |                        | 916   | 321  | 1 | 79  | ring CCCH domains 1 (rerkee) alternative variant bSep08, mRNA.                                                           |
| <a href="#">rerkler</a> | <a href="#">rerkler.aSep08</a> |                        | 664   | 413  |   | 20  | putative protein (2.1 kD) (rerkler) mRNA.                                                                                |
| <a href="#">rerlo</a>   | <a href="#">rerlo.aSep08</a>   |                        | 1624  | 753  |   | 36  | putative protein (4.0 kD) (rerlo) mRNA.                                                                                  |
| <a href="#">rermee</a>  | <a href="#">rermee.aSep08</a>  |                        | 1166  | 660  |   | 34  | putative protein (rermee) mRNA.                                                                                          |
| <a href="#">rermer</a>  | <a href="#">rermer.aSep08</a>  |                        | 1723  | 441  |   | 102 | putative protein (rermer) mRNA.                                                                                          |
| <a href="#">rernoy</a>  | <a href="#">rernoy.aSep08</a>  |                        | 2776  | 915  |   | 128 | putative secreted or extracellular protein precursor (13.7 kD) (rernoy) mRNA.                                            |
| <a href="#">rerpor</a>  | <a href="#">rerpor.aSep08</a>  |                        | 51702 | 647  |   | 41  | putative protein (rerpor) mRNA.                                                                                          |
| <a href="#">rersa</a>   | <a href="#">rersa.aSep08</a>   |                        | 3635  | 327  |   | 108 | E1A binding protein p300 like (rersa) mRNA.                                                                              |
| <a href="#">rershee</a> | <a href="#">rershee.aSep08</a> |                        | 2304  | 509  |   | 42  | putative protein (rershee) mRNA.                                                                                         |
| <a href="#">rertu</a>   | <a href="#">rertu.cSep08</a>   |                        | 5920  | 289  | 2 | 58  | putative protein (rertu) alternative variant cSep08, mRNA.                                                               |
| <a href="#">rervar</a>  | <a href="#">rervar.bSep08</a>  |                        | 6099  | 492  | 2 | 73  | putative secreted or extracellular protein precursor (8.0 kD) (rervar) alternative variant bSep08, mRNA.                 |
| <a href="#">rerwey</a>  | <a href="#">rerwey.aSep08</a>  |                        | 851   | 406  | 2 | 110 | putative mitochondrial protein (12.5 kD) (rerwey) alternative variant aSep08, mRNA.                                      |
| <a href="#">Resp18</a>  | <a href="#">Resp18.bSep08</a>  | <a href="#">50561</a>  | 4390  | 532  | 2 | 141 | regulated endocrine-specific protein 18 (15.9 kD) (Resp18) alternative variant bSep08, mRNA.                             |
| <a href="#">Resp18</a>  | <a href="#">Resp18.cSep08</a>  | <a href="#">50561</a>  | 3917  | 417  | 2 | 103 | regulated endocrine-specific protein 18 (Resp18) alternative variant cSep08, mRNA.                                       |
| <a href="#">Ret</a>     | <a href="#">Ret.dSep08</a>     | <a href="#">24716</a>  | 5378  | 410  | 3 | 31  | ret proto-oncogene (Ret) alternative variant dSep08, mRNA.                                                               |
| <a href="#">Retn</a>    | <a href="#">Retn.bSep08</a>    | <a href="#">246250</a> | 889   | 728  | 1 | 25  | resistin (Retn) alternative variant bSep08, mRNA.                                                                        |
| <a href="#">Rev1</a>    | <a href="#">Rev1.bSep08</a>    | <a href="#">316344</a> | 2477  | 1133 | 6 | 280 | REV1 homolog (S. cerevisiae) (Rev1) alternative variant bSep08, mRNA.                                                    |
| <a href="#">Rev1</a>    | <a href="#">Rev1.cSep08</a>    | <a href="#">316344</a> | 1530  | 723  | 3 | 211 | REV1 homolog (S. cerevisiae) (Rev1) alternative variant cSep08, mRNA.                                                    |
| <a href="#">Rev1</a>    | <a href="#">Rev1.dSep08</a>    | <a href="#">316344</a> | 6395  | 359  | 3 | 119 | REV1 homolog (S. cerevisiae) (Rev1) alternative variant dSep08, mRNA.                                                    |
| <a href="#">Rev1</a>    | <a href="#">Rev1.fSep08</a>    | <a href="#">316344</a> | 700   | 386  | 2 | 65  | REV1 homolog (S. cerevisiae) (7.3 kD) (Rev1) alternative variant fSep08, mRNA.                                           |
| <a href="#">Rev3l</a>   | <a href="#">Rev3l.bSep08</a>   | <a href="#">309812</a> | 4624  | 383  | 3 | 127 | REV3-like, catalytic subunit of DNA polymerase zeta RAD54 like (S. cerevisiae) (Rev3l) alternative variant bSep08, mRNA. |
| <a href="#">Rexo1</a>   | <a href="#">Rexo1.bSep08</a>   | <a href="#">314630</a> | 2010  | 845  | 4 | 229 | REX1, RNA exonuclease 1 homolog (S. cerevisiae) (Rexo1) alternative variant bSep08, mRNA.                                |
| <a href="#">Rexo1</a>   | <a href="#">Rexo1.cSep08</a>   | <a href="#">314630</a> | 1882  | 1047 | 6 | 191 | REX1, RNA exonuclease 1 homolog (S. cerevisiae) (Rexo1) alternative variant cSep08, mRNA.                                |
| <a href="#">Rexo1</a>   | <a href="#">Rexo1.dSep08</a>   | <a href="#">314630</a> | 1521  | 404  | 3 | 62  | REX1, RNA exonuclease 1 homolog (S. cerevisiae) (Rexo1) alternative variant dSep08, mRNA.                                |
| <a href="#">Rexo2</a>   | <a href="#">Rexo2.bSep08</a>   | <a href="#">300689</a> | 7128  | 1882 | 3 | 153 | REX2, RNA exonuclease 2 homolog (S. cerevisiae) (Rexo2) alternative variant bSep08, mRNA.                                |
| <a href="#">Rexo2</a>   | <a href="#">Rexo2.cSep08</a>   | <a href="#">300689</a> | 8160  | 667  | 6 | 145 | REX2, RNA exonuclease 2 homolog (S. cerevisiae) (17.0 kD) (Rexo2) alternative variant cSep08, mRNA.                      |



|                         |                                |                        |       |      |   |     |                                                                                                   |
|-------------------------|--------------------------------|------------------------|-------|------|---|-----|---------------------------------------------------------------------------------------------------|
| <a href="#">Rexo2</a>   | <a href="#">Rexo2.dSep08</a>   | <a href="#">300689</a> | 6627  | 615  | 4 | 117 | REX2, RNA exonuclease 2 homolog (S. cerevisiae) (Rexo2) alternative variant dSep08, mRNA.         |
| <a href="#">Rexo2</a>   | <a href="#">Rexo2.eSep08</a>   | <a href="#">300689</a> | 6430  | 534  | 4 | 82  | REX2, RNA exonuclease 2 homolog (S. cerevisiae) (Rexo2) alternative variant eSep08, mRNA.         |
| <a href="#">Rexo2</a>   | <a href="#">Rexo2.fSep08</a>   | <a href="#">300689</a> | 1054  | 430  | 2 | 74  | REX2, RNA exonuclease 2 homolog (S. cerevisiae) (Rexo2) alternative variant fSep08, mRNA.         |
| <a href="#">reyby</a>   | <a href="#">reyby.aSep08</a>   |                        | 1368  | 616  |   | 30  | putative protein (reyby) mRNA.                                                                    |
| <a href="#">reychy</a>  | <a href="#">reychy.aSep08</a>  |                        | 32747 | 1778 | 5 | 552 | CRA a like (reychy) alternative variant aSep08, mRNA.                                             |
| <a href="#">reychy</a>  | <a href="#">reychy.cSep08</a>  |                        | 1302  | 364  | 2 | 115 | CRA a (reychy) alternative variant cSep08, mRNA.                                                  |
| <a href="#">reychy</a>  | <a href="#">reychy.dSep08</a>  |                        | 30010 | 474  | 4 | 44  | putative protein (reychy) alternative variant dSep08, mRNA.                                       |
| <a href="#">reydar</a>  | <a href="#">reydar.bSep08</a>  |                        | 12459 | 643  | 2 | 42  | putative protein (5.0 kD) (reydar) alternative variant bSep08, mRNA.                              |
| <a href="#">reyfer</a>  | <a href="#">reyfer.aSep08</a>  |                        | 3743  | 616  |   | 55  | putative protein (5.8 kD) (reyfer) mRNA.                                                          |
| <a href="#">reyflo</a>  | <a href="#">reyflo.aSep08</a>  |                        | 69617 | 244  |   | 81  | VPS10 domain receptor (reyflo) mRNA.                                                              |
| <a href="#">reyflu</a>  | <a href="#">reyflu.aSep08</a>  |                        | 2099  | 606  |   | 84  | tyrosine kinase receptor (reyflu) mRNA.                                                           |
| <a href="#">reygar</a>  | <a href="#">reygar.aSep08</a>  |                        | 1181  | 387  |   | 128 | elastin microfibril interfacier 3 (reygar) mRNA.                                                  |
| <a href="#">reyja</a>   | <a href="#">reyja.aSep08</a>   |                        | 3537  | 737  | 2 | 86  | putative cytoplasmic protein (9.8 kD) (reyja) alternative variant aSep08, mRNA.                   |
| <a href="#">reyja</a>   | <a href="#">reyja.bSep08</a>   |                        | 1028  | 244  | 1 | 25  | putative protein (reyja) alternative variant bSep08, mRNA.                                        |
| <a href="#">reyjey</a>  | <a href="#">reyjey.aSep08</a>  |                        | 652   | 550  |   | 52  | CRA a like (5.9 kD) (reyjey) mRNA.                                                                |
| <a href="#">reykee</a>  | <a href="#">reykee.aSep08</a>  |                        | 6144  | 481  |   | 37  | putative protein (4.2 kD) (reykee) mRNA.                                                          |
| <a href="#">reykler</a> | <a href="#">reykler.bSep08</a> |                        | 1987  | 257  |   | 35  | putative protein (reykler) alternative variant bSep08, mRNA.                                      |
| <a href="#">reylo</a>   | <a href="#">reylo.aSep08</a>   |                        | 1482  | 807  |   | 64  | putative protein (reylo) mRNA.                                                                    |
| <a href="#">reymee</a>  | <a href="#">reymee.aSep08</a>  |                        | 2498  | 402  |   | 134 | domain 19 (reymee) mRNA.                                                                          |
| <a href="#">reymmer</a> | <a href="#">reymmer.aSep08</a> |                        | 1468  | 479  | 2 | 123 | putative protein (reymmer) alternative variant aSep08, mRNA.                                      |
| <a href="#">reynoy</a>  | <a href="#">reynoy.aSep08</a>  |                        | 7615  | 753  |   | 48  | putative protein (reynoy) mRNA.                                                                   |
| <a href="#">reypor</a>  | <a href="#">reypor.aSep08</a>  |                        | 4319  | 340  | 3 | 112 | family with sequence similarity 63 member B CRA b like (reypor) alternative variant aSep08, mRNA. |
| <a href="#">reysa</a>   | <a href="#">reysa.aSep08</a>   |                        | 1153  | 338  |   | 112 | putative protein (reysa) mRNA.                                                                    |
| <a href="#">reyshee</a> | <a href="#">reyshee.aSep08</a> |                        | 2580  | 329  |   | 54  | putative protein (reyshee) mRNA.                                                                  |
| <a href="#">reytu</a>   | <a href="#">reytu.aSep08</a>   |                        | 918   | 613  |   | 154 | putative mitochondrial protein (17.4 kD) (reytu) mRNA.                                            |
| <a href="#">reyvar</a>  | <a href="#">reyvar.aSep08</a>  |                        | 2516  | 274  |   | 91  | putative protein, with a transmembrane domain (reyvar) mRNA.                                      |
| <a href="#">reywey</a>  | <a href="#">reywey.aSep08</a>  |                        | 2659  | 1125 | 2 | 60  | ubiquitin specific peptidase 18 CRA a (7.2 kD) (reywey) alternative variant aSep08, mRNA.         |
| <a href="#">reywey</a>  | <a href="#">reywey.bSep08</a>  |                        | 1874  | 665  | 1 | 47  | putative protein (reywey) alternative variant bSep08, mRNA.                                       |
| <a href="#">Rfc1</a>    | <a href="#">Rfc1.bSep08</a>    | <a href="#">89809</a>  | 9194  | 1051 | 6 | 296 | replication factor C (activator 1) 1 (Rfc1) alternative variant bSep08, mRNA.                     |
| <a href="#">Rfc1</a>    | <a href="#">Rfc1.cSep08</a>    | <a href="#">89809</a>  | 3228  | 342  | 2 | 86  | replication factor C (activator 1) 1 (Rfc1) alternative variant cSep08, mRNA.                     |

|                        |                               |                        |        |      |    |     |                                                                                                                |
|------------------------|-------------------------------|------------------------|--------|------|----|-----|----------------------------------------------------------------------------------------------------------------|
| <a href="#">Rfc1</a>   | <a href="#">Rfc1.eSep08</a>   | <a href="#">89809</a>  | 30060  | 379  | 4  | 57  | replication factor C (activator 1) 1 (Rfc1) alternative variant eSep08, mRNA.                                  |
| <a href="#">Rfc2</a>   | <a href="#">Rfc2.bSep08</a>   | <a href="#">116468</a> | 5595   | 1048 | 1  | 152 | replication factor C (activator 1) 2 (17.1 kD) (Rfc2) alternative variant bSep08, mRNA.                        |
| <a href="#">Rfc4</a>   | <a href="#">Rfc4.bSep08</a>   | <a href="#">288003</a> | 15301  | 1347 | 10 | 223 | replication factor C (activator 1) 4 (24.6 kD) (Rfc4) alternative variant bSep08, complete mRNA.               |
| <a href="#">Rfc4</a>   | <a href="#">Rfc4.cSep08</a>   | <a href="#">288003</a> | 13951  | 534  | 5  | 178 | replication factor C (activator 1) 4 (Rfc4) alternative variant cSep08, mRNA.                                  |
| <a href="#">Rfc4</a>   | <a href="#">Rfc4.eSep08</a>   | <a href="#">288003</a> | 800    | 611  | 3  | 22  | replication factor C (activator 1) 4 (2.6 kD) (Rfc4) alternative variant eSep08, mRNA.                         |
| <a href="#">Rfc5</a>   | <a href="#">Rfc5.bSep08</a>   | <a href="#">304528</a> | 7054   | 783  | 8  | 205 | replication factor C (activator 1) 5 (Rfc5) alternative variant bSep08, mRNA.                                  |
| <a href="#">Rfc5</a>   | <a href="#">Rfc5.cSep08</a>   | <a href="#">304528</a> | 1337   | 358  | 2  | 25  | replication factor C (activator 1) 5 (Rfc5) alternative variant cSep08, mRNA.                                  |
| <a href="#">Rffl</a>   | <a href="#">Rffl.aSep08</a>   | <a href="#">282844</a> | 60616  | 1102 | 2  | 367 | putative protein of metazoan origin (Rffl) alternative variant aSep08, mRNA.                                   |
| <a href="#">Rft1</a>   | <a href="#">Rft1.aSep08</a>   | <a href="#">290552</a> | 13108  | 1419 |    | 308 | RFT1 homolog ( <i>S. cerevisiae</i> ) (Rft1) mRNA.                                                             |
| <a href="#">Rftn2</a>  | <a href="#">Rftn2.aSep08</a>  | <a href="#">363231</a> | 35628  | 1264 | 1  | 348 | raftlin family member 2 (Rftn2) alternative variant aSep08, mRNA.                                              |
| <a href="#">Rftn2</a>  | <a href="#">Rftn2.bSep08</a>  | <a href="#">363231</a> | 811    | 386  | 1  | 47  | raftlin family member 2 (Rftn2) alternative variant bSep08, mRNA.                                              |
| <a href="#">Rfwd3</a>  | <a href="#">Rfwd3.aSep08</a>  | <a href="#">361409</a> | 7212   | 2719 |    | 252 | ring finger and WD repeat domain 3 (Rfwd3) mRNA.                                                               |
| <a href="#">Rfx2</a>   | <a href="#">Rfx2.bSep08</a>   | <a href="#">301121</a> | 8162   | 2159 | 9  | 361 | regulatory factor X, 2 (influences HLA class II expression) (Rfx2) alternative variant bSep08, mRNA.           |
| <a href="#">Rfx2</a>   | <a href="#">Rfx2.cSep08</a>   | <a href="#">301121</a> | 22188  | 807  | 1  | 269 | regulatory factor X, 2 (influences HLA class II expression) (Rfx2) alternative variant cSep08, mRNA.           |
| <a href="#">Rfx3</a>   | <a href="#">Rfx3.bSep08</a>   | <a href="#">361746</a> | 77865  | 1155 | 2  | 385 | regulatory factor X, 3 (influences HLA class II expression) (Rfx3) alternative variant bSep08, mRNA.           |
| <a href="#">Rfx4</a>   | <a href="#">Rfx4.aSep08</a>   | <a href="#">500818</a> | 132709 | 1509 | 13 | 502 | regulatory factor X, 4 (influences HLA class II expression) (Rfx4) alternative variant aSep08, mRNA.           |
| <a href="#">Rfx4</a>   | <a href="#">Rfx4.bSep08</a>   | <a href="#">500818</a> | 27809  | 537  | 1  | 140 | regulatory factor X, 4 (influences HLA class II expression) (Rfx4) alternative variant bSep08, mRNA.           |
| <a href="#">Rfx5</a>   | <a href="#">Rfx5.bSep08</a>   | <a href="#">310659</a> | 3444   | 3372 | 2  | 351 | regulatory factor X, 5 (influences HLA class II expression) (35.6 kD) (Rfx5) alternative variant bSep08, mRNA. |
| <a href="#">Rfx5</a>   | <a href="#">Rfx5.cSep08</a>   | <a href="#">310659</a> | 2292   | 366  | 5  | 98  | regulatory factor X, 5 (influences HLA class II expression) (Rfx5) alternative variant cSep08, mRNA.           |
| <a href="#">Rfx5</a>   | <a href="#">Rfx5.dSep08</a>   | <a href="#">310659</a> | 1104   | 417  | 4  | 75  | regulatory factor X, 5 (influences HLA class II expression) (Rfx5) alternative variant dSep08, mRNA.           |
| <a href="#">Rfxank</a> | <a href="#">Rfxank.bSep08</a> | <a href="#">306353</a> | 7422   | 1348 | 8  | 211 | regulatory factor X-associated ankyrin-containing protein (23.1 kD) (Rfxank) alternative variant bSep08, mRNA. |
| <a href="#">Rfxdc1</a> | <a href="#">Rfxdc1.bSep08</a> | <a href="#">294395</a> | 8062   | 1775 | 1  | 381 | regulatory factor X (Rfxdc1) alternative variant bSep08, mRNA.                                                 |
| <a href="#">Rfxdc1</a> | <a href="#">Rfxdc1.cSep08</a> | <a href="#">294395</a> | 4327   | 700  | 2  | 211 | regulatory factor X (Rfxdc1) alternative variant cSep08, mRNA.                                                 |
| <a href="#">Rfxdc2</a> | <a href="#">Rfxdc2.bSep08</a> | <a href="#">315804</a> | 74603  | 1459 | 7  | 302 | regulatory factor X (Rfxdc2) alternative variant bSep08, mRNA.                                                 |

|                           |                                  |                        |       |      |   |     |                                                                                                                    |
|---------------------------|----------------------------------|------------------------|-------|------|---|-----|--------------------------------------------------------------------------------------------------------------------|
| <a href="#">Rfxdc2</a>    | <a href="#">Rfxdc2.cSep08</a>    | <a href="#">315804</a> | 631   | 469  | 2 | 41  | putative protein (Rfxdc2) alternative variant cSep08, mRNA.                                                        |
| <a href="#">Rg9mtd2</a>   | <a href="#">Rg9mtd2.bSep08</a>   | <a href="#">295496</a> | 14255 | 2711 | 7 | 285 | tRNA (guanine-N1-)-methyltransferase (32.7 kD) (Rg9mtd2) alternative variant bSep08, mRNA.                         |
| <a href="#">Rg9mtd2</a>   | <a href="#">Rg9mtd2.cSep08</a>   | <a href="#">295496</a> | 2583  | 854  | 2 | 149 | putative protein of eukaryotic origin (16.5 kD) (Rg9mtd2) alternative variant cSep08, mRNA.                        |
| <a href="#">Rg9mtd2</a>   | <a href="#">Rg9mtd2.dSep08</a>   | <a href="#">295496</a> | 2908  | 391  | 3 | 99  | tRNA (guanine-N1-)-methyltransferase (Rg9mtd2) alternative variant dSep08, mRNA.                                   |
| <a href="#">Rg9mtd3</a>   | <a href="#">Rg9mtd3.bSep08</a>   | <a href="#">298081</a> | 1118  | 571  | 2 | 111 | putative protein of eukaryotic origin (13.0 kD) (Rg9mtd3) alternative variant bSep08, mRNA.                        |
| <a href="#">RGD621352</a> | <a href="#">RGD621352.bSep08</a> | <a href="#">192229</a> | 8049  | 872  | 4 | 158 | similar to RIKEN cDNA 1500031L02 (RGD621352) alternative variant bSep08, mRNA.                                     |
| <a href="#">RGD621352</a> | <a href="#">RGD621352.cSep08</a> | <a href="#">192229</a> | 3144  | 590  | 2 | 156 | similar to RIKEN cDNA 1500031L02 (RGD621352) alternative variant cSep08, mRNA.                                     |
| <a href="#">RGD621352</a> | <a href="#">RGD621352.dSep08</a> | <a href="#">192229</a> | 7776  | 584  | 4 | 137 | similar to RIKEN cDNA 1500031L02 (RGD621352) alternative variant dSep08, mRNA.                                     |
| <a href="#">RGD621352</a> | <a href="#">RGD621352.eSep08</a> | <a href="#">192229</a> | 3265  | 2273 | 2 | 78  | similar to RIKEN cDNA 1500031L02 (9.0 kD) (RGD621352) alternative variant eSep08, mRNA.                            |
| <a href="#">RGD708545</a> | <a href="#">RGD708545.cSep08</a> | <a href="#">56769</a>  | 979   | 818  | 3 | 101 | nuclear protein E3-3 (10.9 kD) (RGD708545) alternative variant cSep08, mRNA.                                       |
| <a href="#">RGD735029</a> | <a href="#">RGD735029.bSep08</a> | <a href="#">307480</a> | 4252  | 609  | 5 | 202 | putative protein of mammalian origin (RGD735029) alternative variant bSep08, mRNA.                                 |
| <a href="#">RGD735029</a> | <a href="#">RGD735029.cSep08</a> | <a href="#">307480</a> | 1672  | 763  | 2 | 90  | CRA c like (RGD735029) alternative variant cSep08, mRNA.                                                           |
| <a href="#">RGD735029</a> | <a href="#">RGD735029.dSep08</a> | <a href="#">307480</a> | 3617  | 1017 | 4 | 91  | CRA c like (9.3 kD) (RGD735029) alternative variant dSep08, mRNA.                                                  |
| <a href="#">RGD735065</a> | <a href="#">RGD735065.aSep08</a> | <a href="#">294311</a> | 26345 | 2375 | 6 | 595 | similar to GI:13385412-like protein splice form I (RGD735065) alternative variant aSep08, mRNA.                    |
| <a href="#">RGD735065</a> | <a href="#">RGD735065.bSep08</a> | <a href="#">294311</a> | 30064 | 2743 | 8 | 348 | similar to GI:13385412-like protein splice form I (39.6 kD) (RGD735065) alternative variant bSep08, mRNA.          |
| <a href="#">RGD735065</a> | <a href="#">RGD735065.dSep08</a> | <a href="#">294311</a> | 39221 | 1381 | 9 | 235 | similar to GI:13385412-like protein splice form I (26.4 kD) (RGD735065) alternative variant dSep08, complete mRNA. |
| <a href="#">RGD735065</a> | <a href="#">RGD735065.eSep08</a> | <a href="#">294311</a> | 20690 | 1193 | 4 | 185 | similar to GI:13385412-like protein splice form I (RGD735065) alternative variant eSep08, mRNA.                    |
| <a href="#">RGD735065</a> | <a href="#">RGD735065.fSep08</a> | <a href="#">294311</a> | 31033 | 553  | 3 | 171 | similar to GI:13385412-like protein splice form I (RGD735065) alternative variant fSep08, mRNA.                    |
| <a href="#">RGD735065</a> | <a href="#">RGD735065.gSep08</a> | <a href="#">294311</a> | 19887 | 780  | 2 | 101 | similar to GI:13385412-like protein splice form I (RGD735065) alternative variant gSep08, mRNA.                    |
| <a href="#">RGD735065</a> | <a href="#">RGD735065.hSep08</a> | <a href="#">294311</a> | 19877 | 862  | 3 | 59  | similar to GI:13385412-like protein splice form I (6.8 kD) (RGD735065) alternative variant hSep08, mRNA.           |
| <a href="#">RGD735065</a> | <a href="#">RGD735065.iSep08</a> | <a href="#">294311</a> | 19685 | 765  | 4 | 130 | similar to GI:13385412-like protein splice form I (RGD735065) alternative variant iSep08, mRNA.                    |
| <a href="#">RGD735065</a> | <a href="#">RGD735065.jSep08</a> | <a href="#">294311</a> | 23894 | 725  | 5 | 82  | similar to GI:13385412-like protein splice form I (RGD735065) alternative variant jSep08, mRNA.                    |
| <a href="#">RGD735065</a> | <a href="#">RGD735065.kSep08</a> | <a href="#">294311</a> | 9293  | 701  | 4 | 134 | similar to GI:13385412-like protein splice form I (RGD735065) alternative variant kSep08, mRNA.                    |

|                            |                                   |                        |       |      |    |     |                                                                                                           |
|----------------------------|-----------------------------------|------------------------|-------|------|----|-----|-----------------------------------------------------------------------------------------------------------|
| <a href="#">RGD735112</a>  | <a href="#">RGD735112.bSep08</a>  | <a href="#">304055</a> | 14150 | 603  | 2  | 101 | similar to RIKEN cDNA 5830404H04 (RGD735112) alternative variant bSep08, mRNA.                            |
| <a href="#">RGD735112</a>  | <a href="#">RGD735112.cSep08</a>  | <a href="#">304055</a> | 4280  | 365  | 3  | 86  | similar to RIKEN cDNA 5830404H04 (RGD735112) alternative variant cSep08, mRNA.                            |
| <a href="#">RGD735140</a>  | <a href="#">RGD735140.bSep08</a>  | <a href="#">362219</a> | 12406 | 1256 | 10 | 297 | hypothetical protein LK44 (RGD735140) alternative variant bSep08, mRNA.                                   |
| <a href="#">RGD735140</a>  | <a href="#">RGD735140.eSep08</a>  | <a href="#">362219</a> | 24747 | 545  | 5  | 37  | hypothetical protein LK44 (RGD735140) alternative variant eSep08, mRNA.                                   |
| <a href="#">RGD735140</a>  | <a href="#">RGD735140.fSep08</a>  | <a href="#">362219</a> | 10000 | 386  | 3  |     |                                                                                                           |
| <a href="#">RGD735175</a>  | <a href="#">RGD735175.aSep08</a>  | <a href="#">316530</a> | 6434  | 2771 | 3  | 408 | hypothetical protein MGC:72616 (45.5 kD) (RGD735175) alternative variant aSep08, mRNA.                    |
| <a href="#">RGD735175</a>  | <a href="#">RGD735175.cSep08</a>  | <a href="#">316530</a> | 4329  | 764  | 3  | 254 | hypothetical protein MGC:72616 (RGD735175) alternative variant cSep08, mRNA.                              |
| <a href="#">RGD735175</a>  | <a href="#">RGD735175.dSep08</a>  | <a href="#">316530</a> | 3644  | 648  | 1  | 216 | hypothetical protein MGC:72616 (RGD735175) alternative variant dSep08, mRNA.                              |
| <a href="#">RGD1302996</a> | <a href="#">RGD1302996.bSep08</a> | <a href="#">294231</a> | 1810  | 652  | 3  | 121 | hypothetical protein MGC:15854 (14.2 kD) (RGD1302996) alternative variant bSep08, mRNA.                   |
| <a href="#">RGD1302996</a> | <a href="#">RGD1302996.cSep08</a> | <a href="#">294231</a> | 1712  | 637  | 2  | 99  | hypothetical protein MGC:15854 (RGD1302996) alternative variant cSep08, mRNA.                             |
| <a href="#">RGD1303003</a> | <a href="#">RGD1303003.bSep08</a> | <a href="#">294326</a> | 7528  | 721  | 1  | 142 | homolog of zebrafish ES1 (RGD1303003) alternative variant bSep08, mRNA.                                   |
| <a href="#">RGD1303066</a> | <a href="#">RGD1303066.bSep08</a> | <a href="#">361789</a> | 12948 | 1300 | 11 | 364 | similar to RIKEN cDNA 2610110G12 (RGD1303066) alternative variant bSep08, mRNA.                           |
| <a href="#">RGD1303066</a> | <a href="#">RGD1303066.cSep08</a> | <a href="#">361789</a> | 1450  | 702  | 5  | 234 | similar to RIKEN cDNA 2610110G12 (RGD1303066) alternative variant cSep08, mRNA.                           |
| <a href="#">RGD1303066</a> | <a href="#">RGD1303066.dSep08</a> | <a href="#">361789</a> | 8195  | 584  | 8  | 188 | similar to RIKEN cDNA 2610110G12 (RGD1303066) alternative variant dSep08, mRNA.                           |
| <a href="#">RGD1303066</a> | <a href="#">RGD1303066.eSep08</a> | <a href="#">361789</a> | 874   | 401  | 2  | 86  | similar to RIKEN cDNA 2610110G12 (RGD1303066) alternative variant eSep08, mRNA.                           |
| <a href="#">RGD1303117</a> | <a href="#">RGD1303117.aSep08</a> | <a href="#">292764</a> | 4216  | 1842 | 9  | 361 | CRA a (RGD1303117) alternative variant aSep08, mRNA.                                                      |
| <a href="#">RGD1303117</a> | <a href="#">RGD1303117.cSep08</a> | <a href="#">292764</a> | 798   | 625  | 3  | 147 | CRA a (RGD1303117) alternative variant cSep08, mRNA.                                                      |
| <a href="#">RGD1303117</a> | <a href="#">RGD1303117.dSep08</a> | <a href="#">292764</a> | 1054  | 718  | 2  | 121 | putative cytoplasmic protein of mammalian origin (13.3 kD) (RGD1303117) alternative variant dSep08, mRNA. |
| <a href="#">RGD1303117</a> | <a href="#">RGD1303117.eSep08</a> | <a href="#">292764</a> | 1844  | 630  | 4  | 102 | putative protein of mammalian origin (11.3 kD) (RGD1303117) alternative variant eSep08, mRNA.             |
| <a href="#">RGD1303117</a> | <a href="#">RGD1303117.gSep08</a> | <a href="#">292764</a> | 753   | 655  | 2  | 64  | CRA a like (6.4 kD) (RGD1303117) alternative variant gSep08, mRNA.                                        |
| <a href="#">RGD1303127</a> | <a href="#">RGD1303127.bSep08</a> | <a href="#">300206</a> | 16712 | 2870 | 8  | 259 | similar to hypothetical protein FLJ20436 (29.2 kD) (RGD1303127) alternative variant bSep08, mRNA.         |
| <a href="#">RGD1303127</a> | <a href="#">RGD1303127.cSep08</a> | <a href="#">300206</a> | 2801  | 390  | 3  | 129 | similar to hypothetical protein FLJ20436 (RGD1303127) alternative variant cSep08, mRNA.                   |
| <a href="#">RGD1303127</a> | <a href="#">RGD1303127.dSep08</a> | <a href="#">300206</a> | 4772  | 957  | 2  | 59  | similar to hypothetical protein FLJ20436 (RGD1303127) alternative variant dSep08, mRNA.                   |
| <a href="#">RGD1303130</a> | <a href="#">RGD1303130.bSep08</a> | <a href="#">295231</a> | 2854  | 1020 | 4  | 205 | kidney predominant protein NCU-G1 (RGD1303130) alternative variant bSep08, mRNA.                          |
| <a href="#">RGD1303144</a> | <a href="#">RGD1303144.bSep08</a> | <a href="#">311833</a> | 39555 | 651  | 8  | 147 | CRA a (RGD1303144) alternative variant bSep08, mRNA.                                                      |

|                            |                                   |                        |       |      |    |     |                                                                                                    |
|----------------------------|-----------------------------------|------------------------|-------|------|----|-----|----------------------------------------------------------------------------------------------------|
| <a href="#">RGD1303232</a> | <a href="#">RGD1303232.bSep08</a> | <a href="#">309381</a> | 7922  | 2792 | 6  | 254 | probable oxidoreductase (27.0 kD) (RGD1303232) alternative variant bSep08, mRNA.                   |
| <a href="#">RGD1303232</a> | <a href="#">RGD1303232.cSep08</a> | <a href="#">309381</a> | 4574  | 464  | 4  | 154 | probable oxidoreductase (RGD1303232) alternative variant cSep08, mRNA.                             |
| <a href="#">RGD1303232</a> | <a href="#">RGD1303232.dSep08</a> | <a href="#">309381</a> | 5973  | 830  | 5  | 135 | probable oxidoreductase (RGD1303232) alternative variant dSep08, mRNA.                             |
| <a href="#">RGD1303232</a> | <a href="#">RGD1303232.fSep08</a> | <a href="#">309381</a> | 2756  | 552  | 4  | 106 | probable oxidoreductase (RGD1303232) alternative variant fSep08, mRNA.                             |
| <a href="#">RGD1303232</a> | <a href="#">RGD1303232.gSep08</a> | <a href="#">309381</a> | 3423  | 464  | 2  | 104 | putative protein (RGD1303232) alternative variant gSep08, mRNA.                                    |
| <a href="#">RGD1303232</a> | <a href="#">RGD1303232.hSep08</a> | <a href="#">309381</a> | 3126  | 551  | 4  | 102 | probable oxidoreductase (11.0 kD) (RGD1303232) alternative variant hSep08, mRNA.                   |
| <a href="#">RGD1303232</a> | <a href="#">RGD1303232.iSep08</a> | <a href="#">309381</a> | 2320  | 557  | 3  | 64  | probable oxidoreductase (RGD1303232) alternative variant iSep08, mRNA.                             |
| <a href="#">RGD1303232</a> | <a href="#">RGD1303232.jSep08</a> | <a href="#">309381</a> | 3074  | 1213 | 3  | 135 | putative protein (14.3 kD) (RGD1303232) alternative variant jSep08, mRNA.                          |
| <a href="#">RGD1303271</a> | <a href="#">RGD1303271.bSep08</a> | <a href="#">313018</a> | 8283  | 436  | 1  | 60  | putative protein of mammalian origin (RGD1303271) alternative variant bSep08, mRNA.                |
| <a href="#">RGD1303272</a> | <a href="#">RGD1303272.bSep08</a> | <a href="#">362134</a> | 14363 | 913  | 6  | 235 | similar to RIKEN cDNA 2010311D03 (26.5 kD) (RGD1303272) alternative variant bSep08, mRNA.          |
| <a href="#">RGD1303272</a> | <a href="#">RGD1303272.cSep08</a> | <a href="#">362134</a> | 8927  | 504  | 5  | 168 | similar to RIKEN cDNA 2010311D03 (RGD1303272) alternative variant cSep08, mRNA.                    |
| <a href="#">RGD1303272</a> | <a href="#">RGD1303272.dSep08</a> | <a href="#">362134</a> | 5514  | 767  | 3  | 124 | similar to RIKEN cDNA 2010311D03 (RGD1303272) alternative variant dSep08, mRNA.                    |
| <a href="#">RGD1303272</a> | <a href="#">RGD1303272.eSep08</a> | <a href="#">362134</a> | 1613  | 845  | 2  | 88  | similar to RIKEN cDNA 2010311D03 (9.9 kD) (RGD1303272) alternative variant eSep08, mRNA.           |
| <a href="#">RGD1303272</a> | <a href="#">RGD1303272.fSep08</a> | <a href="#">362134</a> | 7606  | 750  | 2  | 50  | similar to RIKEN cDNA 2010311D03 (RGD1303272) alternative variant fSep08, mRNA.                    |
| <a href="#">RGD1303272</a> | <a href="#">RGD1303272.gSep08</a> | <a href="#">362134</a> | 10071 | 952  | 7  | 140 | similar to RIKEN cDNA 2010311D03 (RGD1303272) alternative variant gSep08, mRNA.                    |
| <a href="#">RGD1304567</a> | <a href="#">RGD1304567.bSep08</a> | <a href="#">362671</a> | 3588  | 724  | 3  | 216 | similar to RIKEN cDNA A430005L14 (22.8 kD) (RGD1304567) alternative variant bSep08, complete mRNA. |
| <a href="#">RGD1304567</a> | <a href="#">RGD1304567.cSep08</a> | <a href="#">362671</a> | 4239  | 777  | 3  | 215 | similar to RIKEN cDNA A430005L14 (RGD1304567) alternative variant cSep08, mRNA.                    |
| <a href="#">RGD1304579</a> | <a href="#">RGD1304579.bSep08</a> | <a href="#">308906</a> | 8589  | 1515 | 5  | 491 | similar to 9230105E10Rik protein (RGD1304579) alternative variant bSep08, mRNA.                    |
| <a href="#">RGD1304579</a> | <a href="#">RGD1304579.cSep08</a> | <a href="#">308906</a> | 9011  | 658  | 2  | 172 | similar to 9230105E10Rik protein (RGD1304579) alternative variant cSep08, mRNA.                    |
| <a href="#">RGD1304580</a> | <a href="#">RGD1304580.bSep08</a> | <a href="#">292781</a> | 2325  | 384  |    | 114 | similar to Hypothetical protein MGC38513 (RGD1304580) alternative variant bSep08, mRNA.            |
| <a href="#">RGD1304592</a> | <a href="#">RGD1304592.bSep08</a> | <a href="#">362461</a> | 56267 | 3136 | 18 | 700 | similar to KIAA0528 protein (RGD1304592) alternative variant bSep08, mRNA.                         |
| <a href="#">RGD1304592</a> | <a href="#">RGD1304592.cSep08</a> | <a href="#">362461</a> | 7379  | 1644 | 5  | 203 | similar to KIAA0528 protein (RGD1304592) alternative variant cSep08, mRNA.                         |
| <a href="#">RGD1304592</a> | <a href="#">RGD1304592.dSep08</a> | <a href="#">362461</a> | 17619 | 709  | 5  | 136 | similar to KIAA0528 protein (RGD1304592) alternative variant dSep08, mRNA.                         |

|                            |                                   |                        |        |      |    |     |                                                                                                                            |
|----------------------------|-----------------------------------|------------------------|--------|------|----|-----|----------------------------------------------------------------------------------------------------------------------------|
| <a href="#">RGD1304592</a> | <a href="#">RGD1304592.eSep08</a> | <a href="#">362461</a> | 19555  | 414  | 4  | 106 | similar to KIAA0528 protein (RGD1304592) alternative variant eSep08, mRNA.                                                 |
| <a href="#">RGD1304592</a> | <a href="#">RGD1304592.gSep08</a> | <a href="#">362461</a> | 4504   | 824  | 3  | 52  | similar to KIAA0528 protein (RGD1304592) alternative variant gSep08, mRNA.                                                 |
| <a href="#">RGD1304607</a> | <a href="#">RGD1304607.aSep08</a> | <a href="#">361727</a> | 5148   | 1314 | 3  | 147 | similar to thymus atrophy-related protein (RGD1304607) alternative variant aSep08, mRNA.                                   |
| <a href="#">RGD1304607</a> | <a href="#">RGD1304607.bSep08</a> | <a href="#">361727</a> | 3088   | 502  | 1  | 134 | similar to thymus atrophy-related protein (RGD1304607) alternative variant bSep08, mRNA.                                   |
| <a href="#">RGD1304607</a> | <a href="#">RGD1304607.cSep08</a> | <a href="#">361727</a> | 4838   | 1018 | 3  | 87  | similar to thymus atrophy-related protein (9.9 kD) (RGD1304607) alternative variant cSep08, mRNA.                          |
| <a href="#">RGD1304621</a> | <a href="#">RGD1304621.aSep08</a> | <a href="#">304104</a> | 5236   | 1929 |    | 416 | similar to Hypothetical protein KIAA0539 (46.3 kD) (RGD1304621) mRNA.                                                      |
| <a href="#">RGD1304622</a> | <a href="#">RGD1304622.aSep08</a> | <a href="#">305101</a> | 10237  | 604  |    | 201 | similar to 6820428L09 protein (RGD1304622) mRNA.                                                                           |
| <a href="#">RGD1304624</a> | <a href="#">RGD1304624.bSep08</a> | <a href="#">314128</a> | 27861  | 934  | 3  | 72  | similar to RIKEN cDNA 2700097O09 (RGD1304624) alternative variant bSep08, mRNA.                                            |
| <a href="#">RGD1304644</a> | <a href="#">RGD1304644.bSep08</a> | <a href="#">311536</a> | 5979   | 782  | 4  | 203 | similar to RIKEN cDNA 2310046K01 (RGD1304644) alternative variant bSep08, mRNA.                                            |
| <a href="#">RGD1304644</a> | <a href="#">RGD1304644.cSep08</a> | <a href="#">311536</a> | 3697   | 969  | 4  | 111 | similar to RIKEN cDNA 2310046K01 (RGD1304644) alternative variant cSep08, mRNA.                                            |
| <a href="#">RGD1304644</a> | <a href="#">RGD1304644.eSep08</a> | <a href="#">311536</a> | 12220  | 1800 | 4  | 57  | similar to RIKEN cDNA 2310046K01 (6.7 kD) (RGD1304644) alternative variant eSep08, mRNA.                                   |
| <a href="#">RGD1304652</a> | <a href="#">RGD1304652.aSep08</a> | <a href="#">690349</a> | 1973   | 632  | 2  | 135 | similar to RIKEN cDNA 1810009A15 (RGD1304652) alternative variant aSep08, mRNA.                                            |
| <a href="#">RGD1304652</a> | <a href="#">RGD1304652.cSep08</a> | <a href="#">690349</a> | 1686   | 507  | 1  | 94  | similar to RIKEN cDNA 1810009A15 (RGD1304652) alternative variant cSep08, mRNA.                                            |
| <a href="#">RGD1304693</a> | <a href="#">RGD1304693.aSep08</a> | <a href="#">313108</a> | 115007 | 1785 | 8  | 489 | putative protein, with at least 2 transmembrane domains, of metazoan origin (RGD1304693) alternative variant aSep08, mRNA. |
| <a href="#">RGD1304693</a> | <a href="#">RGD1304693.bSep08</a> | <a href="#">313108</a> | 50585  | 1203 | 5  | 390 | putative protein of metazoan origin (RGD1304693) alternative variant bSep08, mRNA.                                         |
| <a href="#">RGD1304693</a> | <a href="#">RGD1304693.cSep08</a> | <a href="#">313108</a> | 17633  | 1299 | 7  | 347 | putative protein (RGD1304693) alternative variant cSep08, mRNA.                                                            |
| <a href="#">RGD1304693</a> | <a href="#">RGD1304693.dSep08</a> | <a href="#">313108</a> | 5995   | 1328 | 5  | 202 | putative protein of metazoan origin (22.7 kD) (RGD1304693) alternative variant dSep08, mRNA.                               |
| <a href="#">RGD1304694</a> | <a href="#">RGD1304694.aSep08</a> | <a href="#">362974</a> | 21186  | 2427 | 10 | 370 | similar to CG9646-PA (41.9 kD) (RGD1304694) alternative variant aSep08, mRNA.                                              |
| <a href="#">RGD1304694</a> | <a href="#">RGD1304694.bSep08</a> | <a href="#">362974</a> | 28284  | 600  | 5  | 199 | similar to CG9646-PA (RGD1304694) alternative variant bSep08, mRNA.                                                        |
| <a href="#">RGD1304694</a> | <a href="#">RGD1304694.dSep08</a> | <a href="#">362974</a> | 4197   | 341  | 2  | 108 | similar to CG9646-PA (RGD1304694) alternative variant dSep08, mRNA.                                                        |
| <a href="#">RGD1304704</a> | <a href="#">RGD1304704.bSep08</a> | <a href="#">302247</a> | 10719  | 1006 | 8  | 278 | homeobox prox 1 (RGD1304704) alternative variant bSep08, mRNA.                                                             |
| <a href="#">RGD1304704</a> | <a href="#">RGD1304704.cSep08</a> | <a href="#">302247</a> | 7967   | 1921 | 5  | 161 | putative protein of eukaryotic origin (19.0 kD) (RGD1304704) alternative variant cSep08, mRNA.                             |
| <a href="#">RGD1304704</a> | <a href="#">RGD1304704.dSep08</a> | <a href="#">302247</a> | 5074   | 718  | 5  | 110 | homeobox prox 1 (12.3 kD) (RGD1304704) alternative variant dSep08, mRNA.                                                   |

|                            |                                   |                        |       |      |   |     |                                                                                                                                                                                                                                                          |
|----------------------------|-----------------------------------|------------------------|-------|------|---|-----|----------------------------------------------------------------------------------------------------------------------------------------------------------------------------------------------------------------------------------------------------------|
| <a href="#">RGD1304704</a> | <a href="#">RGD1304704.eSep08</a> | <a href="#">302247</a> | 2282  | 274  | 3 | 46  | homeobox prox 1 (RGD1304704) alternative variant eSep08, mRNA.                                                                                                                                                                                           |
| <a href="#">RGD1304704</a> | <a href="#">RGD1304704.fSep08</a> | <a href="#">302247</a> | 777   | 660  | 2 | 33  | putative protein (3.5 kD) (RGD1304704) alternative variant fSep08, mRNA.                                                                                                                                                                                 |
| <a href="#">RGD1304704</a> | <a href="#">RGD1304704.gSep08</a> | <a href="#">302247</a> | 2794  | 328  | 3 | 24  | putative protein (RGD1304704) alternative variant gSep08, mRNA.                                                                                                                                                                                          |
| <a href="#">RGD1304728</a> | <a href="#">RGD1304728.aSep08</a> | <a href="#">360560</a> | 4223  | 427  |   | 141 | similar to 4933427D14Rik protein (RGD1304728) mRNA.                                                                                                                                                                                                      |
| <a href="#">RGD1304731</a> | <a href="#">RGD1304731.bSep08</a> | <a href="#">291549</a> | 13847 | 956  | 5 | 141 | CRA d (15.3 kD) (RGD1304731) alternative variant bSep08, mRNA.                                                                                                                                                                                           |
| <a href="#">RGD1304731</a> | <a href="#">RGD1304731.cSep08</a> | <a href="#">291549</a> | 4109  | 456  | 3 | 123 | CRA d (RGD1304731) alternative variant cSep08, mRNA.                                                                                                                                                                                                     |
| <a href="#">RGD1304737</a> | <a href="#">RGD1304737.aSep08</a> | <a href="#">314639</a> | 8970  | 548  | 5 | 182 | similar to KIAA1086 protein (RGD1304737) alternative variant aSep08, mRNA.                                                                                                                                                                               |
| <a href="#">RGD1304737</a> | <a href="#">RGD1304737.bSep08</a> | <a href="#">314639</a> | 2193  | 380  | 2 | 110 | similar to KIAA1086 protein (RGD1304737) alternative variant bSep08, mRNA.                                                                                                                                                                               |
| <a href="#">RGD1304774</a> | <a href="#">RGD1304774.bSep08</a> | <a href="#">360969</a> | 1814  | 1199 | 4 | 134 | protein CRA a (RGD1304774) alternative variant bSep08, mRNA.                                                                                                                                                                                             |
| <a href="#">RGD1304774</a> | <a href="#">RGD1304774.cSep08</a> | <a href="#">360969</a> | 2741  | 682  | 4 | 130 | opposite strand transcription unit Stag3 (RGD1304774) alternative variant cSep08, mRNA.                                                                                                                                                                  |
| <a href="#">RGD1304792</a> | <a href="#">RGD1304792.bSep08</a> | <a href="#">312474</a> | 20136 | 1795 | 7 | 598 | putative protein, with a coiled coil domain, of metazoan origin (RGD1304792) alternative variant bSep08, mRNA.                                                                                                                                           |
| <a href="#">RGD1304792</a> | <a href="#">RGD1304792.cSep08</a> | <a href="#">312474</a> | 7087  | 576  | 3 | 192 | putative protein of mammalian origin (RGD1304792) alternative variant cSep08, mRNA.                                                                                                                                                                      |
| <a href="#">RGD1304792</a> | <a href="#">RGD1304792.dSep08</a> | <a href="#">312474</a> | 2192  | 1235 | 2 | 66  | putative protein of mammalian origin (7.4 kD) (RGD1304792) alternative variant dSep08, mRNA.                                                                                                                                                             |
| <a href="#">RGD1304793</a> | <a href="#">RGD1304793.bSep08</a> | <a href="#">313021</a> | 11692 | 1492 | 6 | 166 | similar to hypothetical protein DKFZp564D0478 (18.9 kD) (RGD1304793) alternative variant bSep08, complete mRNA.                                                                                                                                          |
| <a href="#">RGD1304793</a> | <a href="#">RGD1304793.cSep08</a> | <a href="#">313021</a> | 2795  | 1436 | 3 | 157 | similar to hypothetical protein DKFZp564D0478 (18.0 kD) (RGD1304793) alternative variant cSep08, mRNA.                                                                                                                                                   |
| <a href="#">RGD1304808</a> | <a href="#">RGD1304808.aSep08</a> | <a href="#">316440</a> | 11008 | 400  |   | 115 | similar to hypothetical protein FLJ20309 (RGD1304808) mRNA.                                                                                                                                                                                              |
| <a href="#">RGD1304810</a> | <a href="#">RGD1304810.bSep08</a> | <a href="#">306504</a> | 34554 | 795  | 3 | 96  | similar to 6430573F11Rik protein and similar to Ubiquitin-conjugating enzyme E2 E3 (Ubiquitin-protein ligase E3) (Ubiquitin carrier protein E3) (Ubiquitin-conjugating enzyme E2-23 kDa) (UbcM2) (RGD1304810) alternative variant bSep08, mRNA.          |
| <a href="#">RGD1304810</a> | <a href="#">RGD1304810.bSep08</a> | <a href="#">498640</a> | 34554 | 795  | 3 | 96  | similar to 6430573F11Rik protein and similar to Ubiquitin-conjugating enzyme E2 E3 (Ubiquitin-protein ligase E3) (Ubiquitin carrier protein E3) (Ubiquitin-conjugating enzyme E2-23 kDa) (UbcM2) (RGD1304810) alternative variant bSep08, mRNA.          |
| <a href="#">RGD1304810</a> | <a href="#">RGD1304810.cSep08</a> | <a href="#">306504</a> | 2313  | 588  | 2 | 42  | similar to 6430573F11Rik protein and similar to Ubiquitin-conjugating enzyme E2 E3 (Ubiquitin-protein ligase E3) (Ubiquitin carrier protein E3) (Ubiquitin-conjugating enzyme E2-23 kDa) (UbcM2) (4.9 kD) (RGD1304810) alternative variant cSep08, mRNA. |

|                            |                                   |                        |       |      |    |     |                                                                                                                                                                                                                                                          |
|----------------------------|-----------------------------------|------------------------|-------|------|----|-----|----------------------------------------------------------------------------------------------------------------------------------------------------------------------------------------------------------------------------------------------------------|
| <a href="#">RGD1304810</a> | <a href="#">RGD1304810.cSep08</a> | <a href="#">498640</a> | 2313  | 588  | 2  | 42  | similar to 6430573F11Rik protein and similar to Ubiquitin-conjugating enzyme E2 E3 (Ubiquitin-protein ligase E3) (Ubiquitin carrier protein E3) (Ubiquitin-conjugating enzyme E2-23 kDa) (UbcM2) (4.9 kD) (RGD1304810) alternative variant cSep08, mRNA. |
| <a href="#">RGD1304822</a> | <a href="#">RGD1304822.aSep08</a> | <a href="#">295428</a> | 16152 | 2609 | 11 | 493 | similar to KIAA1627 protein (RGD1304822) alternative variant aSep08, mRNA.                                                                                                                                                                               |
| <a href="#">RGD1304868</a> | <a href="#">RGD1304868.aSep08</a> | <a href="#">296550</a> | 8678  | 1740 | 8  | 123 | repeat domain 85 (13.4 kD) (RGD1304868) alternative variant aSep08, mRNA.                                                                                                                                                                                |
| <a href="#">RGD1304868</a> | <a href="#">RGD1304868.bSep08</a> | <a href="#">296550</a> | 3511  | 621  | 5  | 206 | repeat domain 85 (RGD1304868) alternative variant bSep08, mRNA.                                                                                                                                                                                          |
| <a href="#">RGD1304868</a> | <a href="#">RGD1304868.cSep08</a> | <a href="#">296550</a> | 2752  | 1385 | 2  | 162 | putative protein of vertebrate origin (18.0 kD) (RGD1304868) alternative variant cSep08, mRNA.                                                                                                                                                           |
| <a href="#">RGD1304868</a> | <a href="#">RGD1304868.fSep08</a> | <a href="#">296550</a> | 6220  | 1387 | 6  | 127 | repeat domain 85 (RGD1304868) alternative variant fSep08, mRNA.                                                                                                                                                                                          |
| <a href="#">RGD1304868</a> | <a href="#">RGD1304868.iSep08</a> | <a href="#">296550</a> | 844   | 370  | 2  | 33  | putative protein (RGD1304868) alternative variant iSep08, mRNA.                                                                                                                                                                                          |
| <a href="#">RGD1304868</a> | <a href="#">RGD1304868.jSep08</a> | <a href="#">296550</a> | 3414  | 305  | 3  | 91  | putative protein (RGD1304868) alternative variant jSep08, mRNA.                                                                                                                                                                                          |
| <a href="#">RGD1304876</a> | <a href="#">RGD1304876.cSep08</a> | <a href="#">362368</a> | 3587  | 648  | 2  | 61  | similar to RIKEN cDNA A030007L17; EST AA673177 (RGD1304876) alternative variant cSep08, mRNA.                                                                                                                                                            |
| <a href="#">RGD1304878</a> | <a href="#">RGD1304878.aSep08</a> | <a href="#">314415</a> | 21454 | 3902 |    | 819 | similar to 2410024A21Rik protein (RGD1304878) mRNA.                                                                                                                                                                                                      |
| <a href="#">RGD1304881</a> | <a href="#">RGD1304881.bSep08</a> | <a href="#">304653</a> | 2674  | 1050 | 3  | 181 | putative protein of eukaryotic origin (RGD1304881) alternative variant bSep08, mRNA.                                                                                                                                                                     |
| <a href="#">RGD1304881</a> | <a href="#">RGD1304881.cSep08</a> | <a href="#">304653</a> | 1862  | 1252 | 6  | 169 | putative protein of vertebrate origin (19.4 kD) (RGD1304881) alternative variant cSep08, mRNA.                                                                                                                                                           |
| <a href="#">RGD1304881</a> | <a href="#">RGD1304881.dSep08</a> | <a href="#">304653</a> | 2779  | 756  | 5  | 122 | putative protein of eukaryotic origin (RGD1304881) alternative variant dSep08, mRNA.                                                                                                                                                                     |
| <a href="#">RGD1304881</a> | <a href="#">RGD1304881.eSep08</a> | <a href="#">304653</a> | 2331  | 790  | 2  | 77  | putative protein of vertebrate origin (RGD1304881) alternative variant eSep08, mRNA.                                                                                                                                                                     |
| <a href="#">RGD1304884</a> | <a href="#">RGD1304884.bSep08</a> | <a href="#">307907</a> | 7447  | 625  | 6  | 139 | CRA a (RGD1304884) alternative variant bSep08, mRNA.                                                                                                                                                                                                     |
| <a href="#">RGD1304884</a> | <a href="#">RGD1304884.cSep08</a> | <a href="#">307907</a> | 29802 | 608  | 2  | 104 | putative protein (RGD1304884) alternative variant cSep08, mRNA.                                                                                                                                                                                          |
| <a href="#">RGD1304884</a> | <a href="#">RGD1304884.dSep08</a> | <a href="#">307907</a> | 29930 | 352  | 2  | 94  | putative protein (RGD1304884) alternative variant dSep08, mRNA.                                                                                                                                                                                          |
| <a href="#">RGD1304884</a> | <a href="#">RGD1304884.eSep08</a> | <a href="#">307907</a> | 1157  | 415  | 2  | 61  | putative protein (RGD1304884) alternative variant eSep08, mRNA.                                                                                                                                                                                          |
| <a href="#">RGD1304904</a> | <a href="#">RGD1304904.aSep08</a> | <a href="#">296130</a> | 1663  | 678  |    | 176 | similar to mitochondrial glycerol 3-phosphate acyltransferase (RGD1304904) mRNA.                                                                                                                                                                         |
| <a href="#">RGD1304924</a> | <a href="#">RGD1304924.bSep08</a> | <a href="#">302982</a> | 2768  | 1365 | 6  | 315 | similar to hypothetical protein FLJ31364 (RGD1304924) alternative variant bSep08, mRNA.                                                                                                                                                                  |
| <a href="#">RGD1304924</a> | <a href="#">RGD1304924.cSep08</a> | <a href="#">302982</a> | 2633  | 2052 | 5  | 194 | similar to hypothetical protein FLJ31364 (RGD1304924) alternative variant cSep08, mRNA.                                                                                                                                                                  |
| <a href="#">RGD1304924</a> | <a href="#">RGD1304924.dSep08</a> | <a href="#">302982</a> | 1593  | 687  | 3  | 179 | similar to hypothetical protein FLJ31364 (RGD1304924) alternative variant dSep08, mRNA.                                                                                                                                                                  |
| <a href="#">RGD1304924</a> | <a href="#">RGD1304924.eSep08</a> | <a href="#">302982</a> | 1187  | 681  | 4  | 136 | similar to hypothetical protein FLJ31364 (RGD1304924) alternative variant eSep08, mRNA.                                                                                                                                                                  |



|                            |                                   |                        |       |      |    |     |                                                                                                                        |
|----------------------------|-----------------------------------|------------------------|-------|------|----|-----|------------------------------------------------------------------------------------------------------------------------|
| <a href="#">RGD1304924</a> | <a href="#">RGD1304924.fSep08</a> | <a href="#">302982</a> | 937   | 475  | 2  | 72  | similar to hypothetical protein FLJ31364 (RGD1304924) alternative variant fSep08, mRNA.                                |
| <a href="#">RGD1304929</a> | <a href="#">RGD1304929.aSep08</a> | <a href="#">290403</a> | 4613  | 762  |    | 217 | putative protein of eukaryotic origin (RGD1304929) mRNA.                                                               |
| <a href="#">RGD1304952</a> | <a href="#">RGD1304952.aSep08</a> | <a href="#">312711</a> | 4116  | 2041 | 3  | 304 | similar to RIKEN cDNA C530028O21 gene (RGD1304952) alternative variant aSep08, mRNA.                                   |
| <a href="#">RGD1304953</a> | <a href="#">RGD1304953.aSep08</a> | <a href="#">361979</a> | 9572  | 426  | 1  | 141 | similar to SSTK-interacting protein (RGD1304953) alternative variant aSep08, mRNA.                                     |
| <a href="#">RGD1304963</a> | <a href="#">RGD1304963.aSep08</a> | <a href="#">313891</a> | 4968  | 1178 |    | 119 | similar to hypothetical protein MGC38716 (RGD1304963) mRNA.                                                            |
| <a href="#">RGD1304982</a> | <a href="#">RGD1304982.aSep08</a> | <a href="#">289138</a> | 32080 | 1867 | 4  | 352 | similar to RIKEN cDNA 2810025M15 (RGD1304982) alternative variant aSep08, mRNA.                                        |
| <a href="#">RGD1304982</a> | <a href="#">RGD1304982.cSep08</a> | <a href="#">289138</a> | 18707 | 735  | 2  | 165 | similar to RIKEN cDNA 2810025M15 (RGD1304982) alternative variant cSep08, mRNA.                                        |
| <a href="#">RGD1304999</a> | <a href="#">RGD1304999.bSep08</a> | <a href="#">289833</a> | 2375  | 412  | 2  | 69  | similar to 4930430E16Rik protein (RGD1304999) alternative variant bSep08, mRNA.                                        |
| <a href="#">RGD1305007</a> | <a href="#">RGD1305007.cSep08</a> | <a href="#">303749</a> | 1355  | 304  | 3  | 58  | similar to RIKEN cDNA 1110031I02 (RGD1305007) alternative variant cSep08, mRNA.                                        |
| <a href="#">RGD1305007</a> | <a href="#">RGD1305007.dSep08</a> | <a href="#">303749</a> | 1661  | 693  | 2  | 78  | similar to RIKEN cDNA 1110031I02 (8.8 kD) (RGD1305007) alternative variant dSep08, mRNA.                               |
| <a href="#">RGD1305020</a> | <a href="#">RGD1305020.bSep08</a> | <a href="#">311575</a> | 62219 | 743  | 5  | 171 | similar to Hepatocellular carcinoma-associated antigen 58 homolog (RGD1305020) alternative variant bSep08, mRNA.       |
| <a href="#">RGD1305038</a> | <a href="#">RGD1305038.aSep08</a> | <a href="#">314627</a> | 4370  | 1777 |    | 525 | similar to Serine/threonine-protein kinase SNK (Serum inducible kinase) (RGD1305038) alternative variant aSep08, mRNA. |
| <a href="#">RGD1305038</a> | <a href="#">RGD1305038.bSep08</a> | <a href="#">314627</a> | 2510  | 753  |    | 250 | similar to Serine/threonine-protein kinase SNK (Serum inducible kinase) (RGD1305038) alternative variant bSep08, mRNA. |
| <a href="#">RGD1305038</a> | <a href="#">RGD1305038.cSep08</a> | <a href="#">314627</a> | 1413  | 502  |    | 100 | similar to Serine/threonine-protein kinase SNK (Serum inducible kinase) (RGD1305038) alternative variant cSep08, mRNA. |
| <a href="#">RGD1305045</a> | <a href="#">RGD1305045.aSep08</a> | <a href="#">296050</a> | 10371 | 1102 | 2  | 241 | similar to hypothetical protein (26.4 kD) (RGD1305045) alternative variant aSep08, mRNA.                               |
| <a href="#">RGD1305045</a> | <a href="#">RGD1305045.cSep08</a> | <a href="#">296050</a> | 8882  | 352  | 1  | 116 | similar to hypothetical protein (RGD1305045) alternative variant cSep08, mRNA.                                         |
| <a href="#">RGD1305090</a> | <a href="#">RGD1305090.aSep08</a> | <a href="#">362598</a> | 14600 | 1829 | 8  | 575 | similar to CD2-associated protein (RGD1305090) alternative variant aSep08, mRNA.                                       |
| <a href="#">RGD1305090</a> | <a href="#">RGD1305090.bSep08</a> | <a href="#">362598</a> | 800   | 244  | 1  | 81  | similar to CD2-associated protein (RGD1305090) alternative variant bSep08, mRNA.                                       |
| <a href="#">RGD1305094</a> | <a href="#">RGD1305094.aSep08</a> | <a href="#">304649</a> | 1990  | 1353 | 4  | 268 | similar to CG2662-PA (RGD1305094) alternative variant aSep08, mRNA.                                                    |
| <a href="#">RGD1305094</a> | <a href="#">RGD1305094.bSep08</a> | <a href="#">304649</a> | 906   | 822  | 1  | 91  | similar to CG2662-PA (RGD1305094) alternative variant bSep08, mRNA.                                                    |
| <a href="#">RGD1305110</a> | <a href="#">RGD1305110.aSep08</a> | <a href="#">305579</a> | 37796 | 1809 | 10 | 548 | similar to KIAA1841 protein (RGD1305110) alternative variant aSep08, mRNA.                                             |
| <a href="#">RGD1305138</a> | <a href="#">RGD1305138.bSep08</a> | <a href="#">315329</a> | 1151  | 1067 | 2  | 286 | similar to expressed sequence AW556797 (RGD1305138) alternative variant bSep08, mRNA.                                  |

|                            |                                   |                        |        |      |    |     |                                                                                                            |
|----------------------------|-----------------------------------|------------------------|--------|------|----|-----|------------------------------------------------------------------------------------------------------------|
| <a href="#">RGD1305157</a> | <a href="#">RGD1305157.aSep08</a> | <a href="#">316090</a> | 30560  | 2214 |    | 564 | similar to hypothetical basic protein I-19 (62.5 kD) (RGD1305157) mRNA.                                    |
| <a href="#">RGD1305158</a> | <a href="#">RGD1305158.aSep08</a> | <a href="#">297971</a> | 8702   | 627  | 3  | 97  | similar to RIKEN cDNA 1810030N24 (11.0 kD) (RGD1305158) alternative variant aSep08, complete mRNA.         |
| <a href="#">RGD1305158</a> | <a href="#">RGD1305158.bSep08</a> | <a href="#">297971</a> | 6529   | 520  | 2  | 95  | similar to RIKEN cDNA 1810030N24 (10.8 kD) (RGD1305158) alternative variant bSep08, complete mRNA.         |
| <a href="#">RGD1305158</a> | <a href="#">RGD1305158.cSep08</a> | <a href="#">297971</a> | 8680   | 550  | 3  | 93  | similar to RIKEN cDNA 1810030N24 (RGD1305158) alternative variant cSep08, mRNA.                            |
| <a href="#">RGD1305158</a> | <a href="#">RGD1305158.eSep08</a> | <a href="#">297971</a> | 8821   | 589  | 2  | 6   | similar to RIKEN cDNA 1810030N24 (0.7 kD) (RGD1305158) alternative variant eSep08, complete mRNA.          |
| <a href="#">RGD1305178</a> | <a href="#">RGD1305178.aSep08</a> | <a href="#">311855</a> | 8291   | 1321 | 4  | 289 | similar to Hypothetical protein MGC11690 (33.5 kD) (RGD1305178) alternative variant aSep08, complete mRNA. |
| <a href="#">RGD1305211</a> | <a href="#">RGD1305211.bSep08</a> | <a href="#">365314</a> | 1425   | 763  | 1  | 64  | similar to RIKEN cDNA 2610209A20 (RGD1305211) alternative variant bSep08, mRNA.                            |
| <a href="#">RGD1305215</a> | <a href="#">RGD1305215.bSep08</a> | <a href="#">307643</a> | 5371   | 385  | 1  | 128 | similar to expressed sequence AA960436 (RGD1305215) alternative variant bSep08, mRNA.                      |
| <a href="#">RGD1305222</a> | <a href="#">RGD1305222.aSep08</a> | <a href="#">290686</a> | 15944  | 974  |    | 221 | similar to RIKEN cDNA 1810029B16 (25.8 kD) (RGD1305222) mRNA.                                              |
| <a href="#">RGD1305225</a> | <a href="#">RGD1305225.bSep08</a> | <a href="#">297458</a> | 15814  | 513  | 5  | 21  | similar to RIKEN cDNA C130022K22 gene (2.6 kD) (RGD1305225) alternative variant bSep08, complete mRNA.     |
| <a href="#">RGD1305235</a> | <a href="#">RGD1305235.bSep08</a> | <a href="#">292267</a> | 20608  | 421  | 3  | 139 | similar to RIKEN cDNA 1700052N19 (RGD1305235) alternative variant bSep08, mRNA.                            |
| <a href="#">RGD1305235</a> | <a href="#">RGD1305235.cSep08</a> | <a href="#">292267</a> | 7262   | 880  | 3  | 136 | similar to RIKEN cDNA 1700052N19 (16.0 kD) (RGD1305235) alternative variant cSep08, mRNA.                  |
| <a href="#">RGD1305235</a> | <a href="#">RGD1305235.dSep08</a> | <a href="#">292267</a> | 5958   | 483  | 5  | 79  | similar to RIKEN cDNA 1700052N19 (RGD1305235) alternative variant dSep08, mRNA.                            |
| <a href="#">RGD1305254</a> | <a href="#">RGD1305254.aSep08</a> | <a href="#">308797</a> | 2592   | 350  |    | 116 | similar to transmembrane protein 2 (RGD1305254) mRNA.                                                      |
| <a href="#">RGD1305256</a> | <a href="#">RGD1305256.aSep08</a> | <a href="#">311443</a> | 7312   | 1185 |    | 394 | neuronal leucine rich (RGD1305256) mRNA.                                                                   |
| <a href="#">RGD1305269</a> | <a href="#">RGD1305269.aSep08</a> | <a href="#">305332</a> | 87097  | 5787 | 21 | 914 | similar to hypothetical protein (102.9 kD) (RGD1305269) alternative variant aSep08, mRNA.                  |
| <a href="#">RGD1305269</a> | <a href="#">RGD1305269.bSep08</a> | <a href="#">305332</a> | 254110 | 1168 | 8  | 389 | similar to hypothetical protein (RGD1305269) alternative variant bSep08, mRNA.                             |
| <a href="#">RGD1305269</a> | <a href="#">RGD1305269.cSep08</a> | <a href="#">305332</a> | 13851  | 806  | 8  | 268 | similar to hypothetical protein (RGD1305269) alternative variant cSep08, mRNA.                             |
| <a href="#">RGD1305269</a> | <a href="#">RGD1305269.dSep08</a> | <a href="#">305332</a> | 23130  | 822  | 4  | 237 | similar to hypothetical protein (RGD1305269) alternative variant dSep08, mRNA.                             |
| <a href="#">RGD1305269</a> | <a href="#">RGD1305269.eSep08</a> | <a href="#">305332</a> | 10888  | 361  | 4  | 104 | similar to hypothetical protein (RGD1305269) alternative variant eSep08, mRNA.                             |
| <a href="#">RGD1305283</a> | <a href="#">RGD1305283.aSep08</a> | <a href="#">363162</a> | 58007  | 680  | 2  | 106 | similar to RIKEN cDNA 2010110K16 (12.6 kD) (RGD1305283) alternative variant aSep08, mRNA.                  |
| <a href="#">RGD1305283</a> | <a href="#">RGD1305283.bSep08</a> | <a href="#">363162</a> | 51304  | 425  | 1  | 83  | similar to RIKEN cDNA 2010110K16 (RGD1305283) alternative variant bSep08, mRNA.                            |

|                            |                                   |                        |       |      |    |     |                                                                                                                                                                           |
|----------------------------|-----------------------------------|------------------------|-------|------|----|-----|---------------------------------------------------------------------------------------------------------------------------------------------------------------------------|
| <a href="#">RGD1305288</a> | <a href="#">RGD1305288.aSep08</a> | <a href="#">305882</a> | 7036  | 1248 | 7  | 326 | uncharacterized protein (RGD1305288) alternative variant aSep08, mRNA.                                                                                                    |
| <a href="#">RGD1305288</a> | <a href="#">RGD1305288.cSep08</a> | <a href="#">305882</a> | 1331  | 900  | 3  | 177 | putative nuclear protein, with a coiled coil domain, of metazoan origin (20.9 kD) (RGD1305288) alternative variant cSep08, mRNA.                                          |
| <a href="#">RGD1305288</a> | <a href="#">RGD1305288.dSep08</a> | <a href="#">305882</a> | 1332  | 798  | 4  | 176 | uncharacterized protein (RGD1305288) alternative variant dSep08, mRNA.                                                                                                    |
| <a href="#">RGD1305311</a> | <a href="#">RGD1305311.aSep08</a> | <a href="#">316616</a> | 41582 | 1103 |    | 367 | similar to hypothetical protein FLJ22527 (RGD1305311) mRNA.                                                                                                               |
| <a href="#">RGD1305344</a> | <a href="#">RGD1305344.aSep08</a> | <a href="#">308557</a> | 3851  | 633  | 5  | 144 | similar to Opioid binding protein/cell adhesion molecule precursor (OBCAM) (Opioid-binding cell adhesion molecule) (OPCML) (RGD1305344) alternative variant aSep08, mRNA. |
| <a href="#">RGD1305347</a> | <a href="#">RGD1305347.aSep08</a> | <a href="#">362576</a> | 2673  | 697  | 1  | 113 | similar to RIKEN cDNA 2610528J11 (RGD1305347) alternative variant aSep08, mRNA.                                                                                           |
| <a href="#">RGD1305350</a> | <a href="#">RGD1305350.aSep08</a> | <a href="#">313699</a> | 6108  | 2594 | 3  | 635 | similar to RIKEN cDNA 2510039O18 (RGD1305350) alternative variant aSep08, mRNA.                                                                                           |
| <a href="#">RGD1305351</a> | <a href="#">RGD1305351.bSep08</a> | <a href="#">300663</a> | 1682  | 838  | 1  | 67  | hypothetical LOC300663 (7.3 kD) (RGD1305351) alternative variant bSep08, mRNA.                                                                                            |
| <a href="#">RGD1305362</a> | <a href="#">RGD1305362.aSep08</a> | <a href="#">303155</a> | 13647 | 977  | 2  | 298 | similar to RIKEN cDNA 9030624B09 (RGD1305362) alternative variant aSep08, mRNA.                                                                                           |
| <a href="#">RGD1305362</a> | <a href="#">RGD1305362.bSep08</a> | <a href="#">303155</a> | 12165 | 842  | 2  | 253 | similar to RIKEN cDNA 9030624B09 (RGD1305362) alternative variant bSep08, mRNA.                                                                                           |
| <a href="#">RGD1305362</a> | <a href="#">RGD1305362.cSep08</a> | <a href="#">303155</a> | 12141 | 812  | 2  | 247 | similar to RIKEN cDNA 9030624B09 (RGD1305362) alternative variant cSep08, mRNA.                                                                                           |
| <a href="#">RGD1305362</a> | <a href="#">RGD1305362.dSep08</a> | <a href="#">303155</a> | 12118 | 792  | 2  | 237 | similar to RIKEN cDNA 9030624B09 (RGD1305362) alternative variant dSep08, mRNA.                                                                                           |
| <a href="#">RGD1305415</a> | <a href="#">RGD1305415.aSep08</a> | <a href="#">362958</a> | 15444 | 527  |    | 175 | similar to CG11259-PA (RGD1305415) mRNA.                                                                                                                                  |
| <a href="#">RGD1305420</a> | <a href="#">RGD1305420.bSep08</a> | <a href="#">298072</a> | 2019  | 523  |    | 139 | similar to Nef associated protein 1 (RGD1305420) alternative variant bSep08, mRNA.                                                                                        |
| <a href="#">RGD1305422</a> | <a href="#">RGD1305422.aSep08</a> | <a href="#">303885</a> | 7589  | 3387 | 7  | 388 | similar to mKIAA0226 protein (RGD1305422) alternative variant aSep08, mRNA.                                                                                               |
| <a href="#">RGD1305440</a> | <a href="#">RGD1305440.bSep08</a> | <a href="#">296161</a> | 8588  | 462  | 2  | 101 | similar to Rnf37-pending protein (RGD1305440) alternative variant bSep08, mRNA.                                                                                           |
| <a href="#">RGD1305440</a> | <a href="#">RGD1305440.cSep08</a> | <a href="#">296161</a> | 41501 | 1128 | 5  | 96  | similar to Rnf37-pending protein (10.7 kD) (RGD1305440) alternative variant cSep08, mRNA.                                                                                 |
| <a href="#">RGD1305440</a> | <a href="#">RGD1305440.dSep08</a> | <a href="#">296161</a> | 31527 | 743  | 3  | 64  | similar to Rnf37-pending protein (RGD1305440) alternative variant dSep08, mRNA.                                                                                           |
| <a href="#">RGD1305441</a> | <a href="#">RGD1305441.aSep08</a> | <a href="#">365407</a> | 23951 | 3663 | 11 | 471 | pre-mRNA cleavage factor I subunit (52.0 kD) (RGD1305441) alternative variant aSep08, complete mRNA.                                                                      |
| <a href="#">RGD1305441</a> | <a href="#">RGD1305441.cSep08</a> | <a href="#">365407</a> | 4763  | 1363 | 5  | 213 | pre-mRNA cleavage factor I subunit (22.8 kD) (RGD1305441) alternative variant cSep08, mRNA.                                                                               |
| <a href="#">RGD1305441</a> | <a href="#">RGD1305441.dSep08</a> | <a href="#">365407</a> | 4165  | 738  | 5  | 202 | pre-mRNA cleavage factor I subunit (RGD1305441) alternative variant dSep08, mRNA.                                                                                         |
| <a href="#">RGD1305441</a> | <a href="#">RGD1305441.eSep08</a> | <a href="#">365407</a> | 3015  | 363  | 3  | 120 | pre-mRNA cleavage factor I subunit (RGD1305441) alternative variant eSep08, mRNA.                                                                                         |

|                                               |                                                     |                        |        |      |   |     |                                                                                                                             |
|-----------------------------------------------|-----------------------------------------------------|------------------------|--------|------|---|-----|-----------------------------------------------------------------------------------------------------------------------------|
| <a href="#">RGD1305441</a>                    | <a href="#">RGD1305441.fSep08</a>                   | <a href="#">365407</a> | 6987   | 578  | 3 | 99  | pre-mRNA cleavage factor I subunit (11.0 kD) (RGD1305441) alternative variant fSep08, mRNA.                                 |
| <a href="#">RGD1305441</a>                    | <a href="#">RGD1305441.gSep08</a>                   | <a href="#">365407</a> | 7993   | 1888 | 2 | 69  | putative protein (7.4 kD) (RGD1305441) alternative variant gSep08, mRNA.                                                    |
| <a href="#">RGD1305441</a>                    | <a href="#">RGD1305441.hSep08</a>                   | <a href="#">365407</a> | 6735   | 768  | 3 | 64  | putative protein (RGD1305441) alternative variant hSep08, mRNA.                                                             |
| <a href="#">RGD1305457</a>                    | <a href="#">RGD1305457.bSep08</a>                   | <a href="#">314730</a> | 19443  | 1334 | 3 | 345 | similar to RIKEN cDNA 1700023M03 (38.3 kD) (RGD1305457) alternative variant bSep08, mRNA.                                   |
| <a href="#">RGD1305457</a>                    | <a href="#">RGD1305457.cSep08</a>                   | <a href="#">314730</a> | 17562  | 896  | 4 | 105 | similar to RIKEN cDNA 1700023M03 (11.6 kD) (RGD1305457) alternative variant cSep08, mRNA.                                   |
| <a href="#">RGD1305481</a>                    | <a href="#">RGD1305481.aSep08</a>                   | <a href="#">294030</a> | 4024   | 1363 | 4 | 280 | hypothetical LOC294030 (RGD1305481) alternative variant aSep08, mRNA.                                                       |
| <a href="#">RGD1305481</a>                    | <a href="#">RGD1305481.cSep08</a>                   | <a href="#">294030</a> | 3402   | 870  | 4 | 243 | hypothetical LOC294030 (27.6 kD) (RGD1305481) alternative variant cSep08, mRNA.                                             |
| <a href="#">RGD1305481</a>                    | <a href="#">RGD1305481.dSep08</a>                   | <a href="#">294030</a> | 1748   | 604  | 2 | 200 | hypothetical LOC294030 (RGD1305481) alternative variant dSep08, mRNA.                                                       |
| <a href="#">RGD1305481</a>                    | <a href="#">RGD1305481.eSep08</a>                   | <a href="#">294030</a> | 1595   | 706  | 2 | 62  | hypothetical LOC294030 (6.5 kD) (RGD1305481) alternative variant eSep08, complete mRNA.                                     |
| <a href="#">RGD1305500</a>                    | <a href="#">RGD1305500.bSep08</a>                   | <a href="#">308004</a> | 6008   | 476  | 3 | 108 | similar to hypothetical protein FLJ13188 (RGD1305500) alternative variant bSep08, mRNA.                                     |
| <a href="#">RGD1305500</a>                    | <a href="#">RGD1305500.cSep08</a>                   | <a href="#">308004</a> | 9544   | 337  | 3 | 52  | similar to hypothetical protein FLJ13188 (RGD1305500) alternative variant cSep08, mRNA.                                     |
| <a href="#">RGD1305508</a>                    | <a href="#">RGD1305508.aSep08</a>                   | <a href="#">303275</a> | 3668   | 1564 |   | 194 | similar to hypothetical protein MGC23280 (RGD1305508) mRNA.                                                                 |
| <a href="#">RGD1305526</a>                    | <a href="#">RGD1305526.bSep08</a>                   | <a href="#">294606</a> | 168259 | 753  | 7 | 172 | CRA a (RGD1305526) alternative variant bSep08, mRNA.                                                                        |
| <a href="#">RGD1305526</a>                    | <a href="#">RGD1305526.cSep08</a>                   | <a href="#">294606</a> | 33036  | 277  | 3 | 71  | putative protein (RGD1305526) alternative variant cSep08, mRNA.                                                             |
| <a href="#">RGD1305534</a>                    | <a href="#">RGD1305534.aSep08</a>                   | <a href="#">315864</a> | 14104  | 1872 |   | 356 | similar to dJ202D23.2 (novel protein similar to C21ORF5 (KIAA0933)) (RGD1305534) mRNA.                                      |
| <a href="#">RGD1305539</a>                    | <a href="#">RGD1305539.aSep08</a>                   | <a href="#">303920</a> | 17315  | 936  |   | 311 | similar to hypothetical protein (RGD1305539) mRNA.                                                                          |
| <a href="#">RGD1305560</a>                    | <a href="#">RGD1305560.aSep08</a>                   | <a href="#">301561</a> | 44747  | 372  |   | 123 | similar to RIKEN cDNA 9430031J16 (RGD1305560) mRNA.                                                                         |
| <a href="#">RGD1305572</a>                    | <a href="#">RGD1305572.bSep08</a>                   | <a href="#">289315</a> | 7766   | 666  | 5 | 222 | similar to hypothetical protein MGC30618 (RGD1305572) alternative variant bSep08, mRNA.                                     |
| <a href="#">RGD1305572</a>                    | <a href="#">RGD1305572.cSep08</a>                   | <a href="#">289315</a> | 3261   | 963  | 3 | 220 | similar to hypothetical protein MGC30618 (RGD1305572) alternative variant cSep08, mRNA.                                     |
| <a href="#">RGD1305587</a>                    | <a href="#">RGD1305587.aSep08</a>                   | <a href="#">294499</a> | 2402   | 715  | 1 | 144 | similar to RIKEN cDNA 2010107G23 (RGD1305587) alternative variant aSep08, mRNA.                                             |
| <a href="#">RGD1305592</a>                    | <a href="#">RGD1305592.aSep08</a>                   | <a href="#">293500</a> | 1832   | 945  | 2 | 227 | similar to RIKEN cDNA 2900092E17 (RGD1305592) alternative variant aSep08, mRNA.                                             |
| <a href="#">RGD1305604and<br/>dRGD1564921</a> | <a href="#">RGD1305604andRGD1<br/>564921.aSep08</a> | <a href="#">362580</a> | 16115  | 927  | 6 | 199 | similar to CG2919-PA and similar to peptidyl prolyl isomerase H (RGD1305604andRGD1564921) alternative variant aSep08, mRNA. |
| <a href="#">RGD1305604and<br/>dRGD1564921</a> | <a href="#">RGD1305604andRGD1<br/>564921.aSep08</a> | <a href="#">366461</a> | 16115  | 927  | 6 | 199 | similar to CG2919-PA and similar to peptidyl prolyl isomerase H (RGD1305604andRGD1564921) alternative variant aSep08, mRNA. |

|                                         |                                                |                        |       |      |    |     |                                                                                                                                      |
|-----------------------------------------|------------------------------------------------|------------------------|-------|------|----|-----|--------------------------------------------------------------------------------------------------------------------------------------|
| <a href="#">RGD1305604andRGD1564921</a> | <a href="#">RGD1305604andRGD1564921.bSep08</a> | <a href="#">362580</a> | 919   | 563  | 2  | 38  | similar to CG2919-PA and similar to peptidyl prolyl isomerase H (4.3 kD) (RGD1305604andRGD1564921) alternative variant bSep08, mRNA. |
| <a href="#">RGD1305604andRGD1564921</a> | <a href="#">RGD1305604andRGD1564921.bSep08</a> | <a href="#">366461</a> | 919   | 563  | 2  | 38  | similar to CG2919-PA and similar to peptidyl prolyl isomerase H (4.3 kD) (RGD1305604andRGD1564921) alternative variant bSep08, mRNA. |
| <a href="#">RGD1305613</a>              | <a href="#">RGD1305613.aSep08</a>              | <a href="#">361648</a> | 4584  | 1991 | 9  | 342 | spinster (36.7 kD) (RGD1305613) alternative variant aSep08, mRNA.                                                                    |
| <a href="#">RGD1305613</a>              | <a href="#">RGD1305613.cSep08</a>              | <a href="#">361648</a> | 7277  | 2926 | 10 | 270 | spinster (29.1 kD) (RGD1305613) alternative variant cSep08, complete mRNA.                                                           |
| <a href="#">RGD1305613</a>              | <a href="#">RGD1305613.dSep08</a>              | <a href="#">361648</a> | 4370  | 1476 | 9  | 229 | spinster (24.2 kD) (RGD1305613) alternative variant dSep08, mRNA.                                                                    |
| <a href="#">RGD1305613</a>              | <a href="#">RGD1305613.eSep08</a>              | <a href="#">361648</a> | 2215  | 674  | 3  | 189 | spinster (RGD1305613) alternative variant eSep08, mRNA.                                                                              |
| <a href="#">RGD1305613</a>              | <a href="#">RGD1305613.fSep08</a>              | <a href="#">361648</a> | 1933  | 653  | 4  | 133 | spinster (RGD1305613) alternative variant fSep08, mRNA.                                                                              |
| <a href="#">RGD1305613</a>              | <a href="#">RGD1305613.gSep08</a>              | <a href="#">361648</a> | 1384  | 628  | 2  | 57  | spinster (6.6 kD) (RGD1305613) alternative variant gSep08, mRNA.                                                                     |
| <a href="#">RGD1305628</a>              | <a href="#">RGD1305628.aSep08</a>              | <a href="#">288204</a> | 44496 | 3100 | 10 | 425 | similar to Hypothetical protein 5031404N19 (RGD1305628) alternative variant aSep08, mRNA.                                            |
| <a href="#">RGD1305628</a>              | <a href="#">RGD1305628.bSep08</a>              | <a href="#">288204</a> | 1746  | 708  | 2  | 128 | similar to Hypothetical protein 5031404N19 (RGD1305628) alternative variant bSep08, mRNA.                                            |
| <a href="#">RGD1305645</a>              | <a href="#">RGD1305645.aSep08</a>              | <a href="#">363225</a> | 19887 | 691  | 1  | 173 | similar to RIKEN cDNA 1500015O10 (RGD1305645) alternative variant aSep08, mRNA.                                                      |
| <a href="#">RGD1305645</a>              | <a href="#">RGD1305645.bSep08</a>              | <a href="#">363225</a> | 19560 | 814  | 1  | 148 | similar to RIKEN cDNA 1500015O10 (16.9 kD) (RGD1305645) alternative variant bSep08, mRNA.                                            |
| <a href="#">RGD1305645</a>              | <a href="#">RGD1305645.cSep08</a>              | <a href="#">363225</a> | 55342 | 612  | 1  | 126 | similar to RIKEN cDNA 1500015O10 (14.9 kD) (RGD1305645) alternative variant cSep08, mRNA.                                            |
| <a href="#">RGD1305685</a>              | <a href="#">RGD1305685.bSep08</a>              | <a href="#">360811</a> | 3542  | 395  | 3  | 107 | similar to hypothetical protein FLJ13089 (RGD1305685) alternative variant bSep08, mRNA.                                              |
| <a href="#">RGD1305685</a>              | <a href="#">RGD1305685.cSep08</a>              | <a href="#">360811</a> | 3054  | 1002 | 2  | 83  | similar to hypothetical protein FLJ13089 (RGD1305685) alternative variant cSep08, mRNA.                                              |
| <a href="#">RGD1305685</a>              | <a href="#">RGD1305685.eSep08</a>              | <a href="#">360811</a> | 1666  | 422  | 2  | 21  | similar to hypothetical protein FLJ13089 (RGD1305685) alternative variant eSep08, mRNA.                                              |
| <a href="#">RGD1305689</a>              | <a href="#">RGD1305689.aSep08</a>              | <a href="#">290529</a> | 3053  | 545  | 1  | 142 | similar to DNA segment, Chr 14, ERATO Doi 449, expressed (RGD1305689) alternative variant aSep08, mRNA.                              |
| <a href="#">RGD1305697</a>              | <a href="#">RGD1305697.bSep08</a>              | <a href="#">296846</a> | 11952 | 741  | 3  | 238 | similar to hypothetical protein FLJ25530 (RGD1305697) alternative variant bSep08, mRNA.                                              |
| <a href="#">RGD1305713</a>              | <a href="#">RGD1305713.bSep08</a>              | <a href="#">293059</a> | 6996  | 495  | 4  | 150 | similar to RIKEN cDNA 3110040N11 (RGD1305713) alternative variant bSep08, mRNA.                                                      |
| <a href="#">RGD1305713</a>              | <a href="#">RGD1305713.cSep08</a>              | <a href="#">293059</a> | 4613  | 607  | 4  | 150 | similar to RIKEN cDNA 3110040N11 (RGD1305713) alternative variant cSep08, mRNA.                                                      |
| <a href="#">RGD1305725andRGD1561297</a> | <a href="#">RGD1305725andRGD1561297.aSep08</a> | <a href="#">362255</a> | 27085 | 1103 | 1  | 165 | similar to Rpl7a protein (RGD1305725andRGD1561297) alternative variant aSep08, mRNA.                                                 |
| <a href="#">RGD1305725andRGD1561297</a> | <a href="#">RGD1305725andRGD1561297.aSep08</a> | <a href="#">366239</a> | 27085 | 1103 | 1  | 165 | similar to Rpl7a protein (RGD1305725andRGD1561297) alternative variant aSep08, mRNA.                                                 |
| <a href="#">RGD1305725andRGD1561297</a> | <a href="#">RGD1305725andRGD1561297.bSep08</a> | <a href="#">362255</a> | 7777  | 474  | 1  | 108 | similar to Rpl7a protein (RGD1305725andRGD1561297) alternative variant bSep08, mRNA.                                                 |

|                                         |                                                |                        |        |      |   |     |                                                                                                                |
|-----------------------------------------|------------------------------------------------|------------------------|--------|------|---|-----|----------------------------------------------------------------------------------------------------------------|
| <a href="#">RGD1305725andRGD1561297</a> | <a href="#">RGD1305725andRGD1561297.bSep08</a> | <a href="#">366239</a> | 7777   | 474  | 1 | 108 | similar to Rpl7a protein (RGD1305725andRGD1561297) alternative variant bSep08, mRNA.                           |
| <a href="#">RGD1305727</a>              | <a href="#">RGD1305727.bSep08</a>              | <a href="#">306768</a> | 1389   | 1304 | 1 | 96  | similar to Protein CGI-117 (Protein HSPC111) (11.2 kD) (RGD1305727) alternative variant bSep08, complete mRNA. |
| <a href="#">RGD1305733</a>              | <a href="#">RGD1305733.bSep08</a>              | <a href="#">360459</a> | 6914   | 555  | 1 | 167 | similar to RIKEN cDNA 2900011O08 (RGD1305733) alternative variant bSep08, mRNA.                                |
| <a href="#">RGD1305793</a>              | <a href="#">RGD1305793.bSep08</a>              | <a href="#">309456</a> | 44145  | 705  | 2 | 114 | similar to hypothetical protein FLJ20154 (RGD1305793) alternative variant bSep08, mRNA.                        |
| <a href="#">RGD1305793</a>              | <a href="#">RGD1305793.cSep08</a>              | <a href="#">309456</a> | 1176   | 757  | 2 | 100 | similar to hypothetical protein FLJ20154 (RGD1305793) alternative variant cSep08, mRNA.                        |
| <a href="#">RGD1305793</a>              | <a href="#">RGD1305793.eSep08</a>              | <a href="#">309456</a> | 30356  | 497  | 4 | 110 | similar to hypothetical protein FLJ20154 (RGD1305793) alternative variant eSep08, mRNA.                        |
| <a href="#">RGD1305797</a>              | <a href="#">RGD1305797.bSep08</a>              | <a href="#">298186</a> | 97696  | 1780 | 2 | 516 | similar to hypothetical protein FLJ33868 (RGD1305797) alternative variant bSep08, mRNA.                        |
| <a href="#">RGD1305823</a>              | <a href="#">RGD1305823.bSep08</a>              | <a href="#">360461</a> | 17483  | 871  | 3 | 170 | similar to RIKEN cDNA 0610037P05 (RGD1305823) alternative variant bSep08, mRNA.                                |
| <a href="#">RGD1305823</a>              | <a href="#">RGD1305823.cSep08</a>              | <a href="#">360461</a> | 22706  | 1405 | 4 | 140 | similar to RIKEN cDNA 0610037P05 (16.1 kD) (RGD1305823) alternative variant cSep08, complete mRNA.             |
| <a href="#">RGD1305823</a>              | <a href="#">RGD1305823.dSep08</a>              | <a href="#">360461</a> | 22017  | 631  | 3 | 132 | similar to RIKEN cDNA 0610037P05 (RGD1305823) alternative variant dSep08, mRNA.                                |
| <a href="#">RGD1305823</a>              | <a href="#">RGD1305823.eSep08</a>              | <a href="#">360461</a> | 22163  | 838  | 4 | 132 | similar to RIKEN cDNA 0610037P05 (15.2 kD) (RGD1305823) alternative variant eSep08, mRNA.                      |
| <a href="#">RGD1305823</a>              | <a href="#">RGD1305823.fSep08</a>              | <a href="#">360461</a> | 22289  | 877  | 3 | 104 | similar to RIKEN cDNA 0610037P05 (12.1 kD) (RGD1305823) alternative variant fSep08, mRNA.                      |
| <a href="#">RGD1305823</a>              | <a href="#">RGD1305823.gSep08</a>              | <a href="#">360461</a> | 18334  | 400  | 1 | 54  | similar to RIKEN cDNA 0610037P05 (RGD1305823) alternative variant gSep08, mRNA.                                |
| <a href="#">RGD1305844</a>              | <a href="#">RGD1305844.aSep08</a>              | <a href="#">294883</a> | 284690 | 803  | 5 | 148 | hypothetical LOC294883 (16.6 kD) (RGD1305844) alternative variant aSep08, mRNA.                                |
| <a href="#">RGD1305844</a>              | <a href="#">RGD1305844.bSep08</a>              | <a href="#">294883</a> | 102393 | 1348 | 4 | 145 | hypothetical LOC294883 (RGD1305844) alternative variant bSep08, mRNA.                                          |
| <a href="#">RGD1305844</a>              | <a href="#">RGD1305844.cSep08</a>              | <a href="#">294883</a> | 57153  | 319  | 1 | 96  | hypothetical LOC294883 (RGD1305844) alternative variant cSep08, mRNA.                                          |
| <a href="#">RGD1305898</a>              | <a href="#">RGD1305898.aSep08</a>              | <a href="#">361275</a> | 78521  | 1289 | 8 | 414 | similar to hypothetical protein FLJ40283 (RGD1305898) alternative variant aSep08, mRNA.                        |
| <a href="#">RGD1305898</a>              | <a href="#">RGD1305898.bSep08</a>              | <a href="#">361275</a> | 10960  | 700  | 2 | 136 | similar to hypothetical protein FLJ40283 (RGD1305898) alternative variant bSep08, mRNA.                        |
| <a href="#">RGD1305898</a>              | <a href="#">RGD1305898.dSep08</a>              | <a href="#">361275</a> | 23265  | 436  | 3 | 53  | similar to hypothetical protein FLJ40283 (RGD1305898) alternative variant dSep08, mRNA.                        |
| <a href="#">RGD1305899</a>              | <a href="#">RGD1305899.aSep08</a>              | <a href="#">311715</a> | 18637  | 1058 |   | 352 | similar to Protein C20orf158 (RGD1305899) mRNA.                                                                |
| <a href="#">RGD1305938</a>              | <a href="#">RGD1305938.aSep08</a>              | <a href="#">310362</a> | 10582  | 1385 |   | 292 | similar to expressed sequence AW549877 (RGD1305938) mRNA.                                                      |
| <a href="#">RGD1305939</a>              | <a href="#">RGD1305939.aSep08</a>              | <a href="#">300074</a> | 12431  | 582  | 6 | 103 | hypothetical LOC300074 (RGD1305939) alternative variant aSep08, mRNA.                                          |
| <a href="#">RGD1306001</a>              | <a href="#">RGD1306001.cSep08</a>              | <a href="#">362975</a> | 2251   | 615  | 2 | 61  | similar to 2210021J22Rik protein (RGD1306001) alternative variant cSep08, mRNA.                                |

|                            |                                   |                        |       |      |    |     |                                                                                    |
|----------------------------|-----------------------------------|------------------------|-------|------|----|-----|------------------------------------------------------------------------------------|
| <a href="#">RGD1306041</a> | <a href="#">RGD1306041.bSep08</a> | <a href="#">300125</a> | 10948 | 719  | 7  | 156 | similar to FLJ20699 protein (RGD1306041) alternative variant bSep08, mRNA.         |
| <a href="#">RGD1306041</a> | <a href="#">RGD1306041.cSep08</a> | <a href="#">300125</a> | 3173  | 727  | 4  | 93  | similar to FLJ20699 protein (RGD1306041) alternative variant cSep08, mRNA.         |
| <a href="#">RGD1306058</a> | <a href="#">RGD1306058.bSep08</a> | <a href="#">361224</a> | 11724 | 768  | 6  | 198 | similar to RIKEN cDNA 1110007C09 (RGD1306058) alternative variant bSep08, mRNA.    |
| <a href="#">RGD1306058</a> | <a href="#">RGD1306058.cSep08</a> | <a href="#">361224</a> | 4617  | 552  | 4  | 125 | similar to RIKEN cDNA 1110007C09 (RGD1306058) alternative variant cSep08, mRNA.    |
| <a href="#">RGD1306062</a> | <a href="#">RGD1306062.aSep08</a> | <a href="#">294595</a> | 57964 | 1792 | 10 | 597 | similar to KIAA0372 gene product (RGD1306062) alternative variant aSep08, mRNA.    |
| <a href="#">RGD1306062</a> | <a href="#">RGD1306062.bSep08</a> | <a href="#">294595</a> | 45840 | 1048 | 3  | 300 | similar to KIAA0372 gene product (RGD1306062) alternative variant bSep08, mRNA.    |
| <a href="#">RGD1306062</a> | <a href="#">RGD1306062.cSep08</a> | <a href="#">294595</a> | 3780  | 501  | 2  | 66  | similar to KIAA0372 gene product (RGD1306062) alternative variant cSep08, mRNA.    |
| <a href="#">RGD1306062</a> | <a href="#">RGD1306062.dSep08</a> | <a href="#">294595</a> | 3017  | 479  | 1  | 66  | similar to KIAA0372 gene product (RGD1306062) alternative variant dSep08, mRNA.    |
| <a href="#">RGD1306063</a> | <a href="#">RGD1306063.aSep08</a> | <a href="#">289928</a> | 16880 | 943  | 7  | 135 | similar to HT021 (15.9 kD) (RGD1306063) alternative variant aSep08, mRNA.          |
| <a href="#">RGD1306063</a> | <a href="#">RGD1306063.dSep08</a> | <a href="#">289928</a> | 15480 | 580  | 5  | 117 | similar to HT021 (13.8 kD) (RGD1306063) alternative variant dSep08, mRNA.          |
| <a href="#">RGD1306063</a> | <a href="#">RGD1306063.eSep08</a> | <a href="#">289928</a> | 2326  | 543  | 2  | 89  | similar to HT021 (10.2 kD) (RGD1306063) alternative variant eSep08, mRNA.          |
| <a href="#">RGD1306063</a> | <a href="#">RGD1306063.fSep08</a> | <a href="#">289928</a> | 16667 | 581  | 6  | 87  | similar to HT021 (10.4 kD) (RGD1306063) alternative variant fSep08, complete mRNA. |
| <a href="#">RGD1306063</a> | <a href="#">RGD1306063.gSep08</a> | <a href="#">289928</a> | 7539  | 570  | 3  | 71  | similar to HT021 (8.2 kD) (RGD1306063) alternative variant gSep08, complete mRNA.  |
| <a href="#">RGD1306063</a> | <a href="#">RGD1306063.hSep08</a> | <a href="#">289928</a> | 8724  | 642  | 5  | 69  | similar to HT021 (8.2 kD) (RGD1306063) alternative variant hSep08, complete mRNA.  |
| <a href="#">RGD1306063</a> | <a href="#">RGD1306063.iSep08</a> | <a href="#">289928</a> | 8396  | 311  | 5  | 69  | similar to HT021 (8.2 kD) (RGD1306063) alternative variant iSep08, mRNA.           |
| <a href="#">RGD1306063</a> | <a href="#">RGD1306063.jSep08</a> | <a href="#">289928</a> | 3921  | 285  | 2  | 69  | similar to HT021 (RGD1306063) alternative variant jSep08, mRNA.                    |
| <a href="#">RGD1306063</a> | <a href="#">RGD1306063.kSep08</a> | <a href="#">289928</a> | 8806  | 800  | 5  | 69  | similar to HT021 (8.2 kD) (RGD1306063) alternative variant kSep08, mRNA.           |
| <a href="#">RGD1306063</a> | <a href="#">RGD1306063.lSep08</a> | <a href="#">289928</a> | 8404  | 256  | 4  | 63  | similar to HT021 (RGD1306063) alternative variant lSep08, mRNA.                    |
| <a href="#">RGD1306072</a> | <a href="#">RGD1306072.aSep08</a> | <a href="#">304654</a> | 20924 | 2156 | 5  | 622 | hypothetical LOC304654 (RGD1306072) alternative variant aSep08, mRNA.              |
| <a href="#">RGD1306072</a> | <a href="#">RGD1306072.bSep08</a> | <a href="#">304654</a> | 4520  | 843  | 2  | 170 | hypothetical LOC304654 (RGD1306072) alternative variant bSep08, mRNA.              |
| <a href="#">RGD1306072</a> | <a href="#">RGD1306072.cSep08</a> | <a href="#">304654</a> | 14200 | 720  | 2  | 119 | hypothetical LOC304654 (RGD1306072) alternative variant cSep08, mRNA.              |
| <a href="#">RGD1306091</a> | <a href="#">RGD1306091.aSep08</a> | <a href="#">307950</a> | 16007 | 421  |    | 139 | similar to Mixed lineage kinase 4 (RGD1306091) mRNA.                               |
| <a href="#">RGD1306105</a> | <a href="#">RGD1306105.bSep08</a> | <a href="#">360916</a> | 82241 | 424  | 6  | 140 | similar to RIKEN cDNA 2610318G18 (RGD1306105) alternative variant bSep08, mRNA.    |
| <a href="#">RGD1306105</a> | <a href="#">RGD1306105.cSep08</a> | <a href="#">360916</a> | 82255 | 541  | 5  | 90  | similar to RIKEN cDNA 2610318G18 (RGD1306105) alternative variant cSep08, mRNA.    |

|                            |                                   |                        |       |      |    |     |                                                                                                   |
|----------------------------|-----------------------------------|------------------------|-------|------|----|-----|---------------------------------------------------------------------------------------------------|
| <a href="#">RGD1306107</a> | <a href="#">RGD1306107.bSep08</a> | <a href="#">310640</a> | 1923  | 499  | 5  | 165 | putative protein of vertebrate origin (RGD1306107) alternative variant bSep08, mRNA.              |
| <a href="#">RGD1306107</a> | <a href="#">RGD1306107.cSep08</a> | <a href="#">310640</a> | 992   | 901  | 2  | 124 | putative protein of mammalian origin (13.4 kD) (RGD1306107) alternative variant cSep08, mRNA.     |
| <a href="#">RGD1306107</a> | <a href="#">RGD1306107.dSep08</a> | <a href="#">310640</a> | 1312  | 759  | 3  | 110 | putative protein of mammalian origin (RGD1306107) alternative variant dSep08, mRNA.               |
| <a href="#">RGD1306107</a> | <a href="#">RGD1306107.eSep08</a> | <a href="#">310640</a> | 1543  | 544  | 4  | 107 | putative protein of vertebrate origin (RGD1306107) alternative variant eSep08, mRNA.              |
| <a href="#">RGD1306116</a> | <a href="#">RGD1306116.aSep08</a> | <a href="#">361774</a> | 16524 | 5042 | 14 | 679 | LOC361774 (RGD1306116) alternative variant aSep08, mRNA.                                          |
| <a href="#">RGD1306116</a> | <a href="#">RGD1306116.bSep08</a> | <a href="#">361774</a> | 2733  | 835  | 4  | 154 | LOC361774 (RGD1306116) alternative variant bSep08, mRNA.                                          |
| <a href="#">RGD1306116</a> | <a href="#">RGD1306116.cSep08</a> | <a href="#">361774</a> | 644   | 333  | 2  | 70  | LOC361774 (RGD1306116) alternative variant cSep08, mRNA.                                          |
| <a href="#">RGD1306119</a> | <a href="#">RGD1306119.aSep08</a> | <a href="#">314306</a> | 10834 | 569  | 3  | 189 | similar to transcriptional regulating protein 132 (RGD1306119) alternative variant aSep08, mRNA.  |
| <a href="#">RGD1306148</a> | <a href="#">RGD1306148.aSep08</a> | <a href="#">313196</a> | 31949 | 4505 | 25 | 883 | similar to KIAA0368 (RGD1306148) alternative variant aSep08, mRNA.                                |
| <a href="#">RGD1306151</a> | <a href="#">RGD1306151.bSep08</a> | <a href="#">362455</a> | 21441 | 1310 | 4  | 244 | similar to hypothetical protein DKFZp761D0211 (RGD1306151) alternative variant bSep08, mRNA.      |
| <a href="#">RGD1306153</a> | <a href="#">RGD1306153.aSep08</a> | <a href="#">361410</a> | 18774 | 720  |    | 239 | similar to predicted CDS, putative protein of bilateral origin (4J193) (RGD1306153) mRNA.         |
| <a href="#">RGD1306157</a> | <a href="#">RGD1306157.aSep08</a> | <a href="#">291947</a> | 34500 | 2742 | 10 | 841 | similar to CG9882-PA (93.9 kD) (RGD1306157) alternative variant aSep08, mRNA.                     |
| <a href="#">RGD1306181</a> | <a href="#">RGD1306181.bSep08</a> | <a href="#">308346</a> | 4347  | 708  | 2  | 91  | similar to A630041N19 protein (RGD1306181) alternative variant bSep08, mRNA.                      |
| <a href="#">RGD1306192</a> | <a href="#">RGD1306192.aSep08</a> | <a href="#">361443</a> | 13679 | 1775 | 2  | 539 | similar to RIKEN cDNA 2310079N02 (RGD1306192) alternative variant aSep08, mRNA.                   |
| <a href="#">RGD1306215</a> | <a href="#">RGD1306215.aSep08</a> | <a href="#">296565</a> | 1637  | 998  | 7  | 205 | similar to hypothetical protein MGC36831 (22.1 kD) (RGD1306215) alternative variant aSep08, mRNA. |
| <a href="#">RGD1306215</a> | <a href="#">RGD1306215.bSep08</a> | <a href="#">296565</a> | 1489  | 1155 | 4  | 127 | similar to hypothetical protein MGC36831 (13.7 kD) (RGD1306215) alternative variant bSep08, mRNA. |
| <a href="#">RGD1306215</a> | <a href="#">RGD1306215.cSep08</a> | <a href="#">296565</a> | 1482  | 1003 | 6  | 108 | similar to hypothetical protein MGC36831 (11.4 kD) (RGD1306215) alternative variant cSep08, mRNA. |
| <a href="#">RGD1306215</a> | <a href="#">RGD1306215.eSep08</a> | <a href="#">296565</a> | 780   | 455  | 4  | 85  | similar to hypothetical protein MGC36831 (RGD1306215) alternative variant eSep08, mRNA.           |
| <a href="#">RGD1306215</a> | <a href="#">RGD1306215.fSep08</a> | <a href="#">296565</a> | 953   | 637  | 4  | 62  | similar to hypothetical protein MGC36831 (6.5 kD) (RGD1306215) alternative variant fSep08, mRNA.  |
| <a href="#">RGD1306228</a> | <a href="#">RGD1306228.aSep08</a> | <a href="#">362748</a> | 3510  | 495  | 3  | 46  | CRA b like (RGD1306228) alternative variant aSep08, mRNA.                                         |
| <a href="#">RGD1306271</a> | <a href="#">RGD1306271.aSep08</a> | <a href="#">312246</a> | 6841  | 577  |    | 192 | similar to KIAA1549 protein (RGD1306271) mRNA.                                                    |
| <a href="#">RGD1306284</a> | <a href="#">RGD1306284.bSep08</a> | <a href="#">287918</a> | 4679  | 991  | 3  | 147 | similar to RIKEN cDNA 1110005A03 (16.1 kD) (RGD1306284) alternative variant bSep08, mRNA.         |
| <a href="#">RGD1306284</a> | <a href="#">RGD1306284.cSep08</a> | <a href="#">287918</a> | 889   | 806  | 1  | 114 | similar to RIKEN cDNA 1110005A03 (13.2 kD) (RGD1306284) alternative variant cSep08, mRNA.         |



|                            |                                   |                        |       |      |    |     |                                                                                                                                                |
|----------------------------|-----------------------------------|------------------------|-------|------|----|-----|------------------------------------------------------------------------------------------------------------------------------------------------|
| <a href="#">RGD1306284</a> | <a href="#">RGD1306284.dSep08</a> | <a href="#">287918</a> | 4568  | 569  | 3  | 68  | similar to RIKEN cDNA 1110005A03 (7.8 kD) (RGD1306284) alternative variant dSep08, complete mRNA.                                              |
| <a href="#">RGD1306286</a> | <a href="#">RGD1306286.aSep08</a> | <a href="#">364902</a> | 7221  | 692  | 4  | 230 | similar to mKIAA1632 protein (RGD1306286) alternative variant aSep08, mRNA.                                                                    |
| <a href="#">RGD1306286</a> | <a href="#">RGD1306286.bSep08</a> | <a href="#">364902</a> | 6869  | 705  | 5  | 177 | similar to mKIAA1632 protein (RGD1306286) alternative variant bSep08, mRNA.                                                                    |
| <a href="#">RGD1306286</a> | <a href="#">RGD1306286.cSep08</a> | <a href="#">364902</a> | 5706  | 2507 | 2  | 91  | similar to mKIAA1632 protein (10.5 kD) (RGD1306286) alternative variant cSep08, mRNA.                                                          |
| <a href="#">RGD1306344</a> | <a href="#">RGD1306344.bSep08</a> | <a href="#">296384</a> | 6139  | 372  | 3  | 62  | similar to Ab1-133 (RGD1306344) alternative variant bSep08, mRNA.                                                                              |
| <a href="#">RGD1306349</a> | <a href="#">RGD1306349.aSep08</a> | <a href="#">296512</a> | 12298 | 403  |    | 134 | similar to formin (RGD1306349) mRNA.                                                                                                           |
| <a href="#">RGD1306353</a> | <a href="#">RGD1306353.aSep08</a> | <a href="#">305911</a> | 19137 | 3733 | 7  | 628 | putative nuclear protein, with a coiled coil domain, of eukaryotic origin (70.3 kD) (RGD1306353) alternative variant aSep08, mRNA.             |
| <a href="#">RGD1306353</a> | <a href="#">RGD1306353.bSep08</a> | <a href="#">305911</a> | 5718  | 1587 | 2  | 283 | finger MYM-type 5 (32.4 kD) (RGD1306353) alternative variant bSep08, mRNA.                                                                     |
| <a href="#">RGD1306353</a> | <a href="#">RGD1306353.cSep08</a> | <a href="#">305911</a> | 2533  | 534  | 2  | 155 | zinc finger (RGD1306353) alternative variant cSep08, mRNA.                                                                                     |
| <a href="#">RGD1306371</a> | <a href="#">RGD1306371.bSep08</a> | <a href="#">314061</a> | 36022 | 1792 | 2  | 502 | similar to putative nuclear protein, with 2 coiled coil-4 domains, of eukaryotic origin (5I282) (RGD1306371) alternative variant bSep08, mRNA. |
| <a href="#">RGD1306371</a> | <a href="#">RGD1306371.cSep08</a> | <a href="#">314061</a> | 4163  | 1144 | 1  | 125 | similar to putative nuclear protein, with 2 coiled coil-4 domains, of eukaryotic origin (5I282) (RGD1306371) alternative variant cSep08, mRNA. |
| <a href="#">RGD1306404</a> | <a href="#">RGD1306404.bSep08</a> | <a href="#">296733</a> | 1829  | 1205 | 2  | 230 | similar to mKIAA1402 protein (RGD1306404) alternative variant bSep08, mRNA.                                                                    |
| <a href="#">RGD1306404</a> | <a href="#">RGD1306404.cSep08</a> | <a href="#">296733</a> | 11428 | 572  | 2  | 160 | similar to mKIAA1402 protein (RGD1306404) alternative variant cSep08, mRNA.                                                                    |
| <a href="#">RGD1306410</a> | <a href="#">RGD1306410.aSep08</a> | <a href="#">360768</a> | 22803 | 1451 | 13 | 391 | uncharacterized protein c7orf28 homolog (RGD1306410) alternative variant aSep08, mRNA.                                                         |
| <a href="#">RGD1306410</a> | <a href="#">RGD1306410.cSep08</a> | <a href="#">360768</a> | 20315 | 1824 | 9  | 202 | uncharacterized protein c7orf28 homolog (22.8 kD) (RGD1306410) alternative variant cSep08, mRNA.                                               |
| <a href="#">RGD1306410</a> | <a href="#">RGD1306410.dSep08</a> | <a href="#">360768</a> | 12477 | 837  | 7  | 185 | uncharacterized protein c7orf28 homolog (RGD1306410) alternative variant dSep08, mRNA.                                                         |
| <a href="#">RGD1306410</a> | <a href="#">RGD1306410.eSep08</a> | <a href="#">360768</a> | 2118  | 527  | 2  | 52  | uncharacterized protein c7orf28 homolog like (RGD1306410) alternative variant eSep08, mRNA.                                                    |
| <a href="#">RGD1306410</a> | <a href="#">RGD1306410.fSep08</a> | <a href="#">360768</a> | 2046  | 622  | 2  | 49  | uncharacterized protein c7orf28 homolog (5.8 kD) (RGD1306410) alternative variant fSep08, mRNA.                                                |
| <a href="#">RGD1306441</a> | <a href="#">RGD1306441.bSep08</a> | <a href="#">290425</a> | 3804  | 758  | 2  | 72  | similar to RIKEN cDNA 4921530L21 (RGD1306441) alternative variant bSep08, mRNA.                                                                |
| <a href="#">RGD1306462</a> | <a href="#">RGD1306462.aSep08</a> | <a href="#">315214</a> | 9969  | 856  | 4  | 285 | similar to RIKEN cDNA 1700019P01 (RGD1306462) alternative variant aSep08, mRNA.                                                                |
| <a href="#">RGD1306474</a> | <a href="#">RGD1306474.bSep08</a> | <a href="#">362881</a> | 1099  | 424  | 1  | 141 | similar to RIKEN cDNA 9530003J23 (RGD1306474) alternative variant bSep08, mRNA.                                                                |
| <a href="#">RGD1306487</a> | <a href="#">RGD1306487.aSep08</a> | <a href="#">304759</a> | 20116 | 3036 | 12 | 592 | similar to RAB3 GTPase-activating protein (RGD1306487) alternative variant aSep08, mRNA.                                                       |

|                                    |                                           |                        |       |      |    |     |                                                                                                    |
|------------------------------------|-------------------------------------------|------------------------|-------|------|----|-----|----------------------------------------------------------------------------------------------------|
| <a href="#">RGD1306487</a>         | <a href="#">RGD1306487.bSep08</a>         | <a href="#">304759</a> | 3483  | 629  | 5  | 117 | similar to RAB3 GTPase-activating protein (13.2 kD) (RGD1306487) alternative variant bSep08, mRNA. |
| <a href="#">RGD1306507</a>         | <a href="#">RGD1306507.aSep08</a>         | <a href="#">313063</a> | 39581 | 381  |    | 67  | similar to RAD54B homolog isoform 1; RAD54, S. cerevisiae, homolog of, B (RGD1306507) mRNA.        |
| <a href="#">RGD1306508</a>         | <a href="#">RGD1306508.bSep08</a>         | <a href="#">289874</a> | 22797 | 1636 | 7  | 148 | putative protein of eukaryotic origin (RGD1306508) alternative variant bSep08, mRNA.               |
| <a href="#">RGD1306508</a>         | <a href="#">RGD1306508.cSep08</a>         | <a href="#">289874</a> | 3270  | 528  | 2  | 35  | putative protein of metazoan origin (3.8 kD) (RGD1306508) alternative variant cSep08, mRNA.        |
| <a href="#">RGD1306520</a>         | <a href="#">RGD1306520.bSep08</a>         | <a href="#">310775</a> | 96542 | 1606 | 3  | 279 | similar to receptor-interacting factor 1 (RGD1306520) alternative variant bSep08, mRNA.            |
| <a href="#">RGD1306520</a>         | <a href="#">RGD1306520.cSep08</a>         | <a href="#">310775</a> | 13378 | 822  | 2  | 96  | similar to receptor-interacting factor 1 (11.1 kD) (RGD1306520) alternative variant cSep08, mRNA.  |
| <a href="#">RGD1306534</a>         | <a href="#">RGD1306534.aSep08</a>         | <a href="#">311647</a> | 96076 | 722  |    | 240 | similar to P-Rex1 (RGD1306534) mRNA.                                                               |
| <a href="#">RGD1306556</a>         | <a href="#">RGD1306556.aSep08</a>         | <a href="#">288744</a> | 46953 | 698  |    | 174 | similar to hypothetical protein A530094D01 (RGD1306556) mRNA.                                      |
| <a href="#">RGD1306582</a>         | <a href="#">RGD1306582.aSep08</a>         | <a href="#">362103</a> | 8156  | 754  | 4  | 251 | similar to RIKEN cDNA 2610205E22 (RGD1306582) alternative variant aSep08, mRNA.                    |
| <a href="#">RGD1306582</a>         | <a href="#">RGD1306582.cSep08</a>         | <a href="#">362103</a> | 1159  | 460  | 3  | 77  | similar to RIKEN cDNA 2610205E22 (RGD1306582) alternative variant cSep08, mRNA.                    |
| <a href="#">RGD1306582</a>         | <a href="#">RGD1306582.eSep08</a>         | <a href="#">362103</a> | 7539  | 391  | 2  | 29  | similar to RIKEN cDNA 2610205E22 (RGD1306582) alternative variant eSep08, mRNA.                    |
| <a href="#">RGD1306583</a>         | <a href="#">RGD1306583.bSep08</a>         | <a href="#">294709</a> | 21120 | 1127 | 9  | 327 | protein C5orf44 homolog (RGD1306583) alternative variant bSep08, mRNA.                             |
| <a href="#">RGD1306583</a>         | <a href="#">RGD1306583.cSep08</a>         | <a href="#">294709</a> | 31386 | 2343 | 11 | 299 | protein CRA d (33.5 kD) (RGD1306583) alternative variant cSep08, complete mRNA.                    |
| <a href="#">RGD1306583</a>         | <a href="#">RGD1306583.dSep08</a>         | <a href="#">294709</a> | 20848 | 787  | 6  | 174 | protein CRA d (RGD1306583) alternative variant dSep08, mRNA.                                       |
| <a href="#">RGD1306583</a>         | <a href="#">RGD1306583.eSep08</a>         | <a href="#">294709</a> | 15827 | 745  | 5  | 143 | protein CRA d (15.9 kD) (RGD1306583) alternative variant eSep08, mRNA.                             |
| <a href="#">RGD1306583</a>         | <a href="#">RGD1306583.fSep08</a>         | <a href="#">294709</a> | 812   | 681  | 2  | 81  | protein CRA e precursor (8.8 kD) (RGD1306583) alternative variant fSep08, mRNA.                    |
| <a href="#">RGD1306583</a>         | <a href="#">RGD1306583.gSep08</a>         | <a href="#">294709</a> | 3711  | 956  | 2  | 70  | putative protein (8.0 kD) (RGD1306583) alternative variant gSep08, mRNA.                           |
| <a href="#">RGD1306595</a>         | <a href="#">RGD1306595.bSep08</a>         | <a href="#">287554</a> | 4329  | 2004 | 3  | 216 | similar to hypothetical protein (24.5 kD) (RGD1306595) alternative variant bSep08, complete mRNA.  |
| <a href="#">RGD1306603andlhpk1</a> | <a href="#">RGD1306603andlhpk1.cSep08</a> | <a href="#">50560</a>  | 1988  | 524  | 6  | 142 | CRA a (RGD1306603andlhpk1) alternative variant cSep08, mRNA.                                       |
| <a href="#">RGD1306603andlhpk1</a> | <a href="#">RGD1306603andlhpk1.cSep08</a> | <a href="#">363144</a> | 1988  | 524  | 6  | 142 | CRA a (RGD1306603andlhpk1) alternative variant cSep08, mRNA.                                       |
| <a href="#">RGD1306603andlhpk1</a> | <a href="#">RGD1306603andlhpk1.dSep08</a> | <a href="#">50560</a>  | 661   | 464  | 2  | 128 | CRA d like (RGD1306603andlhpk1) alternative variant dSep08, mRNA.                                  |
| <a href="#">RGD1306603andlhpk1</a> | <a href="#">RGD1306603andlhpk1.dSep08</a> | <a href="#">363144</a> | 661   | 464  | 2  | 128 | CRA d like (RGD1306603andlhpk1) alternative variant dSep08, mRNA.                                  |
| <a href="#">RGD1306603andlhpk1</a> | <a href="#">RGD1306603andlhpk1.eSep08</a> | <a href="#">50560</a>  | 29300 | 739  | 3  | 126 | inositol hexaphosphate kinase 1 (RGD1306603andlhpk1) alternative variant eSep08, mRNA.             |
| <a href="#">RGD1306603andlhpk1</a> | <a href="#">RGD1306603andlhpk1.eSep08</a> | <a href="#">363144</a> | 29300 | 739  | 3  | 126 | inositol hexaphosphate kinase 1 (RGD1306603andlhpk1) alternative variant eSep08, mRNA.             |

|                                    |                                           |                        |       |      |    |     |                                                                                                    |
|------------------------------------|-------------------------------------------|------------------------|-------|------|----|-----|----------------------------------------------------------------------------------------------------|
| <a href="#">RGD1306603andlhpk1</a> | <a href="#">RGD1306603andlhpk1.fSep08</a> | <a href="#">50560</a>  | 4849  | 1751 | 7  | 120 | CRA a like (13.4 kD) (RGD1306603andlhpk1) alternative variant fSep08, mRNA.                        |
| <a href="#">RGD1306603andlhpk1</a> | <a href="#">RGD1306603andlhpk1.fSep08</a> | <a href="#">363144</a> | 4849  | 1751 | 7  | 120 | CRA a like (13.4 kD) (RGD1306603andlhpk1) alternative variant fSep08, mRNA.                        |
| <a href="#">RGD1306603andlhpk1</a> | <a href="#">RGD1306603andlhpk1.gSep08</a> | <a href="#">50560</a>  | 1864  | 604  | 5  | 112 | CRA a like (12.5 kD) (RGD1306603andlhpk1) alternative variant gSep08, mRNA.                        |
| <a href="#">RGD1306603andlhpk1</a> | <a href="#">RGD1306603andlhpk1.gSep08</a> | <a href="#">363144</a> | 1864  | 604  | 5  | 112 | CRA a like (12.5 kD) (RGD1306603andlhpk1) alternative variant gSep08, mRNA.                        |
| <a href="#">RGD1306603andlhpk1</a> | <a href="#">RGD1306603andlhpk1.hSep08</a> | <a href="#">50560</a>  | 849   | 709  | 2  | 71  | putative protein (RGD1306603andlhpk1) alternative variant hSep08, mRNA.                            |
| <a href="#">RGD1306603andlhpk1</a> | <a href="#">RGD1306603andlhpk1.hSep08</a> | <a href="#">363144</a> | 849   | 709  | 2  | 71  | putative protein (RGD1306603andlhpk1) alternative variant hSep08, mRNA.                            |
| <a href="#">RGD1306603andlhpk1</a> | <a href="#">RGD1306603andlhpk1.iSep08</a> | <a href="#">50560</a>  | 34351 | 1227 | 5  | 59  | CRA c like (6.6 kD) (RGD1306603andlhpk1) alternative variant iSep08, mRNA.                         |
| <a href="#">RGD1306603andlhpk1</a> | <a href="#">RGD1306603andlhpk1.iSep08</a> | <a href="#">363144</a> | 34351 | 1227 | 5  | 59  | CRA c like (6.6 kD) (RGD1306603andlhpk1) alternative variant iSep08, mRNA.                         |
| <a href="#">RGD1306613</a>         | <a href="#">RGD1306613.bSep08</a>         | <a href="#">306994</a> | 3764  | 720  | 3  | 139 | similar to RIKEN cDNA 1600012F09 (15.3 kD) (RGD1306613) alternative variant bSep08, mRNA.          |
| <a href="#">RGD1306613</a>         | <a href="#">RGD1306613.cSep08</a>         | <a href="#">306994</a> | 4265  | 1135 | 3  | 139 | similar to RIKEN cDNA 1600012F09 (15.3 kD) (RGD1306613) alternative variant cSep08, complete mRNA. |
| <a href="#">RGD1306613</a>         | <a href="#">RGD1306613.dSep08</a>         | <a href="#">306994</a> | 1455  | 718  | 2  | 30  | similar to RIKEN cDNA 1600012F09 (3.5 kD) (RGD1306613) alternative variant dSep08, mRNA.           |
| <a href="#">RGD1306622</a>         | <a href="#">RGD1306622.aSep08</a>         | <a href="#">293736</a> | 4570  | 1271 |    | 314 | similar to KIAA0954 protein (RGD1306622) mRNA.                                                     |
| <a href="#">RGD1306636</a>         | <a href="#">RGD1306636.aSep08</a>         | <a href="#">293498</a> | 3195  | 1306 | 1  | 360 | hypothetical LOC293498 (38.2 kD) (RGD1306636) alternative variant aSep08, mRNA.                    |
| <a href="#">RGD1306636</a>         | <a href="#">RGD1306636.bSep08</a>         | <a href="#">293498</a> | 3600  | 762  | 1  | 193 | hypothetical LOC293498 (20.9 kD) (RGD1306636) alternative variant bSep08, mRNA.                    |
| <a href="#">RGD1306682</a>         | <a href="#">RGD1306682.bSep08</a>         | <a href="#">360617</a> | 742   | 313  | 3  | 92  | similar to RIKEN cDNA 1810046J19 (RGD1306682) alternative variant bSep08, mRNA.                    |
| <a href="#">RGD1306682</a>         | <a href="#">RGD1306682.cSep08</a>         | <a href="#">360617</a> | 794   | 681  | 2  | 72  | similar to RIKEN cDNA 1810046J19 (RGD1306682) alternative variant cSep08, mRNA.                    |
| <a href="#">RGD1306704</a>         | <a href="#">RGD1306704.aSep08</a>         | <a href="#">295483</a> | 8620  | 590  |    | 145 | hypothetical LOC295483 (17.0 kD) (RGD1306704) mRNA.                                                |
| <a href="#">RGD1306717</a>         | <a href="#">RGD1306717.aSep08</a>         | <a href="#">311257</a> | 38764 | 3828 | 27 | 905 | similar to hypothetical protein MGC25461 (101.4 kD) (RGD1306717) alternative variant aSep08, mRNA. |
| <a href="#">RGD1306717</a>         | <a href="#">RGD1306717.cSep08</a>         | <a href="#">311257</a> | 1613  | 701  | 1  | 117 | similar to hypothetical protein MGC25461 (RGD1306717) alternative variant cSep08, mRNA.            |
| <a href="#">RGD1306730</a>         | <a href="#">RGD1306730.bSep08</a>         | <a href="#">309009</a> | 15218 | 509  | 1  | 53  | putative protein of vertebrate origin (6.1 kD) (RGD1306730) alternative variant bSep08, mRNA.      |
| <a href="#">RGD1306746</a>         | <a href="#">RGD1306746.bSep08</a>         | <a href="#">312511</a> | 5833  | 390  | 1  | 64  | similar to Hypothetical protein MGC25529 (RGD1306746) alternative variant bSep08, mRNA.            |
| <a href="#">RGD1306750</a>         | <a href="#">RGD1306750.aSep08</a>         | <a href="#">362451</a> | 62183 | 694  | 3  | 150 | LOC362451 (16.0 kD) (RGD1306750) alternative variant aSep08, mRNA.                                 |
| <a href="#">RGD1306750</a>         | <a href="#">RGD1306750.cSep08</a>         | <a href="#">362451</a> | 2805  | 387  | 2  | 92  | LOC362451 (RGD1306750) alternative variant cSep08, mRNA.                                           |
| <a href="#">RGD1306772</a>         | <a href="#">RGD1306772.aSep08</a>         | <a href="#">288683</a> | 3640  | 1566 | 3  | 258 | similar to RIKEN cDNA 1110008J03 (28.1 kD) (RGD1306772) alternative variant aSep08, mRNA.          |

|                            |                                   |                        |       |      |    |     |                                                                                                      |
|----------------------------|-----------------------------------|------------------------|-------|------|----|-----|------------------------------------------------------------------------------------------------------|
| <a href="#">RGD1306783</a> | <a href="#">RGD1306783.bSep08</a> | <a href="#">304928</a> | 2791  | 1798 | 1  | 29  | similar to 2810422O20Rik protein (3.4 kD) (RGD1306783) alternative variant bSep08, mRNA.             |
| <a href="#">RGD1306809</a> | <a href="#">RGD1306809.bSep08</a> | <a href="#">365699</a> | 14408 | 605  | 1  | 172 | similar to hypothetical protein FLJ30596 (RGD1306809) alternative variant bSep08, mRNA.              |
| <a href="#">RGD1306811</a> | <a href="#">RGD1306811.aSep08</a> | <a href="#">300517</a> | 12400 | 443  |    | 147 | similar to hypothetical protein FLJ25530 (RGD1306811) mRNA.                                          |
| <a href="#">RGD1306820</a> | <a href="#">RGD1306820.bSep08</a> | <a href="#">309069</a> | 5620  | 731  | 3  | 132 | similar to erythroid differentiation-related factor 1 (RGD1306820) alternative variant bSep08, mRNA. |
| <a href="#">RGD1306839</a> | <a href="#">RGD1306839.aSep08</a> | <a href="#">293888</a> | 8388  | 713  | 4  | 147 | similar to RIKEN cDNA 5033414D02 (17.3 kD) (RGD1306839) alternative variant aSep08, mRNA.            |
| <a href="#">RGD1306839</a> | <a href="#">RGD1306839.cSep08</a> | <a href="#">293888</a> | 9914  | 476  | 5  | 126 | similar to RIKEN cDNA 5033414D02 (RGD1306839) alternative variant cSep08, mRNA.                      |
| <a href="#">RGD1306861</a> | <a href="#">RGD1306861.aSep08</a> | <a href="#">362257</a> | 36531 | 2432 |    | 621 | similar to RIKEN cDNA B230339M05 gene (RGD1306861) mRNA.                                             |
| <a href="#">RGD1306862</a> | <a href="#">RGD1306862.aSep08</a> | <a href="#">287596</a> | 7692  | 1870 | 4  | 552 | similar to RIKEN cDNA 1200011M11 (RGD1306862) alternative variant aSep08, mRNA.                      |
| <a href="#">RGD1306873</a> | <a href="#">RGD1306873.aSep08</a> | <a href="#">304285</a> | 15339 | 3419 | 16 | 623 | similar to RIKEN cDNA 2210010N04 gene (RGD1306873) alternative variant aSep08, mRNA.                 |
| <a href="#">RGD1306873</a> | <a href="#">RGD1306873.bSep08</a> | <a href="#">304285</a> | 10191 | 1537 | 11 | 206 | similar to RIKEN cDNA 2210010N04 gene (23.4 kD) (RGD1306873) alternative variant bSep08, mRNA.       |
| <a href="#">RGD1306873</a> | <a href="#">RGD1306873.dSep08</a> | <a href="#">304285</a> | 1644  | 406  | 2  | 42  | similar to RIKEN cDNA 2210010N04 gene (4.6 kD) (RGD1306873) alternative variant dSep08, mRNA.        |
| <a href="#">RGD1306917</a> | <a href="#">RGD1306917.bSep08</a> | <a href="#">361805</a> | 11560 | 452  | 1  | 59  | similar to RIKEN cDNA 2900010M23 (RGD1306917) alternative variant bSep08, mRNA.                      |
| <a href="#">RGD1306926</a> | <a href="#">RGD1306926.aSep08</a> | <a href="#">303742</a> | 10296 | 1892 | 2  | 454 | similar to hypothetical protein FLJ22175 (RGD1306926) alternative variant aSep08, mRNA.              |
| <a href="#">RGD1306926</a> | <a href="#">RGD1306926.bSep08</a> | <a href="#">303742</a> | 1112  | 405  | 2  | 134 | similar to hypothetical protein FLJ22175 (RGD1306926) alternative variant bSep08, mRNA.              |
| <a href="#">RGD1306926</a> | <a href="#">RGD1306926.cSep08</a> | <a href="#">303742</a> | 1338  | 1122 | 2  | 125 | similar to hypothetical protein FLJ22175 (13.4 kD) (RGD1306926) alternative variant cSep08, mRNA.    |
| <a href="#">RGD1306936</a> | <a href="#">RGD1306936.bSep08</a> | <a href="#">297082</a> | 8991  | 910  | 1  | 137 | uncharacterized protein c7orf30 homolog (RGD1306936) alternative variant bSep08, mRNA.               |
| <a href="#">RGD1306939</a> | <a href="#">RGD1306939.bSep08</a> | <a href="#">306934</a> | 59087 | 1400 | 13 | 281 | similar to mKIAA0386 protein (RGD1306939) alternative variant bSep08, mRNA.                          |
| <a href="#">RGD1306939</a> | <a href="#">RGD1306939.cSep08</a> | <a href="#">306934</a> | 11442 | 2299 | 4  | 133 | similar to mKIAA0386 protein (RGD1306939) alternative variant cSep08, mRNA.                          |
| <a href="#">RGD1306954</a> | <a href="#">RGD1306954.bSep08</a> | <a href="#">288269</a> | 5559  | 757  | 3  | 175 | similar to RIKEN cDNA 1110004E09 (RGD1306954) alternative variant bSep08, mRNA.                      |
| <a href="#">RGD1306954</a> | <a href="#">RGD1306954.cSep08</a> | <a href="#">288269</a> | 1285  | 517  | 3  | 114 | similar to RIKEN cDNA 1110004E09 (RGD1306954) alternative variant cSep08, mRNA.                      |
| <a href="#">RGD1306954</a> | <a href="#">RGD1306954.eSep08</a> | <a href="#">288269</a> | 4563  | 749  | 2  | 91  | similar to RIKEN cDNA 1110004E09 (RGD1306954) alternative variant eSep08, mRNA.                      |
| <a href="#">RGD1306959</a> | <a href="#">RGD1306959.bSep08</a> | <a href="#">361624</a> | 7772  | 692  | 5  | 207 | similar to C11orf17 protein (RGD1306959) alternative variant bSep08, mRNA.                           |
| <a href="#">RGD1306959</a> | <a href="#">RGD1306959.cSep08</a> | <a href="#">361624</a> | 8123  | 1047 | 5  | 181 | similar to C11orf17 protein (19.3 kD) (RGD1306959) alternative variant cSep08, mRNA.                 |

|                            |                                   |                        |        |      |    |     |                                                                                                                           |
|----------------------------|-----------------------------------|------------------------|--------|------|----|-----|---------------------------------------------------------------------------------------------------------------------------|
| <a href="#">RGD1306959</a> | <a href="#">RGD1306959.dSep08</a> | <a href="#">361624</a> | 7637   | 523  | 5  | 174 | similar to C11orf17 protein (RGD1306959) alternative variant dSep08, mRNA.                                                |
| <a href="#">RGD1306959</a> | <a href="#">RGD1306959.eSep08</a> | <a href="#">361624</a> | 7771   | 577  | 4  | 168 | similar to C11orf17 protein (RGD1306959) alternative variant eSep08, mRNA.                                                |
| <a href="#">RGD1306959</a> | <a href="#">RGD1306959.fSep08</a> | <a href="#">361624</a> | 4898   | 494  | 5  | 164 | similar to C11orf17 protein (RGD1306959) alternative variant fSep08, mRNA.                                                |
| <a href="#">RGD1306959</a> | <a href="#">RGD1306959.gSep08</a> | <a href="#">361624</a> | 2872   | 665  | 2  | 135 | similar to C11orf17 protein (RGD1306959) alternative variant gSep08, mRNA.                                                |
| <a href="#">RGD1306959</a> | <a href="#">RGD1306959.hSep08</a> | <a href="#">361624</a> | 4912   | 360  | 3  | 120 | similar to C11orf17 protein (RGD1306959) alternative variant hSep08, mRNA.                                                |
| <a href="#">RGD1306959</a> | <a href="#">RGD1306959.jSep08</a> | <a href="#">361624</a> | 2953   | 344  | 2  | 54  | similar to C11orf17 protein (RGD1306959) alternative variant jSep08, mRNA.                                                |
| <a href="#">RGD1306962</a> | <a href="#">RGD1306962.aSep08</a> | <a href="#">309570</a> | 30511  | 1851 | 10 | 302 | putative protein, with at least 7 transmembrane domains, of ancient origin (RGD1306962) alternative variant aSep08, mRNA. |
| <a href="#">RGD1306962</a> | <a href="#">RGD1306962.bSep08</a> | <a href="#">309570</a> | 19511  | 581  | 3  | 111 | putative protein of metazoan origin (RGD1306962) alternative variant bSep08, mRNA.                                        |
| <a href="#">RGD1306962</a> | <a href="#">RGD1306962.cSep08</a> | <a href="#">309570</a> | 1097   | 721  | 2  | 64  | putative protein of mammalian origin (7.1 kD) (RGD1306962) alternative variant cSep08, mRNA.                              |
| <a href="#">RGD1306991</a> | <a href="#">RGD1306991.bSep08</a> | <a href="#">362220</a> | 11266  | 1095 | 1  | 131 | similar to Protein C20orf103 precursor (RGD1306991) alternative variant bSep08, mRNA.                                     |
| <a href="#">RGD1307032</a> | <a href="#">RGD1307032.bSep08</a> | <a href="#">360486</a> | 1264   | 479  | 7  | 109 | similar to RIKEN cDNA 1520401A03 gene (RGD1307032) alternative variant bSep08, mRNA.                                      |
| <a href="#">RGD1307034</a> | <a href="#">RGD1307034.aSep08</a> | <a href="#">304244</a> | 22491  | 1406 | 7  | 337 | furry homolog (RGD1307034) alternative variant aSep08, mRNA.                                                              |
| <a href="#">RGD1307034</a> | <a href="#">RGD1307034.bSep08</a> | <a href="#">304244</a> | 1174   | 833  | 2  | 127 | furry homolog (14.4 kD) (RGD1307034) alternative variant bSep08, mRNA.                                                    |
| <a href="#">RGD1307034</a> | <a href="#">RGD1307034.cSep08</a> | <a href="#">304244</a> | 3830   | 432  | 2  | 96  | CRA b like (RGD1307034) alternative variant cSep08, mRNA.                                                                 |
| <a href="#">RGD1307041</a> | <a href="#">RGD1307041.aSep08</a> | <a href="#">361182</a> | 24891  | 1789 | 14 | 408 | similar to hypothetical protein FLJ11305 (RGD1307041) alternative variant aSep08, mRNA.                                   |
| <a href="#">RGD1307055</a> | <a href="#">RGD1307055.aSep08</a> | <a href="#">362472</a> | 17470  | 2048 | 12 | 475 | similar to hypothetical protein FLJ22490 (RGD1307055) alternative variant aSep08, mRNA.                                   |
| <a href="#">RGD1307055</a> | <a href="#">RGD1307055.bSep08</a> | <a href="#">362472</a> | 39860  | 1490 | 12 | 461 | similar to hypothetical protein FLJ22490 (RGD1307055) alternative variant bSep08, mRNA.                                   |
| <a href="#">RGD1307055</a> | <a href="#">RGD1307055.cSep08</a> | <a href="#">362472</a> | 71423  | 1778 | 6  | 450 | similar to hypothetical protein FLJ22490 (RGD1307055) alternative variant cSep08, mRNA.                                   |
| <a href="#">RGD1307055</a> | <a href="#">RGD1307055.dSep08</a> | <a href="#">362472</a> | 26400  | 568  | 4  | 179 | similar to hypothetical protein FLJ22490 (RGD1307055) alternative variant dSep08, mRNA.                                   |
| <a href="#">RGD1307055</a> | <a href="#">RGD1307055.eSep08</a> | <a href="#">362472</a> | 26344  | 359  | 3  | 109 | similar to hypothetical protein FLJ22490 (RGD1307055) alternative variant eSep08, mRNA.                                   |
| <a href="#">RGD1307055</a> | <a href="#">RGD1307055.fSep08</a> | <a href="#">362472</a> | 5284   | 626  | 3  | 94  | similar to hypothetical protein FLJ22490 (RGD1307055) alternative variant fSep08, mRNA.                                   |
| <a href="#">RGD1307067</a> | <a href="#">RGD1307067.aSep08</a> | <a href="#">362840</a> | 7005   | 1778 | 8  | 263 | LOC362840 (29.8 kD) (RGD1307067) alternative variant aSep08, complete mRNA.                                               |
| <a href="#">RGD1307071</a> | <a href="#">RGD1307071.aSep08</a> | <a href="#">311502</a> | 111208 | 2554 | 12 | 713 | similar to uncharacterized hypothalamus protein HT013 (RGD1307071) alternative variant aSep08, mRNA.                      |

|                            |                                   |                        |       |      |    |     |                                                                                                      |
|----------------------------|-----------------------------------|------------------------|-------|------|----|-----|------------------------------------------------------------------------------------------------------|
| <a href="#">RGD1307071</a> | <a href="#">RGD1307071.bSep08</a> | <a href="#">311502</a> | 13270 | 763  | 2  | 108 | similar to uncharacterized hypothalamus protein HT013 (RGD1307071) alternative variant bSep08, mRNA. |
| <a href="#">RGD1307084</a> | <a href="#">RGD1307084.bSep08</a> | <a href="#">287598</a> | 17016 | 458  | 2  | 107 | similar to RIKEN cDNA 1110001A07 gene (RGD1307084) alternative variant bSep08, mRNA.                 |
| <a href="#">RGD1307100</a> | <a href="#">RGD1307100.aSep08</a> | <a href="#">294978</a> | 17301 | 2949 | 13 | 822 | similar to RIKEN cDNA D630029K19 (RGD1307100) alternative variant aSep08, mRNA.                      |
| <a href="#">RGD1307100</a> | <a href="#">RGD1307100.bSep08</a> | <a href="#">294978</a> | 4404  | 754  | 3  | 251 | similar to RIKEN cDNA D630029K19 (RGD1307100) alternative variant bSep08, mRNA.                      |
| <a href="#">RGD1307100</a> | <a href="#">RGD1307100.dSep08</a> | <a href="#">294978</a> | 1216  | 775  | 2  | 73  | similar to RIKEN cDNA D630029K19 (RGD1307100) alternative variant dSep08, mRNA.                      |
| <a href="#">RGD1307119</a> | <a href="#">RGD1307119.bSep08</a> | <a href="#">303743</a> | 4950  | 1184 | 9  | 381 | hypothetical LOC303743 (RGD1307119) alternative variant bSep08, mRNA.                                |
| <a href="#">RGD1307119</a> | <a href="#">RGD1307119.cSep08</a> | <a href="#">303743</a> | 4242  | 899  | 8  | 299 | hypothetical LOC303743 (RGD1307119) alternative variant cSep08, mRNA.                                |
| <a href="#">RGD1307119</a> | <a href="#">RGD1307119.dSep08</a> | <a href="#">303743</a> | 1161  | 1050 | 2  | 161 | hypothetical LOC303743 (18.2 kD) (RGD1307119) alternative variant dSep08, mRNA.                      |
| <a href="#">RGD1307122</a> | <a href="#">RGD1307122.bSep08</a> | <a href="#">314321</a> | 2082  | 1331 | 1  | 403 | similar to RIKEN cDNA 2810002I04 (RGD1307122) alternative variant bSep08, mRNA.                      |
| <a href="#">RGD1307155</a> | <a href="#">RGD1307155.bSep08</a> | <a href="#">302998</a> | 1027  | 552  | 5  | 126 | similar to CG18661-PA (RGD1307155) alternative variant bSep08, mRNA.                                 |
| <a href="#">RGD1307158</a> | <a href="#">RGD1307158.aSep08</a> | <a href="#">361773</a> | 5325  | 1797 | 4  | 590 | similar to oocyte-testis gene 1 (RGD1307158) alternative variant aSep08, mRNA.                       |
| <a href="#">RGD1307158</a> | <a href="#">RGD1307158.bSep08</a> | <a href="#">361773</a> | 13943 | 1731 | 7  | 577 | similar to oocyte-testis gene 1 (RGD1307158) alternative variant bSep08, mRNA.                       |
| <a href="#">RGD1307158</a> | <a href="#">RGD1307158.cSep08</a> | <a href="#">361773</a> | 7451  | 2683 | 5  | 220 | similar to oocyte-testis gene 1 (RGD1307158) alternative variant cSep08, mRNA.                       |
| <a href="#">RGD1307158</a> | <a href="#">RGD1307158.dSep08</a> | <a href="#">361773</a> | 2746  | 728  | 2  | 59  | similar to oocyte-testis gene 1 (RGD1307158) alternative variant dSep08, mRNA.                       |
| <a href="#">RGD1307158</a> | <a href="#">RGD1307158.eSep08</a> | <a href="#">361773</a> | 2507  | 1178 | 2  | 42  | similar to oocyte-testis gene 1 (RGD1307158) alternative variant eSep08, mRNA.                       |
| <a href="#">RGD1307161</a> | <a href="#">RGD1307161.aSep08</a> | <a href="#">305031</a> | 19798 | 3354 | 13 | 411 | similar to 0610010K06Rik protein (46.2 kD) (RGD1307161) alternative variant aSep08, complete mRNA.   |
| <a href="#">RGD1307161</a> | <a href="#">RGD1307161.bSep08</a> | <a href="#">305031</a> | 13117 | 565  | 7  | 187 | similar to 0610010K06Rik protein (RGD1307161) alternative variant bSep08, mRNA.                      |
| <a href="#">RGD1307177</a> | <a href="#">RGD1307177.aSep08</a> | <a href="#">365380</a> | 3437  | 329  |    | 41  | similar to Hypothetical protein KIAA0555 (RGD1307177) mRNA.                                          |
| <a href="#">RGD1307179</a> | <a href="#">RGD1307179.bSep08</a> | <a href="#">299900</a> | 4611  | 897  | 3  | 143 | similar to RIKEN cDNA D530033C11 (16.1 kD) (RGD1307179) alternative variant bSep08, mRNA.            |
| <a href="#">RGD1307182</a> | <a href="#">RGD1307182.aSep08</a> | <a href="#">316207</a> | 644   | 403  |    | 59  | similar to RIKEN cDNA B430306N03 gene (RGD1307182) mRNA.                                             |
| <a href="#">RGD1307201</a> | <a href="#">RGD1307201.bSep08</a> | <a href="#">361047</a> | 18979 | 2247 | 8  | 442 | protein c13orf3 homolog (RGD1307201) alternative variant bSep08, mRNA.                               |
| <a href="#">RGD1307201</a> | <a href="#">RGD1307201.cSep08</a> | <a href="#">361047</a> | 3819  | 726  | 1  | 103 | protein c13orf3 homolog (RGD1307201) alternative variant cSep08, mRNA.                               |
| <a href="#">RGD1307218</a> | <a href="#">RGD1307218.bSep08</a> | <a href="#">362518</a> | 13277 | 684  | 1  | 123 | similar to RIKEN cDNA 2810432L12 (RGD1307218) alternative variant bSep08, mRNA.                      |

|                            |                                   |                        |       |      |    |     |                                                                                                                        |
|----------------------------|-----------------------------------|------------------------|-------|------|----|-----|------------------------------------------------------------------------------------------------------------------------|
| <a href="#">RGD1307218</a> | <a href="#">RGD1307218.cSep08</a> | <a href="#">362518</a> | 2113  | 327  | 1  | 29  | similar to RIKEN cDNA 2810432L12 (RGD1307218) alternative variant cSep08, mRNA.                                        |
| <a href="#">RGD1307222</a> | <a href="#">RGD1307222.aSep08</a> | <a href="#">303300</a> | 9952  | 3114 | 14 | 851 | similar to mKIAA0664 protein (RGD1307222) alternative variant aSep08, mRNA.                                            |
| <a href="#">RGD1307222</a> | <a href="#">RGD1307222.bSep08</a> | <a href="#">303300</a> | 5530  | 2715 | 11 | 421 | similar to mKIAA0664 protein (47.6 kD) (RGD1307222) alternative variant bSep08, mRNA.                                  |
| <a href="#">RGD1307222</a> | <a href="#">RGD1307222.cSep08</a> | <a href="#">303300</a> | 2097  | 993  | 7  | 262 | similar to mKIAA0664 protein (RGD1307222) alternative variant cSep08, mRNA.                                            |
| <a href="#">RGD1307222</a> | <a href="#">RGD1307222.dSep08</a> | <a href="#">303300</a> | 10248 | 546  | 5  | 156 | similar to mKIAA0664 protein (RGD1307222) alternative variant dSep08, mRNA.                                            |
| <a href="#">RGD1307222</a> | <a href="#">RGD1307222.eSep08</a> | <a href="#">303300</a> | 1232  | 413  | 4  | 137 | similar to mKIAA0664 protein (RGD1307222) alternative variant eSep08, mRNA.                                            |
| <a href="#">RGD1307234</a> | <a href="#">RGD1307234.aSep08</a> | <a href="#">316732</a> | 39074 | 2883 | 17 | 667 | similar to RIKEN cDNA 4931400A14 (RGD1307234) alternative variant aSep08, mRNA.                                        |
| <a href="#">RGD1307234</a> | <a href="#">RGD1307234.bSep08</a> | <a href="#">316732</a> | 2721  | 1784 | 3  | 113 | similar to RIKEN cDNA 4931400A14 (13.1 kD) (RGD1307234) alternative variant bSep08, mRNA.                              |
| <a href="#">RGD1307235</a> | <a href="#">RGD1307235.bSep08</a> | <a href="#">309053</a> | 14543 | 616  | 7  | 204 | similar to RIKEN cDNA 2310035C23 (RGD1307235) alternative variant bSep08, mRNA.                                        |
| <a href="#">RGD1307235</a> | <a href="#">RGD1307235.cSep08</a> | <a href="#">309053</a> | 10159 | 1436 | 5  | 115 | similar to RIKEN cDNA 2310035C23 (RGD1307235) alternative variant cSep08, mRNA.                                        |
| <a href="#">RGD1307235</a> | <a href="#">RGD1307235.dSep08</a> | <a href="#">309053</a> | 7458  | 337  | 4  | 93  | similar to RIKEN cDNA 2310035C23 (RGD1307235) alternative variant dSep08, mRNA.                                        |
| <a href="#">RGD1307254</a> | <a href="#">RGD1307254.cSep08</a> | <a href="#">298712</a> | 2885  | 633  | 2  | 88  | similar to RIKEN cDNA 1200011I18 (RGD1307254) alternative variant cSep08, mRNA.                                        |
| <a href="#">RGD1307264</a> | <a href="#">RGD1307264.aSep08</a> | <a href="#">309637</a> | 25050 | 843  | 6  | 281 | similar to hypothetical protein FLJ20302; similar to CG31653-PA (RGD1307264) alternative variant aSep08, mRNA.         |
| <a href="#">RGD1307284</a> | <a href="#">RGD1307284.aSep08</a> | <a href="#">306811</a> | 51771 | 1904 | 10 | 574 | similar to protein kinase, lysine deficient 1; kinase deficient protein (RGD1307284) alternative variant aSep08, mRNA. |
| <a href="#">RGD1307284</a> | <a href="#">RGD1307284.bSep08</a> | <a href="#">306811</a> | 43227 | 568  | 4  | 189 | similar to protein kinase, lysine deficient 1; kinase deficient protein (RGD1307284) alternative variant bSep08, mRNA. |
| <a href="#">RGD1307288</a> | <a href="#">RGD1307288.aSep08</a> | <a href="#">287761</a> | 2782  | 1298 |    | 187 | similar to Protein C21orf58 (20.5 kD) (RGD1307288) mRNA.                                                               |
| <a href="#">RGD1307325</a> | <a href="#">RGD1307325.bSep08</a> | <a href="#">306469</a> | 15152 | 363  | 3  | 103 | similar to RIKEN cDNA 4933411K20 (RGD1307325) alternative variant bSep08, mRNA.                                        |
| <a href="#">RGD1307336</a> | <a href="#">RGD1307336.aSep08</a> | <a href="#">293950</a> | 13206 | 742  | 4  | 146 | similar to hypothetical protein (16.2 kD) (RGD1307336) alternative variant aSep08, mRNA.                               |
| <a href="#">RGD1307355</a> | <a href="#">RGD1307355.aSep08</a> | <a href="#">311825</a> | 19105 | 2541 | 2  | 674 | similar to gene model 711 (76.4 kD) (RGD1307355) alternative variant aSep08, mRNA.                                     |
| <a href="#">RGD1307357</a> | <a href="#">RGD1307357.bSep08</a> | <a href="#">291975</a> | 3378  | 596  | 5  | 198 | similar to hypothetical protein DKFZp434A1319 (RGD1307357) alternative variant bSep08, mRNA.                           |
| <a href="#">RGD1307357</a> | <a href="#">RGD1307357.cSep08</a> | <a href="#">291975</a> | 831   | 646  | 3  | 147 | similar to hypothetical protein DKFZp434A1319 (RGD1307357) alternative variant cSep08, mRNA.                           |
| <a href="#">RGD1307365</a> | <a href="#">RGD1307365.aSep08</a> | <a href="#">300880</a> | 10949 | 1892 | 1  | 216 | similar to KIAA1009 protein (25.1 kD) (RGD1307365) alternative variant aSep08, mRNA.                                   |
| <a href="#">RGD1307365</a> | <a href="#">RGD1307365.bSep08</a> | <a href="#">300880</a> | 11906 | 771  | 2  | 210 | similar to KIAA1009 protein (RGD1307365) alternative variant bSep08, mRNA.                                             |

|                            |                                   |                        |       |      |   |     |                                                                                                                                                    |
|----------------------------|-----------------------------------|------------------------|-------|------|---|-----|----------------------------------------------------------------------------------------------------------------------------------------------------|
| <a href="#">RGD1307381</a> | <a href="#">RGD1307381.bSep08</a> | <a href="#">360498</a> | 2686  | 1979 | 9 | 270 | similar to RIKEN cDNA 2610003J06 (30.6 kD) (RGD1307381) alternative variant bSep08, complete mRNA.                                                 |
| <a href="#">RGD1307381</a> | <a href="#">RGD1307381.cSep08</a> | <a href="#">360498</a> | 1939  | 1197 | 9 | 257 | similar to RIKEN cDNA 2610003J06 (RGD1307381) alternative variant cSep08, mRNA.                                                                    |
| <a href="#">RGD1307381</a> | <a href="#">RGD1307381.dSep08</a> | <a href="#">360498</a> | 1764  | 1216 | 7 | 256 | similar to RIKEN cDNA 2610003J06 (29.1 kD) (RGD1307381) alternative variant dSep08, mRNA.                                                          |
| <a href="#">RGD1307381</a> | <a href="#">RGD1307381.eSep08</a> | <a href="#">360498</a> | 1598  | 887  | 9 | 251 | similar to RIKEN cDNA 2610003J06 (RGD1307381) alternative variant eSep08, mRNA.                                                                    |
| <a href="#">RGD1307381</a> | <a href="#">RGD1307381.fSep08</a> | <a href="#">360498</a> | 1382  | 911  | 6 | 187 | similar to RIKEN cDNA 2610003J06 (RGD1307381) alternative variant fSep08, mRNA.                                                                    |
| <a href="#">RGD1307381</a> | <a href="#">RGD1307381.gSep08</a> | <a href="#">360498</a> | 2020  | 1640 | 5 | 153 | similar to RIKEN cDNA 2610003J06 (16.7 kD) (RGD1307381) alternative variant gSep08, mRNA.                                                          |
| <a href="#">RGD1307381</a> | <a href="#">RGD1307381.hSep08</a> | <a href="#">360498</a> | 1794  | 1140 | 8 | 130 | similar to RIKEN cDNA 2610003J06 (14.7 kD) (RGD1307381) alternative variant hSep08, mRNA.                                                          |
| <a href="#">RGD1307381</a> | <a href="#">RGD1307381.iSep08</a> | <a href="#">360498</a> | 920   | 770  | 3 | 98  | similar to RIKEN cDNA 2610003J06 (11.3 kD) (RGD1307381) alternative variant iSep08, complete mRNA.                                                 |
| <a href="#">RGD1307390</a> | <a href="#">RGD1307390.bSep08</a> | <a href="#">292680</a> | 1587  | 721  | 4 | 88  | similar to BC282485 1 (10.0 kD) (RGD1307390) alternative variant bSep08, mRNA.                                                                     |
| <a href="#">RGD1307392</a> | <a href="#">RGD1307392.bSep08</a> | <a href="#">299209</a> | 1210  | 642  | 2 | 106 | similar to 1700019E19Rik protein (12.5 kD) (RGD1307392) alternative variant bSep08, mRNA.                                                          |
| <a href="#">RGD1307392</a> | <a href="#">RGD1307392.cSep08</a> | <a href="#">299209</a> | 802   | 678  | 1 | 92  | similar to 1700019E19Rik protein (10.4 kD) (RGD1307392) alternative variant cSep08, mRNA.                                                          |
| <a href="#">RGD1307394</a> | <a href="#">RGD1307394.bSep08</a> | <a href="#">360667</a> | 3166  | 1424 | 3 | 158 | putative protein, with at least 3 transmembrane domains, of eukaryotic origin (RGD1307394) alternative variant bSep08, mRNA.                       |
| <a href="#">RGD1307394</a> | <a href="#">RGD1307394.cSep08</a> | <a href="#">360667</a> | 5859  | 734  | 6 | 110 | putative endoplasmic reticulum protein, with a transmembrane domain, of eukaryotic origin (12.1 kD) (RGD1307394) alternative variant cSep08, mRNA. |
| <a href="#">RGD1307394</a> | <a href="#">RGD1307394.dSep08</a> | <a href="#">360667</a> | 9961  | 1047 | 7 | 100 | putative endoplasmic reticulum protein, with a transmembrane domain, of eukaryotic origin (10.8 kD) (RGD1307394) alternative variant dSep08, mRNA. |
| <a href="#">RGD1307394</a> | <a href="#">RGD1307394.eSep08</a> | <a href="#">360667</a> | 4399  | 721  | 5 | 84  | putative protein of metazoan origin (RGD1307394) alternative variant eSep08, mRNA.                                                                 |
| <a href="#">RGD1307394</a> | <a href="#">RGD1307394.hSep08</a> | <a href="#">360667</a> | 649   | 411  | 2 | 59  | putative protein (RGD1307394) alternative variant hSep08, mRNA.                                                                                    |
| <a href="#">RGD1307396</a> | <a href="#">RGD1307396.aSep08</a> | <a href="#">360757</a> | 22234 | 2293 | 1 | 518 | similar to RIKEN cDNA 6330406115 (RGD1307396) alternative variant aSep08, mRNA.                                                                    |
| <a href="#">RGD1307396</a> | <a href="#">RGD1307396.bSep08</a> | <a href="#">360757</a> | 20921 | 748  |   | 108 | similar to RIKEN cDNA 6330406115 (RGD1307396) alternative variant bSep08, mRNA.                                                                    |
| <a href="#">RGD1307396</a> | <a href="#">RGD1307396.cSep08</a> | <a href="#">360757</a> | 3747  | 1343 | 1 | 60  | similar to RIKEN cDNA 6330406115 (RGD1307396) alternative variant cSep08, mRNA.                                                                    |
| <a href="#">RGD1307399</a> | <a href="#">RGD1307399.aSep08</a> | <a href="#">681315</a> | 9349  | 1131 | 2 | 120 | putative endoplasmic reticulum protein, with a transmembrane domain, of eukaryotic origin (13.2 kD) (RGD1307399) alternative variant aSep08, mRNA. |



|                            |                                   |                        |       |      |    |     |                                                                                                                    |
|----------------------------|-----------------------------------|------------------------|-------|------|----|-----|--------------------------------------------------------------------------------------------------------------------|
| <a href="#">RGD1307410</a> | <a href="#">RGD1307410.aSep08</a> | <a href="#">360673</a> | 6527  | 2668 | 7  | 553 | similar to hypothetical protein FLJ31528 (RGD1307410) alternative variant aSep08, mRNA.                            |
| <a href="#">RGD1307443</a> | <a href="#">RGD1307443.aSep08</a> | <a href="#">361244</a> | 27899 | 1612 |    | 333 | similar to mKIAA0319 protein (RGD1307443) mRNA.                                                                    |
| <a href="#">RGD1307465</a> | <a href="#">RGD1307465.bSep08</a> | <a href="#">296200</a> | 7146  | 939  | 3  | 285 | CRA a (RGD1307465) alternative variant bSep08, mRNA.                                                               |
| <a href="#">RGD1307465</a> | <a href="#">RGD1307465.cSep08</a> | <a href="#">296200</a> | 1347  | 443  | 1  | 112 | putative protein (RGD1307465) alternative variant cSep08, mRNA.                                                    |
| <a href="#">RGD1307500</a> | <a href="#">RGD1307500.aSep08</a> | <a href="#">363056</a> | 10964 | 829  | 1  | 276 | LOC363056 (RGD1307500) alternative variant aSep08, mRNA.                                                           |
| <a href="#">RGD1307500</a> | <a href="#">RGD1307500.bSep08</a> | <a href="#">363056</a> | 15102 | 393  | 1  | 70  | LOC363056 (RGD1307500) alternative variant bSep08, mRNA.                                                           |
| <a href="#">RGD1307503</a> | <a href="#">RGD1307503.aSep08</a> | <a href="#">314456</a> | 3087  | 342  |    | 113 | similar to Hypothetical protein KIAA0297/KIAA0329 (RGD1307503) mRNA.                                               |
| <a href="#">RGD1307506</a> | <a href="#">RGD1307506.cSep08</a> | <a href="#">294744</a> | 3526  | 1457 | 2  | 135 | similar to RIKEN cDNA 2310016C16 (15.9 kD) (RGD1307506) alternative variant cSep08, mRNA.                          |
| <a href="#">RGD1307506</a> | <a href="#">RGD1307506.dSep08</a> | <a href="#">294744</a> | 844   | 370  | 2  | 122 | similar to RIKEN cDNA 2310016C16 (RGD1307506) alternative variant dSep08, mRNA.                                    |
| <a href="#">RGD1307509</a> | <a href="#">RGD1307509.bSep08</a> | <a href="#">310348</a> | 20757 | 3528 | 8  | 332 | similar to RIKEN cDNA 1700108L22 and hypothetical protein LOC689154 (RGD1307509) alternative variant bSep08, mRNA. |
| <a href="#">RGD1307509</a> | <a href="#">RGD1307509.bSep08</a> | <a href="#">689154</a> | 20757 | 3528 | 8  | 332 | similar to RIKEN cDNA 1700108L22 and hypothetical protein LOC689154 (RGD1307509) alternative variant bSep08, mRNA. |
| <a href="#">RGD1307509</a> | <a href="#">RGD1307509.cSep08</a> | <a href="#">310348</a> | 5091  | 434  | 4  | 74  | similar to RIKEN cDNA 1700108L22 and hypothetical protein LOC689154 (RGD1307509) alternative variant cSep08, mRNA. |
| <a href="#">RGD1307509</a> | <a href="#">RGD1307509.cSep08</a> | <a href="#">689154</a> | 5091  | 434  | 4  | 74  | similar to RIKEN cDNA 1700108L22 and hypothetical protein LOC689154 (RGD1307509) alternative variant cSep08, mRNA. |
| <a href="#">RGD1307524</a> | <a href="#">RGD1307524.aSep08</a> | <a href="#">309415</a> | 75013 | 2212 | 11 | 522 | similar to Friedreich ataxia region gene X123 (RGD1307524) alternative variant aSep08, mRNA.                       |
| <a href="#">RGD1307525</a> | <a href="#">RGD1307525.aSep08</a> | <a href="#">308053</a> | 18825 | 535  | 3  | 114 | similar to intracellular protein transport like (XM453) (RGD1307525) alternative variant aSep08, mRNA.             |
| <a href="#">RGD1307525</a> | <a href="#">RGD1307525.cSep08</a> | <a href="#">308053</a> | 5923  | 406  | 2  | 46  | similar to intracellular protein transport like (XM453) (RGD1307525) alternative variant cSep08, mRNA.             |
| <a href="#">RGD1307526</a> | <a href="#">RGD1307526.aSep08</a> | <a href="#">315792</a> | 27274 | 3187 | 17 | 861 | transcription modulator (RGD1307526) alternative variant aSep08, mRNA.                                             |
| <a href="#">RGD1307526</a> | <a href="#">RGD1307526.bSep08</a> | <a href="#">315792</a> | 11344 | 1052 | 9  | 319 | SAFB-like transcription modulator (RGD1307526) alternative variant bSep08, mRNA.                                   |
| <a href="#">RGD1307526</a> | <a href="#">RGD1307526.cSep08</a> | <a href="#">315792</a> | 3438  | 913  | 4  | 270 | transcription modulator (RGD1307526) alternative variant cSep08, mRNA.                                             |
| <a href="#">RGD1307526</a> | <a href="#">RGD1307526.dSep08</a> | <a href="#">315792</a> | 27777 | 793  | 6  | 231 | transcription modulator (RGD1307526) alternative variant dSep08, mRNA.                                             |
| <a href="#">RGD1307526</a> | <a href="#">RGD1307526.eSep08</a> | <a href="#">315792</a> | 642   | 551  | 2  | 65  | SAFB-like transcription modulator (6.9 kD) (RGD1307526) alternative variant eSep08, mRNA.                          |
| <a href="#">RGD1307537</a> | <a href="#">RGD1307537.bSep08</a> | <a href="#">291077</a> | 11856 | 446  | 1  | 108 | similar to RIKEN cDNA 4933417A18 (RGD1307537) alternative variant bSep08, mRNA.                                    |

|                            |                                   |                        |       |      |    |     |                                                                                                        |
|----------------------------|-----------------------------------|------------------------|-------|------|----|-----|--------------------------------------------------------------------------------------------------------|
| <a href="#">RGD1307554</a> | <a href="#">RGD1307554.bSep08</a> | <a href="#">292739</a> | 24936 | 1996 | 11 | 397 | similar to CG16812-PA (43.1 kD) (RGD1307554) alternative variant bSep08, mRNA.                         |
| <a href="#">RGD1307554</a> | <a href="#">RGD1307554.cSep08</a> | <a href="#">292739</a> | 5225  | 388  | 4  | 121 | similar to CG16812-PA (RGD1307554) alternative variant cSep08, mRNA.                                   |
| <a href="#">RGD1307554</a> | <a href="#">RGD1307554.eSep08</a> | <a href="#">292739</a> | 5460  | 368  | 3  | 59  | similar to CG16812-PA (RGD1307554) alternative variant eSep08, mRNA.                                   |
| <a href="#">RGD1307569</a> | <a href="#">RGD1307569.aSep08</a> | <a href="#">360695</a> | 38520 | 1307 | 5  | 357 | similar to Protein C21orf63 homolog precursor (RGD1307569) alternative variant aSep08, mRNA.           |
| <a href="#">RGD1307569</a> | <a href="#">RGD1307569.bSep08</a> | <a href="#">360695</a> | 60499 | 1188 | 2  | 209 | similar to Protein C21orf63 homolog precursor (23.3 kD) (RGD1307569) alternative variant bSep08, mRNA. |
| <a href="#">RGD1307569</a> | <a href="#">RGD1307569.cSep08</a> | <a href="#">360695</a> | 73042 | 1783 | 2  | 161 | similar to Protein C21orf63 homolog precursor (RGD1307569) alternative variant cSep08, mRNA.           |
| <a href="#">RGD1307597</a> | <a href="#">RGD1307597.bSep08</a> | <a href="#">299197</a> | 27873 | 394  | 3  | 72  | similar to mKIAA0317 protein (RGD1307597) alternative variant bSep08, mRNA.                            |
| <a href="#">RGD1307603</a> | <a href="#">RGD1307603.aSep08</a> | <a href="#">293656</a> | 1984  | 725  | 2  | 222 | similar to hypothetical protein MGC37914 (RGD1307603) alternative variant aSep08, mRNA.                |
| <a href="#">RGD1307615</a> | <a href="#">RGD1307615.bSep08</a> | <a href="#">362084</a> | 2276  | 1412 | 4  | 108 | similar to hypothetical protein FLJ13045 (12.1 kD) (RGD1307615) alternative variant bSep08, mRNA.      |
| <a href="#">RGD1307621</a> | <a href="#">RGD1307621.bSep08</a> | <a href="#">314168</a> | 1338  | 679  | 2  | 142 | hypothetical LOC314168 (RGD1307621) alternative variant bSep08, mRNA.                                  |
| <a href="#">RGD1307621</a> | <a href="#">RGD1307621.cSep08</a> | <a href="#">314168</a> | 1402  | 616  | 3  | 82  | hypothetical LOC314168 (9.8 kD) (RGD1307621) alternative variant cSep08, mRNA.                         |
| <a href="#">RGD1307648</a> | <a href="#">RGD1307648.aSep08</a> | <a href="#">294004</a> | 19030 | 765  | 6  | 225 | similar to CG13901-PA (RGD1307648) alternative variant aSep08, mRNA.                                   |
| <a href="#">RGD1307648</a> | <a href="#">RGD1307648.bSep08</a> | <a href="#">294004</a> | 19310 | 931  | 6  | 203 | similar to CG13901-PA (23.2 kD) (RGD1307648) alternative variant bSep08, mRNA.                         |
| <a href="#">RGD1307648</a> | <a href="#">RGD1307648.cSep08</a> | <a href="#">294004</a> | 13860 | 767  | 3  | 173 | similar to CG13901-PA (19.1 kD) (RGD1307648) alternative variant cSep08, mRNA.                         |
| <a href="#">RGD1307682</a> | <a href="#">RGD1307682.bSep08</a> | <a href="#">300675</a> | 16425 | 1639 | 13 | 217 | CRA a (24.5 kD) (RGD1307682) alternative variant bSep08, complete mRNA.                                |
| <a href="#">RGD1307682</a> | <a href="#">RGD1307682.cSep08</a> | <a href="#">300675</a> | 14364 | 859  | 7  | 210 | CRA a like (RGD1307682) alternative variant cSep08, mRNA.                                              |
| <a href="#">RGD1307682</a> | <a href="#">RGD1307682.dSep08</a> | <a href="#">300675</a> | 4411  | 745  | 5  | 181 | CRA a (RGD1307682) alternative variant dSep08, mRNA.                                                   |
| <a href="#">RGD1307682</a> | <a href="#">RGD1307682.eSep08</a> | <a href="#">300675</a> | 14145 | 728  | 6  | 143 | CRA a like (RGD1307682) alternative variant eSep08, mRNA.                                              |
| <a href="#">RGD1307682</a> | <a href="#">RGD1307682.fSep08</a> | <a href="#">300675</a> | 5226  | 701  | 4  | 115 | CRA a (RGD1307682) alternative variant fSep08, mRNA.                                                   |
| <a href="#">RGD1307682</a> | <a href="#">RGD1307682.gSep08</a> | <a href="#">300675</a> | 1451  | 684  | 3  | 63  | CRA a (7.0 kD) (RGD1307682) alternative variant gSep08, mRNA.                                          |
| <a href="#">RGD1307722</a> | <a href="#">RGD1307722.bSep08</a> | <a href="#">362824</a> | 983   | 459  | 3  | 110 | similar to hypothetical protein MGC20700 (RGD1307722) alternative variant bSep08, mRNA.                |
| <a href="#">RGD1307722</a> | <a href="#">RGD1307722.dSep08</a> | <a href="#">362824</a> | 498   | 412  | 2  | 35  | similar to hypothetical protein MGC20700 (3.7 kD) (RGD1307722) alternative variant dSep08, mRNA.       |
| <a href="#">RGD1307739</a> | <a href="#">RGD1307739.bSep08</a> | <a href="#">362122</a> | 24506 | 573  |    | 150 | similar to CG3306-PA (RGD1307739) alternative variant bSep08, mRNA.                                    |
| <a href="#">RGD1307749</a> | <a href="#">RGD1307749.bSep08</a> | <a href="#">299338</a> | 2150  | 754  | 3  | 251 | similar to RIKEN cDNA 1600013K19 (RGD1307749) alternative variant bSep08, mRNA.                        |

|                            |                                   |                        |        |      |    |     |                                                                                                           |
|----------------------------|-----------------------------------|------------------------|--------|------|----|-----|-----------------------------------------------------------------------------------------------------------|
| <a href="#">RGD1307749</a> | <a href="#">RGD1307749.cSep08</a> | <a href="#">299338</a> | 3174   | 1395 | 4  | 194 | similar to RIKEN cDNA 1600013K19 (RGD1307749) alternative variant cSep08, mRNA.                           |
| <a href="#">RGD1307749</a> | <a href="#">RGD1307749.dSep08</a> | <a href="#">299338</a> | 1946   | 460  | 2  | 122 | similar to RIKEN cDNA 1600013K19 (RGD1307749) alternative variant dSep08, mRNA.                           |
| <a href="#">RGD1307752</a> | <a href="#">RGD1307752.bSep08</a> | <a href="#">296315</a> | 1443   | 664  | 2  | 62  | similar to RIKEN cDNA 1110008F13 (RGD1307752) alternative variant bSep08, mRNA.                           |
| <a href="#">RGD1307773</a> | <a href="#">RGD1307773.aSep08</a> | <a href="#">287115</a> | 2614   | 2522 | 2  | 330 | similar to RIKEN cDNA 1700012G19 gene (RGD1307773) alternative variant aSep08, mRNA.                      |
| <a href="#">RGD1307791</a> | <a href="#">RGD1307791.bSep08</a> | <a href="#">297968</a> | 2878   | 1994 | 3  | 81  | similar to hypothetical protein FLJ10342 (9.5 kD) (RGD1307791) alternative variant bSep08, mRNA.          |
| <a href="#">RGD1307799</a> | <a href="#">RGD1307799.bSep08</a> | <a href="#">307833</a> | 11746  | 2168 | 7  | 340 | similar to RIKEN cDNA 2400003C14 (37.6 kD) (RGD1307799) alternative variant bSep08, mRNA.                 |
| <a href="#">RGD1307799</a> | <a href="#">RGD1307799.cSep08</a> | <a href="#">307833</a> | 18653  | 680  | 7  | 226 | similar to RIKEN cDNA 2400003C14 (RGD1307799) alternative variant cSep08, mRNA.                           |
| <a href="#">RGD1307799</a> | <a href="#">RGD1307799.dSep08</a> | <a href="#">307833</a> | 11417  | 882  | 7  | 187 | similar to RIKEN cDNA 2400003C14 (19.8 kD) (RGD1307799) alternative variant dSep08, mRNA.                 |
| <a href="#">RGD1307799</a> | <a href="#">RGD1307799.eSep08</a> | <a href="#">307833</a> | 14912  | 212  | 3  | 70  | similar to RIKEN cDNA 2400003C14 (RGD1307799) alternative variant eSep08, mRNA.                           |
| <a href="#">RGD1307799</a> | <a href="#">RGD1307799.fSep08</a> | <a href="#">307833</a> | 22112  | 3374 | 8  | 141 | similar to RIKEN cDNA 2400003C14 (14.8 kD) (RGD1307799) alternative variant fSep08, complete mRNA.        |
| <a href="#">RGD1307799</a> | <a href="#">RGD1307799.iSep08</a> | <a href="#">307833</a> | 18653  | 779  | 8  | 65  | similar to RIKEN cDNA 2400003C14 (RGD1307799) alternative variant iSep08, mRNA.                           |
| <a href="#">RGD1307801</a> | <a href="#">RGD1307801.bSep08</a> | <a href="#">309656</a> | 7983   | 1490 | 11 | 351 | similar to RIKEN cDNA 1300018I05 (39.5 kD) (RGD1307801) alternative variant bSep08, mRNA.                 |
| <a href="#">RGD1307801</a> | <a href="#">RGD1307801.cSep08</a> | <a href="#">309656</a> | 11885  | 429  | 5  | 142 | similar to RIKEN cDNA 1300018I05 (RGD1307801) alternative variant cSep08, mRNA.                           |
| <a href="#">RGD1307801</a> | <a href="#">RGD1307801.dSep08</a> | <a href="#">309656</a> | 18749  | 581  | 3  | 78  | similar to RIKEN cDNA 1300018I05 (RGD1307801) alternative variant dSep08, mRNA.                           |
| <a href="#">RGD1307816</a> | <a href="#">RGD1307816.bSep08</a> | <a href="#">295446</a> | 1683   | 751  | 2  | 47  | similar to RIKEN cDNA A630047E20 (5.4 kD) (RGD1307816) alternative variant bSep08, mRNA.                  |
| <a href="#">RGD1307830</a> | <a href="#">RGD1307830.aSep08</a> | <a href="#">304863</a> | 8333   | 1114 |    | 114 | protein odr-4 homolog like (RGD1307830) mRNA.                                                             |
| <a href="#">RGD1307844</a> | <a href="#">RGD1307844.bSep08</a> | <a href="#">316085</a> | 5232   | 2054 | 2  | 372 | trafficking protein kinesin binding 1 CRA c like (40.5 kD) (RGD1307844) alternative variant bSep08, mRNA. |
| <a href="#">RGD1307844</a> | <a href="#">RGD1307844.cSep08</a> | <a href="#">316085</a> | 3175   | 1276 | 3  | 259 | trafficking protein kinesin binding 1 CRA e like (RGD1307844) alternative variant cSep08, mRNA.           |
| <a href="#">RGD1307844</a> | <a href="#">RGD1307844.dSep08</a> | <a href="#">316085</a> | 42037  | 560  | 3  | 168 | trafficking protein kinesin binding 1 CRA a like (RGD1307844) alternative variant dSep08, mRNA.           |
| <a href="#">RGD1307844</a> | <a href="#">RGD1307844.eSep08</a> | <a href="#">316085</a> | 118219 | 693  | 4  | 149 | trafficking protein kinesin binding 1 CRA d like (RGD1307844) alternative variant eSep08, mRNA.           |
| <a href="#">RGD1307844</a> | <a href="#">RGD1307844.fSep08</a> | <a href="#">316085</a> | 45214  | 434  | 5  | 144 | trafficking protein kinesin binding 1 like (RGD1307844) alternative variant fSep08, mRNA.                 |
| <a href="#">RGD1307844</a> | <a href="#">RGD1307844.gSep08</a> | <a href="#">316085</a> | 6632   | 990  | 2  | 128 | trafficking protein kinesin binding 1 CRA b like (RGD1307844) alternative variant gSep08, mRNA.           |
| <a href="#">RGD1307844</a> | <a href="#">RGD1307844.jSep08</a> | <a href="#">316085</a> | 1671   | 315  | 2  | 86  | trafficking protein kinesin binding 1 CRA d like (RGD1307844) alternative variant jSep08, mRNA.           |

|                            |                                   |                        |       |      |    |     |                                                                                                      |
|----------------------------|-----------------------------------|------------------------|-------|------|----|-----|------------------------------------------------------------------------------------------------------|
| <a href="#">RGD1307844</a> | <a href="#">RGD1307844.kSep08</a> | <a href="#">316085</a> | 5628  | 460  | 5  | 74  | putative protein (RGD1307844) alternative variant kSep08, mRNA.                                      |
| <a href="#">RGD1307877</a> | <a href="#">RGD1307877.bSep08</a> | <a href="#">291846</a> | 10820 | 765  | 1  | 145 | similar to plasma kallikrein-like protein 4 precursor (RGD1307877) alternative variant bSep08, mRNA. |
| <a href="#">RGD1307882</a> | <a href="#">RGD1307882.aSep08</a> | <a href="#">315903</a> | 29815 | 3694 | 15 | 596 | similar to CG9346-PA (69.5 kD) (RGD1307882) alternative variant aSep08, mRNA.                        |
| <a href="#">RGD1307882</a> | <a href="#">RGD1307882.bSep08</a> | <a href="#">315903</a> | 52622 | 1830 | 8  | 463 | similar to CG9346-PA (RGD1307882) alternative variant bSep08, mRNA.                                  |
| <a href="#">RGD1307882</a> | <a href="#">RGD1307882.cSep08</a> | <a href="#">315903</a> | 8011  | 648  | 7  | 215 | similar to CG9346-PA (RGD1307882) alternative variant cSep08, mRNA.                                  |
| <a href="#">RGD1307882</a> | <a href="#">RGD1307882.dSep08</a> | <a href="#">315903</a> | 16809 | 487  | 1  | 107 | similar to CG9346-PA (RGD1307882) alternative variant dSep08, mRNA.                                  |
| <a href="#">RGD1307887</a> | <a href="#">RGD1307887.aSep08</a> | <a href="#">366176</a> | 1793  | 758  |    | 252 | similar to RIKEN cDNA 4930424G05 (RGD1307887) mRNA.                                                  |
| <a href="#">RGD1307890</a> | <a href="#">RGD1307890.bSep08</a> | <a href="#">304851</a> | 15677 | 606  | 7  | 201 | similar to C1orf25 (RGD1307890) alternative variant bSep08, mRNA.                                    |
| <a href="#">RGD1307890</a> | <a href="#">RGD1307890.cSep08</a> | <a href="#">304851</a> | 6377  | 826  | 4  | 199 | similar to C1orf25 (RGD1307890) alternative variant cSep08, mRNA.                                    |
| <a href="#">RGD1307890</a> | <a href="#">RGD1307890.dSep08</a> | <a href="#">304851</a> | 14561 | 606  | 5  | 96  | similar to C1orf25 (RGD1307890) alternative variant dSep08, mRNA.                                    |
| <a href="#">RGD1307890</a> | <a href="#">RGD1307890.eSep08</a> | <a href="#">304851</a> | 4041  | 751  | 2  | 81  | similar to C1orf25 (RGD1307890) alternative variant eSep08, mRNA.                                    |
| <a href="#">RGD1307897</a> | <a href="#">RGD1307897.aSep08</a> | <a href="#">314172</a> | 17480 | 2002 |    | 369 | similar to RIKEN cDNA C730036B14 gene (RGD1307897) mRNA.                                             |
| <a href="#">RGD1307929</a> | <a href="#">RGD1307929.aSep08</a> | <a href="#">303280</a> | 14224 | 2939 | 16 | 760 | similar to CG14967-PA (RGD1307929) alternative variant aSep08, mRNA.                                 |
| <a href="#">RGD1307929</a> | <a href="#">RGD1307929.bSep08</a> | <a href="#">303280</a> | 24422 | 359  | 3  | 72  | similar to CG14967-PA (RGD1307929) alternative variant bSep08, mRNA.                                 |
| <a href="#">RGD1307934</a> | <a href="#">RGD1307934.aSep08</a> | <a href="#">293953</a> | 48146 | 1031 |    | 343 | similar to DNA segment, Chr 19, ERATO Doi 386, expressed (RGD1307934) mRNA.                          |
| <a href="#">RGD1307935</a> | <a href="#">RGD1307935.bSep08</a> | <a href="#">360583</a> | 5288  | 1840 | 3  | 141 | similar to Hypothetical protein MGC18716 (RGD1307935) alternative variant bSep08, mRNA.              |
| <a href="#">RGD1307935</a> | <a href="#">RGD1307935.cSep08</a> | <a href="#">360583</a> | 8192  | 1040 | 3  | 82  | similar to Hypothetical protein MGC18716 (RGD1307935) alternative variant cSep08, mRNA.              |
| <a href="#">RGD1307937</a> | <a href="#">RGD1307937.bSep08</a> | <a href="#">289865</a> | 15914 | 1038 | 5  | 233 | similar to hypothetical protein FLJ31438 (RGD1307937) alternative variant bSep08, mRNA.              |
| <a href="#">RGD1307947</a> | <a href="#">RGD1307947.bSep08</a> | <a href="#">314788</a> | 5351  | 577  | 4  | 192 | similar to RIKEN cDNA C430008C19 (RGD1307947) alternative variant bSep08, mRNA.                      |
| <a href="#">RGD1307983</a> | <a href="#">RGD1307983.aSep08</a> | <a href="#">298032</a> | 12571 | 1513 | 4  | 118 | similar to HSPC043 protein (RGD1307983) alternative variant aSep08, mRNA.                            |
| <a href="#">RGD1307983</a> | <a href="#">RGD1307983.bSep08</a> | <a href="#">298032</a> | 11751 | 774  | 5  | 104 | similar to HSPC043 protein (11.4 kD) (RGD1307983) alternative variant bSep08, mRNA.                  |
| <a href="#">RGD1308009</a> | <a href="#">RGD1308009.bSep08</a> | <a href="#">291841</a> | 52592 | 3004 | 21 | 906 | transcription complex (RGD1308009) alternative variant bSep08, mRNA.                                 |
| <a href="#">RGD1308009</a> | <a href="#">RGD1308009.cSep08</a> | <a href="#">291841</a> | 6562  | 2018 | 5  | 309 | transcription complex (RGD1308009) alternative variant cSep08, mRNA.                                 |

|                            |                                   |                        |       |      |    |     |                                                                                               |
|----------------------------|-----------------------------------|------------------------|-------|------|----|-----|-----------------------------------------------------------------------------------------------|
| <a href="#">RGD1308009</a> | <a href="#">RGD1308009.dSep08</a> | <a href="#">291841</a> | 5176  | 708  | 5  | 159 | transcription complex (RGD1308009) alternative variant dSep08, mRNA.                          |
| <a href="#">RGD1308009</a> | <a href="#">RGD1308009.eSep08</a> | <a href="#">291841</a> | 2126  | 747  | 3  | 90  | transcription complex (RGD1308009) alternative variant eSep08, mRNA.                          |
| <a href="#">RGD1308009</a> | <a href="#">RGD1308009.gSep08</a> | <a href="#">291841</a> | 1462  | 600  | 2  | 61  | transcription complex (RGD1308009) alternative variant gSep08, mRNA.                          |
| <a href="#">RGD1308023</a> | <a href="#">RGD1308023.aSep08</a> | <a href="#">296211</a> | 4034  | 815  | 1  | 129 | similar to CG5521-PA (RGD1308023) alternative variant aSep08, mRNA.                           |
| <a href="#">RGD1308023</a> | <a href="#">RGD1308023.bSep08</a> | <a href="#">296211</a> | 66556 | 457  | 3  | 60  | similar to CG5521-PA (RGD1308023) alternative variant bSep08, mRNA.                           |
| <a href="#">RGD1308026</a> | <a href="#">RGD1308026.aSep08</a> | <a href="#">363029</a> | 1409  | 769  | 2  | 256 | similar to 2310047B19Rik protein (RGD1308026) alternative variant aSep08, mRNA.               |
| <a href="#">RGD1308031</a> | <a href="#">RGD1308031.aSep08</a> | <a href="#">300442</a> | 8600  | 1747 | 10 | 397 | similar to RIKEN cDNA 2510048L02 (45.0 kD) (RGD1308031) alternative variant aSep08, mRNA.     |
| <a href="#">RGD1308031</a> | <a href="#">RGD1308031.cSep08</a> | <a href="#">300442</a> | 7203  | 850  | 6  | 283 | similar to RIKEN cDNA 2510048L02 (RGD1308031) alternative variant cSep08, mRNA.               |
| <a href="#">RGD1308031</a> | <a href="#">RGD1308031.dSep08</a> | <a href="#">300442</a> | 5369  | 791  | 4  | 142 | similar to RIKEN cDNA 2510048L02 (RGD1308031) alternative variant dSep08, mRNA.               |
| <a href="#">RGD1308048</a> | <a href="#">RGD1308048.aSep08</a> | <a href="#">298557</a> | 10531 | 1526 | 6  | 242 | similar to HT014 (RGD1308048) alternative variant aSep08, mRNA.                               |
| <a href="#">RGD1308048</a> | <a href="#">RGD1308048.bSep08</a> | <a href="#">298557</a> | 2769  | 1225 | 3  | 98  | similar to HT014 (11.4 kD) (RGD1308048) alternative variant bSep08, mRNA.                     |
| <a href="#">RGD1308065</a> | <a href="#">RGD1308065.bSep08</a> | <a href="#">287935</a> | 8404  | 813  | 1  | 226 | hypothetical LOC287935 (RGD1308065) alternative variant bSep08, mRNA.                         |
| <a href="#">RGD1308093</a> | <a href="#">RGD1308093.aSep08</a> | <a href="#">361034</a> | 11907 | 3062 | 14 | 807 | similar to FLJ00128 protein (RGD1308093) alternative variant aSep08, mRNA.                    |
| <a href="#">RGD1308093</a> | <a href="#">RGD1308093.bSep08</a> | <a href="#">361034</a> | 800   | 685  | 2  | 227 | similar to FLJ00128 protein (RGD1308093) alternative variant bSep08, mRNA.                    |
| <a href="#">RGD1308093</a> | <a href="#">RGD1308093.cSep08</a> | <a href="#">361034</a> | 3392  | 817  | 6  | 179 | similar to FLJ00128 protein (RGD1308093) alternative variant cSep08, mRNA.                    |
| <a href="#">RGD1308093</a> | <a href="#">RGD1308093.dSep08</a> | <a href="#">361034</a> | 1103  | 638  | 3  | 159 | similar to FLJ00128 protein (RGD1308093) alternative variant dSep08, mRNA.                    |
| <a href="#">RGD1308093</a> | <a href="#">RGD1308093.eSep08</a> | <a href="#">361034</a> | 2357  | 1281 | 5  | 134 | similar to FLJ00128 protein (13.7 kD) (RGD1308093) alternative variant eSep08, mRNA.          |
| <a href="#">RGD1308093</a> | <a href="#">RGD1308093.fSep08</a> | <a href="#">361034</a> | 1245  | 671  | 3  | 86  | similar to FLJ00128 protein (9.0 kD) (RGD1308093) alternative variant fSep08, mRNA.           |
| <a href="#">RGD1308093</a> | <a href="#">RGD1308093.gSep08</a> | <a href="#">361034</a> | 1384  | 1076 | 2  | 94  | similar to FLJ00128 protein (10.0 kD) (RGD1308093) alternative variant gSep08, complete mRNA. |
| <a href="#">RGD1308093</a> | <a href="#">RGD1308093.hSep08</a> | <a href="#">361034</a> | 3283  | 925  | 6  | 116 | similar to FLJ00128 protein (RGD1308093) alternative variant hSep08, mRNA.                    |
| <a href="#">RGD1308101</a> | <a href="#">RGD1308101.bSep08</a> | <a href="#">679640</a> | 22556 | 398  | 1  | 132 | similar to hypothetical protein FLJ20276 (RGD1308101) alternative variant bSep08, mRNA.       |
| <a href="#">RGD1308101</a> | <a href="#">RGD1308101.cSep08</a> | <a href="#">679640</a> | 995   | 313  | 1  | 75  | similar to hypothetical protein FLJ20276 (RGD1308101) alternative variant cSep08, mRNA.       |
| <a href="#">RGD1308106</a> | <a href="#">RGD1308106.bSep08</a> | <a href="#">361719</a> | 698   | 395  | 3  | 131 | LOC361719 (RGD1308106) alternative variant bSep08, mRNA.                                      |

|                            |                                   |                        |        |      |   |     |                                                                                                         |
|----------------------------|-----------------------------------|------------------------|--------|------|---|-----|---------------------------------------------------------------------------------------------------------|
| <a href="#">RGD1308112</a> | <a href="#">RGD1308112.aSep08</a> | <a href="#">289038</a> | 7825   | 788  |   | 189 | similar to 40S ribosomal protein S7 (S8) (RGD1308112) mRNA.                                             |
| <a href="#">RGD1308113</a> | <a href="#">RGD1308113.bSep08</a> | <a href="#">290224</a> | 3810   | 571  | 4 | 168 | similar to CGI-112 protein (19.0 kD) (RGD1308113) alternative variant bSep08, mRNA.                     |
| <a href="#">RGD1308113</a> | <a href="#">RGD1308113.cSep08</a> | <a href="#">290224</a> | 4038   | 1233 | 4 | 98  | similar to CGI-112 protein (RGD1308113) alternative variant cSep08, mRNA.                               |
| <a href="#">RGD1308114</a> | <a href="#">RGD1308114.aSep08</a> | <a href="#">361253</a> | 57576  | 387  | 4 | 128 | uncharacterized protein C7orf10 (RGD1308114) alternative variant aSep08, mRNA.                          |
| <a href="#">RGD1308114</a> | <a href="#">RGD1308114.bSep08</a> | <a href="#">361253</a> | 290451 | 689  | 3 | 55  | uncharacterized protein C7orf10 like (5.9 kD) (RGD1308114) alternative variant bSep08, mRNA.            |
| <a href="#">RGD1308116</a> | <a href="#">RGD1308116.aSep08</a> | <a href="#">310376</a> | 15880  | 1331 |   | 400 | similar to hypothetical protein MGC42105 (RGD1308116) mRNA.                                             |
| <a href="#">RGD1308117</a> | <a href="#">RGD1308117.bSep08</a> | <a href="#">361066</a> | 1955   | 1390 | 3 | 127 | similar to 9930012K11Rik protein (14.2 kD) (RGD1308117) alternative variant bSep08, mRNA.               |
| <a href="#">RGD1308119</a> | <a href="#">RGD1308119.bSep08</a> | <a href="#">302032</a> | 7272   | 834  | 1 | 121 | similar to F-box protein FBL2 (14.0 kD) (RGD1308119) alternative variant bSep08, complete mRNA.         |
| <a href="#">RGD1308124</a> | <a href="#">RGD1308124.aSep08</a> | <a href="#">308631</a> | 37997  | 407  |   | 135 | similar to KIAA1357 protein (RGD1308124) mRNA.                                                          |
| <a href="#">RGD1308127</a> | <a href="#">RGD1308127.bSep08</a> | <a href="#">365493</a> | 18587  | 815  | 6 | 162 | similar to 2700078E11Rik protein (RGD1308127) alternative variant bSep08, mRNA.                         |
| <a href="#">RGD1308134</a> | <a href="#">RGD1308134.bSep08</a> | <a href="#">287452</a> | 2751   | 821  | 5 | 184 | CRA b (RGD1308134) alternative variant bSep08, mRNA.                                                    |
| <a href="#">RGD1308134</a> | <a href="#">RGD1308134.cSep08</a> | <a href="#">287452</a> | 2477   | 702  | 4 | 169 | putative protein of metazoan origin (RGD1308134) alternative variant cSep08, mRNA.                      |
| <a href="#">RGD1308134</a> | <a href="#">RGD1308134.dSep08</a> | <a href="#">287452</a> | 2386   | 610  | 4 | 119 | CRA b (RGD1308134) alternative variant dSep08, mRNA.                                                    |
| <a href="#">RGD1308134</a> | <a href="#">RGD1308134.eSep08</a> | <a href="#">287452</a> | 1185   | 568  | 4 | 88  | CRA b like (8.8 kD) (RGD1308134) alternative variant eSep08, mRNA.                                      |
| <a href="#">RGD1308134</a> | <a href="#">RGD1308134.fSep08</a> | <a href="#">287452</a> | 1450   | 743  | 3 | 73  | putative cytoplasmic protein of metazoan origin (7.8 kD) (RGD1308134) alternative variant fSep08, mRNA. |
| <a href="#">RGD1308134</a> | <a href="#">RGD1308134.gSep08</a> | <a href="#">287452</a> | 1568   | 338  | 3 | 67  | putative protein of vertebrate origin (RGD1308134) alternative variant gSep08, mRNA.                    |
| <a href="#">RGD1308134</a> | <a href="#">RGD1308134.jSep08</a> | <a href="#">287452</a> | 960    | 432  | 2 | 57  | CRA d like (RGD1308134) alternative variant jSep08, mRNA.                                               |
| <a href="#">RGD1308147</a> | <a href="#">RGD1308147.bSep08</a> | <a href="#">307008</a> | 5449   | 791  | 2 | 150 | putative protein of eukaryotic origin (RGD1308147) alternative variant bSep08, mRNA.                    |
| <a href="#">RGD1308147</a> | <a href="#">RGD1308147.cSep08</a> | <a href="#">307008</a> | 5439   | 701  | 2 | 140 | putative protein of eukaryotic origin (RGD1308147) alternative variant cSep08, mRNA.                    |
| <a href="#">RGD1308147</a> | <a href="#">RGD1308147.dSep08</a> | <a href="#">307008</a> | 5410   | 828  | 3 | 59  | putative protein (RGD1308147) alternative variant dSep08, mRNA.                                         |
| <a href="#">RGD1308154</a> | <a href="#">RGD1308154.aSep08</a> | <a href="#">363799</a> | 125377 | 812  |   | 270 | similar to CG11388-PA (RGD1308154) mRNA.                                                                |
| <a href="#">RGD1308160</a> | <a href="#">RGD1308160.aSep08</a> | <a href="#">307556</a> | 20086  | 684  |   | 227 | similar to Myosin heavy chain A (MHC A) (RGD1308160) mRNA.                                              |
| <a href="#">RGD1308168</a> | <a href="#">RGD1308168.aSep08</a> | <a href="#">303735</a> | 5566   | 646  |   | 214 | CRA a (RGD1308168) mRNA.                                                                                |
| <a href="#">RGD1308195</a> | <a href="#">RGD1308195.bSep08</a> | <a href="#">315074</a> | 1383   | 525  | 1 | 93  | similar to secreted Ly6/uPAR related protein 2 (RGD1308195) alternative variant bSep08, mRNA.           |
| <a href="#">RGD1308215</a> | <a href="#">RGD1308215.bSep08</a> | <a href="#">293493</a> | 32703  | 455  | 3 | 91  | similar to hypothetical protein DKFZp434I2117 (RGD1308215) alternative variant bSep08, mRNA.            |

|                            |                                   |                        |       |      |    |     |                                                                                                                                                           |
|----------------------------|-----------------------------------|------------------------|-------|------|----|-----|-----------------------------------------------------------------------------------------------------------------------------------------------------------|
| <a href="#">RGD1308221</a> | <a href="#">RGD1308221.bSep08</a> | <a href="#">304645</a> | 2784  | 368  | 1  | 122 | similar to TBC1 domain family, member 8 (with GRAM domain); vascular Rab-GAP/TBC-containing (RGD1308221) alternative variant bSep08, mRNA.                |
| <a href="#">RGD1308226</a> | <a href="#">RGD1308226.bSep08</a> | <a href="#">296968</a> | 21002 | 401  | 4  | 133 | similar to hypothetical protein FLJ32786 (RGD1308226) alternative variant bSep08, mRNA.                                                                   |
| <a href="#">RGD1308226</a> | <a href="#">RGD1308226.cSep08</a> | <a href="#">296968</a> | 5350  | 310  | 3  | 103 | similar to hypothetical protein FLJ32786 (RGD1308226) alternative variant cSep08, mRNA.                                                                   |
| <a href="#">RGD1308226</a> | <a href="#">RGD1308226.dSep08</a> | <a href="#">296968</a> | 35446 | 761  | 1  | 53  | similar to hypothetical protein FLJ32786 (RGD1308226) alternative variant dSep08, mRNA.                                                                   |
| <a href="#">RGD1308234</a> | <a href="#">RGD1308234.aSep08</a> | <a href="#">309150</a> | 3757  | 641  | 3  | 213 | hypothetical LOC309150 (RGD1308234) alternative variant aSep08, mRNA.                                                                                     |
| <a href="#">RGD1308234</a> | <a href="#">RGD1308234.bSep08</a> | <a href="#">309150</a> | 2534  | 460  | 2  | 152 | hypothetical LOC309150 (RGD1308234) alternative variant bSep08, mRNA.                                                                                     |
| <a href="#">RGD1308234</a> | <a href="#">RGD1308234.cSep08</a> | <a href="#">309150</a> | 2515  | 384  | 1  | 127 | hypothetical LOC309150 (RGD1308234) alternative variant cSep08, mRNA.                                                                                     |
| <a href="#">RGD1308251</a> | <a href="#">RGD1308251.bSep08</a> | <a href="#">362676</a> | 19538 | 396  | 1  | 79  | similar to RIKEN cDNA 2810405K02 (RGD1308251) alternative variant bSep08, mRNA.                                                                           |
| <a href="#">RGD1308257</a> | <a href="#">RGD1308257.bSep08</a> | <a href="#">362437</a> | 13762 | 3078 | 9  | 309 | similar to intermediate filament-like protein MGC:2625 isoform 2; HOM-TES-103 tumor antigen-like (35.6 kD) (RGD1308257) alternative variant bSep08, mRNA. |
| <a href="#">RGD1308257</a> | <a href="#">RGD1308257.cSep08</a> | <a href="#">362437</a> | 12209 | 1930 | 9  | 199 | similar to intermediate filament-like protein MGC:2625 isoform 2; HOM-TES-103 tumor antigen-like (22.8 kD) (RGD1308257) alternative variant cSep08, mRNA. |
| <a href="#">RGD1308257</a> | <a href="#">RGD1308257.dSep08</a> | <a href="#">362437</a> | 8698  | 693  | 3  | 140 | similar to intermediate filament-like protein MGC:2625 isoform 2; HOM-TES-103 tumor antigen-like (RGD1308257) alternative variant dSep08, mRNA.           |
| <a href="#">RGD1308257</a> | <a href="#">RGD1308257.eSep08</a> | <a href="#">362437</a> | 3801  | 1091 | 5  | 118 | similar to intermediate filament-like protein MGC:2625 isoform 2; HOM-TES-103 tumor antigen-like (RGD1308257) alternative variant eSep08, mRNA.           |
| <a href="#">RGD1308268</a> | <a href="#">RGD1308268.aSep08</a> | <a href="#">365869</a> | 11761 | 811  |    | 270 | similar to KIAA0460 protein (RGD1308268) mRNA.                                                                                                            |
| <a href="#">RGD1308290</a> | <a href="#">RGD1308290.bSep08</a> | <a href="#">360845</a> | 12973 | 680  | 7  | 226 | similar to RIKEN cDNA 5730454B08 (RGD1308290) alternative variant bSep08, mRNA.                                                                           |
| <a href="#">RGD1308290</a> | <a href="#">RGD1308290.cSep08</a> | <a href="#">360845</a> | 12056 | 990  | 4  | 107 | similar to RIKEN cDNA 5730454B08 (RGD1308290) alternative variant cSep08, mRNA.                                                                           |
| <a href="#">RGD1308290</a> | <a href="#">RGD1308290.dSep08</a> | <a href="#">360845</a> | 6445  | 756  | 2  | 42  | similar to RIKEN cDNA 5730454B08 (RGD1308290) alternative variant dSep08, mRNA.                                                                           |
| <a href="#">RGD1308297</a> | <a href="#">RGD1308297.aSep08</a> | <a href="#">306137</a> | 39998 | 2665 | 15 | 689 | RNA binding motif protein 26 like (RGD1308297) alternative variant aSep08, mRNA.                                                                          |
| <a href="#">RGD1308297</a> | <a href="#">RGD1308297.bSep08</a> | <a href="#">306137</a> | 28389 | 2080 | 10 | 374 | rna binding motif protein 26 CRA a like (RGD1308297) alternative variant bSep08, mRNA.                                                                    |
| <a href="#">RGD1308297</a> | <a href="#">RGD1308297.cSep08</a> | <a href="#">306137</a> | 12133 | 563  | 6  | 175 | rna binding motif protein 26 CRA a like (RGD1308297) alternative variant cSep08, mRNA.                                                                    |
| <a href="#">RGD1308297</a> | <a href="#">RGD1308297.dSep08</a> | <a href="#">306137</a> | 11886 | 955  | 5  | 172 | RNA binding motif protein 26 like (RGD1308297) alternative variant dSep08, mRNA.                                                                          |
| <a href="#">RGD1308297</a> | <a href="#">RGD1308297.eSep08</a> | <a href="#">306137</a> | 1250  | 413  | 3  | 137 | RNA binding motif protein 26 like (RGD1308297) alternative variant eSep08, mRNA.                                                                          |

|                            |                                   |                        |       |      |    |     |                                                                                                |
|----------------------------|-----------------------------------|------------------------|-------|------|----|-----|------------------------------------------------------------------------------------------------|
| <a href="#">RGD1308297</a> | <a href="#">RGD1308297.fSep08</a> | <a href="#">306137</a> | 19080 | 1373 | 4  | 77  | putative protein (RGD1308297) alternative variant fSep08, mRNA.                                |
| <a href="#">RGD1308297</a> | <a href="#">RGD1308297.gSep08</a> | <a href="#">306137</a> | 4759  | 568  | 3  | 42  | putative protein (5.1 kD) (RGD1308297) alternative variant gSep08, mRNA.                       |
| <a href="#">RGD1308297</a> | <a href="#">RGD1308297.iSep08</a> | <a href="#">306137</a> | 2319  | 655  | 3  | 24  | putative protein (2.9 kD) (RGD1308297) alternative variant iSep08, mRNA.                       |
| <a href="#">RGD1308299</a> | <a href="#">RGD1308299.bSep08</a> | <a href="#">367214</a> | 6247  | 791  | 6  | 152 | solution Structure protein Domain (17.1 kD) (RGD1308299) alternative variant bSep08, mRNA.     |
| <a href="#">RGD1308299</a> | <a href="#">RGD1308299.cSep08</a> | <a href="#">367214</a> | 7429  | 748  | 7  | 152 | solution Structure protein Domain (17.1 kD) (RGD1308299) alternative variant cSep08, mRNA.     |
| <a href="#">RGD1308302</a> | <a href="#">RGD1308302.aSep08</a> | <a href="#">308911</a> | 2741  | 1776 | 2  | 478 | similar to RIKEN cDNA 1500003O22 (RGD1308302) alternative variant aSep08, mRNA.                |
| <a href="#">RGD1308302</a> | <a href="#">RGD1308302.cSep08</a> | <a href="#">308911</a> | 2642  | 739  | 2  | 222 | similar to RIKEN cDNA 1500003O22 (RGD1308302) alternative variant cSep08, mRNA.                |
| <a href="#">RGD1308319</a> | <a href="#">RGD1308319.aSep08</a> | <a href="#">316764</a> | 5305  | 811  |    | 140 | similar to KIAA0802 protein (RGD1308319) mRNA.                                                 |
| <a href="#">RGD1308333</a> | <a href="#">RGD1308333.bSep08</a> | <a href="#">292138</a> | 12970 | 2402 | 7  | 289 | similar to enolase (46.6 kD) (2J223) (31.9 kD) (RGD1308333) alternative variant bSep08, mRNA.  |
| <a href="#">RGD1308333</a> | <a href="#">RGD1308333.cSep08</a> | <a href="#">292138</a> | 13552 | 746  | 3  | 184 | similar to enolase (46.6 kD) (2J223) (RGD1308333) alternative variant cSep08, mRNA.            |
| <a href="#">RGD1308380</a> | <a href="#">RGD1308380.bSep08</a> | <a href="#">305443</a> | 5335  | 1152 | 2  | 108 | similar to RIKEN cDNA 2310079F23 (12.5 kD) (RGD1308380) alternative variant bSep08, mRNA.      |
| <a href="#">RGD1308396</a> | <a href="#">RGD1308396.bSep08</a> | <a href="#">290235</a> | 1523  | 1147 | 2  | 76  | putative protein of metazoan origin (8.4 kD) (RGD1308396) alternative variant bSep08, mRNA.    |
| <a href="#">RGD1308428</a> | <a href="#">RGD1308428.aSep08</a> | <a href="#">308509</a> | 43223 | 1050 |    | 349 | similar to RIKEN cDNA 4931406P16 (RGD1308428) mRNA.                                            |
| <a href="#">RGD1308430</a> | <a href="#">RGD1308430.aSep08</a> | <a href="#">361038</a> | 4630  | 983  | 1  | 142 | similar to 1700123O20Rik protein (15.9 kD) (RGD1308430) alternative variant aSep08, mRNA.      |
| <a href="#">RGD1308430</a> | <a href="#">RGD1308430.cSep08</a> | <a href="#">361038</a> | 4065  | 604  | 1  | 65  | similar to 1700123O20Rik protein (RGD1308430) alternative variant cSep08, mRNA.                |
| <a href="#">RGD1308432</a> | <a href="#">RGD1308432.aSep08</a> | <a href="#">362324</a> | 18135 | 2131 | 8  | 441 | WD repeat-containing protein mio like (RGD1308432) alternative variant aSep08, mRNA.           |
| <a href="#">RGD1308432</a> | <a href="#">RGD1308432.bSep08</a> | <a href="#">362324</a> | 1598  | 702  | 1  | 83  | WD repeat-containing protein mio like (9.3 kD) (RGD1308432) alternative variant bSep08, mRNA.  |
| <a href="#">RGD1308461</a> | <a href="#">RGD1308461.aSep08</a> | <a href="#">307901</a> | 8024  | 368  |    | 101 | similar to RIKEN cDNA 4632415K11 (RGD1308461) mRNA.                                            |
| <a href="#">RGD1308470</a> | <a href="#">RGD1308470.bSep08</a> | <a href="#">362778</a> | 22853 | 2089 | 2  | 139 | similar to RIKEN cDNA 4933433P14 gene (15.6 kD) (RGD1308470) alternative variant bSep08, mRNA. |
| <a href="#">RGD1308489</a> | <a href="#">RGD1308489.aSep08</a> | <a href="#">313340</a> | 27216 | 2810 | 11 | 671 | similar to hypothetical protein (RGD1308489) alternative variant aSep08, mRNA.                 |
| <a href="#">RGD1308489</a> | <a href="#">RGD1308489.bSep08</a> | <a href="#">313340</a> | 7506  | 1513 | 4  | 145 | similar to hypothetical protein (16.8 kD) (RGD1308489) alternative variant bSep08, mRNA.       |
| <a href="#">RGD1308517</a> | <a href="#">RGD1308517.aSep08</a> | <a href="#">290722</a> | 16269 | 1801 | 8  | 546 | similar to KIAA1712 protein (RGD1308517) alternative variant aSep08, mRNA.                     |
| <a href="#">RGD1308517</a> | <a href="#">RGD1308517.cSep08</a> | <a href="#">290722</a> | 20049 | 2356 | 9  | 271 | similar to KIAA1712 protein (30.3 kD) (RGD1308517) alternative variant cSep08, mRNA.           |
| <a href="#">RGD1308517</a> | <a href="#">RGD1308517.dSep08</a> | <a href="#">290722</a> | 4261  | 480  | 4  | 159 | similar to KIAA1712 protein (RGD1308517) alternative variant dSep08, mRNA.                     |



|                            |                                   |                        |       |      |   |     |                                                                                            |
|----------------------------|-----------------------------------|------------------------|-------|------|---|-----|--------------------------------------------------------------------------------------------|
| <a href="#">RGD1308523</a> | <a href="#">RGD1308523.aSep08</a> | <a href="#">289502</a> | 3554  | 455  | 1 | 109 | similar to RIKEN cDNA 4932413O14 gene (RGD1308523) alternative variant aSep08, mRNA.       |
| <a href="#">RGD1308523</a> | <a href="#">RGD1308523.bSep08</a> | <a href="#">289502</a> | 3443  | 357  | 1 | 77  | similar to RIKEN cDNA 4932413O14 gene (RGD1308523) alternative variant bSep08, mRNA.       |
| <a href="#">RGD1308523</a> | <a href="#">RGD1308523.cSep08</a> | <a href="#">289502</a> | 3427  | 349  | 1 | 74  | similar to RIKEN cDNA 4932413O14 gene (RGD1308523) alternative variant cSep08, mRNA.       |
| <a href="#">RGD1308541</a> | <a href="#">RGD1308541.aSep08</a> | <a href="#">308768</a> | 1498  | 776  |   | 237 | hypothetical LOC308768 (RGD1308541) mRNA.                                                  |
| <a href="#">RGD1308544</a> | <a href="#">RGD1308544.aSep08</a> | <a href="#">361192</a> | 24751 | 612  |   | 114 | LOC361192 (RGD1308544) mRNA.                                                               |
| <a href="#">RGD1308557</a> | <a href="#">RGD1308557.cSep08</a> | <a href="#">312965</a> | 6331  | 389  | 3 | 16  | similar to homolog of rat p47 (2.0 kD) (RGD1308557) alternative variant cSep08, mRNA.      |
| <a href="#">RGD1308564</a> | <a href="#">RGD1308564.aSep08</a> | <a href="#">287305</a> | 7021  | 731  |   | 153 | similar to L-amino acid oxidase 1 (RGD1308564) mRNA.                                       |
| <a href="#">RGD1308584</a> | <a href="#">RGD1308584.aSep08</a> | <a href="#">289083</a> | 15352 | 1081 | 5 | 183 | similar to RIKEN cDNA 5730449L18 (RGD1308584) alternative variant aSep08, mRNA.            |
| <a href="#">RGD1308601</a> | <a href="#">RGD1308601.bSep08</a> | <a href="#">307249</a> | 43376 | 854  | 1 | 230 | similar to hypothetical protein (RGD1308601) alternative variant bSep08, mRNA.             |
| <a href="#">RGD1308612</a> | <a href="#">RGD1308612.aSep08</a> | <a href="#">311713</a> | 3412  | 1767 | 4 | 222 | similar to Protein C20orf20 (RGD1308612) alternative variant aSep08, mRNA.                 |
| <a href="#">RGD1308612</a> | <a href="#">RGD1308612.bSep08</a> | <a href="#">311713</a> | 3063  | 1109 | 5 | 212 | similar to Protein C20orf20 (RGD1308612) alternative variant bSep08, mRNA.                 |
| <a href="#">RGD1308616</a> | <a href="#">RGD1308616.aSep08</a> | <a href="#">362573</a> | 8219  | 1939 |   | 538 | similar to KIAA0467 protein (RGD1308616) alternative variant aSep08, mRNA.                 |
| <a href="#">RGD1308616</a> | <a href="#">RGD1308616.bSep08</a> | <a href="#">362573</a> | 10040 | 1518 |   | 403 | similar to KIAA0467 protein (RGD1308616) alternative variant bSep08, mRNA.                 |
| <a href="#">RGD1308626</a> | <a href="#">RGD1308626.aSep08</a> | <a href="#">361087</a> | 3672  | 929  | 1 | 309 | similar to 9630044O09Rik protein (RGD1308626) alternative variant aSep08, mRNA.            |
| <a href="#">RGD1308635</a> | <a href="#">RGD1308635.bSep08</a> | <a href="#">296587</a> | 1766  | 786  | 3 | 162 | similar to CG12379-PA (17.2 kD) (RGD1308635) alternative variant bSep08, complete mRNA.    |
| <a href="#">RGD1308635</a> | <a href="#">RGD1308635.cSep08</a> | <a href="#">296587</a> | 989   | 760  | 2 | 119 | similar to CG12379-PA (RGD1308635) alternative variant cSep08, mRNA.                       |
| <a href="#">RGD1308635</a> | <a href="#">RGD1308635.dSep08</a> | <a href="#">296587</a> | 1747  | 1562 | 2 | 112 | similar to CG12379-PA (11.9 kD) (RGD1308635) alternative variant dSep08, complete mRNA.    |
| <a href="#">RGD1308695</a> | <a href="#">RGD1308695.bSep08</a> | <a href="#">289088</a> | 24977 | 440  | 6 | 98  | CRA b like (11.3 kD) (RGD1308695) alternative variant bSep08, mRNA.                        |
| <a href="#">RGD1308695</a> | <a href="#">RGD1308695.cSep08</a> | <a href="#">289088</a> | 15149 | 721  | 7 | 88  | putative protein of vertebrate origin (RGD1308695) alternative variant cSep08, mRNA.       |
| <a href="#">RGD1308695</a> | <a href="#">RGD1308695.dSep08</a> | <a href="#">289088</a> | 6007  | 425  | 2 | 83  | CRA b like (RGD1308695) alternative variant dSep08, mRNA.                                  |
| <a href="#">RGD1308699</a> | <a href="#">RGD1308699.aSep08</a> | <a href="#">309790</a> | 8576  | 2177 | 3 | 371 | similar to 1700060H10Rik protein (41.4 kD) (RGD1308699) alternative variant aSep08, mRNA.  |
| <a href="#">RGD1308706</a> | <a href="#">RGD1308706.bSep08</a> | <a href="#">291925</a> | 25656 | 701  | 4 | 134 | similar to RIKEN cDNA 4921524J17 (15.7 kD) (RGD1308706) alternative variant bSep08, mRNA.  |
| <a href="#">RGD1308706</a> | <a href="#">RGD1308706.cSep08</a> | <a href="#">291925</a> | 26306 | 768  | 3 | 107 | similar to RIKEN cDNA 4921524J17 (RGD1308706) alternative variant cSep08, mRNA.            |
| <a href="#">RGD1308706</a> | <a href="#">RGD1308706.dSep08</a> | <a href="#">291925</a> | 20310 | 407  | 3 | 12  | similar to RIKEN cDNA 4921524J17 (RGD1308706) alternative variant dSep08, mRNA.            |
| <a href="#">RGD1308720</a> | <a href="#">RGD1308720.aSep08</a> | <a href="#">362945</a> | 6473  | 2148 | 4 | 521 | similar to Peroxidasin CG12002-PA (56.3 kD) (RGD1308720) alternative variant aSep08, mRNA. |

|                            |                                   |                        |        |      |   |     |                                                                                                                                                                                                            |
|----------------------------|-----------------------------------|------------------------|--------|------|---|-----|------------------------------------------------------------------------------------------------------------------------------------------------------------------------------------------------------------|
| <a href="#">RGD1308720</a> | <a href="#">RGD1308720.bSep08</a> | <a href="#">362945</a> | 1669   | 546  | 1 | 117 | similar to Peroxidasin CG12002-PA (12.3 kD) (RGD1308720) alternative variant bSep08, mRNA.                                                                                                                 |
| <a href="#">RGD1308722</a> | <a href="#">RGD1308722.bSep08</a> | <a href="#">361822</a> | 5818   | 784  | 5 | 199 | putative protein of ancient origin (RGD1308722) alternative variant bSep08, mRNA.                                                                                                                          |
| <a href="#">RGD1308723</a> | <a href="#">RGD1308723.bSep08</a> | <a href="#">292160</a> | 19753  | 804  | 9 | 268 | similar to hypothetical protein FLJ20729 (RGD1308723) alternative variant bSep08, mRNA.                                                                                                                    |
| <a href="#">RGD1308723</a> | <a href="#">RGD1308723.cSep08</a> | <a href="#">292160</a> | 16557  | 794  | 7 | 264 | similar to hypothetical protein FLJ20729 (RGD1308723) alternative variant cSep08, mRNA.                                                                                                                    |
| <a href="#">RGD1308723</a> | <a href="#">RGD1308723.dSep08</a> | <a href="#">292160</a> | 6560   | 681  | 6 | 186 | similar to hypothetical protein FLJ20729 (RGD1308723) alternative variant dSep08, mRNA.                                                                                                                    |
| <a href="#">RGD1308723</a> | <a href="#">RGD1308723.eSep08</a> | <a href="#">292160</a> | 5338   | 1348 | 2 | 97  | similar to hypothetical protein FLJ20729 (RGD1308723) alternative variant eSep08, mRNA.                                                                                                                    |
| <a href="#">RGD1308729</a> | <a href="#">RGD1308729.bSep08</a> | <a href="#">314584</a> | 56924  | 623  | 3 | 72  | similar to ZFP-like protein (8.3 kD) (RGD1308729) alternative variant bSep08, mRNA.                                                                                                                        |
| <a href="#">RGD1308742</a> | <a href="#">RGD1308742.aSep08</a> | <a href="#">362120</a> | 11350  | 1777 |   | 528 | similar to Complement C5 precursor (RGD1308742) mRNA.                                                                                                                                                      |
| <a href="#">RGD1308759</a> | <a href="#">RGD1308759.bSep08</a> | <a href="#">290668</a> | 6450   | 3921 | 6 | 182 | CRA a (20.5 kD) (RGD1308759) alternative variant bSep08, mRNA.                                                                                                                                             |
| <a href="#">RGD1308759</a> | <a href="#">RGD1308759.cSep08</a> | <a href="#">290668</a> | 4085   | 778  | 5 | 157 | CRA c (RGD1308759) alternative variant cSep08, mRNA.                                                                                                                                                       |
| <a href="#">RGD1308759</a> | <a href="#">RGD1308759.dSep08</a> | <a href="#">290668</a> | 14676  | 1466 | 5 | 105 | CRA c (RGD1308759) alternative variant dSep08, mRNA.                                                                                                                                                       |
| <a href="#">RGD1308759</a> | <a href="#">RGD1308759.eSep08</a> | <a href="#">290668</a> | 2773   | 682  | 3 | 91  | CRA c like (RGD1308759) alternative variant eSep08, mRNA.                                                                                                                                                  |
| <a href="#">RGD1308759</a> | <a href="#">RGD1308759.fSep08</a> | <a href="#">290668</a> | 889    | 613  | 2 | 80  | CRA c like (8.9 kD) (RGD1308759) alternative variant fSep08, mRNA.                                                                                                                                         |
| <a href="#">RGD1308759</a> | <a href="#">RGD1308759.gSep08</a> | <a href="#">290668</a> | 4899   | 446  | 2 | 56  | CRA c like (RGD1308759) alternative variant gSep08, mRNA.                                                                                                                                                  |
| <a href="#">RGD1308772</a> | <a href="#">RGD1308772.aSep08</a> | <a href="#">290381</a> | 127007 | 2602 |   | 510 | similar to KIAA0564 protein (RGD1308772) mRNA.                                                                                                                                                             |
| <a href="#">RGD1308782</a> | <a href="#">RGD1308782.aSep08</a> | <a href="#">308318</a> | 2321   | 572  | 3 | 190 | similar to Zinc finger protein OZF (POZF-1) (RGD1308782) alternative variant aSep08, mRNA.                                                                                                                 |
| <a href="#">RGD1308813</a> | <a href="#">RGD1308813.bSep08</a> | <a href="#">303606</a> | 3466   | 796  | 4 | 108 | similar to adipocyte-specific protein 4 (13.1 kD) (RGD1308813) alternative variant bSep08, mRNA.                                                                                                           |
| <a href="#">RGD1308813</a> | <a href="#">RGD1308813.cSep08</a> | <a href="#">303606</a> | 1825   | 610  | 3 | 66  | similar to adipocyte-specific protein 4 (RGD1308813) alternative variant cSep08, mRNA.                                                                                                                     |
| <a href="#">RGD1308818</a> | <a href="#">RGD1308818.bSep08</a> | <a href="#">311113</a> | 18796  | 1441 | 1 | 412 | similar to hypothetical protein (49.6 kD) (RGD1308818) alternative variant bSep08, complete mRNA.                                                                                                          |
| <a href="#">RGD1308872</a> | <a href="#">RGD1308872.bSep08</a> | <a href="#">291787</a> | 13690  | 334  | 3 | 111 | similar to Retinoblastoma-binding protein 8 (RBBP-8) (CtBP interacting protein) (CtIP) (Retinoblastoma-interacting protein and myosin-like) (RIM) (RGD1308872) alternative variant bSep08, mRNA.           |
| <a href="#">RGD1308872</a> | <a href="#">RGD1308872.cSep08</a> | <a href="#">291787</a> | 11974  | 314  | 5 | 104 | similar to Retinoblastoma-binding protein 8 (RBBP-8) (CtBP interacting protein) (CtIP) (Retinoblastoma-interacting protein and myosin-like) (RIM) (RGD1308872) alternative variant cSep08, mRNA.           |
| <a href="#">RGD1308872</a> | <a href="#">RGD1308872.dSep08</a> | <a href="#">291787</a> | 21142  | 814  | 5 | 94  | similar to Retinoblastoma-binding protein 8 (RBBP-8) (CtBP interacting protein) (CtIP) (Retinoblastoma-interacting protein and myosin-like) (RIM) (10.9 kD) (RGD1308872) alternative variant dSep08, mRNA. |

|                            |                                   |                        |        |      |    |     |                                                                                                |
|----------------------------|-----------------------------------|------------------------|--------|------|----|-----|------------------------------------------------------------------------------------------------|
| <a href="#">RGD1308874</a> | <a href="#">RGD1308874.bSep08</a> | <a href="#">366227</a> | 38021  | 526  | 3  | 148 | similar to RIKEN cDNA 2310001A20 (RGD1308874) alternative variant bSep08, mRNA.                |
| <a href="#">RGD1308874</a> | <a href="#">RGD1308874.cSep08</a> | <a href="#">366227</a> | 15014  | 697  | 2  | 145 | similar to RIKEN cDNA 2310001A20 (RGD1308874) alternative variant cSep08, mRNA.                |
| <a href="#">RGD1308876</a> | <a href="#">RGD1308876.bSep08</a> | <a href="#">362597</a> | 1367   | 869  | 2  | 219 | similar to 2610027C15Rik protein (RGD1308876) alternative variant bSep08, mRNA.                |
| <a href="#">RGD1308876</a> | <a href="#">RGD1308876.cSep08</a> | <a href="#">362597</a> | 1357   | 941  | 2  | 103 | similar to 2610027C15Rik protein (RGD1308876) alternative variant cSep08, mRNA.                |
| <a href="#">RGD1308907</a> | <a href="#">RGD1308907.bSep08</a> | <a href="#">314325</a> | 27275  | 3225 | 1  | 90  | similar to FLJ20689 (RGD1308907) alternative variant bSep08, mRNA.                             |
| <a href="#">RGD1308908</a> | <a href="#">RGD1308908.aSep08</a> | <a href="#">288514</a> | 11949  | 3314 | 23 | 511 | similar to KIAA1440 protein (57.4 kD) (RGD1308908) alternative variant aSep08, mRNA.           |
| <a href="#">RGD1308908</a> | <a href="#">RGD1308908.bSep08</a> | <a href="#">288514</a> | 1339   | 944  | 2  | 196 | similar to KIAA1440 protein (RGD1308908) alternative variant bSep08, mRNA.                     |
| <a href="#">RGD1308908</a> | <a href="#">RGD1308908.cSep08</a> | <a href="#">288514</a> | 1287   | 624  | 4  | 156 | similar to KIAA1440 protein (RGD1308908) alternative variant cSep08, mRNA.                     |
| <a href="#">RGD1308908</a> | <a href="#">RGD1308908.eSep08</a> | <a href="#">288514</a> | 702    | 406  | 3  | 96  | similar to KIAA1440 protein (RGD1308908) alternative variant eSep08, mRNA.                     |
| <a href="#">RGD1308915</a> | <a href="#">RGD1308915.bSep08</a> | <a href="#">363545</a> | 3214   | 2039 | 2  | 147 | similar to RIKEN cDNA 1200013P24 (RGD1308915) alternative variant bSep08, mRNA.                |
| <a href="#">RGD1308918</a> | <a href="#">RGD1308918.bSep08</a> | <a href="#">293570</a> | 21334  | 682  | 1  | 153 | similar to KIAA0157 gene product is novel (RGD1308918) alternative variant bSep08, mRNA.       |
| <a href="#">RGD1308929</a> | <a href="#">RGD1308929.aSep08</a> | <a href="#">361614</a> | 21227  | 1783 | 5  | 586 | CRA b like (RGD1308929) alternative variant aSep08, mRNA.                                      |
| <a href="#">RGD1308929</a> | <a href="#">RGD1308929.cSep08</a> | <a href="#">361614</a> | 139735 | 585  | 6  | 194 | CRA b like (RGD1308929) alternative variant cSep08, mRNA.                                      |
| <a href="#">RGD1308929</a> | <a href="#">RGD1308929.dSep08</a> | <a href="#">361614</a> | 9663   | 551  | 4  | 177 | protein fam168a (RGD1308929) alternative variant dSep08, mRNA.                                 |
| <a href="#">RGD1308929</a> | <a href="#">RGD1308929.eSep08</a> | <a href="#">361614</a> | 133649 | 559  | 4  | 153 | putative protein (RGD1308929) alternative variant eSep08, mRNA.                                |
| <a href="#">RGD1308929</a> | <a href="#">RGD1308929.fSep08</a> | <a href="#">361614</a> | 123228 | 433  | 4  | 96  | CRA e like (RGD1308929) alternative variant fSep08, mRNA.                                      |
| <a href="#">RGD1308929</a> | <a href="#">RGD1308929.gSep08</a> | <a href="#">361614</a> | 39026  | 678  | 3  | 82  | putative protein (RGD1308929) alternative variant gSep08, mRNA.                                |
| <a href="#">RGD1308952</a> | <a href="#">RGD1308952.aSep08</a> | <a href="#">303002</a> | 9321   | 2608 | 7  | 278 | similar to mKIAA0665 protein (RGD1308952) alternative variant aSep08, mRNA.                    |
| <a href="#">RGD1308952</a> | <a href="#">RGD1308952.bSep08</a> | <a href="#">303002</a> | 17119  | 627  | 2  | 155 | similar to mKIAA0665 protein (RGD1308952) alternative variant bSep08, mRNA.                    |
| <a href="#">RGD1308952</a> | <a href="#">RGD1308952.cSep08</a> | <a href="#">303002</a> | 23782  | 1779 | 2  | 50  | similar to mKIAA0665 protein (RGD1308952) alternative variant cSep08, mRNA.                    |
| <a href="#">RGD1308958</a> | <a href="#">RGD1308958.aSep08</a> | <a href="#">298020</a> | 30470  | 1174 |    | 391 | putative protein, with at least 8 transmembrane domains, of metazoan origin (RGD1308958) mRNA. |
| <a href="#">RGD1308977</a> | <a href="#">RGD1308977.aSep08</a> | <a href="#">291312</a> | 9625   | 791  | 4  | 146 | similar to RIKEN cDNA 1110017116 (RGD1308977) alternative variant aSep08, mRNA.                |
| <a href="#">RGD1308977</a> | <a href="#">RGD1308977.cSep08</a> | <a href="#">291312</a> | 4940   | 978  | 1  | 85  | similar to RIKEN cDNA 1110017116 (10.7 kD) (RGD1308977) alternative variant cSep08, mRNA.      |

|                            |                                   |                        |        |      |   |     |                                                                                                                             |
|----------------------------|-----------------------------------|------------------------|--------|------|---|-----|-----------------------------------------------------------------------------------------------------------------------------|
| <a href="#">RGD1309019</a> | <a href="#">RGD1309019.bSep08</a> | <a href="#">314596</a> | 1205   | 762  | 2 | 246 | similar to Ras GTPase-activating protein nGAP (RAS protein activator like 1) (RGD1309019) alternative variant bSep08, mRNA. |
| <a href="#">RGD1309019</a> | <a href="#">RGD1309019.cSep08</a> | <a href="#">314596</a> | 4109   | 662  | 3 | 220 | similar to Ras GTPase-activating protein nGAP (RAS protein activator like 1) (RGD1309019) alternative variant cSep08, mRNA. |
| <a href="#">RGD1309020</a> | <a href="#">RGD1309020.bSep08</a> | <a href="#">291060</a> | 14852  | 902  | 6 | 245 | similar to RIKEN cDNA 6530403A03 (RGD1309020) alternative variant bSep08, mRNA.                                             |
| <a href="#">RGD1309020</a> | <a href="#">RGD1309020.cSep08</a> | <a href="#">291060</a> | 9883   | 752  | 5 | 144 | similar to RIKEN cDNA 6530403A03 (16.6 kD) (RGD1309020) alternative variant cSep08, mRNA.                                   |
| <a href="#">RGD1309020</a> | <a href="#">RGD1309020.fSep08</a> | <a href="#">291060</a> | 1995   | 197  | 2 | 31  | similar to RIKEN cDNA 6530403A03 (RGD1309020) alternative variant fSep08, mRNA.                                             |
| <a href="#">RGD1309028</a> | <a href="#">RGD1309028.aSep08</a> | <a href="#">299265</a> | 1040   | 383  |   | 127 | similar to RIKEN cDNA A830059I20 (RGD1309028) mRNA.                                                                         |
| <a href="#">RGD1309036</a> | <a href="#">RGD1309036.aSep08</a> | <a href="#">292874</a> | 2703   | 746  | 3 | 199 | hypothetical LOC292874 (RGD1309036) alternative variant aSep08, mRNA.                                                       |
| <a href="#">RGD1309051</a> | <a href="#">RGD1309051.bSep08</a> | <a href="#">299153</a> | 8385   | 924  | 2 | 240 | CRA a like (RGD1309051) alternative variant bSep08, mRNA.                                                                   |
| <a href="#">RGD1309051</a> | <a href="#">RGD1309051.cSep08</a> | <a href="#">299153</a> | 4794   | 898  | 5 | 237 | putative protein of eukaryotic origin (RGD1309051) alternative variant cSep08, mRNA.                                        |
| <a href="#">RGD1309051</a> | <a href="#">RGD1309051.dSep08</a> | <a href="#">299153</a> | 15810  | 586  | 3 | 195 | CRA a (RGD1309051) alternative variant dSep08, mRNA.                                                                        |
| <a href="#">RGD1309058</a> | <a href="#">RGD1309058.aSep08</a> | <a href="#">314311</a> | 3758   | 346  | 2 | 115 | similar to RIKEN cDNA 9830169C18 (RGD1309058) alternative variant aSep08, mRNA.                                             |
| <a href="#">RGD1309085</a> | <a href="#">RGD1309085.aSep08</a> | <a href="#">297821</a> | 15643  | 587  |   | 195 | similar to F23N19.9 (RGD1309085) mRNA.                                                                                      |
| <a href="#">RGD1309102</a> | <a href="#">RGD1309102.bSep08</a> | <a href="#">291750</a> | 1527   | 658  | 1 | 133 | similar to TRS85 homolog (RGD1309102) alternative variant bSep08, mRNA.                                                     |
| <a href="#">RGD1309104</a> | <a href="#">RGD1309104.bSep08</a> | <a href="#">289084</a> | 118246 | 561  | 3 | 111 | putative protein (RGD1309104) alternative variant bSep08, mRNA.                                                             |
| <a href="#">RGD1309108</a> | <a href="#">RGD1309108.aSep08</a> | <a href="#">315578</a> | 3762   | 422  |   | 140 | similar to hypothetical protein FLJ23554 (RGD1309108) mRNA.                                                                 |
| <a href="#">RGD1309148</a> | <a href="#">RGD1309148.aSep08</a> | <a href="#">298147</a> | 1101   | 876  | 2 | 119 | similar to RIKEN cDNA 3110001D03 (RGD1309148) alternative variant aSep08, mRNA.                                             |
| <a href="#">RGD1309148</a> | <a href="#">RGD1309148.bSep08</a> | <a href="#">298147</a> | 787    | 472  | 2 | 104 | similar to RIKEN cDNA 3110001D03 (RGD1309148) alternative variant bSep08, mRNA.                                             |
| <a href="#">RGD1309170</a> | <a href="#">RGD1309170.aSep08</a> | <a href="#">362047</a> | 24024  | 857  |   | 202 | similar to hypothetical protein DKFz434G072 (RGD1309170) mRNA.                                                              |
| <a href="#">RGD1309172</a> | <a href="#">RGD1309172.aSep08</a> | <a href="#">315979</a> | 9549   | 637  |   | 212 | similar to RIKEN cDNA E330026B02 (RGD1309172) mRNA.                                                                         |
| <a href="#">RGD1309198</a> | <a href="#">RGD1309198.bSep08</a> | <a href="#">313056</a> | 12872  | 1491 | 1 | 77  | similar to U5 snRNP-specific protein (Prp8-binding) (8.5 kD) (RGD1309198) alternative variant bSep08, mRNA.                 |
| <a href="#">RGD1309216</a> | <a href="#">RGD1309216.bSep08</a> | <a href="#">361726</a> | 28018  | 1412 | 5 | 154 | similar to hypothetical protein FLJ20487 (18.5 kD) (RGD1309216) alternative variant bSep08, mRNA.                           |
| <a href="#">RGD1309216</a> | <a href="#">RGD1309216.cSep08</a> | <a href="#">361726</a> | 23679  | 784  | 5 | 132 | similar to hypothetical protein FLJ20487 (15.5 kD) (RGD1309216) alternative variant cSep08, complete mRNA.                  |
| <a href="#">RGD1309216</a> | <a href="#">RGD1309216.dSep08</a> | <a href="#">361726</a> | 27651  | 717  | 3 | 33  | similar to hypothetical protein FLJ20487 (RGD1309216) alternative variant dSep08, mRNA.                                     |

|                            |                                   |                        |       |      |   |     |                                                                                                                                                           |
|----------------------------|-----------------------------------|------------------------|-------|------|---|-----|-----------------------------------------------------------------------------------------------------------------------------------------------------------|
| <a href="#">RGD1309216</a> | <a href="#">RGD1309216.eSep08</a> | <a href="#">361726</a> | 23844 | 562  | 2 | 37  | similar to hypothetical protein FLJ20487 (RGD1309216) alternative variant eSep08, mRNA.                                                                   |
| <a href="#">RGD1309220</a> | <a href="#">RGD1309220.bSep08</a> | <a href="#">316328</a> | 3885  | 734  | 6 | 244 | protein CRA g (RGD1309220) alternative variant bSep08, mRNA.                                                                                              |
| <a href="#">RGD1309220</a> | <a href="#">RGD1309220.dSep08</a> | <a href="#">316328</a> | 17337 | 941  | 4 | 116 | uncharacterized protein (11.6 kD) (RGD1309220) alternative variant dSep08, mRNA.                                                                          |
| <a href="#">RGD1309220</a> | <a href="#">RGD1309220.eSep08</a> | <a href="#">316328</a> | 1322  | 734  | 2 | 105 | putative protein (RGD1309220) alternative variant eSep08, mRNA.                                                                                           |
| <a href="#">RGD1309220</a> | <a href="#">RGD1309220.gSep08</a> | <a href="#">316328</a> | 3466  | 399  | 3 | 72  | protein CRA e (8.4 kD) (RGD1309220) alternative variant gSep08, mRNA.                                                                                     |
| <a href="#">RGD1309220</a> | <a href="#">RGD1309220.hSep08</a> | <a href="#">316328</a> | 578   | 393  | 2 | 72  | protein CRA e (8.4 kD) (RGD1309220) alternative variant hSep08, mRNA.                                                                                     |
| <a href="#">RGD1309220</a> | <a href="#">RGD1309220.iSep08</a> | <a href="#">316328</a> | 1140  | 374  | 2 | 68  | protein CRA e (RGD1309220) alternative variant iSep08, mRNA.                                                                                              |
| <a href="#">RGD1309228</a> | <a href="#">RGD1309228.bSep08</a> | <a href="#">298851</a> | 7967  | 770  | 1 | 127 | similar to putative protein, with at least 9 transmembrane domains, of eukaryotic origin (43.9 kD) (2G415) (RGD1309228) alternative variant bSep08, mRNA. |
| <a href="#">RGD1309285</a> | <a href="#">RGD1309285.aSep08</a> | <a href="#">303599</a> | 17618 | 379  |   | 126 | similar to KIAA1636 protein (RGD1309285) mRNA.                                                                                                            |
| <a href="#">RGD1309307</a> | <a href="#">RGD1309307.bSep08</a> | <a href="#">361044</a> | 2837  | 1643 | 5 | 264 | putative cytoplasmic protein of ancient origin (28.6 kD) (RGD1309307) alternative variant bSep08, complete mRNA.                                          |
| <a href="#">RGD1309307</a> | <a href="#">RGD1309307.cSep08</a> | <a href="#">361044</a> | 2846  | 638  | 6 | 164 | putative protein of ancient origin (18.1 kD) (RGD1309307) alternative variant cSep08, complete mRNA.                                                      |
| <a href="#">RGD1309307</a> | <a href="#">RGD1309307.dSep08</a> | <a href="#">361044</a> | 2096  | 617  | 6 | 163 | putative protein of ancient origin (RGD1309307) alternative variant dSep08, mRNA.                                                                         |
| <a href="#">RGD1309307</a> | <a href="#">RGD1309307.eSep08</a> | <a href="#">361044</a> | 1858  | 761  | 4 | 143 | putative protein of ancient origin (RGD1309307) alternative variant eSep08, mRNA.                                                                         |
| <a href="#">RGD1309307</a> | <a href="#">RGD1309307.gSep08</a> | <a href="#">361044</a> | 2801  | 1783 | 5 | 79  | putative protein of ancient origin (8.4 kD) (RGD1309307) alternative variant gSep08, mRNA.                                                                |
| <a href="#">RGD1309307</a> | <a href="#">RGD1309307.hSep08</a> | <a href="#">361044</a> | 1026  | 685  | 3 | 67  | putative protein of metazoan origin (RGD1309307) alternative variant hSep08, mRNA.                                                                        |
| <a href="#">RGD1309307</a> | <a href="#">RGD1309307.iSep08</a> | <a href="#">361044</a> | 743   | 657  | 2 | 36  | putative protein (3.8 kD) (RGD1309307) alternative variant iSep08, complete mRNA.                                                                         |
| <a href="#">RGD1309308</a> | <a href="#">RGD1309308.bSep08</a> | <a href="#">313115</a> | 1279  | 866  | 1 | 62  | similar to RIKEN cDNA 1810074P20 (RGD1309308) alternative variant bSep08, mRNA.                                                                           |
| <a href="#">RGD1309313</a> | <a href="#">RGD1309313.bSep08</a> | <a href="#">309454</a> | 3316  | 1302 | 2 | 249 | similar to RIKEN cDNA 4930538D17 (RGD1309313) alternative variant bSep08, mRNA.                                                                           |
| <a href="#">RGD1309313</a> | <a href="#">RGD1309313.cSep08</a> | <a href="#">309454</a> | 1320  | 858  | 2 | 216 | similar to RIKEN cDNA 4930538D17 (23.8 kD) (RGD1309313) alternative variant cSep08, mRNA.                                                                 |
| <a href="#">RGD1309313</a> | <a href="#">RGD1309313.dSep08</a> | <a href="#">309454</a> | 4500  | 445  | 4 | 147 | similar to RIKEN cDNA 4930538D17 (RGD1309313) alternative variant dSep08, mRNA.                                                                           |
| <a href="#">RGD1309326</a> | <a href="#">RGD1309326.aSep08</a> | <a href="#">308568</a> | 1705  | 750  | 3 | 214 | similar to RIKEN cDNA 2410002F23 (RGD1309326) alternative variant aSep08, mRNA.                                                                           |
| <a href="#">RGD1309326</a> | <a href="#">RGD1309326.cSep08</a> | <a href="#">308568</a> | 1451  | 661  | 2 | 99  | similar to RIKEN cDNA 2410002F23 (RGD1309326) alternative variant cSep08, mRNA.                                                                           |
| <a href="#">RGD1309326</a> | <a href="#">RGD1309326.dSep08</a> | <a href="#">308568</a> | 5153  | 2146 | 5 | 167 | similar to RIKEN cDNA 2410002F23 (18.8 kD) (RGD1309326) alternative variant dSep08, mRNA.                                                                 |

|                            |                                   |                        |       |      |    |     |                                                                                                          |
|----------------------------|-----------------------------------|------------------------|-------|------|----|-----|----------------------------------------------------------------------------------------------------------|
| <a href="#">RGD1309326</a> | <a href="#">RGD1309326.eSep08</a> | <a href="#">308568</a> | 5946  | 1952 | 6  | 284 | similar to RIKEN cDNA 2410002F23 (32.4 kD) (RGD1309326) alternative variant eSep08, mRNA.                |
| <a href="#">RGD1309326</a> | <a href="#">RGD1309326.gSep08</a> | <a href="#">308568</a> | 4588  | 760  | 7  | 76  | similar to RIKEN cDNA 2410002F23 (RGD1309326) alternative variant gSep08, mRNA.                          |
| <a href="#">RGD1309350</a> | <a href="#">RGD1309350.bSep08</a> | <a href="#">293613</a> | 3110  | 919  | 2  | 118 | similar to transthyretin (4L369) (13.5 kD) (RGD1309350) alternative variant bSep08, mRNA.                |
| <a href="#">RGD1309350</a> | <a href="#">RGD1309350.cSep08</a> | <a href="#">293613</a> | 2714  | 502  | 2  | 106 | similar to transthyretin (4L369) (RGD1309350) alternative variant cSep08, mRNA.                          |
| <a href="#">RGD1309360</a> | <a href="#">RGD1309360.bSep08</a> | <a href="#">294715</a> | 92087 | 1619 | 6  | 170 | hypothetical LOC294715 (19.3 kD) (RGD1309360) alternative variant bSep08, mRNA.                          |
| <a href="#">RGD1309362</a> | <a href="#">RGD1309362.bSep08</a> | <a href="#">307415</a> | 7919  | 342  | 1  | 79  | similar to interferon-inducible GTPase (RGD1309362) alternative variant bSep08, mRNA.                    |
| <a href="#">RGD1309368</a> | <a href="#">RGD1309368.aSep08</a> | <a href="#">366031</a> | 6656  | 403  |    | 133 | similar to 5930402A21 protein (RGD1309368) mRNA.                                                         |
| <a href="#">RGD1309387</a> | <a href="#">RGD1309387.aSep08</a> | <a href="#">313777</a> | 11783 | 2600 | 19 | 748 | nucleolar complex associated 2 homolog (85.8 kD) (RGD1309387) alternative variant aSep08, complete mRNA. |
| <a href="#">RGD1309387</a> | <a href="#">RGD1309387.cSep08</a> | <a href="#">313777</a> | 2459  | 1481 | 3  | 170 | nucleolar complex associated 2 homolog (19.7 kD) (RGD1309387) alternative variant cSep08, mRNA.          |
| <a href="#">RGD1309387</a> | <a href="#">RGD1309387.dSep08</a> | <a href="#">313777</a> | 1783  | 437  | 3  | 69  | nucleolar complex associated 2 homolog (RGD1309387) alternative variant dSep08, mRNA.                    |
| <a href="#">RGD1309403</a> | <a href="#">RGD1309403.bSep08</a> | <a href="#">310417</a> | 1326  | 750  | 2  | 90  | similar to hypothetical protein FLJ12661 (9.2 kD) (RGD1309403) alternative variant bSep08, mRNA.         |
| <a href="#">RGD1309410</a> | <a href="#">RGD1309410.bSep08</a> | <a href="#">363020</a> | 70648 | 752  | 2  | 111 | LOC363020 (6.3 kD) (RGD1309410) alternative variant bSep08, mRNA.                                        |
| <a href="#">RGD1309414</a> | <a href="#">RGD1309414.aSep08</a> | <a href="#">361004</a> | 5198  | 2711 | 11 | 790 | similar to KIAA0913 protein (RGD1309414) alternative variant aSep08, mRNA.                               |
| <a href="#">RGD1309414</a> | <a href="#">RGD1309414.bSep08</a> | <a href="#">361004</a> | 8755  | 1220 | 8  | 327 | similar to KIAA0913 protein (RGD1309414) alternative variant bSep08, mRNA.                               |
| <a href="#">RGD1309414</a> | <a href="#">RGD1309414.cSep08</a> | <a href="#">361004</a> | 2025  | 1648 | 4  | 145 | similar to KIAA0913 protein (15.5 kD) (RGD1309414) alternative variant cSep08, mRNA.                     |
| <a href="#">RGD1309437</a> | <a href="#">RGD1309437.bSep08</a> | <a href="#">288176</a> | 36740 | 395  | 1  | 66  | similar to RIKEN cDNA 2610528E23 (RGD1309437) alternative variant bSep08, mRNA.                          |
| <a href="#">RGD1309459</a> | <a href="#">RGD1309459.bSep08</a> | <a href="#">360477</a> | 20344 | 461  | 7  | 153 | similar to RIKEN cDNA 3930401K13 (RGD1309459) alternative variant bSep08, mRNA.                          |
| <a href="#">RGD1309471</a> | <a href="#">RGD1309471.bSep08</a> | <a href="#">293719</a> | 3887  | 940  | 9  | 281 | similar to hypothetical protein MGC6696 (RGD1309471) alternative variant bSep08, mRNA.                   |
| <a href="#">RGD1309471</a> | <a href="#">RGD1309471.cSep08</a> | <a href="#">293719</a> | 3571  | 515  | 4  | 140 | similar to hypothetical protein MGC6696 (RGD1309471) alternative variant cSep08, mRNA.                   |
| <a href="#">RGD1309471</a> | <a href="#">RGD1309471.dSep08</a> | <a href="#">293719</a> | 862   | 687  | 1  | 74  | similar to hypothetical protein MGC6696 (8.3 kD) (RGD1309471) alternative variant dSep08, mRNA.          |
| <a href="#">RGD1309482</a> | <a href="#">RGD1309482.bSep08</a> | <a href="#">365458</a> | 31887 | 1464 | 14 | 292 | putative protein of eukaryotic origin (RGD1309482) alternative variant bSep08, mRNA.                     |
| <a href="#">RGD1309482</a> | <a href="#">RGD1309482.cSep08</a> | <a href="#">365458</a> | 5047  | 711  | 4  | 115 | putative protein (RGD1309482) alternative variant cSep08, mRNA.                                          |
| <a href="#">RGD1309482</a> | <a href="#">RGD1309482.dSep08</a> | <a href="#">365458</a> | 33110 | 701  | 7  | 102 | putative protein of eukaryotic origin (RGD1309482) alternative variant dSep08, mRNA.                     |

|                            |                                   |                        |       |      |   |     |                                                                                                                                           |
|----------------------------|-----------------------------------|------------------------|-------|------|---|-----|-------------------------------------------------------------------------------------------------------------------------------------------|
| <a href="#">RGD1309482</a> | <a href="#">RGD1309482.gSep08</a> | <a href="#">365458</a> | 2923  | 268  | 2 | 20  | putative protein (RGD1309482) alternative variant gSep08, mRNA.                                                                           |
| <a href="#">RGD1309483</a> | <a href="#">RGD1309483.aSep08</a> | <a href="#">366915</a> | 16323 | 454  |   | 150 | similar to hypothetical protein MGC39715 (RGD1309483) mRNA.                                                                               |
| <a href="#">RGD1309492</a> | <a href="#">RGD1309492.aSep08</a> | <a href="#">314330</a> | 22822 | 3985 | 4 | 468 | similar to mKIAA1737 protein (RGD1309492) alternative variant aSep08, mRNA.                                                               |
| <a href="#">RGD1309492</a> | <a href="#">RGD1309492.dSep08</a> | <a href="#">314330</a> | 19150 | 407  | 4 | 135 | similar to mKIAA1737 protein (RGD1309492) alternative variant dSep08, mRNA.                                                               |
| <a href="#">RGD1309492</a> | <a href="#">RGD1309492.eSep08</a> | <a href="#">314330</a> | 8106  | 445  | 2 | 92  | similar to mKIAA1737 protein (RGD1309492) alternative variant eSep08, mRNA.                                                               |
| <a href="#">RGD1309501</a> | <a href="#">RGD1309501.bSep08</a> | <a href="#">305552</a> | 68508 | 949  |   | 316 | hypothetical LOC305552 (RGD1309501) alternative variant bSep08, mRNA.                                                                     |
| <a href="#">RGD1309501</a> | <a href="#">RGD1309501.cSep08</a> | <a href="#">305552</a> | 39511 | 518  |   | 119 | hypothetical LOC305552 (RGD1309501) alternative variant cSep08, mRNA.                                                                     |
| <a href="#">RGD1309522</a> | <a href="#">RGD1309522.bSep08</a> | <a href="#">306102</a> | 3191  | 737  | 2 | 200 | similar to hypothetical protein FLJ22624 (RGD1309522) alternative variant bSep08, mRNA.                                                   |
| <a href="#">RGD1309522</a> | <a href="#">RGD1309522.cSep08</a> | <a href="#">306102</a> | 6362  | 853  | 5 | 140 | similar to hypothetical protein FLJ22624 (RGD1309522) alternative variant cSep08, mRNA.                                                   |
| <a href="#">RGD1309534</a> | <a href="#">RGD1309534.bSep08</a> | <a href="#">363016</a> | 3464  | 335  | 2 | 72  | similar to RIKEN cDNA 4931406C07 (RGD1309534) alternative variant bSep08, mRNA.                                                           |
| <a href="#">RGD1309534</a> | <a href="#">RGD1309534.dSep08</a> | <a href="#">363016</a> | 6221  | 437  | 4 | 40  | similar to RIKEN cDNA 4931406C07 (RGD1309534) alternative variant dSep08, mRNA.                                                           |
| <a href="#">RGD1309540</a> | <a href="#">RGD1309540.bSep08</a> | <a href="#">295930</a> | 3681  | 1069 | 1 | 70  | similar to hypothetical protein MGC40841; similar to hypothetical protein MGC4707 (7.7 kD) (RGD1309540) alternative variant bSep08, mRNA. |
| <a href="#">RGD1309543</a> | <a href="#">RGD1309543.aSep08</a> | <a href="#">361790</a> | 9789  | 2461 | 4 | 658 | similar to 2310014H01Rik protein (71.7 kD) (RGD1309543) alternative variant aSep08, mRNA.                                                 |
| <a href="#">RGD1309576</a> | <a href="#">RGD1309576.aSep08</a> | <a href="#">287405</a> | 9005  | 1176 | 6 | 166 | similar to RIKEN cDNA A730055C05 gene (RGD1309576) alternative variant aSep08, mRNA.                                                      |
| <a href="#">RGD1309576</a> | <a href="#">RGD1309576.bSep08</a> | <a href="#">287405</a> | 8310  | 390  | 4 | 130 | similar to RIKEN cDNA A730055C05 gene (RGD1309576) alternative variant bSep08, mRNA.                                                      |
| <a href="#">RGD1309578</a> | <a href="#">RGD1309578.bSep08</a> | <a href="#">361637</a> | 6239  | 900  | 3 | 139 | similar to Aa2-174 (16.0 kD) (RGD1309578) alternative variant bSep08, mRNA.                                                               |
| <a href="#">RGD1309592</a> | <a href="#">RGD1309592.aSep08</a> | <a href="#">290963</a> | 23414 | 1141 | 5 | 198 | similar to hypothetical protein FLJ14675 (RGD1309592) alternative variant aSep08, mRNA.                                                   |
| <a href="#">RGD1309592</a> | <a href="#">RGD1309592.bSep08</a> | <a href="#">290963</a> | 96315 | 665  | 8 | 197 | similar to hypothetical protein FLJ14675 (RGD1309592) alternative variant bSep08, mRNA.                                                   |
| <a href="#">RGD1309592</a> | <a href="#">RGD1309592.dSep08</a> | <a href="#">290963</a> | 29310 | 1330 | 5 | 108 | similar to hypothetical protein FLJ14675 (12.9 kD) (RGD1309592) alternative variant dSep08, mRNA.                                         |
| <a href="#">RGD1309592</a> | <a href="#">RGD1309592.eSep08</a> | <a href="#">290963</a> | 1108  | 632  | 2 | 108 | similar to hypothetical protein FLJ14675 (RGD1309592) alternative variant eSep08, mRNA.                                                   |
| <a href="#">RGD1309592</a> | <a href="#">RGD1309592.fSep08</a> | <a href="#">290963</a> | 9170  | 488  | 2 | 26  | similar to hypothetical protein FLJ14675 (2.9 kD) (RGD1309592) alternative variant fSep08, mRNA.                                          |
| <a href="#">RGD1309592</a> | <a href="#">RGD1309592.gSep08</a> | <a href="#">290963</a> | 9057  | 390  | 2 | 43  | similar to hypothetical protein FLJ14675 (RGD1309592) alternative variant gSep08, mRNA.                                                   |

|                            |                                   |                        |       |      |    |     |                                                                                                                                              |
|----------------------------|-----------------------------------|------------------------|-------|------|----|-----|----------------------------------------------------------------------------------------------------------------------------------------------|
| <a href="#">RGD1309594</a> | <a href="#">RGD1309594.bSep08</a> | <a href="#">309681</a> | 5818  | 704  | 7  | 185 | similar to RIKEN cDNA 1810043G02; DNA segment, Chr 10, Johns Hopkins University 13, expressed (RGD1309594) alternative variant bSep08, mRNA. |
| <a href="#">RGD1309594</a> | <a href="#">RGD1309594.cSep08</a> | <a href="#">309681</a> | 1842  | 759  | 3  | 130 | similar to RIKEN cDNA 1810043G02; DNA segment, Chr 10, Johns Hopkins University 13, expressed (RGD1309594) alternative variant cSep08, mRNA. |
| <a href="#">RGD1309594</a> | <a href="#">RGD1309594.dSep08</a> | <a href="#">309681</a> | 4496  | 754  | 5  | 96  | similar to RIKEN cDNA 1810043G02; DNA segment, Chr 10, Johns Hopkins University 13, expressed (RGD1309594) alternative variant dSep08, mRNA. |
| <a href="#">RGD1309594</a> | <a href="#">RGD1309594.eSep08</a> | <a href="#">309681</a> | 2899  | 414  | 3  | 56  | similar to RIKEN cDNA 1810043G02; DNA segment, Chr 10, Johns Hopkins University 13, expressed (RGD1309594) alternative variant eSep08, mRNA. |
| <a href="#">RGD1309605</a> | <a href="#">RGD1309605.bSep08</a> | <a href="#">291320</a> | 59490 | 1436 | 10 | 272 | putative secreted or extracellular protein precursor of eukaryotic origin (30.6 kD) (RGD1309605) alternative variant bSep08, mRNA.           |
| <a href="#">RGD1309605</a> | <a href="#">RGD1309605.cSep08</a> | <a href="#">291320</a> | 77658 | 1311 | 12 | 245 | putative cytoplasmic protein of eukaryotic origin (27.4 kD) (RGD1309605) alternative variant cSep08, mRNA.                                   |
| <a href="#">RGD1309605</a> | <a href="#">RGD1309605.dSep08</a> | <a href="#">291320</a> | 56169 | 992  | 10 | 177 | putative cytoplasmic protein of eukaryotic origin (19.5 kD) (RGD1309605) alternative variant dSep08, mRNA.                                   |
| <a href="#">RGD1309605</a> | <a href="#">RGD1309605.eSep08</a> | <a href="#">291320</a> | 68846 | 728  | 7  | 144 | putative protein of eukaryotic origin (RGD1309605) alternative variant eSep08, mRNA.                                                         |
| <a href="#">RGD1309605</a> | <a href="#">RGD1309605.fSep08</a> | <a href="#">291320</a> | 70447 | 750  | 8  | 122 | putative protein of eukaryotic origin (RGD1309605) alternative variant fSep08, mRNA.                                                         |
| <a href="#">RGD1309605</a> | <a href="#">RGD1309605.gSep08</a> | <a href="#">291320</a> | 70426 | 870  | 10 | 105 | putative protein of eukaryotic origin (RGD1309605) alternative variant gSep08, mRNA.                                                         |
| <a href="#">RGD1309605</a> | <a href="#">RGD1309605.hSep08</a> | <a href="#">291320</a> | 16687 | 826  | 4  | 52  | putative protein of eukaryotic origin (RGD1309605) alternative variant hSep08, mRNA.                                                         |
| <a href="#">RGD1309621</a> | <a href="#">RGD1309621.aSep08</a> | <a href="#">316982</a> | 7582  | 3366 | 3  | 885 | similar to hypothetical protein FLJ10652 (RGD1309621) alternative variant aSep08, mRNA.                                                      |
| <a href="#">RGD1309621</a> | <a href="#">RGD1309621.cSep08</a> | <a href="#">316982</a> | 5031  | 671  | 4  | 89  | similar to hypothetical protein FLJ10652 (10.2 kD) (RGD1309621) alternative variant cSep08, mRNA.                                            |
| <a href="#">RGD1309634</a> | <a href="#">RGD1309634.aSep08</a> | <a href="#">305452</a> | 48977 | 3584 | 12 | 957 | hypothetical LOC305452 (RGD1309634) alternative variant aSep08, mRNA.                                                                        |
| <a href="#">RGD1309634</a> | <a href="#">RGD1309634.bSep08</a> | <a href="#">305452</a> | 50545 | 1814 | 10 | 604 | hypothetical LOC305452 (RGD1309634) alternative variant bSep08, mRNA.                                                                        |
| <a href="#">RGD1309651</a> | <a href="#">RGD1309651.aSep08</a> | <a href="#">361424</a> | 26408 | 937  | 4  | 111 | similar to 1190005106Rik protein (12.0 kD) (RGD1309651) alternative variant aSep08, mRNA.                                                    |
| <a href="#">RGD1309676</a> | <a href="#">RGD1309676.aSep08</a> | <a href="#">361118</a> | 13291 | 1008 | 1  | 229 | similar to RIKEN cDNA 5730469M10 (25.8 kD) (RGD1309676) alternative variant aSep08, mRNA.                                                    |
| <a href="#">RGD1309696</a> | <a href="#">RGD1309696.aSep08</a> | <a href="#">314478</a> | 1303  | 920  |    | 306 | similar to KIAA2019 protein (RGD1309696) mRNA.                                                                                               |
| <a href="#">RGD1309701</a> | <a href="#">RGD1309701.aSep08</a> | <a href="#">316729</a> | 638   | 591  |    | 196 | similar to RIKEN cDNA 9130005N14 (RGD1309701) mRNA.                                                                                          |
| <a href="#">RGD1309707</a> | <a href="#">RGD1309707.bSep08</a> | <a href="#">690516</a> | 2667  | 734  | 2  | 112 | similar to RIKEN cDNA 4930431E10 (RGD1309707) alternative variant bSep08, mRNA.                                                              |
| <a href="#">RGD1309710</a> | <a href="#">RGD1309710.bSep08</a> | <a href="#">293700</a> | 6219  | 441  | 4  | 112 | similar to RIKEN cDNA 0610038D11 (RGD1309710) alternative variant bSep08, mRNA.                                                              |



|                            |                                   |                        |       |      |   |     |                                                                                                                                                                                             |
|----------------------------|-----------------------------------|------------------------|-------|------|---|-----|---------------------------------------------------------------------------------------------------------------------------------------------------------------------------------------------|
| <a href="#">RGD1309730</a> | <a href="#">RGD1309730.bSep08</a> | <a href="#">295952</a> | 15412 | 910  | 2 | 99  | similar to RIKEN cDNA B230118H07 (10.7 kD) (RGD1309730) alternative variant bSep08, mRNA.                                                                                                   |
| <a href="#">RGD1309735</a> | <a href="#">RGD1309735.bSep08</a> | <a href="#">360776</a> | 3723  | 945  | 1 | 91  | similar to CG14977-PA (9.9 kD) (RGD1309735) alternative variant bSep08, mRNA.                                                                                                               |
| <a href="#">RGD1309744</a> | <a href="#">RGD1309744.bSep08</a> | <a href="#">311405</a> | 2008  | 1119 | 3 | 173 | similar to hypothetical protein FLJ20507 (19.1 kD) (RGD1309744) alternative variant bSep08, mRNA.                                                                                           |
| <a href="#">RGD1309744</a> | <a href="#">RGD1309744.cSep08</a> | <a href="#">311405</a> | 2326  | 982  | 2 | 136 | similar to hypothetical protein FLJ20507 (RGD1309744) alternative variant cSep08, mRNA.                                                                                                     |
| <a href="#">RGD1309747</a> | <a href="#">RGD1309747.aSep08</a> | <a href="#">306665</a> | 13766 | 2449 | 7 | 476 | similar to KIAA0947 protein (RGD1309747) alternative variant aSep08, mRNA.                                                                                                                  |
| <a href="#">RGD1309748</a> | <a href="#">RGD1309748.bSep08</a> | <a href="#">302913</a> | 11591 | 831  | 2 | 252 | similar to CG4768-PA (RGD1309748) alternative variant bSep08, mRNA.                                                                                                                         |
| <a href="#">RGD1309748</a> | <a href="#">RGD1309748.cSep08</a> | <a href="#">302913</a> | 25330 | 884  | 3 | 171 | similar to CG4768-PA (19.0 kD) (RGD1309748) alternative variant cSep08, mRNA.                                                                                                               |
| <a href="#">RGD1309759</a> | <a href="#">RGD1309759.aSep08</a> | <a href="#">361448</a> | 16456 | 1566 | 8 | 339 | putative protein of vertebrate origin (RGD1309759) alternative variant aSep08, mRNA.                                                                                                        |
| <a href="#">RGD1309759</a> | <a href="#">RGD1309759.bSep08</a> | <a href="#">361448</a> | 3823  | 707  | 3 | 128 | putative protein of vertebrate origin (RGD1309759) alternative variant bSep08, mRNA.                                                                                                        |
| <a href="#">RGD1309762</a> | <a href="#">RGD1309762.aSep08</a> | <a href="#">304503</a> | 9025  | 3432 | 9 | 486 | similar to KIAA0614 protein (RGD1309762) alternative variant aSep08, mRNA.                                                                                                                  |
| <a href="#">RGD1309765</a> | <a href="#">RGD1309765.aSep08</a> | <a href="#">290746</a> | 15820 | 1451 | 1 | 217 | similar to hypothetical protein (RGD1309765) alternative variant aSep08, mRNA.                                                                                                              |
| <a href="#">RGD1309765</a> | <a href="#">RGD1309765.bSep08</a> | <a href="#">290746</a> | 15130 | 750  | 1 | 142 | similar to hypothetical protein (16.2 kD) (RGD1309765) alternative variant bSep08, mRNA.                                                                                                    |
| <a href="#">RGD1309784</a> | <a href="#">RGD1309784.bSep08</a> | <a href="#">363099</a> | 7416  | 973  | 5 | 141 | similar to ribosomal protein L24-like; 60S ribosomal protein L30 isolog; my024 protein; homolog of yeast ribosomal like protein 24 (17.1 kD) (RGD1309784) alternative variant bSep08, mRNA. |
| <a href="#">RGD1309792</a> | <a href="#">RGD1309792.bSep08</a> | <a href="#">312199</a> | 46775 | 759  | 5 | 219 | similar to scruin like at the midline CG5186-PA (RGD1309792) alternative variant bSep08, mRNA.                                                                                              |
| <a href="#">RGD1309804</a> | <a href="#">RGD1309804.bSep08</a> | <a href="#">361751</a> | 2514  | 796  | 4 | 126 | similar to hypothetical protein FLJ11218 (13.8 kD) (RGD1309804) alternative variant bSep08, mRNA.                                                                                           |
| <a href="#">RGD1309804</a> | <a href="#">RGD1309804.cSep08</a> | <a href="#">361751</a> | 71635 | 542  | 3 | 123 | similar to hypothetical protein FLJ11218 (RGD1309804) alternative variant cSep08, mRNA.                                                                                                     |
| <a href="#">RGD1309807</a> | <a href="#">RGD1309807.aSep08</a> | <a href="#">362378</a> | 62565 | 750  |   | 250 | similar to Fam13a1 protein (RGD1309807) alternative variant aSep08, mRNA.                                                                                                                   |
| <a href="#">RGD1309823</a> | <a href="#">RGD1309823.aSep08</a> | <a href="#">313525</a> | 4579  | 1166 | 1 | 388 | similar to hypothetical protein FLJ21156 (RGD1309823) alternative variant aSep08, mRNA.                                                                                                     |
| <a href="#">RGD1309823</a> | <a href="#">RGD1309823.bSep08</a> | <a href="#">313525</a> | 2168  | 697  | 3 | 232 | similar to hypothetical protein FLJ21156 (RGD1309823) alternative variant bSep08, mRNA.                                                                                                     |
| <a href="#">RGD1309823</a> | <a href="#">RGD1309823.cSep08</a> | <a href="#">313525</a> | 2396  | 670  | 1 | 217 | similar to hypothetical protein FLJ21156 (RGD1309823) alternative variant cSep08, mRNA.                                                                                                     |
| <a href="#">RGD1309823</a> | <a href="#">RGD1309823.dSep08</a> | <a href="#">313525</a> | 1400  | 1283 | 2 | 48  | similar to hypothetical protein FLJ21156 (RGD1309823) alternative variant dSep08, mRNA.                                                                                                     |
| <a href="#">RGD1309829</a> | <a href="#">RGD1309829.bSep08</a> | <a href="#">296190</a> | 26067 | 842  | 9 | 194 | CRA b (RGD1309829) alternative variant bSep08, mRNA.                                                                                                                                        |
| <a href="#">RGD1309829</a> | <a href="#">RGD1309829.cSep08</a> | <a href="#">296190</a> | 14414 | 749  | 7 | 132 | CRA b (14.9 kD) (RGD1309829) alternative variant cSep08, mRNA.                                                                                                                              |

|                            |                                   |                        |       |      |    |     |                                                                                                         |
|----------------------------|-----------------------------------|------------------------|-------|------|----|-----|---------------------------------------------------------------------------------------------------------|
| <a href="#">RGD1309829</a> | <a href="#">RGD1309829.dSep08</a> | <a href="#">296190</a> | 1122  | 660  | 3  | 83  | CRA a like (9.4 kD) (RGD1309829) alternative variant dSep08, mRNA.                                      |
| <a href="#">RGD1309870</a> | <a href="#">RGD1309870.aSep08</a> | <a href="#">289778</a> | 31922 | 924  | 3  | 237 | hypothetical LOC289778 (27.1 kD) (RGD1309870) alternative variant aSep08, mRNA.                         |
| <a href="#">RGD1309871</a> | <a href="#">RGD1309871.bSep08</a> | <a href="#">309187</a> | 17724 | 445  | 3  | 148 | similar to RIKEN cDNA 5730596K20 (RGD1309871) alternative variant bSep08, mRNA.                         |
| <a href="#">RGD1309888</a> | <a href="#">RGD1309888.bSep08</a> | <a href="#">365215</a> | 2539  | 941  | 5  | 180 | similar to RIKEN cDNA 1500002O20 (RGD1309888) alternative variant bSep08, mRNA.                         |
| <a href="#">RGD1309888</a> | <a href="#">RGD1309888.cSep08</a> | <a href="#">365215</a> | 5520  | 408  | 1  | 79  | similar to RIKEN cDNA 1500002O20 (RGD1309888) alternative variant cSep08, mRNA.                         |
| <a href="#">RGD1309906</a> | <a href="#">RGD1309906.aSep08</a> | <a href="#">287406</a> | 13114 | 1796 | 4  | 337 | similar to RIKEN cDNA 2310004I24 gene (38.7 kD) (RGD1309906) alternative variant aSep08, complete mRNA. |
| <a href="#">RGD1309922</a> | <a href="#">RGD1309922.aSep08</a> | <a href="#">306007</a> | 9852  | 1590 | 11 | 529 | similar to 2610301G19Rik protein (RGD1309922) alternative variant aSep08, mRNA.                         |
| <a href="#">RGD1309922</a> | <a href="#">RGD1309922.bSep08</a> | <a href="#">306007</a> | 8432  | 1043 | 7  | 347 | similar to 2610301G19Rik protein (RGD1309922) alternative variant bSep08, mRNA.                         |
| <a href="#">RGD1309922</a> | <a href="#">RGD1309922.cSep08</a> | <a href="#">306007</a> | 2108  | 399  | 5  | 132 | similar to 2610301G19Rik protein (RGD1309922) alternative variant cSep08, mRNA.                         |
| <a href="#">RGD1309926</a> | <a href="#">RGD1309926.aSep08</a> | <a href="#">303021</a> | 92003 | 1494 | 12 | 315 | similar to RIKEN cDNA G431001E03 gene (RGD1309926) alternative variant aSep08, mRNA.                    |
| <a href="#">RGD1309926</a> | <a href="#">RGD1309926.bSep08</a> | <a href="#">303021</a> | 5975  | 357  | 1  | 85  | similar to RIKEN cDNA G431001E03 gene (RGD1309926) alternative variant bSep08, mRNA.                    |
| <a href="#">RGD1309926</a> | <a href="#">RGD1309926.cSep08</a> | <a href="#">303021</a> | 2273  | 456  | 1  | 41  | similar to RIKEN cDNA G431001E03 gene (RGD1309926) alternative variant cSep08, mRNA.                    |
| <a href="#">RGD1309930</a> | <a href="#">RGD1309930.aSep08</a> | <a href="#">316426</a> | 4554  | 1006 |    | 164 | similar to 2810022L02Rik protein (RGD1309930) mRNA.                                                     |
| <a href="#">RGD1309931</a> | <a href="#">RGD1309931.aSep08</a> | <a href="#">362538</a> | 27859 | 1086 |    | 361 | similar to hypothetical protein (RGD1309931) mRNA.                                                      |
| <a href="#">RGD1309969</a> | <a href="#">RGD1309969.bSep08</a> | <a href="#">362171</a> | 24338 | 410  | 3  | 75  | similar to RIKEN cDNA 2600010E01 (RGD1309969) alternative variant bSep08, mRNA.                         |
| <a href="#">RGD1309985</a> | <a href="#">RGD1309985.aSep08</a> | <a href="#">361931</a> | 3837  | 695  | 2  | 231 | similar to RIKEN cDNA 4932438A13 (RGD1309985) alternative variant aSep08, mRNA.                         |
| <a href="#">RGD1309985</a> | <a href="#">RGD1309985.bSep08</a> | <a href="#">361931</a> | 1939  | 798  | 1  | 167 | similar to RIKEN cDNA 4932438A13 (RGD1309985) alternative variant bSep08, mRNA.                         |
| <a href="#">RGD1309995</a> | <a href="#">RGD1309995.aSep08</a> | <a href="#">314690</a> | 14197 | 2666 | 9  | 309 | similar to CG13957-PA (RGD1309995) alternative variant aSep08, mRNA.                                    |
| <a href="#">RGD1309995</a> | <a href="#">RGD1309995.bSep08</a> | <a href="#">314690</a> | 18261 | 1047 | 3  | 50  | similar to CG13957-PA (RGD1309995) alternative variant bSep08, mRNA.                                    |
| <a href="#">RGD1310012</a> | <a href="#">RGD1310012.aSep08</a> | <a href="#">313490</a> | 5639  | 939  | 1  | 241 | similar to NAG-5 protein (RGD1310012) alternative variant aSep08, mRNA.                                 |
| <a href="#">RGD1310012</a> | <a href="#">RGD1310012.bSep08</a> | <a href="#">313490</a> | 12861 | 753  | 3  | 175 | similar to NAG-5 protein (RGD1310012) alternative variant bSep08, mRNA.                                 |
| <a href="#">RGD1310016</a> | <a href="#">RGD1310016.aSep08</a> | <a href="#">309306</a> | 2945  | 1964 | 3  | 127 | similar to hypothetical protein (RGD1310016) alternative variant aSep08, mRNA.                          |
| <a href="#">RGD1310039</a> | <a href="#">RGD1310039.aSep08</a> | <a href="#">361747</a> | 46679 | 1783 | 5  | 594 | similar to hypothetical protein FLJ10058 (RGD1310039) alternative variant aSep08, mRNA.                 |
| <a href="#">RGD1310039</a> | <a href="#">RGD1310039.cSep08</a> | <a href="#">361747</a> | 17676 | 712  | 7  | 237 | similar to hypothetical protein FLJ10058 (RGD1310039) alternative variant cSep08, mRNA.                 |

|                                       |                                            |                        |       |      |    |     |                                                                                                                                                    |
|---------------------------------------|--------------------------------------------|------------------------|-------|------|----|-----|----------------------------------------------------------------------------------------------------------------------------------------------------|
| <a href="#">RGD1310039</a>            | <a href="#">RGD1310039.dSep08</a>          | <a href="#">361747</a> | 21519 | 704  | 9  | 234 | similar to hypothetical protein FLJ10058 (RGD1310039) alternative variant dSep08, mRNA.                                                            |
| <a href="#">RGD1310039</a>            | <a href="#">RGD1310039.fSep08</a>          | <a href="#">361747</a> | 18391 | 697  | 7  | 131 | similar to hypothetical protein FLJ10058 (RGD1310039) alternative variant fSep08, mRNA.                                                            |
| <a href="#">RGD1310061</a>            | <a href="#">RGD1310061.bSep08</a>          | <a href="#">290912</a> | 37887 | 3669 | 1  | 227 | similar to hypothetical protein FLJ10154 (27.2 kD) (RGD1310061) alternative variant bSep08, mRNA.                                                  |
| <a href="#">RGD1310081</a>            | <a href="#">RGD1310081.aSep08</a>          | <a href="#">310137</a> | 24987 | 2207 | 13 | 645 | similar to hypothetical protein FLJ13231 (RGD1310081) alternative variant aSep08, mRNA.                                                            |
| <a href="#">RGD1310110</a>            | <a href="#">RGD1310110.bSep08</a>          | <a href="#">361032</a> | 85715 | 1780 | 1  | 558 | similar to 3632451O06Rik protein (RGD1310110) alternative variant bSep08, mRNA.                                                                    |
| <a href="#">RGD1310111</a>            | <a href="#">RGD1310111.aSep08</a>          | <a href="#">292875</a> | 2250  | 1078 | 6  | 293 | similar to RIKEN cDNA 0610012D14 (RGD1310111) alternative variant aSep08, complete mRNA.                                                           |
| <a href="#">RGD1310127</a>            | <a href="#">RGD1310127.bSep08</a>          | <a href="#">361654</a> | 25876 | 1568 | 9  | 261 | putative endoplasmic reticulum protein, with a transmembrane domain, of eukaryotic origin (28.5 kD) (RGD1310127) alternative variant bSep08, mRNA. |
| <a href="#">RGD1310127</a>            | <a href="#">RGD1310127.cSep08</a>          | <a href="#">361654</a> | 2605  | 877  | 4  | 157 | putative protein (17.4 kD) (RGD1310127) alternative variant cSep08, mRNA.                                                                          |
| <a href="#">RGD1310127</a>            | <a href="#">RGD1310127.dSep08</a>          | <a href="#">361654</a> | 4284  | 1281 | 7  | 151 | putative protein (RGD1310127) alternative variant dSep08, mRNA.                                                                                    |
| <a href="#">RGD1310127</a>            | <a href="#">RGD1310127.eSep08</a>          | <a href="#">361654</a> | 10307 | 685  | 2  | 126 | putative protein of metazoan origin (RGD1310127) alternative variant eSep08, mRNA.                                                                 |
| <a href="#">RGD1310127</a>            | <a href="#">RGD1310127.fSep08</a>          | <a href="#">361654</a> | 1314  | 398  | 3  | 125 | putative protein of mammalian origin (RGD1310127) alternative variant fSep08, mRNA.                                                                |
| <a href="#">RGD1310133</a>            | <a href="#">RGD1310133.bSep08</a>          | <a href="#">292760</a> | 8086  | 729  | 8  | 243 | similar to RIKEN cDNA 5830482F20 gene (RGD1310133) alternative variant bSep08, mRNA.                                                               |
| <a href="#">RGD1310159</a>            | <a href="#">RGD1310159.aSep08</a>          | <a href="#">304500</a> | 11634 | 1250 | 8  | 319 | similar to acetyl-coA dehydrogenase -related (111.6 kD) (5G231) (RGD1310159) alternative variant aSep08, mRNA.                                     |
| <a href="#">RGD1310159</a>            | <a href="#">RGD1310159.bSep08</a>          | <a href="#">304500</a> | 1380  | 745  | 3  | 126 | similar to acetyl-coA dehydrogenase -related (111.6 kD) (5G231) (13.5 kD) (RGD1310159) alternative variant bSep08, mRNA.                           |
| <a href="#">RGD1310166</a>            | <a href="#">RGD1310166.aSep08</a>          | <a href="#">303395</a> | 8851  | 568  |    | 135 | similar to Chromodomain-helicase-DNA-binding protein 1 (CHD-1) (RGD1310166) mRNA.                                                                  |
| <a href="#">RGD1310169and dCox6b2</a> | <a href="#">RGD1310169andCox6b2.aSep08</a> | <a href="#">308344</a> | 17344 | 2604 | 13 | 356 | putative protein of vertebrate origin (40.3 kD) (RGD1310169andCox6b2) alternative variant aSep08, mRNA.                                            |
| <a href="#">RGD1310169and dCox6b2</a> | <a href="#">RGD1310169andCox6b2.aSep08</a> | <a href="#">654441</a> | 17344 | 2604 | 13 | 356 | putative protein of vertebrate origin (40.3 kD) (RGD1310169andCox6b2) alternative variant aSep08, mRNA.                                            |
| <a href="#">RGD1310169and dCox6b2</a> | <a href="#">RGD1310169andCox6b2.cSep08</a> | <a href="#">308344</a> | 4925  | 739  | 5  | 148 | putative protein of mammalian origin (RGD1310169andCox6b2) alternative variant cSep08, mRNA.                                                       |
| <a href="#">RGD1310169and dCox6b2</a> | <a href="#">RGD1310169andCox6b2.cSep08</a> | <a href="#">654441</a> | 4925  | 739  | 5  | 148 | putative protein of mammalian origin (RGD1310169andCox6b2) alternative variant cSep08, mRNA.                                                       |
| <a href="#">RGD1310169and dCox6b2</a> | <a href="#">RGD1310169andCox6b2.dSep08</a> | <a href="#">308344</a> | 1196  | 412  | 4  | 91  | cytochrome c oxidase VIb (RGD1310169andCox6b2) alternative variant dSep08, mRNA.                                                                   |

|                                     |                                            |                        |       |      |    |      |                                                                                                    |
|-------------------------------------|--------------------------------------------|------------------------|-------|------|----|------|----------------------------------------------------------------------------------------------------|
| <a href="#">RGD1310169andCox6b2</a> | <a href="#">RGD1310169andCox6b2.dSep08</a> | <a href="#">654441</a> | 1196  | 412  | 4  | 91   | cytochrome c oxidase VIb (RGD1310169andCox6b2) alternative variant dSep08, mRNA.                   |
| <a href="#">RGD1310185</a>          | <a href="#">RGD1310185.aSep08</a>          | <a href="#">313790</a> | 1502  | 550  |    | 156  | similar to RIKEN cDNA 9030625A04 (RGD1310185) alternative variant aSep08, mRNA.                    |
| <a href="#">RGD1310185</a>          | <a href="#">RGD1310185.cSep08</a>          | <a href="#">313790</a> | 12320 | 1795 |    |      |                                                                                                    |
| <a href="#">RGD1310199</a>          | <a href="#">RGD1310199.bSep08</a>          | <a href="#">291737</a> | 7683  | 744  | 3  | 183  | similar to RIKEN cDNA D030070L09 (RGD1310199) alternative variant bSep08, mRNA.                    |
| <a href="#">RGD1310199</a>          | <a href="#">RGD1310199.cSep08</a>          | <a href="#">291737</a> | 13628 | 1214 | 2  | 105  | similar to RIKEN cDNA D030070L09 (RGD1310199) alternative variant cSep08, mRNA.                    |
| <a href="#">RGD1310199</a>          | <a href="#">RGD1310199.dSep08</a>          | <a href="#">291737</a> | 4839  | 551  | 2  | 51   | similar to RIKEN cDNA D030070L09 (5.7 kD) (RGD1310199) alternative variant dSep08, mRNA.           |
| <a href="#">RGD1310205</a>          | <a href="#">RGD1310205.aSep08</a>          | <a href="#">366890</a> | 9197  | 727  |    | 137  | similar to RIKEN cDNA 4921508O11 (RGD1310205) mRNA.                                                |
| <a href="#">RGD1310209</a>          | <a href="#">RGD1310209.aSep08</a>          | <a href="#">362019</a> | 78532 | 3741 | 22 | 1013 | similar to KIAA1324 protein (111.1 kD) (RGD1310209) alternative variant aSep08, mRNA.              |
| <a href="#">RGD1310209</a>          | <a href="#">RGD1310209.bSep08</a>          | <a href="#">362019</a> | 53433 | 673  | 6  | 224  | similar to KIAA1324 protein (RGD1310209) alternative variant bSep08, mRNA.                         |
| <a href="#">RGD1310209</a>          | <a href="#">RGD1310209.cSep08</a>          | <a href="#">362019</a> | 736   | 658  | 2  | 131  | similar to KIAA1324 protein (RGD1310209) alternative variant cSep08, mRNA.                         |
| <a href="#">RGD1310209</a>          | <a href="#">RGD1310209.dSep08</a>          | <a href="#">362019</a> | 39789 | 351  | 2  | 111  | similar to KIAA1324 protein (RGD1310209) alternative variant dSep08, mRNA.                         |
| <a href="#">RGD1310209</a>          | <a href="#">RGD1310209.eSep08</a>          | <a href="#">362019</a> | 776   | 243  | 2  | 80   | similar to KIAA1324 protein (RGD1310209) alternative variant eSep08, mRNA.                         |
| <a href="#">RGD1310212</a>          | <a href="#">RGD1310212.aSep08</a>          | <a href="#">299557</a> | 1588  | 326  | 1  | 68   | similar to KIAA1111-like protein (RGD1310212) alternative variant aSep08, mRNA.                    |
| <a href="#">RGD1310212</a>          | <a href="#">RGD1310212.bSep08</a>          | <a href="#">299557</a> | 5525  | 329  | 1  | 67   | similar to KIAA1111-like protein (RGD1310212) alternative variant bSep08, mRNA.                    |
| <a href="#">RGD1310224</a>          | <a href="#">RGD1310224.bSep08</a>          | <a href="#">291076</a> | 14866 | 715  | 7  | 181  | similar to RIKEN cDNA 1810022C23 (RGD1310224) alternative variant bSep08, mRNA.                    |
| <a href="#">RGD1310224</a>          | <a href="#">RGD1310224.cSep08</a>          | <a href="#">291076</a> | 1594  | 598  | 2  | 147  | similar to RIKEN cDNA 1810022C23 (RGD1310224) alternative variant cSep08, mRNA.                    |
| <a href="#">RGD1310230</a>          | <a href="#">RGD1310230.aSep08</a>          | <a href="#">301563</a> | 33413 | 3297 | 10 | 399  | similar to RIKEN cDNA 5230400G24 (44.1 kD) (RGD1310230) alternative variant aSep08, mRNA.          |
| <a href="#">RGD1310230</a>          | <a href="#">RGD1310230.bSep08</a>          | <a href="#">301563</a> | 27482 | 1045 | 8  | 325  | similar to RIKEN cDNA 5230400G24 (RGD1310230) alternative variant bSep08, mRNA.                    |
| <a href="#">RGD1310230</a>          | <a href="#">RGD1310230.cSep08</a>          | <a href="#">301563</a> | 23986 | 1649 | 6  | 271  | similar to RIKEN cDNA 5230400G24 (30.8 kD) (RGD1310230) alternative variant cSep08, mRNA.          |
| <a href="#">RGD1310230</a>          | <a href="#">RGD1310230.dSep08</a>          | <a href="#">301563</a> | 27549 | 1168 | 8  | 244  | similar to RIKEN cDNA 5230400G24 (27.5 kD) (RGD1310230) alternative variant dSep08, complete mRNA. |
| <a href="#">RGD1310230</a>          | <a href="#">RGD1310230.eSep08</a>          | <a href="#">301563</a> | 17603 | 926  | 7  | 222  | similar to RIKEN cDNA 5230400G24 (RGD1310230) alternative variant eSep08, mRNA.                    |
| <a href="#">RGD1310230</a>          | <a href="#">RGD1310230.fSep08</a>          | <a href="#">301563</a> | 28120 | 1303 | 6  | 221  | similar to RIKEN cDNA 5230400G24 (RGD1310230) alternative variant fSep08, mRNA.                    |
| <a href="#">RGD1310230</a>          | <a href="#">RGD1310230.hSep08</a>          | <a href="#">301563</a> | 25096 | 514  | 6  | 74   | similar to RIKEN cDNA 5230400G24 (RGD1310230) alternative variant hSep08, mRNA.                    |

|                            |                                   |                        |        |      |   |     |                                                                                                                                     |
|----------------------------|-----------------------------------|------------------------|--------|------|---|-----|-------------------------------------------------------------------------------------------------------------------------------------|
| <a href="#">RGD1310230</a> | <a href="#">RGD1310230.iSep08</a> | <a href="#">301563</a> | 2457   | 1529 | 2 | 55  | similar to RIKEN cDNA 5230400G24 (6.8 kD) (RGD1310230) alternative variant iSep08, mRNA.                                            |
| <a href="#">RGD1310230</a> | <a href="#">RGD1310230.jSep08</a> | <a href="#">301563</a> | 5307   | 841  | 3 | 55  | similar to RIKEN cDNA 5230400G24 (6.8 kD) (RGD1310230) alternative variant jSep08, mRNA.                                            |
| <a href="#">RGD1310262</a> | <a href="#">RGD1310262.bSep08</a> | <a href="#">304650</a> | 1199   | 1068 | 2 | 200 | hypothetical LOC304650 (RGD1310262) alternative variant bSep08, mRNA.                                                               |
| <a href="#">RGD1310262</a> | <a href="#">RGD1310262.cSep08</a> | <a href="#">304650</a> | 1029   | 813  | 2 | 37  | hypothetical LOC304650 (RGD1310262) alternative variant cSep08, mRNA.                                                               |
| <a href="#">RGD1310270</a> | <a href="#">RGD1310270.bSep08</a> | <a href="#">314798</a> | 10554  | 766  | 4 | 211 | similar to CG33154-PB (RGD1310270) alternative variant bSep08, mRNA.                                                                |
| <a href="#">RGD1310270</a> | <a href="#">RGD1310270.cSep08</a> | <a href="#">314798</a> | 37778  | 619  | 6 | 164 | similar to CG33154-PB (RGD1310270) alternative variant cSep08, mRNA.                                                                |
| <a href="#">RGD1310270</a> | <a href="#">RGD1310270.dSep08</a> | <a href="#">314798</a> | 10171  | 611  | 4 | 87  | similar to CG33154-PB (RGD1310270) alternative variant dSep08, mRNA.                                                                |
| <a href="#">RGD1310271</a> | <a href="#">RGD1310271.aSep08</a> | <a href="#">313778</a> | 5776   | 910  | 7 | 277 | similar to hypothetical protein MGC45873 (RGD1310271) alternative variant aSep08, mRNA.                                             |
| <a href="#">RGD1310311</a> | <a href="#">RGD1310311.bSep08</a> | <a href="#">362746</a> | 3472   | 720  | 1 | 210 | uncharacterized protein homolog (RGD1310311) alternative variant bSep08, mRNA.                                                      |
| <a href="#">RGD1310324</a> | <a href="#">RGD1310324.aSep08</a> | <a href="#">287388</a> | 6215   | 607  |   | 109 | hypothetical LOC287388 (RGD1310324) mRNA.                                                                                           |
| <a href="#">RGD1310335</a> | <a href="#">RGD1310335.aSep08</a> | <a href="#">360711</a> | 4959   | 716  |   | 237 | similar to RIKEN cDNA C330027C09 (RGD1310335) mRNA.                                                                                 |
| <a href="#">RGD1310348</a> | <a href="#">RGD1310348.aSep08</a> | <a href="#">360738</a> | 42843  | 1064 | 7 | 312 | similar to Ser/Thr-rich protein T10 in DGCR region (RGD1310348) alternative variant aSep08, mRNA.                                   |
| <a href="#">RGD1310348</a> | <a href="#">RGD1310348.bSep08</a> | <a href="#">360738</a> | 43075  | 1080 | 7 | 280 | similar to Ser/Thr-rich protein T10 in DGCR region (31.2 kD) (RGD1310348) alternative variant bSep08, mRNA.                         |
| <a href="#">RGD1310348</a> | <a href="#">RGD1310348.dSep08</a> | <a href="#">360738</a> | 36800  | 756  | 4 | 171 | similar to Ser/Thr-rich protein T10 in DGCR region (19.0 kD) (RGD1310348) alternative variant dSep08, mRNA.                         |
| <a href="#">RGD1310348</a> | <a href="#">RGD1310348.eSep08</a> | <a href="#">360738</a> | 40702  | 1281 | 4 | 171 | similar to Ser/Thr-rich protein T10 in DGCR region (19.0 kD) (RGD1310348) alternative variant eSep08, mRNA.                         |
| <a href="#">RGD1310348</a> | <a href="#">RGD1310348.fSep08</a> | <a href="#">360738</a> | 43661  | 752  | 5 | 169 | similar to Ser/Thr-rich protein T10 in DGCR region (RGD1310348) alternative variant fSep08, mRNA.                                   |
| <a href="#">RGD1310348</a> | <a href="#">RGD1310348.gSep08</a> | <a href="#">360738</a> | 40112  | 583  | 4 | 132 | similar to Ser/Thr-rich protein T10 in DGCR region (RGD1310348) alternative variant gSep08, mRNA.                                   |
| <a href="#">RGD1310348</a> | <a href="#">RGD1310348.hSep08</a> | <a href="#">360738</a> | 10971  | 477  | 2 | 84  | similar to Ser/Thr-rich protein T10 in DGCR region (RGD1310348) alternative variant hSep08, mRNA.                                   |
| <a href="#">RGD1310351</a> | <a href="#">RGD1310351.bSep08</a> | <a href="#">298425</a> | 13371  | 605  | 6 | 178 | similar to RIKEN cDNA 4732418C07 (RGD1310351) alternative variant bSep08, mRNA.                                                     |
| <a href="#">RGD1310352</a> | <a href="#">RGD1310352.bSep08</a> | <a href="#">303122</a> | 4643   | 1419 | 2 | 169 | similar to HTGN29 protein; keratinocytes associated transmembrane protein 2 (RGD1310352) alternative variant bSep08, mRNA.          |
| <a href="#">RGD1310352</a> | <a href="#">RGD1310352.cSep08</a> | <a href="#">303122</a> | 967    | 607  | 2 | 65  | similar to HTGN29 protein; keratinocytes associated transmembrane protein 2 (7.0 kD) (RGD1310352) alternative variant cSep08, mRNA. |
| <a href="#">RGD1310358</a> | <a href="#">RGD1310358.bSep08</a> | <a href="#">308537</a> | 37742  | 481  |   | 102 | similar to NNX3 (RGD1310358) alternative variant bSep08, mRNA.                                                                      |
| <a href="#">RGD1310364</a> | <a href="#">RGD1310364.aSep08</a> | <a href="#">313111</a> | 185993 | 945  |   | 130 | similar to KIAA1900 protein (14.3 kD) (RGD1310364) mRNA.                                                                            |

|                                             |                                                    |                        |       |      |    |     |                                                                                                               |
|---------------------------------------------|----------------------------------------------------|------------------------|-------|------|----|-----|---------------------------------------------------------------------------------------------------------------|
| <a href="#">RGD1310371</a>                  | <a href="#">RGD1310371.bSep08</a>                  | <a href="#">308794</a> | 1216  | 692  | 2  | 140 | similar to RIKEN cDNA 1700026D08 (RGD1310371) alternative variant bSep08, mRNA.                               |
| <a href="#">RGD1310371</a>                  | <a href="#">RGD1310371.dSep08</a>                  | <a href="#">308794</a> | 4629  | 1718 | 3  | 76  | similar to RIKEN cDNA 1700026D08 (RGD1310371) alternative variant dSep08, mRNA.                               |
| <a href="#">RGD1310376</a>                  | <a href="#">RGD1310376.aSep08</a>                  | <a href="#">298404</a> | 3804  | 1854 | 9  | 344 | vav-like protein (39.4 kD) (RGD1310376) alternative variant aSep08, mRNA.                                     |
| <a href="#">RGD1310376</a>                  | <a href="#">RGD1310376.cSep08</a>                  | <a href="#">298404</a> | 1682  | 700  | 4  | 125 | vav-like protein (RGD1310376) alternative variant cSep08, mRNA.                                               |
| <a href="#">RGD1310376</a>                  | <a href="#">RGD1310376.eSep08</a>                  | <a href="#">298404</a> | 1019  | 808  | 2  | 84  | novel protein containing RhoGEF PH domains (RGD1310376) alternative variant eSep08, mRNA.                     |
| <a href="#">RGD1310384</a>                  | <a href="#">RGD1310384.aSep08</a>                  | <a href="#">289530</a> | 15670 | 1162 |    | 322 | hypothetical LOC289530 (34.6 kD) (RGD1310384) mRNA.                                                           |
| <a href="#">RGD1310393</a>                  | <a href="#">RGD1310393.aSep08</a>                  | <a href="#">298197</a> | 1781  | 408  | 2  | 100 | similar to hypothetical protein 5930437A14 (RGD1310393) alternative variant aSep08, mRNA.                     |
| <a href="#">RGD1310399_predictedandNgrn</a> | <a href="#">RGD1310399_predictedandNgrn.aSep08</a> | <a href="#">308762</a> | 15933 | 3427 | 15 | 854 | tubulin tyrosine ligase-like family member 13 (RGD1310399_predictedandNgrn) alternative variant aSep08, mRNA. |
| <a href="#">RGD1310399_predictedandNgrn</a> | <a href="#">RGD1310399_predictedandNgrn.aSep08</a> | <a href="#">499191</a> | 15933 | 3427 | 15 | 854 | tubulin tyrosine ligase-like family member 13 (RGD1310399_predictedandNgrn) alternative variant aSep08, mRNA. |
| <a href="#">RGD1310399_predictedandNgrn</a> | <a href="#">RGD1310399_predictedandNgrn.aSep08</a> | <a href="#">685955</a> | 15933 | 3427 | 15 | 854 | tubulin tyrosine ligase-like family member 13 (RGD1310399_predictedandNgrn) alternative variant aSep08, mRNA. |
| <a href="#">RGD1310399_predictedandNgrn</a> | <a href="#">RGD1310399_predictedandNgrn.cSep08</a> | <a href="#">308762</a> | 5839  | 1702 | 2  | 230 | neugrin (26.2 kD) (RGD1310399_predictedandNgrn) alternative variant cSep08, complete mRNA.                    |
| <a href="#">RGD1310399_predictedandNgrn</a> | <a href="#">RGD1310399_predictedandNgrn.cSep08</a> | <a href="#">499191</a> | 5839  | 1702 | 2  | 230 | neugrin (26.2 kD) (RGD1310399_predictedandNgrn) alternative variant cSep08, complete mRNA.                    |
| <a href="#">RGD1310399_predictedandNgrn</a> | <a href="#">RGD1310399_predictedandNgrn.cSep08</a> | <a href="#">685955</a> | 5839  | 1702 | 2  | 230 | neugrin (26.2 kD) (RGD1310399_predictedandNgrn) alternative variant cSep08, complete mRNA.                    |
| <a href="#">RGD1310399_predictedandNgrn</a> | <a href="#">RGD1310399_predictedandNgrn.dSep08</a> | <a href="#">308762</a> | 12671 | 716  | 5  | 188 | tubulin tyrosine ligase-like family member 13 (RGD1310399_predictedandNgrn) alternative variant dSep08, mRNA. |
| <a href="#">RGD1310399_predictedandNgrn</a> | <a href="#">RGD1310399_predictedandNgrn.dSep08</a> | <a href="#">499191</a> | 12671 | 716  | 5  | 188 | tubulin tyrosine ligase-like family member 13 (RGD1310399_predictedandNgrn) alternative variant dSep08, mRNA. |
| <a href="#">RGD1310399_predictedandNgrn</a> | <a href="#">RGD1310399_predictedandNgrn.dSep08</a> | <a href="#">685955</a> | 12671 | 716  | 5  | 188 | tubulin tyrosine ligase-like family member 13 (RGD1310399_predictedandNgrn) alternative variant dSep08, mRNA. |
| <a href="#">RGD1310399_predictedandNgrn</a> | <a href="#">RGD1310399_predictedandNgrn.eSep08</a> | <a href="#">308762</a> | 1299  | 666  | 2  | 73  | tubulin tyrosine ligase-like family member 13 (RGD1310399_predictedandNgrn) alternative variant eSep08, mRNA. |
| <a href="#">RGD1310399_predictedandNgrn</a> | <a href="#">RGD1310399_predictedandNgrn.eSep08</a> | <a href="#">499191</a> | 1299  | 666  | 2  | 73  | tubulin tyrosine ligase-like family member 13 (RGD1310399_predictedandNgrn) alternative variant eSep08, mRNA. |

|                                             |                                                    |                        |       |      |   |     |                                                                                                               |
|---------------------------------------------|----------------------------------------------------|------------------------|-------|------|---|-----|---------------------------------------------------------------------------------------------------------------|
| <a href="#">RGD1310399_predictedandNgrn</a> | <a href="#">RGD1310399_predictedandNgrn.eSep08</a> | <a href="#">685955</a> | 1299  | 666  | 2 | 73  | tubulin tyrosine ligase-like family member 13 (RGD1310399_predictedandNgrn) alternative variant eSep08, mRNA. |
| <a href="#">RGD1310399_predictedandNgrn</a> | <a href="#">RGD1310399_predictedandNgrn.fSep08</a> | <a href="#">308762</a> | 5088  | 1335 | 2 | 65  | putative protein (7.0 kD) (RGD1310399_predictedandNgrn) alternative variant fSep08, mRNA.                     |
| <a href="#">RGD1310399_predictedandNgrn</a> | <a href="#">RGD1310399_predictedandNgrn.fSep08</a> | <a href="#">499191</a> | 5088  | 1335 | 2 | 65  | putative protein (7.0 kD) (RGD1310399_predictedandNgrn) alternative variant fSep08, mRNA.                     |
| <a href="#">RGD1310399_predictedandNgrn</a> | <a href="#">RGD1310399_predictedandNgrn.fSep08</a> | <a href="#">685955</a> | 5088  | 1335 | 2 | 65  | putative protein (7.0 kD) (RGD1310399_predictedandNgrn) alternative variant fSep08, mRNA.                     |
| <a href="#">RGD1310414</a>                  | <a href="#">RGD1310414.bSep08</a>                  | <a href="#">290811</a> | 906   | 445  | 3 | 148 | similar to hypothetical protein FLJ23263 (RGD1310414) alternative variant bSep08, mRNA.                       |
| <a href="#">RGD1310423</a>                  | <a href="#">RGD1310423.aSep08</a>                  | <a href="#">361112</a> | 24203 | 1455 |   | 98  | similar to hypothetical protein FLJ31737 (RGD1310423) mRNA.                                                   |
| <a href="#">RGD1310425</a>                  | <a href="#">RGD1310425.bSep08</a>                  | <a href="#">298398</a> | 1117  | 756  | 2 | 20  | hypothetical LOC298398 (2.1 kD) (RGD1310425) alternative variant bSep08, mRNA.                                |
| <a href="#">RGD1310429</a>                  | <a href="#">RGD1310429.aSep08</a>                  | <a href="#">303764</a> | 78857 | 2806 |   | 479 | similar to Protein Njmu-R1 (53.5 kD) (RGD1310429) mRNA.                                                       |
| <a href="#">RGD1310440</a>                  | <a href="#">RGD1310440.aSep08</a>                  | <a href="#">362594</a> | 24088 | 2109 | 8 | 205 | similar to hypothetical protein (RGD1310440) alternative variant aSep08, mRNA.                                |
| <a href="#">RGD1310440</a>                  | <a href="#">RGD1310440.bSep08</a>                  | <a href="#">362594</a> | 23164 | 1155 | 7 | 193 | similar to hypothetical protein (RGD1310440) alternative variant bSep08, mRNA.                                |
| <a href="#">RGD1310440</a>                  | <a href="#">RGD1310440.cSep08</a>                  | <a href="#">362594</a> | 22999 | 1077 | 9 | 190 | similar to hypothetical protein (RGD1310440) alternative variant cSep08, mRNA.                                |
| <a href="#">RGD1310440</a>                  | <a href="#">RGD1310440.dSep08</a>                  | <a href="#">362594</a> | 11479 | 372  | 3 | 124 | similar to hypothetical protein (RGD1310440) alternative variant dSep08, mRNA.                                |
| <a href="#">RGD1310440</a>                  | <a href="#">RGD1310440.eSep08</a>                  | <a href="#">362594</a> | 6925  | 467  | 2 | 64  | similar to hypothetical protein (RGD1310440) alternative variant eSep08, mRNA.                                |
| <a href="#">RGD1310444</a>                  | <a href="#">RGD1310444.aSep08</a>                  | <a href="#">363015</a> | 25900 | 808  |   | 269 | LOC363015 (RGD1310444) mRNA.                                                                                  |
| <a href="#">RGD1310474</a>                  | <a href="#">RGD1310474.aSep08</a>                  | <a href="#">314169</a> | 32678 | 3268 | 3 | 593 | similar to KIAA0423 (66.4 kD) (RGD1310474) alternative variant aSep08, mRNA.                                  |
| <a href="#">RGD1310474</a>                  | <a href="#">RGD1310474.bSep08</a>                  | <a href="#">314169</a> | 32730 | 1794 | 8 | 549 | similar to KIAA0423 (RGD1310474) alternative variant bSep08, mRNA.                                            |
| <a href="#">RGD1310474</a>                  | <a href="#">RGD1310474.cSep08</a>                  | <a href="#">314169</a> | 20895 | 1160 | 5 | 386 | similar to KIAA0423 (RGD1310474) alternative variant cSep08, mRNA.                                            |
| <a href="#">RGD1310474</a>                  | <a href="#">RGD1310474.dSep08</a>                  | <a href="#">314169</a> | 12165 | 770  | 1 | 208 | similar to KIAA0423 (RGD1310474) alternative variant dSep08, mRNA.                                            |
| <a href="#">RGD1310474</a>                  | <a href="#">RGD1310474.eSep08</a>                  | <a href="#">314169</a> | 8237  | 740  | 1 | 91  | similar to KIAA0423 (RGD1310474) alternative variant eSep08, mRNA.                                            |
| <a href="#">RGD1310475</a>                  | <a href="#">RGD1310475.bSep08</a>                  | <a href="#">293949</a> | 11751 | 1509 | 5 | 188 | similar to RIKEN cDNA 0610010D20 (RGD1310475) alternative variant bSep08, mRNA.                               |
| <a href="#">RGD1310475</a>                  | <a href="#">RGD1310475.cSep08</a>                  | <a href="#">293949</a> | 6945  | 275  | 3 | 91  | similar to RIKEN cDNA 0610010D20 (RGD1310475) alternative variant cSep08, mRNA.                               |
| <a href="#">RGD1310484</a>                  | <a href="#">RGD1310484.bSep08</a>                  | <a href="#">291694</a> | 11606 | 550  | 6 | 183 | similar to hypothetical protein MGC37079 (RGD1310484) alternative variant bSep08, mRNA.                       |

|                            |                                   |                        |       |      |    |     |                                                                                                                  |
|----------------------------|-----------------------------------|------------------------|-------|------|----|-----|------------------------------------------------------------------------------------------------------------------|
| <a href="#">RGD1310484</a> | <a href="#">RGD1310484.cSep08</a> | <a href="#">291694</a> | 6641  | 684  | 5  | 148 | similar to hypothetical protein MGC37079 (RGD1310484) alternative variant cSep08, mRNA.                          |
| <a href="#">RGD1310484</a> | <a href="#">RGD1310484.dSep08</a> | <a href="#">291694</a> | 1614  | 388  | 3  | 73  | similar to hypothetical protein MGC37079 (RGD1310484) alternative variant dSep08, mRNA.                          |
| <a href="#">RGD1310495</a> | <a href="#">RGD1310495.aSep08</a> | <a href="#">309809</a> | 12995 | 2508 |    | 473 | similar to KIAA1919 protein (RGD1310495) mRNA.                                                                   |
| <a href="#">RGD1310507</a> | <a href="#">RGD1310507.bSep08</a> | <a href="#">315963</a> | 38721 | 2350 | 17 | 683 | similar to RIKEN cDNA 1300017J02 (74.8 kD) (RGD1310507) alternative variant bSep08, mRNA.                        |
| <a href="#">RGD1310507</a> | <a href="#">RGD1310507.cSep08</a> | <a href="#">315963</a> | 22676 | 514  | 4  | 69  | similar to RIKEN cDNA 1300017J02 (RGD1310507) alternative variant cSep08, mRNA.                                  |
| <a href="#">RGD1310552</a> | <a href="#">RGD1310552.bSep08</a> | <a href="#">300836</a> | 6714  | 761  | 3  | 105 | putative protein of eukaryotic origin (12.4 kD) (RGD1310552) alternative variant bSep08, mRNA.                   |
| <a href="#">RGD1310552</a> | <a href="#">RGD1310552.cSep08</a> | <a href="#">300836</a> | 915   | 417  | 3  | 93  | putative protein (10.6 kD) (RGD1310552) alternative variant cSep08, mRNA.                                        |
| <a href="#">RGD1310572</a> | <a href="#">RGD1310572.bSep08</a> | <a href="#">304646</a> | 19980 | 629  | 4  | 106 | similar to calmegin (RGD1310572) alternative variant bSep08, mRNA.                                               |
| <a href="#">RGD1310587</a> | <a href="#">RGD1310587.aSep08</a> | <a href="#">360894</a> | 9732  | 2695 |    | 142 | similar to hypothetical protein FLJ14146 (RGD1310587) mRNA.                                                      |
| <a href="#">RGD1310592</a> | <a href="#">RGD1310592.aSep08</a> | <a href="#">297823</a> | 40672 | 2436 | 21 | 780 | integrator complex (RGD1310592) alternative variant aSep08, mRNA.                                                |
| <a href="#">RGD1310592</a> | <a href="#">RGD1310592.bSep08</a> | <a href="#">297823</a> | 7898  | 693  | 7  | 148 | integrator complex (RGD1310592) alternative variant bSep08, mRNA.                                                |
| <a href="#">RGD1310592</a> | <a href="#">RGD1310592.cSep08</a> | <a href="#">297823</a> | 47403 | 479  | 4  | 131 | integrator complex (RGD1310592) alternative variant cSep08, mRNA.                                                |
| <a href="#">RGD1310592</a> | <a href="#">RGD1310592.dSep08</a> | <a href="#">297823</a> | 8695  | 372  | 3  | 66  | integrator complex (RGD1310592) alternative variant dSep08, mRNA.                                                |
| <a href="#">RGD1310592</a> | <a href="#">RGD1310592.eSep08</a> | <a href="#">297823</a> | 9522  | 544  | 5  | 65  | integrator complex (RGD1310592) alternative variant eSep08, mRNA.                                                |
| <a href="#">RGD1310597</a> | <a href="#">RGD1310597.bSep08</a> | <a href="#">294667</a> | 2373  | 723  | 2  | 48  | similar to RIKEN cDNA 1200014M14 (5.4 kD) (RGD1310597) alternative variant bSep08, complete mRNA.                |
| <a href="#">RGD1310606</a> | <a href="#">RGD1310606.aSep08</a> | <a href="#">297728</a> | 32008 | 2918 | 14 | 377 | similar to RIKEN cDNA 1200009B18; EST AA408438 (42.5 kD) (RGD1310606) alternative variant aSep08, mRNA.          |
| <a href="#">RGD1310606</a> | <a href="#">RGD1310606.bSep08</a> | <a href="#">297728</a> | 30460 | 1142 | 12 | 301 | similar to RIKEN cDNA 1200009B18; EST AA408438 (33.8 kD) (RGD1310606) alternative variant bSep08, complete mRNA. |
| <a href="#">RGD1310606</a> | <a href="#">RGD1310606.cSep08</a> | <a href="#">297728</a> | 14351 | 765  | 8  | 228 | similar to RIKEN cDNA 1200009B18; EST AA408438 (RGD1310606) alternative variant cSep08, mRNA.                    |
| <a href="#">RGD1310606</a> | <a href="#">RGD1310606.eSep08</a> | <a href="#">297728</a> | 28909 | 830  | 11 | 152 | similar to RIKEN cDNA 1200009B18; EST AA408438 (RGD1310606) alternative variant eSep08, mRNA.                    |
| <a href="#">RGD1310606</a> | <a href="#">RGD1310606.fSep08</a> | <a href="#">297728</a> | 9503  | 398  | 4  | 103 | similar to RIKEN cDNA 1200009B18; EST AA408438 (RGD1310606) alternative variant fSep08, mRNA.                    |
| <a href="#">RGD1310606</a> | <a href="#">RGD1310606.gSep08</a> | <a href="#">297728</a> | 467   | 337  | 2  | 69  | similar to RIKEN cDNA 1200009B18; EST AA408438 (RGD1310606) alternative variant gSep08, mRNA.                    |
| <a href="#">RGD1310641</a> | <a href="#">RGD1310641.bSep08</a> | <a href="#">366347</a> | 14432 | 813  | 1  | 244 | similar to hypothetical protein (RGD1310641) alternative variant bSep08, mRNA.                                   |
| <a href="#">RGD1310651</a> | <a href="#">RGD1310651.aSep08</a> | <a href="#">362297</a> | 21073 | 688  |    | 228 | similar to hypothetical protein MGC20460 (RGD1310651) mRNA.                                                      |



|                            |                                   |                        |       |      |   |     |                                                                                                   |
|----------------------------|-----------------------------------|------------------------|-------|------|---|-----|---------------------------------------------------------------------------------------------------|
| <a href="#">RGD1310656</a> | <a href="#">RGD1310656.aSep08</a> | <a href="#">288664</a> | 3754  | 750  |   | 170 | similar to hypothetical protein FLJ32356 (RGD1310656) mRNA.                                       |
| <a href="#">RGD1310660</a> | <a href="#">RGD1310660.bSep08</a> | <a href="#">296470</a> | 1697  | 652  | 3 | 115 | similar to RIKEN cDNA 2700038C09 (12.1 kD) (RGD1310660) alternative variant bSep08, mRNA.         |
| <a href="#">RGD1310660</a> | <a href="#">RGD1310660.cSep08</a> | <a href="#">296470</a> | 1239  | 738  | 3 | 115 | similar to RIKEN cDNA 2700038C09 (12.1 kD) (RGD1310660) alternative variant cSep08, mRNA.         |
| <a href="#">RGD1310660</a> | <a href="#">RGD1310660.dSep08</a> | <a href="#">296470</a> | 833   | 602  | 2 | 67  | similar to RIKEN cDNA 2700038C09 (RGD1310660) alternative variant dSep08, mRNA.                   |
| <a href="#">RGD1310660</a> | <a href="#">RGD1310660.eSep08</a> | <a href="#">296470</a> | 1206  | 777  | 2 | 48  | similar to RIKEN cDNA 2700038C09 (5.1 kD) (RGD1310660) alternative variant eSep08, complete mRNA. |
| <a href="#">RGD1310686</a> | <a href="#">RGD1310686.aSep08</a> | <a href="#">360480</a> | 21077 | 1191 | 2 | 240 | putative protein of vertebrate origin (RGD1310686) alternative variant aSep08, complete mRNA.     |
| <a href="#">RGD1310686</a> | <a href="#">RGD1310686.cSep08</a> | <a href="#">360480</a> | 20659 | 450  | 1 | 98  | putative protein of mammalian origin (RGD1310686) alternative variant cSep08, mRNA.               |
| <a href="#">RGD1310693</a> | <a href="#">RGD1310693.aSep08</a> | <a href="#">316238</a> | 13497 | 904  | 5 | 279 | similar to RIKEN cDNA 1700027N10 (RGD1310693) alternative variant aSep08, mRNA.                   |
| <a href="#">RGD1310693</a> | <a href="#">RGD1310693.bSep08</a> | <a href="#">316238</a> | 4860  | 605  | 2 | 94  | similar to RIKEN cDNA 1700027N10 (RGD1310693) alternative variant bSep08, mRNA.                   |
| <a href="#">RGD1310693</a> | <a href="#">RGD1310693.dSep08</a> | <a href="#">316238</a> | 11206 | 329  | 4 | 86  | similar to RIKEN cDNA 1700027N10 (RGD1310693) alternative variant dSep08, mRNA.                   |
| <a href="#">RGD1310712</a> | <a href="#">RGD1310712.aSep08</a> | <a href="#">361607</a> | 6226  | 1568 | 4 | 449 | similar to EMSY protein (RGD1310712) alternative variant aSep08, mRNA.                            |
| <a href="#">RGD1310712</a> | <a href="#">RGD1310712.bSep08</a> | <a href="#">361607</a> | 6932  | 1794 | 3 | 261 | similar to EMSY protein (RGD1310712) alternative variant bSep08, mRNA.                            |
| <a href="#">RGD1310722</a> | <a href="#">RGD1310722.bSep08</a> | <a href="#">312248</a> | 2804  | 383  | 4 | 127 | similar to RIKEN cDNA D130059P03 gene (RGD1310722) alternative variant bSep08, mRNA.              |
| <a href="#">RGD1310727</a> | <a href="#">RGD1310727.aSep08</a> | <a href="#">363070</a> | 558   | 369  | 1 | 122 | LOC363070 (RGD1310727) alternative variant aSep08, mRNA.                                          |
| <a href="#">RGD1310769</a> | <a href="#">RGD1310769.aSep08</a> | <a href="#">299207</a> | 10329 | 739  | 2 | 140 | similar to HSPC288 (15.8 kD) (RGD1310769) alternative variant aSep08, mRNA.                       |
| <a href="#">RGD1310769</a> | <a href="#">RGD1310769.cSep08</a> | <a href="#">299207</a> | 9878  | 390  | 1 | 129 | similar to HSPC288 (RGD1310769) alternative variant cSep08, mRNA.                                 |
| <a href="#">RGD1310784</a> | <a href="#">RGD1310784.aSep08</a> | <a href="#">291441</a> | 9890  | 1089 | 7 | 278 | similar to RIKEN cDNA 2810433K01 (32.2 kD) (RGD1310784) alternative variant aSep08, mRNA.         |
| <a href="#">RGD1310784</a> | <a href="#">RGD1310784.bSep08</a> | <a href="#">291441</a> | 10222 | 1812 | 6 | 257 | similar to RIKEN cDNA 2810433K01 (29.2 kD) (RGD1310784) alternative variant bSep08, mRNA.         |
| <a href="#">RGD1310784</a> | <a href="#">RGD1310784.dSep08</a> | <a href="#">291441</a> | 7470  | 774  | 5 | 149 | similar to RIKEN cDNA 2810433K01 (17.0 kD) (RGD1310784) alternative variant dSep08, mRNA.         |
| <a href="#">RGD1310794</a> | <a href="#">RGD1310794.bSep08</a> | <a href="#">296840</a> | 4254  | 805  |   | 267 | similar to RIKEN cDNA C030048B08 (RGD1310794) alternative variant bSep08, mRNA.                   |
| <a href="#">RGD1310799</a> | <a href="#">RGD1310799.bSep08</a> | <a href="#">309060</a> | 82567 | 831  | 5 | 69  | similar to RIKEN cDNA A930008G19 (RGD1310799) alternative variant bSep08, mRNA.                   |
| <a href="#">RGD1310810</a> | <a href="#">RGD1310810.bSep08</a> | <a href="#">306549</a> | 2080  | 1015 | 4 | 90  | similar to RIKEN cDNA 4930444A02 (9.8 kD) (RGD1310810) alternative variant bSep08, mRNA.          |
| <a href="#">RGD1310819</a> | <a href="#">RGD1310819.aSep08</a> | <a href="#">301351</a> | 2746  | 997  |   | 126 | similar to putative protein (5S487) (RGD1310819) mRNA.                                            |
| <a href="#">RGD1310845</a> | <a href="#">RGD1310845.aSep08</a> | <a href="#">313928</a> | 2711  | 519  |   | 172 | similar to KIAA0953 protein (RGD1310845) mRNA.                                                    |

|                            |                                   |                        |       |      |    |     |                                                                                                              |
|----------------------------|-----------------------------------|------------------------|-------|------|----|-----|--------------------------------------------------------------------------------------------------------------|
| <a href="#">RGD1310852</a> | <a href="#">RGD1310852.bSep08</a> | <a href="#">314992</a> | 5141  | 860  | 4  | 153 | similar to RIKEN cDNA 9130401M01 (RGD1310852) alternative variant bSep08, mRNA.                              |
| <a href="#">RGD1310861</a> | <a href="#">RGD1310861.aSep08</a> | <a href="#">288667</a> | 9250  | 1796 | 1  | 362 | similar to RIKEN cDNA 1500011H22 (RGD1310861) alternative variant aSep08, complete mRNA.                     |
| <a href="#">RGD1310861</a> | <a href="#">RGD1310861.cSep08</a> | <a href="#">288667</a> | 6772  | 1122 | 1  | 221 | similar to RIKEN cDNA 1500011H22 (25.2 kD) (RGD1310861) alternative variant cSep08, mRNA.                    |
| <a href="#">RGD1310862</a> | <a href="#">RGD1310862.aSep08</a> | <a href="#">303016</a> | 5071  | 403  |    | 99  | similar to adult retina protein (RGD1310862) mRNA.                                                           |
| <a href="#">RGD1310868</a> | <a href="#">RGD1310868.bSep08</a> | <a href="#">303702</a> | 3752  | 1488 | 2  | 227 | similar to RIKEN cDNA D230014K01 (RGD1310868) alternative variant bSep08, mRNA.                              |
| <a href="#">RGD1310877</a> | <a href="#">RGD1310877.aSep08</a> | <a href="#">305667</a> | 5554  | 670  |    | 156 | similar to RIKEN cDNA 1810063B07 gene (RGD1310877) mRNA.                                                     |
| <a href="#">RGD1310893</a> | <a href="#">RGD1310893.bSep08</a> | <a href="#">362514</a> | 14319 | 1165 | 6  | 300 | similar to hypothetical protein 3010020C06 (33.9 kD) (RGD1310893) alternative variant bSep08, mRNA.          |
| <a href="#">RGD1310893</a> | <a href="#">RGD1310893.cSep08</a> | <a href="#">362514</a> | 14645 | 1657 | 5  | 195 | similar to hypothetical protein 3010020C06 (22.2 kD) (RGD1310893) alternative variant cSep08, complete mRNA. |
| <a href="#">RGD1310899</a> | <a href="#">RGD1310899.bSep08</a> | <a href="#">299198</a> | 1448  | 620  | 2  | 64  | similar to CGI-35 protein (7.6 kD) (RGD1310899) alternative variant bSep08, mRNA.                            |
| <a href="#">RGD1310899</a> | <a href="#">RGD1310899.cSep08</a> | <a href="#">299198</a> | 9391  | 1799 | 5  | 8   | similar to CGI-35 protein (RGD1310899) alternative variant cSep08, mRNA.                                     |
| <a href="#">RGD1310922</a> | <a href="#">RGD1310922.aSep08</a> | <a href="#">287170</a> | 1760  | 819  | 3  | 175 | putative protein of metazoan origin (RGD1310922) alternative variant aSep08, mRNA.                           |
| <a href="#">RGD1310922</a> | <a href="#">RGD1310922.bSep08</a> | <a href="#">287170</a> | 3300  | 749  | 5  | 115 | CRA a like (12.7 kD) (RGD1310922) alternative variant bSep08, mRNA.                                          |
| <a href="#">RGD1310922</a> | <a href="#">RGD1310922.cSep08</a> | <a href="#">287170</a> | 3152  | 495  | 4  | 91  | u11 U12 protein snRNP (RGD1310922) alternative variant cSep08, mRNA.                                         |
| <a href="#">RGD1310935</a> | <a href="#">RGD1310935.aSep08</a> | <a href="#">360707</a> | 8806  | 687  | 2  | 156 | similar to Dermal papilla derived protein 7 (RGD1310935) alternative variant aSep08, mRNA.                   |
| <a href="#">RGD1310935</a> | <a href="#">RGD1310935.bSep08</a> | <a href="#">360707</a> | 7374  | 562  | 1  | 91  | similar to Dermal papilla derived protein 7 (RGD1310935) alternative variant bSep08, mRNA.                   |
| <a href="#">RGD1310942</a> | <a href="#">RGD1310942.aSep08</a> | <a href="#">292767</a> | 12012 | 1758 | 13 | 585 | similar to R27328 1 (RGD1310942) alternative variant aSep08, mRNA.                                           |
| <a href="#">RGD1310942</a> | <a href="#">RGD1310942.bSep08</a> | <a href="#">292767</a> | 5383  | 676  | 6  | 224 | similar to R27328 1 (RGD1310942) alternative variant bSep08, mRNA.                                           |
| <a href="#">RGD1310942</a> | <a href="#">RGD1310942.cSep08</a> | <a href="#">292767</a> | 1482  | 353  | 1  | 75  | similar to R27328 1 (RGD1310942) alternative variant cSep08, mRNA.                                           |
| <a href="#">RGD1310945</a> | <a href="#">RGD1310945.aSep08</a> | <a href="#">292266</a> | 34782 | 492  | 1  | 164 | similar to hypothetical protein FLJ23305 (RGD1310945) alternative variant aSep08, mRNA.                      |
| <a href="#">RGD1310945</a> | <a href="#">RGD1310945.bSep08</a> | <a href="#">292266</a> | 3479  | 564  | 1  | 129 | similar to hypothetical protein FLJ23305 (RGD1310945) alternative variant bSep08, mRNA.                      |
| <a href="#">RGD1310950</a> | <a href="#">RGD1310950.bSep08</a> | <a href="#">289400</a> | 5742  | 595  | 5  | 37  | similar to KIAA1078 protein (4.3 kD) (RGD1310950) alternative variant bSep08, mRNA.                          |
| <a href="#">RGD1310958</a> | <a href="#">RGD1310958.aSep08</a> | <a href="#">305307</a> | 24301 | 1196 |    | 278 | similar to RIKEN cDNA C130090K23 (RGD1310958) mRNA.                                                          |
| <a href="#">RGD1311019</a> | <a href="#">RGD1311019.bSep08</a> | <a href="#">298694</a> | 1493  | 1014 | 4  | 158 | similar to hypothetical protein DKFzP434H2010 (RGD1311019) alternative variant bSep08, mRNA.                 |

|                            |                                   |                        |       |      |   |     |                                                                                                            |
|----------------------------|-----------------------------------|------------------------|-------|------|---|-----|------------------------------------------------------------------------------------------------------------|
| <a href="#">RGD1311019</a> | <a href="#">RGD1311019.cSep08</a> | <a href="#">298694</a> | 847   | 669  | 3 | 90  | similar to hypothetical protein DKFZp434H2010 (RGD1311019) alternative variant cSep08, mRNA.               |
| <a href="#">RGD1311019</a> | <a href="#">RGD1311019.dSep08</a> | <a href="#">298694</a> | 490   | 392  | 2 | 31  | similar to hypothetical protein DKFZp434H2010 (3.5 kD) (RGD1311019) alternative variant dSep08, mRNA.      |
| <a href="#">RGD1311021</a> | <a href="#">RGD1311021.bSep08</a> | <a href="#">308765</a> | 28375 | 1017 | 3 | 102 | hypothetical LOC308765 (RGD1311021) alternative variant bSep08, mRNA.                                      |
| <a href="#">RGD1311045</a> | <a href="#">RGD1311045.aSep08</a> | <a href="#">360947</a> | 31600 | 1783 | 5 | 463 | similar to RIKEN cDNA 4933428G09 (RGD1311045) alternative variant aSep08, mRNA.                            |
| <a href="#">RGD1311045</a> | <a href="#">RGD1311045.bSep08</a> | <a href="#">360947</a> | 10812 | 1055 | 7 | 284 | similar to RIKEN cDNA 4933428G09 (RGD1311045) alternative variant bSep08, mRNA.                            |
| <a href="#">RGD1311045</a> | <a href="#">RGD1311045.cSep08</a> | <a href="#">360947</a> | 31130 | 847  | 6 | 241 | similar to RIKEN cDNA 4933428G09 (RGD1311045) alternative variant cSep08, mRNA.                            |
| <a href="#">RGD1311045</a> | <a href="#">RGD1311045.dSep08</a> | <a href="#">360947</a> | 25663 | 1102 | 5 | 144 | similar to RIKEN cDNA 4933428G09 (RGD1311045) alternative variant dSep08, mRNA.                            |
| <a href="#">RGD1311045</a> | <a href="#">RGD1311045.eSep08</a> | <a href="#">360947</a> | 31129 | 914  | 7 | 115 | similar to RIKEN cDNA 4933428G09 (15.9 kD) (RGD1311045) alternative variant eSep08, mRNA.                  |
| <a href="#">RGD1311045</a> | <a href="#">RGD1311045.fSep08</a> | <a href="#">360947</a> | 8983  | 696  | 5 | 92  | similar to RIKEN cDNA 4933428G09 (9.9 kD) (RGD1311045) alternative variant fSep08, mRNA.                   |
| <a href="#">RGD1311045</a> | <a href="#">RGD1311045.gSep08</a> | <a href="#">360947</a> | 4246  | 376  | 3 | 72  | similar to RIKEN cDNA 4933428G09 (RGD1311045) alternative variant gSep08, mRNA.                            |
| <a href="#">RGD1311066</a> | <a href="#">RGD1311066.bSep08</a> | <a href="#">296312</a> | 22587 | 3620 | 4 | 384 | similar to RIKEN cDNA 0610011L14 gene (43.5 kD) (RGD1311066) alternative variant bSep08, mRNA.             |
| <a href="#">RGD1311066</a> | <a href="#">RGD1311066.cSep08</a> | <a href="#">296312</a> | 20435 | 666  | 3 | 97  | similar to RIKEN cDNA 0610011L14 gene (11.0 kD) (RGD1311066) alternative variant cSep08, complete mRNA.    |
| <a href="#">RGD1311077</a> | <a href="#">RGD1311077.bSep08</a> | <a href="#">367021</a> | 11477 | 1078 |   | 166 | similar to RIKEN cDNA 2810485I05 (RGD1311077) alternative variant bSep08, mRNA.                            |
| <a href="#">RGD1311078</a> | <a href="#">RGD1311078.aSep08</a> | <a href="#">360664</a> | 11175 | 564  |   | 154 | LOC360664 (RGD1311078) mRNA.                                                                               |
| <a href="#">RGD1311080</a> | <a href="#">RGD1311080.aSep08</a> | <a href="#">312401</a> | 37242 | 3321 |   | 486 | similar to RIKEN cDNA A930038C07 (RGD1311080) mRNA.                                                        |
| <a href="#">RGD1311084</a> | <a href="#">RGD1311084.bSep08</a> | <a href="#">311852</a> | 594   | 249  | 1 | 43  | similar to 1700113K14Rik protein (RGD1311084) alternative variant bSep08, mRNA.                            |
| <a href="#">RGD1311095</a> | <a href="#">RGD1311095.bSep08</a> | <a href="#">301004</a> | 8176  | 1390 | 2 | 463 | similar to hypothetical protein FLJ20259 (RGD1311095) alternative variant bSep08, mRNA.                    |
| <a href="#">RGD1311095</a> | <a href="#">RGD1311095.cSep08</a> | <a href="#">301004</a> | 11333 | 590  | 5 | 190 | similar to hypothetical protein FLJ20259 (RGD1311095) alternative variant cSep08, mRNA.                    |
| <a href="#">RGD1311098</a> | <a href="#">RGD1311098.bSep08</a> | <a href="#">362998</a> | 2053  | 723  | 2 | 138 | similar to RIKEN cDNA 2810451A06 (RGD1311098) alternative variant bSep08, mRNA.                            |
| <a href="#">RGD1311103</a> | <a href="#">RGD1311103.aSep08</a> | <a href="#">301100</a> | 1135  | 654  | 3 | 161 | similar to RIKEN cDNA 2410146L05 (RGD1311103) alternative variant aSep08, mRNA.                            |
| <a href="#">RGD1311107</a> | <a href="#">RGD1311107.bSep08</a> | <a href="#">308428</a> | 3695  | 1653 | 2 | 446 | similar to hypothetical protein R30953 1 (48.7 kD) (RGD1311107) alternative variant bSep08, complete mRNA. |
| <a href="#">RGD1311107</a> | <a href="#">RGD1311107.cSep08</a> | <a href="#">308428</a> | 2946  | 828  | 2 | 238 | similar to hypothetical protein R30953 1 (RGD1311107) alternative variant cSep08, mRNA.                    |
| <a href="#">RGD1311107</a> | <a href="#">RGD1311107.dSep08</a> | <a href="#">308428</a> | 2683  | 664  | 2 | 128 | similar to hypothetical protein R30953 1 (14.2 kD) (RGD1311107) alternative variant dSep08, mRNA.          |

|                            |                                   |                        |       |      |   |     |                                                                                                                                            |
|----------------------------|-----------------------------------|------------------------|-------|------|---|-----|--------------------------------------------------------------------------------------------------------------------------------------------|
| <a href="#">RGD1311107</a> | <a href="#">RGD1311107.eSep08</a> | <a href="#">308428</a> | 1289  | 510  | 2 | 36  | similar to hypothetical protein R30953 1 (RGD1311107) alternative variant eSep08, mRNA.                                                    |
| <a href="#">RGD1311117</a> | <a href="#">RGD1311117.aSep08</a> | <a href="#">314401</a> | 44645 | 2100 |   | 570 | similar to KIAA1409 protein (RGD1311117) alternative variant aSep08, mRNA.                                                                 |
| <a href="#">RGD1311117</a> | <a href="#">RGD1311117.bSep08</a> | <a href="#">314401</a> | 76546 | 1788 |   | 467 | similar to KIAA1409 protein (RGD1311117) alternative variant bSep08, mRNA.                                                                 |
| <a href="#">RGD1311117</a> | <a href="#">RGD1311117.cSep08</a> | <a href="#">314401</a> | 21950 | 1020 |   | 339 | similar to KIAA1409 protein (RGD1311117) alternative variant cSep08, mRNA.                                                                 |
| <a href="#">RGD1311122</a> | <a href="#">RGD1311122.bSep08</a> | <a href="#">364154</a> | 3070  | 676  | 1 | 54  | similar to RIKEN cDNA 1110003E01 (RGD1311122) alternative variant bSep08, mRNA.                                                            |
| <a href="#">RGD1311126</a> | <a href="#">RGD1311126.bSep08</a> | <a href="#">298366</a> | 30756 | 2327 | 2 | 578 | similar to RIKEN cDNA 4922503N01 (65.9 kD) (RGD1311126) alternative variant bSep08, complete mRNA.                                         |
| <a href="#">RGD1311154</a> | <a href="#">RGD1311154.aSep08</a> | <a href="#">300317</a> | 8160  | 1796 | 5 | 573 | similar to hypothetical protein FLJ12242 (RGD1311154) alternative variant aSep08, mRNA.                                                    |
| <a href="#">RGD1311154</a> | <a href="#">RGD1311154.cSep08</a> | <a href="#">300317</a> | 10649 | 1381 | 8 | 203 | similar to hypothetical protein FLJ12242 (RGD1311154) alternative variant cSep08, mRNA.                                                    |
| <a href="#">RGD1311154</a> | <a href="#">RGD1311154.dSep08</a> | <a href="#">300317</a> | 10042 | 751  | 6 | 183 | similar to hypothetical protein FLJ12242 (RGD1311154) alternative variant dSep08, mRNA.                                                    |
| <a href="#">RGD1311154</a> | <a href="#">RGD1311154.eSep08</a> | <a href="#">300317</a> | 9403  | 1207 | 6 | 148 | similar to hypothetical protein FLJ12242 (RGD1311154) alternative variant eSep08, mRNA.                                                    |
| <a href="#">RGD1311186</a> | <a href="#">RGD1311186.aSep08</a> | <a href="#">293587</a> | 2867  | 1798 | 4 | 480 | similar to RIKEN cDNA 1810014F10 gene (RGD1311186) alternative variant aSep08, mRNA.                                                       |
| <a href="#">RGD1311186</a> | <a href="#">RGD1311186.cSep08</a> | <a href="#">293587</a> | 2280  | 796  | 4 | 88  | similar to RIKEN cDNA 1810014F10 gene (RGD1311186) alternative variant cSep08, mRNA.                                                       |
| <a href="#">RGD1311186</a> | <a href="#">RGD1311186.eSep08</a> | <a href="#">293587</a> | 2213  | 462  | 4 | 76  | similar to RIKEN cDNA 1810014F10 gene (RGD1311186) alternative variant eSep08, mRNA.                                                       |
| <a href="#">RGD1311186</a> | <a href="#">RGD1311186.fSep08</a> | <a href="#">293587</a> | 3015  | 993  | 7 | 75  | similar to RIKEN cDNA 1810014F10 gene (8.6 kD) (RGD1311186) alternative variant fSep08, mRNA.                                              |
| <a href="#">RGD1311188</a> | <a href="#">RGD1311188.aSep08</a> | <a href="#">315088</a> | 6955  | 1851 | 1 | 390 | similar to 1500031N24Rik protein (44.5 kD) (RGD1311188) alternative variant aSep08, mRNA.                                                  |
| <a href="#">RGD1311188</a> | <a href="#">RGD1311188.bSep08</a> | <a href="#">315088</a> | 5951  | 844  | 1 | 281 | similar to 1500031N24Rik protein (RGD1311188) alternative variant bSep08, mRNA.                                                            |
| <a href="#">RGD1311224</a> | <a href="#">RGD1311224.aSep08</a> | <a href="#">295714</a> | 5016  | 892  |   | 110 | similar to fatty acid desaturase 2; linoleoyl-CoA desaturase (delta-6-desaturase)-like 2; delta-6 fatty acid desaturase (RGD1311224) mRNA. |
| <a href="#">RGD1311249</a> | <a href="#">RGD1311249.bSep08</a> | <a href="#">298201</a> | 695   | 448  | 1 | 49  | putative protein (5.5 kD) (RGD1311249) alternative variant bSep08, mRNA.                                                                   |
| <a href="#">RGD1311249</a> | <a href="#">RGD1311249.cSep08</a> | <a href="#">298201</a> | 9957  | 630  | 2 | 49  | putative protein (5.5 kD) (RGD1311249) alternative variant cSep08, mRNA.                                                                   |
| <a href="#">RGD1311251</a> | <a href="#">RGD1311251.bSep08</a> | <a href="#">315665</a> | 7824  | 1088 | 4 | 311 | similar to RIKEN cDNA 4930550C14 (RGD1311251) alternative variant bSep08, mRNA.                                                            |
| <a href="#">RGD1311251</a> | <a href="#">RGD1311251.cSep08</a> | <a href="#">315665</a> | 15814 | 772  | 6 | 156 | similar to RIKEN cDNA 4930550C14 (RGD1311251) alternative variant cSep08, mRNA.                                                            |
| <a href="#">RGD1311257</a> | <a href="#">RGD1311257.bSep08</a> | <a href="#">294333</a> | 14916 | 758  | 2 | 197 | similar to C21orf70 protein (RGD1311257) alternative variant bSep08, mRNA.                                                                 |
| <a href="#">RGD1311260</a> | <a href="#">RGD1311260.aSep08</a> | <a href="#">303211</a> | 3759  | 2279 |   | 124 | hypothetical LOC303211 (13.8 kD) (RGD1311260) mRNA.                                                                                        |

|                                         |                                                |                        |        |      |   |     |                                                                                                   |
|-----------------------------------------|------------------------------------------------|------------------------|--------|------|---|-----|---------------------------------------------------------------------------------------------------|
| <a href="#">RGD1311265</a>              | <a href="#">RGD1311265.bSep08</a>              | <a href="#">361976</a> | 4944   | 708  | 5 | 211 | similar to CGI-41 protein (RGD1311265) alternative variant bSep08, mRNA.                          |
| <a href="#">RGD1311265</a>              | <a href="#">RGD1311265.cSep08</a>              | <a href="#">361976</a> | 4552   | 397  | 3 | 132 | similar to CGI-41 protein (RGD1311265) alternative variant cSep08, mRNA.                          |
| <a href="#">RGD1311265</a>              | <a href="#">RGD1311265.dSep08</a>              | <a href="#">361976</a> | 5009   | 678  | 5 | 93  | similar to CGI-41 protein (RGD1311265) alternative variant dSep08, mRNA.                          |
| <a href="#">RGD1311265</a>              | <a href="#">RGD1311265.fSep08</a>              | <a href="#">361976</a> | 4195   | 2320 | 3 | 47  | similar to CGI-41 protein (5.3 kD) (RGD1311265) alternative variant fSep08, mRNA.                 |
| <a href="#">RGD1311267</a>              | <a href="#">RGD1311267.bSep08</a>              | <a href="#">311429</a> | 1102   | 803  | 1 | 69  | similar to RIKEN cDNA 4931426K16 gene (7.7 kD) (RGD1311267) alternative variant bSep08, mRNA.     |
| <a href="#">RGD1311269</a>              | <a href="#">RGD1311269.aSep08</a>              | <a href="#">301419</a> | 18466  | 1800 | 4 | 542 | similar to hypothetical protein FLJ37953 (RGD1311269) alternative variant aSep08, mRNA.           |
| <a href="#">RGD1311269</a>              | <a href="#">RGD1311269.bSep08</a>              | <a href="#">301419</a> | 12396  | 400  | 4 | 133 | similar to hypothetical protein FLJ37953 (RGD1311269) alternative variant bSep08, mRNA.           |
| <a href="#">RGD1311269</a>              | <a href="#">RGD1311269.cSep08</a>              | <a href="#">301419</a> | 18743  | 1456 | 7 | 121 | similar to hypothetical protein FLJ37953 (14.0 kD) (RGD1311269) alternative variant cSep08, mRNA. |
| <a href="#">RGD1311273</a>              | <a href="#">RGD1311273.aSep08</a>              | <a href="#">685545</a> | 5815   | 1379 | 5 | 433 | similar to RIKEN cDNA 9530058B02 (RGD1311273) alternative variant aSep08, mRNA.                   |
| <a href="#">RGD1311273</a>              | <a href="#">RGD1311273.cSep08</a>              | <a href="#">685545</a> | 4922   | 883  | 4 | 134 | similar to RIKEN cDNA 9530058B02 (15.0 kD) (RGD1311273) alternative variant cSep08, mRNA.         |
| <a href="#">RGD1311273</a>              | <a href="#">RGD1311273.dSep08</a>              | <a href="#">685545</a> | 1893   | 656  | 4 | 127 | similar to RIKEN cDNA 9530058B02 (RGD1311273) alternative variant dSep08, mRNA.                   |
| <a href="#">RGD1311273</a>              | <a href="#">RGD1311273.eSep08</a>              | <a href="#">685545</a> | 4742   | 416  | 3 | 109 | similar to RIKEN cDNA 9530058B02 (RGD1311273) alternative variant eSep08, mRNA.                   |
| <a href="#">RGD1311294</a>              | <a href="#">RGD1311294.aSep08</a>              | <a href="#">361853</a> | 22748  | 1798 | 8 | 514 | similar to Hypothetical protein C6orf60 (RGD1311294) alternative variant aSep08, mRNA.            |
| <a href="#">RGD1311294</a>              | <a href="#">RGD1311294.bSep08</a>              | <a href="#">361853</a> | 20112  | 889  | 6 | 296 | similar to Hypothetical protein C6orf60 (RGD1311294) alternative variant bSep08, mRNA.            |
| <a href="#">RGD1311294</a>              | <a href="#">RGD1311294.cSep08</a>              | <a href="#">361853</a> | 20043  | 709  | 4 | 126 | similar to Hypothetical protein C6orf60 (RGD1311294) alternative variant cSep08, mRNA.            |
| <a href="#">RGD1311294</a>              | <a href="#">RGD1311294.dSep08</a>              | <a href="#">361853</a> | 6174   | 520  | 2 | 104 | similar to Hypothetical protein C6orf60 (11.8 kD) (RGD1311294) alternative variant dSep08, mRNA.  |
| <a href="#">RGD1311294</a>              | <a href="#">RGD1311294.eSep08</a>              | <a href="#">361853</a> | 2660   | 1258 | 3 | 54  | similar to Hypothetical protein C6orf60 (6.5 kD) (RGD1311294) alternative variant eSep08, mRNA.   |
| <a href="#">RGD1311300andRGD1359684</a> | <a href="#">RGD1311300andRGD1359684.aSep08</a> | <a href="#">290071</a> | 344095 | 2437 | 9 | 294 | T cell receptor V delta 6 (32.3 kD) (RGD1311300andRGD1359684) alternative variant aSep08, mRNA.   |
| <a href="#">RGD1311300andRGD1359684</a> | <a href="#">RGD1311300andRGD1359684.aSep08</a> | <a href="#">364378</a> | 344095 | 2437 | 9 | 294 | T cell receptor V delta 6 (32.3 kD) (RGD1311300andRGD1359684) alternative variant aSep08, mRNA.   |
| <a href="#">RGD1311300andRGD1359684</a> | <a href="#">RGD1311300andRGD1359684.bSep08</a> | <a href="#">290071</a> | 571920 | 1311 | 7 | 277 | T-cell receptor like (RGD1311300andRGD1359684) alternative variant bSep08, mRNA.                  |
| <a href="#">RGD1311300andRGD1359684</a> | <a href="#">RGD1311300andRGD1359684.bSep08</a> | <a href="#">364378</a> | 571920 | 1311 | 7 | 277 | T-cell receptor like (RGD1311300andRGD1359684) alternative variant bSep08, mRNA.                  |
| <a href="#">RGD1311300andRGD1359684</a> | <a href="#">RGD1311300andRGD1359684.cSep08</a> | <a href="#">290071</a> | 571503 | 888  | 7 | 275 | T-cell receptor like (RGD1311300andRGD1359684) alternative variant cSep08, mRNA.                  |

|                                         |                                                |                        |        |      |   |     |                                                                                                 |
|-----------------------------------------|------------------------------------------------|------------------------|--------|------|---|-----|-------------------------------------------------------------------------------------------------|
| <a href="#">RGD1311300andRGD1359684</a> | <a href="#">RGD1311300andRGD1359684.cSep08</a> | <a href="#">364378</a> | 571503 | 888  | 7 | 275 | T-cell receptor like (RGD1311300andRGD1359684) alternative variant cSep08, mRNA.                |
| <a href="#">RGD1311300andRGD1359684</a> | <a href="#">RGD1311300andRGD1359684.dSep08</a> | <a href="#">290071</a> | 478702 | 1360 | 7 | 269 | T cell receptor precursor (29.7 kD) (RGD1311300andRGD1359684) alternative variant dSep08, mRNA. |
| <a href="#">RGD1311300andRGD1359684</a> | <a href="#">RGD1311300andRGD1359684.dSep08</a> | <a href="#">364378</a> | 478702 | 1360 | 7 | 269 | T cell receptor precursor (29.7 kD) (RGD1311300andRGD1359684) alternative variant dSep08, mRNA. |
| <a href="#">RGD1311300andRGD1359684</a> | <a href="#">RGD1311300andRGD1359684.eSep08</a> | <a href="#">290071</a> | 343464 | 1055 | 5 | 224 | T-cell receptor like (RGD1311300andRGD1359684) alternative variant eSep08, mRNA.                |
| <a href="#">RGD1311300andRGD1359684</a> | <a href="#">RGD1311300andRGD1359684.eSep08</a> | <a href="#">364378</a> | 343464 | 1055 | 5 | 224 | T-cell receptor like (RGD1311300andRGD1359684) alternative variant eSep08, mRNA.                |
| <a href="#">RGD1311300andRGD1359684</a> | <a href="#">RGD1311300andRGD1359684.fSep08</a> | <a href="#">290071</a> | 13516  | 1363 | 6 | 186 | T cell receptor V delta (20.3 kD) (RGD1311300andRGD1359684) alternative variant fSep08, mRNA.   |
| <a href="#">RGD1311300andRGD1359684</a> | <a href="#">RGD1311300andRGD1359684.fSep08</a> | <a href="#">364378</a> | 13516  | 1363 | 6 | 186 | T cell receptor V delta (20.3 kD) (RGD1311300andRGD1359684) alternative variant fSep08, mRNA.   |
| <a href="#">RGD1311300andRGD1359684</a> | <a href="#">RGD1311300andRGD1359684.gSep08</a> | <a href="#">290071</a> | 7762   | 964  | 5 | 162 | T-cell receptor like (RGD1311300andRGD1359684) alternative variant gSep08, mRNA.                |
| <a href="#">RGD1311300andRGD1359684</a> | <a href="#">RGD1311300andRGD1359684.gSep08</a> | <a href="#">364378</a> | 7762   | 964  | 5 | 162 | T-cell receptor like (RGD1311300andRGD1359684) alternative variant gSep08, mRNA.                |
| <a href="#">RGD1311300andRGD1359684</a> | <a href="#">RGD1311300andRGD1359684.hSep08</a> | <a href="#">290071</a> | 60922  | 953  | 5 | 158 | T-cell receptor like (RGD1311300andRGD1359684) alternative variant hSep08, mRNA.                |
| <a href="#">RGD1311300andRGD1359684</a> | <a href="#">RGD1311300andRGD1359684.hSep08</a> | <a href="#">364378</a> | 60922  | 953  | 5 | 158 | T-cell receptor like (RGD1311300andRGD1359684) alternative variant hSep08, mRNA.                |
| <a href="#">RGD1311300andRGD1359684</a> | <a href="#">RGD1311300andRGD1359684.iSep08</a> | <a href="#">290071</a> | 39261  | 944  | 5 | 157 | T-cell receptor like (RGD1311300andRGD1359684) alternative variant iSep08, mRNA.                |
| <a href="#">RGD1311300andRGD1359684</a> | <a href="#">RGD1311300andRGD1359684.iSep08</a> | <a href="#">364378</a> | 39261  | 944  | 5 | 157 | T-cell receptor like (RGD1311300andRGD1359684) alternative variant iSep08, mRNA.                |
| <a href="#">RGD1311300andRGD1359684</a> | <a href="#">RGD1311300andRGD1359684.jSep08</a> | <a href="#">290071</a> | 45481  | 947  | 5 | 156 | T-cell receptor like (RGD1311300andRGD1359684) alternative variant jSep08, mRNA.                |
| <a href="#">RGD1311300andRGD1359684</a> | <a href="#">RGD1311300andRGD1359684.jSep08</a> | <a href="#">364378</a> | 45481  | 947  | 5 | 156 | T-cell receptor like (RGD1311300andRGD1359684) alternative variant jSep08, mRNA.                |
| <a href="#">RGD1311300andRGD1359684</a> | <a href="#">RGD1311300andRGD1359684.kSep08</a> | <a href="#">290071</a> | 29379  | 944  | 5 | 155 | T-cell receptor like (RGD1311300andRGD1359684) alternative variant kSep08, mRNA.                |
| <a href="#">RGD1311300andRGD1359684</a> | <a href="#">RGD1311300andRGD1359684.kSep08</a> | <a href="#">364378</a> | 29379  | 944  | 5 | 155 | T-cell receptor like (RGD1311300andRGD1359684) alternative variant kSep08, mRNA.                |
| <a href="#">RGD1311300andRGD1359684</a> | <a href="#">RGD1311300andRGD1359684.lSep08</a> | <a href="#">290071</a> | 50588  | 930  | 5 | 153 | T-cell receptor like (RGD1311300andRGD1359684) alternative variant lSep08, mRNA.                |
| <a href="#">RGD1311300andRGD1359684</a> | <a href="#">RGD1311300andRGD1359684.lSep08</a> | <a href="#">364378</a> | 50588  | 930  | 5 | 153 | T-cell receptor like (RGD1311300andRGD1359684) alternative variant lSep08, mRNA.                |
| <a href="#">RGD1311300andRGD1359684</a> | <a href="#">RGD1311300andRGD1359684.mSep08</a> | <a href="#">290071</a> | 988    | 667  | 2 | 146 | T cell receptor V delta 2 (RGD1311300andRGD1359684) alternative variant mSep08, mRNA.           |
| <a href="#">RGD1311300andRGD1359684</a> | <a href="#">RGD1311300andRGD1359684.mSep08</a> | <a href="#">364378</a> | 988    | 667  | 2 | 146 | T cell receptor V delta 2 (RGD1311300andRGD1359684) alternative variant mSep08, mRNA.           |

|                                                     |                                                |                        |       |      |   |     |                                                                                                      |
|-----------------------------------------------------|------------------------------------------------|------------------------|-------|------|---|-----|------------------------------------------------------------------------------------------------------|
| <a href="#">RGD1311300andRGD1359684.dRGD1359684</a> | <a href="#">RGD1311300andRGD1359684.nSep08</a> | <a href="#">290071</a> | 50523 | 434  | 4 | 144 | T-cell receptor like (RGD1311300andRGD1359684) alternative variant nSep08, mRNA.                     |
| <a href="#">RGD1311300andRGD1359684.dRGD1359684</a> | <a href="#">RGD1311300andRGD1359684.nSep08</a> | <a href="#">364378</a> | 50523 | 434  | 4 | 144 | T-cell receptor like (RGD1311300andRGD1359684) alternative variant nSep08, mRNA.                     |
| <a href="#">RGD1311300andRGD1359684.dRGD1359684</a> | <a href="#">RGD1311300andRGD1359684.oSep08</a> | <a href="#">290071</a> | 33728 | 359  | 3 | 119 | T-cell receptor like (RGD1311300andRGD1359684) alternative variant oSep08, mRNA.                     |
| <a href="#">RGD1311300andRGD1359684.dRGD1359684</a> | <a href="#">RGD1311300andRGD1359684.oSep08</a> | <a href="#">364378</a> | 33728 | 359  | 3 | 119 | T-cell receptor like (RGD1311300andRGD1359684) alternative variant oSep08, mRNA.                     |
| <a href="#">RGD1311300andRGD1359684.dRGD1359684</a> | <a href="#">RGD1311300andRGD1359684.gSep08</a> | <a href="#">290071</a> | 14275 | 336  | 2 | 111 | T-cell receptor like (RGD1311300andRGD1359684) alternative variant qSep08, mRNA.                     |
| <a href="#">RGD1311300andRGD1359684.dRGD1359684</a> | <a href="#">RGD1311300andRGD1359684.gSep08</a> | <a href="#">364378</a> | 14275 | 336  | 2 | 111 | T-cell receptor like (RGD1311300andRGD1359684) alternative variant qSep08, mRNA.                     |
| <a href="#">RGD1311307</a>                          | <a href="#">RGD1311307.bSep08</a>              | <a href="#">361238</a> | 3099  | 860  | 2 | 114 | similar to 1300014I06Rik protein (13.0 kD) (RGD1311307) alternative variant bSep08, mRNA.            |
| <a href="#">RGD1311307</a>                          | <a href="#">RGD1311307.cSep08</a>              | <a href="#">361238</a> | 11165 | 788  | 4 | 99  | similar to 1300014I06Rik protein (RGD1311307) alternative variant cSep08, mRNA.                      |
| <a href="#">RGD1311309</a>                          | <a href="#">RGD1311309.aSep08</a>              | <a href="#">364144</a> | 22614 | 1467 |   | 433 | similar to 2510002A14Rik protein (RGD1311309) mRNA.                                                  |
| <a href="#">RGD1311310</a>                          | <a href="#">RGD1311310.aSep08</a>              | <a href="#">315166</a> | 3281  | 786  | 3 | 184 | similar to hypothetical protein supported by AL449243 (RGD1311310) alternative variant aSep08, mRNA. |
| <a href="#">RGD1311310</a>                          | <a href="#">RGD1311310.bSep08</a>              | <a href="#">315166</a> | 3105  | 561  | 3 | 110 | similar to hypothetical protein supported by AL449243 (RGD1311310) alternative variant bSep08, mRNA. |
| <a href="#">RGD1311343</a>                          | <a href="#">RGD1311343.bSep08</a>              | <a href="#">360506</a> | 10906 | 521  | 1 | 112 | similar to RIKEN cDNA 4930524B15 (RGD1311343) alternative variant bSep08, mRNA.                      |
| <a href="#">RGD1311344</a>                          | <a href="#">RGD1311344.aSep08</a>              | <a href="#">311486</a> | 4209  | 390  |   | 68  | similar to RIKEN cDNA 2810039F03 (RGD1311344) mRNA.                                                  |
| <a href="#">RGD1311345</a>                          | <a href="#">RGD1311345.aSep08</a>              | <a href="#">361201</a> | 7671  | 2653 | 3 | 355 | similar to CG9752-PA (RGD1311345) alternative variant aSep08, mRNA.                                  |
| <a href="#">RGD1311345</a>                          | <a href="#">RGD1311345.bSep08</a>              | <a href="#">361201</a> | 15953 | 481  | 2 | 64  | similar to CG9752-PA (RGD1311345) alternative variant bSep08, mRNA.                                  |
| <a href="#">RGD1311345</a>                          | <a href="#">RGD1311345.cSep08</a>              | <a href="#">361201</a> | 5119  | 772  | 1 | 75  | similar to CG9752-PA (8.9 kD) (RGD1311345) alternative variant cSep08, mRNA.                         |
| <a href="#">RGD1311350</a>                          | <a href="#">RGD1311350.aSep08</a>              | <a href="#">293823</a> | 22999 | 610  | 6 | 145 | similar to KIAA0367 (RGD1311350) alternative variant aSep08, mRNA.                                   |
| <a href="#">RGD1311350</a>                          | <a href="#">RGD1311350.bSep08</a>              | <a href="#">293823</a> | 23659 | 1267 | 6 | 120 | similar to KIAA0367 (RGD1311350) alternative variant bSep08, mRNA.                                   |
| <a href="#">RGD1311361</a>                          | <a href="#">RGD1311361.bSep08</a>              | <a href="#">305171</a> | 17355 | 1176 | 2 | 245 | similar to hypothetical protein (RGD1311361) alternative variant bSep08, mRNA.                       |
| <a href="#">RGD1311361</a>                          | <a href="#">RGD1311361.cSep08</a>              | <a href="#">305171</a> | 8392  | 804  | 3 | 209 | similar to hypothetical protein (RGD1311361) alternative variant cSep08, mRNA.                       |
| <a href="#">RGD1311361</a>                          | <a href="#">RGD1311361.dSep08</a>              | <a href="#">305171</a> | 19786 | 859  | 3 | 163 | similar to hypothetical protein (RGD1311361) alternative variant dSep08, mRNA.                       |
| <a href="#">RGD1311362</a>                          | <a href="#">RGD1311362.aSep08</a>              | <a href="#">362914</a> | 5841  | 990  | 3 | 114 | similar to hypothetical protein FLJ10204 (RGD1311362) alternative variant aSep08, mRNA.              |
| <a href="#">RGD1311362</a>                          | <a href="#">RGD1311362.bSep08</a>              | <a href="#">362914</a> | 5382  | 1461 | 2 | 57  | similar to hypothetical protein FLJ10204 (6.5 kD) (RGD1311362) alternative variant bSep08, mRNA.     |

|                            |                                   |                        |       |      |    |     |                                                                                                    |
|----------------------------|-----------------------------------|------------------------|-------|------|----|-----|----------------------------------------------------------------------------------------------------|
| <a href="#">RGD1311364</a> | <a href="#">RGD1311364.aSep08</a> | <a href="#">300516</a> | 15967 | 1582 | 2  | 115 | similar to RIKEN cDNA 1810021J13 (12.5 kD) (RGD1311364) alternative variant aSep08, complete mRNA. |
| <a href="#">RGD1311378</a> | <a href="#">RGD1311378.bSep08</a> | <a href="#">296408</a> | 9423  | 3454 | 2  | 131 | similar to RIKEN cDNA 2010011I20 (14.0 kD) (RGD1311378) alternative variant bSep08, mRNA.          |
| <a href="#">RGD1311422</a> | <a href="#">RGD1311422.aSep08</a> | <a href="#">287822</a> | 13985 | 1955 | 12 | 529 | similar to CG8841-PA (RGD1311422) alternative variant aSep08, mRNA.                                |
| <a href="#">RGD1311422</a> | <a href="#">RGD1311422.bSep08</a> | <a href="#">287822</a> | 7188  | 1863 | 9  | 374 | similar to CG8841-PA (RGD1311422) alternative variant bSep08, mRNA.                                |
| <a href="#">RGD1311424</a> | <a href="#">RGD1311424.bSep08</a> | <a href="#">362685</a> | 2457  | 718  | 4  | 133 | similar to hypothetical protein FLJ38348 (RGD1311424) alternative variant bSep08, mRNA.            |
| <a href="#">RGD1311424</a> | <a href="#">RGD1311424.cSep08</a> | <a href="#">362685</a> | 3663  | 705  | 4  | 91  | similar to hypothetical protein FLJ38348 (RGD1311424) alternative variant cSep08, mRNA.            |
| <a href="#">RGD1311429</a> | <a href="#">RGD1311429.aSep08</a> | <a href="#">360642</a> | 16609 | 2616 | 5  | 331 | similar to KIAA1267 protein (RGD1311429) alternative variant aSep08, mRNA.                         |
| <a href="#">RGD1311429</a> | <a href="#">RGD1311429.bSep08</a> | <a href="#">360642</a> | 14815 | 895  | 2  | 298 | similar to KIAA1267 protein (RGD1311429) alternative variant bSep08, mRNA.                         |
| <a href="#">RGD1311429</a> | <a href="#">RGD1311429.cSep08</a> | <a href="#">360642</a> | 13820 | 835  | 4  | 229 | similar to KIAA1267 protein (RGD1311429) alternative variant cSep08, mRNA.                         |
| <a href="#">RGD1311429</a> | <a href="#">RGD1311429.dSep08</a> | <a href="#">360642</a> | 3171  | 2136 | 4  | 217 | similar to KIAA1267 protein (RGD1311429) alternative variant dSep08, mRNA.                         |
| <a href="#">RGD1311433</a> | <a href="#">RGD1311433.aSep08</a> | <a href="#">287054</a> | 17542 | 1337 | 11 | 393 | CRA b (43.7 kD) (RGD1311433) alternative variant aSep08, complete mRNA.                            |
| <a href="#">RGD1311433</a> | <a href="#">RGD1311433.bSep08</a> | <a href="#">287054</a> | 14052 | 819  | 9  | 213 | CRA b (RGD1311433) alternative variant bSep08, mRNA.                                               |
| <a href="#">RGD1311433</a> | <a href="#">RGD1311433.dSep08</a> | <a href="#">287054</a> | 2181  | 673  | 2  | 76  | LP8272 (RGD1311433) alternative variant dSep08, mRNA.                                              |
| <a href="#">RGD1311435</a> | <a href="#">RGD1311435.aSep08</a> | <a href="#">362037</a> | 5152  | 1098 | 2  | 257 | similar to hypothetical protein PRO0971 (RGD1311435) alternative variant aSep08, mRNA.             |
| <a href="#">RGD1311435</a> | <a href="#">RGD1311435.bSep08</a> | <a href="#">362037</a> | 9462  | 2171 | 4  | 232 | similar to hypothetical protein PRO0971 (RGD1311435) alternative variant bSep08, mRNA.             |
| <a href="#">RGD1311435</a> | <a href="#">RGD1311435.cSep08</a> | <a href="#">362037</a> | 7760  | 370  | 3  | 123 | similar to hypothetical protein PRO0971 (RGD1311435) alternative variant cSep08, mRNA.             |
| <a href="#">RGD1311447</a> | <a href="#">RGD1311447.bSep08</a> | <a href="#">363276</a> | 1020  | 895  | 2  | 129 | LOC363276 (14.5 kD) (RGD1311447) alternative variant bSep08, mRNA.                                 |
| <a href="#">RGD1311447</a> | <a href="#">RGD1311447.cSep08</a> | <a href="#">363276</a> | 2636  | 551  | 4  | 119 | LOC363276 (12.0 kD) (RGD1311447) alternative variant cSep08, mRNA.                                 |
| <a href="#">RGD1311456</a> | <a href="#">RGD1311456.aSep08</a> | <a href="#">363089</a> | 43276 | 748  |    | 249 | similar to RIKEN cDNA B230380D07 (RGD1311456) mRNA.                                                |
| <a href="#">RGD1311463</a> | <a href="#">RGD1311463.bSep08</a> | <a href="#">311279</a> | 9076  | 890  | 5  | 259 | similar to RIKEN cDNA 2700007P21 (29.2 kD) (RGD1311463) alternative variant bSep08, mRNA.          |
| <a href="#">RGD1311463</a> | <a href="#">RGD1311463.dSep08</a> | <a href="#">311279</a> | 2630  | 419  | 2  | 135 | similar to RIKEN cDNA 2700007P21 (RGD1311463) alternative variant dSep08, mRNA.                    |
| <a href="#">RGD1311463</a> | <a href="#">RGD1311463.eSep08</a> | <a href="#">311279</a> | 9121  | 304  | 2  | 95  | similar to RIKEN cDNA 2700007P21 (RGD1311463) alternative variant eSep08, mRNA.                    |
| <a href="#">RGD1311490</a> | <a href="#">RGD1311490.bSep08</a> | <a href="#">361697</a> | 6751  | 1576 | 9  | 320 | similar to DKFZP434P1750 protein (35.3 kD) (RGD1311490) alternative variant bSep08, complete mRNA. |



|                            |                                   |                        |       |      |    |     |                                                                                                                  |
|----------------------------|-----------------------------------|------------------------|-------|------|----|-----|------------------------------------------------------------------------------------------------------------------|
| <a href="#">RGD1311490</a> | <a href="#">RGD1311490.cSep08</a> | <a href="#">361697</a> | 4399  | 656  | 6  | 218 | similar to DKFZP434P1750 protein (RGD1311490) alternative variant cSep08, mRNA.                                  |
| <a href="#">RGD1311490</a> | <a href="#">RGD1311490.fSep08</a> | <a href="#">361697</a> | 1222  | 776  | 3  | 99  | similar to DKFZP434P1750 protein (RGD1311490) alternative variant fSep08, mRNA.                                  |
| <a href="#">RGD1311493</a> | <a href="#">RGD1311493.aSep08</a> | <a href="#">287734</a> | 5690  | 3407 |    | 342 | similar to CG13379-PA (RGD1311493) mRNA.                                                                         |
| <a href="#">RGD1311501</a> | <a href="#">RGD1311501.bSep08</a> | <a href="#">296599</a> | 9309  | 2099 | 3  | 108 | putative protein of metazoan origin (RGD1311501) alternative variant bSep08, complete mRNA.                      |
| <a href="#">RGD1311517</a> | <a href="#">RGD1311517.aSep08</a> | <a href="#">313775</a> | 14092 | 692  | 7  | 146 | similar to RIKEN cDNA 9430015G10 (RGD1311517) alternative variant aSep08, mRNA.                                  |
| <a href="#">RGD1311517</a> | <a href="#">RGD1311517.bSep08</a> | <a href="#">313775</a> | 4141  | 2304 | 2  | 47  | similar to RIKEN cDNA 9430015G10 (RGD1311517) alternative variant bSep08, mRNA.                                  |
| <a href="#">RGD1311517</a> | <a href="#">RGD1311517.cSep08</a> | <a href="#">313775</a> | 18264 | 808  | 5  | 43  | similar to RIKEN cDNA 9430015G10 (4.9 kD) (RGD1311517) alternative variant cSep08, complete mRNA.                |
| <a href="#">RGD1311517</a> | <a href="#">RGD1311517.dSep08</a> | <a href="#">313775</a> | 8176  | 636  | 5  | 58  | similar to RIKEN cDNA 9430015G10 (6.2 kD) (RGD1311517) alternative variant dSep08, mRNA.                         |
| <a href="#">RGD1311519</a> | <a href="#">RGD1311519.aSep08</a> | <a href="#">311496</a> | 54379 | 276  |    | 92  | hypothetical LOC311496 (RGD1311519) mRNA.                                                                        |
| <a href="#">RGD1311558</a> | <a href="#">RGD1311558.bSep08</a> | <a href="#">292139</a> | 55512 | 741  | 8  | 236 | similar to 4930506M07Rik protein (RGD1311558) alternative variant bSep08, mRNA.                                  |
| <a href="#">RGD1311558</a> | <a href="#">RGD1311558.cSep08</a> | <a href="#">292139</a> | 30956 | 832  | 8  | 226 | similar to 4930506M07Rik protein (RGD1311558) alternative variant cSep08, mRNA.                                  |
| <a href="#">RGD1311558</a> | <a href="#">RGD1311558.dSep08</a> | <a href="#">292139</a> | 26114 | 2205 | 4  | 194 | similar to 4930506M07Rik protein (RGD1311558) alternative variant dSep08, mRNA.                                  |
| <a href="#">RGD1311563</a> | <a href="#">RGD1311563.aSep08</a> | <a href="#">363160</a> | 37450 | 3428 | 14 | 505 | similar to Oligosaccharyl transferase 3 CG7748-PA (RGD1311563) alternative variant aSep08, mRNA.                 |
| <a href="#">RGD1311563</a> | <a href="#">RGD1311563.bSep08</a> | <a href="#">363160</a> | 66960 | 3044 | 13 | 505 | similar to Oligosaccharyl transferase 3 CG7748-PA (RGD1311563) alternative variant bSep08, mRNA.                 |
| <a href="#">RGD1311564</a> | <a href="#">RGD1311564.bSep08</a> | <a href="#">360590</a> | 21077 | 356  | 3  | 52  | LOC360590 (RGD1311564) alternative variant bSep08, mRNA.                                                         |
| <a href="#">RGD1311575</a> | <a href="#">RGD1311575.aSep08</a> | <a href="#">289568</a> | 10418 | 2096 | 1  | 323 | hypothetical LOC289568 (RGD1311575) alternative variant aSep08, mRNA.                                            |
| <a href="#">RGD1311575</a> | <a href="#">RGD1311575.bSep08</a> | <a href="#">289568</a> | 3919  | 675  | 1  | 168 | hypothetical LOC289568 (18.5 kD) (RGD1311575) alternative variant bSep08, mRNA.                                  |
| <a href="#">RGD1311578</a> | <a href="#">RGD1311578.bSep08</a> | <a href="#">298748</a> | 6597  | 843  | 7  | 260 | upf0511 protein c2orf56 homolog mitochondrial (29.2 kD) (RGD1311578) alternative variant bSep08, mRNA.           |
| <a href="#">RGD1311578</a> | <a href="#">RGD1311578.cSep08</a> | <a href="#">298748</a> | 4873  | 677  | 5  | 165 | upf0511 protein c2orf56 homolog mitochondrial (RGD1311578) alternative variant cSep08, mRNA.                     |
| <a href="#">RGD1311578</a> | <a href="#">RGD1311578.dSep08</a> | <a href="#">298748</a> | 1033  | 635  | 2  | 99  | upf0511 protein c2orf56 homolog mitochondrial (11.0 kD) (RGD1311578) alternative variant dSep08, mRNA.           |
| <a href="#">RGD1311605</a> | <a href="#">RGD1311605.bSep08</a> | <a href="#">298841</a> | 1978  | 821  | 1  | 115 | similar to apoptosis related protein APR-3; p18 protein (12.4 kD) (RGD1311605) alternative variant bSep08, mRNA. |
| <a href="#">RGD1311612</a> | <a href="#">RGD1311612.aSep08</a> | <a href="#">361184</a> | 37778 | 1823 | 14 | 373 | cysteinyI-tRNA synthetase 2 (RGD1311612) alternative variant aSep08, mRNA.                                       |
| <a href="#">RGD1311612</a> | <a href="#">RGD1311612.bSep08</a> | <a href="#">361184</a> | 4932  | 1269 | 6  | 205 | cysteinyI-tRNA synthetase 2 (22.5 kD) (RGD1311612) alternative variant bSep08, mRNA.                             |
| <a href="#">RGD1311612</a> | <a href="#">RGD1311612.cSep08</a> | <a href="#">361184</a> | 7485  | 1080 | 3  | 163 | CRA d (RGD1311612) alternative variant cSep08, mRNA.                                                             |

|                            |                                   |                        |       |      |   |     |                                                                                                       |
|----------------------------|-----------------------------------|------------------------|-------|------|---|-----|-------------------------------------------------------------------------------------------------------|
| <a href="#">RGD1311612</a> | <a href="#">RGD1311612.dSep08</a> | <a href="#">361184</a> | 20600 | 576  | 6 | 114 | cysteinyI-tRNA synthetase 2 (RGD1311612) alternative variant dSep08, mRNA.                            |
| <a href="#">RGD1311612</a> | <a href="#">RGD1311612.eSep08</a> | <a href="#">361184</a> | 709   | 431  | 2 | 95  | cysteinyI-tRNA synthetase 2 (10.5 kD) (RGD1311612) alternative variant eSep08, mRNA.                  |
| <a href="#">RGD1311615</a> | <a href="#">RGD1311615.aSep08</a> | <a href="#">366531</a> | 7221  | 766  |   | 159 | similar to hypothetical protein FLJ33868 (RGD1311615) mRNA.                                           |
| <a href="#">RGD1311624</a> | <a href="#">RGD1311624.aSep08</a> | <a href="#">309001</a> | 1729  | 1288 | 3 | 429 | similar to KIAA0339 protein (RGD1311624) alternative variant aSep08, mRNA.                            |
| <a href="#">RGD1311624</a> | <a href="#">RGD1311624.bSep08</a> | <a href="#">309001</a> | 3647  | 1622 | 6 | 324 | similar to KIAA0339 protein (RGD1311624) alternative variant bSep08, mRNA.                            |
| <a href="#">RGD1311625</a> | <a href="#">RGD1311625.aSep08</a> | <a href="#">310859</a> | 7960  | 299  |   | 99  | similar to KIAA1546 protein (RGD1311625) mRNA.                                                        |
| <a href="#">RGD1311634</a> | <a href="#">RGD1311634.aSep08</a> | <a href="#">293155</a> | 3174  | 1001 | 4 | 132 | similar to RIKEN cDNA 3200002M19 (15.4 kD) (RGD1311634) alternative variant aSep08, mRNA.             |
| <a href="#">RGD1311634</a> | <a href="#">RGD1311634.bSep08</a> | <a href="#">293155</a> | 3655  | 890  | 4 | 121 | similar to RIKEN cDNA 3200002M19 (14.3 kD) (RGD1311634) alternative variant bSep08, mRNA.             |
| <a href="#">RGD1311634</a> | <a href="#">RGD1311634.cSep08</a> | <a href="#">293155</a> | 27174 | 1175 | 4 | 121 | similar to RIKEN cDNA 3200002M19 (13.9 kD) (RGD1311634) alternative variant cSep08, mRNA.             |
| <a href="#">RGD1311640</a> | <a href="#">RGD1311640.aSep08</a> | <a href="#">314787</a> | 5716  | 1090 |   | 363 | similar to Hypothetical protein KIAA0373 (RGD1311640) mRNA.                                           |
| <a href="#">RGD1311642</a> | <a href="#">RGD1311642.aSep08</a> | <a href="#">499941</a> | 3729  | 745  | 3 | 180 | similar to uncharacterized hypothalamus protein HSMNP1 (RGD1311642) alternative variant aSep08, mRNA. |
| <a href="#">RGD1311642</a> | <a href="#">RGD1311642.cSep08</a> | <a href="#">499941</a> | 2255  | 364  | 2 | 120 | similar to uncharacterized hypothalamus protein HSMNP1 (RGD1311642) alternative variant cSep08, mRNA. |
| <a href="#">RGD1311648</a> | <a href="#">RGD1311648.bSep08</a> | <a href="#">313949</a> | 56815 | 742  | 5 | 225 | similar to hypothetical protein FLJ21820 (RGD1311648) alternative variant bSep08, mRNA.               |
| <a href="#">RGD1311660</a> | <a href="#">RGD1311660.aSep08</a> | <a href="#">288518</a> | 17220 | 2266 | 8 | 330 | similar to RIKEN cDNA 1110007L15 (36.8 kD) (RGD1311660) alternative variant aSep08, mRNA.             |
| <a href="#">RGD1311660</a> | <a href="#">RGD1311660.bSep08</a> | <a href="#">288518</a> | 13941 | 750  | 6 | 247 | similar to RIKEN cDNA 1110007L15 (RGD1311660) alternative variant bSep08, mRNA.                       |
| <a href="#">RGD1311660</a> | <a href="#">RGD1311660.cSep08</a> | <a href="#">288518</a> | 800   | 681  | 1 | 73  | similar to RIKEN cDNA 1110007L15 (RGD1311660) alternative variant cSep08, mRNA.                       |
| <a href="#">RGD1311678</a> | <a href="#">RGD1311678.aSep08</a> | <a href="#">296311</a> | 45751 | 2038 | 2 | 452 | similar to 4921517L17Rik protein (RGD1311678) alternative variant aSep08, mRNA.                       |
| <a href="#">RGD1311678</a> | <a href="#">RGD1311678.bSep08</a> | <a href="#">296311</a> | 30214 | 740  | 2 | 246 | similar to 4921517L17Rik protein (RGD1311678) alternative variant bSep08, mRNA.                       |
| <a href="#">RGD1311678</a> | <a href="#">RGD1311678.cSep08</a> | <a href="#">296311</a> | 29900 | 728  | 1 | 242 | similar to 4921517L17Rik protein (RGD1311678) alternative variant cSep08, mRNA.                       |
| <a href="#">RGD1311703</a> | <a href="#">RGD1311703.aSep08</a> | <a href="#">293160</a> | 10886 | 1204 | 5 | 232 | similar to sid2057p (RGD1311703) alternative variant aSep08, mRNA.                                    |
| <a href="#">RGD1311723</a> | <a href="#">RGD1311723.aSep08</a> | <a href="#">363018</a> | 5848  | 1581 | 8 | 480 | similar to KIAA1731 protein (RGD1311723) alternative variant aSep08, mRNA.                            |
| <a href="#">RGD1311723</a> | <a href="#">RGD1311723.bSep08</a> | <a href="#">363018</a> | 866   | 332  | 3 | 81  | similar to KIAA1731 protein (9.9 kD) (RGD1311723) alternative variant bSep08, mRNA.                   |
| <a href="#">RGD1311723</a> | <a href="#">RGD1311723.dSep08</a> | <a href="#">363018</a> | 317   | 203  | 2 | 38  | similar to KIAA1731 protein (4.7 kD) (RGD1311723) alternative variant dSep08, mRNA.                   |
| <a href="#">RGD1311730</a> | <a href="#">RGD1311730.bSep08</a> | <a href="#">292811</a> | 17434 | 1399 | 9 | 465 | similar to RIKEN cDNA 2610507L03 (RGD1311730) alternative variant bSep08, mRNA.                       |

|                            |                                   |                        |       |      |   |     |                                                                                                                                 |
|----------------------------|-----------------------------------|------------------------|-------|------|---|-----|---------------------------------------------------------------------------------------------------------------------------------|
| <a href="#">RGD1311730</a> | <a href="#">RGD1311730.cSep08</a> | <a href="#">292811</a> | 23057 | 1072 | 6 | 311 | similar to RIKEN cDNA 2610507L03 (RGD1311730) alternative variant cSep08, mRNA.                                                 |
| <a href="#">RGD1311730</a> | <a href="#">RGD1311730.dSep08</a> | <a href="#">292811</a> | 3249  | 465  | 2 | 109 | similar to RIKEN cDNA 2610507L03 (RGD1311730) alternative variant dSep08, mRNA.                                                 |
| <a href="#">RGD1311730</a> | <a href="#">RGD1311730.eSep08</a> | <a href="#">292811</a> | 3158  | 398  | 1 | 44  | similar to RIKEN cDNA 2610507L03 (RGD1311730) alternative variant eSep08, mRNA.                                                 |
| <a href="#">RGD1311730</a> | <a href="#">RGD1311730.fSep08</a> | <a href="#">292811</a> | 10148 | 962  | 3 |     |                                                                                                                                 |
| <a href="#">RGD1311739</a> | <a href="#">RGD1311739.bSep08</a> | <a href="#">311428</a> | 13140 | 735  | 7 | 116 | similar to RIKEN cDNA 1700037H04 (RGD1311739) alternative variant bSep08, mRNA.                                                 |
| <a href="#">RGD1311739</a> | <a href="#">RGD1311739.cSep08</a> | <a href="#">311428</a> | 6783  | 877  | 3 | 84  | similar to RIKEN cDNA 1700037H04 (9.2 kD) (RGD1311739) alternative variant cSep08, mRNA.                                        |
| <a href="#">RGD1311739</a> | <a href="#">RGD1311739.dSep08</a> | <a href="#">311428</a> | 975   | 793  | 2 | 79  | similar to RIKEN cDNA 1700037H04 (RGD1311739) alternative variant dSep08, mRNA.                                                 |
| <a href="#">RGD1311742</a> | <a href="#">RGD1311742.bSep08</a> | <a href="#">291676</a> | 3943  | 441  | 5 | 135 | similar to RIKEN cDNA 5133400G04 (RGD1311742) alternative variant bSep08, mRNA.                                                 |
| <a href="#">RGD1311742</a> | <a href="#">RGD1311742.cSep08</a> | <a href="#">291676</a> | 6210  | 292  | 3 | 88  | similar to RIKEN cDNA 5133400G04 (RGD1311742) alternative variant cSep08, mRNA.                                                 |
| <a href="#">RGD1311744</a> | <a href="#">RGD1311744.aSep08</a> | <a href="#">300608</a> | 7152  | 736  |   | 245 | similar to RIKEN cDNA 5830475I06 (RGD1311744) mRNA.                                                                             |
| <a href="#">RGD1311747</a> | <a href="#">RGD1311747.aSep08</a> | <a href="#">290706</a> | 16492 | 1329 | 5 | 368 | similar to 2700029M09Rik protein (RGD1311747) alternative variant aSep08, mRNA.                                                 |
| <a href="#">RGD1311747</a> | <a href="#">RGD1311747.bSep08</a> | <a href="#">290706</a> | 13232 | 1078 | 3 | 335 | similar to 2700029M09Rik protein (RGD1311747) alternative variant bSep08, mRNA.                                                 |
| <a href="#">RGD1311747</a> | <a href="#">RGD1311747.cSep08</a> | <a href="#">290706</a> | 19671 | 979  | 3 | 179 | similar to 2700029M09Rik protein (20.3 kD) (RGD1311747) alternative variant cSep08, mRNA.                                       |
| <a href="#">RGD1311747</a> | <a href="#">RGD1311747.dSep08</a> | <a href="#">290706</a> | 2252  | 529  | 2 | 78  | similar to 2700029M09Rik protein (8.8 kD) (RGD1311747) alternative variant dSep08, mRNA.                                        |
| <a href="#">RGD1311756</a> | <a href="#">RGD1311756.aSep08</a> | <a href="#">362769</a> | 47514 | 982  |   | 222 | similar to hypothetical protein FLJ20950 (RGD1311756) mRNA.                                                                     |
| <a href="#">RGD1311783</a> | <a href="#">RGD1311783.bSep08</a> | <a href="#">294012</a> | 13278 | 1033 | 4 | 83  | similar to RIKEN cDNA 2010012O05 (RGD1311783) alternative variant bSep08, mRNA.                                                 |
| <a href="#">RGD1311783</a> | <a href="#">RGD1311783.cSep08</a> | <a href="#">294012</a> | 11798 | 277  | 3 | 83  | similar to RIKEN cDNA 2010012O05 (9.0 kD) (RGD1311783) alternative variant cSep08, complete mRNA.                               |
| <a href="#">RGD1311784</a> | <a href="#">RGD1311784.bSep08</a> | <a href="#">287871</a> | 14563 | 1781 | 8 | 150 | similar to p150 target of rapamycin (TOR)-scaffold protein containing WD-repeats (RGD1311784) alternative variant bSep08, mRNA. |
| <a href="#">RGD1311784</a> | <a href="#">RGD1311784.cSep08</a> | <a href="#">287871</a> | 11491 | 318  | 4 | 105 | similar to p150 target of rapamycin (TOR)-scaffold protein containing WD-repeats (RGD1311784) alternative variant cSep08, mRNA. |
| <a href="#">RGD1311805</a> | <a href="#">RGD1311805.bSep08</a> | <a href="#">291784</a> | 848   | 434  | 2 | 67  | similar to RIKEN cDNA 2400010D15 (7.7 kD) (RGD1311805) alternative variant bSep08, mRNA.                                        |
| <a href="#">RGD1311847</a> | <a href="#">RGD1311847.bSep08</a> | <a href="#">290615</a> | 10462 | 488  | 2 | 72  | similar to 1700030K09Rik protein (RGD1311847) alternative variant bSep08, mRNA.                                                 |
| <a href="#">RGD1311849</a> | <a href="#">RGD1311849.aSep08</a> | <a href="#">313346</a> | 97341 | 1477 |   | 330 | similar to mKIAA1797 protein (RGD1311849) mRNA.                                                                                 |
| <a href="#">RGD1311861</a> | <a href="#">RGD1311861.aSep08</a> | <a href="#">288042</a> | 12301 | 938  |   | 230 | similar to hypothetical protein MGC19444 (RGD1311861) mRNA.                                                                     |

|                            |                                   |                        |        |      |   |      |                                                                                                                 |
|----------------------------|-----------------------------------|------------------------|--------|------|---|------|-----------------------------------------------------------------------------------------------------------------|
| <a href="#">RGD1311870</a> | <a href="#">RGD1311870.aSep08</a> | <a href="#">298563</a> | 4658   | 400  |   | 122  | similar to RIKEN cDNA 4930549C01 (RGD1311870) mRNA.                                                             |
| <a href="#">RGD1311874</a> | <a href="#">RGD1311874.bSep08</a> | <a href="#">300751</a> | 158152 | 686  | 5 | 189  | hypothetical LOC300751 (RGD1311874) alternative variant bSep08, mRNA.                                           |
| <a href="#">RGD1311874</a> | <a href="#">RGD1311874.cSep08</a> | <a href="#">300751</a> | 8476   | 1424 | 2 | 118  | hypothetical LOC300751 (RGD1311874) alternative variant cSep08, mRNA.                                           |
| <a href="#">RGD1311893</a> | <a href="#">RGD1311893.bSep08</a> | <a href="#">288478</a> | 2044   | 422  | 2 | 113  | hypothetical LOC288478 (RGD1311893) alternative variant bSep08, mRNA.                                           |
| <a href="#">RGD1311893</a> | <a href="#">RGD1311893.cSep08</a> | <a href="#">288478</a> | 4613   | 614  | 2 | 85   | hypothetical LOC288478 (9.5 kD) (RGD1311893) alternative variant cSep08, mRNA.                                  |
| <a href="#">RGD1311899</a> | <a href="#">RGD1311899.bSep08</a> | <a href="#">288704</a> | 5575   | 1491 | 6 | 218  | similar to RIKEN cDNA 2210016L21 gene (24.0 kD) (RGD1311899) alternative variant bSep08, complete mRNA.         |
| <a href="#">RGD1311899</a> | <a href="#">RGD1311899.cSep08</a> | <a href="#">288704</a> | 3551   | 487  | 4 | 157  | similar to RIKEN cDNA 2210016L21 gene (RGD1311899) alternative variant cSep08, mRNA.                            |
| <a href="#">RGD1311899</a> | <a href="#">RGD1311899.eSep08</a> | <a href="#">288704</a> | 1143   | 962  | 2 | 56   | similar to RIKEN cDNA 2210016L21 gene (RGD1311899) alternative variant eSep08, mRNA.                            |
| <a href="#">RGD1311906</a> | <a href="#">RGD1311906.aSep08</a> | <a href="#">292746</a> | 25963  | 6820 |   | 2223 | similar to Fc fragment of IgG binding protein; IgG Fc binding protein (RGD1311906) mRNA.                        |
| <a href="#">RGD1311910</a> | <a href="#">RGD1311910.aSep08</a> | <a href="#">307235</a> | 9193   | 1361 | 5 | 387  | similar to hypothetical p38 protein (RGD1311910) alternative variant aSep08, mRNA.                              |
| <a href="#">RGD1311933</a> | <a href="#">RGD1311933.aSep08</a> | <a href="#">308056</a> | 5458   | 574  |   | 117  | similar to RIKEN cDNA 2310057J18 (13.5 kD) (RGD1311933) mRNA.                                                   |
| <a href="#">RGD1311940</a> | <a href="#">RGD1311940.bSep08</a> | <a href="#">362287</a> | 2579   | 1127 | 4 | 136  | putative protein, with a transmembrane domain, of ancient origin (RGD1311940) alternative variant bSep08, mRNA. |
| <a href="#">RGD1311940</a> | <a href="#">RGD1311940.cSep08</a> | <a href="#">362287</a> | 8493   | 412  | 4 | 108  | uncharacterized mfs-type transporter homolog like (11.9 kD) (RGD1311940) alternative variant cSep08, mRNA.      |
| <a href="#">RGD1311940</a> | <a href="#">RGD1311940.dSep08</a> | <a href="#">362287</a> | 6771   | 381  | 2 | 94   | uncharacterized mfs-type transporter homolog like (RGD1311940) alternative variant dSep08, mRNA.                |
| <a href="#">RGD1311952</a> | <a href="#">RGD1311952.aSep08</a> | <a href="#">311692</a> | 5859   | 501  | 1 | 166  | similar to Protein C20orf177 (RGD1311952) alternative variant aSep08, mRNA.                                     |
| <a href="#">RGD1311952</a> | <a href="#">RGD1311952.bSep08</a> | <a href="#">311692</a> | 5703   | 386  | 1 | 128  | similar to Protein C20orf177 (RGD1311952) alternative variant bSep08, mRNA.                                     |
| <a href="#">RGD1311993</a> | <a href="#">RGD1311993.aSep08</a> | <a href="#">315072</a> | 4869   | 776  | 6 | 228  | hypothetical LOC315072 (RGD1311993) alternative variant aSep08, mRNA.                                           |
| <a href="#">RGD1311993</a> | <a href="#">RGD1311993.bSep08</a> | <a href="#">315072</a> | 5448   | 687  | 6 | 206  | hypothetical LOC315072 (RGD1311993) alternative variant bSep08, mRNA.                                           |
| <a href="#">RGD1311993</a> | <a href="#">RGD1311993.cSep08</a> | <a href="#">315072</a> | 495    | 243  | 2 | 74   | hypothetical LOC315072 (RGD1311993) alternative variant cSep08, mRNA.                                           |
| <a href="#">RGD1312005</a> | <a href="#">RGD1312005.aSep08</a> | <a href="#">291580</a> | 14533  | 1970 | 3 | 193  | similar to DD1 (21.7 kD) (RGD1312005) alternative variant aSep08, mRNA.                                         |
| <a href="#">RGD1312005</a> | <a href="#">RGD1312005.cSep08</a> | <a href="#">291580</a> | 13145  | 662  | 4 | 151  | similar to DD1 (17.0 kD) (RGD1312005) alternative variant cSep08, complete mRNA.                                |
| <a href="#">RGD1312005</a> | <a href="#">RGD1312005.dSep08</a> | <a href="#">291580</a> | 3617   | 383  | 2 | 127  | similar to DD1 (RGD1312005) alternative variant dSep08, mRNA.                                                   |
| <a href="#">RGD1312005</a> | <a href="#">RGD1312005.eSep08</a> | <a href="#">291580</a> | 13432  | 981  | 5 | 117  | similar to DD1 (13.5 kD) (RGD1312005) alternative variant eSep08, mRNA.                                         |

|                            |                                   |                        |        |      |    |     |                                                                                                                                                                  |
|----------------------------|-----------------------------------|------------------------|--------|------|----|-----|------------------------------------------------------------------------------------------------------------------------------------------------------------------|
| <a href="#">RGD1312005</a> | <a href="#">RGD1312005.fSep08</a> | <a href="#">291580</a> | 9556   | 358  | 4  | 80  | similar to DD1 (RGD1312005) alternative variant fSep08, mRNA.                                                                                                    |
| <a href="#">RGD1312026</a> | <a href="#">RGD1312026.bSep08</a> | <a href="#">315686</a> | 98913  | 496  | 4  | 35  | similar to RIKEN cDNA C230081A13 (3.8 kD) (RGD1312026) alternative variant bSep08, mRNA.                                                                         |
| <a href="#">RGD1312038</a> | <a href="#">RGD1312038.aSep08</a> | <a href="#">362732</a> | 337396 | 2328 | 7  | 497 | similar to putative protein, with at least 6 transmembrane domains, of ancient origin (58.5 kD) (3N884) (RGD1312038) alternative variant aSep08, mRNA.           |
| <a href="#">RGD1312038</a> | <a href="#">RGD1312038.bSep08</a> | <a href="#">362732</a> | 181645 | 1039 | 2  | 235 | similar to putative protein, with at least 6 transmembrane domains, of ancient origin (58.5 kD) (3N884) (26.9 kD) (RGD1312038) alternative variant bSep08, mRNA. |
| <a href="#">RGD1359108</a> | <a href="#">RGD1359108.bSep08</a> | <a href="#">313155</a> | 2340   | 767  | 2  | 50  | similar to RIKEN cDNA 3110043O21 (RGD1359108) alternative variant bSep08, mRNA.                                                                                  |
| <a href="#">RGD1359158</a> | <a href="#">RGD1359158.bSep08</a> | <a href="#">361740</a> | 3567   | 633  | 2  | 60  | similar to RIKEN cDNA 1110059E24 (RGD1359158) alternative variant bSep08, mRNA.                                                                                  |
| <a href="#">RGD1359191</a> | <a href="#">RGD1359191.aSep08</a> | <a href="#">314462</a> | 5394   | 1699 | 1  | 290 | trna-methyltransferase TRM61 (31.6 kD) (RGD1359191) alternative variant aSep08, mRNA.                                                                            |
| <a href="#">RGD1359201</a> | <a href="#">RGD1359201.aSep08</a> | <a href="#">289595</a> | 21303  | 1790 |    | 395 | similar to nuclear transcription factor, X-box binding-like 1 (RGD1359201) alternative variant aSep08, mRNA.                                                     |
| <a href="#">RGD1359310</a> | <a href="#">RGD1359310.bSep08</a> | <a href="#">300240</a> | 9135   | 1237 | 2  | 218 | similar to RIKEN cDNA 9430023L20 (25.0 kD) (RGD1359310) alternative variant bSep08, complete mRNA.                                                               |
| <a href="#">RGD1359310</a> | <a href="#">RGD1359310.cSep08</a> | <a href="#">300240</a> | 3377   | 710  | 1  | 28  | similar to RIKEN cDNA 9430023L20 (RGD1359310) alternative variant cSep08, mRNA.                                                                                  |
| <a href="#">RGD1359310</a> | <a href="#">RGD1359310.dSep08</a> | <a href="#">300240</a> | 3244   | 390  | 2  | 58  | similar to RIKEN cDNA 9430023L20 (RGD1359310) alternative variant dSep08, mRNA.                                                                                  |
| <a href="#">RGD1359380</a> | <a href="#">RGD1359380.bSep08</a> | <a href="#">303922</a> | 20828  | 853  | 6  | 236 | similar to hypothetical protein MGC7537 (26.4 kD) (RGD1359380) alternative variant bSep08, mRNA.                                                                 |
| <a href="#">RGD1359380</a> | <a href="#">RGD1359380.cSep08</a> | <a href="#">303922</a> | 14502  | 734  | 5  | 125 | similar to hypothetical protein MGC7537 (RGD1359380) alternative variant cSep08, mRNA.                                                                           |
| <a href="#">RGD1359449</a> | <a href="#">RGD1359449.bSep08</a> | <a href="#">314959</a> | 5760   | 773  | 5  | 212 | putative protein of vertebrate origin (RGD1359449) alternative variant bSep08, mRNA.                                                                             |
| <a href="#">RGD1359449</a> | <a href="#">RGD1359449.cSep08</a> | <a href="#">314959</a> | 3584   | 761  | 6  | 163 | putative protein of vertebrate origin (RGD1359449) alternative variant cSep08, mRNA.                                                                             |
| <a href="#">RGD1359449</a> | <a href="#">RGD1359449.dSep08</a> | <a href="#">314959</a> | 1348   | 786  | 2  | 141 | putative protein, with a coiled coil domain, of mammalian origin (15.6 kD) (RGD1359449) alternative variant dSep08, mRNA.                                        |
| <a href="#">RGD1359452</a> | <a href="#">RGD1359452.bSep08</a> | <a href="#">296118</a> | 37197  | 793  | 9  | 264 | similar to hypothetical protein FLJ32800 (RGD1359452) alternative variant bSep08, mRNA.                                                                          |
| <a href="#">RGD1359452</a> | <a href="#">RGD1359452.cSep08</a> | <a href="#">296118</a> | 6537   | 700  | 5  | 208 | similar to hypothetical protein FLJ32800 (RGD1359452) alternative variant cSep08, mRNA.                                                                          |
| <a href="#">RGD1359452</a> | <a href="#">RGD1359452.dSep08</a> | <a href="#">296118</a> | 37167  | 740  | 10 | 177 | similar to hypothetical protein FLJ32800 (RGD1359452) alternative variant dSep08, mRNA.                                                                          |
| <a href="#">RGD1359460</a> | <a href="#">RGD1359460.bSep08</a> | <a href="#">289562</a> | 12431  | 957  | 1  | 255 | putative protein of ancient origin (RGD1359460) alternative variant bSep08, mRNA.                                                                                |
| <a href="#">RGD1359508</a> | <a href="#">RGD1359508.bSep08</a> | <a href="#">361941</a> | 21896  | 752  |    | 103 | similar to protein C33A12.3 (12.2 kD) (RGD1359508) alternative variant bSep08, mRNA.                                                                             |

|                            |                                   |                        |       |      |   |     |                                                                                                                |
|----------------------------|-----------------------------------|------------------------|-------|------|---|-----|----------------------------------------------------------------------------------------------------------------|
| <a href="#">RGD1359529</a> | <a href="#">RGD1359529.bSep08</a> | <a href="#">362626</a> | 3713  | 2969 | 3 | 251 | putative nuclear protein of mammalian origin (29.3 kD) (RGD1359529) alternative variant bSep08, complete mRNA. |
| <a href="#">RGD1359529</a> | <a href="#">RGD1359529.cSep08</a> | <a href="#">362626</a> | 3224  | 1151 | 5 | 227 | DNA segment Chr 4 Wayne State University 53 expressed like (RGD1359529) alternative variant cSep08, mRNA.      |
| <a href="#">RGD1359529</a> | <a href="#">RGD1359529.dSep08</a> | <a href="#">362626</a> | 2587  | 1555 | 3 | 169 | DNA segment Chr 4 Wayne State University 53 expressed like (RGD1359529) alternative variant dSep08, mRNA.      |
| <a href="#">RGD1359616</a> | <a href="#">RGD1359616.bSep08</a> | <a href="#">300782</a> | 5367  | 1014 | 4 | 163 | putative mitochondrial protein (18.8 kD) (RGD1359616) alternative variant bSep08, mRNA.                        |
| <a href="#">RGD1359616</a> | <a href="#">RGD1359616.cSep08</a> | <a href="#">300782</a> | 1033  | 587  | 2 | 132 | putative protein (RGD1359616) alternative variant cSep08, mRNA.                                                |
| <a href="#">RGD1359616</a> | <a href="#">RGD1359616.eSep08</a> | <a href="#">300782</a> | 3202  | 743  | 2 | 92  | putative protein of metazoan origin (RGD1359616) alternative variant eSep08, mRNA.                             |
| <a href="#">RGD1359634</a> | <a href="#">RGD1359634.aSep08</a> | <a href="#">315126</a> | 7551  | 1192 | 2 | 235 | similar to RIKEN cDNA 1700088E04 (RGD1359634) alternative variant aSep08, mRNA.                                |
| <a href="#">RGD1359634</a> | <a href="#">RGD1359634.cSep08</a> | <a href="#">315126</a> | 7110  | 790  | 3 | 181 | similar to RIKEN cDNA 1700088E04 (20.8 kD) (RGD1359634) alternative variant cSep08, mRNA.                      |
| <a href="#">RGD1359713</a> | <a href="#">RGD1359713.bSep08</a> | <a href="#">305340</a> | 38068 | 1783 | 1 | 440 | hypothetical RNA binding protein RGD1359713 (RGD1359713) alternative variant bSep08, mRNA.                     |
| <a href="#">RGD1359713</a> | <a href="#">RGD1359713.cSep08</a> | <a href="#">305340</a> | 30678 | 815  | 1 | 201 | hypothetical RNA binding protein RGD1359713 (RGD1359713) alternative variant cSep08, mRNA.                     |
| <a href="#">RGD1559150</a> | <a href="#">RGD1559150.bSep08</a> | <a href="#">311353</a> | 1171  | 719  | 2 | 92  | sim to KOX31-like Zfp (9.8 kD) (RGD1559150) alternative variant bSep08, mRNA.                                  |
| <a href="#">RGD1559441</a> | <a href="#">RGD1559441.aSep08</a> | <a href="#">500410</a> | 47723 | 1427 |   | 164 | similar to MIC2L1 (17.1 kD) (RGD1559441) mRNA.                                                                 |
| <a href="#">RGD1559482</a> | <a href="#">RGD1559482.aSep08</a> | <a href="#">498022</a> | 4799  | 844  | 3 | 211 | similar to immunoglobulin superfamily, member 7 (23.2 kD) (RGD1559482) alternative variant aSep08, mRNA.       |
| <a href="#">RGD1559482</a> | <a href="#">RGD1559482.bSep08</a> | <a href="#">498022</a> | 2177  | 382  | 1 | 88  | similar to immunoglobulin superfamily, member 7 (RGD1559482) alternative variant bSep08, mRNA.                 |
| <a href="#">RGD1559493</a> | <a href="#">RGD1559493.bSep08</a> | <a href="#">500516</a> | 25902 | 1950 | 5 | 402 | similar to Hypothetical protein MGC58608 (45.8 kD) (RGD1559493) alternative variant bSep08, complete mRNA.     |
| <a href="#">RGD1559493</a> | <a href="#">RGD1559493.cSep08</a> | <a href="#">500516</a> | 3664  | 724  | 1 | 172 | similar to Hypothetical protein MGC58608 (RGD1559493) alternative variant cSep08, mRNA.                        |
| <a href="#">RGD1559494</a> | <a href="#">RGD1559494.aSep08</a> | <a href="#">499535</a> | 6918  | 452  | 3 | 93  | RGD1559494 (RGD1559494) alternative variant aSep08, mRNA.                                                      |
| <a href="#">RGD1559494</a> | <a href="#">RGD1559494.bSep08</a> | <a href="#">499535</a> | 6871  | 1673 | 3 | 31  | RGD1559494 (3.6 kD) (RGD1559494) alternative variant bSep08, mRNA.                                             |
| <a href="#">RGD1559494</a> | <a href="#">RGD1559494.cSep08</a> | <a href="#">499535</a> | 5684  | 955  | 2 | 31  | RGD1559494 (3.6 kD) (RGD1559494) alternative variant cSep08, mRNA.                                             |
| <a href="#">RGD1559496</a> | <a href="#">RGD1559496.bSep08</a> | <a href="#">292101</a> | 4176  | 1171 | 3 | 390 | similar to hypothetical protein (RGD1559496) alternative variant bSep08, mRNA.                                 |
| <a href="#">RGD1559496</a> | <a href="#">RGD1559496.cSep08</a> | <a href="#">292101</a> | 3473  | 716  | 3 | 161 | similar to hypothetical protein (RGD1559496) alternative variant cSep08, mRNA.                                 |
| <a href="#">RGD1559497</a> | <a href="#">RGD1559497.aSep08</a> | <a href="#">303684</a> | 11668 | 1194 | 1 | 256 | similar to tripartite motif-containing 65 (28.5 kD) (RGD1559497) alternative variant aSep08, mRNA.             |
| <a href="#">RGD1559497</a> | <a href="#">RGD1559497.bSep08</a> | <a href="#">303684</a> | 3178  | 397  | 2 | 131 | similar to tripartite motif-containing 65 (RGD1559497) alternative variant bSep08, mRNA.                       |

|                                         |                                                |                        |        |      |   |     |                                                                                                                                              |
|-----------------------------------------|------------------------------------------------|------------------------|--------|------|---|-----|----------------------------------------------------------------------------------------------------------------------------------------------|
| <a href="#">RGD1559530</a>              | <a href="#">RGD1559530.aSep08</a>              | <a href="#">308653</a> | 6740   | 364  |   | 108 | similar to nuclear RNA export factor 2 (RGD1559530) mRNA.                                                                                    |
| <a href="#">RGD1559536</a>              | <a href="#">RGD1559536.aSep08</a>              | <a href="#">498855</a> | 3373   | 353  |   | 113 | similar to vitellogenin-like 1 precursor (RGD1559536) mRNA.                                                                                  |
| <a href="#">RGD1559548</a>              | <a href="#">RGD1559548.aSep08</a>              | <a href="#">501199</a> | 296856 | 2322 |   | 617 | similar to Tes13-L (71.9 kD) (RGD1559548) mRNA.                                                                                              |
| <a href="#">RGD1559575</a>              | <a href="#">RGD1559575.aSep08</a>              | <a href="#">287231</a> | 15350  | 1540 |   | 401 | similar to novel protein (RGD1559575) mRNA.                                                                                                  |
| <a href="#">RGD1559586</a>              | <a href="#">RGD1559586.aSep08</a>              | <a href="#">502112</a> | 3631   | 838  |   | 66  | similar to cathepsin Q2 (RGD1559586) mRNA.                                                                                                   |
| <a href="#">RGD1559599</a>              | <a href="#">RGD1559599.aSep08</a>              | <a href="#">317624</a> | 997    | 359  |   | 96  | putative protein of vertebrate origin (RGD1559599) mRNA.                                                                                     |
| <a href="#">RGD1559600</a>              | <a href="#">RGD1559600.aSep08</a>              | <a href="#">499256</a> | 12307  | 1120 | 1 | 169 | RGD1559600 (RGD1559600) alternative variant aSep08, mRNA.                                                                                    |
| <a href="#">RGD1559604</a>              | <a href="#">RGD1559604.aSep08</a>              | <a href="#">498790</a> | 10502  | 1207 |   | 323 | similar to protein RAKd (37.0 kD) (RGD1559604) mRNA.                                                                                         |
| <a href="#">RGD1559610</a>              | <a href="#">RGD1559610.bSep08</a>              | <a href="#">313581</a> | 1330   | 637  | 1 | 29  | similar to CGI-94 protein (RGD1559610) alternative variant bSep08, mRNA.                                                                     |
| <a href="#">RGD1559613</a>              | <a href="#">RGD1559613.bSep08</a>              | <a href="#">499067</a> | 17993  | 671  | 1 | 109 | RGD1559613 (12.3 kD) (RGD1559613) alternative variant bSep08, mRNA.                                                                          |
| <a href="#">RGD1559640andRGD1562674</a> | <a href="#">RGD1559640andRGD1562674.aSep08</a> | <a href="#">288691</a> | 303310 | 1798 | 6 | 553 | kinase suppressor of ras 2 CRA a (RGD1559640andRGD1562674) alternative variant aSep08, mRNA.                                                 |
| <a href="#">RGD1559640andRGD1562674</a> | <a href="#">RGD1559640andRGD1562674.aSep08</a> | <a href="#">501840</a> | 303310 | 1798 | 6 | 553 | kinase suppressor of ras 2 CRA a (RGD1559640andRGD1562674) alternative variant aSep08, mRNA.                                                 |
| <a href="#">RGD1559643</a>              | <a href="#">RGD1559643.bSep08</a>              | <a href="#">498100</a> | 42086  | 326  | 1 | 52  | similar to hypothetical protein A430031N04 (RGD1559643) alternative variant bSep08, mRNA.                                                    |
| <a href="#">RGD1559651</a>              | <a href="#">RGD1559651.aSep08</a>              | <a href="#">500637</a> | 18520  | 609  |   | 175 | similar to Ab2-162 (RGD1559651) mRNA.                                                                                                        |
| <a href="#">RGD1559683</a>              | <a href="#">RGD1559683.bSep08</a>              | <a href="#">500620</a> | 10941  | 751  | 1 | 56  | similar to RIKEN cDNA 1700001C02 (RGD1559683) alternative variant bSep08, mRNA.                                                              |
| <a href="#">RGD1559695</a>              | <a href="#">RGD1559695.aSep08</a>              | <a href="#">500889</a> | 4123   | 643  |   | 213 | similar to FLJ43860 protein (RGD1559695) mRNA.                                                                                               |
| <a href="#">RGD1559696</a>              | <a href="#">RGD1559696.aSep08</a>              | <a href="#">289309</a> | 9923   | 730  |   | 243 | similar to kinesin-like protein (103.5 kD) (klp-6) (RGD1559696) mRNA.                                                                        |
| <a href="#">RGD1559709</a>              | <a href="#">RGD1559709.aSep08</a>              | <a href="#">360615</a> | 1573   | 729  |   | 92  | similar to F-box protein 47 (RGD1559709) mRNA.                                                                                               |
| <a href="#">RGD1559710</a>              | <a href="#">RGD1559710.aSep08</a>              | <a href="#">288386</a> | 4325   | 387  |   | 129 | similar to DC-SIGN (RGD1559710) mRNA.                                                                                                        |
| <a href="#">RGD1559732</a>              | <a href="#">RGD1559732.aSep08</a>              | <a href="#">497912</a> | 1008   | 489  |   | 93  | similar to butyrophilin related 1 (10.7 kD) (RGD1559732) mRNA.                                                                               |
| <a href="#">RGD1559747</a>              | <a href="#">RGD1559747.bSep08</a>              | <a href="#">312310</a> | 1708   | 494  | 2 | 103 | zinc finger, C2H2-type (RGD1559747) alternative variant bSep08, mRNA.                                                                        |
| <a href="#">RGD1559748</a>              | <a href="#">RGD1559748.bSep08</a>              | <a href="#">311559</a> | 1486   | 614  | 1 | 35  | similar to Palate lung and nasal carcinoma-like protein precursor (Tongue plunc-like protein) (RGD1559748) alternative variant bSep08, mRNA. |
| <a href="#">RGD1559786</a>              | <a href="#">RGD1559786.bSep08</a>              | <a href="#">298384</a> | 2534   | 387  | 5 | 92  | similar to RIKEN cDNA 0610037L13 (10.4 kD) (RGD1559786) alternative variant bSep08, mRNA.                                                    |
| <a href="#">RGD1559811</a>              | <a href="#">RGD1559811.aSep08</a>              | <a href="#">498657</a> | 4156   | 1869 |   | 223 | similar to RIKEN cDNA 1700112P19 (27.6 kD) (RGD1559811) mRNA.                                                                                |
| <a href="#">RGD1559812</a>              | <a href="#">RGD1559812.bSep08</a>              | <a href="#">297832</a> | 45278  | 384  | 1 | 120 | similar to contactin associated protein-like 5 isoform 1 (RGD1559812) alternative variant bSep08, mRNA.                                      |
| <a href="#">RGD1559841</a>              | <a href="#">RGD1559841.aSep08</a>              | <a href="#">307816</a> | 139946 | 1515 | 4 | 318 | similar to expressed sequence AW413431 (RGD1559841) alternative variant aSep08, mRNA.                                                        |

|                                           |                                                 |                        |       |      |    |     |                                                                                                        |
|-------------------------------------------|-------------------------------------------------|------------------------|-------|------|----|-----|--------------------------------------------------------------------------------------------------------|
| <a href="#">RGD1559841</a>                | <a href="#">RGD1559841.bSep08</a>               | <a href="#">307816</a> | 43589 | 618  | 3  | 205 | similar to expressed sequence AW413431 (RGD1559841) alternative variant bSep08, mRNA.                  |
| <a href="#">RGD1559856</a>                | <a href="#">RGD1559856.aSep08</a>               | <a href="#">291618</a> | 89086 | 1103 |    | 178 | CRA a (19.9 kD) (RGD1559856) complete mRNA.                                                            |
| <a href="#">RGD1559859</a>                | <a href="#">RGD1559859.aSep08</a>               | <a href="#">363244</a> | 9891  | 688  |    | 130 | RGD1559859 (RGD1559859) mRNA.                                                                          |
| <a href="#">RGD1559862</a>                | <a href="#">RGD1559862.aSep08</a>               | <a href="#">499189</a> | 20162 | 720  |    | 239 | similar to hypothetical protein from EUROIMAGE 384293 (RGD1559862) mRNA.                               |
| <a href="#">RGD1559864</a>                | <a href="#">RGD1559864.aSep08</a>               | <a href="#">500446</a> | 7766  | 3037 | 4  | 337 | similar to mKIAA1045 protein (RGD1559864) alternative variant aSep08, mRNA.                            |
| <a href="#">RGD1559864</a>                | <a href="#">RGD1559864.bSep08</a>               | <a href="#">500446</a> | 1205  | 563  | 1  | 67  | similar to mKIAA1045 protein (RGD1559864) alternative variant bSep08, mRNA.                            |
| <a href="#">RGD1559871</a>                | <a href="#">RGD1559871.aSep08</a>               | <a href="#">500135</a> | 24542 | 1233 |    | 410 | similar to Glycyl-tRNA synthetase (RGD1559871) mRNA.                                                   |
| <a href="#">RGD1559875</a>                | <a href="#">RGD1559875.aSep08</a>               | <a href="#">497970</a> | 4757  | 766  |    | 232 | similar to novel protein (RGD1559875) mRNA.                                                            |
| <a href="#">RGD1559879</a>                | <a href="#">RGD1559879.aSep08</a>               | <a href="#">309854</a> | 12018 | 527  |    | 175 | adenylate kinase (RGD1559879) mRNA.                                                                    |
| <a href="#">RGD1559888and<br/>dPlxdc2</a> | <a href="#">RGD1559888andPlxdc2<br/>.bSep08</a> | <a href="#">361282</a> | 65640 | 575  | 6  | 191 | similar to apical early endosomal glycoprotein (RGD1559888andPlxdc2) alternative variant bSep08, mRNA. |
| <a href="#">RGD1559888and<br/>dPlxdc2</a> | <a href="#">RGD1559888andPlxdc2<br/>.bSep08</a> | <a href="#">502147</a> | 65640 | 575  | 6  | 191 | similar to apical early endosomal glycoprotein (RGD1559888andPlxdc2) alternative variant bSep08, mRNA. |
| <a href="#">RGD1559904</a>                | <a href="#">RGD1559904.bSep08</a>               | <a href="#">313061</a> | 32859 | 1942 | 6  | 610 | CRA b (RGD1559904) alternative variant bSep08, mRNA.                                                   |
| <a href="#">RGD1559904</a>                | <a href="#">RGD1559904.cSep08</a>               | <a href="#">313061</a> | 5285  | 1384 | 4  | 256 | CRA b (RGD1559904) alternative variant cSep08, mRNA.                                                   |
| <a href="#">RGD1559904</a>                | <a href="#">RGD1559904.dSep08</a>               | <a href="#">313061</a> | 63665 | 651  | 5  | 181 | CRA b (RGD1559904) alternative variant dSep08, mRNA.                                                   |
| <a href="#">RGD1559904</a>                | <a href="#">RGD1559904.eSep08</a>               | <a href="#">313061</a> | 2017  | 1279 | 2  | 87  | putative protein of mammalian origin (RGD1559904) alternative variant eSep08, mRNA.                    |
| <a href="#">RGD1559904</a>                | <a href="#">RGD1559904.fSep08</a>               | <a href="#">313061</a> | 1879  | 264  | 2  | 65  | CRA b (RGD1559904) alternative variant fSep08, mRNA.                                                   |
| <a href="#">RGD1559909</a>                | <a href="#">RGD1559909.aSep08</a>               | <a href="#">362592</a> | 1343  | 872  | 2  | 265 | RGD1559909 (RGD1559909) alternative variant aSep08, mRNA.                                              |
| <a href="#">RGD1559909</a>                | <a href="#">RGD1559909.bSep08</a>               | <a href="#">362592</a> | 817   | 565  | 1  | 166 | RGD1559909 (RGD1559909) alternative variant bSep08, mRNA.                                              |
| <a href="#">RGD1559923</a>                | <a href="#">RGD1559923.bSep08</a>               | <a href="#">498489</a> | 16059 | 589  | 2  | 104 | N-acetyltransferase 12 (12.0 kD) (RGD1559923) alternative variant bSep08, mRNA.                        |
| <a href="#">RGD1559930</a>                | <a href="#">RGD1559930.aSep08</a>               | <a href="#">296115</a> | 19764 | 5183 | 9  | 628 | similar to mKIAA0256 protein (RGD1559930) alternative variant aSep08, mRNA.                            |
| <a href="#">RGD1559930</a>                | <a href="#">RGD1559930.bSep08</a>               | <a href="#">296115</a> | 7300  | 616  | 5  | 205 | similar to mKIAA0256 protein (RGD1559930) alternative variant bSep08, mRNA.                            |
| <a href="#">RGD1559933</a>                | <a href="#">RGD1559933.aSep08</a>               | <a href="#">498584</a> | 6965  | 471  |    | 122 | RGD1559933 (RGD1559933) mRNA.                                                                          |
| <a href="#">RGD1559942</a>                | <a href="#">RGD1559942.bSep08</a>               | <a href="#">363782</a> | 18054 | 781  | 1  | 226 | similar to hypothetical protein (RGD1559942) alternative variant bSep08, mRNA.                         |
| <a href="#">RGD1559954</a>                | <a href="#">RGD1559954.aSep08</a>               | <a href="#">304353</a> | 7110  | 698  |    | 232 | similar to family with sequence similarity 55, member C (RGD1559954) mRNA.                             |
| <a href="#">RGD1559958</a>                | <a href="#">RGD1559958.aSep08</a>               | <a href="#">362058</a> | 10947 | 1344 |    | 189 | similar to RIKEN cDNA C030011O14 gene (RGD1559958) mRNA.                                               |
| <a href="#">RGD1559961</a>                | <a href="#">RGD1559961.aSep08</a>               | <a href="#">497974</a> | 13935 | 1207 | 11 | 294 | similar to novel protein (RGD1559961) alternative variant aSep08, mRNA.                                |
| <a href="#">RGD1559961</a>                | <a href="#">RGD1559961.bSep08</a>               | <a href="#">497974</a> | 4146  | 421  | 2  | 116 | similar to novel protein (RGD1559961) alternative variant bSep08, mRNA.                                |



|                                      |                                             |                        |        |      |   |     |                                                                                                                    |
|--------------------------------------|---------------------------------------------|------------------------|--------|------|---|-----|--------------------------------------------------------------------------------------------------------------------|
| <a href="#">RGD1559961</a>           | <a href="#">RGD1559961.cSep08</a>           | <a href="#">497974</a> | 1540   | 421  | 2 | 45  | similar to novel protein (RGD1559961) alternative variant cSep08, mRNA.                                            |
| <a href="#">RGD1559980</a>           | <a href="#">RGD1559980.aSep08</a>           | <a href="#">499158</a> | 3900   | 363  |   | 72  | RGD1559980 (RGD1559980) mRNA.                                                                                      |
| <a href="#">RGD1559984</a>           | <a href="#">RGD1559984.aSep08</a>           | <a href="#">499399</a> | 5454   | 423  |   | 140 | RGD1559984 (RGD1559984) mRNA.                                                                                      |
| <a href="#">RGD1559998</a>           | <a href="#">RGD1559998.aSep08</a>           | <a href="#">287131</a> | 1066   | 710  |   | 112 | similar to centrosomal protein 2 (RGD1559998) mRNA.                                                                |
| <a href="#">RGD1560011</a>           | <a href="#">RGD1560011.aSep08</a>           | <a href="#">315732</a> | 309706 | 2951 | 4 | 895 | similar to Nuclear membrane binding protein NUCLING (RGD1560011) alternative variant aSep08, mRNA.                 |
| <a href="#">RGD1560020_predicted</a> | <a href="#">RGD1560020_predicted.aSep08</a> | <a href="#">498982</a> | 22076  | 2144 | 9 | 379 | similar to Myb proto-oncogene protein (C-myb) (predicted) (RGD1560020_predicted) alternative variant aSep08, mRNA. |
| <a href="#">RGD1560020_predicted</a> | <a href="#">RGD1560020_predicted.bSep08</a> | <a href="#">498982</a> | 8452   | 763  | 7 | 134 | similar to Myb proto-oncogene protein (C-myb) (predicted) (RGD1560020_predicted) alternative variant bSep08, mRNA. |
| <a href="#">RGD1560020_predicted</a> | <a href="#">RGD1560020_predicted.dSep08</a> | <a href="#">498982</a> | 1409   | 563  | 2 | 27  | similar to Myb proto-oncogene protein (C-myb) (predicted) (RGD1560020_predicted) alternative variant dSep08, mRNA. |
| <a href="#">RGD1560065</a>           | <a href="#">RGD1560065.aSep08</a>           | <a href="#">499724</a> | 6603   | 1518 | 3 | 184 | similar to RIKEN cDNA 2410004B18 (RGD1560065) alternative variant aSep08, mRNA.                                    |
| <a href="#">RGD1560065</a>           | <a href="#">RGD1560065.bSep08</a>           | <a href="#">499724</a> | 5506   | 738  | 3 | 83  | similar to RIKEN cDNA 2410004B18 (10.2 kD) (RGD1560065) alternative variant bSep08, mRNA.                          |
| <a href="#">RGD1560070</a>           | <a href="#">RGD1560070.bSep08</a>           | <a href="#">287847</a> | 14412  | 668  | 9 | 181 | similar to ataxin 2-binding protein 1 isoform 2 (RGD1560070) alternative variant bSep08, mRNA.                     |
| <a href="#">RGD1560070</a>           | <a href="#">RGD1560070.eSep08</a>           | <a href="#">287847</a> | 9969   | 484  | 2 | 51  | similar to ataxin 2-binding protein 1 isoform 2 (5.3 kD) (RGD1560070) alternative variant eSep08, mRNA.            |
| <a href="#">RGD1560071</a>           | <a href="#">RGD1560071.aSep08</a>           | <a href="#">498691</a> | 4582   | 1307 |   | 330 | similar to Cathepsin L-like (36.8 kD) (RGD1560071) mRNA.                                                           |
| <a href="#">RGD1560112</a>           | <a href="#">RGD1560112.aSep08</a>           | <a href="#">363044</a> | 3623   | 531  |   | 106 | similar to Urinary protein 2 precursor (RUP-2) (RGD1560112) mRNA.                                                  |
| <a href="#">RGD1560125</a>           | <a href="#">RGD1560125.aSep08</a>           | <a href="#">360825</a> | 6399   | 523  |   | 173 | similar to OTTHUMP00000028561 (RGD1560125) mRNA.                                                                   |
| <a href="#">RGD1560137</a>           | <a href="#">RGD1560137.aSep08</a>           | <a href="#">290372</a> | 11575  | 554  | 3 | 123 | similar to expressed sequence AU021034 (14.2 kD) (RGD1560137) alternative variant aSep08, mRNA.                    |
| <a href="#">RGD1560151</a>           | <a href="#">RGD1560151.aSep08</a>           | <a href="#">501105</a> | 10075  | 983  | 2 | 153 | similar to predicted CDS, mechanosensory transduction channel NOMPC (1O503) (RGD1560151) mRNA.                     |
| <a href="#">RGD1560155</a>           | <a href="#">RGD1560155.bSep08</a>           | <a href="#">307067</a> | 254727 | 774  | 5 | 208 | similar to mKIAA0934 protein (23.2 kD) (RGD1560155) alternative variant bSep08, mRNA.                              |
| <a href="#">RGD1560155</a>           | <a href="#">RGD1560155.cSep08</a>           | <a href="#">307067</a> | 358131 | 419  | 3 | 103 | similar to mKIAA0934 protein (RGD1560155) alternative variant cSep08, mRNA.                                        |
| <a href="#">RGD1560174</a>           | <a href="#">RGD1560174.aSep08</a>           | <a href="#">501051</a> | 1861   | 508  |   | 164 | similar to IQ motif containing F4 (RGD1560174) mRNA.                                                               |
| <a href="#">RGD1560175</a>           | <a href="#">RGD1560175.aSep08</a>           | <a href="#">303946</a> | 3091   | 405  | 2 | 135 | similar to hypothetical protein KIAA2018 (RGD1560175) alternative variant aSep08, mRNA.                            |
| <a href="#">RGD1560182</a>           | <a href="#">RGD1560182.aSep08</a>           | <a href="#">362480</a> | 22122  | 640  |   | 126 | similar to lipoxygenase homology domains 1 (RGD1560182) mRNA.                                                      |
| <a href="#">RGD1560187</a>           | <a href="#">RGD1560187.aSep08</a>           | <a href="#">362641</a> | 26333  | 600  | 5 | 116 | similar to Hypothetical UPF0327 protein (12.7 kD) (RGD1560187) alternative variant aSep08, mRNA.                   |
| <a href="#">RGD1560187</a>           | <a href="#">RGD1560187.bSep08</a>           | <a href="#">362641</a> | 1620   | 860  | 2 | 99  | similar to Hypothetical UPF0327 protein (RGD1560187) alternative variant bSep08, mRNA.                             |

|                            |                                   |                        |       |      |    |     |                                                                                                          |
|----------------------------|-----------------------------------|------------------------|-------|------|----|-----|----------------------------------------------------------------------------------------------------------|
| <a href="#">RGD1560187</a> | <a href="#">RGD1560187.cSep08</a> | <a href="#">362641</a> | 26274 | 504  | 4  | 76  | similar to Hypothetical UPF0327 protein (8.5 kD) (RGD1560187) alternative variant cSep08, complete mRNA. |
| <a href="#">RGD1560187</a> | <a href="#">RGD1560187.dSep08</a> | <a href="#">362641</a> | 2486  | 714  | 3  | 48  | similar to Hypothetical UPF0327 protein (5.6 kD) (RGD1560187) alternative variant dSep08, mRNA.          |
| <a href="#">RGD1560205</a> | <a href="#">RGD1560205.aSep08</a> | <a href="#">310548</a> | 30063 | 948  |    | 131 | similar to hypothetical protein MGC27016 (RGD1560205) mRNA.                                              |
| <a href="#">RGD1560210</a> | <a href="#">RGD1560210.aSep08</a> | <a href="#">295622</a> | 8428  | 351  |    | 95  | RGD1560210 (10.9 kD) (RGD1560210) mRNA.                                                                  |
| <a href="#">RGD1560212</a> | <a href="#">RGD1560212.aSep08</a> | <a href="#">498890</a> | 6392  | 1537 | 3  | 309 | N-acetyltransferase ARD1 (RGD1560212) alternative variant aSep08, mRNA.                                  |
| <a href="#">RGD1560212</a> | <a href="#">RGD1560212.bSep08</a> | <a href="#">498890</a> | 15784 | 1271 | 6  | 220 | N-acetyltransferase ARD1 (25.8 kD) (RGD1560212) alternative variant bSep08, complete mRNA.               |
| <a href="#">RGD1560212</a> | <a href="#">RGD1560212.cSep08</a> | <a href="#">498890</a> | 15774 | 719  | 4  | 142 | thioredoxin-like 4A (16.8 kD) (RGD1560212) alternative variant cSep08, complete mRNA.                    |
| <a href="#">RGD1560212</a> | <a href="#">RGD1560212.dSep08</a> | <a href="#">498890</a> | 15764 | 716  | 4  | 142 | thioredoxin-like 4A (16.8 kD) (RGD1560212) alternative variant dSep08, complete mRNA.                    |
| <a href="#">RGD1560212</a> | <a href="#">RGD1560212.eSep08</a> | <a href="#">498890</a> | 714   | 629  | 2  | 129 | N-acetyltransferase ARD1 (RGD1560212) alternative variant eSep08, mRNA.                                  |
| <a href="#">RGD1560212</a> | <a href="#">RGD1560212.fSep08</a> | <a href="#">498890</a> | 6004  | 1225 | 4  | 112 | putative protein (RGD1560212) alternative variant fSep08, mRNA.                                          |
| <a href="#">RGD1560212</a> | <a href="#">RGD1560212.hSep08</a> | <a href="#">498890</a> | 5467  | 739  | 4  | 101 | putative protein (RGD1560212) alternative variant hSep08, mRNA.                                          |
| <a href="#">RGD1560212</a> | <a href="#">RGD1560212.iSep08</a> | <a href="#">498890</a> | 5491  | 705  | 4  | 100 | putative protein (RGD1560212) alternative variant iSep08, mRNA.                                          |
| <a href="#">RGD1560212</a> | <a href="#">RGD1560212.jSep08</a> | <a href="#">498890</a> | 15738 | 752  | 5  | 98  | putative protein (RGD1560212) alternative variant jSep08, mRNA.                                          |
| <a href="#">RGD1560213</a> | <a href="#">RGD1560213.aSep08</a> | <a href="#">498189</a> | 25719 | 760  |    | 253 | similar to RIKEN cDNA 1500001A10 (RGD1560213) mRNA.                                                      |
| <a href="#">RGD1560214</a> | <a href="#">RGD1560214.aSep08</a> | <a href="#">498026</a> | 889   | 679  | 2  | 150 | similar to mKIAA1783 protein (RGD1560214) alternative variant aSep08, mRNA.                              |
| <a href="#">RGD1560214</a> | <a href="#">RGD1560214.bSep08</a> | <a href="#">498026</a> | 714   | 399  | 3  | 133 | similar to mKIAA1783 protein (RGD1560214) alternative variant bSep08, mRNA.                              |
| <a href="#">RGD1560220</a> | <a href="#">RGD1560220.aSep08</a> | <a href="#">502525</a> | 4385  | 579  | 4  | 154 | similar to homolog of yeast TIM14 isoform c (RGD1560220) alternative variant aSep08, mRNA.               |
| <a href="#">RGD1560221</a> | <a href="#">RGD1560221.aSep08</a> | <a href="#">498780</a> | 4672  | 815  |    | 224 | similar to serine/threonine kinase (RGD1560221) mRNA.                                                    |
| <a href="#">RGD1560244</a> | <a href="#">RGD1560244.aSep08</a> | <a href="#">302996</a> | 3898  | 1561 | 12 | 224 | similar to hypothetical protein FLJ34512 (25.6 kD) (RGD1560244) alternative variant aSep08, mRNA.        |
| <a href="#">RGD1560244</a> | <a href="#">RGD1560244.bSep08</a> | <a href="#">302996</a> | 1268  | 508  | 4  | 132 | similar to hypothetical protein FLJ34512 (RGD1560244) alternative variant bSep08, mRNA.                  |
| <a href="#">RGD1560248</a> | <a href="#">RGD1560248.aSep08</a> | <a href="#">499797</a> | 18579 | 1664 | 10 | 446 | similar to formin-like 2 isoform B (RGD1560248) alternative variant aSep08, mRNA.                        |
| <a href="#">RGD1560248</a> | <a href="#">RGD1560248.bSep08</a> | <a href="#">499797</a> | 7967  | 2263 | 3  | 101 | similar to formin-like 2 isoform B (RGD1560248) alternative variant bSep08, mRNA.                        |
| <a href="#">RGD1560248</a> | <a href="#">RGD1560248.cSep08</a> | <a href="#">499797</a> | 5886  | 707  | 3  | 78  | similar to formin-like 2 isoform B (RGD1560248) alternative variant cSep08, mRNA.                        |
| <a href="#">RGD1560248</a> | <a href="#">RGD1560248.dSep08</a> | <a href="#">499797</a> | 5306  | 581  | 3  | 46  | similar to formin-like 2 isoform B (RGD1560248) alternative variant dSep08, mRNA.                        |

|                                      |                                             |                        |       |      |   |     |                                                                                                                                                            |
|--------------------------------------|---------------------------------------------|------------------------|-------|------|---|-----|------------------------------------------------------------------------------------------------------------------------------------------------------------|
| <a href="#">RGD1560257</a>           | <a href="#">RGD1560257.aSep08</a>           | <a href="#">499923</a> | 10084 | 757  |   | 252 | similar to hypothetical protein A630008I04 (RGD1560257) mRNA.                                                                                              |
| <a href="#">RGD1560269</a>           | <a href="#">RGD1560269.aSep08</a>           | <a href="#">289369</a> | 35324 | 420  |   | 139 | similar to usherin isoform B (RGD1560269) mRNA.                                                                                                            |
| <a href="#">RGD1560271</a>           | <a href="#">RGD1560271.bSep08</a>           | <a href="#">501097</a> | 16878 | 1539 | 3 | 247 | similar to inhibitor of MyoD family-a (25.2 kD) (RGD1560271) alternative variant bSep08, complete mRNA.                                                    |
| <a href="#">RGD1560271</a>           | <a href="#">RGD1560271.cSep08</a>           | <a href="#">501097</a> | 5143  | 763  | 1 | 110 | similar to inhibitor of MyoD family-a (RGD1560271) alternative variant cSep08, mRNA.                                                                       |
| <a href="#">RGD1560273</a>           | <a href="#">RGD1560273.aSep08</a>           | <a href="#">498405</a> | 8107  | 1101 | 4 | 121 | putative protein (12.9 kD) (RGD1560273) alternative variant aSep08, mRNA.                                                                                  |
| <a href="#">RGD1560273</a>           | <a href="#">RGD1560273.bSep08</a>           | <a href="#">498405</a> | 1967  | 531  | 2 | 47  | putative protein (RGD1560273) alternative variant bSep08, mRNA.                                                                                            |
| <a href="#">RGD1560286</a>           | <a href="#">RGD1560286.cSep08</a>           | <a href="#">500575</a> | 4528  | 501  | 3 | 133 | similar to DNA segment, Chr 4, ERATO Doi 22, expressed (RGD1560286) alternative variant cSep08, mRNA.                                                      |
| <a href="#">RGD1560286</a>           | <a href="#">RGD1560286.dSep08</a>           | <a href="#">500575</a> | 4436  | 515  | 4 | 117 | similar to DNA segment, Chr 4, ERATO Doi 22, expressed (RGD1560286) alternative variant dSep08, mRNA.                                                      |
| <a href="#">RGD1560286</a>           | <a href="#">RGD1560286.eSep08</a>           | <a href="#">500575</a> | 24478 | 3337 | 5 | 107 | similar to DNA segment, Chr 4, ERATO Doi 22, expressed (RGD1560286) alternative variant eSep08, mRNA.                                                      |
| <a href="#">RGD1560286</a>           | <a href="#">RGD1560286.fSep08</a>           | <a href="#">500575</a> | 21937 | 391  | 2 | 48  | similar to DNA segment, Chr 4, ERATO Doi 22, expressed (5.5 kD) (RGD1560286) alternative variant fSep08, mRNA.                                             |
| <a href="#">RGD1560289</a>           | <a href="#">RGD1560289.bSep08</a>           | <a href="#">500258</a> | 6706  | 978  | 6 | 325 | putative protein of mammalian origin (RGD1560289) alternative variant bSep08, mRNA.                                                                        |
| <a href="#">RGD1560289</a>           | <a href="#">RGD1560289.cSep08</a>           | <a href="#">500258</a> | 11237 | 754  | 5 | 251 | putative protein of metazoan origin (RGD1560289) alternative variant cSep08, mRNA.                                                                         |
| <a href="#">RGD1560300</a>           | <a href="#">RGD1560300.bSep08</a>           | <a href="#">499360</a> | 11918 | 3888 | 6 | 150 | CRA b (RGD1560300) alternative variant bSep08, mRNA.                                                                                                       |
| <a href="#">RGD1560314</a>           | <a href="#">RGD1560314.aSep08</a>           | <a href="#">362846</a> | 5806  | 1690 |   | 266 | RGD1560314 (RGD1560314) mRNA.                                                                                                                              |
| <a href="#">RGD1560328</a>           | <a href="#">RGD1560328.aSep08</a>           | <a href="#">499317</a> | 3808  | 388  | 4 | 91  | similar to UPF0197 protein C11orf10 homolog (RGD1560328) alternative variant aSep08, mRNA.                                                                 |
| <a href="#">RGD1560364</a>           | <a href="#">RGD1560364.aSep08</a>           | <a href="#">363087</a> | 13812 | 1252 |   | 417 | similar to vacuolar protein sorting 13C protein (RGD1560364) mRNA.                                                                                         |
| <a href="#">RGD1560368</a>           | <a href="#">RGD1560368.aSep08</a>           | <a href="#">310544</a> | 9773  | 1204 |   | 320 | similar to hypothetical protein FLJ21159 (RGD1560368) mRNA.                                                                                                |
| <a href="#">RGD1560386</a>           | <a href="#">RGD1560386.aSep08</a>           | <a href="#">294521</a> | 3254  | 702  |   | 140 | similar to novel protein (RGD1560386) mRNA.                                                                                                                |
| <a href="#">RGD1560391_predicted</a> | <a href="#">RGD1560391_predicted.aSep08</a> | <a href="#">499883</a> | 42492 | 1712 | 3 | 383 | similar to GA binding protein transcription factor, beta subunit 2 (GABPB2) (predicted) (41.4 kD) (RGD1560391_predicted) alternative variant aSep08, mRNA. |
| <a href="#">RGD1560391_predicted</a> | <a href="#">RGD1560391_predicted.cSep08</a> | <a href="#">499883</a> | 11483 | 653  | 1 | 162 | similar to GA binding protein transcription factor, beta subunit 2 (GABPB2) (predicted) (RGD1560391_predicted) alternative variant cSep08, mRNA.           |
| <a href="#">RGD1560394</a>           | <a href="#">RGD1560394.aSep08</a>           | <a href="#">289728</a> | 1606  | 478  | 2 | 143 | RGD1560394 (RGD1560394) alternative variant aSep08, mRNA.                                                                                                  |
| <a href="#">RGD1560398</a>           | <a href="#">RGD1560398.bSep08</a>           | <a href="#">498192</a> | 4687  | 1251 | 2 | 81  | RGD1560398 (RGD1560398) alternative variant bSep08, mRNA.                                                                                                  |
| <a href="#">RGD1560398</a>           | <a href="#">RGD1560398.cSep08</a>           | <a href="#">498192</a> | 4177  | 870  | 3 | 73  | RGD1560398 (7.6 kD) (RGD1560398) alternative variant cSep08, complete mRNA.                                                                                |

|                                         |                                                |                        |        |      |    |     |                                                                                                                                                    |
|-----------------------------------------|------------------------------------------------|------------------------|--------|------|----|-----|----------------------------------------------------------------------------------------------------------------------------------------------------|
| <a href="#">RGD1560408</a>              | <a href="#">RGD1560408.aSep08</a>              | <a href="#">499166</a> | 910    | 691  |    | 43  | similar to Mannoside acetylglucosaminyltransferase 4, isoenzyme A (5.0 kD) (RGD1560408) mRNA.                                                      |
| <a href="#">RGD1560433</a>              | <a href="#">RGD1560433.aSep08</a>              | <a href="#">296750</a> | 15958  | 1572 |    | 460 | similar to 1500019C06Rik protein (RGD1560433) mRNA.                                                                                                |
| <a href="#">RGD1560436</a>              | <a href="#">RGD1560436.bSep08</a>              | <a href="#">500546</a> | 3356   | 780  | 1  | 136 | similar to hypothetical protein FLJ20508 (RGD1560436) alternative variant bSep08, mRNA.                                                            |
| <a href="#">RGD1560449andRGD1563545</a> | <a href="#">RGD1560449andRGD1563545.aSep08</a> | <a href="#">499004</a> | 47302  | 1692 | 1  | 138 | similar to nidogen 2 and similar to GTPase activating protein testicular GAP1 (RGD1560449andRGD1563545) alternative variant aSep08, mRNA.          |
| <a href="#">RGD1560449andRGD1563545</a> | <a href="#">RGD1560449andRGD1563545.aSep08</a> | <a href="#">499005</a> | 47302  | 1692 | 1  | 138 | similar to nidogen 2 and similar to GTPase activating protein testicular GAP1 (RGD1560449andRGD1563545) alternative variant aSep08, mRNA.          |
| <a href="#">RGD1560449andRGD1563545</a> | <a href="#">RGD1560449andRGD1563545.bSep08</a> | <a href="#">499004</a> | 56946  | 565  | 3  | 45  | similar to nidogen 2 and similar to GTPase activating protein testicular GAP1 (4.9 kD) (RGD1560449andRGD1563545) alternative variant bSep08, mRNA. |
| <a href="#">RGD1560449andRGD1563545</a> | <a href="#">RGD1560449andRGD1563545.bSep08</a> | <a href="#">499005</a> | 56946  | 565  | 3  | 45  | similar to nidogen 2 and similar to GTPase activating protein testicular GAP1 (4.9 kD) (RGD1560449andRGD1563545) alternative variant bSep08, mRNA. |
| <a href="#">RGD1560470</a>              | <a href="#">RGD1560470.aSep08</a>              | <a href="#">362083</a> | 2686   | 1181 |    | 285 | similar to Gene model 996 (RGD1560470) mRNA.                                                                                                       |
| <a href="#">RGD1560481</a>              | <a href="#">RGD1560481.bSep08</a>              | <a href="#">500409</a> | 21167  | 832  | 5  | 265 | similar to hypothetical protein FLJ20171 (RGD1560481) alternative variant bSep08, mRNA.                                                            |
| <a href="#">RGD1560481</a>              | <a href="#">RGD1560481.cSep08</a>              | <a href="#">500409</a> | 27758  | 1997 | 4  | 154 | similar to hypothetical protein FLJ20171 (RGD1560481) alternative variant cSep08, mRNA.                                                            |
| <a href="#">RGD1560481</a>              | <a href="#">RGD1560481.dSep08</a>              | <a href="#">500409</a> | 24613  | 895  | 4  | 137 | similar to hypothetical protein FLJ20171 (RGD1560481) alternative variant dSep08, mRNA.                                                            |
| <a href="#">RGD1560492</a>              | <a href="#">RGD1560492.aSep08</a>              | <a href="#">361039</a> | 1883   | 882  |    | 259 | similar to leishmanolysin-like (metallopeptidase M8 family) (RGD1560492) mRNA.                                                                     |
| <a href="#">RGD1560493</a>              | <a href="#">RGD1560493.aSep08</a>              | <a href="#">315365</a> | 8460   | 489  | 1  | 162 | putative protein, with a coiled coil domain, of vertebrate origin (RGD1560493) alternative variant aSep08, mRNA.                                   |
| <a href="#">RGD1560493</a>              | <a href="#">RGD1560493.bSep08</a>              | <a href="#">315365</a> | 9194   | 420  | 2  | 140 | putative protein of vertebrate origin (RGD1560493) alternative variant bSep08, mRNA.                                                               |
| <a href="#">RGD1560511</a>              | <a href="#">RGD1560511.aSep08</a>              | <a href="#">306991</a> | 169537 | 3026 | 28 | 853 | similar to Vps41 protein (RGD1560511) alternative variant aSep08, mRNA.                                                                            |
| <a href="#">RGD1560511</a>              | <a href="#">RGD1560511.bSep08</a>              | <a href="#">306991</a> | 20159  | 743  | 8  | 247 | similar to Vps41 protein (RGD1560511) alternative variant bSep08, mRNA.                                                                            |
| <a href="#">RGD1560511</a>              | <a href="#">RGD1560511.cSep08</a>              | <a href="#">306991</a> | 21081  | 656  | 6  | 218 | similar to Vps41 protein (RGD1560511) alternative variant cSep08, mRNA.                                                                            |
| <a href="#">RGD1560511</a>              | <a href="#">RGD1560511.dSep08</a>              | <a href="#">306991</a> | 81082  | 799  | 7  | 164 | similar to Vps41 protein (RGD1560511) alternative variant dSep08, mRNA.                                                                            |
| <a href="#">RGD1560511</a>              | <a href="#">RGD1560511.eSep08</a>              | <a href="#">306991</a> | 925    | 822  | 2  | 54  | similar to Vps41 protein (6.2 kD) (RGD1560511) alternative variant eSep08, mRNA.                                                                   |
| <a href="#">RGD1560516</a>              | <a href="#">RGD1560516.aSep08</a>              | <a href="#">499038</a> | 11795  | 755  |    | 147 | RGD1560516 (16.2 kD) (RGD1560516) mRNA.                                                                                                            |
| <a href="#">RGD1560544</a>              | <a href="#">RGD1560544.aSep08</a>              | <a href="#">293689</a> | 3710   | 2121 | 8  | 663 | putative protein, with a coiled coil domain, of eukaryotic origin (RGD1560544) mRNA.                                                               |
| <a href="#">RGD1560557</a>              | <a href="#">RGD1560557.aSep08</a>              | <a href="#">499437</a> | 7357   | 437  |    | 145 | putative protein of eukaryotic origin (RGD1560557) mRNA.                                                                                           |

|                            |                                   |                        |        |      |    |     |                                                                                                                    |
|----------------------------|-----------------------------------|------------------------|--------|------|----|-----|--------------------------------------------------------------------------------------------------------------------|
| <a href="#">RGD1560565</a> | <a href="#">RGD1560565.aSep08</a> | <a href="#">499287</a> | 1798   | 725  |    | 159 | similar to Tumor protein p53 inducible protein 5 (RGD1560565) mRNA.                                                |
| <a href="#">RGD1560566</a> | <a href="#">RGD1560566.aSep08</a> | <a href="#">308986</a> | 38333  | 1472 | 9  | 290 | RGD1560566 (31.0 kD) (RGD1560566) alternative variant aSep08, mRNA.                                                |
| <a href="#">RGD1560566</a> | <a href="#">RGD1560566.bSep08</a> | <a href="#">308986</a> | 6284   | 929  | 3  | 221 | RGD1560566 (RGD1560566) alternative variant bSep08, mRNA.                                                          |
| <a href="#">RGD1560566</a> | <a href="#">RGD1560566.cSep08</a> | <a href="#">308986</a> | 32523  | 2512 | 9  | 184 | RGD1560566 (19.9 kD) (RGD1560566) alternative variant cSep08, mRNA.                                                |
| <a href="#">RGD1560566</a> | <a href="#">RGD1560566.fSep08</a> | <a href="#">308986</a> | 27373  | 768  | 4  | 41  | RGD1560566 (RGD1560566) alternative variant fSep08, mRNA.                                                          |
| <a href="#">RGD1560600</a> | <a href="#">RGD1560600.bSep08</a> | <a href="#">289810</a> | 4601   | 994  | 4  | 141 | similar to small unique nuclear receptor co-repressor (16.0 kD) (RGD1560600) alternative variant bSep08, mRNA.     |
| <a href="#">RGD1560601</a> | <a href="#">RGD1560601.aSep08</a> | <a href="#">317432</a> | 25905  | 859  | 7  | 281 | similar to Jumonji/ARID domain-containing protein 1C (SmcX protein) (RGD1560601) alternative variant aSep08, mRNA. |
| <a href="#">RGD1560601</a> | <a href="#">RGD1560601.bSep08</a> | <a href="#">317432</a> | 4007   | 537  | 2  | 76  | similar to Jumonji/ARID domain-containing protein 1C (SmcX protein) (RGD1560601) alternative variant bSep08, mRNA. |
| <a href="#">RGD1560612</a> | <a href="#">RGD1560612.aSep08</a> | <a href="#">362166</a> | 118883 | 1207 | 9  | 402 | similar to PHF21A protein (RGD1560612) alternative variant aSep08, mRNA.                                           |
| <a href="#">RGD1560612</a> | <a href="#">RGD1560612.bSep08</a> | <a href="#">362166</a> | 146402 | 1894 | 11 | 388 | similar to PHF21A protein (RGD1560612) alternative variant bSep08, mRNA.                                           |
| <a href="#">RGD1560612</a> | <a href="#">RGD1560612.cSep08</a> | <a href="#">362166</a> | 10255  | 2224 | 5  | 278 | similar to PHF21A protein (RGD1560612) alternative variant cSep08, mRNA.                                           |
| <a href="#">RGD1560612</a> | <a href="#">RGD1560612.dSep08</a> | <a href="#">362166</a> | 3075   | 462  | 3  | 154 | similar to PHF21A protein (RGD1560612) alternative variant dSep08, mRNA.                                           |
| <a href="#">RGD1560612</a> | <a href="#">RGD1560612.eSep08</a> | <a href="#">362166</a> | 2316   | 666  | 2  | 48  | similar to PHF21A protein (RGD1560612) alternative variant eSep08, mRNA.                                           |
| <a href="#">RGD1560612</a> | <a href="#">RGD1560612.gSep08</a> | <a href="#">362166</a> | 1862   | 712  | 3  | 47  | similar to PHF21A protein (RGD1560612) alternative variant gSep08, mRNA.                                           |
| <a href="#">RGD1560620</a> | <a href="#">RGD1560620.aSep08</a> | <a href="#">291940</a> | 42422  | 472  |    | 156 | similar to hypothetical protein (RGD1560620) mRNA.                                                                 |
| <a href="#">RGD1560622</a> | <a href="#">RGD1560622.aSep08</a> | <a href="#">501182</a> | 5717   | 1138 | 2  | 114 | RGD1560622 (12.8 kD) (RGD1560622) alternative variant aSep08, mRNA.                                                |
| <a href="#">RGD1560622</a> | <a href="#">RGD1560622.bSep08</a> | <a href="#">501182</a> | 471    | 381  | 1  | 61  | RGD1560622 (RGD1560622) alternative variant bSep08, mRNA.                                                          |
| <a href="#">RGD1560626</a> | <a href="#">RGD1560626.aSep08</a> | <a href="#">500588</a> | 5027   | 1064 |    | 130 | RGD1560626 (13.9 kD) (RGD1560626) mRNA.                                                                            |
| <a href="#">RGD1560629</a> | <a href="#">RGD1560629.aSep08</a> | <a href="#">499561</a> | 11721  | 1124 | 2  | 245 | similar to RIKEN cDNA A930016P21 (27.4 kD) (RGD1560629) alternative variant aSep08, mRNA.                          |
| <a href="#">RGD1560629</a> | <a href="#">RGD1560629.cSep08</a> | <a href="#">499561</a> | 9261   | 667  | 2  | 70  | similar to RIKEN cDNA A930016P21 (RGD1560629) alternative variant cSep08, mRNA.                                    |
| <a href="#">RGD1560629</a> | <a href="#">RGD1560629.dSep08</a> | <a href="#">499561</a> | 3171   | 347  | 2  | 65  | similar to RIKEN cDNA A930016P21 (RGD1560629) alternative variant dSep08, mRNA.                                    |
| <a href="#">RGD1560636</a> | <a href="#">RGD1560636.aSep08</a> | <a href="#">305467</a> | 5698   | 1890 | 11 | 442 | similar to novel protein (RGD1560636) alternative variant aSep08, mRNA.                                            |
| <a href="#">RGD1560636</a> | <a href="#">RGD1560636.bSep08</a> | <a href="#">305467</a> | 2230   | 1248 | 4  | 187 | similar to novel protein (RGD1560636) alternative variant bSep08, mRNA.                                            |

|                              |                                     |                        |        |      |    |     |                                                                                                                  |
|------------------------------|-------------------------------------|------------------------|--------|------|----|-----|------------------------------------------------------------------------------------------------------------------|
| <a href="#">RGD1560638</a>   | <a href="#">RGD1560638.bSep08</a>   | <a href="#">500233</a> | 204292 | 2455 | 1  | 410 | similar to Exocyst complex component Sec15B (48.2 kD) (RGD1560638) alternative variant bSep08, mRNA.             |
| <a href="#">RGD1560638</a>   | <a href="#">RGD1560638.cSep08</a>   | <a href="#">500233</a> | 42241  | 266  | 2  | 88  | similar to Exocyst complex component Sec15B (RGD1560638) alternative variant cSep08, mRNA.                       |
| <a href="#">RGD1560652</a>   | <a href="#">RGD1560652.aSep08</a>   | <a href="#">500352</a> | 3174   | 405  |    | 108 | RGD1560652 (RGD1560652) mRNA.                                                                                    |
| <a href="#">RGD1560658</a>   | <a href="#">RGD1560658.aSep08</a>   | <a href="#">306891</a> | 5233   | 942  |    | 313 | similar to serine (or cysteine) proteinase inhibitor, clade B, member 1b (RGD1560658) mRNA.                      |
| <a href="#">RGD1560666</a>   | <a href="#">RGD1560666.aSep08</a>   | <a href="#">317439</a> | 50190  | 753  |    | 250 | similar to KIAA1280 protein (RGD1560666) mRNA.                                                                   |
| <a href="#">RGD1560686</a>   | <a href="#">RGD1560686.aSep08</a>   | <a href="#">304297</a> | 94710  | 2067 | 14 | 689 | similar to sidekick 1 (RGD1560686) alternative variant aSep08, mRNA.                                             |
| <a href="#">RGD1560686</a>   | <a href="#">RGD1560686.bSep08</a>   | <a href="#">304297</a> | 3151   | 392  | 1  | 29  | similar to sidekick 1 (RGD1560686) alternative variant bSep08, mRNA.                                             |
| <a href="#">RGD1560700</a>   | <a href="#">RGD1560700.aSep08</a>   | <a href="#">362585</a> | 4305   | 517  |    | 107 | similar to palmitoyl-protein thioesterase (RGD1560700) mRNA.                                                     |
| <a href="#">RGD1560705.1</a> | <a href="#">RGD1560705.1.aSep08</a> | <a href="#">498550</a> | 25696  | 551  |    | 117 | similar to LRRGT00152 (RGD1560705.1) mRNA.                                                                       |
| <a href="#">RGD1560717</a>   | <a href="#">RGD1560717.bSep08</a>   | <a href="#">363169</a> | 8435   | 2082 | 4  | 226 | similar to hypothetical protein DKFZp313N0621 (RGD1560717) alternative variant bSep08, mRNA.                     |
| <a href="#">RGD1560717</a>   | <a href="#">RGD1560717.cSep08</a>   | <a href="#">363169</a> | 19890  | 661  | 6  | 126 | similar to hypothetical protein DKFZp313N0621 (14.7 kD) (RGD1560717) alternative variant cSep08, mRNA.           |
| <a href="#">RGD1560717</a>   | <a href="#">RGD1560717.dSep08</a>   | <a href="#">363169</a> | 19639  | 696  | 6  | 126 | similar to hypothetical protein DKFZp313N0621 (14.7 kD) (RGD1560717) alternative variant dSep08, mRNA.           |
| <a href="#">RGD1560717</a>   | <a href="#">RGD1560717.eSep08</a>   | <a href="#">363169</a> | 7567   | 516  | 4  | 65  | similar to hypothetical protein DKFZp313N0621 (7.9 kD) (RGD1560717) alternative variant eSep08, complete mRNA.   |
| <a href="#">RGD1560720</a>   | <a href="#">RGD1560720.aSep08</a>   | <a href="#">313311</a> | 684    | 513  |    | 122 | RGD1560720 (RGD1560720) mRNA.                                                                                    |
| <a href="#">RGD1560724</a>   | <a href="#">RGD1560724.aSep08</a>   | <a href="#">501127</a> | 19289  | 1242 | 2  | 360 | similar to FLJ42986 protein (RGD1560724) alternative variant aSep08, mRNA.                                       |
| <a href="#">RGD1560736</a>   | <a href="#">RGD1560736.aSep08</a>   | <a href="#">363115</a> | 68745  | 910  |    | 200 | similar to solute carrier family 9 (sodium/hydrogen exchanger), isoform 9 (RGD1560736) mRNA.                     |
| <a href="#">RGD1560755</a>   | <a href="#">RGD1560755.aSep08</a>   | <a href="#">361165</a> | 14624  | 1294 |    | 430 | similar to D8Ertd354e protein (RGD1560755) alternative variant aSep08, mRNA.                                     |
| <a href="#">RGD1560755</a>   | <a href="#">RGD1560755.bSep08</a>   | <a href="#">361165</a> | 20908  | 1191 |    | 327 | similar to D8Ertd354e protein (RGD1560755) alternative variant bSep08, mRNA.                                     |
| <a href="#">RGD1560755</a>   | <a href="#">RGD1560755.cSep08</a>   | <a href="#">361165</a> | 11785  | 2519 |    | 204 | similar to D8Ertd354e protein (RGD1560755) alternative variant cSep08, mRNA.                                     |
| <a href="#">RGD1560775</a>   | <a href="#">RGD1560775.aSep08</a>   | <a href="#">501031</a> | 30197  | 747  | 2  | 229 | similar to RIKEN cDNA 4930579C12 gene (RGD1560775) alternative variant aSep08, mRNA.                             |
| <a href="#">RGD1560775</a>   | <a href="#">RGD1560775.bSep08</a>   | <a href="#">501031</a> | 31928  | 743  | 2  | 229 | similar to RIKEN cDNA 4930579C12 gene (RGD1560775) alternative variant bSep08, mRNA.                             |
| <a href="#">RGD1560796</a>   | <a href="#">RGD1560796.bSep08</a>   | <a href="#">315798</a> | 24359  | 2057 | 4  | 224 | similar to suppressor of hairy wing homolog 4 isoform 1 (23.5 kD) (RGD1560796) alternative variant bSep08, mRNA. |
| <a href="#">RGD1560796</a>   | <a href="#">RGD1560796.cSep08</a>   | <a href="#">315798</a> | 9714   | 544  | 4  | 181 | similar to suppressor of hairy wing homolog 4 isoform 1 (RGD1560796) alternative variant cSep08, mRNA.           |
| <a href="#">RGD1560803</a>   | <a href="#">RGD1560803.aSep08</a>   | <a href="#">501583</a> | 675    | 498  |    | 118 | RGD1560803 (RGD1560803) mRNA.                                                                                    |

|                                      |                                           |                        |        |      |   |     |                                                                                                                           |
|--------------------------------------|-------------------------------------------|------------------------|--------|------|---|-----|---------------------------------------------------------------------------------------------------------------------------|
| <a href="#">RGD1560846</a>           | <a href="#">RGD1560846.bSep08</a>         | <a href="#">498133</a> | 684    | 271  | 1 | 62  | similar to hypothetical protein MGC40178 (RGD1560846) alternative variant bSep08, mRNA.                                   |
| <a href="#">RGD1560854</a>           | <a href="#">RGD1560854.aSep08</a>         | <a href="#">499106</a> | 1577   | 560  | 3 | 171 | similar to FLJ41131 protein (RGD1560854) alternative variant aSep08, mRNA.                                                |
| <a href="#">RGD1560860</a>           | <a href="#">RGD1560860.aSep08</a>         | <a href="#">498767</a> | 53538  | 1388 | 4 | 396 | putative protein, with 4 coiled coil domains, of mammalian origin (RGD1560860) alternative variant aSep08, complete mRNA. |
| <a href="#">RGD1560860</a>           | <a href="#">RGD1560860.bSep08</a>         | <a href="#">498767</a> | 45779  | 700  | 1 | 186 | putative protein, with 2 coiled coil domains, of mammalian origin (RGD1560860) alternative variant bSep08, mRNA.          |
| <a href="#">RGD1560873</a>           | <a href="#">RGD1560873.aSep08</a>         | <a href="#">306238</a> | 7074   | 1528 | 5 | 467 | similar to RIKEN cDNA E230015L20 gene (RGD1560873) alternative variant aSep08, mRNA.                                      |
| <a href="#">RGD1560873</a>           | <a href="#">RGD1560873.bSep08</a>         | <a href="#">306238</a> | 15024  | 1464 | 8 | 462 | similar to RIKEN cDNA E230015L20 gene (RGD1560873) alternative variant bSep08, mRNA.                                      |
| <a href="#">RGD1560873</a>           | <a href="#">RGD1560873.cSep08</a>         | <a href="#">306238</a> | 8442   | 367  | 4 | 122 | similar to RIKEN cDNA E230015L20 gene (RGD1560873) alternative variant cSep08, mRNA.                                      |
| <a href="#">RGD1560902and dCldn7</a> | <a href="#">RGD1560902andCldn7.aSep08</a> | <a href="#">65132</a>  | 2204   | 1217 |   | 211 | claudin 7 and similar to Cofilin, non-muscle isoform (Cofilin-1) (22.4 kD) (RGD1560902andCldn7) complete mRNA.            |
| <a href="#">RGD1560902and dCldn7</a> | <a href="#">RGD1560902andCldn7.aSep08</a> | <a href="#">363635</a> | 2204   | 1217 |   | 211 | claudin 7 and similar to Cofilin, non-muscle isoform (Cofilin-1) (22.4 kD) (RGD1560902andCldn7) complete mRNA.            |
| <a href="#">RGD1560916</a>           | <a href="#">RGD1560916.aSep08</a>         | <a href="#">361288</a> | 4005   | 1082 | 5 | 198 | FUN14 (RGD1560916) alternative variant aSep08, mRNA.                                                                      |
| <a href="#">RGD1560916</a>           | <a href="#">RGD1560916.bSep08</a>         | <a href="#">361288</a> | 5467   | 1564 | 6 | 196 | FUN14 (21.6 kD) (RGD1560916) alternative variant bSep08, mRNA.                                                            |
| <a href="#">RGD1560916</a>           | <a href="#">RGD1560916.cSep08</a>         | <a href="#">361288</a> | 5246   | 983  | 5 | 151 | FUN14 (16.3 kD) (RGD1560916) alternative variant cSep08, mRNA.                                                            |
| <a href="#">RGD1560916</a>           | <a href="#">RGD1560916.dSep08</a>         | <a href="#">361288</a> | 2933   | 755  | 3 | 138 | FUN14 (14.9 kD) (RGD1560916) alternative variant dSep08, mRNA.                                                            |
| <a href="#">RGD1560916</a>           | <a href="#">RGD1560916.eSep08</a>         | <a href="#">361288</a> | 2787   | 1420 | 3 | 115 | FUN14 (RGD1560916) alternative variant eSep08, mRNA.                                                                      |
| <a href="#">RGD1560916</a>           | <a href="#">RGD1560916.fSep08</a>         | <a href="#">361288</a> | 1907   | 346  | 2 | 88  | putative protein of vertebrate origin (RGD1560916) alternative variant fSep08, mRNA.                                      |
| <a href="#">RGD1560925</a>           | <a href="#">RGD1560925.aSep08</a>         | <a href="#">501196</a> | 109320 | 994  |   | 303 | similar to 2610034M16Rik protein (RGD1560925) mRNA.                                                                       |
| <a href="#">RGD1560927</a>           | <a href="#">RGD1560927.bSep08</a>         | <a href="#">501507</a> | 1271   | 429  | 1 | 109 | RGD1560927 (RGD1560927) alternative variant bSep08, mRNA.                                                                 |
| <a href="#">RGD1560940</a>           | <a href="#">RGD1560940.bSep08</a>         | <a href="#">501060</a> | 4514   | 1812 | 5 | 377 | similar to testis specific serine proteinase 3 (RGD1560940) alternative variant bSep08, mRNA.                             |
| <a href="#">RGD1560958</a>           | <a href="#">RGD1560958.aSep08</a>         | <a href="#">499277</a> | 1341   | 528  |   | 122 | similar to RIKEN cDNA 1700063117 (RGD1560958) mRNA.                                                                       |
| <a href="#">RGD1560978</a>           | <a href="#">RGD1560978.aSep08</a>         | <a href="#">500693</a> | 16478  | 1061 | 5 | 353 | similar to hypothetical protein and hypothetical protein LOC685784 (RGD1560978) alternative variant aSep08, mRNA.         |
| <a href="#">RGD1560978</a>           | <a href="#">RGD1560978.aSep08</a>         | <a href="#">685784</a> | 16478  | 1061 | 5 | 353 | similar to hypothetical protein and hypothetical protein LOC685784 (RGD1560978) alternative variant aSep08, mRNA.         |
| <a href="#">RGD1560978</a>           | <a href="#">RGD1560978.cSep08</a>         | <a href="#">500693</a> | 3665   | 671  | 3 | 205 | similar to hypothetical protein and hypothetical protein LOC685784 (RGD1560978) alternative variant cSep08, mRNA.         |
| <a href="#">RGD1560978</a>           | <a href="#">RGD1560978.cSep08</a>         | <a href="#">685784</a> | 3665   | 671  | 3 | 205 | similar to hypothetical protein and hypothetical protein LOC685784 (RGD1560978) alternative variant cSep08, mRNA.         |

|                                     |                                           |                        |        |      |   |     |                                                                                                                     |
|-------------------------------------|-------------------------------------------|------------------------|--------|------|---|-----|---------------------------------------------------------------------------------------------------------------------|
| <a href="#">RGD1560986</a>          | <a href="#">RGD1560986.aSep08</a>         | <a href="#">292786</a> | 3591   | 736  |   | 245 | similar to Gene model 1082 (RGD1560986) mRNA.                                                                       |
| <a href="#">RGD1560989</a>          | <a href="#">RGD1560989.aSep08</a>         | <a href="#">313060</a> | 1206   | 377  |   | 125 | putative protein of vertebrate origin (RGD1560989) mRNA.                                                            |
| <a href="#">RGD1561004</a>          | <a href="#">RGD1561004.aSep08</a>         | <a href="#">501539</a> | 84929  | 374  |   | 124 | similar to AMME syndrome candidate gene 1 protein homolog (RGD1561004) mRNA.                                        |
| <a href="#">RGD1561014</a>          | <a href="#">RGD1561014.aSep08</a>         | <a href="#">497966</a> | 4283   | 417  |   | 112 | similar to T-complex protein 1, zeta-2 subunit (TCP-1-zeta-2) (RGD1561014) mRNA.                                    |
| <a href="#">RGD1561023</a>          | <a href="#">RGD1561023.aSep08</a>         | <a href="#">498429</a> | 6563   | 866  |   | 247 | similar to RIKEN cDNA 4931440F15 gene (RGD1561023) mRNA.                                                            |
| <a href="#">RGD1561034</a>          | <a href="#">RGD1561034.aSep08</a>         | <a href="#">308908</a> | 771    | 407  |   | 29  | similar to hypothetical protein MGC34805 (RGD1561034) mRNA.                                                         |
| <a href="#">RGD1561039</a>          | <a href="#">RGD1561039.bSep08</a>         | <a href="#">498870</a> | 3303   | 259  | 1 | 44  | similar to RIKEN cDNA 1700065I17 (RGD1561039) alternative variant bSep08, mRNA.                                     |
| <a href="#">RGD1561042</a>          | <a href="#">RGD1561042.aSep08</a>         | <a href="#">498386</a> | 6352   | 558  | 4 | 185 | similar to RIKEN cDNA 5730509K17 gene (RGD1561042) alternative variant aSep08, mRNA.                                |
| <a href="#">RGD1561067</a>          | <a href="#">RGD1561067.aSep08</a>         | <a href="#">498642</a> | 134567 | 1176 | 8 | 241 | similar to RNA binding protein gene with multiple splicing (26.4 kD) (RGD1561067) alternative variant aSep08, mRNA. |
| <a href="#">RGD1561067</a>          | <a href="#">RGD1561067.bSep08</a>         | <a href="#">498642</a> | 130974 | 1999 | 7 | 230 | similar to RNA binding protein gene with multiple splicing (26.3 kD) (RGD1561067) alternative variant bSep08, mRNA. |
| <a href="#">RGD1561067</a>          | <a href="#">RGD1561067.cSep08</a>         | <a href="#">498642</a> | 65855  | 695  | 6 | 198 | similar to RNA binding protein gene with multiple splicing (RGD1561067) alternative variant cSep08, mRNA.           |
| <a href="#">RGD1561067</a>          | <a href="#">RGD1561067.dSep08</a>         | <a href="#">498642</a> | 84869  | 760  | 8 | 175 | similar to RNA binding protein gene with multiple splicing (RGD1561067) alternative variant dSep08, mRNA.           |
| <a href="#">RGD1561067</a>          | <a href="#">RGD1561067.eSep08</a>         | <a href="#">498642</a> | 84821  | 578  | 7 | 169 | similar to RNA binding protein gene with multiple splicing (RGD1561067) alternative variant eSep08, mRNA.           |
| <a href="#">RGD1561067</a>          | <a href="#">RGD1561067.fSep08</a>         | <a href="#">498642</a> | 51931  | 426  | 4 | 98  | similar to RNA binding protein gene with multiple splicing (RGD1561067) alternative variant fSep08, mRNA.           |
| <a href="#">RGD1561067</a>          | <a href="#">RGD1561067.gSep08</a>         | <a href="#">498642</a> | 64164  | 436  | 4 | 91  | similar to RNA binding protein gene with multiple splicing (RGD1561067) alternative variant gSep08, mRNA.           |
| <a href="#">RGD1561067</a>          | <a href="#">RGD1561067.hSep08</a>         | <a href="#">498642</a> | 10900  | 652  | 3 | 52  | similar to RNA binding protein gene with multiple splicing (5.4 kD) (RGD1561067) alternative variant hSep08, mRNA.  |
| <a href="#">RGD1561067</a>          | <a href="#">RGD1561067.jSep08</a>         | <a href="#">498642</a> | 12391  | 602  | 4 | 31  | similar to RNA binding protein gene with multiple splicing (3.2 kD) (RGD1561067) alternative variant jSep08, mRNA.  |
| <a href="#">RGD1561069</a>          | <a href="#">RGD1561069.aSep08</a>         | <a href="#">498959</a> | 13671  | 430  |   | 143 | similar to F-box only protein 31 (RGD1561069) mRNA.                                                                 |
| <a href="#">RGD1561074</a>          | <a href="#">RGD1561074.aSep08</a>         | <a href="#">300884</a> | 3850   | 633  |   | 210 | similar to tripartite motif-containing 43 (RGD1561074) mRNA.                                                        |
| <a href="#">RGD1561090</a>          | <a href="#">RGD1561090.aSep08</a>         | <a href="#">313278</a> | 80673  | 780  |   | 260 | similar to protein tyrosine phosphatase, receptor type, D (RGD1561090) mRNA.                                        |
| <a href="#">RGD1561111and Crct1</a> | <a href="#">RGD1561111andCrct1.aSep08</a> | <a href="#">310585</a> | 43143  | 1159 |   | 23  | similar to Eno1 protein and cysteine-rich C-terminal 1 (7.8 kD) (RGD1561111andCrct1) mRNA.                          |
| <a href="#">RGD1561111and Crct1</a> | <a href="#">RGD1561111andCrct1.aSep08</a> | <a href="#">688401</a> | 43143  | 1159 |   | 23  | similar to Eno1 protein and cysteine-rich C-terminal 1 (7.8 kD) (RGD1561111andCrct1) mRNA.                          |
| <a href="#">RGD1561113</a>          | <a href="#">RGD1561113.aSep08</a>         | <a href="#">499780</a> | 2755   | 2220 | 1 | 133 | similar to Hypothetical UPF0184 protein C9orf16 homolog (15.3 kD) (RGD1561113) alternative variant aSep08, mRNA.    |



|                                      |                                             |                        |       |      |   |     |                                                                                                         |
|--------------------------------------|---------------------------------------------|------------------------|-------|------|---|-----|---------------------------------------------------------------------------------------------------------|
| <a href="#">RGD1561113</a>           | <a href="#">RGD1561113.bSep08</a>           | <a href="#">499780</a> | 2784  | 651  | 1 | 125 | similar to Hypothetical UPF0184 protein C9orf16 homolog (RGD1561113) alternative variant bSep08, mRNA.  |
| <a href="#">RGD1561143</a>           | <a href="#">RGD1561143.aSep08</a>           | <a href="#">304382</a> | 5146  | 684  |   | 121 | similar to cell surface receptor FDFACT (RGD1561143) mRNA.                                              |
| <a href="#">RGD1561145</a>           | <a href="#">RGD1561145.bSep08</a>           | <a href="#">498580</a> | 32195 | 1042 | 4 | 109 | similar to novel protein (RGD1561145) alternative variant bSep08, mRNA.                                 |
| <a href="#">RGD1561145</a>           | <a href="#">RGD1561145.cSep08</a>           | <a href="#">498580</a> | 21577 | 315  | 2 | 105 | similar to novel protein (RGD1561145) alternative variant cSep08, mRNA.                                 |
| <a href="#">RGD1561147</a>           | <a href="#">RGD1561147.aSep08</a>           | <a href="#">499468</a> | 3026  | 722  |   | 71  | similar to hypothetical protein FLJ37396 (RGD1561147) mRNA.                                             |
| <a href="#">RGD1561157</a>           | <a href="#">RGD1561157.bSep08</a>           | <a href="#">360487</a> | 762   | 601  | 2 | 103 | RGD1561157 (11.5 kD) (RGD1561157) alternative variant bSep08, mRNA.                                     |
| <a href="#">RGD1561161</a>           | <a href="#">RGD1561161.aSep08</a>           | <a href="#">294747</a> | 2764  | 1640 |   | 546 | similar to BC067074 protein (RGD1561161) mRNA.                                                          |
| <a href="#">RGD1561162</a>           | <a href="#">RGD1561162.aSep08</a>           | <a href="#">297962</a> | 22743 | 585  | 3 | 195 | similar to 35 kDa SR repressor protein (SRrp35) (RGD1561162) alternative variant aSep08, mRNA.          |
| <a href="#">RGD1561162</a>           | <a href="#">RGD1561162.bSep08</a>           | <a href="#">297962</a> | 5594  | 813  | 1 | 161 | similar to 35 kDa SR repressor protein (SRrp35) (RGD1561162) alternative variant bSep08, mRNA.          |
| <a href="#">RGD1561176</a>           | <a href="#">RGD1561176.aSep08</a>           | <a href="#">363155</a> | 35229 | 1780 | 4 | 593 | similar to Programmed cell death 6 interacting protein (ALG-2 interacting protein X) (RGD1561176) mRNA. |
| <a href="#">RGD1561196_predicted</a> | <a href="#">RGD1561196_predicted_aSep08</a> | <a href="#">498560</a> | 5405  | 520  |   | 82  | similar to ubiquitin carboxyl-terminal hydrolase l3 (predicted) (9.3 kD) (RGD1561196_predicted) mRNA.   |
| <a href="#">RGD1561200</a>           | <a href="#">RGD1561200.aSep08</a>           | <a href="#">500230</a> | 6064  | 1714 |   | 510 | similar to hypothetical protein FLJ12056 (57.5 kD) (RGD1561200) mRNA.                                   |
| <a href="#">RGD1561205</a>           | <a href="#">RGD1561205.aSep08</a>           | <a href="#">500557</a> | 2109  | 753  | 2 | 122 | similar to RIKEN cDNA 2610200G18 (13.4 kD) (RGD1561205) alternative variant aSep08, mRNA.               |
| <a href="#">RGD1561205</a>           | <a href="#">RGD1561205.bSep08</a>           | <a href="#">500557</a> | 7627  | 2659 | 4 | 117 | similar to RIKEN cDNA 2610200G18 (13.3 kD) (RGD1561205) alternative variant bSep08, mRNA.               |
| <a href="#">RGD1561205</a>           | <a href="#">RGD1561205.cSep08</a>           | <a href="#">500557</a> | 2828  | 859  | 4 | 74  | similar to RIKEN cDNA 2610200G18 (RGD1561205) alternative variant cSep08, mRNA.                         |
| <a href="#">RGD1561238</a>           | <a href="#">RGD1561238.aSep08</a>           | <a href="#">502091</a> | 18247 | 748  | 1 | 248 | similar to ring finger protein 122 homolog (RGD1561238) alternative variant aSep08, mRNA.               |
| <a href="#">RGD1561238</a>           | <a href="#">RGD1561238.bSep08</a>           | <a href="#">502091</a> | 18575 | 1079 | 1 | 218 | similar to ring finger protein 122 homolog (RGD1561238) alternative variant bSep08, mRNA.               |
| <a href="#">RGD1561238</a>           | <a href="#">RGD1561238.cSep08</a>           | <a href="#">502091</a> | 15353 | 734  | 2 | 178 | similar to ring finger protein 122 homolog (RGD1561238) alternative variant cSep08, mRNA.               |
| <a href="#">RGD1561238</a>           | <a href="#">RGD1561238.dSep08</a>           | <a href="#">502091</a> | 4926  | 1229 | 1 | 95  | similar to ring finger protein 122 homolog (RGD1561238) alternative variant dSep08, mRNA.               |
| <a href="#">RGD1561251</a>           | <a href="#">RGD1561251.aSep08</a>           | <a href="#">499352</a> | 14603 | 413  |   | 118 | RGD1561251 (RGD1561251) mRNA.                                                                           |
| <a href="#">RGD1561277</a>           | <a href="#">RGD1561277.aSep08</a>           | <a href="#">497911</a> | 8029  | 427  |   | 104 | RGD1561277 (RGD1561277) mRNA.                                                                           |
| <a href="#">RGD1561282</a>           | <a href="#">RGD1561282.bSep08</a>           | <a href="#">499958</a> | 827   | 647  | 2 | 167 | RGD1561282 (RGD1561282) alternative variant bSep08, mRNA.                                               |
| <a href="#">RGD1561303</a>           | <a href="#">RGD1561303.aSep08</a>           | <a href="#">304509</a> | 4218  | 556  |   | 185 | RGD1561303 (RGD1561303) mRNA.                                                                           |
| <a href="#">RGD1561306</a>           | <a href="#">RGD1561306.aSep08</a>           | <a href="#">502904</a> | 7180  | 419  | 2 | 61  | similar to immunoreceptor Ly49si3 (RGD1561306) alternative variant aSep08, mRNA.                        |
| <a href="#">RGD1561306</a>           | <a href="#">RGD1561306.bSep08</a>           | <a href="#">502904</a> | 1074  | 995  | 1 | 65  | similar to immunoreceptor Ly49si3 (7.9 kD) (RGD1561306) alternative variant bSep08, mRNA.               |

|                            |                                   |                        |       |      |   |     |                                                                                                                   |
|----------------------------|-----------------------------------|------------------------|-------|------|---|-----|-------------------------------------------------------------------------------------------------------------------|
| <a href="#">RGD1561327</a> | <a href="#">RGD1561327.aSep08</a> | <a href="#">317593</a> | 1783  | 1706 |   | 419 | similar to melanoma antigen family A, 10 (49.2 kD) (RGD1561327) mRNA.                                             |
| <a href="#">RGD1561339</a> | <a href="#">RGD1561339.aSep08</a> | <a href="#">502271</a> | 1495  | 785  |   | 79  | similar to putative protein kinase (RGD1561339) mRNA.                                                             |
| <a href="#">RGD1561347</a> | <a href="#">RGD1561347.bSep08</a> | <a href="#">362612</a> | 16686 | 3358 | 6 | 468 | similar to Sfrs4 protein (RGD1561347) alternative variant bSep08, mRNA.                                           |
| <a href="#">RGD1561357</a> | <a href="#">RGD1561357.aSep08</a> | <a href="#">497798</a> | 57954 | 1420 |   | 145 | similar to LIM domain only 3 (16.6 kD) (RGD1561357) mRNA.                                                         |
| <a href="#">RGD1561367</a> | <a href="#">RGD1561367.aSep08</a> | <a href="#">363031</a> | 2928  | 2077 |   | 105 | similar to Anillin (12.5 kD) (RGD1561367) mRNA.                                                                   |
| <a href="#">RGD1561388</a> | <a href="#">RGD1561388.aSep08</a> | <a href="#">499042</a> | 4331  | 686  |   | 104 | similar to Afadin (Af-6 protein) (11.6 kD) (RGD1561388) mRNA.                                                     |
| <a href="#">RGD1561393</a> | <a href="#">RGD1561393.aSep08</a> | <a href="#">361932</a> | 6365  | 1262 |   | 420 | similar to CG15133-PA (RGD1561393) mRNA.                                                                          |
| <a href="#">RGD1561394</a> | <a href="#">RGD1561394.aSep08</a> | <a href="#">311743</a> | 83912 | 864  |   | 170 | similar to MLTK-beta (RGD1561394) mRNA.                                                                           |
| <a href="#">RGD1561413</a> | <a href="#">RGD1561413.aSep08</a> | <a href="#">500585</a> | 1293  | 377  |   | 125 | similar to BC021442 protein (RGD1561413) mRNA.                                                                    |
| <a href="#">RGD1561415</a> | <a href="#">RGD1561415.bSep08</a> | <a href="#">498943</a> | 670   | 570  | 1 | 149 | RGD1561415 (RGD1561415) alternative variant bSep08, mRNA.                                                         |
| <a href="#">RGD1561416</a> | <a href="#">RGD1561416.aSep08</a> | <a href="#">500536</a> | 650   | 318  |   | 105 | similar to novel protein (HT036) (RGD1561416) mRNA.                                                               |
| <a href="#">RGD1561425</a> | <a href="#">RGD1561425.bSep08</a> | <a href="#">301378</a> | 3844  | 425  | 1 | 119 | similar to RIKEN cDNA 4832428D23 gene (RGD1561425) alternative variant bSep08, mRNA.                              |
| <a href="#">RGD1561426</a> | <a href="#">RGD1561426.aSep08</a> | <a href="#">362633</a> | 8379  | 395  |   | 131 | RGD1561426 (RGD1561426) mRNA.                                                                                     |
| <a href="#">RGD1561442</a> | <a href="#">RGD1561442.aSep08</a> | <a href="#">311416</a> | 18209 | 716  | 1 | 212 | similar to Vinculin (Metavinculin) (RGD1561442) alternative variant aSep08, mRNA.                                 |
| <a href="#">RGD1561442</a> | <a href="#">RGD1561442.bSep08</a> | <a href="#">311416</a> | 18183 | 474  |   | 128 | similar to Vinculin (Metavinculin) (RGD1561442) alternative variant bSep08, mRNA.                                 |
| <a href="#">RGD1561444</a> | <a href="#">RGD1561444.aSep08</a> | <a href="#">315473</a> | 13470 | 1233 |   | 259 | similar to RIKEN cDNA 9530077C05 (RGD1561444) mRNA.                                                               |
| <a href="#">RGD1561445</a> | <a href="#">RGD1561445.aSep08</a> | <a href="#">298320</a> | 4945  | 712  |   | 143 | similar to novel protein (RGD1561445) mRNA.                                                                       |
| <a href="#">RGD1561459</a> | <a href="#">RGD1561459.aSep08</a> | <a href="#">361606</a> | 30643 | 703  | 1 | 124 | similar to RIKEN cDNA 1810020D17 (13.5 kD) (RGD1561459) alternative variant aSep08, mRNA.                         |
| <a href="#">RGD1561459</a> | <a href="#">RGD1561459.cSep08</a> | <a href="#">361606</a> | 30626 | 536  |   | 92  | similar to RIKEN cDNA 1810020D17 (RGD1561459) alternative variant cSep08, mRNA.                                   |
| <a href="#">RGD1561474</a> | <a href="#">RGD1561474.aSep08</a> | <a href="#">314824</a> | 21059 | 943  | 8 | 314 | similar to oxysterol-binding protein-like protein 8 isoform a (RGD1561474) alternative variant aSep08, mRNA.      |
| <a href="#">RGD1561491</a> | <a href="#">RGD1561491.bSep08</a> | <a href="#">365362</a> | 30586 | 1154 | 4 | 384 | similar to ATP-binding cassette transporter sub-family A member 14 (RGD1561491) alternative variant bSep08, mRNA. |
| <a href="#">RGD1561494</a> | <a href="#">RGD1561494.bSep08</a> | <a href="#">500226</a> | 3228  | 993  | 9 | 291 | similar to D3Mm3e (RGD1561494) alternative variant bSep08, mRNA.                                                  |
| <a href="#">RGD1561494</a> | <a href="#">RGD1561494.cSep08</a> | <a href="#">500226</a> | 1345  | 426  | 5 | 128 | similar to D3Mm3e (RGD1561494) alternative variant cSep08, mRNA.                                                  |
| <a href="#">RGD1561494</a> | <a href="#">RGD1561494.dSep08</a> | <a href="#">500226</a> | 1183  | 747  | 3 | 109 | similar to D3Mm3e (RGD1561494) alternative variant dSep08, mRNA.                                                  |
| <a href="#">RGD1561494</a> | <a href="#">RGD1561494.eSep08</a> | <a href="#">500226</a> | 599   | 240  | 2 | 79  | similar to D3Mm3e (RGD1561494) alternative variant eSep08, mRNA.                                                  |
| <a href="#">RGD1561494</a> | <a href="#">RGD1561494.fSep08</a> | <a href="#">500226</a> | 17371 | 494  | 2 | 42  | similar to D3Mm3e (5.2 kD) (RGD1561494) alternative variant fSep08, mRNA.                                         |

|                            |                                   |                        |       |      |   |     |                                                                                                             |
|----------------------------|-----------------------------------|------------------------|-------|------|---|-----|-------------------------------------------------------------------------------------------------------------|
| <a href="#">RGD1561503</a> | <a href="#">RGD1561503.aSep08</a> | <a href="#">499536</a> | 1982  | 1554 |   | 55  | similar to hypothetical protein AN1443.2 (RGD1561503) mRNA.                                                 |
| <a href="#">RGD1561507</a> | <a href="#">RGD1561507.bSep08</a> | <a href="#">292078</a> | 12307 | 562  | 1 | 105 | similar to hypothetical protein FLJ31606 (12.0 kD) (RGD1561507) alternative variant bSep08, complete mRNA.  |
| <a href="#">RGD1561507</a> | <a href="#">RGD1561507.cSep08</a> | <a href="#">292078</a> | 5769  | 311  | 1 | 71  | similar to hypothetical protein FLJ31606 (7.6 kD) (RGD1561507) alternative variant cSep08, mRNA.            |
| <a href="#">RGD1561513</a> | <a href="#">RGD1561513.aSep08</a> | <a href="#">362232</a> | 11561 | 283  | 3 | 94  | similar to ventral prostate-specific protein (RGD1561513) alternative variant aSep08, mRNA.                 |
| <a href="#">RGD1561513</a> | <a href="#">RGD1561513.bSep08</a> | <a href="#">362232</a> | 9004  | 735  | 3 | 91  | similar to ventral prostate-specific protein (11.1 kD) (RGD1561513) alternative variant bSep08, mRNA.       |
| <a href="#">RGD1561513</a> | <a href="#">RGD1561513.dSep08</a> | <a href="#">362232</a> | 1408  | 632  | 2 | 32  | similar to ventral prostate-specific protein (3.7 kD) (RGD1561513) alternative variant dSep08, mRNA.        |
| <a href="#">RGD1561530</a> | <a href="#">RGD1561530.aSep08</a> | <a href="#">299637</a> | 3536  | 1095 | 6 | 321 | similar to Tle6 protein (RGD1561530) alternative variant aSep08, mRNA.                                      |
| <a href="#">RGD1561537</a> | <a href="#">RGD1561537.aSep08</a> | <a href="#">361197</a> | 30795 | 2168 |   | 445 | similar to putative repair and recombination helicase RAD26L (RGD1561537) alternative variant aSep08, mRNA. |
| <a href="#">RGD1561537</a> | <a href="#">RGD1561537.bSep08</a> | <a href="#">361197</a> | 62810 | 1971 |   | 434 | similar to putative repair and recombination helicase RAD26L (RGD1561537) alternative variant bSep08, mRNA. |
| <a href="#">RGD1561551</a> | <a href="#">RGD1561551.aSep08</a> | <a href="#">500359</a> | 8413  | 448  | 1 | 148 | similar to Hypothetical protein MGC75664 (RGD1561551) alternative variant aSep08, mRNA.                     |
| <a href="#">RGD1561551</a> | <a href="#">RGD1561551.bSep08</a> | <a href="#">500359</a> | 11825 | 269  | 1 | 89  | similar to Hypothetical protein MGC75664 (RGD1561551) alternative variant bSep08, mRNA.                     |
| <a href="#">RGD1561560</a> | <a href="#">RGD1561560.aSep08</a> | <a href="#">502711</a> | 2715  | 800  | 1 | 266 | similar to Gpd1l protein (RGD1561560) alternative variant aSep08, mRNA.                                     |
| <a href="#">RGD1561560</a> | <a href="#">RGD1561560.bSep08</a> | <a href="#">502711</a> | 2524  | 818  | 1 | 224 | similar to Gpd1l protein (RGD1561560) alternative variant bSep08, mRNA.                                     |
| <a href="#">RGD1561574</a> | <a href="#">RGD1561574.aSep08</a> | <a href="#">501715</a> | 1837  | 172  |   | 56  | similar to Hypothetical protein MGC76322 (RGD1561574) mRNA.                                                 |
| <a href="#">RGD1561605</a> | <a href="#">RGD1561605.aSep08</a> | <a href="#">289717</a> | 11288 | 3581 |   | 420 | similar to hypothetical protein (48.6 kD) (RGD1561605) mRNA.                                                |
| <a href="#">RGD1561609</a> | <a href="#">RGD1561609.aSep08</a> | <a href="#">306117</a> | 6475  | 942  |   | 229 | similar to TBC1 domain family member 4 (RGD1561609) mRNA.                                                   |
| <a href="#">RGD1561648</a> | <a href="#">RGD1561648.bSep08</a> | <a href="#">500841</a> | 18617 | 707  | 4 | 160 | RGD1561648 (RGD1561648) alternative variant bSep08, mRNA.                                                   |
| <a href="#">RGD1561648</a> | <a href="#">RGD1561648.cSep08</a> | <a href="#">500841</a> | 8408  | 790  | 5 | 46  | RGD1561648 (5.1 kD) (RGD1561648) alternative variant cSep08, mRNA.                                          |
| <a href="#">RGD1561662</a> | <a href="#">RGD1561662.aSep08</a> | <a href="#">301232</a> | 3741  | 3337 |   | 821 | similar to Al661453 protein (RGD1561662) mRNA.                                                              |
| <a href="#">RGD1561665</a> | <a href="#">RGD1561665.aSep08</a> | <a href="#">499429</a> | 13577 | 1182 | 8 | 307 | similar to spatial-delta (RGD1561665) alternative variant aSep08, mRNA.                                     |
| <a href="#">RGD1561665</a> | <a href="#">RGD1561665.bSep08</a> | <a href="#">499429</a> | 13501 | 980  | 8 | 264 | similar to spatial-delta (RGD1561665) alternative variant bSep08, mRNA.                                     |
| <a href="#">RGD1561672</a> | <a href="#">RGD1561672.aSep08</a> | <a href="#">305610</a> | 14323 | 456  |   | 151 | similar to novel protein (RGD1561672) mRNA.                                                                 |
| <a href="#">RGD1561676</a> | <a href="#">RGD1561676.aSep08</a> | <a href="#">307917</a> | 33892 | 1800 | 7 | 526 | putative protein of eukaryotic origin (RGD1561676) alternative variant aSep08, mRNA.                        |

|                                           |                                           |                        |        |      |   |     |                                                                                                          |
|-------------------------------------------|-------------------------------------------|------------------------|--------|------|---|-----|----------------------------------------------------------------------------------------------------------|
| <a href="#">RGD1561676</a>                | <a href="#">RGD1561676.bSep08</a>         | <a href="#">307917</a> | 28819  | 1694 | 9 | 307 | kelch repeat containing protein and kelch (RGD1561676) alternative variant bSep08, mRNA.                 |
| <a href="#">RGD1561676</a>                | <a href="#">RGD1561676.cSep08</a>         | <a href="#">307917</a> | 24646  | 742  | 6 | 246 | kelch repeat containing protein and kelch (RGD1561676) alternative variant cSep08, mRNA.                 |
| <a href="#">RGD1561676</a>                | <a href="#">RGD1561676.dSep08</a>         | <a href="#">307917</a> | 1530   | 536  | 3 | 105 | CRA a (RGD1561676) alternative variant dSep08, mRNA.                                                     |
| <a href="#">RGD1561676</a>                | <a href="#">RGD1561676.fSep08</a>         | <a href="#">307917</a> | 13551  | 419  | 4 | 47  | putative protein of eukaryotic origin (RGD1561676) alternative variant fSep08, mRNA.                     |
| <a href="#">RGD1561678</a>                | <a href="#">RGD1561678.aSep08</a>         | <a href="#">298168</a> | 14559  | 424  |   | 141 | similar to Ten-m1 (RGD1561678) mRNA.                                                                     |
| <a href="#">RGD1561693</a>                | <a href="#">RGD1561693.aSep08</a>         | <a href="#">501597</a> | 6865   | 1155 | 9 | 385 | similar to Gene model 784 (RGD1561693) alternative variant aSep08, mRNA.                                 |
| <a href="#">RGD1561708</a>                | <a href="#">RGD1561708.bSep08</a>         | <a href="#">367838</a> | 15315  | 736  | 2 | 157 | hepatocellular carcinoma-associated antigen like (RGD1561708) alternative variant bSep08, mRNA.          |
| <a href="#">RGD1561724</a>                | <a href="#">RGD1561724.aSep08</a>         | <a href="#">366608</a> | 132786 | 1791 |   | 453 | similar to mKIAA0716 protein (RGD1561724) alternative variant aSep08, mRNA.                              |
| <a href="#">RGD1561732</a>                | <a href="#">RGD1561732.aSep08</a>         | <a href="#">363554</a> | 2914   | 1063 |   | 300 | similar to hypothetical protein 4732467B22 (RGD1561732) mRNA.                                            |
| <a href="#">RGD1561734</a>                | <a href="#">RGD1561734.aSep08</a>         | <a href="#">501201</a> | 3840   | 1065 |   | 232 | similar to KIAA1913 (RGD1561734) mRNA.                                                                   |
| <a href="#">RGD1561785andRhot2.dRhot2</a> | <a href="#">RGD1561785andRhot2.bSep08</a> | <a href="#">287156</a> | 2576   | 867  | 5 | 289 | CRA a (RGD1561785andRhot2) alternative variant bSep08, mRNA.                                             |
| <a href="#">RGD1561785andRhot2.dRhot2</a> | <a href="#">RGD1561785andRhot2.bSep08</a> | <a href="#">287157</a> | 2576   | 867  | 5 | 289 | CRA a (RGD1561785andRhot2) alternative variant bSep08, mRNA.                                             |
| <a href="#">RGD1561785andRhot2.dRhot2</a> | <a href="#">RGD1561785andRhot2.cSep08</a> | <a href="#">287156</a> | 2710   | 1402 | 9 | 232 | ras homolog gene family member T2 CRA a (26.3 kD) (RGD1561785andRhot2) alternative variant cSep08, mRNA. |
| <a href="#">RGD1561785andRhot2.dRhot2</a> | <a href="#">RGD1561785andRhot2.cSep08</a> | <a href="#">287157</a> | 2710   | 1402 | 9 | 232 | ras homolog gene family member T2 CRA a (26.3 kD) (RGD1561785andRhot2) alternative variant cSep08, mRNA. |
| <a href="#">RGD1561785andRhot2.dRhot2</a> | <a href="#">RGD1561785andRhot2.dSep08</a> | <a href="#">287156</a> | 513    | 386  | 2 | 128 | CRA a like (RGD1561785andRhot2) alternative variant dSep08, mRNA.                                        |
| <a href="#">RGD1561785andRhot2.dRhot2</a> | <a href="#">RGD1561785andRhot2.dSep08</a> | <a href="#">287157</a> | 513    | 386  | 2 | 128 | CRA a like (RGD1561785andRhot2) alternative variant dSep08, mRNA.                                        |
| <a href="#">RGD1561785andRhot2.dRhot2</a> | <a href="#">RGD1561785andRhot2.eSep08</a> | <a href="#">287156</a> | 2410   | 796  | 7 | 110 | ras homolog gene family member T2 CRA c (12.3 kD) (RGD1561785andRhot2) alternative variant eSep08, mRNA. |
| <a href="#">RGD1561785andRhot2.dRhot2</a> | <a href="#">RGD1561785andRhot2.eSep08</a> | <a href="#">287157</a> | 2410   | 796  | 7 | 110 | ras homolog gene family member T2 CRA c (12.3 kD) (RGD1561785andRhot2) alternative variant eSep08, mRNA. |
| <a href="#">RGD1561785andRhot2.dRhot2</a> | <a href="#">RGD1561785andRhot2.gSep08</a> | <a href="#">287156</a> | 1700   | 501  | 3 | 48  | putative protein (RGD1561785andRhot2) alternative variant gSep08, mRNA.                                  |
| <a href="#">RGD1561785andRhot2.dRhot2</a> | <a href="#">RGD1561785andRhot2.gSep08</a> | <a href="#">287157</a> | 1700   | 501  | 3 | 48  | putative protein (RGD1561785andRhot2) alternative variant gSep08, mRNA.                                  |
| <a href="#">RGD1561796</a>                | <a href="#">RGD1561796.aSep08</a>         | <a href="#">360483</a> | 5733   | 1465 | 3 | 139 | RGD1561796 (14.8 kD) (RGD1561796) alternative variant aSep08, mRNA.                                      |
| <a href="#">RGD1561796</a>                | <a href="#">RGD1561796.bSep08</a>         | <a href="#">360483</a> | 1246   | 703  | 2 | 117 | RGD1561796 (RGD1561796) alternative variant bSep08, mRNA.                                                |
| <a href="#">RGD1561797</a>                | <a href="#">RGD1561797.aSep08</a>         | <a href="#">499655</a> | 4760   | 1790 |   | 79  | RGD1561797 (9.6 kD) (RGD1561797) mRNA.                                                                   |

|                            |                                   |                        |       |      |    |     |                                                                                                                   |
|----------------------------|-----------------------------------|------------------------|-------|------|----|-----|-------------------------------------------------------------------------------------------------------------------|
| <a href="#">RGD1561817</a> | <a href="#">RGD1561817.bSep08</a> | <a href="#">294917</a> | 58731 | 1800 | 6  | 591 | similar to Traf2 and NCK interacting kinase, splice variant 4 (RGD1561817) alternative variant bSep08, mRNA.      |
| <a href="#">RGD1561817</a> | <a href="#">RGD1561817.cSep08</a> | <a href="#">294917</a> | 12870 | 725  | 5  | 232 | similar to Traf2 and NCK interacting kinase, splice variant 4 (RGD1561817) alternative variant cSep08, mRNA.      |
| <a href="#">RGD1561817</a> | <a href="#">RGD1561817.dSep08</a> | <a href="#">294917</a> | 8838  | 3187 | 5  | 192 | similar to Traf2 and NCK interacting kinase, splice variant 4 (RGD1561817) alternative variant dSep08, mRNA.      |
| <a href="#">RGD1561828</a> | <a href="#">RGD1561828.aSep08</a> | <a href="#">679595</a> | 1202  | 541  |    | 139 | RGD1561828 (RGD1561828) mRNA.                                                                                     |
| <a href="#">RGD1561852</a> | <a href="#">RGD1561852.bSep08</a> | <a href="#">499893</a> | 3004  | 1218 | 3  | 79  | similar to Protein C20orf29 (RGD1561852) alternative variant bSep08, mRNA.                                        |
| <a href="#">RGD1561916</a> | <a href="#">RGD1561916.aSep08</a> | <a href="#">500441</a> | 2742  | 683  |    | 127 | similar to testes development-related NYD-SP22 isoform 1 (14.4 kD) (RGD1561916) mRNA.                             |
| <a href="#">RGD1561931</a> | <a href="#">RGD1561931.aSep08</a> | <a href="#">302396</a> | 3790  | 1130 | 3  | 208 | similar to KIAA2022 protein (RGD1561931) alternative variant aSep08, mRNA.                                        |
| <a href="#">RGD1561932</a> | <a href="#">RGD1561932.aSep08</a> | <a href="#">287346</a> | 9875  | 563  |    | 137 | similar to novel protein (16.5 kD) (RGD1561932) mRNA.                                                             |
| <a href="#">RGD1561934</a> | <a href="#">RGD1561934.aSep08</a> | <a href="#">499940</a> | 1065  | 465  |    | 105 | similar to TP53-target gene 5 protein (TP53-inducible gene 5 protein) (RGD1561934) mRNA.                          |
| <a href="#">RGD1561940</a> | <a href="#">RGD1561940.aSep08</a> | <a href="#">364686</a> | 19849 | 2347 | 6  | 288 | RAN binding protein 9 like (RGD1561940) alternative variant aSep08, mRNA.                                         |
| <a href="#">RGD1561940</a> | <a href="#">RGD1561940.bSep08</a> | <a href="#">364686</a> | 72600 | 1647 | 10 | 273 | RAN binding protein like (RGD1561940) alternative variant bSep08, mRNA.                                           |
| <a href="#">RGD1561940</a> | <a href="#">RGD1561940.cSep08</a> | <a href="#">364686</a> | 48677 | 448  | 4  | 149 | RAN binding protein like (RGD1561940) alternative variant cSep08, mRNA.                                           |
| <a href="#">RGD1561940</a> | <a href="#">RGD1561940.dSep08</a> | <a href="#">364686</a> | 11271 | 753  | 3  | 97  | RAN binding protein 9 like (RGD1561940) alternative variant dSep08, mRNA.                                         |
| <a href="#">RGD1561955</a> | <a href="#">RGD1561955.aSep08</a> | <a href="#">361076</a> | 24908 | 782  | 3  | 236 | similar to diacylglycerol kinase eta (RGD1561955) alternative variant aSep08, mRNA.                               |
| <a href="#">RGD1561955</a> | <a href="#">RGD1561955.bSep08</a> | <a href="#">361076</a> | 5703  | 401  | 1  | 110 | similar to diacylglycerol kinase eta (RGD1561955) alternative variant bSep08, mRNA.                               |
| <a href="#">RGD1561958</a> | <a href="#">RGD1561958.bSep08</a> | <a href="#">363490</a> | 43601 | 734  | 1  | 135 | similar to RIKEN cDNA 2010106E10 (RGD1561958) alternative variant bSep08, mRNA.                                   |
| <a href="#">RGD1561962</a> | <a href="#">RGD1561962.aSep08</a> | <a href="#">304201</a> | 15543 | 2290 | 10 | 688 | similar to ecotropic viral integration site 5-like (RGD1561962) alternative variant aSep08, mRNA.                 |
| <a href="#">RGD1561962</a> | <a href="#">RGD1561962.bSep08</a> | <a href="#">304201</a> | 1615  | 1187 | 5  | 230 | similar to ecotropic viral integration site 5-like (RGD1561962) alternative variant bSep08, mRNA.                 |
| <a href="#">RGD1561962</a> | <a href="#">RGD1561962.dSep08</a> | <a href="#">304201</a> | 5899  | 219  | 2  | 52  | similar to ecotropic viral integration site 5-like (6.1 kD) (RGD1561962) alternative variant dSep08, mRNA.        |
| <a href="#">RGD1561962</a> | <a href="#">RGD1561962.eSep08</a> | <a href="#">304201</a> | 456   | 365  | 2  | 48  | similar to ecotropic viral integration site 5-like (RGD1561962) alternative variant eSep08, mRNA.                 |
| <a href="#">RGD1561963</a> | <a href="#">RGD1561963.aSep08</a> | <a href="#">301556</a> | 26041 | 2032 | 13 | 527 | similar to Dedicator of cytokinesis protein 10 (Protein zizimin 3) (RGD1561963) alternative variant aSep08, mRNA. |
| <a href="#">RGD1561963</a> | <a href="#">RGD1561963.bSep08</a> | <a href="#">301556</a> | 7476  | 1186 | 4  | 183 | similar to Dedicator of cytokinesis protein 10 (Protein zizimin 3) (RGD1561963) alternative variant bSep08, mRNA. |
| <a href="#">RGD1561963</a> | <a href="#">RGD1561963.cSep08</a> | <a href="#">301556</a> | 6321  | 506  | 5  | 168 | similar to Dedicator of cytokinesis protein 10 (Protein zizimin 3) (RGD1561963) alternative variant cSep08, mRNA. |

|                            |                                   |                        |       |      |   |     |                                                                                                                             |
|----------------------------|-----------------------------------|------------------------|-------|------|---|-----|-----------------------------------------------------------------------------------------------------------------------------|
| <a href="#">RGD1561963</a> | <a href="#">RGD1561963.dSep08</a> | <a href="#">301556</a> | 4446  | 809  | 3 | 115 | similar to Deducator of cytokinesis protein 10 (Protein zizimin 3) (12.9 kD) (RGD1561963) alternative variant dSep08, mRNA. |
| <a href="#">RGD1561972</a> | <a href="#">RGD1561972.aSep08</a> | <a href="#">308581</a> | 632   | 444  |   | 94  | similar to hypothetical protein FLJ32658 (RGD1561972) mRNA.                                                                 |
| <a href="#">RGD1561988</a> | <a href="#">RGD1561988.aSep08</a> | <a href="#">307449</a> | 47104 | 551  |   | 108 | similar to Colorectal mutant cancer protein (MCC protein) (RGD1561988) mRNA.                                                |
| <a href="#">RGD1561996</a> | <a href="#">RGD1561996.aSep08</a> | <a href="#">300821</a> | 15482 | 787  | 3 | 123 | similar to 60S ribosomal protein L35 (RGD1561996) alternative variant aSep08, mRNA.                                         |
| <a href="#">RGD1561996</a> | <a href="#">RGD1561996.bSep08</a> | <a href="#">300821</a> | 4458  | 727  | 2 | 53  | similar to 60S ribosomal protein L35 (RGD1561996) alternative variant bSep08, mRNA.                                         |
| <a href="#">RGD1561997</a> | <a href="#">RGD1561997.aSep08</a> | <a href="#">317271</a> | 69084 | 1579 |   | 316 | similar to Smage-1 protein (34.3 kD) (RGD1561997) mRNA.                                                                     |
| <a href="#">RGD1562010</a> | <a href="#">RGD1562010.aSep08</a> | <a href="#">500286</a> | 3706  | 469  |   | 61  | similar to Fls485 protein (RGD1562010) mRNA.                                                                                |
| <a href="#">RGD1562011</a> | <a href="#">RGD1562011.aSep08</a> | <a href="#">499297</a> | 3463  | 2014 | 2 | 301 | similar to MAS-related G-protein coupled receptor, member G (33.9 kD) (RGD1562011) alternative variant aSep08, mRNA.        |
| <a href="#">RGD1562011</a> | <a href="#">RGD1562011.bSep08</a> | <a href="#">499297</a> | 1865  | 383  | 2 | 107 | similar to MAS-related G-protein coupled receptor, member G (RGD1562011) alternative variant bSep08, mRNA.                  |
| <a href="#">RGD1562012</a> | <a href="#">RGD1562012.aSep08</a> | <a href="#">497962</a> | 12953 | 776  | 1 | 93  | RGD1562012 (RGD1562012) alternative variant aSep08, mRNA.                                                                   |
| <a href="#">RGD1562012</a> | <a href="#">RGD1562012.bSep08</a> | <a href="#">497962</a> | 12957 | 759  |   | 78  | RGD1562012 (9.4 kD) (RGD1562012) alternative variant bSep08, complete mRNA.                                                 |
| <a href="#">RGD1562018</a> | <a href="#">RGD1562018.aSep08</a> | <a href="#">361030</a> | 15213 | 1479 | 7 | 298 | similar to Protein C14orf101 homolog (RGD1562018) alternative variant aSep08, mRNA.                                         |
| <a href="#">RGD1562018</a> | <a href="#">RGD1562018.bSep08</a> | <a href="#">361030</a> | 12864 | 614  | 5 | 204 | similar to Protein C14orf101 homolog (RGD1562018) alternative variant bSep08, mRNA.                                         |
| <a href="#">RGD1562018</a> | <a href="#">RGD1562018.cSep08</a> | <a href="#">361030</a> | 20483 | 822  | 6 | 204 | similar to Protein C14orf101 homolog (RGD1562018) alternative variant cSep08, mRNA.                                         |
| <a href="#">RGD1562018</a> | <a href="#">RGD1562018.dSep08</a> | <a href="#">361030</a> | 11333 | 663  | 5 | 179 | similar to Protein C14orf101 homolog (RGD1562018) alternative variant dSep08, mRNA.                                         |
| <a href="#">RGD1562018</a> | <a href="#">RGD1562018.eSep08</a> | <a href="#">361030</a> | 3816  | 264  | 2 | 87  | similar to Protein C14orf101 homolog (RGD1562018) alternative variant eSep08, mRNA.                                         |
| <a href="#">RGD1562026</a> | <a href="#">RGD1562026.aSep08</a> | <a href="#">500074</a> | 4354  | 738  |   | 127 | RGD1562026 (RGD1562026) mRNA.                                                                                               |
| <a href="#">RGD1562029</a> | <a href="#">RGD1562029.aSep08</a> | <a href="#">501150</a> | 46659 | 688  |   | 222 | similar to KIAA2012 protein (RGD1562029) mRNA.                                                                              |
| <a href="#">RGD1562037</a> | <a href="#">RGD1562037.aSep08</a> | <a href="#">498764</a> | 4444  | 711  |   | 106 | similar to OTTHUMP00000046255 (RGD1562037) mRNA.                                                                            |
| <a href="#">RGD1562044</a> | <a href="#">RGD1562044.bSep08</a> | <a href="#">499068</a> | 18915 | 1250 | 4 | 368 | similar to Zfp583 protein (RGD1562044) alternative variant bSep08, mRNA.                                                    |
| <a href="#">RGD1562044</a> | <a href="#">RGD1562044.dSep08</a> | <a href="#">499068</a> | 9592  | 405  | 4 | 68  | similar to Zfp583 protein (RGD1562044) alternative variant dSep08, mRNA.                                                    |
| <a href="#">RGD1562071</a> | <a href="#">RGD1562071.aSep08</a> | <a href="#">499931</a> | 4273  | 770  |   | 144 | similar to Src-like adaptor protein-2 (RGD1562071) mRNA.                                                                    |
| <a href="#">RGD1562080</a> | <a href="#">RGD1562080.aSep08</a> | <a href="#">498827</a> | 879   | 728  |   | 175 | similar to Hypothetical protein CBG10141 (RGD1562080) mRNA.                                                                 |
| <a href="#">RGD1562084</a> | <a href="#">RGD1562084.bSep08</a> | <a href="#">501002</a> | 1349  | 315  | 1 | 86  | similar to expressed sequence AI118078 (RGD1562084) alternative variant bSep08, mRNA.                                       |
| <a href="#">RGD1562091</a> | <a href="#">RGD1562091.bSep08</a> | <a href="#">292690</a> | 1680  | 678  | 2 | 69  | similar to expressed sequence C79127 (7.3 kD) (RGD1562091) alternative variant bSep08, mRNA.                                |

|                                      |                                             |                        |        |      |   |     |                                                                                                                                          |
|--------------------------------------|---------------------------------------------|------------------------|--------|------|---|-----|------------------------------------------------------------------------------------------------------------------------------------------|
| <a href="#">RGD1562095_predicted</a> | <a href="#">RGD1562095_predicted_bSep08</a> | <a href="#">499818</a> | 61043  | 541  | 3 | 39  | similar to protein phosphatase 1, regulatory (inhibitor) subunit 1C (predicted) (RGD1562095_predicted) alternative variant bSep08, mRNA. |
| <a href="#">RGD1562097</a>           | <a href="#">RGD1562097.aSep08</a>           | <a href="#">498718</a> | 15380  | 395  | 1 | 88  | RGD1562097 (RGD1562097) alternative variant aSep08, mRNA.                                                                                |
| <a href="#">RGD1562097</a>           | <a href="#">RGD1562097.bSep08</a>           | <a href="#">498718</a> | 18262  | 328  | 1 | 77  | RGD1562097 (RGD1562097) alternative variant bSep08, mRNA.                                                                                |
| <a href="#">RGD1562099</a>           | <a href="#">RGD1562099.aSep08</a>           | <a href="#">290325</a> | 5964   | 713  |   | 173 | similar to putative protein product of HMFN0672 (RGD1562099) mRNA.                                                                       |
| <a href="#">RGD1562101</a>           | <a href="#">RGD1562101.aSep08</a>           | <a href="#">294614</a> | 13648  | 901  | 4 | 175 | similar to very large G-protein coupled receptor 1 (18.8 kD) (RGD1562101) alternative variant aSep08, mRNA.                              |
| <a href="#">RGD1562101</a>           | <a href="#">RGD1562101.bSep08</a>           | <a href="#">294614</a> | 55891  | 419  | 3 | 139 | similar to very large G-protein coupled receptor 1 (RGD1562101) alternative variant bSep08, mRNA.                                        |
| <a href="#">RGD1562107</a>           | <a href="#">RGD1562107.aSep08</a>           | <a href="#">363205</a> | 7072   | 1775 |   | 510 | similar to class-alpha glutathione S-transferase (RGD1562107) alternative variant aSep08, mRNA.                                          |
| <a href="#">RGD1562114</a>           | <a href="#">RGD1562114.bSep08</a>           | <a href="#">500795</a> | 1401   | 1012 | 1 | 89  | RGD1562114 (10.4 kD) (RGD1562114) alternative variant bSep08, mRNA.                                                                      |
| <a href="#">RGD1562135</a>           | <a href="#">RGD1562135.aSep08</a>           | <a href="#">499979</a> | 28987  | 1842 | 1 | 95  | RGD1562135 (RGD1562135) alternative variant aSep08, mRNA.                                                                                |
| <a href="#">RGD1562135</a>           | <a href="#">RGD1562135.bSep08</a>           | <a href="#">499979</a> | 18668  | 743  | 1 | 50  | RGD1562135 (5.7 kD) (RGD1562135) alternative variant bSep08, mRNA.                                                                       |
| <a href="#">RGD1562146</a>           | <a href="#">RGD1562146.aSep08</a>           | <a href="#">500612</a> | 5310   | 667  |   | 87  | RGD1562146 (9.5 kD) (RGD1562146) mRNA.                                                                                                   |
| <a href="#">RGD1562161</a>           | <a href="#">RGD1562161.cSep08</a>           | <a href="#">501559</a> | 14629  | 557  | 3 | 52  | putative protein of mammalian origin (RGD1562161) alternative variant cSep08, mRNA.                                                      |
| <a href="#">RGD1562174</a>           | <a href="#">RGD1562174.aSep08</a>           | <a href="#">310538</a> | 55721  | 446  |   | 148 | similar to mKIAA1450 protein (RGD1562174) mRNA.                                                                                          |
| <a href="#">RGD1562181</a>           | <a href="#">RGD1562181.aSep08</a>           | <a href="#">498853</a> | 77558  | 673  |   | 92  | similar to ribosomal protein S2 (RGD1562181) mRNA.                                                                                       |
| <a href="#">RGD1562200</a>           | <a href="#">RGD1562200.aSep08</a>           | <a href="#">363471</a> | 3523   | 1025 | 8 | 252 | similar to GS2 gene (27.4 kD) (RGD1562200) alternative variant aSep08, mRNA.                                                             |
| <a href="#">RGD1562200</a>           | <a href="#">RGD1562200.bSep08</a>           | <a href="#">363471</a> | 1034   | 401  | 2 | 110 | similar to GS2 gene (12.2 kD) (RGD1562200) alternative variant bSep08, mRNA.                                                             |
| <a href="#">RGD1562200</a>           | <a href="#">RGD1562200.cSep08</a>           | <a href="#">363471</a> | 1823   | 780  | 3 | 87  | similar to GS2 gene (RGD1562200) alternative variant cSep08, mRNA.                                                                       |
| <a href="#">RGD1562218</a>           | <a href="#">RGD1562218.bSep08</a>           | <a href="#">292100</a> | 8454   | 735  | 4 | 245 | similar to RIKEN cDNA 0610039J04 (RGD1562218) alternative variant bSep08, mRNA.                                                          |
| <a href="#">RGD1562230</a>           | <a href="#">RGD1562230.aSep08</a>           | <a href="#">361839</a> | 717596 | 817  | 6 | 243 | similar to catenin alpha 3 (RGD1562230) alternative variant aSep08, mRNA.                                                                |
| <a href="#">RGD1562230</a>           | <a href="#">RGD1562230.bSep08</a>           | <a href="#">361839</a> | 95617  | 731  | 3 | 130 | similar to catenin alpha 3 (RGD1562230) alternative variant bSep08, mRNA.                                                                |
| <a href="#">RGD1562236</a>           | <a href="#">RGD1562236.aSep08</a>           | <a href="#">315019</a> | 2399   | 1886 |   | 310 | similar to breast cancer membrane protein 101 (34.6 kD) (RGD1562236) mRNA.                                                               |
| <a href="#">RGD1562252</a>           | <a href="#">RGD1562252.bSep08</a>           | <a href="#">315646</a> | 4684   | 2106 | 2 | 547 | similar to hypothetical gene supported by AK085276 (RGD1562252) alternative variant bSep08, mRNA.                                        |
| <a href="#">RGD1562263</a>           | <a href="#">RGD1562263.aSep08</a>           | <a href="#">295092</a> | 71222  | 773  |   | 222 | similar to GTPase activating protein testicular GAP1 and similar to GTPase activating protein testicular GAP1 (RGD1562263) mRNA.         |

|                            |                                   |                        |       |      |   |     |                                                                                                                                  |
|----------------------------|-----------------------------------|------------------------|-------|------|---|-----|----------------------------------------------------------------------------------------------------------------------------------|
| <a href="#">RGD1562263</a> | <a href="#">RGD1562263.aSep08</a> | <a href="#">691033</a> | 71222 | 773  |   | 222 | similar to GTPase activating protein testicular GAP1 and similar to GTPase activating protein testicular GAP1 (RGD1562263) mRNA. |
| <a href="#">RGD1562276</a> | <a href="#">RGD1562276.aSep08</a> | <a href="#">360567</a> | 17527 | 441  |   | 97  | similar to novel protein (RGD1562276) mRNA.                                                                                      |
| <a href="#">RGD1562284</a> | <a href="#">RGD1562284.aSep08</a> | <a href="#">313837</a> | 32237 | 1795 | 2 | 447 | similar to Glutaminy-peptide cyclotransferase precursor (QC) (RGD1562284) alternative variant aSep08, complete mRNA.             |
| <a href="#">RGD1562284</a> | <a href="#">RGD1562284.cSep08</a> | <a href="#">313837</a> | 24576 | 740  | 1 | 246 | similar to Glutaminy-peptide cyclotransferase precursor (QC) (RGD1562284) alternative variant cSep08, mRNA.                      |
| <a href="#">RGD1562301</a> | <a href="#">RGD1562301.aSep08</a> | <a href="#">501055</a> | 2357  | 1043 | 5 | 315 | similar to glutaminyl-tRNA synthetase (RGD1562301) alternative variant aSep08, mRNA.                                             |
| <a href="#">RGD1562301</a> | <a href="#">RGD1562301.bSep08</a> | <a href="#">501055</a> | 1752  | 691  | 2 | 175 | similar to glutaminyl-tRNA synthetase (19.7 kD) (RGD1562301) alternative variant bSep08, mRNA.                                   |
| <a href="#">RGD1562301</a> | <a href="#">RGD1562301.cSep08</a> | <a href="#">501055</a> | 1843  | 672  | 3 | 117 | similar to glutaminyl-tRNA synthetase (RGD1562301) alternative variant cSep08, mRNA.                                             |
| <a href="#">RGD1562310</a> | <a href="#">RGD1562310.bSep08</a> | <a href="#">498188</a> | 6423  | 743  | 3 | 89  | similar to hypothetical protein FLJ21415 (RGD1562310) alternative variant bSep08, mRNA.                                          |
| <a href="#">RGD1562311</a> | <a href="#">RGD1562311.aSep08</a> | <a href="#">365169</a> | 2646  | 231  |   | 54  | similar to PIRA5 (RGD1562311) mRNA.                                                                                              |
| <a href="#">RGD1562317</a> | <a href="#">RGD1562317.bSep08</a> | <a href="#">301388</a> | 2564  | 369  | 1 | 66  | similar to expressed sequence AW212394 (RGD1562317) alternative variant bSep08, mRNA.                                            |
| <a href="#">RGD1562323</a> | <a href="#">RGD1562323.aSep08</a> | <a href="#">499984</a> | 18655 | 2068 |   | 373 | similar to fatty acid translocase/CD36 (RGD1562323) mRNA.                                                                        |
| <a href="#">RGD1562326</a> | <a href="#">RGD1562326.aSep08</a> | <a href="#">499877</a> | 12464 | 2908 | 6 | 190 | similar to ubiquitin-protein ligase E3-alpha (RGD1562326) mRNA.                                                                  |
| <a href="#">RGD1562335</a> | <a href="#">RGD1562335.aSep08</a> | <a href="#">498703</a> | 32622 | 1797 | 5 | 475 | similar to mKIAA1931 protein (RGD1562335) alternative variant aSep08, mRNA.                                                      |
| <a href="#">RGD1562335</a> | <a href="#">RGD1562335.bSep08</a> | <a href="#">498703</a> | 20884 | 1444 | 7 | 357 | similar to mKIAA1931 protein (RGD1562335) alternative variant bSep08, mRNA.                                                      |
| <a href="#">RGD1562335</a> | <a href="#">RGD1562335.cSep08</a> | <a href="#">498703</a> | 27517 | 719  | 2 | 179 | similar to mKIAA1931 protein (RGD1562335) alternative variant cSep08, mRNA.                                                      |
| <a href="#">RGD1562335</a> | <a href="#">RGD1562335.dSep08</a> | <a href="#">498703</a> | 4090  | 530  | 3 | 176 | similar to mKIAA1931 protein (RGD1562335) alternative variant dSep08, mRNA.                                                      |
| <a href="#">RGD1562335</a> | <a href="#">RGD1562335.gSep08</a> | <a href="#">498703</a> | 16155 | 530  | 4 | 76  | similar to mKIAA1931 protein (RGD1562335) alternative variant gSep08, mRNA.                                                      |
| <a href="#">RGD1562344</a> | <a href="#">RGD1562344.aSep08</a> | <a href="#">295337</a> | 5133  | 1236 | 4 | 188 | similar to Gm566 protein (20.8 kD) (RGD1562344) alternative variant aSep08, mRNA.                                                |
| <a href="#">RGD1562344</a> | <a href="#">RGD1562344.cSep08</a> | <a href="#">295337</a> | 10740 | 1783 | 4 | 21  | similar to Gm566 protein (RGD1562344) alternative variant cSep08, mRNA.                                                          |
| <a href="#">RGD1562351</a> | <a href="#">RGD1562351.bSep08</a> | <a href="#">499990</a> | 18199 | 2806 | 2 | 82  | putative protein, with a transmembrane domain, of vertebrate origin (8.8 kD) (RGD1562351) alternative variant bSep08, mRNA.      |
| <a href="#">RGD1562352</a> | <a href="#">RGD1562352.aSep08</a> | <a href="#">498787</a> | 5809  | 1037 | 1 | 294 | similar to isopentenyl diphosphate delta-isomerase type 2 (RGD1562352) alternative variant aSep08, mRNA.                         |
| <a href="#">RGD1562352</a> | <a href="#">RGD1562352.bSep08</a> | <a href="#">498787</a> | 3985  | 716  | 1 | 89  | similar to isopentenyl diphosphate delta-isomerase type 2 (10.5 kD) (RGD1562352) alternative variant bSep08, mRNA.               |



|                                      |                                             |                        |       |      |   |     |                                                                                                                                                                                 |
|--------------------------------------|---------------------------------------------|------------------------|-------|------|---|-----|---------------------------------------------------------------------------------------------------------------------------------------------------------------------------------|
| <a href="#">RGD1562356</a>           | <a href="#">RGD1562356.bSep08</a>           | <a href="#">498456</a> | 12696 | 502  | 3 | 92  | similar to hypothetical protein A430083B19 (RGD1562356) alternative variant bSep08, mRNA.                                                                                       |
| <a href="#">RGD1562356</a>           | <a href="#">RGD1562356.cSep08</a>           | <a href="#">498456</a> | 643   | 524  | 1 | 74  | similar to hypothetical protein A430083B19 (RGD1562356) alternative variant cSep08, mRNA.                                                                                       |
| <a href="#">RGD1562359</a>           | <a href="#">RGD1562359.aSep08</a>           | <a href="#">500049</a> | 10548 | 1067 |   | 355 | similar to hypothetical protein 4932408B21 (RGD1562359) mRNA.                                                                                                                   |
| <a href="#">RGD1562371</a>           | <a href="#">RGD1562371.aSep08</a>           | <a href="#">498819</a> | 11688 | 424  |   | 61  | similar to GREB1 protein isoform a (RGD1562371) mRNA.                                                                                                                           |
| <a href="#">RGD1562376</a>           | <a href="#">RGD1562376.aSep08</a>           | <a href="#">499055</a> | 2310  | 496  | 3 | 165 | CRA d (RGD1562376) alternative variant aSep08, mRNA.                                                                                                                            |
| <a href="#">RGD1562376</a>           | <a href="#">RGD1562376.bSep08</a>           | <a href="#">499055</a> | 5429  | 1211 | 4 | 157 | CRA d (18.3 kD) (RGD1562376) alternative variant bSep08, mRNA.                                                                                                                  |
| <a href="#">RGD1562376</a>           | <a href="#">RGD1562376.cSep08</a>           | <a href="#">499055</a> | 3706  | 1019 | 3 | 75  | CRA d like (8.0 kD) (RGD1562376) alternative variant cSep08, mRNA.                                                                                                              |
| <a href="#">RGD1562376</a>           | <a href="#">RGD1562376.dSep08</a>           | <a href="#">499055</a> | 1243  | 392  | 2 | 59  | CRA c like (6.3 kD) (RGD1562376) alternative variant dSep08, mRNA.                                                                                                              |
| <a href="#">RGD1562376</a>           | <a href="#">RGD1562376.eSep08</a>           | <a href="#">499055</a> | 4810  | 444  | 3 | 19  | putative protein (RGD1562376) alternative variant eSep08, mRNA.                                                                                                                 |
| <a href="#">RGD1562390</a>           | <a href="#">RGD1562390.aSep08</a>           | <a href="#">307797</a> | 1819  | 890  |   | 228 | similar to RGD, leucine-rich repeat, tropomodulin and proline-rich containing protein (RGD1562390) mRNA.                                                                        |
| <a href="#">RGD1562406</a>           | <a href="#">RGD1562406.aSep08</a>           | <a href="#">288559</a> | 1019  | 834  | 3 | 252 | similar to FLJ00248 protein (RGD1562406) alternative variant aSep08, mRNA.                                                                                                      |
| <a href="#">RGD1562449</a>           | <a href="#">RGD1562449.aSep08</a>           | <a href="#">366333</a> | 8824  | 662  |   | 131 | similar to hypothetical protein MGC2817 (RGD1562449) mRNA.                                                                                                                      |
| <a href="#">RGD1562451</a>           | <a href="#">RGD1562451.aSep08</a>           | <a href="#">288398</a> | 3578  | 3023 | 1 | 331 | similar to Pabpc4 predicted protein (35.5 kD) (RGD1562451) alternative variant aSep08, mRNA.                                                                                    |
| <a href="#">RGD1562451</a>           | <a href="#">RGD1562451.bSep08</a>           | <a href="#">288398</a> | 775   | 640  | 2 | 213 | similar to Pabpc4 predicted protein (RGD1562451) alternative variant bSep08, mRNA.                                                                                              |
| <a href="#">RGD1562465</a>           | <a href="#">RGD1562465.aSep08</a>           | <a href="#">499006</a> | 14227 | 656  |   | 58  | similar to GTPase activating protein testicular GAP1 (RGD1562465) mRNA.                                                                                                         |
| <a href="#">RGD1562481andGpr123</a>  | <a href="#">RGD1562481andGpr123.bSep08</a>  | <a href="#">309097</a> | 15540 | 828  | 1 | 120 | putative protein (RGD1562481andGpr123) alternative variant bSep08, mRNA.                                                                                                        |
| <a href="#">RGD1562481andGpr123</a>  | <a href="#">RGD1562481andGpr123.bSep08</a>  | <a href="#">499283</a> | 15540 | 828  | 1 | 120 | putative protein (RGD1562481andGpr123) alternative variant bSep08, mRNA.                                                                                                        |
| <a href="#">RGD1562488_predicted</a> | <a href="#">RGD1562488_predicted.aSep08</a> | <a href="#">294268</a> | 1069  | 671  |   | 127 | similar to butyrophilin-like 8 (predicted) (RGD1562488_predicted) mRNA.                                                                                                         |
| <a href="#">RGD1562492</a>           | <a href="#">RGD1562492.bSep08</a>           | <a href="#">499151</a> | 11405 | 2560 | 4 | 676 | similar to Orphan sodium- and chloride-dependent neurotransmitter transporter NTT5 (Solute carrier family 6 member 16) (76.7 kD) (RGD1562492) alternative variant bSep08, mRNA. |
| <a href="#">RGD1562494</a>           | <a href="#">RGD1562494.aSep08</a>           | <a href="#">500935</a> | 925   | 366  |   | 122 | similar to keratin 6 alpha (RGD1562494) mRNA.                                                                                                                                   |
| <a href="#">RGD1562502</a>           | <a href="#">RGD1562502.bSep08</a>           | <a href="#">363485</a> | 3582  | 1057 | 4 | 102 | similar to RIKEN cDNA 2610029G23 (RGD1562502) alternative variant bSep08, mRNA.                                                                                                 |
| <a href="#">RGD1562511</a>           | <a href="#">RGD1562511.aSep08</a>           | <a href="#">500571</a> | 20800 | 1756 |   | 301 | similar to MmKIF17 (RGD1562511) mRNA.                                                                                                                                           |
| <a href="#">RGD1562526</a>           | <a href="#">RGD1562526.aSep08</a>           | <a href="#">499821</a> | 50954 | 1242 |   | 414 | similar to RIKEN cDNA D430039N05 gene (RGD1562526) mRNA.                                                                                                                        |
| <a href="#">RGD1562529</a>           | <a href="#">RGD1562529.aSep08</a>           | <a href="#">311372</a> | 12487 | 2378 |   | 764 | similar to hypothetical protein FLJ21439 (RGD1562529) mRNA.                                                                                                                     |

|                            |                                   |                        |        |      |    |     |                                                                                                                        |
|----------------------------|-----------------------------------|------------------------|--------|------|----|-----|------------------------------------------------------------------------------------------------------------------------|
| <a href="#">RGD1562532</a> | <a href="#">RGD1562532.aSep08</a> | <a href="#">500513</a> | 66403  | 2433 |    | 441 | hypothetical gene supported by BC079057 (50.6 kD) (RGD1562532) mRNA.                                                   |
| <a href="#">RGD1562533</a> | <a href="#">RGD1562533.bSep08</a> | <a href="#">498136</a> | 17670  | 971  | 3  | 172 | similar to mKIAA0774 protein (RGD1562533) alternative variant bSep08, mRNA.                                            |
| <a href="#">RGD1562540</a> | <a href="#">RGD1562540.bSep08</a> | <a href="#">500678</a> | 13681  | 479  | 4  | 88  | RGD1562540 (RGD1562540) alternative variant bSep08, mRNA.                                                              |
| <a href="#">RGD1562543</a> | <a href="#">RGD1562543.aSep08</a> | <a href="#">308719</a> | 828    | 744  | 2  | 101 | similar to ribosomal protein L27a (RGD1562543) mRNA.                                                                   |
| <a href="#">RGD1562557</a> | <a href="#">RGD1562557.aSep08</a> | <a href="#">500723</a> | 1672   | 722  |    | 240 | putative protein of mammalian origin (RGD1562557) mRNA.                                                                |
| <a href="#">RGD1562582</a> | <a href="#">RGD1562582.bSep08</a> | <a href="#">499935</a> | 30738  | 537  | 4  | 179 | similar to KIAA0406-like protein (RGD1562582) alternative variant bSep08, mRNA.                                        |
| <a href="#">RGD1562590</a> | <a href="#">RGD1562590.aSep08</a> | <a href="#">312365</a> | 42362  | 1027 |    | 342 | similar to hypothetical protein (RGD1562590) mRNA.                                                                     |
| <a href="#">RGD1562608</a> | <a href="#">RGD1562608.aSep08</a> | <a href="#">498831</a> | 30836  | 715  |    | 77  | similar to KIAA1328 protein (RGD1562608) mRNA.                                                                         |
| <a href="#">RGD1562618</a> | <a href="#">RGD1562618.bSep08</a> | <a href="#">501007</a> | 3932   | 994  | 2  | 103 | similar to RIKEN cDNA 6030419C18 gene (11.7 kD) (RGD1562618) alternative variant bSep08, mRNA.                         |
| <a href="#">RGD1562619</a> | <a href="#">RGD1562619.aSep08</a> | <a href="#">499147</a> | 1559   | 345  | 1  | 109 | similar to SCRL protein variant 1 (RGD1562619) alternative variant aSep08, mRNA.                                       |
| <a href="#">RGD1562619</a> | <a href="#">RGD1562619.bSep08</a> | <a href="#">499147</a> | 1557   | 326  | 1  | 75  | similar to SCRL protein variant 1 (RGD1562619) alternative variant bSep08, mRNA.                                       |
| <a href="#">RGD1562622</a> | <a href="#">RGD1562622.bSep08</a> | <a href="#">503035</a> | 1204   | 568  | 2  | 47  | similar to RIKEN cDNA 6330442E10 gene (5.1 kD) (RGD1562622) alternative variant bSep08, mRNA.                          |
| <a href="#">RGD1562626</a> | <a href="#">RGD1562626.aSep08</a> | <a href="#">287622</a> | 44284  | 2073 | 16 | 474 | similar to adaptor molecule SRCASM (RGD1562626) alternative variant aSep08, mRNA.                                      |
| <a href="#">RGD1562626</a> | <a href="#">RGD1562626.bSep08</a> | <a href="#">287622</a> | 4439   | 404  | 3  | 50  | similar to adaptor molecule SRCASM (RGD1562626) alternative variant bSep08, mRNA.                                      |
| <a href="#">RGD1562629</a> | <a href="#">RGD1562629.aSep08</a> | <a href="#">361948</a> | 138028 | 780  | 6  | 260 | similar to neurobeachin (RGD1562629) alternative variant aSep08, mRNA.                                                 |
| <a href="#">RGD1562629</a> | <a href="#">RGD1562629.bSep08</a> | <a href="#">361948</a> | 3237   | 515  | 2  | 31  | similar to neurobeachin (3.8 kD) (RGD1562629) alternative variant bSep08, mRNA.                                        |
| <a href="#">RGD1562639</a> | <a href="#">RGD1562639.aSep08</a> | <a href="#">315756</a> | 28017  | 532  |    | 60  | similar to c-myc promoter binding protein (RGD1562639) mRNA.                                                           |
| <a href="#">RGD1562646</a> | <a href="#">RGD1562646.aSep08</a> | <a href="#">305392</a> | 14790  | 1457 |    | 485 | condensin I complex (RGD1562646) mRNA.                                                                                 |
| <a href="#">RGD1562657</a> | <a href="#">RGD1562657.bSep08</a> | <a href="#">361709</a> | 507    | 425  | 2  | 121 | similar to hypothetical protein DKFZp761E198 (RGD1562657) alternative variant bSep08, mRNA.                            |
| <a href="#">RGD1562665</a> | <a href="#">RGD1562665.aSep08</a> | <a href="#">362936</a> | 6612   | 1657 | 4  | 385 | similar to 1500031N24Rik protein (RGD1562665) alternative variant aSep08, mRNA.                                        |
| <a href="#">RGD1562665</a> | <a href="#">RGD1562665.bSep08</a> | <a href="#">362936</a> | 10817  | 1868 | 5  | 369 | similar to 1500031N24Rik protein (41.7 kD) (RGD1562665) alternative variant bSep08, mRNA.                              |
| <a href="#">RGD1562673</a> | <a href="#">RGD1562673.bSep08</a> | <a href="#">363551</a> | 14632  | 1634 | 3  | 97  | similar to Prostatic spermine-binding protein precursor (SBP) (10.8 kD) (RGD1562673) alternative variant bSep08, mRNA. |
| <a href="#">RGD1562691</a> | <a href="#">RGD1562691.aSep08</a> | <a href="#">361185</a> | 9492   | 1221 | 5  | 273 | similar to RIKEN cDNA 0710008K08 (RGD1562691) alternative variant aSep08, mRNA.                                        |
| <a href="#">RGD1562691</a> | <a href="#">RGD1562691.bSep08</a> | <a href="#">361185</a> | 3150   | 630  | 3  | 130 | similar to RIKEN cDNA 0710008K08 (RGD1562691) alternative variant bSep08, mRNA.                                        |
| <a href="#">RGD1562691</a> | <a href="#">RGD1562691.cSep08</a> | <a href="#">361185</a> | 13198  | 334  | 3  | 70  | similar to RIKEN cDNA 0710008K08 (RGD1562691) alternative variant cSep08, mRNA.                                        |

|                            |                                   |                        |        |      |   |     |                                                                                                                               |
|----------------------------|-----------------------------------|------------------------|--------|------|---|-----|-------------------------------------------------------------------------------------------------------------------------------|
| <a href="#">RGD1562691</a> | <a href="#">RGD1562691.dSep08</a> | <a href="#">361185</a> | 9407   | 1553 | 3 | 126 | similar to RIKEN cDNA 0710008K08 (13.3 kD) (RGD1562691) alternative variant dSep08, mRNA.                                     |
| <a href="#">RGD1562717</a> | <a href="#">RGD1562717.aSep08</a> | <a href="#">363767</a> | 99610  | 448  |   | 149 | similar to ABI gene family, member 3 (NESH) binding protein (RGD1562717) mRNA.                                                |
| <a href="#">RGD1562767</a> | <a href="#">RGD1562767.bSep08</a> | <a href="#">362133</a> | 7874   | 578  | 1 | 192 | similar to RIKEN cDNA 2310010M24 (RGD1562767) alternative variant bSep08, mRNA.                                               |
| <a href="#">RGD1562767</a> | <a href="#">RGD1562767.cSep08</a> | <a href="#">362133</a> | 11137  | 1902 | 2 | 172 | similar to RIKEN cDNA 2310010M24 (19.6 kD) (RGD1562767) alternative variant cSep08, mRNA.                                     |
| <a href="#">RGD1562768</a> | <a href="#">RGD1562768.aSep08</a> | <a href="#">302327</a> | 6092   | 620  |   | 136 | similar to ZNF6 protein (RGD1562768) mRNA.                                                                                    |
| <a href="#">RGD1562811</a> | <a href="#">RGD1562811.aSep08</a> | <a href="#">315651</a> | 11254  | 1250 |   | 220 | RGD1562811 (RGD1562811) mRNA.                                                                                                 |
| <a href="#">RGD1562844</a> | <a href="#">RGD1562844.aSep08</a> | <a href="#">306892</a> | 31461  | 997  | 5 | 332 | similar to serine (or cysteine) proteinase inhibitor, clade B, member 9 (RGD1562844) alternative variant aSep08, mRNA.        |
| <a href="#">RGD1562844</a> | <a href="#">RGD1562844.bSep08</a> | <a href="#">306892</a> | 8023   | 1612 | 4 | 329 | similar to serine (or cysteine) proteinase inhibitor, clade B, member 9 (RGD1562844) alternative variant bSep08, mRNA.        |
| <a href="#">RGD1562844</a> | <a href="#">RGD1562844.cSep08</a> | <a href="#">306892</a> | 4741   | 761  |   | 150 | similar to serine (or cysteine) proteinase inhibitor, clade B, member 9 (RGD1562844) alternative variant cSep08, mRNA.        |
| <a href="#">RGD1562846</a> | <a href="#">RGD1562846.aSep08</a> | <a href="#">502694</a> | 31168  | 541  |   | 178 | similar to Docking protein 5 (Downstream of tyrosine kinase 5) (Protein dok-5) (RGD1562846) alternative variant aSep08, mRNA. |
| <a href="#">RGD1562848</a> | <a href="#">RGD1562848.aSep08</a> | <a href="#">362565</a> | 157860 | 594  |   | 104 | RGD1562848 (RGD1562848) mRNA.                                                                                                 |
| <a href="#">RGD1562860</a> | <a href="#">RGD1562860.aSep08</a> | <a href="#">360945</a> | 15343  | 1353 |   | 181 | similar to RIKEN cDNA 2310045A20 (RGD1562860) mRNA.                                                                           |
| <a href="#">RGD1562865</a> | <a href="#">RGD1562865.aSep08</a> | <a href="#">313125</a> | 12954  | 1032 |   | 344 | similar to BTB and CNC homology 1, basic leucine zipper transcription factor 2 (RGD1562865) mRNA.                             |
| <a href="#">RGD1562877</a> | <a href="#">RGD1562877.aSep08</a> | <a href="#">296780</a> | 3771   | 713  |   | 144 | RGD1562877 (17.3 kD) (RGD1562877) mRNA.                                                                                       |
| <a href="#">RGD1562911</a> | <a href="#">RGD1562911.bSep08</a> | <a href="#">500534</a> | 1727   | 724  | 4 | 159 | similar to hypothetical protein MGC45441 (RGD1562911) alternative variant bSep08, mRNA.                                       |
| <a href="#">RGD1562911</a> | <a href="#">RGD1562911.cSep08</a> | <a href="#">500534</a> | 961    | 434  | 4 | 132 | similar to hypothetical protein MGC45441 (RGD1562911) alternative variant cSep08, mRNA.                                       |
| <a href="#">RGD1562943</a> | <a href="#">RGD1562943.bSep08</a> | <a href="#">499113</a> | 7224   | 1056 | 6 | 229 | similar to selenoprotein V (RGD1562943) alternative variant bSep08, mRNA.                                                     |
| <a href="#">RGD1562943</a> | <a href="#">RGD1562943.cSep08</a> | <a href="#">499113</a> | 6713   | 470  | 5 | 59  | similar to selenoprotein V (RGD1562943) alternative variant cSep08, mRNA.                                                     |
| <a href="#">RGD1562943</a> | <a href="#">RGD1562943.dSep08</a> | <a href="#">499113</a> | 4228   | 272  | 2 | 32  | similar to selenoprotein V (RGD1562943) alternative variant dSep08, mRNA.                                                     |
| <a href="#">RGD1562952</a> | <a href="#">RGD1562952.aSep08</a> | <a href="#">365661</a> | 12639  | 1102 | 9 | 300 | similar to ErbB2 interacting protein isoform 2 (34.6 kD) (RGD1562952) alternative variant aSep08, mRNA.                       |
| <a href="#">RGD1562963</a> | <a href="#">RGD1562963.aSep08</a> | <a href="#">498729</a> | 12656  | 738  | 4 | 157 | putative protein of vertebrate origin (18.0 kD) (RGD1562963) alternative variant aSep08, mRNA.                                |
| <a href="#">RGD1562965</a> | <a href="#">RGD1562965.aSep08</a> | <a href="#">498650</a> | 30398  | 5113 | 4 | 479 | similar to Rab coupling protein isoform 3 (RGD1562965) alternative variant aSep08, mRNA.                                      |
| <a href="#">RGD1562965</a> | <a href="#">RGD1562965.bSep08</a> | <a href="#">498650</a> | 5685   | 904  | 1 | 273 | similar to Rab coupling protein isoform 3 (RGD1562965) alternative variant bSep08, mRNA.                                      |

|                            |                                   |                        |        |      |    |     |                                                                                                                   |
|----------------------------|-----------------------------------|------------------------|--------|------|----|-----|-------------------------------------------------------------------------------------------------------------------|
| <a href="#">RGD1562979</a> | <a href="#">RGD1562979.aSep08</a> | <a href="#">305501</a> | 78547  | 579  |    | 192 | similar to DNA-binding protein Ikaros form 1 - mouse (RGD1562979) mRNA.                                           |
| <a href="#">RGD1562987</a> | <a href="#">RGD1562987.aSep08</a> | <a href="#">498886</a> | 8721   | 1028 | 3  | 118 | CRA a (RGD1562987) alternative variant aSep08, mRNA.                                                              |
| <a href="#">RGD1562988</a> | <a href="#">RGD1562988.aSep08</a> | <a href="#">500464</a> | 87225  | 1800 | 1  | 533 | similar to EHM2 (RGD1562988) alternative variant aSep08, mRNA.                                                    |
| <a href="#">RGD1563034</a> | <a href="#">RGD1563034.aSep08</a> | <a href="#">292720</a> | 1343   | 597  |    | 199 | similar to ETS domain transcription factor ERF (Ets2 repressor factor) (RGD1563034) mRNA.                         |
| <a href="#">RGD1563037</a> | <a href="#">RGD1563037.aSep08</a> | <a href="#">309357</a> | 24711  | 1997 |    | 407 | similar to family with sequence similarity 11, member A (RGD1563037) alternative variant aSep08, mRNA.            |
| <a href="#">RGD1563037</a> | <a href="#">RGD1563037.bSep08</a> | <a href="#">309357</a> | 3641   | 1930 |    | 172 | similar to family with sequence similarity 11, member A (20.0 kD) (RGD1563037) alternative variant bSep08, mRNA.  |
| <a href="#">RGD1563060</a> | <a href="#">RGD1563060.bSep08</a> | <a href="#">291608</a> | 11625  | 319  | 2  | 80  | similar to AVLV472 (RGD1563060) alternative variant bSep08, mRNA.                                                 |
| <a href="#">RGD1563092</a> | <a href="#">RGD1563092.aSep08</a> | <a href="#">500642</a> | 85852  | 610  |    | 93  | similar to histone deacetylase-related protein (RGD1563092) mRNA.                                                 |
| <a href="#">RGD1563095</a> | <a href="#">RGD1563095.aSep08</a> | <a href="#">288485</a> | 6651   | 1139 | 3  | 187 | similar to hypothetical protein DKFZp434J1015.1 - human (fragment) (RGD1563095) alternative variant aSep08, mRNA. |
| <a href="#">RGD1563095</a> | <a href="#">RGD1563095.bSep08</a> | <a href="#">288485</a> | 1607   | 751  | 2  | 148 | similar to hypothetical protein DKFZp434J1015.1 - human (fragment) (RGD1563095) alternative variant bSep08, mRNA. |
| <a href="#">RGD1563102</a> | <a href="#">RGD1563102.aSep08</a> | <a href="#">498044</a> | 76308  | 523  |    | 100 | RGD1563102 (RGD1563102) mRNA.                                                                                     |
| <a href="#">RGD1563106</a> | <a href="#">RGD1563106.bSep08</a> | <a href="#">303238</a> | 7639   | 2448 | 13 | 570 | similar to novel protein (63.2 kD) (RGD1563106) alternative variant bSep08, mRNA.                                 |
| <a href="#">RGD1563107</a> | <a href="#">RGD1563107.aSep08</a> | <a href="#">499034</a> | 14473  | 805  |    | 170 | RGD1563107 (18.7 kD) (RGD1563107) mRNA.                                                                           |
| <a href="#">RGD1563109</a> | <a href="#">RGD1563109.aSep08</a> | <a href="#">499586</a> | 18063  | 763  | 4  | 216 | RGD1563109 (RGD1563109) alternative variant aSep08, mRNA.                                                         |
| <a href="#">RGD1563109</a> | <a href="#">RGD1563109.bSep08</a> | <a href="#">499586</a> | 33478  | 449  | 4  | 141 | RGD1563109 (RGD1563109) alternative variant bSep08, mRNA.                                                         |
| <a href="#">RGD1563109</a> | <a href="#">RGD1563109.cSep08</a> | <a href="#">499586</a> | 6547   | 672  | 3  | 128 | RGD1563109 (RGD1563109) alternative variant cSep08, mRNA.                                                         |
| <a href="#">RGD1563109</a> | <a href="#">RGD1563109.dSep08</a> | <a href="#">499586</a> | 21883  | 275  | 2  | 83  | RGD1563109 (RGD1563109) alternative variant dSep08, mRNA.                                                         |
| <a href="#">RGD1563110</a> | <a href="#">RGD1563110.aSep08</a> | <a href="#">502905</a> | 10038  | 764  | 3  | 159 | similar to immunoreceptor Ly49si3 (RGD1563110) alternative variant aSep08, mRNA.                                  |
| <a href="#">RGD1563110</a> | <a href="#">RGD1563110.bSep08</a> | <a href="#">502905</a> | 4705   | 346  | 1  | 76  | similar to immunoreceptor Ly49si3 (RGD1563110) alternative variant bSep08, mRNA.                                  |
| <a href="#">RGD1563120</a> | <a href="#">RGD1563120.aSep08</a> | <a href="#">499895</a> | 172348 | 700  |    | 194 | similar to RIKEN cDNA 2210009G21 (RGD1563120) mRNA.                                                               |
| <a href="#">RGD1563136</a> | <a href="#">RGD1563136.aSep08</a> | <a href="#">296230</a> | 6343   | 735  |    | 163 | similar to Cystatin-related protein 2 precursor (Prostatic 22 kDa glycoprotein P22K15) (RGD1563136) mRNA.         |
| <a href="#">RGD1563148</a> | <a href="#">RGD1563148.bSep08</a> | <a href="#">362447</a> | 2407   | 848  | 3  | 116 | similar to osteoclast inhibitory lectin (RGD1563148) alternative variant bSep08, mRNA.                            |
| <a href="#">RGD1563148</a> | <a href="#">RGD1563148.cSep08</a> | <a href="#">362447</a> | 2883   | 1927 | 2  | 51  | similar to osteoclast inhibitory lectin (RGD1563148) alternative variant cSep08, mRNA.                            |

|                            |                                   |                        |        |      |    |     |                                                                                                                 |
|----------------------------|-----------------------------------|------------------------|--------|------|----|-----|-----------------------------------------------------------------------------------------------------------------|
| <a href="#">RGD1563148</a> | <a href="#">RGD1563148.dSep08</a> | <a href="#">362447</a> | 756    | 368  | 1  | 49  | similar to osteoclast inhibitory lectin (RGD1563148) alternative variant dSep08, mRNA.                          |
| <a href="#">RGD1563154</a> | <a href="#">RGD1563154.aSep08</a> | <a href="#">296788</a> | 8576   | 368  |    | 122 | similar to cadherin EGF LAG seven-pass G-type receptor 2 (RGD1563154) mRNA.                                     |
| <a href="#">RGD1563180</a> | <a href="#">RGD1563180.aSep08</a> | <a href="#">291815</a> | 6971   | 422  |    | 140 | similar to amyloid beta precursor protein binding protein 1 (RGD1563180) mRNA.                                  |
| <a href="#">RGD1563200</a> | <a href="#">RGD1563200.bSep08</a> | <a href="#">500938</a> | 6152   | 2475 | 1  | 109 | putative nuclear protein of eukaryotic origin (12.4 kD) (RGD1563200) alternative variant bSep08, complete mRNA. |
| <a href="#">RGD1563216</a> | <a href="#">RGD1563216.bSep08</a> | <a href="#">500694</a> | 1576   | 1172 | 2  | 123 | iron-sulfur cluster assembly 2 (13.6 kD) (RGD1563216) alternative variant bSep08, mRNA.                         |
| <a href="#">RGD1563217</a> | <a href="#">RGD1563217.bSep08</a> | <a href="#">499265</a> | 4623   | 746  | 2  | 98  | similar to RIKEN cDNA 4930451I11 (RGD1563217) alternative variant bSep08, mRNA.                                 |
| <a href="#">RGD1563224</a> | <a href="#">RGD1563224.aSep08</a> | <a href="#">500874</a> | 105862 | 1956 | 2  | 227 | similar to 4930438D12Rik protein (RGD1563224) alternative variant aSep08, mRNA.                                 |
| <a href="#">RGD1563224</a> | <a href="#">RGD1563224.cSep08</a> | <a href="#">500874</a> | 42869  | 3940 | 7  | 178 | similar to 4930438D12Rik protein (19.1 kD) (RGD1563224) alternative variant cSep08, mRNA.                       |
| <a href="#">RGD1563224</a> | <a href="#">RGD1563224.dSep08</a> | <a href="#">500874</a> | 669    | 374  | 2  | 124 | similar to 4930438D12Rik protein (RGD1563224) alternative variant dSep08, mRNA.                                 |
| <a href="#">RGD1563236</a> | <a href="#">RGD1563236.aSep08</a> | <a href="#">498608</a> | 1704   | 449  |    | 149 | similar to BC028663 protein (RGD1563236) mRNA.                                                                  |
| <a href="#">RGD1563239</a> | <a href="#">RGD1563239.bSep08</a> | <a href="#">502316</a> | 9084   | 741  | 1  | 178 | similar to Zinc finger protein 566 (RGD1563239) alternative variant bSep08, mRNA.                               |
| <a href="#">RGD1563266</a> | <a href="#">RGD1563266.aSep08</a> | <a href="#">361143</a> | 27899  | 821  | 5  | 118 | RGD1563266 (RGD1563266) alternative variant aSep08, mRNA.                                                       |
| <a href="#">RGD1563266</a> | <a href="#">RGD1563266.bSep08</a> | <a href="#">361143</a> | 11506  | 495  | 1  | 103 | RGD1563266 (RGD1563266) alternative variant bSep08, mRNA.                                                       |
| <a href="#">RGD1563270</a> | <a href="#">RGD1563270.aSep08</a> | <a href="#">302172</a> | 6273   | 522  |    | 94  | similar to synaptonemal complex protein 3 (RGD1563270) mRNA.                                                    |
| <a href="#">RGD1563278</a> | <a href="#">RGD1563278.aSep08</a> | <a href="#">303963</a> | 31008  | 2367 | 19 | 713 | zinc finger DAZ interacting protein 3 CRA a (RGD1563278) alternative variant aSep08, mRNA.                      |
| <a href="#">RGD1563278</a> | <a href="#">RGD1563278.bSep08</a> | <a href="#">303963</a> | 36512  | 1707 | 15 | 430 | DAZ interacting protein 3 zinc finger (RGD1563278) alternative variant bSep08, mRNA.                            |
| <a href="#">RGD1563278</a> | <a href="#">RGD1563278.cSep08</a> | <a href="#">303963</a> | 9962   | 749  | 5  | 163 | DAZ interacting protein 3 zinc finger (18.8 kD) (RGD1563278) alternative variant cSep08, mRNA.                  |
| <a href="#">RGD1563278</a> | <a href="#">RGD1563278.dSep08</a> | <a href="#">303963</a> | 1902   | 508  | 2  | 96  | DAZ interacting protein 3 zinc finger (RGD1563278) alternative variant dSep08, mRNA.                            |
| <a href="#">RGD1563284</a> | <a href="#">RGD1563284.aSep08</a> | <a href="#">290691</a> | 19416  | 688  |    | 68  | similar to actin (8.3 kD) (RGD1563284) mRNA.                                                                    |
| <a href="#">RGD1563285</a> | <a href="#">RGD1563285.aSep08</a> | <a href="#">499273</a> | 6536   | 328  |    | 97  | similar to RIKEN cDNA 1700022C21 (RGD1563285) mRNA.                                                             |
| <a href="#">RGD1563302</a> | <a href="#">RGD1563302.aSep08</a> | <a href="#">361049</a> | 8698   | 709  | 2  | 172 | RGD1563302 (RGD1563302) alternative variant aSep08, mRNA.                                                       |
| <a href="#">RGD1563302</a> | <a href="#">RGD1563302.bSep08</a> | <a href="#">361049</a> | 8364   | 373  | 2  | 63  | RGD1563302 (RGD1563302) alternative variant bSep08, mRNA.                                                       |
| <a href="#">RGD1563309</a> | <a href="#">RGD1563309.aSep08</a> | <a href="#">368088</a> | 11222  | 1319 | 11 | 439 | similar to diacylglycerol kinase, delta 130kDa isoform 1 (RGD1563309) alternative variant aSep08, mRNA.         |
| <a href="#">RGD1563309</a> | <a href="#">RGD1563309.bSep08</a> | <a href="#">368088</a> | 482    | 402  | 1  | 54  | similar to diacylglycerol kinase, delta 130kDa isoform 1 (RGD1563309) alternative variant bSep08, mRNA.         |

|                                      |                                             |                        |       |      |    |     |                                                                                                                              |
|--------------------------------------|---------------------------------------------|------------------------|-------|------|----|-----|------------------------------------------------------------------------------------------------------------------------------|
| <a href="#">RGD1563319</a>           | <a href="#">RGD1563319.aSep08</a>           | <a href="#">293632</a> | 15468 | 1153 |    | 230 | similar to RIKEN cDNA 6330512M04 gene (RGD1563319) mRNA.                                                                     |
| <a href="#">RGD1563323</a>           | <a href="#">RGD1563323.aSep08</a>           | <a href="#">361702</a> | 439   | 359  |    | 91  | similar to hypothetical protein FLJ22531 (RGD1563323) mRNA.                                                                  |
| <a href="#">RGD1563325</a>           | <a href="#">RGD1563325.aSep08</a>           | <a href="#">362857</a> | 18331 | 3482 | 3  | 187 | similar to hypothetical protein MGC17943 (RGD1563325) alternative variant aSep08, mRNA.                                      |
| <a href="#">RGD1563342</a>           | <a href="#">RGD1563342.aSep08</a>           | <a href="#">304572</a> | 15920 | 1124 | 8  | 374 | similar to RIKEN cDNA 2410025L10 (RGD1563342) alternative variant aSep08, mRNA.                                              |
| <a href="#">RGD1563347_predicted</a> | <a href="#">RGD1563347_predicted_aSep08</a> | <a href="#">501095</a> | 54205 | 1739 |    | 244 | similar to RIKEN cDNA 2310015N21 (predicted) (RGD1563347_predicted) mRNA.                                                    |
| <a href="#">RGD1563348</a>           | <a href="#">RGD1563348.aSep08</a>           | <a href="#">502642</a> | 1002  | 792  | 3  | 71  | similar to Selenoprotein H (RGD1563348) alternative variant aSep08, mRNA.                                                    |
| <a href="#">RGD1563348</a>           | <a href="#">RGD1563348.cSep08</a>           | <a href="#">502642</a> | 1474  | 622  | 4  | 70  | similar to Selenoprotein H (RGD1563348) alternative variant cSep08, mRNA.                                                    |
| <a href="#">RGD1563348</a>           | <a href="#">RGD1563348.dSep08</a>           | <a href="#">502642</a> | 1433  | 609  | 5  | 45  | similar to Selenoprotein H (RGD1563348) alternative variant dSep08, mRNA.                                                    |
| <a href="#">RGD1563348</a>           | <a href="#">RGD1563348.eSep08</a>           | <a href="#">502642</a> | 1481  | 607  | 4  | 61  | similar to Selenoprotein H (RGD1563348) alternative variant eSep08, mRNA.                                                    |
| <a href="#">RGD1563351</a>           | <a href="#">RGD1563351.aSep08</a>           | <a href="#">294350</a> | 2356  | 1005 |    | 178 | RGD1563351 (4.5 kD) (RGD1563351) mRNA.                                                                                       |
| <a href="#">RGD1563354</a>           | <a href="#">RGD1563354.aSep08</a>           | <a href="#">311592</a> | 7204  | 1301 |    | 365 | similar to hypothetical protein D630003M21 (RGD1563354) mRNA.                                                                |
| <a href="#">RGD1563398</a>           | <a href="#">RGD1563398.aSep08</a>           | <a href="#">301075</a> | 4223  | 535  |    | 154 | RGD1563398 (RGD1563398) mRNA.                                                                                                |
| <a href="#">RGD1563400</a>           | <a href="#">RGD1563400.aSep08</a>           | <a href="#">360777</a> | 3003  | 1029 | 2  | 50  | similar to paired immunoglobulin-like type 2 receptor beta (RGD1563400) alternative variant aSep08, mRNA.                    |
| <a href="#">RGD1563400</a>           | <a href="#">RGD1563400.bSep08</a>           | <a href="#">360777</a> | 885   | 328  | 2  | 46  | similar to paired immunoglobulin-like type 2 receptor beta (5.1 kD) (RGD1563400) alternative variant bSep08, mRNA.           |
| <a href="#">RGD1563422</a>           | <a href="#">RGD1563422.bSep08</a>           | <a href="#">289182</a> | 19364 | 854  | 4  | 108 | similar to Brain protein 44 (12.0 kD) (RGD1563422) alternative variant bSep08, mRNA.                                         |
| <a href="#">RGD1563437</a>           | <a href="#">RGD1563437.aSep08</a>           | <a href="#">291356</a> | 9601  | 664  | 6  | 221 | similar to KIAA1217 (RGD1563437) alternative variant aSep08, mRNA.                                                           |
| <a href="#">RGD1563438</a>           | <a href="#">RGD1563438.aSep08</a>           | <a href="#">287442</a> | 1123  | 485  | 3  | 113 | similar to novel protein of unknown function (DUF423) family member (11.8 kD) (RGD1563438) alternative variant aSep08, mRNA. |
| <a href="#">RGD1563438</a>           | <a href="#">RGD1563438.cSep08</a>           | <a href="#">287442</a> | 41146 | 444  | 3  | 22  | similar to novel protein of unknown function (DUF423) family member (2.4 kD) (RGD1563438) alternative variant cSep08, mRNA.  |
| <a href="#">RGD1563440</a>           | <a href="#">RGD1563440.bSep08</a>           | <a href="#">298301</a> | 17692 | 1469 | 11 | 483 | similar to hypothetical protein (RGD1563440) alternative variant bSep08, mRNA.                                               |
| <a href="#">RGD1563440</a>           | <a href="#">RGD1563440.cSep08</a>           | <a href="#">298301</a> | 1108  | 390  | 2  | 129 | similar to hypothetical protein (RGD1563440) alternative variant cSep08, mRNA.                                               |
| <a href="#">RGD1563440</a>           | <a href="#">RGD1563440.dSep08</a>           | <a href="#">298301</a> | 8725  | 708  | 5  | 106 | similar to hypothetical protein (RGD1563440) alternative variant dSep08, mRNA.                                               |
| <a href="#">RGD1563444</a>           | <a href="#">RGD1563444.bSep08</a>           | <a href="#">500577</a> | 7703  | 1032 | 5  | 229 | similar to RIKEN cDNA 2900090M10 (26.3 kD) (RGD1563444) alternative variant bSep08, mRNA.                                    |
| <a href="#">RGD1563444</a>           | <a href="#">RGD1563444.cSep08</a>           | <a href="#">500577</a> | 4777  | 549  | 3  | 113 | similar to RIKEN cDNA 2900090M10 (RGD1563444) alternative variant cSep08, mRNA.                                              |

|                            |                                   |                        |       |      |   |     |                                                                                                                         |
|----------------------------|-----------------------------------|------------------------|-------|------|---|-----|-------------------------------------------------------------------------------------------------------------------------|
| <a href="#">RGD1563444</a> | <a href="#">RGD1563444.dSep08</a> | <a href="#">500577</a> | 14026 | 555  | 2 | 50  | similar to RIKEN cDNA 2900090M10 (RGD1563444) alternative variant dSep08, mRNA.                                         |
| <a href="#">RGD1563482</a> | <a href="#">RGD1563482.bSep08</a> | <a href="#">498179</a> | 17497 | 3728 | 4 | 214 | similar to hypothetical protein FLJ38663 (RGD1563482) alternative variant bSep08, mRNA.                                 |
| <a href="#">RGD1563482</a> | <a href="#">RGD1563482.cSep08</a> | <a href="#">498179</a> | 13620 | 1014 | 3 | 106 | similar to hypothetical protein FLJ38663 (RGD1563482) alternative variant cSep08, mRNA.                                 |
| <a href="#">RGD1563507</a> | <a href="#">RGD1563507.aSep08</a> | <a href="#">500238</a> | 6336  | 3092 | 3 | 99  | similar to RIKEN cDNA 1700019G17 and similar to Camello-like 2 (11.4 kD) (RGD1563507) alternative variant aSep08, mRNA. |
| <a href="#">RGD1563507</a> | <a href="#">RGD1563507.aSep08</a> | <a href="#">681227</a> | 6336  | 3092 | 3 | 99  | similar to RIKEN cDNA 1700019G17 and similar to Camello-like 2 (11.4 kD) (RGD1563507) alternative variant aSep08, mRNA. |
| <a href="#">RGD1563507</a> | <a href="#">RGD1563507.bSep08</a> | <a href="#">500238</a> | 4121  | 750  | 3 | 79  | similar to RIKEN cDNA 1700019G17 and similar to Camello-like 2 (RGD1563507) alternative variant bSep08, mRNA.           |
| <a href="#">RGD1563507</a> | <a href="#">RGD1563507.bSep08</a> | <a href="#">681227</a> | 4121  | 750  | 3 | 79  | similar to RIKEN cDNA 1700019G17 and similar to Camello-like 2 (RGD1563507) alternative variant bSep08, mRNA.           |
| <a href="#">RGD1563510</a> | <a href="#">RGD1563510.aSep08</a> | <a href="#">362240</a> | 64408 | 582  | 5 | 193 | similar to RIKEN cDNA 8430427H17 gene (RGD1563510) alternative variant aSep08, mRNA.                                    |
| <a href="#">RGD1563510</a> | <a href="#">RGD1563510.bSep08</a> | <a href="#">362240</a> | 24502 | 483  | 3 | 160 | similar to RIKEN cDNA 8430427H17 gene (RGD1563510) alternative variant bSep08, mRNA.                                    |
| <a href="#">RGD1563510</a> | <a href="#">RGD1563510.cSep08</a> | <a href="#">362240</a> | 24062 | 458  | 3 | 152 | similar to RIKEN cDNA 8430427H17 gene (RGD1563510) alternative variant cSep08, mRNA.                                    |
| <a href="#">RGD1563510</a> | <a href="#">RGD1563510.dSep08</a> | <a href="#">362240</a> | 6061  | 347  | 2 | 107 | similar to RIKEN cDNA 8430427H17 gene (RGD1563510) alternative variant dSep08, mRNA.                                    |
| <a href="#">RGD1563520</a> | <a href="#">RGD1563520.aSep08</a> | <a href="#">361091</a> | 27914 | 908  | 1 | 302 | similar to UDP-glucose ceramide glucosyltransferase-like 2 (RGD1563520) alternative variant aSep08, mRNA.               |
| <a href="#">RGD1563520</a> | <a href="#">RGD1563520.bSep08</a> | <a href="#">361091</a> | 17273 | 648  | 1 | 215 | similar to UDP-glucose ceramide glucosyltransferase-like 2 (RGD1563520) alternative variant bSep08, mRNA.               |
| <a href="#">RGD1563533</a> | <a href="#">RGD1563533.aSep08</a> | <a href="#">313713</a> | 31139 | 998  | 2 | 311 | similar to novel protein (RGD1563533) alternative variant aSep08, mRNA.                                                 |
| <a href="#">RGD1563533</a> | <a href="#">RGD1563533.bSep08</a> | <a href="#">313713</a> | 48094 | 997  | 3 | 306 | similar to novel protein (RGD1563533) alternative variant bSep08, mRNA.                                                 |
| <a href="#">RGD1563547</a> | <a href="#">RGD1563547.bSep08</a> | <a href="#">360478</a> | 1474  | 625  | 1 | 85  | RGD1563547 (9.5 kD) (RGD1563547) alternative variant bSep08, mRNA.                                                      |
| <a href="#">RGD1563550</a> | <a href="#">RGD1563550.aSep08</a> | <a href="#">300834</a> | 5940  | 262  |   | 62  | similar to hypothetical protein FLJ38736 (RGD1563550) mRNA.                                                             |
| <a href="#">RGD1563556</a> | <a href="#">RGD1563556.aSep08</a> | <a href="#">315409</a> | 2572  | 1634 |   | 544 | similar to mKIAA1377 protein (RGD1563556) mRNA.                                                                         |
| <a href="#">RGD1563560</a> | <a href="#">RGD1563560.aSep08</a> | <a href="#">499321</a> | 13052 | 762  |   | 140 | similar to ribosomal protein L27a (RGD1563560) mRNA.                                                                    |
| <a href="#">RGD1563578</a> | <a href="#">RGD1563578.aSep08</a> | <a href="#">501003</a> | 8674  | 407  |   | 135 | similar to PGC7 (RGD1563578) mRNA.                                                                                      |
| <a href="#">RGD1563583</a> | <a href="#">RGD1563583.aSep08</a> | <a href="#">299208</a> | 87064 | 1570 | 7 | 523 | similar to mKIAA0998 protein (RGD1563583) alternative variant aSep08, mRNA.                                             |
| <a href="#">RGD1563583</a> | <a href="#">RGD1563583.bSep08</a> | <a href="#">299208</a> | 6394  | 697  | 1 | 221 | similar to mKIAA0998 protein (RGD1563583) alternative variant bSep08, mRNA.                                             |
| <a href="#">RGD1563600</a> | <a href="#">RGD1563600.aSep08</a> | <a href="#">364093</a> | 10775 | 450  |   | 70  | similar to ribosomal protein S11 (7.9 kD) (RGD1563600) mRNA.                                                            |

|                            |                                   |                        |        |      |   |     |                                                                                                            |
|----------------------------|-----------------------------------|------------------------|--------|------|---|-----|------------------------------------------------------------------------------------------------------------|
| <a href="#">RGD1563612</a> | <a href="#">RGD1563612.aSep08</a> | <a href="#">500026</a> | 227860 | 4005 | 9 | 430 | glucocorticoid induced transcript 1 like (47.6 kD) (RGD1563612) alternative variant aSep08, mRNA.          |
| <a href="#">RGD1563612</a> | <a href="#">RGD1563612.aSep08</a> | <a href="#">680817</a> | 227860 | 4005 | 9 | 430 | glucocorticoid induced transcript 1 like (47.6 kD) (RGD1563612) alternative variant aSep08, mRNA.          |
| <a href="#">RGD1563612</a> | <a href="#">RGD1563612.bSep08</a> | <a href="#">500026</a> | 169488 | 955  | 4 | 133 | CRA b (14.3 kD) (RGD1563612) alternative variant bSep08, mRNA.                                             |
| <a href="#">RGD1563612</a> | <a href="#">RGD1563612.bSep08</a> | <a href="#">680817</a> | 169488 | 955  | 4 | 133 | CRA b (14.3 kD) (RGD1563612) alternative variant bSep08, mRNA.                                             |
| <a href="#">RGD1563612</a> | <a href="#">RGD1563612.cSep08</a> | <a href="#">500026</a> | 169356 | 882  | 5 | 107 | CRA b (11.4 kD) (RGD1563612) alternative variant cSep08, mRNA.                                             |
| <a href="#">RGD1563612</a> | <a href="#">RGD1563612.cSep08</a> | <a href="#">680817</a> | 169356 | 882  | 5 | 107 | CRA b (11.4 kD) (RGD1563612) alternative variant cSep08, mRNA.                                             |
| <a href="#">RGD1563612</a> | <a href="#">RGD1563612.dSep08</a> | <a href="#">500026</a> | 665    | 357  | 2 | 73  | putative protein (RGD1563612) alternative variant dSep08, mRNA.                                            |
| <a href="#">RGD1563612</a> | <a href="#">RGD1563612.dSep08</a> | <a href="#">680817</a> | 665    | 357  | 2 | 73  | putative protein (RGD1563612) alternative variant dSep08, mRNA.                                            |
| <a href="#">RGD1563612</a> | <a href="#">RGD1563612.eSep08</a> | <a href="#">500026</a> | 21590  | 290  | 3 | 50  | CRA b like (RGD1563612) alternative variant eSep08, mRNA.                                                  |
| <a href="#">RGD1563612</a> | <a href="#">RGD1563612.eSep08</a> | <a href="#">680817</a> | 21590  | 290  | 3 | 50  | CRA b like (RGD1563612) alternative variant eSep08, mRNA.                                                  |
| <a href="#">RGD1563628</a> | <a href="#">RGD1563628.bSep08</a> | <a href="#">304554</a> | 20909  | 475  | 3 | 157 | similar to Seizure 6-like protein precursor (RGD1563628) alternative variant bSep08, mRNA.                 |
| <a href="#">RGD1563628</a> | <a href="#">RGD1563628.cSep08</a> | <a href="#">304554</a> | 5275   | 420  | 5 | 89  | similar to Seizure 6-like protein precursor (RGD1563628) alternative variant cSep08, mRNA.                 |
| <a href="#">RGD1563634</a> | <a href="#">RGD1563634.aSep08</a> | <a href="#">500790</a> | 5435   | 3226 | 7 | 764 | similar to R31449 3 (89.4 kD) (RGD1563634) alternative variant aSep08, mRNA.                               |
| <a href="#">RGD1563634</a> | <a href="#">RGD1563634.cSep08</a> | <a href="#">500790</a> | 1040   | 795  | 1 | 183 | similar to R31449 3 (RGD1563634) alternative variant cSep08, mRNA.                                         |
| <a href="#">RGD1563652</a> | <a href="#">RGD1563652.aSep08</a> | <a href="#">291332</a> | 40305  | 548  |   | 182 | putative protein of eukaryotic origin (RGD1563652) mRNA.                                                   |
| <a href="#">RGD1563703</a> | <a href="#">RGD1563703.aSep08</a> | <a href="#">361206</a> | 13294  | 401  |   | 92  | similar to hypothetical protein E230025K15 (RGD1563703) mRNA.                                              |
| <a href="#">RGD1563706</a> | <a href="#">RGD1563706.bSep08</a> | <a href="#">362042</a> | 5153   | 386  | 1 | 107 | similar to Zgc:92184 (RGD1563706) alternative variant bSep08, mRNA.                                        |
| <a href="#">RGD1563706</a> | <a href="#">RGD1563706.cSep08</a> | <a href="#">362042</a> | 5010   | 389  | 2 | 67  | similar to Zgc:92184 (RGD1563706) alternative variant cSep08, mRNA.                                        |
| <a href="#">RGD1563714</a> | <a href="#">RGD1563714.bSep08</a> | <a href="#">500531</a> | 23357  | 748  | 1 | 125 | RGD1563714 (RGD1563714) alternative variant bSep08, mRNA.                                                  |
| <a href="#">RGD1563719</a> | <a href="#">RGD1563719.aSep08</a> | <a href="#">500324</a> | 17304  | 281  |   | 93  | similar to hypothetical protein MGC4266 (RGD1563719) mRNA.                                                 |
| <a href="#">RGD1563746</a> | <a href="#">RGD1563746.aSep08</a> | <a href="#">303572</a> | 4852   | 1460 |   | 321 | similar to nuclear protein with a coiled coil-4 domain of bilateral origin like (3L720) (RGD1563746) mRNA. |
| <a href="#">RGD1563782</a> | <a href="#">RGD1563782.aSep08</a> | <a href="#">498115</a> | 2439   | 1703 | 7 | 368 | RGD1563782 (RGD1563782) alternative variant aSep08, complete mRNA.                                         |
| <a href="#">RGD1563782</a> | <a href="#">RGD1563782.bSep08</a> | <a href="#">498115</a> | 1039   | 952  | 3 | 302 | RGD1563782 (RGD1563782) alternative variant bSep08, mRNA.                                                  |
| <a href="#">RGD1563815</a> | <a href="#">RGD1563815.aSep08</a> | <a href="#">365549</a> | 43991  | 2689 | 3 | 628 | similar to sodium-glucose cotransporter-like 1 (69.9 kD) (RGD1563815) alternative variant aSep08, mRNA.    |



|                            |                                   |                        |        |      |   |     |                                                                                                         |
|----------------------------|-----------------------------------|------------------------|--------|------|---|-----|---------------------------------------------------------------------------------------------------------|
| <a href="#">RGD1563818</a> | <a href="#">RGD1563818.aSep08</a> | <a href="#">296356</a> | 2211   | 606  |   | 128 | similar to secretory leukocyte protease inhibitor (RGD1563818) mRNA.                                    |
| <a href="#">RGD1563821</a> | <a href="#">RGD1563821.aSep08</a> | <a href="#">500984</a> | 7187   | 497  |   | 105 | RGD1563821 (RGD1563821) mRNA.                                                                           |
| <a href="#">RGD1563838</a> | <a href="#">RGD1563838.aSep08</a> | <a href="#">361583</a> | 118893 | 1783 |   | 547 | similar to leucine zipper protein 2 (RGD1563838) mRNA.                                                  |
| <a href="#">RGD1563846</a> | <a href="#">RGD1563846.aSep08</a> | <a href="#">317224</a> | 9655   | 1778 |   | 487 | similar to Gene model 784 (RGD1563846) alternative variant aSep08, mRNA.                                |
| <a href="#">RGD1563853</a> | <a href="#">RGD1563853.bSep08</a> | <a href="#">361181</a> | 9970   | 896  | 6 | 222 | cullin 4A (RGD1563853) alternative variant bSep08, mRNA.                                                |
| <a href="#">RGD1563853</a> | <a href="#">RGD1563853.cSep08</a> | <a href="#">361181</a> | 15743  | 546  | 5 | 181 | cullin 4 (RGD1563853) alternative variant cSep08, mRNA.                                                 |
| <a href="#">RGD1563853</a> | <a href="#">RGD1563853.dSep08</a> | <a href="#">361181</a> | 5478   | 2371 | 4 | 159 | cullin 4A (18.6 kD) (RGD1563853) alternative variant dSep08, mRNA.                                      |
| <a href="#">RGD1563853</a> | <a href="#">RGD1563853.eSep08</a> | <a href="#">361181</a> | 7065   | 515  | 6 | 58  | cullin 4A (RGD1563853) alternative variant eSep08, mRNA.                                                |
| <a href="#">RGD1563866</a> | <a href="#">RGD1563866.aSep08</a> | <a href="#">315652</a> | 4556   | 972  |   | 204 | RGD1563866 (22.5 kD) (RGD1563866) mRNA.                                                                 |
| <a href="#">RGD1563870</a> | <a href="#">RGD1563870.aSep08</a> | <a href="#">500895</a> | 460    | 392  |   | 119 | similar to CG3104-PA, isoform A (RGD1563870) mRNA.                                                      |
| <a href="#">RGD1563874</a> | <a href="#">RGD1563874.aSep08</a> | <a href="#">302900</a> | 1018   | 678  |   | 109 | RGD1563874 (RGD1563874) mRNA.                                                                           |
| <a href="#">RGD1563888</a> | <a href="#">RGD1563888.bSep08</a> | <a href="#">360692</a> | 956    | 549  | 2 | 129 | similar to DNA segment, Chr 16, ERATO Doi 472, expressed (RGD1563888) alternative variant bSep08, mRNA. |
| <a href="#">RGD1563888</a> | <a href="#">RGD1563888.cSep08</a> | <a href="#">360692</a> | 25757  | 381  | 3 | 127 | similar to DNA segment, Chr 16, ERATO Doi 472, expressed (RGD1563888) alternative variant cSep08, mRNA. |
| <a href="#">RGD1563912</a> | <a href="#">RGD1563912.aSep08</a> | <a href="#">362256</a> | 7557   | 1129 | 6 | 97  | RGD1563912 (10.6 kD) (RGD1563912) alternative variant aSep08, mRNA.                                     |
| <a href="#">RGD1563912</a> | <a href="#">RGD1563912.bSep08</a> | <a href="#">362256</a> | 8333   | 3528 | 5 | 97  | RGD1563912 (10.6 kD) (RGD1563912) alternative variant bSep08, mRNA.                                     |
| <a href="#">RGD1563912</a> | <a href="#">RGD1563912.cSep08</a> | <a href="#">362256</a> | 1028   | 332  | 2 | 59  | RGD1563912 (RGD1563912) alternative variant cSep08, mRNA.                                               |
| <a href="#">RGD1563912</a> | <a href="#">RGD1563912.dSep08</a> | <a href="#">362256</a> | 833    | 746  | 2 | 24  | RGD1563912 (2.4 kD) (RGD1563912) alternative variant dSep08, mRNA.                                      |
| <a href="#">RGD1563912</a> | <a href="#">RGD1563912.eSep08</a> | <a href="#">362256</a> | 970    | 597  | 3 | 43  | RGD1563912 (4.8 kD) (RGD1563912) alternative variant eSep08, mRNA.                                      |
| <a href="#">RGD1563913</a> | <a href="#">RGD1563913.aSep08</a> | <a href="#">500691</a> | 66883  | 770  |   | 77  | RGD1563913 (8.7 kD) (RGD1563913) mRNA.                                                                  |
| <a href="#">RGD1563917</a> | <a href="#">RGD1563917.aSep08</a> | <a href="#">501176</a> | 13743  | 591  |   | 155 | similar to Nuclear autoantigen Sp-100 (Speckled 100 kDa) (RGD1563917) mRNA.                             |
| <a href="#">RGD1563945</a> | <a href="#">RGD1563945.aSep08</a> | <a href="#">299305</a> | 13910  | 632  |   | 210 | similar to mKIAA0215 protein (RGD1563945) mRNA.                                                         |
| <a href="#">RGD1563946</a> | <a href="#">RGD1563946.aSep08</a> | <a href="#">306340</a> | 2792   | 1390 | 6 | 462 | similar to mKIAA1623 protein (RGD1563946) alternative variant aSep08, mRNA.                             |
| <a href="#">RGD1563946</a> | <a href="#">RGD1563946.bSep08</a> | <a href="#">306340</a> | 914    | 497  | 1 | 165 | similar to mKIAA1623 protein (RGD1563946) alternative variant bSep08, mRNA.                             |
| <a href="#">RGD1563952</a> | <a href="#">RGD1563952.bSep08</a> | <a href="#">363463</a> | 21084  | 580  | 6 | 162 | similar to Mospd2 protein (RGD1563952) alternative variant bSep08, mRNA.                                |
| <a href="#">RGD1563955</a> | <a href="#">RGD1563955.bSep08</a> | <a href="#">363274</a> | 1119   | 790  | 2 | 179 | similar to transmembrane serine protease 9 (19.5 kD) (RGD1563955) alternative variant bSep08, mRNA.     |
| <a href="#">RGD1563955</a> | <a href="#">RGD1563955.cSep08</a> | <a href="#">363274</a> | 1563   | 474  | 5 | 158 | similar to transmembrane serine protease 9 (RGD1563955) alternative variant cSep08, mRNA.               |

|                            |                                   |                        |        |      |    |     |                                                                                                                                                                        |
|----------------------------|-----------------------------------|------------------------|--------|------|----|-----|------------------------------------------------------------------------------------------------------------------------------------------------------------------------|
| <a href="#">RGD1563973</a> | <a href="#">RGD1563973.aSep08</a> | <a href="#">366466</a> | 4609   | 1598 |    | 452 | similar to Gene model 50 (RGD1563973) alternative variant aSep08, mRNA.                                                                                                |
| <a href="#">RGD1563979</a> | <a href="#">RGD1563979.aSep08</a> | <a href="#">316212</a> | 7486   | 1147 | 6  | 328 | similar to over-expressed breast tumor protein (RGD1563979) alternative variant aSep08, mRNA.                                                                          |
| <a href="#">RGD1563979</a> | <a href="#">RGD1563979.bSep08</a> | <a href="#">316212</a> | 4551   | 678  | 5  | 225 | similar to over-expressed breast tumor protein (RGD1563979) alternative variant bSep08, mRNA.                                                                          |
| <a href="#">RGD1563996</a> | <a href="#">RGD1563996.aSep08</a> | <a href="#">315163</a> | 3949   | 607  |    | 202 | similar to Protein UNQ9166/PRO28631 precursor (RGD1563996) mRNA.                                                                                                       |
| <a href="#">RGD1564005</a> | <a href="#">RGD1564005.bSep08</a> | <a href="#">360575</a> | 725    | 639  | 2  | 92  | similar to novel protein (RGD1564005) alternative variant bSep08, mRNA.                                                                                                |
| <a href="#">RGD1564016</a> | <a href="#">RGD1564016.aSep08</a> | <a href="#">498969</a> | 838    | 745  | 1  | 90  | RGD1564016 (9.9 kD) (RGD1564016) alternative variant aSep08, mRNA.                                                                                                     |
| <a href="#">RGD1564016</a> | <a href="#">RGD1564016.bSep08</a> | <a href="#">498969</a> | 50664  | 770  | 3  | 85  | RGD1564016 (9.5 kD) (RGD1564016) alternative variant bSep08, mRNA.                                                                                                     |
| <a href="#">RGD1564036</a> | <a href="#">RGD1564036.bSep08</a> | <a href="#">497895</a> | 24562  | 740  | 2  | 115 | similar to RIKEN cDNA 3010026O09 (RGD1564036) alternative variant bSep08, mRNA.                                                                                        |
| <a href="#">RGD1564036</a> | <a href="#">RGD1564036.cSep08</a> | <a href="#">497895</a> | 26880  | 1204 | 2  | 224 | similar to RIKEN cDNA 3010026O09 (24.5 kD) (RGD1564036) alternative variant cSep08, mRNA.                                                                              |
| <a href="#">RGD1564046</a> | <a href="#">RGD1564046.aSep08</a> | <a href="#">500823</a> | 34520  | 1468 | 11 | 489 | similar to RIKEN cDNA 4933417K05 gene (RGD1564046) alternative variant aSep08, mRNA.                                                                                   |
| <a href="#">RGD1564046</a> | <a href="#">RGD1564046.bSep08</a> | <a href="#">500823</a> | 3709   | 611  | 2  | 166 | similar to RIKEN cDNA 4933417K05 gene (19.6 kD) (RGD1564046) alternative variant bSep08, mRNA.                                                                         |
| <a href="#">RGD1564053</a> | <a href="#">RGD1564053.bSep08</a> | <a href="#">500390</a> | 129437 | 496  | 4  | 73  | similar to hypothetical protein (RGD1564053) alternative variant bSep08, mRNA.                                                                                         |
| <a href="#">RGD1564058</a> | <a href="#">RGD1564058.bSep08</a> | <a href="#">288925</a> | 1562   | 880  | 2  | 106 | putative nuclear protein of eukaryotic origin (12.1 kD) (RGD1564058) alternative variant bSep08, mRNA.                                                                 |
| <a href="#">RGD1564058</a> | <a href="#">RGD1564058.cSep08</a> | <a href="#">288925</a> | 1326   | 716  | 1  | 90  | putative protein of eukaryotic origin (RGD1564058) alternative variant cSep08, mRNA.                                                                                   |
| <a href="#">RGD1564060</a> | <a href="#">RGD1564060.aSep08</a> | <a href="#">315981</a> | 16841  | 742  |    | 247 | similar to procollagen, type VI, alpha 3 isoform 4 (RGD1564060) mRNA.                                                                                                  |
| <a href="#">RGD1564074</a> | <a href="#">RGD1564074.aSep08</a> | <a href="#">500514</a> | 80906  | 1156 | 15 | 384 | similar to novel protein (RGD1564074) alternative variant aSep08, mRNA.                                                                                                |
| <a href="#">RGD1564081</a> | <a href="#">RGD1564081.aSep08</a> | <a href="#">500943</a> | 130201 | 409  |    | 136 | similar to novel protein similar to human oligophrenin 1 (OPHN1) (RGD1564081) mRNA.                                                                                    |
| <a href="#">RGD1564086</a> | <a href="#">RGD1564086.aSep08</a> | <a href="#">497862</a> | 1016   | 303  |    | 95  | RGD1564086 (RGD1564086) mRNA.                                                                                                                                          |
| <a href="#">RGD1564091</a> | <a href="#">RGD1564091.aSep08</a> | <a href="#">500633</a> | 10157  | 1801 |    | 600 | similar to Kiaa0575 (RGD1564091) alternative variant aSep08, mRNA.                                                                                                     |
| <a href="#">RGD1564091</a> | <a href="#">RGD1564091.bSep08</a> | <a href="#">500633</a> | 5901   | 534  |    | 177 | similar to Kiaa0575 (RGD1564091) alternative variant bSep08, mRNA.                                                                                                     |
| <a href="#">RGD1564114</a> | <a href="#">RGD1564114.bSep08</a> | <a href="#">499765</a> | 109069 | 774  | 1  | 225 | similar to FLJ46082 protein (RGD1564114) alternative variant bSep08, mRNA.                                                                                             |
| <a href="#">RGD1564117</a> | <a href="#">RGD1564117.aSep08</a> | <a href="#">317253</a> | 3840   | 1098 |    | 169 | similar to novel protein similar to multidomain presynaptic cytomatrix protein piccolo (presynaptic cytomatrix protein) (RGD1564117) alternative variant aSep08, mRNA. |
| <a href="#">RGD1564120</a> | <a href="#">RGD1564120.aSep08</a> | <a href="#">499461</a> | 2197   | 527  |    | 112 | similar to WNT1 inducible signaling pathway protein 3 precursor (WISP-3) (RGD1564120) mRNA.                                                                            |
| <a href="#">RGD1564122</a> | <a href="#">RGD1564122.aSep08</a> | <a href="#">362888</a> | 16292  | 765  |    | 240 | RGD1564122 (RGD1564122) mRNA.                                                                                                                                          |

|                            |                                   |                        |        |      |    |     |                                                                                                    |
|----------------------------|-----------------------------------|------------------------|--------|------|----|-----|----------------------------------------------------------------------------------------------------|
| <a href="#">RGD1564129</a> | <a href="#">RGD1564129.aSep08</a> | <a href="#">361257</a> | 2475   | 1063 |    | 243 | similar to hypothetical protein 4930474N05 (RGD1564129) mRNA.                                      |
| <a href="#">RGD1564140</a> | <a href="#">RGD1564140.bSep08</a> | <a href="#">498832</a> | 57657  | 1483 | 2  | 155 | similar to AW554918 protein (RGD1564140) alternative variant bSep08, mRNA.                         |
| <a href="#">RGD1564161</a> | <a href="#">RGD1564161.aSep08</a> | <a href="#">362562</a> | 422311 | 466  | 2  | 154 | atp gtp binding protein-like 4 (RGD1564161) alternative variant aSep08, mRNA.                      |
| <a href="#">RGD1564161</a> | <a href="#">RGD1564161.aSep08</a> | <a href="#">689771</a> | 422311 | 466  | 2  | 154 | atp gtp binding protein-like 4 (RGD1564161) alternative variant aSep08, mRNA.                      |
| <a href="#">RGD1564161</a> | <a href="#">RGD1564161.bSep08</a> | <a href="#">362562</a> | 211012 | 480  | 1  | 106 | atp gtp binding protein-like 4 (RGD1564161) alternative variant bSep08, mRNA.                      |
| <a href="#">RGD1564161</a> | <a href="#">RGD1564161.bSep08</a> | <a href="#">689771</a> | 211012 | 480  | 1  | 106 | atp gtp binding protein-like 4 (RGD1564161) alternative variant bSep08, mRNA.                      |
| <a href="#">RGD1564162</a> | <a href="#">RGD1564162.aSep08</a> | <a href="#">499421</a> | 2706   | 1608 |    | 158 | similar to Homo sapiens fetal lung specific expression~unknown (17.6 kD) (RGD1564162) mRNA.        |
| <a href="#">RGD1564171</a> | <a href="#">RGD1564171.aSep08</a> | <a href="#">361985</a> | 16527  | 1870 | 10 | 253 | similar to NICE-3 and RGD1564171 (28.8 kD) (RGD1564171) alternative variant aSep08, mRNA.          |
| <a href="#">RGD1564171</a> | <a href="#">RGD1564171.aSep08</a> | <a href="#">499656</a> | 16527  | 1870 | 10 | 253 | similar to NICE-3 and RGD1564171 (28.8 kD) (RGD1564171) alternative variant aSep08, mRNA.          |
| <a href="#">RGD1564171</a> | <a href="#">RGD1564171.cSep08</a> | <a href="#">361985</a> | 8140   | 1801 | 5  | 186 | similar to NICE-3 and RGD1564171 (RGD1564171) alternative variant cSep08, mRNA.                    |
| <a href="#">RGD1564171</a> | <a href="#">RGD1564171.cSep08</a> | <a href="#">499656</a> | 8140   | 1801 | 5  | 186 | similar to NICE-3 and RGD1564171 (RGD1564171) alternative variant cSep08, mRNA.                    |
| <a href="#">RGD1564171</a> | <a href="#">RGD1564171.dSep08</a> | <a href="#">361985</a> | 8319   | 761  | 5  | 183 | similar to NICE-3 and RGD1564171 (20.9 kD) (RGD1564171) alternative variant dSep08, mRNA.          |
| <a href="#">RGD1564171</a> | <a href="#">RGD1564171.dSep08</a> | <a href="#">499656</a> | 8319   | 761  | 5  | 183 | similar to NICE-3 and RGD1564171 (20.9 kD) (RGD1564171) alternative variant dSep08, mRNA.          |
| <a href="#">RGD1564171</a> | <a href="#">RGD1564171.eSep08</a> | <a href="#">361985</a> | 8346   | 625  | 6  | 164 | similar to NICE-3 and RGD1564171 (RGD1564171) alternative variant eSep08, mRNA.                    |
| <a href="#">RGD1564171</a> | <a href="#">RGD1564171.eSep08</a> | <a href="#">499656</a> | 8346   | 625  | 6  | 164 | similar to NICE-3 and RGD1564171 (RGD1564171) alternative variant eSep08, mRNA.                    |
| <a href="#">RGD1564171</a> | <a href="#">RGD1564171.fSep08</a> | <a href="#">361985</a> | 8429   | 658  | 6  | 133 | similar to NICE-3 and RGD1564171 (15.2 kD) (RGD1564171) alternative variant fSep08, mRNA.          |
| <a href="#">RGD1564171</a> | <a href="#">RGD1564171.fSep08</a> | <a href="#">499656</a> | 8429   | 658  | 6  | 133 | similar to NICE-3 and RGD1564171 (15.2 kD) (RGD1564171) alternative variant fSep08, mRNA.          |
| <a href="#">RGD1564171</a> | <a href="#">RGD1564171.gSep08</a> | <a href="#">361985</a> | 12289  | 857  | 5  | 126 | similar to NICE-3 and RGD1564171 (14.3 kD) (RGD1564171) alternative variant gSep08, mRNA.          |
| <a href="#">RGD1564171</a> | <a href="#">RGD1564171.gSep08</a> | <a href="#">499656</a> | 12289  | 857  | 5  | 126 | similar to NICE-3 and RGD1564171 (14.3 kD) (RGD1564171) alternative variant gSep08, mRNA.          |
| <a href="#">RGD1564171</a> | <a href="#">RGD1564171.iSep08</a> | <a href="#">361985</a> | 12908  | 1368 | 4  | 114 | similar to NICE-3 and RGD1564171 (13.0 kD) (RGD1564171) alternative variant iSep08, complete mRNA. |
| <a href="#">RGD1564171</a> | <a href="#">RGD1564171.iSep08</a> | <a href="#">499656</a> | 12908  | 1368 | 4  | 114 | similar to NICE-3 and RGD1564171 (13.0 kD) (RGD1564171) alternative variant iSep08, complete mRNA. |
| <a href="#">RGD1564171</a> | <a href="#">RGD1564171.kSep08</a> | <a href="#">361985</a> | 12010  | 897  | 4  | 100 | similar to NICE-3 and RGD1564171 (RGD1564171) alternative variant kSep08, mRNA.                    |

|                            |                                   |                        |        |      |    |     |                                                                                                                                    |
|----------------------------|-----------------------------------|------------------------|--------|------|----|-----|------------------------------------------------------------------------------------------------------------------------------------|
| <a href="#">RGD1564171</a> | <a href="#">RGD1564171.kSep08</a> | <a href="#">499656</a> | 12010  | 897  | 4  | 100 | similar to NICE-3 and RGD1564171 (RGD1564171) alternative variant kSep08, mRNA.                                                    |
| <a href="#">RGD1564174</a> | <a href="#">RGD1564174.aSep08</a> | <a href="#">360980</a> | 147910 | 1947 | 13 | 430 | similar to novel protein similar to Tensin Tns (48.1 kD) (RGD1564174) alternative variant aSep08, mRNA.                            |
| <a href="#">RGD1564174</a> | <a href="#">RGD1564174.bSep08</a> | <a href="#">360980</a> | 7473   | 525  | 1  | 108 | similar to novel protein similar to Tensin Tns (RGD1564174) alternative variant bSep08, mRNA.                                      |
| <a href="#">RGD1564177</a> | <a href="#">RGD1564177.aSep08</a> | <a href="#">501592</a> | 633    | 369  | 1  | 105 | RGD1564177 (RGD1564177) alternative variant aSep08, mRNA.                                                                          |
| <a href="#">RGD1564177</a> | <a href="#">RGD1564177.bSep08</a> | <a href="#">501592</a> | 722    | 396  | 1  | 75  | RGD1564177 (8.7 kD) (RGD1564177) alternative variant bSep08, mRNA.                                                                 |
| <a href="#">RGD1564195</a> | <a href="#">RGD1564195.aSep08</a> | <a href="#">361651</a> | 1736   | 1227 | 3  | 195 | similar to hypothetical protein (RGD1564195) alternative variant aSep08, mRNA.                                                     |
| <a href="#">RGD1564195</a> | <a href="#">RGD1564195.dSep08</a> | <a href="#">361651</a> | 2430   | 433  | 4  | 110 | similar to hypothetical protein (RGD1564195) alternative variant dSep08, mRNA.                                                     |
| <a href="#">RGD1564195</a> | <a href="#">RGD1564195.eSep08</a> | <a href="#">361651</a> | 2446   | 459  | 3  | 79  | similar to hypothetical protein (RGD1564195) alternative variant eSep08, mRNA.                                                     |
| <a href="#">RGD1564200</a> | <a href="#">RGD1564200.bSep08</a> | <a href="#">366311</a> | 12404  | 442  |    | 90  | putative mitochondrial protein (9.7 kD) (RGD1564200) alternative variant bSep08, mRNA.                                             |
| <a href="#">RGD1564209</a> | <a href="#">RGD1564209.aSep08</a> | <a href="#">367046</a> | 3084   | 1111 | 3  | 103 | similar to Acyl-CoA dehydrogenase family member 8, mitochondrial precursor (ACAD-8) (RGD1564209) alternative variant aSep08, mRNA. |
| <a href="#">RGD1564214</a> | <a href="#">RGD1564214.aSep08</a> | <a href="#">499093</a> | 5077   | 598  | 4  | 102 | similar to Zfp93 protein (RGD1564214) alternative variant aSep08, mRNA.                                                            |
| <a href="#">RGD1564214</a> | <a href="#">RGD1564214.bSep08</a> | <a href="#">499093</a> | 4974   | 413  | 3  | 65  | similar to Zfp93 protein (RGD1564214) alternative variant bSep08, mRNA.                                                            |
| <a href="#">RGD1564214</a> | <a href="#">RGD1564214.dSep08</a> | <a href="#">499093</a> | 1180   | 351  | 2  | 42  | similar to Zfp93 protein (RGD1564214) alternative variant dSep08, mRNA.                                                            |
| <a href="#">RGD1564241</a> | <a href="#">RGD1564241.bSep08</a> | <a href="#">363022</a> | 15582  | 1083 | 5  | 97  | similar to zinc finger protein 426 (11.5 kD) (RGD1564241) alternative variant bSep08, mRNA.                                        |
| <a href="#">RGD1564257</a> | <a href="#">RGD1564257.aSep08</a> | <a href="#">500595</a> | 2691   | 453  | 3  | 133 | similar to hypothetical protein FLJ32825 (RGD1564257) alternative variant aSep08, mRNA.                                            |
| <a href="#">RGD1564257</a> | <a href="#">RGD1564257.bSep08</a> | <a href="#">500595</a> | 2602   | 519  | 4  | 115 | similar to hypothetical protein FLJ32825 (RGD1564257) alternative variant bSep08, mRNA.                                            |
| <a href="#">RGD1564257</a> | <a href="#">RGD1564257.cSep08</a> | <a href="#">500595</a> | 2349   | 606  | 2  | 59  | similar to hypothetical protein FLJ32825 (RGD1564257) alternative variant cSep08, mRNA.                                            |
| <a href="#">RGD1564259</a> | <a href="#">RGD1564259.aSep08</a> | <a href="#">292477</a> | 35247  | 1229 |    | 386 | similar to OTTHUMP00000040155 (RGD1564259) mRNA.                                                                                   |
| <a href="#">RGD1564263</a> | <a href="#">RGD1564263.aSep08</a> | <a href="#">499873</a> | 9159   | 1829 |    | 241 | similar to Opa-interacting protein 5 (RGD1564263) mRNA.                                                                            |
| <a href="#">RGD1564272</a> | <a href="#">RGD1564272.aSep08</a> | <a href="#">499065</a> | 1052   | 283  |    | 94  | similar to RIKEN cDNA 9930022N03 gene (RGD1564272) mRNA.                                                                           |
| <a href="#">RGD1564289</a> | <a href="#">RGD1564289.aSep08</a> | <a href="#">367793</a> | 14598  | 670  |    | 169 | similar to transcriptional repressor Scml2 (RGD1564289) mRNA.                                                                      |
| <a href="#">RGD1564300</a> | <a href="#">RGD1564300.aSep08</a> | <a href="#">361661</a> | 10393  | 1785 | 4  | 496 | CRA c (RGD1564300) alternative variant aSep08, mRNA.                                                                               |
| <a href="#">RGD1564300</a> | <a href="#">RGD1564300.bSep08</a> | <a href="#">361661</a> | 10362  | 1082 | 6  | 218 | CRA d (RGD1564300) alternative variant bSep08, mRNA.                                                                               |
| <a href="#">RGD1564300</a> | <a href="#">RGD1564300.cSep08</a> | <a href="#">361661</a> | 15282  | 612  | 3  | 75  | CRA d (RGD1564300) alternative variant cSep08, mRNA.                                                                               |
| <a href="#">RGD1564300</a> | <a href="#">RGD1564300.dSep08</a> | <a href="#">361661</a> | 3589   | 606  | 2  | 71  | CRA c (8.4 kD) (RGD1564300) alternative variant dSep08, mRNA.                                                                      |

|                            |                                   |                        |       |      |   |     |                                                                                                                              |
|----------------------------|-----------------------------------|------------------------|-------|------|---|-----|------------------------------------------------------------------------------------------------------------------------------|
| <a href="#">RGD1564300</a> | <a href="#">RGD1564300.fSep08</a> | <a href="#">361661</a> | 8173  | 1281 | 4 | 69  | CRA c (RGD1564300) alternative variant fSep08, mRNA.                                                                         |
| <a href="#">RGD1564300</a> | <a href="#">RGD1564300.gSep08</a> | <a href="#">361661</a> | 8170  | 262  | 2 | 32  | putative protein (4.0 kD) (RGD1564300) alternative variant gSep08, mRNA.                                                     |
| <a href="#">RGD1564308</a> | <a href="#">RGD1564308.aSep08</a> | <a href="#">502086</a> | 3253  | 383  |   | 78  | similar to LOC495042 protein (RGD1564308) mRNA.                                                                              |
| <a href="#">RGD1564311</a> | <a href="#">RGD1564311.aSep08</a> | <a href="#">300461</a> | 21970 | 748  |   | 52  | similar to hypothetical protein FLJ32949 (RGD1564311) alternative variant aSep08, mRNA.                                      |
| <a href="#">RGD1564322</a> | <a href="#">RGD1564322.aSep08</a> | <a href="#">500917</a> | 979   | 652  | 2 | 133 | similar to shippo 1 (RGD1564322) alternative variant aSep08, mRNA.                                                           |
| <a href="#">RGD1564322</a> | <a href="#">RGD1564322.bSep08</a> | <a href="#">500917</a> | 729   | 374  | 2 | 105 | similar to shippo 1 (RGD1564322) alternative variant bSep08, mRNA.                                                           |
| <a href="#">RGD1564324</a> | <a href="#">RGD1564324.bSep08</a> | <a href="#">290217</a> | 1923  | 404  | 1 | 62  | similar to dehydrogenase/reductase member 2 (RGD1564324) alternative variant bSep08, mRNA.                                   |
| <a href="#">RGD1564327</a> | <a href="#">RGD1564327.aSep08</a> | <a href="#">364786</a> | 47731 | 3249 | 3 | 190 | similar to integrin alpha 8 (RGD1564327) alternative variant aSep08, mRNA.                                                   |
| <a href="#">RGD1564327</a> | <a href="#">RGD1564327.bSep08</a> | <a href="#">364786</a> | 22303 | 491  | 1 | 133 | similar to integrin alpha 8 (RGD1564327) alternative variant bSep08, mRNA.                                                   |
| <a href="#">RGD1564342</a> | <a href="#">RGD1564342.aSep08</a> | <a href="#">305710</a> | 5335  | 547  |   | 182 | similar to hypothetical protein FLJ32685 (RGD1564342) mRNA.                                                                  |
| <a href="#">RGD1564357</a> | <a href="#">RGD1564357.aSep08</a> | <a href="#">502306</a> | 1860  | 818  |   | 35  | RGD1564357 (RGD1564357) mRNA.                                                                                                |
| <a href="#">RGD1564369</a> | <a href="#">RGD1564369.aSep08</a> | <a href="#">302832</a> | 70602 | 714  |   | 85  | RGD1564369 (9.6 kD) (RGD1564369) mRNA.                                                                                       |
| <a href="#">RGD1564379</a> | <a href="#">RGD1564379.aSep08</a> | <a href="#">499758</a> | 1610  | 715  | 2 | 126 | putative protein, with at least 2 transmembrane domains, of vertebrate origin (RGD1564379) alternative variant aSep08, mRNA. |
| <a href="#">RGD1564380</a> | <a href="#">RGD1564380.aSep08</a> | <a href="#">292711</a> | 1133  | 765  |   | 183 | similar to BC049730 protein (RGD1564380) mRNA.                                                                               |
| <a href="#">RGD1564391</a> | <a href="#">RGD1564391.aSep08</a> | <a href="#">361199</a> | 3222  | 755  | 1 | 140 | RGD1564391 (RGD1564391) alternative variant aSep08, mRNA.                                                                    |
| <a href="#">RGD1564391</a> | <a href="#">RGD1564391.bSep08</a> | <a href="#">361199</a> | 4880  | 1048 | 2 | 89  | RGD1564391 (10.1 kD) (RGD1564391) alternative variant bSep08, mRNA.                                                          |
| <a href="#">RGD1564406</a> | <a href="#">RGD1564406.aSep08</a> | <a href="#">501586</a> | 593   | 416  |   | 91  | similar to RIKEN cDNA 1700019M22 (RGD1564406) mRNA.                                                                          |
| <a href="#">RGD1564419</a> | <a href="#">RGD1564419.bSep08</a> | <a href="#">500128</a> | 4625  | 1215 | 2 | 138 | similar to hypothetical gene supported by BC025338 (14.7 kD) (RGD1564419) alternative variant bSep08, mRNA.                  |
| <a href="#">RGD1564419</a> | <a href="#">RGD1564419.dSep08</a> | <a href="#">500128</a> | 1645  | 1443 | 2 | 76  | similar to hypothetical gene supported by BC025338 (7.9 kD) (RGD1564419) alternative variant dSep08, mRNA.                   |
| <a href="#">RGD1564428</a> | <a href="#">RGD1564428.aSep08</a> | <a href="#">498866</a> | 21372 | 424  |   | 108 | similar to FLJ32921 protein (12.4 kD) (RGD1564428) alternative variant aSep08, mRNA.                                         |
| <a href="#">RGD1564450</a> | <a href="#">RGD1564450.bSep08</a> | <a href="#">294291</a> | 1752  | 379  | 5 | 125 | RGD1564450 (RGD1564450) alternative variant bSep08, mRNA.                                                                    |
| <a href="#">RGD1564454</a> | <a href="#">RGD1564454.aSep08</a> | <a href="#">499690</a> | 5855  | 2813 |   | 135 | similar to RIKEN cDNA 2010200O16 (RGD1564454) mRNA.                                                                          |
| <a href="#">RGD1564456</a> | <a href="#">RGD1564456.aSep08</a> | <a href="#">361269</a> | 40437 | 2764 |   | 828 | peripheral benzodiazepine receptor associated protein (RGD1564456) mRNA.                                                     |
| <a href="#">RGD1564482</a> | <a href="#">RGD1564482.aSep08</a> | <a href="#">500568</a> | 1565  | 550  | 2 | 114 | RGD1564482 (RGD1564482) alternative variant aSep08, mRNA.                                                                    |
| <a href="#">RGD1564482</a> | <a href="#">RGD1564482.bSep08</a> | <a href="#">500568</a> | 1429  | 675  | 1 | 110 | RGD1564482 (RGD1564482) alternative variant bSep08, mRNA.                                                                    |

|                            |                                   |                        |       |      |   |     |                                                                                               |
|----------------------------|-----------------------------------|------------------------|-------|------|---|-----|-----------------------------------------------------------------------------------------------|
| <a href="#">RGD1564491</a> | <a href="#">RGD1564491.bSep08</a> | <a href="#">303812</a> | 3578  | 1272 | 5 | 327 | RGD1564491 (RGD1564491) alternative variant bSep08, mRNA.                                     |
| <a href="#">RGD1564491</a> | <a href="#">RGD1564491.cSep08</a> | <a href="#">303812</a> | 3502  | 537  | 3 | 179 | RGD1564491 (RGD1564491) alternative variant cSep08, mRNA.                                     |
| <a href="#">RGD1564496</a> | <a href="#">RGD1564496.aSep08</a> | <a href="#">499650</a> | 1795  | 542  |   | 151 | RGD1564496 (RGD1564496) mRNA.                                                                 |
| <a href="#">RGD1564515</a> | <a href="#">RGD1564515.aSep08</a> | <a href="#">299963</a> | 1618  | 750  |   | 244 | similar to alpha 1B-glycoprotein (RGD1564515) mRNA.                                           |
| <a href="#">RGD1564516</a> | <a href="#">RGD1564516.aSep08</a> | <a href="#">497891</a> | 12537 | 431  |   | 52  | similar to smuckler (6.0 kD) (RGD1564516) mRNA.                                               |
| <a href="#">RGD1564522</a> | <a href="#">RGD1564522.aSep08</a> | <a href="#">305567</a> | 1427  | 618  |   | 99  | similar to Hypothetical protein CBG23547 (RGD1564522) mRNA.                                   |
| <a href="#">RGD1564560</a> | <a href="#">RGD1564560.bSep08</a> | <a href="#">500988</a> | 8404  | 717  | 4 | 103 | dead box polypeptide 6 CRA a (10.8 kD) (RGD1564560) alternative variant bSep08, mRNA.         |
| <a href="#">RGD1564560</a> | <a href="#">RGD1564560.cSep08</a> | <a href="#">500988</a> | 3599  | 557  | 2 | 83  | putative protein (RGD1564560) alternative variant cSep08, mRNA.                               |
| <a href="#">RGD1564560</a> | <a href="#">RGD1564560.fSep08</a> | <a href="#">500988</a> | 2979  | 433  | 2 | 52  | dead box polypeptide 6 CRA a (RGD1564560) alternative variant fSep08, mRNA.                   |
| <a href="#">RGD1564560</a> | <a href="#">RGD1564560.gSep08</a> | <a href="#">500988</a> | 1280  | 289  | 2 | 36  | putative protein (RGD1564560) alternative variant gSep08, mRNA.                               |
| <a href="#">RGD1564567</a> | <a href="#">RGD1564567.aSep08</a> | <a href="#">305453</a> | 5621  | 653  | 1 | 217 | similar to CG14998-PC, isoform C (RGD1564567) alternative variant aSep08, mRNA.               |
| <a href="#">RGD1564567</a> | <a href="#">RGD1564567.bSep08</a> | <a href="#">305453</a> | 3738  | 706  | 1 | 155 | similar to CG14998-PC, isoform C (RGD1564567) alternative variant bSep08, mRNA.               |
| <a href="#">RGD1564579</a> | <a href="#">RGD1564579.aSep08</a> | <a href="#">293491</a> | 3303  | 954  | 5 | 185 | similar to yippee-like 3 (RGD1564579) alternative variant aSep08, mRNA.                       |
| <a href="#">RGD1564579</a> | <a href="#">RGD1564579.bSep08</a> | <a href="#">293491</a> | 1322  | 447  | 5 | 149 | similar to yippee-like 3 (RGD1564579) alternative variant bSep08, mRNA.                       |
| <a href="#">RGD1564579</a> | <a href="#">RGD1564579.cSep08</a> | <a href="#">293491</a> | 2884  | 426  | 4 | 138 | similar to yippee-like 3 (RGD1564579) alternative variant cSep08, mRNA.                       |
| <a href="#">RGD1564579</a> | <a href="#">RGD1564579.dSep08</a> | <a href="#">293491</a> | 2146  | 559  | 3 | 82  | similar to yippee-like 3 (RGD1564579) alternative variant dSep08, mRNA.                       |
| <a href="#">RGD1564579</a> | <a href="#">RGD1564579.eSep08</a> | <a href="#">293491</a> | 3293  | 1819 | 3 | 54  | similar to yippee-like 3 (6.2 kD) (RGD1564579) alternative variant eSep08, complete mRNA.     |
| <a href="#">RGD1564591</a> | <a href="#">RGD1564591.bSep08</a> | <a href="#">501125</a> | 23215 | 732  | 1 | 91  | putative protein of mammalian origin (RGD1564591) alternative variant bSep08, mRNA.           |
| <a href="#">RGD1564614</a> | <a href="#">RGD1564614.bSep08</a> | <a href="#">498241</a> | 24017 | 746  | 2 | 76  | similar to complement factor H-related protein (RGD1564614) alternative variant bSep08, mRNA. |
| <a href="#">RGD1564615</a> | <a href="#">RGD1564615.aSep08</a> | <a href="#">312371</a> | 14344 | 905  | 8 | 203 | similar to mKIAA0241 protein (23.3 kD) (RGD1564615) alternative variant aSep08, mRNA.         |
| <a href="#">RGD1564615</a> | <a href="#">RGD1564615.bSep08</a> | <a href="#">312371</a> | 7911  | 349  |   | 64  | similar to mKIAA0241 protein (RGD1564615) alternative variant bSep08, mRNA.                   |
| <a href="#">RGD1564620</a> | <a href="#">RGD1564620.aSep08</a> | <a href="#">365962</a> | 15391 | 623  |   | 207 | similar to hypothetical protein MGC34032 (RGD1564620) mRNA.                                   |
| <a href="#">RGD1564635</a> | <a href="#">RGD1564635.aSep08</a> | <a href="#">498355</a> | 58551 | 510  | 3 | 124 | similar to CG12206-PA, isoform A (RGD1564635) alternative variant aSep08, mRNA.               |
| <a href="#">RGD1564635</a> | <a href="#">RGD1564635.cSep08</a> | <a href="#">498355</a> | 58520 | 413  | 2 | 96  | similar to CG12206-PA, isoform A (RGD1564635) alternative variant cSep08, mRNA.               |
| <a href="#">RGD1564638</a> | <a href="#">RGD1564638.aSep08</a> | <a href="#">287060</a> | 22080 | 579  |   | 192 | similar to KIAA0420 (RGD1564638) mRNA.                                                        |

|                            |                                   |                        |       |      |   |     |                                                                                                                |
|----------------------------|-----------------------------------|------------------------|-------|------|---|-----|----------------------------------------------------------------------------------------------------------------|
| <a href="#">RGD1564641</a> | <a href="#">RGD1564641.aSep08</a> | <a href="#">303891</a> | 8866  | 422  |   | 140 | similar to Neurogenic locus notch homolog protein 2 precursor (Notch 2) (hN2) (RGD1564641) mRNA.               |
| <a href="#">RGD1564651</a> | <a href="#">RGD1564651.aSep08</a> | <a href="#">292572</a> | 18874 | 729  |   | 197 | similar to oocyte specific homeobox 3 (RGD1564651) mRNA.                                                       |
| <a href="#">RGD1564655</a> | <a href="#">RGD1564655.aSep08</a> | <a href="#">292014</a> | 10538 | 1067 |   | 294 | similar to Tle2 protein (RGD1564655) mRNA.                                                                     |
| <a href="#">RGD1564657</a> | <a href="#">RGD1564657.aSep08</a> | <a href="#">306718</a> | 2730  | 675  |   | 204 | similar to cathepsin 1 precursor (RGD1564657) mRNA.                                                            |
| <a href="#">RGD1564666</a> | <a href="#">RGD1564666.aSep08</a> | <a href="#">499627</a> | 1221  | 572  |   | 119 | RGD1564666 (RGD1564666) mRNA.                                                                                  |
| <a href="#">RGD1564672</a> | <a href="#">RGD1564672.aSep08</a> | <a href="#">499520</a> | 12692 | 239  |   | 50  | similar to hypothetical protein MGC52498 (RGD1564672) mRNA.                                                    |
| <a href="#">RGD1564680</a> | <a href="#">RGD1564680.aSep08</a> | <a href="#">312115</a> | 2072  | 811  |   | 116 | similar to matrilin 2 precursor (RGD1564680) mRNA.                                                             |
| <a href="#">RGD1564709</a> | <a href="#">RGD1564709.bSep08</a> | <a href="#">305142</a> | 19043 | 357  | 1 | 115 | similar to ATP-binding cassette, sub-family G (WHITE), member 3 (RGD1564709) alternative variant bSep08, mRNA. |
| <a href="#">RGD1564722</a> | <a href="#">RGD1564722.aSep08</a> | <a href="#">362832</a> | 2615  | 797  | 9 | 126 | similar to C19orf36 protein (14.8 kD) (RGD1564722) alternative variant aSep08, mRNA.                           |
| <a href="#">RGD1564722</a> | <a href="#">RGD1564722.cSep08</a> | <a href="#">362832</a> | 832   | 651  | 3 | 66  | similar to C19orf36 protein (6.7 kD) (RGD1564722) alternative variant cSep08, mRNA.                            |
| <a href="#">RGD1564731</a> | <a href="#">RGD1564731.aSep08</a> | <a href="#">363824</a> | 2679  | 756  |   | 62  | similar to 60S ribosomal protein L7a (RGD1564731) mRNA.                                                        |
| <a href="#">RGD1564739</a> | <a href="#">RGD1564739.aSep08</a> | <a href="#">296782</a> | 52949 | 685  |   | 173 | similar to spermatogenesis associated glutamate (E)-rich protein 4d (RGD1564739) mRNA.                         |
| <a href="#">RGD1564743</a> | <a href="#">RGD1564743.aSep08</a> | <a href="#">499534</a> | 6220  | 1500 |   | 59  | RGD1564743 (RGD1564743) mRNA.                                                                                  |
| <a href="#">RGD1564752</a> | <a href="#">RGD1564752.aSep08</a> | <a href="#">363050</a> | 96933 | 598  | 3 | 80  | RGD1564752 (9.2 kD) (RGD1564752) mRNA.                                                                         |
| <a href="#">RGD1564763</a> | <a href="#">RGD1564763.aSep08</a> | <a href="#">367747</a> | 5057  | 943  |   | 201 | similar to nudix (nucleoside diphosphate linked moiety X)-type motif 11 (RGD1564763) mRNA.                     |
| <a href="#">RGD1564770</a> | <a href="#">RGD1564770.aSep08</a> | <a href="#">500335</a> | 10917 | 1567 |   | 185 | similar to CD69 antigen (p60, early T-cell activation antigen) (21.6 kD) (RGD1564770) complete mRNA.           |
| <a href="#">RGD1564773</a> | <a href="#">RGD1564773.aSep08</a> | <a href="#">361142</a> | 59819 | 567  |   | 148 | similar to GalNAc transferase 10 isoform a (RGD1564773) mRNA.                                                  |
| <a href="#">RGD1564776</a> | <a href="#">RGD1564776.bSep08</a> | <a href="#">500550</a> | 1759  | 886  | 1 | 107 | similar to ornithine decarboxylase-like protein (RGD1564776) alternative variant bSep08, mRNA.                 |
| <a href="#">RGD1564778</a> | <a href="#">RGD1564778.bSep08</a> | <a href="#">303514</a> | 5135  | 2034 | 3 | 453 | similar to RIKEN cDNA 4121402D02 (RGD1564778) alternative variant bSep08, mRNA.                                |
| <a href="#">RGD1564778</a> | <a href="#">RGD1564778.cSep08</a> | <a href="#">303514</a> | 5907  | 1225 | 8 | 339 | similar to RIKEN cDNA 4121402D02 (RGD1564778) alternative variant cSep08, mRNA.                                |
| <a href="#">RGD1564788</a> | <a href="#">RGD1564788.aSep08</a> | <a href="#">290805</a> | 8268  | 880  | 4 | 200 | similar to Werner syndrome helicase homolog (RGD1564788) alternative variant aSep08, mRNA.                     |
| <a href="#">RGD1564788</a> | <a href="#">RGD1564788.bSep08</a> | <a href="#">290805</a> | 13222 | 917  | 4 | 187 | similar to Werner syndrome helicase homolog (RGD1564788) alternative variant bSep08, mRNA.                     |
| <a href="#">RGD1564788</a> | <a href="#">RGD1564788.cSep08</a> | <a href="#">290805</a> | 11410 | 1256 | 4 | 170 | similar to Werner syndrome helicase homolog (18.9 kD) (RGD1564788) alternative variant cSep08, mRNA.           |
| <a href="#">RGD1564791</a> | <a href="#">RGD1564791.aSep08</a> | <a href="#">498766</a> | 6755  | 778  | 5 | 122 | similar to hypothetical protein 4930474N05 (RGD1564791) mRNA.                                                  |
| <a href="#">RGD1564792</a> | <a href="#">RGD1564792.bSep08</a> | <a href="#">499976</a> | 8644  | 611  | 2 | 53  | RGD1564792 (RGD1564792) alternative variant bSep08, mRNA.                                                      |

|                                               |                                                     |                        |       |      |   |     |                                                                                                                                   |
|-----------------------------------------------|-----------------------------------------------------|------------------------|-------|------|---|-----|-----------------------------------------------------------------------------------------------------------------------------------|
| <a href="#">RGD1564793</a>                    | <a href="#">RGD1564793.aSep08</a>                   | <a href="#">691337</a> | 50434 | 903  |   | 184 | similar to KIAA0965 protein (21.4 kD) (RGD1564793) mRNA.                                                                          |
| <a href="#">RGD1564803</a>                    | <a href="#">RGD1564803.aSep08</a>                   | <a href="#">498181</a> | 1144  | 484  |   | 142 | RGD1564803 (RGD1564803) mRNA.                                                                                                     |
| <a href="#">RGD1564804</a>                    | <a href="#">RGD1564804.bSep08</a>                   | <a href="#">313551</a> | 3157  | 1461 | 2 | 88  | putative nuclear protein of ancient origin (10.1 kD) (RGD1564804) alternative variant bSep08, mRNA.                               |
| <a href="#">RGD1564809</a>                    | <a href="#">RGD1564809.aSep08</a>                   | <a href="#">313208</a> | 32589 | 529  | 6 | 146 | similar to fibronectin type 3 and SPRY domain-containing protein (RGD1564809) alternative variant aSep08, mRNA.                   |
| <a href="#">RGD1564811</a>                    | <a href="#">RGD1564811.bSep08</a>                   | <a href="#">316157</a> | 11827 | 818  | 1 | 164 | putative protein of metazoan origin (RGD1564811) alternative variant bSep08, mRNA.                                                |
| <a href="#">RGD1564827</a>                    | <a href="#">RGD1564827.aSep08</a>                   | <a href="#">498689</a> | 4760  | 426  |   | 31  | similar to cathepsin M (RGD1564827) mRNA.                                                                                         |
| <a href="#">RGD1564833</a>                    | <a href="#">RGD1564833.aSep08</a>                   | <a href="#">498297</a> | 17018 | 3411 | 2 | 387 | similar to 9630058J23Rik protein (RGD1564833) alternative variant aSep08, mRNA.                                                   |
| <a href="#">RGD1564833</a>                    | <a href="#">RGD1564833.bSep08</a>                   | <a href="#">498297</a> | 12118 | 414  | 1 | 131 | similar to 9630058J23Rik protein (RGD1564833) alternative variant bSep08, mRNA.                                                   |
| <a href="#">RGD1564841</a>                    | <a href="#">RGD1564841.aSep08</a>                   | <a href="#">361498</a> | 5917  | 671  |   | 117 | similar to NALP-alpha (RGD1564841) mRNA.                                                                                          |
| <a href="#">RGD1564845</a>                    | <a href="#">RGD1564845.aSep08</a>                   | <a href="#">363507</a> | 4152  | 739  |   | 143 | similar to Xlr-like (RGD1564845) mRNA.                                                                                            |
| <a href="#">RGD1564854</a>                    | <a href="#">RGD1564854.bSep08</a>                   | <a href="#">502617</a> | 17586 | 782  | 6 | 135 | similar to divalent cation tolerant protein CUTA (15.4 kD) (RGD1564854) alternative variant bSep08, mRNA.                         |
| <a href="#">RGD1564859</a>                    | <a href="#">RGD1564859.aSep08</a>                   | <a href="#">362536</a> | 42562 | 1349 | 2 | 117 | RGD1564859 (13.2 kD) (RGD1564859) alternative variant aSep08, complete mRNA.                                                      |
| <a href="#">RGD1564859</a>                    | <a href="#">RGD1564859.bSep08</a>                   | <a href="#">362536</a> | 33360 | 619  | 2 | 72  | RGD1564859 (8.1 kD) (RGD1564859) alternative variant bSep08, mRNA.                                                                |
| <a href="#">RGD1564859</a>                    | <a href="#">RGD1564859.dSep08</a>                   | <a href="#">362536</a> | 41846 | 967  | 4 | 81  | RGD1564859 (RGD1564859) alternative variant dSep08, mRNA.                                                                         |
| <a href="#">RGD1564865</a>                    | <a href="#">RGD1564865.aSep08</a>                   | <a href="#">498789</a> | 6123  | 413  | 2 | 64  | similar to 20-alpha-hydroxysteroid dehydrogenase (RGD1564865) alternative variant aSep08, mRNA.                                   |
| <a href="#">RGD1564865</a>                    | <a href="#">RGD1564865.bSep08</a>                   | <a href="#">498789</a> | 1808  | 294  | 1 | 24  | similar to 20-alpha-hydroxysteroid dehydrogenase (RGD1564865) alternative variant bSep08, mRNA.                                   |
| <a href="#">RGD1564871</a>                    | <a href="#">RGD1564871.aSep08</a>                   | <a href="#">315947</a> | 20697 | 707  | 5 | 171 | thioredoxin domain containing protein (RGD1564871) alternative variant aSep08, mRNA.                                              |
| <a href="#">RGD1564871</a>                    | <a href="#">RGD1564871.bSep08</a>                   | <a href="#">315947</a> | 7199  | 1520 | 2 | 58  | putative protein (RGD1564871) alternative variant bSep08, mRNA.                                                                   |
| <a href="#">RGD1564877</a>                    | <a href="#">RGD1564877.aSep08</a>                   | <a href="#">501581</a> | 675   | 498  |   | 118 | RGD1564877 (RGD1564877) mRNA.                                                                                                     |
| <a href="#">RGD1564878</a>                    | <a href="#">RGD1564878.aSep08</a>                   | <a href="#">502002</a> | 769   | 381  |   | 88  | similar to natural killer cell protease 7 (RGD1564878) mRNA.                                                                      |
| <a href="#">RGD1564887</a>                    | <a href="#">RGD1564887.aSep08</a>                   | <a href="#">499363</a> | 81845 | 2079 |   | 187 | similar to 9130011E15Rik protein (RGD1564887) mRNA.                                                                               |
| <a href="#">RGD1564907</a>                    | <a href="#">RGD1564907.aSep08</a>                   | <a href="#">498723</a> | 15400 | 705  |   | 95  | RGD1564907 (RGD1564907) mRNA.                                                                                                     |
| <a href="#">RGD1564927and<br/>dRGD1560115</a> | <a href="#">RGD1564927andRGD1<br/>560115.aSep08</a> | <a href="#">499929</a> | 18275 | 2888 | 1 | 237 | similar to TGFB-induced factor 2 and similar to TGFB-induced factor 2 (RGD1564927andRGD1560115) alternative variant aSep08, mRNA. |
| <a href="#">RGD1564927and<br/>dRGD1560115</a> | <a href="#">RGD1564927andRGD1<br/>560115.aSep08</a> | <a href="#">499930</a> | 18275 | 2888 | 1 | 237 | similar to TGFB-induced factor 2 and similar to TGFB-induced factor 2 (RGD1564927andRGD1560115) alternative variant aSep08, mRNA. |
| <a href="#">RGD1564927and<br/>dRGD1560115</a> | <a href="#">RGD1564927andRGD1<br/>560115.bSep08</a> | <a href="#">499929</a> | 13052 | 756  | 2 | 179 | similar to TGFB-induced factor 2 and similar to TGFB-induced factor 2 (RGD1564927andRGD1560115) alternative variant bSep08, mRNA. |



|                                         |                                                |                        |        |      |   |     |                                                                                                                                                                 |
|-----------------------------------------|------------------------------------------------|------------------------|--------|------|---|-----|-----------------------------------------------------------------------------------------------------------------------------------------------------------------|
| <a href="#">RGD1564927andRGD1560115</a> | <a href="#">RGD1564927andRGD1560115.bSep08</a> | <a href="#">499930</a> | 13052  | 756  | 2 | 179 | similar to TGFB-induced factor 2 and similar to TGFB-induced factor 2 (RGD1564927andRGD1560115) alternative variant bSep08, mRNA.                               |
| <a href="#">RGD1564936</a>              | <a href="#">RGD1564936.aSep08</a>              | <a href="#">361875</a> | 20704  | 599  | 1 | 188 | similar to Vacuolar ATP synthase subunit S1 precursor (V-ATPase S1 subunit) (RGD1564936) alternative variant aSep08, mRNA.                                      |
| <a href="#">RGD1564936</a>              | <a href="#">RGD1564936.bSep08</a>              | <a href="#">361875</a> | 24173  | 645  | 4 | 163 | similar to Vacuolar ATP synthase subunit S1 precursor (V-ATPase S1 subunit) (RGD1564936) alternative variant bSep08, mRNA.                                      |
| <a href="#">RGD1564941</a>              | <a href="#">RGD1564941.aSep08</a>              | <a href="#">364538</a> | 90362  | 809  |   | 269 | ankyrin (RGD1564941) mRNA.                                                                                                                                      |
| <a href="#">RGD1564942</a>              | <a href="#">RGD1564942.aSep08</a>              | <a href="#">298409</a> | 28188  | 1005 | 1 | 247 | RGD1564942 (RGD1564942) alternative variant aSep08, mRNA.                                                                                                       |
| <a href="#">RGD1564942</a>              | <a href="#">RGD1564942.bSep08</a>              | <a href="#">298409</a> | 1633   | 482  | 1 | 17  | RGD1564942 (RGD1564942) alternative variant bSep08, mRNA.                                                                                                       |
| <a href="#">RGD1564952</a>              | <a href="#">RGD1564952.aSep08</a>              | <a href="#">304761</a> | 58670  | 461  |   | 153 | putative protein of ancient origin (RGD1564952) mRNA.                                                                                                           |
| <a href="#">RGD1564955</a>              | <a href="#">RGD1564955.aSep08</a>              | <a href="#">501642</a> | 31584  | 1926 |   | 566 | similar to fibrous sheath interacting protein 2 (RGD1564955) mRNA.                                                                                              |
| <a href="#">RGD1564956</a>              | <a href="#">RGD1564956.bSep08</a>              | <a href="#">500462</a> | 11593  | 729  | 3 | 138 | similar to calcium binding protein P22 (RGD1564956) alternative variant bSep08, complete mRNA.                                                                  |
| <a href="#">RGD1564964</a>              | <a href="#">RGD1564964.bSep08</a>              | <a href="#">315843</a> | 11847  | 897  | 6 | 298 | similar to WD repeat domain 11 protein (RGD1564964) alternative variant bSep08, mRNA.                                                                           |
| <a href="#">RGD1564964</a>              | <a href="#">RGD1564964.dSep08</a>              | <a href="#">315843</a> | 921    | 319  | 2 | 106 | similar to WD repeat domain 11 protein (RGD1564964) alternative variant dSep08, mRNA.                                                                           |
| <a href="#">RGD1564982</a>              | <a href="#">RGD1564982.aSep08</a>              | <a href="#">308556</a> | 2132   | 767  | 1 | 228 | RGD1564982 (RGD1564982) alternative variant aSep08, mRNA.                                                                                                       |
| <a href="#">RGD1564982</a>              | <a href="#">RGD1564982.bSep08</a>              | <a href="#">308556</a> | 2111   | 453  | 1 | 151 | RGD1564982 (RGD1564982) alternative variant bSep08, mRNA.                                                                                                       |
| <a href="#">RGD1564998</a>              | <a href="#">RGD1564998.aSep08</a>              | <a href="#">498323</a> | 3702   | 420  |   | 121 | hypothetical gene supported by BC082068 (RGD1564998) mRNA.                                                                                                      |
| <a href="#">RGD1564999</a>              | <a href="#">RGD1564999.aSep08</a>              | <a href="#">291266</a> | 4472   | 749  |   | 156 | similar to isopentenyl-diphosphate delta isomerase 2 (RGD1564999) mRNA.                                                                                         |
| <a href="#">RGD1565002</a>              | <a href="#">RGD1565002.aSep08</a>              | <a href="#">299135</a> | 15722  | 1481 | 7 | 418 | similar to Dehydrogenase/reductase SDR family member 7 precursor (Retinal short-chain dehydrogenase/reductase 4) (RGD1565002) alternative variant aSep08, mRNA. |
| <a href="#">RGD1565007</a>              | <a href="#">RGD1565007.aSep08</a>              | <a href="#">365834</a> | 100349 | 556  |   | 66  | similar to RIKEN cDNA 4632419K20 (RGD1565007) mRNA.                                                                                                             |
| <a href="#">RGD1565014</a>              | <a href="#">RGD1565014.aSep08</a>              | <a href="#">290790</a> | 2141   | 407  |   | 114 | similar to Low-density lipoprotein receptor-related protein 4 precursor (LDLR dan) (RGD1565014) mRNA.                                                           |
| <a href="#">RGD1565032</a>              | <a href="#">RGD1565032.aSep08</a>              | <a href="#">367701</a> | 19279  | 235  |   | 78  | similar to transcription elongation factor B (SIII), polypeptide 2 (RGD1565032) mRNA.                                                                           |
| <a href="#">RGD1565033</a>              | <a href="#">RGD1565033.aSep08</a>              | <a href="#">498014</a> | 3911   | 2018 | 3 | 265 | similar to hypothetical protein LOC284018 isoform b and hypothetical protein LOC688846 (RGD1565033) alternative variant aSep08, mRNA.                           |
| <a href="#">RGD1565033</a>              | <a href="#">RGD1565033.aSep08</a>              | <a href="#">688846</a> | 3911   | 2018 | 3 | 265 | similar to hypothetical protein LOC284018 isoform b and hypothetical protein LOC688846 (RGD1565033) alternative variant aSep08, mRNA.                           |

|                            |                                   |                        |       |      |    |     |                                                                                                                                       |
|----------------------------|-----------------------------------|------------------------|-------|------|----|-----|---------------------------------------------------------------------------------------------------------------------------------------|
| <a href="#">RGD1565033</a> | <a href="#">RGD1565033.bSep08</a> | <a href="#">498014</a> | 2416  | 621  | 2  | 192 | similar to hypothetical protein LOC284018 isoform b and hypothetical protein LOC688846 (RGD1565033) alternative variant bSep08, mRNA. |
| <a href="#">RGD1565033</a> | <a href="#">RGD1565033.bSep08</a> | <a href="#">688846</a> | 2416  | 621  | 2  | 192 | similar to hypothetical protein LOC284018 isoform b and hypothetical protein LOC688846 (RGD1565033) alternative variant bSep08, mRNA. |
| <a href="#">RGD1565033</a> | <a href="#">RGD1565033.dSep08</a> | <a href="#">498014</a> | 1621  | 722  | 3  | 169 | similar to hypothetical protein LOC284018 isoform b and hypothetical protein LOC688846 (RGD1565033) alternative variant dSep08, mRNA. |
| <a href="#">RGD1565033</a> | <a href="#">RGD1565033.dSep08</a> | <a href="#">688846</a> | 1621  | 722  | 3  | 169 | similar to hypothetical protein LOC284018 isoform b and hypothetical protein LOC688846 (RGD1565033) alternative variant dSep08, mRNA. |
| <a href="#">RGD1565033</a> | <a href="#">RGD1565033.eSep08</a> | <a href="#">498014</a> | 1877  | 818  | 2  | 123 | similar to hypothetical protein LOC284018 isoform b and hypothetical protein LOC688846 (RGD1565033) alternative variant eSep08, mRNA. |
| <a href="#">RGD1565033</a> | <a href="#">RGD1565033.eSep08</a> | <a href="#">688846</a> | 1877  | 818  | 2  | 123 | similar to hypothetical protein LOC284018 isoform b and hypothetical protein LOC688846 (RGD1565033) alternative variant eSep08, mRNA. |
| <a href="#">RGD1565037</a> | <a href="#">RGD1565037.bSep08</a> | <a href="#">498398</a> | 1714  | 381  | 1  | 65  | similar to selenoprotein SeIM (RGD1565037) alternative variant bSep08, mRNA.                                                          |
| <a href="#">RGD1565043</a> | <a href="#">RGD1565043.aSep08</a> | <a href="#">306618</a> | 3873  | 386  |    | 128 | similar to Rho guanine nucleotide exchange factor (GEF) 10 (RGD1565043) mRNA.                                                         |
| <a href="#">RGD1565052</a> | <a href="#">RGD1565052.bSep08</a> | <a href="#">499589</a> | 5165  | 688  | 4  | 136 | similar to hypothetical protein MGC27085 (RGD1565052) alternative variant bSep08, mRNA.                                               |
| <a href="#">RGD1565057</a> | <a href="#">RGD1565057.aSep08</a> | <a href="#">309300</a> | 1939  | 601  |    | 74  | similar to hypothetical protein FLJ32871 (RGD1565057) mRNA.                                                                           |
| <a href="#">RGD1565058</a> | <a href="#">RGD1565058.aSep08</a> | <a href="#">501587</a> | 752   | 572  |    | 145 | similar to RIKEN cDNA 1700019M22 (RGD1565058) mRNA.                                                                                   |
| <a href="#">RGD1565082</a> | <a href="#">RGD1565082.aSep08</a> | <a href="#">314381</a> | 21550 | 630  |    | 210 | similar to Protein C14orf102 homolog (RGD1565082) mRNA.                                                                               |
| <a href="#">RGD1565095</a> | <a href="#">RGD1565095.aSep08</a> | <a href="#">503252</a> | 13705 | 3869 |    | 74  | similar to hypothetical protein MGC52110 (8.4 kD) (RGD1565095) mRNA.                                                                  |
| <a href="#">RGD1565096</a> | <a href="#">RGD1565096.aSep08</a> | <a href="#">499255</a> | 3412  | 1250 |    | 416 | similar to TSG118.1 (RGD1565096) mRNA.                                                                                                |
| <a href="#">RGD1565132</a> | <a href="#">RGD1565132.aSep08</a> | <a href="#">503462</a> | 82659 | 902  | 2  | 79  | similar to RIKEN cDNA 4732479N06 (RGD1565132) alternative variant aSep08, mRNA.                                                       |
| <a href="#">RGD1565143</a> | <a href="#">RGD1565143.aSep08</a> | <a href="#">296256</a> | 4984  | 3805 | 1  | 620 | similar to serine/threonine kinase (RGD1565143) alternative variant aSep08, mRNA.                                                     |
| <a href="#">RGD1565143</a> | <a href="#">RGD1565143.bSep08</a> | <a href="#">296256</a> | 20319 | 5131 | 8  | 586 | similar to serine/threonine kinase (65.8 kD) (RGD1565143) alternative variant bSep08, mRNA.                                           |
| <a href="#">RGD1565146</a> | <a href="#">RGD1565146.aSep08</a> | <a href="#">498150</a> | 3513  | 2781 |    | 300 | similar to hypothetical gene supported by AF226663 (33.2 kD) (RGD1565146) mRNA.                                                       |
| <a href="#">RGD1565149</a> | <a href="#">RGD1565149.aSep08</a> | <a href="#">307923</a> | 13623 | 2710 | 15 | 647 | vacuolar sorting protein 9 (71.0 kD) (RGD1565149) alternative variant aSep08, complete mRNA.                                          |
| <a href="#">RGD1565149</a> | <a href="#">RGD1565149.cSep08</a> | <a href="#">307923</a> | 3045  | 1417 | 6  | 123 | putative protein, with a coiled coil domain, of vertebrate origin (RGD1565149) alternative variant cSep08, mRNA.                      |
| <a href="#">RGD1565149</a> | <a href="#">RGD1565149.dSep08</a> | <a href="#">307923</a> | 4275  | 411  | 6  | 91  | CRA b like (9.4 kD) (RGD1565149) alternative variant dSep08, mRNA.                                                                    |

|                                      |                                             |                        |        |      |   |     |                                                                                                                           |
|--------------------------------------|---------------------------------------------|------------------------|--------|------|---|-----|---------------------------------------------------------------------------------------------------------------------------|
| <a href="#">RGD1565149</a>           | <a href="#">RGD1565149.eSep08</a>           | <a href="#">307923</a> | 1392   | 401  | 4 | 67  | putative protein, with a coiled coil domain, of vertebrate origin (7.5 kD) (RGD1565149) alternative variant eSep08, mRNA. |
| <a href="#">RGD1565164</a>           | <a href="#">RGD1565164.aSep08</a>           | <a href="#">361582</a> | 2366   | 378  |   | 125 | similar to associated molecule with the SH3 domain of STAM (RGD1565164) mRNA.                                             |
| <a href="#">RGD1565192</a>           | <a href="#">RGD1565192.bSep08</a>           | <a href="#">501923</a> | 9830   | 269  |   | 75  | similar to 1810013D10Rik protein (RGD1565192) alternative variant bSep08, mRNA.                                           |
| <a href="#">RGD1565196_predicted</a> | <a href="#">RGD1565196_predicted_bSep08</a> | <a href="#">500629</a> | 1162   | 763  | 2 | 137 | similar to alcohol dehydrogenase PAN2 (predicted) (14.0 kD) (RGD1565196_predicted) alternative variant bSep08, mRNA.      |
| <a href="#">RGD1565203</a>           | <a href="#">RGD1565203.aSep08</a>           | <a href="#">363523</a> | 1999   | 706  | 2 | 187 | similar to ESO3 protein (RGD1565203) alternative variant aSep08, mRNA.                                                    |
| <a href="#">RGD1565210</a>           | <a href="#">RGD1565210.aSep08</a>           | <a href="#">499072</a> | 4721   | 462  |   | 113 | RGD1565210 (RGD1565210) mRNA.                                                                                             |
| <a href="#">RGD1565215</a>           | <a href="#">RGD1565215.bSep08</a>           | <a href="#">498998</a> | 414    | 341  | 2 | 75  | similar to 60S ribosomal protein L26 (RGD1565215) alternative variant bSep08, mRNA.                                       |
| <a href="#">RGD1565218</a>           | <a href="#">RGD1565218.aSep08</a>           | <a href="#">498697</a> | 14915  | 1546 |   | 198 | similar to Kelch-like protein 3 (RGD1565218) mRNA.                                                                        |
| <a href="#">RGD1565232</a>           | <a href="#">RGD1565232.aSep08</a>           | <a href="#">500443</a> | 1975   | 1129 |   | 141 | RGD1565232 (RGD1565232) mRNA.                                                                                             |
| <a href="#">RGD1565261</a>           | <a href="#">RGD1565261.aSep08</a>           | <a href="#">361672</a> | 5583   | 1079 |   | 359 | similar to kinase non-catalytic C-lobe domain (KIND) containing 1 isoform b (RGD1565261) mRNA.                            |
| <a href="#">RGD1565283</a>           | <a href="#">RGD1565283.bSep08</a>           | <a href="#">498274</a> | 19143  | 705  | 1 | 169 | similar to novel protein (19.2 kD) (RGD1565283) alternative variant bSep08, mRNA.                                         |
| <a href="#">RGD1565289</a>           | <a href="#">RGD1565289.aSep08</a>           | <a href="#">363474</a> | 104826 | 894  |   | 204 | similar to RIKEN cDNA 0610008C08 (RGD1565289) mRNA.                                                                       |
| <a href="#">RGD1565309</a>           | <a href="#">RGD1565309.aSep08</a>           | <a href="#">498292</a> | 25273  | 367  |   | 114 | similar to hypothetical protein MGC33370 (RGD1565309) mRNA.                                                               |
| <a href="#">RGD1565310</a>           | <a href="#">RGD1565310.aSep08</a>           | <a href="#">362697</a> | 43348  | 2224 |   | 523 | similar to RIKEN cDNA 1110018J12 (RGD1565310) mRNA.                                                                       |
| <a href="#">RGD1565316</a>           | <a href="#">RGD1565316.aSep08</a>           | <a href="#">315091</a> | 2539   | 1992 | 6 | 545 | similar to sphingomyelin phosphodiesterase 3, neutral membrane (RGD1565316) alternative variant aSep08, mRNA.             |
| <a href="#">RGD1565316</a>           | <a href="#">RGD1565316.bSep08</a>           | <a href="#">315091</a> | 1610   | 1117 | 3 | 371 | similar to sphingomyelin phosphodiesterase 3, neutral membrane (RGD1565316) alternative variant bSep08, mRNA.             |
| <a href="#">RGD1565316</a>           | <a href="#">RGD1565316.cSep08</a>           | <a href="#">315091</a> | 1388   | 609  | 5 | 76  | similar to sphingomyelin phosphodiesterase 3, neutral membrane (RGD1565316) alternative variant cSep08, mRNA.             |
| <a href="#">RGD1565344</a>           | <a href="#">RGD1565344.aSep08</a>           | <a href="#">308654</a> | 39840  | 616  |   | 98  | similar to zinc finger, matrin type 1 (RGD1565344) mRNA.                                                                  |
| <a href="#">RGD1565350</a>           | <a href="#">RGD1565350.aSep08</a>           | <a href="#">362513</a> | 106442 | 1569 | 2 | 300 | similar to Shb protein (RGD1565350) alternative variant aSep08, mRNA.                                                     |
| <a href="#">RGD1565350</a>           | <a href="#">RGD1565350.bSep08</a>           | <a href="#">362513</a> | 45389  | 694  | 1 | 230 | similar to Shb protein (RGD1565350) alternative variant bSep08, mRNA.                                                     |
| <a href="#">RGD1565355_predicted</a> | <a href="#">RGD1565355_predicted_bSep08</a> | <a href="#">499985</a> | 5574   | 568  | 3 | 128 | similar to fatty acid translocase/CD36 (predicted) (RGD1565355_predicted) alternative variant bSep08, mRNA.               |
| <a href="#">RGD1565355_predicted</a> | <a href="#">RGD1565355_predicted_cSep08</a> | <a href="#">499985</a> | 1680   | 749  | 2 | 70  | similar to fatty acid translocase/CD36 (predicted) (RGD1565355_predicted) alternative variant cSep08, mRNA.               |

|                                      |                                             |                        |        |      |    |     |                                                                                                                                           |
|--------------------------------------|---------------------------------------------|------------------------|--------|------|----|-----|-------------------------------------------------------------------------------------------------------------------------------------------|
| <a href="#">RGD1565361</a>           | <a href="#">RGD1565361.aSep08</a>           | <a href="#">500010</a> | 3335   | 1880 | 3  | 601 | similar to male-enhanced antigen-2 (RGD1565361) alternative variant aSep08, mRNA.                                                         |
| <a href="#">RGD1565362_predicted</a> | <a href="#">RGD1565362_predicted.aSep08</a> | <a href="#">313382</a> | 88423  | 3472 | 13 | 484 | similar to channel-interacting PDZ domain protein isoform 1 (predicted) (RGD1565362_predicted) alternative variant aSep08, mRNA.          |
| <a href="#">RGD1565362_predicted</a> | <a href="#">RGD1565362_predicted.bSep08</a> | <a href="#">313382</a> | 13993  | 601  | 2  | 56  | similar to channel-interacting PDZ domain protein isoform 1 (predicted) (RGD1565362_predicted) alternative variant bSep08, mRNA.          |
| <a href="#">RGD1565362_predicted</a> | <a href="#">RGD1565362_predicted.cSep08</a> | <a href="#">313382</a> | 8726   | 671  | 2  | 66  | similar to channel-interacting PDZ domain protein isoform 1 (predicted) (7.3 kD) (RGD1565362_predicted) alternative variant cSep08, mRNA. |
| <a href="#">RGD1565367</a>           | <a href="#">RGD1565367.aSep08</a>           | <a href="#">312226</a> | 22483  | 722  | 4  | 236 | similar to Solute carrier family 23, member 2 (Sodium-dependent vitamin C transporter 2) (RGD1565367) alternative variant aSep08, mRNA.   |
| <a href="#">RGD1565367</a>           | <a href="#">RGD1565367.cSep08</a>           | <a href="#">312226</a> | 27234  | 390  | 3  | 130 | similar to Solute carrier family 23, member 2 (Sodium-dependent vitamin C transporter 2) (RGD1565367) alternative variant cSep08, mRNA.   |
| <a href="#">RGD1565373</a>           | <a href="#">RGD1565373.aSep08</a>           | <a href="#">296985</a> | 22845  | 1561 | 5  | 254 | C-type lectin (RGD1565373) alternative variant aSep08, mRNA.                                                                              |
| <a href="#">RGD1565373</a>           | <a href="#">RGD1565373.cSep08</a>           | <a href="#">296985</a> | 785    | 665  | 2  | 104 | putative secreted or extracellular protein precursor (11.0 kD) (RGD1565373) alternative variant cSep08, mRNA.                             |
| <a href="#">RGD1565374</a>           | <a href="#">RGD1565374.aSep08</a>           | <a href="#">498128</a> | 2241   | 703  | 4  | 192 | similar to hypothetical protein LOC199675 (RGD1565374) alternative variant aSep08, mRNA.                                                  |
| <a href="#">RGD1565374</a>           | <a href="#">RGD1565374.cSep08</a>           | <a href="#">498128</a> | 3593   | 1782 | 4  | 72  | similar to hypothetical protein LOC199675 (RGD1565374) alternative variant cSep08, mRNA.                                                  |
| <a href="#">RGD1565378</a>           | <a href="#">RGD1565378.aSep08</a>           | <a href="#">360565</a> | 810    | 427  |    | 95  | similar to novel protein (RGD1565378) mRNA.                                                                                               |
| <a href="#">RGD1565385</a>           | <a href="#">RGD1565385.aSep08</a>           | <a href="#">362153</a> | 23821  | 1897 | 1  | 539 | similar to mKIAA1604 protein (62.6 kD) (RGD1565385) alternative variant aSep08, mRNA.                                                     |
| <a href="#">RGD1565385</a>           | <a href="#">RGD1565385.bSep08</a>           | <a href="#">362153</a> | 16099  | 829  | 1  | 275 | similar to mKIAA1604 protein (RGD1565385) alternative variant bSep08, mRNA.                                                               |
| <a href="#">RGD1565407</a>           | <a href="#">RGD1565407.aSep08</a>           | <a href="#">290628</a> | 1744   | 1245 | 1  | 265 | similar to RIKEN cDNA 9430098E02 (29.8 kD) (RGD1565407) alternative variant aSep08, mRNA.                                                 |
| <a href="#">RGD1565407</a>           | <a href="#">RGD1565407.cSep08</a>           | <a href="#">290628</a> | 1310   | 474  |    | 92  | similar to RIKEN cDNA 9430098E02 (RGD1565407) alternative variant cSep08, mRNA.                                                           |
| <a href="#">RGD1565411</a>           | <a href="#">RGD1565411.bSep08</a>           | <a href="#">363000</a> | 810    | 728  | 2  | 88  | similar to 2610317D23Rik protein (RGD1565411) alternative variant bSep08, mRNA.                                                           |
| <a href="#">RGD1565411</a>           | <a href="#">RGD1565411.dSep08</a>           | <a href="#">363000</a> | 524    | 344  | 3  | 75  | similar to 2610317D23Rik protein (RGD1565411) alternative variant dSep08, mRNA.                                                           |
| <a href="#">RGD1565411</a>           | <a href="#">RGD1565411.eSep08</a>           | <a href="#">363000</a> | 928    | 748  | 2  | 31  | similar to 2610317D23Rik protein (3.4 kD) (RGD1565411) alternative variant eSep08, mRNA.                                                  |
| <a href="#">RGD1565416</a>           | <a href="#">RGD1565416.aSep08</a>           | <a href="#">315776</a> | 98292  | 968  | 1  | 264 | similar to talin 2 (RGD1565416) alternative variant aSep08, mRNA.                                                                         |
| <a href="#">RGD1565416</a>           | <a href="#">RGD1565416.bSep08</a>           | <a href="#">315776</a> | 250898 | 575  | 2  | 108 | similar to talin 2 (RGD1565416) alternative variant bSep08, mRNA.                                                                         |
| <a href="#">RGD1565416</a>           | <a href="#">RGD1565416.cSep08</a>           | <a href="#">315776</a> | 145903 | 398  | 1  | 77  | similar to talin 2 (RGD1565416) alternative variant cSep08, mRNA.                                                                         |

|                    |                           |        |       |      |   |     |                                                                                                                                                      |
|--------------------|---------------------------|--------|-------|------|---|-----|------------------------------------------------------------------------------------------------------------------------------------------------------|
| RGD1565419         | RGD1565419.bSep08         | 500950 | 19038 | 2141 | 6 | 596 | similar to zinc finger protein 75 (RGD1565419) alternative variant bSep08, mRNA.                                                                     |
| RGD1565419         | RGD1565419.cSep08         | 500950 | 31564 | 1760 | 5 |     |                                                                                                                                                      |
| RGD1565419         | RGD1565419.dSep08         | 500950 | 31609 | 1484 | 4 |     |                                                                                                                                                      |
| RGD1565421         | RGD1565421.aSep08         | 501086 | 4220  | 1898 | 4 | 172 | similar to Sulfotransferase K2 (rSULT1C2A) (RGD1565421) alternative variant aSep08, mRNA.                                                            |
| RGD1565425andLekr1 | RGD1565425andLekr1.bSep08 | 361953 | 52664 | 584  | 5 | 194 | similar to Restin and leucine, glutamate and lysine rich 1 and hypothetical protein LOC691104 (RGD1565425andLekr1) alternative variant bSep08, mRNA. |
| RGD1565425andLekr1 | RGD1565425andLekr1.bSep08 | 499631 | 52664 | 584  | 5 | 194 | similar to Restin and leucine, glutamate and lysine rich 1 and hypothetical protein LOC691104 (RGD1565425andLekr1) alternative variant bSep08, mRNA. |
| RGD1565425andLekr1 | RGD1565425andLekr1.bSep08 | 691104 | 52664 | 584  | 5 | 194 | similar to Restin and leucine, glutamate and lysine rich 1 and hypothetical protein LOC691104 (RGD1565425andLekr1) alternative variant bSep08, mRNA. |
| RGD1565425andLekr1 | RGD1565425andLekr1.cSep08 | 361953 | 8116  | 463  | 3 | 86  | similar to Restin and leucine, glutamate and lysine rich 1 and hypothetical protein LOC691104 (RGD1565425andLekr1) alternative variant cSep08, mRNA. |
| RGD1565425andLekr1 | RGD1565425andLekr1.cSep08 | 499631 | 8116  | 463  | 3 | 86  | similar to Restin and leucine, glutamate and lysine rich 1 and hypothetical protein LOC691104 (RGD1565425andLekr1) alternative variant cSep08, mRNA. |
| RGD1565425andLekr1 | RGD1565425andLekr1.cSep08 | 691104 | 8116  | 463  | 3 | 86  | similar to Restin and leucine, glutamate and lysine rich 1 and hypothetical protein LOC691104 (RGD1565425andLekr1) alternative variant cSep08, mRNA. |
| RGD1565432         | RGD1565432.aSep08         | 499157 | 5716  | 1205 | 3 | 125 | similar to hypothetical protein (RGD1565432) alternative variant aSep08, mRNA.                                                                       |
| RGD1565432         | RGD1565432.bSep08         | 499157 | 2304  | 610  | 1 | 73  | similar to hypothetical protein (RGD1565432) alternative variant bSep08, mRNA.                                                                       |
| RGD1565457         | RGD1565457.aSep08         | 288589 | 10506 | 1757 | 5 | 492 | similar to Rasa4 protein (RGD1565457) alternative variant aSep08, mRNA.                                                                              |
| RGD1565457         | RGD1565457.bSep08         | 288589 | 10021 | 1762 | 2 | 414 | similar to Rasa4 protein (RGD1565457) alternative variant bSep08, mRNA.                                                                              |
| RGD1565474         | RGD1565474.aSep08         | 362353 | 8861  | 2297 |   | 625 | similar to mKIAA0738 protein (RGD1565474) mRNA.                                                                                                      |
| RGD1565477         | RGD1565477.aSep08         | 498430 | 2332  | 831  | 2 | 98  | similar to echinoderm microtubule associated protein like 5 (11.3 kD) (RGD1565477) alternative variant aSep08, mRNA.                                 |
| RGD1565480         | RGD1565480.aSep08         | 500511 | 10166 | 773  |   | 152 | similar to hypothetical protein MGC35130 (RGD1565480) mRNA.                                                                                          |
| RGD1565482         | RGD1565482.aSep08         | 291535 | 6460  | 462  |   | 109 | RGD1565482 (RGD1565482) mRNA.                                                                                                                        |
| RGD1565487         | RGD1565487.aSep08         | 292625 | 2166  | 480  |   | 132 | RGD1565487 (RGD1565487) mRNA.                                                                                                                        |

|            |                   |        |        |      |    |     |                                                                                                                                        |
|------------|-------------------|--------|--------|------|----|-----|----------------------------------------------------------------------------------------------------------------------------------------|
| RGD1565493 | RGD1565493.aSep08 | 500853 | 43345  | 919  | 2  | 305 | similar to DKFZP434I092 protein (RGD1565493) alternative variant aSep08, mRNA.                                                         |
| RGD1565493 | RGD1565493.bSep08 | 500853 | 32264  | 772  | 1  | 257 | similar to DKFZP434I092 protein (RGD1565493) alternative variant bSep08, mRNA.                                                         |
| RGD1565496 | RGD1565496.bSep08 | 300783 | 9701   | 2203 |    | 188 | similar to Butyrate-induced transcript 1 (RGD1565496) alternative variant bSep08, mRNA.                                                |
| RGD1565498 | RGD1565498.bSep08 | 500843 | 55390  | 556  | 3  | 128 | similar to Hypothetical protein LOC270802 (RGD1565498) alternative variant bSep08, mRNA.                                               |
| RGD1565502 | RGD1565502.aSep08 | 498531 | 3851   | 1308 | 3  | 102 | RGD1565502 (RGD1565502) alternative variant aSep08, mRNA.                                                                              |
| RGD1565512 | RGD1565512.bSep08 | 499759 | 6813   | 681  | 1  | 226 | similar to hypothetical protein 4932418E24 (RGD1565512) alternative variant bSep08, mRNA.                                              |
| RGD1565514 | RGD1565514.aSep08 | 317614 | 11544  | 617  |    | 205 | similar to RIKEN cDNA 4933424A10 gene (RGD1565514) mRNA.                                                                               |
| RGD1565533 | RGD1565533.bSep08 | 498004 | 1417   | 264  | 1  | 41  | RGD1565533 (4.8 kD) (RGD1565533) alternative variant bSep08, mRNA.                                                                     |
| RGD1565536 | RGD1565536.aSep08 | 311323 | 816    | 734  |    | 99  | similar to hypothetical protein (RGD1565536) mRNA.                                                                                     |
| RGD1565551 | RGD1565551.aSep08 | 499807 | 24744  | 1774 | 11 | 365 | similar to RIKEN cDNA 4833418A01 (40.6 kD) (RGD1565551) alternative variant aSep08, mRNA.                                              |
| RGD1565551 | RGD1565551.bSep08 | 499807 | 2014   | 421  | 1  | 90  | similar to RIKEN cDNA 4833418A01 (RGD1565551) alternative variant bSep08, mRNA.                                                        |
| RGD1565556 | RGD1565556.aSep08 | 314721 | 143826 | 3251 | 11 | 448 | similar to cajalin 2 isoform a (RGD1565556) alternative variant aSep08, mRNA.                                                          |
| RGD1565556 | RGD1565556.bSep08 | 314721 | 73991  | 1139 | 9  | 334 | similar to cajalin 2 isoform a (RGD1565556) alternative variant bSep08, mRNA.                                                          |
| RGD1565556 | RGD1565556.cSep08 | 314721 | 18062  | 551  | 3  | 97  | similar to cajalin 2 isoform a (RGD1565556) alternative variant cSep08, mRNA.                                                          |
| RGD1565556 | RGD1565556.dSep08 | 314721 | 970    | 352  | 2  | 60  | similar to cajalin 2 isoform a (RGD1565556) alternative variant dSep08, mRNA.                                                          |
| RGD1565556 | RGD1565556.fSep08 | 314721 | 1526   | 403  | 2  | 35  | similar to cajalin 2 isoform a (3.7 kD) (RGD1565556) alternative variant fSep08, mRNA.                                                 |
| RGD1565557 | RGD1565557.aSep08 | 500247 | 20041  | 1442 | 4  | 200 | similar to RIKEN cDNA 2010301N04 (RGD1565557) alternative variant aSep08, mRNA.                                                        |
| RGD1565557 | RGD1565557.bSep08 | 500247 | 10305  | 1224 | 2  | 70  | similar to RIKEN cDNA 2010301N04 (8.2 kD) (RGD1565557) alternative variant bSep08, mRNA.                                               |
| RGD1565557 | RGD1565557.dSep08 | 500247 | 5806   | 711  | 2  | 83  | similar to RIKEN cDNA 2010301N04 (9.2 kD) (RGD1565557) alternative variant dSep08, mRNA.                                               |
| RGD1565561 | RGD1565561.bSep08 | 498741 | 9457   | 2062 | 1  | 108 | putative protein, with at least 2 transmembrane domains, of bilateral origin (RGD1565561) alternative variant bSep08, mRNA.            |
| RGD1565584 | RGD1565584.aSep08 | 293112 | 3057   | 1816 | 3  | 129 | similar to tyrosine kinase-associated leucine zipper protein LAZipII (15.8 kD) (RGD1565584) alternative variant aSep08, complete mRNA. |
| RGD1565584 | RGD1565584.eSep08 | 293112 | 1950   | 920  | 2  | 112 | similar to tyrosine kinase-associated leucine zipper protein LAZipII (12.9 kD) (RGD1565584) alternative variant eSep08, mRNA.          |

|            |                   |        |       |      |    |     |                                                                                           |
|------------|-------------------|--------|-------|------|----|-----|-------------------------------------------------------------------------------------------|
| RGD1565591 | RGD1565591.aSep08 | 313757 | 5570  | 1981 |    | 480 | similar to Ski protein (RGD1565591) alternative variant aSep08, mRNA.                     |
| RGD1565598 | RGD1565598.aSep08 | 502118 | 1312  | 544  |    | 121 | similar to serine/threonine kinase (RGD1565598) mRNA.                                     |
| RGD1565616 | RGD1565616.aSep08 | 499891 | 20938 | 1011 | 11 | 318 | RGD1565616 (RGD1565616) alternative variant aSep08, mRNA.                                 |
| RGD1565616 | RGD1565616.bSep08 | 499891 | 4000  | 851  | 5  | 170 | RGD1565616 (RGD1565616) alternative variant bSep08, mRNA.                                 |
| RGD1565629 | RGD1565629.aSep08 | 307358 | 6142  | 449  |    | 78  | similar to collagen and calcium binding EGF domains 1 (RGD1565629) mRNA.                  |
| RGD1565635 | RGD1565635.aSep08 | 291802 | 4454  | 625  |    | 176 | similar to zinc finger protein 124 (RGD1565635) mRNA.                                     |
| RGD1565641 | RGD1565641.bSep08 | 499567 | 14001 | 314  | 3  | 45  | RGD1565641 (RGD1565641) alternative variant bSep08, mRNA.                                 |
| RGD1565652 | RGD1565652.aSep08 | 498583 | 16052 | 644  |    | 214 | putative protein (RGD1565652) mRNA.                                                       |
| RGD1565655 | RGD1565655.aSep08 | 499097 | 4449  | 1496 |    | 201 | similar to BC049730 protein (21.2 kD) (RGD1565655) complete mRNA.                         |
| RGD1565672 | RGD1565672.bSep08 | 500870 | 65947 | 2107 |    | 536 | similar to MDM2 Binding protein (RGD1565672) alternative variant bSep08, mRNA.            |
| RGD1565675 | RGD1565675.aSep08 | 290925 | 5343  | 784  |    | 173 | similar to RIKEN cDNA 2410022L05 (18.5 kD) (RGD1565675) complete mRNA.                    |
| RGD1565676 | RGD1565676.aSep08 | 501128 | 9698  | 413  |    | 83  | uncharacterized protein like (RGD1565676) mRNA.                                           |
| RGD1565682 | RGD1565682.aSep08 | 294097 | 7826  | 713  |    | 226 | lipase Gastric (RGD1565682) mRNA.                                                         |
| RGD1565685 | RGD1565685.bSep08 | 317344 | 8446  | 827  | 4  | 119 | similar to RIKEN cDNA 1810030O07 (RGD1565685) alternative variant bSep08, mRNA.           |
| RGD1565687 | RGD1565687.aSep08 | 301596 | 3578  | 720  |    | 191 | similar to hypothetical protein FLJ40243 (RGD1565687) mRNA.                               |
| RGD1565688 | RGD1565688.aSep08 | 498517 | 8567  | 1558 |    | 470 | similar to mKIAA0323 protein (RGD1565688) mRNA.                                           |
| RGD1565690 | RGD1565690.aSep08 | 502784 | 84483 | 465  |    | 86  | similar to mKIAA2027 protein (9.4 kD) (RGD1565690) mRNA.                                  |
| RGD1565705 | RGD1565705.aSep08 | 299488 | 47256 | 1211 | 12 | 403 | similar to chr2 synaptotagmin (RGD1565705) alternative variant aSep08, mRNA.              |
| RGD1565705 | RGD1565705.bSep08 | 299488 | 16517 | 739  | 3  | 245 | similar to chr2 synaptotagmin (RGD1565705) alternative variant bSep08, mRNA.              |
| RGD1565705 | RGD1565705.cSep08 | 299488 | 5808  | 1206 | 1  | 85  | similar to chr2 synaptotagmin (RGD1565705) alternative variant cSep08, mRNA.              |
| RGD1565709 | RGD1565709.aSep08 | 362442 | 4701  | 700  |    | 170 | similar to ovostatin-2 (RGD1565709) mRNA.                                                 |
| RGD1565726 | RGD1565726.aSep08 | 363167 | 44415 | 1056 |    | 276 | similar to hypothetical protein A730098P15 (RGD1565726) mRNA.                             |
| RGD1565744 | RGD1565744.bSep08 | 360494 | 2132  | 1402 | 3  | 228 | similar to RIKEN cDNA 0610007P22 (25.4 kD) (RGD1565744) alternative variant bSep08, mRNA. |
| RGD1565744 | RGD1565744.cSep08 | 360494 | 1541  | 658  | 3  | 208 | similar to RIKEN cDNA 0610007P22 (RGD1565744) alternative variant cSep08, mRNA.           |
| RGD1565744 | RGD1565744.dSep08 | 360494 | 2335  | 897  | 4  | 188 | similar to RIKEN cDNA 0610007P22 (20.8 kD) (RGD1565744) alternative variant dSep08, mRNA. |
| RGD1565775 | RGD1565775.aSep08 | 361980 | 35216 | 2608 | 13 | 544 | similar to RIKEN cDNA 2810403A07 (58.4 kD) (RGD1565775) alternative variant aSep08, mRNA. |

|            |                   |        |       |      |    |     |                                                                                                |
|------------|-------------------|--------|-------|------|----|-----|------------------------------------------------------------------------------------------------|
| RGD1565775 | RGD1565775.bSep08 | 361980 | 21789 | 735  | 6  | 244 | similar to RIKEN cDNA 2810403A07 (RGD1565775) alternative variant bSep08, mRNA.                |
| RGD1565775 | RGD1565775.cSep08 | 361980 | 22697 | 3543 | 3  | 115 | similar to RIKEN cDNA 2810403A07 (RGD1565775) alternative variant cSep08, mRNA.                |
| RGD1565775 | RGD1565775.eSep08 | 361980 | 21500 | 655  | 5  | 71  | similar to RIKEN cDNA 2810403A07 (RGD1565775) alternative variant eSep08, mRNA.                |
| RGD1565779 | RGD1565779.aSep08 | 502155 | 1799  | 696  |    | 166 | similar to hypothetical protein E230025N22 (19.1 kD) (RGD1565779) mRNA.                        |
| RGD1565796 | RGD1565796.bSep08 | 498394 | 3049  | 340  | 2  | 77  | similar to RIKEN cDNA A930005I04 gene (RGD1565796) alternative variant bSep08, mRNA.           |
| RGD1565800 | RGD1565800.aSep08 | 304529 | 9240  | 2658 |    | 148 | similar to hypothetical protein FLJ20674 (RGD1565800) mRNA.                                    |
| RGD1565804 | RGD1565804.aSep08 | 501047 | 2255  | 543  |    | 181 | similar to procollagen, type VI, alpha 3 (RGD1565804) mRNA.                                    |
| RGD1565820 | RGD1565820.aSep08 | 364029 | 12931 | 773  | 2  | 204 | similar to novel protein (RGD1565820) alternative variant aSep08, mRNA.                        |
| RGD1565820 | RGD1565820.bSep08 | 364029 | 14933 | 689  | 2  | 182 | similar to novel protein (RGD1565820) alternative variant bSep08, mRNA.                        |
| RGD1565840 | RGD1565840.aSep08 | 295975 | 17610 | 1264 |    | 374 | similar to Dendritic cell protein GA17 (42.5 kD) (RGD1565840) complete mRNA.                   |
| RGD1565847 | RGD1565847.aSep08 | 367033 | 17125 | 3735 | 10 | 956 | similar to zinc finger protein 560 (108.7 kD) (RGD1565847) alternative variant aSep08, mRNA.   |
| RGD1565858 | RGD1565858.aSep08 | 303965 | 46689 | 395  |    | 131 | similar to KIAA1000 protein (RGD1565858) mRNA.                                                 |
| RGD1565866 | RGD1565866.aSep08 | 314740 | 22796 | 392  |    | 130 | similar to FLJ44112 protein (RGD1565866) mRNA.                                                 |
| RGD1565886 | RGD1565886.aSep08 | 290286 | 7178  | 484  |    | 32  | RGD1565886 (3.4 kD) (RGD1565886) mRNA.                                                         |
| RGD1565895 | RGD1565895.aSep08 | 308850 | 2878  | 743  |    | 206 | similar to DRE1 protein (RGD1565895) mRNA.                                                     |
| RGD1565923 | RGD1565923.aSep08 | 500539 | 26166 | 558  | 4  | 131 | similar to hypothetical protein FLJ20972 (RGD1565923) alternative variant aSep08, mRNA.        |
| RGD1565926 | RGD1565926.aSep08 | 361629 | 3210  | 509  | 2  | 106 | RGD1565926 (RGD1565926) alternative variant aSep08, mRNA.                                      |
| RGD1565926 | RGD1565926.bSep08 | 361629 | 4497  | 1210 | 2  | 85  | RGD1565926 (RGD1565926) alternative variant bSep08, mRNA.                                      |
| RGD1565926 | RGD1565926.cSep08 | 361629 | 3189  | 439  | 2  | 82  | RGD1565926 (RGD1565926) alternative variant cSep08, mRNA.                                      |
| RGD1565926 | RGD1565926.dSep08 | 361629 | 3584  | 235  | 1  | 70  | RGD1565926 (RGD1565926) alternative variant dSep08, mRNA.                                      |
| RGD1565947 | RGD1565947.bSep08 | 299737 | 6137  | 388  | 3  | 129 | similar to netrin 4 (RGD1565947) alternative variant bSep08, mRNA.                             |
| RGD1565953 | RGD1565953.aSep08 | 306166 | 15373 | 561  |    | 186 | similar to multidrug resistance-associated protein 4 (RGD1565953) mRNA.                        |
| RGD1565967 | RGD1565967.aSep08 | 302819 | 2322  | 589  |    | 178 | similar to hypothetical protein FLJ30058 (RGD1565967) mRNA.                                    |
| RGD1565970 | RGD1565970.aSep08 | 498519 | 1733  | 777  |    | 229 | similar to mast cell protease 8 (RGD1565970) mRNA.                                             |
| RGD1565975 | RGD1565975.aSep08 | 291903 | 9766  | 557  |    | 137 | RGD1565975 (RGD1565975) mRNA.                                                                  |
| RGD1565983 | RGD1565983.bSep08 | 317628 | 19778 | 694  | 1  | 184 | similar to apurinic/apyrimidinic endonuclease 2 (RGD1565983) alternative variant bSep08, mRNA. |



|            |                   |        |        |      |    |     |                                                                                                     |
|------------|-------------------|--------|--------|------|----|-----|-----------------------------------------------------------------------------------------------------|
| RGD1565997 | RGD1565997.aSep08 | 500294 | 4187   | 580  | 1  | 63  | putative protein (RGD1565997) alternative variant aSep08, mRNA.                                     |
| RGD1566006 | RGD1566006.aSep08 | 501828 | 3103   | 451  |    | 44  | similar to paired immunoglobulin-like type 2 receptor beta (RGD1566006) mRNA.                       |
| RGD1566010 | RGD1566010.aSep08 | 499195 | 733    | 610  |    | 157 | RGD1566010 (RGD1566010) mRNA.                                                                       |
| RGD1566016 | RGD1566016.aSep08 | 360840 | 212515 | 3542 | 22 | 858 | similar to KIAA0456 protein (98.4 kD) (RGD1566016) alternative variant aSep08, mRNA.                |
| RGD1566016 | RGD1566016.bSep08 | 360840 | 48941  | 275  | 4  | 91  | similar to KIAA0456 protein (RGD1566016) alternative variant bSep08, mRNA.                          |
| RGD1566017 | RGD1566017.aSep08 | 365037 | 10619  | 792  |    | 263 | sterile alpha motif homology 2 and sterile alpha motif SAM (RGD1566017) mRNA.                       |
| RGD1566029 | RGD1566029.aSep08 | 500913 | 89419  | 756  |    | 188 | similar to mKIAA1644 protein (RGD1566029) mRNA.                                                     |
| RGD1566036 | RGD1566036.aSep08 | 498119 | 88077  | 703  |    | 234 | similar to RIKEN cDNA 2310008H04 (RGD1566036) mRNA.                                                 |
| RGD1566052 | RGD1566052.aSep08 | 499851 | 108991 | 591  | 3  | 117 | similar to elongation protein 4 homolog (RGD1566052) alternative variant aSep08, mRNA.              |
| RGD1566083 | RGD1566083.aSep08 | 298602 | 4420   | 862  |    | 160 | similar to hypothetical protein MGC24047 (16.6 kD) (RGD1566083) mRNA.                               |
| RGD1566084 | RGD1566084.aSep08 | 501795 | 2518   | 1304 |    | 372 | similar to Hypothetical protein LOC73072 (RGD1566084) mRNA.                                         |
| RGD1566085 | RGD1566085.aSep08 | 361819 | 4366   | 612  | 3  | 203 | similar to pyridoxal (pyridoxine, vitamin B6) kinase (RGD1566085) alternative variant aSep08, mRNA. |
| RGD1566085 | RGD1566085.bSep08 | 361819 | 3603   | 644  | 1  | 71  | similar to pyridoxal (pyridoxine, vitamin B6) kinase (RGD1566085) alternative variant bSep08, mRNA. |
| RGD1566086 | RGD1566086.aSep08 | 360795 | 3835   | 471  |    | 130 | similar to gtf2ird2 (RGD1566086) mRNA.                                                              |
| RGD1566102 | RGD1566102.aSep08 | 499613 | 2630   | 913  | 4  | 118 | RGD1566102 (RGD1566102) alternative variant aSep08, mRNA.                                           |
| RGD1566114 | RGD1566114.aSep08 | 500671 | 12645  | 1779 | 3  | 593 | c virus f protein-binding protein 2 like (RGD1566114) alternative variant aSep08, mRNA.             |
| RGD1566118 | RGD1566118.aSep08 | 361797 | 2713   | 761  | 6  | 122 | RGD1566118 (RGD1566118) alternative variant aSep08, mRNA.                                           |
| RGD1566118 | RGD1566118.bSep08 | 361797 | 1320   | 739  | 4  | 84  | RGD1566118 (RGD1566118) alternative variant bSep08, mRNA.                                           |
| RGD1566118 | RGD1566118.cSep08 | 361797 | 999    | 752  | 2  | 102 | RGD1566118 (RGD1566118) alternative variant cSep08, mRNA.                                           |
| RGD1566120 | RGD1566120.aSep08 | 497904 | 16484  | 684  |    | 228 | similar to novel protein (RGD1566120) mRNA.                                                         |
| RGD1566124 | RGD1566124.aSep08 | 501861 | 1714   | 364  |    | 57  | similar to hypothetical protein FLJ32940 isoform 1 (RGD1566124) mRNA.                               |
| RGD1566127 | RGD1566127.bSep08 | 499270 | 5325   | 2211 | 9  | 324 | similar to BC039632 protein (34.3 kD) (RGD1566127) alternative variant bSep08, mRNA.                |
| RGD1566127 | RGD1566127.cSep08 | 499270 | 816    | 409  | 1  | 90  | similar to BC039632 protein (RGD1566127) alternative variant cSep08, mRNA.                          |
| RGD1566132 | RGD1566132.aSep08 | 502360 | 799    | 446  |    | 87  | similar to Tripartite motif protein 30-like (10.1 kD) (RGD1566132) mRNA.                            |
| RGD1566133 | RGD1566133.bSep08 | 361219 | 17794  | 1717 | 10 | 406 | similar to Fbxw17 protein (45.0 kD) (RGD1566133) alternative variant bSep08, complete mRNA.         |

|            |                   |        |        |      |   |     |                                                                                                                         |
|------------|-------------------|--------|--------|------|---|-----|-------------------------------------------------------------------------------------------------------------------------|
| RGD1566133 | RGD1566133.cSep08 | 361219 | 2107   | 862  | 4 | 183 | similar to Fbxw17 protein (RGD1566133) alternative variant cSep08, mRNA.                                                |
| RGD1566133 | RGD1566133.dSep08 | 361219 | 905    | 338  | 3 | 89  | similar to Fbxw17 protein (RGD1566133) alternative variant dSep08, mRNA.                                                |
| RGD1566138 | RGD1566138.aSep08 | 498167 | 2629   | 565  |   | 138 | similar to Zinc finger, CW type with PWWP domain 1 (RGD1566138) mRNA.                                                   |
| RGD1566141 | RGD1566141.aSep08 | 288417 | 4056   | 1624 |   | 515 | similar to CG016 (RGD1566141) mRNA.                                                                                     |
| RGD1566144 | RGD1566144.aSep08 | 499562 | 11219  | 393  | 2 | 130 | similar to hypothetical protein A230042K10 (RGD1566144) alternative variant aSep08, mRNA.                               |
| RGD1566144 | RGD1566144.bSep08 | 499562 | 34237  | 396  | 2 | 111 | similar to hypothetical protein A230042K10 (RGD1566144) alternative variant bSep08, mRNA.                               |
| RGD1566144 | RGD1566144.cSep08 | 499562 | 15573  | 506  | 2 | 94  | similar to hypothetical protein A230042K10 (RGD1566144) alternative variant cSep08, mRNA.                               |
| RGD1566155 | RGD1566155.aSep08 | 501658 | 9096   | 638  | 4 | 200 | similar to 2610030H06Rik protein (RGD1566155) alternative variant aSep08, mRNA.                                         |
| RGD1566155 | RGD1566155.bSep08 | 501658 | 5402   | 744  | 4 | 120 | similar to 2610030H06Rik protein (13.4 kD) (RGD1566155) alternative variant bSep08, mRNA.                               |
| RGD1566155 | RGD1566155.cSep08 | 501658 | 7551   | 3270 | 3 | 101 | similar to 2610030H06Rik protein (11.4 kD) (RGD1566155) alternative variant cSep08, mRNA.                               |
| RGD1566180 | RGD1566180.aSep08 | 311956 | 11401  | 1266 |   | 322 | RGD1566180 (RGD1566180) mRNA.                                                                                           |
| RGD1566215 | RGD1566215.bSep08 | 301742 | 55830  | 692  | 8 | 230 | similar to Coatomer gamma-2 subunit (Gamma-2 coat protein) (Gamma-2 COP) (RGD1566215) alternative variant bSep08, mRNA. |
| RGD1566220 | RGD1566220.aSep08 | 500692 | 6099   | 436  |   | 109 | similar to hypothetical MGC48595 (RGD1566220) mRNA.                                                                     |
| RGD1566239 | RGD1566239.aSep08 | 306348 | 2454   | 650  | 5 | 168 | similar to RIKEN cDNA 2810428115 (RGD1566239) alternative variant aSep08, mRNA.                                         |
| RGD1566239 | RGD1566239.bSep08 | 306348 | 1462   | 923  | 2 | 145 | similar to RIKEN cDNA 2810428115 (RGD1566239) alternative variant bSep08, mRNA.                                         |
| RGD1566239 | RGD1566239.cSep08 | 306348 | 2410   | 683  | 4 | 138 | similar to RIKEN cDNA 2810428115 (15.7 kD) (RGD1566239) alternative variant cSep08, mRNA.                               |
| RGD1566239 | RGD1566239.eSep08 | 306348 | 2359   | 1190 | 3 | 44  | similar to RIKEN cDNA 2810428115 (4.9 kD) (RGD1566239) alternative variant eSep08, mRNA.                                |
| RGD1566248 | RGD1566248.aSep08 | 499060 | 34361  | 419  |   | 139 | similar to hypothetical protein FLJ14345 (RGD1566248) mRNA.                                                             |
| RGD1566254 | RGD1566254.aSep08 | 499318 | 3012   | 882  |   | 120 | RGD1566254 (RGD1566254) mRNA.                                                                                           |
| RGD1566266 | RGD1566266.aSep08 | 304486 | 4616   | 1140 |   | 312 | similar to hypothetical protein FLJ21127 (RGD1566266) alternative variant aSep08, mRNA.                                 |
| RGD1566296 | RGD1566296.aSep08 | 315728 | 385039 | 596  |   | 198 | similar to RIKEN cDNA B230114P05 (RGD1566296) mRNA.                                                                     |
| RGD1566307 | RGD1566307.aSep08 | 308350 | 1830   | 652  | 1 | 127 | similar to PIRB1 (RGD1566307) alternative variant aSep08, mRNA.                                                         |
| RGD1566307 | RGD1566307.bSep08 | 308350 | 2551   | 694  | 4 | 59  | similar to PIRB1 (RGD1566307) alternative variant bSep08, mRNA.                                                         |
| RGD1566311 | RGD1566311.aSep08 | 500963 | 968    | 697  |   | 94  | RGD1566311 (RGD1566311) mRNA.                                                                                           |
| RGD1566313 | RGD1566313.aSep08 | 297572 | 15839  | 1079 |   | 359 | similar to Murinoglobulin 1 homolog (RGD1566313) mRNA.                                                                  |

|            |                   |        |       |      |   |     |                                                                                                              |
|------------|-------------------|--------|-------|------|---|-----|--------------------------------------------------------------------------------------------------------------|
| RGD1566314 | RGD1566314.aSep08 | 288106 | 35618 | 1573 | 6 | 524 | similar to KIAA1407 (RGD1566314) alternative variant aSep08, mRNA.                                           |
| RGD1566314 | RGD1566314.bSep08 | 288106 | 3416  | 276  |   | 84  | similar to KIAA1407 (RGD1566314) alternative variant bSep08, mRNA.                                           |
| RGD1566319 | RGD1566319.bSep08 | 502988 | 11455 | 917  | 1 | 60  | similar to Sestrin 2 (Hi95) (6.6 kD) (RGD1566319) alternative variant bSep08, mRNA.                          |
| RGD1566320 | RGD1566320.bSep08 | 296207 | 1280  | 493  | 2 | 68  | RGD1566320 (7.9 kD) (RGD1566320) alternative variant bSep08, complete mRNA.                                  |
| RGD1566325 | RGD1566325.aSep08 | 498682 | 9144  | 579  | 4 | 192 | similar to regulator of sex-limitation candidate 16 (RGD1566325) alternative variant aSep08, mRNA.           |
| RGD1566325 | RGD1566325.bSep08 | 498682 | 9029  | 340  | 3 | 35  | similar to regulator of sex-limitation candidate 16 (RGD1566325) alternative variant bSep08, mRNA.           |
| RGD1566368 | RGD1566368.aSep08 | 301083 | 3140  | 623  |   | 207 | similar to Solute carrier family 6 (neurotransmitter transporter), member 20 (RGD1566368) mRNA.              |
| RGD1566383 | RGD1566383.aSep08 | 362233 | 3455  | 344  |   | 99  | similar to Cystatin S precursor (LM protein) (RGD1566383) mRNA.                                              |
| RGD1566386 | RGD1566386.aSep08 | 304336 | 35002 | 2922 | 1 | 677 | similar to Hypothetical protein A430033K04 (79.7 kD) (RGD1566386) alternative variant aSep08, complete mRNA. |
| RGD1566386 | RGD1566386.bSep08 | 304336 | 32805 | 698  | 1 | 216 | similar to Hypothetical protein A430033K04 (RGD1566386) alternative variant bSep08, mRNA.                    |
| RGD1566400 | RGD1566400.aSep08 | 289001 | 527   | 403  |   | 37  | similar to hypothetical protein FLJ23074 (RGD1566400) mRNA.                                                  |
| RGD1566401 | RGD1566401.aSep08 | 500717 | 23557 | 1216 | 5 | 129 | putative protein (13.9 kD) (RGD1566401) alternative variant aSep08, mRNA.                                    |
| RGD1566401 | RGD1566401.bSep08 | 500717 | 15215 | 6449 | 5 | 129 | putative protein (13.9 kD) (RGD1566401) alternative variant bSep08, mRNA.                                    |
| RGD1566401 | RGD1566401.cSep08 | 500717 | 13518 | 924  | 5 | 108 | CRA a like (11.7 kD) (RGD1566401) alternative variant cSep08, mRNA.                                          |
| RGD1566401 | RGD1566401.dSep08 | 500717 | 13751 | 1184 | 5 | 108 | CRA a like (11.7 kD) (RGD1566401) alternative variant dSep08, mRNA.                                          |
| RGD1566401 | RGD1566401.eSep08 | 500717 | 24531 | 1784 | 5 | 104 | CRA a like (11.3 kD) (RGD1566401) alternative variant eSep08, mRNA.                                          |
| RGD1566401 | RGD1566401.fSep08 | 500717 | 26868 | 699  | 5 | 104 | CRA a like (11.3 kD) (RGD1566401) alternative variant fSep08, mRNA.                                          |
| RGD1566401 | RGD1566401.gSep08 | 500717 | 4356  | 1516 | 3 | 90  | CRA a like (9.5 kD) (RGD1566401) alternative variant gSep08, complete mRNA.                                  |
| RGD1566401 | RGD1566401.jSep08 | 500717 | 4241  | 1374 | 3 | 81  | CRA b like (8.7 kD) (RGD1566401) alternative variant jSep08, mRNA.                                           |
| RGD1566401 | RGD1566401.kSep08 | 500717 | 6270  | 359  | 4 | 44  | CRA a like (4.8 kD) (RGD1566401) alternative variant kSep08, mRNA.                                           |
| RGD1566401 | RGD1566401.nSep08 | 500717 | 3450  | 504  | 2 | 14  | putative protein (1.6 kD) (RGD1566401) alternative variant nSep08, mRNA.                                     |
| RGD1566401 | RGD1566401.oSep08 | 500717 | 6395  | 487  | 3 | 39  | putative protein (4.1 kD) (RGD1566401) alternative variant oSep08, mRNA.                                     |
| RGD1566401 | RGD1566401.pSep08 | 500717 | 6251  | 417  | 4 | 39  | putative protein (4.1 kD) (RGD1566401) alternative variant pSep08, mRNA.                                     |

|            |                   |        |       |      |    |     |                                                                                                  |
|------------|-------------------|--------|-------|------|----|-----|--------------------------------------------------------------------------------------------------|
| RGD1566401 | RGD1566401.qSep08 | 500717 | 2031  | 354  | 2  | 20  | putative protein (RGD1566401) alternative variant qSep08, mRNA.                                  |
| RGD1566401 | RGD1566401.rSep08 | 500717 | 5897  | 347  | 3  | 39  | putative protein (4.1 kD) (RGD1566401) alternative variant rSep08, mRNA.                         |
| RGD1566401 | RGD1566401.sSep08 | 500717 | 6112  | 343  | 3  | 46  | CRA a like (RGD1566401) alternative variant sSep08, mRNA.                                        |
| RGD1566403 | RGD1566403.bSep08 | 502228 | 4462  | 1156 | 5  | 132 | similar to OTTHUMP00000040081 (RGD1566403) alternative variant bSep08, mRNA.                     |
| Rgl1       | Rgl1.aSep08       | 289080 | 8395  | 3017 | 3  | 158 | ral guanine nucleotide dissociation stimulator,-like 1 (Rgl1) alternative variant aSep08, mRNA.  |
| Rgl3       | Rgl3.bSep08       | 300444 | 5104  | 1104 | 2  | 78  | ral guanine nucleotide dissociation stimulator-like 3 (Rgl3) alternative variant bSep08, mRNA.   |
| Rgma       | Rgma.bSep08       | 308739 | 27725 | 3253 | 1  | 433 | RGM domain family, member A (47.5 kD) (Rgma) alternative variant bSep08, mRNA.                   |
| Rgn        | Rgn.bSep08        | 25106  | 16201 | 795  | 1  | 264 | regucalcin (Rgn) alternative variant bSep08, mRNA.                                               |
| Rgnef      | Rgnef.bSep08      | 361882 | 28193 | 757  | 4  | 252 | rho-guanine nucleotide exchange factor (Rgnef) alternative variant bSep08, mRNA.                 |
| Rgnef      | Rgnef.cSep08      | 361882 | 27536 | 465  | 5  | 88  | rho-guanine nucleotide exchange factor (Rgnef) alternative variant cSep08, mRNA.                 |
| Rgp1       | Rgp1.aSep08       | 313493 | 1368  | 379  | 1  | 126 | RGP1 retrograde golgi transport homolog (S. cerevisiae) (Rgp1) alternative variant aSep08, mRNA. |
| Rgp1       | Rgp1.bSep08       | 313493 | 1590  | 419  | 2  | 98  | RGP1 retrograde golgi transport homolog (S. cerevisiae) (Rgp1) alternative variant bSep08, mRNA. |
| Rgr        | Rgr.bSep08        | 306307 | 4982  | 285  | 1  | 88  | retinal G protein coupled receptor (Rgr) alternative variant bSep08, mRNA.                       |
| Rgs2       | Rgs2.bSep08       | 84583  | 2517  | 707  | 2  | 142 | regulator of G-protein signaling 2 (Rgs2) alternative variant bSep08, mRNA.                      |
| Rgs3       | Rgs3.bSep08       | 54293  | 39933 | 4124 | 11 | 433 | regulator of G-protein 3 (48.4 kD) (Rgs3) alternative variant bSep08, complete mRNA.             |
| Rgs3       | Rgs3.cSep08       | 54293  | 2892  | 963  | 5  | 192 | regulator of G-protein 3 (22.4 kD) (Rgs3) alternative variant cSep08, mRNA.                      |
| Rgs3       | Rgs3.dSep08       | 54293  | 16202 | 1198 | 2  | 184 | putative nuclear protein (20.0 kD) (Rgs3) alternative variant dSep08, mRNA.                      |
| Rgs3       | Rgs3.eSep08       | 54293  | 15341 | 524  | 2  | 174 | regulator of G-protein 3 (Rgs3) alternative variant eSep08, mRNA.                                |
| Rgs3       | Rgs3.fSep08       | 54293  | 2142  | 420  | 3  | 109 | regulator of G-protein 3 (Rgs3) alternative variant fSep08, mRNA.                                |
| Rgs3       | Rgs3.gSep08       | 54293  | 6338  | 313  | 4  | 103 | regulator of G-protein 3 (Rgs3) alternative variant gSep08, mRNA.                                |
| Rgs3       | Rgs3.hSep08       | 54293  | 1470  | 418  | 4  | 100 | regulator of G-protein 3 (Rgs3) alternative variant hSep08, mRNA.                                |
| Rgs3       | Rgs3.iSep08       | 54293  | 1439  | 563  | 3  | 83  | regulator of G-protein 3 (Rgs3) alternative variant iSep08, mRNA.                                |
| Rgs3       | Rgs3.jSep08       | 54293  | 6199  | 375  | 2  | 54  | putative protein (Rgs3) alternative variant jSep08, mRNA.                                        |
| Rgs7       | Rgs7.bSep08       | 54296  | 17375 | 737  | 1  | 55  | regulator of G-protein signaling 7 (6.2 kD) (Rgs7) alternative variant bSep08, mRNA.             |

|        |               |        |        |      |    |     |                                                                                                                      |
|--------|---------------|--------|--------|------|----|-----|----------------------------------------------------------------------------------------------------------------------|
| Rgs7   | Rgs7.cSep08   | 54296  | 7680   | 623  | 1  | 34  | regulator of G-protein signaling 7 (Rgs7) alternative variant cSep08, mRNA.                                          |
| Rgs8   | Rgs8.aSep08   | 54297  | 28268  | 900  | 6  | 180 | regulator of G-protein signaling 8 (20.9 kD) (Rgs8) alternative variant aSep08, mRNA.                                |
| Rgs8   | Rgs8.cSep08   | 54297  | 4813   | 451  | 1  | 47  | regulator of G-protein signaling 8 (Rgs8) alternative variant cSep08, mRNA.                                          |
| Rgs9   | Rgs9.bSep08   | 29481  | 16665  | 1263 | 6  | 331 | regulator of G-protein signaling 9 (Rgs9) alternative variant bSep08, mRNA.                                          |
| Rgs9   | Rgs9.cSep08   | 29481  | 11522  | 285  | 3  | 94  | regulator of G-protein signaling 9 (Rgs9) alternative variant cSep08, mRNA.                                          |
| Rgs9   | Rgs9.dSep08   | 29481  | 3144   | 347  | 2  | 73  | regulator of G-protein signaling 9 (Rgs9) alternative variant dSep08, mRNA.                                          |
| Rgs9   | Rgs9.eSep08   | 29481  | 20114  | 293  | 3  | 70  | regulator of G-protein signaling 9 (Rgs9) alternative variant eSep08, mRNA.                                          |
| Rgs9   | Rgs9.fSep08   | 29481  | 716    | 388  | 2  | 58  | regulator of G-protein signaling 9 (Rgs9) alternative variant fSep08, mRNA.                                          |
| Rgs11  | Rgs11.aSep08  | 54291  | 6717   | 1783 | 12 | 184 | regulator of G-protein signaling 11 (21.0 kD) (Rgs11) alternative variant aSep08, mRNA.                              |
| Rgs11  | Rgs11.bSep08  | 54291  | 3879   | 833  | 10 | 141 | regulator of G-protein signaling 11 (16.4 kD) (Rgs11) alternative variant bSep08, mRNA.                              |
| Rgs12  | Rgs12.bSep08  | 54292  | 47022  | 754  | 4  | 234 | regulator of G-protein signaling 12 (Rgs12) alternative variant bSep08, mRNA.                                        |
| Rgs12  | Rgs12.cSep08  | 54292  | 30805  | 731  | 2  | 146 | regulator of G-protein signaling 12 (Rgs12) alternative variant cSep08, mRNA.                                        |
| Rgs13  | Rgs13.aSep08  | 54289  | 3622   | 541  | 1  | 179 | regulator of G-protein signaling 1 and regulator of G-protein signaling 13 (Rgs13) alternative variant aSep08, mRNA. |
| Rgs13  | Rgs13.aSep08  | 498246 | 3622   | 541  | 1  | 179 | regulator of G-protein signaling 1 and regulator of G-protein signaling 13 (Rgs13) alternative variant aSep08, mRNA. |
| Rgs14  | Rgs14.bSep08  | 114705 | 3670   | 704  | 5  | 234 | regulator of G-protein signaling 14 (Rgs14) alternative variant bSep08, mRNA.                                        |
| Rgs14  | Rgs14.cSep08  | 114705 | 7773   | 662  | 5  | 220 | regulator of G-protein signaling 14 (Rgs14) alternative variant cSep08, mRNA.                                        |
| Rgs14  | Rgs14.dSep08  | 114705 | 1501   | 743  | 2  | 107 | regulator of G-protein signaling 14 (Rgs14) alternative variant dSep08, mRNA.                                        |
| Rgs17  | Rgs17.bSep08  | 308118 | 80338  | 523  |    | 127 | regulator of G-protein signaling 17 (Rgs17) alternative variant bSep08, mRNA.                                        |
| Rgs19  | Rgs19.aSep08  | 59293  | 4800   | 1225 | 3  | 295 | regulator of G-protein signaling 19 (Rgs19) alternative variant aSep08, mRNA.                                        |
| Rgs19  | Rgs19.cSep08  | 59293  | 2341   | 648  | 2  | 152 | regulator of G-protein signaling 19 (Rgs19) alternative variant cSep08, mRNA.                                        |
| Rgs19  | Rgs19.dSep08  | 59293  | 4447   | 368  | 2  | 82  | regulator of G-protein signaling 19 (Rgs19) alternative variant dSep08, mRNA.                                        |
| Rhbdd1 | Rhbdd1.aSep08 | 316557 | 116361 | 1799 | 1  | 507 | putative protein of metazoan origin (Rhbdd1) alternative variant aSep08, mRNA.                                       |
| Rhbdd1 | Rhbdd1.cSep08 | 316557 | 24650  | 460  | 1  | 104 | putative protein (Rhbdd1) alternative variant cSep08, mRNA.                                                          |

|        |               |        |       |      |   |     |                                                                                                                     |
|--------|---------------|--------|-------|------|---|-----|---------------------------------------------------------------------------------------------------------------------|
| Rhbdd2 | Rhbdd2.aSep08 | 360793 | 10663 | 1786 | 4 | 398 | peptidase S54, rhomboid (Rhbdd2) alternative variant aSep08, complete mRNA.                                         |
| Rhbdd2 | Rhbdd2.bSep08 | 360793 | 9982  | 1223 | 4 | 379 | peptidase S54, rhomboid (Rhbdd2) alternative variant bSep08, mRNA.                                                  |
| Rhbdd2 | Rhbdd2.cSep08 | 360793 | 10692 | 1095 | 5 | 317 | peptidase S54, rhomboid (Rhbdd2) alternative variant cSep08, mRNA.                                                  |
| Rhbdd3 | Rhbdd3.bSep08 | 289753 | 6024  | 1782 | 5 | 30  | putative protein (Rhbdd3) alternative variant bSep08, mRNA.                                                         |
| Rhbdd3 | Rhbdd3.cSep08 | 289753 | 4586  | 1195 | 4 | 103 | putative protein (Rhbdd3) alternative variant cSep08, mRNA.                                                         |
| Rhbdd3 | Rhbdd3.dSep08 | 289753 | 5304  | 1000 | 5 | 72  | putative protein (Rhbdd3) alternative variant dSep08, mRNA.                                                         |
| Rhbdd3 | Rhbdd3.eSep08 | 289753 | 3867  | 738  | 4 | 69  | putative protein of mammalian origin (Rhbdd3) alternative variant eSep08, mRNA.                                     |
| Rhbdf1 | Rhbdf1.bSep08 | 303008 | 1574  | 719  | 5 | 195 | rhomboid family 1 (Drosophila) (Rhbdf1) alternative variant bSep08, mRNA.                                           |
| Rhbdf2 | Rhbdf2.cSep08 | 303690 | 1158  | 748  | 4 | 67  | rhomboid 5 homolog 2 (Drosophila) (Rhbdf2) alternative variant cSep08, mRNA.                                        |
| Rhbdl1 | Rhbdl1.aSep08 | 117025 | 1649  | 614  | 4 | 204 | rhomboid, veinlet-like 1 (Drosophila) (Rhbdl1) alternative variant aSep08, mRNA.                                    |
| Rhbdl1 | Rhbdl1.bSep08 | 117025 | 1088  | 456  | 3 | 151 | rhomboid, veinlet-like 1 (Drosophila) (Rhbdl1) alternative variant bSep08, mRNA.                                    |
| Rhbdl2 | Rhbdl2.bSep08 | 298512 | 5908  | 838  | 2 | 71  | rhomboid, veinlet-like 2 (Drosophila) (Rhbdl2) alternative variant bSep08, mRNA.                                    |
| Rhbdl3 | Rhbdl3.bSep08 | 287556 | 12125 | 674  | 4 | 149 | rhomboid, veinlet-like 3 (Drosophila) and hypothetical protein LOC686138 (Rhbdl3) alternative variant bSep08, mRNA. |
| Rhbdl3 | Rhbdl3.bSep08 | 686138 | 12125 | 674  | 4 | 149 | rhomboid, veinlet-like 3 (Drosophila) and hypothetical protein LOC686138 (Rhbdl3) alternative variant bSep08, mRNA. |
| Rhbdl3 | Rhbdl3.cSep08 | 287556 | 332   | 262  | 2 | 87  | rhomboid, veinlet-like 3 (Drosophila) and hypothetical protein LOC686138 (Rhbdl3) alternative variant cSep08, mRNA. |
| Rhbdl3 | Rhbdl3.cSep08 | 686138 | 332   | 262  | 2 | 87  | rhomboid, veinlet-like 3 (Drosophila) and hypothetical protein LOC686138 (Rhbdl3) alternative variant cSep08, mRNA. |
| Rhbg   | Rhbg.aSep08   | 310625 | 12153 | 1785 | 2 | 499 | rhesus blood group-associated B glycoprotein (Rhbg) alternative variant aSep08, mRNA.                               |
| Rhbg   | Rhbg.cSep08   | 310625 | 3091  | 720  | 1 | 214 | rhesus blood group-associated B glycoprotein (Rhbg) alternative variant cSep08, mRNA.                               |
| Rhbg   | Rhbg.dSep08   | 310625 | 1657  | 1508 | 2 | 68  | rhesus blood group-associated B glycoprotein (7.4 kD) (Rhbg) alternative variant dSep08, mRNA.                      |
| Rhd    | Rhd.bSep08    | 60414  | 5278  | 446  | 4 | 116 | rh blood group, D antigen (Rhd) alternative variant bSep08, mRNA.                                                   |
| Rhebl1 | Rhebl1.bSep08 | 359959 | 3304  | 1098 | 2 | 87  | ras homolog enriched in brain like 1 (9.7 kD) (Rhebl1) alternative variant bSep08, mRNA.                            |

|          |                 |        |       |      |   |     |                                                                                                    |
|----------|-----------------|--------|-------|------|---|-----|----------------------------------------------------------------------------------------------------|
| Rhoa     | Rhoa.aSep08     | 117273 | 34097 | 1648 | 2 | 281 | ras homolog gene family, member A (Rhoa) alternative variant aSep08, mRNA.                         |
| Rhobtb1  | Rhobtb1.aSep08  | 309722 | 13265 | 1245 | 4 | 415 | putative protein of eukaryotic origin (Rhobtb1) alternative variant aSep08, mRNA.                  |
| Rhobtb3  | Rhobtb3.bSep08  | 309922 | 4392  | 406  | 2 | 78  | putative protein of vertebrate origin (Rhobtb3) alternative variant bSep08, mRNA.                  |
| Rhoc     | Rhoc.aSep08     | 295342 | 6324  | 1246 | 1 | 193 | ras homolog gene family, member C (22.0 kD) (Rhoc) alternative variant aSep08, mRNA.               |
| Rhod     | Rhod.bSep08     | 293660 | 10015 | 719  | 2 | 51  | ras homolog gene family, member D (Rhod) alternative variant bSep08, mRNA.                         |
| Rhog     | Rhog.bSep08     | 308875 | 10773 | 775  | 1 | 185 | ras homolog gene family, member G (Rhog) alternative variant bSep08, mRNA.                         |
| Rhog     | Rhog.cSep08     | 308875 | 10932 | 734  | 2 | 178 | ras homolog gene family, member G (Rhog) alternative variant cSep08, mRNA.                         |
| RhoGAP.0 | RhoGAP.0.aSep08 |        | 8215  | 1415 | 8 | 274 | dual-specificity Rho- Arf-GTPase activating protein 1 (RhoGAP.0) alternative variant aSep08, mRNA. |
| RhoGAP.1 | RhoGAP.1.aSep08 |        | 35966 | 834  |   | 278 | rho gtpase-activating protein rich2 (RhoGAP.1) mRNA.                                               |
| RhoGAP.2 | RhoGAP.2.aSep08 |        | 9335  | 792  |   | 263 | gtpase-activating protein (RhoGAP.2) mRNA.                                                         |
| RhoGAP.3 | RhoGAP.3.aSep08 |        | 4048  | 1057 |   | 287 | binding protein 1 like (RhoGAP.3) mRNA.                                                            |
| RhoGAP.4 | RhoGAP.4.aSep08 |        | 1378  | 415  |   | 138 | regulatory (RhoGAP.4) mRNA.                                                                        |
| RhoGEF.0 | RhoGEF.0.aSep08 |        | 35804 | 1580 |   | 335 | active -related (RhoGEF.0) mRNA.                                                                   |
| RhoGEF.1 | RhoGEF.1.aSep08 |        | 40264 | 1537 |   | 297 | 1 -specific guanine nucleotide-releasing factor (RhoGEF.1) mRNA.                                   |
| Rhoj     | Rhoj.bSep08     | 299145 | 11796 | 394  | 3 | 105 | ras homolog gene family, member J (Rhoj) alternative variant bSep08, mRNA.                         |
| Rhot1    | Rhot1.bSep08    | 303351 | 21093 | 1994 | 9 | 350 | ras homolog gene family, member T1 (Rhot1) alternative variant bSep08, mRNA.                       |
| Rhot1    | Rhot1.cSep08    | 303351 | 13660 | 886  | 4 | 173 | ras homolog gene family, member T1 (Rhot1) alternative variant cSep08, mRNA.                       |
| Rhot1    | Rhot1.dSep08    | 303351 | 2456  | 895  | 2 | 65  | ras homolog gene family, member T1 (Rhot1) alternative variant dSep08, mRNA.                       |
| Rhpn1    | Rhpn1.aSep08    | 300030 | 1957  | 784  | 4 | 192 | rhophilin, Rho GTPase binding protein 1 (Rhpn1) alternative variant aSep08, mRNA.                  |
| Rhpn1    | Rhpn1.bSep08    | 300030 | 1046  | 532  | 2 | 129 | rhophilin, Rho GTPase binding protein 1 (Rhpn1) alternative variant bSep08, mRNA.                  |
| Rhpn1    | Rhpn1.cSep08    | 300030 | 1340  | 1105 | 2 | 113 | rhophilin, Rho GTPase binding protein 1 (Rhpn1) alternative variant cSep08, mRNA.                  |
| Ribc1    | Ribc1.bSep08    | 317431 | 10865 | 1229 | 7 | 351 | RIB43A domain with coiled-coils 1 (Ribc1) alternative variant bSep08, mRNA.                        |
| Ribc1    | Ribc1.cSep08    | 317431 | 9969  | 805  | 6 | 212 | RIB43A domain with coiled-coils 1 (Ribc1) alternative variant cSep08, mRNA.                        |
| Ribc1    | Ribc1.dSep08    | 317431 | 8727  | 756  | 6 | 183 | RIB43A domain with coiled-coils 1 (Ribc1) alternative variant dSep08, mRNA.                        |
| Ribc1    | Ribc1.eSep08    | 317431 | 8521  | 632  | 5 | 103 | RIB43A domain with coiled-coils 1 (Ribc1) alternative variant eSep08, mRNA.                        |

|                  |                         |        |       |      |   |     |                                                                                                                 |
|------------------|-------------------------|--------|-------|------|---|-----|-----------------------------------------------------------------------------------------------------------------|
| Ribc2            | Ribc2.bSep08            | 300122 | 8657  | 678  | 5 | 9   | RIB43A domain with coiled-coils 2 (1.1 kD) (Ribc2) alternative variant bSep08, mRNA.                            |
| Ribosomal_L7Ae.0 | Ribosomal_L7Ae.0.aSep08 |        | 647   | 511  | 2 | 132 | ribosomal protein L7Ae/L30e/S12e/Gadd45 (14.5 kD) (Ribosomal_L7Ae.0) alternative variant aSep08, complete mRNA. |
| Ribosomal_L32e.0 | Ribosomal_L32e.0.aSep08 |        | 3433  | 374  | 3 | 103 | ribosomal protein L32e (Ribosomal_L32e.0) alternative variant aSep08, mRNA.                                     |
| Ribosomal_L32e.0 | Ribosomal_L32e.0.bSep08 |        | 3414  | 1158 | 2 | 47  | putative protein of eukaryotic origin (Ribosomal_L32e.0) alternative variant bSep08, mRNA.                      |
| Ribosomal_L37e.2 | Ribosomal_L37e.2.aSep08 |        | 30777 | 1004 | 3 | 107 | putative protein (12.5 kD) (Ribosomal_L37e.2) alternative variant aSep08, mRNA.                                 |
| Ribosomal_L37e.2 | Ribosomal_L37e.2.cSep08 |        | 23511 | 614  | 3 | 79  | ribosomal protein L37e (8.8 kD) (Ribosomal_L37e.2) alternative variant cSep08, mRNA.                            |
| Ribosomal_L39.4  | Ribosomal_L39.4.aSep08  |        | 4116  | 508  |   | 67  | putative protein (Ribosomal_L39.4) mRNA.                                                                        |
| Ribosomal_S5_C.1 | Ribosomal_S5_C.1.bSep08 |        | 466   | 367  | 2 | 102 | ribosomal protein S5, C-terminal (Ribosomal_S5_C.1) alternative variant bSep08, mRNA.                           |
| Ribosomal_S5_C.1 | Ribosomal_S5_C.1.cSep08 |        | 682   | 371  | 2 | 56  | putative protein of eukaryotic origin (6.4 kD) (Ribosomal_S5_C.1) alternative variant cSep08, mRNA.             |
| Ric8             | Ric8.bSep08             | 293614 | 842   | 564  | 2 | 112 | resistance inhibitors of cholinesterase 8 homolog A (Ric8) alternative variant bSep08, mRNA.                    |
| Ric8             | Ric8.cSep08             | 293614 | 869   | 780  | 1 | 108 | resistance inhibitors of cholinesterase 8 homolog A (Ric8) alternative variant cSep08, mRNA.                    |
| Ric8b            | Ric8b.bSep08            | 314681 | 20550 | 470  | 3 | 93  | resistance inhibitors of cholinesterase 8B (Ric8b) alternative variant bSep08, mRNA.                            |
| Ric8b            | Ric8b.cSep08            | 314681 | 8915  | 3515 | 2 | 74  | putative mitochondrial protein (8.9 kD) (Ric8b) alternative variant cSep08, mRNA.                               |
| Ric8b            | Ric8b.dSep08            | 314681 | 1920  | 1572 | 2 | 65  | putative protein (7.3 kD) (Ric8b) alternative variant dSep08, mRNA.                                             |
| Ricin_B_lectin.0 | Ricin_B_lectin.0.aSep08 |        | 4044  | 679  | 5 | 225 | N-acetylgalactosaminyltransferase (Ricin_B_lectin.0) alternative variant aSep08, mRNA.                          |
| Rictor           | Rictor.aSep08           | 310131 | 41629 | 405  |   | 134 | rapamycin-insensitive companion of mTOR (Rictor) mRNA.                                                          |
| Rif1             | Rif1.aSep08             | 295602 | 4233  | 1667 |   | 159 | rap1 interacting factor 1 homolog (yeast) (Rif1) mRNA.                                                          |
| RIH_assoc.0      | RIH_assoc.0.aSep08      |        | 20167 | 1470 | 2 | 427 | ryanodine receptor (RIH_assoc.0) alternative variant aSep08, mRNA.                                              |
| RIH_assoc.0      | RIH_assoc.0.bSep08      |        | 16550 | 628  | 1 | 186 | ryanodine receptor (RIH_assoc.0) alternative variant bSep08, mRNA.                                              |
| RIH_assoc.0      | RIH_assoc.0.cSep08      |        | 7834  | 516  | 5 | 171 | ryanodine receptor (RIH_assoc.0) alternative variant cSep08, mRNA.                                              |
| Rilpl1           | Rilpl1.aSep08           | 304469 | 37313 | 1870 | 8 | 476 | rab interacting lysosomal protein-like 1 (Rilpl1) alternative variant aSep08, mRNA.                             |
| Rilpl1           | Rilpl1.bSep08           | 304469 | 8251  | 842  | 2 | 78  | rab interacting lysosomal protein-like 1 (Rilpl1) alternative variant bSep08, mRNA.                             |
| Rilpl2           | Rilpl2.bSep08           | 288652 | 4791  | 689  | 1 | 86  | rab interacting lysosomal protein-like 2 (Rilpl2) alternative variant bSep08, mRNA.                             |
| RimK.0           | RimK.0.aSep08           |        | 3796  | 1828 |   | 226 | family with sequence similarity 80 member A (RimK.0) mRNA.                                                      |



|         |                |        |        |      |    |     |                                                                                                   |
|---------|----------------|--------|--------|------|----|-----|---------------------------------------------------------------------------------------------------|
| Rims2   | Rims2.cSep08   | 116839 | 50069  | 326  | 3  | 108 | regulating synaptic membrane exocytosis 2 (Rims2) alternative variant cSep08, mRNA.               |
| Rin2    | Rin2.bSep08    | 311494 | 21432  | 1237 | 4  | 209 | ras and Rab interactor 2 (24.2 kD) (Rin2) alternative variant bSep08, mRNA.                       |
| Rin2    | Rin2.cSep08    | 311494 | 47612  | 1253 | 3  | 53  | ras and Rab interactor 2 (6.0 kD) (Rin2) alternative variant cSep08, mRNA.                        |
| Rin3    | Rin3.bSep08    | 314397 | 14434  | 1921 | 3  | 629 | ras and Rab interactor 3 (Rin3) alternative variant bSep08, mRNA.                                 |
| Rin3    | Rin3.cSep08    | 314397 | 863    | 627  | 2  | 208 | ras and Rab interactor 3 (Rin3) alternative variant cSep08, mRNA.                                 |
| Rin3    | Rin3.dSep08    | 314397 | 44446  | 407  | 3  | 135 | ras and Rab interactor 3 (Rin3) alternative variant dSep08, mRNA.                                 |
| Ring1   | Ring1.bSep08   | 309626 | 912    | 821  | 2  | 128 | ring finger protein 1 (Ring1) alternative variant bSep08, mRNA.                                   |
| Ring1   | Ring1.cSep08   | 309626 | 1752   | 482  | 3  | 111 | ring finger protein 1 (Ring1) alternative variant cSep08, mRNA.                                   |
| Riok1   | Riok1.aSep08   | 291061 | 22901  | 2602 | 17 | 566 | RIO kinase 1 (yeast) (65.2 kD) (Riok1) alternative variant aSep08, mRNA.                          |
| Riok1   | Riok1.bSep08   | 291061 | 9752   | 756  | 6  | 79  | RIO kinase 1 (yeast) (Riok1) alternative variant bSep08, mRNA.                                    |
| Riok2   | Riok2.cSep08   | 308201 | 1265   | 362  | 2  | 24  | RIO kinase 2 (yeast) (Riok2) alternative variant cSep08, mRNA.                                    |
| Riok3   | Riok3.cSep08   | 361293 | 7894   | 351  | 3  | 104 | RIO kinase 3 (Riok3) alternative variant cSep08, mRNA.                                            |
| Riok3   | Riok3.dSep08   | 361293 | 4320   | 1052 | 4  | 98  | RIO kinase 3 (10.9 kD) (Riok3) alternative variant dSep08, mRNA.                                  |
| Riok3   | Riok3.gSep08   | 361293 | 2179   | 1084 | 2  | 87  | putative protein (9.3 kD) (Riok3) alternative variant gSep08, mRNA.                               |
| Riok3   | Riok3.hSep08   | 361293 | 2072   | 360  | 3  | 31  | RIO kinase 3 (Riok3) alternative variant hSep08, mRNA.                                            |
| Ripk1   | Ripk1.bSep08   | 306886 | 18363  | 1776 | 2  | 493 | receptor (TNFRSF)-interacting serine-threonine kinase 1 (Ripk1) alternative variant bSep08, mRNA. |
| Ripk2   | Ripk2.aSep08   | 362491 | 17168  | 1326 | 1  | 381 | receptor (TNFRSF)-interacting serine-threonine kinase 2 (Ripk2) alternative variant aSep08, mRNA. |
| Ripk2   | Ripk2.bSep08   | 362491 | 17088  | 1782 |    | 110 | receptor (TNFRSF)-interacting serine-threonine kinase 2 (Ripk2) alternative variant bSep08, mRNA. |
| Ripk3   | Ripk3.bSep08   | 246240 | 2055   | 895  | 5  | 210 | receptor-interacting serine-threonine kinase 3 (Ripk3) alternative variant bSep08, mRNA.          |
| Ripk3   | Ripk3.cSep08   | 246240 | 1410   | 693  | 4  | 180 | receptor-interacting serine-threonine kinase 3 (Ripk3) alternative variant cSep08, mRNA.          |
| Ripk3   | Ripk3.dSep08   | 246240 | 1504   | 749  | 3  | 108 | receptor-interacting serine-threonine kinase 3 (Ripk3) alternative variant dSep08, mRNA.          |
| Ripply2 | Ripply2.aSep08 | 363111 | 4005   | 525  |    | 134 | rippy2 homolog (zebrafish) (Ripply2) mRNA.                                                        |
| Rit1    | Rit1.aSep08    | 499652 | 13010  | 1619 | 3  | 219 | ras-like without CAAX 1 (25.2 kD) (Rit1) alternative variant aSep08, mRNA.                        |
| Rit1    | Rit1.bSep08    | 499652 | 891    | 454  | 1  | 79  | ras-like without CAAX 1 (8.6 kD) (Rit1) alternative variant bSep08, mRNA.                         |
| Rit2    | Rit2.bSep08    | 291713 | 365856 | 845  |    | 198 | ras-like without CAAX 2 (22.5 kD) (Rit2) alternative variant bSep08, mRNA.                        |

|               |                      |        |       |      |   |     |                                                                                                                      |
|---------------|----------------------|--------|-------|------|---|-----|----------------------------------------------------------------------------------------------------------------------|
| Rkhd1         | Rkhd1.aSep08         | 299613 | 6826  | 2449 | 2 | 577 | KH, type 1 and zinc finger, RING-type (Rkhd1) alternative variant aSep08, mRNA.                                      |
| Rkhd2         | Rkhd2.bSep08         | 307271 | 42307 | 693  | 2 | 230 | hypothetical protein LOC680362 (Rkhd2) alternative variant bSep08, mRNA.                                             |
| Rkhd2         | Rkhd2.bSep08         | 680362 | 42307 | 693  | 2 | 230 | hypothetical protein LOC680362 (Rkhd2) alternative variant bSep08, mRNA.                                             |
| Rlbp112       | Rlbp112.bSep08       | 361459 | 95505 | 621  | 4 | 206 | retinaldehyde binding protein 1-like 2 (Rlbp112) alternative variant bSep08, mRNA.                                   |
| Rlf           | Rlf.aSep08           | 313566 | 34837 | 614  |   | 204 | rearranged L-myc fusion sequence (Rlf) mRNA.                                                                         |
| Rmi1          | Rmi1.aSep08          | 306734 | 3508  | 2559 | 1 | 617 | RMI1, RecQ mediated genome instability 1, homolog (S. cerevisiae) (68.2 kD) (Rmi1) alternative variant aSep08, mRNA. |
| Rmi1          | Rmi1.bSep08          | 306734 | 7202  | 2416 | 2 | 617 | RMI1, RecQ mediated genome instability 1, homolog (S. cerevisiae) (68.2 kD) (Rmi1) alternative variant bSep08, mRNA. |
| Rmnd1         | Rmnd1.bSep08         | 292268 | 10724 | 521  | 6 | 158 | required for meiotic nuclear division 1 homolog (S. cerevisiae) (Rmnd1) alternative variant bSep08, mRNA.            |
| Rmnd1         | Rmnd1.cSep08         | 292268 | 8563  | 1782 | 5 | 123 | required for meiotic nuclear division 1 homolog (S. cerevisiae) (Rmnd1) alternative variant cSep08, mRNA.            |
| Rmnd5a        | Rmnd5a.aSep08        | 312439 | 56583 | 4659 | 2 | 401 | required for meiotic nuclear division 5 homolog A (S. cerevisiae) (Rmnd5a) alternative variant aSep08, mRNA.         |
| Rmnd5a        | Rmnd5a.bSep08        | 312439 | 6645  | 3081 | 1 | 86  | required for meiotic nuclear division 5 homolog A (S. cerevisiae) (Rmnd5a) alternative variant bSep08, mRNA.         |
| Rmnd5a        | Rmnd5a.cSep08        | 312439 | 2935  | 402  | 2 | 41  | required for meiotic nuclear division 5 homolog A (S. cerevisiae) (Rmnd5a) alternative variant cSep08, mRNA.         |
| Rnase4andAng1 | Rnase4andAng1.cSep08 | 56759  | 11743 | 1375 | 2 | 147 | putative protein (Rnase4andAng1) alternative variant cSep08, mRNA.                                                   |
| Rnase4andAng1 | Rnase4andAng1.cSep08 | 305843 | 11743 | 1375 | 2 | 147 | putative protein (Rnase4andAng1) alternative variant cSep08, mRNA.                                                   |
| Rnase4andAng1 | Rnase4andAng1.dSep08 | 56759  | 15908 | 685  | 3 | 147 | ribonuclease 4 precursor (16.9 kD) (Rnase4andAng1) alternative variant dSep08, mRNA.                                 |
| Rnase4andAng1 | Rnase4andAng1.dSep08 | 305843 | 15908 | 685  | 3 | 147 | ribonuclease 4 precursor (16.9 kD) (Rnase4andAng1) alternative variant dSep08, mRNA.                                 |
| RnaseA.0      | RnaseA.0.aSep08      |        | 809   | 649  |   | 171 | eosinophil-associated ribonuclease A family member (RnaseA.0) mRNA.                                                  |
| Rnaseh1       | Rnaseh1.bSep08       | 298933 | 2565  | 506  | 2 | 54  | ribonuclease H1 (Rnaseh1) alternative variant bSep08, mRNA.                                                          |
| Rnaseh1       | Rnaseh1.eSep08       | 298933 | 1712  | 284  | 2 | 28  | ribonuclease H1 (3.2 kD) (Rnaseh1) alternative variant eSep08, mRNA.                                                 |
| Rnaseh2a      | Rnaseh2a.aSep08      | 364974 | 9936  | 1903 | 5 | 339 | ribonuclease H2, large subunit (Rnaseh2a) alternative variant aSep08, mRNA.                                          |
| Rnaseh2a      | Rnaseh2a.cSep08      | 364974 | 8072  | 1389 | 7 | 183 | ribonuclease H2, large subunit (Rnaseh2a) alternative variant cSep08, mRNA.                                          |
| Rnaseh2a      | Rnaseh2a.dSep08      | 364974 | 3662  | 763  | 4 | 180 | ribonuclease H2, large subunit (Rnaseh2a) alternative variant dSep08, mRNA.                                          |
| Rnaseh2a      | Rnaseh2a.eSep08      | 364974 | 2215  | 551  | 4 | 164 | ribonuclease H2, large subunit (Rnaseh2a) alternative variant eSep08, mRNA.                                          |

|                  |                         |        |       |      |    |     |                                                                                       |
|------------------|-------------------------|--------|-------|------|----|-----|---------------------------------------------------------------------------------------|
| Rnaseh2a         | Rnaseh2a.fSep08         | 364974 | 3781  | 671  | 4  | 132 | ribonuclease H2, large subunit (Rnaseh2a) alternative variant fSep08, mRNA.           |
| Rnaseh2a         | Rnaseh2a.hSep08         | 364974 | 3984  | 740  | 5  | 115 | ribonuclease H2, large subunit (13.2 kD) (Rnaseh2a) alternative variant hSep08, mRNA. |
| Rnaseh2b         | Rnaseh2b.bSep08         | 361056 | 32962 | 1276 | 8  | 226 | ribonuclease H2, subunit B (Rnaseh2b) alternative variant bSep08, mRNA.               |
| Rnaseh2b         | Rnaseh2b.cSep08         | 361056 | 24837 | 960  | 8  | 214 | ribonuclease H2, subunit B (Rnaseh2b) alternative variant cSep08, mRNA.               |
| Rnaseh2b         | Rnaseh2b.dSep08         | 361056 | 30565 | 736  | 7  | 172 | ribonuclease H2, subunit B (Rnaseh2b) alternative variant dSep08, mRNA.               |
| Rnasek           | Rnasek.aSep08           | 287453 | 1816  | 687  | 1  | 98  | ribonuclease, RNase K (11.0 kD) (Rnasek) alternative variant aSep08, mRNA.            |
| Rnasek           | Rnasek.bSep08           | 287453 | 1627  | 658  | 1  | 55  | ribonuclease, RNase K (Rnasek) alternative variant bSep08, mRNA.                      |
| Rnasel           | Rnasel.bSep08           | 359726 | 1838  | 332  | 2  | 78  | putative cytoplasmic protein (8.6 kD) (Rnasel) alternative variant bSep08, mRNA.      |
| Rnasen           | Rnasen.bSep08           | 310159 | 63304 | 1940 | 20 | 646 | ribonuclease III, nuclear (Rnasen) alternative variant bSep08, mRNA.                  |
| Rnasen           | Rnasen.cSep08           | 310159 | 9853  | 1721 | 4  | 284 | ribonuclease III, nuclear (32.3 kD) (Rnasen) alternative variant cSep08, mRNA.        |
| Rnasen           | Rnasen.dSep08           | 310159 | 1625  | 895  | 2  | 35  | ribonuclease III, nuclear (Rnasen) alternative variant dSep08, mRNA.                  |
| RNase_H1_sml.0   | RNase_H1_sml.0.aSep08   |        | 1619  | 1177 | 2  | 179 | ribonuclease H2 (RNase_H1_sml.0) alternative variant aSep08, mRNA.                    |
| RNase_H1_sml.0   | RNase_H1_sml.0.bSep08   |        | 1034  | 846  | 1  | 178 | ribonuclease H2 (RNase_H1_sml.0) alternative variant bSep08, mRNA.                    |
| RNase_PH.0       | RNase_PH.0.aSep08       |        | 5820  | 545  | 7  | 181 | polyribonucleotide nucleotidyltransferase 1 (RNase_PH.0) mRNA.                        |
| RNA_pol_Rpb1_1.0 | RNA_pol_Rpb1_1.0.aSep08 |        | 3160  | 561  |    | 187 | polymerase III (RNA_pol_Rpb1_1.0) mRNA.                                               |
| RNA_pol_Rpb1_2.0 | RNA_pol_Rpb1_2.0.aSep08 |        | 4037  | 1722 | 5  | 574 | RNA polymerase II (RNA_pol_Rpb1_2.0) alternative variant aSep08, mRNA.                |
| RNA_pol_Rpb1_2.0 | RNA_pol_Rpb1_2.0.bSep08 |        | 580   | 468  | 1  | 116 | polymerase II (RNA_pol_Rpb1_2.0) alternative variant bSep08, mRNA.                    |
| RNA_pol_Rpb1_5.0 | RNA_pol_Rpb1_5.0.aSep08 |        | 13331 | 1346 |    | 448 | polymerase III polypeptide a 155kDa (RNA_pol_Rpb1_5.0) mRNA.                          |
| RNA_pol_Rpb1_R.0 | RNA_pol_Rpb1_R.0.aSep08 |        | 1118  | 844  |    | 281 | zinc finger protein 768 (RNA_pol_Rpb1_R.0) mRNA.                                      |
| Rnf2             | Rnf2.bSep08             | 304850 | 7275  | 2752 | 2  | 297 | ring finger protein 2 (Rnf2) alternative variant bSep08, mRNA.                        |
| Rnf4             | Rnf4.aSep08             | 29274  | 18680 | 835  | 6  | 113 | CRA b (Rnf4) alternative variant aSep08, mRNA.                                        |
| Rnf4             | Rnf4.cSep08             | 29274  | 18635 | 641  | 6  | 74  | ring finger protein 4 (8.2 kD) (Rnf4) alternative variant cSep08, mRNA.               |
| Rnf4             | Rnf4.dSep08             | 29274  | 21949 | 2905 | 7  | 116 | ring finger protein 4 (13.1 kD) (Rnf4) alternative variant dSep08, mRNA.              |
| Rnf4             | Rnf4.fSep08             | 29274  | 19557 | 770  | 7  | 91  | ring finger protein 4 (Rnf4) alternative variant fSep08, mRNA.                        |

|        |               |        |       |      |   |     |                                                                              |
|--------|---------------|--------|-------|------|---|-----|------------------------------------------------------------------------------|
| Rnf6   | Rnf6.cSep08   | 304271 | 4181  | 810  | 3 | 123 | ring finger protein (C3H2C3 type) 6 (Rnf6) alternative variant cSep08, mRNA. |
| Rnf7   | Rnf7.cSep08   | 300948 | 8404  | 709  | 3 | 42  | ring finger protein 7 (4.8 kD) (Rnf7) alternative variant cSep08, mRNA.      |
| Rnf8   | Rnf8.aSep08   | 361815 | 18002 | 1348 | 6 | 413 | ring finger protein 8 (Rnf8) alternative variant aSep08, mRNA.               |
| Rnf10  | Rnf10.bSep08  | 288710 | 9747  | 1779 | 9 | 522 | ring finger protein 10 (Rnf10) alternative variant bSep08, mRNA.             |
| Rnf10  | Rnf10.cSep08  | 288710 | 6868  | 1111 | 8 | 297 | ring finger protein 10 (Rnf10) alternative variant cSep08, mRNA.             |
| Rnf10  | Rnf10.dSep08  | 288710 | 4483  | 894  | 6 | 216 | ring finger protein 10 (Rnf10) alternative variant dSep08, mRNA.             |
| Rnf10  | Rnf10.eSep08  | 288710 | 802   | 387  | 2 | 115 | ring finger protein 10 (Rnf10) alternative variant eSep08, mRNA.             |
| Rnf10  | Rnf10.fSep08  | 288710 | 1714  | 703  | 3 | 74  | ring finger protein 10 (Rnf10) alternative variant fSep08, mRNA.             |
| Rnf11  | Rnf11.aSep08  | 689577 | 20707 | 632  | 3 | 175 | ring finger protein 11 (Rnf11) alternative variant aSep08, mRNA.             |
| Rnf11  | Rnf11.bSep08  | 689577 | 32822 | 3044 | 5 | 154 | ring finger protein 11 (Rnf11) alternative variant bSep08, mRNA.             |
| Rnf12  | Rnf12.aSep08  | 317241 | 16685 | 3031 | 6 | 603 | ring finger protein 12 (67.0 kD) (Rnf12) alternative variant aSep08, mRNA.   |
| Rnf17  | Rnf17.aSep08  | 305908 | 15460 | 690  |   | 230 | ring finger protein 17 (Rnf17) mRNA.                                         |
| Rnf19a | Rnf19a.bSep08 | 362900 | 3265  | 355  | 3 | 98  | ring finger protein 19A (Rnf19a) alternative variant bSep08, mRNA.           |
| Rnf19b | Rnf19b.aSep08 | 313806 | 23620 | 2451 | 2 | 686 | ring finger protein 19B (Rnf19b) alternative variant aSep08, mRNA.           |
| Rnf20  | Rnf20.bSep08  | 313216 | 2484  | 1469 | 4 | 192 | ring finger protein 20 (Rnf20) alternative variant bSep08, mRNA.             |
| Rnf24  | Rnf24.aSep08  | 362218 | 51219 | 585  |   | 194 | ring finger protein 24 (Rnf24) mRNA.                                         |
| Rnf25  | Rnf25.bSep08  | 301515 | 6382  | 1015 | 9 | 335 | ring finger protein 25 (Rnf25) alternative variant bSep08, mRNA.             |
| Rnf25  | Rnf25.cSep08  | 301515 | 4922  | 758  | 6 | 221 | ring finger protein 25 (25.2 kD) (Rnf25) alternative variant cSep08, mRNA.   |
| Rnf25  | Rnf25.dSep08  | 301515 | 5921  | 774  | 8 | 221 | ring finger protein 25 (Rnf25) alternative variant dSep08, mRNA.             |
| Rnf25  | Rnf25.eSep08  | 301515 | 5126  | 1572 | 7 | 195 | ring finger protein 25 (Rnf25) alternative variant eSep08, mRNA.             |
| Rnf25  | Rnf25.fSep08  | 301515 | 2782  | 301  | 3 | 42  | ring finger protein 25 (Rnf25) alternative variant fSep08, mRNA.             |
| Rnf31  | Rnf31.bSep08  | 364386 | 4764  | 1159 | 8 | 256 | ring finger protein 31 (Rnf31) alternative variant bSep08, mRNA.             |
| Rnf31  | Rnf31.cSep08  | 364386 | 2079  | 424  | 5 | 140 | ring finger protein 31 (Rnf31) alternative variant cSep08, mRNA.             |
| Rnf31  | Rnf31.dSep08  | 364386 | 896   | 386  | 3 | 128 | ring finger protein 31 (Rnf31) alternative variant dSep08, mRNA.             |

|        |               |        |       |      |   |     |                                                                                     |
|--------|---------------|--------|-------|------|---|-----|-------------------------------------------------------------------------------------|
| Rnf31  | Rnf31.eSep08  | 364386 | 4746  | 879  | 8 | 121 | ring finger protein 31 (13.4 kD) (Rnf31) alternative variant eSep08, mRNA.          |
| Rnf32  | Rnf32.bSep08  | 311936 | 10099 | 771  | 7 | 220 | ring finger protein 32 (Rnf32) alternative variant bSep08, mRNA.                    |
| Rnf32  | Rnf32.cSep08  | 311936 | 10076 | 745  | 7 | 208 | ring finger protein 32 (Rnf32) alternative variant cSep08, mRNA.                    |
| Rnf32  | Rnf32.dSep08  | 311936 | 9622  | 543  | 5 | 103 | ring finger protein 32 (11.2 kD) (Rnf32) alternative variant dSep08, complete mRNA. |
| Rnf32  | Rnf32.eSep08  | 311936 | 1849  | 360  | 3 | 59  | ring finger protein 32 (6.7 kD) (Rnf32) alternative variant eSep08, mRNA.           |
| Rnf34  | Rnf34.cSep08  | 282845 | 953   | 751  | 2 | 45  | ring finger protein 34 (4.8 kD) (Rnf34) alternative variant cSep08, mRNA.           |
| Rnf34  | Rnf34.dSep08  | 282845 | 12105 | 302  | 3 | 52  | ring finger protein 34 (6.0 kD) (Rnf34) alternative variant dSep08, mRNA.           |
| Rnf38  | Rnf38.bSep08  | 171501 | 25945 | 783  | 3 | 217 | ring finger protein 38 (Rnf38) alternative variant bSep08, mRNA.                    |
| Rnf38  | Rnf38.cSep08  | 171501 | 18406 | 710  | 1 | 172 | ring finger protein 38 (Rnf38) alternative variant cSep08, mRNA.                    |
| Rnf39  | Rnf39.aSep08  | 171387 | 1956  | 439  | 2 | 145 | ring finger protein 39 (Rnf39) alternative variant aSep08, mRNA.                    |
| Rnf39  | Rnf39.bSep08  | 171387 | 1228  | 423  | 2 | 140 | ring finger protein 39 (Rnf39) alternative variant bSep08, mRNA.                    |
| Rnf39  | Rnf39.cSep08  | 171387 | 655   | 477  | 2 | 57  | ring finger protein 39 (6.1 kD) (Rnf39) alternative variant cSep08, mRNA.           |
| Rnf41  | Rnf41.bSep08  | 362814 | 24368 | 1241 | 7 | 289 | ring finger protein 41 (Rnf41) alternative variant bSep08, mRNA.                    |
| Rnf41  | Rnf41.cSep08  | 362814 | 1399  | 731  | 2 | 101 | ring finger protein 41 CRA b (11.3 kD) (Rnf41) alternative variant cSep08, mRNA.    |
| Rnf41  | Rnf41.dSep08  | 362814 | 21889 | 717  | 5 | 100 | putative mitochondrial protein (10.7 kD) (Rnf41) alternative variant dSep08, mRNA.  |
| Rnf43  | Rnf43.aSep08  | 303412 | 1682  | 401  |   | 133 | ring finger protein 43 (Rnf43) mRNA.                                                |
| Rnf44  | Rnf44.aSep08  | 361212 | 8433  | 1783 | 6 | 357 | ring finger protein 44 (Rnf44) alternative variant aSep08, mRNA.                    |
| Rnf44  | Rnf44.dSep08  | 361212 | 1165  | 405  | 3 | 134 | ring finger protein 44 (Rnf44) alternative variant dSep08, mRNA.                    |
| Rnf44  | Rnf44.eSep08  | 361212 | 1084  | 785  | 3 | 107 | ring finger protein (12.2 kD) (Rnf44) alternative variant eSep08, mRNA.             |
| Rnf44  | Rnf44.fSep08  | 361212 | 10099 | 720  | 4 | 100 | ring finger protein (11.0 kD) (Rnf44) alternative variant fSep08, mRNA.             |
| Rnf44  | Rnf44.gSep08  | 361212 | 4573  | 400  | 4 | 45  | ring finger protein 44 like (4.9 kD) (Rnf44) alternative variant gSep08, mRNA.      |
| Rnf111 | Rnf111.bSep08 | 300813 | 11550 | 2209 | 6 | 219 | ring finger 111 (Rnf111) alternative variant bSep08, mRNA.                          |
| Rnf111 | Rnf111.cSep08 | 300813 | 33888 | 403  | 2 | 112 | ring finger 111 (Rnf111) alternative variant cSep08, mRNA.                          |
| Rnf111 | Rnf111.dSep08 | 300813 | 33628 | 659  | 2 | 73  | ring finger 111 (Rnf111) alternative variant dSep08, mRNA.                          |
| Rnf121 | Rnf121.bSep08 | 308871 | 51283 | 764  | 6 | 122 | ring finger protein 121 (Rnf121) alternative variant bSep08, mRNA.                  |

|         |                |        |        |      |   |     |                                                                              |
|---------|----------------|--------|--------|------|---|-----|------------------------------------------------------------------------------|
| Rnf126  | Rnf126.bSep08  | 314613 | 7233   | 799  | 4 | 266 | ring finger protein 126 (Rnf126) alternative variant bSep08, mRNA.           |
| Rnf126  | Rnf126.cSep08  | 314613 | 5911   | 751  | 7 | 249 | ring finger protein 126 (Rnf126) alternative variant cSep08, mRNA.           |
| Rnf128  | Rnf128.aSep08  | 315911 | 58090  | 2813 | 6 | 519 | ring finger protein 128 (Rnf128) alternative variant aSep08, mRNA.           |
| Rnf128  | Rnf128.bSep08  | 315911 | 7204   | 757  | 2 | 36  | ring finger protein 128 (4.1 kD) (Rnf128) alternative variant bSep08, mRNA.  |
| Rnf138  | Rnf138.aSep08  | 94196  | 22344  | 772  | 2 | 214 | ring finger protein 138 (Rnf138) alternative variant aSep08, mRNA.           |
| Rnf138  | Rnf138.cSep08  | 94196  | 16609  | 2412 | 1 | 117 | ring finger protein 138 (Rnf138) alternative variant cSep08, mRNA.           |
| Rnf138  | Rnf138.dSep08  | 94196  | 7962   | 464  | 2 | 114 | ring finger protein 138 (Rnf138) alternative variant dSep08, mRNA.           |
| rnf141  | rnf141.bSep08  | 308900 | 22345  | 3949 | 7 | 230 | ring finger protein 141 (25.5 kD) (rnf141) alternative variant bSep08, mRNA. |
| rnf141  | rnf141.cSep08  | 308900 | 2346   | 604  | 2 | 72  | ring finger protein 141 (8.1 kD) (rnf141) alternative variant cSep08, mRNA.  |
| Rnf144a | Rnf144a.bSep08 | 500636 | 91690  | 579  | 4 | 171 | ring finger protein 144A (Rnf144a) alternative variant bSep08, mRNA.         |
| Rnf144a | Rnf144a.cSep08 | 500636 | 8742   | 571  | 2 | 61  | ring finger protein 144A (Rnf144a) alternative variant cSep08, mRNA.         |
| Rnf145  | Rnf145.bSep08  | 287212 | 29056  | 1798 | 5 | 599 | ring finger protein 145 (Rnf145) alternative variant bSep08, mRNA.           |
| Rnf145  | Rnf145.cSep08  | 287212 | 2064   | 990  | 2 | 228 | ring finger protein 145 (Rnf145) alternative variant cSep08, mRNA.           |
| Rnf145  | Rnf145.dSep08  | 287212 | 6587   | 672  | 4 | 215 | ring finger protein 145 (Rnf145) alternative variant dSep08, mRNA.           |
| Rnf145  | Rnf145.eSep08  | 287212 | 20664  | 507  | 4 | 124 | ring finger protein 145 (Rnf145) alternative variant eSep08, mRNA.           |
| Rnf145  | Rnf145.fSep08  | 287212 | 4379   | 812  | 3 | 119 | ring finger protein 145 (Rnf145) alternative variant fSep08, mRNA.           |
| Rnf146  | Rnf146.aSep08  | 308051 | 16870  | 1923 | 3 | 355 | ring finger protein 146 (38.6 kD) (Rnf146) alternative variant aSep08, mRNA. |
| Rnf146  | Rnf146.cSep08  | 308051 | 15829  | 940  | 4 | 246 | ring finger protein 146 (Rnf146) alternative variant cSep08, mRNA.           |
| Rnf149  | Rnf149.aSep08  | 363222 | 25336  | 3726 | 3 | 475 | ring finger protein 149 (Rnf149) alternative variant aSep08, mRNA.           |
| Rnf149  | Rnf149.bSep08  | 363222 | 12742  | 774  | 2 | 157 | ring finger protein 149 (Rnf149) alternative variant bSep08, mRNA.           |
| Rnf149  | Rnf149.cSep08  | 363222 | 12838  | 749  | 1 | 81  | ring finger protein 149 (Rnf149) alternative variant cSep08, mRNA.           |
| Rnf150  | Rnf150.aSep08  | 364983 | 49867  | 3046 |   | 66  | ring finger protein 150 (Rnf150) alternative variant aSep08, mRNA.           |
| Rnf165  | Rnf165.aSep08  | 307251 | 114391 | 3449 | 8 | 359 | ring finger protein 165 (Rnf165) alternative variant aSep08, mRNA.           |

|        |               |        |       |      |    |     |                                                                                      |
|--------|---------------|--------|-------|------|----|-----|--------------------------------------------------------------------------------------|
| Rnf165 | Rnf165.cSep08 | 307251 | 2302  | 645  | 1  | 42  | ring finger protein 165 (Rnf165) alternative variant cSep08, mRNA.                   |
| Rnf166 | Rnf166.bSep08 | 365022 | 7429  | 787  | 1  | 216 | ring finger protein 166 (Rnf166) alternative variant bSep08, mRNA.                   |
| Rnf167 | Rnf167.bSep08 | 360554 | 2687  | 415  | 6  | 124 | ring finger protein 167 (Rnf167) alternative variant bSep08, mRNA.                   |
| Rnf167 | Rnf167.cSep08 | 360554 | 1306  | 388  | 4  | 119 | ring finger protein 167 (Rnf167) alternative variant cSep08, mRNA.                   |
| Rnf170 | Rnf170.aSep08 | 364654 | 2696  | 1003 |    | 126 | ring finger protein 170 (Rnf170) mRNA.                                               |
| Rnf180 | Rnf180.aSep08 | 685384 | 67726 | 1410 |    | 183 | ring finger protein 180 (Rnf180) mRNA.                                               |
| Rnf181 | Rnf181.bSep08 | 297337 | 2695  | 1493 | 5  | 129 | ring finger protein 181 (Rnf181) alternative variant bSep08, mRNA.                   |
| Rnf181 | Rnf181.cSep08 | 297337 | 1838  | 569  | 5  | 118 | ring finger protein 181 (13.8 kD) (Rnf181) alternative variant cSep08, mRNA.         |
| Rnf181 | Rnf181.dSep08 | 297337 | 2046  | 742  | 5  | 62  | ring finger protein 181 (7.4 kD) (Rnf181) alternative variant dSep08, complete mRNA. |
| Rnf181 | Rnf181.eSep08 | 297337 | 2115  | 753  | 4  | 62  | ring finger protein 181 (7.4 kD) (Rnf181) alternative variant eSep08, complete mRNA. |
| Rnf181 | Rnf181.fSep08 | 297337 | 1286  | 993  | 2  | 30  | ring finger protein 181 (3.7 kD) (Rnf181) alternative variant fSep08, mRNA.          |
| Rnf185 | Rnf185.bSep08 | 360967 | 12392 | 2385 | 3  | 143 | ring finger protein 185 (Rnf185) alternative variant bSep08, mRNA.                   |
| Rnf187 | Rnf187.aSep08 | 360533 | 5946  | 1937 | 2  | 277 | ring finger protein 187 (Rnf187) alternative variant aSep08, mRNA.                   |
| Rnf187 | Rnf187.bSep08 | 360533 | 4493  | 1050 | 1  | 153 | ring finger protein 187 (Rnf187) alternative variant bSep08, mRNA.                   |
| Rnf190 | Rnf190.bSep08 | 303596 | 58685 | 1786 | 5  | 595 | ring finger protein 190 (Rnf190) alternative variant bSep08, mRNA.                   |
| Rnf190 | Rnf190.dSep08 | 303596 | 33085 | 310  | 3  | 103 | ring finger protein 190 (Rnf190) alternative variant dSep08, mRNA.                   |
| Rnf190 | Rnf190.eSep08 | 303596 | 10832 | 537  | 3  | 32  | ring finger protein 190 (3.6 kD) (Rnf190) alternative variant eSep08, mRNA.          |
| Rnf207 | Rnf207.aSep08 | 691246 | 12972 | 2441 | 17 | 635 | ring finger protein 207 (70.6 kD) (Rnf207) alternative variant aSep08, mRNA.         |
| Rnf207 | Rnf207.bSep08 | 691246 | 7080  | 1596 | 10 | 168 | ring finger protein 207 (18.8 kD) (Rnf207) alternative variant bSep08, mRNA.         |
| Rnf207 | Rnf207.dSep08 | 691246 | 4324  | 698  | 3  | 104 | ring finger protein 207 (Rnf207) alternative variant dSep08, mRNA.                   |
| Rnf207 | Rnf207.eSep08 | 691246 | 2490  | 879  | 5  | 59  | ring finger protein 207 (Rnf207) alternative variant eSep08, mRNA.                   |
| Rnf207 | Rnf207.fSep08 | 691246 | 891   | 493  | 2  | 74  | ring finger protein 207 (Rnf207) alternative variant fSep08, mRNA.                   |
| Rnf215 | Rnf215.bSep08 | 305478 | 1302  | 493  | 2  | 20  | ring finger protein 215 (2.7 kD) (Rnf215) alternative variant bSep08, mRNA.          |
| Rnf216 | Rnf216.bSep08 | 304294 | 6828  | 330  | 2  | 87  | ring finger protein 216 (Rnf216) alternative variant bSep08, mRNA.                   |
| Rnft1  | Rnft1.aSep08  | 360595 | 9358  | 1736 |    | 288 | ring finger protein, transmembrane 1 (Rnft1) mRNA.                                   |

|       |              |        |        |      |    |     |                                                                                                         |
|-------|--------------|--------|--------|------|----|-----|---------------------------------------------------------------------------------------------------------|
| Rnft2 | Rnft2.cSep08 | 304521 | 12745  | 2958 | 4  | 129 | ring finger protein, transmembrane 2 (Rnft2) alternative variant cSep08, mRNA.                          |
| Rnft2 | Rnft2.dSep08 | 304521 | 8380   | 397  | 2  | 48  | ring finger protein, transmembrane 2 (Rnft2) alternative variant dSep08, mRNA.                          |
| Rngtt | Rngtt.bSep08 | 313131 | 206346 | 3960 | 14 | 512 | RNA guanylyltransferase and 5'-phosphatase (58.9 kD) (Rngtt) alternative variant bSep08, complete mRNA. |
| Rngtt | Rngtt.cSep08 | 313131 | 22820  | 525  | 5  | 114 | RNA guanylyltransferase and 5'-phosphatase (Rngtt) alternative variant cSep08, mRNA.                    |
| Rnh1  | Rnh1.bSep08  | 245964 | 9731   | 917  | 7  | 305 | ribonuclease/angiogenin inhibitor 1 (Rnh1) alternative variant bSep08, mRNA.                            |
| Rnh1  | Rnh1.cSep08  | 245964 | 5024   | 830  | 6  | 235 | ribonuclease/angiogenin inhibitor 1 (Rnh1) alternative variant cSep08, mRNA.                            |
| Rnh1  | Rnh1.dSep08  | 245964 | 4100   | 750  | 3  | 86  | ribonuclease/angiogenin inhibitor 1 (9.6 kD) (Rnh1) alternative variant dSep08, mRNA.                   |
| Rnmt  | Rnmt.bSep08  | 291534 | 10888  | 874  | 1  | 257 | RNA (guanine-7-) methyltransferase (29.1 kD) (Rnmt) alternative variant bSep08, mRNA.                   |
| Rnpep | Rnpep.bSep08 | 81761  | 4352   | 597  | 3  | 162 | arginyl aminopeptidase (aminopeptidase B) (Rnpep) alternative variant bSep08, mRNA.                     |
| Rnpep | Rnpep.cSep08 | 81761  | 6000   | 812  | 4  | 122 | arginyl aminopeptidase (aminopeptidase B) (Rnpep) alternative variant cSep08, mRNA.                     |
| Rnps1 | Rnps1.bSep08 | 287113 | 11479  | 2284 | 7  | 282 | ribonucleic acid binding protein S1 (31.7 kD) (Rnps1) alternative variant bSep08, mRNA.                 |
| Rnps1 | Rnps1.cSep08 | 287113 | 7563   | 735  | 6  | 202 | ribonucleic acid binding protein S1 (Rnps1) alternative variant cSep08, mRNA.                           |
| Rnps1 | Rnps1.dSep08 | 287113 | 7516   | 869  | 7  | 200 | ribonucleic acid binding protein S1 (Rnps1) alternative variant dSep08, mRNA.                           |
| Rnps1 | Rnps1.eSep08 | 287113 | 5868   | 999  | 4  | 139 | ribonucleic acid binding protein S1 (Rnps1) alternative variant eSep08, mRNA.                           |
| Rnps1 | Rnps1.fSep08 | 287113 | 661    | 345  | 2  | 84  | ribonucleic acid binding protein S1 (Rnps1) alternative variant fSep08, mRNA.                           |
| Rnps1 | Rnps1.hSep08 | 287113 | 7031   | 578  | 5  | 26  | ribonucleic acid binding protein S1 (2.9 kD) (Rnps1) alternative variant hSep08, complete mRNA.         |
| Robo1 | Robo1.aSep08 | 58946  | 215361 | 576  |    | 191 | roundabout homolog 1 (Drosophila) (Robo1) mRNA.                                                         |
| Robo2 | Robo2.aSep08 | 84409  | 19492  | 1767 | 2  | 509 | roundabout, axon guidance receptor, homolog 2 (Drosophila) (Robo2) alternative variant aSep08, mRNA.    |
| Robo2 | Robo2.bSep08 | 84409  | 10545  | 2030 | 1  | 185 | roundabout, axon guidance receptor, homolog 2 (Drosophila) (Robo2) alternative variant bSep08, mRNA.    |
| Robo2 | Robo2.cSep08 | 84409  | 3441   | 615  | 1  | 125 | roundabout, axon guidance receptor, homolog 2 (Drosophila) (Robo2) alternative variant cSep08, mRNA.    |
| Robo3 | Robo3.bSep08 | 315564 | 1891   | 892  | 5  | 210 | roundabout homolog 3 (Drosophila) (Robo3) alternative variant bSep08, mRNA.                             |
| Robo3 | Robo3.cSep08 | 315564 | 1929   | 711  | 4  | 130 | roundabout homolog 3 (Drosophila) (Robo3) alternative variant cSep08, mRNA.                             |
| Robo4 | Robo4.bSep08 | 300518 | 3407   | 1802 | 1  | 433 | roundabout homolog 4 (Drosophila) (Robo4) alternative variant bSep08, mRNA.                             |
| roby  | roby.aSep08  |        | 1044   | 399  |    | 107 | putative protein (12.5 kD) (roby) mRNA.                                                                 |
| rochy | rochy.aSep08 |        | 6120   | 326  |    | 108 | CRA a (rochy) mRNA.                                                                                     |



|               |                      |        |       |      |    |     |                                                                                                            |
|---------------|----------------------|--------|-------|------|----|-----|------------------------------------------------------------------------------------------------------------|
| Rock1         | Rock1.bSep08         | 81762  | 16290 | 2115 | 9  | 326 | rho-associated coiled-coil containing protein kinase 1 (38.1 kD) (Rock1) alternative variant bSep08, mRNA. |
| Rock2         | Rock2.bSep08         | 25537  | 3913  | 414  | 5  | 82  | rho-associated coiled-coil containing protein kinase 2 (Rock2) alternative variant bSep08, mRNA.           |
| Rock2         | Rock2.cSep08         | 25537  | 2458  | 537  | 2  | 6   | rho-associated coiled-coil containing protein kinase 2 (0.7 kD) (Rock2) alternative variant cSep08, mRNA.  |
| Rod1          | Rod1.bSep08          | 83515  | 3780  | 332  | 3  | 110 | ROD1 regulator of differentiation 1 (S. pombe) (Rod1) alternative variant bSep08, mRNA.                    |
| Rod1          | Rod1.cSep08          | 83515  | 44595 | 381  | 4  | 68  | ROD1 regulator of differentiation 1 (S. pombe) (Rod1) alternative variant cSep08, mRNA.                    |
| rodar         | rodar.aSep08         |        | 2482  | 619  |    | 41  | putative protein (4.6 kD) (rodar) mRNA.                                                                    |
| rofer         | rofer.aSep08         |        | 2006  | 292  |    | 40  | putative protein (rofer) mRNA.                                                                             |
| roflo         | roflo.aSep08         |        | 8661  | 371  |    | 53  | polycomb group ring finger 6 (roflo) mRNA.                                                                 |
| roflu         | roflu.aSep08         |        | 11944 | 714  |    | 62  | uncharacterized protein like (6.8 kD) (roflu) mRNA.                                                        |
| rogar         | rogar.aSep08         |        | 2803  | 1098 |    | 67  | putative protein (7.4 kD) (rogar) mRNA.                                                                    |
| Rogdi         | Rogdi.bSep08         | 287061 | 3229  | 730  | 7  | 123 | rogdi homolog (Rogdi) alternative variant bSep08, mRNA.                                                    |
| Rogdi         | Rogdi.cSep08         | 287061 | 1947  | 943  | 4  | 107 | rogdi homolog (11.3 kD) (Rogdi) alternative variant cSep08, mRNA.                                          |
| Rogdi         | Rogdi.dSep08         | 287061 | 1703  | 831  | 3  | 86  | rogdi homolog CRA a (Rogdi) alternative variant dSep08, mRNA.                                              |
| roja          | roja.aSep08          |        | 21369 | 558  |    | 185 | protein CRA g (roja) mRNA.                                                                                 |
| rojey         | rojey.aSep08         |        | 1976  | 462  |    | 65  | CRA a like (rojey) mRNA.                                                                                   |
| rokee         | rokee.aSep08         |        | 12667 | 494  |    | 41  | putative protein (4.8 kD) (rokee) mRNA.                                                                    |
| rokler        | rokler.aSep08        |        | 13181 | 487  |    | 81  | CRA b (9.3 kD) (rokler) mRNA.                                                                              |
| rolo          | rolo.aSep08          |        | 2724  | 849  |    | 62  | putative protein (7.3 kD) (rolo) mRNA.                                                                     |
| romeo         | romeo.aSep08         |        | 6247  | 303  |    |     |                                                                                                            |
| romer         | romer.aSep08         |        | 1713  | 780  |    | 259 | ring finger protein 213 (romer) mRNA.                                                                      |
| ronoy         | ronoy.aSep08         |        | 1623  | 402  |    | 133 | putative protein of metazoan origin (ronoy) mRNA.                                                          |
| Ropn1l        | Ropn1l.aSep08        | 685646 | 3323  | 353  |    | 79  | ropporin 1-like (Ropn1l) mRNA.                                                                             |
| ropor         | ropor.aSep08         |        | 3927  | 216  |    | 56  | putative protein (ropor) mRNA.                                                                             |
| Ror1          | Ror1.bSep08          | 362550 | 2229  | 503  | 2  | 162 | receptor tyrosine kinase-like orphan receptor 1 (Ror1) alternative variant bSep08, mRNA.                   |
| Ror1          | Ror1.cSep08          | 362550 | 1734  | 479  | 3  | 128 | receptor tyrosine kinase-like orphan receptor 1 (Ror1) alternative variant cSep08, mRNA.                   |
| Rora          | Rora.bSep08          | 300807 | 6874  | 409  | 1  | 136 | RAR-related orphan receptor alpha (Rora) alternative variant bSep08, mRNA.                                 |
| Rorb          | Rorb.aSep08          | 309288 | 17141 | 541  |    | 100 | RAR-related orphan receptor beta (Rorb) mRNA.                                                              |
| rorby         | rorby.aSep08         |        | 35717 | 556  |    | 30  | putative protein (rorby) mRNA.                                                                             |
| RorcandLingo4 | RorcandLingo4.aSep08 | 368158 | 17887 | 2951 | 10 | 413 | RAR-related orphan receptor C (46.3 kD) (RorcandLingo4) alternative variant aSep08, mRNA.                  |
| RorcandLingo4 | RorcandLingo4.aSep08 | 499668 | 17887 | 2951 | 10 | 413 | RAR-related orphan receptor C (46.3 kD) (RorcandLingo4) alternative variant aSep08, mRNA.                  |
| RorcandLingo4 | RorcandLingo4.cSep08 | 368158 | 726   | 476  | 2  | 158 | RAR-related orphan receptor C (RorcandLingo4) alternative variant cSep08, mRNA.                            |

|               |                      |        |       |      |   |     |                                                                                                   |
|---------------|----------------------|--------|-------|------|---|-----|---------------------------------------------------------------------------------------------------|
| RorcandLingo4 | RorcandLingo4.cSep08 | 499668 | 726   | 476  | 2 | 158 | RAR-related orphan receptor C (RorcandLingo4) alternative variant cSep08, mRNA.                   |
| rorchy        | rorchy.aSep08        |        | 792   | 397  |   | 94  | putative protein (rorchy) mRNA.                                                                   |
| rordar        | rordar.aSep08        |        | 8224  | 728  |   | 242 | transmembrane coiled-coil domains 7 (rordar) mRNA.                                                |
| rorfer        | rorfer.aSep08        |        | 1037  | 538  |   | 110 | enhancer trap locus 4 (rorfer) mRNA.                                                              |
| rorflo        | rorflo.aSep08        |        | 47692 | 706  |   | 29  | putative protein (3.5 kD) (rorflo) mRNA.                                                          |
| rorflu        | rorflu.aSep08        |        | 4092  | 648  |   | 108 | putative nuclear protein (11.6 kD) (rorflu) mRNA.                                                 |
| rorgar        | rorgar.aSep08        |        | 3345  | 568  |   | 98  | putative protein (rorgar) mRNA.                                                                   |
| rorja         | rorja.aSep08         |        | 5261  | 504  |   | 82  | putative protein (9.0 kD) (rorja) mRNA.                                                           |
| rorjey        | rorjey.aSep08        |        | 44308 | 313  |   | 34  | putative protein (rorjey) mRNA.                                                                   |
| rorkee        | rorkee.aSep08        |        | 6503  | 1067 | 4 | 113 | putative nuclear protein of mammalian origin (13.2 kD) (rorkee) alternative variant aSep08, mRNA. |
| rorkler       | rorkler.aSep08       |        | 742   | 571  |   | 84  | putative secreted or extracellular protein precursor (9.3 kD) (rorkler) mRNA.                     |
| rorlo         | rorlo.aSep08         |        | 7224  | 1757 | 2 | 175 | furry homolog (rorlo) alternative variant aSep08, mRNA.                                           |
| rorlo         | rorlo.bSep08         |        | 1198  | 943  | 1 | 161 | furry homolog (18.2 kD) (rorlo) alternative variant bSep08, mRNA.                                 |
| ormee         | ormee.aSep08         |        | 1801  | 420  |   | 84  | putative protein (ormee) mRNA.                                                                    |
| ormer         | ormer.bSep08         |        | 7450  | 504  | 4 | 23  | putative protein (ormer) alternative variant bSep08, mRNA.                                        |
| ormer         | ormer.dSep08         |        | 2354  | 645  | 3 |     |                                                                                                   |
| ormer         | ormer.eSep08         |        | 7585  | 591  | 3 |     |                                                                                                   |
| ormer         | ormer.fSep08         |        | 3269  | 486  | 3 |     |                                                                                                   |
| rornoy        | rornoy.bSep08        |        | 4812  | 250  | 2 | 50  | putative protein (rornoy) alternative variant bSep08, mRNA.                                       |
| rorpor        | rorpor.aSep08        |        | 43582 | 410  |   | 38  | putative protein (4.1 kD) (rorpor) mRNA.                                                          |
| rorsa         | rorsa.aSep08         |        | 5690  | 511  |   | 170 | E1A binding protein p300 like (rorsa) mRNA.                                                       |
| rorshee       | rorshee.aSep08       |        | 5067  | 932  |   | 99  | putative secreted or extracellular protein precursor (11.3 kD) (rorshee) mRNA.                    |
| rortu         | rortu.aSep08         |        | 1689  | 1163 |   | 81  | putative mitochondrial protein (9.3 kD) (rortu) mRNA.                                             |
| rorvar        | rorvar.aSep08        |        | 1033  | 831  |   | 75  | putative protein (rorvar) mRNA.                                                                   |
| rorwey        | rorwey.aSep08        |        | 1418  | 446  |   | 33  | putative protein (3.8 kD) (rorwey) mRNA.                                                          |
| rosa          | rosa.aSep08          |        | 1995  | 583  |   | 71  | putative protein of vertebrate origin (7.3 kD) (rosa) mRNA.                                       |
| roshee        | roshee.aSep08        |        | 26810 | 802  | 1 | 36  | putative protein (4.1 kD) (roshee) alternative variant aSep08, mRNA.                              |
| roshee        | roshee.bSep08        |        | 27282 | 410  | 1 | 47  | putative protein (roshee) alternative variant bSep08, mRNA.                                       |
| Rotamase.0    | Rotamase.0.aSep08    |        | 6061  | 515  |   | 80  | protein NIMA-interacting 4 (8.9 kD) (Rotamase.0) alternative variant aSep08, mRNA.                |
| Rotamase.0    | Rotamase.0.bSep08    |        | 794   | 482  |   | 80  | protein NIMA-interacting 4 (8.9 kD) (Rotamase.0) alternative variant bSep08, mRNA.                |
| rotu          | rotu.aSep08          |        | 9109  | 1034 |   | 276 | putative protein (rotu) alternative variant aSep08, mRNA.                                         |
| rovar         | rovar.aSep08         | 689675 | 13774 | 3310 |   | 368 | selenoprotein N 1 (rovar) mRNA.                                                                   |
| rowey         | rowey.aSep08         |        | 394   | 290  |   | 62  | putative protein (7.0 kD) (rowey) mRNA.                                                           |

|         |                |        |       |      |    |     |                                                                                        |
|---------|----------------|--------|-------|------|----|-----|----------------------------------------------------------------------------------------|
| royby   | royby.aSep08   |        | 5681  | 708  |    | 236 | transcriptional regulator atrx (royby) mRNA.                                           |
| roychy  | roychy.aSep08  |        | 7016  | 399  |    | 41  | putative protein (roychy) mRNA.                                                        |
| roydar  | roydar.aSep08  |        | 1090  | 536  |    | 64  | putative protein (6.8 kD) (roydar) mRNA.                                               |
| royfer  | royfer.aSep08  |        | 2519  | 1800 | 3  | 173 | enhancer trap locus 4 (royfer) alternative variant aSep08, mRNA.                       |
| royflo  | royflo.aSep08  |        | 4395  | 755  |    | 68  | putative protein (royflo) mRNA.                                                        |
| royflu  | royflu.aSep08  |        | 871   | 297  |    | 98  | putative protein (royflu) mRNA.                                                        |
| roygar  | roygar.aSep08  |        | 48582 | 632  |    | 49  | putative protein (5.7 kD) (roygar) mRNA.                                               |
| royja   | royja.aSep08   |        | 29144 | 378  |    | 125 | putative protein of metazoan origin (royja) mRNA.                                      |
| royjey  | royjey.aSep08  |        | 47552 | 533  |    | 72  | putative secreted or extracellular protein precursor (8.2 kD) (royjey) mRNA.           |
| roykee  | roykee.aSep08  |        | 58610 | 807  |    | 88  | putative protein (10.1 kD) (roykee) mRNA.                                              |
| roykler | roykler.aSep08 |        | 2233  | 1816 |    | 106 | putative protein (11.1 kD) (roykler) mRNA.                                             |
| roylo   | roylo.aSep08   |        | 10169 | 703  |    | 234 | furry homolog (roylo) mRNA.                                                            |
| roymee  | roymee.aSep08  |        | 1467  | 298  |    | 28  | putative protein (roymee) mRNA.                                                        |
| roymer  | roymer.aSep08  |        | 2019  | 1175 |    | 110 | putative protein (roymer) mRNA.                                                        |
| roynoy  | roynoy.aSep08  |        | 792   | 410  | 2  | 76  | obscurin-like 1 (roynoy) alternative variant aSep08, mRNA.                             |
| roypor  | roypor.aSep08  |        | 3896  | 2382 |    | 73  | adam metallopeptidase domain 10 (roypor) alternative variant aSep08, mRNA.             |
| roysa   | roysa.aSep08   |        | 2236  | 747  | 3  | 118 | CRA a (roysa) alternative variant aSep08, mRNA.                                        |
| roysa   | roysa.bSep08   |        | 7655  | 578  | 3  | 117 | CRA a (roysa) alternative variant bSep08, mRNA.                                        |
| roysa   | roysa.dSep08   |        | 7535  | 407  | 3  | 73  | CRA a (roysa) alternative variant dSep08, mRNA.                                        |
| royshee | royshee.aSep08 |        | 2164  | 710  |    | 17  | putative protein (royshee) mRNA.                                                       |
| roytu   | roytu.aSep08   |        | 548   | 447  | 2  | 128 | uncharacterized protein c2orf53 homolog like (roytu) alternative variant aSep08, mRNA. |
| royvar  | royvar.aSep08  |        | 408   | 294  |    | 91  | putative protein (royvar) mRNA.                                                        |
| roywey  | roywey.aSep08  |        | 744   | 656  |    | 99  | putative protein (roywey) mRNA.                                                        |
| Rp2h    | Rp2h.aSep08    | 367714 | 584   | 240  |    | 65  | retinitis pigmentosa 2 homolog (human) (Rp2h) mRNA.                                    |
| rp9     | rp9.aSep08     | 363032 | 11989 | 861  | 3  | 170 | retinitis pigmentosa 9 (human) (rp9) alternative variant aSep08, mRNA.                 |
| rp9     | rp9.cSep08     | 363032 | 5201  | 433  | 1  | 103 | retinitis pigmentosa 9 (human) (rp9) alternative variant cSep08, mRNA.                 |
| Rpa1    | Rpa1.bSep08    | 287524 | 23117 | 2514 | 13 | 523 | replication protein A1 (Rpa1) alternative variant bSep08, mRNA.                        |
| Rpa1    | Rpa1.cSep08    | 287524 | 495   | 351  | 2  | 117 | replication protein A1 (Rpa1) alternative variant cSep08, mRNA.                        |
| Rpa1    | Rpa1.dSep08    | 287524 | 8086  | 401  | 4  | 81  | replication protein A1 (Rpa1) alternative variant dSep08, mRNA.                        |
| Rpa2    | Rpa2.bSep08    | 59102  | 7577  | 744  | 6  | 178 | replication protein A2 (19.3 kD) (Rpa2) alternative variant bSep08, mRNA.              |
| Rpa2    | Rpa2.cSep08    | 59102  | 8476  | 742  | 6  | 111 | replication protein A2 (Rpa2) alternative variant cSep08, mRNA.                        |
| Rpa2    | Rpa2.dSep08    | 59102  | 3740  | 858  | 3  | 91  | replication protein A2 (9.9 kD) (Rpa2) alternative variant dSep08, complete mRNA.      |

|          |                 |        |        |      |    |     |                                                                                                         |
|----------|-----------------|--------|--------|------|----|-----|---------------------------------------------------------------------------------------------------------|
| Rpa2     | Rpa2.eSep08     | 59102  | 1191   | 868  | 2  | 82  | replication protein A2 (Rpa2) alternative variant eSep08, mRNA.                                         |
| Rpa3     | Rpa3.cSep08     | 296883 | 1807   | 733  | 2  | 62  | replication protein A3 (6.9 kD) (Rpa3) alternative variant cSep08, mRNA.                                |
| Rpa3     | Rpa3.dSep08     | 296883 | 811    | 304  | 2  | 26  | replication protein A3 (Rpa3) alternative variant dSep08, mRNA.                                         |
| Rpain    | Rpain.aSep08    | 287463 | 7467   | 1029 | 6  | 314 | RPA interacting protein (Rpain) alternative variant aSep08, mRNA.                                       |
| Rpain    | Rpain.bSep08    | 287463 | 1542   | 450  | 1  | 91  | RPA interacting protein (10.3 kD) (Rpain) alternative variant bSep08, mRNA.                             |
| Rpap1    | Rpap1.bSep08    | 311338 | 1049   | 818  | 3  | 159 | RNA polymerase II associated protein 1 (Rpap1) alternative variant bSep08, mRNA.                        |
| Rpap2    | Rpap2.bSep08    | 305120 | 120444 | 2056 | 11 | 530 | RNA polymerase II associated protein 2 (59.2 kD) (Rpap2) alternative variant bSep08, mRNA.              |
| Rpap2    | Rpap2.cSep08    | 305120 | 29116  | 527  | 5  | 175 | RNA polymerase II associated protein 2 (Rpap2) alternative variant cSep08, mRNA.                        |
| Rpap2    | Rpap2.dSep08    | 305120 | 15688  | 908  | 3  | 122 | RNA polymerase II associated protein 2 (Rpap2) alternative variant dSep08, mRNA.                        |
| Rpap3    | Rpap3.bSep08    | 300189 | 24346  | 1502 | 12 | 500 | RNA polymerase II associated protein 3 (Rpap3) alternative variant bSep08, mRNA.                        |
| Rpap3    | Rpap3.cSep08    | 300189 | 12211  | 1034 | 6  | 264 | RNA polymerase II associated protein 3 (Rpap3) alternative variant cSep08, mRNA.                        |
| Rpap3    | Rpap3.dSep08    | 300189 | 10388  | 1232 | 6  | 242 | RNA polymerase II associated protein 3 (Rpap3) alternative variant dSep08, mRNA.                        |
| Rpap3    | Rpap3.eSep08    | 300189 | 5029   | 523  | 4  | 174 | RNA polymerase II associated protein 3 (Rpap3) alternative variant eSep08, mRNA.                        |
| Rpap3    | Rpap3.iSep08    | 300189 | 2496   | 818  | 2  | 96  | RNA polymerase II associated protein 3 (Rpap3) alternative variant iSep08, mRNA.                        |
| Rpe      | Rpe.aSep08      | 501157 | 18805  | 828  | 6  | 228 | ribulose-5-phosphate-3-epimerase (Rpe) alternative variant aSep08, mRNA.                                |
| Rpe      | Rpe.bSep08      | 501157 | 19153  | 1187 | 6  | 228 | ribulose-5-phosphate-3-epimerase (24.9 kD) (Rpe) alternative variant bSep08, mRNA.                      |
| Rpe      | Rpe.dSep08      | 501157 | 16015  | 399  | 4  | 131 | ribulose-5-phosphate-3-epimerase (Rpe) alternative variant dSep08, mRNA.                                |
| Rpe65    | Rpe65.bSep08    | 89826  | 2243   | 408  | 3  | 136 | retinal pigment epithelium 65 (Rpe65) alternative variant bSep08, mRNA.                                 |
| Rpe65    | Rpe65.cSep08    | 89826  | 2649   | 903  | 4  | 118 | retinal pigment epithelium 65 (Rpe65) alternative variant cSep08, mRNA.                                 |
| Rpe65    | Rpe65.dSep08    | 89826  | 443    | 310  | 1  | 54  | retinal pigment epithelium 65 (Rpe65) alternative variant dSep08, mRNA.                                 |
| Rpresp   | Rpresp.aSep08   | 297757 | 31191  | 1692 | 5  | 285 | RPE-spondin (Rpresp) alternative variant aSep08, mRNA.                                                  |
| Rpresp   | Rpresp.bSep08   | 297757 | 30420  | 857  | 6  | 239 | RPE-spondin (Rpresp) alternative variant bSep08, mRNA.                                                  |
| Rpgrip1  | Rpgrip1.bSep08  | 305850 | 11735  | 619  | 4  | 205 | retinitis pigmentosa GTPase regulator interacting protein 1 (Rpgrip1) alternative variant bSep08, mRNA. |
| Rpgrip1  | Rpgrip1.cSep08  | 305850 | 14017  | 322  | 4  | 107 | retinitis pigmentosa GTPase regulator interacting protein 1 (Rpgrip1) alternative variant cSep08, mRNA. |
| Rpgrip1l | Rpgrip1l.bSep08 | 307724 | 14982  | 755  | 1  | 181 | rprip1-like (Rpgrip1l) alternative variant bSep08, mRNA.                                                |

|         |                |        |       |      |   |     |                                                                                                                 |
|---------|----------------|--------|-------|------|---|-----|-----------------------------------------------------------------------------------------------------------------|
| Rph3a   | Rph3a.bSep08   | 171039 | 9290  | 561  | 6 | 187 | rabphilin 3A (Rph3a) alternative variant bSep08, mRNA.                                                          |
| Rpia    | Rpia.bSep08    | 362383 | 24768 | 766  | 6 | 244 | ribose 5-phosphate isomerase A (25.9 kD) (Rpia) alternative variant bSep08, mRNA.                               |
| Rpia    | Rpia.cSep08    | 362383 | 24632 | 747  | 8 | 216 | ribose 5-phosphate isomerase A (23.7 kD) (Rpia) alternative variant cSep08, mRNA.                               |
| Rpia    | Rpia.dSep08    | 362383 | 22971 | 741  | 9 | 192 | ribose 5-phosphate isomerase A (Rpia) alternative variant dSep08, mRNA.                                         |
| Rpia    | Rpia.eSep08    | 362383 | 3152  | 285  | 4 | 43  | ribose 5-phosphate isomerase A (Rpia) alternative variant eSep08, mRNA.                                         |
| Rpl3    | Rpl3.bSep08    | 300079 | 3707  | 957  | 6 | 180 | ribosomal protein L3 (19.8 kD) (Rpl3) alternative variant bSep08, mRNA.                                         |
| Rpl3    | Rpl3.cSep08    | 300079 | 2513  | 1094 | 3 | 122 | ribosomal protein L3 (13.9 kD) (Rpl3) alternative variant cSep08, mRNA.                                         |
| Rpl3    | Rpl3.dSep08    | 300079 | 10483 | 294  | 3 | 97  | putative protein of ancient origin (Rpl3) alternative variant dSep08, mRNA.                                     |
| Rpl3l   | Rpl3l.aSep08   | 287122 | 10551 | 1343 |   | 407 | ribosomal protein L3 (46.4 kD) (Rpl3l) complete mRNA.                                                           |
| Rpl4    | Rpl4.bSep08    | 64302  | 2097  | 969  | 4 | 137 | ribosomal protein L4/L1e (Rpl4) alternative variant bSep08, mRNA.                                               |
| Rpl4    | Rpl4.cSep08    | 64302  | 3615  | 1019 | 5 | 103 | ribosomal protein L4/L1e (10.9 kD) (Rpl4) alternative variant cSep08, complete mRNA.                            |
| Rpl7    | Rpl7.aSep08    | 297755 | 3142  | 1621 | 5 | 290 | ribosomal L30, N-terminal and ribosomal protein L30 (33.7 kD) (Rpl7) alternative variant aSep08, mRNA.          |
| Rpl7    | Rpl7.cSep08    | 297755 | 2450  | 1278 | 4 | 212 | ribosomal L30, N-terminal and ribosomal protein L30 (24.6 kD) (Rpl7) alternative variant cSep08, complete mRNA. |
| Rpl7a.1 | Rpl7a.1.bSep08 | 296596 | 2628  | 1355 | 6 | 256 | ribosomal protein L7Ae/L30e/S12e/Gadd45 (28.7 kD) (Rpl7a.1) alternative variant bSep08, mRNA.                   |
| Rpl7a.1 | Rpl7a.1.cSep08 | 296596 | 2141  | 896  | 5 | 186 | putative protein of eukaryotic origin (Rpl7a.1) alternative variant cSep08, mRNA.                               |
| Rpl7a.1 | Rpl7a.1.dSep08 | 296596 | 2468  | 1327 | 6 | 160 | ribosomal protein L7Ae/L30e/S12e/Gadd45 (17.7 kD) (Rpl7a.1) alternative variant dSep08, complete mRNA.          |
| Rpl7a.1 | Rpl7a.1.eSep08 | 296596 | 1661  | 463  | 4 | 154 | ribosomal protein L7Ae/L30e/S12e/Gadd45 (Rpl7a.1) alternative variant eSep08, mRNA.                             |
| Rpl7a.1 | Rpl7a.1.fSep08 | 296596 | 959   | 520  | 3 | 105 | putative protein of eukaryotic origin (Rpl7a.1) alternative variant fSep08, mRNA.                               |
| Rpl711  | Rpl711.aSep08  | 317275 | 7738  | 2219 | 4 | 257 | ribosomal protein L30 (Rpl711) alternative variant aSep08, mRNA.                                                |
| Rpl711  | Rpl711.bSep08  | 317275 | 5587  | 771  | 3 | 221 | ribosomal protein L30 (26.0 kD) (Rpl711) alternative variant bSep08, mRNA.                                      |
| Rpl711  | Rpl711.cSep08  | 317275 | 1065  | 929  | 1 | 78  | putative protein of eukaryotic origin (Rpl711) alternative variant cSep08, mRNA.                                |
| Rpl711  | Rpl711.dSep08  | 317275 | 978   | 273  |   | 37  | putative protein of vertebrate origin (Rpl711) alternative variant dSep08, mRNA.                                |
| Rpl8    | Rpl8.cSep08    | 26962  | 898   | 771  | 2 | 86  | putative protein (Rpl8) alternative variant cSep08, mRNA.                                                       |
| Rpl9    | Rpl9.aSep08    | 29257  | 2797  | 701  | 7 | 207 | ribosomal protein L6 (Rpl9) alternative variant aSep08, mRNA.                                                   |
| Rpl9    | Rpl9.cSep08    | 29257  | 1169  | 480  | 3 | 90  | ribosomal protein L6 (Rpl9) alternative variant cSep08, mRNA.                                                   |

|        |               |        |      |      |   |     |                                                                                           |
|--------|---------------|--------|------|------|---|-----|-------------------------------------------------------------------------------------------|
| Rpl9   | Rpl9.dSep08   | 29257  | 808  | 494  | 2 | 80  | ribosomal protein L6 (9.1 kD) (Rpl9) alternative variant dSep08, mRNA.                    |
| Rpl10  | Rpl10.bSep08  | 81764  | 2073 | 1189 | 4 | 110 | ribosomal protein L16 (12.7 kD) (Rpl10) alternative variant bSep08, complete mRNA.        |
| Rpl10  | Rpl10.cSep08  | 81764  | 1567 | 1287 | 3 | 73  | putative protein (8.6 kD) (Rpl10) alternative variant cSep08, mRNA.                       |
| Rpl10a | Rpl10a.bSep08 | 81729  | 2520 | 1112 | 5 | 133 | ribosomal protein L1 (15.1 kD) (Rpl10a) alternative variant bSep08, mRNA.                 |
| Rpl10a | Rpl10a.cSep08 | 81729  | 583  | 401  | 2 | 74  | ribosomal protein L1 (8.5 kD) (Rpl10a) alternative variant cSep08, mRNA.                  |
| Rpl10a | Rpl10a.dSep08 | 81729  | 1637 | 1342 | 3 | 58  | putative protein of eukaryotic origin (6.8 kD) (Rpl10a) alternative variant dSep08, mRNA. |
| Rpl11  | Rpl11.aSep08  | 362631 | 3703 | 759  | 6 | 185 | ribosomal protein L5 (Rpl11) alternative variant aSep08, mRNA.                            |
| Rpl13  | Rpl13.aSep08  | 81765  | 1770 | 806  | 5 | 233 | ribosomal protein L13e (26.2 kD) (Rpl13) alternative variant aSep08, mRNA.                |
| Rpl13  | Rpl13.cSep08  | 81765  | 1479 | 1388 | 2 | 125 | putative protein (Rpl13) alternative variant cSep08, mRNA.                                |
| Rpl13  | Rpl13.dSep08  | 81765  | 1680 | 910  | 4 | 72  | putative protein (Rpl13) alternative variant dSep08, mRNA.                                |
| Rpl13a | Rpl13a.bSep08 | 317646 | 3061 | 1107 | 7 | 183 | ribosomal protein L13 (Rpl13a) alternative variant bSep08, mRNA.                          |
| Rpl13a | Rpl13a.cSep08 | 317646 | 2687 | 960  | 6 | 165 | ribosomal protein L13 (18.9 kD) (Rpl13a) alternative variant cSep08, complete mRNA.       |
| Rpl13a | Rpl13a.dSep08 | 317646 | 2975 | 952  | 8 | 148 | ribosomal protein L13 (16.5 kD) (Rpl13a) alternative variant dSep08, complete mRNA.       |
| Rpl13a | Rpl13a.eSep08 | 317646 | 1576 | 793  | 6 | 142 | ribosomal protein L13 (16.6 kD) (Rpl13a) alternative variant eSep08, mRNA.                |
| Rpl13a | Rpl13a.fSep08 | 317646 | 1628 | 699  | 6 | 142 | ribosomal protein L13 (16.6 kD) (Rpl13a) alternative variant fSep08, mRNA.                |
| Rpl13a | Rpl13a.gSep08 | 317646 | 2697 | 821  | 8 | 142 | ribosomal protein L13 (16.6 kD) (Rpl13a) alternative variant gSep08, complete mRNA.       |
| Rpl13a | Rpl13a.hSep08 | 317646 | 798  | 595  | 2 | 90  | putative protein (Rpl13a) alternative variant hSep08, mRNA.                               |
| Rpl14  | Rpl14.aSep08  | 65043  | 3771 | 1614 | 5 | 219 | ribosomal protein L14 (23.8 kD) (Rpl14) alternative variant aSep08, complete mRNA.        |
| Rpl14  | Rpl14.bSep08  | 65043  | 1315 | 750  | 1 | 65  | putative protein of eukaryotic origin (Rpl14) alternative variant bSep08, mRNA.           |
| Rpl14  | Rpl14.cSep08  | 65043  | 756  | 677  | 2 | 58  | ribosomal protein L14 (Rpl14) alternative variant cSep08, mRNA.                           |
| Rpl14  | Rpl14.dSep08  | 65043  | 2387 | 869  | 3 | 56  | ribosomal protein L14 (6.8 kD) (Rpl14) alternative variant dSep08, mRNA.                  |
| Rpl15  | Rpl15.aSep08  | 245981 | 1985 | 748  | 4 | 204 | ribosomal protein L15e (24.1 kD) (Rpl15) alternative variant aSep08, mRNA.                |
| Rpl15  | Rpl15.dSep08  | 245981 | 760  | 519  | 2 | 89  | ribosomal protein L15e (Rpl15) alternative variant dSep08, mRNA.                          |
| Rpl17  | Rpl17.bSep08  | 291434 | 2273 | 576  | 6 | 171 | ribosomal protein L22/L17 (20.0 kD) (Rpl17) alternative variant bSep08, complete mRNA.    |

|         |                |        |      |      |   |     |                                                                                                  |
|---------|----------------|--------|------|------|---|-----|--------------------------------------------------------------------------------------------------|
| Rpl17   | Rpl17.cSep08   | 291434 | 3101 | 556  | 6 | 146 | protein ribosomal L17 (17.1 kD) (Rpl17) alternative variant cSep08, complete mRNA.               |
| Rpl17   | Rpl17.dSep08   | 291434 | 1432 | 820  | 4 | 125 | ribosomal protein L22/L17 (Rpl17) alternative variant dSep08, mRNA.                              |
| Rpl17   | Rpl17.eSep08   | 291434 | 2160 | 877  | 4 | 116 | protein ribosomal L17 (13.6 kD) (Rpl17) alternative variant eSep08, mRNA.                        |
| Rpl17   | Rpl17.fSep08   | 291434 | 1459 | 1354 | 2 | 32  | putative protein of eukaryotic origin (3.8 kD) (Rpl17) alternative variant fSep08, mRNA.         |
| Rpl18   | Rpl18.aSep08   | 81766  | 2156 | 716  | 6 | 193 | ribosomal protein L18e (22.2 kD) (Rpl18) alternative variant aSep08, mRNA.                       |
| Rpl18   | Rpl18.dSep08   | 81766  | 1158 | 719  | 3 | 93  | ribosomal protein L18e (Rpl18) alternative variant dSep08, mRNA.                                 |
| Rpl18   | Rpl18.eSep08   | 81766  | 2149 | 813  | 5 | 75  | ribosomal protein L18e (Rpl18) alternative variant eSep08, mRNA.                                 |
| Rpl18   | Rpl18.fSep08   | 81766  | 984  | 372  | 3 | 71  | putative nuclear protein of eukaryotic origin (8.1 kD) (Rpl18) alternative variant fSep08, mRNA. |
| Rpl18   | Rpl18.gSep08   | 81766  | 2620 | 1380 | 5 | 113 | ribosomal protein L18e (12.6 kD) (Rpl18) alternative variant gSep08, complete mRNA.              |
| Rpl18a  | Rpl18a.bSep08  | 290641 | 865  | 682  | 1 | 102 | ribosomal L18ae protein (Rpl18a) alternative variant bSep08, mRNA.                               |
| Rpl19   | Rpl19.bSep08   | 81767  | 1515 | 854  | 3 | 108 | ribosomal protein L19e (13.4 kD) (Rpl19) alternative variant bSep08, mRNA.                       |
| Rpl19   | Rpl19.dSep08   | 81767  | 1590 | 251  | 3 | 83  | ribosomal protein L19e (Rpl19) alternative variant dSep08, mRNA.                                 |
| Rpl21   | Rpl21.aSep08   | 79449  | 3051 | 778  | 6 | 160 | ribosomal protein L21e (18.6 kD) (Rpl21) alternative variant aSep08, mRNA.                       |
| Rpl21   | Rpl21.bSep08   | 79449  | 3707 | 1327 | 6 | 160 | ribosomal protein L21e (18.6 kD) (Rpl21) alternative variant bSep08, complete mRNA.              |
| Rpl21   | Rpl21.dSep08   | 79449  | 1438 | 683  | 3 | 60  | ribosomal protein L21e (Rpl21) alternative variant dSep08, mRNA.                                 |
| Rpl21   | Rpl21.eSep08   | 79449  | 1211 | 601  | 2 | 42  | putative protein (Rpl21) alternative variant eSep08, mRNA.                                       |
| Rpl22   | Rpl22.aSep08   | 81768  | 8160 | 1889 | 4 | 137 | ribosomal L22e protein (Rpl22) alternative variant aSep08, mRNA.                                 |
| Rpl22   | Rpl22.bSep08   | 81768  | 6841 | 729  | 5 | 122 | ribosomal L22e protein (14.4 kD) (Rpl22) alternative variant bSep08, mRNA.                       |
| Rpl22   | Rpl22.cSep08   | 81768  | 6691 | 1952 | 3 | 95  | ribosomal L22e protein (11.2 kD) (Rpl22) alternative variant cSep08, complete mRNA.              |
| Rpl22l1 | Rpl22l1.bSep08 | 361923 | 869  | 517  | 3 | 82  | ribosomal L22e protein (9.7 kD) (Rpl22l1) alternative variant bSep08, complete mRNA.             |
| Rpl22l1 | Rpl22l1.cSep08 | 361923 | 1814 | 858  | 2 | 43  | putative protein of vertebrate origin (Rpl22l1) alternative variant cSep08, mRNA.                |
| Rpl24   | Rpl24.bSep08   | 64307  | 5298 | 597  | 5 | 131 | ribosomal protein L24E (14.8 kD) (Rpl24) alternative variant bSep08, mRNA.                       |
| Rpl24   | Rpl24.cSep08   | 64307  | 5191 | 1635 | 4 | 79  | ribosomal protein L24E (Rpl24) alternative variant cSep08, mRNA.                                 |
| Rpl24   | Rpl24.dSep08   | 64307  | 3271 | 615  | 2 | 57  | CRA c like (6.2 kD) (Rpl24) alternative variant dSep08, mRNA.                                    |

|          |                 |        |       |      |   |     |                                                                                                        |
|----------|-----------------|--------|-------|------|---|-----|--------------------------------------------------------------------------------------------------------|
| Rpl26    | Rpl26.bSep08    | 287417 | 3111  | 527  | 4 | 145 | KOW (17.3 kD) (Rpl26) alternative variant bSep08, complete mRNA.                                       |
| Rpl26    | Rpl26.cSep08    | 287417 | 5903  | 668  | 4 | 110 | KOW (Rpl26) alternative variant cSep08, mRNA.                                                          |
| Rpl27    | Rpl27.bSep08    | 64306  | 3752  | 515  | 5 | 136 | KOW and ribosomal protein L27e (15.8 kD) (Rpl27) alternative variant bSep08, mRNA.                     |
| Rpl27    | Rpl27.cSep08    | 64306  | 3728  | 551  | 5 | 109 | KOW (Rpl27) alternative variant cSep08, mRNA.                                                          |
| Rpl27a   | Rpl27a.bSep08   | 293418 | 1257  | 640  | 1 | 47  | putative protein of fungal and metazoan origin (5.4 kD) (Rpl27a) alternative variant bSep08, mRNA.     |
| Rpl28    | Rpl28.aSep08    | 64638  | 1495  | 788  | 4 | 245 | ribosomal L28e protein (Rpl28) alternative variant aSep08, mRNA.                                       |
| Rpl28    | Rpl28.cSep08    | 64638  | 1288  | 663  | 3 | 74  | putative mitochondrial protein of vertebrate origin (8.6 kD) (Rpl28) alternative variant cSep08, mRNA. |
| Rpl29    | Rpl29.bSep08    | 29283  | 1944  | 774  | 4 | 156 | ribosomal L29e protein (17.3 kD) (Rpl29) alternative variant bSep08, mRNA.                             |
| Rpl29    | Rpl29.cSep08    | 29283  | 2009  | 598  | 4 | 156 | ribosomal L29e protein (17.3 kD) (Rpl29) alternative variant cSep08, complete mRNA.                    |
| Rpl29    | Rpl29.dSep08    | 29283  | 866   | 574  | 2 | 37  | ribosomal L29e protein (Rpl29) alternative variant dSep08, mRNA.                                       |
| Rpl30    | Rpl30.aSep08    | 64640  | 3063  | 740  | 3 | 115 | ribosomal protein L7Ae/L30e/S12e/Gadd45 (12.8 kD) (Rpl30) alternative variant aSep08, mRNA.            |
| Rpl30    | Rpl30.cSep08    | 64640  | 2821  | 1302 | 2 | 114 | ribosomal protein L7Ae/L30e/S12e/Gadd45 (12.8 kD) (Rpl30) alternative variant cSep08, mRNA.            |
| Rpl31    | Rpl31.aSep08    | 64298  | 14522 | 825  | 4 | 233 | ribosomal protein L31e (26.5 kD) (Rpl31) alternative variant aSep08, complete mRNA.                    |
| Rpl31    | Rpl31.bSep08    | 64298  | 3461  | 591  | 4 | 125 | ribosomal protein L31e (14.5 kD) (Rpl31) alternative variant bSep08, complete mRNA.                    |
| Rpl34    | Rpl34.aSep08    | 362041 | 3710  | 603  | 1 | 117 | ribosomal protein L34e (13.3 kD) (Rpl34) alternative variant aSep08, mRNA.                             |
| Rpl34    | Rpl34.bSep08    | 362041 | 3749  | 446  | 1 | 117 | ribosomal protein L34e (13.3 kD) (Rpl34) alternative variant bSep08, complete mRNA.                    |
| Rpl35    | Rpl35.bSep08    | 296709 | 2941  | 2224 | 3 | 126 | ribosomal protein L29 (14.0 kD) (Rpl35) alternative variant bSep08, complete mRNA.                     |
| Rpl35    | Rpl35.cSep08    | 296709 | 2914  | 643  | 3 | 124 | ribosomal protein L29 (14.7 kD) (Rpl35) alternative variant cSep08, mRNA.                              |
| Rpl35a.1 | Rpl35a.1.aSep08 | 57809  | 3871  | 458  | 5 | 140 | ribosomal protein L35Ae (Rpl35a.1) alternative variant aSep08, mRNA.                                   |
| Rpl35a.1 | Rpl35a.1.bSep08 | 57809  | 3239  | 1146 | 4 | 135 | ribosomal protein L35Ae (15.2 kD) (Rpl35a.1) alternative variant bSep08, mRNA.                         |
| Rpl35a.1 | Rpl35a.1.dSep08 | 57809  | 3895  | 436  | 5 | 110 | ribosomal protein L35Ae (12.6 kD) (Rpl35a.1) alternative variant dSep08, complete mRNA.                |
| Rpl36.1  | Rpl36.1.bSep08  | 58927  | 5392  | 467  | 4 | 105 | ribosomal protein L36E (12.3 kD) (Rpl36.1) alternative variant bSep08, mRNA.                           |
| Rpl36.1  | Rpl36.1.cSep08  | 58927  | 995   | 737  | 3 | 105 | ribosomal protein L36E (12.3 kD) (Rpl36.1) alternative variant cSep08, mRNA.                           |
| Rpl36a   | Rpl36a.cSep08   | 292964 | 944   | 630  | 2 | 50  | CRA a like (5.5 kD) (Rpl36a) alternative variant cSep08, mRNA.                                         |



|                  |                         |        |       |      |    |     |                                                                                                           |
|------------------|-------------------------|--------|-------|------|----|-----|-----------------------------------------------------------------------------------------------------------|
| Rpl36al          | Rpl36al.aSep08          | 81769  | 1158  | 499  | 1  | 106 | ribosomal protein L44E (12.4 kD) (Rpl36al) alternative variant aSep08, mRNA.                              |
| Rpl37            | Rpl37.bSep08            | 81770  | 1939  | 1181 | 3  | 98  | ribosomal protein L37e (11.3 kD) (Rpl37) alternative variant bSep08, complete mRNA.                       |
| Rpl37a_predicted | Rpl37a_predicted.bSep08 | 363248 | 1336  | 942  | 2  | 82  | ribosomal L37ae protein (9.2 kD) (Rpl37a_predicted) alternative variant bSep08, mRNA.                     |
| Rpl37a_predicted | Rpl37a_predicted.cSep08 | 363248 | 683   | 340  | 2  | 75  | ribosomal L37ae protein (Rpl37a_predicted) alternative variant cSep08, mRNA.                              |
| Rpl39            | Rpl39.bSep08            | 25347  | 2319  | 402  | 3  | 26  | putative protein (Rpl39) alternative variant bSep08, mRNA.                                                |
| Rpl41.1          | Rpl41.1.aSep08          | 124440 | 1061  | 426  | 3  | 25  | putative protein (3.5 kD) (Rpl41.1) alternative variant aSep08, complete mRNA.                            |
| Rpl41.1          | Rpl41.1.bSep08          | 124440 | 981   | 460  | 2  | 25  | putative protein (3.5 kD) (Rpl41.1) alternative variant bSep08, complete mRNA.                            |
| Rpl41.1          | Rpl41.1.cSep08          | 124440 | 1048  | 716  | 2  | 40  | putative protein, with a coiled coil domain (4.6 kD) (Rpl41.1) alternative variant cSep08, complete mRNA. |
| Rplp1.1          | Rplp1.1.aSep08          | 140661 | 1344  | 506  | 3  | 114 | ribosomal protein 60S (11.5 kD) (Rplp1.1) alternative variant aSep08, complete mRNA.                      |
| Rplp2            | Rplp2.aSep08            | 140662 | 2501  | 657  | 3  | 115 | ribosomal protein 60S (11.7 kD) (Rplp2) alternative variant aSep08, mRNA.                                 |
| Rplp2            | Rplp2.bSep08            | 140662 | 2271  | 424  | 3  | 114 | ribosomal protein 60S (11.6 kD) (Rplp2) alternative variant bSep08, complete mRNA.                        |
| Rplp2            | Rplp2.cSep08            | 140662 | 1625  | 746  | 1  | 70  | putative protein of eukaryotic origin (Rplp2) alternative variant cSep08, mRNA.                           |
| Rpn1             | Rpn1.aSep08             | 25596  | 11103 | 1589 | 7  | 396 | ribophorin I (Rpn1) alternative variant aSep08, mRNA.                                                     |
| Rpn1             | Rpn1.eSep08             | 25596  | 14048 | 298  | 3  | 32  | ribophorin I (Rpn1) alternative variant eSep08, mRNA.                                                     |
| Rpn2             | Rpn2.bSep08             | 64701  | 32155 | 1439 | 10 | 479 | ribophorin II (Rpn2) alternative variant bSep08, mRNA.                                                    |
| Rpn2             | Rpn2.cSep08             | 64701  | 20614 | 945  | 9  | 314 | ribophorin II (Rpn2) alternative variant cSep08, mRNA.                                                    |
| Rpn2             | Rpn2.dSep08             | 64701  | 16986 | 734  | 7  | 240 | ribophorin II (Rpn2) alternative variant dSep08, mRNA.                                                    |
| Rpn2             | Rpn2.eSep08             | 64701  | 11315 | 1264 | 8  | 201 | ribophorin II (22.8 kD) (Rpn2) alternative variant eSep08, mRNA.                                          |
| Rpo1-4           | Rpo1-4.bSep08           | 83581  | 6285  | 703  | 1  | 225 | RNA polymerase 1-4 (Rpo1-4) alternative variant bSep08, mRNA.                                             |
| Rpp14            | Rpp14.aSep08            | 361020 | 9443  | 1302 | 4  | 122 | ribonuclease P 14 subunit (human) (13.4 kD) (Rpp14) alternative variant aSep08, mRNA.                     |
| Rpp14            | Rpp14.cSep08            | 361020 | 9616  | 1783 | 2  | 44  | ribonuclease P 14 subunit (human) (5.1 kD) (Rpp14) alternative variant cSep08, mRNA.                      |
| Rpp21            | Rpp21.aSep08            | 406230 | 1867  | 605  | 3  | 187 | ribonuclease P 21 subunit (human) (Rpp21) alternative variant aSep08, mRNA.                               |
| Rpp21            | Rpp21.dSep08            | 406230 | 1929  | 591  | 4  | 117 | ribonuclease P 21 subunit (human) (13.4 kD) (Rpp21) alternative variant dSep08, complete mRNA.            |
| Rpp21            | Rpp21.eSep08            | 406230 | 1932  | 576  | 4  | 117 | ribonuclease P 21 subunit (human) (13.6 kD) (Rpp21) alternative variant eSep08, complete mRNA.            |
| Rpp21            | Rpp21.fSep08            | 406230 | 1918  | 567  | 4  | 98  | ribonuclease P 21 subunit (human) (11.3 kD) (Rpp21) alternative variant fSep08, complete mRNA.            |
| Rpp21            | Rpp21.gSep08            | 406230 | 1915  | 488  | 5  | 98  | ribonuclease P 21 subunit (human) (11.3 kD) (Rpp21) alternative variant gSep08, complete mRNA.            |

|        |               |        |       |      |    |     |                                                                                                                                                     |
|--------|---------------|--------|-------|------|----|-----|-----------------------------------------------------------------------------------------------------------------------------------------------------|
| Rpp30  | Rpp30.aSep08  | 685332 | 19322 | 1151 | 8  | 192 | ribonuclease P/MRP 30 subunit (human) (21.2 kD) (Rpp30) alternative variant aSep08, mRNA.                                                           |
| Rpp30  | Rpp30.bSep08  | 685332 | 11822 | 1220 | 6  | 156 | ribonuclease P/MRP 30 subunit (human) (17.3 kD) (Rpp30) alternative variant bSep08, mRNA.                                                           |
| Rpp30  | Rpp30.dSep08  | 685332 | 22530 | 1012 | 10 | 92  | ribonuclease P/MRP 30 subunit (human) (10.4 kD) (Rpp30) alternative variant dSep08, complete mRNA.                                                  |
| Rpp38  | Rpp38.aSep08  | 291317 | 3516  | 1481 | 1  | 272 | ribonuclease P/MRP 38 subunit (human) (30.1 kD) (Rpp38) alternative variant aSep08, mRNA.                                                           |
| Rpp38  | Rpp38.cSep08  | 291317 | 3293  | 778  | 1  | 194 | ribonuclease P/MRP 38 subunit (human) (Rpp38) alternative variant cSep08, mRNA.                                                                     |
| Rpp40  | Rpp40.aSep08  | 291071 | 9443  | 1785 | 7  | 512 | ribonuclease P 40 subunit (human) (Rpp40) alternative variant aSep08, mRNA.                                                                         |
| Rpp40  | Rpp40.cSep08  | 291071 | 7396  | 763  | 6  | 254 | ribonuclease P 40 subunit (human) (Rpp40) alternative variant cSep08, mRNA.                                                                         |
| Rpp40  | Rpp40.dSep08  | 291071 | 2351  | 630  | 2  | 129 | ribonuclease P 40 subunit (human) (Rpp40) alternative variant dSep08, mRNA.                                                                         |
| Rps2   | Rps2.aSep08   | 83789  | 1872  | 959  | 7  | 302 | ribosomal protein S5, N-terminal and ribosomal protein S5, C-terminal (Rps2) alternative variant aSep08, mRNA.                                      |
| Rps2   | Rps2.bSep08   | 83789  | 1697  | 840  | 7  | 266 | ribosomal protein S5, N-terminal and ribosomal protein S5, C-terminal (Rps2) alternative variant bSep08, mRNA.                                      |
| Rps2   | Rps2.cSep08   | 83789  | 1726  | 976  | 6  | 260 | ribosomal protein S5, N-terminal and ribosomal protein S5, C-terminal (27.4 kD) (Rps2) alternative variant cSep08, mRNA.                            |
| Rps2   | Rps2.dSep08   | 83789  | 1376  | 745  | 5  | 238 | ribosomal protein S5, N-terminal and ribosomal protein S5, C-terminal (25.0 kD) (Rps2) alternative variant dSep08, mRNA.                            |
| Rps2   | Rps2.eSep08   | 83789  | 1151  | 905  | 3  | 127 | CRA b (13.4 kD) (Rps2) alternative variant eSep08, mRNA.                                                                                            |
| Rps2   | Rps2.fSep08   | 83789  | 1279  | 1112 | 2  | 55  | putative protein of ancient origin (6.4 kD) (Rps2) alternative variant fSep08, mRNA.                                                                |
| Rps2.1 | Rps2.1.bSep08 | 83789  | 464   | 365  | 2  | 102 | ribosomal protein S5, C-terminal (Rps2.1) alternative variant bSep08, mRNA.                                                                         |
| Rps2.1 | Rps2.1.cSep08 | 83789  | 680   | 369  | 2  | 56  | putative protein of eukaryotic origin (6.4 kD) (Rps2.1) alternative variant cSep08, mRNA.                                                           |
| Rps3   | Rps3.bSep08   | 140654 | 4031  | 828  | 5  | 183 | KH, type 2 and ribosomal protein S3, C-terminal (Rps3) alternative variant bSep08, mRNA.                                                            |
| Rps3   | Rps3.cSep08   | 140654 | 4557  | 837  | 5  | 180 | KH, type 2 and ribosomal protein S3, C-terminal (Rps3) alternative variant cSep08, mRNA.                                                            |
| Rps3   | Rps3.dSep08   | 140654 | 5300  | 487  | 6  | 151 | KH, type 2 (16.6 kD) (Rps3) alternative variant dSep08, complete mRNA.                                                                              |
| Rps4x  | Rps4x.bSep08  | 29426  | 4054  | 949  | 4  | 237 | ribosomal protein S4E, N-terminal and RNA-binding S4 and ribosomal protein S4E, central and KOW (26.7 kD) (Rps4x) alternative variant bSep08, mRNA. |
| Rps4x  | Rps4x.cSep08  | 29426  | 1929  | 731  | 1  | 89  | ribosomal protein S4E, N-terminal (10.2 kD) (Rps4x) alternative variant cSep08, mRNA.                                                               |
| Rps5   | Rps5.aSep08   | 25538  | 4298  | 765  | 6  | 236 | ribosomal protein S7 (Rps5) alternative variant aSep08, mRNA.                                                                                       |

|         |                |        |        |      |   |     |                                                                                                         |
|---------|----------------|--------|--------|------|---|-----|---------------------------------------------------------------------------------------------------------|
| Rps6    | Rps6.bSep08    | 29304  | 3084   | 1536 | 4 | 218 | ribosomal protein S6e (25.0 kD) (Rps6) alternative variant bSep08, mRNA.                                |
| Rps6ka1 | Rps6ka1.bSep08 | 81771  | 2724   | 737  | 2 | 81  | putative protein of metazoan origin (9.1 kD) (Rps6ka1) alternative variant bSep08, mRNA.                |
| Rps6ka3 | Rps6ka3.aSep08 | 501560 | 26276  | 1661 | 9 | 348 | protein kinase and tyrosine protein kinase (Rps6ka3) alternative variant aSep08, mRNA.                  |
| Rps6ka3 | Rps6ka3.bSep08 | 501560 | 39868  | 562  | 7 | 187 | tyrosine protein kinase (Rps6ka3) alternative variant bSep08, mRNA.                                     |
| Rps6ka3 | Rps6ka3.cSep08 | 501560 | 100983 | 671  | 8 | 162 | putative protein of eukaryotic origin (Rps6ka3) alternative variant cSep08, mRNA.                       |
| Rps6ka6 | Rps6ka6.aSep08 | 317203 | 26005  | 1682 | 8 | 391 | protein kinase, C-terminal and tyrosine protein kinase (Rps6ka6) alternative variant aSep08, mRNA.      |
| Rps6ka6 | Rps6ka6.bSep08 | 317203 | 36891  | 843  | 6 | 153 | putative protein of eukaryotic origin (17.2 kD) (Rps6ka6) alternative variant bSep08, mRNA.             |
| Rps6kb1 | Rps6kb1.bSep08 | 83840  | 27268  | 718  | 8 | 230 | protein S6 kinase (Rps6kb1) alternative variant bSep08, mRNA.                                           |
| Rps6kb1 | Rps6kb1.cSep08 | 83840  | 22530  | 875  | 9 | 177 | putative cytoplasmic protein of eukaryotic origin (19.9 kD) (Rps6kb1) alternative variant cSep08, mRNA. |
| Rps6kb1 | Rps6kb1.dSep08 | 83840  | 4555   | 516  | 5 | 149 | kinase 70 ribosomal S6 (Rps6kb1) alternative variant dSep08, mRNA.                                      |
| Rps6kb2 | Rps6kb2.cSep08 | 361696 | 730    | 620  | 2 | 117 | kinase 70 ribosomal S6 (Rps6kb2) alternative variant cSep08, mRNA.                                      |
| Rps6kb2 | Rps6kb2.dSep08 | 361696 | 1673   | 700  | 7 | 111 | kinase ribosomal S6 70 (Rps6kb2) alternative variant dSep08, mRNA.                                      |
| Rps6kc1 | Rps6kc1.aSep08 | 289342 | 65773  | 2774 | 5 | 855 | putative protein of metazoan origin (Rps6kc1) alternative variant aSep08, mRNA.                         |
| Rps6kc1 | Rps6kc1.bSep08 | 289342 | 24579  | 1595 | 5 | 294 | putative protein of eukaryotic origin (Rps6kc1) alternative variant bSep08, mRNA.                       |
| Rps6kc1 | Rps6kc1.cSep08 | 289342 | 4616   | 463  | 3 | 54  | putative protein of vertebrate origin (Rps6kc1) alternative variant cSep08, mRNA.                       |
| Rps6kc1 | Rps6kc1.dSep08 | 289342 | 3373   | 139  | 2 | 46  | putative protein (Rps6kc1) alternative variant dSep08, mRNA.                                            |
| Rps6kl1 | Rps6kl1.aSep08 | 299202 | 4022   | 956  | 6 | 318 | putative protein of eukaryotic origin (Rps6kl1) alternative variant aSep08, mRNA.                       |
| Rps7.1  | Rps7.1.aSep08  | 29258  | 45939  | 1377 | 7 | 288 | collectin sub-family member 11 (Rps7.1) alternative variant aSep08, mRNA.                               |
| Rps7.1  | Rps7.1.aSep08  | 497813 | 45939  | 1377 | 7 | 288 | collectin sub-family member 11 (Rps7.1) alternative variant aSep08, mRNA.                               |
| Rps7.1  | Rps7.1.bSep08  | 29258  | 35317  | 950  | 7 | 271 | collectin sub-family member 11 precursor (28.9 kD) (Rps7.1) alternative variant bSep08, mRNA.           |
| Rps7.1  | Rps7.1.bSep08  | 497813 | 35317  | 950  | 7 | 271 | collectin sub-family member 11 precursor (28.9 kD) (Rps7.1) alternative variant bSep08, mRNA.           |
| Rps7.1  | Rps7.1.dSep08  | 29258  | 1987   | 845  | 3 | 105 | ribosomal protein S7E (11.7 kD) (Rps7.1) alternative variant dSep08, mRNA.                              |
| Rps7.1  | Rps7.1.dSep08  | 497813 | 1987   | 845  | 3 | 105 | ribosomal protein S7E (11.7 kD) (Rps7.1) alternative variant dSep08, mRNA.                              |

|          |                 |        |       |      |   |     |                                                                                                           |
|----------|-----------------|--------|-------|------|---|-----|-----------------------------------------------------------------------------------------------------------|
| Rps7.1   | Rps7.1.eSep08   | 29258  | 14861 | 934  | 3 | 79  | collectin sub-family member 11 (Rps7.1) alternative variant eSep08, mRNA.                                 |
| Rps7.1   | Rps7.1.eSep08   | 497813 | 14861 | 934  | 3 | 79  | collectin sub-family member 11 (Rps7.1) alternative variant eSep08, mRNA.                                 |
| Rps8     | Rps8.bSep08     | 65136  | 1706  | 742  | 3 | 101 | ribosomal protein S8E (Rps8) alternative variant bSep08, mRNA.                                            |
| Rps8     | Rps8.cSep08     | 65136  | 975   | 595  | 2 | 88  | putative nuclear protein of eukaryotic origin (9.9 kD) (Rps8) alternative variant cSep08, mRNA.           |
| Rps8     | Rps8.dSep08     | 65136  | 889   | 306  | 3 | 63  | CRA b like (6.9 kD) (Rps8) alternative variant dSep08, mRNA.                                              |
| Rps9     | Rps9.bSep08     | 81772  | 3402  | 929  | 6 | 139 | ribosomal protein S4 (16.6 kD) (Rps9) alternative variant bSep08, mRNA.                                   |
| Rps9     | Rps9.cSep08     | 81772  | 3362  | 1460 | 4 | 136 | ribosomal protein S4 (16.3 kD) (Rps9) alternative variant cSep08, mRNA.                                   |
| Rps9     | Rps9.dSep08     | 81772  | 853   | 635  | 2 | 91  | ribosomal protein S4 (Rps9) alternative variant dSep08, mRNA.                                             |
| Rps10    | Rps10.aSep08    | 81773  | 4585  | 577  | 6 | 165 | plectin/S10, N-terminal (18.9 kD) (Rps10) alternative variant aSep08, complete mRNA.                      |
| Rps10    | Rps10.cSep08    | 81773  | 2571  | 964  | 2 | 83  | putative protein (Rps10) alternative variant cSep08, mRNA.                                                |
| Rps11    | Rps11.bSep08    | 81774  | 1719  | 1231 | 3 | 140 | ribosomal protein S17 (16.4 kD) (Rps11) alternative variant bSep08, complete mRNA.                        |
| Rps11    | Rps11.cSep08    | 81774  | 2157  | 926  | 4 | 134 | ribosomal protein S17 (Rps11) alternative variant cSep08, mRNA.                                           |
| Rps11    | Rps11.dSep08    | 81774  | 1452  | 1108 | 2 | 79  | ribosomal protein S17 (9.5 kD) (Rps11) alternative variant dSep08, mRNA.                                  |
| Rps11    | Rps11.eSep08    | 81774  | 1128  | 354  | 3 | 38  | putative protein (4.3 kD) (Rps11) alternative variant eSep08, mRNA.                                       |
| Rps12    | Rps12.aSep08    | 65139  | 1098  | 862  | 3 | 133 | putative protein human specific (Rps12) alternative variant aSep08, mRNA.                                 |
| Rps12    | Rps12.bSep08    | 65139  | 2074  | 572  | 4 | 132 | ribosomal protein L7Ae/L30e/S12e/Gadd45 (14.5 kD) (Rps12) alternative variant bSep08, mRNA.               |
| Rps12    | Rps12.dSep08    | 65139  | 1951  | 1545 | 1 | 98  | CRA c like (11.3 kD) (Rps12) alternative variant dSep08, mRNA.                                            |
| Rps13    | Rps13.bSep08    | 161477 | 1639  | 760  | 4 | 136 | ribosomal S13S15 N-terminal and ribosomal protein S15 (15.4 kD) (Rps13) alternative variant bSep08, mRNA. |
| Rps13    | Rps13.cSep08    | 161477 | 2168  | 526  | 4 | 124 | ribosomal S13S15 N-terminal and ribosomal protein S15 (14.2 kD) (Rps13) alternative variant cSep08, mRNA. |
| Rps14    | Rps14.bSep08    | 29284  | 4400  | 745  | 5 | 151 | ribosomal protein S11 (16.3 kD) (Rps14) alternative variant bSep08, mRNA.                                 |
| Rps15a.1 | Rps15a.1.aSep08 | 117053 | 6819  | 541  | 4 | 130 | ribosomal protein S8 (14.8 kD) (Rps15a.1) alternative variant aSep08, complete mRNA.                      |
| Rps15a.1 | Rps15a.1.bSep08 | 117053 | 7235  | 850  | 4 | 130 | ribosomal protein S8 (14.8 kD) (Rps15a.1) alternative variant bSep08, complete mRNA.                      |
| Rps15a.1 | Rps15a.1.cSep08 | 117053 | 2009  | 820  | 2 | 81  | ribosomal protein S8 (Rps15a.1) alternative variant cSep08, complete mRNA.                                |
| Rps16    | Rps16.aSep08    | 140655 | 2944  | 817  | 5 | 170 | ribosomal protein S9 (Rps16) alternative variant aSep08, mRNA.                                            |

|          |                 |        |       |      |   |     |                                                                                      |
|----------|-----------------|--------|-------|------|---|-----|--------------------------------------------------------------------------------------|
| Rps16    | Rps16.cSep08    | 140655 | 2639  | 644  | 6 | 87  | ribosomal protein S9 (10.0 kD) (Rps16) alternative variant cSep08, complete mRNA.    |
| Rps17    | Rps17.bSep08    | 29286  | 2599  | 708  | 4 | 78  | ribosomal protein S17e (8.9 kD) (Rps17) alternative variant bSep08, complete mRNA.   |
| Rps18    | Rps18.aSep08    | 294282 | 2020  | 1826 | 3 | 82  | ribosomal protein S13 (9.8 kD) (Rps18) alternative variant aSep08, mRNA.             |
| Rps18    | Rps18.bSep08    | 294282 | 2700  | 230  | 2 | 76  | ribosomal protein S13 (Rps18) alternative variant bSep08, mRNA.                      |
| Rps19    | Rps19.bSep08    | 29287  | 1312  | 551  | 1 | 98  | putative mitochondrial protein (10.7 kD) (Rps19) alternative variant bSep08, mRNA.   |
| Rps19    | Rps19.cSep08    | 29287  | 1779  | 585  | 2 | 71  | ribosomal protein S19e (7.9 kD) (Rps19) alternative variant cSep08, mRNA.            |
| Rps19bp1 | Rps19bp1.aSep08 | 500907 | 3279  | 703  | 4 | 138 | protein S19 binding like (Rps19bp1) alternative variant aSep08, mRNA.                |
| Rps20    | Rps20.aSep08    | 122772 | 1391  | 731  | 3 | 119 | ribosomal protein S10 (13.4 kD) (Rps20) alternative variant aSep08, complete mRNA.   |
| Rps20    | Rps20.bSep08    | 122772 | 711   | 436  | 1 | 91  | protein ribosomal 20 (10.1 kD) (Rps20) alternative variant bSep08, mRNA.             |
| Rps20    | Rps20.cSep08    | 122772 | 907   | 436  | 2 | 64  | ribosomal protein S10 (7.2 kD) (Rps20) alternative variant cSep08, mRNA.             |
| Rps21.1  | Rps21.1.aSep08  | 81775  | 1058  | 380  | 2 | 105 | ribosomal protein S21e (Rps21.1) alternative variant aSep08, mRNA.                   |
| Rps21.1  | Rps21.1.bSep08  | 81775  | 1022  | 499  | 1 | 83  | ribosomal protein S21e (9.1 kD) (Rps21.1) alternative variant bSep08, complete mRNA. |
| Rps24    | Rps24.aSep08    | 81776  | 4652  | 2739 | 4 | 193 | ribosomal protein S24e (Rps24) alternative variant aSep08, mRNA.                     |
| Rps24    | Rps24.cSep08    | 81776  | 4635  | 551  | 7 | 131 | ribosomal protein S24e (15.2 kD) (Rps24) alternative variant cSep08, complete mRNA.  |
| Rps24    | Rps24.dSep08    | 81776  | 4648  | 546  | 6 | 130 | ribosomal protein S24e (15.1 kD) (Rps24) alternative variant dSep08, complete mRNA.  |
| Rps24    | Rps24.eSep08    | 81776  | 4590  | 797  | 6 | 118 | ribosomal protein S24e (13.6 kD) (Rps24) alternative variant eSep08, mRNA.           |
| Rps24    | Rps24.fSep08    | 81776  | 990   | 667  | 2 | 37  | putative protein (4.7 kD) (Rps24) alternative variant fSep08, mRNA.                  |
| Rps26    | Rps26.bSep08    | 27139  | 1480  | 587  | 3 | 111 | ribosomal protein S26E (12.5 kD) (Rps26) alternative variant bSep08, mRNA.           |
| Rps26    | Rps26.cSep08    | 27139  | 10663 | 444  | 5 | 81  | putative protein (8.6 kD) (Rps26) alternative variant cSep08, mRNA.                  |
| Rps27    | Rps27.bSep08    | 94266  | 1067  | 612  | 2 | 52  | ribosomal protein S27E (5.6 kD) (Rps27) alternative variant bSep08, complete mRNA.   |
| Rps27    | Rps27.cSep08    | 94266  | 689   | 470  | 2 | 50  | CRA b like (5.9 kD) (Rps27) alternative variant cSep08, mRNA.                        |
| Rps27a   | Rps27a.bSep08   | 81777  | 2702  | 1515 | 5 | 156 | protein ribosomal S27 (17.9 kD) (Rps27a) alternative variant bSep08, complete mRNA.  |
| Rpsa     | Rpsa.aSep08     | 29236  | 3712  | 1475 | 6 | 295 | ribosomal protein S2 (32.8 kD) (Rpsa) alternative variant aSep08, mRNA.              |

|                   |                          |        |       |      |    |      |                                                                                                                              |
|-------------------|--------------------------|--------|-------|------|----|------|------------------------------------------------------------------------------------------------------------------------------|
| Rpsa              | Rpsa.cSep08              | 29236  | 3859  | 1015 | 7  | 294  | ribosomal protein S2 (32.7 kD) (Rpsa) alternative variant cSep08, complete mRNA.                                             |
| Rpsa              | Rpsa.dSep08              | 29236  | 2662  | 1106 | 3  | 194  | laminin Receptor (Rpsa) alternative variant dSep08, mRNA.                                                                    |
| Rpsa              | Rpsa.eSep08              | 29236  | 1629  | 751  | 2  | 114  | putative protein of eukaryotic origin (12.4 kD) (Rpsa) alternative variant eSep08, mRNA.                                     |
| Rpsa              | Rpsa.fSep08              | 29236  | 3780  | 664  | 6  | 112  | putative protein of eukaryotic origin (Rpsa) alternative variant fSep08, mRNA.                                               |
| Rpusd1            | Rpusd1.bSep08            | 287148 | 3843  | 1757 | 6  | 306  | pseudouridine synthase (34.3 kD) (Rpusd1) alternative variant bSep08, complete mRNA.                                         |
| Rpusd1            | Rpusd1.cSep08            | 287148 | 2471  | 902  | 4  | 260  | pseudouridine synthase (Rpusd1) alternative variant cSep08, mRNA.                                                            |
| Rpusd1            | Rpusd1.dSep08            | 287148 | 1464  | 417  | 4  | 112  | pseudouridine synthase (Rpusd1) alternative variant dSep08, mRNA.                                                            |
| Rpusd1            | Rpusd1.fSep08            | 287148 | 962   | 374  | 3  | 3    | putative protein (0.3 kD) (Rpusd1) alternative variant fSep08, mRNA.                                                         |
| Rpusd3            | Rpusd3.aSep08            | 362416 | 3734  | 991  | 9  | 330  | pseudouridine synthase (Rpusd3) alternative variant aSep08, mRNA.                                                            |
| Rpusd3            | Rpusd3.cSep08            | 362416 | 1954  | 889  | 4  | 157  | putative protein of ancient origin (17.5 kD) (Rpusd3) alternative variant cSep08, mRNA.                                      |
| Rpusd3            | Rpusd3.dSep08            | 362416 | 5328  | 745  | 2  | 117  | CRA b like (Rpusd3) alternative variant dSep08, mRNA.                                                                        |
| Rpusd3            | Rpusd3.fSep08            | 362416 | 1479  | 599  | 3  | 81   | CRA d (Rpusd3) alternative variant fSep08, mRNA.                                                                             |
| Rqcd1             | Rqcd1.bSep08             | 301513 | 4925  | 907  | 3  | 100  | rcd1 (required for cell differentiation) homolog 1 (S. pombe) (Rqcd1) alternative variant bSep08, mRNA.                      |
| Rrad              | Rrad.bSep08              | 83521  | 1770  | 872  | 1  | 215  | ras-related associated with diabetes (Rrad) alternative variant bSep08, mRNA.                                                |
| RragB             | RragB.bSep08             | 117043 | 30244 | 794  | 4  | 87   | ras-related GTP binding B (RragB) alternative variant bSep08, mRNA.                                                          |
| Rragc             | Rragc.bSep08             | 298514 | 7152  | 1502 | 5  | 116  | ras-related GTP binding C (Rragc) alternative variant bSep08, mRNA.                                                          |
| Rragc             | Rragc.cSep08             | 298514 | 15809 | 736  | 6  | 107  | ras-related GTP binding C (Rragc) alternative variant cSep08, mRNA.                                                          |
| Rrbp1             | Rrbp1.aSep08             | 311483 | 39696 | 4127 | 23 | 1207 | ribosome-binding protein 1 like (Rrbp1) alternative variant aSep08, mRNA.                                                    |
| Rrbp1             | Rrbp1.bSep08             | 311483 | 13055 | 1300 | 14 | 347  | ribosome binding protein 1 like (39.2 kD) (Rrbp1) alternative variant bSep08, mRNA.                                          |
| Rrbp1             | Rrbp1.cSep08             | 311483 | 2649  | 734  | 2  | 141  | ribosome receptor (Rrbp1) alternative variant cSep08, mRNA.                                                                  |
| Rrbp1             | Rrbp1.dSep08             | 311483 | 1724  | 626  | 3  | 128  | ribosome binding protein 1 like (Rrbp1) alternative variant dSep08, mRNA.                                                    |
| Rrm2andRGD1559671 | Rrm2andRGD1559671.aSep08 | 304657 | 8830  | 2594 | 1  | 390  | similar to M2 ribonucleotide reductase and ribonucleotide reductase M2 (Rrm2andRGD1559671) alternative variant aSep08, mRNA. |
| Rrm2andRGD1559671 | Rrm2andRGD1559671.aSep08 | 362720 | 8830  | 2594 | 1  | 390  | similar to M2 ribonucleotide reductase and ribonucleotide reductase M2 (Rrm2andRGD1559671) alternative variant aSep08, mRNA. |

|                   |                          |        |       |      |    |     |                                                                                                                              |
|-------------------|--------------------------|--------|-------|------|----|-----|------------------------------------------------------------------------------------------------------------------------------|
| Rrm2andRGD1559671 | Rrm2andRGD1559671.bSep08 | 304657 | 4117  | 940  | 1  | 285 | similar to M2 ribonucleotide reductase and ribonucleotide reductase M2 (Rrm2andRGD1559671) alternative variant bSep08, mRNA. |
| Rrm2andRGD1559671 | Rrm2andRGD1559671.bSep08 | 362720 | 4117  | 940  | 1  | 285 | similar to M2 ribonucleotide reductase and ribonucleotide reductase M2 (Rrm2andRGD1559671) alternative variant bSep08, mRNA. |
| Rrm2b             | Rrm2b.bSep08             | 299976 | 1155  | 287  |    | 83  | ribonucleotide reductase M2 B (TP53 inducible) (Rrm2b) alternative variant bSep08, mRNA.                                     |
| RRM_1.6           | RRM_1.6.aSep08           |        | 3157  | 1010 | 2  | 114 | bruno-like RNA binding protein (RRM_1.6) alternative variant aSep08, mRNA.                                                   |
| RRM_1.6           | RRM_1.6.cSep08           |        | 2756  | 1785 | 2  | 98  | bruno-like 5 RNA binding protein (10.9 kD) (RRM_1.6) alternative variant cSep08, mRNA.                                       |
| RRM_1.9           | RRM_1.9.aSep08           |        | 35282 | 655  |    | 218 | ribonucleoprotein PTB-binding 2 CRA a like (RRM_1.9) mRNA.                                                                   |
| RRM_1.12          | RRM_1.12.aSep08          |        | 5894  | 526  |    | 175 | RNA-binding region RNP-1 (RNA recognition motif) (RRM_1.12) mRNA.                                                            |
| Rrn3              | Rrn3.aSep08              | 304714 | 35038 | 3423 | 13 | 661 | RRN3 RNA polymerase I transcription factor homolog (yeast) (75.1 kD) (Rrn3) alternative variant aSep08, complete mRNA.       |
| Rrn3              | Rrn3.bSep08              | 304714 | 12797 | 784  | 1  | 260 | RRN3 RNA polymerase I transcription factor homolog (yeast) (Rrn3) alternative variant bSep08, mRNA.                          |
| Rrp1              | Rrp1.bSep08              | 309674 | 11145 | 1003 | 9  | 290 | ribosomal RNA processing 1 homolog (S. cerevisiae) (32.9 kD) (Rrp1) alternative variant bSep08, complete mRNA.               |
| Rrp1b             | Rrp1b.aSep08             | 309673 | 25573 | 4420 | 16 | 749 | ribosomal RNA processing 1 homolog B (S. cerevisiae) (Rrp1b) alternative variant aSep08, mRNA.                               |
| Rrp1b             | Rrp1b.cSep08             | 309673 | 9211  | 404  | 2  | 82  | ribosomal RNA processing 1 homolog B (S. cerevisiae) (9.4 kD) (Rrp1b) alternative variant cSep08, mRNA.                      |
| Rrp9              | Rrp9.aSep08              | 363134 | 8990  | 1544 | 15 | 478 | RRP9, small subunit (SSU) processome component, homolog (yeast) (52.5 kD) (Rrp9) alternative variant aSep08, complete mRNA.  |
| Rrp9              | Rrp9.bSep08              | 363134 | 4198  | 399  | 6  | 121 | RRP9, small subunit (SSU) processome component, homolog (yeast) (Rrp9) alternative variant bSep08, mRNA.                     |
| Rrp9              | Rrp9.cSep08              | 363134 | 905   | 734  | 3  | 109 | RRP9, small subunit (SSU) processome component, homolog (yeast) (Rrp9) alternative variant cSep08, mRNA.                     |
| RR_TM4-6.0        | RR_TM4-6.0.aSep08        |        | 2617  | 486  |    | 161 | ryanodine receptor (RR_TM4-6.0) mRNA.                                                                                        |
| Rsb66             | Rsb66.aSep08             | 296610 | 9518  | 826  | 5  | 254 | rsb-66 protein (Rsb66) alternative variant aSep08, mRNA.                                                                     |
| Rsb66             | Rsb66.cSep08             | 296610 | 1017  | 463  | 2  | 130 | rsb-66 protein (Rsb66) alternative variant cSep08, mRNA.                                                                     |
| Rsb1              | Rsb1.aSep08              | 310749 | 13788 | 642  | 2  | 214 | rosbin, round spermatid basic protein 1 (Rsb1) alternative variant aSep08, mRNA.                                             |
| Rsb1l             | Rsb1l.aSep08             | 311987 | 61645 | 1735 | 7  | 578 | round spermatid basic protein 1-like (Rsb1l) alternative variant aSep08, mRNA.                                               |
| Rsb1l             | Rsb1l.bSep08             | 311987 | 49966 | 1093 | 7  | 364 | round spermatid basic protein 1-like (Rsb1l) alternative variant bSep08, mRNA.                                               |
| Rsb1l             | Rsb1l.cSep08             | 311987 | 829   | 750  | 1  | 77  | round spermatid basic protein 1-like (Rsb1l) alternative variant cSep08, mRNA.                                               |
| Rsf1              | Rsf1.aSep08              | 308839 | 94028 | 2131 | 4  | 710 | remodeling and spacing factor 1 (Rsf1) alternative variant aSep08, mRNA.                                                     |

|         |                |        |        |      |   |     |                                                                                                                             |
|---------|----------------|--------|--------|------|---|-----|-----------------------------------------------------------------------------------------------------------------------------|
| Rsf1    | Rsf1.bSep08    | 308839 | 60244  | 391  | 1 | 99  | remodeling and spacing factor 1 (Rsf1) alternative variant bSep08, mRNA.                                                    |
| Rshl2   | Rshl2.aSep08   | 361476 | 39392  | 2027 | 7 | 571 | radial spokehead-like 2 (64.6 kD) (Rshl2) alternative variant aSep08, mRNA.                                                 |
| Rshl2   | Rshl2.cSep08   | 361476 | 4665   | 358  | 2 | 85  | radial spokehead-like 2 (Rshl2) alternative variant cSep08, mRNA.                                                           |
| Rshl3   | Rshl3.bSep08   | 309767 | 7936   | 1135 | 1 | 369 | radial spokehead-like 3 (Rshl3) alternative variant bSep08, mRNA.                                                           |
| Rsl1d1  | Rsl1d1.bSep08  | 302898 | 11887  | 1951 | 9 | 453 | ribosomal protein L1 (50.9 kD) (Rsl1d1) alternative variant bSep08, complete mRNA.                                          |
| Rsl1d1  | Rsl1d1.cSep08  | 302898 | 10158  | 976  | 7 | 311 | putative protein, with a coiled coil domain, of eukaryotic origin (Rsl1d1) alternative variant cSep08, mRNA.                |
| Rspo1   | Rspo1.bSep08   | 313589 | 21337  | 1834 | 1 | 262 | R-spondin homolog (Xenopus laevis) (28.9 kD) (Rspo1) alternative variant bSep08, mRNA.                                      |
| Rspo2   | Rspo2.aSep08   | 500863 | 137831 | 3036 | 3 | 250 | R-spondin 2 homolog (Xenopus laevis) and hypothetical protein LOC688674 (28.9 kD) (Rspo2) alternative variant aSep08, mRNA. |
| Rspo2   | Rspo2.aSep08   | 688674 | 137831 | 3036 | 3 | 250 | R-spondin 2 homolog (Xenopus laevis) and hypothetical protein LOC688674 (28.9 kD) (Rspo2) alternative variant aSep08, mRNA. |
| Rsrc1   | Rsrc1.bSep08   | 361956 | 194801 | 2498 | 5 | 157 | arginine/serine-rich coiled-coil 1 (Rsrc1) alternative variant bSep08, mRNA.                                                |
| Rsrc1   | Rsrc1.cSep08   | 361956 | 126505 | 686  | 5 | 133 | arginine/serine-rich coiled-coil 1 (Rsrc1) alternative variant cSep08, mRNA.                                                |
| Rsu1    | Rsu1.bSep08    | 680419 | 103793 | 1081 | 2 | 243 | ras suppressor protein 1 (27.5 kD) (Rsu1) alternative variant bSep08, complete mRNA.                                        |
| RT1-149 | RT1-149.bSep08 | 414784 | 7340   | 1494 | 6 | 334 | class I precursor (38.9 kD) (RT1-149) alternative variant bSep08, complete mRNA.                                            |
| RT1-149 | RT1-149.cSep08 | 414784 | 6905   | 803  | 4 | 255 | histocompatibility 2 T region locus 24 (RT1-149) alternative variant cSep08, mRNA.                                          |
| RT1-149 | RT1-149.dSep08 | 414784 | 6075   | 868  | 5 | 240 | class I (RT1-149) alternative variant dSep08, mRNA.                                                                         |
| RT1-149 | RT1-149.eSep08 | 414784 | 41516  | 1323 | 8 | 238 | MHC class I (26.5 kD) (RT1-149) alternative variant eSep08, complete mRNA.                                                  |
| RT1-149 | RT1-149.fSep08 | 414784 | 8055   | 731  | 3 | 176 | class I (20.1 kD) (RT1-149) alternative variant fSep08, mRNA.                                                               |
| RT1-149 | RT1-149.gSep08 | 414784 | 7381   | 807  | 4 | 67  | CRA a like (7.8 kD) (RT1-149) alternative variant gSep08, mRNA.                                                             |
| RT1-Ba  | RT1-Ba.bSep08  | 309621 | 1208   | 782  | 2 | 223 | RT1 class II, locus Ba (RT1-Ba) alternative variant bSep08, mRNA.                                                           |
| RT1-Ba  | RT1-Ba.cSep08  | 309621 | 3736   | 619  | 3 | 130 | RT1 class II, locus Ba (14.7 kD) (RT1-Ba) alternative variant cSep08, mRNA.                                                 |
| RT1-Bb  | RT1-Bb.aSep08  | 309622 | 5089   | 951  | 6 | 295 | RT1 class II, locus Bb (RT1-Bb) alternative variant aSep08, mRNA.                                                           |
| RT1-Bb  | RT1-Bb.cSep08  | 309622 | 9155   | 1247 | 4 | 240 | RT1 class II, locus Bb (27.5 kD) (RT1-Bb) alternative variant cSep08, mRNA.                                                 |
| RT1-Bb  | RT1-Bb.dSep08  | 309622 | 2130   | 786  | 2 | 223 | RT1 class II, locus Bb (24.3 kD) (RT1-Bb) alternative variant dSep08, mRNA.                                                 |



|                     |                            |        |       |      |   |     |                                                                                   |
|---------------------|----------------------------|--------|-------|------|---|-----|-----------------------------------------------------------------------------------|
| RT1-Bb              | RT1-Bb.eSep08              | 309622 | 3237  | 1387 | 3 | 181 | RT1 class II, locus Bb (RT1-Bb) alternative variant eSep08, mRNA.                 |
| RT1-CE1             | RT1-CE1.aSep08             | 309603 | 3360  | 1440 | 2 | 330 | RT1 class I, CE1 (RT1-CE1) alternative variant aSep08, mRNA.                      |
| RT1-CE1             | RT1-CE1.bSep08             | 309603 | 3351  | 1708 | 2 | 249 | RT1 class I, CE1 (27.6 kD) (RT1-CE1) alternative variant bSep08, mRNA.            |
| RT1-CE2andRT1-CE5   | RT1-CE2andRT1-CE5.cSep08   | 309607 | 69834 | 1437 | 7 | 327 | class I (RT1-CE2andRT1-CE5) alternative variant cSep08, mRNA.                     |
| RT1-CE2andRT1-CE5   | RT1-CE2andRT1-CE5.cSep08   | 414779 | 69834 | 1437 | 7 | 327 | class I (RT1-CE2andRT1-CE5) alternative variant cSep08, mRNA.                     |
| RT1-CE2andRT1-CE5   | RT1-CE2andRT1-CE5.dSep08   | 309607 | 787   | 584  | 2 | 116 | class I precursor (13.4 kD) (RT1-CE2andRT1-CE5) alternative variant dSep08, mRNA. |
| RT1-CE2andRT1-CE5   | RT1-CE2andRT1-CE5.dSep08   | 414779 | 787   | 584  | 2 | 116 | class I precursor (13.4 kD) (RT1-CE2andRT1-CE5) alternative variant dSep08, mRNA. |
| RT1-CE2andRT1-CE5   | RT1-CE2andRT1-CE5.eSep08   | 309607 | 1251  | 573  | 4 | 66  | histocompatibility class I (RT1-CE2andRT1-CE5) alternative variant eSep08, mRNA.  |
| RT1-CE2andRT1-CE5   | RT1-CE2andRT1-CE5.eSep08   | 414779 | 1251  | 573  | 4 | 66  | histocompatibility class I (RT1-CE2andRT1-CE5) alternative variant eSep08, mRNA.  |
| RT1-CE3             | RT1-CE3.bSep08             | 414793 | 2655  | 914  | 4 | 256 | RT1 class I, CE3 (RT1-CE3) alternative variant bSep08, mRNA.                      |
| RT1-CE7             | RT1-CE7.bSep08             | 368153 | 35606 | 1936 | 6 | 245 | RT1 class I, CE7 (27.1 kD) (RT1-CE7) alternative variant bSep08, mRNA.            |
| RT1-CE7             | RT1-CE7.dSep08             | 368153 | 1254  | 709  | 3 | 49  | RT1 class I, CE7 (RT1-CE7) alternative variant dSep08, mRNA.                      |
| RT1-CE7             | RT1-CE7.eSep08             | 368153 | 1039  | 546  | 3 | 37  | RT1 class I, CE7 (RT1-CE7) alternative variant eSep08, mRNA.                      |
| RT1-CE10            | RT1-CE10.bSep08            | 414792 | 4088  | 1919 | 5 | 328 | RT1 class I, CE10 (RT1-CE10) alternative variant bSep08, mRNA.                    |
| RT1-CE10            | RT1-CE10.cSep08            | 414792 | 916   | 713  | 2 | 116 | RT1 class I, CE10 (13.5 kD) (RT1-CE10) alternative variant cSep08, mRNA.          |
| RT1-CE11            | RT1-CE11.bSep08            | 414791 | 963   | 761  | 1 | 119 | RT1 class I, CE11 (RT1-CE11) alternative variant bSep08, mRNA.                    |
| RT1-CE12            | RT1-CE12.bSep08            | 309600 | 2587  | 906  | 4 | 226 | RT1 class I, CE12 (RT1-CE12) alternative variant bSep08, mRNA.                    |
| RT1-CE12            | RT1-CE12.cSep08            | 309600 | 563   | 436  | 1 | 75  | RT1 class I, CE12 (RT1-CE12) alternative variant cSep08, mRNA.                    |
| RT1-CE13andRT1-CE14 | RT1-CE13andRT1-CE14.cSep08 | 414270 | 1732  | 755  | 2 | 171 | class I (19.2 kD) (RT1-CE13andRT1-CE14) alternative variant cSep08, mRNA.         |

|                     |                            |        |      |      |   |     |                                                                                               |
|---------------------|----------------------------|--------|------|------|---|-----|-----------------------------------------------------------------------------------------------|
| RT1-CE13andRT1-CE14 | RT1-CE13andRT1-CE14.cSep08 | 414790 | 1732 | 755  | 2 | 171 | class I (19.2 kD) (RT1-CE13andRT1-CE14) alternative variant cSep08, mRNA.                     |
| RT1-CE15            | RT1-CE15.bSep08            | 414789 | 1708 | 1159 | 1 | 41  | RT1 class I, CE15 (RT1-CE15) alternative variant bSep08, mRNA.                                |
| RT1-CE16andRT1-CI   | RT1-CE16andRT1-CI.bSep08   | 24977  | 3073 | 1277 | 3 | 255 | class I (RT1-CE16andRT1-CI) alternative variant bSep08, mRNA.                                 |
| RT1-CE16andRT1-CI   | RT1-CE16andRT1-CI.bSep08   | 414819 | 3073 | 1277 | 3 | 255 | class I (RT1-CE16andRT1-CI) alternative variant bSep08, mRNA.                                 |
| RT1-CE16andRT1-CI   | RT1-CE16andRT1-CI.cSep08   | 24977  | 1772 | 805  | 1 | 170 | class I (RT1-CE16andRT1-CI) alternative variant cSep08, mRNA.                                 |
| RT1-CE16andRT1-CI   | RT1-CE16andRT1-CI.cSep08   | 414819 | 1772 | 805  | 1 | 170 | class I (RT1-CE16andRT1-CI) alternative variant cSep08, mRNA.                                 |
| RT1-Db1             | RT1-Db1.bSep08             | 294270 | 9559 | 1865 | 5 | 223 | RT1 class II, locus Db1 (26.0 kD) (RT1-Db1) alternative variant bSep08, complete mRNA.        |
| RT1-Db1             | RT1-Db1.cSep08             | 294270 | 4694 | 917  | 2 | 166 | RT1 class II, locus Db1 (RT1-Db1) alternative variant cSep08, mRNA.                           |
| RT1-Db1             | RT1-Db1.eSep08             | 294270 | 4426 | 596  | 2 | 61  | RT1 class II, locus Db1 (RT1-Db1) alternative variant eSep08, mRNA.                           |
| RT1-Db1             | RT1-Db1.hSep08             | 294270 | 1827 | 278  | 2 | 31  | RT1 class II, locus Db1 (RT1-Db1) alternative variant hSep08, mRNA.                           |
| RT1-DOa             | RT1-DOa.bSep08             | 24984  | 3347 | 756  | 2 | 120 | RT1 class II, locus DOa (RT1-DOa) alternative variant bSep08, mRNA.                           |
| RT1-DOb             | RT1-DOb.aSep08             | 365542 | 5206 | 696  | 4 | 231 | major Histocompatibility complex class II DO beta (RT1-DOb) alternative variant aSep08, mRNA. |
| RT1-DOb             | RT1-DOb.bSep08             | 365542 | 1559 | 632  | 2 | 196 | major Histocompatibility complex class II DO beta (RT1-DOb) alternative variant bSep08, mRNA. |
| RT1-DOb             | RT1-DOb.cSep08             | 365542 | 2895 | 873  | 2 | 52  | histocompatibility 2 O region beta locus like (RT1-DOb) alternative variant cSep08, mRNA.     |
| RT1-Ha              | RT1-Ha.bSep08              | 24986  | 1077 | 776  | 1 | 198 | RT1 class II, locus Ha (RT1-Ha) alternative variant bSep08, mRNA.                             |
| RT1-Ke4andHsd17b8   | RT1-Ke4andHsd17b8.bSep08   | 294281 | 1663 | 940  | 6 | 312 | solute carrier family 39 member 7 (RT1-Ke4andHsd17b8) alternative variant bSep08, mRNA.       |
| RT1-Ke4andHsd17b8   | RT1-Ke4andHsd17b8.bSep08   | 361802 | 1663 | 940  | 6 | 312 | solute carrier family 39 member 7 (RT1-Ke4andHsd17b8) alternative variant bSep08, mRNA.       |
| RT1-Ke4andHsd17b8   | RT1-Ke4andHsd17b8.dSep08   | 294281 | 1971 | 895  | 8 | 239 | hydroxysteroid dehydrogenase 8 CRA a (RT1-Ke4andHsd17b8) alternative variant dSep08, mRNA.    |
| RT1-Ke4andHsd17b8   | RT1-Ke4andHsd17b8.dSep08   | 361802 | 1971 | 895  | 8 | 239 | hydroxysteroid dehydrogenase 8 CRA a (RT1-Ke4andHsd17b8) alternative variant dSep08, mRNA.    |

|                     |                            |        |        |      |   |     |                                                                                                      |
|---------------------|----------------------------|--------|--------|------|---|-----|------------------------------------------------------------------------------------------------------|
| RT1-Ke4andHsd17b8   | RT1-Ke4andHsd17b8.eSep08   | 294281 | 2250   | 2140 | 2 | 162 | solute carrier family 39 member 7 (17.0 kD) (RT1-Ke4andHsd17b8) alternative variant eSep08, mRNA.    |
| RT1-Ke4andHsd17b8   | RT1-Ke4andHsd17b8.eSep08   | 361802 | 2250   | 2140 | 2 | 162 | solute carrier family 39 member 7 (17.0 kD) (RT1-Ke4andHsd17b8) alternative variant eSep08, mRNA.    |
| RT1-Ke4andHsd17b8   | RT1-Ke4andHsd17b8.fSep08   | 294281 | 596    | 386  | 3 | 128 | solute carrier family 39 member 7 (RT1-Ke4andHsd17b8) alternative variant fSep08, mRNA.              |
| RT1-Ke4andHsd17b8   | RT1-Ke4andHsd17b8.fSep08   | 361802 | 596    | 386  | 3 | 128 | solute carrier family 39 member 7 (RT1-Ke4andHsd17b8) alternative variant fSep08, mRNA.              |
| RT1-Ke4andHsd17b8   | RT1-Ke4andHsd17b8.gSep08   | 294281 | 834    | 518  | 3 | 68  | hydroxysteroid dehydrogenase 8 CRA b (RT1-Ke4andHsd17b8) alternative variant gSep08, mRNA.           |
| RT1-Ke4andHsd17b8   | RT1-Ke4andHsd17b8.gSep08   | 361802 | 834    | 518  | 3 | 68  | hydroxysteroid dehydrogenase 8 CRA b (RT1-Ke4andHsd17b8) alternative variant gSep08, mRNA.           |
| RT1-Ke4andHsd17b8   | RT1-Ke4andHsd17b8.hSep08   | 294281 | 846    | 316  | 3 | 46  | hydroxysteroid dehydrogenase 8 CRA a (RT1-Ke4andHsd17b8) alternative variant hSep08, mRNA.           |
| RT1-Ke4andHsd17b8   | RT1-Ke4andHsd17b8.hSep08   | 361802 | 846    | 316  | 3 | 46  | hydroxysteroid dehydrogenase 8 CRA a (RT1-Ke4andHsd17b8) alternative variant hSep08, mRNA.           |
| RT1-M3              | RT1-M3.bSep08              | 24747  | 600    | 439  | 2 | 72  | RT1 class Ib, locus M3 (8.4 kD) (RT1-M3) alternative variant bSep08, mRNA.                           |
| RT1-M3              | RT1-M3.cSep08              | 24747  | 129293 | 733  | 3 | 15  | RT1 class Ib, locus M3 (1.5 kD) (RT1-M3) alternative variant cSep08, mRNA.                           |
| RT1-M5              | RT1-M5.bSep08              | 499400 | 1923   | 982  | 1 | 326 | RT1 class Ib, locus M5 (RT1-M5) alternative variant bSep08, mRNA.                                    |
| RT1-M6-1            | RT1-M6-1.bSep08            | 414785 | 1820   | 657  | 2 | 218 | RT1 class I, M6, gene 1 (RT1-M6-1) alternative variant bSep08, mRNA.                                 |
| RT1-M6-1            | RT1-M6-1.cSep08            | 414785 | 723    | 541  | 1 | 179 | RT1 class I, M6, gene 1 (RT1-M6-1) alternative variant cSep08, mRNA.                                 |
| RT1-M6-2            | RT1-M6-2.bSep08            | 365527 | 1834   | 922  | 1 | 241 | RT1 class I, M6, gene 2 (RT1-M6-2) alternative variant bSep08, mRNA.                                 |
| RT1-M10-2andPpid-ps | RT1-M10-2andPpid-ps.aSep08 | 414807 | 17446  | 570  |   | 34  | RT1 class 1, M10, pseudogene 2 and RT1 class 1, Ppid pseudogene (3.7 kD) (RT1-M10-2andPpid-ps) mRNA. |
| RT1-M10-2andPpid-ps | RT1-M10-2andPpid-ps.aSep08 | 414810 | 17446  | 570  |   | 34  | RT1 class 1, M10, pseudogene 2 and RT1 class 1, Ppid pseudogene (3.7 kD) (RT1-M10-2andPpid-ps) mRNA. |
| RT1-N1              | RT1-N1.bSep08              | 24748  | 2586   | 1661 | 3 | 128 | RT1 class Ib gene, H2-TL-like, grc region (N1) (14.2 kD) (RT1-N1) alternative variant bSep08, mRNA.  |
| RT1-N1              | RT1-N1.cSep08              | 24748  | 1806   | 784  | 3 | 89  | RT1 class Ib gene, H2-TL-like, grc region (N1) (RT1-N1) alternative variant cSep08, mRNA.            |
| RT1-N1              | RT1-N1.dSep08              | 24748  | 1154   | 269  | 3 | 61  | RT1 class Ib gene, H2-TL-like, grc region (N1) (RT1-N1) alternative variant dSep08, mRNA.            |

|        |               |        |       |      |    |     |                                                                                                                           |
|--------|---------------|--------|-------|------|----|-----|---------------------------------------------------------------------------------------------------------------------------|
| RT1-N3 | RT1-N3.bSep08 | 24750  | 2274  | 1862 | 3  | 218 | RT1 class Ib gene, H2-TL-like, grc region (N3) (25.5 kD) (RT1-N3) alternative variant bSep08, mRNA.                       |
| RT1-N3 | RT1-N3.cSep08 | 24750  | 802   | 619  | 2  | 206 | RT1 class Ib gene, H2-TL-like, grc region (N3) (RT1-N3) alternative variant cSep08, mRNA.                                 |
| RT1-O  | RT1-O.bSep08  | 24751  | 558   | 273  | 2  | 47  | RT1 class Ib, locus H2-Q-like, grc region (RT1-O) alternative variant bSep08, mRNA.                                       |
| RT1-O  | RT1-O.cSep08  | 24751  | 3754  | 1050 | 4  | 42  | RT1 class Ib, locus H2-Q-like, grc region (RT1-O) alternative variant cSep08, mRNA.                                       |
| RT1-S3 | RT1-S3.bSep08 | 294228 | 3119  | 1532 | 6  | 324 | RT1 class Ib, locus S3 (35.6 kD) (RT1-S3) alternative variant bSep08, mRNA.                                               |
| RT1-S3 | RT1-S3.cSep08 | 294228 | 2338  | 826  | 6  | 221 | RT1 class Ib, locus S3 (RT1-S3) alternative variant cSep08, mRNA.                                                         |
| Rtcd1  | Rtcd1.bSep08  | 295395 | 15947 | 895  | 9  | 192 | RNA terminal phosphate cyclase domain 1 (Rtcd1) alternative variant bSep08, mRNA.                                         |
| Rtcd1  | Rtcd1.cSep08  | 295395 | 9395  | 689  | 5  | 138 | RNA terminal phosphate cyclase domain 1 (Rtcd1) alternative variant cSep08, mRNA.                                         |
| Rtel1  | Rtel1.aSep08  | 362288 | 5521  | 2166 | 13 | 589 | DEAH helicase (Rtel1) alternative variant aSep08, mRNA.                                                                   |
| Rtel1  | Rtel1.bSep08  | 362288 | 8081  | 4059 | 15 | 466 | DEAH helicase (51.3 kD) (Rtel1) alternative variant bSep08, mRNA.                                                         |
| Rtel1  | Rtel1.cSep08  | 362288 | 22600 | 892  | 11 | 256 | DEAH helicase (Rtel1) alternative variant cSep08, mRNA.                                                                   |
| Rtel1  | Rtel1.dSep08  | 362288 | 2794  | 753  | 6  | 250 | DEAH helicase (Rtel1) alternative variant dSep08, mRNA.                                                                   |
| Rtel1  | Rtel1.eSep08  | 362288 | 2382  | 764  | 4  | 233 | DEAH helicase (Rtel1) alternative variant eSep08, mRNA.                                                                   |
| Rtel1  | Rtel1.fSep08  | 362288 | 12957 | 631  | 6  | 162 | DEAH helicase (Rtel1) alternative variant fSep08, mRNA.                                                                   |
| Rtel1  | Rtel1.gSep08  | 362288 | 35351 | 863  | 7  | 142 | regulator of telomere elongation helicase 1 like (16.3 kD) (Rtel1) alternative variant gSep08, mRNA.                      |
| Rtel1  | Rtel1.hSep08  | 362288 | 6959  | 605  | 5  | 123 | DEAH helicase (13.6 kD) (Rtel1) alternative variant hSep08, mRNA.                                                         |
| Rtel1  | Rtel1.iSep08  | 362288 | 8789  | 473  | 3  | 116 | DEAH helicase (Rtel1) alternative variant iSep08, mRNA.                                                                   |
| Rtel1  | Rtel1.jSep08  | 362288 | 921   | 698  | 2  | 102 | putative protein (Rtel1) alternative variant jSep08, mRNA.                                                                |
| Rtel1  | Rtel1.kSep08  | 362288 | 447   | 350  | 2  | 63  | putative protein (Rtel1) alternative variant kSep08, mRNA.                                                                |
| Rtel1  | Rtel1.lSep08  | 362288 | 4028  | 402  | 2  | 47  | DEAH helicase (Rtel1) alternative variant lSep08, mRNA.                                                                   |
| Rtf1   | Rtf1.aSep08   | 366169 | 51031 | 1457 | 4  | 485 | rtf1, Paf1/RNA polymerase II complex component, homolog ( <i>S. cerevisiae</i> ) (Rtf1) alternative variant aSep08, mRNA. |
| Rtf1   | Rtf1.cSep08   | 366169 | 24694 | 2618 | 3  | 233 | rtf1, Paf1/RNA polymerase II complex component, homolog ( <i>S. cerevisiae</i> ) (Rtf1) alternative variant cSep08, mRNA. |
| Rtkn   | Rtkn.bSep08   | 297383 | 7395  | 1059 | 7  | 353 | rhotekin (Rtkn) alternative variant bSep08, mRNA.                                                                         |
| Rtkn   | Rtkn.cSep08   | 297383 | 7187  | 618  | 6  | 153 | rhotekin (Rtkn) alternative variant cSep08, mRNA.                                                                         |
| Rtkn   | Rtkn.dSep08   | 297383 | 10357 | 527  | 5  | 131 | rhotekin (Rtkn) alternative variant dSep08, mRNA.                                                                         |
| Rtkn   | Rtkn.eSep08   | 297383 | 11612 | 393  | 5  | 130 | rhotekin (Rtkn) alternative variant eSep08, mRNA.                                                                         |
| Rtkn   | Rtkn.fSep08   | 297383 | 7960  | 586  | 2  | 81  | rhotekin (8.5 kD) (Rtkn) alternative variant fSep08, mRNA.                                                                |
| Rtn1   | Rtn1.bSep08   | 116644 | 29254 | 1530 | 7  | 255 | reticulin 1 (Rtn1) alternative variant bSep08, mRNA.                                                                      |
| Rtn2   | Rtn2.bSep08   | 308410 | 5391  | 1029 | 7  | 216 | reticulin 2 (Z-band associated protein) (Rtn2) alternative variant bSep08, mRNA.                                          |
| Rtn3   | Rtn3.bSep08   | 140945 | 25977 | 1616 | 3  | 500 | reticulin 3 (Rtn3) alternative variant bSep08, mRNA.                                                                      |
| Rtn3   | Rtn3.cSep08   | 140945 | 52699 | 720  | 7  | 239 | reticulin 3 (Rtn3) alternative variant cSep08, mRNA.                                                                      |

|         |                |        |       |      |    |     |                                                                                      |
|---------|----------------|--------|-------|------|----|-----|--------------------------------------------------------------------------------------|
| Rtn3    | Rtn3.eSep08    | 140945 | 15095 | 1446 | 7  | 236 | reticulon 3 (26.3 kD) (Rtn3) alternative variant eSep08, mRNA.                       |
| Rtn4    | Rtn4.bSep08    | 83765  | 47475 | 2238 | 7  | 437 | reticulon 4 (Rtn4) alternative variant bSep08, mRNA.                                 |
| Rtn4    | Rtn4.cSep08    | 83765  | 34350 | 851  | 7  | 204 | reticulon 4 (Rtn4) alternative variant cSep08, mRNA.                                 |
| Rtn4    | Rtn4.dSep08    | 83765  | 21825 | 1415 | 7  | 199 | reticulon 4 (22.4 kD) (Rtn4) alternative variant dSep08, mRNA.                       |
| Rtn4    | Rtn4.eSep08    | 83765  | 6142  | 565  | 5  | 155 | reticulon 4 (Rtn4) alternative variant eSep08, mRNA.                                 |
| Rtn4ip1 | Rtn4ip1.bSep08 | 309912 | 8084  | 444  | 1  | 147 | reticulon 4 interacting protein 1 (Rtn4ip1) alternative variant bSep08, mRNA.        |
| Rtn4rl2 | Rtn4rl2.bSep08 | 311169 | 5946  | 618  | 2  | 206 | reticulon 4 receptor-like 2 (Rtn4rl2) alternative variant bSep08, mRNA.              |
| Rttn    | Rttn.aSep08    | 291377 | 48362 | 1394 |    | 464 | rotatin (Rttn) mRNA.                                                                 |
| ruby    | ruby.aSep08    |        | 9803  | 2545 | 2  | 86  | putative nuclear protein (10.2 kD) (ruby) alternative variant aSep08, mRNA.          |
| ruchy   | ruchy.aSep08   |        | 18368 | 603  |    | 200 | CRA b (ruchy) mRNA.                                                                  |
| rudar   | rudar.aSep08   |        | 1080  | 522  |    | 108 | putative protein (12.0 kD) (rudar) mRNA.                                             |
| rufer   | rufer.aSep08   |        | 561   | 267  |    | 41  | putative protein (rufer) mRNA.                                                       |
| ruflo   | ruflo.aSep08   |        | 500   | 135  |    | 45  | putative protein (ruflo) mRNA.                                                       |
| ruflo   | ruflo.bSep08   |        | 26859 | 311  | 2  | 37  | putative protein (ruflo) alternative variant bSep08, mRNA.                           |
| Rufy1   | Rufy1.aSep08   | 360521 | 21680 | 1691 | 11 | 392 | RUN FYVE domain-containing 1 (Rufy1) alternative variant aSep08, mRNA.               |
| Rufy3   | Rufy3.aSep08   | 360921 | 75917 | 3284 | 18 | 634 | RUN and zinc finger, FYVE-type (Rufy3) alternative variant aSep08, mRNA.             |
| Rufy3   | Rufy3.bSep08   | 360921 | 57644 | 4353 | 19 | 487 | RUN (Rufy3) alternative variant bSep08, mRNA.                                        |
| Rufy3   | Rufy3.dSep08   | 360921 | 13856 | 878  | 8  | 179 | rap2 interacting protein x CRA e (20.3 kD) (Rufy3) alternative variant dSep08, mRNA. |
| Rufy3   | Rufy3.eSep08   | 360921 | 28864 | 735  | 4  | 156 | putative protein of metazoan origin (Rufy3) alternative variant eSep08, mRNA.        |
| Rufy3   | Rufy3.fSep08   | 360921 | 24841 | 684  | 2  | 100 | putative protein of bilateral origin (Rufy3) alternative variant fSep08, mRNA.       |
| Rufy3   | Rufy3.gSep08   | 360921 | 3252  | 597  | 3  | 92  | rap2 interacting protein x CRA c (Rufy3) alternative variant gSep08, mRNA.           |
| rujar   | rujar.aSep08   |        | 45623 | 893  | 7  | 297 | CRA d (rujar) alternative variant aSep08, mRNA.                                      |
| ruja    | ruja.aSep08    |        | 14179 | 595  |    | 31  | putative protein (ruja) mRNA.                                                        |
| rujey   | rujey.aSep08   |        | 49870 | 456  |    | 45  | putative protein (5.0 kD) (rujey) mRNA.                                              |
| rukee   | rukee.aSep08   |        | 25934 | 548  |    | 60  | putative protein (7.1 kD) (rukee) mRNA.                                              |
| rukler  | rukler.aSep08  |        | 45226 | 520  | 1  | 113 | putative protein (rukler) alternative variant aSep08, mRNA.                          |
| rukler  | rukler.bSep08  |        | 19275 | 629  | 1  | 97  | putative protein (rukler) alternative variant bSep08, mRNA.                          |
| rulo    | rulo.aSep08    |        | 812   | 475  | 1  | 59  | CRA a like (6.8 kD) (rulo) alternative variant aSep08, mRNA.                         |
| rulo    | rulo.bSep08    |        | 7616  | 486  | 2  | 59  | CRA a like (6.8 kD) (rulo) alternative variant bSep08, mRNA.                         |
| rumee   | rumee.aSep08   |        | 7959  | 247  |    | 70  | putative protein (8.1 kD) (rumee) mRNA.                                              |
| rumer   | rumer.aSep08   |        | 2521  | 373  |    | 124 | CRA a like (rumer) mRNA.                                                             |

|         |                |        |       |      |   |     |                                                                                                                        |
|---------|----------------|--------|-------|------|---|-----|------------------------------------------------------------------------------------------------------------------------|
| RUN.0   | RUN.0.aSep08   |        | 19188 | 694  | 7 | 210 | RUN (RUN.0) alternative variant aSep08, mRNA.                                                                          |
| RUN.1   | RUN.1.aSep08   |        | 4718  | 587  |   | 187 | RUN (RUN.1) mRNA.                                                                                                      |
| RUN.2   | RUN.2.aSep08   |        | 5852  | 1862 | 9 | 450 | RUN and src homology-3 and variant SH3 (RUN.2) alternative variant aSep08, mRNA.                                       |
| RUN.2   | RUN.2.bSep08   |        | 6276  | 2495 | 8 | 380 | RUN (40.6 kD) (RUN.2) alternative variant bSep08, mRNA.                                                                |
| RUN.2   | RUN.2.cSep08   |        | 1150  | 927  | 3 | 168 | putative protein of bilateral origin (RUN.2) alternative variant cSep08, mRNA.                                         |
| RUN.2   | RUN.2.eSep08   |        | 880   | 420  | 5 | 139 | putative protein of bilateral origin (RUN.2) alternative variant eSep08, mRNA.                                         |
| Rundc1  | Rundc1.aSep08  | 303552 | 3495  | 2382 | 2 | 328 | RUN (Rundc1) alternative variant aSep08, mRNA.                                                                         |
| runoy   | runoy.aSep08   |        | 933   | 427  |   | 142 | putative protein, with a coiled coil domain (runoy) mRNA.                                                              |
| Runx1t1 | Runx1t1.bSep08 | 362489 | 53513 | 296  | 2 | 43  | runt-related transcription factor 1; translocated to, 1 (cyclin D-related) (Runx1t1) alternative variant bSep08, mRNA. |
| Rup2    | Rup2.aSep08    | 619560 | 3565  | 413  | 3 | 74  | urinary protein 2 (Rup2) alternative variant aSep08, mRNA.                                                             |
| Rup2    | Rup2.bSep08    | 619560 | 1458  | 804  | 2 | 41  | urinary protein 2 (Rup2) alternative variant bSep08, mRNA.                                                             |
| rupor   | rupor.aSep08   |        | 1962  | 741  | 4 | 132 | putative protein (rupor) alternative variant aSep08, mRNA.                                                             |
| rusa    | rusa.aSep08    |        | 55500 | 559  | 3 | 80  | putative protein of mammalian origin (rusa) alternative variant aSep08, mRNA.                                          |
| rusa    | rusa.bSep08    |        | 5786  | 489  | 2 | 32  | putative protein (rusa) alternative variant bSep08, mRNA.                                                              |
| rushee  | rushee.aSep08  |        | 37935 | 994  |   | 258 | mediator of rna polymerase ii transcription (rushee) mRNA.                                                             |
| rutu    | rutu.aSep08    |        | 28951 | 588  |   | 59  | putative protein (rutu) mRNA.                                                                                          |
| ruvar   | ruvar.aSep08   |        | 507   | 233  |   | 77  | putative protein (ruvar) mRNA.                                                                                         |
| Ruvbl2  | Ruvbl2.bSep08  | 292907 | 9664  | 770  | 8 | 224 | RuvB-like protein 2 (Ruvbl2) alternative variant bSep08, mRNA.                                                         |
| Ruvbl2  | Ruvbl2.cSep08  | 292907 | 2951  | 985  | 5 | 189 | RuvB-like protein 2 (Ruvbl2) alternative variant cSep08, mRNA.                                                         |
| Ruvbl2  | Ruvbl2.dSep08  | 292907 | 2753  | 386  | 4 | 128 | RuvB-like protein 2 (Ruvbl2) alternative variant dSep08, mRNA.                                                         |
| Ruvbl2  | Ruvbl2.eSep08  | 292907 | 3648  | 382  | 3 | 117 | RuvB-like protein 2 (Ruvbl2) alternative variant eSep08, mRNA.                                                         |
| Ruvbl2  | Ruvbl2.fSep08  | 292907 | 4404  | 233  | 3 | 70  | RuvB-like protein 2 (Ruvbl2) alternative variant fSep08, mRNA.                                                         |
| ruwey   | ruwey.aSep08   |        | 4923  | 892  | 2 | 297 | retinoblastoma binding protein 2 like (ruwey) alternative variant aSep08, mRNA.                                        |
| ruwey   | ruwey.bSep08   |        | 2686  | 714  | 1 | 205 | histone demethylase jarid1a (ruwey) alternative variant bSep08, mRNA.                                                  |
| rve.0   | rve.0.aSep08   |        | 942   | 799  |   | 115 | integrase like (12.8 kD) (rve.0) mRNA.                                                                                 |
| rve.1   | rve.1.aSep08   |        | 3808  | 1425 |   | 105 | ac1576 like (11.6 kD) (rve.1) mRNA.                                                                                    |
| rve.5   | rve.5.aSep08   |        | 942   | 799  |   | 115 | integrase like (12.8 kD) (rve.5) mRNA.                                                                                 |
| RWD.0   | RWD.0.aSep08   |        | 15076 | 343  |   | 101 | eukaryotic translation initiation factor 2 alpha kinase 4 CRA a (RWD.0) mRNA.                                          |
| Rwdd2a  | Rwdd2a.aSep08  | 363110 | 2789  | 1016 |   | 292 | RWD (33.8 kD) (Rwdd2a) mRNA.                                                                                           |
| Rwdd3   | Rwdd3.bSep08   | 65026  | 12720 | 685  | 2 | 212 | RWD (Rwdd3) alternative variant bSep08, mRNA.                                                                          |
| Rwdd4a  | Rwdd4a.bSep08  | 502084 | 8669  | 401  | 3 | 44  | putative protein of vertebrate origin (5.1 kD) (Rwdd4a) alternative variant bSep08, complete mRNA.                     |

|             |                    |        |        |      |   |     |                                                                                                    |
|-------------|--------------------|--------|--------|------|---|-----|----------------------------------------------------------------------------------------------------|
| Rwdd4a      | Rwdd4a.cSep08      | 502084 | 3828   | 1390 | 2 | 60  | putative protein (6.3 kD) (Rwdd4a) alternative variant cSep08, mRNA.                               |
| Rxfp2       | Rxfp2.bSep08       | 363866 | 3640   | 808  | 2 | 92  | relaxin/insulin-like family peptide receptor 2 (10.3 kD) (Rxfp2) alternative variant bSep08, mRNA. |
| Rxra        | Rxra.bSep08        | 25271  | 7653   | 729  | 2 | 130 | retinoid X receptor alpha (Rxra) alternative variant bSep08, mRNA.                                 |
| Rxrb        | Rxrb.bSep08        | 361801 | 4040   | 1102 | 8 | 309 | retinoid X receptor beta (Rxrb) alternative variant bSep08, mRNA.                                  |
| Rxrb        | Rxrb.cSep08        | 361801 | 5554   | 3044 | 8 | 239 | retinoid X receptor beta (26.5 kD) (Rxrb) alternative variant cSep08, mRNA.                        |
| Rxrb        | Rxrb.dSep08        | 361801 | 2159   | 1103 | 4 | 229 | retinoid X receptor beta (25.6 kD) (Rxrb) alternative variant dSep08, mRNA.                        |
| Rxrb        | Rxrb.eSep08        | 361801 | 688    | 515  | 2 | 144 | retinoid X receptor beta (Rxrb) alternative variant eSep08, mRNA.                                  |
| Rxrb        | Rxrb.fSep08        | 361801 | 541    | 426  | 2 | 109 | retinoid X receptor beta (Rxrb) alternative variant fSep08, mRNA.                                  |
| Rxrg        | Rxrg.bSep08        | 83574  | 16223  | 1436 | 2 | 292 | retinoid X receptor gamma (33.0 kD) (Rxrg) alternative variant bSep08, mRNA.                       |
| RY2G5       | RY2G5.aSep08       | 499925 | 5172   | 533  |   | 49  | potential ligand-binding protein (5.3 kD) (RY2G5) mRNA.                                            |
| ryby        | ryby.aSep08        |        | 8408   | 4389 |   | 175 | putative protein (19.5 kD) (ryby) mRNA.                                                            |
| rychy       | rychy.aSep08       |        | 14949  | 294  |   | 61  | putative protein (rychy) mRNA.                                                                     |
| rydar       | rydar.aSep08       |        | 26092  | 257  |   | 33  | putative protein (rydar) mRNA.                                                                     |
| RYDR_ITPR.0 | RYDR_ITPR.0.aSep08 |        | 4505   | 429  |   | 142 | ryanodine receptor (RYDR_ITPR.0) mRNA.                                                             |
| ryfer       | ryfer.bSep08       |        | 5560   | 413  |   | 74  | putative protein (ryfer) alternative variant bSep08, mRNA.                                         |
| ryflo       | ryflo.aSep08       |        | 17267  | 688  |   | 120 | putative protein (ryflo) mRNA.                                                                     |
| ryflu       | ryflu.aSep08       |        | 11961  | 559  | 4 | 48  | CRA c like (6.0 kD) (ryflu) alternative variant aSep08, mRNA.                                      |
| ryflu       | ryflu.bSep08       |        | 14588  | 1179 | 5 | 167 | CRA b like (ryflu) alternative variant bSep08, mRNA.                                               |
| rygar       | rygar.aSep08       |        | 3314   | 694  |   | 230 | CRA b (rygar) mRNA.                                                                                |
| ryja        | ryja.aSep08        |        | 156450 | 309  |   | 103 | putative protein (ryja) mRNA.                                                                      |
| ryjey       | ryjey.aSep08       |        | 20783  | 1575 |   | 524 | shroom (ryjey) mRNA.                                                                               |
| Ryk         | Ryk.bSep08         | 140585 | 32434  | 2145 | 2 | 390 | receptor-like tyrosine kinase (Ryk) alternative variant bSep08, mRNA.                              |
| rykee       | rykee.aSep08       |        | 37571  | 3854 |   | 92  | putative protein (9.4 kD) (rykee) alternative variant aSep08, mRNA.                                |
| rykee       | rykee.bSep08       |        | 34265  | 620  | 1 | 83  | CRA b like (rykee) alternative variant bSep08, mRNA.                                               |
| rykler      | rykler.aSep08      |        | 7205   | 1843 |   | 123 | putative protein of mammalian origin (rykler) mRNA.                                                |
| rylo        | rylo.aSep08        |        | 3547   | 402  |   | 41  | LYST-interacting protein 8 like (rylo) mRNA.                                                       |
| rymee       | rymee.aSep08       |        | 7796   | 267  |   | 34  | putative protein (4.2 kD) (rymee) mRNA.                                                            |
| rymer       | rymer.aSep08       |        | 1490   | 330  |   | 109 | putative protein of mammalian origin (rymer) mRNA.                                                 |
| rynoy       | rynoy.aSep08       |        | 360    | 261  |   | 66  | putative protein of vertebrate origin (rynoy) mRNA.                                                |
| rypor       | rypor.aSep08       |        | 8864   | 341  |   | 113 | talin 2 (rypor) mRNA.                                                                              |
| RyR.0       | RyR.0.aSep08       |        | 1051   | 352  |   | 117 | ryanodine receptor (RyR.0) mRNA.                                                                   |
| Ryr1        | Ryr1.aSep08        | 114207 | 14057  | 1453 |   | 445 | ryanodine receptor 1, skeletal muscle (Ryr1) mRNA.                                                 |

|         |                |        |        |      |    |     |                                                                                                           |
|---------|----------------|--------|--------|------|----|-----|-----------------------------------------------------------------------------------------------------------|
| Ryr2    | Ryr2.bSep08    | 689560 | 108463 | 2232 | 15 | 666 | ryanodine receptor 2, cardiac (Ryr2) alternative variant bSep08, mRNA.                                    |
| Ryr2    | Ryr2.cSep08    | 689560 | 11958  | 1794 | 6  | 597 | ryanodine receptor 2, cardiac (Ryr2) alternative variant cSep08, mRNA.                                    |
| Ryr2    | Ryr2.dSep08    | 689560 | 13139  | 701  | 7  | 208 | ryanodine receptor 2, cardiac (Ryr2) alternative variant dSep08, mRNA.                                    |
| Ryr2    | Ryr2.eSep08    | 689560 | 1848   | 246  | 2  | 81  | ryanodine receptor 2, cardiac (Ryr2) alternative variant eSep08, mRNA.                                    |
| Ryr3    | Ryr3.aSep08    | 170546 | 5546   | 700  |    | 233 | ryanodine receptor 3 (Ryr3) mRNA.                                                                         |
| rysa    | rysa.aSep08    |        | 1805   | 414  |    | 138 | mical-like 1 (rysa) mRNA.                                                                                 |
| ryshee  | ryshee.aSep08  |        | 4133   | 591  |    | 196 | mediator of rna polymerase ii transcription (ryshee) mRNA.                                                |
| rytu    | rytu.aSep08    |        | 6196   | 244  |    | 39  | putative protein (rytu) mRNA.                                                                             |
| ryvar   | ryvar.aSep08   |        | 6949   | 557  |    | 62  | putative protein (ryvar) mRNA.                                                                            |
| rywey   | rywey.aSep08   |        | 5272   | 1448 |    | 157 | putative protein, with 3 coiled coil domains, of eukaryotic origin (rywey) mRNA.                          |
| S100a3  | S100a3.aSep08  | 114216 | 22027  | 578  | 1  | 141 | s100 calcium binding protein A3 (S100a3) alternative variant aSep08, mRNA.                                |
| S100a3  | S100a3.bSep08  | 114216 | 18535  | 690  | 1  | 124 | s100 calcium binding protein A3 (S100a3) alternative variant bSep08, mRNA.                                |
| S100a3  | S100a3.dSep08  | 114216 | 40520  | 1290 | 2  | 77  | s100 calcium binding protein A3 (8.5 kD) (S100a3) alternative variant dSep08, mRNA.                       |
| S100a6  | S100a6.aSep08  | 85247  | 1456   | 479  | 3  | 89  | s100 calcium binding protein A6 (calcyclin) (10.0 kD) (S100a6) alternative variant aSep08, mRNA.          |
| S100a6  | S100a6.bSep08  | 85247  | 1236   | 945  | 2  | 89  | s100 calcium binding protein A6 (calcyclin) (10.0 kD) (S100a6) alternative variant bSep08, complete mRNA. |
| S100a10 | S100a10.bSep08 | 81778  | 8499   | 345  | 3  | 77  | s100 calcium binding protein A10 (calpactin) (S100a10) alternative variant bSep08, mRNA.                  |
| S100a13 | S100a13.aSep08 | 295213 | 6496   | 484  | 3  | 98  | s100 calcium binding protein A13 (11.2 kD) (S100a13) alternative variant aSep08, mRNA.                    |
| S100a16 | S100a16.aSep08 | 361991 | 1504   | 643  | 1  | 123 | s100 calcium binding protein A16 (14.2 kD) (S100a16) alternative variant aSep08, mRNA.                    |
| S100a16 | S100a16.bSep08 | 361991 | 3356   | 958  | 1  | 123 | s100 calcium binding protein A16 (14.2 kD) (S100a16) alternative variant bSep08, mRNA.                    |
| S100b   | S100b.aSep08   | 25742  | 7299   | 1988 | 2  | 135 | s100 protein, beta polypeptide, neural (S100b) alternative variant aSep08, mRNA.                          |
| S100vp  | S100vp.aSep08  | 295176 | 2946   | 555  | 3  | 125 | s100 calcium-binding protein, ventral prostate (S100vp) alternative variant aSep08, mRNA.                 |
| S100vp  | S100vp.cSep08  | 295176 | 639    | 332  | 2  | 34  | s100 calcium-binding protein, ventral prostate (S100vp) alternative variant cSep08, mRNA.                 |
| S100vp  | S100vp.dSep08  | 295176 | 522    | 272  | 2  | 48  | s100 calcium-binding protein, ventral prostate (S100vp) alternative variant dSep08, mRNA.                 |
| S100vp  | S100vp.eSep08  | 295176 | 531    | 272  | 3  | 48  | s100 calcium-binding protein, ventral prostate (S100vp) alternative variant eSep08, mRNA.                 |
| SAA.0   | SAA.0.aSep08   |        | 4651   | 1761 | 3  | 339 | serum amyloid (SAA.0) alternative variant aSep08, mRNA.                                                   |
| SAA.0   | SAA.0.bSep08   |        | 3440   | 551  | 2  | 139 | serum amyloid (SAA.0) alternative variant bSep08, mRNA.                                                   |



|             |                    |        |       |      |   |      |                                                                                                                 |
|-------------|--------------------|--------|-------|------|---|------|-----------------------------------------------------------------------------------------------------------------|
| SAA.0       | SAA.0.cSep08       |        | 3085  | 692  | 1 | 130  | serum amyloid precursor (14.9 kD) (SAA.0) alternative variant cSep08, mRNA.                                     |
| SAA.1       | SAA.1.aSep08       |        | 2500  | 395  |   | 87   | serum amyloid A (SAA.1) mRNA.                                                                                   |
| Saa4        | Saa4.aSep08        | 365245 | 3684  | 1121 | 1 | 130  | serum amyloid A 4 (15.0 kD) (Saa4) alternative variant aSep08, mRNA.                                            |
| saby        | saby.aSep08        |        | 9187  | 2916 |   | 323  | alpha thalassemia mental retardation syndrome x-linked homolog like (saby) mRNA.                                |
| SAC3_GANP.0 | SAC3_GANP.0.aSep08 |        | 1597  | 561  |   | 187  | SAC3/GANP/Nin1/mts3/eIF-3 p25 (SAC3_GANP.0) mRNA.                                                               |
| sachy       | sachy.aSep08       |        | 4892  | 177  |   | 34   | putative protein (sachy) mRNA.                                                                                  |
| Sacm1l      | Sacm1l.aSep08      | 116482 | 57093 | 3457 | 5 | 622  | SAC1 (suppressor of actin mutations 1, homolog)-like (S. cerevisiae) (Sacm1l) alternative variant aSep08, mRNA. |
| Sacm1l      | Sacm1l.bSep08      | 116482 | 37721 | 762  |   | 156  | SAC1 (suppressor of actin mutations 1, homolog)-like (S. cerevisiae) (Sacm1l) alternative variant bSep08, mRNA. |
| Sacm1l      | Sacm1l.cSep08      | 116482 | 4779  | 722  | 2 | 146  | SAC1 (suppressor of actin mutations 1, homolog)-like (S. cerevisiae) (Sacm1l) alternative variant cSep08, mRNA. |
| Sacm1l      | Sacm1l.dSep08      | 116482 | 7239  | 397  | 1 | 131  | SAC1 (suppressor of actin mutations 1, homolog)-like (S. cerevisiae) (Sacm1l) alternative variant dSep08, mRNA. |
| sadar       | sadar.aSep08       |        | 1550  | 738  |   | 37   | putative protein (4.1 kD) (sadar) mRNA.                                                                         |
| Sae1        | Sae1.bSep08        | 308384 | 30838 | 799  | 1 | 136  | SUMO1 activating enzyme subunit 1 (15.1 kD) (Sae1) alternative variant bSep08, mRNA.                            |
| Safb        | Safb.bSep08        | 64196  | 2144  | 824  | 5 | 218  | scaffold attachment factor B (Safb) alternative variant bSep08, mRNA.                                           |
| Safb        | Safb.cSep08        | 64196  | 2069  | 673  | 6 | 197  | scaffold attachment factor B (Safb) alternative variant cSep08, mRNA.                                           |
| safer       | safer.aSep08       |        | 6063  | 388  |   | 128  | gtpase-activating protein 21 (safer) mRNA.                                                                      |
| saflo       | saflo.aSep08       |        | 17350 | 762  |   | 93   | putative nuclear protein (10.2 kD) (saflo) mRNA.                                                                |
| saflu       | saflu.aSep08       |        | 2496  | 382  |   | 113  | putative protein (saflu) mRNA.                                                                                  |
| Sag         | Sag.bSep08         | 25539  | 817   | 252  | 1 | 38   | retinal S-antigen (Sag) alternative variant bSep08, mRNA.                                                       |
| Sag         | Sag.cSep08         | 25539  | 10038 | 711  | 3 | 34   | retinal S-antigen (Sag) alternative variant cSep08, mRNA.                                                       |
| sagar       | sagar.aSep08       |        | 3019  | 699  |   | 61   | putative protein (sagar) mRNA.                                                                                  |
| saja        | saja.aSep08        |        | 11950 | 625  |   | 138  | CRA a (saja) mRNA.                                                                                              |
| sajey       | sajey.aSep08       |        | 25142 | 497  | 2 | 52   | putative protein (sajey) alternative variant aSep08, mRNA.                                                      |
| sajey       | sajey.bSep08       |        | 79136 | 474  | 2 | 56   | putative protein (6.3 kD) (sajey) alternative variant bSep08, mRNA.                                             |
| sakee       | sakee.aSep08       |        | 705   | 309  |   | 44   | putative protein (sakee) mRNA.                                                                                  |
| sakler      | sakler.aSep08      |        | 955   | 590  |   | 196  | plasma membrane associated protein s3-12 (sakler) mRNA.                                                         |
| Sall1       | Sall1.aSep08       | 307740 | 5042  | 3928 | 2 | 1242 | sal-like 1 (Drosophila) (Sall1) alternative variant aSep08, mRNA.                                               |
| Sall1       | Sall1.cSep08       | 307740 | 2889  | 1775 | 3 | 462  | sal-like 1 (Drosophila) (Sall1) alternative variant cSep08, mRNA.                                               |
| Sall1       | Sall1.dSep08       | 307740 | 14574 | 700  | 2 | 214  | sal-like 1 (Drosophila) (24.5 kD) (Sall1) alternative variant dSep08, mRNA.                                     |
| salo        | salo.aSep08        |        | 3102  | 374  |   | 124  | furry homolog CRA b (salo) mRNA.                                                                                |

|         |                |        |        |      |    |     |                                                                                                                                                 |
|---------|----------------|--------|--------|------|----|-----|-------------------------------------------------------------------------------------------------------------------------------------------------|
| Samd4   | Samd4.aSep08   | 305826 | 104256 | 2410 | 12 | 610 | sterile alpha motif homology 2 and sterile alpha motif SAM (67.1 kD) (Samd4) alternative variant aSep08, complete mRNA.                         |
| Samd4   | Samd4.cSep08   | 305826 | 90576  | 1782 | 5  | 406 | sterile alpha motif homology 2 and sterile alpha motif SAM (Samd4) alternative variant cSep08, mRNA.                                            |
| Samd4   | Samd4.dSep08   | 305826 | 57220  | 752  | 5  | 250 | sterile alpha motif homology 2 and sterile alpha motif SAM (Samd4) alternative variant dSep08, mRNA.                                            |
| Samd7   | Samd7.aSep08   | 310257 | 8088   | 1000 |    | 43  | putative protein (Samd7) mRNA.                                                                                                                  |
| Samd10  | Samd10.aSep08  | 499957 | 4256   | 2142 | 5  | 238 | sterile alpha motif homology 2 and sterile alpha motif SAM (Samd10) alternative variant aSep08, mRNA.                                           |
| Samd10  | Samd10.bSep08  | 499957 | 2840   | 759  | 5  | 174 | sterile alpha motif homology 2 and sterile alpha motif SAM (19.6 kD) (Samd10) alternative variant bSep08, mRNA.                                 |
| Samd10  | Samd10.cSep08  | 499957 | 2996   | 931  | 5  | 157 | sterile alpha motif homology 2 and sterile alpha motif SAM (17.8 kD) (Samd10) alternative variant cSep08, complete mRNA.                        |
| Samd10  | Samd10.dSep08  | 499957 | 1756   | 419  | 2  | 139 | putative protein of vertebrate origin (Samd10) alternative variant dSep08, mRNA.                                                                |
| Samd12  | Samd12.aSep08  | 362910 | 517273 | 874  | 4  | 161 | sterile alpha motif/pointed and sterile alpha motif homology 2 and sterile alpha motif SAM (18.2 kD) (Samd12) alternative variant aSep08, mRNA. |
| Samd12  | Samd12.cSep08  | 362910 | 15314  | 449  | 1  | 36  | putative protein (4.0 kD) (Samd12) alternative variant cSep08, mRNA.                                                                            |
| Samd14  | Samd14.bSep08  | 287637 | 9868   | 788  | 4  | 257 | putative protein of vertebrate origin (Samd14) alternative variant bSep08, mRNA.                                                                |
| Samd14  | Samd14.cSep08  | 287637 | 8888   | 945  | 1  | 74  | putative protein of mammalian origin (8.2 kD) (Samd14) alternative variant cSep08, mRNA.                                                        |
| samee   | samee.aSep08   |        | 5377   | 269  |    | 41  | putative protein (4.7 kD) (samee) mRNA.                                                                                                         |
| samer   | samer.aSep08   |        | 1957   | 1030 |    | 154 | apoptosis-associated tyrosine kinase (17.3 kD) (samer) mRNA.                                                                                    |
| Samhd1  | Samhd1.aSep08  | 311580 | 13539  | 1659 |    | 346 | SAM domain and HD domain, 1 (Samhd1) alternative variant aSep08, mRNA.                                                                          |
| Samhd1  | Samhd1.bSep08  | 311580 | 10618  | 936  |    | 311 | SAM domain and HD domain, 1 (Samhd1) alternative variant bSep08, mRNA.                                                                          |
| Samm50  | Samm50.bSep08  | 300111 | 4744   | 1289 | 3  | 189 | sorting and assembly machinery component 50 homolog ( <i>S. cerevisiae</i> ) (20.8 kD) (Samm50) alternative variant bSep08, mRNA.               |
| Samm50  | Samm50.cSep08  | 300111 | 2542   | 728  | 2  | 109 | sorting and assembly machinery component 50 homolog ( <i>S. cerevisiae</i> ) (12.8 kD) (Samm50) alternative variant cSep08, mRNA.               |
| SAM_1.0 | SAM_1.0.aSep08 |        | 4751   | 635  |    | 172 | sterile alpha motif homology 2 and sterile alpha motif SAM (SAM_1.0) mRNA.                                                                      |
| SAM_1.1 | SAM_1.1.aSep08 |        | 79187  | 393  |    | 58  | cajalín 2 (SAM_1.1) mRNA.                                                                                                                       |
| SAM_1.2 | SAM_1.2.aSep08 |        | 6571   | 376  |    | 125 | kazrin (SAM_1.2) mRNA.                                                                                                                          |
| SAM_1.3 | SAM_1.3.aSep08 |        | 22011  | 3403 | 13 | 583 | ptprf interacting protein binding 1 like (SAM_1.3) alternative variant aSep08, mRNA.                                                            |
| SAM_1.3 | SAM_1.3.bSep08 |        | 969    | 508  | 1  | 116 | ptprf interacting protein binding 1 like (SAM_1.3) alternative variant bSep08, mRNA.                                                            |

|         |                |        |       |      |    |     |                                                                                            |
|---------|----------------|--------|-------|------|----|-----|--------------------------------------------------------------------------------------------|
| SAM_1.4 | SAM_1.4.aSep08 |        | 2265  | 316  |    | 105 | protein tyrosine phosphatase receptor type f polypeptide interacting alpha (SAM_1.4) mRNA. |
| SAM_2.0 | SAM_2.0.bSep08 |        | 3054  | 2158 |    | 61  | CRA b like (SAM_2.0) alternative variant bSep08, mRNA.                                     |
| SAM_2.1 | SAM_2.1.aSep08 |        | 1463  | 1190 |    | 178 | sterile alpha motif homology 2 and sterile alpha motif SAM (18.9 kD) (SAM_2.1) mRNA.       |
| SAM_2.2 | SAM_2.2.aSep08 |        | 1764  | 827  | 5  | 205 | eph receptor B6 (SAM_2.2) alternative variant aSep08, mRNA.                                |
| SAM_2.2 | SAM_2.2.bSep08 |        | 740   | 385  | 3  | 63  | eph receptor B6 (SAM_2.2) alternative variant bSep08, mRNA.                                |
| sanoy   | sanoy.aSep08   |        | 1038  | 571  |    | 74  | putative protein (sanoy) mRNA.                                                             |
| SAP.0   | SAP.0.aSep08   |        | 20821 | 487  | 5  | 161 | apoptotic chromatin condensation inducer 1 CRA a (SAP.0) alternative variant aSep08, mRNA. |
| SAP.1   | SAP.1.aSep08   |        | 3830  | 1245 |    | 415 | megakaryoblastic leukemia 1 like (SAP.1) mRNA.                                             |
| Sap18   | Sap18.bSep08   | 290284 | 810   | 476  | 2  | 136 | sin3-associated polypeptide 18 (Sap18) alternative variant bSep08, mRNA.                   |
| Sap18   | Sap18.cSep08   | 290284 | 900   | 772  | 2  | 80  | sin3-associated polypeptide 18 (9.2 kD) (Sap18) alternative variant cSep08, mRNA.          |
| Sap30bp | Sap30bp.aSep08 | 360662 | 32676 | 3196 | 11 | 308 | SAP30 binding protein (33.8 kD) (Sap30bp) alternative variant aSep08, complete mRNA.       |
| Sap30bp | Sap30bp.bSep08 | 360662 | 23551 | 395  | 5  | 131 | SAP30 binding protein (Sap30bp) alternative variant bSep08, mRNA.                          |
| Sap30bp | Sap30bp.cSep08 | 360662 | 873   | 613  | 2  | 104 | SAP30 binding protein (10.6 kD) (Sap30bp) alternative variant cSep08, mRNA.                |
| Sap30l  | Sap30l.aSep08  | 360531 | 7656  | 862  |    | 150 | SAP30-like (Sap30l) mRNA.                                                                  |
| Sap130  | Sap130.aSep08  | 307527 | 44720 | 1138 | 6  | 339 | Sin3A associated protein (Sap130) alternative variant aSep08, mRNA.                        |
| Sap130  | Sap130.bSep08  | 307527 | 18233 | 673  | 4  | 224 | Sin3A associated protein (Sap130) alternative variant bSep08, mRNA.                        |
| sapor   | sapor.aSep08   |        | 3644  | 453  |    | 86  | putative protein (sapor) mRNA.                                                             |
| Saps1   | Saps1.aSep08   | 361502 | 12326 | 3129 | 22 | 772 | SAPS domain family, member 1 (Saps1) alternative variant aSep08, mRNA.                     |
| Saps1   | Saps1.bSep08   | 361502 | 5631  | 731  | 8  | 237 | SAPS domain family, member 1 (Saps1) alternative variant bSep08, mRNA.                     |
| Saps1   | Saps1.cSep08   | 361502 | 2169  | 557  | 5  | 143 | SAPS domain family, member 1 (Saps1) alternative variant cSep08, mRNA.                     |
| Saps1   | Saps1.dSep08   | 361502 | 1529  | 384  | 5  | 128 | SAPS domain family, member 1 (Saps1) alternative variant dSep08, mRNA.                     |
| Saps1   | Saps1.eSep08   | 361502 | 1078  | 381  | 2  | 62  | SAPS domain family, member 1 (7.0 kD) (Saps1) alternative variant eSep08, mRNA.            |
| Saps2   | Saps2.aSep08   | 300146 | 33813 | 3665 | 21 | 940 | saps domain family member 2 (Saps2) alternative variant aSep08, mRNA.                      |
| Saps2   | Saps2.cSep08   | 300146 | 1745  | 740  | 3  | 114 | saps domain family member 2 (Saps2) alternative variant cSep08, mRNA.                      |
| Saps2   | Saps2.eSep08   | 300146 | 1196  | 394  | 3  | 78  | putative mitochondrial protein (8.6 kD) (Saps2) alternative variant eSep08, mRNA.          |

|        |               |        |       |      |    |     |                                                                                                  |
|--------|---------------|--------|-------|------|----|-----|--------------------------------------------------------------------------------------------------|
| Saps2  | Saps2.fSep08  | 300146 | 676   | 431  | 2  | 72  | saps domain family member 2 (Saps2) alternative variant fSep08, mRNA.                            |
| Saps3  | Saps3.aSep08  | 309144 | 82856 | 1798 | 4  | 556 | SAPS domain family, member 3 (Saps3) alternative variant aSep08, mRNA.                           |
| Saps3  | Saps3.bSep08  | 309144 | 19364 | 955  | 7  | 317 | SAPS domain family, member 3 (Saps3) alternative variant bSep08, mRNA.                           |
| Saps3  | Saps3.cSep08  | 309144 | 10864 | 2519 | 2  | 150 | SAPS domain family, member 3 (Saps3) alternative variant cSep08, mRNA.                           |
| Sar1a  | Sar1a.aSep08  | 361842 | 10649 | 934  | 4  | 198 | SAR1 gene homolog A (S. cerevisiae) (22.4 kD) (Sar1a) alternative variant aSep08, mRNA.          |
| Sar1a  | Sar1a.cSep08  | 361842 | 10459 | 708  | 5  | 196 | SAR1 gene homolog A (S. cerevisiae) (Sar1a) alternative variant cSep08, mRNA.                    |
| Sar1a  | Sar1a.dSep08  | 361842 | 10727 | 910  | 4  | 186 | SAR1 gene homolog A (S. cerevisiae) (21.1 kD) (Sar1a) alternative variant dSep08, mRNA.          |
| Sar1a  | Sar1a.eSep08  | 361842 | 5870  | 671  | 2  | 116 | SAR1 gene homolog A (S. cerevisiae) (Sar1a) alternative variant eSep08, mRNA.                    |
| Sar1b  | Sar1b.bSep08  | 287276 | 29615 | 1171 | 4  | 155 | SAR1 gene homolog B (S. cerevisiae) (17.6 kD) (Sar1b) alternative variant bSep08, complete mRNA. |
| Sar1b  | Sar1b.cSep08  | 287276 | 25076 | 569  | 2  | 92  | SAR1 gene homolog B (S. cerevisiae) (10.2 kD) (Sar1b) alternative variant cSep08, mRNA.          |
| sarby  | sarby.aSep08  |        | 1194  | 418  |    | 27  | putative protein (3.3 kD) (sarby) mRNA.                                                          |
| sarchy | sarchy.aSep08 |        | 3293  | 405  |    | 134 | kinesin family member 18A (sarchy) mRNA.                                                         |
| sardar | sardar.aSep08 |        | 2355  | 849  |    |     |                                                                                                  |
| Sardh  | Sardh.bSep08  | 114123 | 24758 | 573  | 4  | 190 | sarcosine dehydrogenase (Sardh) alternative variant bSep08, mRNA.                                |
| Sardh  | Sardh.cSep08  | 114123 | 7791  | 1517 | 1  | 101 | sarcosine dehydrogenase (Sardh) alternative variant cSep08, mRNA.                                |
| sarflo | sarflo.aSep08 |        | 837   | 349  |    | 62  | putative protein (sarflo) mRNA.                                                                  |
| sarflu | sarflu.aSep08 |        | 7293  | 983  | 11 | 327 | anemia group I (sarflu) alternative variant aSep08, mRNA.                                        |
| sarflu | sarflu.bSep08 |        | 4720  | 941  | 5  | 141 | anemia group I (sarflu) alternative variant bSep08, mRNA.                                        |
| sargar | sargar.aSep08 |        | 1551  | 598  |    | 11  | putative protein (1.2 kD) (sargar) mRNA.                                                         |
| sarja  | sarja.aSep08  |        | 11312 | 1525 |    | 32  | putative protein (3.7 kD) (sarja) mRNA.                                                          |
| sarjey | sarjey.aSep08 |        | 25038 | 699  | 2  | 43  | putative protein (sarjey) alternative variant aSep08, mRNA.                                      |
| sarjey | sarjey.bSep08 |        | 19162 | 318  | 1  | 44  | putative protein (sarjey) alternative variant bSep08, mRNA.                                      |
| sarkee | sarkee.aSep08 |        | 3515  | 634  |    | 211 | putative protein of vertebrate origin (sarkee) mRNA.                                             |
| sarlo  | sarlo.aSep08  |        | 5846  | 740  |    | 246 | furry homolog CRA a (sarlo) mRNA.                                                                |
| sarmee | sarmee.aSep08 |        | 2506  | 415  |    | 32  | putative protein (3.2 kD) (sarmee) mRNA.                                                         |
| sarmer | sarmer.aSep08 |        | 1731  | 567  |    | 189 | fanconi anemia core complex subunit (sarmer) mRNA.                                               |
| sarnoy | sarnoy.aSep08 |        | 732   | 269  |    | 87  | putative protein (sarnoy) mRNA.                                                                  |
| sarpor | sarpor.bSep08 |        | 3585  | 461  | 2  | 54  | putative protein of mammalian origin (6.4 kD) (sarpor) alternative variant bSep08, mRNA.         |
| Sars   | Sars.bSep08   | 266975 | 3940  | 981  | 5  | 207 | seryl-aminoacyl-tRNA synthetase (Sars) alternative variant bSep08, mRNA.                         |
| Sars   | Sars.cSep08   | 266975 | 875   | 636  | 2  | 122 | seryl-aminoacyl-tRNA synthetase (Sars) alternative variant cSep08, mRNA.                         |

|         |                |        |       |      |   |     |                                                                                                                                                   |
|---------|----------------|--------|-------|------|---|-----|---------------------------------------------------------------------------------------------------------------------------------------------------|
| sarsa   | sarsa.aSep08   |        | 1742  | 394  |   | 69  | putative protein (sarsa) mRNA.                                                                                                                    |
| sarshee | sarshee.aSep08 |        | 1839  | 787  |   | 101 | sucrase-isomaltase (sarshee) mRNA.                                                                                                                |
| Sart1   | Sart1.bSep08   | 29678  | 3837  | 1351 | 2 | 358 | squamous cell carcinoma antigen recognized by T-cells 1 (Sart1) alternative variant bSep08, mRNA.                                                 |
| sartu   | sartu.aSep08   |        | 16464 | 546  |   | 109 | putative protein (sartu) mRNA.                                                                                                                    |
| sarvar  | sarvar.aSep08  |        | 10947 | 468  |   | 62  | putative protein (sarvar) mRNA.                                                                                                                   |
| sarwey  | sarwey.aSep08  |        | 3954  | 1214 | 2 | 49  | putative protein (5.2 kD) (sarwey) alternative variant aSep08, mRNA.                                                                              |
| sarwey  | sarwey.bSep08  |        | 7310  | 2041 | 3 | 49  | putative protein (5.2 kD) (sarwey) alternative variant bSep08, mRNA.                                                                              |
| sasa    | sasa.aSep08    |        | 1594  | 737  | 3 | 156 | polyprotein -pol (sasa) alternative variant aSep08, mRNA.                                                                                         |
| sasa    | sasa.bSep08    |        | 3284  | 282  | 2 | 63  | gag protein like (sasa) alternative variant bSep08, mRNA.                                                                                         |
| Sash3   | Sash3.aSep08   | 317578 | 14720 | 2567 | 8 | 380 | src homology-3 and variant SH3 and sterile alpha motif homology 2 and sterile alpha motif SAM (41.7 kD) (Sash3) alternative variant aSep08, mRNA. |
| Sash3   | Sash3.bSep08   | 317578 | 1520  | 872  | 3 | 198 | domain-containing protein 3 (Sash3) alternative variant bSep08, mRNA.                                                                             |
| sashee  | sashee.aSep08  |        | 1184  | 755  |   | 92  | putative protein (10.1 kD) (sashee) mRNA.                                                                                                         |
| Sass6   | Sass6.bSep08   | 310807 | 9190  | 918  | 7 | 240 | spindle assembly 6 (Sass6) alternative variant bSep08, mRNA.                                                                                      |
| Sass6   | Sass6.cSep08   | 310807 | 6312  | 611  | 7 | 186 | spindle assembly 6 (Sass6) alternative variant cSep08, mRNA.                                                                                      |
| Sass6   | Sass6.dSep08   | 310807 | 6482  | 508  | 3 | 102 | spindle assembly 6 (Sass6) alternative variant dSep08, mRNA.                                                                                      |
| Sat1    | Sat1.bSep08    | 302642 | 3148  | 2457 | 1 | 114 | putative protein of ancient origin (13.2 kD) (Sat1) alternative variant bSep08, complete mRNA.                                                    |
| Sat1    | Sat1.cSep08    | 302642 | 3157  | 1145 | 3 | 71  | spermidine spermine transferase CRA a (8.2 kD) (Sat1) alternative variant cSep08, complete mRNA.                                                  |
| Sat1    | Sat1.dSep08    | 302642 | 3157  | 1058 | 2 | 96  | spermidine spermine N1-acetyltransferase (11.4 kD) (Sat1) alternative variant dSep08, complete mRNA.                                              |
| Sat2    | Sat2.aSep08    | 360547 | 1601  | 775  | 5 | 192 | spermidine/spermine N1-acetyl transferase 2 (Sat2) alternative variant aSep08, mRNA.                                                              |
| Sat2    | Sat2.bSep08    | 360547 | 1586  | 566  | 6 | 185 | spermidine/spermine N1-acetyl transferase 2 (Sat2) alternative variant bSep08, mRNA.                                                              |
| Sat2    | Sat2.dSep08    | 360547 | 1486  | 562  | 4 | 105 | spermidine/spermine N1-acetyl transferase 2 (12.0 kD) (Sat2) alternative variant dSep08, mRNA.                                                    |
| Sat2    | Sat2.eSep08    | 360547 | 849   | 431  | 3 | 98  | spermidine/spermine N1-acetyl transferase 2 (Sat2) alternative variant eSep08, mRNA.                                                              |
| Satb1   | Satb1.bSep08   | 316164 | 39280 | 1797 | 5 | 500 | special AT-rich sequence binding protein 1 like (Satb1) alternative variant bSep08, mRNA.                                                         |
| Satb1   | Satb1.cSep08   | 316164 | 4021  | 2071 | 3 | 271 | CRA a (Satb1) alternative variant cSep08, mRNA.                                                                                                   |
| Satb1   | Satb1.dSep08   | 316164 | 2781  | 735  | 2 | 194 | special AT-rich sequence binding protein 1 CRA b like (Satb1) alternative variant dSep08, mRNA.                                                   |
| Satb1   | Satb1.fSep08   | 316164 | 21375 | 789  | 3 | 41  | putative protein (4.6 kD) (Satb1) alternative variant fSep08, mRNA.                                                                               |

|         |                |        |       |      |    |     |                                                                                                               |
|---------|----------------|--------|-------|------|----|-----|---------------------------------------------------------------------------------------------------------------|
| satu    | satu.aSep08    |        | 3800  | 2004 | 8  | 417 | prolactin regulatory element binding like (45.4 kD) (satu) alternative variant aSep08, mRNA.                  |
| satu    | satu.bSep08    |        | 2599  | 1757 | 5  | 270 | prolactin regulatory element binding like (satu) alternative variant bSep08, mRNA.                            |
| satu    | satu.cSep08    |        | 1621  | 1072 | 3  | 167 | prolactin regulatory element binding CRA c like (satu) alternative variant cSep08, mRNA.                      |
| Sav1    | Sav1.bSep08    | 299116 | 2225  | 406  | 2  | 50  | salvador homolog 1 (Drosophila) (Sav1) alternative variant bSep08, mRNA.                                      |
| savar   | savar.aSep08   |        | 3192  | 734  | 2  | 96  | putative protein (savar) alternative variant aSep08, mRNA.                                                    |
| savar   | savar.bSep08   |        | 12166 | 821  | 4  | 60  | putative protein (7.2 kD) (savar) alternative variant bSep08, mRNA.                                           |
| sawby   | sawby.aSep08   |        | 9515  | 295  |    | 73  | putative protein of eukaryotic origin (sawby) mRNA.                                                           |
| sawchy  | sawchy.aSep08  |        | 20042 | 337  |    | 28  | putative protein (3.2 kD) (sawchy) mRNA.                                                                      |
| sawdar  | sawdar.bSep08  |        | 556   | 261  |    | 76  | AT motif binding factor 1 like (sawdar) alternative variant bSep08, mRNA.                                     |
| sawey   | sawey.aSep08   |        | 45229 | 723  |    | 37  | putative protein (sawey) mRNA.                                                                                |
| sawflo  | sawflo.aSep08  |        | 11613 | 750  |    | 77  | putative mitochondrial protein (8.4 kD) (sawflo) mRNA.                                                        |
| sawflu  | sawflu.aSep08  |        | 16044 | 815  |    | 74  | putative protein (sawflu) mRNA.                                                                               |
| sawgar  | sawgar.bSep08  |        | 6002  | 557  | 2  | 41  | CRA b like (4.6 kD) (sawgar) alternative variant bSep08, mRNA.                                                |
| sawja   | sawja.aSep08   |        | 737   | 567  |    | 80  | putative protein (9.2 kD) (sawja) mRNA.                                                                       |
| sawjey  | sawjey.aSep08  |        | 15769 | 256  |    | 39  | putative protein (sawjey) mRNA.                                                                               |
| sawkee  | sawkee.aSep08  |        | 3969  | 571  |    | 98  | putative protein (sawkee) mRNA.                                                                               |
| sawkler | sawkler.aSep08 |        | 31586 | 644  |    | 60  | putative protein (sawkler) mRNA.                                                                              |
| sawlo   | sawlo.aSep08   |        | 4825  | 353  |    | 117 | furry homolog (sawlo) mRNA.                                                                                   |
| sawmee  | sawmee.aSep08  |        | 2952  | 738  |    | 54  | putative protein (5.8 kD) (sawmee) mRNA.                                                                      |
| sawmer  | sawmer.aSep08  |        | 1674  | 663  |    | 78  | putative protein of mammalian origin (sawmer) mRNA.                                                           |
| sawnoy  | sawnoy.aSep08  |        | 6282  | 214  |    | 49  | putative protein (sawnoy) mRNA.                                                                               |
| sawpor  | sawpor.aSep08  |        | 24006 | 451  |    | 36  | putative protein (4.1 kD) (sawpor) mRNA.                                                                      |
| sawsa   | sawsa.aSep08   |        | 2224  | 284  |    | 34  | putative protein (sawsa) mRNA.                                                                                |
| sawshee | sawshee.aSep08 |        | 2072  | 447  |    | 41  | putative protein (sawshee) mRNA.                                                                              |
| sawtu   | sawtu.cSep08   |        | 3371  | 288  | 3  | 52  | putative protein (sawtu) alternative variant cSep08, mRNA.                                                    |
| sawvar  | sawvar.aSep08  |        | 2088  | 805  |    | 151 | CRA a like (sawvar) mRNA.                                                                                     |
| sawwey  | sawwey.aSep08  |        | 2199  | 511  |    | 45  | putative protein (sawwey) mRNA.                                                                               |
| Sbds    | Sbds.bSep08    | 288615 | 8635  | 735  | 5  | 210 | shwachman-Bodian-Diamond syndrome homolog (human) (Sbds) alternative variant bSep08, mRNA.                    |
| Sbds    | Sbds.cSep08    | 288615 | 4639  | 1198 | 3  | 197 | shwachman-Bodian-Diamond syndrome homolog (human) (21.6 kD) (Sbds) alternative variant cSep08, complete mRNA. |
| Sbf1    | Sbf1.aSep08    | 300147 | 7673  | 1994 | 12 | 548 | SET binding factor 1 like (Sbf1) alternative variant aSep08, mRNA.                                            |
| Sbf1    | Sbf1.bSep08    | 300147 | 4851  | 807  | 3  | 257 | CRA b (Sbf1) alternative variant bSep08, mRNA.                                                                |
| Sbf1    | Sbf1.dSep08    | 300147 | 1328  | 712  | 5  | 93  | SET binding factor 1 like (10.7 kD) (Sbf1) alternative variant dSep08, mRNA.                                  |

|        |               |        |       |      |   |     |                                                                                           |
|--------|---------------|--------|-------|------|---|-----|-------------------------------------------------------------------------------------------|
| Sbk1   | Sbk1.bSep08   | 113907 | 1621  | 1032 | 1 | 200 | SH3-binding kinase 1 (Sbk1) alternative variant bSep08, mRNA.                             |
| Sbno1  | Sbno1.bSep08  | 304470 | 7647  | 2191 | 7 | 273 | sno, strawberry notch homolog 1 (Drosophila) (Sbno1) alternative variant bSep08, mRNA.    |
| Sbno1  | Sbno1.cSep08  | 304470 | 18249 | 733  | 5 | 195 | sno, strawberry notch homolog 1 (Drosophila) (Sbno1) alternative variant cSep08, mRNA.    |
| Sbno2  | Sbno2.cSep08  | 314619 | 1719  | 543  | 6 | 132 | strawberry notch homolog (Sbno2) alternative variant cSep08, mRNA.                        |
| Sbno2  | Sbno2.dSep08  | 314619 | 2389  | 1004 | 2 | 64  | putative protein (Sbno2) alternative variant dSep08, mRNA.                                |
| Sbno2  | Sbno2.eSep08  | 314619 | 17542 | 360  | 3 | 61  | putative protein (Sbno2) alternative variant eSep08, mRNA.                                |
| Sbp    | Sbp.bSep08    | 25540  | 3862  | 1173 | 3 | 246 | spermine binding protein (Sbp) alternative variant bSep08, mRNA.                          |
| Sbsn   | Sbsn.aSep08   | 292793 | 3599  | 1324 | 4 | 392 | suprabasin (Sbsn) alternative variant aSep08, mRNA.                                       |
| Sbsn   | Sbsn.dSep08   | 292793 | 4453  | 429  | 4 | 92  | suprabasin (9.5 kD) (Sbsn) alternative variant dSep08, complete mRNA.                     |
| Sbsn   | Sbsn.fSep08   | 292793 | 22302 | 556  | 6 | 54  | suprabasin (Sbsn) alternative variant fSep08, mRNA.                                       |
| Sc65   | Sc65.bSep08   | 59101  | 3680  | 735  | 2 | 162 | synaptonemal complex protein SC65 (Sc65) alternative variant bSep08, mRNA.                |
| SCA7.0 | SCA7.0.aSep08 |        | 6103  | 400  |   | 133 | ataxin 7 (SCA7.0) mRNA.                                                                   |
| SCA7.1 | SCA7.1.aSep08 |        | 9385  | 699  |   | 179 | ataxin 7-like (SCA7.1) mRNA.                                                              |
| Scaf1  | Scaf1.bSep08  | 56081  | 1197  | 692  | 3 | 99  | SR-related CTD-associated factor 1 (Scaf1) alternative variant bSep08, mRNA.              |
| Scamp2 | Scamp2.bSep08 | 65168  | 1839  | 1623 | 2 | 124 | secretory carrier membrane protein 2 (Scamp2) alternative variant bSep08, mRNA.           |
| Scamp2 | Scamp2.dSep08 | 65168  | 5093  | 317  | 4 | 83  | secretory carrier membrane protein 2 (Scamp2) alternative variant dSep08, mRNA.           |
| Scamp3 | Scamp3.aSep08 | 65169  | 5858  | 1432 | 1 | 413 | secretory carrier membrane protein 3 (Scamp3) alternative variant aSep08, mRNA.           |
| Scamp3 | Scamp3.bSep08 | 65169  | 5790  | 1485 | 2 | 386 | secretory carrier membrane protein 3 (Scamp3) alternative variant bSep08, mRNA.           |
| Scamp4 | Scamp4.aSep08 | 65170  | 12158 | 1825 | 7 | 288 | secretory carrier membrane protein 4 (Scamp4) alternative variant aSep08, mRNA.           |
| Scamp4 | Scamp4.cSep08 | 65170  | 2776  | 922  | 4 | 131 | secretory carrier membrane protein 4 (Scamp4) alternative variant cSep08, mRNA.           |
| Scamp4 | Scamp4.dSep08 | 65170  | 1824  | 654  | 2 | 131 | secretory carrier membrane protein 4 (Scamp4) alternative variant dSep08, mRNA.           |
| Scamp4 | Scamp4.eSep08 | 65170  | 11385 | 686  | 7 | 102 | secretory carrier membrane protein 4 (11.4 kD) (Scamp4) alternative variant eSep08, mRNA. |
| Scamp4 | Scamp4.gSep08 | 65170  | 7122  | 760  | 3 | 59  | secretory carrier membrane protein 4 (6.8 kD) (Scamp4) alternative variant gSep08, mRNA.  |
| Scamp4 | Scamp4.hSep08 | 65170  | 9512  | 590  | 6 | 97  | secretory carrier membrane protein 4 (Scamp4) alternative variant hSep08, mRNA.           |
| SCAN.0 | SCAN.0.aSep08 |        | 11987 | 951  |   | 246 | zinc finger protein 445 (SCAN.0) mRNA.                                                    |
| SCAN.1 | SCAN.1.aSep08 |        | 1656  | 762  |   | 147 | zinc finger (SCAN.1) mRNA.                                                                |

|                   |                          |        |        |      |    |     |                                                                                           |
|-------------------|--------------------------|--------|--------|------|----|-----|-------------------------------------------------------------------------------------------|
| SCAN.3            | SCAN.3.aSep08            |        | 1302   | 441  |    | 61  | putative protein (SCAN.3) mRNA.                                                           |
| Scap              | Scap.bSep08              | 301024 | 44129  | 1074 | 6  | 246 | SREBF chaperone (27.8 kD) (Scap) alternative variant bSep08, mRNA.                        |
| Scap              | Scap.cSep08              | 301024 | 475    | 341  | 2  | 113 | SREBF chaperone (Scap) alternative variant cSep08, mRNA.                                  |
| Scara5            | Scara5.aSep08            | 305974 | 77944  | 1052 |    | 350 | scavenger receptor class A, member 5 (putative) (Scara5) mRNA.                            |
| Scarb1            | Scarb1.bSep08            | 25073  | 43770  | 646  | 4  | 147 | scavenger receptor class B, member 1 (Scarb1) alternative variant bSep08, mRNA.           |
| Scarb1            | Scarb1.cSep08            | 25073  | 42390  | 758  | 3  | 145 | scavenger receptor class B, member 1 (16.5 kD) (Scarb1) alternative variant cSep08, mRNA. |
| Scarb1            | Scarb1.dSep08            | 25073  | 9992   | 775  | 4  | 112 | scavenger receptor class B, member 1 (Scarb1) alternative variant dSep08, mRNA.           |
| Scarb1            | Scarb1.fSep08            | 25073  | 1220   | 577  | 2  | 99  | scavenger receptor class B, member 1 (Scarb1) alternative variant fSep08, mRNA.           |
| Scarf1            | Scarf1.bSep08            | 303313 | 5153   | 1168 | 5  | 281 | scavenger receptor class F, member 1 (Scarf1) alternative variant bSep08, mRNA.           |
| Scarf1            | Scarf1.cSep08            | 303313 | 6526   | 3490 | 6  | 183 | scavenger receptor class F, member 1 (Scarf1) alternative variant cSep08, mRNA.           |
| Scarf1            | Scarf1.dSep08            | 303313 | 774    | 690  | 2  | 95  | scavenger receptor class F, member 1 (Scarf1) alternative variant dSep08, mRNA.           |
| Scarf1            | Scarf1.eSep08            | 303313 | 3161   | 2228 | 3  | 59  | scavenger receptor class F, member 1 (6.3 kD) (Scarf1) alternative variant eSep08, mRNA.  |
| Scarf2            | Scarf2.cSep08            | 287949 | 3512   | 1377 | 2  | 81  | scavenger receptor class F, member 2 (8.0 kD) (Scarf2) alternative variant cSep08, mRNA.  |
| Sccpdh            | Sccpdh.aSep08            | 305021 | 19456  | 1791 | 4  | 544 | saccharopine dehydrogenase (putative) (Sccpdh) alternative variant aSep08, mRNA.          |
| Sccpdh            | Sccpdh.cSep08            | 305021 | 11959  | 825  | 6  | 181 | saccharopine dehydrogenase (putative) (Sccpdh) alternative variant cSep08, mRNA.          |
| Scd1              | Scd1.bSep08              | 246074 | 1242   | 518  | 2  | 47  | stearoyl-Coenzyme A desaturase 1 (Scd1) alternative variant bSep08, mRNA.                 |
| Scel              | Scel.bSep08              | 361086 | 54616  | 1090 | 16 | 299 | sciellin (Scel) alternative variant bSep08, mRNA.                                         |
| Scel              | Scel.cSep08              | 361086 | 35881  | 1376 | 8  | 163 | sciellin (Scel) alternative variant cSep08, mRNA.                                         |
| Scfd1             | Scfd1.aSep08             | 54350  | 78973  | 2086 | 25 | 637 | vesicle transport-related protein (72.3 kD) (Scfd1) alternative variant aSep08, mRNA.     |
| Scg2              | Scg2.bSep08              | 24765  | 5574   | 2435 | 3  | 579 | secretogranin II (66.7 kD) (Scg2) alternative variant bSep08, mRNA.                       |
| Scg2              | Scg2.cSep08              | 24765  | 3345   | 393  | 3  | 85  | secretogranin II (Scg2) alternative variant cSep08, mRNA.                                 |
| Scg2              | Scg2.dSep08              | 24765  | 3269   | 383  | 2  | 76  | secretogranin II (Scg2) alternative variant dSep08, mRNA.                                 |
| Scg3              | Scg3.aSep08              | 116635 | 16296  | 1779 | 1  | 578 | secretogranin III (Scg3) alternative variant aSep08, mRNA.                                |
| Scg3              | Scg3.cSep08              | 116635 | 8535   | 673  | 2  | 66  | secretogranin III (Scg3) alternative variant cSep08, mRNA.                                |
| Scg5              | Scg5.bSep08              | 25719  | 43609  | 755  | 2  | 197 | secretogranin V (Scg5) alternative variant bSep08, mRNA.                                  |
| Scgb2a1andScgb2a2 | Scgb2a1andScgb2a2.aSep08 | 25010  | 135609 | 744  | 4  | 130 | secretoglobin family 2A member 1 (Scgb2a1andScgb2a2) alternative variant aSep08, mRNA.    |
| Scgb2a1andScgb2a2 | Scgb2a1andScgb2a2.aSep08 | 361725 | 135609 | 744  | 4  | 130 | secretoglobin family 2A member 1 (Scgb2a1andScgb2a2) alternative variant aSep08, mRNA.    |



|        |               |        |       |      |    |      |                                                                                                  |
|--------|---------------|--------|-------|------|----|------|--------------------------------------------------------------------------------------------------|
| Schip1 | Schip1.bSep08 | 295105 | 1031  | 826  | 2  | 274  | schwannomin interacting protein 1 (Schip1) alternative variant bSep08, mRNA.                     |
| Schip1 | Schip1.cSep08 | 295105 | 52367 | 1594 | 7  | 261  | schwannomin interacting protein 1 (29.4 kD) (Schip1) alternative variant cSep08, mRNA.           |
| Schip1 | Schip1.dSep08 | 295105 | 63116 | 1030 | 7  | 244  | schwannomin interacting protein 1 (27.5 kD) (Schip1) alternative variant dSep08, mRNA.           |
| Schip1 | Schip1.eSep08 | 295105 | 26952 | 728  | 2  | 242  | schwannomin interacting protein 1 (Schip1) alternative variant eSep08, mRNA.                     |
| Scly   | Scly.bSep08   | 363285 | 11289 | 638  | 5  | 212  | selenocysteine lyase (Scly) alternative variant bSep08, mRNA.                                    |
| Scly   | Scly.cSep08   | 363285 | 1602  | 796  | 2  | 137  | selenocysteine lyase (14.8 kD) (Scly) alternative variant cSep08, mRNA.                          |
| Scly   | Scly.dSep08   | 363285 | 9744  | 407  | 4  | 118  | selenocysteine lyase (Scly) alternative variant dSep08, mRNA.                                    |
| Scly   | Scly.eSep08   | 363285 | 1142  | 377  | 2  | 58   | selenocysteine lyase (Scly) alternative variant eSep08, mRNA.                                    |
| Scmh1  | Scmh1.bSep08  | 362581 | 12859 | 707  | 1  | 181  | sex comb on midleg homolog 1 (Scmh1) alternative variant bSep08, mRNA.                           |
| Scml4  | Scml4.aSep08  | 309859 | 15914 | 955  |    | 241  | sex comb on midleg-like 4 (Drosophila) (Scml4) mRNA.                                             |
| Scn1a  | Scn1a.bSep08  | 81574  | 31004 | 1269 | 8  | 423  | sodium channel, voltage-gated, type I, alpha (Scn1a) alternative variant bSep08, mRNA.           |
| Scn1a  | Scn1a.cSep08  | 81574  | 6205  | 3314 | 2  | 398  | sodium channel, voltage-gated, type I, alpha (Scn1a) alternative variant cSep08, mRNA.           |
| Scn1a  | Scn1a.dSep08  | 81574  | 70005 | 341  | 1  | 52   | sodium channel, voltage-gated, type I, alpha (Scn1a) alternative variant dSep08, mRNA.           |
| Scn1b  | Scn1b.bSep08  | 29686  | 9722  | 1487 | 5  | 260  | sodium channel, voltage-gated, type I, beta (Scn1b) alternative variant bSep08, mRNA.            |
| Scn2a1 | Scn2a1.bSep08 | 24766  | 21574 | 1792 | 7  | 551  | sodium channel, voltage-gated, type II, alpha 1 (Scn2a1) alternative variant bSep08, mRNA.       |
| Scn2a1 | Scn2a1.cSep08 | 24766  | 10891 | 513  | 4  | 98   | sodium channel, voltage-gated, type II, alpha 1 (Scn2a1) alternative variant cSep08, mRNA.       |
| Scn2a1 | Scn2a1.dSep08 | 24766  | 10891 | 504  | 4  | 98   | sodium channel, voltage-gated, type II, alpha 1 (Scn2a1) alternative variant dSep08, mRNA.       |
| Scn2b  | Scn2b.bSep08  | 25349  | 9281  | 890  | 3  | 177  | sodium channel, voltage-gated, type II, beta (20.2 kD) (Scn2b) alternative variant bSep08, mRNA. |
| Scn3b  | Scn3b.cSep08  | 245956 | 3169  | 2859 | 2  | 83   | sodium channel, voltage-gated, type III, beta (Scn3b) alternative variant cSep08, mRNA.          |
| Scn3b  | Scn3b.dSep08  | 245956 | 8686  | 660  | 4  | 44   | sodium channel, voltage-gated, type III, beta (Scn3b) alternative variant dSep08, mRNA.          |
| Scn5a  | Scn5a.bSep08  | 25665  | 80192 | 6196 | 22 | 1381 | sodium channel, voltage-gated, type 5, alpha subunit (Scn5a) alternative variant bSep08, mRNA.   |
| Scn5a  | Scn5a.cSep08  | 25665  | 80192 | 6037 | 21 | 1328 | sodium channel, voltage-gated, type 5, alpha subunit (Scn5a) alternative variant cSep08, mRNA.   |
| Scn5a  | Scn5a.dSep08  | 25665  | 6787  | 718  | 5  | 238  | sodium channel, voltage-gated, type 5, alpha subunit (Scn5a) alternative variant dSep08, mRNA.   |
| Scn7a  | Scn7a.aSep08  | 64155  | 6105  | 2904 |    | 446  | sodium channel, voltage-gated, type VII, alpha (Scn7a) mRNA.                                     |

|        |               |        |       |      |    |     |                                                                                                         |
|--------|---------------|--------|-------|------|----|-----|---------------------------------------------------------------------------------------------------------|
| Scn8a  | Scn8a.cSep08  | 29710  | 4638  | 505  | 2  | 42  | sodium channel, voltage-gated, type 8, alpha subunit (Scn8a) alternative variant cSep08, mRNA.          |
| Scn8a  | Scn8a.dSep08  | 29710  | 1228  | 525  | 2  | 68  | sodium channel, voltage-gated, type 8, alpha subunit (7.5 kD) (Scn8a) alternative variant dSep08, mRNA. |
| Scn9a  | Scn9a.bSep08  | 78956  | 19199 | 565  | 1  | 112 | sodium channel, voltage-gated, type IX, alpha (Scn9a) alternative variant bSep08, mRNA.                 |
| Scn10a | Scn10a.aSep08 | 29571  | 8187  | 1024 |    | 341 | sodium channel, voltage-gated, type X, alpha (Scn10a) mRNA.                                             |
| Scnm1  | Scnm1.bSep08  | 310662 | 3045  | 645  | 1  | 214 | sodium channel modifier 1 (Scnm1) alternative variant bSep08, mRNA.                                     |
| Scnn1a | Scnn1a.bSep08 | 25122  | 4920  | 767  | 2  | 235 | sodium channel, nonvoltage-gated, type I, alpha (Scnn1a) alternative variant bSep08, mRNA.              |
| Scnn1b | Scnn1b.aSep08 | 24767  | 3521  | 742  | 6  | 247 | sodium channel, nonvoltage-gated 1 beta (Scnn1b) alternative variant aSep08, mRNA.                      |
| Scnn1b | Scnn1b.bSep08 | 24767  | 845   | 761  | 2  | 40  | sodium channel, nonvoltage-gated 1 beta (4.6 kD) (Scnn1b) alternative variant bSep08, mRNA.             |
| Sco1   | Sco1.aSep08   | 497930 | 13153 | 2149 |    | 284 | SCO cytochrome oxidase deficient homolog 1 (yeast) (31.8 kD) (Sco1) mRNA.                               |
| Scoc   | Scoc.bSep08   | 364981 | 6275  | 1719 | 4  | 82  | short coiled-coil protein (9.4 kD) (Scoc) alternative variant bSep08, complete mRNA.                    |
| Scoc   | Scoc.eSep08   | 364981 | 2956  | 603  | 3  | 32  | short coiled-coil protein (4.0 kD) (Scoc) alternative variant eSep08, mRNA.                             |
| SCP.0  | SCP.0.aSep08  |        | 22065 | 833  |    | 206 | cysteine-rich secretory protein 2 (SCP.0) mRNA.                                                         |
| Scp2   | Scp2.bSep08   | 25541  | 33576 | 1104 | 10 | 184 | sterol carrier protein 2 (20.4 kD) (Scp2) alternative variant bSep08, mRNA.                             |
| Scp2   | Scp2.cSep08   | 25541  | 27083 | 755  | 4  | 154 | sterol carrier protein 2 (Scp2) alternative variant cSep08, mRNA.                                       |
| Scp2   | Scp2.dSep08   | 25541  | 8574  | 390  | 3  | 60  | sterol carrier protein 2 (Scp2) alternative variant dSep08, mRNA.                                       |
| Scpep1 | Scpep1.bSep08 | 114861 | 18187 | 728  | 9  | 240 | serine carboxypeptidase 1 CRA b (Scpep1) alternative variant bSep08, mRNA.                              |
| Scpep1 | Scpep1.cSep08 | 114861 | 13904 | 733  | 6  | 202 | serine carboxypeptidase 1 CRA b (Scpep1) alternative variant cSep08, mRNA.                              |
| Scpep1 | Scpep1.dSep08 | 114861 | 7692  | 617  | 3  | 102 | serine carboxypeptidase 1 CRA b (Scpep1) alternative variant dSep08, mRNA.                              |
| Scpep1 | Scpep1.eSep08 | 114861 | 1263  | 315  | 2  | 66  | serine carboxypeptidase 1 (Scpep1) alternative variant eSep08, mRNA.                                    |
| Scpep1 | Scpep1.fSep08 | 114861 | 5894  | 993  | 2  | 40  | serine carboxypeptidase 1 (4.4 kD) (Scpep1) alternative variant fSep08, mRNA.                           |
| Scrib  | Scrib.aSep08  | 362938 | 16729 | 3525 | 21 | 715 | scribbled homolog (Drosophila) (Scrib) alternative variant aSep08, mRNA.                                |
| Scrib  | Scrib.bSep08  | 362938 | 7098  | 1787 | 5  | 595 | scribbled homolog (Drosophila) (Scrib) alternative variant bSep08, mRNA.                                |
| Scrib  | Scrib.cSep08  | 362938 | 10946 | 1879 | 11 | 548 | scribbled homolog (Drosophila) (Scrib) alternative variant cSep08, mRNA.                                |
| Scrib  | Scrib.dSep08  | 362938 | 10657 | 1980 | 13 | 493 | scribbled homolog (Drosophila) (52.7 kD) (Scrib) alternative variant dSep08, mRNA.                      |

|          |                 |        |        |      |    |     |                                                                                                      |
|----------|-----------------|--------|--------|------|----|-----|------------------------------------------------------------------------------------------------------|
| Scrib    | Scrib.eSep08    | 362938 | 10218  | 2000 | 10 | 351 | scribbled homolog (Drosophila) (Scrib) alternative variant eSep08, mRNA.                             |
| Scrib    | Scrib.fSep08    | 362938 | 3780   | 1379 | 8  | 238 | scribbled homolog (Drosophila) (Scrib) alternative variant fSep08, mRNA.                             |
| Scrib    | Scrib.gSep08    | 362938 | 891    | 626  | 4  | 208 | scribbled homolog (Drosophila) (Scrib) alternative variant gSep08, mRNA.                             |
| Scrib    | Scrib.hSep08    | 362938 | 3247   | 617  | 4  | 205 | scribbled homolog (Drosophila) (Scrib) alternative variant hSep08, mRNA.                             |
| Scrib    | Scrib.iSep08    | 362938 | 2333   | 764  | 4  | 159 | scribbled homolog (Drosophila) (Scrib) alternative variant iSep08, mRNA.                             |
| Scrib    | Scrib.jSep08    | 362938 | 1007   | 542  | 4  | 102 | scribbled homolog (Drosophila) (Scrib) alternative variant jSep08, mRNA.                             |
| Scrib    | Scrib.kSep08    | 362938 | 2100   | 596  | 2  | 90  | scribbled homolog (Drosophila) (Scrib) alternative variant kSep08, mRNA.                             |
| Scrib    | Scrib.lSep08    | 362938 | 836    | 417  | 3  | 60  | scribbled homolog (Drosophila) (Scrib) alternative variant lSep08, mRNA.                             |
| Scrn1    | Scrn1.bSep08    | 502776 | 4743   | 1791 | 2  | 131 | secernin 1 (Scrn1) alternative variant bSep08, mRNA.                                                 |
| Scrn2    | Scrn2.bSep08    | 360612 | 2722   | 753  | 1  | 229 | secernin 2 (Scrn2) alternative variant bSep08, mRNA.                                                 |
| Scrn3    | Scrn3.bSep08    | 311731 | 18963  | 2536 | 3  | 256 | secernin 3 (Scrn3) alternative variant bSep08, mRNA.                                                 |
| Scube1   | Scube1.bSep08   | 315174 | 5608   | 853  | 4  | 254 | signal peptide, CUB domain, EGF-like 1 (Scube1) alternative variant bSep08, mRNA.                    |
| Scube1   | Scube1.cSep08   | 315174 | 46922  | 702  | 4  | 197 | signal peptide, CUB domain, EGF-like 1 (21.5 kD) (Scube1) alternative variant cSep08, complete mRNA. |
| Scx      | Scx.cSep08      | 680712 | 1908   | 616  | 3  | 91  | scleraxis (Scx) alternative variant cSep08, mRNA.                                                    |
| Scye1    | Scye1.aSep08    | 114632 | 23824  | 1225 | 6  | 317 | small inducible cytokine subfamily E, member 1 (Scye1) alternative variant aSep08, mRNA.             |
| Scye1    | Scye1.cSep08    | 114632 | 10961  | 438  | 2  | 36  | small inducible cytokine subfamily E, member 1 (Scye1) alternative variant cSep08, mRNA.             |
| Scyl1    | Scyl1.bSep08    | 293684 | 2596   | 2026 | 5  | 175 | CRA b (19.6 kD) (Scyl1) alternative variant bSep08, mRNA.                                            |
| Scyl1    | Scyl1.cSep08    | 293684 | 805    | 445  | 3  | 121 | 1 CRA a (Scyl1) alternative variant cSep08, mRNA.                                                    |
| Scyl1    | Scyl1.dSep08    | 293684 | 487    | 387  | 2  | 40  | putative protein (Scyl1) alternative variant dSep08, mRNA.                                           |
| Scyl1bp1 | Scyl1bp1.aSep08 | 304923 | 16620  | 2467 |    | 368 | SCY1-like 1 binding protein 1 (41.6 kD) (Scyl1bp1) complete mRNA.                                    |
| Scyl2    | Scyl2.aSep08    | 314717 | 24980  | 833  |    | 185 | SCY1-like 2 (S. cerevisiae) (Scyl2) mRNA.                                                            |
| Scyl3    | Scyl3.aSep08    | 360866 | 7084   | 2887 |    | 392 | SCY1-like 3 (S. cerevisiae) (Scyl3) mRNA.                                                            |
| Sdc2     | Sdc2.bSep08     | 25615  | 59651  | 829  | 5  | 172 | syndecan 2 (18.9 kD) (Sdc2) alternative variant bSep08, mRNA.                                        |
| Sdc2     | Sdc2.cSep08     | 25615  | 107669 | 730  | 4  | 134 | syndecan 2 (14.6 kD) (Sdc2) alternative variant cSep08, mRNA.                                        |
| Sdcbp    | Sdcbp.bSep08    | 83841  | 25590  | 1656 | 8  | 282 | syndecan binding protein (30.4 kD) (Sdcbp) alternative variant bSep08, mRNA.                         |
| Sdcbp    | Sdcbp.cSep08    | 83841  | 25805  | 1164 | 9  | 278 | syndecan binding protein (29.9 kD) (Sdcbp) alternative variant cSep08, mRNA.                         |
| Sdcbp    | Sdcbp.dSep08    | 83841  | 24076  | 838  | 7  | 250 | syndecan binding protein (Sdcbp) alternative variant dSep08, mRNA.                                   |

|          |                 |        |        |      |    |     |                                                                                                                  |
|----------|-----------------|--------|--------|------|----|-----|------------------------------------------------------------------------------------------------------------------|
| Sdcbp    | Sdcbp.eSep08    | 83841  | 20597  | 641  | 6  | 185 | syndecan binding protein (Sdcbp) alternative variant eSep08, mRNA.                                               |
| Sdcbp    | Sdcbp.fSep08    | 83841  | 6252   | 1554 | 4  | 111 | syndecan binding protein (12.2 kD) (Sdcbp) alternative variant fSep08, mRNA.                                     |
| Sdcbp    | Sdcbp.gSep08    | 83841  | 1813   | 1019 | 2  | 68  | syndecan binding protein (8.1 kD) (Sdcbp) alternative variant gSep08, mRNA.                                      |
| Sdcbp2   | Sdcbp2.bSep08   | 311532 | 1390   | 754  | 1  | 152 | syndecan binding protein (syntenin) 2 (Sdcbp2) alternative variant bSep08, mRNA.                                 |
| Sdccag3  | Sdccag3.aSep08  | 306322 | 6096   | 1648 | 10 | 432 | serologically defined colon cancer antigen 3 like (48.1 kD) (Sdccag3) alternative variant aSep08, mRNA.          |
| Sdccag3  | Sdccag3.bSep08  | 306322 | 6453   | 2409 | 6  | 306 | serologically defined colon cancer antigen 3 like (34.1 kD) (Sdccag3) alternative variant bSep08, mRNA.          |
| Sdccag3  | Sdccag3.cSep08  | 306322 | 5765   | 849  | 5  | 257 | serologically defined colon cancer antigen 3 like (Sdccag3) alternative variant cSep08, mRNA.                    |
| Sdccag3  | Sdccag3.dSep08  | 306322 | 4355   | 1427 | 6  | 251 | serologically defined colon cancer antigen 3 like (Sdccag3) alternative variant dSep08, mRNA.                    |
| Sdccag3  | Sdccag3.eSep08  | 306322 | 6713   | 3561 | 5  | 240 | serologically defined colon cancer antigen 3 like (26.5 kD) (Sdccag3) alternative variant eSep08, complete mRNA. |
| Sdccag3  | Sdccag3.fSep08  | 306322 | 2414   | 739  | 4  | 217 | serologically defined colon cancer antigen 3 like (Sdccag3) alternative variant fSep08, mRNA.                    |
| Sdccag3  | Sdccag3.gSep08  | 306322 | 4143   | 698  | 4  | 216 | serologically defined colon cancer antigen 3 like (Sdccag3) alternative variant gSep08, mRNA.                    |
| Sdccag3  | Sdccag3.hSep08  | 306322 | 2573   | 536  | 2  | 127 | serologically defined colon cancer antigen 3 like (Sdccag3) alternative variant hSep08, mRNA.                    |
| Sdccag3  | Sdccag3.jSep08  | 306322 | 1889   | 381  | 2  | 72  | serologically defined colon cancer antigen 3 like (8.1 kD) (Sdccag3) alternative variant jSep08, mRNA.           |
| Sdccag8  | Sdccag8.bSep08  | 305002 | 128975 | 508  | 4  | 169 | serologically defined colon cancer antigen 8 (Sdccag8) alternative variant bSep08, mRNA.                         |
| Sdccag8  | Sdccag8.cSep08  | 305002 | 11188  | 1076 | 3  | 63  | serologically defined colon cancer antigen 8 (Sdccag8) alternative variant cSep08, mRNA.                         |
| Sdccag10 | Sdccag10.bSep08 | 361887 | 14917  | 846  | 5  | 156 | serologically defined colon cancer antigen 10 (Sdccag10) alternative variant bSep08, mRNA.                       |
| Sdccag10 | Sdccag10.cSep08 | 361887 | 136886 | 701  | 1  | 102 | serologically defined colon cancer antigen 10 (Sdccag10) alternative variant cSep08, mRNA.                       |
| Sdf4     | Sdf4.bSep08     | 155173 | 15358  | 744  | 5  | 240 | stromal cell derived factor 4 (Sdf4) alternative variant bSep08, mRNA.                                           |
| Sdf4     | Sdf4.cSep08     | 155173 | 15665  | 791  | 5  | 235 | stromal cell derived factor 4 (26.9 kD) (Sdf4) alternative variant cSep08, mRNA.                                 |
| Sdf4     | Sdf4.dSep08     | 155173 | 3846   | 489  | 2  | 129 | stromal cell derived factor 4 (14.6 kD) (Sdf4) alternative variant dSep08, mRNA.                                 |
| Sdf4     | Sdf4.eSep08     | 155173 | 2703   | 787  | 3  | 105 | stromal cell derived factor 4 (Sdf4) alternative variant eSep08, mRNA.                                           |
| Sdha     | Sdha.bSep08     | 157074 | 14951  | 874  | 7  | 287 | succinate dehydrogenase complex, subunit A, flavoprotein (Fp) (Sdha) alternative variant bSep08, mRNA.           |
| Sdha     | Sdha.cSep08     | 157074 | 9974   | 549  | 5  | 153 | succinate dehydrogenase complex, subunit A, flavoprotein (Fp) (Sdha) alternative variant cSep08, mRNA.           |

|                |                       |        |       |      |   |     |                                                                                                                                   |
|----------------|-----------------------|--------|-------|------|---|-----|-----------------------------------------------------------------------------------------------------------------------------------|
| Sdha           | Sdha.dSep08           | 157074 | 4028  | 424  | 2 | 107 | succinate dehydrogenase complex, subunit A, flavoprotein (Fp) (Sdha) alternative variant dSep08, mRNA.                            |
| Sdha           | Sdha.fSep08           | 157074 | 5277  | 1034 | 3 | 87  | succinate dehydrogenase complex, subunit A, flavoprotein (Fp) (Sdha) alternative variant fSep08, mRNA.                            |
| Sdhb           | Sdhb.aSep08           | 298596 | 21422 | 1289 | 8 | 282 | succinate dehydrogenase complex, subunit B, iron sulfur (lp) (31.8 kD) (Sdhb) alternative variant aSep08, mRNA.                   |
| Sdhb           | Sdhb.bSep08           | 298596 | 2184  | 901  | 2 | 198 | succinate dehydrogenase complex, subunit B, iron sulfur (lp) (Sdhb) alternative variant bSep08, mRNA.                             |
| Sdhb           | Sdhb.cSep08           | 298596 | 3156  | 475  | 3 | 124 | succinate dehydrogenase complex, subunit B, iron sulfur (lp) (Sdhb) alternative variant cSep08, mRNA.                             |
| Sdhb           | Sdhb.dSep08           | 298596 | 12751 | 730  | 3 | 76  | succinate dehydrogenase complex, subunit B, iron sulfur (lp) (Sdhb) alternative variant dSep08, mRNA.                             |
| Sdhc           | Sdhc.bSep08           | 289217 | 20680 | 1283 | 8 | 132 | succinate dehydrogenase complex, subunit C, integral membrane protein (14.2 kD) (Sdhc) alternative variant bSep08, complete mRNA. |
| Sdhd           | Sdhd.bSep08           | 363061 | 8942  | 749  | 1 | 114 | succinate dehydrogenase complex, subunit D, integral membrane protein (Sdhd) alternative variant bSep08, mRNA.                    |
| Sdk2           | Sdk2.aSep08           | 360652 | 13105 | 679  | 4 | 216 | sidekick homolog 2 (chicken) (Sdk2) alternative variant aSep08, mRNA.                                                             |
| Sds            | Sds.bSep08            | 25044  | 814   | 705  | 1 | 56  | serine dehydratase (Sds) alternative variant bSep08, mRNA.                                                                        |
| Sds3.0         | Sds3.0.aSep08         |        | 14170 | 1129 | 7 | 268 | suppressor of defective silencing 3 (Sds3.0) alternative variant aSep08, mRNA.                                                    |
| Sec3l1         | Sec3l1.bSep08         | 305287 | 16310 | 943  | 5 | 282 | SEC3-like 1 ( <i>S. cerevisiae</i> ) (Sec3l1) alternative variant bSep08, mRNA.                                                   |
| Sec3l1         | Sec3l1.cSep08         | 305287 | 19074 | 785  | 7 | 261 | SEC3-like 1 ( <i>S. cerevisiae</i> ) (Sec3l1) alternative variant cSep08, mRNA.                                                   |
| Sec3l1         | Sec3l1.dSep08         | 305287 | 1924  | 1415 | 3 | 133 | SEC3-like 1 ( <i>S. cerevisiae</i> ) (14.9 kD) (Sec3l1) alternative variant dSep08, mRNA.                                         |
| Sec7.0         | Sec7.0.aSep08         |        | 8363  | 1382 |   | 341 | IQ motif Sec7 domain 1 (Sec7.0) mRNA.                                                                                             |
| Sec8_exocyst.0 | Sec8_exocyst.0.aSep08 |        | 58402 | 753  |   | 250 | sec8 (Sec8_exocyst.0) mRNA.                                                                                                       |
| Sec11a         | Sec11a.bSep08         | 65166  | 11346 | 710  | 2 | 139 | SEC11 homolog A ( <i>S. cerevisiae</i> ) (Sec11a) alternative variant bSep08, mRNA.                                               |
| Sec11c         | Sec11c.bSep08         | 266758 | 12122 | 859  | 3 | 133 | SEC11 homolog C ( <i>S. cerevisiae</i> ) (Sec11c) alternative variant bSep08, mRNA.                                               |
| Sec11c         | Sec11c.cSep08         | 266758 | 3399  | 1020 | 3 | 49  | SEC11 homolog C ( <i>S. cerevisiae</i> ) (5.6 kD) (Sec11c) alternative variant cSep08, mRNA.                                      |
| Sec13          | Sec13.bSep08          | 297522 | 5758  | 689  | 1 | 157 | SEC13 homolog ( <i>S. cerevisiae</i> ) (Sec13) alternative variant bSep08, mRNA.                                                  |
| Sec14l1        | Sec14l1.bSep08        | 360668 | 8367  | 1605 | 9 | 313 | SEC14 -like 1 (35.0 kD) (Sec14l1) alternative variant bSep08, mRNA.                                                               |
| Sec14l1        | Sec14l1.bSep08        | 690667 | 8367  | 1605 | 9 | 313 | SEC14 -like 1 (35.0 kD) (Sec14l1) alternative variant bSep08, mRNA.                                                               |
| Sec14l1        | Sec14l1.cSep08        | 360668 | 5906  | 852  | 4 | 220 | SEC14 -like 1 (Sec14l1) alternative variant cSep08, mRNA.                                                                         |
| Sec14l1        | Sec14l1.cSep08        | 690667 | 5906  | 852  | 4 | 220 | SEC14 -like 1 (Sec14l1) alternative variant cSep08, mRNA.                                                                         |

|         |                |        |       |      |    |      |                                                                                                                  |
|---------|----------------|--------|-------|------|----|------|------------------------------------------------------------------------------------------------------------------|
| Sec1411 | Sec1411.dSep08 | 360668 | 3159  | 618  | 3  | 166  | SEC14 -like 1 (Sec1411) alternative variant dSep08, mRNA.                                                        |
| Sec1411 | Sec1411.dSep08 | 690667 | 3159  | 618  | 3  | 166  | SEC14 -like 1 (Sec1411) alternative variant dSep08, mRNA.                                                        |
| Sec1412 | Sec1412.bSep08 | 116486 | 17607 | 742  | 1  | 247  | SEC14-like 2 ( <i>S. cerevisiae</i> ) (Sec1412) alternative variant bSep08, mRNA.                                |
| Sec15.0 | Sec15.0.aSep08 |        | 45195 | 1537 |    | 153  | exocyst complex component 6 (Sec15.0) mRNA.                                                                      |
| Sec16a  | Sec16a.aSep08  | 114089 | 19398 | 3291 | 24 | 1005 | SEC16 homolog A ( <i>S. cerevisiae</i> ) (Sec16a) alternative variant aSep08, mRNA.                              |
| Sec16a  | Sec16a.bSep08  | 114089 | 10644 | 2528 | 7  | 263  | SEC16 homolog A ( <i>S. cerevisiae</i> ) (27.6 kD) (Sec16a) alternative variant bSep08, mRNA.                    |
| Sec16a  | Sec16a.cSep08  | 114089 | 5049  | 740  | 3  | 98   | SEC16 homolog A ( <i>S. cerevisiae</i> ) (10.0 kD) (Sec16a) alternative variant cSep08, mRNA.                    |
| Sec16b  | Sec16b.bSep08  | 89868  | 2973  | 618  | 3  | 139  | SEC16 homolog B ( <i>S. cerevisiae</i> ) (15.6 kD) (Sec16b) alternative variant bSep08, mRNA.                    |
| Sec23a  | Sec23a.bSep08  | 58817  | 12560 | 700  | 7  | 135  | SEC23A ( <i>S. cerevisiae</i> ) (Sec23a) alternative variant bSep08, mRNA.                                       |
| Sec23a  | Sec23a.cSep08  | 58817  | 7032  | 419  | 4  | 119  | SEC23A ( <i>S. cerevisiae</i> ) (Sec23a) alternative variant cSep08, mRNA.                                       |
| Sec23a  | Sec23a.dSep08  | 58817  | 6999  | 394  | 4  | 108  | SEC23A ( <i>S. cerevisiae</i> ) (Sec23a) alternative variant dSep08, mRNA.                                       |
| Sec23a  | Sec23a.eSep08  | 58817  | 10169 | 549  | 3  | 80   | SEC23A ( <i>S. cerevisiae</i> ) (9.2 kD) (Sec23a) alternative variant eSep08, mRNA.                              |
| Sec23b  | Sec23b.aSep08  | 362226 | 28034 | 1552 | 14 | 517  | protein transport Sec23 (Sec23b) alternative variant aSep08, mRNA.                                               |
| Sec23b  | Sec23b.cSep08  | 362226 | 3390  | 413  | 2  | 113  | SEC23B (12.8 kD) (Sec23b) alternative variant cSep08, mRNA.                                                      |
| Sec23b  | Sec23b.dSep08  | 362226 | 34280 | 382  | 3  | 31   | SEC23B (3.3 kD) (Sec23b) alternative variant dSep08, mRNA.                                                       |
| Sec23ip | Sec23ip.bSep08 | 309010 | 23420 | 1783 | 6  | 396  | SEC23 interacting protein (Sec23ip) alternative variant bSep08, mRNA.                                            |
| Sec23ip | Sec23ip.cSep08 | 309010 | 7911  | 1665 | 5  | 154  | SEC23 interacting protein (Sec23ip) alternative variant cSep08, mRNA.                                            |
| Sec23ip | Sec23ip.dSep08 | 309010 | 2755  | 797  | 4  | 147  | SEC23 interacting protein (Sec23ip) alternative variant dSep08, mRNA.                                            |
| Sec23ip | Sec23ip.eSep08 | 309010 | 10645 | 434  | 3  | 144  | SEC23 interacting protein (Sec23ip) alternative variant eSep08, mRNA.                                            |
| Sec24a  | Sec24a.bSep08  | 287275 | 12036 | 653  | 6  | 217  | SEC24 related gene family, member A ( <i>S. cerevisiae</i> ) (Sec24a) alternative variant bSep08, mRNA.          |
| Sec24a  | Sec24a.cSep08  | 287275 | 4516  | 3112 | 2  | 59   | SEC24 related gene family, member A ( <i>S. cerevisiae</i> ) (7.2 kD) (Sec24a) alternative variant cSep08, mRNA. |
| Sec24d  | Sec24d.aSep08  | 310843 | 76122 | 3098 | 15 | 708  | SEC24 related gene family, member D ( <i>S. cerevisiae</i> ) (Sec24d) alternative variant aSep08, mRNA.          |
| Sec24d  | Sec24d.cSep08  | 310843 | 4173  | 366  | 1  | 98   | SEC24 related gene family, member D ( <i>S. cerevisiae</i> ) (Sec24d) alternative variant cSep08, mRNA.          |
| Sec31a  | Sec31a.bSep08  | 93646  | 56066 | 3669 | 24 | 1082 | SEC31 homolog A ( <i>S. cerevisiae</i> ) (Sec31a) alternative variant bSep08, mRNA.                              |

|          |                 |        |       |      |    |      |                                                                                                       |
|----------|-----------------|--------|-------|------|----|------|-------------------------------------------------------------------------------------------------------|
| Sec31a   | Sec31a.cSep08   | 93646  | 18618 | 1170 | 8  | 390  | SEC31 homolog A ( <i>S. cerevisiae</i> ) (Sec31a) alternative variant cSep08, mRNA.                   |
| Sec31a   | Sec31a.dSep08   | 93646  | 14068 | 748  | 6  | 249  | SEC31 homolog A ( <i>S. cerevisiae</i> ) (Sec31a) alternative variant dSep08, mRNA.                   |
| Sec31a   | Sec31a.eSep08   | 93646  | 5485  | 730  | 4  | 163  | SEC31 homolog A ( <i>S. cerevisiae</i> ) (Sec31a) alternative variant eSep08, mRNA.                   |
| Sec31a   | Sec31a.fSep08   | 93646  | 5378  | 384  | 4  | 127  | SEC31 homolog A ( <i>S. cerevisiae</i> ) (Sec31a) alternative variant fSep08, mRNA.                   |
| Sec61a1  | Sec61a1.bSep08  | 80843  | 6550  | 1179 | 6  | 350  | sec61 (Sec61a1) alternative variant bSep08, mRNA.                                                     |
| Sec61a1  | Sec61a1.dSep08  | 80843  | 3241  | 710  | 4  | 143  | sec61 (Sec61a1) alternative variant dSep08, mRNA.                                                     |
| Sec61a2  | Sec61a2.aSep08  | 361273 | 28526 | 2439 | 12 | 476  | sec61, alpha subunit 2 ( <i>S. cerevisiae</i> ) (52.2 kD) (Sec61a2) alternative variant aSep08, mRNA. |
| Sec61a2  | Sec61a2.bSep08  | 361273 | 22179 | 965  | 6  | 270  | sec61, alpha subunit 2 ( <i>S. cerevisiae</i> ) (Sec61a2) alternative variant bSep08, mRNA.           |
| Sec61a2  | Sec61a2.cSep08  | 361273 | 22164 | 772  | 6  | 162  | sec61, alpha subunit 2 ( <i>S. cerevisiae</i> ) (Sec61a2) alternative variant cSep08, mRNA.           |
| Sec62    | Sec62.bSep08    | 294912 | 26825 | 2584 | 8  | 481  | SEC62 homolog ( <i>S. cerevisiae</i> ) (Sec62) alternative variant bSep08, mRNA.                      |
| Sec62    | Sec62.cSep08    | 294912 | 17525 | 631  | 5  | 124  | SEC62 homolog ( <i>S. cerevisiae</i> ) (Sec62) alternative variant cSep08, mRNA.                      |
| Sec63    | Sec63.bSep08    | 309858 | 18331 | 1418 | 8  | 284  | SEC63-like ( <i>S. cerevisiae</i> ) (Sec63) alternative variant bSep08, mRNA.                         |
| Sec63.1  | Sec63.1.aSep08  |        | 16591 | 5510 | 28 | 1427 | activating signal cointegrator 1 complex CRA c (Sec63.1) alternative variant aSep08, mRNA.            |
| Sec63.1  | Sec63.1.bSep08  |        | 1893  | 757  | 1  | 90   | u5 snRNP-specific protein (Sec63.1) alternative variant bSep08, mRNA.                                 |
| Secisbp2 | Secisbp2.bSep08 | 79049  | 5412  | 807  | 5  | 252  | SECIS binding protein 2 (Secisbp2) alternative variant bSep08, mRNA.                                  |
| Secisbp2 | Secisbp2.cSep08 | 79049  | 3607  | 756  | 4  | 219  | SECIS binding protein 2 (Secisbp2) alternative variant cSep08, mRNA.                                  |
| Secisbp2 | Secisbp2.eSep08 | 79049  | 3545  | 504  | 3  | 96   | SECIS binding protein 2 (Secisbp2) alternative variant eSep08, mRNA.                                  |
| Sectm1b  | Sectm1b.bSep08  | 287884 | 8159  | 827  | 3  | 186  | secreted and transmembrane 1B (Sectm1b) alternative variant bSep08, mRNA.                             |
| Sectm1b  | Sectm1b.cSep08  | 287884 | 1541  | 751  | 1  | 183  | secreted and transmembrane 1B (Sectm1b) alternative variant cSep08, mRNA.                             |
| seeby    | seeby.aSep08    |        | 31289 | 517  |    | 171  | putative protein of vertebrate origin (seeby) mRNA.                                                   |
| seechy   | seechy.aSep08   |        | 6236  | 3234 |    | 120  | transmembrane protein 16C (seechy) mRNA.                                                              |
| seedar   | seedar.aSep08   |        | 5820  | 477  |    | 86   | putative protein (seedar) mRNA.                                                                       |
| seeflo   | seeflo.aSep08   |        | 2289  | 379  |    | 126  | putative protein (seeflo) mRNA.                                                                       |
| seeflu   | seeflu.aSep08   |        | 2233  | 472  |    | 120  | putative protein (seeflu) mRNA.                                                                       |
| seegar   | seegar.aSep08   |        | 3109  | 421  |    | 69   | putative protein (seegar) mRNA.                                                                       |
| seeja    | seeja.aSep08    |        | 8073  | 446  |    | 64   | putative protein (seeja) mRNA.                                                                        |
| seejey   | seejey.aSep08   |        | 10718 | 545  |    | 181  | centrosomal protein 135 CRA a (seejey) mRNA.                                                          |
| seekee   | seekee.aSep08   |        | 36611 | 245  |    | 20   | putative protein (seekee) mRNA.                                                                       |

|          |                 |        |       |      |    |     |                                                                                            |
|----------|-----------------|--------|-------|------|----|-----|--------------------------------------------------------------------------------------------|
| seekler  | seekler.aSep08  |        | 36520 | 752  |    | 128 | putative protein, with a coiled coil domain, of mammalian origin (15.2 kD) (seekler) mRNA. |
| seelo    | seelo.aSep08    |        | 5597  | 627  |    | 142 | putative protein (seelo) mRNA.                                                             |
| seemee   | seemee.aSep08   |        | 22173 | 488  |    | 55  | putative protein (seemee) mRNA.                                                            |
| seemer   | seemer.aSep08   |        | 18950 | 2173 | 13 | 486 | CRA a (54.5 kD) (seemer) alternative variant aSep08, mRNA.                                 |
| seemer   | seemer.bSep08   |        | 17336 | 1800 | 8  | 245 | hexosaminidase containing CRA a (seemer) alternative variant bSep08, mRNA.                 |
| seemer   | seemer.cSep08   |        | 1886  | 903  | 4  | 199 | hexosaminidase containing (22.1 kD) (seemer) alternative variant cSep08, mRNA.             |
| seemer   | seemer.dSep08   |        | 3485  | 1110 | 4  | 172 | hexosaminidase containing (seemer) alternative variant dSep08, mRNA.                       |
| seemer   | seemer.eSep08   |        | 2354  | 638  | 6  | 150 | hexosaminidase containing (seemer) alternative variant eSep08, mRNA.                       |
| seemer   | seemer.fSep08   |        | 2500  | 369  | 4  | 122 | hexosaminidase containing (seemer) alternative variant fSep08, mRNA.                       |
| seemer   | seemer.gSep08   |        | 5502  | 1308 | 5  | 115 | hexosaminidase containing CRA a (seemer) alternative variant gSep08, mRNA.                 |
| seemer   | seemer.hSep08   |        | 3336  | 920  | 6  | 107 | hexosaminidase containing (11.8 kD) (seemer) alternative variant hSep08, mRNA.             |
| seenoy   | seenoy.aSep08   |        | 31354 | 660  |    | 21  | putative protein (2.4 kD) (seenoy) mRNA.                                                   |
| seepor   | seepor.aSep08   |        | 2339  | 617  |    | 43  | putative protein (5.2 kD) (seepor) mRNA.                                                   |
| seesa    | seesa.aSep08    |        | 24095 | 664  |    | 97  | putative protein (seesa) mRNA.                                                             |
| seeshee  | seeshee.aSep08  |        | 3248  | 341  |    | 43  | putative protein (4.8 kD) (seeshee) mRNA.                                                  |
| seetu    | seetu.aSep08    |        | 897   | 355  |    | 117 | otoferlin (seetu) mRNA.                                                                    |
| seevar   | seevar.aSep08   |        | 4385  | 669  |    | 54  | putative protein (6.0 kD) (seevar) mRNA.                                                   |
| seewey   | seewey.aSep08   |        | 19746 | 704  |    | 51  | putative protein (seewey) mRNA.                                                            |
| Sel1.0   | Sel1.0.aSep08   |        | 37471 | 1247 | 9  | 415 | CRA a (Sel1.0) alternative variant aSep08, mRNA.                                           |
| Sel1.0   | Sel1.0.bSep08   |        | 17393 | 531  | 5  | 99  | CRA a (Sel1.0) alternative variant bSep08, mRNA.                                           |
| Sel1l    | Sel1l.bSep08    | 314352 | 1496  | 398  | 3  | 122 | sel1l (Sel1l) alternative variant bSep08, mRNA.                                            |
| Sel1l2   | Sel1l2.bSep08   | 311470 | 30860 | 792  |    | 264 | sel-1 suppressor of 2 (Sel1l2) alternative variant bSep08, mRNA.                           |
| Sel1l2   | Sel1l2.cSep08   | 311470 | 1039  | 325  | 2  | 82  | sel-1 suppressor of 2 (Sel1l2) alternative variant cSep08, mRNA.                           |
| Selenbp1 | Selenbp1.bSep08 | 140927 | 912   | 354  | 2  | 82  | selenium binding protein 1 (Selenbp1) alternative variant bSep08, mRNA.                    |
| Selenbp1 | Selenbp1.dSep08 | 140927 | 919   | 258  | 3  | 35  | selenium binding protein 1 (Selenbp1) alternative variant dSep08, mRNA.                    |
| Seli     | Seli.bSep08     | 362713 | 12694 | 2552 | 5  | 196 | selenoprotein I (Seli) alternative variant bSep08, mRNA.                                   |
| Selk     | Selk.bSep08     | 290549 | 1937  | 1102 | 2  | 31  | selenoprotein K (3.3 kD) (Selk) alternative variant bSep08, mRNA.                          |
| Selo     | Selo.bSep08     | 315216 | 4853  | 1344 | 4  | 180 | selenoprotein O (Selo) alternative variant bSep08, mRNA.                                   |
| Selo     | Selo.cSep08     | 315216 | 3904  | 873  | 6  | 123 | selenoprotein O (Selo) alternative variant cSep08, mRNA.                                   |
| Selo     | Selo.dSep08     | 315216 | 2508  | 1960 | 2  | 66  | selenoprotein O (7.9 kD) (Selo) alternative variant dSep08, mRNA.                          |



|        |               |        |        |      |   |     |                                                                                                                                                             |
|--------|---------------|--------|--------|------|---|-----|-------------------------------------------------------------------------------------------------------------------------------------------------------------|
| Sels   | Sels.bSep08   | 286900 | 960    | 426  | 2 | 71  | selenoprotein S (Sels) alternative variant bSep08, mRNA.                                                                                                    |
| Sema.0 | Sema.0.aSep08 |        | 108985 | 813  |   | 271 | sema 3C (Sema.0) mRNA.                                                                                                                                      |
| Sema3b | Sema3b.bSep08 | 363142 | 2077   | 759  | 8 | 241 | sema domain, immunoglobulin domain (Ig), short basic domain, secreted, (semaphorin) 3B (Sema3b) alternative variant bSep08, mRNA.                           |
| Sema3c | Sema3c.aSep08 | 296787 | 62014  | 1136 | 2 | 378 | sema domain, immunoglobulin domain (Ig), short basic domain, secreted, (semaphorin) 3C (Sema3c) alternative variant aSep08, mRNA.                           |
| Sema3c | Sema3c.bSep08 | 296787 | 46346  | 730  | 2 | 242 | sema domain, immunoglobulin domain (Ig), short basic domain, secreted, (semaphorin) 3C (Sema3c) alternative variant bSep08, mRNA.                           |
| Sema3d | Sema3d.bSep08 | 246262 | 182172 | 2348 | 2 | 660 | sema domain, immunoglobulin domain (Ig), short basic domain, secreted, (semaphorin) 3D (75.1 kD) (Sema3d) alternative variant bSep08, mRNA.                 |
| Sema3e | Sema3e.aSep08 | 296789 | 15677  | 640  |   | 210 | sema domain, immunoglobulin domain (Ig), short basic domain, secreted, (semaphorin) 3E (Sema3e) mRNA.                                                       |
| Sema3f | Sema3f.aSep08 | 315996 | 23724  | 2391 | 5 | 761 | sema domain, immunoglobulin domain (Ig), short basic domain, secreted, (semaphorin) 3 F (Sema3f) alternative variant aSep08, mRNA.                          |
| Sema3f | Sema3f.bSep08 | 315996 | 2140   | 640  | 1 | 149 | sema domain, immunoglobulin domain (Ig), short basic domain, secreted, (semaphorin) 3 F (Sema3f) alternative variant bSep08, mRNA.                          |
| Sema3g | Sema3g.aSep08 | 290562 | 2200   | 691  |   | 230 | sema domain, immunoglobulin domain (Ig), short basic domain, secreted, (semaphorin) 3G (Sema3g) mRNA.                                                       |
| Sema4a | Sema4a.cSep08 | 310630 | 7584   | 611  | 6 | 203 | sema domain, immunoglobulin domain (Ig), transmembrane domain (TM) and short cytoplasmic domain, (semaphorin) 4A (Sema4a) alternative variant cSep08, mRNA. |
| Sema4a | Sema4a.dSep08 | 310630 | 7713   | 570  | 6 | 189 | sema domain, immunoglobulin domain (Ig), transmembrane domain (TM) and short cytoplasmic domain, (semaphorin) 4A (Sema4a) alternative variant dSep08, mRNA. |
| Sema4a | Sema4a.eSep08 | 310630 | 1566   | 405  | 4 | 113 | sema domain, immunoglobulin domain (Ig), transmembrane domain (TM) and short cytoplasmic domain, (semaphorin) 4A (Sema4a) alternative variant eSep08, mRNA. |
| Sema4b | Sema4b.aSep08 | 293042 | 20997  | 1055 |   | 351 | sema domain, immunoglobulin domain (Ig), transmembrane domain (TM) and short cytoplasmic domain, (semaphorin) 4B (Sema4b) mRNA.                             |
| Sema4c | Sema4c.aSep08 | 301346 | 718    | 395  |   | 131 | sema domain, immunoglobulin domain (Ig), transmembrane domain (TM) and short cytoplasmic domain, (semaphorin) 4C (Sema4c) mRNA.                             |
| Sema4d | Sema4d.aSep08 | 306790 | 12552  | 1327 |   | 442 | sema domain, immunoglobulin domain (Ig), transmembrane domain (TM) and short cytoplasmic domain, (semaphorin) 4D (Sema4d) alternative variant aSep08, mRNA. |

|        |               |        |       |      |   |     |                                                                                                                                                                       |
|--------|---------------|--------|-------|------|---|-----|-----------------------------------------------------------------------------------------------------------------------------------------------------------------------|
| Sema4d | Sema4d.bSep08 | 306790 | 10582 | 738  |   | 246 | sema domain, immunoglobulin domain (Ig), transmembrane domain (TM) and short cytoplasmic domain, (semaphorin) 4D (Sema4d) alternative variant bSep08, mRNA.           |
| Sema4f | Sema4f.bSep08 | 29745  | 3919  | 722  | 2 | 173 | sema domain, immunoglobulin domain (Ig), transmembrane domain (TM) and short cytoplasmic domain, (semaphorin) 4F (Sema4f) alternative variant bSep08, mRNA.           |
| Sema4g | Sema4g.aSep08 | 361764 | 2462  | 1167 | 9 | 389 | sema domain, immunoglobulin domain (Ig), transmembrane domain (TM) and short cytoplasmic domain, (semaphorin) 4G (Sema4g) alternative variant aSep08, mRNA.           |
| Sema4g | Sema4g.bSep08 | 361764 | 8073  | 1325 | 8 | 301 | sema domain, immunoglobulin domain (Ig), transmembrane domain (TM) and short cytoplasmic domain, (semaphorin) 4G (Sema4g) alternative variant bSep08, mRNA.           |
| Sema4g | Sema4g.cSep08 | 361764 | 1151  | 927  | 3 | 96  | sema domain, immunoglobulin domain (Ig), transmembrane domain (TM) and short cytoplasmic domain, (semaphorin) 4G (10.2 kD) (Sema4g) alternative variant cSep08, mRNA. |
| Sema5b | Sema5b.bSep08 | 303901 | 4749  | 579  | 1 | 128 | putative protein (Sema5b) alternative variant bSep08, mRNA.                                                                                                           |
| Sema5b | Sema5b.bSep08 | 689558 | 4749  | 579  | 1 | 128 | putative protein (Sema5b) alternative variant bSep08, mRNA.                                                                                                           |
| Sema6a | Sema6a.bSep08 | 361324 | 33605 | 2658 | 7 | 560 | sema domain, transmembrane domain (TM), and cytoplasmic domain, (semaphorin) 6A (Sema6a) alternative variant bSep08, mRNA.                                            |
| Sema6b | Sema6b.bSep08 | 84609  | 2070  | 774  | 6 | 258 | sema domain, transmembrane domain (TM), and cytoplasmic domain, (semaphorin) 6B (Sema6b) alternative variant bSep08, mRNA.                                            |
| Sema6b | Sema6b.cSep08 | 84609  | 8642  | 447  | 4 | 148 | sema domain, transmembrane domain (TM), and cytoplasmic domain, (semaphorin) 6B (Sema6b) alternative variant cSep08, mRNA.                                            |
| Sema6c | Sema6c.bSep08 | 29744  | 3271  | 1875 | 6 | 486 | sema domain, transmembrane domain (TM), and cytoplasmic domain, (semaphorin) 6C (Sema6c) alternative variant bSep08, mRNA.                                            |
| Sema6c | Sema6c.cSep08 | 29744  | 2188  | 856  | 7 | 238 | sema domain, transmembrane domain (TM), and cytoplasmic domain, (semaphorin) 6C (Sema6c) alternative variant cSep08, mRNA.                                            |
| Sema6c | Sema6c.dSep08 | 29744  | 7817  | 953  | 7 | 162 | sema domain, transmembrane domain (TM), and cytoplasmic domain, (semaphorin) 6C (18.1 kD) (Sema6c) alternative variant dSep08, mRNA.                                  |
| Sema6c | Sema6c.eSep08 | 29744  | 7575  | 663  | 6 | 139 | sema domain, transmembrane domain (TM), and cytoplasmic domain, (semaphorin) 6C (Sema6c) alternative variant eSep08, mRNA.                                            |

|        |               |        |       |      |   |     |                                                                                                                            |
|--------|---------------|--------|-------|------|---|-----|----------------------------------------------------------------------------------------------------------------------------|
| Sema6c | Sema6c.fSep08 | 29744  | 7547  | 878  | 8 | 130 | sema domain, transmembrane domain (TM), and cytoplasmic domain, (semaphorin) 6C (Sema6c) alternative variant fSep08, mRNA. |
| Sema6c | Sema6c.gSep08 | 29744  | 3857  | 433  | 4 | 124 | sema domain, transmembrane domain (TM), and cytoplasmic domain, (semaphorin) 6C (Sema6c) alternative variant gSep08, mRNA. |
| Sema6c | Sema6c.iSep08 | 29744  | 3879  | 407  | 3 | 64  | sema domain, transmembrane domain (TM), and cytoplasmic domain, (semaphorin) 6C (Sema6c) alternative variant iSep08, mRNA. |
| Sema6d | Sema6d.bSep08 | 311384 | 2006  | 342  | 2 | 114 | sema domain transmembrane cytoplasmic 6D CRA b (Sema6d) alternative variant bSep08, mRNA.                                  |
| Sema6d | Sema6d.cSep08 | 311384 | 44681 | 350  | 2 | 80  | putative protein (Sema6d) alternative variant cSep08, mRNA.                                                                |
| Sema7a | Sema7a.aSep08 | 315711 | 1260  | 417  |   | 138 | sema domain, immunoglobulin domain (Ig), and GPI membrane anchor, (semaphorin) 7A (Sema7a) mRNA.                           |
| Senp1  | Senp1.aSep08  | 300193 | 6691  | 338  | 3 | 112 | SUMO1/sentrin specific peptidase 1 (Senp1) alternative variant aSep08, mRNA.                                               |
| Senp1  | Senp1.bSep08  | 300193 | 16066 | 761  | 3 | 59  | SUMO1/sentrin specific peptidase 1 (Senp1) alternative variant bSep08, mRNA.                                               |
| Senp2  | Senp2.bSep08  | 78973  | 20854 | 910  | 9 | 186 | SUMO/sentrin specific peptidase 2 (Senp2) alternative variant bSep08, mRNA.                                                |
| Senp3  | Senp3.bSep08  | 303245 | 4875  | 765  | 5 | 134 | specific peptidase 3 CRA a (Senp3) alternative variant bSep08, mRNA.                                                       |
| Senp3  | Senp3.cSep08  | 303245 | 2490  | 1882 | 3 | 55  | specific peptidase 3 CRA a (6.5 kD) (Senp3) alternative variant cSep08, mRNA.                                              |
| Senp3  | Senp3.dSep08  | 303245 | 1964  | 1861 | 2 | 58  | putative protein (6.2 kD) (Senp3) alternative variant dSep08, mRNA.                                                        |
| Senp5  | Senp5.aSep08  | 303874 | 5804  | 3777 |   | 81  | SUMO/sentrin specific protease 5 (Senp5) mRNA.                                                                             |
| Senp6  | Senp6.bSep08  | 300860 | 20542 | 1066 | 6 | 314 | SUMO/sentrin specific peptidase 6 (Senp6) alternative variant bSep08, mRNA.                                                |
| Senp6  | Senp6.cSep08  | 300860 | 5957  | 744  | 3 | 172 | SUMO/sentrin specific peptidase 6 (Senp6) alternative variant cSep08, mRNA.                                                |
| Senp7  | Senp7.aSep08  | 288167 | 55368 | 403  |   | 134 | SUMO1/sentrin specific protease 7 (Senp7) mRNA.                                                                            |
| Senp8  | Senp8.aSep08  | 315723 | 13923 | 953  | 1 | 242 | SUMO/sentrin specific peptidase 8 (Senp8) alternative variant aSep08, mRNA.                                                |
| 15-Sep | Sep15.aSep08  | 113922 | 32600 | 1735 | 7 | 214 | selenoprotein (23.5 kD) (Sep15) alternative variant aSep08, mRNA.                                                          |
| 15-Sep | Sep15.cSep08  | 113922 | 24550 | 736  | 4 | 124 | selenoprotein (Sep15) alternative variant cSep08, mRNA.                                                                    |
| 15-Sep | Sep15.dSep08  | 113922 | 32033 | 844  | 4 | 106 | selenoprotein (11.5 kD) (Sep15) alternative variant dSep08, mRNA.                                                          |
| 15-Sep | Sep15.eSep08  | 113922 | 20199 | 393  | 3 | 92  | selenoprotein (Sep15) alternative variant eSep08, mRNA.                                                                    |
| 15-Sep | Sep15.fSep08  | 113922 | 8276  | 965  | 2 | 71  | selenoprotein (8.0 kD) (Sep15) alternative variant fSep08, mRNA.                                                           |
| 15-Sep | Sep15.hSep08  | 113922 | 31682 | 735  | 6 | 113 | selenoprotein (Sep15) alternative variant hSep08, mRNA.                                                                    |
| Sephs1 | Sephs1.bSep08 | 291314 | 18038 | 1110 | 7 | 270 | selenophosphate synthetase 1 (30.2 kD) (Sephs1) alternative variant bSep08, mRNA.                                          |

|               |                      |        |       |      |    |     |                                                                                |
|---------------|----------------------|--------|-------|------|----|-----|--------------------------------------------------------------------------------|
| Sephs1        | Sephs1.cSep08        | 291314 | 20884 | 1251 | 6  | 263 | selenophosphate synthetase 1 (Sephs1) alternative variant cSep08, mRNA.        |
| Sephs1        | Sephs1.dSep08        | 291314 | 13841 | 788  | 4  | 249 | selenophosphate synthetase 1 (Sephs1) alternative variant dSep08, mRNA.        |
| Sepp1         | Sepp1.cSep08         | 29360  | 7280  | 905  | 4  | 126 | selenoprotein P, plasma, 1 (14.9 kD) (Sepp1) alternative variant cSep08, mRNA. |
| 1-Sep         | Sept1.bSep08         | 293507 | 2169  | 648  | 5  | 215 | septin 1 (Sept1) alternative variant bSep08, mRNA.                             |
| 1-Sep         | Sept1.cSep08         | 293507 | 3726  | 1902 | 10 | 163 | septin 1 (18.3 kD) (Sept1) alternative variant cSep08, mRNA.                   |
| 1-Sep         | Sept1.dSep08         | 293507 | 3676  | 1971 | 9  | 191 | septin 1 (21.5 kD) (Sept1) alternative variant dSep08, mRNA.                   |
| 1-Sep         | Sept1.eSep08         | 293507 | 2449  | 749  | 7  | 191 | septin 1 (Sept1) alternative variant eSep08, mRNA.                             |
| 1-Sep         | Sept1.fSep08         | 293507 | 1807  | 734  | 5  | 165 | septin 1 (Sept1) alternative variant fSep08, mRNA.                             |
| 1-Sep         | Sept1.gSep08         | 293507 | 674   | 570  | 2  | 45  | septin 1 (5.3 kD) (Sept1) alternative variant gSep08, mRNA.                    |
| 2-Sep         | Sept2.bSep08         | 117515 | 26563 | 1087 | 10 | 345 | septin 2 (Sept2) alternative variant bSep08, mRNA.                             |
| 2-Sep         | Sept2.cSep08         | 117515 | 6921  | 759  | 6  | 253 | septin 2 (Sept2) alternative variant cSep08, mRNA.                             |
| 2-Sep         | Sept2.dSep08         | 117515 | 23302 | 775  | 8  | 215 | septin 2 (Sept2) alternative variant dSep08, mRNA.                             |
| 2-Sep         | Sept2.eSep08         | 117515 | 20857 | 427  | 5  | 121 | septin 2 (Sept2) alternative variant eSep08, mRNA.                             |
| 2-Sep         | Sept2.gSep08         | 117515 | 13185 | 995  | 3  | 73  | septin 2 (Sept2) alternative variant gSep08, mRNA.                             |
| 2-Sep         | Sept2.hSep08         | 117515 | 19186 | 501  | 5  | 59  | septin 2 (Sept2) alternative variant hSep08, mRNA.                             |
| 3-Sep         | Sept3.bSep08         | 56003  | 5614  | 458  | 4  | 118 | septin 3 (Sept3) alternative variant bSep08, mRNA.                             |
| 4-Sep         | Sept4.aSep08         | 287606 | 12658 | 1333 | 11 | 360 | septin 4 (41.9 kD) (Sept4) alternative variant aSep08, complete mRNA.          |
| 4-Sep         | Sept4.cSep08         | 287606 | 11007 | 803  | 6  | 227 | septin 4 (Sept4) alternative variant cSep08, mRNA.                             |
| 4-Sep         | Sept4.dSep08         | 287606 | 8031  | 691  | 6  | 207 | septin 4 (Sept4) alternative variant dSep08, mRNA.                             |
| 4-Sep         | Sept4.eSep08         | 287606 | 11303 | 689  | 6  | 188 | septin 4 CRA d (Sept4) alternative variant eSep08, mRNA.                       |
| 4-Sep         | Sept4.fSep08         | 287606 | 11674 | 668  | 7  | 179 | septin 4 CRA a (Sept4) alternative variant fSep08, mRNA.                       |
| 4-Sep         | Sept4.hSep08         | 287606 | 11237 | 720  | 6  | 157 | septin 4 CRA d (Sept4) alternative variant hSep08, mRNA.                       |
| 4-Sep         | Sept4.iSep08         | 287606 | 2021  | 686  | 4  | 114 | septin 4 CRA l (Sept4) alternative variant iSep08, mRNA.                       |
| 4-Sep         | Sept4.jSep08         | 287606 | 1239  | 751  | 3  | 104 | septin 4 (11.9 kD) (Sept4) alternative variant jSep08, mRNA.                   |
| 4-Sep         | Sept4.lSep08         | 287606 | 739   | 513  | 2  | 91  | septin 4 CRA b (10.1 kD) (Sept4) alternative variant lSep08, mRNA.             |
| Sept5andGp1bb | Sept5andGp1bb.bSep08 | 116727 | 5839  | 756  | 8  | 252 | septin 5 CRA g (Sept5andGp1bb) alternative variant bSep08, mRNA.               |
| Sept5andGp1bb | Sept5andGp1bb.bSep08 | 116728 | 5839  | 756  | 8  | 252 | septin 5 CRA g (Sept5andGp1bb) alternative variant bSep08, mRNA.               |
| Sept5andGp1bb | Sept5andGp1bb.dSep08 | 116727 | 5970  | 1035 | 7  | 195 | septin 5 CRA h (22.5 kD) (Sept5andGp1bb) alternative variant dSep08, mRNA.     |
| Sept5andGp1bb | Sept5andGp1bb.dSep08 | 116728 | 5970  | 1035 | 7  | 195 | septin 5 CRA h (22.5 kD) (Sept5andGp1bb) alternative variant dSep08, mRNA.     |
| Sept5andGp1bb | Sept5andGp1bb.eSep08 | 116727 | 5368  | 575  | 6  | 191 | septin 5 CRA d (Sept5andGp1bb) alternative variant eSep08, mRNA.               |

|               |                      |        |       |      |    |     |                                                                                               |
|---------------|----------------------|--------|-------|------|----|-----|-----------------------------------------------------------------------------------------------|
| Sept5andGp1bb | Sept5andGp1bb.eSep08 | 116728 | 5368  | 575  | 6  | 191 | septin 5 CRA d (Sept5andGp1bb) alternative variant eSep08, mRNA.                              |
| Sept5andGp1bb | Sept5andGp1bb.fSep08 | 116727 | 508   | 412  | 2  | 65  | septin 5 CRA f (Sept5andGp1bb) alternative variant fSep08, mRNA.                              |
| Sept5andGp1bb | Sept5andGp1bb.fSep08 | 116728 | 508   | 412  | 2  | 65  | septin 5 CRA f (Sept5andGp1bb) alternative variant fSep08, mRNA.                              |
| 6-Sep         | Sept6.aSep08         | 691335 | 56118 | 1983 | 9  | 417 | septin 6 (Sept6) alternative variant aSep08, mRNA.                                            |
| 6-Sep         | Sept6.bSep08         | 691335 | 29800 | 1697 | 5  | 233 | septin 6 (Sept6) alternative variant bSep08, mRNA.                                            |
| 6-Sep         | Sept6.cSep08         | 691335 | 6897  | 731  | 1  | 38  | septin 6 (Sept6) alternative variant cSep08, mRNA.                                            |
| 7-Sep         | Sept7.bSep08         | 64551  | 30857 | 561  | 6  | 187 | septin 7 (Sept7) alternative variant bSep08, mRNA.                                            |
| 7-Sep         | Sept7.cSep08         | 64551  | 51656 | 727  | 8  | 187 | septin 7 (Sept7) alternative variant cSep08, mRNA.                                            |
| 7-Sep         | Sept7.dSep08         | 64551  | 51352 | 817  | 7  | 177 | septin 7 (Sept7) alternative variant dSep08, mRNA.                                            |
| 8-Sep         | Sept8.aSep08         | 303135 | 21764 | 1806 | 10 | 472 | septin 8 (Sept8) alternative variant aSep08, mRNA.                                            |
| 8-Sep         | Sept8.cSep08         | 303135 | 12349 | 1597 | 3  | 158 | septin 8 (Sept8) alternative variant cSep08, mRNA.                                            |
| 8-Sep         | Sept8.dSep08         | 303135 | 14124 | 412  | 4  | 137 | septin 8 (Sept8) alternative variant dSep08, mRNA.                                            |
| 8-Sep         | Sept8.eSep08         | 303135 | 2330  | 749  | 2  | 94  | septin 8 (Sept8) alternative variant eSep08, mRNA.                                            |
| 9-Sep         | Sept9.dSep08         | 83788  | 26292 | 725  | 6  | 209 | septin 9 (Sept9) alternative variant dSep08, mRNA.                                            |
| 9-Sep         | Sept9.fSep08         | 83788  | 5895  | 515  | 2  | 40  | septin 9 (Sept9) alternative variant fSep08, mRNA.                                            |
| 10-Sep        | Sept10.bSep08        | 309891 | 17425 | 1505 | 6  | 225 | septin 10 (Sept10) alternative variant bSep08, mRNA.                                          |
| 10-Sep        | Sept10.cSep08        | 309891 | 8606  | 886  | 2  | 72  | septin 10 (Sept10) alternative variant cSep08, mRNA.                                          |
| 11-Sep        | Sept11.aSep08        | 305227 | 83883 | 1510 | 10 | 475 | septin 11 (Sept11) alternative variant aSep08, mRNA.                                          |
| 11-Sep        | Sept11.bSep08        | 305227 | 84644 | 2203 | 9  | 468 | septin 11 (Sept11) alternative variant bSep08, mRNA.                                          |
| 11-Sep        | Sept11.dSep08        | 305227 | 84108 | 2376 | 10 | 431 | septin 11 (49.7 kD) (Sept11) alternative variant dSep08, mRNA.                                |
| 11-Sep        | Sept11.fSep08        | 305227 | 4867  | 1453 | 1  | 56  | septin 11 (Sept11) alternative variant fSep08, mRNA.                                          |
| 12-Sep        | Sept12.aSep08        | 363542 | 9826  | 1295 |    | 381 | septin 12 (Sept12) mRNA.                                                                      |
| 14-Sep        | Sept14.aSep08        | 315702 | 3053  | 736  | 2  | 245 | septin 14 (Sept14) alternative variant aSep08, mRNA.                                          |
| 14-Sep        | Sept14.bSep08        | 315702 | 4097  | 1831 | 2  | 124 | septin 14 (12.9 kD) (Sept14) alternative variant bSep08, mRNA.                                |
| Sepw1         | Sepw1.aSep08         | 25545  | 5020  | 480  | 4  | 113 | selenoprotein W, muscle 1 (12.3 kD) (Sepw1) alternative variant aSep08, complete mRNA.        |
| Sepw1         | Sepw1.bSep08         | 25545  | 3288  | 796  | 4  | 88  | selenoprotein W, muscle 1 (9.6 kD) (Sepw1) alternative variant bSep08, mRNA.                  |
| Sepw1         | Sepw1.cSep08         | 25545  | 5041  | 787  | 5  | 88  | selenoprotein W, muscle 1 (9.6 kD) (Sepw1) alternative variant cSep08, complete mRNA.         |
| Serac1        | Serac1.aSep08        | 499015 | 7065  | 694  |    | 211 | serine active site containing 1 (Serac1) mRNA.                                                |
| Serbp1        | Serbp1.bSep08        | 246303 | 17052 | 1586 | 8  | 413 | serpine1 mRNA binding protein 1 (Serbp1) alternative variant bSep08, mRNA.                    |
| Serbp1        | Serbp1.cSep08        | 246303 | 14536 | 1146 | 7  | 381 | serpine1 mRNA binding protein 1 (Serbp1) alternative variant cSep08, mRNA.                    |
| Serbp1        | Serbp1.dSep08        | 246303 | 16845 | 1289 | 7  | 377 | serpine1 mRNA binding protein 1 (41.5 kD) (Serbp1) alternative variant dSep08, complete mRNA. |
| Serbp1        | Serbp1.eSep08        | 246303 | 18587 | 3057 | 9  | 293 | serpine1 mRNA binding protein 1 (Serbp1) alternative variant eSep08, mRNA.                    |

|         |                |        |        |      |    |     |                                                                                                              |
|---------|----------------|--------|--------|------|----|-----|--------------------------------------------------------------------------------------------------------------|
| Serbp1  | Serbp1.fSep08  | 246303 | 5181   | 710  | 2  | 102 | serpine1 mRNA binding protein 1 (Serbp1) alternative variant fSep08, mRNA.                                   |
| serby   | serby.aSep08   |        | 883    | 285  |    | 78  | putative protein (serby) mRNA.                                                                               |
| serchy  | serchy.aSep08  |        | 3120   | 429  |    | 142 | ryanodine receptor (serchy) mRNA.                                                                            |
| serdar  | serdar.aSep08  |        | 4050   | 274  |    | 80  | putative protein (serdar) mRNA.                                                                              |
| Serf1   | Serf1.aSep08   | 502503 | 6048   | 476  | 3  | 92  | small EDRK-rich factor 1 (Serf1) alternative variant aSep08, mRNA.                                           |
| Serf2   | Serf2.bSep08   | 502663 | 1318   | 583  | 3  | 153 | small EDRK-rich factor 2 (Serf2) alternative variant bSep08, mRNA.                                           |
| Serf2   | Serf2.cSep08   | 502663 | 995    | 388  | 2  | 127 | small EDRK-rich factor 2 (Serf2) alternative variant cSep08, mRNA.                                           |
| Serf2   | Serf2.eSep08   | 502663 | 1673   | 1139 | 2  | 39  | small EDRK-rich factor 2 (4.5 kD) (Serf2) alternative variant eSep08, complete mRNA.                         |
| serflo  | serflo.aSep08  |        | 3017   | 290  |    | 40  | putative protein (serflo) mRNA.                                                                              |
| serflu  | serflu.aSep08  |        | 1701   | 348  |    | 116 | leucine-rich repeat kinase 1 (serflu) mRNA.                                                                  |
| sergar  | sergar.aSep08  |        | 10546  | 267  | 3  | 83  | putative protein, with a coiled coil domain (sergar) alternative variant aSep08, mRNA.                       |
| Sergef  | Sergef.aSep08  | 365243 | 177623 | 718  | 4  | 178 | secretion regulating guanine nucleotide exchange factor (18.9 kD) (Sergef) alternative variant aSep08, mRNA. |
| Serhl2  | Serhl2.aSep08  | 500911 | 20444  | 1334 | 12 | 310 | serine hydrolase-like 2 (35.5 kD) (Serhl2) alternative variant aSep08, mRNA.                                 |
| Serhl2  | Serhl2.bSep08  | 500911 | 17664  | 663  | 9  | 220 | serine hydrolase-like 2 (Serhl2) alternative variant bSep08, mRNA.                                           |
| Serinc1 | Serinc1.aSep08 | 294421 | 18966  | 2792 | 2  | 453 | serine incorporator 1 (50.6 kD) (Serinc1) alternative variant aSep08, mRNA.                                  |
| Serinc1 | Serinc1.bSep08 | 294421 | 3101   | 931  | 1  | 62  | serine incorporator 1 (7.4 kD) (Serinc1) alternative variant bSep08, mRNA.                                   |
| Serinc3 | Serinc3.bSep08 | 296350 | 29073  | 2928 | 12 | 261 | serine incorporator 3 (29.5 kD) (Serinc3) alternative variant bSep08, mRNA.                                  |
| Serinc4 | Serinc4.bSep08 | 311358 | 3481   | 881  | 2  | 263 | serine incorporator 4 (29.2 kD) (Serinc4) alternative variant bSep08, mRNA.                                  |
| serja   | serja.aSep08   |        | 1378   | 271  |    | 35  | putative protein (serja) mRNA.                                                                               |
| serjey  | serjey.aSep08  |        | 8200   | 416  |    | 138 | centrosomal protein 135 CRA a (serjey) mRNA.                                                                 |
| serkee  | serkee.aSep08  |        | 25900  | 362  |    | 76  | putative protein (serkee) mRNA.                                                                              |
| serkler | serkler.aSep08 |        | 78366  | 427  | 3  | 118 | putative protein (serkler) alternative variant aSep08, mRNA.                                                 |
| serkler | serkler.bSep08 |        | 20765  | 659  | 3  | 77  | putative secreted or extracellular protein precursor (8.9 kD) (serkler) alternative variant bSep08, mRNA.    |
| serkler | serkler.cSep08 |        | 49793  | 401  | 3  | 45  | putative protein (serkler) alternative variant cSep08, mRNA.                                                 |
| serlo   | serlo.aSep08   |        | 51932  | 573  |    | 81  | furry homolog (serlo) mRNA.                                                                                  |
| sermee  | sermee.aSep08  |        | 1348   | 399  |    | 133 | adam metalloproteinase with thrombospondin type 1 motif 2 (sermee) mRNA.                                     |
| sermer  | sermer.aSep08  |        | 924    | 313  |    | 80  | putative protein (8.7 kD) (sermer) mRNA.                                                                     |
| sernoy  | sernoy.aSep08  |        | 4648   | 770  |    | 64  | putative protein (sernoy) mRNA.                                                                              |

|           |                  |        |       |      |   |     |                                                                                                                                                            |
|-----------|------------------|--------|-------|------|---|-----|------------------------------------------------------------------------------------------------------------------------------------------------------------|
| Serp2     | Serp2.bSep08     | 498546 | 24016 | 613  | 3 | 72  | stress-associated endoplasmic reticulum protein family member 2 (Serp2) alternative variant bSep08, mRNA.                                                  |
| Serp2     | Serp2.dSep08     | 498546 | 379   | 256  | 2 | 55  | stress-associated endoplasmic reticulum protein family member 2 (Serp2) alternative variant dSep08, mRNA.                                                  |
| Serpina1  | Serpina1.bSep08  | 24648  | 10086 | 1412 | 5 | 411 | alpha-1-antiproteinase precursor (46.1 kD) (Serpina1) alternative variant bSep08, mRNA.                                                                    |
| Serpina1  | Serpina1.cSep08  | 24648  | 8276  | 775  | 2 | 258 | alpha-1-antiproteinase (Serpina1) alternative variant cSep08, mRNA.                                                                                        |
| Serpina1  | Serpina1.dSep08  | 24648  | 6278  | 684  | 2 | 213 | alpha-1-antiproteinase precursor (23.9 kD) (Serpina1) alternative variant dSep08, mRNA.                                                                    |
| Serpina1  | Serpina1.eSep08  | 24648  | 4028  | 572  | 3 | 77  | CRA b like (8.6 kD) (Serpina1) alternative variant eSep08, mRNA.                                                                                           |
| Serpina1  | Serpina1.fSep08  | 24648  | 1274  | 468  | 2 | 32  | CRA a like (Serpina1) alternative variant fSep08, mRNA.                                                                                                    |
| Serpina3k | Serpina3k.bSep08 | 24794  | 4676  | 927  | 3 | 275 | serine (or cysteine) peptidase inhibitor, clade A, member 3K (Serpina3k) alternative variant bSep08, mRNA.                                                 |
| Serpina3m | Serpina3m.aSep08 | 299276 | 5721  | 1311 |   | 321 | serine (or cysteine) proteinase inhibitor, clade A, member 3M (36.1 kD) (Serpina3m) mRNA.                                                                  |
| Serpina5  | Serpina5.bSep08  | 65051  | 2087  | 828  | 2 | 273 | serine (or cysteine) peptidase inhibitor, clade A, member 5 (Serpina5) alternative variant bSep08, mRNA.                                                   |
| Serpina6  | Serpina6.bSep08  | 299270 | 1971  | 422  | 1 | 34  | serine (or cysteine) peptidase inhibitor, clade A, member 6 (Serpina6) alternative variant bSep08, mRNA.                                                   |
| Serpina7  | Serpina7.aSep08  | 81806  | 1142  | 430  |   | 98  | serine (or cysteine) peptidase inhibitor, clade A (alpha-1 antiproteinase, antitrypsin), member 7 (Serpina7) mRNA.                                         |
| Serpina10 | Serpina10.bSep08 | 171154 | 2149  | 871  | 2 | 263 | serine (or cysteine) peptidase inhibitor, clade A (alpha-1 antiproteinase, antitrypsin), member 10 (Serpina10) alternative variant bSep08, mRNA.           |
| Serpina11 | Serpina11.bSep08 | 362774 | 9424  | 1468 | 1 | 422 | serine (or cysteine) peptidase inhibitor, clade A (alpha-1 antiproteinase, antitrypsin), member 11 (47.0 kD) (Serpina11) alternative variant bSep08, mRNA. |
| Serpina11 | Serpina11.cSep08 | 362774 | 2935  | 543  | 1 | 150 | serine (or cysteine) peptidase inhibitor, clade A (alpha-1 antiproteinase, antitrypsin), member 11 (Serpina11) alternative variant cSep08, mRNA.           |
| Serpib1a  | Serpib1a.bSep08  | 291091 | 4058  | 557  | 1 | 165 | serine (or cysteine) proteinase inhibitor, clade B, member 1a (18.2 kD) (Serpib1a) alternative variant bSep08, complete mRNA.                              |
| Serpib3a  | Serpib3a.aSep08  | 498209 | 5156  | 1617 |   | 395 | serine (or cysteine) peptidase inhibitor, clade B (ovalbumin), member 3A (Serpib3a) mRNA.                                                                  |
| Serpib6a  | Serpib6a.bSep08  | 291085 | 17971 | 835  | 6 | 245 | serine (or cysteine) peptidase inhibitor, clade B, member 6a (Serpib6a) alternative variant bSep08, mRNA.                                                  |
| Serpib6a  | Serpib6a.cSep08  | 291085 | 13471 | 762  | 5 | 181 | serine (or cysteine) peptidase inhibitor, clade B, member 6a (Serpib6a) alternative variant cSep08, mRNA.                                                  |
| Serpib6b  | Serpib6b.bSep08  | 364705 | 12423 | 778  | 5 | 259 | serine (or cysteine) peptidase inhibitor, clade B, member 6b (Serpib6b) alternative variant bSep08, mRNA.                                                  |
| Serpib6b  | Serpib6b.cSep08  | 364705 | 4043  | 736  | 1 | 44  | serine (or cysteine) peptidase inhibitor, clade B, member 6b (Serpib6b) alternative variant cSep08, mRNA.                                                  |

|          |                 |        |       |      |   |     |                                                                                                                                   |
|----------|-----------------|--------|-------|------|---|-----|-----------------------------------------------------------------------------------------------------------------------------------|
| Serpib11 | Serpib11.bSep08 | 304689 | 6798  | 811  | 1 | 165 | serine (or cysteine) peptidase inhibitor, clade B (ovalbumin), member 11 (Serpib11) alternative variant bSep08, mRNA.             |
| Serpib12 | Serpib12.aSep08 | 304692 | 21622 | 602  |   | 159 | serine (or cysteine) peptidase inhibitor, clade B (ovalbumin), member 12 (Serpib12) mRNA.                                         |
| Serpinc1 | Serpinc1.bSep08 | 304917 | 8246  | 995  | 3 | 295 | serine (or cysteine) peptidase inhibitor, clade C (antithrombin), member 1 (Serpinc1) alternative variant bSep08, mRNA.           |
| Serpinc1 | Serpinc1.cSep08 | 304917 | 6424  | 728  | 1 | 212 | serine (or cysteine) peptidase inhibitor, clade C (antithrombin), member 1 (23.6 kD) (Serpinc1) alternative variant cSep08, mRNA. |
| Serpind1 | Serpind1.bSep08 | 79224  | 8517  | 1160 |   | 367 | serine (or cysteine) peptidase inhibitor, clade D, member 1 (Serpind1) alternative variant bSep08, mRNA.                          |
| Serpine1 | Serpine1.bSep08 | 24617  | 4971  | 750  | 2 | 123 | serine (or cysteine) peptidase inhibitor, clade E, member 1 (Serpine1) alternative variant bSep08, mRNA.                          |
| Serpine2 | Serpine2.bSep08 | 29366  | 52195 | 570  | 1 | 190 | serine (or cysteine) peptidase inhibitor, clade E, member 2 (Serpine2) alternative variant bSep08, mRNA.                          |
| Serpinf1 | Serpinf1.bSep08 | 287526 | 5778  | 1800 | 6 | 393 | serine (or cysteine) peptidase inhibitor, clade F, member 1 (Serpinf1) alternative variant bSep08, mRNA.                          |
| Serpinf2 | Serpinf2.bSep08 | 287527 | 3390  | 810  | 7 | 159 | serine (or cysteine) peptidase inhibitor, clade F, member 2 (Serpinf2) alternative variant bSep08, mRNA.                          |
| Serpinf2 | Serpinf2.cSep08 | 287527 | 930   | 808  | 1 | 131 | serine (or cysteine) peptidase inhibitor, clade F, member 2 (Serpinf2) alternative variant cSep08, mRNA.                          |
| Serping1 | Serping1.bSep08 | 295703 | 4718  | 912  | 3 | 282 | serine (or cysteine) peptidase inhibitor, clade G, member 1 (Serping1) alternative variant bSep08, mRNA.                          |
| Serping1 | Serping1.cSep08 | 295703 | 3554  | 702  | 2 | 213 | serine (or cysteine) peptidase inhibitor, clade G, member 1 (Serping1) alternative variant cSep08, mRNA.                          |
| Serpinh1 | Serpinh1.bSep08 | 29345  | 889   | 796  | 2 | 115 | serine (or cysteine) peptidase inhibitor, clade H, member 1 (Serpinh1) alternative variant bSep08, mRNA.                          |
| Serpinh1 | Serpinh1.cSep08 | 29345  | 4050  | 385  | 3 | 104 | serine (or cysteine) peptidase inhibitor, clade H, member 1 (Serpinh1) alternative variant cSep08, mRNA.                          |
| Serpinh1 | Serpinh1.dSep08 | 29345  | 3885  | 393  | 3 | 90  | serine (or cysteine) peptidase inhibitor, clade H, member 1 (Serpinh1) alternative variant dSep08, mRNA.                          |
| Serpini1 | Serpini1.bSep08 | 116459 | 51846 | 341  | 1 | 44  | serine (or cysteine) peptidase inhibitor, clade I, member 1 (Serpini1) alternative variant bSep08, mRNA.                          |
| serpor   | serpor.aSep08   |        | 6525  | 401  |   | 106 | myosin Va (serpor) mRNA.                                                                                                          |
| sersa    | sersa.aSep08    |        | 2847  | 698  |   | 164 | putative protein (18.3 kD) (sersa) mRNA.                                                                                          |
| sershee  | sershee.aSep08  |        | 785   | 301  |   | 93  | putative protein (sershee) mRNA.                                                                                                  |
| SERTA.0  | SERTA.0.aSep08  |        | 12060 | 743  |   | 151 | SERTA (18.3 kD) (SERTA.0) mRNA.                                                                                                   |
| Sertad2  | Sertad2.bSep08  | 498423 | 16388 | 390  | 1 | 62  | putative protein (Sertad2) alternative variant bSep08, mRNA.                                                                      |
| Sertad4  | Sertad4.cSep08  | 360899 | 8074  | 470  | 3 | 136 | SERTA (Sertad4) alternative variant cSep08, mRNA.                                                                                 |
| Sertad4  | Sertad4.dSep08  | 360899 | 5344  | 461  | 1 | 36  | putative protein of mammalian origin (Sertad4) alternative variant dSep08, mRNA.                                                  |
| sertu    | sertu.aSep08    |        | 37687 | 750  |   | 63  | ras-related GTP-binding protein Rab10 like (sertu) mRNA.                                                                          |
| servar   | servar.aSep08   |        | 10215 | 436  |   | 120 | paired box 7 (servar) mRNA.                                                                                                       |



|        |               |        |       |      |    |      |                                                                                           |
|--------|---------------|--------|-------|------|----|------|-------------------------------------------------------------------------------------------|
| serwey | serwey.aSep08 |        | 2989  | 370  |    | 62   | putative protein (serwey) mRNA.                                                           |
| Sesn1  | Sesn1.aSep08  | 294518 | 21175 | 2405 | 9  | 610  | sestrin 1 (Sesn1) alternative variant aSep08, complete mRNA.                              |
| Sesn1  | Sesn1.bSep08  | 294518 | 21147 | 1790 | 6  | 464  | sestrin 1 (Sesn1) alternative variant bSep08, mRNA.                                       |
| Sestd1 | Sestd1.aSep08 | 295678 | 69053 | 2810 | 18 | 721  | SEC14 and spectrin domains 1 (Sestd1) alternative variant aSep08, mRNA.                   |
| SET.1  | SET.1.aSep08  |        | 4311  | 747  |    | 249  | SET (SET.1) alternative variant aSep08, mRNA.                                             |
| SET.1  | SET.1.bSep08  |        | 2015  | 461  |    | 100  | histone-lysine n-methyltransferase setd1b (SET.1) alternative variant bSep08, mRNA.       |
| SET.2  | SET.2.aSep08  |        | 656   | 379  |    | 126  | mixed-lineage leukemia like (SET.2) mRNA.                                                 |
| SET.3  | SET.3.aSep08  |        | 9157  | 2465 | 5  | 178  | N-methyltransferase mll3 (SET.3) alternative variant aSep08, mRNA.                        |
| Setbp1 | Setbp1.aSep08 | 291423 | 64219 | 1136 |    | 175  | SET binding protein 1 (19.0 kD) (Setbp1) mRNA.                                            |
| Setd2  | Setd2.aSep08  | 316013 | 24745 | 4505 | 4  | 1501 | putative protein of bilateral origin (Setd2) alternative variant aSep08, mRNA.            |
| Setd2  | Setd2.cSep08  | 316013 | 50618 | 3350 | 14 | 903  | WW/Rsp5/WWP (Setd2) alternative variant cSep08, mRNA.                                     |
| Setd2  | Setd2.dSep08  | 316013 | 17822 | 841  | 4  | 147  | putative protein of vertebrate origin (Setd2) alternative variant dSep08, mRNA.           |
| Setd2  | Setd2.gSep08  | 316013 | 16319 | 760  | 6  | 72   | WW/Rsp5/WWP (Setd2) alternative variant gSep08, mRNA.                                     |
| Setd3  | Setd3.aSep08  | 299295 | 66871 | 2699 | 1  | 596  | SET (67.4 kD) (Setd3) alternative variant aSep08, mRNA.                                   |
| Setd3  | Setd3.bSep08  | 299295 | 20929 | 404  |    | 81   | putative protein of vertebrate origin (9.0 kD) (Setd3) alternative variant bSep08, mRNA.  |
| Setd4  | Setd4.bSep08  | 245975 | 4506  | 2221 | 3  | 270  | putative protein of eukaryotic origin (30.5 kD) (Setd4) alternative variant bSep08, mRNA. |
| Setd4  | Setd4.cSep08  | 245975 | 6365  | 1017 | 5  | 139  | protein RDA279 CRA b (15.6 kD) (Setd4) alternative variant cSep08, mRNA.                  |
| Setd4  | Setd4.eSep08  | 245975 | 12491 | 633  | 4  | 111  | putative protein of mammalian origin (13.3 kD) (Setd4) alternative variant eSep08, mRNA.  |
| Setd4  | Setd4.fSep08  | 245975 | 3087  | 329  | 3  | 87   | putative protein of vertebrate origin (Setd4) alternative variant fSep08, mRNA.           |
| Setd4  | Setd4.gSep08  | 245975 | 12680 | 785  | 4  | 44   | putative protein (4.6 kD) (Setd4) alternative variant gSep08, mRNA.                       |
| Setd5  | Setd5.bSep08  | 297514 | 7490  | 939  | 3  | 178  | putative protein of vertebrate origin (Setd5) alternative variant bSep08, mRNA.           |
| Setd5  | Setd5.cSep08  | 297514 | 6327  | 743  | 7  | 117  | putative protein of vertebrate origin (12.7 kD) (Setd5) alternative variant cSep08, mRNA. |
| Setd5  | Setd5.iSep08  | 297514 | 5331  | 439  | 4  | 90   | putative protein (Setd5) alternative variant iSep08, mRNA.                                |
| Setd5  | Setd5.jSep08  | 297514 | 32131 | 437  | 3  | 33   | putative protein (Setd5) alternative variant jSep08, mRNA.                                |
| Setd6  | Setd6.bSep08  | 291844 | 943   | 707  | 2  | 156  | putative protein of eukaryotic origin (Setd6) alternative variant bSep08, mRNA.           |
| Setd6  | Setd6.cSep08  | 291844 | 4637  | 448  | 2  | 103  | putative protein of vertebrate origin (Setd6) alternative variant cSep08, mRNA.           |

|         |                |        |       |      |   |     |                                                                                                                                                                                                                                                                                        |
|---------|----------------|--------|-------|------|---|-----|----------------------------------------------------------------------------------------------------------------------------------------------------------------------------------------------------------------------------------------------------------------------------------------|
| Setdb1  | Setdb1.aSep08  | 689873 | 3283  | 622  | 1 | 176 | similar to Histone-lysine N-methyltransferase, H3 lysine-9 specific 4 (Histone H3-K9 methyltransferase 4) (H3-K9-HMTase 4) (SET domain bifurcated 1) (ERG-associated protein with SET domain) (ESET) and SET domain, bifurcated 1 (19.5 kD) (Setdb1) alternative variant aSep08, mRNA. |
| Setdb1  | Setdb1.aSep08  | 689883 | 3283  | 622  | 1 | 176 | similar to Histone-lysine N-methyltransferase, H3 lysine-9 specific 4 (Histone H3-K9 methyltransferase 4) (H3-K9-HMTase 4) (SET domain bifurcated 1) (ERG-associated protein with SET domain) (ESET) and SET domain, bifurcated 1 (19.5 kD) (Setdb1) alternative variant aSep08, mRNA. |
| Setdb1  | Setdb1.cSep08  | 689873 | 2843  | 395  | 2 | 118 | similar to Histone-lysine N-methyltransferase, H3 lysine-9 specific 4 (Histone H3-K9 methyltransferase 4) (H3-K9-HMTase 4) (SET domain bifurcated 1) (ERG-associated protein with SET domain) (ESET) and SET domain, bifurcated 1 (Setdb1) alternative variant cSep08, mRNA.           |
| Setdb1  | Setdb1.cSep08  | 689883 | 2843  | 395  | 2 | 118 | similar to Histone-lysine N-methyltransferase, H3 lysine-9 specific 4 (Histone H3-K9 methyltransferase 4) (H3-K9-HMTase 4) (SET domain bifurcated 1) (ERG-associated protein with SET domain) (ESET) and SET domain, bifurcated 1 (Setdb1) alternative variant cSep08, mRNA.           |
| Setmar  | Setmar.aSep08  | 500281 | 12005 | 1557 |   | 315 | SET domain and mariner transposase fusion gene (35.0 kD) (Setmar) mRNA.                                                                                                                                                                                                                |
| Setx    | Setx.aSep08    | 362096 | 4681  | 406  |   | 134 | senataxin (Setx) mRNA.                                                                                                                                                                                                                                                                 |
| seyby   | seyby.aSep08   |        | 1953  | 1002 |   | 112 | polyprotein (12.4 kD) (seyby) mRNA.                                                                                                                                                                                                                                                    |
| seychy  | seychy.aSep08  |        | 3295  | 354  |   | 117 | ryanodine receptor (seychy) mRNA.                                                                                                                                                                                                                                                      |
| seydar  | seydar.aSep08  |        | 1596  | 194  |   | 64  | putative protein (seydar) mRNA.                                                                                                                                                                                                                                                        |
| seyflo  | seyflo.aSep08  |        | 15733 | 617  |   | 193 | probable rna-binding protein 20 like (seyflo) mRNA.                                                                                                                                                                                                                                    |
| seyflu  | seyflu.aSep08  |        | 1107  | 214  |   | 21  | putative protein (seyflu) mRNA.                                                                                                                                                                                                                                                        |
| seygar  | seygar.aSep08  |        | 14200 | 542  |   | 37  | putative protein (seygar) mRNA.                                                                                                                                                                                                                                                        |
| seyja   | seyja.aSep08   |        | 7040  | 308  |   | 30  | putative protein (seyja) mRNA.                                                                                                                                                                                                                                                         |
| seyjey  | seyjey.aSep08  |        | 10625 | 1134 |   | 218 | exocyst complex component 1 (seyjey) mRNA.                                                                                                                                                                                                                                             |
| seykee  | seykee.aSep08  |        | 23735 | 961  |   | 80  | putative mitochondrial protein (9.1 kD) (seykee) mRNA.                                                                                                                                                                                                                                 |
| seykler | seykler.aSep08 |        | 10975 | 322  |   | 46  | putative protein (seykler) mRNA.                                                                                                                                                                                                                                                       |
| seylo   | seylo.aSep08   |        | 50785 | 406  |   | 90  | putative protein (seylo) mRNA.                                                                                                                                                                                                                                                         |
| seymee  | seymee.aSep08  |        | 1573  | 537  |   | 98  | putative protein (seymee) mRNA.                                                                                                                                                                                                                                                        |
| seymer  | seymer.aSep08  |        | 853   | 525  |   | 77  | putative protein (seymer) mRNA.                                                                                                                                                                                                                                                        |
| seynoy  | seynoy.aSep08  |        | 5548  | 377  |   | 125 | dedicator of cytokinesis 10 (seynoy) mRNA.                                                                                                                                                                                                                                             |
| seypor  | seypor.aSep08  |        | 8750  | 561  |   | 187 | myosin Va (seypor) mRNA.                                                                                                                                                                                                                                                               |
| seysa   | seysa.aSep08   |        | 2011  | 352  |   | 49  | putative protein (seysa) mRNA.                                                                                                                                                                                                                                                         |
| seyshee | seyshee.aSep08 |        | 7099  | 1270 | 2 | 129 | folliculin interacting protein (seyshee) alternative variant aSep08, mRNA.                                                                                                                                                                                                             |
| seyshee | seyshee.bSep08 |        | 3874  | 437  | 1 | 69  | folliculin interacting protein (seyshee) alternative variant bSep08, mRNA.                                                                                                                                                                                                             |

|         |                |        |       |      |   |     |                                                                                           |
|---------|----------------|--------|-------|------|---|-----|-------------------------------------------------------------------------------------------|
| seyshee | seyshee.cSep08 |        | 5815  | 1779 | 3 | 64  | folliculin interacting protein (seyshee) alternative variant cSep08, mRNA.                |
| seytu   | seytu.aSep08   |        | 14000 | 429  |   | 110 | putative protein (seytu) mRNA.                                                            |
| seyvar  | seyvar.aSep08  |        | 5795  | 947  |   | 34  | putative protein (4.0 kD) (seyvar) mRNA.                                                  |
| seywey  | seywey.aSep08  |        | 11397 | 613  |   | 45  | putative protein (seywey) mRNA.                                                           |
| Sez6    | Sez6.aSep08    | 192247 | 20683 | 1120 |   | 373 | seizure related gene 6 (Sez6) mRNA.                                                       |
| Sez6l2  | Sez6l2.bSep08  | 308988 | 1702  | 542  | 3 | 180 | seizure related 6 homolog like 2 (Sez6l2) alternative variant bSep08, mRNA.               |
| Sez6l2  | Sez6l2.cSep08  | 308988 | 877   | 765  | 2 | 154 | seizure related 6 homolog like 2 (Sez6l2) alternative variant cSep08, mRNA.               |
| Sez6l2  | Sez6l2.dSep08  | 308988 | 3181  | 915  | 4 | 131 | seizure related 6 homolog like 2 (Sez6l2) alternative variant dSep08, mRNA.               |
| Sf1     | Sf1.cSep08     | 117855 | 2422  | 739  | 5 | 246 | splicing factor 1 (Sf1) alternative variant cSep08, mRNA.                                 |
| Sf1     | Sf1.dSep08     | 117855 | 7621  | 682  | 3 | 102 | splicing factor 1 (Sf1) alternative variant dSep08, mRNA.                                 |
| Sf1     | Sf1.eSep08     | 117855 | 783   | 668  | 2 |     |                                                                                           |
| Sf3a1   | Sf3a1.bSep08   | 305479 | 8165  | 1784 | 2 | 382 | splicing factor 3a, subunit 1 (Sf3a1) alternative variant bSep08, mRNA.                   |
| Sf3a2   | Sf3a2.bSep08   | 299620 | 1438  | 666  | 1 | 204 | splicing factor 3a, subunit 2 (Sf3a2) alternative variant bSep08, mRNA.                   |
| Sf3a3   | Sf3a3.bSep08   | 313583 | 11137 | 2146 | 9 | 243 | splicing factor 3a, subunit 3 (Sf3a3) alternative variant bSep08, mRNA.                   |
| Sf3a3   | Sf3a3.cSep08   | 313583 | 7577  | 566  | 7 | 45  | splicing factor 3a, subunit 3 (5.1 kD) (Sf3a3) alternative variant cSep08, complete mRNA. |
| Sf3b1   | Sf3b1.bSep08   | 84486  | 11420 | 1791 | 5 | 462 | splicing factor 3b (Sf3b1) alternative variant bSep08, mRNA.                              |
| Sf3b1   | Sf3b1.cSep08   | 84486  | 2327  | 1315 | 4 | 333 | splicing factor 3b (Sf3b1) alternative variant cSep08, mRNA.                              |
| Sf3b1   | Sf3b1.dSep08   | 84486  | 10943 | 608  | 4 | 159 | splicing factor 3b CRA a (Sf3b1) alternative variant dSep08, mRNA.                        |
| Sf3b1   | Sf3b1.eSep08   | 84486  | 1924  | 720  | 4 | 158 | splicing factor 3b (Sf3b1) alternative variant eSep08, mRNA.                              |
| Sf3b1   | Sf3b1.fSep08   | 84486  | 7578  | 1042 | 4 | 153 | splicing factor 3b (Sf3b1) alternative variant fSep08, mRNA.                              |
| Sf3b1   | Sf3b1.gSep08   | 84486  | 1738  | 602  | 3 | 128 | splicing factor 3b (Sf3b1) alternative variant gSep08, mRNA.                              |
| Sf3b1   | Sf3b1.hSep08   | 84486  | 708   | 343  | 3 | 55  | putative protein (6.5 kD) (Sf3b1) alternative variant hSep08, mRNA.                       |
| Sf3b2   | Sf3b2.bSep08   | 293671 | 6234  | 576  | 3 | 76  | splicing factor 3b, subunit 2 (8.8 kD) (Sf3b2) alternative variant bSep08, mRNA.          |
| Sf3b3   | Sf3b3.bSep08   | 292019 | 4002  | 772  | 5 | 247 | splicing factor 3b, subunit 3 (Sf3b3) alternative variant bSep08, mRNA.                   |
| Sf3b3   | Sf3b3.cSep08   | 292019 | 3712  | 358  | 2 | 85  | splicing factor 3b, subunit 3 (Sf3b3) alternative variant cSep08, mRNA.                   |
| Sf3b3   | Sf3b3.dSep08   | 292019 | 5293  | 412  | 3 | 16  | splicing factor 3b, subunit 3 (Sf3b3) alternative variant dSep08, mRNA.                   |

|        |               |        |       |      |    |     |                                                                                                                                            |
|--------|---------------|--------|-------|------|----|-----|--------------------------------------------------------------------------------------------------------------------------------------------|
| Sf3b4  | Sf3b4.aSep08  | 295270 | 4746  | 1791 | 2  | 541 | splicing factor 3b, subunit 4 (Sf3b4) alternative variant aSep08, complete mRNA.                                                           |
| Sf3b4  | Sf3b4.cSep08  | 295270 | 1353  | 862  | 2  | 171 | splicing factor 3b, subunit 4 (18.5 kD) (Sf3b4) alternative variant cSep08, mRNA.                                                          |
| Sf4    | Sf4.bSep08    | 290666 | 25175 | 1799 | 11 | 554 | splicing factor 4 (Sf4) alternative variant bSep08, mRNA.                                                                                  |
| Sf4    | Sf4.cSep08    | 290666 | 24125 | 788  | 7  | 262 | splicing factor 4 (Sf4) alternative variant cSep08, mRNA.                                                                                  |
| Sf4    | Sf4.dSep08    | 290666 | 7152  | 579  | 2  | 160 | splicing factor 4 (Sf4) alternative variant dSep08, mRNA.                                                                                  |
| Sf4    | Sf4.eSep08    | 290666 | 4600  | 638  | 2  | 121 | splicing factor 4 CRA c (Sf4) alternative variant eSep08, mRNA.                                                                            |
| Sf4    | Sf4.fSep08    | 290666 | 752   | 400  | 2  | 86  | splicing factor 4 (Sf4) alternative variant fSep08, mRNA.                                                                                  |
| Sfmbt1 | Sfmbt1.bSep08 | 58967  | 4751  | 704  | 4  | 185 | scm-like with four mbt domains 1 and similar to farnesyl diphosphate synthetase (Sfmbt1) alternative variant bSep08, mRNA.                 |
| Sfmbt1 | Sfmbt1.bSep08 | 680626 | 4751  | 704  | 4  | 185 | scm-like with four mbt domains 1 and similar to farnesyl diphosphate synthetase (Sfmbt1) alternative variant bSep08, mRNA.                 |
| Sfmbt1 | Sfmbt1.cSep08 | 58967  | 30511 | 435  | 4  | 73  | scm-like with four mbt domains 1 and similar to farnesyl diphosphate synthetase (Sfmbt1) alternative variant cSep08, mRNA.                 |
| Sfmbt1 | Sfmbt1.cSep08 | 680626 | 30511 | 435  | 4  | 73  | scm-like with four mbt domains 1 and similar to farnesyl diphosphate synthetase (Sfmbt1) alternative variant cSep08, mRNA.                 |
| Sfpi1  | Sfpi1.bSep08  | 366126 | 31857 | 385  | 4  | 94  | SFFV proviral integration 1 (Sfpi1) alternative variant bSep08, mRNA.                                                                      |
| Sfpi1  | Sfpi1.cSep08  | 366126 | 7300  | 167  | 2  | 31  | SFFV proviral integration 1 (Sfpi1) alternative variant cSep08, mRNA.                                                                      |
| Sfpq   | Sfpq.bSep08   | 252855 | 10126 | 3902 | 10 | 607 | splicing factor proline/glutamine rich (polypyrimidine tract binding protein associated) (Sfpq) alternative variant bSep08, mRNA.          |
| Sfpq   | Sfpq.dSep08   | 252855 | 4282  | 3523 | 2  | 75  | splicing factor proline/glutamine rich (polypyrimidine tract binding protein associated) (8.3 kD) (Sfpq) alternative variant dSep08, mRNA. |
| Sfpq   | Sfpq.eSep08   | 252855 | 3124  | 2082 | 3  | 75  | splicing factor proline/glutamine rich (polypyrimidine tract binding protein associated) (8.3 kD) (Sfpq) alternative variant eSep08, mRNA. |
| Sfpq   | Sfpq.fSep08   | 252855 | 4821  | 850  | 4  | 43  | splicing factor proline/glutamine rich (polypyrimidine tract binding protein associated) (5.2 kD) (Sfpq) alternative variant fSep08, mRNA. |
| Sfpq   | Sfpq.gSep08   | 252855 | 13335 | 667  | 6  |     |                                                                                                                                            |
| Sfrp1  | Sfrp1.aSep08  | 84402  | 38338 | 3880 |    | 404 | secreted frizzled-related protein 1 (Sfrp1) mRNA.                                                                                          |
| Sfrs1  | Sfrs1.aSep08  | 689890 | 4178  | 3212 | 4  | 248 | splicing factor, arginine/serine-rich 1 and hypothetical protein LOC689898 (27.7 kD) (Sfrs1) alternative variant aSep08, mRNA.             |
| Sfrs1  | Sfrs1.aSep08  | 689898 | 4178  | 3212 | 4  | 248 | splicing factor, arginine/serine-rich 1 and hypothetical protein LOC689898 (27.7 kD) (Sfrs1) alternative variant aSep08, mRNA.             |

|         |                |        |       |      |   |     |                                                                                                                      |
|---------|----------------|--------|-------|------|---|-----|----------------------------------------------------------------------------------------------------------------------|
| Sfrs1   | Sfrs1.bSep08   | 689890 | 2294  | 1525 | 3 | 223 | splicing factor, arginine/serine-rich 1 and hypothetical protein LOC689898 (Sfrs1) alternative variant bSep08, mRNA. |
| Sfrs1   | Sfrs1.bSep08   | 689898 | 2294  | 1525 | 3 | 223 | splicing factor, arginine/serine-rich 1 and hypothetical protein LOC689898 (Sfrs1) alternative variant bSep08, mRNA. |
| Sfrs1   | Sfrs1.cSep08   | 689890 | 1094  | 675  | 2 | 161 | splicing factor, arginine/serine-rich 1 and hypothetical protein LOC689898 (Sfrs1) alternative variant cSep08, mRNA. |
| Sfrs1   | Sfrs1.cSep08   | 689898 | 1094  | 675  | 2 | 161 | splicing factor, arginine/serine-rich 1 and hypothetical protein LOC689898 (Sfrs1) alternative variant cSep08, mRNA. |
| Sfrs1   | Sfrs1.eSep08   | 689890 | 1481  | 594  | 2 | 53  | splicing factor, arginine/serine-rich 1 and hypothetical protein LOC689898 (Sfrs1) alternative variant eSep08, mRNA. |
| Sfrs1   | Sfrs1.eSep08   | 689898 | 1481  | 594  | 2 | 53  | splicing factor, arginine/serine-rich 1 and hypothetical protein LOC689898 (Sfrs1) alternative variant eSep08, mRNA. |
| Sfrs2   | Sfrs2.cSep08   | 494445 | 1241  | 644  | 3 | 70  | splicing factor, arginine/serine-rich 2 (SC-35) (Sfrs2) alternative variant cSep08, mRNA.                            |
| Sfrs2   | Sfrs2.dSep08   | 494445 | 1589  | 1087 | 2 | 43  | splicing factor, arginine/serine-rich 2 (SC-35) (4.9 kD) (Sfrs2) alternative variant dSep08, mRNA.                   |
| Sfrs2ip | Sfrs2ip.aSep08 | 312030 | 39552 | 649  |   | 216 | splicing factor, arginine/serine-rich 2, interacting protein (Sfrs2ip) mRNA.                                         |
| Sfrs3   | Sfrs3.bSep08   | 361814 | 7967  | 1360 | 7 | 147 | CRA c like (16.4 kD) (Sfrs3) alternative variant bSep08, complete mRNA.                                              |
| Sfrs3   | Sfrs3.cSep08   | 361814 | 5726  | 1069 | 3 | 129 | splicing factor arginine serine-rich 3 (15.0 kD) (Sfrs3) alternative variant cSep08, complete mRNA.                  |
| Sfrs3   | Sfrs3.eSep08   | 361814 | 882   | 795  | 2 | 55  | CRA c like (Sfrs3) alternative variant eSep08, mRNA.                                                                 |
| Sfrs3   | Sfrs3.gSep08   | 361814 | 730   | 484  | 3 | 37  | CRA e like (Sfrs3) alternative variant gSep08, mRNA.                                                                 |
| Sfrs5   | Sfrs5.aSep08   | 29667  | 4696  | 1470 | 8 | 269 | splicing factor, arginine/serine-rich 5 (30.9 kD) (Sfrs5) alternative variant aSep08, complete mRNA.                 |
| Sfrs5   | Sfrs5.cSep08   | 29667  | 3859  | 748  | 7 | 190 | splicing factor, arginine/serine-rich 5 (22.0 kD) (Sfrs5) alternative variant cSep08, mRNA.                          |
| Sfrs5   | Sfrs5.dSep08   | 29667  | 3804  | 818  | 7 | 183 | splicing factor, arginine/serine-rich 5 (Sfrs5) alternative variant dSep08, mRNA.                                    |
| Sfrs5   | Sfrs5.eSep08   | 29667  | 2620  | 1449 | 6 | 138 | splicing factor, arginine/serine-rich 5 (15.8 kD) (Sfrs5) alternative variant eSep08, mRNA.                          |
| Sfrs5   | Sfrs5.fSep08   | 29667  | 2429  | 740  | 6 | 138 | splicing factor, arginine/serine-rich 5 (15.8 kD) (Sfrs5) alternative variant fSep08, mRNA.                          |
| Sfrs5   | Sfrs5.gSep08   | 29667  | 4535  | 2281 | 8 | 138 | splicing factor, arginine/serine-rich 5 (15.8 kD) (Sfrs5) alternative variant gSep08, complete mRNA.                 |
| Sfrs5   | Sfrs5.hSep08   | 29667  | 2973  | 1155 | 6 | 138 | splicing factor, arginine/serine-rich 5 (15.8 kD) (Sfrs5) alternative variant hSep08, mRNA.                          |
| Sfrs5   | Sfrs5.iSep08   | 29667  | 2185  | 758  | 5 | 124 | splicing factor, arginine/serine-rich 5 (14.4 kD) (Sfrs5) alternative variant iSep08, mRNA.                          |

|        |               |        |       |      |   |     |                                                                                                                         |
|--------|---------------|--------|-------|------|---|-----|-------------------------------------------------------------------------------------------------------------------------|
| Sfrs5  | Sfrs5.jSep08  | 29667  | 2355  | 799  | 5 | 124 | splicing factor, arginine/serine-rich 5 (14.4 kD) (Sfrs5) alternative variant jSep08, mRNA.                             |
| Sfrs5  | Sfrs5.kSep08  | 29667  | 3052  | 1500 | 5 | 124 | splicing factor, arginine/serine-rich 5 (14.4 kD) (Sfrs5) alternative variant kSep08, mRNA.                             |
| Sfrs5  | Sfrs5.lSep08  | 29667  | 2284  | 912  | 4 | 119 | splicing factor, arginine/serine-rich 5 (14.0 kD) (Sfrs5) alternative variant lSep08, complete mRNA.                    |
| Sfrs5  | Sfrs5.nSep08  | 29667  | 1729  | 384  | 4 | 86  | splicing factor, arginine/serine-rich 5 (Sfrs5) alternative variant nSep08, mRNA.                                       |
| Sfrs6  | Sfrs6.bSep08  | 362264 | 4615  | 4264 | 3 | 210 | splicing factor, arginine/serine-rich 6 (24.1 kD) (Sfrs6) alternative variant bSep08, mRNA.                             |
| Sfrs6  | Sfrs6.cSep08  | 362264 | 1256  | 408  | 3 | 94  | splicing factor, arginine/serine-rich 6 (Sfrs6) alternative variant cSep08, mRNA.                                       |
| Sfrs6  | Sfrs6.dSep08  | 362264 | 1133  | 688  | 2 | 65  | splicing factor, arginine/serine-rich 6 (Sfrs6) alternative variant dSep08, mRNA.                                       |
| Sfrs7  | Sfrs7.aSep08  | 362687 | 6077  | 1180 | 8 | 238 | splicing factor arginine serine-rich 7 (27.4 kD) (Sfrs7) alternative variant aSep08, mRNA.                              |
| Sfrs7  | Sfrs7.bSep08  | 362687 | 5784  | 854  | 8 | 227 | splicing factor arginine serine-rich 7 (26.2 kD) (Sfrs7) alternative variant bSep08, mRNA.                              |
| Sfrs7  | Sfrs7.cSep08  | 362687 | 5757  | 815  | 7 | 223 | splicing factor arginine serine-rich 7 (25.6 kD) (Sfrs7) alternative variant cSep08, mRNA.                              |
| Sfrs7  | Sfrs7.dSep08  | 362687 | 5768  | 1988 | 7 | 179 | arginine serine-rich 7 splicing factor (Sfrs7) alternative variant dSep08, mRNA.                                        |
| Sfrs7  | Sfrs7.fSep08  | 362687 | 3544  | 632  | 5 | 117 | splicing factor arginine serine-rich 7 (Sfrs7) alternative variant fSep08, mRNA.                                        |
| Sfrs7  | Sfrs7.gSep08  | 362687 | 4024  | 1259 | 6 | 113 | putative mitochondrial protein (13.1 kD) (Sfrs7) alternative variant gSep08, mRNA.                                      |
| Sfrs7  | Sfrs7.hSep08  | 362687 | 422   | 341  | 2 | 93  | putative mitochondrial protein (10.8 kD) (Sfrs7) alternative variant hSep08, mRNA.                                      |
| Sfrs7  | Sfrs7.iSep08  | 362687 | 3169  | 1898 | 3 | 74  | CRA i like (Sfrs7) alternative variant iSep08, mRNA.                                                                    |
| Sfrs8  | Sfrs8.bSep08  | 304431 | 10200 | 928  | 6 | 309 | splicing factor arginine serine-rich 8 (Sfrs8) alternative variant bSep08, mRNA.                                        |
| Sfrs8  | Sfrs8.dSep08  | 304431 | 5967  | 717  | 4 | 197 | splicing factor arginine serine-rich 8 (Sfrs8) alternative variant dSep08, mRNA.                                        |
| Sfrs8  | Sfrs8.eSep08  | 304431 | 10754 | 819  | 4 | 134 | splicing factor arginine serine-rich 8 (Sfrs8) alternative variant eSep08, mRNA.                                        |
| Sfrs8  | Sfrs8.fSep08  | 304431 | 2860  | 481  | 2 | 96  | putative nuclear protein (10.7 kD) (Sfrs8) alternative variant fSep08, mRNA.                                            |
| Sfrs8  | Sfrs8.gSep08  | 304431 | 1337  | 744  | 2 | 77  | putative mitochondrial protein (8.8 kD) (Sfrs8) alternative variant gSep08, mRNA.                                       |
| Sfrs9  | Sfrs9.bSep08  | 288701 | 5863  | 790  | 5 | 129 | splicing factor arginine serine rich 9 CRA a (Sfrs9) alternative variant bSep08, mRNA.                                  |
| Sfrs9  | Sfrs9.dSep08  | 288701 | 4447  | 1783 | 3 | 89  | putative protein (9.4 kD) (Sfrs9) alternative variant dSep08, mRNA.                                                     |
| Sfrs10 | Sfrs10.bSep08 | 117259 | 5623  | 1539 | 6 | 147 | splicing factor, arginine/serine-rich 10 (transformer 2 homolog, Drosophila) (Sfrs10) alternative variant bSep08, mRNA. |

|           |                  |        |       |      |    |     |                                                                                                                         |
|-----------|------------------|--------|-------|------|----|-----|-------------------------------------------------------------------------------------------------------------------------|
| Sfrs10    | Sfrs10.cSep08    | 117259 | 1017  | 386  | 2  | 128 | splicing factor, arginine/serine-rich 10 (transformer 2 homolog, Drosophila) (Sfrs10) alternative variant cSep08, mRNA. |
| Sfrs10    | Sfrs10.dSep08    | 117259 | 11487 | 737  | 4  | 84  | splicing factor, arginine/serine-rich 10 (transformer 2 homolog, Drosophila) (Sfrs10) alternative variant dSep08, mRNA. |
| Sfrs11    | Sfrs11.aSep08    | 502603 | 26559 | 1798 | 8  | 598 | splicing factor arginine serine-rich 11 (Sfrs11) alternative variant aSep08, mRNA.                                      |
| Sfrs11    | Sfrs11.bSep08    | 502603 | 7740  | 3194 | 6  | 242 | splicing factor arginine serine-rich 11 (29.3 kD) (Sfrs11) alternative variant bSep08, mRNA.                            |
| Sfrs11    | Sfrs11.dSep08    | 502603 | 16964 | 643  | 6  | 213 | splicing factor arginine serine-rich 11 CRA c (Sfrs11) alternative variant dSep08, mRNA.                                |
| Sfrs11    | Sfrs11.eSep08    | 502603 | 4166  | 1043 | 5  | 211 | splicing factor arginine serine-rich 11 (Sfrs11) alternative variant eSep08, mRNA.                                      |
| Sfrs11    | Sfrs11.fSep08    | 502603 | 10956 | 899  | 8  | 175 | putative protein (Sfrs11) alternative variant fSep08, mRNA.                                                             |
| Sfrs11    | Sfrs11.gSep08    | 502603 | 8324  | 1286 | 5  | 137 | splicing factor arginine serine-rich 11 (14.5 kD) (Sfrs11) alternative variant gSep08, mRNA.                            |
| Sfrs11    | Sfrs11.hSep08    | 502603 | 2263  | 1114 | 3  | 112 | putative protein (Sfrs11) alternative variant hSep08, mRNA.                                                             |
| Sfrs12    | Sfrs12.bSep08    | 56763  | 5576  | 2234 | 4  | 501 | splicing factor arginine serine-rich 12 (Sfrs12) alternative variant bSep08, mRNA.                                      |
| Sfrs12    | Sfrs12.cSep08    | 56763  | 15788 | 3135 | 6  | 320 | splicing factor arginine serine-rich 12 CRA b (38.4 kD) (Sfrs12) alternative variant cSep08, mRNA.                      |
| Sfrs12    | Sfrs12.eSep08    | 56763  | 6183  | 586  | 4  | 83  | putative secreted or extracellular protein precursor (8.7 kD) (Sfrs12) alternative variant eSep08, mRNA.                |
| Sfrs12    | Sfrs12.fSep08    | 56763  | 1385  | 244  | 2  | 78  | splicing factor arginine serine-rich 12 (Sfrs12) alternative variant fSep08, mRNA.                                      |
| Sfrs12    | Sfrs12.gSep08    | 56763  | 17672 | 714  | 3  | 62  | splicing factor arginine serine-rich 12 (Sfrs12) alternative variant gSep08, mRNA.                                      |
| Sfrs12ip1 | Sfrs12ip1.bSep08 | 361888 | 4660  | 724  | 1  | 116 | SFRS12-interacting protein 1 (13.9 kD) (Sfrs12ip1) alternative variant bSep08, mRNA.                                    |
| Sfrs14    | Sfrs14.bSep08    | 361126 | 8921  | 1798 | 4  | 565 | splicing factor, arginine/serine-rich 14 (Sfrs14) alternative variant bSep08, mRNA.                                     |
| Sfrs14    | Sfrs14.cSep08    | 361126 | 9624  | 884  | 3  | 294 | splicing factor, arginine/serine-rich 14 (Sfrs14) alternative variant cSep08, mRNA.                                     |
| Sfrs14    | Sfrs14.dSep08    | 361126 | 2957  | 1058 | 4  | 98  | splicing factor, arginine/serine-rich 14 (Sfrs14) alternative variant dSep08, mRNA.                                     |
| Sfrs14    | Sfrs14.fSep08    | 361126 | 2582  | 424  | 3  | 41  | splicing factor, arginine/serine-rich 14 (4.4 kD) (Sfrs14) alternative variant fSep08, mRNA.                            |
| Sfrs15    | Sfrs15.bSep08    | 245924 | 2517  | 413  | 4  | 137 | splicing factor, arginine/serine-rich 15 (Sfrs15) alternative variant bSep08, mRNA.                                     |
| Sfrs15    | Sfrs15.cSep08    | 245924 | 4162  | 1831 | 3  | 74  | splicing factor, arginine/serine-rich 15 (Sfrs15) alternative variant cSep08, mRNA.                                     |
| Sfrs16    | Sfrs16.bSep08    | 499390 | 33406 | 2483 | 21 | 471 | splicing factor arginine serine-rich 16 CRA b (53.5 kD) (Sfrs16) alternative variant bSep08, mRNA.                      |
| Sfrs16    | Sfrs16.cSep08    | 499390 | 8586  | 1084 | 4  | 250 | reticuloendotheliosis viral oncogene (Sfrs16) alternative variant cSep08, mRNA.                                         |

|        |               |        |       |      |    |     |                                                                                                                    |
|--------|---------------|--------|-------|------|----|-----|--------------------------------------------------------------------------------------------------------------------|
| Sfrs16 | Sfrs16.dSep08 | 499390 | 4837  | 849  | 6  | 197 | splicing factor arginine serine-rich 16 (Sfrs16) alternative variant dSep08, mRNA.                                 |
| Sfrs16 | Sfrs16.eSep08 | 499390 | 4063  | 716  | 5  | 131 | splicing factor arginine serine-rich 16 (Sfrs16) alternative variant eSep08, mRNA.                                 |
| Sfrs16 | Sfrs16.fSep08 | 499390 | 1880  | 790  | 2  | 128 | putative secreted or extracellular protein precursor (13.5 kD) (Sfrs16) alternative variant fSep08, complete mRNA. |
| Sfrs16 | Sfrs16.gSep08 | 499390 | 1199  | 662  | 2  | 116 | putative protein (11.7 kD) (Sfrs16) alternative variant gSep08, mRNA.                                              |
| Sfrs16 | Sfrs16.hSep08 | 499390 | 4979  | 1156 | 8  | 101 | splicing factor arginine serine-rich 16 (12.7 kD) (Sfrs16) alternative variant hSep08, mRNA.                       |
| Sfrs18 | Sfrs18.bSep08 | 297942 | 26896 | 4356 | 11 | 805 | splicing factor, arginine/serine-rich 18 (92.4 kD) (Sfrs18) alternative variant bSep08, mRNA.                      |
| Sfrs18 | Sfrs18.cSep08 | 297942 | 4388  | 2546 | 3  | 522 | splicing factor, arginine/serine-rich 18 (Sfrs18) alternative variant cSep08, mRNA.                                |
| Sfrs18 | Sfrs18.dSep08 | 297942 | 2107  | 620  | 2  | 123 | splicing factor, arginine/serine-rich 18 (Sfrs18) alternative variant dSep08, mRNA.                                |
| Sft2d1 | Sft2d1.dSep08 | 292305 | 16268 | 1365 | 9  | 77  | SFT2-like (8.9 kD) (Sft2d1) alternative variant dSep08, mRNA.                                                      |
| Sftpa1 | Sftpa1.aSep08 | 24773  | 3543  | 1650 | 5  | 280 | surfactant, pulmonary-associated protein A1 (Sftpa1) alternative variant aSep08, mRNA.                             |
| Sftpa1 | Sftpa1.bSep08 | 24773  | 2671  | 775  | 5  | 250 | surfactant, pulmonary-associated protein A1 (Sftpa1) alternative variant bSep08, mRNA.                             |
| Sftpa1 | Sftpa1.cSep08 | 24773  | 2632  | 950  | 5  | 228 | surfactant, pulmonary-associated protein A1 (Sftpa1) alternative variant cSep08, mRNA.                             |
| Sftpa1 | Sftpa1.eSep08 | 24773  | 1865  | 671  | 2  | 151 | surfactant, pulmonary-associated protein A1 (Sftpa1) alternative variant eSep08, mRNA.                             |
| Sftpb  | Sftpb.bSep08  | 192155 | 5315  | 839  | 8  | 278 | surfactant associated protein B (Sftpb) alternative variant bSep08, mRNA.                                          |
| Sftpb  | Sftpb.cSep08  | 192155 | 2949  | 761  | 3  | 189 | surfactant associated protein B (Sftpb) alternative variant cSep08, mRNA.                                          |
| Sftpb  | Sftpb.dSep08  | 192155 | 1884  | 712  | 5  | 189 | surfactant associated protein B (Sftpb) alternative variant dSep08, mRNA.                                          |
| Sftpc  | Sftpc.bSep08  | 50683  | 2944  | 672  | 5  | 157 | surfactant associated protein C (16.9 kD) (Sftpc) alternative variant bSep08, complete mRNA.                       |
| Sftpc  | Sftpc.cSep08  | 50683  | 969   | 749  | 2  | 76  | surfactant associated protein C (Sftpc) alternative variant cSep08, mRNA.                                          |
| Sfxn1  | Sfxn1.aSep08  | 364678 | 24455 | 893  |    | 297 | sideroflexin 1 (Sfxn1) mRNA.                                                                                       |
| Sfxn2  | Sfxn2.aSep08  | 294011 | 26339 | 2971 | 12 | 322 | sideroflexin 2 CRA a (36.2 kD) (Sfxn2) alternative variant aSep08, complete mRNA.                                  |
| Sfxn2  | Sfxn2.bSep08  | 294011 | 3374  | 1154 | 5  | 238 | sideroflexin 2 CRA a (Sfxn2) alternative variant bSep08, mRNA.                                                     |
| Sfxn2  | Sfxn2.cSep08  | 294011 | 1360  | 674  | 2  | 162 | sideroflexin 2 CRA a (17.4 kD) (Sfxn2) alternative variant cSep08, mRNA.                                           |
| Sfxn2  | Sfxn2.eSep08  | 294011 | 10907 | 732  | 5  | 127 | sideroflexin 2 CRA a (14.3 kD) (Sfxn2) alternative variant eSep08, mRNA.                                           |
| Sfxn3  | Sfxn3.bSep08  | 65042  | 4497  | 752  | 7  | 250 | sideroflexin 3 (Sfxn3) alternative variant bSep08, mRNA.                                                           |
| Sfxn3  | Sfxn3.cSep08  | 65042  | 2408  | 393  | 4  | 107 | sideroflexin 3 (Sfxn3) alternative variant cSep08, mRNA.                                                           |



|       |              |        |        |      |    |     |                                                                                                                     |
|-------|--------------|--------|--------|------|----|-----|---------------------------------------------------------------------------------------------------------------------|
| Sfxn4 | Sfxn4.aSep08 | 361778 | 13600  | 686  | 5  | 141 | sideroflexin 4 (Sfxn4) alternative variant aSep08, mRNA.                                                            |
| Sfxn4 | Sfxn4.bSep08 | 361778 | 5962   | 877  | 3  | 112 | sideroflexin 4 (13.0 kD) (Sfxn4) alternative variant bSep08, mRNA.                                                  |
| Sfxn5 | Sfxn5.bSep08 | 261737 | 54568  | 3272 | 7  | 208 | sideroflexin 5 (22.3 kD) (Sfxn5) alternative variant bSep08, mRNA.                                                  |
| Sfxn5 | Sfxn5.dSep08 | 261737 | 44353  | 238  | 4  | 79  | sideroflexin 5 (Sfxn5) alternative variant dSep08, mRNA.                                                            |
| Sgca  | Sgca.bSep08  | 303468 | 10476  | 1306 | 10 | 331 | sarcoglycan, alpha (dystrophin-associated glycoprotein) (37.0 kD) (Sgca) alternative variant bSep08, complete mRNA. |
| Sgcb  | Sgcb.aSep08  | 680229 | 15011  | 3725 | 1  | 320 | sarcoglycan, beta (dystrophin-associated glycoprotein) (35.0 kD) (Sgcb) alternative variant aSep08, complete mRNA.  |
| Sgcb  | Sgcb.bSep08  | 680229 | 8665   | 807  | 1  | 206 | sarcoglycan, beta (dystrophin-associated glycoprotein) (Sgcb) alternative variant bSep08, mRNA.                     |
| Sgcd  | Sgcd.cSep08  | 497892 | 101479 | 587  |    | 123 | sarcoglycan, delta (dystrophin-associated glycoprotein) (Sgcd) alternative variant cSep08, mRNA.                    |
| Sgcg  | Sgcg.bSep08  | 305941 | 11524  | 1214 | 5  | 161 | sarcoglycan, gamma (dystrophin-associated glycoprotein) (17.2 kD) (Sgcg) alternative variant bSep08, mRNA.          |
| Sgef  | Sgef.aSep08  | 310460 | 49545  | 514  |    | 171 | src homology 3 domain-containing guanine nucleotide exchange factor (Sgef) mRNA.                                    |
| Sgip1 | Sgip1.aSep08 | 313413 | 35115  | 1076 | 6  | 322 | SH3-domain GRB2-like (endophilin) interacting protein 1 (Sgip1) alternative variant aSep08, mRNA.                   |
| Sgip1 | Sgip1.bSep08 | 313413 | 106424 | 875  | 7  | 175 | SH3-domain GRB2-like (endophilin) interacting protein 1 (19.3 kD) (Sgip1) alternative variant bSep08, mRNA.         |
| Sgip1 | Sgip1.cSep08 | 313413 | 106081 | 460  | 6  | 87  | SH3-domain GRB2-like (endophilin) interacting protein 1 (Sgip1) alternative variant cSep08, mRNA.                   |
| Sgip1 | Sgip1.dSep08 | 313413 | 8116   | 387  | 2  | 32  | SH3-domain GRB2-like (endophilin) interacting protein 1 (Sgip1) alternative variant dSep08, mRNA.                   |
| Sgk1  | Sgk1.bSep08  | 29517  | 2628   | 793  | 7  | 229 | serum/glucocorticoid regulated kinase 1 (Sgk1) alternative variant bSep08, mRNA.                                    |
| Sgk1  | Sgk1.dSep08  | 29517  | 3476   | 399  | 4  | 90  | serum/glucocorticoid regulated kinase 1 (Sgk1) alternative variant dSep08, mRNA.                                    |
| Sgk2  | Sgk2.aSep08  | 171497 | 4860   | 745  |    | 66  | serum/glucocorticoid regulated kinase 2 (Sgk2) mRNA.                                                                |
| Sgms1 | Sgms1.bSep08 | 353229 | 69936  | 3279 | 7  | 184 | cholinephosphotransferase 1 (21.9 kD) (Sgms1) alternative variant bSep08, mRNA.                                     |
| Sgms1 | Sgms1.cSep08 | 353229 | 12544  | 391  | 4  | 119 | cholinephosphotransferase 1 (Sgms1) alternative variant cSep08, mRNA.                                               |
| Sgms1 | Sgms1.dSep08 | 353229 | 4231   | 370  | 2  | 85  | putative protein (Sgms1) alternative variant dSep08, mRNA.                                                          |
| Sgms1 | Sgms1.eSep08 | 353229 | 225535 | 1220 | 6  | 169 | cholinephosphotransferase 1 (Sgms1) alternative variant eSep08, mRNA.                                               |
| Sgms1 | Sgms1.fSep08 | 353229 | 5985   | 786  | 2  | 90  | putative cytoplasmic protein (10.1 kD) (Sgms1) alternative variant fSep08, mRNA.                                    |
| Sgms1 | Sgms1.gSep08 | 353229 | 73619  | 743  | 4  | 103 | cholinephosphotransferase 1 (Sgms1) alternative variant gSep08, mRNA.                                               |
| Sgms1 | Sgms1.hSep08 | 353229 | 165961 | 606  | 4  | 68  | putative protein (Sgms1) alternative variant hSep08, mRNA.                                                          |

|        |               |        |       |      |    |     |                                                                                                                                   |
|--------|---------------|--------|-------|------|----|-----|-----------------------------------------------------------------------------------------------------------------------------------|
| Sgms1  | Sgms1.iSep08  | 353229 | 46960 | 259  | 2  | 58  | putative protein (Sgms1) alternative variant iSep08, mRNA.                                                                        |
| Sgms2  | Sgms2.bSep08  | 310849 | 3168  | 815  | 2  | 147 | sphingomyelin synthase 2 (Sgms2) alternative variant bSep08, mRNA.                                                                |
| Sgms2  | Sgms2.cSep08  | 310849 | 2567  | 727  | 3  | 51  | sphingomyelin synthase 2 (Sgms2) alternative variant cSep08, mRNA.                                                                |
| Sgol1  | Sgol1.aSep08  | 363174 | 3666  | 1495 |    | 220 | shugoshin-like 1 ( <i>S. pombe</i> ) (Sgol1) mRNA.                                                                                |
| Sgol2  | Sgol2.aSep08  | 316425 | 2314  | 1047 |    | 348 | shugoshin-like 2 ( <i>S. pombe</i> ) (Sgol2) mRNA.                                                                                |
| Sgpp1  | Sgpp1.aSep08  | 81536  | 20731 | 2887 |    | 336 | sphingosine-1-phosphate phosphatase 1 (Sgpp1) mRNA.                                                                               |
| Sgsm1  | Sgsm1.bSep08  | 288743 | 21328 | 424  | 5  | 130 | small G protein signaling modulator 1 (Sgsm1) alternative variant bSep08, mRNA.                                                   |
| Sgsm1  | Sgsm1.cSep08  | 288743 | 9838  | 381  | 5  | 127 | small G protein signaling modulator 1 (Sgsm1) alternative variant cSep08, mRNA.                                                   |
| Sgsm1  | Sgsm1.dSep08  | 288743 | 7504  | 381  | 4  | 126 | small G protein signaling modulator 1 (Sgsm1) alternative variant dSep08, mRNA.                                                   |
| Sgsm1  | Sgsm1.eSep08  | 288743 | 588   | 391  | 2  | 45  | small G protein signaling modulator 1 (4.9 kD) (Sgsm1) alternative variant eSep08, mRNA.                                          |
| Sgsm2  | Sgsm2.bSep08  | 303304 | 3474  | 1165 | 5  | 184 | small G protein signaling modulator 2 (Sgsm2) alternative variant bSep08, mRNA.                                                   |
| Sgsm3  | Sgsm3.bSep08  | 362963 | 3311  | 612  | 7  | 204 | src homology-3 and variant SH3 (Sgsm3) alternative variant bSep08, mRNA.                                                          |
| Sgsm3  | Sgsm3.cSep08  | 362963 | 2167  | 1668 | 5  | 127 | RUN (14.6 kD) (Sgsm3) alternative variant cSep08, mRNA.                                                                           |
| Sgsm3  | Sgsm3.dSep08  | 362963 | 595   | 498  | 2  | 114 | src homology-3 (Sgsm3) alternative variant dSep08, mRNA.                                                                          |
| Sgta   | Sgta.bSep08   | 64667  | 16662 | 1963 | 12 | 315 | small glutamine-rich tetratricopeptide repeat (TPR)-containing, alpha (34.3 kD) (Sgta) alternative variant bSep08, complete mRNA. |
| Sgta   | Sgta.cSep08   | 64667  | 4196  | 599  | 7  | 174 | small glutamine-rich tetratricopeptide repeat (TPR)-containing, alpha (Sgta) alternative variant cSep08, mRNA.                    |
| Sgta   | Sgta.eSep08   | 64667  | 9722  | 348  | 4  | 80  | small glutamine-rich tetratricopeptide repeat (TPR)-containing, alpha (Sgta) alternative variant eSep08, mRNA.                    |
| Sgta   | Sgta.fSep08   | 64667  | 438   | 361  | 2  | 62  | small glutamine-rich tetratricopeptide repeat (TPR)-containing, alpha (Sgta) alternative variant fSep08, mRNA.                    |
| Sgtb   | Sgtb.bSep08   | 294708 | 10885 | 3612 | 5  | 138 | small glutamine-rich tetratricopeptide repeat (TPR)-containing, beta (Sgtb) alternative variant bSep08, mRNA.                     |
| SH2.0  | SH2.0.aSep08  |        | 12177 | 1289 |    | 335 | SH2 motif (37.2 kD) (SH2.0) mRNA.                                                                                                 |
| Sh2b3  | Sh2b3.bSep08  | 58838  | 3241  | 3053 | 2  | 235 | SH2B adaptor protein 3 (Sh2b3) alternative variant bSep08, mRNA.                                                                  |
| Sh2d1a | Sh2d1a.bSep08 | 501502 | 18278 | 613  | 4  | 81  | SH2 domain protein 1A (9.1 kD) (Sh2d1a) alternative variant bSep08, mRNA.                                                         |
| Sh2d3c | Sh2d3c.bSep08 | 362111 | 29441 | 2495 | 12 | 371 | SH2 motif (40.4 kD) (Sh2d3c) alternative variant bSep08, complete mRNA.                                                           |
| Sh2d3c | Sh2d3c.cSep08 | 362111 | 5288  | 1193 | 4  | 332 | SH2 motif (Sh2d3c) alternative variant cSep08, mRNA.                                                                              |
| Sh2d3c | Sh2d3c.dSep08 | 362111 | 3744  | 728  | 3  | 236 | SH2 motif (Sh2d3c) alternative variant dSep08, mRNA.                                                                              |
| Sh2d3c | Sh2d3c.eSep08 | 362111 | 5071  | 691  | 3  | 229 | SH2 motif (Sh2d3c) alternative variant eSep08, mRNA.                                                                              |
| Sh2d4b | Sh2d4b.aSep08 | 290612 | 17473 | 452  |    | 141 | putative protein, with a coiled coil domain, of mammalian origin (Sh2d4b) mRNA.                                                   |

|          |                 |        |        |      |    |     |                                                                                                    |
|----------|-----------------|--------|--------|------|----|-----|----------------------------------------------------------------------------------------------------|
| Sh2d5    | Sh2d5.aSep08    | 366489 | 8975   | 733  |    | 244 | putative protein of metazoan origin (Sh2d5) mRNA.                                                  |
| Sh3bgr   | Sh3bgr.bSep08   | 498066 | 24992  | 2072 | 8  | 204 | SH3-binding domain glutamic acid-rich protein (22.1 kD) (Sh3bgr) alternative variant bSep08, mRNA. |
| Sh3bgr   | Sh3bgr.cSep08   | 498066 | 23786  | 1010 | 7  | 203 | SH3-binding domain glutamic acid-rich protein (22.2 kD) (Sh3bgr) alternative variant cSep08, mRNA. |
| Sh3bgr   | Sh3bgr.dSep08   | 498066 | 7646   | 813  | 2  | 157 | SH3-binding domain glutamic acid-rich protein (Sh3bgr) alternative variant dSep08, mRNA.           |
| Sh3bgrl  | Sh3bgrl.aSep08  | 302363 | 105957 | 2926 |    | 155 | SH3-binding domain glutamic acid-rich protein like (Sh3bgrl) mRNA.                                 |
| Sh3bgrl2 | Sh3bgrl2.aSep08 | 501026 | 52461  | 3442 |    | 107 | SH3 domain binding glutamic acid-rich protein like 2 (12.3 kD) (Sh3bgrl2) mRNA.                    |
| Sh3bp1   | Sh3bp1.aSep08   | 300067 | 5449   | 1988 |    | 292 | SH3-domain binding protein 1 (31.4 kD) (Sh3bp1) mRNA.                                              |
| Sh3bp2   | Sh3bp2.aSep08   | 305450 | 12791  | 2905 | 1  | 619 | SH3-domain binding protein 2 (Sh3bp2) alternative variant aSep08, mRNA.                            |
| Sh3bp2   | Sh3bp2.bSep08   | 305450 | 29226  | 415  | 1  | 138 | SH3-domain binding protein 2 (Sh3bp2) alternative variant bSep08, mRNA.                            |
| Sh3bp4   | Sh3bp4.bSep08   | 64634  | 67914  | 592  | 2  | 197 | SH3-domain binding protein 4 (Sh3bp4) alternative variant bSep08, mRNA.                            |
| Sh3bp5l  | Sh3bp5l.bSep08  | 690898 | 1063   | 601  | 1  | 58  | SH3 binding domain protein 5 like (6.2 kD) (Sh3bp5l) alternative variant bSep08, mRNA.             |
| Sh3bp5l  | Sh3bp5l.cSep08  | 690898 | 770    | 458  | 1  | 42  | SH3 binding domain protein 5 like (Sh3bp5l) alternative variant cSep08, mRNA.                      |
| Sh3d19   | Sh3d19.aSep08   | 295171 | 19665  | 3496 |    | 430 | SH3 domain protein D19 (Sh3d19) mRNA.                                                              |
| Sh3gl2   | Sh3gl2.aSep08   | 116743 | 12046  | 1218 |    | 215 | SH3-domain GRB2-like 2 (Sh3gl2) alternative variant aSep08, mRNA.                                  |
| Sh3gl2   | Sh3gl2.bSep08   | 116743 | 30302  | 462  |    | 154 | SH3-domain GRB2-like 2 (Sh3gl2) alternative variant bSep08, mRNA.                                  |
| Sh3gl3   | Sh3gl3.aSep08   | 81921  | 129992 | 1526 | 4  | 347 | SH3-domain GRB2-like 3 (39.2 kD) (Sh3gl3) alternative variant aSep08, complete mRNA.               |
| Sh3gl3   | Sh3gl3.cSep08   | 81921  | 107287 | 1099 | 3  | 246 | SH3-domain GRB2-like 3 (Sh3gl3) alternative variant cSep08, mRNA.                                  |
| Sh3gl3   | Sh3gl3.dSep08   | 81921  | 106144 | 403  | 1  | 75  | SH3-domain GRB2-like 3 (8.2 kD) (Sh3gl3) alternative variant dSep08, mRNA.                         |
| Sh3glb1  | Sh3glb1.bSep08  | 292156 | 35217  | 1300 | 11 | 351 | SH3-domain GRB2-like B1 (endophilin) (Sh3glb1) alternative variant bSep08, mRNA.                   |
| Sh3glb1  | Sh3glb1.cSep08  | 292156 | 13624  | 668  | 5  | 117 | SH3-domain GRB2-like B1 (endophilin) (Sh3glb1) alternative variant cSep08, mRNA.                   |
| Sh3glb2  | Sh3glb2.aSep08  | 311848 | 13831  | 1018 | 10 | 323 | endophilin B2 CRA a (Sh3glb2) alternative variant aSep08, mRNA.                                    |
| Sh3glb2  | Sh3glb2.bSep08  | 311848 | 13843  | 2502 | 9  | 207 | endophilin B2 (23.2 kD) (Sh3glb2) alternative variant bSep08, mRNA.                                |
| Sh3glb2  | Sh3glb2.cSep08  | 311848 | 10436  | 618  | 6  | 206 | endophilin B2 CRA a (Sh3glb2) alternative variant cSep08, mRNA.                                    |
| Sh3glb2  | Sh3glb2.dSep08  | 311848 | 1306   | 737  | 3  | 192 | endophilin B2 CRA a (Sh3glb2) alternative variant dSep08, mRNA.                                    |
| Sh3glb2  | Sh3glb2.eSep08  | 311848 | 8190   | 573  | 6  | 190 | endophilin B2 CRA b (Sh3glb2) alternative variant eSep08, mRNA.                                    |

|          |                 |        |        |      |   |     |                                                                                                          |
|----------|-----------------|--------|--------|------|---|-----|----------------------------------------------------------------------------------------------------------|
| Sh3glb2  | Sh3glb2.fSep08  | 311848 | 836    | 478  | 3 | 128 | endophilin B2 (Sh3glb2) alternative variant fSep08, mRNA.                                                |
| Sh3glb2  | Sh3glb2.hSep08  | 311848 | 1470   | 1231 | 2 | 88  | endophilin B2 (9.3 kD) (Sh3glb2) alternative variant hSep08, mRNA.                                       |
| Sh3kbp1  | Sh3kbp1.bSep08  | 84357  | 56454  | 813  | 6 | 242 | kinase binding protein 1 like (Sh3kbp1) alternative variant bSep08, mRNA.                                |
| Sh3kbp1  | Sh3kbp1.cSep08  | 84357  | 49747  | 710  | 6 | 236 | kinase binding protein 1 like (Sh3kbp1) alternative variant cSep08, mRNA.                                |
| Sh3kbp1  | Sh3kbp1.dSep08  | 84357  | 113284 | 614  | 5 | 204 | kinase binding protein 1 like (Sh3kbp1) alternative variant dSep08, mRNA.                                |
| Sh3kbp1  | Sh3kbp1.eSep08  | 84357  | 30509  | 884  | 5 | 182 | kinase binding protein 1 like (19.4 kD) (Sh3kbp1) alternative variant eSep08, mRNA.                      |
| Sh3kbp1  | Sh3kbp1.fSep08  | 84357  | 23613  | 790  | 4 | 180 | kinase binding protein 1 like (Sh3kbp1) alternative variant fSep08, mRNA.                                |
| Sh3kbp1  | Sh3kbp1.gSep08  | 84357  | 114885 | 374  | 4 | 79  | kinase binding protein 1 like (8.7 kD) (Sh3kbp1) alternative variant gSep08, mRNA.                       |
| Sh3md4   | Sh3md4.aSep08   | 294557 | 91845  | 768  |   | 256 | SH3 multiple domains 4 (Sh3md4) mRNA.                                                                    |
| Sh3pxd2a | Sh3pxd2a.bSep08 | 309460 | 10147  | 694  | 3 | 216 | SH3 and PX domains 2A (Sh3pxd2a) alternative variant bSep08, mRNA.                                       |
| Sh3pxd2a | Sh3pxd2a.cSep08 | 309460 | 5052   | 367  | 2 | 57  | SH3 and PX domains 2A (Sh3pxd2a) alternative variant cSep08, mRNA.                                       |
| Sh3rf2   | Sh3rf2.bSep08   | 307472 | 12407  | 1015 | 1 | 295 | putative mitochondrial protein of vertebrate origin (31.3 kD) (Sh3rf2) alternative variant bSep08, mRNA. |
| Sh3tc1   | Sh3tc1.bSep08   | 305441 | 20506  | 649  | 5 | 215 | SH3 domain and tetratricopeptide repeats 1 (Sh3tc1) alternative variant bSep08, mRNA.                    |
| Sh3tc2   | Sh3tc2.aSep08   | 307393 | 8351   | 1468 | 5 | 271 | SH3 domain and tetratricopeptide repeats 2 (Sh3tc2) alternative variant aSep08, mRNA.                    |
| Sh3yl1   | Sh3yl1.bSep08   | 362724 | 20613  | 590  | 5 | 196 | sh3 domain YSC-like 1 (Sh3yl1) alternative variant bSep08, mRNA.                                         |
| Sh3yl1   | Sh3yl1.cSep08   | 362724 | 18445  | 732  | 3 | 117 | sh3 domain YSC-like 1 (13.1 kD) (Sh3yl1) alternative variant cSep08, mRNA.                               |
| Sh3yl1   | Sh3yl1.dSep08   | 362724 | 30043  | 609  | 4 | 35  | sh3 domain YSC-like 1 (Sh3yl1) alternative variant dSep08, mRNA.                                         |
| Sh3yl1   | Sh3yl1.eSep08   | 362724 | 20777  | 561  | 4 | 45  | sh3 domain YSC-like 1 (Sh3yl1) alternative variant eSep08, mRNA.                                         |
| SH3_1.0  | SH3_1.0.aSep08  |        | 13971  | 1108 |   | 320 | intersectin 1 (SH3_1.0) mRNA.                                                                            |
| SH3_1.1  | SH3_1.1.aSep08  |        | 18739  | 2319 |   | 294 | intersectin 1 CRA a (SH3_1.1) alternative variant aSep08, mRNA.                                          |
| SH3_1.3  | SH3_1.3.aSep08  |        | 8035   | 2010 |   | 489 | protein phosphatase 1 regulatory like (SH3_1.3) mRNA.                                                    |
| SH3_1.4  | SH3_1.4.aSep08  |        | 8418   | 3235 |   | 465 | dynamitin binding protein like (52.1 kD) (SH3_1.4) mRNA.                                                 |
| SH3_2.0  | SH3_2.0.aSep08  |        | 15536  | 991  | 6 | 244 | 2 -binding protein like (SH3_2.0) alternative variant aSep08, mRNA.                                      |
| SH3_2.0  | SH3_2.0.bSep08  |        | 12824  | 1121 | 4 | 163 | 2 -binding protein like (SH3_2.0) alternative variant bSep08, mRNA.                                      |
| SH3_2.0  | SH3_2.0.cSep08  |        | 12777  | 601  | 5 | 148 | 2 -binding protein like (SH3_2.0) alternative variant cSep08, mRNA.                                      |
| SH3_2.1  | SH3_2.1.aSep08  |        | 57993  | 639  |   | 198 | dedicator of 2 (SH3_2.1) mRNA.                                                                           |

|         |                |       |       |      |   |     |                                                                                            |
|---------|----------------|-------|-------|------|---|-----|--------------------------------------------------------------------------------------------|
| SH3_2.2 | SH3_2.2.aSep08 |       | 8206  | 1397 | 1 | 305 | putative protein (SH3_2.2) alternative variant aSep08, mRNA.                               |
| SH3_2.2 | SH3_2.2.bSep08 |       | 7816  | 1165 | 1 | 114 | putative mitochondrial protein (12.8 kD) (SH3_2.2) alternative variant bSep08, mRNA.       |
| SH3_2.2 | SH3_2.2.cSep08 |       | 7479  | 168  | 1 | 54  | cysteine rich domain (SH3_2.2) alternative variant cSep08, mRNA.                           |
| SH3_2.3 | SH3_2.3.aSep08 |       | 7631  | 455  |   | 96  | melanoma inhibitory activity 2 CRA b like (SH3_2.3) mRNA.                                  |
| SH3_2.4 | SH3_2.4.aSep08 |       | 6729  | 677  |   | 180 | rho guanine nucleotide exchange factor 5 CRA a (SH3_2.4) alternative variant aSep08, mRNA. |
| SH3_2.5 | SH3_2.5.aSep08 |       | 14054 | 420  |   | 127 | domain-containing guanine exchange factor (SH3_2.5) mRNA.                                  |
| SH3_2.6 | SH3_2.6.aSep08 |       | 6280  | 470  |   | 156 | src homology-3 and variant SH3 (SH3_2.6) mRNA.                                             |
| SH3_2.7 | SH3_2.7.aSep08 |       | 3577  | 332  |   | 110 | intersectin 2 (SH3_2.7) mRNA.                                                              |
| shabor  | shabor.aSep08  |       | 6700  | 703  |   | 233 | axonemal dynein heavy Dnahc8 (shabor) mRNA.                                                |
| shachy  | shachy.aSep08  |       | 4614  | 721  |   | 114 | putative protein (12.8 kD) (shachy) mRNA.                                                  |
| shadoy  | shadoy.aSep08  |       | 30475 | 399  | 2 | 91  | putative protein (shadoy) alternative variant aSep08, mRNA.                                |
| shaflu  | shaflu.aSep08  |       | 1975  | 380  |   | 126 | nucleoporin 98kDa CRA a (shaflu) mRNA.                                                     |
| shafly  | shafly.aSep08  |       | 3841  | 426  |   | 38  | putative protein (4.3 kD) (shafly) alternative variant aSep08, mRNA.                       |
| shagar  | shagar.aSep08  |       | 19977 | 434  |   | 79  | pericentriolar material 1 (shagar) mRNA.                                                   |
| shaja   | shaja.aSep08   |       | 66734 | 409  |   | 38  | putative protein (4.5 kD) (shaja) mRNA.                                                    |
| shajey  | shajey.aSep08  |       | 6676  | 469  |   | 37  | putative protein (4.1 kD) (shajey) mRNA.                                                   |
| shakee  | shakee.aSep08  |       | 11723 | 531  |   | 176 | tumor protein p53 binding 2 like (shakee) mRNA.                                            |
| shakler | shakler.aSep08 |       | 13421 | 665  |   | 43  | putative protein (shakler) mRNA.                                                           |
| shalo   | shalo.aSep08   |       | 5259  | 733  |   | 45  | putative protein (5.2 kD) (shalo) mRNA.                                                    |
| shamee  | shamee.aSep08  |       | 1590  | 503  |   | 167 | myosin heavy chain polypeptide 1 skeletal muscle adult (shamee) mRNA.                      |
| Shank1  | Shank1.aSep08  | 78957 | 3544  | 1408 |   | 469 | SH3/ankyrin domain gene 1 (Shank1) mRNA.                                                   |
| Shank3  | Shank3.bSep08  | 59312 | 8172  | 308  | 1 | 102 | SH3/ankyrin domain gene 3 (Shank3) alternative variant bSep08, mRNA.                       |
| shanoy  | shanoy.aSep08  |       | 2849  | 740  |   | 24  | putative protein (2.7 kD) (shanoy) mRNA.                                                   |
| shapor  | shapor.aSep08  |       | 2102  | 193  |   | 63  | topoisomerase II binding protein 1 like (shapor) mRNA.                                     |
| sharbor | sharbor.bSep08 |       | 777   | 612  | 3 | 81  | putative protein (sharbor) alternative variant bSep08, mRNA.                               |
| sharchy | sharchy.aSep08 |       | 1222  | 404  | 1 | 108 | putative protein (sharchy) alternative variant aSep08, mRNA.                               |
| sharchy | sharchy.bSep08 |       | 11163 | 374  | 3 | 87  | putative protein (sharchy) alternative variant bSep08, mRNA.                               |
| shardoy | shardoy.aSep08 |       | 1069  | 514  |   | 104 | putative protein (shardoy) mRNA.                                                           |
| sharflu | sharflu.aSep08 |       | 2869  | 349  |   | 116 | nucleoporin 98 (sharflu) mRNA.                                                             |
| sharfly | sharfly.aSep08 |       | 36043 | 749  |   | 50  | atpase protein like (sharfly) mRNA.                                                        |
| shargar | shargar.aSep08 |       | 7656  | 489  |   | 61  | putative protein (shargar) mRNA.                                                           |

|          |                 |       |       |      |   |     |                                                                                            |
|----------|-----------------|-------|-------|------|---|-----|--------------------------------------------------------------------------------------------|
| sharja   | sharja.aSep08   |       | 2632  | 1132 |   | 54  | putative protein (sharja) mRNA.                                                            |
| sharjey  | sharjey.aSep08  |       | 4205  | 387  |   | 128 | ellis van Creveld (sharjey) mRNA.                                                          |
| sharkee  | sharkee.aSep08  |       | 3502  | 704  |   | 51  | putative protein (5.6 kD) (sharkee) mRNA.                                                  |
| sharlo   | sharlo.aSep08   |       | 16052 | 1204 | 6 | 338 | autism susceptibility candidate 2 (sharlo) alternative variant aSep08, mRNA.               |
| sharmee  | sharmee.aSep08  |       | 403   | 298  |   | 24  | putative protein (2.9 kD) (sharmee) mRNA.                                                  |
| sharnoy  | sharnoy.bSep08  |       | 3139  | 363  | 2 | 35  | putative protein (3.9 kD) (sharnoy) alternative variant bSep08, mRNA.                      |
| sharoy   | sharoy.aSep08   |       | 1173  | 350  |   | 50  | putative protein (5.9 kD) (sharoy) mRNA.                                                   |
| Sharpin  | Sharpin.bSep08  | 81859 | 4277  | 1774 | 7 | 292 | SHANK-associated RH domain interacting protein (Sharpin) alternative variant bSep08, mRNA. |
| Sharpin  | Sharpin.cSep08  | 81859 | 830   | 579  | 2 | 191 | SHANK-associated RH domain interacting protein (Sharpin) alternative variant cSep08, mRNA. |
| Sharpin  | Sharpin.eSep08  | 81859 | 2303  | 335  | 3 | 111 | SHANK-associated RH domain interacting protein (Sharpin) alternative variant eSep08, mRNA. |
| sharpor  | sharpor.aSep08  |       | 16880 | 959  |   | 104 | putative protein (11.5 kD) (sharpor) mRNA.                                                 |
| sharroy  | sharroy.aSep08  |       | 11605 | 341  |   |     |                                                                                            |
| sharsa   | sharsa.aSep08   |       | 492   | 409  |   | 68  | myeloid lymphoid mixed-lineage leukemia 2 CRA c like (sharsa) mRNA.                        |
| sharshee | sharshee.aSep08 |       | 15368 | 449  |   | 31  | putative protein (3.8 kD) (sharshee) mRNA.                                                 |
| shartu   | shartu.aSep08   |       | 6324  | 439  |   | 145 | heat 5a (shartu) mRNA.                                                                     |
| sharvo   | sharvo.aSep08   |       | 856   | 250  |   | 82  | putative protein (sharvo) mRNA.                                                            |
| sharwer  | sharwer.aSep08  |       | 1704  | 337  | 1 | 63  | putative protein (sharwer) alternative variant aSep08, mRNA.                               |
| sharwer  | sharwer.bSep08  |       | 9653  | 597  | 4 | 33  | putative protein (sharwer) alternative variant bSep08, mRNA.                               |
| sharwey  | sharwey.aSep08  |       | 27016 | 788  |   | 203 | lymphoid-restricted membrane protein like (sharwey) mRNA.                                  |
| shasa    | shasa.aSep08    |       | 498   | 227  |   | 62  | putative protein (7.0 kD) (shasa) mRNA.                                                    |
| shashee  | shashee.aSep08  |       | 3785  | 383  |   | 111 | putative protein (shashee) mRNA.                                                           |
| shatu    | shatu.bSep08    |       | 2011  | 568  | 2 | 49  | putative protein (shatu) alternative variant bSep08, mRNA.                                 |
| shavar   | shavar.aSep08   |       | 3644  | 776  |   | 27  | putative protein (shavar) mRNA.                                                            |
| shavo    | shavo.aSep08    |       | 52215 | 316  |   | 80  | putative protein (shavo) mRNA.                                                             |
| shawbor  | shawbor.aSep08  |       | 886   | 237  |   | 78  | putative protein (shawbor) mRNA.                                                           |
| shawchy  | shawchy.aSep08  |       | 21529 | 651  |   | 216 | CRA a (shawchy) mRNA.                                                                      |
| shawdoy  | shawdoy.aSep08  |       | 2652  | 1006 |   | 88  | putative protein (shawdoy) alternative variant aSep08, mRNA.                               |
| shawdoy  | shawdoy.bSep08  |       | 1954  | 309  |   | 88  | putative protein (shawdoy) alternative variant bSep08, mRNA.                               |
| shawer   | shawer.aSep08   |       | 62792 | 431  |   | 93  | putative protein of vertebrate origin (shawer) mRNA.                                       |
| shawey   | shawey.aSep08   |       | 4863  | 753  |   | 136 | organic anion transporter (shawey) mRNA.                                                   |
| shawflu  | shawflu.aSep08  |       | 1151  | 556  |   | 30  | putative protein (3.5 kD) (shawflu) mRNA.                                                  |
| shawfly  | shawfly.aSep08  |       | 9708  | 830  |   | 36  | putative protein (shawfly) mRNA.                                                           |
| shawgar  | shawgar.aSep08  |       | 2507  | 722  |   | 83  | putative protein (9.7 kD) (shawgar) mRNA.                                                  |

|          |                 |        |       |      |   |     |                                                                                                            |
|----------|-----------------|--------|-------|------|---|-----|------------------------------------------------------------------------------------------------------------|
| shawja   | shawja.aSep08   |        | 9427  | 429  |   | 143 | homeobox containing 1 CRA a (shawja) mRNA.                                                                 |
| shawjey  | shawjey.aSep08  |        | 7573  | 746  |   | 97  | janus kinase microtubule interacting protein 1 (shawjey) mRNA.                                             |
| shawkee  | shawkee.aSep08  |        | 5936  | 661  |   | 117 | putative protein (shawkee) mRNA.                                                                           |
| shawlo   | shawlo.aSep08   |        | 76460 | 361  |   | 40  | putative protein (shawlo) mRNA.                                                                            |
| shawmee  | shawmee.aSep08  |        | 1265  | 448  |   | 67  | putative protein (7.5 kD) (shawmee) mRNA.                                                                  |
| shawnoy  | shawnoy.aSep08  |        | 375   | 261  |   | 43  | putative protein (shawnoy) mRNA.                                                                           |
| shawpor  | shawpor.aSep08  |        | 5528  | 448  |   | 148 | nephrocystin 3 (shawpor) mRNA.                                                                             |
| shawroy  | shawroy.bSep08  |        | 1417  | 271  | 2 | 41  | putative protein (4.6 kD) (shawroy) alternative variant bSep08, mRNA.                                      |
| shawsa   | shawsa.aSep08   |        | 630   | 351  |   | 116 | myeloid lymphoid mixed-lineage leukemia 2 like (shawsa) mRNA.                                              |
| shawshee | shawshee.aSep08 |        | 26360 | 541  | 3 | 48  | putative protein (shawshee) alternative variant aSep08, mRNA.                                              |
| shawshee | shawshee.bSep08 |        | 944   | 317  | 2 | 27  | putative protein (3.2 kD) (shawshee) alternative variant bSep08, mRNA.                                     |
| shawtu   | shawtu.aSep08   |        | 11984 | 552  |   | 113 | heat 5A (12.8 kD) (shawtu) mRNA.                                                                           |
| shawvo   | shawvo.aSep08   |        | 307   | 205  |   | 20  | putative protein (shawvo) mRNA.                                                                            |
| shawwer  | shawwer.aSep08  |        | 21531 | 2862 | 3 | 410 | serine kinase (shawwer) alternative variant aSep08, mRNA.                                                  |
| shawwer  | shawwer.bSep08  |        | 6337  | 522  | 2 | 91  | serine kinase (shawwer) alternative variant bSep08, mRNA.                                                  |
| shawwey  | shawwey.aSep08  |        | 1038  | 611  |   | 104 | putative protein (shawwey) mRNA.                                                                           |
| Shbg     | Shbg.bSep08     | 24775  | 17269 | 1457 | 7 | 267 | sex -binding like (29.1 kD) (Shbg) alternative variant bSep08, complete mRNA.                              |
| Shbg     | Shbg.cSep08     | 24775  | 14978 | 761  | 4 | 155 | sex hormone binding globulin like (17.2 kD) (Shbg) alternative variant cSep08, mRNA.                       |
| Shbg     | Shbg.dSep08     | 24775  | 14951 | 729  | 4 | 155 | sex hormone binding globulin like (17.2 kD) (Shbg) alternative variant dSep08, mRNA.                       |
| Shc1     | Shc1.bSep08     | 85385  | 2128  | 956  | 4 | 248 | src homology 2 domain-containing transforming protein C1 (Shc1) alternative variant bSep08, mRNA.          |
| Shc1     | Shc1.cSep08     | 85385  | 3815  | 2558 | 4 | 148 | src homology 2 domain-containing transforming protein C1 (Shc1) alternative variant cSep08, mRNA.          |
| Shc2     | Shc2.bSep08     | 314612 | 1483  | 545  | 2 | 36  | src homology 2 domain-containing transforming protein C2 (3.7 kD) (Shc2) alternative variant bSep08, mRNA. |
| Shc3     | Shc3.bSep08     | 114858 | 90933 | 408  |   | 69  | src homology 2 domain-containing transforming protein C3 (Shc3) alternative variant bSep08, mRNA.          |
| Shcbp1   | Shcbp1.aSep08   | 364648 | 29908 | 607  | 4 | 201 | shc SH2-domain binding protein 1 (Shcbp1) alternative variant aSep08, mRNA.                                |
| Shcbp1   | Shcbp1.bSep08   | 364648 | 3356  | 405  | 1 | 118 | shc SH2-domain binding protein 1 (Shcbp1) alternative variant bSep08, mRNA.                                |
| Shd      | Shd.bSep08      | 316507 | 1813  | 1017 | 3 | 154 | src homology 2 domain-containing transforming protein D (17.4 kD) (Shd) alternative variant bSep08, mRNA.  |
| She      | She.aSep08      | 685088 | 14964 | 382  |   | 127 | src homology 2 domain-containing transforming protein E (She) mRNA.                                        |
| sheebor  | sheebor.aSep08  |        | 22683 | 465  |   | 64  | putative protein (sheebor) mRNA.                                                                           |

|          |                 |  |       |      |   |     |                                                                                                  |
|----------|-----------------|--|-------|------|---|-----|--------------------------------------------------------------------------------------------------|
| sheechy  | sheechy.aSep08  |  | 3340  | 683  |   | 25  | putative protein (sheechy) mRNA.                                                                 |
| sheedoy  | sheedoy.aSep08  |  | 47102 | 525  | 3 | 108 | putative protein (sheedoy) alternative variant aSep08, mRNA.                                     |
| sheedoy  | sheedoy.bSep08  |  | 59140 | 1550 | 3 | 101 | putative nuclear protein (11.1 kD) (sheedoy) alternative variant bSep08, mRNA.                   |
| sheedoy  | sheedoy.cSep08  |  | 2448  | 524  | 2 | 65  | CRA c like (7.4 kD) (sheedoy) alternative variant cSep08, mRNA.                                  |
| sheeflu  | sheeflu.aSep08  |  | 951   | 329  |   | 109 | putative protein, with 2 coiled coil domains, of mammalian origin (sheeflu) mRNA.                |
| sheefly  | sheefly.aSep08  |  | 2643  | 440  |   | 146 | nuclear receptor coactivator 7 CRA a (sheefly) mRNA.                                             |
| sheegar  | sheegar.aSep08  |  | 2492  | 351  |   | 116 | putative protein of metazoan origin (sheegar) mRNA.                                              |
| sheeja   | sheeja.aSep08   |  | 65699 | 338  |   | 42  | putative protein (4.5 kD) (sheeja) mRNA.                                                         |
| sheejey  | sheejey.bSep08  |  | 3011  | 2687 | 1 | 70  | putative protein (7.7 kD) (sheejey) alternative variant bSep08, mRNA.                            |
| sheekee  | sheekee.aSep08  |  | 66650 | 541  |   | 107 | putative protein (12.2 kD) (sheekee) mRNA.                                                       |
| sheelo   | sheelo.aSep08   |  | 8219  | 479  |   | 159 | 2 -binding protein like (sheelo) mRNA.                                                           |
| sheemee  | sheemee.bSep08  |  | 4467  | 419  | 3 | 36  | putative protein (sheemee) alternative variant bSep08, mRNA.                                     |
| sheenoy  | sheenoy.aSep08  |  | 8411  | 816  |   |     |                                                                                                  |
| sheepor  | sheepor.aSep08  |  | 2833  | 586  |   | 20  | putative protein (sheepor) mRNA.                                                                 |
| sheeroy  | sheeroy.aSep08  |  | 2208  | 562  |   | 66  | putative protein (7.2 kD) (sheeroy) mRNA.                                                        |
| sheesa   | sheesa.aSep08   |  | 1163  | 424  |   | 141 | myeloid lymphoid mixed-lineage leukemia 2 CRA a like (sheesa) mRNA.                              |
| sheeshee | sheeshee.aSep08 |  | 7900  | 303  |   | 94  | putative protein (sheeshee) mRNA.                                                                |
| sheetu   | sheetu.aSep08   |  | 638   | 194  |   | 51  | neuronal PAS domain protein 3 (sheetu) mRNA.                                                     |
| sheevo   | sheevo.aSep08   |  | 4232  | 431  | 6 | 79  | putative protein (sheevo) alternative variant aSep08, mRNA.                                      |
| sheewer  | sheewer.aSep08  |  | 2836  | 1034 | 4 | 344 | myeloid lymphoid mixed-lineage leukemia 5 like (sheewer) alternative variant aSep08, mRNA.       |
| sheewer  | sheewer.bSep08  |  | 871   | 206  | 2 | 68  | myeloid lymphoid mixed-lineage leukemia 5 CRA d like (sheewer) alternative variant bSep08, mRNA. |
| sheewer  | sheewer.cSep08  |  | 467   | 360  | 2 | 45  | putative protein (5.4 kD) (sheewer) alternative variant cSep08, mRNA.                            |
| sheewey  | sheewey.aSep08  |  | 2923  | 2878 |   | 51  | putative protein (5.7 kD) (sheewey) mRNA.                                                        |
| sherbor  | sherbor.aSep08  |  | 7982  | 737  |   | 245 | protein particle complex (sherbor) mRNA.                                                         |
| sherchy  | sherchy.aSep08  |  | 560   | 403  |   | 48  | putative protein (5.3 kD) (sherchy) mRNA.                                                        |
| sherdoy  | sherdoy.aSep08  |  | 7104  | 317  | 1 | 66  | putative protein (sherdoy) alternative variant aSep08, mRNA.                                     |
| sherdoy  | sherdoy.bSep08  |  | 9906  | 322  | 2 | 35  | putative protein (sherdoy) alternative variant bSep08, mRNA.                                     |
| sherflu  | sherflu.aSep08  |  | 69392 | 241  |   | 80  | putative protein (sherflu) mRNA.                                                                 |
| sherfly  | sherfly.aSep08  |  | 31012 | 257  |   | 49  | putative protein (sherfly) mRNA.                                                                 |
| shergar  | shergar.aSep08  |  | 9989  | 359  |   | 46  | putative protein (shergar) mRNA.                                                                 |
| sherja   | sherja.aSep08   |  | 2025  | 710  |   | 64  | putative protein (7.1 kD) (sherja) mRNA.                                                         |



|          |                 |  |       |      |   |     |                                                                                      |
|----------|-----------------|--|-------|------|---|-----|--------------------------------------------------------------------------------------|
| sherjey  | sherjey.aSep08  |  | 14014 | 262  |   | 57  | putative protein (sherjey) mRNA.                                                     |
| sherkee  | sherkee.aSep08  |  | 7074  | 947  | 2 | 147 | putative cytoplasmic protein (16.0 kD) (sherkee) alternative variant aSep08, mRNA.   |
| sherlo   | sherlo.aSep08   |  | 893   | 353  |   | 61  | putative protein (6.7 kD) (sherlo) mRNA.                                             |
| shermee  | shermee.aSep08  |  | 1473  | 326  |   | 55  | putative protein (shermee) mRNA.                                                     |
| shernoy  | shernoy.aSep08  |  | 2247  | 848  |   | 145 | helicase 1 (shernoy) mRNA.                                                           |
| sherpor  | sherpor.aSep08  |  | 1234  | 501  |   | 85  | putative protein (sherpor) mRNA.                                                     |
| sherroy  | sherroy.aSep08  |  | 3526  | 1142 |   | 250 | putative protein (sherroy) alternative variant aSep08, mRNA.                         |
| shersa   | shersa.aSep08   |  | 271   | 182  |   | 60  | putative protein (shersa) mRNA.                                                      |
| shershee | shershee.aSep08 |  | 632   | 338  |   | 41  | putative protein (shershee) mRNA.                                                    |
| shertu   | shertu.aSep08   |  | 515   | 230  |   | 68  | putative protein (shertu) mRNA.                                                      |
| shervo   | shervo.aSep08   |  | 1381  | 533  |   | 81  | putative protein (9.4 kD) (shervo) mRNA.                                             |
| sherwer  | sherwer.aSep08  |  | 3541  | 613  |   | 60  | ac2-154 like (sherwer) mRNA.                                                         |
| sherwey  | sherwey.aSep08  |  | 31052 | 387  |   | 129 | inositol 1 receptor 2 (sherwey) mRNA.                                                |
| sheybor  | sheybor.aSep08  |  | 3132  | 283  |   | 93  | protein particle complex (sheybor) mRNA.                                             |
| sheychy  | sheychy.aSep08  |  | 32534 | 346  |   | 43  | putative protein (sheychy) mRNA.                                                     |
| sheydoy  | sheydoy.aSep08  |  | 11348 | 755  |   | 42  | putative protein (sheydoy) mRNA.                                                     |
| sheyflu  | sheyflu.aSep08  |  | 14187 | 814  |   | 271 | suppression of tumorigenicity 5 like (sheyflu) mRNA.                                 |
| sheyfly  | sheyfly.aSep08  |  | 1823  | 468  | 2 | 109 | putative protein (sheyfly) alternative variant aSep08, mRNA.                         |
| sheygar  | sheygar.aSep08  |  | 17769 | 784  | 3 | 164 | putative mitochondrial protein (18.9 kD) (sheygar) alternative variant aSep08, mRNA. |
| sheygar  | sheygar.bSep08  |  | 21239 | 1355 | 2 | 164 | putative mitochondrial protein (18.9 kD) (sheygar) alternative variant bSep08, mRNA. |
| sheyja   | sheyja.aSep08   |  | 16760 | 312  |   | 104 | F-box protein 16 (sheyja) mRNA.                                                      |
| sheyjey  | sheyjey.aSep08  |  | 8173  | 705  |   | 140 | regulator of G-protein signaling 12 CRA a (sheyjey) mRNA.                            |
| sheykee  | sheykee.aSep08  |  | 1679  | 749  |   | 54  | putative protein (sheykee) mRNA.                                                     |
| sheylo   | sheylo.aSep08   |  | 1065  | 365  |   | 67  | putative protein (7.8 kD) (sheylo) mRNA.                                             |
| sheymee  | sheymee.bSep08  |  | 28942 | 571  | 4 | 61  | putative protein (sheymee) alternative variant bSep08, mRNA.                         |
| sheymee  | sheymee.cSep08  |  | 19220 | 504  | 4 | 31  | putative protein (3.3 kD) (sheymee) alternative variant cSep08, mRNA.                |
| sheynoy  | sheynoy.aSep08  |  | 6582  | 695  |   | 81  | putative protein (sheynoy) mRNA.                                                     |
| sheypor  | sheypor.aSep08  |  | 11171 | 600  |   | 44  | ATPase (sheypor) mRNA.                                                               |
| sheyroy  | sheyroy.aSep08  |  | 2383  | 1784 |   | 118 | putative protein (sheyroy) mRNA.                                                     |
| sheysa   | sheysa.aSep08   |  | 5381  | 784  |   | 187 | myeloid lymphoid mixed-lineage leukemia 2 CRA c like (sheysa) mRNA.                  |
| sheyshee | sheyshee.aSep08 |  | 1416  | 881  |   | 48  | putative protein (5.1 kD) (sheyshee) mRNA.                                           |
| sheytu   | sheytu.aSep08   |  | 5072  | 831  |   | 276 | bromodomain adjacent zinc finger domain 1A (sheytu) mRNA.                            |
| sheyvo   | sheyvo.aSep08   |  | 824   | 331  |   | 48  | putative protein (5.7 kD) (sheyvo) mRNA.                                             |
| sheywer  | sheywer.aSep08  |  | 2634  | 255  |   | 74  | putative protein (sheywer) mRNA.                                                     |

|         |                |        |       |      |    |     |                                                                                             |
|---------|----------------|--------|-------|------|----|-----|---------------------------------------------------------------------------------------------|
| sheywey | sheywey.aSep08 |        | 3127  | 658  |    | 219 | inositol 1 receptor 2 (sheywey) mRNA.                                                       |
| Shf     | Shf.aSep08     | 362205 | 6045  | 849  | 2  | 177 | putative protein of eukaryotic origin (Shf) alternative variant aSep08, mRNA.               |
| Shf     | Shf.bSep08     | 362205 | 2138  | 707  | 1  | 130 | putative protein of eukaryotic origin (Shf) alternative variant bSep08, mRNA.               |
| Shh     | Shh.bSep08     | 29499  | 1486  | 1086 | 2  | 292 | sonic hedgehog (Shh) alternative variant bSep08, mRNA.                                      |
| Shisa4  | Shisa4.bSep08  | 360848 | 2437  | 382  | 3  | 120 | shisa homolog 4 (Xenopus laevis) (Shisa4) alternative variant bSep08, mRNA.                 |
| Shkbp1  | Shkbp1.aSep08  | 292735 | 13435 | 2322 | 18 | 711 | sh3kbp1 binding protein 1 like (Shkbp1) alternative variant aSep08, mRNA.                   |
| Shkbp1  | Shkbp1.bSep08  | 292735 | 4796  | 897  | 4  | 166 | binding protein 1 like (Shkbp1) alternative variant bSep08, mRNA.                           |
| Shkbp1  | Shkbp1.cSep08  | 292735 | 1250  | 1153 | 2  | 106 | seta binding protein 1 like (11.1 kD) (Shkbp1) alternative variant cSep08, mRNA.            |
| Shmt1   | Shmt1.bSep08   | 287379 | 22341 | 2792 | 7  | 468 | serine hydroxymethyltransferase 1 (soluble) (Shmt1) alternative variant bSep08, mRNA.       |
| Shmt1   | Shmt1.cSep08   | 287379 | 9123  | 1341 | 8  | 352 | serine hydroxymethyltransferase 1 (soluble) (Shmt1) alternative variant cSep08, mRNA.       |
| Shmt1   | Shmt1.dSep08   | 287379 | 14147 | 897  | 7  | 229 | serine hydroxymethyltransferase 1 (soluble) (Shmt1) alternative variant dSep08, mRNA.       |
| Shmt1   | Shmt1.eSep08   | 287379 | 13164 | 813  | 6  | 194 | serine hydroxymethyltransferase 1 (soluble) (Shmt1) alternative variant eSep08, mRNA.       |
| Shmt2   | Shmt2.bSep08   | 299857 | 3176  | 842  | 7  | 265 | serine hydroxymethyltransferase 2 (mitochondrial) (Shmt2) alternative variant bSep08, mRNA. |
| Shmt2   | Shmt2.cSep08   | 299857 | 3543  | 1515 | 7  | 257 | serine hydroxymethyltransferase 2 (mitochondrial) (Shmt2) alternative variant cSep08, mRNA. |
| Shmt2   | Shmt2.dSep08   | 299857 | 2453  | 1340 | 6  | 256 | serine hydroxymethyltransferase 2 (mitochondrial) (Shmt2) alternative variant dSep08, mRNA. |
| Shmt2   | Shmt2.eSep08   | 299857 | 700   | 524  | 3  | 107 | serine hydroxymethyltransferase 2 (mitochondrial) (Shmt2) alternative variant eSep08, mRNA. |
| shobor  | shobor.aSep08  |        | 4328  | 622  |    | 39  | putative protein (4.6 kD) (shobor) mRNA.                                                    |
| Shoc2   | Shoc2.bSep08   | 309548 | 37756 | 342  | 1  | 14  | putative protein (1.8 kD) (Shoc2) alternative variant bSep08, mRNA.                         |
| shochy  | shochy.aSep08  |        | 41433 | 880  |    | 248 | putative protein of metazoan origin (shochy) mRNA.                                          |
| shodoy  | shodoy.aSep08  |        | 1405  | 691  |    | 43  | putative protein (5.1 kD) (shodoy) mRNA.                                                    |
| shoflu  | shoflu.aSep08  |        | 2403  | 571  | 3  | 166 | nucleoporin 98kDa (shoflu) alternative variant aSep08, mRNA.                                |
| shofly  | shofly.aSep08  |        | 2756  | 656  |    | 86  | putative protein (9.7 kD) (shofly) mRNA.                                                    |
| shogar  | shogar.aSep08  |        | 10235 | 714  |    | 57  | putative protein (6.8 kD) (shogar) mRNA.                                                    |
| shoja   | shoja.aSep08   |        | 650   | 531  |    | 74  | putative mitochondrial protein (8.0 kD) (shoja) mRNA.                                       |
| shojey  | shojey.aSep08  |        | 5655  | 442  |    | 41  | putative protein (4.7 kD) (shojey) mRNA.                                                    |
| shokee  | shokee.aSep08  |        | 1042  | 371  |    | 57  | putative protein (shokee) mRNA.                                                             |
| sholo   | sholo.aSep08   |        | 11238 | 598  |    | 140 | autism susceptibility candidate 2 (sholo) mRNA.                                             |
| shomee  | shomee.aSep08  |        | 1467  | 800  |    | 116 | putative protein (5.7 kD) (shomee) complete mRNA.                                           |
| shonoy  | shonoy.aSep08  |        | 5230  | 765  |    | 96  | putative protein (10.6 kD) (shonoy) mRNA.                                                   |

|          |                 |       |       |      |   |     |                                                                                    |
|----------|-----------------|-------|-------|------|---|-----|------------------------------------------------------------------------------------|
| shopor   | shopor.aSep08   |       | 11117 | 469  |   | 93  | putative protein (shopor) mRNA.                                                    |
| shorbor  | shorbor.aSep08  |       | 400   | 274  |   | 60  | putative protein (6.6 kD) (shorbor) mRNA.                                          |
| shorchy  | shorchy.aSep08  |       | 3436  | 601  |   | 71  | putative protein (shorchy) mRNA.                                                   |
| shordoy  | shordoy.aSep08  |       | 539   | 373  |   | 124 | CRA b (shordoy) mRNA.                                                              |
| shorflu  | shorflu.aSep08  |       | 2863  | 1266 |   | 123 | nuclear receptor interacting protein 3 (12.8 kD) (shorflu) mRNA.                   |
| shorfly  | shorfly.aSep08  |       | 6050  | 1713 |   | 490 | CRA b (shorfly) mRNA.                                                              |
| shorgar  | shorgar.aSep08  |       | 2639  | 410  |   | 56  | putative protein (6.4 kD) (shorgar) mRNA.                                          |
| shorja   | shorja.aSep08   |       | 7343  | 902  |   | 62  | putative protein (6.9 kD) (shorja) mRNA.                                           |
| shorjey  | shorjey.aSep08  |       | 3540  | 920  |   | 113 | putative membrane protein of metazoan origin (12.6 kD) (shorjey) mRNA.             |
| shorkee  | shorkee.aSep08  |       | 9650  | 1693 | 8 | 327 | CRA a (shorkee) alternative variant aSep08, mRNA.                                  |
| shorlo   | shorlo.aSep08   |       | 12539 | 763  |   | 82  | putative protein (shorlo) mRNA.                                                    |
| shormee  | shormee.aSep08  |       | 1796  | 464  |   | 100 | dynein axonemal heavy (shormee) mRNA.                                              |
| shornoy  | shornoy.aSep08  |       | 370   | 261  |   | 43  | putative protein (shornoy) mRNA.                                                   |
| shoroy   | shoroy.aSep08   |       | 3579  | 352  |   | 40  | putative protein (shoroy) mRNA.                                                    |
| shorpor  | shorpor.aSep08  |       | 9508  | 490  |   | 64  | putative protein (shorpor) mRNA.                                                   |
| shorroy  | shorroy.aSep08  |       | 2622  | 715  | 4 | 148 | zinc finger RNA binding protein 2 like (shorroy) alternative variant aSep08, mRNA. |
| shorroy  | shorroy.cSep08  |       | 2286  | 644  | 4 | 19  | putative protein (2.3 kD) (shorroy) alternative variant cSep08, mRNA.              |
| shorsa   | shorsa.aSep08   |       | 23710 | 259  | 3 | 43  | putative protein (shorsa) alternative variant aSep08, mRNA.                        |
| shorsa   | shorsa.bSep08   |       | 7670  | 1055 | 2 | 81  | putative protein (8.8 kD) (shorsa) alternative variant bSep08, mRNA.               |
| shorshee | shorshee.aSep08 |       | 1023  | 930  |   | 106 | putative protein (shorshee) mRNA.                                                  |
| shortu   | shortu.aSep08   |       | 7762  | 494  |   | 164 | bromodomain adjacent zinc finger domain 1A (shortu) mRNA.                          |
| shorvo   | shorvo.aSep08   |       | 22052 | 482  |   | 160 | aspartate-beta-hydroxylase CRA a (shorvo) mRNA.                                    |
| shorwer  | shorwer.aSep08  |       | 1380  | 254  |   | 35  | putative protein (shorwer) mRNA.                                                   |
| shorwey  | shorwey.aSep08  |       | 69098 | 398  |   | 79  | inositol 1 receptor (8.7 kD) (shorwey) mRNA.                                       |
| shosa    | shosa.aSep08    |       | 1177  | 694  |   | 59  | putative protein (shosa) mRNA.                                                     |
| shoshee  | shoshee.aSep08  |       | 22487 | 401  |   | 56  | putative protein (6.3 kD) (shoshee) mRNA.                                          |
| shotu    | shotu.aSep08    |       | 30351 | 351  |   | 26  | putative protein (shotu) mRNA.                                                     |
| shovar   | shovar.aSep08   |       | 2742  | 766  |   | 62  | putative protein (7.0 kD) (shovar) mRNA.                                           |
| shovo    | shovo.aSep08    |       | 21962 | 788  |   | 74  | putative cytoplasmic protein (8.8 kD) (shovo) mRNA.                                |
| shower   | shower.aSep08   |       | 7166  | 684  |   | 227 | pseudouridylate synthase 7 homolog (shower) mRNA.                                  |
| showey   | showey.aSep08   |       | 7359  | 650  |   | 88  | putative protein (showey) mRNA.                                                    |
| Shox2    | Shox2.bSep08    | 25546 | 8640  | 1564 | 1 | 235 | short stature homeobox 2 (Shox2) alternative variant bSep08, mRNA.                 |
| shoybor  | shoybor.aSep08  |       | 2840  | 1213 |   | 62  | putative protein (shoybor) mRNA.                                                   |
| shoychy  | shoychy.aSep08  |       | 10091 | 771  |   | 40  | putative protein (4.1 kD) (shoychy) mRNA.                                          |
| shoydoy  | shoydoy.aSep08  |       | 9809  | 535  |   | 54  | putative protein (shoydoy) mRNA.                                                   |

|          |                 |        |        |      |   |     |                                                                                                       |
|----------|-----------------|--------|--------|------|---|-----|-------------------------------------------------------------------------------------------------------|
| shoyflu  | shoyflu.aSep08  |        | 5923   | 307  |   | 49  | wee 1 homolog like (shoyflu) mRNA.                                                                    |
| shoyfly  | shoyfly.aSep08  |        | 1173   | 262  |   | 87  | solute carrier family 12 member 7 (shoyfly) mRNA.                                                     |
| shoygar  | shoygar.aSep08  |        | 5411   | 413  |   | 75  | putative protein (shoygar) mRNA.                                                                      |
| shoyja   | shoyja.aSep08   |        | 4616   | 635  |   | 96  | putative protein (shoyja) mRNA.                                                                       |
| shoyjey  | shoyjey.aSep08  |        | 21569  | 362  |   | 47  | putative protein (shoyjey) mRNA.                                                                      |
| shoykee  | shoykee.aSep08  |        | 1763   | 1700 |   | 61  | putative protein (6.8 kD) (shoykee) mRNA.                                                             |
| shoylo   | shoylo.aSep08   |        | 1083   | 411  |   | 68  | putative protein (7.3 kD) (shoylo) mRNA.                                                              |
| shoymee  | shoymee.aSep08  |        | 2380   | 669  |   | 223 | putative protein of eukaryotic origin (shoymee) mRNA.                                                 |
| shoynoy  | shoynoy.aSep08  |        | 370    | 261  |   | 43  | putative protein (shoynoy) mRNA.                                                                      |
| shoypor  | shoypor.aSep08  |        | 6148   | 524  |   | 46  | putative protein (shoypor) mRNA.                                                                      |
| shoyroy  | shoyroy.aSep08  |        | 1552   | 728  |   | 128 | CRA b (shoyroy) mRNA.                                                                                 |
| shoysa   | shoysa.aSep08   |        | 1265   | 927  |   | 262 | putative protein of mammalian origin (shoysa) mRNA.                                                   |
| shoyshee | shoyshee.aSep08 |        | 32229  | 376  |   | 124 | round spermatid basic protein 1 CRA c (shoyshee) mRNA.                                                |
| shoytu   | shoytu.aSep08   |        | 27537  | 306  |   | 102 | bromodomain adjacent zinc finger domain 1A (shoytu) mRNA.                                             |
| shoyvo   | shoyvo.aSep08   |        | 487    | 324  |   | 45  | putative protein (shoyvo) mRNA.                                                                       |
| shoywer  | shoywer.aSep08  |        | 52096  | 283  |   | 21  | putative protein (2.5 kD) (shoywer) mRNA.                                                             |
| shoywey  | shoywey.aSep08  |        | 5919   | 296  |   | 78  | uncharacterized protein (shoywey) mRNA.                                                               |
| Shprh    | Shprh.bSep08    | 308282 | 15579  | 724  | 7 | 241 | SNF2 histone linker PHD RING helicase (Shprh) alternative variant bSep08, mRNA.                       |
| Shroom1  | Shroom1.aSep08  | 287285 | 2286   | 1239 |   | 413 | shroom family member 1 (Shroom1) mRNA.                                                                |
| Shroom2  | Shroom2.bSep08  | 317435 | 16713  | 616  | 2 | 152 | shroom family member 2 and hypothetical protein LOC685699 (Shroom2) alternative variant bSep08, mRNA. |
| Shroom2  | Shroom2.bSep08  | 685699 | 16713  | 616  | 2 | 152 | shroom family member 2 and hypothetical protein LOC685699 (Shroom2) alternative variant bSep08, mRNA. |
| Shroom2  | Shroom2.cSep08  | 317435 | 16081  | 582  | 2 | 56  | shroom family member 2 and hypothetical protein LOC685699 (Shroom2) alternative variant cSep08, mRNA. |
| Shroom2  | Shroom2.cSep08  | 685699 | 16081  | 582  | 2 | 56  | shroom family member 2 and hypothetical protein LOC685699 (Shroom2) alternative variant cSep08, mRNA. |
| Shroom3  | Shroom3.aSep08  | 305230 | 12627  | 2049 | 4 | 340 | shroom family member 3 (Shroom3) alternative variant aSep08, mRNA.                                    |
| Shroom4  | Shroom4.aSep08  | 317391 | 153799 | 1482 |   | 439 | shroom family member 4 (Shroom4) mRNA.                                                                |
| shubor   | shubor.aSep08   |        | 912    | 356  |   | 38  | putative protein (shubor) mRNA.                                                                       |
| shuchy   | shuchy.aSep08   |        | 4446   | 418  |   | 138 | putative protein of metazoan origin (shuchy) mRNA.                                                    |
| shudoy   | shudoy.aSep08   |        | 5030   | 348  |   | 72  | CRA b like (shudoy) mRNA.                                                                             |
| shuflu   | shuflu.aSep08   |        | 2856   | 1019 |   | 40  | putative protein of mammalian origin (shuflu) mRNA.                                                   |
| shufly   | shufly.aSep08   |        | 5438   | 730  |   | 75  | putative mitochondrial protein (8.3 kD) (shufly) mRNA.                                                |
| shugar   | shugar.aSep08   |        | 37488  | 453  |   | 53  | CRA b like (5.8 kD) (shugar) mRNA.                                                                    |
| shuja    | shuja.aSep08    |        | 9894   | 396  |   | 31  | putative protein (shuja) mRNA.                                                                        |
| shujey   | shujey.aSep08   |        | 8336   | 423  |   | 15  | putative protein (shujey) mRNA.                                                                       |
| shukee   | shukee.aSep08   |        | 20888  | 717  | 3 | 84  | putative protein (9.4 kD) (shukee) alternative variant aSep08, mRNA.                                  |

|         |                |  |       |     |   |     |                                                                                     |
|---------|----------------|--|-------|-----|---|-----|-------------------------------------------------------------------------------------|
| shukee  | shukee.bSep08  |  | 1167  | 292 | 2 | 82  | putative protein (shukee) alternative variant bSep08, mRNA.                         |
| shulo   | shulo.aSep08   |  | 8826  | 400 |   | 69  | putative protein (8.1 kD) (shulo) mRNA.                                             |
| shumee  | shumee.aSep08  |  | 2581  | 440 | 2 | 116 | myosin heavy chain (shumee) alternative variant aSep08, mRNA.                       |
| shumee  | shumee.bSep08  |  | 2319  | 273 | 1 | 63  | myosin heavy chain (shumee) alternative variant bSep08, mRNA.                       |
| shunoy  | shunoy.aSep08  |  | 5567  | 670 |   | 42  | putative protein (shunoy) mRNA.                                                     |
| shupor  | shupor.aSep08  |  | 25264 | 664 |   | 142 | transmembrane protein 108 (shupor) mRNA.                                            |
| shuroy  | shuroy.aSep08  |  | 4103  | 951 |   | 92  | putative mitochondrial protein (10.5 kD) (shuroy) mRNA.                             |
| shusa   | shusa.aSep08   |  | 4826  | 481 |   | 88  | putative secreted or extracellular protein precursor (9.6 kD) (shusa) mRNA.         |
| shushee | shushee.aSep08 |  | 1156  | 588 |   | 46  | putative protein (5.3 kD) (shushee) mRNA.                                           |
| shutu   | shutu.aSep08   |  | 18829 | 411 |   | 136 | protein kinase D2 (shutu) mRNA.                                                     |
| shuvar  | shuvar.bSep08  |  | 1023  | 663 | 2 | 111 | putative mitochondrial protein (12.1 kD) (shuvar) alternative variant bSep08, mRNA. |
| shuvo   | shuvo.aSep08   |  | 12887 | 666 |   | 159 | putative protein of metazoan origin (shuvo) mRNA.                                   |
| shuwer  | shuwer.aSep08  |  | 38955 | 974 |   | 319 | CRA b (shuwer) alternative variant aSep08, mRNA.                                    |
| shuwey  | shuwey.aSep08  |  | 6876  | 493 |   | 35  | putative protein (4.1 kD) (shuwey) mRNA.                                            |
| shybor  | shybor.aSep08  |  | 1245  | 485 |   | 67  | putative protein (7.4 kD) (shybor) mRNA.                                            |
| shychy  | shychy.aSep08  |  | 2214  | 669 | 2 | 154 | putative protein (shychy) alternative variant aSep08, mRNA.                         |
| shydoy  | shydoy.aSep08  |  | 914   | 332 |   | 33  | putative protein (3.5 kD) (shydoy) mRNA.                                            |
| shyflu  | shyflu.aSep08  |  | 7197  | 368 |   | 122 | nucleoporin 98kDa (shyflu) mRNA.                                                    |
| shyfly  | shyfly.aSep08  |  | 1495  | 258 |   | 85  | putative protein (shyfly) mRNA.                                                     |
| shygar  | shygar.aSep08  |  | 11623 | 602 |   | 40  | putative protein (4.7 kD) (shygar) mRNA.                                            |
| shyja   | shyja.aSep08   |  | 15636 | 593 | 1 | 101 | putative mitochondrial protein (11.3 kD) (shyja) alternative variant aSep08, mRNA.  |
| shyja   | shyja.bSep08   |  | 15746 | 656 | 2 | 57  | putative protein (6.3 kD) (shyja) alternative variant bSep08, mRNA.                 |
| shyjej  | shyjej.aSep08  |  | 1737  | 835 |   | 23  | putative protein (2.6 kD) (shyjej) mRNA.                                            |
| shykee  | shykee.aSep08  |  | 4305  | 750 |   | 249 | tumor protein p53 binding 2 like (shykee) mRNA.                                     |
| shykler | shykler.aSep08 |  | 1716  | 725 |   | 61  | putative protein (shykler) mRNA.                                                    |
| shymee  | shymee.aSep08  |  | 1752  | 329 |   | 109 | myosin heavy chain skeletal muscle (shymee) mRNA.                                   |
| shynoy  | shynoy.aSep08  |  | 895   | 659 |   | 64  | putative protein (shynoy) mRNA.                                                     |
| shypor  | shypor.aSep08  |  | 29523 | 663 |   | 220 | phakinin (shypor) mRNA.                                                             |
| shyroj  | shyroj.aSep08  |  | 8934  | 382 |   | 82  | reverse transcriptase (shyroj) mRNA.                                                |
| shysa   | shysa.aSep08   |  | 762   | 408 |   | 8   | putative protein (0.9 kD) (shysa) mRNA.                                             |
| shyshee | shyshee.aSep08 |  | 637   | 550 |   | 88  | zinc finger DHHC-type containing 3 (9.8 kD) (shyshee) mRNA.                         |
| shytu   | shytu.aSep08   |  | 26558 | 402 |   | 133 | kinase d1 (shytu) mRNA.                                                             |
| shyvar  | shyvar.aSep08  |  | 1247  | 855 | 1 |     |                                                                                     |

|         |                |        |       |      |    |     |                                                                                                                                                                                           |
|---------|----------------|--------|-------|------|----|-----|-------------------------------------------------------------------------------------------------------------------------------------------------------------------------------------------|
| shyvar  | shyvar.bSep08  |        | 388   | 293  | 2  | 25  | putative protein (shyvar) alternative variant bSep08, mRNA.                                                                                                                               |
| shyvo   | shyvo.aSep08   |        | 39619 | 443  | 1  | 61  | putative protein (shyvo) alternative variant aSep08, mRNA.                                                                                                                                |
| shyvo   | shyvo.bSep08   |        | 39671 | 295  |    | 32  | putative protein (shyvo) alternative variant bSep08, mRNA.                                                                                                                                |
| shywer  | shywer.bSep08  |        | 3575  | 746  |    | 60  | putative protein (6.0 kD) (shywer) alternative variant bSep08, mRNA.                                                                                                                      |
| shywey  | shywey.aSep08  |        | 2822  | 893  |    | 50  | putative protein (6.1 kD) (shywey) mRNA.                                                                                                                                                  |
| Si      | Si.aSep08      | 497756 | 9428  | 709  | 2  | 235 | sucrase-isomaltase (alpha-glucosidase) (Si) alternative variant aSep08, mRNA.                                                                                                             |
| Si      | Si.bSep08      | 497756 | 11572 | 883  | 1  | 143 | sucrase-isomaltase (alpha-glucosidase) (Si) alternative variant bSep08, mRNA.                                                                                                             |
| Siae    | Siae.bSep08    | 363045 | 33452 | 1505 | 9  | 274 | sialic acid acetyltransferase precursor (30.2 kD) (Siae) alternative variant bSep08, mRNA.                                                                                                |
| Siae    | Siae.cSep08    | 363045 | 11115 | 407  | 3  | 107 | sialic acid acetyltransferase (Siae) alternative variant cSep08, mRNA.                                                                                                                    |
| Siahbp1 | Siahbp1.aSep08 | 84401  | 10938 | 1889 | 7  | 563 | siah binding protein 1; FBP interacting repressor; pyrimidine tract binding splicing factor; Ro ribonucleoprotein-binding protein 1 (Siahbp1) alternative variant aSep08, complete mRNA.  |
| Siahbp1 | Siahbp1.bSep08 | 84401  | 9934  | 1415 | 3  | 319 | siah binding protein 1; FBP interacting repressor; pyrimidine tract binding splicing factor; Ro ribonucleoprotein-binding protein 1 (34.4 kD) (Siahbp1) alternative variant bSep08, mRNA. |
| Siahbp1 | Siahbp1.cSep08 | 84401  | 10179 | 1416 | 3  | 302 | siah binding protein 1; FBP interacting repressor; pyrimidine tract binding splicing factor; Ro ribonucleoprotein-binding protein 1 (Siahbp1) alternative variant cSep08, mRNA.           |
| Siahbp1 | Siahbp1.dSep08 | 84401  | 9603  | 848  | 2  | 271 | siah binding protein 1; FBP interacting repressor; pyrimidine tract binding splicing factor; Ro ribonucleoprotein-binding protein 1 (Siahbp1) alternative variant dSep08, mRNA.           |
| Siahbp1 | Siahbp1.eSep08 | 84401  | 9256  | 683  | 2  | 227 | siah binding protein 1; FBP interacting repressor; pyrimidine tract binding splicing factor; Ro ribonucleoprotein-binding protein 1 (Siahbp1) alternative variant eSep08, mRNA.           |
| Sidt1   | Sidt1.aSep08   | 288109 | 71000 | 1249 |    | 296 | SID1 transmembrane family, member 1 (Sidt1) mRNA.                                                                                                                                         |
| Sidt2   | Sidt2.bSep08   | 315617 | 6709  | 1941 | 14 | 270 | SID1 transmembrane family member 2 (Sidt2) alternative variant bSep08, mRNA.                                                                                                              |
| Sidt2   | Sidt2.cSep08   | 315617 | 6096  | 748  | 10 | 249 | SID1 transmembrane family member 2 (Sidt2) alternative variant cSep08, mRNA.                                                                                                              |
| Sidt2   | Sidt2.dSep08   | 315617 | 2564  | 811  | 4  | 229 | SID1 transmembrane family member 2 (Sidt2) alternative variant dSep08, mRNA.                                                                                                              |
| Sidt2   | Sidt2.eSep08   | 315617 | 4551  | 649  | 9  | 216 | SID1 transmembrane family member 2 (Sidt2) alternative variant eSep08, mRNA.                                                                                                              |
| Sidt2   | Sidt2.gSep08   | 315617 | 2559  | 433  | 6  | 143 | SID1 transmembrane family member 2 (Sidt2) alternative variant gSep08, mRNA.                                                                                                              |

|         |                |        |       |      |    |     |                                                                                                                 |
|---------|----------------|--------|-------|------|----|-----|-----------------------------------------------------------------------------------------------------------------|
| Sidt2   | Sidt2.hSep08   | 315617 | 3705  | 1693 | 5  | 124 | SID1 transmembrane family member 2 (14.5 kD) (Sidt2) alternative variant hSep08, mRNA.                          |
| Sigirr  | Sigirr.bSep08  | 309106 | 1457  | 873  | 5  | 263 | single immunoglobulin and toll-interleukin 1 receptor (TIR) domain (Sigirr) alternative variant bSep08, mRNA.   |
| Sigirr  | Sigirr.cSep08  | 309106 | 460   | 386  | 2  | 114 | single immunoglobulin and toll-interleukin 1 receptor (TIR) domain (Sigirr) alternative variant cSep08, mRNA.   |
| Siglec1 | Siglec1.bSep08 | 311426 | 1277  | 637  | 1  | 35  | sialic acid binding Ig-like lectin 1, sialoadhesin (Siglec1) alternative variant bSep08, mRNA.                  |
| Siglecg | Siglecg.aSep08 | 292844 | 7036  | 2053 | 4  | 444 | sialic acid binding Ig-like lectin G (Siglecg) alternative variant aSep08, mRNA.                                |
| Siglech | Siglech.aSep08 | 361584 | 9165  | 1733 |    | 220 | sialic acid binding Ig-like lectin H (Siglech) mRNA.                                                            |
| Sike    | Sike.bSep08    | 362007 | 1974  | 871  | 2  | 123 | suppressor of IKK epsilon (Sike) alternative variant bSep08, mRNA.                                              |
| Sike    | Sike.cSep08    | 362007 | 1845  | 357  | 3  | 113 | suppressor of IKK epsilon (Sike) alternative variant cSep08, mRNA.                                              |
| Sil1    | Sil1.bSep08    | 291673 | 3222  | 709  | 1  | 118 | endoplasmic reticulum chaperone SIL1 homolog (S. cerevisiae) (13.5 kD) (Sil1) alternative variant bSep08, mRNA. |
| Silv    | Silv.bSep08    | 362818 | 3116  | 878  | 6  | 254 | silver homolog (mouse) (Silv) alternative variant bSep08, mRNA.                                                 |
| Silv    | Silv.cSep08    | 362818 | 6428  | 698  | 6  | 226 | silver homolog (mouse) (Silv) alternative variant cSep08, mRNA.                                                 |
| Sim1    | Sim1.bSep08    | 309888 | 5264  | 1697 | 3  | 115 | single-minded homolog 1 (Drosophila) (13.3 kD) (Sim1) alternative variant bSep08, mRNA.                         |
| Sim2    | Sim2.bSep08    | 304071 | 11593 | 784  | 5  | 133 | single-minded homolog 2 (Drosophila) (Sim2) alternative variant bSep08, mRNA.                                   |
| Sin3a   | Sin3a.bSep08   | 363067 | 19742 | 2426 | 7  | 471 | transcriptional regulator, SIN3A (yeast) (Sin3a) alternative variant bSep08, mRNA.                              |
| Sip1    | Sip1.aSep08    | 84404  | 13762 | 1777 | 5  | 464 | survival of motor neuron protein interacting protein 1 (Sip1) alternative variant aSep08, mRNA.                 |
| Sip1    | Sip1.cSep08    | 84404  | 11665 | 918  | 9  | 197 | survival of motor neuron protein interacting protein 1 (Sip1) alternative variant cSep08, mRNA.                 |
| Sip1    | Sip1.dSep08    | 84404  | 6205  | 825  | 5  | 127 | survival of motor neuron protein interacting protein 1 (14.3 kD) (Sip1) alternative variant dSep08, mRNA.       |
| Sip1    | Sip1.fSep08    | 84404  | 2539  | 725  | 2  | 63  | survival of motor neuron protein interacting protein 1 (7.4 kD) (Sip1) alternative variant fSep08, mRNA.        |
| Sip1    | Sip1.hSep08    | 84404  | 949   | 672  | 2  | 46  | survival of motor neuron protein interacting protein 1 (5.3 kD) (Sip1) alternative variant hSep08, mRNA.        |
| Sipa1   | Sipa1.bSep08   | 361710 | 1640  | 1309 | 5  | 198 | signal-induced proliferation-associated gene 1 (Sipa1) alternative variant bSep08, mRNA.                        |
| Sipa1   | Sipa1.cSep08   | 361710 | 998   | 829  | 3  | 116 | signal-induced proliferation-associated gene 1 (Sipa1) alternative variant cSep08, mRNA.                        |
| Sipa1   | Sipa1.dSep08   | 361710 | 1367  | 1108 | 4  | 106 | signal-induced proliferation-associated gene 1 (Sipa1) alternative variant dSep08, mRNA.                        |
| Sipa111 | Sipa111.bSep08 | 246212 | 56902 | 2500 | 13 | 770 | signal-induced proliferation-associated 1 like CRA a (Sipa111) alternative variant bSep08, mRNA.                |

|         |                |        |        |      |    |     |                                                                                                                                              |
|---------|----------------|--------|--------|------|----|-----|----------------------------------------------------------------------------------------------------------------------------------------------|
| Sipa111 | Sipa111.cSep08 | 246212 | 19821  | 1175 | 7  | 315 | signal-induced proliferation-associated 1 like CRA a (Sipa111) alternative variant cSep08, mRNA.                                             |
| Sipa111 | Sipa111.dSep08 | 246212 | 29071  | 663  | 5  | 190 | signal-induced proliferation-associated 1 like CRA b (Sipa111) alternative variant dSep08, mRNA.                                             |
| Sipa111 | Sipa111.eSep08 | 246212 | 167577 | 591  | 5  | 163 | putative protein (Sipa111) alternative variant eSep08, mRNA.                                                                                 |
| Sipa111 | Sipa111.fSep08 | 246212 | 6716   | 463  | 2  | 92  | signal-induced proliferation-associated 1 like CRA a (Sipa111) alternative variant fSep08, mRNA.                                             |
| Sipa112 | Sipa112.bSep08 | 361442 | 72605  | 1783 | 9  | 545 | signal-induced proliferation-associated 1 like 2 (Sipa112) alternative variant bSep08, mRNA.                                                 |
| Sipa112 | Sipa112.cSep08 | 361442 | 25934  | 1518 | 8  | 321 | signal-induced proliferation-associated 1 like 2 (Sipa112) alternative variant cSep08, mRNA.                                                 |
| Sirpa   | Sirpa.bSep08   | 25528  | 37082  | 2515 | 8  | 513 | signal-regulatory protein alpha (56.1 kD) (Sirpa) alternative variant bSep08, mRNA.                                                          |
| Sirpa   | Sirpa.cSep08   | 25528  | 16865  | 394  | 2  | 91  | signal-regulatory protein alpha (Sirpa) alternative variant cSep08, mRNA.                                                                    |
| Sirt1   | Sirt1.aSep08   | 309757 | 8188   | 2876 |    | 427 | sirtuin 1 ((silent mating type information regulation 2, homolog) 1 ( <i>S. cerevisiae</i> ) (Sirt1) mRNA.                                   |
| Sirt2   | Sirt2.aSep08   | 361532 | 18707  | 2533 | 11 | 351 | sirtuin (silent mating type information regulation 2 homolog) 2 ( <i>S. cerevisiae</i> ) (39.4 kD) (Sirt2) alternative variant aSep08, mRNA. |
| Sirt2   | Sirt2.cSep08   | 361532 | 20561  | 968  | 9  | 322 | sirtuin (silent mating type information regulation 2 homolog) 2 ( <i>S. cerevisiae</i> ) (Sirt2) alternative variant cSep08, mRNA.           |
| Sirt2   | Sirt2.dSep08   | 361532 | 20207  | 826  | 9  | 274 | sirtuin (silent mating type information regulation 2 homolog) 2 ( <i>S. cerevisiae</i> ) (Sirt2) alternative variant dSep08, mRNA.           |
| Sirt2   | Sirt2.eSep08   | 361532 | 19903  | 1447 | 7  | 238 | sirtuin (silent mating type information regulation 2 homolog) 2 ( <i>S. cerevisiae</i> ) (Sirt2) alternative variant eSep08, mRNA.           |
| Sirt2   | Sirt2.fSep08   | 361532 | 11171  | 688  | 7  | 229 | sirtuin (silent mating type information regulation 2 homolog) 2 ( <i>S. cerevisiae</i> ) (Sirt2) alternative variant fSep08, mRNA.           |
| Sirt2   | Sirt2.gSep08   | 361532 | 16954  | 682  | 5  | 132 | sirtuin (silent mating type information regulation 2 homolog) 2 ( <i>S. cerevisiae</i> ) (Sirt2) alternative variant gSep08, mRNA.           |
| Sirt2   | Sirt2.hSep08   | 361532 | 12404  | 766  | 7  | 130 | sirtuin (silent mating type information regulation 2 homolog) 2 ( <i>S. cerevisiae</i> ) (Sirt2) alternative variant hSep08, mRNA.           |
| Sirt2   | Sirt2.iSep08   | 361532 | 19193  | 724  | 8  | 124 | sirtuin (silent mating type information regulation 2 homolog) 2 ( <i>S. cerevisiae</i> ) (Sirt2) alternative variant iSep08, mRNA.           |
| Sirt2   | Sirt2.jSep08   | 361532 | 12204  | 657  | 6  | 52  | sirtuin (silent mating type information regulation 2 homolog) 2 ( <i>S. cerevisiae</i> ) (5.9 kD) (Sirt2) alternative variant jSep08, mRNA.  |
| Sirt3   | Sirt3.bSep08   | 293615 | 22418  | 1254 | 6  | 276 | sirtuin 3 (silent mating type information regulation 2, homolog) 3 ( <i>S. cerevisiae</i> ) (Sirt3) alternative variant bSep08, mRNA.        |
| Sirt3   | Sirt3.cSep08   | 293615 | 20984  | 753  | 6  | 250 | sirtuin 3 (silent mating type information regulation 2, homolog) 3 ( <i>S. cerevisiae</i> ) (Sirt3) alternative variant cSep08, mRNA.        |
| Sirt3   | Sirt3.dSep08   | 293615 | 17224  | 781  | 5  | 156 | sirtuin 3 (silent mating type information regulation 2, homolog) 3 ( <i>S. cerevisiae</i> ) (Sirt3) alternative variant dSep08, mRNA.        |



|         |                |        |       |      |   |     |                                                                                                                                                |
|---------|----------------|--------|-------|------|---|-----|------------------------------------------------------------------------------------------------------------------------------------------------|
| Sirt3   | Sirt3.fSep08   | 293615 | 6774  | 404  | 3 | 63  | sirtuin 3 (silent mating type information regulation 2, homolog) 3 ( <i>S. cerevisiae</i> ) (Sirt3) alternative variant fSep08, mRNA.          |
| Sirt4   | Sirt4.bSep08   | 304539 | 6762  | 1436 | 5 | 291 | sirtuin 4 (silent mating type information regulation 2 homolog) 4 ( <i>S. cerevisiae</i> ) (33.0 kD) (Sirt4) alternative variant bSep08, mRNA. |
| Sirt5   | Sirt5.bSep08   | 306840 | 20312 | 971  | 6 | 247 | sirtuin 5 (silent mating type information regulation 2 homolog) 5 ( <i>S. cerevisiae</i> ) (Sirt5) alternative variant bSep08, mRNA.           |
| Sirt5   | Sirt5.cSep08   | 306840 | 19506 | 827  | 5 | 238 | sirtuin 5 (silent mating type information regulation 2 homolog) 5 ( <i>S. cerevisiae</i> ) (Sirt5) alternative variant cSep08, mRNA.           |
| Sirt5   | Sirt5.dSep08   | 306840 | 19821 | 698  | 6 | 232 | sirtuin 5 (silent mating type information regulation 2 homolog) 5 ( <i>S. cerevisiae</i> ) (Sirt5) alternative variant dSep08, mRNA.           |
| Sirt5   | Sirt5.eSep08   | 306840 | 13831 | 702  | 5 | 216 | sirtuin 5 (silent mating type information regulation 2 homolog) 5 ( <i>S. cerevisiae</i> ) (23.9 kD) (Sirt5) alternative variant eSep08, mRNA. |
| Sirt5   | Sirt5.fSep08   | 306840 | 20189 | 739  | 5 | 161 | sirtuin 5 (silent mating type information regulation 2 homolog) 5 ( <i>S. cerevisiae</i> ) (Sirt5) alternative variant fSep08, mRNA.           |
| Sirt5   | Sirt5.gSep08   | 306840 | 5211  | 310  | 2 | 87  | sirtuin 5 (silent mating type information regulation 2 homolog) 5 ( <i>S. cerevisiae</i> ) (Sirt5) alternative variant gSep08, mRNA.           |
| Sirt6   | Sirt6.bSep08   | 299638 | 3648  | 588  | 6 | 139 | sirtuin 6 (silent mating type information regulation 2, homolog) 6 ( <i>S. cerevisiae</i> ) (Sirt6) alternative variant bSep08, mRNA.          |
| Sirt6   | Sirt6.cSep08   | 299638 | 1174  | 356  | 4 | 118 | sirtuin 6 (silent mating type information regulation 2, homolog) 6 ( <i>S. cerevisiae</i> ) (Sirt6) alternative variant cSep08, mRNA.          |
| Sirt6   | Sirt6.dSep08   | 299638 | 852   | 711  | 2 | 55  | sirtuin 6 (silent mating type information regulation 2, homolog) 6 ( <i>S. cerevisiae</i> ) (Sirt6) alternative variant dSep08, mRNA.          |
| Sirt7   | Sirt7.bSep08   | 303745 | 6118  | 1228 | 9 | 180 | sirtuin 7 CRA c (Sirt7) alternative variant bSep08, mRNA.                                                                                      |
| Sirt7   | Sirt7.cSep08   | 303745 | 5106  | 1309 | 8 | 174 | sirtuin 7 CRA c (19.0 kD) (Sirt7) alternative variant cSep08, mRNA.                                                                            |
| Sirt7   | Sirt7.dSep08   | 303745 | 2404  | 1125 | 3 | 110 | sirtuin 7 (Sirt7) alternative variant dSep08, mRNA.                                                                                            |
| Sirt7   | Sirt7.eSep08   | 303745 | 551   | 371  | 2 | 97  | sirtuin 7 (Sirt7) alternative variant eSep08, mRNA.                                                                                            |
| SIS.0   | SIS.0.aSep08   |        | 9610  | 4522 | 5 | 193 | transaminase 1 (SIS.0) alternative variant aSep08, mRNA.                                                                                       |
| Siva1   | Siva1.aSep08   | 362791 | 4379  | 717  | 2 | 177 | SIVA1, apoptosis-inducing factor (18.9 kD) (Siva1) alternative variant aSep08, mRNA.                                                           |
| Six1    | Six1.aSep08    | 114634 | 3212  | 1163 | 2 | 224 | sine oculis-related homeobox 1 homolog ( <i>Drosophila</i> ) (Six1) alternative variant aSep08, mRNA.                                          |
| Six6os1 | Six6os1.aSep08 | 500673 | 8730  | 375  |   | 44  | six6 opposite strand transcript 1 (5.3 kD) (Six6os1) mRNA.                                                                                     |
| skabor  | skabor.aSep08  |        | 1183  | 298  |   | 93  | putative protein (skabor) mRNA.                                                                                                                |
| skachy  | skachy.aSep08  |        | 1038  | 365  |   | 98  | CRA a like (skachy) mRNA.                                                                                                                      |

|          |                 |        |       |      |   |     |                                                                                            |
|----------|-----------------|--------|-------|------|---|-----|--------------------------------------------------------------------------------------------|
| skadoy   | skadoy.bSep08   |        | 16819 | 698  | 5 | 83  | putative protein (skadoy) alternative variant bSep08, mRNA.                                |
| skafee   | skafee.aSep08   |        | 2508  | 499  |   | 49  | putative protein (skafee) mRNA.                                                            |
| skafly   | skafly.aSep08   |        | 2489  | 590  |   | 78  | putative mitochondrial protein (8.8 kD) (skafly) mRNA.                                     |
| skafly   | skafly.aSep08   |        | 2004  | 427  |   | 89  | putative protein (skafly) mRNA.                                                            |
| skaja    | skaja.aSep08    |        | 1425  | 384  |   | 65  | putative protein (skaja) mRNA.                                                             |
| skajey   | skajey.aSep08   |        | 17901 | 1730 | 6 | 177 | CRA b (skajey) alternative variant aSep08, mRNA.                                           |
| skalo    | skalo.aSep08    |        | 6450  | 400  |   | 133 | acetyl-Coenzyme a carboxylase (skalo) mRNA.                                                |
| skamee   | skamee.aSep08   |        | 3366  | 897  |   | 63  | putative protein (skamee) mRNA.                                                            |
| Skap1    | Skap1.bSep08    | 286975 | 27041 | 198  | 1 | 65  | src family associated phosphoprotein 1 (Skap1) alternative variant bSep08, mRNA.           |
| Skap2    | Skap2.bSep08    | 155183 | 48434 | 819  | 5 | 118 | src family associated phosphoprotein 2 (Skap2) alternative variant bSep08, mRNA.           |
| Skap2    | Skap2.cSep08    | 155183 | 40579 | 645  | 5 | 98  | src family associated phosphoprotein 2 (11.0 kD) (Skap2) alternative variant cSep08, mRNA. |
| Skap2    | Skap2.eSep08    | 155183 | 923   | 468  | 2 | 40  | src family associated phosphoprotein 2 (4.5 kD) (Skap2) alternative variant eSep08, mRNA.  |
| skapey   | skapey.aSep08   |        | 2806  | 1132 |   | 86  | putative protein (9.5 kD) (skapey) mRNA.                                                   |
| skapor   | skapor.aSep08   |        | 8119  | 747  |   | 29  | putative protein (skapor) mRNA.                                                            |
| skarbor  | skarbor.aSep08  |        | 25165 | 1202 |   | 384 | putative protein, with 3 coiled coil domains, of bilateral origin (skarbor) mRNA.          |
| skarchy  | skarchy.aSep08  |        | 5248  | 469  |   | 69  | small adipocyte factor 1 like (skarchy) mRNA.                                              |
| skardoy  | skardoy.bSep08  |        | 2368  | 741  |   | 54  | putative protein (6.3 kD) (skardoy) alternative variant bSep08, mRNA.                      |
| skarfee  | skarfee.aSep08  |        | 1905  | 943  |   | 115 | putative protein (12.6 kD) (skarfee) mRNA.                                                 |
| skarflu  | skarflu.aSep08  |        | 8694  | 1103 |   | 139 | envelope protein (skarflu) mRNA.                                                           |
| skarfly  | skarfly.aSep08  |        | 32897 | 483  |   | 39  | putative protein (4.5 kD) (skarfly) mRNA.                                                  |
| skarja   | skarja.aSep08   |        | 53744 | 379  |   | 64  | putative protein (6.8 kD) (skarja) mRNA.                                                   |
| skarjey  | skarjey.aSep08  |        | 44116 | 489  |   | 64  | CRA a like (skarjey) mRNA.                                                                 |
| skarlo   | skarlo.aSep08   |        | 1240  | 449  |   | 47  | putative protein (5.5 kD) (skarlo) mRNA.                                                   |
| skarmee  | skarmee.aSep08  |        | 1640  | 687  |   | 186 | putative protein of mammalian origin (skarmee) alternative variant aSep08, mRNA.           |
| skaroy   | skaroy.aSep08   |        | 17196 | 697  |   | 33  | putative protein (skaroy) mRNA.                                                            |
| skarpey  | skarpey.aSep08  |        | 2287  | 183  |   | 61  | repeat-containing protein (skarpey) mRNA.                                                  |
| skarpor  | skarpor.aSep08  |        | 4177  | 403  |   | 34  | putative protein (skarpor) mRNA.                                                           |
| skarroy  | skarroy.aSep08  |        | 3786  | 438  | 1 | 42  | putative protein (skarroy) alternative variant aSep08, mRNA.                               |
| skarroy  | skarroy.bSep08  |        | 24189 | 381  | 2 | 47  | putative protein (skarroy) alternative variant bSep08, mRNA.                               |
| skarshaw | skarshaw.aSep08 |        | 3381  | 623  |   | 74  | putative mitochondrial protein (7.8 kD) (skarshaw) mRNA.                                   |
| skarshee | skarshee.aSep08 |        | 4422  | 605  |   | 107 | putative protein of mammalian origin (skarshee) mRNA.                                      |
| skartu   | skartu.aSep08   |        | 1437  | 570  |   | 80  | gene model 1568 like (skartu) mRNA.                                                        |
| skarvo   | skarvo.aSep08   |        | 4291  | 692  |   | 10  | putative protein (1.1 kD) (skarvo) mRNA.                                                   |

|          |                 |  |        |      |   |     |                                                                                     |
|----------|-----------------|--|--------|------|---|-----|-------------------------------------------------------------------------------------|
| skarwer  | skarwer.aSep08  |  | 832    | 710  |   | 40  | putative protein (4.5 kD) (skarwer) mRNA.                                           |
| skashaw  | skashaw.aSep08  |  | 7258   | 1516 | 3 | 123 | putative protein of metazoan origin (skashaw) alternative variant aSep08, mRNA.     |
| skashee  | skashee.aSep08  |  | 9763   | 255  |   | 20  | putative protein (skashee) mRNA.                                                    |
| skatu    | skatu.aSep08    |  | 4049   | 481  |   | 41  | putative protein (4.6 kD) (skatu) mRNA.                                             |
| skavo    | skavo.aSep08    |  | 11393  | 371  |   | 86  | putative protein (skavo) mRNA.                                                      |
| skawbor  | skawbor.aSep08  |  | 15971  | 545  |   | 128 | putative protein of metazoan origin (skawbor) mRNA.                                 |
| skawchy  | skawchy.aSep08  |  | 3141   | 326  |   | 58  | putative protein (skawchy) mRNA.                                                    |
| skawdoy  | skawdoy.aSep08  |  | 131119 | 377  |   | 39  | putative protein (4.3 kD) (skawdoy) mRNA.                                           |
| skawer   | skawer.aSep08   |  | 4274   | 374  |   | 20  | putative protein (2.3 kD) (skawer) mRNA.                                            |
| skawfee  | skawfee.bSep08  |  | 7807   | 784  | 5 | 53  | putative protein (5.7 kD) (skawfee) alternative variant bSep08, mRNA.               |
| skawflu  | skawflu.bSep08  |  | 18049  | 375  | 3 | 37  | putative protein (4.1 kD) (skawflu) alternative variant bSep08, mRNA.               |
| skawfly  | skawfly.aSep08  |  | 6678   | 330  |   | 33  | putative protein (skawfly) mRNA.                                                    |
| skawja   | skawja.aSep08   |  | 10417  | 1572 | 2 | 182 | slain 1 (skawja) alternative variant aSep08, mRNA.                                  |
| skawja   | skawja.bSep08   |  | 31695  | 537  | 1 | 52  | slain motif family member 1 (skawja) alternative variant bSep08, mRNA.              |
| skawjey  | skawjey.aSep08  |  | 3307   | 357  |   | 65  | polyprotein (skawjey) mRNA.                                                         |
| skawlo   | skawlo.aSep08   |  | 6683   | 252  |   | 83  | phosphatidylinositol transfer protein beta (skawlo) mRNA.                           |
| skawmee  | skawmee.aSep08  |  | 25771  | 508  |   | 88  | neurofibromatosis 1 (skawmee) mRNA.                                                 |
| skawpey  | skawpey.aSep08  |  | 10619  | 790  | 4 | 106 | repeat-containing protein (skawpey) alternative variant aSep08, mRNA.               |
| skawpey  | skawpey.bSep08  |  | 5234   | 855  | 2 | 56  | repeat-containing protein like (6.4 kD) (skawpey) alternative variant bSep08, mRNA. |
| skawpor  | skawpor.aSep08  |  | 3584   | 457  | 2 | 73  | putative protein (skawpor) alternative variant aSep08, mRNA.                        |
| skawroy  | skawroy.aSep08  |  | 1717   | 398  |   | 132 | utp20 processome component homolog CRA a (skawroy) mRNA.                            |
| skawshaw | skawshaw.aSep08 |  | 3781   | 237  |   | 76  | putative protein (skawshaw) mRNA.                                                   |
| skawshee | skawshee.aSep08 |  | 6896   | 485  |   | 22  | putative protein (2.4 kD) (skawshee) mRNA.                                          |
| skawtu   | skawtu.aSep08   |  | 38759  | 643  | 1 | 62  | CRA b like (6.7 kD) (skawtu) alternative variant aSep08, mRNA.                      |
| skawtu   | skawtu.bSep08   |  | 38229  | 528  | 2 | 108 | putative protein (skawtu) alternative variant bSep08, mRNA.                         |
| skawtu   | skawtu.cSep08   |  | 38181  | 356  | 1 | 87  | putative protein (skawtu) alternative variant cSep08, mRNA.                         |
| skawvo   | skawvo.aSep08   |  | 50878  | 575  |   | 191 | ionotropic glutamate receptor (skawvo) mRNA.                                        |
| skawwer  | skawwer.aSep08  |  | 12929  | 800  |   | 145 | CAMP protein like (skawwer) mRNA.                                                   |
| skeebor  | skeebor.aSep08  |  | 3226   | 199  |   | 63  | gag protein like (skeebor) mRNA.                                                    |
| skeechy  | skeechy.aSep08  |  | 1231   | 357  |   | 72  | putative protein (skeechy) mRNA.                                                    |
| skeedoy  | skeedoy.aSep08  |  | 2832   | 400  |   | 71  | putative mitochondrial protein (7.8 kD) (skeedoy) mRNA.                             |
| skeefee  | skeefee.aSep08  |  | 733    | 498  |   | 27  | putative protein (3.1 kD) (skeefee) mRNA.                                           |

|          |                 |  |        |      |   |     |                                                                       |
|----------|-----------------|--|--------|------|---|-----|-----------------------------------------------------------------------|
| skeeflu  | skeeflu.bSep08  |  | 3970   | 426  | 2 | 59  | putative protein (6.7 kD) (skeeflu) alternative variant bSep08, mRNA. |
| skeefly  | skeefly.bSep08  |  | 1425   | 626  | 2 | 44  | putative protein (skeefly) alternative variant bSep08, mRNA.          |
| skeeja   | skeeja.aSep08   |  | 7067   | 1573 |   | 53  | putative protein (5.8 kD) (skeeja) mRNA.                              |
| skeejey  | skeejey.aSep08  |  | 104118 | 397  |   | 34  | putative protein (4.0 kD) (skeejey) mRNA.                             |
| skeelo   | skeelo.aSep08   |  | 8009   | 392  |   | 130 | tetratricopeptide repeat 28 (skeelo) mRNA.                            |
| skeemee  | skeemee.aSep08  |  | 3590   | 347  |   | 115 | neurofibromatosis 1 (skeemee) mRNA.                                   |
| skeepey  | skeepey.aSep08  |  | 17877  | 570  | 4 | 56  | putative protein (6.5 kD) (skeepey) alternative variant aSep08, mRNA. |
| skeepey  | skeepey.bSep08  |  | 9900   | 1294 | 3 | 40  | putative protein (4.6 kD) (skeepey) alternative variant bSep08, mRNA. |
| skeepey  | skeepey.cSep08  |  | 7453   | 1179 | 2 | 40  | putative protein (4.6 kD) (skeepey) alternative variant cSep08, mRNA. |
| skeepey  | skeepey.eSep08  |  | 19875  | 732  | 5 | 56  | putative protein (6.5 kD) (skeepey) alternative variant eSep08, mRNA. |
| skeepor  | skeepor.aSep08  |  | 2313   | 573  |   | 60  | putative protein (skeepor) mRNA.                                      |
| skeeroy  | skeeroy.aSep08  |  | 7803   | 1055 |   | 63  | putative protein (6.9 kD) (skeeroy) mRNA.                             |
| skeeshaw | skeeshaw.aSep08 |  | 1860   | 536  |   | 33  | putative protein (3.3 kD) (skeeshaw) mRNA.                            |
| skeeshee | skeeshee.aSep08 |  | 2820   | 726  | 2 | 57  | putative protein (skeeshee) alternative variant aSep08, mRNA.         |
| skeeshee | skeeshee.bSep08 |  | 5657   | 386  | 2 | 50  | putative protein (skeeshee) alternative variant bSep08, mRNA.         |
| skeetu   | skeetu.aSep08   |  | 5732   | 487  |   | 64  | putative protein (7.3 kD) (skeetu) mRNA.                              |
| skeevo   | skeevo.aSep08   |  | 5544   | 275  |   | 91  | putative protein of mammalian origin (skeevo) mRNA.                   |
| skeewer  | skeewer.bSep08  |  | 18465  | 379  | 3 | 40  | putative protein (skeewer) alternative variant bSep08, mRNA.          |
| skerbor  | skerbor.aSep08  |  | 4155   | 686  |   | 85  | putative protein of vertebrate origin (skerbor) mRNA.                 |
| skerchy  | skerchy.aSep08  |  | 2479   | 536  |   | 65  | putative protein (skerchy) mRNA.                                      |
| skerdoy  | skerdoy.aSep08  |  | 45513  | 712  |   | 137 | putative mitochondrial protein (15.4 kD) (skerdoy) mRNA.              |
| skerfee  | skerfee.aSep08  |  | 3042   | 440  |   | 38  | putative protein (skerfee) mRNA.                                      |
| skerflu  | skerflu.aSep08  |  | 804    | 538  |   | 97  | putative protein (skerflu) mRNA.                                      |
| skerfly  | skerfly.aSep08  |  | 38218  | 921  |   | 47  | putative protein (skerfly) mRNA.                                      |
| skerja   | skerja.aSep08   |  | 278648 | 737  |   | 100 | putative cytoplasmic protein (11.6 kD) (skerja) mRNA.                 |
| skerjey  | skerjey.aSep08  |  | 29978  | 594  | 4 | 43  | putative protein (4.9 kD) (skerjey) alternative variant aSep08, mRNA. |
| skerjey  | skerjey.cSep08  |  | 6910   | 490  | 4 | 40  | putative protein (4.6 kD) (skerjey) alternative variant cSep08, mRNA. |
| skerlo   | skerlo.aSep08   |  | 8079   | 280  |   | 75  | putative protein (skerlo) mRNA.                                       |
| skermee  | skermee.aSep08  |  | 5878   | 481  |   | 52  | neurofibromatosis 1 (skermee) mRNA.                                   |
| skerpey  | skerpey.aSep08  |  | 4285   | 348  |   | 116 | putative protein (skerpey) mRNA.                                      |
| skerpor  | skerpor.bSep08  |  | 1731   | 588  | 2 | 30  | putative protein (3.3 kD) (skerpor) alternative variant bSep08, mRNA. |

|          |                 |        |        |      |   |     |                                                                                                             |
|----------|-----------------|--------|--------|------|---|-----|-------------------------------------------------------------------------------------------------------------|
| skerroy  | skerroy.cSep08  |        | 7410   | 381  | 3 | 49  | putative protein (5.6 kD) (skerroy) alternative variant cSep08, mRNA.                                       |
| skershaw | skershaw.aSep08 |        | 1307   | 341  |   | 34  | putative protein (3.9 kD) (skershaw) mRNA.                                                                  |
| skershee | skershee.aSep08 |        | 1270   | 307  |   | 43  | putative protein (skershee) mRNA.                                                                           |
| skertu   | skertu.aSep08   |        | 113791 | 580  | 4 | 127 | COX16 cytochrome c oxidase assembly homolog (14.6 kD) (skertu) alternative variant aSep08, mRNA.            |
| skertu   | skertu.bSep08   |        | 14716  | 2471 | 4 | 106 | COX16 cytochrome c oxidase assembly homolog (12.3 kD) (skertu) alternative variant bSep08, mRNA.            |
| skervo   | skervo.aSep08   |        | 382    | 295  |   | 47  | nipsnap homolog 3A (skervo) mRNA.                                                                           |
| skerwer  | skerwer.aSep08  |        | 60490  | 497  |   | 42  | putative protein (4.7 kD) (skerwer) mRNA.                                                                   |
| skeybor  | skeybor.aSep08  |        | 11415  | 517  |   | 75  | putative protein of vertebrate origin (skeybor) mRNA.                                                       |
| skeychy  | skeychy.aSep08  |        | 3146   | 593  |   | 58  | putative protein (6.9 kD) (skeychy) mRNA.                                                                   |
| skeydoy  | skeydoy.aSep08  |        | 2466   | 242  |   | 60  | putative protein (skeydoy) mRNA.                                                                            |
| skeyfee  | skeyfee.aSep08  |        | 16546  | 599  |   | 48  | kelch-like 3 (skeyfee) mRNA.                                                                                |
| skeyflu  | skeyflu.aSep08  |        | 2738   | 416  |   | 138 | dedicator of cytokinesis 1 (skeyflu) mRNA.                                                                  |
| skeyfly  | skeyfly.aSep08  |        | 36240  | 799  |   | 49  | putative protein (skeyfly) mRNA.                                                                            |
| skeyja   | skeyja.aSep08   |        | 71290  | 434  | 1 | 112 | putative protein (12.5 kD) (skeyja) alternative variant aSep08, mRNA.                                       |
| skeyja   | skeyja.bSep08   |        | 72542  | 1031 | 2 | 83  | putative protein (9.3 kD) (skeyja) alternative variant bSep08, mRNA.                                        |
| skeyjey  | skeyjey.aSep08  |        | 18944  | 1388 |   | 462 | girdin (skeyjey) mRNA.                                                                                      |
| skeylo   | skeylo.aSep08   |        | 2326   | 775  |   | 247 | nucleolar complex associated 4 homolog (skeylo) mRNA.                                                       |
| skeymee  | skeymee.aSep08  |        | 669    | 472  |   | 42  | putative protein (4.3 kD) (skeymee) mRNA.                                                                   |
| skeypey  | skeypey.aSep08  |        | 7047   | 752  |   | 59  | putative protein (6.5 kD) (skeypey) mRNA.                                                                   |
| skeypor  | skeypor.aSep08  |        | 634    | 505  |   | 63  | putative protein (skeypor) mRNA.                                                                            |
| skeyroy  | skeyroy.aSep08  |        | 11435  | 430  |   | 71  | putative protein (skeyroy) mRNA.                                                                            |
| skeyshaw | skeyshaw.aSep08 |        | 16991  | 400  |   | 75  | putative protein (skeyshaw) mRNA.                                                                           |
| skeyshee | skeyshee.aSep08 |        | 3109   | 760  |   | 55  | putative protein (skeyshee) mRNA.                                                                           |
| skeytu   | skeytu.aSep08   |        | 27172  | 767  |   | 43  | putative protein (5.1 kD) (skeytu) mRNA.                                                                    |
| skeyvo   | skeyvo.aSep08   |        | 17722  | 785  |   | 57  | putative protein (6.4 kD) (skeyvo) mRNA.                                                                    |
| skeywer  | skeywer.aSep08  |        | 23249  | 843  |   | 35  | putative protein (4.0 kD) (skeywer) mRNA.                                                                   |
| Skil     | Skil.aSep08     | 114208 | 19445  | 768  | 4 | 256 | SKI-like (Skil) alternative variant aSep08, mRNA.                                                           |
| Skil     | Skil.bSep08     | 114208 | 22310  | 518  | 5 | 115 | SKI-like (Skil) alternative variant bSep08, mRNA.                                                           |
| Skil     | Skil.cSep08     | 114208 | 1936   | 383  | 2 | 33  | SKI-like (Skil) alternative variant cSep08, mRNA.                                                           |
| Skip     | Skip.bSep08     | 287533 | 5613   | 749  | 5 | 184 | skeletal muscle and kidney enriched inositol phosphatase (Skip) alternative variant bSep08, mRNA.           |
| Skip     | Skip.cSep08     | 287533 | 6418   | 542  | 5 | 149 | skeletal muscle and kidney enriched inositol phosphatase (16.7 kD) (Skip) alternative variant cSep08, mRNA. |
| Skip     | Skip.dSep08     | 287533 | 2539   | 630  | 2 | 71  | skeletal muscle and kidney enriched inositol phosphatase (Skip) alternative variant dSep08, mRNA.           |
| Skip     | Skip.eSep08     | 287533 | 2470   | 1929 | 4 | 97  | skeletal muscle and kidney enriched inositol phosphatase (10.4 kD) (Skip) alternative variant eSep08, mRNA. |

|         |                |        |        |      |    |     |                                                                                                              |
|---------|----------------|--------|--------|------|----|-----|--------------------------------------------------------------------------------------------------------------|
| Skiv2l  | Skiv2l.bSep08  | 294260 | 769    | 418  | 3  | 139 | superkiller viralicidic activity 2-like (Skiv2l) alternative variant bSep08, mRNA.                           |
| Skiv2l2 | Skiv2l2.aSep08 | 365668 | 23285  | 1423 | 13 | 473 | superkiller viralicidic activity 2-like 2 (S. cerevisiae) (Skiv2l2) alternative variant aSep08, mRNA.        |
| Skiv2l2 | Skiv2l2.bSep08 | 365668 | 7380   | 856  | 4  | 285 | superkiller viralicidic activity 2-like 2 (S. cerevisiae) (Skiv2l2) alternative variant bSep08, mRNA.        |
| Skiv2l2 | Skiv2l2.cSep08 | 365668 | 16917  | 1023 | 5  | 257 | superkiller viralicidic activity 2-like 2 (S. cerevisiae) (Skiv2l2) alternative variant cSep08, mRNA.        |
| skobor  | skobor.aSep08  |        | 103686 | 2737 | 13 | 703 | CRA a (80.9 kD) (skobor) alternative variant aSep08, complete mRNA.                                          |
| skobor  | skobor.bSep08  |        | 58255  | 697  | 5  | 231 | putative protein, with a coiled coil domain, of vertebrate origin (skobor) alternative variant bSep08, mRNA. |
| skochoy | skochoy.aSep08 |        | 3704   | 354  |    | 117 | protein CRA b (skochoy) mRNA.                                                                                |
| skodoy  | skodoy.aSep08  |        | 5906   | 1057 |    | 254 | CRA a (skodoy) mRNA.                                                                                         |
| skofee  | skofee.aSep08  |        | 8245   | 445  |    | 34  | putative protein (3.9 kD) (skofee) mRNA.                                                                     |
| skoflu  | skoflu.aSep08  |        | 3360   | 528  | 2  | 43  | putative protein (4.9 kD) (skoflu) alternative variant aSep08, mRNA.                                         |
| skofly  | skofly.aSep08  |        | 2078   | 398  |    | 48  | putative protein (skofly) mRNA.                                                                              |
| skoja   | skoja.aSep08   |        | 937    | 324  |    | 55  | CRA b like (skoja) mRNA.                                                                                     |
| skojey  | skojey.aSep08  |        | 35340  | 323  |    | 57  | putative protein (skojey) mRNA.                                                                              |
| skolo   | skolo.aSep08   |        | 1279   | 723  |    | 33  | CRA a like (3.6 kD) (skolo) mRNA.                                                                            |
| skomee  | skomee.aSep08  |        | 10733  | 414  |    | 137 | neurofibromin (skomee) mRNA.                                                                                 |
| skokey  | skokey.aSep08  |        | 1446   | 708  |    | 58  | putative protein (6.6 kD) (skokey) mRNA.                                                                     |
| skopor  | skopor.aSep08  |        | 75738  | 397  |    | 97  | kinase 4 (skopor) mRNA.                                                                                      |
| skorbor | skorbor.aSep08 |        | 1344   | 710  |    | 39  | putative protein (skorbor) mRNA.                                                                             |
| skorchy | skorchy.aSep08 |        | 69154  | 702  | 2  | 53  | putative protein (skorchy) alternative variant aSep08, mRNA.                                                 |
| skorchy | skorchy.bSep08 |        | 33526  | 616  | 1  | 55  | putative protein (skorchy) alternative variant bSep08, mRNA.                                                 |
| skorchy | skorchy.cSep08 |        | 68976  | 468  | 1  | 61  | putative protein (skorchy) alternative variant cSep08, mRNA.                                                 |
| skordoy | skordoy.aSep08 |        | 2966   | 231  |    | 22  | putative protein (2.5 kD) (skordoy) mRNA.                                                                    |
| skorfee | skorfee.aSep08 |        | 904    | 278  |    | 92  | putative protein (skorfee) mRNA.                                                                             |
| skorflu | skorflu.aSep08 |        | 22999  | 910  |    | 303 | dedicator of cytokinesis 1 (skorflu) mRNA.                                                                   |
| skorfly | skorfly.aSep08 |        | 4320   | 462  | 1  | 70  | CRA b like (skorfly) alternative variant aSep08, mRNA.                                                       |
| skorfly | skorfly.bSep08 |        | 12255  | 381  | 2  | 71  | putative protein (skorfly) alternative variant bSep08, mRNA.                                                 |
| skorja  | skorja.aSep08  |        | 1121   | 439  |    | 80  | transcription factor 1 (skorja) mRNA.                                                                        |
| skorjey | skorjey.aSep08 |        | 113197 | 510  |    | 87  | putative protein (skorjey) mRNA.                                                                             |
| skorlo  | skorlo.aSep08  |        | 2471   | 468  |    | 61  | putative protein (7.2 kD) (skorlo) mRNA.                                                                     |
| skormee | skormee.aSep08 |        | 17929  | 835  |    | 54  | hepatocellular carcinoma-associated antigen 66 like (skormee) mRNA.                                          |
| skoroy  | skoroy.aSep08  |        | 36066  | 644  | 4  | 185 | myosin binding protein C slow type like (skoroy) alternative variant aSep08, mRNA.                           |

|          |                 |  |        |      |   |     |                                                                                    |
|----------|-----------------|--|--------|------|---|-----|------------------------------------------------------------------------------------|
| skoroy   | skoroy.bSep08   |  | 36069  | 569  | 2 | 160 | myosin binding protein C slow type like (skoroy) alternative variant bSep08, mRNA. |
| skoroy   | skoroy.cSep08   |  | 35143  | 376  | 1 | 102 | myosin binding protein C slow type like (skoroy) alternative variant cSep08, mRNA. |
| skorpey  | skorpey.aSep08  |  | 2654   | 371  |   | 66  | putative protein (skorpey) mRNA.                                                   |
| skorpor  | skorpor.aSep08  |  | 103575 | 672  |   | 27  | putative protein (3.1 kD) (skorpor) mRNA.                                          |
| skorroy  | skorroy.aSep08  |  | 1403   | 275  |   | 85  | putative protein (skorroy) mRNA.                                                   |
| skorshaw | skorshaw.aSep08 |  | 12390  | 404  |   | 32  | putative protein (skorshaw) mRNA.                                                  |
| skorshee | skorshee.aSep08 |  | 16317  | 698  |   | 82  | putative nuclear protein (9.8 kD) (skorshee) mRNA.                                 |
| skortu   | skortu.aSep08   |  | 6808   | 581  |   | 118 | putative protein (skortu) mRNA.                                                    |
| skorvo   | skorvo.aSep08   |  | 59789  | 673  |   | 38  | putative protein (4.5 kD) (skorvo) mRNA.                                           |
| skorwer  | skorwer.aSep08  |  | 1992   | 749  | 1 | 39  | putative protein (4.7 kD) (skorwer) alternative variant aSep08, mRNA.              |
| skorwer  | skorwer.bSep08  |  | 3412   | 714  | 3 | 58  | putative protein (6.6 kD) (skorwer) alternative variant bSep08, mRNA.              |
| skoshaw  | skoshaw.aSep08  |  | 2739   | 557  |   | 57  | metaxin 3 (skoshaw) mRNA.                                                          |
| skoshee  | skoshee.aSep08  |  | 6779   | 583  |   | 82  | putative protein of vertebrate origin (skoshee) mRNA.                              |
| skotu    | skotu.bSep08    |  | 2004   | 692  | 3 | 153 | putative protein (skotu) alternative variant bSep08, mRNA.                         |
| skovo    | skovo.aSep08    |  | 7900   | 1001 |   | 186 | glutamate receptor ionotropic NMDA3A (skovo) mRNA.                                 |
| skower   | skower.aSep08   |  | 133690 | 577  | 5 | 84  | CRA a like (9.7 kD) (skower) alternative variant aSep08, mRNA.                     |
| skower   | skower.bSep08   |  | 1457   | 230  | 1 | 43  | CRA d like (skower) alternative variant bSep08, mRNA.                              |
| skoybor  | skoybor.aSep08  |  | 9733   | 850  |   | 283 | RAN binding protein 2 like (skoybor) mRNA.                                         |
| skoychy  | skoychy.aSep08  |  | 2938   | 788  |   | 33  | putative protein (3.8 kD) (skoychy) mRNA.                                          |
| skoydoy  | skoydoy.aSep08  |  | 2756   | 318  |   | 66  | putative protein (7.3 kD) (skoydoy) mRNA.                                          |
| skoyfee  | skoyfee.aSep08  |  | 16168  | 557  |   | 158 | transforming growth factor beta-induced 68kDa like (skoyfee) mRNA.                 |
| skoyflu  | skoyflu.aSep08  |  | 37030  | 667  |   | 222 | CRA f (skoyflu) mRNA.                                                              |
| skoyfly  | skoyfly.aSep08  |  | 2581   | 427  |   | 22  | putative protein (2.5 kD) (skoyfly) mRNA.                                          |
| skoyja   | skoyja.aSep08   |  | 3281   | 739  |   | 97  | putative protein (skoyja) mRNA.                                                    |
| skoyjey  | skoyjey.aSep08  |  | 3936   | 352  |   | 84  | putative protein (9.5 kD) (skoyjey) mRNA.                                          |
| skoylo   | skoylo.aSep08   |  | 15549  | 461  | 3 | 153 | CRA a like (skoylo) alternative variant aSep08, mRNA.                              |
| skoymee  | skoymee.aSep08  |  | 2888   | 751  |   | 227 | putative protein of eukaryotic origin (skoymee) mRNA.                              |
| skoypey  | skoypey.aSep08  |  | 5913   | 288  |   | 22  | putative protein (2.3 kD) (skoypey) mRNA.                                          |
| skoypor  | skoypor.aSep08  |  | 7086   | 649  |   | 63  | putative protein (7.3 kD) (skoypor) mRNA.                                          |
| skoyroy  | skoyroy.aSep08  |  | 17098  | 432  |   | 73  | putative protein (skoyroy) mRNA.                                                   |
| skoyshaw | skoyshaw.aSep08 |  | 24984  | 407  |   | 135 | IQ motif containing GTPase activating protein 2 (skoyshaw) mRNA.                   |
| skoyshee | skoyshee.aSep08 |  | 879    | 755  |   | 101 | putative protein (11.3 kD) (skoyshee) mRNA.                                        |
| skoytu   | skoytu.aSep08   |  | 28757  | 400  |   | 132 | pecanex homolog CRA d (skoytu) mRNA.                                               |
| skoyvo   | skoyvo.aSep08   |  | 4206   | 505  |   | 38  | putative protein (skoyvo) mRNA.                                                    |
| skoywer  | skoywer.aSep08  |  | 12396  | 746  | 4 | 144 | carboxypeptidase 3 cytosolic (16.6 kD) (skoywer) alternative variant aSep08, mRNA. |

|         |                |        |       |      |   |     |                                                                                          |
|---------|----------------|--------|-------|------|---|-----|------------------------------------------------------------------------------------------|
| skoywer | skoywer.bSep08 |        | 2085  | 1277 | 2 | 88  | carboxypeptidase 3 cytosolic (10.3 kD) (skoywer) alternative variant bSep08, mRNA.       |
| Skp1a   | Skp1a.aSep08   | 287280 | 14400 | 775  | 7 | 163 | S-phase kinase-associated protein 1A (18.7 kD) (Skp1a) alternative variant aSep08, mRNA. |
| Skp1a   | Skp1a.cSep08   | 287280 | 13189 | 828  | 5 | 149 | S-phase kinase-associated protein 1A (Skp1a) alternative variant cSep08, mRNA.           |
| Skp1a   | Skp1a.dSep08   | 287280 | 11049 | 262  | 3 | 65  | S-phase kinase-associated protein 1A (Skp1a) alternative variant dSep08, mRNA.           |
| Skp1a   | Skp1a.eSep08   | 287280 | 13126 | 780  | 5 | 63  | S-phase kinase-associated protein 1A (6.9 kD) (Skp1a) alternative variant eSep08, mRNA.  |
| Skp1a   | Skp1a.fSep08   | 287280 | 2686  | 736  | 3 | 37  | S-phase kinase-associated protein 1A (Skp1a) alternative variant fSep08, mRNA.           |
| skubor  | skubor.aSep08  |        | 35799 | 316  |   | 103 | CUB (skubor) mRNA.                                                                       |
| skuchy  | skuchy.aSep08  |        | 12445 | 704  |   | 234 | putative protein of eukaryotic origin (skuchy) mRNA.                                     |
| skudoy  | skudoy.aSep08  |        | 5950  | 733  |   | 244 | CRA a (skudoy) mRNA.                                                                     |
| skufee  | skufee.aSep08  |        | 651   | 488  |   | 46  | putative protein (4.8 kD) (skufee) mRNA.                                                 |
| skuflu  | skuflu.aSep08  |        | 5269  | 350  |   | 81  | putative protein (skuflu) mRNA.                                                          |
| skufly  | skufly.aSep08  |        | 4010  | 657  |   | 81  | putative protein (8.8 kD) (skufly) mRNA.                                                 |
| skuja   | skuja.aSep08   |        | 17783 | 252  |   | 54  | putative protein (skuja) mRNA.                                                           |
| skujey  | skujey.aSep08  |        | 56215 | 400  |   | 90  | putative cytoplasmic protein (10.1 kD) (skujey) mRNA.                                    |
| skulo   | skulo.aSep08   |        | 5465  | 1059 |   | 143 | uncharacterized protein like (skulo) mRNA.                                               |
| skumee  | skumee.aSep08  |        | 5482  | 596  |   | 198 | neurofibromin (skumee) mRNA.                                                             |
| skupey  | skupey.aSep08  |        | 5740  | 1701 |   | 72  | putative protein (skupey) alternative variant aSep08, mRNA.                              |
| skupor  | skupor.aSep08  |        | 770   | 476  |   | 37  | putative protein (skupor) mRNA.                                                          |
| skuroy  | skuroy.bSep08  |        | 2104  | 587  | 2 | 37  | putative protein (skuroy) alternative variant bSep08, mRNA.                              |
| skushaw | skushaw.aSep08 |        | 683   | 348  |   | 54  | metaxin 1 (skushaw) mRNA.                                                                |
| skushee | skushee.aSep08 |        | 6157  | 720  |   | 70  | putative protein (8.0 kD) (skushee) mRNA.                                                |
| skutu   | skutu.aSep08   |        | 1549  | 777  |   | 170 | alpha-actinin like (skutu) alternative variant aSep08, mRNA.                             |
| skuvo   | skuvo.aSep08   |        | 2567  | 467  |   | 134 | procollagen type XV CRA a (skuvo) mRNA.                                                  |
| skuwer  | skuwer.aSep08  |        | 11044 | 540  |   | 125 | putative nuclear protein of mammalian origin (13.8 kD) (skuwer) mRNA.                    |
| skybor  | skybor.bSep08  |        | 1665  | 553  | 2 | 65  | putative protein (7.7 kD) (skybor) alternative variant bSep08, mRNA.                     |
| skychy  | skychy.aSep08  |        | 11484 | 355  |   | 37  | putative protein (skychy) mRNA.                                                          |
| skydoy  | skydoy.aSep08  |        | 11241 | 800  |   | 266 | CRA a (skydoy) mRNA.                                                                     |
| skyfee  | skyfee.aSep08  |        | 967   | 368  |   | 94  | putative protein (skyfee) mRNA.                                                          |
| skyflu  | skyflu.aSep08  |        | 2559  | 360  |   | 29  | putative protein (skyflu) mRNA.                                                          |
| skyfly  | skyfly.aSep08  |        | 2220  | 402  |   | 62  | putative protein (skyfly) mRNA.                                                          |
| skyja   | skyja.aSep08   |        | 3965  | 395  |   | 22  | putative protein (2.6 kD) (skyja) mRNA.                                                  |
| skyjey  | skyjey.aSep08  |        | 6864  | 356  |   | 11  | putative protein (1.2 kD) (skyjey) mRNA.                                                 |
| skylo   | skylo.aSep08   |        | 977   | 367  |   | 70  | putative protein (skylo) mRNA.                                                           |



|         |                |        |       |      |    |     |                                                                                                            |
|---------|----------------|--------|-------|------|----|-----|------------------------------------------------------------------------------------------------------------|
| skymee  | skymee.aSep08  |        | 1259  | 379  |    | 33  | nemo-like kinase (skymee) mRNA.                                                                            |
| skypey  | skypey.aSep08  |        | 4505  | 412  |    | 38  | putative protein (skypey) mRNA.                                                                            |
| skypor  | skypor.aSep08  |        | 3399  | 783  |    | 40  | putative protein (4.7 kD) (skypor) mRNA.                                                                   |
| skyroy  | skyroy.aSep08  |        | 33623 | 656  |    | 218 | transferase (skyroy) mRNA.                                                                                 |
| skyshaw | skyshaw.aSep08 |        | 17625 | 476  |    | 158 | thrombospondin 4 (skyshaw) mRNA.                                                                           |
| skyshee | skyshee.aSep08 |        | 7397  | 291  |    | 24  | putative protein (2.7 kD) (skyshee) mRNA.                                                                  |
| skytu   | skytu.aSep08   |        | 2339  | 726  |    | 38  | putative protein (skytu) mRNA.                                                                             |
| skyvo   | skyvo.aSep08   |        | 41898 | 570  |    | 63  | putative protein (7.4 kD) (skyvo) mRNA.                                                                    |
| skywer  | skywer.aSep08  |        | 3605  | 878  |    | 43  | putative protein (4.8 kD) (skywer) mRNA.                                                                   |
| Sla     | Sla.bSep08     | 338477 | 29042 | 781  | 7  | 162 | src-like adaptor (18.0 kD) (Sla) alternative variant bSep08, mRNA.                                         |
| slabor  | slabor.aSep08  |        | 612   | 367  |    | 121 | RAN binding protein 2 like (slabor) mRNA.                                                                  |
| slachy  | slachy.aSep08  |        | 36554 | 562  | 1  | 42  | putative protein (slachy) alternative variant aSep08, mRNA.                                                |
| slachy  | slachy.bSep08  |        | 46935 | 328  | 1  | 42  | putative protein (5.0 kD) (slachy) alternative variant bSep08, mRNA.                                       |
| sladoy  | sladoy.aSep08  |        | 1181  | 364  |    | 86  | putative protein (sladoy) mRNA.                                                                            |
| slafee  | slafee.aSep08  |        | 5122  | 523  |    | 97  | putative protein (slafee) mRNA.                                                                            |
| slaflu  | slaflu.aSep08  |        | 22039 | 336  | 4  | 111 | dedicator of cytokinesis 1 (slaflu) alternative variant aSep08, mRNA.                                      |
| slafly  | slafly.aSep08  |        | 9504  | 504  |    | 105 | putative nuclear protein (12.1 kD) (slafly) mRNA.                                                          |
| Slain2  | Slain2.bSep08  | 305310 | 77712 | 2466 | 10 | 469 | slain motif family member 2 (Slain2) alternative variant bSep08, mRNA.                                     |
| Slain2  | Slain2.cSep08  | 305310 | 1267  | 780  | 2  | 185 | slain motif family member 2 (Slain2) alternative variant cSep08, mRNA.                                     |
| Slain2  | Slain2.dSep08  | 305310 | 14611 | 707  | 4  | 184 | slain motif family member 2 (Slain2) alternative variant dSep08, mRNA.                                     |
| Slain2  | Slain2.eSep08  | 305310 | 7542  | 283  | 3  | 69  | putative protein (Slain2) alternative variant eSep08, mRNA.                                                |
| slaja   | slaja.aSep08   |        | 32386 | 1256 | 5  | 278 | RNA binding motif protein 26 like (slaja) alternative variant aSep08, mRNA.                                |
| slaja   | slaja.bSep08   |        | 376   | 254  | 1  | 84  | RNA binding motif protein 26 like (slaja) alternative variant bSep08, mRNA.                                |
| slajey  | slajey.aSep08  |        | 10353 | 195  |    | 43  | putative protein (slajey) mRNA.                                                                            |
| slalo   | slalo.aSep08   |        | 40077 | 870  |    | 290 | CRA a (slalo) mRNA.                                                                                        |
| slamee  | slamee.aSep08  |        | 1554  | 882  | 3  | 193 | putative protein, with a coiled coil domain, of metazoan origin (slamee) alternative variant aSep08, mRNA. |
| slamee  | slamee.bSep08  |        | 1303  | 768  | 4  | 183 | putative protein of eukaryotic origin (slamee) alternative variant bSep08, mRNA.                           |
| slamee  | slamee.cSep08  |        | 1369  | 837  | 4  | 141 | putative protein of eukaryotic origin (slamee) alternative variant cSep08, mRNA.                           |
| Slamf6  | Slamf6.aSep08  | 498287 | 5131  | 752  | 6  | 160 | SLAM family member 6 (Slamf6) alternative variant aSep08, mRNA.                                            |
| Slamf6  | Slamf6.bSep08  | 498287 | 3537  | 854  | 3  | 39  | SLAM family member 6 (4.6 kD) (Slamf6) alternative variant bSep08, mRNA.                                   |
| Slamf6  | Slamf6.cSep08  | 498287 | 1556  | 729  | 2  | 36  | SLAM family member 6 (4.2 kD) (Slamf6) alternative variant cSep08, mRNA.                                   |

|          |                 |        |       |      |   |     |                                                                                           |
|----------|-----------------|--------|-------|------|---|-----|-------------------------------------------------------------------------------------------|
| Slamf7   | Slamf7.aSep08   | 364049 | 3724  | 373  |   | 113 | SLAM family member 7 (Slamf7) mRNA.                                                       |
| slapey   | slapey.aSep08   |        | 4213  | 199  |   | 63  | putative protein (slapey) mRNA.                                                           |
| slapor   | slapor.aSep08   |        | 5268  | 530  | 3 | 150 | C-type lectin domain family 3 member b (slapor) alternative variant aSep08, mRNA.         |
| slarbor  | slarbor.aSep08  |        | 7471  | 209  |   | 69  | putative protein of metazoan origin (slarbor) mRNA.                                       |
| slarchy  | slarchy.aSep08  |        | 592   | 374  |   | 102 | putative cytoplasmic protein (11.2 kD) (slarchy) mRNA.                                    |
| slardoy  | slardoy.aSep08  |        | 16769 | 912  |   | 66  | putative protein (7.6 kD) (slardoy) mRNA.                                                 |
| slarfee  | slarfee.aSep08  |        | 648   | 496  |   | 44  | putative protein (4.9 kD) (slarfee) mRNA.                                                 |
| slarflu  | slarflu.aSep08  |        | 3493  | 654  |   | 95  | putative protein (slarflu) mRNA.                                                          |
| slarfly  | slarfly.aSep08  |        | 1880  | 325  |   | 37  | putative protein (4.2 kD) (slarfly) mRNA.                                                 |
| slarja   | slarja.aSep08   |        | 58027 | 441  | 3 | 26  | putative protein (slarja) alternative variant aSep08, mRNA.                               |
| slarja   | slarja.bSep08   |        | 37223 | 301  | 2 | 23  | putative protein (slarja) alternative variant bSep08, mRNA.                               |
| slarjey  | slarjey.aSep08  |        | 2127  | 1199 |   | 55  | CRA a like (6.8 kD) (slarjey) mRNA.                                                       |
| slarlo   | slarlo.aSep08   |        | 752   | 258  |   | 79  | putative protein (slarlo) mRNA.                                                           |
| slarmee  | slarmee.aSep08  |        | 29277 | 385  |   | 61  | RNA methyltransferase like 1 (slarmee) mRNA.                                              |
| slaroy   | slaroy.bSep08   |        | 4480  | 575  | 3 | 41  | putative protein (4.8 kD) (slaroy) alternative variant bSep08, mRNA.                      |
| slarpey  | slarpey.aSep08  |        | 760   | 227  |   | 75  | intercellular adhesion molecule 5 Telencephalin (slarpey) mRNA.                           |
| slarpor  | slarpor.aSep08  |        | 13564 | 769  |   | 197 | complex D3 (slarpor) mRNA.                                                                |
| slarroy  | slarroy.aSep08  |        | 1795  | 306  |   | 99  | uncharacterized protein (slarroy) mRNA.                                                   |
| slarshaw | slarshaw.aSep08 |        | 1561  | 398  |   | 25  | putative protein (3.0 kD) (slarshaw) mRNA.                                                |
| slarshee | slarshee.aSep08 |        | 41936 | 797  | 4 | 116 | tubulin tyrosine ligase-like family member 7 (slarshee) alternative variant aSep08, mRNA. |
| slarshee | slarshee.bSep08 |        | 41922 | 997  | 5 | 102 | tubulin tyrosine ligase-like family member 7 (slarshee) alternative variant bSep08, mRNA. |
| slarshee | slarshee.cSep08 |        | 38767 | 338  | 1 | 34  | tubulin tyrosine ligase-like family member 7 (slarshee) alternative variant cSep08, mRNA. |
| slartu   | slartu.aSep08   |        | 22280 | 604  |   | 46  | putative protein (5.0 kD) (slartu) mRNA.                                                  |
| slarvo   | slarvo.aSep08   |        | 2331  | 795  |   | 52  | putative protein (5.7 kD) (slarvo) mRNA.                                                  |
| slarwer  | slarwer.aSep08  |        | 13126 | 396  |   | 131 | putative protein of vertebrate origin (slarwer) mRNA.                                     |
| slashaw  | slashaw.aSep08  |        | 43222 | 885  |   | 294 | IQ motif containing GTPase activating protein 2 (slashaw) mRNA.                           |
| slashee  | slashee.aSep08  |        | 34794 | 367  |   | 117 | collagen chain like (slashee) mRNA.                                                       |
| slatu    | slatu.aSep08    |        | 15768 | 1062 | 8 | 353 | pecanex homolog (slatu) alternative variant aSep08, mRNA.                                 |
| slatu    | slatu.bSep08    |        | 2251  | 382  | 1 | 35  | putative protein (4.1 kD) (slatu) alternative variant bSep08, mRNA.                       |
| slavo    | slavo.aSep08    |        | 8212  | 740  |   | 122 | putative protein, with a transmembrane domain, of metazoan origin (slavo) mRNA.           |
| slawbor  | slawbor.aSep08  |        | 7706  | 334  |   | 40  | putative protein (slawbor) mRNA.                                                          |
| slawchy  | slawchy.aSep08  |        | 1695  | 288  |   | 90  | putative protein (slawchy) mRNA.                                                          |
| slawdoy  | slawdoy.aSep08  |        | 23429 | 345  |   | 80  | putative protein (slawdoy) mRNA.                                                          |

|          |                 |        |       |      |   |     |                                                                                                                                                              |
|----------|-----------------|--------|-------|------|---|-----|--------------------------------------------------------------------------------------------------------------------------------------------------------------|
| slawer   | slawer.aSep08   |        | 1072  | 419  |   | 139 | carboxypeptidase 3 cytosolic (slawer) mRNA.                                                                                                                  |
| slawfee  | slawfee.aSep08  |        | 21593 | 794  | 3 | 50  | putative protein (5.6 kD) (slawfee) alternative variant aSep08, mRNA.                                                                                        |
| slawflu  | slawflu.aSep08  |        | 44490 | 709  | 1 | 236 | putative protein (slawflu) alternative variant aSep08, mRNA.                                                                                                 |
| slawflu  | slawflu.bSep08  |        | 1779  | 694  |   | 168 | putative protein (slawflu) alternative variant bSep08, mRNA.                                                                                                 |
| slawfly  | slawfly.aSep08  |        | 4716  | 385  |   | 67  | putative protein (7.1 kD) (slawfly) mRNA.                                                                                                                    |
| slawja   | slawja.aSep08   |        | 25918 | 282  |   | 93  | putative protein (slawja) mRNA.                                                                                                                              |
| slawjey  | slawjey.aSep08  |        | 625   | 238  | 2 | 79  | putative protein (slawjey) alternative variant aSep08, mRNA.                                                                                                 |
| slawlo   | slawlo.aSep08   |        | 4036  | 746  |   | 61  | putative protein (6.5 kD) (slawlo) mRNA.                                                                                                                     |
| slawmee  | slawmee.aSep08  |        | 1902  | 1081 |   | 113 | putative protein of metazoan origin (slawmee) mRNA.                                                                                                          |
| slawpey  | slawpey.aSep08  |        | 851   | 363  |   | 59  | putative protein (slawpey) mRNA.                                                                                                                             |
| slawpor  | slawpor.aSep08  |        | 450   | 343  |   | 38  | putative protein (slawpor) mRNA.                                                                                                                             |
| slawroy  | slawroy.bSep08  |        | 34439 | 522  | 5 | 38  | CRA a like (4.2 kD) (slawroy) alternative variant bSep08, mRNA.                                                                                              |
| slawroy  | slawroy.cSep08  |        | 34431 | 456  | 5 | 33  | CRA b like (3.8 kD) (slawroy) alternative variant cSep08, mRNA.                                                                                              |
| slawshaw | slawshaw.aSep08 |        | 5093  | 556  |   | 56  | G elongation factor mitochondrial 2 (6.5 kD) (slawshaw) mRNA.                                                                                                |
| slawshee | slawshee.aSep08 |        | 9417  | 437  |   | 145 | tubulin polyglutamylase ttl17 (slawshee) mRNA.                                                                                                               |
| slawtu   | slawtu.aSep08   |        | 2884  | 199  |   | 63  | gag protein like (slawtu) mRNA.                                                                                                                              |
| slawvo   | slawvo.aSep08   |        | 37227 | 292  |   | 29  | putative protein (slawvo) mRNA.                                                                                                                              |
| slawwer  | slawwer.aSep08  |        | 56261 | 471  |   | 156 | putative protein of mammalian origin (slawwer) mRNA.                                                                                                         |
| Slbp     | Slbp.bSep08     | 681062 | 3206  | 1141 | 2 | 115 | stem-loop binding protein (Slbp) alternative variant bSep08, mRNA.                                                                                           |
| Slbp     | Slbp.cSep08     | 681062 | 1457  | 762  | 1 | 58  | stem-loop binding protein (6.5 kD) (Slbp) alternative variant cSep08, mRNA.                                                                                  |
| Slc1a1   | Slc1a1.bSep08   | 25550  | 8122  | 1622 | 4 | 205 | solute carrier family 1 (neuronal/epithelial high affinity glutamate transporter, system Xag), member 1 (21.7 kD) (Slc1a1) alternative variant bSep08, mRNA. |
| Slc1a2   | Slc1a2.cSep08   | 29482  | 32707 | 885  | 4 | 222 | solute carrier family 1 (glial high affinity glutamate transporter), member 2 (Slc1a2) alternative variant cSep08, mRNA.                                     |
| Slc1a2   | Slc1a2.eSep08   | 29482  | 1841  | 338  | 2 | 31  | solute carrier family 1 (glial high affinity glutamate transporter), member 2 (3.3 kD) (Slc1a2) alternative variant eSep08, mRNA.                            |
| Slc1a3   | Slc1a3.bSep08   | 29483  | 4407  | 423  | 1 | 124 | solute carrier family 1 (glial high affinity glutamate transporter), member 3 (Slc1a3) alternative variant bSep08, mRNA.                                     |
| Slc1a4   | Slc1a4.bSep08   | 305540 | 10479 | 2349 | 2 | 259 | solute carrier family 1 (glutamate/neutral amino acid transporter), member 4 (27.4 kD) (Slc1a4) alternative variant bSep08, mRNA.                            |

|          |                 |        |       |      |    |     |                                                                                                                                                |
|----------|-----------------|--------|-------|------|----|-----|------------------------------------------------------------------------------------------------------------------------------------------------|
| Slc1a6   | Slc1a6.bSep08   | 84012  | 5215  | 506  |    | 117 | solute carrier family 1 (high affinity aspartate/glutamate transporter), member 6 (Slc1a6) alternative variant bSep08, mRNA.                   |
| Slc2a4   | Slc2a4.bSep08   | 25139  | 1041  | 710  | 4  | 236 | solute carrier family 2 (facilitated glucose transporter), member 4 (Slc2a4) alternative variant bSep08, mRNA.                                 |
| Slc2a5   | Slc2a5.bSep08   | 65197  | 3037  | 672  | 3  | 145 | solute carrier family 2 (facilitated glucose/fructose transporter), member 5 (Slc2a5) alternative variant bSep08, mRNA.                        |
| Slc2a5   | Slc2a5.cSep08   | 65197  | 1928  | 1360 | 2  | 132 | solute carrier family 2 (facilitated glucose/fructose transporter), member 5 (14.8 kD) (Slc2a5) alternative variant cSep08, mRNA.              |
| Slc2a8   | Slc2a8.bSep08   | 85256  | 2447  | 1385 | 5  | 288 | solute carrier family 2, (facilitated glucose transporter) member 8 (Slc2a8) alternative variant bSep08, mRNA.                                 |
| Slc2a8   | Slc2a8.cSep08   | 85256  | 4390  | 1323 | 5  | 232 | solute carrier family 2, (facilitated glucose transporter) member 8 (Slc2a8) alternative variant cSep08, mRNA.                                 |
| Slc2a8   | Slc2a8.dSep08   | 85256  | 7685  | 481  | 4  | 154 | solute carrier family 2, (facilitated glucose transporter) member 8 (Slc2a8) alternative variant dSep08, mRNA.                                 |
| Slc2a8   | Slc2a8.eSep08   | 85256  | 1348  | 453  | 2  | 102 | solute carrier family 2, (facilitated glucose transporter) member 8 (Slc2a8) alternative variant eSep08, mRNA.                                 |
| Slc2a9   | Slc2a9.aSep08   | 501925 | 48365 | 2436 | 6  | 229 | solute carrier family 2 (facilitated glucose transporter), member 9 (Slc2a9) alternative variant aSep08, mRNA.                                 |
| Slc2a9   | Slc2a9.bSep08   | 501925 | 96567 | 363  | 3  | 71  | solute carrier family 2 (facilitated glucose transporter), member 9 (Slc2a9) alternative variant bSep08, mRNA.                                 |
| Slc2a13  | Slc2a13.bSep08  | 171147 | 5352  | 1257 | 2  | 188 | solute carrier family 2 (facilitated glucose transporter), member 13 (21.1 kD) (Slc2a13) alternative variant bSep08, mRNA.                     |
| Slc3a1   | Slc3a1.bSep08   | 29484  | 3637  | 285  | 1  | 79  | solute carrier family 3, member 1 (Slc3a1) alternative variant bSep08, mRNA.                                                                   |
| Slc3a2   | Slc3a2.bSep08   | 50567  | 5620  | 738  | 5  | 246 | solute carrier family 3 (activators of dibasic and neutral amino acid transport), member 2 (Slc3a2) alternative variant bSep08, mRNA.          |
| Slc3a2   | Slc3a2.cSep08   | 50567  | 3972  | 841  | 4  | 246 | solute carrier family 3 (activators of dibasic and neutral amino acid transport), member 2 (Slc3a2) alternative variant cSep08, mRNA.          |
| Slc3a2   | Slc3a2.eSep08   | 50567  | 892   | 779  | 2  | 92  | solute carrier family 3 (activators of dibasic and neutral amino acid transport), member 2 (Slc3a2) alternative variant eSep08, mRNA.          |
| Slc3a2   | Slc3a2.fSep08   | 50567  | 1414  | 1217 | 3  | 33  | solute carrier family 3 (activators of dibasic and neutral amino acid transport), member 2 (3.7 kD) (Slc3a2) alternative variant fSep08, mRNA. |
| Slc4a1   | Slc4a1.bSep08   | 24779  | 11515 | 4497 | 10 | 850 | solute carrier family 4 (anion exchanger), member 1 (94.4 kD) (Slc4a1) alternative variant bSep08, mRNA.                                       |
| Slc4a1   | Slc4a1.cSep08   | 24779  | 9988  | 2020 | 1  | 478 | solute carrier family 4 (anion exchanger), member 1 (Slc4a1) alternative variant cSep08, mRNA.                                                 |
| Slc4a1ap | Slc4a1ap.aSep08 | 298805 | 27038 | 1752 | 13 | 432 | solute carrier family 4 member 1 adaptor protein (Slc4a1ap) alternative variant aSep08, mRNA.                                                  |

|          |                 |        |        |      |    |     |                                                                                                                               |
|----------|-----------------|--------|--------|------|----|-----|-------------------------------------------------------------------------------------------------------------------------------|
| Slc4a1ap | Slc4a1ap.bSep08 | 298805 | 17809  | 1357 | 8  | 253 | solute carrier family 4 member 1 adaptor protein CRA d (Slc4a1ap) alternative variant bSep08, mRNA.                           |
| Slc4a1ap | Slc4a1ap.dSep08 | 298805 | 2264   | 894  | 2  | 53  | putative protein (Slc4a1ap) alternative variant dSep08, mRNA.                                                                 |
| Slc4a2   | Slc4a2.dSep08   | 24780  | 646    | 555  | 2  | 81  | solute carrier family 4 (anion exchanger), member 2 (9.3 kD) (Slc4a2) alternative variant dSep08, mRNA.                       |
| Slc4a3   | Slc4a3.bSep08   | 24781  | 2503   | 1416 | 5  | 267 | solute carrier family 4 (anion exchanger), member 3 (29.6 kD) (Slc4a3) alternative variant bSep08, mRNA.                      |
| Slc4a3   | Slc4a3.cSep08   | 24781  | 1674   | 772  | 4  | 219 | solute carrier family 4 (anion exchanger), member 3 (Slc4a3) alternative variant cSep08, mRNA.                                |
| Slc4a4   | Slc4a4.bSep08   | 84484  | 111820 | 598  | 1  | 199 | solute carrier family 4 (anion exchanger), member 4 (Slc4a4) alternative variant bSep08, mRNA.                                |
| Slc4a5   | Slc4a5.bSep08   | 297386 | 14790  | 757  | 5  | 252 | solute carrier family 4, sodium bicarbonate cotransporter, member 5 (Slc4a5) alternative variant bSep08, mRNA.                |
| Slc4a5   | Slc4a5.cSep08   | 297386 | 21356  | 599  | 5  | 199 | solute carrier family 4, sodium bicarbonate cotransporter, member 5 (Slc4a5) alternative variant cSep08, mRNA.                |
| Slc4a5   | Slc4a5.dSep08   | 297386 | 20397  | 402  | 4  | 133 | solute carrier family 4, sodium bicarbonate cotransporter, member 5 (Slc4a5) alternative variant dSep08, mRNA.                |
| Slc4a7   | Slc4a7.bSep08   | 117955 | 10095  | 746  | 6  | 218 | solute carrier family 4, sodium bicarbonate cotransporter, member 7 (Slc4a7) alternative variant bSep08, mRNA.                |
| Slc4a8   | Slc4a8.bSep08   | 315311 | 6920   | 418  | 4  | 139 | solute carrier family 4 (anion exchanger), member 8 (Slc4a8) alternative variant bSep08, mRNA.                                |
| Slc4a8   | Slc4a8.cSep08   | 315311 | 5831   | 1789 | 4  | 108 | solute carrier family 4 (anion exchanger), member 8 (Slc4a8) alternative variant cSep08, mRNA.                                |
| Slc4a8   | Slc4a8.dSep08   | 315311 | 3765   | 487  | 3  | 100 | solute carrier family 4 (anion exchanger), member 8 (Slc4a8) alternative variant dSep08, mRNA.                                |
| Slc4a8   | Slc4a8.fSep08   | 315311 | 2859   | 516  | 3  | 57  | solute carrier family 4 (anion exchanger), member 8 (Slc4a8) alternative variant fSep08, mRNA.                                |
| Slc4a10  | Slc4a10.bSep08  | 295645 | 183738 | 1716 | 5  | 391 | solute carrier family 4, sodium bicarbonate transporter-like, member 10 (Slc4a10) alternative variant bSep08, mRNA.           |
| Slc4a10  | Slc4a10.cSep08  | 295645 | 21318  | 499  | 5  | 140 | solute carrier family 4, sodium bicarbonate transporter-like, member 10 (Slc4a10) alternative variant cSep08, mRNA.           |
| Slc4a10  | Slc4a10.fSep08  | 295645 | 1840   | 300  | 2  | 23  | solute carrier family 4, sodium bicarbonate transporter-like, member 10 (Slc4a10) alternative variant fSep08, mRNA.           |
| Slc4a11  | Slc4a11.bSep08  | 311423 | 1682   | 1401 | 4  | 132 | solute carrier family 4, sodium bicarbonate transporter-like, member 11 (Slc4a11) alternative variant bSep08, mRNA.           |
| Slc4a11  | Slc4a11.cSep08  | 311423 | 822    | 665  | 3  | 125 | solute carrier family 4, sodium bicarbonate transporter-like, member 11 (Slc4a11) alternative variant cSep08, mRNA.           |
| Slc5a2   | Slc5a2.bSep08   | 64522  | 2415   | 678  | 5  | 225 | solute carrier family 5 (sodium/glucose cotransporter), member 2 (Slc5a2) alternative variant bSep08, mRNA.                   |
| Slc5a6   | Slc5a6.bSep08   | 170551 | 11767  | 3287 | 16 | 634 | solute carrier family 5 (sodium-dependent vitamin transporter), member 6 (68.6 kD) (Slc5a6) alternative variant bSep08, mRNA. |
| Slc5a6   | Slc5a6.cSep08   | 170551 | 5853   | 1897 | 12 | 530 | solute carrier family 5 (sodium-dependent vitamin transporter), member 6 (56.9 kD) (Slc5a6) alternative variant cSep08, mRNA. |

|         |                |        |       |      |    |     |                                                                                                                                |
|---------|----------------|--------|-------|------|----|-----|--------------------------------------------------------------------------------------------------------------------------------|
| Slc5a6  | Slc5a6.dSep08  | 170551 | 2928  | 742  | 7  | 247 | solute carrier family 5 (sodium-dependent vitamin transporter), member 6 (Slc5a6) alternative variant dSep08, mRNA.            |
| Slc5a6  | Slc5a6.eSep08  | 170551 | 1122  | 910  | 1  | 84  | solute carrier family 5 (sodium-dependent vitamin transporter), member 6 (Slc5a6) alternative variant eSep08, mRNA.            |
| Slc5a6  | Slc5a6.fSep08  | 170551 | 4249  | 386  | 3  | 11  | solute carrier family 5 (sodium-dependent vitamin transporter), member 6 (1.4 kD) (Slc5a6) alternative variant fSep08, mRNA.   |
| Slc5a6  | Slc5a6.gSep08  | 170551 | 4043  | 344  | 2  | 37  | solute carrier family 5 (sodium-dependent vitamin transporter), member 6 (Slc5a6) alternative variant gSep08, mRNA.            |
| Slc5a8  | Slc5a8.aSep08  | 500820 | 40799 | 1759 |    | 563 | solute carrier family 5 (iodide transporter), member 8 (Slc5a8) mRNA.                                                          |
| Slc5a9  | Slc5a9.bSep08  | 366441 | 1040  | 450  | 4  | 149 | solute carrier family 5 (sodium/glucose cotransporter), member 9 (Slc5a9) alternative variant bSep08, mRNA.                    |
| Slc5a9  | Slc5a9.cSep08  | 366441 | 526   | 295  | 2  | 87  | solute carrier family 5 (sodium/glucose cotransporter), member 9 (Slc5a9) alternative variant cSep08, mRNA.                    |
| Slc5a10 | Slc5a10.bSep08 | 303205 | 47933 | 2214 | 15 | 540 | solute carrier family 5 (sodium/glucose cotransporter), member 10 (59.1 kD) (Slc5a10) alternative variant bSep08, mRNA.        |
| Slc5a10 | Slc5a10.cSep08 | 303205 | 13271 | 796  | 7  | 262 | solute carrier family 5 (sodium/glucose cotransporter), member 10 (Slc5a10) alternative variant cSep08, mRNA.                  |
| Slc5a10 | Slc5a10.dSep08 | 303205 | 11892 | 734  | 7  | 230 | solute carrier family 5 (sodium/glucose cotransporter), member 10 (24.4 kD) (Slc5a10) alternative variant dSep08, mRNA.        |
| Slc5a10 | Slc5a10.fSep08 | 303205 | 1142  | 310  | 2  | 97  | solute carrier family 5 (sodium/glucose cotransporter), member 10 (Slc5a10) alternative variant fSep08, mRNA.                  |
| Slc5a11 | Slc5a11.aSep08 | 252854 | 60262 | 2658 | 15 | 673 | solute carrier family 5 (sodium/glucose cotransporter), member 11 (Slc5a11) alternative variant aSep08, mRNA.                  |
| Slc5a11 | Slc5a11.bSep08 | 252854 | 18827 | 399  |    | 52  | solute carrier family 5 (sodium/glucose cotransporter), member 11 (Slc5a11) alternative variant bSep08, mRNA.                  |
| Slc6a5  | Slc6a5.aSep08  | 171148 | 1624  | 313  |    | 46  | solute carrier family 6 (neurotransmitter transporter, glycine), member 5 (Slc6a5) mRNA.                                       |
| Slc6a6  | Slc6a6.bSep08  | 29464  | 41564 | 1436 | 6  | 235 | solute carrier family 6 (neurotransmitter transporter, taurine), member 6 (Slc6a6) alternative variant bSep08, mRNA.           |
| Slc6a9  | Slc6a9.bSep08  | 116509 | 7992  | 602  | 4  | 183 | solute carrier family 6 (neurotransmitter transporter, glycine), member 9 (Slc6a9) alternative variant bSep08, mRNA.           |
| Slc6a9  | Slc6a9.dSep08  | 116509 | 760   | 669  | 2  | 91  | solute carrier family 6 (neurotransmitter transporter, glycine), member 9 (Slc6a9) alternative variant dSep08, mRNA.           |
| Slc6a9  | Slc6a9.eSep08  | 116509 | 2694  | 1290 | 3  | 91  | solute carrier family 6 (neurotransmitter transporter, glycine), member 9 (10.0 kD) (Slc6a9) alternative variant eSep08, mRNA. |

|         |                |        |       |      |   |     |                                                                                                                                    |
|---------|----------------|--------|-------|------|---|-----|------------------------------------------------------------------------------------------------------------------------------------|
| Slc6a9  | Slc6a9.fSep08  | 116509 | 528   | 400  | 2 | 88  | solute carrier family 6 (neurotransmitter transporter, glycine), member 9 (Slc6a9) alternative variant fSep08, mRNA.               |
| Slc6a12 | Slc6a12.bSep08 | 50676  | 11004 | 742  | 5 | 180 | solute carrier family 6 (neurotransmitter transporter, betaine/GABA), member 12 (Slc6a12) alternative variant bSep08, mRNA.        |
| Slc6a12 | Slc6a12.cSep08 | 50676  | 6147  | 399  | 3 | 109 | solute carrier family 6 (neurotransmitter transporter, betaine/GABA), member 12 (Slc6a12) alternative variant cSep08, mRNA.        |
| Slc6a13 | Slc6a13.bSep08 | 171163 | 22616 | 776  | 7 | 180 | solute carrier family 6 (neurotransmitter transporter, GABA), member 13 (Slc6a13) alternative variant bSep08, mRNA.                |
| Slc6a13 | Slc6a13.cSep08 | 171163 | 2216  | 899  | 3 | 170 | solute carrier family 6 (neurotransmitter transporter, GABA), member 13 (Slc6a13) alternative variant cSep08, mRNA.                |
| Slc6a20 | Slc6a20.cSep08 | 113918 | 3263  | 400  | 2 | 133 | solute carrier family 6 (neurotransmitter transporter), member 20 (Slc6a20) alternative variant cSep08, mRNA.                      |
| Slc7a1  | Slc7a1.aSep08  | 25648  | 10298 | 939  |   | 313 | solute carrier family 7 (cationic amino acid transporter, y+ system), member 1 (Slc7a1) mRNA.                                      |
| Slc7a2  | Slc7a2.cSep08  | 64554  | 3721  | 1801 | 3 | 419 | solute carrier family 7 (cationic amino acid transporter, y+ system), member 2 (Slc7a2) alternative variant cSep08, mRNA.          |
| Slc7a4  | Slc7a4.bSep08  | 303787 | 919   | 806  | 2 | 233 | solute carrier family 7 (cationic amino acid transporter, y+ system), member 4 (Slc7a4) alternative variant bSep08, mRNA.          |
| Slc7a4  | Slc7a4.dSep08  | 303787 | 883   | 411  | 2 | 61  | solute carrier family 7 (cationic amino acid transporter, y+ system), member 4 (6.5 kD) (Slc7a4) alternative variant dSep08, mRNA. |
| Slc7a6  | Slc7a6.cSep08  | 307811 | 2684  | 731  | 3 | 43  | solute carrier family 7 (cationic amino acid transporter, y+ system), member 6 (Slc7a6) alternative variant cSep08, mRNA.          |
| Slc7a7  | Slc7a7.bSep08  | 83509  | 31450 | 687  | 3 | 228 | solute carrier family 7 member (Slc7a7) alternative variant bSep08, mRNA.                                                          |
| Slc7a7  | Slc7a7.cSep08  | 83509  | 38996 | 731  | 7 | 213 | solute carrier family 7 member (Slc7a7) alternative variant cSep08, mRNA.                                                          |
| Slc7a7  | Slc7a7.dSep08  | 83509  | 35492 | 1042 | 3 | 198 | solute carrier family 7 member (Slc7a7) alternative variant dSep08, mRNA.                                                          |
| Slc7a7  | Slc7a7.eSep08  | 83509  | 35679 | 682  | 3 | 169 | solute carrier family 7 member (17.5 kD) (Slc7a7) alternative variant eSep08, mRNA.                                                |
| Slc7a7  | Slc7a7.fSep08  | 83509  | 41387 | 736  | 6 | 123 | solute carrier family 7 member (Slc7a7) alternative variant fSep08, mRNA.                                                          |
| Slc7a7  | Slc7a7.gSep08  | 83509  | 3798  | 294  | 3 | 82  | putative protein (8.5 kD) (Slc7a7) alternative variant gSep08, mRNA.                                                               |
| Slc7a7  | Slc7a7.hSep08  | 83509  | 39570 | 734  | 6 | 71  | solute carrier family 7 member (Slc7a7) alternative variant hSep08, mRNA.                                                          |

|          |                 |        |       |      |   |     |                                                                                                                                           |
|----------|-----------------|--------|-------|------|---|-----|-------------------------------------------------------------------------------------------------------------------------------------------|
| Slc7a8   | Slc7a8.bSep08   | 84551  | 17978 | 491  | 3 | 130 | solute carrier family 7 (cationic amino acid transporter, y+ system), member 8 (13.1 kD) (Slc7a8) alternative variant bSep08, mRNA.       |
| Slc7a9   | Slc7a9.bSep08   | 116726 | 4750  | 1037 | 3 | 213 | solute carrier family 7 (cationic amino acid transporter, y+ system), member 9 (Slc7a9) alternative variant bSep08, mRNA.                 |
| Slc7a9   | Slc7a9.cSep08   | 116726 | 5273  | 1134 | 4 | 191 | solute carrier family 7 (cationic amino acid transporter, y+ system), member 9 (Slc7a9) alternative variant cSep08, mRNA.                 |
| Slc7a10  | Slc7a10.bSep08  | 114518 | 510   | 423  | 2 | 91  | solute carrier family 7 (cationic amino acid transporter, y+ system), member 10 (Slc7a10) alternative variant bSep08, mRNA.               |
| Slc7a11  | Slc7a11.bSep08  | 310392 | 28661 | 427  | 1 | 50  | solute carrier family 7 (cationic amino acid transporter, y+ system), member 11 (Slc7a11) alternative variant bSep08, mRNA.               |
| Slc7a15  | Slc7a15.bSep08  | 298873 | 20073 | 1480 | 4 | 207 | solute carrier family 7 (cationic amino acid transporter, y+ system), member 15 (23.1 kD) (Slc7a15) alternative variant bSep08, mRNA.     |
| Slc7a15  | Slc7a15.cSep08  | 298873 | 14297 | 426  | 2 | 91  | solute carrier family 7 (cationic amino acid transporter, y+ system), member 15 (Slc7a15) alternative variant cSep08, mRNA.               |
| Slc9a3r2 | Slc9a3r2.bSep08 | 116501 | 4381  | 773  | 2 | 207 | solute carrier family 9 (sodium/hydrogen exchanger), member 3 regulator 2 (Slc9a3r2) alternative variant bSep08, mRNA.                    |
| Slc9a5   | Slc9a5.bSep08   | 192215 | 11588 | 1785 | 8 | 120 | solute carrier family 9 (sodium/hydrogen exchanger), member 5 (13.6 kD) (Slc9a5) alternative variant bSep08, mRNA.                        |
| Slc9a5   | Slc9a5.cSep08   | 192215 | 1050  | 565  | 2 | 75  | solute carrier family 9 (sodium/hydrogen exchanger), member 5 (Slc9a5) alternative variant cSep08, mRNA.                                  |
| Slc9a6   | Slc9a6.aSep08   | 302863 | 18188 | 2920 |   | 182 | solute carrier family 9 (sodium/hydrogen exchanger), member 6 (Slc9a6) mRNA.                                                              |
| Slc9a8   | Slc9a8.aSep08   | 311651 | 24521 | 773  |   | 191 | solute carrier family 9 (sodium/hydrogen exchanger), member 8 (Slc9a8) mRNA.                                                              |
| Slc10a3  | Slc10a3.bSep08  | 501665 | 2478  | 566  | 1 | 81  | solute carrier family 10 (sodium/bile acid cotransporter family), member 3 (8.4 kD) (Slc10a3) alternative variant bSep08, mRNA.           |
| Slc11a1  | Slc11a1.bSep08  | 316519 | 6757  | 1197 | 9 | 339 | solute carrier family 11 (proton-coupled divalent metal ion transporters), member 1 (37.5 kD) (Slc11a1) alternative variant bSep08, mRNA. |
| Slc11a2  | Slc11a2.aSep08  | 25715  | 16071 | 1251 | 9 | 297 | solute carrier family 11 (proton-coupled divalent metal ion transporters), member 2 (Slc11a2) alternative variant aSep08, mRNA.           |
| Slc11a2  | Slc11a2.bSep08  | 25715  | 2371  | 447  | 2 | 71  | solute carrier family 11 (proton-coupled divalent metal ion transporters), member 2 (Slc11a2) alternative variant bSep08, mRNA.           |
| Slc12a1  | Slc12a1.bSep08  | 25065  | 18855 | 682  | 6 | 227 | solute carrier family 12, member 1 (Slc12a1) alternative variant bSep08, mRNA.                                                            |



|         |                |        |       |      |    |      |                                                                                                                             |
|---------|----------------|--------|-------|------|----|------|-----------------------------------------------------------------------------------------------------------------------------|
| Slc12a1 | Slc12a1.cSep08 | 25065  | 2294  | 1311 | 2  | 72   | solute carrier family 12, member 1 (Slc12a1) alternative variant cSep08, mRNA.                                              |
| Slc12a2 | Slc12a2.bSep08 | 83629  | 17863 | 797  |    | 265  | solute carrier family 12 (sodium/potassium/chloride transporters), member 2 (Slc12a2) alternative variant bSep08, mRNA.     |
| Slc12a4 | Slc12a4.bSep08 | 29501  | 3071  | 1190 | 6  | 236  | solute carrier family 12, member 4 (Slc12a4) alternative variant bSep08, mRNA.                                              |
| Slc12a4 | Slc12a4.cSep08 | 29501  | 1340  | 535  | 4  | 177  | solute carrier family 12, member 4 (Slc12a4) alternative variant cSep08, mRNA.                                              |
| Slc12a5 | Slc12a5.aSep08 | 171373 | 40120 | 5714 | 26 | 1158 | solute carrier family 12, member 5 (Slc12a5) alternative variant aSep08, mRNA.                                              |
| Slc12a5 | Slc12a5.bSep08 | 171373 | 2818  | 460  | 4  | 152  | solute carrier family 12, member 5 (Slc12a5) alternative variant bSep08, mRNA.                                              |
| Slc12a5 | Slc12a5.cSep08 | 171373 | 1010  | 510  | 2  | 78   | solute carrier family 12, member 5 (Slc12a5) alternative variant cSep08, mRNA.                                              |
| Slc12a7 | Slc12a7.aSep08 | 308069 | 30935 | 1351 | 9  | 450  | solute carrier family 12, member 7 (Slc12a7) alternative variant aSep08, mRNA.                                              |
| Slc12a7 | Slc12a7.bSep08 | 308069 | 12417 | 2556 | 8  | 284  | solute carrier family 12, member 7 (Slc12a7) alternative variant bSep08, mRNA.                                              |
| Slc12a7 | Slc12a7.cSep08 | 308069 | 12405 | 2529 | 7  | 275  | solute carrier family 12, member 7 (Slc12a7) alternative variant cSep08, mRNA.                                              |
| Slc12a7 | Slc12a7.dSep08 | 308069 | 53379 | 1474 | 7  | 266  | solute carrier family 12, member 7 (Slc12a7) alternative variant dSep08, mRNA.                                              |
| Slc12a7 | Slc12a7.eSep08 | 308069 | 2272  | 380  | 3  | 81   | solute carrier family 12, member 7 (Slc12a7) alternative variant eSep08, mRNA.                                              |
| Slc12a8 | Slc12a8.bSep08 | 266733 | 37095 | 550  | 3  | 59   | solute carrier family 12 (potassium/chloride transporters), member 8 (Slc12a8) alternative variant bSep08, mRNA.            |
| Slc13a4 | Slc13a4.bSep08 | 503568 | 14496 | 1515 | 4  | 189  | solute carrier family 13 (sodium/sulfate symporters), member 4 (Slc13a4) alternative variant bSep08, mRNA.                  |
| Slc13a4 | Slc13a4.cSep08 | 503568 | 17248 | 373  | 3  | 124  | solute carrier family 13 (sodium/sulfate symporters), member 4 (Slc13a4) alternative variant cSep08, mRNA.                  |
| Slc14a2 | Slc14a2.dSep08 | 54302  | 8056  | 541  | 4  | 123  | urea transporter (Slc14a2) alternative variant dSep08, mRNA.                                                                |
| Slc16a1 | Slc16a1.bSep08 | 25027  | 13541 | 425  | 3  | 115  | solute carrier family 16 (monocarboxylic acid transporters), member 1 (Slc16a1) alternative variant bSep08, mRNA.           |
| Slc16a2 | Slc16a2.aSep08 | 259248 | 6623  | 742  | 3  | 246  | solute carrier family 16 (monocarboxylic acid transporters), member 2 (Slc16a2) alternative variant aSep08, mRNA.           |
| Slc16a3 | Slc16a3.bSep08 | 80878  | 2853  | 1024 | 4  | 235  | solute carrier family 16 (monocarboxylic acid transporters), member 3 (25.5 kD) (Slc16a3) alternative variant bSep08, mRNA. |
| Slc16a3 | Slc16a3.dSep08 | 80878  | 1697  | 368  | 3  | 95   | solute carrier family 16 (monocarboxylic acid transporters), member 3 (Slc16a3) alternative variant dSep08, mRNA.           |
| Slc16a3 | Slc16a3.eSep08 | 80878  | 1303  | 340  | 2  | 74   | solute carrier family 16 (monocarboxylic acid transporters), member 3 (Slc16a3) alternative variant eSep08, mRNA.           |
| Slc16a4 | Slc16a4.aSep08 | 295356 | 22467 | 1485 | 8  | 327  | solute carrier family 16 (monocarboxylic acid transporters), member 4 (36.3 kD) (Slc16a4) alternative variant aSep08, mRNA. |

|          |                 |        |       |      |    |     |                                                                                                                                              |
|----------|-----------------|--------|-------|------|----|-----|----------------------------------------------------------------------------------------------------------------------------------------------|
| Slc16a4  | Slc16a4.bSep08  | 295356 | 8302  | 705  | 5  | 175 | solute carrier family 16 (monocarboxylic acid transporters), member 4 (Slc16a4) alternative variant bSep08, mRNA.                            |
| Slc16a6  | Slc16a6.bSep08  | 303772 | 17521 | 1461 | 6  | 416 | solute carrier family 16 (monocarboxylic acid transporters), member 6 (Slc16a6) alternative variant bSep08, mRNA.                            |
| Slc16a6  | Slc16a6.cSep08  | 303772 | 14247 | 738  | 4  | 153 | solute carrier family 16 (monocarboxylic acid transporters), member 6 (Slc16a6) alternative variant cSep08, mRNA.                            |
| Slc16a6  | Slc16a6.eSep08  | 303772 | 6633  | 418  | 2  | 42  | solute carrier family 16 (monocarboxylic acid transporters), member 6 (4.9 kD) (Slc16a6) alternative variant eSep08, mRNA.                   |
| Slc16a7  | Slc16a7.bSep08  | 29735  | 79810 | 705  | 5  | 162 | solute carrier family 16 (monocarboxylic acid transporters), member 7 (Slc16a7) alternative variant bSep08, mRNA.                            |
| Slc16a7  | Slc16a7.cSep08  | 29735  | 7097  | 396  | 2  | 55  | solute carrier family 16 (monocarboxylic acid transporters), member 7 (Slc16a7) alternative variant cSep08, mRNA.                            |
| Slc16a11 | Slc16a11.aSep08 | 287450 | 3829  | 2023 | 7  | 575 | solute carrier family 16 (monocarboxylic acid transporters), member 11 (58.3 kD) (Slc16a11) alternative variant aSep08, mRNA.                |
| Slc16a11 | Slc16a11.cSep08 | 287450 | 2329  | 865  | 2  | 143 | solute carrier family 16 (monocarboxylic acid transporters), member 11 (14.8 kD) (Slc16a11) alternative variant cSep08, mRNA.                |
| Slc16a11 | Slc16a11.dSep08 | 287450 | 1948  | 558  | 4  | 83  | solute carrier family 16 (monocarboxylic acid transporters), member 11 (8.8 kD) (Slc16a11) alternative variant dSep08, mRNA.                 |
| Slc16a12 | Slc16a12.aSep08 | 309525 | 2408  | 880  |    | 168 | solute carrier family 16 (monocarboxylic acid transporters), member 12 (Slc16a12) mRNA.                                                      |
| Slc17a3  | Slc17a3.aSep08  | 266730 | 21974 | 1536 | 10 | 487 | solute carrier family 17 (sodium phosphate), member 3 (Slc17a3) alternative variant aSep08, mRNA.                                            |
| Slc17a3  | Slc17a3.bSep08  | 266730 | 11341 | 766  | 3  | 212 | solute carrier family 17 (sodium phosphate), member 3 (Slc17a3) alternative variant bSep08, mRNA.                                            |
| Slc17a3  | Slc17a3.cSep08  | 266730 | 19497 | 1276 | 5  | 109 | solute carrier family 17 (sodium phosphate), member 3 (Slc17a3) alternative variant cSep08, mRNA.                                            |
| Slc17a3  | Slc17a3.dSep08  | 266730 | 16276 | 1249 | 4  | 111 | solute carrier family 17 (sodium phosphate), member 3 (12.1 kD) (Slc17a3) alternative variant dSep08, complete mRNA.                         |
| Slc17a4  | Slc17a4.aSep08  | 679784 | 6568  | 1029 |    | 291 | solute carrier family 17 (sodium phosphate), member 4 (31.8 kD) (Slc17a4) mRNA.                                                              |
| Slc17a7  | Slc17a7.bSep08  | 116638 | 12010 | 2896 | 12 | 585 | solute carrier family 17 (sodium-dependent inorganic phosphate cotransporter), member 7 (Slc17a7) alternative variant bSep08, complete mRNA. |
| Slc17a7  | Slc17a7.cSep08  | 116638 | 5424  | 600  | 1  | 180 | solute carrier family 17 (sodium-dependent inorganic phosphate cotransporter), member 7 (Slc17a7) alternative variant cSep08, mRNA.          |
| Slc18a2  | Slc18a2.aSep08  | 25549  | 7154  | 495  |    | 54  | solute carrier family 18 (vesicular monoamine), member 2 (Slc18a2) mRNA.                                                                     |
| Slc19a1  | Slc19a1.cSep08  | 29723  | 7755  | 2086 | 4  | 278 | solute carrier family 19 (sodium/hydrogen exchanger), member 1 (Slc19a1) alternative variant cSep08, mRNA.                                   |
| Slc19a1  | Slc19a1.dSep08  | 29723  | 6202  | 852  | 3  | 158 | solute carrier family 19 (sodium/hydrogen exchanger), member 1 (Slc19a1) alternative variant dSep08, mRNA.                                   |

|          |                 |        |       |      |   |     |                                                                                                                                |
|----------|-----------------|--------|-------|------|---|-----|--------------------------------------------------------------------------------------------------------------------------------|
| Slc20a1  | Slc20a1.bSep08  | 81826  | 6006  | 872  | 4 | 241 | solute carrier family 20 (phosphate transporter), member 1 (Slc20a1) alternative variant bSep08, mRNA.                         |
| Slc20a1  | Slc20a1.cSep08  | 81826  | 2300  | 1617 | 2 | 99  | solute carrier family 20 (phosphate transporter), member 1 (10.8 kD) (Slc20a1) alternative variant cSep08, mRNA.               |
| Slc21a4  | Slc21a4.bSep08  | 80899  | 23909 | 824  | 6 | 274 | organic anion transporter K2 (Slc21a4) alternative variant bSep08, mRNA.                                                       |
| Slc21a4  | Slc21a4.cSep08  | 80899  | 4960  | 736  | 4 | 207 | organic anion transporter K5 (Slc21a4) alternative variant cSep08, mRNA.                                                       |
| Slc21a4  | Slc21a4.dSep08  | 80899  | 30510 | 670  | 5 | 185 | organic anion transporter K5 (Slc21a4) alternative variant dSep08, mRNA.                                                       |
| Slc21a4  | Slc21a4.eSep08  | 80899  | 13723 | 775  | 5 | 184 | organic anion transporter K6 (Slc21a4) alternative variant eSep08, mRNA.                                                       |
| Slc21a4  | Slc21a4.fSep08  | 80899  | 5450  | 298  | 2 | 42  | organic anion transporter K10 (Slc21a4) alternative variant fSep08, mRNA.                                                      |
| Slc22a1  | Slc22a1.bSep08  | 24904  | 9081  | 553  | 4 | 184 | solute carrier family 22 (organic cation transporter), member 1 (Slc22a1) alternative variant bSep08, mRNA.                    |
| Slc22a1  | Slc22a1.cSep08  | 24904  | 4792  | 518  | 2 | 172 | solute carrier family 22 (organic cation transporter), member 1 (Slc22a1) alternative variant cSep08, mRNA.                    |
| Slc22a1  | Slc22a1.dSep08  | 24904  | 10875 | 773  | 3 | 154 | solute carrier family 22 (organic cation transporter), member 1 (Slc22a1) alternative variant dSep08, mRNA.                    |
| Slc22a2  | Slc22a2.bSep08  | 29503  | 14732 | 721  | 3 | 239 | solute carrier family 22 (organic cation transporter), member 2 (Slc22a2) alternative variant bSep08, mRNA.                    |
| Slc22a2  | Slc22a2.cSep08  | 29503  | 6132  | 386  | 3 | 123 | solute carrier family 22 (organic cation transporter), member 2 (Slc22a2) alternative variant cSep08, mRNA.                    |
| Slc22a5  | Slc22a5.bSep08  | 29726  | 27009 | 2778 | 1 | 469 | solute carrier family 22 (organic cation transporter), member 5 (52.6 kD) (Slc22a5) alternative variant bSep08, complete mRNA. |
| Slc22a6  | Slc22a6.bSep08  | 29509  | 3039  | 961  | 4 | 194 | solute carrier family 22 member 6 (20.9 kD) (Slc22a6) alternative variant bSep08, complete mRNA.                               |
| Slc22a6  | Slc22a6.cSep08  | 29509  | 2783  | 823  | 3 | 144 | solute carrier family 22 member 6 (15.5 kD) (Slc22a6) alternative variant cSep08, mRNA.                                        |
| Slc22a6  | Slc22a6.dSep08  | 29509  | 1050  | 920  | 2 | 51  | solute carrier family 22 member 6 (Slc22a6) alternative variant dSep08, mRNA.                                                  |
| Slc22a7  | Slc22a7.bSep08  | 89776  | 4350  | 751  | 5 | 117 | solute carrier family 22 (organic anion transporter), member 7 (Slc22a7) alternative variant bSep08, mRNA.                     |
| Slc22a8  | Slc22a8.bSep08  | 83500  | 4236  | 757  | 6 | 236 | solute carrier family 22 member 8 (Slc22a8) alternative variant bSep08, mRNA.                                                  |
| Slc22a8  | Slc22a8.cSep08  | 83500  | 5045  | 406  | 4 | 134 | solute carrier family 22 member 8 (Slc22a8) alternative variant cSep08, mRNA.                                                  |
| Slc22a8  | Slc22a8.dSep08  | 83500  | 2750  | 464  | 3 | 126 | putative protein (13.9 kD) (Slc22a8) alternative variant dSep08, mRNA.                                                         |
| Slc22a12 | Slc22a12.bSep08 | 365398 | 4085  | 737  | 2 | 220 | solute carrier family 22 (organic anion/cation transporter), member 12 (Slc22a12) alternative variant bSep08, mRNA.            |
| Slc22a14 | Slc22a14.aSep08 | 316061 | 13119 | 1777 |   | 529 | solute carrier family 22 (organic cation transporter), member 14 (Slc22a14) alternative variant aSep08, mRNA.                  |
| Slc22a14 | Slc22a14.bSep08 | 316061 | 4339  | 710  |   | 205 | solute carrier family 22 (organic cation transporter), member 14 (Slc22a14) alternative variant bSep08, mRNA.                  |

|          |                 |        |        |      |    |     |                                                                                                                                                |
|----------|-----------------|--------|--------|------|----|-----|------------------------------------------------------------------------------------------------------------------------------------------------|
| Slc22a15 | Slc22a15.bSep08 | 310732 | 24614  | 1070 | 4  | 298 | solute carrier family 22, member 15 (Slc22a15) alternative variant bSep08, mRNA.                                                               |
| Slc22a15 | Slc22a15.cSep08 | 310732 | 1611   | 1311 | 2  | 51  | solute carrier family 22, member 15 (5.8 kD) (Slc22a15) alternative variant cSep08, mRNA.                                                      |
| Slc22a17 | Slc22a17.bSep08 | 305886 | 1261   | 1038 | 3  | 237 | solute carrier family 22 member 17 CRA c (24.2 kD) (Slc22a17) alternative variant bSep08, complete mRNA.                                       |
| Slc22a17 | Slc22a17.cSep08 | 305886 | 784    | 647  | 2  | 132 | solute carrier family 22 member 17 (Slc22a17) alternative variant cSep08, mRNA.                                                                |
| Slc22a17 | Slc22a17.dSep08 | 305886 | 625    | 348  | 3  | 100 | solute carrier family 22 member 17 (Slc22a17) alternative variant dSep08, mRNA.                                                                |
| Slc22a18 | Slc22a18.bSep08 | 309131 | 16595  | 704  | 6  | 181 | solute carrier family 22 (organic cation transporter), member 18 (Slc22a18) alternative variant bSep08, mRNA.                                  |
| Slc22a18 | Slc22a18.cSep08 | 309131 | 6272   | 443  | 4  | 147 | solute carrier family 22 (organic cation transporter), member 18 (Slc22a18) alternative variant cSep08, mRNA.                                  |
| Slc22a18 | Slc22a18.dSep08 | 309131 | 1083   | 448  | 3  | 125 | solute carrier family 22 (organic cation transporter), member 18 (Slc22a18) alternative variant dSep08, mRNA.                                  |
| Slc22a23 | Slc22a23.aSep08 | 64559  | 162464 | 2455 |    | 685 | solute carrier family 22, member 23 (Slc22a23) mRNA.                                                                                           |
| Slc23a2  | Slc23a2.bSep08  | 50622  | 4139   | 426  | 1  | 96  | solute carrier family 23 (nucleobase transporters), member 2 (Slc23a2) alternative variant bSep08, mRNA.                                       |
| Slc23a3  | Slc23a3.bSep08  | 367298 | 3532   | 1347 | 2  | 214 | solute carrier family 23 (nucleobase transporters), member 3 (23.3 kD) (Slc23a3) alternative variant bSep08, mRNA.                             |
| Slc24a3  | Slc24a3.aSep08  | 85267  | 37820  | 1327 |    | 360 | solute carrier family 24 (sodium/potassium/calcium exchanger), member 3 (Slc24a3) mRNA.                                                        |
| Slc24a4  | Slc24a4.aSep08  | 314396 | 113005 | 2619 | 15 | 566 | solute carrier family 24 (sodium/potassium/calcium exchanger), member 4 (62.9 kD) (Slc24a4) alternative variant aSep08, mRNA.                  |
| Slc24a4  | Slc24a4.cSep08  | 314396 | 1800   | 537  | 1  | 86  | solute carrier family 24 (sodium/potassium/calcium exchanger), member 4 (Slc24a4) alternative variant cSep08, mRNA.                            |
| Slc24a6  | Slc24a6.bSep08  | 498185 | 6856   | 930  | 6  | 224 | solute carrier family 24 (sodium/potassium/calcium exchanger), member 6 (Slc24a6) alternative variant bSep08, mRNA.                            |
| Slc25a1  | Slc25a1.bSep08  | 29743  | 2156   | 839  | 8  | 275 | solute carrier family 25 (mitochondrial carrier, citrate transporter), member 1 (Slc25a1) alternative variant bSep08, mRNA.                    |
| Slc25a1  | Slc25a1.cSep08  | 29743  | 1280   | 580  | 5  | 193 | solute carrier family 25 (mitochondrial carrier, citrate transporter), member 1 (Slc25a1) alternative variant cSep08, mRNA.                    |
| Slc25a1  | Slc25a1.dSep08  | 29743  | 1649   | 825  | 6  | 153 | solute carrier family 25 (mitochondrial carrier, citrate transporter), member 1 (Slc25a1) alternative variant dSep08, mRNA.                    |
| Slc25a1  | Slc25a1.eSep08  | 29743  | 3014   | 2174 | 4  | 138 | solute carrier family 25 (mitochondrial carrier, citrate transporter), member 1 (15.1 kD) (Slc25a1) alternative variant eSep08, complete mRNA. |
| Slc25a3  | Slc25a3.aSep08  | 245959 | 7490   | 1377 | 8  | 357 | solute carrier family 25 (mitochondrial carrier, phosphate carrier), member 3 (39.6 kD) (Slc25a3) alternative variant aSep08, mRNA.            |

|          |                 |        |       |      |    |     |                                                                                                                                          |
|----------|-----------------|--------|-------|------|----|-----|------------------------------------------------------------------------------------------------------------------------------------------|
| Slc25a3  | Slc25a3.cSep08  | 245959 | 5443  | 760  | 4  | 184 | solute carrier family 25 (mitochondrial carrier, phosphate carrier), member 3 (Slc25a3) alternative variant cSep08, mRNA.                |
| Slc25a3  | Slc25a3.dSep08  | 245959 | 507   | 426  | 2  | 102 | solute carrier family 25 (mitochondrial carrier, phosphate carrier), member 3 (Slc25a3) alternative variant dSep08, mRNA.                |
| Slc25a3  | Slc25a3.eSep08  | 245959 | 4037  | 2785 | 3  | 94  | solute carrier family 25 (mitochondrial carrier, phosphate carrier), member 3 (Slc25a3) alternative variant eSep08, mRNA.                |
| Slc25a3  | Slc25a3.gSep08  | 245959 | 5564  | 806  | 6  | 89  | solute carrier family 25 (mitochondrial carrier, phosphate carrier), member 3 (9.6 kD) (Slc25a3) alternative variant gSep08, mRNA.       |
| Slc25a3  | Slc25a3.iSep08  | 245959 | 706   | 486  | 2  | 89  | solute carrier family 25 (mitochondrial carrier, phosphate carrier), member 3 (9.5 kD) (Slc25a3) alternative variant iSep08, mRNA.       |
| Slc25a4  | Slc25a4.cSep08  | 85333  | 847   | 364  | 2  | 63  | solute carrier family 25 (mitochondrial carrier; adenine nucleotide translocator), member 4 (Slc25a4) alternative variant cSep08, mRNA.  |
| Slc25a5  | Slc25a5.bSep08  | 25176  | 1777  | 780  | 2  | 218 | solute carrier family 25 member 5 (23.8 kD) (Slc25a5) alternative variant bSep08, mRNA.                                                  |
| Slc25a5  | Slc25a5.cSep08  | 25176  | 1300  | 964  | 2  | 98  | solute carrier family 25 member 5 CRA a (11.1 kD) (Slc25a5) alternative variant cSep08, mRNA.                                            |
| Slc25a10 | Slc25a10.bSep08 | 170943 | 3340  | 722  | 9  | 222 | solute carrier family 25 member 10 (Slc25a10) alternative variant bSep08, mRNA.                                                          |
| Slc25a10 | Slc25a10.cSep08 | 170943 | 6707  | 721  | 9  | 221 | solute carrier family 25 member 10 CRA a (24.2 kD) (Slc25a10) alternative variant cSep08, mRNA.                                          |
| Slc25a10 | Slc25a10.dSep08 | 170943 | 7499  | 2204 | 11 | 163 | solute carrier family 25 member 10 CRA a (17.9 kD) (Slc25a10) alternative variant dSep08, complete mRNA.                                 |
| Slc25a10 | Slc25a10.eSep08 | 170943 | 3228  | 707  | 2  | 67  | solute carrier family 25 member 10 (Slc25a10) alternative variant eSep08, mRNA.                                                          |
| Slc25a10 | Slc25a10.fSep08 | 170943 | 1214  | 695  | 3  | 65  | solute carrier family 25 member 10 CRA a (6.8 kD) (Slc25a10) alternative variant fSep08, mRNA.                                           |
| Slc25a10 | Slc25a10.gSep08 | 170943 | 4963  | 343  | 5  | 50  | solute carrier family 25 member 10 (Slc25a10) alternative variant gSep08, mRNA.                                                          |
| Slc25a11 | Slc25a11.bSep08 | 64201  | 1052  | 528  | 2  | 134 | solute carrier family 25 (mitochondrial carrier; oxoglutarate carrier), member 11 (14.3 kD) (Slc25a11) alternative variant bSep08, mRNA. |
| Slc25a12 | Slc25a12.aSep08 | 362145 | 50176 | 476  | 5  | 155 | solute carrier family 25 (mitochondrial carrier, Aralar), member 12 (Slc25a12) alternative variant aSep08, mRNA.                         |
| Slc25a12 | Slc25a12.bSep08 | 362145 | 50172 | 472  | 5  | 155 | solute carrier family 25 (mitochondrial carrier, Aralar), member 12 (Slc25a12) alternative variant bSep08, mRNA.                         |
| Slc25a12 | Slc25a12.cSep08 | 362145 | 12552 | 356  | 3  | 26  | solute carrier family 25 (mitochondrial carrier, Aralar), member 12 (3.2 kD) (Slc25a12) alternative variant cSep08, complete mRNA.       |
| Slc25a12 | Slc25a12.dSep08 | 362145 | 28758 | 360  | 3  | 66  | solute carrier family 25 (mitochondrial carrier, Aralar), member 12 (Slc25a12) alternative variant dSep08, mRNA.                         |

|          |                 |        |        |      |    |     |                                                                                                                                                     |
|----------|-----------------|--------|--------|------|----|-----|-----------------------------------------------------------------------------------------------------------------------------------------------------|
| Slc25a13 | Slc25a13.aSep08 | 362322 | 155085 | 2942 | 17 | 642 | solute carrier family 25 (mitochondrial carrier, adenine nucleotide translocator), member 13 (70.7 kD) (Slc25a13) alternative variant aSep08, mRNA. |
| Slc25a13 | Slc25a13.bSep08 | 362322 | 25119  | 777  | 8  | 259 | solute carrier family 25 (mitochondrial carrier, adenine nucleotide translocator), member 13 (Slc25a13) alternative variant bSep08, mRNA.           |
| Slc25a13 | Slc25a13.cSep08 | 362322 | 33495  | 886  | 6  | 144 | solute carrier family 25 (mitochondrial carrier, adenine nucleotide translocator), member 13 (15.5 kD) (Slc25a13) alternative variant cSep08, mRNA. |
| Slc25a14 | Slc25a14.bSep08 | 85263  | 28734  | 669  | 7  | 204 | solute carrier family 25 (mitochondrial carrier, brain), member 14 (Slc25a14) alternative variant bSep08, mRNA.                                     |
| Slc25a14 | Slc25a14.cSep08 | 85263  | 9827   | 543  | 4  | 124 | solute carrier family 25 (mitochondrial carrier, brain), member 14 (Slc25a14) alternative variant cSep08, mRNA.                                     |
| Slc25a14 | Slc25a14.dSep08 | 85263  | 10012  | 428  | 6  | 83  | solute carrier family 25 (mitochondrial carrier, brain), member 14 (Slc25a14) alternative variant dSep08, mRNA.                                     |
| Slc25a15 | Slc25a15.bSep08 | 306574 | 21965  | 1800 | 5  | 340 | solute carrier family 25 (mitochondrial carrier; ornithine transporter) member 15 (Slc25a15) alternative variant bSep08, mRNA.                      |
| Slc25a15 | Slc25a15.cSep08 | 306574 | 4568   | 725  | 1  | 165 | solute carrier family 25 (mitochondrial carrier; ornithine transporter) member 15 (Slc25a15) alternative variant cSep08, mRNA.                      |
| Slc25a15 | Slc25a15.dSep08 | 306574 | 15026  | 879  | 4  | 150 | solute carrier family 25 (mitochondrial carrier; ornithine transporter) member 15 (Slc25a15) alternative variant dSep08, mRNA.                      |
| Slc25a16 | Slc25a16.aSep08 | 361836 | 17253  | 2979 |    | 256 | solute carrier family 25 (mitochondrial carrier, Graves disease autoantigen), member 16 (Slc25a16) alternative variant aSep08, mRNA.                |
| Slc25a16 | Slc25a16.bSep08 | 361836 | 28323  | 3182 |    | 234 | solute carrier family 25 (mitochondrial carrier, Graves disease autoantigen), member 16 (26.1 kD) (Slc25a16) alternative variant bSep08, mRNA.      |
| Slc25a17 | Slc25a17.bSep08 | 300083 | 11175  | 889  | 5  | 195 | solute carrier family 25 member 17 (22.1 kD) (Slc25a17) alternative variant bSep08, mRNA.                                                           |
| Slc25a17 | Slc25a17.cSep08 | 300083 | 3235   | 615  | 3  | 71  | solute carrier family 25 member 17 CRA a (Slc25a17) alternative variant cSep08, mRNA.                                                               |
| Slc25a19 | Slc25a19.bSep08 | 303676 | 11440  | 706  | 1  | 185 | solute carrier family 25 (mitochondrial thiamine pyrophosphate carrier), member 19 (Slc25a19) alternative variant bSep08, mRNA.                     |
| Slc25a19 | Slc25a19.cSep08 | 303676 | 10072  | 747  | 2  | 163 | solute carrier family 25 (mitochondrial thiamine pyrophosphate carrier), member 19 (Slc25a19) alternative variant cSep08, mRNA.                     |
| Slc25a20 | Slc25a20.bSep08 | 117035 | 15879  | 820  | 1  | 153 | solute carrier family 25 (mitochondrial carnitine/acylcarnitine translocase), member 20 (Slc25a20) alternative variant bSep08, mRNA.                |
| Slc25a22 | Slc25a22.aSep08 | 309111 | 4609   | 1607 | 10 | 323 | solute carrier family 25 (mitochondrial carrier, glutamate), member 22 (34.7 kD) (Slc25a22) alternative variant aSep08, mRNA.                       |

|          |                 |        |       |      |    |     |                                                                                                                                          |
|----------|-----------------|--------|-------|------|----|-----|------------------------------------------------------------------------------------------------------------------------------------------|
| Slc25a22 | Slc25a22.cSep08 | 309111 | 5767  | 707  | 7  | 188 | solute carrier family 25 (mitochondrial carrier, glutamate), member 22 (Slc25a22) alternative variant cSep08, mRNA.                      |
| Slc25a22 | Slc25a22.eSep08 | 309111 | 5193  | 753  | 5  | 98  | solute carrier family 25 (mitochondrial carrier, glutamate), member 22 (10.7 kD) (Slc25a22) alternative variant eSep08, mRNA.            |
| Slc25a22 | Slc25a22.fSep08 | 309111 | 1616  | 450  | 4  | 74  | solute carrier family 25 (mitochondrial carrier, glutamate), member 22 (Slc25a22) alternative variant fSep08, mRNA.                      |
| Slc25a22 | Slc25a22.gSep08 | 309111 | 728   | 404  | 3  | 74  | solute carrier family 25 (mitochondrial carrier, glutamate), member 22 (Slc25a22) alternative variant gSep08, mRNA.                      |
| Slc25a22 | Slc25a22.hSep08 | 309111 | 953   | 381  | 4  | 71  | solute carrier family 25 (mitochondrial carrier, glutamate), member 22 (Slc25a22) alternative variant hSep08, mRNA.                      |
| Slc25a23 | Slc25a23.bSep08 | 301113 | 5004  | 577  | 2  | 155 | solute carrier family 25 (mitochondrial carrier; phosphate carrier), member 23 (Slc25a23) alternative variant bSep08, mRNA.              |
| Slc25a23 | Slc25a23.cSep08 | 301113 | 1710  | 1103 | 2  | 123 | solute carrier family 25 (mitochondrial carrier; phosphate carrier), member 23 (Slc25a23) alternative variant cSep08, mRNA.              |
| Slc25a25 | Slc25a25.bSep08 | 246771 | 2440  | 410  | 2  | 136 | solute carrier family 25 (mitochondrial carrier, phosphate carrier), member 25 (Slc25a25) alternative variant bSep08, mRNA.              |
| Slc25a25 | Slc25a25.cSep08 | 246771 | 3831  | 714  | 2  | 101 | solute carrier family 25 (mitochondrial carrier, phosphate carrier), member 25 (Slc25a25) alternative variant cSep08, mRNA.              |
| Slc25a26 | Slc25a26.aSep08 | 362403 | 96867 | 2862 | 10 | 274 | solute carrier family 25 (mitochondrial carrier, phosphate carrier), member 26 (29.1 kD) (Slc25a26) alternative variant aSep08, mRNA.    |
| Slc25a26 | Slc25a26.bSep08 | 362403 | 84793 | 800  | 8  | 217 | solute carrier family 25 (mitochondrial carrier, phosphate carrier), member 26 (Slc25a26) alternative variant bSep08, mRNA.              |
| Slc25a26 | Slc25a26.dSep08 | 362403 | 11306 | 571  | 3  | 94  | solute carrier family 25 (mitochondrial carrier, phosphate carrier), member 26 (Slc25a26) alternative variant dSep08, mRNA.              |
| Slc25a26 | Slc25a26.eSep08 | 362403 | 19501 | 477  | 3  | 73  | solute carrier family 25 (mitochondrial carrier, phosphate carrier), member 26 (Slc25a26) alternative variant eSep08, mRNA.              |
| Slc25a27 | Slc25a27.aSep08 | 85262  | 24405 | 1219 |    | 344 | solute carrier family 25, member 27 (38.1 kD) (Slc25a27) mRNA.                                                                           |
| Slc25a28 | Slc25a28.bSep08 | 688811 | 11232 | 1489 | 4  | 211 | solute carrier family 25, member 28 (Slc25a28) alternative variant bSep08, mRNA.                                                         |
| Slc25a28 | Slc25a28.cSep08 | 688811 | 10603 | 1995 | 3  | 182 | solute carrier family 25, member 28 (Slc25a28) alternative variant cSep08, mRNA.                                                         |
| Slc25a28 | Slc25a28.dSep08 | 688811 | 7736  | 428  | 2  | 112 | solute carrier family 25, member 28 (Slc25a28) alternative variant dSep08, mRNA.                                                         |
| Slc25a29 | Slc25a29.bSep08 | 314441 | 989   | 710  | 1  | 97  | solute carrier family 25 (mitochondrial carrier, palmitoylcarnitine transporter), member 29 (Slc25a29) alternative variant bSep08, mRNA. |
| Slc25a30 | Slc25a30.aSep08 | 361074 | 14900 | 750  |    | 203 | solute carrier family 25, member 30 (Slc25a30) mRNA.                                                                                     |

|          |                 |        |       |      |    |     |                                                                                                               |
|----------|-----------------|--------|-------|------|----|-----|---------------------------------------------------------------------------------------------------------------|
| Slc25a31 | Slc25a31.aSep08 | 689108 | 11636 | 443  |    | 147 | solute carrier family 25 (mitochondrial carrier; adenine nucleotide translocator), member 31 (Slc25a31) mRNA. |
| Slc25a32 | Slc25a32.aSep08 | 315023 | 17824 | 2316 |    | 316 | solute carrier family 25, member 32 (35.0 kD) (Slc25a32) mRNA.                                                |
| Slc25a35 | Slc25a35.bSep08 | 497933 | 1187  | 877  | 1  | 76  | solute carrier family 25, member 35 (Slc25a35) alternative variant bSep08, mRNA.                              |
| Slc25a36 | Slc25a36.aSep08 | 501039 | 33851 | 1801 | 6  | 397 | solute carrier family 25, member 36 (Slc25a36) alternative variant aSep08, mRNA.                              |
| Slc25a36 | Slc25a36.bSep08 | 501039 | 33668 | 4497 | 7  | 190 | solute carrier family 25, member 36 (21.4 kD) (Slc25a36) alternative variant bSep08, mRNA.                    |
| Slc25a36 | Slc25a36.cSep08 | 501039 | 9768  | 2196 | 4  | 154 | solute carrier family 25, member 36 (17.4 kD) (Slc25a36) alternative variant cSep08, mRNA.                    |
| Slc25a36 | Slc25a36.dSep08 | 501039 | 9145  | 1291 | 5  | 154 | solute carrier family 25, member 36 (17.4 kD) (Slc25a36) alternative variant dSep08, mRNA.                    |
| Slc25a37 | Slc25a37.cSep08 | 306000 | 3002  | 750  | 2  | 187 | solute carrier family 25, member 37 (21.2 kD) (Slc25a37) alternative variant cSep08, mRNA.                    |
| Slc25a38 | Slc25a38.bSep08 | 301067 | 5375  | 552  | 4  | 151 | solute carrier family 25, member 38 (Slc25a38) alternative variant bSep08, mRNA.                              |
| Slc25a38 | Slc25a38.cSep08 | 301067 | 3973  | 271  | 2  | 68  | solute carrier family 25, member 38 (Slc25a38) alternative variant cSep08, mRNA.                              |
| Slc25a38 | Slc25a38.dSep08 | 301067 | 8251  | 698  | 6  | 89  | solute carrier family 25, member 38 (Slc25a38) alternative variant dSep08, mRNA.                              |
| Slc25a39 | Slc25a39.bSep08 | 360636 | 4313  | 2098 | 11 | 341 | solute carrier family 25 member 39 (37.2 kD) (Slc25a39) alternative variant bSep08, complete mRNA.            |
| Slc25a39 | Slc25a39.cSep08 | 360636 | 4176  | 1133 | 10 | 306 | solute carrier family 25 member 39 (Slc25a39) alternative variant cSep08, mRNA.                               |
| Slc25a39 | Slc25a39.dSep08 | 360636 | 2927  | 943  | 8  | 270 | solute carrier family 25 member 39 (Slc25a39) alternative variant dSep08, mRNA.                               |
| Slc25a39 | Slc25a39.eSep08 | 360636 | 1899  | 704  | 5  | 159 | solute carrier family 25 member 39 (17.4 kD) (Slc25a39) alternative variant eSep08, mRNA.                     |
| Slc25a39 | Slc25a39.fSep08 | 360636 | 1136  | 678  | 4  | 144 | solute carrier family 25 member 39 (Slc25a39) alternative variant fSep08, mRNA.                               |
| Slc25a39 | Slc25a39.hSep08 | 360636 | 2258  | 696  | 6  | 110 | solute carrier family 25 member 39 (Slc25a39) alternative variant hSep08, mRNA.                               |
| Slc25a39 | Slc25a39.iSep08 | 360636 | 513   | 410  | 2  | 38  | putative protein (Slc25a39) alternative variant iSep08, mRNA.                                                 |
| Slc25a40 | Slc25a40.bSep08 | 296813 | 7105  | 609  | 1  | 102 | solute carrier family 25, member 40 (Slc25a40) alternative variant bSep08, mRNA.                              |
| Slc25a42 | Slc25a42.bSep08 | 689414 | 4259  | 2381 | 3  | 192 | solute carrier family 25, member 42 (Slc25a42) alternative variant bSep08, mRNA.                              |
| Slc25a45 | Slc25a45.aSep08 | 689625 | 4273  | 734  | 3  | 186 | solute carrier family 25, member 45 (Slc25a45) alternative variant aSep08, mRNA.                              |
| Slc26a2  | Slc26a2.bSep08  | 117267 | 9577  | 426  | 3  | 62  | solute carrier family 26 (sulfate transporter), member 2 (Slc26a2) alternative variant bSep08, mRNA.          |
| Slc26a3  | Slc26a3.bSep08  | 114629 | 11956 | 327  | 1  | 74  | solute carrier family 26, member 3 (Slc26a3) alternative variant bSep08, mRNA.                                |



|          |                 |        |       |      |    |     |                                                                                                                        |
|----------|-----------------|--------|-------|------|----|-----|------------------------------------------------------------------------------------------------------------------------|
| Slc26a4  | Slc26a4.bSep08  | 29440  | 7641  | 789  | 1  | 212 | solute carrier family 26, member 4 (Slc26a4) alternative variant bSep08, mRNA.                                         |
| Slc26a8  | Slc26a8.bSep08  | 309646 | 12785 | 1959 | 9  | 515 | solute carrier family 26, member 8 (Slc26a8) alternative variant bSep08, mRNA.                                         |
| Slc26a8  | Slc26a8.cSep08  | 309646 | 46044 | 1782 | 1  | 456 | solute carrier family 26, member 8 (Slc26a8) alternative variant cSep08, mRNA.                                         |
| Slc26a11 | Slc26a11.aSep08 | 360670 | 4739  | 367  |    | 122 | solute carrier family 26, member 11 (Slc26a11) mRNA.                                                                   |
| Slc27a1  | Slc27a1.bSep08  | 94172  | 3646  | 1179 | 6  | 206 | solute carrier family 27 (fatty acid transporter), member 1 (22.9 kD) (Slc27a1) alternative variant bSep08, mRNA.      |
| Slc27a1  | Slc27a1.cSep08  | 94172  | 9040  | 594  | 3  | 148 | solute carrier family 27 (fatty acid transporter), member 1 (Slc27a1) alternative variant cSep08, mRNA.                |
| Slc27a1  | Slc27a1.dSep08  | 94172  | 7872  | 296  | 2  | 98  | solute carrier family 27 (fatty acid transporter), member 1 (Slc27a1) alternative variant dSep08, mRNA.                |
| Slc27a1  | Slc27a1.eSep08  | 94172  | 893   | 401  | 2  | 75  | solute carrier family 27 (fatty acid transporter), member 1 (Slc27a1) alternative variant eSep08, mRNA.                |
| Slc27a2  | Slc27a2.bSep08  | 65192  | 11130 | 2577 | 2  | 475 | solute carrier family 27 (fatty acid transporter), member 2 (Slc27a2) alternative variant bSep08, mRNA.                |
| Slc27a2  | Slc27a2.cSep08  | 65192  | 17839 | 860  | 5  | 286 | solute carrier family 27 (fatty acid transporter), member 2 (Slc27a2) alternative variant cSep08, mRNA.                |
| Slc27a4  | Slc27a4.aSep08  | 311839 | 12908 | 3053 | 13 | 643 | solute carrier family 27 (fatty acid transporter), member 4 (72.2 kD) (Slc27a4) alternative variant aSep08, mRNA.      |
| Slc28a1  | Slc28a1.bSep08  | 116642 | 1364  | 990  | 1  | 69  | solute carrier family 28 (sodium-coupled nucleoside transporter), member 1 (Slc28a1) alternative variant bSep08, mRNA. |
| Slc28a2  | Slc28a2.bSep08  | 60423  | 12997 | 843  | 8  | 258 | solute carrier family 28 (sodium-coupled nucleoside transporter), member 2 (Slc28a2) alternative variant bSep08, mRNA. |
| Slc28a2  | Slc28a2.cSep08  | 60423  | 8280  | 559  | 4  | 90  | solute carrier family 28 (sodium-coupled nucleoside transporter), member 2 (Slc28a2) alternative variant cSep08, mRNA. |
| Slc28a2  | Slc28a2.eSep08  | 60423  | 728   | 174  | 2  | 19  | solute carrier family 28 (sodium-coupled nucleoside transporter), member 2 (Slc28a2) alternative variant eSep08, mRNA. |
| Slc29a1  | Slc29a1.bSep08  | 63997  | 5995  | 798  | 7  | 158 | solute carrier family 29 member 1 CRA a (Slc29a1) alternative variant bSep08, mRNA.                                    |
| Slc29a1  | Slc29a1.cSep08  | 63997  | 2813  | 954  | 3  | 151 | solute carrier family 29 member 1 CRA a (16.5 kD) (Slc29a1) alternative variant cSep08, mRNA.                          |
| Slc29a1  | Slc29a1.dSep08  | 63997  | 3982  | 452  | 5  | 150 | solute carrier family 29 member 1 CRA c (Slc29a1) alternative variant dSep08, mRNA.                                    |
| Slc29a1  | Slc29a1.eSep08  | 63997  | 2900  | 741  | 2  | 114 | equilibrative nucleoside transporter 1 (12.5 kD) (Slc29a1) alternative variant eSep08, mRNA.                           |
| Slc29a1  | Slc29a1.gSep08  | 63997  | 3595  | 612  | 4  | 89  | putative protein (9.6 kD) (Slc29a1) alternative variant gSep08, mRNA.                                                  |
| Slc29a1  | Slc29a1.hSep08  | 63997  | 1186  | 887  | 2  | 81  | solute carrier family 29 member 1 (9.0 kD) (Slc29a1) alternative variant hSep08, mRNA.                                 |
| Slc29a1  | Slc29a1.iSep08  | 63997  | 5606  | 750  | 7  | 75  | equilibrative nucleoside transporter 1 (Slc29a1) alternative variant iSep08, mRNA.                                     |

|         |                |           |       |      |   |     |                                                                                                                            |
|---------|----------------|-----------|-------|------|---|-----|----------------------------------------------------------------------------------------------------------------------------|
| Slc29a1 | Slc29a1.jSep08 | 63997     | 5620  | 703  | 6 | 79  | equilibrative nucleoside transporter 1 (Slc29a1) alternative variant jSep08, mRNA.                                         |
| Slc29a1 | Slc29a1.kSep08 | 63997     | 1038  | 687  | 2 | 87  | putative protein (Slc29a1) alternative variant kSep08, mRNA.                                                               |
| Slc29a1 | Slc29a1.lSep08 | 63997     | 5949  | 540  | 6 | 70  | equilibrative nucleoside transporter 1 (Slc29a1) alternative variant lSep08, mRNA.                                         |
| Slc30a2 | Slc30a2.cSep08 | 25362     | 1018  | 733  | 2 | 139 | solute carrier family 30 (zinc transporter), member 2 (Slc30a2) alternative variant cSep08, mRNA.                          |
| Slc30a2 | Slc30a2.dSep08 | 25362     | 4680  | 672  | 3 | 106 | solute carrier family 30 (zinc transporter), member 2 (Slc30a2) alternative variant dSep08, mRNA.                          |
| Slc30a2 | Slc30a2.eSep08 | 25362     | 10562 | 1777 | 3 | 35  | solute carrier family 30 (zinc transporter), member 2 (Slc30a2) alternative variant eSep08, mRNA.                          |
| Slc30a3 | Slc30a3.bSep08 | 366568    | 2113  | 837  | 5 | 206 | solute carrier family 30 (zinc transporter), member 3 (Slc30a3) alternative variant bSep08, mRNA.                          |
| Slc30a3 | Slc30a3.cSep08 | 366568    | 19120 | 793  | 6 | 178 | solute carrier family 30 (zinc transporter), member 3 (Slc30a3) alternative variant cSep08, mRNA.                          |
| Slc30a6 | Slc30a6.aSep08 | 298786    | 28947 | 1584 | 2 | 475 | solute carrier family 30 (zinc transporter), member 6 (Slc30a6) alternative variant aSep08, mRNA.                          |
| Slc30a7 | Slc30a7.aSep08 | 310801    | 74607 | 2008 |   | 378 | solute carrier family 30 (zinc transporter), member 7 (41.8 kD) (Slc30a7) mRNA.                                            |
| Slc31a1 | Slc31a1.bSep08 | 171135    | 26029 | 825  | 5 | 170 | solute carrier family 31 (copper transporters), member 1 (19.2 kD) (Slc31a1) alternative variant bSep08, mRNA.             |
| Slc31a2 | Slc31a2.aSep08 | 298091    | 10510 | 1767 | 3 | 143 | solute carrier family 31, member 2 (16.1 kD) (Slc31a2) alternative variant aSep08, mRNA.                                   |
| Slc31a2 | Slc31a2.bSep08 | 298091    | 10335 | 1335 | 1 | 143 | solute carrier family 31, member 2 (Slc31a2) alternative variant bSep08, mRNA.                                             |
| Slc33a1 | Slc33a1.bSep08 | 64018     | 22091 | 1882 | 6 | 243 | solute carrier family 33 (acetyl-CoA transporter), member 1 (26.9 kD) (Slc33a1) alternative variant bSep08, complete mRNA. |
| Slc33a1 | Slc33a1.cSep08 | 64018     | 6556  | 561  | 4 | 186 | solute carrier family 33 (acetyl-CoA transporter), member 1 (Slc33a1) alternative variant cSep08, mRNA.                    |
| Slc33a1 | Slc33a1.dSep08 | 64018     | 2076  | 931  | 2 | 122 | solute carrier family 33 (acetyl-CoA transporter), member 1 (13.4 kD) (Slc33a1) alternative variant dSep08, mRNA.          |
| Slc34a1 | Slc34a1.bSep08 | 25548     | 6198  | 2206 | 4 | 327 | solute carrier family 34 member 1 CRA b (Slc34a1) alternative variant bSep08, mRNA.                                        |
| Slc34a1 | Slc34a1.cSep08 | 25548     | 2692  | 775  | 5 | 215 | solute carrier family 34 member 1 CRA b (22.7 kD) (Slc34a1) alternative variant cSep08, mRNA.                              |
| Slc34a1 | Slc34a1.dSep08 | 25548     | 9693  | 765  | 7 | 126 | solute carrier family 34 member 1 (Slc34a1) alternative variant dSep08, mRNA.                                              |
| Slc34a1 | Slc34a1.eSep08 | 25548     | 897   | 791  | 2 | 122 | solute carrier family 34 member 1 CRA d (Slc34a1) alternative variant eSep08, mRNA.                                        |
| Slc35a2 | Slc35a2.cSep08 | 100158233 | 1867  | 563  | 2 | 129 | solute carrier family 35, member A2 (Slc35a2) alternative variant cSep08, mRNA.                                            |
| Slc35a2 | Slc35a2.dSep08 | 100158233 | 1780  | 478  | 2 | 103 | solute carrier family 35, member A2 (Slc35a2) alternative variant dSep08, mRNA.                                            |
| Slc35a4 | Slc35a4.bSep08 | 257647    | 2355  | 781  | 2 | 103 | putative cytoplasmic protein (11.3 kD) (Slc35a4) alternative variant bSep08, mRNA.                                         |

|         |                |        |       |      |    |     |                                                                                                |
|---------|----------------|--------|-------|------|----|-----|------------------------------------------------------------------------------------------------|
| Slc35a4 | Slc35a4.cSep08 | 257647 | 2160  | 487  | 1  | 70  | putative protein (7.5 kD) (Slc35a4) alternative variant cSep08, mRNA.                          |
| Slc35a4 | Slc35a4.dSep08 | 257647 | 1884  | 396  | 2  | 51  | putative protein (Slc35a4) alternative variant dSep08, mRNA.                                   |
| Slc35a5 | Slc35a5.aSep08 | 498081 | 3091  | 1616 | 2  | 90  | solute carrier family 35, member A5 (Slc35a5) alternative variant aSep08, mRNA.                |
| Slc35b1 | Slc35b1.bSep08 | 287642 | 4361  | 728  | 6  | 190 | solute carrier family 35 member B1 (Slc35b1) alternative variant bSep08, mRNA.                 |
| Slc35b1 | Slc35b1.cSep08 | 287642 | 2343  | 1670 | 2  | 163 | solute carrier family 35 member B1 CRA b (18.3 kD) (Slc35b1) alternative variant cSep08, mRNA. |
| Slc35b1 | Slc35b1.dSep08 | 287642 | 1456  | 268  | 3  | 88  | solute carrier family 35 member B1 CRA c (Slc35b1) alternative variant dSep08, mRNA.           |
| Slc35b1 | Slc35b1.eSep08 | 287642 | 1928  | 905  | 3  | 64  | solute carrier family 35 member B1 CRA c (7.0 kD) (Slc35b1) alternative variant eSep08, mRNA.  |
| Slc35b3 | Slc35b3.aSep08 | 306866 | 26763 | 1889 | 8  | 429 | solute carrier family 35, member B3 (Slc35b3) alternative variant aSep08, mRNA.                |
| Slc35b3 | Slc35b3.bSep08 | 306866 | 6161  | 452  | 1  | 90  | solute carrier family 35, member B3 (Slc35b3) alternative variant bSep08, mRNA.                |
| Slc35b3 | Slc35b3.dSep08 | 306866 | 2060  | 741  | 2  | 57  | solute carrier family 35, member B3 (Slc35b3) alternative variant dSep08, mRNA.                |
| Slc35b3 | Slc35b3.eSep08 | 306866 | 10705 | 727  | 1  | 53  | solute carrier family 35, member B3 (Slc35b3) alternative variant eSep08, mRNA.                |
| Slc35b4 | Slc35b4.bSep08 | 296969 | 5332  | 734  | 4  | 122 | solute carrier family 35, member B4 (Slc35b4) alternative variant bSep08, mRNA.                |
| Slc35b4 | Slc35b4.cSep08 | 296969 | 1852  | 761  | 2  | 95  | solute carrier family 35, member B4 (Slc35b4) alternative variant cSep08, mRNA.                |
| Slc35b4 | Slc35b4.dSep08 | 296969 | 1428  | 682  | 2  | 55  | solute carrier family 35, member B4 (Slc35b4) alternative variant dSep08, mRNA.                |
| Slc35c1 | Slc35c1.bSep08 | 311204 | 1804  | 633  | 2  | 210 | solute carrier family 35, member C1 (Slc35c1) alternative variant bSep08, mRNA.                |
| Slc35c2 | Slc35c2.bSep08 | 311637 | 11065 | 2047 | 11 | 364 | solute carrier family 35 member C2 (40.3 kD) (Slc35c2) alternative variant bSep08, mRNA.       |
| Slc35c2 | Slc35c2.cSep08 | 311637 | 8919  | 1381 | 10 | 335 | solute carrier family 35 member C2 (Slc35c2) alternative variant cSep08, mRNA.                 |
| Slc35c2 | Slc35c2.dSep08 | 311637 | 6251  | 1875 | 7  | 200 | putative protein (44.9 kD) (Slc35c2) alternative variant dSep08, mRNA.                         |
| Slc35c2 | Slc35c2.eSep08 | 311637 | 10130 | 1202 | 9  | 197 | solute carrier family 35 member C2 (Slc35c2) alternative variant eSep08, mRNA.                 |
| Slc35c2 | Slc35c2.fSep08 | 311637 | 4774  | 726  | 6  | 130 | solute carrier family 35 member C2 (Slc35c2) alternative variant fSep08, mRNA.                 |
| Slc35c2 | Slc35c2.gSep08 | 311637 | 1420  | 717  | 2  | 119 | solute carrier family 35 member C2 (Slc35c2) alternative variant gSep08, mRNA.                 |
| Slc35c2 | Slc35c2.hSep08 | 311637 | 5499  | 816  | 5  | 112 | solute carrier family 35 member C2 (12.8 kD) (Slc35c2) alternative variant hSep08, mRNA.       |
| Slc35c2 | Slc35c2.iSep08 | 311637 | 5593  | 663  | 6  | 63  | putative protein (6.8 kD) (Slc35c2) alternative variant iSep08, mRNA.                          |

|         |                |        |       |      |    |     |                                                                                                                                                  |
|---------|----------------|--------|-------|------|----|-----|--------------------------------------------------------------------------------------------------------------------------------------------------|
| Slc35d1 | Slc35d1.bSep08 | 298280 | 50621 | 910  | 10 | 279 | solute carrier family 35 (UDP-glucuronic acid/UDP-N-acetylgalactosamine dual transporter), member D1 (Slc35d1) alternative variant bSep08, mRNA. |
| Slc35d1 | Slc35d1.cSep08 | 298280 | 1294  | 339  | 1  | 62  | solute carrier family 35 (UDP-glucuronic acid/UDP-N-acetylgalactosamine dual transporter), member D1 (Slc35d1) alternative variant cSep08, mRNA. |
| Slc35d2 | Slc35d2.aSep08 | 290959 | 10187 | 947  |    | 127 | solute carrier family 35, member D2 (13.9 kD) (Slc35d2) mRNA.                                                                                    |
| Slc35e3 | Slc35e3.aSep08 | 362883 | 13676 | 3432 |    | 313 | solute carrier family 35, member E3 (34.8 kD) (Slc35e3) mRNA.                                                                                    |
| Slc35f2 | Slc35f2.aSep08 | 300713 | 36528 | 747  | 5  | 249 | solute carrier family 35, member F2 (Slc35f2) alternative variant aSep08, mRNA.                                                                  |
| Slc35f4 | Slc35f4.aSep08 | 305865 | 6765  | 1624 |    | 522 | solute carrier family 35, member F4 (Slc35f4) alternative variant aSep08, mRNA.                                                                  |
| Slc35f4 | Slc35f4.bSep08 | 305865 | 6145  | 1004 |    | 154 | solute carrier family 35, member F4 (Slc35f4) alternative variant bSep08, mRNA.                                                                  |
| Slc35f5 | Slc35f5.bSep08 | 288993 | 17529 | 741  | 8  | 178 | solute carrier family 35, member F5 (20.0 kD) (Slc35f5) alternative variant bSep08, mRNA.                                                        |
| Slc36a1 | Slc36a1.aSep08 | 155205 | 12499 | 1759 | 5  | 525 | solute carrier family 36 (proton/amino acid symporter), member 1 (Slc36a1) alternative variant aSep08, mRNA.                                     |
| Slc36a3 | Slc36a3.bSep08 | 303148 | 11752 | 708  | 1  | 121 | solute carrier family 36 (proton/amino acid symporter), member 3 (Slc36a3) alternative variant bSep08, mRNA.                                     |
| Slc37a1 | Slc37a1.bSep08 | 294321 | 14055 | 781  | 5  | 169 | solute carrier family 37 (glycerol-3-phosphate transporter), member 1 (Slc37a1) alternative variant bSep08, mRNA.                                |
| Slc37a1 | Slc37a1.cSep08 | 294321 | 11173 | 763  | 6  | 129 | solute carrier family 37 (glycerol-3-phosphate transporter), member 1 (Slc37a1) alternative variant cSep08, mRNA.                                |
| Slc37a2 | Slc37a2.aSep08 | 500973 | 7074  | 2004 | 10 | 243 | solute carrier family 37 (glycerol-3-phosphate transporter), member 2 (Slc37a2) alternative variant aSep08, mRNA.                                |
| Slc37a3 | Slc37a3.bSep08 | 312255 | 19995 | 393  | 4  | 130 | solute carrier family 37 (glycerol-3-phosphate transporter), member 3 (Slc37a3) alternative variant bSep08, mRNA.                                |
| Slc37a3 | Slc37a3.dSep08 | 312255 | 2301  | 759  | 2  | 40  | solute carrier family 37 (glycerol-3-phosphate transporter), member 3 (4.8 kD) (Slc37a3) alternative variant dSep08, mRNA.                       |
| Slc37a4 | Slc37a4.bSep08 | 29573  | 5452  | 1924 | 8  | 266 | solute carrier family 37 member 4 (29.1 kD) (Slc37a4) alternative variant bSep08, mRNA.                                                          |
| Slc37a4 | Slc37a4.cSep08 | 29573  | 1155  | 1056 | 2  | 58  | solute carrier family 37 member 4 CRA b (6.4 kD) (Slc37a4) alternative variant cSep08, mRNA.                                                     |
| Slc38a1 | Slc38a1.bSep08 | 170567 | 54417 | 1799 | 7  | 439 | solute carrier family 38 member 1 CRA b (Slc38a1) alternative variant bSep08, mRNA.                                                              |
| Slc38a1 | Slc38a1.cSep08 | 170567 | 6752  | 700  | 7  | 167 | solute carrier family 38 member 1 CRA a (Slc38a1) alternative variant cSep08, mRNA.                                                              |
| Slc38a1 | Slc38a1.eSep08 | 170567 | 26061 | 606  | 4  | 72  | solute carrier family 38 member 1 CRA a (8.4 kD) (Slc38a1) alternative variant eSep08, mRNA.                                                     |
| Slc38a1 | Slc38a1.fSep08 | 170567 | 1744  | 417  | 3  | 50  | solute carrier family 38 member 1 CRA c (Slc38a1) alternative variant fSep08, mRNA.                                                              |
| Slc38a2 | Slc38a2.bSep08 | 29642  | 2543  | 707  | 5  | 116 | solute carrier family 38, member 2 (Slc38a2) alternative variant bSep08, mRNA.                                                                   |

|          |                 |        |       |      |   |     |                                                                                                             |
|----------|-----------------|--------|-------|------|---|-----|-------------------------------------------------------------------------------------------------------------|
| Slc38a2  | Slc38a2.cSep08  | 29642  | 968   | 431  | 3 | 104 | solute carrier family 38, member 2 (Slc38a2) alternative variant cSep08, mRNA.                              |
| Slc38a3  | Slc38a3.bSep08  | 252919 | 3316  | 964  | 5 | 187 | solute carrier family 38 member 3 CRA a (20.9 kD) (Slc38a3) alternative variant bSep08, mRNA.               |
| Slc38a3  | Slc38a3.cSep08  | 252919 | 3099  | 836  | 5 | 178 | solute carrier family 38 member 3 CRA a (Slc38a3) alternative variant cSep08, mRNA.                         |
| Slc38a3  | Slc38a3.dSep08  | 252919 | 3293  | 1143 | 4 | 110 | solute carrier family 38 member 3 CRA a (12.2 kD) (Slc38a3) alternative variant dSep08, mRNA.               |
| Slc38a4  | Slc38a4.bSep08  | 170573 | 4052  | 741  | 6 | 246 | solute carrier family 38, member 4 (Slc38a4) alternative variant bSep08, mRNA.                              |
| Slc38a4  | Slc38a4.cSep08  | 170573 | 29598 | 418  | 5 | 123 | solute carrier family 38, member 4 (Slc38a4) alternative variant cSep08, mRNA.                              |
| Slc38a4  | Slc38a4.dSep08  | 170573 | 24527 | 433  | 5 | 114 | solute carrier family 38, member 4 (Slc38a4) alternative variant dSep08, mRNA.                              |
| Slc38a4  | Slc38a4.eSep08  | 170573 | 39845 | 415  | 4 | 104 | solute carrier family 38, member 4 (Slc38a4) alternative variant eSep08, mRNA.                              |
| Slc38a4  | Slc38a4.fSep08  | 170573 | 30472 | 531  | 2 | 30  | solute carrier family 38, member 4 (3.5 kD) (Slc38a4) alternative variant fSep08, mRNA.                     |
| Slc38a4  | Slc38a4.gSep08  | 170573 | 39203 | 391  | 5 | 53  | solute carrier family 38, member 4 (Slc38a4) alternative variant gSep08, mRNA.                              |
| Slc38a5  | Slc38a5.bSep08  | 192208 | 4124  | 754  | 1 | 251 | solute carrier family 38, member 5 (Slc38a5) alternative variant bSep08, mRNA.                              |
| Slc38a6  | Slc38a6.bSep08  | 299139 | 8714  | 1781 | 5 | 159 | solute carrier family 38, member 6 (Slc38a6) alternative variant bSep08, mRNA.                              |
| Slc38a6  | Slc38a6.cSep08  | 299139 | 45921 | 586  | 9 | 119 | solute carrier family 38, member 6 (12.8 kD) (Slc38a6) alternative variant cSep08, mRNA.                    |
| Slc38a6  | Slc38a6.fSep08  | 299139 | 1901  | 413  | 2 | 33  | solute carrier family 38, member 6 (Slc38a6) alternative variant fSep08, mRNA.                              |
| Slc38a7  | Slc38a7.bSep08  | 291840 | 4780  | 420  | 1 | 59  | solute carrier family 38, member 7 (Slc38a7) alternative variant bSep08, mRNA.                              |
| Slc38a9  | Slc38a9.bSep08  | 310091 | 7413  | 954  | 4 | 111 | solute carrier family 38, member 9 (12.7 kD) (Slc38a9) alternative variant bSep08, mRNA.                    |
| Slc38a10 | Slc38a10.aSep08 | 303740 | 7618  | 3040 | 4 | 645 | solute carrier family 38, member 10 (Slc38a10) alternative variant aSep08, mRNA.                            |
| Slc38a10 | Slc38a10.bSep08 | 303740 | 5631  | 1855 | 2 | 428 | solute carrier family 38, member 10 (Slc38a10) alternative variant bSep08, mRNA.                            |
| Slc38a11 | Slc38a11.aSep08 | 362141 | 16219 | 787  | 6 | 237 | solute carrier family 38, member 11 (Slc38a11) alternative variant aSep08, mRNA.                            |
| Slc38a11 | Slc38a11.bSep08 | 362141 | 2685  | 338  | 1 | 65  | solute carrier family 38, member 11 (Slc38a11) alternative variant bSep08, mRNA.                            |
| Slc39a3  | Slc39a3.aSep08  | 314637 | 5932  | 1538 | 1 | 317 | solute carrier family 39 (zinc transporter), member 3 (34.0 kD) (Slc39a3) alternative variant aSep08, mRNA. |
| Slc39a4  | Slc39a4.bSep08  | 300051 | 934   | 846  | 2 | 100 | solute carrier family 39 (zinc transporter), member 4 (Slc39a4) alternative variant bSep08, mRNA.           |
| Slc39a5  | Slc39a5.bSep08  | 362812 | 4682  | 1052 | 5 | 299 | solute carrier family 39 (metal ion transporter), member 5 (Slc39a5) alternative variant bSep08, mRNA.      |

|                    |                           |        |        |      |   |     |                                                                                                                           |
|--------------------|---------------------------|--------|--------|------|---|-----|---------------------------------------------------------------------------------------------------------------------------|
| Slc39a6            | Slc39a6.bSep08            | 291733 | 11548  | 1776 | 4 | 585 | solute carrier family 39 (metal ion transporter), member 6 (Slc39a6) alternative variant bSep08, mRNA.                    |
| Slc39a6            | Slc39a6.cSep08            | 291733 | 4254   | 428  | 3 | 65  | solute carrier family 39 (metal ion transporter), member 6 (Slc39a6) alternative variant cSep08, mRNA.                    |
| Slc39a9            | Slc39a9.bSep08            | 314275 | 12805  | 674  | 5 | 224 | solute carrier family 39 (zinc transporter), member 9 (Slc39a9) alternative variant bSep08, mRNA.                         |
| Slc39a10_predicted | Slc39a10_predicted.bSep08 | 363229 | 6919   | 603  | 3 | 191 | solute carrier family 39 (zinc transporter), member 10 (predicted) (Slc39a10_predicted) alternative variant bSep08, mRNA. |
| Slc39a11           | Slc39a11.bSep08           | 287796 | 266557 | 702  | 5 | 210 | solute carrier family 39 (metal ion transporter), member 11 (Slc39a11) alternative variant bSep08, mRNA.                  |
| Slc39a11           | Slc39a11.cSep08           | 287796 | 208955 | 864  | 6 | 207 | solute carrier family 39 (metal ion transporter), member 11 (21.9 kD) (Slc39a11) alternative variant cSep08, mRNA.        |
| Slc39a11           | Slc39a11.dSep08           | 287796 | 129866 | 835  | 3 | 82  | solute carrier family 39 (metal ion transporter), member 11 (Slc39a11) alternative variant dSep08, mRNA.                  |
| Slc39a11           | Slc39a11.eSep08           | 287796 | 5827   | 342  | 2 | 43  | solute carrier family 39 (metal ion transporter), member 11 (Slc39a11) alternative variant eSep08, mRNA.                  |
| Slc39a13           | Slc39a13.bSep08           | 295928 | 2056   | 971  | 5 | 144 | solute carrier family 39 (metal ion transporter), member 13 (Slc39a13) alternative variant bSep08, mRNA.                  |
| Slc39a13           | Slc39a13.cSep08           | 295928 | 1318   | 858  | 4 | 113 | solute carrier family 39 (metal ion transporter), member 13 (12.3 kD) (Slc39a13) alternative variant cSep08, mRNA.        |
| Slc39a14           | Slc39a14.bSep08           | 306009 | 6073   | 410  | 4 | 136 | solute carrier family 39 (zinc transporter), member 14 (Slc39a14) alternative variant bSep08, mRNA.                       |
| Slc39a14           | Slc39a14.cSep08           | 306009 | 6584   | 391  | 3 | 129 | solute carrier family 39 (zinc transporter), member 14 (Slc39a14) alternative variant cSep08, mRNA.                       |
| Slc41a2            | Slc41a2.bSep08            | 362861 | 46286  | 751  | 4 | 175 | solute carrier family 41, member 2 (Slc41a2) alternative variant bSep08, mRNA.                                            |
| Slc41a2            | Slc41a2.cSep08            | 362861 | 19710  | 385  | 3 | 107 | solute carrier family 41, member 2 (Slc41a2) alternative variant cSep08, mRNA.                                            |
| Slc41a2            | Slc41a2.eSep08            | 362861 | 14194  | 683  | 3 | 69  | solute carrier family 41, member 2 (Slc41a2) alternative variant eSep08, mRNA.                                            |
| Slc43a1            | Slc43a1.bSep08            | 311168 | 33498  | 933  | 8 | 264 | solute carrier family 43, member 1 (Slc43a1) alternative variant bSep08, mRNA.                                            |
| Slc43a1            | Slc43a1.cSep08            | 311168 | 4430   | 1041 | 4 | 156 | solute carrier family 43, member 1 (17.5 kD) (Slc43a1) alternative variant cSep08, mRNA.                                  |
| Slc43a2            | Slc43a2.bSep08            | 287532 | 4765   | 382  | 3 | 127 | solute carrier family 43 member 2 CRA c (Slc43a2) alternative variant bSep08, mRNA.                                       |
| Slc43a2            | Slc43a2.cSep08            | 287532 | 13618  | 1103 | 4 | 94  | solute carrier family 43 member 2 CRA b (10.8 kD) (Slc43a2) alternative variant cSep08, mRNA.                             |
| Slc43a2            | Slc43a2.dSep08            | 287532 | 10264  | 535  | 3 | 92  | putative protein (10.1 kD) (Slc43a2) alternative variant dSep08, mRNA.                                                    |
| Slc43a3            | Slc43a3.bSep08            | 311170 | 14224  | 831  | 7 | 277 | solute carrier family 43, member 3 (Slc43a3) alternative variant bSep08, mRNA.                                            |
| Slc43a3            | Slc43a3.cSep08            | 311170 | 1562   | 394  | 3 | 131 | solute carrier family 43, member 3 (Slc43a3) alternative variant cSep08, mRNA.                                            |
| Slc44a2            | Slc44a2.bSep08            | 363024 | 6708   | 2083 | 7 | 347 | solute carrier family 44 member 2 (Slc44a2) alternative variant bSep08, mRNA.                                             |

|                   |                          |        |       |      |   |     |                                                                                                                                                                                   |
|-------------------|--------------------------|--------|-------|------|---|-----|-----------------------------------------------------------------------------------------------------------------------------------------------------------------------------------|
| Slc44a2           | Slc44a2.cSep08           | 363024 | 6724  | 1403 | 8 | 270 | solute carrier family 44 member 2 CRA b (Slc44a2) alternative variant cSep08, mRNA.                                                                                               |
| Slc44a2           | Slc44a2.dSep08           | 363024 | 24935 | 1362 | 9 | 252 | solute carrier family 44 member 2 (Slc44a2) alternative variant dSep08, mRNA.                                                                                                     |
| Slc44a2           | Slc44a2.eSep08           | 363024 | 4432  | 734  | 5 | 229 | solute carrier family 44 member 2 (Slc44a2) alternative variant eSep08, mRNA.                                                                                                     |
| Slc44a2           | Slc44a2.fSep08           | 363024 | 24487 | 875  | 8 | 199 | solute carrier family 44 member 2 (Slc44a2) alternative variant fSep08, mRNA.                                                                                                     |
| Slc44a2           | Slc44a2.gSep08           | 363024 | 6153  | 990  | 9 | 117 | solute carrier family 44 member 2 (Slc44a2) alternative variant gSep08, mRNA.                                                                                                     |
| Slc44a3           | Slc44a3.bSep08           | 295417 | 22389 | 799  | 7 | 266 | solute carrier family 44, member 3 (Slc44a3) alternative variant bSep08, mRNA.                                                                                                    |
| Slc44a3           | Slc44a3.cSep08           | 295417 | 1467  | 467  | 2 | 44  | solute carrier family 44, member 3 (Slc44a3) alternative variant cSep08, mRNA.                                                                                                    |
| Slc44a3           | Slc44a3.dSep08           | 295417 | 30396 | 726  | 4 | 6   | solute carrier family 44, member 3 (0.7 kD) (Slc44a3) alternative variant dSep08, mRNA.                                                                                           |
| Slc44a4           | Slc44a4.aSep08           | 294255 | 16161 | 2297 |   | 709 | solute carrier family 44, member 4 (Slc44a4) mRNA.                                                                                                                                |
| Slc45a1           | Slc45a1.cSep08           | 246258 | 1002  | 461  | 2 | 82  | solute carrier family 45, member 1 (Slc45a1) alternative variant cSep08, mRNA.                                                                                                    |
| Slc45a3           | Slc45a3.aSep08           | 304785 | 20551 | 3163 | 1 | 564 | solute carrier family 45, member 3 (60.7 kD) (Slc45a3) alternative variant aSep08, complete mRNA.                                                                                 |
| Slc45a3           | Slc45a3.bSep08           | 304785 | 15533 | 779  | 1 | 158 | solute carrier family 45, member 3 (Slc45a3) alternative variant bSep08, mRNA.                                                                                                    |
| Slc45a4           | Slc45a4.aSep08           | 315054 | 59820 | 1323 |   | 204 | solute carrier family 45, member 4 (Slc45a4) mRNA.                                                                                                                                |
| Slc46a3           | Slc46a3.bSep08           | 288454 | 5063  | 223  | 1 | 74  | solute carrier family 46, member 3 (Slc46a3) alternative variant bSep08, mRNA.                                                                                                    |
| Slc47a2           | Slc47a2.aSep08           | 497921 | 17920 | 740  |   | 134 | solute carrier family 47, member 2 (Slc47a2) mRNA.                                                                                                                                |
| Slco1a4           | Slco1a4.cSep08           | 170698 | 5475  | 842  | 2 | 56  | solute carrier organic anion transporter family, member 1a4 (Slco1a4) alternative variant cSep08, mRNA.                                                                           |
| Slco1a5andSlco1a1 | Slco1a5andSlco1a1.bSep08 | 50572  | 1805  | 650  | 1 | 49  | solute carrier organic anion transporter family, member 1a1 and solute carrier organic anion transporter family, member 1a5 (Slco1a5andSlco1a1) alternative variant bSep08, mRNA. |
| Slco1a5andSlco1a1 | Slco1a5andSlco1a1.bSep08 | 80900  | 1805  | 650  | 1 | 49  | solute carrier organic anion transporter family, member 1a1 and solute carrier organic anion transporter family, member 1a5 (Slco1a5andSlco1a1) alternative variant bSep08, mRNA. |
| Slco1a6           | Slco1a6.bSep08           | 84608  | 25325 | 848  | 2 | 159 | solute carrier organic anion transporter family, member 1a6 (Slco1a6) alternative variant bSep08, mRNA.                                                                           |
| Slco1c1           | Slco1c1.bSep08           | 84511  | 5962  | 608  | 4 | 167 | solute carrier organic anion transporter family, member 1c1 (Slco1c1) alternative variant bSep08, mRNA.                                                                           |
| Slco2b1           | Slco2b1.bSep08           | 140860 | 12553 | 857  | 2 | 175 | solute carrier organic anion transporter family, member 2b1 (Slco2b1) alternative variant bSep08, mRNA.                                                                           |
| Slco3a1           | Slco3a1.bSep08           | 140915 | 53354 | 1657 | 7 | 358 | solute carrier organic anion transporter family, member 3a1 (Slco3a1) alternative variant bSep08, mRNA.                                                                           |
| Slco3a1           | Slco3a1.cSep08           | 140915 | 55007 | 585  | 2 | 194 | solute carrier organic anion transporter family, member 3a1 (Slco3a1) alternative variant cSep08, mRNA.                                                                           |

|          |                 |        |       |      |   |     |                                                                                                         |
|----------|-----------------|--------|-------|------|---|-----|---------------------------------------------------------------------------------------------------------|
| Slco4a1  | Slco4a1.bSep08  | 171144 | 981   | 734  | 1 | 176 | solute carrier organic anion transporter family, member 4a1 (Slco4a1) alternative variant bSep08, mRNA. |
| Slco6b1  | Slco6b1.bSep08  | 170925 | 26766 | 913  | 2 | 144 | solute carrier organic anion transporter family, member 6b1 (Slco6b1) alternative variant bSep08, mRNA. |
| sleebor  | sleebor.aSep08  |        | 1159  | 642  |   | 126 | type X alpha 1 (sleebor) mRNA.                                                                          |
| sleechy  | sleechy.aSep08  |        | 1322  | 439  |   | 60  | putative protein (7.2 kD) (sleechy) mRNA.                                                               |
| sleedoy  | sleedoy.bSep08  |        | 1261  | 1151 |   | 96  | putative protein (sleedoy) alternative variant bSep08, mRNA.                                            |
| sleefee  | sleefee.aSep08  |        | 2131  | 284  |   | 56  | putative protein (sleefee) mRNA.                                                                        |
| sleeflu  | sleeflu.aSep08  |        | 38032 | 952  | 2 | 103 | CRA a (sleeflu) alternative variant aSep08, mRNA.                                                       |
| sleeflu  | sleeflu.bSep08  |        | 11842 | 713  | 1 | 62  | CRA a (sleeflu) alternative variant bSep08, mRNA.                                                       |
| sleefly  | sleefly.aSep08  |        | 726   | 492  |   | 79  | putative nuclear protein (7.9 kD) (sleefly) mRNA.                                                       |
| sleeja   | sleeja.aSep08   |        | 41825 | 369  |   | 53  | putative protein (6.0 kD) (sleeja) mRNA.                                                                |
| sleelo   | sleelo.aSep08   |        | 22188 | 615  |   | 72  | putative protein (sleelo) mRNA.                                                                         |
| sleemee  | sleemee.aSep08  |        | 420   | 315  | 2 | 54  | putative protein (sleemee) alternative variant aSep08, mRNA.                                            |
| sleepy   | sleepy.aSep08   |        | 445   | 351  |   | 71  | tyrosine kinase 2 (sleepy) mRNA.                                                                        |
| sleeroy  | sleeroy.aSep08  |        | 4620  | 306  |   | 56  | putative protein (sleeroy) mRNA.                                                                        |
| sleeshaw | sleeshaw.aSep08 |        | 1751  | 1611 | 2 | 39  | putative protein (4.5 kD) (sleeshaw) alternative variant aSep08, mRNA.                                  |
| sleeshee | sleeshee.aSep08 |        | 5238  | 344  |   | 99  | tubulin polyglutamylase tll17 like (sleeshee) mRNA.                                                     |
| sleetu   | sleetu.aSep08   |        | 6933  | 375  |   | 48  | putative protein (sleetu) mRNA.                                                                         |
| sleevo   | sleevo.aSep08   |        | 6258  | 626  |   | 208 | proteasome-associated protein Ecm29 homolog (sleevo) mRNA.                                              |
| sleewer  | sleewer.aSep08  |        | 9811  | 523  |   | 79  | CRA a like (sleewer) mRNA.                                                                              |
| slerbor  | slerbor.aSep08  |        | 2117  | 311  |   | 35  | putative protein (slerbor) mRNA.                                                                        |
| slerchy  | slerchy.aSep08  |        | 3203  | 295  |   | 35  | putative protein (slerchy) mRNA.                                                                        |
| slerdoy  | slerdoy.aSep08  |        | 4630  | 427  | 3 | 141 | CRA c (slerdoy) alternative variant aSep08, mRNA.                                                       |
| slerdoy  | slerdoy.bSep08  |        | 1840  | 302  | 1 | 64  | CRA c (slerdoy) alternative variant bSep08, mRNA.                                                       |
| slerfee  | slerfee.aSep08  |        | 1293  | 519  |   | 26  | putative protein (2.9 kD) (slerfee) mRNA.                                                               |
| slerflu  | slerflu.aSep08  |        | 13783 | 279  |   | 45  | putative protein (slerflu) mRNA.                                                                        |
| slerfly  | slerfly.aSep08  |        | 3895  | 577  |   | 166 | upf0470 protein homolog (slerfly) mRNA.                                                                 |
| slerja   | slerja.aSep08   |        | 2624  | 441  |   | 82  | putative protein (slerja) mRNA.                                                                         |
| slerlo   | slerlo.aSep08   |        | 14270 | 738  | 1 | 91  | putative protein of mammalian origin (slerlo) alternative variant aSep08, mRNA.                         |
| slerlo   | slerlo.bSep08   |        | 738   | 649  | 1 | 108 | putative protein (slerlo) alternative variant bSep08, mRNA.                                             |
| slermee  | slermee.aSep08  |        | 4307  | 434  |   | 144 | myosin ID (slermee) mRNA.                                                                               |
| slerpey  | slerpey.aSep08  |        | 6956  | 1327 |   | 437 | tyrosine kinase 2 (slerpey) mRNA.                                                                       |
| slerroy  | slerroy.aSep08  |        | 35444 | 575  |   | 138 | putative protein of metazoan origin (slerroy) mRNA.                                                     |
| slershaw | slershaw.aSep08 |        | 1147  | 247  |   | 64  | putative protein (slershaw) mRNA.                                                                       |
| slershee | slershee.aSep08 |        | 1125  | 293  |   | 76  | putative protein (8.2 kD) (slershee) mRNA.                                                              |
| slertu   | slertu.aSep08   |        | 4903  | 944  | 4 | 290 | numb homolog (slertu) alternative variant aSep08, mRNA.                                                 |
| slertu   | slertu.bSep08   |        | 5444  | 2272 | 2 | 246 | numb (slertu) alternative variant bSep08, mRNA.                                                         |



|          |                 |        |       |      |   |     |                                                                                             |
|----------|-----------------|--------|-------|------|---|-----|---------------------------------------------------------------------------------------------|
| slervo   | slervo.aSep08   |        | 7917  | 558  |   | 185 | proteasome-associated protein ecm29 homolog (slervo) mRNA.                                  |
| slerwer  | slerwer.aSep08  |        | 13410 | 810  |   | 269 | putative protein of vertebrate origin (slerwer) mRNA.                                       |
| sleybor  | sleybor.aSep08  |        | 1545  | 721  |   | 37  | putative protein (sleybor) mRNA.                                                            |
| sleychy  | sleychy.aSep08  |        | 1314  | 896  |   | 84  | putative protein (sleychy) mRNA.                                                            |
| sleydoy  | sleydoy.aSep08  |        | 3689  | 210  |   | 24  | putative protein (sleydoy) mRNA.                                                            |
| sleyfee  | sleyfee.aSep08  |        | 2290  | 271  |   | 49  | putative protein (sleyfee) mRNA.                                                            |
| sleyflu  | sleyflu.aSep08  |        | 3478  | 586  | 2 | 74  | putative protein (sleyflu) alternative variant aSep08, mRNA.                                |
| sleyflu  | sleyflu.cSep08  |        | 8762  | 1126 | 3 | 36  | putative protein (4.1 kD) (sleyflu) alternative variant cSep08, mRNA.                       |
| sleyfly  | sleyfly.aSep08  |        | 2745  | 851  |   | 272 | CRA a (sleyfly) mRNA.                                                                       |
| sleyja   | sleyja.aSep08   |        | 1724  | 217  |   | 32  | putative protein (3.8 kD) (sleyja) mRNA.                                                    |
| sleylo   | sleylo.aSep08   |        | 915   | 406  |   | 99  | putative protein (sleylo) mRNA.                                                             |
| sleymee  | sleymee.aSep08  |        | 87581 | 773  | 4 | 206 | myosin ID CRA b (sleymee) alternative variant aSep08, mRNA.                                 |
| sleymee  | sleymee.bSep08  |        | 1123  | 610  | 1 | 124 | putative protein of vertebrate origin (14.2 kD) (sleymee) alternative variant bSep08, mRNA. |
| sleypey  | sleypey.aSep08  |        | 5027  | 285  |   | 85  | putative protein (sleypey) mRNA.                                                            |
| sleyroy  | sleyroy.aSep08  |        | 1801  | 649  |   | 53  | putative protein (sleyroy) mRNA.                                                            |
| sleyshaw | sleyshaw.aSep08 |        | 6835  | 636  |   | 39  | putative protein (4.4 kD) (sleyshaw) mRNA.                                                  |
| sleyshee | sleyshee.aSep08 |        | 1834  | 567  |   | 84  | putative protein (sleyshee) mRNA.                                                           |
| sleytu   | sleytu.aSep08   |        | 9188  | 631  |   | 51  | putative protein (5.7 kD) (sleytu) mRNA.                                                    |
| sleyvo   | sleyvo.aSep08   |        | 45028 | 829  |   | 275 | novel protein containing 10 HEAT domains (sleyvo) alternative variant aSep08, mRNA.         |
| sleyvo   | sleyvo.bSep08   |        | 33206 | 287  | 1 | 58  | novel protein containing 10 HEAT domains (sleyvo) alternative variant bSep08, mRNA.         |
| sleywer  | sleywer.bSep08  |        | 4357  | 744  | 3 | 30  | putative protein (sleywer) alternative variant bSep08, mRNA.                                |
| sleywer  | sleywer.cSep08  |        | 1258  | 428  | 3 | 49  | CRA b like (sleywer) alternative variant cSep08, mRNA.                                      |
| Slfn2    | Slfn2.bSep08    | 303380 | 5477  | 736  | 1 | 80  | schlafen 2 (9.3 kD) (Slfn2) alternative variant bSep08, mRNA.                               |
| Slfn5    | Slfn5.aSep08    | 303377 | 4184  | 587  |   | 195 | schlafen 5 (Slfn5) mRNA.                                                                    |
| Slfn8    | Slfn8.bSep08    | 303378 | 13735 | 1511 | 2 | 410 | schlafen 8 (46.2 kD) (Slfn8) alternative variant bSep08, mRNA.                              |
| Slfnl1   | Slfnl1.bSep08   | 500540 | 1329  | 721  | 2 | 208 | schlafen-like 1 (Slfnl1) alternative variant bSep08, mRNA.                                  |
| Slfnl1   | Slfnl1.cSep08   | 500540 | 931   | 325  | 2 | 58  | schlafen-like 1 (Slfnl1) alternative variant cSep08, mRNA.                                  |
| Slit1    | Slit1.bSep08    | 65047  | 6985  | 2061 | 5 | 283 | slit homolog 1 (Drosophila) (Slit1) alternative variant bSep08, mRNA.                       |
| Slit2    | Slit2.aSep08    | 360272 | 38925 | 1674 | 8 | 339 | slit homolog 2 (Drosophila) (36.9 kD) (Slit2) alternative variant aSep08, mRNA.             |
| Slit3    | Slit3.bSep08    | 83467  | 25768 | 398  | 3 | 132 | slit homolog 3 (Drosophila) (Slit3) alternative variant bSep08, mRNA.                       |
| Slitrk3  | Slitrk3.aSep08  | 310519 | 4927  | 3318 | 1 | 979 | SLIT and NTRK-like family, member 3 (109.2 kD) (Slitrk3) alternative variant aSep08, mRNA.  |

|          |                 |        |        |      |    |     |                                                                                     |
|----------|-----------------|--------|--------|------|----|-----|-------------------------------------------------------------------------------------|
| Slk      | Slk.bSep08      | 54308  | 22480  | 4284 | 9  | 375 | STE20-like kinase (yeast) (Slk) alternative variant bSep08, mRNA.                   |
| Slk      | Slk.dSep08      | 54308  | 1308   | 861  | 2  | 53  | STE20-like kinase (yeast) (6.2 kD) (Slk) alternative variant dSep08, mRNA.          |
| Slmap    | Slmap.bSep08    | 290533 | 116679 | 5085 | 20 | 749 | sarcolemma associated protein (86.0 kD) (Slmap) alternative variant bSep08, mRNA.   |
| Slmo1    | Slmo1.bSep08    | 690253 | 11589  | 705  | 6  | 168 | slowmo homolog 1 (Drosophila) (Slmo1) alternative variant bSep08, mRNA.             |
| slobor   | slobor.aSep08   |        | 28471  | 591  | 2  | 43  | putative protein (slobor) alternative variant aSep08, mRNA.                         |
| slobor   | slobor.bSep08   |        | 27991  | 578  | 5  | 73  | putative cytoplasmic protein (8.2 kD) (slobor) alternative variant bSep08, mRNA.    |
| slochy   | slochy.aSep08   |        | 49867  | 556  |    | 49  | putative protein (5.7 kD) (slochy) mRNA.                                            |
| slodoy   | slodoy.aSep08   |        | 682    | 487  |    | 113 | putative protein (slodoy) mRNA.                                                     |
| slofee   | slofee.aSep08   |        | 562    | 404  |    | 102 | putative protein (slofee) mRNA.                                                     |
| sloflu   | sloflu.aSep08   |        | 26364  | 493  |    | 49  | putative protein (5.3 kD) (sloflu) mRNA.                                            |
| slofly   | slofly.aSep08   |        | 931    | 547  |    | 26  | putative protein (2.9 kD) (slofly) mRNA.                                            |
| sloja    | sloja.aSep08    |        | 69608  | 314  |    | 60  | putative protein (sloja) mRNA.                                                      |
| slojey   | slojey.aSep08   |        | 15378  | 497  |    | 60  | putative protein (slojey) mRNA.                                                     |
| slolo    | slolo.aSep08    |        | 32435  | 1420 | 4  | 54  | CRA a like (6.3 kD) (slolo) alternative variant aSep08, mRNA.                       |
| slolo    | slolo.cSep08    |        | 27377  | 910  | 4  | 79  | CRA c like (slolo) alternative variant cSep08, mRNA.                                |
| slolo    | slolo.dSep08    |        | 25591  | 865  | 4  | 59  | putative protein (6.8 kD) (slolo) alternative variant dSep08, mRNA.                 |
| slolo    | slolo.eSep08    |        | 1828   | 487  | 2  | 57  | putative protein (slolo) alternative variant eSep08, mRNA.                          |
| slomee   | slomee.aSep08   |        | 2301   | 96   |    | 31  | active -related (slomee) mRNA.                                                      |
| slopey   | slopey.aSep08   |        | 2647   | 736  |    | 138 | putative protein (slopey) mRNA.                                                     |
| slopor   | slopor.aSep08   |        | 13833  | 481  |    | 55  | putative protein (slopor) mRNA.                                                     |
| slorbor  | slorbor.aSep08  |        | 7604   | 876  | 5  | 39  | putative protein (4.6 kD) (slorbor) alternative variant aSep08, mRNA.               |
| slorbor  | slorbor.bSep08  |        | 680    | 442  | 1  | 39  | putative protein (4.6 kD) (slorbor) alternative variant bSep08, mRNA.               |
| slorchy  | slorchy.aSep08  |        | 5783   | 593  |    | 55  | putative protein (6.3 kD) (slorchy) mRNA.                                           |
| slordoy  | slordoy.aSep08  |        | 4320   | 444  | 3  | 147 | solute carrier family 14 member 1 CRA a (slordoy) alternative variant aSep08, mRNA. |
| slorfee  | slorfee.aSep08  |        | 1071   | 483  |    | 64  | putative protein (slorfee) mRNA.                                                    |
| slorflu  | slorflu.aSep08  |        | 1089   | 288  |    | 30  | putative protein (slorflu) mRNA.                                                    |
| slorfly  | slorfly.aSep08  |        | 3049   | 257  | 2  | 66  | putative protein (slorfly) alternative variant aSep08, mRNA.                        |
| slorja   | slorja.aSep08   | 306163 | 14082  | 4572 |    | 126 | glypican 6 (slorja) mRNA.                                                           |
| slormee  | slormee.aSep08  |        | 16305  | 1787 |    | 595 | putative protein (slormee) mRNA.                                                    |
| sloroy   | sloroy.aSep08   |        | 31843  | 545  |    | 181 | putative protein of metazoan origin (sloroy) mRNA.                                  |
| slorpey  | slorpey.aSep08  |        | 12996  | 707  |    | 55  | putative protein (slorpey) mRNA.                                                    |
| slorroy  | slorroy.aSep08  |        | 308    | 217  |    | 15  | putative protein (slorroy) mRNA.                                                    |
| slorshaw | slorshaw.aSep08 |        | 4984   | 736  |    | 43  | putative protein (4.9 kD) (slorshaw) mRNA.                                          |

|          |                 |  |       |      |   |     |                                                                                            |
|----------|-----------------|--|-------|------|---|-----|--------------------------------------------------------------------------------------------|
| slorshee | slorshee.aSep08 |  | 6102  | 675  |   | 39  | putative protein (slorshee) mRNA.                                                          |
| slortu   | slortu.dSep08   |  | 5480  | 607  | 3 | 37  | putative protein (slortu) alternative variant dSep08, mRNA.                                |
| slorvo   | slorvo.aSep08   |  | 13741 | 1300 |   | 326 | CRA a (slorvo) mRNA.                                                                       |
| slorwer  | slorwer.aSep08  |  | 8951  | 493  |   | 149 | v-raf murine sarcoma viral oncogene homolog B1 (slorwer) mRNA.                             |
| sloshaw  | sloshaw.aSep08  |  | 6817  | 427  |   | 141 | putative protein of metazoan origin (sloshaw) mRNA.                                        |
| sloshee  | sloshee.aSep08  |  | 463   | 374  |   | 124 | putative protein (sloshee) mRNA.                                                           |
| slotu    | slotu.aSep08    |  | 9501  | 357  | 2 | 33  | putative protein (3.5 kD) (slotu) alternative variant aSep08, mRNA.                        |
| slotu    | slotu.bSep08    |  | 9569  | 826  | 2 | 74  | putative protein (slotu) alternative variant bSep08, mRNA.                                 |
| slovo    | slovo.aSep08    |  | 1493  | 390  |   | 38  | putative protein (4.5 kD) (slovo) mRNA.                                                    |
| slower   | slower.aSep08   |  | 28949 | 891  |   | 69  | putative protein (7.9 kD) (slower) mRNA.                                                   |
| sloybor  | sloybor.aSep08  |  | 4460  | 391  |   | 129 | laminin (sloybor) mRNA.                                                                    |
| sloycha  | sloycha.aSep08  |  | 586   | 485  |   | 77  | putative protein of mammalian origin (sloycha) mRNA.                                       |
| sloychy  | sloychy.aSep08  |  | 9348  | 552  |   | 59  | putative protein (sloychy) mRNA.                                                           |
| sloydoy  | sloydoy.aSep08  |  | 1334  | 288  |   | 37  | putative protein (sloydoy) mRNA.                                                           |
| sloyfee  | sloyfee.aSep08  |  | 1221  | 724  |   | 51  | putative protein (5.4 kD) (sloyfee) mRNA.                                                  |
| sloyflu  | sloyflu.aSep08  |  | 2509  | 500  |   | 37  | putative protein (sloyflu) mRNA.                                                           |
| sloyfly  | sloyfly.aSep08  |  | 2686  | 759  |   | 123 | putative protein of mammalian origin (sloyfly) mRNA.                                       |
| sloyja   | sloyja.aSep08   |  | 4554  | 496  |   | 164 | ATP-binding cassette sub-family C member 4 like (sloyja) mRNA.                             |
| sloymee  | sloymee.aSep08  |  | 1098  | 502  |   | 35  | putative protein (4.0 kD) (sloymee) mRNA.                                                  |
| sloypey  | sloypey.aSep08  |  | 7015  | 684  |   | 109 | phosphodiesterase 4A (11.6 kD) (sloypey) mRNA.                                             |
| sloyroy  | sloyroy.aSep08  |  | 24304 | 255  |   | 47  | putative protein (sloyroy) mRNA.                                                           |
| sloyshaw | sloyshaw.aSep08 |  | 907   | 638  |   | 43  | putative protein (sloyshaw) mRNA.                                                          |
| sloyshee | sloyshee.aSep08 |  | 6572  | 792  |   | 42  | putative protein (5.0 kD) (sloyshee) mRNA.                                                 |
| sloytu   | sloytu.aSep08   |  | 1774  | 504  |   | 35  | putative protein (sloytu) mRNA.                                                            |
| sloyvo   | sloyvo.aSep08   |  | 8407  | 809  |   | 269 | fk506 binding protein 15 133kDa like (sloyvo) mRNA.                                        |
| sloywer  | sloywer.aSep08  |  | 56723 | 354  | 1 | 118 | v-raf murine sarcoma viral oncogene homolog B1 (sloywer) alternative variant aSep08, mRNA. |
| sloywer  | sloywer.bSep08  |  | 56715 | 395  | 1 | 80  | serine threonine kinase (sloywer) alternative variant bSep08, mRNA.                        |
| slubor   | slubor.aSep08   |  | 4010  | 554  |   | 82  | protein particle complex (slubor) mRNA.                                                    |
| sluchy   | sluchy.aSep08   |  | 4090  | 317  | 2 | 57  | putative protein (sluchy) alternative variant aSep08, mRNA.                                |
| sluchy   | sluchy.bSep08   |  | 644   | 326  | 1 | 54  | putative protein (sluchy) alternative variant bSep08, mRNA.                                |
| sludoy   | sludoy.aSep08   |  | 51986 | 408  |   | 91  | putative protein (sludoy) mRNA.                                                            |
| slufee   | slufee.aSep08   |  | 3816  | 794  |   | 27  | putative protein (slufee) mRNA.                                                            |
| sluflu   | sluflu.aSep08   |  | 1422  | 584  | 2 | 194 | ki-67 (sluflu) alternative variant aSep08, mRNA.                                           |
| sluflu   | sluflu.aSep08   |  | 10138 | 453  |   | 37  | putative protein (4.2 kD) (sluflu) mRNA.                                                   |
| sluja    | sluja.aSep08    |  | 3778  | 383  |   | 90  | putative protein (sluja) mRNA.                                                             |
| slujey   | slujey.aSep08   |  | 11436 | 474  |   | 157 | heparanase (slujey) mRNA.                                                                  |
| slulo    | slulo.aSep08    |  | 1582  | 557  |   | 66  | putative protein (7.3 kD) (slulo) mRNA.                                                    |

|         |                |       |       |     |   |     |                                                                                |
|---------|----------------|-------|-------|-----|---|-----|--------------------------------------------------------------------------------|
| slumee  | slumee.aSep08  |       | 929   | 654 |   | 77  | putative protein (8.8 kD) (slumee) mRNA.                                       |
| slupey  | slupey.aSep08  |       | 21274 | 647 |   | 39  | putative protein (slupey) mRNA.                                                |
| slupor  | slupor.aSep08  |       | 2550  | 719 |   | 138 | solute carrier family 6 member 20B (slupor) mRNA.                              |
| sluroy  | sluroy.aSep08  |       | 40748 | 294 |   | 41  | putative protein of mammalian origin (sluroy) mRNA.                            |
| slushaw | slushaw.aSep08 |       | 11760 | 689 |   | 229 | 3-hydroxy-3-methylglutaryl-Coenzyme A reductase (slushaw) mRNA.                |
| slushee | slushee.aSep08 |       | 488   | 265 |   | 46  | putative protein (slushee) mRNA.                                               |
| slutu   | slutu.aSep08   |       | 36786 | 864 |   | 134 | putative protein (15.2 kD) (slutu) mRNA.                                       |
| sluvo   | sluvo.aSep08   |       | 6463  | 821 | 3 | 48  | putative protein (5.5 kD) (sluvo) alternative variant aSep08, mRNA.            |
| sluvo   | sluvo.bSep08   |       | 6443  | 774 | 3 | 48  | putative protein (5.5 kD) (sluvo) alternative variant bSep08, mRNA.            |
| sluvo   | sluvo.cSep08   |       | 1396  | 318 | 2 | 23  | putative protein (2.5 kD) (sluvo) alternative variant cSep08, mRNA.            |
| sluwer  | sluwer.aSep08  |       | 21752 | 527 |   | 84  | putative protein (sluwer) mRNA.                                                |
| slybor  | slybor.aSep08  |       | 2577  | 407 |   | 135 | RAN binding protein 2 like (slybor) mRNA.                                      |
| slychy  | slychy.aSep08  |       | 2948  | 373 |   | 86  | putative protein (slychy) mRNA.                                                |
| slydoy  | slydoy.aSep08  |       | 10851 | 381 | 3 | 126 | putative protein of metazoan origin (slydoy) alternative variant aSep08, mRNA. |
| slyfee  | slyfee.aSep08  |       | 3282  | 431 |   | 64  | F-box leucine-rich repeat protein 21 (slyfee) mRNA.                            |
| slyflu  | slyflu.aSep08  |       | 3987  | 751 |   | 109 | putative protein (11.9 kD) (slyflu) mRNA.                                      |
| slyfly  | slyfly.aSep08  |       | 1475  | 408 |   | 135 | zinc finger protein 580 (slyfly) mRNA.                                         |
| slyja   | slyja.aSep08   |       | 13313 | 698 |   | 36  | putative protein (slyja) mRNA.                                                 |
| slyjey  | slyjey.aSep08  |       | 547   | 393 |   | 44  | putative protein (slyjey) mRNA.                                                |
| slylo   | slylo.aSep08   |       | 6100  | 396 |   | 39  | putative protein (4.6 kD) (slylo) mRNA.                                        |
| slymee  | slymee.aSep08  |       | 13208 | 374 |   | 50  | putative protein (5.4 kD) (slymee) mRNA.                                       |
| slypey  | slypey.aSep08  |       | 9080  | 418 |   | 117 | putative protein (slypey) mRNA.                                                |
| slypor  | slypor.aSep08  |       | 8312  | 417 |   | 65  | putative protein (7.2 kD) (slypor) mRNA.                                       |
| slyroy  | slyroy.aSep08  |       | 1548  | 415 | 2 | 114 | CRA b like (slyroy) alternative variant aSep08, mRNA.                          |
| slyroy  | slyroy.bSep08  |       | 1839  | 386 | 2 | 37  | CRA b like (slyroy) alternative variant bSep08, mRNA.                          |
| slyshaw | slyshaw.aSep08 |       | 2673  | 350 |   | 70  | putative protein (slyshaw) mRNA.                                               |
| slyshee | slyshee.aSep08 |       | 650   | 558 |   | 41  | putative protein (4.8 kD) (slyshee) mRNA.                                      |
| slytu   | slytu.aSep08   |       | 1436  | 379 |   | 76  | putative nuclear protein (8.2 kD) (slytu) mRNA.                                |
| slyvo   | slyvo.aSep08   |       | 902   | 797 |   | 57  | putative protein (slyvo) mRNA.                                                 |
| slywer  | slywer.aSep08  |       | 1392  | 552 |   | 93  | putative mitochondrial protein (10.0 kD) (slywer) mRNA.                        |
| smabor  | smabor.aSep08  |       | 2866  | 450 |   | 65  | putative protein (7.2 kD) (smabor) mRNA.                                       |
| smacha  | smacha.aSep08  |       | 2971  | 371 |   | 85  | GTPase activating protein testicular GAP1 like (smacha) mRNA.                  |
| smachy  | smachy.bSep08  |       | 2129  | 631 | 4 | 101 | CRA a (10.9 kD) (smachy) alternative variant bSep08, mRNA.                     |
| Smad1   | Smad1.bSep08   | 25671 | 5294  | 501 | 2 | 166 | MAD homolog 1 (Drosophila) (Smad1) alternative variant bSep08, mRNA.           |

|         |                |        |       |      |    |     |                                                                                                                                               |
|---------|----------------|--------|-------|------|----|-----|-----------------------------------------------------------------------------------------------------------------------------------------------|
| Smad2   | Smad2.bSep08   | 29357  | 61943 | 2597 | 11 | 467 | MAD homolog 2 (Drosophila) (52.2 kD) (Smad2) alternative variant bSep08, mRNA.                                                                |
| Smad2   | Smad2.cSep08   | 29357  | 47632 | 755  | 5  | 212 | MAD homolog 2 (Drosophila) (Smad2) alternative variant cSep08, mRNA.                                                                          |
| Smad2   | Smad2.dSep08   | 29357  | 2574  | 765  | 2  | 67  | MAD homolog 2 (Drosophila) (Smad2) alternative variant dSep08, mRNA.                                                                          |
| Smad3   | Smad3.bSep08   | 25631  | 2385  | 1511 | 2  | 121 | MAD homolog 3 (Drosophila) (13.5 kD) (Smad3) alternative variant bSep08, mRNA.                                                                |
| Smad4   | Smad4.bSep08   | 50554  | 43836 | 1779 | 2  | 298 | MAD homolog 4 (Drosophila) (Smad4) alternative variant bSep08, mRNA.                                                                          |
| Smad4   | Smad4.cSep08   | 50554  | 12892 | 703  | 1  | 197 | MAD homolog 4 (Drosophila) (Smad4) alternative variant cSep08, mRNA.                                                                          |
| Smad4   | Smad4.dSep08   | 50554  | 4727  | 278  | 2  | 92  | MAD homolog 4 (Drosophila) (Smad4) alternative variant dSep08, mRNA.                                                                          |
| Smad5   | Smad5.bSep08   | 59328  | 5611  | 941  | 1  | 313 | MAD homolog 5 (Drosophila) (Smad5) alternative variant bSep08, mRNA.                                                                          |
| Smad6   | Smad6.bSep08   | 367100 | 1531  | 1448 | 2  | 208 | MAD homolog 6 (Drosophila) (Smad6) alternative variant bSep08, mRNA.                                                                          |
| Smad7   | Smad7.bSep08   | 81516  | 24461 | 790  | 4  | 245 | MAD homolog 7 (Drosophila) (Smad7) alternative variant bSep08, mRNA.                                                                          |
| Smad7   | Smad7.cSep08   | 81516  | 25208 | 2298 | 3  | 235 | MAD homolog 7 (Drosophila) (Smad7) alternative variant cSep08, mRNA.                                                                          |
| smadoy  | smadoy.aSep08  |        | 8737  | 273  |    | 43  | putative protein (smadoy) mRNA.                                                                                                               |
| smafee  | smafee.aSep08  |        | 12941 | 706  |    | 33  | putative protein (smafee) mRNA.                                                                                                               |
| smaflu  | smaflu.aSep08  |        | 7017  | 581  |    | 118 | putative protein of vertebrate origin (smaflu) mRNA.                                                                                          |
| smafly  | smafly.aSep08  |        | 2375  | 736  |    | 123 | putative protein of mammalian origin (smafly) mRNA.                                                                                           |
| Smagp   | Smagp.bSep08   | 300236 | 35238 | 736  | 1  | 39  | small cell adhesion glycoprotein and hypothetical protein LOC685015 (4.1 kD) (Smagp) alternative variant bSep08, mRNA.                        |
| Smagp   | Smagp.bSep08   | 685015 | 35238 | 736  | 1  | 39  | small cell adhesion glycoprotein and hypothetical protein LOC685015 (4.1 kD) (Smagp) alternative variant bSep08, mRNA.                        |
| smaja   | smaja.aSep08   |        | 1283  | 738  |    | 55  | putative protein (6.1 kD) (smaja) mRNA.                                                                                                       |
| smamee  | smamee.aSep08  |        | 4474  | 486  |    | 161 | schlafen 5 CRA b (smamee) mRNA.                                                                                                               |
| Smap2   | Smap2.bSep08   | 298500 | 9160  | 1523 | 6  | 356 | stromal membrane-associated GTPase-activating protein 2 and hypothetical protein LOC680690 (Smap2) alternative variant bSep08, mRNA.          |
| Smap2   | Smap2.bSep08   | 680690 | 9160  | 1523 | 6  | 356 | stromal membrane-associated GTPase-activating protein 2 and hypothetical protein LOC680690 (Smap2) alternative variant bSep08, mRNA.          |
| smapey  | smapey.aSep08  |        | 443   | 363  |    | 54  | putative protein (smapey) mRNA.                                                                                                               |
| smarbor | smarbor.aSep08 |        | 2568  | 340  |    | 55  | putative protein (6.2 kD) (smarbor) mRNA.                                                                                                     |
| Smarca1 | Smarca1.aSep08 | 317575 | 13990 | 568  | 3  | 102 | SWI/SNF related, matrix associated, actin dependent regulator of chromatin, subfamily a, member 1 (Smarca1) alternative variant aSep08, mRNA. |

|         |                |        |        |      |    |      |                                                                                                                                                          |
|---------|----------------|--------|--------|------|----|------|----------------------------------------------------------------------------------------------------------------------------------------------------------|
| Smarca2 | Smarca2.aSep08 | 361745 | 104115 | 3896 | 23 | 954  | SWI SNF-related matrix-associated actin-dependent regulator of chromatin a2 (Smarca2) alternative variant aSep08, mRNA.                                  |
| Smarca2 | Smarca2.bSep08 | 361745 | 61381  | 1055 | 7  | 351  | SWI SNF related matrix associated actin dependent regulator of chromatin subfamily a member 2 like (Smarca2) alternative variant bSep08, mRNA.           |
| Smarca2 | Smarca2.cSep08 | 361745 | 58595  | 752  | 5  | 250  | SWI SNF-related matrix-associated actin-dependent regulator of chromatin a2 (Smarca2) alternative variant cSep08, mRNA.                                  |
| Smarca2 | Smarca2.dSep08 | 361745 | 46324  | 839  | 7  | 220  | SWI SNF related matrix associated actin dependent regulator of chromatin subfamily a member 2 (Smarca2) alternative variant dSep08, mRNA.                |
| Smarca2 | Smarca2.eSep08 | 361745 | 23250  | 1781 | 4  | 159  | SWI SNF related matrix associated actin dependent regulator of chromatin subfamily a member 2 (Smarca2) alternative variant eSep08, mRNA.                |
| Smarca2 | Smarca2.fSep08 | 361745 | 4578   | 384  | 3  | 92   | SWI SNF related matrix associated actin dependent regulator of chromatin subfamily a member 2 (Smarca2) alternative variant fSep08, mRNA.                |
| Smarca2 | Smarca2.gSep08 | 361745 | 9361   | 459  | 3  | 72   | SWI SNF-related matrix-associated actin-dependent regulator of chromatin a2 like (Smarca2) alternative variant gSep08, mRNA.                             |
| Smarca2 | Smarca2.kSep08 | 361745 | 3420   | 390  | 3  | 47   | putative protein (Smarca2) alternative variant kSep08, mRNA.                                                                                             |
| Smarca4 | Smarca4.aSep08 | 171379 | 91244  | 5578 | 34 | 1616 | SWI/SNF related, matrix associated, actin dependent regulator of chromatin, subfamily a, member 4 (181.7 kD) (Smarca4) alternative variant aSep08, mRNA. |
| Smarca4 | Smarca4.bSep08 | 171379 | 26819  | 1863 | 10 | 486  | SWI/SNF related, matrix associated, actin dependent regulator of chromatin, subfamily a, member 4 (Smarca4) alternative variant bSep08, mRNA.            |
| Smarca4 | Smarca4.cSep08 | 171379 | 23372  | 1251 | 8  | 343  | SWI/SNF related, matrix associated, actin dependent regulator of chromatin, subfamily a, member 4 (Smarca4) alternative variant cSep08, mRNA.            |
| Smarca4 | Smarca4.dSep08 | 171379 | 13705  | 895  | 7  | 297  | SWI/SNF related, matrix associated, actin dependent regulator of chromatin, subfamily a, member 4 (Smarca4) alternative variant dSep08, mRNA.            |
| Smarca4 | Smarca4.eSep08 | 171379 | 13050  | 564  | 3  | 187  | SWI/SNF related, matrix associated, actin dependent regulator of chromatin, subfamily a, member 4 (Smarca4) alternative variant eSep08, mRNA.            |
| Smarca4 | Smarca4.fSep08 | 171379 | 31929  | 536  | 5  | 173  | SWI/SNF related, matrix associated, actin dependent regulator of chromatin, subfamily a, member 4 (Smarca4) alternative variant fSep08, mRNA.            |
| Smarca4 | Smarca4.gSep08 | 171379 | 1341   | 363  | 2  | 63   | SWI/SNF related, matrix associated, actin dependent regulator of chromatin, subfamily a, member 4 (Smarca4) alternative variant gSep08, mRNA.            |
| Smarca5 | Smarca5.bSep08 | 307766 | 3268   | 384  | 1  | 56   | SWI/SNF related, matrix associated, actin dependent regulator of chromatin, subfamily a, member 5 (6.2 kD) (Smarca5) alternative variant bSep08, mRNA.   |

|          |                 |        |       |      |    |     |                                                                                                                                                           |
|----------|-----------------|--------|-------|------|----|-----|-----------------------------------------------------------------------------------------------------------------------------------------------------------|
| Smarcad1 | Smarcad1.bSep08 | 312398 | 1524  | 701  | 3  | 123 | SWI SNF-related matrix-associated actin-dependent regulator of chromatin subfamily a containing dead H box 1 (Smarcad1) alternative variant bSep08, mRNA. |
| Smarcad1 | Smarcad1.cSep08 | 312398 | 1679  | 771  | 2  | 84  | SWI SNF-related matrix-associated actin-dependent regulator of chromatin subfamily a containing dead H box 1 (Smarcad1) alternative variant cSep08, mRNA. |
| Smarcal1 | Smarcal1.bSep08 | 316477 | 46888 | 3055 | 18 | 910 | hepa-related protein HARP (101.2 kD) (Smarcal1) alternative variant bSep08, mRNA.                                                                         |
| Smarcal1 | Smarcal1.bSep08 | 690314 | 46888 | 3055 | 18 | 910 | hepa-related protein HARP (101.2 kD) (Smarcal1) alternative variant bSep08, mRNA.                                                                         |
| Smarcal1 | Smarcal1.cSep08 | 316477 | 4934  | 559  | 4  | 119 | hepa-related protein HARP (13.3 kD) (Smarcal1) alternative variant cSep08, mRNA.                                                                          |
| Smarcal1 | Smarcal1.cSep08 | 690314 | 4934  | 559  | 4  | 119 | hepa-related protein HARP (13.3 kD) (Smarcal1) alternative variant cSep08, mRNA.                                                                          |
| Smarcal1 | Smarcal1.eSep08 | 316477 | 2270  | 235  | 3  | 39  | putative protein (4.4 kD) (Smarcal1) alternative variant eSep08, mRNA.                                                                                    |
| Smarcal1 | Smarcal1.eSep08 | 690314 | 2270  | 235  | 3  | 39  | putative protein (4.4 kD) (Smarcal1) alternative variant eSep08, mRNA.                                                                                    |
| Smarcb1  | Smarcb1.bSep08  | 361825 | 15030 | 1164 | 1  | 323 | SWI/SNF related, matrix associated, actin dependent regulator of chromatin, subfamily b, member 1 (Smarcb1) alternative variant bSep08, mRNA.             |
| Smarcc1  | Smarcc1.bSep08  | 301020 | 27509 | 1551 | 5  | 244 | SWI/SNF related, matrix associated, actin dependent regulator of chromatin, subfamily c, member 1 (Smarcc1) alternative variant bSep08, mRNA.             |
| Smarcc1  | Smarcc1.cSep08  | 301020 | 17012 | 720  | 7  | 196 | SWI/SNF related, matrix associated, actin dependent regulator of chromatin, subfamily c, member 1 (Smarcc1) alternative variant cSep08, mRNA.             |
| Smarcc1  | Smarcc1.dSep08  | 301020 | 26836 | 617  | 3  | 126 | SWI/SNF related, matrix associated, actin dependent regulator of chromatin, subfamily c, member 1 (Smarcc1) alternative variant dSep08, mRNA.             |
| Smarcc1  | Smarcc1.eSep08  | 301020 | 17359 | 403  | 3  | 119 | SWI/SNF related, matrix associated, actin dependent regulator of chromatin, subfamily c, member 1 (Smarcc1) alternative variant eSep08, mRNA.             |
| Smarcd1  | Smarcd1.bSep08  | 363002 | 1574  | 415  | 1  | 73  | SWI/SNF related, matrix associated, actin dependent regulator of chromatin, subfamily d, member 1 (Smarcd1) alternative variant bSep08, mRNA.             |
| Smarcd2  | Smarcd2.bSep08  | 83833  | 3271  | 1510 | 7  | 450 | SWI/SNF related, matrix associated, actin dependent regulator of chromatin, subfamily d, member 2 (50.3 kD) (Smarcd2) alternative variant bSep08, mRNA.   |
| Smarcd2  | Smarcd2.cSep08  | 83833  | 2188  | 1606 | 2  | 207 | SWI/SNF related, matrix associated, actin dependent regulator of chromatin, subfamily d, member 2 (Smarcd2) alternative variant cSep08, mRNA.             |
| Smarcd3  | Smarcd3.bSep08  | 296732 | 11513 | 863  | 8  | 287 | SWI/SNF related, matrix associated, actin dependent regulator of chromatin, subfamily d, member 3 (Smarcd3) alternative variant bSep08, mRNA.             |

|         |                |        |       |      |   |     |                                                                                                                                                         |
|---------|----------------|--------|-------|------|---|-----|---------------------------------------------------------------------------------------------------------------------------------------------------------|
| Smarcd3 | Smarcd3.cSep08 | 296732 | 6829  | 897  | 7 | 259 | SWI/SNF related, matrix associated, actin dependent regulator of chromatin, subfamily d, member 3 (Smarcd3) alternative variant cSep08, mRNA.           |
| Smarce1 | Smarce1.bSep08 | 303518 | 16913 | 1323 | 7 | 194 | SWI/SNF related, matrix associated, actin dependent regulator of chromatin, subfamily e, member 1 (22.8 kD) (Smarce1) alternative variant bSep08, mRNA. |
| Smarce1 | Smarce1.cSep08 | 303518 | 17057 | 776  | 5 | 192 | SWI/SNF related, matrix associated, actin dependent regulator of chromatin, subfamily e, member 1 (Smarce1) alternative variant cSep08, mRNA.           |
| Smarce1 | Smarce1.dSep08 | 303518 | 17166 | 1079 | 8 | 171 | SWI/SNF related, matrix associated, actin dependent regulator of chromatin, subfamily e, member 1 (20.2 kD) (Smarce1) alternative variant dSep08, mRNA. |
| Smarce1 | Smarce1.eSep08 | 303518 | 6771  | 995  | 2 | 154 | SWI/SNF related, matrix associated, actin dependent regulator of chromatin, subfamily e, member 1 (17.9 kD) (Smarce1) alternative variant eSep08, mRNA. |
| Smarce1 | Smarce1.fSep08 | 303518 | 16419 | 777  | 6 | 145 | SWI/SNF related, matrix associated, actin dependent regulator of chromatin, subfamily e, member 1 (Smarce1) alternative variant fSep08, mRNA.           |
| smarcha | smarcha.aSep08 |        | 16443 | 1355 |   | 85  | putative protein (smarcha) mRNA.                                                                                                                        |
| smarchy | smarchy.aSep08 |        | 513   | 447  |   | 45  | putative protein (5.4 kD) (smarchy) mRNA.                                                                                                               |
| smardoy | smardoy.aSep08 |        | 4642  | 199  |   | 63  | putative protein (smardoy) mRNA.                                                                                                                        |
| smarfee | smarfee.aSep08 |        | 1239  | 636  |   | 89  | putative protein (9.9 kD) (smarfee) mRNA.                                                                                                               |
| smarflu | smarflu.aSep08 |        | 12694 | 1337 | 4 | 331 | mitochondrial GTPase 1 (37.0 kD) (smarflu) alternative variant aSep08, complete mRNA.                                                                   |
| smarflu | smarflu.bSep08 |        | 11911 | 847  | 4 | 277 | mitochondrial GTPase 1 (smarflu) alternative variant bSep08, mRNA.                                                                                      |
| smarflu | smarflu.cSep08 |        | 926   | 618  | 1 | 94  | mitochondrial GTPase 1 homolog (smarflu) alternative variant cSep08, mRNA.                                                                              |
| smarflu | smarflu.dSep08 |        | 4707  | 725  | 2 | 69  | mitochondrial GTPase 1 (smarflu) alternative variant dSep08, mRNA.                                                                                      |
| smarfly | smarfly.bSep08 |        | 904   | 319  | 2 | 23  | putative protein (2.8 kD) (smarfly) alternative variant bSep08, mRNA.                                                                                   |
| smarja  | smarja.aSep08  |        | 23992 | 289  |   | 49  | putative protein (smarja) mRNA.                                                                                                                         |
| smarmee | smarmee.aSep08 |        | 3296  | 774  | 2 | 79  | ac1576 like (smarmee) alternative variant aSep08, mRNA.                                                                                                 |
| smarmee | smarmee.bSep08 |        | 12553 | 713  | 2 | 38  | putative protein (4.2 kD) (smarmee) alternative variant bSep08, mRNA.                                                                                   |
| smarnor | smarnor.aSep08 |        | 9747  | 734  |   | 244 | shugoshin-like 1 (smarnor) mRNA.                                                                                                                        |
| smaroy  | smaroy.aSep08  |        | 63859 | 765  |   | 152 | putative nuclear protein (16.5 kD) (smaroy) mRNA.                                                                                                       |
| smarpey | smarpey.aSep08 |        | 1907  | 758  | 4 | 166 | hepatocellular carcinoma-associated td26 like (smarpey) alternative variant aSep08, mRNA.                                                               |
| smarpey | smarpey.cSep08 |        | 846   | 738  | 2 | 71  | putative protein (8.6 kD) (smarpey) alternative variant cSep08, mRNA.                                                                                   |
| smarroy | smarroy.aSep08 |        | 26633 | 1400 | 4 | 74  | CRA b like (smarroy) alternative variant aSep08, mRNA.                                                                                                  |
| smarroy | smarroy.bSep08 |        | 25017 | 485  | 2 | 53  | putative protein (smarroy) alternative variant bSep08, mRNA.                                                                                            |



|          |                 |       |        |      |   |     |                                                                                                      |
|----------|-----------------|-------|--------|------|---|-----|------------------------------------------------------------------------------------------------------|
| smarshaw | smarshaw.aSep08 |       | 2011   | 315  | 2 | 98  | putative protein (smarshaw) alternative variant aSep08, mRNA.                                        |
| smarshaw | smarshaw.bSep08 |       | 21066  | 772  | 2 | 35  | putative protein (4.3 kD) (smarshaw) alternative variant bSep08, mRNA.                               |
| smarshee | smarshee.bSep08 |       | 3211   | 439  | 4 | 22  | putative protein (2.7 kD) (smarshee) alternative variant bSep08, mRNA.                               |
| smartu   | smartu.aSep08   |       | 923    | 731  |   | 45  | putative protein (smartu) mRNA.                                                                      |
| smarvo   | smarvo.aSep08   |       | 229970 | 1780 |   | 540 | astrotactin 2 (smarvo) alternative variant aSep08, mRNA.                                             |
| smarvo   | smarvo.bSep08   |       | 13603  | 451  |   | 95  | astrotactin 2 CRA b (smarvo) alternative variant bSep08, mRNA.                                       |
| smarwer  | smarwer.aSep08  |       | 1734   | 298  |   | 99  | maltase-glucoamylase (smarwer) mRNA.                                                                 |
| smashaw  | smashaw.aSep08  |       | 7966   | 955  |   | 37  | putative protein (smashaw) mRNA.                                                                     |
| smashee  | smashee.aSep08  |       | 1174   | 262  |   | 24  | putative protein (2.6 kD) (smashee) mRNA.                                                            |
| smatu    | smatu.aSep08    |       | 5890   | 396  |   | 51  | CRA a (smatu) mRNA.                                                                                  |
| smavo    | smavo.aSep08    |       | 3840   | 836  |   | 136 | fk506 binding protein 15 like (smavo) mRNA.                                                          |
| smawbor  | smawbor.aSep08  |       | 1648   | 370  |   | 123 | putative protein, with a coiled coil domain, of metazoan origin (smawbor) mRNA.                      |
| smawcha  | smawcha.aSep08  |       | 24775  | 780  |   | 260 | calmodulin regulated spectrin-associated protein 1 CRA b (smawcha) alternative variant aSep08, mRNA. |
| smawchy  | smawchy.bSep08  |       | 1472   | 360  | 2 | 29  | putative protein (smawchy) alternative variant bSep08, mRNA.                                         |
| smawdoy  | smawdoy.aSep08  |       | 4100   | 766  |   | 136 | putative protein (14.7 kD) (smawdoy) mRNA.                                                           |
| smawer   | smawer.aSep08   |       | 945    | 472  |   | 66  | putative protein (7.9 kD) (smawer) mRNA.                                                             |
| smawfee  | smawfee.aSep08  |       | 6504   | 306  |   | 57  | putative protein of mammalian origin (smawfee) mRNA.                                                 |
| smawflu  | smawflu.aSep08  |       | 1043   | 625  |   | 107 | CRA a (smawflu) mRNA.                                                                                |
| smawfly  | smawfly.aSep08  |       | 1788   | 714  |   | 121 | putative protein of vertebrate origin (smawfly) mRNA.                                                |
| smawja   | smawja.aSep08   |       | 6802   | 232  |   | 52  | putative protein (smawja) mRNA.                                                                      |
| smawmee  | smawmee.aSep08  |       | 9502   | 381  |   | 75  | putative protein (smawmee) mRNA.                                                                     |
| smawnor  | smawnor.aSep08  |       | 13212  | 309  |   | 37  | putative protein (smawnor) mRNA.                                                                     |
| smawpey  | smawpey.aSep08  |       | 5615   | 812  |   | 270 | dedicator of cytokinesis (smawpey) mRNA.                                                             |
| smawroy  | smawroy.aSep08  |       | 586    | 489  |   | 67  | putative protein (smawroy) mRNA.                                                                     |
| smawshaw | smawshaw.aSep08 |       | 683    | 396  |   | 26  | putative protein (smawshaw) mRNA.                                                                    |
| smawshee | smawshee.aSep08 |       | 848    | 442  | 1 | 121 | putative protein (smawshee) alternative variant aSep08, mRNA.                                        |
| smawshee | smawshee.bSep08 |       | 831    | 421  | 1 | 114 | putative protein (smawshee) alternative variant bSep08, mRNA.                                        |
| smawshee | smawshee.cSep08 |       | 4766   | 386  | 1 | 49  | putative protein (smawshee) alternative variant cSep08, mRNA.                                        |
| smawtu   | smawtu.aSep08   |       | 21040  | 1320 |   | 119 | putative protein of mammalian origin (smawtu) mRNA.                                                  |
| smawvo   | smawvo.aSep08   |       | 29350  | 209  |   | 69  | astrotactin (smawvo) mRNA.                                                                           |
| smawwer  | smawwer.aSep08  |       | 2400   | 377  |   | 125 | maltase-glucoamylase (smawwer) mRNA.                                                                 |
| Smc1a    | Smc1a.cSep08    | 63996 | 1146   | 583  | 3 | 92  | putative protein of ancient origin (Smc1a) alternative variant cSep08, mRNA.                         |

|          |                 |        |       |      |    |     |                                                                                                             |
|----------|-----------------|--------|-------|------|----|-----|-------------------------------------------------------------------------------------------------------------|
| Smc1a    | Smc1a.eSep08    | 63996  | 9299  | 547  | 4  | 37  | putative protein (Smc1a) alternative variant eSep08, mRNA.                                                  |
| Smc2     | Smc2.bSep08     | 362519 | 6480  | 419  | 1  | 139 | putative protein, with a coiled coil domain, of ancient origin (Smc2) alternative variant bSep08, mRNA.     |
| Smc3     | Smc3.aSep08     | 29486  | 22373 | 2563 |    | 731 | SMC protein, N-terminal and SMCs flexible hinge (Smc3) alternative variant aSep08, mRNA.                    |
| Smc3     | Smc3.bSep08     | 29486  | 33593 | 2190 |    | 680 | SMC protein, N-terminal and SMCs flexible hinge (Smc3) alternative variant bSep08, mRNA.                    |
| Smc3     | Smc3.cSep08     | 29486  | 8170  | 2032 |    | 503 | SMC protein, N-terminal (57.9 kD) (Smc3) alternative variant cSep08, mRNA.                                  |
| Smc4     | Smc4.bSep08     | 295107 | 13876 | 1506 | 9  | 465 | SMC protein, N-terminal (Smc4) alternative variant bSep08, mRNA.                                            |
| Smc4     | Smc4.cSep08     | 295107 | 4094  | 547  | 3  | 117 | SMC protein, N-terminal (Smc4) alternative variant cSep08, mRNA.                                            |
| Smc4     | Smc4.dSep08     | 295107 | 1157  | 590  | 2  | 71  | putative cytoplasmic protein of ancient origin (8.1 kD) (Smc4) alternative variant dSep08, mRNA.            |
| Smc5     | Smc5.bSep08     | 293967 | 31827 | 1367 | 10 | 455 | putative protein, with 3 coiled coil domains, of eukaryotic origin (Smc5) alternative variant bSep08, mRNA. |
| Smc5     | Smc5.cSep08     | 293967 | 10300 | 980  | 6  | 198 | putative protein, with a coiled coil domain, of ancient origin (Smc5) alternative variant cSep08, mRNA.     |
| Smc5     | Smc5.dSep08     | 293967 | 13032 | 552  | 5  | 184 | putative protein, with 2 coiled coil domains, of eukaryotic origin (Smc5) alternative variant dSep08, mRNA. |
| Smc6l1   | Smc6l1.bSep08   | 313961 | 11758 | 2715 | 4  | 134 | putative protein of ancient origin (15.3 kD) (Smc6l1) alternative variant bSep08, mRNA.                     |
| Smcr7    | Smcr7.aSep08    | 497916 | 4944  | 2451 |    | 494 | putative protein of vertebrate origin (Smcr7) mRNA.                                                         |
| smeebor  | smeebor.aSep08  |        | 5016  | 394  |    | 130 | putative protein of metazoan origin (smeebor) mRNA.                                                         |
| smeecha  | smeecha.aSep08  |        | 12975 | 463  |    | 90  | putative protein (smeecha) mRNA.                                                                            |
| smeechy  | smeechy.aSep08  |        | 1985  | 409  | 2  | 72  | putative protein (smeechy) alternative variant aSep08, mRNA.                                                |
| smeechy  | smeechy.bSep08  |        | 3880  | 829  | 3  | 90  | putative protein (10.1 kD) (smeechy) alternative variant bSep08, mRNA.                                      |
| smeechy  | smeechy.cSep08  |        | 1312  | 608  | 2  | 67  | putative protein (smeechy) alternative variant cSep08, mRNA.                                                |
| smeedoy  | smeedoy.aSep08  |        | 1668  | 570  |    | 66  | putative protein (7.3 kD) (smeedoy) mRNA.                                                                   |
| smeefee  | smeefee.aSep08  |        | 3757  | 172  |    | 27  | putative protein (smeefee) mRNA.                                                                            |
| smeeflu  | smeeflu.aSep08  |        | 1941  | 1547 | 4  | 132 | ATH1 acid trehalase-like 1 (smeeflu) alternative variant aSep08, mRNA.                                      |
| smeeflu  | smeeflu.bSep08  |        | 399   | 319  | 1  | 105 | ATH1 acid trehalase-like 1 CRA b (smeeflu) alternative variant bSep08, mRNA.                                |
| smeefly  | smeefly.aSep08  |        | 9592  | 380  |    | 46  | putative protein (5.3 kD) (smeefly) mRNA.                                                                   |
| smeeja   | smeeja.aSep08   |        | 3467  | 585  |    | 90  | putative protein (smeeja) mRNA.                                                                             |
| smee mee | smee mee.aSep08 |        | 1448  | 440  | 2  | 31  | CRA b like (3.3 kD) (smee mee) alternative variant aSep08, mRNA.                                            |
| smee mee | smee mee.bSep08 |        | 10141 | 1443 | 3  | 97  | CRA b like (10.5 kD) (smee mee) alternative variant bSep08, mRNA.                                           |

|          |                 |        |        |      |    |     |                                                                                                       |
|----------|-----------------|--------|--------|------|----|-----|-------------------------------------------------------------------------------------------------------|
| smeemee  | smeemee.dSep08  |        | 10176  | 471  | 3  | 60  | putative protein (smeemee) alternative variant dSep08, mRNA.                                          |
| smeenor  | smeenor.aSep08  |        | 6212   | 722  | 4  | 125 | sulfotransferase K2 (smeenor) alternative variant aSep08, mRNA.                                       |
| smeeroy  | smeeroy.aSep08  |        | 2647   | 569  |    | 179 | putative protein, with a coiled coil domain (smeeroy) mRNA.                                           |
| smeeshaw | smeeshaw.aSep08 |        | 4003   | 285  |    | 21  | putative protein (smeeshaw) mRNA.                                                                     |
| smeeshee | smeeshee.aSep08 |        | 4128   | 711  |    | 179 | CRA b (smeeshee) mRNA.                                                                                |
| smeetu   | smeetu.aSep08   |        | 17220  | 437  | 3  | 145 | CRA a (smeetu) alternative variant aSep08, mRNA.                                                      |
| smeevo   | smeevo.aSep08   |        | 177953 | 571  |    | 189 | astrotactin 2 (smeevo) mRNA.                                                                          |
| smeewer  | smeewer.aSep08  |        | 1734   | 298  |    | 99  | maltase-glucoamylase (smeewer) mRNA.                                                                  |
| Smek1    | Smek1.aSep08    | 314388 | 42214  | 3989 | 12 | 833 | smek homolog (Smek1) alternative variant aSep08, mRNA.                                                |
| Smek1    | Smek1.aSep08    | 690008 | 42214  | 3989 | 12 | 833 | smek homolog (Smek1) alternative variant aSep08, mRNA.                                                |
| Smek1    | Smek1.bSep08    | 314388 | 8668   | 1028 | 7  | 342 | smek homolog 1 (Smek1) alternative variant bSep08, mRNA.                                              |
| Smek1    | Smek1.bSep08    | 690008 | 8668   | 1028 | 7  | 342 | smek homolog 1 (Smek1) alternative variant bSep08, mRNA.                                              |
| Smek1    | Smek1.dSep08    | 314388 | 2321   | 1269 | 2  | 106 | smek 1 (10.8 kD) (Smek1) alternative variant dSep08, mRNA.                                            |
| Smek1    | Smek1.dSep08    | 690008 | 2321   | 1269 | 2  | 106 | smek 1 (10.8 kD) (Smek1) alternative variant dSep08, mRNA.                                            |
| Smek2    | Smek2.bSep08    | 360993 | 3846   | 429  | 2  | 91  | SMEK homolog 2, suppressor of mek1 (Dictyostelium) (Smek2) alternative variant bSep08, mRNA.          |
| Smek2    | Smek2.cSep08    | 360993 | 1911   | 824  | 2  | 74  | SMEK homolog 2, suppressor of mek1 (Dictyostelium) (8.4 kD) (Smek2) alternative variant cSep08, mRNA. |
| smerbor  | smerbor.aSep08  |        | 737    | 596  |    | 41  | CRA c like (smerbor) mRNA.                                                                            |
| smercha  | smercha.bSep08  |        | 747    | 570  | 2  | 57  | inositol e (smercha) alternative variant bSep08, mRNA.                                                |
| smerchy  | smerchy.aSep08  |        | 3524   | 393  |    | 130 | nuclear receptor coactivator 3 (smerchy) mRNA.                                                        |
| smerdoy  | smerdoy.aSep08  |        | 967    | 748  |    | 31  | putative protein (smerdoy) mRNA.                                                                      |
| smerfee  | smerfee.aSep08  |        | 40927  | 797  |    | 47  | putative protein (5.7 kD) (smerfee) mRNA.                                                             |
| smerflu  | smerflu.aSep08  |        | 1940   | 437  |    | 52  | putative protein (smerflu) mRNA.                                                                      |
| smerfly  | smerfly.aSep08  |        | 3767   | 1840 |    | 122 | putative protein of mammalian origin (smerfly) mRNA.                                                  |
| smerja   | smerja.aSep08   |        | 2201   | 721  |    | 58  | putative protein (6.5 kD) (smerja) mRNA.                                                              |
| smermee  | smermee.aSep08  |        | 4520   | 846  |    | 61  | putative protein (smermee) mRNA.                                                                      |
| smernor  | smernor.aSep08  |        | 1143   | 1068 |    | 47  | putative protein (4.8 kD) (smernor) mRNA.                                                             |
| smerpey  | smerpey.aSep08  |        | 10513  | 401  |    | 75  | putative protein (smerpey) mRNA.                                                                      |
| smerroy  | smerroy.aSep08  |        | 1089   | 510  |    | 21  | putative protein (2.6 kD) (smerroy) mRNA.                                                             |
| smershaw | smershaw.aSep08 |        | 4453   | 384  |    | 72  | putative protein (6.1 kD) (smershaw) mRNA.                                                            |
| smershee | smershee.aSep08 |        | 3769   | 447  |    | 32  | putative protein (smershee) mRNA.                                                                     |
| smertu   | smertu.aSep08   |        | 19638  | 340  |    | 112 | CRA b like (smertu) mRNA.                                                                             |
| smervo   | smervo.aSep08   |        | 7877   | 377  |    | 64  | cdk5 regulatory associated protein 2 CRA b (smervo) mRNA.                                             |
| smerwer  | smerwer.aSep08  |        | 10403  | 506  |    | 168 | maltase-glucoamylase (smerwer) mRNA.                                                                  |

|          |                 |        |       |      |    |      |                                                                                                                                          |
|----------|-----------------|--------|-------|------|----|------|------------------------------------------------------------------------------------------------------------------------------------------|
| smeybor  | smeybor.aSep08  |        | 2376  | 455  |    | 118  | putative protein of metazoan origin (smeybor) mRNA.                                                                                      |
| smeycha  | smeycha.aSep08  |        | 2726  | 529  |    | 175  | putative protein of mammalian origin (smeycha) mRNA.                                                                                     |
| smeychy  | smeychy.aSep08  |        | 1966  | 703  |    | 75   | putative protein (8.2 kD) (smeychy) mRNA.                                                                                                |
| smeydoy  | smeydoy.aSep08  |        | 5735  | 709  |    | 58   | putative protein (6.5 kD) (smeydoy) mRNA.                                                                                                |
| smeyfee  | smeyfee.aSep08  |        | 5237  | 370  |    | 88   | CRA b like (10.0 kD) (smeyfee) mRNA.                                                                                                     |
| smeyflu  | smeyflu.aSep08  |        | 1029  | 938  |    | 33   | anoctamin 9 like (smeyflu) mRNA.                                                                                                         |
| smeyfly  | smeyfly.aSep08  |        | 3723  | 586  | 5  | 195  | glioma tumor suppressor candidate region gene 1 like (smeyfly) alternative variant aSep08, mRNA.                                         |
| smeyja   | smeyja.aSep08   |        | 14926 | 435  |    | 69   | putative protein (smeyja) mRNA.                                                                                                          |
| smeymee  | smeymee.bSep08  |        | 1108  | 642  | 2  | 62   | putative protein (6.9 kD) (smeymee) alternative variant bSep08, mRNA.                                                                    |
| smeynor  | smeynor.aSep08  |        | 24694 | 849  | 3  | 52   | CRA b like (5.8 kD) (smeynor) mRNA.                                                                                                      |
| smeypey  | smeypey.aSep08  |        | 5177  | 713  | 1  | 66   | putative protein (7.6 kD) (smeypey) alternative variant aSep08, mRNA.                                                                    |
| smeypey  | smeypey.bSep08  |        | 7222  | 395  | 1  | 43   | putative protein (4.7 kD) (smeypey) alternative variant bSep08, mRNA.                                                                    |
| smeyroy  | smeyroy.aSep08  |        | 1801  | 425  |    | 70   | centrosomal protein 290kDa CRA b (smeyroy) mRNA.                                                                                         |
| smeyshaw | smeyshaw.aSep08 |        | 3862  | 435  |    | 58   | putative protein (6.2 kD) (smeyshaw) mRNA.                                                                                               |
| smeyshee | smeyshee.aSep08 |        | 2141  | 335  | 2  | 76   | CRA b (smeyshee) alternative variant aSep08, mRNA.                                                                                       |
| smeytu   | smeytu.aSep08   |        | 1444  | 680  |    | 56   | putative protein (6.1 kD) (smeytu) mRNA.                                                                                                 |
| smeyvo   | smeyvo.aSep08   |        | 34847 | 1140 |    | 379  | cdk5 regulatory associated protein 2 (smeyvo) mRNA.                                                                                      |
| smeywer  | smeywer.aSep08  |        | 2078  | 364  |    | 121  | maltase-glucoamylase (smeywer) mRNA.                                                                                                     |
| Smg5     | Smg5.aSep08     | 681012 | 27112 | 4420 | 22 | 1064 | smg-5 homolog nonsense mediated mRNA decay factor (Smg5) alternative variant aSep08, mRNA.                                               |
| Smg5     | Smg5.cSep08     | 681012 | 6957  | 415  | 4  | 112  | smg-5 homolog nonsense mediated mRNA decay factor (Smg5) alternative variant cSep08, mRNA.                                               |
| Smg7     | Smg7.aSep08     | 360855 | 17339 | 1783 |    | 402  | smg-7 homolog (Smg7) alternative variant aSep08, mRNA.                                                                                   |
| Smg7     | Smg7.bSep08     | 360855 | 4121  | 995  |    | 331  | smg-7 homolog (Smg7) alternative variant bSep08, mRNA.                                                                                   |
| Smndc1   | Smndc1.cSep08   | 287768 | 10012 | 1136 | 5  | 199  | putative protein, with a coiled coil domain, of eukaryotic origin (22.5 kD) (Smndc1) alternative variant cSep08, mRNA.                   |
| Smndc1   | Smndc1.dSep08   | 287768 | 9163  | 797  | 3  | 193  | putative protein, with 2 coiled coil domains, of eukaryotic origin (Smndc1) alternative variant dSep08, mRNA.                            |
| Smndc1   | Smndc1.eSep08   | 287768 | 8906  | 853  | 4  | 159  | putative protein, with a coiled coil domain, of eukaryotic origin (18.1 kD) (Smndc1) alternative variant eSep08, mRNA.                   |
| Smndc1   | Smndc1.fSep08   | 287768 | 8343  | 584  | 3  | 121  | putative protein, with a coiled coil domain, of fungal and metazoan origin (13.5 kD) (Smndc1) alternative variant fSep08, mRNA.          |
| Smndc1   | Smndc1.gSep08   | 287768 | 9913  | 864  | 4  | 121  | putative protein, with a coiled coil domain, of fungal and metazoan origin (13.5 kD) (Smndc1) alternative variant gSep08, complete mRNA. |
| Smndc1   | Smndc1.hSep08   | 287768 | 6978  | 575  | 2  | 79   | putative protein (Smndc1) alternative variant hSep08, mRNA.                                                                              |

|          |                 |        |        |      |   |     |                                                                                            |
|----------|-----------------|--------|--------|------|---|-----|--------------------------------------------------------------------------------------------|
| Smo      | Smo.bSep08      | 25273  | 3386   | 2062 | 2 | 265 | smoothened homolog (Drosophila) (29.3 kD) (Smo) alternative variant bSep08, mRNA.          |
| smobor   | smobor.aSep08   |        | 19934  | 627  |   | 59  | putative protein (6.4 kD) (smobor) mRNA.                                                   |
| Smoc1    | Smoc1.bSep08    | 314280 | 4906   | 338  | 3 | 111 | SPARC related modular calcium binding 1 (Smoc1) alternative variant bSep08, mRNA.          |
| Smoc1    | Smoc1.cSep08    | 314280 | 1379   | 987  | 2 | 86  | SPARC related modular calcium binding 1 (9.4 kD) (Smoc1) alternative variant cSep08, mRNA. |
| Smoc1    | Smoc1.dSep08    | 314280 | 5405   | 783  | 2 | 51  | SPARC related modular calcium binding 1 (Smoc1) alternative variant dSep08, mRNA.          |
| Smoc2    | Smoc2.bSep08    | 292401 | 1410   | 874  | 1 | 107 | SPARC related modular calcium binding 2 (Smoc2) alternative variant bSep08, mRNA.          |
| smocha   | smocha.aSep08   |        | 3156   | 314  | 1 | 68  | putative protein (smocha) alternative variant aSep08, mRNA.                                |
| smocha   | smocha.bSep08   |        | 825    | 215  | 1 | 67  | putative protein (smocha) alternative variant bSep08, mRNA.                                |
| smochy   | smochy.bSep08   |        | 1499   | 400  | 2 | 39  | putative protein (4.7 kD) (smochy) alternative variant bSep08, mRNA.                       |
| smodoy   | smodoy.aSep08   |        | 4328   | 199  |   | 63  | gag protein like (smodoy) mRNA.                                                            |
| smofee   | smofee.bSep08   |        | 1670   | 546  | 2 | 73  | putative protein (smofee) alternative variant bSep08, mRNA.                                |
| smoflu   | smoflu.aSep08   |        | 3558   | 474  |   | 103 | putative protein (smoflu) mRNA.                                                            |
| smofly   | smofly.aSep08   |        | 5382   | 365  |   | 72  | putative cytoplasmic protein (8.1 kD) (smofly) mRNA.                                       |
| smoja    | smoja.aSep08    |        | 1444   | 346  |   | 67  | UDP-glucose ceramide glucosyltransferase-like 2 (smoja) mRNA.                              |
| smomee   | smomee.aSep08   |        | 784    | 644  |   | 149 | putative protein (16.4 kD) (smomee) mRNA.                                                  |
| smopey   | smopey.aSep08   |        | 6080   | 407  |   | 135 | dedicator of cytokinesis (smopey) mRNA.                                                    |
| smorbor  | smorbor.aSep08  |        | 8196   | 663  |   | 160 | armadillo repeat containing 2 like (smorbor) mRNA.                                         |
| smorcha  | smorcha.aSep08  |        | 3737   | 651  |   | 86  | putative protein of mammalian origin (smorcha) mRNA.                                       |
| smorchy  | smorchy.aSep08  |        | 25937  | 573  |   | 40  | putative protein (4.2 kD) (smorchy) mRNA.                                                  |
| smordoy  | smordoy.aSep08  |        | 1575   | 313  |   | 22  | putative protein (smordoy) mRNA.                                                           |
| smorfee  | smorfee.aSep08  |        | 2023   | 482  |   | 41  | putative protein (4.6 kD) (smorfee) mRNA.                                                  |
| smorflu  | smorflu.aSep08  |        | 8238   | 394  | 4 | 131 | PHD ring finger domains 1 like (smorflu) alternative variant aSep08, mRNA.                 |
| smorflu  | smorflu.bSep08  |        | 8641   | 485  | 4 | 128 | PHD ring finger domains 1 like (smorflu) alternative variant bSep08, mRNA.                 |
| smorfly  | smorfly.aSep08  |        | 4204   | 656  | 4 | 69  | putative protein (smorfly) alternative variant aSep08, mRNA.                               |
| smorja   | smorja.aSep08   |        | 986    | 487  |   | 47  | putative protein (5.3 kD) (smorja) mRNA.                                                   |
| smormee  | smormee.aSep08  |        | 2255   | 257  |   | 67  | putative protein (7.4 kD) (smormee) mRNA.                                                  |
| smornor  | smornor.aSep08  |        | 144287 | 1049 |   | 349 | raft-linking protein CRA a (smornor) mRNA.                                                 |
| smoroy   | smoroy.aSep08   |        | 3416   | 853  |   | 69  | putative protein (smoroy) mRNA.                                                            |
| smorpey  | smorpey.aSep08  |        | 5773   | 578  |   | 192 | anillin (smorpey) mRNA.                                                                    |
| smorroy  | smorroy.aSep08  |        | 2472   | 302  |   | 100 | centrosomal protein 290kDa CRA b (smorroy) mRNA.                                           |
| smorshaw | smorshaw.aSep08 |        | 8397   | 365  |   | 86  | cd180 antigen CRA a like (smorshaw) mRNA.                                                  |

|          |                 |        |        |      |    |     |                                                                                              |
|----------|-----------------|--------|--------|------|----|-----|----------------------------------------------------------------------------------------------|
| smorshee | smorshee.aSep08 |        | 24036  | 408  |    | 56  | putative protein (smorshee) mRNA.                                                            |
| smortu   | smortu.aSep08   |        | 53744  | 1733 |    | 75  | putative protein (smortu) mRNA.                                                              |
| smorvo   | smorvo.aSep08   |        | 10655  | 595  |    | 198 | cdk5 regulatory associated protein 2 (smorvo) mRNA.                                          |
| smorwer  | smorwer.aSep08  |        | 28919  | 1521 |    | 224 | maltase-glucoamylase (smorwer) mRNA.                                                         |
| smoshaw  | smoshaw.aSep08  |        | 1841   | 670  |    | 42  | putative protein (4.9 kD) (smoshaw) mRNA.                                                    |
| smoshee  | smoshee.aSep08  |        | 1370   | 636  |    | 59  | putative protein (6.7 kD) (smoshee) mRNA.                                                    |
| smotu    | smotu.aSep08    |        | 975    | 515  |    | 110 | putative protein (smotu) mRNA.                                                               |
| smovo    | smovo.aSep08    |        | 3085   | 498  |    | 90  | putative protein of mammalian origin (smovo) mRNA.                                           |
| smower   | smower.aSep08   |        | 3237   | 390  |    | 129 | maltase-glucoamylase CRA a (smower) mRNA.                                                    |
| Smox     | Smox.bSep08     | 308652 | 31732  | 1980 | 6  | 514 | spermine oxidase (57.1 kD) (Smox) alternative variant bSep08, mRNA.                          |
| Smox     | Smox.cSep08     | 308652 | 34383  | 1799 | 7  | 468 | spermine oxidase (Smox) alternative variant cSep08, mRNA.                                    |
| Smox     | Smox.dSep08     | 308652 | 34385  | 1691 | 6  | 465 | spermine oxidase (Smox) alternative variant dSep08, mRNA.                                    |
| Smox     | Smox.fSep08     | 308652 | 29309  | 392  | 3  | 71  | spermine oxidase (7.3 kD) (Smox) alternative variant fSep08, mRNA.                           |
| smoybor  | smoybor.aSep08  |        | 10834  | 692  |    | 62  | putative protein (7.4 kD) (smoybor) mRNA.                                                    |
| smoycha  | smoycha.bSep08  |        | 863    | 538  | 2  | 40  | putative protein (4.3 kD) (smoycha) alternative variant bSep08, mRNA.                        |
| smoychy  | smoychy.aSep08  |        | 9392   | 2534 |    | 355 | phosphatidylinositol 3 4 5-trisphosphate-dependent Rac exchanger 1 (smoychy) mRNA.           |
| smoydoy  | smoydoy.aSep08  |        | 2724   | 674  | 4  | 68  | putative protein (smoydoy) alternative variant aSep08, mRNA.                                 |
| smoyfee  | smoyfee.aSep08  |        | 517    | 399  |    | 35  | putative protein (4.1 kD) (smoyfee) mRNA.                                                    |
| smoyflu  | smoyflu.aSep08  |        | 552    | 285  |    | 94  | kinase 2 (smoyflu) mRNA.                                                                     |
| smoyfly  | smoyfly.aSep08  |        | 851    | 468  |    | 155 | glioma tumor suppressor candidate region gene 1 like (smoyfly) mRNA.                         |
| smoyja   | smoyja.aSep08   |        | 19150  | 312  |    | 27  | putative protein (3.1 kD) (smoyja) mRNA.                                                     |
| smoylor  | smoylor.aSep08  |        | 136496 | 782  |    | 105 | putative protein (smoylor) alternative variant aSep08, mRNA.                                 |
| smoylor  | smoylor.bSep08  |        | 136392 | 783  | 1  | 46  | putative protein (5.2 kD) (smoylor) alternative variant bSep08, mRNA.                        |
| smoymee  | smoymee.aSep08  |        | 158818 | 1567 | 16 | 478 | breast carcinoma amplified sequence 3 like (smoymee) alternative variant aSep08, mRNA.       |
| smoymee  | smoymee.bSep08  |        | 51676  | 1027 | 7  | 303 | breast carcinoma amplified sequence 3 like (smoymee) alternative variant bSep08, mRNA.       |
| smoymee  | smoymee.cSep08  |        | 19803  | 306  | 5  | 101 | breast carcinoma amplified sequence 3 like (smoymee) alternative variant cSep08, mRNA.       |
| smoymee  | smoymee.dSep08  |        | 12672  | 335  | 3  | 92  | breast carcinoma amplified sequence 3 CRA c like (smoymee) alternative variant dSep08, mRNA. |
| smoymee  | smoymee.eSep08  |        | 1812   | 414  | 3  | 49  | putative protein (smoymee) alternative variant eSep08, mRNA.                                 |
| smoynor  | smoynor.aSep08  |        | 3841   | 405  |    | 71  | kinesin family member 6 (smoynor) mRNA.                                                      |
| smoypey  | smoypey.aSep08  |        | 31038  | 781  | 4  | 210 | CRA a (smoypey) alternative variant aSep08, mRNA.                                            |

|                |                       |        |       |      |   |     |                                                                                                           |
|----------------|-----------------------|--------|-------|------|---|-----|-----------------------------------------------------------------------------------------------------------|
| smoypey        | smoypey.bSep08        |        | 14214 | 959  | 3 | 176 | putative protein of mammalian origin (smoypey) alternative variant bSep08, mRNA.                          |
| smoypey        | smoypey.cSep08        |        | 11309 | 352  | 2 | 117 | CRA b like (smoypey) alternative variant cSep08, mRNA.                                                    |
| smoyroy        | smoyroy.aSep08        |        | 2668  | 549  |   | 182 | centrosomal protein 290kDa CRA a (smoyroy) mRNA.                                                          |
| smoyshaw       | smoyshaw.aSep08       |        | 3439  | 681  |   | 226 | microtubule-associated serine threonine-protein kinase 4 (smoyshaw) mRNA.                                 |
| smoyshee       | smoyshee.aSep08       |        | 20049 | 508  |   | 20  | putative protein (smoyshee) mRNA.                                                                         |
| smoytu         | smoytu.aSep08         |        | 1094  | 863  |   | 43  | echinoderm microtubule associated protein like 5 CRA b (smoytu) mRNA.                                     |
| smoyvo         | smoyvo.aSep08         |        | 1587  | 891  |   | 38  | putative protein (4.0 kD) (smoyvo) mRNA.                                                                  |
| smoywer        | smoywer.aSep08        |        | 582   | 486  |   | 106 | T-cell receptor like precursor (12.1 kD) (smoywer) mRNA.                                                  |
| Smpd1          | Smpd1.bSep08          | 308909 | 2643  | 1537 | 4 | 479 | sphingomyelin phosphodiesterase 1, acid lysosomal (Smpd1) alternative variant bSep08, mRNA.               |
| Smpd1          | Smpd1.cSep08          | 308909 | 1394  | 763  | 4 | 108 | sphingomyelin phosphodiesterase 1, acid lysosomal (Smpd1) alternative variant cSep08, mRNA.               |
| Smpd2          | Smpd2.bSep08          | 83537  | 1319  | 687  | 1 | 56  | sphingomyelin phosphodiesterase 2, neutral (Smpd2) alternative variant bSep08, mRNA.                      |
| Smpd4          | Smpd4.aSep08          | 303790 | 23739 | 3444 | 9 | 860 | sphingomyelin phosphodiesterase 4 (Smpd4) alternative variant aSep08, mRNA.                               |
| Smpd4          | Smpd4.bSep08          | 303790 | 12547 | 598  | 1 | 199 | sphingomyelin phosphodiesterase 4 (Smpd4) alternative variant bSep08, mRNA.                               |
| Smpd4          | Smpd4.cSep08          | 303790 | 11616 | 635  | 2 | 156 | sphingomyelin phosphodiesterase 4 (17.5 kD) (Smpd4) alternative variant cSep08, mRNA.                     |
| Smpdl3a        | Smpdl3a.bSep08        | 294422 | 3922  | 1584 | 2 | 229 | sphingomyelin phosphodiesterase, acid-like 3A (26.1 kD) (Smpdl3a) alternative variant bSep08, mRNA.       |
| Smpdl3bandXkr8 | Smpdl3bandXkr8.cSep08 | 313033 | 27311 | 1092 | 4 | 160 | sphingomyelin phosphodiesterase acid-like 3B (18.3 kD) (Smpdl3bandXkr8) alternative variant cSep08, mRNA. |
| Smpdl3bandXkr8 | Smpdl3bandXkr8.cSep08 | 362619 | 27311 | 1092 | 4 | 160 | sphingomyelin phosphodiesterase acid-like 3B (18.3 kD) (Smpdl3bandXkr8) alternative variant cSep08, mRNA. |
| Smpx           | Smpx.aSep08           | 84416  | 56203 | 890  | 2 | 85  | small muscle protein, X-linked (9.1 kD) (Smpx) alternative variant aSep08, mRNA.                          |
| Smpx           | Smpx.cSep08           | 84416  | 59583 | 520  | 4 | 85  | small muscle protein, X-linked (9.1 kD) (Smpx) alternative variant cSep08, mRNA.                          |
| Smr.0          | Smr.0.aSep08          |        | 5799  | 392  |   | 87  | smr protein/MutS2 C-terminal (Smr.0) mRNA.                                                                |
| Smtn           | Smtn.bSep08           | 289734 | 5470  | 682  | 4 | 175 | smoothelin (Smtn) alternative variant bSep08, mRNA.                                                       |
| Smtn           | Smtn.cSep08           | 289734 | 2035  | 699  | 2 | 92  | putative protein (10.8 kD) (Smtn) alternative variant cSep08, mRNA.                                       |
| Smtn           | Smtn.eSep08           | 289734 | 1091  | 587  | 2 | 72  | smoothelin (Smtn) alternative variant eSep08, mRNA.                                                       |
| Smtnl1         | Smtnl1.aSep08         | 311167 | 6145  | 913  |   | 229 | smoothelin-like 1 (Smtnl1) mRNA.                                                                          |
| Smtnl2         | Smtnl2.aSep08         | 679629 | 12833 | 1835 |   | 276 | smoothelin-like 2 (Smtnl2) mRNA.                                                                          |
| Smu1           | Smu1.bSep08           | 117541 | 4689  | 705  | 3 | 151 | smu-1 suppressor of mec-8 unc-52 homolog (Smu1) alternative variant bSep08, mRNA.                         |
| Smu1           | Smu1.cSep08           | 117541 | 4662  | 420  | 3 | 140 | smu-1 suppressor of mec-8 unc-52 homolog CRA b (Smu1) alternative variant cSep08, mRNA.                   |
| smubor         | smubor.aSep08         |        | 1675  | 272  |   | 82  | putative protein (smubor) mRNA.                                                                           |

|         |                |        |       |      |    |     |                                                                                                                        |
|---------|----------------|--------|-------|------|----|-----|------------------------------------------------------------------------------------------------------------------------|
| smucha  | smucha.aSep08  |        | 952   | 635  | 2  | 147 | putative protein (16.2 kD) (smucha) mRNA.                                                                              |
| smuchy  | smuchy.aSep08  |        | 2215  | 900  |    | 299 | CRA a (smuchy) mRNA.                                                                                                   |
| smudoy  | smudoy.aSep08  |        | 14508 | 720  |    | 93  | putative protein (smudoy) mRNA.                                                                                        |
| smufee  | smufee.aSep08  |        | 3475  | 1899 |    | 60  | sideroflexin 1 (6.6 kD) (smufee) mRNA.                                                                                 |
| smuflu  | smuflu.aSep08  |        | 2468  | 345  |    | 58  | A disintegrin metallopeptidase domain 8 like (smuflu) mRNA.                                                            |
| smufly  | smufly.aSep08  |        | 8231  | 262  |    | 39  | putative protein (smufly) mRNA.                                                                                        |
| Smug1   | Smug1.bSep08   | 315344 | 481   | 277  | 2  | 69  | single-strand selective monofunctional uracil DNA glycosylase (Smug1) alternative variant bSep08, mRNA.                |
| smuja   | smuja.aSep08   |        | 24929 | 708  |    | 143 | UDP-glucose ceramide glucosyltransferase-like (smuja) alternative variant aSep08, mRNA.                                |
| smuja   | smuja.bSep08   |        | 9716  | 308  |    | 47  | UDP-glucose ceramide glucosyltransferase-like 2 (smuja) alternative variant bSep08, mRNA.                              |
| smumee  | smumee.bSep08  |        | 3050  | 962  | 3  | 91  | putative protein (smumee) alternative variant bSep08, mRNA.                                                            |
| smumee  | smumee.cSep08  |        | 3065  | 937  | 2  | 95  | putative protein (smumee) alternative variant cSep08, mRNA.                                                            |
| smupey  | smupey.aSep08  |        | 31580 | 1593 | 13 | 530 | dicator of cytokinesis 6 CRA d (smupey) alternative variant aSep08, mRNA.                                              |
| smuroy  | smuroy.aSep08  |        | 14468 | 269  |    | 31  | putative protein (smuroy) mRNA.                                                                                        |
| smushaw | smushaw.aSep08 |        | 828   | 718  | 2  | 74  | putative protein (8.2 kD) (smushaw) alternative variant aSep08, mRNA.                                                  |
| smushee | smushee.aSep08 |        | 19260 | 712  |    | 101 | putative nuclear protein (11.7 kD) (smushee) mRNA.                                                                     |
| smutu   | smutu.aSep08   |        | 1896  | 433  | 1  | 59  | uncharacterized protein like (smutu) alternative variant aSep08, mRNA.                                                 |
| smutu   | smutu.bSep08   |        | 1829  | 272  |    | 46  | putative protein of mammalian origin (smutu) alternative variant bSep08, mRNA.                                         |
| smuvo   | smuvo.aSep08   |        | 4021  | 689  |    | 56  | putative protein (smuvo) mRNA.                                                                                         |
| smuwer  | smuwer.aSep08  |        | 32007 | 635  |    | 46  | putative protein (smuwer) mRNA.                                                                                        |
| smybor  | smybor.bSep08  |        | 1426  | 605  | 2  | 58  | putative protein (6.3 kD) (smybor) alternative variant bSep08, mRNA.                                                   |
| smybor  | smybor.cSep08  |        | 795   | 544  | 2  | 58  | putative protein (6.3 kD) (smybor) alternative variant cSep08, mRNA.                                                   |
| smychy  | smychy.aSep08  |        | 1380  | 388  |    | 46  | putative protein (smychy) mRNA.                                                                                        |
| Smyd1   | Smyd1.bSep08   | 297333 | 31502 | 541  | 3  | 103 | putative protein of eukaryotic origin (Smyd1) alternative variant bSep08, mRNA.                                        |
| Smyd2   | Smyd2.aSep08   | 289372 | 41327 | 1578 | 12 | 444 | zinc finger, MYND-type (Smyd2) alternative variant aSep08, mRNA.                                                       |
| Smyd2   | Smyd2.bSep08   | 289372 | 3346  | 634  | 3  | 130 | putative protein of eukaryotic origin (Smyd2) alternative variant bSep08, mRNA.                                        |
| Smyd2   | Smyd2.cSep08   | 289372 | 2044  | 662  | 2  | 107 | putative protein of vertebrate origin (11.8 kD) (Smyd2) alternative variant cSep08, mRNA.                              |
| Smyd2   | Smyd2.dSep08   | 289372 | 3262  | 1072 | 3  | 71  | putative endoplasmic reticulum protein, with a transmembrane domain (7.7 kD) (Smyd2) alternative variant dSep08, mRNA. |



|         |                |        |       |      |    |     |                                                                                   |
|---------|----------------|--------|-------|------|----|-----|-----------------------------------------------------------------------------------|
| Smyd5   | Smyd5.aSep08   | 312503 | 10325 | 911  | 10 | 303 | smyd family member 5 (Smyd5) alternative variant aSep08, mRNA.                    |
| Smyd5   | Smyd5.bSep08   | 312503 | 723   | 246  | 2  | 39  | smyd family member 5 (Smyd5) alternative variant bSep08, mRNA.                    |
| smydoy  | smydoy.aSep08  |        | 968   | 304  |    | 35  | putative protein (4.1 kD) (smydoy) mRNA.                                          |
| smyfee  | smyfee.aSep08  |        | 9551  | 1470 |    | 188 | CRA b (smyfee) mRNA.                                                              |
| smyflu  | smyflu.aSep08  |        | 959   | 701  |    | 47  | putative protein (smyflu) mRNA.                                                   |
| smyfly  | smyfly.aSep08  |        | 29012 | 724  |    | 52  | putative protein (6.1 kD) (smyfly) mRNA.                                          |
| smyja   | smyja.aSep08   |        | 10347 | 921  | 3  | 69  | putative protein (7.8 kD) (smyja) alternative variant aSep08, mRNA.               |
| smymee  | smymee.aSep08  |        | 4591  | 1002 | 3  | 53  | CRA a like (6.1 kD) (smymee) alternative variant aSep08, mRNA.                    |
| smymee  | smymee.bSep08  |        | 3902  | 967  | 2  | 34  | CRA a like (smymee) alternative variant bSep08, mRNA.                             |
| smypey  | smypey.aSep08  |        | 1494  | 739  |    | 61  | putative protein (smypey) mRNA.                                                   |
| smyroy  | smyroy.aSep08  |        | 7411  | 487  |    | 70  | putative protein (7.6 kD) (smyroy) mRNA.                                          |
| smyshaw | smyshaw.aSep08 |        | 11418 | 438  |    | 13  | putative protein (smyshaw) mRNA.                                                  |
| smyshee | smyshee.aSep08 |        | 558   | 417  |    | 23  | putative protein (2.5 kD) (smyshee) mRNA.                                         |
| smytu   | smytu.aSep08   |        | 30908 | 752  |    | 42  | putative protein (smytu) mRNA.                                                    |
| smyvo   | smyvo.aSep08   |        | 1827  | 269  |    | 47  | putative protein (smyvo) mRNA.                                                    |
| smywer  | smywer.aSep08  |        | 3089  | 1067 |    | 154 | putative protein of vertebrate origin (17.7 kD) (smywer) mRNA.                    |
| snabor  | snabor.aSep08  |        | 957   | 316  |    | 78  | putative protein (snabor) mRNA.                                                   |
| snacha  | snacha.aSep08  |        | 2879  | 931  | 2  | 66  | CRA b like (7.3 kD) (snacha) alternative variant aSep08, complete mRNA.           |
| snacha  | snacha.bSep08  |        | 2835  | 883  | 2  | 66  | CRA b like (7.3 kD) (snacha) alternative variant bSep08, mRNA.                    |
| snacha  | snacha.cSep08  |        | 2370  | 813  | 1  | 40  | CRA a like (4.3 kD) (snacha) alternative variant cSep08, complete mRNA.           |
| snachy  | snachy.aSep08  |        | 3862  | 758  |    | 223 | phosphatidylinositol 3 4 5-trisphosphate-dependent Rac exchanger 1 (snachy) mRNA. |
| snadoy  | snadoy.aSep08  |        | 1151  | 331  |    | 80  | putative protein (snadoy) mRNA.                                                   |
| snafee  | snafee.bSep08  |        | 1127  | 694  | 2  | 42  | putative protein (snafee) alternative variant bSep08, mRNA.                       |
| snafly  | snafly.aSep08  |        | 9856  | 380  |    | 44  | zinc finger protein 541 like (snafly) mRNA.                                       |
| snaja   | snaja.aSep08   |        | 2833  | 553  | 2  | 60  | putative protein (6.9 kD) (snaja) alternative variant aSep08, mRNA.               |
| snalor  | snalor.aSep08  |        | 1449  | 599  |    | 86  | putative cytoplasmic protein (13.2 kD) (snalor) mRNA.                             |
| snamee  | snamee.bSep08  |        | 23048 | 546  | 3  | 102 | putative cytoplasmic protein (11.2 kD) (snamee) alternative variant bSep08, mRNA. |
| snamee  | snamee.cSep08  |        | 5685  | 284  | 2  | 52  | putative protein (snamee) alternative variant cSep08, mRNA.                       |
| snanor  | snanor.aSep08  |        | 10500 | 407  |    | 59  | putative protein (snanor) mRNA.                                                   |
| Snap25  | Snap25.aSep08  | 25012  | 34363 | 1825 | 5  | 182 | synaptosomal-associated protein 25 (Snap25) alternative variant aSep08, mRNA.     |

|        |               |        |       |      |    |     |                                                                                                          |
|--------|---------------|--------|-------|------|----|-----|----------------------------------------------------------------------------------------------------------|
| Snap25 | Snap25.cSep08 | 25012  | 86945 | 988  | 5  | 175 | synaptosomal-associated protein 25 (19.7 kD) (Snap25) alternative variant cSep08, mRNA.                  |
| Snap25 | Snap25.dSep08 | 25012  | 69487 | 2760 | 1  | 144 | synaptosomal-associated protein 25 (Snap25) alternative variant dSep08, mRNA.                            |
| Snap91 | Snap91.aSep08 | 65178  | 24174 | 1206 | 11 | 401 | synaptosomal-associated protein 91 (Snap91) alternative variant aSep08, mRNA.                            |
| Snap91 | Snap91.bSep08 | 65178  | 25229 | 2346 | 11 | 314 | synaptosomal-associated protein 91 (Snap91) alternative variant bSep08, mRNA.                            |
| Snap91 | Snap91.cSep08 | 65178  | 27907 | 729  | 8  | 242 | synaptosomal-associated protein 91 (Snap91) alternative variant cSep08, mRNA.                            |
| Snap91 | Snap91.dSep08 | 65178  | 6765  | 389  | 4  | 122 | synaptosomal-associated protein 91 (Snap91) alternative variant dSep08, mRNA.                            |
| Snap91 | Snap91.eSep08 | 65178  | 13725 | 403  | 6  | 121 | synaptosomal-associated protein 91 (Snap91) alternative variant eSep08, mRNA.                            |
| Snapap | Snapap.aSep08 | 295217 | 1876  | 825  | 4  | 136 | SNAP-associated protein (14.9 kD) (Snapap) alternative variant aSep08, complete mRNA.                    |
| Snapap | Snapap.cSep08 | 295217 | 1461  | 672  | 3  | 65  | SNAP-associated protein (Snapap) alternative variant cSep08, mRNA.                                       |
| Snapap | Snapap.dSep08 | 295217 | 1431  | 614  | 3  | 37  | SNAP-associated protein (4.7 kD) (Snapap) alternative variant dSep08, mRNA.                              |
| Snapc1 | Snapc1.bSep08 | 314228 | 10661 | 743  | 4  | 138 | small nuclear RNA activating complex, polypeptide 1 (Snapc1) alternative variant bSep08, mRNA.           |
| Snapc2 | Snapc2.aSep08 | 304204 | 2414  | 970  | 4  | 252 | small nuclear RNA activating complex, polypeptide 2 (Snapc2) alternative variant aSep08, mRNA.           |
| Snapc2 | Snapc2.bSep08 | 304204 | 1969  | 853  | 4  | 152 | small nuclear RNA activating complex, polypeptide 2 (15.7 kD) (Snapc2) alternative variant bSep08, mRNA. |
| Snapc3 | Snapc3.bSep08 | 362537 | 21515 | 640  | 5  | 213 | small nuclear RNA activating complex polypeptide 3 CRA c (Snapc3) alternative variant bSep08, mRNA.      |
| Snapc3 | Snapc3.cSep08 | 362537 | 23258 | 889  | 6  | 166 | small nuclear RNA activating complex polypeptide 3 CRA b (Snapc3) alternative variant cSep08, mRNA.      |
| Snapc3 | Snapc3.dSep08 | 362537 | 22634 | 1675 | 4  | 67  | putative protein (7.9 kD) (Snapc3) alternative variant dSep08, mRNA.                                     |
| Snapc3 | Snapc3.eSep08 | 362537 | 17166 | 425  | 3  | 54  | putative protein (Snapc3) alternative variant eSep08, mRNA.                                              |
| Snapc3 | Snapc3.gSep08 | 362537 | 1666  | 729  | 2  | 48  | putative protein (5.7 kD) (Snapc3) alternative variant gSep08, mRNA.                                     |
| Snapc4 | Snapc4.bSep08 | 362088 | 1588  | 752  | 2  | 216 | small nuclear RNA activating complex, polypeptide 4 (Snapc4) alternative variant bSep08, mRNA.           |
| Snapc4 | Snapc4.cSep08 | 362088 | 1122  | 505  | 2  | 46  | small nuclear RNA activating complex, polypeptide 4 (Snapc4) alternative variant cSep08, mRNA.           |
| Snapc4 | Snapc4.dSep08 | 362088 | 12607 | 1800 | 5  | 41  | small nuclear RNA activating complex, polypeptide 4 (Snapc4) alternative variant dSep08, mRNA.           |
| Snapc4 | Snapc4.eSep08 | 362088 | 1799  | 418  | 3  | 50  | small nuclear RNA activating complex, polypeptide 4 (Snapc4) alternative variant eSep08, mRNA.           |
| Snapc4 | Snapc4.gSep08 | 362088 | 2090  | 397  | 2  | 47  | small nuclear RNA activating complex, polypeptide 4 (5.2 kD) (Snapc4) alternative variant gSep08, mRNA.  |
| snapey | snapey.aSep08 |        | 998   | 676  |    | 87  | putative protein (9.4 kD) (snapey) mRNA.                                                                 |

|          |                 |        |       |      |   |     |                                                                        |
|----------|-----------------|--------|-------|------|---|-----|------------------------------------------------------------------------|
| snarbor  | snarbor.aSep08  |        | 399   | 284  | 1 | 54  | putative protein (snarbor) alternative variant aSep08, mRNA.           |
| snarbor  | snarbor.bSep08  |        | 304   | 185  | 1 | 23  | putative protein (snarbor) alternative variant bSep08, mRNA.           |
| snarcha  | snarcha.aSep08  |        | 1044  | 424  |   | 124 | putative protein (snarcha) mRNA.                                       |
| snarchy  | snarchy.aSep08  |        | 1548  | 415  |   | 71  | putative protein (snarchy) mRNA.                                       |
| snardoy  | snardoy.aSep08  |        | 1292  | 342  |   | 51  | putative protein (snardoy) mRNA.                                       |
| SNARE.0  | SNARE.0.aSep08  |        | 5254  | 726  | 3 | 95  | syntaxin (SNARE.0) alternative variant aSep08, mRNA.                   |
| SNARE.0  | SNARE.0.cSep08  |        | 1541  | 712  | 2 | 60  | syntaxin (6.7 kD) (SNARE.0) alternative variant cSep08, mRNA.          |
| snarfee  | snarfee.aSep08  |        | 15643 | 710  | 3 | 67  | putative protein (7.4 kD) (snarfee) alternative variant aSep08, mRNA.  |
| snarfee  | snarfee.bSep08  |        | 16821 | 319  | 1 | 69  | putative protein (snarfee) alternative variant bSep08, mRNA.           |
| snarflu  | snarflu.aSep08  |        | 59252 | 260  |   | 46  | putative protein (snarflu) mRNA.                                       |
| snarfly  | snarfly.aSep08  |        | 1657  | 390  |   | 68  | carcinoembryonic antigen-related like (snarfly) mRNA.                  |
| snarja   | snarja.aSep08   |        | 1819  | 576  |   | 147 | putative protein (snarja) mRNA.                                        |
| snarlor  | snarlor.aSep08  |        | 94167 | 390  |   | 53  | putative protein (snarlor) mRNA.                                       |
| snarmee  | snarmee.aSep08  |        | 8110  | 746  |   | 248 | integrator complex (snarmee) mRNA.                                     |
| snarnor  | snarnor.aSep08  |        | 7857  | 777  |   | 17  | putative protein (snarnor) mRNA.                                       |
| snaroy   | snaroy.aSep08   |        | 972   | 370  |   | 123 | centrosomal protein 290kDa CRA a (snaroy) mRNA.                        |
| snarpey  | snarpey.aSep08  |        | 426   | 262  |   | 49  | putative protein (5.4 kD) (snarpey) mRNA.                              |
| snarroy  | snarroy.aSep08  |        | 762   | 355  |   | 31  | putative protein (snarroy) mRNA.                                       |
| snarshaw | snarshaw.aSep08 |        | 14216 | 385  | 4 | 128 | tripartite motif protein 23 CRA b (snarshaw) mRNA.                     |
| snarshee | snarshee.aSep08 | 362068 | 3477  | 399  |   | 132 | monogenic audiogenic seizure susceptibility 1 homolog (snarshee) mRNA. |
| snartu   | snartu.aSep08   |        | 2021  | 746  |   | 75  | putative protein (8.4 kD) (snartu) mRNA.                               |
| snarvo   | snarvo.aSep08   |        | 7317  | 706  |   | 51  | putative protein (6.0 kD) (snarvo) mRNA.                               |
| snarwer  | snarwer.aSep08  |        | 1390  | 681  |   | 85  | putative protein (9.3 kD) (snarwer) mRNA.                              |
| snashaw  | snashaw.aSep08  |        | 16494 | 299  |   | 43  | putative protein (snashaw) mRNA.                                       |
| snashee  | snashee.aSep08  |        | 46164 | 570  |   | 138 | uncharacterized protein (snashee) mRNA.                                |
| snatu    | snatu.aSep08    |        | 1440  | 392  |   | 130 | echinoderm microtubule associated protein like 5 CRA b (snatu) mRNA.   |
| snavo    | snavo.aSep08    |        | 2719  | 369  |   | 122 | transducin-like enhancer 1 (snavo) mRNA.                               |
| snawbor  | snawbor.bSep08  |        | 28412 | 764  | 2 | 77  | putative protein (8.3 kD) (snawbor) alternative variant bSep08, mRNA.  |
| snawcha  | snawcha.aSep08  |        | 1580  | 1473 |   | 90  | putative protein (snawcha) mRNA.                                       |
| snawchy  | snawchy.aSep08  |        | 4926  | 320  |   | 61  | putative protein (snawchy) mRNA.                                       |
| snawdoy  | snawdoy.aSep08  |        | 1176  | 740  |   | 97  | putative protein (11.1 kD) (snawdoy) mRNA.                             |
| snawer   | snawer.aSep08   |        | 8198  | 593  |   | 104 | putative protein (snawer) mRNA.                                        |
| snawfee  | snawfee.aSep08  |        | 13457 | 741  |   | 64  | putative protein (7.1 kD) (snawfee) mRNA.                              |
| snawflu  | snawflu.aSep08  |        | 11580 | 335  | 2 | 31  | putative protein (snawflu) mRNA.                                       |
| snawfly  | snawfly.aSep08  |        | 1323  | 1259 |   | 79  | putative protein (snawfly) mRNA.                                       |

|          |                 |        |        |      |   |     |                                                                                             |
|----------|-----------------|--------|--------|------|---|-----|---------------------------------------------------------------------------------------------|
| snawja   | snawja.aSep08   |        | 33274  | 266  |   | 60  | putative protein (snawja) mRNA.                                                             |
| snawlor  | snawlor.aSep08  |        | 5796   | 1768 | 5 | 6   | putative protein (snawlor) alternative variant aSep08, mRNA.                                |
| snawnor  | snawnor.aSep08  |        | 805    | 286  |   | 92  | putative protein (snawnor) mRNA.                                                            |
| snawpey  | snawpey.aSep08  |        | 3478   | 329  |   | 40  | putative protein (4.5 kD) (snawpey) mRNA.                                                   |
| snawroy  | snawroy.aSep08  |        | 1015   | 617  |   | 55  | putative protein (6.5 kD) (snawroy) mRNA.                                                   |
| snawshaw | snawshaw.aSep08 |        | 4953   | 434  |   | 144 | kinesin heavy chain member 2 (snawshaw) mRNA.                                               |
| snawshee | snawshee.aSep08 |        | 12017  | 444  |   | 37  | putative protein (snawshee) mRNA.                                                           |
| snawtu   | snawtu.aSep08   |        | 5069   | 376  |   | 68  | putative protein (snawtu) mRNA.                                                             |
| snawvo   | snawvo.aSep08   |        | 19631  | 392  |   | 35  | putative protein (3.9 kD) (snawvo) mRNA.                                                    |
| snawwer  | snawwer.aSep08  |        | 26055  | 1950 |   | 104 | putative mitochondrial protein (11.9 kD) (snawwer) mRNA.                                    |
| Snca     | Snca.bSep08     | 29219  | 65819  | 378  | 1 | 67  | synuclein, alpha (Snca) alternative variant bSep08, mRNA.                                   |
| Sncaip   | Sncaip.bSep08   | 307309 | 966    | 489  | 2 | 60  | synuclein, alpha interacting protein (synphilin) (Sncaip) alternative variant bSep08, mRNA. |
| Sncaip   | Sncaip.cSep08   | 307309 | 8451   | 543  | 2 | 41  | synuclein, alpha interacting protein (synphilin) (Sncaip) alternative variant cSep08, mRNA. |
| Sncb     | Sncb.bSep08     | 113893 | 8011   | 714  | 3 | 116 | synuclein, beta (Sncb) alternative variant bSep08, mRNA.                                    |
| Sncb     | Sncb.cSep08     | 113893 | 1149   | 601  | 3 | 23  | synuclein, beta (2.8 kD) (Sncb) alternative variant cSep08, mRNA.                           |
| Sncb     | Sncb.dSep08     | 113893 | 966    | 308  | 2 | 56  | synuclein, beta (Sncb) alternative variant dSep08, mRNA.                                    |
| Sncg     | Sncg.bSep08     | 64347  | 4377   | 620  | 6 | 148 | synuclein, gamma (15.6 kD) (Sncg) alternative variant bSep08, mRNA.                         |
| Snd1     | Snd1.bSep08     | 64635  | 54842  | 1642 | 9 | 310 | maternal tudor protein (35.2 kD) (Snd1) alternative variant bSep08, mRNA.                   |
| Snd1     | Snd1.cSep08     | 64635  | 217006 | 684  | 6 | 227 | staphylococcus nuclease (SNase-like) (Snd1) alternative variant cSep08, mRNA.               |
| Snd1     | Snd1.dSep08     | 64635  | 18875  | 411  | 4 | 110 | putative protein of eukaryotic origin (Snd1) alternative variant dSep08, mRNA.              |
| Snd1     | Snd1.eSep08     | 64635  | 40851  | 326  | 3 | 108 | putative protein of eukaryotic origin (Snd1) alternative variant eSep08, mRNA.              |
| Snd1     | Snd1.fSep08     | 64635  | 646    | 538  | 2 | 80  | putative protein of metazoan origin (9.2 kD) (Snd1) alternative variant fSep08, mRNA.       |
| Snd1     | Snd1.gSep08     | 64635  | 692    | 294  | 3 | 31  | putative protein of metazoan origin (Snd1) alternative variant gSep08, mRNA.                |
| Sned1    | Sned1.aSep08    | 316638 | 10117  | 610  |   | 201 | sushi, nidogen and EGF-like domains 1 (Sned1) mRNA.                                         |
| sneebor  | sneebor.aSep08  |        | 720    | 308  |   | 46  | putative protein (5.0 kD) (sneebor) mRNA.                                                   |
| sneecha  | sneecha.aSep08  |        | 3879   | 552  |   | 116 | putative protein (sneecha) mRNA.                                                            |
| sneechy  | sneechy.aSep08  |        | 6433   | 381  |   | 70  | putative protein (sneechy) mRNA.                                                            |
| sneedoy  | sneedoy.aSep08  |        | 2958   | 602  |   | 63  | putative protein (7.3 kD) (sneedoy) mRNA.                                                   |
| sneefee  | sneefee.aSep08  |        | 6325   | 744  |   | 103 | putative protein (11.1 kD) (sneefee) mRNA.                                                  |
| sneeflu  | sneeflu.aSep08  |        | 6295   | 525  |   | 105 | putative protein (sneeflu) mRNA.                                                            |
| sneefly  | sneefly.aSep08  |        | 1580   | 736  |   | 133 | putative protein of mammalian origin (sneefly) mRNA.                                        |
| sneeja   | sneeja.aSep08   |        | 561    | 402  |   | 32  | T cell receptor (sneeja) mRNA.                                                              |
| sneelor  | sneelor.aSep08  |        | 8565   | 980  |   | 80  | putative protein (sneelor) mRNA.                                                            |

|          |                 |  |        |      |   |     |                                                                                           |
|----------|-----------------|--|--------|------|---|-----|-------------------------------------------------------------------------------------------|
| sneemee  | sneemee.aSep08  |  | 500    | 402  |   | 115 | putative protein (sneemee) mRNA.                                                          |
| sneenor  | sneenor.aSep08  |  | 1043   | 674  |   | 62  | putative protein (sneenor) mRNA.                                                          |
| sneepey  | sneepey.aSep08  |  | 4194   | 419  |   | 121 | putative protein (sneepey) mRNA.                                                          |
| sneeroy  | sneeroy.aSep08  |  | 766    | 580  |   | 33  | putative protein (3.8 kD) (sneeroy) mRNA.                                                 |
| sneeshaw | sneeshaw.aSep08 |  | 34366  | 286  |   | 95  | kinesin-like protein kif2a (sneeshaw) mRNA.                                               |
| sneeshee | sneeshee.aSep08 |  | 2586   | 351  |   | 116 | glutamyl aminopeptidase (sneeshee) mRNA.                                                  |
| sneetu   | sneetu.aSep08   |  | 13341  | 399  |   | 67  | putative protein (sneetu) mRNA.                                                           |
| sneevo   | sneevo.aSep08   |  | 102373 | 640  |   | 71  | putative protein (sneevo) mRNA.                                                           |
| sneewer  | sneewer.aSep08  |  | 35365  | 367  |   | 96  | putative protein of mammalian origin (sneewer) mRNA.                                      |
| snerbor  | snerbor.aSep08  |  | 2281   | 608  |   | 36  | putative protein (3.9 kD) (snerbor) mRNA.                                                 |
| snercha  | snercha.aSep08  |  | 1404   | 1277 |   | 16  | putative protein (1.9 kD) (snercha) mRNA.                                                 |
| snerchy  | snerchy.aSep08  |  | 686    | 407  |   | 90  | putative protein (snerchy) mRNA.                                                          |
| snerdoy  | snerdoy.aSep08  |  | 1682   | 1307 |   | 114 | putative protein (12.5 kD) (snerdoy) mRNA.                                                |
| snerfee  | snerfee.aSep08  |  | 6394   | 785  |   | 112 | putative protein (snerfee) mRNA.                                                          |
| snerflu  | snerflu.aSep08  |  | 4895   | 666  | 2 | 144 | CRA b like (15.8 kD) (snerflu) alternative variant aSep08, mRNA.                          |
| snerflu  | snerflu.cSep08  |  | 27775  | 780  | 5 | 66  | CRA b like (7.2 kD) (snerflu) alternative variant cSep08, mRNA.                           |
| snerflu  | snerflu.dSep08  |  | 15511  | 222  | 3 | 22  | putative protein (2.4 kD) (snerflu) alternative variant dSep08, mRNA.                     |
| snerfly  | snerfly.aSep08  |  | 5086   | 348  |   | 116 | kinesin light CRA a (snerfly) mRNA.                                                       |
| snerja   | snerja.aSep08   |  | 3187   | 199  |   | 63  | gag protein like (snerja) mRNA.                                                           |
| snerlor  | snerlor.aSep08  |  | 1317   | 703  |   | 61  | putative protein of mammalian origin (7.0 kD) (snerlor) mRNA.                             |
| snermee  | snermee.aSep08  |  | 6972   | 754  | 2 | 74  | putative protein (snermee) alternative variant aSep08, mRNA.                              |
| snernor  | snernor.bSep08  |  | 2609   | 657  | 2 | 70  | putative protein of mammalian origin (7.9 kD) (snernor) alternative variant bSep08, mRNA. |
| snerpey  | snerpey.aSep08  |  | 10629  | 346  |   | 39  | immunoglobulin superfamily member 9B (snerpey) mRNA.                                      |
| snerroy  | snerroy.aSep08  |  | 7564   | 385  |   | 52  | putative protein (snerroy) mRNA.                                                          |
| snershaw | snershaw.aSep08 |  | 9380   | 711  |   | 112 | putative protein (12.6 kD) (snershaw) mRNA.                                               |
| snershee | snershee.aSep08 |  | 8968   | 254  |   | 82  | phosphatidylinositol glycan anchor biosynthesis class (snershee) mRNA.                    |
| snertu   | snertu.aSep08   |  | 22351  | 335  |   | 111 | putative protein of bilateral origin (snertu) mRNA.                                       |
| snervo   | snervo.aSep08   |  | 2009   | 391  |   | 22  | putative protein (snervo) mRNA.                                                           |
| snerwer  | snerwer.aSep08  |  | 56504  | 2639 |   | 183 | contactin associated protein-like 2 CRA b (20.0 kD) (snerwer) mRNA.                       |
| sneybor  | sneybor.bSep08  |  | 3768   | 1103 | 2 | 30  | putative protein (3.4 kD) (sneybor) alternative variant bSep08, mRNA.                     |
| sneycha  | sneycha.aSep08  |  | 1374   | 526  |   | 67  | microtubule-associated protein 1 light beta CRA a (sneycha) mRNA.                         |
| sneychy  | sneychy.aSep08  |  | 16076  | 1076 |   | 65  | putative protein (7.1 kD) (sneychy) alternative variant aSep08, mRNA.                     |
| sneydoy  | sneydoy.aSep08  |  | 16958  | 1209 | 2 | 284 | rotatin CRA e (sneydoy) alternative variant aSep08, mRNA.                                 |

|          |                 |        |       |      |    |     |                                                                                                           |
|----------|-----------------|--------|-------|------|----|-----|-----------------------------------------------------------------------------------------------------------|
| sneydoy  | sneydoy.bSep08  |        | 13481 | 672  | 1  | 178 | rotatin (sneydoy) alternative variant bSep08, mRNA.                                                       |
| sneyfee  | sneyfee.aSep08  |        | 5539  | 412  |    | 62  | isoleucyl-tRNA synthetase (sneyfee) mRNA.                                                                 |
| sneyflu  | sneyflu.aSep08  |        | 2319  | 319  |    | 102 | putative protein (sneyflu) mRNA.                                                                          |
| sneyfly  | sneyfly.aSep08  |        | 17249 | 631  |    | 209 | MAP microtubule affinity-regulating kinase (sneyfly) mRNA.                                                |
| sneylor  | sneylor.bSep08  |        | 4200  | 689  | 2  | 71  | putative mitochondrial protein (7.6 kD) (sneylor) alternative variant bSep08, mRNA.                       |
| sneymee  | sneymee.aSep08  |        | 1655  | 592  | 4  | 197 | benzodiazapine receptor associated protein 1 CRA a (sneymee) alternative variant aSep08, mRNA.            |
| sneynor  | sneynor.aSep08  |        | 1184  | 439  | 2  | 131 | putative protein (sneynor) alternative variant aSep08, mRNA.                                              |
| sneypey  | sneypey.aSep08  |        | 6982  | 1554 |    | 123 | putative protein of mammalian origin (sneypey) mRNA.                                                      |
| sneyroy  | sneyroy.aSep08  |        | 9194  | 185  |    | 57  | putative protein (sneyroy) mRNA.                                                                          |
| sneyshaw | sneyshaw.aSep08 |        | 79805 | 552  |    | 56  | putative protein (6.5 kD) (sneyshaw) mRNA.                                                                |
| sneytu   | sneytu.aSep08   |        | 7461  | 534  |    | 61  | putative protein (sneytu) mRNA.                                                                           |
| sneyvo   | sneyvo.aSep08   |        | 5191  | 321  |    | 72  | putative protein (sneyvo) mRNA.                                                                           |
| sneywer  | sneywer.aSep08  |        | 4492  | 837  |    | 83  | putative protein (6.4 kD) (sneywer) mRNA.                                                                 |
| Snf1lk   | Snf1lk.bSep08   | 59329  | 1545  | 627  | 1  | 208 | SNF1-like kinase (Snf1lk) alternative variant bSep08, mRNA.                                               |
| SNF2_N.0 | SNF2_N.0.aSep08 |        | 14979 | 1113 |    | 301 | transcriptional regulator atrx (SNF2_N.0) mRNA.                                                           |
| SNF2_N.1 | SNF2_N.1.aSep08 |        | 24816 | 1294 | 1  | 359 | stretch responsive protein 278 CRA b (SNF2_N.1) alternative variant aSep08, mRNA.                         |
| SNF2_N.1 | SNF2_N.1.bSep08 |        | 17594 | 883  | 1  | 229 | stretch responsive protein 278 CRA b (SNF2_N.1) alternative variant bSep08, mRNA.                         |
| SNF2_N.2 | SNF2_N.2.aSep08 |        | 9924  | 793  | 4  | 264 | CRA b (SNF2_N.2) alternative variant aSep08, mRNA.                                                        |
| SNF2_N.3 | SNF2_N.3.aSep08 |        | 29960 | 3140 | 19 | 748 | rad54 (84.9 kD) (SNF2_N.3) alternative variant aSep08, mRNA.                                              |
| SNF2_N.3 | SNF2_N.3.bSep08 |        | 8350  | 755  | 6  | 225 | rad54 (SNF2_N.3) alternative variant bSep08, mRNA.                                                        |
| SNF2_N.3 | SNF2_N.3.cSep08 |        | 1190  | 406  | 4  | 75  | rad54 (SNF2_N.3) alternative variant cSep08, mRNA.                                                        |
| SNF2_N.4 | SNF2_N.4.aSep08 |        | 6612  | 734  |    | 244 | SNF2-related (SNF2_N.4) mRNA.                                                                             |
| Snf7.0   | Snf7.0.aSep08   |        | 37464 | 1135 | 4  | 286 | chromatin modifying protein 4b (Snf7.0) alternative variant aSep08, mRNA.                                 |
| Snf8     | Snf8.bSep08     | 287645 | 11961 | 672  | 6  | 127 | SNF8, ESCRT-II complex subunit, homolog (S. cerevisiae) (Snf8) alternative variant bSep08, mRNA.          |
| Snf8     | Snf8.cSep08     | 287645 | 10371 | 757  | 8  | 122 | SNF8, ESCRT-II complex subunit, homolog (S. cerevisiae) (Snf8) alternative variant cSep08, mRNA.          |
| Snf8     | Snf8.dSep08     | 287645 | 1446  | 661  | 2  | 47  | SNF8, ESCRT-II complex subunit, homolog (S. cerevisiae) (4.3 kD) (Snf8) alternative variant dSep08, mRNA. |
| Snhg8    | Snhg8.aSep08    | 361111 | 3889  | 445  |    | 143 | small nucleolar RNA host gene (non-protein coding) 8 (Snhg8) mRNA.                                        |
| Snip     | Snip.bSep08     | 56029  | 4951  | 1091 | 5  | 331 | SNAP25-interacting protein (Snip) alternative variant bSep08, mRNA.                                       |
| Snip     | Snip.cSep08     | 56029  | 10917 | 404  | 4  | 134 | SNAP25-interacting protein (Snip) alternative variant cSep08, mRNA.                                       |
| Snip     | Snip.dSep08     | 56029  | 10577 | 399  | 4  | 133 | SNAP25-interacting protein (Snip) alternative variant dSep08, mRNA.                                       |

|          |                 |        |        |      |   |     |                                                                                        |
|----------|-----------------|--------|--------|------|---|-----|----------------------------------------------------------------------------------------|
| Snip1    | Snip1.bSep08    | 313588 | 2074   | 1093 | 2 | 243 | smad nuclear interacting protein 1 (28.3 kD) (Snip1) alternative variant bSep08, mRNA. |
| Snip1    | Snip1.cSep08    | 313588 | 5128   | 403  | 2 | 118 | smad nuclear interacting protein 1 (Snip1) alternative variant cSep08, mRNA.           |
| snobor   | snobor.aSep08   |        | 2875   | 925  |   | 188 | putative protein, with a coiled coil domain (snobor) mRNA.                             |
| snocha   | snocha.aSep08   |        | 1957   | 413  |   | 119 | putative protein (snocha) mRNA.                                                        |
| snochy   | snochy.aSep08   |        | 2183   | 1697 | 2 | 84  | solute carrier family 9 member 8 CRA a (snochy) alternative variant aSep08, mRNA.      |
| snodoy   | snodoy.aSep08   |        | 12090  | 577  |   | 104 | putative secreted or extracellular protein precursor (10.9 kD) (snodoy) mRNA.          |
| snofee   | snofee.aSep08   |        | 53262  | 1799 | 2 | 472 | putative protein (snofee) alternative variant aSep08, mRNA.                            |
| snofee   | snofee.bSep08   |        | 12887  | 868  | 1 | 109 | putative cytoplasmic protein (12.5 kD) (snofee) alternative variant bSep08, mRNA.      |
| snofee   | snofee.eSep08   |        | 64181  | 665  | 1 | 37  | putative protein (4.3 kD) (snofee) alternative variant eSep08, mRNA.                   |
| snoflu   | snoflu.aSep08   |        | 2071   | 1099 | 4 | 109 | ASM15 like (11.8 kD) (snoflu) alternative variant aSep08, mRNA.                        |
| snoflu   | snoflu.dSep08   |        | 2672   | 2320 | 5 | 59  | putative protein (6.3 kD) (snoflu) alternative variant dSep08, complete mRNA.          |
| snofly   | snofly.aSep08   |        | 10104  | 690  |   | 100 | putative nuclear protein (11.3 kD) (snofly) mRNA.                                      |
| snoja    | snoja.aSep08    |        | 13634  | 1611 |   | 82  | putative protein (9.7 kD) (snoja) mRNA.                                                |
| snolor   | snolor.aSep08   |        | 7546   | 382  |   | 127 | roundabout homolog 2 (snolor) mRNA.                                                    |
| snomee   | snomee.aSep08   |        | 2557   | 418  |   | 139 | integrator complex CRA b (snomee) mRNA.                                                |
| snonor   | snonor.aSep08   |        | 1077   | 580  |   | 39  | putative protein (4.5 kD) (snonor) mRNA.                                               |
| snopey   | snopey.aSep08   |        | 5898   | 546  |   | 44  | putative protein (5.0 kD) (snopey) mRNA.                                               |
| snorbor  | snorbor.aSep08  |        | 17923  | 1375 |   | 63  | putative protein (7.5 kD) (snorbor) mRNA.                                              |
| snorcha  | snorcha.aSep08  |        | 763    | 492  |   | 76  | putative protein (snorcha) mRNA.                                                       |
| snorchy  | snorchy.aSep08  |        | 727    | 343  |   | 45  | putative protein (snorchy) mRNA.                                                       |
| snorfee  | snorfee.aSep08  |        | 6586   | 326  |   | 102 | putative protein (snorfee) mRNA.                                                       |
| snorflu  | snorflu.aSep08  |        | 23028  | 1797 |   | 15  | putative protein (snorflu) alternative variant aSep08, mRNA.                           |
| snorflu  | snorflu.bSep08  |        | 9847   | 407  |   | 48  | putative protein (snorflu) alternative variant bSep08, mRNA.                           |
| snorfly  | snorfly.aSep08  |        | 11095  | 2306 |   | 264 | exocyst complex component 3-like protein 2 (snorfly) mRNA.                             |
| snorlor  | snorlor.aSep08  |        | 43852  | 736  |   | 59  | putative protein (6.5 kD) (snorlor) mRNA.                                              |
| snormee  | snormee.aSep08  |        | 763    | 412  |   | 25  | putative protein (2.5 kD) (snormee) mRNA.                                              |
| snornor  | snornor.aSep08  |        | 8473   | 1027 |   | 258 | ubiquitin ligase E3 alpha-II (snornor) mRNA.                                           |
| snoroy   | snoroy.aSep08   |        | 1587   | 799  | 2 | 102 | centrosomal protein of like (snoroy) alternative variant aSep08, mRNA.                 |
| snorpey  | snorpey.aSep08  |        | 23797  | 669  |   | 62  | putative protein (7.5 kD) (snorpey) mRNA.                                              |
| snorrooy | snorrooy.aSep08 |        | 197482 | 1246 |   | 43  | putative protein (5.2 kD) (snorrooy) mRNA.                                             |
| snorshaw | snorshaw.aSep08 |        | 1003   | 748  |   | 45  | putative protein (5.1 kD) (snorshaw) mRNA.                                             |

|          |                 |        |        |      |    |     |                                                                                                  |
|----------|-----------------|--------|--------|------|----|-----|--------------------------------------------------------------------------------------------------|
| snorshee | snorshee.aSep08 |        | 1094   | 834  |    | 84  | putative protein of mammalian origin (snorshee) mRNA.                                            |
| snortu   | snortu.aSep08   |        | 3364   | 721  |    | 75  | putative protein (8.5 kD) (snortu) mRNA.                                                         |
| snorvo   | snorvo.aSep08   |        | 59545  | 713  |    | 74  | putative secreted or extracellular protein precursor (8.1 kD) (snorvo) mRNA.                     |
| snorwer  | snorwer.aSep08  |        | 3493   | 869  |    | 289 | CRA a (snorwer) mRNA.                                                                            |
| snoshaw  | snoshaw.aSep08  |        | 4199   | 2722 |    | 60  | erbB2 interacting protein (snoshaw) mRNA.                                                        |
| snoshee  | snoshee.aSep08  |        | 2400   | 820  |    | 84  | putative protein (snoshee) mRNA.                                                                 |
| snotu    | snotu.aSep08    |        | 2671   | 480  |    | 68  | putative protein (snotu) mRNA.                                                                   |
| snovo    | snovo.aSep08    |        | 6848   | 691  |    | 32  | putative protein (3.7 kD) (snovo) mRNA.                                                          |
| snower   | snower.aSep08   |        | 38780  | 982  | 2  | 297 | CRA d (snower) alternative variant aSep08, mRNA.                                                 |
| snower   | snower.bSep08   |        | 6663   | 775  | 1  | 258 | CRA d (snower) alternative variant bSep08, mRNA.                                                 |
| snoybor  | snoybor.aSep08  |        | 2117   | 882  |    | 67  | putative protein (7.1 kD) (snoybor) mRNA.                                                        |
| snoycha  | snoycha.aSep08  |        | 1770   | 482  |    | 104 | transcription factor (snoycha) mRNA.                                                             |
| snoychy  | snoychy.aSep08  |        | 1820   | 588  |    | 88  | putative protein (10.2 kD) (snoychy) mRNA.                                                       |
| snoyfee  | snoyfee.aSep08  |        | 176045 | 825  | 5  | 275 | centromere protein P (snoyfee) alternative variant aSep08, mRNA.                                 |
| snoyfee  | snoyfee.bSep08  |        | 17859  | 559  | 1  | 81  | centromere protein P (9.2 kD) (snoyfee) alternative variant bSep08, mRNA.                        |
| snoyflu  | snoyflu.aSep08  |        | 1899   | 391  |    | 102 | transient receptor potential cation channel subfamily M member 5 (snoyflu) mRNA.                 |
| snoylor  | snoylor.aSep08  |        | 12642  | 514  |    | 55  | putative protein (snoylor) mRNA.                                                                 |
| snoymee  | snoymee.aSep08  |        | 700    | 370  |    | 52  | putative protein (snoymee) mRNA.                                                                 |
| snoynor  | snoynor.aSep08  |        | 8478   | 819  | 5  | 272 | ubiquitin ligase E3 alpha-II (snoynor) alternative variant aSep08, mRNA.                         |
| snoynor  | snoynor.bSep08  |        | 3307   | 640  | 1  | 110 | ubiquitin ligase E3 alpha-II (snoynor) alternative variant bSep08, mRNA.                         |
| snoypey  | snoypey.aSep08  |        | 1808   | 484  |    | 140 | putative protein (snoypey) mRNA.                                                                 |
| snoyroy  | snoyroy.aSep08  |        | 5791   | 338  |    | 112 | neuron navigator 3 CRA b (snoyroy) mRNA.                                                         |
| snoyshaw | snoyshaw.aSep08 |        | 12930  | 593  |    | 38  | putative protein (4.4 kD) (snoyshaw) mRNA.                                                       |
| snoytu   | snoytu.aSep08   |        | 27333  | 1462 | 2  | 306 | putative protein of ancient origin (snoytu) alternative variant aSep08, mRNA.                    |
| snoyvo   | snoyvo.aSep08   |        | 13438  | 542  |    | 112 | putative protein, with a coiled coil domain (snoyvo) mRNA.                                       |
| snoywer  | snoywer.aSep08  |        | 6878   | 713  |    | 38  | putative protein (snoywer) mRNA.                                                                 |
| Snrp70   | Snrp70.aSep08   | 361574 | 20433  | 1578 | 10 | 451 | small nuclear ribonucleoprotein (52.1 kD) (Snrp70) alternative variant aSep08, complete mRNA.    |
| Snrp70   | Snrp70.bSep08   | 361574 | 7197   | 3639 | 4  | 352 | small nuclear ribonucleoprotein polypeptide (39.3 kD) (Snrp70) alternative variant bSep08, mRNA. |
| Snrp70   | Snrp70.cSep08   | 361574 | 19660  | 1065 | 10 | 308 | small nuclear ribonucleoprotein (Snrp70) alternative variant cSep08, mRNA.                       |
| Snrp70   | Snrp70.fSep08   | 361574 | 3739   | 370  | 3  | 63  | putative protein (Snrp70) alternative variant fSep08, mRNA.                                      |
| Snrpa    | Snrpa.bSep08    | 292729 | 6894   | 883  | 6  | 228 | small nuclear ribonucleoprotein polypeptide A (Snrpa) alternative variant bSep08, mRNA.          |



|               |                      |        |       |      |   |     |                                                                                                 |
|---------------|----------------------|--------|-------|------|---|-----|-------------------------------------------------------------------------------------------------|
| Snrpb         | Snrpb.bSep08         | 171365 | 6234  | 773  | 6 | 140 | small nuclear ribonucleoprotein polypeptides B and B1 (Snrpb) alternative variant bSep08, mRNA. |
| Snrpb2        | Snrpb2.bSep08        | 362223 | 9474  | 1041 | 4 | 218 | u2 small nuclear ribonucleoprotein B (24.6 kD) (Snrpb2) alternative variant bSep08, mRNA.       |
| Snrpb2        | Snrpb2.cSep08        | 362223 | 6011  | 452  | 1 | 37  | u2 small nuclear ribonucleoprotein B (Snrpb2) alternative variant cSep08, mRNA.                 |
| Snrpc         | Snrpc.aSep08         | 361808 | 10590 | 725  | 1 | 172 | u1 small nuclear ribonucleoprotein C (Snrpc) alternative variant aSep08, mRNA.                  |
| Snrpc         | Snrpc.bSep08         | 361808 | 10524 | 769  | 1 | 118 | u1 small nuclear ribonucleoprotein C (12.3 kD) (Snrpc) alternative variant bSep08, mRNA.        |
| Snta1         | Snta1.aSep08         | 362242 | 30564 | 2102 | 4 | 535 | syntrophin, acidic 1 (Snta1) alternative variant aSep08, mRNA.                                  |
| Snta1         | Snta1.bSep08         | 362242 | 4101  | 643  | 1 | 214 | syntrophin, acidic 1 (Snta1) alternative variant bSep08, mRNA.                                  |
| Sntg1         | Sntg1.aSep08         | 500394 | 54298 | 464  |   | 83  | syntrophin, gamma 1 (Sntg1) mRNA.                                                               |
| snuor         | snuor.aSep08         |        | 2388  | 1086 |   | 279 | putative protein of mammalian origin (snuor) mRNA.                                              |
| snucha        | snucha.aSep08        |        | 1201  | 590  |   | 47  | putative protein (5.3 kD) (snucha) mRNA.                                                        |
| snuchy        | snuchy.aSep08        |        | 11357 | 692  | 4 | 230 | solute carrier family 9 member 8 CRA a (snuchy) alternative variant aSep08, mRNA.               |
| snuchy        | snuchy.bSep08        |        | 11920 | 433  | 5 | 144 | solute carrier family 9 member 8 CRA a (snuchy) alternative variant bSep08, mRNA.               |
| snuchy        | snuchy.cSep08        |        | 754   | 302  | 2 | 100 | solute carrier family 9 member 8 CRA c (snuchy) alternative variant cSep08, mRNA.               |
| snudoy        | snudoy.aSep08        |        | 43756 | 381  |   | 34  | putative protein (3.6 kD) (snudoy) mRNA.                                                        |
| snufee        | snufee.aSep08        |        | 4128  | 750  |   | 46  | putative protein (5.4 kD) (snufee) mRNA.                                                        |
| snufly        | snufly.aSep08        |        | 10921 | 150  |   | 29  | putative protein (snufly) mRNA.                                                                 |
| snufly        | snufly.aSep08        |        | 1839  | 485  |   | 161 | dapper homolog 3 (snufly) mRNA.                                                                 |
| snuja         | snuja.aSep08         |        | 423   | 299  |   | 40  | putative protein (4.5 kD) (snuja) mRNA.                                                         |
| snulor        | snulor.aSep08        |        | 3649  | 702  |   | 110 | putative protein (snulor) mRNA.                                                                 |
| snumee        | snumee.aSep08        |        | 3577  | 1624 |   | 151 | integrator complex (snumee) mRNA.                                                               |
| snunor        | snunor.aSep08        |        | 4551  | 419  |   | 104 | putative protein (snunor) mRNA.                                                                 |
| snupey        | snupey.aSep08        |        | 4640  | 537  |   | 45  | putative protein (snupey) mRNA.                                                                 |
| Snupn         | Snupn.bSep08         | 316108 | 27788 | 2175 | 7 | 202 | snurportin 1 (23.2 kD) (Snupn) alternative variant bSep08, mRNA.                                |
| Snupn         | Snupn.cSep08         | 316108 | 12333 | 391  | 4 | 67  | snurportin 1 (Snupn) alternative variant cSep08, mRNA.                                          |
| SnurfandSnrpn | SnurfandSnrpn.bSep08 | 81781  | 19773 | 1304 | 9 | 221 | small nuclear (23.1 kD) (SnurfandSnrpn) alternative variant bSep08, mRNA.                       |
| SnurfandSnrpn | SnurfandSnrpn.bSep08 | 113938 | 19773 | 1304 | 9 | 221 | small nuclear (23.1 kD) (SnurfandSnrpn) alternative variant bSep08, mRNA.                       |
| SnurfandSnrpn | SnurfandSnrpn.cSep08 | 81781  | 19546 | 921  | 7 | 140 | small nuclear ribonucleoprotein (SnurfandSnrpn) alternative variant cSep08, mRNA.               |
| SnurfandSnrpn | SnurfandSnrpn.cSep08 | 113938 | 19546 | 921  | 7 | 140 | small nuclear ribonucleoprotein (SnurfandSnrpn) alternative variant cSep08, mRNA.               |
| SnurfandSnrpn | SnurfandSnrpn.dSep08 | 81781  | 15879 | 694  | 5 | 90  | SNRPN upstream reading frame (10.7 kD) (SnurfandSnrpn) alternative variant dSep08, mRNA.        |

|               |                      |        |        |      |   |     |                                                                                                  |
|---------------|----------------------|--------|--------|------|---|-----|--------------------------------------------------------------------------------------------------|
| SnurfandSnrpn | SnurfandSnrpn.dSep08 | 113938 | 15879  | 694  | 5 | 90  | SNRPN upstream reading frame (10.7 kD) (SnurfandSnrpn) alternative variant dSep08, mRNA.         |
| SnurfandSnrpn | SnurfandSnrpn.eSep08 | 81781  | 19783  | 437  | 4 | 77  | SNRPN upstream reading frame (9.1 kD) (SnurfandSnrpn) alternative variant eSep08, mRNA.          |
| SnurfandSnrpn | SnurfandSnrpn.eSep08 | 113938 | 19783  | 437  | 4 | 77  | SNRPN upstream reading frame (9.1 kD) (SnurfandSnrpn) alternative variant eSep08, mRNA.          |
| SnurfandSnrpn | SnurfandSnrpn.gSep08 | 81781  | 15898  | 848  | 6 | 90  | SNRPN upstream reading frame (10.7 kD) (SnurfandSnrpn) alternative variant gSep08, mRNA.         |
| SnurfandSnrpn | SnurfandSnrpn.gSep08 | 113938 | 15898  | 848  | 6 | 90  | SNRPN upstream reading frame (10.7 kD) (SnurfandSnrpn) alternative variant gSep08, mRNA.         |
| SnurfandSnrpn | SnurfandSnrpn.hSep08 | 81781  | 18475  | 804  | 7 | 71  | SNRPN upstream reading frame (8.4 kD) (SnurfandSnrpn) alternative variant hSep08, complete mRNA. |
| SnurfandSnrpn | SnurfandSnrpn.hSep08 | 113938 | 18475  | 804  | 7 | 71  | SNRPN upstream reading frame (8.4 kD) (SnurfandSnrpn) alternative variant hSep08, complete mRNA. |
| SnurfandSnrpn | SnurfandSnrpn.iSep08 | 81781  | 6455   | 726  | 3 | 59  | putative protein (SnurfandSnrpn) alternative variant iSep08, mRNA.                               |
| SnurfandSnrpn | SnurfandSnrpn.iSep08 | 113938 | 6455   | 726  | 3 | 59  | putative protein (SnurfandSnrpn) alternative variant iSep08, mRNA.                               |
| SnurfandSnrpn | SnurfandSnrpn.jSep08 | 81781  | 9135   | 666  | 3 | 46  | putative protein (5.4 kD) (SnurfandSnrpn) alternative variant jSep08, mRNA.                      |
| SnurfandSnrpn | SnurfandSnrpn.jSep08 | 113938 | 9135   | 666  | 3 | 46  | putative protein (5.4 kD) (SnurfandSnrpn) alternative variant jSep08, mRNA.                      |
| SnurfandSnrpn | SnurfandSnrpn.kSep08 | 81781  | 17410  | 592  | 6 | 70  | SNRPN upstream reading frame (SnurfandSnrpn) alternative variant kSep08, mRNA.                   |
| SnurfandSnrpn | SnurfandSnrpn.kSep08 | 113938 | 17410  | 592  | 6 | 70  | SNRPN upstream reading frame (SnurfandSnrpn) alternative variant kSep08, mRNA.                   |
| SnurfandSnrpn | SnurfandSnrpn.lSep08 | 81781  | 135526 | 585  | 7 | 86  | SNRPN upstream reading frame (10.2 kD) (SnurfandSnrpn) alternative variant lSep08, mRNA.         |
| SnurfandSnrpn | SnurfandSnrpn.lSep08 | 113938 | 135526 | 585  | 7 | 86  | SNRPN upstream reading frame (10.2 kD) (SnurfandSnrpn) alternative variant lSep08, mRNA.         |
| SnurfandSnrpn | SnurfandSnrpn.mSep08 | 81781  | 16766  | 547  | 5 | 63  | putative protein (SnurfandSnrpn) alternative variant mSep08, mRNA.                               |
| SnurfandSnrpn | SnurfandSnrpn.mSep08 | 113938 | 16766  | 547  | 5 | 63  | putative protein (SnurfandSnrpn) alternative variant mSep08, mRNA.                               |
| SnurfandSnrpn | SnurfandSnrpn.oSep08 | 81781  | 15593  | 342  | 4 | 24  | putative protein (SnurfandSnrpn) alternative variant oSep08, mRNA.                               |
| SnurfandSnrpn | SnurfandSnrpn.oSep08 | 113938 | 15593  | 342  | 4 | 24  | putative protein (SnurfandSnrpn) alternative variant oSep08, mRNA.                               |
| snuroy        | snuroy.aSep08        |        | 5677   | 527  |   | 175 | centrosomal protein 290kDa CRA b (snuroy) mRNA.                                                  |
| snushaw       | snushaw.aSep08       |        | 2645   | 1774 |   | 13  | putative protein (1.6 kD) (snushaw) mRNA.                                                        |
| snushee       | snushee.aSep08       |        | 70905  | 1783 |   |     |                                                                                                  |
| snutu         | snutu.aSep08         |        | 5187   | 313  |   | 99  | CRA b like (snutu) mRNA.                                                                         |
| snuvo         | snuvo.aSep08         |        | 30690  | 575  |   | 191 | protein tyrosine phosphatase receptor type D (snuvo) mRNA.                                       |
| snuwer        | snuwer.aSep08        |        | 1869   | 350  |   | 55  | putative protein (snuwer) mRNA.                                                                  |
| Snx1          | Snx1.bSep08          | 84471  | 6979   | 833  | 6 | 220 | sorting nexin 1 (Snx1) alternative variant bSep08, mRNA.                                         |

|       |              |        |        |      |    |     |                                                                            |
|-------|--------------|--------|--------|------|----|-----|----------------------------------------------------------------------------|
| Snx1  | Snx1.cSep08  | 84471  | 32126  | 696  | 7  | 195 | sorting nexin 1 (Snx1) alternative variant cSep08, mRNA.                   |
| Snx1  | Snx1.dSep08  | 84471  | 2461   | 481  | 5  | 101 | sorting nexin 1 (Snx1) alternative variant dSep08, mRNA.                   |
| Snx2  | Snx2.bSep08  | 291464 | 22312  | 1748 | 10 | 445 | sorting nexin 2 (Snx2) alternative variant bSep08, mRNA.                   |
| Snx2  | Snx2.cSep08  | 291464 | 10556  | 604  | 7  | 172 | sorting nexin 2 CRA c (Snx2) alternative variant cSep08, mRNA.             |
| Snx2  | Snx2.dSep08  | 291464 | 9740   | 911  | 6  | 157 | sorting nexin 2 (Snx2) alternative variant dSep08, mRNA.                   |
| Snx2  | Snx2.eSep08  | 291464 | 11577  | 793  | 6  | 132 | sorting nexin 2 (15.6 kD) (Snx2) alternative variant eSep08, mRNA.         |
| Snx2  | Snx2.fSep08  | 291464 | 7708   | 442  | 3  | 81  | sorting nexin 2 (Snx2) alternative variant fSep08, mRNA.                   |
| Snx4  | Snx4.bSep08  | 360725 | 10271  | 1561 | 5  | 172 | sorting nexin 4 (Snx4) alternative variant bSep08, mRNA.                   |
| Snx4  | Snx4.cSep08  | 360725 | 14565  | 1048 | 7  | 163 | sorting nexin 4 (Snx4) alternative variant cSep08, mRNA.                   |
| Snx5  | Snx5.aSep08  | 296199 | 19297  | 2036 | 14 | 404 | sorting nexin 5 (46.8 kD) (Snx5) alternative variant aSep08, mRNA.         |
| Snx5  | Snx5.bSep08  | 296199 | 14657  | 1084 | 8  | 264 | sorting nexin 5 CRA b (30.3 kD) (Snx5) alternative variant bSep08, mRNA.   |
| Snx5  | Snx5.cSep08  | 296199 | 14242  | 757  | 7  | 240 | sorting nexin 5 CRA b (27.7 kD) (Snx5) alternative variant cSep08, mRNA.   |
| Snx5  | Snx5.eSep08  | 296199 | 1921   | 702  | 2  | 91  | sorting nexin 5 (Snx5) alternative variant eSep08, mRNA.                   |
| Snx5  | Snx5.gSep08  | 296199 | 691    | 597  | 2  | 55  | putative protein (6.5 kD) (Snx5) alternative variant gSep08, mRNA.         |
| Snx6  | Snx6.bSep08  | 362738 | 4509   | 727  | 2  | 9   | sorting nexin 6 (1.1 kD) (Snx6) alternative variant bSep08, complete mRNA. |
| Snx10 | Snx10.bSep08 | 297096 | 45561  | 2548 | 7  | 201 | sorting nexin 10 (23.6 kD) (Snx10) alternative variant bSep08, mRNA.       |
| Snx10 | Snx10.cSep08 | 297096 | 8642   | 561  | 3  | 117 | sorting nexin 10 (13.2 kD) (Snx10) alternative variant cSep08, mRNA.       |
| Snx10 | Snx10.dSep08 | 297096 | 19191  | 221  | 3  | 20  | sorting nexin 10 (Snx10) alternative variant dSep08, mRNA.                 |
| Snx11 | Snx11.aSep08 | 303493 | 8651   | 725  | 6  | 220 | sorting nexin 11 (Snx11) alternative variant aSep08, mRNA.                 |
| Snx11 | Snx11.bSep08 | 303493 | 6756   | 692  | 6  | 133 | sorting nexin 11 (Snx11) alternative variant bSep08, mRNA.                 |
| Snx11 | Snx11.dSep08 | 303493 | 3199   | 407  | 1  | 45  | sorting nexin 11 (Snx11) alternative variant dSep08, mRNA.                 |
| Snx12 | Snx12.aSep08 | 363478 | 126524 | 1823 | 4  | 448 | sorting nexin 12 (Snx12) alternative variant aSep08, mRNA.                 |
| Snx12 | Snx12.cSep08 | 363478 | 3505   | 671  | 2  | 101 | sorting nexin 12 (Snx12) alternative variant cSep08, mRNA.                 |
| Snx12 | Snx12.dSep08 | 363478 | 7730   | 705  | 2  | 58  | sorting nexin 12 (Snx12) alternative variant dSep08, mRNA.                 |
| Snx13 | Snx13.bSep08 | 362731 | 11399  | 611  | 4  | 147 | sorting nexin 13 (Snx13) alternative variant bSep08, mRNA.                 |
| Snx14 | Snx14.bSep08 | 315871 | 64848  | 1928 | 18 | 642 | sorting nexin 14 (Snx14) alternative variant bSep08, mRNA.                 |
| Snx14 | Snx14.cSep08 | 315871 | 4539   | 661  | 8  | 219 | sorting nexin 14 (Snx14) alternative variant cSep08, mRNA.                 |

|        |               |        |        |      |    |     |                                                                               |
|--------|---------------|--------|--------|------|----|-----|-------------------------------------------------------------------------------|
| Snx14  | Snx14.dSep08  | 315871 | 18065  | 472  | 5  | 157 | sorting nexin 14 (Snx14) alternative variant dSep08, mRNA.                    |
| Snx14  | Snx14.eSep08  | 315871 | 10163  | 759  | 3  | 119 | sorting nexin 14 (13.4 kD) (Snx14) alternative variant eSep08, mRNA.          |
| Snx14  | Snx14.fSep08  | 315871 | 3763   | 579  | 2  | 21  | sorting nexin 14 (2.4 kD) (Snx14) alternative variant fSep08, mRNA.           |
| Snx15  | Snx15.bSep08  | 293691 | 2491   | 839  | 4  | 182 | sorting nexin 15 (20.4 kD) (Snx15) alternative variant bSep08, mRNA.          |
| Snx15  | Snx15.cSep08  | 293691 | 1124   | 755  | 3  | 107 | sorting nexin 15 (Snx15) alternative variant cSep08, mRNA.                    |
| Snx16  | Snx16.aSep08  | 64088  | 20537  | 1787 | 1  | 499 | sorting nexin 16 (Snx16) alternative variant aSep08, mRNA.                    |
| Snx17  | Snx17.bSep08  | 298836 | 1936   | 1159 | 6  | 212 | sorting nexin 17 (Snx17) alternative variant bSep08, mRNA.                    |
| Snx17  | Snx17.cSep08  | 298836 | 2055   | 515  | 4  | 150 | sorting nexin 17 (Snx17) alternative variant cSep08, mRNA.                    |
| Snx20  | Snx20.aSep08  | 307742 | 6130   | 1414 | 4  | 313 | sorting nexin 20 (35.7 kD) (Snx20) alternative variant aSep08, mRNA.          |
| Snx22  | Snx22.bSep08  | 300796 | 1198   | 415  |    | 73  | sorting nexin 22 (Snx22) alternative variant bSep08, mRNA.                    |
| Snx24  | Snx24.aSep08  | 361328 | 157988 | 2147 | 7  | 103 | sorting nexin 24 (12.5 kD) (Snx24) alternative variant aSep08, mRNA.          |
| Snx25  | Snx25.aSep08  | 306471 | 103010 | 2885 | 3  | 635 | sorting nexin 25 (73.0 kD) (Snx25) alternative variant aSep08, mRNA.          |
| Snx27  | Snx27.bSep08  | 260323 | 19406  | 1865 | 1  | 176 | sorting nexin family member 27 (Snx27) alternative variant bSep08, mRNA.      |
| Snx30  | Snx30.bSep08  | 298033 | 4816   | 501  |    | 40  | sorting nexin family member 30 (Snx30) alternative variant bSep08, mRNA.      |
| Snx32  | Snx32.aSep08  | 361708 | 17452  | 1630 | 13 | 285 | sorting nexin 32 (33.2 kD) (Snx32) alternative variant aSep08, complete mRNA. |
| Snx32  | Snx32.bSep08  | 361708 | 15367  | 807  | 7  | 233 | sorting nexin 32 (Snx32) alternative variant bSep08, mRNA.                    |
| Snx32  | Snx32.cSep08  | 361708 | 15313  | 729  | 7  | 216 | sorting nexin 32 (Snx32) alternative variant cSep08, mRNA.                    |
| Snx32  | Snx32.dSep08  | 361708 | 1402   | 500  | 5  | 133 | sorting nexin 32 (Snx32) alternative variant dSep08, mRNA.                    |
| snybor | snybor.aSep08 |        | 879    | 292  |    | 27  | putative protein (snybor) mRNA.                                               |
| snycha | snycha.aSep08 |        | 611    | 408  |    | 49  | putative protein (5.5 kD) (snycha) complete mRNA.                             |
| snychy | snychy.aSep08 |        | 2917   | 556  | 5  | 85  | CRA a like (9.5 kD) (snychy) alternative variant aSep08, mRNA.                |
| snychy | snychy.bSep08 |        | 2588   | 487  | 5  | 85  | CRA a like (9.5 kD) (snychy) alternative variant bSep08, mRNA.                |
| snychy | snychy.cSep08 |        | 1008   | 753  | 2  | 69  | CRA a like (7.7 kD) (snychy) alternative variant cSep08, mRNA.                |
| snydoy | snydoy.aSep08 |        | 1217   | 285  |    | 94  | putative protein of vertebrate origin (snydoy) mRNA.                          |
| snyfee | snyfee.aSep08 |        | 951    | 496  |    | 80  | putative protein (snyfee) mRNA.                                               |

|            |                   |        |       |     |   |     |                                                                                                                 |
|------------|-------------------|--------|-------|-----|---|-----|-----------------------------------------------------------------------------------------------------------------|
| snyflu     | snyflu.aSep08     |        | 7345  | 484 |   | 41  | putative protein (snyflu) mRNA.                                                                                 |
| snyfly     | snyfly.aSep08     |        | 579   | 404 |   | 134 | zinc finger CCCH-type containing 4 like (snyfly) mRNA.                                                          |
| snyja      | snyja.aSep08      |        | 1402  | 547 |   | 33  | putative protein (3.8 kD) (snyja) mRNA.                                                                         |
| snylor     | snylor.aSep08     |        | 2812  | 245 |   | 65  | putative protein (snylor) mRNA.                                                                                 |
| snymee     | snymee.aSep08     |        | 8361  | 418 |   | 111 | BRCA1 interacting protein C-terminal helicase 1 like (snymee) mRNA.                                             |
| snynor     | snynor.aSep08     |        | 7890  | 610 |   | 46  | putative protein (snynor) mRNA.                                                                                 |
| snypey     | snypey.aSep08     |        | 6367  | 440 |   | 20  | putative protein (snypey) mRNA.                                                                                 |
| snyroy     | snyroy.aSep08     |        | 10980 | 482 |   | 160 | centrosomal protein 290kDa CRA a (snyroy) mRNA.                                                                 |
| snyshaw    | snyshaw.aSep08    |        | 2189  | 386 |   | 19  | putative protein (snyshaw) mRNA.                                                                                |
| snyshee    | snyshee.aSep08    |        | 652   | 608 |   | 26  | putative protein (snyshee) mRNA.                                                                                |
| snytu      | snytu.aSep08      |        | 373   | 308 |   | 68  | putative protein (snytu) mRNA.                                                                                  |
| snyvo      | snyvo.aSep08      |        | 10515 | 577 |   | 100 | putative protein of eukaryotic origin (snyvo) mRNA.                                                             |
| snywer     | snywer.aSep08     |        | 1196  | 565 |   | 187 | eph receptor B6 (snywer) mRNA.                                                                                  |
| soby       | soby.aSep08       |        | 8542  | 397 |   | 72  | WD repeat (soby) mRNA.                                                                                          |
| sochy      | sochy.aSep08      |        | 11274 | 699 |   | 204 | kinesin 18A (sochy) alternative variant aSep08, mRNA.                                                           |
| sochy      | sochy.bSep08      |        | 2859  | 499 |   | 134 | kinesin family member 18B (sochy) alternative variant bSep08, mRNA.                                             |
| Socs5      | Socs5.bSep08      | 500616 | 5098  | 660 | 2 | 40  | suppressor of cytokine signaling 5 and hypothetical protein LOC681150 (Socs5) alternative variant bSep08, mRNA. |
| Socs5      | Socs5.bSep08      | 681150 | 5098  | 660 | 2 | 40  | suppressor of cytokine signaling 5 and hypothetical protein LOC681150 (Socs5) alternative variant bSep08, mRNA. |
| Socs7      | Socs7.aSep08      | 287659 | 26023 | 989 |   | 126 | suppressor of cytokine signaling 7 (Socs7) mRNA.                                                                |
| SOCS_box.1 | SOCS_box.1.aSep08 | 360206 | 4983  | 964 |   | 293 | ankyrin and SOCS protein, C-terminal (SOCS_box.1) mRNA.                                                         |
| Sod2       | Sod2.bSep08       | 24787  | 5867  | 598 | 5 | 185 | superoxide dismutase 2, mitochondrial (Sod2) alternative variant bSep08, mRNA.                                  |
| sodar      | sodar.aSep08      |        | 35408 | 446 |   | 46  | putative protein (5.1 kD) (sodar) mRNA.                                                                         |
| sofer      | sofer.aSep08      |        | 37988 | 360 | 2 | 120 | type II (sofer) alternative variant aSep08, mRNA.                                                               |
| sofer      | sofer.bSep08      |        | 19696 | 264 | 1 | 47  | type II (sofer) alternative variant bSep08, mRNA.                                                               |
| soflo      | soflo.aSep08      |        | 17350 | 762 |   | 93  | putative nuclear protein (10.2 kD) (soflo) mRNA.                                                                |
| soflu      | soflu.aSep08      |        | 1032  | 678 |   | 61  | putative protein (soflu) mRNA.                                                                                  |
| sogar      | sogar.aSep08      |        | 1566  | 206 |   | 68  | SH2 domain-containing protein (sogar) mRNA.                                                                     |
| Sohlh1     | Sohlh1.aSep08     | 362085 | 1535  | 418 |   | 139 | spermatogenesis and oogenesis specific basic helix-loop-helix 1 (Sohlh1) mRNA.                                  |
| soja       | soja.aSep08       |        | 88936 | 737 | 2 | 46  | putative protein (5.5 kD) (soja) alternative variant aSep08, mRNA.                                              |
| soja       | soja.bSep08       |        | 76245 | 726 | 2 | 31  | putative protein (3.6 kD) (soja) alternative variant bSep08, mRNA.                                              |
| sojey      | sojey.aSep08      |        | 4788  | 835 |   | 77  | aasdh protein (8.4 kD) (sojey) mRNA.                                                                            |
| sokee      | sokee.aSep08      |        | 5537  | 865 |   | 288 | putative protein of vertebrate origin (sokee) mRNA.                                                             |
| sokler     | sokler.aSep08     |        | 1977  | 308 |   | 102 | signal transducing adaptor family member 2 (sokler) mRNA.                                                       |

|        |               |        |        |      |    |     |                                                                                                              |
|--------|---------------|--------|--------|------|----|-----|--------------------------------------------------------------------------------------------------------------|
| Solh   | Solh.bSep08   | 303000 | 623    | 537  | 2  | 178 | small optic lobes homolog (Drosophila) (Solh) alternative variant bSep08, mRNA.                              |
| solo   | solo.aSep08   |        | 15496  | 946  |    | 314 | furry homolog (solo) mRNA.                                                                                   |
| somee  | somee.aSep08  |        | 1123   | 1073 |    | 47  | putative protein (4.8 kD) (somee) mRNA.                                                                      |
| somer  | somer.aSep08  |        | 514    | 360  |    | 120 | CRA c like (somer) mRNA.                                                                                     |
| Son    | Son.aSep08    | 304092 | 6086   | 2280 | 5  | 576 | SON DNA binding protein CRA f like (Son) alternative variant aSep08, mRNA.                                   |
| Son    | Son.bSep08    | 304092 | 19579  | 2584 | 10 | 560 | SON DNA binding protein like (Son) alternative variant bSep08, mRNA.                                         |
| Son    | Son.cSep08    | 304092 | 1802   | 1515 | 3  | 277 | SON protein (Son) alternative variant cSep08, mRNA.                                                          |
| Son    | Son.dSep08    | 304092 | 16652  | 1261 | 10 | 252 | SON protein (Son) alternative variant dSep08, mRNA.                                                          |
| Son    | Son.eSep08    | 304092 | 3872   | 2118 | 3  | 202 | SON protein (Son) alternative variant eSep08, mRNA.                                                          |
| Son    | Son.fSep08    | 304092 | 4833   | 2411 | 4  | 152 | SON DNA binding protein like (16.8 kD) (Son) alternative variant fSep08, mRNA.                               |
| Son    | Son.gSep08    | 304092 | 6516   | 1169 | 7  | 152 | SON DNA binding protein like (16.8 kD) (Son) alternative variant gSep08, mRNA.                               |
| Son    | Son.hSep08    | 304092 | 3427   | 1058 | 4  | 119 | SON protein (13.7 kD) (Son) alternative variant hSep08, mRNA.                                                |
| Son    | Son.iSep08    | 304092 | 4517   | 1523 | 5  | 119 | SON protein (13.7 kD) (Son) alternative variant iSep08, mRNA.                                                |
| sonoy  | sonoy.aSep08  |        | 3931   | 346  |    | 68  | putative protein (sonoy) mRNA.                                                                               |
| sopor  | sopor.aSep08  |        | 4506   | 581  | 2  | 96  | putative protein (sopor) alternative variant aSep08, mRNA.                                                   |
| Sorbs1 | Sorbs1.aSep08 | 686098 | 148646 | 5521 | 25 | 788 | sorbin-like and src homology-3 and variant SH3 (88.6 kD) (Sorbs1) alternative variant aSep08, mRNA.          |
| Sorbs1 | Sorbs1.bSep08 | 686098 | 184628 | 1342 | 16 | 385 | sorbin-like (Sorbs1) alternative variant bSep08, mRNA.                                                       |
| Sorbs1 | Sorbs1.cSep08 | 686098 | 35451  | 792  | 9  | 264 | putative protein, with a coiled coil domain, of vertebrate origin (Sorbs1) alternative variant cSep08, mRNA. |
| Sorbs1 | Sorbs1.dSep08 | 686098 | 22811  | 1015 | 6  | 196 | src homology-3 and variant SH3 (Sorbs1) alternative variant dSep08, mRNA.                                    |
| Sorbs1 | Sorbs1.eSep08 | 686098 | 19264  | 465  | 5  | 155 | putative protein of vertebrate origin (Sorbs1) alternative variant eSep08, mRNA.                             |
| Sorbs1 | Sorbs1.fSep08 | 686098 | 5942   | 837  | 3  | 136 | src homology-3 and variant SH3 (Sorbs1) alternative variant fSep08, mRNA.                                    |
| Sorbs1 | Sorbs1.gSep08 | 686098 | 13236  | 375  | 4  | 124 | putative protein of vertebrate origin (Sorbs1) alternative variant gSep08, mRNA.                             |
| Sorbs1 | Sorbs1.hSep08 | 686098 | 558    | 423  | 2  | 101 | putative protein of metazoan origin (Sorbs1) alternative variant hSep08, mRNA.                               |
| Sorbs1 | Sorbs1.iSep08 | 686098 | 11980  | 296  | 4  | 98  | putative protein of vertebrate origin (Sorbs1) alternative variant iSep08, mRNA.                             |
| Sorbs1 | Sorbs1.jSep08 | 686098 | 3621   | 294  | 2  | 97  | putative protein of vertebrate origin (Sorbs1) alternative variant jSep08, mRNA.                             |
| Sorbs1 | Sorbs1.kSep08 | 686098 | 7223   | 257  | 4  | 85  | putative protein of vertebrate origin (Sorbs1) alternative variant kSep08, mRNA.                             |
| Sorbs1 | Sorbs1.lSep08 | 686098 | 8904   | 345  | 5  | 65  | putative protein of vertebrate origin (Sorbs1) alternative variant lSep08, mRNA.                             |

|        |               |        |       |      |    |     |                                                                                                   |
|--------|---------------|--------|-------|------|----|-----|---------------------------------------------------------------------------------------------------|
| Sorbs3 | Sorbs3.bSep08 | 282843 | 13019 | 2851 | 11 | 562 | src homology-3 and variant SH3 (Sorbs3) alternative variant bSep08, mRNA.                         |
| Sorbs3 | Sorbs3.cSep08 | 282843 | 4992  | 830  | 9  | 217 | putative nuclear protein of mammalian origin (24.2 kD) (Sorbs3) alternative variant cSep08, mRNA. |
| Sorbs3 | Sorbs3.dSep08 | 282843 | 11771 | 580  | 6  | 193 | putative protein of mammalian origin (Sorbs3) alternative variant dSep08, mRNA.                   |
| Sorbs3 | Sorbs3.eSep08 | 282843 | 7447  | 436  | 4  | 145 | sorbin-like (Sorbs3) alternative variant eSep08, mRNA.                                            |
| Sorbs3 | Sorbs3.fSep08 | 282843 | 3141  | 1119 | 2  | 133 | putative protein (Sorbs3) alternative variant fSep08, mRNA.                                       |
| Sorbs3 | Sorbs3.gSep08 | 282843 | 2870  | 629  | 3  | 128 | src homology-3 and variant SH3 (Sorbs3) alternative variant gSep08, mRNA.                         |
| Sorbs3 | Sorbs3.hSep08 | 282843 | 1993  | 325  | 3  | 108 | putative protein of mammalian origin (Sorbs3) alternative variant hSep08, mRNA.                   |
| Sorbs3 | Sorbs3.iSep08 | 282843 | 814   | 389  | 4  | 52  | putative protein of mammalian origin (Sorbs3) alternative variant iSep08, mRNA.                   |
| Sorbs3 | Sorbs3.jSep08 | 282843 | 766   | 390  | 3  | 35  | putative protein of mammalian origin (Sorbs3) alternative variant jSep08, mRNA.                   |
| sorby  | sorby.aSep08  |        | 4075  | 227  |    | 62  | putative protein (7.0 kD) (sorby) mRNA.                                                           |
| sorchy | sorchy.aSep08 |        | 1669  | 268  |    | 17  | putative protein (2.2 kD) (sorchy) mRNA.                                                          |
| Sorcs2 | Sorcs2.bSep08 | 305438 | 6655  | 702  | 5  | 182 | vps10 domain receptor protein sorcs 2 (Sorcs2) alternative variant bSep08, mRNA.                  |
| Sorcs2 | Sorcs2.cSep08 | 305438 | 5752  | 696  | 4  | 105 | vps10 domain receptor protein sorcs 2 (Sorcs2) alternative variant cSep08, mRNA.                  |
| Sorcs2 | Sorcs2.dSep08 | 305438 | 2250  | 314  | 2  | 36  | vps10 domain receptor protein sorcs 2 (Sorcs2) alternative variant dSep08, mRNA.                  |
| Sord   | Sord.bSep08   | 24788  | 25593 | 802  | 2  | 221 | sorbitol dehydrogenase (Sord) alternative variant bSep08, mRNA.                                   |
| Sord   | Sord.cSep08   | 24788  | 25408 | 724  | 2  | 164 | sorbitol dehydrogenase (Sord) alternative variant cSep08, mRNA.                                   |
| sordar | sordar.aSep08 |        | 1027  | 375  |    | 72  | putative protein (8.1 kD) (sordar) mRNA.                                                          |
| sorflo | sorflo.aSep08 |        | 13987 | 642  | 4  | 139 | CRA a like (sorflo) alternative variant aSep08, mRNA.                                             |
| sorflo | sorflo.bSep08 |        | 1345  | 672  | 2  | 70  | CRA a like (8.1 kD) (sorflo) alternative variant bSep08, mRNA.                                    |
| sorflo | sorflo.cSep08 |        | 14897 | 1095 | 3  | 27  | putative protein (3.1 kD) (sorflo) alternative variant cSep08, mRNA.                              |
| sorflo | sorflo.dSep08 |        | 14294 | 900  | 4  | 70  | CRA a like (8.1 kD) (sorflo) alternative variant dSep08, mRNA.                                    |
| sorflo | sorflo.eSep08 |        | 16611 | 440  | 3  | 44  | putative protein (sorflo) alternative variant eSep08, mRNA.                                       |
| sorflu | sorflu.aSep08 |        | 957   | 433  |    | 92  | putative protein (sorflu) mRNA.                                                                   |
| sorgar | sorgar.aSep08 |        | 1329  | 901  | 2  | 72  | putative protein (7.9 kD) (sorgar) alternative variant aSep08, mRNA.                              |
| sorja  | sorja.bSep08  |        | 4926  | 819  | 2  | 52  | putative protein of vertebrate origin (sorja) alternative variant bSep08, mRNA.                   |
| sorjey | sorjey.aSep08 |        | 25483 | 831  |    | 172 | putative protein of metazoan origin (20.2 kD) (sorjey) mRNA.                                      |
| sorkee | sorkee.aSep08 |        | 2529  | 443  |    | 147 | flavin containing monooxygenase 3 (sorkee) mRNA.                                                  |

|         |                |        |        |      |    |     |                                                                                                     |
|---------|----------------|--------|--------|------|----|-----|-----------------------------------------------------------------------------------------------------|
| sorkler | sorkler.aSep08 |        | 3075   | 1375 |    | 71  | putative cytoplasmic protein (8.3 kD) (sorkler) mRNA.                                               |
| Sor1    | Sor1.aSep08    | 300652 | 20241  | 1957 | 13 | 622 | sortilin-related receptor, LDLR class A repeats-containing (Sor1) alternative variant aSep08, mRNA. |
| Sor1    | Sor1.bSep08    | 300652 | 26991  | 2187 | 17 | 523 | sortilin-related receptor, LDLR class A repeats-containing (Sor1) alternative variant bSep08, mRNA. |
| Sor1    | Sor1.cSep08    | 300652 | 6353   | 1001 | 3  | 182 | sortilin-related receptor, LDLR class A repeats-containing (Sor1) alternative variant cSep08, mRNA. |
| Sor1    | Sor1.dSep08    | 300652 | 2792   | 806  | 1  | 137 | sortilin-related receptor, LDLR class A repeats-containing (Sor1) alternative variant dSep08, mRNA. |
| sorlo   | sorlo.aSep08   |        | 2689   | 520  |    | 48  | putative protein (5.4 kD) (sorlo) mRNA.                                                             |
| sormee  | sormee.aSep08  |        | 4650   | 295  |    | 48  | putative protein (5.6 kD) (sormee) mRNA.                                                            |
| sornoy  | sornoy.aSep08  |        | 21427  | 1117 |    | 372 | dedicator of cytokinesis 10 (sornoy) mRNA.                                                          |
| sorpor  | sorpor.aSep08  |        | 8440   | 759  |    | 251 | myosin VC CRA b (sorpor) mRNA.                                                                      |
| sorsa   | sorsa.aSep08   |        | 1813   | 269  |    | 43  | putative protein (sorsa) mRNA.                                                                      |
| sorshee | sorshee.aSep08 |        | 7454   | 369  |    | 122 | folliculin-interacting protein (sorshee) mRNA.                                                      |
| Sort1   | Sort1.aSep08   | 83576  | 21629  | 2087 | 11 | 425 | sortilin 1 (Sort1) alternative variant aSep08, mRNA.                                                |
| Sort1   | Sort1.bSep08   | 83576  | 6353   | 775  | 7  | 257 | sortilin 1 (Sort1) alternative variant bSep08, mRNA.                                                |
| Sort1   | Sort1.cSep08   | 83576  | 6620   | 635  | 4  | 211 | sortilin 1 (Sort1) alternative variant cSep08, mRNA.                                                |
| sortu   | sortu.aSep08   |        | 5798   | 478  |    | 79  | putative protein (sortu) mRNA.                                                                      |
| sorvar  | sorvar.aSep08  |        | 12726  | 1398 |    | 416 | ATPase type 13A2 (sorvar) mRNA.                                                                     |
| sorwey  | sorwey.aSep08  |        | 3429   | 352  |    | 33  | LYST-interacting protein 8 like (sorwey) mRNA.                                                      |
| Sos1    | Sos1.bSep08    | 313845 | 16286  | 681  | 6  | 110 | son of sevenless homolog 1 (Drosophila) (Sos1) alternative variant bSep08, mRNA.                    |
| sosa    | sosa.aSep08    |        | 550    | 291  |    | 60  | putative protein (sosa) mRNA.                                                                       |
| soshee  | soshee.aSep08  |        | 2219   | 376  |    | 125 | sucrase-isomaltase (soshee) mRNA.                                                                   |
| Sostdc1 | Sostdc1.bSep08 | 266803 | 3534   | 835  | 2  | 157 | sclerostin (Sostdc1) alternative variant bSep08, mRNA.                                              |
| sotu    | sotu.aSep08    |        | 2839   | 210  |    | 63  | putative protein (sotu) mRNA.                                                                       |
| sovar   | sovar.aSep08   |        | 6342   | 374  |    | 103 | putative protein (sovar) mRNA.                                                                      |
| sowey   | sowey.aSep08   |        | 1598   | 344  |    | 114 | murinoglobulin (sowey) mRNA.                                                                        |
| Sox5    | Sox5.aSep08    | 140587 | 134222 | 639  |    | 198 | SRY-box containing gene 5 (Sox5) mRNA.                                                              |
| Sox15   | Sox15.aSep08   | 363632 | 1674   | 1102 | 2  | 142 | SRY-box containing gene 15 (Sox15) alternative variant aSep08, mRNA.                                |
| Sox17   | Sox17.aSep08   | 312936 | 4998   | 2544 | 4  | 423 | SRY-box containing gene 17 (45.0 kD) (Sox17) alternative variant aSep08, mRNA.                      |
| Sox17   | Sox17.cSep08   | 312936 | 1143   | 706  | 2  | 172 | SRY-box containing gene 17 (Sox17) alternative variant cSep08, mRNA.                                |
| Sox17   | Sox17.dSep08   | 312936 | 1377   | 1212 | 2  | 42  | SRY-box containing gene 17 (4.7 kD) (Sox17) alternative variant dSep08, mRNA.                       |
| Sox17   | Sox17.eSep08   | 312936 | 519    | 350  | 2  | 32  | SRY-box containing gene 17 (Sox17) alternative variant eSep08, mRNA.                                |
| Sox30   | Sox30.aSep08   | 689918 | 14718  | 746  |    | 232 | SRY (sex determining region Y)-box 30 (Sox30) mRNA.                                                 |
| soyby   | soyby.aSep08   |        | 965    | 544  |    | 28  | putative protein (3.3 kD) (soyby) mRNA.                                                             |
| soychy  | soychy.aSep08  |        | 2821   | 2514 |    | 530 | rho GTPase activating protein 11A (soychy) mRNA.                                                    |



|         |                |        |       |      |    |     |                                                                                           |
|---------|----------------|--------|-------|------|----|-----|-------------------------------------------------------------------------------------------|
| soydar  | soydar.aSep08  |        | 2981  | 264  |    | 34  | putative protein (3.8 kD) (soydar) mRNA.                                                  |
| soyflo  | soyflo.aSep08  |        | 30277 | 968  | 4  | 239 | acyl-CoA synthetase long-chain family member 5 (soyflo) alternative variant aSep08, mRNA. |
| soyflo  | soyflo.bSep08  |        | 14741 | 751  | 4  | 193 | acyl-CoA synthetase long-chain family member 5 (soyflo) alternative variant bSep08, mRNA. |
| soyflo  | soyflo.cSep08  |        | 27474 | 1067 | 3  | 168 | acyl-CoA synthetase long-chain family member 5 (soyflo) alternative variant cSep08, mRNA. |
| soyflo  | soyflo.dSep08  |        | 13678 | 704  | 4  | 154 | acyl-CoA synthetase long-chain family member 5 (soyflo) alternative variant dSep08, mRNA. |
| soyflo  | soyflo.eSep08  |        | 25912 | 726  | 2  | 130 | acyl-CoA synthetase long-chain family member 5 (soyflo) alternative variant eSep08, mRNA. |
| soyflu  | soyflu.aSep08  |        | 1355  | 637  |    | 81  | putative protein (9.0 kD) (soyflu) mRNA.                                                  |
| soygar  | soygar.aSep08  |        | 1685  | 687  |    | 229 | transmembrane protein 16h (soygar) mRNA.                                                  |
| soyja   | soyja.aSep08   |        | 5453  | 317  |    | 34  | putative protein (soyja) mRNA.                                                            |
| soyjoy  | soyjoy.aSep08  |        | 62711 | 678  |    | 62  | putative protein (7.2 kD) (soyjoy) mRNA.                                                  |
| soykee  | soykee.aSep08  |        | 4124  | 882  |    | 49  | putative protein (5.4 kD) (soykee) mRNA.                                                  |
| soykler | soykler.aSep08 |        | 10352 | 322  |    | 46  | putative protein (soykler) mRNA.                                                          |
| soylo   | soylo.aSep08   |        | 1644  | 329  |    | 82  | putative protein (soylo) mRNA.                                                            |
| soymee  | soymee.aSep08  |        | 872   | 276  |    | 91  | transcription factor 7 (soymee) mRNA.                                                     |
| soynoy  | soynoy.aSep08  |        | 2565  | 484  |    | 72  | putative protein (soynoy) mRNA.                                                           |
| soypor  | soypor.aSep08  |        | 1798  | 817  |    | 138 | myosin VC CRA c (16.0 kD) (soypor) mRNA.                                                  |
| soysa   | soysa.aSep08   |        | 4091  | 810  |    | 186 | CAP-binding protein complex interacting 1 like (soysa) mRNA.                              |
| soyshee | soyshee.aSep08 |        | 4141  | 720  |    | 42  | putative protein (4.5 kD) (soyshee) mRNA.                                                 |
| soytu   | soytu.aSep08   |        | 23582 | 590  | 4  | 185 | CRA b (soytu) alternative variant aSep08, mRNA.                                           |
| soyvar  | soyvar.aSep08  |        | 1398  | 697  |    | 119 | putative protein (soyvar) mRNA.                                                           |
| soywey  | soywey.aSep08  |        | 1602  | 725  | 3  | 126 | CRA c (13.2 kD) (soywey) alternative variant aSep08, mRNA.                                |
| soywey  | soywey.bSep08  |        | 1483  | 803  | 3  | 86  | gene rich cluster C10 CRA b like (9.1 kD) (soywey) alternative variant bSep08, mRNA.      |
| Sp1     | Sp1.bSep08     | 24790  | 1353  | 1087 | 2  | 203 | trans-acting transcription factor 1 (Sp1) alternative variant bSep08, mRNA.               |
| Sp2     | Sp2.aSep08     | 303499 | 24972 | 3385 | 8  | 623 | sp2 transcription factor (Sp2) alternative variant aSep08, mRNA.                          |
| Sp3     | Sp3.aSep08     | 367846 | 33263 | 1219 |    | 240 | trans-acting transcription factor 3 (26.5 kD) (Sp3) mRNA.                                 |
| Sp100   | Sp100.aSep08   | 363269 | 35270 | 1428 | 14 | 447 | nuclear antigen Sp100 (Sp100) alternative variant aSep08, mRNA.                           |
| Sp100   | Sp100.bSep08   | 363269 | 42849 | 2649 | 15 | 410 | nuclear antigen Sp100 (Sp100) alternative variant bSep08, mRNA.                           |
| Sp100   | Sp100.cSep08   | 363269 | 23607 | 958  | 8  | 188 | nuclear antigen Sp100 (Sp100) alternative variant cSep08, mRNA.                           |
| Sp100   | Sp100.dSep08   | 363269 | 13226 | 863  | 5  | 166 | nuclear antigen Sp100 (Sp100) alternative variant dSep08, mRNA.                           |
| Sp100   | Sp100.eSep08   | 363269 | 9918  | 560  | 6  | 156 | nuclear antigen Sp100 (Sp100) alternative variant eSep08, mRNA.                           |

|        |               |        |        |      |    |      |                                                                                  |
|--------|---------------|--------|--------|------|----|------|----------------------------------------------------------------------------------|
| Sp100  | Sp100.fSep08  | 363269 | 4781   | 641  | 3  | 131  | nuclear antigen Sp100 (Sp100) alternative variant fSep08, mRNA.                  |
| Sp100  | Sp100.gSep08  | 363269 | 12230  | 661  | 5  | 123  | nuclear antigen Sp100 (Sp100) alternative variant gSep08, mRNA.                  |
| Sp100  | Sp100.hSep08  | 363269 | 3068   | 348  | 2  | 61   | nuclear antigen Sp100 (Sp100) alternative variant hSep08, mRNA.                  |
| Sp110  | Sp110.bSep08  | 301570 | 19582  | 1353 | 4  | 395  | SP110 nuclear body protein (Sp110) alternative variant bSep08, mRNA.             |
| Sp110  | Sp110.cSep08  | 301570 | 13613  | 820  | 1  | 273  | SP110 nuclear body protein (Sp110) alternative variant cSep08, mRNA.             |
| Spa17  | Spa17.bSep08  | 85244  | 10056  | 1428 | 1  | 132  | sperm autoantigenic protein 17 (Spa17) alternative variant bSep08, mRNA.         |
| spabor | spabor.bSep08 |        | 5133   | 709  |    | 47   | putative protein (5.0 kD) (spabor) alternative variant bSep08, mRNA.             |
| Spaca1 | Spaca1.aSep08 | 500432 | 5021   | 414  |    | 110  | sperm acrosome associated 1 (Spaca1) mRNA.                                       |
| Spaca3 | Spaca3.aSep08 | 287557 | 7476   | 756  | 1  | 163  | sperm acrosome associated 3 (18.3 kD) (Spaca3) alternative variant aSep08, mRNA. |
| spacha | spacha.aSep08 |        | 4427   | 350  |    | 116  | senataxin (spacha) mRNA.                                                         |
| spachy | spachy.aSep08 |        | 12187  | 495  |    | 61   | putative protein (spachy) mRNA.                                                  |
| spafee | spafee.aSep08 |        | 1727   | 267  |    | 88   | putative protein (spafee) mRNA.                                                  |
| spafly | spafly.aSep08 |        | 1279   | 284  |    | 57   | putative protein (spafly) mRNA.                                                  |
| spafly | spafly.aSep08 |        | 160283 | 497  |    | 165  | protein phosphatase 1 regulatory like (spafly) mRNA.                             |
| Spag4  | Spag4.bSep08  | 83623  | 1109   | 878  | 2  | 108  | sperm associated antigen 4 (Spag4) alternative variant bSep08, mRNA.             |
| Spag4  | Spag4.cSep08  | 83623  | 804    | 702  | 2  | 36   | sperm associated antigen 4 (4.3 kD) (Spag4) alternative variant cSep08, mRNA.    |
| Spag5  | Spag5.bSep08  | 252918 | 6788   | 1302 | 2  | 227  | sperm associated antigen 5 (Spag5) alternative variant bSep08, mRNA.             |
| Spag8  | Spag8.aSep08  | 362508 | 2574   | 1909 |    | 467  | sperm associated antigen 8 (51.0 kD) (Spag8) mRNA.                               |
| Spag9  | Spag9.aSep08  | 360600 | 64892  | 3282 | 25 | 1038 | sperm associated antigen 9 (Spag9) alternative variant aSep08, mRNA.             |
| Spag9  | Spag9.cSep08  | 360600 | 20869  | 2951 | 9  | 408  | sperm associated antigen 9 (Spag9) alternative variant cSep08, mRNA.             |
| Spag9  | Spag9.dSep08  | 360600 | 37761  | 610  | 6  | 203  | sperm associated antigen 9 (Spag9) alternative variant dSep08, mRNA.             |
| Spag9  | Spag9.eSep08  | 360600 | 13321  | 3798 | 5  | 197  | sperm associated antigen 9 (Spag9) alternative variant eSep08, mRNA.             |
| Spag9  | Spag9.fSep08  | 360600 | 36859  | 437  | 4  | 145  | sperm associated antigen 9 (Spag9) alternative variant fSep08, mRNA.             |
| Spag16 | Spag16.aSep08 | 501158 | 133421 | 743  | 5  | 206  | sperm associated antigen 16 (Spag16) alternative variant aSep08, mRNA.           |
| spalor | spalor.aSep08 |        | 31328  | 326  |    | 50   | putative protein (spalor) mRNA.                                                  |
| spamee | spamee.aSep08 |        | 4885   | 676  | 3  | 52   | putative protein (5.6 kD) (spamee) alternative variant aSep08, mRNA.             |
| spamee | spamee.bSep08 |        | 2678   | 369  | 1  | 37   | putative protein (spamee) alternative variant bSep08, mRNA.                      |

|          |                 |        |       |      |    |     |                                                                                         |
|----------|-----------------|--------|-------|------|----|-----|-----------------------------------------------------------------------------------------|
| spanor   | spanor.aSep08   |        | 16303 | 2103 | 13 | 432 | ubiquitin ligase E3 alpha-II (spanor) alternative variant aSep08, mRNA.                 |
| spapey   | spapey.aSep08   |        | 8638  | 521  |    | 90  | putative protein (10.2 kD) (spapey) mRNA.                                               |
| sparbor  | sparbor.aSep08  |        | 15358 | 291  |    | 97  | cell division cycle 40 homolog (sparbor) mRNA.                                          |
| Sparc    | Sparc.aSep08    | 24791  | 20070 | 963  | 9  | 320 | secreted acidic cysteine rich glycoprotein (Sparc) alternative variant aSep08, mRNA.    |
| Sparc    | Sparc.cSep08    | 24791  | 20024 | 899  | 9  | 260 | secreted acidic cysteine rich glycoprotein (Sparc) alternative variant cSep08, mRNA.    |
| sparcha  | sparcha.aSep08  |        | 4686  | 337  |    | 71  | putative protein (sparcha) mRNA.                                                        |
| sparchy  | sparchy.aSep08  |        | 1275  | 323  |    | 70  | putative protein (sparchy) mRNA.                                                        |
| Sparcl1  | Sparcl1.bSep08  | 25434  | 18292 | 760  | 1  | 253 | SPARC-like 1 (mast9, hevin) (Sparcl1) alternative variant bSep08, mRNA.                 |
| sparfee  | sparfee.aSep08  |        | 35242 | 384  |    | 63  | putative protein (sparfee) mRNA.                                                        |
| sparflu  | sparflu.aSep08  |        | 551   | 255  |    | 36  | putative protein (sparflu) mRNA.                                                        |
| sparfly  | sparfly.aSep08  |        | 348   | 255  |    | 36  | putative protein (sparfly) mRNA.                                                        |
| sparlor  | sparlor.aSep08  |        | 1183  | 1053 | 2  | 57  | putative protein (6.4 kD) (sparlor) alternative variant aSep08, mRNA.                   |
| sparmee  | sparmee.aSep08  |        | 1755  | 272  |    | 90  | tripartite motif protein 25 CRA a (sparmee) mRNA.                                       |
| sparnor  | sparnor.aSep08  |        | 1613  | 491  |    | 163 | parkin-like cytoplasmic protein (sparnor) mRNA.                                         |
| sparoy   | sparoy.aSep08   |        | 6044  | 517  |    | 172 | neuron navigator 3 CRA b (sparoy) mRNA.                                                 |
| sparpey  | sparpey.aSep08  |        | 687   | 200  |    | 33  | putative protein (sparpey) mRNA.                                                        |
| sparroy  | sparroy.aSep08  |        | 3645  | 296  |    | 32  | putative protein (sparroy) mRNA.                                                        |
| sparshaw | sparshaw.aSep08 |        | 3022  | 797  |    | 50  | putative protein (5.6 kD) (sparshaw) mRNA.                                              |
| spartu   | spartu.aSep08   |        | 2652  | 767  |    | 117 | thyroid hormone receptor interactor 11 (spartu) mRNA.                                   |
| sparvo   | sparvo.aSep08   |        | 757   | 388  |    | 27  | putative protein (sparvo) mRNA.                                                         |
| sparwer  | sparwer.aSep08  |        | 1298  | 1245 |    | 96  | putative protein (sparwer) mRNA.                                                        |
| spashaw  | spashaw.aSep08  |        | 5815  | 3156 |    | 74  | putative protein, with a coiled coil domain (8.6 kD) (spashaw) mRNA.                    |
| Spast    | Spast.aSep08    | 362700 | 58690 | 4489 | 15 | 362 | spastin (40.4 kD) (Spast) alternative variant aSep08, mRNA.                             |
| Spast    | Spast.cSep08    | 362700 | 2348  | 390  | 1  | 28  | spastin (3.3 kD) (Spast) alternative variant cSep08, mRNA.                              |
| Spata1   | Spata1.bSep08   | 362056 | 12716 | 682  | 5  | 182 | spermatogenesis associated 1 (20.5 kD) (Spata1) alternative variant bSep08, mRNA.       |
| Spata1   | Spata1.cSep08   | 362056 | 10219 | 670  | 4  | 161 | spermatogenesis associated 1 (Spata1) alternative variant cSep08, mRNA.                 |
| Spata1   | Spata1.dSep08   | 362056 | 18944 | 701  | 6  | 129 | spermatogenesis associated 1 CRA a (Spata1) alternative variant dSep08, mRNA.           |
| Spata1   | Spata1.eSep08   | 362056 | 1509  | 924  | 2  | 126 | spermatogenesis associated 1 (14.8 kD) (Spata1) alternative variant eSep08, mRNA.       |
| Spata2   | Spata2.bSep08   | 114210 | 10272 | 3928 | 3  | 511 | spermatogenesis associated 2 (57.5 kD) (Spata2) alternative variant bSep08, mRNA.       |
| Spata2L  | Spata2L.bSep08  | 498963 | 4727  | 3412 | 1  | 109 | spermatogenesis associated 2-like (12.3 kD) (Spata2L) alternative variant bSep08, mRNA. |
| Spata3   | Spata3.aSep08   | 363270 | 4814  | 892  | 2  | 241 | spermatogenesis associated 3 (Spata3) alternative variant aSep08, mRNA.                 |

|         |                |        |        |      |    |     |                                                                                                |
|---------|----------------|--------|--------|------|----|-----|------------------------------------------------------------------------------------------------|
| Spata5  | Spata5.bSep08  | 361935 | 172135 | 1785 | 1  | 538 | spermatogenesis associated 5 (Spata5) alternative variant bSep08, mRNA.                        |
| Spata5  | Spata5.cSep08  | 361935 | 140698 | 717  | 1  | 182 | spermatogenesis associated 5 (Spata5) alternative variant cSep08, mRNA.                        |
| Spata6  | Spata6.bSep08  | 171413 | 21279  | 580  | 1  | 108 | spermatogenesis associated 6 (Spata6) alternative variant bSep08, mRNA.                        |
| Spata7  | Spata7.aSep08  | 192225 | 45592  | 2008 | 12 | 621 | spermatogenesis associated 7 (Spata7) alternative variant aSep08, mRNA.                        |
| Spata7  | Spata7.bSep08  | 192225 | 35085  | 747  | 6  | 249 | spermatogenesis associated 7 (Spata7) alternative variant bSep08, mRNA.                        |
| Spata7  | Spata7.cSep08  | 192225 | 36681  | 742  | 5  | 235 | spermatogenesis associated 7 (Spata7) alternative variant cSep08, mRNA.                        |
| Spata7  | Spata7.dSep08  | 192225 | 35157  | 727  | 5  | 225 | spermatogenesis associated 7 (Spata7) alternative variant dSep08, mRNA.                        |
| Spata7  | Spata7.eSep08  | 192225 | 26406  | 510  | 6  | 138 | spermatogenesis associated 7 (Spata7) alternative variant eSep08, mRNA.                        |
| Spata7  | Spata7.fSep08  | 192225 | 34925  | 734  | 7  | 129 | spermatogenesis associated 7 (14.6 kD) (Spata7) alternative variant fSep08, complete mRNA.     |
| Spata7  | Spata7.gSep08  | 192225 | 39821  | 1048 | 7  | 72  | spermatogenesis associated 7 (8.3 kD) (Spata7) alternative variant gSep08, mRNA.               |
| Spata9  | Spata9.bSep08  | 294594 | 21895  | 596  | 1  | 136 | spermatogenesis associated 9 (Spata9) alternative variant bSep08, mRNA.                        |
| Spata13 | Spata13.aSep08 | 305938 | 17085  | 748  |    | 223 | spermatogenesis associated 13 (Spata13) mRNA.                                                  |
| Spata16 | Spata16.aSep08 | 294932 | 41641  | 300  |    | 70  | spermatogenesis associated 16 (Spata16) mRNA.                                                  |
| Spata17 | Spata17.aSep08 | 498305 | 120099 | 728  | 7  | 242 | spermatogenesis associated 17 (Spata17) alternative variant aSep08, mRNA.                      |
| Spata17 | Spata17.bSep08 | 498305 | 67450  | 738  | 4  | 157 | spermatogenesis associated 17 (Spata17) alternative variant bSep08, mRNA.                      |
| Spata18 | Spata18.bSep08 | 289586 | 26684  | 1788 | 7  | 499 | spermatogenesis associated 18 (Spata18) alternative variant bSep08, mRNA.                      |
| Spata18 | Spata18.cSep08 | 289586 | 11335  | 773  | 6  | 197 | spermatogenesis associated 18 (Spata18) alternative variant cSep08, mRNA.                      |
| Spata18 | Spata18.dSep08 | 289586 | 9966   | 662  | 6  | 160 | spermatogenesis associated 18 (Spata18) alternative variant dSep08, mRNA.                      |
| Spata18 | Spata18.fSep08 | 289586 | 14814  | 716  | 7  | 116 | spermatogenesis associated 18 (Spata18) alternative variant fSep08, mRNA.                      |
| Spata18 | Spata18.gSep08 | 289586 | 6774   | 770  | 3  | 87  | spermatogenesis associated 18 (Spata18) alternative variant gSep08, mRNA.                      |
| Spata20 | Spata20.bSep08 | 360604 | 1186   | 755  | 1  | 190 | spermatogenesis associated 20 (Spata20) alternative variant bSep08, mRNA.                      |
| Spata21 | Spata21.bSep08 | 366491 | 9019   | 801  | 1  | 171 | spermatogenesis associated 21 (Spata21) alternative variant bSep08, mRNA.                      |
| Spats1  | Spats1.bSep08  | 301255 | 7539   | 652  | 4  | 121 | spermatogenesis associated, serine-rich 1 (Spats1) alternative variant bSep08, mRNA.           |
| Spats2  | Spats2.aSep08  | 300221 | 73601  | 3067 | 6  | 561 | spermatogenesis associated, serine-rich 2 (60.5 kD) (Spats2) alternative variant aSep08, mRNA. |
| spatu   | spatu.aSep08   |        | 3997   | 384  |    | 98  | putative protein (spatu) mRNA.                                                                 |

|            |                   |        |        |      |   |     |                                                                                                                                  |
|------------|-------------------|--------|--------|------|---|-----|----------------------------------------------------------------------------------------------------------------------------------|
| spavo      | spavo.aSep08      |        | 5822   | 708  |   | 45  | putative protein (5.1 kD) (spavo) mRNA.                                                                                          |
| spawcha    | spawcha.aSep08    |        | 11825  | 411  |   | 97  | putative protein (spawcha) mRNA.                                                                                                 |
| spawchy    | spawchy.aSep08    |        | 4043   | 495  |   | 99  | putative protein (11.0 kD) (spawchy) mRNA.                                                                                       |
| spawer     | spawer.aSep08     |        | 4993   | 683  |   | 41  | CRA a like (4.5 kD) (spawer) mRNA.                                                                                               |
| spawfee    | spawfee.bSep08    |        | 2575   | 350  |   | 116 | PHD finger protein 2 (spawfee) alternative variant bSep08, mRNA.                                                                 |
| spawflu    | spawflu.aSep08    |        | 1885   | 216  |   | 47  | putative protein (spawflu) mRNA.                                                                                                 |
| spawfly    | spawfly.aSep08    |        | 2699   | 486  |   | 138 | putative protein (spawfly) mRNA.                                                                                                 |
| spawlor    | spawlor.aSep08    |        | 1470   | 809  |   | 64  | putative protein (spawlor) mRNA.                                                                                                 |
| spawmee    | spawmee.aSep08    |        | 10896  | 809  |   | 52  | putative protein (5.9 kD) (spawmee) mRNA.                                                                                        |
| spawnor    | spawnor.aSep08    |        | 1258   | 541  |   | 157 | cullin 7 (spawnor) mRNA.                                                                                                         |
| spawpey    | spawpey.aSep08    |        | 3575   | 505  |   | 67  | putative protein (7.3 kD) (spawpey) mRNA.                                                                                        |
| spawroy    | spawroy.aSep08    |        | 18581  | 1592 |   | 125 | putative mitochondrial protein (14.0 kD) (spawroy) mRNA.                                                                         |
| spawshaw   | spawshaw.aSep08   |        | 38358  | 479  |   | 53  | putative protein (spawshaw) mRNA.                                                                                                |
| spawtu     | spawtu.aSep08     |        | 11450  | 212  |   | 70  | thyroid hormone receptor interactor 11 (spawtu) mRNA.                                                                            |
| spawvo     | spawvo.aSep08     |        | 12094  | 686  |   | 228 | putative protein of metazoan origin (spawvo) mRNA.                                                                               |
| spawwer    | spawwer.aSep08    |        | 883    | 383  |   | 84  | putative protein (10.1 kD) (spawwer) mRNA.                                                                                       |
| SPC22.0    | SPC22.0.aSep08    |        | 2187   | 1941 |   | 252 | putative protein (SPC22.0) mRNA.                                                                                                 |
| Spc24      | Spc24.aSep08      | 363028 | 4783   | 701  | 4 | 167 | SPC24, NDC80 kinetochore complex component, homolog ( <i>S. cerevisiae</i> ) (Spc24) alternative variant aSep08, mRNA.           |
| Spc24      | Spc24.cSep08      | 363028 | 1545   | 482  | 3 | 54  | SPC24, NDC80 kinetochore complex component, homolog ( <i>S. cerevisiae</i> ) (Spc24) alternative variant cSep08, mRNA.           |
| Spc25      | Spc25.bSep08      | 295661 | 12664  | 683  | 1 | 213 | SPC25, NDC80 kinetochore complex component, homolog ( <i>S. cerevisiae</i> ) (Spc25) alternative variant bSep08, mRNA.           |
| Spcs1      | Spcs1.bSep08      | 290555 | 1383   | 515  | 4 | 82  | signal peptidase complex subunit 1 homolog ( <i>S. cerevisiae</i> ) (Spcs1) alternative variant bSep08, mRNA.                    |
| Spcs2      | Spcs2.aSep08      | 293142 | 19435  | 2965 | 5 | 226 | signal peptidase complex subunit 2 homolog ( <i>S. cerevisiae</i> ) (25.0 kD) (Spcs2) alternative variant aSep08, complete mRNA. |
| Spdef      | Spdef.bSep08      | 689210 | 14245  | 1801 | 1 | 325 | sterile alpha motif/pointed and ets (36.3 kD) (Spdef) alternative variant bSep08, complete mRNA.                                 |
| Spdya      | Spdya.bSep08      | 192209 | 40746  | 1794 | 6 | 311 | speedy homolog A ( <i>Drosophila</i> ) (36.1 kD) (Spdya) alternative variant bSep08, complete mRNA.                              |
| Spdya      | Spdya.cSep08      | 192209 | 39829  | 706  | 6 | 235 | speedy homolog A ( <i>Drosophila</i> ) (Spdya) alternative variant cSep08, mRNA.                                                 |
| Spdya      | Spdya.dSep08      | 192209 | 44095  | 761  | 5 | 96  | speedy homolog A ( <i>Drosophila</i> ) (11.7 kD) (Spdya) alternative variant dSep08, mRNA.                                       |
| Specc1     | Specc1.bSep08     | 303208 | 115733 | 545  | 4 | 161 | sperm antigen with calponin homology and coiled-coil domains 1 (Specc1) alternative variant bSep08, mRNA.                        |
| Specc1l    | Specc1l.cSep08    | 361828 | 6068   | 343  | 3 | 114 | SPECC1-like (Specc1l) alternative variant cSep08, mRNA.                                                                          |
| Specc1l    | Specc1l.dSep08    | 361828 | 8581   | 2914 | 5 | 109 | SPECC1-like (12.4 kD) (Specc1l) alternative variant dSep08, mRNA.                                                                |
| Spectrin.0 | Spectrin.0.aSep08 |        | 48765  | 1468 |   | 489 | dystrophin Dp427l (Spectrin.0) mRNA.                                                                                             |
| Spectrin.1 | Spectrin.1.aSep08 |        | 61604  | 619  |   | 206 | dystrophin CRA c (Spectrin.1) mRNA.                                                                                              |

|            |                   |        |       |      |   |     |                                                                                            |
|------------|-------------------|--------|-------|------|---|-----|--------------------------------------------------------------------------------------------|
| Spectrin.2 | Spectrin.2.aSep08 |        | 50419 | 1020 | 5 | 339 | spectrin repeat containing nuclear envelope (Spectrin.2) alternative variant aSep08, mRNA. |
| Spectrin.3 | Spectrin.3.aSep08 |        | 3101  | 857  |   | 285 | microtubule-actin crosslinking factor 1 (Spectrin.3) mRNA.                                 |
| Spectrin.4 | Spectrin.4.aSep08 |        | 28522 | 914  |   | 304 | microtubule-actin crosslinking factor 1 (Spectrin.4) mRNA.                                 |
| Spectrin.6 | Spectrin.6.aSep08 |        | 12153 | 1146 | 7 | 333 | utrophin (Spectrin.6) alternative variant aSep08, mRNA.                                    |
| Spectrin.7 | Spectrin.7.aSep08 |        | 3974  | 952  |   | 317 | spectrin beta 4 CRA b (Spectrin.7) mRNA.                                                   |
| speecha    | speecha.aSep08    |        | 7628  | 410  | 2 | 136 | tbc1 domain family member 13 (speecha) alternative variant aSep08, mRNA.                   |
| speecha    | speecha.bSep08    |        | 6948  | 583  | 1 | 40  | tbc1 domain family member 13 (speecha) alternative variant bSep08, mRNA.                   |
| speechy    | speechy.aSep08    |        | 7701  | 279  |   | 48  | putative protein (speechy) mRNA.                                                           |
| speefee    | speefee.aSep08    |        | 3719  | 2417 |   | 190 | PHD finger protein 2 (speefee) mRNA.                                                       |
| speeflu    | speeflu.aSep08    |        | 59403 | 671  |   |     |                                                                                            |
| speefly    | speefly.aSep08    |        | 3753  | 1328 |   | 60  | putative protein of mammalian origin (6.5 kD) (speefly) mRNA.                              |
| speelor    | speelor.aSep08    |        | 7964  | 1784 | 3 | 471 | T-cell lymphoma invasion metastasis 1 like (speelor) alternative variant aSep08, mRNA.     |
| speelor    | speelor.bSep08    |        | 10212 | 1311 | 4 | 285 | T-cell lymphoma invasion metastasis 1 like (speelor) alternative variant bSep08, mRNA.     |
| speemee    | speemee.bSep08    |        | 730   | 593  | 2 | 73  | putative protein (speemee) alternative variant bSep08, mRNA.                               |
| speenor    | speenor.aSep08    |        | 620   | 367  |   | 122 | putative protein of vertebrate origin (speenor) mRNA.                                      |
| speepey    | speepey.aSep08    |        | 11134 | 347  |   | 75  | putative protein of mammalian origin (speepey) mRNA.                                       |
| speeroy    | speeroy.aSep08    |        | 1628  | 709  |   | 72  | putative protein (7.7 kD) (speeroy) mRNA.                                                  |
| speeshaw   | speeshaw.aSep08   |        | 520   | 442  |   | 147 | mesoderm induction early response 1 family member 3 CRA c (speeshaw) mRNA.                 |
| speetu     | speetu.aSep08     |        | 2481  | 346  |   | 104 | putative protein (speetu) mRNA.                                                            |
| speevo     | speevo.aSep08     |        | 8071  | 359  |   | 119 | CRA a like (speevo) mRNA.                                                                  |
| speewer    | speewer.aSep08    |        | 2168  | 251  |   | 31  | putative protein (3.7 kD) (speewer) mRNA.                                                  |
| Spef2      | Spef2.bSep08      | 64555  | 37178 | 1526 | 9 | 494 | sperm flagellar 2 (Spef2) alternative variant bSep08, mRNA.                                |
| Spef2      | Spef2.cSep08      | 64555  | 18128 | 396  | 3 | 131 | sperm flagellar 2 (Spef2) alternative variant cSep08, mRNA.                                |
| Speg       | Speg.cSep08       | 363256 | 13078 | 1350 | 5 | 187 | SPEG complex locus (Speg) alternative variant cSep08, mRNA.                                |
| Speg       | Speg.dSep08       | 363256 | 1371  | 538  | 4 | 167 | SPEG complex locus (Speg) alternative variant dSep08, mRNA.                                |
| Speg       | Speg.eSep08       | 363256 | 3970  | 817  | 5 | 113 | SPEG complex locus (12.7 kD) (Speg) alternative variant eSep08, mRNA.                      |
| Speg       | Speg.fSep08       | 363256 | 1884  | 333  | 4 | 111 | SPEG complex locus (Speg) alternative variant fSep08, mRNA.                                |
| Speg       | Speg.gSep08       | 363256 | 876   | 369  | 3 | 82  | SPEG complex locus (Speg) alternative variant gSep08, mRNA.                                |
| Speg       | Speg.hSep08       | 363256 | 1117  | 392  | 2 | 82  | SPEG complex locus (7.0 kD) (Speg) alternative variant hSep08, mRNA.                       |

|                       |                              |        |       |      |    |     |                                                                                                        |
|-----------------------|------------------------------|--------|-------|------|----|-----|--------------------------------------------------------------------------------------------------------|
| Speg                  | Speg.iSep08                  | 363256 | 587   | 450  | 2  | 36  | SPEG complex locus (4.1 kD) (Speg) alternative variant iSep08, mRNA.                                   |
| spercha               | spercha.aSep08               |        | 21818 | 825  |    | 273 | nucleoporin (spercha) mRNA.                                                                            |
| sperchy               | sperchy.aSep08               |        | 1758  | 499  |    | 36  | putative protein (3.7 kD) (sperchy) mRNA.                                                              |
| sperfee               | sperfee.aSep08               |        | 3634  | 621  |    | 125 | putative protein (13.8 kD) (sperfee) mRNA.                                                             |
| sperflu               | sperflu.aSep08               |        | 2490  | 783  |    | 51  | putative protein (sperflu) mRNA.                                                                       |
| sperfly               | sperfly.aSep08               |        | 5140  | 285  |    | 40  | putative protein (4.3 kD) (sperfly) mRNA.                                                              |
| sperlor               | sperlor.aSep08               |        | 2690  | 1624 | 2  | 27  | putative protein (9.1 kD) (sperlor) alternative variant aSep08, mRNA.                                  |
| sperlor               | sperlor.cSep08               |        | 2684  | 779  | 3  | 27  | putative protein (9.1 kD) (sperlor) alternative variant cSep08, mRNA.                                  |
| spermee               | spermee.aSep08               |        | 24757 | 824  |    | 80  | putative protein (spermee) mRNA.                                                                       |
| sperpey               | sperpey.aSep08               |        | 2110  | 490  | 3  | 73  | putative protein of mammalian origin (sperpey) alternative variant aSep08, mRNA.                       |
| sperpey               | sperpey.bSep08               |        | 800   | 353  | 2  | 42  | putative protein (sperpey) alternative variant bSep08, mRNA.                                           |
| sperroy               | sperroy.aSep08               |        | 2396  | 708  |    | 46  | putative protein (sperroy) mRNA.                                                                       |
| spershaw              | spershaw.aSep08              |        | 506   | 354  | 2  | 60  | putative protein (7.0 kD) (spershaw) alternative variant aSep08, mRNA.                                 |
| Spert                 | Spert.bSep08                 | 498572 | 8794  | 2206 | 3  | 372 | spermatid associated (43.1 kD) (Spert) alternative variant bSep08, mRNA.                               |
| Spert                 | Spert.cSep08                 | 498572 | 6442  | 742  | 2  | 247 | spermatid associated (Spert) alternative variant cSep08, mRNA.                                         |
| spertu                | spertu.aSep08                |        | 11795 | 1938 | 3  | 97  | uncharacterized protein (11.2 kD) (spertu) alternative variant aSep08, mRNA.                           |
| spervo                | spervo.aSep08                |        | 31741 | 1780 | 11 | 485 | CRA d (spervo) alternative variant aSep08, mRNA.                                                       |
| spervo                | spervo.bSep08                |        | 11544 | 858  | 6  | 285 | CRA d (spervo) alternative variant bSep08, mRNA.                                                       |
| spervo                | spervo.cSep08                |        | 24007 | 782  | 6  | 123 | CRA d like (spervo) alternative variant cSep08, mRNA.                                                  |
| spervo                | spervo.dSep08                |        | 4244  | 411  | 3  | 86  | CRA d like (spervo) alternative variant dSep08, mRNA.                                                  |
| sperwer               | sperwer.aSep08               |        | 7520  | 466  | 3  | 97  | putative protein (sperwer) alternative variant aSep08, mRNA.                                           |
| sperwer               | sperwer.bSep08               |        | 9695  | 847  | 4  | 79  | putative protein (sperwer) alternative variant bSep08, mRNA.                                           |
| Spesp1                | Spesp1.bSep08                | 501010 | 14489 | 735  | 1  | 178 | sperm equatorial segment protein 1 (Spesp1) alternative variant bSep08, mRNA.                          |
| Spetex-2AandSpetex-2B | Spetex-2AandSpetex-2B.aSep08 | 364261 | 20931 | 747  |    | 106 | spetex-2A protein and Spetex-2B protein and similar to Spetex-2F protein (Spetex-2AandSpetex-2B) mRNA. |
| Spetex-2AandSpetex-2B | Spetex-2AandSpetex-2B.aSep08 | 497084 | 20931 | 747  |    | 106 | spetex-2A protein and Spetex-2B protein and similar to Spetex-2F protein (Spetex-2AandSpetex-2B) mRNA. |
| Spetex-2AandSpetex-2B | Spetex-2AandSpetex-2B.aSep08 | 680542 | 20931 | 747  |    | 106 | spetex-2A protein and Spetex-2B protein and similar to Spetex-2F protein (Spetex-2AandSpetex-2B) mRNA. |
| Spetex-2H             | Spetex-2H.bSep08             | 361008 | 6252  | 375  | 1  | 124 | spetex-2H protein (Spetex-2H) alternative variant bSep08, mRNA.                                        |

|             |                    |        |        |      |   |     |                                                                                                               |
|-------------|--------------------|--------|--------|------|---|-----|---------------------------------------------------------------------------------------------------------------|
| speycha     | speycha.aSep08     |        | 3024   | 564  |   | 188 | nucleoporin (speycha) mRNA.                                                                                   |
| speychy     | speychy.aSep08     |        | 2201   | 778  |   | 78  | putative protein (speychy) mRNA.                                                                              |
| speyfee     | speyfee.aSep08     |        | 3856   | 242  |   | 72  | putative cytoplasmic protein (7.9 kD) (speyfee) mRNA.                                                         |
| speyflu     | speyflu.aSep08     |        | 6652   | 384  |   | 34  | putative protein (4.0 kD) (speyflu) mRNA.                                                                     |
| speyfly     | speyfly.aSep08     |        | 5280   | 576  | 2 | 68  | CRA a like (speyfly) alternative variant aSep08, mRNA.                                                        |
| speyfly     | speyfly.bSep08     |        | 3098   | 353  | 1 | 44  | putative protein (speyfly) alternative variant bSep08, mRNA.                                                  |
| speylor     | speylor.aSep08     |        | 7224   | 870  |   | 132 | nucleolar protein 1 (speylor) mRNA.                                                                           |
| speymee     | speymee.aSep08     |        | 28021  | 492  |   | 50  | putative protein (speymee) mRNA.                                                                              |
| speynor     | speynor.aSep08     |        | 876    | 573  |   | 118 | peroxisomal biogenesis factor 6 (speynor) mRNA.                                                               |
| speypey     | speypey.aSep08     |        | 2254   | 925  |   | 106 | putative protein of mammalian origin (speypey) mRNA.                                                          |
| speyroy     | speyroy.aSep08     |        | 15156  | 564  |   | 187 | proline serine-rich coiled-coil 2 (speyroy) mRNA.                                                             |
| speyshaw    | speyshaw.aSep08    |        | 6986   | 328  |   | 71  | putative protein (speyshaw) mRNA.                                                                             |
| speytu      | speytu.aSep08      |        | 4683   | 393  |   | 131 | uncharacterized protein (speytu) mRNA.                                                                        |
| speyvo      | speyvo.aSep08      |        | 12981  | 415  |   | 58  | putative protein (speyvo) mRNA.                                                                               |
| speywer     | speywer.aSep08     |        | 7002   | 274  |   | 54  | putative protein (speywer) mRNA.                                                                              |
| Spg3a       | Spg3a.bSep08       | 362750 | 43599  | 865  | 7 | 196 | spastic paraplegia 3A homolog (human) (Spg3a) alternative variant bSep08, mRNA.                               |
| Spg7        | Spg7.bSep08        | 353231 | 792    | 386  | 2 | 102 | spastic paraplegia 7 homolog (human) (Spg7) alternative variant bSep08, mRNA.                                 |
| Spg21       | Spg21.aSep08       | 300791 | 27788  | 1962 | 9 | 308 | spastic paraplegia 21 homolog (human) (35.0 kD) (Spg21) alternative variant aSep08, complete mRNA.            |
| Sphk1       | Sphk1.aSep08       | 170897 | 2906   | 1692 | 6 | 474 | sphingosine kinase 1 (Sphk1) alternative variant aSep08, mRNA.                                                |
| Sphk1       | Sphk1.cSep08       | 170897 | 2787   | 786  | 5 | 195 | sphingosine kinase 1 (Sphk1) alternative variant cSep08, mRNA.                                                |
| Sphk1       | Sphk1.dSep08       | 170897 | 2556   | 703  | 3 | 127 | sphingosine kinase 1 (13.4 kD) (Sphk1) alternative variant dSep08, mRNA.                                      |
| Sphk2       | Sphk2.bSep08       | 308589 | 5510   | 818  | 3 | 185 | sphingosine kinase 2 (Sphk2) alternative variant bSep08, mRNA.                                                |
| Sphk2       | Sphk2.dSep08       | 308589 | 565    | 483  | 2 | 67  | sphingosine kinase 2 (Sphk2) alternative variant dSep08, mRNA.                                                |
| Sphkap      | Sphkap.bSep08      | 316561 | 10409  | 1593 | 2 | 498 | protein sphkap (Sphkap) alternative variant bSep08, mRNA.                                                     |
| Sphkap      | Sphkap.cSep08      | 316561 | 159521 | 1432 | 6 | 242 | putative protein of vertebrate origin (Sphkap) alternative variant cSep08, mRNA.                              |
| Sphkap      | Sphkap.dSep08      | 316561 | 5192   | 1073 | 3 | 79  | sphkap protein (Sphkap) alternative variant dSep08, mRNA.                                                     |
| Spin-Ssty.3 | Spin-Ssty.3.aSep08 |        | 5761   | 731  | 3 | 125 | putative mitochondrial protein of eukaryotic origin (14.3 kD) (Spin-Ssty.3) alternative variant aSep08, mRNA. |
| Spin1       | Spin1.bSep08       | 361217 | 43159  | 637  | 2 | 132 | spindlin 1 and hypothetical protein LOC689247 (Spin1) alternative variant bSep08, mRNA.                       |
| Spin1       | Spin1.bSep08       | 689247 | 43159  | 637  | 2 | 132 | spindlin 1 and hypothetical protein LOC689247 (Spin1) alternative variant bSep08, mRNA.                       |



|         |                |        |       |      |    |     |                                                                                                                            |
|---------|----------------|--------|-------|------|----|-----|----------------------------------------------------------------------------------------------------------------------------|
| Spin1   | Spin1.cSep08   | 361217 | 48074 | 652  | 2  | 129 | spindlin 1 and hypothetical protein LOC689247 (Spin1) alternative variant cSep08, mRNA.                                    |
| Spin1   | Spin1.cSep08   | 689247 | 48074 | 652  | 2  | 129 | spindlin 1 and hypothetical protein LOC689247 (Spin1) alternative variant cSep08, mRNA.                                    |
| Spin2   | Spin2.aSep08   | 317395 | 16717 | 714  | 3  | 144 | spindlin family, member 2 (Spin2) alternative variant aSep08, mRNA.                                                        |
| Spin2   | Spin2.bSep08   | 317395 | 5247  | 521  | 3  | 62  | spindlin family, member 2 (Spin2) alternative variant bSep08, mRNA.                                                        |
| Spin2   | Spin2.cSep08   | 317395 | 10296 | 688  | 4  | 56  | spindlin family, member 2 (6.3 kD) (Spin2) alternative variant cSep08, mRNA.                                               |
| Spin2   | Spin2.dSep08   | 317395 | 16663 | 738  | 4  | 43  | spindlin family, member 2 (4.9 kD) (Spin2) alternative variant dSep08, mRNA.                                               |
| Spink5  | Spink5.aSep08  | 361319 | 49259 | 2789 |    | 836 | serine peptidase inhibitor, Kazal type 5 (Spink5) mRNA.                                                                    |
| Spink8  | Spink8.bSep08  | 301016 | 11307 | 580  | 3  | 101 | serine peptidase inhibitor, Kazal type 8 (11.4 kD) (Spink8) alternative variant bSep08, mRNA.                              |
| Spink8  | Spink8.cSep08  | 301016 | 11531 | 2003 | 2  | 81  | serine peptidase inhibitor, Kazal type 8 (Spink8) alternative variant cSep08, mRNA.                                        |
| Spinlw1 | Spinlw1.bSep08 | 685161 | 6736  | 431  | 2  | 55  | serine protease inhibitor-like, with Kunitz and WAP domains 1 (eppin) (Spinlw1) alternative variant bSep08, mRNA.          |
| Spinlw1 | Spinlw1.cSep08 | 685161 | 790   | 351  | 1  | 36  | serine protease inhibitor-like, with Kunitz and WAP domains 1 (eppin) (4.1 kD) (Spinlw1) alternative variant cSep08, mRNA. |
| Spint1  | Spint1.bSep08  | 311331 | 12036 | 1773 | 3  | 451 | serine protease inhibitor, Kunitz type 1 (50.4 kD) (Spint1) alternative variant bSep08, mRNA.                              |
| Spint1  | Spint1.cSep08  | 311331 | 3061  | 615  | 2  | 171 | serine protease inhibitor, Kunitz type 1 (Spint1) alternative variant cSep08, mRNA.                                        |
| Spint2  | Spint2.cSep08  | 292770 | 20793 | 732  | 5  | 222 | serine protease inhibitor, Kunitz type 2 (Spint2) alternative variant cSep08, mRNA.                                        |
| Spint2  | Spint2.dSep08  | 292770 | 20171 | 743  | 4  | 73  | serine protease inhibitor, Kunitz type 2 (Spint2) alternative variant dSep08, mRNA.                                        |
| Spint2  | Spint2.eSep08  | 292770 | 1636  | 1016 | 2  | 93  | serine protease inhibitor, Kunitz type 2 (Spint2) alternative variant eSep08, mRNA.                                        |
| Spire1  | Spire1.bSep08  | 307348 | 26736 | 657  | 7  | 219 | spire homolog 1 (Drosophila) (Spire1) alternative variant bSep08, mRNA.                                                    |
| Spire1  | Spire1.cSep08  | 307348 | 7037  | 1026 | 5  | 159 | spire homolog 1 (Drosophila) (Spire1) alternative variant cSep08, mRNA.                                                    |
| Spna2   | Spna2.bSep08   | 64159  | 5550  | 1660 | 11 | 430 | spectrin alpha 2 (Spna2) alternative variant bSep08, mRNA.                                                                 |
| Spna2   | Spna2.cSep08   | 64159  | 9644  | 1224 | 10 | 408 | non-erythrocytic spectrin alpha (Spna2) alternative variant cSep08, mRNA.                                                  |
| Spna2   | Spna2.dSep08   | 64159  | 3704  | 899  | 7  | 273 | alpha spectrin (Spna2) alternative variant dSep08, mRNA.                                                                   |
| Spna2   | Spna2.eSep08   | 64159  | 1254  | 732  | 4  | 162 | alpha spectrin (Spna2) alternative variant eSep08, mRNA.                                                                   |
| Spna2   | Spna2.fSep08   | 64159  | 5142  | 379  | 3  | 107 | alpha spectrin (Spna2) alternative variant fSep08, mRNA.                                                                   |
| Spna2   | Spna2.gSep08   | 64159  | 2310  | 846  | 3  | 93  | non-erythrocytic spectrin alpha (Spna2) alternative variant gSep08, mRNA.                                                  |

|        |               |        |        |      |   |     |                                                                                                                          |
|--------|---------------|--------|--------|------|---|-----|--------------------------------------------------------------------------------------------------------------------------|
| Spna2  | Spna2.hSep08  | 64159  | 855    | 775  | 2 | 79  | spectrin alpha precursor (9.2 kD) (Spna2) alternative variant hSep08, mRNA.                                              |
| Spnb1  | Spnb1.bSep08  | 314251 | 7410   | 1784 | 5 | 367 | spectrin beta 1 and hypothetical protein LOC679700 (Spnb1) alternative variant bSep08, mRNA.                             |
| Spnb1  | Spnb1.bSep08  | 679700 | 7410   | 1784 | 5 | 367 | spectrin beta 1 and hypothetical protein LOC679700 (Spnb1) alternative variant bSep08, mRNA.                             |
| Spnb1  | Spnb1.cSep08  | 314251 | 898    | 670  | 2 | 79  | spectrin beta 1 and hypothetical protein LOC679700 (Spnb1) alternative variant cSep08, mRNA.                             |
| Spnb1  | Spnb1.cSep08  | 679700 | 898    | 670  | 2 | 79  | spectrin beta 1 and hypothetical protein LOC679700 (Spnb1) alternative variant cSep08, mRNA.                             |
| Spnb2  | Spnb2.bSep08  | 305614 | 17412  | 1110 | 7 | 370 | spectrin beta (Spnb2) alternative variant bSep08, mRNA.                                                                  |
| Spnb2  | Spnb2.cSep08  | 305614 | 15083  | 998  | 7 | 332 | beta spectrin (Spnb2) alternative variant cSep08, mRNA.                                                                  |
| Spnb2  | Spnb2.dSep08  | 305614 | 5170   | 673  | 4 | 224 | spectrin beta (Spnb2) alternative variant dSep08, mRNA.                                                                  |
| Spnb2  | Spnb2.eSep08  | 305614 | 6687   | 3205 | 4 | 224 | spectrin beta (24.7 kD) (Spnb2) alternative variant eSep08, mRNA.                                                        |
| Spnb2  | Spnb2.fSep08  | 305614 | 8485   | 682  | 5 | 176 | spectrin beta (Spnb2) alternative variant fSep08, mRNA.                                                                  |
| Spnb2  | Spnb2.gSep08  | 305614 | 2185   | 1639 | 3 | 84  | spectrin beta 2 CRA b (Spnb2) alternative variant gSep08, mRNA.                                                          |
| Spnb2  | Spnb2.hSep08  | 305614 | 3942   | 3178 | 2 | 80  | spectrin beta (8.6 kD) (Spnb2) alternative variant hSep08, mRNA.                                                         |
| Spnb3  | Spnb3.bSep08  | 29211  | 1214   | 842  | 2 | 280 | spectrin beta 3 (Spnb3) alternative variant bSep08, mRNA.                                                                |
| Spnb4  | Spnb4.aSep08  | 308458 | 16435  | 752  |   | 250 | spectrin beta 4 (Spnb4) mRNA.                                                                                            |
| Spo11  | Spo11.bSep08  | 366261 | 6611   | 666  | 8 | 221 | SPO11 meiotic protein covalently bound to DSB homolog ( <i>S. cerevisiae</i> ) (Spo11) alternative variant bSep08, mRNA. |
| spobor | spobor.aSep08 |        | 1521   | 394  | 2 | 35  | putative protein (spobor) alternative variant aSep08, mRNA.                                                              |
| spobor | spobor.bSep08 |        | 466    | 383  | 1 | 33  | putative protein (spobor) alternative variant bSep08, mRNA.                                                              |
| SPOC.0 | SPOC.0.aSep08 |        | 8897   | 455  |   | 151 | death (SPOC.0) mRNA.                                                                                                     |
| spocha | spocha.aSep08 |        | 1494   | 496  | 2 | 77  | CRA a like (spocha) alternative variant aSep08, mRNA.                                                                    |
| spochy | spochy.aSep08 |        | 13982  | 334  |   | 25  | putative protein (spochy) mRNA.                                                                                          |
| Spock1 | Spock1.aSep08 | 306759 | 503589 | 1790 |   | 431 | sparc/osteonectin, cwcv and kazal-like domains proteoglycan 1 (Spock1) alternative variant aSep08, mRNA.                 |
| Spock1 | Spock1.bSep08 | 306759 | 11785  | 1132 |   | 203 | sparc/osteonectin, cwcv and kazal-like domains proteoglycan 1 (Spock1) alternative variant bSep08, mRNA.                 |
| Spock1 | Spock1.cSep08 | 306759 | 947    | 343  |   | 114 | sparc/osteonectin, cwcv and kazal-like domains proteoglycan 1 (Spock1) alternative variant cSep08, mRNA.                 |
| Spock2 | Spock2.aSep08 | 361840 | 26098  | 3626 | 2 | 385 | sparc/osteonectin, cwcv and kazal-like domains proteoglycan 2 (43.0 kD) (Spock2) alternative variant aSep08, mRNA.       |
| Spock3 | Spock3.bSep08 | 306404 | 106845 | 555  | 1 | 139 | sparc/osteonectin, cwcv and kazal-like domains proteoglycan 3 (Spock3) alternative variant bSep08, mRNA.                 |

|         |                |        |       |      |   |     |                                                                                                                          |
|---------|----------------|--------|-------|------|---|-----|--------------------------------------------------------------------------------------------------------------------------|
| spofee  | spofee.aSep08  |        | 10129 | 901  | 5 | 299 | WNK lysine deficient protein kinase 2 (spofee) alternative variant aSep08, mRNA.                                         |
| spoflu  | spoflu.aSep08  |        | 392   | 286  |   | 44  | putative protein (4.8 kD) (spoflu) mRNA.                                                                                 |
| spofly  | spofly.aSep08  |        | 5288  | 2135 | 2 | 299 | excision repair cross-complementing rodent deficiency complementation group 2 (spofly) alternative variant aSep08, mRNA. |
| spofly  | spofly.bSep08  |        | 821   | 532  | 1 | 136 | excision repair cross-complementing rodent deficiency complementation group 2 (spofly) alternative variant bSep08, mRNA. |
| spolor  | spolor.aSep08  |        | 1598  | 380  |   | 69  | putative protein (7.7 kD) (spolor) mRNA.                                                                                 |
| spomee  | spomee.aSep08  |        | 1180  | 267  |   | 59  | putative protein (spomee) mRNA.                                                                                          |
| Spon1   | Spon1.bSep08   | 64456  | 11550 | 3555 | 9 | 506 | spondin 1, extracellular matrix protein (Spon1) alternative variant bSep08, mRNA.                                        |
| Spon1   | Spon1.cSep08   | 64456  | 52627 | 334  | 3 | 111 | spondin 1, extracellular matrix protein (Spon1) alternative variant cSep08, mRNA.                                        |
| sponsor | sponsor.aSep08 |        | 787   | 409  |   | 136 | parkin-like cytoplasmic protein (sponsor) mRNA.                                                                          |
| Spop    | Spop.bSep08    | 287643 | 67630 | 771  | 6 | 152 | speckle-type POZ protein (Spop) alternative variant bSep08, mRNA.                                                        |
| Spop    | Spop.cSep08    | 287643 | 67363 | 397  | 5 | 81  | speckle-type POZ protein (Spop) alternative variant cSep08, mRNA.                                                        |
| Spop    | Spop.dSep08    | 287643 | 4345  | 390  | 2 | 73  | speckle-type POZ protein (Spop) alternative variant dSep08, mRNA.                                                        |
| Spop    | Spop.fSep08    | 287643 | 67236 | 300  | 3 | 36  | speckle-type POZ protein (3.7 kD) (Spop) alternative variant fSep08, complete mRNA.                                      |
| spopey  | spopey.aSep08  |        | 5556  | 470  |   | 69  | putative protein (7.2 kD) (spopey) mRNA.                                                                                 |
| sporcha | sporcha.aSep08 |        | 5545  | 379  |   | 40  | putative protein (sporcha) mRNA.                                                                                         |
| sporchy | sporchy.aSep08 |        | 691   | 261  |   | 46  | putative protein (sporchy) mRNA.                                                                                         |
| sporfee | sporfee.aSep08 |        | 1685  | 1161 |   | 84  | putative protein (8.7 kD) (sporfee) mRNA.                                                                                |
| sporflu | sporflu.aSep08 |        | 1414  | 553  |   | 95  | putative protein (sporflu) mRNA.                                                                                         |
| sporfly | sporfly.aSep08 |        | 849   | 377  |   | 71  | immunity-related GTPase family Q CRA a (sporfly) mRNA.                                                                   |
| sporlor | sporlor.aSep08 |        | 997   | 754  |   | 111 | putative protein (sporlor) mRNA.                                                                                         |
| spormee | spormee.aSep08 |        | 24205 | 1784 |   | 71  | putative protein (7.8 kD) (spormee) alternative variant aSep08, mRNA.                                                    |
| spormee | spormee.bSep08 |        | 23503 | 314  | 1 | 71  | putative protein (7.8 kD) (spormee) alternative variant bSep08, mRNA.                                                    |
| spormee | spormee.cSep08 |        | 5743  | 791  | 2 | 53  | putative protein (spormee) alternative variant cSep08, mRNA.                                                             |
| spornor | spornor.aSep08 |        | 12874 | 831  | 3 | 276 | zinc finger protein 318 (spornor) alternative variant aSep08, mRNA.                                                      |
| spornor | spornor.bSep08 |        | 12506 | 311  | 2 | 103 | zinc finger protein 318 CRA b (spornor) alternative variant bSep08, mRNA.                                                |
| sporoy  | sporoy.aSep08  |        | 4663  | 409  |   | 136 | oxysterol-binding protein-like protein 8 (sporoy) mRNA.                                                                  |
| sporpey | sporpey.aSep08 |        | 657   | 232  |   | 72  | putative protein of mammalian origin (sporpey) mRNA.                                                                     |
| sporroy | sporroy.aSep08 |        | 785   | 371  |   | 30  | putative protein (3.4 kD) (sporroy) mRNA.                                                                                |

|          |                 |        |       |      |    |     |                                                                                |
|----------|-----------------|--------|-------|------|----|-----|--------------------------------------------------------------------------------|
| sporshaw | sporshaw.aSep08 |        | 2190  | 649  | 2  | 142 | putative protein (sporshaw) alternative variant aSep08, mRNA.                  |
| sportu   | sportu.aSep08   |        | 883   | 252  |    | 84  | putative protein of vertebrate origin (sportu) mRNA.                           |
| sporvo   | sporvo.aSep08   |        | 1822  | 575  |    | 110 | putative protein (12.3 kD) (sporvo) mRNA.                                      |
| sporwer  | sporwer.aSep08  |        | 12717 | 944  |    | 32  | putative protein of mammalian origin (sporwer) mRNA.                           |
| sposhaw  | sposhaw.aSep08  |        | 7824  | 784  |    | 66  | putative protein (7.3 kD) (sposhaw) mRNA.                                      |
| spotu    | spotu.aSep08    |        | 16062 | 394  |    | 131 | CRA b (spotu) mRNA.                                                            |
| spovo    | spovo.aSep08    |        | 47068 | 413  |    | 95  | putative protein (10.5 kD) (spovo) mRNA.                                       |
| spower   | spower.aSep08   |        | 18741 | 528  |    | 128 | oxysterol-binding protein-like protein 3 (spower) mRNA.                        |
| spoycha  | spoycha.aSep08  |        | 1230  | 522  |    | 81  | putative protein (8.6 kD) (spoycha) mRNA.                                      |
| spoychy  | spoychy.aSep08  |        | 12169 | 381  |    | 54  | putative protein (5.9 kD) (spoychy) mRNA.                                      |
| spoyfee  | spoyfee.bSep08  |        | 26518 | 390  | 2  | 49  | putative protein (spoyfee) alternative variant bSep08, mRNA.                   |
| spoyflu  | spoyflu.aSep08  |        | 5652  | 410  |    | 106 | putative cytoplasmic protein (11.3 kD) (spoyflu) mRNA.                         |
| spoyfly  | spoyfly.aSep08  |        | 2117  | 751  |    | 250 | immunity-related GTPase family Q CRA a (spoyfly) mRNA.                         |
| spoylor  | spoylor.aSep08  |        | 4676  | 441  |    | 89  | synaptojanin 1 CRA b (spoylor) mRNA.                                           |
| spoymee  | spoymee.aSep08  |        | 2491  | 329  |    | 109 | putative protein (spoymee) mRNA.                                               |
| spoynor  | spoynor.aSep08  |        | 9882  | 603  |    | 119 | putative protein (spoynor) mRNA.                                               |
| spoyroy  | spoyroy.aSep08  |        | 16995 | 717  |    | 67  | putative protein (7.4 kD) (spoyroy) mRNA.                                      |
| spoyshaw | spoyshaw.aSep08 |        | 90603 | 683  |    | 69  | putative protein (7.7 kD) (spoyshaw) mRNA.                                     |
| spoytu   | spoytu.aSep08   |        | 1506  | 278  |    | 46  | putative protein (spoytu) mRNA.                                                |
| spoyvo   | spoyvo.aSep08   |        | 2978  | 1714 |    | 67  | putative protein (spoyvo) alternative variant aSep08, mRNA.                    |
| spoywer  | spoywer.aSep08  |        | 4191  | 854  |    | 50  | putative protein (5.5 kD) (spoywer) mRNA.                                      |
| Spp2     | Spp2.aSep08     | 94168  | 19461 | 818  | 2  | 232 | secreted phosphoprotein 2 (Spp2) alternative variant aSep08, mRNA.             |
| Spp2     | Spp2.cSep08     | 94168  | 19398 | 647  | 1  | 176 | secreted phosphoprotein 2 (Spp2) alternative variant cSep08, mRNA.             |
| Sppl2b   | Sppl2b.bSep08   | 362828 | 2265  | 794  | 5  | 211 | signal peptide peptidase-like 2B (Sppl2b) alternative variant bSep08, mRNA.    |
| Sppl2b   | Sppl2b.cSep08   | 362828 | 6977  | 611  | 6  | 200 | signal peptide peptidase-like 2B (Sppl2b) alternative variant cSep08, mRNA.    |
| Sppl2b   | Sppl2b.eSep08   | 362828 | 11394 | 563  | 6  | 116 | signal peptide peptidase-like 2B (Sppl2b) alternative variant eSep08, mRNA.    |
| Sppl2b   | Sppl2b.fSep08   | 362828 | 2030  | 341  | 3  | 113 | signal peptide peptidase-like 2B (Sppl2b) alternative variant fSep08, mRNA.    |
| Sppl2b   | Sppl2b.gSep08   | 362828 | 456   | 365  | 2  | 49  | signal peptide peptidase-like 2B (Sppl2b) alternative variant gSep08, mRNA.    |
| Sppl3    | Sppl3.aSep08    | 360822 | 85699 | 2836 | 11 | 448 | signal peptide peptidase 3 (Sppl3) alternative variant aSep08, mRNA.           |
| Sppl3    | Sppl3.cSep08    | 360822 | 34993 | 770  | 5  | 138 | signal peptide peptidase 3 (15.0 kD) (Sppl3) alternative variant cSep08, mRNA. |
| Sppl3    | Sppl3.dSep08    | 360822 | 8852  | 1290 | 5  | 119 | signal peptide peptidase 3 (13.2 kD) (Sppl3) alternative variant dSep08, mRNA. |

|        |               |        |       |      |    |      |                                                                                                                       |
|--------|---------------|--------|-------|------|----|------|-----------------------------------------------------------------------------------------------------------------------|
| Sppl3  | Sppl3.eSep08  | 360822 | 1437  | 725  | 2  | 66   | signal peptide peptidase 3 (10.6 kD) (Sppl3) alternative variant eSep08, mRNA.                                        |
| Spr    | Spr.bSep08    | 29270  | 1349  | 704  | 1  | 36   | sepiapterin reductase (4.2 kD) (Spr) alternative variant bSep08, mRNA.                                                |
| Spred2 | Spred2.aSep08 | 305539 | 24441 | 1786 | 6  | 456  | 2 sprouty-related 1 domain (Spred2) alternative variant aSep08, mRNA.                                                 |
| Spred3 | Spred3.aSep08 | 308478 | 8808  | 1775 |    | 419  | sprouty (43.5 kD) (Spred3) mRNA.                                                                                      |
| SPRY.0 | SPRY.0.aSep08 |        | 954   | 396  |    | 132  | midline 2 (SPRY.0) mRNA.                                                                                              |
| SPRY.1 | SPRY.1.aSep08 |        | 1368  | 958  |    | 212  | tripartite motif-containing 50 (SPRY.1) mRNA.                                                                         |
| SPRY.2 | SPRY.2.aSep08 |        | 1385  | 788  |    | 262  | tripartite motif-containing 65 (SPRY.2) mRNA.                                                                         |
| SPRY.5 | SPRY.5.aSep08 |        | 13428 | 1089 | 4  | 341  | probable E3 ubiquitin-protein ligase herc1 (SPRY.5) alternative variant aSep08, mRNA.                                 |
| SPRY.5 | SPRY.5.bSep08 |        | 4433  | 367  | 1  | 122  | probable E3 ubiquitin-protein ligase herc1 like (SPRY.5) alternative variant bSep08, mRNA.                            |
| SPRY.6 | SPRY.6.aSep08 |        | 27916 | 4569 | 39 | 1312 | ring finger protein 123 CRA a (148.3 kD) (SPRY.6) alternative variant aSep08, mRNA.                                   |
| SPRY.6 | SPRY.6.bSep08 |        | 9219  | 1089 | 10 | 303  | ring finger protein 123 (33.0 kD) (SPRY.6) alternative variant bSep08, mRNA.                                          |
| SPRY.6 | SPRY.6.cSep08 |        | 1923  | 682  | 5  | 127  | ring finger protein 123 (SPRY.6) alternative variant cSep08, mRNA.                                                    |
| SPRY.6 | SPRY.6.dSep08 |        | 1271  | 736  | 2  | 96   | CRA d like (SPRY.6) alternative variant dSep08, mRNA.                                                                 |
| SPRY.6 | SPRY.6.eSep08 |        | 7436  | 787  | 5  | 90   | ring finger protein 123 (SPRY.6) alternative variant eSep08, mRNA.                                                    |
| SPRY.6 | SPRY.6.fSep08 |        | 7766  | 450  | 4  | 72   | ring finger protein 123 (SPRY.6) alternative variant fSep08, mRNA.                                                    |
| SPRY.7 | SPRY.7.bSep08 |        | 1901  | 445  | 4  | 115  | tripartite motif-containing 6 (SPRY.7) alternative variant bSep08, mRNA.                                              |
| SPRY.8 | SPRY.8.aSep08 |        | 11883 | 2749 |    | 124  | nuclear ribonucleoprotein U-like 2 (SPRY.8) mRNA.                                                                     |
| Spry3  | Spry3.bSep08  | 498159 | 9138  | 3259 | 2  | 281  | sprouty homolog 3 (Drosophila) (30.4 kD) (Spry3) alternative variant bSep08, mRNA.                                    |
| Spryd3 | Spryd3.aSep08 | 315327 | 17202 | 2470 | 9  | 461  | spry 3 (Spryd3) alternative variant aSep08, mRNA.                                                                     |
| Spryd3 | Spryd3.bSep08 | 315327 | 3943  | 455  | 1  | 135  | putative protein of eukaryotic origin (Spryd3) alternative variant bSep08, mRNA.                                      |
| Spsb1  | Spsb1.aSep08  | 313722 | 60930 | 2965 | 2  | 273  | splA/ryanodine receptor domain and SOCS box containing 1 (30.8 kD) (Spsb1) alternative variant aSep08, complete mRNA. |
| Spsb2  | Spsb2.aSep08  | 297592 | 1690  | 1496 | 1  | 276  | splA/ryanodine receptor domain and SOCS box containing 2 (29.9 kD) (Spsb2) alternative variant aSep08, mRNA.          |
| Spsb3  | Spsb3.bSep08  | 302981 | 4571  | 776  | 5  | 240  | splA ryanodine receptor domain socs box containing 3 (Spsb3) alternative variant bSep08, mRNA.                        |
| Spsb3  | Spsb3.cSep08  | 302981 | 4507  | 1057 | 5  | 233  | splA ryanodine receptor domain socs box containing 3 (Spsb3) alternative variant cSep08, mRNA.                        |
| Spsb3  | Spsb3.dSep08  | 302981 | 4488  | 799  | 6  | 224  | splA ryanodine receptor domain socs box containing 3 (Spsb3) alternative variant dSep08, mRNA.                        |
| Spsb3  | Spsb3.eSep08  | 302981 | 4317  | 674  | 3  | 181  | splA ryanodine receptor domain socs box containing 3 (19.8 kD) (Spsb3) alternative variant eSep08, mRNA.              |

|         |                |        |       |      |   |     |                                                                                                     |
|---------|----------------|--------|-------|------|---|-----|-----------------------------------------------------------------------------------------------------|
| Spsb3   | Spsb3.fSep08   | 302981 | 3766  | 712  | 2 | 83  | putative mitochondrial protein (9.2 kD) (Spsb3) alternative variant fSep08, mRNA.                   |
| Spsb4   | Spsb4.bSep08   | 300950 | 71711 | 545  |   | 86  | spiA/ryanodine receptor domain and SOCS box containing 4 (Spsb4) alternative variant bSep08, mRNA.  |
| Sptbn5  | Sptbn5.aSep08  | 296090 | 1543  | 767  |   | 255 | spectrin, beta, non-erythrocytic 5 (Sptbn5) mRNA.                                                   |
| Sptlc1  | Sptlc1.bSep08  | 361213 | 882   | 316  | 1 | 43  | serine palmitoyltransferase, long chain base subunit 1 (Sptlc1) alternative variant bSep08, mRNA.   |
| spubor  | spubor.aSep08  |        | 3898  | 342  |   | 113 | putative protein of metazoan origin (spubor) mRNA.                                                  |
| spucha  | spucha.aSep08  |        | 5169  | 350  | 1 | 114 | rap guanine nucleotide exchange factor 1 (spucha) alternative variant aSep08, mRNA.                 |
| spucha  | spucha.bSep08  |        | 5120  | 317  | 1 | 105 | rap guanine nucleotide exchange factor 1 (spucha) alternative variant bSep08, mRNA.                 |
| spucha  | spucha.cSep08  |        | 5203  | 270  |   | 89  | rap guanine nucleotide exchange factor 1 (spucha) alternative variant cSep08, mRNA.                 |
| spuchy  | spuchy.aSep08  |        | 10141 | 779  |   | 36  | putative protein (spuchy) mRNA.                                                                     |
| spufee  | spufee.aSep08  |        | 368   | 284  |   | 90  | putative protein (spufee) mRNA.                                                                     |
| spuflu  | spuflu.aSep08  |        | 5072  | 437  |   | 48  | putative protein (spuflu) mRNA.                                                                     |
| spuflly | spuflly.aSep08 |        | 3388  | 372  |   | 123 | excision repair cross-complementing rodent deficiency complementation group 2 CRA b (spuflly) mRNA. |
| spulor  | spulor.aSep08  |        | 1610  | 472  |   | 126 | putative protein (spulor) mRNA.                                                                     |
| spumee  | spumee.aSep08  |        | 10305 | 326  |   | 42  | putative protein (spumee) mRNA.                                                                     |
| spunor  | spunor.aSep08  |        | 4283  | 446  |   | 142 | putative protein (spunor) mRNA.                                                                     |
| spupey  | spupey.aSep08  |        | 38653 | 587  |   | 46  | putative protein (spupey) mRNA.                                                                     |
| spuroy  | spuroy.aSep08  |        | 1188  | 491  | 2 | 50  | putative protein (spuroy) alternative variant aSep08, mRNA.                                         |
| spuroy  | spuroy.bSep08  |        | 1216  | 485  | 2 | 64  | putative protein (spuroy) alternative variant bSep08, mRNA.                                         |
| spushaw | spushaw.aSep08 |        | 12403 | 791  |   | 35  | putative protein (4.1 kD) (spushaw) mRNA.                                                           |
| sputu   | sputu.aSep08   |        | 4702  | 417  | 2 | 138 | CRA b (sputu) alternative variant aSep08, mRNA.                                                     |
| sputu   | sputu.bSep08   |        | 2646  | 375  | 1 | 79  | putative protein (sputu) alternative variant bSep08, mRNA.                                          |
| spuvo   | spuvo.aSep08   |        | 917   | 530  |   | 51  | putative protein (spuvo) mRNA.                                                                      |
| spuwer  | spuwer.aSep08  |        | 4599  | 568  |   | 100 | oxysterol-binding protein-like protein 3 (spuwer) mRNA.                                             |
| spybor  | spybor.aSep08  |        | 445   | 260  |   | 35  | putative protein (spybor) mRNA.                                                                     |
| spycha  | spycha.aSep08  |        | 6755  | 604  |   | 92  | putative protein (10.1 kD) (spycha) mRNA.                                                           |
| spychy  | spychy.aSep08  |        | 2518  | 311  |   | 48  | putative protein (spychy) mRNA.                                                                     |
| spyfee  | spyfee.aSep08  |        | 12300 | 670  |   | 222 | kinase (spyfee) mRNA.                                                                               |
| spyflu  | spyflu.aSep08  |        | 42751 | 770  | 2 | 54  | putative protein (spyflu) mRNA.                                                                     |
| spyfly  | spyfly.aSep08  |        | 445   | 365  |   | 121 | protein phosphatase 1 regulatory like (spyfly) mRNA.                                                |
| spylor  | spylor.aSep08  |        | 4479  | 709  |   | 86  | putative protein (spylor) mRNA.                                                                     |
| spymee  | spymee.aSep08  |        | 4032  | 542  | 1 | 53  | putative protein (5.9 kD) (spymee) alternative variant aSep08, mRNA.                                |
| spymee  | spymee.bSep08  |        | 4136  | 1003 | 1 | 59  | putative protein (spymee) alternative variant bSep08, mRNA.                                         |
| spynor  | spynor.aSep08  |        | 1551  | 808  |   | 268 | putative protein (spynor) mRNA.                                                                     |

|         |                |        |        |      |    |      |                                                                                  |
|---------|----------------|--------|--------|------|----|------|----------------------------------------------------------------------------------|
| spypey  | spypey.aSep08  |        | 12401  | 4932 |    | 1591 | rho GTPase-activating protein (spypey) mRNA.                                     |
| spyroy  | spyroy.aSep08  |        | 6988   | 541  |    | 115  | neuron navigator 3 (spyroy) mRNA.                                                |
| spyshaw | spyshaw.aSep08 |        | 2778   | 543  |    | 74   | putative membrane protein of eukaryotic origin (8.4 kD) (spyshaw) mRNA.          |
| spytu   | spytu.aSep08   |        | 2709   | 741  |    | 247  | CRA a (spytu) mRNA.                                                              |
| spyvo   | spyvo.aSep08   |        | 4601   | 813  |    | 76   | putative protein (spyvo) mRNA.                                                   |
| spywer  | spywer.aSep08  |        | 26665  | 602  |    | 194  | deafness autosomal dominant 5 (spywer) mRNA.                                     |
| Sqrdl   | Sqrdl.aSep08   | 362292 | 7290   | 481  | 2  | 153  | sulfide quinone reductase-like (yeast) (Sqrdl) alternative variant aSep08, mRNA. |
| Sqstm1  | Sqstm1.aSep08  | 113894 | 11296  | 2058 | 8  | 472  | sequestosome 1 (Sqstm1) alternative variant aSep08, mRNA.                        |
| Sqstm1  | Sqstm1.cSep08  | 113894 | 9080   | 1170 | 8  | 384  | sequestosome 1 (Sqstm1) alternative variant cSep08, mRNA.                        |
| Sqstm1  | Sqstm1.dSep08  | 113894 | 10835  | 1300 | 8  | 374  | sequestosome 1 (Sqstm1) alternative variant dSep08, mRNA.                        |
| Sqstm1  | Sqstm1.eSep08  | 113894 | 3345   | 1146 | 3  | 312  | sequestosome 1 (Sqstm1) alternative variant eSep08, complete mRNA.               |
| Sqstm1  | Sqstm1.fSep08  | 113894 | 3197   | 896  | 4  | 278  | sequestosome 1 (Sqstm1) alternative variant fSep08, complete mRNA.               |
| Sqstm1  | Sqstm1.gSep08  | 113894 | 6552   | 760  | 5  | 253  | sequestosome 1 CRA c (Sqstm1) alternative variant gSep08, mRNA.                  |
| Sqstm1  | Sqstm1.iSep08  | 113894 | 2667   | 811  | 4  | 216  | sequestosome 1 CRA b (Sqstm1) alternative variant iSep08, mRNA.                  |
| Sqstm1  | Sqstm1.jSep08  | 113894 | 10610  | 1127 | 7  | 188  | sequestosome 1 CRA b (Sqstm1) alternative variant jSep08, mRNA.                  |
| Sqstm1  | Sqstm1.kSep08  | 113894 | 3050   | 1418 | 3  | 130  | sequestosome 1 (14.1 kD) (Sqstm1) alternative variant kSep08, mRNA.              |
| Sqstm1  | Sqstm1.lSep08  | 113894 | 2493   | 747  | 3  | 92   | sequestosome 1 (10.2 kD) (Sqstm1) alternative variant lSep08, mRNA.              |
| Sqstm1  | Sqstm1.oSep08  | 113894 | 562    | 384  | 2  |      |                                                                                  |
| Srbd1   | Srbd1.aSep08   | 301665 | 200314 | 2788 | 12 | 735  | s1 RNA binding domain 1 (Srbd1) alternative variant aSep08, mRNA.                |
| Srbd1   | Srbd1.bSep08   | 301665 | 32138  | 1309 | 2  | 258  | s1 RNA binding domain 1 (Srbd1) alternative variant bSep08, mRNA.                |
| Srbd1   | Srbd1.cSep08   | 301665 | 7926   | 812  | 1  | 174  | s1 RNA binding domain 1 (Srbd1) alternative variant cSep08, mRNA.                |
| Src     | Src.bSep08     | 83805  | 24944  | 790  | 6  | 181  | rous sarcoma oncogene (Src) alternative variant bSep08, mRNA.                    |
| SRCR.0  | SRCR.0.aSep08  |        | 7839   | 882  |    | 293  | deleted in malignant brain tumors 1 like (SRCR.0) mRNA.                          |
| Srcrb4d | Srcrb4d.aSep08 | 304401 | 2046   | 395  | 3  | 131  | CRA c (Srcrb4d) alternative variant aSep08, mRNA.                                |
| Srcrb4d | Srcrb4d.bSep08 | 304401 | 2557   | 1129 | 3  | 113  | putative protein (Srcrb4d) alternative variant bSep08, mRNA.                     |
| Srcrb4d | Srcrb4d.cSep08 | 304401 | 8368   | 365  | 3  | 101  | CRA c like (Srcrb4d) alternative variant cSep08, mRNA.                           |
| Srd5a3  | Srd5a3.aSep08  | 305291 | 15584  | 2102 | 1  | 348  | steroid 5 alpha-reductase 3 (Srd5a3) alternative variant aSep08, mRNA.           |

|        |               |        |       |      |    |      |                                                                                                    |
|--------|---------------|--------|-------|------|----|------|----------------------------------------------------------------------------------------------------|
| Sreb1  | Sreb1.aSep08  | 78968  | 22525 | 4876 | 17 | 1144 | sterol regulatory element binding transcription factor 1 (Sreb1) alternative variant aSep08, mRNA. |
| Sreb1  | Sreb1.bSep08  | 78968  | 1071  | 981  | 1  | 127  | sterol regulatory element binding transcription factor 1 (Sreb1) alternative variant bSep08, mRNA. |
| Sreb2  | Sreb2.bSep08  | 300095 | 20443 | 783  | 1  | 116  | sterol regulatory element binding factor 2 (12.5 kD) (Sreb2) alternative variant bSep08, mRNA.     |
| Srf    | Srf.bSep08    | 501099 | 4211  | 577  |    | 192  | serum response factor (Srf) alternative variant bSep08, mRNA.                                      |
| Srfbp1 | Srfbp1.bSep08 | 291469 | 13939 | 1978 | 7  | 417  | serum response factor binding protein 1 (46.6 kD) (Srfbp1) alternative variant bSep08, mRNA.       |
| Srgap1 | Srgap1.aSep08 | 314903 | 9663  | 374  |    | 124  | SLIT-ROBO Rho GTPase activating protein 1 (Srgap1) alternative variant aSep08, mRNA.               |
| Srgap3 | Srgap3.aSep08 | 500287 | 10242 | 708  |    | 229  | SLIT-ROBO Rho GTPase activating protein 3 (Srgap3) mRNA.                                           |
| Srl    | Srl.aSep08    | 302948 | 41018 | 805  | 5  | 268  | sarcalumenin (Srl) alternative variant aSep08, mRNA.                                               |
| Srl    | Srl.bSep08    | 302948 | 25832 | 379  | 1  | 126  | sarcalumenin (Srl) alternative variant bSep08, mRNA.                                               |
| Srm    | Srm.bSep08    | 84596  | 1306  | 646  | 4  | 129  | spermidine synthase (Srm) alternative variant bSep08, mRNA.                                        |
| Srm    | Srm.cSep08    | 84596  | 1394  | 1152 | 3  | 110  | spermidine synthase (12.7 kD) (Srm) alternative variant cSep08, mRNA.                              |
| Srp14  | Srp14.bSep08  | 296076 | 3180  | 467  | 4  | 112  | signal recognition particle 14 (Srp14) alternative variant bSep08, mRNA.                           |
| Srp14  | Srp14.cSep08  | 296076 | 3155  | 299  | 5  | 96   | signal recognition particle 14 (Srp14) alternative variant cSep08, mRNA.                           |
| Srp14  | Srp14.dSep08  | 296076 | 3173  | 841  | 4  | 92   | signal recognition particle 14 (10.3 kD) (Srp14) alternative variant dSep08, mRNA.                 |
| Srp19  | Srp19.bSep08  | 291685 | 2164  | 738  | 3  | 45   | putative protein (5.2 kD) (Srp19) alternative variant bSep08, mRNA.                                |
| Srp19  | Srp19.cSep08  | 291685 | 4296  | 443  | 4  | 43   | signal recognition particle (4.9 kD) (Srp19) alternative variant cSep08, mRNA.                     |
| Srp68  | Srp68.bSep08  | 363707 | 1458  | 780  | 3  | 222  | putative protein (Srp68) alternative variant bSep08, mRNA.                                         |
| Srp68  | Srp68.cSep08  | 363707 | 6326  | 797  | 5  | 115  | signal recognition particle 68kDa CRA a (Srp68) alternative variant cSep08, mRNA.                  |
| Srp68  | Srp68.dSep08  | 363707 | 6447  | 373  | 4  | 98   | signal recognition particle 68kDa CRA a (Srp68) alternative variant dSep08, mRNA.                  |
| Srp68  | Srp68.eSep08  | 363707 | 1060  | 748  | 2  | 89   | putative protein (Srp68) alternative variant eSep08, mRNA.                                         |
| Srp72  | Srp72.aSep08  | 498351 | 12434 | 2473 | 9  | 307  | signal recognition particle 72 (Srp72) alternative variant aSep08, mRNA.                           |
| Srp72  | Srp72.bSep08  | 498351 | 2059  | 867  | 3  | 137  | signal recognition particle 72 (Srp72) alternative variant bSep08, mRNA.                           |
| Srp72  | Srp72.cSep08  | 498351 | 1410  | 815  | 2  | 124  | signal recognition particle 72 (Srp72) alternative variant cSep08, mRNA.                           |
| Srp72  | Srp72.dSep08  | 498351 | 915   | 233  | 2  | 54   | signal recognition particle 72 (Srp72) alternative variant dSep08, mRNA.                           |
| Srp1   | Srp1.aSep08   | 361811 | 43377 | 4204 | 1  | 517  | serine/arginine-rich protein specific kinase 1 (Srp1) alternative variant aSep08, mRNA.            |



|       |              |        |        |      |   |      |                                                                                                             |
|-------|--------------|--------|--------|------|---|------|-------------------------------------------------------------------------------------------------------------|
| Srpk1 | Srpk1.bSep08 | 361811 | 10474  | 792  |   | 171  | serine/arginine-rich protein specific kinase 1 (Srpk1) alternative variant bSep08, mRNA.                    |
| Srpk2 | Srpk2.aSep08 | 296753 | 100069 | 1006 | 9 | 271  | serine/arginine-rich protein specific kinase 2 (Srpk2) alternative variant aSep08, mRNA.                    |
| Srpk2 | Srpk2.bSep08 | 296753 | 160490 | 789  | 6 | 197  | serine/arginine-rich protein specific kinase 2 (Srpk2) alternative variant bSep08, mRNA.                    |
| Srpk3 | Srpk3.bSep08 | 293854 | 2600   | 630  | 7 | 210  | serine/arginine-rich protein specific kinase 3 (Srpk3) alternative variant bSep08, mRNA.                    |
| Srpr  | Srpr.bSep08  | 315548 | 1654   | 865  | 6 | 288  | signal recognition particle receptor ('docking protein') (Srpr) alternative variant bSep08, mRNA.           |
| Srpr  | Srpr.cSep08  | 315548 | 2876   | 1798 | 6 | 281  | signal recognition particle receptor ('docking protein') (Srpr) alternative variant cSep08, mRNA.           |
| Srpr  | Srpr.dSep08  | 315548 | 1046   | 739  | 3 | 135  | signal recognition particle receptor ('docking protein') (14.5 kD) (Srpr) alternative variant dSep08, mRNA. |
| Srprb | Srprb.bSep08 | 300965 | 2889   | 386  | 3 | 112  | signal recognition particle receptor, B subunit (Srprb) alternative variant bSep08, mRNA.                   |
| Srpx  | Srpx.bSep08  | 64316  | 58480  | 695  |   | 231  | sushi-repeat-containing protein (Srpx) alternative variant bSep08, mRNA.                                    |
| Srr   | Srr.bSep08   | 303306 | 16200  | 786  | 6 | 166  | serine racemase (Srr) alternative variant bSep08, mRNA.                                                     |
| Srrd  | Srrd.aSep08  | 288717 | 5983   | 1484 | 7 | 291  | SRR1 (Srrd) alternative variant aSep08, mRNA.                                                               |
| Srrd  | Srrd.bSep08  | 288717 | 4572   | 761  | 5 | 167  | SRR1 (Srrd) alternative variant bSep08, mRNA.                                                               |
| Srrm1 | Srrm1.bSep08 | 313620 | 8874   | 955  | 7 | 318  | serine arginine repetitive matrix 1 (Srrm1) alternative variant bSep08, mRNA.                               |
| Srrm1 | Srrm1.cSep08 | 313620 | 6300   | 801  | 6 | 267  | serine arginine repetitive matrix 1 (Srrm1) alternative variant cSep08, mRNA.                               |
| Srrm1 | Srrm1.dSep08 | 313620 | 19370  | 656  | 4 | 218  | serine arginine repetitive matrix 1 (Srrm1) alternative variant dSep08, mRNA.                               |
| Srrm1 | Srrm1.eSep08 | 313620 | 3784   | 789  | 4 | 187  | serine arginine repetitive matrix 1 (Srrm1) alternative variant eSep08, mRNA.                               |
| Srrm1 | Srrm1.fSep08 | 313620 | 2444   | 445  | 2 | 102  | putative protein (Srrm1) alternative variant fSep08, mRNA.                                                  |
| Srrm1 | Srrm1.gSep08 | 313620 | 741    | 397  | 2 | 84   | serine arginine repetitive matrix 1 (Srrm1) alternative variant gSep08, mRNA.                               |
| Srrm1 | Srrm1.hSep08 | 313620 | 1879   | 1233 | 3 | 72   | serine arginine repetitive matrix 1 (Srrm1) alternative variant hSep08, mRNA.                               |
| Srrm2 | Srrm2.aSep08 | 302969 | 5481   | 4439 | 5 | 1114 | serine arginine repetitive matrix 2 (Srrm2) alternative variant aSep08, mRNA.                               |
| Srrm2 | Srrm2.bSep08 | 302969 | 5025   | 3011 | 5 | 837  | serine arginine repetitive matrix 2 (Srrm2) alternative variant bSep08, mRNA.                               |
| Srrm2 | Srrm2.cSep08 | 302969 | 2215   | 1914 | 2 | 302  | putative nuclear protein of mammalian origin (31.4 kD) (Srrm2) alternative variant cSep08, mRNA.            |
| Srrm2 | Srrm2.dSep08 | 302969 | 2225   | 2015 | 3 | 227  | putative protein of mammalian origin (Srrm2) alternative variant dSep08, mRNA.                              |
| Srrm2 | Srrm2.eSep08 | 302969 | 1422   | 410  | 3 | 136  | serine arginine repetitive matrix 2 CRA f (Srrm2) alternative variant eSep08, mRNA.                         |
| Srrm2 | Srrm2.fSep08 | 302969 | 595    | 371  | 2 | 80   | putative protein of mammalian origin (8.7 kD) (Srrm2) alternative variant fSep08, mRNA.                     |

|       |              |        |        |      |    |     |                                                                                            |
|-------|--------------|--------|--------|------|----|-----|--------------------------------------------------------------------------------------------|
| Ss18  | Ss18.bSep08  | 361295 | 25401  | 1131 | 6  | 217 | putative protein of vertebrate origin (Ss18) alternative variant bSep08, mRNA.             |
| Ss18  | Ss18.cSep08  | 361295 | 25342  | 967  | 5  | 159 | putative protein (Ss18) alternative variant cSep08, mRNA.                                  |
| Ss18  | Ss18.dSep08  | 361295 | 98001  | 693  | 4  | 143 | putative protein of vertebrate origin (Ss18) alternative variant dSep08, mRNA.             |
| Ss18  | Ss18.eSep08  | 361295 | 62018  | 1051 | 7  | 79  | synovial sarcoma (8.8 kD) (Ss18) alternative variant eSep08, complete mRNA.                |
| Ssb   | Ssb.bSep08   | 81783  | 5853   | 719  | 6  | 185 | sjogren syndrome antigen B like (21.5 kD) (Ssb) alternative variant bSep08, mRNA.          |
| Ssb   | Ssb.cSep08   | 81783  | 5849   | 789  | 5  | 152 | sjogren syndrome antigen B like (17.8 kD) (Ssb) alternative variant cSep08, mRNA.          |
| Ssb   | Ssb.dSep08   | 81783  | 5290   | 740  | 4  | 134 | sjogren syndrome antigen B like (15.8 kD) (Ssb) alternative variant dSep08, mRNA.          |
| Ssb   | Ssb.eSep08   | 81783  | 1105   | 686  | 3  | 125 | sjogren syndrome antigen B like (Ssb) alternative variant eSep08, mRNA.                    |
| Ssb   | Ssb.fSep08   | 81783  | 1221   | 727  | 2  | 113 | sjogren syndrome antigen B like (12.9 kD) (Ssb) alternative variant fSep08, mRNA.          |
| Ssbp1 | Ssbp1.aSep08 | 54304  | 10006  | 642  | 6  | 148 | single-stranded DNA binding protein 1 (17.2 kD) (Ssbp1) alternative variant aSep08, mRNA.  |
| Ssbp1 | Ssbp1.bSep08 | 54304  | 10042  | 605  | 6  | 148 | single-stranded DNA binding protein 1 (17.2 kD) (Ssbp1) alternative variant bSep08, mRNA.  |
| Ssbp1 | Ssbp1.cSep08 | 54304  | 10008  | 1186 | 5  | 148 | single-stranded DNA binding protein 1 (17.2 kD) (Ssbp1) alternative variant cSep08, mRNA.  |
| Ssbp1 | Ssbp1.eSep08 | 54304  | 10043  | 693  | 6  | 144 | single-stranded DNA binding protein 1 (16.7 kD) (Ssbp1) alternative variant eSep08, mRNA.  |
| Ssbp1 | Ssbp1.fSep08 | 54304  | 3735   | 643  | 1  | 57  | single-stranded DNA binding protein 1 (6.6 kD) (Ssbp1) alternative variant fSep08, mRNA.   |
| Ssbp2 | Ssbp2.aSep08 | 361877 | 203803 | 840  | 14 | 280 | single-stranded DNA binding protein 2 like (Ssbp2) alternative variant aSep08, mRNA.       |
| Ssbp2 | Ssbp2.bSep08 | 361877 | 252013 | 816  | 11 | 247 | single-stranded DNA binding protein 2 CRA a like (Ssbp2) alternative variant bSep08, mRNA. |
| Ssbp2 | Ssbp2.cSep08 | 361877 | 62601  | 603  | 8  | 140 | single-stranded DNA binding protein 2 like (Ssbp2) alternative variant cSep08, mRNA.       |
| Ssbp2 | Ssbp2.dSep08 | 361877 | 26064  | 504  | 3  | 90  | single-stranded DNA binding protein 2 CRA a like (Ssbp2) alternative variant dSep08, mRNA. |
| Ssbp3 | Ssbp3.aSep08 | 84354  | 94019  | 1343 | 14 | 412 | single stranded DNA binding protein 3 (Ssbp3) alternative variant aSep08, mRNA.            |
| Ssbp3 | Ssbp3.bSep08 | 84354  | 140954 | 3078 | 17 | 361 | single stranded DNA binding protein 3 (37.7 kD) (Ssbp3) alternative variant bSep08, mRNA.  |
| Ssbp3 | Ssbp3.cSep08 | 84354  | 129637 | 882  | 12 | 294 | single stranded DNA binding protein 3 (Ssbp3) alternative variant cSep08, mRNA.            |
| Ssbp4 | Ssbp4.aSep08 | 364534 | 10376  | 1261 | 17 | 382 | single stranded DNA binding protein 4 (Ssbp4) alternative variant aSep08, mRNA.            |
| Ssbp4 | Ssbp4.cSep08 | 364534 | 917    | 388  | 6  | 129 | single stranded DNA binding protein 4 (Ssbp4) alternative variant cSep08, mRNA.            |
| Ssbp4 | Ssbp4.fSep08 | 364534 | 441    | 314  | 2  | 45  | single stranded DNA binding protein 4 (Ssbp4) alternative variant fSep08, mRNA.            |

|        |               |        |       |      |   |     |                                                                                                         |
|--------|---------------|--------|-------|------|---|-----|---------------------------------------------------------------------------------------------------------|
| Ssfa2  | Ssfa2.bSep08  | 311146 | 9881  | 491  | 4 | 116 | sperm specific antigen 2 (Ssfa2) alternative variant bSep08, mRNA.                                      |
| Ssh1   | Ssh1.bSep08   | 304580 | 15517 | 1779 | 6 | 539 | slingshot homolog 1 (Drosophila) (Ssh1) alternative variant bSep08, mRNA.                               |
| Ssh3   | Ssh3.bSep08   | 365396 | 5888  | 1408 | 7 | 265 | slingshot homolog 3 (Drosophila) (Ssh3) alternative variant bSep08, mRNA.                               |
| Ssh3   | Ssh3.cSep08   | 365396 | 6759  | 2468 | 4 | 172 | slingshot homolog 3 (Drosophila) (20.0 kD) (Ssh3) alternative variant cSep08, mRNA.                     |
| Ssna1  | Ssna1.aSep08  | 311802 | 1044  | 681  | 2 | 139 | sjogren's syndrome nuclear autoantigen 1 (15.6 kD) (Ssna1) alternative variant aSep08, mRNA.            |
| Ssna1  | Ssna1.bSep08  | 311802 | 1454  | 918  | 3 | 119 | sjogren's syndrome nuclear autoantigen 1 (13.6 kD) (Ssna1) alternative variant bSep08, mRNA.            |
| Ssr1   | Ssr1.bSep08   | 361233 | 5882  | 421  | 4 | 65  | signal sequence receptor, alpha (Ssr1) alternative variant bSep08, mRNA.                                |
| Ssr3   | Ssr3.aSep08   | 81784  | 3540  | 2569 |   | 67  | signal sequence receptor, gamma (Ssr3) mRNA.                                                            |
| Ssr4   | Ssr4.bSep08   | 29435  | 4064  | 921  | 6 | 214 | signal sequence receptor, delta (Ssr4) alternative variant bSep08, mRNA.                                |
| Ssr4   | Ssr4.cSep08   | 29435  | 3786  | 571  | 5 | 148 | signal sequence receptor, delta (Ssr4) alternative variant cSep08, complete mRNA.                       |
| Ssr4   | Ssr4.dSep08   | 29435  | 2434  | 1303 | 3 | 144 | signal sequence receptor, delta (Ssr4) alternative variant dSep08, mRNA.                                |
| Ssrp1  | Ssrp1.bSep08  | 81785  | 3247  | 1033 | 6 | 344 | structure specific recognition protein 1 (Ssrp1) alternative variant bSep08, mRNA.                      |
| Ssrp1  | Ssrp1.cSep08  | 81785  | 3250  | 950  | 6 | 316 | structure specific recognition protein 1 (Ssrp1) alternative variant cSep08, mRNA.                      |
| Ssrp1  | Ssrp1.dSep08  | 81785  | 5416  | 1696 | 7 | 303 | structure specific recognition protein 1 (34.2 kD) (Ssrp1) alternative variant dSep08, mRNA.            |
| Ssrp1  | Ssrp1.eSep08  | 81785  | 2546  | 721  | 5 | 240 | structure specific recognition protein 1 (Ssrp1) alternative variant eSep08, mRNA.                      |
| Ssrp1  | Ssrp1.fSep08  | 81785  | 2871  | 1290 | 4 | 136 | structure specific recognition protein 1 (Ssrp1) alternative variant fSep08, mRNA.                      |
| Ssrp1  | Ssrp1.gSep08  | 81785  | 2470  | 559  | 5 | 132 | structure specific recognition protein 1 (Ssrp1) alternative variant gSep08, mRNA.                      |
| Ssrp1  | Ssrp1.hSep08  | 81785  | 1225  | 353  | 3 | 117 | structure specific recognition protein 1 (Ssrp1) alternative variant hSep08, mRNA.                      |
| Ssrp1  | Ssrp1.iSep08  | 81785  | 3219  | 1467 | 3 | 106 | structure specific recognition protein 1 (12.0 kD) (Ssrp1) alternative variant iSep08, mRNA.            |
| Sssca1 | Sssca1.bSep08 | 689397 | 1178  | 453  | 2 | 89  | sjogren's syndrome/scleroderma autoantigen 1 homolog (human) (Sssca1) alternative variant bSep08, mRNA. |
| Ssu72  | Ssu72.bSep08  | 298681 | 14091 | 365  | 2 | 111 | ssu72 RNA polymerase II CTD phosphatase homolog (yeast) (Ssu72) alternative variant bSep08, mRNA.       |
| Ssx2ip | Ssx2ip.bSep08 | 308023 | 12011 | 699  | 6 | 232 | synovial sarcoma, X breakpoint 2 interacting protein (Ssx2ip) alternative variant bSep08, mRNA.         |
| Ssx2ip | Ssx2ip.cSep08 | 308023 | 18083 | 954  | 6 | 205 | synovial sarcoma, X breakpoint 2 interacting protein (Ssx2ip) alternative variant cSep08, mRNA.         |
| Ssx2ip | Ssx2ip.dSep08 | 308023 | 16830 | 702  | 5 | 179 | synovial sarcoma, X breakpoint 2 interacting protein (Ssx2ip) alternative variant dSep08, mRNA.         |

|            |                   |        |        |      |    |     |                                                                                                                                                                       |
|------------|-------------------|--------|--------|------|----|-----|-----------------------------------------------------------------------------------------------------------------------------------------------------------------------|
| Ssx2ip     | Ssx2ip.eSep08     | 308023 | 11774  | 358  | 2  | 119 | synovial sarcoma, X breakpoint 2 interacting protein (Ssx2ip) alternative variant eSep08, mRNA.                                                                       |
| Ssx2ip     | Ssx2ip.fSep08     | 308023 | 12526  | 723  | 5  | 102 | synovial sarcoma, X breakpoint 2 interacting protein (Ssx2ip) alternative variant fSep08, mRNA.                                                                       |
| Ssx2ip     | Ssx2ip.gSep08     | 308023 | 2916   | 1787 | 2  | 95  | synovial sarcoma, X breakpoint 2 interacting protein (10.1 kD) (Ssx2ip) alternative variant gSep08, mRNA.                                                             |
| St3gal1    | St3gal1.bSep08    | 362924 | 1407   | 384  | 1  | 120 | ST3 beta-galactoside alpha-2,3-sialyltransferase 1 (St3gal1) alternative variant bSep08, mRNA.                                                                        |
| St3gal2    | St3gal2.aSep08    | 64442  | 16005  | 3355 |    | 417 | ST3 beta-galactoside alpha-2,3-sialyltransferase 2 (St3gal2) mRNA.                                                                                                    |
| St3gal4    | St3gal4.aSep08    | 363040 | 48778  | 2095 | 12 | 420 | ST3 beta-galactoside alpha-2,3-sialyltransferase 4 (St3gal4) alternative variant aSep08, mRNA.                                                                        |
| St3gal4    | St3gal4.bSep08    | 363040 | 42152  | 743  | 8  | 169 | ST3 beta-galactoside alpha-2,3-sialyltransferase 4 (St3gal4) alternative variant bSep08, mRNA.                                                                        |
| St3gal4    | St3gal4.cSep08    | 363040 | 40658  | 788  | 3  | 118 | ST3 beta-galactoside alpha-2,3-sialyltransferase 4 (St3gal4) alternative variant cSep08, mRNA.                                                                        |
| St3gal4    | St3gal4.dSep08    | 363040 | 1022   | 727  | 2  | 92  | ST3 beta-galactoside alpha-2,3-sialyltransferase 4 (10.3 kD) (St3gal4) alternative variant dSep08, mRNA.                                                              |
| St3gal4    | St3gal4.fSep08    | 363040 | 6289   | 580  | 4  | 9   | ST3 beta-galactoside alpha-2,3-sialyltransferase 4 (1.0 kD) (St3gal4) alternative variant fSep08, mRNA.                                                               |
| St3gal5    | St3gal5.bSep08    | 83505  | 48376  | 762  | 1  | 246 | ST3 beta-galactoside alpha-2,3-sialyltransferase 5 (St3gal5) alternative variant bSep08, mRNA.                                                                        |
| St3gal5    | St3gal5.cSep08    | 83505  | 48426  | 707  | 2  | 235 | ST3 beta-galactoside alpha-2,3-sialyltransferase 5 (St3gal5) alternative variant cSep08, mRNA.                                                                        |
| St3gal5    | St3gal5.dSep08    | 83505  | 52122  | 737  | 2  | 167 | ST3 beta-galactoside alpha-2,3-sialyltransferase 5 (St3gal5) alternative variant dSep08, mRNA.                                                                        |
| St5        | St5.aSep08        | 308944 | 33602  | 3165 |    | 825 | suppression of tumorigenicity 5 (St5) mRNA.                                                                                                                           |
| St6gal1    | St6gal1.cSep08    | 25197  | 6567   | 788  | 3  | 184 | beta galactoside alpha 2,6 sialyltransferase 1 (21.9 kD) (St6gal1) alternative variant cSep08, mRNA.                                                                  |
| St6gal1    | St6gal1.dSep08    | 25197  | 2700   | 584  | 1  | 107 | beta galactoside alpha 2,6 sialyltransferase 1 (12.4 kD) (St6gal1) alternative variant dSep08, mRNA.                                                                  |
| St6gal1    | St6gal1.eSep08    | 25197  | 3580   | 417  | 2  | 104 | beta galactoside alpha 2,6 sialyltransferase 1 (St6gal1) alternative variant eSep08, mRNA.                                                                            |
| St6gal2    | St6gal2.aSep08    | 301155 | 105155 | 2343 |    | 525 | beta galactoside alpha 2,6 sialyltransferase 2 (59.9 kD) (St6gal2) mRNA.                                                                                              |
| St6galnac2 | St6galnac2.cSep08 | 303692 | 8838   | 709  | 5  | 138 | ST6 (alpha-N-acetyl-neuraminyl-2,3-beta-galactosyl-1,3)-N-acetylgalactosaminide alpha-2,6-sialyltransferase 2 (St6galnac2) alternative variant cSep08, mRNA.          |
| St6galnac2 | St6galnac2.dSep08 | 303692 | 3324   | 748  | 3  | 123 | ST6 (alpha-N-acetyl-neuraminyl-2,3-beta-galactosyl-1,3)-N-acetylgalactosaminide alpha-2,6-sialyltransferase 2 (St6galnac2) alternative variant dSep08, mRNA.          |
| St6galnac2 | St6galnac2.eSep08 | 303692 | 2031   | 1295 | 2  | 75  | ST6 (alpha-N-acetyl-neuraminyl-2,3-beta-galactosyl-1,3)-N-acetylgalactosaminide alpha-2,6-sialyltransferase 2 (8.8 kD) (St6galnac2) alternative variant eSep08, mRNA. |
| ST7        | ST7.aSep08        | 296911 | 127288 | 2088 | 17 | 413 | suppression of tumorigenicity 7 (47.2 kD) (ST7) alternative variant aSep08, mRNA.                                                                                     |

|         |                |        |        |      |   |     |                                                                                                          |
|---------|----------------|--------|--------|------|---|-----|----------------------------------------------------------------------------------------------------------|
| ST7     | ST7.bSep08     | 296911 | 247416 | 1282 | 9 | 285 | suppression of tumorigenicity 7 (32.7 kD) (ST7) alternative variant bSep08, mRNA.                        |
| ST7     | ST7.cSep08     | 296911 | 39115  | 677  | 7 | 225 | suppression of tumorigenicity 7 (ST7) alternative variant cSep08, mRNA.                                  |
| ST7     | ST7.dSep08     | 296911 | 3485   | 829  | 2 | 77  | suppression of tumorigenicity 7 (ST7) alternative variant dSep08, mRNA.                                  |
| St7l    | St7l.bSep08    | 295344 | 14313  | 468  | 2 | 146 | suppression of tumorigenicity 7-like (St7l) alternative variant bSep08, mRNA.                            |
| St7l    | St7l.cSep08    | 295344 | 24156  | 692  | 5 | 101 | suppression of tumorigenicity 7-like (St7l) alternative variant cSep08, mRNA.                            |
| St8sia3 | St8sia3.bSep08 | 25547  | 3427   | 804  | 3 | 239 | ST8 alpha-N-acetyl-neuraminide alpha-2,8-sialyltransferase 3 (St8sia3) alternative variant bSep08, mRNA. |
| St8sia5 | St8sia5.aSep08 | 364901 | 61632  | 2175 | 2 | 558 | ST8 alpha-N-acetyl-neuraminide alpha-2,8-sialyltransferase 5 (St8sia5) alternative variant aSep08, mRNA. |
| St13    | St13.bSep08    | 81800  | 30089  | 3219 | 2 | 334 | suppression of tumorigenicity 13 (37.1 kD) (St13) alternative variant bSep08, mRNA.                      |
| St13    | St13.cSep08    | 81800  | 15730  | 748  | 1 | 154 | suppression of tumorigenicity 13 (St13) alternative variant cSep08, mRNA.                                |
| St18    | St18.bSep08    | 266680 | 3863   | 1411 | 2 | 91  | suppression of tumorigenicity 18 (10.2 kD) (St18) alternative variant bSep08, mRNA.                      |
| Stac    | Stac.aSep08    | 363152 | 52787  | 471  | 1 | 157 | src homology three (SH3) and cysteine rich domain (Stac) alternative variant aSep08, mRNA.               |
| Stac    | Stac.bSep08    | 363152 | 52774  | 425  | 1 | 141 | src homology three (SH3) and cysteine rich domain (Stac) alternative variant bSep08, mRNA.               |
| Stac3   | Stac3.bSep08   | 362895 | 5854   | 1140 | 7 | 307 | SH3 and cysteine rich domain 3 (Stac3) alternative variant bSep08, mRNA.                                 |
| Stac3   | Stac3.cSep08   | 362895 | 856    | 410  | 4 | 90  | SH3 and cysteine rich domain 3 (Stac3) alternative variant cSep08, mRNA.                                 |
| stacha  | stacha.aSep08  |        | 3307   | 326  |   | 108 | putative protein (stacha) mRNA.                                                                          |
| stachy  | stachy.aSep08  |        | 543    | 314  |   | 33  | putative protein (stachy) mRNA.                                                                          |
| stafee  | stafee.aSep08  |        | 1793   | 678  |   | 40  | putative protein (4.3 kD) (stafee) mRNA.                                                                 |
| staflu  | staflu.aSep08  |        | 973    | 485  |   | 87  | putative protein (staflu) mRNA.                                                                          |
| stafly  | stafly.bSep08  |        | 563    | 365  | 2 | 60  | putative protein (stafly) alternative variant bSep08, mRNA.                                              |
| Stag1   | Stag1.bSep08   | 315958 | 48308  | 1186 | 8 | 394 | stromal antigen 1 (Stag1) alternative variant bSep08, mRNA.                                              |
| Stag1   | Stag1.cSep08   | 315958 | 10624  | 483  | 2 | 126 | stromal antigen 1 (Stag1) alternative variant cSep08, mRNA.                                              |
| Stag2   | Stag2.aSep08   | 313304 | 27484  | 3495 | 1 | 451 | stromal antigen 2 (52.0 kD) (Stag2) alternative variant aSep08, mRNA.                                    |
| Stag2   | Stag2.bSep08   | 313304 | 12061  | 662  |   | 192 | stromal antigen 2 (Stag2) alternative variant bSep08, mRNA.                                              |
| Stag3   | Stag3.bSep08   | 114522 | 6812   | 1208 |   | 402 | stromal antigen 3 (Stag3) alternative variant bSep08, mRNA.                                              |
| Stag3   | Stag3.cSep08   | 114522 | 2380   | 508  |   | 54  | stromal antigen 3 (Stag3) alternative variant cSep08, mRNA.                                              |

|          |                 |        |       |      |   |     |                                                                                                                                                        |
|----------|-----------------|--------|-------|------|---|-----|--------------------------------------------------------------------------------------------------------------------------------------------------------|
| stalor   | stalor.aSep08   |        | 20997 | 540  | 2 | 180 | synaptojanin 1 CRA e (stalor) alternative variant aSep08, mRNA.                                                                                        |
| stalor   | stalor.bSep08   |        | 20980 | 410  | 2 | 136 | synaptojanin 1 CRA e (stalor) alternative variant bSep08, mRNA.                                                                                        |
| stalor   | stalor.cSep08   |        | 20864 | 542  | 2 | 119 | synaptojanin 1 CRA e (stalor) alternative variant cSep08, mRNA.                                                                                        |
| stalor   | stalor.dSep08   |        | 18826 | 528  | 2 | 95  | synaptojanin (stalor) alternative variant dSep08, mRNA.                                                                                                |
| Stam     | Stam.bSep08     | 498798 | 28092 | 745  | 6 | 168 | signal transducing adaptor molecule (SH3 domain and ITAM motif) 1 (Stam) alternative variant bSep08, mRNA.                                             |
| Stampb   | Stampb.aSep08   | 171565 | 24506 | 1796 | 2 | 505 | stam binding protein (Stampb) alternative variant aSep08, complete mRNA.                                                                               |
| Stampb   | Stampb.cSep08   | 171565 | 13770 | 1106 | 7 | 247 | stam binding protein (Stampb) alternative variant cSep08, mRNA.                                                                                        |
| Stampb   | Stampb.dSep08   | 171565 | 11542 | 645  | 3 | 145 | stam binding protein (Stampb) alternative variant dSep08, mRNA.                                                                                        |
| Stampb   | Stampb.eSep08   | 171565 | 11437 | 744  | 6 | 83  | stam binding protein (Stampb) alternative variant eSep08, mRNA.                                                                                        |
| stamee   | stamee.aSep08   |        | 940   | 468  |   | 42  | putative protein (4.6 kD) (stamee) mRNA.                                                                                                               |
| stanor   | stanor.aSep08   |        | 1108  | 687  |   | 32  | putative protein (3.7 kD) (stanor) mRNA.                                                                                                               |
| Stap1    | Stap1.aSep08    | 305269 | 29699 | 1801 | 2 | 426 | signal transducing adaptor family member 1 (Stap1) alternative variant aSep08, complete mRNA.                                                          |
| Stap1    | Stap1.cSep08    | 305269 | 23300 | 777  | 3 | 239 | signal transducing adaptor family member 1 (Stap1) alternative variant cSep08, mRNA.                                                                   |
| Stap2    | Stap2.aSep08    | 363334 | 2360  | 701  | 1 | 156 | signal transducing adaptor family member 2 (Stap2) alternative variant aSep08, mRNA.                                                                   |
| Stap2    | Stap2.bSep08    | 363334 | 2488  | 633  | 1 | 135 | signal transducing adaptor family member 2 (Stap2) alternative variant bSep08, mRNA.                                                                   |
| stapey   | stapey.aSep08   |        | 1703  | 264  |   | 55  | putative protein (stapey) mRNA.                                                                                                                        |
| starcha  | starcha.aSep08  |        | 846   | 599  | 2 | 61  | putative protein (starcha) alternative variant aSep08, mRNA.                                                                                           |
| starchy  | starchy.aSep08  |        | 2604  | 527  |   | 41  | putative protein (4.5 kD) (starchy) mRNA.                                                                                                              |
| Stard3   | Stard3.bSep08   | 363675 | 18262 | 784  | 5 | 210 | putative endoplasmic reticulum protein, with at least 2 transmembrane domains, of metazoan origin (23.1 kD) (Stard3) alternative variant bSep08, mRNA. |
| Stard3   | Stard3.cSep08   | 363675 | 1150  | 754  | 2 | 149 | putative protein (Stard3) alternative variant cSep08, mRNA.                                                                                            |
| Stard3   | Stard3.dSep08   | 363675 | 18066 | 575  | 5 | 121 | putative endoplasmic reticulum protein, with a transmembrane domain, of bilateral origin (13.7 kD) (Stard3) alternative variant dSep08, mRNA.          |
| Stard3   | Stard3.eSep08   | 363675 | 13855 | 594  | 2 | 108 | putative membrane protein of bilateral origin (11.6 kD) (Stard3) alternative variant eSep08, mRNA.                                                     |
| Stard3nl | Stard3nl.bSep08 | 291182 | 6167  | 1086 | 1 | 158 | STAR3 N-terminal like (Stard3nl) alternative variant bSep08, mRNA.                                                                                     |
| Stard5   | Stard5.aSep08   | 502348 | 10000 | 1335 | 5 | 231 | StAR-related lipid transfer 5 (Stard5) mRNA.                                                                                                           |
| Stard6   | Stard6.bSep08   | 291527 | 8675  | 506  | 2 | 76  | hypothetical protein LOC680108 (Stard6) alternative variant bSep08, mRNA.                                                                              |

|          |                 |        |       |      |   |     |                                                                                                                      |
|----------|-----------------|--------|-------|------|---|-----|----------------------------------------------------------------------------------------------------------------------|
| Stard6   | Stard6.bSep08   | 680108 | 8675  | 506  | 2 | 76  | hypothetical protein LOC680108 (Stard6) alternative variant bSep08, mRNA.                                            |
| Stard7   | Stard7.aSep08   | 296128 | 28650 | 3058 | 8 | 373 | lipid-binding START precursor (43.0 kD) (Stard7) alternative variant aSep08, mRNA.                                   |
| Stard7   | Stard7.cSep08   | 296128 | 19972 | 836  | 5 | 138 | putative protein, with a coiled coil domain, of metazoan origin (15.8 kD) (Stard7) alternative variant cSep08, mRNA. |
| Stard10  | Stard10.aSep08  | 293150 | 26259 | 2200 | 6 | 372 | lipid-binding START (Stard10) alternative variant aSep08, mRNA.                                                      |
| Stard10  | Stard10.bSep08  | 293150 | 27167 | 1059 | 5 | 353 | putative protein of eukaryotic origin (Stard10) alternative variant bSep08, mRNA.                                    |
| Stard10  | Stard10.dSep08  | 293150 | 26493 | 809  | 5 | 226 | putative protein of eukaryotic origin (Stard10) alternative variant dSep08, mRNA.                                    |
| Stard10  | Stard10.eSep08  | 293150 | 24805 | 1101 | 5 | 222 | lipid-binding START (Stard10) alternative variant eSep08, mRNA.                                                      |
| Stard10  | Stard10.fSep08  | 293150 | 23624 | 744  | 5 | 165 | putative protein of eukaryotic origin (Stard10) alternative variant fSep08, mRNA.                                    |
| Stard10  | Stard10.gSep08  | 293150 | 1243  | 632  | 1 | 128 | putative protein of eukaryotic origin (Stard10) alternative variant gSep08, mRNA.                                    |
| Stard13  | Stard13.bSep08  | 498130 | 45935 | 606  | 2 | 113 | StAR-related lipid transfer 13 (13.0 kD) (Stard13) alternative variant bSep08, mRNA.                                 |
| starfee  | starfee.aSep08  |        | 6614  | 745  |   | 106 | putative protein (starfee) alternative variant aSep08, mRNA.                                                         |
| starflu  | starflu.aSep08  |        | 736   | 497  |   | 112 | potassium channel (starflu) mRNA.                                                                                    |
| starfly  | starfly.aSep08  |        | 2705  | 459  |   | 42  | putative protein (4.8 kD) (starfly) mRNA.                                                                            |
| starlor  | starlor.aSep08  |        | 19383 | 759  |   | 79  | putative cytoplasmic protein (8.9 kD) (starlor) mRNA.                                                                |
| starmee  | starmee.aSep08  |        | 820   | 278  |   | 40  | putative protein (4.4 kD) (starmee) mRNA.                                                                            |
| starnor  | starnor.aSep08  |        | 2191  | 408  |   | 70  | putative protein (starnor) mRNA.                                                                                     |
| staroy   | staroy.aSep08   |        | 800   | 367  |   | 58  | putative protein of mammalian origin (staroy) mRNA.                                                                  |
| starpey  | starpey.aSep08  |        | 14746 | 376  |   | 55  | putative protein (starpey) mRNA.                                                                                     |
| starroy  | starroy.aSep08  |        | 8214  | 1182 |   | 214 | CRA d like (23.7 kD) (starroy) mRNA.                                                                                 |
| starshaw | starshaw.aSep08 |        | 20448 | 1131 |   | 59  | putative protein (7.2 kD) (starshaw) alternative variant aSep08, mRNA.                                               |
| starshaw | starshaw.bSep08 |        | 19650 | 332  |   | 25  | putative protein (2.8 kD) (starshaw) alternative variant bSep08, mRNA.                                               |
| startu   | startu.aSep08   |        | 50239 | 702  | 3 | 144 | putative secreted or extracellular protein precursor (16.0 kD) (startu) alternative variant aSep08, mRNA.            |
| startu   | startu.bSep08   |        | 19017 | 498  | 3 | 73  | putative protein (startu) alternative variant bSep08, mRNA.                                                          |
| starvo   | starvo.aSep08   |        | 3970  | 1637 | 5 | 91  | putative protein (10.1 kD) (starvo) alternative variant aSep08, mRNA.                                                |
| starvo   | starvo.bSep08   |        | 1921  | 732  | 2 | 88  | putative protein (starvo) alternative variant bSep08, mRNA.                                                          |
| starvo   | starvo.cSep08   |        | 3277  | 1790 | 3 | 25  | putative protein (starvo) alternative variant cSep08, mRNA.                                                          |
| starvo   | starvo.dSep08   |        | 1662  | 1157 | 4 | 128 | putative protein (starvo) alternative variant dSep08, mRNA.                                                          |
| starvo   | starvo.eSep08   |        | 3184  | 721  | 6 | 91  | putative protein (10.1 kD) (starvo) alternative variant eSep08, mRNA.                                                |

|              |                     |        |       |      |    |     |                                                                                                        |
|--------------|---------------------|--------|-------|------|----|-----|--------------------------------------------------------------------------------------------------------|
| starwer      | starwer.aSep08      |        | 5704  | 993  |    | 208 | putative mitochondrial protein (22.4 kD) (starwer) mRNA.                                               |
| stashaw      | stashaw.aSep08      |        | 15363 | 732  |    | 94  | putative protein of vertebrate origin (stashaw) mRNA.                                                  |
| Stat1        | Stat1.cSep08        | 25124  | 15810 | 771  | 7  | 180 | signal transducer and activator of transcription 1 (Stat1) alternative variant cSep08, mRNA.           |
| Stat1        | Stat1.dSep08        | 25124  | 4323  | 785  | 4  | 82  | signal transducer and activator of transcription 1 (Stat1) alternative variant dSep08, mRNA.           |
| Stat1        | Stat1.eSep08        | 25124  | 3600  | 377  | 2  | 41  | signal transducer and activator of transcription 1 (Stat1) alternative variant eSep08, mRNA.           |
| Stat2        | Stat2.aSep08        | 288774 | 16918 | 4084 | 24 | 842 | signal transducer and activator of transcription 2 (96.9 kD) (Stat2) alternative variant aSep08, mRNA. |
| Stat2        | Stat2.bSep08        | 288774 | 1277  | 1080 | 2  | 117 | signal transducer and activator of transcription 2 (12.9 kD) (Stat2) alternative variant bSep08, mRNA. |
| Stat3        | Stat3.bSep08        | 25125  | 4805  | 397  | 5  | 132 | signal transducer and activator of transcription 3 (Stat3) alternative variant bSep08, mRNA.           |
| Stat3        | Stat3.cSep08        | 25125  | 4679  | 912  | 4  | 110 | signal transducer and activator of transcription 3 (Stat3) alternative variant cSep08, mRNA.           |
| Stat3        | Stat3.dSep08        | 25125  | 1003  | 710  | 3  | 69  | signal transducer and activator of transcription 3 (Stat3) alternative variant dSep08, mRNA.           |
| Stat3        | Stat3.eSep08        | 25125  | 4743  | 673  | 4  | 38  | signal transducer and activator of transcription 3 (Stat3) alternative variant eSep08, mRNA.           |
| Stat5a       | Stat5a.aSep08       | 24918  | 5552  | 1928 | 7  | 246 | signal transducer and activator of transcription 5A (Stat5a) alternative variant aSep08, mRNA.         |
| Stat6        | Stat6.bSep08        | 362896 | 2496  | 376  | 5  | 125 | signal transducer and activator of transcription 6 (Stat6) alternative variant bSep08, mRNA.           |
| statu        | statu.aSep08        |        | 5569  | 404  |    | 55  | putative protein (statu) mRNA.                                                                         |
| STAT_alpha.0 | STAT_alpha.0.aSep08 |        | 10471 | 608  |    | 202 | activator of transcription signal transducer 5 (STAT_alpha.0) mRNA.                                    |
| Stau1        | Stau1.cSep08        | 84496  | 4954  | 877  | 5  | 292 | stau RNA binding protein homolog 1 (Drosophila) (Stau1) alternative variant cSep08, mRNA.              |
| Stau1        | Stau1.dSep08        | 84496  | 3152  | 696  | 6  | 216 | stau RNA binding protein homolog 1 (Drosophila) (Stau1) alternative variant dSep08, mRNA.              |
| stavo        | stavo.aSep08        |        | 3160  | 608  |    | 69  | putative protein (7.7 kD) (stavo) mRNA.                                                                |
| stawcha      | stawcha.aSep08      |        | 4337  | 819  |    | 215 | nucleoporin 214kDa (stawcha) mRNA.                                                                     |
| stawchy      | stawchy.aSep08      |        | 851   | 595  | 1  | 39  | putative protein (stawchy) alternative variant aSep08, mRNA.                                           |
| stawchy      | stawchy.bSep08      |        | 39510 | 419  | 2  | 35  | putative protein (stawchy) alternative variant bSep08, mRNA.                                           |
| stawer       | stawer.aSep08       |        | 71692 | 463  |    | 26  | putative protein (stawer) mRNA.                                                                        |
| stawfee      | stawfee.aSep08      |        | 33545 | 712  | 2  | 104 | putative nuclear protein (11.4 kD) (stawfee) alternative variant aSep08, mRNA.                         |
| stawfee      | stawfee.bSep08      |        | 13196 | 1035 | 4  | 11  | putative protein (stawfee) alternative variant bSep08, mRNA.                                           |
| stawfee      | stawfee.cSep08      |        | 1369  | 757  | 2  | 49  | putative protein (5.5 kD) (stawfee) alternative variant cSep08, mRNA.                                  |
| stawfee      | stawfee.dSep08      |        | 1388  | 745  | 2  | 49  | putative protein (5.5 kD) (stawfee) alternative variant dSep08, mRNA.                                  |



|          |                 |        |       |      |   |     |                                                                                                            |
|----------|-----------------|--------|-------|------|---|-----|------------------------------------------------------------------------------------------------------------|
| stawflu  | stawflu.bSep08  |        | 736   | 354  | 2 | 64  | putative protein (stawflu) alternative variant bSep08, mRNA.                                               |
| stawflu  | stawflu.cSep08  |        | 482   | 344  | 2 | 18  | putative protein (2.0 kD) (stawflu) alternative variant cSep08, mRNA.                                      |
| stawfly  | stawfly.aSep08  |        | 3209  | 703  |   | 40  | putative protein (4.0 kD) (stawfly) mRNA.                                                                  |
| stawlor  | stawlor.aSep08  |        | 10711 | 1917 | 4 | 88  | putative protein (9.7 kD) (stawlor) alternative variant aSep08, mRNA.                                      |
| stawmee  | stawmee.aSep08  |        | 8562  | 509  | 4 | 144 | putative protein (stawmee) alternative variant aSep08, mRNA.                                               |
| stawmee  | stawmee.bSep08  |        | 3672  | 984  | 3 | 65  | putative protein (7.5 kD) (stawmee) alternative variant bSep08, mRNA.                                      |
| stawmee  | stawmee.dSep08  |        | 3346  | 372  | 2 | 51  | putative protein (stawmee) alternative variant dSep08, mRNA.                                               |
| stawnor  | stawnor.aSep08  |        | 1464  | 321  |   | 33  | putative protein (3.6 kD) (stawnor) mRNA.                                                                  |
| stawpey  | stawpey.aSep08  |        | 4815  | 828  |   | 33  | putative protein (stawpey) mRNA.                                                                           |
| stawroy  | stawroy.aSep08  |        | 7615  | 662  |   | 92  | putative cytoplasmic protein (10.0 kD) (stawroy) mRNA.                                                     |
| stawshaw | stawshaw.aSep08 |        | 2024  | 396  |   | 92  | putative protein (stawshaw) mRNA.                                                                          |
| stawtu   | stawtu.aSep08   |        | 7710  | 400  |   | 87  | putative protein (stawtu) mRNA.                                                                            |
| stawvo   | stawvo.aSep08   |        | 2918  | 418  |   | 51  | putative protein (5.8 kD) (stawvo) mRNA.                                                                   |
| stawwer  | stawwer.aSep08  |        | 19290 | 1775 |   | 526 | putative protein of eukaryotic origin (stawwer) alternative variant aSep08, mRNA.                          |
| Steap2   | Steap2.cSep08   | 312052 | 10478 | 646  | 3 | 12  | six transmembrane epithelial antigen of the prostate 2 (1.3 kD) (Steap2) alternative variant cSep08, mRNA. |
| Steap2   | Steap2.dSep08   | 312052 | 1865  | 501  | 2 | 31  | six transmembrane epithelial antigen of the prostate 2 (Steap2) alternative variant dSep08, mRNA.          |
| Steap3   | Steap3.bSep08   | 170824 | 25401 | 912  | 1 | 282 | STEAP family member 3 (Steap3) alternative variant bSep08, mRNA.                                           |
| Steap3   | Steap3.cSep08   | 170824 | 18736 | 735  | 1 | 220 | STEAP family member 3 (Steap3) alternative variant cSep08, mRNA.                                           |
| Steap4   | Steap4.bSep08   | 499991 | 3012  | 928  | 3 | 309 | STEAP family member 4 (Steap4) alternative variant bSep08, mRNA.                                           |
| steecha  | steecha.aSep08  |        | 2797  | 228  |   | 75  | nucleoporin 214kDa CRA b (steecha) mRNA.                                                                   |
| steechy  | steechy.aSep08  |        | 1943  | 587  |   | 59  | putative protein of mammalian origin (6.5 kD) (steechy) mRNA.                                              |
| steefee  | steefee.aSep08  |        | 9104  | 777  |   | 113 | putative nuclear protein (13.2 kD) (steefee) mRNA.                                                         |
| steeflu  | steeflu.aSep08  |        | 1468  | 541  |   | 54  | putative protein (5.8 kD) (steeflu) mRNA.                                                                  |
| steefly  | steefly.aSep08  |        | 1563  | 235  |   | 56  | putative protein (steefly) mRNA.                                                                           |
| steelor  | steelor.aSep08  |        | 6180  | 416  |   | 27  | putative protein (3.1 kD) (steelor) mRNA.                                                                  |
| steemee  | steemee.aSep08  |        | 14617 | 1505 | 4 | 223 | putative protein (24.5 kD) (steemee) alternative variant aSep08, mRNA.                                     |
| steemee  | steemee.cSep08  |        | 1453  | 1078 | 2 | 75  | putative protein (9.2 kD) (steemee) alternative variant cSep08, mRNA.                                      |
| steenor  | steenor.aSep08  |        | 673   | 356  |   | 43  | putative protein (steenor) mRNA.                                                                           |
| steepcy  | steepcy.aSep08  |        | 4473  | 1216 | 3 | 104 | BCSC-1 like (steepcy) alternative variant aSep08, mRNA.                                                    |

|          |                 |  |       |      |   |     |                                                                                 |
|----------|-----------------|--|-------|------|---|-----|---------------------------------------------------------------------------------|
| steepcy  | steepcy.bSep08  |  | 1028  | 516  | 1 | 59  | BCSC-1 like (6.9 kD) (steepcy) alternative variant bSep08, mRNA.                |
| steeroy  | steeroy.aSep08  |  | 844   | 741  |   | 59  | putative protein (6.8 kD) (steeroy) mRNA.                                       |
| steeshaw | steeshaw.aSep08 |  | 5881  | 537  |   | 100 | putative protein (steeshaw) mRNA.                                               |
| steetu   | steetu.aSep08   |  | 1631  | 492  | 2 | 54  | putative protein (6.0 kD) (steetu) alternative variant aSep08, mRNA.            |
| steevo   | steevo.aSep08   |  | 5075  | 738  |   | 68  | putative protein (7.5 kD) (steevo) mRNA.                                        |
| steewer  | steewer.aSep08  |  | 15147 | 1037 |   | 299 | CRA d (steewer) mRNA.                                                           |
| stercha  | stercha.aSep08  |  | 1424  | 402  |   | 133 | nucleoporin 214 like (stercha) mRNA.                                            |
| sterchy  | sterchy.aSep08  |  | 1369  | 619  |   | 108 | CRA d like (11.3 kD) (sterchy) mRNA.                                            |
| sterfee  | sterfee.aSep08  |  | 1280  | 518  |   | 39  | putative protein (4.5 kD) (sterfee) mRNA.                                       |
| sterflu  | sterflu.aSep08  |  | 3284  | 1000 |   | 85  | calpain 1 (sterflu) mRNA.                                                       |
| sterfly  | sterfly.aSep08  |  | 1621  | 1533 |   | 208 | putative protein of vertebrate origin (sterfly) mRNA.                           |
| sterlor  | sterlor.aSep08  |  | 66857 | 298  |   | 79  | intersectin 1 ITSN-1 (sterlor) mRNA.                                            |
| stermee  | stermee.aSep08  |  | 2705  | 783  | 4 | 75  | putative protein (7.9 kD) (stermee) alternative variant aSep08, mRNA.           |
| stermee  | stermee.bSep08  |  | 2123  | 641  | 3 | 75  | putative protein (7.9 kD) (stermee) alternative variant bSep08, mRNA.           |
| sternor  | sternor.aSep08  |  | 2249  | 335  | 2 | 65  | putative protein (sternor) alternative variant aSep08, mRNA.                    |
| sterpey  | sterpey.aSep08  |  | 3328  | 398  |   | 132 | putative protein of eukaryotic origin (sterpey) mRNA.                           |
| sterroy  | sterroy.aSep08  |  | 475   | 292  |   | 83  | putative protein (sterroy) mRNA.                                                |
| stershaw | stershaw.bSep08 |  | 1376  | 611  | 3 | 45  | putative protein (5.3 kD) (stershaw) alternative variant bSep08, mRNA.          |
| stertu   | stertu.bSep08   |  | 2340  | 1292 | 2 | 75  | putative protein (stertu) alternative variant bSep08, mRNA.                     |
| stertu   | stertu.cSep08   |  | 1194  | 422  | 2 | 28  | putative protein (stertu) alternative variant cSep08, mRNA.                     |
| stervo   | stervo.aSep08   |  | 15774 | 1168 |   | 40  | putative protein (4.7 kD) (stervo) mRNA.                                        |
| sterwer  | sterwer.aSep08  |  | 7070  | 700  | 6 | 232 | putative protein of metazoan origin (sterwer) alternative variant aSep08, mRNA. |
| steycha  | steycha.aSep08  |  | 12546 | 938  |   | 312 | nucleoporin 214kDa (steycha) mRNA.                                              |
| steychy  | steychy.aSep08  |  | 57455 | 738  |   | 79  | putative cytoplasmic protein (9.0 kD) (steychy) mRNA.                           |
| steyfee  | steyfee.aSep08  |  | 3264  | 513  |   | 61  | putative protein (6.8 kD) (steyfee) mRNA.                                       |
| steyflu  | steyflu.aSep08  |  | 967   | 514  |   | 36  | putative protein (steyflu) mRNA.                                                |
| steyfly  | steyfly.aSep08  |  | 1515  | 506  |   | 80  | cytochrome p450 (steyfly) mRNA.                                                 |
| steylor  | steylor.aSep08  |  | 1191  | 306  |   | 31  | putative protein (3.6 kD) (steylor) mRNA.                                       |
| steymee  | steymee.aSep08  |  | 13155 | 361  |   | 110 | putative protein (steymee) mRNA.                                                |
| steynor  | steynor.aSep08  |  | 23443 | 915  |   | 51  | putative protein (6.0 kD) (steynor) mRNA.                                       |
| steypey  | steypey.aSep08  |  | 3330  | 937  |   | 99  | putative nuclear protein (11.1 kD) (steypey) mRNA.                              |
| steyroy  | steyroy.aSep08  |  | 49170 | 501  | 1 | 60  | CRA a like (6.9 kD) (steyroy) alternative variant aSep08, mRNA.                 |
| steyroy  | steyroy.bSep08  |  | 60010 | 477  | 1 | 77  | CRA b like (8.4 kD) (steyroy) alternative variant bSep08, mRNA.                 |
| steyslaw | steyslaw.aSep08 |  | 4659  | 704  |   | 76  | putative protein (8.1 kD) (steyslaw) mRNA.                                      |

|         |                |        |        |      |   |     |                                                                                              |
|---------|----------------|--------|--------|------|---|-----|----------------------------------------------------------------------------------------------|
| steytu  | steytu.aSep08  |        | 27319  | 793  |   | 160 | putative protein of vertebrate origin (steytu) mRNA.                                         |
| steyvo  | steyvo.aSep08  |        | 6413   | 358  |   | 33  | putative protein (steyvo) mRNA.                                                              |
| steywer | steywer.aSep08 |        | 8701   | 653  |   | 164 | family with sequence similarity 13 member A1 (steywer) mRNA.                                 |
| Stfa2l2 | Stfa2l2.aSep08 | 288070 | 2544   | 356  |   | 93  | stefin A2-like 2 (Stfa2l2) mRNA.                                                             |
| Stfa2l3 | Stfa2l3.aSep08 | 498087 | 2305   | 330  |   | 85  | stefin A2-like 3 (Stfa2l3) mRNA.                                                             |
| Stil    | Stil.aSep08    | 313506 | 4801   | 410  |   | 136 | scl/Tal1 interrupting locus (Stil) mRNA.                                                     |
| Stim1   | Stim1.bSep08   | 361618 | 154222 | 2523 | 7 | 413 | stromal interaction molecule 1 (48.1 kD) (Stim1) alternative variant bSep08, mRNA.           |
| Stim1   | Stim1.cSep08   | 361618 | 9022   | 669  | 4 | 223 | stromal interaction molecule 1 (Stim1) alternative variant cSep08, mRNA.                     |
| Stim2   | Stim2.bSep08   | 117087 | 1093   | 643  | 2 | 43  | stromal interaction molecule 2 (Stim2) alternative variant bSep08, mRNA.                     |
| Stip1   | Stip1.bSep08   | 192277 | 1251   | 392  | 1 | 97  | stress-induced phosphoprotein 1 (Stip1) alternative variant bSep08, mRNA.                    |
| Stk10   | Stk10.aSep08   | 29398  | 9162   | 1196 |   | 275 | serine/threonine kinase 10 (Stk10) alternative variant aSep08, mRNA.                         |
| Stk10   | Stk10.bSep08   | 29398  | 23675  | 965  | 1 | 271 | serine/threonine kinase 10 (Stk10) alternative variant bSep08, mRNA.                         |
| Stk10   | Stk10.cSep08   | 29398  | 21779  | 773  | 2 | 257 | serine/threonine kinase 10 (Stk10) alternative variant cSep08, mRNA.                         |
| Stk11   | Stk11.bSep08   | 314621 | 2538   | 745  | 6 | 231 | serine/threonine kinase 11 (Stk11) alternative variant bSep08, mRNA.                         |
| Stk11ip | Stk11ip.bSep08 | 301535 | 2355   | 1148 | 3 | 154 | serine/threonine kinase 11 interacting protein (Stk11ip) alternative variant bSep08, mRNA.   |
| Stk11ip | Stk11ip.cSep08 | 301535 | 767    | 344  | 4 | 114 | serine/threonine kinase 11 interacting protein (Stk11ip) alternative variant cSep08, mRNA.   |
| Stk16   | Stk16.bSep08   | 286927 | 9278   | 1909 | 8 | 273 | serine threonine kinase 16 (30.6 kD) (Stk16) alternative variant bSep08, mRNA.               |
| Stk16   | Stk16.cSep08   | 286927 | 2076   | 896  | 5 | 205 | serine threonine kinase 16 (23.4 kD) (Stk16) alternative variant cSep08, mRNA.               |
| Stk16   | Stk16.eSep08   | 286927 | 922    | 736  | 2 | 129 | putative protein human specific (Stk16) alternative variant eSep08, mRNA.                    |
| Stk16   | Stk16.fSep08   | 286927 | 936    | 827  | 2 | 78  | serine threonine kinase 16 (8.5 kD) (Stk16) alternative variant fSep08, mRNA.                |
| Stk19   | Stk19.bSep08   | 361800 | 7310   | 734  | 1 | 158 | serine/threonine kinase 19 (17.7 kD) (Stk19) alternative variant bSep08, mRNA.               |
| Stk22s1 | Stk22s1.bSep08 | 292890 | 9127   | 719  | 6 | 220 | serine/threonine kinase 22 substrate 1 (Stk22s1) alternative variant bSep08, mRNA.           |
| Stk22s1 | Stk22s1.cSep08 | 292890 | 3492   | 801  | 4 | 152 | serine/threonine kinase 22 substrate 1 (15.0 kD) (Stk22s1) alternative variant cSep08, mRNA. |
| Stk22s1 | Stk22s1.dSep08 | 292890 | 1482   | 434  | 3 | 112 | serine/threonine kinase 22 substrate 1 (Stk22s1) alternative variant dSep08, mRNA.           |
| Stk22s1 | Stk22s1.eSep08 | 292890 | 824    | 689  | 2 | 108 | serine/threonine kinase 22 substrate 1 (11.0 kD) (Stk22s1) alternative variant eSep08, mRNA. |

|        |               |        |        |      |   |     |                                                                                                            |
|--------|---------------|--------|--------|------|---|-----|------------------------------------------------------------------------------------------------------------|
| Stk24  | Stk24.bSep08  | 361092 | 15430  | 3929 | 2 | 207 | serine/threonine kinase 24 (STE20 homolog, yeast) (23.1 kD) (Stk24) alternative variant bSep08, mRNA.      |
| Stk25  | Stk25.bSep08  | 373542 | 9234   | 2198 | 6 | 154 | kinase (17.6 kD) (Stk25) alternative variant bSep08, mRNA.                                                 |
| Stk25  | Stk25.cSep08  | 373542 | 1361   | 941  | 3 | 88  | kinase (9.9 kD) (Stk25) alternative variant cSep08, mRNA.                                                  |
| Stk25  | Stk25.eSep08  | 373542 | 2593   | 912  | 3 | 61  | putative protein (6.7 kD) (Stk25) alternative variant eSep08, mRNA.                                        |
| Stk32a | Stk32a.aSep08 | 364858 | 55419  | 645  |   | 134 | serine/threonine kinase 32A (Stk32a) mRNA.                                                                 |
| Stk33  | Stk33.aSep08  | 690861 | 986    | 218  |   | 72  | serine/threonine kinase 33 (Stk33) mRNA.                                                                   |
| Stk36  | Stk36.aSep08  | 301516 | 3706   | 2010 |   | 393 | serine/threonine kinase 36 (fused homolog, Drosophila) (Stk36) mRNA.                                       |
| Stk38  | Stk38.aSep08  | 361813 | 10034  | 2084 | 7 | 318 | serine/threonine kinase 38 (37.0 kD) (Stk38) alternative variant aSep08, mRNA.                             |
| Stk38  | Stk38.bSep08  | 361813 | 2346   | 1124 | 2 | 209 | serine/threonine kinase 38 (23.8 kD) (Stk38) alternative variant bSep08, mRNA.                             |
| Stk39  | Stk39.bSep08  | 54348  | 162515 | 1525 | 5 | 168 | serine/threonine kinase 39, STE20/SPS1 homolog (yeast) (17.4 kD) (Stk39) alternative variant bSep08, mRNA. |
| Stk40  | Stk40.bSep08  | 360230 | 4561   | 997  | 2 | 107 | serine/threonine kinase 40 (Stk40) alternative variant bSep08, mRNA.                                       |
| Stmn1  | Stmn1.aSep08  | 29332  | 5750   | 1020 | 5 | 149 | stathmin 1 (17.3 kD) (Stmn1) alternative variant aSep08, mRNA.                                             |
| Stmn1  | Stmn1.cSep08  | 29332  | 3017   | 872  | 3 | 92  | stathmin 1 (10.8 kD) (Stmn1) alternative variant cSep08, mRNA.                                             |
| Stmn3  | Stmn3.aSep08  | 29246  | 7982   | 790  | 2 | 213 | stathmin-like 3 (Stmn3) alternative variant aSep08, mRNA.                                                  |
| Stmn3  | Stmn3.bSep08  | 29246  | 8106   | 1015 | 3 | 180 | stathmin-like 3 (21.0 kD) (Stmn3) alternative variant bSep08, complete mRNA.                               |
| Stmn3  | Stmn3.dSep08  | 29246  | 7317   | 591  | 1 | 168 | stathmin-like 3 (Stmn3) alternative variant dSep08, mRNA.                                                  |
| Stmn4  | Stmn4.aSep08  | 79423  | 18656  | 1328 | 7 | 216 | stathmin-like 4 (25.4 kD) (Stmn4) alternative variant aSep08, mRNA.                                        |
| Stmn4  | Stmn4.bSep08  | 79423  | 18445  | 1036 | 6 | 189 | stathmin-like 4 (22.1 kD) (Stmn4) alternative variant bSep08, mRNA.                                        |
| Stmn4  | Stmn4.cSep08  | 79423  | 18181  | 769  | 6 | 188 | stathmin-like 4 (22.0 kD) (Stmn4) alternative variant cSep08, mRNA.                                        |
| Stmn4  | Stmn4.dSep08  | 79423  | 13952  | 610  | 5 | 99  | stathmin-like 4 (Stmn4) alternative variant dSep08, mRNA.                                                  |
| stocha | stocha.aSep08 |        | 1385   | 1065 |   | 86  | putative protein (stocha) mRNA.                                                                            |
| stochy | stochy.aSep08 |        | 2407   | 405  |   | 37  | putative protein (stochy) mRNA.                                                                            |
| stofee | stofee.aSep08 |        | 5405   | 856  |   | 60  | putative protein (6.5 kD) (stofee) mRNA.                                                                   |
| stoflu | stoflu.aSep08 |        | 998    | 458  |   | 61  | putative protein (stoflu) mRNA.                                                                            |
| stofly | stofly.aSep08 |        | 5655   | 658  | 4 | 171 | CRA c (stofly) alternative variant aSep08, mRNA.                                                           |
| stofly | stofly.bSep08 |        | 1990   | 663  | 2 | 113 | CRA c (stofly) alternative variant bSep08, mRNA.                                                           |
| stofly | stofly.dSep08 |        | 1503   | 392  | 2 | 71  | CRA d like (stofly) alternative variant dSep08, mRNA.                                                      |
| stolor | stolor.aSep08 |        | 596    | 397  |   | 39  | putative protein (stolor) mRNA.                                                                            |
| stomee | stomee.aSep08 |        | 82071  | 365  |   | 94  | carbonic anhydrase (stomee) mRNA.                                                                          |
| Stoml1 | Stoml1.aSep08 | 300748 | 4137   | 1467 | 4 | 248 | stomatin-like 1 (Stoml1) alternative variant aSep08, mRNA.                                                 |

|          |                 |        |       |      |   |     |                                                                                     |
|----------|-----------------|--------|-------|------|---|-----|-------------------------------------------------------------------------------------|
| Stoml2   | Stoml2.bSep08   | 298203 | 2360  | 854  | 8 | 233 | stomatin (Epb7.2)-like 2 (Stoml2) alternative variant bSep08, mRNA.                 |
| Stoml2   | Stoml2.cSep08   | 298203 | 1849  | 1256 | 5 | 91  | stomatin (Epb7.2)-like 2 (Stoml2) alternative variant cSep08, mRNA.                 |
| Stoml2   | Stoml2.dSep08   | 298203 | 1303  | 438  | 2 | 46  | stomatin (Epb7.2)-like 2 (4.8 kD) (Stoml2) alternative variant dSep08, mRNA.        |
| Ston2    | Ston2.aSep08    | 314349 | 44889 | 928  |   | 187 | stonin 2 (20.4 kD) (Ston2) mRNA.                                                    |
| stonor   | stonor.aSep08   |        | 6802  | 746  |   | 83  | putative protein (9.2 kD) (stonor) mRNA.                                            |
| stopey   | stopey.aSep08   |        | 8618  | 3214 |   | 324 | CRA b (37.3 kD) (stopey) mRNA.                                                      |
| storcha  | storcha.aSep08  |        | 23598 | 1014 | 8 | 337 | putative protein (storcha) alternative variant aSep08, mRNA.                        |
| storchy  | storchy.aSep08  |        | 2642  | 224  |   | 64  | putative protein (storchy) mRNA.                                                    |
| storfee  | storfee.aSep08  |        | 29707 | 298  |   | 18  | putative protein (storfee) mRNA.                                                    |
| storflu  | storflu.aSep08  |        | 14029 | 1131 | 3 | 55  | putative protein (6.2 kD) (storflu) alternative variant aSep08, mRNA.               |
| storfly  | storfly.aSep08  |        | 1175  | 370  |   | 70  | putative protein (storfly) alternative variant aSep08, mRNA.                        |
| storlor  | storlor.aSep08  |        | 52873 | 782  | 2 | 160 | mitochondrial ribosomal protein S6 (storlor) alternative variant aSep08, mRNA.      |
| storlor  | storlor.bSep08  |        | 18192 | 387  | 1 | 50  | mitochondrial ribosomal protein S6 like (storlor) alternative variant bSep08, mRNA. |
| stormee  | stormee.aSep08  |        | 2629  | 566  |   | 63  | putative protein (7.1 kD) (stormee) mRNA.                                           |
| stornor  | stornor.aSep08  |        | 728   | 529  |   | 53  | putative protein (5.9 kD) (stornor) mRNA.                                           |
| storoy   | storoy.aSep08   |        | 850   | 334  |   | 21  | putative protein (storoy) mRNA.                                                     |
| storpey  | storpey.aSep08  |        | 9332  | 404  |   | 134 | putative protein of bilateral origin (storpey) mRNA.                                |
| storroy  | storroy.aSep08  |        | 14050 | 739  |   | 55  | putative protein (storroy) mRNA.                                                    |
| storshaw | storshaw.bSep08 |        | 4504  | 1184 | 4 | 65  | putative protein (7.3 kD) (storshaw) alternative variant bSep08, mRNA.              |
| storshaw | storshaw.cSep08 |        | 4437  | 506  | 3 | 40  | putative protein (storshaw) alternative variant cSep08, mRNA.                       |
| stortu   | stortu.aSep08   |        | 741   | 580  |   | 89  | putative protein (10.2 kD) (stortu) mRNA.                                           |
| storvo   | storvo.aSep08   |        | 9517  | 668  |   | 222 | InaD-like (storvo) mRNA.                                                            |
| storwer  | storwer.aSep08  |        | 580   | 422  |   | 82  | putative protein (storwer) mRNA.                                                    |
| stoshaw  | stoshaw.aSep08  |        | 13422 | 736  |   | 59  | putative protein (stoshaw) mRNA.                                                    |
| stotu    | stotu.aSep08    |        | 1895  | 558  |   | 185 | dicer1 (stotu) mRNA.                                                                |
| stovo    | stovo.aSep08    |        | 7326  | 966  | 1 | 99  | putative cytoplasmic protein (10.5 kD) (stovo) alternative variant aSep08, mRNA.    |
| stovo    | stovo.bSep08    |        | 7960  | 690  | 2 | 68  | putative protein (stovo) alternative variant bSep08, mRNA.                          |
| stower   | stower.bSep08   |        | 16336 | 1776 | 4 | 76  | putative protein (8.2 kD) (stower) alternative variant bSep08, mRNA.                |
| stoycha  | stoycha.aSep08  |        | 926   | 452  |   | 93  | putative protein (stoycha) mRNA.                                                    |
| stoychy  | stoychy.aSep08  |        | 476   | 434  |   | 70  | putative protein (stoychy) mRNA.                                                    |
| stoyfee  | stoyfee.aSep08  |        | 7994  | 899  |   | 151 | putative protein (stoyfee) mRNA.                                                    |
| stoyflu  | stoyflu.aSep08  |        | 3958  | 683  |   | 141 | putative protein (stoyflu) mRNA.                                                    |

|               |                      |        |       |      |    |     |                                                                                                   |
|---------------|----------------------|--------|-------|------|----|-----|---------------------------------------------------------------------------------------------------|
| stoyfly       | stoyfly.aSep08       |        | 5036  | 552  |    | 123 | latent transforming growth factor beta binding protein 4 like (stoyfly) mRNA.                     |
| stoylor       | stoylor.aSep08       |        | 2967  | 239  |    | 35  | putative protein (stoylor) mRNA.                                                                  |
| stoymee       | stoymee.aSep08       |        | 3700  | 485  | 4  | 161 | CRA a like (stoymee) alternative variant aSep08, mRNA.                                            |
| stoymee       | stoymee.bSep08       |        | 4024  | 604  | 2  | 110 | CRA a like (stoymee) alternative variant bSep08, mRNA.                                            |
| stoymee       | stoymee.cSep08       |        | 4074  | 531  | 2  | 46  | CRA a like (5.1 kD) (stoymee) alternative variant cSep08, mRNA.                                   |
| stoynor       | stoynor.aSep08       |        | 6600  | 296  |    | 33  | putative protein (stoynor) mRNA.                                                                  |
| stoypey       | stoypey.aSep08       |        | 3729  | 474  |    | 90  | putative protein (9.9 kD) (stoypey) mRNA.                                                         |
| stoyroy       | stoyroy.aSep08       |        | 793   | 259  |    | 34  | putative protein (stoyroy) mRNA.                                                                  |
| stoyshaw      | stoyshaw.aSep08      |        | 3534  | 647  |    | 83  | putative nuclear protein (9.6 kD) (stoyshaw) mRNA.                                                |
| stoytu        | stoytu.aSep08        |        | 6110  | 677  | 3  | 106 | putative protein (stoytu) alternative variant aSep08, mRNA.                                       |
| stoyvo        | stoyvo.aSep08        |        | 2096  | 299  |    | 99  | dedicator of cytokinesis 7 (stoyvo) mRNA.                                                         |
| stoywer       | stoywer.aSep08       |        | 4379  | 802  |    | 54  | putative protein (stoywer) mRNA.                                                                  |
| Stra6         | Stra6.cSep08         | 363071 | 5738  | 410  | 5  | 98  | stimulated by retinoic acid gene 6 (Stra6) alternative variant cSep08, mRNA.                      |
| Strap         | Strap.bSep08         | 297699 | 2810  | 404  | 3  | 87  | serine/threonine kinase receptor associated protein (Strap) alternative variant bSep08, mRNA.     |
| Strbp         | Strbp.bSep08         | 84476  | 21986 | 547  | 3  | 121 | spermatid perinuclear RNA binding protein (Strbp) alternative variant bSep08, mRNA.               |
| Strbp         | Strbp.cSep08         | 84476  | 27997 | 737  | 5  | 109 | spermatid perinuclear RNA binding protein (11.8 kD) (Strbp) alternative variant cSep08, mRNA.     |
| Strbp         | Strbp.dSep08         | 84476  | 11706 | 694  | 2  | 85  | spermatid perinuclear RNA binding protein (Strbp) alternative variant dSep08, mRNA.               |
| Strn3         | Strn3.bSep08         | 114520 | 42470 | 1852 | 8  | 445 | striatin, calmodulin binding protein 3 (Strn3) alternative variant bSep08, mRNA.                  |
| Strn3         | Strn3.cSep08         | 114520 | 1125  | 1045 | 2  | 83  | striatin, calmodulin binding protein 3 (9.0 kD) (Strn3) alternative variant cSep08, mRNA.         |
| Strn4         | Strn4.bSep08         | 308392 | 19641 | 2735 | 17 | 655 | zinedin (Strn4) alternative variant bSep08, mRNA.                                                 |
| Strn4         | Strn4.cSep08         | 308392 | 8587  | 2773 | 8  | 374 | zinedin (40.3 kD) (Strn4) alternative variant cSep08, mRNA.                                       |
| Strn4         | Strn4.dSep08         | 308392 | 8062  | 1143 | 4  | 279 | zinedin (29.4 kD) (Strn4) alternative variant dSep08, mRNA.                                       |
| Strn4         | Strn4.eSep08         | 308392 | 2224  | 979  | 3  | 124 | zinedin (Strn4) alternative variant eSep08, mRNA.                                                 |
| Strn4         | Strn4.gSep08         | 308392 | 3670  | 237  | 2  | 38  | zinedin (Strn4) alternative variant gSep08, mRNA.                                                 |
| Strumpellin.0 | Strumpellin.0.aSep08 |        | 28081 | 5502 | 20 | 776 | CRA a (Strumpellin.0) alternative variant aSep08, mRNA.                                           |
| Sts           | Sts.bSep08           | 24800  | 4031  | 1185 | 6  | 190 | steroid sulfatase (Sts) alternative variant bSep08, mRNA.                                         |
| Sts           | Sts.cSep08           | 24800  | 1601  | 748  | 2  | 174 | steroid sulfatase (Sts) alternative variant cSep08, mRNA.                                         |
| Sts           | Sts.dSep08           | 24800  | 1789  | 766  | 3  | 151 | steroid sulfatase (Sts) alternative variant dSep08, mRNA.                                         |
| Stub1         | Stub1.bSep08         | 287155 | 2852  | 2183 | 4  | 224 | STIP1 homology and U-Box containing protein 1 (25.4 kD) (Stub1) alternative variant bSep08, mRNA. |
| Stub1         | Stub1.cSep08         | 287155 | 1771  | 1519 | 4  | 192 | STIP1 homology and U-Box containing protein 1 (21.0 kD) (Stub1) alternative variant cSep08, mRNA. |
| Stub1         | Stub1.dSep08         | 287155 | 1284  | 608  | 4  | 191 | STIP1 homology and U-Box containing protein 1 (Stub1) alternative variant dSep08, mRNA.           |

|         |                |        |        |      |    |     |                                                                                         |
|---------|----------------|--------|--------|------|----|-----|-----------------------------------------------------------------------------------------|
| Stub1   | Stub1.eSep08   | 287155 | 768    | 685  | 2  | 131 | STIP1 homology and U-Box containing protein 1 (Stub1) alternative variant eSep08, mRNA. |
| stucha  | stucha.aSep08  |        | 2899   | 772  |    | 37  | putative protein (stucha) mRNA.                                                         |
| stuchy  | stuchy.aSep08  |        | 2165   | 1062 |    | 90  | putative protein (10.3 kD) (stuchy) alternative variant aSep08, mRNA.                   |
| stufee  | stufee.aSep08  |        | 836    | 749  |    | 40  | putative protein (stufee) mRNA.                                                         |
| stufly  | stufly.aSep08  |        | 885    | 380  |    | 126 | pecanex-like 3 CRA c (stufly) mRNA.                                                     |
| stufly  | stufly.aSep08  |        | 112960 | 744  | 7  | 95  | putative protein (10.9 kD) (stufly) alternative variant aSep08, mRNA.                   |
| stufly  | stufly.bSep08  |        | 61488  | 355  | 3  | 46  | putative protein (stufly) alternative variant bSep08, mRNA.                             |
| stulor  | stulor.aSep08  |        | 4858   | 274  |    | 43  | putative protein (stulor) mRNA.                                                         |
| stumee  | stumee.aSep08  |        | 18062  | 349  |    | 65  | putative protein (7.2 kD) (stumee) mRNA.                                                |
| stunor  | stunor.aSep08  |        | 12490  | 677  |    | 155 | transmembrane protein 63b (stunor) mRNA.                                                |
| stupey  | stupey.aSep08  |        | 1660   | 748  |    | 151 | hepatocyte cell adhesion molecule (stupey) mRNA.                                        |
| sturoy  | sturoy.aSep08  |        | 897    | 371  |    | 20  | putative protein (2.2 kD) (sturoy) mRNA.                                                |
| stushaw | stushaw.aSep08 |        | 9790   | 780  | 6  | 232 | DEAH box polypeptide 29 (stushaw) alternative variant aSep08, mRNA.                     |
| stutu   | stutu.aSep08   |        | 689    | 354  |    | 60  | putative protein (6.6 kD) (stutu) mRNA.                                                 |
| stuvo   | stuvo.aSep08   |        | 5196   | 693  |    | 60  | putative protein (7.1 kD) (stuvo) mRNA.                                                 |
| stuwcr  | stuwcr.aSep08  |        | 1710   | 1365 |    | 199 | gag-pro-pol polyprotein (stuwcr) mRNA.                                                  |
| Stx1a   | Stx1a.cSep08   | 116470 | 1541   | 712  | 2  | 60  | syntaxin 1A (brain) (6.7 kD) (Stx1a) alternative variant cSep08, mRNA.                  |
| Stx2    | Stx2.bSep08    | 25130  | 32915  | 1019 | 11 | 259 | epimorphin (29.9 kD) (Stx2) alternative variant bSep08, mRNA.                           |
| Stx2    | Stx2.cSep08    | 25130  | 6238   | 642  | 7  | 106 | epimorphin CRA e (12.3 kD) (Stx2) alternative variant cSep08, mRNA.                     |
| Stx2    | Stx2.eSep08    | 25130  | 10917  | 262  | 3  | 79  | putative protein (Stx2) alternative variant eSep08, mRNA.                               |
| Stx2    | Stx2.fSep08    | 25130  | 6510   | 1378 | 3  | 66  | epimorphin CRA e (Stx2) alternative variant fSep08, mRNA.                               |
| Stx3    | Stx3.bSep08    | 81802  | 12053  | 648  | 4  | 109 | syntaxin 3 (Stx3) alternative variant bSep08, mRNA.                                     |
| Stx3    | Stx3.cSep08    | 81802  | 44569  | 1041 | 2  | 65  | syntaxin 3 (Stx3) alternative variant cSep08, mRNA.                                     |
| Stx4a   | Stx4a.aSep08   | 81803  | 7455   | 1238 | 10 | 348 | syntaxin 4A (placental) (Stx4a) alternative variant aSep08, mRNA.                       |
| Stx4a   | Stx4a.cSep08   | 81803  | 5804   | 1336 | 6  | 192 | syntaxin 4A (placental) (22.4 kD) (Stx4a) alternative variant cSep08, mRNA.             |
| Stx4a   | Stx4a.eSep08   | 81803  | 6031   | 1381 | 7  | 141 | syntaxin 4A (placental) (16.5 kD) (Stx4a) alternative variant eSep08, mRNA.             |
| Stx4a   | Stx4a.fSep08   | 81803  | 5102   | 778  | 7  | 133 | syntaxin 4A (placental) (15.4 kD) (Stx4a) alternative variant fSep08, mRNA.             |
| Stx4a   | Stx4a.gSep08   | 81803  | 1522   | 1025 | 3  | 71  | syntaxin 4A (placental) (Stx4a) alternative variant gSep08, mRNA.                       |
| Stx4a   | Stx4a.hSep08   | 81803  | 1834   | 547  | 3  | 69  | syntaxin 4A (placental) (Stx4a) alternative variant hSep08, mRNA.                       |
| Stx5a   | Stx5a.bSep08   | 65134  | 1477   | 793  | 4  | 118 | syntaxin 5a (Stx5a) alternative variant bSep08, mRNA.                                   |
| Stx5a   | Stx5a.cSep08   | 65134  | 4102   | 638  | 1  | 108 | syntaxin 5a (Stx5a) alternative variant cSep08, mRNA.                                   |

|        |               |        |        |      |    |     |                                                                                      |
|--------|---------------|--------|--------|------|----|-----|--------------------------------------------------------------------------------------|
| Stx7   | Stx7.bSep08   | 60466  | 36213  | 815  | 6  | 222 | syntaxin 7 (Stx7) alternative variant bSep08, mRNA.                                  |
| Stx7   | Stx7.cSep08   | 60466  | 28413  | 303  | 2  | 77  | syntaxin 7 (Stx7) alternative variant cSep08, mRNA.                                  |
| Stx8   | Stx8.aSep08   | 59074  | 111484 | 1779 | 3  | 574 | syntaxin 8 (Stx8) alternative variant aSep08, mRNA.                                  |
| Stx8   | Stx8.cSep08   | 59074  | 225232 | 606  | 3  | 165 | syntaxin 8 (Stx8) alternative variant cSep08, mRNA.                                  |
| Stx8   | Stx8.dSep08   | 59074  | 146031 | 375  | 2  | 54  | syntaxin 8 (Stx8) alternative variant dSep08, mRNA.                                  |
| Stx12  | Stx12.aSep08  | 65033  | 28561  | 2632 | 8  | 274 | syntaxin 12 (31.2 kD) (Stx12) alternative variant aSep08, mRNA.                      |
| Stx12  | Stx12.bSep08  | 65033  | 2574   | 591  | 1  | 38  | syntaxin 12 (4.6 kD) (Stx12) alternative variant bSep08, mRNA.                       |
| Stx16  | Stx16.aSep08  | 362283 | 23928  | 1752 | 7  | 328 | syntaxin 16 (37.3 kD) (Stx16) alternative variant aSep08, mRNA.                      |
| Stx16  | Stx16.bSep08  | 362283 | 8736   | 3279 | 6  | 221 | syntaxin 16 (Stx16) alternative variant bSep08, mRNA.                                |
| Stx16  | Stx16.dSep08  | 362283 | 6767   | 1403 | 7  | 139 | syntaxin 16 (16.0 kD) (Stx16) alternative variant dSep08, mRNA.                      |
| Stx18  | Stx18.bSep08  | 360953 | 25850  | 1342 | 9  | 252 | syntaxin 18 (Stx18) alternative variant bSep08, mRNA.                                |
| Stx18  | Stx18.cSep08  | 360953 | 1513   | 683  | 2  | 102 | syntaxin 18 (11.5 kD) (Stx18) alternative variant cSep08, mRNA.                      |
| Stxbp1 | Stxbp1.bSep08 | 25558  | 7326   | 1482 | 5  | 174 | syntaxin binding protein 1 (Stxbp1) alternative variant bSep08, mRNA.                |
| Stxbp1 | Stxbp1.cSep08 | 25558  | 8181   | 744  | 4  | 111 | syntaxin binding protein 1 (Stxbp1) alternative variant cSep08, mRNA.                |
| Stxbp2 | Stxbp2.aSep08 | 81804  | 9694   | 2000 | 17 | 543 | syntaxin binding protein 2 (Stxbp2) alternative variant aSep08, mRNA.                |
| Stxbp2 | Stxbp2.bSep08 | 81804  | 3751   | 720  | 7  | 230 | syntaxin binding protein 2 (Stxbp2) alternative variant bSep08, mRNA.                |
| Stxbp2 | Stxbp2.cSep08 | 81804  | 7210   | 667  | 4  | 200 | syntaxin binding protein 2 (Stxbp2) alternative variant cSep08, mRNA.                |
| Stxbp2 | Stxbp2.dSep08 | 81804  | 3538   | 425  | 6  | 110 | syntaxin binding protein 2 (Stxbp2) alternative variant dSep08, mRNA.                |
| Stxbp2 | Stxbp2.eSep08 | 81804  | 14936  | 908  | 3  | 86  | syntaxin binding protein 2 (9.5 kD) (Stxbp2) alternative variant eSep08, mRNA.       |
| Stxbp3 | Stxbp3.bSep08 | 114095 | 3371   | 479  | 4  | 118 | syntaxin binding protein 3 like (Stxbp3) alternative variant bSep08, mRNA.           |
| Stxbp3 | Stxbp3.cSep08 | 114095 | 10135  | 671  | 2  | 37  | syntaxin binding protein 3 like (4.3 kD) (Stxbp3) alternative variant cSep08, mRNA.  |
| Stxbp4 | Stxbp4.bSep08 | 303443 | 39295  | 334  | 4  | 111 | syntaxin binding protein 4 (Stxbp4) alternative variant bSep08, mRNA.                |
| Stxbp5 | Stxbp5.dSep08 | 81022  | 10636  | 2472 | 5  | 291 | syntaxin binding protein 5 like (32.1 kD) (Stxbp5) alternative variant dSep08, mRNA. |
| Stxbp5 | Stxbp5.eSep08 | 81022  | 18518  | 680  | 5  | 204 | syntaxin binding protein 5 like (Stxbp5) alternative variant eSep08, mRNA.           |
| Stxbp5 | Stxbp5.fSep08 | 81022  | 7695   | 774  | 2  | 52  | syntaxin binding protein 5 like (Stxbp5) alternative variant fSep08, mRNA.           |
| Stxbp6 | Stxbp6.aSep08 | 362734 | 240663 | 1437 |    | 308 | syntaxin binding protein 6 (amisyn) (Stxbp6) alternative variant aSep08, mRNA.       |



|         |                |        |        |      |   |     |                                                                                                               |
|---------|----------------|--------|--------|------|---|-----|---------------------------------------------------------------------------------------------------------------|
| Stxbp6  | Stxbp6.bSep08  | 362734 | 200336 | 551  | 1 | 150 | syntaxin binding protein 6 (amisyn) (Stxbp6) alternative variant bSep08, mRNA.                                |
| stycha  | stycha.aSep08  |        | 5562   | 643  |   | 65  | putative protein (stycha) mRNA.                                                                               |
| stychy  | stychy.aSep08  |        | 3199   | 464  |   | 99  | putative protein (11.2 kD) (stychy) mRNA.                                                                     |
| styfee  | styfee.aSep08  |        | 89484  | 438  |   | 63  | jumonji AT rich interactive domain 2 CRA b (styfee) mRNA.                                                     |
| styflu  | styflu.aSep08  |        | 581    | 432  |   | 54  | putative protein (styflu) mRNA.                                                                               |
| styfly  | styfly.aSep08  |        | 492    | 408  |   | 116 | multiple -like domain (styfly) mRNA.                                                                          |
| stylor  | stylor.aSep08  |        | 724    | 556  |   | 92  | putative protein (stylor) mRNA.                                                                               |
| stymee  | stymee.aSep08  |        | 47537  | 269  |   | 23  | putative protein (stymee) mRNA.                                                                               |
| stynor  | stynor.aSep08  |        | 17608  | 326  | 4 | 62  | putative protein (stynor) alternative variant aSep08, mRNA.                                                   |
| stynor  | stynor.bSep08  |        | 18956  | 360  | 3 | 62  | tight junction associated protein 1 (stynor) alternative variant bSep08, mRNA.                                |
| stynor  | stynor.cSep08  |        | 18570  | 529  | 3 | 39  | putative protein (4.3 kD) (stynor) alternative variant cSep08, mRNA.                                          |
| stynor  | stynor.dSep08  |        | 19496  | 480  | 5 | 57  | putative protein (stynor) alternative variant dSep08, mRNA.                                                   |
| stypey  | stypey.aSep08  |        | 9409   | 251  |   | 69  | pbx knotted 1 homeobox 2 (stypey) mRNA.                                                                       |
| styroy  | styroy.aSep08  |        | 22811  | 668  | 7 | 222 | putative protein of mammalian origin (styroy) alternative variant aSep08, mRNA.                               |
| styshaw | styshaw.aSep08 |        | 4024   | 1728 |   |     |                                                                                                               |
| stytu   | stytu.aSep08   |        | 946    | 330  |   | 75  | putative protein (stytu) mRNA.                                                                                |
| styvo   | styvo.aSep08   |        | 7632   | 274  |   | 90  | myb-like SWIRM MPN domains 1 (styvo) mRNA.                                                                    |
| stywer  | stywer.aSep08  |        | 470    | 352  |   | 30  | putative protein (stywer) mRNA.                                                                               |
| Styxl1  | Styxl1.aSep08  | 360792 | 32717  | 1788 | 8 | 451 | serine/threonine/tyrosine interacting-like 1 (Styxl1) alternative variant aSep08, mRNA.                       |
| Styxl1  | Styxl1.cSep08  | 360792 | 20783  | 637  | 6 | 164 | serine/threonine/tyrosine interacting-like 1 (19.4 kD) (Styxl1) alternative variant cSep08, mRNA.             |
| Styxl1  | Styxl1.dSep08  | 360792 | 20154  | 577  | 5 | 132 | serine/threonine/tyrosine interacting-like 1 (Styxl1) alternative variant dSep08, mRNA.                       |
| Sub1    | Sub1.bSep08    | 192269 | 14767  | 3354 | 5 | 127 | SUB1 homolog (S. cerevisiae) (14.4 kD) (Sub1) alternative variant bSep08, complete mRNA.                      |
| suby    | suby.aSep08    |        | 4906   | 415  |   | 138 | putative protein of eukaryotic origin (suby) mRNA.                                                            |
| suchy   | suchy.aSep08   |        | 43143  | 851  |   | 48  | putative protein (5.2 kD) (suchy) mRNA.                                                                       |
| Sucla2  | Sucla2.bSep08  | 361071 | 27563  | 1524 | 7 | 236 | succinate-Coenzyme A ligase, ADP-forming, beta subunit (25.6 kD) (Sucla2) alternative variant bSep08, mRNA.   |
| Suclg1  | Suclg1.bSep08  | 114597 | 8855   | 503  | 4 | 167 | succinate-CoA ligase, GDP-forming, alpha subunit (Suclg1) alternative variant bSep08, mRNA.                   |
| Suclg1  | Suclg1.cSep08  | 114597 | 1764   | 427  | 2 | 76  | succinate-CoA ligase, GDP-forming, alpha subunit (Suclg1) alternative variant cSep08, mRNA.                   |
| Suclg1  | Suclg1.dSep08  | 114597 | 8999   | 621  | 3 | 60  | succinate-CoA ligase, GDP-forming, alpha subunit (6.5 kD) (Suclg1) alternative variant dSep08, complete mRNA. |
| Suclg2  | Suclg2.aSep08  | 362404 | 158722 | 1895 | 8 | 323 | succinyl-CoA synthetase (Suclg2) alternative variant aSep08, mRNA.                                            |
| Suclg2  | Suclg2.bSep08  | 362404 | 166727 | 856  | 7 | 214 | succinyl-CoA synthetase (Suclg2) alternative variant bSep08, mRNA.                                            |

|        |               |        |        |      |    |     |                                                                                                                          |
|--------|---------------|--------|--------|------|----|-----|--------------------------------------------------------------------------------------------------------------------------|
| Suc1g2 | Suc1g2.dSep08 | 362404 | 156425 | 921  | 6  | 116 | succinyl-CoA synthetase (Suc1g2) alternative variant dSep08, mRNA.                                                       |
| Suc1g2 | Suc1g2.eSep08 | 362404 | 10977  | 800  | 2  | 110 | succinyl-CoA synthetase (Suc1g2) alternative variant eSep08, mRNA.                                                       |
| Suc1g2 | Suc1g2.fSep08 | 362404 | 120363 | 875  | 3  | 103 | succinyl-CoA synthetase (Suc1g2) alternative variant fSep08, mRNA.                                                       |
| Suc1g2 | Suc1g2.gSep08 | 362404 | 25828  | 634  | 3  | 79  | succinyl-CoA synthetase (Suc1g2) alternative variant gSep08, mRNA.                                                       |
| sudar  | sudar.aSep08  |        | 1597   | 1401 |    | 129 | CRA b like (14.7 kD) (sudar) mRNA.                                                                                       |
| Suds3  | Suds3.aSep08  | 360819 | 5629   | 746  | 3  | 132 | suppressor of defective silencing 3 homolog ( <i>S. cerevisiae</i> ) (14.9 kD) (Suds3) alternative variant aSep08, mRNA. |
| Suds3  | Suds3.bSep08  | 360819 | 7373   | 1530 | 6  | 122 | suppressor of defective silencing 3 homolog ( <i>S. cerevisiae</i> ) (Suds3) alternative variant bSep08, mRNA.           |
| Suds3  | Suds3.cSep08  | 360819 | 6671   | 917  | 5  | 108 | suppressor of defective silencing 3 homolog ( <i>S. cerevisiae</i> ) (Suds3) alternative variant cSep08, mRNA.           |
| Suds3  | Suds3.dSep08  | 360819 | 2364   | 777  | 2  | 142 | suppressor of defective silencing 3 homolog ( <i>S. cerevisiae</i> ) (15.7 kD) (Suds3) alternative variant dSep08, mRNA. |
| sufer  | sufer.aSep08  |        | 10119  | 538  |    | 179 | G protein coupled receptor 158 (sufer) mRNA.                                                                             |
| suflo  | suflo.aSep08  |        | 84008  | 280  |    | 23  | putative protein (suflo) mRNA.                                                                                           |
| suflu  | suflu.aSep08  |        | 16145  | 529  |    | 138 | putative protein (suflu) mRNA.                                                                                           |
| Sufu   | Sufu.bSep08   | 361769 | 40402  | 2984 | 9  | 294 | suppressor of fused homolog ( <i>Drosophila</i> ) (Sufu) alternative variant bSep08, mRNA.                               |
| Sufu   | Sufu.cSep08   | 361769 | 3586   | 582  | 3  | 89  | suppressor of fused homolog ( <i>Drosophila</i> ) (Sufu) alternative variant cSep08, mRNA.                               |
| Sufu   | Sufu.dSep08   | 361769 | 28446  | 736  | 2  | 81  | suppressor of fused homolog ( <i>Drosophila</i> ) (Sufu) alternative variant dSep08, mRNA.                               |
| sugar  | sugar.aSep08  |        | 141788 | 712  |    | 33  | putative protein (3.8 kD) (sugar) mRNA.                                                                                  |
| Sugt1  | Sugt1.bSep08  | 290408 | 30769  | 742  | 11 | 240 | SGT1, suppressor of G2 allele of SKP1 ( <i>S. cerevisiae</i> ) (Sugt1) alternative variant bSep08, mRNA.                 |
| Sugt1  | Sugt1.cSep08  | 290408 | 3977   | 472  | 2  | 148 | SGT1, suppressor of G2 allele of SKP1 ( <i>S. cerevisiae</i> ) (Sugt1) alternative variant cSep08, mRNA.                 |
| suja   | suja.aSep08   |        | 632    | 429  |    | 57  | putative protein (suja) mRNA.                                                                                            |
| sujey  | sujey.aSep08  |        | 1673   | 520  |    | 11  | putative protein (sujey) mRNA.                                                                                           |
| sukee  | sukee.aSep08  |        | 4889   | 1143 | 7  | 380 | putative protein of vertebrate origin (sukee) alternative variant aSep08, mRNA.                                          |
| sukee  | sukee.bSep08  |        | 5716   | 2172 | 5  | 132 | putative protein of vertebrate origin (sukee) alternative variant bSep08, mRNA.                                          |
| sukler | sukler.aSep08 |        | 3951   | 1941 |    | 464 | chromatin assembly factor 1 (sukler) mRNA.                                                                               |
| Sulf1  | Sulf1.bSep08  | 171396 | 40060  | 2023 | 3  | 465 | sulfatase 1 (Sulf1) alternative variant bSep08, mRNA.                                                                    |
| Sulf1  | Sulf1.cSep08  | 171396 | 2451   | 718  | 1  | 183 | sulfatase 1 (Sulf1) alternative variant cSep08, mRNA.                                                                    |
| Sulf2  | Sulf2.bSep08  | 311642 | 101162 | 3643 | 21 | 918 | sulfatase 2 (Sulf2) alternative variant bSep08, mRNA.                                                                    |
| Sulf2  | Sulf2.cSep08  | 311642 | 63981  | 1785 | 3  | 548 | sulfatase 2 (Sulf2) alternative variant cSep08, mRNA.                                                                    |
| Sulf2  | Sulf2.dSep08  | 311642 | 3868   | 396  | 4  | 132 | sulfatase 2 (Sulf2) alternative variant dSep08, mRNA.                                                                    |
| Sulf2  | Sulf2.eSep08  | 311642 | 16273  | 299  | 2  | 61  | sulfatase 2 (Sulf2) alternative variant eSep08, mRNA.                                                                    |

|                   |                          |        |       |      |    |     |                                                                                                                                      |
|-------------------|--------------------------|--------|-------|------|----|-----|--------------------------------------------------------------------------------------------------------------------------------------|
| Sulfate_transp.0  | Sulfate_transp.0.aSep08  |        | 9542  | 1874 | 16 | 552 | solute carrier family 26 member 6 CRA a (Sulfate_transp.0) alternative variant aSep08, mRNA.                                         |
| Sulfate_transp.0  | Sulfate_transp.0.bSep08  |        | 835   | 448  | 2  | 144 | transmembrane protein 89 (Sulfate_transp.0) alternative variant bSep08, mRNA.                                                        |
| Sulfate_transp.0  | Sulfate_transp.0.cSep08  |        | 2459  | 532  | 6  | 110 | solute carrier family 26 member 6 CRA e (Sulfate_transp.0) alternative variant cSep08, mRNA.                                         |
| Sulfate_transp.0  | Sulfate_transp.0.dSep08  |        | 1611  | 529  | 4  | 91  | solute carrier family 26 member 6 CRA a (Sulfate_transp.0) alternative variant dSep08, mRNA.                                         |
| Sulfotransfer_1.0 | Sulfotransfer_1.0.aSep08 |        | 14311 | 790  |    | 159 | hydroxysteroid sulfotransferase precursor (18.7 kD) (Sulfotransfer_1.0) mRNA.                                                        |
| sulo              | sulo.aSep08              |        | 4194  | 572  |    | 190 | furry homolog (sulo) mRNA.                                                                                                           |
| Sult1a1           | Sult1a1.bSep08           | 83783  | 2408  | 792  | 1  | 201 | sulfotransferase family 1A, phenol-preferring, member 1 (22.3 kD) (Sult1a1) alternative variant bSep08, mRNA.                        |
| Sult1c2           | Sult1c2.cSep08           | 171072 | 21926 | 802  | 3  | 234 | sulfotransferase family, cytosolic, 1C, member 2 (Sult1c2) alternative variant cSep08, mRNA.                                         |
| Sult1c2           | Sult1c2.dSep08           | 171072 | 21150 | 669  | 2  | 167 | sulfotransferase family, cytosolic, 1C, member 2 (Sult1c2) alternative variant dSep08, mRNA.                                         |
| Sult1c2a          | Sult1c2a.aSep08          | 316153 | 4368  | 2025 | 4  | 172 | sulfotransferase family, cytosolic, 1C, member 2a (Sult1c2a) alternative variant aSep08, mRNA.                                       |
| Sult1e1andste2    | Sult1e1andste2.bSep08    | 25355  | 13539 | 880  | 1  | 211 | estrogen sulfotransferase (25.1 kD) (Sult1e1andste2) alternative variant bSep08, complete mRNA.                                      |
| Sult1e1andste2    | Sult1e1andste2.bSep08    | 360268 | 13539 | 880  | 1  | 211 | estrogen sulfotransferase (25.1 kD) (Sult1e1andste2) alternative variant bSep08, complete mRNA.                                      |
| Sult2a2           | Sult2a2.aSep08           | 361510 | 75416 | 1025 | 6  | 284 | sulfotransferase family 2A, dehydroepiandrosterone (DHEA)-preferring, member 2 (33.2 kD) (Sult2a2) alternative variant aSep08, mRNA. |
| Sult2a2           | Sult2a2.bSep08           | 361510 | 61378 | 635  | 5  | 193 | sulfotransferase family 2A, dehydroepiandrosterone (DHEA)-preferring, member 2 (Sult2a2) alternative variant bSep08, mRNA.           |
| Sult2b1           | Sult2b1.aSep08           | 292915 | 29713 | 1801 | 2  | 594 | sulfotransferase family, cytosolic, 2B, member 1 (Sult2b1) alternative variant aSep08, mRNA.                                         |
| Sult2b1           | Sult2b1.bSep08           | 292915 | 13040 | 1777 | 1  | 586 | sulfotransferase family, cytosolic, 2B, member 1 (Sult2b1) alternative variant bSep08, mRNA.                                         |
| Sult2b1           | Sult2b1.dSep08           | 292915 | 8284  | 538  | 2  | 179 | sulfotransferase family, cytosolic, 2B, member 1 (Sult2b1) alternative variant dSep08, mRNA.                                         |
| Sult5a1           | Sult5a1.aSep08           | 292077 | 5732  | 881  | 6  | 256 | sulfotransferase family 5A member 1 (Sult5a1) alternative variant aSep08, mRNA.                                                      |
| Sult5a1           | Sult5a1.bSep08           | 292077 | 15273 | 945  | 6  | 154 | sulfotransferase family 5A member 1 like (Sult5a1) alternative variant bSep08, mRNA.                                                 |
| Sult5a1           | Sult5a1.dSep08           | 292077 | 1531  | 824  | 2  | 65  | sulfotransferase family 5A member 1 CRA b (7.5 kD) (Sult5a1) alternative variant dSep08, mRNA.                                       |
| Sult5a1           | Sult5a1.eSep08           | 292077 | 26158 | 770  | 5  | 9   | putative protein (Sult5a1) alternative variant eSep08, mRNA.                                                                         |
| Sult5a1           | Sult5a1.fSep08           | 292077 | 1108  | 543  | 2  | 50  | putative protein (5.7 kD) (Sult5a1) alternative variant fSep08, mRNA.                                                                |
| Sult6b1           | Sult6b1.aSep08           | 503103 | 4546  | 490  |    | 95  | sulfotransferase family, cytosolic, 6B, member 1 (Sult6b1) mRNA.                                                                     |

|         |                |        |        |      |    |     |                                                                                                                             |
|---------|----------------|--------|--------|------|----|-----|-----------------------------------------------------------------------------------------------------------------------------|
| sumee   | sumee.aSep08   |        | 11582  | 732  | 2  | 21  | putative protein (2.5 kD) (sumee) alternative variant aSep08, mRNA.                                                         |
| sumer   | sumer.bSep08   |        | 993    | 828  | 2  | 83  | putative cytoplasmic protein (9.4 kD) (sumer) alternative variant bSep08, mRNA.                                             |
| Sumf2   | Sumf2.bSep08   | 360800 | 22929  | 680  | 6  | 226 | sulfatase modifying factor 2 (Sumf2) alternative variant bSep08, mRNA.                                                      |
| Sumf2   | Sumf2.cSep08   | 360800 | 22729  | 702  | 5  | 192 | sulfatase modifying factor 2 (Sumf2) alternative variant cSep08, mRNA.                                                      |
| Sumf2   | Sumf2.dSep08   | 360800 | 14982  | 386  | 4  | 125 | sulfatase modifying factor 2 (Sumf2) alternative variant dSep08, mRNA.                                                      |
| Sumf2   | Sumf2.eSep08   | 360800 | 3410   | 1486 | 3  | 71  | sulfatase modifying factor 2 (7.7 kD) (Sumf2) alternative variant eSep08, mRNA.                                             |
| Sumo1   | Sumo1.bSep08   | 301442 | 29793  | 769  | 4  | 62  | SMT3 suppressor of mif two 3 homolog 1 (yeast) (7.2 kD) (Sumo1) alternative variant bSep08, mRNA.                           |
| Sumo1   | Sumo1.cSep08   | 301442 | 29390  | 740  | 4  | 62  | SMT3 suppressor of mif two 3 homolog 1 (yeast) (7.2 kD) (Sumo1) alternative variant cSep08, mRNA.                           |
| Sumo1   | Sumo1.dSep08   | 301442 | 29258  | 734  | 5  | 61  | SMT3 suppressor of mif two 3 homolog 1 (yeast) (Sumo1) alternative variant dSep08, mRNA.                                    |
| Sumo1   | Sumo1.eSep08   | 301442 | 29700  | 673  | 4  | 62  | SMT3 suppressor of mif two 3 homolog 1 (yeast) (7.2 kD) (Sumo1) alternative variant eSep08, mRNA.                           |
| Sumo3   | Sumo3.bSep08   | 499417 | 7998   | 910  | 3  | 75  | SMT3 suppressor of mif two 3 homolog 3 ( <i>S. cerevisiae</i> ) (8.6 kD) (Sumo3) alternative variant bSep08, complete mRNA. |
| Sumo3   | Sumo3.cSep08   | 499417 | 2649   | 752  | 2  | 57  | SMT3 suppressor of mif two 3 homolog 3 ( <i>S. cerevisiae</i> ) (6.5 kD) (Sumo3) alternative variant cSep08, mRNA.          |
| Sumo3   | Sumo3.dSep08   | 499417 | 2744   | 674  | 3  | 57  | SMT3 suppressor of mif two 3 homolog 3 ( <i>S. cerevisiae</i> ) (6.5 kD) (Sumo3) alternative variant dSep08, mRNA.          |
| sunoy   | sunoy.aSep08   |        | 72068  | 473  |    | 34  | putative protein (sunoy) mRNA.                                                                                              |
| Suox    | Suox.bSep08    | 81805  | 1014   | 417  | 2  | 82  | sulfite oxidase (Suox) alternative variant bSep08, mRNA.                                                                    |
| supor   | supor.aSep08   |        | 22619  | 819  | 7  | 273 | testis expressed 9 (supor) alternative variant aSep08, mRNA.                                                                |
| supor   | supor.bSep08   |        | 36663  | 1805 | 11 | 188 | testis expressed 9 (22.2 kD) (supor) alternative variant bSep08, mRNA.                                                      |
| supor   | supor.cSep08   |        | 18090  | 1172 | 4  | 150 | testis expressed 9 (supor) alternative variant cSep08, mRNA.                                                                |
| supor   | supor.dSep08   |        | 15635  | 634  | 6  | 112 | putative nuclear protein of vertebrate origin (12.3 kD) (supor) alternative variant dSep08, mRNA.                           |
| Supt3h  | Supt3h.aSep08  | 685697 | 340000 | 2933 | 1  | 391 | suppressor of Ty 3 homolog ( <i>S. cerevisiae</i> ) (Supt3h) alternative variant aSep08, mRNA.                              |
| Supt3h  | Supt3h.bSep08  | 685697 | 263490 | 823  | 1  | 193 | suppressor of Ty 3 homolog ( <i>S. cerevisiae</i> ) (Supt3h) alternative variant bSep08, mRNA.                              |
| Supt4h1 | Supt4h1.aSep08 | 287608 | 6195   | 1054 | 5  | 117 | suppressor of Ty 4 homolog 1 ( <i>S. cerevisiae</i> ) (13.2 kD) (Supt4h1) alternative variant aSep08, complete mRNA.        |
| Supt4h1 | Supt4h1.bSep08 | 287608 | 5510   | 449  | 6  | 89  | suppressor of Ty 4 homolog 1 ( <i>S. cerevisiae</i> ) (10.1 kD) (Supt4h1) alternative variant bSep08, complete mRNA.        |
| Supt4h1 | Supt4h1.dSep08 | 287608 | 5520   | 455  | 6  | 85  | suppressor of Ty 4 homolog 1 ( <i>S. cerevisiae</i> ) (9.6 kD) (Supt4h1) alternative variant dSep08, complete mRNA.         |

|         |                |        |       |      |    |     |                                                                                                            |
|---------|----------------|--------|-------|------|----|-----|------------------------------------------------------------------------------------------------------------|
| Supt5h  | Supt5h.aSep08  | 308472 | 29223 | 4443 | 28 | 556 | suppressor of Ty 5 homolog (62.9 kD) (Supt5h) alternative variant aSep08, mRNA.                            |
| Supt5h  | Supt5h.bSep08  | 308472 | 7052  | 1436 | 13 | 478 | suppressor of Ty 5 homolog (Supt5h) alternative variant bSep08, mRNA.                                      |
| Supt5h  | Supt5h.cSep08  | 308472 | 7276  | 2103 | 13 | 328 | suppressor of Ty 5 homolog (35.3 kD) (Supt5h) alternative variant cSep08, mRNA.                            |
| Supt5h  | Supt5h.dSep08  | 308472 | 15130 | 906  | 10 | 262 | suppressor of Ty 5 homolog (Supt5h) alternative variant dSep08, mRNA.                                      |
| Supt5h  | Supt5h.eSep08  | 308472 | 6651  | 756  | 9  | 252 | suppressor of Ty 5 homolog (Supt5h) alternative variant eSep08, mRNA.                                      |
| Supt5h  | Supt5h.fSep08  | 308472 | 12990 | 704  | 10 | 207 | suppressor of Ty 5 homolog (Supt5h) alternative variant fSep08, mRNA.                                      |
| Supt5h  | Supt5h.gSep08  | 308472 | 1494  | 363  | 3  | 121 | suppressor of Ty 5 homolog CRA b (Supt5h) alternative variant gSep08, mRNA.                                |
| Supt5h  | Supt5h.iSep08  | 308472 | 1846  | 1768 | 2  | 78  | suppressor of Ty 5 homolog CRA b (8.7 kD) (Supt5h) alternative variant iSep08, mRNA.                       |
| Supt5h  | Supt5h.jSep08  | 308472 | 1112  | 534  | 3  | 74  | putative protein (Supt5h) alternative variant jSep08, mRNA.                                                |
| Supt5h  | Supt5h.kSep08  | 308472 | 9476  | 264  | 3  | 65  | putative protein (Supt5h) alternative variant kSep08, mRNA.                                                |
| Supt6h  | Supt6h.aSep08  | 303281 | 14767 | 3332 | 16 | 832 | suppressor of Ty 6 homolog CRA c (Supt6h) alternative variant aSep08, mRNA.                                |
| Supt6h  | Supt6h.bSep08  | 303281 | 3814  | 740  | 5  | 187 | suppressor of Ty 6 homolog CRA c (Supt6h) alternative variant bSep08, mRNA.                                |
| Supt6h  | Supt6h.cSep08  | 303281 | 1363  | 708  | 3  | 159 | suppressor of Ty 6 homolog (Supt6h) alternative variant cSep08, mRNA.                                      |
| Supt6h  | Supt6h.dSep08  | 303281 | 4542  | 1327 | 5  | 153 | suppressor of Ty 6 homolog CRA c (Supt6h) alternative variant dSep08, mRNA.                                |
| Supt6h  | Supt6h.eSep08  | 303281 | 1115  | 410  | 2  | 136 | suppressor of Ty 6 homolog CRA c (Supt6h) alternative variant eSep08, mRNA.                                |
| Supt6h  | Supt6h.fSep08  | 303281 | 1242  | 753  | 2  | 113 | suppressor of Ty 6 homolog CRA c (Supt6h) alternative variant fSep08, mRNA.                                |
| Supt7l  | Supt7l.aSep08  | 313905 | 10751 | 1777 | 1  | 438 | suppressor of Ty 7 ( <i>S. cerevisiae</i> )-like (Supt7l) alternative variant aSep08, mRNA.                |
| Supt16h | Supt16h.bSep08 | 305851 | 5377  | 3229 | 4  | 142 | suppressor of Ty 16 homolog ( <i>S. cerevisiae</i> ) (16.2 kD) (Supt16h) alternative variant bSep08, mRNA. |
| Surf1   | Surf1.bSep08   | 64463  | 2078  | 731  | 6  | 201 | surfeit 1 (22.9 kD) (Surf1) alternative variant bSep08, mRNA.                                              |
| Surf1   | Surf1.cSep08   | 64463  | 2028  | 492  | 5  | 148 | surfeit 1 (Surf1) alternative variant cSep08, mRNA.                                                        |
| Surf1   | Surf1.dSep08   | 64463  | 487   | 340  | 2  | 72  | surfeit 1 (Surf1) alternative variant dSep08, mRNA.                                                        |
| Surf1   | Surf1.eSep08   | 64463  | 2817  | 2348 | 4  | 56  | surfeit 1 (Surf1) alternative variant eSep08, mRNA.                                                        |
| Surf2   | Surf2.bSep08   | 619345 | 3812  | 1347 | 5  | 203 | surfeit gene 2 (23.8 kD) (Surf2) alternative variant bSep08, mRNA.                                         |
| Surf2   | Surf2.cSep08   | 619345 | 3715  | 2540 | 4  | 110 | surfeit gene 2 (12.7 kD) (Surf2) alternative variant cSep08, mRNA.                                         |
| Surf2   | Surf2.dSep08   | 619345 | 1265  | 811  | 2  | 92  | surfeit gene 2 (10.8 kD) (Surf2) alternative variant dSep08, mRNA.                                         |

|          |                 |        |       |      |    |     |                                                                                                                       |
|----------|-----------------|--------|-------|------|----|-----|-----------------------------------------------------------------------------------------------------------------------|
| susa     | susa.aSep08     |        | 889   | 677  |    | 152 | putative protein of mammalian origin (susa) mRNA.                                                                     |
| Susd2    | Susd2.bSep08    | 294335 | 7352  | 3008 | 13 | 767 | AMOP and von Willebrand factor, type D and sushi/SCR/CCP (84.7 kD) (Susd2) alternative variant bSep08, complete mRNA. |
| Susd2    | Susd2.cSep08    | 294335 | 922   | 727  | 2  | 230 | putative protein of ancient origin (Susd2) alternative variant cSep08, mRNA.                                          |
| Susd2    | Susd2.dSep08    | 294335 | 474   | 382  | 1  | 123 | putative protein of ancient origin (Susd2) alternative variant dSep08, mRNA.                                          |
| sushee   | sushee.aSep08   |        | 4247  | 420  |    | 139 | sucrase-isomaltase (sushee) mRNA.                                                                                     |
| Sushi.0  | Sushi.0.aSep08  |        | 1926  | 553  |    | 170 | complement component 2 CRA d (Sushi.0) mRNA.                                                                          |
| Sushi.1  | Sushi.1.aSep08  |        | 14281 | 1084 | 4  | 361 | cfh protein (Sushi.1) alternative variant aSep08, mRNA.                                                               |
| Sushi.1  | Sushi.1.bSep08  |        | 14054 | 680  | 3  | 226 | complement factor H-related protein B (Sushi.1) alternative variant bSep08, mRNA.                                     |
| Sushi.1  | Sushi.1.cSep08  |        | 11300 | 1065 | 2  | 31  | cfh protein like (Sushi.1) alternative variant cSep08, mRNA.                                                          |
| Sushi.2  | Sushi.2.aSep08  |        | 16553 | 617  |    | 129 | complement component factor H (Sushi.2) mRNA.                                                                         |
| Sushi.3  | Sushi.3.aSep08  |        | 4685  | 2175 | 9  | 396 | seizure related 6 (Sushi.3) alternative variant aSep08, mRNA.                                                         |
| Sushi.3  | Sushi.3.bSep08  |        | 2379  | 738  | 6  | 245 | seizure related 6 (Sushi.3) alternative variant bSep08, mRNA.                                                         |
| Sushi.3  | Sushi.3.cSep08  |        | 573   | 463  | 2  | 85  | seizure related 6 (Sushi.3) alternative variant cSep08, mRNA.                                                         |
| Sushi.3  | Sushi.3.dSep08  |        | 782   | 697  | 2  | 74  | seizure related 6 precursor (8.0 kD) (Sushi.3) alternative variant dSep08, mRNA.                                      |
| Sushi.4  | Sushi.4.aSep08  |        | 26286 | 1989 |    | 588 | polydom (Sushi.4) alternative variant aSep08, mRNA.                                                                   |
| sutu     | sutu.bSep08     |        | 2875  | 563  |    | 39  | putative protein (4.7 kD) (sutu) alternative variant bSep08, mRNA.                                                    |
| Suv39h1  | Suv39h1.bSep08  | 302553 | 12743 | 2687 | 6  | 412 | suppressor of variegation 3-9 homolog 1 (Drosophila) (47.8 kD) (Suv39h1) alternative variant bSep08, complete mRNA.   |
| Suv39h1  | Suv39h1.cSep08  | 302553 | 1586  | 855  | 2  | 91  | suppressor of variegation 3-9 homolog 1 (Drosophila) (Suv39h1) alternative variant cSep08, mRNA.                      |
| Suv39h1  | Suv39h1.eSep08  | 302553 | 481   | 142  | 2  | 17  | suppressor of variegation 3-9 homolog 1 (Drosophila) (Suv39h1) alternative variant eSep08, mRNA.                      |
| Suv39h2  | Suv39h2.bSep08  | 364785 | 10814 | 879  |    | 217 | suppressor of variegation 3-9 homolog 2 (Drosophila) (Suv39h2) alternative variant bSep08, mRNA.                      |
| Suv420h1 | Suv420h1.cSep08 | 361688 | 656   | 575  | 2  | 66  | suppressor of variegation 4-20 homolog 1 (Drosophila) (Suv420h1) alternative variant cSep08, mRNA.                    |
| Suv420h2 | Suv420h2.bSep08 | 308345 | 2074  | 1840 | 3  | 269 | suppressor of variegation 4-20 homolog 2 (Drosophila) (30.7 kD) (Suv420h2) alternative variant bSep08, mRNA.          |
| Suv420h2 | Suv420h2.cSep08 | 308345 | 2553  | 411  | 4  | 121 | suppressor of variegation 4-20 homolog 2 (Drosophila) (Suv420h2) alternative variant cSep08, mRNA.                    |
| suvar    | suvar.aSep08    |        | 619   | 264  |    | 87  | heparan sulfate proteoglycan (suvar) mRNA.                                                                            |
| suwey    | suwey.aSep08    |        | 2588  | 1074 |    | 216 | murinoglobulin (suwey) mRNA.                                                                                          |
| Sv2a     | Sv2a.bSep08     | 117559 | 2460  | 378  | 5  | 86  | synaptic vesicle glycoprotein 2a (Sv2a) alternative variant bSep08, mRNA.                                             |

|         |                |        |        |      |   |      |                                                                                                 |
|---------|----------------|--------|--------|------|---|------|-------------------------------------------------------------------------------------------------|
| Sv2b    | Sv2b.bSep08    | 117556 | 14853  | 534  | 4 | 126  | synaptic vesicle glycoprotein 2 (Sv2b) alternative variant bSep08, mRNA.                        |
| Sv2b    | Sv2b.cSep08    | 117556 | 98782  | 619  | 2 | 85   | putative protein (Sv2b) alternative variant cSep08, mRNA.                                       |
| Sv2b    | Sv2b.dSep08    | 117556 | 99090  | 682  | 2 | 83   | synaptic vesicle glycoprotein 2b CRA b (Sv2b) alternative variant dSep08, mRNA.                 |
| Svep1   | Svep1.aSep08   | 685899 | 41668  | 3130 |   | 1042 | polydom (Svep1) mRNA.                                                                           |
| Svil    | Svil.aSep08    | 361256 | 122063 | 677  | 6 | 103  | supervillin (Svil) alternative variant aSep08, mRNA.                                            |
| Svil    | Svil.bSep08    | 361256 | 76212  | 314  | 5 | 65   | supervillin (Svil) alternative variant bSep08, mRNA.                                            |
| Svil    | Svil.cSep08    | 361256 | 49571  | 517  | 4 | 65   | supervillin (Svil) alternative variant cSep08, mRNA.                                            |
| Svil    | Svil.dSep08    | 361256 | 38088  | 557  | 2 | 42   | supervillin (Svil) alternative variant dSep08, mRNA.                                            |
| Svs3    | Svs3.bSep08    | 192239 | 51908  | 304  | 2 | 37   | seminal vesicle secretion 3 (4.1 kD) (Svs3) alternative variant bSep08, mRNA.                   |
| Svs4    | Svs4.bSep08    | 24802  | 1557   | 376  | 1 | 49   | seminal vesicle secretory protein 4 (5.5 kD) (Svs4) alternative variant bSep08, mRNA.           |
| Svs6    | Svs6.aSep08    | 362267 | 1663   | 494  | 1 | 99   | seminal vesicle secretory protein 6 (11.4 kD) (Svs6) alternative variant aSep08, complete mRNA. |
| swacha  | swacha.aSep08  |        | 1553   | 693  |   | 95   | putative protein (swacha) mRNA.                                                                 |
| swachy  | swachy.aSep08  |        | 4833   | 497  |   | 93   | putative protein (swachy) mRNA.                                                                 |
| swafee  | swafee.aSep08  |        | 1378   | 542  |   | 53   | CRA b like (swafee) mRNA.                                                                       |
| swafly  | swafly.aSep08  |        | 3090   | 722  |   | 85   | spectrin beta 4 CRA b (swafly) mRNA.                                                            |
| swafly  | swafly.bSep08  |        | 498    | 365  | 2 | 110  | putative protein (swafly) alternative variant bSep08, mRNA.                                     |
| swafly  | swafly.aSep08  |        | 3090   | 722  |   | 85   | spectrin beta 4 CRA b (swafly) mRNA.                                                            |
| swalor  | swalor.bSep08  |        | 827    | 377  | 2 | 39   | putative protein (swalor) alternative variant bSep08, mRNA.                                     |
| swamee  | swamee.aSep08  |        | 4071   | 716  |   | 68   | putative protein (7.5 kD) (swamee) mRNA.                                                        |
| swanor  | swanor.aSep08  |        | 1923   | 480  |   | 52   | putative protein (5.8 kD) (swanor) mRNA.                                                        |
| swapey  | swapey.aSep08  |        | 21264  | 769  |   | 68   | putative protein (7.5 kD) (swapey) mRNA.                                                        |
| swarcha | swarcha.aSep08 |        | 554    | 323  |   | 88   | uncharacterized protein homolog like (swarcha) mRNA.                                            |
| swarchy | swarchy.aSep08 |        | 2190   | 738  |   | 34   | putative protein (3.8 kD) (swarchy) mRNA.                                                       |
| swarfee | swarfee.aSep08 |        | 6172   | 759  |   | 123  | putative protein of mammalian origin (swarfee) mRNA.                                            |
| swarflu | swarflu.aSep08 |        | 2684   | 418  | 4 | 67   | putative protein of mammalian origin (swarflu) alternative variant aSep08, mRNA.                |
| swarflu | swarflu.bSep08 |        | 911    | 269  | 2 | 44   | putative protein of mammalian origin (swarflu) alternative variant bSep08, mRNA.                |
| swarfly | swarfly.aSep08 |        | 2993   | 1309 | 4 | 119  | polyprotein (swarfly) alternative variant aSep08, mRNA.                                         |
| swarfly | swarfly.bSep08 |        | 854    | 668  | 2 | 89   | polyprotein -pol (9.7 kD) (swarfly) alternative variant bSep08, mRNA.                           |
| swarlor | swarlor.aSep08 |        | 900    | 316  |   | 26   | putative protein (swarlor) mRNA.                                                                |
| swarmee | swarmee.aSep08 |        | 1572   | 321  |   | 59   | putative protein of mammalian origin (7.1 kD) (swarmee) mRNA.                                   |
| swarnor | swarnor.aSep08 |        | 12578  | 1800 |   | 53   | putative protein (swarnor) mRNA.                                                                |
| swaroy  | swaroy.aSep08  |        | 2031   | 276  |   | 30   | putative protein (3.6 kD) (swaroy) mRNA.                                                        |
| swarpey | swarpey.aSep08 |        | 10724  | 816  | 2 | 50   | putative protein (5.7 kD) (swarpey) alternative variant aSep08, mRNA.                           |

|          |                 |  |       |      |   |     |                                                                                              |
|----------|-----------------|--|-------|------|---|-----|----------------------------------------------------------------------------------------------|
| swarpey  | swarpey.bSep08  |  | 3692  | 378  | 2 | 50  | putative protein (5.7 kD) (swarpey) alternative variant bSep08, mRNA.                        |
| swarroy  | swarroy.aSep08  |  | 33324 | 416  |   | 121 | putative protein (swarroy) mRNA.                                                             |
| swarshaw | swarshaw.aSep08 |  | 3438  | 2098 | 2 | 77  | putative mitochondrial protein (8.4 kD) (swarshaw) alternative variant aSep08, mRNA.         |
| swartu   | swartu.aSep08   |  | 1227  | 625  |   | 136 | putative protein (swartu) mRNA.                                                              |
| swarvo   | swarvo.aSep08   |  | 7649  | 621  |   | 147 | EF-hand calcium binding domain 7 like (swarvo) mRNA.                                         |
| swarwer  | swarwer.aSep08  |  | 1176  | 1013 |   | 42  | putative protein (swarwer) mRNA.                                                             |
| swashaw  | swashaw.aSep08  |  | 24590 | 294  |   | 55  | putative protein (swashaw) mRNA.                                                             |
| swatu    | swatu.aSep08    |  | 44485 | 374  | 4 | 103 | ATG2 autophagy related 2 homolog b (swatu) alternative variant aSep08, mRNA.                 |
| swavo    | swavo.aSep08    |  | 10050 | 414  |   | 137 | dedicator of cytokinesis 7 (swavo) mRNA.                                                     |
| swawcha  | swawcha.aSep08  |  | 1534  | 1091 | 3 | 99  | putative mitochondrial protein (11.4 kD) (swawcha) alternative variant aSep08, mRNA.         |
| swawchy  | swawchy.aSep08  |  | 2198  | 990  |   | 330 | laminin (swawchy) mRNA.                                                                      |
| swawer   | swawer.aSep08   |  | 27236 | 354  |   | 34  | putative protein (swawer) mRNA.                                                              |
| swawfee  | swawfee.aSep08  |  | 1932  | 531  |   | 176 | desmoplakin CRA b (swawfee) mRNA.                                                            |
| swawflu  | swawflu.aSep08  |  | 3017  | 478  |   | 42  | CRA b like (4.6 kD) (swawflu) mRNA.                                                          |
| swawfly  | swawfly.aSep08  |  | 2420  | 759  |   | 53  | putative protein (5.6 kD) (swawfly) mRNA.                                                    |
| swawlor  | swawlor.bSep08  |  | 1025  | 324  | 2 | 55  | putative protein (6.0 kD) (swawlor) alternative variant bSep08, mRNA.                        |
| swawmee  | swawmee.aSep08  |  | 747   | 272  |   | 39  | putative protein (swawmee) mRNA.                                                             |
| swawnor  | swawnor.bSep08  |  | 4051  | 961  | 2 | 109 | putative endoplasmic reticulum protein (12.3 kD) (swawnor) alternative variant bSep08, mRNA. |
| swawpey  | swawpey.aSep08  |  | 34865 | 731  |   | 243 | sortilin-related receptor L A repeats-containing (swawpey) mRNA.                             |
| swawroy  | swawroy.bSep08  |  | 10308 | 394  | 2 | 48  | putative protein (swawroy) alternative variant bSep08, mRNA.                                 |
| swawshaw | swawshaw.aSep08 |  | 3087  | 638  |   | 47  | putative protein (5.8 kD) (swawshaw) mRNA.                                                   |
| swawtu   | swawtu.aSep08   |  | 887   | 315  |   | 52  | domain-containing protein 85c like (swawtu) mRNA.                                            |
| swawvo   | swawvo.aSep08   |  | 810   | 751  |   | 39  | putative protein (4.3 kD) (swawvo) mRNA.                                                     |
| swawwer  | swawwer.aSep08  |  | 7996  | 1137 | 1 | 76  | CRA a like (8.3 kD) (swawwer) alternative variant aSep08, mRNA.                              |
| swawwer  | swawwer.bSep08  |  | 3970  | 1102 | 1 | 76  | CRA a like (8.3 kD) (swawwer) alternative variant bSep08, mRNA.                              |
| sweecha  | sweecha.aSep08  |  | 985   | 563  |   | 129 | putative protein (14.1 kD) (sweecha) mRNA.                                                   |
| sweechy  | sweechy.aSep08  |  | 16054 | 759  |   | 35  | putative protein (sweechy) mRNA.                                                             |
| sweefee  | sweefee.aSep08  |  | 1743  | 420  |   | 139 | desmoplakin CRA b (sweefee) mRNA.                                                            |
| sweeflu  | sweeflu.aSep08  |  | 7216  | 502  |   | 9   | putative protein (1.0 kD) (sweeflu) mRNA.                                                    |
| sweefly  | sweefly.aSep08  |  | 2449  | 1925 |   | 543 | putative protein of bilateral origin (sweefly) mRNA.                                         |
| sweelor  | sweelor.bSep08  |  | 1023  | 324  | 2 | 55  | putative protein (6.0 kD) (sweelor) alternative variant bSep08, mRNA.                        |
| sweemee  | sweemee.aSep08  |  | 34756 | 812  |   | 117 | putative protein (sweemee) mRNA.                                                             |
| sweenor  | sweenor.aSep08  |  | 10213 | 787  |   | 202 | CRA b (23.2 kD) (sweenor) mRNA.                                                              |



|          |                 |  |       |      |   |     |                                                                                                  |
|----------|-----------------|--|-------|------|---|-----|--------------------------------------------------------------------------------------------------|
| sweepy   | sweepy.aSep08   |  | 1705  | 754  |   | 59  | putative protein (6.3 kD) (sweepy) mRNA.                                                         |
| sweeroy  | sweeroy.aSep08  |  | 12731 | 258  |   | 57  | putative protein (sweeroy) mRNA.                                                                 |
| sweeshaw | sweeshaw.aSep08 |  | 3688  | 116  |   | 38  | rapamycin-insensitive companion of mTOR CRA b (sweeshaw) mRNA.                                   |
| sweetu   | sweetu.aSep08   |  | 8018  | 527  |   | 175 | protein-like 1 (sweetu) mRNA.                                                                    |
| sweevo   | sweevo.aSep08   |  | 5752  | 349  |   | 116 | putative protein of ancient origin (sweevo) mRNA.                                                |
| sweewer  | sweewer.aSep08  |  | 53750 | 423  |   | 19  | putative protein (sweewer) mRNA.                                                                 |
| swercha  | swercha.aSep08  |  | 20944 | 1463 | 8 | 359 | GTPase activating rap RanGAP domain-like 3 (38.5 kD) (swercha) alternative variant aSep08, mRNA. |
| swerchy  | swerchy.bSep08  |  | 1861  | 289  |   | 53  | putative protein (swerchy) alternative variant bSep08, mRNA.                                     |
| swerfee  | swerfee.aSep08  |  | 7865  | 969  |   | 322 | desmoplakin CRA b (swerfee) mRNA.                                                                |
| swerflu  | swerflu.aSep08  |  | 618   | 538  |   | 72  | putative protein (swerflu) mRNA.                                                                 |
| swerfly  | swerfly.aSep08  |  | 2890  | 1783 |   | 533 | putative protein (swerfly) alternative variant aSep08, mRNA.                                     |
| swerlor  | swerlor.aSep08  |  | 6043  | 529  |   | 56  | putative protein (5.7 kD) (swerlor) mRNA.                                                        |
| swermee  | swermee.aSep08  |  | 17136 | 538  |   | 157 | putative protein (swermee) mRNA.                                                                 |
| swernor  | swernor.aSep08  |  | 3701  | 571  |   | 190 | methylmalonyl-CoA mutase (swernor) mRNA.                                                         |
| swerpey  | swerpey.aSep08  |  | 1683  | 419  |   | 38  | putative protein (4.5 kD) (swerpey) mRNA.                                                        |
| swerroy  | swerroy.aSep08  |  | 47655 | 663  |   | 50  | putative protein (swerroy) mRNA.                                                                 |
| swershaw | swershaw.aSep08 |  | 8388  | 444  |   | 64  | putative protein (swershaw) mRNA.                                                                |
| swertu   | swertu.aSep08   |  | 25420 | 401  |   | 97  | putative protein (swertu) mRNA.                                                                  |
| swervo   | swervo.aSep08   |  | 11646 | 637  |   | 211 | putative protein of ancient origin (swervo) mRNA.                                                |
| swerwer  | swerwer.aSep08  |  | 1676  | 688  |   | 83  | putative protein (swerwer) mRNA.                                                                 |
| sweycha  | sweycha.aSep08  |  | 56793 | 583  | 3 | 143 | GTPase activating RanGAP domain-like 3 (sweycha) alternative variant aSep08, mRNA.               |
| sweycha  | sweycha.bSep08  |  | 33861 | 320  | 3 | 106 | GTPase activating RanGAP domain-like 3 (sweycha) alternative variant bSep08, mRNA.               |
| sweychy  | sweychy.aSep08  |  | 1005  | 866  |   | 159 | putative protein (sweychy) mRNA.                                                                 |
| sweyfee  | sweyfee.aSep08  |  | 649   | 498  |   | 36  | putative protein (4.0 kD) (sweyfee) mRNA.                                                        |
| sweyflu  | sweyflu.aSep08  |  | 1053  | 574  | 2 | 41  | putative protein (5.0 kD) (sweyflu) alternative variant aSep08, mRNA.                            |
| sweyflu  | sweyflu.bSep08  |  | 526   | 418  | 1 | 8   | putative protein (1.0 kD) (sweyflu) alternative variant bSep08, mRNA.                            |
| sweyfly  | sweyfly.aSep08  |  | 1859  | 620  |   | 74  | putative protein (sweyfly) mRNA.                                                                 |
| sweylor  | sweylor.aSep08  |  | 14194 | 717  |   | 125 | carbonyl reductase (sweylor) mRNA.                                                               |
| sweymee  | sweymee.aSep08  |  | 7733  | 295  | 2 | 65  | putative protein (7.5 kD) (sweymee) alternative variant aSep08, mRNA.                            |
| sweynor  | sweynor.aSep08  |  | 2653  | 265  |   | 88  | methylmalonyl-CoA mutase (sweynor) mRNA.                                                         |
| sweypey  | sweypey.aSep08  |  | 2258  | 527  | 1 | 57  | putative protein (sweypey) alternative variant aSep08, mRNA.                                     |
| sweypey  | sweypey.bSep08  |  | 1166  | 519  | 1 | 7   | putative protein (sweypey) alternative variant bSep08, mRNA.                                     |

|          |                 |        |       |      |   |     |                                                                                  |
|----------|-----------------|--------|-------|------|---|-----|----------------------------------------------------------------------------------|
| sweyroy  | sweyroy.aSep08  |        | 14518 | 341  |   | 113 | slit-robo Rho GTPase activating protein 3 (sweyroy) mRNA.                        |
| sweyshaw | sweyshaw.aSep08 |        | 3150  | 1230 |   | 64  | putative protein (sweyshaw) mRNA.                                                |
| sweytu   | sweytu.aSep08   |        | 1791  | 515  | 3 | 105 | putative protein (sweytu) alternative variant aSep08, mRNA.                      |
| sweyvo   | sweyvo.aSep08   |        | 11635 | 929  |   | 309 | putative protein of metazoan origin (sweyvo) mRNA.                               |
| sweywer  | sweywer.aSep08  |        | 980   | 301  |   | 99  | putative protein (sweywer) mRNA.                                                 |
| Swi3.0   | Swi3.0.aSep08   |        | 16558 | 1719 |   | 240 | timeless interacting protein (26.9 kD) (Swi3.0) mRNA.                            |
| SWIM.0   | SWIM.0.aSep08   |        | 792   | 330  |   | 110 | finger swim domain-containing protein (SWIM.0) mRNA.                             |
| swocha   | swocha.aSep08   |        | 4060  | 731  |   | 243 | putative protein of mammalian origin (swocha) mRNA.                              |
| swochy   | swochy.aSep08   |        | 20439 | 411  |   | 84  | putative protein (swochy) mRNA.                                                  |
| swofee   | swofee.aSep08   |        | 5454  | 653  |   | 19  | putative protein (swofee) mRNA.                                                  |
| swoflu   | swoflu.aSep08   |        | 1629  | 935  |   | 268 | putative protein, with 2 coiled coil domains, of bilateral origin (swoflu) mRNA. |
| swofly   | swofly.aSep08   |        | 391   | 284  |   | 67  | putative protein (swofly) mRNA.                                                  |
| swolor   | swolor.aSep08   |        | 5162  | 723  |   | 118 | putative protein (13.2 kD) (swolor) mRNA.                                        |
| swomee   | swomee.aSep08   |        | 3990  | 741  |   | 111 | putative protein (swomee) mRNA.                                                  |
| swonor   | swonor.aSep08   |        | 5851  | 437  |   | 84  | putative protein (10.0 kD) (swonor) mRNA.                                        |
| swopey   | swopey.aSep08   |        | 34613 | 1261 | 2 | 35  | putative protein (4.0 kD) (swopey) alternative variant aSep08, mRNA.             |
| sworcha  | sworcha.aSep08  |        | 2202  | 919  |   | 37  | putative protein (4.2 kD) (sworcha) mRNA.                                        |
| sworchy  | sworchy.aSep08  |        | 1573  | 748  |   | 103 | putative protein of mammalian origin (sworchy) mRNA.                             |
| sworfee  | sworfee.aSep08  |        | 5294  | 620  | 2 | 42  | putative protein (sworfee) alternative variant aSep08, mRNA.                     |
| sworfee  | sworfee.bSep08  |        | 5605  | 1347 | 4 | 31  | putative protein (3.5 kD) (sworfee) alternative variant bSep08, mRNA.            |
| sworflu  | sworflu.aSep08  |        | 49082 | 723  |   | 49  | putative protein (5.5 kD) (sworflu) mRNA.                                        |
| sworfly  | sworfly.aSep08  |        | 760   | 348  |   | 53  | putative protein (sworfly) mRNA.                                                 |
| sworlor  | sworlor.aSep08  |        | 6399  | 1777 |   | 592 | dopey family member 2 (sworlor) mRNA.                                            |
| swormee  | swormee.aSep08  |        | 6967  | 660  | 5 | 39  | putative protein (4.5 kD) (swormee) alternative variant aSep08, mRNA.            |
| swormee  | swormee.bSep08  |        | 705   | 460  | 2 | 59  | putative protein (swormee) alternative variant bSep08, mRNA.                     |
| swornor  | swornor.aSep08  |        | 2654  | 265  |   | 88  | methylmalonyl-CoA mutase (swornor) mRNA.                                         |
| sworoy   | sworoy.aSep08   |        | 16448 | 365  |   | 52  | putative protein (6.1 kD) (sworoy) mRNA.                                         |
| sworpey  | sworpey.aSep08  |        | 7891  | 412  |   | 34  | putative protein (sworpey) mRNA.                                                 |
| sworroy  | sworroy.aSep08  |        | 26293 | 710  |   | 32  | putative protein (sworroy) mRNA.                                                 |
| sworshaw | sworshaw.aSep08 |        | 31965 | 648  |   | 49  | putative protein (sworshaw) mRNA.                                                |
| swortu   | swortu.aSep08   | 691052 | 1294  | 915  |   | 263 | putative protein of vertebrate origin (swortu) mRNA.                             |
| sworvo   | sworvo.aSep08   |        | 3902  | 505  |   | 44  | putative protein (sworvo) mRNA.                                                  |
| sworwer  | sworwer.aSep08  |        | 14227 | 655  |   | 31  | putative protein (3.5 kD) (sworwer) alternative variant aSep08, mRNA.            |
| swoshaw  | swoshaw.aSep08  |        | 5953  | 635  |   | 211 | CRA a (swoshaw) mRNA.                                                            |

|          |                 |  |       |      |    |     |                                                                                      |
|----------|-----------------|--|-------|------|----|-----|--------------------------------------------------------------------------------------|
| swotu    | swotu.aSep08    |  | 3026  | 450  | 2  | 44  | putative protein (4.9 kD) (swotu) alternative variant aSep08, mRNA.                  |
| swotu    | swotu.bSep08    |  | 5079  | 341  | 1  | 44  | putative protein (swotu) alternative variant bSep08, mRNA.                           |
| swovo    | swovo.aSep08    |  | 16934 | 682  |    | 227 | EF-hand calcium binding domain 7 like (swovo) mRNA.                                  |
| swower   | swower.aSep08   |  | 37533 | 540  |    | 43  | putative protein (4.7 kD) (swower) mRNA.                                             |
| swoycha  | swoycha.aSep08  |  | 22560 | 530  |    | 94  | GTPase activating protein vps9 domains 1 (swoycha) mRNA.                             |
| swoychy  | swoychy.aSep08  |  | 2833  | 641  | 6  | 138 | collagen type XX alpha 1 (swoychy) alternative variant aSep08, mRNA.                 |
| swoyfee  | swoyfee.aSep08  |  | 7625  | 603  |    | 67  | putative protein (7.2 kD) (swoyfee) mRNA.                                            |
| swoyflu  | swoyflu.aSep08  |  | 2672  | 788  |    | 56  | putative protein (swoyflu) mRNA.                                                     |
| swoyfly  | swoyfly.aSep08  |  | 1230  | 730  | 1  | 99  | putative protein (swoyfly) alternative variant aSep08, mRNA.                         |
| swoyfly  | swoyfly.bSep08  |  | 2876  | 694  | 3  | 79  | putative protein (swoyfly) alternative variant bSep08, mRNA.                         |
| swoylor  | swoylor.aSep08  |  | 63127 | 698  | 2  | 131 | putative protein (swoylor) alternative variant aSep08, mRNA.                         |
| swoylor  | swoylor.bSep08  |  | 4916  | 405  | 1  | 30  | putative protein (swoylor) alternative variant bSep08, mRNA.                         |
| swoymee  | swoymee.aSep08  |  | 13921 | 318  |    | 73  | putative cytoplasmic protein (8.2 kD) (swoymee) mRNA.                                |
| swoynor  | swoynor.aSep08  |  | 3701  | 571  |    | 190 | methylmalonyl-CoA mutase (swoynor) mRNA.                                             |
| swoypey  | swoypey.aSep08  |  | 5589  | 640  |    | 212 | rho guanine nucleotide exchange factor 12 (swoypey) mRNA.                            |
| swoyroy  | swoyroy.aSep08  |  | 5228  | 614  | 1  | 45  | putative protein (swoyroy) alternative variant aSep08, mRNA.                         |
| swoyroy  | swoyroy.bSep08  |  | 9939  | 341  | 1  | 45  | putative protein (5.2 kD) (swoyroy) alternative variant bSep08, mRNA.                |
| swoyshaw | swoyshaw.aSep08 |  | 1284  | 1067 |    | 56  | CRA a like (swoyshaw) alternative variant aSep08, mRNA.                              |
| swoyshaw | swoyshaw.bSep08 |  | 729   | 512  |    | 59  | CRA a like (swoyshaw) alternative variant bSep08, mRNA.                              |
| swoytu   | swoytu.aSep08   |  | 4948  | 818  |    | 94  | putative mitochondrial protein (10.2 kD) (swoytu) mRNA.                              |
| swoyvo   | swoyvo.aSep08   |  | 837   | 213  |    | 16  | putative protein (swoyvo) mRNA.                                                      |
| swoywer  | swoywer.aSep08  |  | 1494  | 495  |    | 119 | gag protein (swoywer) mRNA.                                                          |
| swucha   | swucha.aSep08   |  | 12892 | 760  | 10 | 252 | golgi autoantigen golgin subfamily a like (swucha) alternative variant aSep08, mRNA. |
| swucha   | swucha.bSep08   |  | 11398 | 407  | 5  | 135 | golgi autoantigen golgin subfamily a like (swucha) alternative variant bSep08, mRNA. |
| swucha   | swucha.cSep08   |  | 553   | 454  | 1  | 46  | golgi autoantigen golgin subfamily a like (swucha) alternative variant cSep08, mRNA. |
| swuchy   | swuchy.aSep08   |  | 986   | 817  |    |     |                                                                                      |
| swufee   | swufee.aSep08   |  | 6380  | 964  |    | 35  | putative protein (4.2 kD) (swufee) mRNA.                                             |
| swuflu   | swuflu.aSep08   |  | 2407  | 696  |    | 210 | CRA c like (swuflu) mRNA.                                                            |
| swuflu   | swuflu.aSep08   |  | 2125  | 283  |    | 93  | beta spectrin (swuflu) mRNA.                                                         |
| swuly    | swuly.aSep08    |  | 2125  | 283  |    | 93  | beta spectrin (swuly) mRNA.                                                          |
| swulor   | swulor.aSep08   |  | 22788 | 701  | 2  | 67  | putative protein (7.5 kD) (swulor) alternative variant aSep08, mRNA.                 |

|         |                |        |        |      |   |     |                                                                                  |
|---------|----------------|--------|--------|------|---|-----|----------------------------------------------------------------------------------|
| swulor  | swulor.bSep08  |        | 10219  | 617  | 1 | 39  | putative protein (4.4 kD) (swulor) alternative variant bSep08, mRNA.             |
| swumee  | swumee.aSep08  |        | 3976   | 925  |   | 83  | putative protein (9.0 kD) (swumee) mRNA.                                         |
| swunor  | swunor.aSep08  |        | 8307   | 715  |   | 50  | putative protein (swunor) mRNA.                                                  |
| swupey  | swupey.bSep08  |        | 2435   | 592  | 2 | 32  | putative protein (3.6 kD) (swupey) alternative variant bSep08, mRNA.             |
| swupey  | swupey.cSep08  |        | 115316 | 511  | 4 | 37  | putative protein (swupey) alternative variant cSep08, mRNA.                      |
| swupey  | swupey.dSep08  |        | 61418  | 353  | 3 | 46  | putative protein (5.5 kD) (swupey) alternative variant dSep08, mRNA.             |
| swuroy  | swuroy.aSep08  |        | 1404   | 492  | 2 | 44  | putative protein (5.0 kD) (swuroy) alternative variant aSep08, mRNA.             |
| swuroy  | swuroy.bSep08  |        | 1078   | 396  | 1 | 26  | putative protein (2.9 kD) (swuroy) alternative variant bSep08, mRNA.             |
| swutu   | swutu.aSep08   |        | 6977   | 266  |   | 88  | ATG2 autophagy related 2 homolog B (swutu) mRNA.                                 |
| swuvo   | swuvo.aSep08   |        | 1340   | 503  |   | 47  | putative protein (5.8 kD) (swuvo) mRNA.                                          |
| swuwer  | swuwer.aSep08  |        | 21289  | 416  |   | 49  | putative protein (swuwer) mRNA.                                                  |
| swycha  | swycha.aSep08  |        | 1222   | 851  |   | 90  | protein-O-mannosyltransferase 1 (swycha) mRNA.                                   |
| swychy  | swychy.aSep08  |        | 716    | 513  |   | 31  | putative protein (swychy) mRNA.                                                  |
| swyfee  | swyfee.bSep08  |        | 2962   | 322  | 3 | 38  | putative protein (swyfee) alternative variant bSep08, mRNA.                      |
| swyflu  | swyflu.aSep08  |        | 1539   | 710  |   | 46  | putative protein (swyflu) mRNA.                                                  |
| swyfly  | swyfly.aSep08  |        | 1231   | 315  |   | 104 | spectrin (swyfly) mRNA.                                                          |
| swylor  | swylor.aSep08  |        | 1373   | 602  |   | 38  | putative protein (4.3 kD) (swylor) mRNA.                                         |
| swymee  | swymee.aSep08  |        | 8088   | 611  |   |     |                                                                                  |
| swynor  | swynor.aSep08  |        | 6674   | 285  |   | 15  | putative protein (swynor) mRNA.                                                  |
| swypey  | swypey.aSep08  |        | 3601   | 624  |   | 142 | putative protein (swypey) mRNA.                                                  |
| swyro   | swyro.aSep08   |        | 6201   | 1525 | 1 | 95  | hclb mouse DNA Helicase B like (swyro) alternative variant aSep08, mRNA.         |
| swyro   | swyro.bSep08   |        | 970    | 714  | 1 | 61  | putative protein (swyro) alternative variant bSep08, mRNA.                       |
| swyshaw | swyshaw.aSep08 |        | 18103  | 421  |   | 44  | putative protein (swyshaw) mRNA.                                                 |
| swytu   | swytu.aSep08   |        | 1240   | 284  |   | 94  | ATG2 autophagy related 2 homolog B (swytu) mRNA.                                 |
| swyvo   | swyvo.aSep08   |        | 7191   | 776  |   | 84  | putative membrane protein (9.2 kD) (swyvo) mRNA.                                 |
| Syap1   | Syap1.aSep08   | 302678 | 34918  | 2679 | 9 | 360 | synapse associated protein 1 (40.8 kD) (Syap1) alternative variant aSep08, mRNA. |
| Syap1   | Syap1.bSep08   | 302678 | 32007  | 732  | 6 | 232 | synapse associated protein 1 (Syap1) alternative variant bSep08, mRNA.           |
| syby    | syby.bSep08    |        | 4789   | 597  |   | 50  | putative protein (syby) alternative variant bSep08, mRNA.                        |
| Syce2   | Syce2.aSep08   | 364976 | 1419   | 393  |   | 56  | synaptonemal complex central element protein 2 (Syce2) mRNA.                     |
| sychy   | sychy.bSep08   |        | 1329   | 359  | 2 | 16  | putative protein (2.0 kD) (sychy) alternative variant bSep08, mRNA.              |
| sychy   | sychy.cSep08   |        | 1249   | 314  | 3 | 16  | putative protein (2.0 kD) (sychy) alternative variant cSep08, mRNA.              |

|          |                 |        |       |      |    |     |                                                                                                               |
|----------|-----------------|--------|-------|------|----|-----|---------------------------------------------------------------------------------------------------------------|
| Sycn     | Sycn.bSep08     | 245917 | 1388  | 519  | 2  | 122 | syncollin (Sycn) alternative variant bSep08, mRNA.                                                            |
| sydar    | sydar.aSep08    |        | 933   | 235  |    | 42  | putative protein (sydar) mRNA.                                                                                |
| Syde1    | Syde1.aSep08    | 362842 | 3293  | 1291 | 6  | 430 | synapse defective 1 Rho GTPase homolog (Syde1) alternative variant aSep08, mRNA.                              |
| Syde1    | Syde1.bSep08    | 362842 | 602   | 393  | 2  | 86  | synapse defective 1 Rho GTPase homolog CRA a (Syde1) alternative variant bSep08, mRNA.                        |
| Syde2    | Syde2.aSep08    | 308021 | 13840 | 779  |    | 242 | RhoGAP (Syde2) mRNA.                                                                                          |
| Syf2     | Syf2.bSep08     | 170933 | 4163  | 747  | 4  | 152 | SYF2 homolog, RNA splicing factor ( <i>S. cerevisiae</i> ) (17.5 kD) (Syf2) alternative variant bSep08, mRNA. |
| Syf2     | Syf2.dSep08     | 170933 | 2593  | 865  | 2  | 77  | SYF2 homolog, RNA splicing factor ( <i>S. cerevisiae</i> ) (8.2 kD) (Syf2) alternative variant dSep08, mRNA.  |
| Syf2     | Syf2.fSep08     | 170933 | 2055  | 548  | 3  | 35  | SYF2 homolog, RNA splicing factor ( <i>S. cerevisiae</i> ) (Syf2) alternative variant fSep08, mRNA.           |
| syfer    | syfer.aSep08    |        | 2083  | 624  |    | 58  | rho GTPase activating protein 21 (syfer) mRNA.                                                                |
| syflo    | syflo.aSep08    |        | 1947  | 612  |    | 63  | putative protein (syflo) mRNA.                                                                                |
| syflu    | syflu.aSep08    |        | 2270  | 392  |    | 86  | putative nuclear protein (9.6 kD) (syflu) mRNA.                                                               |
| sygar    | sygar.aSep08    |        | 2712  | 338  |    | 89  | CRA a like (sygar) mRNA.                                                                                      |
| syja     | syja.aSep08     |        | 7904  | 822  |    | 53  | putative protein (syja) mRNA.                                                                                 |
| Syja_N.0 | Syja_N.0.aSep08 |        | 7319  | 420  |    | 139 | synaptojanin 1 CRA e (Syja_N.0) mRNA.                                                                         |
| syjey    | syjey.aSep08    |        | 13746 | 769  |    | 56  | putative protein (6.3 kD) (syjey) mRNA.                                                                       |
| Syk      | Syk.bSep08      | 25155  | 8266  | 389  | 1  | 129 | spleen tyrosine kinase (Syk) alternative variant bSep08, mRNA.                                                |
| Syk      | Syk.cSep08      | 25155  | 16318 | 638  | 3  | 114 | spleen tyrosine kinase (Syk) alternative variant cSep08, mRNA.                                                |
| sykee    | sykee.aSep08    |        | 2152  | 789  |    | 211 | putative protein (sykee) mRNA.                                                                                |
| sykler   | sykler.aSep08   |        | 2177  | 684  | 2  | 71  | chromatin assembly factor 1 like (sykler) alternative variant aSep08, mRNA.                                   |
| sylo     | sylo.aSep08     |        | 8482  | 747  |    | 248 | furry homolog CRA a (sylo) mRNA.                                                                              |
| symee    | symee.aSep08    |        | 1164  | 415  |    | 36  | putative protein (symee) mRNA.                                                                                |
| symer    | symer.aSep08    |        | 16765 | 724  |    | 167 | solute carrier family 38 member 10 (symer) mRNA.                                                              |
| Sympk    | Sympk.aSep08    | 292683 | 17157 | 2585 | 17 | 861 | symplekin (Sympk) alternative variant aSep08, mRNA.                                                           |
| Sympk    | Sympk.bSep08    | 292683 | 2657  | 1416 | 5  | 333 | symplekin (36.4 kD) (Sympk) alternative variant bSep08, mRNA.                                                 |
| Sympk    | Sympk.cSep08    | 292683 | 17465 | 787  | 6  | 222 | symplekin (Sympk) alternative variant cSep08, mRNA.                                                           |
| Sympk    | Sympk.dSep08    | 292683 | 9076  | 419  | 6  | 139 | symplekin (Sympk) alternative variant dSep08, mRNA.                                                           |
| Syn1     | Syn1.bSep08     | 24949  | 2517  | 1574 | 2  | 186 | synapsin I (Syn1) alternative variant bSep08, mRNA.                                                           |
| Syn1     | Syn1.cSep08     | 24949  | 37492 | 679  | 3  | 95  | synapsin I (Syn1) alternative variant cSep08, mRNA.                                                           |
| Syn3     | Syn3.bSep08     | 29130  | 9272  | 560  | 4  | 165 | synapsin III (Syn3) alternative variant bSep08, mRNA.                                                         |
| Sync     | Sync.bSep08     | 297884 | 14629 | 1780 | 4  | 103 | similar to 60S ribosomal protein L23a and syncoilin (Sync) alternative variant bSep08, mRNA.                  |
| Sync     | Sync.bSep08     | 362606 | 14629 | 1780 | 4  | 103 | similar to 60S ribosomal protein L23a and syncoilin (Sync) alternative variant bSep08, mRNA.                  |
| Syncrip  | Syncrip.aSep08  | 363113 | 31945 | 3528 | 12 | 542 | synaptotagmin binding, cytoplasmic RNA interacting protein (Syncrip) alternative variant aSep08, mRNA.        |

|         |                |        |        |      |    |     |                                                                                          |
|---------|----------------|--------|--------|------|----|-----|------------------------------------------------------------------------------------------|
| Syne1   | Syne1.bSep08   | 499010 | 28554  | 2861 | 11 | 631 | spectrin repeat containing, nuclear envelope 1 (Syne1) alternative variant bSep08, mRNA. |
| Syne1   | Syne1.cSep08   | 499010 | 31245  | 994  | 7  | 174 | spectrin repeat containing, nuclear envelope 1 (Syne1) alternative variant cSep08, mRNA. |
| Syne1   | Syne1.dSep08   | 499010 | 4630   | 760  | 3  | 137 | spectrin repeat containing, nuclear envelope 1 (Syne1) alternative variant dSep08, mRNA. |
| Syne1   | Syne1.eSep08   | 499010 | 15735  | 393  | 4  | 131 | spectrin repeat containing, nuclear envelope 1 (Syne1) alternative variant eSep08, mRNA. |
| Syne1   | Syne1.gSep08   | 499010 | 2347   | 472  | 2  | 114 | spectrin repeat containing, nuclear envelope 1 (Syne1) alternative variant gSep08, mRNA. |
| Syne1   | Syne1.hSep08   | 499010 | 11184  | 951  | 3  | 86  | spectrin repeat containing, nuclear envelope 1 (Syne1) alternative variant hSep08, mRNA. |
| Syne1   | Syne1.jSep08   | 499010 | 11837  | 180  | 3  | 60  | spectrin repeat containing, nuclear envelope 1 (Syne1) alternative variant jSep08, mRNA. |
| Syne2   | Syne2.aSep08   | 299151 | 18681  | 1146 |    | 381 | synaptic nuclear envelope 2 (Syne2) mRNA.                                                |
| Syngr1  | Syngr1.bSep08  | 29205  | 20372  | 574  | 2  | 191 | synaptogyrin 1 (Syngr1) alternative variant bSep08, mRNA.                                |
| Syngr1  | Syngr1.cSep08  | 29205  | 20507  | 759  | 2  | 186 | synaptogyrin 1 (Syngr1) alternative variant cSep08, mRNA.                                |
| Syngr3  | Syngr3.aSep08  | 302975 | 4750   | 1989 | 3  | 271 | synaptogyrin 3 (Syngr3) alternative variant aSep08, mRNA.                                |
| Syngr3  | Syngr3.bSep08  | 302975 | 1011   | 471  | 1  | 153 | synaptogyrin 3 (Syngr3) alternative variant bSep08, mRNA.                                |
| Synj1   | Synj1.aSep08   | 85238  | 26731  | 4203 | 4  | 694 | synaptojanin 1 (Synj1) alternative variant aSep08, mRNA.                                 |
| Synj1   | Synj1.bSep08   | 85238  | 19082  | 1239 | 1  | 269 | synaptojanin 1 (Synj1) alternative variant bSep08, mRNA.                                 |
| Synj1   | Synj1.cSep08   | 85238  | 13138  | 737  | 2  | 179 | synaptojanin 1 (Synj1) alternative variant cSep08, mRNA.                                 |
| Synj2   | Synj2.dSep08   | 84018  | 4719   | 532  | 3  | 177 | synaptojanin 2 (Synj2) alternative variant dSep08, mRNA.                                 |
| Synj2   | Synj2.eSep08   | 84018  | 3217   | 381  | 3  | 120 | synaptojanin 2 (Synj2) alternative variant eSep08, mRNA.                                 |
| synoy   | synoy.aSep08   |        | 350    | 257  |    | 41  | putative protein (synoy) mRNA.                                                           |
| Synpo   | Synpo.aSep08   | 60324  | 53399  | 3093 | 4  | 985 | synaptopodin (105.4 kD) (Synpo) alternative variant aSep08, mRNA.                        |
| Synpo2  | Synpo2.aSep08  | 499702 | 41841  | 906  | 2  | 301 | synaptopodin 2 (Synpo2) alternative variant aSep08, mRNA.                                |
| Synpo2l | Synpo2l.aSep08 | 305675 | 3085   | 1191 |    | 396 | synaptopodin 2-like (Synpo2l) mRNA.                                                      |
| Synpr   | Synpr.bSep08   | 66030  | 322006 | 611  | 5  | 153 | synaptoporin (Synpr) alternative variant bSep08, mRNA.                                   |
| Synpr   | Synpr.cSep08   | 66030  | 164248 | 570  | 4  | 139 | synaptoporin (Synpr) alternative variant cSep08, mRNA.                                   |
| Synpr   | Synpr.dSep08   | 66030  | 124700 | 447  | 3  | 88  | synaptoporin (Synpr) alternative variant dSep08, mRNA.                                   |
| Sypl    | Sypl.aSep08    | 366595 | 19073  | 1001 | 4  | 259 | synaptophysin-like protein (28.1 kD) (Sypl) alternative variant aSep08, complete mRNA.   |
| Sypl    | Sypl.bSep08    | 366595 | 17530  | 750  | 6  | 250 | synaptophysin-like protein (Sypl) alternative variant bSep08, mRNA.                      |
| Sypl    | Sypl.dSep08    | 366595 | 20229  | 2017 | 5  | 162 | synaptophysin-like protein (18.2 kD) (Sypl) alternative variant dSep08, complete mRNA.   |
| Sypl    | Sypl.eSep08    | 366595 | 14751  | 467  | 3  | 145 | synaptophysin-like protein (Sypl) alternative variant eSep08, mRNA.                      |
| Sypl    | Sypl.fSep08    | 366595 | 3773   | 730  | 3  | 122 | synaptophysin-like protein (Sypl) alternative variant fSep08, mRNA.                      |
| sypor   | sypor.aSep08   |        | 6663   | 396  | 1  | 120 | suppressor of hairy wing homolog 4 (sypor) alternative variant aSep08, mRNA.             |

|        |               |        |       |      |    |     |                                                                                                |
|--------|---------------|--------|-------|------|----|-----|------------------------------------------------------------------------------------------------|
| sypor  | sypor.bSep08  |        | 20531 | 372  | 2  | 97  | suppressor of hairy wing homolog 4 (sypor) alternative variant bSep08, mRNA.                   |
| sysa   | sysa.aSep08   |        | 677   | 388  |    | 103 | putative protein (sysa) mRNA.                                                                  |
| syshee | syshee.aSep08 |        | 29265 | 1225 |    | 80  | CRA a like (8.9 kD) (syshee) mRNA.                                                             |
| Syt1   | Syt1.bSep08   | 25716  | 14111 | 897  | 4  | 191 | synaptotagmin I (Syt1) alternative variant bSep08, mRNA.                                       |
| Syt3   | Syt3.bSep08   | 25731  | 3880  | 1762 | 4  | 550 | synaptotagmin III (Syt3) alternative variant bSep08, mRNA.                                     |
| Syt3   | Syt3.cSep08   | 25731  | 3960  | 380  | 2  | 117 | synaptotagmin III (Syt3) alternative variant cSep08, mRNA.                                     |
| Syt3   | Syt3.dSep08   | 25731  | 5085  | 437  | 3  | 95  | synaptotagmin III (Syt3) alternative variant dSep08, mRNA.                                     |
| Syt6   | Syt6.bSep08   | 60565  | 50815 | 1973 | 5  | 467 | synaptotagmin VI (52.5 kD) (Syt6) alternative variant bSep08, complete mRNA.                   |
| Syt6   | Syt6.cSep08   | 60565  | 10983 | 473  | 2  | 141 | synaptotagmin VI (Syt6) alternative variant cSep08, mRNA.                                      |
| Syt6   | Syt6.dSep08   | 60565  | 12703 | 1674 | 5  | 122 | synaptotagmin VI (Syt6) alternative variant dSep08, mRNA.                                      |
| Syt7   | Syt7.bSep08   | 59267  | 31846 | 394  | 4  | 131 | synaptotagmin VII (Syt7) alternative variant bSep08, mRNA.                                     |
| Syt7   | Syt7.dSep08   | 59267  | 32900 | 928  | 4  | 116 | synaptotagmin VII (13.0 kD) (Syt7) alternative variant dSep08, mRNA.                           |
| Syt7   | Syt7.eSep08   | 59267  | 6020  | 644  | 6  | 91  | synaptotagmin VII (Syt7) alternative variant eSep08, mRNA.                                     |
| Syt8   | Syt8.bSep08   | 60566  | 1050  | 624  |    | 131 | synaptotagmin VIII (Syt8) alternative variant bSep08, mRNA.                                    |
| Syt11  | Syt11.bSep08  | 60568  | 13281 | 963  | 1  | 224 | synaptotagmin XI (Syt11) alternative variant bSep08, mRNA.                                     |
| Syt16  | Syt16.aSep08  | 299142 | 15359 | 395  |    | 119 | synaptotagmin XVI (Syt16) mRNA.                                                                |
| Syt17  | Syt17.aSep08  | 192189 | 52407 | 612  |    | 193 | synaptotagmin XVII (Syt17) mRNA.                                                               |
| Sytl1  | Sytl1.bSep08  | 297872 | 3074  | 732  | 5  | 218 | synaptotagmin-like 1 (Sytl1) alternative variant bSep08, mRNA.                                 |
| Sytl1  | Sytl1.cSep08  | 297872 | 599   | 524  | 2  | 92  | synaptotagmin-like 1 (9.9 kD) (Sytl1) alternative variant cSep08, mRNA.                        |
| Sytl2  | Sytl2.bSep08  | 361604 | 25174 | 2911 | 10 | 376 | synaptotagmin-like 2 (42.7 kD) (Sytl2) alternative variant bSep08, mRNA.                       |
| Sytl2  | Sytl2.cSep08  | 361604 | 7700  | 718  | 4  | 199 | synaptotagmin-like 2 (Sytl2) alternative variant cSep08, mRNA.                                 |
| Sytl2  | Sytl2.dSep08  | 361604 | 13307 | 585  | 4  | 90  | synaptotagmin-like 2 (Sytl2) alternative variant dSep08, mRNA.                                 |
| Sytl3  | Sytl3.bSep08  | 499017 | 1761  | 645  | 2  | 150 | synaptotagmin-like 3 (Sytl3) alternative variant bSep08, mRNA.                                 |
| sytu   | sytu.aSep08   |        | 1157  | 869  |    | 33  | putative protein (3.8 kD) (sytu) mRNA.                                                         |
| syvar  | syvar.aSep08  |        | 33975 | 414  |    | 120 | heparan sulfate proteoglycan (syvar) mRNA.                                                     |
| Syvn1  | Syvn1.bSep08  | 361712 | 3522  | 2221 | 9  | 397 | synovial apoptosis inhibitor 1, synoviolin (Syvn1) alternative variant bSep08, mRNA.           |
| Syvn1  | Syvn1.cSep08  | 361712 | 1636  | 1063 | 6  | 279 | synovial apoptosis inhibitor 1, synoviolin (29.7 kD) (Syvn1) alternative variant cSep08, mRNA. |
| Syvn1  | Syvn1.dSep08  | 361712 | 2131  | 1381 | 4  | 208 | synovial apoptosis inhibitor 1, synoviolin (Syvn1) alternative variant dSep08, mRNA.           |

|        |               |        |       |      |    |     |                                                                                                           |
|--------|---------------|--------|-------|------|----|-----|-----------------------------------------------------------------------------------------------------------|
| Syvn1  | Syvn1.eSep08  | 361712 | 1248  | 444  | 5  | 147 | synovial apoptosis inhibitor 1, synoviolin (Syvn1) alternative variant eSep08, mRNA.                      |
| Syvn1  | Syvn1.fSep08  | 361712 | 1393  | 386  | 3  | 120 | synovial apoptosis inhibitor 1, synoviolin (Syvn1) alternative variant fSep08, mRNA.                      |
| sywey  | sywey.aSep08  |        | 1992  | 133  |    | 44  | murinoglobulin 2 like (sywey) mRNA.                                                                       |
| T2     | T2.aSep08     | 681288 | 5573  | 388  | 3  | 129 | brachyury 2 (T2) alternative variant aSep08, mRNA.                                                        |
| T2     | T2.bSep08     | 681288 | 910   | 506  | 2  | 54  | brachyury 2 (T2) alternative variant bSep08, mRNA.                                                        |
| taby   | taby.aSep08   |        | 2828  | 728  |    | 44  | putative protein of vertebrate origin (taby) mRNA.                                                        |
| Tacc2  | Tacc2.cSep08  | 309025 | 85309 | 1623 | 4  | 540 | transforming, acidic coiled-coil containing protein 2 (Tacc2) alternative variant cSep08, mRNA.           |
| Tacc2  | Tacc2.dSep08  | 309025 | 20232 | 1554 | 9  | 295 | transforming, acidic coiled-coil containing protein 2 (Tacc2) alternative variant dSep08, mRNA.           |
| Tacc2  | Tacc2.eSep08  | 309025 | 9826  | 731  | 6  | 243 | transforming, acidic coiled-coil containing protein 2 (Tacc2) alternative variant eSep08, mRNA.           |
| Tacc2  | Tacc2.fSep08  | 309025 | 23318 | 652  | 8  | 217 | transforming, acidic coiled-coil containing protein 2 (Tacc2) alternative variant fSep08, mRNA.           |
| Tacc2  | Tacc2.gSep08  | 309025 | 15752 | 495  | 5  | 164 | transforming, acidic coiled-coil containing protein 2 (Tacc2) alternative variant gSep08, mRNA.           |
| Tacc2  | Tacc2.iSep08  | 309025 | 425   | 327  | 2  | 41  | transforming, acidic coiled-coil containing protein 2 (Tacc2) alternative variant iSep08, mRNA.           |
| Tacc3  | Tacc3.aSep08  | 360962 | 14799 | 2442 | 15 | 632 | transforming, acidic coiled-coil containing protein 3 (Tacc3) alternative variant aSep08, mRNA.           |
| Tacc3  | Tacc3.bSep08  | 360962 | 7459  | 891  | 6  | 292 | transforming, acidic coiled-coil containing protein 3 (Tacc3) alternative variant bSep08, mRNA.           |
| Tacc3  | Tacc3.cSep08  | 360962 | 1871  | 818  | 3  | 272 | transforming, acidic coiled-coil containing protein 3 (Tacc3) alternative variant cSep08, mRNA.           |
| Tacc3  | Tacc3.dSep08  | 360962 | 6621  | 810  | 6  | 263 | transforming, acidic coiled-coil containing protein 3 (Tacc3) alternative variant dSep08, mRNA.           |
| Tacc3  | Tacc3.eSep08  | 360962 | 2467  | 1431 | 5  | 123 | transforming, acidic coiled-coil containing protein 3 (Tacc3) alternative variant eSep08, mRNA.           |
| Tacc3  | Tacc3.fSep08  | 360962 | 1369  | 793  | 3  | 104 | transforming, acidic coiled-coil containing protein 3 (Tacc3) alternative variant fSep08, mRNA.           |
| tachy  | tachy.aSep08  |        | 2371  | 350  |    | 49  | putative protein (5.1 kD) (tachy) mRNA.                                                                   |
| Tada1l | Tada1l.bSep08 | 360874 | 14440 | 1812 | 7  | 248 | transcriptional adaptor 1 (HFI1 homolog, yeast) like (28.0 kD) (Tada1l) alternative variant bSep08, mRNA. |
| Tada1l | Tada1l.cSep08 | 360874 | 4286  | 1491 | 3  | 174 | transcriptional adaptor 1 (HFI1 homolog, yeast) like (Tada1l) alternative variant cSep08, mRNA.           |
| Tada2l | Tada2l.bSep08 | 360581 | 24322 | 731  | 8  | 98  | transcriptional adaptor 2 (ADA2 homolog, yeast)-like (12.0 kD) (Tada2l) alternative variant bSep08, mRNA. |
| Tada3l | Tada3l.aSep08 | 362414 | 7446  | 1838 | 7  | 181 | transcriptional adaptor 3 -like CRA c (20.5 kD) (Tada3l) alternative variant aSep08, mRNA.                |
| Tada3l | Tada3l.bSep08 | 362414 | 2889  | 850  | 4  | 135 | transcriptional adaptor 3 -like CRA c (Tada3l) alternative variant bSep08, mRNA.                          |
| Tada3l | Tada3l.cSep08 | 362414 | 4498  | 551  | 2  | 74  | transcriptional adaptor 3 -like CRA d (Tada3l) alternative variant cSep08, mRNA.                          |



|        |               |        |       |      |   |     |                                                                                                                                      |
|--------|---------------|--------|-------|------|---|-----|--------------------------------------------------------------------------------------------------------------------------------------|
| Tada3l | Tada3l.eSep08 | 362414 | 2597  | 644  | 3 | 37  | transcriptional adaptor 3 -like CRA d (Tada3l) alternative variant eSep08, mRNA.                                                     |
| tadar  | tadar.aSep08  |        | 2475  | 223  |   | 73  | hydrocephalus inducing (tadar) mRNA.                                                                                                 |
| Taf1   | Taf1.aSep08   | 317256 | 19472 | 735  | 1 | 214 | TAF1 RNA polymerase II, TATA box binding protein (TBP)-associated factor (Taf1) alternative variant aSep08, mRNA.                    |
| Taf1   | Taf1.bSep08   | 317256 | 17663 | 579  | 1 | 193 | TAF1 RNA polymerase II, TATA box binding protein (TBP)-associated factor (Taf1) alternative variant bSep08, mRNA.                    |
| Taf1a  | Taf1a.bSep08  | 360893 | 4808  | 471  |   | 8   | TATA box binding protein (Tbp)-associated factor, RNA polymerase I, A (1.0 kD) (Taf1a) alternative variant bSep08, mRNA.             |
| Taf1b  | Taf1b.aSep08  | 690450 | 27815 | 673  |   | 224 | TATA box binding protein (Tbp)-associated factor, RNA polymerase I, B (Taf1b) mRNA.                                                  |
| Taf1c  | Taf1c.bSep08  | 361420 | 2205  | 639  | 3 | 160 | CRA b (17.5 kD) (Taf1c) alternative variant bSep08, mRNA.                                                                            |
| Taf1c  | Taf1c.cSep08  | 361420 | 2186  | 494  | 4 | 129 | CRA c (Taf1c) alternative variant cSep08, mRNA.                                                                                      |
| Taf1c  | Taf1c.dSep08  | 361420 | 2204  | 470  | 5 | 108 | tata box binding protein -associated factor RNA polymerase I C 110kDa like (Taf1c) alternative variant dSep08, mRNA.                 |
| Taf1c  | Taf1c.fSep08  | 361420 | 494   | 415  | 2 | 77  | putative protein (Taf1c) alternative variant fSep08, mRNA.                                                                           |
| Taf2   | Taf2.aSep08   | 170844 | 21942 | 1475 |   | 412 | TAF2 RNA polymerase II, TATA box binding protein (TBP)-associated factor (Taf2) mRNA.                                                |
| TAF4.0 | TAF4.0.aSep08 |        | 51558 | 1904 |   | 149 | associated factor (TAF4.0) mRNA.                                                                                                     |
| TAF4.1 | TAF4.1.aSep08 |        | 11601 | 1770 | 6 | 169 | CRA a (TAF4.1) alternative variant aSep08, mRNA.                                                                                     |
| TAF4.1 | TAF4.1.bSep08 |        | 1924  | 536  | 3 | 24  | putative protein (TAF4.1) alternative variant bSep08, mRNA.                                                                          |
| Taf5   | Taf5.bSep08   | 294018 | 3264  | 805  | 1 | 134 | TAF5 RNA polymerase II, TATA box binding protein (TBP)-associated factor (Taf5) alternative variant bSep08, mRNA.                    |
| Taf5l  | Taf5l.aSep08  | 307927 | 17587 | 2782 | 1 | 609 | TAF5-like RNA polymerase II, p300/CBP-associated factor (PCAF)-associated factor (Taf5l) alternative variant aSep08, mRNA.           |
| Taf5l  | Taf5l.bSep08  | 307927 | 17022 | 984  | 1 | 327 | TAF5-like RNA polymerase II, p300/CBP-associated factor (PCAF)-associated factor (Taf5l) alternative variant bSep08, mRNA.           |
| Taf6   | Taf6.bSep08   | 288533 | 2369  | 1031 | 4 | 261 | TAF6 RNA polymerase II, TATA box binding protein (TBP)-associated factor (Taf6) alternative variant bSep08, mRNA.                    |
| Taf6   | Taf6.cSep08   | 288533 | 1508  | 734  | 5 | 187 | TAF6 RNA polymerase II, TATA box binding protein (TBP)-associated factor (Taf6) alternative variant cSep08, mRNA.                    |
| Taf6l  | Taf6l.bSep08  | 309194 | 12652 | 2332 | 5 | 623 | TAF6-like RNA polymerase II, p300/CBP-associated factor (PCAF)-associated factor (68.0 kD) (Taf6l) alternative variant bSep08, mRNA. |
| Taf6l  | Taf6l.cSep08  | 309194 | 7654  | 1057 | 3 | 283 | TAF6-like RNA polymerase II, p300/CBP-associated factor (PCAF)-associated factor (31.6 kD) (Taf6l) alternative variant cSep08, mRNA. |
| Taf7l  | Taf7l.aSep08  | 363493 | 4258  | 1099 |   | 209 | TAF7-like RNA polymerase II, TATA box binding protein (TBP)-associated factor (Taf7l) mRNA.                                          |
| Taf8   | Taf8.cSep08   | 316216 | 4456  | 371  | 2 | 76  | TAF8 RNA polymerase II, TATA box binding protein (TBP)-associated factor (Taf8) alternative variant cSep08, mRNA.                    |

|        |               |        |       |      |    |     |                                                                                                                                        |
|--------|---------------|--------|-------|------|----|-----|----------------------------------------------------------------------------------------------------------------------------------------|
| Taf9   | Taf9.cSep08   | 373541 | 3319  | 801  | 3  | 54  | TAF9 RNA polymerase II, TATA box binding protein (TBP)-associated factor (Taf9) alternative variant cSep08, mRNA.                      |
| Taf9   | Taf9.fSep08   | 373541 | 1005  | 273  | 2  | 23  | TAF9 RNA polymerase II, TATA box binding protein (TBP)-associated factor (Taf9) alternative variant fSep08, mRNA.                      |
| Taf9b  | Taf9b.bSep08  | 171152 | 8250  | 760  | 1  | 201 | TAF9B RNA polymerase II, TATA box binding protein (TBP)-associated factor (Taf9b) alternative variant bSep08, mRNA.                    |
| Taf10  | Taf10.bSep08  | 293345 | 1118  | 715  | 2  | 74  | TAF10 RNA polymerase II, TATA box binding protein (TBP)-associated factor (Taf10) alternative variant bSep08, mRNA.                    |
| Taf11  | Taf11.bSep08  | 309638 | 4188  | 991  | 4  | 144 | putative protein (Taf11) alternative variant bSep08, mRNA.                                                                             |
| Taf11  | Taf11.dSep08  | 309638 | 1762  | 566  | 2  | 28  | putative protein (Taf11) alternative variant dSep08, mRNA.                                                                             |
| Taf13  | Taf13.aSep08  | 310784 | 11374 | 1363 | 3  | 124 | TAF13 RNA polymerase II, TATA box binding protein (TBP)-associated factor (14.3 kD) (Taf13) alternative variant aSep08, complete mRNA. |
| Taf13  | Taf13.bSep08  | 310784 | 10767 | 658  | 2  | 89  | TAF13 RNA polymerase II, TATA box binding protein (TBP)-associated factor (10.6 kD) (Taf13) alternative variant bSep08, mRNA.          |
| Taf15  | Taf15.aSep08  | 287571 | 31981 | 2070 | 16 | 583 | TAF15 RNA polymerase II, TATA box binding protein (TBP)-associated factor (Taf15) alternative variant aSep08, mRNA.                    |
| Taf15  | Taf15.cSep08  | 287571 | 3245  | 818  | 3  | 130 | TAF15 RNA polymerase II, TATA box binding protein (TBP)-associated factor (Taf15) alternative variant cSep08, mRNA.                    |
| taflo  | taflo.aSep08  |        | 6730  | 465  |    | 28  | putative protein (taflo) mRNA.                                                                                                         |
| taflu  | taflu.aSep08  |        | 1150  | 601  |    |     |                                                                                                                                        |
| tagar  | tagar.aSep08  |        | 3641  | 421  |    | 95  | putative protein (tagar) mRNA.                                                                                                         |
| Tagln2 | Tagln2.aSep08 | 304983 | 5176  | 1405 | 5  | 207 | transgelin 2 (23.3 kD) (Tagln2) alternative variant aSep08, mRNA.                                                                      |
| Tagln2 | Tagln2.bSep08 | 304983 | 6014  | 935  | 5  | 199 | transgelin 2 (22.4 kD) (Tagln2) alternative variant bSep08, mRNA.                                                                      |
| Tagln2 | Tagln2.dSep08 | 304983 | 1588  | 749  | 4  | 170 | transgelin 2 (Tagln2) alternative variant dSep08, mRNA.                                                                                |
| Tagln2 | Tagln2.eSep08 | 304983 | 6146  | 823  | 4  | 153 | transgelin 2 (17.4 kD) (Tagln2) alternative variant eSep08, mRNA.                                                                      |
| Tagln2 | Tagln2.fSep08 | 304983 | 3868  | 365  | 2  | 121 | transgelin 2 (Tagln2) alternative variant fSep08, mRNA.                                                                                |
| Tagln3 | Tagln3.aSep08 | 63837  | 13035 | 740  | 3  | 246 | transgelin 3 (Tagln3) alternative variant aSep08, mRNA.                                                                                |
| Tagln3 | Tagln3.dSep08 | 63837  | 12116 | 802  | 2  | 153 | transgelin 3 (Tagln3) alternative variant dSep08, mRNA.                                                                                |
| taja   | taja.aSep08   |        | 1458  | 414  |    | 61  | putative protein (taja) mRNA.                                                                                                          |
| tajey  | tajey.aSep08  |        | 28254 | 1106 |    | 32  | putative protein (tajey) mRNA.                                                                                                         |
| takee  | takee.aSep08  |        | 5308  | 411  | 1  | 136 | ezrin-binding PACE-1 like (takee) alternative variant aSep08, mRNA.                                                                    |
| takee  | takee.bSep08  |        | 5238  | 556  | 1  | 110 | ezrin-binding PACE-1 like (takee) alternative variant bSep08, mRNA.                                                                    |
| takler | takler.aSep08 |        | 460   | 359  |    | 32  | putative protein (3.8 kD) (takler) mRNA.                                                                                               |

|                |                       |        |       |      |    |      |                                                                                                      |
|----------------|-----------------------|--------|-------|------|----|------|------------------------------------------------------------------------------------------------------|
| Tal1           | Tal1.cSep08           | 313507 | 3474  | 1081 | 3  | 7    | T-cell acute lymphocytic leukemia 1 (Tal1) alternative variant cSep08, mRNA.                         |
| Tal1           | Tal1.dSep08           | 313507 | 3410  | 215  | 2  | 54   | T-cell acute lymphocytic leukemia 1 (Tal1) alternative variant dSep08, mRNA.                         |
| Taldo1         | Taldo1.bSep08         | 83688  | 9481  | 1024 | 3  | 108  | transaldolase 1 (12.1 kD) (Taldo1) alternative variant bSep08, mRNA.                                 |
| Talin_middle.0 | Talin_middle.0.aSep08 |        | 13257 | 2295 | 16 | 665  | talin (Talin_middle.0) alternative variant aSep08, mRNA.                                             |
| Talin_middle.0 | Talin_middle.0.bSep08 |        | 2786  | 446  | 1  | 70   | putative protein (Talin_middle.0) alternative variant bSep08, mRNA.                                  |
| talo           | talo.aSep08           |        | 2650  | 438  |    | 48   | putative protein (5.3 kD) (talo) mRNA.                                                               |
| tamee          | tamee.aSep08          |        | 92097 | 720  |    | 66   | putative protein (tamee) mRNA.                                                                       |
| Tank           | Tank.aSep08           | 252961 | 79239 | 2034 | 8  | 413  | TRAF family member-associated Nf-kappa B activator (Tank) alternative variant aSep08, mRNA.          |
| Tank           | Tank.bSep08           | 252961 | 60602 | 680  | 5  | 226  | TRAF family member-associated Nf-kappa B activator (Tank) alternative variant bSep08, mRNA.          |
| Tank           | Tank.cSep08           | 252961 | 55154 | 755  | 6  | 187  | TRAF family member-associated Nf-kappa B activator (Tank) alternative variant cSep08, mRNA.          |
| Tank           | Tank.dSep08           | 252961 | 18393 | 503  | 4  | 113  | TRAF family member-associated Nf-kappa B activator (Tank) alternative variant dSep08, mRNA.          |
| tanoy          | tanoy.aSep08          |        | 3994  | 396  |    | 131  | dedicator of cytokinesis 10 (tanoy) mRNA.                                                            |
| Taok1          | Taok1.bSep08          | 286993 | 26769 | 2895 | 10 | 704  | TAO kinase 1 (Taok1) alternative variant bSep08, mRNA.                                               |
| Taok2          | Taok2.bSep08          | 64666  | 15094 | 3888 | 18 | 1056 | tao kinase 2 (Taok2) alternative variant bSep08, mRNA.                                               |
| Taok2          | Taok2.cSep08          | 64666  | 1685  | 1605 | 2  | 153  | kinase 2 (Taok2) alternative variant cSep08, mRNA.                                                   |
| Taok2          | Taok2.dSep08          | 64666  | 1694  | 765  | 4  | 114  | TAO kinase (Taok2) alternative variant dSep08, mRNA.                                                 |
| Taok3          | Taok3.bSep08          | 304530 | 31116 | 685  | 9  | 228  | TAO kinase 3 (Taok3) alternative variant bSep08, mRNA.                                               |
| Tap1           | Tap1.dSep08           | 24811  | 588   | 336  | 2  | 81   | transporter 1, ATP-binding cassette, sub-family B (MDR/TAP) (Tap1) alternative variant dSep08, mRNA. |
| Tap2           | Tap2.bSep08           | 24812  | 4669  | 2148 | 5  | 315  | putative protein (21.6 kD) (Tap2) alternative variant bSep08, mRNA.                                  |
| Tap2           | Tap2.cSep08           | 24812  | 1277  | 599  | 2  | 194  | transporter 2 (Tap2) alternative variant cSep08, mRNA.                                               |
| Tap2           | Tap2.dSep08           | 24812  | 1403  | 1144 | 3  | 169  | tap2 (Tap2) alternative variant dSep08, mRNA.                                                        |
| Tap2           | Tap2.eSep08           | 24812  | 2993  | 712  | 3  | 123  | putative protein (Tap2) alternative variant eSep08, mRNA.                                            |
| Tap2           | Tap2.fSep08           | 24812  | 2046  | 1337 | 2  | 78   | putative mitochondrial protein (9.2 kD) (Tap2) alternative variant fSep08, mRNA.                     |
| tapor          | tapor.aSep08          |        | 1418  | 394  |    | 74   | putative protein of mammalian origin (tapor) mRNA.                                                   |
| Tapt1          | Tapt1.aSep08          | 305386 | 15235 | 607  | 4  | 202  | transmembrane anterior posterior transformation 1 (Tapt1) alternative variant aSep08, mRNA.          |
| Tapt1          | Tapt1.bSep08          | 305386 | 22795 | 345  | 2  | 114  | transmembrane anterior posterior transformation 1 (Tapt1) alternative variant bSep08, mRNA.          |
| Tarbp2         | Tarbp2.aSep08         | 363006 | 1757  | 1339 |    | 146  | TAR (HIV) RNA binding protein 2 (15.6 kD) (Tarbp2) mRNA.                                             |
| tarby          | tarby.bSep08          |        | 2272  | 494  | 4  | 62   | putative protein (tarby) alternative variant bSep08, mRNA.                                           |
| tarby          | tarby.cSep08          |        | 21182 | 546  | 7  | 36   | putative protein (tarby) alternative variant cSep08, mRNA.                                           |
| tarby          | tarby.dSep08          |        | 1860  | 341  | 4  | 49   | putative protein (tarby) alternative variant dSep08, mRNA.                                           |
| tarchy         | tarchy.aSep08         |        | 1173  | 722  |    | 53   | putative protein (6.1 kD) (tarchy) mRNA.                                                             |

|         |                |        |       |      |    |     |                                                                                       |
|---------|----------------|--------|-------|------|----|-----|---------------------------------------------------------------------------------------|
| tardar  | tardar.aSep08  |        | 2291  | 2099 |    | 276 | putative protein (tardar) mRNA.                                                       |
| Tardbp  | Tardbp.aSep08  | 298648 | 10880 | 2174 | 5  | 414 | TAR DNA binding protein (44.5 kD) (Tardbp) alternative variant aSep08, complete mRNA. |
| Tardbp  | Tardbp.bSep08  | 298648 | 9642  | 1348 | 5  | 298 | TAR DNA binding protein (33.6 kD) (Tardbp) alternative variant bSep08, mRNA.          |
| Tardbp  | Tardbp.dSep08  | 298648 | 4228  | 655  | 3  | 162 | TAR DNA binding protein (Tardbp) alternative variant dSep08, mRNA.                    |
| Tardbp  | Tardbp.eSep08  | 298648 | 4229  | 647  | 3  | 145 | TAR DNA binding protein (Tardbp) alternative variant eSep08, mRNA.                    |
| Tardbp  | Tardbp.fSep08  | 298648 | 4225  | 684  | 3  | 137 | TAR DNA binding protein (Tardbp) alternative variant fSep08, mRNA.                    |
| tarflo  | tarflo.aSep08  |        | 2260  | 475  |    | 35  | putative protein (3.9 kD) (tarflo) mRNA.                                              |
| tarflu  | tarflu.aSep08  |        | 1838  | 619  |    | 52  | putative protein (5.8 kD) (tarflu) mRNA.                                              |
| targar  | targar.aSep08  |        | 2576  | 514  |    | 171 | receptor beta (targar) mRNA.                                                          |
| tarja   | tarja.aSep08   |        | 3351  | 607  |    | 94  | putative protein (tarja) mRNA.                                                        |
| tarjey  | tarjey.aSep08  |        | 17715 | 942  |    | 272 | platelet-derived growth factor receptor (tarjey) mRNA.                                |
| tarkee  | tarkee.aSep08  |        | 2339  | 574  |    | 59  | putative protein (7.0 kD) (tarkee) mRNA.                                              |
| tarkler | tarkler.aSep08 |        | 5419  | 484  |    | 34  | putative protein (tarkler) mRNA.                                                      |
| tarlo   | tarlo.aSep08   |        | 4975  | 387  |    | 66  | putative protein (tarlo) mRNA.                                                        |
| tarmee  | tarmee.aSep08  |        | 5967  | 386  |    | 128 | shroom family member 1 CRA b (tarmee) mRNA.                                           |
| tarnoy  | tarnoy.aSep08  |        | 4992  | 697  |    | 56  | putative protein (6.4 kD) (tarnoy) mRNA.                                              |
| tarpor  | tarpor.aSep08  |        | 14503 | 723  |    | 43  | putative protein of eukaryotic origin (tarpor) mRNA.                                  |
| Tars    | Tars.aSep08    | 294810 | 18847 | 2601 | 19 | 762 | threonyl-tRNA synthetase (Tars) alternative variant aSep08, mRNA.                     |
| Tars    | Tars.bSep08    | 294810 | 7150  | 698  | 6  | 216 | threonyl-tRNA synthetase (Tars) alternative variant bSep08, mRNA.                     |
| Tars2   | Tars2.bSep08   | 310672 | 9706  | 730  | 7  | 168 | threonyl-tRNA synthetase 2 mitochondrial (Tars2) alternative variant bSep08, mRNA.    |
| Tars2   | Tars2.cSep08   | 310672 | 3833  | 464  | 3  | 154 | threonyl-tRNA synthetase mitochondrial (Tars2) alternative variant cSep08, mRNA.      |
| Tars2   | Tars2.dSep08   | 310672 | 7394  | 743  | 6  | 131 | threonyl-tRNA synthetase-like 1 (Tars2) alternative variant dSep08, mRNA.             |
| Tars2   | Tars2.eSep08   | 310672 | 4928  | 645  | 6  | 124 | threonyl-tRNA synthetase-like (13.9 kD) (Tars2) alternative variant eSep08, mRNA.     |
| tarsa   | tarsa.bSep08   |        | 1235  | 636  | 2  | 62  | putative protein (6.5 kD) (tarsa) alternative variant bSep08, mRNA.                   |
| tarshee | tarshee.aSep08 |        | 6489  | 735  |    | 90  | putative protein (tarshee) mRNA.                                                      |
| Tarsl2  | Tarsl2.bSep08  | 308701 | 19870 | 715  | 1  | 238 | threonyl-tRNA synthetase-like 2 (Tarsl2) alternative variant bSep08, mRNA.            |
| tartu   | tartu.aSep08   |        | 8294  | 337  |    | 98  | putative protein of mammalian origin (tartu) mRNA.                                    |
| tarvar  | tarvar.aSep08  |        | 1309  | 276  |    | 60  | putative protein (tarvar) mRNA.                                                       |
| tarwey  | tarwey.aSep08  |        | 755   | 405  |    | 134 | nucleolar protein 1 120kDa (tarwey) mRNA.                                             |
| tasa    | tasa.aSep08    |        | 2980  | 720  |    | 98  | putative protein (10.7 kD) (tasa) mRNA.                                               |
| tashee  | tashee.aSep08  |        | 89777 | 959  | 8  | 298 | CRA a (tashee) alternative variant aSep08, mRNA.                                      |

|         |                |        |       |      |    |     |                                                                                                         |
|---------|----------------|--------|-------|------|----|-----|---------------------------------------------------------------------------------------------------------|
| tashee  | tashee.bSep08  |        | 37178 | 705  | 3  | 40  | putative protein (tashee) alternative variant bSep08, mRNA.                                             |
| tashee  | tashee.cSep08  |        | 30126 | 672  | 2  | 16  | putative protein (tashee) alternative variant cSep08, mRNA.                                             |
| tashee  | tashee.dSep08  |        | 30124 | 670  | 2  | 15  | putative protein (tashee) alternative variant dSep08, mRNA.                                             |
| Tat     | Tat.bSep08     | 24813  | 1550  | 1160 | 2  | 86  | tyrosine aminotransferase (Tat) alternative variant bSep08, mRNA.                                       |
| Tatdn2  | Tatdn2.bSep08  | 500295 | 3353  | 882  | 1  | 145 | TatD-related deoxyribonuclease (Tatdn2) alternative variant bSep08, mRNA.                               |
| Tatdn2  | Tatdn2.cSep08  | 500295 | 9994  | 2191 | 4  | 116 | TatD-related deoxyribonuclease (Tatdn2) alternative variant cSep08, mRNA.                               |
| tatu    | tatu.aSep08    |        | 6462  | 248  |    | 82  | CRA b like (tatu) mRNA.                                                                                 |
| tavar   | tavar.aSep08   |        | 6700  | 551  |    | 47  | putative protein (5.5 kD) (tavar) mRNA.                                                                 |
| tawby   | tawby.aSep08   |        | 3419  | 755  |    | 102 | putative protein (tawby) mRNA.                                                                          |
| tawchy  | tawchy.aSep08  |        | 3346  | 662  |    | 59  | putative protein (tawchy) mRNA.                                                                         |
| tawdar  | tawdar.aSep08  |        | 19334 | 393  |    | 99  | WD repeat domain 59 (tawdar) mRNA.                                                                      |
| tawey   | tawey.aSep08   |        | 19048 | 566  |    | 64  | putative protein (6.8 kD) (tawey) mRNA.                                                                 |
| tawflo  | tawflo.aSep08  |        | 760   | 468  |    | 121 | putative protein (tawflo) mRNA.                                                                         |
| tawflu  | tawflu.aSep08  |        | 1733  | 377  |    | 55  | putative protein (tawflu) mRNA.                                                                         |
| tawgar  | tawgar.aSep08  |        | 7435  | 957  |    | 58  | putative protein (tawgar) mRNA.                                                                         |
| tawja   | tawja.aSep08   |        | 6074  | 818  |    | 272 | CRA a (tawja) mRNA.                                                                                     |
| tawjey  | tawjey.aSep08  |        | 6026  | 365  |    | 118 | putative protein (tawjey) mRNA.                                                                         |
| tawkee  | tawkee.aSep08  |        | 2832  | 248  |    | 70  | soluble adenylyl cyclase (tawkee) mRNA.                                                                 |
| tawkler | tawkler.aSep08 |        | 2062  | 600  |    | 95  | putative protein of mammalian origin (tawkler) mRNA.                                                    |
| tawlo   | tawlo.aSep08   |        | 3480  | 2134 |    | 52  | solute carrier family 7 member (tawlo) mRNA.                                                            |
| tawmee  | tawmee.bSep08  |        | 746   | 442  | 2  | 111 | putative protein (tawmee) alternative variant bSep08, mRNA.                                             |
| tawnoy  | tawnoy.bSep08  |        | 10223 | 461  | 1  | 48  | putative protein (5.4 kD) (tawnoy) alternative variant bSep08, mRNA.                                    |
| tawnoy  | tawnoy.cSep08  |        | 3606  | 389  | 1  | 50  | putative protein (tawnoy) alternative variant cSep08, mRNA.                                             |
| tawpor  | tawpor.aSep08  |        | 40206 | 423  |    | 141 | filamin A interacting protein 1 CRA b (tawpor) mRNA.                                                    |
| tawsa   | tawsa.aSep08   |        | 2472  | 501  | 1  | 35  | putative protein (tawsa) alternative variant aSep08, mRNA.                                              |
| tawsa   | tawsa.bSep08   |        | 2086  | 403  | 1  | 36  | putative protein (tawsa) alternative variant bSep08, mRNA.                                              |
| tawshee | tawshee.aSep08 |        | 1280  | 597  | 2  | 77  | putative protein of mammalian origin (tawshee) alternative variant aSep08, mRNA.                        |
| tawtu   | tawtu.aSep08   |        | 6299  | 1374 |    | 289 | putative protein (tawtu) alternative variant aSep08, mRNA.                                              |
| tawvar  | tawvar.aSep08  |        | 4586  | 690  |    | 84  | putative cytoplasmic protein (9.0 kD) (tawvar) mRNA.                                                    |
| tawwey  | tawwey.aSep08  |        | 4449  | 387  |    | 67  | condensin complex (tawwey) mRNA.                                                                        |
| Tax1bp1 | Tax1bp1.bSep08 | 246244 | 30275 | 1467 | 11 | 488 | tax1 (human T-cell leukemia virus type I) binding protein 1 (Tax1bp1) alternative variant bSep08, mRNA. |
| Tax1bp1 | Tax1bp1.cSep08 | 246244 | 26221 | 1054 | 9  | 350 | tax1 (human T-cell leukemia virus type I) binding protein 1 (Tax1bp1) alternative variant cSep08, mRNA. |

|         |                |        |        |      |    |     |                                                                                                                   |
|---------|----------------|--------|--------|------|----|-----|-------------------------------------------------------------------------------------------------------------------|
| Tax1bp1 | Tax1bp1.dSep08 | 246244 | 26229  | 1021 | 7  | 267 | tax1 (human T-cell leukemia virus type I) binding protein 1 (Tax1bp1) alternative variant dSep08, mRNA.           |
| Tax1bp1 | Tax1bp1.eSep08 | 246244 | 24731  | 756  | 8  | 252 | tax1 (human T-cell leukemia virus type I) binding protein 1 (Tax1bp1) alternative variant eSep08, mRNA.           |
| Tax1bp1 | Tax1bp1.fSep08 | 246244 | 23182  | 721  | 5  | 206 | tax1 (human T-cell leukemia virus type I) binding protein 1 (Tax1bp1) alternative variant fSep08, mRNA.           |
| Tax1bp1 | Tax1bp1.gSep08 | 246244 | 7678   | 407  | 3  | 135 | tax1 (human T-cell leukemia virus type I) binding protein 1 (Tax1bp1) alternative variant gSep08, mRNA.           |
| Tax1bp3 | Tax1bp3.aSep08 | 360564 | 4822   | 1535 | 4  | 124 | tax1 (human T-cell leukemia virus type I) binding protein 3 (13.7 kD) (Tax1bp3) alternative variant aSep08, mRNA. |
| Taz     | Taz.bSep08     | 363521 | 8682   | 916  | 9  | 194 | tafazzin (22.4 kD) (Taz) alternative variant bSep08, mRNA.                                                        |
| Taz     | Taz.cSep08     | 363521 | 5860   | 700  | 6  | 186 | tafazzin (Taz) alternative variant cSep08, mRNA.                                                                  |
| Taz     | Taz.dSep08     | 363521 | 4885   | 606  | 2  | 110 | tafazzin (Taz) alternative variant dSep08, mRNA.                                                                  |
| Taz     | Taz.eSep08     | 363521 | 7188   | 1781 | 7  | 99  | tafazzin (Taz) alternative variant eSep08, mRNA.                                                                  |
| TB.0    | TB.0.aSep08    |        | 10622  | 2998 | 12 | 832 | latent transforming growth factor beta binding protein 3 like (TB.0) alternative variant aSep08, mRNA.            |
| TB.0    | TB.0.bSep08    |        | 553    | 424  | 2  | 111 | latent transforming growth factor beta binding protein 3 like (TB.0) alternative variant bSep08, mRNA.            |
| TB.0    | TB.0.cSep08    |        | 1988   | 1365 | 1  | 108 | latent transforming growth factor beta binding protein 3 like (TB.0) alternative variant cSep08, mRNA.            |
| TBC.0   | TBC.0.aSep08   |        | 21039  | 1229 | 2  | 362 | growth hormone regulated TBC protein 1 (TBC.0) alternative variant aSep08, mRNA.                                  |
| TBC.0   | TBC.0.bSep08   |        | 18494  | 748  |    | 248 | growth hormone regulated tbc protein 1 (TBC.0) alternative variant bSep08, mRNA.                                  |
| Tbc1d1  | Tbc1d1.aSep08  | 360937 | 60561  | 1767 | 8  | 555 | TBC1 domain family, member 1 (Tbc1d1) alternative variant aSep08, mRNA.                                           |
| Tbc1d1  | Tbc1d1.bSep08  | 360937 | 16785  | 630  | 1  | 157 | TBC1 domain family, member 1 (Tbc1d1) alternative variant bSep08, mRNA.                                           |
| Tbc1d2  | Tbc1d2.bSep08  | 313234 | 47413  | 4193 | 13 | 704 | TBC1 domain family, member 2 (80.7 kD) (Tbc1d2) alternative variant bSep08, mRNA.                                 |
| Tbc1d2  | Tbc1d2.cSep08  | 313234 | 929    | 395  | 2  | 38  | TBC1 domain family, member 2 (Tbc1d2) alternative variant cSep08, mRNA.                                           |
| Tbc1d2b | Tbc1d2b.bSep08 | 315880 | 18998  | 376  | 2  | 125 | TBC1 domain family, member 2B (Tbc1d2b) alternative variant bSep08, mRNA.                                         |
| Tbc1d5  | Tbc1d5.bSep08  | 501088 | 379377 | 1790 | 10 | 414 | TBC1 domain family, member 5 (Tbc1d5) alternative variant bSep08, mRNA.                                           |
| Tbc1d5  | Tbc1d5.cSep08  | 501088 | 307768 | 1575 | 13 | 332 | TBC1 domain family, member 5 (38.9 kD) (Tbc1d5) alternative variant cSep08, mRNA.                                 |
| Tbc1d5  | Tbc1d5.dSep08  | 501088 | 73388  | 316  | 3  | 105 | TBC1 domain family, member 5 (Tbc1d5) alternative variant dSep08, mRNA.                                           |
| Tbc1d7  | Tbc1d7.bSep08  | 361227 | 17551  | 1572 | 6  | 204 | TBC1 domain family, member 7 (23.8 kD) (Tbc1d7) alternative variant bSep08, mRNA.                                 |
| Tbc1d9b | Tbc1d9b.aSep08 | 360520 | 17242  | 2900 | 14 | 762 | TBC1 domain family, member 9B (Tbc1d9b) alternative variant aSep08, mRNA.                                         |
| Tbc1d9b | Tbc1d9b.bSep08 | 360520 | 21526  | 3001 | 11 | 692 | TBC1 domain family, member 9B (Tbc1d9b) alternative variant bSep08, mRNA.                                         |

|          |                 |        |       |      |    |     |                                                                                            |
|----------|-----------------|--------|-------|------|----|-----|--------------------------------------------------------------------------------------------|
| Tbc1d9b  | Tbc1d9b.cSep08  | 360520 | 7166  | 583  | 6  | 194 | TBC1 domain family, member 9B (Tbc1d9b) alternative variant cSep08, mRNA.                  |
| Tbc1d9b  | Tbc1d9b.dSep08  | 360520 | 3218  | 572  | 3  | 149 | TBC1 domain family, member 9B (Tbc1d9b) alternative variant dSep08, mRNA.                  |
| Tbc1d10a | Tbc1d10a.bSep08 | 360968 | 1379  | 749  | 2  | 176 | TBC1 domain family, member 10a (Tbc1d10a) alternative variant bSep08, mRNA.                |
| Tbc1d10b | Tbc1d10b.aSep08 | 365372 | 10918 | 2989 | 3  | 717 | TBC1 domain family, member 10b (Tbc1d10b) alternative variant aSep08, mRNA.                |
| Tbc1d10b | Tbc1d10b.bSep08 | 365372 | 5669  | 749  |    | 249 | TBC1 domain family, member 10b (Tbc1d10b) alternative variant bSep08, mRNA.                |
| Tbc1d13  | Tbc1d13.aSep08  | 499768 | 5356  | 2824 |    | 201 | TBC1 domain family, member 13 (Tbc1d13) mRNA.                                              |
| Tbc1d15  | Tbc1d15.aSep08  | 366896 | 59149 | 3682 | 17 | 687 | tbc1 domain family member 15 (Tbc1d15) alternative variant aSep08, mRNA.                   |
| Tbc1d15  | Tbc1d15.bSep08  | 366896 | 13953 | 1242 | 10 | 307 | tbc1 domain family member 15 (36.4 kD) (Tbc1d15) alternative variant bSep08, mRNA.         |
| Tbc1d15  | Tbc1d15.cSep08  | 366896 | 5981  | 660  | 3  | 97  | tbc1 domain family member 15 (Tbc1d15) alternative variant cSep08, mRNA.                   |
| Tbc1d15  | Tbc1d15.dSep08  | 366896 | 1932  | 516  | 3  | 79  | tbc1 domain family member 15 (Tbc1d15) alternative variant dSep08, mRNA.                   |
| Tbc1d20  | Tbc1d20.bSep08  | 362237 | 13003 | 684  | 5  | 227 | TBC1 domain family, member 20 (Tbc1d20) alternative variant bSep08, mRNA.                  |
| Tbc1d20  | Tbc1d20.cSep08  | 362237 | 12653 | 596  | 5  | 126 | TBC1 domain family, member 20 (Tbc1d20) alternative variant cSep08, mRNA.                  |
| Tbc1d22b | Tbc1d22b.bSep08 | 502414 | 13845 | 1100 |    | 340 | TBC1 domain family, member 22B (Tbc1d22b) alternative variant bSep08, mRNA.                |
| Tbc1d23  | Tbc1d23.aSep08  | 304019 | 58662 | 3657 | 18 | 684 | TBC1 domain family, member 23 (76.6 kD) (Tbc1d23) alternative variant aSep08, mRNA.        |
| Tbc1d24  | Tbc1d24.bSep08  | 287110 | 6646  | 1784 | 6  | 136 | TBC1 domain family, member 24 (Tbc1d24) alternative variant bSep08, mRNA.                  |
| Tbc1d24  | Tbc1d24.cSep08  | 287110 | 5519  | 761  | 2  | 45  | TBC1 domain family, member 24 (Tbc1d24) alternative variant cSep08, mRNA.                  |
| Tbcb     | Tbcb.cSep08     | 292777 | 1781  | 599  | 3  | 161 | tubulin folding cofactor B (Tbcb) alternative variant cSep08, mRNA.                        |
| Tbcb     | Tbcb.dSep08     | 292777 | 2868  | 1284 | 4  | 120 | tubulin folding cofactor B (13.3 kD) (Tbcb) alternative variant dSep08, mRNA.              |
| Tbccd1   | Tbccd1.bSep08   | 303830 | 29017 | 2546 | 8  | 503 | putative protein of eukaryotic origin (57.5 kD) (Tbccd1) alternative variant bSep08, mRNA. |
| Tbccd1   | Tbccd1.cSep08   | 303830 | 20059 | 903  | 2  | 188 | putative protein of metazoan origin (21.8 kD) (Tbccd1) alternative variant cSep08, mRNA.   |
| Tbccd1   | Tbccd1.dSep08   | 303830 | 13917 | 368  | 1  | 72  | putative protein (Tbccd1) alternative variant dSep08, mRNA.                                |
| Tbcd     | Tbcd.aSep08     | 360683 | 21974 | 729  |    | 243 | tubulin-specific chaperone d (Tbcd) mRNA.                                                  |
| Tbce     | Tbce.bSep08     | 361255 | 37749 | 759  | 7  | 155 | tubulin-specific chaperone e (Tbce) alternative variant bSep08, mRNA.                      |
| Tbce     | Tbce.cSep08     | 361255 | 8402  | 1462 | 9  | 152 | tubulin-specific chaperone e CRA e (17.4 kD) (Tbce) alternative variant cSep08, mRNA.      |

|               |                      |        |       |      |   |     |                                                                                                |
|---------------|----------------------|--------|-------|------|---|-----|------------------------------------------------------------------------------------------------|
| Tbce          | Tbce.dSep08          | 361255 | 3818  | 1108 | 4 | 93  | tubulin-specific chaperone e (10.4 kD) (Tbce) alternative variant dSep08, mRNA.                |
| Tbce          | Tbce.eSep08          | 361255 | 3649  | 727  | 4 | 88  | tubulin-specific chaperone e (10.2 kD) (Tbce) alternative variant eSep08, mRNA.                |
| Tbce          | Tbce.gSep08          | 361255 | 784   | 608  | 2 | 59  | tubulin-specific chaperone e CRA e (6.8 kD) (Tbce) alternative variant gSep08, mRNA.           |
| Tbk1          | Tbk1.bSep08          | 299827 | 8202  | 1383 | 9 | 225 | TANK-binding kinase 1 like (Tbk1) alternative variant bSep08, mRNA.                            |
| Tbk1          | Tbk1.cSep08          | 299827 | 8796  | 674  | 4 | 184 | TANK-binding kinase 1 like (Tbk1) alternative variant cSep08, mRNA.                            |
| Tbk1          | Tbk1.dSep08          | 299827 | 1828  | 1216 | 3 | 94  | TANK-binding kinase 1 like (11.5 kD) (Tbk1) alternative variant dSep08, mRNA.                  |
| Tbl1xr1       | Tbl1xr1.bSep08       | 365755 | 42391 | 205  |   | 68  | transducin (beta)-like 1X-linked receptor 1 (Tbl1xr1) alternative variant bSep08, mRNA.        |
| Tbl3          | Tbl3.bSep08          | 287120 | 1288  | 771  | 5 | 218 | transducin (beta)-like 3 (Tbl3) alternative variant bSep08, mRNA.                              |
| Tbl3          | Tbl3.cSep08          | 287120 | 1491  | 704  | 4 | 155 | transducin (beta)-like 3 (16.9 kD) (Tbl3) alternative variant cSep08, mRNA.                    |
| Tbp           | Tbp.aSep08           | 117526 | 15668 | 1270 | 7 | 335 | TATA box binding protein (36.5 kD) (Tbp) alternative variant aSep08, mRNA.                     |
| TBP-binding.0 | TBP-binding.0.aSep08 |        | 5846  | 478  |   | 159 | taf1 RNA polymerase II TATA box binding protein - associated factor like (TBP-binding.0) mRNA. |
| Tbpl1         | Tbpl1.aSep08         | 689030 | 26263 | 2834 | 7 | 218 | TATA box binding protein-like 1 (24.2 kD) (Tbpl1) alternative variant aSep08, complete mRNA.   |
| Tbpl1         | Tbpl1.cSep08         | 689030 | 822   | 729  | 2 | 145 | TATA box binding protein-like 1 (16.3 kD) (Tbpl1) alternative variant cSep08, mRNA.            |
| Tbpl1         | Tbpl1.dSep08         | 689030 | 24699 | 1044 | 7 | 130 | TATA box binding protein-like 1 (14.5 kD) (Tbpl1) alternative variant dSep08, complete mRNA.   |
| Tbpl1         | Tbpl1.eSep08         | 689030 | 776   | 649  | 2 | 60  | TATA box binding protein-like 1 (Tbpl1) alternative variant eSep08, mRNA.                      |
| Tbr1          | Tbr1.aSep08          | 680427 | 2061  | 912  |   | 303 | T-box brain gene 1 (Tbr1) mRNA.                                                                |
| Tbrg1         | Tbrg1.bSep08         | 300521 | 1406  | 807  | 2 | 124 | transforming growth factor beta 1 (Tbrg1) alternative variant bSep08, mRNA.                    |
| Tbrg1         | Tbrg1.cSep08         | 300521 | 1099  | 358  | 2 | 95  | transforming growth factor beta 1 (Tbrg1) alternative variant cSep08, mRNA.                    |
| Tbrg1         | Tbrg1.dSep08         | 300521 | 3905  | 532  | 4 | 43  | putative protein (5.1 kD) (Tbrg1) alternative variant dSep08, complete mRNA.                   |
| Tbrg4         | Tbrg4.bSep08         | 360977 | 2998  | 574  | 4 | 190 | transforming growth factor beta regulated gene 4 (Tbrg4) alternative variant bSep08, mRNA.     |
| Tbrg4         | Tbrg4.cSep08         | 360977 | 1775  | 788  | 4 | 162 | transforming growth factor beta regulated gene 4 (Tbrg4) alternative variant cSep08, mRNA.     |
| Tbrg4         | Tbrg4.dSep08         | 360977 | 3079  | 381  | 3 | 100 | transforming growth factor beta regulated gene 4 (Tbrg4) alternative variant dSep08, mRNA.     |
| Tbx2          | Tbx2.bSep08          | 303398 | 6333  | 2627 | 5 | 485 | T-box 2 (50.7 kD) (Tbx2) alternative variant bSep08, mRNA.                                     |
| Tbx3          | Tbx3.bSep08          | 353305 | 9816  | 2368 | 6 | 363 | T-box 3 (Tbx3) alternative variant bSep08, mRNA.                                               |
| Tbx3          | Tbx3.cSep08          | 353305 | 4501  | 2417 | 3 | 260 | T-box 3 (Tbx3) alternative variant cSep08, mRNA.                                               |



|        |               |        |       |      |    |      |                                                                                                             |
|--------|---------------|--------|-------|------|----|------|-------------------------------------------------------------------------------------------------------------|
| Tbx15  | Tbx15.aSep08  | 295315 | 47939 | 1783 | 3  | 363  | T-box 15 (Tbx15) alternative variant aSep08, mRNA.                                                          |
| Tbx18  | Tbx18.bSep08  | 315870 | 2076  | 486  | 2  | 161  | T-box18 (Tbx18) alternative variant bSep08, mRNA.                                                           |
| Tbx19  | Tbx19.bSep08  | 304935 | 6139  | 357  | 1  | 84   | T-box 19 (Tbx19) alternative variant bSep08, mRNA.                                                          |
| Tbx22  | Tbx22.bSep08  | 302369 | 5241  | 787  | 1  | 62   | T-box 22 (Tbx22) alternative variant bSep08, mRNA.                                                          |
| Tc2n   | Tc2n.bSep08   | 500707 | 29586 | 585  | 5  | 195  | tandem C2 domains, nuclear (Tc2n) alternative variant bSep08, mRNA.                                         |
| Tc2n   | Tc2n.cSep08   | 500707 | 13895 | 414  | 1  | 89   | tandem C2 domains, nuclear (Tc2n) alternative variant cSep08, mRNA.                                         |
| Tc2n   | Tc2n.dSep08   | 500707 | 22567 | 1006 | 2  | 83   | tandem C2 domains, nuclear (Tc2n) alternative variant dSep08, mRNA.                                         |
| Tc2n   | Tc2n.eSep08   | 500707 | 6779  | 366  | 1  | 77   | tandem C2 domains, nuclear (Tc2n) alternative variant eSep08, mRNA.                                         |
| Tcam1  | Tcam1.bSep08  | 59305  | 12806 | 2775 | 3  | 319  | testicular cell adhesion molecule 1 (35.3 kD) (Tcam1) alternative variant bSep08, mRNA.                     |
| Tcea1  | Tcea1.aSep08  | 362479 | 37256 | 2364 | 10 | 330  | transcription elongation factor A (SII) 1 (Tcea1) alternative variant aSep08, mRNA.                         |
| Tcea1  | Tcea1.bSep08  | 362479 | 32949 | 943  | 8  | 269  | transcription elongation factor A (SII) 1 (Tcea1) alternative variant bSep08, mRNA.                         |
| Tcea1  | Tcea1.cSep08  | 362479 | 26588 | 1469 | 10 | 263  | transcription elongation factor A (SII) 1 (Tcea1) alternative variant cSep08, mRNA.                         |
| Tcea1  | Tcea1.dSep08  | 362479 | 15978 | 1143 | 8  | 256  | transcription elongation factor A (SII) 1 (Tcea1) alternative variant dSep08, mRNA.                         |
| Tcea1  | Tcea1.eSep08  | 362479 | 19298 | 623  | 2  | 41   | transcription elongation factor A (SII) 1 (Tcea1) alternative variant eSep08, mRNA.                         |
| Tcea2  | Tcea2.aSep08  | 29575  | 4602  | 822  | 7  | 215  | transcription elongation factor A (SII), 2 (Tcea2) alternative variant aSep08, mRNA.                        |
| Tcea2  | Tcea2.bSep08  | 29575  | 4130  | 399  | 4  | 132  | transcription elongation factor A (SII), 2 (Tcea2) alternative variant bSep08, mRNA.                        |
| Tcea2  | Tcea2.cSep08  | 29575  | 854   | 779  | 2  | 110  | transcription elongation factor A (SII), 2 (Tcea2) alternative variant cSep08, mRNA.                        |
| Tceal1 | Tceal1.bSep08 | 302593 | 1097  | 741  | 1  | 164  | transcription elongation factor A (SII)-like 1 (Tceal1) alternative variant bSep08, mRNA.                   |
| Tceal3 | Tceal3.aSep08 | 501628 | 1963  | 1094 |    | 64   | transcription elongation factor A (SII)-like 3 (Tceal3) mRNA.                                               |
| Tceb1  | Tceb1.bSep08  | 64525  | 15096 | 762  | 2  | 112  | transcription elongation factor B (SIII), polypeptide 1 (12.5 kD) (Tceb1) alternative variant bSep08, mRNA. |
| Tceb1  | Tceb1.cSep08  | 64525  | 15170 | 1004 | 2  | 112  | transcription elongation factor B (SIII), polypeptide 1 (12.5 kD) (Tceb1) alternative variant cSep08, mRNA. |
| Tceb1  | Tceb1.dSep08  | 64525  | 14132 | 704  | 2  | 33   | transcription elongation factor B (SIII), polypeptide 1 (Tceb1) alternative variant dSep08, mRNA.           |
| Tceb3  | Tceb3.bSep08  | 25562  | 1469  | 930  | 2  | 82   | transcription elongation factor B (SIII), polypeptide 3 (Tceb3) alternative variant bSep08, mRNA.           |
| Tcerg1 | Tcerg1.bSep08 | 307474 | 60935 | 4100 | 22 | 1077 | transcription elongation regulator 1 (121.7 kD) (Tcerg1) alternative variant bSep08, mRNA.                  |
| Tcerg1 | Tcerg1.cSep08 | 307474 | 20102 | 2207 | 10 | 378  | transcription elongation regulator 1 CRA c (45.6 kD) (Tcerg1) alternative variant cSep08, mRNA.             |

|         |                |        |       |      |    |     |                                                                                                      |
|---------|----------------|--------|-------|------|----|-----|------------------------------------------------------------------------------------------------------|
| Tcerg1  | Tcerg1.dSep08  | 307474 | 21524 | 1490 | 12 | 279 | transcription elongation regulator 1 CRA c (33.0 kD) (Tcerg1) alternative variant dSep08, mRNA.      |
| Tcerg1  | Tcerg1.eSep08  | 307474 | 9165  | 768  | 4  | 232 | transcription elongation regulator 1 (Tcerg1) alternative variant eSep08, mRNA.                      |
| Tcerg1  | Tcerg1.fSep08  | 307474 | 5300  | 927  | 4  | 149 | transcription elongation regulator 1 (Tcerg1) alternative variant fSep08, mRNA.                      |
| Tcerg1  | Tcerg1.gSep08  | 307474 | 8250  | 1905 | 3  | 78  | transcription elongation regulator 1 CRA a (Tcerg1) alternative variant gSep08, mRNA.                |
| Tcf3    | Tcf3.bSep08    | 312451 | 3687  | 820  | 3  | 160 | transcription factor 3 (17.9 kD) (Tcf3) alternative variant bSep08, mRNA.                            |
| Tcf4    | Tcf4.bSep08    | 84382  | 10003 | 3774 | 5  | 221 | transcription factor 4 CRA c (Tcf4) alternative variant bSep08, mRNA.                                |
| Tcf4    | Tcf4.cSep08    | 84382  | 57159 | 556  | 5  | 166 | transcription factor 4 CRA d (Tcf4) alternative variant cSep08, mRNA.                                |
| Tcf4    | Tcf4.dSep08    | 84382  | 47236 | 544  | 4  | 163 | transcription factor 4 CRA a (Tcf4) alternative variant dSep08, mRNA.                                |
| Tcf4    | Tcf4.eSep08    | 84382  | 6974  | 604  | 4  | 158 | transcription factor 4 CRA b (Tcf4) alternative variant eSep08, mRNA.                                |
| Tcf4    | Tcf4.fSep08    | 84382  | 1742  | 409  | 3  | 116 | transcription factor 4 CRA a (Tcf4) alternative variant fSep08, mRNA.                                |
| Tcf4    | Tcf4.hSep08    | 84382  | 2506  | 571  | 2  | 54  | putative protein, with a coiled coil domain (5.9 kD) (Tcf4) alternative variant hSep08, mRNA.        |
| Tcf7    | Tcf7.aSep08    | 363595 | 9262  | 2243 |    | 214 | transcription factor 7, T-cell specific (Tcf7) mRNA.                                                 |
| Tcf12   | Tcf12.bSep08   | 25720  | 41170 | 1797 | 12 | 512 | transcription factor 12 (Tcf12) alternative variant bSep08, mRNA.                                    |
| Tcf12   | Tcf12.cSep08   | 25720  | 28531 | 1097 | 9  | 365 | transcription factor 12 (Tcf12) alternative variant cSep08, mRNA.                                    |
| Tcf20   | Tcf20.bSep08   | 366964 | 30228 | 514  | 1  | 55  | transcription factor 20 (Tcf20) alternative variant bSep08, mRNA.                                    |
| Tcf25   | Tcf25.aSep08   | 292082 | 34494 | 5302 | 18 | 780 | transcription factor 25 (basic helix-loop-helix) (Tcf25) alternative variant aSep08, mRNA.           |
| Tcf25   | Tcf25.bSep08   | 292082 | 17053 | 829  | 7  | 263 | transcription factor 25 (basic helix-loop-helix) (Tcf25) alternative variant bSep08, mRNA.           |
| Tcf25   | Tcf25.cSep08   | 292082 | 16960 | 2276 | 9  | 244 | transcription factor 25 (basic helix-loop-helix) (27.8 kD) (Tcf25) alternative variant cSep08, mRNA. |
| Tcf25   | Tcf25.eSep08   | 292082 | 2401  | 534  | 3  | 109 | transcription factor 25 (basic helix-loop-helix) (Tcf25) alternative variant eSep08, mRNA.           |
| Tcf25   | Tcf25.gSep08   | 292082 | 4400  | 465  | 4  | 69  | transcription factor 25 (basic helix-loop-helix) (Tcf25) alternative variant gSep08, mRNA.           |
| Tcf25   | Tcf25.hSep08   | 292082 | 5743  | 1076 | 4  | 46  | transcription factor 25 (basic helix-loop-helix) (5.3 kD) (Tcf25) alternative variant hSep08, mRNA.  |
| Tcf25   | Tcf25.iSep08   | 292082 | 3042  | 713  | 2  | 15  | transcription factor 25 (basic helix-loop-helix) (Tcf25) alternative variant iSep08, mRNA.           |
| Tcfap2b | Tcfap2b.bSep08 | 301285 | 20405 | 1249 | 1  | 365 | transcription factor AP-2 beta (Tcfap2b) alternative variant bSep08, mRNA.                           |
| Tcfap2c | Tcfap2c.bSep08 | 362280 | 7504  | 872  | 4  | 290 | transcription factor AP-2 gamma (Tcfap2c) alternative variant bSep08, mRNA.                          |

|         |                |        |       |      |    |     |                                                                                              |
|---------|----------------|--------|-------|------|----|-----|----------------------------------------------------------------------------------------------|
| Tcfap2c | Tcfap2c.cSep08 | 362280 | 3938  | 765  | 5  | 238 | transcription factor AP-2 gamma (Tcfap2c) alternative variant cSep08, mRNA.                  |
| Tcfap2c | Tcfap2c.dSep08 | 362280 | 932   | 814  | 2  | 112 | putative mitochondrial protein (12.6 kD) (Tcfap2c) alternative variant dSep08, mRNA.         |
| Tcfap2c | Tcfap2c.fSep08 | 362280 | 5858  | 507  | 2  | 80  | putative protein (Tcfap2c) alternative variant fSep08, mRNA.                                 |
| Tcfap4  | Tcfap4.bSep08  | 360482 | 11154 | 393  | 4  | 64  | transcription factor AP4 (Tcfap4) alternative variant bSep08, mRNA.                          |
| Tcfcp2  | Tcfcp2.bSep08  | 315309 | 9716  | 775  | 7  | 209 | transcription factor CP2 (Tcfcp2) alternative variant bSep08, mRNA.                          |
| Tcfcp2  | Tcfcp2.cSep08  | 315309 | 19238 | 491  | 5  | 129 | transcription factor CP2 (Tcfcp2) alternative variant cSep08, mRNA.                          |
| Tcfcp2  | Tcfcp2.dSep08  | 315309 | 8235  | 810  | 5  | 127 | transcription factor CP2 (Tcfcp2) alternative variant dSep08, mRNA.                          |
| Tcfe2a  | Tcfe2a.bSep08  | 171046 | 22256 | 2505 | 18 | 405 | transcription factor E2a (42.5 kD) (Tcfe2a) alternative variant bSep08, mRNA.                |
| Tcfe2a  | Tcfe2a.cSep08  | 171046 | 6823  | 719  | 5  | 239 | transcription factor E2a (Tcfe2a) alternative variant cSep08, mRNA.                          |
| Tcfe2a  | Tcfe2a.dSep08  | 171046 | 3004  | 551  | 4  | 183 | transcription factor E2a (Tcfe2a) alternative variant dSep08, mRNA.                          |
| Tcfe3   | Tcfe3.aSep08   | 317376 | 9098  | 2669 |    | 437 | transcription factor E3 (Tcfe3) mRNA.                                                        |
| Tcfef   | Tcfef.bSep08   | 316214 | 52039 | 987  | 6  | 236 | transcription factor EB (Tcfef) alternative variant bSep08, mRNA.                            |
| Tcfef   | Tcfef.cSep08   | 316214 | 2685  | 1137 | 2  | 189 | transcription factor EB (16.5 kD) (Tcfef) alternative variant cSep08, mRNA.                  |
| Tcfef   | Tcfef.dSep08   | 316214 | 5302  | 308  | 2  | 102 | transcription factor EB (Tcfef) alternative variant dSep08, mRNA.                            |
| Tchp    | Tchp.aSep08    | 304547 | 4188  | 1547 |    | 128 | trichoplein, keratin filament binding (Tchp) mRNA.                                           |
| Tcirg1  | Tcirg1.aSep08  | 293650 | 11870 | 2570 | 19 | 499 | T-cell immune regulator 1 like (55.9 kD) (Tcirg1) alternative variant aSep08, complete mRNA. |
| Tcirg1  | Tcirg1.bSep08  | 293650 | 3203  | 1398 | 10 | 444 | T-cell immune regulator 1 like (Tcirg1) alternative variant bSep08, mRNA.                    |
| Tcirg1  | Tcirg1.cSep08  | 293650 | 5070  | 1345 | 9  | 227 | T-cell immune regulator 1 like (Tcirg1) alternative variant cSep08, mRNA.                    |
| Tcirg1  | Tcirg1.dSep08  | 293650 | 3958  | 717  | 6  | 211 | T-cell immune regulator 1 like (Tcirg1) alternative variant dSep08, mRNA.                    |
| Tcirg1  | Tcirg1.eSep08  | 293650 | 953   | 567  | 4  | 162 | T-cell immune regulator 1 like (Tcirg1) alternative variant eSep08, mRNA.                    |
| Tcirg1  | Tcirg1.fSep08  | 293650 | 1172  | 831  | 4  | 160 | T-cell immune regulator 1 like (Tcirg1) alternative variant fSep08, mRNA.                    |
| Tcirg1  | Tcirg1.gSep08  | 293650 | 735   | 653  | 2  | 129 | CRA a (13.8 kD) (Tcirg1) alternative variant gSep08, mRNA.                                   |
| Tcirg1  | Tcirg1.hSep08  | 293650 | 1370  | 498  | 3  | 102 | vacuolar proton (Tcirg1) alternative variant hSep08, mRNA.                                   |
| Tcn2    | Tcn2.bSep08    | 64365  | 8121  | 910  | 6  | 253 | transcobalamin 2 (Tcn2) alternative variant bSep08, mRNA.                                    |
| Tcn2    | Tcn2.cSep08    | 64365  | 6856  | 775  | 5  | 195 | transcobalamin 2 (Tcn2) alternative variant cSep08, mRNA.                                    |

|           |                  |        |        |      |    |      |                                                                                              |
|-----------|------------------|--------|--------|------|----|------|----------------------------------------------------------------------------------------------|
| Tcn2      | Tcn2.dSep08      | 64365  | 6795   | 711  | 5  | 178  | transcobalamin 2 (Tcn2) alternative variant dSep08, mRNA.                                    |
| Tcn2      | Tcn2.eSep08      | 64365  | 5180   | 541  | 4  | 111  | transcobalamin 2 (12.6 kD) (Tcn2) alternative variant eSep08, complete mRNA.                 |
| Tcn2      | Tcn2.fSep08      | 64365  | 4600   | 394  | 3  | 84   | transcobalamin 2 (Tcn2) alternative variant fSep08, mRNA.                                    |
| Tcof1     | Tcof1.aSep08     | 291571 | 21074  | 3709 | 20 | 1084 | treacher Collins Franceschetti syndrome 1, homolog (Tcof1) alternative variant aSep08, mRNA. |
| Tcof1     | Tcof1.cSep08     | 291571 | 4604   | 725  | 5  | 241  | treacher Collins Franceschetti syndrome 1, homolog (Tcof1) alternative variant cSep08, mRNA. |
| Tcp1      | Tcp1.bSep08      | 24818  | 3477   | 1507 | 4  | 273  | t-complex protein 1 (Tcp1) alternative variant bSep08, mRNA.                                 |
| Tcp1      | Tcp1.cSep08      | 24818  | 2588   | 285  | 3  | 33   | t-complex protein 1 (Tcp1) alternative variant cSep08, mRNA.                                 |
| Tcp10b    | Tcp10b.bSep08    | 308169 | 23883  | 1912 | 7  | 389  | t-complex protein 10b (Tcp10b) alternative variant bSep08, mRNA.                             |
| Tcp10b    | Tcp10b.cSep08    | 308169 | 11796  | 796  | 2  | 265  | t-complex protein 10b (Tcp10b) alternative variant cSep08, mRNA.                             |
| Tcp10b    | Tcp10b.dSep08    | 308169 | 13006  | 693  | 3  | 158  | t-complex protein 10b (Tcp10b) alternative variant dSep08, mRNA.                             |
| Tcp11     | Tcp11.bSep08     | 309641 | 6892   | 932  | 2  | 310  | t-complex protein 11 (Tcp11) alternative variant bSep08, mRNA.                               |
| Tcp11     | Tcp11.cSep08     | 309641 | 8729   | 736  | 2  | 244  | t-complex protein 11 (Tcp11) alternative variant cSep08, mRNA.                               |
| Tcp111    | Tcp111.bSep08    | 499846 | 9891   | 483  | 1  | 98   | t-complex 11 like 1 (Tcp111) alternative variant bSep08, mRNA.                               |
| Tcp112    | Tcp112.bSep08    | 314683 | 16436  | 799  | 6  | 228  | t-complex 11 (mouse) like 2 (Tcp112) alternative variant bSep08, mRNA.                       |
| Tcp112    | Tcp112.cSep08    | 314683 | 8081   | 168  | 2  | 56   | t-complex 11 (mouse) like 2 (Tcp112) alternative variant cSep08, mRNA.                       |
| Tcrb      | Tcrb.aSep08      | 24820  | 424251 | 1408 | 5  | 204  | T-cell receptor like (Tcrb) alternative variant aSep08, mRNA.                                |
| Tcrb      | Tcrb.bSep08      | 24820  | 441032 | 1184 | 7  | 201  | T-cell receptor like (22.4 kD) (Tcrb) alternative variant bSep08, mRNA.                      |
| Tcrb      | Tcrb.cSep08      | 24820  | 5779   | 724  | 5  | 184  | T-cell receptor like (Tcrb) alternative variant cSep08, mRNA.                                |
| Tcrb      | Tcrb.dSep08      | 24820  | 3953   | 428  | 2  | 142  | T-cell receptor like (Tcrb) alternative variant dSep08, mRNA.                                |
| Tcrb      | Tcrb.eSep08      | 24820  | 508    | 396  |    | 131  | tcrb protein (Tcrb) alternative variant eSep08, mRNA.                                        |
| Tcrb      | Tcrb.fSep08      | 24820  | 538537 | 765  | 4  | 113  | T-cell receptor like (12.8 kD) (Tcrb) alternative variant fSep08, mRNA.                      |
| Tcrb      | Tcrb.hSep08      | 24820  | 1856   | 694  | 2  | 26   | putative protein (Tcrb) alternative variant hSep08, mRNA.                                    |
| Tcta      | Tcta.aSep08      | 306587 | 3404   | 1974 | 2  | 199  | T-cell leukemia translocation altered gene (Tcta) alternative variant aSep08, mRNA.          |
| Tctex-1.0 | Tctex-1.0.aSep08 |        | 2792   | 1226 |    | 74   | tctex-1 (8.5 kD) (Tctex-1.0) mRNA.                                                           |
| Tctex1d1  | Tctex1d1.aSep08  | 362553 | 13265  | 816  |    | 55   | putative protein (6.3 kD) (Tctex1d1) mRNA.                                                   |
| Tctn3     | Tctn3.aSep08     | 309486 | 6967   | 1647 |    | 372  | tectonic family member 3 (Tctn3) mRNA.                                                       |

|        |               |        |       |      |    |     |                                                                                                   |
|--------|---------------|--------|-------|------|----|-----|---------------------------------------------------------------------------------------------------|
| Tdg    | Tdg.aSep08    | 114521 | 19625 | 2937 | 10 | 410 | thymine-DNA glycosylase (45.2 kD) (Tdg) alternative variant aSep08, mRNA.                         |
| Tdg    | Tdg.bSep08    | 114521 | 14314 | 675  | 5  | 176 | thymine-DNA glycosylase (Tdg) alternative variant bSep08, mRNA.                                   |
| Tdrd1  | Tdrd1.bSep08  | 292129 | 3477  | 772  | 1  | 109 | putative protein of vertebrate origin (12.2 kD) (Tdrd1) alternative variant bSep08, mRNA.         |
| Tdrd3  | Tdrd3.bSep08  | 306066 | 63385 | 700  | 6  | 233 | putative protein of eukaryotic origin (Tdrd3) alternative variant bSep08, mRNA.                   |
| Tdrd3  | Tdrd3.cSep08  | 306066 | 37870 | 1780 | 4  | 37  | putative protein (Tdrd3) alternative variant cSep08, mRNA.                                        |
| Tdrd3  | Tdrd3.dSep08  | 306066 | 6809  | 1394 | 2  | 39  | putative protein (4.0 kD) (Tdrd3) alternative variant dSep08, mRNA.                               |
| Tdrd7  | Tdrd7.bSep08  | 85425  | 32249 | 737  | 5  | 245 | putative protein of metazoan origin (Tdrd7) alternative variant bSep08, mRNA.                     |
| Tdrd7  | Tdrd7.cSep08  | 85425  | 25271 | 1131 | 5  | 201 | putative protein of metazoan origin (Tdrd7) alternative variant cSep08, mRNA.                     |
| Tdrd9  | Tdrd9.aSep08  | 299343 | 15390 | 751  |    | 250 | atp-dependent rna helicase tdrd9 (Tdrd9) mRNA.                                                    |
| Tdrd12 | Tdrd12.aSep08 | 292813 | 11492 | 581  |    | 132 | tudor domain-containing protein 12 (Tdrd12) mRNA.                                                 |
| Tdrkh  | Tdrkh.aSep08  | 310652 | 7165  | 1585 | 12 | 499 | CRA a (Tdrkh) alternative variant aSep08, mRNA.                                                   |
| Tdrkh  | Tdrkh.bSep08  | 310652 | 17061 | 1244 | 6  | 296 | CRA a (32.4 kD) (Tdrkh) alternative variant bSep08, complete mRNA.                                |
| Tdrkh  | Tdrkh.cSep08  | 310652 | 1919  | 494  | 3  | 164 | CRA a (Tdrkh) alternative variant cSep08, mRNA.                                                   |
| Tdrkh  | Tdrkh.dSep08  | 310652 | 14762 | 610  | 3  | 80  | tdrkh protein (9.1 kD) (Tdrkh) alternative variant dSep08, complete mRNA.                         |
| Tead1  | Tead1.aSep08  | 361630 | 75612 | 374  |    | 124 | TEA domain family member 1 (Tead1) mRNA.                                                          |
| Tead2  | Tead2.bSep08  | 308582 | 16815 | 2093 | 12 | 466 | TEA domain family member 2 (Tead2) alternative variant bSep08, mRNA.                              |
| Tead2  | Tead2.cSep08  | 308582 | 1673  | 1149 | 2  | 103 | TEA domain family member 2 (12.1 kD) (Tead2) alternative variant cSep08, mRNA.                    |
| Tead2  | Tead2.dSep08  | 308582 | 4171  | 705  | 3  | 45  | TEA domain family member 2 (Tead2) alternative variant dSep08, mRNA.                              |
| Tead3  | Tead3.bSep08  | 294299 | 1282  | 1089 | 3  | 109 | TEA domain family member 3 (12.7 kD) (Tead3) alternative variant bSep08, mRNA.                    |
| Tec    | Tec.bSep08    | 84492  | 4670  | 462  | 3  | 139 | cytoplasmic tyrosine kinase, Dscr28C related (Drosophila) (Tec) alternative variant bSep08, mRNA. |
| Tecta  | Tecta.cSep08  | 300653 | 5063  | 695  | 3  | 78  | tectorin alpha (9.1 kD) (Tecta) alternative variant cSep08, mRNA.                                 |
| teeby  | teeby.aSep08  |        | 2375  | 278  |    | 92  | nik related kinase (teeby) mRNA.                                                                  |
| teechy | teechy.aSep08 |        | 9576  | 930  | 4  | 309 | eukaryotic translation initiation factor 2 alpha kinase 4 CRA a (teechy) mRNA.                    |
| teedar | teedar.aSep08 |        | 9299  | 692  |    | 48  | putative protein (5.8 kD) (teedar) mRNA.                                                          |
| teeflo | teeflo.aSep08 |        | 5181  | 596  |    | 198 | CTCL tumor antigen like (teeflo) mRNA.                                                            |
| teeflu | teeflu.aSep08 |        | 19478 | 1785 |    | 75  | putative protein (teeflu) mRNA.                                                                   |
| teegar | teegar.aSep08 |        | 815   | 479  |    | 97  | putative protein (teegar) mRNA.                                                                   |
| teeja  | teeja.aSep08  |        | 6014  | 334  |    | 110 | retinitis pigmentosa GTPase regulator interacting protein 1 like (teeja) mRNA.                    |

|         |                |        |       |      |    |     |                                                                                              |
|---------|----------------|--------|-------|------|----|-----|----------------------------------------------------------------------------------------------|
| teejey  | teejey.aSep08  |        | 3137  | 622  |    | 37  | putative protein (4.3 kD) (teejey) mRNA.                                                     |
| teekee  | teekee.aSep08  |        | 3719  | 742  |    | 163 | oct-1 (teekee) mRNA.                                                                         |
| teekler | teekler.aSep08 |        | 32289 | 553  |    | 93  | putative protein (teekler) mRNA.                                                             |
| teelo   | teelo.aSep08   |        | 694   | 598  |    | 35  | putative protein (4.0 kD) (teelo) mRNA.                                                      |
| teemee  | teemee.aSep08  |        | 7563  | 850  |    | 263 | kinesin family member 3A (teemee) mRNA.                                                      |
| teenoy  | teenoy.aSep08  |        | 2473  | 223  |    | 22  | putative protein (teenoy) mRNA.                                                              |
| teepor  | teepor.aSep08  |        | 4687  | 358  | 1  | 52  | myosin VI (teepor) alternative variant aSep08, mRNA.                                         |
| teepor  | teepor.bSep08  |        | 7855  | 323  | 2  | 59  | myosin VI (teepor) alternative variant bSep08, mRNA.                                         |
| teesa   | teesa.aSep08   |        | 21997 | 679  |    | 32  | putative protein (3.6 kD) (teesa) mRNA.                                                      |
| teeshee | teeshee.aSep08 |        | 1614  | 287  |    | 44  | putative protein (teeshee) mRNA.                                                             |
| teetu   | teetu.aSep08   |        | 16215 | 294  |    | 28  | putative protein (teetu) mRNA.                                                               |
| teevar  | teevar.aSep08  |        | 13842 | 488  |    | 73  | ac1576 like (teevar) mRNA.                                                                   |
| teewey  | teewey.aSep08  |        | 2489  | 572  |    | 64  | putative protein (7.3 kD) (teewey) mRNA.                                                     |
| Tef     | Tef.bSep08     | 29362  | 20667 | 613  | 2  | 204 | thyrotroph embryonic factor (Tef) alternative variant bSep08, mRNA.                          |
| Tef     | Tef.cSep08     | 29362  | 1715  | 1255 | 1  | 101 | thyrotroph embryonic factor (Tef) alternative variant cSep08, mRNA.                          |
| Tegt    | Tegt.bSep08    | 24822  | 16260 | 2406 | 10 | 237 | testis enhanced gene transcript (26.5 kD) (Tegt) alternative variant bSep08, complete mRNA.  |
| Tegt    | Tegt.cSep08    | 24822  | 13442 | 773  | 9  | 229 | testis enhanced gene transcript (Tegt) alternative variant cSep08, mRNA.                     |
| Tegt    | Tegt.dSep08    | 24822  | 12485 | 782  | 8  | 204 | testis enhanced gene transcript (Tegt) alternative variant dSep08, mRNA.                     |
| Tegt    | Tegt.eSep08    | 24822  | 15774 | 656  | 5  | 122 | testis enhanced gene transcript (13.3 kD) (Tegt) alternative variant eSep08, mRNA.           |
| Tek     | Tek.bSep08     | 89804  | 3336  | 371  | 1  | 92  | endothelial-specific receptor tyrosine kinase (Tek) alternative variant bSep08, mRNA.        |
| Tekt2   | Tekt2.bSep08   | 298532 | 1333  | 719  | 1  | 122 | tektin 2 (Tekt2) alternative variant bSep08, mRNA.                                           |
| Tekt3   | Tekt3.bSep08   | 287392 | 7585  | 508  | 1  | 129 | tektin 3 (Tekt3) alternative variant bSep08, mRNA.                                           |
| Telo2   | Telo2.aSep08   | 302986 | 15213 | 3210 |    | 834 | TEL2, telomere maintenance 2, homolog ( <i>S. cerevisiae</i> ) (93.1 kD) (Telo2) mRNA.       |
| Tenc1   | Tenc1.bSep08   | 315326 | 1696  | 769  | 6  | 255 | putative protein of eukaryotic origin (Tenc1) alternative variant bSep08, mRNA.              |
| Tenc1   | Tenc1.cSep08   | 315326 | 1719  | 1015 | 5  | 157 | SH2 motif (Tenc1) alternative variant cSep08, mRNA.                                          |
| Tenc1   | Tenc1.dSep08   | 315326 | 1281  | 314  | 5  | 104 | putative protein of eukaryotic origin (Tenc1) alternative variant dSep08, mRNA.              |
| Tenc1   | Tenc1.eSep08   | 315326 | 950   | 295  | 4  | 98  | SH2 motif (Tenc1) alternative variant eSep08, mRNA.                                          |
| Tep1    | Tep1.aSep08    | 64523  | 14845 | 2448 | 17 | 777 | telomerase associated protein 1 (Tep1) alternative variant aSep08, mRNA.                     |
| Tep1    | Tep1.bSep08    | 64523  | 2113  | 414  | 2  | 138 | telomerase associated protein 1 (Tep1) alternative variant bSep08, mRNA.                     |
| Tep1    | Tep1.cSep08    | 64523  | 1023  | 420  | 4  | 107 | telomerase associated protein 1 (Tep1) alternative variant cSep08, mRNA.                     |
| Tepp    | Tepp.bSep08    | 291850 | 1280  | 375  | 1  | 74  | testis/prostate/placenta-expressed protein (8.5 kD) (Tepp) alternative variant bSep08, mRNA. |

|         |                |        |       |      |    |     |                                                                                                    |
|---------|----------------|--------|-------|------|----|-----|----------------------------------------------------------------------------------------------------|
| terby   | terby.aSep08   |        | 2675  | 830  |    | 79  | nik related kinase (terby) mRNA.                                                                   |
| terdar  | terdar.aSep08  |        | 4384  | 707  |    | 132 | CRA b like (terdar) mRNA.                                                                          |
| Terf1   | Terf1.bSep08   | 297758 | 12214 | 358  | 4  | 119 | telomeric repeat binding factor 1 (Terf1) alternative variant bSep08, mRNA.                        |
| Terf1   | Terf1.cSep08   | 297758 | 1739  | 792  | 2  | 30  | telomeric repeat binding factor 1 (3.5 kD) (Terf1) alternative variant cSep08, mRNA.               |
| Terf2   | Terf2.bSep08   | 361403 | 20745 | 2475 | 7  | 478 | telomeric repeat binding factor 2 (Terf2) alternative variant bSep08, mRNA.                        |
| Terf2ip | Terf2ip.cSep08 | 307861 | 5419  | 1605 | 3  | 74  | telomeric repeat binding factor 2, interacting protein (Terf2ip) alternative variant cSep08, mRNA. |
| Terf2ip | Terf2ip.dSep08 | 307861 | 5401  | 1584 | 3  | 68  | telomeric repeat binding factor 2, interacting protein (Terf2ip) alternative variant dSep08, mRNA. |
| terflo  | terflo.aSep08  |        | 8655  | 392  |    | 68  | oocyte-testis gene 1 like (terflo) mRNA.                                                           |
| terflu  | terflu.aSep08  |        | 4739  | 506  |    | 71  | putative protein (terflu) mRNA.                                                                    |
| tergar  | tergar.aSep08  |        | 1802  | 885  | 4  | 208 | regulator of nonsense transcripts 1 (tergar) alternative variant aSep08, mRNA.                     |
| tergar  | tergar.bSep08  |        | 501   | 211  | 1  | 65  | putative protein (tergar) alternative variant bSep08, mRNA.                                        |
| terja   | terja.aSep08   |        | 6828  | 618  |    | 60  | putative protein (6.5 kD) (terja) mRNA.                                                            |
| terjey  | terjey.aSep08  |        | 3745  | 265  |    | 34  | putative protein (terjey) mRNA.                                                                    |
| terkee  | terkee.aSep08  |        | 5600  | 1209 |    | 38  | putative protein (4.5 kD) (terkee) mRNA.                                                           |
| terkler | terkler.aSep08 |        | 689   | 566  |    | 42  | putative protein (4.8 kD) (terkler) mRNA.                                                          |
| terlo   | terlo.aSep08   |        | 2119  | 1042 |    | 17  | putative protein (2.0 kD) (terlo) mRNA.                                                            |
| termee  | termee.aSep08  |        | 10492 | 460  |    | 46  | CRA c like (5.0 kD) (termee) mRNA.                                                                 |
| ternoy  | ternoy.aSep08  |        | 7466  | 696  |    | 231 | thyroid hormone receptor interactor 12 CRA f (ternoy) mRNA.                                        |
| terpor  | terpor.aSep08  |        | 7608  | 419  |    | 139 | myosin VI (terpor) mRNA.                                                                           |
| tersa   | tersa.aSep08   |        | 702   | 250  |    | 41  | putative protein (4.4 kD) (tersa) mRNA.                                                            |
| tershee | tershee.aSep08 |        | 49536 | 668  | 2  | 184 | putative protein of vertebrate origin (tershee) alternative variant aSep08, mRNA.                  |
| tershee | tershee.bSep08 |        | 50204 | 451  | 2  | 129 | CRA b like (tershee) alternative variant bSep08, mRNA.                                             |
| Tert    | Tert.bSep08    | 301965 | 1818  | 540  | 2  | 107 | telomerase reverse transcriptase (12.0 kD) (Tert) alternative variant bSep08, mRNA.                |
| tertu   | tertu.aSep08   |        | 8672  | 669  |    | 190 | WD repeat domain 35 (tertu) mRNA.                                                                  |
| tervar  | tervar.aSep08  |        | 912   | 814  |    | 123 | putative protein (14.0 kD) (tervar) mRNA.                                                          |
| terwey  | terwey.aSep08  |        | 5466  | 406  |    | 135 | von Willebrand factor (terwey) mRNA.                                                               |
| Tesb    | Tesb.bSep08    | 414826 | 14539 | 1500 | 6  | 273 | tesb pseudogene (31.2 kD) (Tesb) alternative variant bSep08, mRNA.                                 |
| Tesb    | Tesb.dSep08    | 414826 | 5256  | 678  | 4  | 107 | putative nuclear protein (11.7 kD) (Tesb) alternative variant dSep08, mRNA.                        |
| Tesb    | Tesb.eSep08    | 414826 | 9307  | 319  | 4  | 76  | putative protein (Tesb) alternative variant eSep08, mRNA.                                          |
| Tesb    | Tesb.fSep08    | 414826 | 3603  | 645  | 4  | 72  | tesb pseudogene like (8.4 kD) (Tesb) alternative variant fSep08, mRNA.                             |
| Tesb    | Tesb.gSep08    | 414826 | 14974 | 751  | 10 | 66  | testis specific basic protein (Tesb) alternative variant gSep08, mRNA.                             |

|        |               |        |       |      |    |      |                                                                                  |
|--------|---------------|--------|-------|------|----|------|----------------------------------------------------------------------------------|
| Tesc   | Tesc.aSep08   | 288689 | 33946 | 899  | 8  | 244  | tescalcin (Tesc) alternative variant aSep08, mRNA.                               |
| Tesc   | Tesc.cSep08   | 288689 | 5896  | 540  | 5  | 105  | tescalcin (12.1 kD) (Tesc) alternative variant cSep08, mRNA.                     |
| Tesk2  | Tesk2.bSep08  | 170908 | 32770 | 752  | 3  | 110  | testis-specific kinase 2 (12.1 kD) (Tesk2) alternative variant bSep08, mRNA.     |
| Tessp2 | Tessp2.bSep08 | 301027 | 2822  | 864  | 1  | 185  | testis serine protease 2 (Tessp2) alternative variant bSep08, mRNA.              |
| Tet1   | Tet1.bSep08   | 309902 | 5237  | 423  | 5  | 140  | tet oncogene 1 (Tet1) alternative variant bSep08, mRNA.                          |
| Tex2   | Tex2.aSep08   | 303611 | 63963 | 5194 | 11 | 1061 | testis expressed 2 (Tex2) alternative variant aSep08, mRNA.                      |
| Tex2   | Tex2.bSep08   | 303611 | 8430  | 1011 | 3  | 138  | testis expressed 2 (16.1 kD) (Tex2) alternative variant bSep08, mRNA.            |
| Tex2   | Tex2.cSep08   | 303611 | 2865  | 388  | 2  | 82   | putative protein of metazoan origin (Tex2) alternative variant cSep08, mRNA.     |
| Tex10  | Tex10.bSep08  | 298065 | 18093 | 870  | 5  | 252  | hypothetical protein LOC680809 (Tex10) alternative variant bSep08, mRNA.         |
| Tex10  | Tex10.bSep08  | 680809 | 18093 | 870  | 5  | 252  | hypothetical protein LOC680809 (Tex10) alternative variant bSep08, mRNA.         |
| Tex10  | Tex10.cSep08  | 298065 | 4363  | 498  | 4  | 69   | hypothetical protein LOC680809 (Tex10) alternative variant cSep08, mRNA.         |
| Tex10  | Tex10.cSep08  | 680809 | 4363  | 498  | 4  | 69   | hypothetical protein LOC680809 (Tex10) alternative variant cSep08, mRNA.         |
| Tex11  | Tex11.aSep08  | 501588 | 78261 | 785  |    | 261  | putative protein of metazoan origin (Tex11) mRNA.                                |
| Tex12  | Tex12.aSep08  | 690393 | 3638  | 399  |    | 95   | putative protein, with a coiled coil domain, of mammalian origin (Tex12) mRNA.   |
| Tex13  | Tex13.aSep08  | 680865 | 2755  | 611  |    | 203  | putative protein, with a coiled coil domain, of mammalian origin (Tex13) mRNA.   |
| Tex14  | Tex14.aSep08  | 287603 | 2957  | 447  |    | 46   | testis expressed 14 (Tex14) mRNA.                                                |
| Tex264 | Tex264.bSep08 | 300988 | 26650 | 765  | 5  | 214  | testis expressed 264 (23.7 kD) (Tex264) alternative variant bSep08, mRNA.        |
| Tex264 | Tex264.cSep08 | 300988 | 23316 | 751  | 5  | 187  | testis expressed 264 (Tex264) alternative variant cSep08, mRNA.                  |
| Tex264 | Tex264.dSep08 | 300988 | 22950 | 974  | 5  | 184  | testis expressed 264 (Tex264) alternative variant dSep08, mRNA.                  |
| Tex264 | Tex264.eSep08 | 300988 | 26454 | 722  | 5  | 133  | testis expressed 264 (Tex264) alternative variant eSep08, mRNA.                  |
| Tex264 | Tex264.fSep08 | 300988 | 22424 | 392  | 3  | 82   | testis expressed 264 (Tex264) alternative variant fSep08, mRNA.                  |
| Tex264 | Tex264.hSep08 | 300988 | 2523  | 402  | 2  | 58   | putative protein (Tex264) alternative variant hSep08, mRNA.                      |
| teyby  | teyby.aSep08  |        | 1917  | 418  |    | 139  | putative protein of mammalian origin (teyby) mRNA.                               |
| teychy | teychy.aSep08 |        | 1400  | 375  |    | 89   | putative protein, with a coiled coil domain, of vertebrate origin (teychy) mRNA. |
| teydar | teydar.aSep08 |        | 791   | 178  |    | 47   | putative protein (teydar) mRNA.                                                  |
| teyflo | teyflo.aSep08 |        | 1953  | 334  |    | 110  | actin filament associated Protein 1-like 2 (teyflo) mRNA.                        |
| teyflu | teyflu.aSep08 |        | 1634  | 217  |    | 72   | phosphodiesterase 8A CRA b (teyflu) mRNA.                                        |



|           |                  |        |       |      |   |     |                                                                                                       |
|-----------|------------------|--------|-------|------|---|-----|-------------------------------------------------------------------------------------------------------|
| teygar    | teygar.aSep08    |        | 3100  | 1773 |   | 96  | putative nuclear protein (10.2 kD) (teygar) mRNA.                                                     |
| teyja     | teyja.aSep08     |        | 41941 | 818  |   | 21  | putative protein (2.3 kD) (teyja) mRNA.                                                               |
| teyjey    | teyjey.bSep08    |        | 982   | 564  | 2 | 39  | putative protein (teyjey) alternative variant bSep08, mRNA.                                           |
| teykee    | teykee.aSep08    |        | 6773  | 651  |   | 217 | dual specificity phosphatase 27 (teykee) mRNA.                                                        |
| teykler   | teykler.aSep08   |        | 4367  | 484  |   | 34  | putative protein (teykler) mRNA.                                                                      |
| teylo     | teylo.aSep08     |        | 1953  | 771  |   | 61  | putative protein (6.8 kD) (teylo) mRNA.                                                               |
| teymee    | teymee.aSep08    |        | 1553  | 500  |   | 81  | putative protein (teymee) mRNA.                                                                       |
| teynoy    | teynoy.aSep08    |        | 26307 | 617  | 6 | 205 | thyroid hormone receptor interactor 12 CRA c (teynoy) alternative variant aSep08, mRNA.               |
| teypor    | teypor.aSep08    |        | 23684 | 2578 | 4 | 336 | myosin VI (teypor) alternative variant aSep08, mRNA.                                                  |
| teypor    | teypor.bSep08    |        | 18296 | 611  | 3 | 203 | myosin VI (teypor) alternative variant bSep08, mRNA.                                                  |
| teypor    | teypor.cSep08    |        | 8443  | 419  | 2 | 139 | myosin VI (teypor) alternative variant cSep08, mRNA.                                                  |
| teysa     | teysa.aSep08     |        | 1576  | 400  |   | 67  | death-inducing-protein CRA c (teysa) mRNA.                                                            |
| teyshee   | teyshee.aSep08   |        | 17265 | 691  |   | 230 | putative protein of vertebrate origin (teyshee) mRNA.                                                 |
| teytu     | teytu.aSep08     |        | 4634  | 347  |   | 115 | WD repeat domain 35 (teytu) mRNA.                                                                     |
| teyvar    | teyvar.aSep08    |        | 1320  | 418  |   | 80  | putative protein (teyvar) mRNA.                                                                       |
| teywey    | teywey.aSep08    |        | 2423  | 177  |   | 58  | von Willebrand factor (teywey) mRNA.                                                                  |
| Tfb1m     | Tfb1m.bSep08     | 308140 | 40078 | 754  | 6 | 107 | transcription factor B1, mitochondrial (11.8 kD) (Tfb1m) alternative variant bSep08, mRNA.            |
| Tfb2m     | Tfb2m.bSep08     | 289307 | 5246  | 1159 | 5 | 134 | transcription factor B2 mitochondrial (15.9 kD) (Tfb2m) alternative variant bSep08, mRNA.             |
| Tfb2m     | Tfb2m.cSep08     | 289307 | 4641  | 546  | 3 | 104 | transcription factor B2 mitochondrial (Tfb2m) alternative variant cSep08, mRNA.                       |
| Tfb2m     | Tfb2m.dSep08     | 289307 | 5103  | 773  | 2 | 87  | transcription factor B2 mitochondrial (Tfb2m) alternative variant dSep08, mRNA.                       |
| Tfdp2     | Tfdp2.aSep08     | 300947 | 69707 | 2372 | 8 | 385 | transcription factor Dp 2 (42.9 kD) (Tfdp2) alternative variant aSep08, mRNA.                         |
| Tfdp2     | Tfdp2.cSep08     | 300947 | 77397 | 646  | 3 | 142 | transcription factor Dp 2 (Tfdp2) alternative variant cSep08, mRNA.                                   |
| Tfg       | Tfg.bSep08       | 360709 | 21834 | 1564 | 7 | 372 | trk-fused gene (Tfg) alternative variant bSep08, mRNA.                                                |
| Tfg       | Tfg.cSep08       | 360709 | 15149 | 971  | 5 | 285 | trk-fused gene (30.2 kD) (Tfg) alternative variant cSep08, mRNA.                                      |
| Tfg       | Tfg.dSep08       | 360709 | 13957 | 937  | 5 | 267 | trk-fused gene (Tfg) alternative variant dSep08, mRNA.                                                |
| Tfg       | Tfg.fSep08       | 360709 | 1311  | 598  | 2 | 140 | trk-fused gene (Tfg) alternative variant fSep08, mRNA.                                                |
| TFIIS_M.0 | TFIIS_M.0.aSep08 |        | 13662 | 980  | 5 | 210 | death (TFIIS_M.0) alternative variant aSep08, mRNA.                                                   |
| TFIIS_M.0 | TFIIS_M.0.bSep08 |        | 756   | 550  | 2 | 183 | death (TFIIS_M.0) alternative variant bSep08, mRNA.                                                   |
| Tfpi      | Tfpi.aSep08      | 29436  | 43041 | 1302 | 9 | 306 | tissue factor pathway inhibitor precursor (34.9 kD) (Tfpi) alternative variant aSep08, complete mRNA. |
| Tfpi      | Tfpi.cSep08      | 29436  | 35802 | 3039 | 8 | 232 | tissue factor pathway inhibitor precursor (26.5 kD) (Tfpi) alternative variant cSep08, complete mRNA. |
| Tfpi      | Tfpi.dSep08      | 29436  | 41413 | 852  | 8 | 229 | tissue factor pathway inhibitor (Tfpi) alternative variant dSep08, mRNA.                              |
| Tfpi      | Tfpi.eSep08      | 29436  | 26647 | 723  | 5 | 131 | putative protein (Tfpi) alternative variant eSep08, mRNA.                                             |

|         |                |        |       |      |    |     |                                                                                                              |
|---------|----------------|--------|-------|------|----|-----|--------------------------------------------------------------------------------------------------------------|
| Tfpi2   | Tfpi2.bSep08   | 286926 | 3340  | 620  | 3  | 166 | tissue factor pathway inhibitor 2 (Tfpi2) alternative variant bSep08, mRNA.                                  |
| Tfpt    | Tfpt.aSep08    | 85423  | 9450  | 797  | 6  | 253 | TCF3 (E2A) fusion partner (Tfpt) alternative variant aSep08, mRNA.                                           |
| Tfpt    | Tfpt.cSep08    | 85423  | 8848  | 601  | 4  | 189 | TCF3 (E2A) fusion partner (Tfpt) alternative variant cSep08, mRNA.                                           |
| Tfpt    | Tfpt.dSep08    | 85423  | 8970  | 824  | 5  | 179 | TCF3 (E2A) fusion partner (Tfpt) alternative variant dSep08, mRNA.                                           |
| Tfrc    | Tfrc.aSep08    | 64678  | 21839 | 2140 |    | 563 | transferrin receptor (Tfrc) alternative variant aSep08, mRNA.                                                |
| Tfrc    | Tfrc.bSep08    | 64678  | 10609 | 3475 | 2  | 368 | transferrin receptor (Tfrc) alternative variant bSep08, mRNA.                                                |
| Tfrc    | Tfrc.cSep08    | 64678  | 1451  | 443  | 1  | 55  | transferrin receptor (6.5 kD) (Tfrc) alternative variant cSep08, mRNA.                                       |
| Tg      | Tg.bSep08      | 24826  | 30140 | 1048 | 1  | 349 | thyroglobulin (Tg) alternative variant bSep08, mRNA.                                                         |
| Tgds    | Tgds.aSep08    | 306164 | 21059 | 1808 | 11 | 354 | TDP-glucose 4,6-dehydratase (Tgds) alternative variant aSep08, mRNA.                                         |
| Tgds    | Tgds.cSep08    | 306164 | 976   | 311  | 1  | 74  | TDP-glucose 4,6-dehydratase (Tgds) alternative variant cSep08, mRNA.                                         |
| Tgfb1i1 | Tgfb1i1.aSep08 | 84574  | 6021  | 2091 | 11 | 473 | transforming growth factor beta 1 induced transcript 1 (51.4 kD) (Tgfb1i1) alternative variant aSep08, mRNA. |
| Tgfb1i1 | Tgfb1i1.bSep08 | 84574  | 5178  | 818  | 7  | 272 | transforming growth factor beta 1 induced transcript 1 (Tgfb1i1) alternative variant bSep08, mRNA.           |
| Tgfb1i1 | Tgfb1i1.cSep08 | 84574  | 2456  | 746  | 7  | 237 | transforming growth factor beta 1 induced transcript 1 (Tgfb1i1) alternative variant cSep08, mRNA.           |
| Tgfb1i1 | Tgfb1i1.dSep08 | 84574  | 5033  | 678  | 7  | 225 | transforming growth factor beta 1 induced transcript 1 (Tgfb1i1) alternative variant dSep08, mRNA.           |
| Tgfb1i1 | Tgfb1i1.fSep08 | 84574  | 2869  | 340  | 2  | 113 | transforming growth factor beta 1 induced transcript 1 (Tgfb1i1) alternative variant fSep08, mRNA.           |
| Tgfb1i1 | Tgfb1i1.gSep08 | 84574  | 2039  | 434  | 6  | 106 | transforming growth factor beta 1 induced transcript 1 (Tgfb1i1) alternative variant gSep08, mRNA.           |
| Tgfb2   | Tgfb2.bSep08   | 81809  | 95816 | 1569 | 6  | 362 | transforming growth factor, beta 2 (Tgfb2) alternative variant bSep08, mRNA.                                 |
| Tgfb2   | Tgfb2.dSep08   | 81809  | 67179 | 374  | 3  | 56  | transforming growth factor, beta 2 (Tgfb2) alternative variant dSep08, mRNA.                                 |
| Tgfb3   | Tgfb3.bSep08   | 25717  | 10400 | 399  | 4  | 109 | transforming growth factor, beta 3 (Tgfb3) alternative variant bSep08, mRNA.                                 |
| Tgfb3   | Tgfb3.cSep08   | 25717  | 2952  | 406  | 3  | 75  | transforming growth factor, beta 3 (Tgfb3) alternative variant cSep08, mRNA.                                 |
| Tgfb1   | Tgfb1.aSep08   | 116487 | 11820 | 2368 | 11 | 562 | transforming growth factor, beta induced (Tgfb1) alternative variant aSep08, mRNA.                           |
| Tgfb1   | Tgfb1.bSep08   | 116487 | 7476  | 1374 | 8  | 253 | transforming growth factor, beta induced (Tgfb1) alternative variant bSep08, mRNA.                           |
| Tgfb3   | Tgfb3.bSep08   | 29610  | 10195 | 866  | 6  | 288 | transforming growth factor, beta receptor III (Tgfb3) alternative variant bSep08, mRNA.                      |
| Tgfb3   | Tgfb3.cSep08   | 29610  | 45719 | 686  | 5  | 174 | transforming growth factor, beta receptor III (Tgfb3) alternative variant cSep08, mRNA.                      |

|            |                   |        |       |      |    |     |                                                                                           |
|------------|-------------------|--------|-------|------|----|-----|-------------------------------------------------------------------------------------------|
| TGF_beta.1 | TGF_beta.1.aSep08 |        | 10419 | 750  | 2  | 249 | myostatin (TGF_beta.1) alternative variant aSep08, mRNA.                                  |
| TGF_beta.1 | TGF_beta.1.bSep08 |        | 4805  | 434  | 1  | 144 | growth differentiation (TGF_beta.1) alternative variant bSep08, mRNA.                     |
| TGF_beta.2 | TGF_beta.2.aSep08 |        | 15908 | 620  | 3  | 178 | bone morphogenetic protein 8 (TGF_beta.2) alternative variant aSep08, mRNA.               |
| TGF_beta.2 | TGF_beta.2.bSep08 |        | 2516  | 817  | 1  | 112 | bone morphogenetic protein 8 (TGF_beta.2) alternative variant bSep08, mRNA.               |
| Tgif1      | Tgif1.aSep08      | 316742 | 82362 | 1419 | 3  | 313 | TG interacting factor 1 (Tgif1) alternative variant aSep08, mRNA.                         |
| Tgif1      | Tgif1.cSep08      | 316742 | 6592  | 972  | 3  | 222 | TG interacting factor 1 (Tgif1) alternative variant cSep08, mRNA.                         |
| Tgif1      | Tgif1.dSep08      | 316742 | 5136  | 715  | 3  | 198 | TG interacting factor 1 (Tgif1) alternative variant dSep08, mRNA.                         |
| Tgif1      | Tgif1.eSep08      | 316742 | 1977  | 1110 | 2  | 168 | TG interacting factor 1 (Tgif1) alternative variant eSep08, mRNA.                         |
| Tgm1       | Tgm1.aSep08       | 60335  | 13433 | 2700 | 15 | 843 | transglutaminase 1, K polypeptide (Tgm1) alternative variant aSep08, mRNA.                |
| Tgm1       | Tgm1.cSep08       | 60335  | 3686  | 803  | 5  | 198 | transglutaminase 1, K polypeptide (Tgm1) alternative variant cSep08, mRNA.                |
| Tgm1       | Tgm1.dSep08       | 60335  | 4449  | 345  | 3  | 105 | transglutaminase 1, K polypeptide (Tgm1) alternative variant dSep08, mRNA.                |
| Tgm2       | Tgm2.bSep08       | 56083  | 6862  | 719  | 3  | 191 | transglutaminase 2, C polypeptide (Tgm2) alternative variant bSep08, mRNA.                |
| Tgm2       | Tgm2.cSep08       | 56083  | 7619  | 354  | 3  | 83  | transglutaminase 2, C polypeptide (Tgm2) alternative variant cSep08, mRNA.                |
| Tgm2       | Tgm2.dSep08       | 56083  | 1517  | 675  |    | 80  | transglutaminase 2, C polypeptide (Tgm2) alternative variant dSep08, mRNA.                |
| Tgm2       | Tgm2.fSep08       | 56083  | 2945  | 410  | 3  | 63  | transglutaminase 2, C polypeptide (Tgm2) alternative variant fSep08, mRNA.                |
| Tgm4       | Tgm4.bSep08       | 64679  | 23850 | 737  | 7  | 245 | transglutaminase 4 (prostate) (Tgm4) alternative variant bSep08, mRNA.                    |
| Tgm4       | Tgm4.cSep08       | 64679  | 38203 | 2764 | 5  | 242 | transglutaminase 4 (prostate) (27.0 kD) (Tgm4) alternative variant cSep08, complete mRNA. |
| Tgm4       | Tgm4.dSep08       | 64679  | 3908  | 633  | 5  | 210 | transglutaminase 4 (prostate) (Tgm4) alternative variant dSep08, mRNA.                    |
| Tgm4       | Tgm4.eSep08       | 64679  | 22522 | 799  | 7  | 210 | transglutaminase 4 (prostate) (Tgm4) alternative variant eSep08, mRNA.                    |
| Tgm4       | Tgm4.fSep08       | 64679  | 23823 | 598  | 6  | 194 | transglutaminase 4 (prostate) (Tgm4) alternative variant fSep08, mRNA.                    |
| Tgm4       | Tgm4.gSep08       | 64679  | 22679 | 766  | 7  | 89  | transglutaminase 4 (prostate) (10.1 kD) (Tgm4) alternative variant gSep08, mRNA.          |
| Tgm5       | Tgm5.aSep08       | 691929 | 2274  | 1081 |    | 262 | transglutaminase 5 (Tgm5) mRNA.                                                           |
| Th         | Th.bSep08         | 25085  | 870   | 257  | 1  | 85  | tyrosine hydroxylase (Th) alternative variant bSep08, mRNA.                               |
| Thada      | Thada.aSep08      | 313865 | 99873 | 3548 | 10 | 573 | thyroid adenoma associated (Thada) mRNA.                                                  |
| Thap3      | Thap3.cSep08      | 362667 | 2325  | 642  | 2  | 83  | zinc finger, C2CH-type (Thap3) alternative variant cSep08, mRNA.                          |

|                  |                         |        |       |      |    |     |                                                                                                                               |
|------------------|-------------------------|--------|-------|------|----|-----|-------------------------------------------------------------------------------------------------------------------------------|
| Thap4            | Thap4.bSep08            | 363291 | 25242 | 729  | 4  | 187 | thap 4 (Thap4) alternative variant bSep08, mRNA.                                                                              |
| Thap4            | Thap4.cSep08            | 363291 | 25235 | 722  | 4  | 180 | thap 4 (Thap4) alternative variant cSep08, mRNA.                                                                              |
| Thap4            | Thap4.dSep08            | 363291 | 32337 | 409  | 2  | 136 | putative protein, with a coiled coil domain, of ancient origin (Thap4) alternative variant dSep08, mRNA.                      |
| Thap4            | Thap4.eSep08            | 363291 | 25005 | 388  | 3  | 119 | putative protein of ancient origin (Thap4) alternative variant eSep08, mRNA.                                                  |
| Thap6            | Thap6.bSep08            | 305244 | 12139 | 2661 | 4  | 175 | putative nuclear protein, with a coiled coil domain, of vertebrate origin (20.2 kD) (Thap6) alternative variant bSep08, mRNA. |
| Thap6            | Thap6.cSep08            | 305244 | 17879 | 437  | 4  | 82  | putative cytoplasmic protein of vertebrate origin (9.4 kD) (Thap6) alternative variant cSep08, mRNA.                          |
| Thap7            | Thap7.aSep08            | 287944 | 2944  | 1612 | 3  | 356 | zinc finger, C2CH-type (39.7 kD) (Thap7) alternative variant aSep08, mRNA.                                                    |
| Thap7            | Thap7.cSep08            | 287944 | 2224  | 595  | 4  | 197 | zinc finger, C2CH-type (Thap7) alternative variant cSep08, mRNA.                                                              |
| Thap7            | Thap7.dSep08            | 287944 | 1853  | 1293 | 3  | 139 | putative protein human specific (Thap7) alternative variant dSep08, mRNA.                                                     |
| Thbs2            | Thbs2.aSep08            | 292406 | 6200  | 2709 |    | 240 | thrombospondin 2 (Thbs2) mRNA.                                                                                                |
| Thbs4            | Thbs4.aSep08            | 29220  | 21192 | 1723 |    | 573 | thrombospondin 4 (Thbs4) mRNA.                                                                                                |
| Theg             | Theg.aSep08             | 299599 | 9373  | 1209 | 4  | 352 | theg homolog (Theg) alternative variant aSep08, mRNA.                                                                         |
| Theg             | Theg.cSep08             | 299599 | 6639  | 632  | 1  | 159 | putative protein of metazoan origin (Theg) alternative variant cSep08, mRNA.                                                  |
| Them4            | Them4.bSep08            | 361992 | 14616 | 720  | 1  | 117 | thioesterase superfamily member 4 (Them4) alternative variant bSep08, mRNA.                                                   |
| Thg1l            | Thg1l.bSep08            | 303067 | 5443  | 951  | 5  | 269 | tRNA-histidine guanylyltransferase 1-like ( <i>S. cerevisiae</i> ) (31.4 kD) (Thg1l) alternative variant bSep08, mRNA.        |
| Thiol-ester_cl.0 | Thiol-ester_cl.0.aSep08 |        | 3067  | 380  |    | 126 | putative protein of ancient origin (Thiol-ester_cl.0) mRNA.                                                                   |
| Thiolase_C.0     | Thiolase_C.0.aSep08     |        | 15508 | 639  |    | 161 | acetyl-Coenzyme a acetyltransferase 2 (Thiolase_C.0) mRNA.                                                                    |
| Thiolase_C.1     | Thiolase_C.1.aSep08     |        | 724   | 405  |    | 76  | acetyl-Coenzyme a acetyltransferase 2 (Thiolase_C.1) mRNA.                                                                    |
| Thioredoxin.0    | Thioredoxin.0.aSep08    |        | 28125 | 2613 | 10 | 434 | thioredoxin domain containing protein (Thioredoxin.0) alternative variant aSep08, mRNA.                                       |
| Thioredoxin.0    | Thioredoxin.0.bSep08    |        | 1840  | 618  | 3  | 47  | putative protein of fungal and metazoan origin (5.2 kD) (Thioredoxin.0) alternative variant bSep08, mRNA.                     |
| Thnsl2           | Thnsl2.bSep08           | 297332 | 970   | 616  | 2  | 125 | threonine synthase-like 2 (bacterial) (Thnsl2) alternative variant bSep08, mRNA.                                              |
| Thoc1            | Thoc1.aSep08            | 291797 | 35527 | 3243 | 21 | 657 | THO complex 1 (75.4 kD) (Thoc1) alternative variant aSep08, mRNA.                                                             |
| Thoc1            | Thoc1.cSep08            | 291797 | 14208 | 778  | 7  | 153 | THO complex 1 (Thoc1) alternative variant cSep08, mRNA.                                                                       |
| Thoc1            | Thoc1.dSep08            | 291797 | 6917  | 698  | 3  | 85  | THO complex 1 (10.0 kD) (Thoc1) alternative variant dSep08, mRNA.                                                             |
| Thoc1            | Thoc1.eSep08            | 291797 | 1145  | 791  | 2  | 49  | THO complex 1 (5.3 kD) (Thoc1) alternative variant eSep08, mRNA.                                                              |

|         |                |        |        |      |    |     |                                                                                                    |
|---------|----------------|--------|--------|------|----|-----|----------------------------------------------------------------------------------------------------|
| Thoc2   | Thoc2.aSep08   | 313308 | 32757  | 3063 | 13 | 453 | THO complex 2 (Thoc2) alternative variant aSep08, mRNA.                                            |
| Thoc2   | Thoc2.bSep08   | 313308 | 15050  | 768  | 3  | 225 | THO complex 2 (Thoc2) alternative variant bSep08, mRNA.                                            |
| Thoc4   | Thoc4.aSep08   | 690585 | 4074   | 1532 | 1  | 259 | THO complex 4 (Thoc4) alternative variant aSep08, mRNA.                                            |
| Thoc5   | Thoc5.bSep08   | 360972 | 15530  | 941  | 10 | 313 | THO complex 5 (Thoc5) alternative variant bSep08, mRNA.                                            |
| Thoc5   | Thoc5.cSep08   | 360972 | 8000   | 708  | 7  | 236 | THO complex 5 (Thoc5) alternative variant cSep08, mRNA.                                            |
| Thoc5   | Thoc5.dSep08   | 360972 | 3699   | 648  | 4  | 151 | THO complex 5 (17.9 kD) (Thoc5) alternative variant dSep08, mRNA.                                  |
| Thoc7   | Thoc7.aSep08   | 305714 | 15897  | 1324 | 7  | 152 | THO complex 7 homolog (Drosophila) (17.8 kD) (Thoc7) alternative variant aSep08, mRNA.             |
| Thoc7   | Thoc7.bSep08   | 305714 | 767    | 210  | 1  | 69  | THO complex 7 homolog (Drosophila) (Thoc7) alternative variant bSep08, mRNA.                       |
| Thop1   | Thop1.bSep08   | 64517  | 3455   | 691  | 5  | 188 | thimet oligopeptidase 1 (Thop1) alternative variant bSep08, mRNA.                                  |
| Thop1   | Thop1.cSep08   | 64517  | 7774   | 750  | 5  | 186 | thimet oligopeptidase 1 (Thop1) alternative variant cSep08, mRNA.                                  |
| Thop1   | Thop1.dSep08   | 64517  | 649    | 374  | 3  | 112 | thimet oligopeptidase 1 (Thop1) alternative variant dSep08, mRNA.                                  |
| Thpo    | Thpo.bSep08    | 81811  | 814    | 698  | 2  | 122 | thrombopoietin (Thpo) alternative variant bSep08, mRNA.                                            |
| Thpo    | Thpo.cSep08    | 81811  | 4257   | 728  | 5  | 106 | thrombopoietin (Thpo) alternative variant cSep08, mRNA.                                            |
| Thra    | Thra.bSep08    | 81812  | 1518   | 1033 | 2  | 144 | thyroid hormone receptor alpha (Thra) alternative variant bSep08, mRNA.                            |
| Thrap3  | Thrap3.bSep08  | 313591 | 14443  | 3706 | 8  | 463 | thyroid hormone receptor associated protein 3 (53.7 kD) (Thrap3) alternative variant bSep08, mRNA. |
| Thrap3  | Thrap3.cSep08  | 313591 | 8940   | 1596 | 5  | 201 | thyroid hormone receptor associated protein 3 (Thrap3) alternative variant cSep08, mRNA.           |
| Thrsp   | Thrsp.bSep08   | 25357  | 4169   | 696  | 2  | 89  | thyroid hormone responsive (10.2 kD) (Thrsp) alternative variant bSep08, complete mRNA.            |
| Thsd1   | Thsd1.bSep08   | 364630 | 18746  | 2647 | 1  | 797 | thrombospondin, type I, domain 1 (88.7 kD) (Thsd1) alternative variant bSep08, mRNA.               |
| Thsd7a  | Thsd7a.aSep08  | 500032 | 22870  | 536  | 3  | 178 | thrombospondin type-1 domain-containing protein 7A (Thsd7a) alternative variant aSep08, mRNA.      |
| Thsd7a  | Thsd7a.bSep08  | 500032 | 120266 | 517  | 2  | 171 | thrombospondin type-1 domain-containing protein 7A (Thsd7a) alternative variant bSep08, mRNA.      |
| Thumpd1 | Thumpd1.bSep08 | 309041 | 1730   | 734  | 2  | 210 | THUMP (Thumpd1) alternative variant bSep08, mRNA.                                                  |
| Thumpd1 | Thumpd1.cSep08 | 309041 | 1773   | 777  |    | 153 | putative protein of eukaryotic origin (Thumpd1) alternative variant cSep08, mRNA.                  |
| Thumpd1 | Thumpd1.dSep08 | 309041 | 3551   | 454  | 3  | 35  | putative protein (Thumpd1) alternative variant dSep08, mRNA.                                       |
| Thumpd2 | Thumpd2.bSep08 | 313851 | 39685  | 1241 | 7  | 359 | putative RNA methylase (Thumpd2) alternative variant bSep08, mRNA.                                 |
| Thumpd2 | Thumpd2.cSep08 | 313851 | 2068   | 807  | 1  | 200 | thump domain-containing protein 2 (20.9 kD) (Thumpd2) alternative variant cSep08, mRNA.            |

|            |                   |        |       |      |    |     |                                                                                                             |
|------------|-------------------|--------|-------|------|----|-----|-------------------------------------------------------------------------------------------------------------|
| Thumpd3    | Thumpd3.aSep08    | 500288 | 24297 | 3290 | 10 | 525 | THUMP and putative RNA methylase (Thumpd3) alternative variant aSep08, mRNA.                                |
| Thumpd3    | Thumpd3.bSep08    | 500288 | 14503 | 1160 | 5  | 314 | THUMP (35.3 kD) (Thumpd3) alternative variant bSep08, mRNA.                                                 |
| Thumpd3    | Thumpd3.cSep08    | 500288 | 14280 | 914  | 5  | 288 | putative protein of ancient origin (Thumpd3) alternative variant cSep08, mRNA.                              |
| Thumpd3    | Thumpd3.dSep08    | 500288 | 2857  | 893  | 4  | 65  | putative protein of metazoan origin (Thumpd3) alternative variant dSep08, mRNA.                             |
| Thy1       | Thy1.aSep08       | 24832  | 5076  | 1985 | 4  | 222 | thymus cell antigen 1, theta (24.6 kD) (Thy1) alternative variant aSep08, mRNA.                             |
| Thy1       | Thy1.bSep08       | 24832  | 4108  | 736  | 5  | 217 | thymus cell antigen 1, theta (Thy1) alternative variant bSep08, mRNA.                                       |
| Thy1       | Thy1.dSep08       | 24832  | 4251  | 784  | 4  | 146 | thymus cell antigen 1, theta (16.5 kD) (Thy1) alternative variant dSep08, mRNA.                             |
| Thy1       | Thy1.eSep08       | 24832  | 4287  | 739  | 3  | 146 | thymus cell antigen 1, theta (16.5 kD) (Thy1) alternative variant eSep08, mRNA.                             |
| Thy1       | Thy1.fSep08       | 24832  | 4149  | 654  | 4  | 146 | thymus cell antigen 1, theta (16.5 kD) (Thy1) alternative variant fSep08, mRNA.                             |
| Thy1       | Thy1.gSep08       | 24832  | 1452  | 790  | 2  | 85  | thymus cell antigen 1, theta (Thy1) alternative variant gSep08, mRNA.                                       |
| Thy1       | Thy1.hSep08       | 24832  | 4435  | 625  | 3  |     |                                                                                                             |
| Thymosin.0 | Thymosin.0.aSep08 |        | 2054  | 330  |    | 45  | thymosin -like (5.4 kD) (Thymosin.0) mRNA.                                                                  |
| Thyn1      | Thyn1.bSep08      | 300470 | 1945  | 514  | 4  | 140 | thymocyte nuclear protein 1 (Thyn1) alternative variant bSep08, mRNA.                                       |
| Thyn1      | Thyn1.cSep08      | 300470 | 3888  | 710  | 6  | 121 | thymocyte nuclear protein 1 (14.2 kD) (Thyn1) alternative variant cSep08, mRNA.                             |
| Thyn1      | Thyn1.eSep08      | 300470 | 992   | 347  | 2  | 68  | thymocyte nuclear protein 1 (Thyn1) alternative variant eSep08, mRNA.                                       |
| Tia1       | Tia1.bSep08       | 312510 | 19372 | 3114 | 12 | 353 | cytotoxic granule-associated RNA binding protein 1 (Tia1) alternative variant bSep08, mRNA.                 |
| Tia1       | Tia1.dSep08       | 312510 | 16177 | 740  | 4  | 97  | cytotoxic granule-associated RNA binding protein 1 (10.9 kD) (Tia1) alternative variant dSep08, mRNA.       |
| Tia1       | Tia1.eSep08       | 312510 | 10066 | 394  | 2  | 85  | cytotoxic granule-associated RNA binding protein 1 (Tia1) alternative variant eSep08, mRNA.                 |
| Tia1       | Tia1.fSep08       | 312510 | 880   | 444  | 2  | 84  | cytotoxic granule-associated RNA binding protein 1 (9.7 kD) (Tia1) alternative variant fSep08, mRNA.        |
| Tia1       | Tia1.hSep08       | 312510 | 16256 | 737  | 6  | 54  | cytotoxic granule-associated RNA binding protein 1 (6.1 kD) (Tia1) alternative variant hSep08, mRNA.        |
| Tia1       | Tia1.jSep08       | 312510 | 2190  | 570  | 5  | 66  | cytotoxic granule-associated RNA binding protein 1 (Tia1) alternative variant jSep08, mRNA.                 |
| Tial1      | Tial1.bSep08      | 361655 | 21278 | 5342 | 11 | 419 | TIA-1 precursor (Tial1) alternative variant bSep08, mRNA.                                                   |
| Tial1      | Tial1.cSep08      | 361655 | 2798  | 957  | 5  | 318 | cytotoxic granule-associated RNA binding protein-like 1 (Tial1) alternative variant cSep08, mRNA.           |
| Tial1      | Tial1.dSep08      | 361655 | 6462  | 1789 | 8  | 189 | cytotoxic granule-associated RNA binding protein-like 1 (21.1 kD) (Tial1) alternative variant dSep08, mRNA. |
| Tial1      | Tial1.eSep08      | 361655 | 2750  | 733  | 5  | 133 | cytotoxic granule-associated RNA binding protein-like 1 (Tial1) alternative variant eSep08, mRNA.           |

|          |                 |        |       |      |    |     |                                                                                                                     |
|----------|-----------------|--------|-------|------|----|-----|---------------------------------------------------------------------------------------------------------------------|
| Tial1    | Tial1.fSep08    | 361655 | 27027 | 870  | 5  | 127 | cytotoxic granule-associated RNA binding protein-like 1 (Tial1) alternative variant fSep08, mRNA.                   |
| Tial1    | Tial1.gSep08    | 361655 | 985   | 875  | 2  | 59  | cytotoxic granule-associated RNA binding protein-like 1 (Tial1) alternative variant gSep08, mRNA.                   |
| Tiam1    | Tiam1.aSep08    | 304109 | 34252 | 532  |    | 176 | T-cell lymphoma invasion and metastasis 1 (Tiam1) mRNA.                                                             |
| Tie1     | Tie1.bSep08     | 89806  | 3195  | 535  | 3  | 178 | tyrosine kinase with immunoglobulin-like and EGF-like domains 1 (Tie1) alternative variant bSep08, mRNA.            |
| Tie1     | Tie1.cSep08     | 89806  | 729   | 389  | 3  | 129 | tyrosine kinase with immunoglobulin-like and EGF-like domains 1 (Tie1) alternative variant cSep08, mRNA.            |
| Tie1     | Tie1.dSep08     | 89806  | 781   | 575  | 3  | 66  | tyrosine kinase with immunoglobulin-like and EGF-like domains 1 (Tie1) alternative variant dSep08, mRNA.            |
| Tifa     | Tifa.aSep08     | 310877 | 8224  | 1729 | 1  | 181 | TRAF-interacting protein with forkhead-associated domain (21.0 kD) (Tifa) alternative variant aSep08, mRNA.         |
| Tifab    | Tifab.cSep08    | 364674 | 1546  | 400  | 2  | 26  | TRAF-interacting protein with forkhead-associated domain, family member B (Tifab) alternative variant cSep08, mRNA. |
| TIL.0    | TIL.0.aSep08    |        | 9296  | 433  |    | 143 | willebrand factor (TIL.0) mRNA.                                                                                     |
| TIL.1    | TIL.1.aSep08    |        | 2193  | 581  |    | 193 | protease inhibitor I8, cysteine-rich trypsin inhibitor-like (TIL.1) mRNA.                                           |
| Timd2    | Timd2.bSep08    | 287222 | 37147 | 1195 | 3  | 283 | TIM2 (Timd2) alternative variant bSep08, mRNA.                                                                      |
| Timeless | Timeless.bSep08 | 83508  | 17403 | 2491 | 13 | 552 | timeless homolog (Drosophila) (64.2 kD) (Timeless) alternative variant bSep08, mRNA.                                |
| Timeless | Timeless.cSep08 | 83508  | 8074  | 2526 | 12 | 421 | timeless homolog (Drosophila) (Timeless) alternative variant cSep08, mRNA.                                          |
| Timeless | Timeless.dSep08 | 83508  | 2051  | 1056 | 5  | 182 | timeless homolog (Drosophila) (Timeless) alternative variant dSep08, mRNA.                                          |
| Timeless | Timeless.eSep08 | 83508  | 2066  | 1068 | 5  | 180 | timeless homolog (Drosophila) (Timeless) alternative variant eSep08, mRNA.                                          |
| Timm8a2  | Timm8a2.aSep08  | 680794 | 5372  | 615  | 2  | 80  | translocase of inner mitochondrial membrane 8 homolog a2 (yeast) (Timm8a2) alternative variant aSep08, mRNA.        |
| Timm9    | Timm9.aSep08    | 171139 | 12795 | 700  | 3  | 107 | translocase of inner mitochondrial membrane 9 homolog CRA a (Timm9) alternative variant aSep08, mRNA.               |
| Timm9    | Timm9.bSep08    | 171139 | 12810 | 876  | 5  | 89  | translocase inner membrane (10.4 kD) (Timm9) alternative variant bSep08, complete mRNA.                             |
| Timm9    | Timm9.cSep08    | 171139 | 1774  | 160  | 2  | 51  | putative protein (Timm9) alternative variant cSep08, mRNA.                                                          |
| Timm9    | Timm9.eSep08    | 171139 | 2311  | 471  | 2  | 31  | putative protein (Timm9) alternative variant eSep08, mRNA.                                                          |
| Timm10   | Timm10.bSep08   | 64464  | 3497  | 940  | 2  | 90  | translocase of inner mitochondrial membrane 10 homolog (yeast) (10.3 kD) (Timm10) alternative variant bSep08, mRNA. |
| Timm10   | Timm10.cSep08   | 64464  | 3503  | 653  | 2  | 90  | translocase of inner mitochondrial membrane 10 homolog (yeast) (10.3 kD) (Timm10) alternative variant cSep08, mRNA. |
| Timm17a  | Timm17a.bSep08  | 54311  | 11913 | 1059 | 4  | 161 | translocase of inner mitochondrial membrane 17a (16.9 kD) (Timm17a) alternative variant bSep08, complete mRNA.      |

|           |                  |        |       |      |    |     |                                                                                                                            |
|-----------|------------------|--------|-------|------|----|-----|----------------------------------------------------------------------------------------------------------------------------|
| Timm17a   | Timm17a.cSep08   | 54311  | 5861  | 1708 | 1  | 115 | translocase of inner mitochondrial membrane 17a (12.5 kD) (Timm17a) alternative variant cSep08, mRNA.                      |
| Timm22    | Timm22.aSep08    | 79463  | 7743  | 1785 | 4  | 190 | translocase of inner mitochondrial membrane 22 homolog (yeast) (Timm22) alternative variant aSep08, mRNA.                  |
| Timm22    | Timm22.bSep08    | 79463  | 2782  | 477  | 2  | 158 | translocase of inner mitochondrial membrane 22 homolog (yeast) (Timm22) alternative variant bSep08, mRNA.                  |
| Timm23    | Timm23.bSep08    | 54312  | 10810 | 509  | 1  | 115 | translocase of inner mitochondrial membrane 23 homolog (yeast) (11.9 kD) (Timm23) alternative variant bSep08, mRNA.        |
| Timm50    | Timm50.bSep08    | 685725 | 1786  | 307  | 3  | 102 | translocase of inner mitochondrial membrane 50 homolog ( <i>S. cerevisiae</i> ) (Timm50) alternative variant bSep08, mRNA. |
| Timp1     | Timp1.bSep08     | 116510 | 4680  | 818  | 2  | 217 | tissue inhibitor of metalloproteinase 1 (23.8 kD) (Timp1) alternative variant bSep08, mRNA.                                |
| Timp1     | Timp1.cSep08     | 116510 | 3371  | 324  |    | 98  | tissue inhibitor of metalloproteinase 1 (Timp1) alternative variant cSep08, mRNA.                                          |
| Timp2     | Timp2.cSep08     | 29543  | 765   | 638  | 2  | 27  | tissue inhibitor of metalloproteinase 2 (Timp2) alternative variant cSep08, mRNA.                                          |
| Timp3     | Timp3.bSep08     | 25358  | 5416  | 4007 | 1  | 143 | tissue inhibitor of metalloproteinase 3 (Timp3) alternative variant bSep08, mRNA.                                          |
| Tinagl1   | Tinagl1.bSep08   | 94174  | 9998  | 1937 | 12 | 467 | tubulointerstitial nephritis antigen-like 1 (52.8 kD) (Tinagl1) alternative variant bSep08, complete mRNA.                 |
| Tinagl1   | Tinagl1.cSep08   | 94174  | 7477  | 775  | 6  | 233 | tubulointerstitial nephritis antigen-like 1 (Tinagl1) alternative variant cSep08, mRNA.                                    |
| Tinagl1   | Tinagl1.dSep08   | 94174  | 6079  | 377  | 4  | 125 | tubulointerstitial nephritis antigen-like 1 (Tinagl1) alternative variant dSep08, mRNA.                                    |
| Titin_Z.0 | Titin_Z.0.aSep08 |        | 2074  | 277  |    | 92  | titin N2-B (Titin_Z.0) mRNA.                                                                                               |
| Tjap1     | Tjap1.aSep08     | 316233 | 2657  | 2016 | 1  | 389 | tight junction associated protein 1 (41.9 kD) (Tjap1) alternative variant aSep08, mRNA.                                    |
| Tjap1     | Tjap1.bSep08     | 316233 | 2845  | 1028 | 3  | 127 | tight junction associated protein 1 (13.9 kD) (Tjap1) alternative variant bSep08, mRNA.                                    |
| Tjp1      | Tjp1.bSep08      | 292994 | 5629  | 852  | 2  | 210 | tight junction protein 1 (Tjp1) alternative variant bSep08, mRNA.                                                          |
| Tjp1      | Tjp1.cSep08      | 292994 | 5938  | 1122 | 2  | 195 | tight junction protein 1 (Tjp1) alternative variant cSep08, mRNA.                                                          |
| Tjp2      | Tjp2.bSep08      | 115769 | 94291 | 3087 | 20 | 938 | tight junction protein 2 (Tjp2) alternative variant bSep08, mRNA.                                                          |
| Tjp2      | Tjp2.cSep08      | 115769 | 44091 | 787  | 5  | 213 | tight junction protein 2 (Tjp2) alternative variant cSep08, mRNA.                                                          |
| Tjp2      | Tjp2.dSep08      | 115769 | 5100  | 576  | 4  | 192 | tight junction protein 2 (Tjp2) alternative variant dSep08, mRNA.                                                          |
| Tjp2      | Tjp2.eSep08      | 115769 | 3609  | 1391 | 3  | 165 | tight junction protein 2 (Tjp2) alternative variant eSep08, mRNA.                                                          |
| Tjp2      | Tjp2.fSep08      | 115769 | 14168 | 313  | 2  | 85  | tight junction protein 2 (Tjp2) alternative variant fSep08, mRNA.                                                          |
| Tjp2      | Tjp2.gSep08      | 115769 | 737   | 222  | 2  | 70  | tight junction protein 2 (Tjp2) alternative variant gSep08, mRNA.                                                          |



|         |                |        |       |      |    |     |                                                                                                                      |
|---------|----------------|--------|-------|------|----|-----|----------------------------------------------------------------------------------------------------------------------|
| Tjp3    | Tjp3.bSep08    | 314640 | 1615  | 967  | 3  | 171 | tight junction protein 3 (Tjp3) alternative variant bSep08, mRNA.                                                    |
| Tjp3    | Tjp3.cSep08    | 314640 | 4018  | 741  | 6  | 170 | tight junction protein 3 (Tjp3) alternative variant cSep08, mRNA.                                                    |
| Tk2     | Tk2.cSep08     | 291824 | 6569  | 402  | 4  | 33  | thymidine kinase 2, mitochondrial (Tk2) alternative variant cSep08, mRNA.                                            |
| Tkt     | Tkt.bSep08     | 64524  | 17931 | 893  | 6  | 249 | transketolase (Tkt) alternative variant bSep08, mRNA.                                                                |
| Tkt     | Tkt.cSep08     | 64524  | 1477  | 739  | 3  | 181 | transketolase (Tkt) alternative variant cSep08, mRNA.                                                                |
| Tkt     | Tkt.dSep08     | 64524  | 13329 | 711  | 5  | 162 | transketolase (Tkt) alternative variant dSep08, mRNA.                                                                |
| Tkt     | Tkt.eSep08     | 64524  | 1881  | 921  | 3  | 109 | transketolase (Tkt) alternative variant eSep08, mRNA.                                                                |
| Tkt     | Tkt.fSep08     | 64524  | 2624  | 1145 | 3  | 99  | transketolase (10.8 kD) (Tkt) alternative variant fSep08, mRNA.                                                      |
| Tktl1   | Tktl1.bSep08   | 689374 | 18323 | 704  | 1  | 64  | transketolase-like 1 (Tktl1) alternative variant bSep08, mRNA.                                                       |
| Tlcd2   | Tlcd2.aSep08   | 497955 | 818   | 403  |    | 116 | putative protein of metazoan origin (Tlcd2) mRNA.                                                                    |
| TLD.0   | TLD.0.aSep08   |        | 11221 | 2569 |    | 157 | nuclear receptor coactivator 7 CRA c (18.0 kD) (TLD.0) mRNA.                                                         |
| Tle1    | Tle1.aSep08    | 362533 | 16342 | 854  | 4  | 284 | transducin-like enhancer of split 1, homolog of Drosophila E(spl) (Tle1) alternative variant aSep08, mRNA.           |
| Tle1    | Tle1.bSep08    | 362533 | 4912  | 1551 | 3  | 191 | transducin-like enhancer of split 1, homolog of Drosophila E(spl) (21.3 kD) (Tle1) alternative variant bSep08, mRNA. |
| Tle2    | Tle2.bSep08    | 299636 | 2246  | 1225 | 4  | 297 | transducin-like enhancer of split 2, homolog of Drosophila E(spl) (32.3 kD) (Tle2) alternative variant bSep08, mRNA. |
| Tle2    | Tle2.cSep08    | 299636 | 4572  | 437  | 6  | 145 | transducin-like enhancer of split 2, homolog of Drosophila E(spl) (Tle2) alternative variant cSep08, mRNA.           |
| Tle2    | Tle2.dSep08    | 299636 | 766   | 404  | 3  | 134 | transducin-like enhancer of split 2, homolog of Drosophila E(spl) (Tle2) alternative variant dSep08, mRNA.           |
| Tle2    | Tle2.hSep08    | 299636 | 525   | 413  | 2  | 80  | transducin-like enhancer of split 2, homolog of Drosophila E(spl) (Tle2) alternative variant hSep08, mRNA.           |
| Tle3    | Tle3.aSep08    | 84424  | 44137 | 3621 | 20 | 610 | transducin-like enhancer 3 (Tle3) alternative variant aSep08, mRNA.                                                  |
| Tle3    | Tle3.cSep08    | 84424  | 4008  | 862  | 5  | 287 | transducin-like enhancer 3 (Tle3) alternative variant cSep08, mRNA.                                                  |
| Tle3    | Tle3.eSep08    | 84424  | 2483  | 271  | 3  | 42  | transducin-like enhancer of split 3 (Tle3) alternative variant eSep08, mRNA.                                         |
| Tle4    | Tle4.aSep08    | 25565  | 20833 | 3304 | 7  | 571 | transducin-like enhancer of split 4, homolog of Drosophila E(spl) (Tle4) alternative variant aSep08, mRNA.           |
| Tle4    | Tle4.bSep08    | 25565  | 1196  | 309  | 1  | 102 | transducin-like enhancer of split 4, homolog of Drosophila E(spl) (Tle4) alternative variant bSep08, mRNA.           |
| TLE_N.0 | TLE_N.0.aSep08 |        | 44265 | 1307 | 1  | 236 | transducin-like enhancer 1 (TLE_N.0) alternative variant aSep08, mRNA.                                               |
| TLE_N.0 | TLE_N.0.bSep08 |        | 44289 | 1361 | 1  | 163 | transducin-like enhancer 1 (TLE_N.0) alternative variant bSep08, mRNA.                                               |
| Tlk1    | Tlk1.bSep08    | 311118 | 28351 | 2374 | 10 | 435 | tousled-like kinase 1 (Tlk1) alternative variant bSep08, mRNA.                                                       |

|                    |                           |        |       |      |    |      |                                                                                                                 |
|--------------------|---------------------------|--------|-------|------|----|------|-----------------------------------------------------------------------------------------------------------------|
| Tlk1               | Tlk1.cSep08               | 311118 | 51039 | 411  | 3  | 137  | tousled-like kinase 1 (Tlk1) alternative variant cSep08, mRNA.                                                  |
| Tlk2               | Tlk2.aSep08               | 303592 | 91479 | 3424 | 22 | 837  | tousled-like kinase 2 (Arabidopsis) and hypothetical protein LOC688398 (Tlk2) alternative variant aSep08, mRNA. |
| Tlk2               | Tlk2.aSep08               | 688398 | 91479 | 3424 | 22 | 837  | tousled-like kinase 2 (Arabidopsis) and hypothetical protein LOC688398 (Tlk2) alternative variant aSep08, mRNA. |
| Tlk2               | Tlk2.bSep08               | 303592 | 22114 | 1145 | 6  | 258  | tousled-like kinase 2 (Arabidopsis) and hypothetical protein LOC688398 (Tlk2) alternative variant bSep08, mRNA. |
| Tlk2               | Tlk2.bSep08               | 688398 | 22114 | 1145 | 6  | 258  | tousled-like kinase 2 (Arabidopsis) and hypothetical protein LOC688398 (Tlk2) alternative variant bSep08, mRNA. |
| Tln1               | Tln1.aSep08               | 313494 | 9886  | 4563 | 24 | 1100 | talin 1 (Tln1) alternative variant aSep08, mRNA.                                                                |
| Tln1               | Tln1.bSep08               | 313494 | 532   | 450  | 2  | 150  | talin 1 (Tln1) alternative variant bSep08, mRNA.                                                                |
| Tln1               | Tln1.cSep08               | 313494 | 14184 | 654  | 5  | 136  | talin 1 (Tln1) alternative variant cSep08, mRNA.                                                                |
| Tln1               | Tln1.dSep08               | 313494 | 11265 | 482  | 3  | 69   | talin 1 (Tln1) alternative variant dSep08, mRNA.                                                                |
| Tlr6               | Tlr6.aSep08               | 305353 | 6525  | 2527 | 1  | 806  | toll-like receptor 6 (92.6 kD) (Tlr6) alternative variant aSep08, mRNA.                                         |
| Tlr7               | Tlr7.aSep08               | 317468 | 26617 | 4060 | 2  | 1068 | toll-like receptor 7 (123.4 kD) (Tlr7) alternative variant aSep08, mRNA.                                        |
| Tlx3               | Tlx3.aSep08               | 497881 | 1484  | 562  | 1  | 150  | T-cell leukemia, homeobox 3 (Tlx3) alternative variant aSep08, mRNA.                                            |
| Tlx3               | Tlx3.bSep08               | 497881 | 1328  | 368  | 1  | 122  | T-cell leukemia, homeobox 3 (Tlx3) alternative variant bSep08, mRNA.                                            |
| Tm2d1              | Tm2d1.aSep08              | 362545 | 40932 | 1290 | 5  | 208  | hypothetical protein LOC685326 (22.2 kD) (Tm2d1) alternative variant aSep08, mRNA.                              |
| Tm2d1              | Tm2d1.aSep08              | 685326 | 40932 | 1290 | 5  | 208  | hypothetical protein LOC685326 (22.2 kD) (Tm2d1) alternative variant aSep08, mRNA.                              |
| Tm2d1              | Tm2d1.bSep08              | 362545 | 40972 | 1000 | 4  | 141  | hypothetical protein LOC685326 (14.9 kD) (Tm2d1) alternative variant bSep08, mRNA.                              |
| Tm2d1              | Tm2d1.bSep08              | 685326 | 40972 | 1000 | 4  | 141  | hypothetical protein LOC685326 (14.9 kD) (Tm2d1) alternative variant bSep08, mRNA.                              |
| Tm2d1              | Tm2d1.cSep08              | 362545 | 20236 | 623  | 1  | 81   | hypothetical protein LOC685326 (9.1 kD) (Tm2d1) alternative variant cSep08, mRNA.                               |
| Tm2d1              | Tm2d1.cSep08              | 685326 | 20236 | 623  | 1  | 81   | hypothetical protein LOC685326 (9.1 kD) (Tm2d1) alternative variant cSep08, mRNA.                               |
| Tm2d1              | Tm2d1.dSep08              | 362545 | 11026 | 499  | 3  | 27   | hypothetical protein LOC685326 (3.1 kD) (Tm2d1) alternative variant dSep08, mRNA.                               |
| Tm2d1              | Tm2d1.dSep08              | 685326 | 11026 | 499  | 3  | 27   | hypothetical protein LOC685326 (3.1 kD) (Tm2d1) alternative variant dSep08, mRNA.                               |
| Tm2d2              | Tm2d2.bSep08              | 290833 | 2581  | 498  | 3  | 143  | domain-containing protein 2 precursor (15.2 kD) (Tm2d2) alternative variant bSep08, mRNA.                       |
| Tm2d3              | Tm2d3.bSep08              | 292995 | 11936 | 828  | 2  | 227  | TM2 (Tm2d3) alternative variant bSep08, mRNA.                                                                   |
| Tm2d3              | Tm2d3.cSep08              | 292995 | 10673 | 1141 | 1  | 183  | TM2 (20.3 kD) (Tm2d3) alternative variant cSep08, mRNA.                                                         |
| Tm4sf19andTctex1d2 | Tm4sf19andTctex1d2.cSep08 | 288044 | 14463 | 639  | 5  | 143  | tctex1 domain-containing protein 2 (Tm4sf19andTctex1d2) alternative variant cSep08, mRNA.                       |
| Tm4sf19andTctex1d2 | Tm4sf19andTctex1d2.cSep08 | 498095 | 14463 | 639  | 5  | 143  | tctex1 domain-containing protein 2 (Tm4sf19andTctex1d2) alternative variant cSep08, mRNA.                       |

|                    |                           |        |       |      |    |     |                                                                                                         |
|--------------------|---------------------------|--------|-------|------|----|-----|---------------------------------------------------------------------------------------------------------|
| Tm4sf19andTctex1d2 | Tm4sf19andTctex1d2.dSep08 | 288044 | 3549  | 314  | 2  | 95  | putative protein of metazoan origin (Tm4sf19andTctex1d2) alternative variant dSep08, mRNA.              |
| Tm4sf19andTctex1d2 | Tm4sf19andTctex1d2.dSep08 | 498095 | 3549  | 314  | 2  | 95  | putative protein of metazoan origin (Tm4sf19andTctex1d2) alternative variant dSep08, mRNA.              |
| Tm4sf19andTctex1d2 | Tm4sf19andTctex1d2.eSep08 | 288044 | 1691  | 905  | 2  | 36  | tctex1 domain-containing protein 2 like (4.2 kD) (Tm4sf19andTctex1d2) alternative variant eSep08, mRNA. |
| Tm4sf19andTctex1d2 | Tm4sf19andTctex1d2.eSep08 | 498095 | 1691  | 905  | 2  | 36  | tctex1 domain-containing protein 2 like (4.2 kD) (Tm4sf19andTctex1d2) alternative variant eSep08, mRNA. |
| Tm6sf1             | Tm6sf1.bSep08             | 361600 | 18639 | 1204 | 8  | 266 | transmembrane 6 superfamily member 1 (Tm6sf1) alternative variant bSep08, mRNA.                         |
| Tm6sf2             | Tm6sf2.bSep08             | 689029 | 1414  | 752  | 1  | 149 | transmembrane 6 superfamily member 2 (15.5 kD) (Tm6sf2) alternative variant bSep08, mRNA.               |
| Tm7sf2             | Tm7sf2.bSep08             | 293688 | 3267  | 660  | 6  | 219 | transmembrane 7 superfamily member 2 (Tm7sf2) alternative variant bSep08, mRNA.                         |
| Tm9sf1             | Tm9sf1.bSep08             | 361043 | 7309  | 1886 | 6  | 628 | transmembrane 9 superfamily member 1 (Tm9sf1) alternative variant bSep08, mRNA.                         |
| Tm9sf1             | Tm9sf1.cSep08             | 361043 | 4976  | 1186 | 3  | 280 | transmembrane 9 superfamily member 1 (31.7 kD) (Tm9sf1) alternative variant cSep08, mRNA.               |
| Tm9sf1             | Tm9sf1.dSep08             | 361043 | 2132  | 955  | 3  | 264 | transmembrane 9 superfamily member 1 (Tm9sf1) alternative variant dSep08, mRNA.                         |
| Tm9sf3             | Tm9sf3.aSep08             | 309475 | 53077 | 6396 | 15 | 587 | transmembrane 9 superfamily member 3 (67.5 kD) (Tm9sf3) alternative variant aSep08, mRNA.               |
| Tm9sf3             | Tm9sf3.bSep08             | 309475 | 21839 | 786  | 8  | 247 | transmembrane 9 superfamily member 3 (Tm9sf3) alternative variant bSep08, mRNA.                         |
| Tm9sf4             | Tm9sf4.bSep08             | 296279 | 34076 | 691  | 5  | 160 | transmembrane 9 superfamily protein member 4 (Tm9sf4) alternative variant bSep08, mRNA.                 |
| Tmbim1             | Tmbim1.bSep08             | 316516 | 1722  | 644  | 3  | 111 | transmembrane BAX inhibitor motif containing 1 (Tmbim1) alternative variant bSep08, mRNA.               |
| Tmbim1             | Tmbim1.cSep08             | 316516 | 5600  | 713  | 8  | 109 | transmembrane BAX inhibitor motif containing 1 (Tmbim1) alternative variant cSep08, mRNA.               |
| Tmbim1             | Tmbim1.dSep08             | 316516 | 2556  | 839  | 4  | 78  | transmembrane BAX inhibitor motif containing 1 (8.4 kD) (Tmbim1) alternative variant dSep08, mRNA.      |
| Tmbim4             | Tmbim4.bSep08             | 362884 | 2931  | 1313 | 3  | 139 | transmembrane BAX inhibitor motif containing 4 (15.8 kD) (Tmbim4) alternative variant bSep08, mRNA.     |
| Tmbim4             | Tmbim4.cSep08             | 362884 | 5970  | 575  | 5  | 133 | transmembrane BAX inhibitor motif containing 4 (14.8 kD) (Tmbim4) alternative variant cSep08, mRNA.     |
| Tmc3               | Tmc3.aSep08               | 293065 | 12431 | 703  |    | 195 | transmembrane channel-like gene family 3 (Tmc3) mRNA.                                                   |
| Tmc5               | Tmc5.bSep08               | 365360 | 8455  | 398  | 2  | 74  | transmembrane channel-like gene family 5 (Tmc5) alternative variant bSep08, mRNA.                       |
| Tmcc1              | Tmcc1.aSep08              | 312654 | 28791 | 1410 |    | 220 | transmembrane and coiled coil domains 1 (Tmcc1) mRNA.                                                   |
| Tmcc2              | Tmcc2.aSep08              | 305095 | 13276 | 2752 | 4  | 470 | transmembrane and coiled-coil domains 2 (51.9 kD) (Tmcc2) alternative variant aSep08, mRNA.             |
| Tmcc3              | Tmcc3.bSep08              | 314751 | 25198 | 749  | 2  | 126 | transmembrane and coiled coil domains 3 (Tmcc3) alternative variant bSep08, mRNA.                       |
| Tmcc3              | Tmcc3.cSep08              | 314751 | 26622 | 395  | 1  | 75  | transmembrane and coiled coil domains 3 (Tmcc3) alternative variant cSep08, mRNA.                       |

|        |               |        |       |      |    |     |                                                                                                                              |
|--------|---------------|--------|-------|------|----|-----|------------------------------------------------------------------------------------------------------------------------------|
| Tmco3  | Tmco3.aSep08  | 306607 | 37860 | 3103 | 15 | 678 | transmembrane and coiled-coil domains 3 (75.7 kD) (Tmco3) alternative variant aSep08, mRNA.                                  |
| Tmco3  | Tmco3.bSep08  | 306607 | 22570 | 723  | 6  | 241 | transmembrane and coiled-coil domains 3 (Tmco3) alternative variant bSep08, mRNA.                                            |
| Tmco3  | Tmco3.eSep08  | 306607 | 4255  | 671  | 4  | 81  | transmembrane and coiled-coil domains 3 (Tmco3) alternative variant eSep08, mRNA.                                            |
| Tmco4  | Tmco4.aSep08  | 500573 | 39214 | 916  |    | 142 | transmembrane and coiled-coil domains 4 and hypothetical protein LOC690449 (Tmco4) mRNA.                                     |
| Tmco4  | Tmco4.aSep08  | 690449 | 39214 | 916  |    | 142 | transmembrane and coiled-coil domains 4 and hypothetical protein LOC690449 (Tmco4) mRNA.                                     |
| Tmed1  | Tmed1.bSep08  | 315461 | 2727  | 1620 | 2  | 82  | putative protein, with a coiled coil domain, of bilateral origin (9.6 kD) (Tmed1) alternative variant bSep08, complete mRNA. |
| Tmed2  | Tmed2.aSep08  | 65165  | 7808  | 749  | 5  | 208 | transmembrane emp24 domain trafficking protein 2 (23.4 kD) (Tmed2) alternative variant aSep08, mRNA.                         |
| Tmed4  | Tmed4.aSep08  | 305502 | 4181  | 1607 | 5  | 227 | emp24/gp25L/p24 (26.1 kD) (Tmed4) alternative variant aSep08, complete mRNA.                                                 |
| Tmed4  | Tmed4.bSep08  | 305502 | 4560  | 2099 | 5  | 223 | emp24/gp25L/p24 (24.9 kD) (Tmed4) alternative variant bSep08, complete mRNA.                                                 |
| Tmed10 | Tmed10.bSep08 | 84599  | 12091 | 3154 | 3  | 107 | transmembrane emp24-like trafficking protein 10 (yeast) (Tmed10) alternative variant bSep08, mRNA.                           |
| Tmeff1 | Tmeff1.bSep08 | 63845  | 23085 | 613  | 5  | 150 | transmembrane protein with EGF-like and two follistatin-like domains 1 (Tmeff1) alternative variant bSep08, mRNA.            |
| Tmeff2 | Tmeff2.bSep08 | 363228 | 55947 | 816  | 2  | 195 | transmembrane protein with EGF-like and two follistatin-like domains 2 (Tmeff2) alternative variant bSep08, mRNA.            |
| Tmem1  | Tmem1.aSep08  | 309678 | 16677 | 4505 | 2  | 604 | transmembrane protein 1 (Tmem1) alternative variant aSep08, mRNA.                                                            |
| Tmem1  | Tmem1.bSep08  | 309678 | 4665  | 784  | 1  | 163 | transmembrane protein 1 (Tmem1) alternative variant bSep08, mRNA.                                                            |
| Tmem2  | Tmem2.bSep08  | 309400 | 15018 | 738  | 8  | 238 | transmembrane protein 2 (Tmem2) alternative variant bSep08, mRNA.                                                            |
| Tmem2  | Tmem2.cSep08  | 309400 | 12777 | 619  | 6  | 206 | transmembrane protein 2 (Tmem2) alternative variant cSep08, mRNA.                                                            |
| Tmem2  | Tmem2.dSep08  | 309400 | 9826  | 1104 | 3  | 99  | transmembrane protein 2 (11.0 kD) (Tmem2) alternative variant dSep08, mRNA.                                                  |
| Tmem5  | Tmem5.bSep08  | 299841 | 11810 | 817  | 4  | 188 | transmembrane protein 5 (Tmem5) alternative variant bSep08, mRNA.                                                            |
| Tmem5  | Tmem5.cSep08  | 299841 | 9642  | 774  | 4  | 165 | transmembrane protein 5 (Tmem5) alternative variant cSep08, mRNA.                                                            |
| Tmem8  | Tmem8.cSep08  | 303004 | 3011  | 729  | 1  | 96  | transmembrane protein 8 (five membrane-spanning domains) (Tmem8) alternative variant cSep08, mRNA.                           |
| Tmem9  | Tmem9.bSep08  | 289046 | 17293 | 1583 | 6  | 183 | transmembrane protein 9 (20.6 kD) (Tmem9) alternative variant bSep08, mRNA.                                                  |
| Tmem9  | Tmem9.cSep08  | 289046 | 17357 | 1463 | 6  | 183 | transmembrane protein 9 (20.6 kD) (Tmem9) alternative variant cSep08, complete mRNA.                                         |
| Tmem9  | Tmem9.dSep08  | 289046 | 7581  | 772  | 2  | 52  | transmembrane protein 9 (Tmem9) alternative variant dSep08, mRNA.                                                            |

|         |                |        |        |      |    |     |                                                                                                         |
|---------|----------------|--------|--------|------|----|-----|---------------------------------------------------------------------------------------------------------|
| Tmem9b  | Tmem9b.aSep08  | 293415 | 20018  | 3037 | 2  | 199 | TMEM9 domain family, member B (22.6 kD) (Tmem9b) alternative variant aSep08, mRNA.                      |
| Tmem11  | Tmem11.bSep08  | 303196 | 14049  | 722  | 2  | 133 | transmembrane protein 11 (Tmem11) alternative variant bSep08, mRNA.                                     |
| Tmem14a | Tmem14a.bSep08 | 363206 | 11947  | 469  |    | 44  | transmembrane protein 14A (Tmem14a) alternative variant bSep08, mRNA.                                   |
| Tmem14c | Tmem14c.aSep08 | 171432 | 6027   | 776  | 4  | 114 | transmembrane protein 14C (11.7 kD) (Tmem14c) alternative variant aSep08, mRNA.                         |
| Tmem14c | Tmem14c.cSep08 | 171432 | 2048   | 433  | 2  | 63  | transmembrane protein 14C (Tmem14c) alternative variant cSep08, mRNA.                                   |
| Tmem16a | Tmem16a.bSep08 | 309135 | 35854  | 1134 | 13 | 286 | transmembrane protein 16A (Tmem16a) alternative variant bSep08, mRNA.                                   |
| Tmem16a | Tmem16a.cSep08 | 309135 | 9386   | 398  | 2  | 132 | transmembrane protein 16A (Tmem16a) alternative variant cSep08, mRNA.                                   |
| Tmem16c | Tmem16c.aSep08 | 311287 | 52174  | 560  |    | 186 | transmembrane protein 16C (Tmem16c) mRNA.                                                               |
| Tmem16d | Tmem16d.bSep08 | 299714 | 78728  | 647  | 8  | 215 | transmembrane protein 16D (eight membrane-spanning domains) (Tmem16d) alternative variant bSep08, mRNA. |
| Tmem16d | Tmem16d.cSep08 | 299714 | 9849   | 568  | 5  | 189 | transmembrane protein 16D (eight membrane-spanning domains) (Tmem16d) alternative variant cSep08, mRNA. |
| Tmem16d | Tmem16d.dSep08 | 299714 | 160000 | 574  | 3  | 117 | transmembrane protein 16D (eight membrane-spanning domains) (Tmem16d) alternative variant dSep08, mRNA. |
| Tmem16f | Tmem16f.bSep08 | 315272 | 17207  | 1026 | 6  | 341 | transmembrane protein 16F (Tmem16f) alternative variant bSep08, mRNA.                                   |
| Tmem16f | Tmem16f.cSep08 | 315272 | 33976  | 951  | 7  | 317 | transmembrane protein 16F (Tmem16f) alternative variant cSep08, mRNA.                                   |
| Tmem16f | Tmem16f.dSep08 | 315272 | 10087  | 375  | 3  | 124 | transmembrane protein 16F (Tmem16f) alternative variant dSep08, mRNA.                                   |
| Tmem16f | Tmem16f.eSep08 | 315272 | 8729   | 3052 | 2  | 109 | transmembrane protein 16F (Tmem16f) alternative variant eSep08, mRNA.                                   |
| Tmem16k | Tmem16k.aSep08 | 301111 | 117339 | 2650 | 2  | 723 | transmembrane protein 16K (Tmem16k) alternative variant aSep08, mRNA.                                   |
| Tmem16k | Tmem16k.bSep08 | 301111 | 17713  | 742  |    | 247 | transmembrane protein 16K (Tmem16k) alternative variant bSep08, mRNA.                                   |
| Tmem17  | Tmem17.cSep08  | 360985 | 35266  | 748  | 2  | 94  | transmembrane protein 17 (9.9 kD) (Tmem17) alternative variant cSep08, mRNA.                            |
| Tmem17  | Tmem17.dSep08  | 360985 | 7657   | 272  | 2  | 57  | transmembrane protein 17 (Tmem17) alternative variant dSep08, mRNA.                                     |
| Tmem18  | Tmem18.aSep08  | 362722 | 6744   | 3570 | 4  | 148 | transmembrane protein 18 (17.3 kD) (Tmem18) alternative variant aSep08, mRNA.                           |
| Tmem18  | Tmem18.dSep08  | 362722 | 1078   | 333  | 2  | 42  | transmembrane protein 18 (Tmem18) alternative variant dSep08, mRNA.                                     |
| Tmem19  | Tmem19.bSep08  | 299800 | 20098  | 1007 | 2  | 270 | transmembrane protein 19 (Tmem19) alternative variant bSep08, mRNA.                                     |
| Tmem24  | Tmem24.bSep08  | 300666 | 4851   | 1602 | 6  | 273 | transmembrane protein 24 (Tmem24) alternative variant bSep08, mRNA.                                     |
| Tmem24  | Tmem24.cSep08  | 300666 | 2821   | 856  | 2  | 166 | transmembrane protein 24 (Tmem24) alternative variant cSep08, mRNA.                                     |

|                  |                         |        |       |      |   |     |                                                                                                                |
|------------------|-------------------------|--------|-------|------|---|-----|----------------------------------------------------------------------------------------------------------------|
| Tmem24           | Tmem24.dSep08           | 300666 | 925   | 839  | 2 | 125 | transmembrane protein 24 (Tmem24) alternative variant dSep08, mRNA.                                            |
| Tmem25           | Tmem25.bSep08           | 689172 | 2066  | 1839 | 1 | 70  | transmembrane protein 25 (7.8 kD) (Tmem25) alternative variant bSep08, mRNA.                                   |
| Tmem28l          | Tmem28l.aSep08          | 688841 | 1069  | 681  |   | 186 | transmembrane protein 28-like (Tmem28l) mRNA.                                                                  |
| Tmem30a          | Tmem30a.aSep08          | 300857 | 24489 | 4346 | 2 | 364 | transmembrane protein 30A (41.1 kD) (Tmem30a) alternative variant aSep08, mRNA.                                |
| Tmem33andSlc30a9 | Tmem33andSlc30a9.dSep08 | 59303  | 12275 | 527  | 6 | 175 | solute carrier family 30 member 9 CRA a (Tmem33andSlc30a9) alternative variant dSep08, mRNA.                   |
| Tmem33andSlc30a9 | Tmem33andSlc30a9.dSep08 | 498358 | 12275 | 527  | 6 | 175 | solute carrier family 30 member 9 CRA a (Tmem33andSlc30a9) alternative variant dSep08, mRNA.                   |
| Tmem33andSlc30a9 | Tmem33andSlc30a9.eSep08 | 59303  | 15193 | 462  | 7 | 146 | solute carrier family 30 member 9 CRA a (Tmem33andSlc30a9) alternative variant eSep08, mRNA.                   |
| Tmem33andSlc30a9 | Tmem33andSlc30a9.eSep08 | 498358 | 15193 | 462  | 7 | 146 | solute carrier family 30 member 9 CRA a (Tmem33andSlc30a9) alternative variant eSep08, mRNA.                   |
| Tmem33andSlc30a9 | Tmem33andSlc30a9.fSep08 | 59303  | 20359 | 542  | 2 | 50  | transmembrane protein 33 (Tmem33andSlc30a9) alternative variant fSep08, mRNA.                                  |
| Tmem33andSlc30a9 | Tmem33andSlc30a9.fSep08 | 498358 | 20359 | 542  | 2 | 50  | transmembrane protein 33 (Tmem33andSlc30a9) alternative variant fSep08, mRNA.                                  |
| Tmem34           | Tmem34.bSep08           | 291946 | 7330  | 902  | 7 | 235 | putative protein, with a transmembrane domain, of eukaryotic origin (Tmem34) alternative variant bSep08, mRNA. |
| Tmem34           | Tmem34.cSep08           | 291946 | 983   | 537  | 2 | 91  | putative protein of metazoan origin (Tmem34) alternative variant cSep08, mRNA.                                 |
| Tmem38a          | Tmem38a.bSep08          | 306327 | 16054 | 2715 | 4 | 198 | transmembrane protein 38a (21.4 kD) (Tmem38a) alternative variant bSep08, mRNA.                                |
| Tmem38a          | Tmem38a.cSep08          | 306327 | 8216  | 522  | 2 | 58  | transmembrane protein 38a (Tmem38a) alternative variant cSep08, mRNA.                                          |
| Tmem39a          | Tmem39a.bSep08          | 288092 | 4529  | 732  | 2 | 214 | transmembrane protein 39a (Tmem39a) alternative variant bSep08, mRNA.                                          |
| Tmem39a          | Tmem39a.cSep08          | 288092 | 18550 | 695  | 4 | 186 | transmembrane protein 39a (Tmem39a) alternative variant cSep08, mRNA.                                          |
| Tmem39a          | Tmem39a.dSep08          | 288092 | 4440  | 578  | 3 | 106 | transmembrane protein 39a (12.3 kD) (Tmem39a) alternative variant dSep08, mRNA.                                |
| Tmem39b          | Tmem39b.bSep08          | 362608 | 2119  | 580  | 2 | 120 | transmembrane protein 39b (Tmem39b) alternative variant bSep08, mRNA.                                          |
| Tmem40           | Tmem40.aSep08           | 680858 | 10676 | 340  | 6 | 112 | transmembrane protein 40 (Tmem40) alternative variant aSep08, mRNA.                                            |
| Tmem41b          | Tmem41b.bSep08          | 361626 | 14338 | 2306 | 1 | 206 | transmembrane protein 41B (23.3 kD) (Tmem41b) alternative variant bSep08, mRNA.                                |
| Tmem42           | Tmem42.aSep08           | 363171 | 3511  | 2319 | 3 | 125 | transmembrane protein 42 (13.6 kD) (Tmem42) alternative variant aSep08, complete mRNA.                         |
| Tmem42           | Tmem42.cSep08           | 363171 | 1560  | 936  | 2 | 60  | transmembrane protein 42 (Tmem42) alternative variant cSep08, mRNA.                                            |
| Tmem43           | Tmem43.bSep08           | 362401 | 2028  | 469  | 1 | 61  | transmembrane protein 43 (Tmem43) alternative variant bSep08, mRNA.                                            |
| Tmem44           | Tmem44.aSep08           | 288028 | 15162 | 933  |   | 311 | transmembrane protein 44 (Tmem44) mRNA.                                                                        |

|         |                |        |       |      |   |     |                                                                                       |
|---------|----------------|--------|-------|------|---|-----|---------------------------------------------------------------------------------------|
| Tmem45a | Tmem45a.aSep08 | 680866 | 85840 | 1581 |   | 273 | transmembrane protein 45A (31.2 kD) (Tmem45a) mRNA.                                   |
| Tmem48  | Tmem48.bSep08  | 362557 | 16809 | 366  |   | 122 | transmembrane protein 48 (Tmem48) alternative variant bSep08, mRNA.                   |
| Tmem49  | Tmem49.bSep08  | 192129 | 27590 | 639  | 6 | 182 | transmembrane protein 49 (Tmem49) alternative variant bSep08, mRNA.                   |
| Tmem49  | Tmem49.cSep08  | 192129 | 37927 | 1616 | 6 | 173 | transmembrane protein 49 (Tmem49) alternative variant cSep08, mRNA.                   |
| Tmem49  | Tmem49.dSep08  | 192129 | 17784 | 1144 | 3 | 87  | transmembrane protein 49 (9.9 kD) (Tmem49) alternative variant dSep08, mRNA.          |
| Tmem49  | Tmem49.eSep08  | 192129 | 1931  | 898  | 2 | 61  | transmembrane protein 49 (Tmem49) alternative variant eSep08, mRNA.                   |
| Tmem50b | Tmem50b.aSep08 | 360698 | 31240 | 695  | 5 | 158 | transmembrane protein 50B CRA a (17.9 kD) (Tmem50b) alternative variant aSep08, mRNA. |
| Tmem50b | Tmem50b.cSep08 | 360698 | 28428 | 593  | 4 | 139 | transmembrane protein 50B CRA a (Tmem50b) alternative variant cSep08, mRNA.           |
| Tmem50b | Tmem50b.dSep08 | 360698 | 21769 | 400  | 2 | 74  | putative protein (Tmem50b) alternative variant dSep08, mRNA.                          |
| Tmem50b | Tmem50b.eSep08 | 360698 | 22000 | 375  | 2 | 69  | putative protein (Tmem50b) alternative variant eSep08, mRNA.                          |
| Tmem50b | Tmem50b.fSep08 | 360698 | 22017 | 356  | 2 | 45  | transmembrane protein 50B CRA a (Tmem50b) alternative variant fSep08, mRNA.           |
| Tmem53  | Tmem53.aSep08  | 313529 | 15410 | 872  |   | 275 | transmembrane protein 53 (Tmem53) mRNA.                                               |
| Tmem55a | Tmem55a.bSep08 | 362490 | 25375 | 783  | 1 | 184 | transmembrane protein 55A (Tmem55a) alternative variant bSep08, mRNA.                 |
| Tmem55b | Tmem55b.bSep08 | 364298 | 1964  | 742  | 5 | 230 | transmembrane protein 55B (Tmem55b) alternative variant bSep08, mRNA.                 |
| Tmem55b | Tmem55b.cSep08 | 364298 | 1667  | 691  | 4 | 150 | transmembrane protein 55B (Tmem55b) alternative variant cSep08, mRNA.                 |
| Tmem55b | Tmem55b.dSep08 | 364298 | 2015  | 908  | 2 | 115 | transmembrane protein 55B (13.0 kD) (Tmem55b) alternative variant dSep08, mRNA.       |
| Tmem55b | Tmem55b.eSep08 | 364298 | 2246  | 891  | 3 | 115 | transmembrane protein 55B (13.0 kD) (Tmem55b) alternative variant eSep08, mRNA.       |
| Tmem57  | Tmem57.aSep08  | 313618 | 57039 | 1938 |   | 645 | transmembrane protein 57 (Tmem57) mRNA.                                               |
| Tmem59l | Tmem59l.aSep08 | 306349 | 3666  | 1412 | 8 | 330 | transmembrane protein 59-like (Tmem59l) alternative variant aSep08, mRNA.             |
| Tmem59l | Tmem59l.bSep08 | 306349 | 2994  | 873  | 7 | 290 | transmembrane protein 59-like (Tmem59l) alternative variant bSep08, mRNA.             |
| Tmem59l | Tmem59l.cSep08 | 306349 | 2539  | 555  | 5 | 129 | transmembrane protein 59-like (Tmem59l) alternative variant cSep08, mRNA.             |
| Tmem59l | Tmem59l.dSep08 | 306349 | 674   | 599  | 2 | 110 | transmembrane protein 59-like (Tmem59l) alternative variant dSep08, mRNA.             |
| Tmem60  | Tmem60.aSep08  | 296761 | 4851  | 1365 | 2 | 76  | transmembrane protein 60 (8.1 kD) (Tmem60) alternative variant aSep08, mRNA.          |
| Tmem62  | Tmem62.aSep08  | 311350 | 22169 | 1966 |   | 425 | transmembrane protein 62 (Tmem62) mRNA.                                               |
| Tmem63a | Tmem63a.bSep08 | 289318 | 13209 | 742  | 1 | 138 | transmembrane protein 63a (Tmem63a) alternative variant bSep08, mRNA.                 |

|         |                |        |       |      |    |     |                                                                                       |
|---------|----------------|--------|-------|------|----|-----|---------------------------------------------------------------------------------------|
| Tmem63b | Tmem63b.aSep08 | 363197 | 12086 | 1768 | 15 | 584 | transmembrane protein 63b (Tmem63b) alternative variant aSep08, mRNA.                 |
| Tmem63b | Tmem63b.bSep08 | 363197 | 2794  | 1145 | 7  | 249 | transmembrane protein 63b (29.1 kD) (Tmem63b) alternative variant bSep08, mRNA.       |
| Tmem67  | Tmem67.bSep08  | 313067 | 11744 | 490  | 4  | 137 | transmembrane protein 67 (Tmem67) alternative variant bSep08, mRNA.                   |
| Tmem67  | Tmem67.cSep08  | 313067 | 4275  | 792  | 4  | 120 | transmembrane protein 67 CRA b (Tmem67) alternative variant cSep08, mRNA.             |
| Tmem67  | Tmem67.dSep08  | 313067 | 1494  | 730  | 2  | 78  | transmembrane protein 67 CRA b (9.1 kD) (Tmem67) alternative variant dSep08, mRNA.    |
| Tmem68  | Tmem68.bSep08  | 312946 | 17619 | 683  | 4  | 227 | transmembrane protein 68 (Tmem68) alternative variant bSep08, mRNA.                   |
| Tmem68  | Tmem68.cSep08  | 312946 | 8994  | 867  | 5  | 97  | transmembrane protein 68 (11.3 kD) (Tmem68) alternative variant cSep08, mRNA.         |
| Tmem71  | Tmem71.aSep08  | 690657 | 20632 | 406  |    | 72  | transmembrane protein 71 (Tmem71) alternative variant aSep08, mRNA.                   |
| Tmem77  | Tmem77.bSep08  | 362011 | 26793 | 930  | 9  | 227 | transmembrane protein 77 (Tmem77) alternative variant bSep08, mRNA.                   |
| Tmem77  | Tmem77.cSep08  | 362011 | 25353 | 855  | 7  | 200 | transmembrane protein 77 (Tmem77) alternative variant cSep08, mRNA.                   |
| Tmem77  | Tmem77.dSep08  | 362011 | 25469 | 774  | 7  | 195 | transmembrane protein 77 (Tmem77) alternative variant dSep08, mRNA.                   |
| Tmem77  | Tmem77.eSep08  | 362011 | 9156  | 481  | 4  | 133 | transmembrane protein 77 (Tmem77) alternative variant eSep08, mRNA.                   |
| Tmem77  | Tmem77.fSep08  | 362011 | 17888 | 599  | 5  | 130 | transmembrane protein 77 (14.6 kD) (Tmem77) alternative variant fSep08, mRNA.         |
| Tmem77  | Tmem77.gSep08  | 362011 | 28710 | 1723 | 5  | 53  | transmembrane protein 77 (6.2 kD) (Tmem77) alternative variant gSep08, complete mRNA. |
| Tmem80  | Tmem80.aSep08  | 309109 | 7519  | 796  | 4  | 172 | transmembrane protein 80 (Tmem80) alternative variant aSep08, mRNA.                   |
| Tmem80  | Tmem80.cSep08  | 309109 | 4928  | 829  | 1  | 77  | transmembrane protein 80 (Tmem80) alternative variant cSep08, mRNA.                   |
| Tmem82  | Tmem82.aSep08  | 298605 | 3934  | 1798 | 5  | 548 | transmembrane protein 82 (Tmem82) alternative variant aSep08, mRNA.                   |
| Tmem82  | Tmem82.bSep08  | 298605 | 2036  | 878  | 3  | 249 | transmembrane protein 82 (Tmem82) alternative variant bSep08, mRNA.                   |
| Tmem82  | Tmem82.dSep08  | 298605 | 430   | 322  | 2  | 46  | transmembrane protein 82 (Tmem82) alternative variant dSep08, mRNA.                   |
| Tmem85  | Tmem85.bSep08  | 296049 | 3752  | 487  | 4  | 138 | transmembrane protein 85 (Tmem85) alternative variant bSep08, mRNA.                   |
| Tmem85  | Tmem85.cSep08  | 296049 | 920   | 618  | 2  | 89  | transmembrane protein 85 (9.4 kD) (Tmem85) alternative variant cSep08, mRNA.          |
| Tmem85  | Tmem85.dSep08  | 296049 | 4510  | 1789 | 3  | 89  | transmembrane protein 85 (9.4 kD) (Tmem85) alternative variant dSep08, mRNA.          |
| Tmem86a | Tmem86a.aSep08 | 308602 | 3062  | 442  | 1  | 147 | transmembrane protein 86A (Tmem86a) alternative variant aSep08, mRNA.                 |



|          |                 |        |        |      |    |     |                                                                                   |
|----------|-----------------|--------|--------|------|----|-----|-----------------------------------------------------------------------------------|
| Tmem86a  | Tmem86a.bSep08  | 308602 | 12771  | 544  | 1  | 109 | transmembrane protein 86A (Tmem86a) alternative variant bSep08, mRNA.             |
| Tmem86b  | Tmem86b.aSep08  | 690610 | 2926   | 2100 | 1  | 233 | transmembrane protein 86B (25.9 kD) (Tmem86b) alternative variant aSep08, mRNA.   |
| Tmem87a  | Tmem87a.aSep08  | 366170 | 38839  | 1869 | 16 | 498 | transmembrane protein 87A (Tmem87a) alternative variant aSep08, mRNA.             |
| Tmem87a  | Tmem87a.bSep08  | 366170 | 19715  | 1116 | 9  | 251 | transmembrane protein 87A (Tmem87a) alternative variant bSep08, mRNA.             |
| Tmem87a  | Tmem87a.cSep08  | 366170 | 18273  | 543  | 7  | 139 | transmembrane protein 87A (Tmem87a) alternative variant cSep08, mRNA.             |
| Tmem87a  | Tmem87a.dSep08  | 366170 | 3412   | 1264 | 2  | 12  | transmembrane protein 87A (Tmem87a) alternative variant dSep08, mRNA.             |
| Tmem87b  | Tmem87b.aSep08  | 362212 | 12724  | 3328 |    | 130 | transmembrane protein 87B (Tmem87b) mRNA.                                         |
| Tmem93   | Tmem93.bSep08   | 287477 | 845    | 650  | 2  | 154 | transmembrane protein 93 (Tmem93) alternative variant bSep08, mRNA.               |
| Tmem97   | Tmem97.bSep08   | 303330 | 1497   | 485  | 1  | 161 | transmembrane protein 97 (Tmem97) alternative variant bSep08, mRNA.               |
| Tmem98   | Tmem98.cSep08   | 303356 | 2377   | 1076 | 2  | 81  | transmembrane protein 98 (8.8 kD) (Tmem98) alternative variant cSep08, mRNA.      |
| Tmem100  | Tmem100.aSep08  | 497979 | 4327   | 2756 | 2  | 134 | transmembrane protein 100 (14.4 kD) (Tmem100) alternative variant aSep08, mRNA.   |
| Tmem100  | Tmem100.dSep08  | 497979 | 2721   | 739  | 3  | 134 | transmembrane protein 100 (14.4 kD) (Tmem100) alternative variant dSep08, mRNA.   |
| Tmem101  | Tmem101.aSep08  | 303564 | 3753   | 1694 |    | 257 | transmembrane protein 101 (28.8 kD) (Tmem101) complete mRNA.                      |
| Tmem102  | Tmem102.aSep08  | 497937 | 1537   | 1436 |    | 469 | transmembrane protein 102 (Tmem102) mRNA.                                         |
| Tmem104  | Tmem104.aSep08  | 303670 | 16026  | 617  |    | 151 | transmembrane protein 104 (Tmem104) mRNA.                                         |
| Tmem106a | Tmem106a.bSep08 | 287722 | 5997   | 826  | 7  | 203 | transmembrane protein 106A (Tmem106a) alternative variant bSep08, mRNA.           |
| Tmem106a | Tmem106a.cSep08 | 287722 | 609    | 558  | 2  | 65  | transmembrane protein 106A (7.2 kD) (Tmem106a) alternative variant cSep08, mRNA.  |
| Tmem106b | Tmem106b.bSep08 | 312132 | 2238   | 562  | 3  | 63  | transmembrane protein 106B (Tmem106b) alternative variant bSep08, mRNA.           |
| Tmem106c | Tmem106c.aSep08 | 315286 | 5279   | 1584 | 4  | 260 | transmembrane protein 106C (28.9 kD) (Tmem106c) alternative variant aSep08, mRNA. |
| Tmem106c | Tmem106c.cSep08 | 315286 | 2918   | 709  | 2  | 161 | transmembrane protein 106C (Tmem106c) alternative variant cSep08, mRNA.           |
| Tmem108  | Tmem108.aSep08  | 300967 | 23852  | 1392 | 3  | 324 | transmembrane protein 108 (Tmem108) alternative variant aSep08, mRNA.             |
| Tmem108  | Tmem108.bSep08  | 300967 | 247258 | 626  | 5  | 52  | transmembrane protein 108 (Tmem108) alternative variant bSep08, mRNA.             |
| Tmem108  | Tmem108.cSep08  | 300967 | 247323 | 396  | 3  | 70  | transmembrane protein 108 (Tmem108) alternative variant cSep08, mRNA.             |
| Tmem109  | Tmem109.aSep08  | 361732 | 9536   | 947  | 4  | 243 | transmembrane protein 109 (26.2 kD) (Tmem109) alternative variant aSep08, mRNA.   |
| Tmem109  | Tmem109.cSep08  | 361732 | 5774   | 437  | 1  | 64  | transmembrane protein 109 (Tmem109) alternative variant cSep08, mRNA.             |

|          |                 |        |       |      |    |     |                                                                                                |
|----------|-----------------|--------|-------|------|----|-----|------------------------------------------------------------------------------------------------|
| Tmem109  | Tmem109.dSep08  | 361732 | 7009  | 354  | 2  | 51  | transmembrane protein 109 (Tmem109) alternative variant dSep08, mRNA.                          |
| Tmem110  | Tmem110.bSep08  | 361110 | 9515  | 725  | 2  | 175 | transmembrane protein 110 (Tmem110) alternative variant bSep08, mRNA.                          |
| Tmem116  | Tmem116.aSep08  | 690442 | 33313 | 1330 | 10 | 352 | transmembrane protein 116 CRA a (Tmem116) alternative variant aSep08, mRNA.                    |
| Tmem116  | Tmem116.aSep08  | 690455 | 33313 | 1330 | 10 | 352 | transmembrane protein 116 CRA a (Tmem116) alternative variant aSep08, mRNA.                    |
| Tmem116  | Tmem116.bSep08  | 690442 | 42571 | 750  | 7  | 212 | transmembrane protein 116 CRA c (Tmem116) alternative variant bSep08, mRNA.                    |
| Tmem116  | Tmem116.bSep08  | 690455 | 42571 | 750  | 7  | 212 | transmembrane protein 116 CRA c (Tmem116) alternative variant bSep08, mRNA.                    |
| Tmem116  | Tmem116.cSep08  | 690442 | 1865  | 1137 | 2  | 87  | transmembrane protein 116 CRA a precursor (9.5 kD) (Tmem116) alternative variant cSep08, mRNA. |
| Tmem116  | Tmem116.cSep08  | 690455 | 1865  | 1137 | 2  | 87  | transmembrane protein 116 CRA a precursor (9.5 kD) (Tmem116) alternative variant cSep08, mRNA. |
| Tmem116  | Tmem116.dSep08  | 690442 | 13012 | 350  | 3  | 55  | transmembrane protein 116 CRA b (Tmem116) alternative variant dSep08, mRNA.                    |
| Tmem116  | Tmem116.dSep08  | 690455 | 13012 | 350  | 3  | 55  | transmembrane protein 116 CRA b (Tmem116) alternative variant dSep08, mRNA.                    |
| Tmem120a | Tmem120a.bSep08 | 288591 | 6821  | 614  | 4  | 186 | transmembrane protein 120A (Tmem120a) alternative variant bSep08, mRNA.                        |
| Tmem121  | Tmem121.aSep08  | 691678 | 2435  | 414  |    | 138 | transmembrane protein 121 (Tmem121) mRNA.                                                      |
| Tmem123  | Tmem123.aSep08  | 363013 | 26866 | 876  | 1  | 226 | transmembrane protein 123 (Tmem123) alternative variant aSep08, mRNA.                          |
| Tmem123  | Tmem123.bSep08  | 363013 | 26827 | 831  | 1  | 200 | transmembrane protein 123 (Tmem123) alternative variant bSep08, mRNA.                          |
| Tmem123  | Tmem123.cSep08  | 363013 | 3662  | 2794 | 1  | 141 | transmembrane protein 123 (14.7 kD) (Tmem123) alternative variant cSep08, mRNA.                |
| Tmem126a | Tmem126a.aSep08 | 293113 | 6160  | 854  | 5  | 196 | transmembrane protein 126A (21.7 kD) (Tmem126a) alternative variant aSep08, complete mRNA.     |
| Tmem126a | Tmem126a.cSep08 | 293113 | 4729  | 739  | 3  | 122 | transmembrane protein 126A (13.7 kD) (Tmem126a) alternative variant cSep08, mRNA.              |
| Tmem126a | Tmem126a.dSep08 | 293113 | 1014  | 466  | 2  | 100 | transmembrane protein 126A (11.1 kD) (Tmem126a) alternative variant dSep08, mRNA.              |
| Tmem126b | Tmem126b.bSep08 | 293114 | 11941 | 916  | 4  | 143 | transmembrane protein 126B (15.9 kD) (Tmem126b) alternative variant bSep08, complete mRNA.     |
| Tmem126b | Tmem126b.cSep08 | 293114 | 11943 | 690  | 4  | 80  | transmembrane protein 126B (8.8 kD) (Tmem126b) alternative variant cSep08, complete mRNA.      |
| Tmem126b | Tmem126b.dSep08 | 293114 | 7367  | 1327 | 1  | 53  | transmembrane protein 126B (6.1 kD) (Tmem126b) alternative variant dSep08, mRNA.               |
| Tmem128  | Tmem128.bSep08  | 360952 | 7247  | 930  | 4  | 125 | transmembrane protein 128 (14.6 kD) (Tmem128) alternative variant bSep08, mRNA.                |
| Tmem128  | Tmem128.cSep08  | 360952 | 5153  | 1253 | 3  | 107 | transmembrane protein 128 (12.1 kD) (Tmem128) alternative variant cSep08, mRNA.                |
| Tmem128  | Tmem128.dSep08  | 360952 | 2743  | 393  | 2  | 65  | transmembrane protein 128 (Tmem128) alternative variant dSep08, mRNA.                          |

|          |                 |        |        |      |    |     |                                                                                   |
|----------|-----------------|--------|--------|------|----|-----|-----------------------------------------------------------------------------------|
| Tmem130  | Tmem130.aSep08  | 304280 | 23889  | 2758 | 8  | 461 | transmembrane protein 130 (Tmem130) alternative variant aSep08, mRNA.             |
| Tmem131  | Tmem131.aSep08  | 316335 | 104947 | 963  |    | 321 | transmembrane protein 131 (Tmem131) mRNA.                                         |
| Tmem132a | Tmem132a.bSep08 | 338474 | 11657  | 1834 | 4  | 488 | transmembrane protein 132A (Tmem132a) alternative variant bSep08, complete mRNA.  |
| Tmem132a | Tmem132a.cSep08 | 338474 | 3239   | 1037 | 5  | 345 | transmembrane protein 132A (Tmem132a) alternative variant cSep08, mRNA.           |
| Tmem132a | Tmem132a.dSep08 | 338474 | 2298   | 859  | 3  | 221 | transmembrane protein 132A (24.1 kD) (Tmem132a) alternative variant dSep08, mRNA. |
| Tmem132d | Tmem132d.cSep08 | 288750 | 2457   | 398  | 3  | 62  | transmembrane protein 132D (Tmem132d) alternative variant cSep08, mRNA.           |
| Tmem134  | Tmem134.cSep08  | 361695 | 1754   | 889  | 2  | 125 | putative protein (13.5 kD) (Tmem134) alternative variant cSep08, mRNA.            |
| Tmem134  | Tmem134.dSep08  | 361695 | 4388   | 695  | 6  | 111 | transmembrane protein 134 (12.4 kD) (Tmem134) alternative variant dSep08, mRNA.   |
| Tmem138  | Tmem138.aSep08  | 361728 | 6547   | 886  | 5  | 240 | transmembrane protein 138 (Tmem138) alternative variant aSep08, mRNA.             |
| Tmem138  | Tmem138.cSep08  | 361728 | 6285   | 662  | 5  | 80  | transmembrane protein 138 like (Tmem138) alternative variant cSep08, mRNA.        |
| Tmem138  | Tmem138.dSep08  | 361728 | 2392   | 412  | 3  | 69  | transmembrane protein 138 (Tmem138) alternative variant dSep08, mRNA.             |
| Tmem138  | Tmem138.eSep08  | 361728 | 5744   | 748  | 3  | 65  | transmembrane protein 138 (Tmem138) alternative variant eSep08, mRNA.             |
| Tmem138  | Tmem138.fSep08  | 361728 | 6318   | 762  | 5  | 63  | transmembrane protein 138 (7.8 kD) (Tmem138) alternative variant fSep08, mRNA.    |
| Tmem138  | Tmem138.gSep08  | 361728 | 6092   | 647  | 5  | 58  | transmembrane protein 138 (Tmem138) alternative variant gSep08, mRNA.             |
| Tmem141  | Tmem141.aSep08  | 499755 | 2525   | 1636 | 4  | 128 | transmembrane protein 141 (14.9 kD) (Tmem141) alternative variant aSep08, mRNA.   |
| Tmem141  | Tmem141.cSep08  | 499755 | 1619   | 625  | 3  | 93  | transmembrane protein 141 (11.0 kD) (Tmem141) alternative variant cSep08, mRNA.   |
| Tmem141  | Tmem141.dSep08  | 499755 | 1957   | 1006 | 4  | 77  | transmembrane protein 141 (8.7 kD) (Tmem141) alternative variant dSep08, mRNA.    |
| Tmem143  | Tmem143.bSep08  | 308593 | 10434  | 804  | 5  | 254 | transmembrane protein 143 (Tmem143) alternative variant bSep08, mRNA.             |
| Tmem143  | Tmem143.cSep08  | 308593 | 7530   | 621  | 3  | 207 | transmembrane protein 143 (Tmem143) alternative variant cSep08, mRNA.             |
| Tmem144  | Tmem144.bSep08  | 361968 | 9539   | 461  | 4  | 106 | transmembrane protein 144 (Tmem144) alternative variant bSep08, mRNA.             |
| Tmem144  | Tmem144.cSep08  | 361968 | 4416   | 461  | 3  | 95  | transmembrane protein 144 (Tmem144) alternative variant cSep08, mRNA.             |
| Tmem146  | Tmem146.aSep08  | 680264 | 36498  | 2368 | 22 | 725 | transmembrane protein 146 (Tmem146) alternative variant aSep08, mRNA.             |
| Tmem146  | Tmem146.bSep08  | 680264 | 25003  | 388  | 5  | 87  | transmembrane protein 146 (Tmem146) alternative variant bSep08, mRNA.             |
| Tmem147  | Tmem147.bSep08  | 292792 | 466    | 380  | 2  | 111 | transmembrane protein 147 (Tmem147) alternative variant bSep08, mRNA.             |

|          |                 |        |        |      |    |     |                                                                                          |
|----------|-----------------|--------|--------|------|----|-----|------------------------------------------------------------------------------------------|
| Tmem147  | Tmem147.cSep08  | 292792 | 487    | 415  | 2  | 79  | transmembrane protein 147 (8.9 kD) (Tmem147) alternative variant cSep08, mRNA.           |
| Tmem147  | Tmem147.dSep08  | 292792 | 1543   | 308  | 3  | 77  | transmembrane protein 147 (Tmem147) alternative variant dSep08, mRNA.                    |
| Tmem150  | Tmem150.bSep08  | 245966 | 5007   | 2408 | 8  | 271 | transmembrane protein 150 (29.0 kD) (Tmem150) alternative variant bSep08, complete mRNA. |
| Tmem150  | Tmem150.dSep08  | 245966 | 3179   | 743  | 7  | 100 | transmembrane protein 150 (10.7 kD) (Tmem150) alternative variant dSep08, mRNA.          |
| Tmem150  | Tmem150.eSep08  | 245966 | 861    | 572  | 2  | 69  | transmembrane protein 150 (Tmem150) alternative variant eSep08, mRNA.                    |
| Tmem151a | Tmem151a.bSep08 | 309158 | 4592   | 740  | 2  | 191 | transmembrane protein 151A (Tmem151a) alternative variant bSep08, mRNA.                  |
| Tmem151b | Tmem151b.aSep08 | 301253 | 1275   | 563  |    | 187 | transmembrane protein 151B (Tmem151b) mRNA.                                              |
| Tmem154  | Tmem154.bSep08  | 361972 | 37306  | 697  | 5  | 179 | transmembrane protein 154 (Tmem154) alternative variant bSep08, mRNA.                    |
| Tmem154  | Tmem154.cSep08  | 361972 | 20129  | 425  | 1  | 138 | transmembrane protein 154 (Tmem154) alternative variant cSep08, mRNA.                    |
| Tmem156  | Tmem156.bSep08  | 498365 | 9516   | 594  | 2  | 69  | transmembrane protein 156 (Tmem156) alternative variant bSep08, mRNA.                    |
| Tmem161b | Tmem161b.aSep08 | 309953 | 68882  | 1050 | 7  | 143 | transmembrane protein 161B (16.8 kD) (Tmem161b) alternative variant aSep08, mRNA.        |
| Tmem161b | Tmem161b.bSep08 | 309953 | 47732  | 375  | 3  | 116 | transmembrane protein 161B (Tmem161b) alternative variant bSep08, mRNA.                  |
| Tmem161b | Tmem161b.cSep08 | 309953 | 67530  | 754  | 6  | 115 | transmembrane protein 161B (13.6 kD) (Tmem161b) alternative variant cSep08, mRNA.        |
| Tmem161b | Tmem161b.dSep08 | 309953 | 67559  | 758  | 6  | 48  | transmembrane protein 161B (Tmem161b) alternative variant dSep08, mRNA.                  |
| Tmem163  | Tmem163.bSep08  | 360839 | 157943 | 541  | 5  | 156 | transmembrane protein 163 (Tmem163) alternative variant bSep08, mRNA.                    |
| Tmem163  | Tmem163.cSep08  | 360839 | 5911   | 685  | 3  | 124 | transmembrane protein 163 (Tmem163) alternative variant cSep08, mRNA.                    |
| Tmem165  | Tmem165.bSep08  | 364137 | 747    | 392  | 1  | 116 | transmembrane protein 165 (Tmem165) alternative variant bSep08, mRNA.                    |
| Tmem168  | Tmem168.aSep08  | 312135 | 23129  | 3904 | 4  | 697 | transmembrane protein 168 (79.8 kD) (Tmem168) alternative variant aSep08, mRNA.          |
| Tmem169  | Tmem169.bSep08  | 690294 | 23686  | 2499 | 1  | 297 | transmembrane protein 169 (33.4 kD) (Tmem169) alternative variant bSep08, mRNA.          |
| Tmem169  | Tmem169.cSep08  | 690294 | 18830  | 343  | 1  | 84  | transmembrane protein 169 (Tmem169) alternative variant cSep08, mRNA.                    |
| Tmem171  | Tmem171.bSep08  | 293634 | 7136   | 697  | 3  | 202 | transmembrane protein 171 (Tmem171) alternative variant bSep08, mRNA.                    |
| Tmem175  | Tmem175.cSep08  | 305623 | 16170  | 1657 | 10 | 199 | transmembrane protein 175 (22.4 kD) (Tmem175) alternative variant cSep08, complete mRNA. |
| Tmem175  | Tmem175.dSep08  | 305623 | 4709   | 584  | 7  | 158 | transmembrane protein 175 (Tmem175) alternative variant dSep08, mRNA.                    |
| Tmem175  | Tmem175.fSep08  | 305623 | 11556  | 1052 | 4  | 86  | transmembrane protein 175 (9.1 kD) (Tmem175) alternative variant fSep08, mRNA.           |

|          |                 |        |       |      |   |     |                                                                                            |
|----------|-----------------|--------|-------|------|---|-----|--------------------------------------------------------------------------------------------|
| Tmem175  | Tmem175.gSep08  | 305623 | 1242  | 455  | 2 | 61  | transmembrane protein 175 (Tmem175) alternative variant gSep08, mRNA.                      |
| Tmem176b | Tmem176b.aSep08 | 171411 | 7220  | 1262 | 7 | 274 | transmembrane protein 176B (29.7 kD) (Tmem176b) alternative variant aSep08, mRNA.          |
| Tmem176b | Tmem176b.bSep08 | 171411 | 7429  | 1112 | 8 | 263 | transmembrane protein 176B (28.5 kD) (Tmem176b) alternative variant bSep08, complete mRNA. |
| Tmem176b | Tmem176b.dSep08 | 171411 | 7188  | 805  | 7 | 258 | transmembrane protein 176B (Tmem176b) alternative variant dSep08, mRNA.                    |
| Tmem176b | Tmem176b.eSep08 | 171411 | 7246  | 866  | 7 | 247 | transmembrane protein 176B (Tmem176b) alternative variant eSep08, mRNA.                    |
| Tmem176b | Tmem176b.fSep08 | 171411 | 6669  | 1248 | 6 | 214 | transmembrane protein 176B (Tmem176b) alternative variant fSep08, mRNA.                    |
| Tmem176b | Tmem176b.gSep08 | 171411 | 836   | 480  | 2 | 61  | transmembrane protein 176B (Tmem176b) alternative variant gSep08, mRNA.                    |
| Tmem179b | Tmem179b.aSep08 | 690263 | 1948  | 837  | 5 | 195 | transmembrane protein 179B (Tmem179b) alternative variant aSep08, mRNA.                    |
| Tmem179b | Tmem179b.cSep08 | 690263 | 1731  | 633  | 5 | 147 | transmembrane protein 179B (16.5 kD) (Tmem179b) alternative variant cSep08, mRNA.          |
| Tmem179b | Tmem179b.dSep08 | 690263 | 1314  | 1143 | 2 | 103 | transmembrane protein 179B (11.5 kD) (Tmem179b) alternative variant dSep08, mRNA.          |
| Tmem183a | Tmem183a.bSep08 | 289034 | 10719 | 790  | 6 | 244 | transmembrane protein 183A (Tmem183a) alternative variant bSep08, mRNA.                    |
| Tmem183a | Tmem183a.cSep08 | 289034 | 8321  | 653  | 5 | 213 | transmembrane protein 183A (Tmem183a) alternative variant cSep08, mRNA.                    |
| Tmem183a | Tmem183a.dSep08 | 289034 | 6614  | 2417 | 4 | 157 | transmembrane protein 183A (Tmem183a) alternative variant dSep08, mRNA.                    |
| Tmem183a | Tmem183a.eSep08 | 289034 | 7247  | 466  | 3 | 119 | transmembrane protein 183A (Tmem183a) alternative variant eSep08, mRNA.                    |
| Tmem184a | Tmem184a.bSep08 | 304325 | 6367  | 738  | 6 | 242 | transmembrane protein 184A (Tmem184a) alternative variant bSep08, mRNA.                    |
| Tmem184a | Tmem184a.cSep08 | 304325 | 1219  | 403  | 2 | 89  | transmembrane protein 184A (Tmem184a) alternative variant cSep08, mRNA.                    |
| Tmem184b | Tmem184b.aSep08 | 362959 | 43715 | 3324 | 9 | 463 | transmembrane protein 184B (Tmem184b) alternative variant aSep08, mRNA.                    |
| Tmem184b | Tmem184b.bSep08 | 362959 | 3388  | 506  | 4 | 166 | transmembrane protein 184B (Tmem184b) alternative variant bSep08, mRNA.                    |
| Tmem184b | Tmem184b.eSep08 | 362959 | 20440 | 386  | 2 | 45  | transmembrane protein 184B (5.3 kD) (Tmem184b) alternative variant eSep08, mRNA.           |
| Tmem188  | Tmem188.aSep08  | 291914 | 14972 | 1806 | 5 | 126 | transmembrane protein 188 (14.3 kD) (Tmem188) alternative variant aSep08, complete mRNA.   |
| Tmem188  | Tmem188.cSep08  | 291914 | 13996 | 755  | 4 | 101 | transmembrane protein 188 (11.3 kD) (Tmem188) alternative variant cSep08, mRNA.            |
| Tmem188  | Tmem188.dSep08  | 291914 | 14015 | 772  | 4 | 95  | transmembrane protein 188 (10.7 kD) (Tmem188) alternative variant dSep08, mRNA.            |
| Tmem188  | Tmem188.eSep08  | 291914 | 4858  | 717  | 1 | 68  | transmembrane protein 188 (Tmem188) alternative variant eSep08, mRNA.                      |

|                 |                        |        |       |      |   |     |                                                                                               |
|-----------------|------------------------|--------|-------|------|---|-----|-----------------------------------------------------------------------------------------------|
| Tmem188         | Tmem188.fSep08         | 291914 | 13820 | 505  | 3 | 23  | transmembrane protein 188 (Tmem188) alternative variant fSep08, mRNA.                         |
| Tmem192         | Tmem192.bSep08         | 361137 | 13161 | 822  | 5 | 202 | transmembrane protein 192 (Tmem192) alternative variant bSep08, mRNA.                         |
| Tmem199         | Tmem199.bSep08         | 303332 | 4144  | 1059 | 5 | 176 | transmembrane protein 199 (19.9 kD) (Tmem199) alternative variant bSep08, mRNA.               |
| Tmem200a        | Tmem200a.bSep08        | 498987 | 797   | 261  | 2 | 46  | transmembrane protein 200A (Tmem200a) alternative variant bSep08, mRNA.                       |
| Tmem204         | Tmem204.bSep08         | 287129 | 3247  | 783  | 2 | 98  | putative protein (Tmem204) alternative variant bSep08, mRNA.                                  |
| Tmem205andRab3d | Tmem205andRab3d.bSep08 | 140665 | 12010 | 1159 | 6 | 223 | family rab3 member RAS oncogene (24.8 kD) (Tmem205andRab3d) alternative variant bSep08, mRNA. |
| Tmem205andRab3d | Tmem205andRab3d.bSep08 | 300441 | 12010 | 1159 | 6 | 223 | family rab3 member RAS oncogene (24.8 kD) (Tmem205andRab3d) alternative variant bSep08, mRNA. |
| Tmem205andRab3d | Tmem205andRab3d.cSep08 | 140665 | 5594  | 688  | 4 | 216 | transmembrane protein 205 (Tmem205andRab3d) alternative variant cSep08, mRNA.                 |
| Tmem205andRab3d | Tmem205andRab3d.cSep08 | 300441 | 5594  | 688  | 4 | 216 | transmembrane protein 205 (Tmem205andRab3d) alternative variant cSep08, mRNA.                 |
| Tmem205andRab3d | Tmem205andRab3d.dSep08 | 140665 | 7534  | 732  | 5 | 211 | GTP-binding protein like (Tmem205andRab3d) alternative variant dSep08, mRNA.                  |
| Tmem205andRab3d | Tmem205andRab3d.dSep08 | 300441 | 7534  | 732  | 5 | 211 | GTP-binding protein like (Tmem205andRab3d) alternative variant dSep08, mRNA.                  |
| Tmem205andRab3d | Tmem205andRab3d.eSep08 | 140665 | 5571  | 728  | 5 | 189 | transmembrane protein 205 (21.2 kD) (Tmem205andRab3d) alternative variant eSep08, mRNA.       |
| Tmem205andRab3d | Tmem205andRab3d.eSep08 | 300441 | 5571  | 728  | 5 | 189 | transmembrane protein 205 (21.2 kD) (Tmem205andRab3d) alternative variant eSep08, mRNA.       |
| Tmem205andRab3d | Tmem205andRab3d.fSep08 | 140665 | 5566  | 649  | 4 | 189 | transmembrane protein 205 (21.2 kD) (Tmem205andRab3d) alternative variant fSep08, mRNA.       |
| Tmem205andRab3d | Tmem205andRab3d.fSep08 | 300441 | 5566  | 649  | 4 | 189 | transmembrane protein 205 (21.2 kD) (Tmem205andRab3d) alternative variant fSep08, mRNA.       |
| Tmem205andRab3d | Tmem205andRab3d.hSep08 | 140665 | 4676  | 617  | 3 | 159 | transmembrane protein 205 (17.9 kD) (Tmem205andRab3d) alternative variant hSep08, mRNA.       |
| Tmem205andRab3d | Tmem205andRab3d.hSep08 | 300441 | 4676  | 617  | 3 | 159 | transmembrane protein 205 (17.9 kD) (Tmem205andRab3d) alternative variant hSep08, mRNA.       |
| Tmem206         | Tmem206.bSep08         | 305070 | 1720  | 722  | 2 | 87  | transmembrane protein 206 (10.2 kD) (Tmem206) alternative variant bSep08, mRNA.               |
| Tmem206         | Tmem206.cSep08         | 305070 | 16184 | 328  | 3 | 76  | transmembrane protein 206 (Tmem206) alternative variant cSep08, mRNA.                         |
| Tmem208         | Tmem208.bSep08         | 291963 | 912   | 585  | 2 | 144 | transmembrane protein 208 (Tmem208) alternative variant bSep08, mRNA.                         |
| Tmem208         | Tmem208.cSep08         | 291963 | 2552  | 811  | 3 | 114 | transmembrane protein 208 (Tmem208) alternative variant cSep08, mRNA.                         |
| Tmem208         | Tmem208.dSep08         | 291963 | 2006  | 577  | 2 | 108 | transmembrane protein 208 (Tmem208) alternative variant dSep08, mRNA.                         |
| Tmem208         | Tmem208.eSep08         | 291963 | 2682  | 805  | 4 | 100 | transmembrane protein 208 (11.0 kD) (Tmem208) alternative variant eSep08, mRNA.               |

|         |                |        |       |      |   |     |                                                                                     |
|---------|----------------|--------|-------|------|---|-----|-------------------------------------------------------------------------------------|
| Tmem209 | Tmem209.bSep08 | 312200 | 6949  | 690  | 6 | 213 | transmembrane protein 209 (Tmem209) alternative variant bSep08, mRNA.               |
| Tmem209 | Tmem209.cSep08 | 312200 | 4322  | 922  | 5 | 212 | transmembrane protein 209 (23.1 kD) (Tmem209) alternative variant cSep08, mRNA.     |
| Tmem209 | Tmem209.dSep08 | 312200 | 7403  | 780  | 3 | 55  | transmembrane protein 209 (Tmem209) alternative variant dSep08, mRNA.               |
| Tmem209 | Tmem209.eSep08 | 312200 | 1699  | 296  | 2 | 37  | transmembrane protein 209 (Tmem209) alternative variant eSep08, mRNA.               |
| Tmem211 | Tmem211.aSep08 | 679783 | 855   | 650  |   | 50  | transmembrane protein 211 (Tmem211) mRNA.                                           |
| Tmf1    | Tmf1.bSep08    | 114206 | 8227  | 1801 | 7 | 415 | TATA element modulatory factor 1 (Tmf1) alternative variant bSep08, mRNA.           |
| Tmf1    | Tmf1.cSep08    | 114206 | 5622  | 3683 | 4 | 130 | TATA element modulatory factor 1 (15.1 kD) (Tmf1) alternative variant cSep08, mRNA. |
| Tmf1    | Tmf1.dSep08    | 114206 | 514   | 294  | 2 | 72  | TATA element modulatory factor 1 (Tmf1) alternative variant dSep08, mRNA.           |
| Tmie    | Tmie.bSep08    | 501061 | 4488  | 681  | 2 | 75  | putative protein (8.5 kD) (Tmie) alternative variant bSep08, mRNA.                  |
| Tmigd1  | Tmigd1.aSep08  | 363654 | 5778  | 243  |   | 79  | putative protein of vertebrate origin (Tmigd1) mRNA.                                |
| Tmlhe   | Tmlhe.bSep08   | 170898 | 26851 | 714  | 4 | 237 | trimethyllysine hydroxylase, epsilon (Tmlhe) alternative variant bSep08, mRNA.      |
| Tmlhe   | Tmlhe.cSep08   | 170898 | 12491 | 784  | 4 | 219 | trimethyllysine hydroxylase, epsilon (Tmlhe) alternative variant cSep08, mRNA.      |
| Tmod1   | Tmod1.aSep08   | 25566  | 67366 | 1785 | 8 | 540 | tropomodulin 1 (Tmod1) alternative variant aSep08, mRNA.                            |
| Tmod1   | Tmod1.cSep08   | 25566  | 50900 | 602  | 5 | 155 | tropomodulin 1 (Tmod1) alternative variant cSep08, mRNA.                            |
| Tmod1   | Tmod1.dSep08   | 25566  | 37086 | 1372 | 3 | 72  | tropomodulin 1 (Tmod1) alternative variant dSep08, mRNA.                            |
| Tmod2   | Tmod2.bSep08   | 58814  | 26131 | 925  | 6 | 174 | tropomodulin 2 (Tmod2) alternative variant bSep08, mRNA.                            |
| Tmod2   | Tmod2.cSep08   | 58814  | 24177 | 615  | 5 | 147 | tropomodulin 2 (Tmod2) alternative variant cSep08, mRNA.                            |
| Tmod2   | Tmod2.dSep08   | 58814  | 5677  | 534  | 4 | 99  | tropomodulin 2 (Tmod2) alternative variant dSep08, mRNA.                            |
| Tmod3   | Tmod3.bSep08   | 300838 | 17903 | 3337 | 8 | 213 | tropomodulin 3 (23.8 kD) (Tmod3) alternative variant bSep08, mRNA.                  |
| Tmod3   | Tmod3.cSep08   | 300838 | 3401  | 705  | 3 | 124 | tropomodulin 3 (Tmod3) alternative variant cSep08, mRNA.                            |
| Tmod3   | Tmod3.dSep08   | 300838 | 5658  | 595  | 3 | 21  | tropomodulin 3 (2.5 kD) (Tmod3) alternative variant dSep08, mRNA.                   |
| Tmod4   | Tmod4.bSep08   | 295261 | 3197  | 765  | 7 | 184 | tropomodulin 4 (Tmod4) alternative variant bSep08, mRNA.                            |
| Tmod4   | Tmod4.cSep08   | 295261 | 3135  | 633  | 6 | 176 | tropomodulin 4 (Tmod4) alternative variant cSep08, mRNA.                            |
| Tmpo    | Tmpo.aSep08    | 25359  | 12435 | 3733 | 4 | 692 | thymopoietin (74.9 kD) (Tmpo) alternative variant aSep08, mRNA.                     |
| Tmpo    | Tmpo.cSep08    | 25359  | 24923 | 1939 | 7 | 416 | thymopoietin (Tmpo) alternative variant cSep08, mRNA.                               |
| Tmpo    | Tmpo.dSep08    | 25359  | 18609 | 727  | 7 | 241 | thymopoietin (Tmpo) alternative variant dSep08, mRNA.                               |
| Tmpo    | Tmpo.eSep08    | 25359  | 9810  | 891  | 4 | 174 | thymopoietin (Tmpo) alternative variant eSep08, mRNA.                               |
| Tmpo    | Tmpo.gSep08    | 25359  | 6134  | 271  | 3 | 90  | thymopoietin (Tmpo) alternative variant gSep08, mRNA.                               |

|           |                  |        |       |      |    |     |                                                                                                             |
|-----------|------------------|--------|-------|------|----|-----|-------------------------------------------------------------------------------------------------------------|
| Tmprss2   | Tmprss2.bSep08   | 156435 | 28874 | 818  | 7  | 215 | transmembrane protease, serine 2 (Tmprss2) alternative variant bSep08, mRNA.                                |
| Tmprss4   | Tmprss4.aSep08   | 367074 | 2769  | 1202 |    | 101 | transmembrane protease, serine 4 (Tmprss4) mRNA.                                                            |
| Tmprss5   | Tmprss5.bSep08   | 266681 | 595   | 311  | 2  | 103 | transmembrane protease, serine 5 (spinesin) (Tmprss5) alternative variant bSep08, mRNA.                     |
| Tmprss6   | Tmprss6.bSep08   | 315388 | 3543  | 707  | 4  | 223 | transmembrane serine protease 6 (Tmprss6) alternative variant bSep08, mRNA.                                 |
| Tmprss6   | Tmprss6.cSep08   | 315388 | 604   | 399  | 2  | 99  | transmembrane serine protease 6 (Tmprss6) alternative variant cSep08, mRNA.                                 |
| Tmprss9   | Tmprss9.aSep08   | 314636 | 1465  | 569  |    | 137 | transmembrane protease, serine 9 (Tmprss9) mRNA.                                                            |
| Tmsb10    | Tmsb10.aSep08    | 50665  | 1042  | 486  | 3  | 75  | thymosin, beta 10 (Tmsb10) alternative variant aSep08, mRNA.                                                |
| Tmtc1     | Tmtc1.aSep08     | 362465 | 13625 | 357  |    | 119 | transmembrane and tetratricopeptide repeat containing 1 (Tmtc1) mRNA.                                       |
| Tmtc2     | Tmtc2.aSep08     | 299762 | 52149 | 415  |    | 138 | transmembrane and tetratricopeptide repeat containing 2 (Tmtc2) mRNA.                                       |
| Tmtc4     | Tmtc4.bSep08     | 290501 | 45268 | 2003 | 14 | 606 | transmembrane and tetratricopeptide repeat containing 4 (67.7 kD) (Tmtc4) alternative variant bSep08, mRNA. |
| Tmtc4     | Tmtc4.eSep08     | 290501 | 946   | 349  | 2  | 36  | transmembrane and tetratricopeptide repeat containing 4 (Tmtc4) alternative variant eSep08, mRNA.           |
| Tmub2     | Tmub2.bSep08     | 303567 | 3186  | 784  | 3  | 260 | putative protein of bilateral origin (Tmub2) alternative variant bSep08, mRNA.                              |
| Tmub2     | Tmub2.cSep08     | 303567 | 3169  | 822  | 4  | 229 | putative protein of bilateral origin (Tmub2) alternative variant cSep08, mRNA.                              |
| Tnfaip1   | Tnfaip1.bSep08   | 287543 | 2418  | 452  | 2  | 28  | tumor necrosis factor, alpha-induced protein 1 (endothelial) (Tnfaip1) alternative variant bSep08, mRNA.    |
| Tnfaip2   | Tnfaip2.aSep08   | 299339 | 6171  | 1425 | 6  | 253 | tumor necrosis factor, alpha-induced protein 2 (Tnfaip2) alternative variant aSep08, mRNA.                  |
| Tnfaip2   | Tnfaip2.bSep08   | 299339 | 10275 | 267  | 2  | 68  | tumor necrosis factor, alpha-induced protein 2 (Tnfaip2) alternative variant bSep08, mRNA.                  |
| Tnfaip2   | Tnfaip2.dSep08   | 299339 | 1882  | 273  | 3  | 48  | tumor necrosis factor, alpha-induced protein 2 (Tnfaip2) alternative variant dSep08, mRNA.                  |
| Tnfaip8   | Tnfaip8.aSep08   | 307428 | 63037 | 735  | 2  | 141 | tumor necrosis factor, alpha-induced protein 8 (Tnfaip8) alternative variant aSep08, mRNA.                  |
| Tnfaip8l1 | Tnfaip8l1.aSep08 | 301131 | 8572  | 372  | 1  | 114 | tumor necrosis factor, alpha-induced protein 8-like 1 (Tnfaip8l1) alternative variant aSep08, mRNA.         |
| Tnfaip8l1 | Tnfaip8l1.bSep08 | 301131 | 9001  | 799  | 1  | 99  | tumor necrosis factor, alpha-induced protein 8-like 1 (Tnfaip8l1) alternative variant bSep08, mRNA.         |
| Tnfrsf1a  | Tnfrsf1a.aSep08  | 25625  | 12940 | 2527 | 1  | 531 | tumor necrosis factor receptor superfamily, member 1a (Tnfrsf1a) alternative variant aSep08, mRNA.          |
| Tnfrsf1a  | Tnfrsf1a.bSep08  | 25625  | 11701 | 1230 | 2  | 306 | tumor necrosis factor receptor superfamily, member 1a (Tnfrsf1a) alternative variant bSep08, mRNA.          |
| Tnfrsf9   | Tnfrsf9.bSep08   | 500590 | 10279 | 473  | 2  | 98  | tumor necrosis factor receptor superfamily, member 9 (Tnfrsf9) alternative variant bSep08, mRNA.            |
| Tnfrsf9   | Tnfrsf9.cSep08   | 500590 | 4356  | 330  | 1  | 54  | tumor necrosis factor receptor superfamily, member 9 (Tnfrsf9) alternative variant cSep08, mRNA.            |



|           |                  |        |       |      |    |     |                                                                                                                                 |
|-----------|------------------|--------|-------|------|----|-----|---------------------------------------------------------------------------------------------------------------------------------|
| Tnfrsf10b | Tnfrsf10b.bSep08 | 364420 | 17170 | 927  |    | 219 | tumor necrosis factor receptor superfamily, member 10b (Tnfrsf10b) alternative variant bSep08, mRNA.                            |
| Tnfrsf11a | Tnfrsf11a.aSep08 | 498206 | 12060 | 716  |    | 238 | tumor necrosis factor receptor superfamily, member 11a (Tnfrsf11a) mRNA.                                                        |
| Tnfrsf13c | Tnfrsf13c.aSep08 | 500910 | 1380  | 910  |    | 125 | tumor necrosis factor receptor superfamily, member 13c (Tnfrsf13c) mRNA.                                                        |
| Tnfrsf14  | Tnfrsf14.cSep08  | 366518 | 4363  | 617  | 5  | 118 | tumor necrosis factor receptor superfamily, member 14 (herpesvirus entry mediator) (Tnfrsf14) alternative variant cSep08, mRNA. |
| Tnfrsf14  | Tnfrsf14.eSep08  | 366518 | 939   | 777  | 2  | 74  | tumor necrosis factor receptor superfamily, member 14 (herpesvirus entry mediator) (Tnfrsf14) alternative variant eSep08, mRNA. |
| Tnfrsf22  | Tnfrsf22.aSep08  | 686008 | 4502  | 641  |    | 132 | tumor necrosis factor receptor superfamily, member 22 (14.4 kD) (Tnfrsf22) mRNA.                                                |
| Tnfrsf25  | Tnfrsf25.aSep08  | 500592 | 2800  | 1174 | 7  | 303 | tumor necrosis factor receptor superfamily, member 25 (Tnfrsf25) alternative variant aSep08, mRNA.                              |
| Tnfrsf25  | Tnfrsf25.bSep08  | 500592 | 2713  | 723  | 7  | 157 | tumor necrosis factor receptor superfamily, member 25 (Tnfrsf25) alternative variant bSep08, mRNA.                              |
| Tnfrsf25  | Tnfrsf25.cSep08  | 500592 | 2252  | 592  | 6  | 126 | tumor necrosis factor receptor superfamily, member 25 (Tnfrsf25) alternative variant cSep08, mRNA.                              |
| Tnfrsf25  | Tnfrsf25.dSep08  | 500592 | 904   | 701  | 2  | 72  | tumor necrosis factor receptor superfamily, member 25 (Tnfrsf25) alternative variant dSep08, mRNA.                              |
| Tnfrsf26  | Tnfrsf26.aSep08  | 361685 | 20454 | 2804 | 1  | 211 | tumor necrosis factor receptor superfamily, member 26 (Tnfrsf26) alternative variant aSep08, mRNA.                              |
| Tnfrsf26  | Tnfrsf26.bSep08  | 361685 | 18436 | 738  | 1  | 186 | tumor necrosis factor receptor superfamily, member 26 (Tnfrsf26) alternative variant bSep08, mRNA.                              |
| Tnfsf12   | Tnfsf12.aSep08   | 360548 | 8673  | 916  | 1  | 275 | tumor necrosis factor ligand superfamily member 12 (Tnfsf12) alternative variant aSep08, mRNA.                                  |
| Tnfsf13   | Tnfsf13.aSep08   | 287437 | 3547  | 2052 | 6  | 241 | tumor necrosis factor (ligand) superfamily, member 13 (26.7 kD) (Tnfsf13) alternative variant aSep08, mRNA.                     |
| Tnfsf13   | Tnfsf13.cSep08   | 287437 | 1796  | 717  | 3  | 118 | tumor necrosis factor (ligand) superfamily, member 13 (13.3 kD) (Tnfsf13) alternative variant cSep08, mRNA.                     |
| Tnfsf13   | Tnfsf13.dSep08   | 287437 | 1460  | 714  | 2  | 106 | tumor necrosis factor (ligand) superfamily, member 13 (Tnfsf13) alternative variant dSep08, mRNA.                               |
| Tnip1     | Tnip1.bSep08     | 363599 | 13198 | 1833 | 11 | 382 | TNFAIP3 interacting protein 1 (Tnip1) alternative variant bSep08, mRNA.                                                         |
| Tnip1     | Tnip1.cSep08     | 363599 | 30533 | 622  | 5  | 206 | TNFAIP3 interacting protein 1 (Tnip1) alternative variant cSep08, mRNA.                                                         |
| Tnip1     | Tnip1.dSep08     | 363599 | 15891 | 260  | 3  | 62  | TNFAIP3 interacting protein 1 (Tnip1) alternative variant dSep08, mRNA.                                                         |
| Tnk2      | Tnk2.bSep08      | 303882 | 11767 | 2461 | 7  | 565 | tyrosine kinase, non-receptor, 2 (Tnk2) alternative variant bSep08, mRNA.                                                       |
| Tnk2      | Tnk2.dSep08      | 303882 | 2392  | 418  | 3  | 85  | tyrosine kinase, non-receptor, 2 (Tnk2) alternative variant dSep08, mRNA.                                                       |
| Tnks      | Tnks.bSep08      | 290794 | 46388 | 1783 | 8  | 474 | tankyrase, TRF1-interacting ankyrin-related ADP-ribose polymerase (Tnks) alternative variant bSep08, mRNA.                      |

|          |                 |        |       |      |    |     |                                                                                                               |
|----------|-----------------|--------|-------|------|----|-----|---------------------------------------------------------------------------------------------------------------|
| Tnks     | Tnks.cSep08     | 290794 | 18060 | 872  | 3  | 174 | tankyrase, TRF1-interacting ankyrin-related ADP-ribose polymerase (Tnks) alternative variant cSep08, mRNA.    |
| Tnks     | Tnks.dSep08     | 290794 | 4071  | 348  | 3  | 116 | tankyrase, TRF1-interacting ankyrin-related ADP-ribose polymerase (Tnks) alternative variant dSep08, mRNA.    |
| Tnks     | Tnks.eSep08     | 290794 | 3169  | 414  | 4  | 95  | tankyrase, TRF1-interacting ankyrin-related ADP-ribose polymerase (Tnks) alternative variant eSep08, mRNA.    |
| Tnks1bp1 | Tnks1bp1.aSep08 | 295707 | 10264 | 2627 |    | 721 | tankyrase 1 binding protein 1 (Tnks1bp1) mRNA.                                                                |
| Tnks2    | Tnks2.bSep08    | 309512 | 1529  | 514  | 2  | 48  | tankyrase, TRF1-interacting ankyrin-related ADP-ribose polymerase 2 (Tnks2) alternative variant bSep08, mRNA. |
| Tnks2    | Tnks2.cSep08    | 309512 | 1851  | 577  | 2  | 48  | tankyrase, TRF1-interacting ankyrin-related ADP-ribose polymerase 2 (Tnks2) alternative variant cSep08, mRNA. |
| Tnn      | Tnn.bSep08      | 304913 | 9300  | 379  | 3  | 126 | tenascin N (Tnn) alternative variant bSep08, mRNA.                                                            |
| Tnnc2    | Tnnc2.bSep08    | 296369 | 2938  | 720  | 2  | 145 | troponin C2, fast (16.4 kD) (Tnnc2) alternative variant bSep08, mRNA.                                         |
| Tnni1    | Tnni1.aSep08    | 29388  | 12230 | 846  | 3  | 171 | troponin I, skeletal, slow 1 (19.8 kD) (Tnni1) alternative variant aSep08, mRNA.                              |
| Tnni1    | Tnni1.bSep08    | 29388  | 12128 | 822  | 4  | 171 | troponin I, skeletal, slow 1 (19.8 kD) (Tnni1) alternative variant bSep08, mRNA.                              |
| Tnni1    | Tnni1.dSep08    | 29388  | 12383 | 1029 | 4  | 171 | troponin I, skeletal, slow 1 (19.8 kD) (Tnni1) alternative variant dSep08, complete mRNA.                     |
| Tnni1    | Tnni1.eSep08    | 29388  | 10234 | 645  | 3  | 136 | troponin I, skeletal, slow 1 (Tnni1) alternative variant eSep08, mRNA.                                        |
| Tnni1    | Tnni1.fSep08    | 29388  | 10106 | 759  | 3  | 104 | troponin I, skeletal, slow 1 (Tnni1) alternative variant fSep08, mRNA.                                        |
| Tnni2    | Tnni2.aSep08    | 29389  | 2009  | 757  | 1  | 161 | troponin I type 2 (skeletal, fast) (18.8 kD) (Tnni2) alternative variant aSep08, mRNA.                        |
| Tnni3    | Tnni3.cSep08    | 29248  | 1469  | 748  | 4  | 82  | troponin I type 3 (cardiac) (8.9 kD) (Tnni3) alternative variant cSep08, mRNA.                                |
| Tnni3    | Tnni3.dSep08    | 29248  | 2190  | 1761 | 3  | 82  | troponin I type 3 (cardiac) (8.9 kD) (Tnni3) alternative variant dSep08, mRNA.                                |
| Tnni3    | Tnni3.eSep08    | 29248  | 1037  | 777  | 2  | 46  | troponin I type 3 (cardiac) (Tnni3) alternative variant eSep08, mRNA.                                         |
| Tnni3    | Tnni3.fSep08    | 29248  | 1813  | 500  | 3  | 62  | troponin I type 3 (cardiac) (Tnni3) alternative variant fSep08, mRNA.                                         |
| Tnni3k   | Tnni3k.bSep08   | 295531 | 14022 | 535  | 1  | 102 | TNNI3 interacting kinase (Tnni3k) alternative variant bSep08, mRNA.                                           |
| Tnnt1    | Tnnt1.bSep08    | 171409 | 8557  | 739  | 12 | 232 | troponin T1, skeletal, slow (Tnnt1) alternative variant bSep08, mRNA.                                         |
| Tnnt2    | Tnnt2.aSep08    | 24837  | 17675 | 1027 | 14 | 305 | troponin T2 cardiac (Tnnt2) alternative variant aSep08, mRNA.                                                 |
| Tnnt2    | Tnnt2.bSep08    | 24837  | 13356 | 1785 | 13 | 295 | troponin T2 cardiac CRA a (34.6 kD) (Tnnt2) alternative variant bSep08, mRNA.                                 |
| Tnnt2    | Tnnt2.cSep08    | 24837  | 9359  | 1306 | 11 | 268 | troponin T2 cardiac (Tnnt2) alternative variant cSep08, mRNA.                                                 |
| Tnnt2    | Tnnt2.eSep08    | 24837  | 8353  | 1359 | 5  | 93  | putative protein (Tnnt2) alternative variant eSep08, mRNA.                                                    |
| Tnnt2    | Tnnt2.fSep08    | 24837  | 11661 | 894  | 5  | 89  | putative protein (Tnnt2) alternative variant fSep08, mRNA.                                                    |

|        |               |        |        |      |    |      |                                                                                           |
|--------|---------------|--------|--------|------|----|------|-------------------------------------------------------------------------------------------|
| Tnnt2  | Tnnt2.gSep08  | 24837  | 1910   | 497  | 5  | 81   | troponin T (9.8 kD) (Tnnt2) alternative variant gSep08, mRNA.                             |
| Tnnt2  | Tnnt2.hSep08  | 24837  | 990    | 716  | 2  | 49   | putative protein (5.9 kD) (Tnnt2) alternative variant hSep08, mRNA.                       |
| Tnnt3  | Tnnt3.aSep08  | 24838  | 16943  | 1022 | 17 | 259  | troponin T3, skeletal, fast (30.7 kD) (Tnnt3) alternative variant aSep08, complete mRNA.  |
| Tnnt3  | Tnnt3.bSep08  | 24838  | 16944  | 990  | 15 | 248  | troponin T3, skeletal, fast (29.3 kD) (Tnnt3) alternative variant bSep08, complete mRNA.  |
| Tnnt3  | Tnnt3.cSep08  | 24838  | 12561  | 309  | 9  | 103  | troponin T3, skeletal, fast (Tnnt3) alternative variant cSep08, mRNA.                     |
| Tnnt3  | Tnnt3.dSep08  | 24838  | 4333   | 413  | 4  | 50   | troponin T3, skeletal, fast (Tnnt3) alternative variant dSep08, mRNA.                     |
| Tnnt3  | Tnnt3.eSep08  | 24838  | 3897   | 609  | 6  | 32   | troponin T3, skeletal, fast (3.8 kD) (Tnnt3) alternative variant eSep08, mRNA.            |
| Tnpo1  | Tnpo1.aSep08  | 309126 | 42686  | 2380 | 3  | 780  | transportin 1 (Tnpo1) alternative variant aSep08, mRNA.                                   |
| Tnpo1  | Tnpo1.bSep08  | 309126 | 16045  | 1783 |    | 352  | transportin 1 (Tnpo1) alternative variant bSep08, mRNA.                                   |
| Tnpo1  | Tnpo1.cSep08  | 309126 | 4085   | 624  | 1  | 94   | transportin 1 (Tnpo1) alternative variant cSep08, mRNA.                                   |
| Tnpo2  | Tnpo2.bSep08  | 304670 | 7385   | 548  | 5  | 182  | transportin 2 (importin 3, karyopherin beta 2b) (Tnpo2) alternative variant bSep08, mRNA. |
| Tnpo2  | Tnpo2.cSep08  | 304670 | 3647   | 382  | 4  | 88   | transportin 2 (importin 3, karyopherin beta 2b) (Tnpo2) alternative variant cSep08, mRNA. |
| Tnpo2  | Tnpo2.dSep08  | 304670 | 1183   | 943  | 4  | 83   | transportin 2 (importin 3, karyopherin beta 2b) (Tnpo2) alternative variant dSep08, mRNA. |
| Tnpo3  | Tnpo3.bSep08  | 296954 | 20314  | 420  | 3  | 50   | transportin 3 (Tnpo3) alternative variant bSep08, mRNA.                                   |
| Tnr    | Tnr.bSep08    | 25567  | 17166  | 445  | 4  | 148  | tenascin R (Tnr) alternative variant bSep08, mRNA.                                        |
| Tnr    | Tnr.cSep08    | 25567  | 868    | 492  | 2  | 134  | tenascin R (Tnr) alternative variant cSep08, mRNA.                                        |
| Tnr    | Tnr.dSep08    | 25567  | 4958   | 352  | 4  | 117  | tenascin R (Tnr) alternative variant dSep08, mRNA.                                        |
| Tnrc4  | Tnrc4.bSep08  | 499669 | 3326   | 742  | 8  | 246  | trinucleotide repeat containing 4 (Tnrc4) alternative variant bSep08, mRNA.               |
| Tnrc4  | Tnrc4.cSep08  | 499669 | 2909   | 1190 | 6  | 241  | trinucleotide repeat containing 4 (Tnrc4) alternative variant cSep08, mRNA.               |
| Tnrc4  | Tnrc4.dSep08  | 499669 | 3663   | 1336 | 3  | 80   | trinucleotide repeat containing 4 (Tnrc4) alternative variant dSep08, mRNA.               |
| Tnrc6a | Tnrc6a.aSep08 | 308971 | 17916  | 4544 | 15 | 720  | trinucleotide repeat containing 6a (Tnrc6a) alternative variant aSep08, mRNA.             |
| Tnrc6a | Tnrc6a.bSep08 | 308971 | 3535   | 366  | 3  | 122  | trinucleotide repeat containing 6a (Tnrc6a) alternative variant bSep08, mRNA.             |
| Tnrc6a | Tnrc6a.cSep08 | 308971 | 1311   | 376  | 2  | 98   | trinucleotide repeat containing 6a (Tnrc6a) alternative variant cSep08, mRNA.             |
| Tnrc6b | Tnrc6b.dSep08 | 192178 | 144938 | 360  | 5  | 44   | trinucleotide repeat containing 6B (Tnrc6b) alternative variant dSep08, mRNA.             |
| Tns1   | Tns1.bSep08   | 301509 | 1648   | 459  | 2  | 46   | tensin 1 (5.4 kD) (Tns1) alternative variant bSep08, mRNA.                                |
| Tnxb   | Tnxb.aSep08   | 415089 | 17988  | 4570 | 5  | 1037 | tenascin XB (Tnxb) alternative variant aSep08, mRNA.                                      |
| Tnxb   | Tnxb.bSep08   | 415089 | 9635   | 3691 | 1  | 721  | tenascin XB (Tnxb) alternative variant bSep08, mRNA.                                      |
| Tnxb   | Tnxb.cSep08   | 415089 | 2133   | 1356 | 1  | 387  | tenascin XB (Tnxb) alternative variant cSep08, mRNA.                                      |

|        |               |        |       |      |    |     |                                                                                                                              |
|--------|---------------|--------|-------|------|----|-----|------------------------------------------------------------------------------------------------------------------------------|
| Tnxb   | Tnxb.dSep08   | 415089 | 2489  | 980  |    | 304 | tenascin XB (Tnxb) alternative variant dSep08, mRNA.                                                                         |
| Tnxb   | Tnxb.eSep08   | 415089 | 1366  | 803  | 2  | 204 | tenascin XB (Tnxb) alternative variant eSep08, mRNA.                                                                         |
| toby   | toby.aSep08   |        | 1249  | 384  |    | 41  | putative protein (toby) mRNA.                                                                                                |
| tochy  | tochy.aSep08  |        | 1652  | 640  |    | 44  | putative protein (5.0 kD) (tochy) mRNA.                                                                                      |
| todar  | todar.aSep08  |        | 7921  | 606  |    | 202 | hydrocephalus inducing (todar) mRNA.                                                                                         |
| Toe1   | Toe1.aSep08   | 298443 | 3475  | 2027 | 7  | 426 | target of EGR1, member 1 (nuclear) (Toe1) alternative variant aSep08, mRNA.                                                  |
| Toe1   | Toe1.cSep08   | 298443 | 1952  | 1605 | 2  | 113 | target of EGR1, member 1 (nuclear) (Toe1) alternative variant cSep08, mRNA.                                                  |
| Toe1   | Toe1.dSep08   | 298443 | 1099  | 409  | 3  | 82  | target of EGR1, member 1 (nuclear) (Toe1) alternative variant dSep08, mRNA.                                                  |
| Toe1   | Toe1.eSep08   | 298443 | 1782  | 773  | 4  | 113 | target of EGR1, member 1 (nuclear) (Toe1) alternative variant eSep08, mRNA.                                                  |
| Toe1   | Toe1.fSep08   | 298443 | 1100  | 620  | 3  | 59  | target of EGR1, member 1 (nuclear) (Toe1) alternative variant fSep08, mRNA.                                                  |
| toflo  | toflo.aSep08  |        | 2949  | 842  |    | 61  | putative protein (6.7 kD) (toflo) mRNA.                                                                                      |
| toflu  | toflu.aSep08  |        | 1447  | 814  |    | 51  | putative protein (5.7 kD) (toflu) mRNA.                                                                                      |
| togar  | togar.aSep08  |        | 1255  | 490  |    | 105 | unc-13 homolog A CRA a (12.1 kD) (togar) mRNA.                                                                               |
| toja   | toja.aSep08   |        | 2994  | 522  |    | 36  | putative protein (4.4 kD) (toja) mRNA.                                                                                       |
| tojey  | tojey.aSep08  |        | 8855  | 746  | 5  | 248 | platelet-derived growth factor receptor (tojey) alternative variant aSep08, mRNA.                                            |
| tojey  | tojey.bSep08  |        | 1066  | 423  | 1  | 97  | platelet-derived growth factor receptor (tojey) alternative variant bSep08, mRNA.                                            |
| tokee  | tokee.aSep08  |        | 25795 | 341  |    | 87  | putative protein (tokee) mRNA.                                                                                               |
| tokler | tokler.aSep08 |        | 692   | 569  |    | 42  | putative protein (4.8 kD) (tokler) mRNA.                                                                                     |
| Tollip | Tollip.bSep08 | 361677 | 772   | 678  | 2  | 116 | putative endoplasmic reticulum protein, with a transmembrane domain (12.5 kD) (Tollip) alternative variant bSep08, mRNA.     |
| tolo   | tolo.aSep08   |        | 5632  | 279  |    | 34  | putative protein (tolo) mRNA.                                                                                                |
| Tom1l2 | Tom1l2.bSep08 | 360537 | 86997 | 592  | 2  | 197 | target of myb1-like 2 (chicken) (Tom1l2) alternative variant bSep08, mRNA.                                                   |
| Tom1l2 | Tom1l2.cSep08 | 360537 | 31432 | 385  | 2  | 127 | target of myb1-like 2 (chicken) (Tom1l2) alternative variant cSep08, mRNA.                                                   |
| tomee  | tomee.aSep08  |        | 13319 | 577  |    | 103 | putative protein (tomee) mRNA.                                                                                               |
| Tomm7  | Tomm7.aSep08  | 685620 | 6842  | 377  | 3  | 55  | translocase of outer mitochondrial membrane 7 homolog (yeast) (6.2 kD) (Tomm7) alternative variant aSep08, complete mRNA.    |
| Tomm20 | Tomm20.aSep08 | 266601 | 12331 | 1006 | 1  | 149 | translocase of outer mitochondrial membrane 20 homolog (yeast) (16.8 kD) (Tomm20) alternative variant aSep08, complete mRNA. |
| Tomm34 | Tomm34.bSep08 | 311621 | 4471  | 613  | 2  | 123 | translocase of outer mitochondrial membrane 34 (Tomm34) alternative variant bSep08, mRNA.                                    |
| Tomm40 | Tomm40.aSep08 | 308416 | 12098 | 1558 | 10 | 361 | translocase of outer mitochondrial membrane 40 homolog (yeast) (37.9 kD) (Tomm40) alternative variant aSep08, complete mRNA. |

|              |                     |        |       |      |    |     |                                                                                                                     |
|--------------|---------------------|--------|-------|------|----|-----|---------------------------------------------------------------------------------------------------------------------|
| Tomm40       | Tomm40.cSep08       | 308416 | 10015 | 743  | 7  | 238 | translocase of outer mitochondrial membrane 40 homolog (yeast) (Tomm40) alternative variant cSep08, mRNA.           |
| Tomm40       | Tomm40.dSep08       | 308416 | 2241  | 927  | 4  | 114 | translocase of outer mitochondrial membrane 40 homolog (yeast) (12.5 kD) (Tomm40) alternative variant dSep08, mRNA. |
| tonoy        | tonoy.aSep08        |        | 2858  | 795  | 2  | 39  | putative protein (4.4 kD) (tonoy) alternative variant aSep08, mRNA.                                                 |
| Top1         | Top1.aSep08         | 64550  | 62267 | 1362 |    | 305 | topoisomerase (DNA) I (36.8 kD) (Top1) mRNA.                                                                        |
| Top1mt       | Top1mt.bSep08       | 300029 | 10487 | 687  | 4  | 171 | DNA topoisomerase 1, mitochondrial (Top1mt) alternative variant bSep08, mRNA.                                       |
| Top1mt       | Top1mt.cSep08       | 300029 | 9919  | 814  | 3  | 164 | DNA topoisomerase 1, mitochondrial (Top1mt) alternative variant cSep08, mRNA.                                       |
| Top1mt       | Top1mt.dSep08       | 300029 | 10208 | 694  | 4  | 144 | DNA topoisomerase 1, mitochondrial (Top1mt) alternative variant dSep08, mRNA.                                       |
| Top2a        | Top2a.aSep08        | 360243 | 17446 | 3610 | 20 | 915 | topoisomerase (DNA) II alpha (Top2a) alternative variant aSep08, mRNA.                                              |
| Top2a        | Top2a.bSep08        | 360243 | 8670  | 594  | 5  | 132 | topoisomerase (DNA) II alpha (Top2a) alternative variant bSep08, mRNA.                                              |
| Top2a        | Top2a.cSep08        | 360243 | 3016  | 1051 | 5  | 118 | topoisomerase (DNA) II alpha (Top2a) alternative variant cSep08, mRNA.                                              |
| Top3b        | Top3b.bSep08        | 287930 | 4012  | 749  | 6  | 204 | topoisomerase (DNA) III beta (Top3b) alternative variant bSep08, mRNA.                                              |
| Top3b        | Top3b.cSep08        | 287930 | 18277 | 749  | 6  | 193 | topoisomerase (DNA) III beta (Top3b) alternative variant cSep08, mRNA.                                              |
| Top3b        | Top3b.dSep08        | 287930 | 5329  | 2817 | 4  | 178 | topoisomerase (DNA) III beta (20.5 kD) (Top3b) alternative variant dSep08, mRNA.                                    |
| Topbp1       | Topbp1.aSep08       | 315969 | 14750 | 2322 | 12 | 635 | topoisomerase (DNA) II binding protein 1 (Topbp1) alternative variant aSep08, mRNA.                                 |
| Topbp1       | Topbp1.bSep08       | 315969 | 14643 | 1816 | 9  | 397 | topoisomerase (DNA) II binding protein 1 (44.5 kD) (Topbp1) alternative variant bSep08, mRNA.                       |
| Topbp1       | Topbp1.cSep08       | 315969 | 1986  | 669  | 3  | 101 | topoisomerase (DNA) II binding protein 1 (Topbp1) alternative variant cSep08, mRNA.                                 |
| Topoisom_I.0 | Topoisom_I.0.aSep08 |        | 11558 | 2329 | 1  | 311 | topoisomerase I (Topoisom_I.0) alternative variant aSep08, mRNA.                                                    |
| topor        | topor.aSep08        |        | 16648 | 693  |    | 73  | putative protein (8.4 kD) (topor) mRNA.                                                                             |
| Tor1aip1     | Tor1aip1.bSep08     | 246314 | 26862 | 2064 | 9  | 396 | torsin A interacting protein 1 (44.4 kD) (Tor1aip1) alternative variant bSep08, mRNA.                               |
| Tor1aip1     | Tor1aip1.cSep08     | 246314 | 27106 | 934  | 10 | 255 | torsin A interacting protein 1 (Tor1aip1) alternative variant cSep08, mRNA.                                         |
| Tor1aip2     | Tor1aip2.bSep08     | 304881 | 11572 | 2353 | 3  | 121 | putative protein (13.6 kD) (Tor1aip2) alternative variant bSep08, complete mRNA.                                    |
| Tor1aip2     | Tor1aip2.cSep08     | 304881 | 11158 | 1892 | 3  | 120 | putative protein (Tor1aip2) alternative variant cSep08, mRNA.                                                       |
| Tor1aip2     | Tor1aip2.dSep08     | 304881 | 10230 | 904  | 2  | 89  | putative protein (9.9 kD) (Tor1aip2) alternative variant dSep08, mRNA.                                              |
| Tor1aip2     | Tor1aip2.eSep08     | 304881 | 19506 | 808  | 5  | 68  | torsin A interacting protein 2 (Tor1aip2) alternative variant eSep08, mRNA.                                         |

|               |                      |        |       |      |   |     |                                                                                          |
|---------------|----------------------|--------|-------|------|---|-----|------------------------------------------------------------------------------------------|
| Tor1b         | Tor1b.bSep08         | 311854 | 3638  | 819  | 3 | 163 | torsin family 1 member B (Tor1b) alternative variant bSep08, mRNA.                       |
| Tor1b         | Tor1b.cSep08         | 311854 | 1712  | 1030 | 2 | 158 | torsin family 1 member B CRA a (18.2 kD) (Tor1b) alternative variant cSep08, mRNA.       |
| Tor2aandPtrh1 | Tor2aandPtrh1.cSep08 | 362112 | 4771  | 1932 | 5 | 293 | torsin family 2 member A (Tor2aandPtrh1) alternative variant cSep08, mRNA.               |
| Tor2aandPtrh1 | Tor2aandPtrh1.cSep08 | 362113 | 4771  | 1932 | 5 | 293 | torsin family 2 member A (Tor2aandPtrh1) alternative variant cSep08, mRNA.               |
| Tor2aandPtrh1 | Tor2aandPtrh1.dSep08 | 362112 | 1785  | 934  | 5 | 208 | peptidyl-tRNA hydrolase 1 homolog (Tor2aandPtrh1) alternative variant dSep08, mRNA.      |
| Tor2aandPtrh1 | Tor2aandPtrh1.dSep08 | 362113 | 1785  | 934  | 5 | 208 | peptidyl-tRNA hydrolase 1 homolog (Tor2aandPtrh1) alternative variant dSep08, mRNA.      |
| Tor2aandPtrh1 | Tor2aandPtrh1.eSep08 | 362112 | 2458  | 727  | 3 | 168 | family 2 member a (Tor2aandPtrh1) alternative variant eSep08, mRNA.                      |
| Tor2aandPtrh1 | Tor2aandPtrh1.eSep08 | 362113 | 2458  | 727  | 3 | 168 | family 2 member a (Tor2aandPtrh1) alternative variant eSep08, mRNA.                      |
| Tor2aandPtrh1 | Tor2aandPtrh1.fSep08 | 362112 | 6846  | 659  | 2 | 72  | peptidyl-tRNA hydrolase 1 homolog like (Tor2aandPtrh1) alternative variant fSep08, mRNA. |
| Tor2aandPtrh1 | Tor2aandPtrh1.fSep08 | 362113 | 6846  | 659  | 2 | 72  | peptidyl-tRNA hydrolase 1 homolog like (Tor2aandPtrh1) alternative variant fSep08, mRNA. |
| Tor2aandPtrh1 | Tor2aandPtrh1.gSep08 | 362112 | 668   | 390  | 3 | 56  | peptidyl-tRNA hydrolase 1 homolog (Tor2aandPtrh1) alternative variant gSep08, mRNA.      |
| Tor2aandPtrh1 | Tor2aandPtrh1.gSep08 | 362113 | 668   | 390  | 3 | 56  | peptidyl-tRNA hydrolase 1 homolog (Tor2aandPtrh1) alternative variant gSep08, mRNA.      |
| Tor2aandPtrh1 | Tor2aandPtrh1.hSep08 | 362112 | 923   | 537  | 2 | 37  | family 2 member A (Tor2aandPtrh1) alternative variant hSep08, mRNA.                      |
| Tor2aandPtrh1 | Tor2aandPtrh1.hSep08 | 362113 | 923   | 537  | 2 | 37  | family 2 member A (Tor2aandPtrh1) alternative variant hSep08, mRNA.                      |
| torby         | torby.aSep08         |        | 12317 | 744  |   | 247 | microrchidia 4 CRA a (torby) mRNA.                                                       |
| torchy        | torchy.aSep08        |        | 1679  | 311  |   | 103 | ino80 complex homolog 1 (torchy) mRNA.                                                   |
| tordar        | tordar.aSep08        |        | 85671 | 419  |   | 44  | putative protein (tordar) mRNA.                                                          |
| torflo        | torflo.aSep08        |        | 13443 | 732  |   | 83  | putative protein (9.6 kD) (torflo) mRNA.                                                 |
| torflu        | torflu.aSep08        |        | 12020 | 920  | 1 | 244 | adaptor-related protein complex 3 beta CRA b (torflu) alternative variant aSep08, mRNA.  |
| torflu        | torflu.bSep08        |        | 15948 | 773  | 1 | 153 | adaptor-related protein complex 3 beta CRA c (torflu) alternative variant bSep08, mRNA.  |
| torgar        | torgar.bSep08        |        | 5524  | 184  | 2 | 46  | putative protein (torgar) alternative variant bSep08, mRNA.                              |
| torja         | torja.aSep08         |        | 398   | 251  |   | 83  | T cell receptor (torja) mRNA.                                                            |
| torjey        | torjey.aSep08        |        | 4577  | 3702 |   | 94  | ubiquitin specific peptidase 46 CRA a (torjey) mRNA.                                     |
| torkee        | torkee.aSep08        |        | 37145 | 793  | 4 | 137 | putative protein (14.8 kD) (torkee) alternative variant aSep08, mRNA.                    |
| torkee        | torkee.bSep08        |        | 22110 | 760  | 2 | 38  | putative protein (torkee) alternative variant bSep08, mRNA.                              |
| torkler       | torkler.aSep08       |        | 2062  | 600  |   | 95  | putative protein of mammalian origin (torkler) mRNA.                                     |
| torlo         | torlo.bSep08         |        | 932   | 652  | 2 | 20  | putative protein (torlo) alternative variant bSep08, mRNA.                               |
| tormee        | tormee.aSep08        |        | 18103 | 467  |   | 112 | CRA b like (tormee) mRNA.                                                                |

|         |                |        |        |      |   |     |                                                                                                |
|---------|----------------|--------|--------|------|---|-----|------------------------------------------------------------------------------------------------|
| tornoy  | tornoy.aSep08  |        | 50425  | 782  | 2 | 201 | thyroid hormone receptor interactor 12 CRA c (tornoy) alternative variant aSep08, mRNA.        |
| tornoy  | tornoy.bSep08  |        | 1544   | 281  | 1 | 93  | thyroid hormone receptor interactor 12 (tornoy) alternative variant bSep08, mRNA.              |
| torpor  | torpor.aSep08  |        | 6418   | 418  |   | 102 | interphotoreceptor matrix proteoglycan 1 (torpor) mRNA.                                        |
| torsa   | torsa.aSep08   |        | 3375   | 2441 |   | 83  | death-inducing-protein CRA e (torsa) mRNA.                                                     |
| torshee | torshee.aSep08 |        | 29790  | 439  |   | 91  | putative protein (torshee) mRNA.                                                               |
| tortu   | tortu.aSep08   |        | 4270   | 350  |   | 116 | WD repeat domain 35 (tortu) mRNA.                                                              |
| torvar  | torvar.aSep08  |        | 4800   | 218  |   | 72  | procollagen-lysine 1 (torvar) mRNA.                                                            |
| torwey  | torwey.aSep08  |        | 3088   | 576  |   | 146 | von Willebrand factor (torwey) mRNA.                                                           |
| tosa    | tosa.aSep08    |        | 2088   | 475  |   | 102 | putative protein (tosa) mRNA.                                                                  |
| toshee  | toshee.aSep08  |        | 13280  | 386  |   | 92  | putative protein (toshee) mRNA.                                                                |
| totu    | totu.aSep08    |        | 113069 | 735  |   | 156 | putative protein (totu) mRNA.                                                                  |
| tovar   | tovar.aSep08   |        | 1690   | 325  |   | 108 | putative protein, with a coiled coil domain, of mammalian origin (tovar) mRNA.                 |
| towey   | towey.aSep08   |        | 2255   | 493  |   | 164 | nucleolar protein 1 (towey) mRNA.                                                              |
| Tox     | Tox.bSep08     | 362481 | 2244   | 2054 | 2 | 73  | thymocyte selection-associated high mobility group box (Tox) alternative variant bSep08, mRNA. |
| Tox3    | Tox3.bSep08    | 291908 | 1963   | 1707 | 2 | 172 | TOX high mobility group box family member 3 (Tox3) alternative variant bSep08, mRNA.           |
| Tox3    | Tox3.cSep08    | 291908 | 83682  | 475  | 3 | 135 | TOX high mobility group box family member 3 (Tox3) alternative variant cSep08, mRNA.           |
| toyby   | toyby.aSep08   |        | 15195  | 344  |   | 42  | putative protein (4.6 kD) (toyby) mRNA.                                                        |
| toychy  | toychy.aSep08  |        | 5120   | 394  |   | 131 | ino80 complex homolog 1 (toychy) mRNA.                                                         |
| toydar  | toydar.aSep08  |        | 1023   | 473  |   | 21  | putative protein (toydar) mRNA.                                                                |
| toydoy  | toydoy.aSep08  |        | 1466   | 740  | 3 | 79  | putative protein (toydoy) alternative variant aSep08, mRNA.                                    |
| toydoy  | toydoy.bSep08  |        | 1645   | 796  | 2 | 41  | putative protein (4.9 kD) (toydoy) alternative variant bSep08, mRNA.                           |
| toydoy  | toydoy.cSep08  |        | 1536   | 455  | 3 | 30  | putative protein (3.3 kD) (toydoy) alternative variant cSep08, mRNA.                           |
| toyflo  | toyflo.aSep08  |        | 4914   | 1784 |   | 15  | putative protein (toyflo) mRNA.                                                                |
| toyflu  | toyflu.aSep08  |        | 1361   | 460  |   | 128 | CRA b (toyflu) mRNA.                                                                           |
| toygar  | toygar.bSep08  |        | 1847   | 298  | 2 | 47  | putative protein (toygar) alternative variant bSep08, mRNA.                                    |
| toyja   | toyja.aSep08   |        | 4592   | 883  |   | 108 | putative nuclear protein (11.7 kD) (toyja) alternative variant aSep08, mRNA.                   |
| toyjey  | toyjey.aSep08  |        | 24889  | 758  | 4 | 49  | putative protein (toyjey) alternative variant aSep08, mRNA.                                    |
| toyjey  | toyjey.bSep08  |        | 4173   | 710  | 3 | 80  | putative cytoplasmic protein (8.9 kD) (toyjey) alternative variant bSep08, mRNA.               |
| toykee  | toykee.aSep08  |        | 6979   | 703  |   | 82  | putative protein (toykee) mRNA.                                                                |
| toykler | toykler.aSep08 |        | 3556   | 805  |   | 124 | putative protein, with a coiled coil domain, of mammalian origin (toykler) mRNA.               |
| toylo   | toylo.aSep08   |        | 7427   | 776  |   | 258 | poly-specific ribonuclease PAN3b (toylo) mRNA.                                                 |
| toymee  | toymee.aSep08  |        | 10431  | 762  |   | 45  | putative protein (5.4 kD) (toymee) mRNA.                                                       |

|         |                |        |       |      |    |     |                                                                                |
|---------|----------------|--------|-------|------|----|-----|--------------------------------------------------------------------------------|
| toynoy  | toynoy.aSep08  |        | 7207  | 665  |    | 81  | putative protein (8.7 kD) (toynoy) mRNA.                                       |
| toypor  | toypor.aSep08  |        | 28031 | 702  |    | 75  | putative protein (toypor) mRNA.                                                |
| toysa   | toysa.aSep08   |        | 18966 | 363  |    | 83  | tbc1 domain family member 22a (toysa) mRNA.                                    |
| toyshee | toyshee.aSep08 |        | 606   | 249  |    | 44  | putative protein (toyshee) mRNA.                                               |
| toytu   | toytu.aSep08   |        | 3767  | 863  |    | 58  | putative protein (5.9 kD) (toytu) mRNA.                                        |
| toyvar  | toyvar.aSep08  |        | 2770  | 856  |    | 195 | 5 10-methylenetetrahydrofolate reductase CRA a (toyvar) mRNA.                  |
| toywey  | toywey.aSep08  |        | 15203 | 1105 |    | 158 | transmembrane protein 16B (toywey) mRNA.                                       |
| Tpbg    | Tpbg.bSep08    | 83684  | 1397  | 721  | 2  | 148 | trophoblast glycoprotein (Tpbg) alternative variant bSep08, mRNA.              |
| Tpbg    | Tpbg.cSep08    | 83684  | 442   | 347  | 2  | 25  | trophoblast glycoprotein (Tpbg) alternative variant cSep08, mRNA.              |
| Tpbpa   | Tpbpa.bSep08   | 64509  | 1303  | 605  | 4  | 107 | trophoblast specific protein alpha (Tpbpa) alternative variant bSep08, mRNA.   |
| Tpcn1   | Tpcn1.aSep08   | 246215 | 16267 | 3520 | 18 | 492 | two pore channel 1 (Tpcn1) alternative variant aSep08, mRNA.                   |
| Tpcn2   | Tpcn2.bSep08   | 309139 | 29694 | 3008 | 25 | 309 | two pore segment channel 2 (35.0 kD) (Tpcn2) alternative variant bSep08, mRNA. |
| Tpcn2   | Tpcn2.cSep08   | 309139 | 2917  | 842  | 7  | 155 | two pore segment channel 2 (Tpcn2) alternative variant cSep08, mRNA.           |
| Tpcn2   | Tpcn2.dSep08   | 309139 | 1242  | 880  | 2  | 52  | two pore segment channel 2 (5.5 kD) (Tpcn2) alternative variant dSep08, mRNA.  |
| Tpd52   | Tpd52.bSep08   | 294900 | 80384 | 2356 | 8  | 208 | tumor protein D52 (22.6 kD) (Tpd52) alternative variant bSep08, complete mRNA. |
| Tpd52   | Tpd52.cSep08   | 294900 | 78978 | 881  | 6  | 190 | tumor protein D52 (Tpd52) alternative variant cSep08, mRNA.                    |
| Tpd52   | Tpd52.dSep08   | 294900 | 12932 | 432  | 5  | 111 | tumor protein D52 (Tpd52) alternative variant dSep08, mRNA.                    |
| Tpd52l1 | Tpd52l1.cSep08 | 689256 | 13134 | 788  | 4  | 99  | tumor protein D52-like 1 (Tpd52l1) alternative variant cSep08, mRNA.           |
| Tpd52l2 | Tpd52l2.aSep08 | 296480 | 18391 | 978  | 7  | 245 | tumor protein D52-like 2 (Tpd52l2) alternative variant aSep08, mRNA.           |
| Tpd52l2 | Tpd52l2.bSep08 | 296480 | 18332 | 919  | 9  | 235 | tumor protein D52-like 2 (Tpd52l2) alternative variant bSep08, mRNA.           |
| Tpd52l2 | Tpd52l2.dSep08 | 296480 | 18233 | 760  | 6  | 216 | tumor protein D52-like 2 (Tpd52l2) alternative variant dSep08, mRNA.           |
| Tpd52l2 | Tpd52l2.eSep08 | 296480 | 14821 | 577  | 6  | 191 | tumor protein D52-like 2 (Tpd52l2) alternative variant eSep08, mRNA.           |
| Tph1    | Tph1.bSep08    | 24848  | 3315  | 382  | 3  | 127 | tryptophan hydroxylase 1 (Tph1) alternative variant bSep08, mRNA.              |
| Tph1    | Tph1.dSep08    | 24848  | 493   | 344  | 2  | 28  | tryptophan hydroxylase 1 (Tph1) alternative variant dSep08, mRNA.              |
| Tph2    | Tph2.bSep08    | 317675 | 13571 | 368  | 1  | 57  | tryptophan hydroxylase 2 (Tph2) alternative variant bSep08, mRNA.              |
| Tpi1    | Tpi1.bSep08    | 24849  | 1909  | 728  | 2  | 177 | triosephosphate isomerase 1 (Tpi1) alternative variant bSep08, mRNA.           |



|      |             |        |        |      |    |     |                                                                                 |
|------|-------------|--------|--------|------|----|-----|---------------------------------------------------------------------------------|
| Tpi1 | Tpi1.cSep08 | 24849  | 2051   | 781  | 3  | 160 | triosephosphate isomerase 1 (17.3 kD) (Tpi1) alternative variant cSep08, mRNA.  |
| Tpk1 | Tpk1.aSep08 | 680668 | 201500 | 2136 |    | 108 | thiamine pyrophosphokinase (11.8 kD) (Tpk1) mRNA.                               |
| Tpm1 | Tpm1.dSep08 | 24851  | 20917  | 931  | 10 | 284 | tropomyosin (32.6 kD) (Tpm1) alternative variant dSep08, mRNA.                  |
| Tpm1 | Tpm1.eSep08 | 24851  | 19495  | 992  | 9  | 283 | tropomyosin (Tpm1) alternative variant eSep08, mRNA.                            |
| Tpm1 | Tpm1.jSep08 | 24851  | 18711  | 744  | 8  | 206 | tropomyosin (24.0 kD) (Tpm1) alternative variant jSep08, mRNA.                  |
| Tpm1 | Tpm1.kSep08 | 24851  | 11173  | 698  | 4  | 152 | tropomyosin (17.4 kD) (Tpm1) alternative variant kSep08, mRNA.                  |
| Tpm1 | Tpm1.lSep08 | 24851  | 1209   | 438  | 2  | 127 | tropomyosin 1 (Tpm1) alternative variant lSep08, mRNA.                          |
| Tpm1 | Tpm1.mSep08 | 24851  | 2676   | 1564 | 2  | 110 | tropomyosin (12.4 kD) (Tpm1) alternative variant mSep08, complete mRNA.         |
| Tpm1 | Tpm1.nSep08 | 24851  | 3418   | 1680 | 3  | 70  | tropomyosin (Tpm1) alternative variant nSep08, mRNA.                            |
| Tpm2 | Tpm2.aSep08 | 500450 | 9018   | 1992 | 9  | 284 | tropomyosin 2 (Tpm2) alternative variant aSep08, mRNA.                          |
| Tpm2 | Tpm2.bSep08 | 500450 | 8471   | 1031 | 8  | 235 | tropomyosin 2 (27.2 kD) (Tpm2) alternative variant bSep08, mRNA.                |
| Tpm2 | Tpm2.cSep08 | 500450 | 7157   | 908  | 9  | 165 | tropomyosin 2 (Tpm2) alternative variant cSep08, mRNA.                          |
| Tpm2 | Tpm2.dSep08 | 500450 | 5645   | 2086 | 8  | 158 | tropomyosin 2 (18.4 kD) (Tpm2) alternative variant dSep08, mRNA.                |
| Tpm3 | Tpm3.aSep08 | 117557 | 26546  | 1046 | 10 | 285 | tropomyosin 3, gamma (33.2 kD) (Tpm3) alternative variant aSep08, mRNA.         |
| Tpm3 | Tpm3.bSep08 | 117557 | 27751  | 2172 | 9  | 285 | tropomyosin 3, gamma (33.1 kD) (Tpm3) alternative variant bSep08, mRNA.         |
| Tpm3 | Tpm3.eSep08 | 117557 | 13235  | 631  | 8  | 172 | tropomyosin 3, gamma (Tpm3) alternative variant eSep08, mRNA.                   |
| Tpm3 | Tpm3.fSep08 | 117557 | 8034   | 572  | 4  | 152 | tropomyosin 3, gamma (17.6 kD) (Tpm3) alternative variant fSep08, mRNA.         |
| Tpm3 | Tpm3.iSep08 | 117557 | 10533  | 633  | 5  | 101 | tropomyosin 3, gamma (Tpm3) alternative variant iSep08, mRNA.                   |
| Tpm3 | Tpm3.kSep08 | 117557 | 10295  | 432  | 3  | 59  | tropomyosin 3, gamma (Tpm3) alternative variant kSep08, mRNA.                   |
| Tpm3 | Tpm3.lSep08 | 117557 | 7984   | 418  | 2  | 10  | tropomyosin 3, gamma (Tpm3) alternative variant lSep08, mRNA.                   |
| Tpm3 | Tpm3.mSep08 | 117557 | 1219   | 367  | 2  | 44  | tropomyosin 3, gamma (Tpm3) alternative variant mSep08, mRNA.                   |
| Tpm4 | Tpm4.bSep08 | 24852  | 7614   | 957  | 4  | 151 | tropomyosin 4 (Tpm4) alternative variant bSep08, mRNA.                          |
| Tpm4 | Tpm4.cSep08 | 24852  | 5549   | 1379 | 3  | 101 | tropomyosin 4 (Tpm4) alternative variant cSep08, mRNA.                          |
| Tpmt | Tpmt.aSep08 | 690050 | 16129  | 1778 | 1  | 546 | thiopurine methyltransferase (Tpmt) alternative variant aSep08, mRNA.           |
| Tpmt | Tpmt.bSep08 | 690050 | 18532  | 1068 | 6  | 240 | thiopurine methyltransferase (27.7 kD) (Tpmt) alternative variant bSep08, mRNA. |
| Tpo1 | Tpo1.bSep08 | 170907 | 78821  | 784  | 2  | 260 | developmentally regulated protein TPO1 (Tpo1) alternative variant bSep08, mRNA. |
| Tpo1 | Tpo1.cSep08 | 170907 | 80261  | 767  | 2  | 195 | developmentally regulated protein TPO1 (Tpo1) alternative variant cSep08, mRNA. |

|         |                |        |        |      |   |     |                                                                                                               |
|---------|----------------|--------|--------|------|---|-----|---------------------------------------------------------------------------------------------------------------|
| Tpp1    | Tpp1.bSep08    | 83534  | 824    | 596  | 2 | 83  | tripeptidyl peptidase I (Tpp1) alternative variant bSep08, mRNA.                                              |
| Tpp2    | Tpp2.bSep08    | 81815  | 20659  | 1160 | 9 | 386 | tripeptidyl peptidase II (Tpp2) alternative variant bSep08, mRNA.                                             |
| Tpp2    | Tpp2.cSep08    | 81815  | 14111  | 1065 | 5 | 208 | tripeptidyl peptidase II (Tpp2) alternative variant cSep08, mRNA.                                             |
| Tpp2    | Tpp2.dSep08    | 81815  | 5553   | 843  | 2 | 55  | tripeptidyl peptidase II (6.3 kD) (Tpp2) alternative variant dSep08, mRNA.                                    |
| Tppp    | Tppp.bSep08    | 361466 | 6174   | 959  | 2 | 152 | tubulin polymerization promoting protein (Tppp) alternative variant bSep08, mRNA.                             |
| Tppp3   | Tppp3.aSep08   | 291966 | 3474   | 775  | 1 | 207 | tubulin polymerization-promoting protein family member 3 (Tppp3) alternative variant aSep08, mRNA.            |
| Tpr     | Tpr.bSep08     | 304862 | 10858  | 1784 | 7 | 594 | translocated promoter region (Tpr) alternative variant bSep08, mRNA.                                          |
| Tpr     | Tpr.cSep08     | 304862 | 10374  | 868  | 6 | 289 | translocated promoter region (Tpr) alternative variant cSep08, mRNA.                                          |
| Tpr     | Tpr.dSep08     | 304862 | 1394   | 413  | 2 | 101 | translocated promoter region (Tpr) alternative variant dSep08, mRNA.                                          |
| Tpr     | Tpr.eSep08     | 304862 | 1603   | 454  | 3 | 11  | translocated promoter region (Tpr) alternative variant eSep08, mRNA.                                          |
| Tpr     | Tpr.fSep08     | 304862 | 1283   | 179  | 2 | 7   | translocated promoter region (Tpr) alternative variant fSep08, mRNA.                                          |
| Tprkb   | Tprkb.bSep08   | 297411 | 14894  | 2100 | 3 | 175 | tp53rk binding protein (19.5 kD) (Tprkb) alternative variant bSep08, complete mRNA.                           |
| Tprkb   | Tprkb.cSep08   | 297411 | 12540  | 600  | 3 | 155 | tp53rk binding protein (Tprkb) alternative variant cSep08, mRNA.                                              |
| Tprkb   | Tprkb.dSep08   | 297411 | 13595  | 728  | 3 | 106 | tp53rk binding protein (12.0 kD) (Tprkb) alternative variant dSep08, mRNA.                                    |
| TPR_1.0 | TPR_1.0.aSep08 |        | 68713  | 388  |   | 128 | ubiquitously transcribed tetratricopeptide repeat (TPR_1.0) mRNA.                                             |
| TPR_1.1 | TPR_1.1.aSep08 |        | 9558   | 439  |   | 146 | RAN binding protein 2 like (TPR_1.1) mRNA.                                                                    |
| TPR_1.2 | TPR_1.2.aSep08 |        | 10846  | 831  | 5 | 249 | tetratricopeptide TPR 1 and tetratricopeptide TPR 2 (TPR_1.2) alternative variant aSep08, mRNA.               |
| TPR_1.2 | TPR_1.2.bSep08 |        | 2780   | 2021 | 3 | 101 | tetratricopeptide TPR 1 and tetratricopeptide TPR 2 (11.8 kD) (TPR_1.2) alternative variant bSep08, mRNA.     |
| TPR_1.5 | TPR_1.5.aSep08 |        | 5791   | 902  |   | 300 | tetratricopeptide TPR 1 and sel1-like and tetratricopeptide TPR 2 and tetratricopeptide TPR 3 (TPR_1.5) mRNA. |
| TPR_1.6 | TPR_1.6.aSep08 |        | 4301   | 578  |   | 192 | tetratricopeptide TPR 1 and tetratricopeptide TPR 2 (TPR_1.6) mRNA.                                           |
| TPR_2.0 | TPR_2.0.aSep08 |        | 9796   | 840  |   | 275 | signal recognition particle (TPR_2.0) mRNA.                                                                   |
| TPR_2.1 | TPR_2.1.aSep08 |        | 105814 | 403  |   | 134 | transmembrane tetratricopeptide repeat containing 2 (TPR_2.1) mRNA.                                           |
| Tpst2   | Tpst2.bSep08   | 288719 | 7998   | 1148 | 4 | 331 | tyrosylprotein sulfotransferase 2 (Tpst2) alternative variant bSep08, mRNA.                                   |
| Tpst2   | Tpst2.cSep08   | 288719 | 2857   | 1452 | 2 | 91  | tyrosylprotein sulfotransferase 2 (Tpst2) alternative variant cSep08, mRNA.                                   |

|          |                 |        |       |      |    |     |                                                                                                                 |
|----------|-----------------|--------|-------|------|----|-----|-----------------------------------------------------------------------------------------------------------------|
| Tpx2     | Tpx2.bSep08     | 311546 | 29051 | 815  | 7  | 230 | TPX2, microtubule-associated protein homolog ( <i>Xenopus laevis</i> ) (Tpx2) alternative variant bSep08, mRNA. |
| Tpx2     | Tpx2.cSep08     | 311546 | 7524  | 1045 | 6  | 198 | TPX2, microtubule-associated protein homolog ( <i>Xenopus laevis</i> ) (Tpx2) alternative variant cSep08, mRNA. |
| Tpx2     | Tpx2.dSep08     | 311546 | 22822 | 377  | 4  | 63  | TPX2, microtubule-associated protein homolog ( <i>Xenopus laevis</i> ) (Tpx2) alternative variant dSep08, mRNA. |
| Tpx2     | Tpx2.eSep08     | 311546 | 22759 | 362  | 4  | 49  | TPX2, microtubule-associated protein homolog ( <i>Xenopus laevis</i> ) (Tpx2) alternative variant eSep08, mRNA. |
| Tra1     | Tra1.aSep08     | 362862 | 10993 | 2315 | 14 | 667 | heat shock protein 90kDa beta member 1 (Tra1) alternative variant aSep08, mRNA.                                 |
| Tra1     | Tra1.cSep08     | 362862 | 3252  | 801  | 5  | 179 | shock protein beta member 1 (Tra1) alternative variant cSep08, mRNA.                                            |
| Tra1     | Tra1.dSep08     | 362862 | 4246  | 937  | 3  | 124 | shock protein beta member 1 (Tra1) alternative variant dSep08, mRNA.                                            |
| Tra1     | Tra1.eSep08     | 362862 | 1977  | 883  | 4  | 116 | shock protein beta member 1 (Tra1) alternative variant eSep08, mRNA.                                            |
| Tra1     | Tra1.fSep08     | 362862 | 795   | 705  | 2  | 100 | shock protein (11.6 kD) (Tra1) alternative variant fSep08, mRNA.                                                |
| Tra2a    | Tra2a.aSep08    | 500116 | 18915 | 1859 | 8  | 282 | transformer 2 alpha homolog ( <i>Drosophila</i> ) (32.6 kD) (Tra2a) alternative variant aSep08, mRNA.           |
| Tra2a    | Tra2a.dSep08    | 500116 | 3632  | 683  | 3  | 103 | transformer 2 alpha homolog ( <i>Drosophila</i> ) (Tra2a) alternative variant dSep08, mRNA.                     |
| Tra2a    | Tra2a.eSep08    | 500116 | 10873 | 328  | 3  | 72  | transformer 2 alpha homolog ( <i>Drosophila</i> ) (Tra2a) alternative variant eSep08, mRNA.                     |
| Tra2a    | Tra2a.gSep08    | 500116 | 2755  | 452  | 3  | 78  | transformer 2 alpha homolog ( <i>Drosophila</i> ) (Tra2a) alternative variant gSep08, mRNA.                     |
| Trabd    | Trabd.bSep08    | 300142 | 9376  | 1406 | 9  | 324 | TraB determinant (Trabd) alternative variant bSep08, mRNA.                                                      |
| Trabd    | Trabd.cSep08    | 300142 | 3798  | 722  | 6  | 174 | TraB determinant (Trabd) alternative variant cSep08, mRNA.                                                      |
| Trabd    | Trabd.dSep08    | 300142 | 4185  | 1045 | 7  | 153 | putative protein of ancient origin (Trabd) alternative variant dSep08, mRNA.                                    |
| Tradd    | Tradd.aSep08    | 246756 | 2780  | 2556 |    | 208 | TNFRSF1A-associated via death domain (23.2 kD) (Tradd) mRNA.                                                    |
| Traf2    | Traf2.bSep08    | 311786 | 4387  | 766  | 5  | 255 | tnf receptor-associated factor 2 (Traf2) alternative variant bSep08, mRNA.                                      |
| Traf2    | Traf2.cSep08    | 311786 | 5701  | 770  | 7  | 163 | tnf receptor-associated factor 2 (Traf2) alternative variant cSep08, mRNA.                                      |
| Traf3    | Traf3.bSep08    | 362788 | 20393 | 617  | 3  | 107 | tnf receptor-associated factor 3 (10.0 kD) (Traf3) alternative variant bSep08, mRNA.                            |
| Traf3    | Traf3.cSep08    | 362788 | 995   | 295  | 2  | 98  | tnf receptor-associated factor 3 (Traf3) alternative variant cSep08, mRNA.                                      |
| Traf3    | Traf3.dSep08    | 362788 | 3071  | 3012 | 2  | 108 | tnf receptor-associated factor 3 (11.7 kD) (Traf3) alternative variant dSep08, mRNA.                            |
| Traf3ip1 | Traf3ip1.bSep08 | 363286 | 2040  | 715  | 1  | 63  | TNF receptor-associated factor 3 interacting protein 1 (7.1 kD) (Traf3ip1) alternative variant bSep08, mRNA.    |

|                  |                         |        |        |      |    |     |                                                                                                       |
|------------------|-------------------------|--------|--------|------|----|-----|-------------------------------------------------------------------------------------------------------|
| Traf3ip2         | Traf3ip2.bSep08         | 361857 | 31839  | 1550 | 1  | 157 | traf3 interacting protein 2 (18.4 kD) (Traf3ip2) alternative variant bSep08, mRNA.                    |
| Traf3ip3         | Traf3ip3.bSep08         | 360900 | 12962  | 724  | 7  | 241 | TRAF3 interacting protein 3 (Traf3ip3) alternative variant bSep08, mRNA.                              |
| Traf3ip3         | Traf3ip3.cSep08         | 360900 | 3193   | 694  | 3  | 230 | TRAF3 interacting protein 3 (Traf3ip3) alternative variant cSep08, mRNA.                              |
| Traf3ip3         | Traf3ip3.dSep08         | 360900 | 6142   | 1338 | 4  | 211 | TRAF3 interacting protein 3 (24.0 kD) (Traf3ip3) alternative variant dSep08, mRNA.                    |
| Traf3ip3         | Traf3ip3.eSep08         | 360900 | 5647   | 814  | 4  | 157 | TRAF3 interacting protein 3 (17.8 kD) (Traf3ip3) alternative variant eSep08, mRNA.                    |
| Traf4            | Traf4.bSep08            | 303285 | 4479   | 773  | 4  | 125 | tnf receptor associated factor 4 (Traf4) alternative variant bSep08, mRNA.                            |
| Traf4af1         | Traf4af1.bSep08         | 311325 | 16327  | 684  | 1  | 169 | TRAF4 associated factor 1 (Traf4af1) alternative variant bSep08, mRNA.                                |
| Traf7            | Traf7.bSep08            | 360491 | 14514  | 897  | 9  | 264 | tnf receptor-associated factor 7 (Traf7) alternative variant bSep08, mRNA.                            |
| Traf7            | Traf7.cSep08            | 360491 | 933    | 585  | 4  | 194 | TNF receptor-associated factor 7 (Traf7) alternative variant cSep08, mRNA.                            |
| Traf7            | Traf7.dSep08            | 360491 | 14207  | 696  | 8  | 177 | tnf receptor-associated factor 7 (19.1 kD) (Traf7) alternative variant dSep08, mRNA.                  |
| Traf7            | Traf7.eSep08            | 360491 | 2085   | 817  | 5  | 156 | tnf receptor-associated factor 7 (Traf7) alternative variant eSep08, mRNA.                            |
| Traf7            | Traf7.fSep08            | 360491 | 2038   | 1103 | 5  | 96  | tnf receptor-associated factor 7 (10.5 kD) (Traf7) alternative variant fSep08, mRNA.                  |
| Trafd1           | Trafd1.aSep08           | 114635 | 13424  | 1972 | 12 | 609 | putative protein of eukaryotic origin (Trafd1) alternative variant aSep08, mRNA.                      |
| Trafd1           | Trafd1.bSep08           | 114635 | 5906   | 2644 | 6  | 189 | zinc finger (20.7 kD) (Trafd1) alternative variant bSep08, mRNA.                                      |
| Trafd1           | Trafd1.cSep08           | 114635 | 6974   | 491  | 5  | 113 | putative protein of eukaryotic origin (Trafd1) alternative variant cSep08, mRNA.                      |
| Trafd1           | Trafd1.dSep08           | 114635 | 3720   | 382  | 2  | 100 | putative protein (Trafd1) alternative variant dSep08, mRNA.                                           |
| Traip            | Traip.bSep08            | 367167 | 2791   | 873  | 1  | 159 | TRAF-interacting protein (Traip) alternative variant bSep08, mRNA.                                    |
| Trak2            | Trak2.bSep08            | 171086 | 9513   | 873  | 4  | 177 | trafficking protein, kinesin binding 2 (Trak2) alternative variant bSep08, mRNA.                      |
| Trak2            | Trak2.cSep08            | 171086 | 1790   | 799  | 2  | 148 | trafficking protein, kinesin binding 2 (Trak2) alternative variant cSep08, mRNA.                      |
| TRAM.0           | TRAM.0.aSep08           |        | 157536 | 1223 |    | 184 | CDK5 regulatory associated protein 1-like 1 (TRAM.0) mRNA.                                            |
| Tram1            | Tram1.bSep08            | 312903 | 20168  | 1126 |    | 242 | translocating chain-associating membrane protein 1 (Tram1) alternative variant bSep08, mRNA.          |
| TRAM_LAG1_CLN8.0 | TRAM_LAG1_CLN8.0.aSep08 |        | 4993   | 2622 | 3  | 168 | CRA b (TRAM_LAG1_CLN8.0) mRNA.                                                                        |
| TRAM_LAG1_CLN8.1 | TRAM_LAG1_CLN8.1.aSep08 |        | 11694  | 988  |    | 260 | membrane protein 2 (TRAM_LAG1_CLN8.1) mRNA.                                                           |
| Trappc1          | Trappc1.aSep08          | 287427 | 1685   | 740  | 4  | 145 | trafficking protein particle complex 1 (16.9 kD) (Trappc1) alternative variant aSep08, complete mRNA. |

|          |                 |        |        |      |    |     |                                                                                                      |
|----------|-----------------|--------|--------|------|----|-----|------------------------------------------------------------------------------------------------------|
| Trappc1  | Trappc1.dSep08  | 287427 | 1603   | 448  | 2  | 75  | trafficking protein particle complex 1 (8.8 kD) (Trappc1) alternative variant dSep08, complete mRNA. |
| Trappc1  | Trappc1.eSep08  | 287427 | 1713   | 1153 | 3  | 62  | trafficking protein particle complex 1 (7.0 kD) (Trappc1) alternative variant eSep08, complete mRNA. |
| Trappc2  | Trappc2.aSep08  | 501550 | 6462   | 809  | 6  | 146 | trafficking protein particle complex 2 (17.4 kD) (Trappc2) alternative variant aSep08, mRNA.         |
| Trappc2  | Trappc2.bSep08  | 501550 | 11273  | 1548 | 6  | 140 | trafficking protein particle complex 2 (16.4 kD) (Trappc2) alternative variant bSep08, mRNA.         |
| Trappc2l | Trappc2l.bSep08 | 292074 | 2429   | 621  | 4  | 109 | trafficking protein particle complex 2-like (12.5 kD) (Trappc2l) alternative variant bSep08, mRNA.   |
| Trappc2l | Trappc2l.cSep08 | 292074 | 1325   | 521  | 1  | 54  | trafficking protein particle complex 2-like (6.4 kD) (Trappc2l) alternative variant cSep08, mRNA.    |
| Trappc4  | Trappc4.bSep08  | 367073 | 3635   | 682  | 3  | 196 | trafficking protein particle complex 4 (Trappc4) alternative variant bSep08, mRNA.                   |
| Trappc4  | Trappc4.cSep08  | 367073 | 3341   | 557  | 2  | 154 | trafficking protein particle complex 4 (Trappc4) alternative variant cSep08, mRNA.                   |
| Trappc4  | Trappc4.dSep08  | 367073 | 2720   | 614  | 2  | 151 | trafficking protein particle complex 4 (16.8 kD) (Trappc4) alternative variant dSep08, mRNA.         |
| Trappc5  | Trappc5.bSep08  | 363858 | 2191   | 532  | 2  | 113 | trafficking protein particle complex 5 (12.5 kD) (Trappc5) alternative variant bSep08, mRNA.         |
| Trappc6a | Trappc6a.bSep08 | 680465 | 6890   | 625  | 5  | 126 | trafficking protein particle complex 6A (Trappc6a) alternative variant bSep08, mRNA.                 |
| Trdmt1   | Trdmt1.bSep08   | 291324 | 4568   | 633  | 4  | 210 | tRNA aspartic acid methyltransferase 1 (Trdmt1) alternative variant bSep08, mRNA.                    |
| Trdmt1   | Trdmt1.cSep08   | 291324 | 15438  | 758  | 10 | 149 | tRNA aspartic acid methyltransferase 1 (Trdmt1) alternative variant cSep08, mRNA.                    |
| Trdn     | Trdn.bSep08     | 59299  | 128953 | 1225 | 10 | 229 | triadin (26.3 kD) (Trdn) alternative variant bSep08, mRNA.                                           |
| Trdn     | Trdn.cSep08     | 59299  | 46085  | 916  | 4  | 58  | triadin (Trdn) alternative variant cSep08, mRNA.                                                     |
| Trdn     | Trdn.dSep08     | 59299  | 34348  | 883  | 3  | 47  | triadin (Trdn) alternative variant dSep08, mRNA.                                                     |
| Treh     | Treh.aSep08     | 60576  | 1355   | 652  |    | 139 | trehalase (brush-border membrane glycoprotein) (Treh) mRNA.                                          |
| Trem2    | Trem2.aSep08    | 301227 | 6464   | 881  | 3  | 253 | triggering receptor expressed on myeloid cells 2 (Trem2) alternative variant aSep08, mRNA.           |
| Trem2    | Trem2.bSep08    | 301227 | 4307   | 1012 | 2  | 207 | triggering receptor expressed on myeloid cells 2 (22.5 kD) (Trem2) alternative variant bSep08, mRNA. |
| Treml1   | Treml1.aSep08   | 501096 | 34585  | 1220 |    | 318 | triggering receptor expressed on myeloid cells-like 1 (Treml1) mRNA.                                 |
| Treml2   | Treml2.aSep08   | 680844 | 1783   | 732  |    | 87  | triggering receptor expressed on myeloid cells-like 2 (Treml2) alternative variant aSep08, mRNA.     |
| Trerf1   | Trerf1.bSep08   | 316219 | 33199  | 1909 | 9  | 435 | transcriptional regulating factor 1 (48.1 kD) (Trerf1) alternative variant bSep08, mRNA.             |
| Trerf1   | Trerf1.cSep08   | 316219 | 6572   | 654  | 4  | 218 | transcriptional regulating factor 1 (Trerf1) alternative variant cSep08, mRNA.                       |
| Trf      | Trf.bSep08      | 24825  | 11255  | 1083 | 6  | 235 | transferrin (Trf) alternative variant bSep08, mRNA.                                                  |
| Trf      | Trf.cSep08      | 24825  | 8301   | 759  | 6  | 232 | transferrin precursor (24.7 kD) (Trf) alternative variant cSep08, mRNA.                              |

|                |                       |        |        |      |    |     |                                                                                                                      |
|----------------|-----------------------|--------|--------|------|----|-----|----------------------------------------------------------------------------------------------------------------------|
| Trf            | Trf.dSep08            | 24825  | 2309   | 410  | 3  | 128 | transferrin (Trf) alternative variant dSep08, mRNA.                                                                  |
| Trfr2          | Trfr2.bSep08          | 288562 | 16893  | 3015 | 19 | 798 | transferrin receptor 2 (88.3 kD) (Trfr2) alternative variant bSep08, complete mRNA.                                  |
| Trfr2          | Trfr2.cSep08          | 288562 | 3690   | 719  | 2  | 101 | transferrin receptor 2 (11.3 kD) (Trfr2) alternative variant cSep08, mRNA.                                           |
| Trfr2          | Trfr2.dSep08          | 288562 | 966    | 497  | 6  | 41  | transferrin receptor 2 (Trfr2) alternative variant dSep08, mRNA.                                                     |
| Trib2          | Trib2.cSep08          | 313974 | 47696  | 502  | 2  | 70  | tribbles homolog 2 (Drosophila) (Trib2) alternative variant cSep08, mRNA.                                            |
| Trim2          | Trim2.bSep08          | 361970 | 9494   | 546  | 4  | 138 | tripartite motif protein 2 (Trim2) alternative variant bSep08, mRNA.                                                 |
| Trim2          | Trim2.cSep08          | 361970 | 66168  | 336  | 3  | 95  | tripartite motif protein 2 (Trim2) alternative variant cSep08, mRNA.                                                 |
| Trim2          | Trim2.dSep08          | 361970 | 48013  | 277  | 2  | 91  | tripartite motif protein 2 (Trim2) alternative variant dSep08, mRNA.                                                 |
| Trim2          | Trim2.eSep08          | 361970 | 117171 | 376  | 2  | 80  | tripartite motif protein 2 (Trim2) alternative variant eSep08, mRNA.                                                 |
| Trim3          | Trim3.bSep08          | 83616  | 16564  | 631  | 5  | 180 | tripartite motif-containing 3 (Trim3) alternative variant bSep08, mRNA.                                              |
| Trim3          | Trim3.cSep08          | 83616  | 16115  | 524  | 3  | 157 | putative protein (Trim3) alternative variant cSep08, mRNA.                                                           |
| Trim3          | Trim3.dSep08          | 83616  | 1326   | 922  | 3  | 100 | tripartite motif-containing 3 CRA e (10.9 kD) (Trim3) alternative variant dSep08, mRNA.                              |
| Trim6          | Trim6.aSep08          | 293294 | 4499   | 1738 | 4  | 212 | tripartite motif-containing 6 (24.4 kD) (Trim6) alternative variant aSep08, mRNA.                                    |
| Trim8          | Trim8.bSep08          | 688785 | 2982   | 1715 | 4  | 129 | tripartite motif-containing 8 and hypothetical protein LOC689889 (14.8 kD) (Trim8) alternative variant bSep08, mRNA. |
| Trim8          | Trim8.bSep08          | 689889 | 2982   | 1715 | 4  | 129 | tripartite motif-containing 8 and hypothetical protein LOC689889 (14.8 kD) (Trim8) alternative variant bSep08, mRNA. |
| Trim8          | Trim8.dSep08          | 688785 | 383    | 250  | 2  | 44  | tripartite motif-containing 8 and hypothetical protein LOC689889 (4.9 kD) (Trim8) alternative variant dSep08, mRNA.  |
| Trim8          | Trim8.dSep08          | 689889 | 383    | 250  | 2  | 44  | tripartite motif-containing 8 and hypothetical protein LOC689889 (4.9 kD) (Trim8) alternative variant dSep08, mRNA.  |
| Trim9          | Trim9.cSep08          | 155812 | 1989   | 463  | 2  | 43  | tripartite motif-containing 9 (Trim9) alternative variant cSep08, mRNA.                                              |
| Trim10         | Trim10.bSep08         | 294210 | 6033   | 702  | 1  | 234 | tripartite motif protein 10 (Trim10) alternative variant bSep08, mRNA.                                               |
| Trim11         | Trim11.bSep08         | 360534 | 13035  | 3472 | 5  | 152 | tripartite motif-containing 11 (17.2 kD) (Trim11) alternative variant bSep08, mRNA.                                  |
| Trim11         | Trim11.cSep08         | 360534 | 648    | 560  | 2  | 91  | tripartite motif-containing 11 (Trim11) alternative variant cSep08, mRNA.                                            |
| Trim13andKcnrg | Trim13andKcnrg.bSep08 | 305947 | 15418  | 667  | 1  | 115 | potassium channel regulator (Trim13andKcnrg) alternative variant bSep08, mRNA.                                       |

|                |                       |        |       |      |    |     |                                                                                               |
|----------------|-----------------------|--------|-------|------|----|-----|-----------------------------------------------------------------------------------------------|
| Trim13andKcnrg | Trim13andKcnrg.bSep08 | 364398 | 15418 | 667  | 1  | 115 | potassium channel regulator (Trim13andKcnrg) alternative variant bSep08, mRNA.                |
| Trim14         | Trim14.aSep08         | 313236 | 25337 | 3087 | 3  | 440 | tripartite motif protein 14 (49.8 kD) (Trim14) alternative variant aSep08, mRNA.              |
| Trim16         | Trim16.aSep08         | 303214 | 9074  | 641  |    | 213 | tripartite motif protein 16 (Trim16) mRNA.                                                    |
| Trim17         | Trim17.aSep08         | 64702  | 4931  | 760  |    | 234 | tripartite motif-containing 17 (Trim17) mRNA.                                                 |
| Trim23         | Trim23.aSep08         | 81002  | 13644 | 863  | 3  | 258 | tripartite motif-containing 23 (Trim23) alternative variant aSep08, mRNA.                     |
| Trim23         | Trim23.bSep08         | 81002  | 10598 | 604  | 1  | 155 | tripartite motif-containing 23 (16.8 kD) (Trim23) alternative variant bSep08, mRNA.           |
| Trim24         | Trim24.bSep08         | 500084 | 24843 | 2431 | 12 | 612 | tripartite motif-containing 24 (Trim24) alternative variant bSep08, mRNA.                     |
| Trim24         | Trim24.cSep08         | 500084 | 7227  | 725  | 5  | 109 | tripartite motif-containing 24 (Trim24) alternative variant cSep08, mRNA.                     |
| Trim24         | Trim24.dSep08         | 500084 | 3040  | 801  | 2  | 52  | tripartite motif-containing 24 (6.0 kD) (Trim24) alternative variant dSep08, mRNA.            |
| Trim25         | Trim25.aSep08         | 494338 | 28533 | 1863 |    | 492 | tripartite motif-containing 25 (Trim25) mRNA.                                                 |
| Trim26         | Trim26.bSep08         | 309586 | 3319  | 2316 | 4  | 284 | tripartite motif-containing 26 (Trim26) alternative variant bSep08, mRNA.                     |
| Trim27         | Trim27.aSep08         | 291171 | 12355 | 2081 | 6  | 611 | ret finger protein (Trim27) alternative variant aSep08, mRNA.                                 |
| Trim27         | Trim27.cSep08         | 291171 | 3382  | 1383 | 2  | 216 | ret finger protein (24.1 kD) (Trim27) alternative variant cSep08, mRNA.                       |
| Trim28         | Trim28.aSep08         | 116698 | 6691  | 2989 | 17 | 835 | tripartite motif-containing 28 precursor (89.0 kD) (Trim28) alternative variant aSep08, mRNA. |
| Trim28         | Trim28.bSep08         | 116698 | 1835  | 1159 | 8  | 259 | CRA a (Trim28) alternative variant bSep08, mRNA.                                              |
| Trim28         | Trim28.cSep08         | 116698 | 534   | 429  | 2  | 142 | CRA a (Trim28) alternative variant cSep08, mRNA.                                              |
| Trim28         | Trim28.dSep08         | 116698 | 1430  | 1261 | 3  | 130 | tripartite motif-containing 28 (14.0 kD) (Trim28) alternative variant dSep08, mRNA.           |
| Trim28         | Trim28.eSep08         | 116698 | 872   | 764  | 2  | 98  | tripartite motif-containing 28 (Trim28) alternative variant eSep08, mRNA.                     |
| Trim29         | Trim29.bSep08         | 300656 | 8839  | 1785 | 1  | 503 | tripartite motif protein 29 (Trim29) alternative variant bSep08, mRNA.                        |
| Trim32         | Trim32.aSep08         | 313264 | 10903 | 3212 | 2  | 655 | tripartite motif protein 32 (72.2 kD) (Trim32) alternative variant aSep08, mRNA.              |
| Trim32         | Trim32.cSep08         | 313264 | 14018 | 719  | 2  | 166 | tripartite motif protein 32 (Trim32) alternative variant cSep08, mRNA.                        |
| Trim33         | Trim33.aSep08         | 365894 | 26069 | 3396 | 10 | 582 | tripartite motif-containing 33 (Trim33) alternative variant aSep08, mRNA.                     |
| Trim33         | Trim33.bSep08         | 365894 | 2100  | 577  |    | 121 | tripartite motif-containing 33 (Trim33) alternative variant bSep08, mRNA.                     |
| Trim35         | Trim35.bSep08         | 498538 | 1129  | 421  | 3  | 100 | tripartite motif-containing 35 (Trim35) alternative variant bSep08, mRNA.                     |
| Trim36         | Trim36.bSep08         | 291597 | 3962  | 2567 | 2  | 240 | tripartite motif-containing 36 (Trim36) alternative variant bSep08, mRNA.                     |

|         |                |        |        |      |    |     |                                                                                       |
|---------|----------------|--------|--------|------|----|-----|---------------------------------------------------------------------------------------|
| Trim37  | Trim37.bSep08  | 360592 | 132133 | 3380 | 24 | 967 | tripartite motif-containing 37 (108.4 kD) (Trim37) alternative variant bSep08, mRNA.  |
| Trim37  | Trim37.cSep08  | 360592 | 20932  | 1591 | 4  | 141 | tripartite motif-containing 37 (Trim37) alternative variant cSep08, mRNA.             |
| Trim37  | Trim37.dSep08  | 360592 | 31508  | 373  | 2  | 78  | tripartite motif-containing 37 (Trim37) alternative variant dSep08, mRNA.             |
| Trim37  | Trim37.fSep08  | 360592 | 15081  | 270  | 2  | 14  | tripartite motif-containing 37 (Trim37) alternative variant fSep08, mRNA.             |
| Trim39  | Trim39.bSep08  | 309591 | 5300   | 893  | 1  | 120 | tripartite motif-containing 39 (Trim39) alternative variant bSep08, mRNA.             |
| Trim44  | Trim44.bSep08  | 362172 | 55649  | 1186 | 4  | 250 | tripartite motif-containing 44 (Trim44) alternative variant bSep08, mRNA.             |
| Trim46  | Trim46.aSep08  | 310641 | 10455  | 1907 | 5  | 626 | tripartite motif-containing 46 (Trim46) alternative variant aSep08, mRNA.             |
| Trim46  | Trim46.bSep08  | 310641 | 5620   | 647  | 5  | 207 | tripartite motif-containing 46 (Trim46) alternative variant bSep08, mRNA.             |
| Trim46  | Trim46.cSep08  | 310641 | 1970   | 729  | 1  | 173 | tripartite motif-containing 46 (Trim46) alternative variant cSep08, mRNA.             |
| Trim47l | Trim47l.aSep08 | 287824 | 8022   | 1947 |    | 623 | tripartite motif protein 47-like (Trim47l) complete mRNA.                             |
| Trim50  | Trim50.aSep08  | 288596 | 12321  | 780  |    | 207 | tripartite motif-containing 50 (Trim50) mRNA.                                         |
| Trim54  | Trim54.aSep08  | 362708 | 5803   | 1443 | 6  | 436 | tripartite motif-containing 54 (Trim54) alternative variant aSep08, mRNA.             |
| Trim54  | Trim54.cSep08  | 362708 | 13879  | 697  | 3  | 179 | tripartite motif-containing 54 (Trim54) alternative variant cSep08, mRNA.             |
| Trim55  | Trim55.bSep08  | 365751 | 19360  | 704  | 3  | 131 | tripartite motif-containing 55 (Trim55) alternative variant bSep08, mRNA.             |
| Trim62  | Trim62.aSep08  | 313045 | 6767   | 859  |    | 218 | tripartite motif-containing 62 (Trim62) mRNA.                                         |
| Trim66  | Trim66.aSep08  | 361623 | 56784  | 2413 |    | 804 | tripartite motif-containing 66 (Trim66) alternative variant aSep08, mRNA.             |
| Trim66  | Trim66.bSep08  | 361623 | 10629  | 1191 |    | 350 | tripartite motif-containing 66 (Trim66) alternative variant bSep08, mRNA.             |
| Trim66  | Trim66.cSep08  | 361623 | 2525   | 520  |    | 173 | tripartite motif-containing 66 (Trim66) alternative variant cSep08, mRNA.             |
| Trim69  | Trim69.aSep08  | 311373 | 14621  | 820  | 2  | 215 | tripartite motif-containing 69 (Trim69) alternative variant aSep08, mRNA.             |
| Trim69  | Trim69.bSep08  | 311373 | 11738  | 802  | 2  | 163 | tripartite motif-containing 69 (18.8 kD) (Trim69) alternative variant bSep08, mRNA.   |
| Trio    | Trio.bSep08    | 310192 | 14198  | 1839 | 10 | 612 | triple functional domain (PTPRF interacting) (Trio) alternative variant bSep08, mRNA. |
| Trio    | Trio.cSep08    | 310192 | 18213  | 1783 | 3  | 545 | triple functional domain (PTPRF interacting) (Trio) alternative variant cSep08, mRNA. |
| Trio    | Trio.dSep08    | 310192 | 5705   | 431  | 3  | 125 | triple functional domain (PTPRF interacting) (Trio) alternative variant dSep08, mRNA. |
| Triobp  | Triobp.aSep08  | 362956 | 24291  | 2540 |    | 621 | TRIO and F-actin binding protein (Triobp) alternative variant aSep08, mRNA.           |
| Triobp  | Triobp.bSep08  | 362956 | 8743   | 1776 |    | 33  | TRIO and F-actin binding protein (Triobp) alternative variant bSep08, mRNA.           |



|        |               |        |       |      |    |      |                                                                                                          |
|--------|---------------|--------|-------|------|----|------|----------------------------------------------------------------------------------------------------------|
| Trip10 | Trip10.bSep08 | 116717 | 5256  | 783  | 1  | 243  | thyroid hormone receptor interactor 10 (Trip10) alternative variant bSep08, mRNA.                        |
| Trip10 | Trip10.cSep08 | 116717 | 5995  | 928  | 5  | 220  | thyroid hormone receptor interactor 10 (Trip10) alternative variant cSep08, mRNA.                        |
| Trip11 | Trip11.aSep08 | 314393 | 11111 | 722  |    | 137  | thyroid hormone receptor interactor 11 (Trip11) mRNA.                                                    |
| Trip12 | Trip12.aSep08 | 316575 | 38152 | 6905 | 24 | 1173 | thyroid hormone receptor interactor 12 (Trip12) alternative variant aSep08, mRNA.                        |
| Trip12 | Trip12.bSep08 | 316575 | 18535 | 1557 | 10 | 474  | thyroid hormone receptor interactor 12 (Trip12) alternative variant bSep08, mRNA.                        |
| Trip12 | Trip12.cSep08 | 316575 | 10733 | 1226 | 10 | 408  | thyroid hormone receptor interactor 12 (Trip12) alternative variant cSep08, mRNA.                        |
| Trip13 | Trip13.bSep08 | 292206 | 5502  | 1315 | 2  | 94   | thyroid hormone receptor interactor 13 (10.7 kD) (Trip13) alternative variant bSep08, mRNA.              |
| Trit1  | Trit1.bSep08  | 362586 | 9581  | 408  | 5  | 135  | tRNA isopentenyltransferase 1 (Trit1) alternative variant bSep08, mRNA.                                  |
| Trmt1  | Trmt1.aSep08  | 288914 | 10180 | 1941 | 16 | 470  | trm1 tRNA methyltransferase 1 homolog CRA b (51.6 kD) (Trmt1) alternative variant aSep08, complete mRNA. |
| Trmt1  | Trmt1.cSep08  | 288914 | 5388  | 762  | 6  | 244  | trm1 tRNA methyltransferase 1 homolog CRA b (Trmt1) alternative variant cSep08, mRNA.                    |
| Trmt1  | Trmt1.dSep08  | 288914 | 1824  | 710  | 6  | 204  | trm1 tRNA methyltransferase 1 homolog (22.4 kD) (Trmt1) alternative variant dSep08, mRNA.                |
| Trmt1  | Trmt1.eSep08  | 288914 | 3729  | 493  | 2  | 135  | trm1 tRNA methyltransferase 1 homolog CRA c (Trmt1) alternative variant eSep08, mRNA.                    |
| Trmt1  | Trmt1.fSep08  | 288914 | 449   | 377  | 2  | 125  | trm1 tRNA methyltransferase 1 homolog CRA b (Trmt1) alternative variant fSep08, mRNA.                    |
| Trmt1  | Trmt1.gSep08  | 288914 | 543   | 427  | 2  | 110  | trm1 tRNA methyltransferase 1 homolog (11.9 kD) (Trmt1) alternative variant gSep08, mRNA.                |
| Trmt5  | Trmt5.bSep08  | 362754 | 6037  | 1436 | 3  | 478  | TRM5 tRNA methyltransferase 5 homolog (S. cerevisiae) (Trmt5) alternative variant bSep08, mRNA.          |
| Trmt5  | Trmt5.cSep08  | 362754 | 7034  | 1307 | 2  | 258  | TRM5 tRNA methyltransferase 5 homolog (S. cerevisiae) (Trmt5) alternative variant cSep08, mRNA.          |
| Trmt5  | Trmt5.dSep08  | 362754 | 4401  | 882  | 3  | 189  | TRM5 tRNA methyltransferase 5 homolog (S. cerevisiae) (Trmt5) alternative variant dSep08, mRNA.          |
| Trmt11 | Trmt11.bSep08 | 378794 | 50805 | 1779 | 3  | 157  | tRNA methyltransferase 11 homolog (S. cerevisiae) (Trmt11) alternative variant bSep08, mRNA.             |
| Trmu   | Trmu.aSep08   | 362976 | 16526 | 1623 | 10 | 459  | trna methyltransferase CRA a (Trmu) alternative variant aSep08, mRNA.                                    |
| Trmu   | Trmu.bSep08   | 362976 | 12174 | 768  | 8  | 255  | tRNA -methyltransferase (Trmu) alternative variant bSep08, mRNA.                                         |
| Trmu   | Trmu.cSep08   | 362976 | 12884 | 659  | 6  | 170  | tRNA -methyltransferase (Trmu) alternative variant cSep08, mRNA.                                         |
| Trmu   | Trmu.dSep08   | 362976 | 1670  | 706  | 2  | 90   | trna methyltransferase CRA a (Trmu) alternative variant dSep08, mRNA.                                    |
| Trnt1  | Trnt1.bSep08  | 312616 | 7247  | 612  | 5  | 179  | tRNA nucleotidyl transferase, CCA-adding, 1 (Trnt1) alternative variant bSep08, mRNA.                    |
| Troap  | Troap.aSep08  | 300219 | 4842  | 743  | 6  | 247  | trophinin associated protein (Troap) alternative variant aSep08, mRNA.                                   |

|           |                  |        |       |      |   |     |                                                                                                                        |
|-----------|------------------|--------|-------|------|---|-----|------------------------------------------------------------------------------------------------------------------------|
| Troap     | Troap.bSep08     | 300219 | 2018  | 766  | 2 | 159 | trophinin associated protein (Troap) alternative variant bSep08, mRNA.                                                 |
| Trp53     | Trp53.bSep08     | 24842  | 10162 | 2363 | 8 | 259 | transformation related protein 53 (28.6 kD) (Trp53) alternative variant bSep08, mRNA.                                  |
| Trp53     | Trp53.cSep08     | 24842  | 1756  | 711  | 4 | 199 | transformation related protein 53 (Trp53) alternative variant cSep08, mRNA.                                            |
| Trp53     | Trp53.dSep08     | 24842  | 1918  | 1154 | 3 | 177 | transformation related protein 53 (Trp53) alternative variant dSep08, mRNA.                                            |
| Trp53     | Trp53.eSep08     | 24842  | 8224  | 823  | 3 | 89  | transformation related protein 53 (Trp53) alternative variant eSep08, mRNA.                                            |
| Trp53     | Trp53.fSep08     | 24842  | 8045  | 1233 | 3 | 91  | transformation related protein 53 (9.5 kD) (Trp53) alternative variant fSep08, mRNA.                                   |
| Trp53     | Trp53.gSep08     | 24842  | 1329  | 793  | 2 | 70  | transformation related protein 53 (7.4 kD) (Trp53) alternative variant gSep08, complete mRNA.                          |
| Trp53bp1  | Trp53bp1.bSep08  | 296099 | 3573  | 825  | 5 | 217 | transformation related protein 53 binding protein 1 (Trp53bp1) alternative variant bSep08, mRNA.                       |
| Trp53bp1  | Trp53bp1.cSep08  | 296099 | 6660  | 618  | 5 | 171 | transformation related protein 53 binding protein 1 (Trp53bp1) alternative variant cSep08, mRNA.                       |
| Trp53bp1  | Trp53bp1.dSep08  | 296099 | 1201  | 370  | 3 | 93  | transformation related protein 53 binding protein 1 (Trp53bp1) alternative variant dSep08, mRNA.                       |
| Trp53bp2  | Trp53bp2.aSep08  | 305025 | 16757 | 2116 |   | 465 | transformation related protein 53 binding protein 2 (Trp53bp2) mRNA.                                                   |
| Trp53i11  | Trp53i11.aSep08  | 311209 | 15159 | 2805 | 5 | 204 | transformation related protein 53 inducible protein 11 (22.5 kD) (Trp53i11) alternative variant aSep08, complete mRNA. |
| Trp53i11  | Trp53i11.bSep08  | 311209 | 11108 | 367  | 2 | 75  | transformation related protein 53 inducible protein 11 (Trp53i11) alternative variant bSep08, mRNA.                    |
| Trp53i11  | Trp53i11.cSep08  | 311209 | 10957 | 421  | 1 | 61  | transformation related protein 53 inducible protein 11 (Trp53i11) alternative variant cSep08, mRNA.                    |
| Trp53i13  | Trp53i13.bSep08  | 287550 | 4835  | 713  | 7 | 215 | tumor protein p53 inducible 13 CRA a like (Trp53i13) alternative variant bSep08, mRNA.                                 |
| Trp53i13  | Trp53i13.cSep08  | 287550 | 3938  | 747  | 5 | 203 | tumor protein p53 inducible 13 CRA a like (Trp53i13) alternative variant cSep08, mRNA.                                 |
| Trp53i13  | Trp53i13.dSep08  | 287550 | 4782  | 683  | 5 | 84  | tumor protein p53 inducible 13 CRA a like (Trp53i13) alternative variant dSep08, mRNA.                                 |
| Trp53i13  | Trp53i13.eSep08  | 287550 | 3458  | 600  | 4 | 72  | tumor protein p53 inducible 13 CRA a like (Trp53i13) alternative variant eSep08, mRNA.                                 |
| Trp53i13  | Trp53i13.fSep08  | 287550 | 1001  | 808  | 2 | 51  | transformation related protein 53 inducible 13 like (5.3 kD) (Trp53i13) alternative variant fSep08, mRNA.              |
| Trp53inp1 | Trp53inp1.bSep08 | 297822 | 3069  | 485  | 2 | 123 | transformation related protein 53 inducible nuclear protein 1 (Trp53inp1) alternative variant bSep08, mRNA.            |
| Trp53inp2 | Trp53inp2.aSep08 | 362246 | 8658  | 4559 |   | 221 | tumor protein p53 inducible nuclear protein 2 (24.4 kD) (Trp53inp2) mRNA.                                              |
| Trpc1     | Trpc1.bSep08     | 89821  | 16441 | 1798 | 6 | 360 | transient receptor potential cation channel, subfamily C, member 1 (42.1 kD) (Trpc1) alternative variant bSep08, mRNA. |

|          |                 |        |       |      |    |     |                                                                                                                                   |
|----------|-----------------|--------|-------|------|----|-----|-----------------------------------------------------------------------------------------------------------------------------------|
| Trpc2    | Trpc2.aSep08    | 64573  | 21413 | 3087 | 10 | 407 | transient receptor potential cation channel, subfamily C, member 2 (44.4 kD) (Trpc2) alternative variant aSep08, mRNA.            |
| Trpc2    | Trpc2.bSep08    | 64573  | 5309  | 470  | 2  | 20  | transient receptor potential cation channel, subfamily C, member 2 (2.2 kD) (Trpc2) alternative variant bSep08, mRNA.             |
| Trpc3    | Trpc3.aSep08    | 60395  | 19255 | 1264 | 4  | 170 | transient receptor potential cation channel, subfamily C, member 3 (Trpc3) alternative variant aSep08, mRNA.                      |
| Trpc3    | Trpc3.bSep08    | 60395  | 15254 | 790  | 3  | 70  | transient receptor potential cation channel, subfamily C, member 3 (8.2 kD) (Trpc3) alternative variant bSep08, mRNA.             |
| Trpc4ap  | Trpc4ap.bSep08  | 362247 | 25537 | 855  | 6  | 285 | transient receptor potential cation channel, subfamily C, member 4 associated protein (Trpc4ap) alternative variant bSep08, mRNA. |
| Trpc7    | Trpc7.aSep08    | 282822 | 69644 | 702  |    | 233 | transient receptor potential cation channel, subfamily C, member 7 (Trpc7) mRNA.                                                  |
| Trpd52l3 | Trpd52l3.bSep08 | 293894 | 1700  | 297  | 2  | 71  | tumor protein D52-like 3 (Trpd52l3) alternative variant bSep08, mRNA.                                                             |
| Trpm1    | Trpm1.cSep08    | 361586 | 21549 | 942  | 5  | 233 | transient receptor potential cation channel subfamily M member 1 (Trpm1) alternative variant cSep08, mRNA.                        |
| Trpm1    | Trpm1.dSep08    | 361586 | 7560  | 626  | 3  | 161 | transient receptor potential cation channel subfamily M member 1 (Trpm1) alternative variant dSep08, mRNA.                        |
| Trpm2    | Trpm2.bSep08    | 294329 | 4447  | 740  | 6  | 246 | transient receptor potential cation channel, subfamily M, member 2 (Trpm2) alternative variant bSep08, mRNA.                      |
| Trpm2    | Trpm2.cSep08    | 294329 | 7061  | 746  | 7  | 115 | transient receptor potential cation channel, subfamily M, member 2 (Trpm2) alternative variant cSep08, mRNA.                      |
| Trpm2    | Trpm2.dSep08    | 294329 | 2953  | 869  | 3  | 113 | transient receptor potential cation channel, subfamily M, member 2 (Trpm2) alternative variant dSep08, mRNA.                      |
| Trpm3    | Trpm3.aSep08    | 309407 | 72931 | 1182 | 2  | 394 | transient receptor potential cation channel, subfamily M, member 3 (Trpm3) alternative variant aSep08, mRNA.                      |
| Trpm3    | Trpm3.bSep08    | 309407 | 18375 | 664  | 1  | 221 | transient receptor potential cation channel, subfamily M, member 3 (Trpm3) alternative variant bSep08, mRNA.                      |
| Trpm4    | Trpm4.aSep08    | 171143 | 8588  | 994  |    | 331 | transient receptor potential cation channel, subfamily M, member 4 (Trpm4) mRNA.                                                  |
| Trpm5    | Trpm5.aSep08    | 365391 | 5900  | 1755 | 4  | 219 | transient receptor potential cation channel, subfamily M, member 5 (Trpm5) alternative variant aSep08, mRNA.                      |
| Trpm5    | Trpm5.bSep08    | 365391 | 3326  | 330  | 2  | 110 | transient receptor potential cation channel, subfamily M, member 5 (Trpm5) alternative variant bSep08, mRNA.                      |
| Trpm6    | Trpm6.aSep08    | 293874 | 25514 | 1043 | 10 | 347 | transient receptor potential cation channel, subfamily M, member 6 (Trpm6) alternative variant aSep08, mRNA.                      |
| Trpm6    | Trpm6.bSep08    | 293874 | 4079  | 878  | 1  | 76  | transient receptor potential cation channel, subfamily M, member 6 (8.7 kD) (Trpm6) alternative variant bSep08, mRNA.             |
| Trpm7    | Trpm7.aSep08    | 679906 | 14866 | 2439 | 12 | 386 | transient receptor potential cation channel, subfamily M, member 7 (Trpm7) alternative variant aSep08, mRNA.                      |
| Trpm7    | Trpm7.bSep08    | 679906 | 8494  | 385  | 8  | 71  | transient receptor potential cation channel, subfamily M, member 7 (Trpm7) alternative variant bSep08, mRNA.                      |

|           |                  |        |       |      |    |     |                                                                                                                  |
|-----------|------------------|--------|-------|------|----|-----|------------------------------------------------------------------------------------------------------------------|
| Trps1     | Trps1.aSep08     | 299897 | 10428 | 1903 |    | 420 | trichorhinophalangeal syndrome I (human) (Trps1) mRNA.                                                           |
| Trpv1     | Trpv1.bSep08     | 83810  | 5126  | 461  | 1  | 36  | transient receptor potential cation channel, subfamily V, member 1 (Trpv1) alternative variant bSep08, mRNA.     |
| Trpv2     | Trpv2.cSep08     | 29465  | 2798  | 398  | 2  | 84  | putative protein (8.9 kD) (Trpv2) alternative variant cSep08, mRNA.                                              |
| Trpv2     | Trpv2.dSep08     | 29465  | 2855  | 394  | 2  | 40  | putative protein (Trpv2) alternative variant dSep08, mRNA.                                                       |
| Trpv6     | Trpv6.bSep08     | 114246 | 1477  | 411  | 2  | 83  | transient receptor potential cation channel subfamily V member 6 CRA c (Trpv6) alternative variant bSep08, mRNA. |
| Trpv6     | Trpv6.cSep08     | 114246 | 2037  | 397  | 4  | 72  | putative protein (Trpv6) alternative variant cSep08, mRNA.                                                       |
| TRP_2.0   | TRP_2.0.aSep08   |        | 20098 | 806  |    | 268 | transient receptor potential cation channel subfamily C member 3 (TRP_2.0) mRNA.                                 |
| Trrap     | Trrap.bSep08     | 288471 | 5289  | 729  | 5  | 242 | transformation transcription domain-associated protein CRA b (Trrap) alternative variant bSep08, mRNA.           |
| Trrap     | Trrap.cSep08     | 288471 | 3655  | 2240 | 3  | 238 | transformation transcription domain-associated protein CRA b (26.7 kD) (Trrap) alternative variant cSep08, mRNA. |
| Trrap     | Trrap.dSep08     | 288471 | 2200  | 396  | 3  | 131 | transformation transcription domain-associated protein CRA b (Trrap) alternative variant dSep08, mRNA.           |
| Trrap     | Trrap.eSep08     | 288471 | 781   | 529  | 2  | 99  | transformation transcription domain-associated protein CRA e (Trrap) alternative variant eSep08, mRNA.           |
| Trrap     | Trrap.fSep08     | 288471 | 2282  | 402  | 3  | 93  | transformation transcription domain-associated protein CRA d (Trrap) alternative variant fSep08, mRNA.           |
| Trub1     | Trub1.aSep08     | 361775 | 46447 | 1796 | 7  | 545 | TruB pseudouridine (psi) synthase homolog 1 (E. coli) (Trub1) alternative variant aSep08, complete mRNA.         |
| Trub1     | Trub1.cSep08     | 361775 | 43101 | 732  | 6  | 239 | TruB pseudouridine (psi) synthase homolog 1 (E. coli) (25.0 kD) (Trub1) alternative variant cSep08, mRNA.        |
| Trub1     | Trub1.dSep08     | 361775 | 46378 | 1054 | 7  | 223 | TruB pseudouridine (psi) synthase homolog 1 (E. coli) (25.3 kD) (Trub1) alternative variant dSep08, mRNA.        |
| Trub1     | Trub1.eSep08     | 361775 | 3416  | 1782 | 3  | 119 | TruB pseudouridine (psi) synthase homolog 1 (E. coli) (Trub1) alternative variant eSep08, mRNA.                  |
| Trypsin.0 | Trypsin.0.aSep08 |        | 1298  | 705  |    | 163 | mast cell protease (Trypsin.0) mRNA.                                                                             |
| Trypsin.1 | Trypsin.1.aSep08 |        | 1397  | 655  |    | 180 | granzyme B (Trypsin.1) mRNA.                                                                                     |
| Trypsin.3 | Trypsin.3.aSep08 |        | 8030  | 1814 |    | 426 | regeneration associated muscle protease (Trypsin.3) mRNA.                                                        |
| Trypsin.4 | Trypsin.4.aSep08 |        | 1119  | 660  |    | 200 | kallikrein (Trypsin.4) mRNA.                                                                                     |
| Tsc2      | Tsc2.bSep08      | 24855  | 4450  | 724  | 7  | 240 | tuberous sclerosis 2 (Tsc2) alternative variant bSep08, mRNA.                                                    |
| Tsc2      | Tsc2.cSep08      | 24855  | 4656  | 2134 | 10 | 179 | tuberous sclerosis 2 (20.2 kD) (Tsc2) alternative variant cSep08, mRNA.                                          |
| Tsc2      | Tsc2.dSep08      | 24855  | 924   | 730  | 2  | 89  | tuberous sclerosis 2 (10.3 kD) (Tsc2) alternative variant dSep08, mRNA.                                          |
| Tsc22d1   | Tsc22d1.cSep08   | 498545 | 915   | 806  | 2  | 96  | TSC22 domain family, member 1 (10.5 kD) (Tsc22d1) alternative variant cSep08, mRNA.                              |
| Tsc22d1   | Tsc22d1.dSep08   | 498545 | 29016 | 877  | 3  | 86  | TSC22 domain family, member 1 (9.4 kD) (Tsc22d1) alternative variant dSep08, mRNA.                               |

|          |                 |        |       |      |    |     |                                                                                                                              |
|----------|-----------------|--------|-------|------|----|-----|------------------------------------------------------------------------------------------------------------------------------|
| Tsc22d1  | Tsc22d1.eSep08  | 498545 | 445   | 246  | 2  | 82  | TSC22 domain family, member 1 (Tsc22d1) alternative variant eSep08, mRNA.                                                    |
| Tsc22d2  | Tsc22d2.aSep08  | 499624 | 22509 | 759  |    | 145 | TSC22 domain family, member 2 (16.2 kD) (Tsc22d2) mRNA.                                                                      |
| Tsc22d3  | Tsc22d3.aSep08  | 83514  | 58159 | 1139 | 4  | 254 | TSC22 domain family 3 (Tsc22d3) alternative variant aSep08, mRNA.                                                            |
| Tsc22d3  | Tsc22d3.bSep08  | 83514  | 58736 | 762  | 4  | 194 | TSC22 domain family 3 (Tsc22d3) alternative variant bSep08, mRNA.                                                            |
| Tsc22d3  | Tsc22d3.dSep08  | 83514  | 2092  | 1105 | 2  | 108 | TSC22 domain family 3 (12.0 kD) (Tsc22d3) alternative variant dSep08, mRNA.                                                  |
| Tsc22d3  | Tsc22d3.eSep08  | 83514  | 2247  | 898  | 3  | 77  | TSC22 domain family 3 (8.7 kD) (Tsc22d3) alternative variant eSep08, mRNA.                                                   |
| Tsc22d4  | Tsc22d4.bSep08  | 684980 | 14643 | 829  | 3  | 260 | tsc22 domain family 4 (Tsc22d4) alternative variant bSep08, mRNA.                                                            |
| Tsc22d4  | Tsc22d4.cSep08  | 684980 | 1570  | 1109 | 3  | 206 | CRA c (Tsc22d4) alternative variant cSep08, mRNA.                                                                            |
| Tsc22d4  | Tsc22d4.dSep08  | 684980 | 6181  | 1055 | 3  | 200 | uncharacterized protein homolog (23.5 kD) (Tsc22d4) alternative variant dSep08, mRNA.                                        |
| Tsc22d4  | Tsc22d4.hSep08  | 684980 | 756   | 633  | 2  | 67  | CRA c like (Tsc22d4) alternative variant hSep08, mRNA.                                                                       |
| Tsen2    | Tsen2.bSep08    | 312649 | 8994  | 709  | 2  | 107 | tRNA splicing endonuclease 2 homolog (SEN2, <i>S. cerevisiae</i> ) (Tsen2) alternative variant bSep08, mRNA.                 |
| Tsen34   | Tsen34.bSep08   | 292534 | 5991  | 1797 | 4  | 270 | tRNA splicing endonuclease 34 homolog (SEN34, <i>S. cerevisiae</i> ) (Tsen34) alternative variant bSep08, mRNA.              |
| Tsen34   | Tsen34.cSep08   | 292534 | 1814  | 797  | 4  | 243 | tRNA splicing endonuclease 34 homolog (SEN34, <i>S. cerevisiae</i> ) (Tsen34) alternative variant cSep08, mRNA.              |
| Tsen34   | Tsen34.dSep08   | 292534 | 3816  | 673  | 2  | 108 | tRNA splicing endonuclease 34 homolog (SEN34, <i>S. cerevisiae</i> ) (12.0 kD) (Tsen34) alternative variant dSep08, mRNA.    |
| Tsen54   | Tsen54.bSep08   | 690308 | 7510  | 2068 | 12 | 159 | tRNA splicing endonuclease 54 homolog ( <i>S. cerevisiae</i> ) (18.1 kD) (Tsen54) alternative variant bSep08, complete mRNA. |
| Tsen54   | Tsen54.cSep08   | 690308 | 3909  | 1783 | 7  | 167 | tRNA splicing endonuclease 54 homolog ( <i>S. cerevisiae</i> ) (Tsen54) alternative variant cSep08, mRNA.                    |
| Tsg101   | Tsg101.aSep08   | 292925 | 15646 | 1610 | 3  | 276 | tumor susceptibility gene 101 (Tsg101) alternative variant aSep08, mRNA.                                                     |
| Tsg101   | Tsg101.bSep08   | 292925 | 17845 | 1040 | 4  | 236 | tumor susceptibility gene 101 (Tsg101) alternative variant bSep08, mRNA.                                                     |
| Tsga10   | Tsga10.aSep08   | 252923 | 79457 | 2902 | 16 | 794 | testis specific 10 CRA d (Tsga10) alternative variant aSep08, mRNA.                                                          |
| Tsga10   | Tsga10.bSep08   | 252923 | 23818 | 776  | 3  | 212 | testis specific 10 CRA c (Tsga10) alternative variant bSep08, mRNA.                                                          |
| Tsga10   | Tsga10.cSep08   | 252923 | 800   | 714  | 2  | 80  | testis specific 10 CRA d (Tsga10) alternative variant cSep08, mRNA.                                                          |
| Tsga10ip | Tsga10ip.bSep08 | 361707 | 2397  | 751  | 3  | 250 | testis specific 10 interacting protein (Tsga10ip) alternative variant bSep08, mRNA.                                          |
| Tsga10ip | Tsga10ip.cSep08 | 361707 | 11940 | 289  | 2  | 96  | testis specific 10 interacting protein (Tsga10ip) alternative variant cSep08, mRNA.                                          |

|          |                 |        |        |      |   |     |                                                                                                      |
|----------|-----------------|--------|--------|------|---|-----|------------------------------------------------------------------------------------------------------|
| Tsga14   | Tsga14.bSep08   | 500069 | 32199  | 389  | 6 | 129 | testis specific gene A14 (Tsga14) alternative variant bSep08, mRNA.                                  |
| Tsga14   | Tsga14.cSep08   | 500069 | 13251  | 431  | 3 | 73  | testis specific gene A14 (Tsga14) alternative variant cSep08, mRNA.                                  |
| Tshr     | Tshr.bSep08     | 25360  | 111073 | 788  | 2 | 226 | thyroid stimulating hormone receptor (Tshr) alternative variant bSep08, mRNA.                        |
| Tsku     | Tsku.bSep08     | 308843 | 9444   | 625  | 2 | 185 | tsukushin (Tsku) alternative variant bSep08, mRNA.                                                   |
| Tslp     | Tslp.aSep08     | 688621 | 2467   | 612  | 1 | 85  | thymic stromal lymphopoietin (Tslp) alternative variant aSep08, mRNA.                                |
| Tslp     | Tslp.bSep08     | 688621 | 3009   | 990  | 2 | 52  | thymic stromal lymphopoietin (Tslp) alternative variant bSep08, mRNA.                                |
| Tsnax    | Tsnax.aSep08    | 64028  | 13639  | 2171 | 5 | 284 | translin-associated factor X (Tsnax) alternative variant aSep08, mRNA.                               |
| Tsnaxip1 | Tsnaxip1.bSep08 | 498944 | 1106   | 767  | 4 | 166 | translin-associated factor X interacting protein 1 (Tsnaxip1) alternative variant bSep08, mRNA.      |
| Tsnaxip1 | Tsnaxip1.cSep08 | 498944 | 19190  | 561  | 3 | 101 | translin-associated factor X interacting protein 1 (Tsnaxip1) alternative variant cSep08, mRNA.      |
| Tsnaxip1 | Tsnaxip1.dSep08 | 498944 | 5803   | 533  | 2 | 89  | translin-associated factor X interacting protein 1 like (Tsnaxip1) alternative variant dSep08, mRNA. |
| Tsnaxip1 | Tsnaxip1.eSep08 | 498944 | 1764   | 705  | 2 | 47  | translin-associated factor X interacting protein 1 (Tsnaxip1) alternative variant eSep08, mRNA.      |
| Tsnaxip1 | Tsnaxip1.fSep08 | 498944 | 13585  | 687  | 7 | 89  | translin-associated factor X interacting protein 1 (Tsnaxip1) alternative variant fSep08, mRNA.      |
| Tsnaxip1 | Tsnaxip1.gSep08 | 498944 | 1572   | 554  | 4 | 65  | translin-associated factor X interacting protein 1 (Tsnaxip1) alternative variant gSep08, mRNA.      |
| Tspan1   | Tspan1.aSep08   | 298436 | 9065   | 1783 | 6 | 409 | tetraspanin 1 (Tspan1) alternative variant aSep08, mRNA.                                             |
| Tspan1   | Tspan1.cSep08   | 298436 | 4144   | 828  | 6 | 225 | tetraspanin 1 (24.9 kD) (Tspan1) alternative variant cSep08, mRNA.                                   |
| Tspan2   | Tspan2.bSep08   | 64521  | 38800  | 772  | 2 | 239 | tetraspanin 2 (Tspan2) alternative variant bSep08, mRNA.                                             |
| Tspan3   | Tspan3.bSep08   | 300733 | 8078   | 783  | 1 | 131 | tetraspanin 3 (14.7 kD) (Tspan3) alternative variant bSep08, mRNA.                                   |
| Tspan4   | Tspan4.bSep08   | 293627 | 17373  | 707  | 3 | 216 | tetraspanin 4 (Tspan4) alternative variant bSep08, mRNA.                                             |
| Tspan4   | Tspan4.cSep08   | 293627 | 2288   | 393  | 1 | 124 | tetraspanin 4 (Tspan4) alternative variant cSep08, mRNA.                                             |
| Tspan5   | Tspan5.bSep08   | 362048 | 2533   | 676  | 3 | 114 | tetraspanin 5 (Tspan5) alternative variant bSep08, mRNA.                                             |
| Tspan5   | Tspan5.cSep08   | 362048 | 135860 | 515  | 2 | 76  | tetraspanin 5 (Tspan5) alternative variant cSep08, mRNA.                                             |
| Tspan6   | Tspan6.bSep08   | 302313 | 4077   | 799  | 5 | 141 | tetraspanin 6 (Tspan6) alternative variant bSep08, mRNA.                                             |
| Tspan6   | Tspan6.cSep08   | 302313 | 5112   | 582  | 6 | 119 | tetraspanin 6 (Tspan6) alternative variant cSep08, mRNA.                                             |
| Tspan7   | Tspan7.aSep08   | 363447 | 16991  | 1644 | 6 | 224 | tetraspanin 7 (Tspan7) alternative variant aSep08, mRNA.                                             |
| Tspan7   | Tspan7.cSep08   | 363447 | 955    | 684  | 1 | 45  | tetraspanin 7 (Tspan7) alternative variant cSep08, mRNA.                                             |
| Tspan8   | Tspan8.bSep08   | 171048 | 16443  | 703  | 5 | 156 | tetraspanin 8 (Tspan8) alternative variant bSep08, mRNA.                                             |
| Tspan9   | Tspan9.bSep08   | 312728 | 160580 | 728  | 6 | 169 | tetraspanin 9 (Tspan9) alternative variant bSep08, mRNA.                                             |
| Tspan9   | Tspan9.cSep08   | 312728 | 141055 | 551  | 5 | 126 | tetraspanin 9 (Tspan9) alternative variant cSep08, mRNA.                                             |
| Tspan9   | Tspan9.dSep08   | 312728 | 159585 | 720  | 5 | 110 | tetraspanin 9 (Tspan9) alternative variant dSep08, mRNA.                                             |
| Tspan9   | Tspan9.eSep08   | 312728 | 170755 | 453  | 3 | 75  | tetraspanin 9 (Tspan9) alternative variant eSep08, mRNA.                                             |

|         |                |        |        |      |   |     |                                                                                |
|---------|----------------|--------|--------|------|---|-----|--------------------------------------------------------------------------------|
| Tspan11 | Tspan11.bSep08 | 312727 | 29068  | 458  | 1 | 99  | tetraspanin 11 (Tspan11) alternative variant bSep08, mRNA.                     |
| Tspan12 | Tspan12.bSep08 | 362326 | 50726  | 724  | 5 | 233 | tetraspanin 12 (Tspan12) alternative variant bSep08, mRNA.                     |
| Tspan12 | Tspan12.cSep08 | 362326 | 78771  | 970  | 6 | 232 | tetraspanin 12 (27.2 kD) (Tspan12) alternative variant cSep08, mRNA.           |
| Tspan12 | Tspan12.dSep08 | 362326 | 62599  | 1174 | 9 | 206 | tetraspanin 12 (24.0 kD) (Tspan12) alternative variant dSep08, mRNA.           |
| Tspan12 | Tspan12.eSep08 | 362326 | 48833  | 607  | 6 | 154 | tetraspanin 12 (Tspan12) alternative variant eSep08, mRNA.                     |
| Tspan12 | Tspan12.gSep08 | 362326 | 3390   | 383  | 3 | 93  | tetraspanin 12 (Tspan12) alternative variant gSep08, mRNA.                     |
| Tspan13 | Tspan13.aSep08 | 366602 | 27110  | 1795 | 6 | 409 | tetraspanin 13 (Tspan13) alternative variant aSep08, complete mRNA.            |
| Tspan13 | Tspan13.cSep08 | 366602 | 20953  | 377  | 4 | 68  | tetraspanin 13 (7.1 kD) (Tspan13) alternative variant cSep08, mRNA.            |
| Tspan14 | Tspan14.aSep08 | 306324 | 55515  | 1292 | 8 | 325 | tetraspanin 14 (Tspan14) alternative variant aSep08, mRNA.                     |
| Tspan14 | Tspan14.bSep08 | 306324 | 52003  | 2509 | 9 | 290 | tetraspanin 14 (Tspan14) alternative variant bSep08, mRNA.                     |
| Tspan14 | Tspan14.dSep08 | 306324 | 19533  | 360  | 4 | 119 | tetraspanin 14 (Tspan14) alternative variant dSep08, mRNA.                     |
| Tspan14 | Tspan14.eSep08 | 306324 | 5877   | 965  | 4 | 40  | tetraspanin 14 (Tspan14) alternative variant eSep08, mRNA.                     |
| Tspan18 | Tspan18.aSep08 | 311210 | 137387 | 1777 | 2 | 453 | tetraspanin 18 (Tspan18) alternative variant aSep08, mRNA.                     |
| Tspan31 | Tspan31.aSep08 | 362890 | 3757   | 2342 | 6 | 212 | tetraspanin 31 (22.9 kD) (Tspan31) alternative variant aSep08, mRNA.           |
| Tspan32 | Tspan32.aSep08 | 685765 | 13614  | 1365 | 7 | 210 | tetraspanin 32 (Tspan32) alternative variant aSep08, mRNA.                     |
| Tspan32 | Tspan32.bSep08 | 685765 | 13028  | 756  | 7 | 174 | tetraspanin 32 (19.7 kD) (Tspan32) alternative variant bSep08, mRNA.           |
| Tspan32 | Tspan32.cSep08 | 685765 | 13793  | 760  | 6 | 156 | tetraspanin 32 (Tspan32) alternative variant cSep08, mRNA.                     |
| Tspan32 | Tspan32.dSep08 | 685765 | 13852  | 718  | 5 | 143 | tetraspanin 32 (Tspan32) alternative variant dSep08, mRNA.                     |
| Tspan32 | Tspan32.fSep08 | 685765 | 6675   | 430  | 5 | 79  | tetraspanin 32 (Tspan32) alternative variant fSep08, mRNA.                     |
| Tspan33 | Tspan33.bSep08 | 500065 | 15532  | 282  | 3 | 80  | tetraspanin 33 (Tspan33) alternative variant bSep08, mRNA.                     |
| Tspan33 | Tspan33.cSep08 | 500065 | 2891   | 397  | 2 | 78  | tetraspanin 33 (Tspan33) alternative variant cSep08, mRNA.                     |
| Tspsy2  | Tspsy2.aSep08  | 302612 | 4909   | 2007 | 7 | 476 | TSPY-like 2 (Tspsy2) alternative variant aSep08, mRNA.                         |
| Tspsy2  | Tspsy2.bSep08  | 302612 | 1241   | 792  | 4 | 200 | TSPY-like 2 (Tspsy2) alternative variant bSep08, mRNA.                         |
| TSP_1.0 | TSP_1.0.aSep08 |        | 16556  | 1098 | 1 | 289 | with thrombospondin type 1 motif 2 (TSP_1.0) alternative variant aSep08, mRNA. |

|         |                |        |       |      |    |     |                                                                                                                |
|---------|----------------|--------|-------|------|----|-----|----------------------------------------------------------------------------------------------------------------|
| TSP_1.0 | TSP_1.0.bSep08 |        | 16276 | 818  | 1  | 264 | with thrombospondin type 1 motif 2 (TSP_1.0) alternative variant bSep08, mRNA.                                 |
| TSP_1.2 | TSP_1.2.aSep08 |        | 24826 | 726  |    | 241 | thrombospondin type-1 domain-containing protein 7A (TSP_1.2) mRNA.                                             |
| TSP_3.0 | TSP_3.0.aSep08 |        | 5828  | 917  |    | 305 | thrombospondin (TSP_3.0) mRNA.                                                                                 |
| TSP_C.0 | TSP_C.0.aSep08 |        | 3023  | 721  | 4  | 185 | thrombospondin 4 (TSP_C.0) alternative variant aSep08, mRNA.                                                   |
| Tssc1   | Tssc1.bSep08   | 362721 | 92124 | 673  | 5  | 173 | tumor suppressing subtransferable candidate 1 (Tssc1) alternative variant bSep08, mRNA.                        |
| Tssc1   | Tssc1.cSep08   | 362721 | 4544  | 809  | 3  | 138 | tumor suppressing subtransferable candidate 1 (Tssc1) alternative variant cSep08, mRNA.                        |
| Tssc1   | Tssc1.dSep08   | 362721 | 5064  | 518  | 3  | 88  | tumor suppressing subtransferable candidate 1 (Tssc1) alternative variant dSep08, mRNA.                        |
| Tssc1   | Tssc1.eSep08   | 362721 | 1444  | 658  | 2  | 48  | tumor suppressing subtransferable candidate 1 (5.3 kD) (Tssc1) alternative variant eSep08, mRNA.               |
| Tssc4   | Tssc4.bSep08   | 361682 | 1708  | 1379 | 3  | 321 | tumor-suppressing subchromosomal transferable fragment 4 (34.3 kD) (Tssc4) alternative variant bSep08, mRNA.   |
| Tssc4   | Tssc4.dSep08   | 361682 | 1109  | 750  | 3  | 42  | tumor-suppressing subchromosomal transferable fragment 4 (4.5 kD) (Tssc4) alternative variant dSep08, mRNA.    |
| Tssk3   | Tssk3.bSep08   | 297891 | 994   | 762  | 2  | 49  | testis-specific serine kinase 3 (5.5 kD) (Tssk3) alternative variant bSep08, mRNA.                             |
| Tssk4   | Tssk4.aSep08   | 290229 | 1477  | 789  | 1  | 223 | testis-specific serine kinase 4 (Tssk4) alternative variant aSep08, mRNA.                                      |
| Tssk5   | Tssk5.aSep08   | 315095 | 1352  | 717  | 2  | 171 | testis-specific serine kinase 5 (Tssk5) alternative variant aSep08, mRNA.                                      |
| Tssk5   | Tssk5.bSep08   | 315095 | 3025  | 2049 | 5  | 137 | testis-specific serine kinase 5 (15.7 kD) (Tssk5) alternative variant bSep08, mRNA.                            |
| Tsta3   | Tsta3.bSep08   | 300036 | 4839  | 1195 | 10 | 278 | tissue specific transplantation antigen P35B like (30.9 kD) (Tsta3) alternative variant bSep08, complete mRNA. |
| Tsta3   | Tsta3.cSep08   | 300036 | 3413  | 741  | 7  | 221 | tissue specific transplantation antigen P35B like (Tsta3) alternative variant cSep08, mRNA.                    |
| Tsta3   | Tsta3.dSep08   | 300036 | 2831  | 1633 | 8  | 172 | tissue specific transplantation antigen P35B like (19.0 kD) (Tsta3) alternative variant dSep08, mRNA.          |
| Tsta3   | Tsta3.eSep08   | 300036 | 1557  | 604  | 3  | 105 | tissue specific transplantation antigen P35B like (11.2 kD) (Tsta3) alternative variant eSep08, mRNA.          |
| Tsta3   | Tsta3.fSep08   | 300036 | 1833  | 814  | 3  | 105 | tissue specific transplantation antigen P35B like (11.2 kD) (Tsta3) alternative variant fSep08, mRNA.          |
| Ttc1    | Ttc1.bSep08    | 287208 | 10184 | 511  | 3  | 145 | putative nuclear protein of vertebrate origin (16.5 kD) (Ttc1) alternative variant bSep08, complete mRNA.      |
| Ttc1    | Ttc1.cSep08    | 287208 | 2090  | 474  | 2  | 39  | putative protein (Ttc1) alternative variant cSep08, mRNA.                                                      |
| Ttc3    | Ttc3.aSep08    | 360702 | 6811  | 618  | 7  | 178 | putative protein of vertebrate origin (Ttc3) alternative variant aSep08, mRNA.                                 |
| Ttc3    | Ttc3.bSep08    | 360702 | 18172 | 575  | 6  | 170 | putative protein of vertebrate origin (Ttc3) alternative variant bSep08, mRNA.                                 |
| Ttc3    | Ttc3.cSep08    | 360702 | 3854  | 366  | 4  | 121 | putative protein of vertebrate origin (Ttc3) alternative variant cSep08, mRNA.                                 |



|       |              |        |        |      |    |     |                                                                                                                               |
|-------|--------------|--------|--------|------|----|-----|-------------------------------------------------------------------------------------------------------------------------------|
| Ttc3  | Ttc3.dSep08  | 360702 | 3594   | 318  | 4  | 106 | putative protein of mammalian origin (Ttc3) alternative variant dSep08, mRNA.                                                 |
| Ttc3  | Ttc3.eSep08  | 360702 | 41997  | 425  | 5  | 51  | putative protein (6.2 kD) (Ttc3) alternative variant eSep08, mRNA.                                                            |
| Ttc3  | Ttc3.fSep08  | 360702 | 40749  | 388  | 4  | 56  | putative protein (Ttc3) alternative variant fSep08, mRNA.                                                                     |
| Ttc4  | Ttc4.aSep08  | 362556 | 17405  | 3205 | 5  | 386 | tetratricopeptide TPR 1 (44.2 kD) (Ttc4) alternative variant aSep08, complete mRNA.                                           |
| Ttc4  | Ttc4.cSep08  | 362556 | 6418   | 682  | 1  | 216 | tetratricopeptide TPR 1 (Ttc4) alternative variant cSep08, mRNA.                                                              |
| Ttc5  | Ttc5.bSep08  | 305837 | 12273  | 630  | 6  | 182 | putative protein, with a coiled coil domain, of eukaryotic origin (20.6 kD) (Ttc5) alternative variant bSep08, complete mRNA. |
| Ttc5  | Ttc5.cSep08  | 305837 | 1420   | 652  | 3  | 164 | putative protein of eukaryotic origin (Ttc5) alternative variant cSep08, mRNA.                                                |
| Ttc5  | Ttc5.dSep08  | 305837 | 2375   | 784  | 2  | 56  | putative protein of metazoan origin (Ttc5) alternative variant dSep08, mRNA.                                                  |
| Ttc6  | Ttc6.aSep08  | 299067 | 21341  | 809  | 5  | 269 | tetratricopeptide TPR 1 (Ttc6) alternative variant aSep08, mRNA.                                                              |
| Ttc6  | Ttc6.bSep08  | 299067 | 34571  | 712  | 5  | 237 | tetratricopeptide TPR 1 (Ttc6) alternative variant bSep08, mRNA.                                                              |
| Ttc6  | Ttc6.cSep08  | 299067 | 42021  | 673  | 6  | 168 | tetratricopeptide TPR 1 (Ttc6) alternative variant cSep08, mRNA.                                                              |
| Ttc7  | Ttc7.aSep08  | 362696 | 107497 | 4481 | 18 | 941 | tetratricopeptide TPR 1 and tetratricopeptide TPR 2 (Ttc7) alternative variant aSep08, mRNA.                                  |
| Ttc7  | Ttc7.bSep08  | 362696 | 4137   | 620  | 1  | 157 | putative protein (Ttc7) alternative variant bSep08, mRNA.                                                                     |
| Ttc7b | Ttc7b.bSep08 | 362768 | 70974  | 1712 | 6  | 291 | tetratricopeptide TPR 1 and tetratricopeptide TPR 2 and tetratricopeptide TPR 4 (Ttc7b) alternative variant bSep08, mRNA.     |
| Ttc7b | Ttc7b.cSep08 | 362768 | 30381  | 619  | 6  | 206 | putative protein of metazoan origin (Ttc7b) alternative variant cSep08, mRNA.                                                 |
| Ttc7b | Ttc7b.dSep08 | 362768 | 46971  | 768  | 5  | 140 | putative protein of bilateral origin (Ttc7b) alternative variant dSep08, mRNA.                                                |
| Ttc8  | Ttc8.aSep08  | 299246 | 54287  | 2300 | 14 | 505 | tetratricopeptide TPR 1 and tetratricopeptide TPR 2 (57.4 kD) (Ttc8) alternative variant aSep08, mRNA.                        |
| Ttc8  | Ttc8.cSep08  | 299246 | 17222  | 390  | 5  | 115 | putative protein of eukaryotic origin (Ttc8) alternative variant cSep08, mRNA.                                                |
| Ttc8  | Ttc8.dSep08  | 299246 | 16693  | 422  | 5  | 102 | putative protein of eukaryotic origin (Ttc8) alternative variant dSep08, mRNA.                                                |
| Ttc8  | Ttc8.fSep08  | 299246 | 513    | 421  | 2  | 26  | putative protein (3.0 kD) (Ttc8) alternative variant fSep08, mRNA.                                                            |
| Ttc9  | Ttc9.aSep08  | 500689 | 34990  | 2234 | 4  | 250 | tetratricopeptide TPR 1 and tetratricopeptide TPR 2 (Ttc9) alternative variant aSep08, mRNA.                                  |
| Ttc9  | Ttc9.cSep08  | 500689 | 82852  | 407  | 4  | 132 | tetratricopeptide TPR 1 and tetratricopeptide TPR 2 (Ttc9) alternative variant cSep08, mRNA.                                  |
| Ttc9  | Ttc9.dSep08  | 500689 | 701    | 603  | 2  | 63  | putative protein of vertebrate origin (Ttc9) alternative variant dSep08, mRNA.                                                |

|        |               |        |        |      |    |      |                                                                                                         |
|--------|---------------|--------|--------|------|----|------|---------------------------------------------------------------------------------------------------------|
| Ttc9c  | Ttc9c.aSep08  | 309196 | 9705   | 1473 | 3  | 171  | tetratricopeptide TPR 1 and tetratricopeptide TPR 2 (20.1 kD) (Ttc9c) alternative variant aSep08, mRNA. |
| Ttc9c  | Ttc9c.bSep08  | 309196 | 9595   | 1104 | 5  | 171  | tetratricopeptide TPR 1 and tetratricopeptide TPR 2 (20.1 kD) (Ttc9c) alternative variant bSep08, mRNA. |
| Ttc9c  | Ttc9c.dSep08  | 309196 | 4709   | 512  | 3  | 28   | putative protein (3.0 kD) (Ttc9c) alternative variant dSep08, complete mRNA.                            |
| Ttc12  | Ttc12.aSep08  | 300696 | 38323  | 1453 |    | 478  | tetratricopeptide repeat 12 (Ttc12) mRNA.                                                               |
| Ttc13  | Ttc13.aSep08  | 292095 | 56057  | 3283 | 20 | 791  | tetratricopeptide TPR 1 and tetratricopeptide TPR 2 (Ttc13) alternative variant aSep08, mRNA.           |
| Ttc13  | Ttc13.bSep08  | 292095 | 8522   | 712  | 6  | 222  | putative protein of eukaryotic origin (Ttc13) alternative variant bSep08, mRNA.                         |
| Ttc13  | Ttc13.cSep08  | 292095 | 2846   | 534  | 3  | 118  | putative protein of eukaryotic origin (Ttc13) alternative variant cSep08, mRNA.                         |
| Ttc13  | Ttc13.dSep08  | 292095 | 2130   | 579  | 1  | 39   | putative protein (Ttc13) alternative variant dSep08, mRNA.                                              |
| Ttc15  | Ttc15.aSep08  | 314013 | 65179  | 3190 | 12 | 797  | tetratricopeptide TPR 1 and tetratricopeptide TPR 2 (87.5 kD) (Ttc15) alternative variant aSep08, mRNA. |
| Ttc15  | Ttc15.cSep08  | 314013 | 6851   | 606  | 3  | 116  | putative protein of metazoan origin (Ttc15) alternative variant cSep08, mRNA.                           |
| Ttc17  | Ttc17.aSep08  | 311224 | 109195 | 3487 | 19 | 1162 | tetratricopeptide TPR 1 and tetratricopeptide TPR 2 (Ttc17) alternative variant aSep08, mRNA.           |
| Ttc17  | Ttc17.cSep08  | 311224 | 34859  | 1706 | 2  | 352  | tetratricopeptide TPR 1 and tetratricopeptide TPR 2 (Ttc17) alternative variant cSep08, mRNA.           |
| Ttc18  | Ttc18.bSep08  | 361006 | 10901  | 418  | 4  | 139  | repeat 18 (Ttc18) alternative variant bSep08, mRNA.                                                     |
| Ttc18  | Ttc18.cSep08  | 361006 | 3547   | 403  | 2  | 33   | putative protein (Ttc18) alternative variant cSep08, mRNA.                                              |
| Ttc19  | Ttc19.bSep08  | 691506 | 2040   | 255  | 2  | 62   | putative protein of vertebrate origin (Ttc19) alternative variant bSep08, mRNA.                         |
| ttc21a | ttc21a.aSep08 | 301065 | 4220   | 697  | 5  | 232  | tetratricopeptide repeat 21A (ttc21a) alternative variant aSep08, mRNA.                                 |
| Ttc21b | Ttc21b.aSep08 | 295654 | 3866   | 433  |    | 143  | tetratricopeptide TPR 1 and tetratricopeptide TPR 2 (Ttc21b) mRNA.                                      |
| Ttc23  | Ttc23.aSep08  | 308708 | 51026  | 1391 | 7  | 463  | putative protein (Ttc23) alternative variant aSep08, mRNA.                                              |
| Ttc23  | Ttc23.bSep08  | 308708 | 50807  | 1130 | 6  | 227  | putative protein of metazoan origin (Ttc23) alternative variant bSep08, mRNA.                           |
| Ttc23  | Ttc23.cSep08  | 308708 | 14190  | 650  | 5  | 183  | putative protein of metazoan origin (20.8 kD) (Ttc23) alternative variant cSep08, mRNA.                 |
| Ttc23  | Ttc23.dSep08  | 308708 | 62513  | 754  | 4  | 153  | putative protein of mammalian origin (Ttc23) alternative variant dSep08, mRNA.                          |
| Ttc23  | Ttc23.eSep08  | 308708 | 21851  | 728  | 4  | 142  | putative protein of metazoan origin (Ttc23) alternative variant eSep08, mRNA.                           |
| Ttc25  | Ttc25.bSep08  | 303534 | 9875   | 648  | 3  | 111  | putative protein of ancient origin (Ttc25) alternative variant bSep08, mRNA.                            |
| Ttc25  | Ttc25.cSep08  | 303534 | 1262   | 356  | 3  | 84   | putative protein of eukaryotic origin (Ttc25) alternative variant cSep08, mRNA.                         |
| Ttc26  | Ttc26.bSep08  | 500086 | 18049  | 2684 |    | 176  | tetratricopeptide repeat 26 (Ttc26) alternative variant bSep08, mRNA.                                   |

|       |              |        |        |      |    |     |                                                                                                             |
|-------|--------------|--------|--------|------|----|-----|-------------------------------------------------------------------------------------------------------------|
| Ttc27 | Ttc27.bSep08 | 298782 | 7348   | 634  | 4  | 176 | putative protein, with a coiled coil domain, of eukaryotic origin (Ttc27) alternative variant bSep08, mRNA. |
| Ttc27 | Ttc27.cSep08 | 298782 | 30573  | 690  | 5  | 126 | putative protein, with a coiled coil domain, of eukaryotic origin (Ttc27) alternative variant cSep08, mRNA. |
| Ttf1  | Ttf1.aSep08  | 499766 | 6421   | 727  |    | 242 | transcription termination factor, RNA polymerase I (Ttf1) mRNA.                                             |
| Ttf2  | Ttf2.aSep08  | 295324 | 15843  | 2658 | 13 | 484 | transcription termination factor, RNA polymerase II (Ttf2) alternative variant aSep08, mRNA.                |
| Ttf2  | Ttf2.bSep08  | 295324 | 3097   | 1480 | 2  | 71  | transcription termination factor, RNA polymerase II (8.3 kD) (Ttf2) alternative variant bSep08, mRNA.       |
| Ttk   | Ttk.bSep08   | 315852 | 15496  | 846  | 7  | 281 | tkk protein kinase (Ttk) alternative variant bSep08, mRNA.                                                  |
| Ttk   | Ttk.cSep08   | 315852 | 2038   | 453  | 2  | 84  | tkk protein kinase (Ttk) alternative variant cSep08, mRNA.                                                  |
| Ttl1  | Ttl1.bSep08  | 362969 | 5554   | 415  |    | 71  | tubulin tyrosine ligase-like 1 (Ttl1) alternative variant bSep08, mRNA.                                     |
| Ttl3  | Ttl3.aSep08  | 362415 | 22199  | 2772 | 11 | 662 | tubulin tyrosine ligase-like family member 3 (Ttl3) alternative variant aSep08, mRNA.                       |
| Ttl3  | Ttl3.cSep08  | 362415 | 3803   | 365  | 2  | 121 | tubulin tyrosine ligase-like family member 3 (Ttl3) alternative variant cSep08, mRNA.                       |
| Ttl3  | Ttl3.eSep08  | 362415 | 3932   | 763  | 2  | 112 | tubulin tyrosine ligase-like family member 3 CRA b (Ttl3) alternative variant eSep08, mRNA.                 |
| Ttl3  | Ttl3.fSep08  | 362415 | 10051  | 783  | 5  | 101 | ligase-like protein 3 (Ttl3) alternative variant fSep08, mRNA.                                              |
| Ttl4  | Ttl4.aSep08  | 690512 | 2736   | 718  |    | 239 | tubulin tyrosine ligase-like family, member 4 (Ttl4) mRNA.                                                  |
| Ttl7  | Ttl7.aSep08  | 310982 | 44655  | 4038 |    | 219 | tubulin tyrosine ligase-like family, member 7 (Ttl7) mRNA.                                                  |
| Ttl9  | Ttl9.bSep08  | 311548 | 6130   | 527  | 4  | 117 | tubulin tyrosine ligase-like family, member 9 (13.8 kD) (Ttl9) alternative variant bSep08, mRNA.            |
| Ttl9  | Ttl9.cSep08  | 311548 | 5320   | 288  | 4  | 88  | tubulin tyrosine ligase-like family, member 9 (Ttl9) alternative variant cSep08, mRNA.                      |
| Ttl10 | Ttl10.bSep08 | 298692 | 3120   | 1044 | 5  | 301 | tubulin tyrosine ligase-like family, member 10 (Ttl10) alternative variant bSep08, mRNA.                    |
| Ttl10 | Ttl10.cSep08 | 298692 | 11694  | 1842 | 12 | 270 | tubulin tyrosine ligase-like family, member 10 (Ttl10) alternative variant cSep08, mRNA.                    |
| Ttl10 | Ttl10.dSep08 | 298692 | 4325   | 810  | 8  | 219 | tubulin tyrosine ligase-like family, member 10 (25.2 kD) (Ttl10) alternative variant dSep08, mRNA.          |
| Ttl11 | Ttl11.aSep08 | 689746 | 197141 | 2529 | 7  | 513 | tubulin tyrosine ligase-like family, member 11 (Ttl11) alternative variant aSep08, mRNA.                    |
| Ttl11 | Ttl11.bSep08 | 689746 | 123313 | 644  | 6  | 214 | tubulin tyrosine ligase-like family, member 11 (Ttl11) alternative variant bSep08, mRNA.                    |
| Ttl12 | Ttl12.aSep08 | 300105 | 20140  | 3106 |    | 637 | tubulin tyrosine ligase-like family, member 12 (Ttl12) mRNA.                                                |
| Ttn   | Ttn.aSep08   | 84015  | 6079   | 4229 | 6  | 923 | titin (Ttn) alternative variant aSep08, mRNA.                                                               |
| Ttpa  | Ttpa.bSep08  | 25571  | 21634  | 2925 | 2  | 209 | tocopherol (alpha) transfer protein (24.0 kD) (Ttpa) alternative variant bSep08, mRNA.                      |
| Ttr   | Ttr.bSep08   | 24856  | 4097   | 510  | 2  | 170 | transthyretin (Ttr) alternative variant bSep08, mRNA.                                                       |
| Ttr   | Ttr.cSep08   | 24856  | 3875   | 300  | 2  | 93  | transthyretin (Ttr) alternative variant cSep08, mRNA.                                                       |

|        |               |        |       |      |    |     |                                                                            |
|--------|---------------|--------|-------|------|----|-----|----------------------------------------------------------------------------|
| Ttyh1  | Ttyh1.aSep08  | 292597 | 18529 | 3091 | 14 | 481 | tweety homolog 1 CRA e (Ttyh1) alternative variant aSep08, mRNA.           |
| Ttyh1  | Ttyh1.bSep08  | 292597 | 11365 | 2106 | 11 | 319 | tweety homolog 1 CRA a (35.4 kD) (Ttyh1) alternative variant bSep08, mRNA. |
| Ttyh1  | Ttyh1.cSep08  | 292597 | 6191  | 944  | 6  | 184 | tweety homolog 1 CRA d (20.1 kD) (Ttyh1) alternative variant cSep08, mRNA. |
| Ttyh1  | Ttyh1.dSep08  | 292597 | 3419  | 399  | 2  | 125 | tweety 1 (Ttyh1) alternative variant dSep08, mRNA.                         |
| Ttyh1  | Ttyh1.eSep08  | 292597 | 5334  | 372  | 3  | 124 | tweety 1 (Ttyh1) alternative variant eSep08, mRNA.                         |
| Ttyh1  | Ttyh1.gSep08  | 292597 | 3939  | 812  | 3  | 107 | tweety homolog 1 CRA c (12.0 kD) (Ttyh1) alternative variant gSep08, mRNA. |
| Ttyh2  | Ttyh2.aSep08  | 287803 | 11269 | 2290 |    | 160 | tweety homolog 2 (Drosophila) (Ttyh2) mRNA.                                |
| Ttyh3  | Ttyh3.cSep08  | 304315 | 2682  | 495  | 2  | 57  | tweety homolog 3 (Drosophila) (Ttyh3) alternative variant cSep08, mRNA.    |
| Tub.0  | Tub.0.aSep08  |        | 5933  | 2443 | 5  | 210 | tubby (Tub.0) alternative variant aSep08, mRNA.                            |
| Tub.0  | Tub.0.bSep08  |        | 1658  | 791  | 2  | 88  | tubby (10.0 kD) (Tub.0) alternative variant bSep08, mRNA.                  |
| Tuba1b | Tuba1b.bSep08 | 500929 | 664   | 415  | 1  | 128 | tubulin, alpha 1B (Tuba1b) alternative variant bSep08, mRNA.               |
| Tuba1b | Tuba1b.cSep08 | 500929 | 1384  | 318  |    | 79  | tubulin, alpha 1B (Tuba1b) alternative variant cSep08, mRNA.               |
| Tuba1c | Tuba1c.bSep08 | 300218 | 6761  | 823  | 1  | 131 | tubulin, alpha 1C (Tuba1c) alternative variant bSep08, mRNA.               |
| Tuba4a | Tuba4a.aSep08 | 316531 | 2502  | 2024 | 2  | 452 | tubulin, alpha 4A (Tuba4a) alternative variant aSep08, mRNA.               |
| Tuba4a | Tuba4a.cSep08 | 316531 | 3024  | 781  | 2  | 248 | tubulin, alpha 4A (Tuba4a) alternative variant cSep08, mRNA.               |
| Tubb2a | Tubb2a.cSep08 | 498736 | 1608  | 339  | 2  | 90  | tubulin, beta 2a (Tubb2a) alternative variant cSep08, mRNA.                |
| Tubb2a | Tubb2a.eSep08 | 498736 | 21869 | 286  | 4  | 54  | tubulin, beta 2a (Tubb2a) alternative variant eSep08, mRNA.                |
| Tubb2b | Tubb2b.bSep08 | 291081 | 1053  | 733  | 2  | 244 | tubulin, beta 2b (Tubb2b) alternative variant bSep08, mRNA.                |
| Tube1  | Tube1.bSep08  | 361856 | 14996 | 1129 | 10 | 346 | epsilon-tubulin 1 (Tube1) alternative variant bSep08, mRNA.                |
| Tube1  | Tube1.cSep08  | 361856 | 17988 | 2369 | 12 | 151 | epsilon-tubulin 1 (16.5 kD) (Tube1) alternative variant cSep08, mRNA.      |
| Tube1  | Tube1.dSep08  | 361856 | 2449  | 417  | 2  | 113 | epsilon-tubulin 1 (Tube1) alternative variant dSep08, mRNA.                |
| Tube1  | Tube1.eSep08  | 361856 | 11732 | 797  | 8  | 76  | epsilon-tubulin 1 (8.4 kD) (Tube1) alternative variant eSep08, mRNA.       |
| Tubg1  | Tubg1.bSep08  | 252921 | 4290  | 738  | 6  | 214 | tubulin, gamma 1 (Tubg1) alternative variant bSep08, mRNA.                 |
| Tubg1  | Tubg1.cSep08  | 252921 | 802   | 288  | 3  | 96  | tubulin, gamma 1 (Tubg1) alternative variant cSep08, mRNA.                 |
| Tubg1  | Tubg1.dSep08  | 252921 | 1001  | 471  | 4  | 93  | tubulin, gamma 1 (Tubg1) alternative variant dSep08, mRNA.                 |

|         |                |        |       |      |    |     |                                                                                                    |
|---------|----------------|--------|-------|------|----|-----|----------------------------------------------------------------------------------------------------|
| Tubg1   | Tubg1.eSep08   | 252921 | 1427  | 783  | 2  | 88  | tubulin, gamma 1 (Tubg1) alternative variant eSep08, mRNA.                                         |
| Tubg1   | Tubg1.fSep08   | 252921 | 6540  | 368  | 3  | 58  | tubulin, gamma 1 (6.5 kD) (Tubg1) alternative variant fSep08, complete mRNA.                       |
| Tubg2   | Tubg2.aSep08   | 680991 | 1715  | 868  | 5  | 276 | tubulin, gamma 2 (Tubg2) alternative variant aSep08, mRNA.                                         |
| Tubg2   | Tubg2.bSep08   | 680991 | 680   | 472  | 2  | 95  | tubulin, gamma 2 (Tubg2) alternative variant bSep08, mRNA.                                         |
| Tubgcp2 | Tubgcp2.bSep08 | 309098 | 4215  | 787  | 5  | 262 | tubulin, gamma complex associated protein 2 (Tubgcp2) alternative variant bSep08, mRNA.            |
| Tubgcp2 | Tubgcp2.cSep08 | 309098 | 2093  | 525  | 2  | 137 | tubulin, gamma complex associated protein 2 (15.1 kD) (Tubgcp2) alternative variant cSep08, mRNA.  |
| Tubgcp3 | Tubgcp3.bSep08 | 306599 | 22043 | 1012 | 3  | 337 | tubulin, gamma complex associated protein 3 (Tubgcp3) alternative variant bSep08, mRNA.            |
| Tubgcp3 | Tubgcp3.cSep08 | 306599 | 16348 | 679  | 3  | 127 | tubulin, gamma complex associated protein 3 (Tubgcp3) alternative variant cSep08, mRNA.            |
| Tubgcp6 | Tubgcp6.bSep08 | 362980 | 1737  | 1570 | 3  | 149 | tubulin, gamma complex associated protein 6 (Tubgcp6) alternative variant bSep08, mRNA.            |
| Tubgcp6 | Tubgcp6.cSep08 | 362980 | 1766  | 1685 | 2  | 125 | tubulin, gamma complex associated protein 6 (Tubgcp6) alternative variant cSep08, mRNA.            |
| tuby    | tuby.aSep08    |        | 1326  | 980  |    | 142 | putative secreted or extracellular protein precursor of mammalian origin (15.5 kD) (tuby) mRNA.    |
| tuchy   | tuchy.aSep08   |        | 1545  | 310  |    | 41  | putative protein (tuchy) mRNA.                                                                     |
| tudar   | tudar.aSep08   |        | 1471  | 428  |    | 142 | hydrocephalus inducing (tudar) mRNA.                                                               |
| tuflo   | tuflo.aSep08   |        | 2111  | 276  |    | 56  | putative protein (6.5 kD) (tuflo) mRNA.                                                            |
| tuflu   | tuflu.cSep08   |        | 587   | 394  | 2  | 71  | putative protein (tuflu) alternative variant cSep08, mRNA.                                         |
| Tufm    | Tufm.bSep08    | 293481 | 3069  | 1387 | 7  | 229 | tu translation elongation factor, mitochondrial (25.0 kD) (Tufm) alternative variant bSep08, mRNA. |
| Tufm    | Tufm.cSep08    | 293481 | 1451  | 807  | 4  | 189 | tu translation elongation factor, mitochondrial (21.1 kD) (Tufm) alternative variant cSep08, mRNA. |
| Tuft1   | Tuft1.aSep08   | 365864 | 46099 | 2361 | 10 | 365 | tuftelin 1 (41.4 kD) (Tuft1) alternative variant aSep08, complete mRNA.                            |
| Tuft1   | Tuft1.cSep08   | 365864 | 32157 | 579  | 5  | 193 | tuftelin 1 (Tuft1) alternative variant cSep08, mRNA.                                               |
| tugar   | tugar.aSep08   |        | 2475  | 742  | 4  | 163 | putative protein (17.9 kD) (tugar) alternative variant aSep08, mRNA.                               |
| tugar   | tugar.bSep08   |        | 831   | 379  | 3  | 69  | unc-13 homolog B CRA b (tugar) alternative variant bSep08, mRNA.                                   |
| tuja    | tuja.aSep08    |        | 3349  | 1001 |    | 260 | telomerase protein 1 (tuja) mRNA.                                                                  |
| tujey   | tujey.bSep08   |        | 3226  | 763  | 2  | 59  | putative protein (tujey) alternative variant bSep08, mRNA.                                         |
| tukee   | tukee.aSep08   |        | 6087  | 675  |    | 66  | putative protein (7.3 kD) (tukee) mRNA.                                                            |
| tukler  | tukler.aSep08  |        | 692   | 569  |    | 42  | putative protein (4.8 kD) (tukler) mRNA.                                                           |
| tulo    | tulo.aSep08    |        | 2442  | 550  | 3  | 111 | putative protein (12.2 kD) (tulo) alternative variant aSep08, mRNA.                                |
| Tulp1   | Tulp1.bSep08   | 309900 | 2699  | 855  | 8  | 271 | tubby like protein 1 (Tulp1) alternative variant bSep08, mRNA.                                     |

|        |               |        |       |      |    |     |                                                                                                             |
|--------|---------------|--------|-------|------|----|-----|-------------------------------------------------------------------------------------------------------------|
| Tulp2  | Tulp2.aSep08  | 361576 | 9103  | 1931 | 13 | 555 | tubby-like protein 2 (62.3 kD) (Tulp2) alternative variant aSep08, complete mRNA.                           |
| Tulp2  | Tulp2.cSep08  | 361576 | 2966  | 682  | 5  | 217 | tubby-like protein 2 (Tulp2) alternative variant cSep08, mRNA.                                              |
| Tulp2  | Tulp2.dSep08  | 361576 | 4040  | 719  | 7  | 162 | tubby-like protein 2 (Tulp2) alternative variant dSep08, mRNA.                                              |
| Tulp2  | Tulp2.eSep08  | 361576 | 666   | 396  | 3  | 82  | tubby-like protein 2 (Tulp2) alternative variant eSep08, mRNA.                                              |
| tumee  | tumee.aSep08  |        | 7353  | 457  |    | 40  | putative protein (4.7 kD) (tumee) mRNA.                                                                     |
| tunoy  | tunoy.aSep08  |        | 58254 | 236  |    | 62  | putative protein (tunoy) mRNA.                                                                              |
| tupor  | tupor.aSep08  |        | 20271 | 398  |    | 42  | putative protein (4.9 kD) (tupor) mRNA.                                                                     |
| tusa   | tusa.aSep08   |        | 2372  | 494  | 1  | 96  | putative mitochondrial protein (10.8 kD) (tusa) alternative variant aSep08, mRNA.                           |
| tusa   | tusa.bSep08   |        | 12249 | 685  | 4  | 69  | CRA b like (8.1 kD) (tusa) alternative variant bSep08, mRNA.                                                |
| Tusc3  | Tusc3.aSep08  | 290783 | 99844 | 1783 | 6  | 448 | tumor suppressor candidate 3 (Tusc3) alternative variant aSep08, mRNA.                                      |
| Tusc4  | Tusc4.bSep08  | 363138 | 1603  | 735  | 4  | 244 | tumor suppressor candidate 4 (Tusc4) alternative variant bSep08, mRNA.                                      |
| Tusc4  | Tusc4.cSep08  | 363138 | 1825  | 708  | 6  | 171 | tumor suppressor candidate 4 (Tusc4) alternative variant cSep08, mRNA.                                      |
| Tusc4  | Tusc4.dSep08  | 363138 | 1769  | 1185 | 4  | 163 | tumor suppressor candidate 4 (18.1 kD) (Tusc4) alternative variant dSep08, mRNA.                            |
| Tusc5  | Tusc5.aSep08  | 360576 | 26528 | 1249 |    | 173 | tumor suppressor candidate 5 (18.7 kD) (Tusc5) mRNA.                                                        |
| tushee | tushee.aSep08 |        | 6346  | 438  |    | 20  | putative protein (tushee) mRNA.                                                                             |
| Tut1   | Tut1.bSep08   | 499314 | 4944  | 2725 | 1  | 205 | terminal uridylyl transferase 1, U6 snRNA-specific (Tut1) alternative variant bSep08, mRNA.                 |
| tutu   | tutu.bSep08   |        | 624   | 344  | 3  | 45  | putative protein (tutu) alternative variant bSep08, mRNA.                                                   |
| tuvar  | tuvar.aSep08  |        | 983   | 501  |    | 166 | putative protein of vertebrate origin (tuvar) mRNA.                                                         |
| tuwey  | tuwey.aSep08  |        | 1092  | 667  |    | 40  | putative protein of mammalian origin (4.7 kD) (tuwey) mRNA.                                                 |
| Twf1   | Twf1.bSep08   | 315265 | 5273  | 1541 | 4  | 147 | twinfilin, actin-binding protein, homolog 1 (Drosophila) (17.3 kD) (Twf1) alternative variant bSep08, mRNA. |
| Twsg1  | Twsg1.bSep08  | 363294 | 7404  | 641  | 3  | 54  | twisted gastrulation homolog 1 (Drosophila) (5.7 kD) (Twsg1) alternative variant bSep08, mRNA.              |
| Txk    | Txk.bSep08    | 305311 | 3759  | 742  | 1  | 70  | TXK tyrosine kinase (Txk) alternative variant bSep08, mRNA.                                                 |
| Txlnb  | Txlnb.aSep08  | 308622 | 10818 | 294  |    | 97  | taxilin beta (Txlnb) mRNA.                                                                                  |
| Txndc1 | Txndc1.bSep08 | 362751 | 6191  | 766  | 7  | 229 | thioredoxin domain containing protein (Txndc1) alternative variant bSep08, mRNA.                            |
| Txndc1 | Txndc1.cSep08 | 362751 | 3327  | 420  | 3  | 111 | thioredoxin domain containing protein (Txndc1) alternative variant cSep08, mRNA.                            |
| Txndc2 | Txndc2.aSep08 | 316777 | 2326  | 1783 | 1  | 550 | thioredoxin domain containing protein (61.1 kD) (Txndc2) alternative variant aSep08, mRNA.                  |
| Txndc2 | Txndc2.cSep08 | 316777 | 3874  | 970  | 1  | 323 | putative protein of eukaryotic origin (Txndc2) alternative variant cSep08, mRNA.                            |

|                 |                        |        |       |      |    |     |                                                                                                               |
|-----------------|------------------------|--------|-------|------|----|-----|---------------------------------------------------------------------------------------------------------------|
| Txndc3          | Txndc3.aSep08          | 364729 | 23597 | 713  | 4  | 237 | putative protein of ancient origin (Txndc3) alternative variant aSep08, mRNA.                                 |
| Txndc3          | Txndc3.bSep08          | 364729 | 19551 | 797  | 9  | 226 | thioredoxin domain containing protein (Txndc3) alternative variant bSep08, mRNA.                              |
| Txndc4          | Txndc4.bSep08          | 298066 | 94252 | 2556 | 10 | 369 | thioredoxin domain containing protein (42.8 kD) (Txndc4) alternative variant bSep08, complete mRNA.           |
| Txndc4          | Txndc4.cSep08          | 298066 | 93169 | 1288 | 9  | 238 | putative protein of eukaryotic origin (27.9 kD) (Txndc4) alternative variant cSep08, mRNA.                    |
| Txndc4          | Txndc4.dSep08          | 298066 | 77372 | 610  | 4  | 153 | putative protein of eukaryotic origin (Txndc4) alternative variant dSep08, mRNA.                              |
| Txndc4          | Txndc4.eSep08          | 298066 | 60246 | 415  | 2  | 137 | thioredoxin domain containing protein (Txndc4) alternative variant eSep08, mRNA.                              |
| Txndc4          | Txndc4.fSep08          | 298066 | 81527 | 774  | 7  | 125 | putative protein of ancient origin (Txndc4) alternative variant fSep08, mRNA.                                 |
| Txndc4          | Txndc4.gSep08          | 298066 | 60276 | 449  | 2  | 82  | thioredoxin domain containing protein (Txndc4) alternative variant gSep08, mRNA.                              |
| Txndc9          | Txndc9.bSep08          | 280671 | 6143  | 549  | 4  | 183 | ATP binding protein associated with cell differentiation like (Txndc9) alternative variant bSep08, mRNA.      |
| Txndc9          | Txndc9.cSep08          | 280671 | 3619  | 742  | 2  | 101 | ATP binding protein like (Txndc9) alternative variant cSep08, mRNA.                                           |
| Txndc11         | Txndc11.bSep08         | 302899 | 32944 | 933  | 3  | 275 | putative protein, with a coiled coil domain, of eukaryotic origin (Txndc11) alternative variant bSep08, mRNA. |
| Txndc11         | Txndc11.dSep08         | 302899 | 6008  | 947  | 2  | 131 | putative protein of vertebrate origin (Txndc11) alternative variant dSep08, mRNA.                             |
| Txndc12andKti12 | Txndc12andKti12.aSep08 | 298370 | 6264  | 1472 | 3  | 350 | KTI12 homolog chromatin associated (38.4 kD) (Txndc12andKti12) alternative variant aSep08, mRNA.              |
| Txndc12andKti12 | Txndc12andKti12.aSep08 | 685656 | 6264  | 1472 | 3  | 350 | KTI12 homolog chromatin associated (38.4 kD) (Txndc12andKti12) alternative variant aSep08, mRNA.              |
| Txndc12andKti12 | Txndc12andKti12.cSep08 | 298370 | 25030 | 1315 | 7  | 217 | putative protein of ancient origin (Txndc12andKti12) alternative variant cSep08, mRNA.                        |
| Txndc12andKti12 | Txndc12andKti12.cSep08 | 685656 | 25030 | 1315 | 7  | 217 | putative protein of ancient origin (Txndc12andKti12) alternative variant cSep08, mRNA.                        |
| Txndc12andKti12 | Txndc12andKti12.dSep08 | 298370 | 22852 | 922  | 6  | 191 | endoplasmic reticulum protein ERp19 (Txndc12andKti12) alternative variant dSep08, mRNA.                       |
| Txndc12andKti12 | Txndc12andKti12.dSep08 | 685656 | 22852 | 922  | 6  | 191 | endoplasmic reticulum protein ERp19 (Txndc12andKti12) alternative variant dSep08, mRNA.                       |
| Txndc13         | Txndc13.aSep08         | 296182 | 43393 | 4026 |    | 336 | thioredoxin domain containing protein (37.5 kD) (Txndc13) alternative variant aSep08, mRNA.                   |
| Txndc15         | Txndc15.bSep08         | 307180 | 10748 | 816  | 3  | 247 | putative protein of metazoan origin (Txndc15) alternative variant bSep08, mRNA.                               |
| Txndc15         | Txndc15.cSep08         | 307180 | 6578  | 760  | 2  | 135 | putative protein of vertebrate origin (Txndc15) alternative variant cSep08, mRNA.                             |
| Txndc16         | Txndc16.aSep08         | 361025 | 10832 | 1661 | 3  | 269 | putative protein of vertebrate origin (Txndc16) alternative variant aSep08, mRNA.                             |
| Txndc16         | Txndc16.bSep08         | 361025 | 4610  | 426  | 1  | 21  | putative protein (Txndc16) alternative variant bSep08, mRNA.                                                  |

|        |               |        |       |      |    |     |                                                                                           |
|--------|---------------|--------|-------|------|----|-----|-------------------------------------------------------------------------------------------|
| Txnip  | Txnip.bSep08  | 117514 | 1182  | 967  | 3  | 111 | thioredoxin interacting protein (11.8 kD) (Txnip) alternative variant bSep08, mRNA.       |
| Txnip  | Txnip.dSep08  | 117514 | 915   | 794  | 2  | 51  | thioredoxin interacting protein (Txnip) alternative variant dSep08, mRNA.                 |
| Txnip  | Txnip.eSep08  | 117514 | 516   | 408  | 2  | 34  | thioredoxin interacting protein (Txnip) alternative variant eSep08, mRNA.                 |
| Txn1   | Txn1.bSep08   | 140922 | 13399 | 3613 | 3  | 86  | thioredoxin-like 1 (9.8 kD) (Txn1) alternative variant bSep08, mRNA.                      |
| Txn1   | Txn1.dSep08   | 140922 | 2044  | 511  | 2  | 29  | thioredoxin-like 1 (3.3 kD) (Txn1) alternative variant dSep08, mRNA.                      |
| Txn14b | Txn14b.bSep08 | 292008 | 3298  | 313  | 1  | 66  | thioredoxin-like 4B (Txn14b) alternative variant bSep08, mRNA.                            |
| Txn14b | Txn14b.cSep08 | 292008 | 4238  | 403  | 1  | 54  | thioredoxin-like 4B (Txn14b) alternative variant cSep08, mRNA.                            |
| Txnrd1 | Txnrd1.bSep08 | 58819  | 60961 | 702  | 7  | 204 | thioredoxin reductase 1 (Txnrd1) alternative variant bSep08, mRNA.                        |
| Txnrd1 | Txnrd1.cSep08 | 58819  | 13735 | 289  | 4  | 95  | thioredoxin reductase 1 (Txnrd1) alternative variant cSep08, mRNA.                        |
| Txnrd2 | Txnrd2.bSep08 | 50551  | 21493 | 1755 | 7  | 275 | thioredoxin reductase 2 (Txnrd2) alternative variant bSep08, mRNA.                        |
| Txnrd2 | Txnrd2.cSep08 | 50551  | 25141 | 717  | 9  | 237 | thioredoxin reductase 2 (Txnrd2) alternative variant cSep08, mRNA.                        |
| Txnrd3 | Txnrd3.aSep08 | 297437 | 20799 | 1990 | 10 | 434 | thioredoxin reductase 3 (Txnrd3) alternative variant aSep08, mRNA.                        |
| Txnrd3 | Txnrd3.bSep08 | 297437 | 17782 | 336  | 2  | 112 | thioredoxin reductase 3 (Txnrd3) alternative variant bSep08, mRNA.                        |
| tyby   | tyby.aSep08   |        | 3880  | 1176 |    | 28  | putative protein (tyby) mRNA.                                                             |
| tychy  | tychy.aSep08  |        | 5387  | 816  |    | 6   | putative protein (0.7 kD) (tychy) mRNA.                                                   |
| tydar  | tydar.aSep08  |        | 1678  | 725  |    | 69  | hydrocephalus inducing like (tydar) mRNA.                                                 |
| tyflo  | tyflo.aSep08  |        | 1341  | 606  | 3  | 52  | putative protein (6.2 kD) (tyflo) alternative variant aSep08, mRNA.                       |
| tyflu  | tyflu.aSep08  |        | 1524  | 414  |    | 137 | semaphorin 4B (tyflu) mRNA.                                                               |
| tygar  | tygar.aSep08  |        | 4984  | 595  | 2  | 198 | B-cell novel protein 1 (tygar) alternative variant aSep08, mRNA.                          |
| tygar  | tygar.bSep08  |        | 2909  | 383  | 1  | 127 | B-cell novel protein 1 (tygar) alternative variant bSep08, mRNA.                          |
| tyja   | tyja.aSep08   |        | 13130 | 679  |    | 67  | putative protein (tyja) mRNA.                                                             |
| tyjey  | tyjey.aSep08  |        | 1726  | 384  |    | 35  | putative protein (3.6 kD) (tyjey) mRNA.                                                   |
| tykee  | tykee.aSep08  |        | 1175  | 267  |    | 28  | putative protein (3.2 kD) (tykee) mRNA.                                                   |
| tykler | tykler.aSep08 |        | 13149 | 344  |    | 42  | putative protein (4.7 kD) (tykler) mRNA.                                                  |
| tylo   | tylo.aSep08   |        | 1776  | 325  |    | 55  | putative protein (tylo) mRNA.                                                             |
| tymee  | tymee.aSep08  |        | 448   | 330  |    | 72  | putative cytoplasmic protein (8.2 kD) (tymee) mRNA.                                       |
| Tymp   | Tymp.bSep08   | 315219 | 2111  | 1266 | 2  | 258 | cytochrome oxidase deficient homolog 2 (29.3 kD) (Tymp) alternative variant bSep08, mRNA. |
| Tymp   | Tymp.cSep08   | 315219 | 1832  | 698  | 5  | 205 | thymidine phosphorylase (Tymp) alternative variant cSep08, mRNA.                          |



|                      |                             |        |       |      |   |     |                                                                                                           |
|----------------------|-----------------------------|--------|-------|------|---|-----|-----------------------------------------------------------------------------------------------------------|
| Tymp                 | Tymp.eSep08                 | 315219 | 512   | 376  | 2 | 125 | thymidine phosphorylase (Tymp) alternative variant eSep08, mRNA.                                          |
| Tymp                 | Tymp.fSep08                 | 315219 | 1584  | 767  | 2 | 117 | thymidine phosphorylase (Tymp) alternative variant fSep08, mRNA.                                          |
| Tymp                 | Tymp.gSep08                 | 315219 | 1467  | 571  | 3 | 94  | thymidine phosphorylase (Tymp) alternative variant gSep08, mRNA.                                          |
| tynoy                | tynoy.aSep08                |        | 13817 | 710  | 5 | 236 | dedicator of cytokinesis 10 (tynoy) alternative variant aSep08, mRNA.                                     |
| tynoy                | tynoy.bSep08                |        | 1926  | 507  | 3 | 151 | dedicator of cytokinesis 10 (tynoy) alternative variant bSep08, mRNA.                                     |
| typor                | typor.bSep08                |        | 456   | 361  | 2 | 55  | putative protein (typor) alternative variant bSep08, mRNA.                                                |
| Tyro3                | Tyro3.bSep08                | 25232  | 8564  | 934  | 7 | 311 | TYRO3 protein tyrosine kinase 3 (Tyro3) alternative variant bSep08, mRNA.                                 |
| Tyro3                | Tyro3.cSep08                | 25232  | 768   | 406  | 2 | 92  | TYRO3 protein tyrosine kinase 3 (Tyro3) alternative variant cSep08, mRNA.                                 |
| Tyro3                | Tyro3.dSep08                | 25232  | 1638  | 734  | 2 | 68  | TYRO3 protein tyrosine kinase 3 (Tyro3) alternative variant dSep08, mRNA.                                 |
| Tyrobp               | Tyrobp.bSep08               | 361537 | 3835  | 497  | 5 | 106 | tyro protein tyrosine kinase binding protein (Tyrobp) alternative variant bSep08, mRNA.                   |
| Tyrobp               | Tyrobp.dSep08               | 361537 | 3859  | 669  | 4 | 35  | tyro protein tyrosine kinase binding protein (Tyrobp) alternative variant dSep08, mRNA.                   |
| tysa                 | tysa.bSep08                 |        | 1026  | 350  |   | 29  | putative protein (3.3 kD) (tysa) alternative variant bSep08, mRNA.                                        |
| tyshee               | tyshee.aSep08               |        | 1699  | 722  |   | 117 | putative protein (tyshee) mRNA.                                                                           |
| Tysnd1               | Tysnd1.bSep08               | 365571 | 3067  | 1063 | 1 | 192 | putative peroxisomal protein of ancient origin (20.4 kD) (Tysnd1) alternative variant bSep08, mRNA.       |
| tytu                 | tytu.aSep08                 |        | 15129 | 3562 |   | 81  | CRA a like (tytu) mRNA.                                                                                   |
| tyvar                | tyvar.aSep08                |        | 1421  | 347  |   | 8   | putative protein (0.6 kD) (tyvar) mRNA.                                                                   |
| Tyw1                 | Tyw1.bSep08                 | 304423 | 54300 | 1777 | 1 | 506 | tRNA-yW synthesizing protein 1 homolog (S. cerevisiae) (Tyw1) alternative variant bSep08, mRNA.           |
| Tyw3                 | Tyw3.aSep08                 | 499731 | 22332 | 1109 | 5 | 173 | tRNA-yW synthesizing protein 3 homolog (S. cerevisiae) (19.1 kD) (Tyw3) alternative variant aSep08, mRNA. |
| Tyw3                 | Tyw3.bSep08                 | 499731 | 10478 | 807  | 1 | 81  | tRNA-yW synthesizing protein 3 homolog (S. cerevisiae) (9.1 kD) (Tyw3) alternative variant bSep08, mRNA.  |
| Tyw3                 | Tyw3.cSep08                 | 499731 | 19657 | 652  | 2 | 62  | tRNA-yW synthesizing protein 3 homolog (S. cerevisiae) (Tyw3) alternative variant cSep08, mRNA.           |
| tywey                | tywey.aSep08                |        | 10673 | 625  |   | 78  | putative protein (tywey) mRNA.                                                                            |
| U1snrnpbp            | U1snrnpbp.aSep08            | 360803 | 7496  | 925  | 1 | 270 | u11/U12 snRNP 35K (U1snrnpbp) alternative variant aSep08, mRNA.                                           |
| U2af114andRGD1563574 | U2af114andRGD1563574.bSep08 | 361542 | 1437  | 621  | 6 | 174 | small nuclear RNA factor 1 (U2af114andRGD1563574) alternative variant bSep08, mRNA.                       |
| U2af114andRGD1563574 | U2af114andRGD1563574.bSep08 | 499126 | 1437  | 621  | 6 | 174 | small nuclear RNA factor 1 (U2af114andRGD1563574) alternative variant bSep08, mRNA.                       |
| U2af114andRGD1563574 | U2af114andRGD1563574.cSep08 | 361542 | 1170  | 401  | 6 | 133 | small nuclear RNA factor 1 (U2af114andRGD1563574) alternative variant cSep08, mRNA.                       |

|                      |                             |        |       |      |    |     |                                                                                                                        |
|----------------------|-----------------------------|--------|-------|------|----|-----|------------------------------------------------------------------------------------------------------------------------|
| U2af114andRGD1563574 | U2af114andRGD1563574.cSep08 | 499126 | 1170  | 401  | 6  | 133 | small nuclear RNA factor 1 (U2af114andRGD1563574) alternative variant cSep08, mRNA.                                    |
| U2af114andRGD1563574 | U2af114andRGD1563574.dSep08 | 361542 | 2110  | 860  | 8  | 122 | small nuclear RNA factor 1 (14.5 kD) (U2af114andRGD1563574) alternative variant dSep08, mRNA.                          |
| U2af114andRGD1563574 | U2af114andRGD1563574.dSep08 | 499126 | 2110  | 860  | 8  | 122 | small nuclear RNA factor 1 (14.5 kD) (U2af114andRGD1563574) alternative variant dSep08, mRNA.                          |
| U2af114andRGD1563574 | U2af114andRGD1563574.eSep08 | 361542 | 2137  | 1379 | 3  | 100 | u2 small nuclear RNA auxiliary factor 1-like 4 (10.5 kD) (U2af114andRGD1563574) alternative variant eSep08, mRNA.      |
| U2af114andRGD1563574 | U2af114andRGD1563574.eSep08 | 499126 | 2137  | 1379 | 3  | 100 | u2 small nuclear RNA auxiliary factor 1-like 4 (10.5 kD) (U2af114andRGD1563574) alternative variant eSep08, mRNA.      |
| Uap1                 | Uap1.aSep08                 | 498272 | 34138 | 2324 | 10 | 522 | UDP-N-acetylglucosamine pyrophosphorylase 1 (58.5 kD) (Uap1) alternative variant aSep08, mRNA.                         |
| Uap1                 | Uap1.bSep08                 | 498272 | 14944 | 1253 | 5  | 260 | UDP-N-acetylglucosamine pyrophosphorylase 1 (Uap1) alternative variant bSep08, mRNA.                                   |
| Uap1                 | Uap1.cSep08                 | 498272 | 1715  | 908  | 1  | 73  | UDP-N-acetylglucosamine pyrophosphorylase 1 (8.0 kD) (Uap1) alternative variant cSep08, mRNA.                          |
| UBA.0                | UBA.0.aSep08                |        | 21556 | 328  |    | 109 | ubiquitin-associated protein 2 (UBA.0) mRNA.                                                                           |
| Uba1                 | Uba1.bSep08                 | 314432 | 3739  | 1124 | 7  | 240 | ubiquitin-like modifier activating enzyme 1 (Uba1) alternative variant bSep08, mRNA.                                   |
| Uba1                 | Uba1.cSep08                 | 314432 | 2711  | 696  | 5  | 231 | ubiquitin-like modifier activating enzyme 1 (Uba1) alternative variant cSep08, mRNA.                                   |
| Uba1                 | Uba1.dSep08                 | 314432 | 8469  | 349  | 4  | 116 | ubiquitin-like modifier activating enzyme 1 (Uba1) alternative variant dSep08, mRNA.                                   |
| Uba1                 | Uba1.eSep08                 | 314432 | 745   | 253  | 2  | 84  | ubiquitin-like modifier activating enzyme 1 (Uba1) alternative variant eSep08, mRNA.                                   |
| Uba2                 | Uba2.aSep08                 | 308508 | 22434 | 2245 | 14 | 538 | ubiquitin-like modifier activating enzyme 2 (Uba2) alternative variant aSep08, mRNA.                                   |
| Uba3                 | Uba3.aSep08                 | 117553 | 22164 | 2161 | 18 | 460 | ubiquitin-like modifier activating enzyme 3 (Uba3) alternative variant aSep08, mRNA.                                   |
| Uba3                 | Uba3.bSep08                 | 117553 | 16723 | 702  | 8  | 187 | ubiquitin-like modifier activating enzyme 3 (Uba3) alternative variant bSep08, mRNA.                                   |
| Uba3                 | Uba3.cSep08                 | 117553 | 16747 | 807  | 9  | 126 | ubiquitin-like modifier activating enzyme 3 (Uba3) alternative variant cSep08, mRNA.                                   |
| Uba5                 | Uba5.bSep08                 | 300968 | 3493  | 1506 | 4  | 118 | ubiquitin-like modifier activating enzyme 5 (13.5 kD) (Uba5) alternative variant bSep08, mRNA.                         |
| Uba5                 | Uba5.cSep08                 | 300968 | 789   | 323  | 3  | 107 | ubiquitin-like modifier activating enzyme 5 (Uba5) alternative variant cSep08, mRNA.                                   |
| Uba52                | Uba52.cSep08                | 64156  | 1944  | 446  | 4  | 148 | ubiquitin A-52 residue ribosomal protein fusion product 1 (Uba52) alternative variant cSep08, mRNA.                    |
| Uba52                | Uba52.dSep08                | 64156  | 2133  | 477  | 4  | 128 | ubiquitin A-52 residue ribosomal protein fusion product 1 (14.7 kD) (Uba52) alternative variant dSep08, complete mRNA. |

|         |                |        |        |      |    |      |                                                                                                                        |
|---------|----------------|--------|--------|------|----|------|------------------------------------------------------------------------------------------------------------------------|
| Uba52   | Uba52.eSep08   | 64156  | 2133   | 700  | 4  | 128  | ubiquitin A-52 residue ribosomal protein fusion product 1 (14.7 kD) (Uba52) alternative variant eSep08, complete mRNA. |
| Ubac1   | Ubac1.bSep08   | 362087 | 2507   | 768  | 3  | 145  | ubiquitin-associated (Ubac1) alternative variant bSep08, mRNA.                                                         |
| Ubac1   | Ubac1.cSep08   | 362087 | 8809   | 646  | 3  | 56   | putative protein of vertebrate origin (Ubac1) alternative variant cSep08, mRNA.                                        |
| Ubap1   | Ubap1.aSep08   | 362502 | 40690  | 2586 | 2  | 527  | ubiquitin-associated protein 1 (Ubap1) alternative variant aSep08, complete mRNA.                                      |
| Ubap2   | Ubap2.aSep08   | 313169 | 41010  | 3869 | 24 | 1009 | ubiquitin-associated protein 2 (Ubap2) alternative variant aSep08, mRNA.                                               |
| Ubap2   | Ubap2.bSep08   | 313169 | 1285   | 769  | 5  | 256  | ubiquitin-associated protein 2 (Ubap2) alternative variant bSep08, mRNA.                                               |
| Ubap2   | Ubap2.dSep08   | 313169 | 1715   | 422  | 2  | 71   | ubiquitin-associated protein 2 (Ubap2) alternative variant dSep08, mRNA.                                               |
| Ubash3b | Ubash3b.aSep08 | 315579 | 143447 | 1801 | 2  | 463  | ubiquitin-associated (Ubash3b) alternative variant aSep08, mRNA.                                                       |
| Ubash3b | Ubash3b.bSep08 | 315579 | 112594 | 781  | 2  | 245  | ubiquitin-associated (Ubash3b) alternative variant bSep08, mRNA.                                                       |
| Ubash3b | Ubash3b.cSep08 | 315579 | 4277   | 1576 | 3  | 107  | putative protein of bilateral origin (Ubash3b) alternative variant cSep08, mRNA.                                       |
| Ubc     | Ubc.aSep08     | 50522  | 4958   | 3225 | 2  | 962  | ubiquitin C (108.2 kD) (Ubc) alternative variant aSep08, mRNA.                                                         |
| Ubc     | Ubc.bSep08     | 50522  | 4737   | 724  | 3  | 202  | ubiquitin C (22.7 kD) (Ubc) alternative variant bSep08, complete mRNA.                                                 |
| Ubc     | Ubc.cSep08     | 50522  | 1762   | 505  | 2  | 140  | ubiquitin C (Ubc) alternative variant cSep08, mRNA.                                                                    |
| Ube1l   | Ube1l.bSep08   | 301000 | 1255   | 716  | 6  | 238  | ubiquitin-activating enzyme E1-like (Ube1l) alternative variant bSep08, mRNA.                                          |
| Ube1l   | Ube1l.cSep08   | 301000 | 1183   | 640  | 3  | 153  | ubiquitin-activating enzyme E1-like (Ube1l) alternative variant cSep08, mRNA.                                          |
| Ube1l   | Ube1l.dSep08   | 301000 | 885    | 812  | 2  | 42   | ubiquitin-activating enzyme E1-like (Ube1l) alternative variant dSep08, mRNA.                                          |
| Ube2a   | Ube2a.aSep08   | 298317 | 10360  | 1350 |    | 214  | ubiquitin-conjugating enzyme E2A, RAD6 homolog (S. cerevisiae) (Ube2a) alternative variant aSep08, mRNA.               |
| Ube2b   | Ube2b.aSep08   | 81816  | 13388  | 588  | 7  | 186  | enzyme ubiquitin-conjugating E2 (Ube2b) alternative variant aSep08, mRNA.                                              |
| Ube2b   | Ube2b.cSep08   | 81816  | 3894   | 2539 | 2  | 93   | ubiquitin-conjugating enzyme E2B (10.5 kD) (Ube2b) alternative variant cSep08, mRNA.                                   |
| Ube2b   | Ube2b.dSep08   | 81816  | 5390   | 796  | 3  | 83   | enzyme ubiquitin-conjugating E2 (Ube2b) alternative variant dSep08, mRNA.                                              |
| Ube2b   | Ube2b.eSep08   | 81816  | 4515   | 289  | 3  | 48   | putative protein (Ube2b) alternative variant eSep08, mRNA.                                                             |
| Ube2cbp | Ube2cbp.bSep08 | 315863 | 166668 | 1212 |    | 217  | ubiquitin-conjugating enzyme E2C binding protein (Ube2cbp) alternative variant bSep08, mRNA.                           |
| Ube2d2  | Ube2d2.bSep08  | 641452 | 9020   | 1965 | 3  | 117  | ubiquitin-conjugating enzyme E2D 2 (Ube2d2) alternative variant bSep08, mRNA.                                          |

|        |               |        |        |      |   |     |                                                                                                                 |
|--------|---------------|--------|--------|------|---|-----|-----------------------------------------------------------------------------------------------------------------|
| Ube2d2 | Ube2d2.cSep08 | 641452 | 4978   | 371  | 1 | 65  | ubiquitin-conjugating enzyme E2D 2 (Ube2d2) alternative variant cSep08, mRNA.                                   |
| Ube2d3 | Ube2d3.bSep08 | 81920  | 28674  | 1135 | 8 | 147 | ubiquitin-conjugating enzyme E2D 3 (UBC4/5 homolog, yeast) (16.7 kD) (Ube2d3) alternative variant bSep08, mRNA. |
| Ube2d3 | Ube2d3.cSep08 | 81920  | 29156  | 2136 | 8 | 147 | ubiquitin-conjugating enzyme E2D 3 (UBC4/5 homolog, yeast) (16.7 kD) (Ube2d3) alternative variant cSep08, mRNA. |
| Ube2d3 | Ube2d3.dSep08 | 81920  | 28346  | 1152 | 8 | 147 | ubiquitin-conjugating enzyme E2D 3 (UBC4/5 homolog, yeast) (16.7 kD) (Ube2d3) alternative variant dSep08, mRNA. |
| Ube2d3 | Ube2d3.eSep08 | 81920  | 27896  | 753  | 9 | 118 | ubiquitin-conjugating enzyme E2D 3 (UBC4/5 homolog, yeast) (13.6 kD) (Ube2d3) alternative variant eSep08, mRNA. |
| Ube2d3 | Ube2d3.fSep08 | 81920  | 27836  | 784  | 7 | 109 | ubiquitin-conjugating enzyme E2D 3 (UBC4/5 homolog, yeast) (12.6 kD) (Ube2d3) alternative variant fSep08, mRNA. |
| Ube2d3 | Ube2d3.gSep08 | 81920  | 6853   | 902  | 5 | 87  | ubiquitin-conjugating enzyme E2D 3 (UBC4/5 homolog, yeast) (Ube2d3) alternative variant gSep08, mRNA.           |
| Ube2d3 | Ube2d3.hSep08 | 81920  | 11730  | 592  | 4 | 45  | ubiquitin-conjugating enzyme E2D 3 (UBC4/5 homolog, yeast) (Ube2d3) alternative variant hSep08, mRNA.           |
| Ube2d3 | Ube2d3.iSep08 | 81920  | 2479   | 391  | 2 | 22  | ubiquitin-conjugating enzyme E2D 3 (UBC4/5 homolog, yeast) (Ube2d3) alternative variant iSep08, mRNA.           |
| Ube2e2 | Ube2e2.aSep08 | 361013 | 279501 | 1429 | 3 | 201 | ubiquitin-conjugating enzyme E2E 2 (UBC4/5 homolog, yeast) (22.3 kD) (Ube2e2) alternative variant aSep08, mRNA. |
| Ube2e3 | Ube2e3.bSep08 | 295686 | 54296  | 807  | 1 | 268 | ubiquitin-conjugating enzyme E2E 3, UBC4/5 homolog (yeast) (Ube2e3) alternative variant bSep08, mRNA.           |
| Ube2e3 | Ube2e3.cSep08 | 295686 | 53537  | 730  | 2 | 130 | ubiquitin-conjugating enzyme E2E 3, UBC4/5 homolog (yeast) (Ube2e3) alternative variant cSep08, mRNA.           |
| Ube2f  | Ube2f.aSep08  | 363284 | 35654  | 1304 | 5 | 185 | ubiquitin-conjugating enzyme E2F (putative) (21.1 kD) (Ube2f) alternative variant aSep08, complete mRNA.        |
| Ube2f  | Ube2f.bSep08  | 363284 | 35495  | 1101 | 5 | 185 | ubiquitin-conjugating enzyme E2F (putative) (21.1 kD) (Ube2f) alternative variant bSep08, complete mRNA.        |
| Ube2f  | Ube2f.cSep08  | 363284 | 4856   | 692  | 1 | 50  | ubiquitin-conjugating enzyme E2F (putative) (Ube2f) alternative variant cSep08, mRNA.                           |
| Ube2g1 | Ube2g1.bSep08 | 64631  | 18967  | 583  | 5 | 128 | ubiquitin-conjugating enzyme E2G 1 CRA a (Ube2g1) alternative variant bSep08, mRNA.                             |
| Ube2g1 | Ube2g1.cSep08 | 64631  | 19360  | 3390 | 6 | 124 | ubiquitin-conjugating enzyme E2G 1 CRA a (Ube2g1) alternative variant cSep08, mRNA.                             |
| Ube2g1 | Ube2g1.dSep08 | 64631  | 75910  | 1110 | 7 | 99  | ubiquitin-conjugating enzyme E2G 1 CRA b (11.4 kD) (Ube2g1) alternative variant dSep08, mRNA.                   |
| Ube2g1 | Ube2g1.eSep08 | 64631  | 41733  | 632  | 5 | 45  | putative protein (5.2 kD) (Ube2g1) alternative variant eSep08, mRNA.                                            |
| Ube2i  | Ube2i.aSep08  | 25573  | 12745  | 529  | 6 | 176 | ubiquitin-conjugating enzyme E2I (Ube2i) alternative variant aSep08, mRNA.                                      |

|        |               |        |       |      |    |     |                                                                                                                   |
|--------|---------------|--------|-------|------|----|-----|-------------------------------------------------------------------------------------------------------------------|
| Ube2i  | Ube2i.cSep08  | 25573  | 10434 | 390  | 5  | 129 | ubiquitin-conjugating enzyme E2I (Ube2i) alternative variant cSep08, mRNA.                                        |
| Ube2i  | Ube2i.dSep08  | 25573  | 6555  | 374  | 4  | 124 | ubiquitin-conjugating enzyme E2I (Ube2i) alternative variant dSep08, mRNA.                                        |
| Ube2i  | Ube2i.eSep08  | 25573  | 11656 | 1079 | 6  | 118 | ubiquitin-conjugating enzyme E2I (Ube2i) alternative variant eSep08, mRNA.                                        |
| Ube2i  | Ube2i.fSep08  | 25573  | 4923  | 599  | 3  | 101 | ubiquitin-conjugating enzyme E2I (11.3 kD) (Ube2i) alternative variant fSep08, mRNA.                              |
| Ube2i  | Ube2i.gSep08  | 25573  | 3196  | 1034 | 2  | 88  | ubiquitin-conjugating enzyme E2I (9.6 kD) (Ube2i) alternative variant gSep08, mRNA.                               |
| Ube2i  | Ube2i.iSep08  | 25573  | 4722  | 333  | 2  | 36  | ubiquitin-conjugating enzyme E2I (Ube2i) alternative variant iSep08, mRNA.                                        |
| Ube2j1 | Ube2j1.aSep08 | 297961 | 21186 | 2105 | 2  | 323 | ubiquitin-conjugating enzyme E2, J1 (Ube2j1) alternative variant aSep08, mRNA.                                    |
| Ube2j1 | Ube2j1.bSep08 | 297961 | 19558 | 1367 | 1  | 296 | ubiquitin-conjugating enzyme E2, J1 (Ube2j1) alternative variant bSep08, mRNA.                                    |
| Ube2j2 | Ube2j2.bSep08 | 298689 | 14390 | 2615 | 7  | 172 | ubiquitin-conjugating enzyme E2, J2 homolog (yeast) (19.4 kD) (Ube2j2) alternative variant bSep08, complete mRNA. |
| Ube2j2 | Ube2j2.cSep08 | 298689 | 13096 | 638  | 5  | 162 | ubiquitin-conjugating enzyme E2, J2 homolog (yeast) (Ube2j2) alternative variant cSep08, mRNA.                    |
| Ube2j2 | Ube2j2.dSep08 | 298689 | 13345 | 1607 | 7  | 160 | ubiquitin-conjugating enzyme E2, J2 homolog (yeast) (18.4 kD) (Ube2j2) alternative variant dSep08, mRNA.          |
| Ube2j2 | Ube2j2.eSep08 | 298689 | 13077 | 787  | 6  | 160 | ubiquitin-conjugating enzyme E2, J2 homolog (yeast) (18.4 kD) (Ube2j2) alternative variant eSep08, complete mRNA. |
| Ube2j2 | Ube2j2.fSep08 | 298689 | 13046 | 751  | 6  | 156 | ubiquitin-conjugating enzyme E2, J2 homolog (yeast) (Ube2j2) alternative variant fSep08, mRNA.                    |
| Ube2j2 | Ube2j2.gSep08 | 298689 | 13045 | 745  | 5  | 143 | ubiquitin-conjugating enzyme E2, J2 homolog (yeast) (Ube2j2) alternative variant gSep08, mRNA.                    |
| Ube2j2 | Ube2j2.hSep08 | 298689 | 1256  | 417  | 3  | 98  | ubiquitin-conjugating enzyme E2, J2 homolog (yeast) (Ube2j2) alternative variant hSep08, mRNA.                    |
| Ube2k  | Ube2k.bSep08  | 289623 | 23726 | 854  | 5  | 97  | ubiquitin-conjugating enzyme E2-25K precursor (10.7 kD) (Ube2k) alternative variant bSep08, mRNA.                 |
| Ube2k  | Ube2k.cSep08  | 289623 | 20613 | 336  | 3  | 96  | enzyme Ubiquitin-Conjugating E2 (Ube2k) alternative variant cSep08, mRNA.                                         |
| Ube2k  | Ube2k.dSep08  | 289623 | 55505 | 381  | 3  | 76  | ubiquitin-conjugating enzyme E2K (Ube2k) alternative variant dSep08, mRNA.                                        |
| Ube2k  | Ube2k.eSep08  | 289623 | 1458  | 1233 | 2  | 61  | ubiquitin-conjugating enzyme E2-25K (6.8 kD) (Ube2k) alternative variant eSep08, mRNA.                            |
| Ube2l3 | Ube2l3.bSep08 | 363836 | 39906 | 403  | 1  | 41  | ubiquitin-conjugating enzyme E2L 3 (4.8 kD) (Ube2l3) alternative variant bSep08, mRNA.                            |
| Ube2m  | Ube2m.bSep08  | 361509 | 2413  | 1230 | 1  | 87  | ubiquitin-conjugating enzyme E2M (UBC12 homolog, yeast) (Ube2m) alternative variant bSep08, mRNA.                 |
| Ube2n  | Ube2n.bSep08  | 116725 | 896   | 326  | 1  | 62  | ubiquitin-conjugating enzyme E2N (Ube2n) alternative variant bSep08, mRNA.                                        |
| Ube2o  | Ube2o.aSep08  | 303689 | 3797  | 2633 |    | 339 | ubiquitin-conjugating enzyme E2O (Ube2o) mRNA.                                                                    |
| Ube2q1 | Ube2q1.bSep08 | 295252 | 5745  | 795  | 10 | 264 | ubiquitin-conjugating enzyme E2Q (putative) 1 (Ube2q1) alternative variant bSep08, mRNA.                          |

|        |               |        |        |      |    |     |                                                                                                                     |
|--------|---------------|--------|--------|------|----|-----|---------------------------------------------------------------------------------------------------------------------|
| Ube2q1 | Ube2q1.cSep08 | 295252 | 4861   | 2745 | 9  | 217 | ubiquitin-conjugating enzyme E2Q (putative) 1 (24.3 kD) (Ube2q1) alternative variant cSep08, mRNA.                  |
| Ube2q1 | Ube2q1.eSep08 | 295252 | 1361   | 420  | 4  | 71  | ubiquitin-conjugating enzyme E2Q (putative) 1 (8.0 kD) (Ube2q1) alternative variant eSep08, mRNA.                   |
| Ube2q1 | Ube2q1.fSep08 | 295252 | 2026   | 1416 | 2  | 97  | ubiquitin-conjugating enzyme E2Q (putative) 1 (10.7 kD) (Ube2q1) alternative variant fSep08, mRNA.                  |
| Ube2q2 | Ube2q2.aSep08 | 363065 | 61136  | 1285 | 2  | 356 | ubiquitin-conjugating enzyme E2Q (putative) 2 (Ube2q2) alternative variant aSep08, mRNA.                            |
| Ube2q2 | Ube2q2.bSep08 | 363065 | 44402  | 947  | 2  | 315 | ubiquitin-conjugating enzyme E2Q (putative) 2 (Ube2q2) alternative variant bSep08, mRNA.                            |
| Ube2q2 | Ube2q2.cSep08 | 363065 | 36150  | 706  | 1  | 235 | ubiquitin-conjugating enzyme E2Q (putative) 2 (Ube2q2) alternative variant cSep08, mRNA.                            |
| Ube2q2 | Ube2q2.dSep08 | 363065 | 3919   | 1635 |    | 32  | ubiquitin-conjugating enzyme E2Q (putative) 2 (Ube2q2) alternative variant dSep08, mRNA.                            |
| Ube2t  | Ube2t.bSep08  | 360847 | 5457   | 570  | 4  | 75  | ubiquitin-conjugating enzyme E2T (putative) (Ube2t) alternative variant bSep08, mRNA.                               |
| Ube2v1 | Ube2v1.bSep08 | 296390 | 7774   | 449  | 1  | 53  | ubiquitin-conjugating enzyme E2 variant 1 (Ube2v1) alternative variant bSep08, mRNA.                                |
| Ube2v2 | Ube2v2.aSep08 | 287927 | 31010  | 757  | 4  | 240 | ubiquitin-conjugating enzyme E2 variant 2 (Ube2v2) alternative variant aSep08, mRNA.                                |
| Ube2z  | Ube2z.aSep08  | 303478 | 19140  | 2875 | 7  | 374 | ubiquitin-conjugating enzyme E2Z (putative) (Ube2z) alternative variant aSep08, mRNA.                               |
| Ube3a  | Ube3a.aSep08  | 361585 | 27493  | 1145 |    | 241 | ubiquitin protein ligase E3A (27.9 kD) (Ube3a) mRNA.                                                                |
| Ube3c  | Ube3c.aSep08  | 362294 | 102007 | 2024 | 6  | 557 | ubiquitin protein ligase E3C (Ube3c) alternative variant aSep08, mRNA.                                              |
| Ube3c  | Ube3c.bSep08  | 362294 | 56898  | 3347 | 11 | 535 | ubiquitin protein ligase E3C (Ube3c) alternative variant bSep08, mRNA.                                              |
| Ube3c  | Ube3c.cSep08  | 362294 | 16603  | 474  | 3  | 158 | ubiquitin protein ligase E3C (Ube3c) alternative variant cSep08, mRNA.                                              |
| Ube4a  | Ube4a.bSep08  | 315608 | 4115   | 685  | 4  | 190 | ubiquitination factor E4A, UFD2 homolog ( <i>S. cerevisiae</i> ) (Ube4a) alternative variant bSep08, mRNA.          |
| Ube4a  | Ube4a.cSep08  | 315608 | 12268  | 543  | 4  | 135 | ubiquitination factor E4A, UFD2 homolog ( <i>S. cerevisiae</i> ) (Ube4a) alternative variant cSep08, mRNA.          |
| Ube4a  | Ube4a.eSep08  | 315608 | 7422   | 909  | 3  | 34  | ubiquitination factor E4A, UFD2 homolog ( <i>S. cerevisiae</i> ) (3.7 kD) (Ube4a) alternative variant eSep08, mRNA. |
| Ube4a  | Ube4a.hSep08  | 315608 | 2112   | 352  | 2  | 28  | ubiquitination factor E4A, UFD2 homolog ( <i>S. cerevisiae</i> ) (Ube4a) alternative variant hSep08, mRNA.          |
| Ube4b  | Ube4b.aSep08  | 298652 | 45523  | 3834 | 20 | 855 | ubiquitination factor E4B, UFD2 homolog ( <i>S. cerevisiae</i> ) (Ube4b) alternative variant aSep08, mRNA.          |
| Ube4b  | Ube4b.bSep08  | 298652 | 7931   | 528  | 3  | 176 | ubiquitination factor E4B, UFD2 homolog ( <i>S. cerevisiae</i> ) (Ube4b) alternative variant bSep08, mRNA.          |
| Ube4b  | Ube4b.cSep08  | 298652 | 10127  | 534  | 5  | 171 | ubiquitination factor E4B, UFD2 homolog ( <i>S. cerevisiae</i> ) (Ube4b) alternative variant cSep08, mRNA.          |
| Ubfd1  | Ubfd1.aSep08  | 293454 | 10263  | 2423 | 6  | 313 | ubiquitin (Ubfd1) alternative variant aSep08, mRNA.                                                                 |
| Ubfd1  | Ubfd1.cSep08  | 293454 | 1506   | 709  | 2  | 236 | ubiquitin-binding protein homolog like (Ubfd1) alternative variant cSep08, mRNA.                                    |

|             |                    |        |       |      |    |     |                                                                                                                                             |
|-------------|--------------------|--------|-------|------|----|-----|---------------------------------------------------------------------------------------------------------------------------------------------|
| Ubiad1      | Ubiad1.bSep08      | 313706 | 23430 | 929  | 1  | 191 | putative endoplasmic reticulum protein, with a transmembrane domain, of ancient origin (21.0 kD) (Ubiad1) alternative variant bSep08, mRNA. |
| ubiquitin.3 | ubiquitin.3.aSep08 |        | 78155 | 602  |    | 68  | parkin (ubiquitin.3) mRNA.                                                                                                                  |
| Ubl5        | Ubl5.aSep08        | 500954 | 1902  | 568  | 5  | 73  | ubiquitin-like 5 (8.5 kD) (Ubl5) alternative variant aSep08, complete mRNA.                                                                 |
| Ubl5        | Ubl5.cSep08        | 500954 | 1689  | 1543 | 2  | 47  | ubiquitin-like 5 (5.4 kD) (Ubl5) alternative variant cSep08, complete mRNA.                                                                 |
| Ubl5        | Ubl5.dSep08        | 500954 | 1048  | 604  | 3  | 47  | ubiquitin-like 5 (5.4 kD) (Ubl5) alternative variant dSep08, complete mRNA.                                                                 |
| Ubl7        | Ubl7.bSep08        | 300744 | 10207 | 950  | 9  | 316 | ubiquitin-like 7 (bone marrow stromal cell-derived) (Ubl7) alternative variant bSep08, mRNA.                                                |
| Ubl7        | Ubl7.cSep08        | 300744 | 9600  | 782  | 7  | 233 | ubiquitin-like 7 (bone marrow stromal cell-derived) (Ubl7) alternative variant cSep08, mRNA.                                                |
| Ubl7        | Ubl7.dSep08        | 300744 | 9827  | 741  | 8  | 232 | ubiquitin-like 7 (bone marrow stromal cell-derived) (Ubl7) alternative variant dSep08, mRNA.                                                |
| Ubl7        | Ubl7.eSep08        | 300744 | 8261  | 563  | 6  | 187 | ubiquitin-like 7 (bone marrow stromal cell-derived) (Ubl7) alternative variant eSep08, mRNA.                                                |
| Ublcp1      | Ublcp1.bSep08      | 360514 | 8299  | 750  | 8  | 216 | ubiquitin (Ublcp1) alternative variant bSep08, mRNA.                                                                                        |
| Ubn1        | Ubn1.bSep08        | 302935 | 6829  | 896  | 3  | 248 | ubiquitin 1 (Ubn1) alternative variant bSep08, mRNA.                                                                                        |
| Ubn1        | Ubn1.cSep08        | 302935 | 6315  | 329  | 3  | 109 | ubiquitin 1 (Ubn1) alternative variant cSep08, mRNA.                                                                                        |
| Ubp1        | Ubp1.aSep08        | 301038 | 46332 | 3956 | 17 | 619 | upstream binding protein 1 (Ubp1) alternative variant aSep08, mRNA.                                                                         |
| Ubp1        | Ubp1.bSep08        | 301038 | 27111 | 1742 | 4  | 580 | upstream binding protein 1 (Ubp1) alternative variant bSep08, mRNA.                                                                         |
| Ubp1        | Ubp1.cSep08        | 301038 | 16085 | 1024 | 9  | 321 | upstream binding protein 1 (Ubp1) alternative variant cSep08, mRNA.                                                                         |
| Ubp1        | Ubp1.dSep08        | 301038 | 24420 | 549  | 4  | 182 | upstream binding protein 1 (Ubp1) alternative variant dSep08, mRNA.                                                                         |
| Ubp1        | Ubp1.eSep08        | 301038 | 14047 | 330  | 3  | 109 | upstream binding protein 1 (Ubp1) alternative variant eSep08, mRNA.                                                                         |
| Ubp1        | Ubp1.fSep08        | 301038 | 4515  | 2711 | 2  | 87  | upstream binding protein 1 (9.3 kD) (Ubp1) alternative variant fSep08, mRNA.                                                                |
| Ubqln1      | Ubqln1.bSep08      | 114590 | 3156  | 842  | 3  | 159 | ubiquilin 1 (Ubqln1) alternative variant bSep08, mRNA.                                                                                      |
| Ubqln1      | Ubqln1.cSep08      | 114590 | 3447  | 2190 | 2  | 144 | ubiquilin 1 CRA b (14.8 kD) (Ubqln1) alternative variant cSep08, mRNA.                                                                      |
| Ubtd2       | Ubtd2.aSep08       | 287178 | 16627 | 1799 |    | 211 | dendritic cell-derived ubiquitin-like protein (Ubtd2) mRNA.                                                                                 |
| Ubtf        | Ubtf.cSep08        | 25574  | 3882  | 854  | 5  | 186 | upstream binding transcription factor RNA polymerase I like (21.7 kD) (Ubtf) alternative variant cSep08, mRNA.                              |
| Ubtf        | Ubtf.dSep08        | 25574  | 1272  | 1178 | 2  | 150 | putative mitochondrial protein (16.8 kD) (Ubtf) alternative variant dSep08, mRNA.                                                           |
| Ubtf        | Ubtf.eSep08        | 25574  | 1989  | 706  | 5  | 137 | upstream binding transcription factor RNA polymerase I like (Ubtf) alternative variant eSep08, mRNA.                                        |
| Ubtf        | Ubtf.hSep08        | 25574  | 2839  | 352  | 4  | 83  | upstream binding transcription factor RNA polymerase I CRA b like (Ubtf) alternative variant hSep08, mRNA.                                  |

|                   |                          |        |       |      |    |     |                                                                                                                      |
|-------------------|--------------------------|--------|-------|------|----|-----|----------------------------------------------------------------------------------------------------------------------|
| Ubx1              | Ubx1.bSep08              | 363332 | 4769  | 1519 | 8  | 383 | UBX domain protein 6 (Ubx1) alternative variant bSep08, mRNA.                                                        |
| Ubx1              | Ubx1.cSep08              | 363332 | 4755  | 1974 | 8  | 208 | UBX domain (23.0 kD) (Ubx1) alternative variant cSep08, complete mRNA.                                               |
| Ubx1              | Ubx1.dSep08              | 363332 | 3176  | 747  | 4  | 137 | UBX domain (15.8 kD) (Ubx1) alternative variant dSep08, mRNA.                                                        |
| Ubx1              | Ubx1.eSep08              | 363332 | 1253  | 398  | 1  | 132 | UBX domain (Ubx1) alternative variant eSep08, mRNA.                                                                  |
| Ubx2              | Ubx2.bSep08              | 304766 | 32047 | 1997 | 12 | 351 | UBX domain (39.5 kD) (Ubx2) alternative variant bSep08, mRNA.                                                        |
| Ubx2              | Ubx2.cSep08              | 304766 | 15513 | 974  | 8  | 324 | UBX domain (Ubx2) alternative variant cSep08, mRNA.                                                                  |
| Ubx2              | Ubx2.dSep08              | 304766 | 11748 | 741  | 5  | 219 | UBX domain (Ubx2) alternative variant dSep08, mRNA.                                                                  |
| Ubx2              | Ubx2.eSep08              | 304766 | 2049  | 659  | 2  | 37  | putative protein (4.3 kD) (Ubx2) alternative variant eSep08, mRNA.                                                   |
| Ubx4andRGD1561716 | Ubx4andRGD1561716.bSep08 | 500624 | 25536 | 1486 | 6  | 196 | UBX domain (22.4 kD) (Ubx4andRGD1561716) alternative variant bSep08, mRNA.                                           |
| Ubx4andRGD1561716 | Ubx4andRGD1561716.bSep08 | 685859 | 25536 | 1486 | 6  | 196 | UBX domain (22.4 kD) (Ubx4andRGD1561716) alternative variant bSep08, mRNA.                                           |
| Ubx5              | Ubx5.bSep08              | 192207 | 14721 | 807  | 8  | 268 | UBX domain (Ubx5) alternative variant bSep08, mRNA.                                                                  |
| Ubx5              | Ubx5.cSep08              | 192207 | 12590 | 819  | 7  | 164 | UBX domain (18.1 kD) (Ubx5) alternative variant cSep08, mRNA.                                                        |
| Ubx5              | Ubx5.dSep08              | 192207 | 835   | 674  | 3  | 149 | UBX domain (16.3 kD) (Ubx5) alternative variant dSep08, mRNA.                                                        |
| Ubx5              | Ubx5.eSep08              | 192207 | 3730  | 589  | 4  | 126 | putative protein, with a coiled coil domain, of mammalian origin (14.0 kD) (Ubx5) alternative variant eSep08, mRNA.  |
| Ubx5              | Ubx5.fSep08              | 192207 | 20298 | 433  | 6  | 116 | UBX domain (13.0 kD) (Ubx5) alternative variant fSep08, mRNA.                                                        |
| Ubx6              | Ubx6.bSep08              | 290802 | 12136 | 708  | 1  | 146 | reproduction 8 like (Ubx6) alternative variant bSep08, mRNA.                                                         |
| Ubx7              | Ubx7.aSep08              | 303878 | 58006 | 1070 | 7  | 356 | CRA a (Ubx7) alternative variant aSep08, mRNA.                                                                       |
| UCH.0             | UCH.0.aSep08             |        | 4217  | 2008 |    | 122 | ubiquitin specific peptidase 12 (UCH.0) mRNA.                                                                        |
| Uchl1             | Uchl1.bSep08             | 29545  | 3046  | 505  | 3  | 123 | ubiquitin carboxyl-terminal esterase L1 (ubiquitin thiolesterase) (Uchl1) alternative variant bSep08, mRNA.          |
| Uchl1             | Uchl1.dSep08             | 29545  | 1465  | 345  | 2  | 90  | ubiquitin carboxyl-terminal esterase L1 (ubiquitin thiolesterase) (Uchl1) alternative variant dSep08, mRNA.          |
| Uchl1             | Uchl1.eSep08             | 29545  | 585   | 473  | 2  | 65  | ubiquitin carboxyl-terminal esterase L1 (ubiquitin thiolesterase) (7.0 kD) (Uchl1) alternative variant eSep08, mRNA. |
| Uchl5             | Uchl5.aSep08             | 360853 | 36791 | 1294 | 6  | 363 | ubiquitin carboxyl-terminal hydrolase L5 (Uchl5) alternative variant aSep08, mRNA.                                   |
| Uchl5             | Uchl5.cSep08             | 360853 | 36767 | 1159 | 5  | 291 | ubiquitin carboxyl-terminal hydrolase L5 (33.3 kD) (Uchl5) alternative variant cSep08, complete mRNA.                |
| Uchl5             | Uchl5.dSep08             | 360853 | 11951 | 815  | 2  | 204 | ubiquitin carboxyl-terminal hydrolase L5 (Uchl5) alternative variant dSep08, mRNA.                                   |
| Uchl5ip           | Uchl5ip.aSep08           | 293844 | 19083 | 1366 | 8  | 368 | UCHL5 interacting protein (40.6 kD) (Uchl5ip) alternative variant aSep08, complete mRNA.                             |



|         |                |        |       |      |   |     |                                                                                                         |
|---------|----------------|--------|-------|------|---|-----|---------------------------------------------------------------------------------------------------------|
| Uchl5ip | Uchl5ip.bSep08 | 293844 | 8981  | 769  | 4 | 183 | UCHL5 interacting protein (20.6 kD) (Uchl5ip) alternative variant bSep08, mRNA.                         |
| Uchl5ip | Uchl5ip.cSep08 | 293844 | 5165  | 911  | 2 | 143 | UCHL5 interacting protein (Uchl5ip) alternative variant cSep08, mRNA.                                   |
| Uck1    | Uck1.aSep08    | 311864 | 2369  | 1275 | 4 | 360 | uridine-cytidine kinase 1 (Uck1) alternative variant aSep08, complete mRNA.                             |
| Uck1    | Uck1.bSep08    | 311864 | 5840  | 1889 | 7 | 283 | uridine-cytidine kinase 1 (31.7 kD) (Uck1) alternative variant bSep08, complete mRNA.                   |
| Uck1    | Uck1.cSep08    | 311864 | 3390  | 679  | 4 | 194 | uridine-cytidine kinase 1 (Uck1) alternative variant cSep08, mRNA.                                      |
| Uck1    | Uck1.dSep08    | 311864 | 526   | 362  | 2 | 107 | uridine-cytidine kinase 1 (11.5 kD) (Uck1) alternative variant dSep08, mRNA.                            |
| Uck1    | Uck1.eSep08    | 311864 | 3461  | 989  | 4 | 87  | uridine-cytidine kinase 1 (Uck1) alternative variant eSep08, mRNA.                                      |
| Uck2    | Uck2.bSep08    | 304944 | 52785 | 497  | 1 | 144 | uridine-cytidine kinase 2 (Uck2) alternative variant bSep08, mRNA.                                      |
| Uckl1   | Uckl1.bSep08   | 499956 | 1067  | 850  | 3 | 94  | uridine-cytidine kinase 1-like 1 (10.7 kD) (Uckl1) alternative variant bSep08, mRNA.                    |
| Ucn3    | Ucn3.aSep08    | 498791 | 6256  | 1164 | 2 | 245 | urocortin 3 (stresscopin) (Ucn3) alternative variant aSep08, mRNA.                                      |
| Ucp1    | Ucp1.bSep08    | 24860  | 1272  | 609  | 1 | 126 | uncoupling protein 1 (mitochondrial, proton carrier) (13.4 kD) (Ucp1) alternative variant bSep08, mRNA. |
| Ucp3    | Ucp3.bSep08    | 25708  | 7269  | 734  | 1 | 196 | uncoupling protein 3 (mitochondrial, proton carrier) (Ucp3) alternative variant bSep08, mRNA.           |
| uDENN.0 | uDENN.0.aSep08 |        | 6976  | 434  |   | 93  | CRA b (uDENN.0) mRNA.                                                                                   |
| uDENN.1 | uDENN.1.aSep08 |        | 4304  | 1139 | 4 | 242 | containing DENN MADD domain 4 (26.4 kD) (uDENN.1) alternative variant aSep08, mRNA.                     |
| uDENN.1 | uDENN.1.bSep08 |        | 2789  | 919  | 1 | 122 | putative cytoplasmic protein of metazoan origin (12.9 kD) (uDENN.1) alternative variant bSep08, mRNA.   |
| uDENN.2 | uDENN.2.aSep08 |        | 1486  | 372  |   | 124 | protein CRA e (uDENN.2) mRNA.                                                                           |
| UEV.0   | UEV.0.aSep08   |        | 7288  | 353  |   | 117 | ubiquitin-conjugating enzyme E2-like (UEV.0) mRNA.                                                      |
| Uevld   | Uevld.aSep08   | 691172 | 5311  | 408  |   | 135 | UEV and lactate/malate dehydrogenase domains (Uevld) mRNA.                                              |
| Ufc1    | Ufc1.bSep08    | 445268 | 5457  | 391  | 2 | 93  | ubiquitin-fold modifier conjugating enzyme 1 (11.4 kD) (Ufc1) alternative variant bSep08, mRNA.         |
| Ufc1    | Ufc1.cSep08    | 445268 | 5819  | 889  | 1 | 93  | ubiquitin-fold modifier conjugating enzyme 1 (11.4 kD) (Ufc1) alternative variant cSep08, mRNA.         |
| Ufc1    | Ufc1.dSep08    | 445268 | 6630  | 985  | 4 | 87  | ubiquitin-fold modifier conjugating enzyme 1 (9.6 kD) (Ufc1) alternative variant dSep08, mRNA.          |
| Ufd1l   | Ufd1l.bSep08   | 84478  | 16127 | 731  | 9 | 177 | ubiquitin fusion degradation 1 like (yeast) (Ufd1l) alternative variant bSep08, mRNA.                   |
| Ufm1    | Ufm1.bSep08    | 365797 | 6695  | 690  | 6 | 93  | ubiquitin-fold modifier 1 (10.3 kD) (Ufm1) alternative variant bSep08, mRNA.                            |
| Ufsp2   | Ufsp2.bSep08   | 361151 | 10476 | 869  | 7 | 284 | peptidase 2 (Ufsp2) alternative variant bSep08, mRNA.                                                   |
| Ufsp2   | Ufsp2.cSep08   | 361151 | 14082 | 2219 | 7 | 183 | peptidase 2 (21.2 kD) (Ufsp2) alternative variant cSep08, complete mRNA.                                |

|           |                  |        |       |      |    |     |                                                                                                              |
|-----------|------------------|--------|-------|------|----|-----|--------------------------------------------------------------------------------------------------------------|
| Ufsp2     | Ufsp2.dSep08     | 361151 | 9305  | 909  | 6  | 168 | peptidase 2 (Ufsp2) alternative variant dSep08, mRNA.                                                        |
| Ufsp2     | Ufsp2.eSep08     | 361151 | 9303  | 738  | 7  | 164 | peptidase 2 (Ufsp2) alternative variant eSep08, mRNA.                                                        |
| Ufsp2     | Ufsp2.fSep08     | 361151 | 8001  | 715  | 6  | 128 | peptidase 2 (Ufsp2) alternative variant fSep08, mRNA.                                                        |
| Ufsp2     | Ufsp2.gSep08     | 361151 | 7986  | 646  | 6  | 128 | peptidase 2 (Ufsp2) alternative variant gSep08, mRNA.                                                        |
| Ufsp2     | Ufsp2.hSep08     | 361151 | 2969  | 569  | 3  | 91  | peptidase 2 (10.1 kD) (Ufsp2) alternative variant hSep08, mRNA.                                              |
| Ugcg      | Ugcg.bSep08      | 83626  | 3206  | 262  | 1  | 63  | UDP-glucose ceramide glucosyltransferase (Ugcg) alternative variant bSep08, mRNA.                            |
| Ugcgl1    | Ugcgl1.bSep08    | 171129 | 8738  | 487  | 3  | 148 | UDP-glucose ceramide glucosyltransferase-like 1 (Ugcgl1) alternative variant bSep08, mRNA.                   |
| Ugcgl1    | Ugcgl1.cSep08    | 171129 | 4154  | 338  | 4  | 112 | UDP-glucose ceramide glucosyltransferase-like 1 (Ugcgl1) alternative variant cSep08, mRNA.                   |
| Ugdh      | Ugdh.bSep08      | 83472  | 1374  | 520  | 2  | 100 | UDP-glucose dehydrogenase (11.4 kD) (Ugdh) alternative variant bSep08, mRNA.                                 |
| Ugp2      | Ugp2.bSep08      | 289827 | 32626 | 1081 | 6  | 360 | UDP-glucose pyrophosphorylase 2 (Ugp2) alternative variant bSep08, mRNA.                                     |
| Ugp2      | Ugp2.cSep08      | 289827 | 30333 | 742  | 5  | 243 | UDP-glucose pyrophosphorylase 2 (Ugp2) alternative variant cSep08, mRNA.                                     |
| Ugp2      | Ugp2.dSep08      | 289827 | 2032  | 832  | 2  | 129 | udp-glucose pyrophosphorylase 2 (14.4 kD) (Ugp2) alternative variant dSep08, mRNA.                           |
| Ugt2a3    | Ugt2a3.aSep08    | 289533 | 6037  | 641  |    | 213 | UDP glucuronosyltransferase 2 family, polypeptide A3 (Ugt2a3) mRNA.                                          |
| Ugt2b5    | Ugt2b5.aSep08    | 29623  | 16269 | 1532 |    | 510 | UDP-glucuronosyltransferase 2 family, member 5 (Ugt2b5) mRNA.                                                |
| Ugt2b36   | Ugt2b36.cSep08   | 83808  | 14887 | 1076 | 3  | 78  | UDP glucuronosyltransferase 2 family, polypeptide B36 (Ugt2b36) alternative variant cSep08, mRNA.            |
| Uhmk1     | Uhmk1.bSep08     | 246332 | 5280  | 740  | 4  | 192 | U2AF homology motif (UHM) kinase 1 (Uhmk1) alternative variant bSep08, mRNA.                                 |
| Uhmk1     | Uhmk1.cSep08     | 246332 | 1813  | 202  | 2  | 36  | U2AF homology motif (UHM) kinase 1 (Uhmk1) alternative variant cSep08, mRNA.                                 |
| Uhrf1     | Uhrf1.bSep08     | 316129 | 18532 | 3557 | 13 | 782 | ubiquitin-like with PHD and ring finger domains 1 (88.2 kD) (Uhrf1) alternative variant bSep08, mRNA.        |
| Uhrf1     | Uhrf1.cSep08     | 316129 | 7584  | 791  | 2  | 185 | ubiquitin-like with PHD and ring finger domains 1 (Uhrf1) alternative variant cSep08, mRNA.                  |
| Uhrf1     | Uhrf1.dSep08     | 316129 | 2318  | 431  | 2  | 143 | ubiquitin-like with PHD and ring finger domains 1 (Uhrf1) alternative variant dSep08, mRNA.                  |
| Uhrf1bp1l | Uhrf1bp1l.bSep08 | 363009 | 1591  | 1067 | 2  | 355 | UHRF1 binding protein 1-like (Uhrf1bp1l) alternative variant bSep08, mRNA.                                   |
| Uhrf1bp1l | Uhrf1bp1l.cSep08 | 363009 | 9809  | 2765 | 6  | 325 | UHRF1 binding protein 1-like (Uhrf1bp1l) alternative variant cSep08, mRNA.                                   |
| Uhrf1bp1l | Uhrf1bp1l.dSep08 | 363009 | 9011  | 642  | 4  | 213 | UHRF1 binding protein 1-like (Uhrf1bp1l) alternative variant dSep08, mRNA.                                   |
| Uhrf1bp1l | Uhrf1bp1l.eSep08 | 363009 | 1557  | 845  | 2  | 123 | UHRF1 binding protein 1-like (13.7 kD) (Uhrf1bp1l) alternative variant eSep08, mRNA.                         |
| Uhrf2     | Uhrf2.bSep08     | 309331 | 9177  | 2564 | 8  | 265 | ubiquitin-like, containing PHD and RING finger domains 2 (30.4 kD) (Uhrf2) alternative variant bSep08, mRNA. |

|        |               |        |       |      |    |     |                                                                                                             |
|--------|---------------|--------|-------|------|----|-----|-------------------------------------------------------------------------------------------------------------|
| Uhrf2  | Uhrf2.cSep08  | 309331 | 7386  | 685  | 6  | 217 | ubiquitin-like, containing PHD and RING finger domains 2 (Uhrf2) alternative variant cSep08, mRNA.          |
| Uhrf2  | Uhrf2.dSep08  | 309331 | 2599  | 734  | 3  | 129 | ubiquitin-like, containing PHD and RING finger domains 2 (Uhrf2) alternative variant dSep08, mRNA.          |
| Uhrf2  | Uhrf2.eSep08  | 309331 | 4695  | 753  | 4  | 71  | ubiquitin-like, containing PHD and RING finger domains 2 (8.2 kD) (Uhrf2) alternative variant eSep08, mRNA. |
| Uimc1  | Uimc1.bSep08  | 290997 | 21546 | 853  | 7  | 284 | retinoid x receptor interacting protein (Uimc1) alternative variant bSep08, mRNA.                           |
| Uimc1  | Uimc1.cSep08  | 290997 | 24307 | 643  | 5  | 166 | retinoid x receptor interacting protein (18.7 kD) (Uimc1) alternative variant cSep08, complete mRNA.        |
| Uimc1  | Uimc1.dSep08  | 290997 | 23038 | 561  | 4  | 144 | retinoid x receptor interacting protein (16.6 kD) (Uimc1) alternative variant dSep08, complete mRNA.        |
| Uimc1  | Uimc1.fSep08  | 290997 | 7674  | 1464 | 4  | 58  | retinoid x receptor interacting protein (6.6 kD) (Uimc1) alternative variant fSep08, mRNA.                  |
| Ulk1   | Ulk1.bSep08   | 360827 | 1529  | 891  | 2  | 65  | kinase 1 (Ulk1) alternative variant bSep08, mRNA.                                                           |
| Ulk2   | Ulk2.aSep08   | 303206 | 22662 | 3427 | 1  | 382 | kinase 2 (Ulk2) alternative variant aSep08, mRNA.                                                           |
| Ulk3   | Ulk3.aSep08   | 691171 | 4010  | 1585 |    | 384 | kinase 3 (43.7 kD) (Ulk3) mRNA.                                                                             |
| Umod   | Umod.bSep08   | 25128  | 7231  | 1798 | 2  | 376 | uromodulin (Umod) alternative variant bSep08, mRNA.                                                         |
| Umodl1 | Umodl1.aSep08 | 365544 | 9468  | 1316 |    | 133 | uromodulin-like 1 (Umodl1) mRNA.                                                                            |
| Unc5a  | Unc5a.bSep08  | 60629  | 5992  | 929  | 4  | 192 | unc-5 homolog A CRA a (Unc5a) alternative variant bSep08, mRNA.                                             |
| Unc5a  | Unc5a.cSep08  | 60629  | 804   | 720  | 2  | 123 | unc-5 homolog A CRA a (Unc5a) alternative variant cSep08, mRNA.                                             |
| Unc5c  | Unc5c.bSep08  | 362049 | 2995  | 359  | 2  | 85  | unc-5 homolog c (Unc5c) alternative variant bSep08, mRNA.                                                   |
| Unc13a | Unc13a.aSep08 | 64829  | 6969  | 2845 |    | 217 | unc-13 homolog (Unc13a) mRNA.                                                                               |
| Unc13b | Unc13b.bSep08 | 64830  | 4963  | 1411 | 8  | 343 | unc-13 homolog B (Unc13b) alternative variant bSep08, mRNA.                                                 |
| Unc13b | Unc13b.cSep08 | 64830  | 51295 | 403  | 5  | 134 | unc-13 homolog B CRA a (Unc13b) alternative variant cSep08, mRNA.                                           |
| Unc45a | Unc45a.bSep08 | 308759 | 5449  | 761  | 7  | 234 | smooth muscle cell associated (Unc45a) alternative variant bSep08, mRNA.                                    |
| Unc45a | Unc45a.cSep08 | 308759 | 4890  | 915  | 6  | 218 | smooth muscle cell associated (Unc45a) alternative variant cSep08, mRNA.                                    |
| Unc45a | Unc45a.dSep08 | 308759 | 736   | 376  | 3  | 67  | putative protein of mammalian origin (Unc45a) alternative variant dSep08, mRNA.                             |
| Unc45b | Unc45b.bSep08 | 303373 | 9019  | 917  | 2  | 305 | unc-45 homolog b (Unc45b) alternative variant bSep08, mRNA.                                                 |
| Unc50  | Unc50.bSep08  | 192356 | 7884  | 2131 | 3  | 251 | unc-50 homolog CRA b (29.5 kD) (Unc50) alternative variant bSep08, complete mRNA.                           |
| Unc50  | Unc50.cSep08  | 192356 | 7093  | 1320 | 4  | 226 | unc-50 homolog CRA b (26.9 kD) (Unc50) alternative variant cSep08, mRNA.                                    |
| Unc50  | Unc50.dSep08  | 192356 | 6298  | 686  | 3  | 67  | putative protein (7.5 kD) (Unc50) alternative variant dSep08, mRNA.                                         |
| Unc84a | Unc84a.bSep08 | 360773 | 30368 | 1322 | 12 | 440 | unc-84 homolog A CRA a (Unc84a) alternative variant bSep08, mRNA.                                           |

|         |                |        |       |      |    |     |                                                                                            |
|---------|----------------|--------|-------|------|----|-----|--------------------------------------------------------------------------------------------|
| Unc84a  | Unc84a.cSep08  | 360773 | 34947 | 1059 | 11 | 307 | unc-84 homolog A CRA a (Unc84a) alternative variant cSep08, mRNA.                          |
| Unc84a  | Unc84a.dSep08  | 360773 | 11933 | 702  | 6  | 220 | unc-84 homolog A CRA a (Unc84a) alternative variant dSep08, mRNA.                          |
| Unc84a  | Unc84a.eSep08  | 360773 | 22827 | 790  | 7  | 220 | unc-84 homolog A CRA a (Unc84a) alternative variant eSep08, mRNA.                          |
| Unc84a  | Unc84a.fSep08  | 360773 | 22798 | 789  | 7  | 215 | unc-84 homolog A CRA a (Unc84a) alternative variant fSep08, mRNA.                          |
| Unc84a  | Unc84a.gSep08  | 360773 | 22823 | 604  | 5  | 201 | unc-84 homolog A CRA a (Unc84a) alternative variant gSep08, mRNA.                          |
| Unc84a  | Unc84a.hSep08  | 360773 | 2383  | 937  | 5  | 153 | unc-84 homolog A CRA a (Unc84a) alternative variant hSep08, mRNA.                          |
| Unc84a  | Unc84a.iSep08  | 360773 | 4887  | 412  | 5  | 137 | unc-84 homolog A CRA d (Unc84a) alternative variant iSep08, mRNA.                          |
| Unc84a  | Unc84a.jSep08  | 360773 | 21394 | 489  | 4  | 124 | unc-84 homolog A CRA a (Unc84a) alternative variant jSep08, mRNA.                          |
| Unc84a  | Unc84a.kSep08  | 360773 | 19002 | 353  | 3  | 117 | unc-84 homolog A CRA a (Unc84a) alternative variant kSep08, mRNA.                          |
| Unc84b  | Unc84b.aSep08  | 315135 | 17158 | 4034 | 17 | 625 | unc-84 homolog B (Unc84b) alternative variant aSep08, mRNA.                                |
| Unc84b  | Unc84b.bSep08  | 315135 | 4546  | 1317 | 8  | 313 | unc-84 homolog B (Unc84b) alternative variant bSep08, mRNA.                                |
| Unc93b1 | Unc93b1.bSep08 | 361689 | 4846  | 1066 | 8  | 354 | unc-93 homolog B1 CRA b (Unc93b1) alternative variant bSep08, mRNA.                        |
| Unc93b1 | Unc93b1.cSep08 | 361689 | 27493 | 749  | 6  | 249 | unc-93 homolog B1 CRA b (Unc93b1) alternative variant cSep08, mRNA.                        |
| Unc93b1 | Unc93b1.dSep08 | 361689 | 1439  | 716  | 3  | 153 | unc-93 homolog B1 (Unc93b1) alternative variant dSep08, mRNA.                              |
| Unc93b1 | Unc93b1.fSep08 | 361689 | 3829  | 639  | 5  | 104 | unc-93 homolog B1 CRA b (Unc93b1) alternative variant fSep08, mRNA.                        |
| Unc119  | Unc119.cSep08  | 29402  | 1159  | 898  | 2  | 80  | unc-119 homolog CRA a (9.6 kD) (Unc119) alternative variant cSep08, mRNA.                  |
| Unc119  | Unc119.dSep08  | 29402  | 897   | 701  | 2  | 65  | unc-119 homolog CRA e (Unc119) alternative variant dSep08, mRNA.                           |
| Ung     | Ung.bSep08     | 304577 | 6770  | 748  | 6  | 211 | uracil-DNA glycosylase (Ung) alternative variant bSep08, mRNA.                             |
| Ung     | Ung.cSep08     | 304577 | 1556  | 669  | 3  | 140 | uracil-DNA glycosylase (Ung) alternative variant cSep08, mRNA.                             |
| Ung     | Ung.dSep08     | 304577 | 5980  | 738  | 6  | 120 | uracil-DNA glycosylase (Ung) alternative variant dSep08, mRNA.                             |
| Unk     | Unk.bSep08     | 360663 | 3371  | 725  | 4  | 241 | zinc finger ccch type containing 5 CRA a (Unk) alternative variant bSep08, mRNA.           |
| Unk     | Unk.cSep08     | 360663 | 2458  | 1830 | 2  | 164 | zinc finger ccch type containing 5 CRA a (18.1 kD) (Unk) alternative variant cSep08, mRNA. |
| Unk     | Unk.dSep08     | 360663 | 2359  | 375  | 4  | 124 | zinc finger ccch type containing 5 CRA a (Unk) alternative variant dSep08, mRNA.           |

|           |                  |        |       |      |   |     |                                                                                                                     |
|-----------|------------------|--------|-------|------|---|-----|---------------------------------------------------------------------------------------------------------------------|
| Unk       | Unk.eSep08       | 360663 | 955   | 390  | 2 | 91  | zinc finger ccch type containing 5 CRA a (Unk) alternative variant eSep08, mRNA.                                    |
| Upb1      | Upb1.bSep08      | 116593 | 9744  | 773  | 5 | 186 | ureidopropionase, beta (Upb1) alternative variant bSep08, mRNA.                                                     |
| Upb1      | Upb1.cSep08      | 116593 | 2208  | 1393 | 2 | 105 | ureidopropionase, beta (Upb1) alternative variant cSep08, mRNA.                                                     |
| Upb1      | Upb1.dSep08      | 116593 | 7596  | 1777 | 3 |     |                                                                                                                     |
| Upb1      | Upb1.eSep08      | 116593 | 8475  | 554  | 4 | 47  | ureidopropionase, beta (5.5 kD) (Upb1) alternative variant eSep08, mRNA.                                            |
| Upf3b     | Upf3b.aSep08     | 313449 | 9906  | 1771 | 6 | 316 | UPF3 regulator of nonsense transcripts homolog B (yeast) (Upf3b) alternative variant aSep08, mRNA.                  |
| Upf3b     | Upf3b.cSep08     | 313449 | 4791  | 347  | 5 | 29  | UPF3 regulator of nonsense transcripts homolog B (yeast) (3.6 kD) (Upf3b) alternative variant cSep08, mRNA.         |
| UPF0560.1 | UPF0560.1.aSep08 |        | 8694  | 1658 | 8 | 552 | putative protein (UPF0560.1) alternative variant aSep08, mRNA.                                                      |
| UPF0560.1 | UPF0560.1.bSep08 |        | 2842  | 1042 | 4 | 181 | putative protein of vertebrate origin (UPF0560.1) alternative variant bSep08, mRNA.                                 |
| UPF0560.1 | UPF0560.1.eSep08 |        | 6817  | 371  | 4 | 101 | putative protein (UPF0560.1) alternative variant eSep08, mRNA.                                                      |
| UPF0560.1 | UPF0560.1.fSep08 |        | 3018  | 305  | 4 | 80  | family with sequence similarity 171 member A1 (UPF0560.1) alternative variant fSep08, mRNA.                         |
| Upk2      | Upk2.bSep08      | 689093 | 1414  | 605  |   | 86  | uroplakin 2 (Upk2) alternative variant bSep08, mRNA.                                                                |
| Upk3b     | Upk3b.aSep08     | 360790 | 5993  | 1783 |   | 535 | uroplakin 3B (Upk3b) mRNA.                                                                                          |
| Uprt      | Uprt.aSep08      | 317237 | 20053 | 701  |   | 221 | uracil phosphoribosyltransferase (FUR1) homolog (S. cerevisiae) (Uprt) mRNA.                                        |
| Uqcr      | Uqcr.aSep08      | 690848 | 4641  | 494  | 3 | 89  | ubiquinol-cytochrome c reductase, 6.4kDa subunit (9.8 kD) (Uqcr) alternative variant aSep08, complete mRNA.         |
| Uqcr      | Uqcr.dSep08      | 690848 | 534   | 419  | 2 | 39  | ubiquinol-cytochrome c reductase, 6.4kDa subunit (Uqcr) alternative variant dSep08, mRNA.                           |
| Uqcrbl    | Uqcrbl.bSep08    | 362897 | 4801  | 1058 | 1 | 90  | ubiquinol-cytochrome c reductase binding protein-like (10.8 kD) (Uqcrbl) alternative variant bSep08, complete mRNA. |
| Uqcrc1    | Uqcrc1.bSep08    | 301011 | 8988  | 1042 | 8 | 339 | ubiquinol-cytochrome c reductase core protein I (Uqcrc1) alternative variant bSep08, mRNA.                          |
| Uqcrc1    | Uqcrc1.cSep08    | 301011 | 855   | 435  | 2 | 68  | putative protein (7.4 kD) (Uqcrc1) alternative variant cSep08, mRNA.                                                |
| Uqcrc2    | Uqcrc2.bSep08    | 293448 | 14196 | 644  | 7 | 158 | cytochrome Bc1 complex (Uqcrc2) alternative variant bSep08, mRNA.                                                   |
| Uqcrc2    | Uqcrc2.cSep08    | 293448 | 6279  | 618  | 5 | 116 | core protein II (12.6 kD) (Uqcrc2) alternative variant cSep08, complete mRNA.                                       |
| Uqcrc2    | Uqcrc2.dSep08    | 293448 | 5446  | 793  | 4 | 113 | core protein II (12.2 kD) (Uqcrc2) alternative variant dSep08, complete mRNA.                                       |
| Uqcrc2    | Uqcrc2.eSep08    | 293448 | 3189  | 700  | 3 | 109 | ubiquinol cytochrome c reductase core protein 2 CRA a (Uqcrc2) alternative variant eSep08, mRNA.                    |
| Uqcrq     | Uqcrq.bSep08     | 497902 | 2297  | 415  | 3 | 82  | ubiquinol-cytochrome c reductase, complex III subunit VII (9.8 kD) (Uqcrq) alternative variant bSep08, mRNA.        |
| UQ_con.1  | UQ_con.1.aSep08  |        | 95405 | 4250 | 6 | 192 | ubiquitin-conjugating enzyme (UQ_con.1) alternative variant aSep08, mRNA.                                           |

|          |                 |        |       |      |   |     |                                                                                                                                |
|----------|-----------------|--------|-------|------|---|-----|--------------------------------------------------------------------------------------------------------------------------------|
| UQ_con.1 | UQ_con.1.bSep08 |        | 1530  | 430  | 1 | 78  | ubiquitin-conjugating enzyme E2 H like (UQ_con.1) alternative variant bSep08, mRNA.                                            |
| Urg4     | Urg4.bSep08     | 305493 | 21958 | 381  | 6 | 127 | up-regulated gene 4 (Urg4) alternative variant bSep08, mRNA.                                                                   |
| Urg4     | Urg4.cSep08     | 305493 | 53278 | 595  | 6 | 82  | up-regulated gene 4 (Urg4) alternative variant cSep08, mRNA.                                                                   |
| Urg4     | Urg4.dSep08     | 305493 | 790   | 455  | 2 | 44  | up-regulated gene 4 (Urg4) alternative variant dSep08, mRNA.                                                                   |
| Urg4     | Urg4.eSep08     | 305493 | 46149 | 315  | 3 | 82  | up-regulated gene 4 (Urg4) alternative variant eSep08, mRNA.                                                                   |
| Urm1     | Urm1.aSep08     | 311840 | 17284 | 1235 | 3 | 101 | ubiquitin related modifier 1 homolog (S. cerevisiae) (11.3 kD) (Urm1) alternative variant aSep08, complete mRNA.               |
| Urm1     | Urm1.bSep08     | 311840 | 14472 | 611  | 1 | 63  | ubiquitin related modifier 1 homolog (S. cerevisiae) (7.1 kD) (Urm1) alternative variant bSep08, mRNA.                         |
| Uroc1    | Uroc1.aSep08    | 685999 | 7297  | 1732 |   | 155 | putative protein (17.5 kD) (Uroc1) alternative variant aSep08, mRNA.                                                           |
| Urod     | Urod.bSep08     | 29421  | 1995  | 837  | 6 | 218 | uroporphyrinogen decarboxylase (24.2 kD) (Urod) alternative variant bSep08, complete mRNA.                                     |
| Urod     | Urod.cSep08     | 29421  | 1402  | 1305 | 2 | 138 | uroporphyrinogen decarboxylase (15.3 kD) (Urod) alternative variant cSep08, mRNA.                                              |
| Urod     | Urod.dSep08     | 29421  | 2194  | 1241 | 4 | 110 | uroporphyrinogen decarboxylase (12.3 kD) (Urod) alternative variant dSep08, mRNA.                                              |
| Uros     | Uros.bSep08     | 309070 | 8392  | 403  | 4 | 81  | uroporphyrinogen III synthase (Uros) alternative variant bSep08, mRNA.                                                         |
| Use1     | Use1.aSep08     | 290627 | 2324  | 749  | 6 | 242 | uncharacterized Hematopoietic stem progenitor cells protein MDS032 (Use1) alternative variant aSep08, mRNA.                    |
| Use1     | Use1.bSep08     | 290627 | 2695  | 829  | 7 | 241 | uncharacterized Hematopoietic stem progenitor cells protein MDS032 (27.3 kD) (Use1) alternative variant bSep08, complete mRNA. |
| Use1     | Use1.cSep08     | 290627 | 2693  | 824  | 7 | 240 | uncharacterized Hematopoietic stem progenitor cells protein MDS032 (27.2 kD) (Use1) alternative variant cSep08, complete mRNA. |
| Use1     | Use1.dSep08     | 290627 | 2673  | 1388 | 5 | 148 | uncharacterized Hematopoietic stem progenitor cells protein MDS032 (16.4 kD) (Use1) alternative variant dSep08, complete mRNA. |
| Use1     | Use1.eSep08     | 290627 | 2620  | 687  | 7 | 139 | uncharacterized Hematopoietic stem progenitor cells protein MDS032 (Use1) alternative variant eSep08, mRNA.                    |
| Use1     | Use1.fSep08     | 290627 | 2209  | 818  | 6 | 123 | uncharacterized Hematopoietic stem progenitor cells protein MDS032 (13.8 kD) (Use1) alternative variant fSep08, mRNA.          |
| Use1     | Use1.gSep08     | 290627 | 2685  | 1791 | 2 | 84  | CRA c (9.7 kD) (Use1) alternative variant gSep08, complete mRNA.                                                               |
| Usf1     | Usf1.bSep08     | 83586  | 6895  | 964  | 1 | 222 | upstream transcription factor 1 (Usf1) alternative variant bSep08, mRNA.                                                       |
| Usf2     | Usf2.bSep08     | 81817  | 9788  | 756  | 9 | 251 | upstream transcription factor 2 (Usf2) alternative variant bSep08, mRNA.                                                       |

|         |                |        |       |      |    |     |                                                                                                              |
|---------|----------------|--------|-------|------|----|-----|--------------------------------------------------------------------------------------------------------------|
| Usf2    | Usf2.cSep08    | 81817  | 2042  | 1962 | 2  | 143 | upstream transcription factor 2 (Usf2) alternative variant cSep08, mRNA.                                     |
| Ush1c   | Ush1c.bSep08   | 308596 | 7917  | 1793 | 1  | 254 | usher syndrome 1C homolog (human) (Ush1c) alternative variant bSep08, mRNA.                                  |
| Ushbp1  | Ushbp1.bSep08  | 290629 | 3598  | 695  | 2  | 231 | usher syndrome 1C binding protein 1 (Ushbp1) alternative variant bSep08, mRNA.                               |
| Ushbp1  | Ushbp1.cSep08  | 290629 | 4146  | 666  | 2  | 160 | usher syndrome 1C binding protein 1 (Ushbp1) alternative variant cSep08, mRNA.                               |
| Usmg5.1 | Usmg5.1.aSep08 | 171069 | 5689  | 663  | 5  | 99  | upregulated during skeletal muscle growth 5 (11.3 kD) (Usmg5.1) alternative variant aSep08, mRNA.            |
| Usmg5.1 | Usmg5.1.bSep08 | 171069 | 781   | 694  | 2  | 61  | upregulated during skeletal muscle growth 5 (Usmg5.1) alternative variant bSep08, mRNA.                      |
| Usmg5.1 | Usmg5.1.dSep08 | 171069 | 6890  | 410  | 4  | 58  | upregulated during skeletal muscle growth 5 (6.4 kD) (Usmg5.1) alternative variant dSep08, mRNA.             |
| Usmg5.1 | Usmg5.1.eSep08 | 171069 | 6810  | 369  | 5  | 58  | upregulated during skeletal muscle growth 5 (6.4 kD) (Usmg5.1) alternative variant eSep08, complete mRNA.    |
| Uso1    | Uso1.bSep08    | 56042  | 11656 | 735  | 1  | 244 | USO1 homolog, vesicle docking protein (yeast) (Uso1) alternative variant bSep08, mRNA.                       |
| Usp1    | Usp1.bSep08    | 313387 | 1843  | 693  |    | 230 | ubiquitin specific peptidase 1 (Usp1) alternative variant bSep08, mRNA.                                      |
| Usp2    | Usp2.bSep08    | 115771 | 24934 | 705  | 7  | 234 | ubiquitin specific peptidase 2 (Usp2) alternative variant bSep08, mRNA.                                      |
| Usp2    | Usp2.cSep08    | 115771 | 6930  | 575  | 7  | 191 | ubiquitin specific peptidase 2 (Usp2) alternative variant cSep08, mRNA.                                      |
| Usp2    | Usp2.dSep08    | 115771 | 8947  | 790  | 2  | 190 | ubiquitin specific peptidase 2 (Usp2) alternative variant dSep08, mRNA.                                      |
| Usp2    | Usp2.eSep08    | 115771 | 1307  | 465  | 3  | 88  | ubiquitin specific peptidase 2 (Usp2) alternative variant eSep08, mRNA.                                      |
| Usp3    | Usp3.aSep08    | 363084 | 43814 | 1294 | 8  | 283 | ubiquitin specific peptidase 3 (Usp3) alternative variant aSep08, mRNA.                                      |
| Usp3    | Usp3.bSep08    | 363084 | 14870 | 1226 | 6  | 219 | ubiquitin specific peptidase 3 (Usp3) alternative variant bSep08, mRNA.                                      |
| Usp3    | Usp3.cSep08    | 363084 | 12082 | 436  | 2  | 79  | ubiquitin specific peptidase 3 (Usp3) alternative variant cSep08, mRNA.                                      |
| Usp3    | Usp3.dSep08    | 363084 | 30261 | 2367 | 1  | 41  | ubiquitin specific peptidase 3 (Usp3) alternative variant dSep08, mRNA.                                      |
| Usp4    | Usp4.aSep08    | 290864 | 43298 | 3358 | 22 | 961 | ubiquitin specific peptidase 4 (proto-oncogene) (108.4 kD) (Usp4) alternative variant aSep08, complete mRNA. |
| Usp4    | Usp4.cSep08    | 290864 | 3669  | 511  | 3  | 121 | ubiquitin specific peptidase 4 (proto-oncogene) (Usp4) alternative variant cSep08, mRNA.                     |
| Usp5    | Usp5.bSep08    | 297593 | 6223  | 1661 | 9  | 371 | ubiquitin specific peptidase 5 (isopeptidase T) (Usp5) alternative variant bSep08, mRNA.                     |
| Usp5    | Usp5.cSep08    | 297593 | 762   | 684  | 2  | 116 | ubiquitin specific peptidase 5 (isopeptidase T) (Usp5) alternative variant cSep08, mRNA.                     |
| Usp7    | Usp7.bSep08    | 360471 | 77306 | 1798 | 10 | 563 | ubiquitin 7 (Usp7) alternative variant bSep08, mRNA.                                                         |
| Usp7    | Usp7.cSep08    | 360471 | 3044  | 1789 | 4  | 469 | ubiquitin 7 (Usp7) alternative variant cSep08, mRNA.                                                         |
| Usp7    | Usp7.dSep08    | 360471 | 8145  | 1863 | 8  | 212 | ubiquitin 7 (Usp7) alternative variant dSep08, mRNA.                                                         |

|       |              |        |       |      |    |     |                                                                                           |
|-------|--------------|--------|-------|------|----|-----|-------------------------------------------------------------------------------------------|
| Usp7  | Usp7.eSep08  | 360471 | 4353  | 736  | 8  | 141 | ubiquitin 7 (Usp7) alternative variant eSep08, mRNA.                                      |
| Usp8  | Usp8.bSep08  | 296121 | 20690 | 683  | 5  | 166 | ubiquitin specific peptidase 8 (Usp8) alternative variant bSep08, mRNA.                   |
| Usp9x | Usp9x.aSep08 | 363445 | 9168  | 2975 | 7  | 325 | ubiquitin specific 9 X-linked (Usp9x) alternative variant aSep08, mRNA.                   |
| Usp9x | Usp9x.bSep08 | 363445 | 16849 | 3667 | 3  | 279 | ubiquitin specific peptidase 9 X-linked CRA a (Usp9x) alternative variant bSep08, mRNA.   |
| Usp9x | Usp9x.cSep08 | 363445 | 3435  | 1036 | 4  | 194 | ubiquitin specific peptidase 9 X-linked CRA b (Usp9x) alternative variant cSep08, mRNA.   |
| Usp10 | Usp10.cSep08 | 307905 | 1681  | 480  | 2  | 66  | ubiquitin specific peptidase 10 (Usp10) alternative variant cSep08, mRNA.                 |
| Usp11 | Usp11.bSep08 | 408217 | 1136  | 862  | 2  | 202 | ubiquitin specific peptidase 11 (22.5 kD) (Usp11) alternative variant bSep08, mRNA.       |
| Usp12 | Usp12.aSep08 | 360763 | 43645 | 780  |    | 259 | ubiquitin specific peptidase 12 (Usp12) mRNA.                                             |
| Usp13 | Usp13.bSep08 | 310306 | 1945  | 354  | 2  | 52  | ubiquitin specific (Usp13) alternative variant bSep08, mRNA.                              |
| Usp14 | Usp14.bSep08 | 291796 | 35453 | 1319 | 14 | 267 | ubiquitin specific peptidase 14 (30.0 kD) (Usp14) alternative variant bSep08, mRNA.       |
| Usp14 | Usp14.cSep08 | 291796 | 1122  | 676  | 2  | 36  | ubiquitin specific peptidase 14 (4.2 kD) (Usp14) alternative variant cSep08, mRNA.        |
| Usp15 | Usp15.bSep08 | 171329 | 14858 | 1800 | 5  | 341 | ubiquitin specific peptidase 15 (Usp15) alternative variant bSep08, mRNA.                 |
| Usp15 | Usp15.cSep08 | 171329 | 23303 | 711  | 5  | 237 | ubiquitin specific peptidase 15 CRA c (Usp15) alternative variant cSep08, mRNA.           |
| Usp15 | Usp15.dSep08 | 171329 | 9292  | 2174 | 3  | 127 | ubiquitin specific peptidase 15 CRA b (Usp15) alternative variant dSep08, mRNA.           |
| Usp15 | Usp15.eSep08 | 171329 | 23058 | 394  | 4  | 124 | ubiquitin specific peptidase 15 CRA c (Usp15) alternative variant eSep08, mRNA.           |
| Usp16 | Usp16.aSep08 | 288306 | 29074 | 2845 | 18 | 825 | ubiquitin specific peptidase 16 (93.7 kD) (Usp16) alternative variant aSep08, mRNA.       |
| Usp16 | Usp16.bSep08 | 288306 | 18914 | 1245 | 11 | 287 | ubiquitin specific peptidase 16 (32.6 kD) (Usp16) alternative variant bSep08, mRNA.       |
| Usp16 | Usp16.cSep08 | 288306 | 1989  | 427  | 2  | 24  | ubiquitin specific peptidase 16 (2.5 kD) (Usp16) alternative variant cSep08, mRNA.        |
| Usp18 | Usp18.bSep08 | 312688 | 5071  | 726  | 4  | 149 | ubiquitin specific peptidase 18 (17.1 kD) (Usp18) alternative variant bSep08, mRNA.       |
| Usp18 | Usp18.cSep08 | 312688 | 5971  | 595  | 5  | 113 | ubiquitin specific peptidase 18 (Usp18) alternative variant cSep08, mRNA.                 |
| Usp19 | Usp19.bSep08 | 361190 | 2523  | 860  | 8  | 286 | ubiquitin specific peptidase 19 CRA d (Usp19) alternative variant bSep08, mRNA.           |
| Usp19 | Usp19.cSep08 | 361190 | 1390  | 855  | 6  | 233 | ubiquitin specific peptidase 19 CRA c (Usp19) alternative variant cSep08, mRNA.           |
| Usp19 | Usp19.dSep08 | 361190 | 3027  | 2844 | 3  | 191 | ubiquitin specific peptidase 19 (Usp19) alternative variant dSep08, mRNA.                 |
| Usp19 | Usp19.fSep08 | 361190 | 3241  | 1558 | 4  | 121 | ubiquitin specific peptidase 19 CRA a (13.3 kD) (Usp19) alternative variant fSep08, mRNA. |



|       |              |        |       |      |    |     |                                                                                           |
|-------|--------------|--------|-------|------|----|-----|-------------------------------------------------------------------------------------------|
| Usp19 | Usp19.hSep08 | 361190 | 518   | 409  | 2  | 97  | ubiquitin specific peptidase 19 (Usp19) alternative variant hSep08, mRNA.                 |
| Usp19 | Usp19.iSep08 | 361190 | 701   | 376  | 3  | 94  | ubiquitin specific peptidase 19 CRA d (Usp19) alternative variant iSep08, mRNA.           |
| Usp19 | Usp19.jSep08 | 361190 | 2304  | 437  | 5  | 92  | ubiquitin specific peptidase 19 CRA d (Usp19) alternative variant jSep08, mRNA.           |
| Usp19 | Usp19.lSep08 | 361190 | 603   | 365  | 2  | 30  | putative protein (Usp19) alternative variant lSep08, mRNA.                                |
| Usp20 | Usp20.bSep08 | 311856 | 15022 | 517  | 7  | 171 | ubiquitin specific peptidase 20 (Usp20) alternative variant bSep08, mRNA.                 |
| Usp20 | Usp20.cSep08 | 311856 | 7833  | 939  | 6  | 168 | ubiquitin specific peptidase 20 (Usp20) alternative variant cSep08, mRNA.                 |
| Usp20 | Usp20.eSep08 | 311856 | 2382  | 1913 | 2  | 82  | ubiquitin specific peptidase 20 CRA a (8.9 kD) (Usp20) alternative variant eSep08, mRNA.  |
| Usp22 | Usp22.aSep08 | 303201 | 6304  | 428  |    | 142 | ubiquitin specific protease 22 (Usp22) mRNA.                                              |
| Usp24 | Usp24.aSep08 | 313427 | 3361  | 644  |    | 214 | ubiquitin specific protease 24 (Usp24) mRNA.                                              |
| Usp25 | Usp25.bSep08 | 304150 | 19432 | 563  | 3  | 146 | ubiquitin specific peptidase 25 (Usp25) alternative variant bSep08, mRNA.                 |
| Usp25 | Usp25.cSep08 | 304150 | 1600  | 348  | 3  | 110 | ubiquitin specific peptidase 25 (Usp25) alternative variant cSep08, mRNA.                 |
| Usp28 | Usp28.bSep08 | 315639 | 15465 | 1779 | 11 | 518 | ubiquitin specific peptidase 28 (Usp28) alternative variant bSep08, mRNA.                 |
| Usp28 | Usp28.cSep08 | 315639 | 2896  | 371  | 4  | 123 | ubiquitin specific peptidase 28 (Usp28) alternative variant cSep08, mRNA.                 |
| Usp30 | Usp30.bSep08 | 304579 | 15660 | 627  | 7  | 209 | ubiquitin specific peptidase 30 (Usp30) alternative variant bSep08, mRNA.                 |
| Usp30 | Usp30.cSep08 | 304579 | 37607 | 738  | 4  | 144 | ubiquitin specific peptidase 30 (Usp30) alternative variant cSep08, mRNA.                 |
| Usp30 | Usp30.dSep08 | 304579 | 1226  | 805  | 2  | 115 | ubiquitin specific peptidase 30 (13.0 kD) (Usp30) alternative variant dSep08, mRNA.       |
| Usp32 | Usp32.cSep08 | 303394 | 24754 | 363  | 3  | 95  | ubiquitin specific protease 32 (Usp32) alternative variant cSep08, mRNA.                  |
| Usp33 | Usp33.aSep08 | 310960 | 17009 | 2311 | 12 | 453 | ubiquitin specific peptidase 33 CRA a (Usp33) alternative variant aSep08, mRNA.           |
| Usp33 | Usp33.bSep08 | 310960 | 5894  | 469  | 5  | 144 | ubiquitin specific peptidase 33 (Usp33) alternative variant bSep08, mRNA.                 |
| Usp33 | Usp33.cSep08 | 310960 | 4883  | 411  | 5  | 137 | ubiquitin specific 33 (Usp33) alternative variant cSep08, mRNA.                           |
| Usp33 | Usp33.dSep08 | 310960 | 1169  | 1071 | 2  | 110 | ubiquitin specific 33 (12.5 kD) (Usp33) alternative variant dSep08, mRNA.                 |
| Usp33 | Usp33.eSep08 | 310960 | 3421  | 1242 | 3  | 91  | ubiquitin specific peptidase 33 CRA d (10.1 kD) (Usp33) alternative variant eSep08, mRNA. |
| Usp33 | Usp33.fSep08 | 310960 | 1624  | 707  | 2  | 47  | ubiquitin specific 33 (Usp33) alternative variant fSep08, mRNA.                           |
| Usp35 | Usp35.aSep08 | 308834 | 8190  | 754  | 1  | 250 | ubiquitin specific peptidase 35 (Usp35) alternative variant aSep08, mRNA.                 |
| Usp35 | Usp35.bSep08 | 308834 | 5051  | 816  | 1  | 225 | ubiquitin specific peptidase 35 (Usp35) alternative variant bSep08, mRNA.                 |

|       |              |        |       |      |    |     |                                                                                     |
|-------|--------------|--------|-------|------|----|-----|-------------------------------------------------------------------------------------|
| Usp35 | Usp35.cSep08 | 308834 | 4787  | 707  | 3  | 137 | ubiquitin specific peptidase 35 (Usp35) alternative variant cSep08, mRNA.           |
| Usp36 | Usp36.bSep08 | 303700 | 8760  | 3189 | 7  | 404 | ubiquitin specific peptidase 36 (Usp36) alternative variant bSep08, mRNA.           |
| Usp38 | Usp38.aSep08 | 307764 | 10810 | 1700 | 5  | 566 | ubiquitin specific peptidase 38 (Usp38) alternative variant aSep08, mRNA.           |
| Usp39 | Usp39.bSep08 | 297336 | 32411 | 2603 | 15 | 564 | ubiquitin specific peptidase 39 (65.2 kD) (Usp39) alternative variant bSep08, mRNA. |
| Usp39 | Usp39.cSep08 | 297336 | 19242 | 1790 | 7  | 377 | ubiquitin specific peptidase 39 (Usp39) alternative variant cSep08, mRNA.           |
| Usp39 | Usp39.dSep08 | 297336 | 10232 | 994  | 5  | 179 | ubiquitin specific peptidase 39 (Usp39) alternative variant dSep08, mRNA.           |
| Usp39 | Usp39.eSep08 | 297336 | 5320  | 513  | 4  | 116 | ubiquitin specific peptidase 39 (Usp39) alternative variant eSep08, mRNA.           |
| Usp39 | Usp39.fSep08 | 297336 | 3196  | 693  | 4  | 82  | ubiquitin specific peptidase 39 (9.5 kD) (Usp39) alternative variant fSep08, mRNA.  |
| Usp40 | Usp40.bSep08 | 316599 | 5920  | 661  | 6  | 219 | ubiquitin specific peptidase 40 (Usp40) alternative variant bSep08, mRNA.           |
| Usp40 | Usp40.cSep08 | 316599 | 15939 | 930  | 11 | 209 | ubiquitin specific peptidase 40 (Usp40) alternative variant cSep08, mRNA.           |
| Usp40 | Usp40.dSep08 | 316599 | 2542  | 519  | 4  | 135 | ubiquitin specific peptidase 40 (Usp40) alternative variant dSep08, mRNA.           |
| Usp42 | Usp42.bSep08 | 288482 | 1288  | 515  | 2  | 69  | ubiquitin specific peptidase 42 (Usp42) alternative variant bSep08, mRNA.           |
| Usp45 | Usp45.bSep08 | 313098 | 5938  | 674  | 2  | 224 | ubiquitin specific peptidase 45 (Usp45) alternative variant bSep08, mRNA.           |
| Usp45 | Usp45.cSep08 | 313098 | 3785  | 2143 | 2  | 73  | ubiquitin specific peptidase 45 (8.2 kD) (Usp45) alternative variant cSep08, mRNA.  |
| Usp46 | Usp46.aSep08 | 289584 | 16485 | 728  |    | 162 | ubiquitin specific peptidase 46 (Usp46) mRNA.                                       |
| Usp47 | Usp47.bSep08 | 308896 | 31913 | 1787 | 6  | 472 | ubiquitin specific peptidase 47 (Usp47) alternative variant bSep08, mRNA.           |
| Usp47 | Usp47.cSep08 | 308896 | 17823 | 971  | 9  | 323 | ubiquitin specific peptidase 47 (Usp47) alternative variant cSep08, mRNA.           |
| Usp48 | Usp48.bSep08 | 362636 | 24145 | 1413 | 12 | 278 | ubiquitin specific 48 (31.1 kD) (Usp48) alternative variant bSep08, mRNA.           |
| Usp48 | Usp48.dSep08 | 362636 | 662   | 561  | 2  | 57  | ubiquitin specific 48 (Usp48) alternative variant dSep08, mRNA.                     |
| Usp50 | Usp50.aSep08 | 311399 | 5008  | 720  | 3  | 193 | ubiquitin specific peptidase 50 (Usp50) alternative variant aSep08, mRNA.           |
| Usp50 | Usp50.bSep08 | 311399 | 5072  | 858  | 3  | 139 | ubiquitin specific peptidase 50 (Usp50) alternative variant bSep08, mRNA.           |
| Usp50 | Usp50.cSep08 | 311399 | 3382  | 684  | 2  | 93  | ubiquitin specific peptidase 50 (Usp50) alternative variant cSep08, mRNA.           |
| Usp50 | Usp50.dSep08 | 311399 | 3373  | 749  | 2  | 84  | ubiquitin specific peptidase 50 (Usp50) alternative variant dSep08, mRNA.           |
| Usp52 | Usp52.bSep08 | 408200 | 3212  | 819  | 8  | 272 | ubiquitin specific peptidase 52 CRA e (Usp52) alternative variant bSep08, mRNA.     |

|               |                      |        |        |      |   |     |                                                                                                           |
|---------------|----------------------|--------|--------|------|---|-----|-----------------------------------------------------------------------------------------------------------|
| Usp52         | Usp52.dSep08         | 408200 | 6729   | 1780 | 6 | 132 | ubiquitin specific peptidase 52 CRA b (Usp52) alternative variant dSep08, mRNA.                           |
| Usp52         | Usp52.eSep08         | 408200 | 3480   | 1883 | 4 | 121 | specific 2 (13.9 kD) (Usp52) alternative variant eSep08, mRNA.                                            |
| Usp52         | Usp52.gSep08         | 408200 | 2309   | 755  | 3 | 57  | ubiquitin specific peptidase 52 CRA b (Usp52) alternative variant gSep08, mRNA.                           |
| Usp53         | Usp53.bSep08         | 295425 | 2854   | 906  | 2 | 279 | ubiquitin specific peptidase 53 (Usp53) alternative variant bSep08, mRNA.                                 |
| Usp53         | Usp53.cSep08         | 295425 | 1783   | 403  | 2 | 19  | ubiquitin specific peptidase 53 (Usp53) alternative variant cSep08, mRNA.                                 |
| Usp54         | Usp54.bSep08         | 408223 | 6155   | 1692 | 2 | 438 | ubiquitin specific peptidase 54 (47.8 kD) (Usp54) alternative variant bSep08, mRNA.                       |
| Usp54         | Usp54.cSep08         | 408223 | 2150   | 759  | 2 | 252 | ubiquitin specific peptidase 54 (Usp54) alternative variant cSep08, mRNA.                                 |
| Usp54         | Usp54.dSep08         | 408223 | 6256   | 448  | 2 | 22  | ubiquitin specific peptidase 54 (2.7 kD) (Usp54) alternative variant dSep08, mRNA.                        |
| Uspl1         | Uspl1.aSep08         | 288447 | 11126  | 2395 | 4 | 735 | ubiquitin specific peptidase like 1 (Uspl1) alternative variant aSep08, mRNA.                             |
| Uspl1         | Uspl1.dSep08         | 288447 | 7935   | 768  | 3 | 235 | ubiquitin specific peptidase like 1 (Uspl1) alternative variant dSep08, mRNA.                             |
| Uteroglobin.0 | Uteroglobin.0.aSep08 |        | 4240   | 513  |   | 117 | PBPC1BS like (Uteroglobin.0) alternative variant aSep08, mRNA.                                            |
| Uteroglobin.0 | Uteroglobin.0.bSep08 |        | 4143   | 562  | 1 | 37  | CRA a like (4.4 kD) (Uteroglobin.0) alternative variant bSep08, mRNA.                                     |
| Utp6          | Utp6.aSep08          | 360574 | 6257   | 1796 |   | 197 | UTP6, small subunit (SSU) processome component, homolog (yeast) (Utp6) mRNA.                              |
| Utp14a        | Utp14a.bSep08        | 317579 | 5157   | 1184 | 4 | 348 | UTP14, U3 small nucleolar ribonucleoprotein, homolog A (yeast) (Utp14a) alternative variant bSep08, mRNA. |
| Utp14a        | Utp14a.cSep08        | 317579 | 4239   | 930  | 3 | 292 | UTP14, U3 small nucleolar ribonucleoprotein, homolog A (yeast) (Utp14a) alternative variant cSep08, mRNA. |
| Utp14a        | Utp14a.dSep08        | 317579 | 2590   | 1262 | 4 | 206 | UTP14, U3 small nucleolar ribonucleoprotein, homolog A (yeast) (Utp14a) alternative variant dSep08, mRNA. |
| Utp14a        | Utp14a.eSep08        | 317579 | 2644   | 556  | 2 | 132 | UTP14, U3 small nucleolar ribonucleoprotein, homolog A (yeast) (Utp14a) alternative variant eSep08, mRNA. |
| Utp15         | Utp15.bSep08         | 310019 | 17730  | 1788 | 5 | 445 | UTP15, U3 small nucleolar ribonucleoprotein, homolog (yeast) (Utp15) alternative variant bSep08, mRNA.    |
| Utp15         | Utp15.cSep08         | 310019 | 8979   | 1453 | 7 | 171 | UTP15, U3 small nucleolar ribonucleoprotein, homolog (yeast) (Utp15) alternative variant cSep08, mRNA.    |
| Utp18         | Utp18.aSep08         | 303456 | 26976  | 2506 |   | 560 | UTP18, small subunit (SSU) processome component, homolog (yeast) (Utp18) mRNA.                            |
| Utp20         | Utp20.aSep08         | 314713 | 10798  | 1981 |   | 543 | UTP20, small subunit (SSU) processome component, homolog (yeast) (Utp20) mRNA.                            |
| Utrn          | Utrn.aSep08          | 25600  | 148596 | 1202 | 5 | 321 | utrophin (36.9 kD) (Utrn) alternative variant aSep08, mRNA.                                               |
| Utrn          | Utrn.bSep08          | 25600  | 8769   | 405  | 3 | 135 | utrophin (Utrn) alternative variant bSep08, mRNA.                                                         |
| Utx           | Utx.aSep08           | 317178 | 14015  | 390  |   | 130 | ubiquitously transcribed tetratricopeptide repeat (Utx) mRNA.                                             |

|          |                 |        |        |      |   |     |                                                                                                                                                  |
|----------|-----------------|--------|--------|------|---|-----|--------------------------------------------------------------------------------------------------------------------------------------------------|
| Uvrag    | Uvrag.bSep08    | 308846 | 29975  | 2292 | 3 | 306 | UV radiation resistance associated (33.2 kD) (Uvrag) alternative variant bSep08, mRNA.                                                           |
| Uvrag    | Uvrag.cSep08    | 308846 | 107006 | 899  | 5 | 299 | UV radiation resistance associated (Uvrag) alternative variant cSep08, mRNA.                                                                     |
| Uvrag    | Uvrag.dSep08    | 308846 | 13808  | 904  | 2 | 123 | UV radiation resistance associated (Uvrag) alternative variant dSep08, mRNA.                                                                     |
| Uxs1     | Uxs1.aSep08     | 246232 | 52493  | 1820 | 3 | 370 | UDP-glucuronate decarboxylase 1 (Uxs1) alternative variant aSep08, mRNA.                                                                         |
| Uxs1     | Uxs1.bSep08     | 246232 | 38835  | 701  | 1 | 233 | UDP-glucuronate decarboxylase 1 (Uxs1) alternative variant bSep08, mRNA.                                                                         |
| Uxt      | Uxt.bSep08      | 299313 | 12493  | 842  | 5 | 175 | ubiquitously expressed transcript (Uxt) alternative variant bSep08, mRNA.                                                                        |
| Uxt      | Uxt.cSep08      | 299313 | 10717  | 1082 | 3 | 107 | ubiquitously expressed transcript (12.1 kD) (Uxt) alternative variant cSep08, mRNA.                                                              |
| Uxt      | Uxt.dSep08      | 299313 | 12042  | 571  | 4 | 103 | ubiquitously expressed transcript (11.7 kD) (Uxt) alternative variant dSep08, complete mRNA.                                                     |
| Uxt      | Uxt.eSep08      | 299313 | 12538  | 780  | 4 | 89  | ubiquitously expressed transcript (10.1 kD) (Uxt) alternative variant eSep08, mRNA.                                                              |
| V-set.0  | V-set.0.aSep08  |        | 1012   | 921  |   | 119 | t-cell receptor like (13.3 kD) (V-set.0) mRNA.                                                                                                   |
| V-set.1  | V-set.1.aSep08  |        | 956    | 734  |   | 129 | T cell receptor (V-set.1) mRNA.                                                                                                                  |
| V-set.2  | V-set.2.aSep08  |        | 708    | 590  |   | 148 | T-cell receptor region like (V-set.2) mRNA.                                                                                                      |
| V-set.3  | V-set.3.aSep08  |        | 528    | 348  |   | 109 | T cell receptor (V-set.3) mRNA.                                                                                                                  |
| V-set.4  | V-set.4.aSep08  |        | 570    | 399  |   | 109 | T-cell receptor like (V-set.4) mRNA.                                                                                                             |
| V-set.5  | V-set.5.aSep08  |        | 488    | 340  |   | 113 | T-cell receptor like (V-set.5) mRNA.                                                                                                             |
| V-set.6  | V-set.6.aSep08  |        | 587    | 493  |   | 113 | t-cell receptor like (V-set.6) mRNA.                                                                                                             |
| V-set.7  | V-set.7.aSep08  |        | 520    | 340  |   | 108 | T cell receptor (V-set.7) mRNA.                                                                                                                  |
| V-set.8  | V-set.8.aSep08  |        | 826    | 735  |   | 119 | t-cell receptor like (13.3 kD) (V-set.8) mRNA.                                                                                                   |
| V-set.9  | V-set.9.aSep08  |        | 519    | 339  |   | 112 | T cell receptor AV10S10 like (V-set.9) mRNA.                                                                                                     |
| V-set.10 | V-set.10.aSep08 |        | 568    | 473  |   | 113 | t-cell receptor like (V-set.10) mRNA.                                                                                                            |
| V-set.11 | V-set.11.aSep08 |        | 629    | 534  |   | 177 | T-cell receptor like (V-set.11) mRNA.                                                                                                            |
| V-set.12 | V-set.12.aSep08 |        | 528    | 395  |   | 111 | T cell receptor (V-set.12) mRNA.                                                                                                                 |
| V-set.13 | V-set.13.aSep08 |        | 7671   | 704  |   | 128 | T cell receptor (V-set.13) mRNA.                                                                                                                 |
| V-set.14 | V-set.14.aSep08 |        | 956    | 734  |   | 129 | T cell receptor (V-set.14) mRNA.                                                                                                                 |
| V-set.15 | V-set.15.aSep08 |        | 588    | 395  |   | 131 | T cell receptor V delta 5 (V-set.15) mRNA.                                                                                                       |
| V-set.16 | V-set.16.aSep08 |        | 629    | 534  |   | 177 | T-cell receptor like (V-set.16) mRNA.                                                                                                            |
| V-set.17 | V-set.17.aSep08 |        | 483    | 365  |   | 121 | T-cell receptor like (V-set.17) mRNA.                                                                                                            |
| V-set.18 | V-set.18.aSep08 |        | 484    | 389  |   | 115 | immunoglobulin lambda chain (V-set.18) mRNA.                                                                                                     |
| V-set.19 | V-set.19.aSep08 |        | 514    | 393  |   | 131 | this CDS feature is included show the translation corresponding V region. Presently qualifiers on V region features are illegal (V-set.19) mRNA. |
| V-set.20 | V-set.20.aSep08 |        | 459    | 375  |   | 116 | immunoglobulin heavy chain variable region (V-set.20) mRNA.                                                                                      |
| V-set.21 | V-set.21.aSep08 |        | 525    | 415  |   | 138 | heavy chain (V-set.21) mRNA.                                                                                                                     |
| V-set.22 | V-set.22.aSep08 |        | 455    | 371  |   | 123 | H prechain like (V-set.22) mRNA.                                                                                                                 |

|          |                 |  |      |     |   |     |                                                                 |
|----------|-----------------|--|------|-----|---|-----|-----------------------------------------------------------------|
| V-set.23 | V-set.23.aSep08 |  | 434  | 350 |   | 116 | immunoglobulin heavy chain variable region (V-set.23) mRNA.     |
| V-set.24 | V-set.24.aSep08 |  | 434  | 350 |   | 116 | immunoglobulin heavy chain variable region (V-set.24) mRNA.     |
| V-set.25 | V-set.25.aSep08 |  | 486  | 378 |   | 126 | immunoglobulin heavy chain (V-set.25) mRNA.                     |
| V-set.26 | V-set.26.aSep08 |  | 535  | 421 |   | 139 | heavy chain (V-set.26) mRNA.                                    |
| V-set.27 | V-set.27.aSep08 |  | 438  | 354 |   | 117 | heavy chain variable region (V-set.27) mRNA.                    |
| V-set.28 | V-set.28.aSep08 |  | 443  | 359 |   | 119 | immunoglobulin heavy chain variable region (V-set.28) mRNA.     |
| V-set.29 | V-set.29.aSep08 |  | 518  | 404 |   | 134 | immunoglobulin heavy chain (V-set.29) mRNA.                     |
| V-set.30 | V-set.30.aSep08 |  | 535  | 420 |   | 117 | immunoglobulin heavy chain (V-set.30) mRNA.                     |
| V-set.31 | V-set.31.aSep08 |  | 461  | 375 |   | 115 | heavy chain (V-set.31) mRNA.                                    |
| V-set.32 | V-set.32.aSep08 |  | 494  | 398 |   | 132 | immunoglobulin heavy chain (V-set.32) mRNA.                     |
| V-set.33 | V-set.33.aSep08 |  | 480  | 401 |   | 119 | heavy chain (V-set.33) mRNA.                                    |
| V-set.34 | V-set.34.aSep08 |  | 480  | 394 |   | 117 | immunoglobulin (V-set.34) mRNA.                                 |
| V-set.35 | V-set.35.aSep08 |  | 468  | 393 |   | 118 | heavy chain (V-set.35) mRNA.                                    |
| V-set.36 | V-set.36.aSep08 |  | 526  | 426 |   | 142 | immunoglobulin heavy chain (V-set.36) mRNA.                     |
| V-set.37 | V-set.37.aSep08 |  | 459  | 377 |   | 125 | immunoglobulin (V-set.37) mRNA.                                 |
| V-set.38 | V-set.38.aSep08 |  | 521  | 411 |   | 119 | immunoglobulin heavy chain (V-set.38) mRNA.                     |
| V-set.39 | V-set.39.aSep08 |  | 453  | 372 |   | 123 | heavy chain (V-set.39) mRNA.                                    |
| V-set.40 | V-set.40.aSep08 |  | 454  | 371 |   | 123 | heavy chain (V-set.40) mRNA.                                    |
| V-set.41 | V-set.41.aSep08 |  | 469  | 386 |   | 120 | heavy chain (V-set.41) mRNA.                                    |
| V-set.42 | V-set.42.aSep08 |  | 447  | 363 |   | 120 | immunoglobulin heavy chain variable region (V-set.42) mRNA.     |
| V-set.43 | V-set.43.aSep08 |  | 435  | 352 |   | 116 | heavy chain (V-set.43) mRNA.                                    |
| V-set.44 | V-set.44.aSep08 |  | 439  | 355 |   | 118 | immunoglobulin heavy chain variable region (V-set.44) mRNA.     |
| V-set.60 | V-set.60.aSep08 |  | 738  | 498 |   | 118 | T-cell receptor like (V-set.60) mRNA.                           |
| V-set.61 | V-set.61.aSep08 |  | 575  | 491 |   | 116 | T cell receptor (V-set.61) mRNA.                                |
| V-set.62 | V-set.62.aSep08 |  | 2898 | 399 | 1 | 133 | T cell receptor (V-set.62) alternative variant aSep08, mRNA.    |
| V-set.62 | V-set.62.bSep08 |  | 894  | 774 | 1 | 116 | T cell receptor (V-set.62) alternative variant bSep08, mRNA.    |
| V-set.63 | V-set.63.aSep08 |  | 781  | 400 |   | 121 | immunoglobulin light chain (V-set.63) mRNA.                     |
| V-set.64 | V-set.64.aSep08 |  | 459  | 348 |   | 115 | kappa chain (V-set.64) mRNA.                                    |
| V-set.65 | V-set.65.aSep08 |  | 489  | 374 |   | 124 | immunoglobulin 4G6 light chain variable region (V-set.65) mRNA. |
| V-set.66 | V-set.66.aSep08 |  | 460  | 340 |   | 112 | immunoglobulin light chain (V-set.66) mRNA.                     |
| V-set.67 | V-set.67.aSep08 |  | 480  | 357 |   | 118 | immunoglobulin light chain variable region (V-set.67) mRNA.     |
| V-set.68 | V-set.68.aSep08 |  | 484  | 356 |   | 118 | immunoglobulin chain (V-set.68) mRNA.                           |
| V-set.69 | V-set.69.aSep08 |  | 521  | 322 |   | 107 | chain kappa (V-set.69) mRNA.                                    |
| V-set.70 | V-set.70.aSep08 |  | 484  | 360 |   | 119 | immunoglobulin chain (V-set.70) mRNA.                           |

|          |                 |        |       |      |   |     |                                                                                                 |
|----------|-----------------|--------|-------|------|---|-----|-------------------------------------------------------------------------------------------------|
| V-set.71 | V-set.71.aSep08 |        | 491   | 366  |   | 121 | immunoglobulin chain (V-set.71) mRNA.                                                           |
| V-set.72 | V-set.72.aSep08 |        | 694   | 329  |   | 109 | light chain (V-set.72) mRNA.                                                                    |
| V-set.73 | V-set.73.aSep08 |        | 544   | 360  |   | 120 | immunoglobulin chain (V-set.73) mRNA.                                                           |
| V-set.76 | V-set.76.aSep08 |        | 4264  | 1271 |   | 226 | 15 -related cell adhesion molecule (V-set.76) mRNA.                                             |
| V-set.77 | V-set.77.aSep08 |        | 10349 | 2207 | 5 | 475 | pregnancy specific glycoprotein (53.1 kD) (V-set.77) alternative variant aSep08, complete mRNA. |
| V-set.78 | V-set.78.aSep08 |        | 524   | 414  |   | 137 | heavy chain (V-set.78) mRNA.                                                                    |
| V-set.79 | V-set.79.aSep08 |        | 483   | 365  |   | 121 | T-cell receptor like (V-set.79) mRNA.                                                           |
| vaby     | vaby.aSep08     |        | 2966  | 347  |   | 29  | putative protein (3.2 kD) (vaby) mRNA.                                                          |
| Vac14    | Vac14.bSep08    | 307842 | 8483  | 809  | 3 | 123 | vac14 homolog (S. cerevisiae) (Vac14) alternative variant bSep08, mRNA.                         |
| Vac14    | Vac14.cSep08    | 307842 | 5770  | 397  | 2 | 106 | vac14 homolog (S. cerevisiae) (11.2 kD) (Vac14) alternative variant cSep08, mRNA.               |
| vachy    | vachy.aSep08    |        | 6710  | 464  |   | 154 | gene associated (vachy) mRNA.                                                                   |
| vadar    | vadar.aSep08    |        | 14876 | 544  |   | 17  | putative protein (2.2 kD) (vadar) mRNA.                                                         |
| vadoy    | vadoy.aSep08    |        | 1356  | 287  |   | 53  | putative protein (vadoy) mRNA.                                                                  |
| vaflo    | vaflo.aSep08    |        | 4649  | 325  |   | 100 | putative protein (vaflo) mRNA.                                                                  |
| vaflu    | vaflu.aSep08    |        | 7815  | 512  |   | 54  | putative protein (vaflu) mRNA.                                                                  |
| vagar    | vagar.aSep08    |        | 5553  | 826  |   | 47  | putative protein (vagar) mRNA.                                                                  |
| vaja     | vaja.aSep08     |        | 561   | 402  |   | 32  | T cell receptor (vaja) mRNA.                                                                    |
| vajey    | vajey.aSep08    |        | 8593  | 645  |   | 214 | CRA a (vajey) mRNA.                                                                             |
| vakee    | vakee.aSep08    |        | 7979  | 688  |   | 33  | putative protein (4.1 kD) (vakee) mRNA.                                                         |
| vakler   | vakler.aSep08   |        | 2459  | 687  |   | 115 | putative protein (vakler) mRNA.                                                                 |
| valo     | valo.aSep08     |        | 11513 | 771  |   | 109 | tyrosine kinase 3 (valo) mRNA.                                                                  |
| vamee    | vamee.aSep08    |        | 44889 | 510  |   | 131 | folliculin interacting protein 1 (14.5 kD) (vamee) mRNA.                                        |
| Vamp1    | Vamp1.aSep08    | 25624  | 6937  | 1214 | 2 | 170 | vesicle-associated membrane protein 1 (Vamp1) alternative variant aSep08, mRNA.                 |
| Vamp1    | Vamp1.cSep08    | 25624  | 6683  | 724  | 3 | 149 | vesicle-associated membrane protein 1 (Vamp1) alternative variant cSep08, mRNA.                 |
| Vamp1    | Vamp1.dSep08    | 25624  | 4697  | 960  | 1 | 141 | vesicle-associated membrane protein 1 (Vamp1) alternative variant dSep08, mRNA.                 |
| Vamp2    | Vamp2.bSep08    | 24803  | 1458  | 359  | 4 | 119 | vesicle-associated membrane protein 2 (Vamp2) alternative variant bSep08, mRNA.                 |
| Vamp2    | Vamp2.cSep08    | 24803  | 1392  | 380  | 3 | 103 | vesicle-associated membrane protein 2 (Vamp2) alternative variant cSep08, mRNA.                 |
| Vamp4    | Vamp4.aSep08    | 364033 | 19483 | 1413 | 8 | 141 | vesicle-associated membrane protein 4 (16.4 kD) (Vamp4) alternative variant aSep08, mRNA.       |
| Vamp4    | Vamp4.cSep08    | 364033 | 6574  | 668  | 4 | 52  | vesicle-associated membrane protein 4 (6.0 kD) (Vamp4) alternative variant cSep08, mRNA.        |
| Vamp5    | Vamp5.bSep08    | 89818  | 1700  | 702  | 3 | 91  | vesicle-associated membrane protein 5 (9.7 kD) (Vamp5) alternative variant bSep08, mRNA.        |
| Vamp7    | Vamp7.aSep08    | 85491  | 38808 | 3305 | 8 | 220 | vesicle-associated membrane protein 7 (24.8 kD) (Vamp7) alternative variant aSep08, mRNA.       |

|         |                |        |       |      |   |     |                                                                                                              |
|---------|----------------|--------|-------|------|---|-----|--------------------------------------------------------------------------------------------------------------|
| Vangl1  | Vangl1.cSep08  | 690366 | 1686  | 393  | 2 | 88  | vang-like 1 (van gogh, Drosophila) (Vangl1) alternative variant cSep08, mRNA.                                |
| vanoy   | vanoy.aSep08   |        | 8049  | 705  |   | 47  | putative protein (5.7 kD) (vanoy) mRNA.                                                                      |
| Vapa    | Vapa.cSep08    | 58857  | 23921 | 721  | 5 | 176 | vesicle-associated membrane protein, associated protein a (Vapa) alternative variant cSep08, mRNA.           |
| Vapa    | Vapa.eSep08    | 58857  | 10580 | 602  | 3 | 128 | vesicle-associated membrane protein, associated protein a (14.4 kD) (Vapa) alternative variant eSep08, mRNA. |
| vapor   | vapor.aSep08   |        | 5808  | 1012 |   | 65  | putative protein (vapor) mRNA.                                                                               |
| varby   | varby.aSep08   |        | 5401  | 2125 | 2 | 106 | serine threonine protein kinase MST4 (varby) alternative variant aSep08, mRNA.                               |
| varby   | varby.bSep08   |        | 2049  | 367  | 1 | 49  | putative protein (5.4 kD) (varby) alternative variant bSep08, mRNA.                                          |
| varchy  | varchy.aSep08  |        | 3900  | 3539 |   | 69  | zinc finger protein 106 (varchy) mRNA.                                                                       |
| vardar  | vardar.aSep08  |        | 26093 | 348  |   | 62  | putative protein (7.0 kD) (vardar) mRNA.                                                                     |
| vardoy  | vardoy.aSep08  |        | 25456 | 731  | 4 | 211 | niemann-pick disease type c1 like (vardoy) alternative variant aSep08, mRNA.                                 |
| vardoy  | vardoy.bSep08  |        | 3374  | 308  | 2 | 102 | niemann-pick C1 (vardoy) alternative variant bSep08, mRNA.                                                   |
| varflo  | varflo.aSep08  |        | 6585  | 574  |   | 102 | putative nuclear protein (11.1 kD) (varflo) mRNA.                                                            |
| varflu  | varflu.aSep08  |        | 1818  | 601  |   | 49  | putative protein (varflu) mRNA.                                                                              |
| vargar  | vargar.aSep08  |        | 6547  | 484  |   | 102 | putative protein (11.3 kD) (vargar) mRNA.                                                                    |
| varja   | varja.aSep08   |        | 11724 | 1285 |   | 9   | putative protein (0.9 kD) (varja) mRNA.                                                                      |
| varjey  | varjey.aSep08  |        | 7149  | 552  |   | 183 | FRYL protein (varjey) mRNA.                                                                                  |
| varkee  | varkee.aSep08  |        | 10192 | 738  |   | 51  | putative protein (5.5 kD) (varkee) mRNA.                                                                     |
| varkler | varkler.aSep08 |        | 21749 | 1203 |   | 400 | intersectin 2 CRA a (varkler) mRNA.                                                                          |
| varlo   | varlo.aSep08   |        | 7684  | 763  |   | 41  | putative protein (4.5 kD) (varlo) mRNA.                                                                      |
| varmee  | varmee.aSep08  |        | 30923 | 207  |   | 52  | putative protein (varmee) mRNA.                                                                              |
| varnoy  | varnoy.aSep08  |        | 2371  | 674  |   | 108 | dis3 mitotic control homolog -like 2 (varnoy) mRNA.                                                          |
| varpor  | varpor.aSep08  |        | 2158  | 739  |   | 44  | putative protein (varpor) mRNA.                                                                              |
| Vars2   | Vars2.bSep08   | 25009  | 1727  | 835  | 8 | 278 | valyl-tRNA synthetase 2 (Vars2) alternative variant bSep08, mRNA.                                            |
| Vars2   | Vars2.cSep08   | 25009  | 752   | 570  | 2 | 189 | valyl-tRNA synthetase 2 (Vars2) alternative variant cSep08, mRNA.                                            |
| Vars2   | Vars2.dSep08   | 25009  | 2996  | 738  | 7 | 184 | valyl-tRNA synthetase 2 (Vars2) alternative variant dSep08, mRNA.                                            |
| Vars2   | Vars2.eSep08   | 25009  | 1217  | 579  | 3 | 170 | valyl-tRNA synthetase 2 (Vars2) alternative variant eSep08, mRNA.                                            |
| Vars2   | Vars2.fSep08   | 25009  | 814   | 422  | 4 | 140 | valyl-tRNA synthetase 2 (Vars2) alternative variant fSep08, mRNA.                                            |
| Vars2   | Vars2.hSep08   | 25009  | 830   | 393  | 3 | 98  | valyl-tRNA synthetase 2 (Vars2) alternative variant hSep08, mRNA.                                            |
| Vars2l  | Vars2l.bSep08  | 309596 | 3583  | 1821 | 8 | 348 | valyl-tRNA synthetase 2-like (Vars2l) alternative variant bSep08, mRNA.                                      |
| Vars2l  | Vars2l.cSep08  | 309596 | 1292  | 777  | 7 | 244 | valyl-tRNA synthetase 2-like (Vars2l) alternative variant cSep08, mRNA.                                      |

|         |                |        |        |      |   |     |                                                                                                    |
|---------|----------------|--------|--------|------|---|-----|----------------------------------------------------------------------------------------------------|
| Vars2l  | Vars2l.dSep08  | 309596 | 914    | 691  | 3 | 145 | valyl-tRNA synthetase 2-like (Vars2l) alternative variant dSep08, mRNA.                            |
| Vars2l  | Vars2l.eSep08  | 309596 | 2187   | 781  | 8 | 109 | valyl-tRNA synthetase 2-like (Vars2l) alternative variant eSep08, mRNA.                            |
| varsa   | varsa.aSep08   |        | 1902   | 1200 |   | 244 | ligase-like 8 (varsa) mRNA.                                                                        |
| varshee | varshee.aSep08 |        | 21424  | 587  |   | 85  | putative protein (varshee) mRNA.                                                                   |
| vartu   | vartu.aSep08   |        | 2491   | 293  |   | 97  | gene regulated by estrogen in breast cancer protein like (vartu) mRNA.                             |
| varvar  | varvar.aSep08  |        | 4963   | 785  |   | 261 | zinc finger castor 1 (varvar) mRNA.                                                                |
| varwey  | varwey.aSep08  |        | 33004  | 1777 | 1 | 64  | putative protein (7.2 kD) (varwey) alternative variant aSep08, mRNA.                               |
| varwey  | varwey.bSep08  |        | 11301  | 729  | 2 | 63  | putative protein (7.3 kD) (varwey) alternative variant bSep08, mRNA.                               |
| vasa    | vasa.aSep08    |        | 67432  | 269  |   | 89  | tbc1 domain family member 22a (vasa) mRNA.                                                         |
| Vash1   | Vash1.aSep08   | 503052 | 3019   | 770  |   | 156 | vasohibin 1 (Vash1) mRNA.                                                                          |
| Vash2   | Vash2.aSep08   | 498309 | 17442  | 1434 | 7 | 277 | vasohibin 2 (Vash2) alternative variant aSep08, mRNA.                                              |
| Vash2   | Vash2.cSep08   | 498309 | 7618   | 904  | 4 | 36  | vasohibin 2 (4.3 kD) (Vash2) alternative variant cSep08, mRNA.                                     |
| vashee  | vashee.aSep08  |        | 2853   | 1764 |   | 457 | insulin receptor-related receptor CRA a (vashee) mRNA.                                             |
| Vasp    | Vasp.bSep08    | 361517 | 7854   | 1677 | 3 | 361 | vasodilator-stimulated phosphoprotein (Vasp) alternative variant bSep08, mRNA.                     |
| Vasp    | Vasp.cSep08    | 361517 | 3730   | 661  | 2 | 220 | vasodilator-stimulated phosphoprotein (Vasp) alternative variant cSep08, mRNA.                     |
| Vat1    | Vat1.dSep08    | 287721 | 650    | 225  | 3 | 60  | vesicle amine transport protein 1 homolog (T californica) (Vat1) alternative variant dSep08, mRNA. |
| vatu    | vatu.aSep08    |        | 7450   | 301  |   | 100 | neuroblastoma-amplified protein (vatu) mRNA.                                                       |
| Vav1    | Vav1.bSep08    | 25156  | 23242  | 728  | 6 | 242 | vav 1 oncogene (Vav1) alternative variant bSep08, mRNA.                                            |
| Vav1    | Vav1.cSep08    | 25156  | 2649   | 616  | 6 | 175 | vav 1 oncogene (Vav1) alternative variant cSep08, mRNA.                                            |
| Vav1    | Vav1.dSep08    | 25156  | 12048  | 1733 | 5 | 158 | vav 1 oncogene (Vav1) alternative variant dSep08, mRNA.                                            |
| Vav2    | Vav2.cSep08    | 296603 | 4422   | 753  | 3 | 79  | vav2 oncogene (Vav2) alternative variant cSep08, mRNA.                                             |
| Vav3    | Vav3.aSep08    | 295378 | 102000 | 2389 |   | 311 | vav 3 oncogene (Vav3) mRNA.                                                                        |
| vavar   | vavar.aSep08   |        | 1709   | 778  |   | 259 | putative protein of mammalian origin (vavar) mRNA.                                                 |
| vawby   | vawby.aSep08   |        | 620    | 385  | 2 | 75  | putative protein (vawby) alternative variant aSep08, mRNA.                                         |
| vawby   | vawby.bSep08   |        | 2090   | 770  | 3 | 71  | putative protein (vawby) alternative variant bSep08, mRNA.                                         |
| vawby   | vawby.cSep08   |        | 2426   | 1075 | 3 | 62  | putative protein (vawby) alternative variant cSep08, mRNA.                                         |
| vawby   | vawby.dSep08   |        | 2523   | 1226 | 4 | 49  | CRA d like (6.1 kD) (vawby) alternative variant dSep08, mRNA.                                      |
| vawchy  | vawchy.aSep08  |        | 706    | 490  |   | 40  | putative protein (4.3 kD) (vawchy) mRNA.                                                           |
| vawdar  | vawdar.aSep08  |        | 3955   | 768  |   | 102 | putative protein (11.0 kD) (vawdar) mRNA.                                                          |
| vawdoy  | vawdoy.aSep08  |        | 1098   | 393  |   | 45  | putative protein (vawdoy) mRNA.                                                                    |
| vawey   | vawey.aSep08   |        | 5120   | 531  |   | 96  | putative protein (10.7 kD) (vawey) mRNA.                                                           |
| vawflo  | vawflo.aSep08  |        | 575    | 224  |   | 42  | putative protein (4.7 kD) (vawflo) mRNA.                                                           |
| vawflu  | vawflu.aSep08  |        | 14026  | 674  |   | 50  | putative protein (vawflu) mRNA.                                                                    |



|         |                |        |       |      |   |     |                                                                                       |
|---------|----------------|--------|-------|------|---|-----|---------------------------------------------------------------------------------------|
| vawgar  | vawgar.aSep08  |        | 14238 | 704  |   | 61  | putative protein (7.0 kD) (vawgar) mRNA.                                              |
| vawja   | vawja.aSep08   |        | 667   | 581  |   | 35  | putative protein (3.7 kD) (vawja) mRNA.                                               |
| vawjey  | vawjey.aSep08  |        | 7953  | 726  | 6 | 233 | FRY protein (vawjey) alternative variant aSep08, mRNA.                                |
| vawjey  | vawjey.bSep08  |        | 3591  | 342  | 4 | 113 | FRY protein (vawjey) alternative variant bSep08, mRNA.                                |
| vawkee  | vawkee.aSep08  |        | 1459  | 626  |   | 75  | putative protein (vawkee) mRNA.                                                       |
| vawkler | vawkler.aSep08 |        | 2626  | 249  |   | 43  | putative protein (4.9 kD) (vawkler) mRNA.                                             |
| vawlo   | vawlo.aSep08   |        | 2986  | 575  |   | 39  | putative protein (4.4 kD) (vawlo) mRNA.                                               |
| vawmee  | vawmee.aSep08  |        | 2981  | 448  |   | 53  | putative protein (6.2 kD) (vawmee) mRNA.                                              |
| vawnoy  | vawnoy.aSep08  |        | 627   | 271  |   | 89  | putative protein (vawnoy) mRNA.                                                       |
| vawpor  | vawpor.aSep08  |        | 9019  | 389  |   | 25  | putative protein (vawpor) mRNA.                                                       |
| vawsa   | vawsa.aSep08   |        | 22412 | 738  |   | 176 | ligase-like 8 (vawsa) mRNA.                                                           |
| vawshee | vawshee.aSep08 |        | 7481  | 430  |   | 70  | putative protein (vawshee) mRNA.                                                      |
| vawtu   | vawtu.aSep08   |        | 1361  | 380  |   | 101 | putative protein (10.7 kD) (vawtu) mRNA.                                              |
| vawvar  | vawvar.aSep08  |        | 6800  | 1800 | 2 | 599 | zinc finger castor homolog 1 (vawvar) alternative variant aSep08, mRNA.               |
| vawvar  | vawvar.bSep08  |        | 4847  | 528  | 3 | 175 | zinc finger castor homolog 1 (vawvar) alternative variant bSep08, mRNA.               |
| vawvar  | vawvar.dSep08  |        | 4054  | 1783 | 2 | 33  | putative protein (3.6 kD) (vawvar) alternative variant dSep08, mRNA.                  |
| vawwey  | vawwey.aSep08  |        | 894   | 779  |   | 96  | putative protein (vawwey) mRNA.                                                       |
| VBS.0   | VBS.0.aSep08   |        | 21958 | 663  |   | 221 | talin 2 (VBS.0) mRNA.                                                                 |
| Vcan    | Vcan.aSep08    | 114122 | 36808 | 3013 | 8 | 364 | versican (Vcan) alternative variant aSep08, mRNA.                                     |
| Vcp     | Vcp.bSep08     | 116643 | 2854  | 863  | 6 | 282 | valosin-containing protein (Vcp) alternative variant bSep08, mRNA.                    |
| Vcp     | Vcp.dSep08     | 116643 | 4866  | 760  | 3 | 64  | valosin-containing protein (Vcp) alternative variant dSep08, mRNA.                    |
| Vcsa1   | Vcsa1.bSep08   | 24867  | 56043 | 630  | 2 | 162 | variable coding sequence A1 (Vcsa1) alternative variant bSep08, mRNA.                 |
| Vdac2   | Vdac2.bSep08   | 83531  | 9057  | 1202 | 8 | 274 | voltage-dependent anion channel 2 (29.6 kD) (Vdac2) alternative variant bSep08, mRNA. |
| Vdac2   | Vdac2.cSep08   | 83531  | 6681  | 895  | 5 | 120 | voltage-dependent anion channel 2 (13.1 kD) (Vdac2) alternative variant cSep08, mRNA. |
| Vdac3   | Vdac3.bSep08   | 83532  | 14962 | 1177 | 7 | 245 | voltage-dependent anion channel 3 (26.9 kD) (Vdac3) alternative variant bSep08, mRNA. |
| veeby   | veeby.aSep08   |        | 85284 | 705  |   | 209 | putative protein of bilateral origin (veeby) mRNA.                                    |
| veechy  | veechy.aSep08  |        | 1057  | 668  | 2 | 83  | putative protein of metazoan origin (veechy) alternative variant aSep08, mRNA.        |
| veedar  | veedar.aSep08  |        | 8463  | 281  |   | 47  | putative protein (veedar) mRNA.                                                       |
| veedoy  | veedoy.aSep08  |        | 24440 | 268  |   | 71  | putative nuclear protein (8.0 kD) (veedoy) mRNA.                                      |
| veeflo  | veeflo.aSep08  |        | 2023  | 352  |   | 60  | sideroflexin 4 (veeflo) mRNA.                                                         |
| veeflu  | veeflu.aSep08  |        | 1190  | 348  |   | 53  | putative protein (veeflu) mRNA.                                                       |
| veefly  | veefly.aSep08  |        | 91088 | 733  |   | 97  | putative protein of mammalian origin (veefly) mRNA.                                   |
| veegar  | veegar.aSep08  |        | 64740 | 307  |   | 73  | CRA b like (veegar) mRNA.                                                             |

|         |                |       |       |      |   |     |                                                                                          |
|---------|----------------|-------|-------|------|---|-----|------------------------------------------------------------------------------------------|
| veeja   | veeja.aSep08   |       | 954   | 385  |   | 128 | apoptotic chromatin condensation inducer 1 (veeja) mRNA.                                 |
| veejey  | veejey.aSep08  |       | 31436 | 1790 |   | 548 | FRY protein (veejey) alternative variant aSep08, mRNA.                                   |
| veejey  | veejey.bSep08  |       | 4556  | 2589 |   | 191 | fryl protein (21.3 kD) (veejey) alternative variant bSep08, mRNA.                        |
| veekee  | veekee.aSep08  |       | 1590  | 739  |   | 99  | putative protein (veekee) mRNA.                                                          |
| veekler | veekler.aSep08 |       | 9250  | 332  |   | 69  | putative protein of eukaryotic origin (veekler) mRNA.                                    |
| veelo   | veelo.aSep08   |       | 1750  | 237  |   | 29  | putative protein (veelo) mRNA.                                                           |
| veemee  | veemee.aSep08  |       | 2723  | 298  |   | 53  | putative protein (veemee) mRNA.                                                          |
| veenoy  | veenoy.aSep08  |       | 68659 | 2324 | 9 | 185 | grb10 interacting GYF protein 2 (20.7 kD) (veenoy) alternative variant aSep08, mRNA.     |
| veenoy  | veenoy.bSep08  |       | 1305  | 803  | 2 | 30  | putative protein (3.4 kD) (veenoy) alternative variant bSep08, mRNA.                     |
| veepor  | veepor.aSep08  |       | 1938  | 410  |   | 136 | inhibitor of Bruton's tyrosine kinase (veepor) mRNA.                                     |
| veesa   | veesa.aSep08   |       | 2350  | 530  |   | 111 | putative protein (veesa) alternative variant aSep08, mRNA.                               |
| veeshee | veeshee.aSep08 |       | 744   | 284  |   | 47  | putative protein (veeshee) mRNA.                                                         |
| veetu   | veetu.bSep08   |       | 23704 | 467  | 4 | 85  | putative cytoplasmic protein (9.9 kD) (veetu) alternative variant bSep08, mRNA.          |
| veetu   | veetu.cSep08   |       | 4443  | 393  | 2 | 32  | putative protein (3.5 kD) (veetu) alternative variant cSep08, mRNA.                      |
| veevar  | veevar.bSep08  |       | 5220  | 421  | 4 | 59  | putative protein (veevar) alternative variant bSep08, mRNA.                              |
| veewey  | veewey.aSep08  |       | 635   | 541  |   | 21  | putative protein (veewey) mRNA.                                                          |
| Vegfa   | Vegfa.dSep08   | 83785 | 7879  | 1074 | 5 | 248 | vascular endothelial growth factor A (Vegfa) alternative variant dSep08, mRNA.           |
| Vegfa   | Vegfa.eSep08   | 83785 | 12441 | 513  | 7 | 170 | vascular endothelial growth factor A (20.0 kD) (Vegfa) alternative variant eSep08, mRNA. |
| Vegfa   | Vegfa.fSep08   | 83785 | 12458 | 541  | 6 | 148 | vascular endothelial growth factor A (17.5 kD) (Vegfa) alternative variant fSep08, mRNA. |
| Vegfa   | Vegfa.hSep08   | 83785 | 12458 | 409  | 5 | 104 | vascular endothelial growth factor A (12.3 kD) (Vegfa) alternative variant hSep08, mRNA. |
| Vegfa   | Vegfa.iSep08   | 83785 | 5675  | 292  | 5 | 97  | vascular endothelial growth factor A (Vegfa) alternative variant iSep08, mRNA.           |
| Vegfa   | Vegfa.jSep08   | 83785 | 3091  | 281  | 2 | 93  | vascular endothelial growth factor A (Vegfa) alternative variant jSep08, mRNA.           |
| Vegfa   | Vegfa.lSep08   | 83785 | 11748 | 1401 | 6 | 82  | vascular endothelial growth factor A (Vegfa) alternative variant lSep08, mRNA.           |
| Vegfa   | Vegfa.mSep08   | 83785 | 4615  | 1333 | 3 | 78  | vascular endothelial growth factor A (Vegfa) alternative variant mSep08, mRNA.           |
| Vegfa   | Vegfa.oSep08   | 83785 | 6314  | 793  | 3 | 41  | vascular endothelial growth factor A (5.0 kD) (Vegfa) alternative variant oSep08, mRNA.  |
| Vegfa   | Vegfa.pSep08   | 83785 | 12458 | 105  | 2 | 23  | vascular endothelial growth factor A (2.8 kD) (Vegfa) alternative variant pSep08, mRNA.  |
| Vegfb   | Vegfb.bSep08   | 89811 | 4396  | 563  | 6 | 168 | vascular endothelial growth factor B (Vegfb) alternative variant bSep08, mRNA.           |
| Vegfb   | Vegfb.cSep08   | 89811 | 1791  | 923  | 4 | 101 | vascular endothelial growth factor B (Vegfb) alternative variant cSep08, mRNA.           |

|         |                |        |        |      |   |     |                                                                                                      |
|---------|----------------|--------|--------|------|---|-----|------------------------------------------------------------------------------------------------------|
| Vegfb   | Vegfb.dSep08   | 89811  | 997    | 711  | 2 | 89  | vascular endothelial growth factor B (Vegfb) alternative variant dSep08, mRNA.                       |
| Vegfb   | Vegfb.eSep08   | 89811  | 3328   | 649  | 2 | 81  | vascular endothelial growth factor B (8.8 kD) (Vegfb) alternative variant eSep08, complete mRNA.     |
| Vegfc   | Vegfc.bSep08   | 114111 | 115257 | 1174 | 1 | 269 | vascular endothelial growth factor C (Vegfc) alternative variant bSep08, mRNA.                       |
| Vegp2   | Vegp2.bSep08   | 94106  | 4036   | 489  |   | 107 | von Ebners gland protein 2 (Vegp2) alternative variant bSep08, mRNA.                                 |
| Veph1   | Veph1.bSep08   | 361954 | 92826  | 813  | 4 | 165 | ventricular zone expressed PH domain homolog 1 (zebrafish) (Veph1) alternative variant bSep08, mRNA. |
| Veph1   | Veph1.cSep08   | 361954 | 9529   | 433  | 2 | 126 | ventricular zone expressed PH domain homolog 1 (zebrafish) (Veph1) alternative variant cSep08, mRNA. |
| verby   | verby.aSep08   |        | 5412   | 745  |   | 113 | putative nuclear protein (13.0 kD) (verby) mRNA.                                                     |
| verchy  | verchy.aSep08  |        | 6846   | 375  |   | 56  | putative protein (6.1 kD) (verchy) mRNA.                                                             |
| verdar  | verdar.aSep08  |        | 823    | 350  |   | 62  | putative protein (verdar) mRNA.                                                                      |
| verdoy  | verdoy.aSep08  |        | 1339   | 638  |   | 46  | putative protein (5.0 kD) (verdoy) mRNA.                                                             |
| verflu  | verflu.aSep08  |        | 9461   | 505  |   | 41  | putative protein (verflu) mRNA.                                                                      |
| verfly  | verfly.aSep08  |        | 443    | 250  |   | 19  | putative protein (verfly) mRNA.                                                                      |
| vergar  | vergar.aSep08  |        | 55658  | 619  | 1 | 87  | SEC7-like (vergar) alternative variant aSep08, mRNA.                                                 |
| vergar  | vergar.bSep08  |        | 35258  | 324  | 1 | 75  | SEC7-like (vergar) alternative variant bSep08, mRNA.                                                 |
| verja   | verja.aSep08   |        | 2470   | 614  |   | 204 | putative protein of eukaryotic origin (verja) mRNA.                                                  |
| verjey  | verjey.aSep08  |        | 1586   | 530  |   | 39  | putative protein (verjey) mRNA.                                                                      |
| verkee  | verkee.aSep08  |        | 10883  | 1337 |   | 44  | putative protein (5.1 kD) (verkee) mRNA.                                                             |
| verkler | verkler.aSep08 |        | 8561   | 754  |   | 118 | putative protein (12.6 kD) (verkler) mRNA.                                                           |
| verlo   | verlo.aSep08   |        | 7044   | 450  |   | 68  | putative protein (verlo) mRNA.                                                                       |
| vermee  | vermee.aSep08  |        | 6760   | 294  |   | 92  | putative protein (vermee) mRNA.                                                                      |
| vernoy  | vernoy.aSep08  |        | 575    | 404  |   | 134 | trinucleotide repeat containing 15 CRA c (vernoy) mRNA.                                              |
| verpor  | verpor.aSep08  |        | 2984   | 397  |   | 113 | inhibitor of Bruton tyrosine kinase (verpor) mRNA.                                                   |
| versa   | versa.aSep08   |        | 1271   | 733  | 4 | 164 | histone deacetylase 10 (versa) alternative variant aSep08, mRNA.                                     |
| versa   | versa.bSep08   |        | 869    | 799  | 1 | 77  | histone deacetylase 10 (8.8 kD) (versa) alternative variant bSep08, mRNA.                            |
| vershee | vershee.aSep08 |        | 8876   | 647  |   | 80  | CRA b like (8.7 kD) (vershee) mRNA.                                                                  |
| vertu   | vertu.aSep08   |        | 2623   | 286  |   | 65  | putative protein (7.4 kD) (vertu) mRNA.                                                              |
| vervar  | vervar.aSep08  |        | 6081   | 1670 | 6 | 516 | finger castor 1 (vervar) alternative variant aSep08, mRNA.                                           |
| verwey  | verwey.aSep08  |        | 46678  | 512  |   | 40  | putative protein (4.3 kD) (verwey) mRNA.                                                             |
| veybor  | veybor.aSep08  |        | 2543   | 564  |   | 48  | putative protein (veybor) mRNA.                                                                      |
| veyby   | veyby.aSep08   |        | 889    | 395  |   | 28  | putative protein (veyby) mRNA.                                                                       |
| veychy  | veychy.aSep08  |        | 13670  | 724  | 7 | 241 | ubiquitin protein ligase E3 component n-recognin 1 (veychy) alternative variant aSep08, mRNA.        |
| veychy  | veychy.bSep08  |        | 8617   | 375  | 4 | 97  | ubiquitin protein ligase E3 component n-recognin 1 (veychy) alternative variant bSep08, mRNA.        |
| veydar  | veydar.aSep08  |        | 652    | 377  |   | 36  | putative protein (veydar) mRNA.                                                                      |

|                |                       |        |       |      |   |     |                                                                                            |
|----------------|-----------------------|--------|-------|------|---|-----|--------------------------------------------------------------------------------------------|
| veydoy         | veydoy.aSep08         |        | 39517 | 704  |   | 83  | putative protein (veydoy) mRNA.                                                            |
| veyflo         | veyflo.aSep08         |        | 3535  | 451  |   | 34  | putative protein (3.9 kD) (veyflo) mRNA.                                                   |
| veyflu         | veyflu.aSep08         |        | 79095 | 302  |   | 93  | putative protein (veyflu) mRNA.                                                            |
| veyfly         | veyfly.aSep08         |        | 1487  | 335  |   | 55  | putative protein (veyfly) mRNA.                                                            |
| veygar         | veygar.aSep08         |        | 85806 | 440  |   | 146 | putative protein of metazoan origin (veygar) mRNA.                                         |
| veyja          | veyja.aSep08          |        | 1309  | 842  | 3 | 109 | putative endoplasmic reticulum protein (12.0 kD) (veyja) alternative variant aSep08, mRNA. |
| veyjey         | veyjey.aSep08         |        | 8297  | 650  |   | 216 | nuclear transcription factor X-box binding-like 1 (veyjey) mRNA.                           |
| veykee         | veykee.aSep08         |        | 545   | 359  |   | 55  | putative protein (veykee) mRNA.                                                            |
| veykler        | veykler.aSep08        |        | 12788 | 754  |   | 118 | putative nuclear protein (12.6 kD) (veykler) mRNA.                                         |
| veylo          | veylo.aSep08          |        | 7461  | 739  |   | 219 | CRA a (veylo) mRNA.                                                                        |
| veymee         | veymee.aSep08         |        | 397   | 246  | 1 | 67  | putative protein (veymee) alternative variant aSep08, mRNA.                                |
| veymee         | veymee.bSep08         |        | 87164 | 933  | 6 | 107 | putative protein (12.2 kD) (veymee) alternative variant bSep08, mRNA.                      |
| veynoy         | veynoy.aSep08         |        | 8478  | 875  |   | 291 | GRB10 interacting GYF protein 2 (veynoy) mRNA.                                             |
| veypor         | veypor.aSep08         |        | 774   | 683  |   | 161 | putative protein (18.0 kD) (veypor) mRNA.                                                  |
| veysa          | veysa.aSep08          |        | 1143  | 229  |   | 61  | mitogen-activated protein kinase 11 (veysa) mRNA.                                          |
| veyshee        | veyshee.bSep08        |        | 1786  | 1460 | 1 | 80  | putative protein (8.9 kD) (veyshee) alternative variant bSep08, mRNA.                      |
| veytu          | veytu.aSep08          |        | 1240  | 450  |   | 105 | putative protein (veytu) mRNA.                                                             |
| veyvar         | veyvar.aSep08         |        | 1927  | 597  | 1 | 84  | CRA a like (veyvar) alternative variant aSep08, mRNA.                                      |
| veyvar         | veyvar.bSep08         |        | 4219  | 588  | 2 | 79  | apoptosis-inducing domain 1 (veyvar) alternative variant bSep08, mRNA.                     |
| veywey         | veywey.aSep08         |        | 1933  | 369  |   | 61  | putative protein (veywey) mRNA.                                                            |
| VeZF1andCuedc1 | VeZF1andCuedc1.bSep08 | 287615 | 6379  | 3358 | 2 | 184 | zinc finger 1 (VeZF1andCuedc1) alternative variant bSep08, mRNA.                           |
| VeZF1andCuedc1 | VeZF1andCuedc1.bSep08 | 303419 | 6379  | 3358 | 2 | 184 | zinc finger 1 (VeZF1andCuedc1) alternative variant bSep08, mRNA.                           |
| VeZF1andCuedc1 | VeZF1andCuedc1.cSep08 | 287615 | 4778  | 748  | 4 | 55  | CUE domain-containing 1 like (6.3 kD) (VeZF1andCuedc1) alternative variant cSep08, mRNA.   |
| VeZF1andCuedc1 | VeZF1andCuedc1.cSep08 | 303419 | 4778  | 748  | 4 | 55  | CUE domain-containing 1 like (6.3 kD) (VeZF1andCuedc1) alternative variant cSep08, mRNA.   |
| VeZt           | VeZt.bSep08           | 299738 | 50435 | 1335 | 8 | 411 | vezatin, adherens junctions transmembrane protein (VeZt) alternative variant bSep08, mRNA. |
| VeZt           | VeZt.cSep08           | 299738 | 16955 | 1176 | 5 | 363 | vezatin, adherens junctions transmembrane protein (VeZt) alternative variant cSep08, mRNA. |
| VeZt           | VeZt.eSep08           | 299738 | 4023  | 617  | 2 | 41  | vezatin, adherens junctions transmembrane protein (VeZt) alternative variant eSep08, mRNA. |
| Vgf            | Vgf.bSep08            | 29461  | 3302  | 2798 | 1 | 617 | VGF nerve growth factor inducible (68.2 kD) (Vgf) alternative variant bSep08, mRNA.        |
| Vgll1          | Vgll1.aSep08          | 363508 | 3328  | 468  |   | 112 | vestigial like 1 homolog (Drosophila) (Vgll1) mRNA.                                        |
| Vgll3          | Vgll3.aSep08          | 498038 | 21974 | 297  |   | 98  | vestigial like 3 (Drosophila) (Vgll3) mRNA.                                                |

|          |                 |        |        |      |   |     |                                                                                                       |
|----------|-----------------|--------|--------|------|---|-----|-------------------------------------------------------------------------------------------------------|
| Vgll4    | Vgll4.bSep08    | 297523 | 12698  | 841  | 4 | 212 | vestigial like 4 (Drosophila) (Vgll4) alternative variant bSep08, mRNA.                               |
| Vgll4    | Vgll4.cSep08    | 297523 | 110302 | 793  | 5 | 171 | vestigial like 4 (Drosophila) (Vgll4) alternative variant cSep08, mRNA.                               |
| Vgll4    | Vgll4.dSep08    | 297523 | 109284 | 613  | 5 | 155 | vestigial like 4 (Drosophila) (Vgll4) alternative variant dSep08, mRNA.                               |
| Vgll4    | Vgll4.eSep08    | 297523 | 854    | 536  | 2 | 139 | vestigial like 4 (Drosophila) (Vgll4) alternative variant eSep08, mRNA.                               |
| Vhlh     | Vhlh.cSep08     | 24874  | 4479   | 329  | 3 | 35  | von Hippel-Lindau syndrome homolog (Vhlh) alternative variant cSep08, mRNA.                           |
| VHP.0    | VHP.0.aSep08    |        | 7166   | 1232 | 7 | 335 | supervillin (VHP.0) alternative variant aSep08, mRNA.                                                 |
| Vil1     | Vil1.bSep08     | 316521 | 3509   | 762  | 6 | 253 | villin 1 (Vil1) alternative variant bSep08, mRNA.                                                     |
| Vill     | Vill.aSep08     | 301057 | 4153   | 1001 | 5 | 268 | villin-like (Vill) alternative variant aSep08, mRNA.                                                  |
| Vill     | Vill.bSep08     | 301057 | 3530   | 763  | 5 | 254 | villin-like (Vill) alternative variant bSep08, mRNA.                                                  |
| Vill     | Vill.cSep08     | 301057 | 2542   | 636  | 3 | 207 | villin-like (Vill) alternative variant cSep08, mRNA.                                                  |
| Vill     | Vill.dSep08     | 301057 | 1330   | 609  | 4 | 172 | villin-like (Vill) alternative variant dSep08, mRNA.                                                  |
| Vim      | Vim.bSep08      | 81818  | 4395   | 906  | 4 | 301 | vimentin (Vim) alternative variant bSep08, mRNA.                                                      |
| Vim      | Vim.cSep08      | 81818  | 3627   | 838  | 5 | 172 | vimentin (Vim) alternative variant cSep08, mRNA.                                                      |
| Vim      | Vim.dSep08      | 81818  | 5817   | 479  | 5 | 159 | vimentin (Vim) alternative variant dSep08, mRNA.                                                      |
| Vip      | Vip.aSep08      | 117064 | 8083   | 1502 | 1 | 219 | vasoactive intestinal polypeptide (Vip) alternative variant aSep08, mRNA.                             |
| Vip      | Vip.bSep08      | 117064 | 8079   | 1495 | 1 | 216 | vasoactive intestinal polypeptide (Vip) alternative variant bSep08, mRNA.                             |
| Visa     | Visa.bSep08     | 311430 | 12039  | 888  | 5 | 227 | virus-induced signaling adapter (Visa) alternative variant bSep08, mRNA.                              |
| Visa     | Visa.cSep08     | 311430 | 7384   | 487  | 4 | 132 | virus-induced signaling adapter (Visa) alternative variant cSep08, mRNA.                              |
| Visa     | Visa.eSep08     | 311430 | 6235   | 390  | 4 | 43  | virus-induced signaling adapter (Visa) alternative variant eSep08, mRNA.                              |
| Visa     | Visa.fSep08     | 311430 | 676    | 472  | 2 | 38  | virus-induced signaling adapter (Visa) alternative variant fSep08, mRNA.                              |
| Vit      | Vit.aSep08      | 313831 | 2514   | 974  |   | 159 | vitrin (Vit) mRNA.                                                                                    |
| Vkorc111 | Vkorc111.bSep08 | 399684 | 49057  | 1628 | 3 | 130 | vitamin K epoxide reductase complex, subunit 1-like 1 (Vkorc111) alternative variant bSep08, mRNA.    |
| Vmo1     | Vmo1.aSep08     | 360553 | 6713   | 455  | 2 | 151 | vitelline membrane outer layer 1 homolog (chicken) (Vmo1) alternative variant aSep08, mRNA.           |
| Vmo1     | Vmo1.bSep08     | 360553 | 1250   | 937  | 1 | 105 | vitelline membrane outer layer 1 homolog (chicken) (11.6 kD) (Vmo1) alternative variant bSep08, mRNA. |
| Vnn1     | Vnn1.bSep08     | 29142  | 4470   | 755  | 1 | 172 | vanin 1 (Vnn1) alternative variant bSep08, mRNA.                                                      |
| voby     | voby.aSep08     |        | 999    | 367  |   | 63  | protein CRA a (voby) mRNA.                                                                            |
| vochy    | vochy.aSep08    |        | 6601   | 463  | 2 | 118 | glucosidase alpha (vochy) alternative variant aSep08, mRNA.                                           |
| vochy    | vochy.bSep08    |        | 5264   | 1411 | 2 | 79  | glucosidase alpha (8.9 kD) (vochy) alternative variant bSep08, mRNA.                                  |

|         |                |        |        |      |   |     |                                                                                                                 |
|---------|----------------|--------|--------|------|---|-----|-----------------------------------------------------------------------------------------------------------------|
| vochy   | vochy.cSep08   |        | 4878   | 379  | 2 | 73  | glucosidase alpha (vochy) alternative variant cSep08, mRNA.                                                     |
| vodar   | vodar.aSep08   |        | 13063  | 497  |   | 52  | putative protein (5.9 kD) (vodar) mRNA.                                                                         |
| vodoy   | vodoy.aSep08   |        | 9104   | 727  |   | 242 | niemann-pick C1 (vodoy) mRNA.                                                                                   |
| voflo   | voflo.aSep08   |        | 659    | 248  |   | 36  | putative protein (4.3 kD) (voflo) mRNA.                                                                         |
| voflu   | voflu.aSep08   |        | 29468  | 730  |   | 76  | putative mitochondrial protein (8.4 kD) (voflu) mRNA.                                                           |
| vogar   | vogar.aSep08   |        | 1174   | 330  |   | 24  | putative protein (vogar) mRNA.                                                                                  |
| voja    | voja.aSep08    |        | 1790   | 447  |   | 41  | putative protein (4.7 kD) (voja) mRNA.                                                                          |
| vojey   | vojey.aSep08   |        | 4368   | 871  |   | 289 | furry homolog-like (vojey) mRNA.                                                                                |
| vokee   | vokee.aSep08   |        | 35878  | 402  |   | 27  | putative protein (2.9 kD) (vokee) mRNA.                                                                         |
| vokler  | vokler.aSep08  |        | 27848  | 734  | 3 | 169 | putative protein of metazoan origin (vokler) alternative variant aSep08, mRNA.                                  |
| vokler  | vokler.bSep08  |        | 14932  | 912  | 1 | 155 | putative protein of metazoan origin (vokler) alternative variant bSep08, mRNA.                                  |
| volo    | volo.aSep08    |        | 2781   | 358  |   | 91  | putative protein (volo) mRNA.                                                                                   |
| Vom2r3  | Vom2r3.bSep08  | 502213 | 12363  | 552  | 2 | 48  | vomeronasal 2 receptor, 3 and similar to vomeronasal 2, receptor, 10 (Vom2r3) alternative variant bSep08, mRNA. |
| Vom2r3  | Vom2r3.bSep08  | 679643 | 12363  | 552  | 2 | 48  | vomeronasal 2 receptor, 3 and similar to vomeronasal 2, receptor, 10 (Vom2r3) alternative variant bSep08, mRNA. |
| Vom2r57 | Vom2r57.bSep08 | 299683 | 12239  | 738  | 2 | 113 | vomeronasal 2 receptor, 57 (Vom2r57) alternative variant bSep08, mRNA.                                          |
| Vom2r57 | Vom2r57.cSep08 | 299683 | 570    | 294  | 2 | 89  | vomeronasal 2 receptor, 57 (Vom2r57) alternative variant cSep08, mRNA.                                          |
| vomee   | vomee.aSep08   |        | 568    | 358  |   | 19  | putative protein (vomee) mRNA.                                                                                  |
| vonoy   | vonoy.aSep08   |        | 1237   | 1030 |   |     |                                                                                                                 |
| vopor   | vopor.aSep08   |        | 1753   | 417  |   | 41  | putative protein (vopor) mRNA.                                                                                  |
| vorbor  | vorbor.aSep08  |        | 1181   | 888  | 2 | 112 | CRA c (12.7 kD) (vorbor) alternative variant aSep08, mRNA.                                                      |
| vorbor  | vorbor.cSep08  |        | 11193  | 697  | 4 | 49  | putative protein of mammalian origin (vorbor) alternative variant cSep08, mRNA.                                 |
| vorbor  | vorbor.dSep08  |        | 11054  | 609  | 5 | 33  | putative protein of mammalian origin (3.9 kD) (vorbor) alternative variant dSep08, mRNA.                        |
| vorbor  | vorbor.eSep08  |        | 10673  | 504  | 4 | 49  | CRA b like (5.4 kD) (vorbor) alternative variant eSep08, mRNA.                                                  |
| vorby   | vorby.aSep08   |        | 12378  | 588  |   | 196 | solute carrier family 9 (vorby) mRNA.                                                                           |
| vorchy  | vorchy.aSep08  |        | 10424  | 857  |   | 285 | ubiquitin protein ligase E3 component n-recognin 1 (vorchy) mRNA.                                               |
| vordar  | vordar.aSep08  |        | 8407   | 380  |   | 93  | putative protein (vordar) mRNA.                                                                                 |
| vordoy  | vordoy.aSep08  |        | 2132   | 260  |   | 40  | putative protein (4.5 kD) (vordoy) mRNA.                                                                        |
| vorflo  | vorflo.aSep08  |        | 836    | 596  |   | 155 | hepatocellular carcinoma-associated antigen MHCA108 like (vorflo) mRNA.                                         |
| vorflu  | vorflu.aSep08  |        | 641    | 534  | 2 | 65  | putative protein (vorflu) alternative variant aSep08, mRNA.                                                     |
| vorfly  | vorfly.aSep08  |        | 152142 | 1973 |   | 588 | CRA d (vorfly) alternative variant aSep08, mRNA.                                                                |
| vorfly  | vorfly.bSep08  |        | 7466   | 459  |   | 81  | putative protein, with a coiled coil domain, of mammalian origin (vorfly) alternative variant bSep08, mRNA.     |

|         |                |  |       |      |   |     |                                                                                                                  |
|---------|----------------|--|-------|------|---|-----|------------------------------------------------------------------------------------------------------------------|
| vorgar  | vorgar.aSep08  |  | 3301  | 785  |   | 76  | putative protein (8.4 kD) (vorgar) mRNA.                                                                         |
| vorja   | vorja.bSep08   |  | 20677 | 549  | 3 | 91  | putative protein (9.2 kD) (vorja) alternative variant bSep08, mRNA.                                              |
| vorjey  | vorjey.aSep08  |  | 2103  | 402  |   | 94  | nuclear transcription factor X-box binding-like 1 CRA d (vorjey) mRNA.                                           |
| vorkee  | vorkee.aSep08  |  | 1385  | 362  |   | 119 | putative protein (vorkee) mRNA.                                                                                  |
| vorkler | vorkler.aSep08 |  | 8576  | 754  |   | 118 | putative protein (12.6 kD) (vorkler) mRNA.                                                                       |
| vorlo   | vorlo.aSep08   |  | 8762  | 886  |   | 190 | lemur tyrosine kinase 2 CRA a (vorlo) alternative variant aSep08, mRNA.                                          |
| vormee  | vormee.aSep08  |  | 7703  | 521  |   | 82  | putative protein (vormee) mRNA.                                                                                  |
| vornoy  | vornoy.aSep08  |  | 5728  | 2140 |   | 150 | grb10 interacting GYF protein 2 (vornoy) mRNA.                                                                   |
| vorpor  | vorpor.aSep08  |  | 1030  | 338  |   | 58  | putative protein (vorpor) mRNA.                                                                                  |
| vorsa   | vorsa.aSep08   |  | 1451  | 807  |   | 37  | putative protein (4.0 kD) (vorsa) mRNA.                                                                          |
| vorshee | vorshee.bSep08 |  | 1428  | 529  | 2 | 37  | putative protein (4.2 kD) (vorshee) alternative variant bSep08, mRNA.                                            |
| vortu   | vortu.aSep08   |  | 2789  | 555  |   | 43  | putative protein (4.8 kD) (vortu) mRNA.                                                                          |
| vorvar  | vorvar.aSep08  |  | 564   | 522  |   | 58  | putative protein (6.0 kD) (vorvar) mRNA.                                                                         |
| vorwey  | vorwey.aSep08  |  | 9214  | 374  |   | 28  | putative protein (vorwey) mRNA.                                                                                  |
| voshee  | voshee.aSep08  |  | 1493  | 426  |   | 142 | IQ motif containing GTPase activating protein 3 (voshee) mRNA.                                                   |
| votu    | votu.aSep08    |  | 508   | 333  | 2 | 111 | putative protein of mammalian origin (votu) alternative variant aSep08, mRNA.                                    |
| vovar   | vovar.aSep08   |  | 811   | 477  |   | 69  | putative protein (vovar) mRNA.                                                                                   |
| vowey   | vowey.aSep08   |  | 11543 | 1657 | 3 | 376 | putative protein (vowey) alternative variant aSep08, mRNA.                                                       |
| vowey   | vowey.dSep08   |  | 12767 | 266  | 2 | 27  | putative protein (3.0 kD) (vowey) alternative variant dSep08, mRNA.                                              |
| voybor  | voybor.aSep08  |  | 25075 | 698  |   | 76  | putative protein (8.5 kD) (voybor) mRNA.                                                                         |
| voyby   | voyby.aSep08   |  | 1961  | 1099 |   | 138 | putative mitochondrial protein of mammalian origin (15.2 kD) (voyby) mRNA.                                       |
| voychy  | voychy.aSep08  |  | 9483  | 551  | 3 | 183 | transmembrane protein 62 CRA b (voychy) alternative variant aSep08, mRNA.                                        |
| voychy  | voychy.bSep08  |  | 2052  | 434  | 1 | 138 | transmembrane protein 62 (voychy) alternative variant bSep08, mRNA.                                              |
| voydar  | voydar.aSep08  |  | 9099  | 474  |   | 66  | calcium binding protein like (voydar) mRNA.                                                                      |
| voydoy  | voydoy.aSep08  |  | 17627 | 274  |   | 91  | putative protein of mammalian origin (voydoy) mRNA.                                                              |
| voyflo  | voyflo.aSep08  |  | 21423 | 376  |   | 84  | putative protein (voyflo) mRNA.                                                                                  |
| voyflu  | voyflu.aSep08  |  | 5708  | 2124 | 2 | 127 | putative endoplasmic reticulum protein of eukaryotic origin (13.8 kD) (voyflu) alternative variant aSep08, mRNA. |
| voyfly  | voyfly.aSep08  |  | 4651  | 536  |   | 178 | CRA c (voyfly) mRNA.                                                                                             |
| voygar  | voygar.aSep08  |  | 7903  | 1536 |   | 125 | putative mitochondrial protein of eukaryotic origin (14.4 kD) (voygar) mRNA.                                     |
| voyja   | voyja.aSep08   |  | 10406 | 716  |   | 125 | putative protein (13.7 kD) (voyja) mRNA.                                                                         |
| voyjey  | voyjey.aSep08  |  | 60485 | 551  | 5 | 122 | ATPase class V type 10D (voyjey) alternative variant aSep08, mRNA.                                               |

|         |                |        |        |      |    |     |                                                                                                   |
|---------|----------------|--------|--------|------|----|-----|---------------------------------------------------------------------------------------------------|
| voykee  | voykee.aSep08  |        | 2777   | 1210 |    | 100 | putative protein (voykee) mRNA.                                                                   |
| voykler | voykler.aSep08 |        | 18770  | 736  |    | 36  | putative protein (4.0 kD) (voykler) mRNA.                                                         |
| voylo   | voylo.aSep08   |        | 8440   | 539  |    | 53  | lemur tyrosine kinase 2 CRA a (voylo) mRNA.                                                       |
| voymee  | voymee.aSep08  |        | 2710   | 350  |    | 85  | putative protein (voymee) mRNA.                                                                   |
| voynoy  | voynoy.aSep08  |        | 6558   | 499  |    | 166 | neuronal guanine nucleotide exchange factor (voynoy) mRNA.                                        |
| voypor  | voypor.aSep08  |        | 10762  | 610  |    | 202 | dopey family member 1 (voypor) mRNA.                                                              |
| voysa   | voysa.aSep08   |        | 3285   | 954  |    | 317 | C-jun-amino-terminal kinase-interacting protein 2 (voysa) mRNA.                                   |
| voyshee | voyshee.aSep08 |        | 15110  | 402  |    | 18  | putative protein (voyshee) mRNA.                                                                  |
| voytu   | voytu.aSep08   |        | 19763  | 1885 |    | 44  | putative protein (4.7 kD) (voytu) mRNA.                                                           |
| voyvar  | voyvar.aSep08  |        | 3834   | 413  |    | 131 | ubiquitination factor E4B (voyvar) mRNA.                                                          |
| voywey  | voywey.aSep08  |        | 9467   | 708  |    | 83  | putative protein (voywey) mRNA.                                                                   |
| Vprbp   | Vprbp.aSep08   | 315987 | 44058  | 394  |    | 96  | vpr (HIV-1) binding protein (Vprbp) mRNA.                                                         |
| Vpreb3  | Vpreb3.aSep08  | 365550 | 1492   | 742  | 2  | 122 | pre-B lymphocyte gene 3 (13.5 kD) (Vpreb3) alternative variant aSep08, mRNA.                      |
| Vps4a   | Vps4a.cSep08   | 246772 | 5372   | 380  | 3  | 32  | vacuolar protein sorting 4a (yeast) (Vps4a) alternative variant cSep08, mRNA.                     |
| Vps4b   | Vps4b.bSep08   | 360834 | 2046   | 402  | 1  | 72  | vacuolar protein sorting 4b (yeast) (Vps4b) alternative variant bSep08, mRNA.                     |
| Vps8    | Vps8.aSep08    | 287990 | 111144 | 1651 |    | 430 | vacuolar protein sorting 8 homolog ( <i>S. cerevisiae</i> ) (Vps8) mRNA.                          |
| Vps11   | Vps11.aSep08   | 315600 | 14417  | 3162 | 13 | 941 | vacuolar protein sorting 11 (yeast) (107.8 kD) (Vps11) alternative variant aSep08, complete mRNA. |
| Vps11   | Vps11.bSep08   | 315600 | 1758   | 442  | 1  | 147 | vacuolar protein sorting 11 (yeast) (Vps11) alternative variant bSep08, mRNA.                     |
| Vps13a  | Vps13a.bSep08  | 309243 | 12783  | 677  | 4  | 225 | vacuolar protein sorting 13A (yeast) (Vps13a) alternative variant bSep08, mRNA.                   |
| Vps13a  | Vps13a.cSep08  | 309243 | 28340  | 612  | 6  | 165 | vacuolar protein sorting 13A (yeast) (Vps13a) alternative variant cSep08, mRNA.                   |
| Vps13a  | Vps13a.dSep08  | 309243 | 7589   | 444  | 6  | 148 | vacuolar protein sorting 13A (yeast) (Vps13a) alternative variant dSep08, mRNA.                   |
| Vps13a  | Vps13a.eSep08  | 309243 | 4323   | 400  | 4  | 133 | vacuolar protein sorting 13A (yeast) (Vps13a) alternative variant eSep08, mRNA.                   |
| Vps13a  | Vps13a.fSep08  | 309243 | 20598  | 405  | 4  | 112 | vacuolar protein sorting 13A (yeast) (Vps13a) alternative variant fSep08, mRNA.                   |
| Vps13a  | Vps13a.gSep08  | 309243 | 7551   | 298  | 3  | 98  | vacuolar protein sorting 13A (yeast) (Vps13a) alternative variant gSep08, mRNA.                   |
| Vps13d  | Vps13d.bSep08  | 313825 | 87000  | 1961 | 11 | 539 | vacuolar protein sorting 13D (yeast) (Vps13d) alternative variant bSep08, mRNA.                   |
| Vps13d  | Vps13d.cSep08  | 313825 | 8714   | 523  | 5  | 173 | vacuolar protein sorting 13D (yeast) (Vps13d) alternative variant cSep08, mRNA.                   |
| Vps13d  | Vps13d.dSep08  | 313825 | 10336  | 719  | 3  | 126 | vacuolar protein sorting 13D (yeast) (14.9 kD) (Vps13d) alternative variant dSep08, mRNA.         |
| Vps13d  | Vps13d.gSep08  | 313825 | 10039  | 575  | 4  | 74  | vacuolar protein sorting 13D (yeast) (8.5 kD) (Vps13d) alternative variant gSep08, mRNA.          |



|        |               |        |       |      |    |     |                                                                                                                  |
|--------|---------------|--------|-------|------|----|-----|------------------------------------------------------------------------------------------------------------------|
| Vps16  | Vps16.bSep08  | 296159 | 1797  | 840  | 7  | 280 | vacuolar protein sorting 16 (yeast) (Vps16) alternative variant bSep08, mRNA.                                    |
| Vps16  | Vps16.cSep08  | 296159 | 1908  | 805  | 6  | 213 | vacuolar protein sorting 16 (yeast) (Vps16) alternative variant cSep08, mRNA.                                    |
| Vps16  | Vps16.dSep08  | 296159 | 1926  | 1034 | 5  | 166 | vacuolar protein sorting 16 (yeast) (18.9 kD) (Vps16) alternative variant dSep08, mRNA.                          |
| Vps16  | Vps16.eSep08  | 296159 | 1248  | 554  | 4  | 85  | vacuolar protein sorting 16 (yeast) (Vps16) alternative variant eSep08, mRNA.                                    |
| Vps16  | Vps16.fSep08  | 296159 | 749   | 667  | 2  | 82  | vacuolar protein sorting 16 (yeast) (Vps16) alternative variant fSep08, mRNA.                                    |
| Vps25  | Vps25.aSep08  | 681059 | 5489  | 1094 | 6  | 176 | vacuolar protein sorting 25 homolog (S. cerevisiae) (20.8 kD) (Vps25) alternative variant aSep08, complete mRNA. |
| Vps25  | Vps25.bSep08  | 681059 | 4406  | 1762 | 5  | 161 | vacuolar protein sorting 25 homolog (S. cerevisiae) (Vps25) alternative variant bSep08, mRNA.                    |
| Vps25  | Vps25.cSep08  | 681059 | 2263  | 404  | 4  | 119 | vacuolar protein sorting 25 homolog (S. cerevisiae) (Vps25) alternative variant cSep08, complete mRNA.           |
| Vps25  | Vps25.dSep08  | 681059 | 3951  | 973  | 6  | 100 | vacuolar protein sorting 25 homolog (S. cerevisiae) (11.7 kD) (Vps25) alternative variant dSep08, mRNA.          |
| Vps25  | Vps25.eSep08  | 681059 | 3596  | 429  | 5  | 99  | vacuolar protein sorting 25 homolog (S. cerevisiae) (Vps25) alternative variant eSep08, mRNA.                    |
| Vps25  | Vps25.fSep08  | 681059 | 2984  | 286  | 4  | 95  | vacuolar protein sorting 25 homolog (S. cerevisiae) (Vps25) alternative variant fSep08, mRNA.                    |
| Vps26a | Vps26a.bSep08 | 361846 | 17074 | 730  | 5  | 212 | vacuolar protein sorting 26 homolog A (yeast) (Vps26a) alternative variant bSep08, mRNA.                         |
| Vps26b | Vps26b.bSep08 | 300472 | 16403 | 1329 | 1  | 364 | vacuolar protein sorting 26 homolog B (S. pombe) (Vps26b) alternative variant bSep08, mRNA.                      |
| Vps28  | Vps28.aSep08  | 300052 | 3774  | 923  | 10 | 228 | vacuolar protein sorting 28 (26.1 kD) (Vps28) alternative variant aSep08, complete mRNA.                         |
| Vps28  | Vps28.cSep08  | 300052 | 2047  | 679  | 6  | 120 | vacuolar protein sorting 28 (Vps28) alternative variant cSep08, mRNA.                                            |
| Vps28  | Vps28.dSep08  | 300052 | 2238  | 721  | 5  | 65  | vacuolar protein sorting 28 (7.3 kD) (Vps28) alternative variant dSep08, mRNA.                                   |
| Vps28  | Vps28.eSep08  | 300052 | 776   | 693  | 2  | 61  | vacuolar protein sorting 28 (7.1 kD) (Vps28) alternative variant eSep08, mRNA.                                   |
| Vps29  | Vps29.bSep08  | 288666 | 3677  | 918  | 3  | 181 | vacuolar protein sorting 29 (S. pombe) (20.4 kD) (Vps29) alternative variant bSep08, mRNA.                       |
| Vps33a | Vps33a.aSep08 | 65081  | 19388 | 3625 |    | 446 | vacuolar protein sorting 33A (yeast) (Vps33a) mRNA.                                                              |
| Vps33b | Vps33b.bSep08 | 64060  | 1217  | 420  | 5  | 124 | vacuolar protein sorting 33B (yeast) (Vps33b) alternative variant bSep08, mRNA.                                  |
| Vps33b | Vps33b.cSep08 | 64060  | 4568  | 497  | 7  | 119 | vacuolar protein sorting 33B (yeast) (Vps33b) alternative variant cSep08, mRNA.                                  |
| Vps33b | Vps33b.dSep08 | 64060  | 1318  | 451  | 2  | 100 | vacuolar protein sorting 33B (yeast) (Vps33b) alternative variant dSep08, mRNA.                                  |
| Vps36  | Vps36.bSep08  | 290851 | 14116 | 749  | 5  | 150 | vacuolar protein sorting 36 (yeast) (17.3 kD) (Vps36) alternative variant bSep08, mRNA.                          |
| Vps36  | Vps36.cSep08  | 290851 | 14840 | 545  | 6  | 71  | vacuolar protein sorting 36 (yeast) (8.2 kD) (Vps36) alternative variant cSep08, complete mRNA.                  |

|        |               |        |        |      |    |     |                                                                                                   |
|--------|---------------|--------|--------|------|----|-----|---------------------------------------------------------------------------------------------------|
| Vps37b | Vps37b.bSep08 | 288659 | 20252  | 726  | 2  | 241 | vacuolar protein sorting 37B (yeast) (Vps37b) alternative variant bSep08, mRNA.                   |
| Vps37c | Vps37c.aSep08 | 308178 | 25523  | 2637 | 4  | 353 | vacuolar protein sorting 37C (yeast) (38.4 kD) (Vps37c) alternative variant aSep08, mRNA.         |
| Vps37c | Vps37c.bSep08 | 308178 | 1857   | 755  | 1  | 180 | vacuolar protein sorting 37C (yeast) (Vps37c) alternative variant bSep08, mRNA.                   |
| Vps39  | Vps39.aSep08  | 362199 | 39856  | 4972 | 25 | 875 | vacuolar protein sorting 39 (yeast) (100.6 kD) (Vps39) alternative variant aSep08, complete mRNA. |
| Vps39  | Vps39.bSep08  | 362199 | 8961   | 610  | 5  | 169 | vacuolar protein sorting 39 (yeast) (Vps39) alternative variant bSep08, mRNA.                     |
| Vps39  | Vps39.cSep08  | 362199 | 9870   | 563  | 7  | 140 | vacuolar protein sorting 39 (yeast) (Vps39) alternative variant cSep08, mRNA.                     |
| Vps45  | Vps45.bSep08  | 64516  | 3521   | 1446 | 4  | 129 | vacuolar protein sorting (Vps45) alternative variant bSep08, mRNA.                                |
| Vps45  | Vps45.cSep08  | 64516  | 883    | 332  | 2  | 95  | vacuolar protein sorting (Vps45) alternative variant cSep08, mRNA.                                |
| Vps52  | Vps52.bSep08  | 25218  | 2099   | 765  | 6  | 254 | vacuolar protein sorting 52 CRA a (Vps52) alternative variant bSep08, mRNA.                       |
| Vps52  | Vps52.cSep08  | 25218  | 1870   | 561  | 5  | 169 | vacuolar protein sorting 52 CRA d (Vps52) alternative variant cSep08, mRNA.                       |
| Vps52  | Vps52.dSep08  | 25218  | 1665   | 1083 | 4  | 131 | vacuolar protein sorting 52 CRA a (14.7 kD) (Vps52) alternative variant dSep08, mRNA.             |
| Vps52  | Vps52.fSep08  | 25218  | 1033   | 775  | 2  | 63  | vacuolar protein sorting 52 (7.4 kD) (Vps52) alternative variant fSep08, mRNA.                    |
| Vps53  | Vps53.bSep08  | 287535 | 124750 | 2671 | 21 | 803 | vacuolar protein sorting 53 (yeast) (91.1 kD) (Vps53) alternative variant bSep08, complete mRNA.  |
| Vps53  | Vps53.cSep08  | 287535 | 31107  | 739  | 6  | 199 | vacuolar protein sorting 53 (yeast) (Vps53) alternative variant cSep08, mRNA.                     |
| Vps53  | Vps53.dSep08  | 287535 | 57187  | 762  | 8  | 129 | vacuolar protein sorting 53 (yeast) (Vps53) alternative variant dSep08, mRNA.                     |
| Vps54  | Vps54.bSep08  | 286932 | 8912   | 856  | 6  | 161 | vacuolar protein sorting 54 (yeast) (Vps54) alternative variant bSep08, mRNA.                     |
| Vps54  | Vps54.cSep08  | 286932 | 3452   | 545  | 2  | 49  | vacuolar protein sorting 54 (yeast) (Vps54) alternative variant cSep08, mRNA.                     |
| Vps72  | Vps72.bSep08  | 310661 | 11555  | 1182 | 5  | 197 | vacuolar protein sorting 72 (yeast) (22.5 kD) (Vps72) alternative variant bSep08, complete mRNA.  |
| Vrk1   | Vrk1.bSep08   | 362779 | 51166  | 898  | 9  | 271 | vaccinia related kinase 1 (Vrk1) alternative variant bSep08, mRNA.                                |
| Vrk1   | Vrk1.cSep08   | 362779 | 51073  | 1204 | 10 | 261 | vaccinia related kinase 1 (Vrk1) alternative variant cSep08, mRNA.                                |
| Vrk1   | Vrk1.dSep08   | 362779 | 50421  | 734  | 8  | 214 | vaccinia related kinase 1 (Vrk1) alternative variant dSep08, mRNA.                                |
| Vrk1   | Vrk1.eSep08   | 362779 | 44368  | 793  | 6  | 124 | vaccinia related kinase 1 (Vrk1) alternative variant eSep08, mRNA.                                |
| Vrk1   | Vrk1.gSep08   | 362779 | 31337  | 417  | 4  | 91  | vaccinia related kinase 1 (Vrk1) alternative variant gSep08, mRNA.                                |

|        |               |        |        |      |    |     |                                                                                                                                        |
|--------|---------------|--------|--------|------|----|-----|----------------------------------------------------------------------------------------------------------------------------------------|
| Vrk2   | Vrk2.aSep08   | 360991 | 171197 | 1559 | 12 | 504 | vaccinia related kinase 2 (Vrk2) alternative variant aSep08, mRNA.                                                                     |
| Vrk3   | Vrk3.bSep08   | 361565 | 13065  | 706  | 6  | 178 | vaccinia related kinase 3 (Vrk3) alternative variant bSep08, mRNA.                                                                     |
| Vrk3   | Vrk3.cSep08   | 361565 | 11798  | 720  | 5  | 147 | vaccinia related kinase 3 (Vrk3) alternative variant cSep08, mRNA.                                                                     |
| Vrk3   | Vrk3.dSep08   | 361565 | 9333   | 385  | 4  | 112 | vaccinia related kinase 3 (Vrk3) alternative variant dSep08, mRNA.                                                                     |
| Vrk3   | Vrk3.eSep08   | 361565 | 1808   | 477  | 2  | 66  | vaccinia related kinase 3 (Vrk3) alternative variant eSep08, mRNA.                                                                     |
| Vrk3   | Vrk3.fSep08   | 361565 | 2886   | 318  | 2  | 60  | vaccinia related kinase 3 (Vrk3) alternative variant fSep08, mRNA.                                                                     |
| Vsig4  | Vsig4.aSep08  | 312102 | 23344  | 705  |    | 220 | immunoglobulin V-set (25.0 kD) (Vsig4) mRNA.                                                                                           |
| Vstm2a | Vstm2a.aSep08 | 689106 | 25901  | 1079 | 3  | 252 | CRA b (Vstm2a) alternative variant aSep08, mRNA.                                                                                       |
| Vstm2a | Vstm2a.bSep08 | 689106 | 22000  | 740  | 2  | 179 | CRA b (19.9 kD) (Vstm2a) alternative variant bSep08, mRNA.                                                                             |
| Vstm2a | Vstm2a.cSep08 | 689106 | 2135   | 693  | 1  | 164 | putative protein of vertebrate origin (Vstm2a) alternative variant cSep08, mRNA.                                                       |
| Vta1   | Vta1.aSep08   | 292640 | 47366  | 907  | 2  | 295 | vps20-associated 1 homolog (S. cerevisiae) (Vta1) alternative variant aSep08, mRNA.                                                    |
| Vta1   | Vta1.cSep08   | 292640 | 28801  | 1216 | 1  | 213 | vps20-associated 1 homolog (S. cerevisiae) (23.1 kD) (Vta1) alternative variant cSep08, mRNA.                                          |
| Vti1a  | Vti1a.bSep08  | 65277  | 175651 | 578  | 7  | 123 | vesicle transport through interaction with t-SNAREs homolog 1A (yeast) (Vti1a) alternative variant bSep08, mRNA.                       |
| Vti1a  | Vti1a.cSep08  | 65277  | 139885 | 511  | 5  | 120 | vesicle transport through interaction with t-SNAREs homolog 1A (yeast) (Vti1a) alternative variant cSep08, mRNA.                       |
| Vti1a  | Vti1a.dSep08  | 65277  | 12313  | 444  | 3  | 63  | vesicle transport through interaction with t-SNAREs homolog 1A (yeast) (Vti1a) alternative variant dSep08, mRNA.                       |
| Vtn    | Vtn.bSep08    | 29169  | 1331   | 1166 | 1  | 201 | vitronectin (22.5 kD) (Vtn) alternative variant bSep08, mRNA.                                                                          |
| vuby   | vuby.aSep08   |        | 5168   | 367  | 1  | 86  | SWI SNF related matrix associated actin dependent regulator of chromatin subfamily a member 1 (vuby) alternative variant aSep08, mRNA. |
| vuby   | vuby.bSep08   |        | 4891   | 419  | 2  | 70  | putative protein (7.6 kD) (vuby) alternative variant bSep08, mRNA.                                                                     |
| vuchy  | vuchy.aSep08  |        | 420    | 335  |    | 111 | spectrin beta non-erythrocytic 5 orthologue like (vuchy) mRNA.                                                                         |
| vudar  | vudar.aSep08  |        | 1789   | 409  |    | 48  | putative protein (5.3 kD) (vudar) mRNA.                                                                                                |
| vudoy  | vudoy.aSep08  |        | 1482   | 976  |    | 48  | putative protein (4.9 kD) (vudoy) mRNA.                                                                                                |
| vuflo  | vuflo.aSep08  |        | 2596   | 631  |    | 107 | solute carrier family 18 member 2 (vuflo) mRNA.                                                                                        |
| vufly  | vufly.aSep08  |        | 1278   | 615  |    | 49  | polyprotein (5.5 kD) (vufly) mRNA.                                                                                                     |
| vugar  | vugar.aSep08  |        | 3961   | 402  |    | 90  | putative protein (10.2 kD) (vugar) mRNA.                                                                                               |
| vuja   | vuja.aSep08   |        | 2758   | 1525 |    | 31  | putative protein (3.6 kD) (vuja) mRNA.                                                                                                 |

|        |               |        |        |      |   |     |                                                                                                  |
|--------|---------------|--------|--------|------|---|-----|--------------------------------------------------------------------------------------------------|
| vujey  | vujey.aSep08  |        | 3638   | 394  |   | 89  | furry homolog-like (vujey) mRNA.                                                                 |
| vukee  | vukee.aSep08  |        | 586    | 382  |   | 127 | putative protein (vukee) mRNA.                                                                   |
| vukler | vukler.aSep08 |        | 11778  | 420  |   | 84  | putative protein (vukler) mRNA.                                                                  |
| vulo   | vulo.aSep08   |        | 2567   | 307  |   | 95  | putative protein (vulo) mRNA.                                                                    |
| vumee  | vumee.aSep08  |        | 12733  | 1373 |   | 432 | folliculin interacting protein 1 (vumee) mRNA.                                                   |
| vunoy  | vunoy.aSep08  |        | 4919   | 429  |   | 125 | putative protein (vunoy) mRNA.                                                                   |
| vupor  | vupor.aSep08  |        | 4357   | 630  |   | 43  | putative protein (5.0 kD) (vupor) mRNA.                                                          |
| vusa   | vusa.aSep08   |        | 2026   | 582  |   | 70  | putative protein (vusa) mRNA.                                                                    |
| vushee | vushee.aSep08 |        | 625    | 367  |   | 78  | putative protein (vushee) mRNA.                                                                  |
| vutu   | vutu.aSep08   |        | 3953   | 713  |   | 37  | putative protein (4.4 kD) (vutu) mRNA.                                                           |
| vuvar  | vuvar.aSep08  |        | 593    | 387  |   | 29  | putative protein (3.3 kD) (vuvar) mRNA.                                                          |
| vuwey  | vuwey.aSep08  |        | 1614   | 478  | 1 | 60  | CRA a like (6.5 kD) (vuwey) alternative variant aSep08, mRNA.                                    |
| vuwey  | vuwey.bSep08  |        | 1543   | 374  | 1 | 60  | CRA a like (6.5 kD) (vuwey) alternative variant bSep08, mRNA.                                    |
| VWA.0  | VWA.0.aSep08  |        | 4229   | 673  |   | 198 | type VI alpha 1 (VWA.0) mRNA.                                                                    |
| VWA.1  | VWA.1.aSep08  |        | 19117  | 3611 | 4 | 927 | collagen type VI alpha 3 (VWA.1) alternative variant aSep08, mRNA.                               |
| VWA.1  | VWA.1.bSep08  |        | 13113  | 1881 | 2 | 436 | type VI alpha 3 (VWA.1) alternative variant bSep08, mRNA.                                        |
| VWA.2  | VWA.2.aSep08  |        | 18557  | 1332 |   | 444 | procollagen type XII alpha 1 CRA a (VWA.2) mRNA.                                                 |
| VWA.3  | VWA.3.aSep08  |        | 67477  | 394  |   | 112 | putative protein (VWA.3) alternative variant aSep08, mRNA.                                       |
| VWA.3  | VWA.3.bSep08  |        | 67661  | 740  | 1 | 108 | putative mitochondrial protein (10.9 kD) (VWA.3) alternative variant bSep08, mRNA.               |
| VWA.4  | VWA.4.aSep08  |        | 8566   | 980  |   | 326 | von Willebrand factor (VWA.4) mRNA.                                                              |
| Vwa1   | Vwa1.aSep08   | 298683 | 3940   | 1089 | 3 | 344 | von Willebrand factor, type A and fibronectin, type III (Vwa1) alternative variant aSep08, mRNA. |
| Vwa1   | Vwa1.bSep08   | 298683 | 3633   | 711  | 3 | 159 | von Willebrand factor, type A precursor (17.1 kD) (Vwa1) alternative variant bSep08, mRNA.       |
| Vwa3a  | Vwa3a.bSep08  | 293449 | 9246   | 556  | 4 | 155 | CRA c (Vwa3a) alternative variant bSep08, mRNA.                                                  |
| Vwa3a  | Vwa3a.cSep08  | 293449 | 6182   | 307  | 2 | 101 | CRA c (Vwa3a) alternative variant cSep08, mRNA.                                                  |
| VWC.0  | VWC.0.aSep08  |        | 84913  | 426  |   | 84  | procollagen type V alpha 2 (VWC.0) mRNA.                                                         |
| VWC.1  | VWC.1.aSep08  |        | 1872   | 750  |   | 249 | cysteine-rich motor neuron 2 protein (VWC.1) mRNA.                                               |
| VWC.2  | VWC.2.aSep08  |        | 2972   | 473  |   | 157 | cysteine rich bmp regulator 2 (VWC.2) mRNA.                                                      |
| VWC.3  | VWC.3.aSep08  |        | 3120   | 791  |   | 197 | thrombospondin 2 (VWC.3) mRNA.                                                                   |
| Vwc2   | Vwc2.bSep08   | 501231 | 130912 | 776  | 2 | 75  | putative protein (8.5 kD) (Vwc2) alternative variant bSep08, mRNA.                               |
| Vwce   | Vwce.aSep08   | 309209 | 3259   | 690  |   | 86  | von Willebrand factor C and EGF domains (Vwce) mRNA.                                             |
| VWD.0  | VWD.0.aSep08  |        | 7964   | 623  |   | 207 | CRA a (VWD.0) mRNA.                                                                              |
| VWD.1  | VWD.1.aSep08  |        | 4719   | 1214 |   | 404 | CRA a (VWD.1) mRNA.                                                                              |
| VWD.2  | VWD.2.aSep08  |        | 2427   | 1660 |   | 553 | IgG binding protein like (VWD.2) mRNA.                                                           |
| VWD.3  | VWD.3.aSep08  |        | 1439   | 1103 |   | 367 | fbp protein (VWD.3) mRNA.                                                                        |

|                   |                          |        |        |      |   |     |                                                                                                            |
|-------------------|--------------------------|--------|--------|------|---|-----|------------------------------------------------------------------------------------------------------------|
| VWD.4             | VWD.4.aSep08             |        | 3279   | 773  |   | 208 | fbp protein (VWD.4) mRNA.                                                                                  |
| VWD.5             | VWD.5.aSep08             |        | 11989  | 1016 | 4 | 334 | CRA a (VWD.5) alternative variant aSep08, mRNA.                                                            |
| Vwf               | Vwf.aSep08               | 116669 | 20368  | 1712 | 3 | 570 | von Willebrand factor homolog (Vwf) alternative variant aSep08, mRNA.                                      |
| Vwf               | Vwf.bSep08               | 116669 | 8149   | 798  | 1 | 228 | von Willebrand factor homolog (Vwf) alternative variant bSep08, mRNA.                                      |
| Vwf               | Vwf.cSep08               | 116669 | 8164   | 735  | 2 | 225 | von Willebrand factor homolog (Vwf) alternative variant cSep08, mRNA.                                      |
| vyby              | vyby.aSep08              |        | 5656   | 507  |   | 168 | SWI SNF related matrix associated actin dependent regulator of chromatin subfamily a member 1 (vyby) mRNA. |
| vychy             | vychy.aSep08             |        | 4768   | 1138 |   | 112 | putative protein, with a coiled coil domain, of mammalian origin (vychy) mRNA.                             |
| vydar             | vydar.aSep08             |        | 905    | 320  |   | 26  | putative protein (vydar) mRNA.                                                                             |
| vydoy             | vydoy.aSep08             |        | 997    | 571  | 2 | 76  | CRA a like (vydoy) alternative variant aSep08, mRNA.                                                       |
| vydoy             | vydoy.bSep08             |        | 3774   | 1047 | 3 | 74  | putative protein (vydoy) alternative variant bSep08, mRNA.                                                 |
| vyflo             | vyflo.aSep08             |        | 3099   | 325  |   | 42  | CRA b like (vyflo) mRNA.                                                                                   |
| vyflu             | vyflu.aSep08             |        | 1585   | 410  |   | 55  | putative protein (vyflu) mRNA.                                                                             |
| vygar             | vygar.aSep08             |        | 1219   | 542  | 3 | 140 | putative protein (vygar) alternative variant aSep08, mRNA.                                                 |
| vygar             | vygar.bSep08             |        | 1078   | 503  | 2 | 127 | putative protein (vygar) alternative variant bSep08, mRNA.                                                 |
| vyja              | vyja.aSep08              |        | 3187   | 199  |   | 63  | gag protein like (vyja) mRNA.                                                                              |
| vyjey             | vyjey.aSep08             |        | 112861 | 621  |   | 120 | putative protein (vyjey) mRNA.                                                                             |
| vykee             | vykee.aSep08             |        | 1956   | 241  |   | 79  | putative protein (vykee) mRNA.                                                                             |
| vykler            | vykler.aSep08            |        | 833    | 717  |   | 53  | putative protein (5.7 kD) (vykler) mRNA.                                                                   |
| vylo              | vylo.aSep08              |        | 7350   | 818  |   | 189 | tyrosine kinase 3 (vylo) mRNA.                                                                             |
| vymee             | vymee.aSep08             |        | 11235  | 945  |   | 184 | folliculin interacting protein 1 (vymee) mRNA.                                                             |
| vynoy             | vynoy.aSep08             |        | 2382   | 718  |   | 61  | putative protein (vynoy) mRNA.                                                                             |
| vypor             | vypor.aSep08             |        | 2646   | 373  |   | 50  | putative protein (vypor) mRNA.                                                                             |
| vysa              | vysa.aSep08              |        | 21379  | 682  |   | 44  | putative protein (vysa) mRNA.                                                                              |
| vyshee            | vyshee.aSep08            |        | 2118   | 607  |   | 167 | insulin receptor-related receptor CRA a (vyshee) mRNA.                                                     |
| vytu              | vytu.aSep08              |        | 44238  | 265  |   | 25  | putative protein (3.0 kD) (vytu) mRNA.                                                                     |
| vyvar             | vyvar.aSep08             |        | 2359   | 720  |   | 145 | putative protein human specific (vyvar) mRNA.                                                              |
| vywey             | vywey.aSep08             |        | 1174   | 805  |   | 138 | putative protein (vywey) mRNA.                                                                             |
| wabor             | wabor.aSep08             |        | 1343   | 539  | 2 | 80  | putative protein (wabor) alternative variant aSep08, mRNA.                                                 |
| wabor             | wabor.bSep08             |        | 29168  | 995  | 2 | 40  | putative protein (wabor) alternative variant bSep08, mRNA.                                                 |
| wabor             | wabor.cSep08             |        | 11829  | 627  | 3 | 63  | putative protein (7.3 kD) (wabor) alternative variant cSep08, mRNA.                                        |
| waby              | waby.aSep08              |        | 1751   | 759  |   | 218 | putative protein of mammalian origin (waby) mRNA.                                                          |
| wachy             | wachy.aSep08             |        | 7007   | 687  |   | 163 | tubulin gamma complex associated protein 4 (wachy) mRNA.                                                   |
| WAC_Acf1_DNA_bd.0 | WAC_Acf1_DNA_bd.0.aSep08 |        | 22711  | 1398 |   | 210 | bromodomain adjacent zinc finger domain 1B (WAC_Acf1_DNA_bd.0) mRNA.                                       |
| wadar             | wadar.aSep08             |        | 1414   | 386  |   | 122 | putative protein (wadar) mRNA.                                                                             |

|         |                |        |       |      |   |     |                                                                                          |
|---------|----------------|--------|-------|------|---|-----|------------------------------------------------------------------------------------------|
| wadoy   | wadoy.aSep08   |        | 19790 | 310  |   | 29  | putative protein (wadoy) mRNA.                                                           |
| waflo   | waflo.aSep08   |        | 3034  | 1091 | 3 | 143 | dynamamin binding protein like (16.7 kD) (waflo) alternative variant aSep08, mRNA.       |
| wafllu  | wafllu.aSep08  |        | 5565  | 840  |   | 49  | putative protein (wafllu) mRNA.                                                          |
| wafly   | wafly.aSep08   |        | 5319  | 298  |   | 21  | putative protein (2.4 kD) (wafly) mRNA.                                                  |
| wagar   | wagar.aSep08   |        | 15964 | 1776 |   | 37  | putative protein (4.0 kD) (wagar) mRNA.                                                  |
| waja    | waja.aSep08    |        | 4567  | 403  |   | 78  | putative protein (waja) mRNA.                                                            |
| wajey   | wajey.aSep08   |        | 22115 | 1790 |   | 518 | ATPase class V type 10D (wajey) mRNA.                                                    |
| wakee   | wakee.aSep08   |        | 3367  | 354  |   | 64  | polyprotein (wakee) mRNA.                                                                |
| wakler  | wakler.aSep08  |        | 2509  | 732  |   | 44  | putative protein (4.9 kD) (wakler) mRNA.                                                 |
| walo    | walo.aSep08    |        | 1335  | 494  |   | 26  | putative protein (walo) mRNA.                                                            |
| wamee   | wamee.aSep08   |        | 5015  | 265  |   | 58  | putative protein (wamee) mRNA.                                                           |
| wanoy   | wanoy.aSep08   |        | 6019  | 442  |   | 49  | putative protein (wanoy) mRNA.                                                           |
| wapor   | wapor.aSep08   |        | 3674  | 356  |   | 118 | dopey family member 1 (wapor) mRNA.                                                      |
| warbor  | warbor.aSep08  |        | 664   | 381  |   | 94  | putative protein (warbor) mRNA.                                                          |
| warby   | warby.aSep08   |        | 11120 | 442  |   | 146 | family member 2 (warby) mRNA.                                                            |
| warchy  | warchy.aSep08  |        | 4370  | 1420 |   | 156 | spastic paraplegia 11 (warchy) mRNA.                                                     |
| wardar  | wardar.aSep08  |        | 1765  | 487  |   | 162 | genetic suppressor element 1 (wardar) mRNA.                                              |
| wardoy  | wardoy.aSep08  |        | 983   | 272  |   | 51  | putative protein (wardoy) mRNA.                                                          |
| warflu  | warflu.aSep08  |        | 8512  | 429  |   | 110 | odd Oz ten-m homolog 4 (warflu) mRNA.                                                    |
| warfly  | warfly.aSep08  |        | 8233  | 1365 | 2 | 80  | ac1576 like (9.1 kD) (warfly) mRNA.                                                      |
| wargar  | wargar.aSep08  |        | 5651  | 430  |   | 143 | palladin (wargar) mRNA.                                                                  |
| warja   | warja.aSep08   |        | 723   | 622  |   | 35  | putative protein (warja) mRNA.                                                           |
| warjey  | warjey.aSep08  |        | 8457  | 673  |   | 102 | putative protein (11.4 kD) (warjey) mRNA.                                                |
| warkee  | warkee.aSep08  |        | 16389 | 423  |   | 85  | putative nuclear protein (9.1 kD) (warkee) mRNA.                                         |
| warkler | warkler.aSep08 |        | 803   | 478  |   | 91  | putative protein (warkler) mRNA.                                                         |
| warlo   | warlo.aSep08   |        | 930   | 482  |   | 84  | CRA a like (warlo) mRNA.                                                                 |
| warmee  | warmee.aSep08  |        | 4223  | 398  |   | 15  | putative protein (warmee) mRNA.                                                          |
| warnoy  | warnoy.aSep08  |        | 663   | 275  |   | 22  | putative protein (warnoy) mRNA.                                                          |
| warpor  | warpor.aSep08  |        | 2418  | 388  |   | 129 | CRA a (warpor) mRNA.                                                                     |
| Wars    | Wars.aSep08    | 314442 | 31195 | 1857 | 2 | 481 | tryptophanyl-tRNA synthetase (54.1 kD) (Wars) alternative variant aSep08, complete mRNA. |
| Wars    | Wars.bSep08    | 314442 | 6022  | 1665 | 1 | 111 | tryptophanyl-tRNA synthetase (Wars) alternative variant bSep08, mRNA.                    |
| Wars2   | Wars2.aSep08   | 690654 | 79582 | 542  | 4 | 180 | tryptophanyl tRNA synthetase 2 (mitochondrial) (Wars2) alternative variant aSep08, mRNA. |
| Wars2   | Wars2.bSep08   | 690654 | 3700  | 576  | 1 | 33  | tryptophanyl tRNA synthetase 2 (mitochondrial) (Wars2) alternative variant bSep08, mRNA. |
| warsa   | warsa.aSep08   |        | 18515 | 735  |   | 245 | leucine-rich repeat kinase 2 (warsa) mRNA.                                               |
| warshee | warshee.aSep08 |        | 1305  | 371  |   | 66  | putative protein (warshee) mRNA.                                                         |
| wartu   | wartu.aSep08   |        | 7609  | 826  |   | 80  | putative protein (9.5 kD) (wartu) mRNA.                                                  |
| warvar  | warvar.aSep08  |        | 2277  | 335  |   | 91  | putative protein (9.9 kD) (warvar) mRNA.                                                 |

|         |                |        |       |      |    |     |                                                                                                              |
|---------|----------------|--------|-------|------|----|-----|--------------------------------------------------------------------------------------------------------------|
| warwey  | warwey.aSep08  |        | 1627  | 417  |    | 139 | putative protein of vertebrate origin (warwey) mRNA.                                                         |
| Was     | Was.bSep08     | 317371 | 8728  | 1741 | 12 | 333 | wiskott-Aldrich syndrome homolog (human) (36.2 kD) (Was) alternative variant bSep08, complete mRNA.          |
| Was     | Was.cSep08     | 317371 | 2817  | 763  | 7  | 240 | wiskott-Aldrich syndrome homolog (human) (Was) alternative variant cSep08, mRNA.                             |
| wasa    | wasa.aSep08    |        | 1316  | 458  |    | 49  | putative protein (wasa) mRNA.                                                                                |
| Wasf1   | Wasf1.bSep08   | 294568 | 49882 | 722  | 5  | 180 | WASP family 1 (Wasf1) alternative variant bSep08, mRNA.                                                      |
| washee  | washee.aSep08  |        | 1271  | 568  |    | 67  | putative protein (washee) mRNA.                                                                              |
| watu    | watu.aSep08    |        | 8735  | 730  | 3  | 175 | tata box binding protein -associated factor RNA polymerase I b like (watu) alternative variant aSep08, mRNA. |
| watu    | watu.bSep08    |        | 1177  | 665  | 1  | 35  | putative protein (4.2 kD) (watu) alternative variant bSep08, mRNA.                                           |
| wavar   | wavar.aSep08   |        | 1725  | 1223 | 1  | 187 | putative protein (21.1 kD) (wavar) alternative variant aSep08, mRNA.                                         |
| wavar   | wavar.bSep08   |        | 1814  | 1095 | 1  | 159 | putative protein (18.0 kD) (wavar) alternative variant bSep08, mRNA.                                         |
| wawbor  | wawbor.aSep08  |        | 1301  | 732  |    | 52  | putative protein (5.2 kD) (wawbor) mRNA.                                                                     |
| wawby   | wawby.aSep08   |        | 12755 | 705  |    | 69  | putative protein (wawby) mRNA.                                                                               |
| wawchy  | wawchy.aSep08  |        | 25031 | 1767 |    | 537 | spastic paraplegia 11 (wawchy) mRNA.                                                                         |
| wawdar  | wawdar.aSep08  |        | 1993  | 371  |    | 123 | genetic suppressor element 1 (wawdar) mRNA.                                                                  |
| wawdoy  | wawdoy.aSep08  |        | 70720 | 714  |    | 60  | putative protein (7.0 kD) (wawdoy) mRNA.                                                                     |
| wawey   | wawey.aSep08   |        | 10124 | 744  |    | 107 | putative protein of eukaryotic origin (wawey) mRNA.                                                          |
| wawflu  | wawflu.aSep08  |        | 1931  | 246  |    | 36  | putative protein (4.1 kD) (wawflu) mRNA.                                                                     |
| wawfly  | wawfly.aSep08  |        | 11908 | 301  |    | 99  | G protein-coupled receptor 126 (wawfly) mRNA.                                                                |
| wawgar  | wawgar.aSep08  |        | 15908 | 864  | 1  | 68  | putative protein (7.3 kD) (wawgar) alternative variant aSep08, mRNA.                                         |
| wawgar  | wawgar.bSep08  |        | 15920 | 659  |    | 68  | putative protein (7.3 kD) (wawgar) alternative variant bSep08, mRNA.                                         |
| wawja   | wawja.aSep08   |        | 3198  | 781  |    | 100 | putative protein (11.3 kD) (wawja) mRNA.                                                                     |
| wawjey  | wawjey.aSep08  |        | 40245 | 366  |    | 31  | putative protein (wawjey) mRNA.                                                                              |
| wawkee  | wawkee.aSep08  |        | 1571  | 506  | 1  | 109 | putative protein (wawkee) alternative variant aSep08, mRNA.                                                  |
| wawkee  | wawkee.bSep08  |        | 1138  | 243  | 1  | 43  | putative protein (wawkee) alternative variant bSep08, mRNA.                                                  |
| wawkler | wawkler.aSep08 |        | 2060  | 318  |    | 106 | cytochrome p450 (wawkler) mRNA.                                                                              |
| wawlo   | wawlo.aSep08   |        | 3519  | 923  | 5  | 252 | putative protein of eukaryotic origin (wawlo) alternative variant aSep08, mRNA.                              |
| wawmee  | wawmee.aSep08  |        | 1271  | 650  |    | 151 | obscurin (wawmee) mRNA.                                                                                      |
| wawnoy  | wawnoy.aSep08  |        | 2642  | 251  |    | 51  | putative protein (wawnoy) mRNA.                                                                              |
| wawpor  | wawpor.aSep08  |        | 1964  | 946  | 5  | 110 | putative protein (12.1 kD) (wawpor) alternative variant aSep08, mRNA.                                        |
| wawpor  | wawpor.bSep08  |        | 1682  | 567  | 4  | 49  | putative protein (wawpor) alternative variant bSep08, mRNA.                                                  |
| wawpor  | wawpor.cSep08  |        | 789   | 353  | 3  | 47  | putative protein (wawpor) alternative variant cSep08, mRNA.                                                  |

|         |                |        |       |      |    |     |                                                                                        |
|---------|----------------|--------|-------|------|----|-----|----------------------------------------------------------------------------------------|
| wawpor  | wawpor.dSep08  |        | 1793  | 1694 | 2  | 37  | putative protein (4.1 kD) (wawpor) alternative variant dSep08, mRNA.                   |
| wawsa   | wawsa.aSep08   |        | 5765  | 1625 |    | 120 | ab2-143 like (12.8 kD) (wawsa) mRNA.                                                   |
| wawshee | wawshee.aSep08 |        | 1287  | 668  |    | 222 | putative protein, with a transmembrane domain, of bilateral origin (wawshee) mRNA.     |
| wawtu   | wawtu.aSep08   |        | 409   | 264  |    | 34  | putative protein (wawtu) mRNA.                                                         |
| wawvar  | wawvar.bSep08  |        | 455   | 208  | 2  | 51  | putative protein (wawvar) alternative variant bSep08, mRNA.                            |
| wawwey  | wawwey.aSep08  |        | 17908 | 1090 | 2  | 78  | putative protein (9.7 kD) (wawwey) alternative variant aSep08, mRNA.                   |
| wawwey  | wawwey.bSep08  |        | 798   | 429  | 1  | 69  | putative protein (wawwey) alternative variant bSep08, mRNA.                            |
| Wbp2    | Wbp2.bSep08    | 192645 | 4082  | 675  | 7  | 224 | WW domain binding protein 2 (Wbp2) alternative variant bSep08, mRNA.                   |
| Wbp2    | Wbp2.cSep08    | 192645 | 7100  | 618  | 6  | 196 | WW domain binding protein 2 (Wbp2) alternative variant cSep08, mRNA.                   |
| Wbp2    | Wbp2.dSep08    | 192645 | 1471  | 1360 | 2  | 109 | WW domain binding protein 2 (11.2 kD) (Wbp2) alternative variant dSep08, mRNA.         |
| Wbp4    | Wbp4.bSep08    | 114765 | 18087 | 2741 | 5  | 214 | formin binding protein 21 like (23.9 kD) (Wbp4) alternative variant bSep08, mRNA.      |
| Wbp4    | Wbp4.cSep08    | 114765 | 15526 | 760  | 4  | 170 | formin binding protein 21 like (18.9 kD) (Wbp4) alternative variant cSep08, mRNA.      |
| Wbp4    | Wbp4.dSep08    | 114765 | 7917  | 786  | 5  | 155 | formin binding protein 21 like (17.6 kD) (Wbp4) alternative variant dSep08, mRNA.      |
| Wbp5    | Wbp5.aSep08    | 294067 | 2235  | 1012 | 1  | 182 | WW domain binding protein 5 like (Wbp5) alternative variant aSep08, mRNA.              |
| Wbp5    | Wbp5.aSep08    | 680354 | 2235  | 1012 | 1  | 182 | WW domain binding protein 5 like (Wbp5) alternative variant aSep08, mRNA.              |
| Wbp7    | Wbp7.aSep08    | 361543 | 5995  | 2515 | 10 | 734 | WW domain binding protein 7 (Wbp7) alternative variant aSep08, mRNA.                   |
| Wbp7    | Wbp7.bSep08    | 361543 | 3742  | 794  | 6  | 264 | WW domain binding protein 7 (Wbp7) alternative variant bSep08, mRNA.                   |
| Wbp7    | Wbp7.dSep08    | 361543 | 854   | 683  | 3  | 112 | WW domain binding protein 7 (Wbp7) alternative variant dSep08, mRNA.                   |
| Wbp11   | Wbp11.bSep08   | 297695 | 2715  | 721  | 3  | 144 | WW domain binding protein 11 like (Wbp11) alternative variant bSep08, mRNA.            |
| Wbp11   | Wbp11.cSep08   | 297695 | 3414  | 467  | 2  | 86  | WW domain binding protein 11 like (Wbp11) alternative variant cSep08, mRNA.            |
| Wbp11   | Wbp11.dSep08   | 297695 | 460   | 281  | 2  | 36  | WW domain binding protein 11 like (Wbp11) alternative variant dSep08, mRNA.            |
| Wbscr16 | Wbscr16.bSep08 | 360796 | 7491  | 590  | 4  | 170 | putative protein of bilateral origin (Wbscr16) alternative variant bSep08, mRNA.       |
| Wbscr16 | Wbscr16.cSep08 | 360796 | 17540 | 782  | 8  | 146 | putative protein of ancient origin (Wbscr16) alternative variant cSep08, mRNA.         |
| Wbscr16 | Wbscr16.dSep08 | 360796 | 7528  | 668  | 3  | 117 | regulator of chromosome condensation, RCC1 (Wbscr16) alternative variant dSep08, mRNA. |



|         |                |        |        |      |    |     |                                                                                                     |
|---------|----------------|--------|--------|------|----|-----|-----------------------------------------------------------------------------------------------------|
| Wbscr16 | Wbscr16.eSep08 | 360796 | 2433   | 364  | 3  | 37  | putative protein (4.3 kD) (Wbscr16) alternative variant eSep08, mRNA.                               |
| Wbscr22 | Wbscr22.aSep08 | 360830 | 8729   | 1172 | 10 | 254 | methyltransferase type 11 and methyltransferase type 12 (Wbscr22) alternative variant aSep08, mRNA. |
| Wbscr22 | Wbscr22.bSep08 | 360830 | 925    | 840  | 2  | 88  | putative nuclear protein of mammalian origin (10.5 kD) (Wbscr22) alternative variant bSep08, mRNA.  |
| Wbscr22 | Wbscr22.cSep08 | 360830 | 2987   | 1555 | 4  | 77  | putative protein of eukaryotic origin (Wbscr22) alternative variant cSep08, mRNA.                   |
| Wbscr27 | Wbscr27.bSep08 | 688407 | 9414   | 467  | 4  | 104 | williams-Beuren syndrome region 27 like (Wbscr27) alternative variant bSep08, mRNA.                 |
| Wbscr28 | Wbscr28.aSep08 | 288604 | 1140   | 424  |    | 134 | putative protein of mammalian origin (Wbscr28) mRNA.                                                |
| WD40.0  | WD40.0.aSep08  |        | 12649  | 515  |    | 171 | WD repeat domain 44 (WD40.0) mRNA.                                                                  |
| WD40.1  | WD40.1.aSep08  |        | 1843   | 419  |    | 139 | pwp2 periodic tryptophan protein homolog (WD40.1) mRNA.                                             |
| WD40.2  | WD40.2.aSep08  |        | 22850  | 3394 | 9  | 187 | WD-40 repeat (WD40.2) alternative variant aSep08, mRNA.                                             |
| WD40.2  | WD40.2.bSep08  |        | 11382  | 2858 | 5  | 182 | da1-6 (WD40.2) alternative variant bSep08, mRNA.                                                    |
| WD40.3  | WD40.3.aSep08  |        | 11036  | 841  |    | 279 | lysosomal trafficking regulator (WD40.3) mRNA.                                                      |
| WD40.5  | WD40.5.aSep08  |        | 7918   | 408  | 4  | 135 | hira (WD40.5) alternative variant aSep08, mRNA.                                                     |
| WD40.6  | WD40.6.aSep08  |        | 14881  | 385  | 1  | 127 | hira (WD40.6) alternative variant aSep08, mRNA.                                                     |
| WD40.6  | WD40.6.bSep08  |        | 21890  | 789  | 2  | 88  | histone cell cycle regulation defective homolog A (WD40.6) alternative variant bSep08, mRNA.        |
| WD40.7  | WD40.7.aSep08  |        | 2278   | 1165 |    | 388 | WD repeat domain 24 (WD40.7) mRNA.                                                                  |
| WD40.8  | WD40.8.bSep08  |        | 5926   | 798  | 1  | 123 | WD repeat domain 16 (13.6 kD) (WD40.8) alternative variant bSep08, mRNA.                            |
| WD40.10 | WD40.10.aSep08 |        | 2779   | 1654 | 2  | 126 | dmx-like 2 (WD40.10) alternative variant aSep08, mRNA.                                              |
| WD40.11 | WD40.11.aSep08 |        | 2437   | 391  |    | 130 | guanine nucleotide exchange factor p532 (WD40.11) mRNA.                                             |
| WD40.12 | WD40.12.aSep08 |        | 3874   | 3518 | 5  | 958 | WD repeat domain 6 (WD40.12) alternative variant aSep08, mRNA.                                      |
| WD40.13 | WD40.13.aSep08 |        | 2087   | 890  |    | 296 | CRA c (WD40.13) mRNA.                                                                               |
| WD40.14 | WD40.14.aSep08 |        | 16603  | 790  | 7  | 263 | WD repeat domain 48 (WD40.14) alternative variant aSep08, mRNA.                                     |
| WD40.14 | WD40.14.bSep08 |        | 6942   | 260  | 1  | 46  | WD repeat domain 48 like (WD40.14) alternative variant bSep08, mRNA.                                |
| WD40.15 | WD40.15.aSep08 |        | 128577 | 2093 |    | 583 | WD repeat domain 51B (WD40.15) alternative variant aSep08, mRNA.                                    |
| WD40.16 | WD40.16.bSep08 | 685491 | 10793  | 581  | 5  | 66  | retinoblastoma binding protein 4 like (8.1 kD) (WD40.16) alternative variant bSep08, complete mRNA. |
| WD40.17 | WD40.17.bSep08 |        | 3417   | 541  |    | 113 | CRA b (WD40.17) alternative variant bSep08, mRNA.                                                   |
| WD40.18 | WD40.18.aSep08 |        | 5577   | 840  | 5  | 155 | damage specific DNA binding protein 2 like (WD40.18) alternative variant aSep08, mRNA.              |
| WD40.19 | WD40.19.aSep08 |        | 1049   | 617  |    | 205 | zinc finger protein 106 (WD40.19) mRNA.                                                             |
| WD40.20 | WD40.20.aSep08 |        | 15438  | 737  |    | 245 | CRA b (WD40.20) mRNA.                                                                               |

|         |                |        |       |      |   |     |                                                                                       |
|---------|----------------|--------|-------|------|---|-----|---------------------------------------------------------------------------------------|
| WD40.21 | WD40.21.aSep08 |        | 74545 | 1579 | 5 | 526 | WD-40 repeat (WD40.21) alternative variant aSep08, mRNA.                              |
| WD40.21 | WD40.21.bSep08 |        | 3578  | 654  | 3 | 218 | WD-40 repeat (WD40.21) alternative variant bSep08, mRNA.                              |
| WD40.22 | WD40.22.aSep08 |        | 10180 | 955  |   | 306 | WD repeat domain 62 (WD40.22) mRNA.                                                   |
| WD40.23 | WD40.23.aSep08 |        | 9883  | 670  |   | 222 | WD-40 repeat (WD40.23) mRNA.                                                          |
| WD40.24 | WD40.24.aSep08 |        | 6833  | 801  | 5 | 266 | CRA b (WD40.24) alternative variant aSep08, mRNA.                                     |
| WD40.24 | WD40.24.bSep08 |        | 936   | 812  | 1 | 83  | putative protein of eukaryotic origin (WD40.24) alternative variant bSep08, mRNA.     |
| WD40.25 | WD40.25.aSep08 |        | 7249  | 580  |   | 165 | WD-40 repeat (WD40.25) mRNA.                                                          |
| WD40.26 | WD40.26.bSep08 |        | 703   | 278  | 2 | 86  | guanine nucleotide-binding protein like (WD40.26) alternative variant bSep08, mRNA.   |
| Wdfy1   | Wdfy1.aSep08   | 301549 | 40364 | 707  | 7 | 220 | WD-40 repeat (Wdfy1) alternative variant aSep08, mRNA.                                |
| Wdfy1   | Wdfy1.cSep08   | 301549 | 10674 | 3536 | 5 | 157 | zinc finger, FYVE-type and WD-40 repeat (Wdfy1) alternative variant cSep08, mRNA.     |
| Wdfy1   | Wdfy1.eSep08   | 301549 | 36455 | 647  | 6 | 102 | WD-40 repeat (Wdfy1) alternative variant eSep08, mRNA.                                |
| Wdfy1   | Wdfy1.fSep08   | 301549 | 85256 | 658  | 7 | 76  | WD-40 repeat (8.5 kD) (Wdfy1) alternative variant fSep08, mRNA.                       |
| Wdfy3   | Wdfy3.aSep08   | 305164 | 6533  | 3476 | 2 | 188 | putative protein (Wdfy3) alternative variant aSep08, mRNA.                            |
| Wdfy3   | Wdfy3.bSep08   | 305164 | 7326  | 787  | 4 | 151 | alfy (Wdfy3) alternative variant bSep08, mRNA.                                        |
| Wdfy3   | Wdfy3.cSep08   | 305164 | 869   | 638  | 2 | 136 | alfy (Wdfy3) alternative variant cSep08, mRNA.                                        |
| Wdhd1   | Wdhd1.bSep08   | 305827 | 6053  | 717  | 1 | 238 | WD repeat and HMG-box DNA binding protein 1 (Wdhd1) alternative variant bSep08, mRNA. |
| Wdr1    | Wdr1.bSep08    | 360950 | 21725 | 773  | 7 | 237 | WD repeat domain 1 (Wdr1) alternative variant bSep08, mRNA.                           |
| Wdr1    | Wdr1.cSep08    | 360950 | 11313 | 721  | 6 | 196 | WD repeat domain 1 (Wdr1) alternative variant cSep08, mRNA.                           |
| Wdr1    | Wdr1.dSep08    | 360950 | 1034  | 404  | 4 | 114 | WD repeat domain 1 (Wdr1) alternative variant dSep08, mRNA.                           |
| Wdr1    | Wdr1.eSep08    | 360950 | 1146  | 402  | 2 | 46  | WD repeat domain 1 (Wdr1) alternative variant eSep08, mRNA.                           |
| Wdr3    | Wdr3.bSep08    | 310720 | 4679  | 876  | 5 | 161 | WD repeat domain 3 (Wdr3) alternative variant bSep08, mRNA.                           |
| Wdr3    | Wdr3.cSep08    | 310720 | 3691  | 971  | 4 | 57  | WD repeat domain 3 (Wdr3) alternative variant cSep08, mRNA.                           |
| Wdr7    | Wdr7.bSep08    | 66031  | 19514 | 995  | 4 | 331 | WD repeat domain 7 (Wdr7) alternative variant bSep08, mRNA.                           |
| Wdr12   | Wdr12.bSep08   | 363237 | 7538  | 851  | 5 | 231 | WD repeat domain 12 (Wdr12) alternative variant bSep08, mRNA.                         |
| Wdr12   | Wdr12.cSep08   | 363237 | 19107 | 803  | 5 | 203 | WD repeat domain 12 (Wdr12) alternative variant cSep08, mRNA.                         |
| Wdr12   | Wdr12.dSep08   | 363237 | 19226 | 941  | 5 | 118 | WD repeat domain 12 (13.7 kD) (Wdr12) alternative variant dSep08, mRNA.               |
| Wdr12   | Wdr12.eSep08   | 363237 | 49601 | 422  | 3 | 51  | WD repeat domain 12 (Wdr12) alternative variant eSep08, mRNA.                         |

|        |               |        |       |      |    |     |                                                                         |
|--------|---------------|--------|-------|------|----|-----|-------------------------------------------------------------------------|
| Wdr13  | Wdr13.bSep08  | 317370 | 2351  | 792  | 4  | 166 | WD repeat domain 13 (Wdr13) alternative variant bSep08, mRNA.           |
| Wdr18  | Wdr18.bSep08  | 314617 | 5655  | 847  | 2  | 280 | WD repeat domain 18 (Wdr18) alternative variant bSep08, mRNA.           |
| Wdr18  | Wdr18.cSep08  | 314617 | 5920  | 756  | 3  | 242 | WD repeat domain 18 (26.0 kD) (Wdr18) alternative variant cSep08, mRNA. |
| Wdr18  | Wdr18.dSep08  | 314617 | 6327  | 690  | 3  | 227 | WD repeat domain 18 (Wdr18) alternative variant dSep08, mRNA.           |
| Wdr19  | Wdr19.aSep08  | 305349 | 12935 | 1784 | 9  | 391 | WD repeat domain 19 (Wdr19) alternative variant aSep08, mRNA.           |
| Wdr19  | Wdr19.bSep08  | 305349 | 5708  | 768  | 5  | 178 | WD repeat domain 19 (Wdr19) alternative variant bSep08, mRNA.           |
| Wdr20a | Wdr20a.aSep08 | 314453 | 67026 | 2091 | 5  | 579 | WD repeat domain 20a (Wdr20a) alternative variant aSep08, mRNA.         |
| Wdr20a | Wdr20a.bSep08 | 314453 | 67292 | 2109 | 3  | 448 | WD repeat domain 20a (Wdr20a) alternative variant bSep08, mRNA.         |
| Wdr20a | Wdr20a.dSep08 | 314453 | 4877  | 503  | 3  | 88  | WD repeat domain 20a (Wdr20a) alternative variant dSep08, mRNA.         |
| Wdr22  | Wdr22.aSep08  | 314273 | 88877 | 5318 |    | 864 | WD repeat domain 22 (94.7 kD) (Wdr22) mRNA.                             |
| Wdr23  | Wdr23.bSep08  | 305895 | 5081  | 1442 | 9  | 283 | WD repeat domain 23 (32.0 kD) (Wdr23) alternative variant bSep08, mRNA. |
| Wdr23  | Wdr23.cSep08  | 305895 | 5756  | 1451 | 11 | 258 | WD repeat domain 23 (Wdr23) alternative variant cSep08, mRNA.           |
| Wdr23  | Wdr23.dSep08  | 305895 | 2064  | 978  | 4  | 127 | WD repeat domain 23 (Wdr23) alternative variant dSep08, mRNA.           |
| Wdr23  | Wdr23.eSep08  | 305895 | 3639  | 768  | 5  | 118 | WD repeat domain 23 (Wdr23) alternative variant eSep08, mRNA.           |
| Wdr23  | Wdr23.fSep08  | 305895 | 3040  | 1004 | 3  | 117 | WD repeat domain 23 (Wdr23) alternative variant fSep08, mRNA.           |
| Wdr23  | Wdr23.hSep08  | 305895 | 1340  | 672  | 3  | 77  | WD repeat domain 23 (Wdr23) alternative variant hSep08, mRNA.           |
| Wdr24  | Wdr24.aSep08  | 360497 | 1698  | 1301 | 1  | 365 | WD repeat domain 24 (40.2 kD) (Wdr24) alternative variant aSep08, mRNA. |
| Wdr24  | Wdr24.bSep08  | 360497 | 813   | 617  | 2  | 156 | WD repeat domain 24 (Wdr24) alternative variant bSep08, mRNA.           |
| Wdr25  | Wdr25.aSep08  | 299317 | 46858 | 989  |    | 272 | WD repeat domain 25 (Wdr25) mRNA.                                       |
| Wdr26  | Wdr26.bSep08  | 498301 | 24167 | 1002 | 9  | 334 | WD repeat domain 26 (Wdr26) alternative variant bSep08, mRNA.           |
| Wdr26  | Wdr26.cSep08  | 498301 | 30897 | 1277 | 11 | 309 | WD repeat domain 26 (35.5 kD) (Wdr26) alternative variant cSep08, mRNA. |
| Wdr26  | Wdr26.dSep08  | 498301 | 12845 | 391  | 3  | 130 | WD repeat domain 26 (Wdr26) alternative variant dSep08, mRNA.           |
| Wdr27  | Wdr27.aSep08  | 308222 | 11882 | 928  |    | 308 | WD repeat domain 27 (Wdr27) mRNA.                                       |
| Wdr33  | Wdr33.bSep08  | 307524 | 24393 | 2664 | 7  | 609 | WD repeat domain 33 (Wdr33) alternative variant bSep08, mRNA.           |
| Wdr33  | Wdr33.cSep08  | 307524 | 19606 | 971  | 5  | 323 | WD repeat domain 33 (Wdr33) alternative variant cSep08, mRNA.           |

|        |               |        |       |      |    |     |                                                                                        |
|--------|---------------|--------|-------|------|----|-----|----------------------------------------------------------------------------------------|
| Wdr33  | Wdr33.dSep08  | 307524 | 35108 | 1803 | 6  | 319 | WD repeat domain 33 (37.4 kD) (Wdr33) alternative variant dSep08, complete mRNA.       |
| Wdr33  | Wdr33.eSep08  | 307524 | 7765  | 648  | 7  | 215 | WD repeat domain 33 (Wdr33) alternative variant eSep08, mRNA.                          |
| Wdr34  | Wdr34.bSep08  | 296618 | 4114  | 1783 | 5  | 365 | WD repeat domain 34 (Wdr34) alternative variant bSep08, mRNA.                          |
| Wdr34  | Wdr34.cSep08  | 296618 | 13675 | 754  | 5  | 222 | WD repeat domain 34 (Wdr34) alternative variant cSep08, mRNA.                          |
| Wdr34  | Wdr34.dSep08  | 296618 | 1615  | 673  | 3  | 198 | WD repeat domain 34 (Wdr34) alternative variant dSep08, mRNA.                          |
| Wdr35  | Wdr35.aSep08  | 298876 | 11574 | 1080 |    | 360 | WD repeat domain 35 (Wdr35) mRNA.                                                      |
| Wdr37  | Wdr37.bSep08  | 307075 | 16874 | 1586 | 6  | 412 | WD repeat domain 37 (Wdr37) alternative variant bSep08, mRNA.                          |
| Wdr37  | Wdr37.cSep08  | 307075 | 28931 | 3519 | 7  | 253 | WD repeat domain 37 (Wdr37) alternative variant cSep08, mRNA.                          |
| Wdr37  | Wdr37.dSep08  | 307075 | 19622 | 794  | 8  | 223 | WD repeat domain 37 (Wdr37) alternative variant dSep08, mRNA.                          |
| Wdr37  | Wdr37.fSep08  | 307075 | 9620  | 404  | 2  | 40  | WD repeat domain 37 (Wdr37) alternative variant fSep08, mRNA.                          |
| Wdr38  | Wdr38.aSep08  | 366035 | 1651  | 828  |    | 208 | WD repeat domain 38 (Wdr38) mRNA.                                                      |
| Wdr41  | Wdr41.aSep08  | 361879 | 50133 | 3089 | 13 | 460 | WD repeat domain 41 (51.4 kD) (Wdr41) alternative variant aSep08, mRNA.                |
| Wdr41  | Wdr41.cSep08  | 361879 | 7933  | 513  | 4  | 137 | WD repeat domain 41 (Wdr41) alternative variant cSep08, mRNA.                          |
| Wdr41  | Wdr41.dSep08  | 361879 | 4149  | 732  | 4  | 113 | WD repeat domain 41 CRA a (12.9 kD) (Wdr41) alternative variant dSep08, mRNA.          |
| Wdr41  | Wdr41.eSep08  | 361879 | 4357  | 1152 | 3  | 113 | WD repeat domain 41 CRA a (12.9 kD) (Wdr41) alternative variant eSep08, complete mRNA. |
| Wdr41  | Wdr41.fSep08  | 361879 | 43921 | 1064 | 10 | 110 | WD repeat domain 41 (11.8 kD) (Wdr41) alternative variant fSep08, mRNA.                |
| Wdr42a | Wdr42a.bSep08 | 364050 | 21100 | 1763 | 5  | 141 | WD repeat domain 42A (Wdr42a) alternative variant bSep08, mRNA.                        |
| Wdr42a | Wdr42a.cSep08 | 364050 | 4932  | 872  | 3  | 92  | WD repeat domain 42A (Wdr42a) alternative variant cSep08, mRNA.                        |
| Wdr43  | Wdr43.aSep08  | 362703 | 29820 | 1801 | 16 | 511 | CRA b (57.6 kD) (Wdr43) alternative variant aSep08, mRNA.                              |
| Wdr43  | Wdr43.bSep08  | 362703 | 16637 | 837  | 6  | 278 | WD repeat domain 43 like (Wdr43) alternative variant bSep08, mRNA.                     |
| Wdr43  | Wdr43.cSep08  | 362703 | 12950 | 871  | 8  | 198 | WD repeat domain 43 like (Wdr43) alternative variant cSep08, mRNA.                     |
| Wdr43  | Wdr43.dSep08  | 362703 | 12519 | 848  | 10 | 178 | WD repeat domain 43 like (Wdr43) alternative variant dSep08, mRNA.                     |
| Wdr43  | Wdr43.eSep08  | 362703 | 6701  | 2097 | 4  | 121 | WD repeat domain 43 like (13.8 kD) (Wdr43) alternative variant eSep08, mRNA.           |
| Wdr44  | Wdr44.aSep08  | 246152 | 50710 | 840  | 5  | 186 | WD repeat domain 44 (Wdr44) alternative variant aSep08, mRNA.                          |

|        |               |        |       |      |    |     |                                                                                  |
|--------|---------------|--------|-------|------|----|-----|----------------------------------------------------------------------------------|
| Wdr45  | Wdr45.aSep08  | 302559 | 5480  | 1385 | 11 | 360 | WD repeat domain 45 (39.8 kD) (Wdr45) alternative variant aSep08, complete mRNA. |
| Wdr45  | Wdr45.cSep08  | 302559 | 4207  | 624  | 7  | 157 | WD repeat domain 45 (Wdr45) alternative variant cSep08, mRNA.                    |
| Wdr45l | Wdr45l.bSep08 | 360682 | 3134  | 622  | 4  | 138 | wdr45 like (Wdr45l) alternative variant bSep08, mRNA.                            |
| Wdr45l | Wdr45l.cSep08 | 360682 | 3096  | 1539 | 3  | 122 | wdr45 like (Wdr45l) alternative variant cSep08, mRNA.                            |
| Wdr47  | Wdr47.aSep08  | 310785 | 77620 | 4106 | 14 | 529 | repeat 47 (58.0 kD) (Wdr47) alternative variant aSep08, complete mRNA.           |
| Wdr47  | Wdr47.bSep08  | 310785 | 12191 | 1518 | 6  | 277 | wd repeat domain 47 CRA b (30.1 kD) (Wdr47) alternative variant bSep08, mRNA.    |
| Wdr47  | Wdr47.dSep08  | 310785 | 7110  | 537  | 3  | 142 | repeat 47 (Wdr47) alternative variant dSep08, mRNA.                              |
| Wdr47  | Wdr47.fSep08  | 310785 | 14891 | 303  | 1  | 36  | wd repeat domain 47 CRA b (Wdr47) alternative variant fSep08, mRNA.              |
| Wdr48  | Wdr48.aSep08  | 363164 | 14667 | 1573 | 1  | 429 | WD repeat domain 48 (Wdr48) alternative variant aSep08, mRNA.                    |
| Wdr48  | Wdr48.bSep08  | 363164 | 8076  | 2356 | 2  | 202 | WD repeat domain 48 (Wdr48) alternative variant bSep08, mRNA.                    |
| Wdr55  | Wdr55.bSep08  | 307494 | 2323  | 741  | 3  | 183 | WD repeat domain 55 (Wdr55) alternative variant bSep08, mRNA.                    |
| Wdr55  | Wdr55.cSep08  | 307494 | 1883  | 486  | 1  | 93  | WD repeat domain 55 (Wdr55) alternative variant cSep08, mRNA.                    |
| Wdr59  | Wdr59.aSep08  | 307855 | 51551 | 2478 | 7  | 389 | WD repeat domain 59 (Wdr59) alternative variant aSep08, mRNA.                    |
| Wdr59  | Wdr59.bSep08  | 307855 | 40693 | 617  | 3  | 141 | WD repeat domain 59 (Wdr59) alternative variant bSep08, mRNA.                    |
| Wdr60  | Wdr60.aSep08  | 314523 | 17873 | 1208 | 5  | 341 | WD repeat domain 60 (Wdr60) alternative variant aSep08, mRNA.                    |
| Wdr60  | Wdr60.bSep08  | 314523 | 6183  | 1585 | 1  | 53  | WD repeat domain 60 (Wdr60) alternative variant bSep08, mRNA.                    |
| Wdr61  | Wdr61.bSep08  | 363064 | 17733 | 1158 | 10 | 305 | WD repeat domain 61 (Wdr61) alternative variant bSep08, complete mRNA.           |
| Wdr61  | Wdr61.cSep08  | 363064 | 11061 | 820  | 6  | 219 | WD repeat domain 61 (Wdr61) alternative variant cSep08, mRNA.                    |
| Wdr61  | Wdr61.dSep08  | 363064 | 5613  | 549  | 4  | 118 | WD repeat domain 61 (Wdr61) alternative variant dSep08, mRNA.                    |
| Wdr61  | Wdr61.eSep08  | 363064 | 6356  | 373  | 5  | 61  | WD repeat domain 61 (Wdr61) alternative variant eSep08, mRNA.                    |
| Wdr62  | Wdr62.aSep08  | 308492 | 11467 | 2454 |    | 789 | WD repeat domain 62 (Wdr62) mRNA.                                                |
| Wdr66  | Wdr66.aSep08  | 304498 | 29181 | 722  |    | 240 | WD repeat domain 66 (Wdr66) mRNA.                                                |
| Wdr67  | Wdr67.bSep08  | 299949 | 11011 | 668  | 5  | 222 | WD repeat domain 67 (Wdr67) alternative variant bSep08, mRNA.                    |
| Wdr67  | Wdr67.cSep08  | 299949 | 10123 | 581  | 3  | 128 | WD repeat domain 67 (Wdr67) alternative variant cSep08, mRNA.                    |
| Wdr70  | Wdr70.bSep08  | 294783 | 52062 | 739  | 6  | 212 | WD repeat domain 70 (Wdr70) alternative variant bSep08, mRNA.                    |

|       |              |        |       |      |    |     |                                                                                                                     |
|-------|--------------|--------|-------|------|----|-----|---------------------------------------------------------------------------------------------------------------------|
| Wdr70 | Wdr70.cSep08 | 294783 | 62225 | 647  | 8  | 102 | WD repeat domain 70 (11.5 kD) (Wdr70) alternative variant cSep08, mRNA.                                             |
| Wdr70 | Wdr70.dSep08 | 294783 | 5878  | 368  | 4  | 87  | WD repeat domain 70 (9.6 kD) (Wdr70) alternative variant dSep08, mRNA.                                              |
| Wdr73 | Wdr73.bSep08 | 308751 | 6080  | 745  | 6  | 180 | WD repeat domain 73 (Wdr73) alternative variant bSep08, mRNA.                                                       |
| Wdr73 | Wdr73.dSep08 | 308751 | 1154  | 687  | 2  | 109 | WD repeat domain 73 (Wdr73) alternative variant dSep08, mRNA.                                                       |
| Wdr73 | Wdr73.eSep08 | 308751 | 6468  | 775  | 7  | 102 | WD repeat domain 73 (Wdr73) alternative variant eSep08, mRNA.                                                       |
| Wdr73 | Wdr73.fSep08 | 308751 | 1741  | 654  | 5  | 28  | WD repeat domain 73 (Wdr73) alternative variant fSep08, mRNA.                                                       |
| Wdr73 | Wdr73.gSep08 | 308751 | 1793  | 420  | 5  | 52  | WD repeat domain 73 (Wdr73) alternative variant gSep08, mRNA.                                                       |
| Wdr74 | Wdr74.aSep08 | 690229 | 5288  | 1791 | 11 | 385 | WD repeat domain 74 and hypothetical protein LOC690257 (42.7 kD) (Wdr74) alternative variant aSep08, complete mRNA. |
| Wdr74 | Wdr74.aSep08 | 690257 | 5288  | 1791 | 11 | 385 | WD repeat domain 74 and hypothetical protein LOC690257 (42.7 kD) (Wdr74) alternative variant aSep08, complete mRNA. |
| Wdr74 | Wdr74.cSep08 | 690229 | 874   | 711  | 3  | 80  | WD repeat domain 74 and hypothetical protein LOC690257 (Wdr74) alternative variant cSep08, mRNA.                    |
| Wdr74 | Wdr74.cSep08 | 690257 | 874   | 711  | 3  | 80  | WD repeat domain 74 and hypothetical protein LOC690257 (Wdr74) alternative variant cSep08, mRNA.                    |
| Wdr75 | Wdr75.bSep08 | 314545 | 21764 | 1456 | 13 | 485 | WD repeat domain 75 (Wdr75) alternative variant bSep08, mRNA.                                                       |
| Wdr75 | Wdr75.cSep08 | 314545 | 6546  | 590  | 4  | 124 | WD repeat domain 75 (Wdr75) alternative variant cSep08, mRNA.                                                       |
| Wdr75 | Wdr75.dSep08 | 314545 | 3707  | 459  | 3  | 111 | WD repeat domain 75 (Wdr75) alternative variant dSep08, mRNA.                                                       |
| Wdr75 | Wdr75.fSep08 | 314545 | 771   | 473  | 2  | 58  | WD repeat domain 75 (6.8 kD) (Wdr75) alternative variant fSep08, mRNA.                                              |
| Wdr77 | Wdr77.bSep08 | 310769 | 8152  | 1197 | 8  | 287 | WD repeat domain 77 (30.8 kD) (Wdr77) alternative variant bSep08, mRNA.                                             |
| Wdr77 | Wdr77.cSep08 | 310769 | 2537  | 1347 | 3  | 119 | WD repeat domain 77 (Wdr77) alternative variant cSep08, mRNA.                                                       |
| Wdr78 | Wdr78.bSep08 | 313417 | 22651 | 1703 | 1  | 136 | WD repeat domain 78 (14.7 kD) (Wdr78) alternative variant bSep08, mRNA.                                             |
| Wdr79 | Wdr79.bSep08 | 287432 | 16100 | 1181 | 5  | 279 | WD repeat domain 79 (30.7 kD) (Wdr79) alternative variant bSep08, mRNA.                                             |
| Wdr81 | Wdr81.bSep08 | 303312 | 1875  | 736  | 1  | 245 | WD repeat domain 81 (Wdr81) alternative variant bSep08, mRNA.                                                       |
| Wdr88 | Wdr88.aSep08 | 292809 | 17522 | 710  |    | 236 | WD repeat domain 88 (Wdr88) mRNA.                                                                                   |
| Wdr91 | Wdr91.aSep08 | 312225 | 37324 | 2584 | 15 | 753 | WD repeat domain 91 (Wdr91) alternative variant aSep08, mRNA.                                                       |
| Wdr91 | Wdr91.cSep08 | 312225 | 2507  | 547  | 3  | 179 | WD repeat domain 91 (Wdr91) alternative variant cSep08, mRNA.                                                       |

|         |                |        |       |      |    |     |                                                                                         |
|---------|----------------|--------|-------|------|----|-----|-----------------------------------------------------------------------------------------|
| Wdr91   | Wdr91.dSep08   | 312225 | 10648 | 2341 | 5  | 151 | WD repeat domain 91 (16.1 kD) (Wdr91) alternative variant dSep08, mRNA.                 |
| Wdr91   | Wdr91.eSep08   | 312225 | 2935  | 794  | 3  | 138 | WD repeat domain 91 (Wdr91) alternative variant eSep08, mRNA.                           |
| Wdsof1  | Wdsof1.aSep08  | 362902 | 35349 | 1501 | 11 | 467 | WD-40 repeat and sof1-like protein (Wdsof1) alternative variant aSep08, mRNA.           |
| Wdsof1  | Wdsof1.bSep08  | 362902 | 2469  | 664  | 2  | 36  | putative protein of metazoan origin (4.2 kD) (Wdsof1) alternative variant bSep08, mRNA. |
| Wdsof1  | Wdsof1.cSep08  | 362902 | 2226  | 674  | 2  | 31  | putative protein of vertebrate origin (Wdsof1) alternative variant cSep08, mRNA.        |
| Wdsub1  | Wdsub1.bSep08  | 362137 | 5800  | 723  | 1  | 80  | U box (9.2 kD) (Wdsub1) alternative variant bSep08, mRNA.                               |
| Wdte1   | Wdte1.cSep08   | 313020 | 2252  | 1342 | 2  | 56  | WD and tetratricopeptide repeats 1 (6.2 kD) (Wdte1) alternative variant cSep08, mRNA.   |
| Wee1    | Wee1.bSep08    | 308937 | 5946  | 574  | 4  | 162 | wee 1 homolog (S. pombe) (Wee1) alternative variant bSep08, mRNA.                       |
| Wee1    | Wee1.cSep08    | 308937 | 791   | 584  | 2  | 60  | wee 1 homolog (S. pombe) (Wee1) alternative variant cSep08, mRNA.                       |
| weebor  | weebor.aSep08  |        | 2343  | 825  | 3  | 84  | putative protein (weebor) alternative variant aSep08, mRNA.                             |
| weeby   | weeby.aSep08   |        | 510   | 399  |    | 48  | CRA b like (weeby) mRNA.                                                                |
| weechy  | weechy.aSep08  |        | 4152  | 282  |    | 93  | tripartite motif-containing 69 (weechy) mRNA.                                           |
| weedar  | weedar.aSep08  |        | 1366  | 391  |    | 129 | genetic suppressor element 1 (weedar) mRNA.                                             |
| weedoy  | weedoy.aSep08  |        | 22039 | 1169 |    | 93  | putative protein (10.5 kD) (weedoy) mRNA.                                               |
| weeflu  | weeflu.aSep08  |        | 2527  | 1657 |    | 248 | ubiquitin 35 (weeflu) mRNA.                                                             |
| weefly  | weefly.aSep08  |        | 65254 | 687  |    | 57  | putative protein (6.7 kD) (weefly) mRNA.                                                |
| weegar  | weegar.aSep08  |        | 4846  | 935  |    | 83  | putative nuclear protein (9.4 kD) (weegar) mRNA.                                        |
| weeja   | weeja.aSep08   |        | 1465  | 385  |    | 77  | CRA a like (weeja) mRNA.                                                                |
| weejey  | weejey.aSep08  |        | 2341  | 265  | 2  | 43  | putative protein (weejey) alternative variant aSep08, mRNA.                             |
| weekee  | weekee.aSep08  |        | 4098  | 1121 |    | 38  | putative protein (weekee) mRNA.                                                         |
| weekler | weekler.aSep08 |        | 25767 | 330  |    | 43  | putative protein (4.9 kD) (weekler) mRNA.                                               |
| weelo   | weelo.aSep08   |        | 3054  | 764  |    | 254 | putative protein of eukaryotic origin (weelo) mRNA.                                     |
| weemee  | weemee.aSep08  |        | 1550  | 1136 |    | 160 | obscurin (weemee) mRNA.                                                                 |
| weenoy  | weenoy.aSep08  |        | 39260 | 414  |    | 53  | putative protein (weenoy) mRNA.                                                         |
| weepor  | weepor.aSep08  |        | 2373  | 385  |    | 77  | putative cytoplasmic protein (8.7 kD) (weepor) mRNA.                                    |
| weesa   | weesa.aSep08   |        | 4831  | 692  | 2  | 111 | ab2-143 like (11.9 kD) (weesa) alternative variant aSep08, mRNA.                        |
| weeshee | weeshee.aSep08 |        | 6177  | 299  |    | 52  | putative protein (weeshee) mRNA.                                                        |
| weetu   | weetu.aSep08   |        | 771   | 567  |    | 63  | putative protein (weetu) mRNA.                                                          |
| weevar  | weevar.aSep08  |        | 7564  | 309  |    | 42  | putative protein (weevar) mRNA.                                                         |
| weewey  | weewey.aSep08  |        | 29080 | 1088 | 2  | 97  | putative mitochondrial protein (11.3 kD) (weewey) alternative variant aSep08, mRNA.     |
| weewey  | weewey.bSep08  |        | 21660 | 784  | 1  | 55  | putative protein (6.0 kD) (weewey) alternative variant bSep08, mRNA.                    |

|         |                |  |       |      |   |     |                                                                                                  |
|---------|----------------|--|-------|------|---|-----|--------------------------------------------------------------------------------------------------|
| werbor  | werbor.aSep08  |  | 4681  | 2471 |   | 823 | hla-b associated transcript 2 (werbor) mRNA.                                                     |
| werby   | werby.aSep08   |  | 1666  | 830  | 2 | 126 | zinc finger protein 185 (14.0 kD) (werby) alternative variant aSep08, mRNA.                      |
| werchy  | werchy.aSep08  |  | 52765 | 387  |   | 43  | putative protein (werchy) mRNA.                                                                  |
| werdar  | werdar.aSep08  |  | 981   | 775  |   | 158 | genetic suppressor element 1 (18.2 kD) (werdar) mRNA.                                            |
| werdoy  | werdoy.aSep08  |  | 29483 | 769  |   | 16  | putative protein (1.8 kD) (werdoy) mRNA.                                                         |
| werflu  | werflu.aSep08  |  | 3376  | 412  |   | 137 | ubiquitin 35 (werflu) mRNA.                                                                      |
| werfly  | werfly.aSep08  |  | 41821 | 449  |   | 50  | putative protein (werfly) mRNA.                                                                  |
| wergar  | wergar.aSep08  |  | 17210 | 407  |   | 64  | putative protein (wergar) mRNA.                                                                  |
| werja   | werja.aSep08   |  | 1337  | 305  |   | 101 | mast cell protease (werja) mRNA.                                                                 |
| werjey  | werjey.aSep08  |  | 4475  | 833  | 2 | 64  | putative protein (werjey) alternative variant aSep08, mRNA.                                      |
| werkee  | werkee.aSep08  |  | 1922  | 961  |   | 53  | putative protein (6.0 kD) (werkee) mRNA.                                                         |
| werkler | werkler.aSep08 |  | 3537  | 737  | 2 | 86  | putative cytoplasmic protein (9.8 kD) (werkler) alternative variant aSep08, mRNA.                |
| werkler | werkler.bSep08 |  | 1028  | 244  | 1 | 25  | putative protein (werkler) alternative variant bSep08, mRNA.                                     |
| werlo   | werlo.aSep08   |  | 2706  | 393  |   | 130 | putative protein of metazoan origin (werlo) mRNA.                                                |
| wermee  | wermee.aSep08  |  | 2846  | 722  |   | 173 | obscurin (wermee) mRNA.                                                                          |
| wernoy  | wernoy.aSep08  |  | 1422  | 300  |   | 42  | putative protein (5.1 kD) (wernoy) mRNA.                                                         |
| werpor  | werpor.aSep08  |  | 3839  | 755  |   | 122 | putative protein of eukaryotic origin (werpor) mRNA.                                             |
| wersa   | wersa.aSep08   |  | 4208  | 2115 |   | 511 | putative nuclear protein, with a coiled coil domain, of bilateral origin (58.6 kD) (wersa) mRNA. |
| wershee | wershee.aSep08 |  | 3966  | 760  |   | 53  | putative protein (wershee) mRNA.                                                                 |
| wertu   | wertu.aSep08   |  | 6010  | 5331 |   | 194 | putative protein (20.8 kD) (wertu) mRNA.                                                         |
| wervar  | wervar.aSep08  |  | 911   | 813  |   | 123 | putative protein (14.1 kD) (wervar) mRNA.                                                        |
| werwey  | werwey.aSep08  |  | 4306  | 362  |   | 52  | putative protein (5.9 kD) (werwey) mRNA.                                                         |
| weybor  | weybor.aSep08  |  | 7404  | 271  |   | 20  | putative protein (weybor) mRNA.                                                                  |
| weyby   | weyby.aSep08   |  | 2295  | 360  |   | 108 | putative protein (weyby) mRNA.                                                                   |
| weychy  | weychy.aSep08  |  | 6792  | 661  |   | 112 | putative protein, with a transmembrane domain (13.1 kD) (weychy) mRNA.                           |
| weydar  | weydar.aSep08  |  | 3147  | 720  |   | 239 | genetic suppressor element 1 (weydar) mRNA.                                                      |
| weydoy  | weydoy.aSep08  |  | 12570 | 1778 |   | 99  | nucleolar protein 4 (weydoy) mRNA.                                                               |
| weyflu  | weyflu.aSep08  |  | 7244  | 587  |   | 100 | ubiquitin 35 (weyflu) mRNA.                                                                      |
| weyfly  | weyfly.aSep08  |  | 25903 | 396  |   | 46  | putative protein (5.1 kD) (weyfly) mRNA.                                                         |
| weygar  | weygar.aSep08  |  | 16114 | 496  |   | 67  | putative protein (7.6 kD) (weygar) mRNA.                                                         |
| weyja   | weyja.aSep08   |  | 2650  | 484  |   | 86  | ring finger protein 17 (weyja) mRNA.                                                             |
| weyjey  | weyjey.aSep08  |  | 12882 | 922  |   | 307 | WD repeat (weyjey) mRNA.                                                                         |
| weykee  | weykee.aSep08  |  | 1100  | 668  |   | 18  | putative protein (2.3 kD) (weykee) mRNA.                                                         |
| weykler | weykler.aSep08 |  | 2575  | 716  |   | 58  | putative protein (weykler) mRNA.                                                                 |
| weylo   | weylo.aSep08   |  | 20326 | 556  |   | 141 | sidekick 1 (weylo) mRNA.                                                                         |
| weymee  | weymee.aSep08  |  | 7426  | 1784 |   | 452 | putative protein (weymee) alternative variant aSep08, mRNA.                                      |



|         |                |        |        |      |    |     |                                                                                                           |
|---------|----------------|--------|--------|------|----|-----|-----------------------------------------------------------------------------------------------------------|
| weymee  | weymee.bSep08  |        | 3138   | 884  |    | 142 | putative protein (15.1 kD) (weymee) alternative variant bSep08, mRNA.                                     |
| weynoy  | weynoy.aSep08  |        | 1814   | 260  |    | 47  | putative protein (weynoy) mRNA.                                                                           |
| weypor  | weypor.aSep08  |        | 21650  | 740  |    | 215 | putative protein (weypor) mRNA.                                                                           |
| weysa   | weysa.aSep08   |        | 3722   | 456  |    | 43  | putative protein (weysa) mRNA.                                                                            |
| weyshee | weyshee.aSep08 |        | 1625   | 384  | 3  | 128 | phospholipid-transporting ATPase ID (weyshee) alternative variant aSep08, mRNA.                           |
| weytu   | weytu.aSep08   |        | 1037   | 365  |    | 56  | putative protein (weytu) mRNA.                                                                            |
| weyvar  | weyvar.aSep08  |        | 4243   | 248  |    | 27  | putative protein (weyvar) mRNA.                                                                           |
| weyvo   | weyvo.aSep08   |        | 1622   | 1277 |    | 199 | gag-pro-pol polyprotein (weyvo) mRNA.                                                                     |
| weywey  | weywey.aSep08  |        | 3814   | 286  |    | 94  | putative protein (weywey) mRNA.                                                                           |
| Wfdc1   | Wfdc1.aSep08   | 171112 | 17240  | 992  | 1  | 296 | WAP four-disulfide core domain 1 (Wfdc1) alternative variant aSep08, mRNA.                                |
| Wfdc2   | Wfdc2.bSep08   | 286888 | 4658   | 751  | 3  | 119 | WAP four-disulfide core domain 2 (12.6 kD) (Wfdc2) alternative variant bSep08, mRNA.                      |
| Wfdc2   | Wfdc2.cSep08   | 286888 | 16190  | 616  | 2  | 44  | WAP four-disulfide core domain 2 (Wfdc2) alternative variant cSep08, mRNA.                                |
| Wfdc2   | Wfdc2.dSep08   | 286888 | 25414  | 871  | 4  | 54  | WAP four-disulfide core domain 2 (Wfdc2) alternative variant dSep08, mRNA.                                |
| Wfdc2   | Wfdc2.eSep08   | 286888 | 5429   | 752  | 4  | 59  | WAP four-disulfide core domain 2 (6.4 kD) (Wfdc2) alternative variant eSep08, mRNA.                       |
| Wfdc3   | Wfdc3.bSep08   | 296366 | 10548  | 586  | 2  | 120 | WAP four-disulfide core domain 3 (12.7 kD) (Wfdc3) alternative variant bSep08, mRNA.                      |
| Wfdc6a  | Wfdc6a.aSep08  | 685153 | 2883   | 982  |    | 94  | WAP four-disulfide core domain 6A (Wfdc6a) mRNA.                                                          |
| Wfdc15a | Wfdc15a.bSep08 | 408226 | 1215   | 355  | 3  | 66  | WAP four-disulfide core domain 15A (Wfdc15a) alternative variant bSep08, mRNA.                            |
| Wfikkn2 | Wfikkn2.aSep08 | 287631 | 5992   | 3521 |    | 622 | kazal immunoglobulin kunitz ntr domain-containing protein 2 (Wfikkn2) mRNA.                               |
| Whsc1   | Whsc1.aSep08   | 680537 | 26724  | 3866 | 14 | 762 | wolf-Hirschhorn syndrome candidate 1 like (Whsc1) alternative variant aSep08, mRNA.                       |
| Whsc1   | Whsc1.bSep08   | 680537 | 18317  | 1271 | 7  | 377 | wolf-Hirschhorn syndrome candidate 1 like (Whsc1) alternative variant bSep08, mRNA.                       |
| Whsc1   | Whsc1.cSep08   | 680537 | 4270   | 2904 | 3  | 133 | wolf-Hirschhorn syndrome candidate 1 like (Whsc1) alternative variant cSep08, mRNA.                       |
| Whsc1   | Whsc1.eSep08   | 680537 | 1132   | 332  | 2  | 93  | wolf-Hirschhorn syndrome candidate 1 like (Whsc1) alternative variant eSep08, mRNA.                       |
| Whsc111 | Whsc111.bSep08 | 290831 | 11634  | 2415 | 3  | 231 | wolf-Hirschhorn syndrome candidate 1-like 1 (human) (25.6 kD) (Whsc111) alternative variant bSep08, mRNA. |
| Whsc111 | Whsc111.dSep08 | 290831 | 10339  | 530  | 4  | 118 | wolf-Hirschhorn syndrome candidate 1-like 1 (human) (Whsc111) alternative variant dSep08, mRNA.           |
| Whsc111 | Whsc111.fSep08 | 290831 | 105208 | 1810 | 3  | 13  | wolf-Hirschhorn syndrome candidate 1-like 1 (human) (Whsc111) alternative variant fSep08, mRNA.           |
| Whsc2   | Whsc2.bSep08   | 305455 | 3644   | 1388 | 6  | 284 | wolf-Hirschhorn syndrome candidate 2 (human) (Whsc2) alternative variant bSep08, mRNA.                    |
| Whsc2   | Whsc2.cSep08   | 305455 | 8149   | 610  | 3  | 167 | wolf-Hirschhorn syndrome candidate 2 (human) (Whsc2) alternative variant cSep08, mRNA.                    |

|       |              |        |        |      |   |     |                                                                                                |
|-------|--------------|--------|--------|------|---|-----|------------------------------------------------------------------------------------------------|
| Wif1  | Wif1.bSep08  | 114557 | 65014  | 763  | 7 | 253 | wnt inhibitory factor 1 (Wif1) alternative variant bSep08, mRNA.                               |
| Wif1  | Wif1.cSep08  | 114557 | 48505  | 802  | 8 | 224 | wnt inhibitory factor 1 (Wif1) alternative variant cSep08, mRNA.                               |
| Wif1  | Wif1.dSep08  | 114557 | 6106   | 404  | 2 | 34  | wnt inhibitory factor 1 (Wif1) alternative variant dSep08, mRNA.                               |
| Wif1  | Wif1.eSep08  | 114557 | 29127  | 313  | 3 |     |                                                                                                |
| Wipf2 | Wipf2.aSep08 | 360620 | 9761   | 1782 |   | 155 | WAS/WASL interacting protein family, member 2 (Wipf2) mRNA.                                    |
| Wipi1 | Wipi1.bSep08 | 303630 | 19786  | 628  | 4 | 167 | WD repeat domain, phosphoinositide interacting 1 (Wipi1) alternative variant bSep08, mRNA.     |
| Wipi1 | Wipi1.cSep08 | 303630 | 10781  | 266  | 2 | 61  | WD repeat domain, phosphoinositide interacting 1 (Wipi1) alternative variant cSep08, mRNA.     |
| Wisp1 | Wisp1.bSep08 | 65154  | 21479  | 713  | 3 | 139 | WNT1 inducible signaling pathway protein 1 (15.4 kD) (Wisp1) alternative variant bSep08, mRNA. |
| Wisp1 | Wisp1.cSep08 | 65154  | 1130   | 662  | 2 | 121 | WNT1 inducible signaling pathway protein 1 (Wisp1) alternative variant cSep08, mRNA.           |
| Wisp2 | Wisp2.bSep08 | 29576  | 10551  | 720  |   | 124 | WNT1 inducible signaling pathway protein 2 (Wisp2) alternative variant bSep08, mRNA.           |
| Wnk1  | Wnk1.bSep08  | 116477 | 14231  | 4060 | 6 | 490 | WNK lysine deficient protein kinase 1 (Wnk1) alternative variant bSep08, mRNA.                 |
| Wnk1  | Wnk1.cSep08  | 116477 | 81767  | 1367 | 8 | 372 | WNK lysine deficient protein kinase 1 (Wnk1) alternative variant cSep08, mRNA.                 |
| Wnk1  | Wnk1.dSep08  | 116477 | 11249  | 767  | 4 | 197 | WNK lysine deficient protein kinase 1 (Wnk1) alternative variant dSep08, mRNA.                 |
| Wnk1  | Wnk1.eSep08  | 116477 | 2557   | 479  | 2 | 132 | WNK lysine deficient protein kinase 1 (Wnk1) alternative variant eSep08, mRNA.                 |
| Wnk4  | Wnk4.bSep08  | 287715 | 1448   | 1361 | 2 | 213 | WNK lysine deficient protein kinase 4 (Wnk4) alternative variant bSep08, mRNA.                 |
| Wnk4  | Wnk4.cSep08  | 287715 | 834    | 731  | 2 | 116 | WNK lysine deficient protein kinase 4 (Wnk4) alternative variant cSep08, mRNA.                 |
| Wnt2  | Wnt2.aSep08  | 114487 | 22643  | 738  |   | 246 | wingless-related MMTV integration site 2 (Wnt2) mRNA.                                          |
| Wnt2b | Wnt2b.aSep08 | 116466 | 6435   | 1245 |   | 215 | wingless related MMTV integration site 2b (Wnt2b) mRNA.                                        |
| Wnt4  | Wnt4.aSep08  | 84426  | 18863  | 1717 | 2 | 508 | wingless-related MMTV integration site 4 (Wnt4) alternative variant aSep08, complete mRNA.     |
| Wnt4  | Wnt4.cSep08  | 84426  | 17605  | 461  | 1 | 142 | wingless-related MMTV integration site 4 (Wnt4) alternative variant cSep08, mRNA.              |
| Wnt5b | Wnt5b.bSep08 | 282582 | 148258 | 2265 | 1 | 372 | wingless-related MMTV integration site 5B (41.9 kD) (Wnt5b) alternative variant bSep08, mRNA.  |
| Wnt7a | Wnt7a.cSep08 | 114850 | 2032   | 1283 | 2 | 79  | wingless-related MMTV integration site 7A (Wnt7a) alternative variant cSep08, mRNA.            |
| Wnt11 | Wnt11.aSep08 | 140584 | 9213   | 551  |   | 183 | wingless-related MMTV integration site 11 (Wnt11) mRNA.                                        |
| wobor | wobor.aSep08 |        | 2975   | 385  |   | 38  | putative protein (4.1 kD) (wobor) mRNA.                                                        |
| woby  | woby.aSep08  |        | 53021  | 472  | 4 | 56  | putative protein (woby) alternative variant aSep08, mRNA.                                      |
| woby  | woby.cSep08  |        | 23735  | 401  | 6 | 52  | putative protein (woby) alternative variant cSep08, mRNA.                                      |
| woby  | woby.dSep08  |        | 6074   | 312  | 5 | 48  | putative protein (woby) alternative variant dSep08, mRNA.                                      |

|         |                |  |        |      |   |     |                                                                                                |
|---------|----------------|--|--------|------|---|-----|------------------------------------------------------------------------------------------------|
| woby    | woby.eSep08    |  | 6096   | 285  | 5 | 55  | putative protein (woby) alternative variant eSep08, mRNA.                                      |
| wochy   | wochy.aSep08   |  | 16363  | 447  | 5 | 149 | putative protein of metazoan origin (wochy) alternative variant aSep08, mRNA.                  |
| wodar   | wodar.aSep08   |  | 3543   | 288  |   | 95  | genetic suppressor element 1 (wodar) mRNA.                                                     |
| wodoy   | wodoy.aSep08   |  | 934    | 743  |   | 69  | putative protein (8.4 kD) (wodoy) mRNA.                                                        |
| woflu   | woflu.aSep08   |  | 5082   | 445  |   | 60  | prolylcarboxypeptidase (6.8 kD) (woflu) mRNA.                                                  |
| wofly   | wofly.aSep08   |  | 1311   | 682  |   | 128 | CRA a like (wofly) mRNA.                                                                       |
| wogar   | wogar.aSep08   |  | 7181   | 356  |   | 28  | putative protein (wogar) mRNA.                                                                 |
| woja    | woja.aSep08    |  | 938    | 626  |   | 124 | copine VI (woja) mRNA.                                                                         |
| wojey   | wojey.aSep08   |  | 6304   | 549  | 2 | 72  | lipogenin like (8.3 kD) (wojey) alternative variant aSep08, mRNA.                              |
| wojey   | wojey.bSep08   |  | 29890  | 386  | 2 | 51  | putative protein (wojey) alternative variant bSep08, mRNA.                                     |
| wokee   | wokee.aSep08   |  | 1104   | 989  |   | 60  | f11 receptor like (wokee) mRNA.                                                                |
| wokler  | wokler.aSep08  |  | 6512   | 360  | 3 | 62  | putative protein (7.1 kD) (wokler) alternative variant aSep08, mRNA.                           |
| wokler  | wokler.bSep08  |  | 27948  | 570  | 4 | 85  | GTPase activating protein testicular GAP1 (10.1 kD) (wokler) alternative variant bSep08, mRNA. |
| wolo    | wolo.aSep08    |  | 6773   | 806  | 3 | 190 | CRA b (wolo) alternative variant aSep08, mRNA.                                                 |
| wolo    | wolo.bSep08    |  | 2908   | 406  | 3 | 135 | CRA b (wolo) alternative variant bSep08, mRNA.                                                 |
| womee   | womee.aSep08   |  | 1126   | 603  |   | 88  | gem associated protein 5 (womee) mRNA.                                                         |
| wonoy   | wonoy.aSep08   |  | 3090   | 439  |   | 59  | putative protein (6.9 kD) (wonoy) mRNA.                                                        |
| wopor   | wopor.aSep08   |  | 6600   | 585  |   | 52  | putative protein (wopor) mRNA.                                                                 |
| worbor  | worbor.aSep08  |  | 1904   | 1071 | 2 | 132 | putative protein (worbor) mRNA.                                                                |
| worby   | worby.aSep08   |  | 495    | 280  |   | 41  | putative protein (worby) mRNA.                                                                 |
| worchy  | worchy.aSep08  |  | 4107   | 760  |   | 69  | putative protein (worchy) mRNA.                                                                |
| wordar  | wordar.aSep08  |  | 2371   | 427  |   | 102 | putative protein of vertebrate origin (wordar) mRNA.                                           |
| wordoy  | wordoy.aSep08  |  | 130311 | 407  |   | 135 | nucleolar protein 4 (wordoy) mRNA.                                                             |
| worflu  | worflu.aSep08  |  | 2775   | 349  |   | 69  | putative protein (worflu) mRNA.                                                                |
| worfly  | worfly.aSep08  |  | 21560  | 358  |   | 49  | putative protein (worfly) mRNA.                                                                |
| worgar  | worgar.aSep08  |  | 5947   | 402  |   | 39  | putative protein (worgar) mRNA.                                                                |
| worja   | worja.aSep08   |  | 13345  | 310  |   | 103 | poly polymerase 4 (worja) mRNA.                                                                |
| worjey  | worjey.aSep08  |  | 2396   | 421  | 4 | 140 | WD repeat domain 19 (worjey) alternative variant aSep08, mRNA.                                 |
| workee  | workee.aSep08  |  | 1015   | 537  |   | 168 | cell surface glycoprotein gp42 (workee) mRNA.                                                  |
| workler | workler.aSep08 |  | 5389   | 807  |   | 60  | putative protein (6.7 kD) (workler) mRNA.                                                      |
| worlo   | worlo.bSep08   |  | 1775   | 413  | 3 | 24  | putative protein (worlo) alternative variant bSep08, mRNA.                                     |
| worlo   | worlo.cSep08   |  | 1677   | 267  | 2 | 20  | putative protein (worlo) alternative variant cSep08, mRNA.                                     |
| wormee  | wormee.aSep08  |  | 1301   | 265  |   | 88  | obscurin (wormee) mRNA.                                                                        |
| wornoy  | wornoy.aSep08  |  | 13491  | 442  |   | 24  | putative protein (2.9 kD) (wornoy) alternative variant aSep08, mRNA.                           |
| worpor  | worpor.aSep08  |  | 798    | 722  |   | 22  | putative protein (worpor) mRNA.                                                                |
| worsa   | worsa.aSep08   |  | 13818  | 260  |   | 84  | putative protein (worsa) mRNA.                                                                 |

|         |                |  |       |      |   |     |                                                                                    |
|---------|----------------|--|-------|------|---|-----|------------------------------------------------------------------------------------|
| worshee | worshee.aSep08 |  | 1362  | 231  |   | 45  | putative protein (worshee) mRNA.                                                   |
| wortu   | wortu.aSep08   |  | 2664  | 456  |   | 43  | putative protein (wortu) mRNA.                                                     |
| worvar  | worvar.aSep08  |  | 6013  | 628  |   | 140 | putative protein (worvar) mRNA.                                                    |
| worvo   | worvo.aSep08   |  | 3756  | 637  |   | 50  | lymphocyte antigen 96 like (worvo) mRNA.                                           |
| worwey  | worwey.bSep08  |  | 2219  | 1236 | 2 | 48  | putative protein (5.5 kD) (worwey) alternative variant bSep08, mRNA.               |
| worwey  | worwey.cSep08  |  | 4120  | 853  | 2 | 35  | putative protein (3.9 kD) (worwey) alternative variant cSep08, mRNA.               |
| wosa    | wosa.bSep08    |  | 3464  | 776  | 3 | 33  | putative protein (4.0 kD) (wosa) alternative variant bSep08, mRNA.                 |
| woshee  | woshee.aSep08  |  | 5171  | 638  |   | 53  | putative protein (5.9 kD) (woshee) mRNA.                                           |
| wotu    | wotu.aSep08    |  | 28018 | 824  | 4 | 42  | putative protein (4.7 kD) (wotu) alternative variant aSep08, mRNA.                 |
| wotu    | wotu.bSep08    |  | 96841 | 423  | 2 | 49  | putative protein (wotu) alternative variant bSep08, mRNA.                          |
| wovar   | wovar.aSep08   |  | 4438  | 2203 |   | 107 | putative protein (wovar) mRNA.                                                     |
| wowey   | wowey.aSep08   |  | 33545 | 818  |   | 78  | putative mitochondrial protein (8.4 kD) (wowey) alternative variant aSep08, mRNA.  |
| woybor  | woybor.aSep08  |  | 6404  | 335  |   | 49  | putative protein (5.2 kD) (woybor) mRNA.                                           |
| woyby   | woyby.aSep08   |  | 1388  | 250  |   | 49  | plexin B3 like (woyby) mRNA.                                                       |
| woychy  | woychy.aSep08  |  | 6183  | 406  | 2 | 48  | putative protein (woychy) alternative variant aSep08, mRNA.                        |
| woydar  | woydar.aSep08  |  | 690   | 437  | 2 | 86  | putative mitochondrial protein (9.6 kD) (woydar) alternative variant aSep08, mRNA. |
| woydoy  | woydoy.aSep08  |  | 44788 | 331  |   | 25  | putative protein (woydoy) mRNA.                                                    |
| woyflu  | woyflu.aSep08  |  | 3644  | 360  |   | 48  | putative protein (woyflu) mRNA.                                                    |
| woyfly  | woyfly.aSep08  |  | 9125  | 769  |   | 66  | putative protein (7.0 kD) (woyfly) mRNA.                                           |
| woygar  | woygar.aSep08  |  | 4040  | 702  |   | 41  | putative protein (4.9 kD) (woygar) mRNA.                                           |
| woyja   | woyja.aSep08   |  | 4667  | 398  |   | 132 | poly polymerase 4 (woyja) mRNA.                                                    |
| woyjey  | woyjey.aSep08  |  | 1752  | 296  |   | 91  | WD repeat domain 19 (woyjey) mRNA.                                                 |
| woykee  | woykee.aSep08  |  | 27109 | 1801 |   | 585 | putative protein (woykee) mRNA.                                                    |
| woykler | woykler.aSep08 |  | 10065 | 352  |   | 55  | putative protein (woykler) mRNA.                                                   |
| woylo   | woylo.aSep08   |  | 8482  | 1800 |   |     |                                                                                    |
| woymee  | woymee.aSep08  |  | 6779  | 519  |   | 50  | putative protein (5.4 kD) (woymee) mRNA.                                           |
| woynoy  | woynoy.aSep08  |  | 39084 | 422  | 4 | 140 | IQ containing AAA domain (woynoy) alternative variant aSep08, mRNA.                |
| woypor  | woypor.aSep08  |  | 2220  | 278  |   | 92  | putative protein (woypor) mRNA.                                                    |
| woysa   | woysa.aSep08   |  | 7032  | 292  |   | 97  | putative protein (woysa) mRNA.                                                     |
| woyshee | woyshee.aSep08 |  | 24645 | 402  |   | 29  | putative protein (3.3 kD) (woyshee) mRNA.                                          |
| woytu   | woytu.aSep08   |  | 24331 | 560  | 4 | 60  | putative protein (woytu) alternative variant aSep08, mRNA.                         |
| woyvar  | woyvar.aSep08  |  | 5931  | 592  |   | 196 | calmodulin binding transcription activator 1 like (woyvar) mRNA.                   |
| woyvo   | woyvo.aSep08   |  | 10449 | 606  |   | 97  | putative protein (woyvo) mRNA.                                                     |
| woywey  | woywey.aSep08  |  | 12046 | 682  |   | 48  | putative protein (woywey) mRNA.                                                    |

|        |               |        |       |      |    |     |                                                                                        |
|--------|---------------|--------|-------|------|----|-----|----------------------------------------------------------------------------------------|
| Wrb    | Wrb.bSep08    | 288233 | 7701  | 729  | 6  | 126 | tryptophan rich basic protein (14.4 kD) (Wrb) alternative variant bSep08, mRNA.        |
| Wrb    | Wrb.cSep08    | 288233 | 12649 | 2032 | 6  | 88  | tryptophan rich basic protein (10.3 kD) (Wrb) alternative variant cSep08, mRNA.        |
| Wrnip1 | Wrnip1.bSep08 | 282835 | 19385 | 1724 | 1  | 474 | werner helicase interacting protein 1 (Wrnip1) alternative variant bSep08, mRNA.       |
| Wsb1   | Wsb1.cSep08   | 303336 | 5647  | 691  | 5  | 121 | WD repeat SOCS box-containing 1 (Wsb1) alternative variant cSep08, mRNA.               |
| Wsb1   | Wsb1.dSep08   | 303336 | 1317  | 717  | 3  | 75  | WD repeat SOCS box-containing 1 (Wsb1) alternative variant dSep08, mRNA.               |
| Wsb2   | Wsb2.bSep08   | 288692 | 19791 | 1197 | 7  | 344 | WD repeat and SOCS box-containing 2 (38.8 kD) (Wsb2) alternative variant bSep08, mRNA. |
| Wsb2   | Wsb2.cSep08   | 288692 | 2706  | 1533 | 2  | 163 | WD repeat and SOCS box-containing 2 (Wsb2) alternative variant cSep08, mRNA.           |
| Wscd1  | Wscd1.bSep08  | 287466 | 12490 | 370  | 2  | 119 | putative protein (Wscd1) alternative variant bSep08, mRNA.                             |
| Wscd1  | Wscd1.cSep08  | 287466 | 10371 | 510  | 2  | 74  | putative protein (Wscd1) alternative variant cSep08, mRNA.                             |
| Wscd1  | Wscd1.dSep08  | 287466 | 9169  | 536  | 2  | 60  | putative protein (Wscd1) alternative variant dSep08, mRNA.                             |
| Wt1    | Wt1.bSep08    | 24883  | 43651 | 2356 | 10 | 305 | wilms tumor 1 (34.8 kD) (Wt1) alternative variant bSep08, mRNA.                        |
| Wt1    | Wt1.cSep08    | 24883  | 2578  | 744  | 2  | 75  | wilms tumor 1 (Wt1) alternative variant cSep08, mRNA.                                  |
| Wtap   | Wtap.bSep08   | 499020 | 2677  | 1047 | 2  | 258 | wilms' tumour 1-associating protein (Wtap) alternative variant bSep08, mRNA.           |
| Wtip   | Wtip.aSep08   | 361552 | 33511 | 1273 | 6  | 245 | WT1-interacting protein (Wtip) alternative variant aSep08, mRNA.                       |
| Wtip   | Wtip.bSep08   | 361552 | 27163 | 744  | 5  | 212 | WT1-interacting protein (Wtip) alternative variant bSep08, mRNA.                       |
| Wtip   | Wtip.cSep08   | 361552 | 8404  | 1020 | 3  | 133 | WT1-interacting protein (15.0 kD) (Wtip) alternative variant cSep08, mRNA.             |
| wubor  | wubor.aSep08  |        | 573   | 418  |    | 86  | putative protein (wubor) mRNA.                                                         |
| wuby   | wuby.aSep08   |        | 11356 | 573  |    | 190 | ATPase class VI type 11 (wuby) mRNA.                                                   |
| wuchy  | wuchy.aSep08  |        | 3452  | 1464 |    | 256 | putative protein of vertebrate origin (28.5 kD) (wuchy) mRNA.                          |
| wudar  | wudar.aSep08  |        | 575   | 333  |    | 110 | putative protein (wudar) mRNA.                                                         |
| wudoy  | wudoy.aSep08  |        | 2593  | 1955 |    | 124 | desmocollin 2 CRA c (wudoy) mRNA.                                                      |
| wuflo  | wuflo.aSep08  |        | 13910 | 1179 |    | 193 | carboxypeptidase N polypeptide 1 (21.5 kD) (wuflo) mRNA.                               |
| wuflu  | wuflu.aSep08  |        | 1947  | 1301 | 3  | 26  | putative protein (wuflu) alternative variant aSep08, mRNA.                             |
| wuflly | wuflly.aSep08 |        | 56581 | 377  |    | 56  | utrophin (wuflly) mRNA.                                                                |
| wugar  | wugar.aSep08  |        | 1133  | 230  |    | 54  | putative protein (wugar) mRNA.                                                         |
| wuja   | wuja.aSep08   |        | 3304  | 921  |    | 199 | leucine rich repeat containing 16b (wuja) alternative variant aSep08, mRNA.            |
| wuja   | wuja.bSep08   |        | 17244 | 1922 |    | 123 | leucine rich repeat containing 16b (wuja) alternative variant bSep08, mRNA.            |

|        |               |        |       |      |    |     |                                                                                              |
|--------|---------------|--------|-------|------|----|-----|----------------------------------------------------------------------------------------------|
| wujey  | wujey.aSep08  |        | 42701 | 574  |    | 191 | ATPase aminophospholipid transporter class I type 8A member 1 (wujey) mRNA.                  |
| wukee  | wukee.aSep08  |        | 1081  | 373  | 2  | 86  | CRA b (wukee) alternative variant aSep08, mRNA.                                              |
| wukee  | wukee.bSep08  |        | 875   | 657  | 1  | 66  | CRA b (7.4 kD) (wukee) alternative variant bSep08, mRNA.                                     |
| wukler | wukler.aSep08 |        | 1704  | 594  |    | 84  | putative protein (9.1 kD) (wukler) mRNA.                                                     |
| wulo   | wulo.aSep08   |        | 1237  | 549  | 3  | 60  | putative protein (wulo) alternative variant aSep08, mRNA.                                    |
| wumee  | wumee.aSep08  |        | 31116 | 498  |    | 143 | gem associated protein 5 CRA a (wumee) mRNA.                                                 |
| wunoy  | wunoy.aSep08  |        | 1184  | 465  |    | 36  | putative protein (wunoy) mRNA.                                                               |
| wupor  | wupor.aSep08  |        | 10138 | 742  |    | 246 | dopey family member 1 CRA b (wupor) mRNA.                                                    |
| wusa   | wusa.aSep08   |        | 34608 | 851  |    | 51  | putative protein (wusa) mRNA.                                                                |
| wushee | wushee.aSep08 |        | 3835  | 560  |    | 123 | thrombospondin 3 (wushee) mRNA.                                                              |
| wutu   | wutu.aSep08   |        | 1859  | 664  | 1  | 62  | putative protein (6.9 kD) (wutu) alternative variant aSep08, mRNA.                           |
| wutu   | wutu.bSep08   |        | 1815  | 615  | 1  | 62  | putative protein (6.9 kD) (wutu) alternative variant bSep08, mRNA.                           |
| wuvar  | wuvar.aSep08  |        | 5595  | 2697 | 8  | 448 | calsyntenin 1 (wuvar) alternative variant aSep08, mRNA.                                      |
| wuvar  | wuvar.bSep08  |        | 1041  | 305  | 2  | 66  | putative protein (wuvar) alternative variant bSep08, mRNA.                                   |
| wuwey  | wuwey.aSep08  |        | 30962 | 371  |    | 123 | TEA domain family member 4 (wuwey) mRNA.                                                     |
| WW.0   | WW.0.aSep08   |        | 39815 | 901  |    | 191 | WW/Rsp5/WWP (WW.0) mRNA.                                                                     |
| WW.1   | WW.1.aSep08   |        | 59354 | 783  | 4  | 261 | amyloid beta protein-binding family B member 2 like (WW.1) alternative variant aSep08, mRNA. |
| WW.1   | WW.1.bSep08   |        | 38398 | 630  | 5  | 150 | amyloid beta protein-binding family B member 2 like (WW.1) alternative variant bSep08, mRNA. |
| Wwc1   | Wwc1.aSep08   | 303039 | 12866 | 1150 | 4  | 269 | KIBRA (Wwc1) alternative variant aSep08, mRNA.                                               |
| Wwc1   | Wwc1.bSep08   | 303039 | 3563  | 1522 | 1  | 171 | KIBRA (19.9 kD) (Wwc1) alternative variant bSep08, mRNA.                                     |
| Wwox   | Wwox.bSep08   | 292041 | 13303 | 717  | 5  | 138 | WW domain-containing oxidoreductase (15.7 kD) (Wwox) alternative variant bSep08, mRNA.       |
| Wwox   | Wwox.cSep08   | 292041 | 36611 | 564  | 2  | 64  | WW domain-containing oxidoreductase (Wwox) alternative variant cSep08, mRNA.                 |
| Wwp1   | Wwp1.bSep08   | 297930 | 12530 | 730  | 6  | 208 | CRA a (Wwp1) alternative variant bSep08, mRNA.                                               |
| Wwp2   | Wwp2.bSep08   | 291999 | 95605 | 1584 | 10 | 394 | WW/Rsp5/WWP (42.7 kD) (Wwp2) alternative variant bSep08, mRNA.                               |
| Wwp2   | Wwp2.cSep08   | 291999 | 1205  | 691  | 2  | 229 | WW/Rsp5/WWP (Wwp2) alternative variant cSep08, mRNA.                                         |
| Wwp2   | Wwp2.dSep08   | 291999 | 8664  | 766  | 10 | 168 | WW/Rsp5/WWP (19.8 kD) (Wwp2) alternative variant dSep08, mRNA.                               |
| Wwp2   | Wwp2.eSep08   | 291999 | 1996  | 473  | 3  | 157 | HECT (Wwp2) alternative variant eSep08, mRNA.                                                |
| Wwp2   | Wwp2.fSep08   | 291999 | 13649 | 393  | 3  | 130 | putative protein of vertebrate origin (Wwp2) alternative variant fSep08, mRNA.               |
| Wwp2   | Wwp2.gSep08   | 291999 | 35786 | 325  | 3  | 108 | putative protein (Wwp2) alternative variant gSep08, mRNA.                                    |
| Wwp2   | Wwp2.hSep08   | 291999 | 1325  | 1049 | 2  | 72  | putative protein of eukaryotic origin (Wwp2) alternative variant hSep08, mRNA.               |
| wybor  | wybor.aSep08  |        | 583   | 277  |    | 92  | class I (wybor) mRNA.                                                                        |

|         |                |        |       |      |    |     |                                                                                       |
|---------|----------------|--------|-------|------|----|-----|---------------------------------------------------------------------------------------|
| wyby    | wyby.aSep08    |        | 4232  | 343  |    | 114 | atpase class VI type 11C (wyby) mRNA.                                                 |
| wychy   | wychy.aSep08   |        | 13992 | 2501 | 10 | 371 | tubulin gamma complex associated protein 4 (wychy) alternative variant aSep08, mRNA.  |
| wychy   | wychy.bSep08   |        | 8006  | 715  | 7  | 238 | tubulin gamma complex associated protein 4 (wychy) alternative variant bSep08, mRNA.  |
| wydar   | wydar.aSep08   |        | 9460  | 753  |    | 77  | putative protein (8.6 kD) (wydar) mRNA.                                               |
| wydoy   | wydoy.aSep08   |        | 34726 | 364  |    | 32  | putative protein (wydoy) mRNA.                                                        |
| wyflo   | wyflo.aSep08   |        | 975   | 729  |    | 59  | putative protein (wyflo) mRNA.                                                        |
| wyflu   | wyflu.aSep08   |        | 375   | 277  |    | 36  | putative protein (wyflu) mRNA.                                                        |
| wyfly   | wyfly.aSep08   |        | 11921 | 588  |    | 196 | utrophin (wyfly) mRNA.                                                                |
| wygar   | wygar.aSep08   |        | 2200  | 316  |    | 36  | putative protein (wygar) mRNA.                                                        |
| wyja    | wyja.aSep08    |        | 2283  | 226  |    | 40  | putative protein (wyja) mRNA.                                                         |
| wyjey   | wyjey.aSep08   |        | 68757 | 832  |    | 175 | ATPase aminophospholipid transporter class I type 8A member 1 (20.1 kD) (wyjey) mRNA. |
| wykee   | wykee.aSep08   |        | 2707  | 377  |    | 49  | putative protein (5.7 kD) (wykee) mRNA.                                               |
| wykler  | wykler.aSep08  |        | 4666  | 651  |    | 61  | putative protein (wykler) mRNA.                                                       |
| wylo    | wylo.aSep08    |        | 6837  | 2002 |    | 69  | putative protein (7.6 kD) (wylo) mRNA.                                                |
| wymee   | wymee.aSep08   |        | 2306  | 565  |    | 187 | gem associated protein 5 CRA a (wymee) mRNA.                                          |
| wynoy   | wynoy.aSep08   |        | 3138  | 267  |    | 72  | putative protein (wynoy) mRNA.                                                        |
| wypor   | wypor.aSep08   |        | 1006  | 363  |    | 120 | dopey family member 1 (wypor) mRNA.                                                   |
| wysa    | wysa.aSep08    |        | 3105  | 241  |    | 48  | putative protein (5.0 kD) (wysa) mRNA.                                                |
| wyshee  | wyshee.aSep08  |        | 1093  | 705  |    | 160 | putative protein (wyshee) mRNA.                                                       |
| wytu    | wytu.aSep08    |        | 6083  | 411  |    | 71  | putative protein (wytu) mRNA.                                                         |
| wyvar   | wyvar.aSep08   |        | 6060  | 394  |    | 130 | calsyntenin 1 (wyvar) mRNA.                                                           |
| wywey   | wywey.aSep08   |        | 28435 | 418  | 3  | 138 | TEA domain family member 4 (wywey) alternative variant aSep08, mRNA.                  |
| wywey   | wywey.bSep08   |        | 4630  | 354  | 1  | 117 | TEA domain family member 4 (wywey) alternative variant bSep08, mRNA.                  |
| Xab2    | Xab2.bSep08    | 245976 | 1417  | 790  | 1  | 226 | XPA binding protein 2 (Xab2) alternative variant bSep08, mRNA.                        |
| XAF1    | XAF1.aSep08    | 679600 | 5846  | 470  |    | 156 | XIAP associated factor-1 (XAF1) mRNA.                                                 |
| Xbp1    | Xbp1.bSep08    | 289754 | 3563  | 1065 | 4  | 219 | X-box binding protein 1 (24.9 kD) (Xbp1) alternative variant bSep08, mRNA.            |
| Xbp1    | Xbp1.cSep08    | 289754 | 2284  | 831  | 2  | 120 | X-box binding protein 1 (13.6 kD) (Xbp1) alternative variant cSep08, mRNA.            |
| Xbp1    | Xbp1.dSep08    | 289754 | 3172  | 607  | 4  | 100 | X-box binding protein 1 (Xbp1) alternative variant dSep08, mRNA.                      |
| Xirp2   | Xirp2.aSep08   | 311098 | 15505 | 2046 |    | 415 | xin actin-binding repeat containing 2 (Xirp2) mRNA.                                   |
| Xlink.0 | Xlink.0.aSep08 |        | 4768  | 2498 | 16 | 792 | stabilin 1 (Xlink.0) alternative variant aSep08, mRNA.                                |
| Xlink.0 | Xlink.0.bSep08 |        | 1795  | 730  | 7  | 243 | stabilin 1 (Xlink.0) alternative variant bSep08, mRNA.                                |
| Xlink.0 | Xlink.0.cSep08 |        | 947   | 625  | 3  | 184 | stabilin 1 (Xlink.0) alternative variant cSep08, mRNA.                                |
| Xlink.0 | Xlink.0.dSep08 |        | 477   | 386  | 1  | 93  | stabilin 1 CRA c (Xlink.0) alternative variant dSep08, mRNA.                          |

|             |                    |        |       |      |    |     |                                                                                                             |
|-------------|--------------------|--------|-------|------|----|-----|-------------------------------------------------------------------------------------------------------------|
| Xlink.0     | Xlink.0.eSep08     |        | 1198  | 692  | 3  | 94  | stabilin 1 (Xlink.0) alternative variant eSep08, mRNA.                                                      |
| Xlr4a       | Xlr4a.aSep08       | 293841 | 3889  | 662  |    | 117 | X-linked lymphocyte-regulated 4A (Xlr4a) mRNA.                                                              |
| Xpa         | Xpa.bSep08         | 298074 | 24971 | 1314 | 6  | 235 | xeroderma pigmentosum, complementation group A (27.4 kD) (Xpa) alternative variant bSep08, complete mRNA.   |
| Xpc         | Xpc.dSep08         | 312560 | 1802  | 816  | 2  | 116 | xeroderma pigmentosum, complementation group C (13.1 kD) (Xpc) alternative variant dSep08, mRNA.            |
| Xpnpep1     | Xpnpep1.bSep08     | 170751 | 42748 | 1820 | 12 | 470 | X-prolyl aminopeptidase (aminopeptidase P) 1, soluble (Xpnpep1) alternative variant bSep08, mRNA.           |
| Xpnpep1     | Xpnpep1.cSep08     | 170751 | 34007 | 1458 | 9  | 366 | X-prolyl aminopeptidase (aminopeptidase P) 1, soluble (Xpnpep1) alternative variant cSep08, mRNA.           |
| Xpnpep1     | Xpnpep1.dSep08     | 170751 | 13722 | 1566 | 11 | 314 | X-prolyl aminopeptidase (aminopeptidase P) 1, soluble (34.7 kD) (Xpnpep1) alternative variant dSep08, mRNA. |
| Xpnpep1     | Xpnpep1.eSep08     | 170751 | 65048 | 668  | 6  | 211 | X-prolyl aminopeptidase (aminopeptidase P) 1, soluble (Xpnpep1) alternative variant eSep08, mRNA.           |
| Xpnpep1     | Xpnpep1.gSep08     | 170751 | 839   | 718  | 2  | 75  | X-prolyl aminopeptidase (aminopeptidase P) 1, soluble (Xpnpep1) alternative variant gSep08, mRNA.           |
| Xpnpep2     | Xpnpep2.bSep08     | 117522 | 12125 | 764  | 8  | 254 | X-prolyl aminopeptidase (aminopeptidase P) 2, membrane-bound (Xpnpep2) alternative variant bSep08, mRNA.    |
| Xpnpep2     | Xpnpep2.cSep08     | 117522 | 9211  | 1130 | 8  | 228 | X-prolyl aminopeptidase (aminopeptidase P) 2, membrane-bound (Xpnpep2) alternative variant cSep08, mRNA.    |
| Xpo1        | Xpo1.bSep08        | 85252  | 3849  | 1438 | 2  | 178 | exportin 1, CRM1 homolog (yeast) (Xpo1) alternative variant bSep08, mRNA.                                   |
| Xpo6        | Xpo6.bSep08        | 293476 | 19603 | 765  | 4  | 254 | exportin 6 (Xpo6) alternative variant bSep08, mRNA.                                                         |
| Xpo6        | Xpo6.cSep08        | 293476 | 7070  | 750  | 3  | 228 | exportin 6 (Xpo6) alternative variant cSep08, mRNA.                                                         |
| Xpo6        | Xpo6.dSep08        | 293476 | 16428 | 754  | 7  | 91  | exportin 6 (Xpo6) alternative variant dSep08, mRNA.                                                         |
| Xpo7andNpm2 | Xpo7andNpm2.aSep08 | 290359 | 18005 | 1358 | 11 | 452 | exportin 7 (Xpo7andNpm2) alternative variant aSep08, mRNA.                                                  |
| Xpo7andNpm2 | Xpo7andNpm2.aSep08 | 361070 | 18005 | 1358 | 11 | 452 | exportin 7 (Xpo7andNpm2) alternative variant aSep08, mRNA.                                                  |
| Xpo7andNpm2 | Xpo7andNpm2.bSep08 | 290359 | 17338 | 2702 | 11 | 412 | exportin 7 (Xpo7andNpm2) alternative variant bSep08, mRNA.                                                  |
| Xpo7andNpm2 | Xpo7andNpm2.bSep08 | 361070 | 17338 | 2702 | 11 | 412 | exportin 7 (Xpo7andNpm2) alternative variant bSep08, mRNA.                                                  |
| Xpo7andNpm2 | Xpo7andNpm2.fSep08 | 290359 | 16316 | 397  | 3  | 58  | exportin 7 CRA c (Xpo7andNpm2) alternative variant fSep08, mRNA.                                            |
| Xpo7andNpm2 | Xpo7andNpm2.fSep08 | 361070 | 16316 | 397  | 3  | 58  | exportin 7 CRA c (Xpo7andNpm2) alternative variant fSep08, mRNA.                                            |
| Xpot        | Xpot.bSep08        | 314879 | 18912 | 1786 | 10 | 415 | exportin, tRNA (nuclear export receptor for tRNAs) (Xpot) alternative variant bSep08, mRNA.                 |
| Xpot        | Xpot.cSep08        | 314879 | 14157 | 1411 | 8  | 290 | exportin, tRNA (nuclear export receptor for tRNAs) (Xpot) alternative variant cSep08, mRNA.                 |
| Xpot        | Xpot.dSep08        | 314879 | 8993  | 748  | 7  | 249 | exportin, tRNA (nuclear export receptor for tRNAs) (Xpot) alternative variant dSep08, mRNA.                 |
| Xpot        | Xpot.eSep08        | 314879 | 11999 | 3127 | 4  | 90  | exportin, tRNA (nuclear export receptor for tRNAs) (10.5 kD) (Xpot) alternative variant eSep08, mRNA.       |



|         |                |        |        |      |    |     |                                                                                                                            |
|---------|----------------|--------|--------|------|----|-----|----------------------------------------------------------------------------------------------------------------------------|
| Xpot    | Xpot.fSep08    | 314879 | 1705   | 667  | 2  | 45  | exportin, tRNA (nuclear export receptor for tRNAs) (Xpot) alternative variant fSep08, mRNA.                                |
| Xpr1    | Xpr1.bSep08    | 289424 | 108496 | 2831 | 9  | 392 | xenotropic and polytropic retrovirus receptor 1 (45.9 kD) (Xpr1) alternative variant bSep08, mRNA.                         |
| Xrcc1   | Xrcc1.bSep08   | 84495  | 26843  | 2256 | 14 | 369 | X-ray repair complementing 1 (Xrcc1) alternative variant bSep08, mRNA.                                                     |
| Xrcc1   | Xrcc1.cSep08   | 84495  | 8717   | 589  | 5  | 196 | repair protein (Xrcc1) alternative variant cSep08, mRNA.                                                                   |
| Xrcc1   | Xrcc1.dSep08   | 84495  | 6323   | 888  | 7  | 135 | X-ray repair complementing 1 (15.3 kD) (Xrcc1) alternative variant dSep08, mRNA.                                           |
| Xrcc1   | Xrcc1.eSep08   | 84495  | 1852   | 1476 | 3  | 115 | putative nuclear protein (12.4 kD) (Xrcc1) alternative variant eSep08, mRNA.                                               |
| Xrcc1   | Xrcc1.fSep08   | 84495  | 770    | 404  | 3  | 114 | putative protein (Xrcc1) alternative variant fSep08, mRNA.                                                                 |
| Xrcc4   | Xrcc4.bSep08   | 309995 | 111530 | 619  | 4  | 142 | X-ray repair complementing defective repair in Chinese hamster cells 4 (Xrcc4) alternative variant bSep08, mRNA.           |
| Xrcc4   | Xrcc4.cSep08   | 309995 | 26091  | 539  | 4  | 105 | X-ray repair complementing defective repair in Chinese hamster cells 4 (Xrcc4) alternative variant cSep08, mRNA.           |
| Xrcc4   | Xrcc4.dSep08   | 309995 | 22761  | 690  | 2  | 68  | X-ray repair complementing defective repair in Chinese hamster cells 4 (Xrcc4) alternative variant dSep08, mRNA.           |
| Xrcc5   | Xrcc5.bSep08   | 363247 | 44611  | 946  | 8  | 315 | X-ray repair complementing defective in Chinese hamster cells 5 (Xrcc5) alternative variant bSep08, mRNA.                  |
| Xrcc5   | Xrcc5.cSep08   | 363247 | 8754   | 776  | 5  | 205 | X-ray repair complementing defective in Chinese hamster cells 5 (Xrcc5) alternative variant cSep08, mRNA.                  |
| Xrcc5   | Xrcc5.dSep08   | 363247 | 10242  | 789  | 5  | 185 | X-ray repair complementing defective in Chinese hamster cells 5 (Xrcc5) alternative variant dSep08, mRNA.                  |
| Xrcc5   | Xrcc5.eSep08   | 363247 | 3749   | 461  | 2  | 102 | X-ray repair complementing defective in Chinese hamster cells 5 (Xrcc5) alternative variant eSep08, mRNA.                  |
| Xrcc6   | Xrcc6.bSep08   | 25019  | 2601   | 735  | 2  | 96  | X-ray repair complementing defective repair in Chinese hamster cells 6 (10.6 kD) (Xrcc6) alternative variant bSep08, mRNA. |
| Xrn1    | Xrn1.aSep08    | 300944 | 55096  | 2566 | 18 | 696 | 5'-3' exoribonuclease 1 (Xrn1) alternative variant aSep08, mRNA.                                                           |
| Xrn1    | Xrn1.bSep08    | 300944 | 26042  | 711  | 8  | 236 | 5'-3' exoribonuclease 1 (Xrn1) alternative variant bSep08, mRNA.                                                           |
| Xrn1    | Xrn1.cSep08    | 300944 | 1225   | 676  | 1  | 146 | 5'-3' exoribonuclease 1 (Xrn1) alternative variant cSep08, mRNA.                                                           |
| Xrn2    | Xrn2.bSep08    | 362229 | 15244  | 586  | 6  | 195 | 5'-3' exoribonuclease 2 (Xrn2) alternative variant bSep08, mRNA.                                                           |
| Xrn2    | Xrn2.cSep08    | 362229 | 6443   | 514  | 5  | 46  | 5'-3' exoribonuclease 2 (5.3 kD) (Xrn2) alternative variant cSep08, mRNA.                                                  |
| XRN_N.0 | XRN_N.0.aSep08 |        | 8997   | 521  |    | 173 | 5'-3' exoribonuclease 1 (XRN_N.0) mRNA.                                                                                    |
| Xylb    | Xylb.bSep08    | 316067 | 7090   | 747  | 5  | 151 | xylokinase homolog (H. influenzae) (Xylb) alternative variant bSep08, mRNA.                                                |
| Xylb    | Xylb.cSep08    | 316067 | 4110   | 328  | 3  | 73  | xylokinase homolog (H. influenzae) (Xylb) alternative variant cSep08, mRNA.                                                |
| Xylt2   | Xylt2.bSep08   | 64134  | 2928   | 758  | 3  | 252 | xylosyltransferase II (Xylt2) alternative variant bSep08, mRNA.                                                            |

|        |               |        |       |      |   |     |                                                                                                      |
|--------|---------------|--------|-------|------|---|-----|------------------------------------------------------------------------------------------------------|
| Xylt2  | Xylt2.cSep08  | 64134  | 2090  | 749  | 1 | 135 | xylosyltransferase II (Xylt2) alternative variant cSep08, mRNA.                                      |
| Yaf2   | Yaf2.bSep08   | 690262 | 55074 | 1755 | 2 | 145 | YY1 associated factor 2 (Yaf2) alternative variant bSep08, mRNA.                                     |
| Yaf2   | Yaf2.cSep08   | 690262 | 53932 | 809  | 4 | 109 | YY1 associated factor 2 (Yaf2) alternative variant cSep08, mRNA.                                     |
| Yaf2   | Yaf2.dSep08   | 690262 | 34300 | 651  | 2 | 41  | YY1 associated factor 2 (4.7 kD) (Yaf2) alternative variant dSep08, mRNA.                            |
| Yap1   | Yap1.bSep08   | 363014 | 26310 | 887  | 1 | 238 | yes-associated protein 1 (Yap1) alternative variant bSep08, mRNA.                                    |
| Yars   | Yars.bSep08   | 313047 | 10701 | 415  | 3 | 138 | tyrosyl-tRNA synthetase (Yars) alternative variant bSep08, mRNA.                                     |
| Ybx1   | Ybx1.aSep08   | 500538 | 16649 | 1427 | 7 | 322 | Y box protein 1 (35.7 kD) (Ybx1) alternative variant aSep08, mRNA.                                   |
| Ybx1   | Ybx1.bSep08   | 500538 | 12593 | 750  | 4 | 209 | Y box protein 1 (Ybx1) alternative variant bSep08, mRNA.                                             |
| Ybx1   | Ybx1.cSep08   | 500538 | 723   | 382  | 1 | 95  | Y box protein 1 (Ybx1) alternative variant cSep08, mRNA.                                             |
| Ybx2   | Ybx2.aSep08   | 303250 | 980   | 597  |   | 59  | Y box protein 2 (Ybx2) mRNA.                                                                         |
| Yc2    | Yc2.bSep08    | 494500 | 26208 | 912  | 7 | 221 | glutathione S-transferase Yc2 subunit (25.3 kD) (Yc2) alternative variant bSep08, mRNA.              |
| Yc2    | Yc2.cSep08    | 494500 | 21590 | 741  | 5 | 153 | glutathione S-transferase Yc2 subunit (17.5 kD) (Yc2) alternative variant cSep08, mRNA.              |
| YdjC   | YdjC.aSep08   | 287938 | 1271  | 695  | 2 | 231 | YdjC homolog (bacterial) (YdjC) alternative variant aSep08, mRNA.                                    |
| Yeats2 | Yeats2.bSep08 | 498112 | 8658  | 406  | 2 | 123 | putative protein of vertebrate origin (Yeats2) alternative variant bSep08, mRNA.                     |
| Yeats4 | Yeats4.bSep08 | 299810 | 7072  | 1784 | 1 | 64  | putative protein (7.1 kD) (Yeats4) alternative variant bSep08, complete mRNA.                        |
| Yes1   | Yes1.bSep08   | 24884  | 31829 | 1073 | 6 | 286 | yamaguchi sarcoma viral (v-yes) oncogene homolog 1 (Yes1) alternative variant bSep08, mRNA.          |
| Yif1b  | Yif1b.aSep08  | 292768 | 10063 | 1794 | 1 | 598 | yip1 interacting factor homolog B (S. cerevisiae) (Yif1b) alternative variant aSep08, mRNA.          |
| Yif1b  | Yif1b.dSep08  | 292768 | 8414  | 775  | 3 | 250 | yip1 interacting factor homolog B (S. cerevisiae) (Yif1b) alternative variant dSep08, mRNA.          |
| Yif1b  | Yif1b.eSep08  | 292768 | 2019  | 667  | 1 | 82  | yip1 interacting factor homolog B (S. cerevisiae) (9.2 kD) (Yif1b) alternative variant eSep08, mRNA. |
| Yipf1  | Yipf1.bSep08  | 298312 | 13783 | 685  | 5 | 176 | yip1 domain family member 1 like (19.5 kD) (Yipf1) alternative variant bSep08, mRNA.                 |
| Yipf1  | Yipf1.cSep08  | 298312 | 21211 | 683  | 5 | 151 | yip1 domain family member 1 like (Yipf1) alternative variant cSep08, mRNA.                           |
| Yipf1  | Yipf1.dSep08  | 298312 | 18430 | 758  | 7 | 146 | yip1 domain family member 1 like (16.6 kD) (Yipf1) alternative variant dSep08, mRNA.                 |
| Yipf1  | Yipf1.eSep08  | 298312 | 5989  | 406  | 3 | 134 | yip1 domain family member 1 (Yipf1) alternative variant eSep08, mRNA.                                |
| Yipf1  | Yipf1.fSep08  | 298312 | 2702  | 730  | 3 | 127 | yip1 domain family member 1 (Yipf1) alternative variant fSep08, mRNA.                                |
| Yipf1  | Yipf1.gSep08  | 298312 | 8104  | 606  | 2 | 49  | putative protein (5.4 kD) (Yipf1) alternative variant gSep08, mRNA.                                  |

|          |                 |        |       |      |    |     |                                                                                           |
|----------|-----------------|--------|-------|------|----|-----|-------------------------------------------------------------------------------------------|
| Yipf2    | Yipf2.bSep08    | 363027 | 2699  | 830  | 6  | 213 | yip1 domain family, member 2 (Yipf2) alternative variant bSep08, mRNA.                    |
| Yipf2    | Yipf2.cSep08    | 363027 | 2587  | 796  | 5  | 194 | yip1 domain family, member 2 (Yipf2) alternative variant cSep08, mRNA.                    |
| Yipf2    | Yipf2.dSep08    | 363027 | 8798  | 785  | 3  | 64  | yip1 domain family, member 2 (Yipf2) alternative variant dSep08, mRNA.                    |
| Yipf2    | Yipf2.fSep08    | 363027 | 512   | 429  | 2  | 37  | yip1 domain family, member 2 (Yipf2) alternative variant fSep08, mRNA.                    |
| Yipf3    | Yipf3.aSep08    | 301245 | 4261  | 1760 | 5  | 498 | yip1 domain family, member 3 (Yipf3) alternative variant aSep08, mRNA.                    |
| Yipf3    | Yipf3.cSep08    | 301245 | 1279  | 604  | 2  | 129 | yip1 domain family, member 3 (14.0 kD) (Yipf3) alternative variant cSep08, mRNA.          |
| Yipf4    | Yipf4.bSep08    | 362699 | 7332  | 483  | 4  | 24  | yip1 domain family, member 4 (Yipf4) alternative variant bSep08, mRNA.                    |
| Yipf5    | Yipf5.bSep08    | 361315 | 11356 | 1120 | 5  | 168 | yip1 domain family, member 5 (18.4 kD) (Yipf5) alternative variant bSep08, complete mRNA. |
| Yipf6    | Yipf6.bSep08    | 363476 | 4587  | 518  | 5  | 83  | yip1 domain family, member 6 (Yipf6) alternative variant bSep08, mRNA.                    |
| Yippee.0 | Yippee.0.aSep08 |        | 12299 | 900  | 3  | 118 | yippee-like 3 (13.5 kD) (Yippee.0) alternative variant aSep08, mRNA.                      |
| Yippee.0 | Yippee.0.bSep08 |        | 9144  | 1808 | 1  | 51  | putative protein (5.2 kD) (Yippee.0) alternative variant bSep08, mRNA.                    |
| Ykt6     | Ykt6.bSep08     | 64351  | 8197  | 475  | 3  | 115 | YKT6 homolog (S. Cerevisiae) (Ykt6) alternative variant bSep08, mRNA.                     |
| Ykt6     | Ykt6.cSep08     | 64351  | 5134  | 2204 | 2  | 60  | YKT6 homolog (S. Cerevisiae) (6.8 kD) (Ykt6) alternative variant cSep08, mRNA.            |
| Ylpm1    | Ylpm1.aSep08    | 299199 | 35179 | 2377 | 16 | 649 | YLP motif-containing protein 1 (Ylpm1) alternative variant aSep08, mRNA.                  |
| Ylpm1    | Ylpm1.bSep08    | 299199 | 6064  | 1405 | 3  | 126 | YLP motif containing 1 (14.9 kD) (Ylpm1) alternative variant bSep08, mRNA.                |
| Ylpm1    | Ylpm1.cSep08    | 299199 | 8356  | 440  | 4  | 119 | YLP motif containing 1 (Ylpm1) alternative variant cSep08, mRNA.                          |
| Ylpm1    | Ylpm1.dSep08    | 299199 | 10499 | 903  | 3  | 72  | ylp motif containing 1 (Ylpm1) alternative variant dSep08, mRNA.                          |
| Ylpm1    | Ylpm1.eSep08    | 299199 | 21351 | 846  | 5  | 60  | YLP motif-containing protein 1 like (Ylpm1) alternative variant eSep08, mRNA.             |
| Yme111   | Yme111.bSep08   | 114217 | 15545 | 697  | 6  | 218 | YME1-like 1 (S. cerevisiae) (Yme111) alternative variant bSep08, mRNA.                    |
| Ypel4    | Ypel4.bSep08    | 502643 | 770   | 612  | 2  | 62  | yippee-like 4 (Drosophila) (6.9 kD) (Ypel4) alternative variant bSep08, mRNA.             |
| Ypel5    | Ypel5.aSep08    | 298792 | 9820  | 618  | 4  | 121 | yippee-like 5 (Drosophila) (13.8 kD) (Ypel5) alternative variant aSep08, mRNA.            |
| Ypel5    | Ypel5.bSep08    | 298792 | 9651  | 768  | 3  | 121 | yippee-like 5 (Drosophila) (13.8 kD) (Ypel5) alternative variant bSep08, mRNA.            |
| Ypel5    | Ypel5.cSep08    | 298792 | 13051 | 757  | 4  | 121 | yippee-like 5 (Drosophila) (13.8 kD) (Ypel5) alternative variant cSep08, mRNA.            |

|        |               |        |       |      |    |     |                                                                                                                                             |
|--------|---------------|--------|-------|------|----|-----|---------------------------------------------------------------------------------------------------------------------------------------------|
| Ypel5  | Ypel5.dSep08  | 298792 | 13247 | 784  | 3  | 121 | yippee-like 5 (Drosophila) (13.8 kD) (Ypel5) alternative variant dSep08, mRNA.                                                              |
| Ypel5  | Ypel5.eSep08  | 298792 | 4553  | 990  | 3  | 121 | yippee-like 5 (Drosophila) (13.8 kD) (Ypel5) alternative variant eSep08, mRNA.                                                              |
| Ypel5  | Ypel5.hSep08  | 298792 | 4234  | 333  | 2  | 34  | yippee-like 5 (Drosophila) (Ypel5) alternative variant hSep08, mRNA.                                                                        |
| Yt521  | Yt521.bSep08  | 170956 | 14491 | 1412 | 11 | 359 | splicing factor CRA a (Yt521) alternative variant bSep08, mRNA.                                                                             |
| Yt521  | Yt521.cSep08  | 170956 | 5170  | 749  | 3  | 136 | splicing factor CRA c (Yt521) alternative variant cSep08, mRNA.                                                                             |
| Yt521  | Yt521.dSep08  | 170956 | 2622  | 1263 | 4  | 132 | splicing factor CRA c (15.5 kD) (Yt521) alternative variant dSep08, mRNA.                                                                   |
| Yt521  | Yt521.eSep08  | 170956 | 4377  | 725  | 5  | 129 | splicing factor CRA c (15.9 kD) (Yt521) alternative variant eSep08, mRNA.                                                                   |
| Yt521  | Yt521.fSep08  | 170956 | 11126 | 650  | 4  | 118 | splicing factor CRA a (Yt521) alternative variant fSep08, mRNA.                                                                             |
| Yt521  | Yt521.gSep08  | 170956 | 4180  | 760  | 3  | 82  | putative protein (Yt521) alternative variant gSep08, mRNA.                                                                                  |
| Ythdc2 | Ythdc2.aSep08 | 307446 | 8681  | 970  |    | 267 | putative protein of ancient origin (Ythdc2) mRNA.                                                                                           |
| Ythdf2 | Ythdf2.aSep08 | 313053 | 25194 | 2629 | 2  | 605 | YTH domain family 2 (Ythdf2) alternative variant aSep08, mRNA.                                                                              |
| Ythdf3 | Ythdf3.aSep08 | 361920 | 14338 | 4344 | 2  | 396 | YTH domain family 3 (Ythdf3) alternative variant aSep08, mRNA.                                                                              |
| Ythdf3 | Ythdf3.bSep08 | 361920 | 20016 | 1153 | 4  | 182 | YTH domain family 3 (Ythdf3) alternative variant bSep08, mRNA.                                                                              |
| Ythdf3 | Ythdf3.eSep08 | 361920 | 31225 | 769  | 4  | 52  | YTH domain family 3 (5.8 kD) (Ythdf3) alternative variant eSep08, mRNA.                                                                     |
| Ywhab  | Ywhab.bSep08  | 56011  | 20956 | 788  |    | 127 | tyrosine 3-monooxygenase/tryptophan 5-monooxygenase activation protein, beta polypeptide (Ywhab) alternative variant bSep08, mRNA.          |
| Ywhae  | Ywhae.aSep08  | 29753  | 37995 | 2016 | 1  | 272 | tyrosine 3-monooxygenase/tryptophan 5-monooxygenase activation protein, epsilon polypeptide (Ywhae) alternative variant aSep08, mRNA.       |
| Ywhah  | Ywhah.bSep08  | 25576  | 8414  | 1804 | 1  | 113 | tyrosine 3-monooxygenase/tryptophan 5-monooxygenase activation protein, eta polypeptide (12.1 kD) (Ywhah) alternative variant bSep08, mRNA. |
| Ywhaq  | Ywhaq.bSep08  | 25577  | 26000 | 866  | 3  | 225 | tyrosine 3-monooxygenase/tryptophan 5-monooxygenase activation protein, theta polypeptide (Ywhaq) alternative variant bSep08, mRNA.         |
| Ywhaq  | Ywhaq.cSep08  | 25577  | 25318 | 355  | 3  | 95  | tyrosine 3-monooxygenase/tryptophan 5-monooxygenase activation protein, theta polypeptide (Ywhaq) alternative variant cSep08, mRNA.         |
| Ywhaz  | Ywhaz.aSep08  | 25578  | 18911 | 789  | 3  | 255 | tyrosine 3-monooxygenase/tryptophan 5-monooxygenase activation protein, zeta polypeptide (Ywhaz) alternative variant aSep08, mRNA.          |
| Yy1    | Yy1.bSep08    | 24919  | 23648 | 700  | 2  | 160 | YY1 transcription factor (18.0 kD) (Yy1) alternative variant bSep08, mRNA.                                                                  |

|                 |                        |        |       |      |    |     |                                                                                                  |
|-----------------|------------------------|--------|-------|------|----|-----|--------------------------------------------------------------------------------------------------|
| Y_phosphatase.0 | Y_phosphatase.0.aSep08 |        | 13841 | 375  |    | 117 | protein tyrosine phosphatase (Y_phosphatase.0) mRNA.                                             |
| Y_phosphatase.1 | Y_phosphatase.1.aSep08 |        | 10782 | 1303 | 3  | 179 | protein tyrosine phosphatase receptor type D (Y_phosphatase.1) alternative variant aSep08, mRNA. |
| Y_phosphatase.1 | Y_phosphatase.1.bSep08 |        | 2993  | 369  | 1  | 119 | protein tyrosine phosphatase receptor type D (Y_phosphatase.1) alternative variant bSep08, mRNA. |
| Y_phosphatase.2 | Y_phosphatase.2.aSep08 |        | 1786  | 895  |    | 133 | protein tyrosine phosphatase (Y_phosphatase.2) mRNA.                                             |
| zabor           | zabor.aSep08           |        | 6696  | 881  |    | 85  | putative protein of vertebrate origin (zabor) mRNA.                                              |
| zaby            | zaby.aSep08            |        | 635   | 404  | 3  | 134 | plexin B1 CRA c (zaby) alternative variant aSep08, mRNA.                                         |
| zachy           | zachy.aSep08           |        | 3777  | 247  |    | 74  | putative protein (zachy) mRNA.                                                                   |
| zadar           | zadar.aSep08           |        | 5305  | 735  |    | 66  | putative protein (6.9 kD) (zadar) mRNA.                                                          |
| Zadh1           | Zadh1.aSep08           | 299194 | 30292 | 1564 | 10 | 351 | alcohol dehydrogenase, zinc-binding (38.1 kD) (Zadh1) alternative variant aSep08, mRNA.          |
| zadoy           | zadoy.aSep08           |        | 1485  | 588  |    | 74  | putative protein (zadoy) mRNA.                                                                   |
| zaflu           | zaflu.aSep08           |        | 27938 | 215  |    | 59  | putative protein (zaflu) mRNA.                                                                   |
| zafly           | zafly.aSep08           |        | 1456  | 472  |    | 95  | putative nuclear protein (10.6 kD) (zafly) mRNA.                                                 |
| zagar           | zagar.aSep08           |        | 2139  | 540  | 2  | 100 | putative protein (zagar) alternative variant aSep08, mRNA.                                       |
| zagar           | zagar.bSep08           |        | 2074  | 538  | 2  | 51  | putative protein (zagar) alternative variant bSep08, mRNA.                                       |
| zaja            | zaja.aSep08            |        | 16086 | 746  |    | 96  | putative protein of eukaryotic origin (zaja) mRNA.                                               |
| zajey           | zajey.aSep08           |        | 25517 | 1833 |    | 113 | putative protein of metazoan origin (zajey) mRNA.                                                |
| zakee           | zakee.aSep08           |        | 770   | 545  |    | 86  | putative protein (9.7 kD) (zakee) mRNA.                                                          |
| zakler          | zakler.aSep08          |        | 428   | 265  |    | 25  | putative protein (zakler) mRNA.                                                                  |
| zalo            | zalo.aSep08            |        | 1275  | 782  |    | 100 | putative protein (zalo) mRNA.                                                                    |
| zamee           | zamee.aSep08           |        | 6079  | 3285 |    | 81  | target of 2 CRA f (zamee) mRNA.                                                                  |
| zanoy           | zanoy.aSep08           |        | 5536  | 914  |    | 43  | putative protein (zanoy) mRNA.                                                                   |
| Zap70           | Zap70.bSep08           | 301348 | 1353  | 732  | 4  | 84  | zeta-chain (TCR) associated protein kinase (Zap70) alternative variant bSep08, mRNA.             |
| zapor           | zapor.aSep08           |        | 7468  | 813  |    | 199 | zic family member 4 (zapor) alternative variant aSep08, mRNA.                                    |
| zarbor          | zarbor.aSep08          |        | 2680  | 433  |    | 35  | putative protein (3.6 kD) (zarbor) mRNA.                                                         |
| zarby           | zarby.aSep08           |        | 2285  | 455  |    | 151 | host cell factor (zarby) mRNA.                                                                   |
| zarchy          | zarchy.aSep08          |        | 26203 | 1470 | 10 | 490 | uncharacterized Protein (zarchy) alternative variant aSep08, mRNA.                               |
| zardar          | zardar.aSep08          |        | 1727  | 606  |    | 185 | pecanex-like 2 (zardar) mRNA.                                                                    |
| zardoy          | zardoy.aSep08          |        | 27908 | 395  |    | 131 | putative protein (zardoy) mRNA.                                                                  |
| zarflu          | zarflu.aSep08          |        | 10331 | 934  | 2  | 284 | x-ray radiation resistance associated 1 (zarflu) alternative variant aSep08, mRNA.               |
| zarflu          | zarflu.bSep08          |        | 5908  | 758  | 1  | 252 | x-ray radiation resistance associated 1 protein (zarflu) alternative variant bSep08, mRNA.       |
| zarfly          | zarfly.aSep08          |        | 1453  | 923  |    | 24  | putative protein (zarfly) mRNA.                                                                  |
| zargar          | zargar.aSep08          |        | 6491  | 397  |    | 131 | odd Oz ten-m homolog 3 (zargar) mRNA.                                                            |
| zarja           | zarja.aSep08           |        | 2325  | 670  |    | 95  | putative protein (zarja) mRNA.                                                                   |

|         |                |  |       |      |   |     |                                                                                 |
|---------|----------------|--|-------|------|---|-----|---------------------------------------------------------------------------------|
| zarjey  | zarjey.aSep08  |  | 3498  | 502  |   | 89  | putative protein (10.0 kD) (zarjey) mRNA.                                       |
| zarkee  | zarkee.aSep08  |  | 19632 | 562  |   | 65  | putative protein (zarkee) mRNA.                                                 |
| zarkler | zarkler.aSep08 |  | 3903  | 620  |   | 43  | putative protein (5.0 kD) (zarkler) mRNA.                                       |
| zarlo   | zarlo.aSep08   |  | 28064 | 1016 | 2 | 45  | reverse transcriptase (zarlo) alternative variant aSep08, mRNA.                 |
| zarmee  | zarmee.aSep08  |  | 18920 | 473  |   | 157 | sperm antigen with calponin homology coiled-coil domains 1 like (zarmee) mRNA.  |
| zarnoy  | zarnoy.aSep08  |  | 1862  | 1297 |   | 31  | putative protein (3.6 kD) (zarnoy) mRNA.                                        |
| zarpor  | zarpor.aSep08  |  | 19098 | 426  |   | 29  | putative protein (zarpor) mRNA.                                                 |
| zarsa   | zarsa.aSep08   |  | 989   | 640  |   | 30  | putative protein (3.3 kD) (zarsa) complete mRNA.                                |
| zarshee | zarshee.aSep08 |  | 2489  | 1045 |   | 205 | cingulin (zarshee) mRNA.                                                        |
| zartu   | zartu.aSep08   |  | 1015  | 361  |   | 29  | putative protein (zartu) mRNA.                                                  |
| zarvar  | zarvar.aSep08  |  | 2007  | 777  |   | 259 | nucleolar protein 9 (zarvar) mRNA.                                              |
| zarvo   | zarvo.aSep08   |  | 3950  | 298  |   | 34  | putative protein (zarvo) mRNA.                                                  |
| zarwey  | zarwey.aSep08  |  | 4564  | 337  |   | 29  | putative protein (3.2 kD) (zarwey) mRNA.                                        |
| zasa    | zasa.aSep08    |  | 3956  | 2429 |   | 359 | prickle homolog 1 (zasa) mRNA.                                                  |
| zashee  | zashee.aSep08  |  | 1076  | 549  |   | 74  | putative protein (zashee) mRNA.                                                 |
| zatu    | zatu.aSep08    |  | 5899  | 748  |   | 66  | putative protein (zatu) mRNA.                                                   |
| zavar   | zavar.aSep08   |  | 1229  | 348  | 3 | 61  | putative protein (zavar) alternative variant aSep08, mRNA.                      |
| zavo    | zavo.aSep08    |  | 1649  | 569  |   | 63  | putative protein (zavo) mRNA.                                                   |
| zawbor  | zawbor.aSep08  |  | 9529  | 838  |   | 120 | putative protein (12.6 kD) (zawbor) mRNA.                                       |
| zawby   | zawby.aSep08   |  | 990   | 467  | 1 | 45  | putative protein (zawby) alternative variant aSep08, mRNA.                      |
| zawby   | zawby.bSep08   |  | 936   | 451  | 1 | 58  | CRA b like (6.6 kD) (zawby) alternative variant bSep08, mRNA.                   |
| zawchy  | zawchy.aSep08  |  | 8219  | 1078 |   | 358 | transient receptor potential cation channel subfamily M member 7 (zawchy) mRNA. |
| zawdar  | zawdar.aSep08  |  | 27145 | 295  |   | 55  | putative protein (6.0 kD) (zawdar) mRNA.                                        |
| zawdoy  | zawdoy.aSep08  |  | 25112 | 821  |   | 237 | putative protein of vertebrate origin (zawdoy) mRNA.                            |
| zawey   | zawey.bSep08   |  | 14497 | 886  | 3 | 108 | putative nuclear protein (12.1 kD) (zawey) alternative variant bSep08, mRNA.    |
| zawey   | zawey.cSep08   |  | 10503 | 588  | 2 | 40  | putative protein (4.7 kD) (zawey) alternative variant cSep08, mRNA.             |
| zawflu  | zawflu.aSep08  |  | 4300  | 410  |   | 136 | CRA b (zawflu) mRNA.                                                            |
| zawfly  | zawfly.aSep08  |  | 11950 | 748  |   | 9   | putative cytoplasmic protein (8.6 kD) (zawfly) mRNA.                            |
| zawgar  | zawgar.aSep08  |  | 3259  | 1256 | 2 | 64  | putative protein (zawgar) alternative variant aSep08, mRNA.                     |
| zawja   | zawja.aSep08   |  | 15051 | 346  |   | 71  | putative protein (zawja) mRNA.                                                  |
| zawjey  | zawjey.aSep08  |  | 13026 | 545  |   | 181 | repeat-containing protein (zawjey) mRNA.                                        |
| zawkee  | zawkee.aSep08  |  | 4785  | 429  |   | 30  | putative protein (3.4 kD) (zawkee) mRNA.                                        |
| zawkler | zawkler.aSep08 |  | 1223  | 521  |   | 96  | CRA a like (zawkler) mRNA.                                                      |
| zawlo   | zawlo.aSep08   |  | 1087  | 463  | 2 | 52  | putative protein (5.4 kD) (zawlo) alternative variant aSep08, mRNA.             |

|         |                |        |        |      |    |     |                                                                                          |
|---------|----------------|--------|--------|------|----|-----|------------------------------------------------------------------------------------------|
| zawmee  | zawmee.aSep08  |        | 18222  | 2429 | 11 | 534 | nuclear receptor co-repressor 1 (zawmee) alternative variant aSep08, mRNA.               |
| zawmee  | zawmee.bSep08  |        | 3934   | 740  | 3  | 246 | nuclear receptor co-repressor 1 CRA b (zawmee) alternative variant bSep08, mRNA.         |
| zawmee  | zawmee.cSep08  |        | 9130   | 707  | 5  | 235 | nuclear receptor co-repressor 1 CRA b (zawmee) alternative variant cSep08, mRNA.         |
| zawmee  | zawmee.dSep08  |        | 2203   | 318  | 2  | 105 | nuclear receptor co-repressor 1 CRA a (zawmee) alternative variant dSep08, mRNA.         |
| zawnoy  | zawnoy.aSep08  |        | 16255  | 684  |    | 60  | putative protein (6.7 kD) (zawnoy) mRNA.                                                 |
| zawpor  | zawpor.aSep08  |        | 3208   | 1709 |    | 111 | solute carrier family 9 (zawpor) mRNA.                                                   |
| zawsa   | zawsa.aSep08   |        | 9844   | 332  |    | 110 | putative protein (zawsa) mRNA.                                                           |
| zawshee | zawshee.aSep08 |        | 667    | 350  |    | 116 | cingulin (zawshee) mRNA.                                                                 |
| zawtu   | zawtu.aSep08   |        | 9998   | 240  |    | 79  | oligomeric golgi complex (zawtu) mRNA.                                                   |
| zawvar  | zawvar.aSep08  |        | 2859   | 467  |    | 155 | chromodomain helicase DNA binding protein 5 like (zawvar) mRNA.                          |
| zawvo   | zawvo.aSep08   |        | 1707   | 698  |    | 29  | putative protein (zawvo) mRNA.                                                           |
| zawwey  | zawwey.aSep08  |        | 139952 | 358  |    | 51  | putative protein (5.9 kD) (zawwey) mRNA.                                                 |
| Zbbx    | Zbbx.aSep08    | 361964 | 41631  | 1785 | 2  | 562 | putative protein of mammalian origin (Zbbx) alternative variant aSep08, mRNA.            |
| Zbbx    | Zbbx.cSep08    | 361964 | 2095   | 290  | 2  | 77  | putative protein of mammalian origin (Zbbx) alternative variant cSep08, mRNA.            |
| Zbp1    | Zbp1.aSep08    | 171091 | 2550   | 681  |    | 103 | Z-DNA binding protein 1 (Zbp1) mRNA.                                                     |
| Zbtb5   | Zbtb5.aSep08   | 298084 | 20531  | 2945 | 3  | 692 | BTB/POZ and zinc finger, C2H2-type (Zbtb5) alternative variant aSep08, mRNA.             |
| Zbtb7a  | Zbtb7a.bSep08  | 117107 | 8026   | 620  | 2  | 206 | BTB/POZ (Zbtb7a) alternative variant bSep08, mRNA.                                       |
| Zbtb8a  | Zbtb8a.aSep08  | 313049 | 27973  | 1912 | 1  | 441 | BTB/POZ and zinc finger, C2H2-type (49.9 kD) (Zbtb8a) alternative variant aSep08, mRNA.  |
| Zbtb8os | Zbtb8os.aSep08 | 297885 | 11464  | 1623 | 7  | 167 | putative protein of ancient origin (19.6 kD) (Zbtb8os) alternative variant aSep08, mRNA. |
| Zbtb8os | Zbtb8os.bSep08 | 297885 | 5332   | 567  | 4  | 74  | putative protein of ancient origin (Zbtb8os) alternative variant bSep08, mRNA.           |
| Zbtb10  | Zbtb10.bSep08  | 80338  | 13458  | 611  | 2  | 203 | putative protein of vertebrate origin (Zbtb10) alternative variant bSep08, mRNA.         |
| Zbtb16  | Zbtb16.bSep08  | 353227 | 87052  | 785  | 1  | 193 | zinc finger (Zbtb16) alternative variant bSep08, mRNA.                                   |
| Zbtb17  | Zbtb17.bSep08  | 313666 | 18176  | 1040 | 7  | 288 | BTB/POZ (Zbtb17) alternative variant bSep08, mRNA.                                       |
| Zbtb17  | Zbtb17.cSep08  | 313666 | 1504   | 833  | 6  | 277 | zinc finger, C2H2-type (Zbtb17) alternative variant cSep08, mRNA.                        |
| Zbtb17  | Zbtb17.dSep08  | 313666 | 1021   | 851  | 3  | 207 | zinc finger, C2H2-type (Zbtb17) alternative variant dSep08, mRNA.                        |
| Zbtb20  | Zbtb20.bSep08  | 288105 | 40855  | 1277 | 3  | 321 | BTB/POZ (Zbtb20) alternative variant bSep08, mRNA.                                       |
| Zbtb40  | Zbtb40.aSep08  | 362635 | 5064   | 692  |    | 176 | zinc finger, C2H2-type (Zbtb40) mRNA.                                                    |
| Zbtb43  | Zbtb43.bSep08  | 311872 | 15096  | 768  |    | 197 | zinc finger (Zbtb43) alternative variant bSep08, mRNA.                                   |
| Zbtb45  | Zbtb45.bSep08  | 308366 | 2702   | 1378 | 1  | 424 | BTB/POZ (Zbtb45) alternative variant bSep08, mRNA.                                       |
| Zc3h3   | Zc3h3.bSep08   | 300032 | 20841  | 821  | 5  | 134 | zinc finger CCCH type containing 3 (Zc3h3) alternative variant bSep08, mRNA.             |

|          |                 |        |       |      |   |     |                                                                                          |
|----------|-----------------|--------|-------|------|---|-----|------------------------------------------------------------------------------------------|
| Zc3h3    | Zc3h3.cSep08    | 300032 | 17336 | 368  | 2 | 63  | zinc finger CCCH type containing 3 (Zc3h3) alternative variant cSep08, mRNA.             |
| Zc3h7a   | Zc3h7a.bSep08   | 360466 | 6044  | 655  | 5 | 218 | zinc finger CCCH type containing 7 A (Zc3h7a) alternative variant bSep08, mRNA.          |
| Zc3h7a   | Zc3h7a.cSep08   | 360466 | 7650  | 707  | 6 | 218 | zinc finger CCCH type containing 7 A (Zc3h7a) alternative variant cSep08, mRNA.          |
| Zc3h7a   | Zc3h7a.dSep08   | 360466 | 2708  | 778  | 3 | 172 | zinc finger CCCH type containing 7 A (Zc3h7a) alternative variant dSep08, mRNA.          |
| Zc3h7b   | Zc3h7b.bSep08   | 315158 | 28520 | 799  | 9 | 221 | zinc finger CCCH-type containing 7B (Zc3h7b) alternative variant bSep08, mRNA.           |
| Zc3h7b   | Zc3h7b.cSep08   | 315158 | 653   | 394  | 3 | 89  | zinc finger CCCH-type containing 7B (Zc3h7b) alternative variant cSep08, mRNA.           |
| Zc3h10   | Zc3h10.aSep08   | 685928 | 3243  | 1231 |   | 410 | zinc finger CCCH type containing 10 (Zc3h10) mRNA.                                       |
| Zc3h13   | Zc3h13.aSep08   | 305955 | 36706 | 1131 |   | 275 | zinc finger CCCH type containing 13 (Zc3h13) mRNA.                                       |
| Zc3h14   | Zc3h14.cSep08   | 192359 | 10746 | 973  | 5 | 184 | zinc finger CCCH-type containing 14 (Zc3h14) alternative variant cSep08, mRNA.           |
| Zc3h14   | Zc3h14.dSep08   | 192359 | 3286  | 654  | 2 | 154 | nuclear protein UKp68 (Zc3h14) alternative variant dSep08, mRNA.                         |
| Zc3h14   | Zc3h14.eSep08   | 192359 | 3115  | 724  | 4 | 152 | zinc finger CCCH-type containing 14 (Zc3h14) alternative variant eSep08, mRNA.           |
| Zc3h14   | Zc3h14.fSep08   | 192359 | 22495 | 706  | 6 | 117 | zinc finger CCCH-type containing 14 (Zc3h14) alternative variant fSep08, mRNA.           |
| Zc3h14   | Zc3h14.gSep08   | 192359 | 10228 | 621  | 3 | 84  | zinc finger CCCH-type containing 14 (9.2 kD) (Zc3h14) alternative variant gSep08, mRNA.  |
| Zc3h14   | Zc3h14.iSep08   | 192359 | 3109  | 237  | 3 | 20  | putative protein (Zc3h14) alternative variant iSep08, mRNA.                              |
| Zc3h15   | Zc3h15.bSep08   | 362154 | 13442 | 682  | 5 | 227 | zinc finger CCCH-type containing 15 (Zc3h15) alternative variant bSep08, mRNA.           |
| Zc3h15   | Zc3h15.cSep08   | 362154 | 15319 | 759  | 6 | 172 | zinc finger CCCH-type containing 15 (19.7 kD) (Zc3h15) alternative variant cSep08, mRNA. |
| Zc3h15   | Zc3h15.dSep08   | 362154 | 8258  | 551  | 3 | 103 | zinc finger CCCH-type containing 15 (Zc3h15) alternative variant dSep08, mRNA.           |
| Zc3h15   | Zc3h15.eSep08   | 362154 | 835   | 789  | 2 | 48  | zinc finger CCCH-type containing 15 (Zc3h15) alternative variant eSep08, mRNA.           |
| Zc3h15   | Zc3h15.fSep08   | 362154 | 448   | 402  | 2 | 32  | zinc finger CCCH-type containing 15 (3.6 kD) (Zc3h15) alternative variant fSep08, mRNA.  |
| Zc3h18   | Zc3h18.bSep08   | 292067 | 1630  | 1109 | 3 | 108 | zinc finger CCCH-type containing 18 (Zc3h18) alternative variant bSep08, mRNA.           |
| Zc3hav1  | Zc3hav1.bSep08  | 252832 | 13776 | 2371 | 6 | 246 | zinc finger CCCH type, antiviral 1 (Zc3hav1) alternative variant bSep08, mRNA.           |
| Zc3hav1  | Zc3hav1.cSep08  | 252832 | 780   | 409  | 2 | 87  | zinc finger CCCH type, antiviral 1 (Zc3hav1) alternative variant cSep08, mRNA.           |
| Zc3hav1l | Zc3hav1l.aSep08 | 362341 | 3662  | 547  |   | 182 | zinc finger CCCH-type, antiviral 1-like (Zc3hav1l) mRNA.                                 |
| Zc3hc1   | Zc3hc1.bSep08   | 296957 | 13624 | 763  | 3 | 208 | zinc finger, C3HC-type 1 (Zc3hc1) alternative variant bSep08, mRNA.                      |
| Zc3hc1   | Zc3hc1.cSep08   | 296957 | 8986  | 1347 | 2 | 175 | zinc finger, C3HC-type 1 (Zc3hc1) alternative variant cSep08, mRNA.                      |



|         |                |        |       |      |    |     |                                                                                                           |
|---------|----------------|--------|-------|------|----|-----|-----------------------------------------------------------------------------------------------------------|
| Zcchc2  | Zcchc2.bSep08  | 304695 | 33307 | 2057 | 8  | 266 | putative protein of metazoan origin (Zcchc2) alternative variant bSep08, mRNA.                            |
| Zcchc2  | Zcchc2.cSep08  | 304695 | 4975  | 2334 | 2  | 142 | zinc finger, CCHC-type (Zcchc2) alternative variant cSep08, mRNA.                                         |
| Zcchc2  | Zcchc2.dSep08  | 304695 | 15730 | 1067 | 5  | 111 | zinc finger, CCHC-type (Zcchc2) alternative variant dSep08, mRNA.                                         |
| Zcchc7  | Zcchc7.bSep08  | 298086 | 6659  | 1966 | 3  | 250 | zinc finger, CCHC-type (29.9 kD) (Zcchc7) alternative variant bSep08, mRNA.                               |
| Zcchc8  | Zcchc8.bSep08  | 288661 | 2499  | 1583 | 2  | 251 | putative nuclear protein of vertebrate origin (26.6 kD) (Zcchc8) alternative variant bSep08, mRNA.        |
| Zcchc9  | Zcchc9.bSep08  | 309986 | 2400  | 945  | 2  | 73  | zinc finger, CCHC-type (8.1 kD) (Zcchc9) alternative variant bSep08, mRNA.                                |
| Zcchc9  | Zcchc9.cSep08  | 309986 | 3359  | 1348 | 4  | 37  | putative protein (4.6 kD) (Zcchc9) alternative variant cSep08, mRNA.                                      |
| Zcchc10 | Zcchc10.aSep08 | 360524 | 10471 | 1240 |    | 173 | putative protein of eukaryotic origin (Zcchc10) mRNA.                                                     |
| Zcchc11 | Zcchc11.bSep08 | 313481 | 15019 | 1257 | 6  | 355 | zinc finger, CCHC-type (Zcchc11) alternative variant bSep08, mRNA.                                        |
| Zcchc11 | Zcchc11.cSep08 | 313481 | 14019 | 1506 | 5  | 290 | zinc finger, CCHC-type (Zcchc11) alternative variant cSep08, mRNA.                                        |
| Zcchc11 | Zcchc11.eSep08 | 313481 | 9421  | 369  | 4  | 17  | putative protein (2.1 kD) (Zcchc11) alternative variant eSep08, mRNA.                                     |
| Zcchc12 | Zcchc12.bSep08 | 313436 | 1583  | 490  | 5  | 46  | putative protein (Zcchc12) alternative variant bSep08, mRNA.                                              |
| Zcchc12 | Zcchc12.cSep08 | 313436 | 1719  | 761  | 4  | 46  | putative protein (Zcchc12) alternative variant cSep08, mRNA.                                              |
| Zcchc12 | Zcchc12.dSep08 | 313436 | 1449  | 439  | 4  | 44  | putative protein (Zcchc12) alternative variant dSep08, mRNA.                                              |
| Zcchc12 | Zcchc12.eSep08 | 313436 | 1169  | 399  | 4  | 38  | putative protein (Zcchc12) alternative variant eSep08, mRNA.                                              |
| Zcchc12 | Zcchc12.fSep08 | 313436 | 1613  | 531  | 5  | 34  | putative protein (Zcchc12) alternative variant fSep08, mRNA.                                              |
| Zcchc12 | Zcchc12.gSep08 | 313436 | 2218  | 1108 | 4  | 33  | putative protein (Zcchc12) alternative variant gSep08, mRNA.                                              |
| Zcchc12 | Zcchc12.hSep08 | 313436 | 1056  | 438  | 3  | 51  | putative protein (Zcchc12) alternative variant hSep08, mRNA.                                              |
| Zcchc14 | Zcchc14.aSep08 | 365018 | 1791  | 736  |    | 115 | zinc finger, CCHC-type (Zcchc14) mRNA.                                                                    |
| Zcchc17 | Zcchc17.bSep08 | 500555 | 41226 | 2070 | 7  | 193 | putative nuclear protein of ancient origin (22.1 kD) (Zcchc17) alternative variant bSep08, complete mRNA. |
| Zcchc17 | Zcchc17.cSep08 | 500555 | 9509  | 545  | 2  | 94  | putative nuclear protein of mammalian origin (10.9 kD) (Zcchc17) alternative variant cSep08, mRNA.        |
| Zcrb1   | Zcrb1.bSep08   | 362990 | 6475  | 746  | 2  | 156 | zinc finger CCHC-type and RNA binding motif 1 (17.8 kD) (Zcrb1) alternative variant bSep08, mRNA.         |
| Zcwpw1  | Zcwpw1.aSep08  | 304368 | 20199 | 1695 |    | 515 | zinc finger, CW-type with PWWP domain 1 (Zcwpw1) mRNA.                                                    |
| Zdbf2   | Zdbf2.aSep08   | 501153 | 20682 | 1426 |    | 449 | zinc finger, DBF-type containing 2 (Zdbf2) mRNA.                                                          |
| Zdhhc1  | Zdhhc1.bSep08  | 291967 | 15644 | 2213 | 10 | 234 | putative nuclear protein of mammalian origin (25.5 kD) (Zdhhc1) alternative variant bSep08, mRNA.         |

|         |                |        |       |      |    |     |                                                                                                                |
|---------|----------------|--------|-------|------|----|-----|----------------------------------------------------------------------------------------------------------------|
| Zdhhc1  | Zdhhc1.cSep08  | 291967 | 4932  | 1838 | 6  | 129 | putative protein of vertebrate origin (14.9 kD) (Zdhhc1) alternative variant cSep08, mRNA.                     |
| Zdhhc1  | Zdhhc1.dSep08  | 291967 | 3371  | 744  | 3  | 69  | putative protein (Zdhhc1) alternative variant dSep08, mRNA.                                                    |
| Zdhhc1  | Zdhhc1.eSep08  | 291967 | 19032 | 470  | 5  | 109 | putative protein of eukaryotic origin (Zdhhc1) alternative variant eSep08, mRNA.                               |
| Zdhhc1  | Zdhhc1.fSep08  | 291967 | 14140 | 412  | 5  | 41  | putative protein (4.7 kD) (Zdhhc1) alternative variant fSep08, mRNA.                                           |
| Zdhhc2  | Zdhhc2.bSep08  | 246326 | 35607 | 1196 | 4  | 82  | putative protein of metazoan origin (9.6 kD) (Zdhhc2) alternative variant bSep08, mRNA.                        |
| Zdhhc2  | Zdhhc2.cSep08  | 246326 | 20902 | 2000 | 3  | 55  | putative protein (6.4 kD) (Zdhhc2) alternative variant cSep08, mRNA.                                           |
| Zdhhc4  | Zdhhc4.bSep08  | 304291 | 8341  | 753  | 6  | 148 | putative protein (15.9 kD) (Zdhhc4) alternative variant bSep08, mRNA.                                          |
| Zdhhc4  | Zdhhc4.cSep08  | 304291 | 6042  | 721  | 6  | 120 | putative protein, with a transmembrane domain, of vertebrate origin (Zdhhc4) alternative variant cSep08, mRNA. |
| Zdhhc5  | Zdhhc5.bSep08  | 362156 | 22361 | 392  | 3  | 130 | zinc finger, DHHC-type (Zdhhc5) alternative variant bSep08, mRNA.                                              |
| Zdhhc5  | Zdhhc5.cSep08  | 362156 | 4931  | 426  | 2  | 41  | putative protein (Zdhhc5) alternative variant cSep08, mRNA.                                                    |
| Zdhhc5  | Zdhhc5.dSep08  | 362156 | 4775  | 400  | 3  | 36  | putative protein (Zdhhc5) alternative variant dSep08, mRNA.                                                    |
| Zdhhc6  | Zdhhc6.cSep08  | 361771 | 4002  | 794  | 3  | 42  | putative protein (5.0 kD) (Zdhhc6) alternative variant cSep08, mRNA.                                           |
| Zdhhc8  | Zdhhc8.bSep08  | 303796 | 544   | 379  | 2  | 81  | zinc finger (Zdhhc8) alternative variant bSep08, mRNA.                                                         |
| Zdhhc11 | Zdhhc11.bSep08 | 499000 | 2140  | 772  | 1  | 98  | putative protein (10.9 kD) (Zdhhc11) alternative variant bSep08, mRNA.                                         |
| Zdhhc12 | Zdhhc12.bSep08 | 366014 | 2179  | 458  |    | 152 | zinc finger, DHHC-type (Zdhhc12) alternative variant bSep08, mRNA.                                             |
| Zdhhc13 | Zdhhc13.bSep08 | 365252 | 33957 | 2137 | 14 | 712 | zinc finger DHHC-type containing 13 CRA a (Zdhhc13) alternative variant bSep08, mRNA.                          |
| Zdhhc13 | Zdhhc13.cSep08 | 365252 | 39137 | 2344 | 16 | 638 | zinc finger DHHC-type containing 13 CRA b (Zdhhc13) alternative variant cSep08, mRNA.                          |
| Zdhhc13 | Zdhhc13.dSep08 | 365252 | 6864  | 388  | 4  | 95  | zinc finger DHHC-type containing 13 CRA a (Zdhhc13) alternative variant dSep08, mRNA.                          |
| Zdhhc13 | Zdhhc13.eSep08 | 365252 | 4342  | 551  | 1  | 83  | zinc finger DHHC-type containing 13 CRA b (Zdhhc13) alternative variant eSep08, mRNA.                          |
| Zdhhc17 | Zdhhc17.bSep08 | 366889 | 5172  | 3594 | 3  | 103 | zinc finger DHHC-type containing 17 CRA d (Zdhhc17) alternative variant bSep08, mRNA.                          |
| Zdhhc17 | Zdhhc17.cSep08 | 366889 | 2571  | 268  | 2  | 31  | putative protein (Zdhhc17) alternative variant cSep08, mRNA.                                                   |
| Zdhhc18 | Zdhhc18.aSep08 | 362613 | 19913 | 547  | 3  | 176 | zinc finger DHHC-type containing 18 CRA b (Zdhhc18) alternative variant aSep08, mRNA.                          |
| Zdhhc18 | Zdhhc18.bSep08 | 362613 | 6090  | 425  | 1  | 103 | zinc finger DHHC-type containing 18 precursor (Zdhhc18) alternative variant bSep08, mRNA.                      |

|         |                |        |       |      |   |      |                                                                                                 |
|---------|----------------|--------|-------|------|---|------|-------------------------------------------------------------------------------------------------|
| Zdhhc19 | Zdhhc19.bSep08 | 288045 | 1336  | 576  | 1 | 106  | CRA b like (11.2 kD) (Zdhhc19) alternative variant bSep08, mRNA.                                |
| Zdhhc20 | Zdhhc20.aSep08 | 305923 | 56408 | 2551 | 7 | 387  | zinc finger DHHC-type containing 20 CRA d (Zdhhc20) alternative variant aSep08, complete mRNA.  |
| Zdhhc20 | Zdhhc20.bSep08 | 305923 | 28238 | 1177 | 4 | 296  | zinc finger DHHC-type containing 20 CRA d (Zdhhc20) alternative variant bSep08, mRNA.           |
| Zdhhc20 | Zdhhc20.cSep08 | 305923 | 55459 | 1579 | 7 | 265  | zinc finger DHHC-type containing 20 CRA d (31.0 kD) (Zdhhc20) alternative variant cSep08, mRNA. |
| Zdhhc20 | Zdhhc20.dSep08 | 305923 | 20041 | 582  |   | 193  | zinc finger DHHC-type containing 20 CRA d (Zdhhc20) alternative variant dSep08, mRNA.           |
| Zeb1    | Zeb1.aSep08    | 25705  | 59169 | 5124 | 7 | 1092 | zinc finger E-box binding homeobox 1 (Zeb1) alternative variant aSep08, mRNA.                   |
| zeebor  | zeebor.aSep08  |        | 2505  | 396  |   | 34   | putative protein (3.5 kD) (zeebor) mRNA.                                                        |
| zeeby   | zeeby.aSep08   |        | 1765  | 1089 | 2 | 126  | binding protein 4 CRA a like (zeeby) alternative variant aSep08, mRNA.                          |
| zeechy  | zeechy.aSep08  |        | 1282  | 314  |   | 104  | transient receptor potential cation channel subfamily M member 7 (zeechy) mRNA.                 |
| zeedar  | zeedar.aSep08  |        | 3436  | 767  | 1 | 21   | putative protein (2.5 kD) (zeedar) alternative variant aSep08, mRNA.                            |
| zeedar  | zeedar.bSep08  |        | 3556  | 762  |   | 21   | putative protein (2.5 kD) (zeedar) alternative variant bSep08, mRNA.                            |
| zeedoy  | zeedoy.aSep08  |        | 11629 | 1079 | 1 | 186  | putative protein of metazoan origin (zeedoy) alternative variant aSep08, mRNA.                  |
| zeedoy  | zeedoy.bSep08  |        | 8823  | 473  | 1 | 157  | putative protein of metazoan origin (zeedoy) alternative variant bSep08, mRNA.                  |
| zeeflu  | zeeflu.aSep08  |        | 6816  | 523  |   | 173  | CRA b (zeeflu) mRNA.                                                                            |
| zeefly  | zeefly.aSep08  |        | 1663  | 838  |   | 65   | putative protein (7.2 kD) (zeefly) mRNA.                                                        |
| zeegar  | zeegar.aSep08  |        | 5420  | 354  |   | 64   | polyprotein (zeegar) mRNA.                                                                      |
| zeeja   | zeeja.bSep08   |        | 2307  | 444  | 2 | 63   | putative protein (zeeja) alternative variant bSep08, mRNA.                                      |
| zeejey  | zeejey.aSep08  |        | 12899 | 315  |   | 56   | putative protein (zeejey) mRNA.                                                                 |
| zeekee  | zeekee.aSep08  |        | 3400  | 403  |   | 79   | putative secreted or extracellular protein precursor (8.8 kD) (zeekee) mRNA.                    |
| zeekler | zeekler.aSep08 |        | 7928  | 923  |   | 43   | putative protein (5.0 kD) (zeekler) mRNA.                                                       |
| zeelo   | zeelo.aSep08   |        | 2100  | 588  |   | 31   | putative protein (3.4 kD) (zeelo) mRNA.                                                         |
| zeemee  | zeemee.aSep08  |        | 9913  | 1343 |   | 447  | nuclear receptor co-repressor (zeemee) mRNA.                                                    |
| zeenoy  | zeenoy.aSep08  |        | 5423  | 699  |   | 83   | putative cytoplasmic protein (9.6 kD) (zeenoy) mRNA.                                            |
| zeepor  | zeepor.aSep08  |        | 12118 | 268  |   | 36   | putative protein (4.1 kD) (zeepor) mRNA.                                                        |
| zeesa   | zeesa.bSep08   |        | 2422  | 373  | 4 | 37   | putative protein (zeesa) alternative variant bSep08, mRNA.                                      |
| zeeshee | zeeshee.aSep08 |        | 3485  | 342  |   | 113  | cingulin (zeeshee) mRNA.                                                                        |
| zeetu   | zeetu.aSep08   |        | 62255 | 571  |   | 190  | oligomeric golgi complex (zeetu) mRNA.                                                          |
| zeevar  | zeevar.aSep08  |        | 1961  | 783  |   | 40   | chromodomain helicase DNA binding protein 5 like (zeevar) mRNA.                                 |
| zeevo   | zeevo.aSep08   |        | 4371  | 356  |   | 118  | nuclear receptor coactivator 2 (zeevo) mRNA.                                                    |
| zeewey  | zeewey.aSep08  |        | 5415  | 729  |   | 90   | putative protein (zeewey) mRNA.                                                                 |

|         |                |        |       |      |   |     |                                                                                       |
|---------|----------------|--------|-------|------|---|-----|---------------------------------------------------------------------------------------|
| Zer1    | Zer1.aSep08    | 311842 | 9310  | 1257 | 9 | 359 | zyg-11 homolog B -like (Zer1) alternative variant aSep08, mRNA.                       |
| Zer1    | Zer1.bSep08    | 311842 | 3087  | 1688 | 2 | 74  | zyg-11 homolog B -like (Zer1) alternative variant bSep08, mRNA.                       |
| zerbor  | zerbor.aSep08  |        | 5607  | 4276 |   | 153 | binding protein 1 like (zerbor) mRNA.                                                 |
| zerby   | zerby.aSep08   |        | 3029  | 1106 |   | 111 | putative protein (11.8 kD) (zerby) mRNA.                                              |
| zerchy  | zerchy.aSep08  |        | 1296  | 336  |   | 112 | transient receptor potential cation channel subfamily M member 7 (zerchy) mRNA.       |
| zerdar  | zerdar.aSep08  |        | 8751  | 497  |   | 45  | putative protein (5.0 kD) (zerdar) mRNA.                                              |
| zerdoy  | zerdoy.aSep08  |        | 11982 | 261  |   | 87  | putative protein (zerdoy) mRNA.                                                       |
| zerflu  | zerflu.aSep08  |        | 2832  | 269  |   | 89  | CRA a like (zerflu) mRNA.                                                             |
| zerfly  | zerfly.aSep08  |        | 18393 | 742  |   | 49  | putative protein (zerfly) mRNA.                                                       |
| zergar  | zergar.aSep08  |        | 3942  | 545  |   | 126 | CRA a (zergar) mRNA.                                                                  |
| zerja   | zerja.aSep08   |        | 4205  | 861  | 3 | 141 | PHD finger protein 11 (zerja) alternative variant aSep08, mRNA.                       |
| zerjey  | zerjey.aSep08  |        | 656   | 312  |   | 28  | putative protein (zerjey) mRNA.                                                       |
| zerkee  | zerkee.aSep08  |        | 12527 | 711  |   | 86  | centrosomal protein (zerkee) mRNA.                                                    |
| zerkler | zerkler.aSep08 |        | 6491  | 397  |   | 131 | odd Oz ten-m homolog 3 (zerkler) mRNA.                                                |
| zerlo   | zerlo.aSep08   |        | 6772  | 361  |   | 70  | putative protein of mammalian origin (zerlo) mRNA.                                    |
| zermee  | zermee.aSep08  |        | 18773 | 817  | 4 | 271 | nuclear receptor co-repressor 1 (zermee) alternative variant aSep08, mRNA.            |
| zermee  | zermee.bSep08  |        | 9098  | 411  | 1 | 136 | putative protein of vertebrate origin (zermee) alternative variant bSep08, mRNA.      |
| zernoy  | zernoy.aSep08  |        | 24302 | 1165 |   | 222 | histone deacetylase 4 (zernoy) mRNA.                                                  |
| zerpor  | zerpor.aSep08  |        | 8353  | 974  |   | 166 | ataxia telangiectasia Rad3 related (zerpor) mRNA.                                     |
| zersa   | zersa.aSep08   |        | 4819  | 678  |   | 33  | putative protein (zersa) mRNA.                                                        |
| zershee | zershee.aSep08 |        | 17774 | 664  | 2 | 58  | putative protein (zershee) alternative variant aSep08, mRNA.                          |
| zershee | zershee.bSep08 |        | 856   | 753  | 1 | 44  | putative protein (zershee) alternative variant bSep08, mRNA.                          |
| zertu   | zertu.aSep08   |        | 79596 | 1227 | 3 | 319 | oligomeric golgi complex (35.4 kD) (zertu) alternative variant aSep08, mRNA.          |
| zertu   | zertu.bSep08   |        | 27491 | 514  | 1 | 132 | oligomeric golgi complex (zertu) alternative variant bSep08, mRNA.                    |
| zervar  | zervar.aSep08  |        | 5185  | 717  |   | 64  | putative protein (zervar) mRNA.                                                       |
| zervo   | zervo.aSep08   |        | 773   | 417  |   | 138 | nuclear receptor coactivator 2 (zervo) mRNA.                                          |
| zerwey  | zerwey.aSep08  |        | 8902  | 619  | 2 | 43  | putative protein (5.0 kD) (zerwey) alternative variant aSep08, mRNA.                  |
| zerwey  | zerwey.bSep08  |        | 1944  | 430  | 1 | 38  | putative protein (4.4 kD) (zerwey) alternative variant bSep08, mRNA.                  |
| zeybor  | zeybor.aSep08  |        | 1629  | 304  | 2 | 76  | putative protein (zeybor) mRNA.                                                       |
| zeychy  | zeychy.aSep08  |        | 1677  | 279  |   | 93  | transient receptor potential cation channel subfamily m member 7 CRA b (zeychy) mRNA. |
| zeydar  | zeydar.aSep08  |        | 3137  | 366  | 2 | 37  | putative protein (zeydar) alternative variant aSep08, mRNA.                           |

|            |                   |  |       |      |   |     |                                                                              |
|------------|-------------------|--|-------|------|---|-----|------------------------------------------------------------------------------|
| zeydar     | zeydar.bSep08     |  | 3100  | 307  | 2 | 34  | putative protein (zeydar) alternative variant bSep08, mRNA.                  |
| zeydoy     | zeydoy.aSep08     |  | 2568  | 1115 |   | 52  | putative protein (5.7 kD) (zeydoy) mRNA.                                     |
| zeyflu     | zeyflu.aSep08     |  | 2754  | 333  |   | 110 | CRA a (zeyflu) mRNA.                                                         |
| zeyfly     | zeyfly.aSep08     |  | 3948  | 907  |   | 72  | putative mitochondrial protein (7.7 kD) (zeyfly) mRNA.                       |
| zeygar     | zeygar.aSep08     |  | 13140 | 1287 | 2 | 428 | CRA c (zeygar) alternative variant aSep08, mRNA.                             |
| zeygar     | zeygar.bSep08     |  | 3752  | 764  | 1 | 173 | CRA a (zeygar) alternative variant bSep08, mRNA.                             |
| zeyja      | zeyja.aSep08      |  | 9073  | 961  | 5 | 220 | SET domain bifurcated protein (zeyja) alternative variant aSep08, mRNA.      |
| zeyja      | zeyja.bSep08      |  | 13220 | 370  | 4 | 123 | SET domain bifurcated protein (zeyja) alternative variant bSep08, mRNA.      |
| zeyjey     | zeyjey.aSep08     |  | 686   | 360  |   | 111 | putative protein (zeyjey) mRNA.                                              |
| zeykee     | zeykee.aSep08     |  | 2195  | 692  |   | 230 | centrosomal protein 170kDa (zeykee) mRNA.                                    |
| zeykler    | zeykler.aSep08    |  | 2837  | 400  |   | 71  | putative mitochondrial protein (7.8 kD) (zeykler) mRNA.                      |
| zeylo      | zeylo.aSep08      |  | 8659  | 820  | 3 | 54  | putative protein (6.3 kD) (zeylo) alternative variant aSep08, mRNA.          |
| zeylo      | zeylo.bSep08      |  | 8747  | 185  | 2 | 22  | putative protein (zeylo) alternative variant bSep08, mRNA.                   |
| zeymee     | zeymee.aSep08     |  | 5290  | 326  |   | 108 | nuclear receptor co-repressor 1 (zeymee) mRNA.                               |
| zeynoy     | zeynoy.aSep08     |  | 16715 | 519  |   | 72  | histone deacetylase 4 (zeynoy) mRNA.                                         |
| zeypor     | zeypor.aSep08     |  | 1773  | 709  |   | 129 | 5'-3' exoribonuclease 1 (zeypor) mRNA.                                       |
| zeyroy     | zeyroy.aSep08     |  | 2953  | 376  |   | 35  | putative protein (3.8 kD) (zeyroy) mRNA.                                     |
| zeysa      | zeysa.aSep08      |  | 2940  | 409  |   | 135 | AT rich interactive domain 2 (zeysa) mRNA.                                   |
| zeyshee    | zeyshee.aSep08    |  | 14182 | 658  | 3 | 35  | putative protein (4.1 kD) (zeyshee) alternative variant aSep08, mRNA.        |
| zeytu      | zeytu.aSep08      |  | 3106  | 375  |   | 107 | catalytic gamma polypeptide (zeytu) mRNA.                                    |
| zeyvar     | zeyvar.aSep08     |  | 2732  | 731  |   | 92  | putative protein (10.1 kD) (zeyvar) mRNA.                                    |
| zeyvo      | zeyvo.aSep08      |  | 2884  | 667  |   | 44  | putative protein (5.2 kD) (zeyvo) mRNA.                                      |
| zeywey     | zeywey.aSep08     |  | 22333 | 554  |   | 82  | putative protein of mammalian origin (zeywey) mRNA.                          |
| zf-AD.0    | zf-AD.0.aSep08    |  | 4495  | 1000 |   | 333 | zinc finger protein 276 (zf-AD.0) mRNA.                                      |
| zf-B_box.0 | zf-B_box.0.aSep08 |  | 62824 | 781  |   | 260 | tripartite motif-containing (zf-B_box.0) mRNA.                               |
| zf-C2H2.0  | zf-C2H2.0.aSep08  |  | 1314  | 1183 |   | 394 | transcription factor yy2 (zf-C2H2.0) mRNA.                                   |
| zf-C2H2.1  | zf-C2H2.1.aSep08  |  | 1466  | 394  |   | 131 | zinc finger, C2H2-type (zf-C2H2.1) mRNA.                                     |
| zf-C2H2.3  | zf-C2H2.3.aSep08  |  | 2887  | 900  |   | 224 | zinc finger protein 187 (zf-C2H2.3) mRNA.                                    |
| zf-C2H2.16 | zf-C2H2.16.aSep08 |  | 3355  | 2745 |   | 486 | CRA a (56.9 kD) (zf-C2H2.16) mRNA.                                           |
| zf-C2H2.17 | zf-C2H2.17.aSep08 |  | 11949 | 907  |   | 36  | CRA b like (4.1 kD) (zf-C2H2.17) mRNA.                                       |
| zf-C2H2.38 | zf-C2H2.38.aSep08 |  | 19669 | 910  | 3 | 201 | zinc finger, C2H2-type (zf-C2H2.38) alternative variant aSep08, mRNA.        |
| zf-C2H2.38 | zf-C2H2.38.bSep08 |  | 18104 | 453  | 1 | 39  | putative protein (zf-C2H2.38) alternative variant bSep08, mRNA.              |
| zf-C2H2.45 | zf-C2H2.45.aSep08 |  | 11829 | 515  | 4 | 123 | CRA c like (zf-C2H2.45) alternative variant aSep08, mRNA.                    |
| zf-C2H2.52 | zf-C2H2.52.aSep08 |  | 3997  | 591  | 2 | 197 | zinc finger protein 406 CRA a (zf-C2H2.52) alternative variant aSep08, mRNA. |
| zf-C2H2.52 | zf-C2H2.52.bSep08 |  | 30067 | 444  | 3 | 106 | zinc finger (zf-C2H2.52) alternative variant bSep08, mRNA.                   |

|            |                   |  |       |      |    |     |                                                                                                |
|------------|-------------------|--|-------|------|----|-----|------------------------------------------------------------------------------------------------|
| zf-C2H2.52 | zf-C2H2.52.cSep08 |  | 22217 | 374  | 2  | 103 | zinc finger (zf-C2H2.52) alternative variant cSep08, mRNA.                                     |
| zf-C2H2.53 | zf-C2H2.53.aSep08 |  | 6552  | 3715 | 2  | 152 | zinc finger protein 740 (17.9 kD) (zf-C2H2.53) alternative variant aSep08, mRNA.               |
| zf-C2H2.53 | zf-C2H2.53.bSep08 |  | 3202  | 801  | 1  | 92  | putative protein (zf-C2H2.53) alternative variant bSep08, mRNA.                                |
| zf-C2H2.64 | zf-C2H2.64.aSep08 |  | 2259  | 558  |    | 137 | zinc finger, C2H2-type (zf-C2H2.64) mRNA.                                                      |
| zf-C2H2.65 | zf-C2H2.65.aSep08 |  | 1591  | 781  |    | 260 | zinc finger protein 462 CRA c (zf-C2H2.65) mRNA.                                               |
| zf-C2H2.66 | zf-C2H2.66.aSep08 |  | 12237 | 372  |    | 123 | zinc finger (zf-C2H2.66) mRNA.                                                                 |
| zf-C2H2.67 | zf-C2H2.67.aSep08 |  | 1377  | 487  |    | 118 | zinc finger, C2H2-type (zf-C2H2.67) mRNA.                                                      |
| zf-C2H2.74 | zf-C2H2.74.aSep08 |  | 5530  | 714  | 1  | 115 | putative protein (12.1 kD) (zf-C2H2.74) alternative variant aSep08, mRNA.                      |
| zf-C2H2.74 | zf-C2H2.74.bSep08 |  | 6092  | 1533 | 1  | 115 | putative protein (12.1 kD) (zf-C2H2.74) alternative variant bSep08, mRNA.                      |
| zf-C2H2.77 | zf-C2H2.77.aSep08 |  | 3376  | 1299 |    | 208 | zinc finger protein 341 (zf-C2H2.77) mRNA.                                                     |
| zf-C2H2.78 | zf-C2H2.78.aSep08 |  | 3241  | 881  | 6  | 293 | zinc finger protein 335 (zf-C2H2.78) alternative variant aSep08, mRNA.                         |
| zf-C2H2.79 | zf-C2H2.79.aSep08 |  | 5198  | 732  |    | 244 | zinc finger protein 335 (zf-C2H2.79) mRNA.                                                     |
| zf-C2H2.86 | zf-C2H2.86.aSep08 |  | 4167  | 3173 |    | 497 | zinc finger protein 687 (zf-C2H2.86) mRNA.                                                     |
| zf-C2H2.90 | zf-C2H2.90.aSep08 |  | 5055  | 3010 |    | 574 | pleiomorphic adenoma gene-like 1 (zf-C2H2.90) mRNA.                                            |
| zf-C2H2.91 | zf-C2H2.91.aSep08 |  | 3151  | 2255 | 2  | 448 | KRAB box and zinc finger, C2H2-type (zf-C2H2.91) alternative variant aSep08, mRNA.             |
| zf-C2H2.91 | zf-C2H2.91.bSep08 |  | 15277 | 3356 | 5  | 211 | zinc finger, C2H2-type (24.5 kD) (zf-C2H2.91) alternative variant bSep08, complete mRNA.       |
| zf-C2H2.91 | zf-C2H2.91.eSep08 |  | 4435  | 552  | 4  | 24  | putative protein (2.8 kD) (zf-C2H2.91) alternative variant eSep08, mRNA.                       |
| zf-C2H2.92 | zf-C2H2.92.aSep08 |  | 3926  | 200  | 2  | 66  | putative protein (zf-C2H2.92) alternative variant aSep08, mRNA.                                |
| zf-C2H2.92 | zf-C2H2.92.bSep08 |  | 3642  | 1175 | 2  | 72  | zinc finger, C2H2-type (zf-C2H2.92) alternative variant bSep08, mRNA.                          |
| zf-C2H2.92 | zf-C2H2.92.cSep08 |  | 15949 | 673  | 6  | 65  | putative protein (zf-C2H2.92) alternative variant cSep08, mRNA.                                |
| zf-C2H2.93 | zf-C2H2.93.aSep08 |  | 9230  | 762  |    | 219 | zinc finger, C2H2-type (zf-C2H2.93) mRNA.                                                      |
| zf-C2H2.94 | zf-C2H2.94.aSep08 |  | 9335  | 575  |    | 191 | zinc finger protein 780B (zf-C2H2.94) mRNA.                                                    |
| zf-C2H2.95 | zf-C2H2.95.aSep08 |  | 10828 | 514  |    | 66  | CRA a like (zf-C2H2.95) mRNA.                                                                  |
| zf-C2H2.96 | zf-C2H2.96.aSep08 |  | 2834  | 280  | 2  | 68  | CRA a like (zf-C2H2.96) alternative variant aSep08, mRNA.                                      |
| zf-C2H2.97 | zf-C2H2.97.aSep08 |  | 7640  | 353  | 3  | 55  | putative protein (6.1 kD) (zf-C2H2.97) alternative variant aSep08, mRNA.                       |
| zf-C2H2.97 | zf-C2H2.97.bSep08 |  | 11204 | 825  | 3  | 52  | putative protein (5.8 kD) (zf-C2H2.97) alternative variant bSep08, mRNA.                       |
| zf-C2H2.97 | zf-C2H2.97.dSep08 |  | 9672  | 199  | 2  | 29  | putative protein (zf-C2H2.97) alternative variant dSep08, mRNA.                                |
| zf-C2H2.98 | zf-C2H2.98.aSep08 |  | 11438 | 888  |    | 222 | zinc finger, C2H2-type (zf-C2H2.98) mRNA.                                                      |
| zf-C2HC5.0 | zf-C2HC5.0.aSep08 |  | 90177 | 3798 | 15 | 685 | thyroid hormone receptor interactor 4 (77.6 kD) (zf-C2HC5.0) alternative variant aSep08, mRNA. |

|            |                   |        |       |      |   |     |                                                                                                             |
|------------|-------------------|--------|-------|------|---|-----|-------------------------------------------------------------------------------------------------------------|
| zf-C2HC5.0 | zf-C2HC5.0.bSep08 |        | 34478 | 676  | 5 | 225 | thyroid hormone receptor interactor 4 (zf-C2HC5.0) alternative variant bSep08, mRNA.                        |
| zf-C2HC5.0 | zf-C2HC5.0.cSep08 |        | 8246  | 746  | 4 | 173 | thyroid hormone receptor interactor 4 (zf-C2HC5.0) alternative variant cSep08, mRNA.                        |
| zf-C2HC5.0 | zf-C2HC5.0.dSep08 |        | 6698  | 689  | 2 | 35  | thyroid hormone receptor interactor 4 (4.0 kD) (zf-C2HC5.0) alternative variant dSep08, mRNA.               |
| zf-C3HC4.2 | zf-C3HC4.2.aSep08 |        | 6868  | 716  | 2 | 238 | putative protein of mammalian origin (zf-C3HC4.2) alternative variant aSep08, mRNA.                         |
| zf-C3HC4.2 | zf-C3HC4.2.bSep08 |        | 10682 | 821  | 2 | 234 | ring finger WD repeat domain 3 (zf-C3HC4.2) alternative variant bSep08, mRNA.                               |
| zf-C3HC4.3 | zf-C3HC4.3.aSep08 |        | 2207  | 865  |   | 175 | LON peptidase N-terminal domain ring finger 1 (zf-C3HC4.3) mRNA.                                            |
| zf-C3HC4.4 | zf-C3HC4.4.aSep08 |        | 38009 | 1529 | 1 | 326 | ring finger WD repeat domain 2 CRA a (zf-C3HC4.4) alternative variant aSep08, mRNA.                         |
| zf-C3HC4.4 | zf-C3HC4.4.bSep08 |        | 37218 | 726  | 1 | 241 | ring finger WD repeat domain 2 CRA a (zf-C3HC4.4) alternative variant bSep08, mRNA.                         |
| zf-C3HC4.5 | zf-C3HC4.5.aSep08 |        | 3697  | 730  |   | 242 | CRA a (zf-C3HC4.5) mRNA.                                                                                    |
| zf-C3HC4.6 | zf-C3HC4.6.aSep08 |        | 1523  | 365  |   | 121 | cas-Br-M ecotropic retroviral transforming sequence (zf-C3HC4.6) mRNA.                                      |
| zf-C4.0    | zf-C4.0.aSep08    |        | 2220  | 361  |   | 120 | steroidogenic factor 1 (zf-C4.0) mRNA.                                                                      |
| zf-CCCH.0  | zf-CCCH.0.aSep08  |        | 11232 | 636  |   | 187 | small nuclear auxiliary factor 2 RNA 1-like (zf-CCCH.0) mRNA.                                               |
| zf-CCCH.1  | zf-CCCH.1.aSep08  |        | 18704 | 616  | 2 | 204 | zinc finger, CCCH-type (zf-CCCH.1) alternative variant aSep08, mRNA.                                        |
| zf-CCHC.6  | zf-CCHC.6.aSep08  |        | 5366  | 947  |   | 315 | retinoblastoma binding protein 6 like (zf-CCHC.6) mRNA.                                                     |
| zf-CHCC.0  | zf-CHCC.0.aSep08  |        | 493   | 235  | 2 | 31  | nadh dehydrogenase protein 6 (zf-CHCC.0) alternative variant aSep08, mRNA.                                  |
| zf-CXXC.0  | zf-CXXC.0.aSep08  |        | 643   | 389  |   | 129 | myeloid lymphoid leukemia like (zf-CXXC.0) mRNA.                                                            |
| zf-DHHC.0  | zf-DHHC.0.bSep08  | 308081 | 31408 | 1351 | 1 | 195 | putative protein of metazoan origin (zf-DHHC.0) alternative variant bSep08, mRNA.                           |
| zf-HIT.0   | zf-HIT.0.aSep08   |        | 6275  | 893  | 4 | 153 | zinc finger HIT 1 (17.4 kD) (zf-HIT.0) alternative variant aSep08, mRNA.                                    |
| zf-HIT.0   | zf-HIT.0.cSep08   |        | 3110  | 669  | 2 | 102 | putative secreted or extracellular protein precursor (10.7 kD) (zf-HIT.0) alternative variant cSep08, mRNA. |
| zf-HIT.0   | zf-HIT.0.dSep08   |        | 762   | 478  | 2 | 91  | zinc finger HIT 1 (zf-HIT.0) alternative variant dSep08, mRNA.                                              |
| zf-NF-X1.0 | zf-NF-X1.0.aSep08 |        | 712   | 403  |   | 134 | nuclear transcription factor X-box binding-like 1 CRA d (zf-NF-X1.0) mRNA.                                  |
| zf-TAZ.0   | zf-TAZ.0.aSep08   |        | 1208  | 289  |   | 96  | E1A binding protein p300 like (zf-TAZ.0) mRNA.                                                              |
| zf-UBP.0   | zf-UBP.0.aSep08   |        | 18068 | 1531 | 7 | 453 | ubiquitin specific 33 (zf-UBP.0) alternative variant aSep08, mRNA.                                          |
| zf-UBP.0   | zf-UBP.0.bSep08   |        | 4156  | 739  | 1 | 153 | ubiquitin specific 33 (zf-UBP.0) alternative variant bSep08, mRNA.                                          |
| Zfand1     | Zfand1.aSep08     | 361917 | 4080  | 367  |   | 121 | zinc finger, AN1-type domain 1 (Zfand1) mRNA.                                                               |
| Zfand2a    | Zfand2a.bSep08    | 360772 | 2720  | 585  | 3 | 120 | zinc finger, AN1-type domain 2A (Zfand2a) alternative variant bSep08, mRNA.                                 |

|              |                     |        |       |      |   |     |                                                                                                                        |
|--------------|---------------------|--------|-------|------|---|-----|------------------------------------------------------------------------------------------------------------------------|
| Zfand2b      | Zfand2b.bSep08      | 363253 | 1141  | 409  | 5 | 135 | zinc finger, AN1 type domain 2B (Zfand2b) alternative variant bSep08, mRNA.                                            |
| Zfand2b      | Zfand2b.cSep08      | 363253 | 1115  | 386  | 5 | 128 | zinc finger, AN1 type domain 2B (Zfand2b) alternative variant cSep08, mRNA.                                            |
| Zfand2b      | Zfand2b.dSep08      | 363253 | 1151  | 592  | 4 | 89  | zinc finger, AN1 type domain 2B (Zfand2b) alternative variant dSep08, mRNA.                                            |
| Zfand2b      | Zfand2b.eSep08      | 363253 | 609   | 397  | 2 | 76  | zinc finger, AN1 type domain 2B (Zfand2b) alternative variant eSep08, mRNA.                                            |
| Zfand2b      | Zfand2b.fSep08      | 363253 | 1082  | 423  | 4 | 69  | zinc finger, AN1 type domain 2B (Zfand2b) alternative variant fSep08, mRNA.                                            |
| Zfand3       | Zfand3.bSep08       | 361816 | 16811 | 1286 | 1 | 114 | zinc finger, AN1-type domain 3 (13.2 kD) (Zfand3) alternative variant bSep08, mRNA.                                    |
| Zfand5       | Zfand5.aSep08       | 293960 | 9767  | 2684 | 6 | 298 | zinc finger, AN1-type domain 5 and hypothetical protein LOC679612 (32.3 kD) (Zfand5) alternative variant aSep08, mRNA. |
| Zfand5       | Zfand5.aSep08       | 679612 | 9767  | 2684 | 6 | 298 | zinc finger, AN1-type domain 5 and hypothetical protein LOC679612 (32.3 kD) (Zfand5) alternative variant aSep08, mRNA. |
| Zfand5       | Zfand5.bSep08       | 293960 | 3774  | 744  | 4 | 131 | zinc finger, AN1-type domain 5 and hypothetical protein LOC679612 (Zfand5) alternative variant bSep08, mRNA.           |
| Zfand5       | Zfand5.bSep08       | 679612 | 3774  | 744  | 4 | 131 | zinc finger, AN1-type domain 5 and hypothetical protein LOC679612 (Zfand5) alternative variant bSep08, mRNA.           |
| Zfand6andFah | Zfand6andFah.cSep08 | 29383  | 13890 | 811  | 8 | 234 | fumarylacetoacetate hydrolase (Zfand6andFah) alternative variant cSep08, mRNA.                                         |
| Zfand6andFah | Zfand6andFah.cSep08 | 293067 | 13890 | 811  | 8 | 234 | fumarylacetoacetate hydrolase (Zfand6andFah) alternative variant cSep08, mRNA.                                         |
| Zfand6andFah | Zfand6andFah.dSep08 | 29383  | 63191 | 1095 | 7 | 223 | zinc finger domain (24.0 kD) (Zfand6andFah) alternative variant dSep08, mRNA.                                          |
| Zfand6andFah | Zfand6andFah.dSep08 | 293067 | 63191 | 1095 | 7 | 223 | zinc finger domain (24.0 kD) (Zfand6andFah) alternative variant dSep08, mRNA.                                          |
| Zfand6andFah | Zfand6andFah.eSep08 | 29383  | 74117 | 839  | 6 | 208 | zinc finger domain (22.5 kD) (Zfand6andFah) alternative variant eSep08, mRNA.                                          |
| Zfand6andFah | Zfand6andFah.eSep08 | 293067 | 74117 | 839  | 6 | 208 | zinc finger domain (22.5 kD) (Zfand6andFah) alternative variant eSep08, mRNA.                                          |
| Zfand6andFah | Zfand6andFah.fSep08 | 29383  | 60781 | 567  | 6 | 188 | zinc finger domain (Zfand6andFah) alternative variant fSep08, mRNA.                                                    |
| Zfand6andFah | Zfand6andFah.fSep08 | 293067 | 60781 | 567  | 6 | 188 | zinc finger domain (Zfand6andFah) alternative variant fSep08, mRNA.                                                    |
| Zfand6andFah | Zfand6andFah.gSep08 | 29383  | 72095 | 744  | 6 | 174 | zinc finger domain (Zfand6andFah) alternative variant gSep08, mRNA.                                                    |
| Zfand6andFah | Zfand6andFah.gSep08 | 293067 | 72095 | 744  | 6 | 174 | zinc finger domain (Zfand6andFah) alternative variant gSep08, mRNA.                                                    |
| Zfand6andFah | Zfand6andFah.hSep08 | 29383  | 72004 | 807  | 7 | 172 | zinc finger domain 6 CRA b (Zfand6andFah) alternative variant hSep08, mRNA.                                            |
| Zfand6andFah | Zfand6andFah.hSep08 | 293067 | 72004 | 807  | 7 | 172 | zinc finger domain 6 CRA b (Zfand6andFah) alternative variant hSep08, mRNA.                                            |



|              |                     |        |       |      |   |     |                                                                              |
|--------------|---------------------|--------|-------|------|---|-----|------------------------------------------------------------------------------|
| Zfand6andFah | Zfand6andFah.iSep08 | 29383  | 60799 | 746  | 7 | 171 | zinc finger domain (Zfand6andFah) alternative variant iSep08, mRNA.          |
| Zfand6andFah | Zfand6andFah.iSep08 | 293067 | 60799 | 746  | 7 | 171 | zinc finger domain (Zfand6andFah) alternative variant iSep08, mRNA.          |
| Zfand6andFah | Zfand6andFah.jSep08 | 29383  | 71996 | 761  | 6 | 145 | zinc finger domain (Zfand6andFah) alternative variant jSep08, mRNA.          |
| Zfand6andFah | Zfand6andFah.jSep08 | 293067 | 71996 | 761  | 6 | 145 | zinc finger domain (Zfand6andFah) alternative variant jSep08, mRNA.          |
| Zfand6andFah | Zfand6andFah.kSep08 | 29383  | 60754 | 643  | 6 | 145 | zinc finger domain (Zfand6andFah) alternative variant kSep08, mRNA.          |
| Zfand6andFah | Zfand6andFah.kSep08 | 293067 | 60754 | 643  | 6 | 145 | zinc finger domain (Zfand6andFah) alternative variant kSep08, mRNA.          |
| Zfand6andFah | Zfand6andFah.lSep08 | 29383  | 52099 | 388  | 4 | 128 | zinc finger domain (Zfand6andFah) alternative variant lSep08, mRNA.          |
| Zfand6andFah | Zfand6andFah.lSep08 | 293067 | 52099 | 388  | 4 | 128 | zinc finger domain (Zfand6andFah) alternative variant lSep08, mRNA.          |
| Zfand6andFah | Zfand6andFah.mSep08 | 29383  | 26716 | 780  | 3 | 58  | zinc finger domain 6 (Zfand6andFah) alternative variant mSep08, mRNA.        |
| Zfand6andFah | Zfand6andFah.mSep08 | 293067 | 26716 | 780  | 3 | 58  | zinc finger domain 6 (Zfand6andFah) alternative variant mSep08, mRNA.        |
| Zfand6andFah | Zfand6andFah.nSep08 | 29383  | 3992  | 2110 | 2 | 58  | zinc finger domain (6.6 kD) (Zfand6andFah) alternative variant nSep08, mRNA. |
| Zfand6andFah | Zfand6andFah.nSep08 | 293067 | 3992  | 2110 | 2 | 58  | zinc finger domain (6.6 kD) (Zfand6andFah) alternative variant nSep08, mRNA. |
| Zfand6andFah | Zfand6andFah.oSep08 | 29383  | 63285 | 749  | 6 | 98  | zinc finger domain (Zfand6andFah) alternative variant oSep08, mRNA.          |
| Zfand6andFah | Zfand6andFah.oSep08 | 293067 | 63285 | 749  | 6 | 98  | zinc finger domain (Zfand6andFah) alternative variant oSep08, mRNA.          |
| Zfand6andFah | Zfand6andFah.qSep08 | 29383  | 4869  | 625  | 5 | 59  | putative protein (Zfand6andFah) alternative variant qSep08, mRNA.            |
| Zfand6andFah | Zfand6andFah.qSep08 | 293067 | 4869  | 625  | 5 | 59  | putative protein (Zfand6andFah) alternative variant qSep08, mRNA.            |
| Zfat         | Zfat.aSep08         | 362925 | 90637 | 1786 |   | 390 | zinc finger protein 406 CRA b (Zfat) alternative variant aSep08, mRNA.       |
| Zfat         | Zfat.bSep08         | 362925 | 25287 | 1154 |   | 179 | zinc finger (Zfat) alternative variant bSep08, mRNA.                         |
| Zfhx2        | Zfhx2.bSep08        | 305888 | 2359  | 395  | 1 | 131 | zinc finger homeobox 2 (Zfhx2) alternative variant bSep08, mRNA.             |
| Zfhx3        | Zfhx3.aSep08        | 307829 | 4882  | 827  |   | 275 | zinc finger homeobox 3 (Zfhx3) mRNA.                                         |
| Zfhx4        | Zfhx4.aSep08        | 310250 | 8084  | 612  |   | 203 | zinc finger homeodomain 4 (Zfhx4) mRNA.                                      |
| Zfml         | Zfml.bSep08         | 312491 | 13078 | 1378 | 2 | 459 | zinc finger, matrin-like (Zfml) alternative variant bSep08, mRNA.            |
| Zfml         | Zfml.cSep08         | 312491 | 9165  | 1834 | 5 | 420 | zinc finger, matrin-like (47.2 kD) (Zfml) alternative variant cSep08, mRNA.  |
| Zfml         | Zfml.dSep08         | 312491 | 5395  | 605  | 4 | 119 | zinc finger, matrin-like (Zfml) alternative variant dSep08, mRNA.            |
| Zfml         | Zfml.eSep08         | 312491 | 2983  | 544  | 3 | 99  | zinc finger, matrin-like (Zfml) alternative variant eSep08, mRNA.            |

|         |                |        |       |      |   |     |                                                                                     |
|---------|----------------|--------|-------|------|---|-----|-------------------------------------------------------------------------------------|
| Zfp12   | Zfp12.aSep08   | 288486 | 17400 | 567  |   | 125 | zinc finger protein 12 (13.6 kD) (Zfp12) mRNA.                                      |
| Zfp28   | Zfp28.aSep08   | 502294 | 6245  | 413  |   | 120 | zinc finger protein 28 (Zfp28) mRNA.                                                |
| Zfp36l1 | Zfp36l1.bSep08 | 29344  | 3328  | 2837 | 2 | 309 | zinc finger protein 36, C3H type-like 1 (Zfp36l1) alternative variant bSep08, mRNA. |
| Zfp37   | Zfp37.bSep08   | 115768 | 32249 | 3162 | 3 | 559 | zinc finger protein 37 (63.4 kD) (Zfp37) alternative variant bSep08, mRNA.          |
| Zfp37   | Zfp37.cSep08   | 115768 | 32900 | 3342 | 4 | 134 | zinc finger protein 37 (Zfp37) alternative variant cSep08, mRNA.                    |
| Zfp37   | Zfp37.dSep08   | 115768 | 4019  | 472  | 2 | 70  | zinc finger protein 37 (Zfp37) alternative variant dSep08, mRNA.                    |
| Zfp40   | Zfp40.aSep08   | 690661 | 22454 | 3192 | 4 | 730 | zinc finger protein 40 (86.0 kD) (Zfp40) alternative variant aSep08, mRNA.          |
| Zfp40   | Zfp40.bSep08   | 690661 | 4273  | 411  | 3 | 137 | zinc finger protein 40 (Zfp40) alternative variant bSep08, mRNA.                    |
| Zfp40   | Zfp40.dSep08   | 690661 | 33513 | 264  | 4 | 87  | zinc finger protein 40 (Zfp40) alternative variant dSep08, mRNA.                    |
| Zfp40   | Zfp40.eSep08   | 690661 | 76785 | 1783 | 4 | 80  | zinc finger protein 40 (Zfp40) alternative variant eSep08, mRNA.                    |
| Zfp40   | Zfp40.fSep08   | 690661 | 3041  | 621  | 4 | 42  | zinc finger protein 40 (4.7 kD) (Zfp40) alternative variant fSep08, mRNA.           |
| Zfp40   | Zfp40.gSep08   | 690661 | 15653 | 426  | 4 | 42  | zinc finger protein 40 (4.7 kD) (Zfp40) alternative variant gSep08, mRNA.           |
| Zfp41   | Zfp41.aSep08   | 315081 | 1626  | 386  |   | 42  | zinc finger protein 41 (Zfp41) mRNA.                                                |
| Zfp53   | Zfp53.bSep08   | 308236 | 26677 | 1593 | 4 | 485 | zinc finger protein 53 (Zfp53) alternative variant bSep08, mRNA.                    |
| Zfp53   | Zfp53.cSep08   | 308236 | 18385 | 417  | 3 | 55  | zinc finger protein 53 (6.4 kD) (Zfp53) alternative variant cSep08, mRNA.           |
| Zfp59   | Zfp59.aSep08   | 685610 | 12565 | 589  |   | 195 | zinc finger protein 59 (Zfp59) mRNA.                                                |
| Zfp61   | Zfp61.bSep08   | 499094 | 3517  | 1007 | 5 | 335 | zinc finger protein 61 (Zfp61) alternative variant bSep08, mRNA.                    |
| Zfp61   | Zfp61.cSep08   | 499094 | 2981  | 906  | 4 | 233 | zinc finger protein 61 (Zfp61) alternative variant cSep08, mRNA.                    |
| Zfp61   | Zfp61.dSep08   | 499094 | 2100  | 684  | 3 | 82  | zinc finger protein 61 (9.7 kD) (Zfp61) alternative variant dSep08, mRNA.           |
| Zfp61   | Zfp61.eSep08   | 499094 | 1813  | 686  | 2 | 66  | zinc finger protein 61 (7.2 kD) (Zfp61) alternative variant eSep08, mRNA.           |
| Zfp64   | Zfp64.bSep08   | 311661 | 14577 | 414  | 1 | 138 | zinc finger protein 64 (Zfp64) alternative variant bSep08, mRNA.                    |
| Zfp68   | Zfp68.bSep08   | 304337 | 13885 | 3578 | 1 | 554 | zinc finger protein 68 (64.7 kD) (Zfp68) alternative variant bSep08, mRNA.          |
| Zfp68   | Zfp68.cSep08   | 304337 | 842   | 780  | 2 | 141 | zinc finger protein 68 (Zfp68) alternative variant cSep08, mRNA.                    |
| Zfp74   | Zfp74.aSep08   | 365224 | 1666  | 769  |   | 256 | zinc finger protein 74 (Zfp74) mRNA.                                                |
| Zfp90   | Zfp90.bSep08   | 498945 | 5613  | 543  | 1 | 165 | zinc finger protein 90 (Zfp90) alternative variant bSep08, mRNA.                    |

|        |               |        |        |      |    |     |                                                                                       |
|--------|---------------|--------|--------|------|----|-----|---------------------------------------------------------------------------------------|
| Zfp90  | Zfp90.cSep08  | 498945 | 9637   | 741  | 5  | 102 | zinc finger protein 90 (11.7 kD) (Zfp90) alternative variant cSep08, mRNA.            |
| Zfp91  | Zfp91.aSep08  | 246282 | 36872  | 5211 | 11 | 474 | zinc finger protein 91 (Zfp91) alternative variant aSep08, mRNA.                      |
| Zfp91  | Zfp91.bSep08  | 246282 | 26519  | 735  | 6  | 162 | zinc finger protein 91 (Zfp91) alternative variant bSep08, mRNA.                      |
| Zfp91  | Zfp91.cSep08  | 246282 | 2056   | 340  | 4  | 113 | zinc finger protein 91 (Zfp91) alternative variant cSep08, mRNA.                      |
| Zfp91  | Zfp91.eSep08  | 246282 | 32863  | 476  | 4  | 24  | zinc finger protein 91 (Zfp91) alternative variant eSep08, mRNA.                      |
| Zfp93  | Zfp93.bSep08  | 296399 | 12908  | 718  | 1  | 213 | zinc finger protein 64 (Zfp93) alternative variant bSep08, mRNA.                      |
| Zfp110 | Zfp110.bSep08 | 308362 | 13868  | 1884 | 6  | 292 | zinc finger protein 110 (33.6 kD) (Zfp110) alternative variant bSep08, mRNA.          |
| Zfp131 | Zfp131.bSep08 | 310375 | 27720  | 3077 | 7  | 585 | zinc finger protein 131 (66.7 kD) (Zfp131) alternative variant bSep08, complete mRNA. |
| Zfp131 | Zfp131.dSep08 | 310375 | 14368  | 578  | 4  | 135 | zinc finger protein 131 (Zfp131) alternative variant dSep08, mRNA.                    |
| Zfp131 | Zfp131.eSep08 | 310375 | 2056   | 397  | 2  | 20  | zinc finger protein 131 (2.2 kD) (Zfp131) alternative variant eSep08, mRNA.           |
| Zfp143 | Zfp143.bSep08 | 361627 | 13375  | 688  | 1  | 183 | zinc finger protein 143 (Zfp143) alternative variant bSep08, mRNA.                    |
| Zfp148 | Zfp148.aSep08 | 58820  | 111472 | 4084 | 9  | 800 | zinc finger protein 148 (89.5 kD) (Zfp148) alternative variant aSep08, mRNA.          |
| Zfp157 | Zfp157.aSep08 | 360775 | 25989  | 735  |    | 176 | zinc finger protein 157 (20.0 kD) (Zfp157) mRNA.                                      |
| Zfp167 | Zfp167.aSep08 | 363170 | 7800   | 2148 | 5  | 363 | zinc finger protein 167 (Zfp167) alternative variant aSep08, mRNA.                    |
| Zfp167 | Zfp167.bSep08 | 363170 | 3328   | 761  | 2  | 181 | zinc finger protein 167 (Zfp167) alternative variant bSep08, mRNA.                    |
| Zfp179 | Zfp179.bSep08 | 24916  | 1792   | 672  | 1  | 224 | zinc finger protein 179 (Zfp179) alternative variant bSep08, mRNA.                    |
| Zfp180 | Zfp180.bSep08 | 246279 | 17012  | 641  | 5  | 102 | zinc finger protein 180 (Zfp180) alternative variant bSep08, mRNA.                    |
| Zfp184 | Zfp184.aSep08 | 306966 | 35530  | 1186 | 7  | 274 | zinc finger protein 184 (Kruppel-like) (Zfp184) alternative variant aSep08, mRNA.     |
| Zfp184 | Zfp184.cSep08 | 306966 | 5190   | 638  | 5  | 79  | zinc finger protein 184 (Kruppel-like) (Zfp184) alternative variant cSep08, mRNA.     |
| Zfp185 | Zfp185.aSep08 | 689949 | 4574   | 352  |    | 117 | zinc finger protein 185 (Zfp185) mRNA.                                                |
| Zfp187 | Zfp187.aSep08 | 266792 | 14523  | 954  | 1  | 115 | zinc finger protein 187 (Zfp187) alternative variant aSep08, mRNA.                    |
| Zfp187 | Zfp187.bSep08 | 266792 | 14710  | 389  | 3  | 84  | zinc finger protein 187 (9.0 kD) (Zfp187) alternative variant bSep08, mRNA.           |
| Zfp187 | Zfp187.cSep08 | 266792 | 13874  | 416  | 1  | 98  | zinc finger protein 187 (10.7 kD) (Zfp187) alternative variant cSep08, mRNA.          |
| Zfp191 | Zfp191.bSep08 | 360204 | 9092   | 3223 | 2  | 368 | zinc finger protein 191 (41.9 kD) (Zfp191) alternative variant bSep08, mRNA.          |

|                |                       |        |       |      |    |     |                                                                                          |
|----------------|-----------------------|--------|-------|------|----|-----|------------------------------------------------------------------------------------------|
| Zfp191         | Zfp191.cSep08         | 360204 | 3016  | 773  | 1  | 173 | zinc finger protein 191 (Zfp191) alternative variant cSep08, mRNA.                       |
| Zfp192         | Zfp192.aSep08         | 306974 | 6376  | 652  |    | 216 | zinc finger protein 192 (Zfp192) mRNA.                                                   |
| Zfp207         | Zfp207.bSep08         | 303763 | 9054  | 1263 | 10 | 420 | zinc finger protein 207 (Zfp207) alternative variant bSep08, mRNA.                       |
| Zfp207         | Zfp207.cSep08         | 303763 | 8397  | 1181 | 7  | 262 | zinc finger protein 207 (28.5 kD) (Zfp207) alternative variant cSep08, mRNA.             |
| Zfp207         | Zfp207.dSep08         | 303763 | 9109  | 1405 | 6  | 82  | zinc finger protein 207 (9.1 kD) (Zfp207) alternative variant dSep08, mRNA.              |
| Zfp212         | Zfp212.aSep08         | 297066 | 12353 | 2621 |    | 514 | zinc finger protein 212 (Zfp212) mRNA.                                                   |
| Zfp217         | Zfp217.bSep08         | 311764 | 30518 | 641  | 4  | 32  | zinc finger protein 217 (3.7 kD) (Zfp217) alternative variant bSep08, mRNA.              |
| Zfp219         | Zfp219.cSep08         | 305848 | 11787 | 668  | 3  | 81  | zinc finger protein 219 (8.7 kD) (Zfp219) alternative variant cSep08, mRNA.              |
| Zfp236         | Zfp236.aSep08         | 291409 | 8344  | 418  |    | 138 | zinc finger protein 236 (Zfp236) mRNA.                                                   |
| Zfp251         | Zfp251.aSep08         | 366954 | 689   | 359  |    | 119 | zinc finger protein 251 (Zfp251) mRNA.                                                   |
| Zfp259andBud13 | Zfp259andBud13.bSep08 | 300687 | 14989 | 1583 | 17 | 460 | zinc finger protein 259 (50.5 kD) (Zfp259andBud13) alternative variant bSep08, mRNA.     |
| Zfp259andBud13 | Zfp259andBud13.bSep08 | 500989 | 14989 | 1583 | 17 | 460 | zinc finger protein 259 (50.5 kD) (Zfp259andBud13) alternative variant bSep08, mRNA.     |
| Zfp259andBud13 | Zfp259andBud13.cSep08 | 300687 | 2612  | 660  | 5  | 155 | zinc finger protein 259 (Zfp259andBud13) alternative variant cSep08, mRNA.               |
| Zfp259andBud13 | Zfp259andBud13.cSep08 | 500989 | 2612  | 660  | 5  | 155 | zinc finger protein 259 (Zfp259andBud13) alternative variant cSep08, mRNA.               |
| Zfp259andBud13 | Zfp259andBud13.dSep08 | 300687 | 3068  | 765  | 4  | 111 | zinc finger, ZPR1-type (Zfp259andBud13) alternative variant dSep08, mRNA.                |
| Zfp259andBud13 | Zfp259andBud13.dSep08 | 500989 | 3068  | 765  | 4  | 111 | zinc finger, ZPR1-type (Zfp259andBud13) alternative variant dSep08, mRNA.                |
| Zfp263         | Zfp263.bSep08         | 287076 | 2509  | 399  | 1  | 132 | zinc finger protein 263 (Zfp263) alternative variant bSep08, mRNA.                       |
| Zfp276         | Zfp276.aSep08         | 307924 | 3885  | 1434 | 4  | 234 | zinc finger protein (C2H2 type) 276 (26.8 kD) (Zfp276) alternative variant aSep08, mRNA. |
| Zfp276         | Zfp276.bSep08         | 307924 | 684   | 389  | 1  | 105 | zinc finger protein (C2H2 type) 276 (Zfp276) alternative variant bSep08, mRNA.           |
| Zfp278         | Zfp278.bSep08         | 305471 | 17873 | 2607 | 4  | 409 | zinc finger (Zfp278) alternative variant bSep08, mRNA.                                   |
| Zfp278         | Zfp278.cSep08         | 305471 | 3213  | 753  | 2  | 163 | POZ AT hook containing zinc finger 1 (Zfp278) alternative variant cSep08, mRNA.          |
| Zfp278         | Zfp278.dSep08         | 305471 | 15427 | 1202 | 3  | 160 | zinc finger (17.3 kD) (Zfp278) alternative variant dSep08, mRNA.                         |
| Zfp278         | Zfp278.eSep08         | 305471 | 2412  | 1066 | 2  | 105 | zinc finger (11.5 kD) (Zfp278) alternative variant eSep08, mRNA.                         |
| Zfp282         | Zfp282.aSep08         | 297065 | 23601 | 1993 | 3  | 664 | zinc finger protein 282 (Zfp282) alternative variant aSep08, mRNA.                       |
| Zfp282         | Zfp282.bSep08         | 297065 | 10884 | 732  | 3  | 206 | zinc finger protein 282 (Zfp282) alternative variant bSep08, mRNA.                       |

|                     |                            |        |       |      |    |     |                                                                                                                           |
|---------------------|----------------------------|--------|-------|------|----|-----|---------------------------------------------------------------------------------------------------------------------------|
| Zfp286              | Zfp286.aSep08              | 497923 | 8629  | 1179 | 5  | 303 | zinc finger protein 286 (Zfp286) alternative variant aSep08, mRNA.                                                        |
| Zfp287              | Zfp287.bSep08              | 303212 | 4000  | 893  | 4  | 171 | zinc finger protein 287 (Zfp287) alternative variant bSep08, mRNA.                                                        |
| Zfp294              | Zfp294.bSep08              | 288308 | 2798  | 696  | 4  | 189 | zinc finger protein 294 (Zfp294) alternative variant bSep08, mRNA.                                                        |
| Zfp294              | Zfp294.cSep08              | 288308 | 2496  | 289  | 3  | 49  | zinc finger protein 294 (Zfp294) alternative variant cSep08, mRNA.                                                        |
| Zfp296              | Zfp296.aSep08              | 365511 | 1979  | 419  |    | 139 | zinc finger protein 296 (Zfp296) mRNA.                                                                                    |
| Zfp313              | Zfp313.bSep08              | 362277 | 10687 | 560  | 5  | 107 | zinc finger protein 313 (11.9 kD) (Zfp313) alternative variant bSep08, complete mRNA.                                     |
| Zfp316              | Zfp316.bSep08              | 304293 | 5592  | 369  | 2  | 123 | zinc finger protein 316 (Zfp316) alternative variant bSep08, mRNA.                                                        |
| Zfp322a             | Zfp322a.aSep08             | 680201 | 11487 | 693  | 2  | 81  | zinc finger protein 322a (3.9 kD) (Zfp322a) alternative variant aSep08, mRNA.                                             |
| Zfp322a             | Zfp322a.bSep08             | 680201 | 6096  | 396  |    | 36  | zinc finger protein 322a (Zfp322a) alternative variant bSep08, mRNA.                                                      |
| Zfp329andVom2r-ps60 | Zfp329andVom2r-ps60.bSep08 | 292612 | 12019 | 1758 | 2  | 551 | vomer nasal 2 receptor, pseudogene 60 and zinc finger protein 329 (Zfp329andVom2r-ps60) alternative variant bSep08, mRNA. |
| Zfp329andVom2r-ps60 | Zfp329andVom2r-ps60.bSep08 | 308361 | 12019 | 1758 | 2  | 551 | vomer nasal 2 receptor, pseudogene 60 and zinc finger protein 329 (Zfp329andVom2r-ps60) alternative variant bSep08, mRNA. |
| Zfp330              | Zfp330.bSep08              | 361387 | 6091  | 784  | 6  | 210 | zinc finger protein 330 (Zfp330) alternative variant bSep08, mRNA.                                                        |
| Zfp330              | Zfp330.cSep08              | 361387 | 1834  | 855  | 2  | 88  | zinc finger protein 330 (Zfp330) alternative variant cSep08, mRNA.                                                        |
| Zfp335              | Zfp335.aSep08              | 259270 | 5781  | 1643 | 12 | 547 | zinc finger protein 335 (Zfp335) alternative variant aSep08, mRNA.                                                        |
| Zfp335              | Zfp335.bSep08              | 259270 | 2283  | 1245 | 5  | 278 | zinc finger protein 335 (Zfp335) alternative variant bSep08, mRNA.                                                        |
| Zfp335              | Zfp335.cSep08              | 259270 | 721   | 632  | 2  | 36  | zinc finger protein 335 (4.0 kD) (Zfp335) alternative variant cSep08, mRNA.                                               |
| Zfp341              | Zfp341.aSep08              | 690571 | 12868 | 782  |    | 260 | zinc finger protein 341 (Zfp341) mRNA.                                                                                    |
| Zfp346              | Zfp346.bSep08              | 306765 | 63657 | 1001 | 8  | 272 | zinc finger protein 346 (30.5 kD) (Zfp346) alternative variant bSep08, mRNA.                                              |
| Zfp354a             | Zfp354a.bSep08             | 24522  | 9994  | 653  | 5  | 217 | zinc finger protein 354A (Zfp354a) alternative variant bSep08, mRNA.                                                      |
| Zfp354a             | Zfp354a.cSep08             | 24522  | 9927  | 589  | 5  | 131 | zinc finger protein 354A (Zfp354a) alternative variant cSep08, mRNA.                                                      |
| Zfp354b             | Zfp354b.aSep08             | 497898 | 2922  | 654  |    | 85  | zinc finger protein 354B (Zfp354b) mRNA.                                                                                  |
| Zfp362              | Zfp362.aSep08              | 297879 | 14281 | 2147 | 5  | 228 | zinc finger protein 362 (Zfp362) alternative variant aSep08, mRNA.                                                        |
| Zfp362              | Zfp362.cSep08              | 297879 | 672   | 381  | 2  | 60  | zinc finger protein 362 (Zfp362) alternative variant cSep08, mRNA.                                                        |
| Zfp364              | Zfp364.bSep08              | 362002 | 31759 | 2834 | 8  | 224 | rabring 7 (25.2 kD) (Zfp364) alternative variant bSep08, mRNA.                                                            |

|         |                |        |        |      |   |     |                                                                                            |
|---------|----------------|--------|--------|------|---|-----|--------------------------------------------------------------------------------------------|
| Zfp364  | Zfp364.cSep08  | 362002 | 57806  | 957  | 5 | 214 | finger protein (Zfp364) alternative variant cSep08, mRNA.                                  |
| Zfp364  | Zfp364.dSep08  | 362002 | 1916   | 720  | 2 | 81  | rabring 7 (9.4 kD) (Zfp364) alternative variant dSep08, mRNA.                              |
| Zfp365  | Zfp365.bSep08  | 499425 | 14800  | 395  | 3 | 131 | zinc finger protein 365 (Zfp365) alternative variant bSep08, mRNA.                         |
| Zfp367  | Zfp367.bSep08  | 306695 | 24449  | 1067 | 1 | 218 | zinc finger protein 367 (25.3 kD) (Zfp367) alternative variant bSep08, mRNA.               |
| Zfp382  | Zfp382.bSep08  | 246264 | 9753   | 730  | 2 | 242 | zinc finger protein 382 (Zfp382) alternative variant bSep08, mRNA.                         |
| Zfp384  | Zfp384.dSep08  | 171018 | 28815  | 1778 | 7 | 383 | zinc finger protein 384 (Zfp384) alternative variant dSep08, mRNA.                         |
| Zfp384  | Zfp384.eSep08  | 171018 | 15696  | 633  | 5 | 211 | zinc finger protein 384 CRA d (Zfp384) alternative variant eSep08, mRNA.                   |
| Zfp384  | Zfp384.fSep08  | 171018 | 8626   | 703  | 3 | 186 | zinc finger protein 384 (Zfp384) alternative variant fSep08, mRNA.                         |
| Zfp384  | Zfp384.gSep08  | 171018 | 15914  | 707  | 4 | 166 | zinc finger protein 384 CRA d (Zfp384) alternative variant gSep08, mRNA.                   |
| Zfp385a | Zfp385a.aSep08 | 685474 | 20904  | 2450 | 7 | 415 | zinc finger protein 385A (43.6 kD) (Zfp385a) alternative variant aSep08, mRNA.             |
| Zfp385a | Zfp385a.bSep08 | 685474 | 8332   | 622  | 3 | 207 | zinc finger protein 385A (Zfp385a) alternative variant bSep08, mRNA.                       |
| Zfp385a | Zfp385a.cSep08 | 685474 | 18850  | 557  | 4 | 185 | zinc finger protein 385A (Zfp385a) alternative variant cSep08, mRNA.                       |
| Zfp385a | Zfp385a.dSep08 | 685474 | 16319  | 433  | 2 | 143 | zinc finger protein 385A (Zfp385a) alternative variant dSep08, mRNA.                       |
| Zfp385a | Zfp385a.eSep08 | 685474 | 19227  | 508  | 4 | 126 | zinc finger protein 385A (Zfp385a) alternative variant eSep08, mRNA.                       |
| Zfp385c | Zfp385c.aSep08 | 303537 | 28072  | 3150 |   | 501 | zinc finger protein 385C (Zfp385c) mRNA.                                                   |
| Zfp386  | Zfp386.bSep08  | 25165  | 12417  | 414  | 3 | 83  | zinc finger protein 386 (Kruppel-like) (Zfp386) alternative variant bSep08, mRNA.          |
| Zfp386  | Zfp386.cSep08  | 25165  | 8822   | 366  | 2 | 83  | zinc finger protein 386 (Kruppel-like) (9.7 kD) (Zfp386) alternative variant cSep08, mRNA. |
| Zfp407  | Zfp407.aSep08  | 307213 | 257593 | 861  |   | 286 | zinc finger protein 407 (Zfp407) mRNA.                                                     |
| Zfp410  | Zfp410.bSep08  | 314310 | 13172  | 1135 | 6 | 243 | zinc finger protein 410 (Zfp410) alternative variant bSep08, mRNA.                         |
| Zfp414  | Zfp414.aSep08  | 299647 | 2220   | 1528 | 4 | 344 | zinc finger protein 414 (38.2 kD) (Zfp414) alternative variant aSep08, mRNA.               |
| Zfp414  | Zfp414.cSep08  | 299647 | 1072   | 583  | 3 | 157 | zinc finger protein 414 (Zfp414) alternative variant cSep08, mRNA.                         |
| Zfp414  | Zfp414.dSep08  | 299647 | 2599   | 1845 | 5 | 120 | zinc finger protein 414 (13.7 kD) (Zfp414) alternative variant dSep08, complete mRNA.      |
| Zfp414  | Zfp414.eSep08  | 299647 | 1373   | 767  | 2 | 107 | zinc finger protein 414 (11.3 kD) (Zfp414) alternative variant eSep08, mRNA.               |
| Zfp418  | Zfp418.aSep08  | 292548 | 9267   | 762  |   | 222 | zinc finger protein 418 (Zfp418) mRNA.                                                     |
| Zfp422  | Zfp422.cSep08  | 360389 | 2081   | 443  | 2 | 65  | putative protein (Zfp422) alternative variant cSep08, mRNA.                                |

|        |               |        |       |      |   |     |                                                                                       |
|--------|---------------|--------|-------|------|---|-----|---------------------------------------------------------------------------------------|
| Zfp423 | Zfp423.bSep08 | 94188  | 7107  | 543  | 1 | 113 | zinc finger protein 423 (Zfp423) alternative variant bSep08, mRNA.                    |
| Zfp426 | Zfp426.aSep08 | 367034 | 23240 | 680  | 5 | 113 | CRA b like (Zfp426) alternative variant aSep08, mRNA.                                 |
| Zfp426 | Zfp426.bSep08 | 367034 | 23531 | 764  | 6 | 107 | KRAB box (Zfp426) alternative variant bSep08, mRNA.                                   |
| Zfp426 | Zfp426.cSep08 | 367034 | 1179  | 428  | 1 | 55  | putative protein (6.2 kD) (Zfp426) alternative variant cSep08, mRNA.                  |
| Zfp428 | Zfp428.bSep08 | 361519 | 5997  | 512  | 2 | 111 | zinc finger protein 428 (11.9 kD) (Zfp428) alternative variant bSep08, mRNA.          |
| Zfp428 | Zfp428.cSep08 | 361519 | 8662  | 509  | 2 | 106 | zinc finger protein 428 (Zfp428) alternative variant cSep08, mRNA.                    |
| Zfp428 | Zfp428.dSep08 | 361519 | 8401  | 662  | 2 | 69  | zinc finger protein 428 (Zfp428) alternative variant dSep08, mRNA.                    |
| Zfp444 | Zfp444.aSep08 | 292569 | 17389 | 1507 | 4 | 333 | zinc finger protein 444 (36.1 kD) (Zfp444) alternative variant aSep08, complete mRNA. |
| Zfp444 | Zfp444.bSep08 | 292569 | 11396 | 780  | 2 | 119 | zinc finger protein 444 (Zfp444) alternative variant bSep08, mRNA.                    |
| Zfp451 | Zfp451.bSep08 | 316312 | 6963  | 710  | 4 | 226 | zinc finger protein 451 (Zfp451) alternative variant bSep08, mRNA.                    |
| Zfp451 | Zfp451.cSep08 | 316312 | 12018 | 638  | 4 | 193 | zinc finger protein 451 (Zfp451) alternative variant cSep08, mRNA.                    |
| Zfp451 | Zfp451.dSep08 | 316312 | 30651 | 662  | 6 | 186 | zinc finger protein 451 (Zfp451) alternative variant dSep08, mRNA.                    |
| Zfp451 | Zfp451.eSep08 | 316312 | 7447  | 1126 | 2 | 79  | zinc finger protein 451 (9.0 kD) (Zfp451) alternative variant eSep08, mRNA.           |
| Zfp451 | Zfp451.gSep08 | 316312 | 14460 | 620  | 2 | 32  | zinc finger protein 451 (3.6 kD) (Zfp451) alternative variant gSep08, mRNA.           |
| Zfp455 | Zfp455.bSep08 | 286979 | 6620  | 908  | 1 | 115 | zinc finger protein 455 (Zfp455) alternative variant bSep08, mRNA.                    |
| Zfp462 | Zfp462.aSep08 | 362522 | 85096 | 1586 |   | 375 | zinc finger protein 462 (Zfp462) alternative variant aSep08, mRNA.                    |
| Zfp462 | Zfp462.bSep08 | 362522 | 39579 | 1273 |   | 172 | zinc finger protein 462 (Zfp462) alternative variant bSep08, mRNA.                    |
| Zfp467 | Zfp467.bSep08 | 500110 | 3099  | 837  | 2 | 216 | zinc finger protein 467 (Zfp467) alternative variant bSep08, mRNA.                    |
| Zfp469 | Zfp469.bSep08 | 304302 | 4253  | 780  | 2 | 259 | zinc finger protein 469 (Zfp469) alternative variant bSep08, mRNA.                    |
| Zfp469 | Zfp469.bSep08 | 679549 | 4253  | 780  | 2 | 259 | zinc finger protein 469 (Zfp469) alternative variant bSep08, mRNA.                    |
| Zfp469 | Zfp469.bSep08 | 679577 | 4253  | 780  | 2 | 259 | zinc finger protein 469 (Zfp469) alternative variant bSep08, mRNA.                    |
| Zfp469 | Zfp469.dSep08 | 304302 | 1234  | 724  | 2 | 84  | zinc finger protein 469 (10.3 kD) (Zfp469) alternative variant dSep08, mRNA.          |
| Zfp469 | Zfp469.dSep08 | 679549 | 1234  | 724  | 2 | 84  | zinc finger protein 469 (10.3 kD) (Zfp469) alternative variant dSep08, mRNA.          |
| Zfp469 | Zfp469.dSep08 | 679577 | 1234  | 724  | 2 | 84  | zinc finger protein 469 (10.3 kD) (Zfp469) alternative variant dSep08, mRNA.          |
| Zfp474 | Zfp474.aSep08 | 307310 | 29629 | 1309 |   | 322 | zinc finger protein 474 (Zfp474) mRNA.                                                |

|         |                |        |        |      |    |     |                                                                              |
|---------|----------------|--------|--------|------|----|-----|------------------------------------------------------------------------------|
| zfp507  | zfp507.bSep08  | 292816 | 17043  | 1799 | 1  | 179 | zinc finger protein 507 (zfp507) alternative variant bSep08, mRNA.           |
| Zfp509  | Zfp509.bSep08  | 305428 | 13581  | 765  | 6  | 212 | zinc finger protein 509 (Zfp509) alternative variant bSep08, mRNA.           |
| Zfp509  | Zfp509.dSep08  | 305428 | 4708   | 362  | 2  | 71  | zinc finger protein 509 CRA b (Zfp509) alternative variant dSep08, mRNA.     |
| Zfp511  | Zfp511.bSep08  | 293586 | 4036   | 922  | 5  | 118 | zinc finger protein 511 (13.6 kD) (Zfp511) alternative variant bSep08, mRNA. |
| Zfp512  | Zfp512.aSep08  | 313906 | 31759  | 3376 | 12 | 523 | zinc finger protein 512 (Zfp512) alternative variant aSep08, mRNA.           |
| Zfp512  | Zfp512.bSep08  | 313906 | 6398   | 721  | 7  | 240 | zinc finger protein 512 (Zfp512) alternative variant bSep08, mRNA.           |
| Zfp512  | Zfp512.cSep08  | 313906 | 4082   | 741  | 1  | 161 | zinc finger protein 512 (18.4 kD) (Zfp512) alternative variant cSep08, mRNA. |
| Zfp513  | Zfp513.aSep08  | 313913 | 1581   | 1494 |    | 384 | zinc finger protein 513 (Zfp513) mRNA.                                       |
| Zfp516  | Zfp516.aSep08  | 291406 | 16482  | 4778 |    | 286 | zinc finger protein 516 (Zfp516) mRNA.                                       |
| Zfp518b | Zfp518b.aSep08 | 498390 | 3520   | 2959 | 1  | 202 | zinc finger protein 518B (Zfp518b) alternative variant aSep08, mRNA.         |
| Zfp518b | Zfp518b.bSep08 | 498390 | 3411   | 2388 | 1  | 75  | zinc finger protein 518B (Zfp518b) alternative variant bSep08, mRNA.         |
| Zfp523  | Zfp523.bSep08  | 361809 | 5702   | 730  | 1  | 243 | zinc finger protein 523 (Zfp523) alternative variant bSep08, mRNA.           |
| Zfp536  | Zfp536.aSep08  | 292820 | 199725 | 421  | 1  | 46  | zinc finger protein 536 (Zfp536) alternative variant aSep08, mRNA.           |
| Zfp536  | Zfp536.bSep08  | 292820 | 144023 | 346  | 1  | 46  | zinc finger protein 536 (Zfp536) alternative variant bSep08, mRNA.           |
| Zfp568  | Zfp568.aSep08  | 308488 | 6073   | 615  |    | 117 | zinc finger protein 568 (Zfp568) mRNA.                                       |
| Zfp575  | Zfp575.aSep08  | 308430 | 2097   | 1058 | 1  | 239 | zinc finger protein 575 (26.4 kD) (Zfp575) alternative variant aSep08, mRNA. |
| Zfp592  | Zfp592.bSep08  | 293038 | 996    | 616  | 3  | 204 | zinc finger protein 592 (Zfp592) alternative variant bSep08, mRNA.           |
| Zfp597  | Zfp597.bSep08  | 266774 | 16003  | 1471 | 3  | 401 | zinc finger protein 597 (46.0 kD) (Zfp597) alternative variant bSep08, mRNA. |
| Zfp597  | Zfp597.cSep08  | 266774 | 1422   | 699  | 2  | 84  | zinc finger protein 597 (9.6 kD) (Zfp597) alternative variant cSep08, mRNA.  |
| Zfp598  | Zfp598.bSep08  | 287119 | 2106   | 1781 | 4  | 343 | zinc finger protein 598 (35.3 kD) (Zfp598) alternative variant bSep08, mRNA. |
| Zfp606  | Zfp606.aSep08  | 292610 | 10520  | 449  |    | 33  | zinc finger protein 606 (Zfp606) mRNA.                                       |
| Zfp609  | Zfp609.aSep08  | 363412 | 104849 | 7329 | 9  | 777 | zinc finger protein 609 (81.7 kD) (Zfp609) alternative variant aSep08, mRNA. |
| Zfp609  | Zfp609.bSep08  | 363412 | 1540   | 392  | 2  | 130 | zinc finger protein 609 (Zfp609) alternative variant bSep08, mRNA.           |
| Zfp612  | Zfp612.cSep08  | 307839 | 5259   | 649  | 3  | 93  | zinc finger protein 612 (Zfp612) alternative variant cSep08, mRNA.           |
| Zfp612  | Zfp612.dSep08  | 307839 | 4356   | 636  | 4  | 74  | putative protein (8.0 kD) (Zfp612) alternative variant dSep08, mRNA.         |



|        |               |        |       |      |   |     |                                                                                       |
|--------|---------------|--------|-------|------|---|-----|---------------------------------------------------------------------------------------|
| Zfp612 | Zfp612.eSep08 | 307839 | 4352  | 582  | 4 | 71  | putative protein (7.6 kD) (Zfp612) alternative variant eSep08, mRNA.                  |
| Zfp622 | Zfp622.bSep08 | 294846 | 1452  | 559  | 1 | 79  | zinc finger protein 622 (Zfp622) alternative variant bSep08, mRNA.                    |
| Zfp637 | Zfp637.aSep08 | 362425 | 4815  | 1164 | 3 | 325 | zinc finger protein 637 (Zfp637) alternative variant aSep08, mRNA.                    |
| Zfp637 | Zfp637.bSep08 | 362425 | 2646  | 672  | 3 | 200 | zinc finger protein 637 (Zfp637) alternative variant bSep08, mRNA.                    |
| Zfp637 | Zfp637.cSep08 | 362425 | 4134  | 525  | 3 | 174 | zinc finger protein 637 (Zfp637) alternative variant cSep08, mRNA.                    |
| Zfp644 | Zfp644.aSep08 | 305127 | 18422 | 2241 |   | 233 | zinc finger protein 644 (Zfp644) mRNA.                                                |
| Zfp646 | Zfp646.aSep08 | 309003 | 3285  | 1550 |   | 365 | zinc finger protein 646 (Zfp646) mRNA.                                                |
| Zfp651 | Zfp651.aSep08 | 316087 | 1997  | 504  |   | 168 | zinc finger protein 651 (Zfp651) mRNA.                                                |
| Zfp652 | Zfp652.bSep08 | 497984 | 3965  | 283  | 1 | 94  | zinc finger protein 652 (Zfp652) alternative variant bSep08, mRNA.                    |
| Zfp653 | Zfp653.aSep08 | 300446 | 12586 | 1874 | 5 | 608 | zinc finger protein 653 (Zfp653) alternative variant aSep08, mRNA.                    |
| Zfp653 | Zfp653.cSep08 | 300446 | 831   | 362  | 1 | 41  | zinc finger protein 653 (Zfp653) alternative variant cSep08, mRNA.                    |
| Zfp655 | Zfp655.bSep08 | 360764 | 14120 | 453  | 4 | 117 | zinc finger protein 655 (Zfp655) alternative variant bSep08, mRNA.                    |
| Zfp655 | Zfp655.cSep08 | 360764 | 14125 | 626  | 5 | 116 | zinc finger protein 655 (12.9 kD) (Zfp655) alternative variant cSep08, mRNA.          |
| Zfp655 | Zfp655.dSep08 | 360764 | 6366  | 1441 | 3 | 110 | zinc finger protein 655 (12.2 kD) (Zfp655) alternative variant dSep08, complete mRNA. |
| Zfp655 | Zfp655.eSep08 | 360764 | 4019  | 396  | 4 | 109 | zinc finger protein 655 (Zfp655) alternative variant eSep08, mRNA.                    |
| Zfp655 | Zfp655.fSep08 | 360764 | 14294 | 1181 | 5 | 103 | zinc finger protein 655 (11.6 kD) (Zfp655) alternative variant fSep08, mRNA.          |
| Zfp655 | Zfp655.gSep08 | 360764 | 22710 | 389  | 3 | 64  | zinc finger protein 655 (7.0 kD) (Zfp655) alternative variant gSep08, mRNA.           |
| Zfp667 | Zfp667.bSep08 | 308326 | 5544  | 1292 | 2 | 363 | zinc finger protein 667 (Zfp667) alternative variant bSep08, mRNA.                    |
| Zfp668 | Zfp668.bSep08 | 309002 | 7596  | 1028 | 2 | 280 | zinc finger protein 668 (Zfp668) alternative variant bSep08, mRNA.                    |
| Zfp668 | Zfp668.cSep08 | 309002 | 7317  | 464  | 1 | 154 | zinc finger protein 668 (Zfp668) alternative variant cSep08, mRNA.                    |
| Zfp672 | Zfp672.bSep08 | 303165 | 6482  | 996  | 3 | 207 | zinc finger protein 672 (Zfp672) alternative variant bSep08, mRNA.                    |
| Zfp672 | Zfp672.cSep08 | 303165 | 5770  | 711  | 3 | 48  | zinc finger protein 672 (5.3 kD) (Zfp672) alternative variant cSep08, mRNA.           |
| Zfp672 | Zfp672.dSep08 | 303165 | 612   | 492  | 2 | 50  | zinc finger protein 672 (Zfp672) alternative variant dSep08, mRNA.                    |
| Zfp688 | Zfp688.aSep08 | 293511 | 3029  | 870  | 2 | 227 | zinc finger protein 688 (Zfp688) alternative variant aSep08, mRNA.                    |
| Zfp688 | Zfp688.bSep08 | 293511 | 2390  | 420  | 2 | 140 | zinc finger protein 688 (Zfp688) alternative variant bSep08, mRNA.                    |

|        |               |        |       |      |    |     |                                                                              |
|--------|---------------|--------|-------|------|----|-----|------------------------------------------------------------------------------|
| Zfp689 | Zfp689.bSep08 | 286996 | 4775  | 1104 | 3  | 277 | zinc finger protein 689 (Zfp689) alternative variant bSep08, mRNA.           |
| Zfp689 | Zfp689.cSep08 | 286996 | 15241 | 733  | 4  | 169 | zinc finger protein 689 (Zfp689) alternative variant cSep08, mRNA.           |
| Zfp689 | Zfp689.dSep08 | 286996 | 20460 | 671  | 5  | 20  | zinc finger protein 689 (2.1 kD) (Zfp689) alternative variant dSep08, mRNA.  |
| Zfp689 | Zfp689.eSep08 | 286996 | 797   | 588  | 2  | 49  | zinc finger protein 689 (5.5 kD) (Zfp689) alternative variant eSep08, mRNA.  |
| Zfp692 | Zfp692.aSep08 | 303164 | 8024  | 2430 | 12 | 533 | zinc finger protein 692 (59.2 kD) (Zfp692) alternative variant aSep08, mRNA. |
| Zfp692 | Zfp692.bSep08 | 303164 | 7028  | 1183 | 7  | 315 | zinc finger protein 692 CRA a (Zfp692) alternative variant bSep08, mRNA.     |
| Zfp692 | Zfp692.dSep08 | 303164 | 3369  | 822  | 3  | 183 | zinc finger protein 692 (20.3 kD) (Zfp692) alternative variant dSep08, mRNA. |
| Zfp692 | Zfp692.eSep08 | 303164 | 2467  | 1261 | 6  | 172 | zinc finger protein 692 CRA a (Zfp692) alternative variant eSep08, mRNA.     |
| Zfp692 | Zfp692.gSep08 | 303164 | 3124  | 686  | 2  | 60  | putative protein (6.4 kD) (Zfp692) alternative variant gSep08, mRNA.         |
| Zfp704 | Zfp704.aSep08 | 310233 | 7165  | 437  | 2  | 85  | zinc finger protein 704 (Zfp704) alternative variant aSep08, mRNA.           |
| Zfp704 | Zfp704.bSep08 | 310233 | 78072 | 549  | 2  | 40  | zinc finger protein 704 (Zfp704) alternative variant bSep08, mRNA.           |
| Zfp706 | Zfp706.aSep08 | 500855 | 8153  | 2345 | 4  | 148 | zinc finger protein 706 (Zfp706) alternative variant aSep08, mRNA.           |
| Zfp709 | Zfp709.bSep08 | 266773 | 645   | 431  | 2  | 36  | zinc finger protein 709 (4.1 kD) (Zfp709) alternative variant bSep08, mRNA.  |
| Zfp710 | Zfp710.bSep08 | 293044 | 5869  | 424  | 2  | 84  | zinc finger protein 710 (8.9 kD) (Zfp710) alternative variant bSep08, mRNA.  |
| Zfp746 | Zfp746.aSep08 | 312303 | 4143  | 2691 | 1  | 402 | zinc finger protein 746 (Zfp746) alternative variant aSep08, mRNA.           |
| Zfp746 | Zfp746.bSep08 | 312303 | 1871  | 416  | 1  | 98  | zinc finger protein 746 (Zfp746) alternative variant bSep08, mRNA.           |
| Zfp770 | Zfp770.aSep08 | 691610 | 5167  | 1669 |    | 448 | zinc finger protein 770 (Zfp770) alternative variant aSep08, mRNA.           |
| Zfp770 | Zfp770.bSep08 | 691610 | 3896  | 398  |    | 34  | zinc finger protein 770 (Zfp770) alternative variant bSep08, mRNA.           |
| Zfp771 | Zfp771.bSep08 | 308992 | 9672  | 552  |    |     |                                                                              |
| Zfp775 | Zfp775.bSep08 | 312309 | 15314 | 362  | 2  | 120 | zinc finger protein 775 (Zfp775) alternative variant bSep08, mRNA.           |
| Zfp777 | Zfp777.bSep08 | 502764 | 3613  | 861  | 2  | 251 | zinc finger protein 777 (Zfp777) alternative variant bSep08, mRNA.           |
| Zfp787 | Zfp787.bSep08 | 365176 | 12791 | 1758 | 2  | 164 | zinc finger protein 787 (Zfp787) alternative variant bSep08, mRNA.           |
| Zfp787 | Zfp787.cSep08 | 365176 | 775   | 446  | 2  | 33  | zinc finger protein 787 (Zfp787) alternative variant cSep08, mRNA.           |
| Zfp819 | Zfp819.bSep08 | 308561 | 8738  | 745  | 2  | 165 | zinc finger protein 819 (Zfp819) alternative variant bSep08, mRNA.           |

|         |                |        |        |      |    |     |                                                                                                                                  |
|---------|----------------|--------|--------|------|----|-----|----------------------------------------------------------------------------------------------------------------------------------|
| Zfp819  | Zfp819.cSep08  | 308561 | 35524  | 754  | 2  | 152 | zinc finger protein 819 (Zfp819) alternative variant cSep08, mRNA.                                                               |
| Zfp821  | Zfp821.aSep08  | 307834 | 18218  | 1758 | 8  | 369 | zinc finger protein 821 (41.5 kD) (Zfp821) alternative variant aSep08, complete mRNA.                                            |
| Zfp821  | Zfp821.bSep08  | 307834 | 12088  | 986  | 4  | 124 | putative protein (Zfp821) alternative variant bSep08, mRNA.                                                                      |
| Zfp821  | Zfp821.cSep08  | 307834 | 10168  | 379  | 4  | 89  | putative protein (Zfp821) alternative variant cSep08, mRNA.                                                                      |
| Zfpm2   | Zfpm2.bSep08   | 314930 | 121690 | 346  | 1  | 110 | zinc finger protein, multitype 2 (Zfpm2) alternative variant bSep08, mRNA.                                                       |
| Zfr     | Zfr.aSep08     | 365703 | 29830  | 3312 | 13 | 666 | zinc finger RNA binding protein (Zfr) alternative variant aSep08, mRNA.                                                          |
| Zfr     | Zfr.bSep08     | 365703 | 32856  | 1666 | 9  | 457 | zinc finger RNA binding protein (Zfr) alternative variant bSep08, mRNA.                                                          |
| Zfr     | Zfr.cSep08     | 365703 | 33336  | 1787 | 6  | 373 | zinc finger RNA binding protein (Zfr) alternative variant cSep08, mRNA.                                                          |
| Zfr     | Zfr.dSep08     | 365703 | 13926  | 1733 | 5  | 128 | zinc finger RNA binding protein (14.4 kD) (Zfr) alternative variant dSep08, mRNA.                                                |
| Zfr     | Zfr.eSep08     | 365703 | 5864   | 797  | 4  | 122 | zinc finger RNA binding protein (Zfr) alternative variant eSep08, mRNA.                                                          |
| Zfr     | Zfr.fSep08     | 365703 | 612    | 501  | 2  | 66  | zinc finger RNA binding protein (Zfr) alternative variant fSep08, mRNA.                                                          |
| Zfr     | Zfr.gSep08     | 365703 | 523    | 234  | 2  | 61  | zinc finger RNA binding protein (Zfr) alternative variant gSep08, mRNA.                                                          |
| Zfx     | Zfx.dSep08     | 367832 | 22214  | 477  | 3  | 51  | zinc finger protein X-linked (Zfx) alternative variant dSep08, mRNA.                                                             |
| Zfyve1  | Zfyve1.bSep08  | 299188 | 12268  | 1800 | 8  | 452 | putative protein of metazoan origin (Zfyve1) alternative variant bSep08, mRNA.                                                   |
| Zfyve1  | Zfyve1.cSep08  | 299188 | 11305  | 779  | 5  | 225 | putative protein of metazoan origin (Zfyve1) alternative variant cSep08, mRNA.                                                   |
| Zfyve1  | Zfyve1.eSep08  | 299188 | 6816   | 765  | 5  | 128 | putative protein of metazoan origin (Zfyve1) alternative variant eSep08, mRNA.                                                   |
| Zfyve1  | Zfyve1.gSep08  | 299188 | 2025   | 404  | 2  | 38  | putative protein (Zfyve1) alternative variant gSep08, mRNA.                                                                      |
| Zfyve1  | Zfyve1.hSep08  | 299188 | 1914   | 352  | 2  | 41  | putative protein (Zfyve1) alternative variant hSep08, mRNA.                                                                      |
| Zfyve9  | Zfyve9.bSep08  | 313477 | 38577  | 916  | 5  | 274 | putative cytoplasmic protein of metazoan origin (30.7 kD) (Zfyve9) alternative variant bSep08, mRNA.                             |
| Zfyve9  | Zfyve9.cSep08  | 313477 | 38334  | 742  | 2  | 84  | putative protein of metazoan origin (Zfyve9) alternative variant cSep08, mRNA.                                                   |
| Zfyve16 | Zfyve16.aSep08 | 499508 | 19778  | 1724 | 9  | 574 | zinc finger, FYVE-type (Zfyve16) alternative variant aSep08, mRNA.                                                               |
| Zfyve16 | Zfyve16.bSep08 | 499508 | 5157   | 608  | 1  | 106 | putative protein of metazoan origin (Zfyve16) alternative variant bSep08, mRNA.                                                  |
| Zfyve19 | Zfyve19.bSep08 | 499871 | 6256   | 1655 | 10 | 313 | putative protein, with a coiled coil domain, of fungal and metazoan origin (35.0 kD) (Zfyve19) alternative variant bSep08, mRNA. |

|         |                |        |       |      |   |     |                                                                                                                                                           |
|---------|----------------|--------|-------|------|---|-----|-----------------------------------------------------------------------------------------------------------------------------------------------------------|
| Zfyve19 | Zfyve19.cSep08 | 499871 | 6003  | 830  | 7 | 252 | zinc finger, FYVE-type (Zfyve19) alternative variant cSep08, mRNA.                                                                                        |
| Zfyve19 | Zfyve19.dSep08 | 499871 | 984   | 409  | 4 | 99  | putative protein of vertebrate origin (Zfyve19) alternative variant dSep08, mRNA.                                                                         |
| Zfyve19 | Zfyve19.eSep08 | 499871 | 1667  | 882  | 3 | 96  | putative protein (Zfyve19) alternative variant eSep08, mRNA.                                                                                              |
| Zfyve19 | Zfyve19.fSep08 | 499871 | 2698  | 1013 | 3 | 76  | zinc finger, FYVE-type (8.4 kD) (Zfyve19) alternative variant fSep08, mRNA.                                                                               |
| Zfyve20 | Zfyve20.cSep08 | 312562 | 1117  | 409  | 2 | 15  | hypothetical protein LOC688545 (1.8 kD) (Zfyve20) alternative variant cSep08, mRNA.                                                                       |
| Zfyve20 | Zfyve20.cSep08 | 688545 | 1117  | 409  | 2 | 15  | hypothetical protein LOC688545 (1.8 kD) (Zfyve20) alternative variant cSep08, mRNA.                                                                       |
| Zfyve21 | Zfyve21.bSep08 | 362789 | 15844 | 738  | 2 | 246 | zinc finger, FYVE-type (Zfyve21) alternative variant bSep08, mRNA.                                                                                        |
| Zfyve21 | Zfyve21.cSep08 | 362789 | 19661 | 795  | 2 | 245 | zinc finger, FYVE-type (Zfyve21) alternative variant cSep08, mRNA.                                                                                        |
| Zfyve21 | Zfyve21.dSep08 | 362789 | 16627 | 1337 | 2 | 234 | zinc finger, FYVE-type (26.0 kD) (Zfyve21) alternative variant dSep08, complete mRNA.                                                                     |
| Zfyve21 | Zfyve21.eSep08 | 362789 | 16625 | 1332 | 2 | 233 | zinc finger, FYVE-type (25.9 kD) (Zfyve21) alternative variant eSep08, complete mRNA.                                                                     |
| Zfyve27 | Zfyve27.bSep08 | 309376 | 13003 | 1058 | 8 | 294 | putative endoplasmic reticulum protein, with at least 2 transmembrane domains, of vertebrate origin (32.5 kD) (Zfyve27) alternative variant bSep08, mRNA. |
| Zfyve27 | Zfyve27.dSep08 | 309376 | 4183  | 928  | 3 | 116 | putative protein of metazoan origin (12.8 kD) (Zfyve27) alternative variant dSep08, mRNA.                                                                 |
| Zfyve27 | Zfyve27.eSep08 | 309376 | 4684  | 522  | 4 | 97  | zinc finger, FYVE-type (10.7 kD) (Zfyve27) alternative variant eSep08, mRNA.                                                                              |
| Zfyve27 | Zfyve27.fSep08 | 309376 | 5077  | 771  | 5 | 97  | zinc finger, FYVE-type (10.7 kD) (Zfyve27) alternative variant fSep08, mRNA.                                                                              |
| Zfyve27 | Zfyve27.gSep08 | 309376 | 1074  | 537  | 2 | 66  | putative protein of mammalian origin (Zfyve27) alternative variant gSep08, mRNA.                                                                          |
| Zhx1    | Zhx1.bSep08    | 171159 | 3881  | 630  | 2 | 148 | zinc fingers and homeoboxes 1 (Zhx1) alternative variant bSep08, mRNA.                                                                                    |
| Zhx1    | Zhx1.cSep08    | 171159 | 21784 | 1927 | 2 | 84  | zinc fingers and homeoboxes 1 (10.1 kD) (Zhx1) alternative variant cSep08, mRNA.                                                                          |
| Zic1    | Zic1.bSep08    | 64618  | 3199  | 2144 | 2 | 135 | zinc finger protein of the cerebellum 1 (Zic1) alternative variant bSep08, mRNA.                                                                          |
| Zic4    | Zic4.cSep08    | 315882 | 4220  | 740  | 2 | 78  | zinc finger protein of the cerebellum 4 (Zic4) alternative variant cSep08, mRNA.                                                                          |
| Zkscan2 | Zkscan2.aSep08 | 368120 | 3319  | 1332 |   | 369 | zinc finger with KRAB and SCAN domains 2 (Zkscan2) mRNA.                                                                                                  |
| Zkscan3 | Zkscan3.cSep08 | 306977 | 6639  | 772  | 2 | 134 | zinc finger with KRAB and SCAN domains 3 (Zkscan3) alternative variant cSep08, mRNA.                                                                      |
| Zkscan3 | Zkscan3.eSep08 | 306977 | 14991 | 1799 | 3 | 51  | zinc finger with KRAB and SCAN domains 3 (Zkscan3) alternative variant eSep08, mRNA.                                                                      |
| Zkscan5 | Zkscan5.bSep08 | 304275 | 13180 | 1571 | 1 | 260 | zinc finger with KRAB and SCAN domains 5 (29.6 kD) (Zkscan5) alternative variant bSep08, mRNA.                                                            |

|          |                 |        |        |      |    |      |                                                                                                    |
|----------|-----------------|--------|--------|------|----|------|----------------------------------------------------------------------------------------------------|
| Zkscan6  | Zkscan6.bSep08  | 303226 | 7023   | 1259 | 1  | 326  | zinc finger with KRAB and SCAN domains 6 (Zkscan6) alternative variant bSep08, mRNA.               |
| Zkscan17 | Zkscan17.aSep08 | 287361 | 17044  | 1992 | 2  | 482  | zinc finger with KRAB and SCAN domains 17 (Zkscan17) alternative variant aSep08, mRNA.             |
| Zkscan17 | Zkscan17.bSep08 | 287361 | 2959   | 758  | 1  | 147  | zinc finger with KRAB and SCAN domains 17 (Zkscan17) alternative variant bSep08, mRNA.             |
| Zmat2    | Zmat2.bSep08    | 307491 | 1882   | 339  | 2  | 69   | zinc finger, matrin type 2 (7.6 kD) (Zmat2) alternative variant bSep08, mRNA.                      |
| Zmat5    | Zmat5.aSep08    | 501926 | 15602  | 657  |    | 153  | zinc finger, matrin type 5 (Zmat5) mRNA.                                                           |
| Zmiz1    | Zmiz1.bSep08    | 361103 | 5114   | 1720 | 3  | 420  | zinc finger, MIZ-type containing 1 (Zmiz1) alternative variant bSep08, mRNA.                       |
| Zmiz1    | Zmiz1.dSep08    | 361103 | 82509  | 1101 | 5  | 121  | zinc finger, MIZ-type containing 1 (14.1 kD) (Zmiz1) alternative variant dSep08, mRNA.             |
| Zmiz1    | Zmiz1.eSep08    | 361103 | 116056 | 706  | 6  | 65   | zinc finger, MIZ-type containing 1 (7.6 kD) (Zmiz1) alternative variant eSep08, mRNA.              |
| Zmiz2    | Zmiz2.aSep08    | 289783 | 8699   | 3118 | 13 | 692  | zinc finger, MIZ-type containing 2 (Zmiz2) alternative variant aSep08, mRNA.                       |
| Zmiz2    | Zmiz2.bSep08    | 289783 | 2730   | 2646 | 2  | 246  | zinc finger, MIZ-type containing 2 (25.5 kD) (Zmiz2) alternative variant bSep08, mRNA.             |
| Zmiz2    | Zmiz2.cSep08    | 289783 | 3295   | 719  | 6  | 229  | zinc finger, MIZ-type containing 2 (Zmiz2) alternative variant cSep08, mRNA.                       |
| Zmiz2    | Zmiz2.dSep08    | 289783 | 1138   | 319  | 3  | 106  | zinc finger, MIZ-type containing 2 (Zmiz2) alternative variant dSep08, mRNA.                       |
| Zmpste24 | Zmpste24.bSep08 | 313564 | 24225  | 798  | 5  | 93   | zinc metalloproteinase, STE24 homolog (S. cerevisiae) (Zmpste24) alternative variant bSep08, mRNA. |
| Zmpste24 | Zmpste24.cSep08 | 313564 | 12852  | 300  | 3  | 65   | zinc metalloproteinase, STE24 homolog (S. cerevisiae) (Zmpste24) alternative variant cSep08, mRNA. |
| Zmym1    | Zmym1.aSep08    | 313604 | 17100  | 3327 | 4  | 1086 | HAT dimerisation (Zmym1) alternative variant aSep08, mRNA.                                         |
| Zmym1    | Zmym1.cSep08    | 313604 | 16221  | 1796 | 3  | 439  | zinc finger MYM-type 1 CRA d (Zmym1) alternative variant cSep08, mRNA.                             |
| Zmym2    | Zmym2.aSep08    | 305913 | 37442  | 1807 | 5  | 518  | zinc finger, MYM-type 2 (Zmym2) alternative variant aSep08, mRNA.                                  |
| Zmym2    | Zmym2.bSep08    | 305913 | 12919  | 877  | 5  | 292  | zinc finger, MYM-type 2 (Zmym2) alternative variant bSep08, mRNA.                                  |
| Zmym2    | Zmym2.cSep08    | 305913 | 11909  | 1308 | 6  | 261  | zinc finger, MYM-type 2 (30.0 kD) (Zmym2) alternative variant cSep08, mRNA.                        |
| Zmym2    | Zmym2.dSep08    | 305913 | 12776  | 698  | 5  | 232  | zinc finger, MYM-type 2 (Zmym2) alternative variant dSep08, mRNA.                                  |
| Zmym2    | Zmym2.eSep08    | 305913 | 9614   | 686  | 5  | 227  | zinc finger, MYM-type 2 (Zmym2) alternative variant eSep08, mRNA.                                  |
| Zmym3    | Zmym3.bSep08    | 317260 | 3849   | 1141 | 5  | 365  | putative protein of vertebrate origin (Zmym3) alternative variant bSep08, mRNA.                    |
| Zmym3    | Zmym3.cSep08    | 317260 | 3982   | 1223 | 6  | 279  | zinc finger MYM-type 3 (Zmym3) alternative variant cSep08, mRNA.                                   |
| Zmym3    | Zmym3.dSep08    | 317260 | 1185   | 739  | 2  | 166  | putative protein (Zmym3) alternative variant dSep08, mRNA.                                         |

|         |                |        |       |      |   |     |                                                                                             |
|---------|----------------|--------|-------|------|---|-----|---------------------------------------------------------------------------------------------|
| Zmym3   | Zmym3.eSep08   | 317260 | 781   | 492  | 2 | 134 | zinc finger MYM-type 3 (Zmym3) alternative variant eSep08, mRNA.                            |
| Zmym3   | Zmym3.fSep08   | 317260 | 1016  | 393  | 2 | 122 | putative protein (Zmym3) alternative variant fSep08, mRNA.                                  |
| Zmym4   | Zmym4.bSep08   | 313598 | 2795  | 665  | 3 | 205 | zinc finger, MYM-type 4 (Zmym4) alternative variant bSep08, mRNA.                           |
| Zmym4   | Zmym4.cSep08   | 313598 | 8271  | 736  | 3 | 185 | zinc finger, MYM-type 4 (Zmym4) alternative variant cSep08, mRNA.                           |
| Zmym4   | Zmym4.dSep08   | 313598 | 4871  | 394  | 3 | 130 | zinc finger, MYM-type 4 (Zmym4) alternative variant dSep08, mRNA.                           |
| Zmym6   | Zmym6.bSep08   | 362602 | 19427 | 2018 | 6 | 198 | zinc finger, MYM-type 6 (Zmym6) alternative variant bSep08, mRNA.                           |
| Zmynd10 | Zmynd10.bSep08 | 363139 | 1675  | 1477 | 3 | 132 | zinc finger, MYND domain-containing 10 (Zmynd10) alternative variant bSep08, mRNA.          |
| Zmynd10 | Zmynd10.cSep08 | 363139 | 1640  | 469  | 3 | 92  | zinc finger, MYND domain-containing 10 (Zmynd10) alternative variant cSep08, mRNA.          |
| Zmynd10 | Zmynd10.dSep08 | 363139 | 863   | 747  | 2 | 80  | zinc finger, MYND domain-containing 10 (8.9 kD) (Zmynd10) alternative variant dSep08, mRNA. |
| Zmynd10 | Zmynd10.eSep08 | 363139 | 1051  | 606  | 4 | 50  | zinc finger, MYND domain-containing 10 (Zmynd10) alternative variant eSep08, mRNA.          |
| Zmynd11 | Zmynd11.eSep08 | 291259 | 53390 | 521  | 4 | 141 | hypothetical protein LOC689685 (16.1 kD) (Zmynd11) alternative variant eSep08, mRNA.        |
| Zmynd11 | Zmynd11.eSep08 | 689685 | 53390 | 521  | 4 | 141 | hypothetical protein LOC689685 (16.1 kD) (Zmynd11) alternative variant eSep08, mRNA.        |
| Zmynd11 | Zmynd11.fSep08 | 291259 | 77907 | 661  | 6 | 59  | hypothetical protein LOC689685 (6.8 kD) (Zmynd11) alternative variant fSep08, mRNA.         |
| Zmynd11 | Zmynd11.fSep08 | 689685 | 77907 | 661  | 6 | 59  | hypothetical protein LOC689685 (6.8 kD) (Zmynd11) alternative variant fSep08, mRNA.         |
| Zmynd12 | Zmynd12.bSep08 | 313552 | 1316  | 660  | 3 | 113 | putative protein (12.2 kD) (Zmynd12) alternative variant bSep08, mRNA.                      |
| Zmynd12 | Zmynd12.cSep08 | 313552 | 5276  | 402  | 2 | 70  | putative protein of mammalian origin (Zmynd12) alternative variant cSep08, mRNA.            |
| Zmynd17 | Zmynd17.bSep08 | 289904 | 2788  | 1036 | 3 | 225 | putative protein of vertebrate origin (Zmynd17) alternative variant bSep08, mRNA.           |
| Zmynd17 | Zmynd17.dSep08 | 289904 | 1321  | 1006 | 2 | 104 | putative protein of vertebrate origin (11.8 kD) (Zmynd17) alternative variant dSep08, mRNA. |
| Zmynd17 | Zmynd17.eSep08 | 289904 | 1440  | 635  | 3 | 97  | zinc finger mynd containing 17 (Zmynd17) alternative variant eSep08, mRNA.                  |
| Znf124  | Znf124.bSep08  | 314586 | 4336  | 443  | 2 | 123 | zinc finger protein 124 (HZF-16) (Znf124) alternative variant bSep08, mRNA.                 |
| Znf142  | Znf142.bSep08  | 316524 | 5520  | 1721 | 4 | 509 | zinc finger protein 142 (clone pHZ-49) (Znf142) alternative variant bSep08, mRNA.           |
| Znf142  | Znf142.cSep08  | 316524 | 9454  | 756  | 4 | 175 | zinc finger protein 142 (clone pHZ-49) (Znf142) alternative variant cSep08, mRNA.           |
| Znf213  | Znf213.aSep08  | 287094 | 3028  | 1712 | 5 | 570 | zinc finger protein 213 (Znf213) alternative variant aSep08, mRNA.                          |

|               |                      |        |        |      |   |     |                                                                                                  |
|---------------|----------------------|--------|--------|------|---|-----|--------------------------------------------------------------------------------------------------|
| Znf213        | Znf213.cSep08        | 287094 | 2804   | 1436 | 4 | 199 | zinc finger protein 213 (Znf213) alternative variant cSep08, mRNA.                               |
| Znf213        | Znf213.dSep08        | 287094 | 2270   | 607  | 5 | 135 | zinc finger protein 213 (Znf213) alternative variant dSep08, mRNA.                               |
| Znf213        | Znf213.eSep08        | 287094 | 1229   | 457  | 4 | 116 | zinc finger protein 213 (Znf213) alternative variant eSep08, mRNA.                               |
| Znf291        | Znf291.aSep08        | 117521 | 64373  | 944  |   | 314 | zinc finger protein 291 (Znf291) alternative variant aSep08, mRNA.                               |
| Znf291        | Znf291.bSep08        | 117521 | 38994  | 2408 |   | 214 | zinc finger protein 291 (24.0 kD) (Znf291) alternative variant bSep08, mRNA.                     |
| Znf291        | Znf291.cSep08        | 117521 | 268132 | 1728 |   |     |                                                                                                  |
| Znf307        | Znf307.aSep08        | 291164 | 7535   | 1783 |   | 479 | zinc finger protein 307 (Znf307) alternative variant aSep08, mRNA.                               |
| Znf397        | Znf397.aSep08        | 364827 | 4719   | 794  |   | 256 | zinc finger protein 397 (Znf397) mRNA.                                                           |
| Znf498        | Znf498.bSep08        | 363872 | 5158   | 1564 | 2 | 402 | zinc finger protein 498 (44.2 kD) (Znf498) alternative variant bSep08, mRNA.                     |
| Znf512b       | Znf512b.bSep08       | 311721 | 1606   | 1024 | 2 | 83  | zinc finger protein 512B (8.6 kD) (Znf512b) alternative variant bSep08, mRNA.                    |
| Znf532        | Znf532.bSep08        | 307362 | 102078 | 2641 | 2 | 816 | zinc finger protein 532 (Znf532) alternative variant bSep08, mRNA.                               |
| Znf532        | Znf532.cSep08        | 307362 | 49753  | 845  | 2 | 197 | zinc finger protein 532 (Znf532) alternative variant cSep08, mRNA.                               |
| Znf532        | Znf532.dSep08        | 307362 | 48180  | 409  | 2 | 73  | zinc finger protein 532 (Znf532) alternative variant dSep08, mRNA.                               |
| Znf618        | Znf618.aSep08        | 313253 | 12307  | 1695 |   | 548 | zinc finger protein 618 (Znf618) mRNA.                                                           |
| Znhit3        | Znhit3.aSep08        | 497975 | 8174   | 963  | 2 | 146 | zinc finger, HIT type 3 (Znhit3) alternative variant aSep08, mRNA.                               |
| Znhit3        | Znhit3.bSep08        | 497975 | 10204  | 1323 | 3 | 111 | zinc finger, HIT type 3 (12.4 kD) (Znhit3) alternative variant bSep08, mRNA.                     |
| Znhit3        | Znhit3.cSep08        | 497975 | 28074  | 640  | 2 | 102 | zinc finger, HIT type 3 (Znhit3) alternative variant cSep08, mRNA.                               |
| Znhit3        | Znhit3.dSep08        | 497975 | 14543  | 1017 | 2 | 93  | zinc finger, HIT type 3 (Znhit3) alternative variant dSep08, mRNA.                               |
| Znhit4andWbp1 | Znhit4andWbp1.aSep08 | 297381 | 6243   | 3103 | 9 | 375 | high mobility group AT-hook 1-like 4 (40.5 kD) (Znhit4andWbp1) alternative variant aSep08, mRNA. |
| Znhit4andWbp1 | Znhit4andWbp1.aSep08 | 500225 | 6243   | 3103 | 9 | 375 | high mobility group AT-hook 1-like 4 (40.5 kD) (Znhit4andWbp1) alternative variant aSep08, mRNA. |
| Znhit4andWbp1 | Znhit4andWbp1.dSep08 | 297381 | 1975   | 913  | 3 | 230 | WW domain binding protein 1 like (Znhit4andWbp1) alternative variant dSep08, mRNA.               |
| Znhit4andWbp1 | Znhit4andWbp1.dSep08 | 500225 | 1975   | 913  | 3 | 230 | WW domain binding protein 1 like (Znhit4andWbp1) alternative variant dSep08, mRNA.               |
| Znhit4andWbp1 | Znhit4andWbp1.eSep08 | 297381 | 1814   | 691  | 5 | 230 | WW domain binding protein 1 like (Znhit4andWbp1) alternative variant eSep08, mRNA.               |
| Znhit4andWbp1 | Znhit4andWbp1.eSep08 | 500225 | 1814   | 691  | 5 | 230 | WW domain binding protein 1 like (Znhit4andWbp1) alternative variant eSep08, mRNA.               |
| Znhit4andWbp1 | Znhit4andWbp1.fSep08 | 297381 | 14455  | 816  | 8 | 207 | high mobility group AT-hook 1-like 4 (Znhit4andWbp1) alternative variant fSep08, mRNA.           |

|               |                      |        |        |      |    |     |                                                                                        |
|---------------|----------------------|--------|--------|------|----|-----|----------------------------------------------------------------------------------------|
| Znhit4andWbp1 | Znhit4andWbp1.fSep08 | 500225 | 14455  | 816  | 8  | 207 | high mobility group AT-hook 1-like 4 (Znhit4andWbp1) alternative variant fSep08, mRNA. |
| Znhit4andWbp1 | Znhit4andWbp1.gSep08 | 297381 | 1684   | 868  | 3  | 167 | WW domain binding protein 1 like (Znhit4andWbp1) alternative variant gSep08, mRNA.     |
| Znhit4andWbp1 | Znhit4andWbp1.gSep08 | 500225 | 1684   | 868  | 3  | 167 | WW domain binding protein 1 like (Znhit4andWbp1) alternative variant gSep08, mRNA.     |
| Znhit4andWbp1 | Znhit4andWbp1.hSep08 | 297381 | 1232   | 906  | 2  | 151 | WW domain binding protein 1 like (Znhit4andWbp1) alternative variant hSep08, mRNA.     |
| Znhit4andWbp1 | Znhit4andWbp1.hSep08 | 500225 | 1232   | 906  | 2  | 151 | WW domain binding protein 1 like (Znhit4andWbp1) alternative variant hSep08, mRNA.     |
| Znhit4andWbp1 | Znhit4andWbp1.iSep08 | 297381 | 1362   | 424  | 4  | 117 | WW domain binding protein 1 like (Znhit4andWbp1) alternative variant iSep08, mRNA.     |
| Znhit4andWbp1 | Znhit4andWbp1.iSep08 | 500225 | 1362   | 424  | 4  | 117 | WW domain binding protein 1 like (Znhit4andWbp1) alternative variant iSep08, mRNA.     |
| Znhit4andWbp1 | Znhit4andWbp1.jSep08 | 297381 | 1650   | 1509 | 2  | 102 | WW domain binding protein 1 like (Znhit4andWbp1) alternative variant jSep08, mRNA.     |
| Znhit4andWbp1 | Znhit4andWbp1.jSep08 | 500225 | 1650   | 1509 | 2  | 102 | WW domain binding protein 1 like (Znhit4andWbp1) alternative variant jSep08, mRNA.     |
| Znhit4andWbp1 | Znhit4andWbp1.kSep08 | 297381 | 2807   | 488  | 3  | 29  | putative protein (3.2 kD) (Znhit4andWbp1) alternative variant kSep08, mRNA.            |
| Znhit4andWbp1 | Znhit4andWbp1.kSep08 | 500225 | 2807   | 488  | 3  | 29  | putative protein (3.2 kD) (Znhit4andWbp1) alternative variant kSep08, mRNA.            |
| Znrd1         | Znrd1.bSep08         | 361784 | 3373   | 587  | 2  | 58  | putative protein (6.6 kD) (Znrd1) alternative variant bSep08, mRNA.                    |
| Znrf1         | Znrf1.bSep08         | 362367 | 128776 | 650  | 5  | 152 | zinc and ring finger 1 (Znrf1) alternative variant bSep08, mRNA.                       |
| zobor         | zobor.aSep08         |        | 840    | 589  |    | 113 | putative nuclear protein (12.2 kD) (zobor) mRNA.                                       |
| zoby          | zoby.aSep08          |        | 1177   | 420  |    | 140 | host cell factor (zoby) mRNA.                                                          |
| zochy         | zochy.aSep08         |        | 6916   | 739  |    | 246 | centrosomal protein 152kDa (zochy) mRNA.                                               |
| zodar         | zodar.aSep08         |        | 1636   | 618  |    | 40  | putative protein (zodar) mRNA.                                                         |
| zodoy         | zodoy.aSep08         |        | 102219 | 579  |    | 130 | putative protein of metazoan origin (14.6 kD) (zodoy) mRNA.                            |
| zoflu         | zoflu.aSep08         |        | 8263   | 745  |    | 56  | putative protein (6.5 kD) (zoflu) mRNA.                                                |
| zofly         | zofly.aSep08         |        | 2134   | 547  |    | 87  | putative nuclear protein (9.5 kD) (zofly) mRNA.                                        |
| zogar         | zogar.aSep08         |        | 21142  | 634  |    | 43  | putative protein (zogar) mRNA.                                                         |
| zoja          | zoja.bSep08          |        | 32225  | 1138 | 3  | 53  | putative protein (zoja) alternative variant bSep08, mRNA.                              |
| zojey         | zojey.aSep08         |        | 3444   | 610  |    | 68  | putative protein (zojey) mRNA.                                                         |
| zokee         | zokee.aSep08         |        | 116924 | 640  |    | 183 | formin 2 (zokee) mRNA.                                                                 |
| zokler        | zokler.aSep08        |        | 2794   | 740  |    | 63  | putative protein of mammalian origin (7.4 kD) (zokler) mRNA.                           |
| zolo          | zolo.aSep08          |        | 6379   | 1800 | 8  | 546 | CRA a (zolo) alternative variant aSep08, mRNA.                                         |
| zolo          | zolo.bSep08          |        | 7364   | 1624 | 13 | 541 | CRA b (zolo) alternative variant bSep08, mRNA.                                         |
| zolo          | zolo.cSep08          |        | 3139   | 982  | 4  | 252 | CRA b (zolo) alternative variant cSep08, mRNA.                                         |
| zomee         | zomee.aSep08         |        | 4039   | 621  |    | 48  | solute carrier family 37 member 3 like (5.2 kD) (zomee) mRNA.                          |



|         |                |  |        |      |   |     |                                                                                                                |
|---------|----------------|--|--------|------|---|-----|----------------------------------------------------------------------------------------------------------------|
| zonoy   | zonoy.aSep08   |  | 8123   | 403  |   | 25  | putative protein (zonoy) mRNA.                                                                                 |
| zopor   | zopor.bSep08   |  | 5384   | 803  |   | 57  | putative protein (6.4 kD) (zopor) alternative variant bSep08, mRNA.                                            |
| zorbor  | zorbor.aSep08  |  | 24345  | 552  | 1 | 41  | putative protein (zorbor) alternative variant aSep08, mRNA.                                                    |
| zorbor  | zorbor.bSep08  |  | 24325  | 300  |   | 41  | putative protein (4.8 kD) (zorbor) alternative variant bSep08, mRNA.                                           |
| zorby   | zorby.aSep08   |  | 907    | 614  |   | 48  | putative protein (5.5 kD) (zorby) mRNA.                                                                        |
| zorchy  | zorchy.aSep08  |  | 1679   | 689  |   | 55  | putative protein (zorchy) mRNA.                                                                                |
| zordar  | zordar.aSep08  |  | 13006  | 444  |   | 30  | putative protein (3.5 kD) (zordar) mRNA.                                                                       |
| zordoy  | zordoy.aSep08  |  | 2047   | 334  |   | 50  | putative protein (zordoy) mRNA.                                                                                |
| zorflu  | zorflu.aSep08  |  | 1323   | 431  |   | 143 | putative protein of metazoan origin (zorflu) mRNA.                                                             |
| zorfly  | zorfly.aSep08  |  | 3271   | 199  |   | 63  | gag protein like (zorfly) mRNA.                                                                                |
| zorgar  | zorgar.aSep08  |  | 882    | 296  |   | 51  | putative protein (zorgar) mRNA.                                                                                |
| zorja   | zorja.aSep08   |  | 10424  | 774  |   | 67  | SET domain bifurcated 2 (zorja) mRNA.                                                                          |
| zorjey  | zorjey.aSep08  |  | 57903  | 403  |   | 97  | putative protein (10.0 kD) (zorjey) mRNA.                                                                      |
| zorkee  | zorkee.aSep08  |  | 16052  | 702  |   | 31  | putative protein (3.1 kD) (zorkee) mRNA.                                                                       |
| zorkler | zorkler.aSep08 |  | 1049   | 266  |   | 51  | putative protein (5.6 kD) (zorkler) mRNA.                                                                      |
| zorlo   | zorlo.aSep08   |  | 12122  | 619  |   | 58  | putative protein (6.6 kD) (zorlo) mRNA.                                                                        |
| zormee  | zormee.aSep08  |  | 1882   | 545  |   | 64  | nuclear receptor co-repressor 1 (zormee) mRNA.                                                                 |
| zornoy  | zornoy.aSep08  |  | 121415 | 609  |   | 113 | putative protein of vertebrate origin (zornoy) mRNA.                                                           |
| zorpor  | zorpor.aSep08  |  | 14774  | 811  |   | 270 | 5'-3' exoribonuclease 1 (zorpor) mRNA.                                                                         |
| zorroy  | zorroy.aSep08  |  | 10361  | 521  |   | 173 | 2 cell cycle control (zorroy) mRNA.                                                                            |
| zorsa   | zorsa.aSep08   |  | 3369   | 2431 | 2 | 785 | splicing factor arginine serine-rich 2 interacting protein CRA b (zorsa) alternative variant aSep08, mRNA.     |
| zorsa   | zorsa.bSep08   |  | 2483   | 988  | 4 | 258 | splicing factor arginine serine-rich 2 interacting protein CRA b (zorsa) alternative variant bSep08, mRNA.     |
| zorsa   | zorsa.cSep08   |  | 2205   | 707  | 4 | 164 | splicing factor arginine serine-rich 2 interacting protein CRA b (zorsa) alternative variant cSep08, mRNA.     |
| zorsa   | zorsa.dSep08   |  | 1205   | 1021 | 2 | 100 | splicing factor arginine serine-rich 2 interacting protein (11.5 kD) (zorsa) alternative variant dSep08, mRNA. |
| zorshee | zorshee.aSep08 |  | 551    | 383  |   | 91  | CRA b like (zorshee) mRNA.                                                                                     |
| zortu   | zortu.aSep08   |  | 100016 | 1665 |   | 139 | ataxin 7-like (zortu) mRNA.                                                                                    |
| zorvar  | zorvar.aSep08  |  | 646    | 535  | 2 | 69  | putative protein (7.3 kD) (zorvar) alternative variant aSep08, mRNA.                                           |
| zorvo   | zorvo.aSep08   |  | 22877  | 917  |   | 305 | guanine nucleotide-exchange A-inhibited (zorvo) mRNA.                                                          |
| zorwer  | zorwer.aSep08  |  | 10194  | 409  |   | 44  | putative protein (4.9 kD) (zorwer) mRNA.                                                                       |
| zorwey  | zorwey.aSep08  |  | 18628  | 500  |   | 69  | putative protein (7.5 kD) (zorwey) mRNA.                                                                       |
| zosa    | zosa.aSep08    |  | 3385   | 351  |   | 116 | putative protein (zosa) mRNA.                                                                                  |
| zoshee  | zoshee.aSep08  |  | 2864   | 325  |   | 56  | putative protein human specific (zoshee) mRNA.                                                                 |
| zotu    | zotu.aSep08    |  | 3681   | 441  |   | 57  | putative protein human specific (zotu) mRNA.                                                                   |
| zovar   | zovar.aSep08   |  | 19275  | 552  |   | 36  | putative protein (zovar) mRNA.                                                                                 |
| zovo    | zovo.aSep08    |  | 39242  | 435  |   | 57  | putative protein (zovo) mRNA.                                                                                  |
| zowey   | zowey.aSep08   |  | 2460   | 695  |   | 122 | putative protein of mammalian origin (zowey) mRNA.                                                             |

|         |                |        |        |      |   |     |                                                                                        |
|---------|----------------|--------|--------|------|---|-----|----------------------------------------------------------------------------------------|
| zoybor  | zoybor.aSep08  |        | 5730   | 740  |   | 65  | putative protein (zoybor) mRNA.                                                        |
| zoychy  | zoychy.aSep08  |        | 8173   | 675  | 1 | 124 | adaptor-related protein complex (zoychy) alternative variant aSep08, mRNA.             |
| zoychy  | zoychy.bSep08  |        | 12957  | 372  | 1 | 123 | adaptor-related protein complex (zoychy) alternative variant bSep08, mRNA.             |
| zoydar  | zoydar.aSep08  |        | 3698   | 333  |   | 58  | putative protein (zoydar) mRNA.                                                        |
| zoydoy  | zoydoy.aSep08  |        | 3545   | 480  |   | 76  | putative protein (zoydoy) mRNA.                                                        |
| zoyflu  | zoyflu.aSep08  |        | 3653   | 432  | 2 | 143 | CRA a (zoyflu) alternative variant aSep08, mRNA.                                       |
| zoyfly  | zoyfly.aSep08  |        | 8768   | 417  |   | 75  | putative protein (zoyfly) mRNA.                                                        |
| zoygar  | zoygar.aSep08  |        | 3535   | 733  |   | 60  | putative protein (zoygar) mRNA.                                                        |
| zoyja   | zoyja.aSep08   |        | 5307   | 498  |   | 63  | ATPase aminophospholipid transporter-like Class I type 8A member 2 (zoyja) mRNA.       |
| zoyjey  | zoyjey.aSep08  |        | 973    | 501  |   | 32  | putative protein (zoyjey) mRNA.                                                        |
| zoykee  | zoykee.aSep08  |        | 690    | 483  |   | 62  | putative protein (zoykee) mRNA.                                                        |
| zoykler | zoykler.aSep08 |        | 127118 | 1288 |   | 91  | putative protein (9.9 kD) (zoykler) mRNA.                                              |
| zoylo   | zoylo.aSep08   |        | 3774   | 787  |   | 149 | putative protein (16.1 kD) (zoylo) mRNA.                                               |
| zoymee  | zoymee.bSep08  |        | 1067   | 474  | 2 | 21  | putative protein (2.4 kD) (zoymee) alternative variant bSep08, mRNA.                   |
| zoymee  | zoymee.cSep08  |        | 1039   | 253  | 3 | 46  | putative protein (5.0 kD) (zoymee) alternative variant cSep08, mRNA.                   |
| zoynoy  | zoynoy.aSep08  |        | 5213   | 317  |   | 39  | putative protein (4.7 kD) (zoynoy) mRNA.                                               |
| zoypor  | zoypor.aSep08  |        | 4047   | 549  |   | 70  | putative protein (zoypor) alternative variant aSep08, mRNA.                            |
| zoyroy  | zoyroy.aSep08  |        | 21499  | 859  | 2 | 285 | 2 cell cycle control (zoyroy) alternative variant aSep08, mRNA.                        |
| zoyroy  | zoyroy.bSep08  |        | 21287  | 815  | 1 | 271 | 2 cell cycle control (zoyroy) alternative variant bSep08, mRNA.                        |
| zoysa   | zoysa.aSep08   |        | 1407   | 281  |   | 93  | splicing factor arginine serine-rich 2 interacting protein (zoysa) mRNA.               |
| zoyshee | zoyshee.aSep08 |        | 1202   | 417  |   | 87  | putative protein (zoyshee) mRNA.                                                       |
| zoytu   | zoytu.aSep08   |        | 7472   | 680  | 2 | 63  | putative protein (zoytu) alternative variant aSep08, mRNA.                             |
| zoytu   | zoytu.bSep08   |        | 1078   | 656  | 1 | 83  | CRA a like (8.9 kD) (zoytu) alternative variant bSep08, mRNA.                          |
| zoyvar  | zoyvar.aSep08  |        | 916    | 460  |   | 52  | putative protein (5.7 kD) (zoyvar) mRNA.                                               |
| zoyvo   | zoyvo.aSep08   |        | 4967   | 504  |   | 167 | guanine nucleotide-exchange A-inhibited (zoyvo) mRNA.                                  |
| zoywer  | zoywer.aSep08  |        | 84860  | 387  |   | 68  | putative protein (zoywer) mRNA.                                                        |
| zoywey  | zoywey.aSep08  |        | 2872   | 412  |   | 52  | putative protein (zoywey) mRNA.                                                        |
| Zp3r    | Zp3r.bSep08    | 289010 | 14724  | 518  | 1 | 145 | zona pellucida 3 receptor (Zp3r) alternative variant bSep08, mRNA.                     |
| Zranb2  | Zranb2.bSep08  | 58821  | 2265   | 1487 | 4 | 398 | putative protein, with a coiled coil domain (Zranb2) alternative variant bSep08, mRNA. |
| Zranb2  | Zranb2.cSep08  | 58821  | 11234  | 1782 | 5 | 366 | ZIS1 like (Zranb2) alternative variant cSep08, mRNA.                                   |
| Zranb2  | Zranb2.dSep08  | 58821  | 8208   | 1770 | 7 | 225 | zinc finger protein 265 (Zranb2) alternative variant dSep08, mRNA.                     |

|         |                |        |       |      |   |     |                                                                                                |
|---------|----------------|--------|-------|------|---|-----|------------------------------------------------------------------------------------------------|
| Zranb2  | Zranb2.eSep08  | 58821  | 5605  | 774  | 6 | 142 | putative protein of mammalian origin (15.5 kD) (Zranb2) alternative variant eSep08, mRNA.      |
| Zranb2  | Zranb2.fSep08  | 58821  | 3857  | 634  | 3 | 132 | putative protein of mammalian origin (Zranb2) alternative variant fSep08, mRNA.                |
| Zranb2  | Zranb2.gSep08  | 58821  | 2082  | 837  | 2 | 85  | putative protein of mammalian origin (Zranb2) alternative variant gSep08, mRNA.                |
| Zranb2  | Zranb2.iSep08  | 58821  | 1882  | 518  | 3 | 54  | zinc finger protein 265 CRA a (Zranb2) alternative variant iSep08, mRNA.                       |
| Zrsr2   | Zrsr2.aSep08   | 302670 | 4044  | 684  |   | 104 | zinc finger (CCCH type), RNA binding motif and serine/arginine rich 2 (Zrsr2) mRNA.            |
| Zscan10 | Zscan10.bSep08 | 302962 | 4478  | 382  | 1 | 73  | zinc finger (Zscan10) alternative variant bSep08, mRNA.                                        |
| Zscan12 | Zscan12.aSep08 | 266716 | 5848  | 2574 |   | 503 | transcriptional regulator SCAN and zinc finger, C2H2-type (58.4 kD) (Zscan12) mRNA.            |
| Zscan21 | Zscan21.bSep08 | 304342 | 15760 | 1473 | 3 | 324 | zinc finger (36.7 kD) (Zscan21) alternative variant bSep08, mRNA.                              |
| Zscan21 | Zscan21.cSep08 | 304342 | 5711  | 698  | 2 | 232 | zinc finger (Zscan21) alternative variant cSep08, mRNA.                                        |
| Zswim3  | Zswim3.bSep08  | 311630 | 15262 | 2813 | 1 | 632 | zinc finger SWIM-type containing 3 (71.5 kD) (Zswim3) alternative variant bSep08, mRNA.        |
| Zswim4  | Zswim4.bSep08  | 304655 | 1496  | 275  | 2 | 32  | zinc finger SWIM-type containing 4 (Zswim4) alternative variant bSep08, mRNA.                  |
| Zswim5  | Zswim5.bSep08  | 313524 | 8338  | 1803 | 1 | 462 | putative protein of metazoan origin (Zswim5) alternative variant bSep08, mRNA.                 |
| ZU5.0   | ZU5.0.aSep08   |        | 16435 | 453  | 3 | 150 | ankyrin 2 (ZU5.0) alternative variant aSep08, mRNA.                                            |
| ZU5.0   | ZU5.0.bSep08   |        | 5720  | 319  | 1 | 31  | ankyrin 2 like (ZU5.0) alternative variant bSep08, mRNA.                                       |
| zubor   | zubor.aSep08   |        | 1841  | 1717 | 3 | 303 | putative protein (zubor) alternative variant aSep08, mRNA.                                     |
| zubor   | zubor.bSep08   |        | 1055  | 930  | 2 | 56  | putative protein (6.1 kD) (zubor) alternative variant bSep08, mRNA.                            |
| zuby    | zuby.aSep08    |        | 963   | 502  |   | 167 | host cell factor (zuby) mRNA.                                                                  |
| zuchy   | zuchy.aSep08   |        | 2447  | 644  |   | 40  | putative protein (4.3 kD) (zuchy) mRNA.                                                        |
| zudar   | zudar.aSep08   |        | 3844  | 477  |   | 44  | putative protein (4.8 kD) (zudar) mRNA.                                                        |
| zudoy   | zudoy.aSep08   |        | 6760  | 303  |   | 43  | putative protein (zudoy) mRNA.                                                                 |
| zuflu   | zuflu.aSep08   |        | 3932  | 334  | 1 | 111 | putative protein (zuflu) alternative variant aSep08, mRNA.                                     |
| zuflu   | zuflu.bSep08   |        | 3082  | 311  | 1 | 54  | putative protein (zuflu) alternative variant bSep08, mRNA.                                     |
| zufly   | zufly.aSep08   |        | 5759  | 282  |   | 76  | putative protein (zufly) mRNA.                                                                 |
| Zufsp   | Zufsp.bSep08   | 294390 | 8548  | 1105 | 6 | 249 | zinc finger with peptidase domain (28.2 kD) (Zufsp) alternative variant bSep08, complete mRNA. |
| Zufsp   | Zufsp.cSep08   | 294390 | 10497 | 707  | 4 | 190 | zinc finger with peptidase domain (Zufsp) alternative variant cSep08, mRNA.                    |
| Zufsp   | Zufsp.dSep08   | 294390 | 5635  | 679  | 3 | 185 | zinc finger with peptidase domain (Zufsp) alternative variant dSep08, mRNA.                    |
| Zufsp   | Zufsp.eSep08   | 294390 | 10346 | 765  | 5 | 123 | zinc finger with peptidase domain (Zufsp) alternative variant eSep08, mRNA.                    |
| Zufsp   | Zufsp.fSep08   | 294390 | 6480  | 756  | 3 | 62  | zinc finger with peptidase domain (Zufsp) alternative variant fSep08, mRNA.                    |
| zugar   | zugar.aSep08   |        | 853   | 493  |   | 31  | putative protein (zugar) mRNA.                                                                 |

|        |               |        |        |      |   |     |                                                                                                                                     |
|--------|---------------|--------|--------|------|---|-----|-------------------------------------------------------------------------------------------------------------------------------------|
| zuja   | zuja.aSep08   |        | 9918   | 1491 | 5 | 276 | zinc finger (zuja) alternative variant aSep08, mRNA.                                                                                |
| zujey  | zujey.aSep08  |        | 15935  | 2441 |   | 180 | tbc1 domain family member 1 (20.5 kD) (zujey) mRNA.                                                                                 |
| zukee  | zukee.aSep08  |        | 16046  | 506  |   | 30  | putative protein (3.6 kD) (zukee) mRNA.                                                                                             |
| zukler | zukler.aSep08 |        | 17806  | 1638 | 3 | 211 | putative mitochondrial protein, with a coiled coil domain, of mammalian origin (23.2 kD) (zukler) alternative variant aSep08, mRNA. |
| zukler | zukler.bSep08 |        | 7890   | 395  | 2 | 128 | putative protein (zukler) alternative variant bSep08, mRNA.                                                                         |
| zulo   | zulo.aSep08   |        | 2916   | 1613 |   | 105 | IQ motif containing e (10.9 kD) (zulo) mRNA.                                                                                        |
| zumee  | zumee.aSep08  |        | 1372   | 415  |   | 78  | myosin XVA (zumee) mRNA.                                                                                                            |
| zunoy  | zunoy.aSep08  |        | 5166   | 458  | 1 | 40  | putative protein (4.3 kD) (zunoy) alternative variant aSep08, mRNA.                                                                 |
| zunoy  | zunoy.bSep08  |        | 3514   | 286  | 1 | 45  | putative protein (zunoy) alternative variant bSep08, mRNA.                                                                          |
| zupor  | zupor.aSep08  |        | 7016   | 498  |   | 124 | putative protein (zupor) mRNA.                                                                                                      |
| zusa   | zusa.aSep08   |        | 116718 | 767  |   | 35  | putative protein (zusa) mRNA.                                                                                                       |
| zushee | zushee.aSep08 |        | 7921   | 411  | 5 | 80  | domain-containing protein (zushee) alternative variant aSep08, mRNA.                                                                |
| zushee | zushee.bSep08 |        | 16362  | 392  | 4 | 73  | domain-containing protein like (zushee) alternative variant bSep08, mRNA.                                                           |
| zushee | zushee.cSep08 |        | 16321  | 548  | 6 | 64  | putative protein (zushee) alternative variant cSep08, mRNA.                                                                         |
| zutu   | zutu.aSep08   |        | 6977   | 602  |   | 169 | laminin (zutu) mRNA.                                                                                                                |
| zuvar  | zuvar.bSep08  |        | 689    | 482  | 2 | 86  | putative nuclear protein (10.0 kD) (zuvar) alternative variant bSep08, mRNA.                                                        |
| zuvo   | zuvo.aSep08   |        | 16203  | 250  |   | 30  | putative protein (3.6 kD) (zuvo) mRNA.                                                                                              |
| zuwey  | zuwey.aSep08  |        | 111215 | 709  |   | 36  | putative protein (4.5 kD) (zuwey) mRNA.                                                                                             |
| Zw10   | Zw10.bSep08   | 363059 | 5267   | 642  | 5 | 200 | ZW10 homolog (Drosophila), centromere/kinetochore protein (Zw10) alternative variant bSep08, mRNA.                                  |
| Zwilch | Zwilch.aSep08 | 691493 | 15692  | 1755 |   | 266 | zwilch, kinetochore associated, homolog (Drosophila) (Zwilch) mRNA.                                                                 |
| Zxdc   | Zxdc.aSep08   | 362399 | 28407  | 3336 | 3 | 828 | ZXD family zinc finger C (Zxdc) alternative variant aSep08, mRNA.                                                                   |
| Zxdc   | Zxdc.bSep08   | 362399 | 31289  | 1782 | 1 | 356 | ZXD family zinc finger C (Zxdc) alternative variant bSep08, mRNA.                                                                   |
| Zxdc   | Zxdc.cSep08   | 362399 | 18481  | 1763 | 3 | 130 | ZXD family zinc finger C (Zxdc) alternative variant cSep08, mRNA.                                                                   |
| zybor  | zybor.aSep08  |        | 1037   | 463  |   | 49  | putative protein (5.4 kD) (zybor) mRNA.                                                                                             |
| zyby   | zyby.aSep08   |        | 854    | 347  |   | 115 | plexin B3 (zyby) mRNA.                                                                                                              |
| zychy  | zychy.aSep08  |        | 2283   | 255  |   | 84  | centrosomal protein 152 (zychy) mRNA.                                                                                               |
| zydar  | zydar.aSep08  |        | 4109   | 419  |   | 139 | CRA b (zydar) mRNA.                                                                                                                 |
| zydoy  | zydoy.aSep08  |        | 13366  | 1469 | 4 | 165 | dystrobrevin alpha (zydoy) alternative variant aSep08, mRNA.                                                                        |
| zyflu  | zyflu.aSep08  |        | 1075   | 646  |   | 41  | putative protein (zyflu) mRNA.                                                                                                      |
| zyfly  | zyfly.aSep08  |        | 22573  | 817  |   | 57  | putative protein (6.3 kD) (zyfly) mRNA.                                                                                             |
| Zyg11a | Zyg11a.aSep08 | 313482 | 7625   | 621  |   | 206 | protein zyg-11 homolog a (Zyg11a) mRNA.                                                                                             |

|        |               |        |        |      |    |     |                                                                            |
|--------|---------------|--------|--------|------|----|-----|----------------------------------------------------------------------------|
| Zyg11b | Zyg11b.aSep08 | 362559 | 35597  | 1379 |    | 412 | zyg-11 homolog B (Zyg11b) mRNA.                                            |
| zygar  | zygar.aSep08  |        | 3468   | 698  |    | 82  | putative protein (zygar) mRNA.                                             |
| zyja   | zyja.aSep08   |        | 15468  | 846  | 1  | 281 | zinc finger (zyja) alternative variant aSep08, mRNA.                       |
| zyja   | zyja.bSep08   |        | 14882  | 378  | 1  | 125 | zinc finger (zyja) alternative variant bSep08, mRNA.                       |
| zyjey  | zyjey.aSep08  |        | 46428  | 440  |    | 41  | putative protein (zyjey) mRNA.                                             |
| zykee  | zykee.aSep08  |        | 1294   | 658  |    | 53  | absent in melanoma 2 like (zykee) mRNA.                                    |
| zykler | zykler.aSep08 |        | 7158   | 682  |    | 82  | domain-containing protein 3A like (9.1 kD) (zykler) mRNA.                  |
| zylo   | zylo.aSep08   |        | 4123   | 983  |    | 327 | CRA c (zylo) mRNA.                                                         |
| zymee  | zymee.aSep08  |        | 516    | 408  |    | 34  | putative protein (zymee) mRNA.                                             |
| zynoy  | zynoy.aSep08  |        | 11943  | 731  |    | 82  | putative nuclear protein (9.2 kD) (zynoy) mRNA.                            |
| zypor  | zypor.aSep08  |        | 15871  | 647  |    | 47  | putative protein (5.5 kD) (zypor) mRNA.                                    |
| zysa   | zysa.aSep08   |        | 1829   | 383  |    | 42  | putative protein (zysa) mRNA.                                              |
| zyshee | zyshee.aSep08 |        | 4093   | 477  |    | 54  | putative protein (zyshee) mRNA.                                            |
| zytu   | zytu.aSep08   |        | 26516  | 482  |    | 84  | putative cytoplasmic protein (9.7 kD) (zytu) mRNA.                         |
| zyvar  | zyvar.aSep08  |        | 70801  | 620  |    | 109 | calmodulin binding transcription activator 1 like (zyvar) mRNA.            |
| zyvo   | zyvo.aSep08   |        | 13445  | 524  | 2  | 36  | putative protein (4.1 kD) (zyvo) alternative variant aSep08, mRNA.         |
| zyvo   | zyvo.bSep08   |        | 5075   | 426  | 2  | 36  | putative protein (4.1 kD) (zyvo) alternative variant bSep08, mRNA.         |
| zywey  | zywey.aSep08  |        | 1515   | 512  |    | 52  | putative protein of mammalian origin (6.2 kD) (zywey) mRNA.                |
| Zyx    | Zyx.aSep08    | 114636 | 9018   | 2721 | 10 | 682 | zyxin (Zyx) alternative variant aSep08, mRNA.                              |
| Zyx    | Zyx.bSep08    | 114636 | 1933   | 1077 | 5  | 358 | zyxin (Zyx) alternative variant bSep08, mRNA.                              |
| Zyx    | Zyx.cSep08    | 114636 | 5203   | 739  | 3  | 246 | zyxin (Zyx) alternative variant cSep08, mRNA.                              |
| Zyx    | Zyx.dSep08    | 114636 | 1570   | 850  | 4  | 218 | zyxin (Zyx) alternative variant dSep08, mRNA.                              |
| Zyx    | Zyx.eSep08    | 114636 | 1705   | 601  | 3  | 146 | zyxin (Zyx) alternative variant eSep08, mRNA.                              |
| Zyx    | Zyx.fSep08    | 114636 | 1586   | 1363 | 3  | 132 | zyxin (14.7 kD) (Zyx) alternative variant fSep08, mRNA.                    |
| Zzef1  | Zzef1.aSep08  | 287476 | 35940  | 654  |    | 217 | zinc finger, ZZ-type with EF hand domain 1 (Zzef1) mRNA.                   |
| _Pcdhg | _Pcdhg.pSep08 | 116782 | 133290 | 633  | 3  | 210 | protocadherin gamma subfamily A (_Pcdhg) alternative variant pSep08, mRNA. |
| _Pcdhg | _Pcdhg.pSep08 | 252895 | 133290 | 633  | 3  | 210 | protocadherin gamma subfamily A (_Pcdhg) alternative variant pSep08, mRNA. |
| _Pcdhg | _Pcdhg.pSep08 | 252897 | 133290 | 633  | 3  | 210 | protocadherin gamma subfamily A (_Pcdhg) alternative variant pSep08, mRNA. |
| _Pcdhg | _Pcdhg.pSep08 | 291635 | 133290 | 633  | 3  | 210 | protocadherin gamma subfamily A (_Pcdhg) alternative variant pSep08, mRNA. |
| _Pcdhg | _Pcdhg.pSep08 | 291637 | 133290 | 633  | 3  | 210 | protocadherin gamma subfamily A (_Pcdhg) alternative variant pSep08, mRNA. |
| _Pcdhg | _Pcdhg.pSep08 | 364843 | 133290 | 633  | 3  | 210 | protocadherin gamma subfamily A (_Pcdhg) alternative variant pSep08, mRNA. |
| _Pcdhg | _Pcdhg.pSep08 | 364844 | 133290 | 633  | 3  | 210 | protocadherin gamma subfamily A (_Pcdhg) alternative variant pSep08, mRNA. |

|        |               |        |        |      |   |     |                                                                              |
|--------|---------------|--------|--------|------|---|-----|------------------------------------------------------------------------------|
| _Pcdhg | _Pcdhg.pSep08 | 364845 | 133290 | 633  | 3 | 210 | protocadherin gamma subfamily A (_Pcdhg) alternative variant pSep08, mRNA.   |
| _Pcdhg | _Pcdhg.pSep08 | 498846 | 133290 | 633  | 3 | 210 | protocadherin gamma subfamily A (_Pcdhg) alternative variant pSep08, mRNA.   |
| _Pcdhg | _Pcdhg.pSep08 | 498849 | 133290 | 633  | 3 | 210 | protocadherin gamma subfamily A (_Pcdhg) alternative variant pSep08, mRNA.   |
| _Pcdhg | _Pcdhg.pSep08 | 498850 | 133290 | 633  | 3 | 210 | protocadherin gamma subfamily A (_Pcdhg) alternative variant pSep08, mRNA.   |
| _Pcdhg | _Pcdhg.pSep08 | 502156 | 133290 | 633  | 3 | 210 | protocadherin gamma subfamily A (_Pcdhg) alternative variant pSep08, mRNA.   |
| _Pcdhg | _Pcdhg.pSep08 | 553129 | 133290 | 633  | 3 | 210 | protocadherin gamma subfamily A (_Pcdhg) alternative variant pSep08, mRNA.   |
| _Pcdhg | _Pcdhg.pSep08 | 680470 | 133290 | 633  | 3 | 210 | protocadherin gamma subfamily A (_Pcdhg) alternative variant pSep08, mRNA.   |
| _Pcdhg | _Pcdhg.qSep08 | 116782 | 6721   | 2077 | 2 | 105 | protocadherin gamma subfamily A 6 (_Pcdhg) alternative variant qSep08, mRNA. |
| _Pcdhg | _Pcdhg.qSep08 | 252895 | 6721   | 2077 | 2 | 105 | protocadherin gamma subfamily A 6 (_Pcdhg) alternative variant qSep08, mRNA. |
| _Pcdhg | _Pcdhg.qSep08 | 252897 | 6721   | 2077 | 2 | 105 | protocadherin gamma subfamily A 6 (_Pcdhg) alternative variant qSep08, mRNA. |
| _Pcdhg | _Pcdhg.qSep08 | 291635 | 6721   | 2077 | 2 | 105 | protocadherin gamma subfamily A 6 (_Pcdhg) alternative variant qSep08, mRNA. |
| _Pcdhg | _Pcdhg.qSep08 | 291637 | 6721   | 2077 | 2 | 105 | protocadherin gamma subfamily A 6 (_Pcdhg) alternative variant qSep08, mRNA. |
| _Pcdhg | _Pcdhg.qSep08 | 364843 | 6721   | 2077 | 2 | 105 | protocadherin gamma subfamily A 6 (_Pcdhg) alternative variant qSep08, mRNA. |
| _Pcdhg | _Pcdhg.qSep08 | 364844 | 6721   | 2077 | 2 | 105 | protocadherin gamma subfamily A 6 (_Pcdhg) alternative variant qSep08, mRNA. |
| _Pcdhg | _Pcdhg.qSep08 | 364845 | 6721   | 2077 | 2 | 105 | protocadherin gamma subfamily A 6 (_Pcdhg) alternative variant qSep08, mRNA. |
| _Pcdhg | _Pcdhg.qSep08 | 498846 | 6721   | 2077 | 2 | 105 | protocadherin gamma subfamily A 6 (_Pcdhg) alternative variant qSep08, mRNA. |
| _Pcdhg | _Pcdhg.qSep08 | 498849 | 6721   | 2077 | 2 | 105 | protocadherin gamma subfamily A 6 (_Pcdhg) alternative variant qSep08, mRNA. |
| _Pcdhg | _Pcdhg.qSep08 | 498850 | 6721   | 2077 | 2 | 105 | protocadherin gamma subfamily A 6 (_Pcdhg) alternative variant qSep08, mRNA. |
| _Pcdhg | _Pcdhg.qSep08 | 502156 | 6721   | 2077 | 2 | 105 | protocadherin gamma subfamily A 6 (_Pcdhg) alternative variant qSep08, mRNA. |
| _Pcdhg | _Pcdhg.qSep08 | 553129 | 6721   | 2077 | 2 | 105 | protocadherin gamma subfamily A 6 (_Pcdhg) alternative variant qSep08, mRNA. |
| _Pcdhg | _Pcdhg.qSep08 | 680470 | 6721   | 2077 | 2 | 105 | protocadherin gamma subfamily A 6 (_Pcdhg) alternative variant qSep08, mRNA. |
| _RT1   | _RT1.aSep08   | 24737  | 4087   | 2150 | 8 | 374 | class I MHC (42.0 kD) (_RT1) alternative variant aSep08, mRNA.               |
| _RT1   | _RT1.aSep08   | 24973  | 4087   | 2150 | 8 | 374 | class I MHC (42.0 kD) (_RT1) alternative variant aSep08, mRNA.               |

|      |             |        |       |      |   |     |                                                                                                                    |
|------|-------------|--------|-------|------|---|-----|--------------------------------------------------------------------------------------------------------------------|
| _RT1 | _RT1.aSep08 | 24974  | 4087  | 2150 | 8 | 374 | class I MHC (42.0 kD) (_RT1) alternative variant aSep08, mRNA.                                                     |
| _RT1 | _RT1.aSep08 | 309627 | 4087  | 2150 | 8 | 374 | class I MHC (42.0 kD) (_RT1) alternative variant aSep08, mRNA.                                                     |
| _RT1 | _RT1.aSep08 | 415073 | 4087  | 2150 | 8 | 374 | class I MHC (42.0 kD) (_RT1) alternative variant aSep08, mRNA.                                                     |
| _RT1 | _RT1.dSep08 | 24737  | 2977  | 1537 | 4 | 318 | class I (_RT1) alternative variant dSep08, mRNA.                                                                   |
| _RT1 | _RT1.dSep08 | 24973  | 2977  | 1537 | 4 | 318 | class I (_RT1) alternative variant dSep08, mRNA.                                                                   |
| _RT1 | _RT1.dSep08 | 24974  | 2977  | 1537 | 4 | 318 | class I (_RT1) alternative variant dSep08, mRNA.                                                                   |
| _RT1 | _RT1.dSep08 | 309627 | 2977  | 1537 | 4 | 318 | class I (_RT1) alternative variant dSep08, mRNA.                                                                   |
| _RT1 | _RT1.dSep08 | 415073 | 2977  | 1537 | 4 | 318 | class I (_RT1) alternative variant dSep08, mRNA.                                                                   |
| _RT1 | _RT1.eSep08 | 24737  | 3019  | 1450 | 6 | 248 | mature of major histocompatibility complex class I antigen like (27.5 kD) (_RT1) alternative variant eSep08, mRNA. |
| _RT1 | _RT1.eSep08 | 24973  | 3019  | 1450 | 6 | 248 | mature of major histocompatibility complex class I antigen like (27.5 kD) (_RT1) alternative variant eSep08, mRNA. |
| _RT1 | _RT1.eSep08 | 24974  | 3019  | 1450 | 6 | 248 | mature of major histocompatibility complex class I antigen like (27.5 kD) (_RT1) alternative variant eSep08, mRNA. |
| _RT1 | _RT1.eSep08 | 309627 | 3019  | 1450 | 6 | 248 | mature of major histocompatibility complex class I antigen like (27.5 kD) (_RT1) alternative variant eSep08, mRNA. |
| _RT1 | _RT1.eSep08 | 415073 | 3019  | 1450 | 6 | 248 | mature of major histocompatibility complex class I antigen like (27.5 kD) (_RT1) alternative variant eSep08, mRNA. |
| _RT1 | _RT1.fSep08 | 24737  | 38473 | 1749 | 8 | 247 | MHC class I (27.5 kD) (_RT1) alternative variant fSep08, complete mRNA.                                            |
| _RT1 | _RT1.fSep08 | 24973  | 38473 | 1749 | 8 | 247 | MHC class I (27.5 kD) (_RT1) alternative variant fSep08, complete mRNA.                                            |
| _RT1 | _RT1.fSep08 | 24974  | 38473 | 1749 | 8 | 247 | MHC class I (27.5 kD) (_RT1) alternative variant fSep08, complete mRNA.                                            |
| _RT1 | _RT1.fSep08 | 309627 | 38473 | 1749 | 8 | 247 | MHC class I (27.5 kD) (_RT1) alternative variant fSep08, complete mRNA.                                            |
| _RT1 | _RT1.fSep08 | 415073 | 38473 | 1749 | 8 | 247 | MHC class I (27.5 kD) (_RT1) alternative variant fSep08, complete mRNA.                                            |
| _RT1 | _RT1.gSep08 | 24737  | 2795  | 1196 | 5 | 244 | class I (_RT1) alternative variant gSep08, mRNA.                                                                   |
| _RT1 | _RT1.gSep08 | 24973  | 2795  | 1196 | 5 | 244 | class I (_RT1) alternative variant gSep08, mRNA.                                                                   |
| _RT1 | _RT1.gSep08 | 24974  | 2795  | 1196 | 5 | 244 | class I (_RT1) alternative variant gSep08, mRNA.                                                                   |
| _RT1 | _RT1.gSep08 | 309627 | 2795  | 1196 | 5 | 244 | class I (_RT1) alternative variant gSep08, mRNA.                                                                   |
| _RT1 | _RT1.gSep08 | 415073 | 2795  | 1196 | 5 | 244 | class I (_RT1) alternative variant gSep08, mRNA.                                                                   |
| _RT1 | _RT1.hSep08 | 24737  | 1942  | 879  | 3 | 240 | class I antigen like (_RT1) alternative variant hSep08, mRNA.                                                      |
| _RT1 | _RT1.hSep08 | 24973  | 1942  | 879  | 3 | 240 | class I antigen like (_RT1) alternative variant hSep08, mRNA.                                                      |
| _RT1 | _RT1.hSep08 | 24974  | 1942  | 879  | 3 | 240 | class I antigen like (_RT1) alternative variant hSep08, mRNA.                                                      |
| _RT1 | _RT1.hSep08 | 309627 | 1942  | 879  | 3 | 240 | class I antigen like (_RT1) alternative variant hSep08, mRNA.                                                      |
| _RT1 | _RT1.hSep08 | 415073 | 1942  | 879  | 3 | 240 | class I antigen like (_RT1) alternative variant hSep08, mRNA.                                                      |

|        |               |        |       |     |   |     |                                                                                         |
|--------|---------------|--------|-------|-----|---|-----|-----------------------------------------------------------------------------------------|
| _RT1   | _RT1.jSep08   | 24737  | 1374  | 754 | 3 | 163 | class I (_RT1) alternative variant jSep08, mRNA.                                        |
| _RT1   | _RT1.jSep08   | 24973  | 1374  | 754 | 3 | 163 | class I (_RT1) alternative variant jSep08, mRNA.                                        |
| _RT1   | _RT1.jSep08   | 24974  | 1374  | 754 | 3 | 163 | class I (_RT1) alternative variant jSep08, mRNA.                                        |
| _RT1   | _RT1.jSep08   | 309627 | 1374  | 754 | 3 | 163 | class I (_RT1) alternative variant jSep08, mRNA.                                        |
| _RT1   | _RT1.jSep08   | 415073 | 1374  | 754 | 3 | 163 | class I (_RT1) alternative variant jSep08, mRNA.                                        |
| _RT1   | _RT1.mSep08   | 24737  | 616   | 522 | 2 | 146 | MHC class I (_RT1) alternative variant mSep08, mRNA.                                    |
| _RT1   | _RT1.mSep08   | 24973  | 616   | 522 | 2 | 146 | MHC class I (_RT1) alternative variant mSep08, mRNA.                                    |
| _RT1   | _RT1.mSep08   | 24974  | 616   | 522 | 2 | 146 | MHC class I (_RT1) alternative variant mSep08, mRNA.                                    |
| _RT1   | _RT1.mSep08   | 309627 | 616   | 522 | 2 | 146 | MHC class I (_RT1) alternative variant mSep08, mRNA.                                    |
| _RT1   | _RT1.mSep08   | 415073 | 616   | 522 | 2 | 146 | MHC class I (_RT1) alternative variant mSep08, mRNA.                                    |
| _RT1   | _RT1.nSep08   | 24737  | 23896 | 338 | 3 | 112 | class I (_RT1) alternative variant nSep08, mRNA.                                        |
| _RT1   | _RT1.nSep08   | 24973  | 23896 | 338 | 3 | 112 | class I (_RT1) alternative variant nSep08, mRNA.                                        |
| _RT1   | _RT1.nSep08   | 24974  | 23896 | 338 | 3 | 112 | class I (_RT1) alternative variant nSep08, mRNA.                                        |
| _RT1   | _RT1.nSep08   | 309627 | 23896 | 338 | 3 | 112 | class I (_RT1) alternative variant nSep08, mRNA.                                        |
| _RT1   | _RT1.nSep08   | 415073 | 23896 | 338 | 3 | 112 | class I (_RT1) alternative variant nSep08, mRNA.                                        |
| _RT1   | _RT1.oSep08   | 24737  | 1436  | 788 | 4 | 108 | class I MHC heavy chain antigen like (_RT1) alternative variant oSep08, mRNA.           |
| _RT1   | _RT1.oSep08   | 24973  | 1436  | 788 | 4 | 108 | class I MHC heavy chain antigen like (_RT1) alternative variant oSep08, mRNA.           |
| _RT1   | _RT1.oSep08   | 24974  | 1436  | 788 | 4 | 108 | class I MHC heavy chain antigen like (_RT1) alternative variant oSep08, mRNA.           |
| _RT1   | _RT1.oSep08   | 309627 | 1436  | 788 | 4 | 108 | class I MHC heavy chain antigen like (_RT1) alternative variant oSep08, mRNA.           |
| _RT1   | _RT1.oSep08   | 415073 | 1436  | 788 | 4 | 108 | class I MHC heavy chain antigen like (_RT1) alternative variant oSep08, mRNA.           |
| _RT1   | _RT1.pSep08   | 24737  | 36320 | 781 | 5 | 106 | class I MHC heavy chain antigen like (_RT1) alternative variant pSep08, mRNA.           |
| _RT1   | _RT1.pSep08   | 24973  | 36320 | 781 | 5 | 106 | class I MHC heavy chain antigen like (_RT1) alternative variant pSep08, mRNA.           |
| _RT1   | _RT1.pSep08   | 24974  | 36320 | 781 | 5 | 106 | class I MHC heavy chain antigen like (_RT1) alternative variant pSep08, mRNA.           |
| _RT1   | _RT1.pSep08   | 309627 | 36320 | 781 | 5 | 106 | class I MHC heavy chain antigen like (_RT1) alternative variant pSep08, mRNA.           |
| _RT1   | _RT1.pSep08   | 415073 | 36320 | 781 | 5 | 106 | class I MHC heavy chain antigen like (_RT1) alternative variant pSep08, mRNA.           |
| _RT1   | _RT1.qSep08   | 24737  | 644   | 512 | 2 | 26  | putative protein (_RT1) alternative variant qSep08, mRNA.                               |
| _RT1   | _RT1.qSep08   | 24973  | 644   | 512 | 2 | 26  | putative protein (_RT1) alternative variant qSep08, mRNA.                               |
| _RT1   | _RT1.qSep08   | 24974  | 644   | 512 | 2 | 26  | putative protein (_RT1) alternative variant qSep08, mRNA.                               |
| _RT1   | _RT1.qSep08   | 309627 | 644   | 512 | 2 | 26  | putative protein (_RT1) alternative variant qSep08, mRNA.                               |
| _RT1   | _RT1.qSep08   | 415073 | 644   | 512 | 2 | 26  | putative protein (_RT1) alternative variant qSep08, mRNA.                               |
| _Ugt1a | _Ugt1a.jSep08 | 24861  | 18021 | 622 | 4 | 150 | UDP glycosyltransferase 1 family polypeptide (_Ugt1a) alternative variant jSep08, mRNA. |
| _Ugt1a | _Ugt1a.jSep08 | 113992 | 18021 | 622 | 4 | 150 | UDP glycosyltransferase 1 family polypeptide (_Ugt1a) alternative variant jSep08, mRNA. |



|        |               |        |        |     |   |     |                                                                                         |
|--------|---------------|--------|--------|-----|---|-----|-----------------------------------------------------------------------------------------|
| _Ugt1a | _Ugt1a.jSep08 | 154516 | 18021  | 622 | 4 | 150 | UDP glycosyltransferase 1 family polypeptide (_Ugt1a) alternative variant jSep08, mRNA. |
| _Ugt1a | _Ugt1a.jSep08 | 301595 | 18021  | 622 | 4 | 150 | UDP glycosyltransferase 1 family polypeptide (_Ugt1a) alternative variant jSep08, mRNA. |
| _Ugt1a | _Ugt1a.jSep08 | 396527 | 18021  | 622 | 4 | 150 | UDP glycosyltransferase 1 family polypeptide (_Ugt1a) alternative variant jSep08, mRNA. |
| _Ugt1a | _Ugt1a.jSep08 | 396551 | 18021  | 622 | 4 | 150 | UDP glycosyltransferase 1 family polypeptide (_Ugt1a) alternative variant jSep08, mRNA. |
| _Ugt1a | _Ugt1a.jSep08 | 396552 | 18021  | 622 | 4 | 150 | UDP glycosyltransferase 1 family polypeptide (_Ugt1a) alternative variant jSep08, mRNA. |
| _Ugt1a | _Ugt1a.jSep08 | 574523 | 18021  | 622 | 4 | 150 | UDP glycosyltransferase 1 family polypeptide (_Ugt1a) alternative variant jSep08, mRNA. |
| _Ugt1a | _Ugt1a.kSep08 | 24861  | 1701   | 505 | 2 | 137 | UDP-glucuronosyltransferase (_Ugt1a) alternative variant kSep08, mRNA.                  |
| _Ugt1a | _Ugt1a.kSep08 | 113992 | 1701   | 505 | 2 | 137 | UDP-glucuronosyltransferase (_Ugt1a) alternative variant kSep08, mRNA.                  |
| _Ugt1a | _Ugt1a.kSep08 | 154516 | 1701   | 505 | 2 | 137 | UDP-glucuronosyltransferase (_Ugt1a) alternative variant kSep08, mRNA.                  |
| _Ugt1a | _Ugt1a.kSep08 | 301595 | 1701   | 505 | 2 | 137 | UDP-glucuronosyltransferase (_Ugt1a) alternative variant kSep08, mRNA.                  |
| _Ugt1a | _Ugt1a.kSep08 | 396527 | 1701   | 505 | 2 | 137 | UDP-glucuronosyltransferase (_Ugt1a) alternative variant kSep08, mRNA.                  |
| _Ugt1a | _Ugt1a.kSep08 | 396551 | 1701   | 505 | 2 | 137 | UDP-glucuronosyltransferase (_Ugt1a) alternative variant kSep08, mRNA.                  |
| _Ugt1a | _Ugt1a.kSep08 | 396552 | 1701   | 505 | 2 | 137 | UDP-glucuronosyltransferase (_Ugt1a) alternative variant kSep08, mRNA.                  |
| _Ugt1a | _Ugt1a.kSep08 | 574523 | 1701   | 505 | 2 | 137 | UDP-glucuronosyltransferase (_Ugt1a) alternative variant kSep08, mRNA.                  |
| _Ugt1a | _Ugt1a.ISep08 | 24861  | 125464 | 293 | 3 | 97  | UGT1A7 (_Ugt1a) alternative variant ISep08, mRNA.                                       |
| _Ugt1a | _Ugt1a.ISep08 | 113992 | 125464 | 293 | 3 | 97  | UGT1A7 (_Ugt1a) alternative variant ISep08, mRNA.                                       |
| _Ugt1a | _Ugt1a.ISep08 | 154516 | 125464 | 293 | 3 | 97  | UGT1A7 (_Ugt1a) alternative variant ISep08, mRNA.                                       |
| _Ugt1a | _Ugt1a.ISep08 | 301595 | 125464 | 293 | 3 | 97  | UGT1A7 (_Ugt1a) alternative variant ISep08, mRNA.                                       |
| _Ugt1a | _Ugt1a.ISep08 | 396527 | 125464 | 293 | 3 | 97  | UGT1A7 (_Ugt1a) alternative variant ISep08, mRNA.                                       |
| _Ugt1a | _Ugt1a.ISep08 | 396551 | 125464 | 293 | 3 | 97  | UGT1A7 (_Ugt1a) alternative variant ISep08, mRNA.                                       |
| _Ugt1a | _Ugt1a.ISep08 | 396552 | 125464 | 293 | 3 | 97  | UGT1A7 (_Ugt1a) alternative variant ISep08, mRNA.                                       |
| _Ugt1a | _Ugt1a.ISep08 | 574523 | 125464 | 293 | 3 | 97  | UGT1A7 (_Ugt1a) alternative variant ISep08, mRNA.                                       |
